# Supplementary material for: Functional development of a V3/glycan-specific broadly neutralizing antibody isolated from a case of HIV superinfection
Source: eLife journal article supplement (doi:10.7554/elife.68110), 2021-07-15
Supplement: fig2-data2 [file D5.xls]

Vers 3.43 Data Simulation
Conc1	2.5E-07	2.5E-07	2.5E-07	2.5E-07	2.5E-07	2.5E-07	2.5E-07
Start1	290	880	1470	2060	2649.99	3239.99	3829.98
Stop1	649.8	1239.79	1829.8	2419.8	3009.79	3599.78	4189.78
Time1	Data1	Sim1	Time2	Data2	Sim2	Time3	Data3	Sim3	Time4	Data4	Sim4	Time5	Data5	Sim5	Time6	Data6	Sim6	Time7	Data7	Sim7
290	0.00570596		880	-0.00047445		1470	0.00365994		2060	-0.00316432		2649.99	-0.00029724		3239.99	-0.00312825		3829.98	-0.00193506
290.2	0.00486295		880.2	-0.00035152		1470.2	0.00321694		2060.2	-0.00246636		2650.19	-0.00189995		3240.19	-0.00362945		3830.18	-0.00239126
290.4	0.00497277		880.4	-0.00032102		1470.4	0.00296347		2060.4	-0.00166669		2650.39	-0.00231573		3240.39	-0.00437273		3830.38	-0.0034055
290.6	0.00401426		880.6	-0.00001469		1470.6	0.0027933		2060.6	-0.00112439		2650.59	-0.0029397		3240.59	-0.0051174		3830.58	-0.00351538
290.8	0.00341188		880.8	0.0006875		1470.8	0.00242338		2060.8	-0.00065116		2650.79	-0.00448589		3240.79	-0.00519318		3830.78	-0.0036359
291	0.00355812		881	0.00127206		1471	0.00251395		2061	-0.00010481		2650.99	-0.00594411		3240.99	-0.00557131		3830.98	-0.00384868
291.2	0.00383103		881.2	0.00188929		1471.2	0.00336468		2061.2	0.00012302		2651.19	-0.00646733		3241.19	-0.00574833		3831.18	-0.00370415
291.4	0.0046237		881.4	0.00223281		1471.4	0.00444392		2061.4	0.00026731		2651.39	-0.0071048		3241.39	-0.0061521		3831.38	-0.0036709
291.6	0.00493455		881.6	0.00248243		1471.6	0.00414471		2061.6	0.00047324		2651.59	-0.00757091		3241.59	-0.00670663		3831.58	-0.00418251
291.8	0.00511317		881.8	0.00285977		1471.8	0.00452674		2061.8	0.00071981		2651.79	-0.00770394		3241.79	-0.00650821		3831.78	-0.00441849
292	0.00591718		882	0.00334303		1472	0.00429914		2062	0.00045081		2651.99	-0.00771261		3241.99	-0.00612239		3831.98	-0.0051859
292.2	0.00705426		882.2	0.00337637		1472.2	0.00475435		2062.2	0.00034169		2652.19	-0.00732349		3242.19	-0.00585706		3832.18	-0.00551029
292.4	0.00791079		882.4	0.00388015		1472.4	0.00495519		2062.4	0.00049527		2652.39	-0.00662254		3242.39	-0.00603846		3832.38	-0.00543569
292.6	0.00872549		882.6	0.00426325		1472.6	0.00468929		2062.6	0.00001815		2652.59	-0.00678882		3242.59	-0.00611819		3832.58	-0.00543401
292.8	0.00907346		882.8	0.00464199		1472.8	0.00519784		2062.8	-0.00033766		2652.79	-0.00640567		3242.79	-0.00612097		3832.78	-0.00573298
293	0.00928599		883	0.00488658		1473	0.00594138		2063	-0.00035448		2652.99	-0.006255		3242.99	-0.00494796		3832.98	-0.0053481
293.2	0.0093915		883.2	0.00496733		1473.2	0.00615682		2063.2	-0.00049334		2653.19	-0.00655534		3243.19	-0.00421391		3833.18	-0.00530946
293.4	0.01080362		883.4	0.00475594		1473.4	0.0059816		2063.4	-0.00109013		2653.39	-0.00683056		3243.39	-0.00445283		3833.38	-0.005314
293.6	0.01237159		883.6	0.00479132		1473.6	0.00496093		2063.6	-0.00073695		2653.59	-0.00750252		3243.59	-0.0038227		3833.58	-0.00519788
293.8	0.01358359		883.8	0.00562568		1473.8	0.00473005		2063.8	-0.00022664		2653.79	-0.00735302		3243.79	-0.00395852		3833.78	-0.0047001
294	0.0144165		884	0.00553452		1474	0.00411863		2064	-0.00010661		2653.99	-0.00789037		3243.99	-0.00405921		3833.98	-0.00428767
294.2	0.01490407		884.2	0.00486863		1474.2	0.00387694		2064.2	0.00055835		2654.19	-0.00732914		3244.19	-0.00467926		3834.18	-0.00463377
294.4	0.01640634		884.4	0.00431575		1474.4	0.00383389		2064.4	0.00010146		2654.39	-0.00682988		3244.39	-0.00464263		3834.38	-0.00421735
294.6	0.0166954		884.6	0.00464401		1474.6	0.00408205		2064.6	-0.00030931		2654.59	-0.00686858		3244.59	-0.00512255		3834.58	-0.00347407
294.8	0.01785329		884.8	0.00451696		1474.8	0.00427254		2064.8	-0.00097177		2654.79	-0.0071203		3244.79	-0.00516697		3834.78	-0.0035167
295	0.0190958		885	0.0047111		1475	0.00462726		2065	-0.00057475		2654.99	-0.00713975		3244.99	-0.00508555		3834.98	-0.00472111
295.2	0.0201499		885.2	0.00489494		1475.2	0.00539922		2065.2	-0.00102352		2655.19	-0.00672681		3245.19	-0.00554679		3835.18	-0.00404317
295.4	0.0214939		885.4	0.00420182		1475.4	0.00518585		2065.4	-0.0005079		2655.39	-0.00725391		3245.39	-0.00581488		3835.38	-0.00377349
295.6	0.02117554		885.6	0.00387106		1475.6	0.00443747		2065.6	0.00023408		2655.59	-0.00784525		3245.59	-0.00542841		3835.58	-0.00400986
295.8	0.02129074		885.8	0.00377586		1475.8	0.00467384		2065.8	-0.00046949		2655.79	-0.00731399		3245.79	-0.00500907		3835.78	-0.00395079
296	0.02235647		886	0.00343306		1476	0.00441613		2066	-0.00119577		2655.99	-0.00696641		3245.99	-0.00536589		3835.98	-0.00404097
296.2	0.02354849		886.2	0.003068		1476.2	0.00481937		2066.2	-0.00150482		2656.19	-0.00693701		3246.19	-0.00494041		3836.18	-0.00348705
296.4	0.02362057		886.4	0.00370068		1476.4	0.00492692		2066.4	-0.00221487		2656.39	-0.00670908		3246.39	-0.00456216		3836.38	-0.0029961
296.6	0.02387852		886.6	0.0033461		1476.6	0.00500102		2066.6	-0.00161069		2656.59	-0.00637792		3246.59	-0.00382078		3836.58	-0.00243158
296.8	0.02434406		886.8	0.00367317		1476.8	0.00611332		2066.8	-0.0011055		2656.79	-0.00611003		3246.79	-0.00241993		3836.78	-0.00304477
297	0.02349665		887	0.00479408		1477	0.00664552		2067	-0.00020949		2656.99	-0.00710172		3246.99	-0.00164598		3836.98	-0.0029855
297.2	0.02374348		887.2	0.00469206		1477.2	0.00562074		2067.2	0.00010369		2657.19	-0.00706569		3247.19	-0.00122287		3837.18	-0.00312629
297.4	0.02436125		887.4	0.0046181		1477.4	0.00533477		2067.4	0.00009343		2657.39	-0.00689144		3247.39	-0.00181419		3837.38	-0.00210227
297.6	0.02446298		887.6	0.00514252		1477.6	0.00577996		2067.6	0.00062441		2657.59	-0.00675676		3247.59	-0.00240901		3837.58	-0.00159702
297.8	0.02447392		887.8	0.00487825		1477.8	0.00600955		2067.8	0.00132415		2657.79	-0.0066404		3247.79	-0.00271968		3837.78	-0.00080949
298	0.02462088		888	0.00480531		1478	0.00611403		2068	0.00186709		2657.99	-0.00693381		3247.99	-0.00234486		3837.98	0.00008034
298.2	0.02440292		888.2	0.00484319		1478.2	0.00640685		2068.2	0.00139854		2658.19	-0.00675229		3248.19	-0.00252475		3838.18	0.00075673
298.4	0.02526124		888.4	0.00437299		1478.4	0.00656271		2068.4	0.00064382		2658.39	-0.00718376		3248.39	-0.00239161		3838.38	0.00119038
298.6	0.02531894		888.6	0.00557961		1478.6	0.00719435		2068.6	0.00086531		2658.59	-0.00631409		3248.59	-0.00308007		3838.58	0.0004669
298.8	0.02570254		888.8	0.00640931		1478.8	0.00792574		2068.8	0.0010497		2658.79	-0.00666443		3248.79	-0.00228808		3838.78	0.00023246
299	0.02639274		889	0.00801103		1479	0.00773387		2069	0.0023847		2658.99	-0.00785013		3248.99	-0.00153005		3838.98	0.00052187
299.2	0.02726167		889.2	0.00770057		1479.2	0.00830021		2069.2	0.0022826		2659.19	-0.00737309		3249.19	-0.00218895		3839.18	0.00101247
299.4	0.0273264		889.4	0.0080383		1479.4	0.00826145		2069.4	0.00191731		2659.39	-0.00756382		3249.39	-0.00170954		3839.38	0.00050577
299.6	0.02788461		889.6	0.00813964		1479.6	0.00886479		2069.6	0.00127952		2659.59	-0.00752927		3249.59	-0.00163135		3839.58	0.00057445
299.8	0.02903698		889.8	0.00838293		1479.8	0.0093722		2069.8	0.0000079		2659.79	-0.00600919		3249.79	-0.00157399		3839.78	0.00006667
300	0.03063703		890	0.00845007		1480	0.00850656		2070	-0.00055876		2659.99	-0.00567229		3249.99	-0.00124954		3839.98	-0.00030894
300.2	0.03086502		890.2	0.00935985		1480.2	0.00831533		2070.2	-0.00001281		2660.19	-0.00604724		3250.19	-0.00101254		3840.18	-0.0005795
300.4	0.03032437		890.4	0.0097994		1480.4	0.00853809		2070.4	0.00006172		2660.39	-0.00639313		3250.39	-0.00111127		3840.38	-0.00130562
300.6	0.03001271		890.6	0.00952258		1480.6	0.00821629		2070.6	0.00069073		2660.59	-0.00642732		3250.59	-0.00116251		3840.58	-0.00185237
300.8	0.03060248		890.8	0.00980404		1480.8	0.00859352		2070.8	0.00093448		2660.79	-0.00737751		3250.79	-0.00121065		3840.78	-0.00297117
301	0.03027332		891	0.00973696		1481	0.00865669		2071	0.00119491		2660.99	-0.0075042		3250.99	-0.00126855		3840.98	-0.00379891
301.2	0.03094225		891.2	0.00873898		1481.2	0.00851187		2071.2	0.00088291		2661.19	-0.00617728		3251.19	-0.00199036		3841.18	-0.00527614
301.4	0.03213834		891.4	0.00815904		1481.4	0.00820572		2071.4	-0.00009301		2661.39	-0.00606058		3251.39	-0.0033008		3841.38	-0.00604523
301.6	0.03276574		891.6	0.0075115		1481.6	0.00855034		2071.6	-0.00037099		2661.59	-0.00606417		3251.59	-0.00388604		3841.58	-0.00623731
301.8	0.03336838		891.8	0.00704447		1481.8	0.00786829		2071.8	-0.00023661		2661.79	-0.00658339		3251.79	-0.00410294		3841.78	-0.00610695
302	0.03393415		892	0.00747068		1482	0.00826292		2072	-0.00066891		2661.99	-0.00670535		3251.99	-0.00433097		3841.98	-0.00598438
302.2	0.03515227		892.2	0.00779483		1482.2	0.00855616		2072.2	-0.00165202		2662.19	-0.00612438		3252.19	-0.00512064		3842.18	-0.0057742
302.4	0.03610577		892.4	0.00810033		1482.4	0.00818269		2072.4	-0.00115493		2662.39	-0.00578512		3252.39	-0.00570636		3842.38	-0.00557238
302.6	0.03673434		892.6	0.00901206		1482.6	0.00844684		2072.6	-0.00073523		2662.59	-0.00544945		3252.59	-0.00618114		3842.58	-0.0054832
302.8	0.03724251		892.8	0.00966492		1482.8	0.00972501		2072.8	-0.00110752		2662.79	-0.00537234		3252.79	-0.00614345		3842.78	-0.00477573
303	0.03818185		893	0.00949901		1483	0.00934891		2073	-0.00127637		2662.99	-0.0046543		3252.99	-0.00660214		3842.98	-0.00437146
303.2	0.03872446		893.2	0.00866842		1483.2	0.01001176		2073.2	-0.00154394		2663.19	-0.0037489		3253.19	-0.00757225		3843.18	-0.00453273
303.4	0.03950893		893.4	0.00956945		1483.4	0.01017225		2073.4	-0.001514		2663.39	-0.00353048		3253.39	-0.0074105		3843.38	-0.00354877
303.6	0.04130827		893.6	0.00972801		1483.6	0.01061254		2073.6	-0.00087125		2663.59	-0.00254091		3253.59	-0.00685213		3843.58	-0.00230916
303.8	0.04190119		893.8	0.00965365		1483.8	0.0108819		2073.8	-0.00108276		2663.79	-0.00159573		3253.79	-0.00611516		3843.78	-0.00281436
304	0.04180265		894	0.00920114		1484	0.01020409		2074	-0.00145785		2663.99	-0.00208151		3253.99	-0.00612495		3843.98	-0.00244036
304.2	0.04084987		894.2	0.00975383		1484.2	0.01062092		2074.2	-0.00113629		2664.19	-0.00306711		3254.19	-0.00691349		3844.18	-0.00208642
304.4	0.04059931		894.4	0.0091417		1484.4	0.01083691		2074.4	-0.00166427		2664.39	-0.00400998		3254.39	-0.00720989		3844.38	-0.00209364
304.6	0.03992754		894.6	0.00885945		1484.6	0.01021044		2074.6	-0.00082028		2664.59	-0.00472921		3254.59	-0.00727932		3844.58	-0.00217418
304.8	0.04000487		894.8	0.00834531		1484.8	0.01022339		2074.8	-0.00067393		2664.79	-0.00549828		3254.79	-0.00586994		3844.78	-0.00218161
305	0.04000666		895	0.0088154		1485	0.01019291		2075	-0.00100589		2664.99	-0.00403445		3254.99	-0.00559018		3844.98	-0.00303835
305.2	0.03975062		895.2	0.00878004		1485.2	0.00993968		2075.2	-0.00085767		2665.19	-0.0043513		3255.19	-0.00552725		3845.18	-0.00321298
305.4	0.04081773		895.4	0.00880122		1485.4	0.00949507		2075.4	-0.00093505		2665.39	-0.00492802		3255.39	-0.00560978		3845.38	-0.00299526
305.6	0.04036818		895.6	0.00861577		1485.6	0.00974822		2075.6	0.00003169		2665.59	-0.0044252		3255.59	-0.00520639		3845.58	-0.00192639
305.8	0.04048759		895.8	0.00864495		1485.8	0.00899297		2075.8	-0.00001068		2665.79	-0.00528858		3255.79	-0.00589071		3845.78	-0.00190678
306	0.04115441		896	0.00807863		1486	0.00903013		2076	0.00058532		2665.99	-0.00533588		3255.99	-0.00532641		3845.98	-0.00231747
306.2	0.04121573		896.2	0.00752668		1486.2	0.00807184		2076.2	0.00030366		2666.19	-0.00464483		3256.19	-0.00548934		3846.18	-0.00283343
306.4	0.04060397		896.4	0.00663687		1486.4	0.00767353		2076.4	0.00076265		2666.39	-0.00391546		3256.39	-0.00562144		3846.38	-0.00216623
306.6	0.04062666		896.6	0.00559562		1486.6	0.00803689		2076.6	0.00009557		2666.59	-0.00430233		3256.59	-0.00633213		3846.58	-0.0026357
306.8	0.04011646		896.8	0.00599312		1486.8	0.00855951		2076.8	-0.00038412		2666.79	-0.00343528		3256.79	-0.00608839		3846.78	-0.00253073
307	0.04084738		897	0.00580522		1487	0.00775439		2077	0.00001854		2666.99	-0.00335263		3256.99	-0.00582156		3846.98	-0.00238187
307.2	0.04167008		897.2	0.0059664		1487.2	0.00775916		2077.2	0.00136162		2667.19	-0.00399816		3257.19	-0.00549132		3847.18	-0.00218334
307.4	0.04258232		897.4	0.00620394		1487.4	0.00737328		2077.4	0.00167489		2667.39	-0.00417544		3257.39	-0.00497478		3847.38	-0.00216536
307.6	0.04386783		897.6	0.00609772		1487.6	0.00746217		2077.6	0.00193475		2667.59	-0.0045514		3257.59	-0.00327979		3847.58	-0.00219154
307.8	0.04432487		897.8	0.00506312		1487.8	0.00702876		2077.8	0.00140158		2667.79	-0.00544572		3257.79	-0.0030153		3847.78	-0.00262658
308	0.04508875		898	0.00504712		1488	0.00683918		2078	0.00120045		2667.99	-0.00649119		3257.99	-0.00268371		3847.98	-0.00232777
308.2	0.04573124		898.2	0.00590756		1488.2	0.00622032		2078.2	0.00095007		2668.19	-0.00761487		3258.19	-0.00319803		3848.18	-0.00192023
308.4	0.04567438		898.4	0.0055767		1488.4	0.00606179		2078.4	0.0015466		2668.39	-0.00834931		3258.39	-0.00344024		3848.38	-0.00099402
308.6	0.04588598		898.6	0.00657259		1488.6	0.00526507		2078.6	0.00157152		2668.59	-0.00906993		3258.59	-0.00319292		3848.58	-0.000368
308.8	0.04665523		898.8	0.00719267		1488.8	0.00612481		2078.8	0.00172438		2668.79	-0.00899765		3258.79	-0.00224207		3848.78	-0.00012006
309	0.04758934		899	0.00859768		1489	0.00682476		2079	0.00246019		2668.99	-0.00829779		3258.99	-0.00217313		3848.98	-0.00027751
309.2	0.04816454		899.2	0.00932777		1489.2	0.00783667		2079.2	0.00326088		2669.19	-0.00910923		3259.19	-0.00162876		3849.18	0.00133082
309.4	0.04906369		899.4	0.00911917		1489.4	0.0085621		2079.4	0.00239749		2669.39	-0.00881483		3259.39	-0.0015235		3849.38	0.00129589
309.6	0.0490195		899.6	0.00829037		1489.6	0.00958024		2079.6	0.00323559		2669.59	-0.00853913		3259.59	-0.0013656		3849.58	0.00125999
309.8	0.04985558		899.8	0.00833454		1489.8	0.01040929		2079.8	0.00367609		2669.79	-0.00847592		3259.79	-0.00216355		3849.78	0.0009198
310	0.0503136		900	0.0079374		1490	0.011421		2080	0.00346338		2669.99	-0.00760227		3259.99	-0.00218288		3849.98	0.00020462
310.2	0.04997243		900.2	0.00864482		1490.2	0.01252446		2080.2	0.00336147		2670.19	-0.00663897		3260.19	-0.00261997		3850.18	0.00003204
310.4	0.05018266		900.4	0.00866024		1490.4	0.0146783		2080.4	0.00241138		2670.39	-0.00568649		3260.39	-0.00278611		3850.38	0.00012374
310.6	0.04980024		900.6	0.00929489		1490.6	0.01556986		2080.6	0.00218119		2670.59	-0.00575672		3260.59	-0.00324664		3850.58	-0.00034817
310.8	0.04985932		900.8	0.01002181		1490.8	0.01606486		2080.8	0.00194812		2670.79	-0.00497262		3260.79	-0.00305494		3850.78	-0.00045801
311	0.0507323		901	0.00951126		1491	0.01623573		2081	0.00229588		2670.99	-0.00474108		3260.99	-0.0032967		3850.98	0.00009307
311.2	0.05137852		901.2	0.00897405		1491.2	0.01629875		2081.2	0.00299052		2671.19	-0.00482074		3261.19	-0.00357488		3851.18	-0.00034765
311.4	0.05168388		901.4	0.00871576		1491.4	0.01546017		2081.4	0.00304199		2671.39	-0.00435929		3261.39	-0.00365455		3851.38	-0.00043953
311.6	0.05242353		901.6	0.0087933		1491.6	0.0144812		2081.6	0.00413616		2671.59	-0.00401695		3261.59	-0.00304622		3851.58	-0.00065162
311.8	0.05285526		901.8	0.00864335		1491.8	0.01387475		2081.8	0.00419748		2671.79	-0.00394099		3261.79	-0.00455294		3851.78	-0.00169288
312	0.05386611		902	0.00852475		1492	0.01358033		2082	0.00427294		2671.99	-0.00440916		3261.99	-0.00491457		3851.98	-0.00150699
312.2	0.05382505		902.2	0.00884712		1492.2	0.01199356		2082.2	0.00448999		2672.19	-0.00518437		3262.19	-0.0053835		3852.18	-0.0016531
312.4	0.05380097		902.4	0.00836785		1492.4	0.01116832		2082.4	0.00535885		2672.39	-0.00614968		3262.39	-0.00608905		3852.38	-0.0009324
312.6	0.05416845		902.6	0.00881567		1492.6	0.0099775		2082.6	0.0049937		2672.59	-0.00638586		3262.59	-0.00597816		3852.58	-0.00163837
312.8	0.05501366		902.8	0.00873828		1492.8	0.00995721		2082.8	0.00631568		2672.79	-0.00713218		3262.79	-0.00484249		3852.78	-0.0020225
313	0.05465931		903	0.00872374		1493	0.01009824		2083	0.00660532		2672.99	-0.00795311		3262.99	-0.00516147		3852.98	-0.00268593
313.2	0.05473808		903.2	0.00847643		1493.2	0.00948126		2083.2	0.00643624		2673.19	-0.00836158		3263.19	-0.00521138		3853.18	-0.00155126
313.4	0.05488951		903.4	0.00854791		1493.4	0.0094695		2083.4	0.00626406		2673.39	-0.00803042		3263.39	-0.00580902		3853.38	-0.00224007
313.6	0.05517053		903.6	0.00922153		1493.6	0.0093432		2083.6	0.00732948		2673.59	-0.00779647		3263.59	-0.0060853		3853.58	-0.00245659
313.8	0.05554931		903.8	0.01081732		1493.8	0.00951932		2083.8	0.00716734		2673.79	-0.00732487		3263.79	-0.00666191		3853.78	-0.00159899
314	0.05633038		904	0.01090648		1494	0.00990102		2084	0.00597295		2673.99	-0.00797583		3263.99	-0.0061755		3853.98	-0.00097229
314.2	0.05695678		904.2	0.01185018		1494.2	0.01042182		2084.2	0.00575264		2674.19	-0.00778221		3264.19	-0.00553404		3854.18	-0.00020264
314.4	0.05702605		904.4	0.01219717		1494.4	0.01170835		2084.4	0.00476824		2674.39	-0.00727928		3264.39	-0.00462618		3854.38	-0.00019957
314.6	0.05666834		904.6	0.01275878		1494.6	0.01186164		2084.6	0.00533663		2674.59	-0.00663119		3264.59	-0.00477421		3854.58	0.00055734
314.8	0.05710343		904.8	0.0129552		1494.8	0.01210556		2084.8	0.00406058		2674.79	-0.00602401		3264.79	-0.00434353		3854.78	0.00101527
315	0.05690494		905	0.01301228		1495	0.012388		2085	0.00404483		2674.99	-0.00566691		3264.99	-0.00407354		3854.98	0.00123793
315.2	0.05714639		905.2	0.01307964		1495.2	0.01204157		2085.2	0.00334928		2675.19	-0.00481144		3265.19	-0.00345071		3855.18	0.00035833
315.4	0.05772384		905.4	0.01375738		1495.4	0.01206522		2085.4	0.00362102		2675.39	-0.00437082		3265.39	-0.00265751		3855.38	0.00034972
315.6	0.05836327		905.6	0.01391076		1495.6	0.01199661		2085.6	0.00344284		2675.59	-0.00421537		3265.59	-0.00225358		3855.58	0.0009018
315.8	0.05940849		905.8	0.01371235		1495.8	0.01230975		2085.8	0.00273502		2675.79	-0.00438638		3265.79	-0.00208267		3855.78	0.00035757
316	0.05971792		906	0.01335449		1496	0.01187931		2086	0.00290355		2675.99	-0.00515048		3265.99	-0.00148708		3855.98	0.00044781
316.2	0.05974902		906.2	0.01267353		1496.2	0.0115006		2086.2	0.00261303		2676.19	-0.00598771		3266.19	-0.00076675		3856.18	0.00015743
316.4	0.05923664		906.4	0.01178852		1496.4	0.01177826		2086.4	0.00220033		2676.39	-0.00649472		3266.39	-0.00119518		3856.38	0.00010621
316.6	0.05913187		906.6	0.01154585		1496.6	0.01156731		2086.6	0.00195375		2676.59	-0.00627655		3266.59	-0.00081619		3856.58	-0.00031143
316.8	0.05915397		906.8	0.01124808		1496.8	0.01186909		2086.8	0.00253338		2676.79	-0.0066009		3266.79	-0.0009694		3856.78	-0.00036491
317	0.05845021		907	0.01049932		1497	0.0119436		2087	0.00296113		2676.99	-0.00608408		3266.99	-0.00160901		3856.98	-0.00142622
317.2	0.05892844		907.2	0.01047489		1497.2	0.01120612		2087.2	0.00292895		2677.19	-0.00614481		3267.19	-0.00171776		3857.18	-0.00100966
317.4	0.05933929		907.4	0.01098898		1497.4	0.01135107		2087.4	0.00342412		2677.39	-0.00545851		3267.39	-0.00282155		3857.38	-0.00162133
317.6	0.05942946		907.6	0.0112241		1497.6	0.01044118		2087.6	0.00423297		2677.59	-0.00524729		3267.59	-0.0032513		3857.58	-0.00114694
317.8	0.05926522		907.8	0.01057858		1497.8	0.01053215		2087.8	0.00427827		2677.79	-0.00436753		3267.79	-0.003561		3857.78	-0.00055334
318	0.06001316		908	0.01018062		1498	0.00966907		2088	0.00432449		2677.99	-0.00440283		3267.99	-0.00396044		3857.98	-0.0009164
318.2	0.06040709		908.2	0.01023433		1498.2	0.0090661		2088.2	0.0048798		2678.19	-0.0040357		3268.19	-0.00392189		3858.18	-0.00107332
318.4	0.06052693		908.4	0.01046021		1498.4	0.00948157		2088.4	0.00582284		2678.39	-0.00372023		3268.39	-0.00397717		3858.38	-0.00112364
318.6	0.06079512		908.6	0.01065739		1498.6	0.0097114		2088.6	0.00583024		2678.59	-0.00259589		3268.59	-0.0044323		3858.58	-0.00136315
318.8	0.06119654		908.8	0.01161144		1498.8	0.009936		2088.8	0.00517246		2678.79	-0.00206813		3268.79	-0.00433809		3858.78	-0.00202043
319	0.0618098		909	0.01225723		1499	0.01100114		2089	0.00442192		2678.99	-0.0019299		3268.99	-0.00420639		3858.98	-0.00218522
319.2	0.06326336		909.2	0.01251286		1499.2	0.01139192		2089.2	0.00403396		2679.19	-0.00110575		3269.19	-0.00310291		3859.18	-0.00144905
319.4	0.06326068		909.4	0.0137743		1499.4	0.01244328		2089.4	0.00465904		2679.39	-0.00144798		3269.39	-0.00284329		3859.38	-0.00069992
319.6	0.06407138		909.6	0.01447461		1499.6	0.01256196		2089.6	0.00452206		2679.59	-0.00118723		3269.59	-0.00246509		3859.58	0.00047426
319.8	0.06371494		909.8	0.01560779		1499.8	0.01318266		2089.8	0.00443469		2679.79	-0.00148498		3269.79	-0.0030208		3859.78	-0.00000347
320	0.06420771		910	0.01580919		1500	0.01462253		2090	0.00455151		2679.99	-0.00242665		3269.99	-0.00341714		3859.98	0.00063388
320.2	0.06518962		910.2	0.01541428		1500.2	0.01495421		2090.2	0.00418707		2680.19	-0.00349101		3270.19	-0.0027893		3860.18	0.00036301
320.4	0.06543931		910.4	0.01633995		1500.4	0.01509683		2090.4	0.0041955		2680.39	-0.00373799		3270.39	-0.00377686		3860.38	0.00121299
320.6	0.06631471		910.6	0.01652984		1500.6	0.01563811		2090.6	0.0044819		2680.59	-0.00385893		3270.59	-0.00304859		3860.58	0.00178744
320.8	0.06678521		910.8	0.01604597		1500.8	0.0151051		2090.8	0.00411598		2680.79	-0.00404417		3270.79	-0.00346543		3860.78	0.00089459
321	0.06706713		911	0.01495601		1501	0.01443089		2091	0.00522398		2680.99	-0.00438117		3270.99	-0.00339239		3860.98	-0.00010539
321.2	0.06717331		911.2	0.01410378		1501.2	0.01398888		2091.2	0.00562842		2681.19	-0.00601195		3271.19	-0.00433061		3861.18	0.00045172
321.4	0.06773116		911.4	0.01281556		1501.4	0.01316585		2091.4	0.0067452		2681.39	-0.0062857		3271.39	-0.0052933		3861.38	0.00114545
321.6	0.0672834		911.6	0.01172085		1501.6	0.01269574		2091.6	0.00779186		2681.59	-0.00617611		3271.59	-0.00498693		3861.58	0.00179277
321.8	0.06706782		911.8	0.00986773		1501.8	0.01184195		2091.8	0.00793967		2681.79	-0.00618325		3271.79	-0.00531234		3861.78	0.00141113
322	0.06737884		912	0.00887678		1502	0.0106198		2092	0.00804116		2681.99	-0.00720555		3271.99	-0.00568014		3861.98	0.0014333
322.2	0.06783206		912.2	0.00750597		1502.2	0.01058748		2092.2	0.00796261		2682.19	-0.00739075		3272.19	-0.00541241		3862.18	0.00223086
322.4	0.06766917		912.4	0.00760725		1502.4	0.01047589		2092.4	0.00824186		2682.39	-0.00754517		3272.39	-0.00573744		3862.38	0.00197061
322.6	0.0680593		912.6	0.00706286		1502.6	0.01027542		2092.6	0.00795583		2682.59	-0.0066314		3272.59	-0.00579008		3862.58	0.00118462
322.8	0.06846142		912.8	0.00637144		1502.8	0.01028406		2092.8	0.00730522		2682.79	-0.00696719		3272.79	-0.00499588		3862.78	0.00053237
323	0.06866467		913	0.00651807		1503	0.01154601		2093	0.00667026		2682.99	-0.00672004		3272.99	-0.00423864		3862.98	0.00063663
323.2	0.06884035		913.2	0.00648175		1503.2	0.01159765		2093.2	0.00617574		2683.19	-0.00592779		3273.19	-0.00370335		3863.18	0.00053757
323.4	0.06801776		913.4	0.00727883		1503.4	0.01241317		2093.4	0.00658412		2683.39	-0.00603824		3273.39	-0.00377645		3863.38	0.00017033
323.6	0.06843346		913.6	0.00845662		1503.6	0.01274458		2093.6	0.00673052		2683.59	-0.00504889		3273.59	-0.00286002		3863.58	0.00029153
323.8	0.0679841		913.8	0.00977775		1503.8	0.01389828		2093.8	0.00644481		2683.79	-0.00495766		3273.79	-0.00328082		3863.78	-0.0004103
324	0.0692589		914	0.01030466		1504	0.0149223		2094	0.00633356		2683.99	-0.0046011		3273.99	-0.0021087		3863.98	-0.00023613
324.2	0.07036352		914.2	0.01146836		1504.2	0.01516959		2094.2	0.00653981		2684.19	-0.0041592		3274.19	-0.00145787		3864.18	-0.00117122
324.4	0.07096926		914.4	0.01225109		1504.4	0.01630981		2094.4	0.00638312		2684.39	-0.00265725		3274.39	-0.00148198		3864.38	-0.00018837
324.6	0.07180121		914.6	0.01189095		1504.6	0.01669127		2094.6	0.00629453		2684.59	-0.00211701		3274.59	0.00000986		3864.58	-0.00119571
324.8	0.07192325		914.8	0.01148992		1504.8	0.01683899		2094.8	0.00605826		2684.79	-0.00231708		3274.79	0.00000109		3864.78	-0.00155061
325	0.07217638		915	0.01144503		1505	0.01708022		2095	0.00682275		2684.99	-0.00213961		3274.99	0.00043185		3864.98	-0.00183252
325.2	0.07201939		915.2	0.01142988		1505.2	0.01742656		2095.2	0.00648671		2685.19	-0.00293896		3275.19	0.00026393		3865.18	-0.00084386
325.4	0.07239785		915.4	0.01140725		1505.4	0.01671792		2095.4	0.00716673		2685.39	-0.00324379		3275.39	0.00064706		3865.38	-0.00026204
325.6	0.07280013		915.6	0.01159044		1505.6	0.01674365		2095.6	0.00780762		2685.59	-0.00335703		3275.59	0.00136678		3865.58	0.00024064
325.8	0.07238697		915.8	0.0110861		1505.8	0.01594562		2095.8	0.00720951		2685.79	-0.00427165		3275.79	0.00053635		3865.78	0.00035898
326	0.0725785		916	0.01078981		1506	0.01530453		2096	0.00787285		2685.99	-0.00460497		3275.99	0.00053457		3865.98	0.00104545
326.2	0.07254761		916.2	0.01061278		1506.2	0.01456549		2096.2	0.0075822		2686.19	-0.00500164		3276.19	-0.00048661		3866.18	0.00145554
326.4	0.07291887		916.4	0.01020633		1506.4	0.01387931		2096.4	0.00796205		2686.39	-0.00570183		3276.39	-0.0004037		3866.38	0.00106101
326.6	0.07352991		916.6	0.00897953		1506.6	0.01336642		2096.6	0.00794548		2686.59	-0.00583988		3276.59	-0.00051184		3866.58	0.00128065
326.8	0.07372145		916.8	0.0090269		1506.8	0.01297579		2096.8	0.00837435		2686.79	-0.0062818		3276.79	-0.00060505		3866.78	0.00166959
327	0.07361052		917	0.00905343		1507	0.01290294		2097	0.00827049		2686.99	-0.00624343		3276.99	-0.00106697		3866.98	0.00187384
327.2	0.07352188		917.2	0.00970166		1507.2	0.01226078		2097.2	0.00745989		2687.19	-0.00613409		3277.19	-0.00227788		3867.18	0.00171524
327.4	0.07349634		917.4	0.01012613		1507.4	0.01170865		2097.4	0.00800549		2687.39	-0.00566146		3277.39	-0.00281942		3867.38	0.0026231
327.6	0.07335777		917.6	0.01085318		1507.6	0.01128634		2097.6	0.00845429		2687.59	-0.00498826		3277.59	-0.003132		3867.58	0.00290936
327.8	0.0735884		917.8	0.01109939		1507.8	0.01079357		2097.8	0.00892055		2687.79	-0.00472569		3277.79	-0.00460345		3867.78	0.00239106
328	0.07367518		918	0.01155852		1508	0.01058539		2098	0.00892965		2687.99	-0.00399762		3277.99	-0.00444053		3867.98	0.00286605
328.2	0.07386977		918.2	0.01179632		1508.2	0.01098888		2098.2	0.00931322		2688.19	-0.00327549		3278.19	-0.00523769		3868.18	0.0033543
328.4	0.07382058		918.4	0.01162876		1508.4	0.01175959		2098.4	0.0094225		2688.39	-0.00234922		3278.39	-0.00547797		3868.38	0.00392272
328.6	0.0737667		918.6	0.0120178		1508.6	0.01156567		2098.6	0.00929197		2688.59	-0.00255754		3278.59	-0.00539944		3868.58	0.00351217
328.8	0.07371829		918.8	0.01211593		1508.8	0.01245171		2098.8	0.0093538		2688.79	-0.00261774		3278.79	-0.00532312		3868.78	0.00350794
329	0.07407282		919	0.0126881		1509	0.01275512		2099	0.01001906		2688.99	-0.00194921		3278.99	-0.00556636		3868.98	0.00214281
329.2	0.07399698		919.2	0.01218572		1509.2	0.01315763		2099.2	0.01032419		2689.19	-0.00186647		3279.19	-0.0055844		3869.18	0.00237493
329.4	0.0750751		919.4	0.01226831		1509.4	0.01291381		2099.4	0.01099162		2689.39	-0.00150928		3279.39	-0.00602258		3869.38	0.0023275
329.6	0.07595582		919.6	0.01198686		1509.6	0.01390297		2099.6	0.01071837		2689.59	-0.00117119		3279.59	-0.00672965		3869.58	0.0017677
329.8	0.07621338		919.8	0.01243773		1509.8	0.01349452		2099.8	0.01065522		2689.79	-0.00100965		3279.79	-0.00755823		3869.78	0.00122088
330	0.07789841		920	0.01256083		1510	0.01448346		2100	0.01116513		2689.99	0.00001122		3279.99	-0.00738544		3869.98	0.00078598
330.2	0.07847008		920.2	0.01255332		1510.2	0.01489159		2100.2	0.0104716		2690.19	-0.00093489		3280.19	-0.00690865		3870.18	0.00086454
330.4	0.07948484		920.4	0.01293215		1510.4	0.01532282		2100.4	0.01033691		2690.39	-0.00140212		3280.39	-0.006567		3870.38	0.00020384
330.6	0.07971542		920.6	0.01384197		1510.6	0.0154307		2100.6	0.01034866		2690.59	-0.00176818		3280.59	-0.00608422		3870.58	0.00028507
330.8	0.07989592		920.8	0.01357712		1510.8	0.0145851		2100.8	0.01067011		2690.79	-0.00207638		3280.79	-0.00605033		3870.78	0.00061893
331	0.079764		921	0.01272759		1511	0.01407753		2101	0.01004384		2690.99	-0.00215358		3280.99	-0.00554639		3870.98	0.00011913
331.2	0.08005697		921.2	0.01323024		1511.2	0.01270599		2101.2	0.00932348		2691.19	-0.00203481		3281.19	-0.00612115		3871.18	-0.00011743
331.4	0.08075791		921.4	0.01302482		1511.4	0.01230102		2101.4	0.00953015		2691.39	-0.00225008		3281.39	-0.0054775		3871.38	-0.00012261
331.6	0.08069787		921.6	0.01272109		1511.6	0.01202091		2101.6	0.00982571		2691.59	-0.00267048		3281.59	-0.00425421		3871.58	-0.00117402
331.8	0.08071194		921.8	0.01294337		1511.8	0.01122923		2101.8	0.00961925		2691.79	-0.00260696		3281.79	-0.00342356		3871.78	-0.00107046
332	0.07998848		922	0.0129225		1512	0.01141884		2102	0.00903457		2691.99	-0.00334694		3281.99	-0.00268022		3871.98	0.00012797
332.2	0.0798581		922.2	0.01272799		1512.2	0.01184679		2102.2	0.00968382		2692.19	-0.00360439		3282.19	-0.00209725		3872.18	0.00054441
332.4	0.08001157		922.4	0.0129161		1512.4	0.01235589		2102.4	0.00953888		2692.39	-0.00371115		3282.39	-0.0013052		3872.38	0.00146524
332.6	0.0804483		922.6	0.01311339		1512.6	0.01229291		2102.6	0.00988753		2692.59	-0.0042345		3282.59	-0.00054221		3872.58	0.00105465
332.8	0.08020733		922.8	0.01301199		1512.8	0.01320699		2102.8	0.01094461		2692.79	-0.00435655		3282.79	-0.000434		3872.78	0.00141269
333	0.07985488		923	0.01299585		1513	0.01368033		2103	0.01176145		2692.99	-0.00403574		3282.99	-0.00074225		3872.98	0.00164907
333.2	0.08008462		923.2	0.01324697		1513.2	0.01351621		2103.2	0.01093989		2693.19	-0.00379534		3283.19	-0.00154503		3873.18	0.00207962
333.4	0.08055085		923.4	0.01431656		1513.4	0.01453375		2103.4	0.0102793		2693.39	-0.00322869		3283.39	-0.00407576		3873.38	0.00206721
333.6	0.08188489		923.6	0.01492323		1513.6	0.01488711		2103.6	0.00973613		2693.59	-0.00284376		3283.59	-0.00490915		3873.58	0.0014291
333.8	0.08229156		923.8	0.01577235		1513.8	0.01470807		2103.8	0.00985028		2693.79	-0.00281615		3283.79	-0.00538514		3873.78	0.00080618
334	0.08324508		924	0.01616315		1514	0.01563803		2104	0.00906739		2693.99	-0.0021609		3283.99	-0.00532023		3873.98	0.00039332
334.2	0.08304177		924.2	0.01688998		1514.2	0.01518935		2104.2	0.00852605		2694.19	-0.00260806		3284.19	-0.00572207		3874.18	0.00009269
334.4	0.08408247		924.4	0.01820425		1514.4	0.01489625		2104.4	0.00807831		2694.39	-0.00243184		3284.39	-0.00683959		3874.38	-0.00128649
334.6	0.08389758		924.6	0.01825272		1514.6	0.01401315		2104.6	0.0088969		2694.59	-0.00290109		3284.59	-0.00653524		3874.58	-0.00158492
334.8	0.08376112		924.8	0.01697615		1514.8	0.01353173		2104.8	0.00873677		2694.79	-0.0023309		3284.79	-0.00701575		3874.78	-0.0012494
335	0.08446623		925	0.01677871		1515	0.01293763		2105	0.00815644		2694.99	-0.00218901		3284.99	-0.00597363		3874.98	-0.00127808
335.2	0.08513229		925.2	0.01643985		1515.2	0.01288453		2105.2	0.00771237		2695.19	-0.00298285		3285.19	-0.00615414		3875.18	-0.00127259
335.4	0.08616948		925.4	0.01588402		1515.4	0.01419847		2105.4	0.00810881		2695.39	-0.00274617		3285.39	-0.00466003		3875.38	-0.00106415
335.6	0.08601204		925.6	0.01646265		1515.6	0.0139881		2105.6	0.00784248		2695.59	-0.00183903		3285.59	-0.00356087		3875.58	-0.0007379
335.8	0.08634581		925.8	0.01648285		1515.8	0.01374842		2105.8	0.00780824		2695.79	-0.00203428		3285.79	-0.00350711		3875.78	0.00078584
336	0.08556164		926	0.01534771		1516	0.01334384		2106	0.00875206		2695.99	-0.00294239		3285.99	-0.0028566		3875.98	0.00122469
336.2	0.08526668		926.2	0.01509763		1516.2	0.01422428		2106.2	0.00959982		2696.19	-0.00371479		3286.19	-0.00255358		3876.18	0.0019853
336.4	0.08535698		926.4	0.01419494		1516.4	0.01471426		2106.4	0.01052381		2696.39	-0.00356614		3286.39	-0.00229067		3876.38	0.00334236
336.6	0.08579365		926.6	0.01379511		1516.6	0.01501522		2106.6	0.01124898		2696.59	-0.00473775		3286.59	-0.0017919		3876.58	0.00394229
336.8	0.08610306		926.8	0.01321777		1516.8	0.01505218		2106.8	0.01221797		2696.79	-0.00445811		3286.79	-0.00264082		3876.78	0.00589713
337	0.0860424		927	0.01247133		1517	0.015574		2107	0.01233487		2696.99	-0.00492685		3286.99	-0.00305447		3876.98	0.00653469
337.2	0.08591376		927.2	0.0126174		1517.2	0.01554599		2107.2	0.01169942		2697.19	-0.0046842		3287.19	-0.00413862		3877.18	0.00634551
337.4	0.086214		927.4	0.01247965		1517.4	0.01657798		2107.4	0.01221227		2697.39	-0.00385805		3287.39	-0.00503367		3877.38	0.00576205
337.6	0.08712792		927.6	0.01135193		1517.6	0.01614429		2107.6	0.01238091		2697.59	-0.00297002		3287.59	-0.00517037		3877.58	0.00475484
337.8	0.08663003		927.8	0.01163748		1517.8	0.01606582		2107.8	0.01168517		2697.79	-0.00257824		3287.79	-0.00563108		3877.78	0.00382022
338	0.08752594		928	0.0124929		1518	0.01645835		2108	0.01195834		2697.99	-0.0015007		3287.99	-0.0054804		3877.98	0.00342762
338.2	0.08817068		928.2	0.01286663		1518.2	0.01649068		2108.2	0.01179717		2698.19	-0.00091435		3288.19	-0.00605555		3878.18	0.00280419
338.4	0.08956896		928.4	0.01318583		1518.4	0.01615258		2108.4	0.01246006		2698.39	-0.00061796		3288.39	-0.00610421		3878.38	0.00229811
338.6	0.08917118		928.6	0.01339601		1518.6	0.01517407		2108.6	0.0123605		2698.59	-0.00054793		3288.59	-0.00599331		3878.58	0.00224606
338.8	0.08897868		928.8	0.01297513		1518.8	0.01615541		2108.8	0.01158438		2698.79	-0.00014004		3288.79	-0.00491142		3878.78	0.00260718
339	0.08914422		929	0.01388781		1519	0.0152103		2109	0.01087801		2698.99	-0.00045729		3288.99	-0.0043767		3878.98	0.0030715
339.2	0.08903074		929.2	0.01478808		1519.2	0.01566427		2109.2	0.01075511		2699.19	-0.0011251		3289.19	-0.00459659		3879.18	0.00276479
339.4	0.08910307		929.4	0.01593548		1519.4	0.01572491		2109.4	0.01045398		2699.39	-0.0004361		3289.39	-0.00355215		3879.38	0.00277633
339.6	0.08880188		929.6	0.01752896		1519.6	0.01493446		2109.6	0.01021243		2699.59	-0.00041772		3289.59	-0.00374744		3879.58	0.00272203
339.8	0.08834983		929.8	0.01676437		1519.8	0.01518905		2109.8	0.01036684		2699.79	-0.00188185		3289.79	-0.00385777		3879.78	0.00339357
340	0.08715835		930	0.01677581		1520	0.0147269		2110	0.01062665		2699.99	-0.00208163		3289.99	-0.00373436		3879.98	0.00261967
340.2	0.08737475		930.2	0.01621781		1520.2	0.01496869		2110.2	0.01026396		2700.19	-0.00301309		3290.19	-0.00391724		3880.18	0.0027998
340.4	0.08800308		930.4	0.01500761		1520.4	0.01446315		2110.4	0.01051147		2700.39	-0.00342217		3290.39	-0.00349625		3880.38	0.00290567
340.6	0.08885243		930.6	0.01522155		1520.6	0.01340354		2110.6	0.00984859		2700.59	-0.00388754		3290.59	-0.00373826		3880.58	0.00352634
340.8	0.08910213		930.8	0.01481561		1520.8	0.01325462		2110.8	0.00997827		2700.79	-0.00394543		3290.79	-0.00390561		3880.78	0.00415934
341	0.08826144		931	0.01442123		1521	0.01397636		2111	0.00895468		2700.99	-0.0044956		3290.99	-0.00384159		3880.98	0.00341698
341.2	0.08907399		931.2	0.01443696		1521.2	0.01353154		2111.2	0.00869991		2701.19	-0.00409619		3291.19	-0.00440857		3881.18	0.00282229
341.4	0.09080981		931.4	0.01403661		1521.4	0.01420584		2111.4	0.00878826		2701.39	-0.00379827		3291.39	-0.00505098		3881.38	0.00216253
341.6	0.0917895		931.6	0.013122		1521.6	0.01369658		2111.6	0.00832057		2701.59	-0.00315565		3291.59	-0.00562144		3881.58	0.00207125
341.8	0.09302085		931.8	0.01410388		1521.8	0.01392332		2111.8	0.00777765		2701.79	-0.00302435		3291.79	-0.00611301		3881.78	0.00228799
342	0.09442654		932	0.01391079		1522	0.0141579		2112	0.00881559		2701.99	-0.00237046		3291.99	-0.00602987		3881.98	0.00322724
342.2	0.09547705		932.2	0.01325354		1522.2	0.01360199		2112.2	0.00850162		2702.19	-0.00133966		3292.19	-0.00630871		3882.18	0.00200336
342.4	0.09618182		932.4	0.01384609		1522.4	0.0133498		2112.4	0.00858336		2702.39	-0.00119095		3292.39	-0.00582199		3882.38	0.0013879
342.6	0.09589802		932.6	0.01480144		1522.6	0.01273741		2112.6	0.00765795		2702.59	-0.00121556		3292.59	-0.00515274		3882.58	0.0009133
342.8	0.09687435		932.8	0.01542062		1522.8	0.01346667		2112.8	0.00757722		2702.79	-0.00128684		3292.79	-0.0051155		3882.78	0.00075686
343	0.09655067		933	0.01603184		1523	0.01325732		2113	0.00771014		2702.99	-0.0015198		3292.99	-0.0049992		3882.98	0.00001585
343.2	0.09630043		933.2	0.01685246		1523.2	0.01380157		2113.2	0.0068935		2703.19	-0.0015839		3293.19	-0.00529706		3883.18	-0.00114786
343.4	0.09669023		933.4	0.01736158		1523.4	0.01403648		2113.4	0.00700621		2703.39	-0.0013936		3293.39	-0.00438028		3883.38	-0.00106493
343.6	0.09649546		933.6	0.01804435		1523.6	0.0146536		2113.6	0.00725144		2703.59	-0.00214928		3293.59	-0.00518427		3883.58	-0.00152103
343.8	0.09553675		933.8	0.01867626		1523.8	0.01554316		2113.8	0.00744016		2703.79	-0.00317137		3293.79	-0.00566137		3883.78	-0.00164482
344	0.09484181		934	0.0187226		1524	0.01501773		2114	0.00735805		2703.99	-0.0025354		3293.99	-0.00547632		3883.98	-0.00213504
344.2	0.09417697		934.2	0.0186657		1524.2	0.01594721		2114.2	0.00779519		2704.19	-0.00296415		3294.19	-0.0051194		3884.18	-0.00198355
344.4	0.09351778		934.4	0.01878279		1524.4	0.01703745		2114.4	0.00818725		2704.39	-0.00296454		3294.39	-0.00500536		3884.38	-0.00198339
344.6	0.0931788		934.6	0.01883965		1524.6	0.01743729		2114.6	0.00860517		2704.59	-0.00219447		3294.59	-0.00487904		3884.58	-0.00154862
344.8	0.09206593		934.8	0.01826783		1524.8	0.01811748		2114.8	0.00901916		2704.79	-0.00284456		3294.79	-0.0043558		3884.78	-0.00087187
345	0.09230008		935	0.01787491		1525	0.01883407		2115	0.00857788		2704.99	-0.00289781		3294.99	-0.00556818		3884.98	0.00000698
345.2	0.09293964		935.2	0.01774758		1525.2	0.01912766		2115.2	0.00959708		2705.19	-0.00260008		3295.19	-0.00599861		3885.18	0.00086376
345.4	0.09383483		935.4	0.01776252		1525.4	0.01910927		2115.4	0.00962359		2705.39	-0.002989		3295.39	-0.00607483		3885.38	0.00111782
345.6	0.09368598		935.6	0.0167154		1525.6	0.01834624		2115.6	0.00974246		2705.59	-0.0023363		3295.59	-0.00589033		3885.58	0.00153337
345.8	0.09438357		935.8	0.01668834		1525.8	0.01813641		2115.8	0.00996052		2705.79	-0.00234408		3295.79	-0.00660359		3885.78	0.00238799
346	0.09443912		936	0.0159256		1526	0.01764277		2116	0.01083976		2705.99	-0.00233677		3295.99	-0.00638141		3885.98	0.00240201
346.2	0.09490535		936.2	0.01614578		1526.2	0.01756759		2116.2	0.01081599		2706.19	-0.0022012		3296.19	-0.00667343		3886.18	0.00103528
346.4	0.09508623		936.4	0.01671679		1526.4	0.01800941		2116.4	0.01044102		2706.39	-0.00272424		3296.39	-0.00641371		3886.38	0.00041493
346.6	0.09576126		936.6	0.01715875		1526.6	0.01642516		2116.6	0.00983608		2706.59	-0.00283305		3296.59	-0.00675295		3886.58	0.00020485
346.8	0.09658024		936.8	0.01744112		1526.8	0.01652142		2116.8	0.0098435		2706.79	-0.00335595		3296.79	-0.00688171		3886.78	-0.00003838
347	0.09564708		937	0.01755602		1527	0.01605377		2117	0.00960665		2706.99	-0.00331872		3296.99	-0.0062171		3886.98	-0.00105027
347.2	0.09550843		937.2	0.01896292		1527.2	0.01520883		2117.2	0.00868165		2707.19	-0.0032996		3297.19	-0.00672059		3887.18	-0.00119472
347.4	0.09678768		937.4	0.01842212		1527.4	0.01564294		2117.4	0.00913734		2707.39	-0.00363698		3297.39	-0.0065958		3887.38	-0.00068272
347.6	0.09715125		937.6	0.01933018		1527.6	0.01534126		2117.6	0.00841678		2707.59	-0.00315669		3297.59	-0.00722609		3887.58	-0.00141115
347.8	0.09767473		937.8	0.02020358		1527.8	0.01583161		2117.8	0.00815323		2707.79	-0.00246144		3297.79	-0.00653197		3887.78	-0.00096101
348	0.0971094		938	0.01909148		1528	0.01638554		2118	0.00820651		2707.99	-0.00128204		3297.99	-0.00558924		3887.98	-0.00062322
348.2	0.0973527		938.2	0.01862155		1528.2	0.01730876		2118.2	0.00845589		2708.19	-0.00074112		3298.19	-0.0052557		3888.18	-0.00073867
348.4	0.09767866		938.4	0.01727203		1528.4	0.01765797		2118.4	0.00842715		2708.39	0.00008455		3298.39	-0.00402668		3888.38	-0.00091559
348.6	0.09793589		938.6	0.01684161		1528.6	0.01711057		2118.6	0.00884846		2708.59	0.00057189		3298.59	-0.00315018		3888.58	0.00008515
348.8	0.09765077		938.8	0.0165936		1528.8	0.01755456		2118.8	0.00885819		2708.79	0.0005214		3298.79	-0.00341931		3888.78	0.00090896
349	0.09810212		939	0.01626667		1529	0.01818507		2119	0.00943637		2708.99	0.00117896		3298.99	-0.0035776		3888.98	0.00172659
349.2	0.09893372		939.2	0.01671059		1529.2	0.01830416		2119.2	0.01035515		2709.19	0.00139406		3299.19	-0.00247034		3889.18	0.00104663
349.4	0.09983674		939.4	0.01630976		1529.4	0.01754468		2119.4	0.01055799		2709.39	0.00074585		3299.39	-0.00333512		3889.38	0.00087917
349.6	0.09930906		939.6	0.01474783		1529.6	0.01778535		2119.6	0.01150206		2709.59	0.00078303		3299.59	-0.00368906		3889.58	0.00208641
349.8	0.10021072		939.8	0.01491578		1529.8	0.01795777		2119.8	0.012393		2709.79	-0.00055289		3299.79	-0.00450178		3889.78	0.00236043
350	0.10035519		940	0.01456735		1530	0.01809692		2120	0.01317084		2709.99	-0.00123207		3299.99	-0.00523457		3889.98	0.00295299
350.2	0.1009072		940.2	0.0148524		1530.2	0.01900667		2120.2	0.01249243		2710.19	-0.0019369		3300.19	-0.00497359		3890.18	0.00246062
350.4	0.10068496		940.4	0.0155731		1530.4	0.0178405		2120.4	0.013013		2710.39	-0.00237107		3300.39	-0.0048612		3890.38	0.0018718
350.6	0.10142715		940.6	0.01589303		1530.6	0.01608529		2120.6	0.01308203		2710.59	-0.0025797		3300.59	-0.004638		3890.58	0.00210024
350.8	0.10116676		940.8	0.01575414		1530.8	0.01654238		2120.8	0.01318835		2710.79	-0.00194443		3300.79	-0.00374772		3890.78	0.00218212
351	0.10080145		941	0.01587237		1531	0.01526519		2121	0.01288811		2710.99	-0.00300399		3300.99	-0.00433968		3890.98	0.0014935
351.2	0.10083507		941.2	0.01640121		1531.2	0.01546409		2121.2	0.01251307		2711.19	-0.00364529		3301.19	-0.00516512		3891.18	0.00163008
351.4	0.10116448		941.4	0.01612724		1531.4	0.01552972		2121.4	0.01109075		2711.39	-0.00382287		3301.39	-0.00571193		3891.38	0.00087844
351.6	0.10171339		941.6	0.01762822		1531.6	0.01464933		2121.6	0.010246		2711.59	-0.00327771		3301.59	-0.0052346		3891.58	-0.00021195
351.8	0.10161502		941.8	0.0181764		1531.8	0.01460715		2121.8	0.00963105		2711.79	-0.00320627		3301.79	-0.00501905		3891.78	-0.00029382
352	0.10126234		942	0.01752166		1532	0.01439971		2122	0.00901471		2711.99	-0.00348657		3301.99	-0.00428592		3891.98	-0.0007842
352.2	0.1016027		942.2	0.01769683		1532.2	0.01493209		2122.2	0.00818185		2712.19	-0.00370896		3302.19	-0.0039851		3892.18	-0.00100033
352.4	0.10168737		942.4	0.01802587		1532.4	0.01499329		2122.4	0.00764076		2712.39	-0.00360921		3302.39	-0.00268406		3892.38	-0.00110386
352.6	0.1022794		942.6	0.01830394		1532.6	0.01479528		2122.6	0.00688147		2712.59	-0.0041185		3302.59	-0.00264592		3892.58	-0.00050132
352.8	0.10252808		942.8	0.01815438		1532.8	0.01571963		2122.8	0.00716987		2712.79	-0.00318542		3302.79	-0.00300213		3892.78	-0.00091344
353	0.10384176		943	0.01798632		1533	0.01582157		2123	0.00903852		2712.99	-0.00296797		3302.99	-0.00301125		3892.98	-0.00067855
353.2	0.10488337		943.2	0.01842641		1533.2	0.01562763		2123.2	0.00967485		2713.19	-0.00347938		3303.19	-0.00288363		3893.18	-0.0006489
353.4	0.10506875		943.4	0.01720088		1533.4	0.0153343		2123.4	0.01008134		2713.39	-0.00315108		3303.39	-0.00463765		3893.38	0.00051221
353.6	0.10520349		943.6	0.01677846		1533.6	0.01600318		2123.6	0.01037935		2713.59	-0.00306004		3303.59	-0.00462098		3893.58	0.00138228
353.8	0.10652596		943.8	0.01672297		1533.8	0.01666102		2123.8	0.0114059		2713.79	-0.003279		3303.79	-0.00520433		3893.78	0.00212649
354	0.10618301		944	0.01621446		1534	0.01655717		2124	0.01171673		2713.99	-0.00248006		3303.99	-0.00552561		3893.98	0.00311384
354.2	0.10644642		944.2	0.01579068		1534.2	0.0174225		2124.2	0.01182992		2714.19	-0.00277772		3304.19	-0.00455308		3894.18	0.00272604
354.4	0.10530331		944.4	0.01689489		1534.4	0.01715737		2124.4	0.01346378		2714.39	-0.00186199		3304.39	-0.00467761		3894.38	0.00311505
354.6	0.10601021		944.6	0.01619895		1534.6	0.01776728		2124.6	0.01363093		2714.59	-0.00147379		3304.59	-0.00416431		3894.58	0.0036584
354.8	0.10565174		944.8	0.01610123		1534.8	0.0181232		2124.8	0.01375282		2714.79	-0.00103496		3304.79	-0.00395397		3894.78	0.004879
355	0.10476712		945	0.01714785		1535	0.01828249		2125	0.01352988		2714.99	-0.00247837		3304.99	-0.00497528		3894.98	0.00508653
355.2	0.10385418		945.2	0.01774247		1535.2	0.01859233		2125.2	0.01377947		2715.19	-0.00177222		3305.19	-0.00534317		3895.18	0.00590569
355.4	0.10321799		945.4	0.01829495		1535.4	0.01849272		2125.4	0.01368785		2715.39	-0.00199567		3305.39	-0.00512882		3895.38	0.00546891
355.6	0.10325158		945.6	0.0181552		1535.6	0.01823474		2125.6	0.01412019		2715.59	-0.0014798		3305.59	-0.00355259		3895.58	0.00540777
355.8	0.10337118		945.8	0.01758647		1535.8	0.01810955		2125.8	0.01464387		2715.79	-0.00160377		3305.79	-0.00314177		3895.78	0.00555614
356	0.10393404		946	0.01716813		1536	0.01884928		2126	0.01390031		2715.99	-0.00299381		3305.99	-0.00283781		3895.98	0.00447568
356.2	0.10428025		946.2	0.01728104		1536.2	0.02007019		2126.2	0.01380482		2716.19	-0.00340261		3306.19	-0.00391091		3896.18	0.0039405
356.4	0.10514859		946.4	0.01676097		1536.4	0.01956375		2126.4	0.01369839		2716.39	-0.00304488		3306.39	-0.00310849		3896.38	0.00319163
356.6	0.10666307		946.6	0.01570616		1536.6	0.01909128		2126.6	0.01437134		2716.59	-0.0028348		3306.59	-0.00333325		3896.58	0.0028007
356.8	0.10647731		946.8	0.01555476		1536.8	0.01868123		2126.8	0.01514488		2716.79	-0.00245711		3306.79	-0.00361604		3896.78	0.00130364
357	0.10747549		947	0.01530698		1537	0.01840352		2127	0.01566011		2716.99	-0.00301603		3306.99	-0.00420724		3896.98	0.00059843
357.2	0.10809301		947.2	0.01504544		1537.2	0.01720209		2127.2	0.0150777		2717.19	-0.00306187		3307.19	-0.0038259		3897.18	0.00005538
357.4	0.1089707		947.4	0.01472501		1537.4	0.01698917		2127.4	0.01476409		2717.39	-0.0021572		3307.39	-0.00491288		3897.38	0.0004186
357.6	0.11021748		947.6	0.01430946		1537.6	0.0169925		2127.6	0.01450612		2717.59	-0.00235551		3307.59	-0.00485205		3897.58	0.00095033
357.8	0.11088415		947.8	0.01365939		1537.8	0.0174847		2127.8	0.0149678		2717.79	-0.00166737		3307.79	-0.0054143		3897.78	0.00176221
358	0.11132646		948	0.01386235		1538	0.01654619		2128	0.01453803		2717.99	-0.00079362		3307.99	-0.00504122		3897.98	0.00151324
358.2	0.11212177		948.2	0.01429051		1538.2	0.0166807		2128.2	0.01431952		2718.19	-0.00060402		3308.19	-0.00496473		3898.18	0.00194479
358.4	0.11167762		948.4	0.01586242		1538.4	0.01632668		2128.4	0.01380251		2718.39	0.00035986		3308.39	-0.00481933		3898.38	0.0021432
358.6	0.11218211		948.6	0.01551081		1538.6	0.01547632		2128.6	0.01280079		2718.59	0.00017921		3308.59	-0.00511095		3898.58	0.00318109
358.8	0.11132977		948.8	0.01579621		1538.8	0.01533215		2128.8	0.01276961		2718.79	0.00072792		3308.79	-0.00572942		3898.78	0.00416201
359	0.11072866		949	0.01756243		1539	0.0156281		2129	0.0121151		2718.99	0.00047658		3308.99	-0.00625634		3898.98	0.00388475
359.2	0.11019508		949.2	0.01717495		1539.2	0.01487322		2129.2	0.01227438		2719.19	0.0006551		3309.19	-0.00634121		3899.18	0.00343041
359.4	0.10976433		949.4	0.01729749		1539.4	0.01549658		2129.4	0.01172351		2719.39	0.00036374		3309.39	-0.00573218		3899.38	0.00352175
359.6	0.10927324		949.6	0.0171326		1539.6	0.01548667		2129.6	0.01150479		2719.59	0.00014686		3309.59	-0.00532324		3899.58	0.00359994
359.8	0.10991402		949.8	0.01732867		1539.8	0.01529723		2129.8	0.01220815		2719.79	-0.00048872		3309.79	-0.00587799		3899.78	0.00324833
360	0.11032049		950	0.01824987		1540	0.01569139		2130	0.01083449		2719.99	-0.00068795		3309.99	-0.00693965		3899.98	0.00276529
360.2	0.10995422		950.2	0.01885845		1540.2	0.01656879		2130.2	0.01189889		2720.19	-0.00107089		3310.19	-0.00800132		3900.18	0.00307126
360.4	0.10963854		950.4	0.01926425		1540.4	0.01640365		2130.4	0.01206095		2720.39	-0.00065121		3310.39	-0.00703078		3900.38	0.00285869
360.6	0.10943507		950.6	0.01946589		1540.6	0.01677716		2130.6	0.01197099		2720.59	-0.00121374		3310.59	-0.00733247		3900.58	0.0022465
360.8	0.10837648		950.8	0.0196404		1540.8	0.0169172		2130.8	0.01154072		2720.79	-0.00196463		3310.79	-0.00648204		3900.78	0.00082013
361	0.10977172		951	0.0202857		1541	0.01740688		2131	0.01151855		2720.99	-0.00194158		3310.99	-0.00611097		3900.98	0.00061463
361.2	0.11115882		951.2	0.02000396		1541.2	0.01701445		2131.2	0.0117377		2721.19	-0.00128441		3311.19	-0.00469779		3901.18	0.00111868
361.4	0.1123276		951.4	0.01998514		1541.4	0.01695827		2131.4	0.01168444		2721.39	-0.0006493		3311.39	-0.00499024		3901.38	0.00157518
361.6	0.11302163		951.6	0.0193571		1541.6	0.01724688		2131.6	0.01171033		2721.59	-0.00043951		3311.59	-0.00491622		3901.58	0.0020107
361.8	0.11306617		951.8	0.01958239		1541.8	0.0173135		2131.8	0.01111668		2721.79	-0.00026935		3311.79	-0.00463681		3901.78	0.0024038
362	0.1131114		952	0.0192959		1542	0.01652432		2132	0.01065315		2721.99	-0.00051584		3311.99	-0.00453057		3901.98	0.00228249
362.2	0.11347747		952.2	0.01962456		1542.2	0.01671355		2132.2	0.01038595		2722.19	-0.0010272		3312.19	-0.00442936		3902.18	0.00256845
362.4	0.11373468		952.4	0.01902721		1542.4	0.01639529		2132.4	0.00996151		2722.39	-0.00061006		3312.39	-0.00437555		3902.38	0.00225678
362.6	0.11352197		952.6	0.01862109		1542.6	0.01610112		2132.6	0.0107574		2722.59	-0.00122125		3312.59	-0.00435011		3902.58	0.00228857
362.8	0.11393379		952.8	0.01822327		1542.8	0.01617598		2132.8	0.01140713		2722.79	-0.00132496		3312.79	-0.00383314		3902.78	0.00200096
363	0.11432645		953	0.0185377		1543	0.0162109		2133	0.01068182		2722.99	-0.00142552		3312.99	-0.00323596		3902.98	0.00097603
363.2	0.11388888		953.2	0.01767618		1543.2	0.01620651		2133.2	0.01204791		2723.19	-0.00175368		3313.19	-0.00371533		3903.18	0.00064329
363.4	0.11373336		953.4	0.01819871		1543.4	0.01653109		2133.4	0.01173836		2723.39	-0.00207227		3313.39	-0.0029175		3903.38	0.00196535
363.6	0.11357399		953.6	0.01813233		1543.6	0.0165052		2133.6	0.01214459		2723.59	-0.00184598		3313.59	-0.00341252		3903.58	0.00247207
363.8	0.11448463		953.8	0.01817242		1543.8	0.01608279		2133.8	0.01252392		2723.79	-0.00185054		3313.79	-0.00340783		3903.78	0.00272242
364	0.11373842		954	0.01811375		1544	0.01675308		2134	0.01251038		2723.99	-0.00109886		3313.99	-0.00441535		3903.98	0.00343341
364.2	0.11315035		954.2	0.01813354		1544.2	0.01769545		2134.2	0.01338937		2724.19	-0.00121205		3314.19	-0.00443571		3904.18	0.00267178
364.4	0.11306183		954.4	0.01904657		1544.4	0.01855816		2134.4	0.01334844		2724.39	-0.00075307		3314.39	-0.00329579		3904.38	0.00184097
364.6	0.11310722		954.6	0.01871266		1544.6	0.01916456		2134.6	0.01382075		2724.59	-0.0001265		3314.59	-0.00263978		3904.58	0.00138296
364.8	0.1136799		954.8	0.01855721		1544.8	0.01915242		2134.8	0.01415473		2724.79	0.00040691		3314.79	-0.0020884		3904.78	0.00150033
365	0.11422599		955	0.0197713		1545	0.01923917		2135	0.01455455		2724.99	0.00071153		3314.99	-0.00340058		3904.98	0.00172556
365.2	0.11469721		955.2	0.0191477		1545.2	0.01875779		2135.2	0.01538532		2725.19	0.00107578		3315.19	-0.00372073		3905.18	0.00150605
365.4	0.11487865		955.4	0.01975767		1545.4	0.01875585		2135.4	0.01563024		2725.39	0.00001081		3315.39	-0.00430246		3905.38	0.00181816
365.6	0.11451476		955.6	0.01973789		1545.6	0.01917682		2135.6	0.01551325		2725.59	-0.00064238		3315.59	-0.00439971		3905.58	0.00225763
365.8	0.11438093		955.8	0.01988037		1545.8	0.01862259		2135.8	0.01476978		2725.79	0.0000023		3315.79	-0.00378574		3905.78	0.0022897
366	0.11401264		956	0.01961268		1546	0.01762707		2136	0.01514206		2725.99	0.0001036		3315.99	-0.00415999		3905.98	0.00205784
366.2	0.11516387		956.2	0.01978652		1546.2	0.01772744		2136.2	0.01493186		2726.19	0.00031551		3316.19	-0.00419118		3906.18	0.00178906
366.4	0.1157011		956.4	0.01914142		1546.4	0.01682201		2136.4	0.01512774		2726.39	0.00013726		3316.39	-0.00484924		3906.38	0.00210506
366.6	0.11550026		956.6	0.01869498		1546.6	0.01641675		2136.6	0.01505848		2726.59	-0.00049538		3316.59	-0.00478117		3906.58	0.00201891
366.8	0.11569306		956.8	0.01828713		1546.8	0.01696698		2136.8	0.01423836		2726.79	-0.0001928		3316.79	-0.00508094		3906.78	0.00313476
367	0.11631137		957	0.01857252		1547	0.01726285		2137	0.01342272		2726.99	0.00031212		3316.99	-0.00518864		3906.98	0.00339871
367.2	0.11656854		957.2	0.01851148		1547.2	0.01820229		2137.2	0.01369412		2727.19	0.00038081		3317.19	-0.00490349		3907.18	0.00411828
367.4	0.11691904		957.4	0.01891183		1547.4	0.018578		2137.4	0.01224131		2727.39	0.00002143		3317.39	-0.00440592		3907.38	0.00463065
367.6	0.11720397		957.6	0.01806988		1547.6	0.01950793		2137.6	0.0119309		2727.59	0.00008102		3317.59	-0.00536609		3907.58	0.00451792
367.8	0.1174347		957.8	0.01803133		1547.8	0.01999434		2137.8	0.01214559		2727.79	0.0002851		3317.79	-0.00461175		3907.78	0.00394296
368	0.11712588		958	0.01806159		1548	0.02050933		2138	0.01186048		2727.99	0.00033193		3317.99	-0.00415217		3907.98	0.00384635
368.2	0.11761363		958.2	0.01809036		1548.2	0.02070552		2138.2	0.01272632		2728.19	-0.00004231		3318.19	-0.00393365		3908.18	0.0038188
368.4	0.11769445		958.4	0.01846471		1548.4	0.02145171		2138.4	0.01312703		2728.39	-0.00097122		3318.39	-0.00279667		3908.38	0.00351889
368.6	0.11770153		958.6	0.0182638		1548.6	0.02082601		2138.6	0.01422824		2728.59	-0.00050821		3318.59	-0.00283686		3908.58	0.00391134
368.8	0.11855203		958.8	0.01886171		1548.8	0.0208926		2138.8	0.01435199		2728.79	-0.00079647		3318.79	-0.00356797		3908.78	0.0042338
369	0.11922775		959	0.0199018		1549	0.02065501		2139	0.01578926		2728.99	-0.00126127		3318.99	-0.00422546		3908.98	0.0038304
369.2	0.11963363		959.2	0.01973444		1549.2	0.02044625		2139.2	0.01610904		2729.19	-0.00151532		3319.19	-0.003799		3909.18	0.00372646
369.4	0.12052549		959.4	0.02084782		1549.4	0.01979858		2139.4	0.01624856		2729.39	-0.00235354		3319.39	-0.00358744		3909.38	0.00351169
369.6	0.12049168		959.6	0.02079726		1549.6	0.01920056		2139.6	0.01593359		2729.59	-0.00160884		3319.59	-0.00395447		3909.58	0.00252685
369.8	0.1205988		959.8	0.02164745		1549.8	0.01861561		2139.8	0.01616407		2729.79	-0.00048994		3319.79	-0.00420371		3909.78	0.00178801
370	0.12061789		960	0.02169729		1550	0.01802823		2140	0.01621293		2729.99	-0.00140065		3319.99	-0.00493101		3909.98	0.00161462
370.2	0.12109072		960.2	0.02171513		1550.2	0.01860969		2140.2	0.01619844		2730.19	-0.00107846		3320.19	-0.0054471		3910.18	0.00190563
370.4	0.12056366		960.4	0.02220913		1550.4	0.01830569		2140.4	0.01586792		2730.39	-0.00125396		3320.39	-0.00522671		3910.38	0.00201174
370.6	0.11984651		960.6	0.02196962		1550.6	0.01847207		2140.6	0.01535896		2730.59	-0.00072691		3320.59	-0.00445116		3910.58	0.0026201
370.8	0.11975551		960.8	0.022461		1550.8	0.01873332		2140.8	0.01469234		2730.79	-0.00005387		3320.79	-0.0041441		3910.78	0.00308701
371	0.11983395		961	0.02236164		1551	0.0187302		2141	0.01400217		2730.99	-0.00027784		3320.99	-0.00367789		3910.98	0.00268522
371.2	0.11971907		961.2	0.02158968		1551.2	0.0196229		2141.2	0.0130021		2731.19	0.00039244		3321.19	-0.00369838		3911.18	0.00226367
371.4	0.11966627		961.4	0.02108076		1551.4	0.01974676		2141.4	0.01313473		2731.39	-0.00058935		3321.39	-0.00410403		3911.38	0.00186141
371.6	0.1201126		961.6	0.02037422		1551.6	0.01972868		2141.6	0.01283877		2731.59	-0.00082113		3321.59	-0.00449979		3911.58	0.00160192
371.8	0.12007585		961.8	0.02043025		1551.8	0.01902246		2141.8	0.01302731		2731.79	-0.00144421		3321.79	-0.00277878		3911.78	0.00086597
372	0.12027989		962	0.02032702		1552	0.01864131		2142	0.01346823		2731.99	-0.0030321		3321.99	-0.00228768		3911.98	0.0018362
372.2	0.12040286		962.2	0.02005525		1552.2	0.01854104		2142.2	0.01430265		2732.19	-0.00344589		3322.19	-0.00234858		3912.18	0.00256184
372.4	0.12031714		962.4	0.02035694		1552.4	0.01850437		2142.4	0.01445349		2732.39	-0.00376621		3322.39	-0.00175011		3912.38	0.00141892
372.6	0.12074659		962.6	0.01974839		1552.6	0.01806403		2142.6	0.01528862		2732.59	-0.00361767		3322.59	-0.00274423		3912.58	0.00252086
372.8	0.12184605		962.8	0.01963889		1552.8	0.01838281		2142.8	0.01463311		2732.79	-0.0031502		3322.79	-0.00297375		3912.78	0.0032535
373	0.12184825		963	0.01941673		1553	0.0181786		2143	0.01408165		2732.99	-0.00303611		3322.99	-0.00383343		3912.98	0.00340493
373.2	0.12219569		963.2	0.01935434		1553.2	0.01833943		2143.2	0.01351877		2733.19	-0.00350616		3323.19	-0.00446673		3913.18	0.00399858
373.4	0.12296355		963.4	0.02058289		1553.4	0.01800074		2143.4	0.01351875		2733.39	-0.00355735		3323.39	-0.00550504		3913.38	0.00370353
373.6	0.12283113		963.6	0.02012373		1553.6	0.01785202		2143.6	0.01320585		2733.59	-0.00329379		3323.59	-0.00580471		3913.58	0.00413792
373.8	0.12307182		963.8	0.02093061		1553.8	0.01784372		2143.8	0.01368219		2733.79	-0.00325411		3323.79	-0.00661396		3913.78	0.00464966
374	0.12288299		964	0.0208119		1554	0.01812678		2144	0.01315293		2733.99	-0.00302816		3323.99	-0.00705414		3913.98	0.00479964
374.2	0.12265691		964.2	0.0214285		1554.2	0.01849722		2144.2	0.0132821		2734.19	-0.00248814		3324.19	-0.007036		3914.18	0.00503572
374.4	0.12243627		964.4	0.02153098		1554.4	0.01758331		2144.4	0.01214053		2734.39	-0.00269388		3324.39	-0.00690303		3914.38	0.0047337
374.6	0.12273582		964.6	0.02203472		1554.6	0.01720859		2144.6	0.01158132		2734.59	-0.00277743		3324.59	-0.00693278		3914.58	0.00513641
374.8	0.12267419		964.8	0.02256223		1554.8	0.0166299		2144.8	0.01037197		2734.79	-0.00209741		3324.79	-0.00758432		3914.78	0.004267
375	0.12294906		965	0.02331406		1555	0.0168906		2145	0.00989894		2734.99	-0.0025661		3324.99	-0.00732174		3914.98	0.00387476
375.2	0.12363159		965.2	0.02338658		1555.2	0.01674441		2145.2	0.00894297		2735.19	-0.00194458		3325.19	-0.00744257		3915.18	0.00382556
375.4	0.12404741		965.4	0.02401992		1555.4	0.01599443		2145.4	0.00953838		2735.39	-0.00242485		3325.39	-0.00691328		3915.38	0.00375798
375.6	0.12455959		965.6	0.02433009		1555.6	0.01539069		2145.6	0.0095344		2735.59	-0.00208581		3325.59	-0.00639003		3915.58	0.00335008
375.8	0.12447856		965.8	0.02404719		1555.8	0.01562133		2145.8	0.01020366		2735.79	-0.00294771		3325.79	-0.00522246		3915.78	0.00299298
376	0.12440354		966	0.02373441		1556	0.01549487		2146	0.01190131		2735.99	-0.00312785		3325.99	-0.00538246		3915.98	0.00305136
376.2	0.124304		966.2	0.02295161		1556.2	0.0155068		2146.2	0.01296338		2736.19	-0.00280235		3326.19	-0.00552572		3916.18	0.00235893
376.4	0.12434783		966.4	0.02234554		1556.4	0.01602041		2146.4	0.01402119		2736.39	-0.00222682		3326.39	-0.00545213		3916.38	0.00191845
376.6	0.12466748		966.6	0.02086886		1556.6	0.01624805		2146.6	0.0152007		2736.59	-0.00194316		3326.59	-0.00535336		3916.58	0.00268329
376.8	0.12459509		966.8	0.01997563		1556.8	0.01693104		2146.8	0.01549951		2736.79	-0.00051778		3326.79	-0.00500771		3916.78	0.00161009
377	0.12452773		967	0.01963841		1557	0.01758697		2147	0.01572973		2736.99	0.00017881		3326.99	-0.00467957		3916.98	0.00175937
377.2	0.12469131		967.2	0.01966052		1557.2	0.01833252		2147.2	0.0166094		2737.19	0.00100982		3327.19	-0.00389707		3917.18	0.0018857
377.4	0.12504203		967.4	0.01879017		1557.4	0.01838324		2147.4	0.01729795		2737.39	0.0014222		3327.39	-0.00395913		3917.38	0.00242423
377.6	0.12518533		967.6	0.01752316		1557.6	0.01853738		2147.6	0.01830634		2737.59	0.00199139		3327.59	-0.00439435		3917.58	0.00336308
377.8	0.12513409		967.8	0.01776432		1557.8	0.01961536		2147.8	0.01865621		2737.79	0.00180093		3327.79	-0.00520011		3917.78	0.00329663
378	0.12469392		968	0.01774871		1558	0.02057319		2148	0.0180705		2737.99	0.00204502		3327.99	-0.00537107		3917.98	0.00328843
378.2	0.125031		968.2	0.01786995		1558.2	0.02058867		2148.2	0.01786415		2738.19	0.00147787		3328.19	-0.00497723		3918.18	0.00342488
378.4	0.12543162		968.4	0.01756103		1558.4	0.02043383		2148.4	0.01707157		2738.39	0.00059455		3328.39	-0.00492216		3918.38	0.00343521
378.6	0.12529497		968.6	0.01872397		1558.6	0.02081302		2148.6	0.01621952		2738.59	0.00059084		3328.59	-0.00510283		3918.58	0.0034352
378.8	0.1247416		968.8	0.0193591		1558.8	0.02118548		2148.8	0.01560811		2738.79	0.00029406		3328.79	-0.0058671		3918.78	0.00363751
379	0.12507327		969	0.02008256		1559	0.02201208		2149	0.01449532		2738.99	-0.00068047		3328.99	-0.00566016		3918.98	0.0043525
379.2	0.12556264		969.2	0.01928828		1559.2	0.02126134		2149.2	0.01404752		2739.19	-0.0009958		3329.19	-0.00604918		3919.18	0.00445326
379.4	0.12631409		969.4	0.01942004		1559.4	0.02054131		2149.4	0.01399804		2739.39	-0.00147015		3329.39	-0.00587935		3919.38	0.0045304
379.6	0.12625435		969.6	0.02009877		1559.6	0.02029949		2149.6	0.01474685		2739.59	-0.0023263		3329.59	-0.00667737		3919.58	0.00387807
379.8	0.12596097		969.8	0.02026329		1559.8	0.0201653		2149.8	0.01469396		2739.79	-0.00344858		3329.79	-0.00708332		3919.78	0.00337343
380	0.12574649		970	0.02055703		1560	0.01911913		2150	0.01536216		2739.99	-0.00403187		3329.99	-0.00712966		3919.98	0.00306303
380.2	0.12546537		970.2	0.02038935		1560.2	0.01823333		2150.2	0.01521319		2740.19	-0.00389506		3330.19	-0.0075905		3920.18	0.00294121
380.4	0.12587509		970.4	0.02051164		1560.4	0.01803919		2150.4	0.01517156		2740.39	-0.00337092		3330.39	-0.00791727		3920.38	0.00359154
380.6	0.12600197		970.6	0.02017758		1560.6	0.01745385		2150.6	0.0152034		2740.59	-0.00306105		3330.59	-0.00814314		3920.58	0.00315933
380.8	0.12608832		970.8	0.02055305		1560.8	0.01704747		2150.8	0.01467956		2740.79	-0.00213819		3330.79	-0.00793105		3920.78	0.00252174
381	0.12658124		971	0.02112309		1561	0.01743164		2151	0.01445337		2740.99	-0.00161192		3330.99	-0.00706212		3920.98	0.00304235
381.2	0.12624845		971.2	0.02133145		1561.2	0.01750592		2151.2	0.01502754		2741.19	-0.00102171		3331.19	-0.00665893		3921.18	0.00337803
381.4	0.12716494		971.4	0.02077619		1561.4	0.01744258		2151.4	0.01524912		2741.39	-0.00148214		3331.39	-0.0067691		3921.38	0.00436857
381.6	0.12660744		971.6	0.02153172		1561.6	0.01747566		2151.6	0.01611642		2741.59	-0.00158723		3331.59	-0.00696887		3921.58	0.00486364
381.8	0.12626008		971.8	0.02239998		1561.8	0.01813045		2151.8	0.01549873		2741.79	-0.00086171		3331.79	-0.00630201		3921.78	0.00482827
382	0.12567158		972	0.02199586		1562	0.01819721		2152	0.01525206		2741.99	-0.00061603		3331.99	-0.00662097		3921.98	0.00462095
382.2	0.126561		972.2	0.02117789		1562.2	0.01810168		2152.2	0.01523478		2742.19	-0.00106598		3332.19	-0.00617841		3922.18	0.00442377
382.4	0.12672046		972.4	0.02036799		1562.4	0.0183878		2152.4	0.01535687		2742.39	-0.00007991		3332.39	-0.00631442		3922.38	0.00500048
382.6	0.12718908		972.6	0.02072385		1562.6	0.01872618		2152.6	0.01508709		2742.59	0.00061472		3332.59	-0.00700938		3922.58	0.00488139
382.8	0.1279987		972.8	0.01998005		1562.8	0.01908333		2152.8	0.01463918		2742.79	0.00055689		3332.79	-0.00686667		3922.78	0.00471028
383	0.12916782		973	0.01943557		1563	0.01834987		2153	0.01448473		2742.99	0.00012579		3332.99	-0.0056153		3922.98	0.00443502
383.2	0.13044369		973.2	0.01895265		1563.2	0.01786484		2153.2	0.01534462		2743.19	0.00002912		3333.19	-0.00553875		3923.18	0.00358556
383.4	0.13029144		973.4	0.01957221		1563.4	0.0180839		2153.4	0.01472496		2743.39	0.00005379		3333.39	-0.00519919		3923.38	0.00341386
383.6	0.13014731		973.6	0.02012666		1563.6	0.01809639		2153.6	0.01500023		2743.59	0.00025844		3333.59	-0.00513459		3923.58	0.00269466
383.8	0.12961815		973.8	0.01987579		1563.8	0.01749671		2153.8	0.01477147		2743.79	0.00019436		3333.79	-0.00398884		3923.78	0.0024475
384	0.12863099		974	0.01900372		1564	0.01738999		2154	0.01513843		2743.99	0.0003561		3333.99	-0.00354455		3923.98	0.00329201
384.2	0.12796429		974.2	0.01857174		1564.2	0.01691878		2154.2	0.01402452		2744.19	0.00085229		3334.19	-0.00381167		3924.18	0.00325188
384.4	0.12820268		974.4	0.0181416		1564.4	0.01783212		2154.4	0.01397307		2744.39	0.00032134		3334.39	-0.0037637		3924.38	0.00360245
384.6	0.12842598		974.6	0.01992737		1564.6	0.01837589		2154.6	0.01346042		2744.59	-0.000071		3334.59	-0.00380931		3924.58	0.00266521
384.8	0.12878332		974.8	0.02083001		1564.8	0.01850672		2154.8	0.01322106		2744.79	0.00016098		3334.79	-0.00370468		3924.78	0.00260862
385	0.12885968		975	0.02181279		1565	0.01885491		2155	0.01351582		2744.99	-0.00012184		3334.99	-0.00337594		3924.98	0.0024049
385.2	0.12818377		975.2	0.02253779		1565.2	0.01945457		2155.2	0.01449039		2745.19	0.00012372		3335.19	-0.00371972		3925.18	0.00289706
385.4	0.12861865		975.4	0.02309187		1565.4	0.01970753		2155.4	0.01458228		2745.39	-0.00022672		3335.39	-0.00332261		3925.38	0.00299133
385.6	0.12886632		975.6	0.02347927		1565.6	0.01996649		2155.6	0.01536707		2745.59	-0.00070399		3335.59	-0.00371856		3925.58	0.00312353
385.8	0.12840096		975.8	0.02384532		1565.8	0.02009533		2155.8	0.01557365		2745.79	-0.00080699		3335.79	-0.00448716		3925.78	0.00311084
386	0.12891223		976	0.02323869		1566	0.01960163		2156	0.01593145		2745.99	-0.00095411		3335.99	-0.00521822		3925.98	0.00354106
386.2	0.13030838		976.2	0.02326077		1566.2	0.01946485		2156.2	0.01639061		2746.19	-0.00093247		3336.19	-0.00565508		3926.18	0.0039965
386.4	0.13074014		976.4	0.02305793		1566.4	0.01974655		2156.4	0.01685098		2746.39	-0.00002333		3336.39	-0.0061059		3926.38	0.00440227
386.6	0.13159218		976.6	0.02346002		1566.6	0.01959906		2156.6	0.01700202		2746.59	-0.00044668		3336.59	-0.0071618		3926.58	0.00340154
386.8	0.13225434		976.8	0.02257769		1566.8	0.01903772		2156.8	0.01657532		2746.79	-0.00079989		3336.79	-0.00770639		3926.78	0.00242169
387	0.13255082		977	0.02281883		1567	0.01803369		2157	0.01689774		2746.99	-0.0006229		3336.99	-0.00817161		3926.98	0.00198949
387.2	0.13269143		977.2	0.02309972		1567.2	0.0185073		2157.2	0.01655023		2747.19	-0.00062785		3337.19	-0.00865472		3927.18	0.00215874
387.4	0.13284723		977.4	0.0226789		1567.4	0.0184713		2157.4	0.01626036		2747.39	-0.00068346		3337.39	-0.00829119		3927.38	0.00174158
387.6	0.13386804		977.6	0.02261735		1567.6	0.01797228		2157.6	0.01643689		2747.59	-0.00077001		3337.59	-0.00780191		3927.58	0.00176339
387.8	0.13325462		977.8	0.02194812		1567.8	0.0181526		2157.8	0.01637907		2747.79	-0.0016873		3337.79	-0.00827637		3927.78	0.00136756
388	0.13275906		978	0.02062091		1568	0.01840882		2158	0.0164241		2747.99	-0.0021277		3337.99	-0.00816774		3927.98	0.00241809
388.2	0.13306295		978.2	0.02031362		1568.2	0.01806182		2158.2	0.01527612		2748.19	-0.00213354		3338.19	-0.00795279		3928.18	0.00281368
388.4	0.13414883		978.4	0.0197588		1568.4	0.01819324		2158.4	0.015437		2748.39	-0.00277387		3338.39	-0.00810424		3928.38	0.00323934
388.6	0.13458325		978.6	0.02060955		1568.6	0.01736093		2158.6	0.01455682		2748.59	-0.00341405		3338.59	-0.00822252		3928.58	0.00306245
388.8	0.13443693		978.8	0.02003376		1568.8	0.01727398		2158.8	0.01450055		2748.79	-0.00329636		3338.79	-0.00777895		3928.78	0.00391073
389	0.13443652		979	0.01988157		1569	0.01705516		2159	0.01489575		2748.99	-0.00375849		3338.99	-0.00802889		3928.98	0.00421234
389.2	0.13388164		979.2	0.01959479		1569.2	0.0178545		2159.2	0.01546101		2749.19	-0.00350122		3339.19	-0.00780128		3929.18	0.00507218
389.4	0.1339765		979.4	0.01970787		1569.4	0.01761169		2159.4	0.01558884		2749.39	-0.00347332		3339.39	-0.00650393		3929.38	0.00469445
389.6	0.13384014		979.6	0.01964115		1569.6	0.01734181		2159.6	0.01609469		2749.59	-0.00385625		3339.59	-0.006706		3929.58	0.00527048
389.8	0.1332494		979.8	0.02056337		1569.8	0.01727864		2159.8	0.0164908		2749.79	-0.00319874		3339.79	-0.00629983		3929.78	0.00602553
390	0.13388921		980	0.02109931		1570	0.01679819		2160	0.01689462		2749.99	-0.00145448		3339.99	-0.00642467		3929.98	0.00633421
390.2	0.13394653		980.2	0.0216421		1570.2	0.01698541		2160.2	0.01716001		2750.19	-0.00142108		3340.19	-0.00587496		3930.18	0.00675442
390.4	0.13341064		980.4	0.02235129		1570.4	0.01794686		2160.4	0.01742018		2750.39	-0.00054864		3340.39	-0.00577036		3930.38	0.00736889
390.6	0.13395289		980.6	0.02229697		1570.6	0.0175289		2160.6	0.01835177		2750.59	-0.00005723		3340.59	-0.00631821		3930.58	0.00663612
390.8	0.13395771		980.8	0.02148584		1570.8	0.0177423		2160.8	0.01853328		2750.79	0.00089161		3340.79	-0.00681766		3930.78	0.00573451
391	0.13427566		981	0.02202961		1571	0.01765186		2161	0.01981405		2750.99	0.00157727		3340.99	-0.00777015		3930.98	0.00624781
391.2	0.13509023		981.2	0.02143242		1571.2	0.01826881		2161.2	0.02016549		2751.19	0.00047152		3341.19	-0.00858776		3931.18	0.00590574
391.4	0.13521541		981.4	0.02059303		1571.4	0.018509		2161.4	0.02074085		2751.39	0.00083575		3341.39	-0.00873238		3931.38	0.00527906
391.6	0.13560052		981.6	0.02061399		1571.6	0.017637		2161.6	0.02101053		2751.59	0.00046013		3341.59	-0.00995369		3931.58	0.00556249
391.8	0.13557531		981.8	0.01975835		1571.8	0.01775681		2161.8	0.02083578		2751.79	0.00046272		3341.79	-0.01103249		3931.78	0.0055139
392	0.13540754		982	0.01933443		1572	0.01806902		2162	0.02142655		2751.99	0.00046705		3341.99	-0.01088317		3931.98	0.00590404
392.2	0.13646955		982.2	0.018252		1572.2	0.01815351		2162.2	0.02109322		2752.19	0.00101189		3342.19	-0.01092468		3932.18	0.00580783
392.4	0.13687274		982.4	0.01833401		1572.4	0.01773999		2162.4	0.02030767		2752.39	0.00069395		3342.39	-0.01074217		3932.38	0.00505171
392.6	0.13600684		982.6	0.01783114		1572.6	0.01733953		2162.6	0.0194462		2752.59	0.00025685		3342.59	-0.01044409		3932.58	0.00432416
392.8	0.13552135		982.8	0.01760684		1572.8	0.01821283		2162.8	0.01904488		2752.79	0.00035493		3342.79	-0.00983206		3932.78	0.00405395
393	0.13530005		983	0.01744374		1573	0.01811419		2163	0.01804606		2752.99	-0.00016583		3342.99	-0.00979888		3932.98	0.00358233
393.2	0.13552509		983.2	0.01797816		1573.2	0.01863393		2163.2	0.01781304		2753.19	-0.00001211		3343.19	-0.0082058		3933.18	0.00325061
393.4	0.13634055		983.4	0.01865124		1573.4	0.01791668		2163.4	0.01696115		2753.39	0.00036195		3343.39	-0.00700032		3933.38	0.00287712
393.6	0.13655336		983.6	0.02032502		1573.6	0.01840672		2163.6	0.01605267		2753.59	-0.00065537		3343.59	-0.00625162		3933.58	0.00348449
393.8	0.13715999		983.8	0.02195869		1573.8	0.01890853		2163.8	0.01514		2753.79	-0.00038292		3343.79	-0.00490223		3933.78	0.00325409
394	0.13677608		984	0.02228799		1574	0.0181768		2164	0.01458495		2753.99	-0.00089984		3343.99	-0.00499639		3933.98	0.00347608
394.2	0.1370058		984.2	0.02324994		1574.2	0.01915883		2164.2	0.01382306		2754.19	-0.00086637		3344.19	-0.00345666		3934.18	0.00422861
394.4	0.13730659		984.4	0.02271442		1574.4	0.01980352		2164.4	0.0139528		2754.39	-0.00067788		3344.39	-0.0033884		3934.38	0.00403199
394.6	0.13843136		984.6	0.02247586		1574.6	0.01904641		2164.6	0.01374426		2754.59	-0.00041362		3344.59	-0.00329658		3934.58	0.00346023
394.8	0.13854772		984.8	0.02276318		1574.8	0.01906019		2164.8	0.01379304		2754.79	-0.00037648		3344.79	-0.00350002		3934.78	0.00332569
395	0.13895389		985	0.02303782		1575	0.01914366		2165	0.01413245		2754.99	-0.0009806		3344.99	-0.00382944		3934.98	0.00397962
395.2	0.13943937		985.2	0.02278523		1575.2	0.0190885		2165.2	0.01344534		2755.19	-0.00149572		3345.19	-0.00359135		3935.18	0.00411957
395.4	0.13875192		985.4	0.0230641		1575.4	0.01864683		2165.4	0.01393687		2755.39	-0.0009881		3345.39	-0.00357472		3935.38	0.00470488
395.6	0.1387707		985.6	0.02382038		1575.6	0.01778376		2165.6	0.01473365		2755.59	-0.00151087		3345.59	-0.00409474		3935.58	0.00525967
395.8	0.1392648		985.8	0.02342145		1575.8	0.01866261		2165.8	0.01539723		2755.79	-0.00056178		3345.79	-0.00403063		3935.78	0.0054509
396	0.13905181		986	0.02257729		1576	0.01902039		2166	0.01729615		2755.99	-0.00049158		3345.99	-0.00470019		3935.98	0.00474643
396.2	0.13989403		986.2	0.02187698		1576.2	0.01817042		2166.2	0.01834849		2756.19	-0.00039157		3346.19	-0.00546221		3936.18	0.00423102
396.4	0.13937998		986.4	0.02190197		1576.4	0.01780992		2166.4	0.01896232		2756.39	0.0000329		3346.39	-0.0050978		3936.38	0.00481873
396.6	0.13899854		986.6	0.02108418		1576.6	0.01829982		2166.6	0.0195167		2756.59	-0.00018393		3346.59	-0.00556878		3936.58	0.00480718
396.8	0.13947607		986.8	0.02070789		1576.8	0.01870718		2166.8	0.01914048		2756.79	-0.00001192		3346.79	-0.00538177		3936.78	0.0052152
397	0.13947748		987	0.02075681		1577	0.01848254		2167	0.01919431		2756.99	0.0005923		3346.99	-0.0058071		3936.98	0.00586741
397.2	0.1401137		987.2	0.02052881		1577.2	0.01875422		2167.2	0.01964617		2757.19	0.00057918		3347.19	-0.00593499		3937.18	0.00667441
397.4	0.14004907		987.4	0.02018944		1577.4	0.01858097		2167.4	0.01917295		2757.39	-0.00016773		3347.39	-0.00613188		3937.38	0.00716241
397.6	0.1394018		987.6	0.0206679		1577.6	0.01973781		2167.6	0.01832527		2757.59	-0.00056906		3347.59	-0.00599639		3937.58	0.00684586
397.8	0.13939919		987.8	0.01975643		1577.8	0.01981976		2167.8	0.01792324		2757.79	-0.00009671		3347.79	-0.00541451		3937.78	0.00692761
398	0.13933211		988	0.01950301		1578	0.02018396		2168	0.01695509		2757.99	0.00028289		3347.99	-0.00520255		3937.98	0.00674971
398.2	0.14050852		988.2	0.01975172		1578.2	0.02090373		2168.2	0.01616458		2758.19	0.00153519		3348.19	-0.00401091		3938.18	0.00582611
398.4	0.1408739		988.4	0.01932839		1578.4	0.02011753		2168.4	0.0153267		2758.39	0.00119305		3348.39	-0.00390147		3938.38	0.00535002
398.6	0.14144765		988.6	0.02076601		1578.6	0.01938625		2168.6	0.01353968		2758.59	0.00128432		3348.59	-0.00340849		3938.58	0.00482327
398.8	0.1417298		988.8	0.02155516		1578.8	0.01901756		2168.8	0.01358367		2758.79	0.00151403		3348.79	-0.00283093		3938.78	0.00471
399	0.14203457		989	0.02125732		1579	0.01984375		2169	0.01349892		2758.99	0.00109293		3348.99	-0.0027405		3938.98	0.00479516
399.2	0.14256281		989.2	0.02155029		1579.2	0.01893841		2169.2	0.01338609		2759.19	0.00091333		3349.19	-0.00370531		3939.18	0.00490847
399.4	0.14199066		989.4	0.02222914		1579.4	0.01891102		2169.4	0.01402657		2759.39	0.00068673		3349.39	-0.00446973		3939.38	0.00426294
399.6	0.14304526		989.6	0.02363947		1579.6	0.01893235		2169.6	0.01503874		2759.59	0.00064439		3349.59	-0.00504575		3939.58	0.0042393
399.8	0.14367721		989.8	0.02362432		1579.8	0.01927918		2169.8	0.01534488		2759.79	0.00124129		3349.79	-0.00521595		3939.78	0.00415908
400	0.14406123		990	0.02387532		1580	0.01851799		2170	0.01664592		2759.99	0.00061301		3349.99	-0.00549419		3939.98	0.00328417
400.2	0.14462056		990.2	0.02513865		1580.2	0.01838851		2170.2	0.01759529		2760.19	-0.00047481		3350.19	-0.00640441		3940.18	0.003116
400.4	0.14409497		990.4	0.02582718		1580.4	0.01874368		2170.4	0.01817121		2760.39	-0.00003702		3350.39	-0.0053		3940.38	0.00370393
400.6	0.14443053		990.6	0.02582474		1580.6	0.01911823		2170.6	0.0184169		2760.59	-0.00023993		3350.59	-0.0057427		3940.58	0.00339128
400.8	0.14424725		990.8	0.025547		1580.8	0.01905207		2170.8	0.01844226		2760.79	-0.00034885		3350.79	-0.0059761		3940.78	0.00385126
401	0.1427478		991	0.02555303		1581	0.01845723		2171	0.01950353		2760.99	-0.00025302		3350.99	-0.00656086		3940.98	0.00424341
401.2	0.1420447		991.2	0.0254134		1581.2	0.01835134		2171.2	0.02012971		2761.19	-0.00165942		3351.19	-0.00670126		3941.18	0.00416499
401.4	0.14115715		991.4	0.02555077		1581.4	0.01781738		2171.4	0.02032987		2761.39	-0.00176381		3351.39	-0.00570463		3941.38	0.00371531
401.6	0.1407132		991.6	0.02528523		1581.6	0.01761329		2171.6	0.0205579		2761.59	-0.00148407		3351.59	-0.00484		3941.58	0.00341535
401.8	0.14073054		991.8	0.02493687		1581.8	0.01826637		2171.8	0.02069655		2761.79	-0.0017278		3351.79	-0.00373177		3941.78	0.00375402
402	0.14089217		992	0.02543662		1582	0.0187368		2172	0.02016715		2761.99	-0.00098051		3351.99	-0.00301292		3941.98	0.00362951
402.2	0.14077578		992.2	0.024704		1582.2	0.01857434		2172.2	0.01987876		2762.19	-0.00063641		3352.19	-0.00192498		3942.18	0.00343265
402.4	0.14030961		992.4	0.02451531		1582.4	0.0177611		2172.4	0.01930424		2762.39	-0.00099882		3352.39	-0.00253795		3942.38	0.00329242
402.6	0.13924934		992.6	0.02447352		1582.6	0.01747802		2172.6	0.01933191		2762.59	-0.00034326		3352.59	-0.00244324		3942.58	0.00318785
402.8	0.13953953		992.8	0.02413581		1582.8	0.0168634		2172.8	0.01895033		2762.79	0.00080986		3352.79	-0.0036208		3942.78	0.00380634
403	0.14013056		993	0.02326281		1583	0.01697739		2173	0.01889393		2762.99	0.00082747		3352.99	-0.00378063		3942.98	0.00370734
403.2	0.14110089		993.2	0.02328138		1583.2	0.01631494		2173.2	0.01761592		2763.19	0.00118449		3353.19	-0.00415878		3943.18	0.00393825
403.4	0.14173199		993.4	0.02377409		1583.4	0.01761069		2173.4	0.01694949		2763.39	0.00193778		3353.39	-0.00375583		3943.38	0.00341064
403.6	0.14284657		993.6	0.0241614		1583.6	0.01772554		2173.6	0.01597188		2763.59	0.00284563		3353.59	-0.00305928		3943.58	0.00367063
403.8	0.1426022		993.8	0.02398905		1583.8	0.01761771		2173.8	0.01509051		2763.79	0.00279522		3353.79	-0.00260288		3943.78	0.00392747
404	0.14353308		994	0.02357764		1584	0.01733904		2174	0.01541767		2763.99	0.00268178		3353.99	-0.00341428		3943.98	0.00330724
404.2	0.14406879		994.2	0.02409119		1584.2	0.01905777		2174.2	0.01533142		2764.19	0.00250113		3354.19	-0.00369906		3944.18	0.00334189
404.4	0.14431697		994.4	0.02377948		1584.4	0.01962101		2174.4	0.01502026		2764.39	0.00326387		3354.39	-0.00356531		3944.38	0.00303978
404.6	0.14539175		994.6	0.02360755		1584.6	0.02016242		2174.6	0.01567356		2764.59	0.00401157		3354.59	-0.00472438		3944.58	0.00265327
404.8	0.14508987		994.8	0.02318929		1584.8	0.02057847		2174.8	0.01597295		2764.79	0.00425059		3354.79	-0.00517414		3944.78	0.00259579
405	0.14512848		995	0.02349916		1585	0.02005264		2175	0.01658681		2764.99	0.00368656		3354.99	-0.00558278		3944.98	0.00226697
405.2	0.14543814		995.2	0.02407805		1585.2	0.02072857		2175.2	0.01773438		2765.19	0.00277263		3355.19	-0.0059133		3945.18	0.00174515
405.4	0.14540314		995.4	0.02426283		1585.4	0.02135985		2175.4	0.01795837		2765.39	0.00261467		3355.39	-0.00530013		3945.38	0.00104842
405.6	0.14589873		995.6	0.02367541		1585.6	0.02245109		2175.6	0.0179773		2765.59	0.0017131		3355.59	-0.00597413		3945.58	0.00114123
405.8	0.145955		995.8	0.0241675		1585.8	0.02312167		2175.8	0.01801267		2765.79	0.00147927		3355.79	-0.00624333		3945.78	0.00129294
406	0.14553564		996	0.02401472		1586	0.02335395		2176	0.01755635		2765.99	0.00137111		3355.99	-0.00655219		3945.98	0.00136139
406.2	0.14576901		996.2	0.02409564		1586.2	0.02298265		2176.2	0.01736205		2766.19	0.00108837		3356.19	-0.0065629		3946.18	0.00139584
406.4	0.14522952		996.4	0.02429772		1586.4	0.02255707		2176.4	0.01756435		2766.39	0.00031038		3356.39	-0.0074427		3946.38	0.00134506
406.6	0.14474724		996.6	0.02416727		1586.6	0.02213896		2176.6	0.01736171		2766.59	0.00019306		3356.59	-0.00812464		3946.58	0.00198818
406.8	0.1454292		996.8	0.02341373		1586.8	0.02171984		2176.8	0.01644886		2766.79	-0.00039389		3356.79	-0.00879099		3946.78	0.00252817
407	0.14594476		997	0.02304835		1587	0.02144417		2177	0.0168004		2766.99	-0.00125105		3356.99	-0.00762377		3946.98	0.00339404
407.2	0.1461687		997.2	0.02275065		1587.2	0.0213258		2177.2	0.01678274		2767.19	-0.00165182		3357.19	-0.00712881		3947.18	0.00460459
407.4	0.14586821		997.4	0.02284881		1587.4	0.02131329		2177.4	0.01747509		2767.39	-0.00153854		3357.39	-0.00669049		3947.38	0.00469753
407.6	0.14624979		997.6	0.02354941		1587.6	0.02070332		2177.6	0.01665997		2767.59	-0.00187217		3357.59	-0.00679989		3947.58	0.00565143
407.8	0.14641727		997.8	0.02374782		1587.8	0.02014682		2177.8	0.01690567		2767.79	-0.00262052		3357.79	-0.00710541		3947.78	0.0063436
408	0.14585337		998	0.02370793		1588	0.02062322		2178	0.01723694		2767.99	-0.00285231		3357.99	-0.0062391		3947.98	0.00615285
408.2	0.14617764		998.2	0.02473561		1588.2	0.0211547		2178.2	0.01716503		2768.19	-0.0024242		3358.19	-0.00637098		3948.18	0.00640598
408.4	0.1465285		998.4	0.02415325		1588.4	0.02027337		2178.4	0.01701081		2768.39	-0.00188059		3358.39	-0.00672937		3948.38	0.00561127
408.6	0.14708329		998.6	0.02453027		1588.6	0.02023713		2178.6	0.01739969		2768.59	-0.00101983		3358.59	-0.00634559		3948.58	0.00552682
408.8	0.14730595		998.8	0.0245688		1588.8	0.02030445		2178.8	0.01699075		2768.79	-0.00068819		3358.79	-0.00539498		3948.78	0.00601119
409	0.14825189		999	0.0257093		1589	0.02010025		2179	0.01736227		2768.99	-0.00191291		3358.99	-0.00491188		3948.98	0.00584317
409.2	0.14832942		999.2	0.02568936		1589.2	0.02125936		2179.2	0.01751806		2769.19	-0.0017256		3359.19	-0.00430293		3949.18	0.0050143
409.4	0.14897378		999.4	0.02566824		1589.4	0.02132948		2179.4	0.01731671		2769.39	-0.00072906		3359.39	-0.00381898		3949.38	0.00446193
409.6	0.14940986		999.6	0.02558333		1589.6	0.02162631		2179.6	0.01731931		2769.59	-0.00022724		3359.59	-0.00465654		3949.58	0.00358718
409.8	0.14938467		999.8	0.02615561		1589.8	0.0211104		2179.8	0.01771157		2769.79	0.00063983		3359.79	-0.0051059		3949.78	0.00240985
410	0.14965048		1000	0.02623451		1590	0.02144709		2180	0.01751932		2769.99	0.00089714		3359.99	-0.00476367		3949.98	0.00153017
410.2	0.15074027		1000.2	0.02685654		1590.2	0.02089102		2180.2	0.01845495		2770.19	0.00073729		3360.19	-0.00478856		3950.18	0.00155401
410.4	0.15072389		1000.4	0.02623742		1590.4	0.02129076		2180.4	0.01900348		2770.39	-0.00014481		3360.39	-0.00485873		3950.38	0.00136606
410.6	0.1511303		1000.6	0.02570305		1590.6	0.02041964		2180.6	0.01871382		2770.59	-0.00025305		3360.59	-0.00585775		3950.58	0.00145766
410.8	0.15070277		1000.8	0.02511535		1590.8	0.02051075		2180.8	0.01928611		2770.79	-0.00050853		3360.79	-0.00665684		3950.78	0.00184767
411	0.15105755		1001	0.02525858		1591	0.0198398		2181	0.01988308		2770.99	-0.00023244		3360.99	-0.00665976		3950.98	0.00199719
411.2	0.15094559		1001.2	0.02523419		1591.2	0.01911923		2181.2	0.02002135		2771.19	-0.00012436		3361.19	-0.00746145		3951.18	0.0027929
411.4	0.15132613		1001.4	0.02575856		1591.4	0.01930578		2181.4	0.02035167		2771.39	0.00004352		3361.39	-0.00696057		3951.38	0.00305992
411.6	0.15126001		1001.6	0.02618811		1591.6	0.01882105		2181.6	0.01944528		2771.59	-0.00024342		3361.59	-0.00802784		3951.58	0.00374671
411.8	0.15014101		1001.8	0.02522881		1591.8	0.01835993		2181.8	0.01946419		2771.79	-0.00030522		3361.79	-0.00843512		3951.78	0.00386983
412	0.14850686		1002	0.02475541		1592	0.01868424		2182	0.01945659		2771.99	-0.00057242		3361.99	-0.00855046		3951.98	0.00420538
412.2	0.14786806		1002.2	0.02442865		1592.2	0.01779553		2182.2	0.01887193		2772.19	-0.00001496		3362.19	-0.00958865		3952.18	0.00434523
412.4	0.14763026		1002.4	0.02330248		1592.4	0.0190012		2182.4	0.01795636		2772.39	-0.00015741		3362.39	-0.00933007		3952.38	0.00518746
412.6	0.14707938		1002.6	0.02335336		1592.6	0.01836298		2182.6	0.01708868		2772.59	0.00053105		3362.59	-0.00841776		3952.58	0.00609667
412.8	0.14735518		1002.8	0.02292099		1592.8	0.01826385		2182.8	0.01660634		2772.79	0.00051036		3362.79	-0.00702894		3952.78	0.00618507
413	0.14831055		1003	0.02259643		1593	0.01901861		2183	0.0167287		2772.99	0.00084884		3362.99	-0.00647051		3952.98	0.00624494
413.2	0.14875694		1003.2	0.02178753		1593.2	0.0196264		2183.2	0.01580244		2773.19	0.00223657		3363.19	-0.00665842		3953.18	0.0058205
413.4	0.14895067		1003.4	0.02199177		1593.4	0.02025991		2183.4	0.01603041		2773.39	0.00240073		3363.39	-0.00650532		3953.38	0.00595907
413.6	0.14854358		1003.6	0.02230694		1593.6	0.02047755		2183.6	0.01609345		2773.59	0.00249257		3363.59	-0.00624994		3953.58	0.00496138
413.8	0.14880032		1003.8	0.02279074		1593.8	0.0207373		2183.8	0.01686798		2773.79	0.00217745		3363.79	-0.00617649		3953.78	0.00424733
414	0.14939571		1004	0.02329233		1594	0.0207812		2184	0.01737462		2773.99	0.00146742		3363.99	-0.00483049		3953.98	0.0036368
414.2	0.15036628		1004.2	0.02373625		1594.2	0.02059302		2184.2	0.01797367		2774.19	0.00106937		3364.19	-0.00320726		3954.18	0.00287567
414.4	0.15163242		1004.4	0.02423122		1594.4	0.02028899		2184.4	0.01796297		2774.39	0.00107363		3364.39	-0.00251884		3954.38	0.00310858
414.6	0.15285723		1004.6	0.02468124		1594.6	0.01933055		2184.6	0.0178441		2774.59	0.00057562		3364.59	-0.00295062		3954.58	0.00372067
414.8	0.15356751		1004.8	0.02548695		1594.8	0.01983176		2184.8	0.0175829		2774.79	0.00024853		3364.79	-0.00333998		3954.78	0.00368717
415	0.15367326		1005	0.02676258		1595	0.01944734		2185	0.01821359		2774.99	0.00027871		3364.99	-0.00292247		3954.98	0.00296205
415.2	0.15346258		1005.2	0.0271478		1595.2	0.01900346		2185.2	0.01839169		2775.19	0.0001931		3365.19	-0.00309168		3955.18	0.00340621
415.4	0.15358296		1005.4	0.02690007		1595.4	0.0202354		2185.4	0.02001388		2775.39	0.00004122		3365.39	-0.00329403		3955.38	0.0032608
415.6	0.153047		1005.6	0.02647186		1595.6	0.01969571		2185.6	0.01997887		2775.59	-0.00006894		3365.59	-0.00488331		3955.58	0.00296895
415.8	0.15224035		1005.8	0.02552249		1595.8	0.0193191		2185.8	0.02091076		2775.79	-0.00089751		3365.79	-0.0051316		3955.78	0.00319889
416	0.15150784		1006	0.02608785		1596	0.01964859		2186	0.0216053		2775.99	-0.00119996		3365.99	-0.00557108		3955.98	0.0042236
416.2	0.15053783		1006.2	0.0262188		1596.2	0.01931496		2186.2	0.02117635		2776.19	-0.00103061		3366.19	-0.00615451		3956.18	0.004513
416.4	0.1507545		1006.4	0.02536367		1596.4	0.01990442		2186.4	0.02039758		2776.39	-0.00119916		3366.39	-0.00652222		3956.38	0.00586505
416.6	0.15053725		1006.6	0.02515115		1596.6	0.01826036		2186.6	0.01948564		2776.59	-0.0013211		3366.59	-0.00640978		3956.58	0.00551351
416.8	0.15118253		1006.8	0.02460306		1596.8	0.01855402		2186.8	0.01925317		2776.79	-0.00152066		3366.79	-0.00696012		3956.78	0.00548976
417	0.15088143		1007	0.02511732		1597	0.01924276		2187	0.01862965		2776.99	-0.00097473		3366.99	-0.00799331		3956.98	0.00576152
417.2	0.15071791		1007.2	0.0254143		1597.2	0.01944045		2187.2	0.01828324		2777.19	-0.00080468		3367.19	-0.00907224		3957.18	0.00590704
417.4	0.15112708		1007.4	0.02542442		1597.4	0.0201774		2187.4	0.01837076		2777.39	-0.00231834		3367.39	-0.00951083		3957.38	0.00577779
417.6	0.15108782		1007.6	0.02507863		1597.6	0.02001067		2187.6	0.01820552		2777.59	-0.00126566		3367.59	-0.00969283		3957.58	0.00556191
417.8	0.15197578		1007.8	0.02484862		1597.8	0.02029434		2187.8	0.01827549		2777.79	-0.00202042		3367.79	-0.00976714		3957.78	0.00501663
418	0.15199043		1008	0.02515931		1598	0.01982695		2188	0.0180676		2777.99	-0.00178535		3367.99	-0.00854186		3957.98	0.00391355
418.2	0.15285836		1008.2	0.02522228		1598.2	0.02033534		2188.2	0.01734633		2778.19	-0.00110801		3368.19	-0.00709781		3958.18	0.00382066
418.4	0.15352542		1008.4	0.0257859		1598.4	0.01967151		2188.4	0.01579442		2778.39	-0.00135102		3368.39	-0.00729426		3958.38	0.0052906
418.6	0.1542902		1008.6	0.02606257		1598.6	0.01999243		2188.6	0.01528794		2778.59	-0.00139833		3368.59	-0.00717233		3958.58	0.00537155
418.8	0.153884		1008.8	0.02670994		1598.8	0.0205844		2188.8	0.01521454		2778.79	-0.00036679		3368.79	-0.00676102		3958.78	0.0041924
419	0.15358206		1009	0.02662024		1599	0.0216786		2189	0.01632934		2778.99	0.0007098		3368.99	-0.00600604		3958.98	0.00348405
419.2	0.15344822		1009.2	0.02634813		1599.2	0.0218523		2189.2	0.01666333		2779.19	0.00065876		3369.19	-0.00599153		3959.18	0.00360363
419.4	0.15383293		1009.4	0.02594107		1599.4	0.0234601		2189.4	0.01695116		2779.39	0.00087393		3369.39	-0.00583268		3959.38	0.00371242
419.6	0.15403149		1009.6	0.02593709		1599.6	0.02267851		2189.6	0.01705442		2779.59	0.00142601		3369.59	-0.0051136		3959.58	0.00466062
419.8	0.15286784		1009.8	0.0264436		1599.8	0.02248615		2189.8	0.01854166		2779.79	0.00063987		3369.79	-0.00446014		3959.78	0.00503693
420	0.15274256		1010	0.0270984		1600	0.02305876		2190	0.01818349		2779.99	0.00085288		3369.99	-0.00392893		3959.98	0.00531525
420.2	0.15167506		1010.2	0.02743516		1600.2	0.02300427		2190.2	0.01746674		2780.19	0.00053083		3370.19	-0.00371459		3960.18	0.00561758
420.4	0.15212658		1010.4	0.02721353		1600.4	0.02182045		2190.4	0.01740908		2780.39	0.00078308		3370.39	-0.00352434		3960.38	0.00582929
420.6	0.15243757		1010.6	0.02777671		1600.6	0.02128414		2190.6	0.01805711		2780.59	0.00078914		3370.59	-0.00401037		3960.58	0.00599795
420.8	0.15244433		1010.8	0.02786213		1600.8	0.02084142		2190.8	0.01961531		2780.79	0.00129872		3370.79	-0.00469347		3960.78	0.00624754
421	0.15216245		1011	0.0285036		1601	0.0208802		2191	0.01984134		2780.99	0.00137225		3370.99	-0.00500971		3960.98	0.00649278
421.2	0.15315112		1011.2	0.02844527		1601.2	0.02099521		2191.2	0.02085481		2781.19	0.00128327		3371.19	-0.00485391		3961.18	0.00630036
421.4	0.15365858		1011.4	0.02789089		1601.4	0.02079281		2191.4	0.02077543		2781.39	0.00049159		3371.39	-0.00500421		3961.38	0.00647177
421.6	0.15342192		1011.6	0.02779857		1601.6	0.02061075		2191.6	0.02102048		2781.59	0.00115669		3371.59	-0.00447816		3961.58	0.00743491
421.8	0.1538381		1011.8	0.02794678		1601.8	0.0197191		2191.8	0.02114177		2781.79	0.00021812		3371.79	-0.00408425		3961.78	0.00698159
422	0.15375384		1012	0.02801687		1602	0.01948683		2192	0.02174408		2781.99	-0.00000706		3371.99	-0.00394169		3961.98	0.00684235
422.2	0.15480936		1012.2	0.02698313		1602.2	0.01969745		2192.2	0.02173119		2782.19	-0.00059028		3372.19	-0.00373663		3962.18	0.00727406
422.4	0.15462552		1012.4	0.02739605		1602.4	0.01906709		2192.4	0.02165623		2782.39	-0.00081406		3372.39	-0.00449537		3962.38	0.00731971
422.6	0.15633828		1012.6	0.02676455		1602.6	0.01945193		2192.6	0.02264057		2782.59	-0.0000185		3372.59	-0.00461747		3962.58	0.00702542
422.8	0.15612173		1012.8	0.02678805		1602.8	0.01964599		2192.8	0.02269494		2782.79	-0.00000124		3372.79	-0.00464735		3962.78	0.00631955
423	0.15605852		1013	0.02603063		1603	0.01958122		2193	0.02242226		2782.99	0.00004673		3372.99	-0.00439352		3962.98	0.00602337
423.2	0.1555832		1013.2	0.02643929		1603.2	0.01923299		2193.2	0.02243061		2783.19	-0.00017758		3373.19	-0.0038342		3963.18	0.00661326
423.4	0.15605775		1013.4	0.02588701		1603.4	0.02007342		2193.4	0.02170492		2783.39	0.00029736		3373.39	-0.00353913		3963.38	0.00634452
423.6	0.15629853		1013.6	0.02580711		1603.6	0.01982313		2193.6	0.02214089		2783.59	0.00111045		3373.59	-0.00353237		3963.58	0.00663264
423.8	0.15586448		1013.8	0.0260926		1603.8	0.02006708		2193.8	0.02118521		2783.79	0.00091402		3373.79	-0.00320981		3963.78	0.00597123
424	0.15652638		1014	0.02550114		1604	0.02022309		2194	0.02001205		2783.99	0.00152918		3373.99	-0.00355206		3963.98	0.00574463
424.2	0.15621376		1014.2	0.02613962		1604.2	0.01980768		2194.2	0.01904501		2784.19	0.0015314		3374.19	-0.00374475		3964.18	0.005631
424.4	0.15728686		1014.4	0.02593781		1604.4	0.01859354		2194.4	0.01879833		2784.39	0.0021033		3374.39	-0.00439111		3964.38	0.00571933
424.6	0.15729071		1014.6	0.02602848		1604.6	0.01894949		2194.6	0.0183148		2784.59	0.00233074		3374.59	-0.00516453		3964.58	0.00575898
424.8	0.15748103		1014.8	0.02629022		1604.8	0.01922781		2194.8	0.01707467		2784.79	0.00249453		3374.79	-0.00570853		3964.78	0.00552611
425	0.15713532		1015	0.02630827		1605	0.01933593		2195	0.01530956		2784.99	0.00196663		3374.99	-0.00536507		3964.98	0.00504367
425.2	0.15744753		1015.2	0.0266954		1605.2	0.01969806		2195.2	0.01515447		2785.19	0.00172009		3375.19	-0.00525371		3965.18	0.00394084
425.4	0.15737099		1015.4	0.02666804		1605.4	0.01957403		2195.4	0.01426067		2785.39	0.00139553		3375.39	-0.00562885		3965.38	0.0049944
425.6	0.15736599		1015.6	0.02657714		1605.6	0.01973086		2195.6	0.01386232		2785.59	0.00106358		3375.59	-0.00615459		3965.58	0.00576818
425.8	0.15753152		1015.8	0.02728524		1605.8	0.0190852		2195.8	0.01392165		2785.79	0.00004441		3375.79	-0.00642325		3965.78	0.00537495
426	0.15798308		1016	0.02692169		1606	0.01942624		2196	0.01578542		2785.99	-0.00023839		3375.99	-0.00707853		3965.98	0.00525347
426.2	0.15844569		1016.2	0.02617925		1606.2	0.01982917		2196.2	0.01611758		2786.19	-0.00176611		3376.19	-0.00757482		3966.18	0.00485807
426.4	0.1577335		1016.4	0.02666985		1606.4	0.02027746		2196.4	0.01652352		2786.39	-0.00164758		3376.39	-0.00813508		3966.38	0.00491485
426.6	0.15869375		1016.6	0.02609779		1606.6	0.02003871		2196.6	0.01784804		2786.59	-0.00138078		3376.59	-0.00752187		3966.58	0.00453998
426.8	0.1584002		1016.8	0.0263682		1606.8	0.02070601		2196.8	0.0183734		2786.79	-0.00142212		3376.79	-0.0074089		3966.78	0.00353086
427	0.15812341		1017	0.02524063		1607	0.02093871		2197	0.01863858		2786.99	-0.00043157		3376.99	-0.00697798		3966.98	0.00391591
427.2	0.15827205		1017.2	0.02558745		1607.2	0.02137752		2197.2	0.01887517		2787.19	0.00057083		3377.19	-0.00648068		3967.18	0.0044176
427.4	0.1597042		1017.4	0.02635326		1607.4	0.02206218		2197.4	0.01909979		2787.39	0.00103038		3377.39	-0.00591892		3967.38	0.00407926
427.6	0.15987468		1017.6	0.02696067		1607.6	0.02190316		2197.6	0.01994884		2787.59	0.00163474		3377.59	-0.00576153		3967.58	0.00430326
427.8	0.15948356		1017.8	0.02646142		1607.8	0.02190123		2197.8	0.01995876		2787.79	0.00180065		3377.79	-0.00506409		3967.78	0.0048652
428	0.15953588		1018	0.02680575		1608	0.02198349		2198	0.02084855		2787.99	0.00154587		3377.99	-0.00537606		3967.98	0.00513443
428.2	0.1587279		1018.2	0.02690807		1608.2	0.02147841		2198.2	0.02050891		2788.19	0.00109165		3378.19	-0.0042468		3968.18	0.0054587
428.4	0.15969767		1018.4	0.02679572		1608.4	0.02110773		2198.4	0.02119449		2788.39	0.00180485		3378.39	-0.00486834		3968.38	0.00550834
428.6	0.15946721		1018.6	0.02750038		1608.6	0.0221771		2198.6	0.02076683		2788.59	0.00185408		3378.59	-0.00403888		3968.58	0.00473606
428.8	0.15979854		1018.8	0.02857425		1608.8	0.02268234		2198.8	0.02043353		2788.79	0.00199075		3378.79	-0.00388194		3968.78	0.00506209
429	0.15910643		1019	0.02910962		1609	0.02233316		2199	0.02150877		2788.99	0.0019549		3378.99	-0.00430399		3968.98	0.00503181
429.2	0.15878496		1019.2	0.02979072		1609.2	0.02296128		2199.2	0.02174883		2789.19	0.00177825		3379.19	-0.00443939		3969.18	0.00533861
429.4	0.15875218		1019.4	0.03029525		1609.4	0.02292491		2199.4	0.02100362		2789.39	0.00173568		3379.39	-0.004486		3969.38	0.00628529
429.6	0.15859798		1019.6	0.03028154		1609.6	0.02360838		2199.6	0.02140485		2789.59	0.0017961		3379.59	-0.00531431		3969.58	0.00679541
429.8	0.15852717		1019.8	0.0311445		1609.8	0.02286917		2199.8	0.02226101		2789.79	0.00175269		3379.79	-0.00562945		3969.78	0.00708781
430	0.15895424		1020	0.03034602		1610	0.02313513		2200	0.02306938		2789.99	0.00182856		3379.99	-0.00583729		3969.98	0.00728671
430.2	0.15808904		1020.2	0.02999072		1610.2	0.02374749		2200.2	0.02220522		2790.19	0.00076055		3380.19	-0.00579937		3970.18	0.00763064
430.4	0.15796928		1020.4	0.0305716		1610.4	0.02386481		2200.4	0.02268449		2790.39	0.00136592		3380.39	-0.00585439		3970.38	0.00757461
430.6	0.15934336		1020.6	0.03048954		1610.6	0.02344063		2200.6	0.02258115		2790.59	0.00128721		3380.59	-0.00495685		3970.58	0.00727132
430.8	0.15991326		1020.8	0.02978969		1610.8	0.02428064		2200.8	0.02130232		2790.79	0.00155477		3380.79	-0.00486406		3970.78	0.0065315
431	0.1599089		1021	0.02873527		1611	0.02379527		2201	0.02061156		2790.99	0.00225153		3380.99	-0.0041253		3970.98	0.00718134
431.2	0.16032409		1021.2	0.02909661		1611.2	0.02298443		2201.2	0.02035704		2791.19	0.00272577		3381.19	-0.00429529		3971.18	0.00666312
431.4	0.16040354		1021.4	0.02982577		1611.4	0.02291784		2201.4	0.02012223		2791.39	0.00306053		3381.39	-0.00341445		3971.38	0.00622792
431.6	0.15987124		1021.6	0.02947143		1611.6	0.02307223		2201.6	0.01991878		2791.59	0.00270749		3381.59	-0.00370766		3971.58	0.0061316
431.8	0.15908552		1021.8	0.02853289		1611.8	0.02346575		2201.8	0.01997328		2791.79	0.00238146		3381.79	-0.0032542		3971.78	0.00608342
432	0.15899268		1022	0.02873529		1612	0.02372764		2202	0.01922575		2791.99	0.00111397		3381.99	-0.00312738		3971.98	0.00613934
432.2	0.15883275		1022.2	0.02825324		1612.2	0.02320665		2202.2	0.01885067		2792.19	0.00124435		3382.19	-0.00232576		3972.18	0.00576373
432.4	0.15944167		1022.4	0.02804506		1612.4	0.02345091		2202.4	0.01977111		2792.39	0.00163738		3382.39	-0.00266909		3972.38	0.00499378
432.6	0.1589102		1022.6	0.02879478		1612.6	0.02398711		2202.6	0.0196364		2792.59	0.00119577		3382.59	-0.00254347		3972.58	0.00470582
432.8	0.15894931		1022.8	0.02871412		1612.8	0.02407459		2202.8	0.02024516		2792.79	0.00174483		3382.79	-0.00336806		3972.78	0.00449072
433	0.15855394		1023	0.02827402		1613	0.02371725		2203	0.02056037		2792.99	0.00180549		3382.99	-0.0037958		3972.98	0.0034565
433.2	0.158307		1023.2	0.02763923		1613.2	0.02384411		2203.2	0.01982466		2793.19	0.00232296		3383.19	-0.00330526		3973.18	0.00326714
433.4	0.15876644		1023.4	0.02707949		1613.4	0.02358214		2203.4	0.01972489		2793.39	0.00251782		3383.39	-0.00426841		3973.38	0.00365227
433.6	0.15867932		1023.6	0.02663703		1613.6	0.02382268		2203.6	0.02028131		2793.59	0.00258353		3383.59	-0.00527741		3973.58	0.00412052
433.8	0.15931956		1023.8	0.02687929		1613.8	0.02242383		2203.8	0.02044188		2793.79	0.0026182		3383.79	-0.00553425		3973.78	0.00389951
434	0.15971376		1024	0.02725721		1614	0.02192757		2204	0.01989337		2793.99	0.00245228		3383.99	-0.00597572		3973.98	0.00444078
434.2	0.15960847		1024.2	0.02763375		1614.2	0.02150823		2204.2	0.02020985		2794.19	0.00203571		3384.19	-0.00649539		3974.18	0.00484904
434.4	0.16093719		1024.4	0.02836052		1614.4	0.02167398		2204.4	0.02075876		2794.39	0.00179894		3384.39	-0.00668196		3974.38	0.00539688
434.6	0.16205132		1024.6	0.02751501		1614.6	0.02170408		2204.6	0.02006272		2794.59	0.00100553		3384.59	-0.006108		3974.58	0.00552865
434.8	0.16150871		1024.8	0.02667252		1614.8	0.02191656		2204.8	0.0210136		2794.79	0.00037166		3384.79	-0.00663859		3974.78	0.00467066
435	0.16145052		1025	0.02616594		1615	0.02149951		2205	0.02161019		2794.99	0.00091936		3384.99	-0.00647033		3974.98	0.00462835
435.2	0.16097712		1025.2	0.0262165		1615.2	0.021388		2205.2	0.02158527		2795.19	0.00096589		3385.19	-0.00722733		3975.18	0.00400344
435.4	0.16067827		1025.4	0.02676392		1615.4	0.02213269		2205.4	0.02158582		2795.39	0.00070842		3385.39	-0.00680884		3975.38	0.00408993
435.6	0.1613053		1025.6	0.02691013		1615.6	0.02279018		2205.6	0.0217093		2795.59	0.00003645		3385.59	-0.00763074		3975.58	0.0042534
435.8	0.16013938		1025.8	0.02713457		1615.8	0.02303261		2205.8	0.02137869		2795.79	-0.00086827		3385.79	-0.00749638		3975.78	0.00473109
436	0.16010238		1026	0.02707836		1616	0.0236794		2206	0.0204651		2795.99	-0.00089399		3385.99	-0.00794942		3975.98	0.00509176
436.2	0.15994499		1026.2	0.02767469		1616.2	0.02340047		2206.2	0.02054148		2796.19	-0.00040066		3386.19	-0.00825161		3976.18	0.00526703
436.4	0.1598589		1026.4	0.02683318		1616.4	0.02403664		2206.4	0.0208348		2796.39	-0.00035471		3386.39	-0.00813411		3976.38	0.00522655
436.6	0.16021077		1026.6	0.02706728		1616.6	0.02417778		2206.6	0.02102515		2796.59	0.00024922		3386.59	-0.00819482		3976.58	0.0051136
436.8	0.16043915		1026.8	0.02650989		1616.8	0.02476929		2206.8	0.02108902		2796.79	0.00058263		3386.79	-0.00763337		3976.78	0.00630279
437	0.1611453		1027	0.02663621		1617	0.02405065		2207	0.02038945		2796.99	0.00085747		3386.99	-0.00658633		3976.98	0.00646293
437.2	0.16152894		1027.2	0.02656021		1617.2	0.02382817		2207.2	0.02036831		2797.19	0.00098269		3387.19	-0.00584865		3977.18	0.00753866
437.4	0.16196046		1027.4	0.02659179		1617.4	0.02318085		2207.4	0.02054309		2797.39	0.00099933		3387.39	-0.00590895		3977.38	0.00843867
437.6	0.16270041		1027.6	0.02779599		1617.6	0.02270294		2207.6	0.02047227		2797.59	0.00072651		3387.59	-0.00534383		3977.58	0.00827503
437.8	0.16385683		1027.8	0.02838792		1617.8	0.02200756		2207.8	0.02040725		2797.79	0.00081723		3387.79	-0.00501011		3977.78	0.00796326
438	0.16384579		1028	0.02879525		1618	0.02248456		2208	0.0209122		2797.99	0.00082836		3387.99	-0.00428685		3977.98	0.00831639
438.2	0.16433138		1028.2	0.0288891		1618.2	0.02230139		2208.2	0.02148262		2798.19	0.00017596		3388.19	-0.00370427		3978.18	0.00798995
438.4	0.16516014		1028.4	0.029867		1618.4	0.02338892		2208.4	0.0218966		2798.39	-0.00052963		3388.39	-0.00344461		3978.38	0.00697566
438.6	0.16525914		1028.6	0.02932933		1618.6	0.02364794		2208.6	0.02249677		2798.59	-0.00163809		3388.59	-0.0027412		3978.58	0.00548108
438.8	0.16475732		1028.8	0.02938058		1618.8	0.02406982		2208.8	0.02370901		2798.79	-0.00144649		3388.79	-0.00234318		3978.78	0.00503591
439	0.16482012		1029	0.02951289		1619	0.02336349		2209	0.02320313		2798.99	-0.00022106		3388.99	-0.00217763		3978.98	0.00379722
439.2	0.16404156		1029.2	0.02921164		1619.2	0.02337726		2209.2	0.02303872		2799.19	0.00050883		3389.19	-0.00318993		3979.18	0.00390332
439.4	0.16462099		1029.4	0.02971688		1619.4	0.02424708		2209.4	0.02271156		2799.39	0.00048796		3389.39	-0.003639		3979.38	0.0035518
439.6	0.16415674		1029.6	0.02944569		1619.6	0.02436633		2209.6	0.02231592		2799.59	0.00113269		3389.59	-0.00500693		3979.58	0.00392435
439.8	0.1634671		1029.8	0.02984837		1619.8	0.0242527		2209.8	0.02205233		2799.79	0.00084257		3389.79	-0.00560364		3979.78	0.00387917
440	0.16360726		1030	0.02897571		1620	0.02461662		2210	0.02209274		2799.99	0.00130694		3389.99	-0.00737703		3979.98	0.00407468
440.2	0.16365251		1030.2	0.02946081		1620.2	0.02385288		2210.2	0.02177692		2800.19	0.00022578		3390.19	-0.00821127		3980.18	0.00453469
440.4	0.16353766		1030.4	0.02802733		1620.4	0.02331508		2210.4	0.02155952		2800.39	0.00045861		3390.39	-0.00905255		3980.38	0.00476827
440.6	0.16382583		1030.6	0.02802052		1620.6	0.02278166		2210.6	0.02196381		2800.59	0.00025054		3390.59	-0.00913812		3980.58	0.0057798
440.8	0.16384923		1030.8	0.02813131		1620.8	0.02216904		2210.8	0.02176972		2800.79	-0.00047769		3390.79	-0.00981185		3980.78	0.00642423
441	0.16439673		1031	0.02810497		1621	0.02145295		2211	0.021262		2800.99	-0.00076323		3390.99	-0.00949394		3980.98	0.00563814
441.2	0.16414119		1031.2	0.02798081		1621.2	0.0211406		2211.2	0.02162707		2801.19	-0.00054894		3391.19	-0.00991284		3981.18	0.00629638
441.4	0.1632706		1031.4	0.02795035		1621.4	0.02042135		2211.4	0.02179134		2801.39	-0.00067761		3391.39	-0.01001487		3981.38	0.00662946
441.6	0.16357385		1031.6	0.02787134		1621.6	0.02037962		2211.6	0.02187636		2801.59	-0.00101463		3391.59	-0.00947047		3981.58	0.00639325
441.8	0.16318872		1031.8	0.02751774		1621.8	0.02073692		2211.8	0.02250163		2801.79	-0.00047648		3391.79	-0.008946		3981.78	0.00623713
442	0.16298162		1032	0.02739559		1622	0.02072853		2212	0.02325145		2801.99	-0.00011044		3391.99	-0.00753069		3981.98	0.00569734
442.2	0.16290728		1032.2	0.02815774		1622.2	0.02008304		2212.2	0.02357593		2802.19	0.00005918		3392.19	-0.00680436		3982.18	0.00527401
442.4	0.16345153		1032.4	0.02864522		1622.4	0.02087011		2212.4	0.02421684		2802.39	0.00023304		3392.39	-0.00618716		3982.38	0.00401474
442.6	0.16346238		1032.6	0.02829524		1622.6	0.02135509		2212.6	0.02442386		2802.59	0.00073568		3392.59	-0.00504533		3982.58	0.0040992
442.8	0.16298893		1032.8	0.02850778		1622.8	0.02122679		2212.8	0.02377515		2802.79	0.00198503		3392.79	-0.00459962		3982.78	0.00426529
443	0.16323493		1033	0.02899329		1623	0.02074167		2213	0.02349309		2802.99	0.00236711		3392.99	-0.00437407		3982.98	0.00313201
443.2	0.16261526		1033.2	0.02843835		1623.2	0.02209427		2213.2	0.02307096		2803.19	0.00283764		3393.19	-0.00394677		3983.18	0.00365001
443.4	0.16337826		1033.4	0.02963147		1623.4	0.02277321		2213.4	0.02275292		2803.39	0.00239818		3393.39	-0.00268161		3983.38	0.00287484
443.6	0.163721		1033.6	0.02932519		1623.6	0.02259038		2213.6	0.02287511		2803.59	0.00290573		3393.59	-0.00233414		3983.58	0.0032019
443.8	0.16467485		1033.8	0.02953202		1623.8	0.02262958		2213.8	0.02187829		2803.79	0.00169523		3393.79	-0.00209111		3983.78	0.00335598
444	0.16479644		1034	0.02925619		1624	0.02263351		2214	0.02125003		2803.99	0.00063845		3393.99	-0.00284699		3983.98	0.00351932
444.2	0.16498989		1034.2	0.02967218		1624.2	0.02206951		2214.2	0.02018442		2804.19	-0.00061747		3394.19	-0.00290861		3984.18	0.00344751
444.4	0.16561018		1034.4	0.02931025		1624.4	0.02204366		2214.4	0.01985642		2804.39	-0.00024113		3394.39	-0.00319866		3984.38	0.00370504
444.6	0.16610251		1034.6	0.02994005		1624.6	0.02255461		2214.6	0.01944976		2804.59	-0.00168581		3394.59	-0.00376445		3984.58	0.004218
444.8	0.16609726		1034.8	0.02967641		1624.8	0.02239894		2214.8	0.01955135		2804.79	-0.00285062		3394.79	-0.00447893		3984.78	0.0038579
445	0.16649977		1035	0.02911421		1625	0.02284496		2215	0.01925653		2804.99	-0.00367953		3394.99	-0.00451595		3984.98	0.00497628
445.2	0.16595427		1035.2	0.02878975		1625.2	0.02313435		2215.2	0.01989283		2805.19	-0.00395945		3395.19	-0.00609239		3985.18	0.00555059
445.4	0.16528504		1035.4	0.02833344		1625.4	0.02298568		2215.4	0.02028399		2805.39	-0.00415875		3395.39	-0.00618724		3985.38	0.00646876
445.6	0.16528442		1035.6	0.02801018		1625.6	0.02271328		2215.6	0.02092329		2805.59	-0.00353978		3395.59	-0.00683583		3985.58	0.00681087
445.8	0.16493939		1035.8	0.02797268		1625.8	0.0228315		2215.8	0.02201832		2805.79	-0.00254037		3395.79	-0.00745154		3985.78	0.00668001
446	0.16466863		1036	0.02669754		1626	0.02262313		2216	0.02210606		2805.99	-0.00155417		3395.99	-0.00784975		3985.98	0.00759078
446.2	0.164431		1036.2	0.02689518		1626.2	0.0220957		2216.2	0.02297153		2806.19	-0.00032642		3396.19	-0.00895654		3986.18	0.00856168
446.4	0.16495318		1036.4	0.02676917		1626.4	0.02260619		2216.4	0.02353776		2806.39	0.00014494		3396.39	-0.00960215		3986.38	0.00797203
446.6	0.16466568		1036.6	0.02658513		1626.6	0.02278129		2216.6	0.02395659		2806.59	0.00057096		3396.59	-0.0099552		3986.58	0.00802039
446.8	0.16517266		1036.8	0.02652467		1626.8	0.02284343		2216.8	0.02391156		2806.79	0.00136309		3396.79	-0.01017433		3986.78	0.00735578
447	0.16592396		1037	0.02699928		1627	0.02347075		2217	0.02454617		2806.99	0.00197125		3396.99	-0.00927947		3986.98	0.00642594
447.2	0.16622309		1037.2	0.02689417		1627.2	0.02430425		2217.2	0.02370788		2807.19	0.00226607		3397.19	-0.00837244		3987.18	0.006497
447.4	0.16718906		1037.4	0.02758077		1627.4	0.02445034		2217.4	0.02359727		2807.39	0.00282646		3397.39	-0.0072029		3987.38	0.00643417
447.6	0.16755369		1037.6	0.02688235		1627.6	0.02474003		2217.6	0.02247177		2807.59	0.00313933		3397.59	-0.00667888		3987.58	0.00647817
447.8	0.16796915		1037.8	0.02679328		1627.8	0.02493095		2217.8	0.02137541		2807.79	0.00236099		3397.79	-0.0064141		3987.78	0.00677162
448	0.16801396		1038	0.02766778		1628	0.02508215		2218	0.02110856		2807.99	0.00206927		3397.99	-0.00629609		3987.98	0.00498206
448.2	0.16824978		1038.2	0.02765864		1628.2	0.02539218		2218.2	0.02098767		2808.19	0.00185964		3398.19	-0.00612024		3988.18	0.00501234
448.4	0.16884985		1038.4	0.02725927		1628.4	0.02493123		2218.4	0.02138399		2808.39	0.00191145		3398.39	-0.00606451		3988.38	0.00477917
448.6	0.16832917		1038.6	0.02695598		1628.6	0.02499322		2218.6	0.02104711		2808.59	0.0006212		3398.59	-0.00712235		3988.58	0.00476622
448.8	0.16824081		1038.8	0.0263373		1628.8	0.02477756		2218.8	0.02173195		2808.79	-0.00021689		3398.79	-0.00644542		3988.78	0.00468008
449	0.1683794		1039	0.02674146		1629	0.02476053		2219	0.02180574		2808.99	0.00014583		3398.99	-0.00812759		3988.98	0.00517454
449.2	0.16770283		1039.2	0.02628403		1629.2	0.02483544		2219.2	0.02182515		2809.19	0.00022412		3399.19	-0.00875318		3989.18	0.00510589
449.4	0.16698324		1039.4	0.02613598		1629.4	0.02424251		2219.4	0.02201032		2809.39	0.00062259		3399.39	-0.00849563		3989.38	0.00577235
449.6	0.16673323		1039.6	0.02637043		1629.6	0.0239224		2219.6	0.02224834		2809.59	0.00049707		3399.59	-0.00911091		3989.58	0.00598495
449.8	0.16714344		1039.8	0.0265305		1629.8	0.02392316		2219.8	0.02215707		2809.79	0.00166936		3399.79	-0.00931268		3989.78	0.00633148
450	0.16707334		1040	0.02643483		1630	0.0244626		2220	0.02216508		2809.99	0.00191844		3399.99	-0.00990716		3989.98	0.00746732
450.2	0.1673461		1040.2	0.02699178		1630.2	0.02353359		2220.2	0.02324084		2810.19	0.00195899		3400.19	-0.01010647		3990.18	0.0076118
450.4	0.16810536		1040.4	0.02751804		1630.4	0.02413746		2220.4	0.02384255		2810.39	0.00157911		3400.39	-0.00921782		3990.38	0.0065948
450.6	0.16844579		1040.6	0.0281645		1630.6	0.02338661		2220.6	0.0244205		2810.59	0.00203749		3400.59	-0.00881732		3990.58	0.00695822
450.8	0.16963309		1040.8	0.02895863		1630.8	0.02324269		2220.8	0.02452505		2810.79	0.00334983		3400.79	-0.00816374		3990.78	0.00742139
451	0.16939825		1041	0.02965774		1631	0.02391885		2221	0.02506786		2810.99	0.00332359		3400.99	-0.00714255		3990.98	0.00768219
451.2	0.17026305		1041.2	0.0294219		1631.2	0.02402465		2221.2	0.02389502		2811.19	0.00257389		3401.19	-0.00647643		3991.18	0.00782828
451.4	0.17023071		1041.4	0.03012164		1631.4	0.02396939		2221.4	0.02394825		2811.39	0.00251507		3401.39	-0.0059771		3991.38	0.00768397
451.6	0.17033897		1041.6	0.03023632		1631.6	0.02377071		2221.6	0.02291226		2811.59	0.00207824		3401.59	-0.00570228		3991.58	0.00779062
451.8	0.1713576		1041.8	0.03032355		1631.8	0.02327809		2221.8	0.02230447		2811.79	0.00174998		3401.79	-0.00563684		3991.78	0.00666535
452	0.17111562		1042	0.03147779		1632	0.02363753		2222	0.02259818		2811.99	0.00145805		3401.99	-0.0053452		3991.98	0.00584667
452.2	0.17091496		1042.2	0.03138307		1632.2	0.0236661		2222.2	0.02288961		2812.19	0.00151404		3402.19	-0.00580912		3992.18	0.0068385
452.4	0.17061845		1042.4	0.03117473		1632.4	0.02301815		2222.4	0.02337853		2812.39	0.00168994		3402.39	-0.00649483		3992.38	0.00685878
452.6	0.17031861		1042.6	0.03252564		1632.6	0.02363047		2222.6	0.02335413		2812.59	0.00172106		3402.59	-0.00787172		3992.58	0.00706685
452.8	0.1697398		1042.8	0.03289272		1632.8	0.02329058		2222.8	0.02363234		2812.79	0.00192798		3402.79	-0.00805055		3992.78	0.00712496
453	0.16882008		1043	0.03321035		1633	0.0233358		2223	0.02357762		2812.99	0.00180073		3402.99	-0.00927424		3992.98	0.00707696
453.2	0.16794521		1043.2	0.0330225		1633.2	0.02380606		2223.2	0.02434129		2813.19	0.00136824		3403.19	-0.00873507		3993.18	0.0070313
453.4	0.16782894		1043.4	0.03297648		1633.4	0.02407184		2223.4	0.02432234		2813.39	0.00149029		3403.39	-0.008651		3993.38	0.00698494
453.6	0.16862972		1043.6	0.03371334		1633.6	0.02455378		2223.6	0.02443393		2813.59	0.00114776		3403.59	-0.00851988		3993.58	0.0067772
453.8	0.16888427		1043.8	0.0339402		1633.8	0.02489419		2223.8	0.02449925		2813.79	0.00170697		3403.79	-0.00837043		3993.78	0.00746729
454	0.16858506		1044	0.03338459		1634	0.02564115		2224	0.02410398		2813.99	0.00088567		3403.99	-0.00852111		3993.98	0.00768734
454.2	0.16834911		1044.2	0.03341463		1634.2	0.02514738		2224.2	0.02375072		2814.19	0.00088875		3404.19	-0.0080229		3994.18	0.00806421
454.4	0.16823895		1044.4	0.03435495		1634.4	0.02526189		2224.4	0.02363243		2814.39	0.00156279		3404.39	-0.00778462		3994.38	0.00819529
454.6	0.16829674		1044.6	0.03410615		1634.6	0.02444935		2224.6	0.02366583		2814.59	0.00156279		3404.59	-0.00770421		3994.58	0.00892736
454.8	0.16954401		1044.8	0.03397218		1634.8	0.02449796		2224.8	0.02271876		2814.79	0.00153419		3404.79	-0.00746469		3994.78	0.0086224
455	0.16908839		1045	0.0334535		1635	0.02495783		2225	0.02195959		2814.99	0.00099175		3404.99	-0.00741605		3994.98	0.00882471
455.2	0.16966703		1045.2	0.03275311		1635.2	0.02466733		2225.2	0.02069818		2815.19	0.00040191		3405.19	-0.00717162		3995.18	0.00792834
455.4	0.17055472		1045.4	0.03277709		1635.4	0.02446607		2225.4	0.02003734		2815.39	-0.00021557		3405.39	-0.00727055		3995.38	0.00769585
455.6	0.17093603		1045.6	0.03208081		1635.6	0.02432652		2225.6	0.01896534		2815.59	-0.00005156		3405.59	-0.00674728		3995.58	0.0071407
455.8	0.17173462		1045.8	0.03192607		1635.8	0.0247742		2225.8	0.01892259		2815.79	-0.0001973		3405.79	-0.00568282		3995.78	0.00650406
456	0.17095952		1046	0.03207347		1636	0.0243495		2226	0.01967291		2815.99	-0.00064588		3405.99	-0.00528396		3995.98	0.00641295
456.2	0.17134897		1046.2	0.03177384		1636.2	0.02365116		2226.2	0.01940029		2816.19	-0.00077073		3406.19	-0.00544327		3996.18	0.00582072
456.4	0.17155501		1046.4	0.03164208		1636.4	0.0230991		2226.4	0.02025092		2816.39	0.00007336		3406.39	-0.00537674		3996.38	0.004963
456.6	0.17195611		1046.6	0.03130714		1636.6	0.02275903		2226.6	0.02098562		2816.59	0.00023714		3406.59	-0.00552269		3996.58	0.00477827
456.8	0.17114124		1046.8	0.03000349		1636.8	0.0225044		2226.8	0.02219108		2816.79	0.00063136		3406.79	-0.00563274		3996.78	0.00514812
457	0.17160249		1047	0.03017434		1637	0.02249842		2227	0.02428607		2816.99	0.00047275		3406.99	-0.00512317		3996.98	0.00450743
457.2	0.17190982		1047.2	0.02910645		1637.2	0.02242785		2227.2	0.02563831		2817.19	0.00098728		3407.19	-0.00498623		3997.18	0.00482448
457.4	0.17196577		1047.4	0.02897061		1637.4	0.02242593		2227.4	0.02573225		2817.39	0.00174705		3407.39	-0.00472837		3997.38	0.00467148
457.6	0.17268849		1047.6	0.02974902		1637.6	0.0220503		2227.6	0.02665575		2817.59	0.00216008		3407.59	-0.00486071		3997.58	0.00456675
457.8	0.17247687		1047.8	0.03012129		1637.8	0.02171274		2227.8	0.02781372		2817.79	0.0026758		3407.79	-0.00509137		3997.78	0.00493149
458	0.17281174		1048	0.03020845		1638	0.02173743		2228	0.02734198		2817.99	0.00318225		3407.99	-0.0055303		3997.98	0.00449046
458.2	0.17336918		1048.2	0.03104918		1638.2	0.0214991		2228.2	0.0278474		2818.19	0.00372092		3408.19	-0.00507744		3998.18	0.00456854
458.4	0.17396504		1048.4	0.0313382		1638.4	0.02082078		2228.4	0.02838726		2818.39	0.00395157		3408.39	-0.00515039		3998.38	0.00514798
458.6	0.1743531		1048.6	0.03082245		1638.6	0.02142725		2228.6	0.02789017		2818.59	0.0031862		3408.59	-0.00550389		3998.58	0.00519508
458.8	0.17469803		1048.8	0.03131355		1638.8	0.02229515		2228.8	0.02678095		2818.79	0.00405859		3408.79	-0.00521509		3998.78	0.00447571
459	0.1732807		1049	0.03053734		1639	0.02342641		2229	0.02654823		2818.99	0.00433181		3408.99	-0.0054795		3998.98	0.00542266
459.2	0.17340796		1049.2	0.03032386		1639.2	0.02461423		2229.2	0.02559731		2819.19	0.00437791		3409.19	-0.00644884		3999.18	0.00461749
459.4	0.17356365		1049.4	0.03000631		1639.4	0.02507986		2229.4	0.0242405		2819.39	0.00408531		3409.39	-0.00663331		3999.38	0.00520805
459.6	0.17242388		1049.6	0.02921188		1639.6	0.02545747		2229.6	0.02329112		2819.59	0.00380068		3409.59	-0.00635046		3999.58	0.005472
459.8	0.1730151		1049.8	0.02915159		1639.8	0.02594804		2229.8	0.02274813		2819.79	0.00329715		3409.79	-0.00629815		3999.78	0.00563313
460	0.17243321		1050	0.02891998		1640	0.02493286		2230	0.02220107		2819.99	0.00265		3409.99	-0.00705518		3999.98	0.00528838
460.2	0.17277517		1050.2	0.02849351		1640.2	0.02567202		2230.2	0.02140322		2820.19	0.00269311		3410.19	-0.00733985		4000.18	0.00553597
460.4	0.17368819		1050.4	0.02845528		1640.4	0.02531572		2230.4	0.02153156		2820.39	0.00345997		3410.39	-0.00725772		4000.38	0.00662619
460.6	0.17351611		1050.6	0.02729991		1640.6	0.02576922		2230.6	0.02155746		2820.59	0.0031294		3410.59	-0.00752774		4000.58	0.00742247
460.8	0.17299627		1050.8	0.02730916		1640.8	0.026193		2230.8	0.02217159		2820.79	0.00334121		3410.79	-0.00655916		4000.78	0.00821863
461	0.17319551		1051	0.02825933		1641	0.0258094		2231	0.02291594		2820.99	0.00295714		3410.99	-0.00568227		4000.98	0.00793372
461.2	0.17237026		1051.2	0.02790159		1641.2	0.02618373		2231.2	0.02275719		2821.19	0.00282875		3411.19	-0.00659221		4001.18	0.00769762
461.4	0.17172441		1051.4	0.02976417		1641.4	0.02567559		2231.4	0.02306418		2821.39	0.00370812		3411.39	-0.00627889		4001.38	0.00632022
461.6	0.17204994		1051.6	0.02994947		1641.6	0.02508851		2231.6	0.02460504		2821.59	0.00384434		3411.59	-0.00549775		4001.58	0.0059464
461.8	0.17206007		1051.8	0.03027107		1641.8	0.0247884		2231.8	0.02484159		2821.79	0.00339078		3411.79	-0.00514937		4001.78	0.00632025
462	0.17304988		1052	0.03098051		1642	0.02500507		2232	0.02426635		2821.99	0.00232464		3411.99	-0.00519259		4001.98	0.00663375
462.2	0.17383186		1052.2	0.03086744		1642.2	0.02469021		2232.2	0.02493315		2822.19	0.00141206		3412.19	-0.0048125		4002.18	0.00617998
462.4	0.17353277		1052.4	0.03071583		1642.4	0.02415401		2232.4	0.02555217		2822.39	0.00119254		3412.39	-0.0052545		4002.38	0.00671836
462.6	0.17253274		1052.6	0.03014314		1642.6	0.0245835		2232.6	0.024781		2822.59	0.00066738		3412.59	-0.00548987		4002.58	0.00693557
462.8	0.17203886		1052.8	0.03024237		1642.8	0.02469625		2232.8	0.02496552		2822.79	0.00073565		3412.79	-0.00477874		4002.78	0.00722352
463	0.17227181		1053	0.02982426		1643	0.02517391		2233	0.02548309		2822.99	0.00005421		3412.99	-0.00566152		4002.98	0.00758544
463.2	0.17230977		1053.2	0.03055261		1643.2	0.02573602		2233.2	0.02455385		2823.19	0.0005538		3413.19	-0.00625473		4003.18	0.00769035
463.4	0.17274743		1053.4	0.03036722		1643.4	0.02540595		2233.4	0.02366859		2823.39	0.0002528		3413.39	-0.00604145		4003.38	0.00845147
463.6	0.17319371		1053.6	0.03035721		1643.6	0.02520507		2233.6	0.02327473		2823.59	0.00003865		3413.59	-0.00649001		4003.58	0.00841567
463.8	0.17387443		1053.8	0.03158374		1643.8	0.02543329		2233.8	0.02299703		2823.79	0.00026362		3413.79	-0.00661452		4003.78	0.00784355
464	0.1745743		1054	0.03171009		1644	0.02528604		2234	0.02381409		2823.99	-0.00027995		3413.99	-0.00724469		4003.98	0.00810363
464.2	0.17558203		1054.2	0.03161884		1644.2	0.02546257		2234.2	0.02432731		2824.19	0.00025575		3414.19	-0.00756706		4004.18	0.00757073
464.4	0.17646659		1054.4	0.03195664		1644.4	0.02436896		2234.4	0.02444308		2824.39	0.00060812		3414.39	-0.007474		4004.38	0.007714
464.6	0.17641559		1054.6	0.03160567		1644.6	0.02501119		2234.6	0.02408703		2824.59	0.00012642		3414.59	-0.00660169		4004.58	0.00672958
464.8	0.17682929		1054.8	0.03144098		1644.8	0.02518343		2234.8	0.02440463		2824.79	0.00045809		3414.79	-0.00580753		4004.78	0.0060317
465	0.17670578		1055	0.03157882		1645	0.02543875		2235	0.02442225		2824.99	0.00069612		3414.99	-0.00552485		4004.98	0.00521089
465.2	0.17626769		1055.2	0.03140152		1645.2	0.02529321		2235.2	0.02298983		2825.19	0.0008609		3415.19	-0.00594872		4005.18	0.00379216
465.4	0.17664507		1055.4	0.03183051		1645.4	0.02502188		2235.4	0.02274517		2825.39	0.00172896		3415.39	-0.00516971		4005.38	0.00359996
465.6	0.17701718		1055.6	0.03180414		1645.6	0.02498171		2235.6	0.02349042		2825.59	0.00147172		3415.59	-0.00548084		4005.58	0.00440663
465.8	0.17746458		1055.8	0.03204833		1645.8	0.025444		2235.8	0.02276164		2825.79	0.00105625		3415.79	-0.00742825		4005.78	0.00444061
466	0.1771821		1056	0.03248812		1646	0.02556458		2236	0.02288208		2825.99	0.00043305		3415.99	-0.00854873		4005.98	0.00430036
466.2	0.1770009		1056.2	0.03151335		1646.2	0.02580832		2236.2	0.02365309		2826.19	0.00113729		3416.19	-0.00902253		4006.18	0.00441195
466.4	0.1762086		1056.4	0.0322682		1646.4	0.0255704		2236.4	0.02367957		2826.39	0.00167781		3416.39	-0.00911856		4006.38	0.00583452
466.6	0.1763009		1056.6	0.03237673		1646.6	0.02573744		2236.6	0.02289018		2826.59	0.00226209		3416.59	-0.00907528		4006.58	0.00657791
466.8	0.17635996		1056.8	0.03229883		1646.8	0.02615248		2236.8	0.02292011		2826.79	0.00299678		3416.79	-0.00922448		4006.78	0.0067118
467	0.17687283		1057	0.03214783		1647	0.02596985		2237	0.02344296		2826.99	0.00368755		3416.99	-0.00950288		4006.98	0.00682892
467.2	0.17699106		1057.2	0.03251792		1647.2	0.02668064		2237.2	0.02324314		2827.19	0.00440913		3417.19	-0.00924188		4007.18	0.0085127
467.4	0.17702077		1057.4	0.03223211		1647.4	0.0260275		2237.4	0.02266482		2827.39	0.00384797		3417.39	-0.00880026		4007.38	0.00866267
467.6	0.17698553		1057.6	0.03225972		1647.6	0.02561925		2237.6	0.02320722		2827.59	0.00359265		3417.59	-0.00897743		4007.58	0.00872949
467.8	0.1768975		1057.8	0.03303333		1647.8	0.02575878		2237.8	0.0240526		2827.79	0.00356021		3417.79	-0.00876946		4007.78	0.00840307
468	0.17747561		1058	0.03288359		1648	0.02519358		2238	0.02550676		2827.99	0.00314683		3417.99	-0.00892751		4007.98	0.00852174
468.2	0.17737474		1058.2	0.03281063		1648.2	0.02458443		2238.2	0.02606489		2828.19	0.00313266		3418.19	-0.00846605		4008.18	0.00815607
468.4	0.17737995		1058.4	0.03269411		1648.4	0.02377239		2238.4	0.02601284		2828.39	0.00270165		3418.39	-0.00762541		4008.38	0.00826761
468.6	0.17781243		1058.6	0.03228067		1648.6	0.02360011		2238.6	0.02608343		2828.59	0.00213296		3418.59	-0.00632298		4008.58	0.00791285
468.8	0.17782753		1058.8	0.03145356		1648.8	0.02340039		2238.8	0.02655978		2828.79	0.00216678		3418.79	-0.00590155		4008.78	0.00784783
469	0.17751062		1059	0.03126421		1649	0.02275107		2239	0.0265457		2828.99	0.0018183		3418.99	-0.00512357		4008.98	0.00805741
469.2	0.1774911		1059.2	0.03122844		1649.2	0.02195403		2239.2	0.02618052		2829.19	0.00129103		3419.19	-0.00523801		4009.18	0.00793039
469.4	0.17767299		1059.4	0.03124037		1649.4	0.02182334		2239.4	0.02751648		2829.39	0.00106569		3419.39	-0.00525485		4009.38	0.00847406
469.6	0.17702291		1059.6	0.03108622		1649.6	0.02135283		2239.6	0.02811385		2829.59	0.00055602		3419.59	-0.00593043		4009.58	0.00857996
469.8	0.17654267		1059.8	0.03045425		1649.8	0.021543		2239.8	0.02821196		2829.79	0.00017797		3419.79	-0.00643963		4009.78	0.00850375
470	0.17654267		1059.99	0.03045425		1650	0.021543		2240	0.02821196		2829.99	0.00017797		3419.98	-0.00643963		4009.98	0.00850375
470.2	0.17557108		1060.19	0.03041304		1650.2	0.02170273		2240.2	0.02794311		2830.19	0.00023821		3420.18	-0.00621876		4010.18	0.00959553
470.4	0.17535288		1060.39	0.03020984		1650.4	0.02212333		2240.4	0.02744777		2830.39	0.00044836		3420.38	-0.00570387		4010.38	0.00990016
470.6	0.17503461		1060.59	0.02992722		1650.6	0.02185135		2240.6	0.02713438		2830.59	0.00046998		3420.58	-0.00595941		4010.58	0.0089206
470.8	0.17476522		1060.79	0.03048162		1650.8	0.02177388		2240.8	0.02692043		2830.79	0.00066333		3420.78	-0.00529505		4010.78	0.00863613
471	0.17435515		1060.99	0.03001552		1651	0.02198623		2241	0.02595471		2830.99	0.00067422		3420.98	-0.00521458		4010.98	0.00867742
471.2	0.17434845		1061.19	0.03012191		1651.2	0.02171752		2241.2	0.02518914		2831.19	0.00056537		3421.18	-0.00537997		4011.18	0.00866438
471.4	0.173261		1061.39	0.0296022		1651.4	0.02135919		2241.4	0.02480141		2831.39	0.00039946		3421.38	-0.00586241		4011.38	0.00868235
471.6	0.17298318		1061.59	0.02939066		1651.6	0.02113726		2241.6	0.02440807		2831.59	0.00064908		3421.58	-0.00645899		4011.58	0.00898037
471.8	0.17300631		1061.79	0.02959366		1651.8	0.02053053		2241.8	0.02426831		2831.79	0.00120709		3421.78	-0.00698269		4011.78	0.00834698
472	0.17372255		1061.99	0.02981665		1652	0.01908571		2242	0.02457165		2831.99	0.00148017		3421.98	-0.00715083		4011.98	0.00839997
472.2	0.17422831		1062.19	0.02979701		1652.2	0.01810942		2242.2	0.02433793		2832.19	0.0015201		3422.18	-0.00764099		4012.18	0.00797222
472.4	0.17439274		1062.39	0.02861844		1652.4	0.01822425		2242.4	0.02359341		2832.39	0.00152961		3422.38	-0.00785362		4012.38	0.0072159
472.6	0.17562158		1062.59	0.02849313		1652.6	0.018731		2242.6	0.02345087		2832.59	0.00310007		3422.58	-0.00775596		4012.58	0.00631297
472.8	0.17610996		1062.79	0.02774448		1652.8	0.0190856		2242.8	0.02362505		2832.79	0.00356281		3422.78	-0.00747142		4012.78	0.00582696
473	0.17704448		1062.99	0.02774572		1653	0.01960387		2243	0.02317239		2832.99	0.00338433		3422.98	-0.0075656		4012.98	0.0060493
473.2	0.17789218		1063.19	0.02788622		1653.2	0.01978127		2243.2	0.02383508		2833.19	0.00344974		3423.18	-0.00804513		4013.18	0.00617607
473.4	0.17835044		1063.39	0.02727367		1653.4	0.01877989		2243.4	0.02436642		2833.39	0.00243015		3423.38	-0.00751994		4013.38	0.00672544
473.6	0.17853901		1063.59	0.02686732		1653.6	0.01802484		2243.6	0.02507121		2833.59	0.00231712		3423.58	-0.00685625		4013.58	0.00704002
473.8	0.17924942		1063.79	0.02718247		1653.8	0.01888648		2243.8	0.02583564		2833.79	0.00143859		3423.78	-0.00666642		4013.78	0.00739269
474	0.17785092		1063.99	0.02775352		1654	0.01947312		2244	0.02640112		2833.99	0.00107958		3423.98	-0.00540848		4013.98	0.00736721
474.2	0.17722284		1064.19	0.02805396		1654.2	0.01927825		2244.2	0.0272261		2834.19	0.00061011		3424.18	-0.00421918		4014.18	0.00828343
474.4	0.17681523		1064.39	0.02830406		1654.4	0.01934283		2244.4	0.02728859		2834.39	-0.00032728		3424.38	-0.00345192		4014.38	0.00805907
474.6	0.17566953		1064.59	0.02806327		1654.6	0.0191744		2244.6	0.02722961		2834.59	-0.00090813		3424.58	-0.00305764		4014.58	0.00824958
474.8	0.17480768		1064.79	0.02870253		1654.8	0.0195335		2244.8	0.02705053		2834.79	-0.00082377		3424.78	-0.00257321		4014.78	0.00858384
475	0.17432361		1064.99	0.02804598		1655	0.02003513		2245	0.02644674		2834.99	-0.00175594		3424.98	-0.00277351		4014.98	0.00958854
475.2	0.17346985		1065.19	0.0296713		1655.2	0.01945275		2245.2	0.02658394		2835.19	-0.00192966		3425.18	-0.00352216		4015.18	0.0092916
475.4	0.17249937		1065.39	0.02916193		1655.4	0.01892342		2245.4	0.02654411		2835.39	-0.00135841		3425.38	-0.00432253		4015.38	0.00961344
475.6	0.17333378		1065.59	0.02936641		1655.6	0.01864468		2245.6	0.02624382		2835.59	-0.00177185		3425.58	-0.00463014		4015.58	0.00891056
475.8	0.1738355		1065.79	0.02963368		1655.8	0.01778447		2245.8	0.02655278		2835.79	-0.00204286		3425.78	-0.00471781		4015.78	0.0081873
476	0.17432842		1065.99	0.02878302		1656	0.01699314		2246	0.02668707		2835.99	-0.00185898		3425.98	-0.004918		4015.98	0.0084401
476.2	0.17409232		1066.19	0.02825345		1656.2	0.01687534		2246.2	0.02592958		2836.19	-0.00168304		3426.18	-0.00594855		4016.18	0.00798683
476.4	0.17426912		1066.39	0.02764524		1656.4	0.0171965		2246.4	0.02561498		2836.39	-0.00178495		3426.38	-0.00613534		4016.38	0.00729083
476.6	0.17451463		1066.59	0.02827541		1656.6	0.01735798		2246.6	0.02626895		2836.59	-0.00165653		3426.58	-0.00601759		4016.58	0.00757337
476.8	0.17431139		1066.79	0.02667729		1656.8	0.01811269		2246.8	0.02592048		2836.79	-0.00177633		3426.78	-0.00560599		4016.78	0.0078089
477	0.17466906		1066.99	0.02677931		1657	0.01834666		2247	0.02627335		2836.99	-0.00146223		3426.98	-0.00466205		4016.98	0.00703504
477.2	0.17534876		1067.19	0.02730759		1657.2	0.01790076		2247.2	0.02586256		2837.19	-0.00093347		3427.18	-0.00430808		4017.18	0.00644278
477.4	0.17518033		1067.39	0.02785067		1657.4	0.01787471		2247.4	0.02596166		2837.39	-0.00084571		3427.38	-0.00345075		4017.38	0.00592651
477.6	0.17436789		1067.59	0.02799338		1657.6	0.01697197		2247.6	0.02594865		2837.59	0.00014181		3427.58	-0.00415914		4017.58	0.00560546
477.8	0.17356285		1067.79	0.02864856		1657.8	0.01738768		2247.8	0.02613274		2837.79	0.00033647		3427.78	-0.00414322		4017.78	0.00588724
478	0.17215409		1067.99	0.02767558		1658	0.01681796		2248	0.02641954		2837.99	0.00041339		3427.98	-0.00406414		4017.98	0.00583767
478.2	0.17114835		1068.19	0.02725241		1658.2	0.01708335		2248.2	0.02574623		2838.19	0.00079477		3428.18	-0.00410188		4018.18	0.00740778
478.4	0.17021625		1068.39	0.02757101		1658.4	0.0176693		2248.4	0.02510789		2838.39	0.00054667		3428.38	-0.00491723		4018.38	0.00795974
478.6	0.17016662		1068.59	0.02703885		1658.6	0.0174832		2248.6	0.02449901		2838.59	0.00177734		3428.58	-0.0050519		4018.58	0.00832231
478.8	0.16991482		1068.79	0.0276146		1658.8	0.01756645		2248.8	0.02422552		2838.79	0.00315182		3428.78	-0.00600316		4018.78	0.00685995
479	0.1694803		1068.99	0.02797587		1659	0.0173495		2249	0.02369787		2838.99	0.00260788		3428.98	-0.00606045		4018.98	0.0070696
479.2	0.1695095		1069.19	0.02866264		1659.2	0.01744135		2249.2	0.02369801		2839.19	0.00354742		3429.18	-0.0067033		4019.18	0.00674564
479.4	0.16950699		1069.39	0.02800387		1659.4	0.0177096		2249.4	0.02291008		2839.39	0.00394442		3429.38	-0.00673529		4019.38	0.00688756
479.6	0.1700412		1069.59	0.02813634		1659.6	0.01747014		2249.6	0.02248751		2839.59	0.00324451		3429.58	-0.00713028		4019.58	0.00698568
479.8	0.16976688		1069.79	0.02848932		1659.8	0.01709882		2249.8	0.02288019		2839.79	0.0042487		3429.78	-0.0071729		4019.78	0.00780715
480	0.16966383		1069.99	0.02789009		1660	0.01741421		2250	0.02332851		2839.99	0.00452157		3429.98	-0.00702921		4019.98	0.00763108
480.2	0.16912078		1070.19	0.02914537		1660.2	0.01737085		2250.2	0.02296667		2840.19	0.00391868		3430.18	-0.00796066		4020.18	0.00764497
480.4	0.16873102		1070.39	0.02909789		1660.4	0.01790193		2250.4	0.02288997		2840.39	0.00334352		3430.38	-0.00719369		4020.38	0.00726336
480.6	0.16853892		1070.59	0.02881138		1660.6	0.01830417		2250.6	0.02344785		2840.59	0.00294493		3430.58	-0.00650425		4020.58	0.00805562
480.8	0.16864279		1070.79	0.02797269		1660.8	0.01937908		2250.8	0.02315395		2840.79	0.00309531		3430.78	-0.00614207		4020.78	0.00749611
481	0.16888715		1070.99	0.02881051		1661	0.01955941		2251	0.02301404		2840.99	0.00323121		3430.98	-0.00646201		4020.98	0.00649899
481.2	0.16865599		1071.19	0.02898331		1661.2	0.01952474		2251.2	0.02226023		2841.19	0.00334249		3431.18	-0.00622212		4021.18	0.00688925
481.4	0.16840767		1071.39	0.02921196		1661.4	0.02001713		2251.4	0.02375819		2841.39	0.00364772		3431.38	-0.00688015		4021.38	0.00637714
481.6	0.16809343		1071.59	0.02843197		1661.6	0.0189951		2251.6	0.023985		2841.59	0.00401971		3431.58	-0.00771573		4021.58	0.00684077
481.8	0.16833781		1071.79	0.02777623		1661.8	0.01871338		2251.8	0.02433977		2841.79	0.00367271		3431.78	-0.00758948		4021.78	0.00717967
482	0.16841382		1071.99	0.02691647		1662	0.01876255		2252	0.02383137		2841.99	0.00222038		3431.98	-0.00809495		4021.98	0.00677482
482.2	0.1681289		1072.19	0.02678049		1662.2	0.01996986		2252.2	0.02359168		2842.19	0.00206529		3432.18	-0.00823326		4022.18	0.0075754
482.4	0.16823798		1072.39	0.02680476		1662.4	0.01950384		2252.4	0.0234597		2842.39	0.00141346		3432.38	-0.00786682		4022.38	0.00685617
482.6	0.16858973		1072.59	0.02629761		1662.6	0.0188894		2252.6	0.02319415		2842.59	0.00169886		3432.58	-0.00735689		4022.58	0.00664287
482.8	0.16844102		1072.79	0.02601609		1662.8	0.01894296		2252.8	0.02407567		2842.79	0.00132308		3432.78	-0.00712859		4022.78	0.00653429
483	0.1676669		1072.99	0.02533591		1663	0.01797162		2253	0.024091		2842.99	-0.00103098		3432.98	-0.00649073		4022.98	0.00689281
483.2	0.16793539		1073.19	0.02454083		1663.2	0.0176519		2253.2	0.02417839		2843.19	-0.00163643		3433.18	-0.00603193		4023.18	0.00771321
483.4	0.16790026		1073.39	0.02480842		1663.4	0.01663873		2253.4	0.02318254		2843.39	-0.00174104		3433.38	-0.00548981		4023.38	0.0075464
483.6	0.1675996		1073.59	0.02405958		1663.6	0.01628496		2253.6	0.02331379		2843.59	-0.00229251		3433.58	-0.00578898		4023.58	0.00821883
483.8	0.16751051		1073.79	0.02416498		1663.8	0.0156799		2253.8	0.02310134		2843.79	-0.00268997		3433.78	-0.00505293		4023.78	0.00772143
484	0.16741153		1073.99	0.02412728		1664	0.01497737		2254	0.02292271		2843.99	-0.00333385		3433.98	-0.00521527		4023.98	0.00830566
484.2	0.16709638		1074.19	0.0255011		1664.2	0.01417233		2254.2	0.02283302		2844.19	-0.00349664		3434.18	-0.00560381		4024.18	0.00881398
484.4	0.16752412		1074.39	0.02632095		1664.4	0.01446605		2254.4	0.02316582		2844.39	-0.00338344		3434.38	-0.00488707		4024.38	0.00964306
484.6	0.16799801		1074.59	0.0260982		1664.6	0.01483982		2254.6	0.02297239		2844.59	-0.00428985		3434.58	-0.00454668		4024.58	0.00969841
484.8	0.16745665		1074.79	0.02682471		1664.8	0.01489588		2254.8	0.02258754		2844.79	-0.00360704		3434.78	-0.00554854		4024.78	0.00909461
485	0.16729615		1074.99	0.02771827		1665	0.01548901		2255	0.02315256		2844.99	-0.0027939		3434.98	-0.0060898		4024.98	0.00895772
485.2	0.16671859		1075.19	0.02790884		1665.2	0.01540113		2255.2	0.0243051		2845.19	-0.00239032		3435.18	-0.00629406		4025.18	0.00898315
485.4	0.16774143		1075.39	0.02873499		1665.4	0.01480564		2255.4	0.02554385		2845.39	-0.00148643		3435.38	-0.00780893		4025.38	0.00803927
485.6	0.16720844		1075.59	0.02892459		1665.6	0.01462281		2255.6	0.02546263		2845.59	-0.00141861		3435.58	-0.00733477		4025.58	0.0081902
485.8	0.16770904		1075.79	0.02874801		1665.8	0.01452567		2255.8	0.0247436		2845.79	-0.001398		3435.78	-0.00738625		4025.78	0.0086858
486	0.16730088		1075.99	0.02899709		1666	0.0149919		2256	0.0245134		2845.99	-0.00139954		3435.98	-0.00786061		4025.98	0.00828101
486.2	0.16575581		1076.19	0.02876124		1666.2	0.01566739		2256.2	0.02470389		2846.19	-0.00039116		3436.18	-0.00687752		4026.18	0.00794677
486.4	0.16514875		1076.39	0.02897562		1666.4	0.01626701		2256.4	0.02394764		2846.39	0.00006687		3436.38	-0.0066052		4026.38	0.00859999
486.6	0.16464429		1076.59	0.02890107		1666.6	0.01612221		2256.6	0.02419829		2846.59	0.00017018		3436.58	-0.0063458		4026.58	0.00920338
486.8	0.16408899		1076.79	0.02785903		1666.8	0.01650669		2256.8	0.02489588		2846.79	0.00075384		3436.78	-0.00603385		4026.78	0.00886306
487	0.16305111		1076.99	0.02647302		1667	0.01592072		2257	0.02363196		2846.99	0.00006745		3436.98	-0.00648905		4026.98	0.00844349
487.2	0.16333612		1077.19	0.02570794		1667.2	0.01563025		2257.2	0.02358018		2847.19	0.00008182		3437.18	-0.00634026		4027.18	0.00851667
487.4	0.16287734		1077.39	0.02533912		1667.4	0.01541978		2257.4	0.02295222		2847.39	0.00083278		3437.38	-0.0065982		4027.38	0.00833765
487.6	0.16179977		1077.59	0.0246794		1667.6	0.01609079		2257.6	0.0233367		2847.59	0.0005032		3437.58	-0.00678375		4027.58	0.00830844
487.8	0.16225335		1077.79	0.02456409		1667.8	0.0156445		2257.8	0.02254738		2847.79	0.00006315		3437.78	-0.00711601		4027.78	0.00770295
488	0.16273518		1077.99	0.02456088		1668	0.01521649		2258	0.0222997		2847.99	0.00044419		3437.98	-0.00739995		4027.98	0.00846994
488.2	0.16251284		1078.19	0.0250392		1668.2	0.01465233		2258.2	0.02230549		2848.19	0.00078194		3438.18	-0.00720425		4028.18	0.00777656
488.4	0.16304408		1078.39	0.02531506		1668.4	0.01531336		2258.4	0.02269084		2848.39	0.00099238		3438.38	-0.00703867		4028.38	0.00753299
488.6	0.16387894		1078.59	0.02535739		1668.6	0.01482651		2258.6	0.0223011		2848.59	0.00066287		3438.58	-0.00758336		4028.58	0.00632301
488.8	0.16410095		1078.79	0.02617159		1668.8	0.01341452		2258.8	0.02360678		2848.79	0.00163887		3438.78	-0.00853804		4028.78	0.00596757
489	0.16494314		1078.99	0.02679747		1669	0.01380049		2259	0.02448011		2848.99	0.0006999		3438.98	-0.00898779		4028.98	0.00570139
489.2	0.16519125		1079.19	0.0274277		1669.2	0.01343079		2259.2	0.02554895		2849.19	0.00061453		3439.18	-0.00961698		4029.18	0.00580052
489.4	0.16554833		1079.39	0.02827236		1669.4	0.01367317		2259.4	0.02488162		2849.39	0.00057733		3439.38	-0.01042137		4029.38	0.00504535
489.6	0.16545056		1079.59	0.02779671		1669.6	0.01382922		2259.6	0.02457834		2849.59	0.00010917		3439.58	-0.00972979		4029.58	0.0052422
489.8	0.1667012		1079.79	0.02762527		1669.8	0.01369387		2259.8	0.0247817		2849.79	0.00038646		3439.78	-0.0097463		4029.78	0.00543549
490	0.16625352		1079.99	0.02757432		1670	0.01452607		2260	0.02519252		2849.99	0.00065328		3439.98	-0.0096074		4029.98	0.0054406
490.2	0.16533272		1080.19	0.02791946		1670.2	0.01501763		2260.2	0.02509853		2850.19	0.00088694		3440.18	-0.00946575		4030.18	0.00530591
490.4	0.16577668		1080.39	0.02752075		1670.4	0.01574456		2260.4	0.02426194		2850.39	0.00073255		3440.38	-0.00916875		4030.38	0.00632309
490.6	0.16458064		1080.59	0.0269036		1670.6	0.01537721		2260.6	0.02415072		2850.59	0.0007221		3440.58	-0.00841411		4030.58	0.00575689
490.8	0.16467936		1080.79	0.02599648		1670.8	0.0157317		2260.8	0.02403511		2850.79	0.00014765		3440.78	-0.00816417		4030.78	0.00586299
491	0.16357035		1080.99	0.02511807		1671	0.01526062		2261	0.02333945		2850.99	-0.00042225		3440.98	-0.00779112		4030.98	0.00706573
491.2	0.16255055		1081.19	0.02534444		1671.2	0.01491087		2261.2	0.02403571		2851.19	-0.00110266		3441.18	-0.00663969		4031.18	0.0069365
491.4	0.1614231		1081.39	0.02542706		1671.4	0.01493915		2261.4	0.02336795		2851.39	-0.00137828		3441.38	-0.00655927		4031.38	0.00671597
491.6	0.1603447		1081.59	0.02618132		1671.6	0.01527112		2261.6	0.02284147		2851.59	-0.0017322		3441.58	-0.00570165		4031.58	0.00615457
491.8	0.16036478		1081.79	0.02522205		1671.8	0.01530778		2261.8	0.02167805		2851.79	-0.00224976		3441.78	-0.00619732		4031.78	0.00514907
492	0.16013429		1081.99	0.02533133		1672	0.01504913		2262	0.02157509		2851.99	-0.00135255		3441.98	-0.00641756		4031.98	0.00477358
492.2	0.15985015		1082.19	0.02518659		1672.2	0.01460726		2262.2	0.02210448		2852.19	-0.00154073		3442.18	-0.00672525		4032.18	0.00524042
492.4	0.16101042		1082.39	0.02586749		1672.4	0.01548622		2262.4	0.02282914		2852.39	-0.00172703		3442.38	-0.00708901		4032.38	0.00550207
492.6	0.16154529		1082.59	0.02671521		1672.6	0.01537714		2262.6	0.02230887		2852.59	-0.00249361		3442.58	-0.00775433		4032.58	0.00542454
492.8	0.16186985		1082.79	0.02618379		1672.8	0.01421413		2262.8	0.02233916		2852.79	-0.00195		3442.78	-0.00842372		4032.78	0.00561806
493	0.1627073		1082.99	0.02661715		1673	0.01444563		2263	0.02264693		2852.99	-0.00225744		3442.98	-0.00874655		4032.98	0.00529572
493.2	0.16312368		1083.19	0.02720824		1673.2	0.01476028		2263.2	0.023214		2853.19	-0.00093146		3443.18	-0.00901336		4033.18	0.00559825
493.4	0.1637686		1083.39	0.02775194		1673.4	0.01567365		2263.4	0.02267718		2853.39	-0.00074786		3443.38	-0.01018464		4033.38	0.00506701
493.6	0.1645559		1083.59	0.027745		1673.6	0.01504371		2263.6	0.02340397		2853.59	-0.00001163		3443.58	-0.00954815		4033.58	0.0055871
493.8	0.165214		1083.79	0.02780871		1673.8	0.01589067		2263.8	0.0239791		2853.79	0.00022539		3443.78	-0.00925565		4033.78	0.00583449
494	0.16600305		1083.99	0.0275936		1674	0.01572661		2264	0.02417287		2853.99	0.00094305		3443.98	-0.00966432		4033.98	0.00621911
494.2	0.1660562		1084.19	0.02695889		1674.2	0.01515965		2264.2	0.0242998		2854.19	0.00156337		3444.18	-0.00916957		4034.18	0.00630746
494.4	0.16603139		1084.39	0.02591164		1674.4	0.01480901		2264.4	0.02445558		2854.39	0.00003202		3444.38	-0.00830366		4034.38	0.00627664
494.6	0.16542917		1084.59	0.02535224		1674.6	0.01393383		2264.6	0.02534264		2854.59	-0.00060763		3444.58	-0.00820086		4034.58	0.00617036
494.8	0.16501028		1084.79	0.02494282		1674.8	0.01360467		2264.8	0.0254567		2854.79	-0.00148267		3444.78	-0.00751566		4034.78	0.00664206
495	0.16400436		1084.99	0.02458406		1675	0.01386919		2265	0.02567581		2854.99	-0.00161462		3444.98	-0.00674483		4034.98	0.00646994
495.2	0.16311543		1085.19	0.02458217		1675.2	0.01364906		2265.2	0.02514997		2855.19	-0.0024303		3445.18	-0.00657068		4035.18	0.00550788
495.4	0.16308769		1085.39	0.02396944		1675.4	0.0139605		2265.4	0.023919		2855.39	-0.00280198		3445.38	-0.00611939		4035.38	0.00582086
495.6	0.16264147		1085.59	0.02393931		1675.6	0.01455694		2265.6	0.02407245		2855.59	-0.00243695		3445.58	-0.00537373		4035.58	0.00593247
495.8	0.16242225		1085.79	0.02266598		1675.8	0.01508919		2265.8	0.02406719		2855.79	-0.00243066		3445.78	-0.00613067		4035.78	0.00580026
496	0.16246284		1085.99	0.02264249		1676	0.01517628		2266	0.024675		2855.99	-0.00175899		3445.98	-0.00680044		4035.98	0.00643219
496.2	0.16228269		1086.19	0.02234502		1676.2	0.01530884		2266.2	0.02407333		2856.19	-0.00221634		3446.18	-0.00668807		4036.18	0.00766822
496.4	0.16148779		1086.39	0.02322573		1676.4	0.01594335		2266.4	0.02335148		2856.39	-0.0018495		3446.38	-0.00621609		4036.38	0.00736809
496.6	0.16057959		1086.59	0.02238862		1676.6	0.0149507		2266.6	0.02304681		2856.59	-0.00106649		3446.58	-0.00594888		4036.58	0.00714233
496.8	0.16105543		1086.79	0.02262912		1676.8	0.01416906		2266.8	0.02192454		2856.79	-0.00027957		3446.78	-0.00666737		4036.78	0.00734988
497	0.16013721		1086.99	0.02312105		1677	0.01425929		2267	0.02176154		2856.99	-0.00055716		3446.98	-0.0058923		4036.98	0.00713983
497.2	0.1592771		1087.19	0.02379636		1677.2	0.01480417		2267.2	0.02104214		2857.19	0.00050359		3447.18	-0.00665305		4037.18	0.00749968
497.4	0.15917162		1087.39	0.02426171		1677.4	0.01489713		2267.4	0.02009068		2857.39	0.00122018		3447.38	-0.00719761		4037.38	0.00757834
497.6	0.15980327		1087.59	0.02432566		1677.6	0.01424832		2267.6	0.01969098		2857.59	0.00228994		3447.58	-0.00730521		4037.58	0.00799321
497.8	0.15949641		1087.79	0.02415536		1677.8	0.01385499		2267.8	0.01880185		2857.79	0.00154819		3447.78	-0.00714898		4037.78	0.00756758
498	0.16026838		1087.99	0.02364043		1678	0.0129618		2268	0.01870078		2857.99	0.00136158		3447.98	-0.00719629		4037.98	0.00734958
498.2	0.16040024		1088.19	0.02350378		1678.2	0.01307997		2268.2	0.01897747		2858.19	0.000136		3448.18	-0.00641894		4038.18	0.00729032
498.4	0.16027349		1088.39	0.02381413		1678.4	0.01300189		2268.4	0.01893664		2858.39	-0.00160694		3448.38	-0.00727625		4038.38	0.00665706
498.6	0.16032897		1088.59	0.02374074		1678.6	0.0130375		2268.6	0.01876273		2858.59	-0.00218542		3448.58	-0.00773218		4038.58	0.00616439
498.8	0.1603591		1088.79	0.02350774		1678.8	0.01312843		2268.8	0.01751078		2858.79	-0.00284817		3448.78	-0.00770632		4038.78	0.00538036
499	0.16107554		1088.99	0.02391422		1679	0.01338383		2269	0.01774703		2858.99	-0.00358899		3448.98	-0.00778155		4038.98	0.00457389
499.2	0.16107805		1089.19	0.02364844		1679.2	0.01349553		2269.2	0.01747702		2859.19	-0.00400713		3449.18	-0.00833154		4039.18	0.00396177
499.4	0.16195232		1089.39	0.02340855		1679.4	0.01338404		2269.4	0.01811899		2859.39	-0.00438885		3449.38	-0.00894123		4039.38	0.00497044
499.6	0.16184705		1089.59	0.02367414		1679.6	0.0138852		2269.6	0.01943902		2859.59	-0.00466072		3449.58	-0.00946288		4039.58	0.00401778
499.8	0.16174703		1089.79	0.02350771		1679.8	0.01365564		2269.8	0.01996549		2859.79	-0.00464276		3449.78	-0.00993141		4039.78	0.00373496
500	0.16184096		1089.99	0.02343796		1680	0.01315579		2270	0.02046676		2859.99	-0.00486483		3449.98	-0.0102404		4039.98	0.00308053
500.2	0.16092871		1090.19	0.02374181		1680.2	0.01387636		2270.2	0.02086063		2860.19	-0.00473817		3450.18	-0.01061091		4040.18	0.00341398
500.4	0.15988847		1090.39	0.02400725		1680.4	0.01367002		2270.4	0.02148984		2860.39	-0.00440532		3450.38	-0.01011883		4040.38	0.00346229
500.6	0.15932477		1090.59	0.02315741		1680.6	0.01288028		2270.6	0.02163858		2860.59	-0.00293885		3450.58	-0.0100573		4040.58	0.00319872
500.8	0.15928976		1090.79	0.02401598		1680.8	0.01344345		2270.8	0.02093505		2860.79	-0.00309326		3450.78	-0.01008088		4040.78	0.00325961
501	0.15806167		1090.99	0.0237702		1681	0.01289486		2271	0.02161389		2860.99	-0.00184896		3450.98	-0.00988112		4040.98	0.00280397
501.2	0.15802209		1091.19	0.02332372		1681.2	0.01294873		2271.2	0.02214916		2861.19	-0.00007658		3451.18	-0.00946874		4041.18	0.00303262
501.4	0.15852998		1091.39	0.02265397		1681.4	0.01241238		2271.4	0.0214067		2861.39	0.00019531		3451.38	-0.00952502		4041.38	0.00298805
501.6	0.15916473		1091.59	0.02263137		1681.6	0.01309881		2271.6	0.02071673		2861.59	0.00013011		3451.58	-0.00929281		4041.58	0.00314874
501.8	0.15869657		1091.79	0.02228932		1681.8	0.01312364		2271.8	0.02041471		2861.79	-0.00062096		3451.78	-0.00846254		4041.78	0.00323296
502	0.15961964		1091.99	0.02204002		1682	0.01437802		2272	0.02061844		2861.99	-0.00008809		3451.98	-0.00757994		4041.98	0.00448568
502.2	0.15914182		1092.19	0.02233327		1682.2	0.01471354		2272.2	0.02068136		2862.19	-0.00038946		3452.18	-0.00708983		4042.18	0.00471045
502.4	0.15876005		1092.39	0.02164835		1682.4	0.01475354		2272.4	0.01998199		2862.39	0.00006683		3452.38	-0.00716007		4042.38	0.0049053
502.6	0.15883483		1092.59	0.02164292		1682.6	0.01495595		2272.6	0.02012042		2862.59	-0.00079731		3452.58	-0.0074078		4042.58	0.00553289
502.8	0.15916004		1092.79	0.02176135		1682.8	0.01534871		2272.8	0.02013922		2862.79	-0.00093505		3452.78	-0.00718721		4042.78	0.00509218
503	0.15938648		1092.99	0.02296519		1683	0.01558312		2273	0.0209769		2862.99	-0.00101368		3452.98	-0.0066981		4042.98	0.00555988
503.2	0.15915301		1093.19	0.02301966		1683.2	0.01583058		2273.2	0.02066714		2863.19	-0.0018402		3453.18	-0.00689136		4043.18	0.00610308
503.4	0.15948362		1093.39	0.02288516		1683.4	0.01567773		2273.4	0.02107336		2863.39	-0.00237395		3453.38	-0.006885		4043.38	0.00726152
503.6	0.15941738		1093.59	0.02353506		1683.6	0.01614689		2273.6	0.02140695		2863.59	-0.00251631		3453.58	-0.0064487		4043.58	0.00632525
503.8	0.15968423		1093.79	0.0240099		1683.8	0.01573326		2273.8	0.02171568		2863.79	-0.00250364		3453.78	-0.00660736		4043.78	0.00707979
504	0.15978627		1093.99	0.02486955		1684	0.01563555		2274	0.0214524		2863.99	-0.00223214		3453.98	-0.00728013		4043.98	0.0074508
504.2	0.15989833		1094.19	0.02544133		1684.2	0.01584858		2274.2	0.0225799		2864.19	-0.00175989		3454.18	-0.00784456		4044.18	0.00838463
504.4	0.15936818		1094.39	0.0255643		1684.4	0.01502891		2274.4	0.02201841		2864.39	-0.00094271		3454.38	-0.00691821		4044.38	0.00890542
504.6	0.15964795		1094.59	0.02608175		1684.6	0.01499119		2274.6	0.02216453		2864.59	-0.00003463		3454.58	-0.00716615		4044.58	0.00869169
504.8	0.16057714		1094.79	0.02701792		1684.8	0.01485082		2274.8	0.02213931		2864.79	0.00004416		3454.78	-0.00759977		4044.78	0.00875162
505	0.16050525		1094.99	0.0272105		1685	0.01360962		2275	0.02265152		2864.99	0.00018664		3454.98	-0.00757169		4044.98	0.00879574
505.2	0.16108529		1095.19	0.02665203		1685.2	0.01320977		2275.2	0.02250951		2865.19	0.0000369		3455.18	-0.00666355		4045.18	0.00878808
505.4	0.1607151		1095.39	0.02640525		1685.4	0.01300157		2275.4	0.02071664		2865.39	-0.00092272		3455.38	-0.00704619		4045.38	0.00830806
505.6	0.16060836		1095.59	0.02642092		1685.6	0.01389303		2275.6	0.02059269		2865.59	-0.00177634		3455.58	-0.0069649		4045.58	0.00884653
505.8	0.15979482		1095.79	0.02687878		1685.8	0.01317153		2275.8	0.02109442		2865.79	-0.00177127		3455.78	-0.00722188		4045.78	0.00840526
506	0.15946779		1095.99	0.02586437		1686	0.01327309		2276	0.0193603		2865.99	-0.00187359		3455.98	-0.00660656		4045.98	0.00849871
506.2	0.15825761		1096.19	0.02457172		1686.2	0.01271534		2276.2	0.01956107		2866.19	-0.00191625		3456.18	-0.00660091		4046.18	0.0079297
506.4	0.15801354		1096.39	0.02379764		1686.4	0.01335022		2276.4	0.01975627		2866.39	-0.00322428		3456.38	-0.00673342		4046.38	0.00743608
506.6	0.15793213		1096.59	0.02349848		1686.6	0.01359794		2276.6	0.01927653		2866.59	-0.00383868		3456.58	-0.00656217		4046.58	0.00728568
506.8	0.15717793		1096.79	0.02332602		1686.8	0.01339868		2276.8	0.01872902		2866.79	-0.00403939		3456.78	-0.00628361		4046.78	0.00690087
507	0.15647303		1096.99	0.023313		1687	0.01386866		2277	0.01814498		2866.99	-0.00400291		3456.98	-0.00583622		4046.98	0.00803323
507.2	0.15608302		1097.19	0.02239829		1687.2	0.01411734		2277.2	0.0176885		2867.19	-0.00470143		3457.18	-0.00565208		4047.18	0.0081218
507.4	0.15637659		1097.39	0.0224057		1687.4	0.01415991		2277.4	0.01832459		2867.39	-0.00422483		3457.38	-0.00596153		4047.38	0.00785562
507.6	0.15671394		1097.59	0.02288084		1687.6	0.01421985		2277.6	0.01866854		2867.59	-0.00314627		3457.58	-0.00663158		4047.58	0.00697985
507.8	0.15640144		1097.79	0.02344736		1687.8	0.01387515		2277.8	0.01956109		2867.79	-0.00213622		3457.78	-0.00700056		4047.78	0.00748265
508	0.15699742		1097.99	0.02366195		1688	0.01386495		2278	0.02028239		2867.99	-0.00065765		3457.98	-0.00713605		4047.98	0.00784149
508.2	0.15739418		1098.19	0.02283325		1688.2	0.01385792		2278.2	0.02116069		2868.19	-0.0009577		3458.18	-0.00722545		4048.18	0.00735683
508.4	0.15824389		1098.39	0.02268819		1688.4	0.01388908		2278.4	0.02117789		2868.39	-0.00017859		3458.38	-0.00726375		4048.38	0.00724747
508.6	0.15847965		1098.59	0.02371433		1688.6	0.0140235		2278.6	0.02225447		2868.59	-0.00018197		3458.58	-0.00839233		4048.58	0.00683727
508.8	0.15916705		1098.79	0.0241851		1688.8	0.0125977		2278.8	0.02322296		2868.79	-0.00041802		3458.78	-0.0082975		4048.78	0.00663695
509	0.15895338		1098.99	0.02388017		1689	0.01237188		2279	0.0241166		2868.99	-0.00089504		3458.98	-0.00833671		4048.98	0.00695931
509.2	0.1592143		1099.19	0.0234935		1689.2	0.01249313		2279.2	0.02469316		2869.19	-0.00089915		3459.18	-0.00856487		4049.18	0.0065815
509.4	0.15838871		1099.39	0.02381699		1689.4	0.01286051		2279.4	0.02405426		2869.39	-0.00109258		3459.38	-0.00870464		4049.38	0.00602045
509.6	0.15841651		1099.59	0.02425004		1689.6	0.01316367		2279.6	0.0243794		2869.59	-0.00139851		3459.58	-0.00883124		4049.58	0.00599771
509.8	0.15820647		1099.79	0.02435821		1689.8	0.01239956		2279.8	0.02377838		2869.79	-0.00131739		3459.78	-0.00864327		4049.78	0.00520092
510	0.15816711		1099.99	0.02312513		1690	0.01242203		2280	0.02323665		2869.99	-0.0012267		3459.98	-0.00824592		4049.98	0.00492975
510.2	0.15748515		1100.19	0.02233281		1690.2	0.01339237		2280.2	0.02415678		2870.19	-0.00090097		3460.18	-0.00825634		4050.18	0.0040418
510.4	0.15686384		1100.39	0.02252309		1690.4	0.0136327		2280.4	0.02389462		2870.39	-0.00221824		3460.38	-0.00791656		4050.38	0.00348788
510.6	0.15607585		1100.59	0.02145898		1690.6	0.01364255		2280.6	0.02277391		2870.59	-0.00171515		3460.58	-0.00752013		4050.58	0.00405574
510.8	0.15507906		1100.79	0.02118835		1690.8	0.01397165		2280.8	0.0223189		2870.79	-0.00154751		3460.78	-0.00842266		4050.78	0.00482613
511	0.15520653		1100.99	0.02173389		1691	0.01497645		2281	0.02243093		2870.99	-0.0016151		3460.98	-0.00814487		4050.98	0.00555958
511.2	0.15571984		1101.19	0.02165781		1691.2	0.01508575		2281.2	0.02231866		2871.19	-0.00045884		3461.18	-0.00827179		4051.18	0.0054643
511.4	0.15646591		1101.39	0.02205488		1691.4	0.0155946		2281.4	0.02257292		2871.39	0.00027741		3461.38	-0.00919743		4051.38	0.00509983
511.6	0.15638206		1101.59	0.02221402		1691.6	0.01622694		2281.6	0.02285253		2871.59	0.00173379		3461.58	-0.0085277		4051.58	0.0052415
511.8	0.15609554		1101.79	0.02290224		1691.8	0.0161387		2281.8	0.02258362		2871.79	0.00241908		3461.78	-0.00787924		4051.78	0.00605231
512	0.15648952		1101.99	0.02298091		1692	0.01636595		2282	0.02211032		2871.99	0.00195028		3461.98	-0.00799796		4051.98	0.00610986
512.2	0.15676614		1102.19	0.02314223		1692.2	0.01670781		2282.2	0.02161336		2872.19	0.00026046		3462.18	-0.00813841		4052.18	0.00531468
512.4	0.15794144		1102.39	0.02417461		1692.4	0.01637006		2282.4	0.02214413		2872.39	0.00050481		3462.38	-0.00886096		4052.38	0.00537113
512.6	0.15672935		1102.59	0.02466403		1692.6	0.01585355		2282.6	0.02259684		2872.59	0.00023792		3462.58	-0.00931263		4052.58	0.00518251
512.8	0.15678309		1102.79	0.02469959		1692.8	0.0147592		2282.8	0.02359913		2872.79	-0.00037781		3462.78	-0.00941542		4052.78	0.00524336
513	0.15675594		1102.99	0.02492341		1693	0.0156783		2283	0.02337834		2872.99	-0.00038879		3462.98	-0.00936449		4052.98	0.00591944
513.2	0.15722839		1103.19	0.02523048		1693.2	0.01490688		2283.2	0.02244121		2873.19	-0.00061783		3463.18	-0.01011973		4053.18	0.00564203
513.4	0.15712801		1103.39	0.02587572		1693.4	0.01508861		2283.4	0.02168811		2873.39	-0.00040491		3463.38	-0.00968401		4053.38	0.00524029
513.6	0.15696334		1103.59	0.02611445		1693.6	0.01487883		2283.6	0.02158433		2873.59	-0.00091806		3463.58	-0.0097229		4053.58	0.00486343
513.8	0.15651714		1103.79	0.02535341		1693.8	0.01426623		2283.8	0.02121781		2873.79	-0.0007819		3463.78	-0.00949247		4053.78	0.00367241
514	0.15679757		1103.99	0.02507546		1694	0.01394365		2284	0.02141021		2873.99	-0.00028587		3463.98	-0.00917537		4053.98	0.00263244
514.2	0.15635228		1104.19	0.0242985		1694.2	0.01377132		2284.2	0.02121275		2874.19	-0.00071542		3464.18	-0.00912076		4054.18	0.00274059
514.4	0.15552499		1104.39	0.02400386		1694.4	0.01289918		2284.4	0.02051887		2874.39	-0.0005076		3464.38	-0.00955092		4054.38	0.00337535
514.6	0.15451301		1104.59	0.02309048		1694.6	0.01319333		2284.6	0.01998663		2874.59	-0.00013179		3464.58	-0.00992179		4054.58	0.00354913
514.8	0.15388427		1104.79	0.02359167		1694.8	0.01255161		2284.8	0.01970173		2874.79	-0.00000073		3464.78	-0.01027035		4054.78	0.0038513
515	0.15408493		1104.99	0.0239363		1695	0.0131943		2285	0.02008117		2874.99	-0.00014897		3464.98	-0.00984824		4054.98	0.00421086
515.2	0.15442594		1105.19	0.0229067		1695.2	0.01299276		2285.2	0.01976771		2875.19	0.00037679		3465.18	-0.00963284		4055.18	0.00412758
515.4	0.15478536		1105.39	0.0222497		1695.4	0.01333684		2285.4	0.02029802		2875.39	-0.00009307		3465.38	-0.00936055		4055.38	0.00433748
515.6	0.15440047		1105.59	0.02225578		1695.6	0.01387451		2285.6	0.01970425		2875.59	-0.00063686		3465.58	-0.00842362		4055.58	0.0055069
515.8	0.15457087		1105.79	0.02199853		1695.8	0.01295846		2285.8	0.01891601		2875.79	-0.00132284		3465.78	-0.008416		4055.78	0.00553954
516	0.15439461		1105.99	0.02161438		1696	0.01281227		2286	0.01925166		2875.99	-0.00220575		3465.98	-0.00910597		4055.98	0.00480238
516.2	0.15524469		1106.19	0.02202209		1696.2	0.01348648		2286.2	0.01964463		2876.19	-0.00214713		3466.18	-0.00914825		4056.18	0.00428417
516.4	0.15540281		1106.39	0.02205024		1696.4	0.01344929		2286.4	0.02061666		2876.39	-0.00213455		3466.38	-0.009535		4056.38	0.00524376
516.6	0.15415829		1106.59	0.02212916		1696.6	0.01337617		2286.6	0.02025981		2876.59	-0.00187114		3466.58	-0.0093953		4056.58	0.00511825
516.8	0.15457945		1106.79	0.02324277		1696.8	0.01374863		2286.8	0.02070403		2876.79	-0.0019933		3466.78	-0.01017787		4056.78	0.00538854
517	0.15424495		1106.99	0.02432007		1697	0.01416358		2287	0.02014776		2876.99	-0.00148126		3466.98	-0.0107174		4056.98	0.00589863
517.2	0.15434866		1107.19	0.02507532		1697.2	0.01484022		2287.2	0.01890053		2877.19	-0.00113668		3467.18	-0.01236061		4057.18	0.00621227
517.4	0.15396006		1107.39	0.02545858		1697.4	0.01497985		2287.4	0.02007929		2877.39	-0.00060973		3467.38	-0.01112421		4057.38	0.00596106
517.6	0.1537757		1107.59	0.02556751		1697.6	0.01424626		2287.6	0.01992042		2877.59	-0.00017422		3467.58	-0.0106276		4057.58	0.00582417
517.8	0.15405386		1107.79	0.0254121		1697.8	0.01398505		2287.8	0.01935341		2877.79	0.00093376		3467.78	-0.0104498		4057.78	0.00542636
518	0.15471908		1107.99	0.02525018		1698	0.0134815		2288	0.01884898		2877.99	0.00167532		3467.98	-0.01092786		4057.98	0.00497187
518.2	0.15443288		1108.19	0.0246611		1698.2	0.01384676		2288.2	0.0188253		2878.19	0.00184632		3468.18	-0.01154206		4058.18	0.00508267
518.4	0.15313439		1108.39	0.02438043		1698.4	0.0129584		2288.4	0.01855121		2878.39	0.00210185		3468.38	-0.01149653		4058.38	0.00514497
518.6	0.15230268		1108.59	0.02500754		1698.6	0.01214162		2288.6	0.01870384		2878.59	0.00216645		3468.58	-0.011216		4058.58	0.00453965
518.8	0.15254397		1108.79	0.02558971		1698.8	0.01155109		2288.8	0.01925089		2878.79	0.00195089		3468.78	-0.01082219		4058.78	0.00452585
519	0.1539317		1108.99	0.02590208		1699	0.01171587		2289	0.01998376		2878.99	0.00176443		3468.98	-0.01029898		4058.98	0.003723
519.2	0.1542207		1109.19	0.02527853		1699.2	0.01139389		2289.2	0.02043792		2879.19	0.00132348		3469.18	-0.010371		4059.18	0.00315549
519.4	0.15477795		1109.39	0.02519149		1699.4	0.0121516		2289.4	0.02079733		2879.39	0.00045801		3469.38	-0.01089239		4059.38	0.00330953
519.6	0.15539637		1109.59	0.02536929		1699.6	0.01243413		2289.6	0.02101108		2879.59	-0.00048294		3469.58	-0.01201535		4059.58	0.00335452
519.8	0.15596633		1109.79	0.0252655		1699.8	0.01159405		2289.8	0.02137367		2879.79	-0.00033527		3469.78	-0.01257511		4059.78	0.00259865
520	0.15577044		1109.99	0.02450721		1700	0.01208535		2290	0.02188413		2879.99	-0.00058601		3469.98	-0.01394397		4059.98	0.00259127
520.2	0.15607153		1110.19	0.0249756		1700.2	0.01257051		2290.2	0.02221845		2880.19	-0.00114992		3470.18	-0.0143284		4060.18	0.00342448
520.4	0.1559014		1110.39	0.02492087		1700.4	0.01212982		2290.4	0.02190179		2880.39	-0.00205335		3470.38	-0.01434336		4060.38	0.00408426
520.6	0.15579586		1110.59	0.02497395		1700.6	0.01209975		2290.6	0.02181726		2880.59	-0.00201089		3470.58	-0.01408687		4060.58	0.00363165
520.8	0.1561001		1110.79	0.02531039		1700.8	0.01212293		2290.8	0.02162146		2880.79	-0.00249161		3470.78	-0.01405838		4060.78	0.00418286
521	0.15570688		1110.99	0.02487166		1701	0.01253792		2291	0.02094951		2880.99	-0.00244043		3470.98	-0.01338205		4060.98	0.00528567
521.2	0.15575524		1111.19	0.02457456		1701.2	0.01296648		2291.2	0.02038194		2881.19	-0.00177941		3471.18	-0.01238316		4061.18	0.00670893
521.4	0.15594486		1111.39	0.02376651		1701.4	0.0125185		2291.4	0.0198266		2881.39	-0.00179283		3471.38	-0.01073205		4061.38	0.00681723
521.6	0.15610714		1111.59	0.02282055		1701.6	0.0132918		2291.6	0.01919572		2881.59	-0.00161525		3471.58	-0.0105758		4061.58	0.00715862
521.8	0.1559068		1111.79	0.02149718		1701.8	0.01430731		2291.8	0.01915039		2881.79	-0.00122835		3471.78	-0.01022853		4061.78	0.00681673
522	0.15604134		1111.99	0.02056569		1702	0.01429752		2292	0.01982191		2881.99	-0.00117998		3471.98	-0.0097582		4061.98	0.00673557
522.2	0.15533536		1112.19	0.01999422		1702.2	0.01390538		2292.2	0.02055278		2882.19	-0.00150296		3472.18	-0.00868284		4062.18	0.00693476
522.4	0.15430509		1112.39	0.01989048		1702.4	0.01275275		2292.4	0.02123638		2882.39	-0.00122926		3472.38	-0.00769581		4062.38	0.00652225
522.6	0.15505379		1112.59	0.02001231		1702.6	0.01253316		2292.6	0.0212361		2882.59	-0.00106168		3472.58	-0.00781194		4062.58	0.00582127
522.8	0.15508413		1112.79	0.01991836		1702.8	0.01293786		2292.8	0.0215863		2882.79	-0.00184266		3472.78	-0.0083455		4062.78	0.00510521
523	0.15510854		1112.99	0.02067751		1703	0.01315884		2293	0.02189174		2882.99	-0.00172364		3472.98	-0.00964826		4062.98	0.0036742
523.2	0.15464867		1113.19	0.0203877		1703.2	0.01301106		2293.2	0.02235474		2883.19	-0.0024887		3473.18	-0.01030839		4063.18	0.00212235
523.4	0.1554858		1113.39	0.02093676		1703.4	0.01330481		2293.4	0.02309226		2883.39	-0.00395128		3473.38	-0.01091215		4063.38	0.0021647
523.6	0.15518894		1113.59	0.02197243		1703.6	0.01260552		2293.6	0.02292622		2883.59	-0.00462424		3473.58	-0.01209066		4063.58	0.00239285
523.8	0.15429388		1113.79	0.02219044		1703.8	0.01256177		2293.8	0.02280272		2883.79	-0.00519351		3473.78	-0.01232641		4063.78	0.00194521
524	0.15386819		1113.99	0.02206156		1704	0.01229587		2294	0.02316447		2883.99	-0.0057179		3473.98	-0.01325517		4063.98	0.0029476
524.2	0.15339311		1114.19	0.02382049		1704.2	0.01177168		2294.2	0.02266204		2884.19	-0.00631944		3474.18	-0.01337101		4064.18	0.00330008
524.4	0.15344232		1114.39	0.02437449		1704.4	0.0126977		2294.4	0.02160767		2884.39	-0.00601309		3474.38	-0.01281252		4064.38	0.00274961
524.6	0.15362811		1114.59	0.02379639		1704.6	0.01261512		2294.6	0.02135467		2884.59	-0.0057784		3474.58	-0.01274562		4064.58	0.00264407
524.8	0.15371423		1114.79	0.02408746		1704.8	0.01307641		2294.8	0.02020044		2884.79	-0.00556336		3474.78	-0.01262753		4064.78	0.00298993
525	0.15403186		1114.99	0.0242522		1705	0.01366149		2295	0.02001344		2884.99	-0.00515537		3474.98	-0.01293182		4064.98	0.0041362
525.2	0.15384614		1115.19	0.02540076		1705.2	0.01344596		2295.2	0.01931485		2885.19	-0.00430261		3475.18	-0.01274537		4065.18	0.00456905
525.4	0.15347158		1115.39	0.0250443		1705.4	0.01459095		2295.4	0.01882334		2885.39	-0.00415638		3475.38	-0.01379907		4065.38	0.00439251
525.6	0.1533709		1115.59	0.02447701		1705.6	0.01537835		2295.6	0.0188007		2885.59	-0.00425021		3475.58	-0.01450666		4065.58	0.00438642
525.8	0.1531279		1115.79	0.02358769		1705.8	0.01546879		2295.8	0.01881117		2885.79	-0.00379473		3475.78	-0.01427187		4065.78	0.00540198
526	0.15296606		1115.99	0.02311758		1706	0.01454322		2296	0.01890758		2885.99	-0.00305705		3475.98	-0.01410503		4065.98	0.00605401
526.2	0.15253985		1116.19	0.0218669		1706.2	0.01512888		2296.2	0.01863804		2886.19	-0.00238001		3476.18	-0.01390444		4066.18	0.00548198
526.4	0.15267663		1116.39	0.0212846		1706.4	0.01480566		2296.4	0.01903898		2886.39	-0.00201607		3476.38	-0.01429291		4066.38	0.00498847
526.6	0.15220965		1116.59	0.02010247		1706.6	0.01446247		2296.6	0.01851908		2886.59	-0.00253006		3476.58	-0.01487598		4066.58	0.00561386
526.8	0.15126443		1116.79	0.01936719		1706.8	0.01369262		2296.8	0.01946959		2886.79	-0.00183555		3476.78	-0.01559577		4066.78	0.00506728
527	0.15063305		1116.99	0.01863893		1707	0.01337836		2297	0.01953431		2886.99	-0.00080041		3476.98	-0.01422903		4066.98	0.00389678
527.2	0.1500982		1117.19	0.01840538		1707.2	0.01271819		2297.2	0.02000922		2887.19	-0.00112661		3477.18	-0.01305838		4067.18	0.00256933
527.4	0.15019588		1117.39	0.01910372		1707.4	0.01273759		2297.4	0.01990667		2887.39	-0.00201074		3477.38	-0.01264295		4067.38	0.0028498
527.6	0.14950049		1117.59	0.0195507		1707.6	0.01269771		2297.6	0.01953072		2887.59	-0.00171925		3477.58	-0.0118605		4067.58	0.00327396
527.8	0.14922189		1117.79	0.020148		1707.8	0.01228666		2297.8	0.01979585		2887.79	-0.00161943		3477.78	-0.01109419		4067.78	0.00283776
528	0.14981494		1117.99	0.02068347		1708	0.01306548		2298	0.0197924		2887.99	-0.00115712		3477.98	-0.01117957		4067.98	0.00365025
528.2	0.14990759		1118.19	0.0218059		1708.2	0.01397512		2298.2	0.01929404		2888.19	-0.00092984		3478.18	-0.01029612		4068.18	0.0034991
528.4	0.15060239		1118.39	0.02073715		1708.4	0.01456767		2298.4	0.01960072		2888.39	-0.00092307		3478.38	-0.00954334		4068.38	0.00323241
528.6	0.15097769		1118.59	0.02060655		1708.6	0.01356085		2298.6	0.02034317		2888.59	-0.00129924		3478.58	-0.00959488		4068.58	0.00300521
528.8	0.15165193		1118.79	0.02180178		1708.8	0.01372381		2298.8	0.02074499		2888.79	-0.00189166		3478.78	-0.00926139		4068.78	0.00345563
529	0.15196832		1118.99	0.02244395		1709	0.01355506		2299	0.02058992		2888.99	-0.00173261		3478.98	-0.00988996		4068.98	0.00387286
529.2	0.15237051		1119.19	0.02297869		1709.2	0.01293805		2299.2	0.02016613		2889.19	-0.00147961		3479.18	-0.01078277		4069.18	0.00374288
529.4	0.15280991		1119.39	0.02274984		1709.4	0.01289027		2299.4	0.0198298		2889.39	-0.00240492		3479.38	-0.01130915		4069.38	0.00392003
529.6	0.15374397		1119.59	0.02303846		1709.6	0.01279976		2299.6	0.01902976		2889.59	-0.00345914		3479.58	-0.01203615		4069.58	0.0043845
529.8	0.15386705		1119.79	0.02263803		1709.8	0.01214793		2299.8	0.01854611		2889.79	-0.00325182		3479.78	-0.01193655		4069.78	0.00535336
530	0.1531562		1119.99	0.02217156		1710	0.01193422		2300	0.0182219		2889.99	-0.00317335		3479.98	-0.01221771		4069.98	0.00490018
530.2	0.15319652		1120.19	0.02192511		1710.2	0.01227794		2300.2	0.01788812		2890.19	-0.00267967		3480.18	-0.01194156		4070.18	0.00426152
530.4	0.15248978		1120.39	0.02197559		1710.4	0.01101433		2300.4	0.01804836		2890.39	-0.00365917		3480.38	-0.01232872		4070.38	0.00426444
530.6	0.15144392		1120.59	0.02156151		1710.6	0.01081539		2300.6	0.01835353		2890.59	-0.00324879		3480.58	-0.01257226		4070.58	0.00464201
530.8	0.15118785		1120.79	0.0218043		1710.8	0.01057809		2300.8	0.01846837		2890.79	-0.00214076		3480.78	-0.01246215		4070.78	0.0036031
531	0.15115526		1120.99	0.02186059		1711	0.01052166		2301	0.01773296		2890.99	-0.00275456		3480.98	-0.0123115		4070.98	0.00296016
531.2	0.15114466		1121.19	0.02247956		1711.2	0.01081171		2301.2	0.01797385		2891.19	-0.00264167		3481.18	-0.01292982		4071.18	0.00233814
531.4	0.15176545		1121.39	0.02286214		1711.4	0.0104785		2301.4	0.01742361		2891.39	-0.00256078		3481.38	-0.01241973		4071.38	0.00307121
531.6	0.15254457		1121.59	0.02312062		1711.6	0.01093931		2301.6	0.01800037		2891.59	-0.00260484		3481.58	-0.01172419		4071.58	0.0035252
531.8	0.15302497		1121.79	0.02303749		1711.8	0.01099517		2301.8	0.01811292		2891.79	-0.00289202		3481.78	-0.01213101		4071.78	0.00364551
532	0.15350652		1121.99	0.02312734		1712	0.01243803		2302	0.01946696		2891.99	-0.00272723		3481.98	-0.01207523		4071.98	0.00362503
532.2	0.15320902		1122.19	0.02320212		1712.2	0.01179017		2302.2	0.02043472		2892.19	-0.00309205		3482.18	-0.01139686		4072.18	0.00402364
532.4	0.15299139		1122.39	0.02225529		1712.4	0.0113584		2302.4	0.02098539		2892.39	-0.00360753		3482.38	-0.01209518		4072.38	0.00432356
532.6	0.15309342		1122.59	0.02271965		1712.6	0.01151828		2302.6	0.02148673		2892.59	-0.00291291		3482.58	-0.01207185		4072.58	0.00471415
532.8	0.15297495		1122.79	0.02305933		1712.8	0.01164544		2302.8	0.02052912		2892.79	-0.00282191		3482.78	-0.01205646		4072.78	0.00462597
533	0.15193651		1122.99	0.02242699		1713	0.01129166		2303	0.02041762		2892.99	-0.00249459		3482.98	-0.01252677		4072.98	0.00488699
533.2	0.15213682		1123.19	0.02285285		1713.2	0.0107285		2303.2	0.01930312		2893.19	-0.00283079		3483.18	-0.01276225		4073.18	0.0047878
533.4	0.15139553		1123.39	0.02238657		1713.4	0.01056673		2303.4	0.01963756		2893.39	-0.00370191		3483.38	-0.01289794		4073.38	0.00441145
533.6	0.15004588		1123.59	0.0219783		1713.6	0.01066592		2303.6	0.01928793		2893.59	-0.00295458		3483.58	-0.01366444		4073.58	0.00476109
533.8	0.14911915		1123.79	0.02133268		1713.8	0.01043449		2303.8	0.01868748		2893.79	-0.0024224		3483.78	-0.0135372		4073.78	0.00502341
534	0.14799541		1123.99	0.02039068		1714	0.01026381		2304	0.01891448		2893.99	-0.00277692		3483.98	-0.01403937		4073.98	0.00447123
534.2	0.14757521		1124.19	0.02053532		1714.2	0.00970564		2304.2	0.01848084		2894.19	-0.00292108		3484.18	-0.01326407		4074.18	0.00470679
534.4	0.14784059		1124.39	0.02026435		1714.4	0.00920684		2304.4	0.01906486		2894.39	-0.00402264		3484.38	-0.01387277		4074.38	0.00517787
534.6	0.14812892		1124.59	0.02072164		1714.6	0.00889991		2304.6	0.01975887		2894.59	-0.00332687		3484.58	-0.01377794		4074.58	0.00542888
534.8	0.14824287		1124.79	0.02126977		1714.8	0.00899545		2304.8	0.01985998		2894.79	-0.00311533		3484.78	-0.01352941		4074.78	0.00551094
535	0.14824611		1124.99	0.02084038		1715	0.00896475		2305	0.02112684		2894.99	-0.00408354		3484.98	-0.01360905		4074.98	0.00619996
535.2	0.14890001		1125.19	0.02091923		1715.2	0.00944503		2305.2	0.0205506		2895.19	-0.0037396		3485.18	-0.01325994		4075.18	0.00645398
535.4	0.14924338		1125.39	0.02119445		1715.4	0.00922631		2305.4	0.02110333		2895.39	-0.00357403		3485.38	-0.01333274		4075.38	0.00634435
535.6	0.14956054		1125.59	0.02095467		1715.6	0.01049082		2305.6	0.02190494		2895.59	-0.00493216		3485.58	-0.01252723		4075.58	0.00614041
535.8	0.1498727		1125.79	0.02133257		1715.8	0.01129708		2305.8	0.02242685		2895.79	-0.00502546		3485.78	-0.01244803		4075.78	0.00653923
536	0.15073057		1125.99	0.02224357		1716	0.01159923		2306	0.0230185		2895.99	-0.00521266		3485.98	-0.01216712		4075.98	0.00576858
536.2	0.15046207		1126.19	0.02327927		1716.2	0.01121036		2306.2	0.022896		2896.19	-0.00547782		3486.18	-0.01141692		4076.18	0.00551649
536.4	0.15086228		1126.39	0.0228644		1716.4	0.01172004		2306.4	0.02186415		2896.39	-0.00500655		3486.38	-0.01197431		4076.38	0.00572618
536.6	0.15094711		1126.59	0.02408502		1716.6	0.01219148		2306.6	0.02049648		2896.59	-0.00455023		3486.58	-0.01167348		4076.58	0.00580769
536.8	0.15039651		1126.79	0.02476738		1716.8	0.0125215		2306.8	0.01856607		2896.79	-0.00444903		3486.78	-0.01150751		4076.78	0.00512368
537	0.14986789		1126.99	0.02494949		1717	0.01310864		2307	0.01836472		2896.99	-0.00470199		3486.98	-0.01173564		4076.98	0.00532371
537.2	0.1489984		1127.19	0.02501537		1717.2	0.01390211		2307.2	0.01709116		2897.19	-0.00501199		3487.18	-0.01231385		4077.18	0.00494996
537.4	0.14813435		1127.39	0.02415943		1717.4	0.01407044		2307.4	0.01738675		2897.39	-0.00497402		3487.38	-0.01235626		4077.38	0.00441537
537.6	0.14704953		1127.59	0.02365974		1717.6	0.01326694		2307.6	0.01613565		2897.59	-0.00486123		3487.58	-0.01232291		4077.58	0.00398274
537.8	0.14719084		1127.79	0.02266548		1717.8	0.01342791		2307.8	0.01552205		2897.79	-0.00475811		3487.78	-0.01295901		4077.78	0.00428542
538	0.14705353		1127.99	0.02180298		1718	0.01206206		2308	0.01560415		2897.99	-0.00515886		3487.98	-0.01278589		4077.98	0.00421827
538.2	0.14654709		1128.19	0.02152544		1718.2	0.01098456		2308.2	0.01556452		2898.19	-0.00500172		3488.18	-0.01245588		4078.18	0.00465088
538.4	0.14692606		1128.39	0.02100826		1718.4	0.01091665		2308.4	0.01571801		2898.39	-0.00435028		3488.38	-0.01296685		4078.38	0.00440858
538.6	0.14587181		1128.59	0.02088735		1718.6	0.01036541		2308.6	0.01669794		2898.59	-0.00361023		3488.58	-0.01256295		4078.58	0.00480228
538.8	0.14552061		1128.79	0.02073595		1718.8	0.00984686		2308.8	0.01735214		2898.79	-0.0029432		3488.78	-0.01169401		4078.78	0.00494979
539	0.14558619		1128.99	0.01974013		1719	0.00965133		2309	0.01757132		2898.99	-0.00270887		3488.98	-0.01251363		4078.98	0.00465198
539.2	0.14697646		1129.19	0.01955082		1719.2	0.01015662		2309.2	0.01711026		2899.19	-0.00207935		3489.18	-0.01315784		4079.18	0.00472332
539.4	0.1465881		1129.39	0.01971516		1719.4	0.00980733		2309.4	0.01795901		2899.39	-0.00106704		3489.38	-0.01300932		4079.38	0.00469043
539.6	0.14803532		1129.59	0.01966286		1719.6	0.01040014		2309.6	0.01793241		2899.59	-0.0015197		3489.58	-0.01271581		4079.58	0.00633023
539.8	0.1495615		1129.79	0.02054588		1719.8	0.00938624		2309.8	0.01868496		2899.79	-0.00177279		3489.78	-0.0129211		4079.78	0.00633043
540	0.15021053		1129.99	0.02084058		1720	0.00908949		2310	0.01908505		2899.99	-0.00170997		3489.98	-0.01324002		4079.98	0.00566927
540.2	0.15031253		1130.19	0.02143131		1720.2	0.00913469		2310.2	0.01929987		2900.19	-0.00186402		3490.18	-0.0133112		4080.18	0.00563917
540.4	0.15139969		1130.39	0.02149806		1720.4	0.01037909		2310.4	0.01855537		2900.39	-0.00143479		3490.38	-0.01424105		4080.38	0.00593206
540.6	0.15110613		1130.59	0.02226714		1720.6	0.01108516		2310.6	0.01793601		2900.59	-0.00196504		3490.58	-0.01436518		4080.58	0.00618141
540.8	0.15063877		1130.79	0.02267705		1720.8	0.01239112		2310.8	0.01786933		2900.79	-0.00198945		3490.78	-0.01383616		4080.78	0.00611863
541	0.14979186		1130.99	0.02311426		1721	0.01319248		2311	0.01785437		2900.99	-0.00374415		3490.98	-0.01388338		4080.98	0.00662721
541.2	0.14838002		1131.19	0.02281652		1721.2	0.01350587		2311.2	0.01705947		2901.19	-0.00443158		3491.18	-0.01363926		4081.18	0.00575688
541.4	0.14848155		1131.39	0.02257832		1721.4	0.01352234		2311.4	0.01639914		2901.39	-0.00465032		3491.38	-0.01271155		4081.38	0.00503707
541.6	0.14745346		1131.59	0.02174972		1721.6	0.01343246		2311.6	0.01562824		2901.59	-0.00534114		3491.58	-0.01310875		4081.58	0.00483416
541.8	0.14720494		1131.79	0.02232211		1721.8	0.01364926		2311.8	0.01526461		2901.79	-0.00555275		3491.78	-0.01260053		4081.78	0.0053314
542	0.14630562		1131.99	0.02238972		1722	0.01289958		2312	0.01555774		2901.99	-0.00576543		3491.98	-0.01257156		4081.98	0.00488183
542.2	0.14613337		1132.19	0.02253689		1722.2	0.01229311		2312.2	0.01573939		2902.19	-0.0055363		3492.18	-0.01292515		4082.18	0.00433392
542.4	0.14621244		1132.39	0.02296125		1722.4	0.01242251		2312.4	0.01579977		2902.39	-0.00563195		3492.38	-0.01181884		4082.38	0.00411334
542.6	0.14630061		1132.59	0.02309623		1722.6	0.01119658		2312.6	0.01647657		2902.59	-0.00517827		3492.58	-0.01138139		4082.58	0.00452559
542.8	0.14648828		1132.79	0.02377928		1722.8	0.01048896		2312.8	0.01634786		2902.79	-0.00414144		3492.78	-0.01080499		4082.78	0.00438662
543	0.14661537		1132.99	0.02323193		1723	0.01019891		2313	0.01660824		2902.99	-0.00381199		3492.98	-0.01142879		4082.98	0.00354936
543.2	0.14786138		1133.19	0.02360676		1723.2	0.01071949		2313.2	0.01652031		2903.19	-0.00311494		3493.18	-0.0118241		4083.18	0.00450578
543.4	0.14785075		1133.39	0.0246997		1723.4	0.00982782		2313.4	0.0170542		2903.39	-0.00284455		3493.38	-0.01133454		4083.38	0.00508818
543.6	0.14900956		1133.59	0.0237315		1723.6	0.00956508		2313.6	0.01831594		2903.59	-0.00287139		3493.58	-0.01168912		4083.58	0.00544621
543.8	0.14998222		1133.79	0.0240312		1723.8	0.00883242		2313.8	0.01929671		2903.79	-0.00284926		3493.78	-0.01194357		4083.78	0.00442753
544	0.15048431		1133.99	0.02326622		1724	0.00957091		2314	0.02012535		2903.99	-0.00229386		3493.98	-0.01201747		4083.98	0.00478731
544.2	0.15105038		1134.19	0.02313219		1724.2	0.01002738		2314.2	0.02038599		2904.19	-0.00183521		3494.18	-0.01292872		4084.18	0.00484165
544.4	0.15132624		1134.39	0.02271446		1724.4	0.0104223		2314.4	0.02038706		2904.39	-0.00122951		3494.38	-0.01351519		4084.38	0.00472762
544.6	0.1511438		1134.59	0.02128954		1724.6	0.01069062		2314.6	0.0197942		2904.59	-0.0012806		3494.58	-0.0131865		4084.58	0.00481869
544.8	0.15044874		1134.79	0.02040833		1724.8	0.01122367		2314.8	0.01997242		2904.79	-0.00160834		3494.78	-0.01309362		4084.78	0.00459298
545	0.1498255		1134.99	0.01987107		1725	0.01072517		2315	0.01982825		2904.99	-0.00221791		3494.98	-0.01329435		4084.98	0.00460507
545.2	0.14881334		1135.19	0.01906277		1725.2	0.01103283		2315.2	0.01918841		2905.19	-0.00188017		3495.18	-0.01312615		4085.18	0.00429544
545.4	0.14800236		1135.39	0.01797463		1725.4	0.0110677		2315.4	0.01908132		2905.39	-0.00222369		3495.38	-0.01311842		4085.38	0.00400273
545.6	0.14714266		1135.59	0.01695884		1725.6	0.01123468		2315.6	0.01880143		2905.59	-0.00243998		3495.58	-0.01329841		4085.58	0.00414422
545.8	0.14680287		1135.79	0.01708422		1725.8	0.01085359		2315.8	0.01882191		2905.79	-0.002998		3495.78	-0.01306132		4085.78	0.00380395
546	0.14615268		1135.99	0.01641936		1726	0.0103986		2316	0.01879446		2905.99	-0.00341062		3495.98	-0.01359383		4085.98	0.00461863
546.2	0.14673577		1136.19	0.0157599		1726.2	0.00955705		2316.2	0.01885574		2906.19	-0.00410882		3496.18	-0.01347285		4086.18	0.00455748
546.4	0.14600404		1136.39	0.01555002		1726.4	0.00966137		2316.4	0.01831199		2906.39	-0.00478841		3496.38	-0.01288669		4086.38	0.00543353
546.6	0.14613974		1136.59	0.01579007		1726.6	0.00930554		2316.6	0.0184044		2906.59	-0.00433348		3496.58	-0.01361157		4086.58	0.00613893
546.8	0.14593233		1136.79	0.01647734		1726.8	0.00938275		2316.8	0.01851203		2906.79	-0.00395555		3496.78	-0.01335275		4086.78	0.0062384
547	0.14561353		1136.99	0.01665638		1727	0.00980563		2317	0.01937476		2906.99	-0.00404488		3496.98	-0.01320065		4086.98	0.00538714
547.2	0.14657691		1137.19	0.01718011		1727.2	0.01057518		2317.2	0.01855512		2907.19	-0.00368143		3497.18	-0.01368913		4087.18	0.0063341
547.4	0.14654507		1137.39	0.01764769		1727.4	0.01041908		2317.4	0.0189703		2907.39	-0.00385866		3497.38	-0.0132083		4087.38	0.00580241
547.6	0.14722625		1137.59	0.01716924		1727.6	0.01061358		2317.6	0.01930472		2907.59	-0.0031472		3497.58	-0.01371962		4087.58	0.00544056
547.8	0.14749278		1137.79	0.01803954		1727.8	0.01070836		2317.8	0.01807227		2907.79	-0.00312713		3497.78	-0.01419409		4087.78	0.0054032
548	0.14735068		1137.99	0.01848454		1728	0.01089108		2318	0.01793093		2907.99	-0.00366984		3497.98	-0.01399349		4087.98	0.005647
548.2	0.14715629		1138.19	0.01909709		1728.2	0.01134704		2318.2	0.01748228		2908.19	-0.00361205		3498.18	-0.0141772		4088.18	0.00483358
548.4	0.14771479		1138.39	0.01898862		1728.4	0.01177575		2318.4	0.01698902		2908.39	-0.00436228		3498.38	-0.01427138		4088.38	0.00508691
548.6	0.14751629		1138.59	0.0186581		1728.6	0.01199245		2318.6	0.01637988		2908.59	-0.00488419		3498.58	-0.01410817		4088.58	0.00494877
548.8	0.14659583		1138.79	0.01964969		1728.8	0.0118107		2318.8	0.01608612		2908.79	-0.00516813		3498.78	-0.01488761		4088.78	0.00483608
549	0.14586225		1138.99	0.02043414		1729	0.011918		2319	0.01597307		2908.99	-0.0047384		3498.98	-0.01466855		4088.98	0.00396937
549.2	0.14483773		1139.19	0.02103522		1729.2	0.01237421		2319.2	0.01547501		2909.19	-0.0049427		3499.18	-0.01423409		4089.18	0.00384917
549.4	0.14455212		1139.39	0.02066615		1729.4	0.01245498		2319.4	0.0156793		2909.39	-0.00547877		3499.38	-0.01364121		4089.38	0.00278175
549.6	0.14469661		1139.59	0.02007175		1729.6	0.01235042		2319.6	0.01579293		2909.59	-0.00529718		3499.58	-0.01347915		4089.58	0.00341966
549.8	0.14528641		1139.79	0.02093522		1729.8	0.01171536		2319.8	0.01589293		2909.79	-0.00625641		3499.78	-0.01301859		4089.78	0.00346972
550	0.14578251		1139.99	0.02122261		1730	0.0118355		2320	0.01559628		2909.99	-0.00641978		3499.98	-0.01305021		4089.98	0.004397
550.2	0.14672914		1140.19	0.02078849		1730.2	0.01211447		2320.2	0.01591059		2910.19	-0.00610299		3500.18	-0.01356828		4090.18	0.00417666
550.4	0.14664001		1140.39	0.02069444		1730.4	0.0128144		2320.4	0.01674014		2910.39	-0.00505481		3500.38	-0.01410059		4090.38	0.00440355
550.6	0.14803108		1140.59	0.02105393		1730.6	0.01279535		2320.6	0.01787066		2910.59	-0.0048871		3500.58	-0.01409505		4090.58	0.00374355
550.8	0.14844542		1140.79	0.02144749		1730.8	0.0127182		2320.8	0.01799256		2910.79	-0.00358873		3500.78	-0.01440476		4090.78	0.00340656
551	0.14901608		1140.99	0.02069211		1731	0.01285856		2321	0.01810528		2910.99	-0.00242208		3500.98	-0.01452052		4090.98	0.00294429
551.2	0.14960096		1141.19	0.02037493		1731.2	0.01232948		2321.2	0.01818242		2911.19	-0.00156916		3501.18	-0.01401233		4091.18	0.00243301
551.4	0.14943388		1141.39	0.02023549		1731.4	0.01176892		2321.4	0.01860871		2911.39	-0.00033446		3501.38	-0.01398974		4091.38	0.0018691
551.6	0.14893497		1141.59	0.0211182		1731.6	0.01171639		2321.6	0.01912307		2911.59	0.00022384		3501.58	-0.01474759		4091.58	0.00228766
551.8	0.14828933		1141.79	0.02115692		1731.8	0.01169852		2321.8	0.01805739		2911.79	-0.00000061		3501.78	-0.01411242		4091.78	0.0025978
552	0.14793091		1141.99	0.02067206		1732	0.01173218		2322	0.0192046		2911.99	0.00016241		3501.98	-0.01310509		4091.98	0.00393235
552.2	0.14705559		1142.19	0.02008799		1732.2	0.01179881		2322.2	0.01915876		2912.19	-0.00010434		3502.18	-0.01235344		4092.18	0.00389591
552.4	0.14693232		1142.39	0.02004067		1732.4	0.01168759		2322.4	0.01916582		2912.39	-0.00016182		3502.38	-0.01258966		4092.38	0.00456391
552.6	0.14601497		1142.59	0.02016998		1732.6	0.01103149		2322.6	0.01874799		2912.59	0.00000273		3502.58	-0.01219096		4092.58	0.00465927
552.8	0.14474521		1142.79	0.02028679		1732.8	0.01109101		2322.8	0.01899695		2912.79	-0.00059906		3502.78	-0.01146477		4092.78	0.00522586
553	0.14205411		1142.99	0.01993424		1733	0.01130089		2323	0.01943495		2912.99	-0.00173446		3502.98	-0.01068047		4092.98	0.00473604
553.2	0.1413404		1143.19	0.02047124		1733.2	0.01156099		2323.2	0.01911781		2913.19	-0.00269994		3503.18	-0.01048487		4093.18	0.00532705
553.4	0.14150844		1143.39	0.02010155		1733.4	0.01164232		2323.4	0.01948427		2913.39	-0.00311873		3503.38	-0.0104778		4093.38	0.00543301
553.6	0.14110989		1143.59	0.02007957		1733.6	0.01071036		2323.6	0.01945095		2913.59	-0.00377026		3503.58	-0.01069272		4093.58	0.00559084
553.8	0.14234036		1143.79	0.02068639		1733.8	0.01103483		2323.8	0.02020153		2913.79	-0.00492125		3503.78	-0.01071671		4093.78	0.00551152
554	0.14343176		1143.99	0.02022942		1734	0.0115608		2324	0.01998771		2913.99	-0.00528257		3503.98	-0.01157232		4093.98	0.00525764
554.2	0.14414583		1144.19	0.01924105		1734.2	0.01178774		2324.2	0.01970398		2914.19	-0.00545642		3504.18	-0.01254448		4094.18	0.00528395
554.4	0.14463624		1144.39	0.01846306		1734.4	0.0114263		2324.4	0.01971108		2914.39	-0.00462301		3504.38	-0.01260794		4094.38	0.00477455
554.6	0.1462922		1144.59	0.01817906		1734.6	0.01067139		2324.6	0.01933554		2914.59	-0.00508091		3504.58	-0.01310695		4094.58	0.00462392
554.8	0.1460891		1144.79	0.01841343		1734.8	0.01014157		2324.8	0.01843991		2914.79	-0.00430691		3504.78	-0.01413377		4094.78	0.00454715
555	0.14724692		1144.99	0.01786743		1735	0.00967327		2325	0.01850657		2914.99	-0.00397971		3504.98	-0.01443995		4094.98	0.00402976
555.2	0.14736638		1145.19	0.01818923		1735.2	0.00872671		2325.2	0.0187216		2915.19	-0.00338844		3505.18	-0.01492872		4095.18	0.00381645
555.4	0.14736432		1145.39	0.01773046		1735.4	0.00907988		2325.4	0.01808725		2915.39	-0.0028166		3505.38	-0.01618494		4095.38	0.00348209
555.6	0.14696056		1145.59	0.01755099		1735.6	0.00885597		2325.6	0.01767108		2915.59	-0.00322558		3505.58	-0.01628793		4095.58	0.0036857
555.8	0.14754048		1145.79	0.01672896		1735.8	0.00940432		2325.8	0.01695805		2915.79	-0.00305626		3505.78	-0.01551861		4095.78	0.00397505
556	0.14677631		1145.99	0.01664419		1736	0.0094315		2326	0.01727212		2915.99	-0.00313969		3505.98	-0.01516327		4095.98	0.00453594
556.2	0.14562566		1146.19	0.01689039		1736.2	0.0088849		2326.2	0.01659088		2916.19	-0.00431564		3506.18	-0.01502278		4096.18	0.00365281
556.4	0.14525454		1146.39	0.01727969		1736.4	0.00854277		2326.4	0.01672316		2916.39	-0.00498673		3506.38	-0.01475578		4096.38	0.00359051
556.6	0.14415521		1146.59	0.01786779		1736.6	0.00847876		2326.6	0.01650308		2916.59	-0.00592553		3506.58	-0.01468088		4096.58	0.0043807
556.8	0.14314468		1146.79	0.01797367		1736.8	0.00904991		2326.8	0.01747637		2916.79	-0.00739387		3506.78	-0.01423666		4096.78	0.00497536
557	0.14153916		1146.99	0.01854392		1737	0.00858296		2327	0.01778292		2916.99	-0.00778426		3506.98	-0.01461302		4096.98	0.00425519
557.2	0.14229871		1147.19	0.01963263		1737.2	0.0086272		2327.2	0.01740047		2917.19	-0.00792559		3507.18	-0.01499506		4097.18	0.00481067
557.4	0.14269357		1147.39	0.02024453		1737.4	0.0085089		2327.4	0.0179595		2917.39	-0.00834007		3507.38	-0.01481055		4097.38	0.00484812
557.6	0.14223342		1147.59	0.02005767		1737.6	0.00763649		2327.6	0.01854499		2917.59	-0.00842409		3507.58	-0.01479797		4097.58	0.00445109
557.8	0.14354151		1147.79	0.02040551		1737.8	0.00823609		2327.8	0.01933008		2917.79	-0.00849819		3507.78	-0.01419137		4097.78	0.0050295
558	0.14409495		1147.99	0.02038361		1738	0.00851036		2328	0.01903916		2917.99	-0.00746677		3507.98	-0.0139308		4097.98	0.00501151
558.2	0.14470768		1148.19	0.02026055		1738.2	0.00849621		2328.2	0.0186898		2918.19	-0.00603558		3508.18	-0.01367741		4098.18	0.00582134
558.4	0.14480144		1148.39	0.02005065		1738.4	0.00764309		2328.4	0.01847334		2918.39	-0.00482128		3508.38	-0.01278711		4098.38	0.0067136
558.6	0.1458738		1148.59	0.02009174		1738.6	0.00805056		2328.6	0.01843605		2918.59	-0.00396308		3508.58	-0.01335643		4098.58	0.00711291
558.8	0.14623455		1148.79	0.02062053		1738.8	0.0084788		2328.8	0.0185795		2918.79	-0.00349453		3508.78	-0.01374058		4098.78	0.00697563
559	0.14686966		1148.99	0.0194905		1739	0.0087479		2329	0.01792759		2918.99	-0.00194801		3508.98	-0.01385676		4098.98	0.00732853
559.2	0.14771997		1149.19	0.01918189		1739.2	0.00945487		2329.2	0.01770425		2919.19	-0.0010586		3509.18	-0.01411105		4099.18	0.00717555
559.4	0.14745246		1149.39	0.01794668		1739.4	0.00993116		2329.4	0.01752258		2919.39	-0.00098884		3509.38	-0.01357306		4099.38	0.00684893
559.6	0.14761379		1149.59	0.01735415		1739.6	0.01003677		2329.6	0.01728431		2919.59	-0.00083806		3509.58	-0.01265235		4099.58	0.00684904
559.8	0.14742393		1149.79	0.01649662		1739.8	0.01108496		2329.8	0.01695515		2919.79	-0.00067316		3509.78	-0.01289959		4099.78	0.0068916
560	0.14605482		1149.99	0.01618754		1740	0.01123207		2330	0.01631493		2919.99	-0.00074399		3509.98	-0.01296854		4099.98	0.00623044
560.2	0.14610018		1150.19	0.01583777		1740.2	0.01111656		2330.2	0.01516577		2920.19	-0.00087988		3510.18	-0.01343816		4100.18	0.00547409
560.4	0.14635561		1150.39	0.01603262		1740.4	0.01182575		2330.4	0.01554996		2920.39	-0.00102		3510.38	-0.01304041		4100.38	0.00422617
560.6	0.14551794		1150.59	0.01617929		1740.6	0.01243129		2330.6	0.0150729		2920.59	-0.00114924		3510.58	-0.01356537		4100.58	0.00431581
560.8	0.14544279		1150.79	0.01624803		1740.8	0.01236287		2330.8	0.01582932		2920.79	-0.00144176		3510.78	-0.01326289		4100.78	0.00369952
561	0.14487056		1150.99	0.01693036		1741	0.01166396		2331	0.01562955		2920.99	-0.00118334		3510.98	-0.01307384		4100.98	0.00274744
561.2	0.14460033		1151.19	0.01847234		1741.2	0.0123361		2331.2	0.01483403		2921.19	-0.00221994		3511.18	-0.01372606		4101.18	0.00260985
561.4	0.14404314		1151.39	0.01898873		1741.4	0.0126014		2331.4	0.01511575		2921.39	-0.00253008		3511.38	-0.01411897		4101.38	0.00228143
561.6	0.14369668		1151.59	0.01961336		1741.6	0.01213977		2331.6	0.01571953		2921.59	-0.0016646		3511.58	-0.01444584		4101.58	0.00249404
561.8	0.14364289		1151.79	0.02024861		1741.8	0.0127013		2331.8	0.01620834		2921.79	-0.00161321		3511.78	-0.01421028		4101.78	0.00288824
562	0.14329945		1151.99	0.02059474		1742	0.01193094		2332	0.01697178		2921.99	-0.00047525		3511.98	-0.01491318		4101.98	0.00318343
562.2	0.14307264		1152.19	0.0211551		1742.2	0.0111102		2332.2	0.01616736		2922.19	-0.0001956		3512.18	-0.01427414		4102.18	0.00373158
562.4	0.14282518		1152.39	0.0206798		1742.4	0.01059112		2332.4	0.01615486		2922.39	-0.00036054		3512.38	-0.01433512		4102.38	0.00437702
562.6	0.14369179		1152.59	0.02161763		1742.6	0.0107546		2332.6	0.01603648		2922.59	-0.00038218		3512.58	-0.01476556		4102.58	0.00481555
562.8	0.14288726		1152.79	0.02206137		1742.8	0.00977499		2332.8	0.01549109		2922.79	-0.00139872		3512.78	-0.01473269		4102.78	0.0053502
563	0.14266816		1152.99	0.02153075		1743	0.00989758		2333	0.01449655		2922.99	-0.00168054		3512.98	-0.01493518		4102.98	0.00560952
563.2	0.14418762		1153.19	0.02176429		1743.2	0.00955767		2333.2	0.01547135		2923.19	-0.0017906		3513.18	-0.01485184		4103.18	0.00536822
563.4	0.14341433		1153.39	0.02028143		1743.4	0.00882462		2333.4	0.01573569		2923.39	-0.00263438		3513.38	-0.01407089		4103.38	0.00545699
563.6	0.14348901		1153.59	0.01935272		1743.6	0.00846893		2333.6	0.01546011		2923.59	-0.0026377		3513.58	-0.01328442		4103.58	0.00446854
563.8	0.14348544		1153.79	0.01798738		1743.8	0.00815084		2333.8	0.01506702		2923.79	-0.00321729		3513.78	-0.01315229		4103.78	0.00458173
564	0.14306013		1153.99	0.0172871		1744	0.00845075		2334	0.01516938		2923.99	-0.00381997		3513.98	-0.01254032		4103.98	0.00405569
564.2	0.14330148		1154.19	0.01711389		1744.2	0.00840883		2334.2	0.01539946		2924.19	-0.00434071		3514.18	-0.01266944		4104.18	0.00351588
564.4	0.14333041		1154.39	0.016499		1744.4	0.0087065		2334.4	0.01650089		2924.39	-0.00444563		3514.38	-0.01221144		4104.38	0.00303831
564.6	0.14342259		1154.59	0.0166505		1744.6	0.00902179		2334.6	0.01612312		2924.59	-0.00515065		3514.58	-0.01307223		4104.58	0.00359742
564.8	0.14414872		1154.79	0.01721173		1744.8	0.00856374		2334.8	0.01612285		2924.79	-0.004876		3514.78	-0.01221974		4104.78	0.00328994
565	0.14382678		1154.99	0.01763186		1745	0.0085237		2335	0.01583824		2924.99	-0.00450259		3514.98	-0.01184646		4104.98	0.00298376
565.2	0.14390888		1155.19	0.01831459		1745.2	0.00873701		2335.2	0.01644898		2925.19	-0.00459342		3515.18	-0.01243837		4105.18	0.00319854
565.4	0.14484377		1155.39	0.01776456		1745.4	0.0090656		2335.4	0.01724764		2925.39	-0.00431066		3515.38	-0.01267701		4105.38	0.00392704
565.6	0.14559802		1155.59	0.0182429		1745.6	0.00918966		2335.6	0.01783127		2925.59	-0.00354159		3515.58	-0.01235173		4105.58	0.00448051
565.8	0.14502303		1155.79	0.01851761		1745.8	0.00924644		2335.8	0.01797887		2925.79	-0.00379449		3515.78	-0.01169414		4105.78	0.00459293
566	0.14586919		1155.99	0.01877814		1746	0.00900256		2336	0.01789041		2925.99	-0.00356429		3515.98	-0.01145285		4105.98	0.00439961
566.2	0.14645208		1156.19	0.01918262		1746.2	0.0086333		2336.2	0.01754606		2926.19	-0.00346027		3516.18	-0.01149356		4106.18	0.00417732
566.4	0.14736721		1156.39	0.01947307		1746.4	0.00786546		2336.4	0.01743053		2926.39	-0.00321578		3516.38	-0.01294512		4106.38	0.00454505
566.6	0.14727067		1156.59	0.02054944		1746.6	0.00756472		2336.6	0.01691144		2926.59	-0.00324252		3516.58	-0.01325138		4106.58	0.00539917
566.8	0.14707288		1156.79	0.02139448		1746.8	0.00743751		2336.8	0.01650148		2926.79	-0.00257811		3516.78	-0.01421328		4106.78	0.00481225
567	0.14731415		1156.99	0.02189593		1747	0.00811728		2337	0.01687855		2926.99	-0.00158571		3516.98	-0.01507913		4106.98	0.00399883
567.2	0.14776004		1157.19	0.02206691		1747.2	0.00742922		2337.2	0.01687186		2927.19	-0.00032799		3517.18	-0.01500414		4107.18	0.00412859
567.4	0.14644483		1157.39	0.02134659		1747.4	0.00684071		2337.4	0.0159797		2927.39	-0.00059597		3517.38	-0.01489992		4107.38	0.00428222
567.6	0.14616899		1157.59	0.02026129		1747.6	0.00733395		2337.6	0.01568378		2927.59	-0.00135985		3517.58	-0.01445551		4107.58	0.00401211
567.8	0.14552725		1157.79	0.02019664		1747.8	0.00803193		2337.8	0.0162144		2927.79	-0.00162324		3517.78	-0.01440769		4107.78	0.00407772
568	0.14491222		1157.99	0.01971326		1748	0.00814898		2338	0.01672753		2927.99	-0.00209317		3517.98	-0.01532304		4107.98	0.00342468
568.2	0.14449532		1158.19	0.01923509		1748.2	0.00829199		2338.2	0.01622989		2928.19	-0.00230972		3518.18	-0.01550776		4108.18	0.00340466
568.4	0.14368144		1158.39	0.0185948		1748.4	0.00868215		2338.4	0.01613286		2928.39	-0.00184168		3518.38	-0.01666633		4108.38	0.00367273
568.6	0.14308655		1158.59	0.01821688		1748.6	0.00817655		2338.6	0.01582325		2928.59	-0.0029031		3518.58	-0.01655874		4108.58	0.00349904
568.8	0.1418051		1158.79	0.01814093		1748.8	0.00773143		2338.8	0.01614162		2928.79	-0.00201078		3518.78	-0.01576926		4108.78	0.00407411
569	0.14182703		1158.99	0.01680475		1749	0.00819772		2339	0.01667665		2928.99	-0.00274792		3518.98	-0.01574945		4108.98	0.00410071
569.2	0.14234426		1159.19	0.01712646		1749.2	0.00866823		2339.2	0.01736836		2929.19	-0.00390786		3519.18	-0.01588858		4109.18	0.00455172
569.4	0.14315862		1159.39	0.01602627		1749.4	0.00966737		2339.4	0.01768901		2929.39	-0.00388275		3519.38	-0.01590259		4109.38	0.00527414
569.6	0.14281976		1159.59	0.01711648		1749.6	0.00999811		2339.6	0.01763714		2929.59	-0.00432992		3519.58	-0.01470149		4109.58	0.00584286
569.8	0.1422861		1159.79	0.01862793		1749.8	0.01003943		2339.8	0.01707038		2929.79	-0.00502064		3519.78	-0.01439468		4109.78	0.00611928
570	0.14318531		1159.99	0.01901818		1750	0.01022461		2340	0.01684863		2929.99	-0.00450317		3519.98	-0.01499861		4109.98	0.00555125
570.2	0.14387685		1160.19	0.02022919		1750.2	0.00972242		2340.2	0.01734622		2930.19	-0.00401313		3520.18	-0.01522408		4110.18	0.00557183
570.4	0.1438806		1160.39	0.02152001		1750.4	0.00936264		2340.4	0.01696863		2930.39	-0.00349264		3520.38	-0.01570985		4110.38	0.00578447
570.6	0.14400494		1160.59	0.02277836		1750.6	0.00937054		2340.6	0.01630498		2930.59	-0.00295424		3520.58	-0.01575194		4110.58	0.00632247
570.8	0.14494372		1160.79	0.02435809		1750.8	0.00939675		2340.8	0.01577923		2930.79	-0.00174223		3520.78	-0.01629495		4110.78	0.00581486
571	0.14506565		1160.99	0.02543825		1751	0.00919189		2341	0.01593707		2930.99	-0.00138722		3520.98	-0.01632738		4110.98	0.00548402
571.2	0.14552772		1161.19	0.02597972		1751.2	0.00888021		2341.2	0.01653038		2931.19	-0.00074185		3521.18	-0.01615446		4111.18	0.00555982
571.4	0.14526374		1161.39	0.02577751		1751.4	0.00858093		2341.4	0.01595095		2931.39	-0.00179154		3521.38	-0.01578729		4111.38	0.00582029
571.6	0.14562464		1161.59	0.02549043		1751.6	0.00937334		2341.6	0.0163817		2931.59	-0.00237659		3521.58	-0.01523983		4111.58	0.00531326
571.8	0.1456717		1161.79	0.02613945		1751.8	0.00903938		2341.8	0.01631052		2931.79	-0.0025874		3521.78	-0.0150712		4111.78	0.00435741
572	0.14639109		1161.99	0.02566402		1752	0.00817796		2342	0.01613675		2931.99	-0.00309145		3521.98	-0.01540635		4111.98	0.00321142
572.2	0.1447292		1162.19	0.02450683		1752.2	0.00889731		2342.2	0.01592216		2932.19	-0.00332139		3522.18	-0.01434405		4112.18	0.00264126
572.4	0.14391759		1162.39	0.02417574		1752.4	0.00964773		2342.4	0.01597462		2932.39	-0.00340963		3522.38	-0.01459312		4112.38	0.00182424
572.6	0.14376937		1162.59	0.0228846		1752.6	0.00882622		2342.6	0.01581103		2932.59	-0.00458433		3522.58	-0.01328644		4112.58	0.00224343
572.8	0.14323506		1162.79	0.02167428		1752.8	0.00932709		2342.8	0.01638856		2932.79	-0.00395051		3522.78	-0.01306334		4112.78	0.00285604
573	0.14301072		1162.99	0.0197344		1753	0.00962182		2343	0.01655503		2932.99	-0.00518848		3522.98	-0.01368409		4112.98	0.00219673
573.2	0.14155827		1163.19	0.0192596		1753.2	0.01003655		2343.2	0.01634392		2933.19	-0.00512919		3523.18	-0.01400944		4113.18	0.00262622
573.4	0.14121919		1163.39	0.01851086		1753.4	0.00946155		2343.4	0.01621185		2933.39	-0.00431558		3523.38	-0.01418853		4113.38	0.00309723
573.6	0.1399491		1163.59	0.01846329		1753.6	0.00918397		2343.6	0.01622458		2933.59	-0.00519019		3523.58	-0.01400071		4113.58	0.00350347
573.8	0.13903362		1163.79	0.01859042		1753.8	0.00930817		2343.8	0.01596925		2933.79	-0.00535408		3523.78	-0.0146118		4113.78	0.00310846
574	0.13871606		1163.99	0.01844117		1754	0.00871185		2344	0.01678676		2933.99	-0.00487309		3523.98	-0.01417593		4113.98	0.00277686
574.2	0.13894158		1164.19	0.01846871		1754.2	0.00764677		2344.2	0.01800647		2934.19	-0.00474516		3524.18	-0.01388062		4114.18	0.00334594
574.4	0.13862763		1164.39	0.01797636		1754.4	0.00708465		2344.4	0.01822257		2934.39	-0.00407691		3524.38	-0.01406288		4114.38	0.0037763
574.6	0.13928292		1164.59	0.01786292		1754.6	0.00649211		2344.6	0.01800206		2934.59	-0.00426822		3524.58	-0.01469266		4114.58	0.00386949
574.8	0.13958331		1164.79	0.01807019		1754.8	0.00643241		2344.8	0.01833022		2934.79	-0.00429007		3524.78	-0.01512445		4114.78	0.00388326
575	0.14065557		1164.99	0.01779778		1755	0.00600303		2345	0.01871055		2934.99	-0.00455302		3524.98	-0.01517654		4114.98	0.00358708
575.2	0.14089781		1165.19	0.01760799		1755.2	0.00678482		2345.2	0.0183961		2935.19	-0.00481494		3525.18	-0.01483072		4115.18	0.0041162
575.4	0.14105438		1165.39	0.01681959		1755.4	0.00731626		2345.4	0.01732219		2935.39	-0.00596674		3525.38	-0.01470354		4115.38	0.00390566
575.6	0.14191116		1165.59	0.01765362		1755.6	0.00740141		2345.6	0.0172962		2935.59	-0.00611053		3525.58	-0.01418971		4115.58	0.00341741
575.8	0.14231896		1165.79	0.01802525		1755.8	0.00709614		2345.8	0.01681643		2935.79	-0.00636071		3525.78	-0.01369677		4115.78	0.00268262
576	0.14258964		1165.99	0.01823639		1756	0.00714928		2346	0.0166678		2935.99	-0.00625166		3525.98	-0.01321846		4115.98	0.0013338
576.2	0.14160343		1166.19	0.01796052		1756.2	0.00864194		2346.2	0.01618987		2936.19	-0.00564274		3526.18	-0.01272845		4116.18	0.0008351
576.4	0.14220518		1166.39	0.01833482		1756.4	0.00892265		2346.4	0.01559196		2936.39	-0.00548414		3526.38	-0.01240431		4116.38	0.00093645
576.6	0.14198904		1166.59	0.01790422		1756.6	0.00842491		2346.6	0.01552015		2936.59	-0.00532404		3526.58	-0.01256299		4116.58	0.00112666
576.8	0.14144472		1166.79	0.01793471		1756.8	0.00910529		2346.8	0.01522202		2936.79	-0.00497189		3526.78	-0.0130501		4116.78	-0.00014369
577	0.14077667		1166.99	0.01771983		1757	0.00956979		2347	0.01461185		2936.99	-0.00558534		3526.98	-0.01414015		4116.98	-0.0008102
577.2	0.14011809		1167.19	0.01808013		1757.2	0.00952586		2347.2	0.01354754		2937.19	-0.00506022		3527.18	-0.01438018		4117.18	-0.00002414
577.4	0.14090493		1167.39	0.01858611		1757.4	0.00877393		2347.4	0.01373808		2937.39	-0.00452671		3527.38	-0.01538113		4117.38	0.00027026
577.6	0.14034704		1167.59	0.01804556		1757.6	0.00911463		2347.6	0.01463557		2937.59	-0.00413084		3527.58	-0.01549266		4117.58	0.00095539
577.8	0.14024617		1167.79	0.01836707		1757.8	0.00866512		2347.8	0.01528231		2937.79	-0.00244709		3527.78	-0.01553227		4117.78	0.00106674
578	0.14002733		1167.99	0.01885738		1758	0.0079386		2348	0.01566845		2937.99	-0.00115281		3527.98	-0.01470201		4117.98	0.00210387
578.2	0.14064305		1168.19	0.01876562		1758.2	0.00813164		2348.2	0.015559		2938.19	-0.00066583		3528.18	-0.01508661		4118.18	0.00292559
578.4	0.14135714		1168.39	0.01828141		1758.4	0.00853317		2348.4	0.01527939		2938.39	-0.00025077		3528.38	-0.01509946		4118.38	0.00328974
578.6	0.14139259		1168.59	0.01856433		1758.6	0.00823074		2348.6	0.01484592		2938.59	-0.00027756		3528.58	-0.0159612		4118.58	0.00412758
578.8	0.14195016		1168.79	0.01822476		1758.8	0.00851026		2348.8	0.01439004		2938.79	-0.00021108		3528.78	-0.01527302		4118.78	0.00484795
579	0.14188539		1168.99	0.0176399		1759	0.00899011		2349	0.01443773		2938.99	-0.00005384		3528.98	-0.01576803		4118.98	0.00485045
579.2	0.14205671		1169.19	0.01777467		1759.2	0.00997076		2349.2	0.01384182		2939.19	-0.00000672		3529.18	-0.01563009		4119.18	0.00529479
579.4	0.14204922		1169.39	0.01720746		1759.4	0.00961991		2349.4	0.01409854		2939.39	0.0001194		3529.38	-0.01534932		4119.38	0.00552455
579.6	0.14275618		1169.59	0.01813502		1759.6	0.00888534		2349.6	0.01440688		2939.59	0.00039821		3529.58	-0.01435533		4119.58	0.0062587
579.8	0.14247183		1169.79	0.01763251		1759.8	0.00914729		2349.8	0.0149477		2939.79	0.00063264		3529.78	-0.01377557		4119.78	0.00597471
580	0.14146963		1169.99	0.01744472		1760	0.00972595		2350	0.01557082		2939.99	-0.00036048		3529.98	-0.01404416		4119.98	0.00468785
580.2	0.14104405		1170.19	0.01784902		1760.2	0.01032379		2350.2	0.01525844		2940.19	-0.00145294		3530.18	-0.01377389		4120.18	0.00467641
580.4	0.14127708		1170.39	0.01833799		1760.4	0.00996703		2350.4	0.01557008		2940.39	-0.00260617		3530.38	-0.01322673		4120.38	0.00378957
580.6	0.14023014		1170.59	0.01787994		1760.6	0.01025579		2350.6	0.01520943		2940.59	-0.00299256		3530.58	-0.01319674		4120.58	0.00350842
580.8	0.1399238		1170.79	0.01757332		1760.8	0.00954989		2350.8	0.01470039		2940.79	-0.00379891		3530.78	-0.01257848		4120.78	0.00215146
581	0.14006729		1170.99	0.01670667		1761	0.00912559		2351	0.01465246		2940.99	-0.00453381		3530.98	-0.01344472		4120.98	0.00196172
581.2	0.13980362		1171.19	0.01627347		1761.2	0.00859632		2351.2	0.01454236		2941.19	-0.00458313		3531.18	-0.01420389		4121.18	0.00247534
581.4	0.14013588		1171.39	0.01607149		1761.4	0.00856454		2351.4	0.01506243		2941.39	-0.00470805		3531.38	-0.01416701		4121.38	0.00210959
581.6	0.14027554		1171.59	0.01655952		1761.6	0.00786737		2351.6	0.01565985		2941.59	-0.00523581		3531.58	-0.01393404		4121.58	0.00200401
581.8	0.14060214		1171.79	0.0173407		1761.8	0.00748221		2351.8	0.0147314		2941.79	-0.00463124		3531.78	-0.01331722		4121.78	0.00229688
582	0.14071058		1171.99	0.01722611		1762	0.00772883		2352	0.01455224		2941.99	-0.00472781		3531.98	-0.01358378		4121.98	0.00234054
582.2	0.14117612		1172.19	0.01691706		1762.2	0.00788493		2352.2	0.013699		2942.19	-0.00503391		3532.18	-0.01429274		4122.18	0.00234433
582.4	0.14115752		1172.39	0.01677519		1762.4	0.00734655		2352.4	0.01358779		2942.39	-0.00550527		3532.38	-0.0143962		4122.38	0.00254772
582.6	0.14054043		1172.59	0.0166193		1762.6	0.00730003		2352.6	0.01401994		2942.59	-0.00588708		3532.58	-0.01464776		4122.58	0.00250671
582.8	0.14096793		1172.79	0.01664651		1762.8	0.00734995		2352.8	0.01390326		2942.79	-0.00570956		3532.78	-0.01388016		4122.78	0.00253608
583	0.14096849		1172.99	0.01648499		1763	0.00738515		2353	0.01518476		2942.99	-0.00563317		3532.98	-0.01515024		4122.98	0.00299181
583.2	0.14169321		1173.19	0.0166736		1763.2	0.00714176		2353.2	0.01530028		2943.19	-0.00436406		3533.18	-0.01457315		4123.18	0.00341016
583.4	0.14160753		1173.39	0.01675364		1763.4	0.00805935		2353.4	0.0164521		2943.39	-0.00353209		3533.38	-0.01471224		4123.38	0.00384298
583.6	0.14227704		1173.59	0.01714369		1763.6	0.00837641		2353.6	0.01740207		2943.59	-0.00361055		3533.58	-0.01488661		4123.58	0.0035373
583.8	0.14130825		1173.79	0.01683791		1763.8	0.00909767		2353.8	0.01785365		2943.79	-0.00359974		3533.78	-0.01544689		4123.78	0.00301823
584	0.14048567		1173.99	0.01652574		1764	0.0096199		2354	0.01843813		2943.99	-0.00417568		3533.98	-0.01594764		4123.98	0.00196565
584.2	0.14108487		1174.19	0.0172032		1764.2	0.01001576		2354.2	0.01872132		2944.19	-0.00473334		3534.18	-0.01495642		4124.18	0.00280398
584.4	0.14076188		1174.39	0.017242		1764.4	0.01017627		2354.4	0.01877288		2944.39	-0.00471053		3534.38	-0.01520726		4124.38	0.00222852
584.6	0.14009111		1174.59	0.01702183		1764.6	0.01056468		2354.6	0.01849126		2944.59	-0.00415124		3534.58	-0.01563216		4124.58	0.00215069
584.8	0.13958634		1174.79	0.017297		1764.8	0.01019868		2354.8	0.0179852		2944.79	-0.00374671		3534.78	-0.0150856		4124.78	0.00204836
585	0.13823424		1174.99	0.01678574		1765	0.01004978		2355	0.0176903		2944.99	-0.00367426		3534.98	-0.01615015		4124.98	0.00235961
585.2	0.13759362		1175.19	0.01698271		1765.2	0.00946092		2355.2	0.01669248		2945.19	-0.00360823		3535.18	-0.01555961		4125.18	0.00259848
585.4	0.1375011		1175.39	0.01830093		1765.4	0.00911094		2355.4	0.01633387		2945.39	-0.00382658		3535.38	-0.01475126		4125.38	0.00258547
585.6	0.13724085		1175.59	0.01990673		1765.6	0.00917767		2355.6	0.01564105		2945.59	-0.00364634		3535.58	-0.01420903		4125.58	0.00223912
585.8	0.13764327		1175.79	0.01934938		1765.8	0.00950269		2355.8	0.01415685		2945.79	-0.00316961		3535.78	-0.01314782		4125.78	0.0029978
586	0.13768555		1175.99	0.018281		1766	0.00939404		2356	0.01392447		2945.99	-0.00326371		3535.98	-0.01385445		4125.98	0.00276724
586.2	0.13781173		1176.19	0.01836219		1766.2	0.00920155		2356.2	0.01302096		2946.19	-0.0029944		3536.18	-0.01374146		4126.18	0.00272465
586.4	0.13794647		1176.39	0.01900767		1766.4	0.00868165		2356.4	0.01267796		2946.39	-0.00387083		3536.38	-0.01339238		4126.38	0.00340567
586.6	0.13812884		1176.59	0.01936913		1766.6	0.00836384		2356.6	0.01291526		2946.59	-0.00413973		3536.58	-0.01310499		4126.58	0.00334818
586.8	0.13903039		1176.79	0.01933409		1766.8	0.00828576		2356.8	0.01310295		2946.79	-0.00410029		3536.78	-0.01364734		4126.78	0.00329541
587	0.13913177		1176.99	0.01912018		1767	0.0078493		2357	0.01339645		2946.99	-0.00350647		3536.98	-0.01384512		4126.98	0.00298807
587.2	0.13861239		1177.19	0.01910113		1767.2	0.00790122		2357.2	0.01376876		2947.19	-0.00236873		3537.18	-0.01399664		4127.18	0.00301205
587.4	0.13926703		1177.39	0.01953706		1767.4	0.00783673		2357.4	0.01394471		2947.39	-0.00238024		3537.38	-0.01434814		4127.38	0.00299134
587.6	0.13884634		1177.59	0.01883354		1767.6	0.00728178		2357.6	0.01401577		2947.59	-0.00327948		3537.58	-0.01427185		4127.58	0.00306448
587.8	0.13818686		1177.79	0.01735912		1767.8	0.00833235		2357.8	0.01473024		2947.79	-0.00388373		3537.78	-0.01374334		4127.78	0.00304012
588	0.13820255		1177.99	0.01636013		1768	0.00884234		2358	0.01458949		2947.99	-0.00515999		3537.98	-0.01360186		4127.98	0.00284418
588.2	0.13832166		1178.19	0.01670581		1768.2	0.00924991		2358.2	0.01441287		2948.19	-0.00573974		3538.18	-0.01392454		4128.18	0.0030197
588.4	0.13855731		1178.39	0.01598378		1768.4	0.00947976		2358.4	0.01374064		2948.39	-0.00548343		3538.38	-0.01483474		4128.38	0.0025001
588.6	0.13916823		1178.59	0.01586327		1768.6	0.00973015		2358.6	0.01403314		2948.59	-0.00499086		3538.58	-0.01506289		4128.58	0.00294915
588.8	0.13880407		1178.79	0.01582665		1768.8	0.00777259		2358.8	0.01339611		2948.79	-0.00471423		3538.78	-0.01461913		4128.78	0.003731
589	0.13900298		1178.99	0.01535276		1769	0.00658845		2359	0.01334131		2948.99	-0.0047707		3538.98	-0.01469256		4128.98	0.00413343
589.2	0.13995117		1179.19	0.01494961		1769.2	0.00648295		2359.2	0.01322188		2949.19	-0.00468679		3539.18	-0.01516143		4129.18	0.00373393
589.4	0.1400354		1179.39	0.01561061		1769.4	0.0067759		2359.4	0.01372552		2949.39	-0.00413743		3539.38	-0.01518529		4129.38	0.00372606
589.6	0.13960211		1179.59	0.01508573		1769.6	0.00686204		2359.6	0.01378483		2949.59	-0.00354284		3539.58	-0.01484224		4129.58	0.00343972
589.8	0.14117083		1179.79	0.01373328		1769.8	0.00661066		2359.8	0.01282295		2949.79	-0.00358701		3539.78	-0.01515024		4129.78	0.00336888
590	0.14129656		1179.99	0.01508815		1770	0.00660934		2360	0.01248979		2949.99	-0.00245875		3539.98	-0.01623376		4129.98	0.00342637
590.2	0.14177944		1180.19	0.01625084		1770.2	0.00679313		2360.2	0.01251353		2950.19	-0.00258444		3540.18	-0.01674836		4130.18	0.00344346
590.4	0.14271206		1180.39	0.01787509		1770.4	0.00673985		2360.4	0.01304769		2950.39	-0.00260614		3540.38	-0.01697248		4130.38	0.00368651
590.6	0.14357941		1180.59	0.01868016		1770.6	0.00690409		2360.6	0.01346359		2950.59	-0.00276253		3540.58	-0.01712195		4130.58	0.00281445
590.8	0.14331253		1180.79	0.01831568		1770.8	0.00763117		2360.8	0.01442977		2950.79	-0.00237131		3540.78	-0.01741016		4130.78	0.00227294
591	0.14211915		1180.99	0.01899372		1771	0.00747333		2361	0.01476606		2950.99	-0.00172776		3540.98	-0.0168755		4130.98	0.00157411
591.2	0.14048231		1181.19	0.01859793		1771.2	0.00754958		2361.2	0.01612605		2951.19	-0.00192619		3541.18	-0.01711734		4131.18	0.00214409
591.4	0.13972199		1181.39	0.01846882		1771.4	0.00719957		2361.4	0.01586008		2951.39	-0.00260171		3541.38	-0.01599753		4131.38	0.0021906
591.6	0.13861956		1181.59	0.01701649		1771.6	0.00819256		2361.6	0.01544716		2951.59	-0.00296622		3541.58	-0.01529581		4131.58	0.00230778
591.8	0.13865723		1181.79	0.01625685		1771.8	0.00877219		2361.8	0.01525737		2951.79	-0.00410892		3541.78	-0.01494236		4131.78	0.00208034
592	0.13772942		1181.99	0.01612101		1772	0.0086649		2362	0.01465364		2951.99	-0.00334759		3541.98	-0.01457365		4131.98	0.00172099
592.2	0.13811141		1182.19	0.0159971		1772.2	0.00862159		2362.2	0.01539438		2952.19	-0.00329294		3542.18	-0.01395961		4132.18	0.00160736
592.4	0.13816154		1182.39	0.01548487		1772.4	0.00807667		2362.4	0.01539849		2952.39	-0.00249444		3542.38	-0.01409153		4132.38	0.00204622
592.6	0.13865525		1182.59	0.01550771		1772.6	0.00689083		2362.6	0.01536736		2952.59	-0.00315417		3542.58	-0.01379092		4132.58	0.00296385
592.8	0.13887071		1182.79	0.01588635		1772.8	0.00607095		2362.8	0.01501968		2952.79	-0.00301386		3542.78	-0.01355393		4132.78	0.00384306
593	0.13852674		1182.99	0.01517293		1773	0.00668532		2363	0.01463534		2952.99	-0.00244541		3542.98	-0.01325907		4132.98	0.00409076
593.2	0.13737413		1183.19	0.01392451		1773.2	0.00671082		2363.2	0.0137488		2953.19	-0.00242537		3543.18	-0.0137016		4133.18	0.00299321
593.4	0.13709516		1183.39	0.01323671		1773.4	0.00624553		2363.4	0.01315609		2953.39	-0.00198478		3543.38	-0.01329493		4133.38	0.00274317
593.6	0.13633812		1183.59	0.01216828		1773.6	0.00579693		2363.6	0.01229867		2953.59	-0.00232842		3543.58	-0.0134668		4133.58	0.0024854
593.8	0.13726882		1183.79	0.01326317		1773.8	0.00612244		2363.8	0.01114273		2953.79	-0.00271492		3543.78	-0.01373581		4133.78	0.00278378
594	0.13762446		1183.99	0.01480219		1774	0.00584063		2364	0.01117816		2953.99	-0.00327001		3543.98	-0.01426692		4133.98	0.00353818
594.2	0.13866267		1184.19	0.01530328		1774.2	0.00582077		2364.2	0.01224006		2954.19	-0.0037186		3544.18	-0.01490624		4134.18	0.00289109
594.4	0.13850265		1184.39	0.01579576		1774.4	0.00586602		2364.4	0.01243794		2954.39	-0.0030198		3544.38	-0.01582238		4134.38	0.00238935
594.6	0.13871041		1184.59	0.01524688		1774.6	0.00587878		2364.6	0.01233648		2954.59	-0.00301556		3544.58	-0.01586848		4134.58	0.00209761
594.8	0.13782549		1184.79	0.01464647		1774.8	0.00674611		2364.8	0.01265583		2954.79	-0.00285982		3544.78	-0.0167183		4134.78	0.00174945
595	0.13750285		1184.99	0.01505366		1775	0.00649263		2365	0.01307664		2954.99	-0.00399041		3544.98	-0.0169506		4134.98	0.0010411
595.2	0.13670438		1185.19	0.0142023		1775.2	0.00721878		2365.2	0.0138568		2955.19	-0.00399126		3545.18	-0.01644895		4135.18	0.00192296
595.4	0.13753911		1185.39	0.0143131		1775.4	0.00696843		2365.4	0.01408736		2955.39	-0.00465157		3545.38	-0.01560403		4135.38	0.00233949
595.6	0.13761701		1185.59	0.01456289		1775.6	0.00711798		2365.6	0.01442438		2955.59	-0.00462017		3545.58	-0.01572409		4135.58	0.00300085
595.8	0.13717876		1185.79	0.01436585		1775.8	0.00727985		2365.8	0.01496606		2955.79	-0.00569729		3545.78	-0.01550813		4135.78	0.00391727
596	0.13654813		1185.99	0.01415977		1776	0.00751336		2366	0.01475869		2955.99	-0.00480456		3545.98	-0.01498008		4135.98	0.0039258
596.2	0.13652		1186.19	0.01385708		1776.2	0.00725607		2366.2	0.01503069		2956.19	-0.00514215		3546.18	-0.01557989		4136.18	0.00445634
596.4	0.13648181		1186.39	0.0137549		1776.4	0.0074314		2366.4	0.01469386		2956.39	-0.00471548		3546.38	-0.01610839		4136.38	0.00545044
596.6	0.13720308		1186.59	0.01416277		1776.6	0.00771104		2366.6	0.01443206		2956.59	-0.00478194		3546.58	-0.01632302		4136.58	0.00524888
596.8	0.13709468		1186.79	0.01427013		1776.8	0.00879039		2366.8	0.01355139		2956.79	-0.00458602		3546.78	-0.01587319		4136.78	0.00533394
597	0.1364986		1186.99	0.0135057		1777	0.00856599		2367	0.01282049		2956.99	-0.00473148		3546.98	-0.01550602		4136.98	0.00452019
597.2	0.13649137		1187.19	0.01348454		1777.2	0.00798347		2367.2	0.01187955		2957.19	-0.00576413		3547.18	-0.01567842		4137.18	0.00388931
597.4	0.13625706		1187.39	0.0140657		1777.4	0.00748097		2367.4	0.01174594		2957.39	-0.00546381		3547.38	-0.01586882		4137.38	0.00410045
597.6	0.13574957		1187.59	0.01515059		1777.6	0.00727644		2367.6	0.01077211		2957.59	-0.00625926		3547.58	-0.01612216		4137.58	0.00421096
597.8	0.13578482		1187.79	0.01654053		1777.8	0.00705467		2367.8	0.0100768		2957.79	-0.00629601		3547.78	-0.01616927		4137.78	0.00437604
598	0.13594636		1187.99	0.01757435		1778	0.00677109		2368	0.0101923		2957.99	-0.00677086		3547.98	-0.0156574		4137.98	0.00375714
598.2	0.13582969		1188.19	0.01827241		1778.2	0.00713066		2368.2	0.00981023		2958.19	-0.00589429		3548.18	-0.01579358		4138.18	0.00267055
598.4	0.13514661		1188.39	0.01826075		1778.4	0.00733819		2368.4	0.0090292		2958.39	-0.00657812		3548.38	-0.0160553		4138.38	0.00259789
598.6	0.13645723		1188.59	0.01889349		1778.6	0.00651543		2368.6	0.00869222		2958.59	-0.00604405		3548.58	-0.01612869		4138.58	0.00263867
598.8	0.13591946		1188.79	0.0190522		1778.8	0.0064057		2368.8	0.00876428		2958.79	-0.00672468		3548.78	-0.01656093		4138.78	0.00192303
599	0.13647289		1188.99	0.02002492		1779	0.00611055		2369	0.01013271		2958.99	-0.00780432		3548.98	-0.01657104		4138.98	0.00193917
599.2	0.13611167		1189.19	0.0192667		1779.2	0.00691186		2369.2	0.01092874		2959.19	-0.00726726		3549.18	-0.01639364		4139.18	0.00209006
599.4	0.13712843		1189.39	0.01913958		1779.4	0.00623629		2369.4	0.01172791		2959.39	-0.0077841		3549.38	-0.0161569		4139.38	0.00258678
599.6	0.13695818		1189.59	0.01863376		1779.6	0.00653884		2369.6	0.0118057		2959.59	-0.00803608		3549.58	-0.01648049		4139.58	0.00368583
599.8	0.13743852		1189.79	0.01783231		1779.8	0.00647203		2369.8	0.01180022		2959.79	-0.00784351		3549.78	-0.01586077		4139.78	0.00362997
600	0.1382667		1189.99	0.0176418		1780	0.00690744		2370	0.01193099		2959.99	-0.00675085		3549.98	-0.0159342		4139.98	0.00347631
600.2	0.13838197		1190.19	0.01746101		1780.2	0.00690628		2370.2	0.01285528		2960.19	-0.00660062		3550.18	-0.0164446		4140.18	0.00399228
600.4	0.1398278		1190.39	0.0167832		1780.4	0.00792911		2370.4	0.01393749		2960.39	-0.00673207		3550.38	-0.01688564		4140.38	0.00440872
600.6	0.13983987		1190.59	0.01742805		1780.6	0.00748653		2370.6	0.01372885		2960.59	-0.00577118		3550.58	-0.01749406		4140.58	0.00449472
600.8	0.1402666		1190.79	0.01694368		1780.8	0.00774522		2370.8	0.01396731		2960.79	-0.00608525		3550.78	-0.01710044		4140.78	0.00557888
601	0.14027287		1190.99	0.01690982		1781	0.00710787		2371	0.0139874		2960.99	-0.00600533		3550.98	-0.01708197		4140.98	0.00587259
601.2	0.1407733		1191.19	0.01765692		1781.2	0.00652279		2371.2	0.01408808		2961.19	-0.00519084		3551.18	-0.01659645		4141.18	0.00650852
601.4	0.14031029		1191.39	0.01776654		1781.4	0.00664518		2371.4	0.01413616		2961.39	-0.00458195		3551.38	-0.01726323		4141.38	0.00702903
601.6	0.14052649		1191.59	0.0172053		1781.6	0.00737746		2371.6	0.01410035		2961.59	-0.00467208		3551.58	-0.01732103		4141.58	0.00650728
601.8	0.14025414		1191.79	0.01775698		1781.8	0.00756224		2371.8	0.01428688		2961.79	-0.00463394		3551.78	-0.01672158		4141.78	0.00682028
602	0.14069375		1191.99	0.0183317		1782	0.00813411		2372	0.01405359		2961.99	-0.00556035		3551.98	-0.01571186		4141.98	0.00646685
602.2	0.14018433		1192.19	0.01860541		1782.2	0.00755577		2372.2	0.01362778		2962.19	-0.00558313		3552.18	-0.01660116		4142.18	0.0057617
602.4	0.13993552		1192.39	0.01871843		1782.4	0.00746122		2372.4	0.01371804		2962.39	-0.00605858		3552.38	-0.01754941		4142.38	0.00477115
602.6	0.13875007		1192.59	0.01896014		1782.6	0.0074666		2372.6	0.01363979		2962.59	-0.00517883		3552.58	-0.01769047		4142.58	0.00419081
602.8	0.13777638		1192.79	0.01840128		1782.8	0.00828454		2372.8	0.01432484		2962.79	-0.00631861		3552.78	-0.0175259		4142.78	0.00290113
603	0.13839259		1192.99	0.01867006		1783	0.00883835		2373	0.01355872		2962.99	-0.00639129		3552.98	-0.01782982		4142.98	0.00207734
603.2	0.13786182		1193.19	0.01852919		1783.2	0.00925617		2373.2	0.01338407		2963.19	-0.00671929		3553.18	-0.01773171		4143.18	0.00112952
603.4	0.13821281		1193.39	0.01913882		1783.4	0.00930451		2373.4	0.01273926		2963.39	-0.00762219		3553.38	-0.0176185		4143.38	0.00098189
603.6	0.13762092		1193.59	0.0189961		1783.6	0.00971001		2373.6	0.01275006		2963.59	-0.00712893		3553.58	-0.01759655		4143.58	0.00083171
603.8	0.13765472		1193.79	0.01904331		1783.8	0.00965103		2373.8	0.01277881		2963.79	-0.00693267		3553.78	-0.016796		4143.78	-0.00044521
604	0.13754564		1193.99	0.01891454		1784	0.01010523		2374	0.01280026		2963.99	-0.00626505		3553.98	-0.01747277		4143.98	-0.00054367
604.2	0.13753506		1194.19	0.01817889		1784.2	0.00985372		2374.2	0.0135083		2964.19	-0.0060848		3554.18	-0.01804835		4144.18	0.0004853
604.4	0.13737489		1194.39	0.01819183		1784.4	0.01030887		2374.4	0.01457103		2964.39	-0.00528148		3554.38	-0.01853547		4144.38	0.00084883
604.6	0.13718505		1194.59	0.01866554		1784.6	0.00847009		2374.6	0.01452387		2964.59	-0.00462158		3554.58	-0.01812153		4144.58	0.00124045
604.8	0.13730689		1194.79	0.01800752		1784.8	0.00788828		2374.8	0.01462117		2964.79	-0.00419675		3554.78	-0.01754511		4144.78	0.00158593
605	0.13746952		1194.99	0.01775216		1785	0.00619962		2375	0.01447124		2964.99	-0.00340526		3554.98	-0.01693915		4144.98	0.0023863
605.2	0.13764544		1195.19	0.01779018		1785.2	0.00522962		2375.2	0.01457328		2965.19	-0.002917		3555.18	-0.01682456		4145.18	0.00232364
605.4	0.1375652		1195.39	0.01685731		1785.4	0.00532368		2375.4	0.01492592		2965.39	-0.0023726		3555.38	-0.01719154		4145.38	0.00312601
605.6	0.13738001		1195.59	0.01677312		1785.6	0.00469798		2375.6	0.01495999		2965.59	-0.00126179		3555.58	-0.01667286		4145.58	0.00327128
605.8	0.13890175		1195.79	0.01697758		1785.8	0.00463902		2375.8	0.01395265		2965.79	-0.0004922		3555.78	-0.01626649		4145.78	0.00387658
606	0.139244		1195.99	0.01682615		1786	0.00493448		2376	0.01381332		2965.99	-0.00042366		3555.98	-0.01642734		4145.98	0.00309525
606.2	0.13887671		1196.19	0.01643635		1786.2	0.00458025		2376.2	0.01348383		2966.19	-0.00045868		3556.18	-0.01693783		4146.18	0.00214421
606.4	0.13783991		1196.39	0.01562785		1786.4	0.00569249		2376.4	0.01362105		2966.39	-0.00108379		3556.38	-0.01635777		4146.38	0.00141589
606.6	0.13727305		1196.59	0.01407885		1786.6	0.00559249		2376.6	0.01464827		2966.59	-0.00133991		3556.58	-0.01569998		4146.58	0.00122811
606.8	0.13798118		1196.79	0.01340071		1786.8	0.00623029		2376.8	0.01442823		2966.79	-0.00286121		3556.78	-0.01603939		4146.78	0.00062537
607	0.13878938		1196.99	0.01354855		1787	0.00574256		2377	0.01330404		2966.99	-0.00324383		3556.98	-0.01643263		4146.98	-0.00007022
607.2	0.13836338		1197.19	0.01364653		1787.2	0.00645593		2377.2	0.01351494		2967.19	-0.00404755		3557.18	-0.01705438		4147.18	-0.00019596
607.4	0.13815277		1197.39	0.01304763		1787.4	0.0067549		2377.4	0.01337889		2967.39	-0.00426654		3557.38	-0.01741141		4147.38	-0.00054534
607.6	0.13829312		1197.59	0.01259023		1787.6	0.00719218		2377.6	0.01370822		2967.59	-0.00424631		3557.58	-0.01728969		4147.58	-0.00115725
607.8	0.13877951		1197.79	0.0119245		1787.8	0.00674985		2377.8	0.01273697		2967.79	-0.00486571		3557.78	-0.01667478		4147.78	-0.00184841
608	0.13975291		1197.99	0.01221764		1788	0.0063651		2378	0.01322978		2967.99	-0.00497224		3557.98	-0.01693236		4147.98	-0.00196598
608.2	0.14037762		1198.19	0.01198		1788.2	0.00583321		2378.2	0.0134931		2968.19	-0.00575735		3558.18	-0.01681089		4148.18	-0.00137497
608.4	0.14038501		1198.39	0.01361919		1788.4	0.00558218		2378.4	0.01364754		2968.39	-0.00615322		3558.38	-0.01683116		4148.38	-0.0016401
608.6	0.14089872		1198.59	0.01325298		1788.6	0.00432648		2378.6	0.01263441		2968.59	-0.00607532		3558.58	-0.01633456		4148.58	-0.00043477
608.8	0.13999013		1198.79	0.01459435		1788.8	0.00388931		2378.8	0.01226009		2968.79	-0.00528951		3558.78	-0.0166797		4148.78	0.0007667
609	0.14019525		1198.99	0.01523803		1789	0.00353301		2379	0.01210202		2968.99	-0.00556281		3558.98	-0.01669961		4148.98	0.00126368
609.2	0.13968601		1199.19	0.01571984		1789.2	0.00300971		2379.2	0.01107536		2969.19	-0.00513826		3559.18	-0.01757573		4149.18	0.00144688
609.4	0.13992634		1199.39	0.01601294		1789.4	0.00365946		2379.4	0.01120165		2969.39	-0.00445123		3559.38	-0.0179275		4149.38	0.00310407
609.6	0.13942834		1199.59	0.01693993		1789.6	0.00414638		2379.6	0.01019955		2969.59	-0.00422971		3559.58	-0.01862127		4149.58	0.00331162
609.8	0.14015265		1199.79	0.0171234		1789.8	0.00571165		2379.8	0.01016432		2969.79	-0.00463622		3559.78	-0.0193735		4149.78	0.00410849
610	0.13926413		1199.99	0.01806174		1790	0.00609784		2380	0.01018457		2969.99	-0.00522262		3559.98	-0.02004503		4149.98	0.00381675
610.2	0.13760029		1200.19	0.01820079		1790.2	0.00654938		2380.2	0.00974597		2970.19	-0.00570341		3560.18	-0.01983883		4150.18	0.00356825
610.4	0.13652926		1200.39	0.01811276		1790.4	0.00782219		2380.4	0.01123159		2970.39	-0.00614021		3560.38	-0.01960505		4150.38	0.00374798
610.6	0.13677052		1200.59	0.01714789		1790.6	0.00817954		2380.6	0.01183324		2970.59	-0.00568216		3560.58	-0.01958348		4150.58	0.00319751
610.8	0.13682278		1200.79	0.01692223		1790.8	0.00925851		2380.8	0.01097358		2970.79	-0.00552084		3560.78	-0.02006819		4150.78	0.002589
611	0.13646847		1200.99	0.01647387		1791	0.00920871		2381	0.01119518		2970.99	-0.00635667		3560.98	-0.02002305		4150.98	0.00187339
611.2	0.13530489		1201.19	0.01593553		1791.2	0.00991941		2381.2	0.01163625		2971.19	-0.00620602		3561.18	-0.0198009		4151.18	0.00105468
611.4	0.13528252		1201.39	0.01601394		1791.4	0.00937736		2381.4	0.01181713		2971.39	-0.00606847		3561.38	-0.01923088		4151.38	0.00021482
611.6	0.13498445		1201.59	0.01592015		1791.6	0.00861037		2381.6	0.01123509		2971.59	-0.00619941		3561.58	-0.01833821		4151.58	-0.00089036
611.8	0.13488921		1201.79	0.01532381		1791.8	0.00758548		2381.8	0.0113182		2971.79	-0.00555193		3561.78	-0.01750387		4151.78	-0.00133951
612	0.13509952		1201.99	0.01605642		1792	0.00759929		2382	0.01159425		2971.99	-0.00600769		3561.98	-0.01694596		4151.98	-0.00193963
612.2	0.13445352		1202.19	0.01573598		1792.2	0.00655432		2382.2	0.01195223		2972.19	-0.0063027		3562.18	-0.01700191		4152.18	-0.0007969
612.4	0.13438493		1202.39	0.01717529		1792.4	0.00611709		2382.4	0.01202349		2972.39	-0.00529471		3562.38	-0.01690083		4152.38	0.00013938
612.6	0.13481938		1202.59	0.01671532		1792.6	0.00522284		2382.6	0.01231922		2972.59	-0.00414369		3562.58	-0.01714436		4152.58	0.00088871
612.8	0.13508353		1202.79	0.01776039		1792.8	0.00424117		2382.8	0.0134441		2972.79	-0.004249		3562.78	-0.01735332		4152.78	0.00119265
613	0.13581422		1202.99	0.01678003		1793	0.00464241		2383	0.01319914		2972.99	-0.00414961		3562.98	-0.01858642		4152.98	0.0018283
613.2	0.1361842		1203.19	0.01708838		1793.2	0.00428459		2383.2	0.01309301		2973.19	-0.00476576		3563.18	-0.0195254		4153.18	0.00307148
613.4	0.13666352		1203.39	0.01706269		1793.4	0.0045412		2383.4	0.01377155		2973.39	-0.00525433		3563.38	-0.01956332		4153.38	0.00380455
613.6	0.13668972		1203.59	0.01664517		1793.6	0.004523		2383.6	0.01428655		2973.59	-0.00507945		3563.58	-0.0190182		4153.58	0.00354651
613.8	0.13697596		1203.79	0.01719731		1793.8	0.00451921		2383.8	0.01495257		2973.79	-0.00489304		3563.78	-0.01937861		4153.78	0.00421343
614	0.13682437		1203.99	0.017392		1794	0.00412294		2384	0.0135827		2973.99	-0.00486815		3563.98	-0.01922052		4153.98	0.00382926
614.2	0.13647286		1204.19	0.01711749		1794.2	0.00459322		2384.2	0.0140226		2974.19	-0.00448133		3564.18	-0.01873588		4154.18	0.00418163
614.4	0.13700284		1204.39	0.01692188		1794.4	0.00575884		2384.4	0.01404187		2974.39	-0.004196		3564.38	-0.01806549		4154.38	0.00441046
614.6	0.13697392		1204.59	0.01612771		1794.6	0.00594099		2384.6	0.01296829		2974.59	-0.00382823		3564.58	-0.01810803		4154.58	0.00363041
614.8	0.13659711		1204.79	0.01538185		1794.8	0.00599355		2384.8	0.01289054		2974.79	-0.00426432		3564.78	-0.01841767		4154.78	0.00284949
615	0.13564004		1204.99	0.01556413		1795	0.00616004		2385	0.01343713		2974.99	-0.00486483		3564.98	-0.0185449		4154.98	0.00204523
615.2	0.13485636		1205.19	0.01535579		1795.2	0.00594062		2385.2	0.0134286		2975.19	-0.00432083		3565.18	-0.01841372		4155.18	0.00192805
615.4	0.13547524		1205.39	0.01505603		1795.4	0.00537758		2385.4	0.0123394		2975.39	-0.00401293		3565.38	-0.01819547		4155.38	0.00241273
615.6	0.13549539		1205.59	0.01471989		1795.6	0.00465298		2385.6	0.01244506		2975.59	-0.00379458		3565.58	-0.01741199		4155.58	0.00264992
615.8	0.13596343		1205.79	0.01399272		1795.8	0.00472814		2385.8	0.01262092		2975.79	-0.00325928		3565.78	-0.01698251		4155.78	0.002473
616	0.13630226		1205.99	0.01410963		1796	0.00424874		2386	0.01289492		2975.99	-0.0033917		3565.98	-0.01639236		4155.98	0.00219882
616.2	0.13655937		1206.19	0.01385009		1796.2	0.00301569		2386.2	0.0135413		2976.19	-0.00258414		3566.18	-0.01573537		4156.18	0.00347094
616.4	0.13753638		1206.39	0.01443067		1796.4	0.00320735		2386.4	0.01342211		2976.39	-0.00220244		3566.38	-0.01527227		4156.38	0.00320628
616.6	0.13768837		1206.59	0.01302186		1796.6	0.00322807		2386.6	0.01402826		2976.59	-0.00182264		3566.58	-0.01501856		4156.58	0.00363604
616.8	0.13747728		1206.79	0.01365756		1796.8	0.00330159		2386.8	0.01446265		2976.79	-0.00229283		3566.78	-0.0143191		4156.78	0.0037675
617	0.13746877		1206.99	0.01310059		1797	0.00357003		2387	0.01424275		2976.99	-0.00199298		3566.98	-0.01472634		4156.98	0.00417275
617.2	0.13734494		1207.19	0.01382381		1797.2	0.00316224		2387.2	0.01427005		2977.19	-0.00278946		3567.18	-0.01408376		4157.18	0.00360971
617.4	0.13718918		1207.39	0.01317041		1797.4	0.00288172		2387.4	0.01441397		2977.39	-0.0024946		3567.38	-0.01420962		4157.38	0.00253518
617.6	0.13713665		1207.59	0.01314408		1797.6	0.00342043		2387.6	0.0143161		2977.59	-0.00233313		3567.58	-0.01373248		4157.58	0.00140973
617.8	0.13719238		1207.79	0.01318857		1797.8	0.0037555		2387.8	0.0134216		2977.79	-0.00263579		3567.78	-0.01430162		4157.78	0.00161127
618	0.13619155		1207.99	0.01358359		1798	0.00471794		2388	0.01180546		2977.99	-0.00316279		3567.98	-0.01483574		4157.98	0.00147416
618.2	0.136329		1208.19	0.01456758		1798.2	0.00551375		2388.2	0.01246905		2978.19	-0.00296088		3568.18	-0.01480437		4158.18	0.00167705
618.4	0.13543409		1208.39	0.01499783		1798.4	0.00615066		2388.4	0.01245864		2978.39	-0.0035207		3568.38	-0.0154577		4158.38	0.00142807
618.6	0.13455619		1208.59	0.015033		1798.6	0.00690714		2388.6	0.01188043		2978.59	-0.00376405		3568.58	-0.01711623		4158.58	0.00089339
618.8	0.13384116		1208.79	0.01452469		1798.8	0.00745138		2388.8	0.0114		2978.79	-0.0043065		3568.78	-0.01841025		4158.78	0.00060936
619	0.13425899		1208.99	0.01392806		1799	0.00804334		2389	0.01044567		2978.99	-0.00485453		3568.98	-0.0189994		4158.98	0.00085092
619.2	0.13389571		1209.19	0.01330253		1799.2	0.00770449		2389.2	0.00936847		2979.19	-0.00575382		3569.18	-0.01877597		4159.18	0.00173106
619.4	0.1342909		1209.39	0.012612		1799.4	0.00754263		2389.4	0.00794183		2979.39	-0.00595057		3569.38	-0.01889075		4159.38	0.00163174
619.6	0.13487423		1209.59	0.01191421		1799.6	0.00748289		2389.6	0.00867278		2979.59	-0.00561353		3569.58	-0.01858523		4159.58	0.00160596
619.8	0.13538401		1209.79	0.01153516		1799.8	0.00696619		2389.8	0.00833496		2979.79	-0.00581737		3569.78	-0.01842874		4159.78	0.00087116
620	0.13547345		1209.99	0.01128131		1800	0.0068888		2390	0.00890066		2979.99	-0.00585449		3569.98	-0.01745875		4159.98	0.00109523
620.2	0.13532721		1210.19	0.01155142		1800.2	0.00704299		2390.2	0.00904334		2980.19	-0.00571511		3570.18	-0.01692024		4160.18	0.00221388
620.4	0.13496927		1210.39	0.01264496		1800.4	0.00703834		2390.4	0.00910421		2980.39	-0.00626625		3570.38	-0.01658442		4160.38	0.00208295
620.6	0.13435576		1210.59	0.01271525		1800.6	0.0071871		2390.6	0.00986633		2980.59	-0.00609619		3570.58	-0.01559847		4160.58	0.00201381
620.8	0.13414467		1210.79	0.01439513		1800.8	0.0066741		2390.8	0.01062682		2980.79	-0.00586105		3570.78	-0.01491421		4160.78	0.00229794
621	0.13393154		1210.99	0.01387863		1801	0.00679214		2391	0.01076441		2980.99	-0.00578477		3570.98	-0.01544293		4160.98	0.00211061
621.2	0.13358427		1211.19	0.01403686		1801.2	0.00754402		2391.2	0.01120275		2981.19	-0.00608243		3571.18	-0.01618815		4161.18	0.00195865
621.4	0.13427216		1211.39	0.01387182		1801.4	0.00822049		2391.4	0.01183528		2981.39	-0.00630762		3571.38	-0.01663287		4161.38	0.00150997
621.6	0.13412423		1211.59	0.01462768		1801.6	0.00866851		2391.6	0.01301898		2981.59	-0.00663383		3571.58	-0.0168967		4161.58	0.00159136
621.8	0.13471452		1211.79	0.01490655		1801.8	0.0087147		2391.8	0.0132107		2981.79	-0.00773125		3571.78	-0.01750652		4161.78	0.00217151
622	0.13405243		1211.99	0.01598314		1802	0.0083714		2392	0.01408894		2981.99	-0.00777347		3571.98	-0.01778168		4161.98	0.00248162
622.2	0.13432387		1212.19	0.01656292		1802.2	0.00770632		2392.2	0.01563157		2982.19	-0.0076284		3572.18	-0.01812868		4162.18	0.00255712
622.4	0.13397223		1212.39	0.01737796		1802.4	0.00820963		2392.4	0.01574446		2982.39	-0.00799182		3572.38	-0.01958572		4162.38	0.00300029
622.6	0.13379553		1212.59	0.01753107		1802.6	0.00865801		2392.6	0.01488603		2982.59	-0.00752818		3572.58	-0.0199427		4162.58	0.00295872
622.8	0.1341542		1212.79	0.01671472		1802.8	0.00806626		2392.8	0.0144303		2982.79	-0.00801837		3572.78	-0.02033467		4162.78	0.00311153
623	0.1346412		1212.99	0.01581167		1803	0.00815684		2393	0.01415441		2982.99	-0.00768247		3572.98	-0.02031726		4162.98	0.00323017
623.2	0.1335503		1213.19	0.01610759		1803.2	0.00806644		2393.2	0.01400579		2983.19	-0.00782795		3573.18	-0.02090006		4163.18	0.00214223
623.4	0.13368909		1213.39	0.01549768		1803.4	0.00747847		2393.4	0.01406239		2983.39	-0.00752816		3573.38	-0.02047435		4163.38	0.00098306
623.6	0.13411656		1213.59	0.01455611		1803.6	0.00708051		2393.6	0.01522141		2983.59	-0.00730729		3573.58	-0.01969295		4163.58	0.00110439
623.8	0.13420463		1213.79	0.01569981		1803.8	0.0056601		2393.8	0.01507673		2983.79	-0.00784904		3573.78	-0.01916098		4163.78	0.00020252
624	0.1339547		1213.99	0.01523512		1804	0.00578645		2394	0.0157762		2983.99	-0.00742568		3573.98	-0.01914217		4163.98	0.00031408
624.2	0.13407476		1214.19	0.01587619		1804.2	0.00549462		2394.2	0.01567984		2984.19	-0.00705306		3574.18	-0.01873903		4164.18	0.00126104
624.4	0.1336023		1214.39	0.01627617		1804.4	0.00532534		2394.4	0.0157564		2984.39	-0.00689264		3574.38	-0.01828598		4164.38	0.00101096
624.6	0.13349848		1214.59	0.01600455		1804.6	0.00554802		2394.6	0.01601998		2984.59	-0.00701521		3574.58	-0.01712709		4164.58	0.00143955
624.8	0.13300757		1214.79	0.01649762		1804.8	0.00499255		2394.8	0.01588399		2984.79	-0.00689335		3574.78	-0.01725783		4164.78	0.00217029
625	0.13298137		1214.99	0.01612324		1805	0.0058267		2395	0.0157261		2984.99	-0.00781841		3574.98	-0.01783921		4164.98	0.00158282
625.2	0.13240028		1215.19	0.01665359		1805.2	0.00566039		2395.2	0.01560279		2985.19	-0.00802315		3575.18	-0.01762242		4165.18	0.00309599
625.4	0.13333303		1215.39	0.01637583		1805.4	0.00568155		2395.4	0.01543377		2985.39	-0.00803218		3575.38	-0.01747339		4165.38	0.0028724
625.6	0.13273083		1215.59	0.01656232		1805.6	0.00536171		2395.6	0.01591748		2985.59	-0.00863844		3575.58	-0.01727426		4165.58	0.00353743
625.8	0.13331759		1215.79	0.01602046		1805.8	0.00535805		2395.8	0.01464871		2985.79	-0.00878782		3575.78	-0.01720991		4165.78	0.00401087
626	0.13309156		1215.99	0.01567494		1806	0.00564796		2396	0.01489185		2985.99	-0.00793632		3575.98	-0.01702169		4165.98	0.00417338
626.2	0.1323781		1216.19	0.0161322		1806.2	0.00636476		2396.2	0.01369508		2986.19	-0.00779848		3576.18	-0.0174363		4166.18	0.004417
626.4	0.133424		1216.39	0.01634184		1806.4	0.00700201		2396.4	0.01227226		2986.39	-0.00743847		3576.38	-0.01852833		4166.38	0.00487273
626.6	0.13286168		1216.59	0.01561572		1806.6	0.00721467		2396.6	0.01199926		2986.59	-0.00694429		3576.58	-0.01822424		4166.58	0.00452468
626.8	0.13300507		1216.79	0.01533971		1806.8	0.00678119		2396.8	0.0113844		2986.79	-0.00758502		3576.78	-0.01867329		4166.78	0.00443434
627	0.13325416		1216.99	0.0150197		1807	0.0066345		2397	0.01095184		2986.99	-0.00684924		3576.98	-0.01878474		4166.98	0.00408414
627.2	0.13225042		1217.19	0.0146611		1807.2	0.00533121		2397.2	0.01062663		2987.19	-0.00715503		3577.18	-0.01843712		4167.18	0.00320684
627.4	0.13213317		1217.39	0.01500272		1807.4	0.00393042		2397.4	0.01094026		2987.39	-0.0076368		3577.38	-0.01701699		4167.38	0.00305139
627.6	0.13188289		1217.59	0.01497643		1807.6	0.0033152		2397.6	0.01097719		2987.59	-0.00782729		3577.58	-0.01690566		4167.58	0.00308329
627.8	0.13178579		1217.79	0.01560079		1807.8	0.00178061		2397.8	0.01002251		2987.79	-0.00705785		3577.78	-0.01686041		4167.78	0.00270889
628	0.13155596		1217.99	0.01535824		1808	0.00136334		2398	0.01002298		2987.99	-0.00697906		3577.98	-0.01643238		4167.98	0.00319007
628.2	0.13081152		1218.19	0.01615008		1808.2	0.00066881		2398.2	0.00999803		2988.19	-0.00748139		3578.18	-0.01558772		4168.18	0.00386759
628.4	0.13050658		1218.39	0.0169915		1808.4	0.00031899		2398.4	0.01008532		2988.39	-0.0072159		3578.38	-0.01578897		4168.38	0.00372286
628.6	0.13071022		1218.59	0.01780914		1808.6	-0.00091888		2398.6	0.01068127		2988.59	-0.00745905		3578.58	-0.01587295		4168.58	0.0033269
628.8	0.13122701		1218.79	0.01843539		1808.8	-0.00086097		2398.8	0.01067073		2988.79	-0.00743052		3578.78	-0.01663772		4168.78	0.00281172
629	0.13210606		1218.99	0.01864059		1809	-0.00089763		2399	0.01155369		2988.99	-0.00759154		3578.98	-0.01667065		4168.98	0.00236972
629.2	0.13179728		1219.19	0.01798703		1809.2	-0.00114046		2399.2	0.012151		2989.19	-0.0068568		3579.18	-0.01712933		4169.18	0.00309836
629.4	0.1327632		1219.39	0.0171117		1809.4	-0.00046286		2399.4	0.01189184		2989.39	-0.00599365		3579.38	-0.0169512		4169.38	0.00175369
629.6	0.13278154		1219.59	0.01745228		1809.6	0.00077918		2399.6	0.01203496		2989.59	-0.00571117		3579.58	-0.0176102		4169.58	0.0013978
629.8	0.13349713		1219.79	0.01690991		1809.8	0.00190255		2399.8	0.01177026		2989.79	-0.00494488		3579.78	-0.01885089		4169.78	0.00053228
630	0.13318588		1219.99	0.0167869		1810	0.00275918		2400	0.01206346		2989.99	-0.00482987		3579.98	-0.01986503		4169.98	0.00095929
630.2	0.13314905		1220.19	0.01655739		1810.2	0.00346763		2400.2	0.01094835		2990.19	-0.00479848		3580.18	-0.02020476		4170.18	0.00152826
630.4	0.13415144		1220.39	0.01628397		1810.4	0.00423329		2400.4	0.01147326		2990.39	-0.00468179		3580.38	-0.02092079		4170.38	0.00105546
630.6	0.13419099		1220.59	0.01597748		1810.6	0.00474644		2400.6	0.01206445		2990.59	-0.00530581		3580.58	-0.02042534		4170.58	0.00062559
630.8	0.13496281		1220.79	0.01543862		1810.8	0.00423427		2400.8	0.01163869		2990.79	-0.00549322		3580.78	-0.02032664		4170.78	0.00090123
631	0.13551389		1220.99	0.01437646		1811	0.00419392		2401	0.01153006		2990.99	-0.00456626		3580.98	-0.02019152		4170.98	0.00084504
631.2	0.13413503		1221.19	0.01384128		1811.2	0.0036302		2401.2	0.01148652		2991.19	-0.00486066		3581.18	-0.01922179		4171.18	0.00158404
631.4	0.13403885		1221.39	0.01382329		1811.4	0.00291864		2401.4	0.01151016		2991.39	-0.00523267		3581.38	-0.01878213		4171.38	0.00161742
631.6	0.13390793		1221.59	0.01367364		1811.6	0.0025961		2401.6	0.01141275		2991.59	-0.00467731		3581.58	-0.01874015		4171.58	0.00140825
631.8	0.13312852		1221.79	0.01277445		1811.8	0.0019472		2401.8	0.01054162		2991.79	-0.00419107		3581.78	-0.01785224		4171.78	0.00251276
632	0.133047		1221.99	0.01343412		1812	0.0016388		2402	0.01026693		2991.99	-0.00493221		3581.98	-0.01662173		4171.98	0.00358721
632.2	0.13256661		1222.19	0.01417827		1812.2	0.00164308		2402.2	0.00991001		2992.19	-0.00465482		3582.18	-0.01635797		4172.18	0.00351997
632.4	0.13311822		1222.39	0.01473868		1812.4	0.00120246		2402.4	0.00996117		2992.39	-0.00405298		3582.38	-0.01646834		4172.38	0.00308421
632.6	0.13299199		1222.59	0.01556623		1812.6	0.00070913		2402.6	0.01061278		2992.59	-0.00427045		3582.58	-0.01655019		4172.58	0.00173522
632.8	0.13288706		1222.79	0.0160269		1812.8	0.00199505		2402.8	0.01041778		2992.79	-0.00434447		3582.78	-0.01622096		4172.78	0.00211836
633	0.13221824		1222.99	0.01679586		1813	0.00193136		2403	0.01139454		2992.99	-0.00368138		3582.98	-0.0167704		4172.98	0.00192209
633.2	0.13128973		1223.19	0.01823254		1813.2	0.00260199		2403.2	0.01100266		2993.19	-0.00290236		3583.18	-0.01791175		4173.18	0.00175748
633.4	0.13150452		1223.39	0.01923365		1813.4	0.00354467		2403.4	0.01068663		2993.39	-0.00264431		3583.38	-0.0182445		4173.38	0.0009538
633.6	0.1313419		1223.59	0.01908557		1813.6	0.00490922		2403.6	0.01133609		2993.59	-0.00283002		3583.58	-0.01877218		4173.58	0.00036151
633.8	0.13024313		1223.79	0.01937581		1813.8	0.00456539		2403.8	0.01226816		2993.79	-0.00345227		3583.78	-0.01907142		4173.78	-0.00031502
634	0.12991288		1223.99	0.01994001		1814	0.00522446		2404	0.01294679		2993.99	-0.00415284		3583.98	-0.02074243		4173.98	0.00076002
634.2	0.130413		1224.19	0.02040131		1814.2	0.00643262		2404.2	0.01257104		2994.19	-0.00478953		3584.18	-0.02082611		4174.18	0.00021585
634.4	0.13110452		1224.39	0.01987783		1814.4	0.00670241		2404.4	0.01232493		2994.39	-0.00612348		3584.38	-0.02181513		4174.38	0.00016281
634.6	0.13139533		1224.59	0.01997033		1814.6	0.00662028		2404.6	0.01210561		2994.59	-0.00698658		3584.58	-0.02184247		4174.58	-0.00009534
634.8	0.13090158		1224.79	0.01927464		1814.8	0.00588071		2404.8	0.0115898		2994.79	-0.00784782		3584.78	-0.02262957		4174.78	-0.00017921
635	0.13106582		1224.99	0.01928277		1815	0.00527425		2405	0.01106128		2994.99	-0.00805817		3584.98	-0.02389627		4174.98	0.00060059
635.2	0.13012469		1225.19	0.01882956		1815.2	0.00381625		2405.2	0.01073966		2995.19	-0.00905967		3585.18	-0.02388814		4175.18	0.00160253
635.4	0.13127889		1225.39	0.01816961		1815.4	0.00378487		2405.4	0.0109831		2995.39	-0.00886974		3585.38	-0.02422519		4175.38	0.00159503
635.6	0.13148793		1225.59	0.01786315		1815.6	0.00376551		2405.6	0.01082582		2995.59	-0.00906998		3585.58	-0.02377227		4175.58	0.00210127
635.8	0.1318638		1225.79	0.01693629		1815.8	0.00309595		2405.8	0.01030697		2995.79	-0.00890575		3585.78	-0.0224882		4175.78	0.00296382
636	0.13314119		1225.99	0.01623309		1816	0.00303944		2406	0.01038574		2995.99	-0.0091683		3585.98	-0.02187448		4175.98	0.00322753
636.2	0.13346001		1226.19	0.01589516		1816.2	0.0023881		2406.2	0.01068956		2996.19	-0.00835094		3586.18	-0.0214646		4176.18	0.00336342
636.4	0.13360457		1226.39	0.01568887		1816.4	0.00175612		2406.4	0.01084798		2996.39	-0.00780757		3586.38	-0.02088124		4176.38	0.00395437
636.6	0.13298402		1226.59	0.01559229		1816.6	0.00185762		2406.6	0.01130254		2996.59	-0.00692096		3586.58	-0.01998599		4176.58	0.00378898
636.8	0.13329718		1226.79	0.0157699		1816.8	0.0024379		2406.8	0.01140407		2996.79	-0.00665741		3586.78	-0.01956462		4176.78	0.00475531
637	0.13417891		1226.99	0.01592994		1817	0.00193019		2407	0.01270875		2996.99	-0.0052273		3586.98	-0.01937874		4176.98	0.00507477
637.2	0.13428325		1227.19	0.01589784		1817.2	0.00236141		2407.2	0.01322573		2997.19	-0.00489873		3587.18	-0.01854459		4177.18	0.00446735
637.4	0.13466887		1227.39	0.01434003		1817.4	0.00276111		2407.4	0.01446125		2997.39	-0.00461154		3587.38	-0.01764041		4177.38	0.00386438
637.6	0.13447979		1227.59	0.01358174		1817.6	0.00277504		2407.6	0.01481238		2997.59	-0.00472083		3587.58	-0.01655112		4177.58	0.00377585
637.8	0.13411383		1227.79	0.01413001		1817.8	0.00331527		2407.8	0.01440999		2997.79	-0.00528638		3587.78	-0.01715054		4177.78	0.00388459
638	0.13391201		1227.99	0.01419503		1818	0.00460413		2408	0.01406271		2997.99	-0.00560856		3587.98	-0.01727632		4177.98	0.00416891
638.2	0.13323567		1228.19	0.0143717		1818.2	0.00409332		2408.2	0.01215175		2998.19	-0.00618395		3588.18	-0.01614985		4178.18	0.00403416
638.4	0.13301694		1228.39	0.01404663		1818.4	0.00440198		2408.4	0.01041731		2998.39	-0.00695105		3588.38	-0.01651741		4178.38	0.00363023
638.6	0.13276475		1228.59	0.01551147		1818.6	0.00457106		2408.6	0.00995881		2998.59	-0.00741642		3588.58	-0.01589168		4178.58	0.00174814
638.8	0.13210853		1228.79	0.01633459		1818.8	0.00371141		2408.8	0.00925721		2998.79	-0.00758102		3588.78	-0.01621844		4178.78	0.00108307
639	0.13186831		1228.99	0.01656735		1819	0.00387725		2409	0.00772483		2998.99	-0.00743889		3588.98	-0.01718157		4178.98	0.00176343
639.2	0.131174		1229.19	0.0164104		1819.2	0.00359201		2409.2	0.00787134		2999.19	-0.00735609		3589.18	-0.01665423		4179.18	0.00238164
639.4	0.13125524		1229.39	0.01706586		1819.4	0.00420401		2409.4	0.00801239		2999.39	-0.00691315		3589.38	-0.01651299		4179.38	0.00218552
639.6	0.13146889		1229.59	0.01739784		1819.6	0.0033527		2409.6	0.0082715		2999.59	-0.00746545		3589.58	-0.01671691		4179.58	0.00178324
639.8	0.13171771		1229.79	0.01715399		1819.8	0.00331171		2409.8	0.00861318		2999.79	-0.00771844		3589.78	-0.01776624		4179.78	0.00190593
640	0.13142868		1229.99	0.01692535		1820	0.00337983		2410	0.00926582		2999.99	-0.00804938		3589.98	-0.01875042		4179.98	0.00178763
640.2	0.1310973		1230.19	0.01747781		1820.2	0.00213304		2410.2	0.00917715		3000.19	-0.00771184		3590.18	-0.01961167		4180.18	0.00326921
640.4	0.13101215		1230.39	0.01812765		1820.4	0.00181574		2410.4	0.00970976		3000.39	-0.00793472		3590.38	-0.02080123		4180.38	0.00313516
640.6	0.13081306		1230.59	0.01839438		1820.6	0.00205873		2410.6	0.01087756		3000.59	-0.00804106		3590.58	-0.02117321		4180.58	0.00314809
640.8	0.13150433		1230.79	0.01897074		1820.8	0.00318168		2410.8	0.0109639		3000.79	-0.00838657		3590.78	-0.02167634		4180.78	0.00415003
641	0.13214072		1230.99	0.0179042		1821	0.00348851		2411	0.01235607		3000.99	-0.00758134		3590.98	-0.02197114		4180.98	0.00435402
641.2	0.1317521		1231.19	0.01692039		1821.2	0.00408446		2411.2	0.01250505		3001.19	-0.00764425		3591.18	-0.02249449		4181.18	0.00362179
641.4	0.13212457		1231.39	0.01636517		1821.4	0.00466101		2411.4	0.0126728		3001.39	-0.00901311		3591.38	-0.02282637		4181.38	0.00337025
641.6	0.13143286		1231.59	0.0161962		1821.6	0.00466568		2411.6	0.01198724		3001.59	-0.00915773		3591.58	-0.02318504		4181.58	0.00385215
641.8	0.1311142		1231.79	0.01552991		1821.8	0.00516717		2411.8	0.01184225		3001.79	-0.00907749		3591.78	-0.02359118		4181.78	0.00316328
642	0.13043358		1231.99	0.01487468		1822	0.00528735		2412	0.01134096		3001.99	-0.00859568		3591.98	-0.02336277		4181.98	0.00230873
642.2	0.13093138		1232.19	0.01488953		1822.2	0.00608339		2412.2	0.00981172		3002.19	-0.00903222		3592.18	-0.02279327		4182.18	0.00155029
642.4	0.13151069		1232.39	0.01450758		1822.4	0.00711089		2412.4	0.00968945		3002.39	-0.00898412		3592.38	-0.02241523		4182.38	0.00098804
642.6	0.13176502		1232.59	0.01426664		1822.6	0.00697829		2412.6	0.0099681		3002.59	-0.00906855		3592.58	-0.02132961		4182.58	0.00050064
642.8	0.13111784		1232.79	0.01332717		1822.8	0.00664837		2412.8	0.0107698		3002.79	-0.00821479		3592.78	-0.02127203		4182.78	0.0001212
643	0.13170201		1232.99	0.01267721		1823	0.00714978		2413	0.00990825		3002.99	-0.00823374		3592.98	-0.0198322		4182.98	0.00147986
643.2	0.13184318		1233.19	0.01307672		1823.2	0.00684899		2413.2	0.01125699		3003.19	-0.00762108		3593.18	-0.01893422		4183.18	0.00223878
643.4	0.13197594		1233.39	0.01297134		1823.4	0.00688371		2413.4	0.01090217		3003.39	-0.00799855		3593.38	-0.01772834		4183.38	0.00178292
643.6	0.13234239		1233.59	0.01289892		1823.6	0.00626308		2413.6	0.01069107		3003.59	-0.00826389		3593.58	-0.01783168		4183.58	0.00103849
643.8	0.13167402		1233.79	0.01213841		1823.8	0.00565051		2413.8	0.01086934		3003.79	-0.00808708		3593.78	-0.01813899		4183.78	0.00108512
644	0.1320858		1233.99	0.01286873		1824	0.00460284		2414	0.01060344		3003.99	-0.00804058		3593.98	-0.01770892		4183.98	0.00076508
644.2	0.13157232		1234.19	0.01227834		1824.2	0.0047657		2414.2	0.00981196		3004.19	-0.00866688		3594.18	-0.01809585		4184.18	0.00155986
644.4	0.13194932		1234.39	0.0127658		1824.4	0.00463662		2414.4	0.01033266		3004.39	-0.00820425		3594.38	-0.01838049		4184.38	0.00148545
644.6	0.13166701		1234.59	0.01321038		1824.6	0.0047767		2414.6	0.0107685		3004.59	-0.00821216		3594.58	-0.01771509		4184.58	0.00198123
644.8	0.13178698		1234.79	0.01238322		1824.8	0.00479309		2414.8	0.0105404		3004.79	-0.00820094		3594.78	-0.0175388		4184.78	0.00226777
645	0.1315945		1234.99	0.01139784		1825	0.00408241		2415	0.01129818		3004.99	-0.00838667		3594.98	-0.01796481		4184.98	0.00143352
645.2	0.13136761		1235.19	0.01039654		1825.2	0.00419408		2415.2	0.01144879		3005.19	-0.00841651		3595.18	-0.01815008		4185.18	0.00107832
645.4	0.13084127		1235.39	0.01125174		1825.4	0.00433525		2415.4	0.01134655		3005.39	-0.00928784		3595.38	-0.01896192		4185.38	0.0006478
645.6	0.13030773		1235.59	0.01167858		1825.6	0.00432011		2415.6	0.0104436		3005.59	-0.00748908		3595.58	-0.01994976		4185.58	0.00034163
645.8	0.13065566		1235.79	0.01172241		1825.8	0.00409721		2415.8	0.01052728		3005.79	-0.00737162		3595.78	-0.02062384		4185.78	-0.00018458
646	0.13029225		1235.99	0.01200472		1826	0.00503631		2416	0.00976372		3005.99	-0.00722791		3595.98	-0.02075058		4185.98	0.00015776
646.2	0.12952618		1236.19	0.012556		1826.2	0.00566418		2416.2	0.00955163		3006.19	-0.00707662		3596.18	-0.01988468		4186.18	-0.0001062
646.4	0.12915773		1236.39	0.01207717		1826.4	0.00553937		2416.4	0.010684		3006.39	-0.00662824		3596.38	-0.02013838		4186.38	-0.00047399
646.6	0.12876708		1236.59	0.01191563		1826.6	0.00557491		2416.6	0.01076769		3006.59	-0.00598206		3596.58	-0.02046266		4186.58	-0.00098073
646.8	0.1283462		1236.79	0.01230361		1826.8	0.0050971		2416.8	0.01198581		3006.79	-0.0057365		3596.78	-0.01952973		4186.78	-0.00122495
647	0.12890005		1236.99	0.01254847		1827	0.00439859		2417	0.01199993		3006.99	-0.00625347		3596.98	-0.0185197		4186.98	0.00004174
647.2	0.12836994		1237.19	0.01267351		1827.2	0.00410103		2417.2	0.01178032		3007.19	-0.00626226		3597.18	-0.0189641		4187.18	0.00039002
647.4	0.12825297		1237.39	0.01282186		1827.4	0.00369524		2417.4	0.01126112		3007.39	-0.00643629		3597.38	-0.01816675		4187.38	-0.00008897
647.6	0.12868127		1237.59	0.01300381		1827.6	0.00312695		2417.6	0.01149597		3007.59	-0.00594798		3597.58	-0.01789395		4187.58	-0.00059155
647.8	0.12893955		1237.79	0.01363296		1827.8	0.00280406		2417.8	0.01171141		3007.79	-0.00568951		3597.78	-0.01748813		4187.78	-0.00079478
648	0.12921698		1237.99	0.01469624		1828	0.00279879		2418	0.01088841		3007.99	-0.00596274		3597.98	-0.01726941		4187.98	-0.00107612
648.2	0.12876185		1238.19	0.01463212		1828.2	0.0032577		2418.2	0.01080002		3008.19	-0.00676591		3598.18	-0.01733738		4188.18	-0.00097728
648.4	0.12952403		1238.39	0.01533105		1828.4	0.00243858		2418.4	0.01097745		3008.39	-0.00699839		3598.38	-0.01715538		4188.38	-0.00047729
648.6	0.12945111		1238.59	0.01538073		1828.6	0.0023562		2418.6	0.01080984		3008.59	-0.0081466		3598.58	-0.01673749		4188.58	-0.00026742
648.8	0.1294318		1238.79	0.01438437		1828.8	0.00250295		2418.8	0.0100921		3008.79	-0.00902239		3598.78	-0.01662575		4188.78	-0.00003767
649	0.12926436		1238.99	0.01417228		1829	0.00287985		2419	0.00954228		3008.99	-0.00991871		3598.98	-0.0167359		4188.98	0.00030994
649.2	0.12976506		1239.19	0.01362347		1829.2	0.00359601		2419.2	0.00877669		3009.19	-0.01045543		3599.18	-0.01677049		4189.18	0.00094654
649.4	0.12968579		1239.39	0.01442753		1829.4	0.0039472		2419.4	0.00754525		3009.39	-0.01141747		3599.38	-0.01741622		4189.38	0.00132213
649.6	0.13002133		1239.59	0.01404429		1829.6	0.00409068		2419.6	0.00638251		3009.59	-0.01168752		3599.58	-0.01746973		4189.58	0.0018599
649.8	0.13001771		1239.79	0.01346339		1829.8	0.00387015		2419.8	0.00594976		3009.79	-0.01287213		3599.78	-0.01764993		4189.78	0.00261687
