# Supplementary material for: Functional development of a V3/glycan-specific broadly neutralizing antibody isolated from a case of HIV superinfection
Source: eLife journal article supplement (doi:10.7554/elife.68110), 2021-07-15
Supplement: fig2-data2 [file D7.xls]

Vers 3.43 Data Simulation
Conc1	2.5E-07	2.5E-07	2.5E-07	2.5E-07	2.5E-07	2.5E-07	2.5E-07	2.5E-07
Start1	200	729.99	1259.99	1789.98	2319.98	2849.98	3379.98	3909.98
Stop1	559.79	1089.79	1619.79	2149.78	2679.78	3209.78	3739.78	4269.78
Time1	Data1	Sim1	Time2	Data2	Sim2	Time3	Data3	Sim3	Time4	Data4	Sim4	Time5	Data5	Sim5	Time6	Data6	Sim6	Time7	Data7	Sim7	Time8	Data8	Sim8
200	0.00664325		729.99	0.00622934		1259.99	-0.00207931		1789.98	-0.00146391		2319.98	0.00786451		2849.98	0.00860589		3379.98	0.00984145		3909.98	0.00202153
200.2	0.00654113		730.19	0.0062981		1260.19	-0.00178036		1790.18	-0.00169977		2320.18	0.00802589		2850.18	0.0085981		3380.18	0.01030597		3910.18	0.00170231
200.4	0.00642287		730.39	0.00597657		1260.39	-0.00185801		1790.38	-0.00337825		2320.38	0.00803923		2850.38	0.00840314		3380.38	0.01059469		3910.38	0.0006911
200.6	0.00590875		730.59	0.00645296		1260.59	-0.00263807		1790.58	-0.00461987		2320.58	0.00796972		2850.58	0.00799379		3380.58	0.0113035		3910.58	-0.00043442
200.8	0.00569049		730.79	0.00683095		1260.79	-0.00220394		1790.78	-0.00483466		2320.78	0.00744694		2850.78	0.00708394		3380.78	0.01137715		3910.78	-0.00172081
201	0.00511027		730.99	0.00800673		1260.99	-0.00172404		1790.98	-0.00487152		2320.98	0.00818342		2850.98	0.0062898		3380.98	0.01200661		3910.98	-0.00240702
201.2	0.00535935		731.19	0.00840273		1261.19	-0.00224225		1791.18	-0.00454964		2321.18	0.00760047		2851.18	0.00536345		3381.18	0.01184453		3911.18	-0.00372464
201.4	0.0054584		731.39	0.00923838		1261.39	-0.00243866		1791.38	-0.00429218		2321.38	0.00814618		2851.38	0.00460449		3381.38	0.01113172		3911.38	-0.0041749
201.6	0.00629129		731.59	0.01000751		1261.59	-0.00232574		1791.58	-0.00389111		2321.58	0.00808751		2851.58	0.00408546		3381.58	0.00966961		3911.58	-0.00451941
201.8	0.00606462		731.79	0.01080427		1261.79	-0.00315035		1791.78	-0.00365545		2321.78	0.00864644		2851.78	0.00402074		3381.78	0.00887222		3911.78	-0.00475708
202	0.00697882		731.99	0.01128676		1261.99	-0.00297364		1791.98	-0.00325337		2321.98	0.00870819		2851.98	0.0035652		3381.98	0.00785027		3911.98	-0.00479456
202.2	0.00731116		732.19	0.01194855		1262.19	-0.00297941		1792.18	-0.0023204		2322.18	0.00858174		2852.18	0.0033237		3382.18	0.00727778		3912.18	-0.00434218
202.4	0.00677356		732.39	0.01192495		1262.39	-0.00327453		1792.38	-0.00228445		2322.38	0.00831105		2852.38	0.00321665		3382.38	0.00643089		3912.38	-0.00453644
202.6	0.00695287		732.59	0.01195229		1262.59	-0.00193373		1792.58	-0.00194312		2322.58	0.00913002		2852.58	0.00270934		3382.58	0.00570194		3912.58	-0.00467583
202.8	0.00713457		732.79	0.01239878		1262.79	-0.00122345		1792.78	-0.00152487		2322.78	0.00884408		2852.78	0.00273235		3382.78	0.00559155		3912.78	-0.00493302
203	0.00726458		732.99	0.01130092		1262.99	-0.00105083		1792.98	-0.00142158		2322.98	0.00863093		2852.98	0.00340244		3382.98	0.00557682		3912.98	-0.00495934
203.2	0.00760259		733.19	0.0102147		1263.19	-0.0013743		1793.18	-0.00120862		2323.18	0.00820997		2853.18	0.00423486		3383.18	0.00543476		3913.18	-0.00561603
203.4	0.00719904		733.39	0.00899194		1263.39	-0.00088674		1793.38	-0.00092512		2323.38	0.00675473		2853.38	0.00497959		3383.38	0.00501885		3913.38	-0.00458184
203.6	0.00705749		733.59	0.00931065		1263.59	-0.00144884		1793.58	-0.00126203		2323.58	0.00637063		2853.58	0.00524383		3383.58	0.0053655		3913.58	-0.00419029
203.8	0.00772454		733.79	0.01013559		1263.79	-0.00124949		1793.78	-0.00105439		2323.78	0.00618417		2853.78	0.00603664		3383.78	0.00644141		3913.78	-0.00413545
204	0.00735526		733.99	0.00983073		1263.99	-0.00145859		1793.98	-0.00186248		2323.98	0.00628149		2853.98	0.00720087		3383.98	0.00627107		3913.98	-0.00505968
204.2	0.00762412		734.19	0.01058986		1264.19	-0.00197266		1794.18	-0.00167959		2324.18	0.00607175		2854.18	0.00854963		3384.18	0.00706114		3914.18	-0.0056404
204.4	0.00780645		734.39	0.01079527		1264.39	-0.0030726		1794.38	-0.00299083		2324.38	0.00600932		2854.38	0.00860971		3384.38	0.00755663		3914.38	-0.00638282
204.6	0.00748558		734.59	0.01237225		1264.59	-0.00316586		1794.58	-0.00352455		2324.58	0.00629097		2854.58	0.0092173		3384.58	0.00876834		3914.58	-0.00736756
204.8	0.00817406		734.79	0.01346377		1264.79	-0.00231515		1794.78	-0.00322346		2324.78	0.00634409		2854.78	0.009451		3384.78	0.00901749		3914.78	-0.00766819
205	0.00813284		734.99	0.01444032		1264.99	-0.00267786		1794.98	-0.00393928		2324.98	0.00772408		2854.98	0.00935295		3384.98	0.00975952		3914.98	-0.00779935
205.2	0.0091446		735.19	0.0140312		1265.19	-0.00391325		1795.18	-0.00424316		2325.18	0.00738148		2855.18	0.00967521		3385.18	0.00887553		3915.18	-0.0080113
205.4	0.00923765		735.39	0.01452845		1265.39	-0.00412144		1795.38	-0.0049895		2325.38	0.00865719		2855.38	0.01000116		3385.38	0.00858109		3915.38	-0.00814808
205.6	0.00938529		735.59	0.01485091		1265.59	-0.0045059		1795.58	-0.00553419		2325.58	0.00919505		2855.58	0.01044007		3385.58	0.00757319		3915.58	-0.00837312
205.8	0.00841909		735.79	0.01443444		1265.79	-0.00523319		1795.78	-0.00624086		2325.78	0.00988224		2855.78	0.0104288		3385.78	0.00855794		3915.78	-0.00835568
206	0.00825524		735.99	0.01331088		1265.99	-0.00399258		1795.98	-0.00592898		2325.98	0.00974352		2855.98	0.00989399		3385.98	0.00895388		3915.98	-0.0085886
206.2	0.00752543		736.19	0.01258379		1266.19	-0.00401687		1796.18	-0.00568501		2326.18	0.00962751		2856.18	0.00944509		3386.18	0.00915349		3916.18	-0.00807778
206.4	0.00683235		736.39	0.01125443		1266.39	-0.00327679		1796.38	-0.00546875		2326.38	0.0094447		2856.38	0.0094127		3386.38	0.00995072		3916.38	-0.00860105
206.6	0.00666771		736.59	0.01018672		1266.59	-0.00189701		1796.58	-0.00493187		2326.58	0.00988168		2856.58	0.0092763		3386.58	0.01003886		3916.58	-0.00921891
206.8	0.00569206		736.79	0.00935219		1266.79	-0.00198849		1796.78	-0.00487582		2326.78	0.00905296		2856.78	0.01062366		3386.78	0.01021797		3916.78	-0.00878155
207	0.00534182		736.99	0.00938446		1266.99	-0.00122209		1796.98	-0.00441164		2326.98	0.00763902		2856.98	0.01056664		3386.98	0.01129685		3916.98	-0.00804925
207.2	0.00521979		737.19	0.00828986		1267.19	-0.00104344		1797.18	-0.00466265		2327.18	0.0063272		2857.18	0.01124025		3387.18	0.01132499		3917.18	-0.00752256
207.4	0.0053228		737.39	0.00826787		1267.39	-0.00046005		1797.38	-0.00483528		2327.38	0.00554347		2857.38	0.01130255		3387.38	0.01165266		3917.38	-0.00657962
207.6	0.00564601		737.59	0.00819053		1267.59	-0.00003503		1797.58	-0.00474354		2327.58	0.0058489		2857.58	0.0118253		3387.58	0.01119601		3917.58	-0.00732638
207.8	0.00665284		737.79	0.00817136		1267.79	0.00030603		1797.78	-0.00382721		2327.78	0.00551688		2857.78	0.01255416		3387.78	0.01067053		3917.78	-0.00816848
208	0.00616944		737.99	0.00845475		1267.99	-0.00012057		1797.98	-0.00391186		2327.98	0.00578152		2857.98	0.01331596		3387.98	0.00958034		3917.98	-0.00886328
208.2	0.00771189		738.19	0.00867226		1268.19	-0.00116081		1798.18	-0.00242049		2328.18	0.00676742		2858.18	0.01347618		3388.18	0.00920022		3918.18	-0.00916117
208.4	0.00816945		738.39	0.00965248		1268.39	-0.00126581		1798.38	-0.00267938		2328.38	0.00729779		2858.38	0.01386213		3388.38	0.00849004		3918.38	-0.00868952
208.6	0.00853212		738.59	0.01094091		1268.59	-0.0007991		1798.58	-0.0031495		2328.58	0.00800763		2858.58	0.01481341		3388.58	0.00837771		3918.58	-0.00871743
208.8	0.00918031		738.79	0.01148791		1268.79	-0.00172602		1798.78	-0.00307738		2328.78	0.00841326		2858.78	0.01421185		3388.78	0.00752396		3918.78	-0.00854357
209	0.00948387		738.99	0.01157995		1268.99	-0.00279881		1798.98	-0.00309858		2328.98	0.00929243		2858.98	0.01391932		3388.98	0.00722861		3918.98	-0.00930882
209.2	0.00985725		739.19	0.01141985		1269.19	-0.00367138		1799.18	-0.00329288		2329.18	0.01009615		2859.18	0.01446349		3389.18	0.00654403		3919.18	-0.00994332
209.4	0.00947625		739.39	0.01289921		1269.39	-0.0031478		1799.38	-0.00322248		2329.38	0.01064793		2859.38	0.01398457		3389.38	0.00599889		3919.38	-0.01012635
209.6	0.00969451		739.59	0.01346793		1269.59	-0.00360058		1799.58	-0.00240194		2329.58	0.01050246		2859.58	0.01303109		3389.58	0.00543818		3919.58	-0.0095121
209.8	0.00963642		739.79	0.01330082		1269.79	-0.00366977		1799.78	-0.00194905		2329.78	0.00975513		2859.78	0.0124816		3389.78	0.00625792		3919.78	-0.0094463
210	0.00949101		739.99	0.01334056		1269.99	-0.00254039		1799.98	-0.00155921		2329.98	0.00956297		2859.98	0.01254894		3389.98	0.00561423		3919.98	-0.00952712
210.2	0.00960555		740.19	0.01293071		1270.19	-0.00284185		1800.18	-0.00151094		2330.18	0.00884095		2860.18	0.01254363		3390.18	0.00530512		3920.18	-0.00826353
210.4	0.00912271		740.39	0.01240798		1270.39	-0.00209626		1800.38	-0.00098022		2330.38	0.00844308		2860.38	0.0118962		3390.38	0.00562571		3920.38	-0.00928287
210.6	0.00853483		740.59	0.01305128		1270.59	-0.00178041		1800.58	-0.00131545		2330.58	0.007303		2860.58	0.01176727		3390.58	0.00540381		3920.58	-0.00931229
210.8	0.00767186		740.79	0.01281816		1270.79	-0.00142168		1800.78	-0.00173954		2330.78	0.00630064		2860.78	0.01224838		3390.78	0.00592248		3920.78	-0.0085471
211	0.0067704		740.99	0.01289278		1270.99	-0.00040717		1800.98	-0.00181073		2330.98	0.00446176		2860.98	0.01169124		3390.98	0.00647731		3920.98	-0.00731122
211.2	0.00694887		741.19	0.01325555		1271.19	-0.00046332		1801.18	-0.00285629		2331.18	0.00454929		2861.18	0.01220169		3391.18	0.00631157		3921.18	-0.00690757
211.4	0.0063677		741.39	0.01366648		1271.39	0.00039594		1801.38	-0.00239994		2331.38	0.00454322		2861.38	0.01318047		3391.38	0.00744024		3921.38	-0.00661755
211.6	0.00618618		741.59	0.01401055		1271.59	0.00033714		1801.58	-0.00217117		2331.58	0.00454474		2861.58	0.01428696		3391.58	0.00672044		3921.58	-0.00750575
211.8	0.00633693		741.79	0.014744		1271.79	0.00034154		1801.78	-0.00246756		2331.78	0.00494019		2861.78	0.01629424		3391.78	0.00670649		3921.78	-0.00691999
212	0.00589567		741.99	0.01462273		1271.99	-0.00015794		1801.98	-0.00233374		2331.98	0.00550212		2861.98	0.01813031		3391.98	0.00787187		3921.98	-0.00704255
212.2	0.00674178		742.19	0.0149974		1272.19	0.00001614		1802.18	-0.00156847		2332.18	0.00656192		2862.18	0.01901819		3392.18	0.00856855		3922.18	-0.00747959
212.4	0.00604394		742.39	0.01536074		1272.39	-0.00037743		1802.38	-0.00192775		2332.38	0.00689065		2862.38	0.0196717		3392.38	0.00852547		3922.38	-0.00757718
212.6	0.00622194		742.59	0.01445792		1272.59	-0.00076958		1802.58	-0.00167434		2332.58	0.00739145		2862.58	0.0197283		3392.58	0.00974021		3922.58	-0.00805865
212.8	0.00679823		742.79	0.01448502		1272.79	-0.0008815		1802.78	-0.00189629		2332.78	0.00821764		2862.78	0.02012675		3392.78	0.00960072		3922.78	-0.00883121
213	0.00769417		742.99	0.01456079		1272.99	-0.00122745		1802.98	-0.00134463		2332.98	0.00861063		2862.98	0.02089414		3392.98	0.00941195		3922.98	-0.00926113
213.2	0.00802124		743.19	0.01476988		1273.19	-0.00114137		1803.18	-0.00167092		2333.18	0.0095681		2863.18	0.02085258		3393.18	0.00913623		3923.18	-0.00854945
213.4	0.00845676		743.39	0.01526535		1273.39	-0.00009246		1803.38	-0.00118634		2333.38	0.00908361		2863.38	0.02026173		3393.38	0.00866878		3923.38	-0.00830168
213.6	0.00910276		743.59	0.01388699		1273.59	-0.0008627		1803.58	-0.00128701		2333.58	0.00845919		2863.58	0.02036339		3393.58	0.00825836		3923.58	-0.00800996
213.8	0.00890601		743.79	0.01329288		1273.79	-0.00022999		1803.78	-0.00083441		2333.78	0.00799102		2863.78	0.02000301		3393.78	0.00789205		3923.78	-0.00865666
214	0.00896064		743.99	0.01246659		1273.99	0.00017729		1803.98	-0.001134		2333.98	0.00719781		2863.98	0.01904168		3393.98	0.00694913		3923.98	-0.00872828
214.2	0.00998059		744.19	0.011398		1274.19	-0.00044886		1804.18	-0.00111193		2334.18	0.00629104		2864.18	0.01900741		3394.18	0.0061859		3924.18	-0.00809338
214.4	0.01003238		744.39	0.01088308		1274.39	0.000209		1804.38	-0.00163715		2334.38	0.00564752		2864.38	0.01841921		3394.38	0.00572693		3924.38	-0.00832218
214.6	0.00956953		744.59	0.01076737		1274.59	-0.00035472		1804.58	-0.00233475		2334.58	0.00421833		2864.58	0.01838736		3394.58	0.00587688		3924.58	-0.00805736
214.8	0.00865088		744.79	0.01093292		1274.79	-0.00037346		1804.78	-0.00258341		2334.78	0.0038413		2864.78	0.01778261		3394.78	0.00532416		3924.78	-0.00773243
215	0.00817271		744.99	0.01106491		1274.99	-0.00030457		1804.98	-0.00270975		2334.98	0.00262592		2864.98	0.01758128		3394.98	0.0053904		3924.98	-0.00694028
215.2	0.00821532		745.19	0.01153839		1275.19	-0.00037287		1805.18	-0.00284348		2335.18	0.00290318		2865.18	0.01713491		3395.18	0.00566931		3925.18	-0.00710438
215.4	0.00771324		745.39	0.01168695		1275.39	-0.000629		1805.38	-0.00233986		2335.38	0.00301027		2865.38	0.01737192		3395.38	0.00666487		3925.38	-0.00821992
215.6	0.007513		745.59	0.01221505		1275.59	-0.00193609		1805.58	-0.00374992		2335.58	0.00282227		2865.58	0.0180501		3395.58	0.00634597		3925.58	-0.00812695
215.8	0.00652608		745.79	0.012254		1275.79	-0.00243513		1805.78	-0.00396054		2335.78	0.00294123		2865.78	0.0192115		3395.78	0.00699228		3925.78	-0.00807849
216	0.00655565		745.99	0.01224953		1275.99	-0.00318949		1805.98	-0.00393295		2335.98	0.002747		2865.98	0.01986982		3395.98	0.00880962		3925.98	-0.00938019
216.2	0.00670453		746.19	0.01250818		1276.19	-0.00371539		1806.18	-0.004172		2336.18	0.00374964		2866.18	0.02005655		3396.18	0.00862162		3926.18	-0.01019283
216.4	0.00673393		746.39	0.01184404		1276.39	-0.00442458		1806.38	-0.0036899		2336.38	0.0034364		2866.38	0.0199177		3396.38	0.00811879		3926.38	-0.01163035
216.6	0.00660336		746.59	0.01211562		1276.59	-0.00473319		1806.58	-0.00313309		2336.58	0.00316023		2866.58	0.0198622		3396.58	0.00865407		3926.58	-0.01265217
216.8	0.00726338		746.79	0.01272363		1276.79	-0.00453947		1806.78	-0.00295754		2336.78	0.00330708		2866.78	0.02078395		3396.78	0.00786913		3926.78	-0.01281296
217	0.00788695		746.99	0.01226275		1276.99	-0.00582405		1806.98	-0.00263957		2336.98	0.00354983		2866.98	0.02096631		3396.98	0.00728202		3926.98	-0.01252779
217.2	0.00820022		747.19	0.01203925		1277.19	-0.00446686		1807.18	-0.0024519		2337.18	0.00440708		2867.18	0.02063407		3397.18	0.00672534		3927.18	-0.01231896
217.4	0.00854084		747.39	0.01179098		1277.39	-0.00351487		1807.38	-0.0017899		2337.38	0.00508064		2867.38	0.0208676		3397.38	0.00606427		3927.38	-0.01305678
217.6	0.00860421		747.59	0.01107588		1277.59	-0.00306015		1807.58	-0.00171158		2337.58	0.0049731		2867.58	0.02084268		3397.58	0.00503405		3927.58	-0.01295511
217.8	0.00887314		747.79	0.01111179		1277.79	-0.00193494		1807.78	-0.00113851		2337.78	0.00471632		2867.78	0.01973264		3397.78	0.00481396		3927.78	-0.01364502
218	0.00967833		747.99	0.01088123		1277.99	-0.00159524		1807.98	-0.00188057		2337.98	0.00487092		2867.98	0.02051997		3397.98	0.00497356		3927.98	-0.01318986
218.2	0.01050946		748.19	0.0103975		1278.19	-0.00083908		1808.18	-0.00264674		2338.18	0.0050596		2868.18	0.02188294		3398.18	0.00393361		3928.18	-0.01229699
218.4	0.00987099		748.39	0.01035577		1278.39	0.00012135		1808.38	-0.00266574		2338.38	0.00535429		2868.38	0.02244556		3398.38	0.00428593		3928.38	-0.01130482
218.6	0.00914007		748.59	0.01124547		1278.59	0.00053674		1808.58	-0.00138734		2338.58	0.00489786		2868.58	0.02219517		3398.58	0.00443164		3928.58	-0.01112833
218.8	0.00862833		748.79	0.01245787		1278.79	0.00122921		1808.78	-0.00096122		2338.78	0.00557188		2868.78	0.02248902		3398.78	0.00419564		3928.78	-0.01041003
219	0.00860948		748.99	0.01231008		1278.99	0.00147598		1808.98	-0.00168726		2338.98	0.00555738		2868.98	0.02249415		3398.98	0.00527258		3928.98	-0.01017507
219.2	0.00828571		749.19	0.0124521		1279.19	0.00178201		1809.18	-0.00230558		2339.18	0.00601715		2869.18	0.023175		3399.18	0.00645722		3929.18	-0.01045429
219.4	0.0077965		749.39	0.01284563		1279.39	0.00054359		1809.38	-0.0028835		2339.38	0.00734828		2869.38	0.02359735		3399.38	0.00738431		3929.38	-0.01023505
219.6	0.00709388		749.59	0.01323147		1279.59	-0.00059631		1809.58	-0.00400591		2339.58	0.00691715		2869.58	0.02459114		3399.58	0.00715422		3929.58	-0.00957355
219.8	0.00702414		749.79	0.01335905		1279.79	-0.00057718		1809.78	-0.00378095		2339.78	0.00675521		2869.78	0.02474277		3399.78	0.00778558		3929.78	-0.00971687
220	0.00798497		749.99	0.0136116		1279.99	-0.00088648		1809.98	-0.00476543		2339.98	0.00721847		2869.98	0.02446835		3399.98	0.00799081		3929.98	-0.01084036
220.2	0.00834766		750.19	0.01415866		1280.19	-0.00154695		1810.18	-0.00460573		2340.18	0.00761961		2870.18	0.02352034		3400.18	0.00736638		3930.18	-0.01163791
220.4	0.00812477		750.39	0.01388837		1280.39	-0.00206485		1810.38	-0.00419441		2340.38	0.0069394		2870.38	0.02245613		3400.38	0.00756962		3930.38	-0.01239164
220.6	0.00845672		750.59	0.01377067		1280.59	-0.00265979		1810.58	-0.00410668		2340.58	0.00670695		2870.58	0.0221709		3400.58	0.00786587		3930.58	-0.01290217
220.8	0.00945603		750.79	0.01325739		1280.79	-0.00285889		1810.78	-0.00481048		2340.78	0.00633486		2870.78	0.02132566		3400.78	0.0085518		3930.78	-0.0130266
221	0.01008482		750.99	0.01307802		1280.99	-0.00271173		1810.98	-0.00489616		2340.98	0.00588528		2870.98	0.02050806		3400.98	0.00820666		3930.98	-0.01302454
221.2	0.01066035		751.19	0.01302277		1281.19	-0.00190487		1811.18	-0.0049191		2341.18	0.00595541		2871.18	0.01940747		3401.18	0.00764242		3931.18	-0.01297664
221.4	0.01055525		751.39	0.01322407		1281.39	-0.00184594		1811.38	-0.00556119		2341.38	0.00601541		2871.38	0.01870568		3401.38	0.00798832		3931.38	-0.01272605
221.6	0.01104094		751.59	0.01253696		1281.59	-0.0014027		1811.58	-0.00630027		2341.58	0.00516684		2871.58	0.01915027		3401.58	0.00819937		3931.58	-0.01222706
221.8	0.01128683		751.79	0.0122348		1281.79	-0.00163239		1811.78	-0.00597191		2341.78	0.00496791		2871.78	0.0189114		3401.78	0.00842667		3931.78	-0.0122326
222	0.0116831		751.99	0.01284502		1281.99	-0.00191308		1811.98	-0.00596943		2341.98	0.00475497		2871.98	0.01928947		3401.98	0.00881032		3931.98	-0.01187755
222.2	0.01113576		752.19	0.01309128		1282.19	-0.00191769		1812.18	-0.00572658		2342.18	0.0041212		2872.18	0.01884238		3402.18	0.00829957		3932.18	-0.01119146
222.4	0.01117946		752.39	0.01365765		1282.39	-0.00162916		1812.38	-0.00486585		2342.38	0.00432698		2872.38	0.01984703		3402.38	0.0082077		3932.38	-0.01037723
222.6	0.01134724		752.59	0.01409689		1282.59	-0.00213484		1812.58	-0.00334359		2342.58	0.00358694		2872.58	0.01956644		3402.58	0.00796397		3932.58	-0.01028265
222.8	0.01142954		752.79	0.01464893		1282.79	-0.00313501		1812.78	-0.00470015		2342.78	0.00346941		2872.78	0.02110799		3402.78	0.00801041		3932.78	-0.00986063
223	0.01139985		752.99	0.01445358		1282.99	-0.00406551		1812.98	-0.00610097		2342.98	0.00283054		2872.98	0.02204575		3402.98	0.00838423		3932.98	-0.01050056
223.2	0.01136932		753.19	0.01382638		1283.19	-0.00449977		1813.18	-0.00590072		2343.18	0.00306505		2873.18	0.02350134		3403.18	0.00835225		3933.18	-0.01042771
223.4	0.01146241		753.39	0.01422491		1283.39	-0.00580673		1813.38	-0.00570593		2343.38	0.00324441		2873.38	0.02351812		3403.38	0.00832097		3933.38	-0.01037979
223.6	0.0122823		753.59	0.01392565		1283.59	-0.00531258		1813.58	-0.00511866		2343.58	0.00304727		2873.58	0.02449815		3403.58	0.00822896		3933.58	-0.01056542
223.8	0.01223343		753.79	0.01307446		1283.79	-0.00497515		1813.78	-0.0047906		2343.78	0.00291477		2873.78	0.02443609		3403.78	0.00857946		3933.78	-0.01129566
224	0.01238185		753.99	0.01283125		1283.99	-0.00494344		1813.98	-0.00507282		2343.98	0.00376828		2873.98	0.02433624		3403.98	0.00833		3933.98	-0.01231361
224.2	0.01198557		754.19	0.01224585		1284.19	-0.00506814		1814.18	-0.00415701		2344.18	0.00437909		2874.18	0.02382912		3404.18	0.0083913		3934.18	-0.01275847
224.4	0.01144763		754.39	0.01093313		1284.39	-0.00435644		1814.38	-0.0043162		2344.38	0.00488416		2874.38	0.02338116		3404.38	0.00840711		3934.38	-0.01274257
224.6	0.01119003		754.59	0.01020466		1284.59	-0.00354476		1814.58	-0.0038373		2344.58	0.00420953		2874.58	0.0229969		3404.58	0.00812028		3934.58	-0.01378798
224.8	0.01036581		754.79	0.00986688		1284.79	-0.00280417		1814.78	-0.0035535		2344.78	0.00427695		2874.78	0.02211957		3404.78	0.00844294		3934.78	-0.0131913
225	0.01035212		754.99	0.00982825		1284.99	-0.00198024		1814.98	-0.00264038		2344.98	0.00464503		2874.98	0.02240047		3404.98	0.0077455		3934.98	-0.01287838
225.2	0.01025789		755.19	0.01002762		1285.19	-0.00170385		1815.18	-0.00239012		2345.18	0.00526099		2875.18	0.02204007		3405.18	0.00763017		3935.18	-0.01144201
225.4	0.00913006		755.39	0.01133871		1285.39	-0.00023706		1815.38	-0.00121803		2345.38	0.00617673		2875.38	0.02165678		3405.38	0.00721769		3935.38	-0.01141485
225.6	0.00966656		755.59	0.01176965		1285.59	0.00015635		1815.58	-0.00059065		2345.58	0.00655881		2875.58	0.02232967		3405.58	0.00648342		3935.58	-0.01119006
225.8	0.00913903		755.79	0.01291239		1285.79	0.0001343		1815.78	0.00001324		2345.78	0.0068088		2875.78	0.02219059		3405.78	0.00531434		3935.78	-0.01146174
226	0.00925571		755.99	0.0138459		1285.99	-0.00008482		1815.98	0.00011762		2345.98	0.00680692		2875.98	0.02331495		3405.98	0.00499435		3935.98	-0.01074474
226.2	0.00899586		756.19	0.01388222		1286.19	0.0001743		1816.18	-0.00018716		2346.18	0.0062638		2876.18	0.02408928		3406.18	0.00420665		3936.18	-0.01035773
226.4	0.0096931		756.39	0.01385187		1286.39	0.00070907		1816.38	-0.00024151		2346.38	0.00557095		2876.38	0.02511464		3406.38	0.00288998		3936.38	-0.0101045
226.6	0.00991974		756.59	0.01455216		1286.59	0.00030442		1816.58	-0.00015999		2346.58	0.00444267		2876.58	0.02535817		3406.58	0.00312735		3936.58	-0.01019551
226.8	0.00969713		756.79	0.01531574		1286.79	-0.00044939		1816.78	-0.00170627		2346.78	0.00331541		2876.78	0.02678605		3406.78	0.00327023		3936.78	-0.00984708
227	0.00975591		756.99	0.01558379		1286.99	-0.00064764		1816.98	-0.00138996		2346.98	0.00370334		2876.98	0.02716039		3406.98	0.00371638		3936.98	-0.01150377
227.2	0.01027991		757.19	0.01531739		1287.19	-0.00078264		1817.18	-0.00123942		2347.18	0.0037712		2877.18	0.02724154		3407.18	0.00489132		3937.18	-0.01193577
227.4	0.01136512		757.39	0.01504415		1287.39	-0.0012204		1817.38	-0.00185734		2347.38	0.00303367		2877.38	0.02783056		3407.38	0.00611602		3937.38	-0.01230831
227.6	0.01145641		757.59	0.01400077		1287.59	-0.00133125		1817.58	-0.00277646		2347.58	0.00348194		2877.58	0.02812556		3407.58	0.0067896		3937.58	-0.01223866
227.8	0.01131666		757.79	0.01440231		1287.79	-0.00127242		1817.78	-0.00420583		2347.78	0.00333667		2877.78	0.02772813		3407.78	0.0077601		3937.78	-0.0131568
228	0.01149428		757.99	0.0148719		1287.99	-0.00098629		1817.98	-0.00475139		2347.98	0.00402036		2877.98	0.02693476		3407.98	0.00816514		3937.98	-0.01353513
228.2	0.01091875		758.19	0.01412028		1288.19	-0.00131365		1818.18	-0.00534794		2348.18	0.00435754		2878.18	0.02543382		3408.18	0.00839286		3938.18	-0.01279429
228.4	0.00986945		758.39	0.01344942		1288.39	-0.00099601		1818.38	-0.00512566		2348.38	0.00437146		2878.38	0.02508602		3408.38	0.00866542		3938.38	-0.01193067
228.6	0.00895578		758.59	0.01361129		1288.59	-0.00180824		1818.58	-0.00514677		2348.58	0.00416042		2878.58	0.02535083		3408.58	0.0090159		3938.58	-0.01262019
228.8	0.00863887		758.79	0.01405493		1288.79	-0.00199888		1818.78	-0.00499508		2348.78	0.00459542		2878.78	0.02513498		3408.78	0.00942281		3938.78	-0.0117431
229	0.0089118		758.99	0.01448543		1288.99	-0.00154659		1818.98	-0.00474685		2348.98	0.0052578		2878.98	0.02474448		3408.98	0.0093065		3938.98	-0.01191544
229.2	0.00791828		759.19	0.01554096		1289.19	-0.00086596		1819.18	-0.00393275		2349.18	0.00553817		2879.18	0.02376819		3409.18	0.0089038		3939.18	-0.01104968
229.4	0.00751856		759.39	0.01573934		1289.39	-0.00038459		1819.38	-0.0039574		2349.38	0.00660852		2879.38	0.02392261		3409.38	0.00728285		3939.38	-0.01125319
229.6	0.00712871		759.59	0.0154838		1289.59	-0.00096913		1819.58	-0.00374645		2349.58	0.00662813		2879.58	0.02474622		3409.58	0.00651342		3939.58	-0.01046332
229.8	0.00684949		759.79	0.01551497		1289.79	-0.00137526		1819.78	-0.00314275		2349.78	0.00669072		2879.78	0.02553602		3409.78	0.0064593		3939.78	-0.01004001
230	0.00707663		759.99	0.01532314		1289.99	-0.00211201		1819.98	-0.00240211		2349.98	0.00617147		2879.98	0.02586728		3409.98	0.00676013		3939.98	-0.00957256
230.2	0.00689318		760.19	0.01584445		1290.19	-0.00109193		1820.18	-0.00234225		2350.18	0.00554206		2880.18	0.02540564		3410.18	0.00596246		3940.18	-0.0097497
230.4	0.00799158		760.39	0.01626599		1290.39	-0.00048823		1820.38	-0.0014978		2350.38	0.00511032		2880.38	0.02522489		3410.38	0.00589138		3940.38	-0.00949814
230.6	0.00887734		760.59	0.01727399		1290.59	-0.00045244		1820.58	-0.00043961		2350.58	0.00459412		2880.58	0.02569036		3410.58	0.00643644		3940.58	-0.00971945
230.8	0.00954476		760.79	0.01798509		1290.79	-0.00052525		1820.78	0.00024269		2350.78	0.0041039		2880.78	0.02619301		3410.78	0.00693003		3940.78	-0.00978591
231	0.00977175		760.99	0.01817123		1290.99	0.00106722		1820.98	0.00114268		2350.98	0.0052392		2880.98	0.02610551		3410.98	0.00704143		3940.98	-0.01072813
231.2	0.01081531		761.19	0.01702194		1291.19	0.00036235		1821.18	0.00101547		2351.18	0.00403344		2881.18	0.02584082		3411.18	0.00741733		3941.18	-0.01112366
231.4	0.01078965		761.39	0.01739026		1291.39	0.00015811		1821.38	0.00027261		2351.38	0.0039466		2881.38	0.02633622		3411.38	0.00784396		3941.38	-0.01118393
231.6	0.01085571		761.59	0.01802089		1291.59	-0.00020305		1821.58	0.00021869		2351.58	0.00409858		2881.58	0.0269094		3411.58	0.00791331		3941.58	-0.01153738
231.8	0.01167801		761.79	0.01879404		1291.79	0.00031165		1821.78	0.00028653		2351.78	0.00397741		2881.78	0.02716836		3411.78	0.00823696		3941.78	-0.01209052
232	0.01125791		761.99	0.018544		1291.99	-0.00074981		1821.98	0.00063031		2351.98	0.00365539		2881.98	0.02727355		3411.98	0.00842281		3941.98	-0.01155043
232.2	0.01063648		762.19	0.01714814		1292.19	-0.00179578		1822.18	-0.00005199		2352.18	0.00336336		2882.18	0.02705435		3412.18	0.00835685		3942.18	-0.01086078
232.4	0.0094388		762.39	0.01691537		1292.39	-0.00219109		1822.38	0.000162		2352.38	0.00348255		2882.38	0.02815212		3412.38	0.00869593		3942.38	-0.01133171
232.6	0.00927394		762.59	0.01618781		1292.59	-0.00288512		1822.58	-0.00062008		2352.58	0.00412337		2882.58	0.02906821		3412.58	0.00839974		3942.58	-0.01201012
232.8	0.00894417		762.79	0.01608491		1292.79	-0.00311396		1822.78	-0.00114833		2352.78	0.00348069		2882.78	0.02910171		3412.78	0.00851391		3942.78	-0.01178802
233	0.00910813		762.99	0.01508623		1292.99	-0.003525		1822.98	-0.00153018		2352.98	0.00499096		2882.98	0.02960029		3412.98	0.00813745		3942.98	-0.01136125
233.2	0.00957228		763.19	0.01524242		1293.19	-0.00423255		1823.18	-0.00187821		2353.18	0.00488182		2883.18	0.02980385		3413.18	0.00791081		3943.18	-0.01112525
233.4	0.0095013		763.39	0.01474668		1293.39	-0.00495053		1823.38	-0.0026148		2353.38	0.00448645		2883.38	0.03026356		3413.38	0.00831803		3943.38	-0.01068015
233.6	0.00874399		763.59	0.01466662		1293.59	-0.00569259		1823.58	-0.00183166		2353.58	0.00444549		2883.58	0.02948585		3413.58	0.008931		3943.58	-0.01077936
233.8	0.00904034		763.79	0.0147588		1293.79	-0.00593454		1823.78	-0.00281469		2353.78	0.00437663		2883.78	0.02903356		3413.78	0.00941277		3943.78	-0.01087273
234	0.00906801		763.99	0.01515802		1293.99	-0.0059012		1823.98	-0.00324202		2353.98	0.00467517		2883.98	0.02885366		3413.98	0.00958157		3943.98	-0.01028963
234.2	0.00960862		764.19	0.01595994		1294.19	-0.00481085		1824.18	-0.00412299		2354.18	0.00468185		2884.18	0.02868913		3414.18	0.00861538		3944.18	-0.01027467
234.4	0.01084075		764.39	0.0163508		1294.39	-0.00421093		1824.38	-0.00356949		2354.38	0.00450159		2884.38	0.02868665		3414.38	0.00968056		3944.38	-0.01070504
234.6	0.01116606		764.59	0.01647607		1294.59	-0.00356236		1824.58	-0.00290599		2354.58	0.00405792		2884.58	0.02911215		3414.58	0.00986799		3944.58	-0.01164521
234.8	0.01146129		764.79	0.01666685		1294.79	-0.00247484		1824.78	-0.00308381		2354.78	0.00496671		2884.78	0.02903086		3414.78	0.00911955		3944.78	-0.01186677
235	0.01143099		764.99	0.01595105		1294.99	-0.00164342		1824.98	-0.00211208		2354.98	0.00597341		2884.98	0.02836502		3414.98	0.00855887		3944.98	-0.01215676
235.2	0.01195095		765.19	0.01530005		1295.19	-0.0019669		1825.18	-0.00147491		2355.18	0.00527118		2885.18	0.02891615		3415.18	0.00897614		3945.18	-0.01355129
235.4	0.0114674		765.39	0.01618283		1295.39	-0.00114063		1825.38	-0.00072583		2355.38	0.00556779		2885.38	0.02903685		3415.38	0.00951033		3945.38	-0.01342503
235.6	0.01296525		765.59	0.01547128		1295.59	-0.00067697		1825.58	-0.00013407		2355.58	0.00547457		2885.58	0.02958017		3415.58	0.00852474		3945.58	-0.01368303
235.8	0.01335088		765.79	0.01469183		1295.79	-0.00046096		1825.78	0.00030237		2355.78	0.00543067		2885.78	0.02932419		3415.78	0.00870772		3945.78	-0.01368907
236	0.01333842		765.99	0.01415858		1295.99	-0.00019696		1825.98	0.00016617		2355.98	0.00478117		2885.98	0.03000381		3415.98	0.00908753		3945.98	-0.01338773
236.2	0.01279142		766.19	0.01327385		1296.19	0.00037125		1826.18	-0.00010549		2356.18	0.0047168		2886.18	0.03019813		3416.18	0.0080066		3946.18	-0.01355404
236.4	0.01174999		766.39	0.01300697		1296.39	0.00074567		1826.38	0.00006603		2356.38	0.00518302		2886.38	0.03195585		3416.38	0.00804759		3946.38	-0.01381116
236.6	0.01186093		766.59	0.01219496		1296.59	0.00119881		1826.58	-0.00030777		2356.58	0.00481106		2886.58	0.03274025		3416.58	0.00728786		3946.58	-0.01390595
236.8	0.01235249		766.79	0.01296064		1296.79	0.00066947		1826.78	-0.0008232		2356.78	0.00399111		2886.78	0.03320298		3416.78	0.00711145		3946.78	-0.01370836
237	0.0122305		766.99	0.01290572		1296.99	0.00023224		1826.98	-0.00022288		2356.98	0.00462946		2886.98	0.03397902		3416.98	0.00661438		3946.98	-0.01382874
237.2	0.01199645		767.19	0.01308774		1297.19	-0.00005505		1827.18	0.00045463		2357.18	0.00267078		2887.18	0.03358045		3417.18	0.00647561		3947.18	-0.0140501
237.4	0.01067137		767.39	0.01273425		1297.39	0.00017805		1827.38	0.00043023		2357.38	0.00195304		2887.38	0.0335877		3417.38	0.00717439		3947.38	-0.01384756
237.6	0.0097001		767.59	0.0123219		1297.59	0.00008175		1827.58	-0.00031458		2357.58	0.00232239		2887.58	0.03310114		3417.58	0.0066341		3947.58	-0.01411011
237.8	0.00920506		767.79	0.01277028		1297.79	-0.00005873		1827.78	-0.00143903		2357.78	0.00198023		2887.78	0.03334356		3417.78	0.00685609		3947.78	-0.01416056
238	0.00901436		767.99	0.01397608		1297.99	0.00017547		1827.98	-0.00109136		2357.98	0.00210172		2887.98	0.03367163		3417.98	0.00717788		3947.98	-0.01341747
238.2	0.00895332		768.19	0.01397958		1298.19	-0.00002346		1828.18	-0.00126459		2358.18	0.00188174		2888.18	0.03320738		3418.18	0.00795911		3948.18	-0.01405543
238.4	0.0090218		768.39	0.01411985		1298.39	-0.00012914		1828.38	-0.00066582		2358.38	0.00172709		2888.38	0.03326196		3418.38	0.00954292		3948.38	-0.01433516
238.6	0.00922851		768.59	0.01386342		1298.59	-0.00067279		1828.58	-0.00131668		2358.58	0.00165164		2888.58	0.03300996		3418.58	0.00900756		3948.58	-0.01450284
238.8	0.00912015		768.79	0.01384765		1298.79	-0.00042192		1828.78	-0.00081779		2358.78	0.00229364		2888.78	0.03285767		3418.78	0.00904175		3948.78	-0.01496235
239	0.00882755		768.99	0.01373643		1298.99	-0.00117499		1828.98	-0.00015722		2358.98	0.00218871		2888.98	0.03208791		3418.98	0.00994041		3948.98	-0.01507154
239.2	0.00898068		769.19	0.01353408		1299.19	-0.00022631		1829.18	-0.00042372		2359.18	0.00176031		2889.18	0.03190806		3419.18	0.01107545		3949.18	-0.01496223
239.4	0.00912016		769.39	0.01441116		1299.39	0.00033493		1829.38	-0.00106982		2359.38	0.00202469		2889.38	0.03162498		3419.38	0.01214529		3949.38	-0.01391455
239.6	0.00977387		769.59	0.01395011		1299.59	0.00092266		1829.58	-0.00190902		2359.58	0.00245327		2889.58	0.03199797		3419.58	0.0117856		3949.58	-0.01331488
239.8	0.00944888		769.79	0.01361056		1299.79	0.00022708		1829.78	-0.00334372		2359.78	0.00240022		2889.78	0.03271458		3419.78	0.01262779		3949.78	-0.01374244
240	0.01045909		769.99	0.01361038		1299.99	0.00122671		1829.98	-0.00361453		2359.98	0.00206376		2889.98	0.03391631		3419.98	0.01152412		3949.98	-0.01384189
240.2	0.01044319		770.19	0.01400818		1300.19	0.00092086		1830.18	-0.00373187		2360.18	0.00247846		2890.18	0.03490465		3420.18	0.01065911		3950.18	-0.01408005
240.4	0.01077117		770.39	0.01369609		1300.39	0.0007388		1830.38	-0.00351926		2360.38	0.00276104		2890.38	0.03548077		3420.38	0.01026748		3950.38	-0.01382719
240.6	0.01111697		770.59	0.01299545		1300.59	0.00101053		1830.58	-0.0036357		2360.58	0.00251612		2890.58	0.03540013		3420.58	0.00993074		3950.58	-0.01288969
240.8	0.0106951		770.79	0.01295131		1300.79	0.00049991		1830.78	-0.00337689		2360.78	0.002855		2890.78	0.03647845		3420.78	0.00947276		3950.78	-0.01300658
241	0.00988138		770.99	0.0128581		1300.99	0.00055958		1830.98	-0.00266279		2360.98	0.00359728		2890.98	0.03756354		3420.98	0.0086176		3950.98	-0.01365053
241.2	0.01023958		771.19	0.01272161		1301.19	0.00049078		1831.18	-0.0029096		2361.18	0.00308474		2891.18	0.03783223		3421.18	0.00778113		3951.18	-0.01347845
241.4	0.01019826		771.39	0.01230038		1301.39	0.00062145		1831.38	-0.00329903		2361.38	0.00327403		2891.38	0.03860385		3421.38	0.00828613		3951.38	-0.01355856
241.6	0.01045353		771.59	0.01218261		1301.59	-0.0005574		1831.58	-0.00298574		2361.58	0.00343816		2891.58	0.03884225		3421.58	0.00757233		3951.58	-0.01285485
241.8	0.01064681		771.79	0.01275624		1301.79	-0.00092715		1831.78	-0.00234959		2361.78	0.00436479		2891.78	0.0391088		3421.78	0.00808459		3951.78	-0.01237278
242	0.01070419		771.99	0.01271534		1301.99	-0.00121785		1831.98	-0.00165082		2361.98	0.00443767		2891.98	0.03979714		3421.98	0.00781481		3951.98	-0.01153955
242.2	0.01137646		772.19	0.01201769		1302.19	-0.00165908		1832.18	-0.00132325		2362.18	0.00480171		2892.18	0.0394675		3422.18	0.00837278		3952.18	-0.01215242
242.4	0.01273198		772.39	0.01202569		1302.39	-0.00238802		1832.38	-0.0018588		2362.38	0.00373332		2892.38	0.03938453		3422.38	0.00833805		3952.38	-0.01160536
242.6	0.01356041		772.59	0.01189526		1302.59	-0.00301167		1832.58	-0.00197243		2362.58	0.00424526		2892.58	0.03895842		3422.58	0.00834058		3952.58	-0.01177388
242.8	0.01342871		772.79	0.01165393		1302.79	-0.00243792		1832.78	-0.00162927		2362.78	0.00403543		2892.78	0.03954251		3422.78	0.00895272		3952.78	-0.01219267
243	0.01370277		772.99	0.01211362		1302.99	-0.00312062		1832.98	-0.00286442		2362.98	0.00412427		2892.98	0.03901227		3422.98	0.00917162		3952.98	-0.01114922
243.2	0.01380968		773.19	0.01253399		1303.19	-0.00207452		1833.18	-0.00349		2363.18	0.00508385		2893.18	0.03871154		3423.18	0.00961759		3953.18	-0.01085898
243.4	0.01324814		773.39	0.01312124		1303.39	-0.00188565		1833.38	-0.0040797		2363.38	0.00533085		2893.38	0.03906918		3423.38	0.01001974		3953.38	-0.01067645
243.6	0.01328414		773.59	0.01269463		1303.59	-0.00200707		1833.58	-0.00392131		2363.58	0.00531703		2893.58	0.03878178		3423.58	0.00950535		3953.58	-0.01067064
243.8	0.01422589		773.79	0.01304732		1303.79	-0.00227457		1833.78	-0.00408768		2363.78	0.00514338		2893.78	0.03928847		3423.78	0.00974386		3953.78	-0.01135957
244	0.01513972		773.99	0.01346448		1303.99	-0.00222335		1833.98	-0.00291073		2363.98	0.00460148		2893.98	0.03913324		3423.98	0.00859177		3953.98	-0.01160705
244.2	0.01459684		774.19	0.01379165		1304.19	-0.00282597		1834.18	-0.0024373		2364.18	0.00442763		2894.18	0.03867827		3424.18	0.00917958		3954.18	-0.01139417
244.4	0.01397592		774.39	0.01376613		1304.39	-0.00309626		1834.38	-0.00158913		2364.38	0.00357285		2894.38	0.03850178		3424.38	0.00882267		3954.38	-0.010811
244.6	0.01261769		774.59	0.01370274		1304.59	-0.00310259		1834.58	-0.00198503		2364.58	0.00344485		2894.58	0.03823262		3424.58	0.00833141		3954.58	-0.01004894
244.8	0.01145518		774.79	0.01438703		1304.79	-0.00194907		1834.78	-0.00154798		2364.78	0.00373381		2894.78	0.03952063		3424.78	0.00731087		3954.78	-0.01125881
245	0.01104503		774.99	0.01629873		1304.99	-0.0017278		1834.98	-0.00110236		2364.98	0.00370045		2894.98	0.04059382		3424.98	0.00674812		3954.98	-0.01186129
245.2	0.0105089		775.19	0.01658841		1305.19	-0.00147382		1835.18	-0.00033735		2365.18	0.00336435		2895.18	0.04061769		3425.18	0.00601403		3955.18	-0.01157955
245.4	0.01033606		775.39	0.01677447		1305.39	-0.00149149		1835.38	0.00039938		2365.38	0.00279628		2895.38	0.04088374		3425.38	0.0061341		3955.38	-0.01130524
245.6	0.00986587		775.59	0.01635181		1305.59	-0.00096585		1835.58	0.00102561		2365.58	0.00322683		2895.58	0.0408494		3425.58	0.00577459		3955.58	-0.01133376
245.8	0.0098584		775.79	0.01656834		1305.79	0.0000958		1835.78	0.00151456		2365.78	0.00342998		2895.78	0.04028772		3425.78	0.00652071		3955.78	-0.01300427
246	0.00985444		775.99	0.01643098		1305.99	0.00050803		1835.98	0.00219799		2365.98	0.00291241		2895.98	0.04044505		3425.98	0.00595999		3955.98	-0.01426166
246.2	0.01154778		776.19	0.01589876		1306.19	0.00057869		1836.18	0.00237707		2366.18	0.00307422		2896.18	0.0398753		3426.18	0.00631141		3956.18	-0.01520623
246.4	0.01194718		776.39	0.01445473		1306.39	0.00010134		1836.38	0.00167666		2366.38	0.00292145		2896.38	0.04008922		3426.38	0.00674921		3956.38	-0.01507534
246.6	0.01215425		776.59	0.01385631		1306.59	0.0002612		1836.58	0.00154227		2366.58	0.00331303		2896.58	0.03978917		3426.58	0.00680435		3956.58	-0.01599872
246.8	0.01209777		776.79	0.01317234		1306.79	0.00048551		1836.78	0.00074968		2366.78	0.00412243		2896.78	0.03979572		3426.78	0.00671386		3956.78	-0.01708715
247	0.01306478		776.99	0.01266644		1306.99	-0.00009706		1836.98	-0.00002274		2366.98	0.005042		2896.98	0.03918556		3426.98	0.00681271		3956.98	-0.01702005
247.2	0.01210689		777.19	0.01185549		1307.19	0.00049611		1837.18	0.00002641		2367.18	0.00597714		2897.18	0.03798465		3427.18	0.00737035		3957.18	-0.0178213
247.4	0.0119367		777.39	0.01124097		1307.39	0.00110438		1837.38	0.00078012		2367.38	0.00652282		2897.38	0.03801248		3427.38	0.00838192		3957.38	-0.01706796
247.6	0.01242862		777.59	0.01109613		1307.59	0.00067921		1837.58	0.00091889		2367.58	0.00686283		2897.58	0.03701192		3427.58	0.00830829		3957.58	-0.01692037
247.8	0.01361664		777.79	0.0111083		1307.79	0.00025979		1837.78	0.00057739		2367.78	0.00766643		2897.78	0.03673336		3427.78	0.00789277		3957.78	-0.01652799
248	0.0133365		777.99	0.01073941		1307.99	0.0001674		1837.98	0.00029097		2367.98	0.00679363		2897.98	0.03599722		3427.98	0.00755455		3957.98	-0.01595968
248.2	0.01338495		778.19	0.01117552		1308.19	-0.00030014		1838.18	0.00058722		2368.18	0.00569867		2898.18	0.03611996		3428.18	0.00786739		3958.18	-0.01530728
248.4	0.01350072		778.39	0.0117248		1308.39	-0.00116147		1838.38	0.00000784		2368.38	0.00518152		2898.38	0.03644606		3428.38	0.00689094		3958.38	-0.0150089
248.6	0.01238395		778.59	0.01232076		1308.59	-0.00106375		1838.58	-0.0009126		2368.58	0.00596222		2898.58	0.03704778		3428.58	0.00641715		3958.58	-0.01473704
248.8	0.01223944		778.79	0.01350576		1308.79	-0.00015978		1838.78	-0.00034155		2368.78	0.00550227		2898.78	0.03823826		3428.78	0.00677106		3958.78	-0.01524729
249	0.01104396		778.99	0.01493288		1308.99	-0.00065848		1838.98	-0.00005338		2368.98	0.00449427		2898.98	0.03847591		3428.98	0.00709646		3958.98	-0.01405837
249.2	0.01073566		779.19	0.01414641		1309.19	-0.00061508		1839.18	0.00024593		2369.18	0.00435442		2899.18	0.03929182		3429.18	0.00623481		3959.18	-0.01332674
249.4	0.00994877		779.39	0.0152364		1309.39	-0.00057759		1839.38	0.00044209		2369.38	0.00287266		2899.38	0.03936605		3429.38	0.0068991		3959.38	-0.01323569
249.6	0.01007513		779.59	0.01568831		1309.59	0.00017966		1839.58	0.00137596		2369.58	0.00226383		2899.58	0.03926346		3429.58	0.00743326		3959.58	-0.01362193
249.8	0.01028758		779.79	0.01668066		1309.79	0.00049698		1839.78	0.00203859		2369.78	0.00164394		2899.78	0.03963011		3429.78	0.00809887		3959.78	-0.01450556
250	0.00981711		779.99	0.01697488		1309.99	0.00040707		1839.98	0.00271853		2369.98	0.00099187		2899.98	0.03951093		3429.98	0.00775976		3959.98	-0.01496802
250.2	0.01069763		780.19	0.01650239		1310.19	0.00068609		1840.18	0.00261895		2370.18	0.00040037		2900.18	0.03903003		3430.18	0.00829577		3960.18	-0.01485651
250.4	0.00971761		780.39	0.01730716		1310.39	0.00039001		1840.38	0.00216791		2370.38	0.00098551		2900.38	0.03915407		3430.38	0.00877428		3960.38	-0.01469511
250.6	0.00995321		780.59	0.0182746		1310.59	-0.00018784		1840.58	0.00207183		2370.58	0.0010064		2900.58	0.03824032		3430.58	0.00850406		3960.58	-0.01560097
250.8	0.01043369		780.79	0.01858448		1310.79	-0.00001808		1840.78	0.00156175		2370.78	0.00168174		2900.78	0.03877298		3430.78	0.00856213		3960.78	-0.01603958
251	0.0114314		780.99	0.01868283		1310.99	-0.00033473		1840.98	0.0010795		2370.98	0.00146068		2900.98	0.03901685		3430.98	0.00894539		3960.98	-0.01558822
251.2	0.01065748		781.19	0.01834246		1311.19	0.00043685		1841.18	0.00143311		2371.18	0.00201804		2901.18	0.03851105		3431.18	0.00955636		3961.18	-0.01524949
251.4	0.01146014		781.39	0.01874336		1311.39	0.00084228		1841.38	0.00163647		2371.38	0.0028086		2901.38	0.03939711		3431.38	0.00955714		3961.38	-0.01413779
251.6	0.01221211		781.59	0.01851236		1311.59	0.00040393		1841.58	0.0009089		2371.58	0.00268898		2901.58	0.03882616		3431.58	0.00851955		3961.58	-0.01451846
251.8	0.01291943		781.79	0.01855114		1311.79	0.00039241		1841.78	0.00084229		2371.78	0.00350855		2901.78	0.03875884		3431.78	0.00773466		3961.78	-0.01483518
252	0.01304659		781.99	0.01835169		1311.99	0.00017943		1841.98	-0.00004123		2371.98	0.00343962		2901.98	0.03943497		3431.98	0.00784276		3961.98	-0.01529572
252.2	0.01332879		782.19	0.01869215		1312.19	-0.0006587		1842.18	-0.00013132		2372.18	0.00412963		2902.18	0.04059618		3432.18	0.00769678		3962.18	-0.01513727
252.4	0.01335892		782.39	0.01847187		1312.39	-0.00133089		1842.38	-0.00103473		2372.38	0.00457653		2902.38	0.04171942		3432.38	0.0071675		3962.38	-0.01524307
252.6	0.01285283		782.59	0.01806527		1312.59	-0.00070051		1842.58	-0.00070673		2372.58	0.00569618		2902.58	0.04329565		3432.58	0.00790721		3962.58	-0.01648387
252.8	0.0131016		782.79	0.0177096		1312.79	-0.00059024		1842.78	-0.00001687		2372.78	0.00546659		2902.78	0.04290717		3432.78	0.00796181		3962.78	-0.01653321
253	0.01251738		782.99	0.01627162		1312.99	-0.00108223		1842.98	-0.00053864		2372.98	0.00583735		2902.98	0.04366173		3432.98	0.0079553		3962.98	-0.01526331
253.2	0.01281638		783.19	0.01506826		1313.19	-0.00129233		1843.18	-0.00038349		2373.18	0.00642562		2903.18	0.04466428		3433.18	0.00751843		3963.18	-0.01584458
253.4	0.01164596		783.39	0.01555373		1313.39	-0.00157438		1843.38	0.0007145		2373.38	0.00613784		2903.38	0.04433842		3433.38	0.00895135		3963.38	-0.0156732
253.6	0.01256795		783.59	0.0147491		1313.59	-0.00153504		1843.58	0.00126647		2373.58	0.00624485		2903.58	0.0438388		3433.58	0.0090329		3963.58	-0.01593464
253.8	0.01126949		783.79	0.01449797		1313.79	-0.00172383		1843.78	0.00151478		2373.78	0.00610488		2903.78	0.04282382		3433.78	0.00943641		3963.78	-0.01690348
254	0.01137263		783.99	0.01389022		1313.99	-0.00164835		1843.98	0.00242441		2373.98	0.00575397		2903.98	0.04084092		3433.98	0.00955582		3963.98	-0.01741147
254.2	0.01128328		784.19	0.01393878		1314.19	-0.00126796		1844.18	0.0020659		2374.18	0.00603828		2904.18	0.03946914		3434.18	0.01006349		3964.18	-0.017006
254.4	0.01038845		784.39	0.01442403		1314.39	-0.0017243		1844.38	0.00176391		2374.38	0.00577484		2904.38	0.03890164		3434.38	0.00943193		3964.38	-0.01716499
254.6	0.01095672		784.59	0.0137308		1314.59	-0.00146677		1844.58	0.00249744		2374.58	0.00506606		2904.58	0.0379611		3434.58	0.00903211		3964.58	-0.0167823
254.8	0.01146609		784.79	0.01384248		1314.79	-0.00081005		1844.78	0.0019926		2374.78	0.00392978		2904.78	0.0383811		3434.78	0.00826077		3964.78	-0.01684208
255	0.01213286		784.99	0.01366034		1314.99	-0.00079366		1844.98	0.00149259		2374.98	0.00341628		2904.98	0.03834379		3434.98	0.00788629		3964.98	-0.01599468
255.2	0.012277		785.19	0.01409137		1315.19	-0.00018196		1845.18	0.00170337		2375.18	0.00313068		2905.18	0.03709748		3435.18	0.00691327		3965.18	-0.01583689
255.4	0.01317034		785.39	0.0146891		1315.39	-0.00004616		1845.38	0.00134092		2375.38	0.00259588		2905.38	0.0372084		3435.38	0.00619027		3965.38	-0.01567238
255.6	0.01357083		785.59	0.01528282		1315.59	-0.0005774		1845.58	0.00150833		2375.58	0.00326886		2905.58	0.03763146		3435.58	0.00625243		3965.58	-0.01614697
255.8	0.01370635		785.79	0.01543096		1315.79	-0.00105861		1845.78	0.00157908		2375.78	0.00390115		2905.78	0.03849055		3435.78	0.00605588		3965.78	-0.01582776
256	0.01478116		785.99	0.01526089		1315.99	-0.00157735		1845.98	0.00081301		2375.98	0.00397823		2905.98	0.03996858		3435.98	0.0065606		3965.98	-0.01581445
256.2	0.01481925		786.19	0.01476302		1316.19	-0.00131651		1846.18	0.00061092		2376.18	0.00370194		2906.18	0.04052216		3436.18	0.00644779		3966.18	-0.01524018
256.4	0.01509305		786.39	0.01441439		1316.39	-0.0011344		1846.38	0.00023251		2376.38	0.00323686		2906.38	0.04164415		3436.38	0.00699425		3966.38	-0.01551938
256.6	0.01539466		786.59	0.01352214		1316.59	-0.00072087		1846.58	0.00081101		2376.58	0.00333364		2906.58	0.04221296		3436.58	0.00702885		3966.58	-0.01659219
256.8	0.01559371		786.79	0.01377691		1316.79	-0.00101448		1846.78	0.0009108		2376.78	0.00355632		2906.78	0.04268394		3436.78	0.00685381		3966.78	-0.01521473
257	0.0149797		786.99	0.01237412		1316.99	-0.00103828		1846.98	0.00020266		2376.98	0.00375236		2906.98	0.04373482		3436.98	0.00718865		3966.98	-0.01499693
257.2	0.01388602		787.19	0.01221372		1317.19	-0.00096396		1847.18	0.00086273		2377.18	0.00417665		2907.18	0.0447802		3437.18	0.00773345		3967.18	-0.01544411
257.4	0.01275968		787.39	0.01293788		1317.39	-0.00135241		1847.38	0.00120087		2377.38	0.00415893		2907.38	0.04525314		3437.38	0.00884076		3967.38	-0.01517867
257.6	0.01289946		787.59	0.01186365		1317.59	-0.00176218		1847.58	0.0013154		2377.58	0.00357166		2907.58	0.04480543		3437.58	0.00880412		3967.58	-0.01548165
257.8	0.01182219		787.79	0.01243859		1317.79	-0.0003775		1847.78	0.00156322		2377.78	0.00343626		2907.78	0.04392652		3437.78	0.00926787		3967.78	-0.01578707
258	0.0126384		787.99	0.01364188		1317.99	0.00056756		1847.98	0.00196551		2377.98	0.00334385		2907.98	0.04298318		3437.98	0.00985618		3967.98	-0.01548431
258.2	0.01246141		788.19	0.01376649		1318.19	0.00090631		1848.18	0.0014601		2378.18	0.00306776		2908.18	0.04314074		3438.18	0.00959369		3968.18	-0.01497297
258.4	0.01162725		788.39	0.01379432		1318.39	0.00079942		1848.38	0.00146551		2378.38	0.0037798		2908.38	0.04298865		3438.38	0.00911137		3968.38	-0.01488083
258.6	0.0122788		788.59	0.01416276		1318.59	0.00094791		1848.58	0.00087199		2378.58	0.00463014		2908.58	0.04272981		3438.58	0.00915513		3968.58	-0.01394789
258.8	0.01243112		788.79	0.01582086		1318.79	0.0008071		1848.78	0.00021548		2378.78	0.00463167		2908.78	0.04241029		3438.78	0.00854662		3968.78	-0.01486807
259	0.01366596		788.99	0.0164852		1318.99	0.00062158		1848.98	-0.00076213		2378.98	0.0053652		2908.98	0.04179447		3438.98	0.00890464		3968.98	-0.01366607
259.2	0.01358152		789.19	0.01801863		1319.19	-0.00014984		1849.18	-0.00028404		2379.18	0.00547426		2909.18	0.03993769		3439.18	0.00859224		3969.18	-0.01353483
259.4	0.01371598		789.39	0.01824306		1319.39	-0.00063752		1849.38	-0.00011035		2379.38	0.00603196		2909.38	0.04080082		3439.38	0.00834097		3969.38	-0.01308032
259.6	0.0135441		789.59	0.01810819		1319.59	-0.00115491		1849.58	-0.00090953		2379.58	0.00686229		2909.58	0.04181429		3439.58	0.00878629		3969.58	-0.01309138
259.8	0.01392636		789.79	0.01785663		1319.79	-0.00167963		1849.78	-0.00086448		2379.78	0.00765937		2909.78	0.04196199		3439.78	0.00837468		3969.78	-0.01286955
260	0.01378787		789.99	0.01645423		1319.99	-0.00217751		1849.98	-0.00128097		2379.98	0.00661337		2909.98	0.04142369		3439.98	0.00910024		3969.98	-0.01258282
260.2	0.01284046		790.19	0.01528492		1320.19	-0.0021303		1850.18	-0.00160962		2380.18	0.00685678		2910.18	0.04120613		3440.18	0.00937041		3970.18	-0.01258687
260.4	0.01229345		790.39	0.01475137		1320.39	-0.00197443		1850.38	-0.001039		2380.38	0.00630055		2910.38	0.04188806		3440.38	0.00984979		3970.38	-0.01265874
260.6	0.01203991		790.59	0.01356179		1320.59	-0.00169119		1850.58	-0.00058026		2380.58	0.00645867		2910.58	0.04223102		3440.58	0.00961022		3970.58	-0.01333654
260.8	0.01196391		790.79	0.01287506		1320.79	-0.00131541		1850.78	-0.00023374		2380.78	0.0064284		2910.78	0.04361584		3440.78	0.00995536		3970.78	-0.01311281
261	0.0112375		790.99	0.01181452		1320.99	-0.00130709		1850.98	-0.00017122		2380.98	0.00612074		2910.98	0.04370538		3440.98	0.00986795		3970.98	-0.0131965
261.2	0.01075392		791.19	0.01158153		1321.19	-0.00202482		1851.18	0.00010249		2381.18	0.00567851		2911.18	0.04428984		3441.18	0.01033949		3971.18	-0.01352714
261.4	0.0112491		791.39	0.0116366		1321.39	-0.00140283		1851.38	0.00033421		2381.38	0.00496745		2911.38	0.04514392		3441.38	0.01005139		3971.38	-0.01359999
261.6	0.01131164		791.59	0.01087812		1321.59	-0.00093302		1851.58	0.0014195		2381.58	0.00382898		2911.58	0.04479701		3441.58	0.01036538		3971.58	-0.01446481
261.8	0.01163151		791.79	0.01174363		1321.79	0.00083026		1851.78	0.00169713		2381.78	0.00406407		2911.78	0.04470978		3441.78	0.00935821		3971.78	-0.01513688
262	0.01292209		791.99	0.01302031		1321.99	0.00014894		1851.98	0.00226452		2381.98	0.00355133		2911.98	0.04541102		3441.98	0.00860989		3971.98	-0.015002
262.2	0.01382874		792.19	0.01257929		1322.19	-0.00004027		1852.18	0.00216151		2382.18	0.00412335		2912.18	0.04636677		3442.18	0.00783337		3972.18	-0.0149084
262.4	0.01449993		792.39	0.01297708		1322.39	0.00021732		1852.38	0.00249368		2382.38	0.00504634		2912.38	0.04593071		3442.38	0.00757405		3972.38	-0.0153167
262.6	0.01562414		792.59	0.01465406		1322.59	0.00081118		1852.58	0.00157702		2382.58	0.0048377		2912.58	0.04586503		3442.58	0.00693752		3972.58	-0.01503741
262.8	0.01607566		792.79	0.01682279		1322.79	0.00085003		1852.78	0.00285212		2382.78	0.00437219		2912.78	0.04480391		3442.78	0.00685249		3972.78	-0.0151396
263	0.01642034		792.99	0.01712837		1322.99	0.00082591		1852.98	0.00264486		2382.98	0.00330916		2912.98	0.04465364		3442.98	0.00555525		3972.98	-0.01372256
263.2	0.01516987		793.19	0.01788689		1323.19	-0.00045348		1853.18	0.00330352		2383.18	0.0027438		2913.18	0.04432054		3443.18	0.00483472		3973.18	-0.01315968
263.4	0.01561624		793.39	0.01833107		1323.39	-0.00009474		1853.38	0.00327922		2383.38	0.00305115		2913.38	0.04513981		3443.38	0.00471533		3973.38	-0.01239639
263.6	0.01569592		793.59	0.01874941		1323.59	-0.00009989		1853.58	0.00199642		2383.58	0.00298826		2913.58	0.04504052		3443.58	0.00549214		3973.58	-0.01216407
263.8	0.01471388		793.79	0.01924688		1323.79	-0.00042882		1853.78	0.0018886		2383.78	0.00426428		2913.78	0.04515791		3443.78	0.00584098		3973.78	-0.01151426
264	0.01307819		793.99	0.01831542		1323.99	-0.00069687		1853.98	0.00127656		2383.98	0.00366255		2913.98	0.0445817		3443.98	0.00651054		3973.98	-0.01126577
264.2	0.01214738		794.19	0.01858434		1324.19	-0.00066563		1854.18	0.00089175		2384.18	0.0035967		2914.18	0.04487555		3444.18	0.00727758		3974.18	-0.01176997
264.4	0.01207776		794.39	0.01899018		1324.39	-0.00055163		1854.38	0.00089194		2384.38	0.00316423		2914.38	0.04422906		3444.38	0.00734978		3974.38	-0.01125122
264.6	0.01169072		794.59	0.01871174		1324.59	-0.00081339		1854.58	0.0007476		2384.58	0.00310517		2914.58	0.04443484		3444.58	0.00735257		3974.58	-0.01128087
264.8	0.01101806		794.79	0.01819617		1324.79	-0.00136571		1854.78	0.0000514		2384.78	0.00269409		2914.78	0.04394807		3444.78	0.00733836		3974.78	-0.01079027
265	0.01072593		794.99	0.01900832		1324.99	-0.00199078		1854.98	-0.00026411		2384.98	0.00291094		2914.98	0.04395952		3444.98	0.00750065		3974.98	-0.01020939
265.2	0.00986375		795.19	0.01840689		1325.19	-0.00242198		1855.18	-0.00090873		2385.18	0.00242099		2915.18	0.04406597		3445.18	0.00834724		3975.18	-0.01122507
265.4	0.00999665		795.39	0.01730826		1325.39	-0.00163911		1855.38	-0.0000724		2385.38	0.00216865		2915.38	0.04485899		3445.38	0.00852207		3975.38	-0.01139492
265.6	0.00910424		795.59	0.01665542		1325.59	-0.00147119		1855.58	-0.0000207		2385.58	0.00265587		2915.58	0.04420011		3445.58	0.00878803		3975.58	-0.01240401
265.8	0.00966576		795.79	0.01659537		1325.79	-0.0009354		1855.78	0.0000624		2385.78	0.00333807		2915.78	0.04508247		3445.78	0.00731403		3975.78	-0.01250507
266	0.01030736		795.99	0.01658149		1325.99	-0.00116917		1855.98	0.00007181		2385.98	0.00298085		2915.98	0.04591093		3445.98	0.00757994		3975.98	-0.01325047
266.2	0.01076075		796.19	0.01604341		1326.19	-0.00052399		1856.18	-0.00046107		2386.18	0.00403556		2916.18	0.04588791		3446.18	0.00813594		3976.18	-0.01439208
266.4	0.01029907		796.39	0.0159001		1326.39	0.00022028		1856.38	-0.00043926		2386.38	0.00401916		2916.38	0.04608303		3446.38	0.00782215		3976.38	-0.01520482
266.6	0.01040154		796.59	0.01716264		1326.59	0.00063167		1856.58	-0.00105355		2386.58	0.00455375		2916.58	0.04684628		3446.58	0.00826131		3976.58	-0.01588229
266.8	0.01104913		796.79	0.01699764		1326.79	0.00017324		1856.78	0.00012998		2386.78	0.00418775		2916.78	0.04671658		3446.78	0.00909431		3976.78	-0.01594083
267	0.0110424		796.99	0.01656162		1326.99	-0.0000713		1856.98	-0.0005188		2386.98	0.00357273		2916.98	0.04722994		3446.98	0.00898522		3976.98	-0.01586311
267.2	0.011449		797.19	0.01665281		1327.19	-0.0002975		1857.18	-0.00079045		2387.18	0.00482475		2917.18	0.04735182		3447.18	0.01090099		3977.18	-0.01623166
267.4	0.01254127		797.39	0.01690498		1327.39	-0.00002359		1857.38	-0.00091975		2387.38	0.00512553		2917.38	0.04756446		3447.38	0.01108952		3977.38	-0.01698295
267.6	0.01292705		797.59	0.01752244		1327.59	0.00013811		1857.58	-0.00182177		2387.58	0.00540674		2917.58	0.04779995		3447.58	0.01120453		3977.58	-0.01755756
267.8	0.01162089		797.79	0.01747569		1327.79	0.00008588		1857.78	-0.00228299		2387.78	0.00566364		2917.78	0.0477697		3447.78	0.01132543		3977.78	-0.01789188
268	0.01173811		797.99	0.01722701		1327.99	0.00005952		1857.98	-0.00154549		2387.98	0.00586794		2917.98	0.04736878		3447.98	0.0118545		3977.98	-0.01834337
268.2	0.01257559		798.19	0.01806513		1328.19	0.00007599		1858.18	-0.00151633		2388.18	0.00406737		2918.18	0.047544		3448.18	0.01184349		3978.18	-0.01908037
268.4	0.01199902		798.39	0.01823619		1328.39	0.00027177		1858.38	-0.00181901		2388.38	0.00408894		2918.38	0.0469002		3448.38	0.01054425		3978.38	-0.01867052
268.6	0.01166015		798.59	0.01741378		1328.59	-0.00071645		1858.58	-0.00176899		2388.58	0.00338747		2918.58	0.04755829		3448.58	0.01007725		3978.58	-0.01893113
268.8	0.01160153		798.79	0.0172456		1328.79	-0.00131318		1858.78	-0.00151931		2388.78	0.003245		2918.78	0.04663136		3448.78	0.00948706		3978.78	-0.0193202
269	0.01247742		798.99	0.01746956		1328.99	-0.00120962		1858.98	-0.00071415		2388.98	0.00249682		2918.98	0.04714213		3448.98	0.00925104		3978.98	-0.01907236
269.2	0.01266716		799.19	0.01614382		1329.19	-0.00109062		1859.18	-0.00014763		2389.18	0.00231462		2919.18	0.04681505		3449.18	0.01008785		3979.18	-0.01890828
269.4	0.01372657		799.39	0.01555992		1329.39	-0.00138939		1859.38	0.00146026		2389.38	0.00198924		2919.38	0.04708202		3449.38	0.00961168		3979.38	-0.01853337
269.6	0.01369384		799.59	0.01520793		1329.59	-0.00080384		1859.58	0.00104726		2389.58	0.00218438		2919.58	0.04658736		3449.58	0.00920863		3979.58	-0.01819499
269.8	0.01381617		799.79	0.01514479		1329.79	-0.00038849		1859.78	0.00175025		2389.78	0.00177516		2919.78	0.04728175		3449.78	0.00848755		3979.78	-0.01827335
270	0.01390415		799.99	0.0146581		1329.99	-0.00078445		1859.98	0.0016605		2389.98	0.00166501		2919.98	0.04694642		3449.98	0.00894365		3979.98	-0.01863691
270.2	0.01437481		800.19	0.01452582		1330.19	-0.00052347		1860.18	0.0017253		2390.18	0.0021823		2920.18	0.04759372		3450.18	0.0084229		3980.18	-0.01804659
270.4	0.01480987		800.39	0.01496314		1330.39	-0.00091854		1860.38	0.00134526		2390.38	0.00324921		2920.38	0.04770135		3450.38	0.00853773		3980.38	-0.01702964
270.6	0.01525131		800.59	0.0152414		1330.59	-0.00160166		1860.58	0.00107953		2390.58	0.00332423		2920.58	0.04842095		3450.58	0.0087926		3980.58	-0.01644866
270.8	0.01593328		800.79	0.01500842		1330.79	-0.00251983		1860.78	0.00103854		2390.78	0.0026883		2920.78	0.0487475		3450.78	0.00840354		3980.78	-0.01538188
271	0.01569498		800.99	0.01545938		1330.99	-0.00289287		1860.98	0.00086866		2390.98	0.00221985		2920.98	0.04954526		3450.98	0.00809714		3980.98	-0.01496944
271.2	0.01639814		801.19	0.01480156		1331.19	-0.00345815		1861.18	0.00031257		2391.18	0.00269407		2921.18	0.05034956		3451.18	0.00786737		3981.18	-0.01465554
271.4	0.01630051		801.39	0.01449765		1331.39	-0.00370499		1861.38	0.00088874		2391.38	0.00329011		2921.38	0.05033464		3451.38	0.00718845		3981.38	-0.01341315
271.6	0.01621602		801.59	0.01468048		1331.59	-0.00328658		1861.58	0.00110891		2391.58	0.00337354		2921.58	0.0504184		3451.58	0.00712272		3981.58	-0.01306386
271.8	0.01499499		801.79	0.01389214		1331.79	-0.00280437		1861.78	0.0012714		2391.78	0.00298592		2921.78	0.050254		3451.78	0.00676511		3981.78	-0.0134478
272	0.0150514		801.99	0.01409487		1331.99	-0.0022196		1861.98	0.00200832		2391.98	0.00368978		2921.98	0.0503869		3451.98	0.00638189		3981.98	-0.01416989
272.2	0.01502369		802.19	0.01446286		1332.19	-0.00189481		1862.18	0.00148217		2392.18	0.00256039		2922.18	0.05069814		3452.18	0.00574145		3982.18	-0.01460142
272.4	0.01412786		802.39	0.01359359		1332.39	-0.00140529		1862.38	0.0017868		2392.38	0.00308155		2922.38	0.05018309		3452.38	0.00549839		3982.38	-0.0150331
272.6	0.01478369		802.59	0.01358523		1332.59	-0.00106342		1862.58	0.00251085		2392.58	0.00297793		2922.58	0.05011121		3452.58	0.00597082		3982.58	-0.01604724
272.8	0.01482932		802.79	0.01376563		1332.79	0.00046753		1862.78	0.0030474		2392.78	0.00325377		2922.78	0.04897474		3452.78	0.00669745		3982.78	-0.01575463
273	0.01599887		802.99	0.01443733		1332.99	0.00096153		1862.98	0.00315444		2392.98	0.00337802		2922.98	0.04883193		3452.98	0.00773291		3982.98	-0.01514686
273.2	0.01579628		803.19	0.01406049		1333.19	0.00148104		1863.18	0.00325107		2393.18	0.00357265		2923.18	0.0488047		3453.18	0.00957779		3983.18	-0.01510374
273.4	0.01544342		803.39	0.01459672		1333.39	0.00167738		1863.38	0.00220295		2393.38	0.00290483		2923.38	0.04792057		3453.38	0.00998131		3983.38	-0.01564482
273.6	0.0146982		803.59	0.01510679		1333.59	0.0019337		1863.58	0.00180391		2393.58	0.00311656		2923.58	0.0468672		3453.58	0.01090128		3983.58	-0.01535381
273.8	0.01483391		803.79	0.01590303		1333.79	0.00104886		1863.78	0.00154684		2393.78	0.00389719		2923.78	0.04614574		3453.78	0.01090385		3983.78	-0.01628561
274	0.01539602		803.99	0.01586058		1333.99	0.0011311		1863.98	0.00052333		2393.98	0.00422747		2923.98	0.04657399		3453.98	0.0124885		3983.98	-0.01568103
274.2	0.01602964		804.19	0.01614738		1334.19	0.00070937		1864.18	-0.00027129		2394.18	0.00423524		2924.18	0.04674072		3454.18	0.01242686		3984.18	-0.01561279
274.4	0.01624006		804.39	0.0161462		1334.39	-0.00018321		1864.38	-0.00152373		2394.38	0.00526077		2924.38	0.04696736		3454.38	0.01245221		3984.38	-0.01536538
274.6	0.01639612		804.59	0.01519957		1334.59	-0.00117716		1864.58	-0.00177974		2394.58	0.00398677		2924.58	0.04806761		3454.58	0.01111343		3984.58	-0.01533696
274.8	0.0163886		804.79	0.01453114		1334.79	-0.00105738		1864.78	-0.002458		2394.78	0.00320635		2924.78	0.04812973		3454.78	0.0106401		3984.78	-0.01581315
275	0.01610418		804.99	0.01436291		1334.99	-0.00165824		1864.98	-0.00225521		2394.98	0.00300997		2924.98	0.04801152		3454.98	0.01039364		3984.98	-0.01590735
275.2	0.01664018		805.19	0.01286058		1335.19	-0.00215135		1865.18	-0.00230961		2395.18	0.00348973		2925.18	0.04793417		3455.18	0.01068014		3985.18	-0.01550268
275.4	0.01672549		805.39	0.01297305		1335.39	-0.00165626		1865.38	-0.00146759		2395.38	0.00366776		2925.38	0.04724185		3455.38	0.01012045		3985.38	-0.01506468
275.6	0.01715583		805.59	0.01288528		1335.59	-0.00157803		1865.58	-0.00077141		2395.58	0.0031165		2925.58	0.04794539		3455.58	0.0099017		3985.58	-0.01626211
275.8	0.01636026		805.79	0.01209069		1335.79	-0.00107291		1865.78	-0.00007498		2395.78	0.00163864		2925.78	0.04834473		3455.78	0.00942798		3985.78	-0.01666964
276	0.01641837		805.99	0.0123321		1335.99	-0.00104445		1865.98	0.0009696		2395.98	0.00132182		2925.98	0.04930707		3455.98	0.00927425		3985.98	-0.01763846
276.2	0.0160727		806.19	0.01210153		1336.19	-0.00051785		1866.18	0.00195537		2396.18	0.0008627		2926.18	0.04941168		3456.18	0.00986412		3986.18	-0.01798385
276.4	0.01579657		806.39	0.01196136		1336.39	-0.00044366		1866.38	0.00382244		2396.38	0.00102072		2926.38	0.04976163		3456.38	0.00967892		3986.38	-0.01822069
276.6	0.01570696		806.59	0.01270324		1336.59	-0.00101447		1866.58	0.00427783		2396.58	0.00066611		2926.58	0.05019475		3456.58	0.00983924		3986.58	-0.01783837
276.8	0.01528736		806.79	0.0127351		1336.79	-0.00159744		1866.78	0.00475839		2396.78	0.00035553		2926.78	0.05060044		3456.78	0.01067764		3986.78	-0.01680659
277	0.01481196		806.99	0.01349563		1336.99	-0.00300834		1866.98	0.00518093		2396.98	-0.00017194		2926.98	0.05135496		3456.98	0.01101847		3986.98	-0.01684602
277.2	0.01390114		807.19	0.01316702		1337.19	-0.00333935		1867.18	0.00506284		2397.18	-0.00009444		2927.18	0.050962		3457.18	0.01122282		3987.18	-0.01622058
277.4	0.01372924		807.39	0.01451805		1337.39	-0.00333482		1867.38	0.00433169		2397.38	0.00042658		2927.38	0.05084328		3457.38	0.01082508		3987.38	-0.01611487
277.6	0.0136528		807.59	0.0153811		1337.59	-0.00419414		1867.58	0.00484032		2397.58	0.00126413		2927.58	0.05014405		3457.58	0.01016077		3987.58	-0.01573855
277.8	0.01396414		807.79	0.01596312		1337.79	-0.00409052		1867.78	0.00398853		2397.78	0.00198818		2927.78	0.0510591		3457.78	0.00944687		3987.78	-0.01586287
278	0.01387741		807.99	0.01606199		1337.99	-0.00296295		1867.98	0.00407749		2397.98	0.00276871		2927.98	0.0519331		3457.98	0.00985807		3987.98	-0.01489861
278.2	0.01349278		808.19	0.01590545		1338.19	-0.00326936		1868.18	0.0039794		2398.18	0.0029141		2928.18	0.05177687		3458.18	0.00899256		3988.18	-0.01484195
278.4	0.01319172		808.39	0.01523939		1338.39	-0.00244274		1868.38	0.00316103		2398.38	0.00364612		2928.38	0.05267205		3458.38	0.00833868		3988.38	-0.01468301
278.6	0.01374288		808.59	0.01505816		1338.59	-0.00230098		1868.58	0.00293145		2398.58	0.0036354		2928.58	0.05281246		3458.58	0.00743786		3988.58	-0.01471815
278.8	0.01352048		808.79	0.01503242		1338.79	-0.00125705		1868.78	0.00232529		2398.78	0.00424035		2928.78	0.05137252		3458.78	0.00762375		3988.78	-0.01513036
279	0.01355791		808.99	0.01499049		1338.99	-0.00099121		1868.98	0.00281072		2398.98	0.00493391		2928.98	0.05096094		3458.98	0.00758104		3988.98	-0.01481485
279.2	0.01388381		809.19	0.01386167		1339.19	0.00018136		1869.18	0.00239238		2399.18	0.00476562		2929.18	0.05118953		3459.18	0.00840763		3989.18	-0.01436866
279.4	0.01408595		809.39	0.01405898		1339.39	0.00130819		1869.38	0.00175308		2399.38	0.00458493		2929.38	0.05112575		3459.38	0.0081325		3989.38	-0.01463533
279.6	0.01385776		809.59	0.01336536		1339.59	0.00190008		1869.58	0.00215994		2399.58	0.0044353		2929.58	0.05200147		3459.58	0.00891512		3989.58	-0.01478051
279.8	0.01342378		809.79	0.01284265		1339.79	0.00160303		1869.78	0.00222443		2399.78	0.00358666		2929.78	0.05194569		3459.78	0.00843945		3989.78	-0.01556142
280	0.0135424		809.99	0.01290323		1339.99	0.00168763		1869.98	0.00211294		2399.98	0.00360386		2929.98	0.05230599		3459.98	0.00866501		3989.98	-0.01531545
280.2	0.01297697		810.19	0.01264559		1340.19	0.00179663		1870.18	0.00202199		2400.18	0.00374266		2930.18	0.05201685		3460.18	0.00860955		3990.18	-0.01443205
280.4	0.01294638		810.39	0.01238182		1340.39	0.0011777		1870.38	0.00170273		2400.38	0.00358289		2930.38	0.05239053		3460.38	0.0089681		3990.38	-0.01452225
280.6	0.01293158		810.59	0.01209268		1340.59	0.0001837		1870.58	0.00128712		2400.58	0.00268123		2930.58	0.05203143		3460.58	0.00897435		3990.58	-0.01504032
280.8	0.01209766		810.79	0.01204503		1340.79	0.00004995		1870.78	0.00151668		2400.78	0.00160167		2930.78	0.05216135		3460.78	0.00937953		3990.78	-0.0153273
281	0.01193966		810.99	0.01207839		1340.99	0.00007715		1870.98	0.00104718		2400.98	0.00165364		2930.98	0.05210659		3460.98	0.00919423		3990.98	-0.01440264
281.2	0.01229043		811.19	0.01217977		1341.19	0.00049124		1871.18	0.00051322		2401.18	0.00214768		2931.18	0.05190779		3461.18	0.00855619		3991.18	-0.0145086
281.4	0.01301003		811.39	0.01305701		1341.39	0.00028978		1871.38	-0.00053003		2401.38	0.00232096		2931.38	0.05209467		3461.38	0.00791369		3991.38	-0.01537912
281.6	0.01316298		811.59	0.0138813		1341.59	-0.00005541		1871.58	-0.00093299		2401.58	0.00256359		2931.58	0.05145621		3461.58	0.00795384		3991.58	-0.01555552
281.8	0.01294525		811.79	0.01510204		1341.79	-0.00032256		1871.78	-0.00094592		2401.78	0.00256839		2931.78	0.05230405		3461.78	0.00808252		3991.78	-0.01548762
282	0.0134962		811.99	0.01523702		1341.99	0.00006856		1871.98	-0.0002408		2401.98	0.00308339		2931.98	0.05192666		3461.98	0.00852422		3991.98	-0.01602731
282.2	0.01381306		812.19	0.01438191		1342.19	0.00055734		1872.18	-0.00013864		2402.18	0.00243779		2932.18	0.0525417		3462.18	0.00841332		3992.18	-0.01699559
282.4	0.01451349		812.39	0.01434293		1342.39	0.00020046		1872.38	-0.00017016		2402.38	0.00213206		2932.38	0.05260704		3462.38	0.00743779		3992.38	-0.0181264
282.6	0.01596242		812.59	0.01580534		1342.59	-0.00045664		1872.58	0.00100984		2402.58	0.00320496		2932.58	0.05292995		3462.58	0.00689103		3992.58	-0.0192328
282.8	0.01694927		812.79	0.01543415		1342.79	-0.00038948		1872.78	0.00149001		2402.78	0.00288241		2932.78	0.05129409		3462.78	0.00706636		3992.78	-0.01914203
283	0.0169769		812.99	0.01521597		1342.99	-0.00093066		1872.98	0.00215986		2402.98	0.00221784		2932.98	0.05211283		3462.98	0.00767213		3992.98	-0.01974533
283.2	0.01771701		813.19	0.01535756		1343.19	-0.00054253		1873.18	0.00244777		2403.18	0.00166955		2933.18	0.05230704		3463.18	0.00865382		3993.18	-0.02011716
283.4	0.01816057		813.39	0.0152545		1343.39	-0.00076988		1873.38	0.00258208		2403.38	0.00156397		2933.38	0.05217876		3463.38	0.00812064		3993.38	-0.02101923
283.6	0.01789006		813.59	0.01580552		1343.59	-0.00179162		1873.58	0.00297468		2403.58	0.00078801		2933.58	0.05260985		3463.58	0.00824602		3993.58	-0.02125742
283.8	0.01822691		813.79	0.01546969		1343.79	-0.00233767		1873.78	0.00328974		2403.78	0.0003476		2933.78	0.05308654		3463.78	0.00867522		3993.78	-0.02144709
284	0.01869648		813.99	0.01559733		1343.99	-0.00222647		1873.98	0.00308676		2403.98	0.00024374		2933.98	0.05366778		3463.98	0.00946513		3993.98	-0.02017606
284.2	0.01858256		814.19	0.01617667		1344.19	-0.00289753		1874.18	0.00369166		2404.18	-0.00015866		2934.18	0.05448353		3464.18	0.01007682		3994.18	-0.02004911
284.4	0.01864563		814.39	0.01604391		1344.39	-0.00295113		1874.38	0.00381238		2404.38	-0.00048798		2934.38	0.05424637		3464.38	0.01142747		3994.38	-0.0202598
284.6	0.01844554		814.59	0.01628665		1344.59	-0.00354895		1874.58	0.00425779		2404.58	-0.00074436		2934.58	0.05402503		3464.58	0.01179344		3994.58	-0.02006016
284.8	0.01812556		814.79	0.01697897		1344.79	-0.00326358		1874.78	0.00355808		2404.78	-0.00054025		2934.78	0.0545891		3464.78	0.01237446		3994.78	-0.01942386
285	0.01777447		814.99	0.0174142		1344.99	-0.00324203		1874.98	0.0021929		2404.98	0.00061078		2934.98	0.05422149		3464.98	0.01207847		3994.98	-0.01744823
285.2	0.01692418		815.19	0.01737823		1345.19	-0.00300673		1875.18	0.00143176		2405.18	0.00062836		2935.18	0.05485123		3465.18	0.01187182		3995.18	-0.01645304
285.4	0.01698984		815.39	0.01824267		1345.39	-0.00287972		1875.38	-0.00006095		2405.38	0.00096313		2935.38	0.05500385		3465.38	0.01183314		3995.38	-0.01607379
285.6	0.01600498		815.59	0.01902648		1345.59	-0.00175006		1875.58	-0.00119215		2405.58	0.00133383		2935.58	0.05480399		3465.58	0.01167935		3995.58	-0.01561941
285.8	0.01510653		815.79	0.01934414		1345.79	-0.00107677		1875.78	-0.00235066		2405.78	0.00119773		2935.78	0.05469972		3465.78	0.0114225		3995.78	-0.01494768
286	0.01562157		815.99	0.01894013		1345.99	0.000604		1875.98	-0.00220383		2405.98	0.00157362		2935.98	0.05462879		3465.98	0.01153721		3995.98	-0.01534018
286.2	0.01451415		816.19	0.01794308		1346.19	0.00107997		1876.18	-0.00246699		2406.18	0.00149967		2936.18	0.05508762		3466.18	0.01044398		3996.18	-0.01516225
286.4	0.01366366		816.39	0.01803541		1346.39	0.00102542		1876.38	-0.00328718		2406.38	0.00152787		2936.38	0.0543266		3466.38	0.00972813		3996.38	-0.0150381
286.6	0.0134264		816.59	0.0182965		1346.59	0.00108694		1876.58	-0.00246327		2406.58	0.002122		2936.58	0.05445259		3466.58	0.0091404		3996.58	-0.01500935
286.8	0.01347008		816.79	0.01692318		1346.79	0.000968		1876.78	-0.00251548		2406.78	0.00166185		2936.78	0.05282955		3466.78	0.00871921		3996.78	-0.01457255
287	0.01256184		816.99	0.01664128		1346.99	0.00088628		1876.98	-0.00268421		2406.98	0.0017942		2936.98	0.05381906		3466.98	0.00862521		3996.98	-0.01583793
287.2	0.01208222		817.19	0.01680445		1347.19	0.0010045		1877.18	-0.00267067		2407.18	0.00165507		2937.18	0.05386878		3467.18	0.00808504		3997.18	-0.01629077
287.4	0.01089682		817.39	0.01671352		1347.39	0.00066364		1877.38	-0.00287685		2407.38	0.00175147		2937.38	0.05445259		3467.38	0.00730565		3997.38	-0.01632681
287.6	0.01103329		817.59	0.01704127		1347.59	-0.000647		1877.58	-0.00200458		2407.58	0.00143383		2937.58	0.05454893		3467.58	0.00845033		3997.58	-0.01696901
287.8	0.01157963		817.79	0.01630102		1347.79	-0.00083885		1877.78	-0.0005731		2407.78	0.00219766		2937.78	0.05569781		3467.78	0.00899828		3997.78	-0.016953
288	0.01229422		817.99	0.01726556		1347.99	-0.00215721		1877.98	0.00037252		2407.98	0.00328869		2937.98	0.05659579		3467.98	0.00882063		3997.98	-0.01753253
288.2	0.01201524		818.19	0.01738952		1348.19	-0.00355827		1878.18	0.00184957		2408.18	0.00313912		2938.18	0.05710453		3468.18	0.00922825		3998.18	-0.01799087
288.4	0.01301489		818.39	0.01638323		1348.39	-0.00390976		1878.38	0.00283713		2408.38	0.00336144		2938.38	0.05679298		3468.38	0.00952957		3998.38	-0.01829538
288.6	0.01339213		818.59	0.01682481		1348.59	-0.00496679		1878.58	0.00318776		2408.58	0.0039628		2938.58	0.05733227		3468.58	0.00986217		3998.58	-0.01933587
288.8	0.01429626		818.79	0.01760614		1348.79	-0.00534326		1878.78	0.0033492		2408.78	0.00454744		2938.78	0.05678007		3468.78	0.00946782		3998.78	-0.01883221
289	0.01404889		818.99	0.01777242		1348.99	-0.00520754		1878.98	0.00358375		2408.98	0.00534115		2938.98	0.0570485		3468.98	0.00923861		3998.98	-0.01814785
289.2	0.01384065		819.19	0.01728671		1349.19	-0.00469565		1879.18	0.0036313		2409.18	0.0058793		2939.18	0.0580707		3469.18	0.00941405		3999.18	-0.01775796
289.4	0.01429074		819.39	0.01775816		1349.39	-0.00437026		1879.38	0.00293871		2409.38	0.00644458		2939.38	0.0578783		3469.38	0.00985387		3999.38	-0.01822815
289.6	0.01420534		819.59	0.01838592		1349.59	-0.00355326		1879.58	0.00291946		2409.58	0.00652767		2939.58	0.05760349		3469.58	0.01036593		3999.58	-0.01873314
289.8	0.01366117		819.79	0.01813868		1349.79	-0.0031104		1879.78	0.00270019		2409.78	0.00634463		2939.78	0.05756374		3469.78	0.01103986		3999.78	-0.01822054
290	0.01379035		819.99	0.01796869		1349.99	-0.00197486		1879.98	0.00218405		2409.98	0.00605471		2939.98	0.0572298		3469.98	0.01161137		3999.98	-0.01789052
290.2	0.01273757		820.19	0.01696158		1350.19	-0.00143217		1880.18	0.00168078		2410.18	0.00593757		2940.18	0.0577506		3470.18	0.01122152		4000.18	-0.0172363
290.4	0.01283703		820.39	0.01646967		1350.39	-0.00031744		1880.38	0.00133281		2410.38	0.00542255		2940.38	0.05748671		3470.38	0.01143835		4000.38	-0.01707044
290.6	0.01360884		820.59	0.01643475		1350.59	0.00010626		1880.58	0.00151488		2410.58	0.00536018		2940.58	0.05779229		3470.58	0.01127019		4000.58	-0.0169833
290.8	0.01403636		820.79	0.01675471		1350.79	-0.00011381		1880.78	0.00167957		2410.78	0.00502033		2940.78	0.05780407		3470.78	0.01136086		4000.78	-0.01640222
291	0.01392811		820.99	0.01735267		1350.99	0.00045531		1880.98	0.00150131		2410.98	0.00456775		2940.98	0.05927388		3470.98	0.01146832		4000.98	-0.01658946
291.2	0.01405668		821.19	0.01769598		1351.19	0.0009812		1881.18	0.00118716		2411.18	0.00407353		2941.18	0.0592186		3471.18	0.01238743		4001.18	-0.01599041
291.4	0.01414537		821.39	0.01761303		1351.39	0.00051131		1881.38	0.00176414		2411.38	0.00302079		2941.38	0.05880775		3471.38	0.01251289		4001.38	-0.01658143
291.6	0.01519213		821.59	0.01772658		1351.59	-0.00041414		1881.58	0.00247538		2411.58	0.00202354		2941.58	0.05867953		3471.58	0.01324457		4001.58	-0.01733233
291.8	0.0150383		821.79	0.01801973		1351.79	-0.00111454		1881.78	0.00264262		2411.78	0.0022983		2941.78	0.05960205		3471.78	0.01278721		4001.78	-0.01750376
292	0.01575175		821.99	0.01847206		1351.99	-0.0018679		1881.98	0.00354496		2411.98	0.0021896		2941.98	0.05969808		3471.98	0.01174389		4001.98	-0.01842119
292.2	0.01605369		822.19	0.01824329		1352.19	-0.00276329		1882.18	0.00391109		2412.18	0.00217197		2942.18	0.05845486		3472.18	0.01156163		4002.18	-0.0188416
292.4	0.01739031		822.39	0.01794965		1352.39	-0.00316268		1882.38	0.00420394		2412.38	0.00180792		2942.38	0.05808113		3472.38	0.01120641		4002.38	-0.01996064
292.6	0.01751594		822.59	0.01889893		1352.59	-0.00299847		1882.58	0.00334424		2412.58	0.00229765		2942.58	0.05779793		3472.58	0.01085759		4002.58	-0.02052277
292.8	0.01760132		822.79	0.01897274		1352.79	-0.0038396		1882.78	0.00372847		2412.78	0.00235479		2942.78	0.0571232		3472.78	0.01060155		4002.78	-0.02039637
293	0.01720706		822.99	0.01837348		1352.99	-0.00401875		1882.98	0.00319445		2412.98	0.00312142		2942.98	0.05812603		3472.98	0.01076787		4002.98	-0.0205179
293.2	0.01708399		823.19	0.01782605		1353.19	-0.0040993		1883.18	0.00260594		2413.18	0.00294408		2943.18	0.05854417		3473.18	0.0101591		4003.18	-0.02055463
293.4	0.01679203		823.39	0.01781439		1353.39	-0.00436746		1883.38	0.00218415		2413.38	0.00268754		2943.38	0.0576941		3473.38	0.01012824		4003.38	-0.02070681
293.6	0.01656308		823.59	0.01790993		1353.59	-0.00396499		1883.58	0.00160222		2413.58	0.00241159		2943.58	0.0578321		3473.58	0.00979227		4003.58	-0.02137601
293.8	0.01587436		823.79	0.0168782		1353.79	-0.0040436		1883.78	0.00039796		2413.78	0.00194161		2943.78	0.05750569		3473.78	0.00926929		4003.78	-0.02058821
294	0.01571268		823.99	0.01629081		1353.99	-0.00224134		1883.98	-0.00065248		2413.98	0.00224124		2943.98	0.05685612		3473.98	0.00971962		4003.98	-0.01955414
294.2	0.01591132		824.19	0.0157169		1354.19	-0.0015219		1884.18	-0.00053988		2414.18	0.00155005		2944.18	0.05813425		3474.18	0.00962781		4004.18	-0.01876741
294.4	0.01624781		824.39	0.01547061		1354.39	-0.00078212		1884.38	-0.0009582		2414.38	0.00132108		2944.38	0.0579388		3474.38	0.00910457		4004.38	-0.01840506
294.6	0.0163306		824.59	0.01580605		1354.59	-0.00018027		1884.58	0.00033904		2414.58	0.00077735		2944.58	0.05834878		3474.58	0.00870838		4004.58	-0.01840855
294.8	0.01572443		824.79	0.01589726		1354.79	-0.00054235		1884.78	0.00218364		2414.78	0.00017443		2944.78	0.05891734		3474.78	0.00823156		4004.78	-0.01782286
295	0.01531611		824.99	0.01551705		1354.99	0.00066639		1884.98	0.00298684		2414.98	-0.00028476		2944.98	0.05860477		3474.98	0.00797777		4004.98	-0.01893829
295.2	0.01498453		825.19	0.01528886		1355.19	0.00168067		1885.18	0.00407736		2415.18	-0.00112833		2945.18	0.05841067		3475.18	0.00905412		4005.18	-0.01936701
295.4	0.01456069		825.39	0.01569505		1355.39	0.00130965		1885.38	0.00510772		2415.38	-0.00095262		2945.38	0.05833237		3475.38	0.00833906		4005.38	-0.02070205
295.6	0.01371283		825.59	0.01617126		1355.59	0.00102238		1885.58	0.00516679		2415.58	-0.00081304		2945.58	0.05852988		3475.58	0.00882013		4005.58	-0.02072438
295.8	0.0137882		825.79	0.01610719		1355.79	0.00035152		1885.78	0.00563837		2415.78	0.00005019		2945.78	0.0582565		3475.78	0.00892772		4005.78	-0.02145847
296	0.01400593		825.99	0.01621411		1355.99	0.00049117		1885.98	0.0071351		2415.98	0.00044118		2945.98	0.0577759		3475.98	0.00867177		4005.98	-0.02125846
296.2	0.01371103		826.19	0.01641889		1356.19	0.00088708		1886.18	0.00713533		2416.18	0.00061258		2946.18	0.05688297		3476.18	0.00919043		4006.18	-0.02091623
296.4	0.01375316		826.39	0.01657089		1356.39	0.00056022		1886.38	0.00728721		2416.38	0.0007769		2946.38	0.05747961		3476.38	0.01006409		4006.38	-0.02042861
296.6	0.01398358		826.59	0.01669275		1356.59	0.00018959		1886.58	0.0064223		2416.58	0.00072919		2946.58	0.05720579		3476.58	0.01013757		4006.58	-0.01979799
296.8	0.01487531		826.79	0.01692687		1356.79	-0.00057669		1886.78	0.00611414		2416.78	0.0001991		2946.78	0.05808859		3476.78	0.01110128		4006.78	-0.01939518
297	0.01509695		826.99	0.01640711		1356.99	-0.00036304		1886.98	0.00525204		2416.98	0.00016577		2946.98	0.05907117		3476.98	0.01109983		4006.98	-0.01891237
297.2	0.01519813		827.19	0.01646184		1357.19	-0.00050092		1887.18	0.00510995		2417.18	0.00033134		2947.18	0.0589478		3477.18	0.01151432		4007.18	-0.01838889
297.4	0.0157677		827.39	0.01621012		1357.39	-0.0008182		1887.38	0.0048118		2417.38	0.00040486		2947.38	0.05858948		3477.38	0.01208309		4007.38	-0.01750144
297.6	0.01631413		827.59	0.01598521		1357.59	-0.00086359		1887.58	0.00398641		2417.58	0.00089918		2947.58	0.05824613		3477.58	0.01231622		4007.58	-0.01770773
297.8	0.01674756		827.79	0.01543785		1357.79	-0.00098637		1887.78	0.00354453		2417.78	0.00086487		2947.78	0.05835697		3477.78	0.01293448		4007.78	-0.01702957
298	0.01738103		827.99	0.01512268		1357.99	-0.00033959		1887.98	0.00307681		2417.98	0.00086583		2947.98	0.05896697		3477.98	0.0136389		4007.98	-0.01633684
298.2	0.01783636		828.19	0.01540113		1358.19	-0.00094496		1888.18	0.00332009		2418.18	-0.00014083		2948.18	0.06047192		3478.18	0.013132		4008.18	-0.01588013
298.4	0.01807331		828.39	0.01517468		1358.39	-0.00072913		1888.38	0.00343327		2418.38	0.00012785		2948.38	0.06062483		3478.38	0.0121114		4008.38	-0.01705562
298.6	0.01763093		828.59	0.0157232		1358.59	-0.00125851		1888.58	0.00471954		2418.58	-0.00040813		2948.58	0.06103738		3478.58	0.01255133		4008.58	-0.01784135
298.8	0.01665438		828.79	0.01591423		1358.79	-0.00156947		1888.78	0.00504981		2418.78	-0.00003074		2948.78	0.06017276		3478.78	0.01218895		4008.78	-0.01823297
299	0.01615536		828.99	0.01573669		1358.99	-0.00122044		1888.98	0.00557943		2418.98	-0.00002746		2948.98	0.06056359		3478.98	0.01229756		4008.98	-0.01946224
299.2	0.01576325		829.19	0.01751734		1359.19	-0.0014809		1889.18	0.00555376		2419.18	0.00051509		2949.18	0.0605552		3479.18	0.01261873		4009.18	-0.02008178
299.4	0.01520874		829.39	0.01814233		1359.39	-0.00248348		1889.38	0.00438052		2419.38	0.0012068		2949.38	0.06070299		3479.38	0.01256482		4009.38	-0.02030639
299.6	0.01519311		829.59	0.01821627		1359.59	-0.00354356		1889.58	0.00413904		2419.58	0.00135376		2949.58	0.06054932		3479.58	0.01344872		4009.58	-0.02026641
299.8	0.0154553		829.79	0.01898804		1359.79	-0.00395924		1889.78	0.00484066		2419.78	0.00234582		2949.78	0.06073388		3479.78	0.01344738		4009.78	-0.01985689
300	0.01556894		829.99	0.01979221		1359.99	-0.00314563		1889.98	0.0050217		2419.98	0.00343797		2949.98	0.06075283		3479.98	0.0127359		4009.98	-0.01993859
300.2	0.01573501		830.19	0.02042412		1360.19	-0.00291208		1890.18	0.00443509		2420.18	0.00307089		2950.18	0.0601431		3480.18	0.01322081		4010.18	-0.01965386
300.4	0.01600283		830.39	0.02067752		1360.39	-0.00344138		1890.38	0.00375695		2420.38	0.00372015		2950.38	0.06022732		3480.38	0.01299175		4010.38	-0.01906019
300.6	0.01693368		830.59	0.0206441		1360.59	-0.00350174		1890.58	0.00260395		2420.58	0.00362914		2950.58	0.0600365		3480.58	0.01240512		4010.58	-0.01898487
300.8	0.0166762		830.79	0.02012562		1360.79	-0.0029083		1890.78	0.00223033		2420.78	0.00335208		2950.78	0.06090874		3480.78	0.01266151		4010.78	-0.01929059
301	0.01587014		830.99	0.01920642		1360.99	-0.00282378		1890.98	0.00224093		2420.98	0.00329023		2950.98	0.06055407		3480.98	0.01291459		4010.98	-0.01912165
301.2	0.015895		831.19	0.01843858		1361.19	-0.00246519		1891.18	0.0025734		2421.18	0.00427517		2951.18	0.05983748		3481.18	0.01302518		4011.18	-0.01905473
301.4	0.0163745		831.39	0.01709739		1361.39	-0.00189758		1891.38	0.00180676		2421.38	0.00402029		2951.38	0.0601748		3481.38	0.01304078		4011.38	-0.01814179
301.6	0.01656943		831.59	0.01638302		1361.59	-0.00117088		1891.58	0.00219853		2421.58	0.00339855		2951.58	0.06004274		3481.58	0.01296551		4011.58	-0.01840305
301.8	0.01674901		831.79	0.01562941		1361.79	-0.00067361		1891.78	0.00293129		2421.78	0.00302573		2951.78	0.06131875		3481.78	0.01310065		4011.78	-0.01772584
302	0.01675167		831.99	0.01526412		1361.99	-0.00024461		1891.98	0.00274295		2421.98	0.00176224		2951.98	0.06210204		3481.98	0.01294354		4011.98	-0.01758706
302.2	0.01668076		832.19	0.01475386		1362.19	0.00027187		1892.18	0.00275857		2422.18	0.00232821		2952.18	0.06157553		3482.18	0.0117913		4012.18	-0.01781332
302.4	0.01701987		832.39	0.01465813		1362.39	0.0009459		1892.38	0.00257511		2422.38	0.00168582		2952.38	0.06099456		3482.38	0.01175878		4012.38	-0.01893709
302.6	0.01664246		832.59	0.01465358		1362.59	0.00078123		1892.58	0.00284003		2422.58	0.00151508		2952.58	0.06056876		3482.58	0.01204189		4012.58	-0.01891053
302.8	0.01610417		832.79	0.01470164		1362.79	0.00121122		1892.78	0.00243628		2422.78	0.00166632		2952.78	0.06045113		3482.78	0.01137524		4012.78	-0.01896557
303	0.01573544		832.99	0.01491724		1362.99	0.00113207		1892.98	0.00252099		2422.98	0.00154647		2952.98	0.06041483		3482.98	0.01077923		4012.98	-0.01891421
303.2	0.01595103		833.19	0.01555889		1363.19	0.00126865		1893.18	0.00201028		2423.18	0.0017714		2953.18	0.06026873		3483.18	0.01002281		4013.18	-0.01881375
303.4	0.01596727		833.39	0.01553566		1363.39	0.00151174		1893.38	0.0023942		2423.38	0.0020571		2953.38	0.06033611		3483.38	0.01043235		4013.38	-0.01854491
303.6	0.01717427		833.59	0.0162743		1363.59	0.00112997		1893.58	0.00337421		2423.58	0.0026606		2953.58	0.06039662		3483.58	0.00971508		4013.58	-0.01886538
303.8	0.01695036		833.79	0.01743497		1363.79	0.00091708		1893.78	0.00329154		2423.78	0.00324291		2953.78	0.06116594		3483.78	0.00876956		4013.78	-0.01921396
304	0.01720469		833.99	0.0185714		1363.99	0.00140512		1893.98	0.00263649		2423.98	0.0032952		2953.98	0.06058615		3483.98	0.00807616		4013.98	-0.02016722
304.2	0.01728471		834.19	0.01925525		1364.19	0.00102934		1894.18	0.00314763		2424.18	0.00241207		2954.18	0.06040386		3484.18	0.00851035		4014.18	-0.01944135
304.4	0.01702195		834.39	0.01986613		1364.39	0.00127909		1894.38	0.00367588		2424.38	0.00299294		2954.38	0.06132085		3484.38	0.00801626		4014.38	-0.01953767
304.6	0.01761871		834.59	0.02017757		1364.59	0.00083881		1894.58	0.00357532		2424.58	0.00241975		2954.58	0.06145221		3484.58	0.00877819		4014.58	-0.0203388
304.8	0.01621131		834.79	0.01958216		1364.79	0.00111108		1894.78	0.00424692		2424.78	0.00211915		2954.78	0.06107228		3484.78	0.0095771		4014.78	-0.02057457
305	0.01631445		834.99	0.01982218		1364.99	0.00140616		1894.98	0.00462859		2424.98	0.00225022		2954.98	0.06074731		3484.98	0.01044745		4014.98	-0.01914338
305.2	0.01527778		835.19	0.0192087		1365.19	0.00179198		1895.18	0.00512387		2425.18	0.00203999		2955.18	0.0607144		3485.18	0.01097277		4015.18	-0.01887616
305.4	0.01522383		835.39	0.01865903		1365.39	0.00199065		1895.38	0.00539195		2425.38	0.00171498		2955.38	0.06073658		3485.38	0.01251886		4015.38	-0.01759907
305.6	0.01517656		835.59	0.01830095		1365.59	0.001896		1895.58	0.00646666		2425.58	0.00077647		2955.58	0.06097677		3485.58	0.01307324		4015.58	-0.01786074
305.8	0.01465556		835.79	0.01846463		1365.79	0.00140454		1895.78	0.00564549		2425.78	0.00166996		2955.78	0.06137913		3485.78	0.01410637		4015.78	-0.01792385
306	0.01436619		835.99	0.01871126		1365.99	0.00088914		1895.98	0.00456798		2425.98	0.00130328		2955.98	0.06077298		3485.98	0.01457564		4015.98	-0.01846625
306.2	0.01466278		836.19	0.01865593		1366.19	0.00071962		1896.18	0.00408711		2426.18	0.00204456		2956.18	0.06002373		3486.18	0.0149911		4016.18	-0.01893733
306.4	0.01510438		836.39	0.01926888		1366.39	0.00087723		1896.38	0.00411227		2426.38	0.00135912		2956.38	0.05964591		3486.38	0.0152337		4016.38	-0.01821028
306.6	0.01532517		836.59	0.01863407		1366.59	0.00038072		1896.58	0.00399643		2426.58	0.00148868		2956.58	0.05957917		3486.58	0.01510279		4016.58	-0.01845962
306.8	0.01525638		836.79	0.01821552		1366.79	-0.0010438		1896.78	0.0033428		2426.78	0.00137207		2956.78	0.05915105		3486.78	0.01497215		4016.78	-0.01849404
307	0.01507302		836.99	0.01811057		1366.99	-0.00090983		1896.98	0.00296293		2426.98	0.00181298		2956.98	0.05812674		3486.98	0.01383706		4016.98	-0.01926949
307.2	0.01633088		837.19	0.01854951		1367.19	-0.00099785		1897.18	0.00265898		2427.18	0.00189014		2957.18	0.05851957		3487.18	0.01363535		4017.18	-0.01959186
307.4	0.01674667		837.39	0.01910548		1367.39	-0.00230279		1897.38	0.00220195		2427.38	0.00261292		2957.38	0.05841576		3487.38	0.01344514		4017.38	-0.02023498
307.6	0.01723738		837.59	0.01898712		1367.59	-0.00378633		1897.58	0.00177739		2427.58	0.00269147		2957.58	0.05840805		3487.58	0.0122476		4017.58	-0.02091799
307.8	0.01687483		837.79	0.01940826		1367.79	-0.00392486		1897.78	0.00057663		2427.78	0.00344402		2957.78	0.05855596		3487.78	0.01129013		4017.78	-0.0220765
308	0.01762127		837.99	0.02051413		1367.99	-0.00391562		1897.98	0.00028017		2427.98	0.00314742		2957.98	0.05805101		3487.98	0.01075235		4017.98	-0.02283159
308.2	0.01767729		838.19	0.02073837		1368.19	-0.00425744		1898.18	0.00064104		2428.18	0.00372572		2958.18	0.05883014		3488.18	0.01069494		4018.18	-0.02203881
308.4	0.01734857		838.39	0.02094778		1368.39	-0.00365574		1898.38	0.00092683		2428.38	0.00359314		2958.38	0.05978696		3488.38	0.00977589		4018.38	-0.02206994
308.6	0.01688356		838.59	0.01987055		1368.59	-0.00314443		1898.58	0.00142649		2428.58	0.00310192		2958.58	0.05962681		3488.58	0.00984598		4018.58	-0.0218814
308.8	0.01585857		838.79	0.02009612		1368.79	-0.00208966		1898.78	0.00182951		2428.78	0.00361856		2958.78	0.0596034		3488.78	0.00996156		4018.78	-0.02267339
309	0.0154421		838.99	0.02020832		1368.99	-0.00112176		1898.98	0.00260528		2428.98	0.00336611		2958.98	0.05996158		3488.98	0.00976855		4018.98	-0.02220956
309.2	0.01403898		839.19	0.0188837		1369.19	-0.00004401		1899.18	0.00298893		2429.18	0.00250822		2959.18	0.05995838		3489.18	0.01021236		4019.18	-0.02352231
309.4	0.01418122		839.39	0.0179731		1369.39	0.0008127		1899.38	0.00353394		2429.38	0.0028503		2959.38	0.06031914		3489.38	0.01001524		4019.38	-0.02331564
309.6	0.01369373		839.59	0.01731896		1369.59	0.00128578		1899.58	0.00319193		2429.58	0.00181194		2959.58	0.06075422		3489.58	0.01108722		4019.58	-0.02363247
309.8	0.01362344		839.79	0.01737301		1369.79	0.00280748		1899.78	0.00270876		2429.78	0.00183359		2959.78	0.06180013		3489.78	0.01112356		4019.78	-0.0229737
310	0.01343228		839.99	0.01717743		1369.99	0.00311113		1899.98	0.0028646		2429.98	0.00103249		2959.98	0.0614769		3489.98	0.01179742		4019.98	-0.02307659
310.2	0.01351701		840.19	0.01679446		1370.19	0.00382268		1900.18	0.00310164		2430.18	0.00054401		2960.18	0.06198313		3490.18	0.01269298		4020.18	-0.02278572
310.4	0.01364193		840.39	0.0171094		1370.39	0.00384823		1900.38	0.00344763		2430.38	0.00046093		2960.38	0.06215695		3490.38	0.01219819		4020.38	-0.02156549
310.6	0.01359871		840.59	0.01711352		1370.59	0.00344518		1900.58	0.00364354		2430.58	0.00069506		2960.58	0.06260141		3490.58	0.01236854		4020.58	-0.02209197
310.8	0.01371272		840.79	0.01657857		1370.79	0.00288277		1900.78	0.00303866		2430.78	0.00142367		2960.78	0.06290259		3490.78	0.01236266		4020.78	-0.02213938
311	0.01394426		840.99	0.01680699		1370.99	0.00362899		1900.98	0.00249787		2430.98	0.00133436		2960.98	0.06248379		3490.98	0.01226018		4020.98	-0.02245884
311.2	0.01578769		841.19	0.01659997		1371.19	0.00138576		1901.18	0.00225473		2431.18	0.00112108		2961.18	0.0629607		3491.18	0.01271484		4021.18	-0.02198307
311.4	0.01525501		841.39	0.01623058		1371.39	-0.00032618		1901.38	0.00199555		2431.38	0.00182587		2961.38	0.0636762		3491.38	0.01223837		4021.38	-0.02211851
311.6	0.01613132		841.59	0.01538776		1371.59	-0.00128291		1901.58	0.0018343		2431.58	0.0019394		2961.58	0.06245253		3491.58	0.01155503		4021.58	-0.02037504
311.8	0.01710246		841.79	0.01560698		1371.79	-0.00155806		1901.78	0.00167727		2431.78	0.00202514		2961.78	0.06314042		3491.78	0.01116488		4021.78	-0.01982782
312	0.0183053		841.99	0.01564329		1371.99	-0.00253637		1901.98	0.00224789		2431.98	0.00186485		2961.98	0.0636262		3491.98	0.01109827		4021.98	-0.01861309
312.2	0.01791994		842.19	0.01514217		1372.19	-0.00295751		1902.18	0.00295127		2432.18	0.00223752		2962.18	0.06400066		3492.18	0.01113817		4022.18	-0.01777153
312.4	0.01775215		842.39	0.01451724		1372.39	-0.00270113		1902.38	0.00302336		2432.38	0.0017071		2962.38	0.06516973		3492.38	0.01081818		4022.38	-0.01785035
312.6	0.017574		842.59	0.01405563		1372.59	-0.0030268		1902.58	0.00348038		2432.58	0.00165915		2962.58	0.06440214		3492.58	0.0112596		4022.58	-0.01876403
312.8	0.01759369		842.79	0.0139764		1372.79	-0.00308645		1902.78	0.00367908		2432.78	0.00181726		2962.78	0.06399666		3492.78	0.01074497		4022.78	-0.01964672
313	0.0172569		842.99	0.01405275		1372.99	-0.00287945		1902.98	0.00470186		2432.98	0.00194831		2962.98	0.06395628		3492.98	0.00960115		4022.98	-0.01943841
313.2	0.01793804		843.19	0.01403009		1373.19	-0.00300196		1903.18	0.00472636		2433.18	0.0018451		2963.18	0.06339726		3493.18	0.00935778		4023.18	-0.0200625
313.4	0.01803418		843.39	0.0153025		1373.39	-0.00249377		1903.38	0.00540982		2433.38	0.00254955		2963.38	0.0634978		3493.38	0.00917596		4023.38	-0.01951276
313.6	0.01829249		843.59	0.01604325		1373.59	-0.00215663		1903.58	0.00503655		2433.58	0.00214482		2963.58	0.06351699		3493.58	0.01002473		4023.58	-0.01991434
313.8	0.01813075		843.79	0.01717155		1373.79	-0.00168679		1903.78	0.00475237		2433.78	0.00244761		2963.78	0.0649599		3493.78	0.00937331		4023.78	-0.02051155
314	0.01786764		843.99	0.01793199		1373.99	-0.00217229		1903.98	0.00463775		2433.98	0.00274382		2963.98	0.06395871		3493.98	0.01053368		4023.98	-0.02179092
314.2	0.01769577		844.19	0.01837436		1374.19	-0.00163159		1904.18	0.00495445		2434.18	0.00272363		2964.18	0.06440372		3494.18	0.01084447		4024.18	-0.02168442
314.4	0.01729538		844.39	0.01971977		1374.39	-0.0021744		1904.38	0.00406088		2434.38	0.00309458		2964.38	0.06477928		3494.38	0.0102471		4024.38	-0.02211438
314.6	0.01708567		844.59	0.02009396		1374.59	-0.00208938		1904.58	0.00350624		2434.58	0.00387019		2964.58	0.06390616		3494.58	0.01045576		4024.58	-0.02308868
314.8	0.01742152		844.79	0.01955368		1374.79	-0.00270218		1904.78	0.00314047		2434.78	0.00355359		2964.78	0.06390296		3494.78	0.01128494		4024.78	-0.02393646
315	0.01780779		844.99	0.01999752		1374.99	-0.0024578		1904.98	0.00225872		2434.98	0.00324093		2964.98	0.06349804		3494.98	0.01176689		4024.98	-0.02390194
315.2	0.01803091		845.19	0.0199753		1375.19	-0.00428305		1905.18	0.00204141		2435.18	0.00370722		2965.18	0.06503113		3495.18	0.01249643		4025.18	-0.02309431
315.4	0.01742416		845.39	0.01944341		1375.39	-0.00388465		1905.38	0.0018608		2435.38	0.00356946		2965.38	0.06454938		3495.38	0.01280764		4025.38	-0.02230672
315.6	0.0184648		845.59	0.01832494		1375.59	-0.00368184		1905.58	0.00058057		2435.58	0.00260091		2965.58	0.0643303		3495.58	0.01239786		4025.58	-0.02075836
315.8	0.01809914		845.79	0.01812313		1375.79	-0.00305041		1905.78	0.00107049		2435.78	0.00188896		2965.78	0.06547705		3495.78	0.01332082		4025.78	-0.02063726
316	0.01819983		845.99	0.0180483		1375.99	-0.00263829		1905.98	0.00084452		2435.98	0.00200262		2965.98	0.06633304		3495.98	0.01335234		4025.98	-0.02033711
316.2	0.01821471		846.19	0.01782774		1376.19	-0.00146301		1906.18	0.00051934		2436.18	0.00208909		2966.18	0.06683992		3496.18	0.01365954		4026.18	-0.02011263
316.4	0.01787339		846.39	0.01739063		1376.39	-0.00011614		1906.38	-0.0003906		2436.38	0.00190846		2966.38	0.0666854		3496.38	0.013765		4026.38	-0.01891639
316.6	0.01785412		846.59	0.01671994		1376.59	0.00035721		1906.58	0.00018605		2436.58	0.00190121		2966.58	0.06578194		3496.58	0.01342593		4026.58	-0.01754891
316.8	0.01726437		846.79	0.0165711		1376.79	0.00100484		1906.78	0.00089361		2436.78	0.00177971		2966.78	0.06614987		3496.78	0.01255043		4026.78	-0.01645671
317	0.01769898		846.99	0.01779668		1376.99	0.0015434		1906.98	0.00123484		2436.98	0.00192846		2966.98	0.06660608		3496.98	0.01167876		4026.98	-0.01623993
317.2	0.01786871		847.19	0.01878211		1377.19	0.00101763		1907.18	0.00156554		2437.18	0.00237401		2967.18	0.06650931		3497.18	0.01132462		4027.18	-0.01524156
317.4	0.01710709		847.39	0.01959713		1377.39	0.00220855		1907.38	0.0022197		2437.38	0.00234894		2967.38	0.06664556		3497.38	0.0114793		4027.38	-0.014628
317.6	0.0173983		847.59	0.01946931		1377.59	0.00178645		1907.58	0.00294106		2437.58	0.00192371		2967.58	0.06614972		3497.58	0.01134139		4027.58	-0.01486263
317.8	0.01699931		847.79	0.01898215		1377.79	0.00180294		1907.78	0.00368227		2437.78	0.00173732		2967.78	0.06638129		3497.78	0.01067122		4027.78	-0.01576717
318	0.01724796		847.99	0.01901352		1377.99	0.00111196		1907.98	0.00417578		2437.98	0.00066049		2967.98	0.06549856		3497.98	0.01088748		4027.98	-0.0162345
318.2	0.01664255		848.19	0.01868564		1378.19	0.00093496		1908.18	0.00405856		2438.18	-0.00076711		2968.18	0.06566039		3498.18	0.01077889		4028.18	-0.01673447
318.4	0.01620408		848.39	0.01902323		1378.39	0.00010583		1908.38	0.003817		2438.38	-0.00103244		2968.38	0.06604654		3498.38	0.01077164		4028.38	-0.01786149
318.6	0.01669824		848.59	0.01936784		1378.59	-0.00125845		1908.58	0.00410187		2438.58	-0.00106152		2968.58	0.06590299		3498.58	0.01107022		4028.58	-0.01884831
318.8	0.01713206		848.79	0.01851268		1378.79	-0.00274629		1908.78	0.00425807		2438.78	-0.00105099		2968.78	0.06604016		3498.78	0.01181868		4028.78	-0.019855
319	0.01652494		848.99	0.01985122		1378.99	-0.00324706		1908.98	0.00368998		2438.98	-0.001412		2968.98	0.06623313		3498.98	0.01289232		4028.98	-0.01961851
319.2	0.01615064		849.19	0.01922373		1379.19	-0.00531015		1909.18	0.00394883		2439.18	-0.00217277		2969.18	0.06724254		3499.18	0.0132909		4029.18	-0.0193523
319.4	0.01655509		849.39	0.01781715		1379.39	-0.00576156		1909.38	0.00390409		2439.38	-0.00274954		2969.38	0.06621838		3499.38	0.01322834		4029.38	-0.02021059
319.6	0.01555187		849.59	0.01725156		1379.59	-0.00653923		1909.58	0.00304931		2439.58	-0.00294089		2969.58	0.06731169		3499.58	0.01298603		4029.58	-0.02067253
319.8	0.01458417		849.79	0.01678014		1379.79	-0.00583941		1909.78	0.00368502		2439.78	-0.00298843		2969.78	0.06744026		3499.78	0.01321033		4029.78	-0.0209568
320	0.01499412		849.99	0.017085		1379.99	-0.00558732		1909.98	0.00367809		2439.98	-0.0021119		2969.98	0.06781882		3499.98	0.01289899		4029.98	-0.02184081
320.2	0.01564356		850.19	0.01642986		1380.19	-0.00484556		1910.18	0.00409006		2440.18	-0.00135624		2970.18	0.0672815		3500.18	0.01284113		4030.18	-0.02188651
320.4	0.01454602		850.39	0.01631876		1380.39	-0.00383524		1910.38	0.00389169		2440.38	-0.00050106		2970.38	0.06747649		3500.38	0.0129479		4030.38	-0.02121587
320.6	0.01441741		850.59	0.01551565		1380.59	-0.00408788		1910.58	0.00437246		2440.58	0.00004218		2970.58	0.06745122		3500.58	0.01286181		4030.58	-0.02167081
320.8	0.01403629		850.79	0.015784		1380.79	-0.00380942		1910.78	0.0049058		2440.78	0.00132832		2970.78	0.06713276		3500.78	0.0124684		4030.78	-0.02194094
321	0.01464723		850.99	0.01620916		1380.99	-0.00291313		1910.98	0.00528734		2440.98	0.002036		2970.98	0.06656424		3500.98	0.01270851		4030.98	-0.02218075
321.2	0.01408871		851.19	0.01712491		1381.19	-0.00252223		1911.18	0.00480644		2441.18	0.00362801		2971.18	0.06526896		3501.18	0.01253836		4031.18	-0.02185556
321.4	0.01379058		851.39	0.01695968		1381.39	-0.0014812		1911.38	0.00453429		2441.38	0.00384206		2971.38	0.06406124		3501.38	0.01267941		4031.38	-0.02228616
321.6	0.01427659		851.59	0.01735312		1381.59	-0.00120348		1911.58	0.00461005		2441.58	0.00464768		2971.58	0.06311235		3501.58	0.0130552		4031.58	-0.02315826
321.8	0.01523872		851.79	0.01720417		1381.79	-0.0000156		1911.78	0.00459158		2441.78	0.00426159		2971.78	0.06304403		3501.78	0.01344201		4031.78	-0.02355932
322	0.01629624		851.99	0.01805303		1381.99	0.00009859		1911.98	0.00450366		2441.98	0.00348038		2971.98	0.06276965		3501.98	0.0140595		4031.98	-0.02376231
322.2	0.01720105		852.19	0.01899643		1382.19	0.00009139		1912.18	0.0040159		2442.18	0.00390224		2972.18	0.06289685		3502.18	0.01401366		4032.18	-0.02361619
322.4	0.0177865		852.39	0.02011884		1382.39	0.00004194		1912.38	0.00410875		2442.38	0.00407149		2972.38	0.06365285		3502.38	0.01496028		4032.38	-0.02254697
322.6	0.01882223		852.59	0.02078947		1382.59	-0.00085909		1912.58	0.00335716		2442.58	0.00398464		2972.58	0.06342259		3502.58	0.01536289		4032.58	-0.02159171
322.8	0.01966174		852.79	0.02098918		1382.79	-0.00085593		1912.78	0.00296261		2442.78	0.00295406		2972.78	0.0625213		3502.78	0.0167707		4032.78	-0.02027738
323	0.02007702		852.99	0.02194164		1382.99	-0.00128572		1912.98	0.00287626		2442.98	0.00161166		2972.98	0.06386822		3502.98	0.01728209		4032.98	-0.01902655
323.2	0.02064729		853.19	0.02007101		1383.19	-0.00189519		1913.18	0.00292129		2443.18	0.00137139		2973.18	0.06458827		3503.18	0.01596892		4033.18	-0.01809739
323.4	0.02085015		853.39	0.0195175		1383.39	-0.00214294		1913.38	0.00236894		2443.38	0.00088857		2973.38	0.06504529		3503.38	0.01580681		4033.38	-0.01801032
323.6	0.0205454		853.59	0.02010575		1383.59	-0.00246595		1913.58	0.00165479		2443.58	0.00029488		2973.58	0.06601657		3503.58	0.01575458		4033.58	-0.01743144
323.8	0.02012033		853.79	0.02009886		1383.79	-0.00113629		1913.78	0.00188095		2443.78	-0.00037156		2973.78	0.06623701		3503.78	0.01444406		4033.78	-0.01748929
324	0.02085675		853.99	0.01967449		1383.99	-0.00116624		1913.98	0.00165561		2443.98	-0.0000639		2973.98	0.06726554		3503.98	0.01427162		4033.98	-0.01716106
324.2	0.02089146		854.19	0.01831028		1384.19	-0.0010941		1914.18	0.00174096		2444.18	0.00052188		2974.18	0.06820335		3504.18	0.01428414		4034.18	-0.01659189
324.4	0.01980698		854.39	0.01769307		1384.39	-0.00092403		1914.38	0.00225016		2444.38	0.00102975		2974.38	0.0699459		3504.38	0.01443211		4034.38	-0.01637234
324.6	0.01955854		854.59	0.01682804		1384.59	-0.00088581		1914.58	0.00286052		2444.58	0.00063373		2974.58	0.06958198		3504.58	0.01483264		4034.58	-0.01698417
324.8	0.01869416		854.79	0.01737872		1384.79	0.00005857		1914.78	0.00328172		2444.78	0.00080256		2974.78	0.06949414		3504.78	0.01493913		4034.78	-0.01624232
325	0.01807394		854.99	0.01680301		1384.99	0.00060957		1914.98	0.00377311		2444.98	-0.00032818		2974.98	0.06922323		3504.98	0.01528111		4034.98	-0.01639261
325.2	0.0163773		855.19	0.01619737		1385.19	0.00094841		1915.18	0.00381112		2445.18	0.00095902		2975.18	0.06885158		3505.18	0.01478638		4035.18	-0.01559119
325.4	0.01537948		855.39	0.01578978		1385.39	0.00082241		1915.38	0.00425715		2445.38	0.00017843		2975.38	0.06853432		3505.38	0.01465923		4035.38	-0.01594897
325.6	0.01515723		855.59	0.01571777		1385.59	0.00076869		1915.58	0.00569983		2445.58	0.00060866		2975.58	0.06771679		3505.58	0.01529569		4035.58	-0.01666284
325.8	0.01525395		855.79	0.01507307		1385.79	0.00052503		1915.78	0.00698094		2445.78	0.00078537		2975.78	0.06712833		3505.78	0.01548903		4035.78	-0.01703563
326	0.01452366		855.99	0.01595238		1385.99	0.000259		1915.98	0.00708262		2445.98	0.0011947		2975.98	0.06681159		3505.98	0.01482262		4035.98	-0.01834116
326.2	0.01383276		856.19	0.01539893		1386.19	-0.00034907		1916.18	0.00708703		2446.18	0.00121978		2976.18	0.0668715		3506.18	0.01434593		4036.18	-0.0182739
326.4	0.01256213		856.39	0.01485727		1386.39	-0.00021334		1916.38	0.00709005		2446.38	0.0006856		2976.38	0.06631839		3506.38	0.01508995		4036.38	-0.01808055
326.6	0.01313862		856.59	0.013743		1386.59	-0.00083839		1916.58	0.00675557		2446.58	-0.00053954		2976.58	0.06612119		3506.58	0.01491098		4036.58	-0.01809861
326.8	0.01360467		856.79	0.01407882		1386.79	-0.0010908		1916.78	0.00634534		2446.78	-0.00169788		2976.78	0.06577976		3506.78	0.01452327		4036.78	-0.0181004
327	0.0140385		856.99	0.01365966		1386.99	-0.00219269		1916.98	0.00604856		2446.98	-0.00198388		2976.98	0.06644798		3506.98	0.01354072		4036.98	-0.01871388
327.2	0.01404589		857.19	0.01313961		1387.19	-0.00181295		1917.18	0.00609475		2447.18	-0.00228937		2977.18	0.06603061		3507.18	0.01285952		4037.18	-0.01863453
327.4	0.01444481		857.39	0.01406344		1387.39	-0.00195758		1917.38	0.00570721		2447.38	-0.00286254		2977.38	0.06595919		3507.38	0.01194283		4037.38	-0.01923435
327.6	0.01566898		857.59	0.01487367		1387.59	-0.00161745		1917.58	0.00487412		2447.58	-0.00296888		2977.58	0.06610746		3507.58	0.01103475		4037.58	-0.01906537
327.8	0.01582722		857.79	0.01501746		1387.79	-0.00042472		1917.78	0.00465269		2447.78	-0.00230384		2977.78	0.06610503		3507.78	0.00985574		4037.78	-0.01939305
328	0.01671465		857.99	0.0150301		1387.99	-0.00011683		1917.98	0.00351214		2447.98	-0.00194583		2977.98	0.06685918		3507.98	0.01040522		4037.98	-0.01917986
328.2	0.0172968		858.19	0.01600204		1388.19	-0.00021146		1918.18	0.00417694		2448.18	-0.00170548		2978.18	0.06758044		3508.18	0.01063658		4038.18	-0.0190404
328.4	0.01768005		858.39	0.01621286		1388.39	0.0005873		1918.38	0.0034725		2448.38	-0.00153053		2978.38	0.06854953		3508.38	0.01062411		4038.38	-0.01924444
328.6	0.0181297		858.59	0.0172351		1388.59	0.00198309		1918.58	0.00293637		2448.58	-0.00210809		2978.58	0.06871801		3508.58	0.0110158		4038.58	-0.01955971
328.8	0.01849105		858.79	0.01828405		1388.79	0.00250888		1918.78	0.00273035		2448.78	-0.00151286		2978.78	0.06854364		3508.78	0.01062776		4038.78	-0.01940864
329	0.01897333		858.99	0.01865004		1388.99	0.00233551		1918.98	0.00349507		2448.98	-0.00109964		2978.98	0.06835811		3508.98	0.01081967		4038.98	-0.01953115
329.2	0.0188265		859.19	0.01835796		1389.19	0.00273898		1919.18	0.00345549		2449.18	-0.00000745		2979.18	0.06879563		3509.18	0.01104974		4039.18	-0.01953283
329.4	0.01842316		859.39	0.01855142		1389.39	0.00214532		1919.38	0.00315028		2449.38	-0.00000276		2979.38	0.06898715		3509.38	0.01068389		4039.38	-0.02025285
329.6	0.01908699		859.59	0.01863561		1389.59	0.00204062		1919.58	0.0041572		2449.58	0.00123585		2979.58	0.0676634		3509.58	0.01137832		4039.58	-0.02108311
329.8	0.01915163		859.79	0.019707		1389.79	0.00218115		1919.78	0.00392569		2449.78	0.00301558		2979.78	0.067733		3509.78	0.01186212		4039.78	-0.02147259
330	0.01826706		859.99	0.01960382		1389.99	0.0026076		1919.98	0.0034115		2449.98	0.00312243		2979.98	0.06729524		3509.98	0.01027731		4039.98	-0.02267662
330.2	0.01754782		860.19	0.01942637		1390.19	0.0018887		1920.18	0.00343325		2450.18	0.00298173		2980.18	0.06713682		3510.18	0.01074508		4040.18	-0.02272397
330.4	0.01756546		860.39	0.02002741		1390.39	0.00163713		1920.38	0.00368034		2450.38	0.00363889		2980.38	0.06657088		3510.38	0.01133846		4040.38	-0.02260685
330.6	0.01851105		860.59	0.01910777		1390.59	0.00048926		1920.58	0.00398785		2450.58	0.00279558		2980.58	0.06628845		3510.58	0.01169218		4040.58	-0.02165435
330.8	0.01820933		860.79	0.01899182		1390.79	-0.00036395		1920.78	0.00355331		2450.78	0.00410512		2980.78	0.06595508		3510.78	0.01165393		4040.78	-0.02147222
331	0.01900108		860.99	0.01864651		1390.99	-0.00106299		1920.98	0.00432713		2450.98	0.00436686		2980.98	0.06586256		3510.98	0.01164663		4040.98	-0.02150292
331.2	0.0188911		861.19	0.01785615		1391.19	-0.00032383		1921.18	0.00477048		2451.18	0.00435117		2981.18	0.06559354		3511.18	0.01128578		4041.18	-0.02041344
331.4	0.01947556		861.39	0.01781415		1391.39	-0.00107882		1921.38	0.00391135		2451.38	0.00512102		2981.38	0.06544754		3511.38	0.01055124		4041.38	-0.01998901
331.6	0.01991139		861.59	0.01851952		1391.59	-0.00069056		1921.58	0.0034213		2451.58	0.00544057		2981.58	0.06548669		3511.58	0.01068863		4041.58	-0.01899388
331.8	0.01910421		861.79	0.01809562		1391.79	-0.00061919		1921.78	0.00440267		2451.78	0.00583045		2981.78	0.06557527		3511.78	0.01133712		4041.78	-0.01793329
332	0.01909472		861.99	0.01776061		1391.99	-0.00068321		1921.98	0.00485997		2451.98	0.00539741		2981.98	0.06614797		3511.98	0.01194		4041.98	-0.01779095
332.2	0.01861141		862.19	0.01801522		1392.19	-0.00048088		1922.18	0.00543284		2452.18	0.00498575		2982.18	0.06658432		3512.18	0.01162905		4042.18	-0.01778508
332.4	0.01792589		862.39	0.01737967		1392.39	-0.00003977		1922.38	0.00397239		2452.38	0.00421456		2982.38	0.06766092		3512.38	0.0115473		4042.38	-0.01780556
332.6	0.01676671		862.59	0.01774401		1392.59	0.00045487		1922.58	0.00412828		2452.58	0.0030496		2982.58	0.06806859		3512.58	0.01160842		4042.58	-0.0185426
332.8	0.01635691		862.79	0.01852242		1392.79	0.00062011		1922.78	0.00472395		2452.78	0.00239379		2982.78	0.0683795		3512.78	0.0111491		4042.78	-0.01829596
333	0.01615427		862.99	0.01907563		1392.99	0.0000276		1922.98	0.00540357		2452.98	0.00127341		2982.98	0.06918105		3512.98	0.01147133		4042.98	-0.01847084
333.2	0.01607482		863.19	0.01824271		1393.19	-0.00055684		1923.18	0.00454892		2453.18	0.00034019		2983.18	0.07061991		3513.18	0.01083112		4043.18	-0.0186082
333.4	0.01555933		863.39	0.01895186		1393.39	-0.00063868		1923.38	0.0040107		2453.38	0.0000294		2983.38	0.07163212		3513.38	0.01016647		4043.38	-0.01875058
333.6	0.01651077		863.59	0.02028945		1393.59	-0.00044773		1923.58	0.00412054		2453.58	0.00037734		2983.58	0.071767		3513.58	0.01108436		4043.58	-0.01933965
333.8	0.01567239		863.79	0.02149111		1393.79	-0.00026927		1923.78	0.00367798		2453.78	-0.00011995		2983.78	0.07318593		3513.78	0.01075089		4043.78	-0.02010979
334	0.01516006		863.99	0.02179503		1393.99	-0.00061307		1923.98	0.0032169		2453.98	-0.00098237		2983.98	0.07268875		3513.98	0.00928971		4043.98	-0.02130296
334.2	0.01605618		864.19	0.02272564		1394.19	-0.00070722		1924.18	0.00317348		2454.18	-0.00052083		2984.18	0.07313676		3514.18	0.01073552		4044.18	-0.02135288
334.4	0.0171302		864.39	0.02258766		1394.39	-0.00080792		1924.38	0.0039467		2454.38	0.00019087		2984.38	0.07337928		3514.38	0.0107821		4044.38	-0.02135756
334.6	0.01754777		864.59	0.02089871		1394.59	-0.00098232		1924.58	0.00321722		2454.58	0.00053202		2984.58	0.0734749		3514.58	0.01132204		4044.58	-0.02185674
334.8	0.01767138		864.79	0.02118441		1394.79	-0.00007898		1924.78	0.00249468		2454.78	0.00142304		2984.78	0.07394255		3514.78	0.01164595		4044.78	-0.02255264
335	0.01864327		864.99	0.02020995		1394.99	0.00027082		1924.98	0.00259581		2454.98	0.00100627		2984.98	0.07432541		3514.98	0.01185609		4044.98	-0.02238194
335.2	0.01888205		865.19	0.01908078		1395.19	0.00075856		1925.18	0.00230293		2455.18	0.00114962		2985.18	0.07440512		3515.18	0.01189045		4045.18	-0.02150855
335.4	0.01945006		865.39	0.01866333		1395.39	0.0003921		1925.38	0.00261769		2455.38	0.00236202		2985.38	0.07453117		3515.38	0.01256689		4045.38	-0.02206195
335.6	0.01995428		865.59	0.01820548		1395.59	0.00112373		1925.58	0.00373906		2455.58	0.00291314		2985.58	0.07398316		3515.58	0.01281976		4045.58	-0.02177942
335.8	0.01996896		865.79	0.01644745		1395.79	0.00089623		1925.78	0.00453489		2455.78	0.00338838		2985.78	0.07294037		3515.78	0.01323758		4045.78	-0.02150176
336	0.01944446		865.99	0.01659367		1395.99	0.00078393		1925.98	0.0046574		2455.98	0.00339792		2985.98	0.07268026		3515.98	0.01297864		4045.98	-0.02214917
336.2	0.01871284		866.19	0.01593451		1396.19	0.00034177		1926.18	0.00424862		2456.18	0.0022672		2986.18	0.07241972		3516.18	0.01202433		4046.18	-0.02235987
336.4	0.0188204		866.39	0.0158719		1396.39	-0.00025992		1926.38	0.00380321		2456.38	0.00225229		2986.38	0.07175695		3516.38	0.01110657		4046.38	-0.02154233
336.6	0.01875476		866.59	0.01583145		1396.59	-0.00071081		1926.58	0.00413963		2456.58	0.00209567		2986.58	0.07110186		3516.58	0.01105262		4046.58	-0.02124365
336.8	0.01899711		866.79	0.01618155		1396.79	-0.00146038		1926.78	0.00382215		2456.78	0.00174704		2986.78	0.07088302		3516.78	0.01048579		4046.78	-0.02047925
337	0.01900506		866.99	0.016782		1396.99	-0.00239508		1926.98	0.00291742		2456.98	0.00183434		2986.98	0.07127155		3516.98	0.01055494		4046.98	-0.02015805
337.2	0.01889048		867.19	0.01693857		1397.19	-0.0029355		1927.18	0.00203905		2457.18	0.00198432		2987.18	0.07096802		3517.18	0.00971617		4047.18	-0.01998332
337.4	0.01859816		867.39	0.01748058		1397.39	-0.00227522		1927.38	0.00125446		2457.38	0.0021163		2987.38	0.0716794		3517.38	0.00945429		4047.38	-0.02000278
337.6	0.01931116		867.59	0.01798256		1397.59	-0.00212199		1927.58	0.00063436		2457.58	0.00171935		2987.58	0.07240757		3517.58	0.01021233		4047.58	-0.02021633
337.8	0.01946549		867.79	0.01862612		1397.79	-0.00229196		1927.78	0.00094943		2457.78	0.00059359		2987.78	0.07203118		3517.78	0.00972285		4047.78	-0.02022061
338	0.01975783		867.99	0.01909677		1397.99	-0.00169726		1927.98	-0.00007549		2457.98	0.00097986		2987.98	0.07202068		3517.98	0.00988922		4047.98	-0.02034572
338.2	0.01997622		868.19	0.01880744		1398.19	-0.00150829		1928.18	-0.00062941		2458.18	0.00135352		2988.18	0.07257228		3518.18	0.01051787		4048.18	-0.02052138
338.4	0.01971168		868.39	0.0189901		1398.39	-0.00105689		1928.38	-0.00130784		2458.38	0.00083578		2988.38	0.07335901		3518.38	0.0105928		4048.38	-0.02052621
338.6	0.01836819		868.59	0.018016		1398.59	-0.00011883		1928.58	-0.00178063		2458.58	0.00134746		2988.58	0.0737311		3518.58	0.01129023		4048.58	-0.02077922
338.8	0.01792029		868.79	0.01890025		1398.79	0.00085951		1928.78	-0.00069887		2458.78	0.00120916		2988.78	0.07412009		3518.78	0.01166715		4048.78	-0.02018837
339	0.01795193		868.99	0.01697938		1398.99	0.00075571		1928.98	-0.00034212		2458.98	0.00019604		2988.98	0.07437162		3518.98	0.01136071		4048.98	-0.01973594
339.2	0.01849697		869.19	0.01790789		1399.19	0.00100708		1929.18	0.00046827		2459.18	0.00004227		2989.18	0.07403679		3519.18	0.01221558		4049.18	-0.01940693
339.4	0.0189188		869.39	0.0177124		1399.39	0.00136029		1929.38	0.00191658		2459.38	0.00064917		2989.38	0.07362149		3519.38	0.01331078		4049.38	-0.01898562
339.6	0.01939819		869.59	0.01747865		1399.59	0.00138824		1929.58	0.00255668		2459.58	0.00072885		2989.58	0.07284984		3519.58	0.01294489		4049.58	-0.01841998
339.8	0.01945773		869.79	0.01755594		1399.79	0.00130975		1929.78	0.00386253		2459.78	-0.00019293		2989.78	0.07201898		3519.78	0.01349198		4049.78	-0.01836923
340	0.01966741		869.99	0.01849975		1399.99	0.00065564		1929.98	0.00564842		2459.98	-0.00032966		2989.98	0.07241332		3519.98	0.01212656		4049.98	-0.01785285
340.2	0.01986467		870.19	0.0178594		1400.19	0.00002024		1930.18	0.00660186		2460.18	-0.00000818		2990.18	0.07171347		3520.18	0.01171942		4050.18	-0.01775981
340.4	0.02049026		870.39	0.01827787		1400.39	-0.00048481		1930.38	0.00689887		2460.38	0.00214002		2990.38	0.07045167		3520.38	0.01176535		4050.38	-0.01687875
340.6	0.0208293		870.59	0.01817199		1400.59	-0.00115028		1930.58	0.00726235		2460.58	0.00211483		2990.58	0.0701399		3520.58	0.01169631		4050.58	-0.01683507
340.8	0.01986072		870.79	0.0180064		1400.79	-0.00054135		1930.78	0.00697165		2460.78	0.00166949		2990.78	0.06974513		3520.78	0.01121327		4050.78	-0.01702372
341	0.0187107		870.99	0.01815999		1400.99	-0.00034212		1930.98	0.00754777		2460.98	0.00238318		2990.98	0.06948246		3520.98	0.01159361		4050.98	-0.01634218
341.2	0.01803337		871.19	0.01739175		1401.19	-0.00018667		1931.18	0.00719387		2461.18	0.00264032		2991.18	0.06889265		3521.18	0.01085008		4051.18	-0.01684052
341.4	0.01847584		871.39	0.01723548		1401.39	0.00065859		1931.38	0.00667629		2461.38	0.00240631		2991.38	0.06984996		3521.38	0.01117258		4051.38	-0.01684549
341.6	0.01859149		871.59	0.01757069		1401.59	0.00129376		1931.58	0.00618702		2461.58	0.00212212		2991.58	0.07097319		3521.58	0.01167674		4051.58	-0.01672053
341.8	0.01900056		871.79	0.0178808		1401.79	0.00094535		1931.78	0.0061356		2461.78	0.00227057		2991.78	0.07114548		3521.78	0.01175854		4051.78	-0.01684825
342	0.01870032		871.99	0.01782546		1401.99	0.00171001		1931.98	0.00464927		2461.98	0.00303025		2991.98	0.0721242		3521.98	0.01184024		4051.98	-0.01768104
342.2	0.01834209		872.19	0.01779332		1402.19	0.00164249		1932.18	0.00427714		2462.18	0.00283526		2992.18	0.07296807		3522.18	0.01150127		4052.18	-0.0184774
342.4	0.01772213		872.39	0.01831413		1402.39	0.00255681		1932.38	0.00393162		2462.38	0.00213197		2992.38	0.07402809		3522.38	0.01158314		4052.38	-0.0189138
342.6	0.01756866		872.59	0.01734944		1402.59	0.00251133		1932.58	0.00388803		2462.58	0.00299283		2992.58	0.07420513		3522.58	0.01165569		4052.58	-0.01911772
342.8	0.0180751		872.79	0.0169504		1402.79	0.00267097		1932.78	0.0045334		2462.78	0.00178675		2992.78	0.07492143		3522.78	0.01262747		4052.78	-0.01880899
343	0.0189026		872.99	0.01608277		1402.99	0.00159238		1932.98	0.0035913		2462.98	0.00065601		2992.98	0.07520391		3522.98	0.01336851		4052.98	-0.01844188
343.2	0.0199779		873.19	0.01730728		1403.19	0.00085686		1933.18	0.00438249		2463.18	0.00010433		2993.18	0.07585505		3523.18	0.01434428		4053.18	-0.01798084
343.4	0.02087782		873.39	0.01631689		1403.39	0.00125148		1933.38	0.00495889		2463.38	-0.00039786		2993.38	0.07590742		3523.38	0.01468408		4053.38	-0.01753623
343.6	0.02092954		873.59	0.01666498		1403.59	0.0015733		1933.58	0.00570958		2463.58	-0.00122705		2993.58	0.07553204		3523.58	0.01435586		4053.58	-0.01814532
343.8	0.02088893		873.79	0.01715433		1403.79	0.00146276		1933.78	0.00640799		2463.78	-0.00189634		2993.78	0.07563975		3523.78	0.01432476		4053.78	-0.01811483
344	0.02140861		873.99	0.01741662		1403.99	0.00063206		1933.98	0.00656945		2463.98	-0.00097589		2993.98	0.07568982		3523.98	0.01251727		4053.98	-0.01813593
344.2	0.02097759		874.19	0.01735632		1404.19	0.00056429		1934.18	0.00623275		2464.18	-0.00118616		2994.18	0.07551194		3524.18	0.01220474		4054.18	-0.01877705
344.4	0.02130558		874.39	0.01676735		1404.39	0.00074427		1934.38	0.00614098		2464.38	-0.00023573		2994.38	0.07455615		3524.38	0.0119165		4054.38	-0.01842643
344.6	0.02089142		874.59	0.01638779		1404.59	0.00133269		1934.58	0.00622008		2464.58	-0.00021959		2994.58	0.07427834		3524.58	0.01076726		4054.58	-0.01946118
344.8	0.019536		874.79	0.01609613		1404.79	0.00128938		1934.78	0.00616081		2464.78	-0.00043252		2994.78	0.07387668		3524.78	0.01034822		4054.78	-0.01981806
345	0.01923269		874.99	0.0161471		1404.99	0.00083564		1934.98	0.00568655		2464.98	0.00036273		2994.98	0.07410998		3524.98	0.01011716		4054.98	-0.01978929
345.2	0.01897123		875.19	0.01583285		1405.19	0.00103158		1935.18	0.00447829		2465.18	0.00058211		2995.18	0.07388817		3525.18	0.00993497		4055.18	-0.02053905
345.4	0.01874335		875.39	0.01679551		1405.39	0.00106214		1935.38	0.00432333		2465.38	0.00106522		2995.38	0.07399737		3525.38	0.01023903		4055.38	-0.02057172
345.6	0.01771888		875.59	0.01771504		1405.59	0.00128226		1935.58	0.00461015		2465.58	0.001419		2995.58	0.07444713		3525.58	0.01008184		4055.58	-0.02076155
345.8	0.01755128		875.79	0.01780953		1405.79	0.00091035		1935.78	0.00458501		2465.78	0.00175745		2995.78	0.07443824		3525.78	0.01025879		4055.78	-0.02159124
346	0.01703872		875.99	0.01747051		1405.99	0.00177011		1935.98	0.00428601		2465.98	0.00265447		2995.98	0.0745753		3525.98	0.01057603		4055.98	-0.02243223
346.2	0.01691131		876.19	0.01738209		1406.19	0.00156513		1936.18	0.00374813		2466.18	0.00292997		2996.18	0.07591338		3526.18	0.01018909		4056.18	-0.02276046
346.4	0.01704266		876.39	0.01769908		1406.39	0.00221561		1936.38	0.00349378		2466.38	0.00385021		2996.38	0.07614725		3526.38	0.01101193		4056.38	-0.02243092
346.6	0.01747061		876.59	0.01778169		1406.59	0.00136096		1936.58	0.00349679		2466.58	0.00446765		2996.58	0.07660412		3526.58	0.01190074		4056.58	-0.02149633
346.8	0.01705479		876.79	0.0185539		1406.79	0.00080233		1936.78	0.00413647		2466.78	0.00402531		2996.78	0.07763821		3526.78	0.01415325		4056.78	-0.02143837
347	0.01733838		876.99	0.01926502		1406.99	-0.00016337		1936.98	0.00400883		2466.98	0.00389718		2996.98	0.07813901		3526.98	0.01414379		4056.98	-0.02160417
347.2	0.01826296		877.19	0.01968173		1407.19	0.00027414		1937.18	0.00467575		2467.18	0.00263705		2997.18	0.07806026		3527.18	0.01405303		4057.18	-0.02189433
347.4	0.01808328		877.39	0.01973732		1407.39	0.00077417		1937.38	0.00501743		2467.38	0.00241944		2997.38	0.07714565		3527.38	0.01478152		4057.38	-0.02205631
347.6	0.01798424		877.59	0.0208773		1407.59	0.00060316		1937.58	0.00626099		2467.58	0.00193067		2997.58	0.07703121		3527.58	0.01451012		4057.58	-0.02163936
347.8	0.01835485		877.79	0.0211186		1407.79	-0.00013976		1937.78	0.00610151		2467.78	0.00147391		2997.78	0.07705428		3527.78	0.01402777		4057.78	-0.02144812
348	0.01931247		877.99	0.02091366		1407.99	-0.00035598		1937.98	0.00656182		2467.98	0.00045349		2997.98	0.07724812		3527.98	0.01358333		4057.98	-0.02160715
348.2	0.01886701		878.19	0.02109824		1408.19	-0.00023964		1938.18	0.00680691		2468.18	-0.00039537		2998.18	0.07686892		3528.18	0.01359447		4058.18	-0.02121016
348.4	0.01885818		878.39	0.02045882		1408.39	-0.00007327		1938.38	0.00680157		2468.38	-0.00019487		2998.38	0.07594791		3528.38	0.01357871		4058.38	-0.0211977
348.6	0.01934596		878.59	0.02113632		1408.59	-0.00024788		1938.58	0.00690049		2468.58	-0.00023087		2998.58	0.07550715		3528.58	0.01267743		4058.58	-0.02127442
348.8	0.02007916		878.79	0.02131603		1408.79	-0.00031553		1938.78	0.00727766		2468.78	-0.00089564		2998.78	0.07588839		3528.78	0.01272146		4058.78	-0.02084011
349	0.02002011		878.99	0.02115805		1408.99	-0.00053693		1938.98	0.00639674		2468.98	-0.00046595		2998.98	0.07645559		3528.98	0.01216521		4058.98	-0.02107851
349.2	0.01920896		879.19	0.02070126		1409.19	-0.00072079		1939.18	0.00642817		2469.18	-0.00069036		2999.18	0.07565135		3529.18	0.01233293		4059.18	-0.02074516
349.4	0.01890064		879.39	0.02119899		1409.39	-0.00079524		1939.38	0.00698269		2469.38	-0.00040721		2999.38	0.07454473		3529.38	0.01239539		4059.38	-0.0203539
349.6	0.01904214		879.59	0.02066276		1409.59	-0.00089274		1939.58	0.00654978		2469.58	-0.00052484		2999.58	0.07388921		3529.58	0.01185117		4059.58	-0.02040962
349.8	0.01909159		879.79	0.02041553		1409.79	-0.00153681		1939.78	0.00614001		2469.78	0.00031173		2999.78	0.07412769		3529.78	0.01219518		4059.78	-0.02031819
350	0.01929185		879.99	0.01949935		1409.99	-0.00219935		1939.98	0.00624256		2469.98	0.00198499		2999.98	0.07438005		3529.98	0.01242162		4059.98	-0.02049047
350.2	0.01916172		880.19	0.02088235		1410.19	-0.00241204		1940.18	0.0058176		2470.18	0.00276268		3000.18	0.07443649		3530.18	0.01289298		4060.18	-0.01971715
350.4	0.01854489		880.39	0.02157686		1410.39	-0.00203989		1940.38	0.00606809		2470.38	0.00335053		3000.38	0.07391595		3530.38	0.0131619		4060.38	-0.01911112
350.6	0.01832881		880.59	0.02104735		1410.59	-0.00244644		1940.58	0.00637321		2470.58	0.00359663		3000.58	0.07497666		3530.58	0.0134845		4060.58	-0.01799792
350.8	0.01839867		880.79	0.02025846		1410.79	-0.00280949		1940.78	0.00613714		2470.78	0.00337807		3000.78	0.07548079		3530.78	0.01466973		4060.78	-0.0185643
351	0.0184333		880.99	0.0195951		1410.99	-0.00284719		1940.98	0.00624167		2470.98	0.00306649		3000.98	0.0749235		3530.98	0.01406371		4060.98	-0.01942132
351.2	0.01911666		881.19	0.01940516		1411.19	-0.00330624		1941.18	0.00601481		2471.18	0.00220624		3001.18	0.07461902		3531.18	0.0148501		4061.18	-0.01902785
351.4	0.01862586		881.39	0.01956485		1411.39	-0.00390285		1941.38	0.00639352		2471.38	0.00176239		3001.38	0.07455734		3531.38	0.01497976		4061.38	-0.01895453
351.6	0.01871228		881.59	0.01956546		1411.59	-0.0032228		1941.58	0.00727976		2471.58	0.00133065		3001.58	0.07479022		3531.58	0.01553057		4061.58	-0.01950899
351.8	0.01955448		881.79	0.01864738		1411.79	-0.00285443		1941.78	0.0070042		2471.78	0.00064661		3001.78	0.07464575		3531.78	0.01575909		4061.78	-0.01991228
352	0.01895391		881.99	0.0186431		1411.99	-0.00275518		1941.98	0.00645058		2471.98	-0.00070046		3001.98	0.0753494		3531.98	0.0153438		4061.98	-0.02051675
352.2	0.01883962		882.19	0.01908261		1412.19	-0.00200628		1942.18	0.00663847		2472.18	-0.00047602		3002.18	0.07495423		3532.18	0.01498472		4062.18	-0.0205582
352.4	0.01837804		882.39	0.01954496		1412.39	-0.00144251		1942.38	0.00645358		2472.38	-0.00080276		3002.38	0.07556924		3532.38	0.01396041		4062.38	-0.02091441
352.6	0.01889633		882.59	0.02028972		1412.59	-0.00081398		1942.58	0.00631088		2472.58	-0.0002018		3002.58	0.07616721		3532.58	0.01314774		4062.58	-0.02056389
352.8	0.01925822		882.79	0.02049689		1412.79	-0.00015963		1942.78	0.00582096		2472.78	0.00031959		3002.78	0.07723578		3532.78	0.01302624		4062.78	-0.02180747
353	0.01864033		882.99	0.02128418		1412.99	0.00004086		1942.98	0.00437297		2472.98	0.00106226		3002.98	0.0767236		3532.98	0.01248184		4062.98	-0.02205498
353.2	0.01972589		883.19	0.02112422		1413.19	0.0009714		1943.18	0.00486145		2473.18	0.00100754		3003.18	0.0760775		3533.18	0.01268578		4063.18	-0.02172788
353.4	0.01980746		883.39	0.02138548		1413.39	0.00069948		1943.38	0.00396364		2473.38	0.0005627		3003.38	0.07636462		3533.38	0.01252789		4063.38	-0.02213843
353.6	0.01949342		883.59	0.02099454		1413.59	0.00026262		1943.58	0.00354135		2473.58	0.00074116		3003.58	0.07659758		3533.58	0.01194602		4063.58	-0.02217201
353.8	0.01918285		883.79	0.02137328		1413.79	-0.0000065		1943.78	0.00368262		2473.78	0.00118931		3003.78	0.07745591		3533.78	0.01204666		4063.78	-0.02174558
354	0.01913918		883.99	0.02081982		1413.99	-0.0002835		1943.98	0.00300329		2473.98	0.00124009		3003.98	0.0777621		3533.98	0.01230409		4063.98	-0.02093919
354.2	0.01846988		884.19	0.02103079		1414.19	0.0001822		1944.18	0.00215493		2474.18	0.00089296		3004.18	0.07733871		3534.18	0.01300756		4064.18	-0.02005584
354.4	0.01843922		884.39	0.01885805		1414.39	0.00052474		1944.38	0.00159498		2474.38	0.00132874		3004.38	0.0783956		3534.38	0.01207884		4064.38	-0.01919857
354.6	0.01905937		884.59	0.0170221		1414.59	0.00008519		1944.58	0.00192164		2474.58	0.00049259		3004.58	0.07975227		3534.58	0.01314582		4064.58	-0.01810422
354.8	0.01871653		884.79	0.01643094		1414.79	-0.00096487		1944.78	0.00189635		2474.78	-0.00027943		3004.78	0.07897854		3534.78	0.01345931		4064.78	-0.01850113
355	0.01901828		884.99	0.01658588		1414.99	-0.00149778		1944.98	0.00188719		2474.98	-0.00147813		3004.98	0.07791897		3534.98	0.01324369		4064.98	-0.01811307
355.2	0.01883937		885.19	0.01609331		1415.19	-0.00213797		1945.18	0.00213027		2475.18	-0.00236167		3005.18	0.07798599		3535.18	0.01305719		4065.18	-0.01806454
355.4	0.01881132		885.39	0.01622893		1415.39	-0.00222361		1945.38	0.00291695		2475.38	-0.00258847		3005.38	0.07787162		3535.38	0.01277897		4065.38	-0.01858627
355.6	0.01850814		885.59	0.01631522		1415.59	-0.00144555		1945.58	0.00410168		2475.58	-0.00307481		3005.58	0.07769393		3535.58	0.01371957		4065.58	-0.01959019
355.8	0.0192752		885.79	0.01596248		1415.79	-0.00198139		1945.78	0.00406533		2475.78	-0.00379774		3005.78	0.07794635		3535.78	0.01266005		4065.78	-0.01945014
356	0.01821006		885.99	0.01738063		1415.99	-0.0025315		1945.98	0.00396974		2475.98	-0.00409977		3005.98	0.07864731		3535.98	0.01229152		4065.98	-0.01990459
356.2	0.01823958		886.19	0.01788497		1416.19	-0.00226051		1946.18	0.00438101		2476.18	-0.00344921		3006.18	0.07866193		3536.18	0.0122207		4066.18	-0.0191726
356.4	0.01715175		886.39	0.01825899		1416.39	-0.0024933		1946.38	0.00428972		2476.38	-0.003383		3006.38	0.07880792		3536.38	0.01172688		4066.38	-0.01960915
356.6	0.01734036		886.59	0.01856223		1416.59	-0.00233468		1946.58	0.00462168		2476.58	-0.00229472		3006.58	0.07799964		3536.58	0.01150147		4066.58	-0.01981232
356.8	0.01709342		886.79	0.01973245		1416.79	-0.00290857		1946.78	0.0047777		2476.78	-0.00210777		3006.78	0.07813228		3536.78	0.01181599		4066.78	-0.02025222
357	0.01659518		886.99	0.0204383		1416.99	-0.00280957		1946.98	0.00508019		2476.98	-0.00217378		3006.98	0.07721877		3536.98	0.01202216		4066.98	-0.01925111
357.2	0.01665145		887.19	0.02027861		1417.19	-0.00335485		1947.18	0.00667951		2477.18	-0.00206786		3007.18	0.07778972		3537.18	0.01157239		4067.18	-0.01941434
357.4	0.01681301		887.39	0.0210228		1417.39	-0.00357364		1947.38	0.00586728		2477.38	-0.00204613		3007.38	0.07851618		3537.38	0.0115988		4067.38	-0.01958411
357.6	0.0175862		887.59	0.02054553		1417.59	-0.00385586		1947.58	0.00591912		2477.58	-0.00052638		3007.58	0.07816965		3537.58	0.0116864		4067.58	-0.0196307
357.8	0.01862656		887.79	0.02117569		1417.79	-0.00304803		1947.78	0.00529082		2477.78	-0.00087442		3007.78	0.07877306		3537.78	0.01184191		4067.78	-0.01997898
358	0.01893495		887.99	0.02075154		1417.99	-0.00176966		1947.98	0.00558584		2477.98	-0.00136241		3007.98	0.07871927		3537.98	0.01262782		4067.98	-0.0194587
358.2	0.01864568		888.19	0.0201864		1418.19	-0.00158438		1948.18	0.00551549		2478.18	-0.00016682		3008.18	0.07900242		3538.18	0.013228		4068.18	-0.01959012
358.4	0.01964413		888.39	0.01949086		1418.39	-0.00068113		1948.38	0.00521513		2478.38	0.00019616		3008.38	0.07949049		3538.38	0.01250727		4068.38	-0.01884131
358.6	0.01974538		888.59	0.01953881		1418.59	-0.00077552		1948.58	0.00599095		2478.58	0.00002286		3008.58	0.07838779		3538.58	0.01287872		4068.58	-0.01964085
358.8	0.01938531		888.79	0.02047892		1418.79	-0.00035014		1948.78	0.00599014		2478.78	0.00026848		3008.78	0.07710807		3538.78	0.01128717		4068.78	-0.02049851
359	0.01964183		888.99	0.02088395		1418.99	-0.00012862		1948.98	0.00575978		2478.98	-0.00058639		3008.98	0.07624346		3538.98	0.01147106		4068.98	-0.02137285
359.2	0.01874592		889.19	0.02031201		1419.19	0.00045614		1949.18	0.00632808		2479.18	-0.00111524		3009.18	0.07607607		3539.18	0.01144463		4069.18	-0.02306622
359.4	0.01913649		889.39	0.02036258		1419.39	0.00072465		1949.38	0.00675133		2479.38	-0.00204779		3009.38	0.07604573		3539.38	0.0120202		4069.38	-0.02302364
359.6	0.01866586		889.59	0.0201989		1419.59	0.00083147		1949.58	0.00631911		2479.58	-0.00287362		3009.58	0.07607949		3539.58	0.01222511		4069.58	-0.02359209
359.8	0.01872312		889.79	0.0198827		1419.79	0.00066617		1949.78	0.00583288		2479.78	-0.00304611		3009.78	0.07691196		3539.78	0.01165016		4069.78	-0.0230277
360	0.01758802		889.99	0.02061222		1419.99	0.00042011		1949.98	0.00471783		2479.98	-0.00342573		3009.98	0.07685475		3539.98	0.01225704		4069.98	-0.02344253
360.2	0.01749137		890.19	0.0205131		1420.19	0.00134316		1950.18	0.0049054		2480.18	-0.0032718		3010.18	0.07700686		3540.18	0.01210685		4070.18	-0.02352406
360.4	0.0176388		890.39	0.02062846		1420.39	0.00130531		1950.38	0.00505079		2480.38	-0.00348644		3010.38	0.07729689		3540.38	0.01182931		4070.38	-0.02336397
360.6	0.01744135		890.59	0.02061558		1420.59	0.00128769		1950.58	0.00486672		2480.58	-0.00288201		3010.58	0.07802871		3540.58	0.0116434		4070.58	-0.02296998
360.8	0.01627595		890.79	0.02126922		1420.79	-0.0000277		1950.78	0.00458151		2480.78	-0.00227861		3010.78	0.07829852		3540.78	0.01133222		4070.78	-0.02252465
361	0.01643173		890.99	0.0215701		1420.99	0.00023876		1950.98	0.00487771		2480.98	-0.00150889		3010.98	0.0788295		3540.98	0.01108987		4070.98	-0.02189675
361.2	0.01725659		891.19	0.02176157		1421.19	0.00033736		1951.18	0.00512968		2481.18	0.00051762		3011.18	0.07955487		3541.18	0.01066629		4071.18	-0.02180284
361.4	0.01832578		891.39	0.02160288		1421.39	0.00012773		1951.38	0.00487798		2481.38	0.00151136		3011.38	0.07986304		3541.38	0.01147809		4071.38	-0.02131615
361.6	0.01877201		891.59	0.02051251		1421.59	-0.00025026		1951.58	0.00471576		2481.58	0.00210304		3011.58	0.08044649		3541.58	0.01224619		4071.58	-0.02052282
361.8	0.01940315		891.79	0.02088803		1421.79	0.00100818		1951.78	0.00561854		2481.78	0.00223077		3011.78	0.08066156		3541.78	0.01232366		4071.78	-0.0200481
362	0.01886644		891.99	0.01992426		1421.99	0.00075238		1951.98	0.00591659		2481.98	0.00274896		3011.98	0.08070004		3541.98	0.01356084		4071.98	-0.01907441
362.2	0.01869629		892.19	0.01927924		1422.19	-0.00111856		1952.18	0.00529484		2482.18	0.00458166		3012.18	0.08081492		3542.18	0.01331569		4072.18	-0.01913092
362.4	0.01941291		892.39	0.01838345		1422.39	-0.00058044		1952.38	0.00552225		2482.38	0.00527159		3012.38	0.08014404		3542.38	0.01279392		4072.38	-0.01917089
362.6	0.01875527		892.59	0.01838582		1422.59	-0.0008088		1952.58	0.00623334		2482.58	0.0058642		3012.58	0.07958748		3542.58	0.01301448		4072.58	-0.01981157
362.8	0.01806843		892.79	0.01810354		1422.79	-0.00137144		1952.78	0.00660284		2482.78	0.00513698		3012.78	0.07980478		3542.78	0.01214494		4072.78	-0.01983314
363	0.01765536		892.99	0.01691845		1422.99	-0.00151295		1952.98	0.00708084		2482.98	0.00424692		3012.98	0.07954892		3542.98	0.01273365		4072.98	-0.01935429
363.2	0.01753252		893.19	0.01565321		1423.19	-0.00223466		1953.18	0.00817637		2483.18	0.00284456		3013.18	0.07985467		3543.18	0.01229453		4073.18	-0.02013336
363.4	0.01785702		893.39	0.01571538		1423.39	-0.00256923		1953.38	0.00808418		2483.38	0.00248009		3013.38	0.07986775		3543.38	0.0123662		4073.38	-0.02010837
363.6	0.01722649		893.59	0.01571922		1423.59	-0.00335904		1953.58	0.00755157		2483.58	0.00195692		3013.58	0.08022707		3543.58	0.01287282		4073.58	-0.02034591
363.8	0.01659549		893.79	0.01606252		1423.79	-0.00245044		1953.78	0.00737681		2483.78	0.00138203		3013.78	0.08020584		3543.78	0.0128969		4073.78	-0.02094033
364	0.01695612		893.99	0.01701453		1423.99	-0.0024398		1953.98	0.0065532		2483.98	0.00041501		3013.98	0.08042686		3543.98	0.01291563		4073.98	-0.02180543
364.2	0.01758503		894.19	0.01777475		1424.19	-0.00193944		1954.18	0.00759809		2484.18	0.00071306		3014.18	0.08168672		3544.18	0.01252654		4074.18	-0.02103769
364.4	0.01772774		894.39	0.01787918		1424.39	-0.00281617		1954.38	0.00663824		2484.38	0.00027371		3014.38	0.08218766		3544.38	0.01207984		4074.38	-0.02034657
364.6	0.01780668		894.59	0.01811096		1424.59	-0.00332059		1954.58	0.0063763		2484.58	0.00021326		3014.58	0.08238294		3544.58	0.01192311		4074.58	-0.02057569
364.8	0.0174656		894.79	0.0188696		1424.79	-0.00331322		1954.78	0.00553946		2484.78	0.00100355		3014.78	0.08219381		3544.78	0.01154871		4074.78	-0.02008854
365	0.0185934		894.99	0.01871317		1424.99	-0.00208558		1954.98	0.00483702		2484.98	0.0012729		3014.98	0.08295621		3544.98	0.01133335		4074.98	-0.01927878
365.2	0.01858008		895.19	0.01868687		1425.19	-0.00165381		1955.18	0.00451832		2485.18	0.0019748		3015.18	0.08247958		3545.18	0.011883		4075.18	-0.01939755
365.4	0.01854752		895.39	0.0185237		1425.39	-0.00200271		1955.38	0.0050433		2485.38	0.00199419		3015.38	0.08222813		3545.38	0.01309184		4075.38	-0.0196807
365.6	0.01908502		895.59	0.01766221		1425.59	-0.00183076		1955.58	0.00443088		2485.58	0.0019035		3015.58	0.08250844		3545.58	0.01342053		4075.58	-0.01927619
365.8	0.01957075		895.79	0.01769528		1425.79	-0.00143706		1955.78	0.00449462		2485.78	0.00289086		3015.78	0.08190911		3545.78	0.0138072		4075.78	-0.02002889
366	0.01954614		895.99	0.01736925		1425.99	-0.00160501		1955.98	0.00341737		2485.98	0.00230531		3015.98	0.08124995		3545.98	0.01399481		4075.98	-0.01999008
366.2	0.01963933		896.19	0.01702288		1426.19	-0.00154279		1956.18	0.00304904		2486.18	0.00309415		3016.18	0.08106631		3546.18	0.01370073		4076.18	-0.01987625
366.4	0.01944236		896.39	0.01730909		1426.39	-0.00092689		1956.38	0.00349454		2486.38	0.00400666		3016.38	0.08057311		3546.38	0.01417615		4076.38	-0.01965068
366.6	0.01838608		896.59	0.01763074		1426.59	-0.00092225		1956.58	0.00411401		2486.58	0.00350415		3016.58	0.08124969		3546.58	0.01420236		4076.58	-0.01940478
366.8	0.01806006		896.79	0.01738789		1426.79	-0.00148725		1956.78	0.004918		2486.78	0.00270311		3016.78	0.08213966		3546.78	0.01359998		4076.78	-0.01970271
367	0.01809332		896.99	0.01678933		1426.99	-0.00141108		1956.98	0.00578798		2486.98	0.00227946		3016.98	0.0823733		3546.98	0.01324521		4076.98	-0.02004088
367.2	0.01830099		897.19	0.01738349		1427.19	-0.00191218		1957.18	0.00701529		2487.18	0.00119477		3017.18	0.08282004		3547.18	0.0132306		4077.18	-0.02174172
367.4	0.01871961		897.39	0.01789265		1427.39	-0.00115626		1957.38	0.00738283		2487.38	0.00124143		3017.38	0.08301236		3547.38	0.01344977		4077.38	-0.02169917
367.6	0.01818907		897.59	0.01877683		1427.59	-0.00174629		1957.58	0.0075897		2487.58	0.00022699		3017.58	0.08185423		3547.58	0.01362309		4077.58	-0.02197068
367.8	0.01778244		897.79	0.01965658		1427.79	-0.00092262		1957.78	0.00748087		2487.78	-0.00019199		3017.78	0.08165083		3547.78	0.01285757		4077.78	-0.02230047
368	0.01847591		897.99	0.02073147		1427.99	-0.00217052		1957.98	0.00751486		2487.98	-0.00081916		3017.98	0.08219948		3547.98	0.01234522		4077.98	-0.02199615
368.2	0.01819858		898.19	0.02175908		1428.19	-0.00273733		1958.18	0.00780064		2488.18	-0.00045086		3018.18	0.08161603		3548.18	0.01166961		4078.18	-0.02109622
368.4	0.01838147		898.39	0.02156428		1428.39	-0.00318183		1958.38	0.00675527		2488.38	-0.00102178		3018.38	0.08094065		3548.38	0.011608		4078.38	-0.02150926
368.6	0.01918064		898.59	0.02192541		1428.59	-0.00334675		1958.58	0.00652315		2488.58	-0.00147978		3018.58	0.08059932		3548.58	0.01171628		4078.58	-0.02155338
368.8	0.01936993		898.79	0.02159279		1428.79	-0.00246751		1958.78	0.00599575		2488.78	-0.0010402		3018.78	0.08104776		3548.78	0.01277122		4078.78	-0.02107676
369	0.01976885		898.99	0.02133252		1428.99	-0.002268		1958.98	0.00640105		2488.98	-0.00067728		3018.98	0.08064997		3548.98	0.01340007		4078.98	-0.02074563
369.2	0.01950691		899.19	0.02139023		1429.19	-0.00210529		1959.18	0.00662439		2489.18	-0.00079663		3019.18	0.07963549		3549.18	0.01420333		4079.18	-0.0212165
369.4	0.01989263		899.39	0.02168318		1429.39	-0.00234237		1959.38	0.00678272		2489.38	0.00032455		3019.38	0.07896609		3549.38	0.01512201		4079.38	-0.02098905
369.6	0.02052853		899.59	0.02084874		1429.59	-0.00247992		1959.58	0.0063272		2489.58	-0.00026112		3019.58	0.07926562		3549.58	0.01553806		4079.58	-0.02059391
369.8	0.02127457		899.79	0.02060009		1429.79	-0.0020413		1959.78	0.00644817		2489.78	0.00022355		3019.78	0.07913795		3549.78	0.01632083		4079.78	-0.0210737
370	0.02114018		899.99	0.02135544		1429.99	-0.00136192		1959.98	0.00677666		2489.98	-0.00032053		3019.98	0.0787875		3549.98	0.01588371		4079.98	-0.02029329
370.2	0.02052184		900.19	0.02143217		1430.19	-0.00155031		1960.18	0.00734475		2490.18	0.00069545		3020.18	0.07968169		3550.18	0.0167435		4080.18	-0.02002568
370.4	0.02015919		900.39	0.0214736		1430.39	-0.00150603		1960.38	0.00890546		2490.38	0.00080861		3020.38	0.07996475		3550.38	0.01618597		4080.38	-0.02064563
370.6	0.01935381		900.59	0.02036775		1430.59	-0.00147843		1960.58	0.00999701		2490.58	0.00052069		3020.58	0.08179998		3550.58	0.01563739		4080.58	-0.02134225
370.8	0.01970289		900.79	0.01996968		1430.79	-0.00217941		1960.78	0.01065015		2490.78	-0.00006836		3020.78	0.08276463		3550.78	0.0147724		4080.78	-0.02227268
371	0.02038651		900.99	0.01899574		1430.99	-0.00177964		1960.98	0.01119251		2490.98	-0.00081684		3020.98	0.08376215		3550.98	0.01442445		4080.98	-0.02284779
371.2	0.02026517		901.19	0.01884268		1431.19	-0.00204022		1961.18	0.0113972		2491.18	-0.00120961		3021.18	0.08400961		3551.18	0.01446751		4081.18	-0.02304313
371.4	0.02050022		901.39	0.01860268		1431.39	-0.00063607		1961.38	0.01092297		2491.38	-0.00000501		3021.38	0.08332713		3551.38	0.01403924		4081.38	-0.02373163
371.6	0.01998227		901.59	0.01990293		1431.59	-0.00094501		1961.58	0.00954697		2491.58	0.0006352		3021.58	0.08217097		3551.58	0.01317132		4081.58	-0.02450901
371.8	0.01996734		901.79	0.01988376		1431.79	-0.00020858		1961.78	0.00884039		2491.78	0.00131448		3021.78	0.08255221		3551.78	0.01224105		4081.78	-0.02414761
372	0.01942368		901.99	0.02008515		1431.99	-0.00044543		1961.98	0.00830178		2491.98	0.00147452		3021.98	0.08282733		3551.98	0.01173723		4081.98	-0.02388197
372.2	0.01841069		902.19	0.02008757		1432.19	-0.00046356		1962.18	0.00794677		2492.18	0.00221112		3022.18	0.08231982		3552.18	0.01107636		4082.18	-0.02440409
372.4	0.01839561		902.39	0.01935829		1432.39	-0.00026248		1962.38	0.0070381		2492.38	0.00215663		3022.38	0.08190286		3552.38	0.01103765		4082.38	-0.02549289
372.6	0.01900201		902.59	0.01952032		1432.59	-0.00027116		1962.58	0.00671793		2492.58	0.00226455		3022.58	0.08152704		3552.58	0.01139673		4082.58	-0.02459867
372.8	0.01917611		902.79	0.01936349		1432.79	0.00021713		1962.78	0.00668836		2492.78	0.00263154		3022.78	0.08150169		3552.78	0.01160579		4082.78	-0.02396768
373	0.01885679		902.99	0.01978056		1432.99	0.00082161		1962.98	0.00606664		2492.98	0.00232876		3022.98	0.08057105		3552.98	0.0113528		4082.98	-0.02352373
373.2	0.01842978		903.19	0.01944032		1433.19	0.00102154		1963.18	0.00562121		2493.18	0.00145389		3023.18	0.08032909		3553.18	0.01193968		4083.18	-0.02309644
373.4	0.01854657		903.39	0.01922474		1433.39	0.00100725		1963.38	0.00569218		2493.38	0.00144939		3023.38	0.08107616		3553.38	0.0131531		4083.38	-0.0226963
373.6	0.0184655		903.59	0.01779174		1433.59	0.00109067		1963.58	0.00605711		2493.58	0.00053768		3023.58	0.08144489		3553.58	0.01312358		4083.58	-0.02199163
373.8	0.01803584		903.79	0.01733995		1433.79	0.00262873		1963.78	0.00698741		2493.78	-0.00024612		3023.78	0.08127384		3553.78	0.01393473		4083.78	-0.02263391
374	0.01805238		903.99	0.01739641		1433.99	0.00372824		1963.98	0.0073166		2493.98	-0.00065882		3023.98	0.0817399		3553.98	0.01413171		4083.98	-0.02146785
374.2	0.0182837		904.19	0.01645167		1434.19	0.00408459		1964.18	0.00810432		2494.18	-0.00099395		3024.18	0.0825835		3554.18	0.01435772		4084.18	-0.02128841
374.4	0.01824038		904.39	0.01617448		1434.39	0.00413412		1964.38	0.00953955		2494.38	-0.00207666		3024.38	0.08335941		3554.38	0.01363267		4084.38	-0.02225135
374.6	0.01829902		904.59	0.01604871		1434.59	0.00406138		1964.58	0.00887501		2494.58	-0.00256553		3024.58	0.08502641		3554.58	0.01441591		4084.58	-0.02262594
374.8	0.0188116		904.79	0.01679424		1434.79	0.00306331		1964.78	0.00912556		2494.78	-0.00339723		3024.78	0.08530907		3554.78	0.0146402		4084.78	-0.02302326
375	0.01927793		904.99	0.01683403		1434.99	0.00348386		1964.98	0.00958259		2494.98	-0.00331076		3024.98	0.08608061		3554.98	0.01563163		4084.98	-0.0229869
375.2	0.01957377		905.19	0.0182923		1435.19	0.00305613		1965.18	0.00904247		2495.18	-0.00297134		3025.18	0.08536915		3555.18	0.01651606		4085.18	-0.02219184
375.4	0.02006892		905.39	0.01969401		1435.39	0.00382413		1965.38	0.008532		2495.38	-0.00243269		3025.38	0.08564867		3555.38	0.0170889		4085.38	-0.02262673
375.6	0.02091731		905.59	0.02051506		1435.59	0.00250194		1965.58	0.00785701		2495.58	-0.00245484		3025.58	0.08680464		3555.58	0.01642511		4085.58	-0.02159232
375.8	0.02146554		905.79	0.02060272		1435.79	0.00250599		1965.78	0.00857921		2495.78	-0.0023139		3025.78	0.08643313		3555.78	0.01678752		4085.78	-0.02044774
376	0.02141315		905.99	0.02191292		1435.99	0.00125781		1965.98	0.00818957		2495.98	-0.00262499		3025.98	0.08589882		3555.98	0.01624097		4085.98	-0.01998164
376.2	0.02196416		906.19	0.02265599		1436.19	0.00042042		1966.18	0.00769496		2496.18	-0.00139987		3026.18	0.08473591		3556.18	0.01528343		4086.18	-0.01960155
376.4	0.02268968		906.39	0.02272144		1436.39	0.00081137		1966.38	0.00631048		2496.38	-0.00148465		3026.38	0.08375323		3556.38	0.01476596		4086.38	-0.01900115
376.6	0.02241118		906.59	0.02307238		1436.59	-0.00004712		1966.58	0.00586939		2496.58	-0.00067065		3026.58	0.08304384		3556.58	0.01449101		4086.58	-0.01806008
376.8	0.02203816		906.79	0.02334474		1436.79	-0.00053505		1966.78	0.00587864		2496.78	-0.0007958		3026.78	0.0829134		3556.78	0.01396431		4086.78	-0.01859673
377	0.02126253		906.99	0.02295312		1436.99	-0.00044689		1966.98	0.00560423		2496.98	-0.00147765		3026.98	0.08248751		3556.98	0.01485887		4086.98	-0.01881131
377.2	0.02054666		907.19	0.02200248		1437.19	-0.0013079		1967.18	0.00625053		2497.18	-0.00126862		3027.18	0.08200932		3557.18	0.01544219		4087.18	-0.0187126
377.4	0.02072458		907.39	0.02098442		1437.39	-0.00066631		1967.38	0.00616214		2497.38	-0.00157375		3027.38	0.08243822		3557.38	0.0159852		4087.38	-0.01924622
377.6	0.01978343		907.59	0.0196724		1437.59	-0.00047834		1967.58	0.00629566		2497.58	-0.00192755		3027.58	0.0816897		3557.58	0.01500618		4087.58	-0.01973285
377.8	0.0199282		907.79	0.01924519		1437.79	0.00023943		1967.78	0.00614464		2497.78	-0.00199046		3027.78	0.08178938		3557.78	0.01540178		4087.78	-0.02117245
378	0.02037724		907.99	0.01871056		1437.99	0.00006011		1967.98	0.00572308		2497.98	-0.00148049		3027.98	0.08246742		3557.98	0.01474687		4087.98	-0.02109017
378.2	0.01992645		908.19	0.01820386		1438.19	-0.00011156		1968.18	0.00592212		2498.18	-0.00163801		3028.18	0.08273374		3558.18	0.01409489		4088.18	-0.0221336
378.4	0.01920957		908.39	0.01821379		1438.39	-0.00053199		1968.38	0.00594506		2498.38	-0.00217946		3028.38	0.08328508		3558.38	0.01356313		4088.38	-0.02356883
378.6	0.01854585		908.59	0.01802038		1438.59	-0.00058776		1968.58	0.00539853		2498.58	-0.00255701		3028.58	0.08370209		3558.58	0.01362623		4088.58	-0.02396346
378.8	0.01752507		908.79	0.01782079		1438.79	-0.00114378		1968.78	0.00621247		2498.78	-0.00308129		3028.78	0.0834472		3558.78	0.01297361		4088.78	-0.024401
379	0.01700036		908.99	0.01748218		1438.99	-0.0006509		1968.98	0.00616854		2498.98	-0.00378233		3028.98	0.0839046		3558.98	0.01281072		4088.98	-0.02424279
379.2	0.01678944		909.19	0.01770848		1439.19	-0.00073429		1969.18	0.00560546		2499.18	-0.00527734		3029.18	0.08392596		3559.18	0.01242865		4089.18	-0.02358652
379.4	0.01596662		909.39	0.01692436		1439.39	-0.00046233		1969.38	0.0057364		2499.38	-0.00631493		3029.38	0.08433014		3559.38	0.01174563		4089.38	-0.0235853
379.6	0.01589904		909.59	0.01635195		1439.59	-0.00061454		1969.58	0.00600358		2499.58	-0.00705212		3029.58	0.08413145		3559.58	0.01044783		4089.58	-0.0227446
379.8	0.01543358		909.79	0.01629456		1439.79	-0.00054199		1969.78	0.00643809		2499.78	-0.00776082		3029.78	0.08274618		3559.78	0.0101156		4089.78	-0.02218106
379.99	0.01543358		909.99	0.01629456		1439.99	-0.00054199		1969.98	0.00643809		2499.98	-0.00776082		3029.98	0.08274618		3559.98	0.0101156		4089.98	-0.02218106
380.19	0.01640049		910.19	0.01579932		1440.19	-0.00076627		1970.18	0.00741597		2500.18	-0.00808931		3030.18	0.08319559		3560.18	0.00937379		4090.18	-0.02216389
380.39	0.01653076		910.39	0.01503794		1440.39	-0.0009094		1970.38	0.00867891		2500.38	-0.00839282		3030.38	0.08303251		3560.38	0.00887003		4090.38	-0.022108
380.59	0.01741465		910.59	0.01471757		1440.59	-0.00034901		1970.58	0.0090459		2500.58	-0.00813214		3030.58	0.08369193		3560.58	0.00894711		4090.58	-0.022172
380.79	0.01766965		910.79	0.01465907		1440.79	-0.00079118		1970.78	0.00896796		2500.78	-0.00852079		3030.78	0.08351997		3560.78	0.00858346		4090.78	-0.02187009
380.99	0.01762177		910.99	0.01426085		1440.99	-0.00109783		1970.98	0.00931035		2500.98	-0.00799606		3030.98	0.08433907		3560.98	0.00864152		4090.98	-0.0219386
381.19	0.01789797		911.19	0.01390394		1441.19	-0.00059318		1971.18	0.00974214		2501.18	-0.00792634		3031.18	0.0845252		3561.18	0.00874761		4091.18	-0.02161353
381.39	0.01753908		911.39	0.01377944		1441.39	-0.0000695		1971.38	0.01016065		2501.38	-0.00810698		3031.38	0.08494756		3561.38	0.00914648		4091.38	-0.02136266
381.59	0.01739322		911.59	0.01392971		1441.59	0.00085196		1971.58	0.01021803		2501.58	-0.00855312		3031.58	0.08550203		3561.58	0.00964383		4091.58	-0.02136582
381.79	0.01734667		911.79	0.01346386		1441.79	0.00194799		1971.78	0.0095426		2501.78	-0.00808456		3031.78	0.0860119		3561.78	0.00955593		4091.78	-0.02092603
381.99	0.01673798		911.99	0.01352496		1441.99	0.0024096		1971.98	0.00959603		2501.98	-0.0082004		3031.98	0.0854719		3561.98	0.00992428		4091.98	-0.0211591
382.19	0.016664		912.19	0.01295146		1442.19	0.00264903		1972.18	0.00891752		2502.18	-0.00819534		3032.18	0.08509902		3562.18	0.01038915		4092.18	-0.02068217
382.39	0.01620965		912.39	0.01269026		1442.39	0.00259575		1972.38	0.00853283		2502.38	-0.00875593		3032.38	0.08513216		3562.38	0.01041927		4092.38	-0.02005534
382.59	0.0166563		912.59	0.01331626		1442.59	0.00204377		1972.58	0.00866337		2502.58	-0.00859748		3032.58	0.08395265		3562.58	0.00982733		4092.58	-0.01998886
382.79	0.01591057		912.79	0.01369724		1442.79	0.00234336		1972.78	0.00756678		2502.78	-0.00782509		3032.78	0.08429003		3562.78	0.00950948		4092.78	-0.02038481
382.99	0.01594832		912.99	0.01416084		1442.99	0.00300449		1972.98	0.00751318		2502.98	-0.00801437		3032.98	0.08366943		3562.98	0.00824873		4092.98	-0.02131314
383.19	0.0162408		913.19	0.01380339		1443.19	0.00321702		1973.18	0.00795089		2503.18	-0.00849041		3033.18	0.0845015		3563.18	0.0073724		4093.18	-0.02134465
383.39	0.01588828		913.39	0.01400227		1443.39	0.00331539		1973.38	0.00841761		2503.38	-0.00824542		3033.38	0.085021		3563.38	0.00646723		4093.38	-0.02158654
383.59	0.0168306		913.59	0.01345247		1443.59	0.0033516		1973.58	0.00957049		2503.58	-0.00852141		3033.58	0.08556837		3563.58	0.00672343		4093.58	-0.02167398
383.79	0.01629653		913.79	0.0128036		1443.79	0.0028996		1973.78	0.00956423		2503.78	-0.00916767		3033.78	0.08499243		3563.78	0.00548385		4093.78	-0.02161724
383.99	0.01575233		913.99	0.01263747		1443.99	0.00315122		1973.98	0.01028967		2503.98	-0.0089924		3033.98	0.08447906		3563.98	0.00567439		4093.98	-0.02178598
384.19	0.01547545		914.19	0.01205455		1444.19	0.00368033		1974.18	0.01048153		2504.18	-0.00852868		3034.18	0.0837777		3564.18	0.0059124		4094.18	-0.02135794
384.39	0.01444799		914.39	0.01168404		1444.39	0.00472847		1974.38	0.00994731		2504.38	-0.00852254		3034.38	0.08344047		3564.38	0.00662897		4094.38	-0.02078007
384.59	0.01416553		914.59	0.01251461		1444.59	0.00490857		1974.58	0.00853968		2504.58	-0.00818879		3034.58	0.0833421		3564.58	0.00663526		4094.58	-0.02091946
384.79	0.01265307		914.79	0.01296593		1444.79	0.00359008		1974.78	0.00873884		2504.78	-0.0077051		3034.78	0.08285963		3564.78	0.00654335		4094.78	-0.02063153
384.99	0.01217973		914.99	0.01329478		1444.99	0.00394838		1974.98	0.00853817		2504.98	-0.00707309		3034.98	0.08338		3564.98	0.0066669		4094.98	-0.02020195
385.19	0.0115356		915.19	0.01373264		1445.19	0.00526154		1975.18	0.00837905		2505.18	-0.00776075		3035.18	0.08303444		3565.18	0.00706132		4095.18	-0.02005273
385.39	0.01064522		915.39	0.01489316		1445.39	0.0053032		1975.38	0.00855662		2505.38	-0.00837122		3035.38	0.08286679		3565.38	0.00858681		4095.38	-0.02001556
385.59	0.0110086		915.59	0.01487767		1445.59	0.00580896		1975.58	0.0075636		2505.58	-0.00871405		3035.58	0.08239614		3565.58	0.00880971		4095.58	-0.02071528
385.79	0.01132894		915.79	0.01441504		1445.79	0.00502886		1975.78	0.00775142		2505.78	-0.00884602		3035.78	0.08138263		3565.78	0.00850239		4095.78	-0.02114546
385.99	0.01109702		915.99	0.01502832		1445.99	0.00476836		1975.98	0.00765946		2505.98	-0.00919193		3035.98	0.08028156		3565.98	0.00893748		4095.98	-0.02134047
386.19	0.01134117		916.19	0.01447107		1446.19	0.00433104		1976.18	0.00716928		2506.18	-0.00950525		3036.18	0.07991518		3566.18	0.00925031		4096.18	-0.02002714
386.39	0.01184592		916.39	0.01466508		1446.39	0.00435162		1976.38	0.00726979		2506.38	-0.00861814		3036.38	0.08027684		3566.38	0.00960766		4096.38	-0.02023323
386.59	0.01275109		916.59	0.01548147		1446.59	0.00374032		1976.58	0.00755984		2506.58	-0.00733399		3036.58	0.07945334		3566.58	0.01006237		4096.58	-0.02005228
386.79	0.01231183		916.79	0.01536742		1446.79	0.00370271		1976.78	0.00728345		2506.78	-0.00681651		3036.78	0.0796614		3566.78	0.00996907		4096.78	-0.02090358
386.99	0.01352659		916.99	0.01490465		1446.99	0.00349353		1976.98	0.00816769		2506.98	-0.00696915		3036.98	0.07984334		3566.98	0.0098255		4096.98	-0.02173319
387.19	0.01415801		917.19	0.0149336		1447.19	0.00223549		1977.18	0.00888352		2507.18	-0.00612507		3037.18	0.0802154		3567.18	0.00992498		4097.18	-0.02107125
387.39	0.01420828		917.39	0.01471442		1447.39	0.00231371		1977.38	0.00855967		2507.38	-0.0061216		3037.38	0.08015908		3567.38	0.00982576		4097.38	-0.02175768
387.59	0.01499721		917.59	0.01396829		1447.59	0.00205679		1977.58	0.00927737		2507.58	-0.00666491		3037.58	0.07995335		3567.58	0.00993329		4097.58	-0.02175091
387.79	0.01481241		917.79	0.01324385		1447.79	0.00117512		1977.78	0.00891127		2507.78	-0.00680551		3037.78	0.07952246		3567.78	0.00979162		4097.78	-0.02128497
387.99	0.01402683		917.99	0.01350513		1447.99	0.00088401		1977.98	0.009053		2507.98	-0.0063979		3037.98	0.07857488		3567.98	0.00970977		4097.98	-0.02053588
388.19	0.0139683		918.19	0.01324637		1448.19	0.00099861		1978.18	0.00912015		2508.18	-0.00696089		3038.18	0.07896356		3568.18	0.00967635		4098.18	-0.01984212
388.39	0.01280564		918.39	0.01315296		1448.39	0.00086086		1978.38	0.00870392		2508.38	-0.00734683		3038.38	0.07935657		3568.38	0.00937764		4098.38	-0.01974322
388.59	0.01201859		918.59	0.01313916		1448.59	0.00023571		1978.58	0.0081147		2508.58	-0.00752689		3038.58	0.07888428		3568.58	0.00810714		4098.58	-0.02015164
388.79	0.01182613		918.79	0.01345972		1448.79	0.00003252		1978.78	0.00781114		2508.78	-0.00720019		3038.78	0.07963161		3568.78	0.00767264		4098.78	-0.02005383
388.99	0.01139505		918.99	0.01405078		1448.99	0.00005287		1978.98	0.00757675		2508.98	-0.00872455		3038.98	0.0790266		3568.98	0.00718566		4098.98	-0.02052329
389.19	0.01041376		919.19	0.01452033		1449.19	-0.00019852		1979.18	0.0076158		2509.18	-0.0095847		3039.18	0.07892686		3569.18	0.00729862		4099.18	-0.02113844
389.39	0.0102872		919.39	0.01509022		1449.39	-0.0009002		1979.38	0.00780694		2509.38	-0.00981578		3039.38	0.07796342		3569.38	0.00816262		4099.38	-0.02229352
389.59	0.01013519		919.59	0.01461155		1449.59	-0.0001145		1979.58	0.00710811		2509.58	-0.01056474		3039.58	0.07745534		3569.58	0.00747224		4099.58	-0.0232543
389.79	0.00993579		919.79	0.01438425		1449.79	-0.00013973		1979.78	0.00788661		2509.78	-0.01142039		3039.78	0.07728732		3569.78	0.00786287		4099.78	-0.02375821
389.99	0.0092944		919.99	0.01483012		1449.99	0.00093658		1979.98	0.00722041		2509.98	-0.01175025		3039.98	0.07702836		3569.98	0.00809875		4099.98	-0.02359039
390.19	0.00889898		920.19	0.01467038		1450.19	0.00153922		1980.18	0.00771637		2510.18	-0.01153652		3040.18	0.07655013		3570.18	0.0082932		4100.18	-0.02401156
390.39	0.00924514		920.39	0.01478096		1450.39	0.00232836		1980.38	0.00784009		2510.38	-0.0104241		3040.38	0.07764582		3570.38	0.00843577		4100.38	-0.02537277
390.59	0.00873888		920.59	0.01479357		1450.59	0.00261733		1980.58	0.00760739		2510.58	-0.01035274		3040.58	0.07729041		3570.58	0.00878813		4100.58	-0.02581424
390.79	0.0087157		920.79	0.01464375		1450.79	0.0037783		1980.78	0.00700413		2510.78	-0.00972867		3040.78	0.07718157		3570.78	0.00881991		4100.78	-0.02644887
390.99	0.01053987		920.99	0.01458878		1450.99	0.00396546		1980.98	0.00668917		2510.98	-0.00981297		3040.98	0.07773817		3570.98	0.00888054		4100.98	-0.02622924
391.19	0.01121301		921.19	0.01546419		1451.19	0.00408164		1981.18	0.0056052		2511.18	-0.00971902		3041.18	0.07741025		3571.18	0.00923496		4101.18	-0.02543355
391.39	0.01148174		921.39	0.01497652		1451.39	0.0047174		1981.38	0.00496626		2511.38	-0.01019589		3041.38	0.07774929		3571.38	0.00894501		4101.38	-0.02502315
391.59	0.01148681		921.59	0.01459982		1451.59	0.00342599		1981.58	0.00592172		2511.58	-0.00994856		3041.58	0.07822845		3571.58	0.00949025		4101.58	-0.02332751
391.79	0.01119948		921.79	0.01472038		1451.79	0.00271411		1981.78	0.0057823		2511.78	-0.00943259		3041.78	0.07884315		3571.78	0.00980373		4101.78	-0.02219986
391.99	0.01168059		921.99	0.01476973		1451.99	0.00258396		1981.98	0.00671819		2511.98	-0.00876931		3041.98	0.07881283		3571.98	0.00924671		4101.98	-0.02060291
392.19	0.01181434		922.19	0.01373833		1452.19	0.00295509		1982.18	0.00732793		2512.18	-0.00973834		3042.18	0.08000284		3572.18	0.00884744		4102.18	-0.01935426
392.39	0.01096547		922.39	0.01321836		1452.39	0.00282569		1982.38	0.0074105		2512.38	-0.00943376		3042.38	0.08054722		3572.38	0.00868768		4102.38	-0.01801499
392.59	0.01082109		922.59	0.01288476		1452.59	0.00254022		1982.58	0.00666091		2512.58	-0.00982646		3042.58	0.08005605		3572.58	0.00768178		4102.58	-0.01731343
392.79	0.01159037		922.79	0.01335033		1452.79	0.00169434		1982.78	0.00735038		2512.78	-0.00985897		3042.78	0.08044887		3572.78	0.00718473		4102.78	-0.01702178
392.99	0.01056271		922.99	0.01304863		1452.99	0.00067433		1982.98	0.00907657		2512.98	-0.01075636		3042.98	0.07958765		3572.98	0.00689034		4102.98	-0.01662011
393.19	0.01036922		923.19	0.01175453		1453.19	0.000322		1983.18	0.0087804		2513.18	-0.00998615		3043.18	0.07967627		3573.18	0.0071342		4103.18	-0.01620329
393.39	0.01017153		923.39	0.01127948		1453.39	-0.00001401		1983.38	0.0091216		2513.38	-0.00932752		3043.38	0.07935879		3573.38	0.00717598		4103.38	-0.01696011
393.59	0.01018548		923.59	0.01041077		1453.59	0.00073745		1983.58	0.00946827		2513.58	-0.00948232		3043.58	0.07970923		3573.58	0.00716631		4103.58	-0.01660502
393.79	0.01022054		923.79	0.00983278		1453.79	0.00107721		1983.78	0.00987086		2513.78	-0.0094444		3043.78	0.07932651		3573.78	0.00727945		4103.78	-0.01715664
393.99	0.00996667		923.99	0.00971359		1453.99	0.00110943		1983.98	0.009218		2513.98	-0.00970572		3043.98	0.07984161		3573.98	0.00785397		4103.98	-0.01725238
394.19	0.00970448		924.19	0.00911806		1454.19	0.002217		1984.18	0.00866968		2514.18	-0.00904243		3044.18	0.07921291		3574.18	0.00731633		4104.18	-0.0181658
394.39	0.01024257		924.39	0.00927685		1454.39	0.0028019		1984.38	0.00814993		2514.38	-0.00878579		3044.38	0.07970187		3574.38	0.00723894		4104.38	-0.01895093
394.59	0.01011562		924.59	0.01009584		1454.59	0.00280128		1984.58	0.00787803		2514.58	-0.00859702		3044.58	0.07891334		3574.58	0.00749305		4104.58	-0.01891766
394.79	0.01054107		924.79	0.01025004		1454.79	0.00275482		1984.78	0.00760394		2514.78	-0.00755094		3044.78	0.07866867		3574.78	0.00822676		4104.78	-0.01865439
394.99	0.01177761		924.99	0.0109012		1454.99	0.00164916		1984.98	0.00639866		2514.98	-0.00788724		3044.98	0.07897458		3574.98	0.00795942		4104.98	-0.01871537
395.19	0.01113078		925.19	0.01138934		1455.19	0.00160811		1985.18	0.00517647		2515.18	-0.00776522		3045.18	0.07793265		3575.18	0.00847641		4105.18	-0.01894808
395.39	0.01013242		925.39	0.01167646		1455.39	0.00078557		1985.38	0.00561464		2515.38	-0.00829319		3045.38	0.07765357		3575.38	0.00793695		4105.38	-0.01876437
395.59	0.00980319		925.59	0.01215379		1455.59	-0.00014295		1985.58	0.00581791		2515.58	-0.00836345		3045.58	0.07695975		3575.58	0.00869073		4105.58	-0.01814599
395.79	0.01011374		925.79	0.01228652		1455.79	-0.000518		1985.78	0.005529		2515.78	-0.00781701		3045.78	0.07709236		3575.78	0.00862648		4105.78	-0.01876179
395.99	0.01065553		925.99	0.01353083		1455.99	-0.00043503		1985.98	0.00577593		2515.98	-0.00911118		3045.98	0.07685041		3575.98	0.00830892		4105.98	-0.01881715
396.19	0.01082638		926.19	0.01413978		1456.19	-0.00055919		1986.18	0.00526304		2516.18	-0.0100572		3046.18	0.07632174		3576.18	0.00778423		4106.18	-0.01952214
396.39	0.01010092		926.39	0.01449168		1456.39	-0.00079735		1986.38	0.00490986		2516.38	-0.01013163		3046.38	0.07654416		3576.38	0.00709747		4106.38	-0.02038304
396.59	0.01105925		926.59	0.01453261		1456.59	-0.00051957		1986.58	0.00429784		2516.58	-0.01143776		3046.58	0.07608942		3576.58	0.006649		4106.58	-0.02136421
396.79	0.0116793		926.79	0.01468484		1456.79	0.00000513		1986.78	0.00561227		2516.78	-0.01153629		3046.78	0.07622369		3576.78	0.00693854		4106.78	-0.02211444
396.99	0.01077823		926.99	0.01425585		1456.99	-0.00016558		1986.98	0.00611515		2516.98	-0.0115831		3046.98	0.07657938		3576.98	0.00765476		4106.98	-0.02195649
397.19	0.01091328		927.19	0.01348859		1457.19	-0.0000588		1987.18	0.00589748		2517.18	-0.01065601		3047.18	0.07752477		3577.18	0.0073243		4107.18	-0.02249223
397.39	0.01156649		927.39	0.01339131		1457.39	0.00015903		1987.38	0.00642193		2517.38	-0.01069935		3047.38	0.07784184		3577.38	0.00728239		4107.38	-0.02328278
397.59	0.01185409		927.59	0.01302441		1457.59	0.00116033		1987.58	0.00677726		2517.58	-0.01110012		3047.58	0.07871275		3577.58	0.00776957		4107.58	-0.0227404
397.79	0.01145313		927.79	0.01280159		1457.79	0.0014541		1987.78	0.00678747		2517.78	-0.01104394		3047.78	0.07883751		3577.78	0.00817322		4107.78	-0.02278958
397.99	0.01101663		927.99	0.0126985		1457.99	0.00178927		1987.98	0.00643737		2517.98	-0.01102315		3047.98	0.08001853		3577.98	0.00959988		4107.98	-0.02255012
398.19	0.01027764		928.19	0.01244749		1458.19	0.00300436		1988.18	0.00694851		2518.18	-0.01026738		3048.18	0.07955986		3578.18	0.00917443		4108.18	-0.02270818
398.39	0.0108309		928.39	0.01262325		1458.39	0.00280221		1988.38	0.00707984		2518.38	-0.0094105		3048.38	0.08017155		3578.38	0.00946847		4108.38	-0.02237793
398.59	0.01010104		928.59	0.01245644		1458.59	0.00165232		1988.58	0.00686556		2518.58	-0.00881276		3048.58	0.08007215		3578.58	0.00969671		4108.58	-0.02150383
398.79	0.00972638		928.79	0.01187909		1458.79	0.00217158		1988.78	0.00646781		2518.78	-0.0089086		3048.78	0.07999442		3578.78	0.00970275		4108.78	-0.02162565
398.99	0.00905574		928.99	0.01301468		1458.99	0.0022089		1988.98	0.00619615		2518.98	-0.00945322		3048.98	0.07937255		3578.98	0.00926528		4108.98	-0.0209647
399.19	0.00753452		929.19	0.01274925		1459.19	0.00256637		1989.18	0.00643043		2519.18	-0.01046669		3049.18	0.07901112		3579.18	0.00916516		4109.18	-0.02045348
399.39	0.00681406		929.39	0.01275381		1459.39	0.00231407		1989.38	0.00680837		2519.38	-0.01092543		3049.38	0.07861002		3579.38	0.00935888		4109.38	-0.01976453
399.59	0.00657562		929.59	0.01284312		1459.59	0.00260257		1989.58	0.00765373		2519.58	-0.0103248		3049.58	0.07799224		3579.58	0.0093451		4109.58	-0.01891351
399.79	0.00774446		929.79	0.01303754		1459.79	0.00261414		1989.78	0.00792376		2519.78	-0.01043558		3049.78	0.07816287		3579.78	0.00886575		4109.78	-0.01955207
399.99	0.0090668		929.99	0.01402653		1459.99	0.00279981		1989.98	0.00817203		2519.98	-0.01171119		3049.98	0.07813271		3579.98	0.00807768		4109.98	-0.01929527
400.19	0.00989513		930.19	0.01365081		1460.19	0.00251113		1990.18	0.00821524		2520.18	-0.01195955		3050.18	0.07841365		3580.18	0.0075777		4110.18	-0.01971248
400.39	0.00985502		930.39	0.01277966		1460.39	0.00277576		1990.38	0.00874939		2520.38	-0.01255162		3050.38	0.07799166		3580.38	0.00640685		4110.38	-0.01983844
400.59	0.01169533		930.59	0.01220345		1460.59	0.00265546		1990.58	0.00930294		2520.58	-0.01305358		3050.58	0.0776622		3580.58	0.00630093		4110.58	-0.02016836
400.79	0.01117697		930.79	0.01173964		1460.79	0.00249924		1990.78	0.01029374		2520.78	-0.01311233		3050.78	0.07683334		3580.78	0.00577049		4110.78	-0.01968626
400.99	0.01208133		930.99	0.01086457		1460.99	0.00190396		1990.98	0.00984259		2520.98	-0.01358359		3050.98	0.07734283		3580.98	0.00567114		4110.98	-0.01969376
401.19	0.01312884		931.19	0.00990843		1461.19	0.00210011		1991.18	0.01019968		2521.18	-0.01278082		3051.18	0.07652891		3581.18	0.00551064		4111.18	-0.020423
401.39	0.01394157		931.39	0.00981373		1461.39	0.00190842		1991.38	0.01006611		2521.38	-0.01275211		3051.38	0.07518363		3581.38	0.00672757		4111.38	-0.0207652
401.59	0.01347036		931.59	0.01012659		1461.59	0.00142364		1991.58	0.00989775		2521.58	-0.01249796		3051.58	0.07561385		3581.58	0.00745949		4111.58	-0.02007905
401.79	0.01400451		931.79	0.00946013		1461.79	0.00091473		1991.78	0.00967585		2521.78	-0.01159557		3051.78	0.07604313		3581.78	0.00818426		4111.78	-0.01999801
401.99	0.01406864		931.99	0.0091907		1461.99	0.00108328		1991.98	0.00936837		2521.98	-0.01154853		3051.98	0.07619681		3581.98	0.00878199		4111.98	-0.02001618
402.19	0.01425864		932.19	0.00836342		1462.19	0.00008841		1992.18	0.00923082		2522.18	-0.01155589		3052.18	0.07580881		3582.18	0.00793588		4112.18	-0.01997494
402.39	0.01465373		932.39	0.00806809		1462.39	-0.00087068		1992.38	0.00806429		2522.38	-0.01116459		3052.38	0.07544879		3582.38	0.00673769		4112.38	-0.020379
402.59	0.0138889		932.59	0.00830924		1462.59	-0.00076087		1992.58	0.00798119		2522.58	-0.01108377		3052.58	0.07557426		3582.58	0.00688096		4112.58	-0.02052832
402.79	0.0133353		932.79	0.00908694		1462.79	0.00034557		1992.78	0.00767027		2522.78	-0.01153675		3052.78	0.07561955		3582.78	0.00700307		4112.78	-0.02044912
402.99	0.01305141		932.99	0.00925257		1462.99	-0.00045505		1992.98	0.00730204		2522.98	-0.01088417		3052.98	0.07619354		3582.98	0.00735404		4112.98	-0.01932303
403.19	0.01222627		933.19	0.00875829		1463.19	0.00020622		1993.18	0.00683403		2523.18	-0.01114834		3053.18	0.07718804		3583.18	0.0077742		4113.18	-0.02002948
403.39	0.01176553		933.39	0.00953091		1463.39	0.00067534		1993.38	0.00584128		2523.38	-0.0114557		3053.38	0.07734154		3583.38	0.0080431		4113.38	-0.0191304
403.59	0.01189953		933.59	0.00994532		1463.59	0.00107713		1993.58	0.00629834		2523.58	-0.01096887		3053.58	0.07742466		3583.58	0.00788127		4113.58	-0.01988434
403.79	0.01321417		933.79	0.00960819		1463.79	0.00091848		1993.78	0.00527995		2523.78	-0.01078517		3053.78	0.07783759		3583.78	0.00833534		4113.78	-0.01998497
403.99	0.01367718		933.99	0.00938876		1463.99	0.00124001		1993.98	0.00515861		2523.98	-0.01030586		3053.98	0.07905924		3583.98	0.00808501		4113.98	-0.0200901
404.19	0.01283495		934.19	0.00900136		1464.19	0.00096586		1994.18	0.00512151		2524.18	-0.01012151		3054.18	0.07855995		3584.18	0.00787068		4114.18	-0.02086122
404.39	0.01304805		934.39	0.00802838		1464.39	0.00086985		1994.38	0.00421071		2524.38	-0.01062416		3054.38	0.07828491		3584.38	0.00703617		4114.38	-0.02125339
404.59	0.01324709		934.59	0.00799268		1464.59	0.00088469		1994.58	0.00447314		2524.58	-0.01106182		3054.58	0.0788935		3584.58	0.00688661		4114.58	-0.02168541
404.79	0.01250379		934.79	0.00807551		1464.79	0.00100651		1994.78	0.00407942		2524.78	-0.01109676		3054.78	0.07828539		3584.78	0.00630562		4114.78	-0.02072976
404.99	0.01331313		934.99	0.008495		1464.99	0.00148369		1994.98	0.00394687		2524.98	-0.01089017		3054.98	0.07797169		3584.98	0.00713117		4114.98	-0.02047893
405.19	0.01274687		935.19	0.00914871		1465.19	0.00133289		1995.18	0.00496162		2525.18	-0.01001183		3055.18	0.07761445		3585.18	0.00824534		4115.18	-0.02098788
405.39	0.01254641		935.39	0.0092593		1465.39	0.00175285		1995.38	0.00535622		2525.38	-0.01033727		3055.38	0.07786068		3585.38	0.00814601		4115.38	-0.02045269
405.59	0.01187093		935.59	0.00906702		1465.59	0.00179185		1995.58	0.00605611		2525.58	-0.01018965		3055.58	0.07815469		3585.58	0.00821627		4115.58	-0.02064232
405.79	0.01223675		935.79	0.00894811		1465.79	0.00168893		1995.78	0.00666667		2525.78	-0.01011105		3055.78	0.07830274		3585.78	0.00728008		4115.78	-0.02060759
405.99	0.01145899		935.99	0.00914135		1465.99	0.00150455		1995.98	0.00756157		2525.98	-0.01074437		3055.98	0.07695061		3585.98	0.00736026		4115.98	-0.02111339
406.19	0.01129659		936.19	0.01006596		1466.19	0.0007737		1996.18	0.00822503		2526.18	-0.01100694		3056.18	0.07663946		3586.18	0.0064588		4116.18	-0.02153302
406.39	0.0101956		936.39	0.00948552		1466.39	0.00069246		1996.38	0.008321		2526.38	-0.01105077		3056.38	0.07642545		3586.38	0.00621325		4116.38	-0.02164434
406.59	0.00926128		936.59	0.00981291		1466.59	0.00051754		1996.58	0.00924685		2526.58	-0.01107596		3056.58	0.07657306		3586.58	0.00675153		4116.58	-0.02144007
406.79	0.00869628		936.79	0.00993052		1466.79	0.00053546		1996.78	0.00945242		2526.78	-0.01046758		3056.78	0.07624621		3586.78	0.00665188		4116.78	-0.02108996
406.99	0.00797147		936.99	0.00959886		1466.99	-0.0002366		1996.98	0.00876197		2526.98	-0.01069565		3056.98	0.07677776		3586.98	0.00652648		4116.98	-0.02119658
407.19	0.00680763		937.19	0.01068144		1467.19	0.00055506		1997.18	0.00904324		2527.18	-0.01174024		3057.18	0.07638261		3587.18	0.00675221		4117.18	-0.02237752
407.39	0.00684329		937.39	0.01109408		1467.39	0.00050171		1997.38	0.00853501		2527.38	-0.01279203		3057.38	0.07555085		3587.38	0.00718892		4117.38	-0.02161148
407.59	0.00658573		937.59	0.01007147		1467.59	0.00017503		1997.58	0.00889601		2527.58	-0.01213218		3057.58	0.07562811		3587.58	0.00749621		4117.58	-0.02282632
407.79	0.0066208		937.79	0.00981006		1467.79	0.00098256		1997.78	0.0079914		2527.78	-0.01133041		3057.78	0.07605322		3587.78	0.0072896		4117.78	-0.02167609
407.99	0.00652275		937.99	0.00944764		1467.99	0.00137742		1997.98	0.00808716		2527.98	-0.01114712		3057.98	0.07654543		3587.98	0.00726371		4117.98	-0.02222649
408.19	0.0064216		938.19	0.00912624		1468.19	0.00033161		1998.18	0.00706533		2528.18	-0.01137533		3058.18	0.0761625		3588.18	0.00696535		4118.18	-0.02168366
408.39	0.00718327		938.39	0.00920314		1468.39	0.00052717		1998.38	0.00708484		2528.38	-0.01140423		3058.38	0.07708659		3588.38	0.00638485		4118.38	-0.0217659
408.59	0.00739605		938.59	0.01003075		1468.59	0.00046903		1998.58	0.00732492		2528.58	-0.01097321		3058.58	0.07659664		3588.58	0.00631665		4118.58	-0.02151427
408.79	0.00770471		938.79	0.01053949		1468.79	0.00102453		1998.78	0.00645853		2528.78	-0.01034352		3058.78	0.07672249		3588.78	0.00629736		4118.78	-0.02011434
408.99	0.0087478		938.99	0.01069721		1468.99	0.00205625		1998.98	0.00625239		2528.98	-0.010513		3058.98	0.07710171		3588.98	0.00671371		4118.98	-0.01976518
409.19	0.00931122		939.19	0.0107608		1469.19	0.00275785		1999.18	0.00656204		2529.18	-0.01051635		3059.18	0.07815599		3589.18	0.00665516		4119.18	-0.02036638
409.39	0.00962764		939.39	0.01018981		1469.39	0.0037457		1999.38	0.00628965		2529.38	-0.01100828		3059.38	0.07787122		3589.38	0.00633986		4119.38	-0.02005417
409.59	0.01038797		939.59	0.01035812		1469.59	0.00338618		1999.58	0.00591895		2529.58	-0.01140082		3059.58	0.0778124		3589.58	0.00618391		4119.58	-0.02002487
409.79	0.01027117		939.79	0.01003972		1469.79	0.00264707		1999.78	0.00565208		2529.78	-0.01186748		3059.78	0.07790188		3589.78	0.0066037		4119.78	-0.02006846
409.99	0.00944877		939.99	0.01004535		1469.99	0.00231672		1999.98	0.00511998		2529.98	-0.01208118		3059.98	0.07714083		3589.98	0.00733941		4119.98	-0.02101445
410.19	0.00900143		940.19	0.009602		1470.19	0.00323871		2000.18	0.00487786		2530.18	-0.01248301		3060.18	0.0775966		3590.18	0.00756452		4120.18	-0.02124502
410.39	0.00803119		940.39	0.00831358		1470.39	0.00327653		2000.38	0.0043256		2530.38	-0.01238463		3060.38	0.0777573		3590.38	0.00821189		4120.38	-0.02183501
410.59	0.00793951		940.59	0.0086653		1470.59	0.00344894		2000.58	0.00465287		2530.58	-0.01206451		3060.58	0.07837339		3590.58	0.00850856		4120.58	-0.02263652
410.79	0.00892636		940.79	0.00873879		1470.79	0.00340174		2000.78	0.00338555		2530.78	-0.01141089		3060.78	0.07865139		3590.78	0.00932059		4120.78	-0.02358158
410.99	0.00838741		940.99	0.00877418		1470.99	0.00332031		2000.98	0.00259212		2530.98	-0.01203186		3060.98	0.07883228		3590.98	0.00917033		4120.98	-0.02457824
411.19	0.00764079		941.19	0.00866066		1471.19	0.0038211		2001.18	0.0031244		2531.18	-0.01252006		3061.18	0.07841288		3591.18	0.00893639		4121.18	-0.02508419
411.39	0.00781569		941.39	0.00751764		1471.39	0.00326744		2001.38	0.00310857		2531.38	-0.01218766		3061.38	0.07798209		3591.38	0.00824764		4121.38	-0.02412427
411.59	0.00711357		941.59	0.00704018		1471.59	0.00284077		2001.58	0.00370016		2531.58	-0.01131629		3061.58	0.07721748		3591.58	0.00729566		4121.58	-0.02515992
411.79	0.00725383		941.79	0.00767464		1471.79	0.00347423		2001.78	0.0048431		2531.78	-0.01052659		3061.78	0.07653696		3591.78	0.00677851		4121.78	-0.02430807
411.99	0.00697447		941.99	0.00766818		1471.99	0.00219658		2001.98	0.00613963		2531.98	-0.00988202		3061.98	0.07616404		3591.98	0.00739038		4121.98	-0.02393211
412.19	0.00666122		942.19	0.00786288		1472.19	0.00045173		2002.18	0.00649167		2532.18	-0.00870156		3062.18	0.07613642		3592.18	0.00692368		4122.18	-0.02283094
412.39	0.00713181		942.39	0.0088464		1472.39	0.00032278		2002.38	0.00793101		2532.38	-0.00842264		3062.38	0.07578687		3592.38	0.0066385		4122.38	-0.02177048
412.59	0.00756656		942.59	0.00979473		1472.59	-0.0006718		2002.58	0.0080332		2532.58	-0.0081237		3062.58	0.07506711		3592.58	0.00690642		4122.58	-0.02111794
412.79	0.00720832		942.79	0.0103522		1472.79	-0.00083446		2002.78	0.0083617		2532.78	-0.0086216		3062.78	0.07482029		3592.78	0.00607196		4122.78	-0.01880467
412.99	0.00749962		942.99	0.01095963		1472.99	-0.0012777		2002.98	0.00895642		2532.98	-0.00932811		3062.98	0.07506489		3592.98	0.00565743		4122.98	-0.01825809
413.19	0.00794183		943.19	0.01153687		1473.19	-0.0017966		2003.18	0.01026376		2533.18	-0.00963891		3063.18	0.07462605		3593.18	0.00575005		4123.18	-0.01720738
413.39	0.00767406		943.39	0.01215028		1473.39	-0.00199485		2003.38	0.01062339		2533.38	-0.01083159		3063.38	0.07433402		3593.38	0.0059136		4123.38	-0.01740096
413.59	0.00840767		943.59	0.01194702		1473.59	-0.00279902		2003.58	0.00984274		2533.58	-0.01153934		3063.58	0.07474508		3593.58	0.00615576		4123.58	-0.01731997
413.79	0.00757067		943.79	0.01183567		1473.79	-0.00275732		2003.78	0.00966857		2533.78	-0.01160019		3063.78	0.07412872		3593.78	0.00680218		4123.78	-0.01798984
413.99	0.00743009		943.99	0.01183823		1473.99	-0.00227508		2003.98	0.00925176		2533.98	-0.01230157		3063.98	0.07396379		3593.98	0.00734965		4123.98	-0.01893182
414.19	0.00828561		944.19	0.0120635		1474.19	-0.00140916		2004.18	0.00883525		2534.18	-0.01257865		3064.18	0.07377449		3594.18	0.00744428		4124.18	-0.01900447
414.39	0.00962863		944.39	0.01279314		1474.39	-0.00115419		2004.38	0.00802196		2534.38	-0.0130405		3064.38	0.07426957		3594.38	0.00696438		4124.38	-0.01994485
414.59	0.01051309		944.59	0.01242415		1474.59	-0.0005232		2004.58	0.00750646		2534.58	-0.01335788		3064.58	0.07528565		3594.58	0.00680257		4124.58	-0.01957198
414.79	0.0107811		944.79	0.01209978		1474.79	0.00024616		2004.78	0.00609292		2534.78	-0.01297983		3064.78	0.07563287		3594.78	0.00658867		4124.78	-0.01996094
414.99	0.00977352		944.99	0.01136724		1474.99	0.00133245		2004.98	0.00636451		2534.98	-0.01400859		3064.98	0.07607148		3594.98	0.00526365		4124.98	-0.01966937
415.19	0.00889517		945.19	0.01059456		1475.19	0.00103336		2005.18	0.00536771		2535.18	-0.01487253		3065.18	0.07599751		3595.18	0.00509361		4125.18	-0.01918618
415.39	0.00880335		945.39	0.01038709		1475.39	0.00034464		2005.38	0.00584445		2535.38	-0.01451568		3065.38	0.07626847		3595.38	0.00476568		4125.38	-0.01917799
415.59	0.00810526		945.59	0.01098101		1475.59	0.00101196		2005.58	0.00631825		2535.58	-0.01485134		3065.58	0.076061		3595.58	0.00509235		4125.58	-0.02010345
415.79	0.00791182		945.79	0.01104088		1475.79	0.00086432		2005.78	0.00650738		2535.78	-0.01404004		3065.78	0.0769601		3595.78	0.00564224		4125.78	-0.01903048
415.99	0.00735298		945.99	0.01059755		1475.99	0.00046732		2005.98	0.00670153		2535.98	-0.0138908		3065.98	0.07687245		3595.98	0.00631424		4125.98	-0.01817427
416.19	0.00718544		946.19	0.01012403		1476.19	-0.000054		2006.18	0.00654561		2536.18	-0.01417131		3066.18	0.07717167		3596.18	0.00595122		4126.18	-0.01745991
416.39	0.00748919		946.39	0.01070637		1476.39	0.00049271		2006.38	0.00635448		2536.38	-0.01473282		3066.38	0.0772155		3596.38	0.00619913		4126.38	-0.01667091
416.59	0.00690052		946.59	0.00974258		1476.59	-0.00062911		2006.58	0.00617887		2536.58	-0.01483072		3066.58	0.07706839		3596.58	0.00590651		4126.58	-0.01727576
416.79	0.00631141		946.79	0.00881227		1476.79	-0.00115781		2006.78	0.0066424		2536.78	-0.01536525		3066.78	0.07648876		3596.78	0.00569948		4126.78	-0.01705347
416.99	0.00650558		946.99	0.00966038		1476.99	-0.00119326		2006.98	0.00652028		2536.98	-0.01530365		3066.98	0.0766857		3596.98	0.00629836		4126.98	-0.0175855
417.19	0.00653201		947.19	0.0102404		1477.19	-0.00129429		2007.18	0.0062605		2537.18	-0.01559615		3067.18	0.07595375		3597.18	0.00680397		4127.18	-0.01756933
417.39	0.00670885		947.39	0.0103348		1477.39	-0.00080107		2007.38	0.00622981		2537.38	-0.01612839		3067.38	0.07573293		3597.38	0.00683715		4127.38	-0.01957972
417.59	0.00748355		947.59	0.00905489		1477.59	-0.00153266		2007.58	0.00459807		2537.58	-0.01522415		3067.58	0.07557887		3597.58	0.00673342		4127.58	-0.01947806
417.79	0.00772731		947.79	0.00960403		1477.79	-0.00121439		2007.78	0.00458832		2537.78	-0.01433707		3067.78	0.07533101		3597.78	0.0067195		4127.78	-0.01943893
417.99	0.00719776		947.99	0.00990317		1477.99	-0.00196118		2007.98	0.00404924		2537.98	-0.01378518		3067.98	0.07521482		3597.98	0.00620359		4127.98	-0.02003738
418.19	0.00707477		948.19	0.01063317		1478.19	-0.00271716		2008.18	0.00307106		2538.18	-0.01346026		3068.18	0.07482299		3598.18	0.00472596		4128.18	-0.02065869
418.39	0.00656566		948.39	0.0109393		1478.39	-0.00204117		2008.38	0.00389715		2538.38	-0.01366483		3068.38	0.07550815		3598.38	0.004627		4128.38	-0.02189138
418.59	0.00616598		948.59	0.01039304		1478.59	-0.00203281		2008.58	0.00496018		2538.58	-0.01179458		3068.58	0.07651265		3598.58	0.00525877		4128.58	-0.02212374
418.79	0.00610952		948.79	0.0098945		1478.79	-0.00224207		2008.78	0.00482576		2538.78	-0.01173242		3068.78	0.07666243		3598.78	0.00473356		4128.78	-0.02219091
418.99	0.00612141		948.99	0.00985556		1478.99	-0.00323154		2008.98	0.00559614		2538.98	-0.0120932		3068.98	0.07686077		3598.98	0.00487461		4128.98	-0.02244156
419.19	0.00580442		949.19	0.01047688		1479.19	-0.00393831		2009.18	0.00545857		2539.18	-0.01214785		3069.18	0.07653149		3599.18	0.00551407		4129.18	-0.02231293
419.39	0.00625234		949.39	0.0107279		1479.39	-0.00388954		2009.38	0.00642621		2539.38	-0.01169329		3069.38	0.07737057		3599.38	0.005139		4129.38	-0.02312091
419.59	0.00652096		949.59	0.01140174		1479.59	-0.00358846		2009.58	0.00648603		2539.58	-0.01161015		3069.58	0.07692568		3599.58	0.00584392		4129.58	-0.02290586
419.79	0.0070387		949.79	0.01159742		1479.79	-0.00388282		2009.78	0.00656272		2539.78	-0.01219147		3069.78	0.07666708		3599.78	0.00654147		4129.78	-0.02244415
419.99	0.00729729		949.99	0.01132988		1479.99	-0.0036049		2009.98	0.00723495		2539.98	-0.01324601		3069.98	0.07574112		3599.98	0.00660319		4129.98	-0.02155227
420.19	0.00693806		950.19	0.01108589		1480.19	-0.00314869		2010.18	0.00769503		2540.18	-0.01378081		3070.18	0.07569272		3600.18	0.0068722		4130.18	-0.02120366
420.39	0.00663793		950.39	0.01037805		1480.39	-0.00255057		2010.38	0.00764778		2540.38	-0.01439407		3070.38	0.07552444		3600.38	0.00671461		4130.38	-0.02133505
420.59	0.00704975		950.59	0.00907981		1480.59	-0.00194952		2010.58	0.00769222		2540.58	-0.01553004		3070.58	0.07446202		3600.58	0.00593299		4130.58	-0.02147903
420.79	0.0072879		950.79	0.00963496		1480.79	-0.00170301		2010.78	0.00752654		2540.78	-0.01641751		3070.78	0.07412581		3600.78	0.00556375		4130.78	-0.02114942
420.99	0.00743033		950.99	0.01088878		1480.99	-0.00055628		2010.98	0.00682201		2540.98	-0.01647036		3070.98	0.07412742		3600.98	0.00494269		4130.98	-0.02143336
421.19	0.00712571		951.19	0.0106221		1481.19	-0.00000865		2011.18	0.00653287		2541.18	-0.01677013		3071.18	0.0731299		3601.18	0.00431834		4131.18	-0.0209992
421.39	0.00697898		951.39	0.00992065		1481.39	0.00104944		2011.38	0.00652339		2541.38	-0.01712141		3071.38	0.0731308		3601.38	0.00403223		4131.38	-0.02140476
421.59	0.00719637		951.59	0.00941806		1481.59	0.00113806		2011.58	0.0050342		2541.58	-0.01606362		3071.58	0.07359316		3601.58	0.00354975		4131.58	-0.02019098
421.79	0.00672392		951.79	0.01006268		1481.79	0.00164913		2011.78	0.00475167		2541.78	-0.01629602		3071.78	0.07385951		3601.78	0.00388252		4131.78	-0.01999862
421.99	0.0060983		951.99	0.00931241		1481.99	0.0007317		2011.98	0.00434056		2541.98	-0.01592096		3071.98	0.07300805		3601.98	0.00337085		4131.98	-0.02069818
422.19	0.00646542		952.19	0.00902307		1482.19	0.00088405		2012.18	0.00431061		2542.18	-0.01520123		3072.18	0.07268368		3602.18	0.00304079		4132.18	-0.02248244
422.39	0.00588812		952.39	0.0085135		1482.39	0.0009237		2012.38	0.00503452		2542.38	-0.0137493		3072.38	0.07319302		3602.38	0.00331071		4132.38	-0.02295576
422.59	0.00639589		952.59	0.00818701		1482.59	0.00107813		2012.58	0.00464166		2542.58	-0.01239916		3072.58	0.0728424		3602.58	0.00378937		4132.58	-0.02198555
422.79	0.00653311		952.79	0.00803546		1482.79	0.00091335		2012.78	0.00377009		2542.78	-0.01276701		3072.78	0.07236005		3602.78	0.00338796		4132.78	-0.02128765
422.99	0.00605912		952.99	0.00824477		1482.99	-0.00005256		2012.98	0.00406553		2542.98	-0.01198374		3072.98	0.07173037		3602.98	0.00435522		4132.98	-0.0215753
423.19	0.00637257		953.19	0.00819874		1483.19	-0.00019095		2013.18	0.00419986		2543.18	-0.0115047		3073.18	0.07149384		3603.18	0.00553868		4133.18	-0.02130943
423.39	0.00667315		953.39	0.00787974		1483.39	-0.0005681		2013.38	0.00462549		2543.38	-0.01112266		3073.38	0.07203615		3603.38	0.00623881		4133.38	-0.02177712
423.59	0.00658555		953.59	0.00846399		1483.59	-0.00090156		2013.58	0.00446201		2543.58	-0.01109161		3073.58	0.07183304		3603.58	0.00751381		4133.58	-0.02084472
423.79	0.006592		953.79	0.00865924		1483.79	-0.0013369		2013.78	0.00468098		2543.78	-0.01195456		3073.78	0.07220896		3603.78	0.00810596		4133.78	-0.02059377
423.99	0.00630385		953.99	0.0090833		1483.99	-0.00242169		2013.98	0.00502867		2543.98	-0.01189018		3073.98	0.0724479		3603.98	0.00826474		4133.98	-0.01912024
424.19	0.00640404		954.19	0.00913504		1484.19	-0.00212838		2014.18	0.00516792		2544.18	-0.01188844		3074.18	0.0725624		3604.18	0.00891317		4134.18	-0.0191515
424.39	0.00649923		954.39	0.00984021		1484.39	-0.0016617		2014.38	0.00451023		2544.38	-0.01228896		3074.38	0.07346475		3604.38	0.00905543		4134.38	-0.01960532
424.59	0.00612978		954.59	0.01098246		1484.59	-0.00177372		2014.58	0.00459096		2544.58	-0.01352092		3074.58	0.07407718		3604.58	0.00941838		4134.58	-0.01968752
424.79	0.00626816		954.79	0.01218411		1484.79	-0.00272059		2014.78	0.00480604		2544.78	-0.01368155		3074.78	0.07498991		3604.78	0.00911375		4134.78	-0.01968304
424.99	0.00623729		954.99	0.01200268		1484.99	-0.0027891		2014.98	0.00468846		2544.98	-0.01263895		3074.98	0.07456103		3604.98	0.00895064		4134.98	-0.01987916
425.19	0.00527844		955.19	0.01109714		1485.19	-0.00290243		2015.18	0.00495582		2545.18	-0.01272881		3075.18	0.07393863		3605.18	0.00839523		4135.18	-0.01925988
425.39	0.00524834		955.39	0.01102328		1485.39	-0.00262077		2015.38	0.00481272		2545.38	-0.01364925		3075.38	0.07452127		3605.38	0.00859935		4135.38	-0.0197412
425.59	0.00534706		955.59	0.01082958		1485.59	-0.00235831		2015.58	0.00362524		2545.58	-0.01365167		3075.58	0.07469572		3605.58	0.00870307		4135.58	-0.01981073
425.79	0.00545223		955.79	0.0103812		1485.79	-0.0024712		2015.78	0.00290046		2545.78	-0.01417469		3075.78	0.07466776		3605.78	0.00856588		4135.78	-0.02025958
425.99	0.00543948		955.99	0.00948919		1485.99	-0.00281101		2015.98	0.00221984		2545.98	-0.01341627		3075.98	0.07391871		3605.98	0.00811393		4135.98	-0.0213606
426.19	0.0050188		956.19	0.00932504		1486.19	-0.00210905		2016.18	0.00165152		2546.18	-0.01352042		3076.18	0.07404358		3606.18	0.0070315		4136.18	-0.02212011
426.39	0.00429647		956.39	0.00929161		1486.39	-0.002335		2016.38	0.00103981		2546.38	-0.0149417		3076.38	0.07387683		3606.38	0.00669254		4136.38	-0.02200624
426.59	0.00441785		956.59	0.01009032		1486.59	-0.00069568		2016.58	0.00142784		2546.58	-0.01529275		3076.58	0.07211939		3606.58	0.00619925		4136.58	-0.02172942
426.79	0.00422896		956.79	0.00930778		1486.79	-0.00088077		2016.78	0.00210388		2546.78	-0.01572493		3076.78	0.07157249		3606.78	0.00593302		4136.78	-0.02233424
426.99	0.00374085		956.99	0.00785477		1486.99	-0.00102135		2016.98	0.00305837		2546.98	-0.01525694		3076.98	0.07152346		3606.98	0.0058657		4136.98	-0.0223759
427.19	0.00438123		957.19	0.00741065		1487.19	-0.0006725		2017.18	0.00440632		2547.18	-0.01599485		3077.18	0.07124392		3607.18	0.00507963		4137.18	-0.02316919
427.39	0.0047641		957.39	0.00701765		1487.39	-0.00114516		2017.38	0.00498644		2547.38	-0.0171391		3077.38	0.07183235		3607.38	0.00404411		4137.38	-0.02353487
427.59	0.00486539		957.59	0.00638869		1487.59	-0.00197553		2017.58	0.0048252		2547.58	-0.01745624		3077.58	0.07179687		3607.58	0.00422997		4137.58	-0.02314769
427.79	0.00467081		957.79	0.0057509		1487.79	-0.00311498		2017.78	0.00532866		2547.78	-0.01719817		3077.78	0.07267142		3607.78	0.00384339		4137.78	-0.02355726
427.99	0.00479584		957.99	0.00597627		1487.99	-0.00400366		2017.98	0.00541748		2547.98	-0.01692627		3077.98	0.07227736		3607.98	0.00377444		4137.98	-0.0225472
428.19	0.00524195		958.19	0.00596102		1488.19	-0.00385311		2018.18	0.00500795		2548.18	-0.01633046		3078.18	0.07246218		3608.18	0.00404277		4138.18	-0.02378233
428.39	0.00452925		958.39	0.00682425		1488.39	-0.00488727		2018.38	0.00500239		2548.38	-0.01625663		3078.38	0.0730798		3608.38	0.0042657		4138.38	-0.02411495
428.59	0.00411601		958.59	0.00704395		1488.59	-0.00635934		2018.58	0.00645389		2548.58	-0.01628269		3078.58	0.07329781		3608.58	0.00408567		4138.58	-0.02395964
428.79	0.00505467		958.79	0.00647035		1488.79	-0.00692571		2018.78	0.00607368		2548.78	-0.01467581		3078.78	0.07300278		3608.78	0.00358966		4138.78	-0.02437895
428.99	0.004457		958.99	0.00588168		1488.99	-0.00725994		2018.98	0.00613984		2548.98	-0.01296461		3078.98	0.07257111		3608.98	0.00366229		4138.98	-0.02438476
429.19	0.00430292		959.19	0.00479673		1489.19	-0.00684675		2019.18	0.00694099		2549.18	-0.01264914		3079.18	0.07300528		3609.18	0.00382224		4139.18	-0.02435069
429.39	0.0036785		959.39	0.00549576		1489.39	-0.0069941		2019.38	0.00626		2549.38	-0.01278822		3079.38	0.07310076		3609.38	0.00447858		4139.38	-0.02393048
429.59	0.00290754		959.59	0.00535512		1489.59	-0.00738087		2019.58	0.00583649		2549.58	-0.01257278		3079.58	0.07232469		3609.58	0.00506081		4139.58	-0.02354044
429.79	0.00287862		959.79	0.00619483		1489.79	-0.00719626		2019.78	0.00637246		2549.78	-0.01271762		3079.78	0.07262097		3609.78	0.00498128		4139.78	-0.02396093
429.99	0.00337938		959.99	0.00648774		1489.99	-0.00603276		2019.98	0.00631526		2549.98	-0.01225133		3079.98	0.07189351		3609.98	0.00626637		4139.98	-0.02390503
430.19	0.00350212		960.19	0.00745333		1490.19	-0.00488736		2020.18	0.0063066		2550.18	-0.01240349		3080.18	0.07127394		3610.18	0.00607062		4140.18	-0.02347252
430.39	0.00369213		960.39	0.00754107		1490.39	-0.00367001		2020.38	0.0069845		2550.38	-0.01287059		3080.38	0.07048146		3610.38	0.00580668		4140.38	-0.02307668
430.59	0.00368286		960.59	0.00825798		1490.59	-0.00223786		2020.58	0.00799365		2550.58	-0.01231659		3080.58	0.07035151		3610.58	0.00575642		4140.58	-0.02199162
430.79	0.00305675		960.79	0.00837115		1490.79	-0.00230413		2020.78	0.00739962		2550.78	-0.01241053		3080.78	0.07079893		3610.78	0.00645433		4140.78	-0.02133486
430.99	0.00249968		960.99	0.00855559		1490.99	-0.00130034		2020.98	0.00754586		2550.98	-0.01300539		3080.98	0.07142177		3610.98	0.00651497		4140.98	-0.02120352
431.19	0.00314444		961.19	0.00906462		1491.19	-0.00070747		2021.18	0.00761737		2551.18	-0.01479597		3081.18	0.07066983		3611.18	0.00665381		4141.18	-0.02142427
431.39	0.0041815		961.39	0.00908667		1491.39	-0.00079951		2021.38	0.00682404		2551.38	-0.01509203		3081.38	0.07076558		3611.38	0.0065153		4141.38	-0.02016258
431.59	0.003608		961.59	0.00840705		1491.59	-0.00069916		2021.58	0.00661895		2551.58	-0.01510459		3081.58	0.06962922		3611.58	0.00691556		4141.58	-0.01986418
431.79	0.00372175		961.79	0.00803797		1491.79	-0.0011471		2021.78	0.00593428		2551.78	-0.01528808		3081.78	0.069871		3611.78	0.00661658		4141.78	-0.01980545
431.99	0.00437009		961.99	0.00858158		1491.99	-0.00144164		2021.98	0.00500933		2551.98	-0.01622507		3081.98	0.06836533		3611.98	0.00617159		4141.98	-0.0191369
432.19	0.00465609		962.19	0.00855685		1492.19	-0.00122778		2022.18	0.00404229		2552.18	-0.01751842		3082.18	0.06891251		3612.18	0.0055608		4142.18	-0.01958718
432.39	0.00487966		962.39	0.00922041		1492.39	-0.00245387		2022.38	0.00404959		2552.38	-0.01858783		3082.38	0.06858379		3612.38	0.0050337		4142.38	-0.01954577
432.59	0.00582351		962.59	0.00952775		1492.59	-0.00244311		2022.58	0.00411339		2552.58	-0.01844261		3082.58	0.06903614		3612.58	0.00517075		4142.58	-0.01965092
432.79	0.00628007		962.79	0.00906355		1492.79	-0.00222031		2022.78	0.00253723		2552.78	-0.01837215		3082.78	0.06832675		3612.78	0.00560303		4142.78	-0.02084474
432.99	0.00598939		962.99	0.00862157		1492.99	-0.00233099		2022.98	0.00269815		2552.98	-0.0186538		3082.98	0.06946325		3612.98	0.00567146		4142.98	-0.02057752
433.19	0.00634153		963.19	0.00727618		1493.19	-0.0019876		2023.18	0.00256828		2553.18	-0.01911985		3083.18	0.069396		3613.18	0.00551849		4143.18	-0.02040094
433.39	0.00612945		963.39	0.007842		1493.39	-0.00201563		2023.38	0.00239366		2553.38	-0.01950922		3083.38	0.06918721		3613.38	0.00593244		4143.38	-0.0199649
433.59	0.00661064		963.59	0.00751826		1493.59	-0.00256011		2023.58	0.00340614		2553.58	-0.01938184		3083.58	0.06910778		3613.58	0.00584288		4143.58	-0.02088702
433.79	0.0069339		963.79	0.00738247		1493.79	-0.00231047		2023.78	0.00353622		2553.78	-0.01912273		3083.78	0.06997698		3613.78	0.00508198		4143.78	-0.0224911
433.99	0.00771924		963.99	0.00642996		1493.99	-0.00178102		2023.98	0.00432548		2553.98	-0.01731464		3083.98	0.06996859		3613.98	0.00588894		4143.98	-0.02285042
434.19	0.00667668		964.19	0.00640852		1494.19	-0.00187702		2024.18	0.00508225		2554.18	-0.01710976		3084.18	0.07010869		3614.18	0.00485213		4144.18	-0.02363271
434.39	0.00618934		964.39	0.00638962		1494.39	-0.0024415		2024.38	0.00544391		2554.38	-0.01711632		3084.38	0.0709271		3614.38	0.00483434		4144.38	-0.0241274
434.59	0.00561692		964.59	0.00730931		1494.59	-0.00318381		2024.58	0.00585146		2554.58	-0.01668153		3084.58	0.07249117		3614.58	0.0057153		4144.58	-0.02407726
434.79	0.00462836		964.79	0.0071423		1494.79	-0.00334531		2024.78	0.005318		2554.78	-0.01638146		3084.78	0.07290565		3614.78	0.0056932		4144.78	-0.0247113
434.99	0.00433257		964.99	0.00692527		1494.99	-0.00307934		2024.98	0.0067019		2554.98	-0.01678071		3084.98	0.07267921		3614.98	0.0054545		4144.98	-0.02540918
435.19	0.00394131		965.19	0.00660084		1495.19	-0.0033297		2025.18	0.00645824		2555.18	-0.01657501		3085.18	0.07201488		3615.18	0.00582367		4145.18	-0.02534442
435.39	0.00403157		965.39	0.0070838		1495.39	-0.00386009		2025.38	0.00620548		2555.38	-0.01632124		3085.38	0.07127563		3615.38	0.00513661		4145.38	-0.02464809
435.59	0.00318813		965.59	0.00675434		1495.59	-0.00447107		2025.58	0.00673897		2555.58	-0.01641249		3085.58	0.07031821		3615.58	0.00532441		4145.58	-0.02524909
435.79	0.00363389		965.79	0.00723857		1495.79	-0.00547207		2025.78	0.00631997		2555.78	-0.01660654		3085.78	0.07049611		3615.78	0.00529156		4145.78	-0.02513513
435.99	0.00301475		965.99	0.00736894		1495.99	-0.00575825		2025.98	0.00650513		2555.98	-0.01667028		3085.98	0.06987683		3615.98	0.00466135		4145.98	-0.02474512
436.19	0.00289236		966.19	0.00776917		1496.19	-0.00500291		2026.18	0.00631128		2556.18	-0.01732484		3086.18	0.07081575		3616.18	0.00522685		4146.18	-0.02460392
436.39	0.00330839		966.39	0.00830956		1496.39	-0.00516205		2026.38	0.00584519		2556.38	-0.01742678		3086.38	0.07057424		3616.38	0.00576043		4146.38	-0.02431809
436.59	0.00376167		966.59	0.0084609		1496.59	-0.00468007		2026.58	0.00543156		2556.58	-0.01681361		3086.58	0.07022574		3616.58	0.00718185		4146.58	-0.02395616
436.79	0.0035148		966.79	0.0085571		1496.79	-0.00454685		2026.78	0.00467241		2556.78	-0.01667266		3086.78	0.06977949		3616.78	0.00748184		4146.78	-0.02386825
436.99	0.00339894		966.99	0.00853598		1496.99	-0.00434897		2026.98	0.00434384		2556.98	-0.01689404		3086.98	0.07158341		3616.98	0.00769906		4146.98	-0.02324637
437.19	0.00392984		967.19	0.00930604		1497.19	-0.0038751		2027.18	0.00347449		2557.18	-0.01672263		3087.18	0.07104451		3617.18	0.00736817		4147.18	-0.02356848
437.39	0.00422332		967.39	0.00963508		1497.39	-0.00412778		2027.38	0.00370753		2557.38	-0.01673894		3087.38	0.07087525		3617.38	0.00772597		4147.38	-0.02261134
437.59	0.00416138		967.59	0.00858112		1497.59	-0.00457822		2027.58	0.00366994		2557.58	-0.01660377		3087.58	0.07064841		3617.58	0.00660936		4147.58	-0.02330997
437.79	0.00405019		967.79	0.0078014		1497.79	-0.00465791		2027.78	0.003462		2557.78	-0.01605072		3087.78	0.0710633		3617.78	0.00636324		4147.78	-0.02416652
437.99	0.00440077		967.99	0.00758004		1497.99	-0.00405539		2027.98	0.00409858		2557.98	-0.01515977		3087.98	0.0719374		3617.98	0.00687045		4147.98	-0.0240592
438.19	0.00450088		968.19	0.00781118		1498.19	-0.00397006		2028.18	0.00358648		2558.18	-0.01489687		3088.18	0.07208797		3618.18	0.00657733		4148.18	-0.02352569
438.39	0.00483076		968.39	0.00801829		1498.39	-0.00390934		2028.38	0.00311693		2558.38	-0.0145192		3088.38	0.07324946		3618.38	0.00671635		4148.38	-0.023514
438.59	0.00524484		968.59	0.00775206		1498.59	-0.00343609		2028.58	0.00335955		2558.58	-0.01426928		3088.58	0.07394092		3618.58	0.00729457		4148.58	-0.02329473
438.79	0.0052958		968.79	0.00758052		1498.79	-0.00292143		2028.78	0.00320088		2558.78	-0.01383304		3088.78	0.07380796		3618.78	0.00647932		4148.78	-0.02373602
438.99	0.00574201		968.99	0.00801947		1498.99	-0.00274639		2028.98	0.0034118		2558.98	-0.01416843		3088.98	0.07321333		3618.98	0.00671485		4148.98	-0.02368358
439.19	0.00488795		969.19	0.00772988		1499.19	-0.00276474		2029.18	0.00277233		2559.18	-0.01378774		3089.18	0.0724925		3619.18	0.00760859		4149.18	-0.0230792
439.39	0.00451123		969.39	0.00791276		1499.39	-0.00291733		2029.38	0.00287087		2559.38	-0.01385007		3089.38	0.07166512		3619.38	0.00663492		4149.38	-0.02223232
439.59	0.00471321		969.59	0.00769658		1499.59	-0.003599		2029.58	0.00368081		2559.58	-0.01410037		3089.58	0.07098797		3619.58	0.00665898		4149.58	-0.02229355
439.79	0.00497528		969.79	0.00782482		1499.79	-0.00314763		2029.78	0.00395091		2559.78	-0.01422326		3089.78	0.07043839		3619.78	0.00636549		4149.78	-0.02214691
439.99	0.00454403		969.99	0.00730908		1499.99	-0.00311575		2029.98	0.00480544		2559.98	-0.01439687		3089.98	0.06946352		3619.98	0.0060961		4149.98	-0.02187379
440.19	0.00525772		970.19	0.0075454		1500.19	-0.00228948		2030.18	0.0043977		2560.18	-0.01526463		3090.18	0.06901043		3620.18	0.00624116		4150.18	-0.02190979
440.39	0.00530202		970.39	0.00682014		1500.39	-0.00252121		2030.38	0.00475609		2560.38	-0.01556337		3090.38	0.06808648		3620.38	0.00644747		4150.38	-0.02170501
440.59	0.00497573		970.59	0.00695805		1500.59	-0.00277084		2030.58	0.00491991		2560.58	-0.01550772		3090.58	0.0674934		3620.58	0.00615023		4150.58	-0.02248659
440.79	0.0042022		970.79	0.00724065		1500.79	-0.00318308		2030.78	0.00529293		2560.78	-0.01598182		3090.78	0.06744087		3620.78	0.00672504		4150.78	-0.022724
440.99	0.00408596		970.99	0.007144		1500.99	-0.00404746		2030.98	0.00483895		2560.98	-0.01584519		3090.98	0.06791084		3620.98	0.00657487		4150.98	-0.02309585
441.19	0.00449115		971.19	0.00726073		1501.19	-0.00506345		2031.18	0.00449088		2561.18	-0.01588711		3091.18	0.0673336		3621.18	0.00609426		4151.18	-0.02413078
441.39	0.00451229		971.39	0.00645012		1501.39	-0.00493828		2031.38	0.00481874		2561.38	-0.01550952		3091.38	0.06720623		3621.38	0.00603786		4151.38	-0.02390688
441.59	0.00399134		971.59	0.00576995		1501.59	-0.0054068		2031.58	0.00506086		2561.58	-0.01560365		3091.58	0.06748088		3621.58	0.00605799		4151.58	-0.02457068
441.79	0.00408866		971.79	0.00527341		1501.79	-0.00577009		2031.78	0.00508934		2561.78	-0.01584506		3091.78	0.06862833		3621.78	0.00643139		4151.78	-0.0240971
441.99	0.00431203		971.99	0.00545174		1501.99	-0.00590406		2031.98	0.00534937		2561.98	-0.01548201		3091.98	0.06951899		3621.98	0.00644882		4151.98	-0.02358172
442.19	0.0055683		972.19	0.00549141		1502.19	-0.00586235		2032.18	0.00523121		2562.18	-0.01570987		3092.18	0.07036135		3622.18	0.0071259		4152.18	-0.02277387
442.39	0.00575032		972.39	0.00509193		1502.39	-0.00566716		2032.38	0.00568659		2562.38	-0.01620543		3092.38	0.07190317		3622.38	0.00827169		4152.38	-0.0237724
442.59	0.00564013		972.59	0.00622843		1502.59	-0.00627148		2032.58	0.00574629		2562.58	-0.01602463		3092.58	0.07220325		3622.58	0.00929324		4152.58	-0.02364473
442.79	0.0046607		972.79	0.00619376		1502.79	-0.0059241		2032.78	0.00606848		2562.78	-0.01615286		3092.78	0.07295361		3622.78	0.00831374		4152.78	-0.02369454
442.99	0.00430908		972.99	0.00696975		1502.99	-0.00576992		2032.98	0.00621074		2562.98	-0.01665646		3092.98	0.07232845		3622.98	0.00793567		4152.98	-0.02295353
443.19	0.0030659		973.19	0.00658024		1503.19	-0.00461915		2033.18	0.00648655		2563.18	-0.0162433		3093.18	0.07217784		3623.18	0.00788623		4153.18	-0.02223394
443.39	0.00283103		973.39	0.00663422		1503.39	-0.00428895		2033.38	0.00658346		2563.38	-0.0173952		3093.38	0.0721241		3623.38	0.00626669		4153.38	-0.02228534
443.59	0.00343795		973.59	0.0064211		1503.59	-0.0045531		2033.58	0.00716826		2563.58	-0.01789166		3093.58	0.07173408		3623.58	0.00582448		4153.58	-0.02196327
443.79	0.0039393		973.79	0.0061782		1503.79	-0.00374911		2033.78	0.00738673		2563.78	-0.01841297		3093.78	0.07151968		3623.78	0.00542195		4153.78	-0.02126035
443.99	0.00343167		973.99	0.00703696		1503.99	-0.00352623		2033.98	0.00712032		2563.98	-0.01892586		3093.98	0.07098267		3623.98	0.00410729		4153.98	-0.02099159
444.19	0.00295637		974.19	0.00680407		1504.19	-0.00260855		2034.18	0.00656703		2564.18	-0.01911454		3094.18	0.07016588		3624.18	0.00396468		4154.18	-0.02044832
444.39	0.00249497		974.39	0.00593407		1504.39	-0.00270183		2034.38	0.00680009		2564.38	-0.01818963		3094.38	0.07085918		3624.38	0.00398173		4154.38	-0.021263
444.59	0.00277987		974.59	0.00607723		1504.59	-0.00252451		2034.58	0.00624746		2564.58	-0.01836166		3094.58	0.07124985		3624.58	0.00372577		4154.58	-0.02247647
444.79	0.00220841		974.79	0.00663014		1504.79	-0.00303009		2034.78	0.00561006		2564.78	-0.01817609		3094.78	0.07156641		3624.78	0.00399911		4154.78	-0.02216427
444.99	0.00257091		974.99	0.00671094		1504.99	-0.00320273		2034.98	0.00485065		2564.98	-0.0175221		3094.98	0.07198811		3624.98	0.00308424		4154.98	-0.02230994
445.19	0.00258186		975.19	0.00711556		1505.19	-0.00272126		2035.18	0.00459206		2565.18	-0.01811956		3095.18	0.0716682		3625.18	0.00348573		4155.18	-0.02239257
445.39	0.00254147		975.39	0.00703781		1505.39	-0.00180926		2035.38	0.00437948		2565.38	-0.01805739		3095.38	0.07134794		3625.38	0.00430102		4155.38	-0.02194418
445.59	0.00123538		975.59	0.00661918		1505.59	-0.00275923		2035.58	0.00420882		2565.58	-0.0186002		3095.58	0.07096804		3625.58	0.00525042		4155.58	-0.02114838
445.79	0.00111906		975.79	0.00611503		1505.79	-0.00306741		2035.78	0.00405437		2565.78	-0.01844716		3095.78	0.07149651		3625.78	0.00661266		4155.78	-0.02100706
445.99	0.0013396		975.99	0.00595129		1505.99	-0.00391782		2035.98	0.00385963		2565.98	-0.01754093		3095.98	0.07155147		3625.98	0.00728351		4155.98	-0.02156084
446.19	0.0013822		976.19	0.00492808		1506.19	-0.00378111		2036.18	0.00381721		2566.18	-0.01689807		3096.18	0.07198991		3626.18	0.00869619		4156.18	-0.02230216
446.39	0.00102106		976.39	0.00498498		1506.39	-0.00346981		2036.38	0.00386874		2566.38	-0.01632089		3096.38	0.07160779		3626.38	0.00843676		4156.38	-0.02367887
446.59	0.00085696		976.59	0.00536223		1506.59	-0.00372194		2036.58	0.00376002		2566.58	-0.01587698		3096.58	0.07091194		3626.58	0.00860947		4156.58	-0.023443
446.79	0.00123169		976.79	0.0049329		1506.79	-0.00316231		2036.78	0.00410875		2566.78	-0.01602739		3096.78	0.07063151		3626.78	0.00766915		4156.78	-0.02394123
446.99	0.00211806		976.99	0.00560619		1506.99	-0.00262662		2036.98	0.00343555		2566.98	-0.01603688		3096.98	0.06944695		3626.98	0.00733903		4156.98	-0.0232742
447.19	0.00252821		977.19	0.00447519		1507.19	-0.00179085		2037.18	0.00274088		2567.18	-0.01581927		3097.18	0.06920033		3627.18	0.00714169		4157.18	-0.02307519
447.39	0.00332796		977.39	0.00387885		1507.39	-0.00235427		2037.38	0.00184929		2567.38	-0.01688428		3097.38	0.06901513		3627.38	0.00653332		4157.38	-0.02257446
447.59	0.0042059		977.59	0.00309945		1507.59	-0.00264548		2037.58	0.00165557		2567.58	-0.01713263		3097.58	0.06921046		3627.58	0.00615284		4157.58	-0.02149619
447.79	0.00446689		977.79	0.003481		1507.79	-0.00261212		2037.78	0.0014071		2567.78	-0.01769883		3097.78	0.06847655		3627.78	0.00626446		4157.78	-0.02064726
447.99	0.00413905		977.99	0.00401072		1507.99	-0.00258257		2037.98	0.00041948		2567.98	-0.01774122		3097.98	0.06823924		3627.98	0.00540551		4157.98	-0.02064425
448.19	0.00367493		978.19	0.00290259		1508.19	-0.00335353		2038.18	0.0004655		2568.18	-0.01772557		3098.18	0.06750956		3628.18	0.00566211		4158.18	-0.02119273
448.39	0.00362316		978.39	0.00204199		1508.39	-0.00434938		2038.38	0.00057157		2568.38	-0.01728814		3098.38	0.06834096		3628.38	0.00579326		4158.38	-0.02230641
448.59	0.00297329		978.59	0.00297313		1508.59	-0.00429782		2038.58	0.00050261		2568.58	-0.01776644		3098.58	0.06906115		3628.58	0.0058774		4158.58	-0.022311
448.79	0.00197962		978.79	0.0039609		1508.79	-0.00388313		2038.78	0.00131818		2568.78	-0.01835995		3098.78	0.0690346		3628.78	0.00536363		4158.78	-0.02148204
448.99	0.00123527		978.99	0.00429479		1508.99	-0.00363499		2038.98	0.00303495		2568.98	-0.01857841		3098.98	0.06920938		3628.98	0.00575506		4158.98	-0.02114635
449.19	0.00073428		979.19	0.00482236		1509.19	-0.00388071		2039.18	0.00369855		2569.18	-0.01889183		3099.18	0.06938054		3629.18	0.00620339		4159.18	-0.02061956
449.39	-0.00017377		979.39	0.00446463		1509.39	-0.00432621		2039.38	0.00405249		2569.38	-0.0186863		3099.38	0.06959415		3629.38	0.00681694		4159.38	-0.0206812
449.59	-0.00055133		979.59	0.00446238		1509.59	-0.00520007		2039.58	0.00459327		2569.58	-0.01925077		3099.58	0.07044399		3629.58	0.00754232		4159.58	-0.02091855
449.79	-0.00101241		979.79	0.00431018		1509.79	-0.0051145		2039.78	0.00617234		2569.78	-0.01886084		3099.78	0.07199407		3629.78	0.00824184		4159.78	-0.02210344
449.99	-0.00080823		979.99	0.00431295		1509.99	-0.00532209		2039.98	0.00643426		2569.98	-0.01825789		3099.98	0.07220593		3629.98	0.00752672		4159.98	-0.02316957
450.19	-0.00101683		980.19	0.00471371		1510.19	-0.00523518		2040.18	0.00654076		2570.18	-0.01802259		3100.18	0.07238722		3630.18	0.00707532		4160.18	-0.02378293
450.39	0.00020055		980.39	0.00515126		1510.39	-0.00484043		2040.38	0.00722131		2570.38	-0.01809883		3100.38	0.0720417		3630.38	0.00623591		4160.38	-0.02459516
450.59	0.00084879		980.59	0.00604622		1510.59	-0.00501244		2040.58	0.00715692		2570.58	-0.01756103		3100.58	0.07256869		3630.58	0.00672745		4160.58	-0.02445482
450.79	0.00177237		980.79	0.00675084		1510.79	-0.00533311		2040.78	0.00739242		2570.78	-0.01819414		3100.78	0.0724097		3630.78	0.00587211		4160.78	-0.02417989
450.99	0.00246032		980.99	0.00631026		1510.99	-0.00560686		2040.98	0.00638584		2570.98	-0.01818019		3100.98	0.07212243		3630.98	0.00555937		4160.98	-0.02397984
451.19	0.00248207		981.19	0.00632423		1511.19	-0.00558367		2041.18	0.00569936		2571.18	-0.01837216		3101.18	0.07222163		3631.18	0.00549519		4161.18	-0.0238088
451.39	0.00375787		981.39	0.00683612		1511.39	-0.00601106		2041.38	0.00505933		2571.38	-0.01911164		3101.38	0.07227589		3631.38	0.00574435		4161.38	-0.02366529
451.59	0.00434211		981.59	0.00682786		1511.59	-0.00657637		2041.58	0.00477513		2571.58	-0.0186506		3101.58	0.07198303		3631.58	0.00561923		4161.58	-0.02346484
451.79	0.00440683		981.79	0.00729287		1511.79	-0.00703465		2041.78	0.00438179		2571.78	-0.01804033		3101.78	0.07022591		3631.78	0.00627038		4161.78	-0.02344912
451.99	0.00392799		981.99	0.00687993		1511.99	-0.00664812		2041.98	0.00319438		2571.98	-0.01725755		3101.98	0.07009784		3631.98	0.00611065		4161.98	-0.02430883
452.19	0.00306413		982.19	0.0066563		1512.19	-0.00714318		2042.18	0.00327079		2572.18	-0.01654025		3102.18	0.06936763		3632.18	0.00543402		4162.18	-0.02442541
452.39	0.00211656		982.39	0.00616668		1512.39	-0.00663164		2042.38	0.00326605		2572.38	-0.01483802		3102.38	0.06968903		3632.38	0.00568572		4162.38	-0.02381862
452.59	0.00140327		982.59	0.00711889		1512.59	-0.00573812		2042.58	0.00317933		2572.58	-0.01388279		3102.58	0.0700388		3632.58	0.00589434		4162.58	-0.02283332
452.79	0.00149036		982.79	0.00718443		1512.79	-0.00519297		2042.78	0.00339663		2572.78	-0.01316687		3102.78	0.06960028		3632.78	0.0052213		4162.78	-0.02270768
452.99	0.00138902		982.99	0.00679057		1512.99	-0.0055284		2042.98	0.00310493		2572.98	-0.01295897		3102.98	0.06967955		3632.98	0.00564115		4162.98	-0.02204273
453.19	0.00178794		983.19	0.0067745		1513.19	-0.00495092		2043.18	0.00285777		2573.18	-0.01283474		3103.18	0.07006605		3633.18	0.00595711		4163.18	-0.02162377
453.39	0.00167204		983.39	0.0064124		1513.39	-0.00462906		2043.38	0.00250675		2573.38	-0.01326699		3103.38	0.06975874		3633.38	0.006841		4163.38	-0.02138331
453.59	0.00222454		983.59	0.00613552		1513.59	-0.00429636		2043.58	0.00267977		2573.58	-0.01457517		3103.58	0.07043254		3633.58	0.00722383		4163.58	-0.0212685
453.79	0.00213528		983.79	0.00553924		1513.79	-0.00347562		2043.78	0.00332668		2573.78	-0.01378569		3103.78	0.0707237		3633.78	0.00719533		4163.78	-0.02220366
453.99	0.00244278		983.99	0.00566916		1513.99	-0.00371629		2043.98	0.00265061		2573.98	-0.01434888		3103.98	0.06929852		3633.98	0.00714715		4163.98	-0.02254355
454.19	0.00222697		984.19	0.00603324		1514.19	-0.00414776		2044.18	0.00202888		2574.18	-0.01499933		3104.18	0.06964711		3634.18	0.0071181		4164.18	-0.02237041
454.39	0.00268745		984.39	0.0061508		1514.39	-0.004125		2044.38	0.00289273		2574.38	-0.01563329		3104.38	0.07038593		3634.38	0.00763635		4164.38	-0.02313265
454.59	0.00314834		984.59	0.00682143		1514.59	-0.00533365		2044.58	0.00183405		2574.58	-0.01675546		3104.58	0.07046414		3634.58	0.00789428		4164.58	-0.02197857
454.79	0.00251303		984.79	0.00645571		1514.79	-0.00568817		2044.78	0.00256923		2574.78	-0.01763882		3104.78	0.07010177		3634.78	0.00782838		4164.78	-0.02190232
454.99	0.00266928		984.99	0.00618558		1514.99	-0.0058158		2044.98	0.0023698		2574.98	-0.01724884		3104.98	0.07042377		3634.98	0.00784644		4164.98	-0.02229674
455.19	0.00260159		985.19	0.00661378		1515.19	-0.00547527		2045.18	0.00196355		2575.18	-0.01770668		3105.18	0.07011048		3635.18	0.00818258		4165.18	-0.02182404
455.39	0.00321926		985.39	0.0061109		1515.39	-0.00654293		2045.38	0.00197861		2575.38	-0.01780542		3105.38	0.06945488		3635.38	0.00839998		4165.38	-0.02205234
455.59	0.00227219		985.59	0.00518458		1515.59	-0.00585559		2045.58	0.00107333		2575.58	-0.01780611		3105.58	0.06912386		3635.58	0.00840394		4165.58	-0.0224404
455.79	0.00259073		985.79	0.00543111		1515.79	-0.00551367		2045.78	0.00098166		2575.78	-0.01775912		3105.78	0.06908873		3635.78	0.00851633		4165.78	-0.02229911
455.99	0.00189224		985.99	0.00483987		1515.99	-0.00509228		2045.98	0.00032004		2575.98	-0.01820594		3105.98	0.06909967		3635.98	0.00756736		4165.98	-0.02258686
456.19	0.00170844		986.19	0.00423149		1516.19	-0.00610636		2046.18	0.0009975		2576.18	-0.01780463		3106.18	0.06850959		3636.18	0.00633861		4166.18	-0.02211926
456.39	0.00218918		986.39	0.00399105		1516.39	-0.00626459		2046.38	0.00049753		2576.38	-0.01766431		3106.38	0.06849725		3636.38	0.00608657		4166.38	-0.02236756
456.59	0.0028206		986.59	0.00432472		1516.59	-0.00658331		2046.58	0.00072677		2576.58	-0.01780263		3106.58	0.06781331		3636.58	0.00601852		4166.58	-0.0224312
456.79	0.00322004		986.79	0.0042135		1516.79	-0.00691791		2046.78	0.00154901		2576.78	-0.01738817		3106.78	0.06767673		3636.78	0.00535119		4166.78	-0.02237433
456.99	0.00359654		986.99	0.00426469		1516.99	-0.00762489		2046.98	0.0019561		2576.98	-0.01768751		3106.98	0.06701421		3636.98	0.0059152		4166.98	-0.02180664
457.19	0.00383427		987.19	0.00445028		1517.19	-0.00811339		2047.18	0.00352556		2577.18	-0.01793411		3107.18	0.06701445		3637.18	0.00545468		4167.18	-0.02214549
457.39	0.00361956		987.39	0.00435157		1517.39	-0.00774365		2047.38	0.00426622		2577.38	-0.01835797		3107.38	0.06608755		3637.38	0.00522954		4167.38	-0.02239949
457.59	0.00412277		987.59	0.00378614		1517.59	-0.00757011		2047.58	0.00520521		2577.58	-0.01914707		3107.58	0.06685798		3637.58	0.00506583		4167.58	-0.02306678
457.79	0.00416237		987.79	0.00370043		1517.79	-0.00763366		2047.78	0.00637639		2577.78	-0.01929684		3107.78	0.06778091		3637.78	0.00480774		4167.78	-0.02515581
457.99	0.00281992		987.99	0.00379485		1517.99	-0.00797709		2047.98	0.00630034		2577.98	-0.02019067		3107.98	0.06856985		3637.98	0.00499157		4167.98	-0.02533435
458.19	0.00282378		988.19	0.00441793		1518.19	-0.00859791		2048.18	0.00605462		2578.18	-0.02035194		3108.18	0.07035447		3638.18	0.0052595		4168.18	-0.02578848
458.39	0.00327608		988.39	0.00504653		1518.39	-0.00855213		2048.38	0.00681012		2578.38	-0.02001551		3108.38	0.07097956		3638.38	0.00474751		4168.38	-0.02591551
458.59	0.00365617		988.59	0.00488487		1518.59	-0.00885121		2048.58	0.006299		2578.58	-0.01937828		3108.58	0.07120017		3638.58	0.00428811		4168.58	-0.02518068
458.79	0.00269892		988.79	0.00510193		1518.79	-0.00815591		2048.78	0.00683046		2578.78	-0.01812047		3108.78	0.07195969		3638.78	0.00429204		4168.78	-0.02585195
458.99	0.00296176		988.99	0.00462501		1518.99	-0.00789974		2048.98	0.00596494		2578.98	-0.01818893		3108.98	0.07217545		3638.98	0.00519042		4168.98	-0.02538433
459.19	0.00219123		989.19	0.00474188		1519.19	-0.00783744		2049.18	0.0047614		2579.18	-0.01827986		3109.18	0.07175413		3639.18	0.00535684		4169.18	-0.02458495
459.39	0.00138839		989.39	0.00452301		1519.39	-0.00788681		2049.38	0.00395573		2579.38	-0.01793996		3109.38	0.07154803		3639.38	0.00620202		4169.38	-0.02423668
459.59	0.00067933		989.59	0.0051968		1519.59	-0.00718624		2049.58	0.00230618		2579.58	-0.01733285		3109.58	0.07139269		3639.58	0.00605993		4169.58	-0.02353984
459.79	0.00160394		989.79	0.00549252		1519.79	-0.00739551		2049.78	0.00246706		2579.78	-0.01717787		3109.78	0.07108517		3639.78	0.00556041		4169.78	-0.02213561
459.99	0.00097812		989.99	0.00561241		1519.99	-0.00701462		2049.98	0.00242189		2579.98	-0.01697344		3109.98	0.07007498		3639.98	0.00398344		4169.98	-0.02207932
460.19	0.00116942		990.19	0.00607876		1520.19	-0.0070994		2050.18	0.0020255		2580.18	-0.01622339		3110.18	0.07013657		3640.18	0.00402217		4170.18	-0.02189788
460.39	0.00106327		990.39	0.00700643		1520.39	-0.00661092		2050.38	0.00144345		2580.38	-0.01655764		3110.38	0.07002719		3640.38	0.00430042		4170.38	-0.02110601
460.59	0.00072778		990.59	0.00698235		1520.59	-0.00659528		2050.58	0.00206193		2580.58	-0.01622623		3110.58	0.06902888		3640.58	0.00408681		4170.58	-0.02003213
460.79	0.00092669		990.79	0.0067653		1520.79	-0.00662959		2050.78	0.00196838		2580.78	-0.01562114		3110.78	0.06944875		3640.78	0.00365066		4170.78	-0.01912717
460.99	0.00069927		990.99	0.00701644		1520.99	-0.00659555		2050.98	0.00157146		2580.98	-0.01651588		3110.98	0.06869582		3640.98	0.00338188		4170.98	-0.0190781
461.19	0.00141154		991.19	0.00648438		1521.19	-0.0059103		2051.18	0.00204153		2581.18	-0.01703625		3111.18	0.06847107		3641.18	0.00212001		4171.18	-0.01874679
461.39	0.00130357		991.39	0.00613051		1521.39	-0.00522162		2051.38	0.00146574		2581.38	-0.01729757		3111.38	0.06871425		3641.38	0.00259619		4171.38	-0.01886101
461.59	0.00144535		991.59	0.00637617		1521.59	-0.00526904		2051.58	0.00194882		2581.58	-0.0179011		3111.58	0.070006		3641.58	0.0022975		4171.58	-0.01927767
461.79	0.00057621		991.79	0.00605324		1521.79	-0.00485289		2051.78	0.00185764		2581.78	-0.01826605		3111.78	0.06997685		3641.78	0.00099836		4171.78	-0.01964878
461.99	0.00055368		991.99	0.00619086		1521.99	-0.00486901		2051.98	0.0011109		2581.98	-0.01691151		3111.98	0.07063543		3641.98	0.00213319		4171.98	-0.01936189
462.19	0.00217648		992.19	0.00585523		1522.19	-0.00526297		2052.18	0.00077215		2582.18	-0.01708893		3112.18	0.07107995		3642.18	0.00209634		4172.18	-0.01996703
462.39	0.00310107		992.39	0.00619481		1522.39	-0.00464041		2052.38	0.00055189		2582.38	-0.01613118		3112.38	0.07132174		3642.38	0.00207603		4172.38	-0.0204417
462.59	0.00387886		992.59	0.00580291		1522.59	-0.00475559		2052.58	-0.00059191		2582.58	-0.01573179		3112.58	0.07075541		3642.58	0.00305014		4172.58	-0.02095295
462.79	0.00449122		992.79	0.00589237		1522.79	-0.0050191		2052.78	-0.00145717		2582.78	-0.01559078		3112.78	0.07055222		3642.78	0.00409759		4172.78	-0.02187729
462.99	0.00554824		992.99	0.0057389		1522.99	-0.00577413		2052.98	-0.0024245		2582.98	-0.0165555		3112.98	0.06969282		3642.98	0.00435438		4172.98	-0.02208633
463.19	0.00489268		993.19	0.00567676		1523.19	-0.00685667		2053.18	-0.00254761		2583.18	-0.01600944		3113.18	0.06933312		3643.18	0.00410114		4173.18	-0.02262339
463.39	0.00426095		993.39	0.00591163		1523.39	-0.00682726		2053.38	-0.00254336		2583.38	-0.01624768		3113.38	0.06961596		3643.38	0.00435549		4173.38	-0.02271868
463.59	0.00390561		993.59	0.00707957		1523.59	-0.00707447		2053.58	-0.00222354		2583.58	-0.01660149		3113.58	0.06929589		3643.58	0.00422738		4173.58	-0.02348428
463.79	0.00382229		993.79	0.00718781		1523.79	-0.00707313		2053.78	-0.00096889		2583.78	-0.01729573		3113.78	0.06959265		3643.78	0.00467336		4173.78	-0.02357434
463.99	0.00317532		993.99	0.00756675		1523.99	-0.00743132		2053.98	-0.00021029		2583.98	-0.01755393		3113.98	0.06983353		3643.98	0.00468217		4173.98	-0.02372857
464.19	0.00268813		994.19	0.00829744		1524.19	-0.00702624		2054.18	0.00009054		2584.18	-0.01785647		3114.18	0.07090482		3644.18	0.00561299		4174.18	-0.02431339
464.39	0.00186846		994.39	0.0088723		1524.39	-0.00761364		2054.38	0.00161724		2584.38	-0.0184474		3114.38	0.07035305		3644.38	0.0051898		4174.38	-0.02438953
464.59	0.00192588		994.59	0.00833952		1524.59	-0.0079229		2054.58	0.00192399		2584.58	-0.01886212		3114.58	0.06968321		3644.58	0.00479015		4174.58	-0.02511625
464.79	0.00144981		994.79	0.00843269		1524.79	-0.00826982		2054.78	0.00182971		2584.78	-0.0191623		3114.78	0.069206		3644.78	0.00508037		4174.78	-0.02516907
464.99	0.0007823		994.99	0.00886548		1524.99	-0.00855996		2054.98	0.00220019		2584.98	-0.02001121		3114.98	0.06794791		3644.98	0.00489549		4174.98	-0.02494204
465.19	0.00096718		995.19	0.00883357		1525.19	-0.00884395		2055.18	0.00296879		2585.18	-0.02041917		3115.18	0.06777887		3645.18	0.00543325		4175.18	-0.02384049
465.39	0.00044569		995.39	0.008594		1525.39	-0.00949566		2055.38	0.00300336		2585.38	-0.02018569		3115.38	0.06727978		3645.38	0.00624434		4175.38	-0.02414851
465.59	-0.00019957		995.59	0.0084668		1525.59	-0.00858202		2055.58	0.00401857		2585.58	-0.01996808		3115.58	0.0669261		3645.58	0.00620972		4175.58	-0.02421417
465.79	-0.00037932		995.79	0.00730526		1525.79	-0.00810057		2055.78	0.00384004		2585.78	-0.01981009		3115.78	0.06600395		3645.78	0.00667594		4175.78	-0.0237247
465.99	-0.00066189		995.99	0.00636682		1525.99	-0.0083509		2055.98	0.00372322		2585.98	-0.01939986		3115.98	0.06620451		3645.98	0.00805648		4175.98	-0.02391786
466.19	-0.00045686		996.19	0.00536808		1526.19	-0.00783525		2056.18	0.00294876		2586.18	-0.01991662		3116.18	0.06605319		3646.18	0.00731383		4176.18	-0.02421681
466.39	-0.00072317		996.39	0.00538909		1526.39	-0.00736151		2056.38	0.00225089		2586.38	-0.01929958		3116.38	0.06454841		3646.38	0.00775763		4176.38	-0.02437846
466.59	-0.00095446		996.59	0.00475		1526.59	-0.00824014		2056.58	0.00166243		2586.58	-0.01873855		3116.58	0.06371941		3646.58	0.00828725		4176.58	-0.02434223
466.79	-0.00051883		996.79	0.0035755		1526.79	-0.0081198		2056.78	0.00111175		2586.78	-0.01941198		3116.78	0.06316055		3646.78	0.00834352		4176.78	-0.0242874
466.99	-0.00110602		996.99	0.00231339		1526.99	-0.00780548		2056.98	0.00011374		2586.98	-0.01988439		3116.98	0.06316016		3646.98	0.0075687		4176.98	-0.02380182
467.19	-0.00211767		997.19	0.00173521		1527.19	-0.00714089		2057.18	-0.00021798		2587.18	-0.0200292		3117.18	0.06348968		3647.18	0.00755438		4177.18	-0.02337752
467.39	-0.00201387		997.39	0.00211084		1527.39	-0.00555396		2057.38	0.00037328		2587.38	-0.02080884		3117.38	0.06356283		3647.38	0.00736908		4177.38	-0.02208991
467.59	-0.00173206		997.59	0.00178833		1527.59	-0.00506068		2057.58	0.00083101		2587.58	-0.02064993		3117.58	0.06336708		3647.58	0.00762029		4177.58	-0.0219025
467.79	-0.00077139		997.79	0.00127344		1527.79	-0.00491118		2057.78	0.0020595		2587.78	-0.02057754		3117.78	0.06459798		3647.78	0.00707577		4177.78	-0.02179231
467.99	0.00022395		997.99	0.00140087		1527.99	-0.00394937		2057.98	0.00269062		2587.98	-0.02001212		3117.98	0.06541187		3647.98	0.00624299		4177.98	-0.0216713
468.19	0.00064126		998.19	0.00199505		1528.19	-0.00309586		2058.18	0.0032244		2588.18	-0.01993736		3118.18	0.06653094		3648.18	0.00542672		4178.18	-0.02190836
468.39	0.0010413		998.39	0.00238219		1528.39	-0.00333902		2058.38	0.00385754		2588.38	-0.01949227		3118.38	0.06625803		3648.38	0.00440722		4178.38	-0.02190769
468.59	0.00170597		998.59	0.00296117		1528.59	-0.0026451		2058.58	0.00352175		2588.58	-0.01949151		3118.58	0.06619035		3648.58	0.00371388		4178.58	-0.02132889
468.79	0.00227815		998.79	0.00419301		1528.79	-0.00313946		2058.78	0.00395221		2588.78	-0.0195536		3118.78	0.06649219		3648.78	0.00305875		4178.78	-0.02125519
468.99	0.00256802		998.99	0.00548409		1528.99	-0.00289998		2058.98	0.00510815		2588.98	-0.01908349		3118.98	0.06708357		3648.98	0.00186877		4178.98	-0.02063641
469.19	0.00309328		999.19	0.00608348		1529.19	-0.00271922		2059.18	0.00568309		2589.18	-0.01846654		3119.18	0.06786152		3649.18	0.00175049		4179.18	-0.02117001
469.39	0.0039853		999.39	0.00610144		1529.39	-0.00357985		2059.38	0.00478849		2589.38	-0.01852219		3119.38	0.06823186		3649.38	0.00072508		4179.38	-0.02227296
469.59	0.00406644		999.59	0.00705042		1529.59	-0.00419188		2059.58	0.00525445		2589.58	-0.01892689		3119.58	0.06912142		3649.58	0.00027502		4179.58	-0.02222978
469.79	0.00439859		999.79	0.00749673		1529.79	-0.00511332		2059.78	0.00453583		2589.78	-0.01868748		3119.78	0.06904793		3649.78	-0.00019374		4179.78	-0.02150284
469.99	0.00351802		999.99	0.00773516		1529.99	-0.0060623		2059.98	0.0039823		2589.98	-0.01886946		3119.98	0.06968499		3649.98	-0.00063285		4179.98	-0.02187938
470.19	0.00286923		1000.19	0.00914982		1530.19	-0.00693741		2060.18	0.00365498		2590.18	-0.01901014		3120.18	0.07061975		3650.18	-0.00076493		4180.18	-0.02245516
470.39	0.00199731		1000.39	0.00942423		1530.39	-0.00805189		2060.38	0.00391021		2590.38	-0.01799546		3120.38	0.0702387		3650.38	-0.00001878		4180.38	-0.02276444
470.59	0.0010542		1000.59	0.00817935		1530.59	-0.00847952		2060.58	0.00311269		2590.58	-0.01763736		3120.58	0.07038813		3650.58	0.00087116		4180.58	-0.02249303
470.79	0.00065908		1000.79	0.00735592		1530.79	-0.00779019		2060.78	0.00248632		2590.78	-0.01819705		3120.78	0.06913272		3650.78	0.00101724		4180.78	-0.02247263
470.99	-0.00052857		1000.99	0.00618896		1530.99	-0.00761766		2060.98	0.00190555		2590.98	-0.01822084		3120.98	0.06898297		3650.98	0.00073056		4180.98	-0.02330262
471.19	-0.0007039		1001.19	0.0064429		1531.19	-0.00848068		2061.18	0.00246643		2591.18	-0.01898156		3121.18	0.06793123		3651.18	0.00093847		4181.18	-0.02306866
471.39	-0.00117644		1001.39	0.00560387		1531.39	-0.00847814		2061.38	0.00326089		2591.38	-0.01928537		3121.38	0.06751944		3651.38	0.00084582		4181.38	-0.02355708
471.59	-0.00104602		1001.59	0.00442866		1531.59	-0.0081723		2061.58	0.00372124		2591.58	-0.01910664		3121.58	0.06775121		3651.58	0.00081814		4181.58	-0.02414334
471.79	-0.0004877		1001.79	0.00403076		1531.79	-0.00862946		2061.78	0.00471007		2591.78	-0.01929909		3121.78	0.06775657		3651.78	0.00076887		4181.78	-0.02511999
471.99	-0.00060241		1001.99	0.00349855		1531.99	-0.00764468		2061.98	0.00512079		2591.98	-0.01922693		3121.98	0.06681312		3651.98	0.00128162		4181.98	-0.024849
472.19	-0.00109436		1002.19	0.00337232		1532.19	-0.00843524		2062.18	0.00570005		2592.18	-0.01966317		3122.18	0.06633848		3652.18	0.00135485		4182.18	-0.02481877
472.39	-0.00164779		1002.39	0.00415381		1532.39	-0.00782931		2062.38	0.005574		2592.38	-0.01956086		3122.38	0.06556717		3652.38	0.0012716		4182.38	-0.0250434
472.59	-0.00125116		1002.59	0.00428574		1532.59	-0.00790314		2062.58	0.00615524		2592.58	-0.02062324		3122.58	0.06508284		3652.58	0.00185349		4182.58	-0.02539111
472.79	-0.00045058		1002.79	0.00449672		1532.79	-0.00779151		2062.78	0.00631302		2592.78	-0.02115361		3122.78	0.06531314		3652.78	0.00225963		4182.78	-0.02571714
472.99	0.00027366		1002.99	0.00494818		1532.99	-0.0074441		2062.98	0.00602909		2592.98	-0.02083503		3122.98	0.06548632		3652.98	0.00227839		4182.98	-0.02592782
473.19	0.00073879		1003.19	0.00450513		1533.19	-0.00780888		2063.18	0.00513577		2593.18	-0.02084042		3123.18	0.06647245		3653.18	0.00167346		4183.18	-0.02544684
473.39	0.00219807		1003.39	0.00449476		1533.39	-0.00835862		2063.38	0.00531148		2593.38	-0.02120482		3123.38	0.06724485		3653.38	0.00160135		4183.38	-0.0248589
473.59	0.00215735		1003.59	0.00489331		1533.59	-0.00835639		2063.58	0.00529899		2593.58	-0.01988699		3123.58	0.06726895		3653.58	0.00205389		4183.58	-0.02409943
473.79	0.00290156		1003.79	0.00449778		1533.79	-0.00871777		2063.78	0.00463491		2593.78	-0.01955203		3123.78	0.06714539		3653.78	0.00269694		4183.78	-0.0236469
473.99	0.00320039		1003.99	0.00429791		1533.99	-0.00818533		2063.98	0.00491691		2593.98	-0.01963548		3123.98	0.06832559		3653.98	0.00312284		4183.98	-0.02356436
474.19	0.00297488		1004.19	0.00460436		1534.19	-0.00908916		2064.18	0.00409555		2594.18	-0.01969213		3124.18	0.06913221		3654.18	0.00391777		4184.18	-0.02331645
474.39	0.00409656		1004.39	0.00329086		1534.39	-0.00842861		2064.38	0.00391968		2594.38	-0.0189989		3124.38	0.06863781		3654.38	0.00397247		4184.38	-0.02337573
474.59	0.00406068		1004.59	0.002423		1534.59	-0.00791682		2064.58	0.00315271		2594.58	-0.01955806		3124.58	0.06809228		3654.58	0.00465852		4184.58	-0.02291952
474.79	0.00320517		1004.79	0.00331618		1534.79	-0.00802384		2064.78	0.00340835		2594.78	-0.01964153		3124.78	0.06765326		3654.78	0.00427987		4184.78	-0.02245302
474.99	0.00309575		1004.99	0.00358554		1534.99	-0.00798178		2064.98	0.00286954		2594.98	-0.02004045		3124.98	0.06801444		3654.98	0.00356287		4184.98	-0.02291657
475.19	0.00283042		1005.19	0.00410909		1535.19	-0.00853864		2065.18	0.00248653		2595.18	-0.02079326		3125.18	0.06797913		3655.18	0.00315767		4185.18	-0.02285804
475.39	0.00200899		1005.39	0.00415249		1535.39	-0.00754355		2065.38	0.00212707		2595.38	-0.0209794		3125.38	0.06836312		3655.38	0.00241558		4185.38	-0.02363323
475.59	0.00103961		1005.59	0.00475957		1535.59	-0.0066485		2065.58	0.00250473		2595.58	-0.02096311		3125.58	0.06846486		3655.58	0.00249561		4185.58	-0.02320961
475.79	0.00011406		1005.79	0.00519415		1535.79	-0.00704309		2065.78	0.00319195		2595.78	-0.02051289		3125.78	0.06837798		3655.78	0.00248133		4185.78	-0.02369057
475.99	-0.00106024		1005.99	0.0063523		1535.99	-0.00653029		2065.98	0.00290784		2595.98	-0.02055879		3125.98	0.06762624		3655.98	0.00317544		4185.98	-0.02423452
476.19	-0.00132334		1006.19	0.00719861		1536.19	-0.00735901		2066.18	0.00219892		2596.18	-0.02169537		3126.18	0.06706875		3656.18	0.00385675		4186.18	-0.02491935
476.39	-0.00240191		1006.39	0.00800888		1536.39	-0.00734517		2066.38	0.00117038		2596.38	-0.02255008		3126.38	0.0669145		3656.38	0.00376989		4186.38	-0.02529465
476.59	-0.00187357		1006.59	0.00831128		1536.59	-0.00776697		2066.58	0.00093577		2596.58	-0.02379429		3126.58	0.06765439		3656.58	0.0041003		4186.58	-0.02475283
476.79	-0.00107457		1006.79	0.00952272		1536.79	-0.00748308		2066.78	-0.0004987		2596.78	-0.02402644		3126.78	0.06756582		3656.78	0.004096		4186.78	-0.02378058
476.99	-0.00086709		1006.99	0.00884974		1536.99	-0.00794133		2066.98	-0.00132905		2596.98	-0.02323727		3126.98	0.06774658		3656.98	0.00350622		4186.98	-0.02390311
477.19	-0.00076049		1007.19	0.00841593		1537.19	-0.00794613		2067.18	-0.00133185		2597.18	-0.02288665		3127.18	0.06770309		3657.18	0.00324315		4187.18	-0.02297819
477.39	0.00043028		1007.39	0.00761234		1537.39	-0.0079483		2067.38	-0.00067526		2597.38	-0.02277651		3127.38	0.06730784		3657.38	0.00305219		4187.38	-0.02356222
477.59	0.00031512		1007.59	0.00674795		1537.59	-0.00784081		2067.58	-0.00093568		2597.58	-0.02267763		3127.58	0.0663542		3657.58	0.00365365		4187.58	-0.02305634
477.79	0.001751		1007.79	0.00564244		1537.79	-0.0086464		2067.78	-0.00039968		2597.78	-0.02253646		3127.78	0.06573038		3657.78	0.00461674		4187.78	-0.02254743
477.99	0.00299997		1007.99	0.00484059		1537.99	-0.00854408		2067.98	-0.00075355		2597.98	-0.02221143		3127.98	0.06670153		3657.98	0.0042897		4187.98	-0.02264569
478.19	0.00351829		1008.19	0.00411		1538.19	-0.00941155		2068.18	-0.00096723		2598.18	-0.02284284		3128.18	0.0663923		3658.18	0.00457557		4188.18	-0.02281631
478.39	0.004382		1008.39	0.00292724		1538.39	-0.0087652		2068.38	-0.00064275		2598.38	-0.0223131		3128.38	0.0654809		3658.38	0.00468103		4188.38	-0.02333484
478.59	0.00414232		1008.59	0.00273352		1538.59	-0.00871969		2068.58	-0.00035316		2598.58	-0.02180879		3128.58	0.06404674		3658.58	0.00578		4188.58	-0.02281338
478.79	0.00371589		1008.79	0.00325688		1538.79	-0.00883988		2068.78	-0.00004623		2598.78	-0.02122145		3128.78	0.06410696		3658.78	0.00544506		4188.78	-0.02336489
478.99	0.00374735		1008.99	0.0032145		1538.99	-0.00794368		2068.98	0.00010485		2598.98	-0.02109934		3128.98	0.06414988		3658.98	0.0048199		4188.98	-0.02453942
479.19	0.00369934		1009.19	0.00300757		1539.19	-0.00796841		2069.18	0.00106922		2599.18	-0.0218766		3129.18	0.06416224		3659.18	0.00413668		4189.18	-0.02528635
479.39	0.00252743		1009.39	0.00401801		1539.39	-0.00749559		2069.38	0.00201846		2599.38	-0.02120174		3129.38	0.06392457		3659.38	0.00363276		4189.38	-0.02579337
479.59	0.00175077		1009.59	0.00435322		1539.59	-0.00697898		2069.58	0.00262333		2599.58	-0.01994257		3129.58	0.06376275		3659.58	0.00297893		4189.58	-0.02607012
479.79	0.00177997		1009.79	0.00459823		1539.79	-0.00742764		2069.78	0.00292992		2599.78	-0.01883717		3129.78	0.06394535		3659.78	0.00304852		4189.78	-0.02662633
479.99	0.00147349		1009.99	0.00529209		1539.99	-0.007342		2069.98	0.00256482		2599.98	-0.01927432		3129.98	0.06419046		3659.98	0.00301794		4189.98	-0.0272552
480.19	0.00140802		1010.19	0.00552195		1540.19	-0.00742854		2070.18	0.00272285		2600.18	-0.01941859		3130.18	0.06456406		3660.18	0.00352122		4190.18	-0.02779274
480.39	0.00100018		1010.39	0.00614208		1540.39	-0.0077782		2070.38	0.00200356		2600.38	-0.01929135		3130.38	0.06518149		3660.38	0.00232374		4190.38	-0.02777659
480.59	0.00125105		1010.59	0.0065471		1540.59	-0.00742523		2070.58	0.0017944		2600.58	-0.01967182		3130.58	0.06606363		3660.58	0.00222933		4190.58	-0.02735993
480.79	0.0016671		1010.79	0.00683915		1540.79	-0.00762747		2070.78	0.00135404		2600.78	-0.02013203		3130.78	0.06614649		3660.78	0.00132635		4190.78	-0.02726727
480.99	0.00160169		1010.99	0.00632669		1540.99	-0.00757428		2070.98	0.00134308		2600.98	-0.02021374		3130.98	0.06651861		3660.98	0.00127532		4190.98	-0.02777819
481.19	0.00135776		1011.19	0.00636792		1541.19	-0.00718924		2071.18	0.00076007		2601.18	-0.02059499		3131.18	0.06683564		3661.18	0.00100058		4191.18	-0.02733775
481.39	0.00131252		1011.39	0.0061982		1541.39	-0.00792856		2071.38	0.00151142		2601.38	-0.02006214		3131.38	0.06769524		3661.38	0.0010781		4191.38	-0.02655706
481.59	0.00140945		1011.59	0.00535722		1541.59	-0.00816808		2071.58	0.00151802		2601.58	-0.01926576		3131.58	0.06748849		3661.58	0.00209368		4191.58	-0.02555551
481.79	0.00265675		1011.79	0.00413974		1541.79	-0.0083779		2071.78	0.00137174		2601.78	-0.0192646		3131.78	0.06753568		3661.78	0.0025312		4191.78	-0.02471768
481.99	0.00302994		1011.99	0.0038242		1541.99	-0.0084914		2071.98	0.00000682		2601.98	-0.01978999		3131.98	0.06828112		3661.98	0.00242236		4191.98	-0.02470807
482.19	0.00233474		1012.19	0.00370239		1542.19	-0.00831199		2072.18	0.00026075		2602.18	-0.02043269		3132.18	0.06830436		3662.18	0.00246141		4192.18	-0.02552513
482.39	0.00191727		1012.39	0.0027328		1542.39	-0.00910589		2072.38	-0.00071061		2602.38	-0.02019801		3132.38	0.06712329		3662.38	0.00367046		4192.38	-0.02532523
482.59	0.00165372		1012.59	0.00275192		1542.59	-0.00811569		2072.58	-0.00044687		2602.58	-0.02074251		3132.58	0.06731078		3662.58	0.0038568		4192.58	-0.02494909
482.79	0.00095603		1012.79	0.00279029		1542.79	-0.00829801		2072.78	0.00094151		2602.78	-0.02056708		3132.78	0.06818989		3662.78	0.00408864		4192.78	-0.02466302
482.99	0.00123121		1012.99	0.00269776		1542.99	-0.00832433		2072.98	0.0013838		2602.98	-0.021033		3132.98	0.06864273		3662.98	0.00373938		4192.98	-0.02400087
483.19	0.00181292		1013.19	0.0026778		1543.19	-0.00892997		2073.18	0.00224696		2603.18	-0.02151652		3133.18	0.0686376		3663.18	0.00386205		4193.18	-0.02435396
483.39	0.00104965		1013.39	0.00286225		1543.39	-0.00891656		2073.38	0.00210411		2603.38	-0.02113743		3133.38	0.06849669		3663.38	0.00400354		4193.38	-0.02485558
483.59	0.00018845		1013.59	0.00297145		1543.59	-0.00808105		2073.58	0.00181225		2603.58	-0.02083139		3133.58	0.0691003		3663.58	0.00375958		4193.58	-0.0250691
483.79	-0.00030519		1013.79	0.00354708		1543.79	-0.00868242		2073.78	0.00204794		2603.78	-0.02095782		3133.78	0.07035217		3663.78	0.00449231		4193.78	-0.02468741
483.99	-0.00012157		1013.99	0.00503393		1543.99	-0.00847666		2073.98	0.00261414		2603.98	-0.0208846		3133.98	0.07089617		3663.98	0.00385862		4193.98	-0.02567451
484.19	-0.00036832		1014.19	0.00573773		1544.19	-0.00855534		2074.18	0.0027083		2604.18	-0.02104033		3134.18	0.07037888		3664.18	0.00447087		4194.18	-0.02682965
484.39	-0.00065912		1014.39	0.00526822		1544.39	-0.00838628		2074.38	0.00256658		2604.38	-0.02226609		3134.38	0.06989055		3664.38	0.0032557		4194.38	-0.02738668
484.59	-0.00087716		1014.59	0.00537363		1544.59	-0.00819022		2074.58	0.00294419		2604.58	-0.02208358		3134.58	0.06916507		3664.58	0.00284824		4194.58	-0.02700837
484.79	0.00046094		1014.79	0.00559645		1544.79	-0.00924239		2074.78	0.00223827		2604.78	-0.0217153		3134.78	0.06873568		3664.78	0.00197917		4194.78	-0.02673041
484.99	-0.00010364		1014.99	0.00618193		1544.99	-0.00922082		2074.98	0.00161588		2604.98	-0.02101415		3134.98	0.06809049		3664.98	0.00247363		4194.98	-0.02672018
485.19	-0.00045456		1015.19	0.00631429		1545.19	-0.00938329		2075.18	0.00121643		2605.18	-0.01971186		3135.18	0.06859918		3665.18	0.00202649		4195.18	-0.02636434
485.39	-0.00032254		1015.39	0.00712189		1545.39	-0.01007107		2075.38	0.00135628		2605.38	-0.01866768		3135.38	0.06798577		3665.38	0.00296565		4195.38	-0.0259074
485.59	0.00024809		1015.59	0.00640642		1545.59	-0.00996048		2075.58	0.00030941		2605.58	-0.01854819		3135.58	0.06684988		3665.58	0.00294626		4195.58	-0.02553327
485.79	0.00102208		1015.79	0.00553034		1545.79	-0.00946332		2075.78	-0.00039962		2605.78	-0.01853121		3135.78	0.06618653		3665.78	0.00241305		4195.78	-0.02511527
485.99	0.00072277		1015.99	0.00636986		1545.99	-0.01025576		2075.98	-0.00058734		2605.98	-0.01847031		3135.98	0.06486475		3665.98	0.00150789		4195.98	-0.02503702
486.19	0.00050031		1016.19	0.0060374		1546.19	-0.00976254		2076.18	-0.00010747		2606.18	-0.01890883		3136.18	0.06474419		3666.18	0.00033745		4196.18	-0.02543384
486.39	0.00034464		1016.39	0.0053855		1546.39	-0.00999297		2076.38	-0.00020422		2606.38	-0.01928183		3136.38	0.06374073		3666.38	0.00074247		4196.38	-0.02418451
486.59	-0.00030013		1016.59	0.00581283		1546.59	-0.00899069		2076.58	0.0013277		2606.58	-0.01910638		3136.58	0.06431396		3666.58	0.00115786		4196.58	-0.02435278
486.79	-0.00068836		1016.79	0.00494328		1546.79	-0.00983028		2076.78	0.00220795		2606.78	-0.01892854		3136.78	0.06406537		3666.78	0.00195621		4196.78	-0.02377099
486.99	-0.00075668		1016.99	0.0041948		1546.99	-0.0098476		2076.98	0.00121585		2606.98	-0.01943017		3136.98	0.06410187		3666.98	0.00198581		4196.98	-0.02423685
487.19	-0.00154051		1017.19	0.00352631		1547.19	-0.00966458		2077.18	0.00141992		2607.18	-0.02004662		3137.18	0.064032		3667.18	0.00205841		4197.18	-0.02519319
487.39	-0.00194507		1017.39	0.00426065		1547.39	-0.00957353		2077.38	0.00161154		2607.38	-0.02139276		3137.38	0.06403285		3667.38	0.00222204		4197.38	-0.02452404
487.59	-0.00179417		1017.59	0.00414738		1547.59	-0.00837166		2077.58	0.00235986		2607.58	-0.02206074		3137.58	0.0639135		3667.58	0.00222905		4197.58	-0.02363463
487.79	-0.00214099		1017.79	0.00421382		1547.79	-0.00885843		2077.78	0.00287589		2607.78	-0.02247816		3137.78	0.06462149		3667.78	0.00214808		4197.78	-0.02279739
487.99	-0.00183695		1017.99	0.00487716		1547.99	-0.00865865		2077.98	0.00391377		2607.98	-0.02300191		3137.98	0.06454456		3667.98	0.00188105		4197.98	-0.02369291
488.19	-0.00183054		1018.19	0.00435644		1548.19	-0.00890947		2078.18	0.00448436		2608.18	-0.02388528		3138.18	0.06476736		3668.18	0.00252822		4198.18	-0.0243088
488.39	-0.0018302		1018.39	0.00390265		1548.39	-0.00871548		2078.38	0.00487579		2608.38	-0.02384321		3138.38	0.06486402		3668.38	0.00246972		4198.38	-0.02451971
488.59	-0.00116512		1018.59	0.00407491		1548.59	-0.00925696		2078.58	0.005003		2608.58	-0.02374868		3138.58	0.06490859		3668.58	0.00236635		4198.58	-0.02415479
488.79	-0.0007179		1018.79	0.00468993		1548.79	-0.00998634		2078.78	0.00459654		2608.78	-0.02400506		3138.78	0.06563565		3668.78	0.00249664		4198.78	-0.02435865
488.99	-0.00226718		1018.99	0.00529238		1548.99	-0.00892551		2078.98	0.00484877		2608.98	-0.02531814		3138.98	0.06588577		3668.98	0.00288575		4198.98	-0.02440243
489.19	-0.00204711		1019.19	0.00593329		1549.19	-0.0091056		2079.18	0.00464338		2609.18	-0.02479946		3139.18	0.06625611		3669.18	0.00224798		4199.18	-0.02456774
489.39	-0.00253527		1019.39	0.00634976		1549.39	-0.00884841		2079.38	0.0041045		2609.38	-0.02538122		3139.38	0.06602075		3669.38	0.00219092		4199.38	-0.02390798
489.59	-0.00158091		1019.59	0.00565999		1549.59	-0.00881422		2079.58	0.00389232		2609.58	-0.02499863		3139.58	0.06615617		3669.58	0.00190701		4199.58	-0.02383882
489.79	-0.00091599		1019.79	0.00488973		1549.79	-0.00876649		2079.78	0.00355569		2609.78	-0.02493628		3139.78	0.06598749		3669.78	0.0011766		4199.78	-0.02394987
489.99	-0.00109772		1019.99	0.00497445		1549.99	-0.00983664		2079.98	0.00405113		2609.98	-0.02527632		3139.98	0.06594344		3669.98	0.00083076		4199.98	-0.02436635
490.19	-0.00088573		1020.19	0.00483929		1550.19	-0.00978074		2080.18	0.00346501		2610.18	-0.0256002		3140.18	0.06696485		3670.18	0.00108077		4200.18	-0.02504518
490.39	-0.00146197		1020.39	0.00501128		1550.39	-0.01026933		2080.38	0.0026631		2610.38	-0.0253043		3140.38	0.06703128		3670.38	0.00227962		4200.38	-0.02535465
490.59	-0.00132083		1020.59	0.00482986		1550.59	-0.01089336		2080.58	0.00178111		2610.58	-0.02449907		3140.58	0.06715519		3670.58	0.00330158		4200.58	-0.02614748
490.79	-0.00072016		1020.79	0.00363488		1550.79	-0.01192588		2080.78	0.0008749		2610.78	-0.02460258		3140.78	0.0676059		3670.78	0.00333367		4200.78	-0.02647679
490.99	-0.0004687		1020.99	0.00345241		1550.99	-0.01163711		2080.98	0.00040519		2610.98	-0.02463786		3140.98	0.06732226		3670.98	0.00358355		4200.98	-0.02713411
491.19	0.00026766		1021.19	0.00458719		1551.19	-0.01109657		2081.18	-0.00008231		2611.18	-0.0252823		3141.18	0.06775085		3671.18	0.003192		4201.18	-0.02754933
491.39	0.00132285		1021.39	0.00467405		1551.39	-0.01120923		2081.38	-0.00012506		2611.38	-0.02531022		3141.38	0.06700341		3671.38	0.003237		4201.38	-0.02729718
491.59	0.00202533		1021.59	0.00401669		1551.59	-0.01033117		2081.58	0.00006508		2611.58	-0.02423964		3141.58	0.06714477		3671.58	0.0031338		4201.58	-0.02736937
491.79	0.00075155		1021.79	0.00484012		1551.79	-0.01122709		2081.78	0.0000813		2611.78	-0.02390975		3141.78	0.06746153		3671.78	0.00346319		4201.78	-0.02703525
491.99	0.00121175		1021.99	0.00499417		1551.99	-0.01028298		2081.98	0.00045963		2611.98	-0.02305402		3141.98	0.06684697		3671.98	0.00322211		4201.98	-0.02824128
492.19	0.00131069		1022.19	0.00506248		1552.19	-0.0103432		2082.18	0.00113548		2612.18	-0.02256559		3142.18	0.06604641		3672.18	0.00288843		4202.18	-0.02871849
492.39	0.00150289		1022.39	0.00543625		1552.39	-0.0096057		2082.38	0.00177585		2612.38	-0.02228985		3142.38	0.06518097		3672.38	0.00272627		4202.38	-0.02874829
492.59	0.00135946		1022.59	0.00530367		1552.59	-0.00950629		2082.58	0.00271149		2612.58	-0.0222809		3142.58	0.06466281		3672.58	0.00223734		4202.58	-0.02806507
492.79	0.00085275		1022.79	0.00546781		1552.79	-0.00944707		2082.78	0.0033084		2612.78	-0.02144256		3142.78	0.06379053		3672.78	0.00208715		4202.78	-0.02738377
492.99	0.00039659		1022.99	0.005668		1552.99	-0.00896048		2082.98	0.0035031		2612.98	-0.02178754		3142.98	0.06303649		3672.98	0.0022243		4202.98	-0.02728155
493.19	0.0006585		1023.19	0.00615663		1553.19	-0.0095977		2083.18	0.00327725		2613.18	-0.02117976		3143.18	0.06236224		3673.18	0.00176498		4203.18	-0.02652267
493.39	0.00073023		1023.39	0.00586686		1553.39	-0.00855648		2083.38	0.00343788		2613.38	-0.02157502		3143.38	0.06210449		3673.38	0.00189297		4203.38	-0.02574803
493.59	0.00170152		1023.59	0.00523301		1553.59	-0.00855846		2083.58	0.00450611		2613.58	-0.02094982		3143.58	0.06170544		3673.58	0.00260764		4203.58	-0.02587683
493.79	0.00172589		1023.79	0.00519948		1553.79	-0.00916086		2083.78	0.00451117		2613.78	-0.02137553		3143.78	0.0618709		3673.78	0.00295244		4203.78	-0.0259821
493.99	0.00090018		1023.99	0.00474712		1553.99	-0.0093437		2083.98	0.00506094		2613.98	-0.02214245		3143.98	0.06132058		3673.98	0.00345409		4203.98	-0.02631044
494.19	0.00014842		1024.19	0.00515479		1554.19	-0.00966533		2084.18	0.00467383		2614.18	-0.02305746		3144.18	0.06150164		3674.18	0.0042105		4204.18	-0.02649933
494.39	0.00053872		1024.39	0.00530226		1554.39	-0.01030541		2084.38	0.00372105		2614.38	-0.02319492		3144.38	0.06142602		3674.38	0.00412084		4204.38	-0.02609449
494.59	0.00082754		1024.59	0.00563932		1554.59	-0.01137556		2084.58	0.00327398		2614.58	-0.0236199		3144.58	0.06144785		3674.58	0.00443538		4204.58	-0.02651409
494.79	0.00083847		1024.79	0.00542631		1554.79	-0.01142928		2084.78	0.00346127		2614.78	-0.02497607		3144.78	0.06197303		3674.78	0.00432039		4204.78	-0.02728099
494.99	0.00059386		1024.99	0.00606105		1554.99	-0.01088539		2084.98	0.00246244		2614.98	-0.02515195		3144.98	0.06183012		3674.98	0.00352204		4204.98	-0.02731757
495.19	0.0009863		1025.19	0.0062736		1555.19	-0.01080199		2085.18	0.0012641		2615.18	-0.02555243		3145.18	0.06293607		3675.18	0.00265239		4205.18	-0.02762656
495.39	0.00078044		1025.39	0.00539731		1555.39	-0.01055194		2085.38	0.00112434		2615.38	-0.02447025		3145.38	0.06260913		3675.38	0.0019023		4205.38	-0.0274898
495.59	0.00089808		1025.59	0.00585224		1555.59	-0.01037107		2085.58	0.00121612		2615.58	-0.02391345		3145.58	0.06363854		3675.58	0.00100331		4205.58	-0.02722852
495.79	0.0002943		1025.79	0.00533525		1555.79	-0.01034598		2085.78	0.00065282		2615.78	-0.02437919		3145.78	0.06331191		3675.78	-0.00045122		4205.78	-0.02727687
495.99	0.00040671		1025.99	0.00407685		1555.99	-0.00901583		2085.98	0.00055683		2615.98	-0.02355504		3145.98	0.06287459		3675.98	-0.00249783		4205.98	-0.02841914
496.19	0.0002952		1026.19	0.00359195		1556.19	-0.00851956		2086.18	0.00067249		2616.18	-0.02381309		3146.18	0.06313626		3676.18	-0.00388586		4206.18	-0.02903452
496.39	0.00052673		1026.39	0.00363143		1556.39	-0.00790815		2086.38	0.00045859		2616.38	-0.02331161		3146.38	0.06357305		3676.38	-0.00461258		4206.38	-0.02897195
496.59	0.00007826		1026.59	0.00277311		1556.59	-0.00806794		2086.58	-0.00000583		2616.58	-0.02205862		3146.58	0.06416999		3676.58	-0.00464305		4206.58	-0.02866468
496.79	0.00025534		1026.79	0.00322827		1556.79	-0.0075073		2086.78	-0.00053344		2616.78	-0.02181666		3146.78	0.0640245		3676.78	-0.00495075		4206.78	-0.02833315
496.99	0.00024188		1026.99	0.0031896		1556.99	-0.00795515		2086.98	-0.00155934		2616.98	-0.02167827		3146.98	0.06416478		3676.98	-0.00431472		4206.98	-0.02814303
497.19	-0.00018813		1027.19	0.00313244		1557.19	-0.00750767		2087.18	-0.00155297		2617.18	-0.02172946		3147.18	0.06472612		3677.18	-0.0040461		4207.18	-0.0275882
497.39	-0.00078813		1027.39	0.00257826		1557.39	-0.00626491		2087.38	-0.00110179		2617.38	-0.02097306		3147.38	0.0656273		3677.38	-0.00305914		4207.38	-0.02798585
497.59	-0.00223448		1027.59	0.00242627		1557.59	-0.0069473		2087.58	-0.00005383		2617.58	-0.01963721		3147.58	0.06572354		3677.58	-0.00155917		4207.58	-0.02684434
497.79	-0.00359322		1027.79	0.00287548		1557.79	-0.00740309		2087.78	-0.00011713		2617.78	-0.0197999		3147.78	0.06532782		3677.78	-0.0005589		4207.78	-0.02635797
497.99	-0.00493177		1027.99	0.00282423		1557.99	-0.00824811		2087.98	0.00036217		2617.98	-0.01936971		3147.98	0.06450362		3677.98	0.00065051		4207.98	-0.02633315
498.19	-0.00555579		1028.19	0.0035463		1558.19	-0.00931227		2088.18	0.00056811		2618.18	-0.0191699		3148.18	0.06574977		3678.18	0.00181067		4208.18	-0.0262817
498.39	-0.00524389		1028.39	0.00394129		1558.39	-0.01016173		2088.38	0.00067631		2618.38	-0.01925489		3148.38	0.06612301		3678.38	0.00241634		4208.38	-0.02519528
498.59	-0.00645979		1028.59	0.00418501		1558.59	-0.0109949		2088.58	-0.00006174		2618.58	-0.01977004		3148.58	0.06584816		3678.58	0.00480221		4208.58	-0.02579014
498.79	-0.00647545		1028.79	0.00331793		1558.79	-0.01075158		2088.78	-0.00037395		2618.78	-0.02058734		3148.78	0.06603036		3678.78	0.00515396		4208.78	-0.02624674
498.99	-0.00680758		1028.99	0.00362261		1558.99	-0.01153171		2088.98	-0.00074737		2618.98	-0.02073696		3148.98	0.06635861		3678.98	0.0052281		4208.98	-0.02573392
499.19	-0.00669645		1029.19	0.00359958		1559.19	-0.01230745		2089.18	-0.00055246		2619.18	-0.02095223		3149.18	0.06712582		3679.18	0.00539682		4209.18	-0.02517506
499.39	-0.00648647		1029.39	0.00408493		1559.39	-0.01233011		2089.38	-0.00014051		2619.38	-0.0208848		3149.38	0.06656905		3679.38	0.00543684		4209.38	-0.02624802
499.59	-0.00579538		1029.59	0.00446144		1559.59	-0.01293248		2089.58	-0.00060518		2619.58	-0.02175643		3149.58	0.06683696		3679.58	0.00461598		4209.58	-0.02644336
499.79	-0.0057969		1029.79	0.00382652		1559.79	-0.01279783		2089.78	-0.000747		2619.78	-0.02258773		3149.78	0.06686576		3679.78	0.00321624		4209.78	-0.02693975
499.99	-0.00538696		1029.99	0.00325293		1559.99	-0.01264241		2089.98	-0.00091077		2619.98	-0.0229746		3149.98	0.06644988		3679.98	0.00298916		4209.98	-0.02574446
500.19	-0.00473598		1030.19	0.00369796		1560.19	-0.01242882		2090.18	-0.0012866		2620.18	-0.02402047		3150.18	0.06682218		3680.18	0.0021458		4210.18	-0.02547872
500.39	-0.00363316		1030.39	0.00412071		1560.39	-0.01227263		2090.38	-0.0010976		2620.38	-0.02409353		3150.38	0.06615324		3680.38	0.00141157		4210.38	-0.02490803
500.59	-0.00347276		1030.59	0.0036814		1560.59	-0.01140493		2090.58	-0.00230926		2620.58	-0.02322805		3150.58	0.06650173		3680.58	0.001283		4210.58	-0.02488451
500.79	-0.00239121		1030.79	0.00379137		1560.79	-0.01111167		2090.78	-0.00175983		2620.78	-0.02375624		3150.78	0.06621527		3680.78	0.00023984		4210.78	-0.02506663
500.99	-0.00263664		1030.99	0.00317782		1560.99	-0.01121369		2090.98	-0.00217464		2620.98	-0.02330558		3150.98	0.06564198		3680.98	0.00020641		4210.98	-0.02465767
501.19	-0.00261652		1031.19	0.00371583		1561.19	-0.01077357		2091.18	-0.00171987		2621.18	-0.0228265		3151.18	0.06512887		3681.18	0.00007367		4211.18	-0.02502632
501.39	-0.00252944		1031.39	0.00339222		1561.39	-0.01023404		2091.38	-0.00184613		2621.38	-0.02167509		3151.38	0.06482451		3681.38	-0.0006484		4211.38	-0.02495372
501.59	-0.00273468		1031.59	0.00378384		1561.59	-0.01021504		2091.58	-0.00119861		2621.58	-0.02179905		3151.58	0.06391235		3681.58	-0.00082809		4211.58	-0.0240422
501.79	-0.00275248		1031.79	0.00469591		1561.79	-0.00973949		2091.78	-0.00148659		2621.78	-0.02193487		3151.78	0.06298977		3681.78	-0.0010351		4211.78	-0.02508593
501.99	-0.00208154		1031.99	0.0052547		1561.99	-0.01044464		2091.98	-0.00109836		2621.98	-0.02187724		3151.98	0.06285785		3681.98	-0.00083531		4211.98	-0.02578148
502.19	-0.00131197		1032.19	0.00552177		1562.19	-0.00910811		2092.18	-0.00093266		2622.18	-0.02301026		3152.18	0.0633604		3682.18	-0.00053098		4212.18	-0.02721855
502.39	-0.00129928		1032.39	0.00553364		1562.39	-0.00856486		2092.38	-0.0012478		2622.38	-0.02265713		3152.38	0.0626458		3682.38	-0.00079748		4212.38	-0.02765219
502.59	-0.00187893		1032.59	0.00526471		1562.59	-0.00721677		2092.58	-0.00148868		2622.58	-0.02258205		3152.58	0.06219055		3682.58	0.00038341		4212.58	-0.02864685
502.79	-0.00164342		1032.79	0.00427105		1562.79	-0.00641549		2092.78	-0.00081025		2622.78	-0.0222002		3152.78	0.06288266		3682.78	0.00003669		4212.78	-0.02868196
502.99	-0.00252675		1032.99	0.00528851		1562.99	-0.00765012		2092.98	0.00014804		2622.98	-0.02192075		3152.98	0.06363599		3682.98	0.00041701		4212.98	-0.02873485
503.19	-0.00221344		1033.19	0.00523358		1563.19	-0.00829395		2093.18	0.00036148		2623.18	-0.02209725		3153.18	0.06419933		3683.18	0.00053861		4213.18	-0.02927439
503.39	-0.00227162		1033.39	0.0054251		1563.39	-0.0079444		2093.38	0.0005052		2623.38	-0.02295451		3153.38	0.06450434		3683.38	0.00118896		4213.38	-0.03060085
503.59	-0.00272141		1033.59	0.00539421		1563.59	-0.00827217		2093.58	0.00025079		2623.58	-0.02349454		3153.58	0.06563466		3683.58	0.00052079		4213.58	-0.02974344
503.79	-0.00325052		1033.79	0.00473448		1563.79	-0.00893561		2093.78	0.00077671		2623.78	-0.02403654		3153.78	0.06586413		3683.78	0.00051837		4213.78	-0.02935962
503.99	-0.00315145		1033.99	0.00408187		1563.99	-0.00975923		2093.98	0.00026574		2623.98	-0.02410016		3153.98	0.06499272		3683.98	0.00117839		4213.98	-0.02796935
504.19	-0.00362425		1034.19	0.00399258		1564.19	-0.01028672		2094.18	0.00016418		2624.18	-0.02449258		3154.18	0.06451243		3684.18	0.0006345		4214.18	-0.02917928
504.39	-0.00345567		1034.39	0.0038677		1564.39	-0.01066906		2094.38	0.00063819		2624.38	-0.0243662		3154.38	0.06351914		3684.38	0.000618		4214.38	-0.02896215
504.59	-0.00381711		1034.59	0.00370669		1564.59	-0.01111425		2094.58	0.00033135		2624.58	-0.02413254		3154.58	0.06347436		3684.58	0.00022877		4214.58	-0.02863437
504.79	-0.00340004		1034.79	0.00302536		1564.79	-0.01225253		2094.78	0.0009752		2624.78	-0.02498517		3154.78	0.06236525		3684.78	0.00014213		4214.78	-0.02801389
504.99	-0.00394829		1034.99	0.00292669		1564.99	-0.01324569		2094.98	0.00023193		2624.98	-0.02499572		3154.98	0.06093026		3684.98	0.00101416		4214.98	-0.02715058
505.19	-0.00345941		1035.19	0.00351869		1565.19	-0.0136153		2095.18	0.0001174		2625.18	-0.0249015		3155.18	0.06057053		3685.18	0.00098284		4215.18	-0.02724907
505.39	-0.00383278		1035.39	0.00364424		1565.39	-0.0129058		2095.38	-0.00019218		2625.38	-0.02546915		3155.38	0.06047428		3685.38	0.00137456		4215.38	-0.02740849
505.59	-0.00333894		1035.59	0.00460771		1565.59	-0.01288659		2095.58	-0.00023134		2625.58	-0.02661311		3155.58	0.06019752		3685.58	0.00225422		4215.58	-0.02847843
505.79	-0.00271281		1035.79	0.00421698		1565.79	-0.01283742		2095.78	-0.00070736		2625.78	-0.02681298		3155.78	0.05962291		3685.78	0.00208496		4215.78	-0.02908472
505.99	-0.00185635		1035.99	0.00374049		1565.99	-0.01298115		2095.98	-0.00031209		2625.98	-0.02733131		3155.98	0.0602057		3685.98	0.00245304		4215.98	-0.02893543
506.19	-0.00078974		1036.19	0.00409814		1566.19	-0.01152998		2096.18	-0.00000667		2626.18	-0.02679873		3156.18	0.06110361		3686.18	0.00322154		4216.18	-0.02968495
506.39	-0.0001273		1036.39	0.00322737		1566.39	-0.00990872		2096.38	0.00082592		2626.38	-0.02552289		3156.38	0.06152022		3686.38	0.00365311		4216.38	-0.0285989
506.59	0.00003078		1036.59	0.00245125		1566.59	-0.00871826		2096.58	0.00149595		2626.58	-0.02558973		3156.58	0.06258178		3686.58	0.00445041		4216.58	-0.02866708
506.79	-0.00035274		1036.79	0.00212298		1566.79	-0.00902826		2096.78	0.00196145		2626.78	-0.02453661		3156.78	0.06381629		3686.78	0.00438254		4216.78	-0.02805392
506.99	-0.0005262		1036.99	0.00247642		1566.99	-0.00919379		2096.98	0.00265577		2626.98	-0.02434835		3156.98	0.06448158		3686.98	0.00427109		4216.98	-0.02849294
507.19	0.0001104		1037.19	0.00190393		1567.19	-0.00858115		2097.18	0.00277873		2627.18	-0.02497839		3157.18	0.06587992		3687.18	0.00377265		4217.18	-0.02829749
507.39	0.00051101		1037.39	0.00222353		1567.39	-0.00836847		2097.38	0.00305526		2627.38	-0.02464176		3157.38	0.06621605		3687.38	0.00318736		4217.38	-0.02745889
507.59	0.00082831		1037.59	0.00298068		1567.59	-0.00881308		2097.58	0.00278765		2627.58	-0.02461052		3157.58	0.06671069		3687.58	0.00228418		4217.58	-0.02718668
507.79	0.00097427		1037.79	0.0022636		1567.79	-0.00958858		2097.78	0.00258151		2627.78	-0.0247389		3157.78	0.06625943		3687.78	0.00183944		4217.78	-0.02737435
507.99	0.00160268		1037.99	0.00207286		1567.99	-0.01065675		2097.98	0.00218873		2627.98	-0.02463628		3157.98	0.06546894		3687.98	0.00108344		4217.98	-0.02699775
508.19	0.00162658		1038.19	0.00241857		1568.19	-0.01131363		2098.18	0.00158542		2628.18	-0.02470957		3158.18	0.06464434		3688.18	0.00027652		4218.18	-0.02709755
508.39	0.00240158		1038.39	0.00308466		1568.39	-0.01177338		2098.38	0.00182213		2628.38	-0.02412374		3158.38	0.06482488		3688.38	-0.00034733		4218.38	-0.02633235
508.59	0.00222232		1038.59	0.00289662		1568.59	-0.01192898		2098.58	0.00088781		2628.58	-0.02383922		3158.58	0.06459797		3688.58	-0.00091939		4218.58	-0.02587521
508.79	0.00136601		1038.79	0.00277351		1568.79	-0.01286279		2098.78	0.0000617		2628.78	-0.02365341		3158.78	0.06360691		3688.78	-0.0002722		4218.78	-0.02572812
508.99	0.00031559		1038.99	0.00318335		1568.99	-0.01359155		2098.98	-0.00019275		2628.98	-0.02355565		3158.98	0.06371623		3688.98	0.00009551		4218.98	-0.02640466
509.19	-0.00038434		1039.19	0.00337711		1569.19	-0.01287652		2099.18	-0.00097733		2629.18	-0.02330785		3159.18	0.06408564		3689.18	0.00012334		4219.18	-0.02703303
509.39	-0.00159602		1039.39	0.00342728		1569.39	-0.01267546		2099.38	-0.00163245		2629.38	-0.02348851		3159.38	0.06366251		3689.38	0.00033808		4219.38	-0.0279738
509.59	-0.00166066		1039.59	0.0025154		1569.59	-0.01211559		2099.58	-0.00178753		2629.58	-0.02335741		3159.58	0.06399863		3689.58	0.00090868		4219.58	-0.02876745
509.79	-0.00248237		1039.79	0.00093957		1569.79	-0.01225281		2099.78	-0.00141326		2629.78	-0.02396624		3159.78	0.06289641		3689.78	0.00103951		4219.78	-0.02938448
509.99	-0.00302684		1039.99	0.00123826		1569.99	-0.01167859		2099.98	-0.00136823		2629.98	-0.02387297		3159.98	0.06364804		3689.98	0.00265009		4219.98	-0.03017038
510.19	-0.00259545		1040.19	0.00154824		1570.19	-0.00991568		2100.18	-0.00042137		2630.18	-0.02429897		3160.18	0.06376202		3690.18	0.00262354		4220.18	-0.03101239
510.39	-0.00372072		1040.39	0.00002616		1570.39	-0.00810731		2100.38	0.00088211		2630.38	-0.02484535		3160.38	0.06360688		3690.38	0.00344658		4220.38	-0.03138925
510.59	-0.00481295		1040.59	-0.00007145		1570.59	-0.0076913		2100.58	0.00126093		2630.58	-0.0254586		3160.58	0.06368831		3690.58	0.00310904		4220.58	-0.03270381
510.79	-0.00587985		1040.79	-0.00009709		1570.79	-0.00768538		2100.78	0.00264969		2630.78	-0.02487188		3160.78	0.06381808		3690.78	0.00269185		4220.78	-0.03221838
510.99	-0.0057453		1040.99	-0.00069485		1570.99	-0.00670458		2100.98	0.00319054		2630.98	-0.02491919		3160.98	0.06389822		3690.98	0.00169262		4220.98	-0.03239156
511.19	-0.00539211		1041.19	-0.00048904		1571.19	-0.00675725		2101.18	0.0039088		2631.18	-0.02478151		3161.18	0.06393523		3691.18	0.00050431		4221.18	-0.03153478
511.39	-0.00522226		1041.39	-0.00039046		1571.39	-0.00666339		2101.38	0.00444692		2631.38	-0.02410852		3161.38	0.06279803		3691.38	-0.0000078		4221.38	-0.03097051
511.59	-0.00412238		1041.59	-0.00039765		1571.59	-0.00677403		2101.58	0.00395748		2631.58	-0.02425416		3161.58	0.0618618		3691.58	-0.00007957		4221.58	-0.0307962
511.79	-0.00349711		1041.79	-0.0016359		1571.79	-0.00718912		2101.78	0.00402971		2631.78	-0.02412635		3161.78	0.06107081		3691.78	-0.00076742		4221.78	-0.03087342
511.99	-0.00211403		1041.99	-0.00099762		1571.99	-0.00743331		2101.98	0.00359549		2631.98	-0.02398999		3161.98	0.06058619		3691.98	-0.00088686		4221.98	-0.02999744
512.19	-0.00183926		1042.19	-0.00012196		1572.19	-0.00767509		2102.18	0.00288243		2632.18	-0.02357946		3162.18	0.0604512		3692.18	-0.0008248		4222.18	-0.02913507
512.39	-0.00057549		1042.39	0.00056764		1572.39	-0.00810228		2102.38	0.0028182		2632.38	-0.02412041		3162.38	0.06079474		3692.38	-0.00054924		4222.38	-0.02864137
512.59	-0.00103978		1042.59	0.00042729		1572.59	-0.00929738		2102.58	0.00180739		2632.58	-0.02392803		3162.58	0.06040733		3692.58	-0.00018026		4222.58	-0.02825578
512.79	-0.00100835		1042.79	0.00202963		1572.79	-0.0103832		2102.78	0.00116297		2632.78	-0.02410223		3162.78	0.06078176		3692.78	0.00017519		4222.78	-0.02752624
512.99	-0.0010596		1042.99	0.00210226		1572.99	-0.01097989		2102.98	0.00033365		2632.98	-0.02411258		3162.98	0.06086955		3692.98	-0.00008346		4222.98	-0.02800977
513.19	-0.00133544		1043.19	0.00206574		1573.19	-0.01134161		2103.18	-0.00045398		2633.18	-0.0234862		3163.18	0.06071271		3693.18	0.0003773		4223.18	-0.02797796
513.39	-0.00183883		1043.39	0.00287993		1573.39	-0.01178359		2103.38	-0.00008664		2633.38	-0.02319226		3163.38	0.06099851		3693.38	0.00068568		4223.38	-0.02721427
513.59	-0.00097551		1043.59	0.00290118		1573.59	-0.01203173		2103.58	0.00011737		2633.58	-0.02299833		3163.58	0.06156422		3693.58	0.00197987		4223.58	-0.02710172
513.79	-0.00065576		1043.79	0.00369685		1573.79	-0.01199953		2103.78	-0.00053405		2633.78	-0.02397603		3163.78	0.06123488		3693.78	0.00223388		4223.78	-0.02736691
513.99	-0.00074331		1043.99	0.00390771		1573.99	-0.01151404		2103.98	-0.00050852		2633.98	-0.02402246		3163.98	0.06277108		3693.98	0.00301102		4223.98	-0.02722332
514.19	-0.00102616		1044.19	0.00408789		1574.19	-0.01077666		2104.18	0.00005106		2634.18	-0.02432045		3164.18	0.06345535		3694.18	0.00214355		4224.18	-0.02710263
514.39	-0.00178612		1044.39	0.00473286		1574.39	-0.01112689		2104.38	0.000125		2634.38	-0.02456721		3164.38	0.064148		3694.38	0.00347069		4224.38	-0.02738782
514.59	-0.00192337		1044.59	0.00453525		1574.59	-0.01117569		2104.58	-0.00045943		2634.58	-0.02388247		3164.58	0.06414568		3694.58	0.00255389		4224.58	-0.02666246
514.79	-0.00245651		1044.79	0.00429381		1574.79	-0.01107322		2104.78	-0.00018408		2634.78	-0.02324505		3164.78	0.06438439		3694.78	0.00135991		4224.78	-0.02550899
514.99	-0.00248767		1044.99	0.00409388		1574.99	-0.01100053		2104.98	-0.0006703		2634.98	-0.0223969		3164.98	0.0643238		3694.98	0.00057794		4224.98	-0.02523988
515.19	-0.00269121		1045.19	0.00387459		1575.19	-0.01123707		2105.18	-0.00050047		2635.18	-0.02189178		3165.18	0.06426813		3695.18	-0.00023932		4225.18	-0.02482623
515.39	-0.00340474		1045.39	0.00283241		1575.39	-0.010457		2105.38	0.0001749		2635.38	-0.02202865		3165.38	0.06390363		3695.38	0.00023235		4225.38	-0.02454884
515.59	-0.00308902		1045.59	0.00284988		1575.59	-0.00959804		2105.58	-0.00038655		2635.58	-0.02133324		3165.58	0.06327128		3695.58	0.000481		4225.58	-0.02416089
515.79	-0.00406894		1045.79	0.00200721		1575.79	-0.0094708		2105.78	-0.00097359		2635.78	-0.02178721		3165.78	0.06360031		3695.78	0.00000105		4225.78	-0.02454404
515.99	-0.00488136		1045.99	0.00249806		1575.99	-0.00914357		2105.98	-0.00081281		2635.98	-0.02265087		3165.98	0.063851		3695.98	0.00011371		4225.98	-0.02458776
516.19	-0.00519991		1046.19	0.00289378		1576.19	-0.00942383		2106.18	-0.00076506		2636.18	-0.02338367		3166.18	0.06308557		3696.18	0.00004776		4226.18	-0.02468129
516.39	-0.00523246		1046.39	0.00285823		1576.39	-0.00931004		2106.38	-0.00056424		2636.38	-0.02450049		3166.38	0.06251611		3696.38	-0.0002677		4226.38	-0.02513846
516.59	-0.00603272		1046.59	0.00262004		1576.59	-0.01036995		2106.58	-0.00057449		2636.58	-0.02401073		3166.58	0.06186467		3696.58	-0.00034639		4226.58	-0.02535082
516.79	-0.00600434		1046.79	0.00363531		1576.79	-0.01136648		2106.78	0.00002784		2636.78	-0.02438682		3166.78	0.06144363		3696.78	-0.00093258		4226.78	-0.0256775
516.99	-0.00604963		1046.99	0.00297915		1576.99	-0.01171881		2106.98	0.00066378		2636.98	-0.02468165		3166.98	0.06033943		3696.98	-0.00089255		4226.98	-0.0266228
517.19	-0.0059769		1047.19	0.00295235		1577.19	-0.01231659		2107.18	0.00065105		2637.18	-0.02540528		3167.18	0.06078197		3697.18	-0.00054556		4227.18	-0.02696779
517.39	-0.00584296		1047.39	0.00337215		1577.39	-0.01160517		2107.38	0.00048189		2637.38	-0.0256262		3167.38	0.06174182		3697.38	0.00032451		4227.38	-0.02672669
517.59	-0.00531314		1047.59	0.00324422		1577.59	-0.01186418		2107.58	-0.00011654		2637.58	-0.02659184		3167.58	0.06240237		3697.58	0.00076933		4227.58	-0.02716545
517.79	-0.00517628		1047.79	0.00363034		1577.79	-0.01129345		2107.78	-0.00045792		2637.78	-0.02679197		3167.78	0.06208794		3697.78	0.00116691		4227.78	-0.02704034
517.99	-0.00533133		1047.99	0.00279832		1577.99	-0.01162524		2107.98	0.00013049		2637.98	-0.02685265		3167.98	0.06278281		3697.98	0.00056006		4227.98	-0.02764535
518.19	-0.00504817		1048.19	0.00295558		1578.19	-0.01165944		2108.18	-0.00086436		2638.18	-0.02700061		3168.18	0.06253217		3698.18	0.00010012		4228.18	-0.02798629
518.39	-0.00497957		1048.39	0.00321168		1578.39	-0.01277025		2108.38	-0.00079443		2638.38	-0.0273188		3168.38	0.06212206		3698.38	0.00031347		4228.38	-0.02777332
518.59	-0.00470607		1048.59	0.0022184		1578.59	-0.01265107		2108.58	-0.00058908		2638.58	-0.02672998		3168.58	0.06164882		3698.58	-0.00089512		4228.58	-0.02763803
518.79	-0.0040509		1048.79	0.00248879		1578.79	-0.01307786		2108.78	-0.00020113		2638.78	-0.02677407		3168.78	0.06249871		3698.78	-0.00146335		4228.78	-0.02815095
518.99	-0.00428044		1048.99	0.00297132		1578.99	-0.0128356		2108.98	-0.00076355		2638.98	-0.0257219		3168.98	0.06316885		3698.98	-0.00184897		4228.98	-0.02883462
519.19	-0.00499209		1049.19	0.00251841		1579.19	-0.01147413		2109.18	-0.00068177		2639.18	-0.02593091		3169.18	0.06359269		3699.18	-0.00152418		4229.18	-0.028849
519.39	-0.00514342		1049.39	0.00204541		1579.39	-0.01090476		2109.38	0.00008104		2639.38	-0.02538229		3169.38	0.06289174		3699.38	-0.00074075		4229.38	-0.02939608
519.59	-0.00495982		1049.59	0.00211213		1579.59	-0.01062409		2109.58	-0.00073246		2639.58	-0.02355804		3169.58	0.06273403		3699.58	-0.00059562		4229.58	-0.02972158
519.79	-0.00553144		1049.79	0.0015506		1579.79	-0.01114633		2109.78	-0.00102558		2639.78	-0.02323365		3169.78	0.06222185		3699.78	-0.00071412		4229.78	-0.03005072
519.99	-0.00508462		1049.99	0.00183024		1579.99	-0.01098943		2109.98	-0.00012274		2639.98	-0.02348219		3169.98	0.0614496		3699.98	-0.00007215		4229.98	-0.02997148
520.19	-0.004455		1050.19	0.00193849		1580.19	-0.0114603		2110.18	0.00000889		2640.18	-0.02283743		3170.18	0.06038545		3700.18	0.00023673		4230.18	-0.02956191
520.39	-0.00428955		1050.39	0.00150597		1580.39	-0.01224579		2110.38	0.00015779		2640.38	-0.02260762		3170.38	0.05968986		3700.38	-0.00011338		4230.38	-0.02917944
520.59	-0.00333388		1050.59	0.00064278		1580.59	-0.01297675		2110.58	0.00045454		2640.58	-0.02210428		3170.58	0.05955254		3700.58	-0.00018234		4230.58	-0.02840289
520.79	-0.0022387		1050.79	0.00096374		1580.79	-0.01371774		2110.78	0.00122869		2640.78	-0.02196547		3170.78	0.06032062		3700.78	-0.00018937		4230.78	-0.02834898
520.99	-0.00096023		1050.99	0.00098995		1580.99	-0.01305937		2110.98	0.00078709		2640.98	-0.02268258		3170.98	0.06023036		3700.98	0.00049522		4230.98	-0.02795181
521.19	-0.00094281		1051.19	0.00102217		1581.19	-0.01322392		2111.18	0.00026184		2641.18	-0.02269533		3171.18	0.06147557		3701.18	0.00067994		4231.18	-0.02860228
521.39	-0.00157448		1051.39	0.0006647		1581.39	-0.01245222		2111.38	0.00049897		2641.38	-0.02251516		3171.38	0.06178719		3701.38	0.00074085		4231.38	-0.02862245
521.59	-0.00174435		1051.59	0.00053539		1581.59	-0.01367297		2111.58	0.00039374		2641.58	-0.02298888		3171.58	0.06293305		3701.58	0.00036659		4231.58	-0.02890821
521.79	-0.001739		1051.79	0.00034807		1581.79	-0.01356265		2111.78	0.0001677		2641.78	-0.02340492		3171.78	0.06326096		3701.78	-0.00012437		4231.78	-0.02860853
521.99	-0.00223013		1051.99	-0.00033028		1581.99	-0.01369245		2111.98	-0.00026843		2641.98	-0.02430213		3171.98	0.06341281		3701.98	-0.00155599		4231.98	-0.02859339
522.19	-0.00185309		1052.19	0.00029533		1582.19	-0.01384203		2112.18	-0.0004931		2642.18	-0.02471643		3172.18	0.06387996		3702.18	-0.00182435		4232.18	-0.02826412
522.39	-0.0016883		1052.39	0.00129518		1582.39	-0.01354146		2112.38	0.00005827		2642.38	-0.0253105		3172.38	0.0642828		3702.38	-0.00167823		4232.38	-0.02864536
522.59	-0.00158663		1052.59	0.00149589		1582.59	-0.01308922		2112.58	0.00045347		2642.58	-0.02516859		3172.58	0.06550812		3702.58	-0.00222216		4232.58	-0.02866536
522.79	-0.00249149		1052.79	0.00181151		1582.79	-0.01241934		2112.78	0.00031435		2642.78	-0.02463863		3172.78	0.06727808		3702.78	-0.00157931		4232.78	-0.02876735
522.99	-0.00407583		1052.99	0.00147802		1582.99	-0.01151663		2112.98	-0.00022797		2642.98	-0.02431183		3172.98	0.06752105		3702.98	-0.00165653		4232.98	-0.02859438
523.19	-0.00489531		1053.19	0.00150847		1583.19	-0.01083631		2113.18	-0.00004683		2643.18	-0.02510938		3173.18	0.06769974		3703.18	-0.00101896		4233.18	-0.02859322
523.39	-0.00538002		1053.39	0.00117736		1583.39	-0.01169046		2113.38	0.00072176		2643.38	-0.02434256		3173.38	0.06669958		3703.38	-0.00095312		4233.38	-0.02925503
523.59	-0.00603107		1053.59	0.00204098		1583.59	-0.01167647		2113.58	-0.00031963		2643.58	-0.0238523		3173.58	0.06645066		3703.58	0.00000328		4233.58	-0.02952464
523.79	-0.00687663		1053.79	0.00197647		1583.79	-0.01167487		2113.78	-0.00053461		2643.78	-0.02454873		3173.78	0.06539213		3703.78	0.00051423		4233.78	-0.02936067
523.99	-0.00616479		1053.99	0.00179576		1583.99	-0.01128318		2113.98	-0.00050591		2643.98	-0.0252691		3173.98	0.06445029		3703.98	0.00155678		4233.98	-0.0294226
524.19	-0.00633708		1054.19	0.00104684		1584.19	-0.0112822		2114.18	-0.00039845		2644.18	-0.02465314		3174.18	0.06346759		3704.18	0.00126077		4234.18	-0.02906032
524.39	-0.00623516		1054.39	0.0006321		1584.39	-0.01214937		2114.38	-0.00063022		2644.38	-0.02442367		3174.38	0.06307815		3704.38	0.00125331		4234.38	-0.02837014
524.59	-0.00591533		1054.59	0.00048366		1584.59	-0.01183081		2114.58	0.00070317		2644.58	-0.02420229		3174.58	0.06303391		3704.58	0.00096564		4234.58	-0.02789679
524.79	-0.00603067		1054.79	0.00055676		1584.79	-0.01147461		2114.78	0.0013809		2644.78	-0.02446868		3174.78	0.06331115		3704.78	0.00100812		4234.78	-0.0280798
524.99	-0.00629421		1054.99	-0.00000725		1584.99	-0.01124156		2114.98	0.00079087		2644.98	-0.02475917		3174.98	0.06273922		3704.98	0.00062348		4234.98	-0.02840857
525.19	-0.00682945		1055.19	-0.00016601		1585.19	-0.01154611		2115.18	0.00068241		2645.18	-0.02474356		3175.18	0.06283143		3705.18	0.00052854		4235.18	-0.02881173
525.39	-0.00671083		1055.39	-0.00033621		1585.39	-0.01119696		2115.38	0.00093083		2645.38	-0.02486321		3175.38	0.06246388		3705.38	-0.00074019		4235.38	-0.0282729
525.59	-0.00578388		1055.59	0.00053995		1585.59	-0.0117732		2115.58	0.0011945		2645.58	-0.02420938		3175.58	0.06321724		3705.58	-0.00048826		4235.58	-0.02843777
525.79	-0.00522114		1055.79	0.00013693		1585.79	-0.01080942		2115.78	0.00085757		2645.78	-0.02422927		3175.78	0.06302409		3705.78	-0.00134107		4235.78	-0.0270523
525.99	-0.00474559		1055.99	0.00103702		1585.99	-0.00978825		2115.98	0.00142451		2645.98	-0.02385124		3175.98	0.06319145		3705.98	-0.002072		4235.98	-0.02640961
526.19	-0.00402862		1056.19	0.00212351		1586.19	-0.0091163		2116.18	0.0022642		2646.18	-0.02411617		3176.18	0.06449098		3706.18	-0.00121628		4236.18	-0.02619551
526.39	-0.00387571		1056.39	0.00305076		1586.39	-0.00882665		2116.38	0.00168631		2646.38	-0.02390406		3176.38	0.06446883		3706.38	-0.00142643		4236.38	-0.02599986
526.59	-0.00389292		1056.59	0.00333085		1586.59	-0.00933213		2116.58	0.00188621		2646.58	-0.02389417		3176.58	0.06523062		3706.58	-0.00194783		4236.58	-0.02584951
526.79	-0.00430423		1056.79	0.00341035		1586.79	-0.00929326		2116.78	0.00101044		2646.78	-0.02401576		3176.78	0.06500903		3706.78	-0.00101584		4236.78	-0.02580159
526.99	-0.00363978		1056.99	0.00346775		1586.99	-0.00963258		2116.98	-0.00019225		2646.98	-0.02420198		3176.98	0.06451403		3706.98	-0.00127862		4236.98	-0.02598165
527.19	-0.00372013		1057.19	0.00436116		1587.19	-0.00991887		2117.18	-0.00087893		2647.18	-0.0239504		3177.18	0.0639121		3707.18	-0.00113516		4237.18	-0.02611216
527.39	-0.00343234		1057.39	0.00471712		1587.39	-0.01111233		2117.38	-0.00104133		2647.38	-0.02467959		3177.38	0.06320827		3707.38	0.00001502		4237.38	-0.02618088
527.59	-0.00317772		1057.59	0.00492147		1587.59	-0.01078088		2117.58	-0.00235148		2647.58	-0.02486754		3177.58	0.06262668		3707.58	0.00047233		4237.58	-0.02709089
527.79	-0.00250978		1057.79	0.00444183		1587.79	-0.01110935		2117.78	-0.00314796		2647.78	-0.02536968		3177.78	0.0615141		3707.78	0.00053866		4237.78	-0.02734434
527.99	-0.00263426		1057.99	0.00406712		1587.99	-0.01147382		2117.98	-0.00330094		2647.98	-0.02517872		3177.98	0.06069125		3707.98	0.00135325		4237.98	-0.02815606
528.19	-0.0028823		1058.19	0.00332617		1588.19	-0.01232433		2118.18	-0.00462785		2648.18	-0.02539026		3178.18	0.05983603		3708.18	0.00100456		4238.18	-0.02889753
528.39	-0.00325381		1058.39	0.00334611		1588.39	-0.01388293		2118.38	-0.00432744		2648.38	-0.02588216		3178.38	0.05977793		3708.38	0.00113325		4238.38	-0.02943523
528.59	-0.00270848		1058.59	0.00297218		1588.59	-0.01394031		2118.58	-0.00330315		2648.58	-0.02621705		3178.58	0.05903232		3708.58	0.00045879		4238.58	-0.03018379
528.79	-0.00289509		1058.79	0.00148434		1588.79	-0.01332521		2118.78	-0.00266998		2648.78	-0.02696327		3178.78	0.05869675		3708.78	0.0001708		4238.78	-0.03122332
528.99	-0.00239936		1058.99	0.00125826		1588.99	-0.01412343		2118.98	-0.00270474		2648.98	-0.02722347		3178.98	0.05805523		3708.98	-0.00029687		4238.98	-0.03148958
529.19	-0.0027641		1059.19	0.00136068		1589.19	-0.01340478		2119.18	-0.0014885		2649.18	-0.02768872		3179.18	0.05801681		3709.18	-0.00002064		4239.18	-0.03178403
529.39	-0.00239263		1059.39	0.00068489		1589.39	-0.01246705		2119.38	0.00030889		2649.38	-0.02779356		3179.38	0.05862275		3709.38	-0.00127427		4239.38	-0.03216039
529.59	-0.00234258		1059.59	0.00042757		1589.59	-0.01261751		2119.58	0.00109529		2649.58	-0.02754732		3179.58	0.05864358		3709.58	-0.0012869		4239.58	-0.03255258
529.79	-0.00275868		1059.79	-0.00033214		1589.79	-0.01160717		2119.78	0.00067962		2649.78	-0.02766224		3179.78	0.05893686		3709.78	-0.00227583		4239.78	-0.03250214
529.99	-0.00368985		1059.99	0.00000257		1589.99	-0.01095142		2119.98	0.00133816		2649.98	-0.02840741		3179.98	0.06014103		3709.98	-0.00304998		4239.98	-0.03247719
530.19	-0.00339812		1060.19	0.0004126		1590.19	-0.01077124		2120.18	0.00144437		2650.18	-0.0289083		3180.18	0.06047344		3710.18	-0.00241001		4240.18	-0.03389134
530.39	-0.00340316		1060.39	0.00117426		1590.39	-0.01132235		2120.38	0.00085238		2650.38	-0.02936418		3180.38	0.06085768		3710.38	-0.00280943		4240.38	-0.03377109
530.59	-0.00321917		1060.59	0.00140937		1590.59	-0.0119578		2120.58	0.00123776		2650.58	-0.0300009		3180.58	0.06125172		3710.58	-0.00264854		4240.58	-0.03324848
530.79	-0.00342739		1060.79	0.00169852		1590.79	-0.01189756		2120.78	0.00082401		2650.78	-0.02923371		3180.78	0.06057327		3710.78	-0.0019755		4240.78	-0.0325075
530.99	-0.0034099		1060.99	0.00131416		1590.99	-0.01220384		2120.98	0.00051558		2650.98	-0.02903472		3180.98	0.06088269		3710.98	-0.00237421		4240.98	-0.03221719
531.19	-0.00373494		1061.19	0.00143201		1591.19	-0.01215113		2121.18	0.00053575		2651.18	-0.02869924		3181.18	0.06150874		3711.18	-0.00162053		4241.18	-0.03094374
531.39	-0.00323053		1061.39	0.00179936		1591.39	-0.01219106		2121.38	0.00054435		2651.38	-0.02887176		3181.38	0.06247987		3711.38	-0.00152532		4241.38	-0.03092464
531.59	-0.00360401		1061.59	0.00187828		1591.59	-0.01210973		2121.58	-0.00012617		2651.58	-0.02750773		3181.58	0.06167534		3711.58	-0.00131526		4241.58	-0.03191556
531.79	-0.00403711		1061.79	0.00222012		1591.79	-0.0129743		2121.78	-0.0005625		2651.78	-0.0262357		3181.78	0.06167019		3711.78	-0.00108505		4241.78	-0.03150017
531.99	-0.00446756		1061.99	0.00242689		1591.99	-0.01316107		2121.98	-0.00089372		2651.98	-0.02607361		3181.98	0.06060743		3711.98	-0.00060461		4241.98	-0.03142946
532.19	-0.00369838		1062.19	0.00199771		1592.19	-0.01282145		2122.18	-0.00109981		2652.18	-0.02628936		3182.18	0.06045981		3712.18	-0.00076482		4242.18	-0.03116827
532.39	-0.00290668		1062.39	0.00095828		1592.39	-0.01408234		2122.38	-0.00009206		2652.38	-0.02576788		3182.38	0.06016226		3712.38	-0.00048829		4242.38	-0.0314378
532.59	-0.00265169		1062.59	-0.00015235		1592.59	-0.01426086		2122.58	0.00012396		2652.58	-0.02522823		3182.58	0.05965958		3712.58	-0.00055953		4242.58	-0.03104401
532.79	-0.0033711		1062.79	0.00003853		1592.79	-0.01345648		2122.78	0.00019885		2652.78	-0.0256729		3182.78	0.05934933		3712.78	-0.00067816		4242.78	-0.03032807
532.99	-0.00350136		1062.99	0.00045749		1592.99	-0.01397817		2122.98	-0.00059485		2652.98	-0.02656773		3182.98	0.05902539		3712.98	-0.00015539		4242.98	-0.02963998
533.19	-0.0037995		1063.19	0.00075986		1593.19	-0.01295023		2123.18	0.00066973		2653.18	-0.02656678		3183.18	0.05932874		3713.18	0.0001324		4243.18	-0.0295223
533.39	-0.00406853		1063.39	-0.0003819		1593.39	-0.0132919		2123.38	0.00000209		2653.38	-0.02621818		3183.38	0.0594773		3713.38	-0.00054385		4243.38	-0.02957603
533.59	-0.00461451		1063.59	-0.00016422		1593.59	-0.01326229		2123.58	-0.00068038		2653.58	-0.02627394		3183.58	0.05888999		3713.58	-0.00127226		4243.58	-0.02929805
533.79	-0.00523132		1063.79	0.00025956		1593.79	-0.01338908		2123.78	-0.00158995		2653.78	-0.02572591		3183.78	0.05896671		3713.78	-0.00174976		4243.78	-0.0292779
533.99	-0.00586352		1063.99	0.00006976		1593.99	-0.01288533		2123.98	-0.00119927		2653.98	-0.0258578		3183.98	0.05924281		3713.98	-0.00183848		4243.98	-0.02909129
534.19	-0.00610736		1064.19	0.00084333		1594.19	-0.01272139		2124.18	-0.00134048		2654.18	-0.02647484		3184.18	0.05905285		3714.18	-0.00155261		4244.18	-0.02960519
534.39	-0.00665981		1064.39	0.00152309		1594.39	-0.01303533		2124.38	-0.00240175		2654.38	-0.02658985		3184.38	0.06003731		3714.38	-0.00182386		4244.38	-0.02679221
534.59	-0.00663871		1064.59	0.00148973		1594.59	-0.01347491		2124.58	-0.00221325		2654.58	-0.02587415		3184.58	0.0598465		3714.58	-0.00157814		4244.58	-0.02571938
534.79	-0.00670561		1064.79	0.00197203		1594.79	-0.01334743		2124.78	-0.00258411		2654.78	-0.0250458		3184.78	0.05958202		3714.78	-0.00196596		4244.78	-0.02608912
534.99	-0.00649202		1064.99	0.00183052		1594.99	-0.01340183		2124.98	-0.0028207		2654.98	-0.0253465		3184.98	0.06093115		3714.98	-0.00213466		4244.98	-0.02571346
535.19	-0.00656634		1065.19	0.00248151		1595.19	-0.01349806		2125.18	-0.00281001		2655.18	-0.02542083		3185.18	0.0615661		3715.18	-0.00211575		4245.18	-0.02551249
535.39	-0.00646703		1065.39	0.00247388		1595.39	-0.01364549		2125.38	-0.00256549		2655.38	-0.02511848		3185.38	0.06252341		3715.38	-0.00254751		4245.38	-0.02617519
535.59	-0.00651651		1065.59	0.0014168		1595.59	-0.01366956		2125.58	-0.00184429		2655.58	-0.02513196		3185.58	0.06190907		3715.58	-0.00220009		4245.58	-0.02623319
535.79	-0.00586549		1065.79	0.00093679		1595.79	-0.01375586		2125.78	-0.00150485		2655.78	-0.02466524		3185.78	0.06224452		3715.78	-0.00243926		4245.78	-0.02595301
535.99	-0.00496997		1065.99	0.00009332		1595.99	-0.0127204		2125.98	-0.00127744		2655.98	-0.02564026		3185.98	0.06143554		3715.98	-0.0015905		4245.98	-0.02655888
536.19	-0.00407054		1066.19	-0.0007056		1596.19	-0.01192241		2126.18	-0.00106075		2656.18	-0.02635664		3186.18	0.06158153		3716.18	-0.00132041		4246.18	-0.02784516
536.39	-0.00327951		1066.39	-0.00172193		1596.39	-0.01250796		2126.38	-0.00093213		2656.38	-0.02665059		3186.38	0.06135036		3716.38	-0.00058735		4246.38	-0.02874857
536.59	-0.00376087		1066.59	-0.00108932		1596.59	-0.01154686		2126.58	-0.0009263		2656.58	-0.02754997		3186.58	0.06143339		3716.58	-0.00044864		4246.58	-0.02839715
536.79	-0.00397479		1066.79	-0.0003901		1596.79	-0.01153616		2126.78	-0.0008504		2656.78	-0.02835035		3186.78	0.06034023		3716.78	0.00002116		4246.78	-0.02868251
536.99	-0.00326027		1066.99	-0.00124152		1596.99	-0.01210761		2126.98	-0.00019642		2656.98	-0.02880496		3186.98	0.05891475		3716.98	0.00154791		4246.98	-0.02980703
537.19	-0.00328986		1067.19	-0.00144996		1597.19	-0.01144732		2127.18	0.0006184		2657.18	-0.02819778		3187.18	0.05860273		3717.18	0.00159916		4247.18	-0.03035116
537.39	-0.00417567		1067.39	-0.00164662		1597.39	-0.01213089		2127.38	-0.00059106		2657.38	-0.02774891		3187.38	0.05850834		3717.38	0.00053191		4247.38	-0.03139437
537.59	-0.00314119		1067.59	-0.00051869		1597.59	-0.01226824		2127.58	-0.0001034		2657.58	-0.02761332		3187.58	0.05715698		3717.58	-0.00022887		4247.58	-0.03231671
537.79	-0.00312036		1067.79	-0.00009086		1597.79	-0.01318751		2127.78	-0.00004178		2657.78	-0.02655216		3187.78	0.05745465		3717.78	-0.00001244		4247.78	-0.03191013
537.99	-0.00274857		1067.99	-0.00049535		1597.99	-0.01311668		2127.98	0.0000988		2657.98	-0.02654104		3187.98	0.0580964		3717.98	-0.00064769		4247.98	-0.03269099
538.19	-0.0023138		1068.19	0.0004663		1598.19	-0.01366464		2128.18	-0.00094288		2658.18	-0.02643484		3188.18	0.05795317		3718.18	-0.00170879		4248.18	-0.0326232
538.39	-0.00196143		1068.39	0.00020718		1598.39	-0.01446713		2128.38	-0.00133481		2658.38	-0.02587047		3188.38	0.0578046		3718.38	-0.0017957		4248.38	-0.03235178
538.59	-0.00235238		1068.59	0.00025848		1598.59	-0.01460419		2128.58	-0.00092909		2658.58	-0.02546236		3188.58	0.05746526		3718.58	-0.00179453		4248.58	-0.03270171
538.79	-0.00220513		1068.79	0.00082463		1598.79	-0.01413063		2128.78	-0.00119478		2658.78	-0.02542114		3188.78	0.05779392		3718.78	-0.00291949		4248.78	-0.03257334
538.99	-0.00271013		1068.99	0.0004353		1598.99	-0.01402872		2128.98	-0.00109613		2658.98	-0.02520585		3188.98	0.05828417		3718.98	-0.00298532		4248.98	-0.03205827
539.19	-0.00342468		1069.19	0.00025718		1599.19	-0.01492437		2129.18	-0.00179953		2659.18	-0.02519007		3189.18	0.05887982		3719.18	-0.00328265		4249.18	-0.03158035
539.39	-0.00316088		1069.39	-0.00061553		1599.39	-0.01366087		2129.38	-0.00224653		2659.38	-0.02500407		3189.38	0.0594526		3719.38	-0.00322584		4249.38	-0.03149699
539.59	-0.0028096		1069.59	-0.00146618		1599.59	-0.01347809		2129.58	-0.00212109		2659.58	-0.02508605		3189.58	0.05819434		3719.58	-0.0026284		4249.58	-0.03079929
539.79	-0.00209265		1069.79	-0.00071851		1599.79	-0.01282308		2129.78	-0.00301961		2659.78	-0.02504719		3189.78	0.05884693		3719.78	-0.00226882		4249.78	-0.03059756
539.99	-0.00202389		1069.99	-0.00119995		1599.99	-0.01094172		2129.98	-0.00293357		2659.98	-0.02577316		3189.98	0.05899679		3719.98	-0.00163734		4249.98	-0.0306976
540.19	-0.00149864		1070.19	-0.00049732		1600.19	-0.01019103		2130.18	-0.00324978		2660.18	-0.02671944		3190.18	0.05921513		3720.18	-0.00144858		4250.18	-0.03115942
540.39	-0.00114588		1070.39	0.00025595		1600.39	-0.01070045		2130.38	-0.00332463		2660.38	-0.02709199		3190.38	0.05969084		3720.38	-0.0012699		4250.38	-0.03009298
540.59	-0.00188356		1070.59	0.00080151		1600.59	-0.01103628		2130.58	-0.00294561		2660.58	-0.02758198		3190.58	0.05945512		3720.58	-0.00146105		4250.58	-0.02917952
540.79	-0.00224988		1070.79	0.00095914		1600.79	-0.01129642		2130.78	-0.00201313		2660.78	-0.02741939		3190.78	0.05942365		3720.78	-0.00130377		4250.78	-0.02831413
540.99	-0.00254538		1070.99	0.00138172		1600.99	-0.01098667		2130.98	-0.00062055		2660.98	-0.02741257		3190.98	0.05922616		3720.98	-0.00037665		4250.98	-0.02834136
541.19	-0.00394259		1071.19	0.00180961		1601.19	-0.0112413		2131.18	-0.0002239		2661.18	-0.02681821		3191.18	0.05981912		3721.18	-0.00120949		4251.18	-0.02801594
541.39	-0.00377353		1071.39	0.00246348		1601.39	-0.01169381		2131.38	0.00042741		2661.38	-0.02683724		3191.38	0.06003012		3721.38	-0.00167709		4251.38	-0.02879889
541.59	-0.00309276		1071.59	0.00229414		1601.59	-0.01219122		2131.58	0.00136958		2661.58	-0.02742625		3191.58	0.06018546		3721.58	-0.00185218		4251.58	-0.02909843
541.79	-0.00348746		1071.79	0.00181106		1601.79	-0.01254804		2131.78	0.00150393		2661.78	-0.02738731		3191.78	0.06149808		3721.78	-0.002317		4251.78	-0.02848131
541.99	-0.00402697		1071.99	0.00112427		1601.99	-0.01245233		2131.98	0.00205066		2661.98	-0.02740028		3191.98	0.06107848		3721.98	-0.00336608		4251.98	-0.02954461
542.19	-0.00369721		1072.19	0.00068156		1602.19	-0.01243261		2132.18	0.00152115		2662.18	-0.02709658		3192.18	0.05937135		3722.18	-0.00359632		4252.18	-0.02982351
542.39	-0.00499325		1072.39	-0.00045182		1602.39	-0.0119976		2132.38	0.00197946		2662.38	-0.02686085		3192.38	0.05879974		3722.38	-0.003172		4252.38	-0.0299225
542.59	-0.00608744		1072.59	-0.00094335		1602.59	-0.01184551		2132.58	0.00213953		2662.58	-0.02665831		3192.58	0.05891372		3722.58	-0.00228548		4252.58	-0.02969096
542.79	-0.00586602		1072.79	-0.00153049		1602.79	-0.01155605		2132.78	0.00192289		2662.78	-0.02678622		3192.78	0.05894378		3722.78	-0.00153142		4252.78	-0.0301864
542.99	-0.00653697		1072.99	-0.00275521		1602.99	-0.01158955		2132.98	0.00130796		2662.98	-0.02608819		3192.98	0.05884047		3722.98	-0.00169375		4252.98	-0.03126728
543.19	-0.00710349		1073.19	-0.00270242		1603.19	-0.01066394		2133.18	0.0001081		2663.18	-0.02596343		3193.18	0.0594383		3723.18	-0.00146476		4253.18	-0.03195136
543.39	-0.00623284		1073.39	-0.00340528		1603.39	-0.00980075		2133.38	0.00015747		2663.38	-0.02553264		3193.38	0.05824505		3723.38	-0.00037464		4253.38	-0.03317909
543.59	-0.00576725		1073.59	-0.0035799		1603.59	-0.00940695		2133.58	-0.00097211		2663.58	-0.02526056		3193.58	0.05818425		3723.58	-0.00017733		4253.58	-0.03350963
543.79	-0.00558252		1073.79	-0.00360318		1603.79	-0.00882699		2133.78	-0.00183215		2663.78	-0.02513629		3193.78	0.05912554		3723.78	-0.00017353		4253.78	-0.03444743
543.99	-0.00607737		1073.99	-0.00357528		1603.99	-0.0085547		2133.98	-0.00172624		2663.98	-0.02520308		3193.98	0.05934816		3723.98	0.00011758		4253.98	-0.03498778
544.19	-0.00599151		1074.19	-0.00253918		1604.19	-0.00900083		2134.18	-0.00279537		2664.18	-0.02541158		3194.18	0.0593256		3724.18	-0.00011467		4254.18	-0.03507737
544.39	-0.00507973		1074.39	-0.00112256		1604.39	-0.00997069		2134.38	-0.00309717		2664.38	-0.02585914		3194.38	0.05973651		3724.38	-0.00019998		4254.38	-0.03423882
544.59	-0.0050905		1074.59	-0.00051091		1604.59	-0.01047386		2134.58	-0.00231476		2664.58	-0.02596533		3194.58	0.06013997		3724.58	0.00042464		4254.58	-0.03409732
544.79	-0.004547		1074.79	0.00011028		1604.79	-0.01110507		2134.78	-0.00151826		2664.78	-0.02638851		3194.78	0.06075115		3724.78	0.00030667		4254.78	-0.03433702
544.99	-0.00495109		1074.99	0.00072104		1604.99	-0.0117887		2134.98	-0.00109746		2664.98	-0.02674815		3194.98	0.05984477		3724.98	0.00059221		4254.98	-0.03415341
545.19	-0.00518568		1075.19	0.00040171		1605.19	-0.01378226		2135.18	-0.00132248		2665.18	-0.02659835		3195.18	0.05964536		3725.18	-0.00045754		4255.18	-0.03388771
545.39	-0.00433155		1075.39	0.00151569		1605.39	-0.01372035		2135.38	-0.00116172		2665.38	-0.02770518		3195.38	0.05939603		3725.38	-0.0008233		4255.38	-0.03352754
545.59	-0.00435751		1075.59	0.00176433		1605.59	-0.01393613		2135.58	-0.00096338		2665.58	-0.02756149		3195.58	0.05933816		3725.58	-0.00142737		4255.58	-0.03241704
545.79	-0.003525		1075.79	0.00139813		1605.79	-0.01403265		2135.78	-0.0009548		2665.78	-0.02713962		3195.78	0.05840099		3725.78	-0.0024541		4255.78	-0.03118907
545.99	-0.00399547		1075.99	0.00092394		1605.99	-0.01402788		2135.98	-0.00121795		2665.98	-0.0277757		3195.98	0.05746466		3725.98	-0.00289982		4255.98	-0.03048932
546.19	-0.00443468		1076.19	0.00037861		1606.19	-0.01407013		2136.18	-0.00154833		2666.18	-0.02791575		3196.18	0.05726768		3726.18	-0.00214263		4256.18	-0.03068624
546.39	-0.00536297		1076.39	0.00028045		1606.39	-0.01398787		2136.38	-0.00050343		2666.38	-0.02744362		3196.38	0.05817804		3726.38	-0.00192559		4256.38	-0.03047208
546.59	-0.00595611		1076.59	-0.00042258		1606.59	-0.01370533		2136.58	-0.00041957		2666.58	-0.0272785		3196.58	0.05868641		3726.58	-0.0015049		4256.58	-0.03027956
546.79	-0.00659448		1076.79	-0.0005822		1606.79	-0.01356159		2136.78	-0.00080119		2666.78	-0.02641903		3196.78	0.05909931		3726.78	-0.00196126		4256.78	-0.03034884
546.99	-0.00728655		1076.99	-0.00108524		1606.99	-0.01320108		2136.98	-0.00157033		2666.98	-0.02636048		3196.98	0.05900545		3726.98	-0.0030761		4256.98	-0.03117903
547.19	-0.00778928		1077.19	-0.00097308		1607.19	-0.01268088		2137.18	-0.00201264		2667.18	-0.02548515		3197.18	0.05838043		3727.18	-0.00230839		4257.18	-0.03130357
547.39	-0.00756531		1077.39	-0.00170586		1607.39	-0.01254587		2137.38	-0.0020033		2667.38	-0.0248242		3197.38	0.05784527		3727.38	-0.00193802		4257.38	-0.03157472
547.59	-0.008379		1077.59	-0.0016916		1607.59	-0.01173489		2137.58	-0.00264632		2667.58	-0.02498963		3197.58	0.05887859		3727.58	-0.00199519		4257.58	-0.03118117
547.79	-0.00819695		1077.79	-0.00185013		1607.79	-0.01103162		2137.78	-0.00234823		2667.78	-0.02487016		3197.78	0.05984962		3727.78	-0.00122421		4257.78	-0.03159754
547.99	-0.00806822		1077.99	-0.00142481		1607.99	-0.0118303		2137.98	-0.00227641		2667.98	-0.02533621		3197.98	0.06010635		3727.98	-0.00095841		4257.98	-0.03113587
548.19	-0.00660493		1078.19	-0.00096019		1608.19	-0.01145288		2138.18	-0.00283489		2668.18	-0.02672116		3198.18	0.06120344		3728.18	-0.00136575		4258.18	-0.03138464
548.39	-0.00529519		1078.39	-0.00037079		1608.39	-0.01156022		2138.38	-0.00245309		2668.38	-0.02724506		3198.38	0.0621343		3728.38	-0.00150822		4258.38	-0.03200003
548.59	-0.00474433		1078.59	-0.00042774		1608.59	-0.01220905		2138.58	-0.00224602		2668.58	-0.02722189		3198.58	0.06177065		3728.58	-0.00147157		4258.58	-0.03255862
548.79	-0.00412069		1078.79	-0.00091639		1608.79	-0.0131994		2138.78	-0.00170674		2668.78	-0.02775752		3198.78	0.06161913		3728.78	-0.00233588		4258.78	-0.03194237
548.99	-0.00376309		1078.99	-0.0007091		1608.99	-0.01335514		2138.98	-0.00166911		2668.98	-0.02767496		3198.98	0.06038999		3728.98	-0.00197706		4258.98	-0.03138162
549.19	-0.00321147		1079.19	-0.00060643		1609.19	-0.01357711		2139.18	-0.001395		2669.18	-0.02727699		3199.18	0.05993809		3729.18	-0.001971		4259.18	-0.03087011
549.39	-0.00187273		1079.39	-0.00055472		1609.39	-0.01326769		2139.38	-0.00152373		2669.38	-0.02761954		3199.38	0.05885772		3729.38	-0.00178239		4259.38	-0.02989936
549.59	-0.00155055		1079.59	-0.0003596		1609.59	-0.01357987		2139.58	-0.00178516		2669.58	-0.02751293		3199.58	0.05772235		3729.58	-0.00178669		4259.58	-0.02919183
549.79	-0.00144473		1079.79	-0.0011751		1609.79	-0.01348002		2139.78	-0.00253831		2669.78	-0.02785734		3199.78	0.05681942		3729.78	-0.00276032		4259.78	-0.02882134
549.99	-0.00249652		1079.99	-0.00108245		1609.99	-0.01347739		2139.98	-0.00274396		2669.98	-0.02832016		3199.98	0.05613874		3729.98	-0.00242236		4259.98	-0.03001476
550.19	-0.00306613		1080.19	-0.00056841		1610.19	-0.01272724		2140.18	-0.00214581		2670.18	-0.02729483		3200.18	0.05535284		3730.18	-0.00223848		4260.18	-0.03070308
550.39	-0.00275142		1080.39	-0.00095903		1610.39	-0.01274766		2140.38	-0.0026626		2670.38	-0.02650688		3200.38	0.05507447		3730.38	-0.00374532		4260.38	-0.03041896
550.59	-0.00361913		1080.59	-0.00080426		1610.59	-0.01313223		2140.58	-0.0035164		2670.58	-0.02619463		3200.58	0.05430453		3730.58	-0.00505339		4260.58	-0.03044864
550.79	-0.00425685		1080.79	-0.00114858		1610.79	-0.01464374		2140.78	-0.00370153		2670.78	-0.02627821		3200.78	0.05428099		3730.78	-0.00564284		4260.78	-0.03147003
550.99	-0.0042815		1080.99	-0.00040496		1610.99	-0.01402419		2140.98	-0.00374243		2670.98	-0.02669058		3200.98	0.05413375		3730.98	-0.0058349		4260.98	-0.03293385
551.19	-0.00460343		1081.19	0.00012644		1611.19	-0.01336812		2141.18	-0.0035556		2671.18	-0.02666071		3201.18	0.05437761		3731.18	-0.00551935		4261.18	-0.03317841
551.39	-0.00471345		1081.39	-0.00020934		1611.39	-0.01247464		2141.38	-0.00264759		2671.38	-0.02685465		3201.38	0.05512048		3731.38	-0.00482194		4261.38	-0.03336532
551.59	-0.0037184		1081.59	-0.00026883		1611.59	-0.01204084		2141.58	-0.00291098		2671.58	-0.02728436		3201.58	0.05660257		3731.58	-0.00398303		4261.58	-0.03291735
551.79	-0.00303428		1081.79	0.00012099		1611.79	-0.01194954		2141.78	-0.00352368		2671.78	-0.02798829		3201.78	0.05703577		3731.78	-0.00416997		4261.78	-0.03354564
551.99	-0.00300763		1081.99	-0.00001444		1611.99	-0.01254976		2141.98	-0.00312575		2671.98	-0.02926568		3201.98	0.05728656		3731.98	-0.00375237		4261.98	-0.03328792
552.19	-0.00248371		1082.19	-0.00013455		1612.19	-0.01188389		2142.18	-0.00315642		2672.18	-0.02947038		3202.18	0.05842221		3732.18	-0.00477737		4262.18	-0.03325964
552.39	-0.00278566		1082.39	-0.00021056		1612.39	-0.01267195		2142.38	-0.00251452		2672.38	-0.02831518		3202.38	0.05878582		3732.38	-0.00458315		4262.38	-0.03368615
552.59	-0.00206557		1082.59	-0.00035856		1612.59	-0.01313886		2142.58	-0.00223715		2672.58	-0.02847129		3202.58	0.05831878		3732.58	-0.00413389		4262.58	-0.03261214
552.79	-0.00195799		1082.79	-0.00043552		1612.79	-0.01356548		2142.78	-0.00139453		2672.78	-0.02824286		3202.78	0.058893		3732.78	-0.00377331		4262.78	-0.03162452
552.99	-0.00185308		1082.99	-0.00087825		1612.99	-0.01411344		2142.98	-0.00154146		2672.98	-0.02783431		3202.98	0.05823165		3732.98	-0.00319137		4262.98	-0.03102301
553.19	-0.00265921		1083.19	-0.00087887		1613.19	-0.0142677		2143.18	-0.00149053		2673.18	-0.0280065		3203.18	0.05789807		3733.18	-0.00245955		4263.18	-0.0299971
553.39	-0.00294643		1083.39	-0.00117184		1613.39	-0.0150428		2143.38	-0.00185984		2673.38	-0.02862261		3203.38	0.05688979		3733.38	-0.00202795		4263.38	-0.03009871
553.59	-0.00444335		1083.59	-0.00038701		1613.59	-0.0157269		2143.58	-0.002286		2673.58	-0.02846234		3203.58	0.0563626		3733.58	-0.00181344		4263.58	-0.02999062
553.79	-0.00500778		1083.79	-0.00057937		1613.79	-0.01473595		2143.78	-0.00225399		2673.78	-0.02833502		3203.78	0.05558636		3733.78	-0.00162656		4263.78	-0.03037904
553.99	-0.00632602		1083.99	-0.00026515		1613.99	-0.01393432		2143.98	-0.00219156		2673.98	-0.02755954		3203.98	0.0545811		3733.98	-0.00097998		4263.98	-0.03094897
554.19	-0.00704232		1084.19	0.00030909		1614.19	-0.0131026		2144.18	-0.00256485		2674.18	-0.02675306		3204.18	0.05430272		3734.18	-0.00138756		4264.18	-0.03057723
554.39	-0.00768281		1084.39	-0.00031025		1614.39	-0.01324837		2144.38	-0.00295417		2674.38	-0.02670026		3204.38	0.0546172		3734.38	-0.00191256		4264.38	-0.03111491
554.59	-0.00858688		1084.59	0.00078183		1614.59	-0.01326807		2144.58	-0.00287491		2674.58	-0.02634511		3204.58	0.05539858		3734.58	-0.00154945		4264.58	-0.0321073
554.79	-0.00900059		1084.79	0.00047942		1614.79	-0.01313556		2144.78	-0.00331553		2674.78	-0.02571298		3204.78	0.05601914		3734.78	-0.00080424		4264.78	-0.03335273
554.99	-0.0091765		1084.99	0.00125481		1614.99	-0.01191294		2144.98	-0.00339477		2674.98	-0.02578781		3204.98	0.0560928		3734.98	-0.00049908		4264.98	-0.03363059
555.19	-0.00857831		1085.19	0.00078051		1615.19	-0.01145742		2145.18	-0.00442784		2675.18	-0.02599599		3205.18	0.05624499		3735.18	-0.00030138		4265.18	-0.03407023
555.39	-0.00841484		1085.39	0.00002921		1615.39	-0.01118846		2145.38	-0.00429812		2675.38	-0.02588909		3205.38	0.05561197		3735.38	-0.00034859		4265.38	-0.03414094
555.59	-0.00741148		1085.59	-0.00054434		1615.59	-0.01062865		2145.58	-0.00531923		2675.58	-0.02688189		3205.58	0.05599485		3735.58	-0.00098807		4265.58	-0.03452928
555.79	-0.00708268		1085.79	-0.00100945		1615.79	-0.01088719		2145.78	-0.00573333		2675.78	-0.02835887		3205.78	0.05590646		3735.78	-0.00198424		4265.78	-0.03543035
555.99	-0.00657103		1085.99	-0.00165183		1615.99	-0.01129523		2145.98	-0.00550407		2675.98	-0.02913472		3205.98	0.05649672		3735.98	-0.00278773		4265.98	-0.03506007
556.19	-0.00560064		1086.19	-0.00200829		1616.19	-0.01234066		2146.18	-0.0046702		2676.18	-0.02909067		3206.18	0.05734942		3736.18	-0.00412854		4266.18	-0.0335363
556.39	-0.00475445		1086.39	-0.00213599		1616.39	-0.01336173		2146.38	-0.00415076		2676.38	-0.02956064		3206.38	0.05711236		3736.38	-0.00471382		4266.38	-0.03322805
556.59	-0.00409732		1086.59	-0.00233226		1616.59	-0.01379928		2146.58	-0.0030168		2676.58	-0.03007709		3206.58	0.05691816		3736.58	-0.00504242		4266.58	-0.03220418
556.79	-0.00441915		1086.79	-0.00324102		1616.79	-0.01451737		2146.78	-0.00241552		2676.78	-0.03003837		3206.78	0.05708749		3736.78	-0.00547448		4266.78	-0.03176602
556.99	-0.00471712		1086.99	-0.00351963		1616.99	-0.01539846		2146.98	-0.00273078		2676.98	-0.03017465		3206.98	0.0560278		3736.98	-0.00572156		4266.98	-0.0321756
557.19	-0.00553428		1087.19	-0.00285982		1617.19	-0.01582699		2147.18	-0.00209016		2677.18	-0.03100036		3207.18	0.05516573		3737.18	-0.00563891		4267.18	-0.03228647
557.39	-0.00510693		1087.39	-0.00324867		1617.39	-0.01564387		2147.38	-0.00306762		2677.38	-0.03110453		3207.38	0.05599556		3737.38	-0.00544913		4267.38	-0.03284052
557.59	-0.00509568		1087.59	-0.00301295		1617.59	-0.01599067		2147.58	-0.00340861		2677.58	-0.03066623		3207.58	0.05652465		3737.58	-0.00492514		4267.58	-0.03299882
557.79	-0.00488209		1087.79	-0.00304102		1617.79	-0.01530664		2147.78	-0.00336819		2677.78	-0.03027127		3207.78	0.0562936		3737.78	-0.00390789		4267.78	-0.03287377
557.99	-0.00546971		1087.99	-0.00335079		1617.99	-0.0154471		2147.98	-0.00344837		2677.98	-0.02942693		3207.98	0.05663027		3737.98	-0.00320359		4267.98	-0.03280699
558.19	-0.00521623		1088.19	-0.00300266		1618.19	-0.01582806		2148.18	-0.00326701		2678.18	-0.02935638		3208.18	0.05713417		3738.18	-0.00290702		4268.18	-0.03301897
558.39	-0.00532418		1088.39	-0.00297625		1618.39	-0.01607571		2148.38	-0.00309404		2678.38	-0.02933142		3208.38	0.05748683		3738.38	-0.00238148		4268.38	-0.03320932
558.59	-0.00536503		1088.59	-0.00240759		1618.59	-0.01619631		2148.58	-0.00330742		2678.58	-0.02922404		3208.58	0.05789184		3738.58	-0.00220545		4268.58	-0.03326385
558.79	-0.005435		1088.79	-0.00264349		1618.79	-0.01639217		2148.78	-0.00359513		2678.78	-0.02927051		3208.78	0.05762856		3738.78	-0.00244933		4268.78	-0.03315935
558.99	-0.00553549		1088.99	-0.00228623		1618.99	-0.01613165		2148.98	-0.00310664		2678.98	-0.03010196		3208.98	0.05756045		3738.98	-0.00299099		4268.98	-0.03285765
559.19	-0.00549374		1089.19	-0.00209532		1619.19	-0.01591895		2149.18	-0.00303017		2679.18	-0.03062402		3209.18	0.05748625		3739.18	-0.0037182		4269.18	-0.03322423
559.39	-0.00616191		1089.39	-0.0018938		1619.39	-0.01530029		2149.38	-0.00214527		2679.38	-0.03182601		3209.38	0.05735871		3739.38	-0.00476697		4269.38	-0.03293257
559.59	-0.00607913		1089.59	-0.00205331		1619.59	-0.01489051		2149.58	-0.00194643		2679.58	-0.03338344		3209.58	0.05776391		3739.58	-0.00555959		4269.58	-0.03280998
559.79	-0.00616657		1089.79	-0.00175634		1619.79	-0.01522372		2149.78	-0.00143629		2679.78	-0.03467806		3209.78	0.05802749		3739.78	-0.0067364		4269.78	-0.03214047
