# Supplementary material for: Functional development of a V3/glycan-specific broadly neutralizing antibody isolated from a case of HIV superinfection
Source: eLife journal article supplement (doi:10.7554/elife.68110), 2021-07-15
Supplement: fig2-data2 [file D7.xls]

Vers 3.43 Data Simulation
Conc1	1.25E-07	1.25E-07	1.25E-07	1.25E-07	1.25E-07	1.25E-07	1.25E-07
Start1	200	730.02	1260.01	1790.04	2320.04	2850.04	3380.04
Stop1	559.79	1089.82	1619.81	2149.84	2679.84	3209.84	3739.84
Time1	Data1	Sim1	Time2	Data2	Sim2	Time3	Data3	Sim3	Time4	Data4	Sim4	Time5	Data5	Sim5	Time6	Data6	Sim6	Time7	Data7	Sim7
200	0.00270481		730.02	-0.00562779		1260.01	-0.00122688		1790.04	0.00640032		2320.04	-0.00178434		2850.04	-0.00458864		3380.04	-0.00527555
200.2	0.0031709		730.22	-0.00509675		1260.21	0.00017077		1790.24	0.00635789		2320.24	-0.0016805		2850.24	-0.00482628		3380.24	-0.00507759
200.4	0.00349388		730.42	-0.00566105		1260.41	0.00101081		1790.44	0.00651131		2320.44	-0.00212367		2850.44	-0.00513566		3380.44	-0.00491164
200.6	0.00413129		730.62	-0.00582898		1260.61	0.00225752		1790.64	0.00724361		2320.64	-0.00272156		2850.64	-0.00545149		3380.64	-0.00452671
200.8	0.00416594		730.82	-0.00538778		1260.81	0.00294212		1790.84	0.00758175		2320.84	-0.00352231		2850.84	-0.00558273		3380.84	-0.00403042
201	0.00478365		731.02	-0.00454899		1261.01	0.00352622		1791.04	0.00732672		2321.04	-0.00347083		2851.04	-0.00600136		3381.04	-0.00353371
201.2	0.00496302		731.22	-0.00399153		1261.21	0.00432811		1791.24	0.00676379		2321.24	-0.00410972		2851.24	-0.00652116		3381.24	-0.00329114
201.4	0.00477946		731.42	-0.00376458		1261.41	0.00522776		1791.44	0.00632651		2321.44	-0.00432951		2851.44	-0.00693184		3381.44	-0.00329718
201.6	0.00488286		731.62	-0.00404598		1261.61	0.0051162		1791.64	0.00609239		2321.64	-0.00450457		2851.64	-0.00690875		3381.64	-0.00313328
201.8	0.00461507		731.82	-0.00415219		1261.81	0.00523201		1791.84	0.00602179		2321.84	-0.00554675		2851.84	-0.00732571		3381.84	-0.00307478
202	0.00406291		732.02	-0.0037162		1262.01	0.00544285		1792.04	0.00562544		2322.04	-0.00602438		2852.04	-0.00796765		3382.04	-0.00263136
202.2	0.00337644		732.22	-0.00369814		1262.21	0.00500468		1792.24	0.00566933		2322.24	-0.00632611		2852.24	-0.00861609		3382.24	-0.00245623
202.4	0.00339405		732.42	-0.00309571		1262.41	0.00515198		1792.44	0.00489269		2322.44	-0.00555429		2852.44	-0.0079639		3382.44	-0.00247434
202.6	0.00366745		732.62	-0.00193989		1262.61	0.00474793		1792.64	0.00515777		2322.64	-0.00710428		2852.64	-0.0083405		3382.64	-0.00181284
202.8	0.00368813		732.82	-0.00154391		1262.81	0.00417164		1792.84	0.00555614		2322.84	-0.00703517		2852.84	-0.00884732		3382.84	-0.00106715
203	0.00329638		733.02	-0.00157248		1263.01	0.0034184		1793.04	0.00495674		2323.04	-0.00644482		2853.04	-0.00902945		3383.04	-0.00053398
203.2	0.00300082		733.22	-0.00136978		1263.21	0.00381208		1793.24	0.00454442		2323.24	-0.00668174		2853.24	-0.01022489		3383.24	0.000041
203.4	0.00192265		733.42	-0.001057		1263.41	0.00356434		1793.44	0.00401492		2323.44	-0.00642218		2853.44	-0.01016758		3383.44	-0.00019878
203.6	0.00171815		733.62	-0.00164265		1263.61	0.00385823		1793.64	0.00386764		2323.64	-0.00595128		2853.64	-0.01023677		3383.64	-0.00012866
203.8	0.00129517		733.82	-0.00197074		1263.81	0.00352301		1793.84	0.00452841		2323.84	-0.0057012		2853.84	-0.0094171		3383.84	0.00071282
204	0.00160257		734.02	-0.00219299		1264.01	0.00299573		1794.04	0.00447129		2324.04	-0.00575777		2854.04	-0.00851525		3384.04	0.0001268
204.2	0.00121		734.22	-0.00191559		1264.21	0.0031263		1794.24	0.00431097		2324.24	-0.00515053		2854.24	-0.00849172		3384.24	0.00029537
204.4	0.00071834		734.42	-0.00289886		1264.41	0.00230067		1794.44	0.00492092		2324.44	-0.0053541		2854.44	-0.00792033		3384.44	-0.0000354
204.6	0.00135255		734.62	-0.0027573		1264.61	0.0020647		1794.64	0.00562806		2324.64	-0.00498736		2854.64	-0.0076435		3384.64	-0.00057379
204.8	0.00141397		734.82	-0.0022174		1264.81	0.00135363		1794.84	0.00504662		2324.84	-0.00448341		2854.84	-0.00643547		3384.84	-0.00076769
205	0.00180136		735.02	-0.0020795		1265.01	0.00111373		1795.04	0.00410394		2325.04	-0.00415165		2855.04	-0.00603473		3385.04	-0.00134966
205.2	0.00180648		735.22	-0.00316948		1265.21	0.00121223		1795.24	0.00366005		2325.24	-0.00385926		2855.24	-0.00520335		3385.24	-0.00278705
205.4	0.00311182		735.42	-0.00406804		1265.41	0.00102206		1795.44	0.003592		2325.44	-0.00362431		2855.44	-0.00496871		3385.44	-0.00360096
205.6	0.00306933		735.62	-0.00502503		1265.61	0.00032202		1795.64	0.00403517		2325.64	-0.0042634		2855.64	-0.00459234		3385.64	-0.00437995
205.8	0.00360755		735.82	-0.00495686		1265.81	0.00050064		1795.84	0.00490278		2325.84	-0.00441671		2855.84	-0.00509127		3385.84	-0.00458221
206	0.0039331		736.02	-0.00486355		1266.01	0.00045835		1796.04	0.00482008		2326.04	-0.00334236		2856.04	-0.00535099		3386.04	-0.00408637
206.2	0.00429714		736.22	-0.0047824		1266.21	0.00090107		1796.24	0.00482033		2326.24	-0.00323071		2856.24	-0.00534368		3386.24	-0.00450568
206.4	0.00518222		736.42	-0.00457618		1266.41	0.00076933		1796.44	0.00424737		2326.44	-0.00368962		2856.44	-0.00522481		3386.44	-0.00419955
206.6	0.00652287		736.62	-0.00411444		1266.61	0.00134384		1796.64	0.00515738		2326.64	-0.00404666		2856.64	-0.00581843		3386.64	-0.00387266
206.8	0.00675741		736.82	-0.00429908		1266.81	0.00231528		1796.84	0.00481376		2326.84	-0.00389063		2856.84	-0.00649807		3386.84	-0.0035303
207	0.0066218		737.02	-0.00438267		1267.01	0.00259384		1797.04	0.00422034		2327.04	-0.00518447		2857.04	-0.00711988		3387.04	-0.00247418
207.2	0.00645375		737.22	-0.00452254		1267.21	0.00299712		1797.24	0.00396121		2327.24	-0.00635832		2857.24	-0.00770452		3387.24	-0.00272388
207.4	0.00621035		737.42	-0.00491502		1267.41	0.00264974		1797.44	0.00450118		2327.44	-0.00700718		2857.44	-0.00809435		3387.44	-0.00293826
207.6	0.00597401		737.62	-0.00571104		1267.61	0.00307444		1797.64	0.00458989		2327.64	-0.00748885		2857.64	-0.00860048		3387.64	-0.00306943
207.8	0.00558809		737.82	-0.00476681		1267.81	0.00363968		1797.84	0.00399279		2327.84	-0.00794269		2857.84	-0.00813543		3387.84	-0.00268932
208	0.00595199		738.02	-0.00444044		1268.01	0.00346807		1798.04	0.00360652		2328.04	-0.00763405		2858.04	-0.00811566		3388.04	-0.00275328
208.2	0.00624229		738.22	-0.00405151		1268.21	0.00307874		1798.24	0.00320351		2328.24	-0.00840597		2858.24	-0.00830861		3388.24	-0.0023017
208.4	0.00550852		738.42	-0.00374727		1268.41	0.00294738		1798.44	0.00392289		2328.44	-0.00849833		2858.44	-0.00860924		3388.44	-0.00210068
208.6	0.00635865		738.62	-0.00376922		1268.61	0.00337598		1798.64	0.0039513		2328.64	-0.00897734		2858.64	-0.00821257		3388.64	-0.00211558
208.8	0.00638137		738.82	-0.00332116		1268.81	0.00383162		1798.84	0.00366658		2328.84	-0.00920624		2858.84	-0.00736625		3388.84	-0.0023094
209	0.00623956		739.02	-0.00387598		1269.01	0.00381554		1799.04	0.00304674		2329.04	-0.00893641		2859.04	-0.00734574		3389.04	-0.00272638
209.2	0.00673624		739.22	-0.00406571		1269.21	0.00334972		1799.24	0.00378241		2329.24	-0.00809296		2859.24	-0.00685492		3389.24	-0.00355059
209.4	0.00733184		739.42	-0.00410713		1269.41	0.00209848		1799.44	0.00448297		2329.44	-0.00764283		2859.44	-0.00774117		3389.44	-0.00322826
209.6	0.00657063		739.62	-0.00413154		1269.61	0.00127013		1799.64	0.00500669		2329.64	-0.00737683		2859.64	-0.00731246		3389.64	-0.00314589
209.8	0.00790742		739.82	-0.00409471		1269.81	0.00101738		1799.84	0.00563218		2329.84	-0.0060144		2859.84	-0.00743549		3389.84	-0.0022902
210	0.00828163		740.02	-0.00368055		1270.01	0.0012397		1800.04	0.00523725		2330.04	-0.00570236		2860.04	-0.00698303		3390.04	-0.00198638
210.2	0.00923733		740.22	-0.0036328		1270.21	0.00250271		1800.24	0.00514093		2330.24	-0.00540047		2860.24	-0.00706493		3390.24	-0.00261641
210.4	0.01039349		740.42	-0.00439273		1270.41	0.0016479		1800.44	0.00509119		2330.44	-0.0049961		2860.44	-0.00742155		3390.44	-0.00182395
210.6	0.01119375		740.62	-0.00487678		1270.61	0.0019728		1800.64	0.00519726		2330.64	-0.00423682		2860.64	-0.00640415		3390.64	-0.00218987
210.8	0.01071521		740.82	-0.0056838		1270.81	0.00174983		1800.84	0.00508255		2330.84	-0.00523199		2860.84	-0.00561131		3390.84	-0.00160219
211	0.01085693		741.02	-0.00608852		1271.01	0.00107742		1801.04	0.00493048		2331.04	-0.00630025		2861.04	-0.0059082		3391.04	-0.00161798
211.2	0.01099978		741.22	-0.00787217		1271.21	0.00067006		1801.24	0.0046386		2331.24	-0.00552492		2861.24	-0.00563711		3391.24	-0.00236186
211.4	0.01072667		741.42	-0.00775405		1271.41	0.00042191		1801.44	0.00417957		2331.44	-0.00541003		2861.44	-0.00607811		3391.44	-0.00245568
211.6	0.0100632		741.62	-0.00741142		1271.61	0.00033255		1801.64	0.00297558		2331.64	-0.00447537		2861.64	-0.00577363		3391.64	-0.00341467
211.8	0.00988008		741.82	-0.00705203		1271.81	0.00018333		1801.84	0.00263396		2331.84	-0.00387079		2861.84	-0.00559181		3391.84	-0.00250509
212	0.00973172		742.02	-0.00780411		1272.01	-0.00025856		1802.04	0.00215366		2332.04	-0.0032148		2862.04	-0.00530997		3392.04	-0.00211782
212.2	0.00907779		742.22	-0.00697572		1272.21	-0.00012582		1802.24	0.00182514		2332.24	-0.0034198		2862.24	-0.00528597		3392.24	-0.00173369
212.4	0.00838895		742.42	-0.00702328		1272.41	0.00053725		1802.44	0.00237759		2332.44	-0.00377082		2862.44	-0.0048498		3392.44	-0.00230813
212.6	0.00901046		742.62	-0.00734098		1272.61	0.00079975		1802.64	0.0022276		2332.64	-0.00416234		2862.64	-0.00488168		3392.64	-0.00275279
212.8	0.00856949		742.82	-0.00708647		1272.81	0.00109705		1802.84	0.00194933		2332.84	-0.00419579		2862.84	-0.00468014		3392.84	-0.0034695
213	0.00812602		743.02	-0.00705035		1273.01	0.00038567		1803.04	0.00191002		2333.04	-0.00409346		2863.04	-0.00479082		3393.04	-0.00287475
213.2	0.00811307		743.22	-0.00647102		1273.21	0.00028814		1803.24	0.00209372		2333.24	-0.00416513		2863.24	-0.00504287		3393.24	-0.00300971
213.4	0.00801934		743.42	-0.00622849		1273.41	-0.00036935		1803.44	0.00223355		2333.44	-0.00434461		2863.44	-0.00603289		3393.44	-0.00324512
213.6	0.00819438		743.62	-0.00587628		1273.61	-0.00020215		1803.64	0.0018111		2333.64	-0.00467102		2863.64	-0.00640992		3393.64	-0.00349618
213.8	0.00824643		743.82	-0.00547767		1273.81	0.00027291		1803.84	0.00166143		2333.84	-0.00503275		2863.84	-0.00691298		3393.84	-0.00399854
214	0.00787947		744.02	-0.00492729		1274.01	0.00086666		1804.04	0.00166676		2334.04	-0.00538545		2864.04	-0.00710896		3394.04	-0.00463076
214.2	0.00836799		744.22	-0.00449654		1274.21	0.00181441		1804.24	0.00108998		2334.24	-0.00538263		2864.24	-0.00801723		3394.24	-0.00538738
214.4	0.00837372		744.42	-0.00444823		1274.41	0.001546		1804.44	0.00123239		2334.44	-0.00608007		2864.44	-0.00868448		3394.44	-0.00506234
214.6	0.00822416		744.62	-0.0041541		1274.61	0.00211948		1804.64	0.00158907		2334.64	-0.0067337		2864.64	-0.00785674		3394.64	-0.00528233
214.8	0.00792616		744.82	-0.00445022		1274.81	0.00159928		1804.84	0.00217995		2334.84	-0.00733335		2864.84	-0.0077994		3394.84	-0.0052544
215	0.00760706		745.02	-0.00465672		1275.01	0.00141807		1805.04	0.00311896		2335.04	-0.00704475		2865.04	-0.00773229		3395.04	-0.00596086
215.2	0.0071712		745.22	-0.00538177		1275.21	0.00131051		1805.24	0.00338114		2335.24	-0.00635808		2865.24	-0.00785859		3395.24	-0.00606027
215.4	0.00709267		745.42	-0.00489085		1275.41	0.00106065		1805.44	0.00323041		2335.44	-0.00599469		2865.44	-0.00793082		3395.44	-0.00589843
215.6	0.00719699		745.62	-0.00506452		1275.61	-0.00011544		1805.64	0.00313426		2335.64	-0.00511856		2865.64	-0.00690037		3395.64	-0.00624408
215.8	0.00680669		745.82	-0.00519807		1275.81	0.00050255		1805.84	0.00415389		2335.84	-0.00470967		2865.84	-0.00633782		3395.84	-0.00567134
216	0.00707091		746.02	-0.00525626		1276.01	0.00029764		1806.04	0.00374473		2336.04	-0.00416917		2866.04	-0.00586893		3396.04	-0.00566155
216.2	0.00685825		746.22	-0.00529844		1276.21	0.00003195		1806.24	0.0047808		2336.24	-0.00456427		2866.24	-0.00528788		3396.24	-0.00516756
216.4	0.0067924		746.42	-0.0049814		1276.41	0.00000184		1806.44	0.00570059		2336.44	-0.00456268		2866.44	-0.00548643		3396.44	-0.00554307
216.6	0.00752156		746.62	-0.00460034		1276.61	-0.00032305		1806.64	0.00625603		2336.64	-0.00424294		2866.64	-0.00615402		3396.64	-0.00476669
216.8	0.00768201		746.82	-0.0039188		1276.81	0.00003987		1806.84	0.00639709		2336.84	-0.0050373		2866.84	-0.00592044		3396.84	-0.00477696
217	0.00804262		747.02	-0.00370412		1277.01	0.00055252		1807.04	0.0068118		2337.04	-0.00542743		2867.04	-0.00608536		3397.04	-0.00406433
217.2	0.00792899		747.22	-0.00329248		1277.21	0.00073582		1807.24	0.00665922		2337.24	-0.00539047		2867.24	-0.00702579		3397.24	-0.00448696
217.4	0.00820498		747.42	-0.0023029		1277.41	0.00037496		1807.44	0.00615708		2337.44	-0.00463534		2867.44	-0.00768511		3397.44	-0.00474514
217.6	0.0085516		747.62	-0.00278197		1277.61	0.00032468		1807.64	0.00585132		2337.64	-0.00421759		2867.64	-0.00781275		3397.64	-0.00475804
217.8	0.00813442		747.82	-0.00277918		1277.81	-0.00003146		1807.84	0.00552804		2337.84	-0.00491428		2867.84	-0.00744612		3397.84	-0.00484757
218	0.00848915		748.02	-0.00260932		1278.01	0.00089398		1808.04	0.00511351		2338.04	-0.00527904		2868.04	-0.00836869		3398.04	-0.00491453
218.2	0.00918406		748.22	-0.00223565		1278.21	0.00229168		1808.24	0.00430626		2338.24	-0.00521161		2868.24	-0.0092046		3398.24	-0.00490397
218.4	0.00881289		748.42	-0.0028539		1278.41	0.00234353		1808.44	0.00537573		2338.44	-0.00520904		2868.44	-0.00908866		3398.44	-0.00482612
218.6	0.00925988		748.62	-0.00325727		1278.61	0.00243184		1808.64	0.00470252		2338.64	-0.00569895		2868.64	-0.00860299		3398.64	-0.00455971
218.8	0.00949148		748.82	-0.00319103		1278.81	0.00205853		1808.84	0.00477567		2338.84	-0.00626951		2868.84	-0.00809048		3398.84	-0.00437326
219	0.00916016		749.02	-0.00375051		1279.01	0.00293926		1809.04	0.00503969		2339.04	-0.00631962		2869.04	-0.00781249		3399.04	-0.00394536
219.2	0.00975911		749.22	-0.00458392		1279.21	0.00320303		1809.24	0.00429719		2339.24	-0.00636498		2869.24	-0.00785113		3399.24	-0.00332739
219.4	0.01016852		749.42	-0.0051214		1279.41	0.00319639		1809.44	0.00448037		2339.44	-0.00663342		2869.44	-0.00776559		3399.44	-0.00298691
219.6	0.0100917		749.62	-0.00521267		1279.61	0.00357521		1809.64	0.00456833		2339.64	-0.00734117		2869.64	-0.00797152		3399.64	-0.00272406
219.8	0.00837436		749.82	-0.00492343		1279.81	0.00400747		1809.84	0.00544745		2339.84	-0.0072047		2869.84	-0.00756159		3399.84	-0.00179439
220	0.0080087		750.02	-0.00463206		1280.01	0.00438672		1810.04	0.00496829		2340.04	-0.00740782		2870.04	-0.00728545		3400.04	-0.00134981
220.2	0.0071876		750.22	-0.00390792		1280.21	0.00518905		1810.24	0.00529319		2340.24	-0.00836576		2870.24	-0.00737611		3400.24	-0.00095571
220.4	0.00715028		750.42	-0.00247064		1280.41	0.00582083		1810.44	0.00623036		2340.44	-0.00856989		2870.44	-0.00779747		3400.44	-0.00117314
220.6	0.00732156		750.62	-0.00241464		1280.61	0.00543552		1810.64	0.00643625		2340.64	-0.00921655		2870.64	-0.00746123		3400.64	-0.00123816
220.8	0.00733602		750.82	-0.00245615		1280.81	0.00566457		1810.84	0.00648961		2340.84	-0.00918431		2870.84	-0.00713694		3400.84	-0.00181291
221	0.00751814		751.02	-0.00253421		1281.01	0.00561789		1811.04	0.00672759		2341.04	-0.0081905		2871.04	-0.00715076		3401.04	-0.00233855
221.2	0.00620759		751.22	-0.0018175		1281.21	0.00472477		1811.24	0.00646599		2341.24	-0.00692735		2871.24	-0.00736308		3401.24	-0.0032509
221.4	0.00652359		751.42	-0.00156347		1281.41	0.00430932		1811.44	0.0056799		2341.44	-0.00557375		2871.44	-0.00635051		3401.44	-0.00371257
221.6	0.00691193		751.62	-0.00257352		1281.61	0.00338357		1811.64	0.0056568		2341.64	-0.00492371		2871.64	-0.00604083		3401.64	-0.00457421
221.8	0.00684793		751.82	-0.00232097		1281.81	0.00270328		1811.84	0.00530393		2341.84	-0.00402295		2871.84	-0.00553672		3401.84	-0.00544159
222	0.00748597		752.02	-0.00225601		1282.01	0.00238572		1812.04	0.00472101		2342.04	-0.00336365		2872.04	-0.00568035		3402.04	-0.00584429
222.2	0.00767449		752.22	-0.00221202		1282.21	0.00206227		1812.24	0.00495667		2342.24	-0.0028602		2872.24	-0.00522235		3402.24	-0.00538334
222.4	0.0078908		752.42	-0.00198609		1282.41	0.00090546		1812.44	0.00468233		2342.44	-0.00204736		2872.44	-0.00405966		3402.44	-0.00574984
222.6	0.0092195		752.62	-0.00180333		1282.61	0.00098487		1812.64	0.00338537		2342.64	-0.00216624		2872.64	-0.00357645		3402.64	-0.00582747
222.8	0.01014354		752.82	-0.00125739		1282.81	0.00073228		1812.84	0.00363591		2342.84	-0.00136		2872.84	-0.00294883		3402.84	-0.00559925
223	0.01020232		753.02	-0.00137513		1283.01	0.00162993		1813.04	0.00414036		2343.04	-0.00146902		2873.04	-0.00339036		3403.04	-0.00520404
223.2	0.01088532		753.22	-0.00175467		1283.21	0.00090747		1813.24	0.00395437		2343.24	-0.00168639		2873.24	-0.00332503		3403.24	-0.00447065
223.4	0.0111158		753.42	-0.00198405		1283.41	0.00088558		1813.44	0.00472976		2343.44	-0.00244444		2873.44	-0.00479583		3403.44	-0.00498902
223.6	0.01128985		753.62	-0.00154162		1283.61	0.00112302		1813.64	0.00448948		2343.64	-0.00295604		2873.64	-0.00470424		3403.64	-0.00495516
223.8	0.01053506		753.82	-0.00067592		1283.81	0.00120292		1813.84	0.00485488		2343.84	-0.00286449		2873.84	-0.00325923		3403.84	-0.0045112
224	0.01117844		754.02	-0.00124476		1284.01	0.00278014		1814.04	0.0037763		2344.04	-0.00390597		2874.04	-0.00353482		3404.04	-0.00498065
224.2	0.01114873		754.22	-0.00181422		1284.21	0.00318494		1814.24	0.00411544		2344.24	-0.00588765		2874.24	-0.00477194		3404.24	-0.00457782
224.4	0.01094315		754.42	-0.00225833		1284.41	0.00279362		1814.44	0.0048271		2344.44	-0.00612591		2874.44	-0.00454502		3404.44	-0.0056614
224.6	0.01065649		754.62	-0.00302936		1284.61	0.00259349		1814.64	0.00453256		2344.64	-0.00619101		2874.64	-0.00467151		3404.64	-0.00591364
224.8	0.01096782		754.82	-0.00385831		1284.81	0.00269531		1814.84	0.00335906		2344.84	-0.00564182		2874.84	-0.00539193		3404.84	-0.00661004
225	0.00985186		755.02	-0.00394413		1285.01	0.00346154		1815.04	0.00343755		2345.04	-0.00559632		2875.04	-0.00532288		3405.04	-0.00722121
225.2	0.00843992		755.22	-0.00371996		1285.21	0.00356254		1815.24	0.00284479		2345.24	-0.00561796		2875.24	-0.00481703		3405.24	-0.00726455
225.4	0.00893507		755.42	-0.0037316		1285.41	0.00331554		1815.44	0.00217374		2345.44	-0.00554007		2875.44	-0.0055645		3405.44	-0.00780633
225.6	0.00941602		755.62	-0.0041163		1285.61	0.00325934		1815.64	0.00174887		2345.64	-0.0047111		2875.64	-0.00621578		3405.64	-0.00775222
225.8	0.00911291		755.82	-0.00353339		1285.81	0.00384965		1815.84	0.00234743		2345.84	-0.00475723		2875.84	-0.0059112		3405.84	-0.00782662
226	0.00886217		756.02	-0.00249799		1286.01	0.00393772		1816.04	0.00226688		2346.04	-0.0050659		2876.04	-0.00569893		3406.04	-0.00710554
226.2	0.00789115		756.22	-0.00181288		1286.21	0.00458863		1816.24	0.00281581		2346.24	-0.00542495		2876.24	-0.00605847		3406.24	-0.00661729
226.4	0.00831291		756.42	-0.00104779		1286.41	0.00437421		1816.44	0.00242983		2346.44	-0.00518913		2876.44	-0.00601422		3406.44	-0.00704247
226.6	0.00831342		756.62	-0.00104364		1286.61	0.00457229		1816.64	0.0025578		2346.64	-0.00550735		2876.64	-0.00683946		3406.64	-0.00698822
226.8	0.00911756		756.82	-0.00038471		1286.81	0.00443085		1816.84	0.00333615		2346.84	-0.00558059		2876.84	-0.00735046		3406.84	-0.00615071
227	0.00875417		757.02	0.00026626		1287.01	0.00491807		1817.04	0.00407896		2347.04	-0.00629772		2877.04	-0.00809733		3407.04	-0.00606191
227.2	0.00919293		757.22	-0.00001105		1287.21	0.00368896		1817.24	0.0036578		2347.24	-0.00619316		2877.24	-0.00819653		3407.24	-0.00572793
227.4	0.00925363		757.42	0.00007619		1287.41	0.0032603		1817.44	0.00395153		2347.44	-0.00610919		2877.44	-0.00853863		3407.44	-0.00685628
227.6	0.00995293		757.62	0.00017983		1287.61	0.00268538		1817.64	0.00376023		2347.64	-0.00581305		2877.64	-0.00753624		3407.64	-0.00751806
227.8	0.00949796		757.82	0.00010669		1287.81	0.00244542		1817.84	0.00378588		2347.84	-0.00628781		2877.84	-0.00744465		3407.84	-0.00760842
228	0.01006166		758.02	-0.00176957		1288.01	0.00233991		1818.04	0.00280072		2348.04	-0.00674721		2878.04	-0.00761948		3408.04	-0.00778823
228.2	0.01063169		758.22	-0.00233082		1288.21	0.00213571		1818.24	0.00357247		2348.24	-0.00704932		2878.24	-0.00790385		3408.24	-0.00822594
228.4	0.01103186		758.42	-0.00250226		1288.41	0.00214464		1818.44	0.00328586		2348.44	-0.00669561		2878.44	-0.00703586		3408.44	-0.00925596
228.6	0.01138083		758.62	-0.00317366		1288.61	0.00231394		1818.64	0.00249928		2348.64	-0.00717887		2878.64	-0.00664699		3408.64	-0.00895779
228.8	0.01179015		758.82	-0.00329392		1288.81	0.00257546		1818.84	0.00250452		2348.84	-0.00743709		2878.84	-0.0060832		3408.84	-0.00987482
229	0.01216934		759.02	-0.00382397		1289.01	0.00378028		1819.04	0.00254446		2349.04	-0.00741914		2879.04	-0.00512046		3409.04	-0.00900251
229.2	0.01309235		759.22	-0.00406262		1289.21	0.00322096		1819.24	0.00202464		2349.24	-0.00676852		2879.24	-0.00483099		3409.24	-0.00899443
229.4	0.01378732		759.42	-0.00444789		1289.41	0.00320866		1819.44	0.00199823		2349.44	-0.00628984		2879.44	-0.00607949		3409.44	-0.00921349
229.6	0.0142675		759.62	-0.00437383		1289.61	0.00373199		1819.64	0.00214011		2349.64	-0.00595046		2879.64	-0.00567452		3409.64	-0.00854714
229.8	0.01379941		759.82	-0.00390588		1289.81	0.00413753		1819.84	0.00230595		2349.84	-0.00614155		2879.84	-0.00484582		3409.84	-0.00880666
230	0.01396871		760.02	-0.0032847		1290.01	0.00407382		1820.04	0.00222982		2350.04	-0.00653671		2880.04	-0.00457051		3410.04	-0.00857542
230.2	0.01307746		760.22	-0.00386802		1290.21	0.00342222		1820.24	0.00189221		2350.24	-0.0075057		2880.24	-0.00597934		3410.24	-0.00847208
230.4	0.01425629		760.42	-0.00360521		1290.41	0.00272904		1820.44	0.0014797		2350.44	-0.0078012		2880.44	-0.00648544		3410.44	-0.00829435
230.6	0.01381454		760.62	-0.00391272		1290.61	0.00278066		1820.64	0.00142391		2350.64	-0.00702628		2880.64	-0.00711857		3410.64	-0.00721886
230.8	0.0140349		760.82	-0.00224317		1290.81	0.00310396		1820.84	0.00215416		2350.84	-0.00742894		2880.84	-0.00760108		3410.84	-0.00675304
231	0.01402717		761.02	-0.00144609		1291.01	0.00358733		1821.04	0.00245053		2351.04	-0.0070621		2881.04	-0.00754684		3411.04	-0.00652794
231.2	0.01388478		761.22	-0.00070907		1291.21	0.00291211		1821.24	0.00237853		2351.24	-0.00675466		2881.24	-0.00705713		3411.24	-0.00618361
231.4	0.01311059		761.42	-0.00030927		1291.41	0.0031797		1821.44	0.00292833		2351.44	-0.00645396		2881.44	-0.00676452		3411.44	-0.00645197
231.6	0.01330359		761.62	-0.0001819		1291.61	0.00303662		1821.64	0.00341399		2351.64	-0.00618858		2881.64	-0.00706979		3411.64	-0.00573758
231.8	0.01316468		761.82	-0.00019351		1291.81	0.00313726		1821.84	0.00336567		2351.84	-0.00549149		2881.84	-0.00767977		3411.84	-0.00500366
232	0.0137318		762.02	-0.00059141		1292.01	0.00390294		1822.04	0.00362676		2352.04	-0.00496892		2882.04	-0.00694774		3412.04	-0.00540449
232.2	0.01386667		762.22	-0.00056381		1292.21	0.00449487		1822.24	0.00456819		2352.24	-0.00498851		2882.24	-0.00741388		3412.24	-0.00635114
232.4	0.01347664		762.42	-0.0010108		1292.41	0.00507008		1822.44	0.00520728		2352.44	-0.00568212		2882.44	-0.00720143		3412.44	-0.00684884
232.6	0.01341666		762.62	-0.00175612		1292.61	0.00522155		1822.64	0.00613934		2352.64	-0.00573878		2882.64	-0.00701025		3412.64	-0.00679176
232.8	0.01351436		762.82	-0.00276789		1292.81	0.00564544		1822.84	0.00613792		2352.84	-0.00566094		2882.84	-0.00684805		3412.84	-0.00706981
233	0.01461858		763.02	-0.00345241		1293.01	0.00556298		1823.04	0.00561826		2353.04	-0.00512597		2883.04	-0.00665554		3413.04	-0.00677578
233.2	0.01446835		763.22	-0.00403118		1293.21	0.00497169		1823.24	0.00567526		2353.24	-0.00463658		2883.24	-0.006747		3413.24	-0.00778345
233.4	0.01419978		763.42	-0.00425593		1293.41	0.00580379		1823.44	0.00598295		2353.44	-0.00474954		2883.44	-0.00762347		3413.44	-0.0086033
233.6	0.0138056		763.62	-0.00401311		1293.61	0.00493392		1823.64	0.00540214		2353.64	-0.00480334		2883.64	-0.00719602		3413.64	-0.00884433
233.8	0.01296674		763.82	-0.00468846		1293.81	0.00434409		1823.84	0.00436783		2353.84	-0.00421592		2883.84	-0.00699657		3413.84	-0.00945001
234	0.01290358		764.02	-0.00501743		1294.01	0.00329945		1824.04	0.00462105		2354.04	-0.00526376		2884.04	-0.00731803		3414.04	-0.00986125
234.2	0.01252052		764.22	-0.00621171		1294.21	0.00319184		1824.24	0.00393693		2354.24	-0.00538705		2884.24	-0.00762926		3414.24	-0.00974107
234.4	0.01276409		764.42	-0.00628318		1294.41	0.00346484		1824.44	0.00362874		2354.44	-0.00511316		2884.44	-0.00688999		3414.44	-0.00882142
234.6	0.01227094		764.62	-0.00635178		1294.61	0.0035201		1824.64	0.0040741		2354.64	-0.00486665		2884.64	-0.00753048		3414.64	-0.00747789
234.8	0.01216629		764.82	-0.00502473		1294.81	0.00413138		1824.84	0.00454984		2354.84	-0.00509996		2884.84	-0.00736441		3414.84	-0.00787153
235	0.01183783		765.02	-0.00441442		1295.01	0.00433681		1825.04	0.00474242		2355.04	-0.0040654		2885.04	-0.00684808		3415.04	-0.00705999
235.2	0.01127961		765.22	-0.0037156		1295.21	0.00412027		1825.24	0.00516199		2355.24	-0.00364935		2885.24	-0.00649355		3415.24	-0.00651046
235.4	0.01107649		765.42	-0.00462066		1295.41	0.00413215		1825.44	0.00469819		2355.44	-0.00372783		2885.44	-0.00638836		3415.44	-0.00558474
235.6	0.01192791		765.62	-0.00513978		1295.61	0.0042151		1825.64	0.00426678		2355.64	-0.00305724		2885.64	-0.00701858		3415.64	-0.00566357
235.8	0.01241108		765.82	-0.00499539		1295.81	0.0051902		1825.84	0.00442445		2355.84	-0.00277121		2885.84	-0.00743561		3415.84	-0.00610387
236	0.01270251		766.02	-0.0050141		1296.01	0.00573098		1826.04	0.00446114		2356.04	-0.00269344		2886.04	-0.00725922		3416.04	-0.00675005
236.2	0.01252419		766.22	-0.0052157		1296.21	0.00588231		1826.24	0.00454587		2356.24	-0.00268086		2886.24	-0.00737683		3416.24	-0.00685585
236.4	0.01266054		766.42	-0.00520292		1296.41	0.00724936		1826.44	0.00492096		2356.44	-0.00319733		2886.44	-0.00736787		3416.44	-0.00739528
236.6	0.01283398		766.62	-0.00478399		1296.61	0.00662677		1826.64	0.00467223		2356.64	-0.00298546		2886.64	-0.00737238		3416.64	-0.00754243
236.8	0.01376442		766.82	-0.00417926		1296.81	0.00728991		1826.84	0.00395243		2356.84	-0.00323317		2886.84	-0.00759091		3416.84	-0.0080595
237	0.01493751		767.02	-0.00317436		1297.01	0.0072534		1827.04	0.00445638		2357.04	-0.00357566		2887.04	-0.00778747		3417.04	-0.00810621
237.2	0.01456086		767.22	-0.00337255		1297.21	0.00809724		1827.24	0.00431022		2357.24	-0.00458118		2887.24	-0.0084595		3417.24	-0.00895376
237.4	0.0141986		767.42	-0.0023314		1297.41	0.00757582		1827.44	0.00475734		2357.44	-0.00549845		2887.44	-0.00891359		3417.44	-0.00861743
237.6	0.01390781		767.62	-0.00246806		1297.61	0.00566277		1827.64	0.0039493		2357.64	-0.00495123		2887.64	-0.00867398		3417.64	-0.00857835
237.8	0.01314568		767.82	-0.00312711		1297.81	0.00504848		1827.84	0.00410719		2357.84	-0.00500308		2887.84	-0.00870657		3417.84	-0.00873938
238	0.01389566		768.02	-0.00326295		1298.01	0.00424767		1828.04	0.00504814		2358.04	-0.00646841		2888.04	-0.00887198		3418.04	-0.00923981
238.2	0.01412701		768.22	-0.0036501		1298.21	0.00470882		1828.24	0.0046082		2358.24	-0.00671718		2888.24	-0.00866569		3418.24	-0.00885578
238.4	0.01373435		768.42	-0.00351903		1298.41	0.00450693		1828.44	0.0044309		2358.44	-0.00691801		2888.44	-0.00889053		3418.44	-0.0084891
238.6	0.01446265		768.62	-0.0039808		1298.61	0.00382411		1828.64	0.00587512		2358.64	-0.00689254		2888.64	-0.00914239		3418.64	-0.00796285
238.8	0.01383689		768.82	-0.00335025		1298.81	0.00357571		1828.84	0.00590376		2358.84	-0.00678728		2888.84	-0.00826356		3418.84	-0.00766648
239	0.01369808		769.02	-0.00287901		1299.01	0.00280367		1829.04	0.00652868		2359.04	-0.00620342		2889.04	-0.00824477		3419.04	-0.00660538
239.2	0.01428739		769.22	-0.0032908		1299.21	0.00241478		1829.24	0.0063284		2359.24	-0.00695436		2889.24	-0.00705647		3419.24	-0.00583374
239.4	0.01409546		769.42	-0.00401492		1299.41	0.0021929		1829.44	0.00522681		2359.44	-0.00725618		2889.44	-0.00679129		3419.44	-0.00583041
239.6	0.01396886		769.62	-0.00422526		1299.61	0.00289936		1829.64	0.00551901		2359.64	-0.00649858		2889.64	-0.0061805		3419.64	-0.0064918
239.8	0.01382461		769.82	-0.00439875		1299.81	0.00362444		1829.84	0.00663693		2359.84	-0.00580189		2889.84	-0.00580946		3419.84	-0.00656619
240	0.01345396		770.02	-0.00456628		1300.01	0.00335071		1830.04	0.00620944		2360.04	-0.00528255		2890.04	-0.00517587		3420.04	-0.00688623
240.2	0.01357423		770.22	-0.00438914		1300.21	0.00367822		1830.24	0.00607179		2360.24	-0.00467248		2890.24	-0.00487771		3420.24	-0.0070813
240.4	0.01397757		770.42	-0.00435297		1300.41	0.00417655		1830.44	0.00554444		2360.44	-0.00500923		2890.44	-0.00495416		3420.44	-0.00798122
240.6	0.01429124		770.62	-0.00426862		1300.61	0.00356754		1830.64	0.00513104		2360.64	-0.00391876		2890.64	-0.00481387		3420.64	-0.00761748
240.8	0.01363077		770.82	-0.00397309		1300.81	0.00418738		1830.84	0.00500498		2360.84	-0.00374012		2890.84	-0.00540087		3420.84	-0.00715704
241	0.01259265		771.02	-0.0039834		1301.01	0.00373151		1831.04	0.00477068		2361.04	-0.00397314		2891.04	-0.00607967		3421.04	-0.00659972
241.2	0.01172231		771.22	-0.00298705		1301.21	0.0037389		1831.24	0.00434798		2361.24	-0.00445568		2891.24	-0.00696913		3421.24	-0.00754069
241.4	0.0114738		771.42	-0.00218014		1301.41	0.00245063		1831.44	0.00399529		2361.44	-0.00429429		2891.44	-0.00696908		3421.44	-0.00728077
241.6	0.01175704		771.62	-0.00281753		1301.61	0.00239534		1831.64	0.003725		2361.64	-0.00388312		2891.64	-0.00807939		3421.64	-0.00819558
241.8	0.01195023		771.82	-0.00250926		1301.81	0.00255806		1831.84	0.00375697		2361.84	-0.00402242		2891.84	-0.00917035		3421.84	-0.00916114
242	0.01277846		772.02	-0.00256158		1302.01	0.00235012		1832.04	0.00419926		2362.04	-0.00407514		2892.04	-0.00923309		3422.04	-0.0102407
242.2	0.01282722		772.22	-0.00277234		1302.21	0.00278339		1832.24	0.00355412		2362.24	-0.00420733		2892.24	-0.00926868		3422.24	-0.0096788
242.4	0.01308992		772.42	-0.00304511		1302.41	0.0033511		1832.44	0.00307106		2362.44	-0.00378029		2892.44	-0.00915636		3422.44	-0.00906435
242.6	0.01373468		772.62	-0.00191846		1302.61	0.00384953		1832.64	0.00315605		2362.64	-0.00405226		2892.64	-0.01001423		3422.64	-0.00806864
242.8	0.01316175		772.82	-0.00106597		1302.81	0.00336842		1832.84	0.00234458		2362.84	-0.00396271		2892.84	-0.01052031		3422.84	-0.00736593
243	0.01284887		773.02	-0.0008758		1303.01	0.00410906		1833.04	0.00259157		2363.04	-0.0039907		2893.04	-0.01013853		3423.04	-0.00747558
243.2	0.0129926		773.22	0.00008886		1303.21	0.00495082		1833.24	0.00206645		2363.24	-0.00503917		2893.24	-0.0088927		3423.24	-0.00671543
243.4	0.012241		773.42	-0.00005083		1303.41	0.00525		1833.44	0.00218052		2363.44	-0.00458826		2893.44	-0.00859383		3423.44	-0.00707259
243.6	0.01227614		773.62	-0.00070498		1303.61	0.0055683		1833.64	0.00309396		2363.64	-0.00472875		2893.64	-0.0071619		3423.64	-0.00718455
243.8	0.01313226		773.82	-0.0008988		1303.81	0.00599345		1833.84	0.00302711		2363.84	-0.00455922		2893.84	-0.00701642		3423.84	-0.00769968
244	0.01330913		774.02	-0.00106578		1304.01	0.00511041		1834.04	0.00242672		2364.04	-0.00509075		2894.04	-0.00653532		3424.04	-0.00780964
244.2	0.01424454		774.22	-0.00213316		1304.21	0.00485011		1834.24	0.00241565		2364.24	-0.0046871		2894.24	-0.00616775		3424.24	-0.00744641
244.4	0.01477323		774.42	-0.00287115		1304.41	0.00407662		1834.44	0.0023213		2364.44	-0.00479441		2894.44	-0.00564642		3424.44	-0.00745875
244.6	0.01486559		774.62	-0.00283946		1304.61	0.00396287		1834.64	0.00233103		2364.64	-0.0041224		2894.64	-0.00553276		3424.64	-0.00724886
244.8	0.01452858		774.82	-0.00212369		1304.81	0.00372666		1834.84	0.00326527		2364.84	-0.00443066		2894.84	-0.0052342		3424.84	-0.00735769
245	0.01499822		775.02	-0.00228591		1305.01	0.00316795		1835.04	0.00278738		2365.04	-0.00491471		2895.04	-0.00506228		3425.04	-0.00789938
245.2	0.01561673		775.22	-0.00139416		1305.21	0.0022777		1835.24	0.00397006		2365.24	-0.00474346		2895.24	-0.00471851		3425.24	-0.00869545
245.4	0.01560019		775.42	-0.00182325		1305.41	0.00134505		1835.44	0.00456462		2365.44	-0.00525561		2895.44	-0.00476864		3425.44	-0.00870817
245.6	0.01648899		775.62	-0.00204466		1305.61	0.00093742		1835.64	0.00552491		2365.64	-0.00479947		2895.64	-0.00578799		3425.64	-0.0088492
245.8	0.01647618		775.82	-0.00280936		1305.81	0.0005592		1835.84	0.00523604		2365.84	-0.00412712		2895.84	-0.00549521		3425.84	-0.0092597
246	0.01684584		776.02	-0.00285506		1306.01	0.00052326		1836.04	0.00626011		2366.04	-0.00432558		2896.04	-0.00558503		3426.04	-0.00911116
246.2	0.01716086		776.22	-0.00260078		1306.21	0.00151584		1836.24	0.00579173		2366.24	-0.00367644		2896.24	-0.005765		3426.24	-0.00846309
246.4	0.01667505		776.42	-0.00193794		1306.41	0.00202548		1836.44	0.0058272		2366.44	-0.00318081		2896.44	-0.00596199		3426.44	-0.00866225
246.6	0.01669092		776.62	-0.00111631		1306.61	0.00188624		1836.64	0.00587517		2366.64	-0.00366494		2896.64	-0.00726278		3426.64	-0.00841036
246.8	0.01576269		776.82	-0.00211284		1306.81	0.00133481		1836.84	0.00625559		2366.84	-0.00288558		2896.84	-0.00655668		3426.84	-0.00808509
247	0.0148196		777.02	-0.00104583		1307.01	0.00302074		1837.04	0.00663296		2367.04	-0.00305739		2897.04	-0.00572424		3427.04	-0.0080751
247.2	0.01497023		777.22	-0.00129297		1307.21	0.00322361		1837.24	0.00583318		2367.24	-0.00347602		2897.24	-0.00536737		3427.24	-0.00732607
247.4	0.01462473		777.42	-0.0019978		1307.41	0.00329689		1837.44	0.00525456		2367.44	-0.00354264		2897.44	-0.00526644		3427.44	-0.00733654
247.6	0.01535209		777.62	-0.00234618		1307.61	0.00321226		1837.64	0.00489764		2367.64	-0.00302159		2897.64	-0.00451709		3427.64	-0.00648394
247.8	0.01612188		777.82	-0.0025792		1307.81	0.00338597		1837.84	0.00394384		2367.84	-0.00262339		2897.84	-0.00452909		3427.84	-0.00703527
248	0.01534192		778.02	-0.00320289		1308.01	0.00243663		1838.04	0.00417375		2368.04	-0.0020947		2898.04	-0.00452196		3428.04	-0.00710185
248.2	0.01616393		778.22	-0.00469358		1308.21	0.00265305		1838.24	0.00345372		2368.24	-0.00202239		2898.24	-0.00476293		3428.24	-0.00624587
248.4	0.01652082		778.42	-0.00496257		1308.41	0.00350606		1838.44	0.00323545		2368.44	-0.00189063		2898.44	-0.00397571		3428.44	-0.00614462
248.6	0.01637793		778.62	-0.00477769		1308.61	0.00418319		1838.64	0.00257851		2368.64	-0.00229038		2898.64	-0.00399565		3428.64	-0.00658816
248.8	0.01660253		778.82	-0.00470668		1308.81	0.00349136		1838.84	0.00303317		2368.84	-0.00278334		2898.84	-0.00333014		3428.84	-0.00675778
249	0.01612013		779.02	-0.00511991		1309.01	0.0029668		1839.04	0.00242596		2369.04	-0.00311115		2899.04	-0.0036321		3429.04	-0.00729707
249.2	0.01630296		779.22	-0.00458219		1309.21	0.00280411		1839.24	0.00351445		2369.24	-0.00274065		2899.24	-0.00326003		3429.24	-0.0078405
249.4	0.01574064		779.42	-0.00425597		1309.41	0.00288271		1839.44	0.00338326		2369.44	-0.00248202		2899.44	-0.00354078		3429.44	-0.00755175
249.6	0.01649262		779.62	-0.00401876		1309.61	0.00274971		1839.64	0.00330631		2369.64	-0.0019836		2899.64	-0.00375218		3429.64	-0.00746944
249.8	0.01612871		779.82	-0.00359466		1309.81	0.00338634		1839.84	0.00302456		2369.84	-0.00309719		2899.84	-0.00407675		3429.84	-0.00732516
250	0.01632696		780.02	-0.002525		1310.01	0.00379297		1840.04	0.00390832		2370.04	-0.00345633		2900.04	-0.00473867		3430.04	-0.00722304
250.2	0.01602152		780.22	-0.00227861		1310.21	0.00317825		1840.24	0.00383789		2370.24	-0.00308509		2900.24	-0.0042672		3430.24	-0.00731439
250.4	0.01528364		780.42	-0.002239		1310.41	0.00283236		1840.44	0.00399031		2370.44	-0.00400297		2900.44	-0.0042662		3430.44	-0.00727191
250.6	0.01511046		780.62	-0.00215499		1310.61	0.0029886		1840.64	0.00442764		2370.64	-0.00468927		2900.64	-0.00423372		3430.64	-0.00756602
250.8	0.01481483		780.82	-0.00191014		1310.81	0.00294665		1840.84	0.00427402		2370.84	-0.00486589		2900.84	-0.00372335		3430.84	-0.00764768
251	0.01501528		781.02	-0.00100725		1311.01	0.00361169		1841.04	0.00416064		2371.04	-0.00554616		2901.04	-0.00419741		3431.04	-0.00759842
251.2	0.01590837		781.22	-0.00232836		1311.21	0.00297932		1841.24	0.00427346		2371.24	-0.00619836		2901.24	-0.00398687		3431.24	-0.00737671
251.4	0.01640069		781.42	-0.00188294		1311.41	0.00240689		1841.44	0.00469322		2371.44	-0.00583787		2901.44	-0.0041491		3431.44	-0.00707057
251.6	0.01746597		781.62	-0.00155017		1311.61	0.00225471		1841.64	0.00478804		2371.64	-0.00535578		2901.64	-0.0039392		3431.64	-0.00669673
251.8	0.01727781		781.82	-0.0013075		1311.81	0.00348414		1841.84	0.00482816		2371.84	-0.00551965		2901.84	-0.00439586		3431.84	-0.00711461
252	0.01711229		782.02	-0.00160084		1312.01	0.00345375		1842.04	0.00483255		2372.04	-0.00545538		2902.04	-0.00466246		3432.04	-0.0069813
252.2	0.01798121		782.22	-0.00207601		1312.21	0.00327785		1842.24	0.00416535		2372.24	-0.0053818		2902.24	-0.00512594		3432.24	-0.00717064
252.4	0.0180963		782.42	-0.00178145		1312.41	0.00359448		1842.44	0.00466409		2372.44	-0.00491785		2902.44	-0.00517976		3432.44	-0.00763535
252.6	0.01796809		782.62	-0.00198383		1312.61	0.00356638		1842.64	0.00445535		2372.64	-0.00520113		2902.64	-0.00567627		3432.64	-0.008221
252.8	0.01915049		782.82	-0.0022547		1312.81	0.00234359		1842.84	0.00500957		2372.84	-0.00438228		2902.84	-0.00579339		3432.84	-0.00838067
253	0.01921264		783.02	-0.0021767		1313.01	0.00274761		1843.04	0.00491567		2373.04	-0.00394981		2903.04	-0.00615081		3433.04	-0.00901002
253.2	0.01972108		783.22	-0.00156208		1313.21	0.00240047		1843.24	0.00594222		2373.24	-0.00318054		2903.24	-0.00616803		3433.24	-0.00951932
253.4	0.01954266		783.42	-0.00102046		1313.41	0.00214996		1843.44	0.00650928		2373.44	-0.00269872		2903.44	-0.00721208		3433.44	-0.00930012
253.6	0.01984632		783.62	-0.00103051		1313.61	0.00204437		1843.64	0.00640286		2373.64	-0.00354808		2903.64	-0.00753456		3433.64	-0.00889302
253.8	0.0197036		783.82	0.00045129		1313.81	0.00144719		1843.84	0.00620016		2373.84	-0.00454474		2903.84	-0.00857829		3433.84	-0.00879467
254	0.01937503		784.02	0.00061452		1314.01	0.00122906		1844.04	0.00577118		2374.04	-0.00427993		2904.04	-0.00835469		3434.04	-0.00856802
254.2	0.01918202		784.22	0.00013102		1314.21	0.00098328		1844.24	0.00548333		2374.24	-0.00410967		2904.24	-0.00767951		3434.24	-0.00867263
254.4	0.01845356		784.42	-0.00015399		1314.41	0.0015958		1844.44	0.00524391		2374.44	-0.00446872		2904.44	-0.00710386		3434.44	-0.00886701
254.6	0.01860021		784.62	-0.00012456		1314.61	0.00229461		1844.64	0.00502966		2374.64	-0.00439604		2904.64	-0.00673549		3434.64	-0.00901982
254.8	0.01858669		784.82	-0.00049888		1314.81	0.00204313		1844.84	0.00402783		2374.84	-0.00475286		2904.84	-0.0065219		3434.84	-0.00843418
255	0.01881994		785.02	-0.00159124		1315.01	0.00246568		1845.04	0.00377133		2375.04	-0.00414261		2905.04	-0.00646042		3435.04	-0.00840349
255.2	0.01847849		785.22	-0.00185507		1315.21	0.00273366		1845.24	0.00410923		2375.24	-0.0038372		2905.24	-0.00578913		3435.24	-0.0083534
255.4	0.01792382		785.42	-0.00186405		1315.41	0.00305946		1845.44	0.00415334		2375.44	-0.00363809		2905.44	-0.00599442		3435.44	-0.00824819
255.6	0.01804582		785.62	-0.00230738		1315.61	0.00455273		1845.64	0.00434028		2375.64	-0.00390009		2905.64	-0.00564833		3435.64	-0.00759335
255.8	0.01695984		785.82	-0.00285017		1315.81	0.00517379		1845.84	0.00522545		2375.84	-0.00282128		2905.84	-0.00564481		3435.84	-0.00740101
256	0.01701504		786.02	-0.00365178		1316.01	0.00417367		1846.04	0.00572935		2376.04	-0.00249912		2906.04	-0.00485114		3436.04	-0.00725918
256.2	0.01674706		786.22	-0.00467402		1316.21	0.00410617		1846.24	0.00542115		2376.24	-0.00096905		2906.24	-0.00518801		3436.24	-0.00764587
256.4	0.01755628		786.42	-0.00569687		1316.41	0.00449977		1846.44	0.00500689		2376.44	-0.00119941		2906.44	-0.00595496		3436.44	-0.00729458
256.6	0.01717814		786.62	-0.00698021		1316.61	0.00465291		1846.64	0.0054324		2376.64	-0.00152142		2906.64	-0.00584895		3436.64	-0.00675522
256.8	0.01808839		786.82	-0.0075455		1316.81	0.00400961		1846.84	0.00617492		2376.84	-0.00061389		2906.84	-0.00650329		3436.84	-0.00647241
257	0.01747408		787.02	-0.00844542		1317.01	0.00426001		1847.04	0.00701806		2377.04	-0.00124796		2907.04	-0.00699391		3437.04	-0.00673219
257.2	0.0175317		787.22	-0.00837875		1317.21	0.0036244		1847.24	0.00758046		2377.24	-0.00189939		2907.24	-0.00761097		3437.24	-0.00640489
257.4	0.01856496		787.42	-0.00800995		1317.41	0.00359973		1847.44	0.00774164		2377.44	-0.00278464		2907.44	-0.00832642		3437.44	-0.00636006
257.6	0.01953166		787.62	-0.00725416		1317.61	0.0032683		1847.64	0.00803578		2377.64	-0.00375369		2907.64	-0.00788121		3437.64	-0.00628536
257.8	0.02011799		787.82	-0.00516426		1317.81	0.00258523		1847.84	0.00821029		2377.84	-0.0046745		2907.84	-0.00857943		3437.84	-0.00675084
258	0.01989642		788.02	-0.00560701		1318.01	0.00306157		1848.04	0.00813583		2378.04	-0.00475489		2908.04	-0.00797676		3438.04	-0.00633385
258.2	0.02043616		788.22	-0.00539283		1318.21	0.00311075		1848.24	0.00810004		2378.24	-0.00551731		2908.24	-0.00780359		3438.24	-0.00648128
258.4	0.02063231		788.42	-0.00531687		1318.41	0.00368865		1848.44	0.00758928		2378.44	-0.00617105		2908.44	-0.00828523		3438.44	-0.00652668
258.6	0.02066365		788.62	-0.00489812		1318.61	0.00398669		1848.64	0.00665871		2378.64	-0.00628004		2908.64	-0.00859154		3438.64	-0.00681178
258.8	0.02022284		788.82	-0.00412074		1318.81	0.00436753		1848.84	0.0061288		2378.84	-0.00698383		2908.84	-0.00845632		3438.84	-0.00736539
259	0.02035161		789.02	-0.00342011		1319.01	0.00377409		1849.04	0.00548933		2379.04	-0.00693502		2909.04	-0.00907736		3439.04	-0.00792551
259.2	0.01955312		789.22	-0.00188923		1319.21	0.00417612		1849.24	0.00545749		2379.24	-0.00727121		2909.24	-0.00965412		3439.24	-0.00801502
259.4	0.01850904		789.42	-0.00159092		1319.41	0.0041766		1849.44	0.00544811		2379.44	-0.00672765		2909.44	-0.00931971		3439.44	-0.0077865
259.6	0.01828444		789.62	-0.00138135		1319.61	0.00340179		1849.64	0.00519101		2379.64	-0.00573735		2909.64	-0.00900547		3439.64	-0.00745921
259.8	0.01741625		789.82	-0.00120999		1319.81	0.00333936		1849.84	0.0056823		2379.84	-0.00511808		2909.84	-0.00884731		3439.84	-0.00763334
260	0.01830602		790.02	-0.00129397		1320.01	0.00343943		1850.04	0.00504586		2380.04	-0.00467494		2910.04	-0.00798198		3440.04	-0.00752133
260.2	0.01842342		790.22	-0.00256507		1320.21	0.00419572		1850.24	0.00428453		2380.24	-0.00389707		2910.24	-0.00813522		3440.24	-0.00776808
260.4	0.01878214		790.42	-0.00295495		1320.41	0.00353634		1850.44	0.0030233		2380.44	-0.00427387		2910.44	-0.00856424		3440.44	-0.0074199
260.6	0.01779406		790.62	-0.00381341		1320.61	0.00379729		1850.64	0.00360244		2380.64	-0.00397654		2910.64	-0.00786842		3440.64	-0.00752827
260.8	0.01747758		790.82	-0.00427695		1320.81	0.00331174		1850.84	0.00288104		2380.84	-0.00319741		2910.84	-0.00814654		3440.84	-0.00815614
261	0.01702287		791.02	-0.00508174		1321.01	0.00313223		1851.04	0.00250053		2381.04	-0.00332103		2911.04	-0.00757849		3441.04	-0.00885646
261.2	0.01706937		791.22	-0.00434745		1321.21	0.00299355		1851.24	0.00132622		2381.24	-0.00366377		2911.24	-0.00663097		3441.24	-0.00978028
261.4	0.01802609		791.42	-0.00381425		1321.41	0.00290662		1851.44	0.00157668		2381.44	-0.00360821		2911.44	-0.00663501		3441.44	-0.01101171
261.6	0.01783855		791.62	-0.00381686		1321.61	0.00259111		1851.64	0.00191294		2381.64	-0.00338022		2911.64	-0.00574678		3441.64	-0.01163329
261.8	0.01699985		791.82	-0.00386291		1321.81	0.00222942		1851.84	0.00241007		2381.84	-0.0036499		2911.84	-0.00655408		3441.84	-0.01159605
262	0.01601948		792.02	-0.00512135		1322.01	0.00248795		1852.04	0.00309213		2382.04	-0.0029919		2912.04	-0.00587324		3442.04	-0.01106449
262.2	0.01632668		792.22	-0.00513334		1322.21	0.00244037		1852.24	0.00369981		2382.24	-0.00364208		2912.24	-0.00591662		3442.24	-0.01056205
262.4	0.01583836		792.42	-0.0053024		1322.41	0.00279976		1852.44	0.00414507		2382.44	-0.00359151		2912.44	-0.00619782		3442.44	-0.01017364
262.6	0.01531725		792.62	-0.00448997		1322.61	0.00241996		1852.64	0.00402247		2382.64	-0.00328868		2912.64	-0.0059541		3442.64	-0.01053997
262.8	0.01584719		792.82	-0.00379723		1322.81	0.00256906		1852.84	0.00518257		2382.84	-0.00295894		2912.84	-0.00611243		3442.84	-0.01009556
263	0.01565332		793.02	-0.0030997		1323.01	0.00207042		1853.04	0.00568753		2383.04	-0.00261309		2913.04	-0.00715755		3443.04	-0.0097541
263.2	0.0156382		793.22	-0.00213038		1323.21	0.00296486		1853.24	0.00619305		2383.24	-0.00313742		2913.24	-0.00724262		3443.24	-0.00881968
263.4	0.01600309		793.42	-0.00163723		1323.41	0.00275746		1853.44	0.0072799		2383.44	-0.00326942		2913.44	-0.00673195		3443.44	-0.00813435
263.6	0.01640006		793.62	-0.00198269		1323.61	0.00289841		1853.64	0.00779814		2383.64	-0.00379392		2913.64	-0.00676749		3443.64	-0.00740594
263.8	0.01626151		793.82	-0.00128707		1323.81	0.00467765		1853.84	0.0085527		2383.84	-0.00383027		2913.84	-0.00668971		3443.84	-0.0072436
264	0.01734076		794.02	-0.00126691		1324.01	0.00516911		1854.04	0.00892613		2384.04	-0.00334053		2914.04	-0.00657832		3444.04	-0.00665304
264.2	0.0172046		794.22	-0.00199542		1324.21	0.00569904		1854.24	0.00877167		2384.24	-0.00335411		2914.24	-0.00653095		3444.24	-0.00565673
264.4	0.01698314		794.42	-0.00109463		1324.41	0.00528183		1854.44	0.00788462		2384.44	-0.00443748		2914.44	-0.00674791		3444.44	-0.0050299
264.6	0.01749111		794.62	-0.0007679		1324.61	0.00520086		1854.64	0.00768704		2384.64	-0.00465854		2914.64	-0.00696413		3444.64	-0.00419288
264.8	0.0175362		794.82	-0.00078691		1324.81	0.00496053		1854.84	0.00676876		2384.84	-0.00486567		2914.84	-0.00692577		3444.84	-0.00460457
265	0.01842147		795.02	-0.00103045		1325.01	0.00533033		1855.04	0.00574788		2385.04	-0.00509746		2915.04	-0.00678011		3445.04	-0.00488831
265.2	0.01868082		795.22	-0.0010733		1325.21	0.00533062		1855.24	0.004754		2385.24	-0.0053536		2915.24	-0.00673045		3445.24	-0.0049914
265.4	0.01943549		795.42	-0.00137001		1325.41	0.00555977		1855.44	0.0044881		2385.44	-0.00535079		2915.44	-0.00699726		3445.44	-0.00458582
265.6	0.01946689		795.62	-0.00203201		1325.61	0.00566067		1855.64	0.00403		2385.64	-0.0045556		2915.64	-0.00642452		3445.64	-0.00425528
265.8	0.01939493		795.82	-0.00199947		1325.81	0.00517201		1855.84	0.00426543		2385.84	-0.0043569		2915.84	-0.00650783		3445.84	-0.00425163
266	0.01965628		796.02	-0.00292967		1326.01	0.0048763		1856.04	0.00413022		2386.04	-0.00376689		2916.04	-0.00609547		3446.04	-0.00429218
266.2	0.02035342		796.22	-0.0036346		1326.21	0.00481619		1856.24	0.00389349		2386.24	-0.00386001		2916.24	-0.00660626		3446.24	-0.00470581
266.4	0.01974599		796.42	-0.00434796		1326.41	0.00517964		1856.44	0.00359846		2386.44	-0.00352696		2916.44	-0.00631123		3446.44	-0.00533519
266.6	0.0195321		796.62	-0.00481586		1326.61	0.00407501		1856.64	0.00370025		2386.64	-0.00276147		2916.64	-0.00637314		3446.64	-0.00645944
266.8	0.01932414		796.82	-0.00464895		1326.81	0.00478906		1856.84	0.00503226		2386.84	-0.00224614		2916.84	-0.00701285		3446.84	-0.0068817
267	0.01896252		797.02	-0.00393622		1327.01	0.00497383		1857.04	0.00507855		2387.04	-0.00195392		2917.04	-0.00665706		3447.04	-0.00720035
267.2	0.01917853		797.22	-0.00387848		1327.21	0.00494595		1857.24	0.00576851		2387.24	-0.00277047		2917.24	-0.00634963		3447.24	-0.00729161
267.4	0.01926399		797.42	-0.00488495		1327.41	0.00452243		1857.44	0.00638789		2387.44	-0.00232224		2917.44	-0.00630424		3447.44	-0.00770492
267.6	0.01908835		797.62	-0.00528846		1327.61	0.00458473		1857.64	0.00681398		2387.64	-0.00166255		2917.64	-0.00603354		3447.64	-0.008499
267.8	0.01854675		797.82	-0.00467271		1327.81	0.00536911		1857.84	0.00710789		2387.84	-0.00094684		2917.84	-0.00566338		3447.84	-0.00923798
268	0.0178383		798.02	-0.00517726		1328.01	0.00609188		1858.04	0.00780235		2388.04	-0.00142031		2918.04	-0.00575831		3448.04	-0.00951166
268.2	0.01775074		798.22	-0.00492267		1328.21	0.00638799		1858.24	0.00759143		2388.24	-0.00140717		2918.24	-0.00504608		3448.24	-0.00990735
268.4	0.01841334		798.42	-0.00395144		1328.41	0.00598106		1858.44	0.00749365		2388.44	-0.00236055		2918.44	-0.0054659		3448.44	-0.01021206
268.6	0.01917439		798.62	-0.00403223		1328.61	0.00638775		1858.64	0.00683272		2388.64	-0.00225877		2918.64	-0.00606024		3448.64	-0.01031123
268.8	0.01985396		798.82	-0.00406878		1328.81	0.00711736		1858.84	0.00632935		2388.84	-0.00292358		2918.84	-0.00590711		3448.84	-0.01133188
269	0.02053716		799.02	-0.00291026		1329.01	0.00659732		1859.04	0.00533342		2389.04	-0.00259056		2919.04	-0.00597763		3449.04	-0.01120985
269.2	0.02069645		799.22	-0.002384		1329.21	0.00633998		1859.24	0.00547912		2389.24	-0.00261527		2919.24	-0.0058092		3449.24	-0.01036971
269.4	0.02163996		799.42	-0.00150642		1329.41	0.00637493		1859.44	0.0046592		2389.44	-0.00342104		2919.44	-0.00582005		3449.44	-0.01055162
269.6	0.02099372		799.62	-0.00130102		1329.61	0.00614517		1859.64	0.00399612		2389.64	-0.00316133		2919.64	-0.00595481		3449.64	-0.01057159
269.8	0.02058541		799.82	-0.00099689		1329.81	0.00539723		1859.84	0.00347941		2389.84	-0.00444842		2919.84	-0.00651138		3449.84	-0.0105108
270	0.02023669		800.02	-0.0015799		1330.01	0.00584656		1860.04	0.00319571		2390.04	-0.00500094		2920.04	-0.00724241		3450.04	-0.01050704
270.2	0.02016014		800.22	-0.00128981		1330.21	0.0065041		1860.24	0.00295025		2390.24	-0.00508872		2920.24	-0.00729132		3450.24	-0.0102678
270.4	0.01901777		800.42	-0.00116992		1330.41	0.00625045		1860.44	0.00313915		2390.44	-0.00527776		2920.44	-0.00774541		3450.44	-0.00987009
270.6	0.01782307		800.62	-0.00145187		1330.61	0.00675019		1860.64	0.00301103		2390.64	-0.00581398		2920.64	-0.00778348		3450.64	-0.00969728
270.8	0.01727588		800.82	-0.00116924		1330.81	0.00748602		1860.84	0.00291829		2390.84	-0.00572328		2920.84	-0.0079228		3450.84	-0.00975096
271	0.01754689		801.02	-0.00106477		1331.01	0.00691606		1861.04	0.00284784		2391.04	-0.00546954		2921.04	-0.00816457		3451.04	-0.00943328
271.2	0.01691605		801.22	-0.00189759		1331.21	0.00587166		1861.24	0.00334544		2391.24	-0.00613135		2921.24	-0.00849124		3451.24	-0.00994212
271.4	0.01733658		801.42	-0.00262041		1331.41	0.00557073		1861.44	0.00348659		2391.44	-0.00630698		2921.44	-0.00875355		3451.44	-0.01012975
271.6	0.01722015		801.62	-0.00289145		1331.61	0.00535772		1861.64	0.00437579		2391.64	-0.00642955		2921.64	-0.00744642		3451.64	-0.01142192
271.8	0.01656236		801.82	-0.0033654		1331.81	0.00612739		1861.84	0.00324601		2391.84	-0.00630298		2921.84	-0.00716055		3451.84	-0.0120074
272	0.01664898		802.02	-0.00357844		1332.01	0.00553974		1862.04	0.00305872		2392.04	-0.0068016		2922.04	-0.00739179		3452.04	-0.01279544
272.2	0.01745179		802.22	-0.00327681		1332.21	0.00471737		1862.24	0.0034421		2392.24	-0.00588652		2922.24	-0.00690904		3452.24	-0.0136665
272.4	0.01872069		802.42	-0.00279364		1332.41	0.00450552		1862.44	0.00346626		2392.44	-0.00655454		2922.44	-0.00675016		3452.44	-0.013909
272.6	0.01947193		802.62	-0.00231047		1332.61	0.00421084		1862.64	0.00316105		2392.64	-0.00612508		2922.64	-0.00606739		3452.64	-0.01382053
272.8	0.02109487		802.82	-0.00208346		1332.81	0.00263147		1862.84	0.00294522		2392.84	-0.0055427		2922.84	-0.00616386		3452.84	-0.01407302
273	0.02130357		803.02	-0.0014582		1333.01	0.00157492		1863.04	0.00350002		2393.04	-0.00473075		2923.04	-0.00627968		3453.04	-0.01341609
273.2	0.02153435		803.22	-0.00181394		1333.21	0.00069902		1863.24	0.00381216		2393.24	-0.00454768		2923.24	-0.00700067		3453.24	-0.0127783
273.4	0.02153357		803.42	-0.00132511		1333.41	0.00112011		1863.44	0.00349818		2393.44	-0.00485155		2923.44	-0.00667473		3453.44	-0.0132533
273.6	0.02083643		803.62	-0.00181535		1333.61	0.00093176		1863.64	0.00407949		2393.64	-0.00441811		2923.64	-0.00704285		3453.64	-0.01183397
273.8	0.0207142		803.82	-0.00190909		1333.81	0.00201038		1863.84	0.00419468		2393.84	-0.00405254		2923.84	-0.00732635		3453.84	-0.01148328
274	0.02101661		804.02	-0.00228537		1334.01	0.00343102		1864.04	0.00519947		2394.04	-0.00400542		2924.04	-0.00667911		3454.04	-0.01004006
274.2	0.02090238		804.22	-0.00237243		1334.21	0.00392749		1864.24	0.00577093		2394.24	-0.00305187		2924.24	-0.00623552		3454.24	-0.0097492
274.4	0.02011292		804.42	-0.00329131		1334.41	0.0049984		1864.44	0.00595197		2394.44	-0.0028999		2924.44	-0.00672967		3454.44	-0.00860223
274.6	0.01910013		804.62	-0.00415903		1334.61	0.00604276		1864.64	0.00522165		2394.64	-0.00343963		2924.64	-0.00610635		3454.64	-0.00757727
274.8	0.01925495		804.82	-0.00373069		1334.81	0.00600365		1864.84	0.005883		2394.84	-0.0028198		2924.84	-0.00677855		3454.84	-0.00737779
275	0.01912797		805.02	-0.00329852		1335.01	0.00619088		1865.04	0.00637841		2395.04	-0.00324287		2925.04	-0.00748822		3455.04	-0.00605072
275.2	0.01858863		805.22	-0.00352504		1335.21	0.00661537		1865.24	0.00642243		2395.24	-0.00355241		2925.24	-0.00666475		3455.24	-0.0060835
275.4	0.01898847		805.42	-0.00335318		1335.41	0.00732279		1865.44	0.0065325		2395.44	-0.00444052		2925.44	-0.00656584		3455.44	-0.00581402
275.6	0.01784874		805.62	-0.00372422		1335.61	0.00779542		1865.64	0.00656244		2395.64	-0.00493569		2925.64	-0.00625899		3455.64	-0.00631884
275.8	0.01841652		805.82	-0.00345742		1335.81	0.00806052		1865.84	0.00552496		2395.84	-0.00468533		2925.84	-0.00669757		3455.84	-0.00549205
276	0.01824048		806.02	-0.00287974		1336.01	0.00763723		1866.04	0.00631202		2396.04	-0.00607886		2926.04	-0.00617859		3456.04	-0.00526245
276.2	0.01823601		806.22	-0.00150281		1336.21	0.00874708		1866.24	0.00652104		2396.24	-0.00557799		2926.24	-0.00534154		3456.24	-0.00518513
276.4	0.01913444		806.42	-0.00089491		1336.41	0.00916042		1866.44	0.00606379		2396.44	-0.00604527		2926.44	-0.00522597		3456.44	-0.00477509
276.6	0.0193687		806.62	-0.00032663		1336.61	0.00870342		1866.64	0.00555578		2396.64	-0.00560742		2926.64	-0.00553068		3456.64	-0.00538463
276.8	0.01892778		806.82	-0.00051873		1336.81	0.00819578		1866.84	0.00532066		2396.84	-0.00578939		2926.84	-0.00591459		3456.84	-0.00621374
277	0.01839726		807.02	-0.00038005		1337.01	0.00808238		1867.04	0.00580237		2397.04	-0.00594887		2927.04	-0.0052107		3457.04	-0.00627616
277.2	0.01791289		807.22	-0.00066352		1337.21	0.00776789		1867.24	0.00472084		2397.24	-0.00577612		2927.24	-0.00534116		3457.24	-0.00717103
277.4	0.01778816		807.42	-0.00091855		1337.41	0.00797359		1867.44	0.00448786		2397.44	-0.0061284		2927.44	-0.00459554		3457.44	-0.00846619
277.6	0.01808884		807.62	-0.00223884		1337.61	0.00728888		1867.64	0.00405875		2397.64	-0.00586626		2927.64	-0.00516043		3457.64	-0.00892787
277.8	0.01826114		807.82	-0.00363573		1337.81	0.00739788		1867.84	0.00390022		2397.84	-0.00529245		2927.84	-0.00508109		3457.84	-0.00966014
278	0.01905173		808.02	-0.00401823		1338.01	0.00683936		1868.04	0.00449033		2398.04	-0.00583434		2928.04	-0.0047888		3458.04	-0.00886239
278.2	0.01892891		808.22	-0.00438099		1338.21	0.00552017		1868.24	0.0044584		2398.24	-0.00494869		2928.24	-0.00532527		3458.24	-0.00960212
278.4	0.01970181		808.42	-0.00460904		1338.41	0.00543039		1868.44	0.00472753		2398.44	-0.00462288		2928.44	-0.00602376		3458.44	-0.00907031
278.6	0.01932789		808.62	-0.00485384		1338.61	0.00420504		1868.64	0.00496466		2398.64	-0.00479001		2928.64	-0.00645399		3458.64	-0.00895341
278.8	0.01969099		808.82	-0.00529457		1338.81	0.0035765		1868.84	0.00530159		2398.84	-0.00446159		2928.84	-0.00716588		3458.84	-0.00976486
279	0.01971107		809.02	-0.00571657		1339.01	0.00333102		1869.04	0.00467562		2399.04	-0.00422324		2929.04	-0.00706606		3459.04	-0.0095164
279.2	0.01962023		809.22	-0.00681208		1339.21	0.00309576		1869.24	0.00500246		2399.24	-0.00347712		2929.24	-0.00708802		3459.24	-0.01053784
279.4	0.01933292		809.42	-0.00714089		1339.41	0.00283939		1869.44	0.00552458		2399.44	-0.00277339		2929.44	-0.00742752		3459.44	-0.01122226
279.6	0.01932516		809.62	-0.00691676		1339.61	0.00241349		1869.64	0.00601782		2399.64	-0.00218548		2929.64	-0.00807029		3459.64	-0.01094626
279.8	0.02034285		809.82	-0.00627589		1339.81	0.0026614		1869.84	0.00586485		2399.84	-0.00179919		2929.84	-0.00787846		3459.84	-0.01029577
280	0.02043485		810.02	-0.00576239		1340.01	0.00321942		1870.04	0.00605289		2400.04	-0.00294373		2930.04	-0.00731943		3460.04	-0.01039394
280.2	0.02090827		810.22	-0.00505334		1340.21	0.00420307		1870.24	0.00549793		2400.24	-0.00280639		2930.24	-0.0070261		3460.24	-0.00995214
280.4	0.02150255		810.42	-0.00450907		1340.41	0.00466966		1870.44	0.00524231		2400.44	-0.0028373		2930.44	-0.00765423		3460.44	-0.010189
280.6	0.02115265		810.62	-0.00390058		1340.61	0.00448304		1870.64	0.00524029		2400.64	-0.00381343		2930.64	-0.00742902		3460.64	-0.01116412
280.8	0.02140023		810.82	-0.00326251		1340.81	0.00490119		1870.84	0.005162		2400.84	-0.00489245		2930.84	-0.00756132		3460.84	-0.01085441
281	0.02187705		811.02	-0.00254571		1341.01	0.00505489		1871.04	0.00518665		2401.04	-0.00492011		2931.04	-0.00660444		3461.04	-0.01116504
281.2	0.02155552		811.22	-0.00226556		1341.21	0.00546134		1871.24	0.00453038		2401.24	-0.00615239		2931.24	-0.00649974		3461.24	-0.0113893
281.4	0.02100318		811.42	-0.00202122		1341.41	0.00519688		1871.44	0.0037512		2401.44	-0.0065067		2931.44	-0.00593134		3461.44	-0.01195832
281.6	0.02173193		811.62	-0.00190741		1341.61	0.00522206		1871.64	0.0037266		2401.64	-0.0069639		2931.64	-0.00612772		3461.64	-0.01138208
281.8	0.02121567		811.82	-0.00101715		1341.81	0.00471477		1871.84	0.00422266		2401.84	-0.00759103		2931.84	-0.00609264		3461.84	-0.01075483
282	0.02096982		812.02	-0.00044773		1342.01	0.00437781		1872.04	0.00435596		2402.04	-0.00818799		2932.04	-0.00645434		3462.04	-0.01064633
282.2	0.02079403		812.22	-0.00048988		1342.21	0.0035354		1872.24	0.00467041		2402.24	-0.0081521		2932.24	-0.00682903		3462.24	-0.01016799
282.4	0.02118061		812.42	-0.00079267		1342.41	0.00301875		1872.44	0.00481485		2402.44	-0.00836892		2932.44	-0.00606612		3462.44	-0.00970205
282.6	0.01971192		812.62	-0.00104045		1342.61	0.00261241		1872.64	0.00485385		2402.64	-0.00827214		2932.64	-0.00611481		3462.64	-0.00948737
282.8	0.01910749		812.82	-0.00199586		1342.81	0.00185739		1872.84	0.0048181		2402.84	-0.00762304		2932.84	-0.005499		3462.84	-0.00934956
283	0.01895106		813.02	-0.00217703		1343.01	0.00196365		1873.04	0.0055765		2403.04	-0.00701747		2933.04	-0.00561051		3463.04	-0.00884503
283.2	0.01884243		813.22	-0.00228922		1343.21	0.00161652		1873.24	0.00654479		2403.24	-0.00591653		2933.24	-0.0062622		3463.24	-0.00869212
283.4	0.0183016		813.42	-0.00287584		1343.41	0.00166854		1873.44	0.00687738		2403.44	-0.0044816		2933.44	-0.00683016		3463.44	-0.00900261
283.6	0.01846844		813.62	-0.0032322		1343.61	0.00104796		1873.64	0.00689941		2403.64	-0.00476275		2933.64	-0.0070569		3463.64	-0.00777738
283.8	0.01868241		813.82	-0.00347064		1343.81	0.00161517		1873.84	0.00732316		2403.84	-0.00505858		2933.84	-0.00617727		3463.84	-0.00736669
284	0.01975024		814.02	-0.00391117		1344.01	0.00138525		1874.04	0.00746353		2404.04	-0.00474721		2934.04	-0.00633532		3464.04	-0.00739711
284.2	0.01985707		814.22	-0.00399514		1344.21	0.00172092		1874.24	0.00702258		2404.24	-0.00463521		2934.24	-0.00662658		3464.24	-0.00715126
284.4	0.02049007		814.42	-0.00365429		1344.41	0.0020273		1874.44	0.00675929		2404.44	-0.00313669		2934.44	-0.00695917		3464.44	-0.00762072
284.6	0.02037952		814.62	-0.00307901		1344.61	0.00161792		1874.64	0.00689703		2404.64	-0.00345379		2934.64	-0.00709733		3464.64	-0.00855506
284.8	0.02080875		814.82	-0.00251878		1344.81	0.00213648		1874.84	0.00638959		2404.84	-0.00418134		2934.84	-0.0078552		3464.84	-0.00889735
285	0.02117412		815.02	-0.00220347		1345.01	0.00172655		1875.04	0.00624464		2405.04	-0.00352487		2935.04	-0.0072731		3465.04	-0.00987667
285.2	0.02151399		815.22	-0.00259885		1345.21	0.00258078		1875.24	0.00585225		2405.24	-0.00334194		2935.24	-0.00811537		3465.24	-0.01035612
285.4	0.02156253		815.42	-0.0018024		1345.41	0.00304852		1875.44	0.00447748		2405.44	-0.00243576		2935.44	-0.00827549		3465.44	-0.01172831
285.6	0.02281045		815.62	0.00018591		1345.61	0.00343997		1875.64	0.00453566		2405.64	-0.00247998		2935.64	-0.00833307		3465.64	-0.0121245
285.8	0.02240634		815.82	0.00083001		1345.81	0.00339705		1875.84	0.00376643		2405.84	-0.00238929		2935.84	-0.00862376		3465.84	-0.01309851
286	0.02253347		816.02	0.0006995		1346.01	0.00398217		1876.04	0.00277073		2406.04	-0.00272697		2936.04	-0.00889393		3466.04	-0.01321602
286.2	0.0224255		816.22	0.00142787		1346.21	0.00405699		1876.24	0.00229534		2406.24	-0.00366896		2936.24	-0.00839484		3466.24	-0.01243426
286.4	0.02230774		816.42	0.00223229		1346.41	0.00392715		1876.44	0.00137567		2406.44	-0.00412034		2936.44	-0.00791227		3466.44	-0.01186287
286.6	0.02205112		816.62	0.00282778		1346.61	0.00482123		1876.64	0.00114227		2406.64	-0.00430895		2936.64	-0.00861265		3466.64	-0.01179095
286.8	0.02225642		816.82	0.00302122		1346.81	0.00508758		1876.84	0.00046689		2406.84	-0.0045889		2936.84	-0.00862508		3466.84	-0.01142849
287	0.02241188		817.02	0.00267596		1347.01	0.00586814		1877.04	0.00067744		2407.04	-0.00497411		2937.04	-0.00883224		3467.04	-0.01136568
287.2	0.02224385		817.22	0.0018355		1347.21	0.00582239		1877.24	0.00028489		2407.24	-0.00497594		2937.24	-0.00913175		3467.24	-0.01052931
287.4	0.02195629		817.42	0.00047355		1347.41	0.00560134		1877.44	0.000666		2407.44	-0.00456653		2937.44	-0.00868622		3467.44	-0.00979471
287.6	0.02150243		817.62	-0.00019929		1347.61	0.00572344		1877.64	-0.0000568		2407.64	-0.00480984		2937.64	-0.00800035		3467.64	-0.00817633
287.8	0.02153136		817.82	-0.00146326		1347.81	0.00598073		1877.84	0.0000725		2407.84	-0.00402472		2937.84	-0.00763181		3467.84	-0.00870686
288	0.02155882		818.02	-0.00227584		1348.01	0.00634484		1878.04	-0.00019865		2408.04	-0.00339591		2938.04	-0.00829715		3468.04	-0.00867952
288.2	0.02114837		818.22	-0.00308079		1348.21	0.00602361		1878.24	-0.0000237		2408.24	-0.0032082		2938.24	-0.00796085		3468.24	-0.00811989
288.4	0.02157383		818.42	-0.0041466		1348.41	0.00602891		1878.44	0.00050428		2408.44	-0.00287514		2938.44	-0.00774975		3468.44	-0.00902612
288.6	0.0210415		818.62	-0.00475659		1348.61	0.00541636		1878.64	0.00151036		2408.64	-0.00335661		2938.64	-0.00829337		3468.64	-0.00947078
288.8	0.02112621		818.82	-0.00510624		1348.81	0.00603791		1878.84	0.00178511		2408.84	-0.00377828		2938.84	-0.00901055		3468.84	-0.01057257
289	0.02165695		819.02	-0.00521883		1349.01	0.00553193		1879.04	0.00228754		2409.04	-0.00238276		2939.04	-0.00898679		3469.04	-0.01112821
289.2	0.02218434		819.22	-0.0052646		1349.21	0.00557458		1879.24	0.00238739		2409.24	-0.00175993		2939.24	-0.00966633		3469.24	-0.01202853
289.4	0.02215637		819.42	-0.00432566		1349.41	0.0051596		1879.44	0.00279897		2409.44	-0.00189763		2939.44	-0.00910054		3469.44	-0.01294973
289.6	0.02199138		819.62	-0.00333197		1349.61	0.00457824		1879.64	0.00309238		2409.64	-0.0022603		2939.64	-0.00893434		3469.64	-0.01219643
289.8	0.02189767		819.82	-0.00387652		1349.81	0.00434931		1879.84	0.00345875		2409.84	-0.00308243		2939.84	-0.0088118		3469.84	-0.01279622
290	0.0223365		820.02	-0.00383215		1350.01	0.00484456		1880.04	0.00306603		2410.04	-0.00419629		2940.04	-0.00757663		3470.04	-0.01279463
290.2	0.02200837		820.22	-0.0034052		1350.21	0.00457027		1880.24	0.00351723		2410.24	-0.00454203		2940.24	-0.00666764		3470.24	-0.01230415
290.4	0.02240932		820.42	-0.00279537		1350.41	0.0038565		1880.44	0.00361556		2410.44	-0.00423515		2940.44	-0.00620857		3470.44	-0.01232251
290.6	0.02272786		820.62	-0.00293304		1350.61	0.00355506		1880.64	0.00359674		2410.64	-0.00495043		2940.64	-0.0057347		3470.64	-0.0122732
290.8	0.02271864		820.82	-0.00296036		1350.81	0.00360457		1880.84	0.00310105		2410.84	-0.00555566		2940.84	-0.00530891		3470.84	-0.01279314
291	0.02240632		821.02	-0.00331456		1351.01	0.00286792		1881.04	0.00301524		2411.04	-0.00526907		2941.04	-0.00477209		3471.04	-0.0129373
291.2	0.02214677		821.22	-0.00315099		1351.21	0.00270379		1881.24	0.00336546		2411.24	-0.00415164		2941.24	-0.00403769		3471.24	-0.01262168
291.4	0.02245421		821.42	-0.00260659		1351.41	0.00298011		1881.44	0.00369508		2411.44	-0.00354891		2941.44	-0.00359183		3471.44	-0.01196678
291.6	0.02186429		821.62	-0.00287143		1351.61	0.00393086		1881.64	0.0027693		2411.64	-0.00310365		2941.64	-0.00363995		3471.64	-0.01239117
291.8	0.02191453		821.82	-0.00324074		1351.81	0.00341539		1881.84	0.0034468		2411.84	-0.00367322		2941.84	-0.00387275		3471.84	-0.01246878
292	0.02207722		822.02	-0.00267616		1352.01	0.00405712		1882.04	0.00365665		2412.04	-0.00372517		2942.04	-0.00430232		3472.04	-0.01190954
292.2	0.02253983		822.22	-0.0024419		1352.21	0.00397411		1882.24	0.00401424		2412.24	-0.00313263		2942.24	-0.00443595		3472.24	-0.01179857
292.4	0.02265933		822.42	-0.0021097		1352.41	0.00429745		1882.44	0.00447655		2412.44	-0.00324407		2942.44	-0.00514508		3472.44	-0.01194283
292.6	0.02233654		822.62	-0.00122718		1352.61	0.00460771		1882.64	0.00467769		2412.64	-0.00294139		2942.64	-0.00638831		3472.64	-0.01245509
292.8	0.02178571		822.82	-0.00100399		1352.81	0.0044723		1882.84	0.00438261		2412.84	-0.0030998		2942.84	-0.00695551		3472.84	-0.01305751
293	0.0221309		823.02	-0.00207591		1353.01	0.00368943		1883.04	0.00379038		2413.04	-0.00297686		2943.04	-0.00834029		3473.04	-0.0133653
293.2	0.02131052		823.22	-0.00297589		1353.21	0.00368663		1883.24	0.003558		2413.24	-0.00312902		2943.24	-0.00963622		3473.24	-0.0129873
293.4	0.02119214		823.42	-0.00335885		1353.41	0.00334249		1883.44	0.00364159		2413.44	-0.00299103		2943.44	-0.01026938		3473.44	-0.01344699
293.6	0.02118279		823.62	-0.00308269		1353.61	0.00333831		1883.64	0.00326639		2413.64	-0.00309266		2943.64	-0.01060425		3473.64	-0.01320401
293.8	0.02162332		823.82	-0.00412512		1353.81	0.00405847		1883.84	0.00401461		2413.84	-0.00280061		2943.84	-0.01047835		3473.84	-0.01440502
294	0.02141771		824.02	-0.00366982		1354.01	0.0042349		1884.04	0.00377333		2414.04	-0.00244298		2944.04	-0.01051879		3474.04	-0.01369269
294.2	0.0209317		824.22	-0.00364346		1354.21	0.00363489		1884.24	0.00411569		2414.24	-0.0023847		2944.24	-0.01022413		3474.24	-0.0125758
294.4	0.02098165		824.42	-0.00358931		1354.41	0.0027185		1884.44	0.00354306		2414.44	-0.00193127		2944.44	-0.01043967		3474.44	-0.01242579
294.6	0.02003136		824.62	-0.00357964		1354.61	0.00257819		1884.64	0.00320494		2414.64	-0.00237089		2944.64	-0.01039607		3474.64	-0.0119027
294.8	0.02056338		824.82	-0.00325967		1354.81	0.00288147		1884.84	0.0032152		2414.84	-0.00232133		2944.84	-0.01030438		3474.84	-0.01231727
295	0.02050763		825.02	-0.00366419		1355.01	0.00237003		1885.04	0.00421825		2415.04	-0.00214767		2945.04	-0.00986987		3475.04	-0.0123316
295.2	0.02039511		825.22	-0.00332808		1355.21	0.00329642		1885.24	0.00508656		2415.24	-0.00158108		2945.24	-0.00868521		3475.24	-0.01164048
295.4	0.02140482		825.42	-0.00293365		1355.41	0.00378267		1885.44	0.00514747		2415.44	-0.00227805		2945.44	-0.00737831		3475.44	-0.01075142
295.6	0.02135563		825.62	-0.00311362		1355.61	0.00406948		1885.64	0.00577318		2415.64	-0.00245661		2945.64	-0.00716778		3475.64	-0.00974624
295.8	0.0214523		825.82	-0.00345851		1355.81	0.0042569		1885.84	0.00639825		2415.84	-0.00271006		2945.84	-0.00687213		3475.84	-0.00927533
296	0.02231626		826.02	-0.00342633		1356.01	0.00530945		1886.04	0.00716299		2416.04	-0.00235592		2946.04	-0.00578013		3476.04	-0.00941246
296.2	0.022704		826.22	-0.00355964		1356.21	0.00509797		1886.24	0.00789239		2416.24	-0.00235249		2946.24	-0.00568761		3476.24	-0.00940079
296.4	0.02292327		826.42	-0.0036874		1356.41	0.00538879		1886.44	0.00806828		2416.44	-0.00282921		2946.44	-0.00542665		3476.44	-0.00932964
296.6	0.02307076		826.62	-0.00423602		1356.61	0.00550426		1886.64	0.0079061		2416.64	-0.0034266		2946.64	-0.00544659		3476.64	-0.01030729
296.8	0.02263374		826.82	-0.00523093		1356.81	0.00492477		1886.84	0.00724793		2416.84	-0.00446324		2946.84	-0.00533865		3476.84	-0.00946913
297	0.02286297		827.02	-0.00596973		1357.01	0.00557878		1887.04	0.00698967		2417.04	-0.00399766		2947.04	-0.00557946		3477.04	-0.0100649
297.2	0.02192727		827.22	-0.00566909		1357.21	0.00575297		1887.24	0.00638558		2417.24	-0.00447406		2947.24	-0.00553731		3477.24	-0.01009448
297.4	0.02259973		827.42	-0.00618217		1357.41	0.00512912		1887.44	0.00591094		2417.44	-0.004015		2947.44	-0.0060966		3477.44	-0.01159166
297.6	0.02235162		827.62	-0.00551756		1357.61	0.00596969		1887.64	0.00560902		2417.64	-0.00409923		2947.64	-0.00588414		3477.64	-0.01196211
297.8	0.02230324		827.82	-0.00598952		1357.81	0.00592965		1887.84	0.00558606		2417.84	-0.00397859		2947.84	-0.00579294		3477.84	-0.01235829
298	0.02229422		828.02	-0.00460696		1358.01	0.00555324		1888.04	0.00439875		2418.04	-0.00443516		2948.04	-0.00653539		3478.04	-0.01167602
298.2	0.02258176		828.22	-0.00482011		1358.21	0.00538077		1888.24	0.00356794		2418.24	-0.00473378		2948.24	-0.00612686		3478.24	-0.01133385
298.4	0.02240361		828.42	-0.00470231		1358.41	0.00551487		1888.44	0.00348923		2418.44	-0.004132		2948.44	-0.00690374		3478.44	-0.01106012
298.6	0.02226559		828.62	-0.00475549		1358.61	0.0051621		1888.64	0.00326468		2418.64	-0.0045497		2948.64	-0.0065693		3478.64	-0.01067183
298.8	0.02355761		828.82	-0.00416612		1358.81	0.00541131		1888.84	0.00346625		2418.84	-0.00372918		2948.84	-0.0074845		3478.84	-0.01022967
299	0.02354945		829.02	-0.00478118		1359.01	0.00547728		1889.04	0.003725		2419.04	-0.00366966		2949.04	-0.00779813		3479.04	-0.01051598
299.2	0.02345159		829.22	-0.00432782		1359.21	0.00656583		1889.24	0.00296792		2419.24	-0.00301359		2949.24	-0.00698652		3479.24	-0.0107637
299.4	0.02399097		829.42	-0.00434822		1359.41	0.00641466		1889.44	0.00310591		2419.44	-0.00285294		2949.44	-0.00635671		3479.44	-0.01038946
299.6	0.02392757		829.62	-0.00460361		1359.61	0.00683114		1889.64	0.00400603		2419.64	-0.0025531		2949.64	-0.0079181		3479.64	-0.01036451
299.8	0.02441817		829.82	-0.00416555		1359.81	0.00711393		1889.84	0.00353337		2419.84	-0.00167238		2949.84	-0.00763718		3479.84	-0.01088056
300	0.02437599		830.02	-0.00396381		1360.01	0.00672974		1890.04	0.00309959		2420.04	-0.00159819		2950.04	-0.00792049		3480.04	-0.01068601
300.2	0.02368484		830.22	-0.00372201		1360.21	0.00684924		1890.24	0.00326262		2420.24	-0.00079113		2950.24	-0.00887887		3480.24	-0.01059557
300.4	0.02335399		830.42	-0.00308949		1360.41	0.00654244		1890.44	0.00366406		2420.44	-0.0010954		2950.44	-0.00821832		3480.44	-0.01070684
300.6	0.02333137		830.62	-0.00277296		1360.61	0.00612666		1890.64	0.00362545		2420.64	-0.00108475		2950.64	-0.00877334		3480.64	-0.01121061
300.8	0.02336569		830.82	-0.00184361		1360.81	0.00661575		1890.84	0.00363233		2420.84	-0.00146669		2950.84	-0.00853334		3480.84	-0.0110868
301	0.02274794		831.02	-0.00239402		1361.01	0.00649374		1891.04	0.0038986		2421.04	-0.00073733		2951.04	-0.00861994		3481.04	-0.01250288
301.2	0.02186955		831.22	-0.00223681		1361.21	0.00612235		1891.24	0.0029826		2421.24	-0.00107689		2951.24	-0.0102563		3481.24	-0.0130941
301.4	0.02143414		831.42	-0.00230975		1361.41	0.00558076		1891.44	0.00363825		2421.44	-0.0010192		2951.44	-0.01046909		3481.44	-0.01333825
301.6	0.02029684		831.62	-0.000846		1361.61	0.0055289		1891.64	0.00434071		2421.64	-0.00125882		2951.64	-0.01069511		3481.64	-0.01375728
301.8	0.01961072		831.82	-0.00059945		1361.81	0.00485014		1891.84	0.00448652		2421.84	-0.00217172		2951.84	-0.01070206		3481.84	-0.01318517
302	0.01995543		832.02	0.00000794		1362.01	0.00450474		1892.04	0.00475024		2422.04	-0.00243717		2952.04	-0.01067161		3482.04	-0.0127289
302.2	0.02011381		832.22	-0.00016373		1362.21	0.00457681		1892.24	0.00543316		2422.24	-0.00213483		2952.24	-0.01000784		3482.24	-0.0109812
302.4	0.02035052		832.42	-0.00086558		1362.41	0.0038551		1892.44	0.00570242		2422.44	-0.00248122		2952.44	-0.00993226		3482.44	-0.01059883
302.6	0.02007591		832.62	-0.00086671		1362.61	0.0038108		1892.64	0.00620452		2422.64	-0.00251779		2952.64	-0.00955481		3482.64	-0.01001877
302.8	0.02089978		832.82	-0.00108581		1362.81	0.00453122		1892.84	0.00640968		2422.84	-0.00226016		2952.84	-0.00947627		3482.84	-0.00883095
303	0.02128961		833.02	-0.00204444		1363.01	0.00488157		1893.04	0.00633346		2423.04	-0.0030013		2953.04	-0.00851194		3483.04	-0.00904017
303.2	0.02145787		833.22	-0.00278042		1363.21	0.00500491		1893.24	0.00539513		2423.24	-0.00329119		2953.24	-0.00852537		3483.24	-0.00780294
303.4	0.02195471		833.42	-0.00289439		1363.41	0.0048443		1893.44	0.00575426		2423.44	-0.003267		2953.44	-0.00851525		3483.44	-0.00620616
303.6	0.02206292		833.62	-0.00342089		1363.61	0.00504198		1893.64	0.00522127		2423.64	-0.00274543		2953.64	-0.00884659		3483.64	-0.00627005
303.8	0.02228122		833.82	-0.00367543		1363.81	0.00484086		1893.84	0.00325884		2423.84	-0.00260175		2953.84	-0.00828831		3483.84	-0.00598568
304	0.02217631		834.02	-0.00472764		1364.01	0.00481426		1894.04	0.00305141		2424.04	-0.00205881		2954.04	-0.00886968		3484.04	-0.00630984
304.2	0.02186275		834.22	-0.00449252		1364.21	0.00485047		1894.24	0.00316051		2424.24	-0.00179107		2954.24	-0.00832333		3484.24	-0.00665014
304.4	0.02224684		834.42	-0.00462821		1364.41	0.00452608		1894.44	0.00358231		2424.44	-0.00162323		2954.44	-0.00751883		3484.44	-0.00780165
304.6	0.02298147		834.62	-0.00460119		1364.61	0.00534149		1894.64	0.00299375		2424.64	-0.00163111		2954.64	-0.00790176		3484.64	-0.00836647
304.8	0.02388953		834.82	-0.00444373		1364.81	0.00537159		1894.84	0.00322978		2424.84	-0.0022495		2954.84	-0.00795089		3484.84	-0.00974044
305	0.02347278		835.02	-0.00443878		1365.01	0.00495009		1895.04	0.00297862		2425.04	-0.00216908		2955.04	-0.00827615		3485.04	-0.01101316
305.2	0.02316668		835.22	-0.00385916		1365.21	0.00472733		1895.24	0.00331431		2425.24	-0.00176785		2955.24	-0.00883491		3485.24	-0.01129324
305.4	0.02345185		835.42	-0.00293154		1365.41	0.00426927		1895.44	0.00462211		2425.44	-0.00152334		2955.44	-0.00801731		3485.44	-0.01148888
305.6	0.02266406		835.62	-0.00204817		1365.61	0.00387474		1895.64	0.00464067		2425.64	-0.00130804		2955.64	-0.00757862		3485.64	-0.01219082
305.8	0.02328515		835.82	-0.00165492		1365.81	0.00338189		1895.84	0.00426235		2425.84	-0.00184907		2955.84	-0.00692942		3485.84	-0.01243143
306	0.02365606		836.02	-0.00132481		1366.01	0.00342753		1896.04	0.00400665		2426.04	-0.00149886		2956.04	-0.00675157		3486.04	-0.01256973
306.2	0.02338701		836.22	-0.00108702		1366.21	0.00332335		1896.24	0.00416973		2426.24	-0.0010657		2956.24	-0.00699461		3486.24	-0.01266397
306.4	0.02329121		836.42	-0.00143581		1366.41	0.00335676		1896.44	0.00398924		2426.44	-0.00151702		2956.44	-0.00721829		3486.44	-0.01340265
306.6	0.02301122		836.62	-0.00075881		1366.61	0.00445566		1896.64	0.00450215		2426.64	-0.00163009		2956.64	-0.0071891		3486.64	-0.01244584
306.8	0.023982		836.82	-0.00147755		1366.81	0.00444409		1896.84	0.00414824		2426.84	-0.0017471		2956.84	-0.00769587		3486.84	-0.01154381
307	0.02306906		837.02	-0.00066993		1367.01	0.00441986		1897.04	0.00396372		2427.04	-0.0020472		2957.04	-0.00825296		3487.04	-0.01115612
307.2	0.02309659		837.22	-0.00091063		1367.21	0.00375045		1897.24	0.00351794		2427.24	-0.00225336		2957.24	-0.00909263		3487.24	-0.0094278
307.4	0.02261036		837.42	-0.00104524		1367.41	0.00408364		1897.44	0.00310138		2427.44	-0.00221085		2957.44	-0.00841685		3487.44	-0.0092313
307.6	0.02176853		837.62	-0.00119492		1367.61	0.00414665		1897.64	0.00258606		2427.64	-0.0018084		2957.64	-0.0089609		3487.64	-0.01021084
307.8	0.02140114		837.82	-0.00111349		1367.81	0.00408864		1897.84	0.00237924		2427.84	-0.00100751		2957.84	-0.00913018		3487.84	-0.01052358
308	0.02173029		838.02	-0.00070251		1368.01	0.00441302		1898.04	0.00325959		2428.04	-0.00061037		2958.04	-0.00992544		3488.04	-0.01054257
308.2	0.02107753		838.22	-0.00037063		1368.21	0.00433577		1898.24	0.00348318		2428.24	-0.00073689		2958.24	-0.0095301		3488.24	-0.01076514
308.4	0.02149317		838.42	-0.00028289		1368.41	0.0042549		1898.44	0.00413262		2428.44	-0.00163961		2958.44	-0.00888222		3488.44	-0.01100034
308.6	0.02146758		838.62	-0.00073003		1368.61	0.00510003		1898.64	0.00468757		2428.64	-0.00215644		2958.64	-0.00882281		3488.64	-0.01116793
308.8	0.02197188		838.82	-0.00008606		1368.81	0.00525081		1898.84	0.00531903		2428.84	-0.00257161		2958.84	-0.0087329		3488.84	-0.01197418
309	0.021923		839.02	0.00019729		1369.01	0.00563737		1899.04	0.00507414		2429.04	-0.00226245		2959.04	-0.00814014		3489.04	-0.01239728
309.2	0.02288175		839.22	-0.00101559		1369.21	0.00547792		1899.24	0.00524675		2429.24	-0.00122106		2959.24	-0.00743739		3489.24	-0.01283295
309.4	0.02314136		839.42	-0.00055799		1369.41	0.00501604		1899.44	0.0065871		2429.44	-0.00135962		2959.44	-0.00760607		3489.44	-0.01363897
309.6	0.02253338		839.62	-0.00098748		1369.61	0.00559709		1899.64	0.00573003		2429.64	-0.00152499		2959.64	-0.00685356		3489.64	-0.01428494
309.8	0.02323296		839.82	-0.00123354		1369.81	0.00564257		1899.84	0.00479281		2429.84	-0.00170881		2959.84	-0.00686243		3489.84	-0.01449137
310	0.02300352		840.02	-0.00157845		1370.01	0.00624341		1900.04	0.00476557		2430.04	-0.00185273		2960.04	-0.00672462		3490.04	-0.014743
310.2	0.02316682		840.22	-0.00183402		1370.21	0.00591222		1900.24	0.00474832		2430.24	-0.00094288		2960.24	-0.00740969		3490.24	-0.01498368
310.4	0.02363275		840.42	-0.00219485		1370.41	0.00715553		1900.44	0.00462542		2430.44	-0.00152771		2960.44	-0.00720226		3490.44	-0.013563
310.6	0.02345563		840.62	-0.00170273		1370.61	0.00711295		1900.64	0.00452074		2430.64	-0.00168497		2960.64	-0.00760216		3490.64	-0.01305442
310.8	0.02383447		840.82	-0.00196684		1370.81	0.00712941		1900.84	0.00465534		2430.84	-0.00184732		2960.84	-0.00763009		3490.84	-0.01260689
311	0.022697		841.02	-0.00099409		1371.01	0.00730538		1901.04	0.00451326		2431.04	-0.00183014		2961.04	-0.00723489		3491.04	-0.01131067
311.2	0.02311172		841.22	-0.00089868		1371.21	0.00796875		1901.24	0.00440229		2431.24	-0.00227159		2961.24	-0.00699727		3491.24	-0.00992922
311.4	0.02280155		841.42	-0.00065465		1371.41	0.00855727		1901.44	0.00387907		2431.44	-0.0022565		2961.44	-0.00694105		3491.44	-0.00996775
311.6	0.02251842		841.62	-0.0002708		1371.61	0.00706734		1901.64	0.00449394		2431.64	-0.00232275		2961.64	-0.00773967		3491.64	-0.01021565
311.8	0.02298738		841.82	-0.00040793		1371.81	0.00679997		1901.84	0.00369858		2431.84	-0.00209153		2961.84	-0.0079362		3491.84	-0.00989765
312	0.0231067		842.02	-0.00066417		1372.01	0.00638484		1902.04	0.00374333		2432.04	-0.00287233		2962.04	-0.00737599		3492.04	-0.00884116
312.2	0.02289501		842.22	-0.00151342		1372.21	0.00576879		1902.24	0.00427773		2432.24	-0.00347405		2962.24	-0.00720051		3492.24	-0.00891553
312.4	0.02224415		842.42	-0.00144491		1372.41	0.00553306		1902.44	0.00453163		2432.44	-0.00408377		2962.44	-0.00796092		3492.44	-0.00890396
312.6	0.02222002		842.62	-0.00187656		1372.61	0.00559347		1902.64	0.0054473		2432.64	-0.00378793		2962.64	-0.00807575		3492.64	-0.00901046
312.8	0.02222706		842.82	-0.00134227		1372.81	0.00519524		1902.84	0.0053944		2432.84	-0.00389944		2962.84	-0.00831523		3492.84	-0.00932837
313	0.02219055		843.02	-0.00241339		1373.01	0.00478976		1903.04	0.00546109		2433.04	-0.00305152		2963.04	-0.0085251		3493.04	-0.00952608
313.2	0.02269809		843.22	-0.00269058		1373.21	0.00401044		1903.24	0.00596763		2433.24	-0.00330427		2963.24	-0.00860019		3493.24	-0.01016993
313.4	0.02284607		843.42	-0.00263176		1373.41	0.00370927		1903.44	0.00665837		2433.44	-0.00336115		2963.44	-0.0092957		3493.44	-0.01075919
313.6	0.0230515		843.62	-0.00380121		1373.61	0.00346834		1903.64	0.00556126		2433.64	-0.00226529		2963.64	-0.00868702		3493.64	-0.01085317
313.8	0.02292315		843.82	-0.00359647		1373.81	0.00319266		1903.84	0.00513321		2433.84	-0.00182561		2963.84	-0.00853328		3493.84	-0.01158194
314	0.02318318		844.02	-0.00365349		1374.01	0.00365888		1904.04	0.00533278		2434.04	-0.00185762		2964.04	-0.00877579		3494.04	-0.01239868
314.2	0.02309844		844.22	-0.00324446		1374.21	0.00335308		1904.24	0.00482499		2434.24	-0.00114083		2964.24	-0.0093616		3494.24	-0.01224523
314.4	0.02391825		844.42	-0.00338698		1374.41	0.00437714		1904.44	0.00480508		2434.44	-0.00166311		2964.44	-0.00904263		3494.44	-0.01186031
314.6	0.02376629		844.62	-0.00340385		1374.61	0.00453173		1904.64	0.00414034		2434.64	-0.00163389		2964.64	-0.00875591		3494.64	-0.01280437
314.8	0.0241858		844.82	-0.00366458		1374.81	0.00498058		1904.84	0.00462225		2434.84	-0.00178918		2964.84	-0.00798738		3494.84	-0.01321717
315	0.02390317		845.02	-0.00352266		1375.01	0.00562518		1905.04	0.00435389		2435.04	-0.00208863		2965.04	-0.00787216		3495.04	-0.01340817
315.2	0.02429712		845.22	-0.00313722		1375.21	0.00573938		1905.24	0.00430097		2435.24	-0.00259975		2965.24	-0.00725747		3495.24	-0.01361902
315.4	0.02470591		845.42	-0.00276435		1375.41	0.00526058		1905.44	0.00408329		2435.44	-0.00257389		2965.44	-0.00676337		3495.44	-0.01407921
315.6	0.02420354		845.62	-0.00264326		1375.61	0.00396197		1905.64	0.00377072		2435.64	-0.00261391		2965.64	-0.00630702		3495.64	-0.01352425
315.8	0.0243594		845.82	-0.0030247		1375.81	0.00444101		1905.84	0.0031085		2435.84	-0.00292373		2965.84	-0.00571246		3495.84	-0.01371959
316	0.02370667		846.02	-0.00358916		1376.01	0.00452109		1906.04	0.00311949		2436.04	-0.00313701		2966.04	-0.00476613		3496.04	-0.01333271
316.2	0.02334782		846.22	-0.00368396		1376.21	0.00493809		1906.24	0.00397486		2436.24	-0.00350995		2966.24	-0.00614477		3496.24	-0.01334168
316.4	0.02238123		846.42	-0.00331991		1376.41	0.00482593		1906.44	0.00368764		2436.44	-0.00300845		2966.44	-0.0068986		3496.44	-0.01376643
316.6	0.02224518		846.62	-0.00323834		1376.61	0.00444182		1906.64	0.0038547		2436.64	-0.00268193		2966.64	-0.00613958		3496.64	-0.01293319
316.8	0.02169347		846.82	-0.00332672		1376.81	0.00488443		1906.84	0.00416087		2436.84	-0.00246908		2966.84	-0.00668582		3496.84	-0.01247595
317	0.02209465		847.02	-0.00341612		1377.01	0.00489366		1907.04	0.00440229		2437.04	-0.00221158		2967.04	-0.00685577		3497.04	-0.01267199
317.2	0.02242792		847.22	-0.00286109		1377.21	0.00472721		1907.24	0.00501488		2437.24	-0.00252556		2967.24	-0.00691111		3497.24	-0.01300558
317.4	0.02275034		847.42	-0.00299798		1377.41	0.00472486		1907.44	0.00553097		2437.44	-0.00207182		2967.44	-0.00646262		3497.44	-0.01329335
317.6	0.02241379		847.62	-0.00376266		1377.61	0.004443		1907.64	0.00504414		2437.64	-0.00163805		2967.64	-0.00722861		3497.64	-0.01363238
317.8	0.02211778		847.82	-0.00308153		1377.81	0.00483496		1907.84	0.00444673		2437.84	-0.00194201		2967.84	-0.00756371		3497.84	-0.01373883
318	0.02332486		848.02	-0.00336925		1378.01	0.00456038		1908.04	0.00469899		2438.04	-0.00291593		2968.04	-0.00791749		3498.04	-0.01370289
318.2	0.022611		848.22	-0.00407261		1378.21	0.00417524		1908.24	0.00453131		2438.24	-0.00269757		2968.24	-0.00800008		3498.24	-0.01296282
318.4	0.02368472		848.42	-0.00460933		1378.41	0.00458577		1908.44	0.00440222		2438.44	-0.00323868		2968.44	-0.00817561		3498.44	-0.01232194
318.6	0.02325547		848.62	-0.00462548		1378.61	0.00371334		1908.64	0.00449013		2438.64	-0.00324439		2968.64	-0.0079485		3498.64	-0.01211286
318.8	0.02320336		848.82	-0.00501964		1378.81	0.00339063		1908.84	0.00454897		2438.84	-0.00274332		2968.84	-0.00833259		3498.84	-0.01187006
319	0.02312191		849.02	-0.00399181		1379.01	0.00329844		1909.04	0.00431212		2439.04	-0.00276519		2969.04	-0.00743091		3499.04	-0.01112395
319.2	0.02348958		849.22	-0.00355709		1379.21	0.00244983		1909.24	0.00455487		2439.24	-0.00213112		2969.24	-0.00672093		3499.24	-0.01019345
319.4	0.02363845		849.42	-0.00299085		1379.41	0.00277938		1909.44	0.00389445		2439.44	-0.00217003		2969.44	-0.00607043		3499.44	-0.00963573
319.6	0.02329963		849.62	-0.00276673		1379.61	0.00284598		1909.64	0.0032088		2439.64	-0.00217419		2969.64	-0.00550082		3499.64	-0.00986682
319.8	0.02379782		849.82	-0.00305126		1379.81	0.00355023		1909.84	0.00233387		2439.84	-0.00231079		2969.84	-0.00484051		3499.84	-0.01056724
320	0.02319425		850.02	-0.00270934		1380.01	0.00476972		1910.04	0.00148434		2440.04	-0.00245293		2970.04	-0.00426792		3500.04	-0.0099315
320.2	0.02342347		850.22	-0.00200735		1380.21	0.00529343		1910.24	0.00217237		2440.24	-0.00181557		2970.24	-0.00514881		3500.24	-0.01001193
320.4	0.02309195		850.42	-0.00210358		1380.41	0.00579316		1910.44	0.00181897		2440.44	-0.00078184		2970.44	-0.0050186		3500.44	-0.01039686
320.6	0.02359373		850.62	-0.00206038		1380.61	0.00658194		1910.64	0.00202417		2440.64	-0.00128097		2970.64	-0.00384631		3500.64	-0.01015164
320.8	0.02478351		850.82	-0.00204045		1380.81	0.00824162		1910.84	0.00296869		2440.84	-0.00160585		2970.84	-0.00343582		3500.84	-0.01034212
321	0.02517317		851.02	-0.00222791		1381.01	0.00817834		1911.04	0.00278868		2441.04	-0.00078751		2971.04	-0.00275643		3501.04	-0.01141533
321.2	0.024778		851.22	-0.00174532		1381.21	0.00813754		1911.24	0.0031684		2441.24	-0.00086464		2971.24	-0.00346314		3501.24	-0.0117007
321.4	0.0245501		851.42	-0.00216904		1381.41	0.00862339		1911.44	0.00368047		2441.44	-0.00113432		2971.44	-0.0031896		3501.44	-0.01276702
321.6	0.02505306		851.62	-0.00294007		1381.61	0.00859425		1911.64	0.00358465		2441.64	-0.0010279		2971.64	-0.00378998		3501.64	-0.01301526
321.8	0.02452155		851.82	-0.00253434		1381.81	0.00851411		1911.84	0.00353821		2441.84	-0.00117222		2971.84	-0.00391026		3501.84	-0.01336013
322	0.02465271		852.02	-0.00317572		1382.01	0.00818548		1912.04	0.00430803		2442.04	-0.00124729		2972.04	-0.00403753		3502.04	-0.01345534
322.2	0.02398528		852.22	-0.00459023		1382.21	0.00767964		1912.24	0.00398059		2442.24	-0.00085011		2972.24	-0.00447982		3502.24	-0.01258407
322.4	0.0249257		852.42	-0.0038809		1382.41	0.00770776		1912.44	0.00383231		2442.44	-0.00156807		2972.44	-0.00487411		3502.44	-0.01205773
322.6	0.02391743		852.62	-0.00355487		1382.61	0.00705032		1912.64	0.00377654		2442.64	-0.00102337		2972.64	-0.00485806		3502.64	-0.0110718
322.8	0.02366631		852.82	-0.00391621		1382.81	0.00710632		1912.84	0.00354686		2442.84	-0.00129343		2972.84	-0.00459147		3502.84	-0.01156983
323	0.02437688		853.02	-0.00357108		1383.01	0.00647779		1913.04	0.00434561		2443.04	-0.00176759		2973.04	-0.0037075		3503.04	-0.0115971
323.2	0.02450268		853.22	-0.0038658		1383.21	0.00545034		1913.24	0.00388052		2443.24	-0.00272734		2973.24	-0.00413285		3503.24	-0.01176269
323.4	0.02430484		853.42	-0.00425019		1383.41	0.00595228		1913.44	0.0035162		2443.44	-0.00339188		2973.44	-0.00391498		3503.44	-0.01232142
323.6	0.02463201		853.62	-0.00451453		1383.61	0.00614652		1913.64	0.00303461		2443.64	-0.00363447		2973.64	-0.00367764		3503.64	-0.01283499
323.8	0.0254903		853.82	-0.00435141		1383.81	0.00581982		1913.84	0.0034174		2443.84	-0.0038536		2973.84	-0.00452622		3503.84	-0.01265782
324	0.02542164		854.02	-0.00393193		1384.01	0.00579852		1914.04	0.00311242		2444.04	-0.00401102		2974.04	-0.00465392		3504.04	-0.01256105
324.2	0.02569926		854.22	-0.00384971		1384.21	0.00561299		1914.24	0.00402475		2444.24	-0.00427459		2974.24	-0.00489798		3504.24	-0.01280957
324.4	0.02579004		854.42	-0.00409472		1384.41	0.00532887		1914.44	0.0038012		2444.44	-0.00444717		2974.44	-0.00429823		3504.44	-0.01299198
324.6	0.02691814		854.62	-0.00446206		1384.61	0.00523147		1914.64	0.00368366		2444.64	-0.00515396		2974.64	-0.00448922		3504.64	-0.01342111
324.8	0.02813868		854.82	-0.00398515		1384.81	0.00519331		1914.84	0.00356552		2444.84	-0.00493441		2974.84	-0.00509099		3504.84	-0.01378399
325	0.0279403		855.02	-0.00332989		1385.01	0.0047041		1915.04	0.00289875		2445.04	-0.0049592		2975.04	-0.00567313		3505.04	-0.01451104
325.2	0.02823126		855.22	-0.00231669		1385.21	0.00515255		1915.24	0.00373449		2445.24	-0.00479663		2975.24	-0.00649232		3505.24	-0.01437189
325.4	0.02828819		855.42	-0.00315923		1385.41	0.00469903		1915.44	0.00372623		2445.44	-0.00502422		2975.44	-0.00599547		3505.44	-0.01402455
325.6	0.02835523		855.62	-0.00279735		1385.61	0.00369815		1915.64	0.0036105		2445.64	-0.0046501		2975.64	-0.00617011		3505.64	-0.01380446
325.8	0.02753914		855.82	-0.00318184		1385.81	0.00389916		1915.84	0.00286207		2445.84	-0.00464655		2975.84	-0.00719861		3505.84	-0.0137458
326	0.02739663		856.02	-0.0033279		1386.01	0.00383963		1916.04	0.00279551		2446.04	-0.00439405		2976.04	-0.00770791		3506.04	-0.01330817
326.2	0.02660739		856.22	-0.0034213		1386.21	0.00350466		1916.24	0.00251377		2446.24	-0.00465736		2976.24	-0.00761528		3506.24	-0.01226084
326.4	0.02637782		856.42	-0.00227238		1386.41	0.0049341		1916.44	0.00232111		2446.44	-0.00471229		2976.44	-0.0073441		3506.44	-0.01206308
326.6	0.02478854		856.62	-0.00171968		1386.61	0.00503704		1916.64	0.002197		2446.64	-0.00400609		2976.64	-0.00706931		3506.64	-0.01173983
326.8	0.02483917		856.82	-0.00169426		1386.81	0.00495887		1916.84	0.00272962		2446.84	-0.00406861		2976.84	-0.00705451		3506.84	-0.01238693
327	0.02487041		857.02	-0.00185488		1387.01	0.00449079		1917.04	0.00317979		2447.04	-0.00366604		2977.04	-0.00664822		3507.04	-0.0116551
327.2	0.02445708		857.22	-0.00182496		1387.21	0.00371821		1917.24	0.00288366		2447.24	-0.00380003		2977.24	-0.00629413		3507.24	-0.01170151
327.4	0.02382473		857.42	-0.00201458		1387.41	0.004537		1917.44	0.00350557		2447.44	-0.00333972		2977.44	-0.00642726		3507.44	-0.01182983
327.6	0.02417189		857.62	-0.00123691		1387.61	0.00461323		1917.64	0.00333785		2447.64	-0.00305139		2977.64	-0.00680007		3507.64	-0.01177683
327.8	0.02429918		857.82	-0.00043413		1387.81	0.00435717		1917.84	0.00390176		2447.84	-0.00210112		2977.84	-0.0069736		3507.84	-0.0120261
328	0.02445877		858.02	-0.00026867		1388.01	0.00434508		1918.04	0.00273788		2448.04	-0.00178028		2978.04	-0.00636153		3508.04	-0.01226397
328.2	0.02411815		858.22	-0.00065488		1388.21	0.00383649		1918.24	0.00290385		2448.24	-0.00179553		2978.24	-0.00577381		3508.24	-0.0124413
328.4	0.02466247		858.42	-0.00106609		1388.41	0.00352304		1918.44	0.00197584		2448.44	-0.00119818		2978.44	-0.00586075		3508.44	-0.012435
328.6	0.02474002		858.62	-0.00204932		1388.61	0.00353782		1918.64	0.00224682		2448.64	-0.0013946		2978.64	-0.00652304		3508.64	-0.01221779
328.8	0.02540864		858.82	-0.00213786		1388.81	0.00395204		1918.84	0.00185379		2448.84	-0.00156581		2978.84	-0.00574646		3508.84	-0.01285988
329	0.02532667		859.02	-0.00294675		1389.01	0.00383318		1919.04	0.00163818		2449.04	-0.00113262		2979.04	-0.00618399		3509.04	-0.01255925
329.2	0.02571087		859.22	-0.00323642		1389.21	0.00368506		1919.24	0.00155335		2449.24	-0.00065335		2979.24	-0.00630116		3509.24	-0.01190682
329.4	0.0256874		859.42	-0.00379657		1389.41	0.00259645		1919.44	0.00105221		2449.44	-0.00154401		2979.44	-0.00666126		3509.44	-0.01247448
329.6	0.02535465		859.62	-0.00425478		1389.61	0.00251504		1919.64	0.0018557		2449.64	-0.00159288		2979.64	-0.00709555		3509.64	-0.01265611
329.8	0.0251943		859.82	-0.0053097		1389.81	0.00265717		1919.84	0.00126815		2449.84	-0.00229582		2979.84	-0.00781312		3509.84	-0.01291603
330	0.02491897		860.02	-0.00463241		1390.01	0.00246879		1920.04	0.00104937		2450.04	-0.00259281		2980.04	-0.00851472		3510.04	-0.01309624
330.2	0.0243142		860.22	-0.00530546		1390.21	0.00278706		1920.24	0.00092522		2450.24	-0.00320494		2980.24	-0.00836268		3510.24	-0.01250424
330.4	0.02467419		860.42	-0.00522276		1390.41	0.00364472		1920.44	0.00038399		2450.44	-0.00342013		2980.44	-0.00832188		3510.44	-0.01293991
330.6	0.02432101		860.62	-0.00481663		1390.61	0.00331549		1920.64	0.0001734		2450.64	-0.00296284		2980.64	-0.0082367		3510.64	-0.01315585
330.8	0.02515885		860.82	-0.00468122		1390.81	0.00322613		1920.84	0.00126559		2450.84	-0.00359091		2980.84	-0.00845046		3510.84	-0.01291623
331	0.02500433		861.02	-0.00439074		1391.01	0.00301977		1921.04	0.0013575		2451.04	-0.0041233		2981.04	-0.00774488		3511.04	-0.01254708
331.2	0.02448603		861.22	-0.00335038		1391.21	0.00238284		1921.24	0.00159565		2451.24	-0.00442889		2981.24	-0.00738165		3511.24	-0.01243916
331.4	0.02491104		861.42	-0.00163287		1391.41	0.00257698		1921.44	0.00068394		2451.44	-0.00458123		2981.44	-0.00751611		3511.44	-0.01189695
331.6	0.02611603		861.62	-0.00065449		1391.61	0.00242207		1921.64	-0.00005392		2451.64	-0.00426424		2981.64	-0.0068058		3511.64	-0.01093273
331.8	0.02691959		861.82	-0.00053017		1391.81	0.00248357		1921.84	-0.00045384		2451.84	-0.00412757		2981.84	-0.00582439		3511.84	-0.0108665
332	0.02736174		862.02	-0.00081354		1392.01	0.00174833		1922.04	-0.00018875		2452.04	-0.00371028		2982.04	-0.00551072		3512.04	-0.01122485
332.2	0.02690086		862.22	-0.00186843		1392.21	0.00110086		1922.24	-0.00006593		2452.24	-0.0032386		2982.24	-0.0048987		3512.24	-0.01065751
332.4	0.0272666		862.42	-0.00230949		1392.41	0.00132353		1922.44	0.0000982		2452.44	-0.00283425		2982.44	-0.00478872		3512.44	-0.01044498
332.6	0.02638693		862.62	-0.00302594		1392.61	0.00120636		1922.64	0.00137288		2452.64	-0.00286734		2982.64	-0.00452321		3512.64	-0.01119296
332.8	0.02733208		862.82	-0.00337173		1392.81	0.00151914		1922.84	0.00128054		2452.84	-0.00310522		2982.84	-0.00462817		3512.84	-0.01174644
333	0.02731128		863.02	-0.00346979		1393.01	0.0011518		1923.04	0.00198637		2453.04	-0.00215802		2983.04	-0.00491377		3513.04	-0.01188768
333.2	0.02754111		863.22	-0.00279147		1393.21	0.00166093		1923.24	0.00329201		2453.24	-0.00282819		2983.24	-0.00497037		3513.24	-0.01220198
333.4	0.02746166		863.42	-0.00286122		1393.41	0.00115034		1923.44	0.00389517		2453.44	-0.0033815		2983.44	-0.00527948		3513.44	-0.01321493
333.6	0.02704553		863.62	-0.0040822		1393.61	0.00102809		1923.64	0.00441173		2453.64	-0.00309978		2983.64	-0.00558844		3513.64	-0.01297727
333.8	0.02625819		863.82	-0.00494713		1393.81	0.00144869		1923.84	0.00419926		2453.84	-0.00378634		2983.84	-0.00655926		3513.84	-0.01409286
334	0.02565623		864.02	-0.00607032		1394.01	0.00229352		1924.04	0.00402869		2454.04	-0.00380321		2984.04	-0.00679391		3514.04	-0.0137483
334.2	0.02517321		864.22	-0.00822408		1394.21	0.0026889		1924.24	0.00411412		2454.24	-0.00386493		2984.24	-0.00649155		3514.24	-0.01363932
334.4	0.0244099		864.42	-0.00770682		1394.41	0.00347518		1924.44	0.0037681		2454.44	-0.00402188		2984.44	-0.00696757		3514.44	-0.01380021
334.6	0.02406926		864.62	-0.00736675		1394.61	0.00402755		1924.64	0.00327799		2454.64	-0.00421629		2984.64	-0.00709886		3514.64	-0.01319388
334.8	0.02344816		864.82	-0.00711154		1394.81	0.0043699		1924.84	0.00352408		2454.84	-0.00467028		2984.84	-0.00726087		3514.84	-0.01253323
335	0.02255485		865.02	-0.00619967		1395.01	0.00463551		1925.04	0.00244186		2455.04	-0.00476959		2985.04	-0.00686334		3515.04	-0.01188635
335.2	0.02197534		865.22	-0.00532255		1395.21	0.00509088		1925.24	0.001879		2455.24	-0.0040203		2985.24	-0.00658574		3515.24	-0.01180876
335.4	0.02302229		865.42	-0.00436755		1395.41	0.00505854		1925.44	0.00068616		2455.44	-0.003456		2985.44	-0.00671676		3515.44	-0.01151883
335.6	0.0226263		865.62	-0.00392266		1395.61	0.00543305		1925.64	0.00099051		2455.64	-0.00339438		2985.64	-0.00654691		3515.64	-0.01072201
335.8	0.02254548		865.82	-0.00364949		1395.81	0.00575492		1925.84	0.00033283		2455.84	-0.00253886		2985.84	-0.00639456		3515.84	-0.01062764
336	0.02188844		866.02	-0.00312513		1396.01	0.00487651		1926.04	0.00116542		2456.04	-0.00118722		2986.04	-0.00565152		3516.04	-0.01089468
336.2	0.02220184		866.22	-0.00149796		1396.21	0.00557447		1926.24	0.00062281		2456.24	-0.00081371		2986.24	-0.00545771		3516.24	-0.01036652
336.4	0.02245315		866.42	-0.00064981		1396.41	0.00576451		1926.44	0.00116646		2456.44	-0.00108535		2986.44	-0.00583636		3516.44	-0.01100232
336.6	0.02238104		866.62	0.00007063		1396.61	0.0061528		1926.64	0.00228026		2456.64	-0.00141841		2986.64	-0.00593239		3516.64	-0.01116698
336.8	0.02298362		866.82	-0.00025034		1396.81	0.00653204		1926.84	0.0023751		2456.84	-0.00113042		2986.84	-0.00596567		3516.84	-0.01138673
337	0.02309298		867.02	0.0004323		1397.01	0.00623092		1927.04	0.0039088		2457.04	-0.00065856		2987.04	-0.00532238		3517.04	-0.01196155
337.2	0.02343406		867.22	0.00091925		1397.21	0.00651679		1927.24	0.0044358		2457.24	-0.00140367		2987.24	-0.00621973		3517.24	-0.01204282
337.4	0.02391541		867.42	0.00064017		1397.41	0.00596029		1927.44	0.00399196		2457.44	-0.00188485		2987.44	-0.00642979		3517.44	-0.01279819
337.6	0.02384258		867.62	-0.0005217		1397.61	0.00583211		1927.64	0.00457198		2457.64	-0.00172276		2987.64	-0.00656644		3517.64	-0.01338435
337.8	0.02350487		867.82	-0.00179523		1397.81	0.00586149		1927.84	0.00511342		2457.84	-0.00224113		2987.84	-0.00679979		3517.84	-0.01373973
338	0.02372948		868.02	-0.00290355		1398.01	0.00600236		1928.04	0.00511353		2458.04	-0.00215038		2988.04	-0.00571574		3518.04	-0.0136565
338.2	0.02408501		868.22	-0.00316531		1398.21	0.00632408		1928.24	0.00559688		2458.24	-0.00244262		2988.24	-0.00627438		3518.24	-0.01394166
338.4	0.02354425		868.42	-0.0025162		1398.41	0.00674744		1928.44	0.00563065		2458.44	-0.00252093		2988.44	-0.0060802		3518.44	-0.01404843
338.6	0.02395905		868.62	-0.00278533		1398.61	0.00643104		1928.64	0.00535734		2458.64	-0.00316428		2988.64	-0.00599685		3518.64	-0.0144384
338.8	0.02441285		868.82	-0.00324745		1398.81	0.00598622		1928.84	0.00523836		2458.84	-0.00311442		2988.84	-0.00657974		3518.84	-0.01569624
339	0.02434552		869.02	-0.00357647		1399.01	0.00634247		1929.04	0.00471261		2459.04	-0.00265468		2989.04	-0.00710921		3519.04	-0.0162157
339.2	0.02411099		869.22	-0.00463686		1399.21	0.00675585		1929.24	0.00464667		2459.24	-0.00229097		2989.24	-0.00781545		3519.24	-0.01632736
339.4	0.02479291		869.42	-0.00499478		1399.41	0.00610823		1929.44	0.00474786		2459.44	-0.00189375		2989.44	-0.0089555		3519.44	-0.01561197
339.6	0.02383471		869.62	-0.00493451		1399.61	0.00615254		1929.64	0.0038772		2459.64	-0.00215025		2989.64	-0.00875624		3519.64	-0.01530957
339.8	0.02386203		869.82	-0.00464772		1399.81	0.00624323		1929.84	0.00346956		2459.84	-0.00139301		2989.84	-0.00860783		3519.84	-0.0153437
340	0.02367394		870.02	-0.00425381		1400.01	0.0057983		1930.04	0.0034468		2460.04	-0.00125373		2990.04	-0.00752217		3520.04	-0.01558635
340.2	0.02440174		870.22	-0.00386168		1400.21	0.00604652		1930.24	0.00248466		2460.24	-0.00064224		2990.24	-0.00779753		3520.24	-0.01462098
340.4	0.02448096		870.42	-0.00487119		1400.41	0.00585244		1930.44	0.00206002		2460.44	-0.00107952		2990.44	-0.00795863		3520.44	-0.01450611
340.6	0.02517612		870.62	-0.00477648		1400.61	0.00581926		1930.64	0.00253002		2460.64	-0.00095521		2990.64	-0.00746833		3520.64	-0.01358587
340.8	0.02578744		870.82	-0.00514228		1400.81	0.00520403		1930.84	0.00256175		2460.84	-0.0010568		2990.84	-0.00725842		3520.84	-0.01348708
341	0.02632141		871.02	-0.00477106		1401.01	0.0044026		1931.04	0.00388329		2461.04	-0.0021488		2991.04	-0.00790809		3521.04	-0.01312456
341.2	0.02695339		871.22	-0.00510186		1401.21	0.00353887		1931.24	0.00372124		2461.24	-0.0023433		2991.24	-0.00801848		3521.24	-0.01238797
341.4	0.02758143		871.42	-0.00521617		1401.41	0.00293854		1931.44	0.0035466		2461.44	-0.00291406		2991.44	-0.0074956		3521.44	-0.01238497
341.6	0.02672839		871.62	-0.0046396		1401.61	0.00298165		1931.64	0.00420176		2461.64	-0.00309522		2991.64	-0.0073214		3521.64	-0.01281925
341.8	0.02666141		871.82	-0.00487613		1401.81	0.00370682		1931.84	0.00455572		2461.84	-0.00279536		2991.84	-0.00663978		3521.84	-0.01216473
342	0.026772		872.02	-0.00450967		1402.01	0.00443419		1932.04	0.0046131		2462.04	-0.00322424		2992.04	-0.00551577		3522.04	-0.01297501
342.2	0.02715546		872.22	-0.00415219		1402.21	0.00533108		1932.24	0.00501836		2462.24	-0.0027394		2992.24	-0.00530891		3522.24	-0.01237854
342.4	0.02723857		872.42	-0.00381709		1402.41	0.00542447		1932.44	0.0046889		2462.44	-0.00351219		2992.44	-0.00412286		3522.44	-0.01269387
342.6	0.02792699		872.62	-0.00400204		1402.61	0.00554457		1932.64	0.00494976		2462.64	-0.00402604		2992.64	-0.0050336		3522.64	-0.01356864
342.8	0.02825698		872.82	-0.00426912		1402.81	0.00619317		1932.84	0.00436981		2462.84	-0.00274882		2992.84	-0.00574329		3522.84	-0.01328955
343	0.02691867		873.02	-0.00380809		1403.01	0.00743315		1933.04	0.00359896		2463.04	-0.00187255		2993.04	-0.00640006		3523.04	-0.01243652
343.2	0.02681444		873.22	-0.00362495		1403.21	0.00748691		1933.24	0.0035953		2463.24	-0.00200151		2993.24	-0.00723871		3523.24	-0.01201616
343.4	0.02674665		873.42	-0.00346534		1403.41	0.00805045		1933.44	0.00312679		2463.44	-0.00156974		2993.44	-0.00675495		3523.44	-0.01268862
343.6	0.02559352		873.62	-0.00285279		1403.61	0.00804793		1933.64	0.00205666		2463.64	-0.00206915		2993.64	-0.00584153		3523.64	-0.01301495
343.8	0.02569463		873.82	-0.00209112		1403.81	0.00783293		1933.84	0.00142456		2463.84	-0.00214509		2993.84	-0.0061097		3523.84	-0.01278055
344	0.02531832		874.02	-0.00153057		1404.01	0.00729788		1934.04	0.00009957		2464.04	-0.0024511		2994.04	-0.00650497		3524.04	-0.01190138
344.2	0.02635794		874.22	-0.00109568		1404.21	0.00699083		1934.24	-0.00075138		2464.24	-0.00264658		2994.24	-0.00731587		3524.24	-0.01172692
344.4	0.02662814		874.42	-0.00063585		1404.41	0.00684318		1934.44	-0.00126096		2464.44	-0.00376861		2994.44	-0.00751232		3524.44	-0.01142864
344.6	0.02683473		874.62	-0.00007088		1404.61	0.00623416		1934.64	-0.00110723		2464.64	-0.00409655		2994.64	-0.00745122		3524.64	-0.01130561
344.8	0.02726715		874.82	-0.00033		1404.81	0.00521663		1934.84	-0.0003837		2464.84	-0.00507663		2994.84	-0.00788819		3524.84	-0.01158891
345	0.02713996		875.02	-0.00083131		1405.01	0.00471919		1935.04	0.00058302		2465.04	-0.00516252		2995.04	-0.00825878		3525.04	-0.01184929
345.2	0.02800012		875.22	-0.00136505		1405.21	0.00514046		1935.24	0.00092704		2465.24	-0.00543866		2995.24	-0.00817331		3525.24	-0.01186647
345.4	0.02802015		875.42	-0.00154829		1405.41	0.0058153		1935.44	0.00078878		2465.44	-0.00568593		2995.44	-0.00874511		3525.44	-0.01277676
345.6	0.02733109		875.62	-0.00206477		1405.61	0.00663505		1935.64	0.00187278		2465.64	-0.00647052		2995.64	-0.00831507		3525.64	-0.01379835
345.8	0.02702587		875.82	-0.00259314		1405.81	0.00744451		1935.84	0.00235855		2465.84	-0.00568909		2995.84	-0.0072142		3525.84	-0.01353077
346	0.02747929		876.02	-0.00291779		1406.01	0.00725444		1936.04	0.00303665		2466.04	-0.00542633		2996.04	-0.00649572		3526.04	-0.01420612
346.2	0.02757436		876.22	-0.00346783		1406.21	0.00755306		1936.24	0.0035895		2466.24	-0.00490686		2996.24	-0.00588407		3526.24	-0.01361951
346.4	0.0275443		876.42	-0.00342315		1406.41	0.00742447		1936.44	0.00355462		2466.44	-0.00502616		2996.44	-0.00596699		3526.44	-0.01370863
346.6	0.02750965		876.62	-0.00357282		1406.61	0.0074187		1936.64	0.00438827		2466.64	-0.00328675		2996.64	-0.00642791		3526.64	-0.01339212
346.8	0.02677081		876.82	-0.00362573		1406.81	0.00721611		1936.84	0.00374286		2466.84	-0.0023598		2996.84	-0.00560533		3526.84	-0.0128889
347	0.02625956		877.02	-0.0030454		1407.01	0.00708084		1937.04	0.0035702		2467.04	-0.00256604		2997.04	-0.00537092		3527.04	-0.01318673
347.2	0.02582303		877.22	-0.00377474		1407.21	0.00608538		1937.24	0.00434978		2467.24	-0.00276221		2997.24	-0.00514118		3527.24	-0.01330781
347.4	0.0253467		877.42	-0.00378229		1407.41	0.00624935		1937.44	0.00352628		2467.44	-0.00331468		2997.44	-0.00488886		3527.44	-0.01427235
347.6	0.02519136		877.62	-0.00402884		1407.61	0.00602333		1937.64	0.00293441		2467.64	-0.00363355		2997.64	-0.00599696		3527.64	-0.013874
347.8	0.02615477		877.82	-0.00357811		1407.81	0.00567338		1937.84	0.00249332		2467.84	-0.00442137		2997.84	-0.00671863		3527.84	-0.01332637
348	0.02613396		878.02	-0.00297914		1408.01	0.0055631		1938.04	0.00203647		2468.04	-0.00514131		2998.04	-0.00733848		3528.04	-0.01426988
348.2	0.02640502		878.22	-0.0034396		1408.21	0.00500847		1938.24	0.00154543		2468.24	-0.00532561		2998.24	-0.00738259		3528.24	-0.01458299
348.4	0.02642252		878.42	-0.00297282		1408.41	0.00573413		1938.44	0.00080326		2468.44	-0.00505704		2998.44	-0.00657393		3528.44	-0.01416498
348.6	0.02684717		878.62	-0.00295411		1408.61	0.00580479		1938.64	0.00032803		2468.64	-0.0052222		2998.64	-0.00636815		3528.64	-0.01476565
348.8	0.02724739		878.82	-0.00353749		1408.81	0.00560161		1938.84	0.00065537		2468.84	-0.00521612		2998.84	-0.00721526		3528.84	-0.01453454
349	0.02741384		879.02	-0.00410251		1409.01	0.0058134		1939.04	0.00069376		2469.04	-0.00463706		2999.04	-0.00773456		3529.04	-0.01451753
349.2	0.02779416		879.22	-0.00469688		1409.21	0.00615735		1939.24	0.0008976		2469.24	-0.00512951		2999.24	-0.00887215		3529.24	-0.0143004
349.4	0.02830748		879.42	-0.00536534		1409.41	0.0057473		1939.44	0.00037008		2469.44	-0.00469763		2999.44	-0.00858184		3529.44	-0.01447723
349.6	0.02735681		879.62	-0.00546912		1409.61	0.00536166		1939.64	0.00136904		2469.64	-0.00496242		2999.64	-0.00727005		3529.64	-0.01424812
349.8	0.02693193		879.82	-0.00565391		1409.81	0.00527878		1939.84	0.0020352		2469.84	-0.00413245		2999.84	-0.00645172		3529.84	-0.01394794
350	0.02682663		880.02	-0.00599822		1410.01	0.00443568		1940.04	0.00271582		2470.04	-0.00405069		3000.04	-0.00547652		3530.04	-0.01341778
350.2	0.02603035		880.22	-0.00626589		1410.21	0.00397058		1940.24	0.00329502		2470.24	-0.00427495		3000.24	-0.00490933		3530.24	-0.01283844
350.4	0.02582299		880.42	-0.00583274		1410.41	0.00441498		1940.44	0.00348785		2470.44	-0.00396999		3000.44	-0.00495902		3530.44	-0.01274757
350.6	0.025061		880.62	-0.00600891		1410.61	0.00407818		1940.64	0.00419206		2470.64	-0.00359519		3000.64	-0.00349009		3530.64	-0.01299281
350.8	0.02481562		880.82	-0.00634307		1410.81	0.00344681		1940.84	0.00378203		2470.84	-0.00414829		3000.84	-0.00274232		3530.84	-0.01414066
351	0.02467299		881.02	-0.00602702		1411.01	0.00393268		1941.04	0.00365259		2471.04	-0.00375457		3001.04	-0.00372676		3531.04	-0.01384552
351.2	0.02408004		881.22	-0.00562334		1411.21	0.00354236		1941.24	0.00387887		2471.24	-0.00376381		3001.24	-0.00436292		3531.24	-0.01332542
351.4	0.02425118		881.42	-0.00492652		1411.41	0.00397685		1941.44	0.00323914		2471.44	-0.00263498		3001.44	-0.005279		3531.44	-0.01446665
351.6	0.02437215		881.62	-0.00483425		1411.61	0.00395702		1941.64	0.00346241		2471.64	-0.00274299		3001.64	-0.00487482		3531.64	-0.0138033
351.8	0.02472118		881.82	-0.00428079		1411.81	0.00317327		1941.84	0.00413739		2471.84	-0.00347259		3001.84	-0.00488606		3531.84	-0.01438969
352	0.02461306		882.02	-0.00442138		1412.01	0.00393424		1942.04	0.0033932		2472.04	-0.00338103		3002.04	-0.00491066		3532.04	-0.01555595
352.2	0.02483865		882.22	-0.00449522		1412.21	0.00416977		1942.24	0.00353573		2472.24	-0.00316866		3002.24	-0.00583008		3532.24	-0.01464619
352.4	0.02565854		882.42	-0.00286545		1412.41	0.00551615		1942.44	0.0027737		2472.44	-0.00274024		3002.44	-0.00574955		3532.44	-0.01397401
352.6	0.02583591		882.62	-0.00318183		1412.61	0.00516386		1942.64	0.00239974		2472.64	-0.0022792		3002.64	-0.00615455		3532.64	-0.01382506
352.8	0.02596298		882.82	-0.00308233		1412.81	0.0049794		1942.84	0.00233281		2472.84	-0.00170004		3002.84	-0.00716723		3532.84	-0.01381659
353	0.02647051		883.02	-0.00244215		1413.01	0.00481723		1943.04	0.00300121		2473.04	-0.00167437		3003.04	-0.00750858		3533.04	-0.01357729
353.2	0.02650402		883.22	-0.00218495		1413.21	0.00476816		1943.24	0.00329449		2473.24	-0.00211942		3003.24	-0.00756705		3533.24	-0.01408753
353.4	0.02619983		883.42	-0.00151198		1413.41	0.00466375		1943.44	0.00251429		2473.44	-0.00266405		3003.44	-0.00634534		3533.44	-0.01376045
353.6	0.02549431		883.62	-0.00094103		1413.61	0.00501695		1943.64	0.00298987		2473.64	-0.00335029		3003.64	-0.00564973		3533.64	-0.01364288
353.8	0.02557714		883.82	-0.00089985		1413.81	0.00514486		1943.84	0.00290285		2473.84	-0.00397777		3003.84	-0.00507397		3533.84	-0.01280295
354	0.02553454		884.02	-0.0011476		1414.01	0.0049685		1944.04	0.00319968		2474.04	-0.00437984		3004.04	-0.00400545		3534.04	-0.01281959
354.2	0.0259003		884.22	-0.00172647		1414.21	0.0055024		1944.24	0.00345494		2474.24	-0.00463143		3004.24	-0.0032789		3534.24	-0.01378981
354.4	0.02636325		884.42	-0.00182677		1414.41	0.00677533		1944.44	0.00315919		2474.44	-0.00497629		3004.44	-0.00344604		3534.44	-0.01430519
354.6	0.02602348		884.62	-0.00204901		1414.61	0.00622333		1944.64	0.00272433		2474.64	-0.00439829		3004.64	-0.00288926		3534.64	-0.01438368
354.8	0.02616104		884.82	-0.00196674		1414.81	0.00623704		1944.84	0.00169933		2474.84	-0.00486907		3004.84	-0.00214967		3534.84	-0.01481196
355	0.02587844		885.02	-0.00198721		1415.01	0.00638399		1945.04	0.00182571		2475.04	-0.00440468		3005.04	-0.00235549		3535.04	-0.01479372
355.2	0.02579679		885.22	-0.00179797		1415.21	0.0059598		1945.24	0.00221003		2475.24	-0.00383292		3005.24	-0.0016512		3535.24	-0.01534728
355.4	0.02576094		885.42	-0.002161		1415.41	0.00678602		1945.44	0.00191236		2475.44	-0.00330315		3005.44	-0.00177363		3535.44	-0.01580348
355.6	0.02592035		885.62	-0.00206984		1415.61	0.00624241		1945.64	0.00236243		2475.64	-0.00408232		3005.64	-0.00186366		3535.64	-0.0154812
355.8	0.02689721		885.82	-0.00270324		1415.81	0.0060495		1945.84	0.00256462		2475.84	-0.00423526		3005.84	-0.00267462		3535.84	-0.01557377
356	0.02698424		886.02	-0.00292996		1416.01	0.00661431		1946.04	0.00210321		2476.04	-0.00543132		3006.04	-0.00330436		3536.04	-0.01560376
356.2	0.02706549		886.22	-0.00222524		1416.21	0.0064119		1946.24	0.00316052		2476.24	-0.00506899		3006.24	-0.00453123		3536.24	-0.01511569
356.4	0.02681069		886.42	-0.00176878		1416.41	0.00649748		1946.44	0.00349302		2476.44	-0.00539181		3006.44	-0.0043051		3536.44	-0.01529782
356.6	0.0270247		886.62	-0.00279988		1416.61	0.00536915		1946.64	0.00389189		2476.64	-0.00538298		3006.64	-0.00466973		3536.64	-0.01626418
356.8	0.02720337		886.82	-0.00183077		1416.81	0.00525111		1946.84	0.0044938		2476.84	-0.00585278		3006.84	-0.00565843		3536.84	-0.01626729
357	0.02691394		887.02	-0.00124512		1417.01	0.0050345		1947.04	0.0048954		2477.04	-0.00622442		3007.04	-0.00631238		3537.04	-0.01596766
357.2	0.02646652		887.22	-0.00120371		1417.21	0.00503861		1947.24	0.00411159		2477.24	-0.00679159		3007.24	-0.00611621		3537.24	-0.01575934
357.4	0.02654042		887.42	-0.00102372		1417.41	0.00483385		1947.44	0.00350857		2477.44	-0.00708658		3007.44	-0.0060028		3537.44	-0.0145236
357.6	0.02740741		887.62	-0.00130076		1417.61	0.00524615		1947.64	0.00318329		2477.64	-0.00780497		3007.64	-0.00683123		3537.64	-0.01475414
357.8	0.02773184		887.82	-0.00172492		1417.81	0.00437707		1947.84	0.00313226		2477.84	-0.00811772		3007.84	-0.00694899		3537.84	-0.01357367
358	0.02803611		888.02	-0.00286513		1418.01	0.00435003		1948.04	0.00423583		2478.04	-0.00841108		3008.04	-0.0072631		3538.04	-0.01424945
358.2	0.02766424		888.22	-0.00377124		1418.21	0.00446289		1948.24	0.00377091		2478.24	-0.00833787		3008.24	-0.00762885		3538.24	-0.01366065
358.4	0.02703968		888.42	-0.00401679		1418.41	0.00498205		1948.44	0.00358482		2478.44	-0.0080646		3008.44	-0.00832424		3538.44	-0.01324938
358.6	0.02655203		888.62	-0.00394391		1418.61	0.00385644		1948.64	0.00350936		2478.64	-0.00784649		3008.64	-0.0071954		3538.64	-0.01331274
358.8	0.02623309		888.82	-0.00447953		1418.81	0.00387875		1948.84	0.0036815		2478.84	-0.0078118		3008.84	-0.00625502		3538.84	-0.01341778
359	0.02605243		889.02	-0.00548655		1419.01	0.003832		1949.04	0.00397815		2479.04	-0.00680064		3009.04	-0.00636786		3539.04	-0.01377031
359.2	0.02646586		889.22	-0.00612264		1419.21	0.00373544		1949.24	0.00483613		2479.24	-0.00629022		3009.24	-0.00603575		3539.24	-0.01362056
359.4	0.02606173		889.42	-0.00584163		1419.41	0.00425961		1949.44	0.00447677		2479.44	-0.00674094		3009.44	-0.00625739		3539.44	-0.01329371
359.6	0.02579651		889.62	-0.00555165		1419.61	0.00362792		1949.64	0.00444		2479.64	-0.00582399		3009.64	-0.00679396		3539.64	-0.0134457
359.8	0.0259495		889.82	-0.00673079		1419.81	0.00335036		1949.84	0.00438575		2479.84	-0.00589627		3009.84	-0.00669339		3539.84	-0.01380212
360	0.025496		890.02	-0.00665166		1420.01	0.00348241		1950.04	0.00478164		2480.04	-0.00609898		3010.04	-0.0072464		3540.04	-0.01398522
360.2	0.02611917		890.22	-0.00602463		1420.21	0.00408356		1950.24	0.00555761		2480.24	-0.00388327		3010.24	-0.00768924		3540.24	-0.01461574
360.4	0.02627987		890.42	-0.00628347		1420.41	0.00432846		1950.44	0.00585247		2480.44	-0.00380619		3010.44	-0.00761472		3540.44	-0.01571604
360.6	0.02687534		890.62	-0.00673145		1420.61	0.00323155		1950.64	0.00593632		2480.64	-0.00255503		3010.64	-0.00754618		3540.64	-0.01656707
360.8	0.02714941		890.82	-0.00606977		1420.81	0.00396683		1950.84	0.00656771		2480.84	-0.00171358		3010.84	-0.00727399		3540.84	-0.0165109
361	0.02758278		891.02	-0.00616816		1421.01	0.00394094		1951.04	0.00573334		2481.04	-0.00113483		3011.04	-0.00709689		3541.04	-0.01678543
361.2	0.02815341		891.22	-0.00589101		1421.21	0.00451827		1951.24	0.00538795		2481.24	-0.00062652		3011.24	-0.00639936		3541.24	-0.01637191
361.4	0.02843872		891.42	-0.00604495		1421.41	0.00458456		1951.44	0.00539726		2481.44	-0.00009376		3011.44	-0.00658228		3541.44	-0.01621771
361.6	0.02858245		891.62	-0.00520479		1421.61	0.00421577		1951.64	0.00552051		2481.64	-0.0007982		3011.64	-0.00652528		3541.64	-0.01608745
361.8	0.02855777		891.82	-0.00497022		1421.81	0.0037261		1951.84	0.00569775		2481.84	-0.00039988		3011.84	-0.00629591		3541.84	-0.01583655
362	0.02775179		892.02	-0.00591306		1422.01	0.00382576		1952.04	0.00534232		2482.04	-0.00111432		3012.04	-0.00615713		3542.04	-0.01572657
362.2	0.02721022		892.22	-0.0055363		1422.21	0.00412108		1952.24	0.0042347		2482.24	-0.00142883		3012.24	-0.00575656		3542.24	-0.01479181
362.4	0.02683558		892.42	-0.00501621		1422.41	0.00436091		1952.44	0.00393174		2482.44	-0.00219277		3012.44	-0.00587647		3542.44	-0.01501038
362.6	0.02688617		892.62	-0.00431634		1422.61	0.00395817		1952.64	0.0032466		2482.64	-0.00296406		3012.64	-0.00520876		3542.64	-0.01450435
362.8	0.02629015		892.82	-0.00568951		1422.81	0.00480051		1952.84	0.00284878		2482.84	-0.00316859		3012.84	-0.00555392		3542.84	-0.01373876
363	0.02594308		893.02	-0.00550861		1423.01	0.00494378		1953.04	0.0028738		2483.04	-0.00427092		3013.04	-0.00567762		3543.04	-0.0142274
363.2	0.0255758		893.22	-0.00598409		1423.21	0.00476728		1953.24	0.00327578		2483.24	-0.00579145		3013.24	-0.00525062		3543.24	-0.01460857
363.4	0.02547484		893.42	-0.00536224		1423.41	0.00550155		1953.44	0.00261204		2483.44	-0.00695122		3013.44	-0.00500837		3543.44	-0.0139988
363.6	0.02562558		893.62	-0.00555529		1423.61	0.00651328		1953.64	0.00236126		2483.64	-0.00757907		3013.64	-0.00575424		3543.64	-0.01386927
363.8	0.0257483		893.82	-0.00583178		1423.81	0.00691443		1953.84	0.00176564		2483.84	-0.00854		3013.84	-0.00578257		3543.84	-0.01367043
364	0.02549107		894.02	-0.00447289		1424.01	0.00727149		1954.04	0.00209376		2484.04	-0.00899421		3014.04	-0.00539105		3544.04	-0.01338176
364.2	0.02589355		894.22	-0.00344532		1424.21	0.00728388		1954.24	0.00214232		2484.24	-0.00855519		3014.24	-0.00619546		3544.24	-0.01471877
364.4	0.02607905		894.42	-0.00352647		1424.41	0.00690341		1954.44	0.0024226		2484.44	-0.00905125		3014.44	-0.00547142		3544.44	-0.01560257
364.6	0.02577119		894.62	-0.00408371		1424.61	0.00586716		1954.64	0.00230297		2484.64	-0.00838767		3014.64	-0.00530819		3544.64	-0.01572368
364.8	0.0254885		894.82	-0.00311065		1424.81	0.005935		1954.84	0.00333417		2484.84	-0.00830824		3014.84	-0.00572115		3544.84	-0.01573999
365	0.02563154		895.02	-0.00250203		1425.01	0.00539392		1955.04	0.00343331		2485.04	-0.00796011		3015.04	-0.00561473		3545.04	-0.01591935
365.2	0.02541126		895.22	-0.00167658		1425.21	0.00601775		1955.24	0.00396753		2485.24	-0.00749905		3015.24	-0.00528729		3545.24	-0.01577749
365.4	0.02593721		895.42	-0.00141004		1425.41	0.00534128		1955.44	0.00441025		2485.44	-0.00636254		3015.44	-0.004894		3545.44	-0.01647274
365.6	0.02654552		895.62	-0.00027445		1425.61	0.00440701		1955.64	0.0044441		2485.64	-0.00598296		3015.64	-0.00434552		3545.64	-0.01636158
365.8	0.02713088		895.82	-0.00023274		1425.81	0.00438653		1955.84	0.0041839		2485.84	-0.00530522		3015.84	-0.00466304		3545.84	-0.01747647
366	0.02665211		896.02	-0.00096315		1426.01	0.00390001		1956.04	0.00379614		2486.04	-0.00491277		3016.04	-0.00453096		3546.04	-0.01693687
366.2	0.02638362		896.22	-0.00041846		1426.21	0.00431309		1956.24	0.00393098		2486.24	-0.00365803		3016.24	-0.00534979		3546.24	-0.0170207
366.4	0.02651494		896.42	-0.00068523		1426.41	0.00471686		1956.44	0.00390239		2486.44	-0.00358745		3016.44	-0.00594022		3546.44	-0.01721457
366.6	0.02656166		896.62	-0.00052484		1426.61	0.00458921		1956.64	0.00358778		2486.64	-0.00355691		3016.64	-0.00559717		3546.64	-0.01723911
366.8	0.02673675		896.82	-0.00173796		1426.81	0.00557382		1956.84	0.00383332		2486.84	-0.0033832		3016.84	-0.00643193		3546.84	-0.01700778
367	0.02715003		897.02	-0.0013677		1427.01	0.00466116		1957.04	0.00416082		2487.04	-0.00352082		3017.04	-0.00698459		3547.04	-0.01763726
367.2	0.0273455		897.22	-0.00177945		1427.21	0.00435933		1957.24	0.0046428		2487.24	-0.00336425		3017.24	-0.00634027		3547.24	-0.01712855
367.4	0.02847238		897.42	-0.00090818		1427.41	0.00445546		1957.44	0.00502434		2487.44	-0.00337329		3017.44	-0.00600701		3547.44	-0.01661098
367.6	0.02862909		897.62	-0.00064995		1427.61	0.004962		1957.64	0.00491329		2487.64	-0.00309676		3017.64	-0.00600165		3547.64	-0.01704924
367.8	0.02837626		897.82	-0.00075561		1427.81	0.00421929		1957.84	0.00421609		2487.84	-0.00359399		3017.84	-0.00592251		3547.84	-0.01663471
368	0.02820496		898.02	0.00023028		1428.01	0.00288325		1958.04	0.00471615		2488.04	-0.00332508		3018.04	-0.00535611		3548.04	-0.01766422
368.2	0.02914769		898.22	-0.00055616		1428.21	0.00224384		1958.24	0.00473611		2488.24	-0.00299861		3018.24	-0.00588183		3548.24	-0.0180073
368.4	0.02838502		898.42	-0.0018828		1428.41	0.00266458		1958.44	0.00419188		2488.44	-0.00267012		3018.44	-0.0054063		3548.44	-0.01780491
368.6	0.02784623		898.62	-0.00271743		1428.61	0.00256722		1958.64	0.00401578		2488.64	-0.00256178		3018.64	-0.00657933		3548.64	-0.01719881
368.8	0.02826101		898.82	-0.00229315		1428.81	0.00284269		1958.84	0.00459983		2488.84	-0.0032433		3018.84	-0.00740005		3548.84	-0.01717428
369	0.0281211		899.02	-0.00319624		1429.01	0.00271876		1959.04	0.00386243		2489.04	-0.00360422		3019.04	-0.00733659		3549.04	-0.01694691
369.2	0.02826797		899.22	-0.00355835		1429.21	0.00355158		1959.24	0.00310797		2489.24	-0.00347129		3019.24	-0.00797913		3549.24	-0.01627884
369.4	0.02872252		899.42	-0.00415643		1429.41	0.00330984		1959.44	0.00274949		2489.44	-0.00302655		3019.44	-0.00941016		3549.44	-0.01626834
369.6	0.02835194		899.62	-0.00402635		1429.61	0.00323054		1959.64	0.00174726		2489.64	-0.00305298		3019.64	-0.00925314		3549.64	-0.01554988
369.8	0.02775528		899.82	-0.00473191		1429.81	0.00324165		1959.84	0.00200406		2489.84	-0.00298355		3019.84	-0.00936324		3549.84	-0.01542784
370	0.02621524		900.02	-0.00530874		1430.01	0.00406944		1960.04	0.0016574		2490.04	-0.00298099		3020.04	-0.00921664		3550.04	-0.01365868
370.2	0.0259656		900.22	-0.00501487		1430.21	0.00469977		1960.24	0.0021632		2490.24	-0.00321078		3020.24	-0.00955159		3550.24	-0.01368338
370.4	0.02560245		900.42	-0.00489766		1430.41	0.00470742		1960.44	0.00148123		2490.44	-0.00425543		3020.44	-0.00867893		3550.44	-0.01257931
370.6	0.02493011		900.62	-0.00438357		1430.61	0.00489843		1960.64	0.00136588		2490.64	-0.00508586		3020.64	-0.00807927		3550.64	-0.01183063
370.8	0.02480006		900.82	-0.00363001		1430.81	0.00515563		1960.84	0.00152782		2490.84	-0.00442644		3020.84	-0.00779196		3550.84	-0.01024668
371	0.02414254		901.02	-0.00364623		1431.01	0.00429045		1961.04	0.00151843		2491.04	-0.00435769		3021.04	-0.00729496		3551.04	-0.0104173
371.2	0.02401901		901.22	-0.00266036		1431.21	0.004703		1961.24	0.00209967		2491.24	-0.00387686		3021.24	-0.00635496		3551.24	-0.01016857
371.4	0.02369654		901.42	-0.00220111		1431.41	0.00402358		1961.44	0.00219355		2491.44	-0.00353487		3021.44	-0.00567656		3551.44	-0.01019148
371.6	0.02316057		901.62	-0.00104748		1431.61	0.00439125		1961.64	0.00191206		2491.64	-0.0027039		3021.64	-0.00470018		3551.64	-0.01039543
371.8	0.02340444		901.82	-0.00136591		1431.81	0.00392764		1961.84	0.00203583		2491.84	-0.0030322		3021.84	-0.00420271		3551.84	-0.01011225
372	0.02373122		902.02	-0.00113005		1432.01	0.00331943		1962.04	0.00202757		2492.04	-0.00223904		3022.04	-0.00340481		3552.04	-0.01020036
372.2	0.02442501		902.22	-0.00191131		1432.21	0.00394243		1962.24	0.00145009		2492.24	-0.00277405		3022.24	-0.00344684		3552.24	-0.00944872
372.4	0.02475944		902.42	-0.00252038		1432.41	0.00495527		1962.44	0.00131503		2492.44	-0.00286689		3022.44	-0.00349182		3552.44	-0.00905716
372.6	0.02515263		902.62	-0.00362379		1432.61	0.00508407		1962.64	0.00174577		2492.64	-0.00380718		3022.64	-0.00423307		3552.64	-0.00961327
372.8	0.02609835		902.82	-0.00370679		1432.81	0.00538516		1962.84	0.00192134		2492.84	-0.00355558		3022.84	-0.00470527		3552.84	-0.01049192
373	0.02601365		903.02	-0.00444005		1433.01	0.00504738		1963.04	0.00154937		2493.04	-0.00334045		3023.04	-0.00539665		3553.04	-0.01111303
373.2	0.02689971		903.22	-0.00435988		1433.21	0.00500934		1963.24	0.00236699		2493.24	-0.00369026		3023.24	-0.00560079		3553.24	-0.01163164
373.4	0.0272089		903.42	-0.00422703		1433.41	0.00392131		1963.44	0.00227157		2493.44	-0.00292276		3023.44	-0.00628702		3553.44	-0.01228977
373.6	0.02741943		903.62	-0.00376528		1433.61	0.00356712		1963.64	0.00287951		2493.64	-0.00289133		3023.64	-0.00573269		3553.64	-0.01252286
373.8	0.02753716		903.82	-0.00371899		1433.81	0.00426787		1963.84	0.0032271		2493.84	-0.0037696		3023.84	-0.00657376		3553.84	-0.01311006
374	0.02796063		904.02	-0.00297432		1434.01	0.00473283		1964.04	0.0035225		2494.04	-0.00418503		3024.04	-0.00648586		3554.04	-0.0140423
374.2	0.02797519		904.22	-0.00237523		1434.21	0.0046054		1964.24	0.0034473		2494.24	-0.00444946		3024.24	-0.00628925		3554.24	-0.01533544
374.4	0.02783189		904.42	-0.0021893		1434.41	0.00540203		1964.44	0.00340542		2494.44	-0.00500644		3024.44	-0.00592316		3554.44	-0.01493752
374.6	0.02843668		904.62	-0.00119442		1434.61	0.00601692		1964.64	0.0040962		2494.64	-0.0054485		3024.64	-0.00582561		3554.64	-0.01506021
374.8	0.02854346		904.82	-0.00101143		1434.81	0.00578628		1964.84	0.00421715		2494.84	-0.004706		3024.84	-0.0058834		3554.84	-0.01569623
375	0.02830019		905.02	-0.00211629		1435.01	0.00576979		1965.04	0.00432479		2495.04	-0.00498574		3025.04	-0.00652019		3555.04	-0.0172291
375.2	0.0279759		905.22	-0.00136867		1435.21	0.0062637		1965.24	0.00499647		2495.24	-0.00431757		3025.24	-0.00652898		3555.24	-0.01779649
375.4	0.02758644		905.42	-0.0010578		1435.41	0.00569967		1965.44	0.00491783		2495.44	-0.00422365		3025.44	-0.00628404		3555.44	-0.01787126
375.6	0.02835409		905.62	-0.00104288		1435.61	0.00598609		1965.64	0.00480799		2495.64	-0.00437845		3025.64	-0.00525672		3555.64	-0.01780262
375.8	0.02888187		905.82	-0.0022957		1435.81	0.00510533		1965.84	0.00430531		2495.84	-0.00508382		3025.84	-0.00557405		3555.84	-0.01725806
376	0.02932187		906.02	-0.00298339		1436.01	0.00416874		1966.04	0.00362296		2496.04	-0.0052296		3026.04	-0.00564112		3556.04	-0.01626476
376.2	0.02880585		906.22	-0.00281653		1436.21	0.00480953		1966.24	0.00315127		2496.24	-0.00535479		3026.24	-0.00608462		3556.24	-0.01589903
376.4	0.02920611		906.42	-0.00347738		1436.41	0.00533366		1966.44	0.00401868		2496.44	-0.00519484		3026.44	-0.00570417		3556.44	-0.01537682
376.6	0.02845175		906.62	-0.00351308		1436.61	0.00562224		1966.64	0.00328943		2496.64	-0.00513032		3026.64	-0.00607159		3556.64	-0.01556688
376.8	0.02906229		906.82	-0.00347106		1436.81	0.0059154		1966.84	0.00269206		2496.84	-0.00403603		3026.84	-0.00601526		3556.84	-0.01603817
377	0.02887489		907.02	-0.00388324		1437.01	0.00484389		1967.04	0.00209094		2497.04	-0.00334883		3027.04	-0.00586165		3557.04	-0.01481951
377.2	0.0296688		907.22	-0.00407102		1437.21	0.0041085		1967.24	0.00248236		2497.24	-0.00268063		3027.24	-0.00545825		3557.24	-0.01446214
377.4	0.02919177		907.42	-0.00369815		1437.41	0.00394271		1967.44	0.00174196		2497.44	-0.00200161		3027.44	-0.00604625		3557.44	-0.01377572
377.6	0.02924488		907.62	-0.00350772		1437.61	0.0048881		1967.64	0.00223049		2497.64	-0.00266014		3027.64	-0.00633593		3557.64	-0.01367894
377.8	0.02987467		907.82	-0.00341246		1437.81	0.00525254		1967.84	0.00166932		2497.84	-0.00324383		3027.84	-0.00661718		3557.84	-0.01399716
378	0.030272		908.02	-0.00331906		1438.01	0.00507512		1968.04	0.00182595		2498.04	-0.00290849		3028.04	-0.00629561		3558.04	-0.01407875
378.2	0.02983764		908.22	-0.00326024		1438.21	0.00559562		1968.24	0.00153771		2498.24	-0.00310393		3028.24	-0.00619133		3558.24	-0.01352828
378.4	0.03029216		908.42	-0.00310166		1438.41	0.00615236		1968.44	0.00202892		2498.44	-0.00328806		3028.44	-0.00614383		3558.44	-0.01325299
378.6	0.03006612		908.62	-0.00273078		1438.61	0.00609781		1968.64	0.00201322		2498.64	-0.00327688		3028.64	-0.00595858		3558.64	-0.01324378
378.8	0.02933555		908.82	-0.00297418		1438.81	0.0060642		1968.84	0.00196179		2498.84	-0.00317682		3028.84	-0.00597991		3558.84	-0.0137691
379	0.02845332		909.02	-0.00298071		1439.01	0.00615653		1969.04	0.00194776		2499.04	-0.00353727		3029.04	-0.00595178		3559.04	-0.01387415
379.2	0.02745909		909.22	-0.0023995		1439.21	0.00659794		1969.24	0.00180092		2499.24	-0.00374328		3029.24	-0.00537559		3559.24	-0.01363228
379.4	0.02691246		909.42	-0.00227582		1439.41	0.0061032		1969.44	0.00112244		2499.44	-0.00449747		3029.44	-0.0047627		3559.44	-0.01312527
379.6	0.02631137		909.62	-0.00249944		1439.61	0.00589672		1969.64	0.00072399		2499.64	-0.00489304		3029.64	-0.00411834		3559.64	-0.01262818
379.8	0.02483778		909.82	-0.00220033		1439.81	0.00552645		1969.84	0.00010462		2499.84	-0.0051415		3029.84	-0.00429267		3559.84	-0.01236922
379.99	0.02483778		910.02	-0.00220033		1440.01	0.00552645		1970.04	0.00010462		2500.04	-0.0051415		3030.04	-0.00429267		3560.04	-0.01236922
380.19	0.02560514		910.22	-0.00129957		1440.21	0.00538384		1970.24	-0.00107118		2500.24	-0.00519148		3030.24	-0.00376009		3560.24	-0.01187054
380.39	0.02604769		910.42	-0.00056825		1440.41	0.00542823		1970.44	-0.00125985		2500.44	-0.00571292		3030.44	-0.00293889		3560.44	-0.01150005
380.59	0.02674698		910.62	0.00013037		1440.61	0.0059798		1970.64	-0.0022427		2500.64	-0.00524111		3030.64	-0.00206719		3560.64	-0.01085338
380.79	0.02778696		910.82	0.00161669		1440.81	0.00659652		1970.84	-0.00324959		2500.84	-0.00541913		3030.84	-0.00092036		3560.84	-0.00967383
380.99	0.0284965		911.02	0.00252837		1441.01	0.00694011		1971.04	-0.00394664		2501.04	-0.00570864		3031.04	-0.00031615		3561.04	-0.00876529
381.19	0.02918582		911.22	0.0024249		1441.21	0.00727283		1971.24	-0.00473845		2501.24	-0.00637016		3031.24	0.00042867		3561.24	-0.00879956
381.39	0.02927535		911.42	0.00272315		1441.41	0.00793388		1971.44	-0.00516596		2501.44	-0.00595615		3031.44	0.00057482		3561.44	-0.00826546
381.59	0.02909407		911.62	0.00302304		1441.61	0.0078863		1971.64	-0.00559624		2501.64	-0.00548397		3031.64	0.00015699		3561.64	-0.00741566
381.79	0.02949584		911.82	0.00292763		1441.81	0.00796487		1971.84	-0.00555746		2501.84	-0.00449818		3031.84	-0.00004498		3561.84	-0.00779589
381.99	0.02934984		912.02	0.0023318		1442.01	0.00808827		1972.04	-0.00541972		2502.04	-0.00405176		3032.04	-0.00025074		3562.04	-0.0081916
382.19	0.0289729		912.22	0.00160388		1442.21	0.00871954		1972.24	-0.00502452		2502.24	-0.00272838		3032.24	-0.00098341		3562.24	-0.00846981
382.39	0.02974203		912.42	0.00086952		1442.41	0.00840942		1972.44	-0.00495583		2502.44	-0.00143166		3032.44	-0.00066483		3562.44	-0.00841243
382.59	0.02984164		912.62	0.00055088		1442.61	0.00833942		1972.64	-0.00552113		2502.64	0.00023813		3032.64	-0.00138251		3562.64	-0.00896288
382.79	0.02996748		912.82	0.00049066		1442.81	0.00778157		1972.84	-0.00515792		2502.84	0.00004571		3032.84	-0.00171764		3562.84	-0.00904775
382.99	0.02970371		913.02	-0.00042193		1443.01	0.00702209		1973.04	-0.00472729		2503.04	0.00009692		3033.04	-0.00182163		3563.04	-0.00903344
383.19	0.02926772		913.22	-0.00059219		1443.21	0.0060984		1973.24	-0.00353629		2503.24	0.00123942		3033.24	-0.00184625		3563.24	-0.00918388
383.39	0.02946419		913.42	-0.00162482		1443.41	0.00522785		1973.44	-0.00314887		2503.44	0.0012519		3033.44	-0.00103067		3563.44	-0.00861055
383.59	0.03027349		913.62	-0.00138291		1443.61	0.00552468		1973.64	-0.00336177		2503.64	0.00159019		3033.64	-0.00130799		3563.64	-0.00850057
383.79	0.02987562		913.82	-0.0015738		1443.81	0.00593906		1973.84	-0.00383808		2503.84	0.00149236		3033.84	-0.00132554		3563.84	-0.00891209
383.99	0.03024324		914.02	-0.00157158		1444.01	0.00550113		1974.04	-0.00432307		2504.04	0.00239581		3034.04	-0.00072145		3564.04	-0.00843809
384.19	0.02904669		914.22	-0.00123138		1444.21	0.00559775		1974.24	-0.00360975		2504.24	0.00177773		3034.24	-0.00059477		3564.24	-0.00815181
384.39	0.02812993		914.42	-0.0004106		1444.41	0.00594913		1974.44	-0.00299929		2504.44	0.00168335		3034.44	0.00016656		3564.44	-0.00769257
384.59	0.02821396		914.62	0.00076155		1444.61	0.00659108		1974.64	-0.00326964		2504.64	0.00156573		3034.64	0.00034103		3564.64	-0.0074018
384.79	0.0275052		914.82	0.00186164		1444.81	0.00668706		1974.84	-0.00362536		2504.84	0.00050731		3034.84	0.00080311		3564.84	-0.00775943
384.99	0.02696184		915.02	0.00192968		1445.01	0.00664126		1975.04	-0.00400239		2505.04	-0.00082846		3035.04	0.00045901		3565.04	-0.00833287
385.19	0.02632013		915.22	0.00169749		1445.21	0.00713302		1975.24	-0.00364023		2505.24	-0.00208581		3035.24	0.00075035		3565.24	-0.00897276
385.39	0.02593647		915.42	0.0027319		1445.41	0.0069528		1975.44	-0.00351617		2505.44	-0.0014927		3035.44	-0.00003303		3565.44	-0.00833867
385.59	0.02618963		915.62	0.00301613		1445.61	0.0061051		1975.64	-0.00304207		2505.64	-0.00264884		3035.64	-0.00063395		3565.64	-0.00793516
385.79	0.02574106		915.82	0.00343334		1445.81	0.00681319		1975.84	-0.00242749		2505.84	-0.0026028		3035.84	-0.00060643		3565.84	-0.00884107
385.99	0.02505208		916.02	0.00328131		1446.01	0.00726494		1976.04	-0.00226224		2506.04	-0.00290165		3036.04	-0.00083528		3566.04	-0.00893368
386.19	0.02493718		916.22	0.00337092		1446.21	0.00776985		1976.24	-0.00220081		2506.24	-0.00253232		3036.24	-0.00124897		3566.24	-0.00960658
386.39	0.02447677		916.42	0.00355659		1446.41	0.00661121		1976.44	-0.00245855		2506.44	-0.0015048		3036.44	-0.00252127		3566.44	-0.00944503
386.59	0.02364442		916.62	0.00332284		1446.61	0.00597399		1976.64	-0.00272075		2506.64	-0.00118933		3036.64	-0.00355263		3566.64	-0.00890057
386.79	0.02300428		916.82	0.0025784		1446.81	0.00533296		1976.84	-0.00111706		2506.84	-0.00180465		3036.84	-0.00327661		3566.84	-0.00877554
386.99	0.02293047		917.02	0.00228512		1447.01	0.00547867		1977.04	-0.00126684		2507.04	-0.00189252		3037.04	-0.00305927		3567.04	-0.00777282
387.19	0.02334544		917.22	0.00136117		1447.21	0.00495946		1977.24	-0.00121526		2507.24	-0.00135983		3037.24	-0.00267551		3567.24	-0.00762432
387.39	0.02360486		917.42	0.00053272		1447.41	0.00501002		1977.44	-0.00243246		2507.44	-0.0018304		3037.44	-0.00216946		3567.44	-0.00728487
387.59	0.0237585		917.62	0.00049429		1447.61	0.00449986		1977.64	-0.00417515		2507.64	-0.0018562		3037.64	-0.00097283		3567.64	-0.00753806
387.79	0.02327989		917.82	0.00052221		1447.81	0.00499917		1977.84	-0.00492909		2507.84	-0.00114083		3037.84	-0.00007555		3567.84	-0.00749576
387.99	0.02381018		918.02	0.00143009		1448.01	0.00507646		1978.04	-0.00495023		2508.04	-0.00085018		3038.04	0.00060067		3568.04	-0.00764685
388.19	0.02358338		918.22	0.00149095		1448.21	0.00509456		1978.24	-0.00449228		2508.24	-0.00150519		3038.24	0.00041465		3568.24	-0.00859964
388.39	0.02425561		918.42	0.00112789		1448.41	0.00526749		1978.44	-0.00596194		2508.44	-0.00146227		3038.44	0.00055954		3568.44	-0.00875945
388.59	0.02480625		918.62	0.00177414		1448.61	0.00614756		1978.64	-0.00617443		2508.64	-0.00259803		3038.64	0.00009312		3568.64	-0.00990523
388.79	0.02465086		918.82	0.00167178		1448.81	0.0064966		1978.84	-0.00673909		2508.84	-0.00299988		3038.84	0.00039392		3568.84	-0.01075404
388.99	0.02527779		919.02	0.00161363		1449.01	0.00689465		1979.04	-0.00704118		2509.04	-0.00362422		3039.04	0.00063709		3569.04	-0.01076713
389.19	0.02569014		919.22	0.00150048		1449.21	0.00751601		1979.24	-0.00580483		2509.24	-0.00434492		3039.24	0.00065608		3569.24	-0.01086914
389.39	0.02676249		919.42	0.00190656		1449.41	0.00691825		1979.44	-0.00559406		2509.44	-0.00410251		3039.44	0.00059651		3569.44	-0.01017612
389.59	0.02661273		919.62	0.00225526		1449.61	0.00741875		1979.64	-0.00457222		2509.64	-0.00492364		3039.64	0.00116026		3569.64	-0.01089652
389.79	0.02621246		919.82	0.00263085		1449.81	0.00851692		1979.84	-0.0039145		2509.84	-0.00366867		3039.84	0.00164132		3569.84	-0.01161607
389.99	0.026275		920.02	0.00258107		1450.01	0.00809709		1980.04	-0.00329329		2510.04	-0.00303734		3040.04	0.00135144		3570.04	-0.01229739
390.19	0.02612673		920.22	0.00213806		1450.21	0.00771383		1980.24	-0.00284919		2510.24	-0.00312497		3040.24	0.00083246		3570.24	-0.01336174
390.39	0.02585726		920.42	0.0020207		1450.41	0.00666252		1980.44	-0.00261556		2510.44	-0.00297474		3040.44	-0.00011399		3570.44	-0.01228796
390.59	0.02551574		920.62	0.00130913		1450.61	0.00656123		1980.64	-0.00203714		2510.64	-0.00387335		3040.64	0.00014276		3570.64	-0.01256248
390.79	0.02571836		920.82	0.00144659		1450.81	0.00620425		1980.84	-0.00157028		2510.84	-0.00478651		3040.84	0.00108739		3570.84	-0.01282661
390.99	0.02531283		921.02	0.00154076		1451.01	0.00562745		1981.04	-0.00228844		2511.04	-0.00515593		3041.04	0.00070978		3571.04	-0.01236597
391.19	0.02537987		921.22	0.00144385		1451.21	0.00507459		1981.24	-0.0027722		2511.24	-0.00437514		3041.24	-0.00060485		3571.24	-0.01218628
391.39	0.02513048		921.42	0.00197722		1451.41	0.0054514		1981.44	-0.00245646		2511.44	-0.00444612		3041.44	-0.00091232		3571.44	-0.01196553
391.59	0.02557473		921.62	0.00169236		1451.61	0.00465245		1981.64	-0.00259667		2511.64	-0.00358171		3041.64	-0.0007984		3571.64	-0.0112899
391.79	0.02500162		921.82	0.00183599		1451.81	0.00599289		1981.84	-0.00284506		2511.84	-0.00184788		3041.84	-0.00157424		3571.84	-0.01095634
391.99	0.02508102		922.02	0.0012116		1452.01	0.00531091		1982.04	-0.00319416		2512.04	-0.00260094		3042.04	-0.0020209		3572.04	-0.01057762
392.19	0.02553177		922.22	0.00071393		1452.21	0.00511137		1982.24	-0.00382865		2512.24	-0.00323858		3042.24	-0.0020866		3572.24	-0.01047022
392.39	0.02544756		922.42	0.00005424		1452.41	0.00477222		1982.44	-0.00490228		2512.44	-0.00279169		3042.44	-0.00286992		3572.44	-0.0094995
392.59	0.02458193		922.62	0.0006823		1452.61	0.00550284		1982.64	-0.00501262		2512.64	-0.00305148		3042.64	-0.00344992		3572.64	-0.00966233
392.79	0.02419086		922.82	-0.00018589		1452.81	0.00536911		1982.84	-0.00560683		2512.84	-0.00162173		3042.84	-0.0028265		3572.84	-0.00912933
392.99	0.02324716		923.02	-0.0005434		1453.01	0.00541024		1983.04	-0.0054417		2513.04	-0.00162457		3043.04	-0.00200868		3573.04	-0.00935598
393.19	0.02346405		923.22	-0.00095418		1453.21	0.00525673		1983.24	-0.00462382		2513.24	-0.00208473		3043.24	-0.00226673		3573.24	-0.00944233
393.39	0.02423942		923.42	-0.00086922		1453.41	0.00431882		1983.44	-0.00440835		2513.44	-0.00209504		3043.44	-0.00114456		3573.44	-0.0091434
393.59	0.02389731		923.62	-0.00069552		1453.61	0.00560749		1983.64	-0.00424577		2513.64	-0.00149627		3043.64	-0.00059405		3573.64	-0.00987084
393.79	0.02428391		923.82	0.00005503		1453.81	0.00543266		1983.84	-0.00387051		2513.84	-0.00083369		3043.84	-0.00062127		3573.84	-0.01017699
393.99	0.0238147		924.02	0.00117959		1454.01	0.00474465		1984.04	-0.00380247		2514.04	-0.00099186		3044.04	-0.00032975		3574.04	-0.01043904
394.19	0.02310266		924.22	0.0011042		1454.21	0.0042626		1984.24	-0.00448671		2514.24	-0.00204861		3044.24	0.00044309		3574.24	-0.01089727
394.39	0.02311343		924.42	0.00113954		1454.41	0.0038997		1984.44	-0.00422191		2514.44	-0.00181159		3044.44	0.00111429		3574.44	-0.01095884
394.59	0.02237781		924.62	0.00135258		1454.61	0.00401613		1984.64	-0.00438688		2514.64	-0.00196055		3044.64	0.00164588		3574.64	-0.01214137
394.79	0.02241629		924.82	0.00204486		1454.81	0.0039941		1984.84	-0.00444902		2514.84	-0.00226026		3044.84	0.00166959		3574.84	-0.01206325
394.99	0.02218855		925.02	0.00216634		1455.01	0.00424174		1985.04	-0.00471827		2515.04	-0.00192971		3045.04	0.00004766		3575.04	-0.01263179
395.19	0.02273475		925.22	0.00191214		1455.21	0.00478397		1985.24	-0.00494409		2515.24	-0.00190729		3045.24	-0.00007001		3575.24	-0.01161905
395.39	0.02270347		925.42	0.00189346		1455.41	0.00430393		1985.44	-0.00408533		2515.44	-0.00294766		3045.44	0.00063592		3575.44	-0.01180345
395.59	0.02259925		925.62	0.00184317		1455.61	0.00378083		1985.64	-0.00424126		2515.64	-0.00345019		3045.64	0.0007798		3575.64	-0.01168729
395.79	0.02284993		925.82	0.00140449		1455.81	0.00430357		1985.84	-0.0052691		2515.84	-0.00344157		3045.84	0.00059932		3575.84	-0.01155123
395.99	0.02328432		926.02	0.0011604		1456.01	0.00407791		1986.04	-0.00578605		2516.04	-0.00413279		3046.04	0.00019105		3576.04	-0.01100584
396.19	0.02376094		926.22	0.00135777		1456.21	0.00411233		1986.24	-0.00635441		2516.24	-0.00385189		3046.24	0.00013398		3576.24	-0.01170093
396.39	0.02330227		926.42	0.00003273		1456.41	0.00490563		1986.44	-0.00660883		2516.44	-0.00393382		3046.44	-0.00130644		3576.44	-0.01173844
396.59	0.02341432		926.62	-0.00035251		1456.61	0.00582118		1986.64	-0.00778062		2516.64	-0.00449167		3046.64	-0.00147011		3576.64	-0.01172427
396.79	0.02372428		926.82	-0.00118344		1456.81	0.00635133		1986.84	-0.00815658		2516.84	-0.00408993		3046.84	-0.00168973		3576.84	-0.01149571
396.99	0.02328907		927.02	-0.00099229		1457.01	0.00620052		1987.04	-0.00731844		2517.04	-0.00476992		3047.04	-0.00174179		3577.04	-0.01172631
397.19	0.02457835		927.22	-0.00151804		1457.21	0.00590039		1987.24	-0.00743669		2517.24	-0.00495985		3047.24	-0.00289544		3577.24	-0.01075644
397.39	0.02517431		927.42	-0.00118249		1457.41	0.00521459		1987.44	-0.00706822		2517.44	-0.00533352		3047.44	-0.00295649		3577.44	-0.01042231
397.59	0.02482886		927.62	-0.00065145		1457.61	0.00552341		1987.64	-0.00694362		2517.64	-0.00537148		3047.64	-0.00293479		3577.64	-0.01038702
397.79	0.02424207		927.82	0.00053057		1457.81	0.004365		1987.84	-0.0058491		2517.84	-0.00552382		3047.84	-0.00240662		3577.84	-0.01077833
397.99	0.02358537		928.02	0.00072662		1458.01	0.00373363		1988.04	-0.00579853		2518.04	-0.00557736		3048.04	-0.00201275		3578.04	-0.01124905
398.19	0.02257861		928.22	0.00032176		1458.21	0.00337548		1988.24	-0.00579954		2518.24	-0.00546449		3048.24	-0.00136652		3578.24	-0.01142095
398.39	0.02216892		928.42	0.00029071		1458.41	0.0027436		1988.44	-0.00512986		2518.44	-0.00463742		3048.44	-0.00059513		3578.44	-0.01091575
398.59	0.02123496		928.62	0.0009768		1458.61	0.00272271		1988.64	-0.00468495		2518.64	-0.00546546		3048.64	-0.00070703		3578.64	-0.01123468
398.79	0.02094786		928.82	0.00107284		1458.81	0.00262585		1988.84	-0.00455544		2518.84	-0.00520837		3048.84	-0.00080568		3578.84	-0.01088001
398.99	0.0216703		929.02	0.00100159		1459.01	0.00205447		1989.04	-0.00448781		2519.04	-0.00561963		3049.04	-0.00140235		3579.04	-0.01167513
399.19	0.02177812		929.22	0.00047523		1459.21	0.00220904		1989.24	-0.00403929		2519.24	-0.00650759		3049.24	-0.00073872		3579.24	-0.01048769
399.39	0.02230006		929.42	0.00026006		1459.41	0.00150635		1989.44	-0.00358577		2519.44	-0.00666486		3049.44	-0.00068049		3579.44	-0.01038086
399.59	0.02277315		929.62	-0.00031016		1459.61	0.00219301		1989.64	-0.00353998		2519.64	-0.00632414		3049.64	-0.00205096		3579.64	-0.01044258
399.79	0.02318767		929.82	-0.0011341		1459.81	0.00294981		1989.84	-0.00340819		2519.84	-0.00616418		3049.84	-0.00314632		3579.84	-0.01085178
399.99	0.02291786		930.02	-0.00185355		1460.01	0.00325654		1990.04	-0.00360304		2520.04	-0.00535867		3050.04	-0.00386816		3580.04	-0.01051999
400.19	0.0235312		930.22	-0.00174643		1460.21	0.00357231		1990.24	-0.00329796		2520.24	-0.00533905		3050.24	-0.00412682		3580.24	-0.0112125
400.39	0.0232859		930.42	-0.00247094		1460.41	0.00471958		1990.44	-0.00341865		2520.44	-0.00443471		3050.44	-0.00446001		3580.44	-0.01208606
400.59	0.02343518		930.62	-0.00262595		1460.61	0.00451594		1990.64	-0.00423186		2520.64	-0.00484529		3050.64	-0.00399166		3580.64	-0.01201146
400.79	0.02378608		930.82	-0.00162482		1460.81	0.00421177		1990.84	-0.00412317		2520.84	-0.00444427		3050.84	-0.00371706		3580.84	-0.01163309
400.99	0.02371873		931.02	-0.00076321		1461.01	0.00375392		1991.04	-0.00359592		2521.04	-0.00398482		3051.04	-0.00329375		3581.04	-0.01190861
401.19	0.02318541		931.22	-0.00020469		1461.21	0.00321747		1991.24	-0.00430896		2521.24	-0.00412509		3051.24	-0.00304145		3581.24	-0.01175288
401.39	0.02337423		931.42	0.00026085		1461.41	0.00240375		1991.44	-0.00365122		2521.44	-0.00461884		3051.44	-0.00291204		3581.44	-0.01178207
401.59	0.0228911		931.62	0.0007924		1461.61	0.00266946		1991.64	-0.00376815		2521.64	-0.00520243		3051.64	-0.0023998		3581.64	-0.01173477
401.79	0.02204247		931.82	0.00215364		1461.81	0.00259862		1991.84	-0.00361559		2521.84	-0.00548353		3051.84	-0.00212932		3581.84	-0.01219765
401.99	0.02227992		932.02	0.00241507		1462.01	0.00280507		1992.04	-0.00468861		2522.04	-0.00543044		3052.04	-0.00177267		3582.04	-0.01156567
402.19	0.02158455		932.22	0.00236579		1462.21	0.00398767		1992.24	-0.00467703		2522.24	-0.0050637		3052.24	-0.00127174		3582.24	-0.01112976
402.39	0.02178269		932.42	0.00288858		1462.41	0.00340898		1992.44	-0.00450263		2522.44	-0.00554291		3052.44	-0.00088507		3582.44	-0.01060861
402.59	0.02149373		932.62	0.00371772		1462.61	0.0037539		1992.64	-0.00452045		2522.64	-0.0059091		3052.64	-0.00099397		3582.64	-0.01126097
402.79	0.02153288		932.82	0.00327667		1462.81	0.0039001		1992.84	-0.00471262		2522.84	-0.00525895		3052.84	-0.00091076		3582.84	-0.01015863
402.99	0.02221339		933.02	0.00288439		1463.01	0.00359384		1993.04	-0.00551857		2523.04	-0.00460119		3053.04	-0.00104173		3583.04	-0.01030136
403.19	0.02214746		933.22	0.00172899		1463.21	0.0039064		1993.24	-0.00589799		2523.24	-0.0043702		3053.24	-0.00075591		3583.24	-0.00914362
403.39	0.02255686		933.42	0.00023796		1463.41	0.00299505		1993.44	-0.0062767		2523.44	-0.00445028		3053.44	-0.00034498		3583.44	-0.00920148
403.59	0.02254571		933.62	-0.00061316		1463.61	0.00321762		1993.64	-0.00591343		2523.64	-0.00430974		3053.64	-0.00139927		3583.64	-0.00953203
403.79	0.02266419		933.82	-0.0012155		1463.81	0.00326814		1993.84	-0.00511075		2523.84	-0.00422891		3053.84	-0.001399		3583.84	-0.00962346
403.99	0.02222526		934.02	-0.00164032		1464.01	0.00269943		1994.04	-0.00580533		2524.04	-0.00299906		3054.04	-0.00208254		3584.04	-0.0094111
404.19	0.02256024		934.22	-0.0017705		1464.21	0.00271384		1994.24	-0.00552997		2524.24	-0.00281169		3054.24	-0.00172263		3584.24	-0.00995026
404.39	0.02226036		934.42	-0.0016042		1464.41	0.0024094		1994.44	-0.005799		2524.44	-0.00278603		3054.44	-0.00157421		3584.44	-0.01064858
404.59	0.02184621		934.62	-0.0017076		1464.61	0.00146493		1994.64	-0.00609624		2524.64	-0.00396564		3054.64	-0.00141573		3584.64	-0.00946297
404.79	0.02192473		934.82	-0.00098938		1464.81	0.00116369		1994.84	-0.00575019		2524.84	-0.00400428		3054.84	-0.00064166		3584.84	-0.00912545
404.99	0.02190312		935.02	-0.00154474		1465.01	0.001891		1995.04	-0.00479434		2525.04	-0.0043766		3055.04	-0.00091592		3585.04	-0.00986095
405.19	0.02068106		935.22	-0.00120123		1465.21	0.00188147		1995.24	-0.0051158		2525.24	-0.00468236		3055.24	-0.00127389		3585.24	-0.00989705
405.39	0.02175155		935.42	-0.00160938		1465.41	0.00217492		1995.44	-0.00404763		2525.44	-0.00518753		3055.44	-0.00240337		3585.44	-0.00976947
405.59	0.02126142		935.62	-0.0009146		1465.61	0.00276819		1995.64	-0.00415744		2525.64	-0.00591901		3055.64	-0.00175456		3585.64	-0.0103445
405.79	0.020896		935.82	0.00007619		1465.81	0.00305071		1995.84	-0.00361656		2525.84	-0.00689356		3055.84	-0.00075638		3585.84	-0.01144062
405.99	0.02036421		936.02	-0.00080631		1466.01	0.00305294		1996.04	-0.00354194		2526.04	-0.0069483		3056.04	-0.00061334		3586.04	-0.01176992
406.19	0.01971249		936.22	-0.00044215		1466.21	0.00355965		1996.24	-0.00308013		2526.24	-0.0072957		3056.24	-0.00101271		3586.24	-0.01282469
406.39	0.01986245		936.42	0.00051469		1466.41	0.00256769		1996.44	-0.00318062		2526.44	-0.00716946		3056.44	-0.00131214		3586.44	-0.01281997
406.59	0.01927793		936.62	0.00100584		1466.61	0.00318278		1996.64	-0.00378822		2526.64	-0.0066823		3056.64	-0.00153222		3586.64	-0.01307706
406.79	0.01941383		936.82	0.00033424		1466.81	0.00333699		1996.84	-0.00377609		2526.84	-0.00592902		3056.84	-0.00167355		3586.84	-0.01294528
406.99	0.0202136		937.02	0.00044128		1467.01	0.00277062		1997.04	-0.00490213		2527.04	-0.00500947		3057.04	-0.00178962		3587.04	-0.01380112
407.19	0.02076822		937.22	0.00013745		1467.21	0.00227803		1997.24	-0.00524413		2527.24	-0.0058017		3057.24	-0.00185905		3587.24	-0.01392016
407.39	0.02138653		937.42	-0.00002085		1467.41	0.00198403		1997.44	-0.00546112		2527.44	-0.0062029		3057.44	-0.00150317		3587.44	-0.01448621
407.59	0.02150451		937.62	0.0001256		1467.61	0.00251254		1997.64	-0.00539863		2527.64	-0.00547716		3057.64	-0.0017653		3587.64	-0.01449078
407.79	0.02134456		937.82	-0.00070879		1467.81	0.00248971		1997.84	-0.00613524		2527.84	-0.00532885		3057.84	-0.00224898		3587.84	-0.01437923
407.99	0.02076314		938.02	-0.00079895		1468.01	0.00184751		1998.04	-0.0065845		2528.04	-0.0049879		3058.04	-0.00323509		3588.04	-0.01501511
408.19	0.02153133		938.22	-0.00114214		1468.21	0.00218674		1998.24	-0.00701579		2528.24	-0.00569524		3058.24	-0.00262923		3588.24	-0.0144744
408.39	0.02067855		938.42	-0.00089056		1468.41	0.00215885		1998.44	-0.00703414		2528.44	-0.00569756		3058.44	-0.00256129		3588.44	-0.01415042
408.59	0.02033566		938.62	-0.00155457		1468.61	0.00257106		1998.64	-0.0067939		2528.64	-0.00543133		3058.64	-0.0019989		3588.64	-0.01346003
408.79	0.02026096		938.82	-0.00170998		1468.81	0.00356263		1998.84	-0.00616268		2528.84	-0.00592514		3058.84	-0.00161417		3588.84	-0.01363992
408.99	0.02092926		939.02	-0.00216343		1469.01	0.00402115		1999.04	-0.00566214		2529.04	-0.0057524		3059.04	-0.00218769		3589.04	-0.01338029
409.19	0.01943774		939.22	-0.00303612		1469.21	0.00365748		1999.24	-0.00642878		2529.24	-0.00592434		3059.24	-0.00200086		3589.24	-0.01333762
409.39	0.01938637		939.42	-0.00317464		1469.41	0.00404653		1999.44	-0.00566126		2529.44	-0.0061576		3059.44	-0.00179809		3589.44	-0.01321056
409.59	0.01836231		939.62	-0.00248381		1469.61	0.00410004		1999.64	-0.00608345		2529.64	-0.00634866		3059.64	-0.0010164		3589.64	-0.01349022
409.79	0.01769716		939.82	-0.00189684		1469.81	0.00422664		1999.84	-0.0058708		2529.84	-0.00534692		3059.84	-0.00066565		3589.84	-0.01373838
409.99	0.01668736		940.02	-0.00169953		1470.01	0.00403103		2000.04	-0.00634462		2530.04	-0.00476687		3060.04	-0.00139214		3590.04	-0.0135849
410.19	0.01677668		940.22	-0.00080391		1470.21	0.00418087		2000.24	-0.0067439		2530.24	-0.00330307		3060.24	-0.0017933		3590.24	-0.01348407
410.39	0.01771488		940.42	0.00012675		1470.41	0.0038657		2000.44	-0.00679905		2530.44	-0.00230854		3060.44	-0.00209136		3590.44	-0.01310169
410.59	0.01799318		940.62	0.00032632		1470.61	0.00453294		2000.64	-0.00774991		2530.64	-0.00227927		3060.64	-0.00200335		3590.64	-0.01256827
410.79	0.01808874		940.82	0.00052331		1470.81	0.00369276		2000.84	-0.00793007		2530.84	-0.00203751		3060.84	-0.00184313		3590.84	-0.0130296
410.99	0.01862691		941.02	0.00096462		1471.01	0.00325607		2001.04	-0.00775567		2531.04	-0.00204774		3061.04	-0.00196594		3591.04	-0.01259781
411.19	0.01863212		941.22	0.00118864		1471.21	0.00351597		2001.24	-0.00853367		2531.24	-0.00244986		3061.24	-0.00081518		3591.24	-0.01322594
411.39	0.01926187		941.42	0.00177287		1471.41	0.00368013		2001.44	-0.00897394		2531.44	-0.00354896		3061.44	-0.00015857		3591.44	-0.01384354
411.59	0.01926404		941.62	0.00147872		1471.61	0.00392875		2001.64	-0.00933766		2531.64	-0.00357375		3061.64	0.00039607		3591.64	-0.01324854
411.79	0.01904846		941.82	0.00129106		1471.81	0.00345225		2001.84	-0.0090959		2531.84	-0.00436487		3061.84	-0.00022828		3591.84	-0.01371091
411.99	0.01893921		942.02	0.00146535		1472.01	0.00354353		2002.04	-0.0085172		2532.04	-0.00453904		3062.04	0.00016144		3592.04	-0.01368391
412.19	0.01911231		942.22	0.00094033		1472.21	0.00371528		2002.24	-0.00906203		2532.24	-0.00574828		3062.24	0.00035967		3592.24	-0.01334628
412.39	0.01827346		942.42	0.00145774		1472.41	0.00372505		2002.44	-0.00909076		2532.44	-0.00525711		3062.44	0.00043554		3592.44	-0.01329815
412.59	0.01881793		942.62	0.00183406		1472.61	0.00389272		2002.64	-0.00847013		2532.64	-0.00576469		3062.64	0.0005435		3592.64	-0.01319237
412.79	0.01989673		942.82	0.00142408		1472.81	0.00412831		2002.84	-0.00819631		2532.84	-0.00604157		3062.84	0.00024619		3592.84	-0.01317157
412.99	0.02064313		943.02	0.00137109		1473.01	0.00374866		2003.04	-0.00778963		2533.04	-0.00636248		3063.04	0.00062721		3593.04	-0.0127576
413.19	0.01956104		943.22	0.00066871		1473.21	0.00396459		2003.24	-0.00810007		2533.24	-0.00721622		3063.24	0.00035073		3593.24	-0.01291616
413.39	0.01999808		943.42	0.00132013		1473.41	0.00456919		2003.44	-0.00714406		2533.44	-0.00692857		3063.44	-0.00037285		3593.44	-0.01278735
413.59	0.01979968		943.62	0.00162754		1473.61	0.00425098		2003.64	-0.0067658		2533.64	-0.006266		3063.64	-0.00069981		3593.64	-0.01311618
413.79	0.01965009		943.82	0.00093131		1473.81	0.00410251		2003.84	-0.00662564		2533.84	-0.00554647		3063.84	-0.00067431		3593.84	-0.0135923
413.99	0.01945911		944.02	0.00045004		1474.01	0.00390846		2004.04	-0.00652894		2534.04	-0.00593779		3064.04	-0.00143302		3594.04	-0.01370495
414.19	0.01991488		944.22	-0.00008333		1474.21	0.00333775		2004.24	-0.0063874		2534.24	-0.00436678		3064.24	-0.00160968		3594.24	-0.01293312
414.39	0.0204624		944.42	-0.00071535		1474.41	0.00352932		2004.44	-0.00673329		2534.44	-0.00460911		3064.44	-0.0015834		3594.44	-0.01289302
414.59	0.02008911		944.62	-0.00170602		1474.61	0.00334108		2004.64	-0.00712958		2534.64	-0.00421887		3064.64	-0.00134165		3594.64	-0.01263641
414.79	0.02006904		944.82	-0.00192354		1474.81	0.00229628		2004.84	-0.00743206		2534.84	-0.00387015		3064.84	-0.00118903		3594.84	-0.01382827
414.99	0.01991083		945.02	-0.00243768		1475.01	0.00272308		2005.04	-0.0076431		2535.04	-0.00327176		3065.04	-0.00046726		3595.04	-0.0135189
415.19	0.01957511		945.22	-0.00268109		1475.21	0.0026154		2005.24	-0.00915819		2535.24	-0.00377948		3065.24	-0.00036401		3595.24	-0.01431387
415.39	0.01891053		945.42	-0.00313178		1475.41	0.00217292		2005.44	-0.00944085		2535.44	-0.00397705		3065.44	-0.00019747		3595.44	-0.01403946
415.59	0.01841479		945.62	-0.00357116		1475.61	0.00210442		2005.64	-0.00900101		2535.64	-0.00349764		3065.64	-0.0006601		3595.64	-0.01381779
415.79	0.01772921		945.82	-0.00416752		1475.81	0.0014273		2005.84	-0.00860444		2535.84	-0.00302371		3065.84	-0.00071299		3595.84	-0.01436361
415.99	0.0171458		946.02	-0.00406742		1476.01	0.00192943		2006.04	-0.00882462		2536.04	-0.00265497		3066.04	-0.00165465		3596.04	-0.01394389
416.19	0.01732318		946.22	-0.00378851		1476.21	0.00185015		2006.24	-0.00959535		2536.24	-0.00293374		3066.24	-0.00233886		3596.24	-0.01467329
416.39	0.01778459		946.42	-0.00412795		1476.41	0.00151204		2006.44	-0.00900056		2536.44	-0.00201942		3066.44	-0.0023929		3596.44	-0.01429389
416.59	0.01809501		946.62	-0.00408559		1476.61	0.00201792		2006.64	-0.00792743		2536.64	-0.0025569		3066.64	-0.00229458		3596.64	-0.01408158
416.79	0.01832758		946.82	-0.00379105		1476.81	0.00211832		2006.84	-0.00779836		2536.84	-0.00290804		3066.84	-0.00293312		3596.84	-0.01420834
416.99	0.01756831		947.02	-0.00328375		1477.01	0.00133532		2007.04	-0.00788565		2537.04	-0.00367813		3067.04	-0.00298783		3597.04	-0.01415017
417.19	0.01728809		947.22	-0.0033869		1477.21	0.00085321		2007.24	-0.00785194		2537.24	-0.00426283		3067.24	-0.00433322		3597.24	-0.01390999
417.39	0.01722283		947.42	-0.00382912		1477.41	0.00066821		2007.44	-0.00759503		2537.44	-0.00415927		3067.44	-0.00409335		3597.44	-0.01400352
417.59	0.01698626		947.62	-0.00354794		1477.61	-0.00034771		2007.64	-0.00731925		2537.64	-0.00415527		3067.64	-0.00409291		3597.64	-0.01424088
417.79	0.01712685		947.82	-0.00385561		1477.81	-0.00006059		2007.84	-0.00809656		2537.84	-0.00400497		3067.84	-0.00471935		3597.84	-0.01435336
417.99	0.01699833		948.02	-0.00371195		1478.01	0.00023519		2008.04	-0.00786628		2538.04	-0.0041117		3068.04	-0.00547371		3598.04	-0.01353307
418.19	0.01663099		948.22	-0.00364458		1478.21	0.0003736		2008.24	-0.00778609		2538.24	-0.00411391		3068.24	-0.00468268		3598.24	-0.01245516
418.39	0.01622825		948.42	-0.00410764		1478.41	0.00055926		2008.44	-0.0086681		2538.44	-0.00508737		3068.44	-0.00427448		3598.44	-0.01306523
418.59	0.01653507		948.62	-0.00334936		1478.61	0.00049322		2008.64	-0.00822875		2538.64	-0.00530532		3068.64	-0.00397099		3598.64	-0.01276156
418.79	0.01633455		948.82	-0.00277961		1478.81	0.00105117		2008.84	-0.00890001		2538.84	-0.00613651		3068.84	-0.00329767		3598.84	-0.01401487
418.99	0.01593923		949.02	-0.00265472		1479.01	0.00158792		2009.04	-0.00961258		2539.04	-0.00722089		3069.04	-0.00381196		3599.04	-0.01382498
419.19	0.01570541		949.22	-0.00230026		1479.21	0.00167599		2009.24	-0.00986189		2539.24	-0.00790034		3069.24	-0.00432911		3599.24	-0.0141074
419.39	0.01606038		949.42	-0.00224162		1479.41	0.00202121		2009.44	-0.01003732		2539.44	-0.00751694		3069.44	-0.00381673		3599.44	-0.01450878
419.59	0.01672885		949.62	-0.0014533		1479.61	0.00247534		2009.64	-0.00889965		2539.64	-0.00806147		3069.64	-0.00409868		3599.64	-0.01504838
419.79	0.01677667		949.82	-0.0011796		1479.81	0.00269908		2009.84	-0.00890841		2539.84	-0.0080472		3069.84	-0.00315802		3599.84	-0.01391127
419.99	0.01682827		950.02	-0.00050984		1480.01	0.00331389		2010.04	-0.00922629		2540.04	-0.00773703		3070.04	-0.00367539		3600.04	-0.01452183
420.19	0.0185512		950.22	-0.00028038		1480.21	0.00319626		2010.24	-0.00895773		2540.24	-0.0075869		3070.24	-0.00326999		3600.24	-0.01482403
420.39	0.01860842		950.42	-0.00093768		1480.41	0.00270102		2010.44	-0.00849046		2540.44	-0.00766699		3070.44	-0.00337444		3600.44	-0.01468966
420.59	0.01768843		950.62	0.00022002		1480.61	0.00360663		2010.64	-0.00854207		2540.64	-0.00776156		3070.64	-0.0038473		3600.64	-0.01439176
420.79	0.01771347		950.82	-0.00000744		1480.81	0.00310298		2010.84	-0.00842487		2540.84	-0.00745426		3070.84	-0.0039847		3600.84	-0.0142275
420.99	0.0187288		951.02	-0.00028274		1481.01	0.0023565		2011.04	-0.00832973		2541.04	-0.00710139		3071.04	-0.00323675		3601.04	-0.01369637
421.19	0.01897615		951.22	-0.0005313		1481.21	0.00169688		2011.24	-0.00802904		2541.24	-0.00683709		3071.24	-0.00295428		3601.24	-0.01313653
421.39	0.01885908		951.42	-0.00133506		1481.41	0.00236837		2011.44	-0.00802216		2541.44	-0.00612017		3071.44	-0.00185819		3601.44	-0.0131893
421.59	0.018719		951.62	-0.00052837		1481.61	0.00224314		2011.64	-0.00789746		2541.64	-0.00529509		3071.64	-0.00214659		3601.64	-0.01311745
421.79	0.01849726		951.82	-0.00016998		1481.81	0.00257856		2011.84	-0.00759216		2541.84	-0.00524715		3071.84	-0.00278449		3601.84	-0.01253567
421.99	0.0179792		952.02	-0.00131477		1482.01	0.00203781		2012.04	-0.00634531		2542.04	-0.00618164		3072.04	-0.00252257		3602.04	-0.01233229
422.19	0.01789276		952.22	-0.00191763		1482.21	0.00159205		2012.24	-0.00616861		2542.24	-0.0066408		3072.24	-0.00173393		3602.24	-0.01298088
422.39	0.01776386		952.42	-0.00275412		1482.41	0.00175108		2012.44	-0.00589339		2542.44	-0.00625783		3072.44	-0.00157879		3602.44	-0.0140892
422.59	0.01753814		952.62	-0.00254062		1482.61	0.0020867		2012.64	-0.00516478		2542.64	-0.00692469		3072.64	-0.00197499		3602.64	-0.01468331
422.79	0.01775467		952.82	-0.00333749		1482.81	0.00146912		2012.84	-0.0059485		2542.84	-0.0074203		3072.84	-0.00239759		3602.84	-0.01517845
422.99	0.01809858		953.02	-0.00396827		1483.01	0.00063523		2013.04	-0.00638545		2543.04	-0.00781484		3073.04	-0.00361564		3603.04	-0.01509716
423.19	0.01824169		953.22	-0.00412071		1483.21	0.00086769		2013.24	-0.00605791		2543.24	-0.00708029		3073.24	-0.00340188		3603.24	-0.01586168
423.39	0.01829524		953.42	-0.00404949		1483.41	0.00049691		2013.44	-0.00580804		2543.44	-0.00738572		3073.44	-0.00304635		3603.44	-0.016007
423.59	0.01799767		953.62	-0.0036056		1483.61	-0.00012964		2013.64	-0.00532795		2543.64	-0.00804544		3073.64	-0.00331321		3603.64	-0.01555984
423.79	0.01742563		953.82	-0.0037557		1483.81	-0.00053486		2013.84	-0.00678537		2543.84	-0.00800077		3073.84	-0.00363385		3603.84	-0.01515041
423.99	0.01777991		954.02	-0.0045831		1484.01	-0.00032723		2014.04	-0.00756333		2544.04	-0.00792072		3074.04	-0.00450203		3604.04	-0.01555603
424.19	0.01805333		954.22	-0.00448404		1484.21	0.00050632		2014.24	-0.00742914		2544.24	-0.00809896		3074.24	-0.00519711		3604.24	-0.01490966
424.39	0.01709677		954.42	-0.00527864		1484.41	0.00142713		2014.44	-0.00834162		2544.44	-0.00864553		3074.44	-0.00576284		3604.44	-0.01517381
424.59	0.01728665		954.62	-0.00520098		1484.61	0.00241242		2014.64	-0.00838306		2544.64	-0.00845568		3074.64	-0.00605835		3604.64	-0.01456055
424.79	0.01779213		954.82	-0.00504853		1484.81	0.00221706		2014.84	-0.00851315		2544.84	-0.00869083		3074.84	-0.00545028		3604.84	-0.01374712
424.99	0.01815518		955.02	-0.00420593		1485.01	0.00230909		2015.04	-0.00879994		2545.04	-0.00788306		3075.04	-0.00524714		3605.04	-0.01365194
425.19	0.01709716		955.22	-0.00367376		1485.21	0.00200375		2015.24	-0.00927454		2545.24	-0.00748297		3075.24	-0.00495832		3605.24	-0.01359198
425.39	0.01692493		955.42	-0.00269431		1485.41	0.00253878		2015.44	-0.00901958		2545.44	-0.00782578		3075.44	-0.00493513		3605.44	-0.01328563
425.59	0.01695298		955.62	-0.00181387		1485.61	0.00151256		2015.64	-0.00904505		2545.64	-0.00767971		3075.64	-0.00475893		3605.64	-0.01305695
425.79	0.01681134		955.82	-0.0017005		1485.81	0.00106332		2015.84	-0.00829255		2545.84	-0.00825089		3075.84	-0.00437517		3605.84	-0.01313261
425.99	0.01653731		956.02	-0.00242167		1486.01	0.00036037		2016.04	-0.0085431		2546.04	-0.0082692		3076.04	-0.00340756		3606.04	-0.01422457
426.19	0.01621284		956.22	-0.00215083		1486.21	-0.00004258		2016.24	-0.00836172		2546.24	-0.00800102		3076.24	-0.00352141		3606.24	-0.01424164
426.39	0.01568925		956.42	-0.00243028		1486.41	-0.00065697		2016.44	-0.00736104		2546.44	-0.00711321		3076.44	-0.00331542		3606.44	-0.01376901
426.59	0.01591742		956.62	-0.00140428		1486.61	-0.00141031		2016.64	-0.00688948		2546.64	-0.00774435		3076.64	-0.00321609		3606.64	-0.01336651
426.79	0.01639875		956.82	-0.00171098		1486.81	-0.00231167		2016.84	-0.00750936		2546.84	-0.00677386		3076.84	-0.0030569		3606.84	-0.01332074
426.99	0.0167299		957.02	-0.00216989		1487.01	-0.00280519		2017.04	-0.00767696		2547.04	-0.00706567		3077.04	-0.0029882		3607.04	-0.0132404
427.19	0.01722474		957.22	-0.00145156		1487.21	-0.00254802		2017.24	-0.0075935		2547.24	-0.00654029		3077.24	-0.00284059		3607.24	-0.01416405
427.39	0.01730368		957.42	-0.00154038		1487.41	-0.00307884		2017.44	-0.00723456		2547.44	-0.0066539		3077.44	-0.00284833		3607.44	-0.01327095
427.59	0.01702233		957.62	-0.00182869		1487.61	-0.00379981		2017.64	-0.00761064		2547.64	-0.0069848		3077.64	-0.00310447		3607.64	-0.01302316
427.79	0.01675907		957.82	-0.00227634		1487.81	-0.00276839		2017.84	-0.00768976		2547.84	-0.00657471		3077.84	-0.00245701		3607.84	-0.01349417
427.99	0.0180406		958.02	-0.00305884		1488.01	-0.00199549		2018.04	-0.00732583		2548.04	-0.00641688		3078.04	-0.0019234		3608.04	-0.01350453
428.19	0.01789024		958.22	-0.00289016		1488.21	-0.00073076		2018.24	-0.00700117		2548.24	-0.00564417		3078.24	-0.00194424		3608.24	-0.01347867
428.39	0.0189583		958.42	-0.00357156		1488.41	-0.00020976		2018.44	-0.00715155		2548.44	-0.00604274		3078.44	-0.00173206		3608.44	-0.01392185
428.59	0.01908363		958.62	-0.00378839		1488.61	0.00040113		2018.64	-0.00749858		2548.64	-0.00600598		3078.64	-0.0016802		3608.64	-0.0136063
428.79	0.0186327		958.82	-0.00298091		1488.81	0.00114308		2018.84	-0.00742041		2548.84	-0.00585955		3078.84	-0.00257178		3608.84	-0.0136225
428.99	0.01825897		959.02	-0.00334078		1489.01	0.00155059		2019.04	-0.00745482		2549.04	-0.00517053		3079.04	-0.00304258		3609.04	-0.014304
429.19	0.01845579		959.22	-0.00314197		1489.21	0.00093521		2019.24	-0.00720797		2549.24	-0.00605433		3079.24	-0.00299767		3609.24	-0.01359917
429.39	0.01841713		959.42	-0.00273567		1489.41	0.00122258		2019.44	-0.00668448		2549.44	-0.00721394		3079.44	-0.00321108		3609.44	-0.0133168
429.59	0.01857544		959.62	-0.00336547		1489.61	0.00152851		2019.64	-0.00661043		2549.64	-0.00698734		3079.64	-0.00341029		3609.64	-0.01422174
429.79	0.01820519		959.82	-0.00339195		1489.81	0.0019018		2019.84	-0.00634947		2549.84	-0.00778081		3079.84	-0.00400031		3609.84	-0.01382352
429.99	0.01773795		960.02	-0.0035022		1490.01	0.00140301		2020.04	-0.00629058		2550.04	-0.00789864		3080.04	-0.00427126		3610.04	-0.01314997
430.19	0.018114		960.22	-0.00357416		1490.21	0.00140209		2020.24	-0.00514702		2550.24	-0.00833359		3080.24	-0.00508922		3610.24	-0.01211209
430.39	0.01798903		960.42	-0.00386661		1490.41	0.00008323		2020.44	-0.00471014		2550.44	-0.0077252		3080.44	-0.00403589		3610.44	-0.0123549
430.59	0.01760921		960.62	-0.0032345		1490.61	0.00017292		2020.64	-0.00492581		2550.64	-0.00785027		3080.64	-0.0039849		3610.64	-0.01202998
430.79	0.01734654		960.82	-0.00412262		1490.81	-0.00034961		2020.84	-0.00644288		2550.84	-0.0071894		3080.84	-0.00426275		3610.84	-0.01271418
430.99	0.0177742		961.02	-0.00517777		1491.01	-0.00125288		2021.04	-0.00646376		2551.04	-0.00755603		3081.04	-0.00403163		3611.04	-0.01300895
431.19	0.01725925		961.22	-0.004486		1491.21	-0.00135329		2021.24	-0.00583206		2551.24	-0.00734257		3081.24	-0.00421237		3611.24	-0.01354756
431.39	0.01699109		961.42	-0.00476821		1491.41	-0.00142235		2021.44	-0.00531963		2551.44	-0.00794872		3081.44	-0.00383513		3611.44	-0.01292704
431.59	0.01666926		961.62	-0.00448294		1491.61	-0.00191474		2021.64	-0.00509043		2551.64	-0.0077285		3081.64	-0.00324181		3611.64	-0.01353326
431.79	0.01786909		961.82	-0.00447319		1491.81	-0.00102725		2021.84	-0.00532202		2551.84	-0.00662746		3081.84	-0.00266171		3611.84	-0.01394376
431.99	0.01905007		962.02	-0.00530212		1492.01	-0.00070676		2022.04	-0.00530118		2552.04	-0.00621447		3082.04	-0.00231629		3612.04	-0.01404217
432.19	0.01894278		962.22	-0.00506392		1492.21	-0.00045008		2022.24	-0.00528537		2552.24	-0.00585282		3082.24	-0.00233412		3612.24	-0.01376522
432.39	0.01970542		962.42	-0.00451996		1492.41	0.00012671		2022.44	-0.00669881		2552.44	-0.00605688		3082.44	-0.00195896		3612.44	-0.0146461
432.59	0.01888773		962.62	-0.00429204		1492.61	-0.00002169		2022.64	-0.0077919		2552.64	-0.0064919		3082.64	-0.0023844		3612.64	-0.01423455
432.79	0.01896917		962.82	-0.00341901		1492.81	-0.00009442		2022.84	-0.00796507		2552.84	-0.00702239		3082.84	-0.0033329		3612.84	-0.0142603
432.99	0.01895097		963.02	-0.00386077		1493.01	0.00031315		2023.04	-0.00865408		2553.04	-0.00780438		3083.04	-0.00304305		3613.04	-0.01344572
433.19	0.01906022		963.22	-0.00292574		1493.21	-0.00017853		2023.24	-0.00953085		2553.24	-0.00825079		3083.24	-0.00309533		3613.24	-0.01343334
433.39	0.0188713		963.42	-0.00297098		1493.41	0.00062636		2023.44	-0.00968195		2553.44	-0.00834827		3083.44	-0.00390285		3613.44	-0.01441635
433.59	0.02014975		963.62	-0.00265363		1493.61	0.00096199		2023.64	-0.00983377		2553.64	-0.00870244		3083.64	-0.00441293		3613.64	-0.01503515
433.79	0.02047017		963.82	-0.00311611		1493.81	0.00063561		2023.84	-0.00958749		2553.84	-0.00894003		3083.84	-0.00474267		3613.84	-0.01445094
433.99	0.0209046		964.02	-0.00263243		1494.01	0.0006447		2024.04	-0.01020412		2554.04	-0.00839661		3084.04	-0.00471543		3614.04	-0.01426317
434.19	0.02083738		964.22	-0.00263385		1494.21	0.00071932		2024.24	-0.01023911		2554.24	-0.00913034		3084.24	-0.00473528		3614.24	-0.01459805
434.39	0.02005256		964.42	-0.00311046		1494.41	-0.00044309		2024.44	-0.01037709		2554.44	-0.0086847		3084.44	-0.00484402		3614.44	-0.01573364
434.59	0.01921832		964.62	-0.00360832		1494.61	-0.00030677		2024.64	-0.01053215		2554.64	-0.00890909		3084.64	-0.00616224		3614.64	-0.01603753
434.79	0.01862201		964.82	-0.0048405		1494.81	-0.00108805		2024.84	-0.01037477		2554.84	-0.00834089		3084.84	-0.00615131		3614.84	-0.01766342
434.99	0.01826148		965.02	-0.00546686		1495.01	-0.00190068		2025.04	-0.00987707		2555.04	-0.0091205		3085.04	-0.00599138		3615.04	-0.0182586
435.19	0.0173202		965.22	-0.00480918		1495.21	-0.0014865		2025.24	-0.00939913		2555.24	-0.00956599		3085.24	-0.00687746		3615.24	-0.0179463
435.39	0.01683554		965.42	-0.00483682		1495.41	-0.00106989		2025.44	-0.00920876		2555.44	-0.00998356		3085.44	-0.0069656		3615.44	-0.01753952
435.59	0.01649753		965.62	-0.00536379		1495.61	-0.00182411		2025.64	-0.0095776		2555.64	-0.0091704		3085.64	-0.00765899		3615.64	-0.01756881
435.79	0.0174551		965.82	-0.00549711		1495.81	-0.00097128		2025.84	-0.00969432		2555.84	-0.00891539		3085.84	-0.00801925		3615.84	-0.01793512
435.99	0.01706465		966.02	-0.0056756		1496.01	-0.00061397		2026.04	-0.00901647		2556.04	-0.00836892		3086.04	-0.00778222		3616.04	-0.01746055
436.19	0.01553564		966.22	-0.00455656		1496.21	-0.00033119		2026.24	-0.00935322		2556.24	-0.00763634		3086.24	-0.00780561		3616.24	-0.0172127
436.39	0.01553418		966.42	-0.0047657		1496.41	-0.00012064		2026.44	-0.01038259		2556.44	-0.0072416		3086.44	-0.00672031		3616.44	-0.01675957
436.59	0.0144703		966.62	-0.00546643		1496.61	-0.00083128		2026.64	-0.01042317		2556.64	-0.00821804		3086.64	-0.00622129		3616.64	-0.01513848
436.79	0.01466261		966.82	-0.00545083		1496.81	-0.00034518		2026.84	-0.01017558		2556.84	-0.00882506		3086.84	-0.00570054		3616.84	-0.01542475
436.99	0.01436742		967.02	-0.00533124		1497.01	0.00009731		2027.04	-0.01105688		2557.04	-0.00858065		3087.04	-0.00441237		3617.04	-0.01504591
437.19	0.0140478		967.22	-0.00396188		1497.21	-0.0005562		2027.24	-0.01141556		2557.24	-0.00821109		3087.24	-0.00401781		3617.24	-0.01554637
437.39	0.01477045		967.42	-0.00363943		1497.41	-0.00004918		2027.44	-0.01040007		2557.44	-0.00763055		3087.44	-0.00377389		3617.44	-0.01596509
437.59	0.01547936		967.62	-0.00290698		1497.61	-0.00001719		2027.64	-0.01073279		2557.64	-0.00698993		3087.64	-0.00348236		3617.64	-0.01638027
437.79	0.01575555		967.82	-0.0037341		1497.81	-0.00089543		2027.84	-0.01081795		2557.84	-0.00615187		3087.84	-0.00301445		3617.84	-0.01622881
437.99	0.01539498		968.02	-0.00354791		1498.01	-0.00141211		2028.04	-0.01103705		2558.04	-0.00596656		3088.04	-0.0030834		3618.04	-0.01614647
438.19	0.01440809		968.22	-0.00407388		1498.21	-0.0018401		2028.24	-0.00991673		2558.24	-0.00678783		3088.24	-0.00314691		3618.24	-0.01620721
438.39	0.01485323		968.42	-0.00422728		1498.41	-0.0028851		2028.44	-0.00960783		2558.44	-0.00617145		3088.44	-0.00383006		3618.44	-0.01661697
438.59	0.01497085		968.62	-0.00430525		1498.61	-0.0027751		2028.64	-0.00886562		2558.64	-0.00619242		3088.64	-0.00355216		3618.64	-0.01698296
438.79	0.01464952		968.82	-0.0045149		1498.81	-0.00332954		2028.84	-0.00790845		2558.84	-0.00610712		3088.84	-0.00354631		3618.84	-0.01722239
438.99	0.01570241		969.02	-0.00374331		1499.01	-0.00410434		2029.04	-0.00822349		2559.04	-0.00698279		3089.04	-0.00376709		3619.04	-0.01646227
439.19	0.0149832		969.22	-0.0034789		1499.21	-0.00359648		2029.24	-0.00767808		2559.24	-0.00642117		3089.24	-0.00436367		3619.24	-0.01597593
439.39	0.01515345		969.42	-0.00374439		1499.41	-0.00366957		2029.44	-0.00739412		2559.44	-0.00674013		3089.44	-0.004976		3619.44	-0.01590135
439.59	0.01590619		969.62	-0.00507071		1499.61	-0.00401153		2029.64	-0.00779041		2559.64	-0.00711016		3089.64	-0.00502519		3619.64	-0.01575876
439.79	0.01656613		969.82	-0.00539807		1499.81	-0.00233004		2029.84	-0.00744905		2559.84	-0.0073286		3089.84	-0.00536419		3619.84	-0.01641627
439.99	0.0165707		970.02	-0.005405		1500.01	-0.00099032		2030.04	-0.00710015		2560.04	-0.00786634		3090.04	-0.00497089		3620.04	-0.01585007
440.19	0.01638884		970.22	-0.00549198		1500.21	-0.00036641		2030.24	-0.00774223		2560.24	-0.00865771		3090.24	-0.00514918		3620.24	-0.01608013
440.39	0.01709377		970.42	-0.00621226		1500.41	-0.00007133		2030.44	-0.00833999		2560.44	-0.01000201		3090.44	-0.00388121		3620.44	-0.01629062
440.59	0.01686362		970.62	-0.00609126		1500.61	0.00035385		2030.64	-0.00959613		2560.64	-0.01154407		3090.64	-0.00375579		3620.64	-0.01672604
440.79	0.01725003		970.82	-0.00544952		1500.81	0.00084352		2030.84	-0.01001865		2560.84	-0.01211588		3090.84	-0.00338449		3620.84	-0.01771565
440.99	0.01726496		971.02	-0.00519176		1501.01	0.00153175		2031.04	-0.01048404		2561.04	-0.01188481		3091.04	-0.00321909		3621.04	-0.01729304
441.19	0.0167323		971.22	-0.00464555		1501.21	0.00151583		2031.24	-0.0107479		2561.24	-0.01220971		3091.24	-0.00273977		3621.24	-0.01827921
441.39	0.01677486		971.42	-0.0051124		1501.41	0.0016945		2031.44	-0.01049031		2561.44	-0.01173154		3091.44	-0.00281568		3621.44	-0.01953966
441.59	0.0166533		971.62	-0.00504833		1501.61	0.00110106		2031.64	-0.01140982		2561.64	-0.01205107		3091.64	-0.00336484		3621.64	-0.01946625
441.79	0.01643475		971.82	-0.00492518		1501.81	0.00003821		2031.84	-0.01126699		2561.84	-0.01261611		3091.84	-0.00296283		3621.84	-0.01932916
441.99	0.01521868		972.02	-0.00456791		1502.01	0.00109188		2032.04	-0.01061449		2562.04	-0.01286484		3092.04	-0.00379091		3622.04	-0.01930938
442.19	0.01478914		972.22	-0.00382636		1502.21	0.00122976		2032.24	-0.00997743		2562.24	-0.01220601		3092.24	-0.00436294		3622.24	-0.01878063
442.39	0.01515652		972.42	-0.00314964		1502.41	0.00119081		2032.44	-0.01100738		2562.44	-0.01117185		3092.44	-0.0046766		3622.44	-0.01909517
442.59	0.01449688		972.62	-0.00246752		1502.61	0.0011298		2032.64	-0.01041635		2562.64	-0.01028674		3092.64	-0.00469209		3622.64	-0.01904464
442.79	0.01402767		972.82	-0.00204276		1502.81	0.00128565		2032.84	-0.01044974		2562.84	-0.0097404		3092.84	-0.00502465		3622.84	-0.01848433
442.99	0.01398998		973.02	-0.00081751		1503.01	0.00100614		2033.04	-0.01081309		2563.04	-0.00974039		3093.04	-0.00449099		3623.04	-0.01807301
443.19	0.01347989		973.22	-0.00076183		1503.21	0.00141483		2033.24	-0.00997389		2563.24	-0.00891006		3093.24	-0.00418407		3623.24	-0.01827815
443.39	0.0139927		973.42	-0.00118042		1503.41	0.00171611		2033.44	-0.01018714		2563.44	-0.00842206		3093.44	-0.00389437		3623.44	-0.01776544
443.59	0.01425689		973.62	-0.00187569		1503.61	0.00192853		2033.64	-0.0104287		2563.64	-0.00868757		3093.64	-0.00379208		3623.64	-0.01700249
443.79	0.01469905		973.82	-0.00184564		1503.81	0.00255956		2033.84	-0.0104994		2563.84	-0.00813204		3093.84	-0.00393907		3623.84	-0.01725386
443.99	0.01509704		974.02	-0.00212633		1504.01	0.00292311		2034.04	-0.01085803		2564.04	-0.00840275		3094.04	-0.00371151		3624.04	-0.01702205
444.19	0.0152248		974.22	-0.00243449		1504.21	0.00307878		2034.24	-0.01179069		2564.24	-0.00898711		3094.24	-0.00340979		3624.24	-0.01718007
444.39	0.01471866		974.42	-0.00247553		1504.41	0.00322817		2034.44	-0.01258593		2564.44	-0.00913669		3094.44	-0.00264627		3624.44	-0.01772537
444.59	0.01519148		974.62	-0.0036616		1504.61	0.00326292		2034.64	-0.01351955		2564.64	-0.00881935		3094.64	-0.00264234		3624.64	-0.01810651
444.79	0.01537816		974.82	-0.00398004		1504.81	0.00309193		2034.84	-0.01309655		2564.84	-0.00869298		3094.84	-0.00265188		3624.84	-0.01773335
444.99	0.01559849		975.02	-0.00479859		1505.01	0.00277381		2035.04	-0.0123996		2565.04	-0.00870006		3095.04	-0.0022404		3625.04	-0.01764876
445.19	0.01509857		975.22	-0.00560657		1505.21	0.00184234		2035.24	-0.01268367		2565.24	-0.00897161		3095.24	-0.00175889		3625.24	-0.01799153
445.39	0.01544825		975.42	-0.0066393		1505.41	0.00121316		2035.44	-0.01197862		2565.44	-0.0090438		3095.44	-0.00261646		3625.44	-0.01784701
445.59	0.01589066		975.62	-0.0064565		1505.61	0.00089944		2035.64	-0.01272276		2565.64	-0.00920339		3095.64	-0.00338746		3625.64	-0.01710945
445.79	0.01548459		975.82	-0.00648147		1505.81	0.00081435		2035.84	-0.01209904		2565.84	-0.00898292		3095.84	-0.0038147		3625.84	-0.01768908
445.99	0.0158325		976.02	-0.00586508		1506.01	0.00173483		2036.04	-0.01141932		2566.04	-0.00854491		3096.04	-0.0055515		3626.04	-0.01784286
446.19	0.01536671		976.22	-0.00581166		1506.21	0.00068651		2036.24	-0.01088062		2566.24	-0.00710666		3096.24	-0.00653308		3626.24	-0.01756774
446.39	0.01520407		976.42	-0.00526563		1506.41	0.00021643		2036.44	-0.01161307		2566.44	-0.00667189		3096.44	-0.00723849		3626.44	-0.01729727
446.59	0.01457836		976.62	-0.00464174		1506.61	-0.00062056		2036.64	-0.01092658		2566.64	-0.00631009		3096.64	-0.00807283		3626.64	-0.0168944
446.79	0.01412681		976.82	-0.00476056		1506.81	0.00012793		2036.84	-0.01090644		2566.84	-0.00674236		3096.84	-0.00809014		3626.84	-0.01705888
446.99	0.013843		977.02	-0.00417753		1507.01	-0.00082315		2037.04	-0.01068534		2567.04	-0.00710364		3097.04	-0.00891758		3627.04	-0.01677334
447.19	0.01381785		977.22	-0.00438492		1507.21	-0.00054466		2037.24	-0.00997499		2567.24	-0.00650914		3097.24	-0.01004914		3627.24	-0.01714134
447.39	0.01339211		977.42	-0.0042242		1507.41	-0.00096482		2037.44	-0.01019019		2567.44	-0.0064855		3097.44	-0.00982778		3627.44	-0.01703377
447.59	0.01358071		977.62	-0.00423035		1507.61	-0.00130792		2037.64	-0.00929092		2567.64	-0.00720688		3097.64	-0.01013634		3627.64	-0.01689953
447.79	0.0136863		977.82	-0.00413778		1507.81	-0.00108487		2037.84	-0.00958753		2567.84	-0.00717445		3097.84	-0.01004383		3627.84	-0.01691341
447.99	0.0132431		978.02	-0.0036735		1508.01	-0.00018859		2038.04	-0.00958287		2568.04	-0.00746857		3098.04	-0.01031481		3628.04	-0.01732148
448.19	0.01379418		978.22	-0.00260162		1508.21	-0.00001474		2038.24	-0.01033749		2568.24	-0.00784155		3098.24	-0.00928236		3628.24	-0.01750363
448.39	0.01371838		978.42	-0.00301321		1508.41	-0.00053959		2038.44	-0.01045504		2568.44	-0.00740429		3098.44	-0.00839272		3628.44	-0.01766268
448.59	0.01360428		978.62	-0.00344411		1508.61	-0.00100222		2038.64	-0.01101813		2568.64	-0.00726764		3098.64	-0.00859669		3628.64	-0.01738264
448.79	0.01353035		978.82	-0.00305914		1508.81	-0.00147489		2038.84	-0.0111163		2568.84	-0.0075042		3098.84	-0.00813874		3628.84	-0.01675549
448.99	0.01375773		979.02	-0.00329553		1509.01	-0.00121955		2039.04	-0.01073096		2569.04	-0.00799627		3099.04	-0.0070091		3629.04	-0.01670707
449.19	0.01325811		979.22	-0.00388525		1509.21	-0.00114045		2039.24	-0.01172073		2569.24	-0.0079044		3099.24	-0.00630086		3629.24	-0.01660949
449.39	0.01337265		979.42	-0.00417518		1509.41	-0.00159315		2039.44	-0.01186352		2569.44	-0.0074221		3099.44	-0.00572636		3629.44	-0.01642548
449.59	0.01369923		979.62	-0.00324087		1509.61	-0.00130828		2039.64	-0.01268746		2569.64	-0.0073256		3099.64	-0.00568734		3629.64	-0.01595207
449.79	0.01325567		979.82	-0.00266824		1509.81	-0.00145768		2039.84	-0.01284987		2569.84	-0.00679762		3099.84	-0.00551333		3629.84	-0.01637647
449.99	0.01387281		980.02	-0.00179761		1510.01	-0.00194024		2040.04	-0.0126118		2570.04	-0.00637785		3100.04	-0.00566719		3630.04	-0.01524873
450.19	0.01291674		980.22	-0.00256389		1510.21	-0.00159225		2040.24	-0.01226495		2570.24	-0.00565132		3100.24	-0.00563663		3630.24	-0.01484543
450.39	0.01248652		980.42	-0.00289868		1510.41	-0.00164339		2040.44	-0.01218501		2570.44	-0.00578904		3100.44	-0.00599406		3630.44	-0.01454468
450.59	0.01188252		980.62	-0.00346665		1510.61	-0.00157241		2040.64	-0.01233715		2570.64	-0.00578192		3100.64	-0.00681681		3630.64	-0.01512751
450.79	0.01184257		980.82	-0.00347804		1510.81	-0.00097707		2040.84	-0.01323242		2570.84	-0.0062016		3100.84	-0.00638389		3630.84	-0.01638229
450.99	0.01147253		981.02	-0.00371466		1511.01	-0.000239		2041.04	-0.01316969		2571.04	-0.00661831		3101.04	-0.00698896		3631.04	-0.01708714
451.19	0.0106065		981.22	-0.00432216		1511.21	0.00046905		2041.24	-0.01288305		2571.24	-0.00717114		3101.24	-0.00699165		3631.24	-0.01750403
451.39	0.0103422		981.42	-0.00487439		1511.41	0.00021946		2041.44	-0.01288664		2571.44	-0.00755796		3101.44	-0.00593197		3631.44	-0.01750295
451.59	0.01138233		981.62	-0.00503526		1511.61	0.0005061		2041.64	-0.01204486		2571.64	-0.00804641		3101.64	-0.00624724		3631.64	-0.01717856
451.79	0.01138328		981.82	-0.0051177		1511.81	0.00130354		2041.84	-0.01262946		2571.84	-0.00875143		3101.84	-0.00659685		3631.84	-0.01731951
451.99	0.01052954		982.02	-0.0054337		1512.01	0.001715		2042.04	-0.01187107		2572.04	-0.00886505		3102.04	-0.00592585		3632.04	-0.01696922
452.19	0.01105554		982.22	-0.00532639		1512.21	0.00083688		2042.24	-0.01164117		2572.24	-0.00938159		3102.24	-0.00549368		3632.24	-0.01757169
452.39	0.0107466		982.42	-0.00570186		1512.41	0.00010679		2042.44	-0.01098021		2572.44	-0.01002641		3102.44	-0.00597721		3632.44	-0.0177306
452.59	0.01090895		982.62	-0.00551272		1512.61	-0.00083613		2042.64	-0.01157506		2572.64	-0.01082058		3102.64	-0.00678977		3632.64	-0.01835212
452.79	0.01140754		982.82	-0.00548758		1512.81	-0.00060213		2042.84	-0.01166291		2572.84	-0.01098022		3102.84	-0.00635081		3632.84	-0.01820047
452.99	0.01142616		983.02	-0.00549252		1513.01	-0.00100244		2043.04	-0.01149432		2573.04	-0.01117659		3103.04	-0.00592089		3633.04	-0.01882748
453.19	0.01203235		983.22	-0.00698303		1513.21	-0.00163122		2043.24	-0.0125324		2573.24	-0.01100194		3103.24	-0.00526948		3633.24	-0.01927055
453.39	0.01258421		983.42	-0.00703221		1513.41	-0.00251393		2043.44	-0.01268767		2573.44	-0.01050715		3103.44	-0.00464775		3633.44	-0.01904705
453.59	0.01271474		983.62	-0.00645317		1513.61	-0.00243921		2043.64	-0.01339218		2573.64	-0.00984032		3103.64	-0.00515964		3633.64	-0.01943074
453.79	0.01339754		983.82	-0.005909		1513.81	-0.00306365		2043.84	-0.01361909		2573.84	-0.00867573		3103.84	-0.00503626		3633.84	-0.0197434
453.99	0.01442385		984.02	-0.00525902		1514.01	-0.00329641		2044.04	-0.01302802		2574.04	-0.00814697		3104.04	-0.00518059		3634.04	-0.0192104
454.19	0.01377487		984.22	-0.00554074		1514.21	-0.00375856		2044.24	-0.0127862		2574.24	-0.00771077		3104.24	-0.00520688		3634.24	-0.02005231
454.39	0.01250398		984.42	-0.00592898		1514.41	-0.00438051		2044.44	-0.01255659		2574.44	-0.0074394		3104.44	-0.00540709		3634.44	-0.02020923
454.59	0.01192461		984.62	-0.00527551		1514.61	-0.00448631		2044.64	-0.01293364		2574.64	-0.0068247		3104.64	-0.00599132		3634.64	-0.02102877
454.79	0.01194227		984.82	-0.0045685		1514.81	-0.00377595		2044.84	-0.01290265		2574.84	-0.00679024		3104.84	-0.00487829		3634.84	-0.02160491
454.99	0.0107903		985.02	-0.00501476		1515.01	-0.00314779		2045.04	-0.01173881		2575.04	-0.00671717		3105.04	-0.00543644		3635.04	-0.02058361
455.19	0.01075851		985.22	-0.0052349		1515.21	-0.00297391		2045.24	-0.01191357		2575.24	-0.00640263		3105.24	-0.00499052		3635.24	-0.01931489
455.39	0.01092814		985.42	-0.00552404		1515.41	-0.00280966		2045.44	-0.01176056		2575.44	-0.00610211		3105.44	-0.00433593		3635.44	-0.01847067
455.59	0.01073895		985.62	-0.00520663		1515.61	-0.00155504		2045.64	-0.01038758		2575.64	-0.00682827		3105.64	-0.00482901		3635.64	-0.01784083
455.79	0.01002945		985.82	-0.00544463		1515.81	-0.00080335		2045.84	-0.01022743		2575.84	-0.00742215		3105.84	-0.00416484		3635.84	-0.01787673
455.99	0.00964735		986.02	-0.00570195		1516.01	-0.00141676		2046.04	-0.00920688		2576.04	-0.00721311		3106.04	-0.00440601		3636.04	-0.01783946
456.19	0.01053613		986.22	-0.00519867		1516.21	-0.00203589		2046.24	-0.00877276		2576.24	-0.00813645		3106.24	-0.00571326		3636.24	-0.01885621
456.39	0.01057789		986.42	-0.00514909		1516.41	-0.00203252		2046.44	-0.00806025		2576.44	-0.00847581		3106.44	-0.00597813		3636.44	-0.01901775
456.59	0.01090098		986.62	-0.00525138		1516.61	-0.00186197		2046.64	-0.00900803		2576.64	-0.00846621		3106.64	-0.00592074		3636.64	-0.01936856
456.79	0.01080533		986.82	-0.00487669		1516.81	-0.00207579		2046.84	-0.00947981		2576.84	-0.00856548		3106.84	-0.00529702		3636.84	-0.01902635
456.99	0.01175736		987.02	-0.00614669		1517.01	-0.00274313		2047.04	-0.00879745		2577.04	-0.0087638		3107.04	-0.00501182		3637.04	-0.01996464
457.19	0.01303221		987.22	-0.0075925		1517.21	-0.00336787		2047.24	-0.00938331		2577.24	-0.00953908		3107.24	-0.00463084		3637.24	-0.01963707
457.39	0.01311137		987.42	-0.00672163		1517.41	-0.00341925		2047.44	-0.00973054		2577.44	-0.00968664		3107.44	-0.00496876		3637.44	-0.01902914
457.59	0.01308026		987.62	-0.00634799		1517.61	-0.00329736		2047.64	-0.01032451		2577.64	-0.00966054		3107.64	-0.00526861		3637.64	-0.01967709
457.79	0.01318055		987.82	-0.00667104		1517.81	-0.0042173		2047.84	-0.01008064		2577.84	-0.0098203		3107.84	-0.00534543		3637.84	-0.01947345
457.99	0.01327992		988.02	-0.00710523		1518.01	-0.0045191		2048.04	-0.01008907		2578.04	-0.00975177		3108.04	-0.00497438		3638.04	-0.01960544
458.19	0.01180051		988.22	-0.00790881		1518.21	-0.00526424		2048.24	-0.0102653		2578.24	-0.00948159		3108.24	-0.00533712		3638.24	-0.02003602
458.39	0.01051066		988.42	-0.00793993		1518.41	-0.00467092		2048.44	-0.01029601		2578.44	-0.00911351		3108.44	-0.00645987		3638.44	-0.01971168
458.59	0.01033115		988.62	-0.00748747		1518.61	-0.0047627		2048.64	-0.01086875		2578.64	-0.00853277		3108.64	-0.00728853		3638.64	-0.01977606
458.79	0.01048398		988.82	-0.00770834		1518.81	-0.00379656		2048.84	-0.01088495		2578.84	-0.00844854		3108.84	-0.00754788		3638.84	-0.0192569
458.99	0.01015093		989.02	-0.00773515		1519.01	-0.00312436		2049.04	-0.01159391		2579.04	-0.00792368		3109.04	-0.00868685		3639.04	-0.01876048
459.19	0.01031337		989.22	-0.00867306		1519.21	-0.00242463		2049.24	-0.01224923		2579.24	-0.00762126		3109.24	-0.00904689		3639.24	-0.01798038
459.39	0.0096454		989.42	-0.00839937		1519.41	-0.00167837		2049.44	-0.01166967		2579.44	-0.00768809		3109.44	-0.00973052		3639.44	-0.01735378
459.59	0.00874525		989.62	-0.00833485		1519.61	-0.00081185		2049.64	-0.0112229		2579.64	-0.0075879		3109.64	-0.01033801		3639.64	-0.01817703
459.79	0.00895896		989.82	-0.00872496		1519.81	-0.00113624		2049.84	-0.01146133		2579.84	-0.00703866		3109.84	-0.01048373		3639.84	-0.01856079
459.99	0.0093779		990.02	-0.00827882		1520.01	-0.00138901		2050.04	-0.01116403		2580.04	-0.00641552		3110.04	-0.0120361		3640.04	-0.01856227
460.19	0.00918478		990.22	-0.00747888		1520.21	-0.00072119		2050.24	-0.01127596		2580.24	-0.00627169		3110.24	-0.01145739		3640.24	-0.01789248
460.39	0.00897137		990.42	-0.00728967		1520.41	-0.00094252		2050.44	-0.01153143		2580.44	-0.00569436		3110.44	-0.01038605		3640.44	-0.01797128
460.59	0.00908514		990.62	-0.00726727		1520.61	-0.00132404		2050.64	-0.01257407		2580.64	-0.00552947		3110.64	-0.00947558		3640.64	-0.01774215
460.79	0.01006684		990.82	-0.00618435		1520.81	-0.0021878		2050.84	-0.01243323		2580.84	-0.00659437		3110.84	-0.00848274		3640.84	-0.01844203
460.99	0.0107854		991.02	-0.00648871		1521.01	-0.00257674		2051.04	-0.01168445		2581.04	-0.00739274		3111.04	-0.00872356		3641.04	-0.01845596
461.19	0.0116202		991.22	-0.00581617		1521.21	-0.002513		2051.24	-0.0122926		2581.24	-0.00943068		3111.24	-0.00784801		3641.24	-0.01704502
461.39	0.01175195		991.42	-0.00490987		1521.41	-0.00270866		2051.44	-0.01244696		2581.44	-0.01062963		3111.44	-0.00704291		3641.44	-0.01658834
461.59	0.01168224		991.62	-0.00488201		1521.61	-0.00331969		2051.64	-0.01211908		2581.64	-0.01152574		3111.64	-0.00557474		3641.64	-0.01707115
461.79	0.01182996		991.82	-0.00555083		1521.81	-0.00359685		2051.84	-0.01111175		2581.84	-0.01223205		3111.84	-0.00471672		3641.84	-0.0168887
461.99	0.01261936		992.02	-0.00488186		1522.01	-0.00386633		2052.04	-0.01124183		2582.04	-0.01277555		3112.04	-0.00406449		3642.04	-0.01795237
462.19	0.0129448		992.22	-0.00473276		1522.21	-0.00422705		2052.24	-0.01230759		2582.24	-0.01316037		3112.24	-0.0045892		3642.24	-0.01837401
462.39	0.01269417		992.42	-0.00512629		1522.41	-0.00522893		2052.44	-0.01285483		2582.44	-0.01343525		3112.44	-0.00447203		3642.44	-0.01854662
462.59	0.01359301		992.62	-0.00550007		1522.61	-0.00540867		2052.64	-0.0133715		2582.64	-0.01364492		3112.64	-0.00463884		3642.64	-0.01893242
462.79	0.01374566		992.82	-0.00631783		1522.81	-0.00466719		2052.84	-0.01301844		2582.84	-0.01345421		3112.84	-0.00501559		3642.84	-0.01959957
462.99	0.01325759		993.02	-0.00567383		1523.01	-0.0043546		2053.04	-0.0133567		2583.04	-0.01381624		3113.04	-0.00596767		3643.04	-0.02022041
463.19	0.01243807		993.22	-0.00618833		1523.21	-0.00433195		2053.24	-0.01297898		2583.24	-0.01405877		3113.24	-0.00596719		3643.24	-0.02068658
463.39	0.0115663		993.42	-0.0054848		1523.41	-0.00399844		2053.44	-0.01221258		2583.44	-0.01370993		3113.44	-0.00657936		3643.44	-0.02100577
463.59	0.01158559		993.62	-0.00609748		1523.61	-0.00364506		2053.64	-0.01163486		2583.64	-0.01283017		3113.64	-0.00729862		3643.64	-0.02200782
463.79	0.01141531		993.82	-0.00686247		1523.81	-0.00318787		2053.84	-0.01167537		2583.84	-0.01218465		3113.84	-0.0074597		3643.84	-0.02179972
463.99	0.01030335		994.02	-0.00674295		1524.01	-0.00246461		2054.04	-0.01184934		2584.04	-0.01164955		3114.04	-0.00751462		3644.04	-0.0213331
464.19	0.01009079		994.22	-0.00757338		1524.21	-0.00209478		2054.24	-0.01245312		2584.24	-0.01061567		3114.24	-0.00638928		3644.24	-0.02074111
464.39	0.01038364		994.42	-0.00793026		1524.41	-0.00226909		2054.44	-0.01282577		2584.44	-0.00963313		3114.44	-0.00727962		3644.44	-0.02076068
464.59	0.01080769		994.62	-0.00825738		1524.61	-0.00142699		2054.64	-0.01228357		2584.64	-0.00961349		3114.64	-0.00731185		3644.64	-0.02105226
464.79	0.01137337		994.82	-0.0080092		1524.81	-0.00093324		2054.84	-0.01189336		2584.84	-0.01017139		3114.84	-0.00740651		3644.84	-0.02099102
464.99	0.01080522		995.02	-0.00857708		1525.01	-0.00132857		2055.04	-0.01179065		2585.04	-0.0098072		3115.04	-0.00695209		3645.04	-0.02062508
465.19	0.01100477		995.22	-0.00781903		1525.21	-0.00110056		2055.24	-0.01172621		2585.24	-0.00987124		3115.24	-0.00661822		3645.24	-0.01943357
465.39	0.01091641		995.42	-0.00797864		1525.41	-0.00133524		2055.44	-0.01130435		2585.44	-0.01056885		3115.44	-0.00607884		3645.44	-0.01885949
465.59	0.011225		995.62	-0.00814051		1525.61	-0.00101711		2055.64	-0.01092607		2585.64	-0.01056043		3115.64	-0.00563821		3645.64	-0.01892375
465.79	0.01142931		995.82	-0.00891333		1525.81	-0.00110192		2055.84	-0.01015141		2585.84	-0.01061451		3115.84	-0.00572068		3645.84	-0.01901309
465.99	0.01114011		996.02	-0.00892704		1526.01	-0.00183675		2056.04	-0.01039768		2586.04	-0.01008436		3116.04	-0.0056133		3646.04	-0.01925201
466.19	0.01201382		996.22	-0.00954537		1526.21	-0.0020921		2056.24	-0.0113092		2586.24	-0.00955725		3116.24	-0.00577851		3646.24	-0.01846086
466.39	0.01126953		996.42	-0.01011336		1526.41	-0.00272317		2056.44	-0.01061597		2586.44	-0.00942868		3116.44	-0.00556153		3646.44	-0.01860051
466.59	0.01156929		996.62	-0.00949962		1526.61	-0.00251417		2056.64	-0.0106385		2586.64	-0.0093796		3116.64	-0.00612797		3646.64	-0.01903798
466.79	0.01147771		996.82	-0.00965381		1526.81	-0.00291935		2056.84	-0.01110261		2586.84	-0.01005374		3116.84	-0.00625596		3646.84	-0.01976995
466.99	0.01154283		997.02	-0.00861998		1527.01	-0.00358161		2057.04	-0.01194932		2587.04	-0.01078319		3117.04	-0.00735292		3647.04	-0.02035644
467.19	0.01179505		997.22	-0.00902468		1527.21	-0.00474552		2057.24	-0.01246721		2587.24	-0.01152371		3117.24	-0.00716166		3647.24	-0.0202955
467.39	0.01205984		997.42	-0.00882021		1527.41	-0.00460682		2057.44	-0.01262201		2587.44	-0.01131718		3117.44	-0.00834543		3647.44	-0.02004209
467.59	0.01241292		997.62	-0.00868005		1527.61	-0.00415905		2057.64	-0.01333379		2587.64	-0.01141578		3117.64	-0.00806801		3647.64	-0.02070961
467.79	0.01162363		997.82	-0.00934088		1527.81	-0.00435825		2057.84	-0.01438262		2587.84	-0.01139619		3117.84	-0.00700754		3647.84	-0.02117884
467.99	0.01088204		998.02	-0.00854794		1528.01	-0.00483271		2058.04	-0.01433035		2588.04	-0.01193599		3118.04	-0.00711297		3648.04	-0.02049792
468.19	0.01263059		998.22	-0.00788274		1528.21	-0.00560326		2058.24	-0.01389171		2588.24	-0.01231474		3118.24	-0.00729915		3648.24	-0.02005361
468.39	0.01276661		998.42	-0.00758365		1528.41	-0.00600762		2058.44	-0.0141217		2588.44	-0.01234239		3118.44	-0.00774812		3648.44	-0.01961074
468.59	0.01326182		998.62	-0.00794677		1528.61	-0.00611537		2058.64	-0.01351527		2588.64	-0.01329333		3118.64	-0.00766207		3648.64	-0.01990361
468.79	0.01269606		998.82	-0.00766347		1528.81	-0.00642273		2058.84	-0.01454797		2588.84	-0.01328852		3118.84	-0.00672778		3648.84	-0.01966357
468.99	0.0119513		999.02	-0.00678405		1529.01	-0.00572452		2059.04	-0.01501834		2589.04	-0.01319317		3119.04	-0.0062758		3649.04	-0.02027883
469.19	0.01176653		999.22	-0.00628577		1529.21	-0.00542415		2059.24	-0.0146518		2589.24	-0.01397473		3119.24	-0.006465		3649.24	-0.01987953
469.39	0.01165121		999.42	-0.00704908		1529.41	-0.00554644		2059.44	-0.01402392		2589.44	-0.01537001		3119.44	-0.00606383		3649.44	-0.01981109
469.59	0.01180934		999.62	-0.00713811		1529.61	-0.00519954		2059.64	-0.01344765		2589.64	-0.01532361		3119.64	-0.00535219		3649.64	-0.01991412
469.79	0.01095266		999.82	-0.00710446		1529.81	-0.00525164		2059.84	-0.01307397		2589.84	-0.01547114		3119.84	-0.00473904		3649.84	-0.01951465
469.99	0.01023451		1000.02	-0.00634957		1530.01	-0.00510923		2060.04	-0.01300997		2590.04	-0.01521189		3120.04	-0.00391847		3650.04	-0.01955601
470.19	0.01042813		1000.22	-0.00636478		1530.21	-0.00552641		2060.24	-0.01311329		2590.24	-0.01513123		3120.24	-0.00406987		3650.24	-0.01877489
470.39	0.00996376		1000.42	-0.00633472		1530.41	-0.00598094		2060.44	-0.01186458		2590.44	-0.01524676		3120.44	-0.0038738		3650.44	-0.01911337
470.59	0.01047062		1000.62	-0.00645587		1530.61	-0.00553468		2060.64	-0.01223396		2590.64	-0.01507478		3120.64	-0.00405827		3650.64	-0.0195125
470.79	0.01066564		1000.82	-0.00667092		1530.81	-0.0059359		2060.84	-0.01268975		2590.84	-0.01498943		3120.84	-0.00474091		3650.84	-0.01935054
470.99	0.01059976		1001.02	-0.00665319		1531.01	-0.00610467		2061.04	-0.01331924		2591.04	-0.01425615		3121.04	-0.0061681		3651.04	-0.01868041
471.19	0.00978882		1001.22	-0.00750573		1531.21	-0.00632655		2061.24	-0.01288495		2591.24	-0.01443128		3121.24	-0.00726876		3651.24	-0.01762355
471.39	0.01003972		1001.42	-0.00789362		1531.41	-0.00538976		2061.44	-0.01317254		2591.44	-0.01381771		3121.44	-0.00843549		3651.44	-0.01811872
471.59	0.01069682		1001.62	-0.00824708		1531.61	-0.0062537		2061.64	-0.01263257		2591.64	-0.01442682		3121.64	-0.00854226		3651.64	-0.01804653
471.79	0.01011519		1001.82	-0.00854102		1531.81	-0.00672968		2061.84	-0.01245061		2591.84	-0.01400244		3121.84	-0.00873076		3651.84	-0.01884197
471.99	0.01024901		1002.02	-0.00826025		1532.01	-0.00702651		2062.04	-0.0124733		2592.04	-0.01409349		3122.04	-0.00983351		3652.04	-0.01802991
472.19	0.01192324		1002.22	-0.00821768		1532.21	-0.00747112		2062.24	-0.0118542		2592.24	-0.01356172		3122.24	-0.01025763		3652.24	-0.0180862
472.39	0.01139728		1002.42	-0.0093181		1532.41	-0.00661146		2062.44	-0.01282665		2592.44	-0.01250085		3122.44	-0.01095093		3652.44	-0.0181796
472.59	0.0121041		1002.62	-0.00946151		1532.61	-0.00551092		2062.64	-0.01278765		2592.64	-0.01176569		3122.64	-0.01192369		3652.64	-0.01871891
472.79	0.0116871		1002.82	-0.00977643		1532.81	-0.00515252		2062.84	-0.01322366		2592.84	-0.01097324		3122.84	-0.01094713		3652.84	-0.01933814
472.99	0.01235715		1003.02	-0.00966092		1533.01	-0.00464996		2063.04	-0.01294282		2593.04	-0.0112357		3123.04	-0.0115269		3653.04	-0.020109
473.19	0.01259006		1003.22	-0.00970384		1533.21	-0.00552244		2063.24	-0.01195637		2593.24	-0.01144865		3123.24	-0.01174829		3653.24	-0.02032109
473.39	0.01267869		1003.42	-0.01026709		1533.41	-0.00513144		2063.44	-0.01161933		2593.44	-0.01196599		3123.44	-0.0109344		3653.44	-0.02007129
473.59	0.01324752		1003.62	-0.00933765		1533.61	-0.00472914		2063.64	-0.01179277		2593.64	-0.01211952		3123.64	-0.01038611		3653.64	-0.01991791
473.79	0.012012		1003.82	-0.00867363		1533.81	-0.00456524		2063.84	-0.01170502		2593.84	-0.01254153		3123.84	-0.00983733		3653.84	-0.0193864
473.99	0.01207783		1004.02	-0.00810671		1534.01	-0.00440852		2064.04	-0.01125153		2594.04	-0.0119065		3124.04	-0.00973745		3654.04	-0.01948727
474.19	0.01194278		1004.22	-0.00784724		1534.21	-0.0045674		2064.24	-0.01147809		2594.24	-0.01156668		3124.24	-0.00988581		3654.24	-0.01890662
474.39	0.01105595		1004.42	-0.00734062		1534.41	-0.00410807		2064.44	-0.01099101		2594.44	-0.01193955		3124.44	-0.00952312		3654.44	-0.01939774
474.59	0.01060926		1004.62	-0.00735328		1534.61	-0.00355512		2064.64	-0.01141815		2594.64	-0.01212754		3124.64	-0.00945326		3654.64	-0.01917543
474.79	0.00936704		1004.82	-0.00757147		1534.81	-0.00401464		2064.84	-0.01109331		2594.84	-0.01186998		3124.84	-0.00954603		3654.84	-0.01875764
474.99	0.00968391		1005.02	-0.00840322		1535.01	-0.0043027		2065.04	-0.0116021		2595.04	-0.01206642		3125.04	-0.00989211		3655.04	-0.01797978
475.19	0.00897986		1005.22	-0.00837093		1535.21	-0.00463756		2065.24	-0.01080975		2595.24	-0.01238282		3125.24	-0.0108462		3655.24	-0.01781663
475.39	0.00950815		1005.42	-0.00832482		1535.41	-0.00562109		2065.44	-0.01058889		2595.44	-0.01248398		3125.44	-0.01031266		3655.44	-0.0181755
475.59	0.00939914		1005.62	-0.00767106		1535.61	-0.00664566		2065.64	-0.01030652		2595.64	-0.01309703		3125.64	-0.0092795		3655.64	-0.0185723
475.79	0.00815951		1005.82	-0.00708007		1535.81	-0.00681232		2065.84	-0.01115269		2595.84	-0.01210334		3125.84	-0.00822608		3655.84	-0.02013104
475.99	0.00887766		1006.02	-0.0066487		1536.01	-0.00673036		2066.04	-0.01173617		2596.04	-0.01162571		3126.04	-0.00835704		3656.04	-0.01945726
476.19	0.00868674		1006.22	-0.00646819		1536.21	-0.00649889		2066.24	-0.01164007		2596.24	-0.01160137		3126.24	-0.0079474		3656.24	-0.02035062
476.39	0.00837245		1006.42	-0.00725646		1536.41	-0.00557003		2066.44	-0.0125073		2596.44	-0.01134398		3126.44	-0.00828564		3656.44	-0.02038947
476.59	0.00881695		1006.62	-0.00774862		1536.61	-0.00647172		2066.64	-0.01187709		2596.64	-0.01171851		3126.64	-0.00766891		3656.64	-0.02079045
476.79	0.00931258		1006.82	-0.00834365		1536.81	-0.00745283		2066.84	-0.01200484		2596.84	-0.01201018		3126.84	-0.00726177		3656.84	-0.02096143
476.99	0.00962243		1007.02	-0.0085888		1537.01	-0.00775801		2067.04	-0.01236719		2597.04	-0.01247465		3127.04	-0.0088864		3657.04	-0.02161112
477.19	0.00922166		1007.22	-0.00852934		1537.21	-0.00748029		2067.24	-0.01200473		2597.24	-0.01308433		3127.24	-0.00927082		3657.24	-0.02136517
477.39	0.00924066		1007.42	-0.00862392		1537.41	-0.00742657		2067.44	-0.01275323		2597.44	-0.01386879		3127.44	-0.00926932		3657.44	-0.02144031
477.59	0.00972198		1007.62	-0.00796191		1537.61	-0.0076874		2067.64	-0.01290518		2597.64	-0.01390076		3127.64	-0.01003384		3657.64	-0.02168847
477.79	0.00881102		1007.82	-0.00820153		1537.81	-0.00702101		2067.84	-0.01273142		2597.84	-0.01424073		3127.84	-0.0104971		3657.84	-0.02109649
477.99	0.00932331		1008.02	-0.00821513		1538.01	-0.00668125		2068.04	-0.01293327		2598.04	-0.01434001		3128.04	-0.01107321		3658.04	-0.02162979
478.19	0.00939252		1008.22	-0.00865739		1538.21	-0.00601912		2068.24	-0.01262101		2598.24	-0.01496562		3128.24	-0.01154117		3658.24	-0.0208465
478.39	0.00860936		1008.42	-0.00907829		1538.41	-0.00561852		2068.44	-0.0122848		2598.44	-0.01569429		3128.44	-0.01166628		3658.44	-0.02048655
478.59	0.00879236		1008.62	-0.00998596		1538.61	-0.00499898		2068.64	-0.0114223		2598.64	-0.01599279		3128.64	-0.01174743		3658.64	-0.02027053
478.79	0.00834224		1008.82	-0.0101877		1538.81	-0.0049483		2068.84	-0.01159435		2598.84	-0.01482583		3128.84	-0.01154726		3658.84	-0.02074693
478.99	0.00902899		1009.02	-0.00995794		1539.01	-0.00409503		2069.04	-0.01158427		2599.04	-0.01465668		3129.04	-0.01115666		3659.04	-0.02049277
479.19	0.00815054		1009.22	-0.00887067		1539.21	-0.00403251		2069.24	-0.01098024		2599.24	-0.01436175		3129.24	-0.01047805		3659.24	-0.02068009
479.39	0.00809051		1009.42	-0.00810403		1539.41	-0.00419973		2069.44	-0.01041418		2599.44	-0.01376753		3129.44	-0.0089937		3659.44	-0.02152504
479.59	0.00872251		1009.62	-0.00743045		1539.61	-0.00291483		2069.64	-0.01034355		2599.64	-0.01364483		3129.64	-0.00849431		3659.64	-0.02169824
479.79	0.00826074		1009.82	-0.00730749		1539.81	-0.00221618		2069.84	-0.01049304		2599.84	-0.01270858		3129.84	-0.00727501		3659.84	-0.02232905
479.99	0.00819929		1010.02	-0.00672475		1540.01	-0.0018309		2070.04	-0.01098579		2600.04	-0.01262953		3130.04	-0.00693761		3660.04	-0.02225017
480.19	0.00727154		1010.22	-0.00676786		1540.21	-0.00136		2070.24	-0.01101487		2600.24	-0.01344278		3130.24	-0.00584851		3660.24	-0.02274521
480.39	0.00794355		1010.42	-0.00784784		1540.41	-0.00217493		2070.44	-0.01078325		2600.44	-0.01328584		3130.44	-0.00632456		3660.44	-0.02272
480.59	0.00781316		1010.62	-0.00810815		1540.61	-0.00316967		2070.64	-0.01055608		2600.64	-0.01373474		3130.64	-0.00611626		3660.64	-0.02266723
480.79	0.00844888		1010.82	-0.00759337		1540.81	-0.00400995		2070.84	-0.01092551		2600.84	-0.01362037		3130.84	-0.00645964		3660.84	-0.02259409
480.99	0.00816589		1011.02	-0.00854794		1541.01	-0.00429205		2071.04	-0.01159676		2601.04	-0.01377082		3131.04	-0.00756415		3661.04	-0.02244842
481.19	0.00886354		1011.22	-0.00870449		1541.21	-0.00381414		2071.24	-0.01168836		2601.24	-0.01361589		3131.24	-0.00734769		3661.24	-0.02212399
481.39	0.00994234		1011.42	-0.00903105		1541.41	-0.00401352		2071.44	-0.01190285		2601.44	-0.01319944		3131.44	-0.00711218		3661.44	-0.0218143
481.59	0.01015062		1011.62	-0.00935903		1541.61	-0.00459505		2071.64	-0.0123784		2601.64	-0.01265742		3131.64	-0.00767205		3661.64	-0.02179304
481.79	0.0097701		1011.82	-0.00968484		1541.81	-0.00526754		2071.84	-0.01257697		2601.84	-0.01229056		3131.84	-0.00852748		3661.84	-0.02043645
481.99	0.00991527		1012.02	-0.01032929		1542.01	-0.00570249		2072.04	-0.01283955		2602.04	-0.01210024		3132.04	-0.00818938		3662.04	-0.02010156
482.19	0.00956379		1012.22	-0.01100567		1542.21	-0.00587847		2072.24	-0.01268927		2602.24	-0.01173234		3132.24	-0.00890545		3662.24	-0.01837455
482.39	0.0082632		1012.42	-0.01048719		1542.41	-0.00560944		2072.44	-0.01323832		2602.44	-0.01203368		3132.44	-0.00956275		3662.44	-0.01850494
482.59	0.00708317		1012.62	-0.0107894		1542.61	-0.00555252		2072.64	-0.01385641		2602.64	-0.01195643		3132.64	-0.00955189		3662.64	-0.01893174
482.79	0.00726235		1012.82	-0.01044129		1542.81	-0.00538608		2072.84	-0.0151917		2602.84	-0.01174645		3132.84	-0.01009383		3662.84	-0.01878099
482.99	0.00764673		1013.02	-0.00979469		1543.01	-0.00410757		2073.04	-0.01479517		2603.04	-0.01177804		3133.04	-0.01034194		3663.04	-0.01895478
483.19	0.00769198		1013.22	-0.00939765		1543.21	-0.00440678		2073.24	-0.01486492		2603.24	-0.0111532		3133.24	-0.01090422		3663.24	-0.01941097
483.39	0.00786092		1013.42	-0.00848373		1543.41	-0.00365315		2073.44	-0.01413583		2603.44	-0.01041342		3133.44	-0.01174134		3663.44	-0.02007705
483.59	0.00860658		1013.62	-0.00887614		1543.61	-0.00267118		2073.64	-0.01441976		2603.64	-0.01128343		3133.64	-0.01272125		3663.64	-0.02004381
483.79	0.00810355		1013.82	-0.00939812		1543.81	-0.0032556		2073.84	-0.014839		2603.84	-0.0106157		3133.84	-0.0120901		3663.84	-0.02053489
483.99	0.00692236		1014.02	-0.00910297		1544.01	-0.0025899		2074.04	-0.01500138		2604.04	-0.0103953		3134.04	-0.01257069		3664.04	-0.02072278
484.19	0.00797865		1014.22	-0.00888541		1544.21	-0.00192655		2074.24	-0.0147589		2604.24	-0.01090939		3134.24	-0.01244165		3664.24	-0.02045516
484.39	0.00896817		1014.42	-0.00983045		1544.41	-0.00262859		2074.44	-0.01440624		2604.44	-0.01057854		3134.44	-0.01353869		3664.44	-0.02060059
484.59	0.00883338		1014.62	-0.009631		1544.61	-0.00283828		2074.64	-0.01474337		2604.64	-0.01091033		3134.64	-0.01297827		3664.64	-0.02105686
484.79	0.00965159		1014.82	-0.01001938		1544.81	-0.00262931		2074.84	-0.01399852		2604.84	-0.01066413		3134.84	-0.01254865		3664.84	-0.02137557
484.99	0.00950074		1015.02	-0.01137961		1545.01	-0.00125357		2075.04	-0.01456188		2605.04	-0.0104506		3135.04	-0.01243356		3665.04	-0.02164387
485.19	0.00952945		1015.22	-0.01102824		1545.21	-0.00074328		2075.24	-0.0147471		2605.24	-0.01010865		3135.24	-0.01137338		3665.24	-0.0229512
485.39	0.00961079		1015.42	-0.01067589		1545.41	-0.00121938		2075.44	-0.01501513		2605.44	-0.00970109		3135.44	-0.01049284		3665.44	-0.02349145
485.59	0.0088115		1015.62	-0.01053647		1545.61	-0.00224927		2075.64	-0.01504138		2605.64	-0.0094267		3135.64	-0.01008729		3665.64	-0.02330356
485.79	0.00807929		1015.82	-0.01028345		1545.81	-0.00290577		2075.84	-0.01470533		2605.84	-0.0095727		3135.84	-0.00916632		3665.84	-0.0224503
485.99	0.00773633		1016.02	-0.01010494		1546.01	-0.00326566		2076.04	-0.01477792		2606.04	-0.01034696		3136.04	-0.00841951		3666.04	-0.02244349
486.19	0.00742171		1016.22	-0.0098527		1546.21	-0.00361578		2076.24	-0.01532119		2606.24	-0.01106839		3136.24	-0.00817903		3666.24	-0.02210304
486.39	0.00734835		1016.42	-0.00901817		1546.41	-0.00417977		2076.44	-0.01533039		2606.44	-0.01242344		3136.44	-0.00766513		3666.44	-0.02222122
486.59	0.00816074		1016.62	-0.00905756		1546.61	-0.00488477		2076.64	-0.01522268		2606.64	-0.01278325		3136.64	-0.0073427		3666.64	-0.02200106
486.79	0.00888402		1016.82	-0.00876581		1546.81	-0.00571059		2076.84	-0.01416814		2606.84	-0.01365966		3136.84	-0.00763694		3666.84	-0.02201225
486.99	0.00837786		1017.02	-0.00800507		1547.01	-0.00651551		2077.04	-0.01331467		2607.04	-0.0134372		3137.04	-0.00731156		3667.04	-0.02281274
487.19	0.00825539		1017.22	-0.00865428		1547.21	-0.00716051		2077.24	-0.0137441		2607.24	-0.01415305		3137.24	-0.00730012		3667.24	-0.02254537
487.39	0.00781346		1017.42	-0.0082495		1547.41	-0.00707028		2077.44	-0.01277018		2607.44	-0.01406162		3137.44	-0.00659074		3667.44	-0.02186107
487.59	0.00811253		1017.62	-0.00896318		1547.61	-0.00751272		2077.64	-0.0125599		2607.64	-0.01503428		3137.64	-0.00717414		3667.64	-0.02202385
487.79	0.00718409		1017.82	-0.00849203		1547.81	-0.00721962		2077.84	-0.01267742		2607.84	-0.01422218		3137.84	-0.00636496		3667.84	-0.02181447
487.99	0.00692806		1018.02	-0.00836246		1548.01	-0.00654461		2078.04	-0.01225095		2608.04	-0.01491661		3138.04	-0.00676778		3668.04	-0.02132766
488.19	0.00801719		1018.22	-0.00841298		1548.21	-0.00617829		2078.24	-0.01179741		2608.24	-0.01490694		3138.24	-0.0065403		3668.24	-0.02114528
488.39	0.00732269		1018.42	-0.00846634		1548.41	-0.00609193		2078.44	-0.01101519		2608.44	-0.01484281		3138.44	-0.00744726		3668.44	-0.02162996
488.59	0.0064234		1018.62	-0.00874084		1548.61	-0.0055982		2078.64	-0.01108224		2608.64	-0.01519193		3138.64	-0.00701054		3668.64	-0.02209097
488.79	0.00676159		1018.82	-0.00891189		1548.81	-0.00422685		2078.84	-0.01090875		2608.84	-0.01418712		3138.84	-0.00604464		3668.84	-0.02234632
488.99	0.00516693		1019.02	-0.00907236		1549.01	-0.00287253		2079.04	-0.01150983		2609.04	-0.01471633		3139.04	-0.00567288		3669.04	-0.02382249
489.19	0.00576214		1019.22	-0.00897486		1549.21	-0.00258643		2079.24	-0.01183386		2609.24	-0.01426314		3139.24	-0.00584913		3669.24	-0.02486084
489.39	0.0060117		1019.42	-0.00958258		1549.41	-0.00212201		2079.44	-0.01125185		2609.44	-0.0145986		3139.44	-0.00630726		3669.44	-0.02452046
489.59	0.00594047		1019.62	-0.00971224		1549.61	-0.00200075		2079.64	-0.01143253		2609.64	-0.01463822		3139.64	-0.00681814		3669.64	-0.02344376
489.79	0.00670993		1019.82	-0.00924613		1549.81	-0.00170636		2079.84	-0.01143586		2609.84	-0.01537529		3139.84	-0.00757646		3669.84	-0.02374125
489.99	0.00803408		1020.02	-0.00959948		1550.01	-0.00277222		2080.04	-0.01222907		2610.04	-0.0150749		3140.04	-0.00806547		3670.04	-0.02373115
490.19	0.00901333		1020.22	-0.00959757		1550.21	-0.00315846		2080.24	-0.01295298		2610.24	-0.01531053		3140.24	-0.00793303		3670.24	-0.0235527
490.39	0.01013344		1020.42	-0.00946131		1550.41	-0.00413176		2080.44	-0.01266295		2610.44	-0.01512423		3140.44	-0.00754424		3670.44	-0.02391531
490.59	0.01029031		1020.62	-0.0096062		1550.61	-0.00408537		2080.64	-0.01299472		2610.64	-0.01519686		3140.64	-0.0079382		3670.64	-0.02436319
490.79	0.00964049		1020.82	-0.00990179		1550.81	-0.00478427		2080.84	-0.01306563		2610.84	-0.01598915		3140.84	-0.0085043		3670.84	-0.02444395
490.99	0.00916355		1021.02	-0.00935135		1551.01	-0.00583445		2081.04	-0.01377904		2611.04	-0.01612693		3141.04	-0.00834782		3671.04	-0.02480381
491.19	0.00914401		1021.22	-0.01020594		1551.21	-0.00651239		2081.24	-0.01354283		2611.24	-0.01670602		3141.24	-0.00801619		3671.24	-0.02440797
491.39	0.00880845		1021.42	-0.00967762		1551.41	-0.00697711		2081.44	-0.01193987		2611.44	-0.01596247		3141.44	-0.00736996		3671.44	-0.02292234
491.59	0.00808316		1021.62	-0.00979467		1551.61	-0.00707984		2081.64	-0.01338884		2611.64	-0.01584673		3141.64	-0.00761117		3671.64	-0.02352932
491.79	0.00854125		1021.82	-0.00873839		1551.81	-0.0072136		2081.84	-0.01367913		2611.84	-0.01543459		3141.84	-0.00746333		3671.84	-0.02288099
491.99	0.00882695		1022.02	-0.00927098		1552.01	-0.00788087		2082.04	-0.01327784		2612.04	-0.01500654		3142.04	-0.00800325		3672.04	-0.02199536
492.19	0.00908212		1022.22	-0.00904204		1552.21	-0.0075254		2082.24	-0.01273345		2612.24	-0.01431499		3142.24	-0.00796718		3672.24	-0.02274297
492.39	0.00859698		1022.42	-0.00865018		1552.41	-0.00766242		2082.44	-0.01234511		2612.44	-0.01395193		3142.44	-0.0077885		3672.44	-0.02252795
492.59	0.00849199		1022.62	-0.00896252		1552.61	-0.00713095		2082.64	-0.0126506		2612.64	-0.01303146		3142.64	-0.00772939		3672.64	-0.0224263
492.79	0.00804788		1022.82	-0.00893639		1552.81	-0.0064233		2082.84	-0.01250578		2612.84	-0.01189227		3142.84	-0.00719709		3672.84	-0.02352823
492.99	0.00729396		1023.02	-0.0087096		1553.01	-0.00597546		2083.04	-0.01247767		2613.04	-0.01227768		3143.04	-0.00788654		3673.04	-0.02268765
493.19	0.00770693		1023.22	-0.00970883		1553.21	-0.00598962		2083.24	-0.01212202		2613.24	-0.01244473		3143.24	-0.00789878		3673.24	-0.02232519
493.39	0.00644258		1023.42	-0.00969587		1553.41	-0.00596537		2083.44	-0.01217506		2613.44	-0.01246975		3143.44	-0.00866167		3673.44	-0.02217903
493.59	0.00607668		1023.62	-0.00997396		1553.61	-0.00656365		2083.64	-0.01303556		2613.64	-0.01208917		3143.64	-0.00990866		3673.64	-0.02183447
493.79	0.00606159		1023.82	-0.01013418		1553.81	-0.00662219		2083.84	-0.01291355		2613.84	-0.01239596		3143.84	-0.01096064		3673.84	-0.02206545
493.99	0.005733		1024.02	-0.00982688		1554.01	-0.00754897		2084.04	-0.01384939		2614.04	-0.01257455		3144.04	-0.01142314		3674.04	-0.02216697
494.19	0.00456383		1024.22	-0.00967583		1554.21	-0.00755118		2084.24	-0.01448028		2614.24	-0.0124261		3144.24	-0.01223008		3674.24	-0.02267869
494.39	0.00392903		1024.42	-0.01001369		1554.41	-0.00760269		2084.44	-0.01455991		2614.44	-0.01342524		3144.44	-0.01219323		3674.44	-0.02388846
494.59	0.00282983		1024.62	-0.01016389		1554.61	-0.00688337		2084.64	-0.01500844		2614.64	-0.01445309		3144.64	-0.0132669		3674.64	-0.02347712
494.79	0.00195748		1024.82	-0.01028009		1554.81	-0.00727563		2084.84	-0.01489626		2614.84	-0.01469094		3144.84	-0.01393348		3674.84	-0.02303256
494.99	0.00159035		1025.02	-0.01017584		1555.01	-0.00820611		2085.04	-0.01455004		2615.04	-0.01530736		3145.04	-0.01262432		3675.04	-0.02327713
495.19	0.00157489		1025.22	-0.01096478		1555.21	-0.00774417		2085.24	-0.01346988		2615.24	-0.01497379		3145.24	-0.01169584		3675.24	-0.02324745
495.39	0.00117284		1025.42	-0.01159155		1555.41	-0.00661407		2085.44	-0.01364296		2615.44	-0.01370804		3145.44	-0.01081349		3675.44	-0.02249639
495.59	0.00112277		1025.62	-0.01210503		1555.61	-0.0058772		2085.64	-0.01426963		2615.64	-0.01366696		3145.64	-0.01011456		3675.64	-0.02358955
495.79	0.00271365		1025.82	-0.01218411		1555.81	-0.00639622		2085.84	-0.0136563		2615.84	-0.01362473		3145.84	-0.01021185		3675.84	-0.02381496
495.99	0.00257692		1026.02	-0.01282184		1556.01	-0.00567631		2086.04	-0.01333084		2616.04	-0.01334433		3146.04	-0.00938577		3676.04	-0.0241052
496.19	0.00319364		1026.22	-0.01281106		1556.21	-0.00572617		2086.24	-0.01324531		2616.24	-0.01336239		3146.24	-0.00897547		3676.24	-0.02350986
496.39	0.0031167		1026.42	-0.01254746		1556.41	-0.0054151		2086.44	-0.01317005		2616.44	-0.01269688		3146.44	-0.00787878		3676.44	-0.02240446
496.59	0.00424537		1026.62	-0.01203434		1556.61	-0.00471284		2086.64	-0.01306691		2616.64	-0.01256803		3146.64	-0.00817898		3676.64	-0.02214967
496.79	0.00435998		1026.82	-0.01144616		1556.81	-0.00471749		2086.84	-0.01307426		2616.84	-0.01297119		3146.84	-0.00708574		3676.84	-0.02212003
496.99	0.00560569		1027.02	-0.01122861		1557.01	-0.00519352		2087.04	-0.01213431		2617.04	-0.01385926		3147.04	-0.00688722		3677.04	-0.02070637
497.19	0.00525817		1027.22	-0.0117652		1557.21	-0.0053573		2087.24	-0.01208024		2617.24	-0.01445834		3147.24	-0.0066355		3677.24	-0.02142108
497.39	0.00459197		1027.42	-0.01141736		1557.41	-0.00514672		2087.44	-0.01269036		2617.44	-0.01328294		3147.44	-0.00751777		3677.44	-0.02117964
497.59	0.00548129		1027.62	-0.01190399		1557.61	-0.00549939		2087.64	-0.0133813		2617.64	-0.0133899		3147.64	-0.00796913		3677.64	-0.0207497
497.79	0.00534569		1027.82	-0.01092791		1557.81	-0.00535412		2087.84	-0.01352607		2617.84	-0.01243007		3147.84	-0.00820004		3677.84	-0.02090742
497.99	0.00515339		1028.02	-0.0105482		1558.01	-0.00562207		2088.04	-0.01343507		2618.04	-0.01152716		3148.04	-0.0082279		3678.04	-0.02140193
498.19	0.00459385		1028.22	-0.01054667		1558.21	-0.00545717		2088.24	-0.01400088		2618.24	-0.01158171		3148.24	-0.00804262		3678.24	-0.0219849
498.39	0.00463188		1028.42	-0.01029406		1558.41	-0.00525986		2088.44	-0.01370586		2618.44	-0.01258992		3148.44	-0.00785692		3678.44	-0.02218324
498.59	0.00419326		1028.62	-0.01015867		1558.61	-0.00560115		2088.64	-0.01405763		2618.64	-0.0116106		3148.64	-0.00807194		3678.64	-0.02216802
498.79	0.00366219		1028.82	-0.01058368		1558.81	-0.00520109		2088.84	-0.01387466		2618.84	-0.01151707		3148.84	-0.00768799		3678.84	-0.0223106
498.99	0.00354039		1029.02	-0.01084736		1559.01	-0.00498323		2089.04	-0.01363159		2619.04	-0.01119565		3149.04	-0.00663045		3679.04	-0.02298343
499.19	0.00341329		1029.22	-0.01133064		1559.21	-0.00413627		2089.24	-0.01340294		2619.24	-0.01075498		3149.24	-0.00628208		3679.24	-0.02373846
499.39	0.00295804		1029.42	-0.01163059		1559.41	-0.00395396		2089.44	-0.01402479		2619.44	-0.01107019		3149.44	-0.00727944		3679.44	-0.02400314
499.59	0.00359745		1029.62	-0.01194396		1559.61	-0.00486391		2089.64	-0.01359078		2619.64	-0.01193591		3149.64	-0.00826499		3679.64	-0.02457157
499.79	0.00368082		1029.82	-0.01169556		1559.81	-0.0055875		2089.84	-0.01450349		2619.84	-0.01189315		3149.84	-0.00862825		3679.84	-0.02423901
499.99	0.00337714		1030.02	-0.01094875		1560.01	-0.00473352		2090.04	-0.0149075		2620.04	-0.01206918		3150.04	-0.00930163		3680.04	-0.02390353
500.19	0.0036298		1030.22	-0.01045999		1560.21	-0.00534411		2090.24	-0.01525705		2620.24	-0.01232654		3150.24	-0.01056683		3680.24	-0.02308014
500.39	0.00412317		1030.42	-0.01000918		1560.41	-0.00536069		2090.44	-0.01544966		2620.44	-0.01213355		3150.44	-0.01156466		3680.44	-0.02358739
500.59	0.00452748		1030.62	-0.00966573		1560.61	-0.00580266		2090.64	-0.01515		2620.64	-0.01267298		3150.64	-0.01307791		3680.64	-0.0233531
500.79	0.0044264		1030.82	-0.00929122		1560.81	-0.00627216		2090.84	-0.01506201		2620.84	-0.01303131		3150.84	-0.01319764		3680.84	-0.02379481
500.99	0.00465708		1031.02	-0.00968226		1561.01	-0.00687652		2091.04	-0.01426053		2621.04	-0.01317482		3151.04	-0.01311584		3681.04	-0.0235436
501.19	0.00379189		1031.22	-0.01060446		1561.21	-0.00633771		2091.24	-0.01475022		2621.24	-0.01296242		3151.24	-0.01352856		3681.24	-0.02323034
501.39	0.00278892		1031.42	-0.01114293		1561.41	-0.00593685		2091.44	-0.01466562		2621.44	-0.01267883		3151.44	-0.01327815		3681.44	-0.02301391
501.59	0.00373016		1031.62	-0.01156241		1561.61	-0.00600904		2091.64	-0.01431454		2621.64	-0.0127821		3151.64	-0.01268161		3681.64	-0.02331264
501.79	0.00326618		1031.82	-0.01141708		1561.81	-0.00568217		2091.84	-0.01410455		2621.84	-0.0130805		3151.84	-0.01234431		3681.84	-0.02319565
501.99	0.00313284		1032.02	-0.01202405		1562.01	-0.00559918		2092.04	-0.0137907		2622.04	-0.01341028		3152.04	-0.01175825		3682.04	-0.02287671
502.19	0.00268501		1032.22	-0.01221126		1562.21	-0.00532483		2092.24	-0.01359131		2622.24	-0.01471319		3152.24	-0.01095568		3682.24	-0.02305092
502.39	0.00253103		1032.42	-0.01276088		1562.41	-0.00508446		2092.44	-0.0131542		2622.44	-0.01447002		3152.44	-0.01062235		3682.44	-0.02270237
502.59	0.00186889		1032.62	-0.01307647		1562.61	-0.00574829		2092.64	-0.01313708		2622.64	-0.01426955		3152.64	-0.00972941		3682.64	-0.02288269
502.79	0.00155381		1032.82	-0.01355129		1562.81	-0.00479535		2092.84	-0.01196177		2622.84	-0.01458692		3152.84	-0.00911742		3682.84	-0.02238296
502.99	0.00106045		1033.02	-0.01347001		1563.01	-0.00484814		2093.04	-0.01170534		2623.04	-0.01476411		3153.04	-0.00872527		3683.04	-0.02223872
503.19	0.00113472		1033.22	-0.01306552		1563.21	-0.0052315		2093.24	-0.01058922		2623.24	-0.01591101		3153.24	-0.00956401		3683.24	-0.02191304
503.39	0.0013277		1033.42	-0.01326845		1563.41	-0.00621326		2093.44	-0.01068359		2623.44	-0.01624965		3153.44	-0.01033541		3683.44	-0.02173644
503.59	0.00215047		1033.62	-0.01407984		1563.61	-0.00642063		2093.64	-0.01074751		2623.64	-0.01659453		3153.64	-0.01034121		3683.64	-0.02226193
503.79	0.00155385		1033.82	-0.01335247		1563.81	-0.00607015		2093.84	-0.0108012		2623.84	-0.01712369		3153.84	-0.01039793		3683.84	-0.02200992
503.99	0.00222554		1034.02	-0.01241274		1564.01	-0.00579051		2094.04	-0.01095169		2624.04	-0.01740132		3154.04	-0.01097443		3684.04	-0.02256465
504.19	0.00269656		1034.22	-0.01223123		1564.21	-0.00623888		2094.24	-0.01032557		2624.24	-0.01677306		3154.24	-0.01201644		3684.24	-0.02194574
504.39	0.00408089		1034.42	-0.01193272		1564.41	-0.00698239		2094.44	-0.01084465		2624.44	-0.01641679		3154.44	-0.01247007		3684.44	-0.02236528
504.59	0.00444754		1034.62	-0.01232192		1564.61	-0.00764666		2094.64	-0.01110477		2624.64	-0.01593808		3154.64	-0.01201165		3684.64	-0.02212494
504.79	0.00514278		1034.82	-0.01166969		1564.81	-0.00777206		2094.84	-0.01175485		2624.84	-0.01606905		3154.84	-0.01137944		3684.84	-0.02333072
504.99	0.00553009		1035.02	-0.01166779		1565.01	-0.00676124		2095.04	-0.01201228		2625.04	-0.01601176		3155.04	-0.01114872		3685.04	-0.02331423
505.19	0.00555528		1035.22	-0.01239175		1565.21	-0.00614464		2095.24	-0.01241934		2625.24	-0.01615037		3155.24	-0.01126873		3685.24	-0.02260896
505.39	0.00499086		1035.42	-0.0120791		1565.41	-0.0062507		2095.44	-0.01215967		2625.44	-0.01621654		3155.44	-0.01113737		3685.44	-0.02363615
505.59	0.00601283		1035.62	-0.01178094		1565.61	-0.00599647		2095.64	-0.0123812		2625.64	-0.01582435		3155.64	-0.01167778		3685.64	-0.02360629
505.79	0.00592521		1035.82	-0.01125657		1565.81	-0.00622709		2095.84	-0.01323301		2625.84	-0.01605774		3155.84	-0.01187717		3685.84	-0.02334405
505.99	0.00566159		1036.02	-0.01105451		1566.01	-0.005933		2096.04	-0.01352775		2626.04	-0.01548691		3156.04	-0.01128909		3686.04	-0.02339274
506.19	0.00559588		1036.22	-0.01209341		1566.21	-0.00568185		2096.24	-0.01430755		2626.24	-0.01489021		3156.24	-0.01103353		3686.24	-0.02428943
506.39	0.00487949		1036.42	-0.01229596		1566.41	-0.0057299		2096.44	-0.01509805		2626.44	-0.01514945		3156.44	-0.0109193		3686.44	-0.02371962
506.59	0.00500098		1036.62	-0.01212779		1566.61	-0.00659619		2096.64	-0.01513739		2626.64	-0.01537232		3156.64	-0.01053524		3686.64	-0.0235294
506.79	0.00524588		1036.82	-0.01273634		1566.81	-0.00625731		2096.84	-0.01437701		2626.84	-0.0156207		3156.84	-0.01108244		3686.84	-0.02326822
506.99	0.00415732		1037.02	-0.01339741		1567.01	-0.00597628		2097.04	-0.01515659		2627.04	-0.01602741		3157.04	-0.01057033		3687.04	-0.02264674
507.19	0.00409707		1037.22	-0.01347174		1567.21	-0.00627957		2097.24	-0.01532442		2627.24	-0.01631708		3157.24	-0.01056822		3687.24	-0.02240263
507.39	0.00437481		1037.42	-0.01468164		1567.41	-0.00643486		2097.44	-0.01593591		2627.44	-0.01682192		3157.44	-0.01095843		3687.44	-0.02271006
507.59	0.00436841		1037.62	-0.014857		1567.61	-0.00614074		2097.64	-0.01538128		2627.64	-0.0170442		3157.64	-0.01226597		3687.64	-0.02316516
507.79	0.00450806		1037.82	-0.01460443		1567.81	-0.0067819		2097.84	-0.01412781		2627.84	-0.01746097		3157.84	-0.01238306		3687.84	-0.02320116
507.99	0.00504113		1038.02	-0.01426259		1568.01	-0.0063225		2098.04	-0.01438678		2628.04	-0.0166306		3158.04	-0.01217257		3688.04	-0.02336574
508.19	0.00532708		1038.22	-0.01455447		1568.21	-0.00639574		2098.24	-0.01428446		2628.24	-0.0159183		3158.24	-0.01232162		3688.24	-0.02223057
508.39	0.00597323		1038.42	-0.01469704		1568.41	-0.00721483		2098.44	-0.01470081		2628.44	-0.01516164		3158.44	-0.01183425		3688.44	-0.02223715
508.59	0.00618354		1038.62	-0.0152244		1568.61	-0.00725168		2098.64	-0.0144882		2628.64	-0.01472054		3158.64	-0.01111077		3688.64	-0.02233956
508.79	0.00637527		1038.82	-0.01475741		1568.81	-0.00700846		2098.84	-0.01401475		2628.84	-0.0148411		3158.84	-0.01107612		3688.84	-0.02359984
508.99	0.00642389		1039.02	-0.01504775		1569.01	-0.00627984		2099.04	-0.01356351		2629.04	-0.01431256		3159.04	-0.01095917		3689.04	-0.02349688
509.19	0.00612335		1039.22	-0.01512382		1569.21	-0.00770523		2099.24	-0.01291297		2629.24	-0.0138161		3159.24	-0.01087656		3689.24	-0.02321948
509.39	0.00554486		1039.42	-0.01413575		1569.41	-0.00801648		2099.44	-0.01246157		2629.44	-0.01325918		3159.44	-0.01155125		3689.44	-0.02431571
509.59	0.00578082		1039.62	-0.01357494		1569.61	-0.00802855		2099.64	-0.0126081		2629.64	-0.01337238		3159.64	-0.01197801		3689.64	-0.02371671
509.79	0.00560981		1039.82	-0.01330051		1569.81	-0.00862394		2099.84	-0.01271811		2629.84	-0.01380268		3159.84	-0.01106741		3689.84	-0.02447187
509.99	0.00503667		1040.02	-0.01339602		1570.01	-0.00856404		2100.04	-0.01275723		2630.04	-0.01374472		3160.04	-0.01079717		3690.04	-0.02513223
510.19	0.00482358		1040.22	-0.01423259		1570.21	-0.00925421		2100.24	-0.01366543		2630.24	-0.01428866		3160.24	-0.01057651		3690.24	-0.02638423
510.39	0.00427776		1040.42	-0.01339517		1570.41	-0.00930642		2100.44	-0.01378269		2630.44	-0.01506648		3160.44	-0.01097198		3690.44	-0.0255531
510.59	0.00444974		1040.62	-0.01298766		1570.61	-0.009338		2100.64	-0.01380266		2630.64	-0.01512876		3160.64	-0.01111646		3690.64	-0.02548129
510.79	0.0040075		1040.82	-0.01273325		1570.81	-0.00901446		2100.84	-0.01422436		2630.84	-0.01488962		3160.84	-0.01124181		3690.84	-0.02597954
510.99	0.0026973		1041.02	-0.01327563		1571.01	-0.00827012		2101.04	-0.01542441		2631.04	-0.01430724		3161.04	-0.01051291		3691.04	-0.02603224
511.19	0.00233317		1041.22	-0.01241059		1571.21	-0.0086815		2101.24	-0.01592582		2631.24	-0.01503083		3161.24	-0.01100662		3691.24	-0.02700195
511.39	0.00186187		1041.42	-0.0124668		1571.41	-0.00877087		2101.44	-0.01581293		2631.44	-0.01588104		3161.44	-0.01251181		3691.44	-0.02708513
511.59	0.00174447		1041.62	-0.01175672		1571.61	-0.00897223		2101.64	-0.0158162		2631.64	-0.01610035		3161.64	-0.01249558		3691.64	-0.02816762
511.79	0.00179481		1041.82	-0.01122325		1571.81	-0.00896343		2101.84	-0.01599329		2631.84	-0.01735256		3161.84	-0.01121138		3691.84	-0.02816261
511.99	0.00233716		1042.02	-0.01142087		1572.01	-0.00842821		2102.04	-0.0171736		2632.04	-0.01707003		3162.04	-0.01123907		3692.04	-0.02749381
512.19	0.00239523		1042.22	-0.01179016		1572.21	-0.00888339		2102.24	-0.01694228		2632.24	-0.01688287		3162.24	-0.01068098		3692.24	-0.02644616
512.39	0.00291722		1042.42	-0.01205568		1572.41	-0.00906092		2102.44	-0.01677295		2632.44	-0.01713183		3162.44	-0.01083422		3692.44	-0.02670575
512.59	0.00346402		1042.62	-0.0124829		1572.61	-0.01001765		2102.64	-0.01631045		2632.64	-0.01729606		3162.64	-0.00992015		3692.64	-0.02773458
512.79	0.00391988		1042.82	-0.01259163		1572.81	-0.01082128		2102.84	-0.0160397		2632.84	-0.01735635		3162.84	-0.009502		3692.84	-0.02853689
512.99	0.00443051		1043.02	-0.01271143		1573.01	-0.01033519		2103.04	-0.01561812		2633.04	-0.01804082		3163.04	-0.00948598		3693.04	-0.02781702
513.19	0.00453743		1043.22	-0.01208597		1573.21	-0.01014271		2103.24	-0.01503419		2633.24	-0.01792701		3163.24	-0.00883305		3693.24	-0.02670536
513.39	0.00465886		1043.42	-0.01187767		1573.41	-0.00973941		2103.44	-0.01424336		2633.44	-0.01811067		3163.44	-0.00897397		3693.44	-0.0263673
513.59	0.00538234		1043.62	-0.01251632		1573.61	-0.00977073		2103.64	-0.0137224		2633.64	-0.01887914		3163.64	-0.00878635		3693.64	-0.02589561
513.79	0.00527236		1043.82	-0.01293999		1573.81	-0.00953554		2103.84	-0.01423223		2633.84	-0.019267		3163.84	-0.00871006		3693.84	-0.02586015
513.99	0.00467562		1044.02	-0.01260407		1574.01	-0.00925702		2104.04	-0.0140977		2634.04	-0.01931767		3164.04	-0.00900144		3694.04	-0.02586361
514.19	0.0042617		1044.22	-0.01293278		1574.21	-0.00809083		2104.24	-0.01392422		2634.24	-0.01886931		3164.24	-0.00866013		3694.24	-0.02543459
514.39	0.00348144		1044.42	-0.01296222		1574.41	-0.00640029		2104.44	-0.01356825		2634.44	-0.01855455		3164.44	-0.00940981		3694.44	-0.02428107
514.59	0.00261496		1044.62	-0.01331867		1574.61	-0.00568863		2104.64	-0.013575		2634.64	-0.01775628		3164.64	-0.00982208		3694.64	-0.02405481
514.79	0.00202699		1044.82	-0.01316976		1574.81	-0.00568494		2104.84	-0.01445497		2634.84	-0.01663497		3164.84	-0.01061631		3694.84	-0.02436758
514.99	0.00204844		1045.02	-0.01279448		1575.01	-0.00589575		2105.04	-0.01550981		2635.04	-0.01618417		3165.04	-0.01136424		3695.04	-0.02480693
515.19	0.00107539		1045.22	-0.01241242		1575.21	-0.00636549		2105.24	-0.01601952		2635.24	-0.01632433		3165.24	-0.01217956		3695.24	-0.02470068
515.39	0.00136151		1045.42	-0.01238847		1575.41	-0.00602536		2105.44	-0.01647369		2635.44	-0.0164454		3165.44	-0.01336378		3695.44	-0.02390195
515.59	0.00171		1045.62	-0.01225524		1575.61	-0.00633415		2105.64	-0.01688		2635.64	-0.01711274		3165.64	-0.01322356		3695.64	-0.02426098
515.79	0.00221976		1045.82	-0.01260592		1575.81	-0.00663161		2105.84	-0.01730863		2635.84	-0.01679338		3165.84	-0.0133683		3695.84	-0.02355526
515.99	0.00307139		1046.02	-0.01338078		1576.01	-0.00700532		2106.04	-0.01764668		2636.04	-0.01588937		3166.04	-0.01413463		3696.04	-0.02380179
516.19	0.00258845		1046.22	-0.01382656		1576.21	-0.00792927		2106.24	-0.01733343		2636.24	-0.01586491		3166.24	-0.01471175		3696.24	-0.02390977
516.39	0.00295152		1046.42	-0.01397166		1576.41	-0.00912147		2106.44	-0.0171603		2636.44	-0.01657268		3166.44	-0.01442244		3696.44	-0.02448462
516.59	0.00285828		1046.62	-0.01463231		1576.61	-0.01002088		2106.64	-0.01671729		2636.64	-0.01587536		3166.64	-0.01415806		3696.64	-0.02505507
516.79	0.00247077		1046.82	-0.01424144		1576.81	-0.00984634		2106.84	-0.01642724		2636.84	-0.01604768		3166.84	-0.01426902		3696.84	-0.02505614
516.99	0.00245406		1047.02	-0.01410488		1577.01	-0.00927859		2107.04	-0.01550906		2637.04	-0.01730391		3167.04	-0.01352733		3697.04	-0.02461412
517.19	0.00302263		1047.22	-0.01404597		1577.21	-0.00962579		2107.24	-0.01512101		2637.24	-0.01686889		3167.24	-0.01240765		3697.24	-0.02455841
517.39	0.00412082		1047.42	-0.01487895		1577.41	-0.0105448		2107.44	-0.0142992		2637.44	-0.01709417		3167.44	-0.01216436		3697.44	-0.02461722
517.59	0.00370713		1047.62	-0.01582741		1577.61	-0.01026977		2107.64	-0.01451386		2637.64	-0.01766972		3167.64	-0.01169265		3697.64	-0.02469891
517.79	0.00300893		1047.82	-0.01572416		1577.81	-0.00990313		2107.84	-0.01428456		2637.84	-0.01840009		3167.84	-0.01081196		3697.84	-0.024987
517.99	0.00217992		1048.02	-0.01551745		1578.01	-0.00933732		2108.04	-0.01367809		2638.04	-0.01781974		3168.04	-0.01025978		3698.04	-0.02533875
518.19	0.00194881		1048.22	-0.01632336		1578.21	-0.00874642		2108.24	-0.01315788		2638.24	-0.01690759		3168.24	-0.01023116		3698.24	-0.02482868
518.39	0.00147147		1048.42	-0.01648386		1578.41	-0.00940977		2108.44	-0.0127992		2638.44	-0.0175005		3168.44	-0.01065657		3698.44	-0.02525436
518.59	0.00080835		1048.62	-0.01628137		1578.61	-0.00957815		2108.64	-0.01253279		2638.64	-0.0171686		3168.64	-0.00999696		3698.64	-0.02509197
518.79	0.00074959		1048.82	-0.01546652		1578.81	-0.01042134		2108.84	-0.01244599		2638.84	-0.01659352		3168.84	-0.00997112		3698.84	-0.02574732
518.99	0.00125327		1049.02	-0.01537921		1579.01	-0.01078103		2109.04	-0.01283178		2639.04	-0.01651479		3169.04	-0.00963404		3699.04	-0.02555528
519.19	0.00077009		1049.22	-0.01541304		1579.21	-0.01094598		2109.24	-0.01279788		2639.24	-0.01694946		3169.24	-0.00991421		3699.24	-0.02497116
519.39	0.0015962		1049.42	-0.01504926		1579.41	-0.01076088		2109.44	-0.0128266		2639.44	-0.01714616		3169.44	-0.00990815		3699.44	-0.02487545
519.59	0.00114041		1049.62	-0.01550438		1579.61	-0.01071063		2109.64	-0.01263736		2639.64	-0.01766425		3169.64	-0.00925675		3699.64	-0.02453711
519.79	0.00109411		1049.82	-0.01527078		1579.81	-0.01041885		2109.84	-0.01271135		2639.84	-0.01750322		3169.84	-0.00891577		3699.84	-0.02458345
519.99	0.00047745		1050.02	-0.01530168		1580.01	-0.00964991		2110.04	-0.01285193		2640.04	-0.01847742		3170.04	-0.0087026		3700.04	-0.02441469
520.19	-0.00023092		1050.22	-0.01513802		1580.21	-0.00925793		2110.24	-0.01319546		2640.24	-0.01925991		3170.24	-0.0085694		3700.24	-0.02436261
520.39	-0.00066224		1050.42	-0.01412843		1580.41	-0.00962794		2110.44	-0.01327182		2640.44	-0.01973554		3170.44	-0.0080395		3700.44	-0.02456412
520.59	-0.00099717		1050.62	-0.01351113		1580.61	-0.00957134		2110.64	-0.01357516		2640.64	-0.01976209		3170.64	-0.00858837		3700.64	-0.0244366
520.79	-0.00059993		1050.82	-0.01255796		1580.81	-0.00962715		2110.84	-0.01409197		2640.84	-0.01987857		3170.84	-0.00900187		3700.84	-0.02405104
520.99	0.00014143		1051.02	-0.01310447		1581.01	-0.00972398		2111.04	-0.01454479		2641.04	-0.02066029		3171.04	-0.0091971		3701.04	-0.02375183
521.19	0.00070704		1051.22	-0.01332024		1581.21	-0.00916364		2111.24	-0.01597406		2641.24	-0.02043017		3171.24	-0.01017764		3701.24	-0.02350949
521.39	0.00139923		1051.42	-0.01340077		1581.41	-0.00935259		2111.44	-0.01645351		2641.44	-0.02024369		3171.44	-0.01045077		3701.44	-0.02283696
521.59	0.00090373		1051.62	-0.01366612		1581.61	-0.00993197		2111.64	-0.01777845		2641.64	-0.0203378		3171.64	-0.01109151		3701.64	-0.0234392
521.79	0.00120213		1051.82	-0.0127386		1581.81	-0.00909388		2111.84	-0.01753496		2641.84	-0.02004588		3171.84	-0.01176527		3701.84	-0.02323072
521.99	0.00163063		1052.02	-0.01338443		1582.01	-0.00919293		2112.04	-0.01802001		2642.04	-0.01911531		3172.04	-0.01286657		3702.04	-0.02307848
522.19	0.00216791		1052.22	-0.01385413		1582.21	-0.0096597		2112.24	-0.01775139		2642.24	-0.01884318		3172.24	-0.01295561		3702.24	-0.0217898
522.39	0.00229324		1052.42	-0.01387323		1582.41	-0.0104432		2112.44	-0.01729968		2642.44	-0.01894124		3172.44	-0.01220076		3702.44	-0.02251968
522.59	0.00226683		1052.62	-0.01361535		1582.61	-0.00973805		2112.64	-0.01710918		2642.64	-0.01793617		3172.64	-0.01202872		3702.64	-0.02245745
522.79	0.00229058		1052.82	-0.01393835		1582.81	-0.01044199		2112.84	-0.01785973		2642.84	-0.01703326		3172.84	-0.01196976		3702.84	-0.02264145
522.99	0.00236815		1053.02	-0.01477994		1583.01	-0.01057257		2113.04	-0.01798288		2643.04	-0.01746906		3173.04	-0.01187671		3703.04	-0.0223543
523.19	0.00198138		1053.22	-0.01419203		1583.21	-0.01020444		2113.24	-0.0185005		2643.24	-0.01810041		3173.24	-0.01178797		3703.24	-0.02285738
523.39	0.00210754		1053.42	-0.01486391		1583.41	-0.00968948		2113.44	-0.01813227		2643.44	-0.01811388		3173.44	-0.01067038		3703.44	-0.0226482
523.59	0.00183984		1053.62	-0.01562796		1583.61	-0.00992499		2113.64	-0.01719941		2643.64	-0.02026812		3173.64	-0.01080126		3703.64	-0.02249482
523.79	0.00179593		1053.82	-0.01557271		1583.81	-0.0094242		2113.84	-0.01755257		2643.84	-0.02123718		3173.84	-0.00985179		3703.84	-0.02295874
523.99	0.00207086		1054.02	-0.01556731		1584.01	-0.00979735		2114.04	-0.01728144		2644.04	-0.02232828		3174.04	-0.00972196		3704.04	-0.02335268
524.19	0.00230535		1054.22	-0.01498879		1584.21	-0.01034242		2114.24	-0.01621201		2644.24	-0.02253099		3174.24	-0.01004961		3704.24	-0.02443061
524.39	0.00223029		1054.42	-0.01445021		1584.41	-0.01085775		2114.44	-0.01577339		2644.44	-0.02377647		3174.44	-0.01093551		3704.44	-0.02514438
524.59	0.00205168		1054.62	-0.01505963		1584.61	-0.01083482		2114.64	-0.01621813		2644.64	-0.02451687		3174.64	-0.01131485		3704.64	-0.02556285
524.79	0.00180196		1054.82	-0.01561169		1584.81	-0.01040106		2114.84	-0.01617558		2644.84	-0.0241251		3174.84	-0.01214248		3704.84	-0.02596218
524.99	0.00144155		1055.02	-0.01598159		1585.01	-0.01026282		2115.04	-0.01595153		2645.04	-0.02447173		3175.04	-0.01251847		3705.04	-0.02580874
525.19	0.00143496		1055.22	-0.01582504		1585.21	-0.00967983		2115.24	-0.01540506		2645.24	-0.02410057		3175.24	-0.0133452		3705.24	-0.0259157
525.39	0.00196641		1055.42	-0.01571082		1585.41	-0.00906888		2115.44	-0.01440846		2645.44	-0.02328537		3175.44	-0.01337716		3705.44	-0.02669021
525.59	0.00207231		1055.62	-0.01556818		1585.61	-0.0085131		2115.64	-0.01361591		2645.64	-0.02326734		3175.64	-0.01372265		3705.64	-0.02667364
525.79	0.00172026		1055.82	-0.01499365		1585.81	-0.00684337		2115.84	-0.01203941		2645.84	-0.02233309		3175.84	-0.01430299		3705.84	-0.02596905
525.99	0.00177171		1056.02	-0.01522605		1586.01	-0.00679662		2116.04	-0.01219308		2646.04	-0.02168606		3176.04	-0.01428414		3706.04	-0.02615604
526.19	0.00157167		1056.22	-0.01524861		1586.21	-0.00694803		2116.24	-0.01167782		2646.24	-0.02041877		3176.24	-0.01354892		3706.24	-0.02577304
526.39	0.00119234		1056.42	-0.01482851		1586.41	-0.00693574		2116.44	-0.01162413		2646.44	-0.0191028		3176.44	-0.01298088		3706.44	-0.02691129
526.59	0.00024461		1056.62	-0.01475543		1586.61	-0.00568551		2116.64	-0.01120155		2646.64	-0.01744293		3176.64	-0.01283683		3706.64	-0.02664416
526.79	-0.00038993		1056.82	-0.01519721		1586.81	-0.0061881		2116.84	-0.01221088		2646.84	-0.01712111		3176.84	-0.01185993		3706.84	-0.0266991
526.99	-0.00063957		1057.02	-0.01506507		1587.01	-0.00613541		2117.04	-0.01228564		2647.04	-0.01701823		3177.04	-0.01171701		3707.04	-0.02647122
527.19	-0.00170626		1057.22	-0.01487133		1587.21	-0.00651287		2117.24	-0.012995		2647.24	-0.01732884		3177.24	-0.01152775		3707.24	-0.02612242
527.39	-0.00108874		1057.42	-0.01488433		1587.41	-0.00732939		2117.44	-0.01253246		2647.44	-0.0174002		3177.44	-0.0107767		3707.44	-0.02542981
527.59	-0.00112395		1057.62	-0.01579945		1587.61	-0.00775245		2117.64	-0.01277224		2647.64	-0.01807327		3177.64	-0.01139164		3707.64	-0.02502872
527.79	-0.00067985		1057.82	-0.01534783		1587.81	-0.00746751		2117.84	-0.01373491		2647.84	-0.01758645		3177.84	-0.01092969		3707.84	-0.0248457
527.99	-0.00048895		1058.02	-0.01580472		1588.01	-0.0077704		2118.04	-0.01366138		2648.04	-0.01730101		3178.04	-0.01103116		3708.04	-0.02553606
528.19	0.0000024		1058.22	-0.01658436		1588.21	-0.0085535		2118.24	-0.01407175		2648.24	-0.01747786		3178.24	-0.01129149		3708.24	-0.02648194
528.39	-0.00006286		1058.42	-0.01643905		1588.41	-0.00827256		2118.44	-0.01538307		2648.44	-0.01820406		3178.44	-0.01186384		3708.44	-0.02662455
528.59	-0.00004498		1058.62	-0.01723277		1588.61	-0.00817424		2118.64	-0.01671242		2648.64	-0.01825973		3178.64	-0.0113215		3708.64	-0.02641807
528.79	0.0004638		1058.82	-0.01644582		1588.81	-0.0084007		2118.84	-0.0164617		2648.84	-0.01712485		3178.84	-0.0114895		3708.84	-0.02557132
528.99	0.00057346		1059.02	-0.01666917		1589.01	-0.00849408		2119.04	-0.01738588		2649.04	-0.01767398		3179.04	-0.01179274		3709.04	-0.02511216
529.19	0.00049475		1059.22	-0.01745137		1589.21	-0.00797023		2119.24	-0.01729759		2649.24	-0.01736596		3179.24	-0.01205567		3709.24	-0.02532334
529.39	0.00105539		1059.42	-0.01730834		1589.41	-0.00721614		2119.44	-0.01820647		2649.44	-0.0182497		3179.44	-0.01172328		3709.44	-0.0253522
529.59	0.00154998		1059.62	-0.01681471		1589.61	-0.00695141		2119.64	-0.01901442		2649.64	-0.01872298		3179.64	-0.01178492		3709.64	-0.0252929
529.79	0.00162845		1059.82	-0.01636958		1589.81	-0.00704022		2119.84	-0.01901714		2649.84	-0.01850231		3179.84	-0.01269087		3709.84	-0.02568332
529.99	0.00218622		1060.02	-0.01633466		1590.01	-0.00699443		2120.04	-0.0189283		2650.04	-0.0184254		3180.04	-0.01275016		3710.04	-0.02614339
530.19	0.00185937		1060.22	-0.01620613		1590.21	-0.00759431		2120.24	-0.01820414		2650.24	-0.01783763		3180.24	-0.01202532		3710.24	-0.02619142
530.39	0.00098646		1060.42	-0.01576312		1590.41	-0.00786723		2120.44	-0.01796747		2650.44	-0.01697196		3180.44	-0.01182992		3710.44	-0.02666388
530.59	0.00055892		1060.62	-0.01560151		1590.61	-0.00868542		2120.64	-0.01731564		2650.64	-0.01683828		3180.64	-0.01137665		3710.64	-0.02697019
530.79	-0.00048028		1060.82	-0.01518251		1590.81	-0.00978131		2120.84	-0.01766012		2650.84	-0.01693699		3180.84	-0.01166306		3710.84	-0.02671682
530.99	-0.00103935		1061.02	-0.01460465		1591.01	-0.0109326		2121.04	-0.01738571		2651.04	-0.01704094		3181.04	-0.0112941		3711.04	-0.02598172
531.19	-0.00193525		1061.22	-0.01496476		1591.21	-0.01166089		2121.24	-0.01658966		2651.24	-0.01713048		3181.24	-0.01014643		3711.24	-0.02618567
531.39	-0.00139691		1061.42	-0.01475322		1591.41	-0.01173564		2121.44	-0.01567716		2651.44	-0.01640066		3181.44	-0.0098456		3711.44	-0.02607119
531.59	-0.00090726		1061.62	-0.01564688		1591.61	-0.01194238		2121.64	-0.01510314		2651.64	-0.01576364		3181.64	-0.01009894		3711.64	-0.02584902
531.79	-0.00042616		1061.82	-0.01525981		1591.81	-0.01179726		2121.84	-0.01489576		2651.84	-0.01551873		3181.84	-0.01003212		3711.84	-0.0264482
531.99	0.00020813		1062.02	-0.01635515		1592.01	-0.01147362		2122.04	-0.01398954		2652.04	-0.01522188		3182.04	-0.0092199		3712.04	-0.02760331
532.19	0.00082356		1062.22	-0.01635324		1592.21	-0.01199075		2122.24	-0.01329295		2652.24	-0.01590578		3182.24	-0.00946233		3712.24	-0.02859521
532.39	0.00113158		1062.42	-0.01576907		1592.41	-0.01030449		2122.44	-0.01274433		2652.44	-0.01606868		3182.44	-0.01055249		3712.44	-0.02811332
532.59	0.00206717		1062.62	-0.01554814		1592.61	-0.00967242		2122.64	-0.01345863		2652.64	-0.01707765		3182.64	-0.01021178		3712.64	-0.02800857
532.79	0.0028266		1062.82	-0.01481119		1592.81	-0.00918131		2122.84	-0.01379155		2652.84	-0.01688383		3182.84	-0.01074269		3712.84	-0.02784257
532.99	0.00251522		1063.02	-0.01584397		1593.01	-0.0081536		2123.04	-0.01495713		2653.04	-0.01856201		3183.04	-0.01135475		3713.04	-0.02823729
533.19	0.00275436		1063.22	-0.0162895		1593.21	-0.00753646		2123.24	-0.01475811		2653.24	-0.01907673		3183.24	-0.01180326		3713.24	-0.02788875
533.39	0.00316448		1063.42	-0.01613056		1593.41	-0.00675812		2123.44	-0.01551312		2653.44	-0.01930447		3183.44	-0.01276916		3713.44	-0.0280686
533.59	0.00365666		1063.62	-0.01590714		1593.61	-0.0058561		2123.64	-0.0155472		2653.64	-0.01992301		3183.64	-0.0137883		3713.64	-0.02842245
533.79	0.00441139		1063.82	-0.01627479		1593.81	-0.00605387		2123.84	-0.01504431		2653.84	-0.02008339		3183.84	-0.01448329		3713.84	-0.02844897
533.99	0.00408058		1064.02	-0.01689763		1594.01	-0.00619517		2124.04	-0.01507464		2654.04	-0.01964709		3184.04	-0.01483317		3714.04	-0.02822175
534.19	0.0030671		1064.22	-0.01655807		1594.21	-0.00640115		2124.24	-0.01562301		2654.24	-0.01981544		3184.24	-0.01456121		3714.24	-0.0283132
534.39	0.00296714		1064.42	-0.0172344		1594.41	-0.00709583		2124.44	-0.01532753		2654.44	-0.02002155		3184.44	-0.01439367		3714.44	-0.02874223
534.59	0.00262464		1064.62	-0.01743384		1594.61	-0.00758203		2124.64	-0.0158161		2654.64	-0.02039343		3184.64	-0.0134826		3714.64	-0.02814135
534.79	0.00106296		1064.82	-0.0176693		1594.81	-0.00750696		2124.84	-0.01665467		2654.84	-0.02011117		3184.84	-0.01274171		3714.84	-0.02702989
534.99	0.00066658		1065.02	-0.01679976		1595.01	-0.00880436		2125.04	-0.01709752		2655.04	-0.01987354		3185.04	-0.01217349		3715.04	-0.02701117
535.19	0.00011869		1065.22	-0.017244		1595.21	-0.00900076		2125.24	-0.01727358		2655.24	-0.01972059		3185.24	-0.01152727		3715.24	-0.02710683
535.39	-0.0002275		1065.42	-0.01690822		1595.41	-0.00970832		2125.44	-0.01707712		2655.44	-0.01881394		3185.44	-0.01186817		3715.44	-0.02688649
535.59	-0.00137075		1065.62	-0.01670742		1595.61	-0.00980505		2125.64	-0.01740291		2655.64	-0.0184445		3185.64	-0.01100098		3715.64	-0.02688409
535.79	-0.00233766		1065.82	-0.01618234		1595.81	-0.00963189		2125.84	-0.01704989		2655.84	-0.01941462		3185.84	-0.01044614		3715.84	-0.02760281
535.99	-0.00275204		1066.02	-0.01609929		1596.01	-0.00967243		2126.04	-0.01634188		2656.04	-0.01949446		3186.04	-0.0095587		3716.04	-0.0280701
536.19	-0.00355422		1066.22	-0.01571798		1596.21	-0.01015644		2126.24	-0.0163342		2656.24	-0.0196507		3186.24	-0.01075418		3716.24	-0.02903566
536.39	-0.00353532		1066.42	-0.01512206		1596.41	-0.0093905		2126.44	-0.01665533		2656.44	-0.01997011		3186.44	-0.01170513		3716.44	-0.02932235
536.59	-0.00380196		1066.62	-0.0145282		1596.61	-0.00929184		2126.64	-0.01794028		2656.64	-0.01994715		3186.64	-0.01121143		3716.64	-0.02993672
536.79	-0.00498169		1066.82	-0.01492388		1596.81	-0.0095863		2126.84	-0.01800835		2656.84	-0.01934313		3186.84	-0.01190177		3716.84	-0.02999338
536.99	-0.00547573		1067.02	-0.01472209		1597.01	-0.00943753		2127.04	-0.01862262		2657.04	-0.01942114		3187.04	-0.01262855		3717.04	-0.02994055
537.19	-0.00494668		1067.22	-0.01502563		1597.21	-0.00883438		2127.24	-0.01785696		2657.24	-0.01931987		3187.24	-0.01337054		3717.24	-0.03037528
537.39	-0.00473218		1067.42	-0.01518799		1597.41	-0.00847622		2127.44	-0.01775561		2657.44	-0.01810395		3187.44	-0.01397375		3717.44	-0.03121481
537.59	-0.00406125		1067.62	-0.01545314		1597.61	-0.00843184		2127.64	-0.01732776		2657.64	-0.01832402		3187.64	-0.01352004		3717.64	-0.03078215
537.79	-0.00327678		1067.82	-0.01678811		1597.81	-0.00841463		2127.84	-0.01731656		2657.84	-0.01825174		3187.84	-0.01325169		3717.84	-0.03059729
537.99	-0.0034227		1068.02	-0.01712049		1598.01	-0.0085886		2128.04	-0.01721631		2658.04	-0.01773772		3188.04	-0.0138031		3718.04	-0.03020161
538.19	-0.00244139		1068.22	-0.01721968		1598.21	-0.00848641		2128.24	-0.01728583		2658.24	-0.01806793		3188.24	-0.01333627		3718.24	-0.02951475
538.39	-0.00214513		1068.42	-0.0182294		1598.41	-0.00889815		2128.44	-0.01630776		2658.44	-0.01803882		3188.44	-0.01278944		3718.44	-0.02844515
538.59	-0.00182852		1068.62	-0.01765738		1598.61	-0.0087706		2128.64	-0.01697999		2658.64	-0.01762722		3188.64	-0.0115208		3718.64	-0.02762672
538.79	-0.00226271		1068.82	-0.01762631		1598.81	-0.00856799		2128.84	-0.01723722		2658.84	-0.01773561		3188.84	-0.01128344		3718.84	-0.02769136
538.99	-0.0022999		1069.02	-0.01672232		1599.01	-0.00855136		2129.04	-0.01749927		2659.04	-0.01786763		3189.04	-0.01165292		3719.04	-0.02784365
539.19	-0.00232029		1069.22	-0.01719103		1599.21	-0.00873927		2129.24	-0.01750493		2659.24	-0.01725205		3189.24	-0.01147742		3719.24	-0.02702048
539.39	-0.00275454		1069.42	-0.01733662		1599.41	-0.00885588		2129.44	-0.01686241		2659.44	-0.01717598		3189.44	-0.01205719		3719.44	-0.02667558
539.59	-0.0031552		1069.62	-0.01769517		1599.61	-0.00880867		2129.64	-0.01710985		2659.64	-0.01750676		3189.64	-0.01178185		3719.64	-0.02647297
539.79	-0.00319328		1069.82	-0.01720942		1599.81	-0.00960464		2129.84	-0.01656467		2659.84	-0.01870711		3189.84	-0.01175826		3719.84	-0.02627466
539.99	-0.00314229		1070.02	-0.01751888		1600.01	-0.00973663		2130.04	-0.01596289		2660.04	-0.01834391		3190.04	-0.01176691		3720.04	-0.0268676
540.19	-0.00301384		1070.22	-0.01724948		1600.21	-0.01011564		2130.24	-0.01562105		2660.24	-0.01859071		3190.24	-0.01313065		3720.24	-0.02845266
540.39	-0.00358436		1070.42	-0.01695286		1600.41	-0.00972406		2130.44	-0.01550242		2660.44	-0.01918805		3190.44	-0.01354986		3720.44	-0.02797117
540.59	-0.00327314		1070.62	-0.01703075		1600.61	-0.00963907		2130.64	-0.01579614		2660.64	-0.01955888		3190.64	-0.01387904		3720.64	-0.02797096
540.79	-0.00348859		1070.82	-0.01741738		1600.81	-0.01020172		2130.84	-0.01483389		2660.84	-0.01960314		3190.84	-0.01480955		3720.84	-0.02790293
540.99	-0.00273955		1071.02	-0.01739521		1601.01	-0.00955624		2131.04	-0.01485102		2661.04	-0.01964224		3191.04	-0.01526139		3721.04	-0.02801015
541.19	-0.00304513		1071.22	-0.01769516		1601.21	-0.0094548		2131.24	-0.01371573		2661.24	-0.02029583		3191.24	-0.01490692		3721.24	-0.02836838
541.39	-0.00389694		1071.42	-0.01717065		1601.41	-0.01012018		2131.44	-0.0141643		2661.44	-0.01963078		3191.44	-0.01441103		3721.44	-0.02834131
541.59	-0.00313309		1071.62	-0.01724902		1601.61	-0.01018075		2131.64	-0.01379513		2661.64	-0.01979497		3191.64	-0.01340076		3721.64	-0.02841157
541.79	-0.00338618		1071.82	-0.01697988		1601.81	-0.0113265		2131.84	-0.01433152		2661.84	-0.02021046		3191.84	-0.01332601		3721.84	-0.02829247
541.99	-0.00311972		1072.02	-0.01622272		1602.01	-0.01303466		2132.04	-0.01485084		2662.04	-0.02016434		3192.04	-0.0138002		3722.04	-0.02807163
542.19	-0.00249449		1072.22	-0.01624281		1602.21	-0.01347245		2132.24	-0.01546192		2662.24	-0.01980772		3192.24	-0.01356693		3722.24	-0.02749967
542.39	-0.0023179		1072.42	-0.0159262		1602.41	-0.01342759		2132.44	-0.01618895		2662.44	-0.02035104		3192.44	-0.01313399		3722.44	-0.02753239
542.59	-0.00185041		1072.62	-0.01506855		1602.61	-0.01339712		2132.64	-0.01706235		2662.64	-0.02019663		3192.64	-0.01272177		3722.64	-0.02832252
542.79	-0.00247584		1072.82	-0.01606066		1602.81	-0.01398501		2132.84	-0.017984		2662.84	-0.02031314		3192.84	-0.01366022		3722.84	-0.02886292
542.99	-0.00257602		1073.02	-0.01543795		1603.01	-0.01380118		2133.04	-0.01829203		2663.04	-0.02014375		3193.04	-0.0131608		3723.04	-0.02846141
543.19	-0.00251994		1073.22	-0.015591		1603.21	-0.014085		2133.24	-0.01799082		2663.24	-0.01942013		3193.24	-0.01310594		3723.24	-0.02818537
543.39	-0.00096627		1073.42	-0.01597171		1603.41	-0.01379983		2133.44	-0.01800749		2663.44	-0.02082267		3193.44	-0.01315982		3723.44	-0.02825135
543.59	-0.00032383		1073.62	-0.01601198		1603.61	-0.01371543		2133.64	-0.01833843		2663.64	-0.02098952		3193.64	-0.01260005		3723.64	-0.02841201
543.79	0.00003196		1073.82	-0.01538691		1603.81	-0.01402029		2133.84	-0.0175762		2663.84	-0.02115965		3193.84	-0.01253482		3723.84	-0.02846956
543.99	0.00068863		1074.02	-0.01591522		1604.01	-0.01298678		2134.04	-0.01753873		2664.04	-0.02089327		3194.04	-0.01254721		3724.04	-0.0287547
544.19	0.00120372		1074.22	-0.01588279		1604.21	-0.01205715		2134.24	-0.01768619		2664.24	-0.02109106		3194.24	-0.01282032		3724.24	-0.02810978
544.39	0.00115788		1074.42	-0.01560095		1604.41	-0.01124129		2134.44	-0.0176057		2664.44	-0.02200659		3194.44	-0.01276401		3724.44	-0.02650877
544.59	0.00148676		1074.62	-0.01628952		1604.61	-0.01037104		2134.64	-0.01690633		2664.64	-0.02241068		3194.64	-0.01268834		3724.64	-0.02683543
544.79	0.00091416		1074.82	-0.01704468		1604.81	-0.00979345		2134.84	-0.01584609		2664.84	-0.02204157		3194.84	-0.01307284		3724.84	-0.02686216
544.99	0.00085955		1075.02	-0.01671694		1605.01	-0.00921892		2135.04	-0.01623255		2665.04	-0.02205729		3195.04	-0.01236086		3725.04	-0.02710402
545.19	-0.00013811		1075.22	-0.01585481		1605.21	-0.00884134		2135.24	-0.01479792		2665.24	-0.0226683		3195.24	-0.01247945		3725.24	-0.02828852
545.39	0.00017305		1075.42	-0.01552398		1605.41	-0.00885913		2135.44	-0.01514336		2665.44	-0.02261788		3195.44	-0.01296222		3725.44	-0.02859096
545.59	-0.00035189		1075.62	-0.01548286		1605.61	-0.0083695		2135.64	-0.01477764		2665.64	-0.02196108		3195.64	-0.0123536		3725.64	-0.02855449
545.79	-0.00154547		1075.82	-0.01538147		1605.81	-0.00938412		2135.84	-0.01497417		2665.84	-0.02212274		3195.84	-0.01250761		3725.84	-0.02828545
545.99	-0.00136678		1076.02	-0.01622275		1606.01	-0.00904296		2136.04	-0.01550725		2666.04	-0.02195997		3196.04	-0.01341626		3726.04	-0.02815027
546.19	-0.00184574		1076.22	-0.01649811		1606.21	-0.00828407		2136.24	-0.01610982		2666.24	-0.02114914		3196.24	-0.01350058		3726.24	-0.02795224
546.39	-0.00271978		1076.42	-0.01600886		1606.41	-0.00908924		2136.44	-0.01714828		2666.44	-0.021691		3196.44	-0.01410627		3726.44	-0.02761643
546.59	-0.00255076		1076.62	-0.01656699		1606.61	-0.00966086		2136.64	-0.01690547		2666.64	-0.02082768		3196.64	-0.01405446		3726.64	-0.02771684
546.79	-0.00285475		1076.82	-0.01644252		1606.81	-0.01026925		2136.84	-0.01802435		2666.84	-0.02129608		3196.84	-0.01458467		3726.84	-0.02752448
546.99	-0.00253823		1077.02	-0.01622267		1607.01	-0.01009675		2137.04	-0.01870098		2667.04	-0.02088629		3197.04	-0.01417484		3727.04	-0.02735562
547.19	-0.00250461		1077.22	-0.01673247		1607.21	-0.01091755		2137.24	-0.01917759		2667.24	-0.02041836		3197.24	-0.01466957		3727.24	-0.0272091
547.39	-0.00186366		1077.42	-0.01670942		1607.41	-0.0107835		2137.44	-0.02024299		2667.44	-0.02074689		3197.44	-0.01509466		3727.44	-0.02684561
547.59	-0.00247554		1077.62	-0.0170931		1607.61	-0.0107698		2137.64	-0.02021736		2667.64	-0.02019538		3197.64	-0.01523508		3727.64	-0.02606137
547.79	-0.00303183		1077.82	-0.01742262		1607.81	-0.01098433		2137.84	-0.02057712		2667.84	-0.02041009		3197.84	-0.01560943		3727.84	-0.0255391
547.99	-0.00347957		1078.02	-0.01783968		1608.01	-0.01080016		2138.04	-0.02120736		2668.04	-0.02073633		3198.04	-0.01532931		3728.04	-0.02527142
548.19	-0.00370496		1078.22	-0.01813938		1608.21	-0.01125918		2138.24	-0.02026388		2668.24	-0.02069093		3198.24	-0.01443517		3728.24	-0.02556808
548.39	-0.00365906		1078.42	-0.0175247		1608.41	-0.01209847		2138.44	-0.01975183		2668.44	-0.02170737		3198.44	-0.0144927		3728.44	-0.02539476
548.59	-0.00442578		1078.62	-0.01849871		1608.61	-0.01259167		2138.64	-0.01906627		2668.64	-0.02131526		3198.64	-0.01556866		3728.64	-0.02656453
548.79	-0.00422696		1078.82	-0.01837483		1608.81	-0.01293467		2138.84	-0.01835042		2668.84	-0.02207717		3198.84	-0.01631002		3728.84	-0.02741164
548.99	-0.0036866		1079.02	-0.01766422		1609.01	-0.01404853		2139.04	-0.01724433		2669.04	-0.02162182		3199.04	-0.01713339		3729.04	-0.02841894
549.19	-0.00448373		1079.22	-0.01750142		1609.21	-0.01396935		2139.24	-0.01580519		2669.24	-0.02171185		3199.24	-0.01750687		3729.24	-0.02923336
549.39	-0.00454772		1079.42	-0.01775507		1609.41	-0.01393141		2139.44	-0.01552077		2669.44	-0.02165565		3199.44	-0.01648108		3729.44	-0.02934025
549.59	-0.00491594		1079.62	-0.01780386		1609.61	-0.01301557		2139.64	-0.01509777		2669.64	-0.02095829		3199.64	-0.01511957		3729.64	-0.02926066
549.79	-0.00462985		1079.82	-0.01775646		1609.81	-0.01287307		2139.84	-0.01495022		2669.84	-0.02170987		3199.84	-0.01407651		3729.84	-0.02985478
549.99	-0.00461963		1080.02	-0.01787427		1610.01	-0.01305869		2140.04	-0.01581029		2670.04	-0.02120545		3200.04	-0.01362677		3730.04	-0.02954383
550.19	-0.00425805		1080.22	-0.01773184		1610.21	-0.01268428		2140.24	-0.01609936		2670.24	-0.02051121		3200.24	-0.01264713		3730.24	-0.02934479
550.39	-0.00361262		1080.42	-0.01778066		1610.41	-0.01275301		2140.44	-0.01662369		2670.44	-0.02039762		3200.44	-0.01264753		3730.44	-0.02891507
550.59	-0.00339505		1080.62	-0.01844585		1610.61	-0.01222251		2140.64	-0.01644302		2670.64	-0.02058804		3200.64	-0.01165422		3730.64	-0.0289765
550.79	-0.00332488		1080.82	-0.01817005		1610.81	-0.01188012		2140.84	-0.01707582		2670.84	-0.02088502		3200.84	-0.01168135		3730.84	-0.02895871
550.99	-0.00314249		1081.02	-0.01925717		1611.01	-0.01195636		2141.04	-0.01781774		2671.04	-0.0204935		3201.04	-0.01131787		3731.04	-0.02916572
551.19	-0.00346897		1081.22	-0.01936601		1611.21	-0.01211728		2141.24	-0.01781206		2671.24	-0.02030502		3201.24	-0.01124623		3731.24	-0.02871677
551.39	-0.0037569		1081.42	-0.01911929		1611.41	-0.01133708		2141.44	-0.0183471		2671.44	-0.02040008		3201.44	-0.01067711		3731.44	-0.02835613
551.59	-0.00395693		1081.62	-0.01942697		1611.61	-0.01148474		2141.64	-0.01815415		2671.64	-0.02076019		3201.64	-0.01046222		3731.64	-0.02755104
551.79	-0.00441877		1081.82	-0.0197485		1611.81	-0.01214128		2141.84	-0.01838379		2671.84	-0.02108328		3201.84	-0.00995088		3731.84	-0.02808367
551.99	-0.0036651		1082.02	-0.02035559		1612.01	-0.01225429		2142.04	-0.01832999		2672.04	-0.02012169		3202.04	-0.01000093		3732.04	-0.02783442
552.19	-0.00325828		1082.22	-0.02032672		1612.21	-0.01317046		2142.24	-0.01782932		2672.24	-0.01989016		3202.24	-0.00983495		3732.24	-0.02807569
552.39	-0.00311331		1082.42	-0.01977314		1612.41	-0.01348625		2142.44	-0.01811802		2672.44	-0.01950854		3202.44	-0.01067002		3732.44	-0.02729137
552.59	-0.00301517		1082.62	-0.01987794		1612.61	-0.01407624		2142.64	-0.01773705		2672.64	-0.01865493		3202.64	-0.0112166		3732.64	-0.02808573
552.79	-0.00280367		1082.82	-0.01859096		1612.81	-0.01413496		2142.84	-0.01700451		2672.84	-0.01817589		3202.84	-0.01186525		3732.84	-0.02764859
552.99	-0.00260205		1083.02	-0.01791725		1613.01	-0.01453476		2143.04	-0.01677505		2673.04	-0.01734338		3203.04	-0.01192248		3733.04	-0.027535
553.19	-0.00297589		1083.22	-0.01797972		1613.21	-0.01417211		2143.24	-0.0165815		2673.24	-0.0182527		3203.24	-0.01149768		3733.24	-0.02731567
553.39	-0.00331375		1083.42	-0.01761139		1613.41	-0.01450858		2143.44	-0.01701095		2673.44	-0.01921823		3203.44	-0.01206771		3733.44	-0.02725607
553.59	-0.00257111		1083.62	-0.01682474		1613.61	-0.01437724		2143.64	-0.01715645		2673.64	-0.01975403		3203.64	-0.01273369		3733.64	-0.0272684
553.79	-0.00227929		1083.82	-0.01632461		1613.81	-0.01489928		2143.84	-0.01715988		2673.84	-0.01962192		3203.84	-0.01238407		3733.84	-0.02763047
553.99	-0.00246957		1084.02	-0.01665072		1614.01	-0.01495359		2144.04	-0.01704106		2674.04	-0.01901553		3204.04	-0.01379939		3734.04	-0.02824686
554.19	-0.00232502		1084.22	-0.01704216		1614.21	-0.01368055		2144.24	-0.0169456		2674.24	-0.01942422		3204.24	-0.01492985		3734.24	-0.02874924
554.39	-0.00315377		1084.42	-0.01647303		1614.41	-0.01353726		2144.44	-0.01629748		2674.44	-0.01987851		3204.44	-0.01546967		3734.44	-0.0288645
554.59	-0.00388528		1084.62	-0.01676985		1614.61	-0.01344419		2144.64	-0.01589228		2674.64	-0.02117363		3204.64	-0.0158392		3734.64	-0.0303762
554.79	-0.00337199		1084.82	-0.01593657		1614.81	-0.01319192		2144.84	-0.01547109		2674.84	-0.02197476		3204.84	-0.01663993		3734.84	-0.03123924
554.99	-0.00335492		1085.02	-0.01593425		1615.01	-0.01346168		2145.04	-0.01625543		2675.04	-0.02192391		3205.04	-0.01724528		3735.04	-0.03063815
555.19	-0.00328293		1085.22	-0.01593786		1615.21	-0.01311692		2145.24	-0.0155841		2675.24	-0.02202225		3205.24	-0.01737069		3735.24	-0.03019988
555.39	-0.0040537		1085.42	-0.01682103		1615.41	-0.01277333		2145.44	-0.01540334		2675.44	-0.0222363		3205.44	-0.01766802		3735.44	-0.03043713
555.59	-0.00477893		1085.62	-0.01696074		1615.61	-0.01220492		2145.64	-0.0154016		2675.64	-0.0222074		3205.64	-0.0179257		3735.64	-0.03026754
555.79	-0.00528809		1085.82	-0.01724467		1615.81	-0.01172327		2145.84	-0.01581779		2675.84	-0.0221675		3205.84	-0.01799873		3735.84	-0.03082393
555.99	-0.00510441		1086.02	-0.01743874		1616.01	-0.01100613		2146.04	-0.01658553		2676.04	-0.02213708		3206.04	-0.01864603		3736.04	-0.03016172
556.19	-0.0059429		1086.22	-0.01715477		1616.21	-0.01179604		2146.24	-0.01689973		2676.24	-0.02170412		3206.24	-0.01790283		3736.24	-0.03032228
556.39	-0.00667783		1086.42	-0.01714907		1616.41	-0.01113444		2146.44	-0.01712733		2676.44	-0.02186067		3206.44	-0.01664397		3736.44	-0.03033996
556.59	-0.00607733		1086.62	-0.01744346		1616.61	-0.01191926		2146.64	-0.01712038		2676.64	-0.02221295		3206.64	-0.01623446		3736.64	-0.02985394
556.79	-0.00666858		1086.82	-0.01743438		1616.81	-0.01235361		2146.84	-0.01686471		2676.84	-0.02111839		3206.84	-0.01626985		3736.84	-0.02856249
556.99	-0.00614995		1087.02	-0.01780207		1617.01	-0.01277286		2147.04	-0.01706018		2677.04	-0.02204113		3207.04	-0.01582206		3737.04	-0.02834895
557.19	-0.0053755		1087.22	-0.01848061		1617.21	-0.01347736		2147.24	-0.0180241		2677.24	-0.02243661		3207.24	-0.01657101		3737.24	-0.02846928
557.39	-0.00547403		1087.42	-0.01867887		1617.41	-0.01348701		2147.44	-0.01791072		2677.44	-0.02248407		3207.44	-0.01678852		3737.44	-0.02848127
557.59	-0.00409587		1087.62	-0.0188117		1617.61	-0.01372122		2147.64	-0.0174282		2677.64	-0.02161942		3207.64	-0.01619861		3737.64	-0.02870958
557.79	-0.00351376		1087.82	-0.01894695		1617.81	-0.01355392		2147.84	-0.01797169		2677.84	-0.02079211		3207.84	-0.01585101		3737.84	-0.0290414
557.99	-0.00350422		1088.02	-0.01901091		1618.01	-0.01282086		2148.04	-0.01847006		2678.04	-0.02099745		3208.04	-0.01661184		3738.04	-0.02968039
558.19	-0.00344515		1088.22	-0.01864998		1618.21	-0.01254268		2148.24	-0.01925894		2678.24	-0.0211491		3208.24	-0.01632035		3738.24	-0.02969686
558.39	-0.00339871		1088.42	-0.0180526		1618.41	-0.01249353		2148.44	-0.01926114		2678.44	-0.02100082		3208.44	-0.0158055		3738.44	-0.0298786
558.59	-0.00314666		1088.62	-0.01820399		1618.61	-0.01221639		2148.64	-0.01991485		2678.64	-0.02145003		3208.64	-0.01575683		3738.64	-0.0302927
558.79	-0.0032767		1088.82	-0.01765259		1618.81	-0.01212288		2148.84	-0.02009827		2678.84	-0.02124398		3208.84	-0.01563172		3738.84	-0.02954648
558.99	-0.00348984		1089.02	-0.01804733		1619.01	-0.01186686		2149.04	-0.02069415		2679.04	-0.02058458		3209.04	-0.01524965		3739.04	-0.02847731
559.19	-0.0044877		1089.22	-0.01848831		1619.21	-0.01140096		2149.24	-0.02039413		2679.24	-0.02079901		3209.24	-0.01483853		3739.24	-0.02875128
559.39	-0.00607642		1089.42	-0.01888979		1619.41	-0.01132079		2149.44	-0.02078806		2679.44	-0.0206719		3209.44	-0.01489637		3739.44	-0.02897843
559.59	-0.0073485		1089.62	-0.0180335		1619.61	-0.01111584		2149.64	-0.02150017		2679.64	-0.02060999		3209.64	-0.01446459		3739.64	-0.02880602
559.79	-0.00843395		1089.82	-0.01796367		1619.81	-0.0112889		2149.84	-0.02217111		2679.84	-0.02098175		3209.84	-0.01419793		3739.84	-0.02875413
