# Supplementary material for: Functional development of a V3/glycan-specific broadly neutralizing antibody isolated from a case of HIV superinfection
Source: eLife journal article supplement (doi:10.7554/elife.68110), 2021-07-15
Supplement: fig2-data2 [file D9.xls]

Vers 3.43 Data Simulation
Conc1	6.25E-08	6.25E-08	6.25E-08	6.25E-08	6.25E-08	6.25E-08	6.25E-08
Start1	199.99	729.99	1259.98	1789.98	2319.97	2849.97	3380
Stop1	559.79	1089.79	1619.78	2149.78	2679.77	3209.77	3739.8
Time1	Data1	Sim1	Time2	Data2	Sim2	Time3	Data3	Sim3	Time4	Data4	Sim4	Time5	Data5	Sim5	Time6	Data6	Sim6	Time7	Data7	Sim7
199.99	0.00412214		729.99	-0.00283854		1259.98	0.00082663		1789.98	0.00159924		2319.97	-0.00886909		2849.97	-0.00043536		3380	-0.00444692
200.19	0.004376		730.19	-0.00307185		1260.18	0.00082186		1790.18	0.00125426		2320.17	-0.00887277		2850.17	-0.00091719		3380.2	-0.0050722
200.39	0.00432633		730.39	-0.00293414		1260.38	0.00101517		1790.38	0.00129524		2320.37	-0.0085629		2850.37	-0.00176279		3380.4	-0.00488039
200.59	0.00483319		730.59	-0.00322404		1260.58	0.00177853		1790.58	0.00149228		2320.57	-0.00743536		2850.57	-0.00315625		3380.6	-0.00491119
200.79	0.00532242		730.79	-0.00294204		1260.78	0.0023227		1790.78	0.00196998		2320.77	-0.00776013		2850.77	-0.00377767		3380.8	-0.0043859
200.99	0.00523393		730.99	-0.0022043		1260.98	0.00242128		1790.98	0.00174078		2320.97	-0.00722182		2850.97	-0.00478432		3381	-0.00402532
201.19	0.00549679		731.19	-0.00224051		1261.18	0.00285059		1791.18	0.00159209		2321.17	-0.00713385		2851.17	-0.00608674		3381.2	-0.00337164
201.39	0.00585925		731.39	-0.00270376		1261.38	0.00353738		1791.38	0.0020188		2321.37	-0.00691808		2851.37	-0.00657306		3381.4	-0.00280349
201.59	0.00653128		731.59	-0.00243245		1261.58	0.00338248		1791.58	0.00190688		2321.57	-0.00662461		2851.57	-0.00658055		3381.6	-0.00233321
201.79	0.00626485		731.79	-0.00210179		1261.78	0.00423754		1791.78	0.00193854		2321.77	-0.00669173		2851.77	-0.00614292		3381.8	-0.00185339
201.99	0.00683604		731.99	-0.00217672		1261.98	0.00510505		1791.98	0.00223473		2321.97	-0.00675601		2851.97	-0.0051119		3382	-0.0019324
202.19	0.00766847		732.19	-0.00281994		1262.18	0.00547284		1792.18	0.00312816		2322.17	-0.00662606		2852.17	-0.0038365		3382.2	-0.00217392
202.39	0.00848062		732.39	-0.00269718		1262.38	0.00643317		1792.38	0.00333797		2322.37	-0.0059507		2852.37	-0.00279377		3382.4	-0.00278609
202.59	0.00944731		732.59	-0.00326651		1262.58	0.00769451		1792.58	0.00280933		2322.57	-0.00528956		2852.57	-0.00196185		3382.6	-0.0026193
202.79	0.01015903		732.79	-0.00348831		1262.78	0.00695497		1792.78	0.00231193		2322.77	-0.00422971		2852.77	-0.0022789		3382.8	-0.00327848
202.99	0.01078654		732.99	-0.00382839		1262.98	0.006735		1792.98	0.00153866		2322.97	-0.00399145		2852.97	-0.0020366		3383	-0.003607
203.19	0.01099972		733.19	-0.00444109		1263.18	0.00721682		1793.18	0.00210941		2323.17	-0.00355677		2853.17	-0.00196439		3383.2	-0.00376462
203.39	0.01116272		733.39	-0.00427921		1263.38	0.0065532		1793.38	0.00163978		2323.37	-0.00333565		2853.37	-0.0013771		3383.4	-0.00480239
203.59	0.01117396		733.59	-0.00536422		1263.58	0.0057358		1793.58	0.00116879		2323.57	-0.00361331		2853.57	-0.00110088		3383.6	-0.00511416
203.79	0.0108623		733.79	-0.00557897		1263.78	0.00431179		1793.78	0.00095621		2323.77	-0.00400731		2853.77	-0.00138098		3383.8	-0.00474658
203.99	0.01162813		733.99	-0.0056364		1263.98	0.00442822		1793.98	0.00074343		2323.97	-0.00415547		2853.97	-0.00115079		3384	-0.00564233
204.19	0.01127395		734.19	-0.00531185		1264.18	0.00365611		1794.18	0.00028801		2324.17	-0.00426033		2854.17	-0.00127035		3384.2	-0.00572665
204.39	0.01169043		734.39	-0.00498392		1264.38	0.00396143		1794.38	0.00103391		2324.37	-0.00379816		2854.37	-0.00229837		3384.4	-0.00544163
204.59	0.01264382		734.59	-0.00459489		1264.58	0.00375252		1794.58	0.00102991		2324.57	-0.00406949		2854.57	-0.00255496		3384.6	-0.00481332
204.79	0.01272101		734.79	-0.00458127		1264.78	0.00321698		1794.78	0.00085418		2324.77	-0.00599604		2854.77	-0.00239928		3384.8	-0.00453213
204.99	0.01284645		734.99	-0.00404901		1264.98	0.00240472		1794.98	0.00026408		2324.97	-0.00578137		2854.97	-0.00320015		3385	-0.00427505
205.19	0.01363695		735.19	-0.00430597		1265.18	0.0030017		1795.18	-0.00035727		2325.17	-0.00635728		2855.17	-0.00372627		3385.2	-0.00399892
205.39	0.01397896		735.39	-0.00382701		1265.38	0.0037426		1795.38	-0.00042334		2325.37	-0.00657921		2855.37	-0.00337288		3385.4	-0.00397678
205.59	0.01414773		735.59	-0.00345026		1265.58	0.00402636		1795.58	-0.00104365		2325.57	-0.00731953		2855.57	-0.00266136		3385.6	-0.00432021
205.79	0.01400893		735.79	-0.00340524		1265.78	0.00561881		1795.78	-0.00079722		2325.77	-0.0076568		2855.77	-0.00148355		3385.8	-0.00456225
205.99	0.01513917		735.99	-0.00413371		1265.98	0.0057779		1795.98	-0.00008799		2325.97	-0.00751417		2855.97	-0.000728		3386	-0.00577532
206.19	0.01567342		736.19	-0.00488047		1266.18	0.00626087		1796.18	0.00040254		2326.17	-0.00757926		2856.17	0.00050984		3386.2	-0.00637255
206.39	0.01632608		736.39	-0.00428473		1266.38	0.0070219		1796.38	0.00034378		2326.37	-0.00697155		2856.37	0.0009358		3386.4	-0.00657226
206.59	0.01717266		736.59	-0.00415717		1266.58	0.00753286		1796.58	0.00014649		2326.57	-0.00615896		2856.57	0.00109647		3386.6	-0.00703803
206.79	0.01815229		736.79	-0.00471262		1266.78	0.00694858		1796.78	-0.00004744		2326.77	-0.00560891		2856.77	0.00096328		3386.8	-0.00763346
206.99	0.01779718		736.99	-0.00597949		1266.98	0.00767001		1796.98	0.00014796		2326.97	-0.00546688		2856.97	0.00114864		3387	-0.0080299
207.19	0.01776645		737.19	-0.00676973		1267.18	0.00802718		1797.18	0.00074351		2327.17	-0.00495427		2857.17	0.00135232		3387.2	-0.00829919
207.39	0.01859987		737.39	-0.0078746		1267.38	0.00754365		1797.38	0.00128817		2327.37	-0.00533798		2857.37	0.00115255		3387.4	-0.00787128
207.59	0.0187332		737.59	-0.00735661		1267.58	0.00717704		1797.58	0.00174876		2327.57	-0.00448966		2857.57	0.00123662		3387.6	-0.00751542
207.79	0.01972439		737.79	-0.00773682		1267.78	0.00737632		1797.78	0.00202198		2327.77	-0.00397923		2857.77	0.00083491		3387.8	-0.00743567
207.99	0.02032063		737.99	-0.00754566		1267.98	0.00738713		1797.98	0.00283678		2327.97	-0.00283331		2857.97	0.00123157		3388	-0.00757936
208.19	0.02020044		738.19	-0.00617439		1268.18	0.00737236		1798.18	0.00308893		2328.17	-0.00232085		2858.17	0.00043373		3388.2	-0.00764316
208.39	0.02111218		738.39	-0.00614417		1268.38	0.00722437		1798.38	0.00364284		2328.37	-0.00269829		2858.37	0.00044217		3388.4	-0.00834001
208.59	0.02203678		738.59	-0.00634308		1268.58	0.00658989		1798.58	0.00312129		2328.57	-0.00385985		2858.57	0.0002795		3388.6	-0.00783488
208.79	0.02253682		738.79	-0.00618333		1268.78	0.00743771		1798.78	0.00288701		2328.77	-0.004476		2858.77	-0.00050542		3388.8	-0.00788546
208.99	0.02320057		738.99	-0.00505219		1268.98	0.00719878		1798.98	0.00182632		2328.97	-0.00421033		2858.97	-0.00069979		3389	-0.00775145
209.19	0.02338966		739.19	-0.00410314		1269.18	0.00818821		1799.18	0.00034347		2329.17	-0.00464416		2859.17	-0.00215976		3389.2	-0.0078126
209.39	0.02331646		739.39	-0.00368372		1269.38	0.0083142		1799.38	-0.00005764		2329.37	-0.00516592		2859.37	-0.00339155		3389.4	-0.0072384
209.59	0.02298337		739.59	-0.00432334		1269.58	0.00851225		1799.58	-0.00066215		2329.57	-0.00539107		2859.57	-0.00305622		3389.6	-0.00730269
209.79	0.02305461		739.79	-0.00431857		1269.78	0.0079137		1799.78	-0.00069779		2329.77	-0.00535036		2859.77	-0.00270634		3389.8	-0.00814195
209.99	0.0231835		739.99	-0.00454974		1269.98	0.00747592		1799.98	-0.00094195		2329.97	-0.0055422		2859.97	-0.00343423		3390	-0.00800882
210.19	0.02312487		740.19	-0.00482282		1270.18	0.00835979		1800.18	-0.00171857		2330.17	-0.0062296		2860.17	-0.00301212		3390.2	-0.00776182
210.39	0.02362976		740.39	-0.00475937		1270.38	0.00846956		1800.38	-0.00166127		2330.37	-0.00598076		2860.37	-0.00351396		3390.4	-0.00803144
210.59	0.02305728		740.59	-0.00437326		1270.58	0.00798733		1800.58	-0.00228039		2330.57	-0.00611662		2860.57	-0.00317269		3390.6	-0.00811997
210.79	0.02340531		740.79	-0.00477954		1270.78	0.00774446		1800.78	-0.00154316		2330.77	-0.00635433		2860.77	-0.00208792		3390.8	-0.00832547
210.99	0.02302301		740.99	-0.00525094		1270.98	0.00782557		1800.98	-0.0010484		2330.97	-0.00634713		2860.97	-0.00195111		3391	-0.00930169
211.19	0.02366925		741.19	-0.00451543		1271.18	0.00809212		1801.18	-0.00085957		2331.17	-0.00602805		2861.17	-0.0016971		3391.2	-0.00862122
211.39	0.02546226		741.39	-0.00555956		1271.38	0.00727831		1801.38	0.00026247		2331.37	-0.00592615		2861.37	-0.00095548		3391.4	-0.00833743
211.59	0.02620359		741.59	-0.00489719		1271.58	0.00664453		1801.58	0.00017078		2331.57	-0.00489379		2861.57	-0.00100575		3391.6	-0.00813653
211.79	0.02704977		741.79	-0.00584192		1271.78	0.00576769		1801.78	0.00089166		2331.77	-0.00471353		2861.77	-0.00160771		3391.8	-0.00754946
211.99	0.02681781		741.99	-0.00542525		1271.98	0.00502528		1801.98	0.00075124		2331.97	-0.00383906		2861.97	-0.00133856		3392	-0.00757995
212.19	0.02747419		742.19	-0.00474921		1272.18	0.00462412		1802.18	0.0009825		2332.17	-0.00418351		2862.17	-0.00163857		3392.2	-0.0074003
212.39	0.02832267		742.39	-0.0048341		1272.38	0.00378706		1802.38	0.00167125		2332.37	-0.00478702		2862.37	-0.00146856		3392.4	-0.00731768
212.59	0.02885835		742.59	-0.00484388		1272.58	0.00476064		1802.58	0.00124323		2332.57	-0.00433169		2862.57	-0.00245312		3392.6	-0.00624851
212.79	0.02869359		742.79	-0.00427926		1272.78	0.00519523		1802.78	0.00116098		2332.77	-0.00397499		2862.77	-0.00281934		3392.8	-0.00632482
212.99	0.02949425		742.99	-0.00419679		1272.98	0.00442396		1802.98	0.00133173		2332.97	-0.00361351		2862.97	-0.00234366		3393	-0.00615194
213.19	0.02955995		743.19	-0.00450855		1273.18	0.00486065		1803.18	0.00135586		2333.17	-0.00360195		2863.17	-0.0038746		3393.2	-0.00638563
213.39	0.02996678		743.39	-0.00570533		1273.38	0.00477592		1803.38	0.00176377		2333.37	-0.00262409		2863.37	-0.00341838		3393.4	-0.00603652
213.59	0.02986677		743.59	-0.00597071		1273.58	0.00524608		1803.58	0.00133717		2333.57	-0.00232781		2863.57	-0.00291645		3393.6	-0.00676072
213.79	0.02950298		743.79	-0.0054497		1273.78	0.00535221		1803.78	0.00076714		2333.77	-0.00224213		2863.77	-0.00351975		3393.8	-0.0080153
213.99	0.02918513		743.99	-0.00513735		1273.98	0.0066032		1803.98	0.00009522		2333.97	-0.00266527		2863.97	-0.00349126		3394	-0.00738229
214.19	0.02866959		744.19	-0.00470089		1274.18	0.00796589		1804.18	-0.00000276		2334.17	-0.0033618		2864.17	-0.00304635		3394.2	-0.00895962
214.39	0.02858364		744.39	-0.00468702		1274.38	0.0079819		1804.38	0.00077759		2334.37	-0.00340031		2864.37	-0.00246659		3394.4	-0.01047543
214.59	0.02810964		744.59	-0.00462145		1274.58	0.00908212		1804.58	0.0008557		2334.57	-0.00312011		2864.57	-0.00150749		3394.6	-0.01028961
214.79	0.03022137		744.79	-0.00514929		1274.78	0.00991025		1804.78	0.00166215		2334.77	-0.00275222		2864.77	-0.00064132		3394.8	-0.01084792
214.99	0.03057099		744.99	-0.00579177		1274.98	0.01049841		1804.98	0.00214095		2334.97	-0.00255181		2864.97	-0.00054217		3395	-0.01051748
215.19	0.03173337		745.19	-0.00629205		1275.18	0.01093959		1805.18	0.00254727		2335.17	-0.00325804		2865.17	-0.00029927		3395.2	-0.00968219
215.39	0.03241566		745.39	-0.00814928		1275.38	0.00973518		1805.38	0.00258457		2335.37	-0.00329221		2865.37	0.00006064		3395.4	-0.01013547
215.59	0.03297727		745.59	-0.00779187		1275.58	0.00901271		1805.58	0.00203807		2335.57	-0.00332915		2865.57	-0.00036339		3395.6	-0.00939425
215.79	0.03381422		745.79	-0.00833225		1275.78	0.00872075		1805.78	0.00234175		2335.77	-0.00391887		2865.77	0.00065915		3395.8	-0.00939005
215.99	0.03450401		745.99	-0.00832453		1275.98	0.00868231		1805.98	0.00228386		2335.97	-0.00436626		2865.97	0.00164417		3396	-0.00938226
216.19	0.0347019		746.19	-0.00720116		1276.18	0.00834219		1806.18	0.00266776		2336.17	-0.00446466		2866.17	0.00187382		3396.2	-0.00854379
216.39	0.03482329		746.39	-0.00664055		1276.38	0.00772729		1806.38	0.00291804		2336.37	-0.0043		2866.37	0.00220076		3396.4	-0.00800659
216.59	0.03492278		746.59	-0.00632629		1276.58	0.0079061		1806.58	0.00265822		2336.57	-0.00364033		2866.57	0.00207647		3396.6	-0.00782182
216.79	0.03563791		746.79	-0.00626329		1276.78	0.00707857		1806.78	0.00339146		2336.77	-0.00440924		2866.77	0.00250664		3396.8	-0.00841539
216.99	0.03725327		746.99	-0.00572706		1276.98	0.00625435		1806.98	0.00314658		2336.97	-0.00430087		2866.97	0.00248753		3397	-0.00810069
217.19	0.03721868		747.19	-0.00626761		1277.18	0.00601173		1807.18	0.00266353		2337.17	-0.00398602		2867.17	0.00197962		3397.2	-0.00768894
217.39	0.03691828		747.39	-0.00559734		1277.38	0.00531866		1807.38	0.00207798		2337.37	-0.00353116		2867.37	0.00083373		3397.4	-0.00710535
217.59	0.03660712		747.59	-0.00445103		1277.58	0.00480472		1807.58	0.00059386		2337.57	-0.00368197		2867.57	-0.00011995		3397.6	-0.00674612
217.79	0.0362682		747.79	-0.00409414		1277.78	0.00514069		1807.78	-0.00083791		2337.77	-0.00377655		2867.77	-0.00099097		3397.8	-0.00687016
217.99	0.03668323		747.99	-0.00454429		1277.98	0.00567938		1807.98	-0.00150991		2337.97	-0.00453267		2867.97	-0.000312		3398	-0.0067103
218.19	0.03750431		748.19	-0.00455598		1278.18	0.00627624		1808.18	-0.00146035		2338.17	-0.00392165		2868.17	-0.00084974		3398.2	-0.0072401
218.39	0.03770051		748.39	-0.00510249		1278.38	0.007466		1808.38	-0.00175044		2338.37	-0.00313104		2868.37	-0.00058954		3398.4	-0.00774829
218.59	0.0392109		748.59	-0.00516147		1278.58	0.00815724		1808.58	-0.00149887		2338.57	-0.00229739		2868.57	-0.00076015		3398.6	-0.00669086
218.79	0.04022513		748.79	-0.00543348		1278.78	0.00699983		1808.78	-0.00126089		2338.77	-0.00218676		2868.77	-0.00102786		3398.8	-0.00707396
218.99	0.04011587		748.99	-0.00547132		1278.98	0.00692515		1808.98	-0.00157407		2338.97	-0.00237849		2868.97	-0.00060468		3399	-0.00665253
219.19	0.04103401		749.19	-0.00513677		1279.18	0.00614233		1809.18	-0.00237395		2339.17	-0.00289074		2869.17	-0.00039517		3399.2	-0.00707213
219.39	0.04118347		749.39	-0.00572284		1279.38	0.00525901		1809.38	-0.00271849		2339.37	-0.00250309		2869.37	-0.00029516		3399.4	-0.0068916
219.59	0.04173752		749.59	-0.00579177		1279.58	0.00568214		1809.58	-0.00295555		2339.57	-0.00300165		2869.57	0.00039782		3399.6	-0.00635357
219.79	0.04184926		749.79	-0.00618645		1279.78	0.0053509		1809.78	-0.00249094		2339.77	-0.00333199		2869.77	0.00127061		3399.8	-0.00696138
219.99	0.04171097		749.99	-0.00502325		1279.98	0.00537653		1809.98	-0.001657		2339.97	-0.00266372		2869.97	0.001127		3400	-0.00620995
220.19	0.04152156		750.19	-0.00394113		1280.18	0.00438784		1810.18	-0.00128749		2340.17	-0.0014918		2870.17	0.00154744		3400.2	-0.00598654
220.39	0.04126706		750.39	-0.00293545		1280.38	0.00428331		1810.38	-0.0005746		2340.37	-0.00049725		2870.37	0.00207242		3400.4	-0.00685058
220.59	0.04176299		750.59	-0.00275744		1280.58	0.00470922		1810.58	-0.0001344		2340.57	-0.00069037		2870.57	0.00226737		3400.6	-0.007769
220.79	0.04209086		750.79	-0.00317878		1280.78	0.00457853		1810.78	-0.00002338		2340.77	-0.00088219		2870.77	0.00250948		3400.8	-0.009289
220.99	0.04245515		750.99	-0.00306897		1280.98	0.00417091		1810.98	-0.00004325		2340.97	0.00011568		2870.97	0.00197978		3401	-0.00957432
221.19	0.04293923		751.19	-0.00305713		1281.18	0.00446971		1811.18	0.000905		2341.17	0.00030197		2871.17	0.00229152		3401.2	-0.00985176
221.39	0.04286671		751.39	-0.00303822		1281.38	0.00448523		1811.38	0.00098484		2341.37	0.00069018		2871.37	0.00154666		3401.4	-0.01076024
221.59	0.04412296		751.59	-0.00389026		1281.58	0.00538703		1811.58	0.00097331		2341.57	0.00072939		2871.57	0.0034466		3401.6	-0.01045635
221.79	0.04495658		751.79	-0.00539075		1281.78	0.00602282		1811.78	0.00082352		2341.77	0.00053556		2871.77	0.00360933		3401.8	-0.01094926
221.99	0.04467368		751.99	-0.00609068		1281.98	0.006532		1811.98	0.00000907		2341.97	0.00017361		2871.97	0.00433495		3402	-0.0114835
222.19	0.04447285		752.19	-0.00632342		1282.18	0.00741159		1812.18	-0.00014817		2342.17	0.00005316		2872.17	0.00409101		3402.2	-0.01269135
222.39	0.04389318		752.39	-0.00700923		1282.38	0.00784983		1812.38	-0.00037052		2342.37	-0.00064359		2872.37	0.00465191		3402.4	-0.01430004
222.59	0.04518939		752.59	-0.00696037		1282.58	0.00727578		1812.58	0.00085507		2342.57	-0.00131897		2872.57	0.00464448		3402.6	-0.01417754
222.79	0.0442238		752.79	-0.00691614		1282.78	0.00706171		1812.78	0.0004211		2342.77	-0.00165538		2872.77	0.0042392		3402.8	-0.01505348
222.99	0.044145		752.99	-0.0074078		1282.98	0.00666917		1812.98	-0.00014082		2342.97	-0.00181066		2872.97	0.00414371		3403	-0.0144247
223.19	0.04430821		753.19	-0.00754482		1283.18	0.00690044		1813.18	-0.00022122		2343.17	-0.00229039		2873.17	0.00371459		3403.2	-0.01402073
223.39	0.04395111		753.39	-0.00903508		1283.38	0.00717471		1813.38	0.00019699		2343.37	-0.00305651		2873.37	0.00246349		3403.4	-0.01304198
223.59	0.04352482		753.59	-0.00991282		1283.58	0.00756032		1813.58	0.00094922		2343.57	-0.00289926		2873.57	0.00169635		3403.6	-0.01270997
223.79	0.04376292		753.79	-0.00943706		1283.78	0.00638061		1813.78	0.00153361		2343.77	-0.00278438		2873.77	0.00087657		3403.8	-0.0126532
223.99	0.04410419		753.99	-0.00834398		1283.98	0.00608017		1813.98	0.00172839		2343.97	-0.00210442		2873.97	0.00015844		3404	-0.01224035
224.19	0.04382305		754.19	-0.00787968		1284.18	0.00592134		1814.18	0.00181629		2344.17	-0.00134456		2874.17	-0.00000137		3404.2	-0.01199625
224.39	0.04372394		754.39	-0.00761658		1284.38	0.0063099		1814.38	0.00203559		2344.37	-0.00172321		2874.37	-0.0002026		3404.4	-0.01232574
224.59	0.04444084		754.59	-0.00811076		1284.58	0.00572923		1814.58	0.00220132		2344.57	-0.00232238		2874.57	-0.00068031		3404.6	-0.01308427
224.79	0.04513654		754.79	-0.00839164		1284.78	0.00514196		1814.78	0.00271689		2344.77	-0.00192201		2874.77	-0.00100782		3404.8	-0.01313158
224.99	0.04658229		754.99	-0.00650405		1284.98	0.00568523		1814.98	0.00298657		2344.97	-0.00132199		2874.97	-0.00069274		3405	-0.01218236
225.19	0.04769233		755.19	-0.00507326		1285.18	0.00585262		1815.18	0.0038317		2345.17	-0.00106695		2875.17	-0.00007894		3405.2	-0.01235265
225.39	0.04826089		755.39	-0.00560638		1285.38	0.00637931		1815.38	0.00407611		2345.37	-0.00027382		2875.37	0.00073541		3405.4	-0.01207794
225.59	0.04946124		755.59	-0.00554448		1285.58	0.00659543		1815.58	0.00346058		2345.57	-0.00080299		2875.57	0.00127867		3405.6	-0.01071251
225.79	0.04971922		755.79	-0.00477422		1285.78	0.0059215		1815.78	0.0023992		2345.77	-0.00050996		2875.77	0.00112307		3405.8	-0.01075068
225.99	0.0497683		755.99	-0.00456951		1285.98	0.00600276		1815.98	0.00109594		2345.97	-0.0012126		2875.97	0.00069014		3406	-0.01110026
226.19	0.05086493		756.19	-0.00474753		1286.18	0.00619578		1816.18	0.00127963		2346.17	-0.00179992		2876.17	0.00119959		3406.2	-0.01151682
226.39	0.05190937		756.39	-0.00525804		1286.38	0.0067443		1816.38	0.00198641		2346.37	-0.00185268		2876.37	0.00211231		3406.4	-0.01190562
226.59	0.05325463		756.59	-0.00447209		1286.58	0.00726209		1816.58	0.00254768		2346.57	-0.00142448		2876.57	0.00187577		3406.6	-0.01117291
226.79	0.0532798		756.79	-0.00438138		1286.78	0.0081569		1816.78	0.00281698		2346.77	-0.00114668		2876.77	0.00148844		3406.8	-0.01184081
226.99	0.05403756		756.99	-0.00517449		1286.98	0.008531		1816.98	0.00268084		2346.97	-0.00175283		2876.97	0.00164493		3407	-0.01049226
227.19	0.05454429		757.19	-0.00567201		1287.18	0.0091707		1817.18	0.00331282		2347.17	-0.00209216		2877.17	0.00145448		3407.2	-0.01020368
227.39	0.05529828		757.39	-0.00620503		1287.38	0.00960498		1817.38	0.0034161		2347.37	-0.00253864		2877.37	0.00114238		3407.4	-0.01065939
227.59	0.05702708		757.59	-0.00608414		1287.58	0.00927858		1817.58	0.00306175		2347.57	-0.00191322		2877.57	0.00162269		3407.6	-0.01011309
227.79	0.05852821		757.79	-0.00558661		1287.78	0.00853699		1817.78	0.00264589		2347.77	-0.00299671		2877.77	0.00108522		3407.8	-0.01018053
227.99	0.05935367		757.99	-0.00483261		1287.98	0.00867617		1817.98	0.00231501		2347.97	-0.00288518		2877.97	0.00087502		3408	-0.01012849
228.19	0.0593833		758.19	-0.00468496		1288.18	0.00936829		1818.18	0.00328167		2348.17	-0.00333562		2878.17	0.00065462		3408.2	-0.00974528
228.39	0.05900928		758.39	-0.0051845		1288.38	0.00855645		1818.38	0.00269506		2348.37	-0.00428871		2878.37	0.00051464		3408.4	-0.0102026
228.59	0.05877257		758.59	-0.00495604		1288.58	0.00826959		1818.58	0.00287308		2348.57	-0.0045912		2878.57	0.0006109		3408.6	-0.00969745
228.79	0.05848737		758.79	-0.00509567		1288.78	0.00822719		1818.78	0.00332462		2348.77	-0.00439065		2878.77	0.00114352		3408.8	-0.00837731
228.99	0.05741371		758.99	-0.00383152		1288.98	0.00865205		1818.98	0.00307786		2348.97	-0.00413261		2878.97	0.00148806		3409	-0.00781394
229.19	0.05682479		759.19	-0.00494493		1289.18	0.00745095		1819.18	0.00298397		2349.17	-0.00412432		2879.17	0.00042868		3409.2	-0.00787795
229.39	0.05636013		759.39	-0.00557352		1289.38	0.00726115		1819.38	0.00206924		2349.37	-0.0048281		2879.37	0.00044658		3409.4	-0.00741772
229.59	0.0568628		759.59	-0.00481392		1289.58	0.00655395		1819.58	0.00168817		2349.57	-0.00556715		2879.57	0.00034832		3409.6	-0.00711024
229.79	0.05673308		759.79	-0.00423017		1289.78	0.00601999		1819.78	0.00097944		2349.77	-0.00552429		2879.77	0.0005899		3409.8	-0.00804176
229.99	0.05666558		759.99	-0.00525379		1289.98	0.00604946		1819.98	0.00057276		2349.97	-0.00527224		2879.97	0.00079259		3410	-0.0089316
230.19	0.05635182		760.19	-0.00661025		1290.18	0.0063389		1820.18	0.00074824		2350.17	-0.00540107		2880.17	0.00199998		3410.2	-0.00932732
230.39	0.05622267		760.39	-0.00729924		1290.38	0.00696048		1820.38	0.00061734		2350.37	-0.00502027		2880.37	0.0023055		3410.4	-0.01059927
230.59	0.05613179		760.59	-0.0072959		1290.58	0.00684467		1820.58	0.00014165		2350.57	-0.00417419		2880.57	0.00220271		3410.6	-0.01043747
230.79	0.05548767		760.79	-0.00832528		1290.78	0.00720302		1820.78	0.00022019		2350.77	-0.00465963		2880.77	0.00207786		3410.8	-0.01108002
230.99	0.0558772		760.99	-0.00907711		1290.98	0.00703877		1820.98	-0.00043205		2350.97	-0.00423054		2880.97	0.00191794		3411	-0.01057727
231.19	0.05542574		761.19	-0.0089115		1291.18	0.00718455		1821.18	-0.00044563		2351.17	-0.00277006		2881.17	0.0012822		3411.2	-0.01161329
231.39	0.05665439		761.39	-0.00839436		1291.38	0.00731025		1821.38	-0.00094304		2351.37	-0.00176748		2881.37	0.00133787		3411.4	-0.01191706
231.59	0.05787952		761.59	-0.00841614		1291.58	0.00702272		1821.58	-0.00031572		2351.57	-0.0015785		2881.57	0.00149607		3411.6	-0.01242177
231.79	0.05855638		761.79	-0.00796917		1291.78	0.0071403		1821.78	-0.00011522		2351.77	-0.00095529		2881.77	0.0010685		3411.8	-0.01289924
231.99	0.05892872		761.99	-0.00755778		1291.98	0.00709194		1821.98	0.00039491		2351.97	0.00054314		2881.97	0.00146391		3412	-0.01263581
232.19	0.05903663		762.19	-0.00678012		1292.18	0.00751178		1822.18	0.00083038		2352.17	0.00006414		2882.17	0.00150435		3412.2	-0.01242707
232.39	0.05869831		762.39	-0.0059107		1292.38	0.00737839		1822.38	0.00078007		2352.37	-0.00012198		2882.37	0.00116397		3412.4	-0.01163474
232.59	0.058852		762.59	-0.00521217		1292.58	0.00766589		1822.58	0.00145449		2352.57	-0.00032824		2882.57	0.00174629		3412.6	-0.01077313
232.79	0.05948688		762.79	-0.00508411		1292.78	0.00720881		1822.78	0.00181484		2352.77	-0.00018526		2882.77	0.00159418		3412.8	-0.00993174
232.99	0.06016009		762.99	-0.00460352		1292.98	0.00722948		1822.98	0.00109223		2352.97	-0.00045741		2882.97	0.00052997		3413	-0.00848888
233.19	0.06171734		763.19	-0.00474359		1293.18	0.00638093		1823.18	0.00098514		2353.17	-0.00105102		2883.17	0.000389		3413.2	-0.00729451
233.39	0.06192155		763.39	-0.00444394		1293.38	0.00715405		1823.38	0.00098094		2353.37	-0.00194799		2883.37	0.00138526		3413.4	-0.00652238
233.59	0.06361286		763.59	-0.00444884		1293.58	0.00783615		1823.58	0.00112592		2353.57	-0.00185717		2883.57	0.00179909		3413.6	-0.00720588
233.79	0.06379229		763.79	-0.0040259		1293.78	0.00862272		1823.78	0.00037234		2353.77	-0.00222291		2883.77	0.0020969		3413.8	-0.00767674
233.99	0.06373576		763.99	-0.00483169		1293.98	0.00834212		1823.98	0.00039106		2353.97	-0.00216009		2883.97	0.00276223		3414	-0.00828743
234.19	0.06401024		764.19	-0.00554612		1294.18	0.00897196		1824.18	-0.0000235		2354.17	-0.0025161		2884.17	0.00291458		3414.2	-0.00781279
234.39	0.06360869		764.39	-0.0052379		1294.38	0.00925099		1824.38	-0.00112125		2354.37	-0.00242388		2884.37	0.00339332		3414.4	-0.00758387
234.59	0.06351418		764.59	-0.00591515		1294.58	0.00865008		1824.58	-0.00109769		2354.57	-0.00243843		2884.57	0.0039741		3414.6	-0.00703298
234.79	0.06218168		764.79	-0.00627878		1294.78	0.00879537		1824.78	-0.00136881		2354.77	-0.00203384		2884.77	0.00409613		3414.8	-0.00761565
234.99	0.06175451		764.99	-0.00619083		1294.98	0.00835713		1824.98	-0.00091855		2354.97	-0.00053758		2884.97	0.00422837		3415	-0.00819779
235.19	0.06104925		765.19	-0.00607298		1295.18	0.00823494		1825.18	-0.00073412		2355.17	0.00014148		2885.17	0.00398006		3415.2	-0.00960319
235.39	0.06118871		765.39	-0.00578107		1295.38	0.00800279		1825.38	-0.00014281		2355.37	0.00061928		2885.37	0.00466893		3415.4	-0.00996609
235.59	0.06070246		765.59	-0.00513126		1295.58	0.00762956		1825.58	0.00037626		2355.57	0.00118812		2885.57	0.00458279		3415.6	-0.01220633
235.79	0.06069092		765.79	-0.00487772		1295.78	0.00802146		1825.78	-0.00058259		2355.77	0.00280581		2885.77	0.00471807		3415.8	-0.01224223
235.99	0.06135368		765.99	-0.00423714		1295.98	0.0077875		1825.98	-0.00014396		2355.97	0.00340606		2885.97	0.00472503		3416	-0.01276328
236.19	0.06138701		766.19	-0.00312934		1296.18	0.00780411		1826.18	-0.00020662		2356.17	0.0025763		2886.17	0.00472775		3416.2	-0.01305474
236.39	0.06216089		766.39	-0.00306657		1296.38	0.00839657		1826.38	-0.00038684		2356.37	0.0025468		2886.37	0.00487589		3416.4	-0.01304311
236.59	0.06282296		766.59	-0.00421304		1296.58	0.00852424		1826.58	-0.00071369		2356.57	0.00251186		2886.57	0.0053097		3416.6	-0.01336667
236.79	0.06472371		766.79	-0.00539817		1296.78	0.00802526		1826.78	-0.00079832		2356.77	0.00252801		2886.77	0.00516518		3416.8	-0.01186185
236.99	0.06600594		766.99	-0.0067734		1296.98	0.00826447		1826.98	-0.00156782		2356.97	0.00128077		2886.97	0.00509128		3417	-0.01154025
237.19	0.06633915		767.19	-0.00678225		1297.18	0.00787384		1827.18	-0.00120156		2357.17	0.00105186		2887.17	0.0056508		3417.2	-0.01108717
237.39	0.06677818		767.39	-0.00775216		1297.38	0.00927026		1827.38	-0.00166173		2357.37	0.00063141		2887.37	0.00562112		3417.4	-0.01101682
237.59	0.06829725		767.59	-0.00809486		1297.58	0.00954638		1827.58	-0.00257778		2357.57	0.00056111		2887.57	0.00531094		3417.6	-0.01156755
237.79	0.06904005		767.79	-0.00806824		1297.78	0.00989173		1827.78	-0.00246731		2357.77	-0.00042819		2887.77	0.00570963		3417.8	-0.01130751
237.99	0.06949137		767.99	-0.00946962		1297.98	0.00974538		1827.98	-0.00292562		2357.97	-0.00051108		2887.97	0.00596757		3418	-0.01126333
238.19	0.0703636		768.19	-0.00957321		1298.18	0.01101039		1828.18	-0.0033229		2358.17	-0.00032185		2888.17	0.00650876		3418.2	-0.0101648
238.39	0.07091362		768.39	-0.0100875		1298.38	0.01051042		1828.38	-0.00329803		2358.37	-0.00040521		2888.37	0.00692585		3418.4	-0.01060414
238.59	0.07131911		768.59	-0.00958434		1298.58	0.01005136		1828.58	-0.00327902		2358.57	-0.00097862		2888.57	0.00769925		3418.6	-0.01121401
238.79	0.07059471		768.79	-0.00887354		1298.78	0.01019707		1828.78	-0.00318374		2358.77	-0.00057084		2888.77	0.00673767		3418.8	-0.01169434
238.99	0.07175658		768.99	-0.00834972		1298.98	0.00912583		1828.98	-0.00267578		2358.97	-0.00079988		2888.97	0.00566423		3419	-0.01175105
239.19	0.07144415		769.19	-0.00734608		1299.18	0.00940667		1829.18	-0.00245971		2359.17	-0.00075827		2889.17	0.0049143		3419.2	-0.01188126
239.39	0.07131731		769.39	-0.0049988		1299.38	0.00932217		1829.38	-0.0022861		2359.37	0.00002439		2889.37	0.00485959		3419.4	-0.01152623
239.59	0.07203814		769.59	-0.00379502		1299.58	0.00934069		1829.58	-0.00193139		2359.57	0.00066207		2889.57	0.00472185		3419.6	-0.01201276
239.79	0.0720813		769.79	-0.00350963		1299.78	0.00949987		1829.78	-0.00119966		2359.77	0.00149774		2889.77	0.00488356		3419.8	-0.01139993
239.99	0.07185807		769.99	-0.00327574		1299.98	0.00910966		1829.98	-0.00046156		2359.97	0.00140477		2889.97	0.00522084		3420	-0.01118519
240.19	0.07133697		770.19	-0.00338213		1300.18	0.00857968		1830.18	-0.00018656		2360.17	0.00125763		2890.17	0.00533897		3420.2	-0.01036471
240.39	0.07203024		770.39	-0.00405747		1300.38	0.00955275		1830.38	0.00038766		2360.37	0.00104489		2890.37	0.00490545		3420.4	-0.00923171
240.59	0.07202692		770.59	-0.00448207		1300.58	0.00903618		1830.58	0.00138523		2360.57	0.0010622		2890.57	0.00494733		3420.6	-0.0091921
240.79	0.07205984		770.79	-0.00465474		1300.78	0.00895095		1830.78	0.00137366		2360.77	0.00116019		2890.77	0.00432274		3420.8	-0.00801326
240.99	0.07166492		770.99	-0.00551193		1300.98	0.0093089		1830.98	0.00148269		2360.97	0.00064462		2890.97	0.00382727		3421	-0.00818201
241.19	0.07097394		771.19	-0.00515787		1301.18	0.00933904		1831.18	0.00172661		2361.17	0.00188519		2891.17	0.00429352		3421.2	-0.00762943
241.39	0.07123679		771.39	-0.00615814		1301.38	0.00977561		1831.38	0.00057221		2361.37	0.00189632		2891.37	0.00483852		3421.4	-0.00775835
241.59	0.07121683		771.59	-0.00664347		1301.58	0.00964465		1831.58	0.0004261		2361.57	0.00211811		2891.57	0.0048457		3421.6	-0.00768267
241.79	0.07141484		771.79	-0.00660694		1301.78	0.01054385		1831.78	0.00031928		2361.77	0.00214546		2891.77	0.00446445		3421.8	-0.00844843
241.99	0.0723138		771.99	-0.00701626		1301.98	0.01077304		1831.98	-0.00025305		2361.97	0.00182583		2891.97	0.00449479		3422	-0.00937018
242.19	0.07330553		772.19	-0.0068294		1302.18	0.01067359		1832.18	-0.00049823		2362.17	0.00218918		2892.17	0.00453261		3422.2	-0.01024443
242.39	0.07414041		772.39	-0.0069409		1302.38	0.01008657		1832.38	-0.00063337		2362.37	0.00264925		2892.37	0.00454672		3422.4	-0.01220398
242.59	0.07443207		772.59	-0.00697812		1302.58	0.00969409		1832.58	-0.00091121		2362.57	0.00274065		2892.57	0.00499876		3422.6	-0.0130121
242.79	0.07539579		772.79	-0.00724073		1302.78	0.00836443		1832.78	-0.00039808		2362.77	0.00316392		2892.77	0.0040157		3422.8	-0.01394272
242.99	0.07735341		772.99	-0.00710744		1302.98	0.00801821		1832.98	-0.00046735		2362.97	0.00355076		2892.97	0.00412195		3423	-0.01401267
243.19	0.0777845		773.19	-0.00683707		1303.18	0.00780829		1833.18	0.0003845		2363.17	0.00412642		2893.17	0.00512901		3423.2	-0.01414944
243.39	0.07944329		773.39	-0.00604514		1303.38	0.00763314		1833.38	0.00047173		2363.37	0.00430252		2893.37	0.0057057		3423.4	-0.0155586
243.59	0.07981721		773.59	-0.0064882		1303.58	0.00682223		1833.58	0.00142272		2363.57	0.00398395		2893.57	0.0070536		3423.6	-0.0161211
243.79	0.08000654		773.79	-0.00697642		1303.78	0.00492326		1833.78	0.00178282		2363.77	0.00394465		2893.77	0.00709799		3423.8	-0.01665798
243.99	0.08024682		773.99	-0.00686115		1303.98	0.00536107		1833.98	0.0013936		2363.97	0.00327512		2893.97	0.00717899		3424	-0.01566203
244.19	0.08051451		774.19	-0.00719662		1304.18	0.00528221		1834.18	0.00199568		2364.17	0.00281368		2894.17	0.00729023		3424.2	-0.01474322
244.39	0.08019617		774.39	-0.00731179		1304.38	0.00720642		1834.38	0.00282899		2364.37	0.00123133		2894.37	0.00661241		3424.4	-0.01392734
244.59	0.07934769		774.59	-0.00687609		1304.58	0.00767392		1834.58	0.00296993		2364.57	0.00085783		2894.57	0.00727953		3424.6	-0.01369241
244.79	0.07938492		774.79	-0.0069216		1304.78	0.00822602		1834.78	0.00301211		2364.77	0.00026559		2894.77	0.00664402		3424.8	-0.01293344
244.99	0.07915564		774.99	-0.00745023		1304.98	0.00866151		1834.98	0.00259341		2364.97	-0.0002181		2894.97	0.00758372		3425	-0.01228434
245.19	0.07875377		775.19	-0.00711898		1305.18	0.00882892		1835.18	0.00225471		2365.17	-0.00008863		2895.17	0.0084425		3425.2	-0.01122654
245.39	0.07938143		775.39	-0.00610888		1305.38	0.00922654		1835.38	0.00153915		2365.37	-0.00046905		2895.37	0.00796855		3425.4	-0.01043987
245.59	0.07896763		775.59	-0.00608886		1305.58	0.00990092		1835.58	0.00081912		2365.57	-0.00115407		2895.57	0.0076452		3425.6	-0.00936901
245.79	0.07958145		775.79	-0.00532983		1305.78	0.01082774		1835.78	-0.00099661		2365.77	-0.00123939		2895.77	0.00783796		3425.8	-0.00922971
245.99	0.08000702		775.99	-0.00494454		1305.98	0.01040278		1835.98	-0.0012684		2365.97	-0.00159319		2895.97	0.00873481		3426	-0.00950358
246.19	0.0801828		776.19	-0.00565864		1306.18	0.00938962		1836.18	-0.00219221		2366.17	-0.00039861		2896.17	0.00920622		3426.2	-0.00972385
246.39	0.08004143		776.39	-0.00627461		1306.38	0.00908629		1836.38	-0.00225933		2366.37	0.00003425		2896.37	0.00878658		3426.4	-0.01022732
246.59	0.07957019		776.59	-0.00644272		1306.58	0.00822925		1836.58	-0.00228631		2366.57	0.00026991		2896.57	0.00854205		3426.6	-0.00975092
246.79	0.08071037		776.79	-0.00590853		1306.78	0.00850053		1836.78	-0.0028		2366.77	0.00018315		2896.77	0.00759195		3426.8	-0.00948565
246.99	0.08215849		776.99	-0.00539652		1306.98	0.00917424		1836.98	-0.00297019		2366.97	0.00044356		2896.97	0.00728667		3427	-0.00964136
247.19	0.08299706		777.19	-0.00522466		1307.18	0.00922039		1837.18	-0.00279949		2367.17	0.00113121		2897.17	0.00786149		3427.2	-0.01055272
247.39	0.08411135		777.39	-0.00464819		1307.38	0.00827798		1837.38	-0.00340175		2367.37	0.00190485		2897.37	0.00732425		3427.4	-0.01129496
247.59	0.08476557		777.59	-0.00372177		1307.58	0.0082782		1837.58	-0.00323624		2367.57	0.00218074		2897.57	0.00775312		3427.6	-0.01111287
247.79	0.08569531		777.79	-0.00318073		1307.78	0.00797411		1837.78	-0.00337865		2367.77	0.00213217		2897.77	0.00744808		3427.8	-0.01082566
247.99	0.08595759		777.99	-0.00235637		1307.98	0.00952277		1837.98	-0.0036142		2367.97	0.00210602		2897.97	0.00776015		3428	-0.01055703
248.19	0.0857357		778.19	-0.00279045		1308.18	0.01055185		1838.18	-0.00354993		2368.17	0.00153997		2898.17	0.00803111		3428.2	-0.01101666
248.39	0.08493001		778.39	-0.00273997		1308.38	0.01177107		1838.38	-0.00330718		2368.37	0.00115135		2898.37	0.00800878		3428.4	-0.01153284
248.59	0.08464769		778.59	-0.00277949		1308.58	0.01174708		1838.58	-0.00320031		2368.57	0.00208713		2898.57	0.00861885		3428.6	-0.01122555
248.79	0.08548777		778.79	-0.00289354		1308.78	0.01252455		1838.78	-0.00236026		2368.77	0.00207557		2898.77	0.00852425		3428.8	-0.01127862
248.99	0.08412587		778.99	-0.00338049		1308.98	0.01246711		1838.98	-0.00195145		2368.97	0.00314602		2898.97	0.00940673		3429	-0.01047431
249.19	0.08374711		779.19	-0.00374014		1309.18	0.01297491		1839.18	-0.00152958		2369.17	0.00300323		2899.17	0.0088366		3429.2	-0.00986113
249.39	0.08330938		779.39	-0.00351176		1309.38	0.01335021		1839.38	-0.00076536		2369.37	0.00194368		2899.37	0.0090429		3429.4	-0.00946407
249.59	0.08265242		779.59	-0.00404972		1309.58	0.01310884		1839.58	-0.00141271		2369.57	0.00199697		2899.57	0.0099355		3429.6	-0.00885237
249.79	0.0824413		779.79	-0.00375615		1309.78	0.01303791		1839.78	-0.00134727		2369.77	0.00304245		2899.77	0.01005028		3429.8	-0.00864952
249.99	0.08248943		779.99	-0.00392276		1309.98	0.01266881		1839.98	-0.00002761		2369.97	0.00313912		2899.97	0.0097798		3430	-0.00922975
250.19	0.08186448		780.19	-0.0055142		1310.18	0.01156739		1840.18	0.00009471		2370.17	0.00378336		2900.17	0.00901504		3430.2	-0.00935492
250.39	0.08132992		780.39	-0.00615966		1310.38	0.0109286		1840.38	0.00136285		2370.37	0.00344177		2900.37	0.00766148		3430.4	-0.01001663
250.59	0.08175207		780.59	-0.00609416		1310.58	0.01064139		1840.58	0.00243728		2370.57	0.0041721		2900.57	0.0071129		3430.6	-0.00952905
250.79	0.08338024		780.79	-0.00629302		1310.78	0.01115826		1840.78	0.00228687		2370.77	0.00400753		2900.77	0.00620975		3430.8	-0.00977597
250.99	0.08419091		780.99	-0.00720076		1310.98	0.01043008		1840.98	0.00259159		2370.97	0.00515994		2900.97	0.00596691		3431	-0.0108269
251.19	0.08507559		781.19	-0.00756542		1311.18	0.01078444		1841.18	0.00250564		2371.17	0.00614728		2901.17	0.00567628		3431.2	-0.01118451
251.39	0.08613536		781.39	-0.00739499		1311.38	0.00995162		1841.38	0.00271034		2371.37	0.00669369		2901.37	0.00506938		3431.4	-0.0110456
251.59	0.08712148		781.59	-0.00670067		1311.58	0.01021839		1841.58	0.00267924		2371.57	0.00651906		2901.57	0.00590746		3431.6	-0.01255124
251.79	0.08755855		781.79	-0.00703779		1311.78	0.00910375		1841.78	0.00145955		2371.77	0.00606347		2901.77	0.00585964		3431.8	-0.01270925
251.99	0.08814126		781.99	-0.00667909		1311.98	0.0094969		1841.98	0.00013383		2371.97	0.00618137		2901.97	0.00604795		3432	-0.01306605
252.19	0.08760585		782.19	-0.00720766		1312.18	0.0095236		1842.18	-0.00064954		2372.17	0.00585647		2902.17	0.00612066		3432.2	-0.01331704
252.39	0.08729043		782.39	-0.00724836		1312.38	0.01011216		1842.38	-0.00049464		2372.37	0.00626025		2902.37	0.00558685		3432.4	-0.01335366
252.59	0.08771828		782.59	-0.00679809		1312.58	0.01015167		1842.58	-0.00039715		2372.57	0.00659557		2902.57	0.00679653		3432.6	-0.01264286
252.79	0.08760543		782.79	-0.0060848		1312.78	0.01036409		1842.78	-0.00010883		2372.77	0.00623597		2902.77	0.00696775		3432.8	-0.01278673
252.99	0.08702046		782.99	-0.00547433		1312.98	0.00989578		1842.98	-0.000247		2372.97	0.00611606		2902.97	0.00733523		3433	-0.01217235
253.19	0.08846682		783.19	-0.00411786		1313.18	0.01030073		1843.18	-0.00070364		2373.17	0.00572034		2903.17	0.00692095		3433.2	-0.01150766
253.39	0.08924476		783.39	-0.00303058		1313.38	0.01079119		1843.38	-0.00038135		2373.37	0.00506205		2903.37	0.00733628		3433.4	-0.01117996
253.59	0.09037062		783.59	-0.00214659		1313.58	0.01100384		1843.58	-0.00169431		2373.57	0.00591767		2903.57	0.00736775		3433.6	-0.01090776
253.79	0.09162149		783.79	-0.00196988		1313.78	0.01158593		1843.78	-0.00113161		2373.77	0.005824		2903.77	0.00698458		3433.8	-0.01103393
253.99	0.09199493		783.99	-0.00225061		1313.98	0.01159949		1843.98	-0.00007733		2373.97	0.00511729		2903.97	0.00718839		3434	-0.01167274
254.19	0.09255132		784.19	-0.0031		1314.18	0.01100045		1844.18	-0.00045402		2374.17	0.00526338		2904.17	0.00677351		3434.2	-0.01170293
254.39	0.0933587		784.39	-0.00361041		1314.38	0.01099296		1844.38	-0.0000979		2374.37	0.00473781		2904.37	0.00683244		3434.4	-0.01181341
254.59	0.09365179		784.59	-0.00368364		1314.58	0.01139516		1844.58	-0.00027922		2374.57	0.00511138		2904.57	0.00692695		3434.6	-0.0113146
254.79	0.09356108		784.79	-0.00463686		1314.78	0.01100452		1844.78	-0.00075732		2374.77	0.00518501		2904.77	0.00735427		3434.8	-0.01191097
254.99	0.09319369		784.99	-0.00520228		1314.98	0.01068277		1844.98	-0.00064838		2374.97	0.00570774		2904.97	0.00772451		3435	-0.01278975
255.19	0.09363535		785.19	-0.00548954		1315.18	0.01123689		1845.18	-0.000774		2375.17	0.00554282		2905.17	0.00828048		3435.2	-0.01279901
255.39	0.09379245		785.39	-0.00572546		1315.38	0.00982364		1845.38	-0.00041338		2375.37	0.00522789		2905.37	0.00856474		3435.4	-0.0129178
255.59	0.09336302		785.59	-0.00545438		1315.58	0.0094653		1845.58	-0.00062626		2375.57	0.00493827		2905.57	0.0097098		3435.6	-0.01382296
255.79	0.09350907		785.79	-0.00562149		1315.78	0.00898979		1845.78	-0.00112832		2375.77	0.00449705		2905.77	0.00993485		3435.8	-0.01287913
255.99	0.09310046		785.99	-0.00631663		1315.98	0.00976666		1845.98	-0.00036028		2375.97	0.00426307		2905.97	0.01071541		3436	-0.01299111
256.19	0.09283217		786.19	-0.00625205		1316.18	0.01019047		1846.18	-0.00025047		2376.17	0.00440529		2906.17	0.01031171		3436.2	-0.01354971
256.39	0.09238165		786.39	-0.00492342		1316.38	0.01051292		1846.38	0.00014433		2376.37	0.00521544		2906.37	0.00997453		3436.4	-0.01380961
256.59	0.09254003		786.59	-0.00519628		1316.58	0.01031745		1846.58	0.00017572		2376.57	0.00525383		2906.57	0.01052585		3436.6	-0.01358388
256.79	0.09210137		786.79	-0.00490595		1316.78	0.01026507		1846.78	0.00021917		2376.77	0.00495097		2906.77	0.00934949		3436.8	-0.01416016
256.99	0.09202426		786.99	-0.00384399		1316.98	0.01054765		1846.98	0.00006332		2376.97	0.00488729		2906.97	0.00840287		3437	-0.01294406
257.19	0.09295285		787.19	-0.00396881		1317.18	0.01061819		1847.18	-0.00013571		2377.17	0.00432547		2907.17	0.00705606		3437.2	-0.01248838
257.39	0.09307154		787.39	-0.0041664		1317.38	0.01179735		1847.38	0.00002381		2377.37	0.00343688		2907.37	0.00593667		3437.4	-0.01231364
257.59	0.09434793		787.59	-0.00423692		1317.58	0.01243737		1847.58	-0.00024372		2377.57	0.00293401		2907.57	0.00579453		3437.6	-0.01145202
257.79	0.09535189		787.79	-0.00561978		1317.78	0.01258804		1847.78	-0.0008799		2377.77	0.00209608		2907.77	0.00549579		3437.8	-0.01138146
257.99	0.09483789		787.99	-0.00594074		1317.98	0.01279122		1847.98	-0.00170959		2377.97	0.00215034		2907.97	0.00515205		3438	-0.01088129
258.19	0.09567651		788.19	-0.00618565		1318.18	0.01332519		1848.18	-0.00252911		2378.17	0.00191264		2908.17	0.00543486		3438.2	-0.01109895
258.39	0.0955438		788.39	-0.00672834		1318.38	0.01258652		1848.38	-0.00230633		2378.37	0.00216007		2908.37	0.00533394		3438.4	-0.01110821
258.59	0.09599924		788.59	-0.00651714		1318.58	0.01242998		1848.58	-0.00217702		2378.57	0.00324867		2908.57	0.00572821		3438.6	-0.01113972
258.79	0.09626313		788.79	-0.00616331		1318.78	0.01116384		1848.78	-0.0020122		2378.77	0.00331284		2908.77	0.006127		3438.8	-0.01149425
258.99	0.09615257		788.99	-0.00560771		1318.98	0.01050773		1848.98	-0.00170895		2378.97	0.00302714		2908.97	0.00623382		3439	-0.01151955
259.19	0.09643274		789.19	-0.00575044		1319.18	0.01118952		1849.18	-0.00074542		2379.17	0.00348389		2909.17	0.00725761		3439.2	-0.01204154
259.39	0.09606611		789.39	-0.00561406		1319.38	0.00995659		1849.38	0.00006105		2379.37	0.00417028		2909.37	0.00798004		3439.4	-0.0131343
259.59	0.0954292		789.59	-0.00563343		1319.58	0.00973546		1849.58	0.00096304		2379.57	0.0052212		2909.57	0.00986858		3439.6	-0.01339567
259.79	0.0962012		789.79	-0.00609901		1319.78	0.00991438		1849.78	0.0011749		2379.77	0.00591128		2909.77	0.01030577		3439.8	-0.01409946
259.99	0.09548946		789.99	-0.00597368		1319.98	0.01003419		1849.98	0.00087686		2379.97	0.00694457		2909.97	0.0106745		3440	-0.01486481
260.19	0.0952531		790.19	-0.00386209		1320.18	0.0090512		1850.18	0.00117155		2380.17	0.00746678		2910.17	0.01079139		3440.2	-0.01495782
260.39	0.09472744		790.39	-0.00293565		1320.38	0.00862867		1850.38	0.00159357		2380.37	0.00751706		2910.37	0.01036259		3440.4	-0.01539736
260.59	0.09474356		790.59	-0.00376748		1320.58	0.00867623		1850.58	0.00207041		2380.57	0.00781635		2910.57	0.00958392		3440.6	-0.0149512
260.79	0.09423362		790.79	-0.00320331		1320.78	0.00912727		1850.78	0.0018713		2380.77	0.00746797		2910.77	0.00993936		3440.8	-0.01527738
260.99	0.0949938		790.99	-0.00294504		1320.98	0.00997901		1850.98	0.00161493		2380.97	0.00733343		2910.97	0.00949011		3441	-0.01355489
261.19	0.09602014		791.19	-0.00373237		1321.18	0.01102671		1851.18	0.00147602		2381.17	0.0068101		2911.17	0.00944427		3441.2	-0.01264682
261.39	0.09671773		791.39	-0.00325122		1321.38	0.01185429		1851.38	0.00066994		2381.37	0.00647786		2911.37	0.0092093		3441.4	-0.01194574
261.59	0.09828631		791.59	-0.00415362		1321.58	0.01218831		1851.58	-0.00031292		2381.57	0.00663625		2911.57	0.0094027		3441.6	-0.01117873
261.79	0.09773113		791.79	-0.00473956		1321.78	0.01243739		1851.78	-0.00114027		2381.77	0.00639329		2911.77	0.0103687		3441.8	-0.01141235
261.99	0.09789149		791.99	-0.00418443		1321.98	0.01347134		1851.98	-0.00145886		2381.97	0.00595448		2911.97	0.01080968		3442	-0.01108149
262.19	0.09905101		792.19	-0.00542678		1322.18	0.01344085		1852.18	-0.00107513		2382.17	0.00495168		2912.17	0.01113358		3442.2	-0.01105144
262.39	0.10012059		792.39	-0.00606213		1322.38	0.01238785		1852.38	-0.00124623		2382.37	0.00512248		2912.37	0.01083425		3442.4	-0.01057849
262.59	0.10107997		792.59	-0.00601431		1322.58	0.01345506		1852.58	-0.00126153		2382.57	0.00515364		2912.57	0.01075707		3442.6	-0.01085025
262.79	0.10134723		792.79	-0.00631203		1322.78	0.01226492		1852.78	-0.00173719		2382.77	0.0049141		2912.77	0.01059049		3442.8	-0.01144353
262.99	0.10207395		792.99	-0.00705373		1322.98	0.01216273		1852.98	-0.00093874		2382.97	0.00504917		2912.97	0.0115075		3443	-0.01156085
263.19	0.10186496		793.19	-0.00741636		1323.18	0.01307157		1853.18	-0.00066925		2383.17	0.00584957		2913.17	0.01210305		3443.2	-0.01275683
263.39	0.10127733		793.39	-0.00821294		1323.38	0.01207844		1853.38	-0.00082066		2383.37	0.00650267		2913.37	0.01194205		3443.4	-0.01308347
263.59	0.10132404		793.59	-0.00801168		1323.58	0.01229802		1853.58	-0.00019042		2383.57	0.00661723		2913.57	0.01184394		3443.6	-0.01320767
263.79	0.10206382		793.79	-0.00777423		1323.78	0.01195408		1853.78	-0.00072267		2383.77	0.00729837		2913.77	0.01146586		3443.8	-0.01409294
263.99	0.10195832		793.99	-0.00617258		1323.98	0.01083678		1853.98	-0.00066581		2383.97	0.00746728		2913.97	0.01121136		3444	-0.01450459
264.19	0.10152406		794.19	-0.00470955		1324.18	0.0101183		1854.18	0.00035683		2384.17	0.00683666		2914.17	0.01041306		3444.2	-0.0152115
264.39	0.10159929		794.39	-0.00372318		1324.38	0.01072111		1854.38	0.00093122		2384.37	0.00699196		2914.37	0.00866263		3444.4	-0.01484266
264.59	0.10249219		794.59	-0.00412858		1324.58	0.01160459		1854.58	0.00117415		2384.57	0.00750215		2914.57	0.00854262		3444.6	-0.01447566
264.79	0.10375379		794.79	-0.00404635		1324.78	0.01255874		1854.78	0.00067098		2384.77	0.0066338		2914.77	0.00868196		3444.8	-0.01467159
264.99	0.10532188		794.99	-0.00382229		1324.98	0.0133481		1854.98	0.00081174		2384.97	0.00712439		2914.97	0.00798927		3445	-0.01390111
265.19	0.10599383		795.19	-0.00307419		1325.18	0.01380413		1855.18	0.00088552		2385.17	0.00714751		2915.17	0.0073918		3445.2	-0.01404958
265.39	0.10578222		795.39	-0.00212439		1325.38	0.01380352		1855.38	0.00055484		2385.37	0.00681008		2915.37	0.00741911		3445.4	-0.01392974
265.59	0.10578486		795.59	-0.00265065		1325.58	0.01410995		1855.58	0.00091128		2385.57	0.0071961		2915.57	0.00828732		3445.6	-0.01452129
265.79	0.10485331		795.79	-0.00233256		1325.78	0.01452614		1855.78	0.00062097		2385.77	0.00687267		2915.77	0.00978489		3445.8	-0.01457031
265.99	0.10497967		795.99	-0.00310637		1325.98	0.01439157		1855.98	-0.00092467		2385.97	0.00630849		2915.97	0.009426		3446	-0.01477461
266.19	0.10457917		796.19	-0.0041126		1326.18	0.01390039		1856.18	-0.0001225		2386.17	0.00627241		2916.17	0.00934903		3446.2	-0.01483339
266.39	0.10462698		796.39	-0.00461636		1326.38	0.01351345		1856.38	-0.00014328		2386.37	0.00670814		2916.37	0.00953899		3446.4	-0.01572704
266.59	0.10441229		796.59	-0.00492893		1326.58	0.01403955		1856.58	-0.00020231		2386.57	0.00785291		2916.57	0.00916081		3446.6	-0.01569661
266.79	0.10525637		796.79	-0.0051622		1326.78	0.0131515		1856.78	-0.00049866		2386.77	0.00819978		2916.77	0.00978092		3446.8	-0.01590032
266.99	0.10490464		796.99	-0.00520624		1326.98	0.0134457		1856.98	-0.0004709		2386.97	0.00842689		2916.97	0.01136389		3447	-0.01532205
267.19	0.10404491		797.19	-0.00557483		1327.18	0.01362988		1857.18	-0.00056097		2387.17	0.00851972		2917.17	0.01122262		3447.2	-0.01581358
267.39	0.10344664		797.39	-0.0051938		1327.38	0.01243342		1857.38	-0.00021805		2387.37	0.00841543		2917.37	0.01139992		3447.4	-0.0156576
267.59	0.10395152		797.59	-0.00479436		1327.58	0.01198746		1857.58	0.0001671		2387.57	0.00881674		2917.57	0.0117156		3447.6	-0.01459824
267.79	0.10322914		797.79	-0.00492966		1327.78	0.0109487		1857.78	0.00072227		2387.77	0.01039149		2917.77	0.01233319		3447.8	-0.01424451
267.99	0.10328135		797.99	-0.00415816		1327.98	0.01067131		1857.98	0.0010798		2387.97	0.01057208		2917.97	0.01165937		3448	-0.01394125
268.19	0.10378822		798.19	-0.00425324		1328.18	0.01082024		1858.18	0.00161273		2388.17	0.01024068		2918.17	0.01133809		3448.2	-0.01385551
268.39	0.10531246		798.39	-0.00396102		1328.38	0.0110481		1858.38	0.0024379		2388.37	0.01048973		2918.37	0.01048429		3448.4	-0.01286348
268.59	0.1066389		798.59	-0.00522373		1328.58	0.01138334		1858.58	0.00217111		2388.57	0.01049152		2918.57	0.01026163		3448.6	-0.01340096
268.79	0.1078209		798.79	-0.00530605		1328.78	0.012265		1858.78	0.0023379		2388.77	0.01038994		2918.77	0.01019831		3448.8	-0.01350092
268.99	0.10886716		798.99	-0.00502339		1328.98	0.01268399		1858.98	0.00255765		2388.97	0.01095267		2918.97	0.01027027		3449	-0.01298455
269.19	0.11028025		799.19	-0.00454987		1329.18	0.01297368		1859.18	0.00270481		2389.17	0.01047883		2919.17	0.01050991		3449.2	-0.01316825
269.39	0.11016669		799.39	-0.00457631		1329.38	0.01273964		1859.38	0.00221118		2389.37	0.00947694		2919.37	0.01122513		3449.4	-0.01325119
269.59	0.11109587		799.59	-0.00471378		1329.58	0.01244168		1859.58	0.00131812		2389.57	0.0098243		2919.57	0.01162847		3449.6	-0.01355002
269.79	0.11081663		799.79	-0.00418544		1329.78	0.0120873		1859.78	0.00077701		2389.77	0.00968103		2919.77	0.01185045		3449.8	-0.01333823
269.99	0.11134457		799.99	-0.00476438		1329.98	0.01241347		1859.98	0.00005192		2389.97	0.009532		2919.97	0.01100541		3450	-0.01423128
270.19	0.11189105		800.19	-0.00524045		1330.18	0.01263397		1860.18	0.00141564		2390.17	0.00961462		2920.17	0.01133949		3450.2	-0.01466747
270.39	0.11266431		800.39	-0.00523316		1330.38	0.01293209		1860.38	0.00109238		2390.37	0.00938271		2920.37	0.01175929		3450.4	-0.01557368
270.59	0.11256508		800.59	-0.0049674		1330.58	0.01377692		1860.58	-0.00004782		2390.57	0.01044343		2920.57	0.01228403		3450.6	-0.01624775
270.79	0.11331679		800.79	-0.00423511		1330.78	0.0146666		1860.78	0.00004899		2390.77	0.00950903		2920.77	0.01327191		3450.8	-0.01689604
270.99	0.11267862		800.99	-0.00374254		1330.98	0.01477053		1860.98	-0.00058023		2390.97	0.00939838		2920.97	0.0140162		3451	-0.01637226
271.19	0.11216508		801.19	-0.00338042		1331.18	0.01425821		1861.18	-0.00001452		2391.17	0.00900599		2921.17	0.01382382		3451.2	-0.01648643
271.39	0.11153789		801.39	-0.00257234		1331.38	0.01299757		1861.38	0.0002204		2391.37	0.00862793		2921.37	0.01448885		3451.4	-0.01611087
271.59	0.11163065		801.59	-0.00296114		1331.58	0.01288605		1861.58	0.00034838		2391.57	0.00877171		2921.57	0.01538794		3451.6	-0.01527323
271.79	0.11066898		801.79	-0.00304605		1331.78	0.01308813		1861.78	0.00072851		2391.77	0.00817019		2921.77	0.01564677		3451.8	-0.01592858
271.99	0.11046407		801.99	-0.00293818		1331.98	0.01305871		1861.98	0.00050072		2391.97	0.00712026		2921.97	0.0147576		3452	-0.01616944
272.19	0.11019149		802.19	-0.00300095		1332.18	0.01306375		1862.18	0.00102075		2392.17	0.00686111		2922.17	0.0141988		3452.2	-0.01722095
272.39	0.11022718		802.39	-0.00273948		1332.38	0.01277789		1862.38	0.00089769		2392.37	0.00603949		2922.37	0.01298552		3452.4	-0.01749652
272.59	0.10971674		802.59	-0.00374058		1332.58	0.01294942		1862.58	0.00105387		2392.57	0.00543513		2922.57	0.01203228		3452.6	-0.01723988
272.79	0.10968781		802.79	-0.00317422		1332.78	0.01351235		1862.78	0.00113321		2392.77	0.00552272		2922.77	0.0120771		3452.8	-0.01708411
272.99	0.11025451		802.99	-0.00364933		1332.98	0.01262489		1862.98	0.00005191		2392.97	0.00438502		2922.97	0.01175376		3453	-0.01681369
273.19	0.11088626		803.19	-0.00377779		1333.18	0.01280031		1863.18	-0.00044515		2393.17	0.00439576		2923.17	0.01154367		3453.2	-0.0175931
273.39	0.11056319		803.39	-0.00331342		1333.38	0.01184561		1863.38	-0.00218652		2393.37	0.00370144		2923.37	0.01132257		3453.4	-0.01752247
273.59	0.11114795		803.59	-0.00306325		1333.58	0.01163562		1863.58	-0.00331756		2393.57	0.00522829		2923.57	0.01119523		3453.6	-0.01659032
273.79	0.11102348		803.79	-0.00277535		1333.78	0.01137611		1863.78	-0.00273428		2393.77	0.00540122		2923.77	0.01129143		3453.8	-0.01642263
273.99	0.11220892		803.99	-0.00385611		1333.98	0.01172047		1863.98	-0.00303577		2393.97	0.00624018		2923.97	0.01022462		3454	-0.01647775
274.19	0.11228836		804.19	-0.00386892		1334.18	0.01219647		1864.18	-0.00210516		2394.17	0.00702364		2924.17	0.0106634		3454.2	-0.01686059
274.39	0.11251249		804.39	-0.00386402		1334.38	0.01246453		1864.38	-0.00152949		2394.37	0.00681042		2924.37	0.01114473		3454.4	-0.01751046
274.59	0.1125528		804.59	-0.00398493		1334.58	0.01308515		1864.58	-0.00204019		2394.57	0.00791389		2924.57	0.01149705		3454.6	-0.01801368
274.79	0.11326973		804.79	-0.00349139		1334.78	0.01272714		1864.78	-0.00088902		2394.77	0.00758177		2924.77	0.01202071		3454.8	-0.01771225
274.99	0.11353789		804.99	-0.00369548		1334.98	0.0118681		1864.98	-0.00089028		2394.97	0.00826903		2924.97	0.01227989		3455	-0.01767603
275.19	0.11364756		805.19	-0.00357413		1335.18	0.01197561		1865.18	0.00050449		2395.17	0.00903202		2925.17	0.01248464		3455.2	-0.01774464
275.39	0.11444932		805.39	-0.0035646		1335.38	0.01186188		1865.38	0.0010608		2395.37	0.00894079		2925.37	0.01357461		3455.4	-0.01799354
275.59	0.11465926		805.59	-0.00399995		1335.58	0.0125734		1865.58	0.00152009		2395.57	0.00988889		2925.57	0.0142364		3455.6	-0.01857935
275.79	0.11472793		805.79	-0.00343844		1335.78	0.01316325		1865.78	0.00212051		2395.77	0.00988699		2925.77	0.0137256		3455.8	-0.01930593
275.99	0.11509972		805.99	-0.0036913		1335.98	0.01407952		1865.98	0.00268144		2395.97	0.01058041		2925.97	0.01326596		3456	-0.0199241
276.19	0.11575281		806.19	-0.00379053		1336.18	0.01366637		1866.18	0.00393196		2396.17	0.01084997		2926.17	0.01367789		3456.2	-0.02033228
276.39	0.11689096		806.39	-0.00427552		1336.38	0.01380466		1866.38	0.00379216		2396.37	0.00999509		2926.37	0.01285648		3456.4	-0.02020479
276.59	0.11636402		806.59	-0.00530518		1336.58	0.01346796		1866.58	0.00393555		2396.57	0.01039162		2926.57	0.01241435		3456.6	-0.01960582
276.79	0.11617513		806.79	-0.00487652		1336.78	0.01413974		1866.78	0.00277825		2396.77	0.01012811		2926.77	0.01310092		3456.8	-0.0197868
276.99	0.11618311		806.99	-0.00486236		1336.98	0.01463954		1866.98	0.00125457		2396.97	0.00967201		2926.97	0.01376057		3457	-0.01934027
277.19	0.11583102		807.19	-0.00483644		1337.18	0.01590474		1867.18	0.00082321		2397.17	0.00978375		2927.17	0.01392449		3457.2	-0.01981379
277.39	0.11565204		807.39	-0.00446124		1337.38	0.01518813		1867.38	-0.00067117		2397.37	0.00920063		2927.37	0.01424499		3457.4	-0.0179914
277.59	0.11595205		807.59	-0.00550658		1337.58	0.01550878		1867.58	-0.00084369		2397.57	0.00984195		2927.57	0.01372119		3457.6	-0.01716369
277.79	0.11604332		807.79	-0.00519666		1337.78	0.0151029		1867.78	-0.00024598		2397.77	0.0094976		2927.77	0.01405603		3457.8	-0.01647545
277.99	0.11631061		807.99	-0.00630402		1337.98	0.01575061		1867.98	-0.00144751		2397.97	0.00889754		2927.97	0.01381189		3458	-0.01596422
278.19	0.11675445		808.19	-0.00609199		1338.18	0.01577761		1868.18	-0.00083893		2398.17	0.00778314		2928.17	0.01511492		3458.2	-0.01612822
278.39	0.1169201		808.39	-0.00614072		1338.38	0.01529131		1868.38	-0.00074217		2398.37	0.00675061		2928.37	0.01562376		3458.4	-0.01564903
278.59	0.11678666		808.59	-0.00555661		1338.58	0.0150217		1868.58	-0.00135877		2398.57	0.00672177		2928.57	0.0157648		3458.6	-0.01563598
278.79	0.11662871		808.79	-0.00526481		1338.78	0.01450701		1868.78	-0.0013103		2398.77	0.0064834		2928.77	0.01578408		3458.8	-0.01504013
278.99	0.11663951		808.99	-0.00550875		1338.98	0.0141422		1868.98	-0.00079855		2398.97	0.00710549		2928.97	0.01508867		3459	-0.01465643
279.19	0.11652407		809.19	-0.00458516		1339.18	0.01418275		1869.18	-0.00001584		2399.17	0.00767766		2929.17	0.01395822		3459.2	-0.01449371
279.39	0.11670163		809.39	-0.00395729		1339.38	0.01348257		1869.38	-0.00015674		2399.37	0.00841688		2929.37	0.01440706		3459.4	-0.01475527
279.59	0.11731378		809.59	-0.00371273		1339.58	0.01401136		1869.58	0.00051063		2399.57	0.00950492		2929.57	0.01420533		3459.6	-0.01495222
279.79	0.11775414		809.79	-0.00303242		1339.78	0.01403238		1869.78	0.00090682		2399.77	0.00988213		2929.77	0.01310918		3459.8	-0.01496355
279.99	0.11857595		809.99	-0.00399372		1339.98	0.01458905		1869.98	0.00126125		2399.97	0.01079592		2929.97	0.01281645		3460	-0.01450267
280.19	0.11924503		810.19	-0.00385263		1340.18	0.01318513		1870.18	0.00221722		2400.17	0.01144829		2930.17	0.01297917		3460.2	-0.01473149
280.39	0.11958669		810.39	-0.00401837		1340.38	0.01242893		1870.38	0.00215198		2400.37	0.01193061		2930.37	0.0120793		3460.4	-0.01468234
280.59	0.11921068		810.59	-0.00407354		1340.58	0.01195804		1870.58	0.00203652		2400.57	0.0125298		2930.57	0.01202574		3460.6	-0.01422992
280.79	0.11978083		810.79	-0.00346399		1340.78	0.01266896		1870.78	0.00156989		2400.77	0.01255714		2930.77	0.01257506		3460.8	-0.01412341
280.99	0.12015431		810.99	-0.00383943		1340.98	0.01317096		1870.98	0.00121994		2400.97	0.01352257		2930.97	0.01247146		3461	-0.01390804
281.19	0.12022693		811.19	-0.00506518		1341.18	0.01318753		1871.18	0.00054885		2401.17	0.01267189		2931.17	0.01175072		3461.2	-0.01405962
281.39	0.12051274		811.39	-0.00557582		1341.38	0.01206922		1871.38	-0.00017721		2401.37	0.01328706		2931.37	0.01176948		3461.4	-0.01399761
281.59	0.12176677		811.59	-0.00647347		1341.58	0.01279143		1871.58	-0.00055342		2401.57	0.01340672		2931.57	0.01183062		3461.6	-0.01505229
281.79	0.12279507		811.79	-0.00674476		1341.78	0.01243907		1871.78	-0.00079236		2401.77	0.01278717		2931.77	0.01245601		3461.8	-0.01434664
281.99	0.12353345		811.99	-0.00642332		1341.98	0.01329598		1871.98	-0.00151181		2401.97	0.01246267		2931.97	0.01233892		3462	-0.01465011
282.19	0.12409767		812.19	-0.00565635		1342.18	0.01374175		1872.18	-0.00130361		2402.17	0.011494		2932.17	0.01253193		3462.2	-0.01512953
282.39	0.12342229		812.39	-0.00529708		1342.38	0.01420645		1872.38	-0.00110456		2402.37	0.0108287		2932.37	0.01176615		3462.4	-0.01606185
282.59	0.12327618		812.59	-0.0055354		1342.58	0.01409245		1872.58	-0.0018901		2402.57	0.01012358		2932.57	0.01155301		3462.6	-0.01585135
282.79	0.12265536		812.79	-0.00545534		1342.78	0.01438524		1872.78	-0.00287182		2402.77	0.00985644		2932.77	0.01104185		3462.8	-0.01553204
282.99	0.12345144		812.99	-0.005612		1342.98	0.01327822		1872.98	-0.00283432		2402.97	0.00955504		2932.97	0.01021917		3463	-0.01585339
283.19	0.12436993		813.19	-0.00560681		1343.18	0.01333496		1873.18	-0.00331173		2403.17	0.00969155		2933.17	0.00977852		3463.2	-0.01664964
283.39	0.12402221		813.39	-0.00550275		1343.38	0.01388564		1873.38	-0.00276529		2403.37	0.01018893		2933.37	0.01114191		3463.4	-0.01632957
283.59	0.1246064		813.59	-0.00592061		1343.58	0.0151596		1873.58	-0.00135457		2403.57	0.0105632		2933.57	0.01141618		3463.6	-0.01666945
283.79	0.12439944		813.79	-0.00635394		1343.78	0.01498779		1873.78	-0.00041402		2403.77	0.01153393		2933.77	0.01156295		3463.8	-0.01664854
283.99	0.12447141		813.99	-0.00601674		1343.98	0.01558621		1873.98	0.0002267		2403.97	0.0115553		2933.97	0.01216839		3464	-0.01649796
284.19	0.12414695		814.19	-0.00581081		1344.18	0.01486919		1874.18	0.0014237		2404.17	0.01178801		2934.17	0.01342416		3464.2	-0.0166042
284.39	0.1242191		814.39	-0.00575282		1344.38	0.01475855		1874.38	0.00130638		2404.37	0.01211879		2934.37	0.01328982		3464.4	-0.01544825
284.59	0.1245776		814.59	-0.00503474		1344.58	0.01538041		1874.58	0.00203846		2404.57	0.01186622		2934.57	0.0141237		3464.6	-0.01424516
284.79	0.12489527		814.79	-0.00442579		1344.78	0.01547425		1874.78	0.00246668		2404.77	0.01182267		2934.77	0.01446602		3464.8	-0.0139491
284.99	0.12520204		814.99	-0.00465196		1344.98	0.01564244		1874.98	0.00142042		2404.97	0.01212427		2934.97	0.01411939		3465	-0.01395712
285.19	0.12546337		815.19	-0.00386361		1345.18	0.01594612		1875.18	0.00081328		2405.17	0.01174096		2935.17	0.01512586		3465.2	-0.01365855
285.39	0.12529934		815.39	-0.00296066		1345.38	0.0157662		1875.38	0.00065169		2405.37	0.01228887		2935.37	0.01572424		3465.4	-0.01413593
285.59	0.1262074		815.59	-0.00305637		1345.58	0.01739144		1875.58	-0.00011486		2405.57	0.01237268		2935.57	0.01664098		3465.6	-0.01310079
285.79	0.12594652		815.79	-0.00254232		1345.78	0.01757305		1875.78	-0.00032263		2405.77	0.01256546		2935.77	0.01650945		3465.8	-0.01245872
285.99	0.12558198		815.99	-0.00136092		1345.98	0.01860353		1875.98	-0.00045739		2405.97	0.01227154		2935.97	0.01634532		3466	-0.01407192
286.19	0.1246335		816.19	-0.00107285		1346.18	0.01886168		1876.18	-0.00101933		2406.17	0.01126615		2936.17	0.01658721		3466.2	-0.01473554
286.39	0.12393031		816.39	-0.00070172		1346.38	0.01839099		1876.38	-0.00126529		2406.37	0.01062409		2936.37	0.01637792		3466.4	-0.01522952
286.59	0.1246286		816.59	-0.00073165		1346.58	0.01812052		1876.58	-0.0024844		2406.57	0.01103798		2936.57	0.01645274		3466.6	-0.01509234
286.79	0.12666653		816.79	-0.00105108		1346.78	0.01697677		1876.78	-0.00291498		2406.77	0.01145441		2936.77	0.01573727		3466.8	-0.01605613
286.99	0.12746187		816.99	-0.00142726		1346.98	0.0157204		1876.98	-0.00258268		2406.97	0.01212736		2936.97	0.0159121		3467	-0.01664033
287.19	0.12777255		817.19	-0.00143886		1347.18	0.01622121		1877.18	-0.00170756		2407.17	0.01249251		2937.17	0.01643407		3467.2	-0.01674445
287.39	0.12685285		817.39	-0.00107976		1347.38	0.01585151		1877.38	-0.00092689		2407.37	0.01324977		2937.37	0.01710367		3467.4	-0.01612839
287.59	0.12769455		817.59	-0.00145072		1347.58	0.0154418		1877.58	-0.00000899		2407.57	0.01356001		2937.57	0.0170445		3467.6	-0.01585628
287.79	0.12718826		817.79	-0.00204993		1347.78	0.01509729		1877.78	0.00038932		2407.77	0.01355362		2937.77	0.01703416		3467.8	-0.01594289
287.99	0.1270274		817.99	-0.00169215		1347.98	0.01477796		1877.98	0.00006664		2407.97	0.01288774		2937.97	0.01579606		3468	-0.01556718
288.19	0.12744396		818.19	-0.00212624		1348.18	0.01495538		1878.18	0.00057091		2408.17	0.01320751		2938.17	0.01509821		3468.2	-0.01479508
288.39	0.12846409		818.39	-0.00188893		1348.38	0.01421978		1878.38	0.0004485		2408.37	0.01354349		2938.37	0.01477544		3468.4	-0.01490774
288.59	0.1281098		818.59	-0.00198868		1348.58	0.01451194		1878.58	0.00128745		2408.57	0.01339308		2938.57	0.01451309		3468.6	-0.0147714
288.79	0.12752001		818.79	-0.00224349		1348.78	0.01415216		1878.78	0.00078312		2408.77	0.01338833		2938.77	0.01411176		3468.8	-0.01530257
288.99	0.12800671		818.99	-0.00301572		1348.98	0.01455905		1878.98	-0.00007503		2408.97	0.01362314		2938.97	0.01455679		3469	-0.01579216
289.19	0.12745169		819.19	-0.00253326		1349.18	0.01578406		1879.18	0.00022356		2409.17	0.01373124		2939.17	0.01497222		3469.2	-0.01610518
289.39	0.12652555		819.39	-0.00248247		1349.38	0.01608206		1879.38	0.00045721		2409.37	0.01393955		2939.37	0.01476677		3469.4	-0.0167705
289.59	0.12704723		819.59	-0.00337883		1349.58	0.01734371		1879.58	0.00021794		2409.57	0.01482655		2939.57	0.01525834		3469.6	-0.01641195
289.79	0.12629494		819.79	-0.00322228		1349.78	0.01729231		1879.78	0.000741		2409.77	0.01421563		2939.77	0.01555323		3469.8	-0.01759144
289.99	0.12621538		819.99	-0.00315736		1349.98	0.01774971		1879.98	-0.00010155		2409.97	0.01376866		2939.97	0.01587511		3470	-0.01816018
290.19	0.125774		820.19	-0.00318526		1350.18	0.01775097		1880.18	-0.00077401		2410.17	0.01385605		2940.17	0.01659353		3470.2	-0.01815412
290.39	0.12616013		820.39	-0.00380992		1350.38	0.01805707		1880.38	-0.00022683		2410.37	0.01316467		2940.37	0.01675996		3470.4	-0.01792696
290.59	0.12736721		820.59	-0.00396548		1350.58	0.01806002		1880.58	-0.00039326		2410.57	0.01280121		2940.57	0.01641989		3470.6	-0.01816178
290.79	0.1282404		820.79	-0.00445052		1350.78	0.01705749		1880.78	-0.00006428		2410.77	0.01317342		2940.77	0.01582234		3470.8	-0.01770761
290.99	0.12730848		820.99	-0.00377127		1350.98	0.01745069		1880.98	-0.00025104		2410.97	0.01305083		2940.97	0.01562882		3471	-0.01669119
291.19	0.12746933		821.19	-0.0039678		1351.18	0.01718525		1881.18	0.00046206		2411.17	0.01318668		2941.17	0.01575353		3471.2	-0.01528421
291.39	0.1279356		821.39	-0.0048316		1351.38	0.01675818		1881.38	0.00050795		2411.37	0.01319444		2941.37	0.01533523		3471.4	-0.01492767
291.59	0.1283015		821.59	-0.00469278		1351.58	0.01652952		1881.58	0.00125175		2411.57	0.01272008		2941.57	0.01470602		3471.6	-0.01404399
291.79	0.1285443		821.79	-0.00518493		1351.78	0.0162125		1881.78	0.00193726		2411.77	0.01199274		2941.77	0.01418375		3471.8	-0.01344481
291.99	0.12961803		821.99	-0.00494142		1351.98	0.01516372		1881.98	0.0019924		2411.97	0.0118955		2941.97	0.01360465		3472	-0.01265911
292.19	0.13053008		822.19	-0.00505772		1352.18	0.01558107		1882.18	0.00231788		2412.17	0.01203507		2942.17	0.01311942		3472.2	-0.01220626
292.39	0.13050213		822.39	-0.00573357		1352.38	0.01452759		1882.38	0.00250485		2412.37	0.01317662		2942.37	0.01389612		3472.4	-0.01284727
292.59	0.12977		822.59	-0.00535641		1352.58	0.01514592		1882.58	0.0025421		2412.57	0.01280064		2942.57	0.01391832		3472.6	-0.01285032
292.79	0.12939363		822.79	-0.00516259		1352.78	0.01525066		1882.78	0.00209846		2412.77	0.01284851		2942.77	0.01470649		3472.8	-0.01347182
292.99	0.12982085		822.99	-0.00499479		1352.98	0.01539607		1882.98	0.00283594		2412.97	0.01310416		2942.97	0.01496837		3473	-0.01424729
293.19	0.12990054		823.19	-0.0036051		1353.18	0.01583616		1883.18	0.00304162		2413.17	0.01368715		2943.17	0.01497736		3473.2	-0.01437536
293.39	0.13002127		823.39	-0.00285233		1353.38	0.01652361		1883.38	0.00308654		2413.37	0.01492348		2943.37	0.01553478		3473.4	-0.01474191
293.59	0.13086778		823.59	-0.0027181		1353.58	0.0172128		1883.58	0.00212989		2413.57	0.0151657		2943.57	0.01609138		3473.6	-0.01541671
293.79	0.1304735		823.79	-0.00242574		1353.78	0.01793626		1883.78	0.00113655		2413.77	0.01466288		2943.77	0.01664473		3473.8	-0.01696111
293.99	0.13136043		823.99	-0.00237656		1353.98	0.01785139		1883.98	-0.00063764		2413.97	0.01506747		2943.97	0.01699002		3474	-0.01745108
294.19	0.13152579		824.19	-0.00190586		1354.18	0.01736924		1884.18	-0.00096265		2414.17	0.01469906		2944.17	0.01736978		3474.2	-0.01807729
294.39	0.13125569		824.39	-0.00191251		1354.38	0.01805612		1884.38	-0.00076845		2414.37	0.01412166		2944.37	0.01708962		3474.4	-0.01772471
294.59	0.13248089		824.59	-0.00101		1354.58	0.018044		1884.58	-0.00178052		2414.57	0.01359975		2944.57	0.01700902		3474.6	-0.01838061
294.79	0.13365073		824.79	-0.00207852		1354.78	0.01755517		1884.78	-0.00146927		2414.77	0.01363835		2944.77	0.01663771		3474.8	-0.01791006
294.99	0.13362245		824.99	-0.00294702		1354.98	0.01750817		1884.98	-0.00211917		2414.97	0.01399375		2944.97	0.01700295		3475	-0.01788255
295.19	0.13406835		825.19	-0.00387968		1355.18	0.01706447		1885.18	-0.00170955		2415.17	0.01409386		2945.17	0.0177677		3475.2	-0.01752615
295.39	0.13468896		825.39	-0.00479962		1355.38	0.01622798		1885.38	-0.00159164		2415.37	0.0133602		2945.37	0.0167903		3475.4	-0.01843802
295.59	0.13510497		825.59	-0.00489043		1355.58	0.01613957		1885.58	-0.00142894		2415.57	0.01332642		2945.57	0.01643873		3475.6	-0.01741059
295.79	0.1359634		825.79	-0.00538766		1355.78	0.01598746		1885.78	-0.0016136		2415.77	0.0122298		2945.77	0.01689678		3475.8	-0.01727129
295.99	0.13650961		825.99	-0.00565945		1355.98	0.01574239		1885.98	-0.00198865		2415.97	0.01237604		2945.97	0.01680474		3476	-0.01734166
296.19	0.13626998		826.19	-0.00551417		1356.18	0.01638475		1886.18	-0.00257078		2416.17	0.01331735		2946.17	0.01681916		3476.2	-0.01660597
296.39	0.13491794		826.39	-0.00527351		1356.38	0.01597346		1886.38	-0.00129153		2416.37	0.01373046		2946.37	0.01682487		3476.4	-0.01656465
296.59	0.13480012		826.59	-0.0045555		1356.58	0.01597912		1886.58	-0.00072851		2416.57	0.01298871		2946.57	0.01676279		3476.6	-0.01573611
296.79	0.1343853		826.79	-0.00460092		1356.78	0.01563601		1886.78	-0.00027591		2416.77	0.01321072		2946.77	0.01621357		3476.8	-0.0150717
296.99	0.13394923		826.99	-0.00365978		1356.98	0.01552364		1886.98	0.00082739		2416.97	0.01310801		2946.97	0.01567415		3477	-0.01424301
297.19	0.13442918		827.19	-0.00345425		1357.18	0.01597615		1887.18	0.00047947		2417.17	0.01274255		2947.17	0.01609497		3477.2	-0.01368895
297.39	0.13416092		827.39	-0.00331184		1357.38	0.01774566		1887.38	0.00076021		2417.37	0.01230939		2947.37	0.01597344		3477.4	-0.01295532
297.59	0.13524618		827.59	-0.00368349		1357.58	0.01751877		1887.58	0.00112367		2417.57	0.01177362		2947.57	0.01620309		3477.6	-0.01254593
297.79	0.1356171		827.79	-0.00379042		1357.78	0.01736517		1887.78	0.00132381		2417.77	0.01173682		2947.77	0.01698089		3477.8	-0.01184464
297.99	0.13598167		827.99	-0.00341714		1357.98	0.01651074		1887.98	0.0010976		2417.97	0.01236397		2947.97	0.01731607		3478	-0.01086948
298.19	0.13603411		828.19	-0.00270216		1358.18	0.01685464		1888.18	0.00204435		2418.17	0.01204311		2948.17	0.0171829		3478.2	-0.01019095
298.39	0.13607479		828.39	-0.00347744		1358.38	0.01695		1888.38	0.00254077		2418.37	0.01223894		2948.37	0.016838		3478.4	-0.01039064
298.59	0.13765408		828.59	-0.00335853		1358.58	0.01639304		1888.58	0.00295837		2418.57	0.01245055		2948.57	0.01717829		3478.6	-0.01056386
298.79	0.13744213		828.79	-0.00452952		1358.78	0.0159677		1888.78	0.00229609		2418.77	0.01297365		2948.77	0.01765576		3478.8	-0.01018165
298.99	0.13743508		828.99	-0.00483674		1358.98	0.01603098		1888.98	0.00213812		2418.97	0.01394378		2948.97	0.01815888		3479	-0.01019122
299.19	0.1382535		829.19	-0.00487669		1359.18	0.01600727		1889.18	0.00323252		2419.17	0.01299322		2949.17	0.01804311		3479.2	-0.01086823
299.39	0.13833408		829.39	-0.00503668		1359.38	0.01557854		1889.38	0.00302074		2419.37	0.01261299		2949.37	0.01734078		3479.4	-0.01287009
299.59	0.13963195		829.59	-0.00457848		1359.58	0.01741546		1889.58	0.00217677		2419.57	0.01274442		2949.57	0.01729045		3479.6	-0.0129342
299.79	0.14006964		829.79	-0.00479803		1359.78	0.0167992		1889.78	0.00230691		2419.77	0.01274107		2949.77	0.01698945		3479.8	-0.01393115
299.99	0.14062317		829.99	-0.00442089		1359.98	0.01659178		1889.98	0.00196004		2419.97	0.01351419		2949.97	0.01714988		3480	-0.01456429
300.19	0.14042376		830.19	-0.00397462		1360.18	0.01621994		1890.18	0.00344159		2420.17	0.01353075		2950.17	0.01645607		3480.2	-0.01453794
300.39	0.1398651		830.39	-0.00396904		1360.38	0.01523252		1890.38	0.00411599		2420.37	0.01250181		2950.37	0.01585513		3480.4	-0.01598647
300.59	0.14000613		830.59	-0.00352731		1360.58	0.01468132		1890.58	0.00348349		2420.57	0.01208246		2950.57	0.01613477		3480.6	-0.01652705
300.79	0.13948905		830.79	-0.00351143		1360.78	0.01474141		1890.78	0.00335525		2420.77	0.01176526		2950.77	0.01629839		3480.8	-0.01785529
300.99	0.13934091		830.99	-0.00301914		1360.98	0.01534952		1890.98	0.00265685		2420.97	0.01109552		2950.97	0.01726999		3481	-0.01869029
301.19	0.13982104		831.19	-0.00346226		1361.18	0.01566082		1891.18	0.00202394		2421.17	0.01058377		2951.17	0.01826483		3481.2	-0.01902937
301.39	0.13973791		831.39	-0.00292263		1361.38	0.01650441		1891.38	0.00246824		2421.37	0.01114462		2951.37	0.01803164		3481.4	-0.01855114
301.59	0.14113491		831.59	-0.00322804		1361.58	0.01600465		1891.58	0.00222728		2421.57	0.01105397		2951.57	0.01814177		3481.6	-0.01937794
301.79	0.14131353		831.79	-0.0030132		1361.78	0.01595701		1891.78	0.00231024		2421.77	0.01135108		2951.77	0.01835229		3481.8	-0.01928923
301.99	0.14149751		831.99	-0.0030401		1361.98	0.01596808		1891.98	0.00227252		2421.97	0.01179514		2951.97	0.01773417		3482	-0.0198442
302.19	0.14154061		832.19	-0.00362283		1362.18	0.01596737		1892.18	0.00310934		2422.17	0.01197233		2952.17	0.01775261		3482.2	-0.01963081
302.39	0.14238566		832.39	-0.00414881		1362.38	0.01512644		1892.38	0.00278095		2422.37	0.0127433		2952.37	0.01783728		3482.4	-0.01952223
302.59	0.14313621		832.59	-0.00334863		1362.58	0.01592085		1892.58	0.00249297		2422.57	0.01386309		2952.57	0.01907804		3482.6	-0.01819225
302.79	0.14300245		832.79	-0.00431574		1362.78	0.01581142		1892.78	0.00141524		2422.77	0.01381262		2952.77	0.01920562		3482.8	-0.01729299
302.99	0.1438689		832.99	-0.00430234		1362.98	0.01641253		1892.98	0.00235589		2422.97	0.01469017		2952.97	0.01924208		3483	-0.01605488
303.19	0.14378891		833.19	-0.00453843		1363.18	0.0167808		1893.18	0.00258403		2423.17	0.01478147		2953.17	0.01871409		3483.2	-0.01598699
303.39	0.1442134		833.39	-0.00498928		1363.38	0.01694189		1893.38	0.00145837		2423.37	0.014935		2953.37	0.01844273		3483.4	-0.01539472
303.59	0.1451747		833.59	-0.00548131		1363.58	0.01772745		1893.58	0.00089781		2423.57	0.01548782		2953.57	0.0181497		3483.6	-0.01338462
303.79	0.14496259		833.79	-0.00629073		1363.78	0.0173239		1893.78	0.00087936		2423.77	0.01585344		2953.77	0.01830183		3483.8	-0.01314874
303.99	0.14509884		833.99	-0.00631813		1363.98	0.01767371		1893.98	0.00030572		2423.97	0.01564873		2953.97	0.01881935		3484	-0.01295101
304.19	0.1443569		834.19	-0.00597999		1364.18	0.01757063		1894.18	0.00087195		2424.17	0.01475263		2954.17	0.01807865		3484.2	-0.0125683
304.39	0.14346507		834.39	-0.00601553		1364.38	0.01775317		1894.38	-0.00083203		2424.37	0.01475513		2954.37	0.01934514		3484.4	-0.01290274
304.59	0.14337451		834.59	-0.00481061		1364.58	0.01733627		1894.58	-0.00118748		2424.57	0.01489673		2954.57	0.01930753		3484.6	-0.01263019
304.79	0.1433744		834.79	-0.00534167		1364.78	0.01752097		1894.78	-0.00111879		2424.77	0.01432341		2954.77	0.01941566		3484.8	-0.0132535
304.99	0.14319549		834.99	-0.00500613		1364.98	0.01699971		1894.98	-0.00144514		2424.97	0.0144533		2954.97	0.01984667		3485	-0.01339707
305.19	0.14249313		835.19	-0.00443092		1365.18	0.01725873		1895.18	-0.0008976		2425.17	0.01559331		2955.17	0.0195933		3485.2	-0.01350995
305.39	0.1422827		835.39	-0.00365849		1365.38	0.01731899		1895.38	-0.00094158		2425.37	0.01574253		2955.37	0.01882483		3485.4	-0.013743
305.59	0.14273582		835.59	-0.00390422		1365.58	0.01734341		1895.58	-0.00080594		2425.57	0.01532663		2955.57	0.01843007		3485.6	-0.01461218
305.79	0.14274263		835.79	-0.00235575		1365.78	0.01770584		1895.78	0.00015224		2425.77	0.01611048		2955.77	0.01869765		3485.8	-0.01401916
305.99	0.14269599		835.99	-0.00138571		1365.98	0.01796826		1895.98	0.00040889		2425.97	0.01606905		2955.97	0.01906483		3486	-0.01426333
306.19	0.1424672		836.19	-0.00092047		1366.18	0.01749391		1896.18	0.00192091		2426.17	0.01641879		2956.17	0.01924563		3486.2	-0.01338329
306.39	0.14313825		836.39	-0.00152601		1366.38	0.01712775		1896.38	0.00229879		2426.37	0.01667531		2956.37	0.01908249		3486.4	-0.01393029
306.59	0.1438647		836.59	-0.00115531		1366.58	0.01720964		1896.58	0.00222514		2426.57	0.01717358		2956.57	0.01953416		3486.6	-0.01384289
306.79	0.14477305		836.79	-0.00189195		1366.78	0.01740618		1896.78	0.002078		2426.77	0.01731026		2956.77	0.01926014		3486.8	-0.01418629
306.99	0.14572487		836.99	-0.00213868		1366.98	0.01770283		1896.98	0.00226509		2426.97	0.01793439		2956.97	0.02027859		3487	-0.01442873
307.19	0.14536116		837.19	-0.00191987		1367.18	0.01817992		1897.18	0.00210333		2427.17	0.01748		2957.17	0.02019869		3487.2	-0.01533553
307.39	0.14583566		837.39	-0.003002		1367.38	0.01902852		1897.38	0.00175925		2427.37	0.01677692		2957.37	0.019904		3487.4	-0.01591665
307.59	0.14624667		837.59	-0.00352684		1367.58	0.01955976		1897.58	0.00099099		2427.57	0.01713946		2957.57	0.01944189		3487.6	-0.01667735
307.79	0.1465412		837.79	-0.00388375		1367.78	0.01936021		1897.78	0.0001731		2427.77	0.01681618		2957.77	0.01876293		3487.8	-0.01760019
307.99	0.14718158		837.99	-0.00437338		1367.98	0.01931877		1897.98	-0.00042436		2427.97	0.01574534		2957.97	0.01795932		3488	-0.0178774
308.19	0.1472394		838.19	-0.00446007		1368.18	0.01949969		1898.18	-0.00108088		2428.17	0.01476332		2958.17	0.01779856		3488.2	-0.01837906
308.39	0.14791878		838.39	-0.00490496		1368.38	0.01926353		1898.38	-0.00164628		2428.37	0.01391283		2958.37	0.01867199		3488.4	-0.01841073
308.59	0.14831236		838.59	-0.0048693		1368.58	0.01795253		1898.58	-0.00102003		2428.57	0.01296927		2958.57	0.01817502		3488.6	-0.01896356
308.79	0.14805798		838.79	-0.00554676		1368.78	0.0183109		1898.78	-0.00081016		2428.77	0.01234706		2958.77	0.01761478		3488.8	-0.01966545
308.99	0.14771964		838.99	-0.0057527		1368.98	0.0182074		1898.98	-0.00019406		2428.97	0.01251632		2958.97	0.01738316		3489	-0.02065194
309.19	0.14737547		839.19	-0.00395559		1369.18	0.01905683		1899.18	0.00047833		2429.17	0.01270351		2959.17	0.01701476		3489.2	-0.02045233
309.39	0.14767255		839.39	-0.00259811		1369.38	0.01871538		1899.38	0.00087609		2429.37	0.01273792		2959.37	0.01663296		3489.4	-0.02072275
309.59	0.14774349		839.59	-0.00187385		1369.58	0.01878829		1899.58	0.0014893		2429.57	0.0132396		2959.57	0.01736078		3489.6	-0.02066636
309.79	0.14714046		839.79	-0.00061266		1369.78	0.01826185		1899.78	0.00213094		2429.77	0.0133603		2959.77	0.01807313		3489.8	-0.01939904
309.99	0.14658269		839.99	-0.00015613		1369.98	0.0176055		1899.98	0.00242409		2429.97	0.0131177		2959.97	0.01860346		3490	-0.01920737
310.19	0.14622036		840.19	-0.00045916		1370.18	0.01670029		1900.18	0.00418809		2430.17	0.01330023		2960.17	0.01941398		3490.2	-0.01911846
310.39	0.14690324		840.39	-0.00037431		1370.38	0.01690428		1900.38	0.00389761		2430.37	0.01326226		2960.37	0.01997789		3490.4	-0.01933729
310.59	0.14793081		840.59	0.00044787		1370.58	0.0171909		1900.58	0.00315925		2430.57	0.01451281		2960.57	0.02058385		3490.6	-0.01914973
310.79	0.1480889		840.79	0.0005085		1370.78	0.01822862		1900.78	0.00262135		2430.77	0.01533509		2960.77	0.02108663		3490.8	-0.0188714
310.99	0.14765937		840.99	0.00074046		1370.98	0.01790601		1900.98	0.00244646		2430.97	0.01499624		2960.97	0.02126721		3491	-0.01910051
311.19	0.14684158		841.19	0.00173438		1371.18	0.01894919		1901.18	0.00223107		2431.17	0.01510114		2961.17	0.01997071		3491.2	-0.01844592
311.39	0.14749671		841.39	0.00083002		1371.38	0.0196954		1901.38	0.0017023		2431.37	0.01560498		2961.37	0.01944599		3491.4	-0.01830555
311.59	0.14791561		841.59	0.00065778		1371.58	0.01955592		1901.58	0.0006388		2431.57	0.01523111		2961.57	0.01881803		3491.6	-0.01817136
311.79	0.14792346		841.79	0.00113337		1371.78	0.01950467		1901.78	-0.00029948		2431.77	0.0145352		2961.77	0.01797256		3491.8	-0.01730417
311.99	0.14794481		841.99	0.00116972		1371.98	0.01997317		1901.98	-0.00102164		2431.97	0.01405448		2961.97	0.01722622		3492	-0.01737574
312.19	0.14815424		842.19	0.00106981		1372.18	0.02043432		1902.18	-0.00181596		2432.17	0.01411982		2962.17	0.01737077		3492.2	-0.01738758
312.39	0.14877401		842.39	0.00154202		1372.38	0.01994295		1902.38	-0.00122303		2432.37	0.01367174		2962.37	0.01699468		3492.4	-0.01729394
312.59	0.14864787		842.59	0.00140456		1372.58	0.02012918		1902.58	-0.00032202		2432.57	0.01409148		2962.57	0.016366		3492.6	-0.0168346
312.79	0.14901453		842.79	0.00092834		1372.78	0.02045213		1902.78	-0.0001149		2432.77	0.01428073		2962.77	0.01566194		3492.8	-0.01706991
312.99	0.14982839		842.99	0.00039927		1372.98	0.0205139		1902.98	0.00041866		2432.97	0.0140662		2962.97	0.01613751		3493	-0.01803846
313.19	0.14990235		843.19	0.0015141		1373.18	0.02015384		1903.18	0.00073787		2433.17	0.01412635		2963.17	0.01546643		3493.2	-0.01698991
313.39	0.15041349		843.39	0.00139446		1373.38	0.01920577		1903.38	0.00176183		2433.37	0.01486103		2963.37	0.01587656		3493.4	-0.01767787
313.59	0.15004179		843.59	-0.00021499		1373.58	0.01858938		1903.58	0.00168957		2433.57	0.01582391		2963.57	0.01656341		3493.6	-0.01738761
313.79	0.14881171		843.79	-0.00069429		1373.78	0.01829066		1903.78	0.00214909		2433.77	0.01482496		2963.77	0.01726093		3493.8	-0.01780475
313.99	0.14865211		843.99	-0.00049579		1373.98	0.01879345		1903.98	0.00228397		2433.97	0.01548059		2963.97	0.01826061		3494	-0.01792163
314.19	0.14946613		844.19	-0.00086967		1374.18	0.0186804		1904.18	0.00349849		2434.17	0.01572514		2964.17	0.01970091		3494.2	-0.01896077
314.39	0.15002506		844.39	-0.00057502		1374.38	0.01878948		1904.38	0.00266149		2434.37	0.01611402		2964.37	0.01994488		3494.4	-0.01938041
314.59	0.1498002		844.59	-0.00129161		1374.58	0.01838193		1904.58	0.00173657		2434.57	0.01695956		2964.57	0.02020212		3494.6	-0.02028128
314.79	0.14965843		844.79	-0.00140198		1374.78	0.0182008		1904.78	0.00164778		2434.77	0.0169926		2964.77	0.02017034		3494.8	-0.0201299
314.99	0.14956356		844.99	-0.00180934		1374.98	0.01747202		1904.98	0.00130315		2434.97	0.01666704		2964.97	0.02073757		3495	-0.02055443
315.19	0.15047612		845.19	-0.00161677		1375.18	0.01827302		1905.18	0.00084671		2435.17	0.01721771		2965.17	0.02076104		3495.2	-0.01946119
315.39	0.15103565		845.39	-0.00234093		1375.38	0.01842277		1905.38	0.00090592		2435.37	0.01729918		2965.37	0.02138441		3495.4	-0.01991527
315.59	0.15105239		845.59	-0.00219053		1375.58	0.01847348		1905.58	0.00041447		2435.57	0.01639999		2965.57	0.02077489		3495.6	-0.01964897
315.79	0.15119804		845.79	-0.00166794		1375.78	0.01763809		1905.78	0.00036477		2435.77	0.01697886		2965.77	0.02073695		3495.8	-0.01929941
315.99	0.15241529		845.99	-0.00130806		1375.98	0.01709193		1905.98	-0.00057023		2435.97	0.0169817		2965.97	0.01985687		3496	-0.0191256
316.19	0.15353589		846.19	-0.00206514		1376.18	0.01704524		1906.18	-0.00069062		2436.17	0.0178221		2966.17	0.02046763		3496.2	-0.01821642
316.39	0.15368108		846.39	-0.00200565		1376.38	0.01697371		1906.38	-0.00004807		2436.37	0.01798849		2966.37	0.02015229		3496.4	-0.01796574
316.59	0.15389314		846.59	-0.00227345		1376.58	0.01812567		1906.58	0.00010737		2436.57	0.01897003		2966.57	0.02047904		3496.6	-0.01727832
316.79	0.15424599		846.79	-0.00224971		1376.78	0.01838745		1906.78	0.00033206		2436.77	0.01904057		2966.77	0.02122384		3496.8	-0.01742972
316.99	0.15446545		846.99	-0.0026982		1376.98	0.01861839		1906.98	0.00047811		2436.97	0.01829447		2966.97	0.02154465		3497	-0.01658779
317.19	0.15482152		847.19	-0.00305593		1377.18	0.01862414		1907.18	0.0010948		2437.17	0.0184039		2967.17	0.02091553		3497.2	-0.01519661
317.39	0.15509601		847.39	-0.00263625		1377.38	0.01881698		1907.38	0.0013902		2437.37	0.01898941		2967.37	0.02142333		3497.4	-0.01585089
317.59	0.15467876		847.59	-0.00348289		1377.58	0.01920764		1907.58	0.00107219		2437.57	0.01885911		2967.57	0.02246574		3497.6	-0.01658696
317.79	0.15458067		847.79	-0.00285322		1377.78	0.02010678		1907.78	0.00079034		2437.77	0.0180733		2967.77	0.02275837		3497.8	-0.01713542
317.99	0.15468251		847.99	-0.00190821		1377.98	0.02039878		1907.98	0.00095392		2437.97	0.0185026		2967.97	0.02327568		3498	-0.01662739
318.19	0.15437186		848.19	-0.00258921		1378.18	0.02000709		1908.18	0.00076306		2438.17	0.01753968		2968.17	0.02340534		3498.2	-0.01839318
318.39	0.15315905		848.39	-0.00288859		1378.38	0.01959253		1908.38	0.00013383		2438.37	0.01697616		2968.37	0.02303501		3498.4	-0.01878959
318.59	0.15265944		848.59	-0.00361524		1378.58	0.01856647		1908.58	0.00035581		2438.57	0.01677327		2968.57	0.02334033		3498.6	-0.0190868
318.79	0.15317288		848.79	-0.0031627		1378.78	0.01905309		1908.78	0.00075122		2438.77	0.01718954		2968.77	0.02324731		3498.8	-0.01882485
318.99	0.15261047		848.99	-0.00313704		1378.98	0.01959769		1908.98	0.0002418		2438.97	0.01704149		2968.97	0.02425913		3499	-0.01853106
319.19	0.1529566		849.19	-0.00236545		1379.18	0.02017168		1909.18	0.0002367		2439.17	0.01596762		2969.17	0.02327494		3499.2	-0.0177305
319.39	0.15188674		849.39	-0.00193735		1379.38	0.01956202		1909.38	0.00063638		2439.37	0.01504193		2969.37	0.02337717		3499.4	-0.01761983
319.59	0.15243063		849.59	-0.00117363		1379.58	0.01835169		1909.58	-0.00002703		2439.57	0.01520527		2969.57	0.02280254		3499.6	-0.01775862
319.79	0.15264015		849.79	-0.00099125		1379.78	0.01784436		1909.78	-0.00008948		2439.77	0.01494163		2969.77	0.02270872		3499.8	-0.01702328
319.99	0.15419131		849.99	-0.0008163		1379.98	0.01782022		1909.98	-0.00077497		2439.97	0.01487565		2969.97	0.02213684		3500	-0.01599087
320.19	0.15463752		850.19	-0.00134062		1380.18	0.01870131		1910.18	-0.00075604		2440.17	0.01446155		2970.17	0.02213714		3500.2	-0.01577044
320.39	0.15498225		850.39	-0.00128523		1380.38	0.01914604		1910.38	-0.00031893		2440.37	0.01386056		2970.37	0.02169357		3500.4	-0.0159073
320.59	0.1561427		850.59	-0.00151383		1380.58	0.01969615		1910.58	-0.00010574		2440.57	0.01472157		2970.57	0.02174324		3500.6	-0.01513542
320.79	0.15752268		850.79	-0.00053652		1380.78	0.01923111		1910.78	-0.00074682		2440.77	0.01506799		2970.77	0.02161498		3500.8	-0.01528593
320.99	0.15797283		850.99	-0.0017735		1380.98	0.01859217		1910.98	-0.00069062		2440.97	0.01504441		2970.97	0.0213867		3501	-0.01475676
321.19	0.15947611		851.19	-0.00172932		1381.18	0.01899479		1911.18	-0.00082213		2441.17	0.01581278		2971.17	0.02081542		3501.2	-0.01505645
321.39	0.15963526		851.39	-0.00078397		1381.38	0.01865079		1911.38	-0.0016428		2441.37	0.0166243		2971.37	0.01959447		3501.4	-0.01587337
321.59	0.16009741		851.59	-0.00109133		1381.58	0.01908569		1911.58	-0.00164225		2441.57	0.01673583		2971.57	0.01973272		3501.6	-0.01689527
321.79	0.16089173		851.79	-0.00071315		1381.78	0.01928204		1911.78	-0.00194345		2441.77	0.01807583		2971.77	0.01881767		3501.8	-0.0163675
321.99	0.16079108		851.99	-0.00033806		1381.98	0.01907955		1911.98	-0.00196397		2441.97	0.01874629		2971.97	0.01902697		3502	-0.01625071
322.19	0.16087337		852.19	-0.00216198		1382.18	0.01888997		1912.18	-0.00272199		2442.17	0.01911161		2972.17	0.01966436		3502.2	-0.01663257
322.39	0.16096348		852.39	-0.00237324		1382.38	0.01914336		1912.38	-0.00166724		2442.37	0.01998712		2972.37	0.01999859		3502.4	-0.01663789
322.59	0.1603526		852.59	-0.00173584		1382.58	0.01908652		1912.58	-0.00144844		2442.57	0.02107914		2972.57	0.02060508		3502.6	-0.01662801
322.79	0.16051624		852.79	-0.00055038		1382.78	0.01972393		1912.78	-0.00098053		2442.77	0.02122757		2972.77	0.02168482		3502.8	-0.01677599
322.99	0.1594331		852.99	-0.00034261		1382.98	0.01914031		1912.98	-0.00011388		2442.97	0.0213206		2972.97	0.02251458		3503	-0.01656469
323.19	0.15921126		853.19	0.00004124		1383.18	0.01831844		1913.18	0.0010409		2443.17	0.02005121		2973.17	0.0219392		3503.2	-0.01694213
323.39	0.15867657		853.39	0.00066626		1383.38	0.01777792		1913.38	0.0017047		2443.37	0.02015463		2973.37	0.0221006		3503.4	-0.01692798
323.59	0.15935799		853.59	0.00035853		1383.58	0.01722313		1913.58	0.00248247		2443.57	0.01963287		2973.57	0.02245579		3503.6	-0.01712824
323.79	0.15889618		853.79	0.00058445		1383.78	0.01856907		1913.78	0.0032945		2443.77	0.01832946		2973.77	0.02229812		3503.8	-0.0163878
323.99	0.15969491		853.99	0.00075516		1383.98	0.01817357		1913.98	0.00334681		2443.97	0.01819762		2973.97	0.02246459		3504	-0.01630436
324.19	0.16003709		854.19	0.00147014		1384.18	0.01798047		1914.18	0.0032414		2444.17	0.01780482		2974.17	0.02177703		3504.2	-0.01725107
324.39	0.16051387		854.39	0.00163995		1384.38	0.01743568		1914.38	0.00366114		2444.37	0.01832086		2974.37	0.02151206		3504.4	-0.01727241
324.59	0.16003844		854.59	0.00162576		1384.58	0.01795691		1914.58	0.00302376		2444.57	0.01927135		2974.57	0.0206175		3504.6	-0.01715322
324.79	0.16032194		854.79	0.00246556		1384.78	0.01767779		1914.78	0.00315786		2444.77	0.01960026		2974.77	0.01985957		3504.8	-0.01782277
324.99	0.15955683		854.99	0.00182128		1384.98	0.01818015		1914.98	0.00380058		2444.97	0.01953968		2974.97	0.01972894		3505	-0.01749274
325.19	0.16014858		855.19	0.00231165		1385.18	0.01912264		1915.18	0.00299935		2445.17	0.01933734		2975.17	0.01937125		3505.2	-0.01688671
325.39	0.1595909		855.39	0.00233336		1385.38	0.01934152		1915.38	0.00169775		2445.37	0.01948042		2975.37	0.0190481		3505.4	-0.01639622
325.59	0.15967299		855.59	0.00174165		1385.58	0.02028464		1915.58	0.00094571		2445.57	0.02009195		2975.57	0.01966599		3505.6	-0.01609782
325.79	0.15964983		855.79	0.00080429		1385.78	0.02109446		1915.78	0.00008855		2445.77	0.02062601		2975.77	0.02013229		3505.8	-0.01438177
325.99	0.15953166		855.99	0.00062279		1385.98	0.02184521		1915.98	-0.00110088		2445.97	0.02089003		2975.97	0.02060043		3506	-0.01396354
326.19	0.15913321		856.19	-0.00059867		1386.18	0.02208818		1916.18	-0.001872		2446.17	0.02115928		2976.17	0.02149369		3506.2	-0.0140383
326.39	0.15863908		856.39	-0.00123184		1386.38	0.02294723		1916.38	-0.00197017		2446.37	0.0215904		2976.37	0.02147148		3506.4	-0.0147527
326.59	0.15850415		856.59	-0.00066869		1386.58	0.02234301		1916.58	-0.00229415		2446.57	0.02173441		2976.57	0.02269632		3506.6	-0.01494236
326.79	0.15936409		856.79	-0.00135883		1386.78	0.02228021		1916.78	-0.00228402		2446.77	0.02075467		2976.77	0.02358522		3506.8	-0.01481844
326.99	0.15918374		856.99	-0.00256828		1386.98	0.02220991		1916.98	-0.00208597		2446.97	0.01975733		2976.97	0.02370112		3507	-0.01549554
327.19	0.15908663		857.19	-0.00275126		1387.18	0.02195334		1917.18	-0.00209716		2447.17	0.01965526		2977.17	0.02320519		3507.2	-0.01588924
327.39	0.15865771		857.39	-0.00302957		1387.38	0.02176656		1917.38	-0.0018023		2447.37	0.01941426		2977.37	0.02323737		3507.4	-0.01615754
327.59	0.15931396		857.59	-0.00325599		1387.58	0.02111927		1917.58	-0.00083769		2447.57	0.01925192		2977.57	0.0234557		3507.6	-0.01699159
327.79	0.1589624		857.79	-0.00207152		1387.78	0.02128138		1917.78	-0.00110572		2447.77	0.01935798		2977.77	0.02245546		3507.8	-0.01797496
327.99	0.16034957		857.99	-0.00070797		1387.98	0.0197404		1917.98	-0.00139592		2447.97	0.01958671		2977.97	0.02281049		3508	-0.01879811
328.19	0.16114338		858.19	0.00001578		1388.18	0.01900522		1918.18	-0.00195978		2448.17	0.0193759		2978.17	0.02185123		3508.2	-0.01979184
328.39	0.16098291		858.39	-0.00073275		1388.38	0.01883268		1918.38	-0.00197369		2448.37	0.02007279		2978.37	0.02094429		3508.4	-0.01958524
328.59	0.16088463		858.59	-0.00023334		1388.58	0.01875913		1918.58	-0.0018959		2448.57	0.02037726		2978.57	0.02093065		3508.6	-0.02031993
328.79	0.162125		858.79	0.0009387		1388.78	0.01848562		1918.78	-0.00048857		2448.77	0.02024589		2978.77	0.02091155		3508.8	-0.02070498
328.99	0.16256125		858.99	0.00089431		1388.98	0.01850595		1918.98	-0.00027547		2448.97	0.02037049		2978.97	0.02169973		3509	-0.02032603
329.19	0.16338599		859.19	0.00051505		1389.18	0.01775693		1919.18	-0.00015008		2449.17	0.02006369		2979.17	0.02251499		3509.2	-0.01886992
329.39	0.16377413		859.39	0.00022539		1389.38	0.01769755		1919.38	-0.00005235		2449.37	0.02069233		2979.37	0.02235788		3509.4	-0.01809221
329.59	0.16403898		859.59	0.00004717		1389.58	0.01764883		1919.58	0.00091394		2449.57	0.02177579		2979.57	0.0226782		3509.6	-0.01837583
329.79	0.16368952		859.79	-0.0001155		1389.78	0.01752203		1919.78	0.00103588		2449.77	0.02220345		2979.77	0.02218071		3509.8	-0.01764021
329.99	0.16474475		859.99	0.00064345		1389.98	0.01709696		1919.98	0.00042838		2449.97	0.02293622		2979.97	0.02188009		3510	-0.01742224
330.19	0.1644425		860.19	0.00017639		1390.18	0.01690522		1920.18	0.00019216		2450.17	0.02293064		2980.17	0.0227849		3510.2	-0.01737868
330.39	0.16489237		860.39	0.00069993		1390.38	0.01745623		1920.38	-0.00006549		2450.37	0.02318251		2980.37	0.02341134		3510.4	-0.01742403
330.59	0.16482213		860.59	0.00103641		1390.58	0.0177152		1920.58	0.00010082		2450.57	0.02337122		2980.57	0.02438917		3510.6	-0.01733383
330.79	0.16474289		860.79	0.00047481		1390.78	0.01836471		1920.78	-0.00022062		2450.77	0.02236596		2980.77	0.02449613		3510.8	-0.01695304
330.99	0.1639757		860.99	-0.00001461		1390.98	0.01804532		1920.98	0.00007839		2450.97	0.02217498		2980.97	0.02418764		3511	-0.01743742
331.19	0.16372946		861.19	0.00055064		1391.18	0.0176599		1921.18	0.00037758		2451.17	0.02261415		2981.17	0.02436338		3511.2	-0.01730605
331.39	0.16366876		861.39	0.00082784		1391.38	0.01849614		1921.38	0.00083503		2451.37	0.02147493		2981.37	0.02402513		3511.4	-0.01758373
331.59	0.16340016		861.59	0.00198458		1391.58	0.01861885		1921.58	0.00131714		2451.57	0.02105553		2981.57	0.02382683		3511.6	-0.01740123
331.79	0.16358188		861.79	0.00302763		1391.78	0.01966066		1921.78	0.00151468		2451.77	0.01974984		2981.77	0.02353023		3511.8	-0.01775246
331.99	0.16418001		861.99	0.00325293		1391.98	0.02017941		1921.98	0.00091736		2451.97	0.01909042		2981.97	0.02285303		3512	-0.01880363
332.19	0.1637797		862.19	0.00241979		1392.18	0.02122897		1922.18	0.00036695		2452.17	0.01832688		2982.17	0.02194958		3512.2	-0.01850675
332.39	0.16357932		862.39	0.00231927		1392.38	0.02146473		1922.38	0.00097835		2452.37	0.01786549		2982.37	0.02209121		3512.4	-0.01859051
332.59	0.16426856		862.59	0.0022673		1392.58	0.02227365		1922.58	0.0011489		2452.57	0.01670031		2982.57	0.02202031		3512.6	-0.01968065
332.79	0.16466177		862.79	0.00208441		1392.78	0.02201036		1922.78	0.00241058		2452.77	0.01592857		2982.77	0.02148686		3512.8	-0.01941666
332.99	0.16578096		862.99	0.00131732		1392.98	0.0226003		1922.98	0.00240403		2452.97	0.01606272		2982.97	0.02213575		3513	-0.01948826
333.19	0.16609246		863.19	0.00068076		1393.18	0.02237435		1923.18	0.00223344		2453.17	0.01568344		2983.17	0.02129222		3513.2	-0.01956243
333.39	0.16646211		863.39	0.00072313		1393.38	0.02224959		1923.38	0.00202194		2453.37	0.0167209		2983.37	0.02074709		3513.4	-0.0210345
333.59	0.16589332		863.59	-0.00055404		1393.58	0.02113926		1923.58	0.00232062		2453.57	0.01745248		2983.57	0.02021638		3513.6	-0.02129834
333.79	0.16571372		863.79	-0.0011297		1393.78	0.02066285		1923.78	0.00102081		2453.77	0.01783605		2983.77	0.01964012		3513.8	-0.02106079
333.99	0.16709546		863.99	-0.00115319		1393.98	0.02023391		1923.98	0.00061726		2453.97	0.01807734		2983.97	0.02066226		3514	-0.02039708
334.19	0.16689732		864.19	-0.00271072		1394.18	0.02022424		1924.18	0.00009244		2454.17	0.01904565		2984.17	0.02159796		3514.2	-0.02028993
334.39	0.16733713		864.39	-0.00303905		1394.38	0.02017321		1924.38	0.00020946		2454.37	0.02052043		2984.37	0.02231088		3514.4	-0.02031671
334.59	0.16694992		864.59	-0.00311441		1394.58	0.01981922		1924.58	-0.00038958		2454.57	0.02160243		2984.57	0.02272927		3514.6	-0.01969567
334.79	0.16686274		864.79	-0.00337511		1394.78	0.01943721		1924.78	-0.00064648		2454.77	0.02209034		2984.77	0.02291981		3514.8	-0.01875165
334.99	0.16636789		864.99	-0.00484223		1394.98	0.01972476		1924.98	-0.00097858		2454.97	0.02210224		2984.97	0.0228606		3515	-0.01797718
335.19	0.16669207		865.19	-0.00392562		1395.18	0.02021197		1925.18	-0.00083522		2455.17	0.02218013		2985.17	0.02381713		3515.2	-0.01730651
335.39	0.16638159		865.39	-0.00342402		1395.38	0.02109727		1925.38	-0.00043602		2455.37	0.02282539		2985.37	0.02395937		3515.4	-0.01671479
335.59	0.16593845		865.59	-0.00277157		1395.58	0.02122949		1925.58	0.00028106		2455.57	0.02329781		2985.57	0.02443307		3515.6	-0.0167051
335.79	0.1668156		865.79	-0.0027815		1395.78	0.02212319		1925.78	0.00048192		2455.77	0.02267649		2985.77	0.02505424		3515.8	-0.01719092
335.99	0.16667007		865.99	-0.00290175		1395.98	0.02170219		1925.98	0.00022947		2455.97	0.02224602		2985.97	0.02507909		3516	-0.01829893
336.19	0.16665281		866.19	-0.0026352		1396.18	0.02162555		1926.18	0.00052643		2456.17	0.02110248		2986.17	0.02532974		3516.2	-0.01769135
336.39	0.16670603		866.39	-0.0017393		1396.38	0.02130615		1926.38	0.00054595		2456.37	0.01992704		2986.37	0.02476489		3516.4	-0.01778092
336.59	0.16803118		866.59	-0.00171676		1396.58	0.02175946		1926.58	0.00097051		2456.57	0.01914339		2986.57	0.02449573		3516.6	-0.01815928
336.79	0.16851203		866.79	-0.00006662		1396.78	0.0228111		1926.78	0.00151609		2456.77	0.01874595		2986.77	0.02404138		3516.8	-0.01813735
336.99	0.16922651		866.99	0.00030177		1396.98	0.02350758		1926.98	0.00028502		2456.97	0.01819596		2986.97	0.02390027		3517	-0.01884531
337.19	0.16916288		867.19	0.00063082		1397.18	0.02341543		1927.18	0.00018135		2457.17	0.01776186		2987.17	0.02315515		3517.2	-0.01902255
337.39	0.16930369		867.39	0.00087089		1397.38	0.02302859		1927.38	0.00008126		2457.37	0.01742676		2987.37	0.02342973		3517.4	-0.02000189
337.59	0.16894853		867.59	0.00010723		1397.58	0.02275198		1927.58	0.00055481		2457.57	0.01644177		2987.57	0.02315193		3517.6	-0.0192537
337.79	0.16956629		867.79	0.00069572		1397.78	0.02394404		1927.78	-0.00080488		2457.77	0.01598358		2987.77	0.02324911		3517.8	-0.02017222
337.99	0.17060558		867.99	0.00057646		1397.98	0.02415826		1927.98	0.00005198		2457.97	0.0156651		2987.97	0.02331736		3518	-0.0196241
338.19	0.1706123		868.19	-0.00010034		1398.18	0.02366008		1928.18	-0.00002593		2458.17	0.01578058		2988.17	0.02291206		3518.2	-0.01917307
338.39	0.17048054		868.39	0.00003548		1398.38	0.0241883		1928.38	-0.00014976		2458.37	0.0152407		2988.37	0.02323685		3518.4	-0.01887477
338.59	0.17008074		868.59	-0.00040751		1398.58	0.02427825		1928.58	-0.00062822		2458.57	0.01516476		2988.57	0.02252315		3518.6	-0.01823206
338.79	0.17045369		868.79	-0.00211749		1398.78	0.0244588		1928.78	-0.00059697		2458.77	0.01585507		2988.77	0.02209453		3518.8	-0.01747239
338.99	0.17080924		868.99	-0.00362605		1398.98	0.02494298		1928.98	-0.00040526		2458.97	0.01620537		2988.97	0.0225421		3519	-0.01753316
339.19	0.17135248		869.19	-0.00224543		1399.18	0.0243984		1929.18	-0.00029612		2459.17	0.01708236		2989.17	0.02343826		3519.2	-0.01792871
339.39	0.17110425		869.39	-0.00276354		1399.38	0.02297481		1929.38	0.00083936		2459.37	0.01793523		2989.37	0.02369273		3519.4	-0.01736774
339.59	0.17155426		869.59	-0.00281018		1399.58	0.0216019		1929.58	0.00116853		2459.57	0.01869865		2989.57	0.02427771		3519.6	-0.01759459
339.79	0.17150297		869.79	-0.00294999		1399.78	0.02085294		1929.78	0.0017174		2459.77	0.01874587		2989.77	0.02554082		3519.8	-0.01739008
339.99	0.17111338		869.99	-0.0031924		1399.98	0.01961687		1929.98	0.00217055		2459.97	0.01956351		2989.97	0.02537371		3520	-0.01812563
340.19	0.17165572		870.19	-0.00327412		1400.18	0.0193679		1930.18	0.00175305		2460.17	0.01990265		2990.17	0.02519816		3520.2	-0.01778507
340.39	0.17143676		870.39	-0.0040165		1400.38	0.01914131		1930.38	0.00128877		2460.37	0.02027912		2990.37	0.02485694		3520.4	-0.01738768
340.59	0.17164551		870.59	-0.00356778		1400.58	0.01913683		1930.58	0.00176393		2460.57	0.02053497		2990.57	0.02532811		3520.6	-0.0178555
340.79	0.17041249		870.79	-0.00293292		1400.78	0.01991786		1930.78	0.00085688		2460.77	0.02162938		2990.77	0.02454338		3520.8	-0.01851325
340.99	0.16970698		870.99	-0.0026989		1400.98	0.01904283		1930.98	0.00064345		2460.97	0.02196411		2990.97	0.02463879		3521	-0.01850189
341.19	0.16939593		871.19	-0.0023347		1401.18	0.01946226		1931.18	0.0016258		2461.17	0.02261231		2991.17	0.02495286		3521.2	-0.0178397
341.39	0.16905261		871.39	-0.00181156		1401.38	0.01949525		1931.38	0.00155078		2461.37	0.02277817		2991.37	0.02524775		3521.4	-0.01858689
341.59	0.16860801		871.59	-0.0012638		1401.58	0.02032967		1931.58	0.00207085		2461.57	0.0227226		2991.57	0.02471311		3521.6	-0.0183348
341.79	0.16936728		871.79	-0.00088515		1401.78	0.0212957		1931.78	0.0013001		2461.77	0.02302565		2991.77	0.02426575		3521.8	-0.01855485
341.99	0.16945761		871.99	-0.00080183		1401.98	0.02153427		1931.98	0.00209055		2461.97	0.02222562		2991.97	0.02403728		3522	-0.01820189
342.19	0.1690918		872.19	-0.00116734		1402.18	0.02195106		1932.18	0.00174592		2462.17	0.02205993		2992.17	0.02396538		3522.2	-0.01782017
342.39	0.16923324		872.39	-0.00175525		1402.38	0.02287357		1932.38	0.00078002		2462.37	0.02193824		2992.37	0.02382635		3522.4	-0.01757832
342.59	0.16979484		872.59	-0.00268836		1402.58	0.02332309		1932.58	0.0010103		2462.57	0.02314655		2992.57	0.02309024		3522.6	-0.01717277
342.79	0.17128306		872.79	-0.00337616		1402.78	0.02334844		1932.78	0.00092784		2462.77	0.02439995		2992.77	0.02369004		3522.8	-0.01655644
342.99	0.17164957		872.99	-0.00267264		1402.98	0.02298273		1932.98	0.00085852		2462.97	0.0242447		2992.97	0.02446766		3523	-0.01732169
343.19	0.17228501		873.19	-0.00210716		1403.18	0.02188048		1933.18	0.00063304		2463.17	0.02380439		2993.17	0.02467736		3523.2	-0.01713717
343.39	0.17241674		873.39	-0.00349279		1403.38	0.02140977		1933.38	0.00176352		2463.37	0.02378038		2993.37	0.02463151		3523.4	-0.01620789
343.59	0.17175813		873.59	-0.00371109		1403.58	0.02187654		1933.58	0.00123087		2463.57	0.02425423		2993.57	0.02561176		3523.6	-0.01617515
343.79	0.17152113		873.79	-0.00320688		1403.78	0.02278519		1933.78	0.00210704		2463.77	0.02361241		2993.77	0.02582121		3523.8	-0.01606418
343.99	0.17264115		873.99	-0.00311822		1403.98	0.02241503		1933.98	0.00156419		2463.97	0.02318653		2993.97	0.02584741		3524	-0.01667925
344.19	0.17405925		874.19	-0.00340753		1404.18	0.02295177		1934.18	0.00114505		2464.17	0.02293591		2994.17	0.02536621		3524.2	-0.0170429
344.39	0.17389967		874.39	-0.0034266		1404.38	0.02360261		1934.38	0.00092084		2464.37	0.02301837		2994.37	0.0258163		3524.4	-0.0169629
344.59	0.174484		874.59	-0.00245655		1404.58	0.02407752		1934.58	0.00090236		2464.57	0.02363169		2994.57	0.02577068		3524.6	-0.01744914
344.79	0.17503376		874.79	-0.00104312		1404.78	0.02457299		1934.78	0.00182744		2464.77	0.02493093		2994.77	0.02575325		3524.8	-0.0180498
344.99	0.17488862		874.99	-0.00059627		1404.98	0.02551455		1934.98	0.00243049		2464.97	0.02459885		2994.97	0.02625307		3525	-0.0176096
345.19	0.17509969		875.19	-0.0000052		1405.18	0.02622134		1935.18	0.00299905		2465.17	0.02488922		2995.17	0.02638739		3525.2	-0.01751815
345.39	0.1756845		875.39	0.00079953		1405.38	0.02617352		1935.38	0.00272995		2465.37	0.02510619		2995.37	0.02618878		3525.4	-0.01829357
345.59	0.17539998		875.59	0.00123755		1405.58	0.02612364		1935.58	0.00242141		2465.57	0.02452951		2995.57	0.02574575		3525.6	-0.01804506
345.79	0.17556573		875.79	0.00164461		1405.78	0.02576326		1935.78	0.00128971		2465.77	0.02482275		2995.77	0.02535871		3525.8	-0.01837427
345.99	0.17460275		875.99	0.0022162		1405.98	0.02543164		1935.98	0.00090747		2465.97	0.02426052		2995.97	0.02523832		3526	-0.0198221
346.19	0.17496452		876.19	0.00214695		1406.18	0.02530723		1936.18	0.00101763		2466.17	0.02497105		2996.17	0.02506844		3526.2	-0.01936862
346.39	0.17516162		876.39	0.0022196		1406.38	0.02389316		1936.38	0.00116239		2466.37	0.02495197		2996.37	0.02514513		3526.4	-0.01903055
346.59	0.17562738		876.59	0.00160306		1406.58	0.02361727		1936.58	0.00152865		2466.57	0.02519692		2996.57	0.02564039		3526.6	-0.01885065
346.79	0.17585174		876.79	0.00143531		1406.78	0.02241513		1936.78	0.00079425		2466.77	0.0246442		2996.77	0.02569451		3526.8	-0.0187304
346.99	0.1753218		876.99	0.00214069		1406.98	0.02121462		1936.98	-0.00000286		2466.97	0.02442613		2996.97	0.02543619		3527	-0.01928875
347.19	0.17530582		877.19	0.00167862		1407.18	0.02067619		1937.18	0.00017421		2467.17	0.02362511		2997.17	0.02523174		3527.2	-0.01854315
347.39	0.17460749		877.39	0.00037326		1407.38	0.02146384		1937.38	0.00097665		2467.37	0.02360238		2997.37	0.02605268		3527.4	-0.01803062
347.59	0.17377511		877.59	0.0010923		1407.58	0.02108789		1937.58	0.00130929		2467.57	0.02402494		2997.57	0.02647073		3527.6	-0.01752501
347.79	0.17489779		877.79	0.00212327		1407.78	0.02092743		1937.78	0.00190366		2467.77	0.02400436		2997.77	0.02690031		3527.8	-0.01610101
347.99	0.17637638		877.99	0.00210529		1407.98	0.02081856		1937.98	0.00161363		2467.97	0.02368528		2997.97	0.02717246		3528	-0.01655005
348.19	0.17684168		878.19	0.002285		1408.18	0.02116206		1938.18	0.00155446		2468.17	0.02432573		2998.17	0.02776931		3528.2	-0.01562662
348.39	0.17789004		878.39	0.00229983		1408.38	0.02166967		1938.38	0.00134645		2468.37	0.02494709		2998.37	0.02862621		3528.4	-0.01590478
348.59	0.17832166		878.59	0.00219175		1408.58	0.02292825		1938.58	0.00113031		2468.57	0.02539562		2998.57	0.0280939		3528.6	-0.01711248
348.79	0.17839109		878.79	0.0029172		1408.78	0.0233809		1938.78	0.00168723		2468.77	0.02528583		2998.77	0.02800648		3528.8	-0.01704468
348.99	0.17803718		878.99	0.00155879		1408.98	0.02518225		1938.98	0.00104664		2468.97	0.02487559		2998.97	0.02781948		3529	-0.01763845
349.19	0.17771584		879.19	0.0015784		1409.18	0.02472794		1939.18	0.00126376		2469.17	0.02477981		2999.17	0.02636611		3529.2	-0.0178987
349.39	0.17767294		879.39	0.00188971		1409.38	0.02377248		1939.38	0.0008649		2469.37	0.02492117		2999.37	0.02552428		3529.4	-0.01819127
349.59	0.1775136		879.59	0.00123135		1409.58	0.02352247		1939.58	-0.0002281		2469.57	0.02477564		2999.57	0.02618347		3529.6	-0.01886216
349.79	0.1769467		879.79	0.00131255		1409.78	0.02351165		1939.78	-0.00066716		2469.77	0.02537467		2999.77	0.0252022		3529.8	-0.01986982
349.99	0.17733894		879.99	0.00130478		1409.98	0.02340553		1939.98	-0.0000013		2469.97	0.02477698		2999.97	0.02514109		3530	-0.02151082
350.19	0.17772534		880.19	0.00068413		1410.18	0.02313225		1940.18	0.00002915		2470.17	0.02498287		3000.17	0.02531616		3530.2	-0.02095402
350.39	0.17726674		880.39	0.00049757		1410.38	0.02189994		1940.38	0.00025297		2470.37	0.02455368		3000.37	0.02517965		3530.4	-0.02114872
350.59	0.1778601		880.59	0.00057597		1410.58	0.02272332		1940.58	-0.00065596		2470.57	0.02429296		3000.57	0.02573907		3530.6	-0.02066993
350.79	0.17754765		880.79	0.00045438		1410.78	0.02231424		1940.78	-0.00097491		2470.77	0.02391508		3000.77	0.02544514		3530.8	-0.02029582
350.99	0.17699735		880.99	0.00100744		1410.98	0.02178642		1940.98	-0.00075838		2470.97	0.02415625		3000.97	0.02556062		3531	-0.0204667
351.19	0.17731005		881.19	0.00106767		1411.18	0.02138112		1941.18	-0.00059569		2471.17	0.02432765		3001.17	0.02555334		3531.2	-0.01988387
351.39	0.17687568		881.39	0.0004906		1411.38	0.02142666		1941.38	-0.00051954		2471.37	0.0243497		3001.37	0.02663192		3531.4	-0.01924586
351.59	0.17716915		881.59	0.00152102		1411.58	0.0203975		1941.58	0.00006111		2471.57	0.02471122		3001.57	0.02674481		3531.6	-0.01780959
351.79	0.17826769		881.79	0.00188725		1411.78	0.02035033		1941.78	0.0000827		2471.77	0.02441852		3001.77	0.02799773		3531.8	-0.01637933
351.99	0.17853145		881.99	0.00260617		1411.98	0.02029151		1941.98	0.00017895		2471.97	0.02302672		3001.97	0.02823495		3532	-0.01765914
352.19	0.17895904		882.19	0.00238153		1412.18	0.01989336		1942.18	-0.00025874		2472.17	0.02394931		3002.17	0.02855885		3532.2	-0.01757747
352.39	0.17920011		882.39	0.00230155		1412.38	0.02036152		1942.38	-0.00067517		2472.37	0.0242052		3002.37	0.02751467		3532.4	-0.01833098
352.59	0.17884958		882.59	0.00221463		1412.58	0.02110754		1942.58	-0.00098068		2472.57	0.02460552		3002.57	0.02625944		3532.6	-0.01832245
352.79	0.17912396		882.79	0.00183719		1412.78	0.02045824		1942.78	-0.00018652		2472.77	0.02449247		3002.77	0.02560605		3532.8	-0.01724138
352.99	0.1790909		882.99	0.0018271		1412.98	0.02095103		1942.98	-0.0002893		2472.97	0.02517239		3002.97	0.0250655		3533	-0.01767259
353.19	0.17854217		883.19	0.00236821		1413.18	0.02028698		1943.18	-0.00055231		2473.17	0.02447322		3003.17	0.02467672		3533.2	-0.01753213
353.39	0.17949		883.39	0.00276193		1413.38	0.02052172		1943.38	-0.00023957		2473.37	0.02466514		3003.37	0.02564827		3533.4	-0.01671776
353.59	0.17987575		883.59	0.00230969		1413.58	0.02101644		1943.58	-0.00078085		2473.57	0.02428239		3003.57	0.02698137		3533.6	-0.01670996
353.79	0.17919949		883.79	0.00303399		1413.78	0.02079658		1943.78	-0.00003508		2473.77	0.02393493		3003.77	0.02671522		3533.8	-0.01674706
353.99	0.18039942		883.99	0.00219355		1413.98	0.02021083		1943.98	-0.00023323		2473.97	0.02362549		3003.97	0.02740946		3534	-0.01649046
354.19	0.18017151		884.19	0.0017877		1414.18	0.01963667		1944.18	-0.00123811		2474.17	0.02365869		3004.17	0.02767338		3534.2	-0.01616362
354.39	0.18032329		884.39	0.00197831		1414.38	0.0198537		1944.38	-0.00054745		2474.37	0.02296457		3004.37	0.0279074		3534.4	-0.01641691
354.59	0.18058512		884.59	0.00169777		1414.58	0.02096203		1944.58	-0.00115608		2474.57	0.02258326		3004.57	0.02912723		3534.6	-0.01671423
354.79	0.18016606		884.79	0.00011114		1414.78	0.02093179		1944.78	-0.00115383		2474.77	0.02261059		3004.77	0.02900285		3534.8	-0.01721
354.99	0.18027221		884.99	-0.00041114		1414.98	0.02128315		1944.98	-0.00025433		2474.97	0.02334752		3004.97	0.02854568		3535	-0.01808962
355.19	0.18102583		885.19	-0.00158636		1415.18	0.0214708		1945.18	-0.00008465		2475.17	0.02274174		3005.17	0.02850358		3535.2	-0.01761997
355.39	0.18080766		885.39	-0.00308426		1415.38	0.02261206		1945.38	0.00010337		2475.37	0.02215909		3005.37	0.02869467		3535.4	-0.01725644
355.59	0.18143125		885.59	-0.00305819		1415.58	0.0230074		1945.58	0.0010275		2475.57	0.02250004		3005.57	0.02883337		3535.6	-0.01779428
355.79	0.18126388		885.79	-0.00408775		1415.78	0.02377303		1945.78	0.00005055		2475.77	0.02254846		3005.77	0.02888358		3535.8	-0.01857963
355.99	0.18094936		885.99	-0.00410665		1415.98	0.02415492		1945.98	-0.00099536		2475.97	0.02300541		3005.97	0.02849926		3536	-0.01902291
356.19	0.18098037		886.19	-0.00497622		1416.18	0.02395339		1946.18	-0.0018831		2476.17	0.02434314		3006.17	0.02702109		3536.2	-0.01872857
356.39	0.18046605		886.39	-0.00470292		1416.38	0.02387472		1946.38	-0.00272474		2476.37	0.02428929		3006.37	0.02597651		3536.4	-0.0182105
356.59	0.1794627		886.59	-0.00422237		1416.58	0.02375416		1946.58	-0.00249538		2476.57	0.02489872		3006.57	0.02536877		3536.6	-0.01791059
356.79	0.17901633		886.79	-0.004236		1416.78	0.02360608		1946.78	-0.00213507		2476.77	0.02490567		3006.77	0.02540818		3536.8	-0.01745438
356.99	0.17826103		886.99	-0.00284788		1416.98	0.02332777		1946.98	-0.00289634		2476.97	0.02510215		3006.97	0.02609655		3537	-0.01771579
357.19	0.17749608		887.19	-0.00148909		1417.18	0.02294156		1947.18	-0.00337096		2477.17	0.02400069		3007.17	0.02639645		3537.2	-0.01722587
357.39	0.17785428		887.39	-0.00044701		1417.38	0.02259652		1947.38	-0.00264567		2477.37	0.0241976		3007.37	0.02659578		3537.4	-0.01570383
357.59	0.17766985		887.59	-0.00019712		1417.58	0.02211644		1947.58	-0.002804		2477.57	0.0244238		3007.57	0.02720893		3537.6	-0.0158109
357.79	0.17768515		887.79	-0.00049923		1417.78	0.02072316		1947.78	-0.0030414		2477.77	0.02429164		3007.77	0.0269259		3537.8	-0.01602892
357.99	0.17783014		887.99	-0.00059996		1417.98	0.02089358		1947.98	-0.00323401		2477.97	0.02378373		3007.97	0.02694416		3538	-0.01611594
358.19	0.17804404		888.19	-0.00063828		1418.18	0.0213948		1948.18	-0.00295912		2478.17	0.02379657		3008.17	0.02690764		3538.2	-0.01759573
358.39	0.17893806		888.39	-0.00015566		1418.38	0.02191107		1948.38	-0.00179563		2478.37	0.02353657		3008.37	0.02708631		3538.4	-0.0185407
358.59	0.17963914		888.59	0.00034298		1418.58	0.02221441		1948.58	-0.00150266		2478.57	0.02351753		3008.57	0.02751268		3538.6	-0.01954343
358.79	0.18050586		888.79	-0.000064		1418.78	0.02225327		1948.78	0.00005056		2478.77	0.02402112		3008.77	0.02772078		3538.8	-0.01934524
358.99	0.18173561		888.99	0.00012574		1418.98	0.02320172		1948.98	0.00183767		2478.97	0.02405809		3008.97	0.02779025		3539	-0.01981606
359.19	0.18293372		889.19	-0.00090396		1419.18	0.02457784		1949.18	0.00265139		2479.17	0.02349503		3009.17	0.02807226		3539.2	-0.01976519
359.39	0.18338523		889.39	-0.00050224		1419.38	0.02525472		1949.38	0.00248798		2479.37	0.0234906		3009.37	0.02827975		3539.4	-0.02040036
359.59	0.18422475		889.59	0.0001324		1419.58	0.02563388		1949.58	0.00253894		2479.57	0.02320882		3009.57	0.02875245		3539.6	-0.0214762
359.79	0.18451468		889.79	-0.00001742		1419.78	0.02655015		1949.78	0.00150722		2479.77	0.02323233		3009.77	0.0291121		3539.8	-0.02079207
359.99	0.18503192		889.99	0.00107612		1419.98	0.02648135		1949.98	0.00191732		2479.97	0.02329908		3009.97	0.02953218		3540	-0.01953643
360.19	0.18548691		890.19	0.00169107		1420.18	0.02636191		1950.18	0.00271848		2480.17	0.02287592		3010.17	0.02845749		3540.2	-0.01875491
360.39	0.18516483		890.39	0.00255754		1420.38	0.02741879		1950.38	0.00299765		2480.37	0.02296769		3010.37	0.02862886		3540.4	-0.01875982
360.59	0.18416908		890.59	0.00337778		1420.58	0.02756403		1950.58	0.00278056		2480.57	0.02376895		3010.57	0.02838242		3540.6	-0.01924832
360.79	0.18430669		890.79	0.00366829		1420.78	0.02733825		1950.78	0.00166956		2480.77	0.02492629		3010.77	0.02798745		3540.8	-0.0191412
360.99	0.18413076		890.99	0.00442762		1420.98	0.02619569		1950.98	0.00152814		2480.97	0.02530261		3010.97	0.02813606		3541	-0.0190855
361.19	0.18371965		891.19	0.00479235		1421.18	0.0258959		1951.18	0.0010463		2481.17	0.02529455		3011.17	0.02702041		3541.2	-0.01835505
361.39	0.18353428		891.39	0.00402804		1421.38	0.0252026		1951.38	0.00081969		2481.37	0.02577511		3011.37	0.02668551		3541.4	-0.01817127
361.59	0.18308582		891.59	0.00234937		1421.58	0.02467199		1951.58	0.00009475		2481.57	0.02583533		3011.57	0.02674666		3541.6	-0.01900231
361.79	0.18270687		891.79	0.00184418		1421.78	0.02441424		1951.78	0.00005022		2481.77	0.02485221		3011.77	0.02594109		3541.8	-0.01907147
361.99	0.18285592		891.99	0.00222539		1421.98	0.02423865		1951.98	0.00007382		2481.97	0.02434797		3011.97	0.02586724		3542	-0.01904135
362.19	0.18333996		892.19	0.00188978		1422.18	0.02371851		1952.18	0.00023801		2482.17	0.02532569		3012.17	0.02593094		3542.2	-0.01849218
362.39	0.18377343		892.39	0.00261593		1422.38	0.02229308		1952.38	0.0001717		2482.37	0.02543194		3012.37	0.02578388		3542.4	-0.01821279
362.59	0.18380087		892.59	0.00212561		1422.58	0.02109497		1952.58	0.0001313		2482.57	0.02485213		3012.57	0.02613668		3542.6	-0.0179947
362.79	0.18417345		892.79	0.00192268		1422.78	0.02160579		1952.78	0.00086455		2482.77	0.02514451		3012.77	0.0266256		3542.8	-0.01712896
362.99	0.18448131		892.99	0.00139354		1422.98	0.02239838		1952.98	0.00076647		2482.97	0.02477618		3012.97	0.02661428		3543	-0.01766198
363.19	0.18394822		893.19	0.00128076		1423.18	0.02141545		1953.18	0.00022317		2483.17	0.02496513		3013.17	0.02725821		3543.2	-0.01757364
363.39	0.18407901		893.39	0.00180772		1423.38	0.02049728		1953.38	-0.00031264		2483.37	0.02427693		3013.37	0.02731007		3543.4	-0.01709639
363.59	0.18428648		893.59	0.0010429		1423.58	0.02089957		1953.58	-0.00018629		2483.57	0.02488176		3013.57	0.02788801		3543.6	-0.01649299
363.79	0.18456482		893.79	0.00188998		1423.78	0.02123492		1953.78	0.00004406		2483.77	0.02542476		3013.77	0.02909622		3543.8	-0.0152372
363.99	0.18444996		893.99	0.0021335		1423.98	0.02110812		1953.98	0.0010142		2483.97	0.02610548		3013.97	0.0292127		3544	-0.01498892
364.19	0.1854559		894.19	0.0025424		1424.18	0.02235048		1954.18	0.00199511		2484.17	0.02695285		3014.17	0.02893463		3544.2	-0.01470333
364.39	0.18497945		894.39	0.00252839		1424.38	0.02335724		1954.38	0.00172838		2484.37	0.02759957		3014.37	0.02960616		3544.4	-0.01481507
364.59	0.18535261		894.59	0.00244276		1424.58	0.02269371		1954.58	0.00099549		2484.57	0.02855716		3014.57	0.02942209		3544.6	-0.01468669
364.79	0.1850488		894.79	0.00289557		1424.78	0.02209249		1954.78	0.00106929		2484.77	0.02906428		3014.77	0.02943449		3544.8	-0.01442756
364.99	0.18510764		894.99	0.00309048		1424.98	0.02208413		1954.98	0.00227668		2484.97	0.02810866		3014.97	0.02973214		3545	-0.01430048
365.19	0.1847645		895.19	0.00274435		1425.18	0.02164678		1955.18	0.00139676		2485.17	0.0267839		3015.17	0.0299474		3545.2	-0.01428923
365.39	0.18478786		895.39	0.00245804		1425.38	0.02106382		1955.38	0.0007806		2485.37	0.02616091		3015.37	0.03060431		3545.4	-0.01502208
365.59	0.18509546		895.59	0.00133642		1425.58	0.02168173		1955.58	0.00121061		2485.57	0.02521592		3015.57	0.03065809		3545.6	-0.01598887
365.79	0.18582036		895.79	0.00225014		1425.78	0.02203543		1955.78	0.00066649		2485.77	0.02449983		3015.77	0.03114512		3545.8	-0.01555214
365.99	0.1865871		895.99	0.00244548		1425.98	0.02159855		1955.98	0.00092834		2485.97	0.02462555		3015.97	0.03213582		3546	-0.01569183
366.19	0.18696958		896.19	0.00158775		1426.18	0.02238711		1956.18	0.00163598		2486.17	0.0251301		3016.17	0.03180762		3546.2	-0.01536488
366.39	0.18735512		896.39	0.00085252		1426.38	0.02242451		1956.38	0.00123611		2486.37	0.02449072		3016.37	0.0310314		3546.4	-0.01629389
366.59	0.18721633		896.59	0.0003661		1426.58	0.02300903		1956.58	0.00099837		2486.57	0.023458		3016.57	0.03132483		3546.6	-0.01626446
366.79	0.18743358		896.79	0.00111087		1426.78	0.02391947		1956.78	0.00129072		2486.77	0.02336435		3016.77	0.03093374		3546.8	-0.01688875
366.99	0.18765188		896.99	0.00012854		1426.98	0.0235277		1956.98	0.00103969		2486.97	0.02332263		3016.97	0.03001506		3547	-0.01741563
367.19	0.1879762		897.19	0.00017005		1427.18	0.02293796		1957.18	0.00073014		2487.17	0.02418637		3017.17	0.03009231		3547.2	-0.01764951
367.39	0.18881423		897.39	-0.0010492		1427.38	0.02308774		1957.38	0.00035272		2487.37	0.02428296		3017.37	0.02967473		3547.4	-0.01754491
367.59	0.18852343		897.59	-0.001514		1427.58	0.02352315		1957.58	-0.00006591		2487.57	0.02513297		3017.57	0.02986296		3547.6	-0.01792261
367.79	0.18934156		897.79	-0.00155176		1427.78	0.02416278		1957.78	-0.00002381		2487.77	0.02552814		3017.77	0.03083994		3547.8	-0.018749
367.99	0.18967161		897.99	-0.00207989		1427.98	0.02396777		1957.98	0.00016962		2487.97	0.02628051		3017.97	0.03020104		3548	-0.01916404
368.19	0.19077901		898.19	-0.00227072		1428.18	0.02446486		1958.18	0.00038084		2488.17	0.02736535		3018.17	0.03004972		3548.2	-0.01860134
368.39	0.19112091		898.39	-0.00213803		1428.38	0.02373546		1958.38	0.00023808		2488.37	0.02709329		3018.37	0.03046712		3548.4	-0.0178305
368.59	0.19179493		898.59	-0.00141164		1428.58	0.02340125		1958.58	0.00044029		2488.57	0.02678327		3018.57	0.03003754		3548.6	-0.01819623
368.79	0.19099523		898.79	-0.00032057		1428.78	0.02289887		1958.78	0.00031023		2488.77	0.02603398		3018.77	0.02949735		3548.8	-0.01771008
368.99	0.19074938		898.99	0.00014222		1428.98	0.02190699		1958.98	0.00019881		2488.97	0.02528419		3018.97	0.02931625		3549	-0.01786309
369.19	0.19038549		899.19	0.00047781		1429.18	0.02143197		1959.18	-0.00042198		2489.17	0.02546692		3019.17	0.02980653		3549.2	-0.01765381
369.39	0.18947606		899.39	0.00061292		1429.38	0.02159366		1959.38	0.00024986		2489.37	0.02615276		3019.37	0.02982519		3549.4	-0.01732146
369.59	0.18916508		899.59	-0.0002114		1429.58	0.0220263		1959.58	0.00032368		2489.57	0.02678523		3019.57	0.02996415		3549.6	-0.0168951
369.79	0.18918531		899.79	0.00035642		1429.78	0.02163542		1959.78	-0.00025301		2489.77	0.0262778		3019.77	0.03056039		3549.8	-0.01693779
369.99	0.18936117		899.99	0.00031761		1429.98	0.02194335		1959.98	0.00130887		2489.97	0.0272664		3019.97	0.03040764		3550	-0.01671305
370.19	0.18967527		900.19	0.00018584		1430.18	0.022446		1960.18	0.00180007		2490.17	0.02758104		3020.17	0.02868186		3550.2	-0.01640578
370.39	0.18936136		900.39	0.00046663		1430.38	0.022553		1960.38	0.00170512		2490.37	0.02797502		3020.37	0.02862016		3550.4	-0.01655687
370.59	0.18997385		900.59	0.00045726		1430.58	0.02331533		1960.58	0.00193144		2490.57	0.02778519		3020.57	0.02928264		3550.6	-0.01640324
370.79	0.19015504		900.79	0.00068505		1430.78	0.023396		1960.78	0.00243368		2490.77	0.02840167		3020.77	0.02878407		3550.8	-0.01708592
370.99	0.19042098		900.99	0.00054759		1430.98	0.02327089		1960.98	0.00242012		2490.97	0.0298246		3020.97	0.02904811		3551	-0.01590771
371.19	0.19070096		901.19	-0.00009259		1431.18	0.02302985		1961.18	0.00245911		2491.17	0.03073379		3021.17	0.02899037		3551.2	-0.01624475
371.39	0.19040189		901.39	-0.00120889		1431.38	0.02294334		1961.38	0.00186562		2491.37	0.0308716		3021.37	0.02891776		3551.4	-0.01621132
371.59	0.190406		901.59	-0.00167231		1431.58	0.0237292		1961.58	0.00256399		2491.57	0.03004929		3021.57	0.02799772		3551.6	-0.01661817
371.79	0.19147448		901.79	-0.00191117		1431.78	0.02436098		1961.78	0.00264106		2491.77	0.03017747		3021.77	0.02861876		3551.8	-0.01708032
371.99	0.19205698		901.99	-0.00161255		1431.98	0.02379095		1961.98	0.00251462		2491.97	0.02904245		3021.97	0.0286183		3552	-0.016863
372.19	0.1913325		902.19	-0.00184464		1432.18	0.02403221		1962.18	0.00251536		2492.17	0.02822447		3022.17	0.02899349		3552.2	-0.01656176
372.39	0.19139152		902.39	-0.00123863		1432.38	0.02396745		1962.38	0.00228463		2492.37	0.02696549		3022.37	0.029634		3552.4	-0.01617343
372.59	0.19095014		902.59	-0.00131516		1432.58	0.02366619		1962.58	0.00126718		2492.57	0.02616964		3022.57	0.0296998		3552.6	-0.0168374
372.79	0.19019074		902.79	-0.00125677		1432.78	0.02337703		1962.78	0.00065321		2492.77	0.02598856		3022.77	0.03042721		3552.8	-0.01618664
372.99	0.18996701		902.99	-0.00152606		1432.98	0.02335329		1962.98	-0.0000221		2492.97	0.02567879		3022.97	0.03083873		3553	-0.01789069
373.19	0.18946739		903.19	-0.00159781		1433.18	0.02366794		1963.18	-0.00096435		2493.17	0.02619349		3023.17	0.03067219		3553.2	-0.0173126
373.39	0.18933096		903.39	-0.00230039		1433.38	0.02394801		1963.38	-0.00133102		2493.37	0.02619155		3023.37	0.03120064		3553.4	-0.0177498
373.59	0.18985072		903.59	-0.00215446		1433.58	0.02408478		1963.58	-0.00321009		2493.57	0.02507724		3023.57	0.03150897		3553.6	-0.01870894
373.79	0.19007966		903.79	-0.00167116		1433.78	0.02423637		1963.78	-0.00354573		2493.77	0.02532498		3023.77	0.03112469		3553.8	-0.01902019
373.99	0.19104485		903.99	-0.00139773		1433.98	0.02476528		1963.98	-0.00307049		2493.97	0.02712165		3023.97	0.03108806		3554	-0.01861264
374.19	0.19135885		904.19	-0.00157178		1434.18	0.02465912		1964.18	-0.0028801		2494.17	0.02783249		3024.17	0.0310545		3554.2	-0.0183628
374.39	0.19124102		904.39	-0.00094042		1434.38	0.02463382		1964.38	-0.00266667		2494.37	0.02848248		3024.37	0.0312355		3554.4	-0.01800162
374.59	0.19177969		904.59	-0.00063307		1434.58	0.02484474		1964.58	-0.00226609		2494.57	0.02842213		3024.57	0.03133917		3554.6	-0.01840886
374.79	0.19137825		904.79	0.00000117		1434.78	0.02400202		1964.78	-0.00195551		2494.77	0.02956739		3024.77	0.03127379		3554.8	-0.01818835
374.99	0.19229249		904.99	0.00025927		1434.98	0.02315459		1964.98	-0.00083054		2494.97	0.02983553		3024.97	0.03135625		3555	-0.01673258
375.19	0.19244448		905.19	-0.00018102		1435.18	0.02321768		1965.18	0.00089888		2495.17	0.02906335		3025.17	0.03063932		3555.2	-0.01786969
375.39	0.19248216		905.39	-0.00071626		1435.38	0.02315935		1965.38	0.00077242		2495.37	0.02901818		3025.37	0.03077604		3555.4	-0.01786174
375.59	0.19291705		905.59	-0.0003903		1435.58	0.02330887		1965.58	0.00247342		2495.57	0.0279306		3025.57	0.03034095		3555.6	-0.01804719
375.79	0.19261316		905.79	0.00002263		1435.78	0.02364016		1965.78	0.00256403		2495.77	0.02781556		3025.77	0.03190874		3555.8	-0.01866032
375.99	0.19174494		905.99	0.00016766		1435.98	0.02324309		1965.98	0.00314063		2495.97	0.02737826		3025.97	0.03228568		3556	-0.01842788
376.19	0.19099116		906.19	0.0002566		1436.18	0.02331025		1966.18	0.003095		2496.17	0.02777344		3026.17	0.03258592		3556.2	-0.01832437
376.39	0.19081914		906.39	0.00054894		1436.38	0.0222714		1966.38	0.00352385		2496.37	0.02784265		3026.37	0.03350848		3556.4	-0.01886623
376.59	0.19114122		906.59	0.00006222		1436.58	0.02225215		1966.58	0.00325115		2496.57	0.02736598		3026.57	0.03422307		3556.6	-0.01924804
376.79	0.19111679		906.79	0.00127256		1436.78	0.02262668		1966.78	0.00430682		2496.77	0.02706131		3026.77	0.03439486		3556.8	-0.01992663
376.99	0.19151549		906.99	0.00094114		1436.98	0.02332734		1966.98	0.00317126		2496.97	0.02701974		3026.97	0.03396853		3557	-0.02115135
377.19	0.19103783		907.19	0.00128154		1437.18	0.02365175		1967.18	0.00227469		2497.17	0.02765146		3027.17	0.03354357		3557.2	-0.02080787
377.39	0.19123143		907.39	0.00167998		1437.38	0.02435537		1967.38	0.00251211		2497.37	0.02709361		3027.37	0.03421802		3557.4	-0.02082244
377.59	0.19114757		907.59	0.00167962		1437.58	0.02514198		1967.58	0.00196819		2497.57	0.02761415		3027.57	0.03451863		3557.6	-0.02021516
377.79	0.19090777		907.79	0.00140592		1437.78	0.02524407		1967.78	0.00273194		2497.77	0.02988984		3027.77	0.03437249		3557.8	-0.02024415
377.99	0.19095364		907.99	0.0012172		1437.98	0.02491559		1967.98	0.00316725		2497.97	0.03046657		3027.97	0.03453964		3558	-0.0208207
378.19	0.19052319		908.19	0.00122853		1438.18	0.02447647		1968.18	0.00344566		2498.17	0.0308772		3028.17	0.03396088		3558.2	-0.02057755
378.39	0.19064258		908.39	0.00181415		1438.38	0.02418227		1968.38	0.00375954		2498.37	0.03089736		3028.37	0.03289858		3558.4	-0.02062636
378.59	0.19134123		908.59	0.00141554		1438.58	0.02423994		1968.58	0.00381348		2498.57	0.03102738		3028.57	0.03240653		3558.6	-0.02097146
378.79	0.19206307		908.79	0.00109203		1438.78	0.02409624		1968.78	0.00384686		2498.77	0.0312238		3028.77	0.03203026		3558.8	-0.02049173
378.99	0.19319278		908.99	0.00066416		1438.98	0.02412564		1968.98	0.00436643		2498.97	0.03093105		3028.97	0.03139971		3559	-0.01996324
379.19	0.1936035		909.19	0.000065		1439.18	0.0246943		1969.18	0.00417493		2499.17	0.03100468		3029.17	0.03067222		3559.2	-0.02040391
379.39	0.19439068		909.39	-0.00090173		1439.38	0.02465714		1969.38	0.00330825		2499.37	0.03131435		3029.37	0.03008278		3559.4	-0.01979632
379.59	0.19489692		909.59	-0.00075472		1439.58	0.02522803		1969.58	0.00402589		2499.57	0.03093115		3029.57	0.0292904		3559.6	-0.01955515
379.79	0.19491643		909.79	-0.00115536		1439.78	0.02557931		1969.78	0.00350593		2499.77	0.03076678		3029.77	0.02892697		3559.8	-0.01933077
379.99	0.19491643		909.99	-0.00115536		1439.98	0.02557931		1969.98	0.00350593		2499.97	0.03076678		3029.97	0.02892697		3560	-0.01933077
380.19	0.19440885		910.19	-0.00097445		1440.18	0.02485813		1970.18	0.00279266		2500.17	0.03215151		3030.17	0.02893421		3560.2	-0.0196921
380.39	0.19439055		910.39	-0.00032327		1440.38	0.02436922		1970.38	0.00215497		2500.37	0.0339206		3030.37	0.02873404		3560.4	-0.0201412
380.59	0.19451571		910.59	0.00017708		1440.58	0.0237706		1970.58	0.0012013		2500.57	0.03550267		3030.57	0.02874989		3560.6	-0.02031827
380.79	0.19424013		910.79	-0.00000028		1440.78	0.02346189		1970.78	0.00051481		2500.77	0.03664767		3030.77	0.02903342		3560.8	-0.0206252
380.99	0.19358827		910.99	0.0000331		1440.98	0.02211049		1970.98	-0.00023171		2500.97	0.0380967		3030.97	0.02863026		3561	-0.02121462
381.19	0.19313026		911.19	-0.0001161		1441.18	0.02155499		1971.18	-0.00062178		2501.17	0.03876085		3031.17	0.02836159		3561.2	-0.02094131
381.39	0.19261229		911.39	0.00039859		1441.38	0.021665		1971.38	-0.00116955		2501.37	0.03878637		3031.37	0.02895062		3561.4	-0.02112705
381.59	0.19226006		911.59	0.00107487		1441.58	0.0222948		1971.58	-0.00113915		2501.57	0.03914805		3031.57	0.02867139		3561.6	-0.02113131
381.79	0.19137557		911.79	0.00156737		1441.78	0.02243701		1971.78	-0.00154948		2501.77	0.03965554		3031.77	0.02928809		3561.8	-0.02208938
381.99	0.19094051		911.99	0.00109256		1441.98	0.02357036		1971.98	-0.00149976		2501.97	0.03962386		3031.97	0.02936718		3562	-0.0223587
382.19	0.19073626		912.19	0.00085434		1442.18	0.02421849		1972.18	-0.00134245		2502.17	0.03916094		3032.17	0.03034736		3562.2	-0.02263627
382.39	0.18994884		912.39	0.00148657		1442.38	0.02468786		1972.38	-0.00168472		2502.37	0.03873949		3032.37	0.03124355		3562.4	-0.02132576
382.59	0.19018531		912.59	0.00174668		1442.58	0.02641193		1972.58	-0.00188324		2502.57	0.03931811		3032.57	0.03203602		3562.6	-0.02075897
382.79	0.19010978		912.79	0.00134582		1442.78	0.02646771		1972.78	-0.00114583		2502.77	0.03898223		3032.77	0.03267989		3562.8	-0.02034162
382.99	0.19048993		912.99	0.00155937		1442.98	0.02725346		1972.98	-0.00046837		2502.97	0.03875884		3032.97	0.03337591		3563	-0.01996076
383.19	0.19107787		913.19	0.00197406		1443.18	0.02675171		1973.18	0.00048182		2503.17	0.03799068		3033.17	0.03220824		3563.2	-0.01939741
383.39	0.19101293		913.39	0.00240496		1443.38	0.02705082		1973.38	0.0014621		2503.37	0.03790461		3033.37	0.03258461		3563.4	-0.01820924
383.59	0.19037715		913.59	0.00271176		1443.58	0.02662296		1973.58	0.00297808		2503.57	0.03798654		3033.57	0.03291033		3563.6	-0.01745672
383.79	0.19019478		913.79	0.00337055		1443.78	0.02600302		1973.78	0.0038416		2503.77	0.0377518		3033.77	0.03336014		3563.8	-0.01756206
383.99	0.19019162		913.99	0.00331442		1443.98	0.02560252		1973.98	0.00488473		2503.97	0.03793851		3033.97	0.03454438		3564	-0.01663492
384.19	0.1905229		914.19	0.003079		1444.18	0.02497154		1974.18	0.00506389		2504.17	0.03822534		3034.17	0.03506868		3564.2	-0.01627038
384.39	0.19119897		914.39	0.00336047		1444.38	0.02481611		1974.38	0.00492639		2504.37	0.03852428		3034.37	0.03504344		3564.4	-0.01618401
384.59	0.19139203		914.59	0.0036283		1444.58	0.02402365		1974.58	0.00560888		2504.57	0.03844951		3034.57	0.03515584		3564.6	-0.01518461
384.79	0.19183703		914.79	0.00263764		1444.78	0.02336717		1974.78	0.00596257		2504.77	0.03818206		3034.77	0.03509751		3564.8	-0.01544161
384.99	0.19180924		914.99	0.00223265		1444.98	0.0225087		1974.98	0.00622671		2504.97	0.03840827		3034.97	0.03502903		3565	-0.01577843
385.19	0.19280539		915.19	0.00264355		1445.18	0.02322481		1975.18	0.00631152		2505.17	0.03773842		3035.17	0.03472153		3565.2	-0.0159073
385.39	0.19311576		915.39	0.0027886		1445.38	0.0234347		1975.38	0.00598508		2505.37	0.03786054		3035.37	0.03484831		3565.4	-0.01704094
385.59	0.19323485		915.59	0.00280166		1445.58	0.0234475		1975.58	0.00530775		2505.57	0.03941671		3035.57	0.0345783		3565.6	-0.01743289
385.79	0.19322175		915.79	0.0021153		1445.78	0.0237047		1975.78	0.00401808		2505.77	0.04033043		3035.77	0.03550332		3565.8	-0.01932641
385.99	0.19366343		915.99	0.00165344		1445.98	0.02444332		1975.98	0.00360351		2505.97	0.04150962		3035.97	0.03491427		3566	-0.01957468
386.19	0.19360884		916.19	0.00166805		1446.18	0.02443514		1976.18	0.00356073		2506.17	0.0419717		3036.17	0.03511918		3566.2	-0.01964107
386.39	0.19307446		916.39	0.00219455		1446.38	0.02466798		1976.38	0.00213151		2506.37	0.04169674		3036.37	0.03455304		3566.4	-0.01947072
386.59	0.19412867		916.59	0.00174758		1446.58	0.0249493		1976.58	0.00180827		2506.57	0.04122551		3036.57	0.0343905		3566.6	-0.02007311
386.79	0.19537652		916.79	0.00150175		1446.78	0.02456569		1976.78	0.00095186		2506.77	0.04136238		3036.77	0.03469295		3566.8	-0.0211602
386.99	0.1950472		916.99	0.00159154		1446.98	0.02468159		1976.98	0.0008275		2506.97	0.04194187		3036.97	0.03512478		3567	-0.02254464
387.19	0.19438671		917.19	0.0026026		1447.18	0.02358848		1977.18	0.00117334		2507.17	0.04144948		3037.17	0.03389102		3567.2	-0.02248898
387.39	0.19412201		917.39	0.00328773		1447.38	0.0248741		1977.38	0.00170492		2507.37	0.04191511		3037.37	0.03410822		3567.4	-0.02194005
387.59	0.19336546		917.59	0.00275115		1447.58	0.02469125		1977.58	0.0015783		2507.57	0.04101505		3037.57	0.03375645		3567.6	-0.02182332
387.79	0.1926829		917.79	0.00371894		1447.78	0.02441234		1977.78	0.00231877		2507.77	0.04082596		3037.77	0.03354656		3567.8	-0.02154957
387.99	0.19191056		917.99	0.00329977		1447.98	0.02439632		1977.98	0.00236263		2507.97	0.04050468		3037.97	0.03328775		3568	-0.02048465
388.19	0.19206422		918.19	0.00376577		1448.18	0.0241226		1978.18	0.00316947		2508.17	0.04028434		3038.17	0.03336473		3568.2	-0.01912758
388.39	0.19193037		918.39	0.00436011		1448.38	0.02526968		1978.38	0.00374954		2508.37	0.04036118		3038.37	0.03307549		3568.4	-0.01871888
388.59	0.19102447		918.59	0.00447909		1448.58	0.02511239		1978.58	0.00575134		2508.57	0.03969696		3038.57	0.03305023		3568.6	-0.0175705
388.79	0.19147725		918.79	0.00374562		1448.78	0.0242469		1978.78	0.0059822		2508.77	0.03965102		3038.77	0.03308619		3568.8	-0.01761818
388.99	0.19145328		918.99	0.00347535		1448.98	0.02422557		1978.98	0.0064617		2508.97	0.03990992		3038.97	0.03308094		3569	-0.01709291
389.19	0.19219157		919.19	0.00341001		1449.18	0.02384151		1979.18	0.00655989		2509.17	0.03967884		3039.17	0.03277473		3569.2	-0.01697496
389.39	0.19217081		919.39	0.0023044		1449.38	0.02354164		1979.38	0.00650514		2509.37	0.04000842		3039.37	0.03342413		3569.4	-0.01684542
389.59	0.19288559		919.59	0.00235204		1449.58	0.02383082		1979.58	0.00678485		2509.57	0.04011745		3039.57	0.03412529		3569.6	-0.01660917
389.79	0.19291326		919.79	0.0015701		1449.78	0.02498694		1979.78	0.00778564		2509.77	0.04051522		3039.77	0.03425941		3569.8	-0.01663573
389.99	0.19328767		919.99	0.00177676		1449.98	0.02583198		1979.98	0.00831332		2509.97	0.04134698		3039.97	0.03389159		3570	-0.01581998
390.19	0.19374117		920.19	0.00108162		1450.18	0.02610028		1980.18	0.00753761		2510.17	0.04103428		3040.17	0.03385051		3570.2	-0.01592348
390.39	0.19507156		920.39	0.00141544		1450.38	0.02687752		1980.38	0.00528658		2510.37	0.04060517		3040.37	0.03473639		3570.4	-0.0164465
390.59	0.19631753		920.59	0.0015907		1450.58	0.02631199		1980.58	0.00431014		2510.57	0.0406254		3040.57	0.03552005		3570.6	-0.01578194
390.79	0.19645811		920.79	0.00252673		1450.78	0.02665719		1980.78	0.00361156		2510.77	0.04065084		3040.77	0.03547074		3570.8	-0.01663145
390.99	0.19603739		920.99	0.00347909		1450.98	0.02688956		1980.98	0.0036778		2510.97	0.04061836		3040.97	0.03463894		3571	-0.01713553
391.19	0.19562327		921.19	0.00399991		1451.18	0.02599786		1981.18	0.00445798		2511.17	0.0396496		3041.17	0.03396883		3571.2	-0.01612414
391.39	0.19596297		921.39	0.00348361		1451.38	0.02610402		1981.38	0.00402451		2511.37	0.03960534		3041.37	0.0338716		3571.4	-0.01599657
391.59	0.19525834		921.59	0.00352318		1451.58	0.02561168		1981.58	0.00368665		2511.57	0.03839233		3041.57	0.03347433		3571.6	-0.01557883
391.79	0.19482336		921.79	0.00497234		1451.78	0.02502072		1981.78	0.0048202		2511.77	0.03803542		3041.77	0.03375723		3571.8	-0.01513742
391.99	0.19473184		921.99	0.00450221		1451.98	0.02449048		1981.98	0.00557689		2511.97	0.03812608		3041.97	0.03331197		3572	-0.01530948
392.19	0.19528051		922.19	0.0045736		1452.18	0.02342361		1982.18	0.00679952		2512.17	0.03698373		3042.17	0.03317966		3572.2	-0.01512825
392.39	0.19401198		922.39	0.00543779		1452.38	0.0234016		1982.38	0.00664934		2512.37	0.03682755		3042.37	0.03296365		3572.4	-0.01521388
392.59	0.1927502		922.59	0.00555637		1452.58	0.02156047		1982.58	0.00823697		2512.57	0.03642614		3042.57	0.03272089		3572.6	-0.01576445
392.79	0.1927213		922.79	0.00552367		1452.78	0.0202572		1982.78	0.00877424		2512.77	0.03658309		3042.77	0.03267086		3572.8	-0.01693543
392.99	0.19253504		922.99	0.00505119		1452.98	0.02066611		1982.98	0.00918449		2512.97	0.03612657		3042.97	0.0325266		3573	-0.01785679
393.19	0.19267464		923.19	0.00512504		1453.18	0.02063839		1983.18	0.01010338		2513.17	0.03562204		3043.17	0.0327147		3573.2	-0.01874429
393.39	0.19231868		923.39	0.00415695		1453.38	0.02044003		1983.38	0.01065879		2513.37	0.0347215		3043.37	0.03330665		3573.4	-0.01900167
393.59	0.19218515		923.59	0.00359111		1453.58	0.02021998		1983.58	0.01139735		2513.57	0.03547603		3043.57	0.03347567		3573.6	-0.01919378
393.79	0.19192258		923.79	0.00294507		1453.78	0.02116295		1983.78	0.01161417		2513.77	0.03680676		3043.77	0.03348693		3573.8	-0.01931233
393.99	0.19202712		923.99	0.0031138		1453.98	0.02222015		1983.98	0.01121074		2513.97	0.03715614		3043.97	0.03339146		3574	-0.01980644
394.19	0.19221657		924.19	0.00262294		1454.18	0.02285187		1984.18	0.01009431		2514.17	0.03705663		3044.17	0.03296231		3574.2	-0.01967499
394.39	0.19272827		924.39	0.00239848		1454.38	0.02403955		1984.38	0.00938033		2514.37	0.03829461		3044.37	0.03333216		3574.4	-0.01914824
394.59	0.19310028		924.59	0.00269635		1454.58	0.0234965		1984.58	0.00941829		2514.57	0.03881781		3044.57	0.0325611		3574.6	-0.01862977
394.79	0.19314511		924.79	0.00311321		1454.78	0.02408829		1984.78	0.00960856		2514.77	0.03884075		3044.77	0.0312396		3574.8	-0.01909762
394.99	0.1931746		924.99	0.00306392		1454.98	0.02339369		1984.98	0.00953823		2514.97	0.039348		3044.97	0.03130798		3575	-0.01843357
395.19	0.1934119		925.19	0.00183257		1455.18	0.02229073		1985.18	0.00958743		2515.17	0.03969596		3045.17	0.03151877		3575.2	-0.01805034
395.39	0.19356826		925.39	0.001741		1455.38	0.02255129		1985.38	0.00891915		2515.37	0.03982608		3045.37	0.0318632		3575.4	-0.01781894
395.59	0.19366265		925.59	0.00216882		1455.58	0.02317697		1985.58	0.0087935		2515.57	0.03963878		3045.57	0.0322872		3575.6	-0.01739481
395.79	0.19354822		925.79	0.00197298		1455.78	0.02199875		1985.78	0.00985345		2515.77	0.03974447		3045.77	0.03321518		3575.8	-0.01646008
395.99	0.19346355		925.99	0.00199337		1455.98	0.02104222		1985.98	0.01086697		2515.97	0.0397989		3045.97	0.03242557		3576	-0.01635424
396.19	0.19348443		926.19	0.00313905		1456.18	0.02045492		1986.18	0.01077682		2516.17	0.03920769		3046.17	0.03249366		3576.2	-0.01624271
396.39	0.1934051		926.39	0.00398384		1456.38	0.02101856		1986.38	0.01049121		2516.37	0.03949215		3046.37	0.03267407		3576.4	-0.01655324
396.59	0.19313303		926.59	0.00389507		1456.58	0.02058532		1986.58	0.01257298		2516.57	0.03980729		3046.57	0.03270607		3576.6	-0.0168224
396.79	0.19259023		926.79	0.00387142		1456.78	0.02118674		1986.78	0.01318654		2516.77	0.03925438		3046.77	0.03252728		3576.8	-0.0168067
396.99	0.19280746		926.99	0.0044211		1456.98	0.02179179		1986.98	0.01362277		2516.97	0.03833493		3046.97	0.03220942		3577	-0.01671171
397.19	0.19285276		927.19	0.00474525		1457.18	0.02207304		1987.18	0.01402468		2517.17	0.03818289		3047.17	0.03251859		3577.2	-0.01666201
397.39	0.19219092		927.39	0.00340807		1457.38	0.02174808		1987.38	0.01304255		2517.37	0.03755703		3047.37	0.03274881		3577.4	-0.01696235
397.59	0.19301648		927.59	0.00314246		1457.58	0.022311		1987.58	0.01254875		2517.57	0.03824045		3047.57	0.03260881		3577.6	-0.0173203
397.79	0.19322879		927.79	0.00288711		1457.78	0.02344415		1987.78	0.01256094		2517.77	0.03759909		3047.77	0.03309332		3577.8	-0.01734638
397.99	0.19354531		927.99	0.00252511		1457.98	0.02409788		1987.98	0.01246917		2517.97	0.03760938		3047.97	0.03323951		3578	-0.01631556
398.19	0.19382483		928.19	0.00296868		1458.18	0.02389506		1988.18	0.01076466		2518.17	0.03742994		3048.17	0.0328638		3578.2	-0.01525184
398.39	0.19364659		928.39	0.00209665		1458.38	0.02360157		1988.38	0.01024489		2518.37	0.03792228		3048.37	0.03318752		3578.4	-0.01535623
398.59	0.19468329		928.59	0.00252286		1458.58	0.02316666		1988.58	0.00896382		2518.57	0.03781331		3048.57	0.03307111		3578.6	-0.01497052
398.79	0.19511419		928.79	0.00227783		1458.78	0.02320949		1988.78	0.00825002		2518.77	0.03752037		3048.77	0.03374881		3578.8	-0.01431785
398.99	0.19521547		928.99	0.00178643		1458.98	0.02265098		1988.98	0.00744368		2518.97	0.03706383		3048.97	0.03419356		3579	-0.01406929
399.19	0.19501024		929.19	0.00102098		1459.18	0.02272681		1989.18	0.00642362		2519.17	0.03642199		3049.17	0.03413216		3579.2	-0.01386241
399.39	0.19407709		929.39	0.00165705		1459.38	0.02227133		1989.38	0.00631016		2519.37	0.03589653		3049.37	0.03498892		3579.4	-0.01337275
399.59	0.19452183		929.59	0.00137811		1459.58	0.02176438		1989.58	0.0066506		2519.57	0.03561499		3049.57	0.03450714		3579.6	-0.01300403
399.79	0.19444668		929.79	0.001455		1459.78	0.02148931		1989.78	0.00790914		2519.77	0.03614438		3049.77	0.03473023		3579.8	-0.01300255
399.99	0.19505898		929.99	0.0022962		1459.98	0.02086599		1989.98	0.00920201		2519.97	0.03622834		3049.97	0.03262044		3580	-0.01272241
400.19	0.19483157		930.19	0.00227366		1460.18	0.02125884		1990.18	0.01004862		2520.17	0.03633193		3050.17	0.03186677		3580.2	-0.01400194
400.39	0.19421454		930.39	0.00273445		1460.38	0.02077379		1990.38	0.01216608		2520.37	0.03637951		3050.37	0.03111257		3580.4	-0.01514628
400.59	0.19307604		930.59	0.00347066		1460.58	0.02066064		1990.58	0.01376795		2520.57	0.03685752		3050.57	0.02960525		3580.6	-0.01577339
400.79	0.19237594		930.79	0.00422061		1460.78	0.02099719		1990.78	0.01502556		2520.77	0.0367354		3050.77	0.02828654		3580.8	-0.01667748
400.99	0.19196583		930.99	0.00513482		1460.98	0.02118901		1990.98	0.01509859		2520.97	0.03667922		3050.97	0.0280797		3581	-0.01793931
401.19	0.19082788		931.19	0.00482991		1461.18	0.02130127		1991.18	0.01527707		2521.17	0.0373649		3051.17	0.02761012		3581.2	-0.01826563
401.39	0.18993794		931.39	0.0044708		1461.38	0.02127792		1991.38	0.01469053		2521.37	0.03799504		3051.37	0.02730195		3581.4	-0.01899769
401.59	0.19001627		931.59	0.00441605		1461.58	0.02187653		1991.58	0.01485571		2521.57	0.03850235		3051.57	0.02804817		3581.6	-0.0185609
401.79	0.1891959		931.79	0.00404196		1461.78	0.02216515		1991.78	0.01453073		2521.77	0.03856596		3051.77	0.02882831		3581.8	-0.0179087
401.99	0.18788397		931.99	0.00450699		1461.98	0.02218827		1991.98	0.01405396		2521.97	0.03967296		3051.97	0.02875349		3582	-0.01704345
402.19	0.18695725		932.19	0.00482632		1462.18	0.02150101		1992.18	0.0125677		2522.17	0.03924942		3052.17	0.02851557		3582.2	-0.01728346
402.39	0.18672637		932.39	0.00360794		1462.38	0.02146948		1992.38	0.01138746		2522.37	0.03891792		3052.37	0.02920394		3582.4	-0.01757116
402.59	0.18848662		932.59	0.00381276		1462.58	0.02125835		1992.58	0.00968058		2522.57	0.039244		3052.57	0.02951257		3582.6	-0.01697079
402.79	0.18936941		932.79	0.00376717		1462.78	0.02070706		1992.78	0.00925507		2522.77	0.03830336		3052.77	0.03161625		3582.8	-0.01717252
402.99	0.18982603		932.99	0.00303944		1462.98	0.02000579		1992.98	0.00778664		2522.97	0.0379306		3052.97	0.03169344		3583	-0.01710784
403.19	0.18941676		933.19	0.00307285		1463.18	0.02005836		1993.18	0.0070889		2523.17	0.03785923		3053.17	0.03234538		3583.2	-0.01658847
403.39	0.19040761		933.39	0.00376456		1463.38	0.01939128		1993.38	0.0076759		2523.37	0.03778609		3053.37	0.03307706		3583.4	-0.01585684
403.59	0.19209508		933.59	0.00354553		1463.58	0.01959503		1993.58	0.00854309		2523.57	0.03718881		3053.57	0.03334643		3583.6	-0.01543856
403.79	0.19311131		933.79	0.00284257		1463.78	0.01993033		1993.78	0.00880523		2523.77	0.03755568		3053.77	0.03428641		3583.8	-0.01569184
403.99	0.19408821		933.99	0.00329182		1463.98	0.01947338		1993.98	0.00984804		2523.97	0.03745825		3053.97	0.03327994		3584	-0.01582483
404.19	0.19408507		934.19	0.00295932		1464.18	0.02019924		1994.18	0.01090473		2524.17	0.03713328		3054.17	0.03334404		3584.2	-0.01730043
404.39	0.19446487		934.39	0.00396581		1464.38	0.01887719		1994.38	0.0120094		2524.37	0.03795357		3054.37	0.03251275		3584.4	-0.01848528
404.59	0.19521742		934.59	0.0042921		1464.58	0.0195482		1994.58	0.01238995		2524.57	0.03822102		3054.57	0.03131924		3584.6	-0.01886137
404.79	0.19467498		934.79	0.00412882		1464.78	0.02017991		1994.78	0.01295106		2524.77	0.03919989		3054.77	0.03089062		3584.8	-0.01820908
404.99	0.19484397		934.99	0.00468579		1464.98	0.0210262		1994.98	0.01306504		2524.97	0.03882069		3054.97	0.03115285		3585	-0.01796692
405.19	0.19418493		935.19	0.00424452		1465.18	0.0208264		1995.18	0.01373757		2525.17	0.03955243		3055.17	0.03072215		3585.2	-0.01777848
405.39	0.19512737		935.39	0.00436785		1465.38	0.02186321		1995.38	0.01304217		2525.37	0.03990748		3055.37	0.0302851		3585.4	-0.01812922
405.59	0.19425204		935.59	0.00463056		1465.58	0.02288595		1995.58	0.01318758		2525.57	0.03931435		3055.57	0.0298395		3585.6	-0.01802677
405.79	0.19385535		935.79	0.00521763		1465.78	0.02264653		1995.78	0.0126156		2525.77	0.03964932		3055.77	0.02918405		3585.8	-0.0177473
405.99	0.19331399		935.99	0.00553603		1465.98	0.02268362		1995.98	0.01209054		2525.97	0.03981938		3055.97	0.02865943		3586	-0.01779745
406.19	0.19365642		936.19	0.00492171		1466.18	0.02269267		1996.18	0.0104872		2526.17	0.03943813		3056.17	0.02845042		3586.2	-0.01801583
406.39	0.19419853		936.39	0.00468192		1466.38	0.02268669		1996.38	0.00911845		2526.37	0.03883039		3056.37	0.02866736		3586.4	-0.01771395
406.59	0.19532913		936.59	0.00548765		1466.58	0.02242984		1996.58	0.0087533		2526.57	0.03867583		3056.57	0.02887208		3586.6	-0.01829895
406.79	0.19499934		936.79	0.00592727		1466.78	0.02227061		1996.78	0.00842606		2526.77	0.0380903		3056.77	0.03052198		3586.8	-0.01918693
406.99	0.19489516		936.99	0.00548275		1466.98	0.02216759		1996.98	0.00853157		2526.97	0.03711284		3056.97	0.0305332		3587	-0.01906306
407.19	0.19398712		937.19	0.00577837		1467.18	0.02242168		1997.18	0.00846303		2527.17	0.03572419		3057.17	0.03100215		3587.2	-0.01824548
407.39	0.19413927		937.39	0.00580684		1467.38	0.02233571		1997.38	0.00973933		2527.37	0.03478002		3057.37	0.03234059		3587.4	-0.01861813
407.59	0.19412743		937.59	0.00546446		1467.58	0.0217583		1997.58	0.01077735		2527.57	0.03447327		3057.57	0.03219029		3587.6	-0.01935752
407.79	0.19348038		937.79	0.00474649		1467.78	0.02163817		1997.78	0.00987436		2527.77	0.0350461		3057.77	0.03242259		3587.8	-0.01932289
407.99	0.19359801		937.99	0.00512725		1467.98	0.02198714		1997.98	0.01049073		2527.97	0.03474907		3057.97	0.03183004		3588	-0.01886265
408.19	0.19356082		938.19	0.00423236		1468.18	0.02129644		1998.18	0.01017639		2528.17	0.03534231		3058.17	0.03167703		3588.2	-0.01951597
408.39	0.19341255		938.39	0.00451635		1468.38	0.02061069		1998.38	0.01036366		2528.37	0.03641183		3058.37	0.03190185		3588.4	-0.01911578
408.59	0.19339751		938.59	0.00425687		1468.58	0.02148242		1998.58	0.01101103		2528.57	0.03594471		3058.57	0.03252932		3588.6	-0.01808486
408.79	0.19294856		938.79	0.00421701		1468.78	0.02131849		1998.78	0.01107488		2528.77	0.03589999		3058.77	0.03369937		3588.8	-0.01733778
408.99	0.19408814		938.99	0.00407984		1468.98	0.02119629		1998.98	0.01175048		2528.97	0.03530504		3058.97	0.03471828		3589	-0.01780643
409.19	0.19354623		939.19	0.00374373		1469.18	0.02065053		1999.18	0.0120549		2529.17	0.03563576		3059.17	0.03515726		3589.2	-0.0179235
409.39	0.19445356		939.39	0.00423126		1469.38	0.02125048		1999.38	0.0117771		2529.37	0.03559069		3059.37	0.03477577		3589.4	-0.01788377
409.59	0.19253934		939.59	0.00441913		1469.58	0.02067314		1999.58	0.01143556		2529.57	0.03532257		3059.57	0.03479291		3589.6	-0.01742821
409.79	0.1924366		939.79	0.00446146		1469.78	0.02015634		1999.78	0.01004752		2529.77	0.03639955		3059.77	0.03555735		3589.8	-0.01652649
409.99	0.19237081		939.99	0.00374702		1469.98	0.02046283		1999.98	0.00909295		2529.97	0.03670342		3059.97	0.03585605		3590	-0.01627238
410.19	0.19252826		940.19	0.00348957		1470.18	0.02094279		2000.18	0.00839655		2530.17	0.037007		3060.17	0.03524726		3590.2	-0.0163431
410.39	0.19300127		940.39	0.00398935		1470.38	0.02093239		2000.38	0.00780269		2530.37	0.03650274		3060.37	0.03535565		3590.4	-0.01647207
410.59	0.19328784		940.59	0.00507551		1470.58	0.02121874		2000.58	0.00818758		2530.57	0.03630132		3060.57	0.03555331		3590.6	-0.01780463
410.79	0.19268057		940.79	0.00452421		1470.78	0.02098765		2000.78	0.00898479		2530.77	0.03624418		3060.77	0.03517012		3590.8	-0.01788736
410.99	0.19240047		940.99	0.00425581		1470.98	0.02037027		2000.98	0.00963896		2530.97	0.03616123		3060.97	0.03450989		3591	-0.01757158
411.19	0.19190532		941.19	0.00466977		1471.18	0.01968368		2001.18	0.00955534		2531.17	0.03692623		3061.17	0.03347774		3591.2	-0.01808507
411.39	0.19134968		941.39	0.00479744		1471.38	0.01948851		2001.38	0.01062362		2531.37	0.03770206		3061.37	0.03265883		3591.4	-0.01969734
411.59	0.19115245		941.59	0.0047745		1471.58	0.01935938		2001.58	0.01061031		2531.57	0.03830657		3061.57	0.03115952		3591.6	-0.02008775
411.79	0.19099033		941.79	0.004398		1471.78	0.01913968		2001.78	0.00921651		2531.77	0.03857377		3061.77	0.03153642		3591.8	-0.0192916
411.99	0.19228958		941.99	0.00442298		1471.98	0.01862327		2001.98	0.00946502		2531.97	0.0394606		3061.97	0.03165188		3592	-0.01875143
412.19	0.19301792		942.19	0.0042396		1472.18	0.01756753		2002.18	0.00929579		2532.17	0.04126003		3062.17	0.03190339		3592.2	-0.01962756
412.39	0.19301906		942.39	0.00407601		1472.38	0.01730028		2002.38	0.01034573		2532.37	0.04170662		3062.37	0.03232933		3592.4	-0.01955398
412.59	0.19284403		942.59	0.00330496		1472.58	0.017162		2002.58	0.01051009		2532.57	0.04179467		3062.57	0.03281265		3592.6	-0.02073388
412.79	0.19333202		942.79	0.00327686		1472.78	0.01658382		2002.78	0.01065109		2532.77	0.0419807		3062.77	0.03334555		3592.8	-0.02084461
412.99	0.19385706		942.99	0.00287041		1472.98	0.016452		2002.98	0.01069656		2532.97	0.04176314		3062.97	0.03322363		3593	-0.0204739
413.19	0.19352841		943.19	0.00259666		1473.18	0.01684659		2003.18	0.01025219		2533.17	0.04026887		3063.17	0.03383501		3593.2	-0.02039574
413.39	0.19301988		943.39	0.00221001		1473.38	0.0161898		2003.38	0.0100448		2533.37	0.04009502		3063.37	0.03333775		3593.4	-0.01997356
413.59	0.19261961		943.59	0.00197725		1473.58	0.01627942		2003.58	0.00919525		2533.57	0.04020884		3063.57	0.03329945		3593.6	-0.01977035
413.79	0.19258882		943.79	0.00221418		1473.78	0.01711063		2003.78	0.00760995		2533.77	0.0402521		3063.77	0.03396011		3593.8	-0.01950472
413.99	0.19251		943.99	0.00193205		1473.98	0.0176105		2003.98	0.00701496		2533.97	0.03942358		3063.97	0.03350575		3594	-0.01916957
414.19	0.19308732		944.19	0.0019801		1474.18	0.01790722		2004.18	0.00650912		2534.17	0.0383004		3064.17	0.03227695		3594.2	-0.01893071
414.39	0.19241144		944.39	0.00216798		1474.38	0.01815702		2004.38	0.00541512		2534.37	0.03744835		3064.37	0.03257809		3594.4	-0.01829366
414.59	0.19278881		944.59	0.00293882		1474.58	0.01849864		2004.58	0.00548119		2534.57	0.0371542		3064.57	0.03222024		3594.6	-0.0178732
414.79	0.19262894		944.79	0.00301697		1474.78	0.0183048		2004.78	0.00478246		2534.77	0.03705901		3064.77	0.03112169		3594.8	-0.01714781
414.99	0.19257661		944.99	0.0037063		1474.98	0.01815951		2004.98	0.00463961		2534.97	0.03617008		3064.97	0.03117205		3595	-0.01672996
415.19	0.19166774		945.19	0.00363055		1475.18	0.01852618		2005.18	0.00463712		2535.17	0.0353442		3065.17	0.03110799		3595.2	-0.01621386
415.39	0.19089244		945.39	0.00345624		1475.38	0.01902625		2005.38	0.00452732		2535.37	0.03475548		3065.37	0.03104346		3595.4	-0.01655824
415.59	0.19128943		945.59	0.00344313		1475.58	0.02022643		2005.58	0.00484912		2535.57	0.03583833		3065.57	0.03154235		3595.6	-0.01651345
415.79	0.19096578		945.79	0.00345788		1475.78	0.01989157		2005.78	0.00447678		2535.77	0.03675298		3065.77	0.03262891		3595.8	-0.01648915
415.99	0.19161254		945.99	0.00379113		1475.98	0.02053793		2005.98	0.00526294		2535.97	0.03831686		3065.97	0.03247933		3596	-0.01702231
416.19	0.19078342		946.19	0.0035698		1476.18	0.02055472		2006.18	0.00578169		2536.17	0.03882494		3066.17	0.03236243		3596.2	-0.01840391
416.39	0.19028924		946.39	0.00351256		1476.38	0.02088652		2006.38	0.00579586		2536.37	0.03880621		3066.37	0.0322791		3596.4	-0.01981513
416.59	0.19072236		946.59	0.00354813		1476.58	0.02137219		2006.58	0.00641351		2536.57	0.03892485		3066.57	0.03274574		3596.6	-0.02009404
416.79	0.19078641		946.79	0.00408909		1476.78	0.02100463		2006.78	0.00672466		2536.77	0.037921		3066.77	0.03250294		3596.8	-0.01978646
416.99	0.19130311		946.99	0.00364167		1476.98	0.02068701		2006.98	0.00666305		2536.97	0.03729536		3066.97	0.03169969		3597	-0.0209184
417.19	0.19150234		947.19	0.00375848		1477.18	0.02095458		2007.18	0.00748931		2537.17	0.03674691		3067.17	0.03172931		3597.2	-0.02238262
417.39	0.19111868		947.39	0.00372346		1477.38	0.02062123		2007.38	0.00742349		2537.37	0.03735989		3067.37	0.03095315		3597.4	-0.02264928
417.59	0.1918409		947.59	0.00298172		1477.58	0.02081209		2007.58	0.00690083		2537.57	0.03770808		3067.57	0.0309673		3597.6	-0.02331639
417.79	0.19103351		947.79	0.00211845		1477.78	0.02045515		2007.78	0.00711923		2537.77	0.03692616		3067.77	0.03144335		3597.8	-0.02297338
417.99	0.19119023		947.99	0.00153639		1477.98	0.02006977		2007.98	0.0076817		2537.97	0.0368659		3067.97	0.03102812		3598	-0.02267996
418.19	0.19185674		948.19	0.00169378		1478.18	0.01990206		2008.18	0.00728184		2538.17	0.0364189		3068.17	0.0303919		3598.2	-0.02225929
418.39	0.19270957		948.39	0.00203648		1478.38	0.02063354		2008.38	0.00631844		2538.37	0.03606523		3068.37	0.03085291		3598.4	-0.02187166
418.59	0.19405817		948.59	0.00232082		1478.58	0.02046219		2008.58	0.00666061		2538.57	0.03620228		3068.57	0.03063606		3598.6	-0.02104683
418.79	0.19460211		948.79	0.00209945		1478.78	0.01983521		2008.78	0.00639694		2538.77	0.03635227		3068.77	0.03108693		3598.8	-0.02031322
418.99	0.19420706		948.99	0.00191712		1478.98	0.01966263		2008.98	0.00664823		2538.97	0.03606866		3068.97	0.03167294		3599	-0.01881697
419.19	0.19378984		949.19	0.00187075		1479.18	0.01988823		2009.18	0.00629955		2539.17	0.03676002		3069.17	0.03305292		3599.2	-0.01760185
419.39	0.19358886		949.39	0.00228367		1479.38	0.01938007		2009.38	0.00624005		2539.37	0.03779745		3069.37	0.03431574		3599.4	-0.01768708
419.59	0.19389168		949.59	0.00251242		1479.58	0.01960801		2009.58	0.0060523		2539.57	0.03911132		3069.57	0.03524845		3599.6	-0.01770103
419.79	0.19306804		949.79	0.00305093		1479.78	0.01921153		2009.78	0.00596398		2539.77	0.03896715		3069.77	0.03576791		3599.8	-0.01734308
419.99	0.19298978		949.99	0.00354717		1479.98	0.01975208		2009.98	0.00657145		2539.97	0.03852147		3069.97	0.03543993		3600	-0.01718101
420.19	0.19246178		950.19	0.0034103		1480.18	0.01840574		2010.18	0.00561159		2540.17	0.03797459		3070.17	0.03548531		3600.2	-0.01717434
420.39	0.19354319		950.39	0.00488944		1480.38	0.01876666		2010.38	0.00503385		2540.37	0.03834249		3070.37	0.03648686		3600.4	-0.01801698
420.59	0.19459709		950.59	0.00563616		1480.58	0.01906089		2010.58	0.00544048		2540.57	0.03803945		3070.57	0.03614595		3600.6	-0.01773543
420.79	0.19409437		950.79	0.00564388		1480.78	0.01860413		2010.78	0.00383365		2540.77	0.03710563		3070.77	0.03507136		3600.8	-0.01849848
420.99	0.19442153		950.99	0.00595325		1480.98	0.01884676		2010.98	0.00339841		2540.97	0.03678223		3070.97	0.03466819		3601	-0.01932003
421.19	0.19383596		951.19	0.00607483		1481.18	0.01900722		2011.18	0.00212759		2541.17	0.03620329		3071.17	0.03457119		3601.2	-0.01918857
421.39	0.19218763		951.39	0.00526595		1481.38	0.01871815		2011.38	0.00127345		2541.37	0.03651979		3071.37	0.03440477		3601.4	-0.01997858
421.59	0.19258925		951.59	0.00405098		1481.58	0.01905231		2011.58	0.0014527		2541.57	0.03634345		3071.57	0.03332854		3601.6	-0.02035513
421.79	0.19184717		951.79	0.00341763		1481.78	0.01845641		2011.78	0.00211289		2541.77	0.03604004		3071.77	0.03257376		3601.8	-0.0204418
421.99	0.19182565		951.99	0.00385201		1481.98	0.0192932		2011.98	0.00169841		2541.97	0.03645509		3071.97	0.03159938		3602	-0.02162239
422.19	0.19155975		952.19	0.00413253		1482.18	0.0201892		2012.18	0.00115301		2542.17	0.03600321		3072.17	0.02983517		3602.2	-0.02189244
422.39	0.1913858		952.39	0.0038244		1482.38	0.02013078		2012.38	0.00081879		2542.37	0.03608331		3072.37	0.0297127		3602.4	-0.02220206
422.59	0.19154606		952.59	0.00345665		1482.58	0.01945447		2012.58	0.00120481		2542.57	0.03657511		3072.57	0.02978517		3602.6	-0.02171984
422.79	0.19084249		952.79	0.00294131		1482.78	0.01936525		2012.78	0.00130146		2542.77	0.03664678		3072.77	0.03016516		3602.8	-0.02095285
422.99	0.19047657		952.99	0.00346565		1482.98	0.0195315		2012.98	0.00182376		2542.97	0.03666729		3072.97	0.03066284		3603	-0.02042863
423.19	0.19039783		953.19	0.00350363		1483.18	0.01846204		2013.18	0.00296092		2543.17	0.03764459		3073.17	0.0310143		3603.2	-0.01985869
423.39	0.19003121		953.39	0.00364477		1483.38	0.01781255		2013.38	0.00405415		2543.37	0.03783425		3073.37	0.03141563		3603.4	-0.01983561
423.59	0.1904973		953.59	0.00333341		1483.58	0.01820605		2013.58	0.00401758		2543.57	0.03803081		3073.57	0.03133553		3603.6	-0.01989347
423.79	0.19095803		953.79	0.00303962		1483.78	0.01865524		2013.78	0.00539677		2543.77	0.03845099		3073.77	0.03158503		3603.8	-0.01939686
423.99	0.19156485		953.99	0.00246423		1483.98	0.01926901		2013.98	0.00577914		2543.97	0.03849694		3073.97	0.03142115		3604	-0.01914504
424.19	0.19260424		954.19	0.0020914		1484.18	0.01958463		2014.18	0.00550373		2544.17	0.03955792		3074.17	0.03228349		3604.2	-0.01892263
424.39	0.19329824		954.39	0.00220177		1484.38	0.02035466		2014.38	0.00620835		2544.37	0.03937269		3074.37	0.03313225		3604.4	-0.01953354
424.59	0.19416554		954.59	0.0011526		1484.58	0.0200278		2014.58	0.00609286		2544.57	0.03949688		3074.57	0.03279441		3604.6	-0.01873834
424.79	0.19424188		954.79	0.0007637		1484.78	0.02001291		2014.78	0.00559506		2544.77	0.03919236		3074.77	0.03322414		3604.8	-0.0183655
424.99	0.19469101		954.99	0.00125707		1484.98	0.01963784		2014.98	0.00527577		2544.97	0.03866866		3074.97	0.03389415		3605	-0.01800687
425.19	0.19468836		955.19	0.0012159		1485.18	0.01923726		2015.18	0.00508914		2545.17	0.03875604		3075.17	0.03444651		3605.2	-0.01815789
425.39	0.19417758		955.39	0.00075159		1485.38	0.01901562		2015.38	0.00545956		2545.37	0.03879076		3075.37	0.03489716		3605.4	-0.01886833
425.59	0.1940546		955.59	0.00046632		1485.58	0.01957272		2015.58	0.0048663		2545.57	0.03827145		3075.57	0.03406264		3605.6	-0.01907668
425.79	0.19337007		955.79	0.00086778		1485.78	0.01910405		2015.78	0.00555989		2545.77	0.03787451		3075.77	0.03355142		3605.8	-0.02063496
425.99	0.19308475		955.99	0.00176561		1485.98	0.02028666		2015.98	0.00430529		2545.97	0.03755815		3075.97	0.0324003		3606	-0.02208924
426.19	0.1924751		956.19	0.00158501		1486.18	0.02059179		2016.18	0.00308339		2546.17	0.03747528		3076.17	0.03180666		3606.2	-0.02181771
426.39	0.19146756		956.39	0.00125277		1486.38	0.02014036		2016.38	0.00275116		2546.37	0.03728721		3076.37	0.03213581		3606.4	-0.02225688
426.59	0.19149059		956.59	0.00142063		1486.58	0.02001928		2016.58	0.0021681		2546.57	0.03690848		3076.57	0.03222195		3606.6	-0.02275276
426.79	0.19008713		956.79	0.00154819		1486.78	0.01978203		2016.78	0.00228178		2546.77	0.03620705		3076.77	0.03157411		3606.8	-0.02356939
426.99	0.18964757		956.99	0.00266682		1486.98	0.01932316		2016.98	0.00252851		2546.97	0.03580916		3076.97	0.03113264		3607	-0.02420183
427.19	0.18904582		957.19	0.002505		1487.18	0.01837562		2017.18	0.00223093		2547.17	0.0355203		3077.17	0.03041439		3607.2	-0.02376984
427.39	0.18817975		957.39	0.00210742		1487.38	0.01947488		2017.38	0.00149752		2547.37	0.03529453		3077.37	0.03089107		3607.4	-0.02344501
427.59	0.18856884		957.59	0.00127845		1487.58	0.019615		2017.58	0.00053411		2547.57	0.03542649		3077.57	0.03106168		3607.6	-0.02286638
427.79	0.18892664		957.79	0.00078836		1487.78	0.01921929		2017.78	0.00076184		2547.77	0.03618348		3077.77	0.03178534		3607.8	-0.02229883
427.99	0.18861787		957.99	-0.00005944		1487.98	0.01958386		2017.98	0.00102303		2547.97	0.03636519		3077.97	0.03143762		3608	-0.02176303
428.19	0.18863998		958.19	0.00016698		1488.18	0.02036587		2018.18	0.000739		2548.17	0.03694018		3078.17	0.03211232		3608.2	-0.02164872
428.39	0.18848561		958.39	-0.00102676		1488.38	0.01959967		2018.38	0.00112677		2548.37	0.03728976		3078.37	0.03144139		3608.4	-0.02148028
428.59	0.18976687		958.59	-0.0003516		1488.58	0.01974934		2018.58	0.00090836		2548.57	0.0382913		3078.57	0.03213489		3608.6	-0.02096602
428.79	0.1900232		958.79	0.00006627		1488.78	0.01983476		2018.78	0.00185336		2548.77	0.03802413		3078.77	0.03281564		3608.8	-0.01987285
428.99	0.18919651		958.99	0.00067808		1488.98	0.01885728		2018.98	0.00204458		2548.97	0.03810965		3078.97	0.03306869		3609	-0.01928694
429.19	0.18921164		959.19	0.0009256		1489.18	0.01906931		2019.18	0.00256915		2549.17	0.03829632		3079.17	0.03419026		3609.2	-0.01856022
429.39	0.18954385		959.39	0.00037455		1489.38	0.01896458		2019.38	0.00247157		2549.37	0.03835936		3079.37	0.03440352		3609.4	-0.01776447
429.59	0.18964751		959.59	0.00112041		1489.58	0.01961196		2019.58	0.0030925		2549.57	0.03906678		3079.57	0.03392007		3609.6	-0.01781549
429.79	0.1909624		959.79	0.00174595		1489.78	0.01980997		2019.78	0.00338937		2549.77	0.03921129		3079.77	0.0333566		3609.8	-0.01806983
429.99	0.19150696		959.99	0.00176814		1489.98	0.0208389		2019.98	0.00267387		2549.97	0.03935338		3079.97	0.0326124		3610	-0.01837591
430.19	0.19154569		960.19	0.00158562		1490.18	0.02106844		2020.18	0.00300422		2550.17	0.03932633		3080.17	0.0332195		3610.2	-0.01847419
430.39	0.19251452		960.39	0.00174944		1490.38	0.02115508		2020.38	0.00395874		2550.37	0.03890653		3080.37	0.03266651		3610.4	-0.01929488
430.59	0.19280829		960.59	0.00207927		1490.58	0.02060226		2020.58	0.00418247		2550.57	0.03813054		3080.57	0.03332909		3610.6	-0.01968879
430.79	0.19310483		960.79	0.00229574		1490.78	0.02035776		2020.78	0.00460292		2550.77	0.037716		3080.77	0.03289358		3610.8	-0.02039639
430.99	0.19331207		960.99	0.00189476		1490.98	0.01996498		2020.98	0.00466437		2550.97	0.03686666		3080.97	0.03258403		3611	-0.02040657
431.19	0.19379921		961.19	0.0008664		1491.18	0.0196036		2021.18	0.00382202		2551.17	0.03754895		3081.17	0.0323779		3611.2	-0.02040788
431.39	0.19356977		961.39	0.0005681		1491.38	0.02025965		2021.38	0.00333275		2551.37	0.03778529		3081.37	0.03294413		3611.4	-0.02055723
431.59	0.19451055		961.59	0.00036897		1491.58	0.0193786		2021.58	0.00306446		2551.57	0.0378431		3081.57	0.03332595		3611.6	-0.02157956
431.79	0.19396791		961.79	0.00015015		1491.78	0.01995034		2021.78	0.00318667		2551.77	0.03772507		3081.77	0.0335879		3611.8	-0.0221005
431.99	0.19273328		961.99	0.00010059		1491.98	0.02014553		2021.98	0.00350989		2551.97	0.03750965		3081.97	0.03257964		3612	-0.02253012
432.19	0.19188797		962.19	0.00083626		1492.18	0.02057016		2022.18	0.00272542		2552.17	0.03790283		3082.17	0.03288836		3612.2	-0.02329917
432.39	0.19138264		962.39	0.00034138		1492.38	0.01963225		2022.38	0.00302665		2552.37	0.03824572		3082.37	0.03305217		3612.4	-0.02302126
432.59	0.19148772		962.59	0.00189341		1492.58	0.01961437		2022.58	0.00247158		2552.57	0.03784307		3082.57	0.03266819		3612.6	-0.02292144
432.79	0.18981686		962.79	0.00144347		1492.78	0.0190962		2022.78	0.00298768		2552.77	0.0376734		3082.77	0.03210876		3612.8	-0.02194653
432.99	0.18871476		962.99	0.0026901		1492.98	0.01838645		2022.98	0.00264016		2552.97	0.03803246		3082.97	0.03197311		3613	-0.02182165
433.19	0.18913505		963.19	0.00279556		1493.18	0.01853575		2023.18	0.00175427		2553.17	0.03763919		3083.17	0.03313707		3613.2	-0.02128742
433.39	0.18937962		963.39	0.00288766		1493.38	0.01834934		2023.38	0.00207397		2553.37	0.03753223		3083.37	0.03298684		3613.4	-0.02152115
433.59	0.18944054		963.59	0.00323954		1493.58	0.01882293		2023.58	0.00129176		2553.57	0.03810028		3083.57	0.03346043		3613.6	-0.02186336
433.79	0.18953652		963.79	0.00319096		1493.78	0.01912547		2023.78	0.00138479		2553.77	0.03789673		3083.77	0.03319012		3613.8	-0.0222233
433.99	0.18956395		963.99	0.00253559		1493.98	0.01936901		2023.98	0.0011078		2553.97	0.03769721		3083.97	0.03279122		3614	-0.0231208
434.19	0.18999731		964.19	0.002251		1494.18	0.01904192		2024.18	0.00087105		2554.17	0.03743814		3084.17	0.03298806		3614.2	-0.02274461
434.39	0.19056692		964.39	0.0018333		1494.38	0.01941519		2024.38	0.00118279		2554.37	0.03774863		3084.37	0.03285965		3614.4	-0.02225423
434.59	0.19047942		964.59	0.00183408		1494.58	0.01925811		2024.58	0.00039598		2554.57	0.0376143		3084.57	0.03321417		3614.6	-0.02234238
434.79	0.19102311		964.79	0.00216559		1494.78	0.01963884		2024.78	0.00007563		2554.77	0.0377118		3084.77	0.03182422		3614.8	-0.02312134
434.99	0.19163902		964.99	0.0019266		1494.98	0.01945601		2024.98	-0.00002589		2554.97	0.03744571		3084.97	0.03210517		3615	-0.0230277
435.19	0.19216683		965.19	0.00277936		1495.18	0.02039186		2025.18	-0.00097735		2555.17	0.0377534		3085.17	0.03238189		3615.2	-0.02350433
435.39	0.19187398		965.39	0.0033219		1495.38	0.02027968		2025.38	-0.00097296		2555.37	0.03679864		3085.37	0.03318015		3615.4	-0.02355039
435.59	0.19157314		965.59	0.00272603		1495.58	0.01983664		2025.58	-0.00162501		2555.57	0.03638605		3085.57	0.03334269		3615.6	-0.02306821
435.79	0.19084631		965.79	0.00322825		1495.78	0.0198754		2025.78	-0.00192519		2555.77	0.03564489		3085.77	0.03429048		3615.8	-0.02309477
435.99	0.1899271		965.99	0.0033113		1495.98	0.01901239		2025.98	-0.00165686		2555.97	0.03557325		3085.97	0.03420855		3616	-0.02296499
436.19	0.18993121		966.19	0.0037587		1496.18	0.01903688		2026.18	-0.00145507		2556.17	0.03535794		3086.17	0.03473327		3616.2	-0.02247235
436.39	0.1900461		966.39	0.00341859		1496.38	0.01976962		2026.38	-0.00105601		2556.37	0.03489714		3086.37	0.0343791		3616.4	-0.02165763
436.59	0.18968387		966.59	0.00357699		1496.58	0.02001836		2026.58	-0.00077379		2556.57	0.03423367		3086.57	0.03314699		3616.6	-0.0220071
436.79	0.18935388		966.79	0.00207451		1496.78	0.01990919		2026.78	0.00015925		2556.77	0.03409204		3086.77	0.03345054		3616.8	-0.02216863
436.99	0.19004526		966.99	0.00201427		1496.98	0.02028635		2026.98	0.00075027		2556.97	0.03432596		3086.97	0.03398258		3617	-0.02214048
437.19	0.19078375		967.19	0.00068427		1497.18	0.02025502		2027.18	0.00036298		2557.17	0.03415478		3087.17	0.03441324		3617.2	-0.02186528
437.39	0.19106894		967.39	-0.00017513		1497.38	0.02011061		2027.38	0.00101239		2557.37	0.03459377		3087.37	0.03360909		3617.4	-0.0224361
437.59	0.19144775		967.59	-0.00109863		1497.58	0.01976423		2027.58	0.00056806		2557.57	0.03567318		3087.57	0.03363158		3617.6	-0.02293363
437.79	0.19133474		967.79	-0.00125785		1497.78	0.01983619		2027.78	0.001237		2557.77	0.03604762		3087.77	0.03270746		3617.8	-0.02279864
437.99	0.19124323		967.99	-0.00200943		1497.98	0.0192807		2027.98	0.00053188		2557.97	0.03652524		3087.97	0.03234804		3618	-0.02270123
438.19	0.19172238		968.19	-0.00225097		1498.18	0.01893087		2028.18	0.00105952		2558.17	0.03656483		3088.17	0.03215746		3618.2	-0.02223281
438.39	0.19207197		968.39	-0.00168579		1498.38	0.01902319		2028.38	0.00113622		2558.37	0.03673351		3088.37	0.0307401		3618.4	-0.02248546
438.59	0.19221527		968.59	-0.00109932		1498.58	0.01860867		2028.58	0.00037998		2558.57	0.03687326		3088.57	0.02999238		3618.6	-0.0231324
438.79	0.19215656		968.79	-0.00048352		1498.78	0.01841248		2028.78	0.00059529		2558.77	0.03652677		3088.77	0.0294652		3618.8	-0.02371651
438.99	0.19180198		968.99	0.00019662		1498.98	0.01874144		2028.98	0.00053673		2558.97	0.0365133		3088.97	0.03076659		3619	-0.02285532
439.19	0.19174104		969.19	0.00102344		1499.18	0.01864345		2029.18	0.0000941		2559.17	0.03697385		3089.17	0.03053398		3619.2	-0.02287347
439.39	0.1910509		969.39	0.00129948		1499.38	0.01763542		2029.38	0.00104449		2559.37	0.03714511		3089.37	0.02973875		3619.4	-0.021629
439.59	0.18961415		969.59	0.00220836		1499.58	0.01739691		2029.58	0.00051957		2559.57	0.03689843		3089.57	0.02917624		3619.6	-0.0213084
439.79	0.18871023		969.79	0.00267864		1499.78	0.01701414		2029.78	0.00084945		2559.77	0.03634236		3089.77	0.02918199		3619.8	-0.02168772
439.99	0.18771029		969.99	0.0025395		1499.98	0.01689925		2029.98	0.00166458		2559.97	0.03548697		3089.97	0.02839322		3620	-0.02127817
440.19	0.18691374		970.19	0.00255977		1500.18	0.01747285		2030.18	0.00224247		2560.17	0.03441244		3090.17	0.02825265		3620.2	-0.02127181
440.39	0.18671714		970.39	0.00185737		1500.38	0.01806658		2030.38	0.00205129		2560.37	0.03370267		3090.37	0.02756483		3620.4	-0.02175793
440.59	0.18610623		970.59	0.00088605		1500.58	0.01698548		2030.58	0.00290289		2560.57	0.03277692		3090.57	0.02731843		3620.6	-0.02262394
440.79	0.1863624		970.79	0.00007084		1500.78	0.01688702		2030.78	0.00363069		2560.77	0.03297864		3090.77	0.02792966		3620.8	-0.02252724
440.99	0.18679063		970.99	-0.00029223		1500.98	0.01674357		2030.98	0.00420231		2560.97	0.03266081		3090.97	0.02862201		3621	-0.02189255
441.19	0.18718213		971.19	-0.00081091		1501.18	0.01652141		2031.18	0.00381905		2561.17	0.03249454		3091.17	0.02853284		3621.2	-0.02109408
441.39	0.18726		971.39	-0.00128495		1501.38	0.01596353		2031.38	0.00373753		2561.37	0.03327969		3091.37	0.02839118		3621.4	-0.02194904
441.59	0.18834494		971.59	-0.00161977		1501.58	0.0161742		2031.58	0.0031049		2561.57	0.033585		3091.57	0.02936647		3621.6	-0.0217623
441.79	0.18872845		971.79	-0.00188308		1501.78	0.01704184		2031.78	0.00347192		2561.77	0.03402358		3091.77	0.02975966		3621.8	-0.02187977
441.99	0.18846897		971.99	-0.00140298		1501.98	0.01711561		2031.98	0.00352049		2561.97	0.03420637		3091.97	0.03000962		3622	-0.02181184
442.19	0.18929081		972.19	-0.00176226		1502.18	0.01708201		2032.18	0.00374931		2562.17	0.03423514		3092.17	0.03075064		3622.2	-0.02192309
442.39	0.18995583		972.39	-0.00112947		1502.38	0.01777423		2032.38	0.00275027		2562.37	0.03519556		3092.37	0.03065955		3622.4	-0.02228694
442.59	0.18916499		972.59	-0.00103227		1502.58	0.01815026		2032.58	0.00270133		2562.57	0.03557691		3092.57	0.03159316		3622.6	-0.02292315
442.79	0.18871224		972.79	-0.00053788		1502.78	0.01858501		2032.78	0.00251409		2562.77	0.03591539		3092.77	0.03174643		3622.8	-0.02312914
442.99	0.18838394		972.99	-0.00022643		1502.98	0.01976473		2032.98	0.00233457		2562.97	0.03678867		3092.97	0.03199848		3623	-0.02194391
443.19	0.1885339		973.19	-0.00005046		1503.18	0.01944957		2033.18	0.00222625		2563.17	0.03793085		3093.17	0.03170211		3623.2	-0.02135749
443.39	0.18757521		973.39	0.00049299		1503.38	0.02012427		2033.38	0.00224695		2563.37	0.03774572		3093.37	0.03140207		3623.4	-0.02179054
443.59	0.18696324		973.59	0.00028396		1503.58	0.02053205		2033.58	0.00184544		2563.57	0.03790813		3093.57	0.03180093		3623.6	-0.02198191
443.79	0.1874395		973.79	-0.00074943		1503.78	0.0204343		2033.78	0.00197043		2563.77	0.03741854		3093.77	0.03157003		3623.8	-0.02194906
443.99	0.18741497		973.99	-0.00123029		1503.98	0.02054422		2033.98	0.002236		2563.97	0.03700217		3093.97	0.03227091		3624	-0.02275198
444.19	0.18708547		974.19	-0.0012085		1504.18	0.02053456		2034.18	0.00226623		2564.17	0.03678778		3094.17	0.03210814		3624.2	-0.02283758
444.39	0.18715274		974.39	-0.0023283		1504.38	0.01982249		2034.38	0.00141466		2564.37	0.03688287		3094.37	0.03118608		3624.4	-0.02335445
444.59	0.18686692		974.59	-0.00274372		1504.58	0.01875929		2034.58	0.00136614		2564.57	0.03577826		3094.57	0.03169629		3624.6	-0.02353242
444.79	0.18642648		974.79	-0.00353863		1504.78	0.01826815		2034.78	0.00149669		2564.77	0.03557809		3094.77	0.03275625		3624.8	-0.02237581
444.99	0.18647142		974.99	-0.00383147		1504.98	0.01742388		2034.98	0.00147564		2564.97	0.03469156		3094.97	0.03292038		3625	-0.02224477
445.19	0.18628195		975.19	-0.00387522		1505.18	0.01766458		2035.18	0.00135755		2565.17	0.0346306		3095.17	0.03242548		3625.2	-0.02131928
445.39	0.18691303		975.39	-0.00476281		1505.38	0.0171266		2035.38	0.00079517		2565.37	0.0351254		3095.37	0.0316184		3625.4	-0.02153787
445.59	0.1872806		975.59	-0.00463388		1505.58	0.01709462		2035.58	0.00082453		2565.57	0.0343848		3095.57	0.03162977		3625.6	-0.02118333
445.79	0.18690323		975.79	-0.0035317		1505.78	0.01665534		2035.78	0.00083072		2565.77	0.03423763		3095.77	0.03117983		3625.8	-0.02141482
445.99	0.18668258		975.99	-0.00279224		1505.98	0.01635237		2035.98	-0.00002207		2565.97	0.03440201		3095.97	0.03032924		3626	-0.0203823
446.19	0.18776111		976.19	-0.00399651		1506.18	0.01580677		2036.18	-0.00045269		2566.17	0.03457174		3096.17	0.03088277		3626.2	-0.02102586
446.39	0.18807556		976.39	-0.00305092		1506.38	0.01624745		2036.38	-0.00168459		2566.37	0.03487827		3096.37	0.02955762		3626.4	-0.02158163
446.59	0.18725669		976.59	-0.00279042		1506.58	0.01607597		2036.58	-0.00251177		2566.57	0.03452565		3096.57	0.02912071		3626.6	-0.02200823
446.79	0.18757914		976.79	-0.00253151		1506.78	0.01619006		2036.78	-0.0030475		2566.77	0.03458231		3096.77	0.02804212		3626.8	-0.02168971
446.99	0.18814216		976.99	-0.00325525		1506.98	0.01628573		2036.98	-0.00267307		2566.97	0.03514195		3096.97	0.0284393		3627	-0.02091805
447.19	0.18836685		977.19	-0.00249112		1507.18	0.01701746		2037.18	-0.0025287		2567.17	0.03545385		3097.17	0.02835945		3627.2	-0.02122144
447.39	0.1891546		977.39	-0.00187119		1507.38	0.01786334		2037.38	-0.00248618		2567.37	0.03525695		3097.37	0.02841615		3627.4	-0.02285199
447.59	0.18990155		977.59	-0.00248719		1507.58	0.0189014		2037.58	-0.0023639		2567.57	0.03583196		3097.57	0.02861979		3627.6	-0.02231102
447.79	0.19007977		977.79	-0.00252351		1507.78	0.0188252		2037.78	-0.00216524		2567.77	0.03541107		3097.77	0.02863083		3627.8	-0.02300442
447.99	0.19063374		977.99	-0.00175107		1507.98	0.01927564		2037.98	-0.00241584		2567.97	0.03647021		3097.97	0.02900685		3628	-0.02332724
448.19	0.19047235		978.19	-0.00128678		1508.18	0.0189097		2038.18	-0.00249694		2568.17	0.03696436		3098.17	0.02866135		3628.2	-0.02308945
448.39	0.18962769		978.39	-0.00179557		1508.38	0.01882467		2038.38	-0.00247367		2568.37	0.03690197		3098.37	0.02848343		3628.4	-0.02368582
448.59	0.18937492		978.59	-0.00077066		1508.58	0.01828022		2038.58	-0.00228343		2568.57	0.03668161		3098.57	0.02973881		3628.6	-0.02283306
448.79	0.18859508		978.79	-0.00094426		1508.78	0.01831764		2038.78	-0.00140518		2568.77	0.03730505		3098.77	0.03078666		3628.8	-0.023278
448.99	0.18884417		978.99	0.00030242		1508.98	0.01888622		2038.98	-0.00120906		2568.97	0.03765194		3098.97	0.03068157		3629	-0.02367919
449.19	0.18884813		979.19	0.0005216		1509.18	0.02016405		2039.18	-0.00102617		2569.17	0.03737133		3099.17	0.03050687		3629.2	-0.02396234
449.39	0.18922972		979.39	0.00046668		1509.38	0.02067904		2039.38	-0.00189743		2569.37	0.03751279		3099.37	0.02951551		3629.4	-0.02488772
449.59	0.18927935		979.59	0.00145236		1509.58	0.02063534		2039.58	-0.00187287		2569.57	0.03706244		3099.57	0.02994221		3629.6	-0.02517211
449.79	0.18938227		979.79	0.00202431		1509.78	0.02095586		2039.78	-0.00240355		2569.77	0.03720062		3099.77	0.02932686		3629.8	-0.02459237
449.99	0.18898178		979.99	0.00160138		1509.98	0.02093597		2039.98	-0.0023466		2569.97	0.03756111		3099.97	0.02894313		3630	-0.02480069
450.19	0.18887067		980.19	0.00165891		1510.18	0.02055867		2040.18	-0.00246861		2570.17	0.03727026		3100.17	0.02859067		3630.2	-0.02552718
450.39	0.18879066		980.39	0.00145636		1510.38	0.0200956		2040.38	-0.00326807		2570.37	0.03634175		3100.37	0.02765837		3630.4	-0.02459071
450.59	0.18878025		980.59	0.00080591		1510.58	0.01969452		2040.58	-0.0031762		2570.57	0.03534671		3100.57	0.02819676		3630.6	-0.02478175
450.79	0.18945553		980.79	0.00094239		1510.78	0.01934879		2040.78	-0.00192295		2570.77	0.03505901		3100.77	0.02775711		3630.8	-0.02537124
450.99	0.19018325		980.99	0.00061629		1510.98	0.01821959		2040.98	-0.00208862		2570.97	0.03449188		3100.97	0.02756307		3631	-0.02509595
451.19	0.18970161		981.19	0.0008379		1511.18	0.01835152		2041.18	-0.00214433		2571.17	0.03401148		3101.17	0.02748106		3631.2	-0.02538721
451.39	0.18930964		981.39	0.00101483		1511.38	0.01709549		2041.38	-0.00178873		2571.37	0.03455554		3101.37	0.02737583		3631.4	-0.02556616
451.59	0.1886867		981.59	0.00014011		1511.58	0.01683978		2041.58	-0.00167844		2571.57	0.03460579		3101.57	0.02814568		3631.6	-0.02534596
451.79	0.18915422		981.79	0.00039102		1511.78	0.01591872		2041.78	-0.00192336		2571.77	0.03490936		3101.77	0.02825432		3631.8	-0.02587218
451.99	0.18924885		981.99	0.00028295		1511.98	0.01552242		2041.98	-0.00209634		2571.97	0.03554906		3101.97	0.02846839		3632	-0.02538522
452.19	0.18823032		982.19	-0.00025816		1512.18	0.0148673		2042.18	-0.00206914		2572.17	0.03532552		3102.17	0.02865078		3632.2	-0.02508466
452.39	0.18755136		982.39	-0.00040658		1512.38	0.01484949		2042.38	-0.00233354		2572.37	0.03424502		3102.37	0.0291574		3632.4	-0.02511607
452.59	0.18739386		982.59	-0.00022105		1512.58	0.01521839		2042.58	-0.00256785		2572.57	0.03455069		3102.57	0.03059304		3632.6	-0.02541137
452.79	0.18687683		982.79	-0.00013694		1512.78	0.01592539		2042.78	-0.00238257		2572.77	0.03444851		3102.77	0.030935		3632.8	-0.02672218
452.99	0.18654169		982.99	-0.00004033		1512.98	0.01666462		2042.98	-0.00312931		2572.97	0.0346787		3102.97	0.03113689		3633	-0.02671757
453.19	0.18626339		983.19	0.00014449		1513.18	0.01738661		2043.18	-0.00380752		2573.17	0.03393816		3103.17	0.030859		3633.2	-0.0270587
453.39	0.18542419		983.39	-0.0000162		1513.38	0.01774968		2043.38	-0.00504283		2573.37	0.03284065		3103.37	0.03090715		3633.4	-0.02674395
453.59	0.18534038		983.59	0.00119611		1513.58	0.01790595		2043.58	-0.00509838		2573.57	0.03275632		3103.57	0.03142318		3633.6	-0.02625136
453.79	0.18435276		983.79	0.0012595		1513.78	0.01796226		2043.78	-0.00499862		2573.77	0.03262256		3103.77	0.03080962		3633.8	-0.02589995
453.99	0.18356071		983.99	0.00104033		1513.98	0.01810311		2043.98	-0.00521035		2573.97	0.03247871		3103.97	0.03099515		3634	-0.02579867
454.19	0.1835364		984.19	0.00082911		1514.18	0.01820475		2044.18	-0.00515107		2574.17	0.03239081		3104.17	0.03054157		3634.2	-0.02487221
454.39	0.18385512		984.39	0.00000902		1514.38	0.01819948		2044.38	-0.00480403		2574.37	0.03153946		3104.37	0.03043968		3634.4	-0.0244732
454.59	0.18401349		984.59	0.00075698		1514.58	0.01893174		2044.58	-0.00417877		2574.57	0.0311704		3104.57	0.02992174		3634.6	-0.02491745
454.79	0.18448929		984.79	0.00131136		1514.78	0.01936943		2044.78	-0.00321785		2574.77	0.03140434		3104.77	0.02912186		3634.8	-0.0248629
454.99	0.18459635		984.99	0.00117181		1514.98	0.0193608		2044.98	-0.00255769		2574.97	0.03157599		3104.97	0.02842043		3635	-0.02342258
455.19	0.1833052		985.19	0.00049448		1515.18	0.02005551		2045.18	-0.00128371		2575.17	0.03247895		3105.17	0.02860345		3635.2	-0.02333536
455.39	0.18272602		985.39	0.00153179		1515.38	0.01950797		2045.38	-0.00058685		2575.37	0.03294347		3105.37	0.02852118		3635.4	-0.02291536
455.59	0.18348942		985.59	0.00171975		1515.58	0.01890918		2045.58	0.00022288		2575.57	0.03327243		3105.57	0.02881344		3635.6	-0.02286994
455.79	0.18422522		985.79	0.00165345		1515.78	0.01898576		2045.78	-0.00070227		2575.77	0.03428019		3105.77	0.02892404		3635.8	-0.02335038
455.99	0.18423764		985.99	0.00095739		1515.98	0.01890183		2045.98	0.00067287		2575.97	0.03395366		3105.97	0.02906076		3636	-0.02274402
456.19	0.18457759		986.19	0.0010256		1516.18	0.01828777		2046.18	0.00091413		2576.17	0.03446695		3106.17	0.02858856		3636.2	-0.02319931
456.39	0.18455501		986.39	0.00077098		1516.38	0.01820217		2046.38	0.00134241		2576.37	0.03428085		3106.37	0.02976261		3636.4	-0.0236005
456.59	0.18419757		986.59	0.00049661		1516.58	0.01800471		2046.58	0.00116718		2576.57	0.03588835		3106.57	0.03041236		3636.6	-0.02367951
456.79	0.18502909		986.79	-0.00022648		1516.78	0.0176277		2046.78	0.00035104		2576.77	0.03658708		3106.77	0.03042187		3636.8	-0.0242661
456.99	0.18570242		986.99	-0.00103001		1516.98	0.0170811		2046.98	-0.00004026		2576.97	0.03664202		3106.97	0.03092295		3637	-0.02355558
457.19	0.18532253		987.19	-0.00101943		1517.18	0.01579878		2047.18	-0.00049278		2577.17	0.03634002		3107.17	0.03134839		3637.2	-0.02409444
457.39	0.18399669		987.39	-0.00168678		1517.38	0.0151058		2047.38	-0.00136532		2577.37	0.0364848		3107.37	0.03163494		3637.4	-0.02438263
457.59	0.18455011		987.59	-0.00136598		1517.58	0.0141342		2047.58	-0.00171298		2577.57	0.03701584		3107.57	0.03216675		3637.6	-0.02406494
457.79	0.18501454		987.79	-0.00218071		1517.78	0.01359659		2047.78	-0.00245107		2577.77	0.03693251		3107.77	0.03203581		3637.8	-0.02345723
457.99	0.1841495		987.99	-0.00294869		1517.98	0.01301596		2047.98	-0.00333724		2577.97	0.03737018		3107.97	0.03238578		3638	-0.0236841
458.19	0.18414281		988.19	-0.00357965		1518.18	0.01339085		2048.18	-0.00350801		2578.17	0.03668375		3108.17	0.03102408		3638.2	-0.0229586
458.39	0.18454426		988.39	-0.00429689		1518.38	0.0142317		2048.38	-0.00427923		2578.37	0.03546216		3108.37	0.02986002		3638.4	-0.02270292
458.59	0.18391377		988.59	-0.00409703		1518.58	0.01477242		2048.58	-0.00415448		2578.57	0.03514795		3108.57	0.02845591		3638.6	-0.02271682
458.79	0.18399881		988.79	-0.00395908		1518.78	0.01587138		2048.78	-0.00337016		2578.77	0.03391439		3108.77	0.02833472		3638.8	-0.02266803
458.99	0.18339317		988.99	-0.00408151		1518.98	0.01631729		2048.98	-0.0031969		2578.97	0.03409549		3108.97	0.02714189		3639	-0.02283912
459.19	0.18359789		989.19	-0.00436908		1519.18	0.01609288		2049.18	-0.003222		2579.17	0.03371767		3109.17	0.02727186		3639.2	-0.02348425
459.39	0.18341621		989.39	-0.00253514		1519.38	0.01519936		2049.38	-0.00280138		2579.37	0.03324408		3109.37	0.02697711		3639.4	-0.02319835
459.59	0.18436549		989.59	-0.00283934		1519.58	0.01499631		2049.58	-0.0024017		2579.57	0.0338807		3109.57	0.02598352		3639.6	-0.02338403
459.79	0.18454491		989.79	-0.00234728		1519.78	0.01595593		2049.78	-0.00201296		2579.77	0.03382312		3109.77	0.0247259		3639.8	-0.0233468
459.99	0.18476215		989.99	-0.0017561		1519.98	0.0157526		2049.98	-0.0007654		2579.97	0.03338853		3109.97	0.02393694		3640	-0.02265585
460.19	0.18508987		990.19	-0.00063393		1520.18	0.01610056		2050.18	-0.0003903		2580.17	0.03350083		3110.17	0.02318315		3640.2	-0.02311247
460.39	0.18491916		990.39	-0.00055095		1520.38	0.01670799		2050.38	-0.00009839		2580.37	0.03372921		3110.37	0.02363477		3640.4	-0.0233288
460.59	0.18506097		990.59	-0.00056441		1520.58	0.01678228		2050.58	-0.00118352		2580.57	0.03383996		3110.57	0.02355132		3640.6	-0.02310541
460.79	0.18622895		990.79	-0.00036689		1520.78	0.01707564		2050.78	-0.00097181		2580.77	0.0333839		3110.77	0.02382915		3640.8	-0.02369018
460.99	0.18630477		990.99	0.00007312		1520.98	0.01602635		2050.98	-0.00097906		2580.97	0.03367145		3110.97	0.02474291		3641	-0.02333964
461.19	0.18571307		991.19	0.00048614		1521.18	0.01497141		2051.18	-0.00155868		2581.17	0.0340439		3111.17	0.02545123		3641.2	-0.02407785
461.39	0.18546291		991.39	-0.00032976		1521.38	0.01518071		2051.38	-0.00253062		2581.37	0.03449672		3111.37	0.02511319		3641.4	-0.02294585
461.59	0.18562845		991.59	-0.00129089		1521.58	0.01464972		2051.58	-0.00287024		2581.57	0.03389704		3111.57	0.02697387		3641.6	-0.02326898
461.79	0.18604725		991.79	-0.00170584		1521.78	0.01439558		2051.78	-0.00415458		2581.77	0.03401585		3111.77	0.02675758		3641.8	-0.02317218
461.99	0.18439622		991.99	-0.00272864		1521.98	0.0140788		2051.98	-0.00509743		2581.97	0.03384848		3111.97	0.02711788		3642	-0.02351603
462.19	0.18521746		992.19	-0.00318506		1522.18	0.0151548		2052.18	-0.00489572		2582.17	0.03265611		3112.17	0.02604429		3642.2	-0.02396498
462.39	0.18580339		992.39	-0.00374328		1522.38	0.01582671		2052.38	-0.00485285		2582.37	0.03166073		3112.37	0.02646508		3642.4	-0.0248746
462.59	0.18530251		992.59	-0.00365828		1522.58	0.0158571		2052.58	-0.00417418		2582.57	0.03193232		3112.57	0.02671592		3642.6	-0.02499925
462.79	0.1848571		992.79	-0.00423935		1522.78	0.01655814		2052.78	-0.00334688		2582.77	0.03190487		3112.77	0.02750934		3642.8	-0.02558521
462.99	0.18398573		992.99	-0.00536276		1522.98	0.01676062		2052.98	-0.00380912		2582.97	0.03207864		3112.97	0.02834215		3643	-0.02585534
463.19	0.18407918		993.19	-0.00593904		1523.18	0.01767846		2053.18	-0.00374357		2583.17	0.03303666		3113.17	0.02964986		3643.2	-0.02526814
463.39	0.18325239		993.39	-0.00568945		1523.38	0.01848461		2053.38	-0.00317962		2583.37	0.03327428		3113.37	0.0300872		3643.4	-0.0240826
463.59	0.18319354		993.59	-0.00635242		1523.58	0.01900106		2053.58	-0.00215209		2583.57	0.03344118		3113.57	0.03036724		3643.6	-0.02313289
463.79	0.18305703		993.79	-0.00559441		1523.78	0.01960131		2053.78	-0.00081319		2583.77	0.03359561		3113.77	0.02967886		3643.8	-0.02278134
463.99	0.18335441		993.99	-0.00519466		1523.98	0.02020381		2053.98	-0.00050124		2583.97	0.034137		3113.97	0.02990281		3644	-0.02256217
464.19	0.18448689		994.19	-0.00475037		1524.18	0.02101603		2054.18	0.00031473		2584.17	0.0340115		3114.17	0.02912338		3644.2	-0.02292943
464.39	0.18479302		994.39	-0.00497396		1524.38	0.02075849		2054.38	-0.00051362		2584.37	0.03481006		3114.37	0.02878585		3644.4	-0.02320174
464.59	0.18485384		994.59	-0.00515326		1524.58	0.0202587		2054.58	-0.00077696		2584.57	0.03529145		3114.57	0.02863339		3644.6	-0.02219808
464.79	0.18573158		994.79	-0.00484007		1524.78	0.01938278		2054.78	-0.0012842		2584.77	0.03584053		3114.77	0.02884441		3644.8	-0.02249607
464.99	0.18553383		994.99	-0.00474086		1524.98	0.01894242		2054.98	-0.00221355		2584.97	0.03635047		3114.97	0.02892773		3645	-0.02255221
465.19	0.1858656		995.19	-0.00457472		1525.18	0.01859298		2055.18	-0.00260135		2585.17	0.03655068		3115.17	0.02857585		3645.2	-0.02211943
465.39	0.18569478		995.39	-0.00518521		1525.38	0.01828549		2055.38	-0.00236498		2585.37	0.03668523		3115.37	0.02806507		3645.4	-0.02182108
465.59	0.18525395		995.59	-0.00452467		1525.58	0.01745398		2055.58	-0.00273407		2585.57	0.03635224		3115.57	0.02813571		3645.6	-0.02351308
465.79	0.18623095		995.79	-0.00331082		1525.78	0.01746205		2055.78	-0.00243264		2585.77	0.03619781		3115.77	0.02645757		3645.8	-0.02351535
465.99	0.18592699		995.99	-0.00303517		1525.98	0.01702334		2055.98	-0.00264629		2585.97	0.03551439		3115.97	0.02664619		3646	-0.02529382
466.19	0.18696541		996.19	-0.00223816		1526.18	0.01660563		2056.18	-0.00255426		2586.17	0.03422046		3116.17	0.02583934		3646.2	-0.02633349
466.39	0.18669429		996.39	-0.00215942		1526.38	0.0157266		2056.38	-0.00258026		2586.37	0.03395804		3116.37	0.02669356		3646.4	-0.02627739
466.59	0.18650332		996.59	-0.00161009		1526.58	0.01534408		2056.58	-0.00348639		2586.57	0.03378836		3116.57	0.02677647		3646.6	-0.0260644
466.79	0.18529072		996.79	-0.00224173		1526.78	0.01508188		2056.78	-0.00387503		2586.77	0.03290664		3116.77	0.02732697		3646.8	-0.02684247
466.99	0.18422084		996.99	-0.00235018		1526.98	0.01568218		2056.98	-0.00470334		2586.97	0.03183072		3116.97	0.02808743		3647	-0.02679686
467.19	0.18365804		997.19	-0.00275164		1527.18	0.01698386		2057.18	-0.00499169		2587.17	0.03244596		3117.17	0.02709181		3647.2	-0.02627924
467.39	0.183529		997.39	-0.00313656		1527.38	0.01602231		2057.38	-0.00369359		2587.37	0.03229491		3117.37	0.02718621		3647.4	-0.0256746
467.59	0.18337281		997.59	-0.00391279		1527.58	0.01626256		2057.58	-0.00280862		2587.57	0.03242646		3117.57	0.02674201		3647.6	-0.02575869
467.79	0.18413946		997.79	-0.00505122		1527.78	0.01525669		2057.78	-0.00226202		2587.77	0.03309758		3117.77	0.02525938		3647.8	-0.02552134
467.99	0.18526782		997.99	-0.00611617		1527.98	0.01553585		2057.98	-0.00216626		2587.97	0.03371383		3117.97	0.02570861		3648	-0.02562052
468.19	0.18581367		998.19	-0.00691133		1528.18	0.01577412		2058.18	-0.00233492		2588.17	0.03390609		3118.17	0.02557278		3648.2	-0.02595911
468.39	0.18554931		998.39	-0.00726802		1528.38	0.01603011		2058.38	-0.00244587		2588.37	0.03508195		3118.37	0.02553609		3648.4	-0.02577124
468.59	0.18528172		998.59	-0.00859134		1528.58	0.01563259		2058.58	-0.00177962		2588.57	0.0360461		3118.57	0.026483		3648.6	-0.02500648
468.79	0.18570737		998.79	-0.00849303		1528.78	0.01559633		2058.78	-0.00195647		2588.77	0.03635407		3118.77	0.0271595		3648.8	-0.02489388
468.99	0.18577094		998.99	-0.00901263		1528.98	0.01622882		2058.98	-0.00147561		2588.97	0.03677485		3118.97	0.02791702		3649	-0.02414747
469.19	0.18590922		999.19	-0.00917934		1529.18	0.01573379		2059.18	-0.00062561		2589.17	0.03767771		3119.17	0.02803121		3649.2	-0.02372717
469.39	0.18529199		999.39	-0.00919494		1529.38	0.01633356		2059.38	0.0001272		2589.37	0.03784887		3119.37	0.02802382		3649.4	-0.0240705
469.59	0.18525693		999.59	-0.00783968		1529.58	0.01688297		2059.58	-0.00070712		2589.57	0.03793358		3119.57	0.02810503		3649.6	-0.02536043
469.79	0.18554212		999.79	-0.00755084		1529.78	0.01714608		2059.78	-0.00011241		2589.77	0.03674633		3119.77	0.02863996		3649.8	-0.02608745
469.99	0.184919		999.99	-0.00649696		1529.98	0.01660978		2059.98	-0.0009492		2589.97	0.03509487		3119.97	0.02937425		3650	-0.02654348
470.19	0.18476319		1000.19	-0.00555939		1530.18	0.01617767		2060.18	-0.00117909		2590.17	0.03408269		3120.17	0.02896834		3650.2	-0.02560634
470.39	0.18463203		1000.39	-0.00442833		1530.38	0.01622495		2060.38	-0.00104228		2590.37	0.03315983		3120.37	0.02918786		3650.4	-0.02541854
470.59	0.1854364		1000.59	-0.0032744		1530.58	0.01684073		2060.58	-0.00179553		2590.57	0.03165201		3120.57	0.02805203		3650.6	-0.02545566
470.79	0.18504263		1000.79	-0.00280379		1530.78	0.01726853		2060.78	-0.00190588		2590.77	0.03085617		3120.77	0.02751697		3650.8	-0.02542968
470.99	0.18452935		1000.99	-0.0015438		1530.98	0.01796424		2060.98	-0.00214547		2590.97	0.03067194		3120.97	0.02624241		3651	-0.02495792
471.19	0.18478216		1001.19	-0.00156753		1531.18	0.01819382		2061.18	-0.00251863		2591.17	0.03020431		3121.17	0.02472506		3651.2	-0.02480056
471.39	0.18511654		1001.39	-0.00143396		1531.38	0.01741795		2061.38	-0.00227797		2591.37	0.03004288		3121.37	0.02487517		3651.4	-0.02476086
471.59	0.18561954		1001.59	-0.0013034		1531.58	0.01745999		2061.58	-0.00352958		2591.57	0.02985215		3121.57	0.02528707		3651.6	-0.02487794
471.79	0.18595502		1001.79	-0.00106438		1531.78	0.01615931		2061.78	-0.0036707		2591.77	0.03028369		3121.77	0.02520008		3651.8	-0.02436961
471.99	0.18616663		1001.99	-0.00121214		1531.98	0.0168802		2061.98	-0.00353578		2591.97	0.03041535		3121.97	0.02623304		3652	-0.02512505
472.19	0.18570766		1002.19	-0.00047001		1532.18	0.01678956		2062.18	-0.00321321		2592.17	0.0307682		3122.17	0.02645344		3652.2	-0.02499227
472.39	0.18530212		1002.39	-0.00079814		1532.38	0.01592591		2062.38	-0.00295198		2592.37	0.03162534		3122.37	0.02641304		3652.4	-0.02495957
472.59	0.18507221		1002.59	-0.00152417		1532.58	0.01515174		2062.58	-0.00302408		2592.57	0.03269229		3122.57	0.02704417		3652.6	-0.02510914
472.79	0.18508523		1002.79	-0.00088337		1532.78	0.01431225		2062.78	-0.00318279		2592.77	0.03367091		3122.77	0.0272193		3652.8	-0.02495205
472.99	0.18510556		1002.99	-0.00276209		1532.98	0.01435716		2062.98	-0.00358064		2592.97	0.0346894		3122.97	0.02737043		3653	-0.02585104
473.19	0.18473961		1003.19	-0.00269547		1533.18	0.01391102		2063.18	-0.00253444		2593.17	0.03519225		3123.17	0.02734885		3653.2	-0.0263514
473.39	0.18402381		1003.39	-0.00304559		1533.38	0.01435977		2063.38	-0.00289835		2593.37	0.03522367		3123.37	0.02768642		3653.4	-0.02641354
473.59	0.18343562		1003.59	-0.00265535		1533.58	0.01425016		2063.58	-0.00324796		2593.57	0.03460579		3123.57	0.0272571		3653.6	-0.02717579
473.79	0.18336477		1003.79	-0.00310328		1533.78	0.01430896		2063.78	-0.0023753		2593.77	0.0337789		3123.77	0.02764459		3653.8	-0.02769038
473.99	0.1833941		1003.99	-0.00261592		1533.98	0.01533069		2063.98	-0.00233991		2593.97	0.03374459		3123.97	0.02744822		3654	-0.02657451
474.19	0.18339553		1004.19	-0.00238235		1534.18	0.01555682		2064.18	-0.00243212		2594.17	0.03306913		3124.17	0.02622398		3654.2	-0.02645528
474.39	0.18453707		1004.39	-0.0022561		1534.38	0.01596323		2064.38	-0.00192664		2594.37	0.03274688		3124.37	0.02664334		3654.4	-0.02650017
474.59	0.18493295		1004.59	-0.00236332		1534.58	0.01646845		2064.58	-0.00189763		2594.57	0.03239651		3124.57	0.02649656		3654.6	-0.02674315
474.79	0.18517075		1004.79	-0.00206152		1534.78	0.01641519		2064.78	-0.00192923		2594.77	0.03250308		3124.77	0.026169		3654.8	-0.02653687
474.99	0.18532132		1004.99	-0.00231254		1534.98	0.01657492		2064.98	-0.00246402		2594.97	0.03249175		3124.97	0.02649506		3655	-0.02662165
475.19	0.18531674		1005.19	-0.00300631		1535.18	0.01674288		2065.18	-0.00309831		2595.17	0.0312342		3125.17	0.02731292		3655.2	-0.02677602
475.39	0.1856293		1005.39	-0.0035275		1535.38	0.0168819		2065.38	-0.00398527		2595.37	0.03119955		3125.37	0.02779366		3655.4	-0.02629241
475.59	0.18606003		1005.59	-0.00298722		1535.58	0.0166743		2065.58	-0.00403369		2595.57	0.0306698		3125.57	0.02800125		3655.6	-0.02575524
475.79	0.18580997		1005.79	-0.00313856		1535.78	0.01723488		2065.78	-0.00369435		2595.77	0.03026917		3125.77	0.02805816		3655.8	-0.02546605
475.99	0.18596195		1005.99	-0.00382361		1535.98	0.01734662		2065.98	-0.0035446		2595.97	0.03042592		3125.97	0.02836802		3656	-0.02504256
476.19	0.18629191		1006.19	-0.00372821		1536.18	0.01711224		2066.18	-0.00409612		2596.17	0.03059127		3126.17	0.02880186		3656.2	-0.02460562
476.39	0.18589212		1006.39	-0.00426025		1536.38	0.0171737		2066.38	-0.0039394		2596.37	0.03085438		3126.37	0.02871166		3656.4	-0.02468327
476.59	0.18622318		1006.59	-0.00400729		1536.58	0.01759344		2066.58	-0.00413649		2596.57	0.03167406		3126.57	0.0289631		3656.6	-0.02493296
476.79	0.1866259		1006.79	-0.00389376		1536.78	0.01752288		2066.78	-0.0048005		2596.77	0.03228162		3126.77	0.02878221		3656.8	-0.02424858
476.99	0.18617982		1006.99	-0.00454262		1536.98	0.01805983		2066.98	-0.00490859		2596.97	0.03223732		3126.97	0.02850464		3657	-0.02434902
477.19	0.18582691		1007.19	-0.0035697		1537.18	0.0180848		2067.18	-0.00435501		2597.17	0.03208641		3127.17	0.02791783		3657.2	-0.02337748
477.39	0.18459148		1007.39	-0.00357876		1537.38	0.01790756		2067.38	-0.00413424		2597.37	0.03244418		3127.37	0.02728592		3657.4	-0.02306582
477.59	0.18448907		1007.59	-0.00281394		1537.58	0.01813875		2067.58	-0.00424298		2597.57	0.0322168		3127.57	0.0268754		3657.6	-0.02389029
477.79	0.1846266		1007.79	-0.00285886		1537.78	0.01807609		2067.78	-0.00445817		2597.77	0.03179838		3127.77	0.02725018		3657.8	-0.02345183
477.99	0.18443634		1007.99	-0.00204849		1537.98	0.01772628		2067.98	-0.00458069		2597.97	0.03168864		3127.97	0.0266018		3658	-0.02418435
478.19	0.18361184		1008.19	-0.00234892		1538.18	0.01642427		2068.18	-0.00491198		2598.17	0.03030916		3128.17	0.02628563		3658.2	-0.02486214
478.39	0.18377027		1008.39	-0.00256386		1538.38	0.0159233		2068.38	-0.00502362		2598.37	0.03074592		3128.37	0.02658675		3658.4	-0.02549908
478.59	0.18315312		1008.59	-0.00286357		1538.58	0.01514461		2068.58	-0.00435319		2598.57	0.03035949		3128.57	0.02595454		3658.6	-0.02537558
478.79	0.18258586		1008.79	-0.00290831		1538.78	0.01423781		2068.78	-0.00381084		2598.77	0.03079528		3128.77	0.02598186		3658.8	-0.02538535
478.99	0.18185289		1008.99	-0.00396334		1538.98	0.01414859		2068.98	-0.00437584		2598.97	0.03029685		3128.97	0.02542885		3659	-0.02487416
479.19	0.18167661		1009.19	-0.00401486		1539.18	0.01427175		2069.18	-0.00401302		2599.17	0.0294359		3129.17	0.02511594		3659.2	-0.02500194
479.39	0.18169852		1009.39	-0.00406311		1539.38	0.01440021		2069.38	-0.00360813		2599.37	0.02922852		3129.37	0.02401544		3659.4	-0.0245002
479.59	0.18086044		1009.59	-0.00325249		1539.58	0.01508938		2069.58	-0.00305915		2599.57	0.02869334		3129.57	0.02473769		3659.6	-0.02456882
479.79	0.18105852		1009.79	-0.00378068		1539.78	0.01605119		2069.78	-0.00312415		2599.77	0.02926432		3129.77	0.02486494		3659.8	-0.02465935
479.99	0.18140556		1009.99	-0.00370892		1539.98	0.01564468		2069.98	-0.00254342		2599.97	0.03016639		3129.97	0.02503148		3660	-0.02430121
480.19	0.1819883		1010.19	-0.00386316		1540.18	0.0154867		2070.18	-0.00153919		2600.17	0.0305501		3130.17	0.02522602		3660.2	-0.02505602
480.39	0.18179584		1010.39	-0.00405307		1540.38	0.01644269		2070.38	-0.00078836		2600.37	0.0310432		3130.37	0.02434015		3660.4	-0.02507356
480.59	0.18258907		1010.59	-0.00395143		1540.58	0.01692913		2070.58	-0.00153096		2600.57	0.03203726		3130.57	0.02333649		3660.6	-0.02546892
480.79	0.18239643		1010.79	-0.00387159		1540.78	0.01697712		2070.78	-0.0018549		2600.77	0.03265379		3130.77	0.02319573		3660.8	-0.02485455
480.99	0.18277605		1010.99	-0.0034142		1540.98	0.0174907		2070.98	-0.00211607		2600.97	0.03310631		3130.97	0.02351147		3661	-0.02543965
481.19	0.18370588		1011.19	-0.00401342		1541.18	0.01772552		2071.18	-0.00173029		2601.17	0.03457244		3131.17	0.02226298		3661.2	-0.02537275
481.39	0.18379614		1011.39	-0.00369012		1541.38	0.0176499		2071.38	-0.00156277		2601.37	0.03491911		3131.37	0.0229422		3661.4	-0.0262045
481.59	0.18419953		1011.59	-0.00436691		1541.58	0.01816119		2071.58	-0.00314167		2601.57	0.03450933		3131.57	0.02252697		3661.6	-0.02700421
481.79	0.18406831		1011.79	-0.0047448		1541.78	0.01797704		2071.78	-0.00410354		2601.77	0.03494891		3131.77	0.02270106		3661.8	-0.02676315
481.99	0.18448628		1011.99	-0.00447348		1541.98	0.01732494		2071.98	-0.00502974		2601.97	0.03544329		3131.97	0.02298925		3662	-0.02795364
482.19	0.184044		1012.19	-0.00460424		1542.18	0.01766429		2072.18	-0.00591258		2602.17	0.03498776		3132.17	0.02296452		3662.2	-0.02763929
482.39	0.18384219		1012.39	-0.00389488		1542.38	0.01794828		2072.38	-0.00579634		2602.37	0.03543587		3132.37	0.02259039		3662.4	-0.02768073
482.59	0.18338369		1012.59	-0.00447957		1542.58	0.01737599		2072.58	-0.00523775		2602.57	0.03462502		3132.57	0.02257808		3662.6	-0.02653361
482.79	0.18261781		1012.79	-0.00465752		1542.78	0.01720942		2072.78	-0.00543476		2602.77	0.03437288		3132.77	0.02284937		3662.8	-0.02645791
482.99	0.1820811		1012.99	-0.00448443		1542.98	0.01725721		2072.98	-0.00522117		2602.97	0.03337191		3132.97	0.02243944		3663	-0.02583966
483.19	0.18226637		1013.19	-0.00448755		1543.18	0.01683126		2073.18	-0.00424743		2603.17	0.03205475		3133.17	0.02308272		3663.2	-0.02637704
483.39	0.18112873		1013.39	-0.00409114		1543.38	0.01685707		2073.38	-0.00357856		2603.37	0.03136569		3133.37	0.02293387		3663.4	-0.02501252
483.59	0.18123513		1013.59	-0.00363928		1543.58	0.01643275		2073.58	-0.0030547		2603.57	0.0309256		3133.57	0.02400387		3663.6	-0.0251814
483.79	0.18182274		1013.79	-0.00404792		1543.78	0.01592146		2073.78	-0.00247135		2603.77	0.03064538		3133.77	0.02407646		3663.8	-0.02527728
483.99	0.18206084		1013.99	-0.00427538		1543.98	0.01498989		2073.98	-0.00225689		2603.97	0.03077228		3133.97	0.02427597		3664	-0.02563733
484.19	0.18217527		1014.19	-0.00430109		1544.18	0.01509824		2074.18	-0.00122974		2604.17	0.03100588		3134.17	0.02454193		3664.2	-0.02667038
484.39	0.181949		1014.39	-0.00440032		1544.38	0.01480835		2074.38	-0.00136074		2604.37	0.03075789		3134.37	0.0237491		3664.4	-0.02694441
484.59	0.18266649		1014.59	-0.00446598		1544.58	0.01477664		2074.58	-0.00156849		2604.57	0.03116259		3134.57	0.02438239		3664.6	-0.02733386
484.79	0.18282813		1014.79	-0.00346133		1544.78	0.01440675		2074.78	-0.00154827		2604.77	0.03161812		3134.77	0.02575631		3664.8	-0.02719911
484.99	0.18383688		1014.99	-0.00329343		1544.98	0.01460017		2074.98	-0.00133777		2604.97	0.03172549		3134.97	0.02574255		3665	-0.0280095
485.19	0.18490951		1015.19	-0.00313839		1545.18	0.01365856		2075.18	-0.00176599		2605.17	0.03221141		3135.17	0.02494063		3665.2	-0.02777195
485.39	0.1845482		1015.39	-0.00298492		1545.38	0.01381689		2075.38	-0.00363405		2605.37	0.03213338		3135.37	0.02558836		3665.4	-0.02864717
485.59	0.18441125		1015.59	-0.0022757		1545.58	0.01397876		2075.58	-0.0047522		2605.57	0.03218171		3135.57	0.02506332		3665.6	-0.02821035
485.79	0.18451352		1015.79	-0.00139737		1545.78	0.01391002		2075.78	-0.00552306		2605.77	0.03328395		3135.77	0.026237		3665.8	-0.02804493
485.99	0.18477302		1015.99	-0.00075737		1545.98	0.01386727		2075.98	-0.00609428		2605.97	0.03388296		3135.97	0.02707592		3666	-0.0279593
486.19	0.18440589		1016.19	-0.00047133		1546.18	0.01422792		2076.18	-0.00667663		2606.17	0.03359318		3136.17	0.02697671		3666.2	-0.02738108
486.39	0.18448792		1016.39	-0.00143914		1546.38	0.01423363		2076.38	-0.00684954		2606.37	0.03334588		3136.37	0.0278717		3666.4	-0.02700472
486.59	0.18407476		1016.59	-0.0019247		1546.58	0.01404118		2076.58	-0.00721388		2606.57	0.03239849		3136.57	0.02832185		3666.6	-0.02658617
486.79	0.18412908		1016.79	-0.00271198		1546.78	0.01366015		2076.78	-0.00702907		2606.77	0.0325838		3136.77	0.02899965		3666.8	-0.02704563
486.99	0.18340521		1016.99	-0.00340433		1546.98	0.01405266		2076.98	-0.00660974		2606.97	0.03208584		3136.97	0.03030532		3667	-0.02761121
487.19	0.1833776		1017.19	-0.00350521		1547.18	0.01409859		2077.18	-0.00645237		2607.17	0.03161732		3137.17	0.03104979		3667.2	-0.02674738
487.39	0.18302861		1017.39	-0.00433574		1547.38	0.01491373		2077.38	-0.00642799		2607.37	0.03109089		3137.37	0.03091345		3667.4	-0.02617824
487.59	0.18379428		1017.59	-0.00571436		1547.58	0.01470196		2077.58	-0.00646941		2607.57	0.03138583		3137.57	0.03079033		3667.6	-0.0265762
487.79	0.18324012		1017.79	-0.00695392		1547.78	0.01499185		2077.78	-0.00584448		2607.77	0.03110826		3137.77	0.03049387		3667.8	-0.02663154
487.99	0.18256204		1017.99	-0.00758036		1547.98	0.01527396		2077.98	-0.00548962		2607.97	0.030339		3137.97	0.02957963		3668	-0.02723833
488.19	0.1820484		1018.19	-0.00778031		1548.18	0.01578368		2078.18	-0.00446537		2608.17	0.02993863		3138.17	0.02935109		3668.2	-0.02763846
488.39	0.18177064		1018.39	-0.0090832		1548.38	0.01489076		2078.38	-0.00467865		2608.37	0.02966696		3138.37	0.02862214		3668.4	-0.0275412
488.59	0.18196949		1018.59	-0.00875986		1548.58	0.01490119		2078.58	-0.00448051		2608.57	0.02997742		3138.57	0.02885452		3668.6	-0.02701513
488.79	0.18156341		1018.79	-0.00784484		1548.78	0.01443085		2078.78	-0.00450336		2608.77	0.03000413		3138.77	0.02874744		3668.8	-0.02719399
488.99	0.18142962		1018.99	-0.00782673		1548.98	0.01391664		2078.98	-0.00456876		2608.97	0.03022912		3138.97	0.02767009		3669	-0.02672343
489.19	0.18139567		1019.19	-0.00717815		1549.18	0.01333469		2079.18	-0.00530557		2609.17	0.02985907		3139.17	0.02722625		3669.2	-0.02666157
489.39	0.18086167		1019.39	-0.00706756		1549.38	0.01394128		2079.38	-0.00592937		2609.37	0.02998		3139.37	0.02595418		3669.4	-0.02641452
489.59	0.18136369		1019.59	-0.00525819		1549.58	0.01346827		2079.58	-0.00575043		2609.57	0.02972807		3139.57	0.02606423		3669.6	-0.02544424
489.79	0.18145821		1019.79	-0.00559778		1549.78	0.01365677		2079.78	-0.00541898		2609.77	0.03095225		3139.77	0.02562735		3669.8	-0.02588231
489.99	0.18149333		1019.99	-0.00425941		1549.98	0.01393467		2079.98	-0.00619199		2609.97	0.03095045		3139.97	0.02488311		3670	-0.02593649
490.19	0.18210758		1020.19	-0.00425393		1550.18	0.01397506		2080.18	-0.00623544		2610.17	0.03115701		3140.17	0.0246626		3670.2	-0.0264919
490.39	0.18247109		1020.39	-0.00345576		1550.38	0.01462202		2080.38	-0.00649766		2610.37	0.03178562		3140.37	0.02569306		3670.4	-0.0266105
490.59	0.18266369		1020.59	-0.00198373		1550.58	0.01486823		2080.58	-0.00605323		2610.57	0.03183572		3140.57	0.0261454		3670.6	-0.02625619
490.79	0.1834312		1020.79	-0.00217236		1550.78	0.01556741		2080.78	-0.00569586		2610.77	0.03293593		3140.77	0.02699009		3670.8	-0.02666229
490.99	0.18370506		1020.99	-0.00232222		1550.98	0.01635687		2080.98	-0.0054694		2610.97	0.03346814		3140.97	0.02831958		3671	-0.02675778
491.19	0.18409685		1021.19	-0.00207174		1551.18	0.01672637		2081.18	-0.00595655		2611.17	0.03293101		3141.17	0.02863035		3671.2	-0.02595283
491.39	0.18479223		1021.39	-0.00351435		1551.38	0.01670088		2081.38	-0.00636963		2611.37	0.03245688		3141.37	0.02732831		3671.4	-0.02616035
491.59	0.18450671		1021.59	-0.00350162		1551.58	0.01672344		2081.58	-0.00555919		2611.57	0.03286551		3141.57	0.02620132		3671.6	-0.02626536
491.79	0.18362759		1021.79	-0.00310048		1551.78	0.01683322		2081.78	-0.00481338		2611.77	0.03165173		3141.77	0.02640434		3671.8	-0.02703038
491.99	0.18345728		1021.99	-0.00370539		1551.98	0.01744435		2081.98	-0.00470958		2611.97	0.03079075		3141.97	0.02626929		3672	-0.02698923
492.19	0.18316586		1022.19	-0.0044093		1552.18	0.01773695		2082.18	-0.00492803		2612.17	0.03094904		3142.17	0.02647944		3672.2	-0.02713723
492.39	0.18296071		1022.39	-0.00523652		1552.38	0.01703589		2082.38	-0.00510358		2612.37	0.03043081		3142.37	0.02696614		3672.4	-0.02661714
492.59	0.18262655		1022.59	-0.0051355		1552.58	0.01617053		2082.58	-0.00481379		2612.57	0.03072431		3142.57	0.02682646		3672.6	-0.02623169
492.79	0.18238734		1022.79	-0.0053321		1552.78	0.01627736		2082.78	-0.00460122		2612.77	0.03007451		3142.77	0.02652788		3672.8	-0.02608697
492.99	0.18189783		1022.99	-0.00586908		1552.98	0.01537035		2082.98	-0.0051124		2612.97	0.02908085		3142.97	0.02647395		3673	-0.02550957
493.19	0.18133383		1023.19	-0.00750096		1553.18	0.01586596		2083.18	-0.00513136		2613.17	0.02764794		3143.17	0.02625139		3673.2	-0.0266177
493.39	0.18154362		1023.39	-0.00829935		1553.38	0.01551488		2083.38	-0.00543406		2613.37	0.0279669		3143.37	0.02583157		3673.4	-0.02601593
493.59	0.1810065		1023.59	-0.0089258		1553.58	0.01498678		2083.58	-0.00519852		2613.57	0.02770256		3143.57	0.02641637		3673.6	-0.02714254
493.79	0.18027643		1023.79	-0.00948611		1553.78	0.01527188		2083.78	-0.00467189		2613.77	0.02862724		3143.77	0.02516219		3673.8	-0.02808909
493.99	0.18042504		1023.99	-0.00895694		1553.98	0.01560262		2083.98	-0.00560618		2613.97	0.02851965		3143.97	0.02579845		3674	-0.02847045
494.19	0.18050822		1024.19	-0.00978694		1554.18	0.01653742		2084.18	-0.00551447		2614.17	0.02951462		3144.17	0.02608882		3674.2	-0.02854149
494.39	0.17987406		1024.39	-0.00935703		1554.38	0.01769046		2084.38	-0.00517315		2614.37	0.03051195		3144.37	0.0261038		3674.4	-0.02814485
494.59	0.1796086		1024.59	-0.00910083		1554.58	0.01746759		2084.58	-0.00477214		2614.57	0.03042145		3144.57	0.02530887		3674.6	-0.02769038
494.79	0.17922061		1024.79	-0.00939486		1554.78	0.01827391		2084.78	-0.00532816		2614.77	0.03093188		3144.77	0.02476549		3674.8	-0.02780225
494.99	0.17901042		1024.99	-0.00910864		1554.98	0.01795359		2084.98	-0.00549309		2614.97	0.03084314		3144.97	0.02460545		3675	-0.02743496
495.19	0.17946221		1025.19	-0.0089544		1555.18	0.01773216		2085.18	-0.00594294		2615.17	0.03076696		3145.17	0.02410294		3675.2	-0.02744618
495.39	0.17989856		1025.39	-0.00864572		1555.38	0.01752		2085.38	-0.00555176		2615.37	0.03126593		3145.37	0.02309092		3675.4	-0.02709852
495.59	0.17987793		1025.59	-0.00738807		1555.58	0.01715217		2085.58	-0.00478761		2615.57	0.03186672		3145.57	0.02283372		3675.6	-0.02789456
495.79	0.17961188		1025.79	-0.00653117		1555.78	0.01652287		2085.78	-0.00480558		2615.77	0.03225945		3145.77	0.02336905		3675.8	-0.02863776
495.99	0.17981824		1025.99	-0.00619743		1555.98	0.01566863		2085.98	-0.00458029		2615.97	0.03160335		3145.97	0.02312536		3676	-0.02791382
496.19	0.17989277		1026.19	-0.00543606		1556.18	0.01567109		2086.18	-0.00441153		2616.17	0.03138914		3146.17	0.02287135		3676.2	-0.02894958
496.39	0.18062078		1026.39	-0.0045768		1556.38	0.01454505		2086.38	-0.00355901		2616.37	0.03011987		3146.37	0.02302143		3676.4	-0.02811227
496.59	0.18161819		1026.59	-0.00391944		1556.58	0.01393578		2086.58	-0.00324455		2616.57	0.02946483		3146.57	0.02243728		3676.6	-0.02881489
496.79	0.18204129		1026.79	-0.00346955		1556.78	0.01390717		2086.78	-0.00382866		2616.77	0.02911489		3146.77	0.02311784		3676.8	-0.02916788
496.99	0.18260657		1026.99	-0.0041868		1556.98	0.0131246		2086.98	-0.0038364		2616.97	0.02912319		3146.97	0.02396945		3677	-0.02856244
497.19	0.18272602		1027.19	-0.00513136		1557.18	0.01241987		2087.18	-0.0034756		2617.17	0.02938243		3147.17	0.02454074		3677.2	-0.02962847
497.39	0.18317209		1027.39	-0.0050517		1557.38	0.01141615		2087.38	-0.00370112		2617.37	0.02927817		3147.37	0.02507925		3677.4	-0.02985346
497.59	0.18259067		1027.59	-0.00569404		1557.58	0.01161588		2087.58	-0.0039691		2617.57	0.02876275		3147.57	0.02626699		3677.6	-0.0306029
497.79	0.18244762		1027.79	-0.00568474		1557.78	0.01136275		2087.78	-0.00509516		2617.77	0.02920182		3147.77	0.02630204		3677.8	-0.03017593
497.99	0.18289734		1027.99	-0.00641023		1557.98	0.01191657		2087.98	-0.00582956		2617.97	0.0288995		3147.97	0.02729312		3678	-0.03009973
498.19	0.18267363		1028.19	-0.00674035		1558.18	0.01272713		2088.18	-0.00624368		2618.17	0.02863007		3148.17	0.02645867		3678.2	-0.03018561
498.39	0.18286286		1028.39	-0.00701922		1558.38	0.01365618		2088.38	-0.00658655		2618.37	0.02886939		3148.37	0.02618481		3678.4	-0.02948393
498.59	0.18331202		1028.59	-0.00700577		1558.58	0.01314535		2088.58	-0.00722589		2618.57	0.02836981		3148.57	0.02594518		3678.6	-0.02911028
498.79	0.1837681		1028.79	-0.00744695		1558.78	0.01451857		2088.78	-0.00745534		2618.77	0.02857071		3148.77	0.02590086		3678.8	-0.02858476
498.99	0.1838346		1028.99	-0.00908032		1558.98	0.01476099		2088.98	-0.00785094		2618.97	0.02939721		3148.97	0.02569721		3679	-0.02794382
499.19	0.18409647		1029.19	-0.00976919		1559.18	0.01424133		2089.18	-0.00785203		2619.17	0.0305574		3149.17	0.02515579		3679.2	-0.02765814
499.39	0.18358571		1029.39	-0.0095849		1559.38	0.01432811		2089.38	-0.00734942		2619.37	0.03030617		3149.37	0.0246545		3679.4	-0.02726212
499.59	0.18362562		1029.59	-0.00908546		1559.58	0.01462984		2089.58	-0.00721949		2619.57	0.03117738		3149.57	0.02517421		3679.6	-0.02831805
499.79	0.1823463		1029.79	-0.00906906		1559.78	0.01525345		2089.78	-0.00744937		2619.77	0.03079512		3149.77	0.0250451		3679.8	-0.02775071
499.99	0.18220681		1029.99	-0.00865112		1559.98	0.01516731		2089.98	-0.00651597		2619.97	0.02958958		3149.97	0.02403266		3680	-0.02707791
500.19	0.18271436		1030.19	-0.00772086		1560.18	0.01635614		2090.18	-0.00575474		2620.17	0.02969353		3150.17	0.02304147		3680.2	-0.0271312
500.39	0.18267123		1030.39	-0.00695052		1560.38	0.0162255		2090.38	-0.00515049		2620.37	0.02938797		3150.37	0.02212916		3680.4	-0.02715437
500.59	0.18296626		1030.59	-0.00683153		1560.58	0.01677953		2090.58	-0.0048008		2620.57	0.02966916		3150.57	0.02126359		3680.6	-0.02787574
500.79	0.18274145		1030.79	-0.00692679		1560.78	0.01675594		2090.78	-0.00533848		2620.77	0.03032008		3150.77	0.02112441		3680.8	-0.02765559
500.99	0.18287143		1030.99	-0.00784888		1560.98	0.01611489		2090.98	-0.00451483		2620.97	0.03055776		3150.97	0.0207461		3681	-0.02667641
501.19	0.18237465		1031.19	-0.00757701		1561.18	0.01502626		2091.18	-0.00514634		2621.17	0.03044118		3151.17	0.02064728		3681.2	-0.02763027
501.39	0.18178945		1031.39	-0.00776939		1561.38	0.01599223		2091.38	-0.00548459		2621.37	0.03022972		3151.37	0.02043194		3681.4	-0.02786722
501.59	0.18075169		1031.59	-0.00776066		1561.58	0.01644929		2091.58	-0.00574799		2621.57	0.03025543		3151.57	0.02168282		3681.6	-0.02797463
501.79	0.18065306		1031.79	-0.00729546		1561.78	0.01615977		2091.78	-0.00717242		2621.77	0.03037543		3151.77	0.02121872		3681.8	-0.02809437
501.99	0.18027026		1031.99	-0.00733431		1561.98	0.01640582		2091.98	-0.00713228		2621.97	0.03058685		3151.97	0.02140337		3682	-0.02821297
502.19	0.18097201		1032.19	-0.00723273		1562.18	0.01575417		2092.18	-0.00678323		2622.17	0.03028855		3152.17	0.02113875		3682.2	-0.0284141
502.39	0.18126963		1032.39	-0.00749047		1562.38	0.01522083		2092.38	-0.00713312		2622.37	0.03084609		3152.37	0.02197993		3682.4	-0.0276846
502.59	0.18072894		1032.59	-0.00773787		1562.58	0.01411269		2092.58	-0.00662823		2622.57	0.03106133		3152.57	0.02311708		3682.6	-0.02841013
502.79	0.1804784		1032.79	-0.0076899		1562.78	0.01462352		2092.78	-0.00694469		2622.77	0.03140194		3152.77	0.0232238		3682.8	-0.0281774
502.99	0.17975059		1032.99	-0.00837031		1562.98	0.01416474		2092.98	-0.00717508		2622.97	0.03087696		3152.97	0.02249027		3683	-0.02807264
503.19	0.17971462		1033.19	-0.00763638		1563.18	0.01395637		2093.18	-0.00662062		2623.17	0.03070091		3153.17	0.02308392		3683.2	-0.02779345
503.39	0.18036219		1033.39	-0.00646328		1563.38	0.01366308		2093.38	-0.00633681		2623.37	0.03017182		3153.37	0.02416444		3683.4	-0.02712644
503.59	0.17993743		1033.59	-0.00670322		1563.58	0.01399085		2093.58	-0.00630826		2623.57	0.03036536		3153.57	0.02506688		3683.6	-0.02724029
503.79	0.17930295		1033.79	-0.00696173		1563.78	0.0132039		2093.78	-0.00664738		2623.77	0.02968435		3153.77	0.02434063		3683.8	-0.02667888
503.99	0.17983955		1033.99	-0.00722356		1563.98	0.01258053		2093.98	-0.00588356		2623.97	0.02939381		3153.97	0.02398684		3684	-0.02607426
504.19	0.18025614		1034.19	-0.00710523		1564.18	0.0126516		2094.18	-0.0056588		2624.17	0.02917883		3154.17	0.02396001		3684.2	-0.0261936
504.39	0.17946431		1034.39	-0.00736987		1564.38	0.01234825		2094.38	-0.00606541		2624.37	0.02902776		3154.37	0.02425405		3684.4	-0.02703313
504.59	0.17944113		1034.59	-0.00802487		1564.58	0.01167815		2094.58	-0.00540283		2624.57	0.0292699		3154.57	0.02393494		3684.6	-0.02644725
504.79	0.17940316		1034.79	-0.00831264		1564.78	0.01183761		2094.78	-0.0066794		2624.77	0.02942075		3154.77	0.02372352		3684.8	-0.02635308
504.99	0.17918132		1034.99	-0.00884875		1564.98	0.01161739		2094.98	-0.00709409		2624.97	0.029823		3154.97	0.02365479		3685	-0.02605599
505.19	0.17910583		1035.19	-0.00838468		1565.18	0.01219971		2095.18	-0.00749484		2625.17	0.03018485		3155.17	0.02374556		3685.2	-0.02585941
505.39	0.17825561		1035.39	-0.00886922		1565.38	0.01341097		2095.38	-0.00797045		2625.37	0.03001922		3155.37	0.02365236		3685.4	-0.02613502
505.59	0.17811848		1035.59	-0.00743214		1565.58	0.01313466		2095.58	-0.00878487		2625.57	0.02997506		3155.57	0.0239255		3685.6	-0.02660286
505.79	0.17734571		1035.79	-0.00704769		1565.78	0.01313566		2095.78	-0.00899693		2625.77	0.03097748		3155.77	0.02384892		3685.8	-0.02677925
505.99	0.17683643		1035.99	-0.00721024		1565.98	0.01370992		2095.98	-0.00873146		2625.97	0.03138903		3155.97	0.02424455		3686	-0.02684747
506.19	0.17746953		1036.19	-0.00716451		1566.18	0.01367344		2096.18	-0.00813225		2626.17	0.03143734		3156.17	0.023865		3686.2	-0.02692884
506.39	0.17682894		1036.39	-0.00711124		1566.38	0.01426322		2096.38	-0.00842164		2626.37	0.03163284		3156.37	0.02398043		3686.4	-0.02705884
506.59	0.17666417		1036.59	-0.0070993		1566.58	0.01543292		2096.58	-0.00826671		2626.57	0.0315842		3156.57	0.02389492		3686.6	-0.02770888
506.79	0.17687419		1036.79	-0.00628704		1566.78	0.01655372		2096.78	-0.00776329		2626.77	0.03119768		3156.77	0.02245412		3686.8	-0.02862869
506.99	0.17691874		1036.99	-0.0062295		1566.98	0.01621445		2096.98	-0.00718427		2626.97	0.03069359		3156.97	0.02297435		3687	-0.02875758
507.19	0.17681407		1037.19	-0.00617719		1567.18	0.0160999		2097.18	-0.00714747		2627.17	0.03196849		3157.17	0.02367645		3687.2	-0.0288374
507.39	0.17700346		1037.39	-0.00558742		1567.38	0.01536806		2097.38	-0.00703508		2627.37	0.03224988		3157.37	0.02315471		3687.4	-0.02882262
507.59	0.17659439		1037.59	-0.00660215		1567.58	0.01550682		2097.58	-0.00733934		2627.57	0.03213433		3157.57	0.02300181		3687.6	-0.02991173
507.79	0.17729984		1037.79	-0.0067071		1567.78	0.01481309		2097.78	-0.00701697		2627.77	0.03178861		3157.77	0.02307517		3687.8	-0.03025932
507.99	0.17830057		1037.99	-0.00751342		1567.98	0.01483068		2097.98	-0.00586696		2627.97	0.03068966		3157.97	0.02338446		3688	-0.03016341
508.19	0.17841428		1038.19	-0.00766175		1568.18	0.01442425		2098.18	-0.00553889		2628.17	0.03051019		3158.17	0.02364339		3688.2	-0.0302809
508.39	0.17814693		1038.39	-0.00799621		1568.38	0.01366668		2098.38	-0.00534111		2628.37	0.03081519		3158.37	0.02395906		3688.4	-0.03060416
508.59	0.17910902		1038.59	-0.00901095		1568.58	0.01268145		2098.58	-0.00563563		2628.57	0.03107729		3158.57	0.02334913		3688.6	-0.0299416
508.79	0.17952857		1038.79	-0.00909338		1568.78	0.0129865		2098.78	-0.00683619		2628.77	0.03062512		3158.77	0.02364344		3688.8	-0.03019449
508.99	0.18073386		1038.99	-0.00923116		1568.98	0.01295819		2098.98	-0.00679215		2628.97	0.0302046		3158.97	0.02365182		3689	-0.02901724
509.19	0.18153738		1039.19	-0.00908713		1569.18	0.01159909		2099.18	-0.00732808		2629.17	0.02977568		3159.17	0.02330468		3689.2	-0.02775271
509.39	0.18202305		1039.39	-0.00930801		1569.38	0.01057743		2099.38	-0.00867711		2629.37	0.02887198		3159.37	0.02255762		3689.4	-0.02813298
509.59	0.18211046		1039.59	-0.00839847		1569.58	0.00975754		2099.58	-0.00929298		2629.57	0.02917038		3159.57	0.02226981		3689.6	-0.02764971
509.79	0.18137431		1039.79	-0.00930552		1569.78	0.01014209		2099.78	-0.0095695		2629.77	0.02906917		3159.77	0.02246995		3689.8	-0.02813902
509.99	0.18154485		1039.99	-0.00877873		1569.98	0.01128598		2099.98	-0.01026146		2629.97	0.02841662		3159.97	0.02205248		3690	-0.02777298
510.19	0.18099855		1040.19	-0.00848771		1570.18	0.01182188		2100.18	-0.00987014		2630.17	0.02841771		3160.17	0.02108519		3690.2	-0.02805609
510.39	0.18086045		1040.39	-0.00770799		1570.38	0.0124437		2100.38	-0.01069668		2630.37	0.02747684		3160.37	0.02106732		3690.4	-0.02744668
510.59	0.18028547		1040.59	-0.00725858		1570.58	0.01324456		2100.58	-0.0106492		2630.57	0.02750494		3160.57	0.02135812		3690.6	-0.02711856
510.79	0.18013663		1040.79	-0.00678445		1570.78	0.01341457		2100.78	-0.00980474		2630.77	0.02711612		3160.77	0.02100258		3690.8	-0.02761706
510.99	0.17957182		1040.99	-0.00641732		1570.98	0.01337123		2100.98	-0.01000225		2630.97	0.02731112		3160.97	0.02150524		3691	-0.02666072
511.19	0.17902995		1041.19	-0.00603806		1571.18	0.01294287		2101.18	-0.01004363		2631.17	0.02793335		3161.17	0.02059022		3691.2	-0.02672996
511.39	0.17921713		1041.39	-0.00654632		1571.38	0.01324272		2101.38	-0.00935255		2631.37	0.02743584		3161.37	0.02010679		3691.4	-0.0264217
511.59	0.17879839		1041.59	-0.00623177		1571.58	0.0132648		2101.58	-0.00883581		2631.57	0.02689181		3161.57	0.02044402		3691.6	-0.02658352
511.79	0.17930181		1041.79	-0.00681388		1571.78	0.01354987		2101.78	-0.00800831		2631.77	0.02634276		3161.77	0.02001754		3691.8	-0.02625296
511.99	0.18005113		1041.99	-0.00743875		1571.98	0.0141378		2101.98	-0.0069525		2631.97	0.02530128		3161.97	0.01982752		3692	-0.0260136
512.19	0.18020242		1042.19	-0.00793863		1572.18	0.01431197		2102.18	-0.00715357		2632.17	0.02613381		3162.17	0.01959963		3692.2	-0.02563475
512.39	0.18011771		1042.39	-0.00902043		1572.38	0.01407154		2102.38	-0.00688077		2632.37	0.02585905		3162.37	0.01973573		3692.4	-0.02603247
512.59	0.18048033		1042.59	-0.00988508		1572.58	0.01373746		2102.58	-0.00699299		2632.57	0.02667575		3162.57	0.01916847		3692.6	-0.02593747
512.79	0.18089012		1042.79	-0.01028363		1572.78	0.01359911		2102.78	-0.00691846		2632.77	0.02732067		3162.77	0.01980253		3692.8	-0.02619506
512.99	0.18129358		1042.99	-0.01013208		1572.98	0.01284318		2102.98	-0.00675957		2632.97	0.02757769		3162.97	0.02009625		3693	-0.02559109
513.19	0.1816781		1043.19	-0.01010053		1573.18	0.01155588		2103.18	-0.00738513		2633.17	0.02799636		3163.17	0.01991935		3693.2	-0.02632265
513.39	0.18152599		1043.39	-0.01014808		1573.38	0.01192199		2103.38	-0.00726703		2633.37	0.02802118		3163.37	0.01995181		3693.4	-0.02764416
513.59	0.18114062		1043.59	-0.01070742		1573.58	0.01264727		2103.58	-0.00777402		2633.57	0.0283054		3163.57	0.02028481		3693.6	-0.02739253
513.79	0.1807332		1043.79	-0.01082928		1573.78	0.0132024		2103.78	-0.00804345		2633.77	0.02826728		3163.77	0.02075536		3693.8	-0.02820902
513.99	0.18045365		1043.99	-0.01003405		1573.98	0.01397409		2103.98	-0.00846031		2633.97	0.02874644		3163.97	0.02173748		3694	-0.02782948
514.19	0.17996114		1044.19	-0.01051403		1574.18	0.01365721		2104.18	-0.0081444		2634.17	0.02896894		3164.17	0.02242528		3694.2	-0.02810142
514.39	0.18013155		1044.39	-0.01093861		1574.38	0.01362194		2104.38	-0.00918037		2634.37	0.02862816		3164.37	0.0233651		3694.4	-0.02743714
514.59	0.17938444		1044.59	-0.01126069		1574.58	0.0134436		2104.58	-0.00878144		2634.57	0.02897053		3164.57	0.02339105		3694.6	-0.02854063
514.79	0.17897518		1044.79	-0.01089248		1574.78	0.01340416		2104.78	-0.00855011		2634.77	0.02929355		3164.77	0.022891		3694.8	-0.02934795
514.99	0.17849293		1044.99	-0.01091042		1574.98	0.01194693		2104.98	-0.00931453		2634.97	0.02886568		3164.97	0.02292419		3695	-0.02912953
515.19	0.17807706		1045.19	-0.01205293		1575.18	0.0109919		2105.18	-0.00827643		2635.17	0.02877315		3165.17	0.02304348		3695.2	-0.02910488
515.39	0.17863869		1045.39	-0.01293644		1575.38	0.01143164		2105.38	-0.00793199		2635.37	0.028113		3165.37	0.02253965		3695.4	-0.02837332
515.59	0.17900358		1045.59	-0.01255864		1575.58	0.01102104		2105.58	-0.00826697		2635.57	0.02729919		3165.57	0.02277385		3695.6	-0.02865001
515.79	0.18046329		1045.79	-0.01268303		1575.78	0.01112423		2105.78	-0.00925848		2635.77	0.02601596		3165.77	0.02200341		3695.8	-0.02860254
515.99	0.18158957		1045.99	-0.01250022		1575.98	0.01075048		2105.98	-0.00948129		2635.97	0.02523707		3165.97	0.02292225		3696	-0.02855421
516.19	0.18186739		1046.19	-0.01300168		1576.18	0.01100118		2106.18	-0.01008354		2636.17	0.0254093		3166.17	0.02320235		3696.2	-0.02901654
516.39	0.18126953		1046.39	-0.01341065		1576.38	0.01086263		2106.38	-0.00980282		2636.37	0.02541359		3166.37	0.02370682		3696.4	-0.02896938
516.59	0.1815355		1046.59	-0.01269247		1576.58	0.01063577		2106.58	-0.00936347		2636.57	0.02709718		3166.57	0.02383015		3696.6	-0.02940089
516.79	0.18158356		1046.79	-0.01231368		1576.78	0.01026331		2106.78	-0.0094773		2636.77	0.02780301		3166.77	0.02469808		3696.8	-0.02927821
516.99	0.1809498		1046.99	-0.01141533		1576.98	0.00987484		2106.98	-0.00963397		2636.97	0.02774866		3166.97	0.02493912		3697	-0.02907803
517.19	0.18084473		1047.19	-0.01075919		1577.18	0.0103459		2107.18	-0.00919576		2637.17	0.02894631		3167.17	0.02519774		3697.2	-0.02973261
517.39	0.18032044		1047.39	-0.01041069		1577.38	0.01029031		2107.38	-0.00988205		2637.37	0.02908021		3167.37	0.02480763		3697.4	-0.02902513
517.59	0.17972279		1047.59	-0.01052026		1577.58	0.00973673		2107.58	-0.0107555		2637.57	0.03012797		3167.57	0.0252095		3697.6	-0.02757818
517.79	0.17889938		1047.79	-0.00961338		1577.78	0.00859049		2107.78	-0.01046517		2637.77	0.03025133		3167.77	0.02491824		3697.8	-0.02754429
517.99	0.1785122		1047.99	-0.00889093		1577.98	0.00803616		2107.98	-0.01037928		2637.97	0.03036471		3167.97	0.02539636		3698	-0.02726009
518.19	0.17761842		1048.19	-0.00899314		1578.18	0.00721722		2108.18	-0.00984097		2638.17	0.03034467		3168.17	0.02456039		3698.2	-0.02659056
518.39	0.17687652		1048.39	-0.00907444		1578.38	0.00734273		2108.38	-0.01010131		2638.37	0.02994432		3168.37	0.02393768		3698.4	-0.02670887
518.59	0.17605098		1048.59	-0.00822695		1578.58	0.00768545		2108.58	-0.0091579		2638.57	0.03048204		3168.57	0.02307414		3698.6	-0.02638465
518.79	0.17564597		1048.79	-0.00831447		1578.78	0.00683719		2108.78	-0.00843527		2638.77	0.03033579		3168.77	0.02252434		3698.8	-0.0262991
518.99	0.17639423		1048.99	-0.00873787		1578.98	0.00573614		2108.98	-0.00816693		2638.97	0.02925727		3168.97	0.02226406		3699	-0.02542729
519.19	0.17637785		1049.19	-0.00853844		1579.18	0.00655139		2109.18	-0.00646616		2639.17	0.02954765		3169.17	0.02145853		3699.2	-0.02519832
519.39	0.17816743		1049.39	-0.00748675		1579.38	0.00816189		2109.38	-0.00648082		2639.37	0.02781381		3169.37	0.02048792		3699.4	-0.02509633
519.59	0.17834244		1049.59	-0.00683421		1579.58	0.00872153		2109.58	-0.0066722		2639.57	0.02678187		3169.57	0.02046351		3699.6	-0.0258607
519.79	0.17888542		1049.79	-0.006722		1579.78	0.00990249		2109.78	-0.00694429		2639.77	0.02616002		3169.77	0.02030927		3699.8	-0.02517902
519.99	0.1796384		1049.99	-0.00738011		1579.98	0.01099615		2109.98	-0.00667864		2639.97	0.02596933		3169.97	0.02019867		3700	-0.0255138
520.19	0.17975239		1050.19	-0.0084529		1580.18	0.01158828		2110.18	-0.0064048		2640.17	0.02621335		3170.17	0.02057945		3700.2	-0.02587054
520.39	0.1790224		1050.39	-0.0086504		1580.38	0.01209779		2110.38	-0.00543859		2640.37	0.02682485		3170.37	0.0211411		3700.4	-0.02621512
520.59	0.17944694		1050.59	-0.00795661		1580.58	0.01249983		2110.58	-0.00542762		2640.57	0.02757104		3170.57	0.02171096		3700.6	-0.02687158
520.79	0.17928947		1050.79	-0.00792291		1580.78	0.01187007		2110.78	-0.00646434		2640.77	0.02746721		3170.77	0.02212567		3700.8	-0.02657568
520.99	0.17874916		1050.99	-0.00812712		1580.98	0.01188004		2110.98	-0.00698694		2640.97	0.02726908		3170.97	0.02211628		3701	-0.02779588
521.19	0.17751535		1051.19	-0.00856484		1581.18	0.01175006		2111.18	-0.00688534		2641.17	0.0277494		3171.17	0.02258284		3701.2	-0.02814345
521.39	0.17688268		1051.39	-0.00878707		1581.38	0.01174166		2111.38	-0.00806244		2641.37	0.0279617		3171.37	0.02228145		3701.4	-0.02743249
521.59	0.17489941		1051.59	-0.0090593		1581.58	0.01104945		2111.58	-0.0082157		2641.57	0.02725948		3171.57	0.02287502		3701.6	-0.02703954
521.79	0.17379334		1051.79	-0.00885328		1581.78	0.01101521		2111.78	-0.00902721		2641.77	0.02671237		3171.77	0.02279339		3701.8	-0.02757643
521.99	0.17321198		1051.99	-0.00856822		1581.98	0.01146211		2111.98	-0.01001119		2641.97	0.02731662		3171.97	0.02292227		3702	-0.02712892
522.19	0.17247957		1052.19	-0.0090967		1582.18	0.01212		2112.18	-0.0102371		2642.17	0.02637744		3172.17	0.02308692		3702.2	-0.02645582
522.39	0.17234174		1052.39	-0.00973263		1582.38	0.01250174		2112.38	-0.0094245		2642.37	0.02610064		3172.37	0.02354378		3702.4	-0.02710061
522.59	0.1723359		1052.59	-0.01046888		1582.58	0.01243527		2112.58	-0.00936799		2642.57	0.02619567		3172.57	0.02371554		3702.6	-0.02682496
522.79	0.17275414		1052.79	-0.01106051		1582.78	0.0116878		2112.78	-0.00987347		2642.77	0.02537603		3172.77	0.02315727		3702.8	-0.02712053
522.99	0.17345929		1052.99	-0.0101329		1582.98	0.01203294		2112.98	-0.01085845		2642.97	0.02522049		3172.97	0.02272842		3703	-0.02606473
523.19	0.17372356		1053.19	-0.00943077		1583.18	0.01232004		2113.18	-0.01075597		2643.17	0.02532452		3173.17	0.0217756		3703.2	-0.02586504
523.39	0.17428978		1053.39	-0.0094086		1583.38	0.01343693		2113.38	-0.01122811		2643.37	0.02467282		3173.37	0.02135404		3703.4	-0.02527641
523.59	0.17459554		1053.59	-0.00925978		1583.58	0.01384185		2113.58	-0.01137638		2643.57	0.02435755		3173.57	0.02112965		3703.6	-0.02601471
523.79	0.17639326		1053.79	-0.00965165		1583.78	0.01402733		2113.78	-0.01174207		2643.77	0.02363474		3173.77	0.02099056		3703.8	-0.02541997
523.99	0.1778142		1053.99	-0.00969517		1583.98	0.01417048		2113.98	-0.01207736		2643.97	0.02389237		3173.97	0.02081104		3704	-0.02574425
524.19	0.17900652		1054.19	-0.01059997		1584.18	0.0139697		2114.18	-0.01215191		2644.17	0.0250178		3174.17	0.02271236		3704.2	-0.02587623
524.39	0.17935865		1054.39	-0.00940626		1584.38	0.01378357		2114.38	-0.01153683		2644.37	0.02402939		3174.37	0.02295318		3704.4	-0.02566146
524.59	0.18014658		1054.59	-0.00916926		1584.58	0.01359805		2114.58	-0.01168983		2644.57	0.02361879		3174.57	0.02300425		3704.6	-0.02553636
524.79	0.17988188		1054.79	-0.00866096		1584.78	0.01252587		2114.78	-0.01197841		2644.77	0.02326017		3174.77	0.02238285		3704.8	-0.02563047
524.99	0.17893695		1054.99	-0.00962029		1584.98	0.01303857		2114.98	-0.01168319		2644.97	0.02313952		3174.97	0.02246429		3705	-0.02687484
525.19	0.17854293		1055.19	-0.00987073		1585.18	0.012965		2115.18	-0.0121168		2645.17	0.02277354		3175.17	0.02342214		3705.2	-0.02694324
525.39	0.17841139		1055.39	-0.00971984		1585.38	0.01351247		2115.38	-0.01199046		2645.37	0.02338147		3175.37	0.02308367		3705.4	-0.02692272
525.59	0.17812304		1055.59	-0.00968621		1585.58	0.0126271		2115.58	-0.01155125		2645.57	0.02258381		3175.57	0.02291096		3705.6	-0.02689332
525.79	0.1793383		1055.79	-0.00974272		1585.78	0.01294352		2115.78	-0.01133413		2645.77	0.02366293		3175.77	0.0220776		3705.8	-0.02813056
525.99	0.17968985		1055.99	-0.00899075		1585.98	0.01314204		2115.98	-0.01087182		2645.97	0.02326868		3175.97	0.02118864		3706	-0.02822094
526.19	0.17957126		1056.19	-0.00890039		1586.18	0.0132588		2116.18	-0.00969551		2646.17	0.02269832		3176.17	0.02187657		3706.2	-0.02869749
526.39	0.18037732		1056.39	-0.00946433		1586.38	0.01274804		2116.38	-0.00927442		2646.37	0.02305578		3176.37	0.02103034		3706.4	-0.02896547
526.59	0.18046173		1056.59	-0.00922062		1586.58	0.01282545		2116.58	-0.0096379		2646.57	0.02358744		3176.57	0.0204971		3706.6	-0.02914193
526.79	0.18041048		1056.79	-0.00970619		1586.78	0.01255279		2116.78	-0.00957156		2646.77	0.02374002		3176.77	0.01906236		3706.8	-0.02952059
526.99	0.18034736		1056.99	-0.00913498		1586.98	0.01228165		2116.98	-0.01019327		2646.97	0.02481669		3176.97	0.01817243		3707	-0.0298089
527.19	0.18027536		1057.19	-0.00935004		1587.18	0.01237071		2117.18	-0.00945001		2647.17	0.02523845		3177.17	0.01813104		3707.2	-0.03010894
527.39	0.17990474		1057.39	-0.00958927		1587.38	0.01283509		2117.38	-0.00954966		2647.37	0.02597393		3177.37	0.01770309		3707.4	-0.03022204
527.59	0.18006009		1057.59	-0.00897984		1587.58	0.01322967		2117.58	-0.00940414		2647.57	0.02597202		3177.57	0.01695605		3707.6	-0.03101584
527.79	0.18082183		1057.79	-0.01019893		1587.78	0.012304		2117.78	-0.00965311		2647.77	0.02740842		3177.77	0.01660258		3707.8	-0.02976614
527.99	0.18040627		1057.99	-0.01025726		1587.98	0.01216806		2117.98	-0.00966653		2647.97	0.02807421		3177.97	0.01659367		3708	-0.02919864
528.19	0.17916175		1058.19	-0.01075809		1588.18	0.01177107		2118.18	-0.00946322		2648.17	0.02728082		3178.17	0.01713125		3708.2	-0.02920237
528.39	0.17821702		1058.39	-0.01025675		1588.38	0.01041488		2118.38	-0.00944485		2648.37	0.02624662		3178.37	0.01749353		3708.4	-0.02911996
528.59	0.17834808		1058.59	-0.01073128		1588.58	0.01051165		2118.58	-0.01030585		2648.57	0.02635712		3178.57	0.01804332		3708.6	-0.02998726
528.79	0.1776963		1058.79	-0.01006421		1588.78	0.01036724		2118.78	-0.01078794		2648.77	0.02563865		3178.77	0.01799233		3708.8	-0.03041228
528.99	0.17808365		1058.99	-0.01079631		1588.98	0.01113934		2118.98	-0.01140431		2648.97	0.02476988		3178.97	0.01883909		3709	-0.03095275
529.19	0.17852535		1059.19	-0.01030384		1589.18	0.01075506		2119.18	-0.01104625		2649.17	0.02394871		3179.17	0.01907837		3709.2	-0.03021144
529.39	0.17895024		1059.39	-0.01031171		1589.38	0.01085911		2119.38	-0.01038341		2649.37	0.02390815		3179.37	0.01839925		3709.4	-0.02989383
529.59	0.18015244		1059.59	-0.01060432		1589.58	0.01072761		2119.58	-0.01083651		2649.57	0.02299346		3179.57	0.01852179		3709.6	-0.02974452
529.79	0.18013761		1059.79	-0.0101868		1589.78	0.01065475		2119.78	-0.01107005		2649.77	0.02259415		3179.77	0.01908948		3709.8	-0.0304327
529.99	0.17924604		1059.99	-0.00958695		1589.98	0.0111109		2119.98	-0.0115166		2649.97	0.02088831		3179.97	0.01946624		3710	-0.02994469
530.19	0.17925172		1060.19	-0.009569		1590.18	0.01126965		2120.18	-0.01197657		2650.17	0.02018838		3180.17	0.02009698		3710.2	-0.02963934
530.39	0.18015597		1060.39	-0.00954242		1590.38	0.01109153		2120.38	-0.01190568		2650.37	0.02022075		3180.37	0.01946217		3710.4	-0.0290247
530.59	0.18015564		1060.59	-0.0097272		1590.58	0.01101482		2120.58	-0.01176349		2650.57	0.02029991		3180.57	0.02013637		3710.6	-0.03006957
530.79	0.18002148		1060.79	-0.01075628		1590.78	0.01104576		2120.78	-0.01152061		2650.77	0.02044181		3180.77	0.01997698		3710.8	-0.02994544
530.99	0.17982502		1060.99	-0.01064007		1590.98	0.01119716		2120.98	-0.01138634		2650.97	0.02133839		3180.97	0.02061867		3711	-0.02964762
531.19	0.17915291		1061.19	-0.0106655		1591.18	0.01132537		2121.18	-0.01033645		2651.17	0.02153687		3181.17	0.02055173		3711.2	-0.02925132
531.39	0.17931558		1061.39	-0.01137478		1591.38	0.01133997		2121.38	-0.01048737		2651.37	0.0223599		3181.37	0.02001804		3711.4	-0.02853682
531.59	0.17876039		1061.59	-0.01143058		1591.58	0.01112156		2121.58	-0.00940366		2651.57	0.02300038		3181.57	0.01979001		3711.6	-0.02878103
531.79	0.17847118		1061.79	-0.01334351		1591.78	0.01011526		2121.78	-0.00956735		2651.77	0.02310566		3181.77	0.02007608		3711.8	-0.02842284
531.99	0.17663401		1061.99	-0.01299716		1591.98	0.01023083		2121.98	-0.00860052		2651.97	0.02224744		3181.97	0.02099291		3712	-0.02883233
532.19	0.17613975		1062.19	-0.01371901		1592.18	0.0102484		2122.18	-0.00847511		2652.17	0.02228451		3182.17	0.02139648		3712.2	-0.02931399
532.39	0.17648827		1062.39	-0.01348431		1592.38	0.01029688		2122.38	-0.00859802		2652.37	0.02265565		3182.37	0.02121499		3712.4	-0.02967893
532.59	0.17586972		1062.59	-0.01355631		1592.58	0.01071689		2122.58	-0.00852107		2652.57	0.02209157		3182.57	0.02155654		3712.6	-0.03001127
532.79	0.17464285		1062.79	-0.01271232		1592.78	0.01104558		2122.78	-0.00818262		2652.77	0.02167696		3182.77	0.02147153		3712.8	-0.02938326
532.99	0.17541612		1062.99	-0.01314466		1592.98	0.01125164		2122.98	-0.00811853		2652.97	0.02195987		3182.97	0.02142425		3713	-0.0289837
533.19	0.17513841		1063.19	-0.01265341		1593.18	0.01110321		2123.18	-0.0085535		2653.17	0.02299524		3183.17	0.02107738		3713.2	-0.02849212
533.39	0.17540397		1063.39	-0.01280129		1593.38	0.01192096		2123.38	-0.00951215		2653.37	0.02393408		3183.37	0.02092975		3713.4	-0.0293043
533.59	0.17583795		1063.59	-0.01317828		1593.58	0.01208152		2123.58	-0.01043694		2653.57	0.02374046		3183.57	0.02142886		3713.6	-0.02897641
533.79	0.17553464		1063.79	-0.01286481		1593.78	0.0123863		2123.78	-0.01074053		2653.77	0.02455414		3183.77	0.02179728		3713.8	-0.02932447
533.99	0.17616445		1063.99	-0.01259382		1593.98	0.01378821		2123.98	-0.01132235		2653.97	0.02365808		3183.97	0.02049038		3714	-0.03027831
534.19	0.17679181		1064.19	-0.01215372		1594.18	0.01334696		2124.18	-0.01049692		2654.17	0.02425813		3184.17	0.02052171		3714.2	-0.03005348
534.39	0.17745598		1064.39	-0.01225106		1594.38	0.0127069		2124.38	-0.01072591		2654.37	0.02470634		3184.37	0.02080865		3714.4	-0.02975296
534.59	0.1776287		1064.59	-0.01287827		1594.58	0.01247127		2124.58	-0.01145314		2654.57	0.02473305		3184.57	0.02099241		3714.6	-0.02964741
534.79	0.17763388		1064.79	-0.01277173		1594.78	0.01222926		2124.78	-0.01149281		2654.77	0.02492182		3184.77	0.01989683		3714.8	-0.02949922
534.99	0.17835547		1064.99	-0.01337135		1594.98	0.01185329		2124.98	-0.01141257		2654.97	0.02484657		3184.97	0.01924534		3715	-0.02905962
535.19	0.17856415		1065.19	-0.01302208		1595.18	0.01135235		2125.18	-0.01085881		2655.17	0.02441766		3185.17	0.01827726		3715.2	-0.02827404
535.39	0.17886741		1065.39	-0.01321613		1595.38	0.01143004		2125.38	-0.01069853		2655.37	0.02370591		3185.37	0.01916291		3715.4	-0.027827
535.59	0.17871419		1065.59	-0.01343533		1595.58	0.01101154		2125.58	-0.01007463		2655.57	0.02372532		3185.57	0.01923723		3715.6	-0.02849336
535.79	0.17834891		1065.79	-0.01440763		1595.78	0.01020249		2125.78	-0.00981112		2655.77	0.02346156		3185.77	0.01978853		3715.8	-0.02770664
535.99	0.17778571		1065.99	-0.01332167		1595.98	0.01045541		2125.98	-0.00852172		2655.97	0.02320533		3185.97	0.0199852		3716	-0.02762412
536.19	0.17818678		1066.19	-0.01379388		1596.18	0.00974062		2126.18	-0.00900759		2656.17	0.0221942		3186.17	0.01904067		3716.2	-0.02770287
536.39	0.1774775		1066.39	-0.01279032		1596.38	0.00870332		2126.38	-0.00847546		2656.37	0.02145999		3186.37	0.01939934		3716.4	-0.02809539
536.59	0.1772218		1066.59	-0.01262781		1596.58	0.00750154		2126.58	-0.00822158		2656.57	0.02140129		3186.57	0.02030925		3716.6	-0.02842513
536.79	0.17773794		1066.79	-0.01183479		1596.78	0.00744789		2126.78	-0.00915349		2656.77	0.02087266		3186.77	0.0205402		3716.8	-0.02792931
536.99	0.17810409		1066.99	-0.01209123		1596.98	0.0070586		2126.98	-0.00957527		2656.97	0.0214137		3186.97	0.02065798		3717	-0.02794909
537.19	0.17736577		1067.19	-0.01205586		1597.18	0.007471		2127.18	-0.01114964		2657.17	0.02233223		3187.17	0.02127208		3717.2	-0.0282411
537.39	0.17726904		1067.39	-0.01154017		1597.38	0.00862914		2127.38	-0.01128277		2657.37	0.02170655		3187.37	0.02235071		3717.4	-0.02885105
537.59	0.17751028		1067.59	-0.012168		1597.58	0.00821671		2127.58	-0.01121886		2657.57	0.02183612		3187.57	0.02234123		3717.6	-0.02945164
537.79	0.17794168		1067.79	-0.01248876		1597.78	0.00943702		2127.78	-0.01077281		2657.77	0.02232225		3187.77	0.0230771		3717.8	-0.02985002
537.99	0.17743954		1067.99	-0.01239212		1597.98	0.00973769		2127.98	-0.01078004		2657.97	0.02212556		3187.97	0.02302888		3718	-0.03092262
538.19	0.1771002		1068.19	-0.01273094		1598.18	0.00958401		2128.18	-0.01057145		2658.17	0.02270125		3188.17	0.02368163		3718.2	-0.03061695
538.39	0.1761377		1068.39	-0.01292764		1598.38	0.01002149		2128.38	-0.01243695		2658.37	0.02254807		3188.37	0.0239897		3718.4	-0.03035543
538.59	0.1761793		1068.59	-0.01267311		1598.58	0.0099855		2128.58	-0.01309265		2658.57	0.0229578		3188.57	0.02289142		3718.6	-0.03038244
538.79	0.17593964		1068.79	-0.0130939		1598.78	0.0104933		2128.78	-0.01374197		2658.77	0.02275819		3188.77	0.02281677		3718.8	-0.03009961
538.99	0.17582085		1068.99	-0.01400935		1598.98	0.01022433		2128.98	-0.01293002		2658.97	0.02342819		3188.97	0.02291011		3719	-0.02959163
539.19	0.1750228		1069.19	-0.01364467		1599.18	0.01040526		2129.18	-0.01276753		2659.17	0.02316271		3189.17	0.02256381		3719.2	-0.02927349
539.39	0.17522445		1069.39	-0.01334462		1599.38	0.01060768		2129.38	-0.01247128		2659.37	0.02348147		3189.37	0.02318954		3719.4	-0.02928762
539.59	0.17607824		1069.59	-0.01365427		1599.58	0.01007355		2129.58	-0.01188733		2659.57	0.02325082		3189.57	0.02246083		3719.6	-0.0289135
539.79	0.17477507		1069.79	-0.01309645		1599.78	0.00958465		2129.78	-0.01180364		2659.77	0.02337647		3189.77	0.022237		3719.8	-0.02815638
539.99	0.17405935		1069.99	-0.01236804		1599.98	0.01068814		2129.98	-0.01042386		2659.97	0.02220033		3189.97	0.0215905		3720	-0.02887531
540.19	0.17467739		1070.19	-0.01330477		1600.18	0.01027416		2130.18	-0.01011052		2660.17	0.02103469		3190.17	0.02088156		3720.2	-0.02949214
540.39	0.17532686		1070.39	-0.01298615		1600.38	0.01031597		2130.38	-0.00979309		2660.37	0.02129119		3190.37	0.02145387		3720.4	-0.02954197
540.59	0.17561327		1070.59	-0.01282011		1600.58	0.01056557		2130.58	-0.00958819		2660.57	0.02138311		3190.57	0.02094315		3720.6	-0.0288363
540.79	0.17521879		1070.79	-0.01321811		1600.78	0.01079208		2130.78	-0.00988947		2660.77	0.02104683		3190.77	0.02124336		3720.8	-0.02832189
540.99	0.17442496		1070.99	-0.01403194		1600.98	0.01015308		2130.98	-0.01035712		2660.97	0.02149516		3190.97	0.02110647		3721	-0.0284224
541.19	0.1743591		1071.19	-0.01408146		1601.18	0.00982658		2131.18	-0.0101239		2661.17	0.0217596		3191.17	0.02149913		3721.2	-0.02791305
541.39	0.17473945		1071.39	-0.01359573		1601.38	0.01012245		2131.38	-0.00978139		2661.37	0.02217103		3191.37	0.02049948		3721.4	-0.02823657
541.59	0.17399394		1071.59	-0.01417041		1601.58	0.00898744		2131.58	-0.00946138		2661.57	0.02351506		3191.57	0.01910152		3721.6	-0.0286901
541.79	0.17416389		1071.79	-0.01415719		1601.78	0.00943448		2131.78	-0.01020129		2661.77	0.02405308		3191.77	0.01941794		3721.8	-0.02850349
541.99	0.173982		1071.99	-0.0136773		1601.98	0.0098556		2131.98	-0.01157809		2661.97	0.02491482		3191.97	0.01959077		3722	-0.02969866
542.19	0.17436797		1072.19	-0.01365256		1602.18	0.01031479		2132.18	-0.01212959		2662.17	0.02510108		3192.17	0.0196256		3722.2	-0.02986223
542.39	0.17442691		1072.39	-0.01264168		1602.38	0.01051782		2132.38	-0.01282841		2662.37	0.02502937		3192.37	0.01933649		3722.4	-0.02935686
542.59	0.17508098		1072.59	-0.01248394		1602.58	0.00968755		2132.58	-0.01333934		2662.57	0.0245062		3192.57	0.01908534		3722.6	-0.02917823
542.79	0.17492914		1072.79	-0.01304511		1602.78	0.00948401		2132.78	-0.01425684		2662.77	0.02481749		3192.77	0.01952413		3722.8	-0.02858804
542.99	0.17484576		1072.99	-0.01325056		1602.98	0.00864985		2132.98	-0.01397189		2662.97	0.02449872		3192.97	0.01864318		3723	-0.02976947
543.19	0.17514847		1073.19	-0.01225075		1603.18	0.00794277		2133.18	-0.01472549		2663.17	0.0236585		3193.17	0.01857016		3723.2	-0.02939186
543.39	0.17509964		1073.39	-0.01179712		1603.38	0.00752195		2133.38	-0.01419037		2663.37	0.02381201		3193.37	0.01897799		3723.4	-0.02918269
543.59	0.17471615		1073.59	-0.01169741		1603.58	0.00659368		2133.58	-0.01412771		2663.57	0.02286133		3193.57	0.01841492		3723.6	-0.02905065
543.79	0.17354871		1073.79	-0.01144334		1603.78	0.00747076		2133.78	-0.01334469		2663.77	0.0226708		3193.77	0.01878858		3723.8	-0.02962091
543.99	0.17329312		1073.99	-0.01231254		1603.98	0.00875695		2133.98	-0.01205093		2663.97	0.02144338		3193.97	0.01857415		3724	-0.02992962
544.19	0.1738492		1074.19	-0.01436234		1604.18	0.00839632		2134.18	-0.01155147		2664.17	0.02145581		3194.17	0.01852222		3724.2	-0.03085095
544.39	0.17413902		1074.39	-0.0143546		1604.38	0.0077626		2134.38	-0.01067119		2664.37	0.02171551		3194.37	0.01880126		3724.4	-0.03046104
544.59	0.173017		1074.59	-0.01570737		1604.58	0.0074439		2134.58	-0.01051276		2664.57	0.0214305		3194.57	0.01864706		3724.6	-0.03037742
544.79	0.17291056		1074.79	-0.01600855		1604.78	0.00757422		2134.78	-0.01051413		2664.77	0.0216844		3194.77	0.01899386		3724.8	-0.03100759
544.99	0.17331176		1074.99	-0.0164732		1604.98	0.00739317		2134.98	-0.0101924		2664.97	0.02142416		3194.97	0.01926968		3725	-0.03117088
545.19	0.17341062		1075.19	-0.01638318		1605.18	0.00766894		2135.18	-0.00936897		2665.17	0.02230301		3195.17	0.01931194		3725.2	-0.03036268
545.39	0.17336509		1075.39	-0.01617355		1605.38	0.00828526		2135.38	-0.00984323		2665.37	0.02282054		3195.37	0.01852807		3725.4	-0.03131782
545.59	0.1725566		1075.59	-0.01528362		1605.58	0.00780686		2135.58	-0.0103411		2665.57	0.02278667		3195.57	0.01876499		3725.6	-0.03099248
545.79	0.17335891		1075.79	-0.01425469		1605.78	0.00849075		2135.78	-0.01090142		2665.77	0.02304548		3195.77	0.01940422		3725.8	-0.0303908
545.99	0.17399719		1075.99	-0.01333591		1605.98	0.00900779		2135.98	-0.0103535		2665.97	0.02278921		3195.97	0.02015356		3726	-0.03064411
546.19	0.17478636		1076.19	-0.01339519		1606.18	0.00878132		2136.18	-0.01032447		2666.17	0.02254084		3196.17	0.01971808		3726.2	-0.02950886
546.39	0.17568551		1076.39	-0.01255047		1606.38	0.0094536		2136.38	-0.01061322		2666.37	0.02243294		3196.37	0.01958901		3726.4	-0.02873211
546.59	0.17555292		1076.59	-0.01226259		1606.58	0.00941722		2136.58	-0.01124517		2666.57	0.02223867		3196.57	0.02018266		3726.6	-0.02798539
546.79	0.17558284		1076.79	-0.01205888		1606.78	0.00938878		2136.78	-0.01084434		2666.77	0.02286668		3196.77	0.01976965		3726.8	-0.02792667
546.99	0.17509219		1076.99	-0.01166548		1606.98	0.00925788		2136.98	-0.01057076		2666.97	0.02239417		3196.97	0.01861372		3727	-0.02785916
547.19	0.17503807		1077.19	-0.01146678		1607.18	0.00828826		2137.18	-0.01105893		2667.17	0.02219007		3197.17	0.01847389		3727.2	-0.02753422
547.39	0.17481302		1077.39	-0.01094853		1607.38	0.00792232		2137.38	-0.01052923		2667.37	0.02252608		3197.37	0.01807056		3727.4	-0.0277735
547.59	0.17495242		1077.59	-0.00995462		1607.58	0.00694406		2137.58	-0.01072613		2667.57	0.02216081		3197.57	0.01759638		3727.6	-0.02831657
547.79	0.17423918		1077.79	-0.01040679		1607.78	0.00781872		2137.78	-0.00935428		2667.77	0.02138542		3197.77	0.01764956		3727.8	-0.02937026
547.99	0.17401466		1077.99	-0.01137752		1607.98	0.00822061		2137.98	-0.00978079		2667.97	0.02077884		3197.97	0.0169135		3728	-0.02978249
548.19	0.17450734		1078.19	-0.01203689		1608.18	0.00777607		2138.18	-0.00870709		2668.17	0.02151897		3198.17	0.01682139		3728.2	-0.03046011
548.39	0.17358755		1078.39	-0.01127236		1608.38	0.00740213		2138.38	-0.008487		2668.37	0.02016814		3198.37	0.01611053		3728.4	-0.03040987
548.59	0.17328521		1078.59	-0.01227137		1608.58	0.0076856		2138.58	-0.00934569		2668.57	0.02015271		3198.57	0.0164297		3728.6	-0.03058994
548.79	0.17415921		1078.79	-0.0113101		1608.78	0.0081159		2138.78	-0.00962835		2668.77	0.02052231		3198.77	0.01598461		3728.8	-0.0313617
548.99	0.17406167		1078.99	-0.01216106		1608.98	0.00781868		2138.98	-0.01004015		2668.97	0.01977722		3198.97	0.01667565		3729	-0.03123776
549.19	0.17369687		1079.19	-0.01265517		1609.18	0.00790306		2139.18	-0.01032941		2669.17	0.01979605		3199.17	0.01715059		3729.2	-0.03110437
549.39	0.17368285		1079.39	-0.01219357		1609.38	0.00727927		2139.38	-0.01098472		2669.37	0.02002375		3199.37	0.0173037		3729.4	-0.03191469
549.59	0.17413028		1079.59	-0.01175788		1609.58	0.00708272		2139.58	-0.01179249		2669.57	0.02001715		3199.57	0.01808356		3729.6	-0.03105993
549.79	0.17424668		1079.79	-0.01188988		1609.78	0.00796976		2139.78	-0.01161142		2669.77	0.02033707		3199.77	0.01804194		3729.8	-0.03194676
549.99	0.17364995		1079.99	-0.01254796		1609.98	0.0077516		2139.98	-0.01104823		2669.97	0.0210561		3199.97	0.01807818		3730	-0.03192695
550.19	0.17392614		1080.19	-0.0134915		1610.18	0.00868747		2140.18	-0.01180293		2670.17	0.02134336		3200.17	0.01810671		3730.2	-0.03139387
550.39	0.17355313		1080.39	-0.01380398		1610.38	0.0094323		2140.38	-0.01117845		2670.37	0.02195868		3200.37	0.01905093		3730.4	-0.03119436
550.59	0.1733433		1080.59	-0.01403513		1610.58	0.0088711		2140.58	-0.0107303		2670.57	0.02223685		3200.57	0.01882202		3730.6	-0.03078235
550.79	0.17407941		1080.79	-0.01463777		1610.78	0.00908218		2140.78	-0.01060136		2670.77	0.02248003		3200.77	0.01782169		3730.8	-0.03024171
550.99	0.17449165		1080.99	-0.01500391		1610.98	0.00915515		2140.98	-0.0112072		2670.97	0.02279461		3200.97	0.01682383		3731	-0.02971954
551.19	0.17472758		1081.19	-0.01477579		1611.18	0.00798115		2141.18	-0.01189217		2671.17	0.02280593		3201.17	0.01690928		3731.2	-0.03062666
551.39	0.17503467		1081.39	-0.01413125		1611.38	0.00825243		2141.38	-0.01085549		2671.37	0.02402552		3201.37	0.01704066		3731.4	-0.03065987
551.59	0.17501689		1081.59	-0.01382481		1611.58	0.00892141		2141.58	-0.01093491		2671.57	0.0244952		3201.57	0.01826257		3731.6	-0.03036823
551.79	0.1748466		1081.79	-0.0141918		1611.78	0.00962683		2141.78	-0.010322		2671.77	0.02487043		3201.77	0.01845517		3731.8	-0.03070679
551.99	0.17477168		1081.99	-0.01410104		1611.98	0.00968275		2141.98	-0.01066037		2671.97	0.02561542		3201.97	0.01809026		3732	-0.03061735
552.19	0.17488508		1082.19	-0.01310574		1612.18	0.00974623		2142.18	-0.0097511		2672.17	0.02624725		3202.17	0.01788424		3732.2	-0.03000111
552.39	0.17480268		1082.39	-0.01270193		1612.38	0.00949009		2142.38	-0.01036883		2672.37	0.02560284		3202.37	0.01740931		3732.4	-0.02991495
552.59	0.17559599		1082.59	-0.01286013		1612.58	0.00893428		2142.58	-0.01084692		2672.57	0.02625107		3202.57	0.01787177		3732.6	-0.03007824
552.79	0.17565905		1082.79	-0.01281108		1612.78	0.00870525		2142.78	-0.01144958		2672.77	0.02606524		3202.77	0.01739632		3732.8	-0.03034109
552.99	0.17448519		1082.99	-0.0132885		1612.98	0.00821711		2142.98	-0.01202332		2672.97	0.02494139		3202.97	0.01763772		3733	-0.03066518
553.19	0.17425173		1083.19	-0.01334466		1613.18	0.00829047		2143.18	-0.01259061		2673.17	0.02500251		3203.17	0.0173851		3733.2	-0.03054843
553.39	0.1739332		1083.39	-0.01321415		1613.38	0.00802405		2143.38	-0.01359481		2673.37	0.02431384		3203.37	0.0175768		3733.4	-0.03113261
553.59	0.17345317		1083.59	-0.01355163		1613.58	0.0081089		2143.58	-0.01424229		2673.57	0.02310508		3203.57	0.01793207		3733.6	-0.03174895
553.79	0.17192555		1083.79	-0.01484631		1613.78	0.0074179		2143.78	-0.01452764		2673.77	0.02179597		3203.77	0.01724507		3733.8	-0.03202791
553.99	0.17149938		1083.99	-0.01517184		1613.98	0.00636539		2143.98	-0.01396045		2673.97	0.02153137		3203.97	0.01752149		3734	-0.03149591
554.19	0.17221213		1084.19	-0.01577603		1614.18	0.00627941		2144.18	-0.0150382		2674.17	0.01986881		3204.17	0.01749855		3734.2	-0.03153747
554.39	0.17237196		1084.39	-0.01606737		1614.38	0.00578244		2144.38	-0.0148984		2674.37	0.01878088		3204.37	0.01734294		3734.4	-0.0303876
554.59	0.17237665		1084.59	-0.01548721		1614.58	0.00563431		2144.58	-0.01567058		2674.57	0.01826279		3204.57	0.01632993		3734.6	-0.029841
554.79	0.17336365		1084.79	-0.01605608		1614.78	0.00648476		2144.78	-0.01585782		2674.77	0.01788263		3204.77	0.01604353		3734.8	-0.02949211
554.99	0.17290799		1084.99	-0.01562378		1614.98	0.00567134		2144.98	-0.01569082		2674.97	0.01828668		3204.97	0.01625826		3735	-0.02947114
555.19	0.17237785		1085.19	-0.01531995		1615.18	0.00590572		2145.18	-0.01545787		2675.17	0.01803041		3205.17	0.01659134		3735.2	-0.03000024
555.39	0.17218935		1085.39	-0.01502441		1615.38	0.00710769		2145.38	-0.01357914		2675.37	0.01875258		3205.37	0.01731551		3735.4	-0.02944998
555.59	0.17223499		1085.59	-0.01413688		1615.58	0.00757383		2145.58	-0.01290329		2675.57	0.0185009		3205.57	0.01776738		3735.6	-0.02983499
555.79	0.17204492		1085.79	-0.01326397		1615.78	0.00831977		2145.78	-0.01233884		2675.77	0.01899395		3205.77	0.01711955		3735.8	-0.03001785
555.99	0.17156653		1085.99	-0.01298347		1615.98	0.00895094		2145.98	-0.01215511		2675.97	0.01886642		3205.97	0.0168713		3736	-0.03023736
556.19	0.17135901		1086.19	-0.01260573		1616.18	0.00987565		2146.18	-0.01160244		2676.17	0.01965448		3206.17	0.01612602		3736.2	-0.03008478
556.39	0.17156186		1086.39	-0.01324093		1616.38	0.00936328		2146.38	-0.0121174		2676.37	0.02061843		3206.37	0.01523647		3736.4	-0.03128693
556.59	0.17131593		1086.59	-0.01306248		1616.58	0.00969952		2146.58	-0.01173859		2676.57	0.02127053		3206.57	0.01503167		3736.6	-0.03198169
556.79	0.17077508		1086.79	-0.01270237		1616.78	0.01091083		2146.78	-0.01200847		2676.77	0.02188153		3206.77	0.01470313		3736.8	-0.03272374
556.99	0.17015901		1086.99	-0.01283524		1616.98	0.01093917		2146.98	-0.01268072		2676.97	0.0212234		3206.97	0.01464784		3737	-0.03355904
557.19	0.1702616		1087.19	-0.01285863		1617.18	0.01147021		2147.18	-0.01329256		2677.17	0.02122172		3207.17	0.01512262		3737.2	-0.03406411
557.39	0.16993189		1087.39	-0.01307557		1617.38	0.01074229		2147.38	-0.01296135		2677.37	0.02052438		3207.37	0.01571025		3737.4	-0.0348833
557.59	0.16955418		1087.59	-0.0139266		1617.58	0.00972011		2147.58	-0.01348422		2677.57	0.01997666		3207.57	0.01566112		3737.6	-0.03501711
557.79	0.17060264		1087.79	-0.01493414		1617.78	0.00813827		2147.78	-0.01428158		2677.77	0.01925574		3207.77	0.01568625		3737.8	-0.03438205
557.99	0.17192471		1087.99	-0.01498866		1617.98	0.00767629		2147.98	-0.01465512		2677.97	0.01943419		3207.97	0.01606321		3738	-0.03453183
558.19	0.17285174		1088.19	-0.01521478		1618.18	0.00709612		2148.18	-0.01595769		2678.17	0.0187715		3208.17	0.01593408		3738.2	-0.03406714
558.39	0.17325043		1088.39	-0.0152159		1618.38	0.00683117		2148.38	-0.01634597		2678.37	0.01863319		3208.37	0.01626826		3738.4	-0.03361035
558.59	0.17345593		1088.59	-0.01520007		1618.58	0.00663336		2148.58	-0.01697471		2678.57	0.01906629		3208.57	0.01671488		3738.6	-0.03383949
558.79	0.17448313		1088.79	-0.01605313		1618.78	0.00646887		2148.78	-0.01703574		2678.77	0.01921616		3208.77	0.01717834		3738.8	-0.03395121
558.99	0.17400973		1088.99	-0.01570553		1618.98	0.00604588		2148.98	-0.01725131		2678.97	0.01948597		3208.97	0.01774817		3739	-0.03367297
559.19	0.17406076		1089.19	-0.01596156		1619.18	0.00685259		2149.18	-0.01689088		2679.17	0.01938382		3209.17	0.0178732		3739.2	-0.03387277
559.39	0.17379916		1089.39	-0.01563655		1619.38	0.00699058		2149.38	-0.01647443		2679.37	0.01983979		3209.37	0.01813753		3739.4	-0.03353117
559.59	0.17363756		1089.59	-0.01566881		1619.58	0.00758296		2149.58	-0.01685844		2679.57	0.01999471		3209.57	0.01805488		3739.6	-0.03372612
559.79	0.17280991		1089.79	-0.01577019		1619.78	0.00831636		2149.78	-0.01749424		2679.77	0.02099242		3209.77	0.01833182		3739.8	-0.03331701
