# Supplementary material for: Functional development of a V3/glycan-specific broadly neutralizing antibody isolated from a case of HIV superinfection
Source: eLife journal article supplement (doi:10.7554/elife.68110), 2021-07-15
Supplement: fig2-data2 [file D9.xls]

Vers 3.43 Data Simulation
Conc1	6.25E-08	6.25E-08	6.25E-08	6.25E-08	2.5E-07	2.5E-07	2.5E-07	2.5E-07
Start1	199.99	729.99	1259.98	1789.99	2319.98	2850.01	3380	3910
Stop1	559.79	1089.79	1619.78	2149.79	2679.78	3209.81	3739.8	4269.8
Time1	Data1	Sim1	Time2	Data2	Sim2	Time3	Data3	Sim3	Time4	Data4	Sim4	Time5	Data5	Sim5	Time6	Data6	Sim6	Time7	Data7	Sim7	Time8	Data8	Sim8
199.99	0.00814715		729.99	-0.0031442		1259.98	-0.00060776		1789.99	0.00035765		2319.98	0.001385		2850.01	-0.0016719		3380	0.0105141		3910	-0.00583273
200.19	0.00762141		730.19	-0.00373164		1260.18	-0.0000642		1790.19	-0.00105284		2320.18	0.00082469		2850.21	-0.0019176		3380.2	0.01022958		3910.2	-0.00532542
200.39	0.0069102		730.39	-0.00320209		1260.38	0.00023467		1790.39	-0.00175653		2320.38	0.00059108		2850.41	-0.00187879		3380.4	0.0098003		3910.4	-0.00502376
200.59	0.00608576		730.59	-0.00216363		1260.58	0.00116353		1790.59	-0.00266134		2320.58	0.00088362		2850.61	-0.00245464		3380.6	0.00847832		3910.6	-0.00446132
200.79	0.0052461		730.79	-0.00130262		1260.78	0.00129468		1790.79	-0.00308011		2320.78	0.0014102		2850.81	-0.00198665		3380.8	0.00813871		3910.8	-0.00402711
200.99	0.00454909		730.99	-0.00115897		1260.98	0.00198073		1790.99	-0.00360117		2320.98	0.00156042		2851.01	-0.00175402		3381	0.0082033		3911	-0.0036166
201.19	0.00405322		731.19	-0.00070714		1261.18	0.00234558		1791.19	-0.0043741		2321.18	0.00125898		2851.21	-0.00164699		3381.2	0.00827119		3911.2	-0.003757
201.39	0.00324177		731.39	-0.00063546		1261.38	0.00254412		1791.39	-0.0050951		2321.38	0.0011595		2851.41	-0.00184285		3381.4	0.00790057		3911.4	-0.00400612
201.59	0.00305037		731.59	-0.00142235		1261.58	0.00213307		1791.59	-0.00472028		2321.58	0.00174959		2851.61	-0.00148565		3381.6	0.00779123		3911.6	-0.00426214
201.79	0.00303255		731.79	-0.00191731		1261.78	0.00180389		1791.79	-0.00467244		2321.78	0.00195324		2851.81	-0.00205838		3381.8	0.00782204		3911.8	-0.00441556
201.99	0.00265621		731.99	-0.00221535		1261.98	0.00153234		1791.99	-0.00436629		2321.98	0.00265254		2852.01	-0.0025184		3382	0.00835274		3912	-0.00410936
202.19	0.0029562		732.19	-0.00295412		1262.18	0.00139287		1792.19	-0.003964		2322.18	0.00296443		2852.21	-0.00296315		3382.2	0.00892691		3912.2	-0.00472291
202.39	0.00420212		732.39	-0.0035253		1262.38	0.00106353		1792.39	-0.00372406		2322.38	0.00295564		2852.41	-0.00338296		3382.4	0.00987453		3912.4	-0.00493134
202.59	0.00482918		732.59	-0.00368935		1262.58	0.00040423		1792.59	-0.00417297		2322.58	0.00288636		2852.61	-0.00424761		3382.6	0.01164678		3912.6	-0.00500059
202.79	0.00532748		732.79	-0.00336758		1262.78	0.00009324		1792.79	-0.00408666		2322.78	0.00196902		2852.81	-0.00437737		3382.8	0.01115681		3912.8	-0.0056394
202.99	0.00629413		732.99	-0.00334651		1262.98	0.00007105		1792.99	-0.00448694		2322.98	0.00197449		2853.01	-0.00404126		3383	0.01249425		3913	-0.00596432
203.19	0.00726667		733.19	-0.00324237		1263.18	-0.00042207		1793.19	-0.00373365		2323.18	0.00274461		2853.21	-0.00344847		3383.2	0.0135248		3913.2	-0.00578181
203.39	0.00823109		733.39	-0.0032516		1263.38	0.00023514		1793.39	-0.00364258		2323.38	0.00290816		2853.41	-0.00333372		3383.4	0.01314829		3913.4	-0.00661523
203.59	0.00874193		733.59	-0.00310864		1263.58	0.00038901		1793.59	-0.00352947		2323.58	0.00205173		2853.61	-0.00234027		3383.6	0.01224775		3913.6	-0.00591546
203.79	0.00930409		733.79	-0.00247768		1263.78	0.00163562		1793.79	-0.00442214		2323.78	0.00102022		2853.81	-0.00265611		3383.8	0.01233784		3913.8	-0.00511406
203.99	0.01027101		733.99	-0.00261246		1263.98	0.00212204		1793.99	-0.0046285		2323.98	0.00148115		2854.01	-0.00194441		3384	0.01207416		3914	-0.00450799
204.19	0.01196086		734.19	-0.00194532		1264.18	0.0030742		1794.19	-0.00439475		2324.18	0.00142698		2854.21	-0.00286924		3384.2	0.01242787		3914.2	-0.00395082
204.39	0.01275246		734.39	-0.00089366		1264.38	0.00415357		1794.39	-0.00410592		2324.38	0.00170044		2854.41	-0.00301118		3384.4	0.01142796		3914.4	-0.00380355
204.59	0.01293898		734.59	0.00031652		1264.58	0.00525624		1794.59	-0.00406634		2324.58	0.00335442		2854.61	-0.00365401		3384.6	0.01004513		3914.6	-0.00419813
204.79	0.01362941		734.79	0.00066609		1264.78	0.00545506		1794.79	-0.00453375		2324.78	0.00376931		2854.81	-0.00318999		3384.8	0.0095438		3914.8	-0.00409115
204.99	0.01442203		734.99	0.00033507		1264.98	0.00667712		1794.99	-0.00479467		2324.98	0.003329		2855.01	-0.00351341		3385	0.00890173		3915	-0.00489275
205.19	0.01516125		735.19	0.00066587		1265.18	0.00716085		1795.19	-0.00538316		2325.18	0.00313041		2855.21	-0.0043531		3385.2	0.00755592		3915.2	-0.0059716
205.39	0.01576157		735.39	-0.00008615		1265.38	0.00797618		1795.39	-0.00502268		2325.38	0.00373965		2855.41	-0.00485902		3385.4	0.00713235		3915.4	-0.0066611
205.59	0.01617737		735.59	-0.00181384		1265.58	0.00761894		1795.59	-0.00492017		2325.58	0.00411947		2855.61	-0.00481887		3385.6	0.0071623		3915.6	-0.00659607
205.79	0.01558948		735.79	-0.00215598		1265.78	0.00783064		1795.79	-0.00503909		2325.78	0.00404538		2855.81	-0.00565245		3385.8	0.00645089		3915.8	-0.0063707
205.99	0.01547725		735.99	-0.00158966		1265.98	0.00799379		1795.99	-0.00472707		2325.98	0.00467842		2856.01	-0.00558934		3386	0.00613412		3916	-0.00655272
206.19	0.01596853		736.19	-0.00151711		1266.18	0.00712583		1796.19	-0.00483272		2326.18	0.0038595		2856.21	-0.00543036		3386.2	0.00552576		3916.2	-0.0079444
206.39	0.01649064		736.39	-0.00192059		1266.38	0.00630701		1796.39	-0.00493035		2326.38	0.00378915		2856.41	-0.00492148		3386.4	0.00596232		3916.4	-0.00922226
206.59	0.01633732		736.59	-0.00190202		1266.58	0.00496461		1796.59	-0.00504638		2326.58	0.00406336		2856.61	-0.00446531		3386.6	0.00643911		3916.6	-0.01022334
206.79	0.01743558		736.79	-0.00186958		1266.78	0.00383603		1796.79	-0.00522122		2326.78	0.00406795		2856.81	-0.00337174		3386.8	0.00613855		3916.8	-0.01016973
206.99	0.01691541		736.99	-0.00263532		1266.98	0.00375558		1796.99	-0.00609382		2326.98	0.00338101		2857.01	-0.00285754		3387	0.00649968		3917	-0.00970811
207.19	0.01716121		737.19	-0.00248712		1267.18	0.00338114		1797.19	-0.00529638		2327.18	0.00342725		2857.21	-0.00256436		3387.2	0.00631363		3917.2	-0.00983276
207.39	0.01651651		737.39	-0.00239828		1267.38	0.00301469		1797.39	-0.00546152		2327.38	0.00264702		2857.41	-0.00260231		3387.4	0.00622236		3917.4	-0.01026986
207.59	0.01658432		737.59	-0.00186126		1267.58	0.00256831		1797.59	-0.0058898		2327.58	0.00210147		2857.61	-0.0022922		3387.6	0.00689862		3917.6	-0.00927302
207.79	0.01733001		737.79	-0.00108353		1267.78	0.00282749		1797.79	-0.0069286		2327.78	0.00189285		2857.81	-0.00157433		3387.8	0.00805065		3917.8	-0.00885145
207.99	0.01790201		737.99	-0.00056263		1267.98	0.00269864		1797.99	-0.00702974		2327.98	0.00251934		2858.01	-0.00187587		3388	0.00785756		3918	-0.00740267
208.19	0.01899609		738.19	-0.0000806		1268.18	0.0023859		1798.19	-0.00696263		2328.18	0.00319005		2858.21	-0.0017485		3388.2	0.00874911		3918.2	-0.00631375
208.39	0.01994188		738.39	0.00018187		1268.38	0.00333803		1798.39	-0.00741422		2328.38	0.00318243		2858.41	-0.00126785		3388.4	0.00864777		3918.4	-0.00674252
208.59	0.02084922		738.59	0.00053102		1268.58	0.00401285		1798.59	-0.00792226		2328.58	0.00421206		2858.61	-0.00182695		3388.6	0.00892206		3918.6	-0.00682157
208.79	0.02263512		738.79	0.00048829		1268.78	0.00475874		1798.79	-0.00850834		2328.78	0.00361573		2858.81	-0.00152463		3388.8	0.00922215		3918.8	-0.00567312
208.99	0.02456941		738.99	-0.00025405		1268.98	0.00598733		1798.99	-0.00802732		2328.98	0.00393674		2859.01	-0.00153125		3389	0.01014267		3919	-0.00595857
209.19	0.02620654		739.19	-0.00063004		1269.18	0.00657694		1799.19	-0.00738878		2329.18	0.00413439		2859.21	-0.00167653		3389.2	0.01063333		3919.2	-0.00602034
209.39	0.02730549		739.39	-0.00222797		1269.38	0.00779972		1799.39	-0.00696787		2329.38	0.00406736		2859.41	-0.00112851		3389.4	0.01139257		3919.4	-0.00574913
209.59	0.02744167		739.59	-0.00355243		1269.58	0.00776962		1799.59	-0.00685727		2329.58	0.00407162		2859.61	-0.00093295		3389.6	0.0110658		3919.6	-0.0053438
209.79	0.0284252		739.79	-0.00311931		1269.78	0.00879574		1799.79	-0.00628238		2329.78	0.00465329		2859.81	-0.00089912		3389.8	0.01019345		3919.8	-0.00543367
209.99	0.02916978		739.99	-0.00252856		1269.98	0.00941452		1799.99	-0.00534341		2329.98	0.00432944		2860.01	-0.00010907		3390	0.00997891		3920	-0.00597779
210.19	0.02955084		740.19	-0.00271985		1270.18	0.00927043		1800.19	-0.00588592		2330.18	0.00336103		2860.21	0.00026309		3390.2	0.00989778		3920.2	-0.00685556
210.39	0.02952243		740.39	-0.00350836		1270.38	0.00956034		1800.39	-0.00551789		2330.38	0.00345699		2860.41	0.00001967		3390.4	0.00991601		3920.4	-0.0072431
210.59	0.0302996		740.59	-0.00361187		1270.58	0.00869013		1800.59	-0.00642009		2330.58	0.00423077		2860.61	-0.0005149		3390.6	0.01021762		3920.6	-0.00760107
210.79	0.03040711		740.79	-0.00330658		1270.78	0.00809129		1800.79	-0.00676594		2330.78	0.0049977		2860.81	-0.00140392		3390.8	0.00907241		3920.8	-0.00729771
210.99	0.0288105		740.99	-0.00333513		1270.98	0.00729228		1800.99	-0.0079227		2330.98	0.00427141		2861.01	-0.00277036		3391	0.00848649		3921	-0.00751717
211.19	0.02992848		741.19	-0.0023694		1271.18	0.00647167		1801.19	-0.00749157		2331.18	0.00524522		2861.21	-0.00369003		3391.2	0.00850439		3921.2	-0.00763611
211.39	0.02929175		741.39	-0.00168168		1271.38	0.00637475		1801.39	-0.00829565		2331.38	0.00558834		2861.41	-0.00379465		3391.4	0.00874227		3921.4	-0.00690125
211.59	0.02938699		741.59	-0.00083032		1271.58	0.0059456		1801.59	-0.0084561		2331.58	0.00633147		2861.61	-0.00374173		3391.6	0.00923458		3921.6	-0.00659639
211.79	0.02998148		741.79	0.00017924		1271.78	0.00544562		1801.79	-0.00866622		2331.78	0.00656053		2861.81	-0.00287989		3391.8	0.00880299		3921.8	-0.00717134
211.99	0.03023294		741.99	0.00026528		1271.98	0.00498905		1801.99	-0.00844357		2331.98	0.00706283		2862.01	-0.00321225		3392	0.00915772		3922	-0.00677535
212.19	0.03125801		742.19	0.00059272		1272.18	0.00436651		1802.19	-0.00828399		2332.18	0.00838164		2862.21	-0.00245595		3392.2	0.01012078		3922.2	-0.0059912
212.39	0.03156729		742.39	0.0018818		1272.38	0.00481098		1802.39	-0.007369		2332.38	0.00834553		2862.41	-0.00235859		3392.4	0.01040427		3922.4	-0.00623721
212.59	0.03188237		742.59	0.00218169		1272.58	0.0048181		1802.59	-0.00647414		2332.58	0.00853251		2862.61	-0.00236378		3392.6	0.01124399		3922.6	-0.00542666
212.79	0.03282417		742.79	0.00251977		1272.78	0.00459456		1802.79	-0.00581453		2332.78	0.00832409		2862.81	-0.00169965		3392.8	0.01144443		3922.8	-0.00478532
212.99	0.03373262		742.99	0.00199205		1272.98	0.00526216		1802.99	-0.0043387		2332.98	0.0082185		2863.01	-0.0017606		3393	0.01125361		3923	-0.00533002
213.19	0.03414033		743.19	0.00194354		1273.18	0.00541864		1803.19	-0.00316669		2333.18	0.00742621		2863.21	-0.00135541		3393.2	0.01048634		3923.2	-0.00555001
213.39	0.03437467		743.39	0.00059304		1273.38	0.00602095		1803.39	-0.00340061		2333.38	0.00713391		2863.41	-0.00042444		3393.4	0.00994456		3923.4	-0.00597859
213.59	0.03492224		743.59	0.00013139		1273.58	0.00607345		1803.59	-0.00274583		2333.58	0.00760902		2863.61	-0.00016914		3393.6	0.01006081		3923.6	-0.00672757
213.79	0.03658998		743.79	0.00043158		1273.78	0.00709947		1803.79	-0.00199561		2333.78	0.00678614		2863.81	-0.00018885		3393.8	0.00985024		3923.8	-0.00673201
213.99	0.03718656		743.99	-0.00038361		1273.98	0.00705004		1803.99	-0.00087439		2333.98	0.00513936		2864.01	0.00022903		3394	0.01000161		3924	-0.00667169
214.19	0.03839296		744.19	-0.00071209		1274.18	0.00721141		1804.19	-0.00147669		2334.18	0.00465409		2864.21	-0.0003637		3394.2	0.00928288		3924.2	-0.00723823
214.39	0.03854466		744.39	-0.00064784		1274.38	0.00648929		1804.39	-0.00233487		2334.38	0.00468616		2864.41	-0.00173992		3394.4	0.00890442		3924.4	-0.00773058
214.59	0.03913873		744.59	-0.00039793		1274.58	0.00566664		1804.59	-0.00413641		2334.58	0.00570995		2864.61	-0.00227825		3394.6	0.00903222		3924.6	-0.00802399
214.79	0.03960234		744.79	-0.00028072		1274.78	0.00520984		1804.79	-0.00472535		2334.78	0.00552978		2864.81	-0.00297697		3394.8	0.00780804		3924.8	-0.0083268
214.99	0.04061328		744.99	-0.00100363		1274.98	0.00411083		1804.99	-0.00644354		2334.98	0.00538372		2865.01	-0.00334326		3395	0.00841599		3925	-0.0082563
215.19	0.04213478		745.19	-0.00101302		1275.18	0.00496133		1805.19	-0.00621696		2335.18	0.00618383		2865.21	-0.00327415		3395.2	0.00811139		3925.2	-0.00784469
215.39	0.04260754		745.39	-0.00051087		1275.38	0.0053993		1805.39	-0.00693917		2335.38	0.00682676		2865.41	-0.00309842		3395.4	0.00821928		3925.4	-0.00661312
215.59	0.04267296		745.59	-0.00020026		1275.58	0.00537105		1805.59	-0.00749872		2335.58	0.00701205		2865.61	-0.00230102		3395.6	0.00907821		3925.6	-0.00715765
215.79	0.0433405		745.79	0.00026103		1275.78	0.00546412		1805.79	-0.00820539		2335.78	0.00682425		2865.81	-0.00243204		3395.8	0.00890654		3925.8	-0.00768606
215.99	0.04417134		745.99	0.00013494		1275.98	0.00531556		1805.99	-0.00880957		2335.98	0.00737323		2866.01	-0.00317877		3396	0.00908767		3926	-0.00711098
216.19	0.04486722		746.19	0.00086213		1276.18	0.00520576		1806.19	-0.00882454		2336.18	0.00848286		2866.21	-0.0032735		3396.2	0.00928502		3926.2	-0.00614056
216.39	0.04478214		746.39	0.00129986		1276.38	0.00615882		1806.39	-0.00790671		2336.38	0.00822861		2866.41	-0.00333795		3396.4	0.00961207		3926.4	-0.00649938
216.59	0.04496372		746.59	0.00190647		1276.58	0.00707347		1806.59	-0.00736751		2336.58	0.00754426		2866.61	-0.00322917		3396.6	0.00974463		3926.6	-0.0061548
216.79	0.04486169		746.79	0.00198583		1276.78	0.0074896		1806.79	-0.00771525		2336.78	0.00675599		2866.81	-0.00254439		3396.8	0.00915786		3926.8	-0.0061319
216.99	0.04436561		746.99	0.00177657		1276.98	0.00761483		1806.99	-0.00762326		2336.98	0.00724648		2867.01	-0.00208355		3397	0.00899448		3927	-0.00585977
217.19	0.04420506		747.19	0.00215163		1277.18	0.00726387		1807.19	-0.00825103		2337.18	0.00774757		2867.21	-0.00195428		3397.2	0.00902941		3927.2	-0.00596282
217.39	0.04422961		747.39	0.00255129		1277.38	0.00769767		1807.39	-0.00880261		2337.38	0.00782006		2867.41	-0.00163655		3397.4	0.00949419		3927.4	-0.00623216
217.59	0.04434601		747.59	0.00323395		1277.58	0.00775569		1807.59	-0.00798059		2337.58	0.00824813		2867.61	-0.00156079		3397.6	0.00972468		3927.6	-0.00703581
217.79	0.04464627		747.79	0.0039659		1277.78	0.00772322		1807.79	-0.00772118		2337.78	0.00776317		2867.81	-0.00177904		3397.8	0.00947046		3927.8	-0.0059395
217.99	0.04464697		747.99	0.00417855		1277.98	0.00735043		1807.99	-0.00730672		2337.98	0.00750664		2868.01	-0.00186513		3398	0.00967742		3928	-0.00553452
218.19	0.04501569		748.19	0.00524443		1278.18	0.00752286		1808.19	-0.00752105		2338.18	0.00794488		2868.21	-0.00221148		3398.2	0.00907358		3928.2	-0.00606184
218.39	0.04457762		748.39	0.00571777		1278.38	0.00706524		1808.39	-0.00776526		2338.38	0.00830306		2868.41	-0.00259856		3398.4	0.00940433		3928.4	-0.00658871
218.59	0.04571453		748.59	0.00515704		1278.58	0.00675805		1808.59	-0.00740452		2338.58	0.0081496		2868.61	-0.00196259		3398.6	0.00922895		3928.6	-0.00703994
218.79	0.04597799		748.79	0.00439376		1278.78	0.00597492		1808.79	-0.00728897		2338.78	0.00771412		2868.81	-0.00224852		3398.8	0.00921225		3928.8	-0.00800316
218.99	0.0465735		748.99	0.00439748		1278.98	0.00526409		1808.99	-0.00740656		2338.98	0.0082617		2869.01	-0.00181054		3399	0.00867124		3929	-0.00809857
219.19	0.04715438		749.19	0.0042459		1279.18	0.00543797		1809.19	-0.00720706		2339.18	0.00813159		2869.21	-0.00171652		3399.2	0.00806883		3929.2	-0.00824519
219.39	0.04766025		749.39	0.00419462		1279.38	0.00528536		1809.39	-0.00735871		2339.38	0.00823321		2869.41	-0.00128174		3399.4	0.00858433		3929.4	-0.00833314
219.59	0.04785841		749.59	0.00427045		1279.58	0.00502584		1809.59	-0.00732393		2339.58	0.00759294		2869.61	-0.00065674		3399.6	0.0087986		3929.6	-0.00910263
219.79	0.04915506		749.79	0.00399129		1279.78	0.00488038		1809.79	-0.0071578		2339.78	0.00765498		2869.81	-0.00057274		3399.8	0.0078001		3929.8	-0.00900499
219.99	0.05084156		749.99	0.00408111		1279.98	0.00461057		1809.99	-0.00677881		2339.98	0.00768145		2870.01	-0.0002005		3400	0.0082042		3930	-0.00885982
220.19	0.05163857		750.19	0.00339853		1280.18	0.00486457		1810.19	-0.00681687		2340.18	0.00749024		2870.21	0.00010209		3400.2	0.00935389		3930.2	-0.00872328
220.39	0.05278329		750.39	0.00348839		1280.38	0.00549682		1810.39	-0.00656331		2340.38	0.00631131		2870.41	-0.00031843		3400.4	0.01026853		3930.4	-0.00882146
220.59	0.05273681		750.59	0.0037506		1280.58	0.00533231		1810.59	-0.00598536		2340.58	0.00530124		2870.61	0.00044733		3400.6	0.00997452		3930.6	-0.00881521
220.79	0.05301618		750.79	0.00365861		1280.78	0.00478653		1810.79	-0.00629999		2340.78	0.00500689		2870.81	0.00076129		3400.8	0.01077139		3930.8	-0.00800726
220.99	0.05390926		750.99	0.00299564		1280.98	0.00592696		1810.99	-0.00647248		2340.98	0.00556461		2871.01	-0.00041535		3401	0.01119561		3931	-0.00829402
221.19	0.05506795		751.19	0.00285063		1281.18	0.00651287		1811.19	-0.00576458		2341.18	0.00537812		2871.21	-0.00151927		3401.2	0.01121557		3931.2	-0.00878014
221.39	0.05566607		751.39	0.00310955		1281.38	0.00758892		1811.39	-0.00554448		2341.38	0.00485925		2871.41	-0.00074717		3401.4	0.01130083		3931.4	-0.00847469
221.59	0.05620862		751.59	0.00246106		1281.58	0.00803768		1811.59	-0.00543721		2341.58	0.00499073		2871.61	-0.00152063		3401.6	0.01098941		3931.6	-0.0085861
221.79	0.05734365		751.79	0.00149927		1281.78	0.0089975		1811.79	-0.00512579		2341.78	0.00482887		2871.81	-0.00267069		3401.8	0.01146924		3931.8	-0.0072376
221.99	0.05770215		751.99	0.00102961		1281.98	0.01016285		1811.99	-0.00469706		2341.98	0.00508098		2872.01	-0.0038411		3402	0.01144107		3932	-0.00762157
222.19	0.05838804		752.19	0.00076812		1282.18	0.011052		1812.19	-0.00455199		2342.18	0.00564292		2872.21	-0.0042367		3402.2	0.01084786		3932.2	-0.00746609
222.39	0.05835618		752.39	0.00029755		1282.38	0.01181665		1812.39	-0.00387387		2342.38	0.00625083		2872.41	-0.00468249		3402.4	0.01032548		3932.4	-0.00781143
222.59	0.05949363		752.59	0.00019845		1282.58	0.01141838		1812.59	-0.00347585		2342.58	0.00628375		2872.61	-0.00460719		3402.6	0.01046942		3932.6	-0.00777449
222.79	0.05975258		752.79	-0.00003999		1282.78	0.01119188		1812.79	-0.00334715		2342.78	0.00678094		2872.81	-0.00534908		3402.8	0.00996193		3932.8	-0.00752254
222.99	0.06058323		752.99	-0.00014788		1282.98	0.01100466		1812.99	-0.0031366		2342.98	0.00700486		2873.01	-0.00523037		3403	0.00930623		3933	-0.0076236
223.19	0.06059712		753.19	-0.0000033		1283.18	0.0106121		1813.19	-0.00305894		2343.18	0.00669388		2873.21	-0.00549078		3403.2	0.008847		3933.2	-0.00757816
223.39	0.06068278		753.39	0.00047846		1283.38	0.01051229		1813.39	-0.00239255		2343.38	0.00814755		2873.41	-0.00442756		3403.4	0.00842461		3933.4	-0.00755758
223.59	0.06141432		753.59	0.00163676		1283.58	0.00995092		1813.59	-0.00270934		2343.58	0.00923177		2873.61	-0.00400992		3403.6	0.00823844		3933.6	-0.00670171
223.79	0.06227937		753.79	0.00199349		1283.78	0.00978034		1813.79	-0.00332169		2343.78	0.00974916		2873.81	-0.00350882		3403.8	0.00810615		3933.8	-0.00633261
223.99	0.06304577		753.99	0.00323666		1283.98	0.00952612		1813.99	-0.00450157		2343.98	0.00959375		2874.01	-0.00319621		3404	0.00907873		3934	-0.00594555
224.19	0.06275699		754.19	0.00367672		1284.18	0.00980186		1814.19	-0.00475629		2344.18	0.00945938		2874.21	-0.00276767		3404.2	0.00932353		3934.2	-0.00583168
224.39	0.06299837		754.39	0.00542159		1284.38	0.00960892		1814.39	-0.00411639		2344.38	0.00884585		2874.41	-0.00263217		3404.4	0.00984081		3934.4	-0.00500815
224.59	0.06293187		754.59	0.00555323		1284.58	0.00879256		1814.59	-0.00367234		2344.58	0.00862752		2874.61	-0.0017383		3404.6	0.0101533		3934.6	-0.00491793
224.79	0.06366865		754.79	0.00628719		1284.78	0.00905107		1814.79	-0.00414661		2344.78	0.00799734		2874.81	-0.00110459		3404.8	0.01124734		3934.8	-0.00475663
224.99	0.06384473		754.99	0.00612636		1284.98	0.00979162		1814.99	-0.0037782		2344.98	0.00749551		2875.01	-0.0014517		3405	0.01185166		3935	-0.00501135
225.19	0.06357843		755.19	0.00639857		1285.18	0.00914413		1815.19	-0.00401049		2345.18	0.00731632		2875.21	-0.00161199		3405.2	0.01220356		3935.2	-0.00473174
225.39	0.06376812		755.39	0.00607884		1285.38	0.00919556		1815.39	-0.00464128		2345.38	0.00671334		2875.41	-0.00056374		3405.4	0.01298596		3935.4	-0.00384916
225.59	0.06375684		755.59	0.00607966		1285.58	0.00955303		1815.59	-0.00535928		2345.58	0.00614341		2875.61	-0.00131032		3405.6	0.01344114		3935.6	-0.0039352
225.79	0.0636114		755.79	0.00571928		1285.78	0.00994156		1815.79	-0.00543929		2345.78	0.0060394		2875.81	-0.00134511		3405.8	0.01457993		3935.8	-0.00335204
225.99	0.0635013		755.99	0.00529808		1285.98	0.00984354		1815.99	-0.00618897		2345.98	0.00649172		2876.01	-0.00116651		3406	0.01466351		3936	-0.00428516
226.19	0.06406568		756.19	0.00499408		1286.18	0.00916827		1816.19	-0.00598168		2346.18	0.00712932		2876.21	-0.00047758		3406.2	0.01468125		3936.2	-0.00422733
226.39	0.06397718		756.39	0.00458116		1286.38	0.00902135		1816.39	-0.00588398		2346.38	0.00739558		2876.41	-0.00076633		3406.4	0.01509657		3936.4	-0.00484461
226.59	0.06480646		756.59	0.00384502		1286.58	0.00832892		1816.59	-0.00518419		2346.58	0.00725146		2876.61	-0.00112663		3406.6	0.01512863		3936.6	-0.00608449
226.79	0.06546941		756.79	0.00292417		1286.78	0.00866368		1816.79	-0.00530212		2346.78	0.00741036		2876.81	-0.00266159		3406.8	0.01472218		3936.8	-0.00752604
226.99	0.06565141		756.99	0.00387814		1286.98	0.00875454		1816.99	-0.00566991		2346.98	0.00787166		2877.01	-0.00345921		3407	0.01422336		3937	-0.00821148
227.19	0.06599278		757.19	0.0042887		1287.18	0.00908838		1817.19	-0.00659827		2347.18	0.00871831		2877.21	-0.00271089		3407.2	0.01281743		3937.2	-0.00854966
227.39	0.06698955		757.39	0.00475532		1287.38	0.00923862		1817.39	-0.00618959		2347.38	0.01002448		2877.41	-0.00204381		3407.4	0.01180188		3937.4	-0.0086366
227.59	0.06757909		757.59	0.00510108		1287.58	0.00931854		1817.59	-0.00733487		2347.58	0.00995391		2877.61	-0.00204506		3407.6	0.0115969		3937.6	-0.0088317
227.79	0.06784336		757.79	0.00506118		1287.78	0.00971891		1817.79	-0.00723998		2347.78	0.01014711		2877.81	-0.00219178		3407.8	0.01136075		3937.8	-0.00912237
227.99	0.06900104		757.99	0.00613461		1287.98	0.01004593		1817.99	-0.00761517		2347.98	0.01066141		2878.01	-0.00184948		3408	0.0111735		3938	-0.00866404
228.19	0.07027722		758.19	0.00666334		1288.18	0.01060633		1818.19	-0.00646561		2348.18	0.00994001		2878.21	-0.00139597		3408.2	0.01147244		3938.2	-0.00797289
228.39	0.07082342		758.39	0.00738447		1288.38	0.01080705		1818.39	-0.00637117		2348.38	0.0092294		2878.41	-0.00057256		3408.4	0.01133897		3938.4	-0.00682336
228.59	0.07221457		758.59	0.00771343		1288.58	0.01054743		1818.59	-0.00678166		2348.58	0.00893909		2878.61	0.00026745		3408.6	0.01178689		3938.6	-0.0067351
228.79	0.07314963		758.79	0.00748473		1288.78	0.01105824		1818.79	-0.00666038		2348.78	0.00917108		2878.81	0.00101276		3408.8	0.01165092		3938.8	-0.0057992
228.99	0.07325747		758.99	0.0077818		1288.98	0.0115965		1818.99	-0.00638141		2348.98	0.0090055		2879.01	0.00109368		3409	0.01142704		3939	-0.00498921
229.19	0.07398303		759.19	0.00733277		1289.18	0.01246314		1819.19	-0.0069069		2349.18	0.00855172		2879.21	0.00093413		3409.2	0.01095636		3939.2	-0.00445829
229.39	0.07436146		759.39	0.00719941		1289.38	0.01289217		1819.39	-0.00712594		2349.38	0.00751347		2879.41	0.00210784		3409.4	0.01122157		3939.4	-0.00391027
229.59	0.07437821		759.59	0.00755872		1289.58	0.01393726		1819.59	-0.00734912		2349.58	0.00687939		2879.61	0.00201204		3409.6	0.01081012		3939.6	-0.00428591
229.79	0.07504468		759.79	0.00644473		1289.78	0.01407033		1819.79	-0.00674771		2349.78	0.00612799		2879.81	0.00099677		3409.8	0.01001751		3939.8	-0.00388477
229.99	0.07609495		759.99	0.00536488		1289.98	0.01411715		1819.99	-0.00664594		2349.98	0.00540101		2880.01	0.00108275		3410	0.00979199		3940	-0.00443202
230.19	0.07664683		760.19	0.0050409		1290.18	0.01517208		1820.19	-0.00597451		2350.18	0.00492824		2880.21	0.00070432		3410.2	0.0096765		3940.2	-0.00488216
230.39	0.07640151		760.39	0.00490123		1290.38	0.01593518		1820.39	-0.00580999		2350.38	0.00338382		2880.41	-0.00050995		3410.4	0.00992927		3940.4	-0.00599662
230.59	0.07657631		760.59	0.00414847		1290.58	0.01664442		1820.59	-0.0046861		2350.58	0.00384305		2880.61	-0.0009685		3410.6	0.00901299		3940.6	-0.00745077
230.79	0.07758064		760.79	0.00421618		1290.78	0.01736053		1820.79	-0.00547378		2350.78	0.0041105		2880.81	-0.00158015		3410.8	0.00935566		3940.8	-0.00801911
230.99	0.07768697		760.99	0.00514173		1290.98	0.01716561		1820.99	-0.00560343		2350.98	0.00468903		2881.01	-0.00121777		3411	0.00872059		3941	-0.0074739
231.19	0.07779359		761.19	0.00499679		1291.18	0.01668054		1821.19	-0.00492768		2351.18	0.00529533		2881.21	-0.00056816		3411.2	0.00869791		3941.2	-0.00809513
231.39	0.07803871		761.39	0.00487359		1291.38	0.01563284		1821.39	-0.00428447		2351.38	0.00647096		2881.41	-0.00204526		3411.4	0.00860126		3941.4	-0.00860251
231.59	0.07832108		761.59	0.00470372		1291.58	0.01515082		1821.59	-0.00471468		2351.58	0.00681115		2881.61	-0.00259761		3411.6	0.00990377		3941.6	-0.00892103
231.79	0.07903009		761.79	0.00425554		1291.78	0.01405307		1821.79	-0.00385676		2351.78	0.00735245		2881.81	-0.00270075		3411.8	0.01068762		3941.8	-0.00928208
231.99	0.07996537		761.99	0.004762		1291.98	0.01292052		1821.99	-0.00371777		2351.98	0.00745663		2882.01	-0.002046		3412	0.01166238		3942	-0.00925017
232.19	0.08021026		762.19	0.0051571		1292.18	0.01232842		1822.19	-0.00383411		2352.18	0.00701509		2882.21	-0.00107673		3412.2	0.01280393		3942.2	-0.00893379
232.39	0.0797612		762.39	0.00482239		1292.38	0.01117608		1822.39	-0.00457214		2352.38	0.00809328		2882.41	-0.0001123		3412.4	0.013696		3942.4	-0.00863576
232.59	0.07960168		762.59	0.00412138		1292.58	0.00977189		1822.59	-0.0050419		2352.58	0.00942383		2882.61	-0.00062908		3412.6	0.01474969		3942.6	-0.00901263
232.79	0.07949739		762.79	0.00331866		1292.78	0.00898927		1822.79	-0.00532519		2352.78	0.00960726		2882.81	-0.00020838		3412.8	0.01552196		3942.8	-0.00870828
232.99	0.07936823		762.99	0.00392551		1292.98	0.00865803		1822.99	-0.00512259		2352.98	0.0093095		2883.01	-0.00010978		3413	0.01661693		3943	-0.00893957
233.19	0.07882249		763.19	0.0036041		1293.18	0.00812049		1823.19	-0.00485034		2353.18	0.00990195		2883.21	-0.00030535		3413.2	0.01724011		3943.2	-0.00913785
233.39	0.07792473		763.39	0.00378904		1293.38	0.00880194		1823.39	-0.00536881		2353.38	0.00909813		2883.41	-0.00038169		3413.4	0.01732533		3943.4	-0.00935106
233.59	0.07840518		763.59	0.00409271		1293.58	0.00866623		1823.59	-0.00528923		2353.58	0.00894488		2883.61	-0.00081248		3413.6	0.01639198		3943.6	-0.00833196
233.79	0.07863185		763.79	0.00381451		1293.78	0.00884695		1823.79	-0.00522983		2353.78	0.00765247		2883.81	-0.00179488		3413.8	0.01560531		3943.8	-0.00820991
233.99	0.07906634		763.99	0.00449043		1293.98	0.00988589		1823.99	-0.00562786		2353.98	0.00666306		2884.01	-0.00133041		3414	0.01687417		3944	-0.00754575
234.19	0.07937976		764.19	0.00477754		1294.18	0.0111163		1824.19	-0.00552116		2354.18	0.00663945		2884.21	-0.00124645		3414.2	0.01630989		3944.2	-0.00785265
234.39	0.07976213		764.39	0.00468362		1294.38	0.01112869		1824.39	-0.00607457		2354.38	0.00624233		2884.41	-0.00125304		3414.4	0.01585366		3944.4	-0.00764043
234.59	0.08013997		764.59	0.00463598		1294.58	0.01230342		1824.59	-0.00560133		2354.58	0.00720856		2884.61	-0.00068465		3414.6	0.01463829		3944.6	-0.00798076
234.79	0.08127507		764.79	0.00539954		1294.78	0.01259686		1824.79	-0.00635223		2354.78	0.00721892		2884.81	-0.00107366		3414.8	0.01449941		3944.8	-0.00729125
234.99	0.08160415		764.99	0.0055493		1294.98	0.01272514		1824.99	-0.00583289		2354.98	0.00805523		2885.01	-0.00130985		3415	0.01268197		3945	-0.00660313
235.19	0.08197691		765.19	0.00523578		1295.18	0.01295531		1825.19	-0.00584251		2355.18	0.00868135		2885.21	-0.00155394		3415.2	0.01156121		3945.2	-0.00709426
235.39	0.08255143		765.39	0.00419081		1295.38	0.01320286		1825.39	-0.00666929		2355.38	0.00860081		2885.41	-0.00201694		3415.4	0.01023965		3945.4	-0.00704211
235.59	0.08286794		765.59	0.0044997		1295.58	0.01348078		1825.59	-0.00705455		2355.58	0.0081333		2885.61	-0.00057844		3415.6	0.00954064		3945.6	-0.00685045
235.79	0.08293642		765.79	0.00519792		1295.78	0.01336025		1825.79	-0.00681018		2355.78	0.0075632		2885.81	-0.00020581		3415.8	0.00947437		3945.8	-0.00717342
235.99	0.08327682		765.99	0.00579676		1295.98	0.01351635		1825.99	-0.00651289		2355.98	0.00735753		2886.01	0.00088316		3416	0.00933538		3946	-0.00711478
236.19	0.0836676		766.19	0.00611323		1296.18	0.01279861		1826.19	-0.00738894		2356.18	0.00715059		2886.21	0.00119731		3416.2	0.0097295		3946.2	-0.00736454
236.39	0.08400728		766.39	0.00596605		1296.38	0.01234928		1826.39	-0.00740447		2356.38	0.0076633		2886.41	0.00135961		3416.4	0.00971844		3946.4	-0.00763687
236.59	0.08387698		766.59	0.00588055		1296.58	0.01180784		1826.59	-0.00678262		2356.58	0.00882748		2886.61	0.00136222		3416.6	0.00929992		3946.6	-0.00863403
236.79	0.08498848		766.79	0.00695303		1296.78	0.01142001		1826.79	-0.00602071		2356.78	0.00819549		2886.81	0.00250755		3416.8	0.00998719		3946.8	-0.00924105
236.99	0.08543719		766.99	0.00785321		1296.98	0.01083681		1826.99	-0.00455345		2356.98	0.00896002		2887.01	0.00238923		3417	0.01107119		3947	-0.00966317
237.19	0.08505996		767.19	0.00825761		1297.18	0.0107088		1827.19	-0.0041817		2357.18	0.00929558		2887.21	0.00274539		3417.2	0.01113817		3947.2	-0.01008377
237.39	0.08584649		767.39	0.0079508		1297.38	0.01129888		1827.39	-0.00555266		2357.38	0.00949284		2887.41	0.00247115		3417.4	0.01153899		3947.4	-0.00991735
237.59	0.08706338		767.59	0.0096185		1297.58	0.0105122		1827.59	-0.00603917		2357.58	0.00989875		2887.61	0.00280197		3417.6	0.01211468		3947.6	-0.00965761
237.79	0.08814642		767.79	0.00926682		1297.78	0.01074694		1827.79	-0.00625841		2357.78	0.00954535		2887.81	0.00216791		3417.8	0.01280449		3947.8	-0.0102147
237.99	0.08952518		767.99	0.00989847		1297.98	0.01088117		1827.99	-0.0061906		2357.98	0.00987343		2888.01	0.00261208		3418	0.01391831		3948	-0.00930706
238.19	0.091052		768.19	0.00973314		1298.18	0.01065788		1828.19	-0.00609042		2358.18	0.01030898		2888.21	0.0024608		3418.2	0.01412504		3948.2	-0.00878127
238.39	0.09214732		768.39	0.00891233		1298.38	0.01141691		1828.39	-0.00627254		2358.38	0.01023641		2888.41	0.00188364		3418.4	0.01435547		3948.4	-0.00812579
238.59	0.09232648		768.59	0.00885719		1298.58	0.01122654		1828.59	-0.00580251		2358.58	0.01068945		2888.61	0.00147745		3418.6	0.01441988		3948.6	-0.00790856
238.79	0.09277709		768.79	0.00833609		1298.78	0.01090807		1828.79	-0.00600847		2358.78	0.01161615		2888.81	0.00093591		3418.8	0.01454055		3948.8	-0.00710054
238.99	0.09252517		768.99	0.00716723		1298.98	0.01108847		1828.99	-0.00555562		2358.98	0.01185182		2889.01	0.00053857		3419	0.01352479		3949	-0.00720477
239.19	0.09201133		769.19	0.00635866		1299.18	0.01053723		1829.19	-0.00590245		2359.18	0.01236437		2889.21	0.00001097		3419.2	0.01358425		3949.2	-0.00708136
239.39	0.09156362		769.39	0.0060813		1299.38	0.01123396		1829.39	-0.00604331		2359.38	0.01207119		2889.41	0.00000364		3419.4	0.01310061		3949.4	-0.00602762
239.59	0.09128332		769.59	0.00610043		1299.58	0.01209472		1829.59	-0.0065074		2359.58	0.01208751		2889.61	0.00022781		3419.6	0.01314678		3949.6	-0.00568468
239.79	0.09127197		769.79	0.00725378		1299.78	0.01279466		1829.79	-0.00657072		2359.78	0.01184237		2889.81	-0.00021557		3419.8	0.01367139		3949.8	-0.00574409
239.99	0.09152115		769.99	0.00797771		1299.98	0.0133454		1829.99	-0.00610014		2359.98	0.01229405		2890.01	0.00052995		3420	0.01288861		3950	-0.00528144
240.19	0.09179668		770.19	0.008801		1300.18	0.01350333		1830.19	-0.0061632		2360.18	0.01279322		2890.21	0.00055609		3420.2	0.01299777		3950.2	-0.00541343
240.39	0.0919803		770.39	0.00979141		1300.38	0.01424032		1830.39	-0.00581164		2360.38	0.01336889		2890.41	0.00104272		3420.4	0.0131354		3950.4	-0.00588131
240.59	0.09169811		770.59	0.00898001		1300.58	0.01429864		1830.59	-0.00514035		2360.58	0.01353849		2890.61	0.00127674		3420.6	0.0128741		3950.6	-0.00660418
240.79	0.09195082		770.79	0.00932962		1300.78	0.01464476		1830.79	-0.00493535		2360.78	0.01180741		2890.81	0.00158191		3420.8	0.01319902		3950.8	-0.00700457
240.99	0.09234877		770.99	0.0095614		1300.98	0.01471369		1830.99	-0.00429404		2360.98	0.01107204		2891.01	0.00145979		3421	0.01308403		3951	-0.00669272
241.19	0.09265063		771.19	0.00906053		1301.18	0.01557979		1831.19	-0.00458047		2361.18	0.01034746		2891.21	0.00160486		3421.2	0.01288047		3951.2	-0.00688017
241.39	0.09422382		771.39	0.00867013		1301.38	0.01668133		1831.39	-0.00465226		2361.38	0.01030448		2891.41	0.00129809		3421.4	0.01300915		3951.4	-0.00663577
241.59	0.09515842		771.59	0.00964103		1301.58	0.01701034		1831.59	-0.00415203		2361.58	0.00878625		2891.61	0.00139065		3421.6	0.01287081		3951.6	-0.00673514
241.79	0.09600946		771.79	0.00882206		1301.78	0.0175188		1831.79	-0.00395991		2361.78	0.00800409		2891.81	0.00061667		3421.8	0.01263269		3951.8	-0.00701087
241.99	0.09731328		771.99	0.00877934		1301.98	0.01783742		1831.99	-0.00354418		2361.98	0.00845646		2892.01	0.00084985		3422	0.01251868		3952	-0.00670026
242.19	0.09772905		772.19	0.00908865		1302.18	0.01832929		1832.19	-0.00356151		2362.18	0.00818695		2892.21	0.00085583		3422.2	0.01205047		3952.2	-0.00703648
242.39	0.09799816		772.39	0.00844427		1302.38	0.01760433		1832.39	-0.00377772		2362.38	0.00783248		2892.41	0.00034758		3422.4	0.01121302		3952.4	-0.0072603
242.59	0.09800873		772.59	0.00864019		1302.58	0.01594457		1832.59	-0.00360412		2362.58	0.00839881		2892.61	0.0005837		3422.6	0.01069809		3952.6	-0.00784346
242.79	0.09772624		772.79	0.00847384		1302.78	0.01583297		1832.79	-0.00287886		2362.78	0.0090014		2892.81	-0.00023128		3422.8	0.01068683		3952.8	-0.00750597
242.99	0.09748183		772.99	0.00828064		1302.98	0.01549519		1832.99	-0.00304663		2362.98	0.00963382		2893.01	-0.00069773		3423	0.01099991		3953	-0.00743709
243.19	0.09736827		773.19	0.00862966		1303.18	0.01478509		1833.19	-0.00371377		2363.18	0.01012571		2893.21	-0.00015065		3423.2	0.01125001		3953.2	-0.00643264
243.39	0.09774996		773.39	0.00941124		1303.38	0.01493483		1833.39	-0.00402082		2363.38	0.01044741		2893.41	0.00084064		3423.4	0.01149308		3953.4	-0.00561532
243.59	0.09837887		773.59	0.01003974		1303.58	0.01420727		1833.59	-0.00515354		2363.58	0.01073048		2893.61	0.00138676		3423.6	0.01182896		3953.6	-0.00617733
243.79	0.09892388		773.79	0.01200067		1303.78	0.01390254		1833.79	-0.00476489		2363.78	0.01172989		2893.81	0.001328		3423.8	0.01212895		3953.8	-0.00610681
243.99	0.0992		773.99	0.01289292		1303.98	0.01343209		1833.99	-0.00432455		2363.98	0.01245056		2894.01	0.00170754		3424	0.01227404		3954	-0.00591286
244.19	0.09983856		774.19	0.01333616		1304.18	0.01288759		1834.19	-0.00529445		2364.18	0.01371154		2894.21	0.00164198		3424.2	0.01353895		3954.2	-0.00603743
244.39	0.10049177		774.39	0.01329094		1304.38	0.01229588		1834.39	-0.00612069		2364.38	0.01423451		2894.41	0.00143111		3424.4	0.01441657		3954.4	-0.0066595
244.59	0.1006783		774.59	0.01226906		1304.58	0.01228107		1834.59	-0.00610186		2364.58	0.0133626		2894.61	0.00104208		3424.6	0.01394155		3954.6	-0.00647256
244.79	0.10116588		774.79	0.01218075		1304.78	0.01267426		1834.79	-0.00622638		2364.78	0.01212584		2894.81	0.00127419		3424.8	0.01433453		3954.8	-0.00620465
244.99	0.10272988		774.99	0.01225373		1304.98	0.01351999		1834.99	-0.00593213		2364.98	0.01108104		2895.01	0.00099175		3425	0.01361931		3955	-0.00579753
245.19	0.10381833		775.19	0.01147609		1305.18	0.01395549		1835.19	-0.00605281		2365.18	0.01146902		2895.21	0.0012367		3425.2	0.01401904		3955.2	-0.00600336
245.39	0.10456945		775.39	0.01140234		1305.38	0.01463812		1835.39	-0.00591081		2365.38	0.0120727		2895.41	0.00095924		3425.4	0.0140972		3955.4	-0.00591538
245.59	0.10505977		775.59	0.01144525		1305.58	0.01462157		1835.59	-0.00646202		2365.58	0.01169508		2895.61	0.00116986		3425.6	0.01411929		3955.6	-0.00690318
245.79	0.10565119		775.79	0.01134149		1305.78	0.01512223		1835.79	-0.00687379		2365.78	0.01167778		2895.81	0.00050105		3425.8	0.01334858		3955.8	-0.00719499
245.99	0.10614651		775.99	0.01164702		1305.98	0.0153829		1835.99	-0.00643137		2365.98	0.01226049		2896.01	0.00082989		3426	0.01306167		3956	-0.00671617
246.19	0.10631563		776.19	0.01231083		1306.18	0.01586453		1836.19	-0.00744001		2366.18	0.01167217		2896.21	0.00087076		3426.2	0.01176404		3956.2	-0.0072604
246.39	0.10656944		776.39	0.01177893		1306.38	0.01552106		1836.39	-0.00752492		2366.38	0.01140531		2896.41	0.00021888		3426.4	0.01125917		3956.4	-0.00738176
246.59	0.10586653		776.59	0.01144511		1306.58	0.01643676		1836.59	-0.00772608		2366.58	0.01179899		2896.61	0.00052791		3426.6	0.01100578		3956.6	-0.00765999
246.79	0.10561499		776.79	0.01120809		1306.78	0.0176264		1836.79	-0.00694989		2366.78	0.01169223		2896.81	0.00007167		3426.8	0.01215397		3956.8	-0.00717404
246.99	0.10556414		776.99	0.01125477		1306.98	0.01843885		1836.99	-0.00742461		2366.98	0.01181572		2897.01	0.00022143		3427	0.01227688		3957	-0.00694061
247.19	0.10561564		777.19	0.01192045		1307.18	0.01826411		1837.19	-0.00726674		2367.18	0.01137144		2897.21	0.00128265		3427.2	0.01248933		3957.2	-0.00587919
247.39	0.10653267		777.39	0.01159779		1307.38	0.01818367		1837.39	-0.00702812		2367.38	0.01189567		2897.41	0.00091392		3427.4	0.01304285		3957.4	-0.00642492
247.59	0.10707705		777.59	0.01160818		1307.58	0.01841514		1837.59	-0.00782641		2367.58	0.01196186		2897.61	0.00110472		3427.6	0.01319309		3957.6	-0.00655183
247.79	0.1071018		777.79	0.0124125		1307.78	0.01885646		1837.79	-0.00783306		2367.78	0.01335899		2897.81	0.00112113		3427.8	0.01344019		3957.8	-0.0062339
247.99	0.10635207		777.99	0.01231202		1307.98	0.01844533		1837.99	-0.00818252		2367.98	0.01387316		2898.01	0.00079619		3428	0.01330025		3958	-0.00615232
248.19	0.10723067		778.19	0.01279131		1308.18	0.0182119		1838.19	-0.00882342		2368.18	0.0148723		2898.21	0.00023963		3428.2	0.01328392		3958.2	-0.00638543
248.39	0.10812715		778.39	0.01247775		1308.38	0.0186352		1838.39	-0.00790223		2368.38	0.01402537		2898.41	0.00110566		3428.4	0.01380797		3958.4	-0.0061288
248.59	0.10842754		778.59	0.01208578		1308.58	0.01875325		1838.59	-0.00832026		2368.58	0.01264866		2898.61	0.00076774		3428.6	0.01338446		3958.6	-0.00529619
248.79	0.10919411		778.79	0.01152996		1308.78	0.01851219		1838.79	-0.00863351		2368.78	0.01162904		2898.81	0.00105873		3428.8	0.01285613		3958.8	-0.00567852
248.99	0.11022755		778.99	0.01143645		1308.98	0.01819568		1838.99	-0.00822531		2368.98	0.01124017		2899.01	0.00057608		3429	0.01191541		3959	-0.00515977
249.19	0.11042782		779.19	0.01090886		1309.18	0.0170692		1839.19	-0.00801932		2369.18	0.01137145		2899.21	0.00166107		3429.2	0.01195518		3959.2	-0.00540351
249.39	0.11057883		779.39	0.00995005		1309.38	0.01667658		1839.39	-0.00715117		2369.38	0.01094936		2899.41	0.00171868		3429.4	0.01174533		3959.4	-0.00560565
249.59	0.11092116		779.59	0.0085694		1309.58	0.01700622		1839.59	-0.00696421		2369.58	0.00976457		2899.61	0.0018722		3429.6	0.01103272		3959.6	-0.00643384
249.79	0.11088018		779.79	0.00901495		1309.78	0.01703646		1839.79	-0.00641077		2369.78	0.00911801		2899.81	0.00178088		3429.8	0.00996516		3959.8	-0.00581044
249.99	0.11132198		779.99	0.00921885		1309.98	0.01713745		1839.99	-0.00556799		2369.98	0.00956225		2900.01	0.00235414		3430	0.00977362		3960	-0.00614925
250.19	0.11159858		780.19	0.0081663		1310.18	0.01806643		1840.19	-0.00643393		2370.18	0.00925257		2900.21	0.00295849		3430.2	0.00912135		3960.2	-0.00756749
250.39	0.11150867		780.39	0.00739813		1310.38	0.01858858		1840.39	-0.00562481		2370.38	0.0086233		2900.41	0.00289974		3430.4	0.00850661		3960.4	-0.0076362
250.59	0.11156043		780.59	0.00696316		1310.58	0.01884498		1840.59	-0.00583832		2370.58	0.00910414		2900.61	0.00221519		3430.6	0.00930938		3960.6	-0.00764013
250.79	0.11233704		780.79	0.00716097		1310.78	0.01903824		1840.79	-0.00488139		2370.78	0.00973903		2900.81	0.00222193		3430.8	0.00955478		3960.8	-0.00694008
250.99	0.11270636		780.99	0.00757058		1310.98	0.01922417		1840.99	-0.00466305		2370.98	0.01015883		2901.01	0.00203131		3431	0.00930323		3961	-0.00709757
251.19	0.11300977		781.19	0.00811652		1311.18	0.01862349		1841.19	-0.00482083		2371.18	0.01055251		2901.21	0.00257018		3431.2	0.00985899		3961.2	-0.00721809
251.39	0.11386402		781.39	0.00825757		1311.38	0.01852275		1841.39	-0.00526139		2371.38	0.01103274		2901.41	0.00144837		3431.4	0.00992841		3961.4	-0.0081059
251.59	0.11343251		781.59	0.00793013		1311.58	0.01854278		1841.59	-0.00614974		2371.58	0.01170016		2901.61	0.00142685		3431.6	0.00980665		3961.6	-0.007815
251.79	0.11321919		781.79	0.00890143		1311.78	0.01834483		1841.79	-0.0057807		2371.78	0.01248666		2901.81	0.00127052		3431.8	0.00989346		3961.8	-0.00739517
251.99	0.11337339		781.99	0.00951601		1311.98	0.01739382		1841.99	-0.00586142		2371.98	0.01228867		2902.01	0.00006589		3432	0.01013097		3962	-0.00771073
252.19	0.11391633		782.19	0.01009452		1312.18	0.01749022		1842.19	-0.00556879		2372.18	0.01225173		2902.21	0.00017842		3432.2	0.01002666		3962.2	-0.0078521
252.39	0.11440024		782.39	0.01003421		1312.38	0.01795964		1842.39	-0.00534012		2372.38	0.01135121		2902.41	0.00052058		3432.4	0.01115267		3962.4	-0.00733733
252.59	0.11477692		782.59	0.01001491		1312.58	0.01691731		1842.59	-0.00625394		2372.58	0.01039116		2902.61	-0.00099784		3432.6	0.01148491		3962.6	-0.00795972
252.79	0.11444393		782.79	0.01070457		1312.78	0.01674414		1842.79	-0.00587599		2372.78	0.00995099		2902.81	-0.00127458		3432.8	0.01221378		3962.8	-0.00835416
252.99	0.1145677		782.99	0.01050973		1312.98	0.01740849		1842.99	-0.00521379		2372.98	0.00958709		2903.01	-0.00129046		3433	0.01292471		3963	-0.00814813
253.19	0.11514708		783.19	0.00952428		1313.18	0.01688497		1843.19	-0.00541259		2373.18	0.00820698		2903.21	-0.00033483		3433.2	0.01322581		3963.2	-0.00932212
253.39	0.11532196		783.39	0.00848929		1313.38	0.01687071		1843.39	-0.00527844		2373.38	0.00831042		2903.41	-0.00071727		3433.4	0.01281917		3963.4	-0.00967584
253.59	0.11502048		783.59	0.0090939		1313.58	0.01765422		1843.59	-0.0051904		2373.58	0.00866872		2903.61	-0.00088718		3433.6	0.01200478		3963.6	-0.00929203
253.79	0.11510984		783.79	0.01018819		1313.78	0.01714059		1843.79	-0.00462279		2373.78	0.01013359		2903.81	0.0001785		3433.8	0.0119496		3963.8	-0.00919963
253.99	0.11500962		783.99	0.01010425		1313.98	0.01760916		1843.99	-0.00493148		2373.98	0.01058142		2904.01	0.00104814		3434	0.01163009		3964	-0.00861698
254.19	0.11519114		784.19	0.00982095		1314.18	0.01808361		1844.19	-0.00607539		2374.18	0.01082437		2904.21	0.00183425		3434.2	0.01164555		3964.2	-0.00813164
254.39	0.1165328		784.39	0.01015729		1314.38	0.01871554		1844.39	-0.00666351		2374.38	0.0106582		2904.41	0.0017469		3434.4	0.01073086		3964.4	-0.00665285
254.59	0.11764064		784.59	0.01060243		1314.58	0.01927997		1844.59	-0.00670873		2374.58	0.01132277		2904.61	0.00175566		3434.6	0.01159493		3964.6	-0.00642553
254.79	0.11792859		784.79	0.01167389		1314.78	0.01973056		1844.79	-0.00606593		2374.78	0.01175278		2904.81	0.00223819		3434.8	0.01187369		3964.8	-0.00620976
254.99	0.11801021		784.99	0.01251161		1314.98	0.01958619		1844.99	-0.00674756		2374.98	0.01148737		2905.01	0.00250398		3435	0.01265398		3965	-0.00664557
255.19	0.11836203		785.19	0.0129332		1315.18	0.01849095		1845.19	-0.00691183		2375.18	0.01139844		2905.21	0.00252223		3435.2	0.01218927		3965.2	-0.00581389
255.39	0.11811965		785.39	0.01221182		1315.38	0.0183709		1845.39	-0.00693639		2375.38	0.01174856		2905.41	0.00145734		3435.4	0.01171577		3965.4	-0.00564373
255.59	0.1178185		785.59	0.01117047		1315.58	0.01844804		1845.59	-0.00710242		2375.58	0.01213927		2905.61	0.0017406		3435.6	0.01175614		3965.6	-0.0050382
255.79	0.11773883		785.79	0.01185402		1315.78	0.01934322		1845.79	-0.00668717		2375.78	0.0122661		2905.81	0.0024117		3435.8	0.0124728		3965.8	-0.0048762
255.99	0.11769976		785.99	0.01173487		1315.98	0.0192947		1845.99	-0.00730198		2375.98	0.01261914		2906.01	0.00240191		3436	0.01325632		3966	-0.00593751
256.19	0.11728684		786.19	0.01149967		1316.18	0.0197502		1846.19	-0.00716336		2376.18	0.01246115		2906.21	0.00271024		3436.2	0.01381715		3966.2	-0.00630048
256.39	0.11750763		786.39	0.01132878		1316.38	0.01970354		1846.39	-0.00816822		2376.38	0.01193664		2906.41	0.00229076		3436.4	0.01520047		3966.4	-0.00694836
256.59	0.11776785		786.59	0.01122827		1316.58	0.01964267		1846.59	-0.00870798		2376.58	0.01064681		2906.61	0.00231129		3436.6	0.01626441		3966.6	-0.00822642
256.79	0.11704749		786.79	0.01157458		1316.78	0.02043367		1846.79	-0.00922132		2376.78	0.01051466		2906.81	0.00246595		3436.8	0.01709921		3966.8	-0.00907809
256.99	0.11770055		786.99	0.01058633		1316.98	0.02119359		1846.99	-0.00931104		2376.98	0.01050182		2907.01	0.00259988		3437	0.01711623		3967	-0.00995861
257.19	0.11788605		787.19	0.01041412		1317.18	0.02048341		1847.19	-0.0096326		2377.18	0.01019683		2907.21	0.00322847		3437.2	0.01639407		3967.2	-0.01035687
257.39	0.11755814		787.39	0.01074125		1317.38	0.02066819		1847.39	-0.00919529		2377.38	0.01095553		2907.41	0.00298103		3437.4	0.01490678		3967.4	-0.01064405
257.59	0.11734977		787.59	0.01149504		1317.58	0.02128738		1847.59	-0.0088721		2377.58	0.0118698		2907.61	0.00318802		3437.6	0.01455937		3967.6	-0.00968502
257.79	0.11777445		787.79	0.0115205		1317.78	0.02162652		1847.79	-0.00904301		2377.78	0.01264885		2907.81	0.00298009		3437.8	0.01389342		3967.8	-0.00926839
257.99	0.11839012		787.99	0.01283482		1317.98	0.02259153		1847.99	-0.009208		2377.98	0.01204164		2908.01	0.00267397		3438	0.0129106		3968	-0.00872486
258.19	0.12054274		788.19	0.01363895		1318.18	0.0237977		1848.19	-0.00947034		2378.18	0.01222681		2908.21	0.00267878		3438.2	0.0125067		3968.2	-0.00875023
258.39	0.12155088		788.39	0.01344329		1318.38	0.02466094		1848.39	-0.00904026		2378.38	0.0118861		2908.41	0.00194834		3438.4	0.01231727		3968.4	-0.00776533
258.59	0.12244254		788.59	0.01405679		1318.58	0.02468662		1848.59	-0.00768458		2378.58	0.01175884		2908.61	0.00204931		3438.6	0.01214453		3968.6	-0.00766001
258.79	0.12282056		788.79	0.01436007		1318.78	0.02479802		1848.79	-0.00772322		2378.78	0.01286029		2908.81	0.00115273		3438.8	0.01223967		3968.8	-0.00751732
258.99	0.12414354		788.99	0.01430255		1318.98	0.02359031		1848.99	-0.00759412		2378.98	0.01256408		2909.01	0.00164592		3439	0.01209849		3969	-0.00654044
259.19	0.12483591		789.19	0.01372657		1319.18	0.02329567		1849.19	-0.0062394		2379.18	0.01241547		2909.21	0.00146922		3439.2	0.01094044		3969.2	-0.00604451
259.39	0.12541556		789.39	0.01243424		1319.38	0.02381605		1849.39	-0.00620282		2379.38	0.01267251		2909.41	0.00145499		3439.4	0.01093487		3969.4	-0.00597896
259.59	0.12561516		789.59	0.01229364		1319.58	0.02347833		1849.59	-0.00611828		2379.58	0.01308364		2909.61	0.00244267		3439.6	0.01114721		3969.6	-0.00676215
259.79	0.12606909		789.79	0.01152118		1319.78	0.023579		1849.79	-0.00580147		2379.78	0.01328944		2909.81	0.00305466		3439.8	0.01181034		3969.8	-0.0075297
259.99	0.12692479		789.99	0.0109062		1319.98	0.02328905		1849.99	-0.00675386		2379.98	0.01319008		2910.01	0.00240359		3440	0.01214059		3970	-0.00784209
260.19	0.12685643		790.19	0.0108702		1320.18	0.02236771		1850.19	-0.00651439		2380.18	0.01336777		2910.21	0.00270232		3440.2	0.01295098		3970.2	-0.00801339
260.39	0.12741169		790.39	0.01008575		1320.38	0.02193154		1850.39	-0.00692765		2380.38	0.01372734		2910.41	0.00249345		3440.4	0.01337173		3970.4	-0.00861405
260.59	0.12749111		790.59	0.0101182		1320.58	0.02144789		1850.59	-0.00723759		2380.58	0.01301987		2910.61	0.00304255		3440.6	0.013414		3970.6	-0.00890711
260.79	0.12721499		790.79	0.0109425		1320.78	0.02160895		1850.79	-0.00748978		2380.78	0.01367222		2910.81	0.00291361		3440.8	0.0135467		3970.8	-0.00932711
260.99	0.12700255		790.99	0.01116326		1320.98	0.02146122		1850.99	-0.00768509		2380.98	0.01304219		2911.01	0.00247378		3441	0.0134516		3971	-0.0091743
261.19	0.12646161		791.19	0.01155586		1321.18	0.02104075		1851.19	-0.00801902		2381.18	0.01309285		2911.21	0.00231806		3441.2	0.01268506		3971.2	-0.00851849
261.39	0.12716147		791.39	0.0117226		1321.38	0.02119919		1851.39	-0.00827436		2381.38	0.01338511		2911.41	0.00055194		3441.4	0.01197249		3971.4	-0.00890919
261.59	0.12766661		791.59	0.01265134		1321.58	0.02073745		1851.59	-0.00774686		2381.58	0.01395322		2911.61	-0.00025296		3441.6	0.01196731		3971.6	-0.00860665
261.79	0.12793549		791.79	0.01300269		1321.78	0.02130509		1851.79	-0.00713657		2381.78	0.01384056		2911.81	-0.00121519		3441.8	0.01100047		3971.8	-0.00844569
261.99	0.12808508		791.99	0.01370585		1321.98	0.02099127		1851.99	-0.0072018		2381.98	0.01380354		2912.01	-0.00182371		3442	0.01039117		3972	-0.00873295
262.19	0.12856278		792.19	0.01353022		1322.18	0.02120551		1852.19	-0.00764833		2382.18	0.01435757		2912.21	-0.00151546		3442.2	0.01034101		3972.2	-0.00823163
262.39	0.12862176		792.39	0.01390092		1322.38	0.02090721		1852.39	-0.00781424		2382.38	0.01382162		2912.41	-0.00124654		3442.4	0.01005209		3972.4	-0.00814488
262.59	0.12907386		792.59	0.01405999		1322.58	0.0201125		1852.59	-0.00767747		2382.58	0.01312759		2912.61	-0.00029094		3442.6	0.00882911		3972.6	-0.0091263
262.79	0.12990516		792.79	0.01415144		1322.78	0.02050445		1852.79	-0.00745826		2382.78	0.01259309		2912.81	-0.00054997		3442.8	0.00881077		3972.8	-0.0093395
262.99	0.12979964		792.99	0.0144146		1322.98	0.02016633		1852.99	-0.00732072		2382.98	0.01133575		2913.01	-0.00008266		3443	0.00924444		3973	-0.00905935
263.19	0.12884524		793.19	0.01398289		1323.18	0.02092695		1853.19	-0.00735601		2383.18	0.01056309		2913.21	0.00056399		3443.2	0.00906783		3973.2	-0.0092229
263.39	0.12930588		793.39	0.01323264		1323.38	0.02138547		1853.39	-0.00767065		2383.38	0.00988887		2913.41	0.00117087		3443.4	0.0086895		3973.4	-0.00975606
263.59	0.1296608		793.59	0.01327886		1323.58	0.02152919		1853.59	-0.00749085		2383.58	0.00968542		2913.61	0.00190877		3443.6	0.00941946		3973.6	-0.0106893
263.79	0.13092001		793.79	0.01302109		1323.78	0.02153841		1853.79	-0.00669471		2383.78	0.00919967		2913.81	0.00184679		3443.8	0.00977974		3973.8	-0.01104921
263.99	0.13107309		793.99	0.01321992		1323.98	0.02242884		1853.99	-0.00721767		2383.98	0.00906468		2914.01	0.00219593		3444	0.01016111		3974	-0.01110766
264.19	0.13136208		794.19	0.01321904		1324.18	0.02222873		1854.19	-0.0067755		2384.18	0.00925723		2914.21	0.00256517		3444.2	0.01101025		3974.2	-0.01175431
264.39	0.13170664		794.39	0.01322357		1324.38	0.02261559		1854.39	-0.00824049		2384.38	0.0091022		2914.41	0.0023743		3444.4	0.01180787		3974.4	-0.01159551
264.59	0.13156731		794.59	0.01361417		1324.58	0.02279834		1854.59	-0.00925438		2384.58	0.0087944		2914.61	0.00191654		3444.6	0.01183855		3974.6	-0.01138958
264.79	0.1321691		794.79	0.01423055		1324.78	0.02364446		1854.79	-0.00943368		2384.78	0.00921217		2914.81	0.00154388		3444.8	0.01192625		3974.8	-0.01184766
264.99	0.13205265		794.99	0.01429899		1324.98	0.02369012		1854.99	-0.00875562		2384.98	0.00890745		2915.01	0.00075437		3445	0.01249781		3975	-0.01157441
265.19	0.13270285		795.19	0.01437133		1325.18	0.02354608		1855.19	-0.00890088		2385.18	0.01041411		2915.21	0.00009242		3445.2	0.01209589		3975.2	-0.01093796
265.39	0.13388747		795.39	0.01433211		1325.38	0.02337042		1855.39	-0.0088637		2385.38	0.01156576		2915.41	-0.00048461		3445.4	0.01226731		3975.4	-0.01058263
265.59	0.1336456		795.59	0.01457108		1325.58	0.02307137		1855.59	-0.00795758		2385.58	0.01147351		2915.61	0.00012217		3445.6	0.01213459		3975.6	-0.01040085
265.79	0.13299513		795.79	0.01419982		1325.78	0.02297269		1855.79	-0.00789824		2385.78	0.01168945		2915.81	-0.00024982		3445.8	0.01218404		3975.8	-0.00939372
265.99	0.13348597		795.99	0.01452998		1325.98	0.02204803		1855.99	-0.00809947		2385.98	0.01240338		2916.01	-0.00081972		3446	0.01228246		3976	-0.00868633
266.19	0.13409601		796.19	0.01499361		1326.18	0.02214721		1856.19	-0.00858528		2386.18	0.01354466		2916.21	0.00055231		3446.2	0.01241717		3976.2	-0.00844564
266.39	0.13443667		796.39	0.01558637		1326.38	0.02239787		1856.39	-0.00820359		2386.38	0.01276803		2916.41	0.00073089		3446.4	0.01202847		3976.4	-0.00808012
266.59	0.1343913		796.59	0.01588736		1326.58	0.02166148		1856.59	-0.00734976		2386.58	0.01263501		2916.61	0.00080894		3446.6	0.01128265		3976.6	-0.0075067
266.79	0.13464234		796.79	0.01650639		1326.78	0.0223171		1856.79	-0.00721196		2386.78	0.01222634		2916.81	0.00060672		3446.8	0.01141745		3976.8	-0.00727037
266.99	0.13442352		796.99	0.01709367		1326.98	0.02275392		1856.99	-0.00697035		2386.98	0.01230062		2917.01	0.00088649		3447	0.01131669		3977	-0.00631786
267.19	0.1345957		797.19	0.01754301		1327.18	0.0240685		1857.19	-0.00611271		2387.18	0.01251899		2917.21	0.00152808		3447.2	0.01050273		3977.2	-0.00650926
267.39	0.13589886		797.39	0.01720106		1327.38	0.02456457		1857.39	-0.00551755		2387.38	0.01243857		2917.41	0.00187452		3447.4	0.0104142		3977.4	-0.00629214
267.59	0.13641074		797.59	0.01762223		1327.58	0.02424904		1857.59	-0.00517324		2387.58	0.01292015		2917.61	0.00252719		3447.6	0.01104988		3977.6	-0.00610986
267.79	0.13693818		797.79	0.01744967		1327.78	0.02409993		1857.79	-0.00457702		2387.78	0.01220504		2917.81	0.00323697		3447.8	0.01047246		3977.8	-0.00613705
267.99	0.13692771		797.99	0.01743324		1327.98	0.02493895		1857.99	-0.00537363		2387.98	0.01257027		2918.01	0.00410317		3448	0.01034601		3978	-0.00642895
268.19	0.13761039		798.19	0.01699356		1328.18	0.02510002		1858.19	-0.0048321		2388.18	0.01304931		2918.21	0.00421954		3448.2	0.01052929		3978.2	-0.00644754
268.39	0.13816016		798.39	0.0170228		1328.38	0.02539711		1858.39	-0.00504315		2388.38	0.01340061		2918.41	0.00452762		3448.4	0.01110134		3978.4	-0.00628655
268.59	0.13854887		798.59	0.0166981		1328.58	0.02522982		1858.59	-0.00433503		2388.58	0.01361685		2918.61	0.00418052		3448.6	0.01006173		3978.6	-0.00695185
268.79	0.13874285		798.79	0.0171255		1328.78	0.02533973		1858.79	-0.00341894		2388.78	0.01408897		2918.81	0.00420479		3448.8	0.01015279		3978.8	-0.00770457
268.99	0.1383972		798.99	0.01764504		1328.98	0.02450157		1858.99	-0.00355766		2388.98	0.01469162		2919.01	0.00364871		3449	0.01076405		3979	-0.00729858
269.19	0.13835227		799.19	0.01733687		1329.18	0.02406537		1859.19	-0.00506061		2389.18	0.01551086		2919.21	0.00308574		3449.2	0.01067256		3979.2	-0.00729231
269.39	0.13826483		799.39	0.01671217		1329.38	0.02387042		1859.39	-0.00480447		2389.38	0.01563756		2919.41	0.0030096		3449.4	0.01094928		3979.4	-0.0062948
269.59	0.13873793		799.59	0.01761262		1329.58	0.02365862		1859.59	-0.0048989		2389.58	0.01468552		2919.61	0.00266605		3449.6	0.01151662		3979.6	-0.00609585
269.79	0.1388185		799.79	0.01694928		1329.78	0.0228458		1859.79	-0.00538516		2389.78	0.01535889		2919.81	0.0020392		3449.8	0.01095563		3979.8	-0.0055176
269.99	0.13993575		799.99	0.01665044		1329.98	0.02278497		1859.99	-0.00609989		2389.98	0.01566013		2920.01	0.00128735		3450	0.01173804		3980	-0.00491873
270.19	0.14010033		800.19	0.01692178		1330.18	0.02329078		1860.19	-0.00681626		2390.18	0.01612406		2920.21	0.00160926		3450.2	0.01193331		3980.2	-0.00451309
270.39	0.13978041		800.39	0.01732989		1330.38	0.0235539		1860.39	-0.00696433		2390.38	0.01543263		2920.41	0.00123336		3450.4	0.01241014		3980.4	-0.00461846
270.59	0.13995762		800.59	0.01728527		1330.58	0.02282001		1860.59	-0.00764568		2390.58	0.01474578		2920.61	0.00089511		3450.6	0.01199823		3980.6	-0.00554141
270.79	0.14052058		800.79	0.01750585		1330.78	0.02306464		1860.79	-0.00812315		2390.78	0.0143005		2920.81	0.0009702		3450.8	0.01198157		3980.8	-0.0061403
270.99	0.14054039		800.99	0.01705054		1330.98	0.02359309		1860.99	-0.00772468		2390.98	0.01425543		2921.01	0.00107927		3451	0.01153815		3981	-0.00565982
271.19	0.14000658		801.19	0.01698427		1331.18	0.02436954		1861.19	-0.00755784		2391.18	0.01385595		2921.21	0.00070379		3451.2	0.01164001		3981.2	-0.0062503
271.39	0.14039875		801.39	0.01615437		1331.38	0.02384495		1861.39	-0.00744327		2391.38	0.01306022		2921.41	0.00065164		3451.4	0.01172741		3981.4	-0.00573467
271.59	0.14016395		801.59	0.01607055		1331.58	0.02326796		1861.59	-0.0074067		2391.58	0.01356353		2921.61	0.00178276		3451.6	0.01141733		3981.6	-0.00655748
271.79	0.14068452		801.79	0.01553452		1331.78	0.02223834		1861.79	-0.00699064		2391.78	0.01317553		2921.81	0.00230398		3451.8	0.01189437		3981.8	-0.00771612
271.99	0.14147185		801.99	0.01574415		1331.98	0.02270573		1861.99	-0.00677546		2391.98	0.01380121		2922.01	0.00255671		3452	0.01153867		3982	-0.00830912
272.19	0.14245084		802.19	0.01533139		1332.18	0.02232302		1862.19	-0.00618869		2392.18	0.01343061		2922.21	0.00267784		3452.2	0.01156016		3982.2	-0.00803288
272.39	0.1422608		802.39	0.01561588		1332.38	0.02197951		1862.39	-0.00662371		2392.38	0.01356652		2922.41	0.00292048		3452.4	0.01168038		3982.4	-0.00910541
272.59	0.14244108		802.59	0.01486127		1332.58	0.02139004		1862.59	-0.00659551		2392.58	0.01398161		2922.61	0.00233609		3452.6	0.01097343		3982.6	-0.00964907
272.79	0.14263762		802.79	0.01531083		1332.78	0.02125223		1862.79	-0.006784		2392.78	0.01475298		2922.81	0.00192689		3452.8	0.0113464		3982.8	-0.00987293
272.99	0.14263934		802.99	0.01526467		1332.98	0.02135701		1862.99	-0.00685158		2392.98	0.0149909		2923.01	0.00106426		3453	0.01072466		3983	-0.00951427
273.19	0.14329462		803.19	0.01465561		1333.18	0.02200548		1863.19	-0.00750402		2393.18	0.0148199		2923.21	0.0006718		3453.2	0.01011382		3983.2	-0.00876445
273.39	0.14422448		803.39	0.01493648		1333.38	0.0224509		1863.39	-0.00671492		2393.38	0.01437378		2923.41	0.00025447		3453.4	0.00932174		3983.4	-0.00741052
273.59	0.14572496		803.59	0.01562252		1333.58	0.02238596		1863.59	-0.00707814		2393.58	0.01444686		2923.61	-0.00037677		3453.6	0.00930409		3983.6	-0.00682265
273.79	0.14615004		803.79	0.01521998		1333.78	0.02315987		1863.79	-0.00717652		2393.78	0.01493464		2923.81	-0.0000369		3453.8	0.00868775		3983.8	-0.00668507
273.99	0.14667664		803.99	0.01545578		1333.98	0.0237327		1863.99	-0.00769233		2393.98	0.01510655		2924.01	-0.00127804		3454	0.01000344		3984	-0.00604458
274.19	0.14662229		804.19	0.01619517		1334.18	0.02397474		1864.19	-0.00843643		2394.18	0.0145646		2924.21	-0.00109074		3454.2	0.00995331		3984.2	-0.00563848
274.39	0.14638239		804.39	0.01608009		1334.38	0.02412524		1864.39	-0.00913971		2394.38	0.01399268		2924.41	-0.00113694		3454.4	0.01065353		3984.4	-0.00632059
274.59	0.14662883		804.59	0.0167335		1334.58	0.02346794		1864.59	-0.00925775		2394.58	0.01376301		2924.61	-0.00134622		3454.6	0.01032424		3984.6	-0.00556042
274.79	0.14661074		804.79	0.01768032		1334.78	0.02381008		1864.79	-0.00916982		2394.78	0.01426534		2924.81	-0.00123573		3454.8	0.01071135		3984.8	-0.00484837
274.99	0.14563425		804.99	0.0171198		1334.98	0.02412303		1864.99	-0.00910404		2394.98	0.01363746		2925.01	-0.00157724		3455	0.01128752		3985	-0.00448823
275.19	0.14530624		805.19	0.0170968		1335.18	0.02461576		1865.19	-0.0089456		2395.18	0.01315271		2925.21	-0.00153328		3455.2	0.01147419		3985.2	-0.00565315
275.39	0.14493667		805.39	0.01701293		1335.38	0.02427504		1865.39	-0.00837372		2395.38	0.01339573		2925.41	-0.00051741		3455.4	0.01165282		3985.4	-0.00587914
275.59	0.14383578		805.59	0.0178656		1335.58	0.02382688		1865.59	-0.00844563		2395.58	0.01409607		2925.61	0.00020671		3455.6	0.01226535		3985.6	-0.00711629
275.79	0.14410932		805.79	0.01832542		1335.78	0.02354179		1865.79	-0.00842946		2395.78	0.0137041		2925.81	0.00080209		3455.8	0.01346057		3985.8	-0.00807337
275.99	0.14378389		805.99	0.01815341		1335.98	0.02479274		1865.99	-0.00902263		2395.98	0.01336877		2926.01	0.0016173		3456	0.01337449		3986	-0.00871481
276.19	0.14424657		806.19	0.01835458		1336.18	0.0245765		1866.19	-0.00949155		2396.18	0.01321318		2926.21	0.00270436		3456.2	0.01401439		3986.2	-0.00957258
276.39	0.14430801		806.39	0.01897409		1336.38	0.02461369		1866.39	-0.00942574		2396.38	0.01404619		2926.41	0.00398996		3456.4	0.0142548		3986.4	-0.01074434
276.59	0.14470092		806.59	0.01857703		1336.58	0.02415282		1866.59	-0.00867573		2396.58	0.01381977		2926.61	0.00426092		3456.6	0.0144778		3986.6	-0.01114101
276.79	0.14535902		806.79	0.01909027		1336.78	0.02452659		1866.79	-0.00849633		2396.78	0.01401616		2926.81	0.00468522		3456.8	0.01472559		3986.8	-0.01120895
276.99	0.14562597		806.99	0.01879249		1336.98	0.02481589		1866.99	-0.00786988		2396.98	0.01376526		2927.01	0.00486785		3457	0.01401773		3987	-0.01139894
277.19	0.14791907		807.19	0.01875472		1337.18	0.02446917		1867.19	-0.00855098		2397.18	0.01390459		2927.21	0.00582878		3457.2	0.01397484		3987.2	-0.01126516
277.39	0.14855063		807.39	0.01972313		1337.38	0.02451433		1867.39	-0.00720727		2397.38	0.01357937		2927.41	0.00547105		3457.4	0.01399474		3987.4	-0.01165724
277.59	0.15049525		807.59	0.01997435		1337.58	0.0243816		1867.59	-0.0075613		2397.58	0.01320941		2927.61	0.00484588		3457.6	0.01398136		3987.6	-0.01225885
277.79	0.15126316		807.79	0.02154066		1337.78	0.02520317		1867.79	-0.00763806		2397.78	0.01255292		2927.81	0.00452117		3457.8	0.01366074		3987.8	-0.011558
277.99	0.15230729		807.99	0.02155146		1337.98	0.02468833		1867.99	-0.00757462		2397.98	0.01229958		2928.01	0.00383955		3458	0.01430908		3988	-0.01131467
278.19	0.15266547		808.19	0.02148445		1338.18	0.02431067		1868.19	-0.00743851		2398.18	0.01140086		2928.21	0.00375011		3458.2	0.01480284		3988.2	-0.01132256
278.39	0.15328969		808.39	0.02200202		1338.38	0.02456234		1868.39	-0.00678483		2398.38	0.01188188		2928.41	0.00333029		3458.4	0.01417202		3988.4	-0.01057896
278.59	0.1532417		808.59	0.02217484		1338.58	0.02435949		1868.59	-0.00610386		2398.58	0.01280558		2928.61	0.0024571		3458.6	0.01359613		3988.6	-0.00901968
278.79	0.15379103		808.79	0.02158251		1338.78	0.02494824		1868.79	-0.00632073		2398.78	0.01430929		2928.81	0.00154676		3458.8	0.0140129		3988.8	-0.0089504
278.99	0.15312759		808.99	0.02011501		1338.98	0.02522267		1868.99	-0.00575578		2398.98	0.01374364		2929.01	0.00095588		3459	0.01342792		3989	-0.00870234
279.19	0.15294226		809.19	0.01978633		1339.18	0.02492889		1869.19	-0.00460371		2399.18	0.01418618		2929.21	0.00101955		3459.2	0.01349869		3989.2	-0.00874215
279.39	0.15192096		809.39	0.01992056		1339.38	0.02538641		1869.39	-0.00403212		2399.38	0.01451157		2929.41	0.00041185		3459.4	0.01428809		3989.4	-0.00807869
279.59	0.15066152		809.59	0.01991839		1339.58	0.02573857		1869.59	-0.00416808		2399.58	0.01418358		2929.61	-0.00014334		3459.6	0.01461269		3989.6	-0.0086959
279.79	0.15000864		809.79	0.01936285		1339.78	0.02621299		1869.79	-0.00408399		2399.78	0.01384549		2929.81	0.00045438		3459.8	0.01491156		3989.8	-0.00856439
279.99	0.15031961		809.99	0.01869981		1339.98	0.02644446		1869.99	-0.004648		2399.98	0.01376028		2930.01	-0.00007585		3460	0.0143555		3990	-0.00840693
280.19	0.15159165		810.19	0.01872429		1340.18	0.02657086		1870.19	-0.00442123		2400.18	0.01368273		2930.21	0.00044396		3460.2	0.01454997		3990.2	-0.00858363
280.39	0.15131453		810.39	0.01831704		1340.38	0.02588028		1870.39	-0.00398771		2400.38	0.0136421		2930.41	-0.00023688		3460.4	0.01412927		3990.4	-0.0080955
280.59	0.15142875		810.59	0.01763941		1340.58	0.02490992		1870.59	-0.00433819		2400.58	0.01368927		2930.61	-0.00028278		3460.6	0.0143319		3990.6	-0.00745647
280.79	0.15184734		810.79	0.01710216		1340.78	0.02563995		1870.79	-0.00504841		2400.78	0.0139584		2930.81	-0.00050799		3460.8	0.01348855		3990.8	-0.00704781
280.99	0.15195426		810.99	0.01719838		1340.98	0.02457427		1870.99	-0.00519842		2400.98	0.01340132		2931.01	0.00015221		3461	0.01345353		3991	-0.00738837
281.19	0.15297383		811.19	0.01730537		1341.18	0.02458575		1871.19	-0.00581568		2401.18	0.01350253		2931.21	0.00030006		3461.2	0.0135295		3991.2	-0.00759967
281.39	0.15221257		811.39	0.01818101		1341.38	0.02506103		1871.39	-0.00595701		2401.38	0.01226388		2931.41	-0.00055586		3461.4	0.01297653		3991.4	-0.00793022
281.59	0.15268246		811.59	0.01764528		1341.58	0.02554308		1871.59	-0.00715738		2401.58	0.0119937		2931.61	-0.00046949		3461.6	0.01227184		3991.6	-0.00824022
281.79	0.15243582		811.79	0.01817469		1341.78	0.02626845		1871.79	-0.00761445		2401.78	0.01219217		2931.81	0.00047891		3461.8	0.01214862		3991.8	-0.00682777
281.99	0.1529558		811.99	0.01737453		1341.98	0.02565967		1871.99	-0.00703515		2401.98	0.01204726		2932.01	0.00164935		3462	0.01258286		3992	-0.00742328
282.19	0.15327657		812.19	0.01669543		1342.18	0.02619015		1872.19	-0.00732646		2402.18	0.01199678		2932.21	0.00198201		3462.2	0.01240095		3992.2	-0.00720172
282.39	0.15381106		812.39	0.01681898		1342.38	0.02682387		1872.39	-0.006537		2402.38	0.01284674		2932.41	0.00275702		3462.4	0.01220125		3992.4	-0.00682168
282.59	0.15387626		812.59	0.01653877		1342.58	0.02715836		1872.59	-0.0064		2402.58	0.01362894		2932.61	0.00226482		3462.6	0.01183392		3992.6	-0.00671946
282.79	0.1553477		812.79	0.01663194		1342.78	0.02719727		1872.79	-0.00678714		2402.78	0.01445289		2932.81	0.00302591		3462.8	0.01220369		3992.8	-0.00677823
282.99	0.15507984		812.99	0.01634992		1342.98	0.02727082		1872.99	-0.0058865		2402.98	0.0133109		2933.01	0.00336679		3463	0.01197002		3993	-0.00651581
283.19	0.15640932		813.19	0.0165098		1343.18	0.02703281		1873.19	-0.00509055		2403.18	0.01333102		2933.21	0.00344009		3463.2	0.01300356		3993.2	-0.00578073
283.39	0.15667219		813.39	0.01700654		1343.38	0.02747554		1873.39	-0.00543969		2403.38	0.01364735		2933.41	0.00294729		3463.4	0.01301757		3993.4	-0.00601214
283.59	0.15764963		813.59	0.01737876		1343.58	0.02738214		1873.59	-0.00474204		2403.58	0.01363071		2933.61	0.00294405		3463.6	0.0128422		3993.6	-0.00624269
283.79	0.15923743		813.79	0.01773505		1343.78	0.02765633		1873.79	-0.00416535		2403.78	0.01330467		2933.81	0.00330949		3463.8	0.0121662		3993.8	-0.00598989
283.99	0.16037438		813.99	0.01774069		1343.98	0.02781821		1873.99	-0.0047625		2403.98	0.01302952		2934.01	0.00315283		3464	0.01174709		3994	-0.00607006
284.19	0.16098293		814.19	0.01742701		1344.18	0.0276417		1874.19	-0.00469734		2404.18	0.0128884		2934.21	0.00285152		3464.2	0.01176685		3994.2	-0.00652923
284.39	0.16095858		814.39	0.01767357		1344.38	0.02724104		1874.39	-0.00518219		2404.38	0.01156541		2934.41	0.00279872		3464.4	0.01110916		3994.4	-0.00587078
284.59	0.16165321		814.59	0.01891226		1344.58	0.02745474		1874.59	-0.00524488		2404.58	0.01190768		2934.61	0.00290059		3464.6	0.0106516		3994.6	-0.00548265
284.79	0.16142998		814.79	0.01968214		1344.78	0.02742946		1874.79	-0.00583562		2404.78	0.01161066		2934.81	0.00275611		3464.8	0.01025184		3994.8	-0.00585864
284.99	0.16171136		814.99	0.02110697		1344.98	0.02722861		1874.99	-0.0065917		2404.98	0.01145201		2935.01	0.00278845		3465	0.01102773		3995	-0.00542727
285.19	0.16125645		815.19	0.02014655		1345.18	0.02766374		1875.19	-0.0070601		2405.18	0.01174352		2935.21	0.00294735		3465.2	0.01111066		3995.2	-0.00535719
285.39	0.16111916		815.39	0.02005962		1345.38	0.02633384		1875.39	-0.00788561		2405.38	0.01124428		2935.41	0.00262013		3465.4	0.01088258		3995.4	-0.00547368
285.59	0.16035962		815.59	0.01935976		1345.58	0.02601395		1875.59	-0.00791072		2405.58	0.01224526		2935.61	0.00240061		3465.6	0.01076221		3995.6	-0.00580867
285.79	0.16067079		815.79	0.01896849		1345.78	0.02569958		1875.79	-0.00795612		2405.78	0.01191179		2935.81	0.00222373		3465.8	0.01127597		3995.8	-0.0050861
285.99	0.16032297		815.99	0.01852979		1345.98	0.02514898		1875.99	-0.00698283		2405.98	0.01134665		2936.01	0.00214413		3466	0.01244095		3996	-0.00604249
286.19	0.15996739		816.19	0.01795078		1346.18	0.0262366		1876.19	-0.00664411		2406.18	0.01148296		2936.21	0.00186182		3466.2	0.01284984		3996.2	-0.00634635
286.39	0.15949156		816.39	0.01807751		1346.38	0.02696415		1876.39	-0.00579992		2406.38	0.01166154		2936.41	0.00174432		3466.4	0.01243992		3996.4	-0.00739468
286.59	0.15914481		816.59	0.01786736		1346.58	0.02801869		1876.59	-0.00606545		2406.58	0.01193016		2936.61	0.00161842		3466.6	0.01246046		3996.6	-0.00689427
286.79	0.15883341		816.79	0.01790381		1346.78	0.02911644		1876.79	-0.00567621		2406.78	0.01240013		2936.81	0.00208974		3466.8	0.01370653		3996.8	-0.00636816
286.99	0.15944922		816.99	0.01795958		1346.98	0.02972508		1876.99	-0.00481703		2406.98	0.01270798		2937.01	0.00240186		3467	0.01447844		3997	-0.00676204
287.19	0.16070725		817.19	0.01822715		1347.18	0.0292291		1877.19	-0.004738		2407.18	0.01385135		2937.21	0.00334935		3467.2	0.01516177		3997.2	-0.00702828
287.39	0.16149799		817.39	0.01873809		1347.38	0.03009655		1877.39	-0.00466235		2407.38	0.01525585		2937.41	0.00408153		3467.4	0.01426667		3997.4	-0.00799061
287.59	0.16185635		817.59	0.01793694		1347.58	0.03001595		1877.59	-0.00501449		2407.58	0.01553993		2937.61	0.00486304		3467.6	0.0145409		3997.6	-0.00855583
287.79	0.16188583		817.79	0.01812612		1347.78	0.03006282		1877.79	-0.00563002		2407.78	0.01517752		2937.81	0.00611422		3467.8	0.01361573		3997.8	-0.00951314
287.99	0.1614477		817.99	0.01833777		1347.98	0.02977591		1877.99	-0.0067032		2407.98	0.01524533		2938.01	0.00667465		3468	0.01329599		3998	-0.01005541
288.19	0.16225526		818.19	0.01823592		1348.18	0.02947973		1878.19	-0.00719029		2408.18	0.01498434		2938.21	0.00615583		3468.2	0.01357689		3998.2	-0.01042988
288.39	0.16216009		818.39	0.01938123		1348.38	0.02980407		1878.39	-0.00750737		2408.38	0.01418563		2938.41	0.00654158		3468.4	0.01314165		3998.4	-0.01043041
288.59	0.16381528		818.59	0.02028973		1348.58	0.02940599		1878.59	-0.00803329		2408.58	0.01477717		2938.61	0.00631464		3468.6	0.01226738		3998.6	-0.01013138
288.79	0.16441549		818.79	0.02110705		1348.78	0.0284302		1878.79	-0.00937922		2408.78	0.01392389		2938.81	0.00643207		3468.8	0.01269489		3998.8	-0.0099233
288.99	0.16486518		818.99	0.02076638		1348.98	0.02877673		1878.99	-0.01044369		2408.98	0.01396786		2939.01	0.00626084		3469	0.01284454		3999	-0.0088548
289.19	0.16497311		819.19	0.01994708		1349.18	0.02710816		1879.19	-0.01107362		2409.18	0.01372937		2939.21	0.0060884		3469.2	0.01237418		3999.2	-0.00943619
289.39	0.16522387		819.39	0.02013537		1349.38	0.02653146		1879.39	-0.01183309		2409.38	0.01334834		2939.41	0.00475817		3469.4	0.01173769		3999.4	-0.00920713
289.59	0.16481418		819.59	0.01932673		1349.58	0.02674152		1879.59	-0.01114926		2409.58	0.01301001		2939.61	0.00350852		3469.6	0.01145445		3999.6	-0.00986096
289.79	0.16490683		819.79	0.01861689		1349.78	0.02675175		1879.79	-0.01163972		2409.78	0.01215547		2939.81	0.00286869		3469.8	0.01231276		3999.8	-0.00926982
289.99	0.16457422		819.99	0.01807157		1349.98	0.02731233		1879.99	-0.01093034		2409.98	0.01151088		2940.01	0.00208558		3470	0.01175026		4000	-0.00932006
290.19	0.16468953		820.19	0.01800892		1350.18	0.02778219		1880.19	-0.0101047		2410.18	0.01089428		2940.21	0.00130362		3470.2	0.01121958		4000.2	-0.00869314
290.39	0.16505579		820.39	0.01824002		1350.38	0.02850246		1880.39	-0.00997162		2410.38	0.01128526		2940.41	0.00087339		3470.4	0.01083009		4000.4	-0.00834541
290.59	0.16437173		820.59	0.01821547		1350.58	0.0292188		1880.59	-0.00930441		2410.58	0.01177126		2940.61	0.0012905		3470.6	0.01241751		4000.6	-0.00733848
290.79	0.1649594		820.79	0.01856317		1350.78	0.02991977		1880.79	-0.00883416		2410.78	0.01203542		2940.81	0.00140348		3470.8	0.01266293		4000.8	-0.00719365
290.99	0.16640617		820.99	0.01916897		1350.98	0.02962191		1880.99	-0.00953762		2410.98	0.01249464		2941.01	0.002068		3471	0.01350805		4001	-0.00797575
291.19	0.16738401		821.19	0.01899012		1351.18	0.03002865		1881.19	-0.00960386		2411.18	0.01330148		2941.21	0.00226827		3471.2	0.01315793		4001.2	-0.00798706
291.39	0.16787696		821.39	0.01899303		1351.38	0.03046593		1881.39	-0.0093472		2411.38	0.01368288		2941.41	0.00249099		3471.4	0.01256039		4001.4	-0.00766517
291.59	0.16764536		821.59	0.01895251		1351.58	0.02947171		1881.59	-0.00981463		2411.58	0.01383201		2941.61	0.0034972		3471.6	0.01283836		4001.6	-0.0076583
291.79	0.16808186		821.79	0.01945965		1351.78	0.02949559		1881.79	-0.00975004		2411.78	0.01387649		2941.81	0.00413811		3471.8	0.01191826		4001.8	-0.00769345
291.99	0.16847177		821.99	0.01931151		1351.98	0.02954994		1881.99	-0.00895478		2411.98	0.01370579		2942.01	0.00364077		3472	0.01213815		4002	-0.00763651
292.19	0.16831872		822.19	0.01941122		1352.18	0.02941925		1882.19	-0.00930141		2412.18	0.0142586		2942.21	0.00382625		3472.2	0.01175547		4002.2	-0.00776405
292.39	0.16799263		822.39	0.0195682		1352.38	0.02836129		1882.39	-0.00893316		2412.38	0.01369991		2942.41	0.00399078		3472.4	0.01125723		4002.4	-0.00791493
292.59	0.16831682		822.59	0.01989876		1352.58	0.0275292		1882.59	-0.00945225		2412.58	0.01353679		2942.61	0.0045809		3472.6	0.01020876		4002.6	-0.00719059
292.79	0.16708698		822.79	0.02049211		1352.78	0.02778285		1882.79	-0.00912146		2412.78	0.01348389		2942.81	0.00433862		3472.8	0.01133956		4002.8	-0.00720251
292.99	0.16709196		822.99	0.02024464		1352.98	0.02752037		1882.99	-0.00920105		2412.98	0.01416		2943.01	0.00459718		3473	0.01163337		4003	-0.00736657
293.19	0.16713145		823.19	0.02071441		1353.18	0.02740586		1883.19	-0.00850382		2413.18	0.01418959		2943.21	0.00387567		3473.2	0.0116427		4003.2	-0.00780327
293.39	0.1670793		823.39	0.02077479		1353.38	0.02829532		1883.39	-0.0080659		2413.38	0.01431674		2943.41	0.00398923		3473.4	0.01211695		4003.4	-0.00728167
293.59	0.16660382		823.59	0.02034078		1353.58	0.0280588		1883.59	-0.00696233		2413.58	0.01469345		2943.61	0.00431223		3473.6	0.01239673		4003.6	-0.00758666
293.79	0.16637358		823.79	0.02005974		1353.78	0.02781402		1883.79	-0.00631365		2413.78	0.01461628		2943.81	0.00415572		3473.8	0.01281636		4003.8	-0.00687346
293.99	0.16595856		823.99	0.02005261		1353.98	0.02847194		1883.99	-0.00515563		2413.98	0.01380411		2944.01	0.00329996		3474	0.01219074		4004	-0.0056906
294.19	0.16610819		824.19	0.02064264		1354.18	0.02819759		1884.19	-0.00453495		2414.18	0.01310702		2944.21	0.00290585		3474.2	0.01229099		4004.2	-0.00549227
294.39	0.16638992		824.39	0.02016877		1354.38	0.02921968		1884.39	-0.00514913		2414.38	0.01351209		2944.41	0.00286117		3474.4	0.01264379		4004.4	-0.00568427
294.59	0.1666548		824.59	0.0201193		1354.58	0.02955999		1884.59	-0.00655516		2414.58	0.01300561		2944.61	0.00351478		3474.6	0.01362218		4004.6	-0.00631933
294.79	0.16741848		824.79	0.02068793		1354.78	0.03057069		1884.79	-0.00772265		2414.78	0.01319505		2944.81	0.00363408		3474.8	0.01393864		4004.8	-0.00640331
294.99	0.16842425		824.99	0.02050718		1354.98	0.03068785		1884.99	-0.0084859		2414.98	0.01287382		2945.01	0.00334911		3475	0.01448993		4005	-0.00674661
295.19	0.16943693		825.19	0.02007463		1355.18	0.03111317		1885.19	-0.00849522		2415.18	0.01286921		2945.21	0.00320316		3475.2	0.01348466		4005.2	-0.00670266
295.39	0.16900397		825.39	0.02077194		1355.38	0.03097056		1885.39	-0.00882884		2415.38	0.01347156		2945.41	0.00380041		3475.4	0.01316258		4005.4	-0.0071433
295.59	0.16950475		825.59	0.0202373		1355.58	0.03106966		1885.59	-0.00937155		2415.58	0.01304349		2945.61	0.00390419		3475.6	0.01301006		4005.6	-0.00736667
295.79	0.16955917		825.79	0.0194836		1355.78	0.03149568		1885.79	-0.00946563		2415.78	0.01307338		2945.81	0.00360085		3475.8	0.0123538		4005.8	-0.00784544
295.99	0.16968661		825.99	0.01961801		1355.98	0.03175672		1885.99	-0.00901121		2415.98	0.01262349		2946.01	0.00282657		3476	0.01237687		4006	-0.00808619
296.19	0.1691805		826.19	0.01959795		1356.18	0.03178695		1886.19	-0.01046837		2416.18	0.01319742		2946.21	0.00279384		3476.2	0.0120589		4006.2	-0.00862715
296.39	0.16839193		826.39	0.01985904		1356.38	0.03012746		1886.39	-0.01100078		2416.38	0.01269462		2946.41	0.00220101		3476.4	0.0120764		4006.4	-0.00884132
296.59	0.16792074		826.59	0.0201684		1356.58	0.03026113		1886.59	-0.01085395		2416.58	0.01326437		2946.61	0.00207357		3476.6	0.01185063		4006.6	-0.00885021
296.79	0.16787696		826.79	0.02009616		1356.78	0.03021109		1886.79	-0.0110055		2416.78	0.01365072		2946.81	0.0018166		3476.8	0.01328641		4006.8	-0.00882813
296.99	0.16884118		826.99	0.02095286		1356.98	0.02992663		1886.99	-0.01089902		2416.98	0.01403124		2947.01	0.00152827		3477	0.01344984		4007	-0.00901059
297.19	0.1690303		827.19	0.02157323		1357.18	0.0306186		1887.19	-0.01065596		2417.18	0.01476585		2947.21	0.00120804		3477.2	0.01363789		4007.2	-0.00857168
297.39	0.16953685		827.39	0.02138148		1357.38	0.03109937		1887.39	-0.01016903		2417.38	0.0153623		2947.41	0.00212055		3477.4	0.01334445		4007.4	-0.00811
297.59	0.16970868		827.59	0.02047943		1357.58	0.03131851		1887.59	-0.00940471		2417.58	0.01579586		2947.61	0.00213602		3477.6	0.01245251		4007.6	-0.00728853
297.79	0.17008112		827.79	0.02041746		1357.78	0.03082555		1887.79	-0.0084626		2417.78	0.01439708		2947.81	0.00179657		3477.8	0.01218975		4007.8	-0.0061583
297.99	0.17047708		827.99	0.02068372		1357.98	0.03116464		1887.99	-0.00851809		2417.98	0.01384467		2948.01	0.00194287		3478	0.01168051		4008	-0.00546356
298.19	0.17164171		828.19	0.02084362		1358.18	0.03098399		1888.19	-0.00856344		2418.18	0.01459593		2948.21	0.00253134		3478.2	0.01140089		4008.2	-0.00516291
298.39	0.17217829		828.39	0.02059313		1358.38	0.03132396		1888.39	-0.00998766		2418.38	0.01488556		2948.41	0.00301358		3478.4	0.01195296		4008.4	-0.00453575
298.59	0.17328934		828.59	0.02160025		1358.58	0.03074412		1888.59	-0.01112108		2418.58	0.0151233		2948.61	0.00355101		3478.6	0.01294284		4008.6	-0.00416211
298.79	0.17414626		828.79	0.02264977		1358.78	0.03147495		1888.79	-0.01059947		2418.78	0.01567152		2948.81	0.00334014		3478.8	0.01342531		4008.8	-0.00362004
298.99	0.17462875		828.99	0.02225369		1358.98	0.03145358		1888.99	-0.01002665		2418.98	0.01558495		2949.01	0.00306261		3479	0.01295666		4009	-0.00385575
299.19	0.17437341		829.19	0.02263636		1359.18	0.03145595		1889.19	-0.01006402		2419.18	0.01622812		2949.21	0.00290137		3479.2	0.01248617		4009.2	-0.00428177
299.39	0.17407738		829.39	0.02213235		1359.38	0.03187934		1889.39	-0.00987597		2419.38	0.01635104		2949.41	0.00314883		3479.4	0.01289409		4009.4	-0.00511829
299.59	0.17491885		829.59	0.0213754		1359.58	0.03121608		1889.59	-0.00947408		2419.58	0.01522737		2949.61	0.00342189		3479.6	0.01325322		4009.6	-0.00505295
299.79	0.17498363		829.79	0.02124575		1359.78	0.03218579		1889.79	-0.00924863		2419.78	0.01571526		2949.81	0.00369196		3479.8	0.01273196		4009.8	-0.006167
299.99	0.17581605		829.99	0.02257949		1359.98	0.03197118		1889.99	-0.00931618		2419.98	0.01544275		2950.01	0.00331329		3480	0.01188974		4010	-0.0063737
300.19	0.17618411		830.19	0.02217753		1360.18	0.0312412		1890.19	-0.00922543		2420.18	0.01583427		2950.21	0.00258046		3480.2	0.0112159		4010.2	-0.00746678
300.39	0.17612581		830.39	0.02229836		1360.38	0.02950305		1890.39	-0.00868383		2420.38	0.01578885		2950.41	0.00282661		3480.4	0.0113953		4010.4	-0.00834655
300.59	0.17679559		830.59	0.02200767		1360.58	0.02985386		1890.59	-0.00858661		2420.58	0.01530972		2950.61	0.0026295		3480.6	0.01176992		4010.6	-0.00788576
300.79	0.17647342		830.79	0.02259185		1360.78	0.02987172		1890.79	-0.00935022		2420.78	0.01545308		2950.81	0.00196151		3480.8	0.01205818		4010.8	-0.00854655
300.99	0.17648737		830.99	0.02331752		1360.98	0.03041641		1890.99	-0.00894554		2420.98	0.01547757		2951.01	0.00110367		3481	0.01220082		4011	-0.00937056
301.19	0.17659549		831.19	0.02269453		1361.18	0.03084581		1891.19	-0.0084514		2421.18	0.01578891		2951.21	0.00177726		3481.2	0.01277692		4011.2	-0.00937922
301.39	0.1766229		831.39	0.02110953		1361.38	0.03134577		1891.39	-0.00785866		2421.38	0.01527424		2951.41	0.00186188		3481.4	0.01169202		4011.4	-0.00852597
301.59	0.17680353		831.59	0.02068896		1361.58	0.031449		1891.59	-0.00754465		2421.58	0.01537921		2951.61	0.00226938		3481.6	0.01148771		4011.6	-0.00807951
301.79	0.17669362		831.79	0.01995795		1361.78	0.03104372		1891.79	-0.00716477		2421.78	0.01538364		2951.81	0.00261279		3481.8	0.0121063		4011.8	-0.00771816
301.99	0.17663165		831.99	0.02043535		1361.98	0.03102642		1891.99	-0.00743596		2421.98	0.01542476		2952.01	0.00285266		3482	0.01217464		4012	-0.00791557
302.19	0.17666223		832.19	0.02173045		1362.18	0.03148344		1892.19	-0.00724715		2422.18	0.0167119		2952.21	0.00269488		3482.2	0.01169376		4012.2	-0.00607827
302.39	0.17764418		832.39	0.02175642		1362.38	0.03124981		1892.39	-0.00791115		2422.38	0.01651588		2952.41	0.00242087		3482.4	0.01258838		4012.4	-0.00585449
302.59	0.17800196		832.59	0.0222715		1362.58	0.03221228		1892.59	-0.00759376		2422.58	0.01715906		2952.61	0.00283502		3482.6	0.01329872		4012.6	-0.00564965
302.79	0.17739873		832.79	0.02213769		1362.78	0.03358859		1892.79	-0.0075967		2422.78	0.01751201		2952.81	0.00337809		3482.8	0.0128713		4012.8	-0.00587817
302.99	0.17637315		832.99	0.02194468		1362.98	0.03387026		1892.99	-0.0082424		2422.98	0.01795379		2953.01	0.00388916		3483	0.01298516		4013	-0.00611113
303.19	0.175741		833.19	0.02174552		1363.18	0.03439015		1893.19	-0.00903737		2423.18	0.01770038		2953.21	0.00473803		3483.2	0.01312669		4013.2	-0.00649218
303.39	0.17591888		833.39	0.02117781		1363.38	0.03403687		1893.39	-0.0095719		2423.38	0.01698051		2953.41	0.00519117		3483.4	0.01306868		4013.4	-0.00673764
303.59	0.17650401		833.59	0.02106263		1363.58	0.03356374		1893.59	-0.0098592		2423.58	0.01678799		2953.61	0.00526655		3483.6	0.01295222		4013.6	-0.00764596
303.79	0.17682458		833.79	0.02245699		1363.78	0.0337863		1893.79	-0.01096373		2423.78	0.01652268		2953.81	0.00500099		3483.8	0.01230165		4013.8	-0.00862774
303.99	0.17857493		833.99	0.02270394		1363.98	0.03276527		1893.99	-0.01041418		2423.98	0.01639479		2954.01	0.00493922		3484	0.01210484		4014	-0.00838121
304.19	0.17909672		834.19	0.0216444		1364.18	0.03230179		1894.19	-0.00992652		2424.18	0.01528756		2954.21	0.0044489		3484.2	0.01261074		4014.2	-0.0096975
304.39	0.17942881		834.39	0.02250317		1364.38	0.03157603		1894.39	-0.00999726		2424.38	0.01454612		2954.41	0.00416586		3484.4	0.01303294		4014.4	-0.00990281
304.59	0.17935418		834.59	0.02217077		1364.58	0.0313699		1894.59	-0.01040658		2424.58	0.01435528		2954.61	0.00419587		3484.6	0.01283852		4014.6	-0.00957128
304.79	0.17843839		834.79	0.02211136		1364.78	0.03093712		1894.79	-0.01069798		2424.78	0.01429275		2954.81	0.00338959		3484.8	0.01333468		4014.8	-0.01014984
304.99	0.17847294		834.99	0.0214136		1364.98	0.03132959		1894.99	-0.01045924		2424.98	0.01406934		2955.01	0.00327029		3485	0.0136112		4015	-0.00963782
305.19	0.17826672		835.19	0.02032663		1365.18	0.0315546		1895.19	-0.01047193		2425.18	0.01416017		2955.21	0.00453441		3485.2	0.01300173		4015.2	-0.00897758
305.39	0.17830385		835.39	0.01959796		1365.38	0.03145114		1895.39	-0.01075763		2425.38	0.0138369		2955.41	0.00380066		3485.4	0.01157712		4015.4	-0.00891271
305.59	0.17900239		835.59	0.0196955		1365.58	0.03069524		1895.59	-0.01090924		2425.58	0.01436258		2955.61	0.00400598		3485.6	0.01232641		4015.6	-0.00942774
305.79	0.17922582		835.79	0.01963326		1365.78	0.02942536		1895.79	-0.01085228		2425.78	0.01406795		2955.81	0.00385802		3485.8	0.01240482		4015.8	-0.00919394
305.99	0.17970128		835.99	0.02017557		1365.98	0.02893489		1895.99	-0.01087977		2425.98	0.0129926		2956.01	0.00342938		3486	0.01153035		4016	-0.00929829
306.19	0.18053636		836.19	0.02040902		1366.18	0.02848836		1896.19	-0.01112724		2426.18	0.01391813		2956.21	0.00323309		3486.2	0.01030977		4016.2	-0.00817197
306.39	0.1811797		836.39	0.02045249		1366.38	0.02800479		1896.39	-0.01170036		2426.38	0.01492928		2956.41	0.00320099		3486.4	0.01096703		4016.4	-0.008497
306.59	0.18106941		836.59	0.02053791		1366.58	0.02884002		1896.59	-0.01197681		2426.58	0.01529499		2956.61	0.00351145		3486.6	0.01051317		4016.6	-0.00880199
306.79	0.18096034		836.79	0.02126099		1366.78	0.02893401		1896.79	-0.01252992		2426.78	0.0158021		2956.81	0.0042426		3486.8	0.01064919		4016.8	-0.00888492
306.99	0.18106487		836.99	0.02215132		1366.98	0.02906397		1896.99	-0.01254784		2426.98	0.01590927		2957.01	0.00466818		3487	0.01122246		4017	-0.00885838
307.19	0.1807513		837.19	0.02239377		1367.18	0.02969049		1897.19	-0.01235834		2427.18	0.01596761		2957.21	0.00538029		3487.2	0.01090327		4017.2	-0.00813754
307.39	0.18156474		837.39	0.02261239		1367.38	0.02904046		1897.39	-0.01271862		2427.38	0.01600771		2957.41	0.00474345		3487.4	0.01147152		4017.4	-0.00812614
307.59	0.18193961		837.59	0.02342957		1367.58	0.02955861		1897.59	-0.01231929		2427.58	0.01555469		2957.61	0.00470563		3487.6	0.01202779		4017.6	-0.00850674
307.79	0.18232875		837.79	0.02487786		1367.78	0.03081616		1897.79	-0.01189462		2427.78	0.01483196		2957.81	0.00418681		3487.8	0.01149682		4017.8	-0.00808786
307.99	0.18322438		837.99	0.02482344		1367.98	0.0316231		1897.99	-0.01067503		2427.98	0.01520788		2958.01	0.00385586		3488	0.01194691		4018	-0.00799806
308.19	0.18310559		838.19	0.02509042		1368.18	0.03184936		1898.19	-0.01035286		2428.18	0.0150927		2958.21	0.00354009		3488.2	0.01192667		4018.2	-0.00827743
308.39	0.18364184		838.39	0.02566517		1368.38	0.03240796		1898.39	-0.00976797		2428.38	0.01521523		2958.41	0.00304541		3488.4	0.01215352		4018.4	-0.00756064
308.59	0.18345056		838.59	0.02509309		1368.58	0.03330882		1898.59	-0.00955267		2428.58	0.01619775		2958.61	0.00351536		3488.6	0.01307652		4018.6	-0.00734004
308.79	0.18293016		838.79	0.02508818		1368.78	0.03370927		1898.79	-0.00916215		2428.78	0.01624648		2958.81	0.00251066		3488.8	0.01378774		4018.8	-0.00671136
308.99	0.18191496		838.99	0.02431499		1368.98	0.03504828		1898.99	-0.00956191		2428.98	0.01601185		2959.01	0.00254267		3489	0.01399097		4019	-0.00692307
309.19	0.18206338		839.19	0.02455259		1369.18	0.03513902		1899.19	-0.0091378		2429.18	0.01558897		2959.21	0.00360691		3489.2	0.01335808		4019.2	-0.00734004
309.39	0.18231203		839.39	0.02438789		1369.38	0.0355626		1899.39	-0.00884881		2429.38	0.01506472		2959.41	0.00287567		3489.4	0.01355474		4019.4	-0.00801042
309.59	0.18328571		839.59	0.02457838		1369.58	0.03599506		1899.59	-0.00841783		2429.58	0.01463785		2959.61	0.00345467		3489.6	0.01405937		4019.6	-0.00815842
309.79	0.18335108		839.79	0.02396824		1369.78	0.03616113		1899.79	-0.00864978		2429.78	0.01361065		2959.81	0.00366215		3489.8	0.01376382		4019.8	-0.00778507
309.99	0.18355532		839.99	0.02405021		1369.98	0.03599353		1899.99	-0.00866473		2429.98	0.01304152		2960.01	0.00385828		3490	0.01271313		4020	-0.00772281
310.19	0.1839187		840.19	0.02468914		1370.18	0.03586578		1900.19	-0.00926088		2430.18	0.01335556		2960.21	0.00371302		3490.2	0.01257611		4020.2	-0.00827394
310.39	0.18454401		840.39	0.02549796		1370.38	0.03594194		1900.39	-0.00966469		2430.38	0.01406143		2960.41	0.00419869		3490.4	0.01243277		4020.4	-0.00864412
310.59	0.1850628		840.59	0.02522623		1370.58	0.03607004		1900.59	-0.00938346		2430.58	0.01401205		2960.61	0.00467613		3490.6	0.01201719		4020.6	-0.0088062
310.79	0.1846946		840.79	0.02579194		1370.78	0.0356094		1900.79	-0.00854845		2430.78	0.0142867		2960.81	0.00480823		3490.8	0.01218746		4020.8	-0.00840295
310.99	0.18551554		840.99	0.02577877		1370.98	0.03638433		1900.99	-0.00815155		2430.98	0.01423854		2961.01	0.00491105		3491	0.01174649		4021	-0.00778207
311.19	0.185933		841.19	0.02583652		1371.18	0.0361995		1901.19	-0.00892764		2431.18	0.01457765		2961.21	0.00505783		3491.2	0.01136863		4021.2	-0.00765298
311.39	0.18691147		841.39	0.02552226		1371.38	0.03566703		1901.39	-0.00886374		2431.38	0.01417423		2961.41	0.00540441		3491.4	0.01190749		4021.4	-0.00806804
311.59	0.18728315		841.59	0.02619143		1371.58	0.0362074		1901.59	-0.00874113		2431.58	0.01366185		2961.61	0.00562081		3491.6	0.01109892		4021.6	-0.00784471
311.79	0.18706231		841.79	0.02602811		1371.78	0.03567377		1901.79	-0.00901767		2431.78	0.01315862		2961.81	0.00508369		3491.8	0.01022541		4021.8	-0.00747111
311.99	0.18739658		841.99	0.02597821		1371.98	0.03435914		1901.99	-0.00953044		2431.98	0.01421705		2962.01	0.00522729		3492	0.01042069		4022	-0.00742167
312.19	0.18775064		842.19	0.02580239		1372.18	0.03366916		1902.19	-0.00967824		2432.18	0.01462417		2962.21	0.00557066		3492.2	0.01058477		4022.2	-0.00633263
312.39	0.18732174		842.39	0.0262257		1372.38	0.0334349		1902.39	-0.00937801		2432.38	0.01452121		2962.41	0.00560507		3492.4	0.01097229		4022.4	-0.00682388
312.59	0.18691001		842.59	0.02627394		1372.58	0.03255613		1902.59	-0.00964409		2432.58	0.01598768		2962.61	0.00539889		3492.6	0.0109145		4022.6	-0.00601408
312.79	0.18665096		842.79	0.02560215		1372.78	0.03163349		1902.79	-0.00899414		2432.78	0.01622967		2962.81	0.00551798		3492.8	0.01124449		4022.8	-0.00687738
312.99	0.18600771		842.99	0.02521105		1372.98	0.03201178		1902.99	-0.009677		2432.98	0.01600325		2963.01	0.00605069		3493	0.0110928		4023	-0.00776841
313.19	0.1865686		843.19	0.02562917		1373.18	0.03216029		1903.19	-0.00901755		2433.18	0.01622601		2963.21	0.0055976		3493.2	0.01052391		4023.2	-0.00826007
313.39	0.18644124		843.39	0.02463727		1373.38	0.03356042		1903.39	-0.00932316		2433.38	0.01641803		2963.41	0.0051776		3493.4	0.01050617		4023.4	-0.00829741
313.59	0.18662927		843.59	0.02444121		1373.58	0.03358256		1903.59	-0.00864058		2433.58	0.01629128		2963.61	0.00528122		3493.6	0.01103958		4023.6	-0.00882893
313.79	0.18598889		843.79	0.02481868		1373.78	0.0328177		1903.79	-0.00796636		2433.78	0.01658188		2963.81	0.00551613		3493.8	0.01160571		4023.8	-0.00867183
313.99	0.1861328		843.99	0.02568649		1373.98	0.03308306		1903.99	-0.00766972		2433.98	0.01639719		2964.01	0.00585899		3494	0.01175712		4024	-0.00946831
314.19	0.18627456		844.19	0.02546446		1374.18	0.03406971		1904.19	-0.00771097		2434.18	0.01595964		2964.21	0.00589322		3494.2	0.01247639		4024.2	-0.01079772
314.39	0.18656254		844.39	0.02497118		1374.38	0.03370609		1904.39	-0.00762885		2434.38	0.01619701		2964.41	0.00588221		3494.4	0.01273486		4024.4	-0.01120232
314.59	0.18647136		844.59	0.02459283		1374.58	0.03372868		1904.59	-0.00647794		2434.58	0.01646158		2964.61	0.00502768		3494.6	0.01291711		4024.6	-0.01089448
314.79	0.18718167		844.79	0.02425784		1374.78	0.03398834		1904.79	-0.00686511		2434.78	0.01565777		2964.81	0.00464802		3494.8	0.01323268		4024.8	-0.0116818
314.99	0.18780874		844.99	0.02494494		1374.98	0.03441223		1904.99	-0.00705598		2434.98	0.01480995		2965.01	0.00508601		3495	0.01321423		4025	-0.01221517
315.19	0.18845146		845.19	0.02433505		1375.18	0.03392408		1905.19	-0.00748952		2435.18	0.01333425		2965.21	0.00569252		3495.2	0.01362231		4025.2	-0.01289136
315.39	0.18905591		845.39	0.0237596		1375.38	0.03293264		1905.39	-0.0071821		2435.38	0.01280144		2965.41	0.00610291		3495.4	0.01395363		4025.4	-0.01264311
315.59	0.18946215		845.59	0.02407703		1375.58	0.03214424		1905.59	-0.00731317		2435.58	0.01171504		2965.61	0.00580758		3495.6	0.01317455		4025.6	-0.0122174
315.79	0.18925461		845.79	0.02402277		1375.78	0.03154034		1905.79	-0.00764161		2435.78	0.01144729		2965.81	0.00554598		3495.8	0.01345857		4025.8	-0.01183462
315.99	0.18994822		845.99	0.0241021		1375.98	0.03148689		1905.99	-0.00748357		2435.98	0.01183445		2966.01	0.00489302		3496	0.01383181		4026	-0.01122338
316.19	0.18995929		846.19	0.02414367		1376.18	0.03178134		1906.19	-0.00779629		2436.18	0.01161108		2966.21	0.0045442		3496.2	0.01391829		4026.2	-0.01038139
316.39	0.19025126		846.39	0.02404836		1376.38	0.03165014		1906.39	-0.00722213		2436.38	0.01211388		2966.41	0.00493697		3496.4	0.01398045		4026.4	-0.01052415
316.59	0.19171912		846.59	0.02344067		1376.58	0.03140768		1906.59	-0.00775434		2436.58	0.01307579		2966.61	0.00442632		3496.6	0.01352786		4026.6	-0.01008091
316.79	0.19220668		846.79	0.02341133		1376.78	0.03185437		1906.79	-0.00825491		2436.78	0.0136345		2966.81	0.00420065		3496.8	0.01412827		4026.8	-0.01106383
316.99	0.19240447		846.99	0.02287843		1376.98	0.03298797		1906.99	-0.00954689		2436.98	0.01406926		2967.01	0.00368688		3497	0.01304056		4027	-0.0104087
317.19	0.19272055		847.19	0.02243985		1377.18	0.03396418		1907.19	-0.01003423		2437.18	0.01526563		2967.21	0.00293203		3497.2	0.01259709		4027.2	-0.0099494
317.39	0.19273735		847.39	0.02272532		1377.38	0.03438552		1907.39	-0.01044371		2437.38	0.0154155		2967.41	0.00293907		3497.4	0.01264063		4027.4	-0.00962542
317.59	0.19337111		847.59	0.02286484		1377.58	0.03412671		1907.59	-0.01011492		2437.58	0.01551622		2967.61	0.00321548		3497.6	0.01308663		4027.6	-0.00882601
317.79	0.19303887		847.79	0.02341062		1377.78	0.03478898		1907.79	-0.01021282		2437.78	0.01603041		2967.81	0.00321018		3497.8	0.01246721		4027.8	-0.0082072
317.99	0.19294279		847.99	0.02327704		1377.98	0.0363903		1907.99	-0.0112071		2437.98	0.01585554		2968.01	0.00392982		3498	0.01164235		4028	-0.00787178
318.19	0.19290973		848.19	0.02286829		1378.18	0.03685909		1908.19	-0.01083814		2438.18	0.01610984		2968.21	0.00391154		3498.2	0.01165491		4028.2	-0.00752584
318.39	0.19259678		848.39	0.02337133		1378.38	0.03643981		1908.39	-0.01100177		2438.38	0.01624867		2968.41	0.00335559		3498.4	0.01180809		4028.4	-0.0080484
318.59	0.19270612		848.59	0.02349007		1378.58	0.03660781		1908.59	-0.01116371		2438.58	0.01674618		2968.61	0.00372593		3498.6	0.01068546		4028.6	-0.00803049
318.79	0.19204414		848.79	0.02405541		1378.78	0.03679206		1908.79	-0.01215908		2438.78	0.01620509		2968.81	0.00448797		3498.8	0.01074102		4028.8	-0.00875849
318.99	0.19167963		848.99	0.02508205		1378.98	0.03657684		1908.99	-0.01120431		2438.98	0.01571035		2969.01	0.00456945		3499	0.01070354		4029	-0.00877217
319.19	0.19216052		849.19	0.02432907		1379.18	0.03645441		1909.19	-0.01063585		2439.18	0.01570316		2969.21	0.00558598		3499.2	0.01021671		4029.2	-0.00835925
319.39	0.1920072		849.39	0.02405291		1379.38	0.03541107		1909.39	-0.01067161		2439.38	0.01672395		2969.41	0.00571084		3499.4	0.01032006		4029.4	-0.00885097
319.59	0.19163254		849.59	0.02413636		1379.58	0.03598959		1909.59	-0.00972173		2439.58	0.01594886		2969.61	0.00576689		3499.6	0.01036037		4029.6	-0.00868038
319.79	0.19149738		849.79	0.02389514		1379.78	0.03694326		1909.79	-0.00899716		2439.78	0.01570867		2969.81	0.00558046		3499.8	0.01069651		4029.8	-0.00841297
319.99	0.19114841		849.99	0.02371896		1379.98	0.03721515		1909.99	-0.00797836		2439.98	0.01486304		2970.01	0.00505863		3500	0.01095461		4030	-0.00780751
320.19	0.19177023		850.19	0.02355741		1380.18	0.03743094		1910.19	-0.00779093		2440.18	0.01487853		2970.21	0.0053042		3500.2	0.01191186		4030.2	-0.00810947
320.39	0.19362414		850.39	0.02423434		1380.38	0.03731139		1910.39	-0.00718206		2440.38	0.01497564		2970.41	0.00647849		3500.4	0.01286485		4030.4	-0.00835276
320.59	0.1946253		850.59	0.02475009		1380.58	0.03731724		1910.59	-0.00821133		2440.58	0.01488377		2970.61	0.00595182		3500.6	0.01319653		4030.6	-0.00856128
320.79	0.19451296		850.79	0.02522373		1380.78	0.03810839		1910.79	-0.00882923		2440.78	0.01496064		2970.81	0.00607948		3500.8	0.01358224		4030.8	-0.00798851
320.99	0.19452192		850.99	0.02454318		1380.98	0.03864002		1910.99	-0.00913383		2440.98	0.01440323		2971.01	0.00640671		3501	0.01352268		4031	-0.00807546
321.19	0.19423148		851.19	0.02548777		1381.18	0.03867343		1911.19	-0.00905492		2441.18	0.01453745		2971.21	0.00699576		3501.2	0.01441578		4031.2	-0.00750162
321.39	0.19440771		851.39	0.02627287		1381.38	0.03796751		1911.39	-0.00973213		2441.38	0.01403391		2971.41	0.00765417		3501.4	0.01470901		4031.4	-0.0066763
321.59	0.19467329		851.59	0.02591216		1381.58	0.03803468		1911.59	-0.01054071		2441.58	0.01323061		2971.61	0.00797617		3501.6	0.0149547		4031.6	-0.00612423
321.79	0.19429923		851.79	0.02647096		1381.78	0.03805205		1911.79	-0.01058542		2441.78	0.01397682		2971.81	0.00774575		3501.8	0.01519153		4031.8	-0.00605747
321.99	0.19493716		851.99	0.02633512		1381.98	0.03851646		1911.99	-0.0105565		2441.98	0.01403574		2972.01	0.00846554		3502	0.01576893		4032	-0.00578369
322.19	0.19633267		852.19	0.02630974		1382.18	0.03810483		1912.19	-0.01013675		2442.18	0.01405439		2972.21	0.00812998		3502.2	0.01617332		4032.2	-0.00630064
322.39	0.19609968		852.39	0.02615893		1382.38	0.03691608		1912.39	-0.0106288		2442.38	0.01426478		2972.41	0.00787044		3502.4	0.01538717		4032.4	-0.00700517
322.59	0.19643374		852.59	0.02540996		1382.58	0.03706754		1912.59	-0.01085987		2442.58	0.01512248		2972.61	0.00843766		3502.6	0.01534743		4032.6	-0.00662014
322.79	0.19639955		852.79	0.02591839		1382.78	0.03641254		1912.79	-0.01034387		2442.78	0.01527754		2972.81	0.00858563		3502.8	0.0155493		4032.8	-0.00670613
322.99	0.19648287		852.99	0.02528931		1382.98	0.0359698		1912.99	-0.00902493		2442.98	0.01607824		2973.01	0.00839121		3503	0.01554716		4033	-0.00776758
323.19	0.19657377		853.19	0.02367463		1383.18	0.03491775		1913.19	-0.00849048		2443.18	0.01709487		2973.21	0.00765214		3503.2	0.01535704		4033.2	-0.00897138
323.39	0.19679658		853.39	0.02300345		1383.38	0.03515037		1913.39	-0.00818982		2443.38	0.01741433		2973.41	0.00710962		3503.4	0.01541201		4033.4	-0.009574
323.59	0.19700932		853.59	0.02301589		1383.58	0.03616587		1913.59	-0.0071115		2443.58	0.01679413		2973.61	0.00640012		3503.6	0.01488882		4033.6	-0.0102677
323.79	0.19738104		853.79	0.02266314		1383.78	0.0365263		1913.79	-0.00665935		2443.78	0.01610203		2973.81	0.00641654		3503.8	0.01402386		4033.8	-0.00993515
323.99	0.1977552		853.99	0.02323926		1383.98	0.03726437		1913.99	-0.00686102		2443.98	0.01593833		2974.01	0.00532861		3504	0.01423058		4034	-0.00973484
324.19	0.19896196		854.19	0.02350913		1384.18	0.03731663		1914.19	-0.00693082		2444.18	0.0164272		2974.21	0.00481202		3504.2	0.01458126		4034.2	-0.01028415
324.39	0.1996371		854.39	0.02455712		1384.38	0.03752174		1914.39	-0.0068169		2444.38	0.01594705		2974.41	0.00495151		3504.4	0.01436642		4034.4	-0.00966904
324.59	0.19884298		854.59	0.02470497		1384.58	0.03770305		1914.59	-0.00677411		2444.58	0.01601391		2974.61	0.00429009		3504.6	0.01378211		4034.6	-0.00945318
324.79	0.19840131		854.79	0.02455173		1384.78	0.03821285		1914.79	-0.00650022		2444.78	0.01617099		2974.81	0.00463071		3504.8	0.01356076		4034.8	-0.00908517
324.99	0.19828135		854.99	0.02494471		1384.98	0.0383197		1914.99	-0.00676359		2444.98	0.01636949		2975.01	0.00470294		3505	0.01394764		4035	-0.00934267
325.19	0.19853981		855.19	0.02584698		1385.18	0.03835614		1915.19	-0.00757729		2445.18	0.01660137		2975.21	0.00477432		3505.2	0.01395266		4035.2	-0.00894471
325.39	0.19895438		855.39	0.0259412		1385.38	0.03874833		1915.39	-0.00843242		2445.38	0.01628306		2975.41	0.00444184		3505.4	0.01355143		4035.4	-0.00919741
325.59	0.19943919		855.59	0.02601114		1385.58	0.03875481		1915.59	-0.00831164		2445.58	0.0154458		2975.61	0.00347925		3505.6	0.01382101		4035.6	-0.00883504
325.79	0.20042214		855.79	0.02604599		1385.78	0.03897251		1915.79	-0.00779618		2445.78	0.01622499		2975.81	0.00311578		3505.8	0.01337755		4035.8	-0.00922097
325.99	0.20173075		855.99	0.02609626		1385.98	0.0392832		1915.99	-0.00719404		2445.98	0.01630335		2976.01	0.00381258		3506	0.01273816		4036	-0.00875837
326.19	0.202549		856.19	0.02583069		1386.18	0.03873923		1916.19	-0.00782393		2446.18	0.01670849		2976.21	0.00410513		3506.2	0.0117948		4036.2	-0.00867261
326.39	0.20200779		856.39	0.02580142		1386.38	0.03802756		1916.39	-0.00827975		2446.38	0.01735022		2976.41	0.00384626		3506.4	0.01099491		4036.4	-0.0084068
326.59	0.20223194		856.59	0.02562863		1386.58	0.0386587		1916.59	-0.00823596		2446.58	0.01828613		2976.61	0.00384422		3506.6	0.01153541		4036.6	-0.00868191
326.79	0.20214217		856.79	0.02563233		1386.78	0.03792862		1916.79	-0.00860858		2446.78	0.01849763		2976.81	0.00349502		3506.8	0.01147335		4036.8	-0.00877126
326.99	0.20135671		856.99	0.02552384		1386.98	0.03833448		1916.99	-0.00853499		2446.98	0.01918272		2977.01	0.00274112		3507	0.01201428		4037	-0.00943831
327.19	0.20176719		857.19	0.0256625		1387.18	0.03811965		1917.19	-0.00892556		2447.18	0.01838963		2977.21	0.00248593		3507.2	0.01147522		4037.2	-0.00992168
327.39	0.20148125		857.39	0.02512461		1387.38	0.0388372		1917.39	-0.00870252		2447.38	0.01749499		2977.41	0.00376681		3507.4	0.0116115		4037.4	-0.00952416
327.59	0.20177863		857.59	0.02498571		1387.58	0.03916121		1917.59	-0.00910904		2447.58	0.01692877		2977.61	0.00308497		3507.6	0.01116831		4037.6	-0.00961743
327.79	0.20095778		857.79	0.02457052		1387.78	0.0391341		1917.79	-0.00918796		2447.78	0.01609336		2977.81	0.0033759		3507.8	0.01069391		4037.8	-0.00812024
327.99	0.20117907		857.99	0.02516843		1387.98	0.03923387		1917.99	-0.00911358		2447.98	0.01545421		2978.01	0.00286729		3508	0.01084945		4038	-0.00798757
328.19	0.20103021		858.19	0.02578811		1388.18	0.03852488		1918.19	-0.00850911		2448.18	0.01483683		2978.21	0.00296483		3508.2	0.01114895		4038.2	-0.00854743
328.39	0.20129496		858.39	0.02597096		1388.38	0.0384956		1918.39	-0.00837545		2448.38	0.01428154		2978.41	0.00386096		3508.4	0.01139038		4038.4	-0.00760909
328.59	0.20151711		858.59	0.02560093		1388.58	0.03833392		1918.59	-0.00834932		2448.58	0.01490954		2978.61	0.0041771		3508.6	0.01126775		4038.6	-0.00786863
328.79	0.2017104		858.79	0.02566479		1388.78	0.03838135		1918.79	-0.00891811		2448.78	0.01486727		2978.81	0.00498052		3508.8	0.01194842		4038.8	-0.00768849
328.99	0.20200776		858.99	0.02653965		1388.98	0.03837508		1918.99	-0.00940201		2448.98	0.01423855		2979.01	0.00500789		3509	0.01272708		4039	-0.0081969
329.19	0.20230638		859.19	0.0266577		1389.18	0.03853456		1919.19	-0.00895048		2449.18	0.01334459		2979.21	0.00500457		3509.2	0.01363817		4039.2	-0.00844365
329.39	0.20268793		859.39	0.02658319		1389.38	0.03840274		1919.39	-0.00800376		2449.38	0.01314105		2979.41	0.00511571		3509.4	0.01370412		4039.4	-0.00811395
329.59	0.2030563		859.59	0.02673689		1389.58	0.03797902		1919.59	-0.00738064		2449.58	0.01278331		2979.61	0.00512603		3509.6	0.01413405		4039.6	-0.00726981
329.79	0.20353621		859.79	0.0269896		1389.78	0.03823729		1919.79	-0.00681377		2449.78	0.01339342		2979.81	0.0060258		3509.8	0.01422492		4039.8	-0.00788155
329.99	0.20404486		859.99	0.02706374		1389.98	0.03852841		1919.99	-0.00668819		2449.98	0.01445294		2980.01	0.00696654		3510	0.01516181		4040	-0.00778575
330.19	0.20452335		860.19	0.0270604		1390.18	0.03833472		1920.19	-0.00766451		2450.18	0.01464358		2980.21	0.00719221		3510.2	0.01588309		4040.2	-0.00831955
330.39	0.20443181		860.39	0.02683163		1390.38	0.03844858		1920.39	-0.00778255		2450.38	0.01525872		2980.41	0.006605		3510.4	0.01557516		4040.4	-0.00812655
330.59	0.20372287		860.59	0.02626346		1390.58	0.03907525		1920.59	-0.00788218		2450.58	0.01638106		2980.61	0.0059707		3510.6	0.01666359		4040.6	-0.00728938
330.79	0.20384372		860.79	0.02649839		1390.78	0.03992607		1920.79	-0.00799158		2450.78	0.01665825		2980.81	0.00614823		3510.8	0.01661351		4040.8	-0.0067072
330.99	0.20421154		860.99	0.02722925		1390.98	0.03965563		1920.99	-0.0074195		2450.98	0.01708692		2981.01	0.00547186		3511	0.01650699		4041	-0.00642686
331.19	0.20517712		861.19	0.02651458		1391.18	0.03906118		1921.19	-0.00747526		2451.18	0.01733834		2981.21	0.00580246		3511.2	0.01585697		4041.2	-0.0064099
331.39	0.20528726		861.39	0.02575207		1391.38	0.03931499		1921.39	-0.00764974		2451.38	0.01729847		2981.41	0.00530473		3511.4	0.01565158		4041.4	-0.00680621
331.59	0.20611703		861.59	0.0265165		1391.58	0.03973947		1921.59	-0.00793121		2451.58	0.01783988		2981.61	0.00407292		3511.6	0.01476621		4041.6	-0.00675604
331.79	0.20537497		861.79	0.02688471		1391.78	0.03961649		1921.79	-0.00828907		2451.78	0.017208		2981.81	0.0045971		3511.8	0.01355977		4041.8	-0.00614464
331.99	0.20576313		861.99	0.02752896		1391.98	0.03951872		1921.99	-0.00834371		2451.98	0.01653092		2982.01	0.00464684		3512	0.01252105		4042	-0.0071018
332.19	0.20595113		862.19	0.02733203		1392.18	0.0397471		1922.19	-0.00871325		2452.18	0.01622678		2982.21	0.00494018		3512.2	0.01194077		4042.2	-0.00735755
332.39	0.20619887		862.39	0.02778479		1392.38	0.03972495		1922.39	-0.00925742		2452.38	0.01622017		2982.41	0.00590233		3512.4	0.01136743		4042.4	-0.00686975
332.59	0.2063413		862.59	0.02809501		1392.58	0.03931297		1922.59	-0.00949604		2452.58	0.01520102		2982.61	0.0052004		3512.6	0.01076995		4042.6	-0.00683793
332.79	0.20586997		862.79	0.02818166		1392.78	0.03889182		1922.79	-0.0100027		2452.78	0.01492944		2982.81	0.0058843		3512.8	0.01027903		4042.8	-0.00774365
332.99	0.20606639		862.99	0.02788482		1392.98	0.03891444		1922.99	-0.00945661		2452.98	0.0137904		2983.01	0.00601722		3513	0.01014604		4043	-0.00893509
333.19	0.2064424		863.19	0.02750866		1393.18	0.03843968		1923.19	-0.00857596		2453.18	0.0128129		2983.21	0.00549054		3513.2	0.01028229		4043.2	-0.00947249
333.39	0.20637263		863.39	0.0276387		1393.38	0.03815053		1923.39	-0.00886577		2453.38	0.01306661		2983.41	0.00600731		3513.4	0.00975898		4043.4	-0.00943683
333.59	0.20633285		863.59	0.02766412		1393.58	0.03872376		1923.59	-0.00925308		2453.58	0.01271557		2983.61	0.00608028		3513.6	0.00981292		4043.6	-0.00940341
333.79	0.20636812		863.79	0.02709859		1393.78	0.03867537		1923.79	-0.00880704		2453.78	0.01321181		2983.81	0.00657864		3513.8	0.00960653		4043.8	-0.01033586
333.99	0.20642253		863.99	0.02737649		1393.98	0.0396938		1923.99	-0.00908906		2453.98	0.01357287		2984.01	0.0059142		3514	0.00921359		4044	-0.01130275
334.19	0.20671649		864.19	0.02720944		1394.18	0.04012868		1924.19	-0.00885469		2454.18	0.01276074		2984.21	0.00588159		3514.2	0.00911785		4044.2	-0.01156736
334.39	0.2057301		864.39	0.02620576		1394.38	0.04026233		1924.39	-0.00918483		2454.38	0.01379809		2984.41	0.00572441		3514.4	0.00848418		4044.4	-0.01171418
334.59	0.20503396		864.59	0.02493484		1394.58	0.04118725		1924.59	-0.0083264		2454.58	0.01539763		2984.61	0.00533047		3514.6	0.00966886		4044.6	-0.01152229
334.79	0.20553216		864.79	0.02477734		1394.78	0.04195083		1924.79	-0.00828883		2454.78	0.01637125		2984.81	0.00561847		3514.8	0.00907342		4044.8	-0.01144134
334.99	0.20601889		864.99	0.02508757		1394.98	0.04159345		1924.99	-0.00820995		2454.98	0.01690646		2985.01	0.0046038		3515	0.0091947		4045	-0.01104714
335.19	0.20711974		865.19	0.02411576		1395.18	0.04211605		1925.19	-0.00888544		2455.18	0.01736662		2985.21	0.00443675		3515.2	0.00887518		4045.2	-0.0111295
335.39	0.20695451		865.39	0.0245346		1395.38	0.04283633		1925.39	-0.00917099		2455.38	0.01726721		2985.41	0.00441862		3515.4	0.0090042		4045.4	-0.0113686
335.59	0.20685056		865.59	0.02490812		1395.58	0.04309991		1925.59	-0.00931938		2455.58	0.01869857		2985.61	0.00466942		3515.6	0.00913534		4045.6	-0.01107168
335.79	0.20576063		865.79	0.02495541		1395.78	0.04328485		1925.79	-0.00971202		2455.78	0.01919756		2985.81	0.0047523		3515.8	0.00856268		4045.8	-0.00997977
335.99	0.20609257		865.99	0.0249531		1395.98	0.04256882		1925.99	-0.00952537		2455.98	0.01937728		2986.01	0.005		3516	0.00897965		4046	-0.01026417
336.19	0.20674191		866.19	0.02536268		1396.18	0.0423466		1926.19	-0.00889443		2456.18	0.01991224		2986.21	0.00584993		3516.2	0.01040208		4046.2	-0.00914326
336.39	0.20681332		866.39	0.02611083		1396.38	0.04137189		1926.39	-0.00833365		2456.38	0.01993212		2986.41	0.006098		3516.4	0.01118525		4046.4	-0.00889481
336.59	0.20783588		866.59	0.02610959		1396.58	0.04031082		1926.59	-0.00829886		2456.58	0.01969752		2986.61	0.00600957		3516.6	0.01123385		4046.6	-0.00870071
336.79	0.20843851		866.79	0.0257638		1396.78	0.03920366		1926.79	-0.00844807		2456.78	0.02083786		2986.81	0.00604289		3516.8	0.01152721		4046.8	-0.00990022
336.99	0.20944332		866.99	0.02624821		1396.98	0.03918266		1926.99	-0.00772445		2456.98	0.02026135		2987.01	0.00558712		3517	0.01284464		4047	-0.00968566
337.19	0.20997423		867.19	0.02681934		1397.18	0.03874851		1927.19	-0.00717573		2457.18	0.01951861		2987.21	0.00541693		3517.2	0.0133989		4047.2	-0.00880656
337.39	0.21019632		867.39	0.02748048		1397.38	0.03816558		1927.39	-0.00778882		2457.38	0.01950062		2987.41	0.00582033		3517.4	0.0133766		4047.4	-0.00833676
337.59	0.21047856		867.59	0.0273915		1397.58	0.03818361		1927.59	-0.00774983		2457.58	0.01843662		2987.61	0.00494783		3517.6	0.01261206		4047.6	-0.0081602
337.79	0.21039219		867.79	0.02852404		1397.78	0.0375281		1927.79	-0.00762398		2457.78	0.01792553		2987.81	0.00427985		3517.8	0.01252116		4047.8	-0.00893075
337.99	0.21078217		867.99	0.02905149		1397.98	0.03769622		1927.99	-0.00711605		2457.98	0.01746254		2988.01	0.00371123		3518	0.01268897		4048	-0.00910745
338.19	0.21125192		868.19	0.02846506		1398.18	0.03796478		1928.19	-0.00766652		2458.18	0.01662034		2988.21	0.00389738		3518.2	0.01336719		4048.2	-0.00891506
338.39	0.21063159		868.39	0.02805031		1398.38	0.03828487		1928.39	-0.00812285		2458.38	0.01688819		2988.41	0.00342302		3518.4	0.01354888		4048.4	-0.00879747
338.59	0.2103809		868.59	0.02711089		1398.58	0.03902826		1928.59	-0.00760462		2458.58	0.01639248		2988.61	0.00296607		3518.6	0.01432751		4048.6	-0.00864136
338.79	0.21021284		868.79	0.02762595		1398.78	0.03998946		1928.79	-0.00799085		2458.78	0.01571537		2988.81	0.00285789		3518.8	0.01373201		4048.8	-0.00830247
338.99	0.21049409		868.99	0.02723295		1398.98	0.04024049		1928.99	-0.00807198		2458.98	0.01525585		2989.01	0.0024425		3519	0.01354532		4049	-0.00868882
339.19	0.21057862		869.19	0.02607626		1399.18	0.04004569		1929.19	-0.00885879		2459.18	0.01538085		2989.21	0.00242851		3519.2	0.01350031		4049.2	-0.00900192
339.39	0.20966782		869.39	0.0260991		1399.38	0.04009475		1929.39	-0.00938569		2459.38	0.01603747		2989.41	0.00417413		3519.4	0.01366184		4049.4	-0.00889035
339.59	0.20991756		869.59	0.02625095		1399.58	0.04074773		1929.59	-0.00933582		2459.58	0.01669959		2989.61	0.0047235		3519.6	0.01290479		4049.6	-0.00990888
339.79	0.20927202		869.79	0.0262324		1399.78	0.0402042		1929.79	-0.00974426		2459.78	0.01705126		2989.81	0.00442941		3519.8	0.0126523		4049.8	-0.00977944
339.99	0.20956025		869.99	0.02650209		1399.98	0.03904659		1929.99	-0.0097986		2459.98	0.01732685		2990.01	0.00536943		3520	0.0126504		4050	-0.00991938
340.19	0.21003897		870.19	0.02621505		1400.18	0.039368		1930.19	-0.00950065		2460.18	0.01805368		2990.21	0.00609338		3520.2	0.01356791		4050.2	-0.01046478
340.39	0.21032681		870.39	0.02678179		1400.38	0.038555		1930.39	-0.00949134		2460.38	0.01780546		2990.41	0.00603479		3520.4	0.01358458		4050.4	-0.01091862
340.59	0.21146997		870.59	0.02762941		1400.58	0.03796321		1930.59	-0.00985422		2460.58	0.01804453		2990.61	0.00640628		3520.6	0.01363505		4050.6	-0.01118443
340.79	0.21108152		870.79	0.02737167		1400.78	0.03814592		1930.79	-0.0099363		2460.78	0.01779554		2990.81	0.00619767		3520.8	0.01393283		4050.8	-0.01132571
340.99	0.21117202		870.99	0.02721765		1400.98	0.03801748		1930.99	-0.01010651		2460.98	0.01812004		2991.01	0.00653713		3521	0.01422074		4051	-0.01076553
341.19	0.21096816		871.19	0.02712067		1401.18	0.03821896		1931.19	-0.01070833		2461.18	0.01710825		2991.21	0.00612672		3521.2	0.01347443		4051.2	-0.01003324
341.39	0.21074413		871.39	0.02748676		1401.38	0.03798481		1931.39	-0.01177567		2461.38	0.01744779		2991.41	0.00589108		3521.4	0.01361121		4051.4	-0.00990098
341.59	0.2108079		871.59	0.02751553		1401.58	0.03828514		1931.59	-0.0118032		2461.58	0.01724847		2991.61	0.00553434		3521.6	0.01260477		4051.6	-0.00958632
341.79	0.21081621		871.79	0.02819837		1401.78	0.0384427		1931.79	-0.01160052		2461.78	0.01725198		2991.81	0.00517259		3521.8	0.01391025		4051.8	-0.00988433
341.99	0.21160413		871.99	0.0276795		1401.98	0.039267		1931.99	-0.01146912		2461.98	0.01707957		2992.01	0.00541116		3522	0.01418335		4052	-0.00882789
342.19	0.21194724		872.19	0.0278758		1402.18	0.04028296		1932.19	-0.01188569		2462.18	0.01639765		2992.21	0.00425269		3522.2	0.01396342		4052.2	-0.00839896
342.39	0.21169687		872.39	0.02785569		1402.38	0.04121393		1932.39	-0.01109251		2462.38	0.01592457		2992.41	0.00327918		3522.4	0.01374857		4052.4	-0.00925487
342.59	0.21170294		872.59	0.02768015		1402.58	0.0420448		1932.59	-0.01075508		2462.58	0.01581833		2992.61	0.00351929		3522.6	0.01326608		4052.6	-0.00926012
342.79	0.21210459		872.79	0.02740584		1402.78	0.04266587		1932.79	-0.01023792		2462.78	0.01603795		2992.81	0.00388623		3522.8	0.01305013		4052.8	-0.00895542
342.99	0.21263802		872.99	0.02751554		1402.98	0.04312948		1932.99	-0.01044115		2462.98	0.01673998		2993.01	0.00400395		3523	0.01306108		4053	-0.00898744
343.19	0.21296035		873.19	0.02740887		1403.18	0.04359153		1933.19	-0.0100607		2463.18	0.01692565		2993.21	0.00392374		3523.2	0.01307525		4053.2	-0.00887774
343.39	0.21268607		873.39	0.02791261		1403.38	0.04397146		1933.39	-0.01037266		2463.38	0.01635506		2993.41	0.00509061		3523.4	0.01252888		4053.4	-0.00854217
343.59	0.2133364		873.59	0.02830531		1403.58	0.04440313		1933.59	-0.00978457		2463.58	0.0168557		2993.61	0.0042922		3523.6	0.0120034		4053.6	-0.00876435
343.79	0.21331868		873.79	0.02961402		1403.78	0.04456233		1933.79	-0.01058569		2463.78	0.01763141		2993.81	0.00409904		3523.8	0.01269282		4053.8	-0.00787558
343.99	0.21411213		873.99	0.02968213		1403.98	0.0443871		1933.99	-0.01064002		2463.98	0.01865495		2994.01	0.00464501		3524	0.01305168		4054	-0.00798829
344.19	0.21495952		874.19	0.02907499		1404.18	0.04463223		1934.19	-0.00988246		2464.18	0.01872016		2994.21	0.00485719		3524.2	0.01341765		4054.2	-0.00882536
344.39	0.21499087		874.39	0.02958882		1404.38	0.04455415		1934.39	-0.00973832		2464.38	0.0181978		2994.41	0.00579252		3524.4	0.01366378		4054.4	-0.00859905
344.59	0.21517778		874.59	0.0294558		1404.58	0.04412634		1934.59	-0.01003493		2464.58	0.0182374		2994.61	0.00617126		3524.6	0.0144112		4054.6	-0.00894758
344.79	0.2147663		874.79	0.02928167		1404.78	0.04404197		1934.79	-0.01097597		2464.78	0.0178762		2994.81	0.00710743		3524.8	0.01454364		4054.8	-0.00847975
344.99	0.21563819		874.99	0.02918471		1404.98	0.04398968		1934.99	-0.01231148		2464.98	0.01844934		2995.01	0.00770607		3525	0.01455543		4055	-0.00805643
345.19	0.21540019		875.19	0.03029034		1405.18	0.04504633		1935.19	-0.01234579		2465.18	0.01706983		2995.21	0.00764875		3525.2	0.01491776		4055.2	-0.00755537
345.39	0.21519031		875.39	0.03048259		1405.38	0.04527309		1935.39	-0.01171691		2465.38	0.01745521		2995.41	0.0087724		3525.4	0.01523139		4055.4	-0.00732715
345.59	0.21556715		875.59	0.03029538		1405.58	0.04562389		1935.59	-0.01174892		2465.58	0.01705425		2995.61	0.00871057		3525.6	0.01531376		4055.6	-0.00729262
345.79	0.21511632		875.79	0.03113701		1405.78	0.04578363		1935.79	-0.01131646		2465.78	0.01564518		2995.81	0.00860734		3525.8	0.01697346		4055.8	-0.00750718
345.99	0.21534627		875.99	0.03190929		1405.98	0.04585456		1935.99	-0.01170167		2465.98	0.01525546		2996.01	0.00866979		3526	0.01570765		4056	-0.00773143
346.19	0.21573523		876.19	0.03180532		1406.18	0.04511283		1936.19	-0.01157694		2466.18	0.01514564		2996.21	0.00837315		3526.2	0.01580826		4056.2	-0.00836903
346.39	0.21631338		876.39	0.03137185		1406.38	0.04537246		1936.39	-0.01134843		2466.38	0.01573388		2996.41	0.00814926		3526.4	0.01650016		4056.4	-0.00913782
346.59	0.21672246		876.59	0.0308881		1406.58	0.04499421		1936.59	-0.01131043		2466.58	0.01589625		2996.61	0.00795758		3526.6	0.01638386		4056.6	-0.00886557
346.79	0.21705781		876.79	0.03162182		1406.78	0.04431879		1936.79	-0.01100501		2466.78	0.01516907		2996.81	0.00759547		3526.8	0.01672439		4056.8	-0.00897736
346.99	0.21677451		876.99	0.03226062		1406.98	0.04482322		1936.99	-0.01142113		2466.98	0.01471881		2997.01	0.00712728		3527	0.0166028		4057	-0.00856777
347.19	0.21634245		877.19	0.0322172		1407.18	0.04390262		1937.19	-0.01064491		2467.18	0.01480857		2997.21	0.0072435		3527.2	0.01621873		4057.2	-0.00808995
347.39	0.21591614		877.39	0.03196039		1407.38	0.04273993		1937.39	-0.01156537		2467.38	0.01490291		2997.41	0.00735722		3527.4	0.01563261		4057.4	-0.00836755
347.59	0.21616693		877.59	0.03133984		1407.58	0.04281923		1937.59	-0.01145717		2467.58	0.01623874		2997.61	0.00646392		3527.6	0.01500465		4057.6	-0.00799597
347.79	0.21618382		877.79	0.03176662		1407.78	0.04271957		1937.79	-0.01242561		2467.78	0.01699886		2997.81	0.00649257		3527.8	0.01543152		4057.8	-0.00892442
347.99	0.21604026		877.99	0.03105475		1407.98	0.04169538		1937.99	-0.01233059		2467.98	0.01736769		2998.01	0.00686081		3528	0.0144929		4058	-0.01034925
348.19	0.21552574		878.19	0.03039786		1408.18	0.0411483		1938.19	-0.01146105		2468.18	0.01681317		2998.21	0.0065797		3528.2	0.01407226		4058.2	-0.01013817
348.39	0.21596954		878.39	0.03012185		1408.38	0.04100531		1938.39	-0.01154389		2468.38	0.01603146		2998.41	0.00635067		3528.4	0.01402696		4058.4	-0.0096574
348.59	0.21576248		878.59	0.03024004		1408.58	0.04068842		1938.59	-0.01154773		2468.58	0.01662341		2998.61	0.00633561		3528.6	0.01449573		4058.6	-0.00918998
348.79	0.21659439		878.79	0.03049047		1408.78	0.04150739		1938.79	-0.01128641		2468.78	0.01673344		2998.81	0.00693215		3528.8	0.01352812		4058.8	-0.00914334
348.99	0.21786374		878.99	0.03047759		1408.98	0.04203032		1938.99	-0.01111158		2468.98	0.01623141		2999.01	0.00655577		3529	0.01253583		4059	-0.00875488
349.19	0.21766965		879.19	0.03110583		1409.18	0.04293877		1939.19	-0.00984486		2469.18	0.01592378		2999.21	0.00633417		3529.2	0.01300177		4059.2	-0.00905128
349.39	0.21796941		879.39	0.03064591		1409.38	0.04325748		1939.39	-0.00885798		2469.38	0.01676048		2999.41	0.0055827		3529.4	0.01326258		4059.4	-0.00876984
349.59	0.21814803		879.59	0.030985		1409.58	0.043094		1939.59	-0.00891516		2469.58	0.01691474		2999.61	0.00536281		3529.6	0.01395515		4059.6	-0.00934855
349.79	0.21824537		879.79	0.03134724		1409.78	0.04274471		1939.79	-0.0087207		2469.78	0.0164383		2999.81	0.00570258		3529.8	0.01406916		4059.8	-0.00979747
349.99	0.2186189		879.99	0.0309402		1409.98	0.04261077		1939.99	-0.00894974		2469.98	0.01736116		3000.01	0.00609248		3530	0.01314902		4060	-0.00934776
350.19	0.21979357		880.19	0.02998047		1410.18	0.04215455		1940.19	-0.00880187		2470.18	0.01771058		3000.21	0.00637341		3530.2	0.01440247		4060.2	-0.00957181
350.39	0.22026008		880.39	0.02958986		1410.38	0.04266604		1940.39	-0.00813617		2470.38	0.01838541		3000.41	0.00570662		3530.4	0.01436839		4060.4	-0.00956793
350.59	0.22074158		880.59	0.02956144		1410.58	0.04313143		1940.59	-0.00820927		2470.58	0.01769903		3000.61	0.00580923		3530.6	0.01345622		4060.6	-0.00947525
350.79	0.22113233		880.79	0.02945749		1410.78	0.0437255		1940.79	-0.00803577		2470.78	0.01732793		3000.81	0.00627433		3530.8	0.01339084		4060.8	-0.0087386
350.99	0.2207371		880.99	0.02885681		1410.98	0.04407941		1940.99	-0.00879129		2470.98	0.01762954		3001.01	0.00700765		3531	0.01329657		4061	-0.00820213
351.19	0.22059613		881.19	0.02863155		1411.18	0.04398468		1941.19	-0.00862875		2471.18	0.01844921		3001.21	0.00723165		3531.2	0.01343874		4061.2	-0.00818201
351.39	0.21960739		881.39	0.02773083		1411.38	0.04255084		1941.39	-0.00884322		2471.38	0.01822058		3001.41	0.00705927		3531.4	0.01335753		4061.4	-0.00808114
351.59	0.21908902		881.59	0.02740766		1411.58	0.04294192		1941.59	-0.00912209		2471.58	0.01811729		3001.61	0.00656465		3531.6	0.01302527		4061.6	-0.00791463
351.79	0.21906811		881.79	0.02781618		1411.78	0.04278498		1941.79	-0.00964128		2471.78	0.01815784		3001.81	0.00755573		3531.8	0.01331722		4061.8	-0.00870689
351.99	0.21883063		881.99	0.02767416		1411.98	0.04333514		1941.99	-0.01060633		2471.98	0.01802103		3002.01	0.00833579		3532	0.01305795		4062	-0.0082207
352.19	0.21863752		882.19	0.02648591		1412.18	0.04401044		1942.19	-0.01060791		2472.18	0.01763246		3002.21	0.00835513		3532.2	0.01332804		4062.2	-0.00710528
352.39	0.21937645		882.39	0.02605987		1412.38	0.04469434		1942.39	-0.01024577		2472.38	0.0174206		3002.41	0.00800002		3532.4	0.01281228		4062.4	-0.00741914
352.59	0.21961184		882.59	0.02607083		1412.58	0.0454316		1942.59	-0.01019535		2472.58	0.01795254		3002.61	0.00784301		3532.6	0.01342308		4062.6	-0.00721614
352.79	0.22050411		882.79	0.02653906		1412.78	0.04631078		1942.79	-0.01012349		2472.78	0.01757304		3002.81	0.00734569		3532.8	0.01414376		4062.8	-0.00751102
352.99	0.22163205		882.99	0.02706301		1412.98	0.04747792		1942.99	-0.01069992		2472.98	0.0166959		3003.01	0.00671918		3533	0.01465839		4063	-0.00711678
353.19	0.22138079		883.19	0.02757142		1413.18	0.04799443		1943.19	-0.00990072		2473.18	0.01713389		3003.21	0.0063901		3533.2	0.01650108		4063.2	-0.0081688
353.39	0.22166121		883.39	0.02768517		1413.38	0.04719991		1943.39	-0.01030025		2473.38	0.01727399		3003.41	0.0052779		3533.4	0.01736854		4063.4	-0.0080457
353.59	0.22163533		883.59	0.02811529		1413.58	0.04680337		1943.59	-0.01061904		2473.58	0.01725944		3003.61	0.00487564		3533.6	0.01704133		4063.6	-0.00848212
353.79	0.22301989		883.79	0.02823526		1413.78	0.04705845		1943.79	-0.01033721		2473.78	0.01662567		3003.81	0.00439827		3533.8	0.0168218		4063.8	-0.00894988
353.99	0.22273631		883.99	0.02896764		1413.98	0.04711223		1943.99	-0.0102323		2473.98	0.01746079		3004.01	0.00412157		3534	0.015969		4064	-0.00909227
354.19	0.22370178		884.19	0.02934046		1414.18	0.04725041		1944.19	-0.00953788		2474.18	0.01793072		3004.21	0.00425298		3534.2	0.01557564		4064.2	-0.00995981
354.39	0.22450568		884.39	0.0300828		1414.38	0.04757912		1944.39	-0.00884167		2474.38	0.01746308		3004.41	0.00373367		3534.4	0.01440551		4064.4	-0.00961129
354.59	0.22529761		884.59	0.03085084		1414.58	0.0481321		1944.59	-0.00870444		2474.58	0.01667736		3004.61	0.00330078		3534.6	0.01431332		4064.6	-0.00912107
354.79	0.22548131		884.79	0.0315523		1414.78	0.04790885		1944.79	-0.00823373		2474.78	0.01570658		3004.81	0.00312719		3534.8	0.01428425		4064.8	-0.00895413
354.99	0.22511999		884.99	0.03251807		1414.98	0.04705468		1944.99	-0.0081187		2474.98	0.01514383		3005.01	0.00317502		3535	0.01375414		4065	-0.00854092
355.19	0.22500087		885.19	0.03314158		1415.18	0.04616426		1945.19	-0.00835593		2475.18	0.01524263		3005.21	0.00287357		3535.2	0.0138068		4065.2	-0.00707029
355.39	0.22370711		885.39	0.03279718		1415.38	0.04413676		1945.39	-0.00811571		2475.38	0.01439567		3005.41	0.0034637		3535.4	0.01395544		4065.4	-0.00647151
355.59	0.22369122		885.59	0.03258102		1415.58	0.04492425		1945.59	-0.00910459		2475.58	0.01454738		3005.61	0.00315007		3535.6	0.01315219		4065.6	-0.00704839
355.79	0.22289249		885.79	0.03231136		1415.78	0.04514423		1945.79	-0.0098416		2475.78	0.01557177		3005.81	0.00541002		3535.8	0.01300442		4065.8	-0.00705557
355.99	0.22268223		885.99	0.03155537		1415.98	0.04598133		1945.99	-0.01073273		2475.98	0.01569843		3006.01	0.00594713		3536	0.01340656		4066	-0.00694382
356.19	0.22265118		886.19	0.03036024		1416.18	0.04502802		1946.19	-0.00998109		2476.18	0.01541986		3006.21	0.00672394		3536.2	0.01318249		4066.2	-0.00696426
356.39	0.22280071		886.39	0.03046664		1416.38	0.04513298		1946.39	-0.00940415		2476.38	0.01512393		3006.41	0.0065549		3536.4	0.01306696		4066.4	-0.00739514
356.59	0.22297804		886.59	0.03054729		1416.58	0.04574285		1946.59	-0.00957536		2476.58	0.01542955		3006.61	0.00767534		3536.6	0.01392814		4066.6	-0.00694672
356.79	0.22240787		886.79	0.03046782		1416.78	0.04620779		1946.79	-0.00937985		2476.78	0.01491939		3006.81	0.00845488		3536.8	0.01484621		4066.8	-0.00759707
356.99	0.22298865		886.99	0.03035613		1416.98	0.04638605		1946.99	-0.00992809		2476.98	0.01460393		3007.01	0.00901789		3537	0.01526912		4067	-0.00809553
357.19	0.22213071		887.19	0.03031122		1417.18	0.04606506		1947.19	-0.008998		2477.18	0.01473423		3007.21	0.00901925		3537.2	0.01573383		4067.2	-0.00822492
357.39	0.22221363		887.39	0.03043131		1417.38	0.04578327		1947.39	-0.00869313		2477.38	0.01480765		3007.41	0.00881409		3537.4	0.01580737		4067.4	-0.00816506
357.59	0.22228522		887.59	0.03035271		1417.58	0.04666857		1947.59	-0.0082134		2477.58	0.01549942		3007.61	0.00828795		3537.6	0.01534846		4067.6	-0.00849386
357.79	0.22260196		887.79	0.03059138		1417.78	0.04731165		1947.79	-0.00831493		2477.78	0.01561573		3007.81	0.00879305		3537.8	0.01529607		4067.8	-0.00883361
357.99	0.22184498		887.99	0.0311918		1417.98	0.04803595		1947.99	-0.00834378		2477.98	0.01599158		3008.01	0.00857504		3538	0.01416991		4068	-0.0085614
358.19	0.22244176		888.19	0.03178996		1418.18	0.04853519		1948.19	-0.00786959		2478.18	0.01556661		3008.21	0.00912043		3538.2	0.01307076		4068.2	-0.00792603
358.39	0.2231107		888.39	0.03239595		1418.38	0.04830946		1948.39	-0.00793705		2478.38	0.01443676		3008.41	0.0085981		3538.4	0.01263245		4068.4	-0.00782253
358.59	0.22286539		888.59	0.03275017		1418.58	0.04815777		1948.59	-0.00850719		2478.58	0.01465748		3008.61	0.00732487		3538.6	0.01288317		4068.6	-0.00697881
358.79	0.22324549		888.79	0.03330689		1418.78	0.04750017		1948.79	-0.00854723		2478.78	0.01484085		3008.81	0.00679233		3538.8	0.01243626		4068.8	-0.0074243
358.99	0.22379143		888.99	0.03323558		1418.98	0.04716328		1948.99	-0.00885023		2478.98	0.01513694		3009.01	0.00614676		3539	0.01199078		4069	-0.00673954
359.19	0.22399545		889.19	0.03350619		1419.18	0.04707492		1949.19	-0.00885637		2479.18	0.01577457		3009.21	0.00590388		3539.2	0.012789		4069.2	-0.00688802
359.39	0.22367651		889.39	0.03287626		1419.38	0.04702456		1949.39	-0.00896986		2479.38	0.01530839		3009.41	0.00605364		3539.4	0.0126076		4069.4	-0.00770526
359.59	0.22437855		889.59	0.03266003		1419.58	0.04799854		1949.59	-0.0090843		2479.58	0.01631564		3009.61	0.00570117		3539.6	0.0124139		4069.6	-0.00844952
359.79	0.22495531		889.79	0.03274873		1419.78	0.04781929		1949.79	-0.00887934		2479.78	0.01653104		3009.81	0.00668131		3539.8	0.01317251		4069.8	-0.00884197
359.99	0.22647615		889.99	0.03242018		1419.98	0.04724859		1949.99	-0.00922422		2479.98	0.01628063		3010.01	0.00617917		3540	0.01352764		4070	-0.00955202
360.19	0.22709054		890.19	0.03228099		1420.18	0.04632196		1950.19	-0.00930741		2480.18	0.01619355		3010.21	0.00633237		3540.2	0.01420715		4070.2	-0.01040981
360.39	0.22677954		890.39	0.03264557		1420.38	0.04650051		1950.39	-0.00917403		2480.38	0.0153265		3010.41	0.00582916		3540.4	0.01474058		4070.4	-0.01102066
360.59	0.22725354		890.59	0.032342		1420.58	0.04606222		1950.59	-0.00862268		2480.58	0.0160308		3010.61	0.00691935		3540.6	0.01599149		4070.6	-0.01235567
360.79	0.22695345		890.79	0.03216277		1420.78	0.04555783		1950.79	-0.00846765		2480.78	0.01543294		3010.81	0.00652819		3540.8	0.01741918		4070.8	-0.01339185
360.99	0.22698265		890.99	0.03280046		1420.98	0.04442493		1950.99	-0.00861592		2480.98	0.01492814		3011.01	0.00733664		3541	0.01821999		4071	-0.01338484
361.19	0.22724847		891.19	0.03313036		1421.18	0.04436224		1951.19	-0.0075381		2481.18	0.01574002		3011.21	0.00770652		3541.2	0.01850873		4071.2	-0.01393707
361.39	0.22755452		891.39	0.03311063		1421.38	0.04397369		1951.39	-0.0080056		2481.38	0.01654874		3011.41	0.00867737		3541.4	0.01845387		4071.4	-0.01369083
361.59	0.22751646		891.59	0.03265891		1421.58	0.04458417		1951.59	-0.00872633		2481.58	0.01642925		3011.61	0.00896932		3541.6	0.01914447		4071.6	-0.01327315
361.79	0.22750249		891.79	0.03327142		1421.78	0.04493512		1951.79	-0.00896323		2481.78	0.01556491		3011.81	0.00916708		3541.8	0.0184377		4071.8	-0.01352142
361.99	0.22776137		891.99	0.03268801		1421.98	0.04458352		1951.99	-0.00958121		2481.98	0.01534186		3012.01	0.00908183		3542	0.01753075		4072	-0.01360347
362.19	0.22757419		892.19	0.03263928		1422.18	0.04461777		1952.19	-0.00993444		2482.18	0.01571488		3012.21	0.00961085		3542.2	0.01642634		4072.2	-0.01284832
362.39	0.22792103		892.39	0.03197011		1422.38	0.04513826		1952.39	-0.01074842		2482.38	0.01559819		3012.41	0.00869694		3542.4	0.01643249		4072.4	-0.01278296
362.59	0.227454		892.59	0.03145667		1422.58	0.04494739		1952.59	-0.01126652		2482.58	0.01619757		3012.61	0.00776629		3542.6	0.01591735		4072.6	-0.01171647
362.79	0.22772347		892.79	0.03177988		1422.78	0.04583577		1952.79	-0.01049444		2482.78	0.01645385		3012.81	0.00790615		3542.8	0.01402588		4072.8	-0.01230464
362.99	0.22799301		892.99	0.0313692		1422.98	0.04667937		1952.99	-0.01075196		2482.98	0.01562181		3013.01	0.00796092		3543	0.01319937		4073	-0.01156008
363.19	0.22807427		893.19	0.03115069		1423.18	0.04707		1953.19	-0.01038849		2483.18	0.01576486		3013.21	0.00772177		3543.2	0.01315051		4073.2	-0.01142118
363.39	0.22822757		893.39	0.03140979		1423.38	0.04755921		1953.39	-0.01098397		2483.38	0.015039		3013.41	0.00781829		3543.4	0.01155126		4073.4	-0.01000899
363.59	0.22871788		893.59	0.0315231		1423.58	0.04814138		1953.59	-0.01081866		2483.58	0.01489616		3013.61	0.00807944		3543.6	0.01142974		4073.6	-0.0097369
363.79	0.22871688		893.79	0.0317701		1423.78	0.04813905		1953.79	-0.01107746		2483.78	0.01509577		3013.81	0.00835764		3543.8	0.01105017		4073.8	-0.00937535
363.99	0.22859393		893.99	0.03173353		1423.98	0.0483699		1953.99	-0.01206601		2483.98	0.01501275		3014.01	0.00732706		3544	0.01061844		4074	-0.00872336
364.19	0.22933909		894.19	0.03224368		1424.18	0.0480272		1954.19	-0.01225734		2484.18	0.0149983		3014.21	0.00721144		3544.2	0.01109847		4074.2	-0.00830919
364.39	0.22912044		894.39	0.03249025		1424.38	0.04755281		1954.39	-0.01172972		2484.38	0.01504199		3014.41	0.00660795		3544.4	0.01084312		4074.4	-0.00785724
364.59	0.22972459		894.59	0.0330836		1424.58	0.04788057		1954.59	-0.01115061		2484.58	0.01605081		3014.61	0.00718793		3544.6	0.01172609		4074.6	-0.00872119
364.79	0.22973447		894.79	0.03468972		1424.78	0.0473921		1954.79	-0.01117415		2484.78	0.01632785		3014.81	0.00763685		3544.8	0.01228387		4074.8	-0.00887054
364.99	0.23035009		894.99	0.03549157		1424.98	0.045648		1954.99	-0.01018709		2484.98	0.01674787		3015.01	0.00848512		3545	0.0130746		4075	-0.00906205
365.19	0.23035543		895.19	0.03508278		1425.18	0.04597761		1955.19	-0.00968553		2485.18	0.01804512		3015.21	0.00899034		3545.2	0.01304228		4075.2	-0.01019973
365.39	0.23068592		895.39	0.03530532		1425.38	0.04597532		1955.39	-0.00942078		2485.38	0.01817389		3015.41	0.00902749		3545.4	0.01327908		4075.4	-0.00921898
365.59	0.23063286		895.59	0.03504406		1425.58	0.0462031		1955.59	-0.00946504		2485.58	0.01723316		3015.61	0.00868657		3545.6	0.01428703		4075.6	-0.00983786
365.79	0.23045277		895.79	0.03481942		1425.78	0.04628156		1955.79	-0.00807836		2485.78	0.0172106		3015.81	0.00830703		3545.8	0.01381315		4075.8	-0.01049095
365.99	0.23035483		895.99	0.03424391		1425.98	0.04587609		1955.99	-0.00856139		2485.98	0.01745351		3016.01	0.00805884		3546	0.01402507		4076	-0.01065753
366.19	0.23018567		896.19	0.03486725		1426.18	0.0460492		1956.19	-0.00728002		2486.18	0.01725922		3016.21	0.00720704		3546.2	0.01398297		4076.2	-0.01004571
366.39	0.2297995		896.39	0.03476601		1426.38	0.04620098		1956.39	-0.00700343		2486.38	0.01736327		3016.41	0.00664136		3546.4	0.01486126		4076.4	-0.00958482
366.59	0.22895317		896.59	0.03456553		1426.58	0.04579356		1956.59	-0.00643353		2486.58	0.01816447		3016.61	0.00627645		3546.6	0.01497808		4076.6	-0.00921034
366.79	0.22913114		896.79	0.0356245		1426.78	0.04682038		1956.79	-0.00586369		2486.78	0.0183092		3016.81	0.00623563		3546.8	0.01440034		4076.8	-0.00980107
366.99	0.22929758		896.99	0.03535116		1426.98	0.04706219		1956.99	-0.00661806		2486.98	0.01858359		3017.01	0.00571774		3547	0.01470864		4077	-0.00996025
367.19	0.22949667		897.19	0.03551096		1427.18	0.04718046		1957.19	-0.0062768		2487.18	0.01822905		3017.21	0.00506611		3547.2	0.01424725		4077.2	-0.00986895
367.39	0.22937258		897.39	0.03598221		1427.38	0.04720355		1957.39	-0.00678888		2487.38	0.01810492		3017.41	0.00541613		3547.4	0.01365711		4077.4	-0.00902361
367.59	0.22865857		897.59	0.03572433		1427.58	0.04720131		1957.59	-0.00766248		2487.58	0.01885807		3017.61	0.00566803		3547.6	0.01384533		4077.6	-0.00936805
367.79	0.22839375		897.79	0.0359312		1427.78	0.04734585		1957.79	-0.00806654		2487.78	0.01914655		3017.81	0.00534919		3547.8	0.01341903		4077.8	-0.00932734
367.99	0.22894428		897.99	0.03604563		1427.98	0.04694695		1957.99	-0.00833258		2487.98	0.0186334		3018.01	0.00517912		3548	0.01293352		4078	-0.00840646
368.19	0.22987654		898.19	0.03647576		1428.18	0.04698134		1958.19	-0.00810826		2488.18	0.01865112		3018.21	0.00609493		3548.2	0.01218209		4078.2	-0.00837625
368.39	0.22935474		898.39	0.03625172		1428.38	0.04677627		1958.39	-0.0075245		2488.38	0.01886487		3018.41	0.00639234		3548.4	0.01235141		4078.4	-0.00777368
368.59	0.2292989		898.59	0.03670724		1428.58	0.0464798		1958.59	-0.00795976		2488.58	0.01885696		3018.61	0.00710215		3548.6	0.01210839		4078.6	-0.00800492
368.79	0.22963696		898.79	0.03692058		1428.78	0.0454306		1958.79	-0.00829747		2488.78	0.01912868		3018.81	0.00772953		3548.8	0.01243894		4078.8	-0.00818419
368.99	0.229252		898.99	0.03599651		1428.98	0.04501697		1958.99	-0.00819815		2488.98	0.01832374		3019.01	0.00723878		3549	0.01330131		4079	-0.00823944
369.19	0.22890213		899.19	0.03586596		1429.18	0.04601432		1959.19	-0.00885928		2489.18	0.01823915		3019.21	0.00737602		3549.2	0.01262092		4079.2	-0.00861834
369.39	0.22932648		899.39	0.0357303		1429.38	0.04557741		1959.39	-0.00914335		2489.38	0.01789834		3019.41	0.00690704		3549.4	0.01240594		4079.4	-0.00802629
369.59	0.22882391		899.59	0.03526613		1429.58	0.04611922		1959.59	-0.00980094		2489.58	0.01619621		3019.61	0.00700821		3549.6	0.01197511		4079.6	-0.00860284
369.79	0.22795559		899.79	0.03567621		1429.78	0.04532319		1959.79	-0.00910566		2489.78	0.01630008		3019.81	0.00634511		3549.8	0.01133708		4079.8	-0.00924102
369.99	0.22787288		899.99	0.03628493		1429.98	0.04438315		1959.99	-0.0100652		2489.98	0.01686277		3020.01	0.00627286		3550	0.01178853		4080	-0.00984112
370.19	0.22797216		900.19	0.03623005		1430.18	0.04333048		1960.19	-0.01022147		2490.18	0.01637115		3020.21	0.00529189		3550.2	0.0120408		4080.2	-0.01032292
370.39	0.22868817		900.39	0.03596973		1430.38	0.04369694		1960.39	-0.0107875		2490.38	0.0164751		3020.41	0.00530692		3550.4	0.01226885		4080.4	-0.01005706
370.59	0.22904478		900.59	0.035328		1430.58	0.04424938		1960.59	-0.01097855		2490.58	0.01643799		3020.61	0.00493701		3550.6	0.01275539		4080.6	-0.01082985
370.79	0.22974126		900.79	0.03503703		1430.78	0.04471397		1960.79	-0.01145039		2490.78	0.01640463		3020.81	0.00389403		3550.8	0.01173661		4080.8	-0.01137133
370.99	0.23007411		900.99	0.03406249		1430.98	0.04538489		1960.99	-0.01215906		2490.98	0.01609709		3021.01	0.0033787		3551	0.01160736		4081	-0.01173662
371.19	0.23117935		901.19	0.03358221		1431.18	0.04483484		1961.19	-0.01197066		2491.18	0.01529486		3021.21	0.00443348		3551.2	0.01226694		4081.2	-0.01135475
371.39	0.23210746		901.39	0.03357468		1431.38	0.04474231		1961.39	-0.01160629		2491.38	0.01446854		3021.41	0.00444628		3551.4	0.01373113		4081.4	-0.01097269
371.59	0.23269392		901.59	0.03312381		1431.58	0.04574388		1961.59	-0.01132471		2491.58	0.01443665		3021.61	0.00456112		3551.6	0.01371984		4081.6	-0.01168881
371.79	0.23350656		901.79	0.03267071		1431.78	0.04707425		1961.79	-0.01057089		2491.78	0.01433871		3021.81	0.00528295		3551.8	0.01308935		4081.8	-0.01156325
371.99	0.23453103		901.99	0.0317927		1431.98	0.04720665		1961.99	-0.00986937		2491.98	0.01459615		3022.01	0.00634487		3552	0.0123563		4082	-0.01075883
372.19	0.23481991		902.19	0.03130191		1432.18	0.0472564		1962.19	-0.00920576		2492.18	0.01519084		3022.21	0.00546078		3552.2	0.0121815		4082.2	-0.01083402
372.39	0.23592774		902.39	0.03100732		1432.38	0.04728014		1962.39	-0.00878568		2492.38	0.01545699		3022.41	0.00569801		3552.4	0.01312958		4082.4	-0.01001441
372.59	0.23635378		902.59	0.03096786		1432.58	0.04686722		1962.59	-0.0092689		2492.58	0.01558865		3022.61	0.00522629		3552.6	0.01395064		4082.6	-0.01047188
372.79	0.23725907		902.79	0.03084163		1432.78	0.04717113		1962.79	-0.00859734		2492.78	0.01577125		3022.81	0.00463297		3552.8	0.01493575		4082.8	-0.01069475
372.99	0.23750278		902.99	0.03113629		1432.98	0.04778146		1962.99	-0.00849094		2492.98	0.01571029		3023.01	0.00407966		3553	0.01557049		4083	-0.01097945
373.19	0.23756236		903.19	0.03150409		1433.18	0.04891057		1963.19	-0.00860359		2493.18	0.01536319		3023.21	0.0048515		3553.2	0.0141432		4083.2	-0.01127558
373.39	0.23713662		903.39	0.03134782		1433.38	0.04954274		1963.39	-0.00852055		2493.38	0.01525395		3023.41	0.00440973		3553.4	0.01423432		4083.4	-0.01153645
373.59	0.23626137		903.59	0.03207628		1433.58	0.05025602		1963.59	-0.0090508		2493.58	0.01484926		3023.61	0.0045358		3553.6	0.01462843		4083.6	-0.01223895
373.79	0.23493526		903.79	0.0333732		1433.78	0.04953421		1963.79	-0.0096377		2493.78	0.01587755		3023.81	0.00447386		3553.8	0.01441909		4083.8	-0.01203907
373.99	0.23494471		903.99	0.03322099		1433.98	0.04992901		1963.99	-0.00962478		2493.98	0.01574807		3024.01	0.00439637		3554	0.01438459		4084	-0.01158964
374.19	0.23444957		904.19	0.03314415		1434.18	0.05000346		1964.19	-0.00944588		2494.18	0.0143662		3024.21	0.00413586		3554.2	0.01473703		4084.2	-0.01174378
374.39	0.23443309		904.39	0.03355474		1434.38	0.05051206		1964.39	-0.00933262		2494.38	0.01531547		3024.41	0.0038712		3554.4	0.01462851		4084.4	-0.00978745
374.59	0.23381045		904.59	0.03354274		1434.58	0.05081681		1964.59	-0.00959992		2494.58	0.0150799		3024.61	0.0034882		3554.6	0.01519455		4084.6	-0.01007141
374.79	0.23393072		904.79	0.03483532		1434.78	0.05105406		1964.79	-0.01057158		2494.78	0.0150397		3024.81	0.00428731		3554.8	0.01535519		4084.8	-0.01000301
374.99	0.23402688		904.99	0.03525031		1434.98	0.05165677		1964.99	-0.01062278		2494.98	0.0145045		3025.01	0.00502759		3555	0.01653869		4085	-0.00961503
375.19	0.23516931		905.19	0.03459961		1435.18	0.05188945		1965.19	-0.01054821		2495.18	0.01451291		3025.21	0.00657498		3555.2	0.01732789		4085.2	-0.00877213
375.39	0.23521329		905.39	0.03483648		1435.38	0.05241634		1965.39	-0.01070509		2495.38	0.01384481		3025.41	0.00592774		3555.4	0.01761886		4085.4	-0.00902832
375.59	0.23482969		905.59	0.03482027		1435.58	0.05310043		1965.59	-0.01158801		2495.58	0.0152155		3025.61	0.00649269		3555.6	0.01577595		4085.6	-0.00954139
375.79	0.23440947		905.79	0.03481018		1435.78	0.0525966		1965.79	-0.01182147		2495.78	0.01699808		3025.81	0.00745639		3555.8	0.0145783		4085.8	-0.00957742
375.99	0.23491241		905.99	0.03486094		1435.98	0.05134748		1965.99	-0.01214406		2495.98	0.01800945		3026.01	0.00806126		3556	0.01402671		4086	-0.00939036
376.19	0.23517183		906.19	0.0343002		1436.18	0.0506153		1966.19	-0.01232316		2496.18	0.01882981		3026.21	0.0075384		3556.2	0.01497552		4086.2	-0.00953525
376.39	0.2362601		906.39	0.03414885		1436.38	0.05025578		1966.39	-0.01190371		2496.38	0.0184762		3026.41	0.00835324		3556.4	0.01581373		4086.4	-0.00943696
376.59	0.23654211		906.59	0.03398309		1436.58	0.04919757		1966.59	-0.01189301		2496.58	0.01999736		3026.61	0.00835986		3556.6	0.01699403		4086.6	-0.01047173
376.79	0.23709614		906.79	0.03399762		1436.78	0.04878517		1966.79	-0.01158432		2496.78	0.0207191		3026.81	0.00783038		3556.8	0.01593441		4086.8	-0.01079037
376.99	0.23799835		906.99	0.03459159		1436.98	0.04862673		1966.99	-0.0119707		2496.98	0.02132794		3027.01	0.00863654		3557	0.01586324		4087	-0.01205863
377.19	0.2377051		907.19	0.03442428		1437.18	0.04851451		1967.19	-0.01142055		2497.18	0.02081576		3027.21	0.00891		3557.2	0.01582881		4087.2	-0.01230295
377.39	0.23798058		907.39	0.0339449		1437.38	0.04781021		1967.39	-0.01043973		2497.38	0.02076304		3027.41	0.00827207		3557.4	0.01647161		4087.4	-0.01231989
377.59	0.23769074		907.59	0.03480373		1437.58	0.04671635		1967.59	-0.01019007		2497.58	0.019644		3027.61	0.00865236		3557.6	0.01665143		4087.6	-0.01232568
377.79	0.23745179		907.79	0.03549282		1437.78	0.046882		1967.79	-0.00973972		2497.78	0.0188087		3027.81	0.00854756		3557.8	0.01601188		4087.8	-0.0115108
377.99	0.23757754		907.99	0.03529892		1437.98	0.04725401		1967.99	-0.00877779		2497.98	0.01790758		3028.01	0.00818875		3558	0.01567734		4088	-0.01128105
378.19	0.23724524		908.19	0.03602832		1438.18	0.04725589		1968.19	-0.00834818		2498.18	0.01757052		3028.21	0.00818853		3558.2	0.01589386		4088.2	-0.01129034
378.39	0.23760922		908.39	0.03679882		1438.38	0.04738919		1968.39	-0.00867112		2498.38	0.01795002		3028.41	0.00766178		3558.4	0.01514116		4088.4	-0.01037181
378.59	0.23767351		908.59	0.03696432		1438.58	0.04782653		1968.59	-0.00903225		2498.58	0.01673999		3028.61	0.00797715		3558.6	0.01517242		4088.6	-0.01086744
378.79	0.23745884		908.79	0.03738189		1438.78	0.04834501		1968.79	-0.00926876		2498.78	0.01629589		3028.81	0.00853393		3558.8	0.0147172		4088.8	-0.01026581
378.99	0.2369984		908.99	0.03635098		1438.98	0.04894524		1968.99	-0.0090065		2498.98	0.01607936		3029.01	0.00807973		3559	0.01372206		4089	-0.00932913
379.19	0.23706876		909.19	0.03562099		1439.18	0.04920529		1969.19	-0.00942686		2499.18	0.01589846		3029.21	0.00886886		3559.2	0.01256476		4089.2	-0.00886989
379.39	0.2362756		909.39	0.03604222		1439.38	0.04893291		1969.39	-0.01006047		2499.38	0.0157124		3029.41	0.00883508		3559.4	0.01134032		4089.4	-0.00915616
379.59	0.23593251		909.59	0.03594614		1439.58	0.0490132		1969.59	-0.01039901		2499.58	0.01643413		3029.61	0.00949437		3559.6	0.00970088		4089.6	-0.0087128
379.79	0.2358039		909.79	0.03546198		1439.78	0.04877019		1969.79	-0.01052794		2499.78	0.01734712		3029.81	0.01023212		3559.8	0.00917029		4089.8	-0.00829599
379.99	0.2358039		909.99	0.03546198		1439.98	0.04877019		1969.99	-0.01052794		2499.98	0.01734712		3030.01	0.01023212		3560	0.00917029		4090	-0.00829599
380.19	0.2359527		910.19	0.03542962		1440.18	0.04909818		1970.19	-0.01004523		2500.18	0.01738505		3030.21	0.00994369		3560.2	0.00850633		4090.2	-0.00839191
380.39	0.23634419		910.39	0.03502829		1440.38	0.04941863		1970.39	-0.00984158		2500.38	0.01712537		3030.41	0.01018387		3560.4	0.00766228		4090.4	-0.00825729
380.59	0.2369037		910.59	0.03559974		1440.58	0.04981497		1970.59	-0.00975136		2500.58	0.01786982		3030.61	0.01005838		3560.6	0.00688561		4090.6	-0.00758218
380.79	0.23716781		910.79	0.03578531		1440.78	0.05014658		1970.79	-0.00976555		2500.78	0.01842923		3030.81	0.00958207		3560.8	0.00616098		4090.8	-0.00721684
380.99	0.23706185		910.99	0.03670287		1440.98	0.05090701		1970.99	-0.00951447		2500.98	0.01878517		3031.01	0.00898236		3561	0.00592677		4091	-0.00676108
381.19	0.23785705		911.19	0.03793767		1441.18	0.05167988		1971.19	-0.00963038		2501.18	0.01887015		3031.21	0.00931117		3561.2	0.00590874		4091.2	-0.00561282
381.39	0.23846415		911.39	0.03861083		1441.38	0.05286453		1971.39	-0.00974832		2501.38	0.01976678		3031.41	0.00968272		3561.4	0.00537152		4091.4	-0.0056576
381.59	0.2379878		911.59	0.03971349		1441.58	0.05365901		1971.59	-0.01042138		2501.58	0.02036992		3031.61	0.00983644		3561.6	0.00528994		4091.6	-0.00517631
381.79	0.23854054		911.79	0.03982403		1441.78	0.0541852		1971.79	-0.01123631		2501.78	0.02019351		3031.81	0.00988016		3561.8	0.00551184		4091.8	-0.00530287
381.99	0.23832809		911.99	0.04036321		1441.98	0.05511521		1971.99	-0.01121536		2501.98	0.02013196		3032.01	0.01031041		3562	0.00581382		4092	-0.00528398
382.19	0.23911003		912.19	0.04098675		1442.18	0.05505405		1972.19	-0.01158544		2502.18	0.01987513		3032.21	0.01024778		3562.2	0.00666156		4092.2	-0.00599861
382.39	0.23961506		912.39	0.04081863		1442.38	0.05548645		1972.39	-0.01265901		2502.38	0.0192023		3032.41	0.00963969		3562.4	0.00585023		4092.4	-0.00619799
382.59	0.23974058		912.59	0.04123119		1442.58	0.05596962		1972.59	-0.01260486		2502.58	0.01788967		3032.61	0.00911733		3562.6	0.0060241		4092.6	-0.00631468
382.79	0.24055019		912.79	0.04177521		1442.78	0.05610554		1972.79	-0.0123013		2502.78	0.01708584		3032.81	0.009047		3562.8	0.00578781		4092.8	-0.00648859
382.99	0.24093918		912.99	0.04144124		1442.98	0.05614266		1972.99	-0.01240457		2502.98	0.01667894		3033.01	0.00904435		3563	0.00575646		4093	-0.00635166
383.19	0.24161344		913.19	0.04172825		1443.18	0.05600853		1973.19	-0.01127794		2503.18	0.01607435		3033.21	0.00849162		3563.2	0.00542516		4093.2	-0.00629812
383.39	0.24219752		913.39	0.04198107		1443.38	0.05629361		1973.39	-0.01090224		2503.38	0.01589933		3033.41	0.00937074		3563.4	0.00512514		4093.4	-0.00572742
383.59	0.24242217		913.59	0.04239284		1443.58	0.05624931		1973.59	-0.01085935		2503.58	0.01585703		3033.61	0.01036758		3563.6	0.00511763		4093.6	-0.00584757
383.79	0.24209899		913.79	0.04281668		1443.78	0.05591061		1973.79	-0.01055407		2503.78	0.01566487		3033.81	0.01038284		3563.8	0.00555653		4093.8	-0.00549905
383.99	0.24186616		913.99	0.04290909		1443.98	0.05470303		1973.99	-0.01063594		2503.98	0.01509904		3034.01	0.01047411		3564	0.00578804		4094	-0.00543354
384.19	0.24161819		914.19	0.04215783		1444.18	0.05482261		1974.19	-0.01060613		2504.18	0.01476412		3034.21	0.01119844		3564.2	0.00509538		4094.2	-0.0049833
384.39	0.24229645		914.39	0.0417123		1444.38	0.05464526		1974.39	-0.01061695		2504.38	0.01552763		3034.41	0.0113561		3564.4	0.00433664		4094.4	-0.00490845
384.59	0.24269463		914.59	0.04275489		1444.58	0.05455706		1974.59	-0.01079856		2504.58	0.01627942		3034.61	0.01072498		3564.6	0.00505198		4094.6	-0.00440492
384.79	0.24255123		914.79	0.04267469		1444.78	0.05469826		1974.79	-0.01063385		2504.78	0.01626953		3034.81	0.00983289		3564.8	0.00568778		4094.8	-0.00406156
384.99	0.24219225		914.99	0.04270774		1444.98	0.05489303		1974.99	-0.01062178		2504.98	0.016518		3035.01	0.00935137		3565	0.00631356		4095	-0.00354461
385.19	0.24269519		915.19	0.04358858		1445.18	0.05520726		1975.19	-0.0108203		2505.18	0.01703232		3035.21	0.00996173		3565.2	0.00677555		4095.2	-0.00328319
385.39	0.2416566		915.39	0.04273529		1445.38	0.05505789		1975.39	-0.01102332		2505.38	0.01801665		3035.41	0.01018021		3565.4	0.00628678		4095.4	-0.00417524
385.59	0.24082044		915.59	0.04235653		1445.58	0.05479096		1975.59	-0.01140351		2505.58	0.01848018		3035.61	0.00964918		3565.6	0.0066609		4095.6	-0.00368815
385.79	0.24084663		915.79	0.04182172		1445.78	0.05438763		1975.79	-0.01135332		2505.78	0.01845173		3035.81	0.00960583		3565.8	0.0077184		4095.8	-0.00490178
385.99	0.24099632		915.99	0.04217582		1445.98	0.05445156		1975.99	-0.01086468		2505.98	0.01789445		3036.01	0.00964693		3566	0.00776345		4096	-0.00425199
386.19	0.24156381		916.19	0.04248967		1446.18	0.05327073		1976.19	-0.01192816		2506.18	0.01740055		3036.21	0.00912847		3566.2	0.00749576		4096.2	-0.00470719
386.39	0.2414867		916.39	0.04246838		1446.38	0.053883		1976.39	-0.01202128		2506.38	0.01656975		3036.41	0.00879211		3566.4	0.00697125		4096.4	-0.00458497
386.59	0.24120692		916.59	0.04252252		1446.58	0.05384552		1976.59	-0.01246992		2506.58	0.01611839		3036.61	0.00859003		3566.6	0.00691619		4096.6	-0.00500719
386.79	0.2417825		916.79	0.0422793		1446.78	0.05403996		1976.79	-0.0131437		2506.78	0.01608265		3036.81	0.00916629		3566.8	0.00614322		4096.8	-0.00424569
386.99	0.24178339		916.99	0.04271855		1446.98	0.05321325		1976.99	-0.01337347		2506.98	0.01666272		3037.01	0.01023243		3567	0.00524112		4097	-0.00327573
387.19	0.24239985		917.19	0.04316831		1447.18	0.05342999		1977.19	-0.01303257		2507.18	0.01688468		3037.21	0.01102277		3567.2	0.00568859		4097.2	-0.0031467
387.39	0.24235337		917.39	0.04268428		1447.38	0.05354271		1977.39	-0.01295895		2507.38	0.01646596		3037.41	0.01245198		3567.4	0.00578884		4097.4	-0.00282439
387.59	0.24187485		917.59	0.04247476		1447.58	0.05389273		1977.59	-0.0120705		2507.58	0.01661857		3037.61	0.01254627		3567.6	0.00547738		4097.6	-0.00284064
387.79	0.24168068		917.79	0.04225358		1447.78	0.05425553		1977.79	-0.01093992		2507.78	0.0164853		3037.81	0.01214941		3567.8	0.0054074		4097.8	-0.00288471
387.99	0.24228641		917.99	0.04145911		1447.98	0.05321045		1977.99	-0.0102415		2507.98	0.01533121		3038.01	0.01177599		3568	0.00508482		4098	-0.00178253
388.19	0.24284935		918.19	0.04074691		1448.18	0.055016		1978.19	-0.01017887		2508.18	0.0158269		3038.21	0.01149817		3568.2	0.00399684		4098.2	-0.0014625
388.39	0.24421109		918.39	0.04099812		1448.38	0.05567466		1978.39	-0.0092348		2508.38	0.01585349		3038.41	0.01095204		3568.4	0.00443246		4098.4	-0.0018651
388.59	0.24495934		918.59	0.04129446		1448.58	0.05614047		1978.59	-0.00920423		2508.58	0.01541379		3038.61	0.01003386		3568.6	0.00569058		4098.6	-0.00166737
388.79	0.24514587		918.79	0.04050467		1448.78	0.05691779		1978.79	-0.00852351		2508.78	0.01486525		3038.81	0.00938303		3568.8	0.00532238		4098.8	-0.00181388
388.99	0.24500271		918.99	0.03985963		1448.98	0.05682066		1978.99	-0.00734803		2508.98	0.01524183		3039.01	0.00930418		3569	0.00535803		4099	-0.00189103
389.19	0.24499565		919.19	0.04078895		1449.18	0.05676554		1979.19	-0.00591206		2509.18	0.01515933		3039.21	0.00993804		3569.2	0.00552149		4099.2	-0.00223923
389.39	0.24449518		919.39	0.03989636		1449.38	0.05607686		1979.39	-0.00590509		2509.38	0.01523857		3039.41	0.00940566		3569.4	0.00510096		4099.4	-0.00231952
389.59	0.24459037		919.59	0.03959444		1449.58	0.05608544		1979.59	-0.00556603		2509.58	0.01519669		3039.61	0.00885712		3569.6	0.00638871		4099.6	-0.00244517
389.79	0.24515123		919.79	0.03995327		1449.78	0.05586859		1979.79	-0.00575164		2509.78	0.01502436		3039.81	0.00958613		3569.8	0.00687518		4099.8	-0.0020932
389.99	0.24598113		919.99	0.04079703		1449.98	0.05539372		1979.99	-0.00667743		2509.98	0.01387499		3040.01	0.0098688		3570	0.00597357		4100	-0.00080039
390.19	0.24626788		920.19	0.04190099		1450.18	0.05537641		1980.19	-0.00854231		2510.18	0.01332254		3040.21	0.01012541		3570.2	0.00604425		4100.2	-0.00161326
390.39	0.24570814		920.39	0.04221428		1450.38	0.05500771		1980.39	-0.00931773		2510.38	0.01313277		3040.41	0.01051682		3570.4	0.00580117		4100.4	-0.00172455
390.59	0.24531139		920.59	0.04223465		1450.58	0.05371261		1980.59	-0.01048216		2510.58	0.01343304		3040.61	0.01100426		3570.6	0.00561455		4100.6	-0.00256718
390.79	0.24532781		920.79	0.04300451		1450.78	0.05344961		1980.79	-0.01049893		2510.78	0.0136573		3040.81	0.01117879		3570.8	0.00518514		4100.8	-0.00223945
390.99	0.24565617		920.99	0.04387044		1450.98	0.05290397		1980.99	-0.01059877		2510.98	0.01409832		3041.01	0.01140535		3571	0.00541446		4101	-0.00246305
391.19	0.24523435		921.19	0.04383796		1451.18	0.0529787		1981.19	-0.01087981		2511.18	0.01464693		3041.21	0.01022868		3571.2	0.00598411		4101.2	-0.00282684
391.39	0.24474342		921.39	0.04392974		1451.38	0.0526267		1981.39	-0.01073406		2511.38	0.01446685		3041.41	0.00989824		3571.4	0.0060579		4101.4	-0.00316104
391.59	0.2443768		921.59	0.04387026		1451.58	0.05316295		1981.59	-0.00995744		2511.58	0.0155731		3041.61	0.00953293		3571.6	0.00628381		4101.6	-0.00385774
391.79	0.24440685		921.79	0.04377692		1451.78	0.05293332		1981.79	-0.00991434		2511.78	0.01562951		3041.81	0.009617		3571.8	0.00673726		4101.8	-0.00373788
391.99	0.24518462		921.99	0.04323755		1451.98	0.05208115		1981.99	-0.0103853		2511.98	0.01567307		3042.01	0.00946199		3572	0.0062101		4102	-0.00279969
392.19	0.24438798		922.19	0.04327442		1452.18	0.05462944		1982.19	-0.01100046		2512.18	0.01701993		3042.21	0.0095004		3572.2	0.00574177		4102.2	-0.00303169
392.39	0.2435374		922.39	0.0437553		1452.38	0.05522153		1982.39	-0.01120013		2512.38	0.01752976		3042.41	0.01016889		3572.4	0.00598726		4102.4	-0.00288015
392.59	0.24319838		922.59	0.04321312		1452.58	0.05585346		1982.59	-0.01136568		2512.58	0.01751328		3042.61	0.01026664		3572.6	0.00603806		4102.6	-0.00268167
392.79	0.24202667		922.79	0.04303286		1452.78	0.05665619		1982.79	-0.0101047		2512.78	0.01756611		3042.81	0.01084306		3572.8	0.00535607		4102.8	-0.00252723
392.99	0.24134126		922.99	0.04360761		1452.98	0.05643754		1982.99	-0.00861091		2512.98	0.01760229		3043.01	0.01109525		3573	0.00551441		4103	-0.00181909
393.19	0.24157599		923.19	0.04386055		1453.18	0.05624427		1983.19	-0.00839011		2513.18	0.01705456		3043.21	0.01125004		3573.2	0.00564453		4103.2	-0.00212619
393.39	0.24118762		923.39	0.04390792		1453.38	0.05642689		1983.39	-0.0087037		2513.38	0.01724608		3043.41	0.01166329		3573.4	0.00568049		4103.4	-0.0019046
393.59	0.24096817		923.59	0.04382285		1453.58	0.05710851		1983.59	-0.00871355		2513.58	0.01685739		3043.61	0.01325029		3573.6	0.00620131		4103.6	-0.0018902
393.79	0.24187838		923.79	0.04415755		1453.78	0.05719745		1983.79	-0.00887983		2513.78	0.01646655		3043.81	0.0144453		3573.8	0.00496859		4103.8	-0.00148655
393.99	0.24189184		923.99	0.04507139		1453.98	0.05722953		1983.99	-0.00946927		2513.98	0.01548555		3044.01	0.01539452		3574	0.00445415		4104	-0.00221833
394.19	0.24273274		924.19	0.04511438		1454.18	0.05694694		1984.19	-0.00942692		2514.18	0.0148143		3044.21	0.01588569		3574.2	0.00491801		4104.2	-0.00295901
394.39	0.24268587		924.39	0.04465021		1454.38	0.056086		1984.39	-0.00903424		2514.38	0.01508865		3044.41	0.01602335		3574.4	0.00394488		4104.4	-0.00280306
394.59	0.24390907		924.59	0.04493404		1454.58	0.0549208		1984.59	-0.00879284		2514.58	0.01383487		3044.61	0.01529636		3574.6	0.0039457		4104.6	-0.00419904
394.79	0.24496321		924.79	0.04546307		1454.78	0.05426069		1984.79	-0.00844047		2514.78	0.01228551		3044.81	0.01441825		3574.8	0.00328166		4104.8	-0.00439013
394.99	0.24568075		924.99	0.04471978		1454.98	0.05317193		1984.99	-0.00892189		2514.98	0.01234556		3045.01	0.01401501		3575	0.00442484		4105	-0.00478357
395.19	0.24501151		925.19	0.04468089		1455.18	0.05211495		1985.19	-0.00977036		2515.18	0.01243787		3045.21	0.01355648		3575.2	0.00412701		4105.2	-0.00523409
395.39	0.24523751		925.39	0.0444426		1455.38	0.05177872		1985.39	-0.00993072		2515.38	0.0124155		3045.41	0.01390033		3575.4	0.00371846		4105.4	-0.00509129
395.59	0.24566385		925.59	0.04486833		1455.58	0.051794		1985.59	-0.0098853		2515.58	0.01222828		3045.61	0.01328358		3575.6	0.00297742		4105.6	-0.00541153
395.79	0.24612251		925.79	0.04568453		1455.78	0.05097878		1985.79	-0.01017138		2515.78	0.01185431		3045.81	0.01320195		3575.8	0.00321008		4105.8	-0.00413916
395.99	0.24663464		925.99	0.04564573		1455.98	0.05056939		1985.99	-0.0105414		2515.98	0.01285275		3046.01	0.01264134		3576	0.00292179		4106	-0.00344329
396.19	0.24566125		926.19	0.04562		1456.18	0.0516921		1986.19	-0.0104431		2516.18	0.01322177		3046.21	0.01221771		3576.2	0.00326313		4106.2	-0.00313717
396.39	0.24568847		926.39	0.04499817		1456.38	0.0514009		1986.39	-0.01064838		2516.38	0.01368017		3046.41	0.01217829		3576.4	0.00373856		4106.4	-0.00284147
396.59	0.24637379		926.59	0.04503465		1456.58	0.05116978		1986.59	-0.01035632		2516.58	0.01365668		3046.61	0.01142279		3576.6	0.00399756		4106.6	-0.00193526
396.79	0.24623462		926.79	0.04479051		1456.78	0.05142967		1986.79	-0.00933385		2516.78	0.01320813		3046.81	0.01056005		3576.8	0.00404064		4106.8	-0.00183762
396.99	0.24666042		926.99	0.04466743		1456.98	0.05194177		1986.99	-0.00882424		2516.98	0.01336522		3047.01	0.0100876		3577	0.0049056		4107	-0.00109327
397.19	0.24653606		927.19	0.04411266		1457.18	0.05273985		1987.19	-0.00859866		2517.18	0.01430389		3047.21	0.01015064		3577.2	0.00551178		4107.2	-0.00142342
397.39	0.24594522		927.39	0.04392801		1457.38	0.05358757		1987.39	-0.00758491		2517.38	0.01480019		3047.41	0.01017361		3577.4	0.00576879		4107.4	-0.00138701
397.59	0.24603132		927.59	0.04350028		1457.58	0.05448689		1987.59	-0.00775722		2517.58	0.01489351		3047.61	0.01018728		3577.6	0.00513694		4107.6	-0.00192617
397.79	0.24646678		927.79	0.04282422		1457.78	0.0545689		1987.79	-0.00694814		2517.78	0.01427747		3047.81	0.00976576		3577.8	0.00497115		4107.8	-0.00198234
397.99	0.24644534		927.99	0.04242442		1457.98	0.05522113		1987.99	-0.00685662		2517.98	0.0133442		3048.01	0.00960567		3578	0.00537314		4108	-0.00182676
398.19	0.24686		928.19	0.04193272		1458.18	0.05468414		1988.19	-0.00652968		2518.18	0.01269576		3048.21	0.00892941		3578.2	0.00544127		4108.2	-0.00233972
398.39	0.24671427		928.39	0.04217841		1458.38	0.05508769		1988.39	-0.00689894		2518.38	0.01252973		3048.41	0.00837445		3578.4	0.00475773		4108.4	-0.00248183
398.59	0.24688889		928.59	0.04268319		1458.58	0.05384294		1988.59	-0.00727301		2518.58	0.01144499		3048.61	0.0076134		3578.6	0.00537008		4108.6	-0.0032005
398.79	0.24703775		928.79	0.0427511		1458.78	0.05427721		1988.79	-0.00841042		2518.78	0.01151771		3048.81	0.00702425		3578.8	0.00493197		4108.8	-0.0020678
398.99	0.24669658		928.99	0.04262316		1458.98	0.0544245		1988.99	-0.00941692		2518.98	0.01239434		3049.01	0.0072345		3579	0.00508493		4109	-0.00186499
399.19	0.24552869		929.19	0.04334565		1459.18	0.05567542		1989.19	-0.00999169		2519.18	0.01269449		3049.21	0.00782141		3579.2	0.00380828		4109.2	-0.00139555
399.39	0.24520373		929.39	0.04384339		1459.38	0.05615248		1989.39	-0.00944225		2519.38	0.01233896		3049.41	0.00780321		3579.4	0.00268178		4109.4	-0.00106412
399.59	0.24592999		929.59	0.04472538		1459.58	0.05606942		1989.59	-0.00959841		2519.58	0.01231545		3049.61	0.00817729		3579.6	0.00266871		4109.6	-0.00082979
399.79	0.2467553		929.79	0.04468998		1459.78	0.05600046		1989.79	-0.00965074		2519.78	0.01305718		3049.81	0.00915788		3579.8	0.00352713		4109.8	-0.00073679
399.99	0.24682789		929.99	0.04367887		1459.98	0.056246		1989.99	-0.01017253		2519.98	0.01381949		3050.01	0.00893972		3580	0.00326784		4110	-0.00140465
400.19	0.24712823		930.19	0.04335704		1460.18	0.05612447		1990.19	-0.01065667		2520.18	0.01415999		3050.21	0.00941999		3580.2	0.00415668		4110.2	-0.00166377
400.39	0.24768927		930.39	0.04328018		1460.38	0.05588026		1990.39	-0.01109708		2520.38	0.01435098		3050.41	0.00953781		3580.4	0.00445455		4110.4	-0.00159483
400.59	0.24749046		930.59	0.04334464		1460.58	0.05649536		1990.59	-0.01111701		2520.58	0.01404075		3050.61	0.00993542		3580.6	0.00491378		4110.6	-0.00214221
400.79	0.24780568		930.79	0.04298207		1460.78	0.05757582		1990.79	-0.01045819		2520.78	0.01352609		3050.81	0.01041158		3580.8	0.00615739		4110.8	-0.00187642
400.99	0.24776335		930.99	0.04274726		1460.98	0.0577083		1990.99	-0.01050249		2520.98	0.0141608		3051.01	0.01146895		3581	0.00691115		4111	-0.00176912
401.19	0.24796279		931.19	0.04294412		1461.18	0.0576696		1991.19	-0.00985498		2521.18	0.01371989		3051.21	0.01143871		3581.2	0.00721807		4111.2	-0.00368106
401.39	0.24780986		931.39	0.04234961		1461.38	0.05811647		1991.39	-0.00922528		2521.38	0.01328971		3051.41	0.01145651		3581.4	0.00725448		4111.4	-0.00470142
401.59	0.24776393		931.59	0.04320714		1461.58	0.0579013		1991.59	-0.00865089		2521.58	0.01270914		3051.61	0.01196372		3581.6	0.00669092		4111.6	-0.00506104
401.79	0.24719643		931.79	0.04275018		1461.78	0.05722654		1991.79	-0.00847895		2521.78	0.01201674		3051.81	0.01186746		3581.8	0.00689149		4111.8	-0.00554034
401.99	0.24753034		931.99	0.04300489		1461.98	0.05699341		1991.99	-0.00851897		2521.98	0.01147148		3052.01	0.01153928		3582	0.00693787		4112	-0.00618672
402.19	0.24740738		932.19	0.04297157		1462.18	0.05640965		1992.19	-0.00868976		2522.18	0.01172887		3052.21	0.01175889		3582.2	0.00684508		4112.2	-0.00684739
402.39	0.24734514		932.39	0.0437022		1462.38	0.05646774		1992.39	-0.00864256		2522.38	0.01150948		3052.41	0.01070315		3582.4	0.00696145		4112.4	-0.00611221
402.59	0.24709783		932.59	0.04371304		1462.58	0.0564062		1992.59	-0.00877776		2522.58	0.01141603		3052.61	0.01044887		3582.6	0.00684272		4112.6	-0.00541496
402.79	0.2465837		932.79	0.04390571		1462.78	0.05711907		1992.79	-0.00975139		2522.78	0.01165784		3052.81	0.01016279		3582.8	0.00572791		4112.8	-0.0041706
402.99	0.24572672		932.99	0.04349634		1462.98	0.05650165		1992.99	-0.00914901		2522.98	0.01196392		3053.01	0.01073619		3583	0.00539826		4113	-0.00377459
403.19	0.24495415		933.19	0.04357519		1463.18	0.05669928		1993.19	-0.00895624		2523.18	0.01210495		3053.21	0.01057816		3583.2	0.00555093		4113.2	-0.00311749
403.39	0.2451926		933.39	0.04326235		1463.38	0.05529408		1993.39	-0.00877091		2523.38	0.01225627		3053.41	0.00997201		3583.4	0.00482752		4113.4	-0.00232407
403.59	0.24592065		933.59	0.04257292		1463.58	0.05517368		1993.59	-0.00912676		2523.58	0.01268204		3053.61	0.00942959		3583.6	0.00523403		4113.6	-0.00174411
403.79	0.24603345		933.79	0.04241933		1463.78	0.05472518		1993.79	-0.00901362		2523.78	0.01357962		3053.81	0.00846092		3583.8	0.00524512		4113.8	-0.00171566
403.99	0.2451508		933.99	0.04216632		1463.98	0.05411404		1993.99	-0.00967741		2523.98	0.014299		3054.01	0.00753119		3584	0.00613149		4114	-0.0016648
404.19	0.24460921		934.19	0.04284843		1464.18	0.05337816		1994.19	-0.00981974		2524.18	0.01338228		3054.21	0.00779889		3584.2	0.00637876		4114.2	-0.00174496
404.39	0.24393728		934.39	0.04313205		1464.38	0.05380126		1994.39	-0.00985885		2524.38	0.01293336		3054.41	0.00695771		3584.4	0.00637439		4114.4	-0.00145926
404.59	0.24322725		934.59	0.04347154		1464.58	0.05401602		1994.59	-0.01013773		2524.58	0.01294553		3054.61	0.00721634		3584.6	0.00673808		4114.6	-0.0016153
404.79	0.24387317		934.79	0.04404608		1464.78	0.05373128		1994.79	-0.01065759		2524.78	0.01296327		3054.81	0.00736415		3584.8	0.00701472		4114.8	-0.0015489
404.99	0.24382208		934.99	0.04420639		1464.98	0.05313986		1994.99	-0.01107525		2524.98	0.01238597		3055.01	0.00752427		3585	0.00623596		4115	-0.00261459
405.19	0.24401976		935.19	0.0440633		1465.18	0.05331107		1995.19	-0.01153911		2525.18	0.01238734		3055.21	0.00738367		3585.2	0.00690458		4115.2	-0.00443553
405.39	0.24389065		935.39	0.04344246		1465.38	0.05357342		1995.39	-0.01121538		2525.38	0.01225549		3055.41	0.00779607		3585.4	0.00662358		4115.4	-0.00467936
405.59	0.24340851		935.59	0.04385882		1465.58	0.05350577		1995.59	-0.010971		2525.58	0.01224142		3055.61	0.00776644		3585.6	0.00638222		4115.6	-0.00489175
405.79	0.24387512		935.79	0.04312948		1465.78	0.05367238		1995.79	-0.01183418		2525.78	0.01155054		3055.81	0.00799755		3585.8	0.00613113		4115.8	-0.00552474
405.99	0.24476992		935.99	0.04303284		1465.98	0.0538984		1995.99	-0.01089469		2525.98	0.01146214		3056.01	0.00890679		3586	0.00621443		4116	-0.00653563
406.19	0.24529447		936.19	0.04278556		1466.18	0.05422595		1996.19	-0.01085514		2526.18	0.01138918		3056.21	0.00900269		3586.2	0.00613017		4116.2	-0.00635791
406.39	0.24508386		936.39	0.042967		1466.38	0.05388986		1996.39	-0.01025493		2526.38	0.01099642		3056.41	0.00858497		3586.4	0.0058997		4116.4	-0.00636778
406.59	0.24497685		936.59	0.04169013		1466.58	0.0538961		1996.59	-0.01014558		2526.58	0.01159967		3056.61	0.00971373		3586.6	0.00582704		4116.6	-0.00639585
406.79	0.24467494		936.79	0.0414829		1466.78	0.05392694		1996.79	-0.01040384		2526.78	0.01202777		3056.81	0.0101854		3586.8	0.00592293		4116.8	-0.00635943
406.99	0.24491508		936.99	0.04182917		1466.98	0.05339082		1996.99	-0.01002003		2526.98	0.01229366		3057.01	0.01077338		3587	0.00649267		4117	-0.00568239
407.19	0.2449059		937.19	0.04164112		1467.18	0.05328777		1997.19	-0.00935928		2527.18	0.01284154		3057.21	0.00972938		3587.2	0.0065993		4117.2	-0.00545674
407.39	0.24460926		937.39	0.04125436		1467.38	0.05421327		1997.39	-0.0092919		2527.38	0.01350411		3057.41	0.00937144		3587.4	0.0058328		4117.4	-0.00497766
407.59	0.24392023		937.59	0.0406502		1467.58	0.05481012		1997.59	-0.00836622		2527.58	0.01362276		3057.61	0.00950869		3587.6	0.00583341		4117.6	-0.00460267
407.79	0.24301184		937.79	0.0405669		1467.78	0.0550769		1997.79	-0.00880558		2527.78	0.01453024		3057.81	0.00989446		3587.8	0.00571503		4117.8	-0.00460434
407.99	0.24183911		937.99	0.04068538		1467.98	0.05603237		1997.99	-0.00933962		2527.98	0.01398035		3058.01	0.0101753		3588	0.00544201		4118	-0.00550428
408.19	0.24020393		938.19	0.04124367		1468.18	0.05646593		1998.19	-0.00939568		2528.18	0.012981		3058.21	0.00993361		3588.2	0.00531923		4118.2	-0.00484353
408.39	0.23969847		938.39	0.04198293		1468.38	0.05718855		1998.39	-0.00958373		2528.38	0.01403776		3058.41	0.00900004		3588.4	0.00583041		4118.4	-0.00429257
408.59	0.23956932		938.59	0.04301335		1468.58	0.05734842		1998.59	-0.00985052		2528.58	0.01376224		3058.61	0.0093475		3588.6	0.00605057		4118.6	-0.00451528
408.79	0.2400731		938.79	0.0438519		1468.78	0.05753688		1998.79	-0.01134011		2528.78	0.01374554		3058.81	0.00893167		3588.8	0.00576554		4118.8	-0.0056892
408.99	0.24039547		938.99	0.04424391		1468.98	0.0575633		1998.99	-0.01163733		2528.98	0.01296161		3059.01	0.00811963		3589	0.00539868		4119	-0.00548955
409.19	0.24119647		939.19	0.04438629		1469.18	0.05800823		1999.19	-0.01249907		2529.18	0.01283433		3059.21	0.00774694		3589.2	0.0069258		4119.2	-0.00493598
409.39	0.24142049		939.39	0.0441393		1469.38	0.05833897		1999.39	-0.01192115		2529.38	0.01187753		3059.41	0.0072672		3589.4	0.00674876		4119.4	-0.0044033
409.59	0.2419196		939.59	0.04472298		1469.58	0.05780916		1999.59	-0.01180562		2529.58	0.01110179		3059.61	0.00671923		3589.6	0.00653		4119.6	-0.00466653
409.79	0.2439712		939.79	0.04474178		1469.78	0.05742234		1999.79	-0.01190325		2529.78	0.01012432		3059.81	0.00744919		3589.8	0.00640407		4119.8	-0.00491334
409.99	0.24432135		939.99	0.04462097		1469.98	0.05663857		1999.99	-0.01208926		2529.98	0.0103058		3060.01	0.00766571		3590	0.00650796		4120	-0.00554936
410.19	0.24506522		940.19	0.04516319		1470.18	0.05635763		2000.19	-0.01339778		2530.18	0.01042598		3060.21	0.00663972		3590.2	0.00714032		4120.2	-0.00514552
410.39	0.2449718		940.39	0.04392332		1470.38	0.05550636		2000.39	-0.01329236		2530.38	0.01049597		3060.41	0.00689143		3590.4	0.00632766		4120.4	-0.00501976
410.59	0.2452248		940.59	0.04283504		1470.58	0.05559279		2000.59	-0.01368104		2530.58	0.01075466		3060.61	0.00755212		3590.6	0.00603312		4120.6	-0.00466161
410.79	0.24482087		940.79	0.04342449		1470.78	0.0553769		2000.79	-0.01384658		2530.78	0.01068428		3060.81	0.00804077		3590.8	0.00680068		4120.8	-0.00405772
410.99	0.24466248		940.99	0.0430327		1470.98	0.054927		2000.99	-0.01342913		2530.98	0.0110368		3061.01	0.00761248		3591	0.00632354		4121	-0.00325854
411.19	0.24403394		941.19	0.04160479		1471.18	0.05473194		2001.19	-0.01298188		2531.18	0.0116031		3061.21	0.00744739		3591.2	0.00635123		4121.2	-0.00331649
411.39	0.24265418		941.39	0.04060258		1471.38	0.05575564		2001.39	-0.01346904		2531.38	0.01105449		3061.41	0.00827918		3591.4	0.00603649		4121.4	-0.00312785
411.59	0.24254951		941.59	0.04033973		1471.58	0.05524365		2001.59	-0.01292983		2531.58	0.01152102		3061.61	0.00885235		3591.6	0.00591794		4121.6	-0.00311458
411.79	0.24202363		941.79	0.03978447		1471.78	0.05635198		2001.79	-0.01290902		2531.78	0.01232921		3061.81	0.00914948		3591.8	0.00574191		4121.8	-0.00357744
411.99	0.24175663		941.99	0.04035188		1471.98	0.05644368		2001.99	-0.01281083		2531.98	0.01334202		3062.01	0.00849194		3592	0.00616269		4122	-0.00372268
412.19	0.24158777		942.19	0.04077597		1472.18	0.056232		2002.19	-0.01203264		2532.18	0.0140254		3062.21	0.00775758		3592.2	0.006452		4122.2	-0.00380921
412.39	0.24209468		942.39	0.04092446		1472.38	0.05613736		2002.39	-0.01143583		2532.38	0.01452802		3062.41	0.0079348		3592.4	0.00623668		4122.4	-0.00442037
412.59	0.24229305		942.59	0.04045154		1472.58	0.05622701		2002.59	-0.0116061		2532.58	0.01441194		3062.61	0.00756654		3592.6	0.00616241		4122.6	-0.0053082
412.79	0.24219594		942.79	0.0403202		1472.78	0.05594032		2002.79	-0.01101036		2532.78	0.01469352		3062.81	0.00726843		3592.8	0.00606862		4122.8	-0.00568505
412.99	0.24223593		942.99	0.04024671		1472.98	0.05613289		2002.99	-0.00953457		2532.98	0.0140364		3063.01	0.0074486		3593	0.0062341		4123	-0.00457454
413.19	0.24312243		943.19	0.04038904		1473.18	0.05615713		2003.19	-0.00943319		2533.18	0.01422146		3063.21	0.00700369		3593.2	0.00690915		4123.2	-0.00496308
413.39	0.24381426		943.39	0.04046563		1473.38	0.05562423		2003.39	-0.00888898		2533.38	0.01385838		3063.41	0.00661014		3593.4	0.00578128		4123.4	-0.00587368
413.59	0.24454019		943.59	0.04082161		1473.58	0.05469087		2003.59	-0.00925009		2533.58	0.01331708		3063.61	0.00719842		3593.6	0.00514772		4123.6	-0.00673316
413.79	0.24456967		943.79	0.04081518		1473.78	0.0545716		2003.79	-0.01012716		2533.78	0.01305803		3063.81	0.00793203		3593.8	0.00472606		4123.8	-0.00639006
413.99	0.24441633		943.99	0.04066613		1473.98	0.05434953		2003.99	-0.01053288		2533.98	0.01293491		3064.01	0.00756782		3594	0.00444043		4124	-0.00642913
414.19	0.24454725		944.19	0.04113054		1474.18	0.05382158		2004.19	-0.0106722		2534.18	0.01296746		3064.21	0.00733965		3594.2	0.00379167		4124.2	-0.00644819
414.39	0.24428661		944.39	0.04067564		1474.38	0.05338661		2004.39	-0.00996484		2534.38	0.01265778		3064.41	0.00787367		3594.4	0.00315223		4124.4	-0.00575195
414.59	0.24449607		944.59	0.04088793		1474.58	0.05250656		2004.59	-0.01033828		2534.58	0.01199212		3064.61	0.00852002		3594.6	0.00344744		4124.6	-0.00537
414.79	0.24379445		944.79	0.0417342		1474.78	0.0522387		2004.79	-0.01014461		2534.78	0.01090626		3064.81	0.00892778		3594.8	0.00419847		4124.8	-0.00524859
414.99	0.24280539		944.99	0.04095551		1474.98	0.05191898		2004.99	-0.01020041		2534.98	0.01034075		3065.01	0.00891803		3595	0.00392505		4125	-0.00516072
415.19	0.24258755		945.19	0.04154212		1475.18	0.05169553		2005.19	-0.00975888		2535.18	0.01020099		3065.21	0.00925785		3595.2	0.00386116		4125.2	-0.00556221
415.39	0.24133828		945.39	0.041802		1475.38	0.05175509		2005.39	-0.00964281		2535.38	0.00956822		3065.41	0.00946548		3595.4	0.00354825		4125.4	-0.00573603
415.59	0.24215794		945.59	0.04221066		1475.58	0.05144655		2005.59	-0.00928246		2535.58	0.01074419		3065.61	0.00967195		3595.6	0.00376445		4125.6	-0.00631551
415.79	0.2415091		945.79	0.04217437		1475.78	0.05190996		2005.79	-0.00892855		2535.78	0.01133759		3065.81	0.00910533		3595.8	0.0038924		4125.8	-0.00666335
415.99	0.24221085		945.99	0.04263959		1475.98	0.05166895		2005.99	-0.00915775		2535.98	0.01130692		3066.01	0.008269		3596	0.0051068		4126	-0.00711015
416.19	0.24143306		946.19	0.04269882		1476.18	0.05138709		2006.19	-0.00861095		2536.18	0.01036394		3066.21	0.00813613		3596.2	0.00552961		4126.2	-0.00823466
416.39	0.24120331		946.39	0.04153376		1476.38	0.05195372		2006.39	-0.00816045		2536.38	0.01003939		3066.41	0.00838547		3596.4	0.0065277		4126.4	-0.00821073
416.59	0.24106725		946.59	0.04102626		1476.58	0.05314422		2006.59	-0.00784496		2536.58	0.00986547		3066.61	0.00737608		3596.6	0.00705692		4126.6	-0.00834521
416.79	0.24126365		946.79	0.04156392		1476.78	0.05329069		2006.79	-0.00717493		2536.78	0.00936943		3066.81	0.00741262		3596.8	0.00791406		4126.8	-0.00876275
416.99	0.24177576		946.99	0.04185537		1476.98	0.05386387		2006.99	-0.00716366		2536.98	0.00843861		3067.01	0.00735774		3597	0.0078818		4127	-0.00890037
417.19	0.24264364		947.19	0.04172112		1477.18	0.05381375		2007.19	-0.00829451		2537.18	0.00931702		3067.21	0.00740979		3597.2	0.00750304		4127.2	-0.00927819
417.39	0.24365871		947.39	0.04158333		1477.38	0.05403337		2007.39	-0.00854838		2537.38	0.01013237		3067.41	0.00784315		3597.4	0.00696705		4127.4	-0.00857839
417.59	0.24344475		947.59	0.0410504		1477.58	0.05360164		2007.59	-0.00950322		2537.58	0.01046354		3067.61	0.00947789		3597.6	0.0071663		4127.6	-0.00895175
417.79	0.24419184		947.79	0.0421239		1477.78	0.05328298		2007.79	-0.00993232		2537.78	0.01108019		3067.81	0.00948159		3597.8	0.00725523		4127.8	-0.00810175
417.99	0.24495631		947.99	0.04256571		1477.98	0.05349233		2007.99	-0.01029417		2537.98	0.01146818		3068.01	0.00925504		3598	0.00683992		4128	-0.00792889
418.19	0.24495423		948.19	0.04364508		1478.18	0.05298531		2008.19	-0.01043907		2538.18	0.01183868		3068.21	0.01028016		3598.2	0.00615965		4128.2	-0.00795559
418.39	0.24555197		948.39	0.0439332		1478.38	0.05313756		2008.39	-0.01152332		2538.38	0.01247824		3068.41	0.01021834		3598.4	0.00570736		4128.4	-0.00844608
418.59	0.24576681		948.59	0.0441594		1478.58	0.05323144		2008.59	-0.01230739		2538.58	0.01225388		3068.61	0.01085401		3598.6	0.00482289		4128.6	-0.00840638
418.79	0.24516782		948.79	0.04466226		1478.78	0.05405797		2008.79	-0.01339777		2538.78	0.01232486		3068.81	0.01116862		3598.8	0.00407281		4128.8	-0.00771229
418.99	0.24501029		948.99	0.04437834		1478.98	0.05329761		2008.99	-0.01357653		2538.98	0.01263063		3069.01	0.01183704		3599	0.00349014		4129	-0.00747759
419.19	0.2455509		949.19	0.0441796		1479.18	0.05386326		2009.19	-0.01360793		2539.18	0.01346975		3069.21	0.01167979		3599.2	0.00212966		4129.2	-0.00743975
419.39	0.24531389		949.39	0.04396746		1479.38	0.05375406		2009.39	-0.01439084		2539.38	0.01391344		3069.41	0.01165139		3599.4	0.0023747		4129.4	-0.00713325
419.59	0.24606096		949.59	0.04345978		1479.58	0.05382555		2009.59	-0.01413165		2539.58	0.01419009		3069.61	0.01149434		3599.6	0.00264112		4129.6	-0.00709312
419.79	0.24571001		949.79	0.04333357		1479.78	0.05453542		2009.79	-0.01390247		2539.78	0.01380655		3069.81	0.01047098		3599.8	0.00268632		4129.8	-0.00702641
419.99	0.24642213		949.99	0.04280257		1479.98	0.05561225		2009.99	-0.01373348		2539.98	0.01294331		3070.01	0.00952324		3600	0.00344006		4130	-0.0068474
420.19	0.24554547		950.19	0.04163331		1480.18	0.05538073		2010.19	-0.01312342		2540.18	0.01246422		3070.21	0.00932778		3600.2	0.00334953		4130.2	-0.00695432
420.39	0.24662089		950.39	0.04108714		1480.38	0.05658481		2010.39	-0.01243187		2540.38	0.0124596		3070.41	0.00897411		3600.4	0.00336304		4130.4	-0.00627663
420.59	0.24679484		950.59	0.0413122		1480.58	0.05646209		2010.59	-0.01230418		2540.58	0.01217611		3070.61	0.00874785		3600.6	0.00373432		4130.6	-0.00618705
420.79	0.24658433		950.79	0.04138567		1480.78	0.05567649		2010.79	-0.01165702		2540.78	0.01164211		3070.81	0.00868745		3600.8	0.00442724		4130.8	-0.00659427
420.99	0.24592614		950.99	0.04095737		1480.98	0.0558526		2010.99	-0.01097508		2540.98	0.01078454		3071.01	0.00949197		3601	0.00498194		4131	-0.00658689
421.19	0.24546736		951.19	0.04088073		1481.18	0.05573972		2011.19	-0.01048025		2541.18	0.01182313		3071.21	0.00973746		3601.2	0.00493662		4131.2	-0.00564118
421.39	0.24598053		951.39	0.04094625		1481.38	0.05555487		2011.39	-0.0099571		2541.38	0.01177647		3071.41	0.00913979		3601.4	0.0051836		4131.4	-0.00578758
421.59	0.24563611		951.59	0.04168858		1481.58	0.05560221		2011.59	-0.01020885		2541.58	0.01155365		3071.61	0.0093553		3601.6	0.0061145		4131.6	-0.00528094
421.79	0.2460294		951.79	0.04257629		1481.78	0.05570458		2011.79	-0.01019549		2541.78	0.01100375		3071.81	0.00875337		3601.8	0.00582958		4131.8	-0.00462797
421.99	0.24532701		951.99	0.04255907		1481.98	0.0556096		2011.99	-0.00993341		2541.98	0.01100476		3072.01	0.00781389		3602	0.00550806		4132	-0.00482773
422.19	0.24454885		952.19	0.04248571		1482.18	0.05506503		2012.19	-0.01044674		2542.18	0.01122062		3072.21	0.00752256		3602.2	0.00537145		4132.2	-0.00576391
422.39	0.24402334		952.39	0.04152421		1482.38	0.05452109		2012.39	-0.01138903		2542.38	0.01217526		3072.41	0.00692336		3602.4	0.00499669		4132.4	-0.00592979
422.59	0.24234676		952.59	0.04129617		1482.58	0.05386317		2012.59	-0.0112722		2542.58	0.01173089		3072.61	0.00742758		3602.6	0.00475998		4132.6	-0.00569122
422.79	0.24223304		952.79	0.04125552		1482.78	0.05336767		2012.79	-0.01253583		2542.78	0.01212156		3072.81	0.00771238		3602.8	0.00402271		4132.8	-0.00531609
422.99	0.24103664		952.99	0.04077409		1482.98	0.05289888		2012.99	-0.01274625		2542.98	0.01245876		3073.01	0.007777		3603	0.00308731		4133	-0.00600038
423.19	0.23992794		953.19	0.0406363		1483.18	0.05317205		2013.19	-0.01296647		2543.18	0.01256873		3073.21	0.00751732		3603.2	0.00217252		4133.2	-0.00567574
423.39	0.23913404		953.39	0.04089162		1483.38	0.05218303		2013.39	-0.01307294		2543.38	0.0129613		3073.41	0.00760337		3603.4	0.00152937		4133.4	-0.00563647
423.59	0.23928286		953.59	0.04052987		1483.58	0.05213791		2013.59	-0.01264355		2543.58	0.01231394		3073.61	0.00749541		3603.6	0.00119409		4133.6	-0.00470678
423.79	0.23948312		953.79	0.0400902		1483.78	0.05163982		2013.79	-0.0129218		2543.78	0.01200653		3073.81	0.00756488		3603.8	0.00158089		4133.8	-0.00492666
423.99	0.24047615		953.99	0.03996123		1483.98	0.05146793		2013.99	-0.01306915		2543.98	0.01261962		3074.01	0.00797119		3604	0.00173577		4134	-0.00454542
424.19	0.2397631		954.19	0.0402261		1484.18	0.05072655		2014.19	-0.01313056		2544.18	0.01275611		3074.21	0.00888744		3604.2	0.00202923		4134.2	-0.00393405
424.39	0.24016147		954.39	0.0410486		1484.38	0.05088128		2014.39	-0.01297539		2544.38	0.01321642		3074.41	0.00945173		3604.4	0.00287784		4134.4	-0.00441602
424.59	0.24054831		954.59	0.04183604		1484.58	0.05029815		2014.59	-0.0123337		2544.58	0.01242585		3074.61	0.00971118		3604.6	0.0038047		4134.6	-0.00505208
424.79	0.24058886		954.79	0.04196785		1484.78	0.0508398		2014.79	-0.01168054		2544.78	0.01120921		3074.81	0.00962196		3604.8	0.00447653		4134.8	-0.0053072
424.99	0.24141541		954.99	0.04263992		1484.98	0.05145963		2014.99	-0.0116946		2544.98	0.0100219		3075.01	0.01040434		3605	0.00505426		4135	-0.00555181
425.19	0.2422301		955.19	0.04268716		1485.18	0.05195513		2015.19	-0.01072708		2545.18	0.01040943		3075.21	0.01043692		3605.2	0.0045497		4135.2	-0.00504001
425.39	0.2433172		955.39	0.04302469		1485.38	0.0523199		2015.39	-0.01149352		2545.38	0.00961362		3075.41	0.01054036		3605.4	0.00487143		4135.4	-0.00531873
425.59	0.24414265		955.59	0.04333678		1485.58	0.05408145		2015.59	-0.01143039		2545.58	0.0090595		3075.61	0.01074864		3605.6	0.00482362		4135.6	-0.00478615
425.79	0.24394835		955.79	0.04249897		1485.78	0.05474719		2015.79	-0.01142727		2545.78	0.00866812		3075.81	0.01094103		3605.8	0.00449086		4135.8	-0.00580503
425.99	0.24402239		955.99	0.0423602		1485.98	0.05467842		2015.99	-0.01256362		2545.98	0.00892257		3076.01	0.01029542		3606	0.00417656		4136	-0.00612564
426.19	0.24382463		956.19	0.04219308		1486.18	0.05443396		2016.19	-0.0135336		2546.18	0.00961841		3076.21	0.01025677		3606.2	0.00364411		4136.2	-0.00721281
426.39	0.24375557		956.39	0.04171179		1486.38	0.05444592		2016.39	-0.01382848		2546.38	0.00984284		3076.41	0.01093557		3606.4	0.00289003		4136.4	-0.00774737
426.59	0.24354578		956.59	0.0414304		1486.58	0.05358372		2016.59	-0.01339624		2546.58	0.00988405		3076.61	0.01044636		3606.6	0.00192615		4136.6	-0.00885115
426.79	0.24363222		956.79	0.04145136		1486.78	0.05337813		2016.79	-0.01440517		2546.78	0.01071693		3076.81	0.01001179		3606.8	0.00133802		4136.8	-0.00905946
426.99	0.24258369		956.99	0.0409304		1486.98	0.05319878		2016.99	-0.0139098		2546.98	0.01072949		3077.01	0.0087886		3607	0.00003408		4137	-0.00978085
427.19	0.24196728		957.19	0.04164145		1487.18	0.0528232		2017.19	-0.01360935		2547.18	0.01035384		3077.21	0.00856167		3607.2	-0.00009496		4137.2	-0.00986631
427.39	0.24212252		957.39	0.04149268		1487.38	0.05252347		2017.39	-0.01332032		2547.38	0.01079125		3077.41	0.00845455		3607.4	-0.00057522		4137.4	-0.01024554
427.59	0.24248424		957.59	0.04204715		1487.58	0.05219158		2017.59	-0.01315928		2547.58	0.01060137		3077.61	0.00775362		3607.6	0.00068164		4137.6	-0.00988222
427.79	0.24294423		957.79	0.0421045		1487.78	0.05167755		2017.79	-0.01306142		2547.78	0.01110767		3077.81	0.00825145		3607.8	0.00129978		4137.8	-0.010178
427.99	0.24281883		957.99	0.0421619		1487.98	0.05204696		2017.99	-0.01334966		2547.98	0.01220164		3078.01	0.00821581		3608	0.00129147		4138	-0.00953211
428.19	0.2416556		958.19	0.04206649		1488.18	0.05166902		2018.19	-0.01336002		2548.18	0.01216965		3078.21	0.00797506		3608.2	0.0015495		4138.2	-0.00931359
428.39	0.24208189		958.39	0.04210267		1488.38	0.05144234		2018.39	-0.01294901		2548.38	0.01187557		3078.41	0.00825972		3608.4	0.00141347		4138.4	-0.00942256
428.59	0.24300283		958.59	0.04220961		1488.58	0.051282		2018.59	-0.01291961		2548.58	0.0116441		3078.61	0.00843935		3608.6	0.00183871		4138.6	-0.00926698
428.79	0.24281326		958.79	0.04225866		1488.78	0.05177062		2018.79	-0.01295642		2548.78	0.01103843		3078.81	0.00872199		3608.8	0.00201179		4138.8	-0.00917879
428.99	0.2431534		958.99	0.04249601		1488.98	0.05222339		2018.99	-0.01272605		2548.98	0.01101587		3079.01	0.00922296		3609	0.0028745		4139	-0.00878647
429.19	0.24278819		959.19	0.04206665		1489.18	0.05277168		2019.19	-0.01235608		2549.18	0.01096297		3079.21	0.00957564		3609.2	0.00302505		4139.2	-0.00811566
429.39	0.24222528		959.39	0.04285247		1489.38	0.05284023		2019.39	-0.01286285		2549.38	0.01018779		3079.41	0.00966749		3609.4	0.00297325		4139.4	-0.00809362
429.59	0.24194707		959.59	0.04257586		1489.58	0.0532864		2019.59	-0.01328636		2549.58	0.0100594		3079.61	0.00961402		3609.6	0.00322275		4139.6	-0.00746609
429.79	0.24143194		959.79	0.04235114		1489.78	0.05279101		2019.79	-0.01367299		2549.78	0.01060324		3079.81	0.00983399		3609.8	0.00347828		4139.8	-0.00747385
429.99	0.24248985		959.99	0.0424143		1489.98	0.05238591		2019.99	-0.01441218		2549.98	0.01057469		3080.01	0.00985636		3610	0.00347725		4140	-0.00608484
430.19	0.24294054		960.19	0.04240201		1490.18	0.05207862		2020.19	-0.01425485		2550.18	0.01114763		3080.21	0.01016641		3610.2	0.00400312		4140.2	-0.00612368
430.39	0.24387759		960.39	0.04175792		1490.38	0.052479		2020.39	-0.01477375		2550.38	0.01013078		3080.41	0.01000568		3610.4	0.00384547		4140.4	-0.00567418
430.59	0.24404554		960.59	0.04134579		1490.58	0.05176464		2020.59	-0.01495116		2550.58	0.01089099		3080.61	0.00956162		3610.6	0.00324414		4140.6	-0.00534954
430.79	0.24471134		960.79	0.0415493		1490.78	0.05172334		2020.79	-0.01548453		2550.78	0.01035009		3080.81	0.00895487		3610.8	0.00340443		4140.8	-0.00454654
430.99	0.24501891		960.99	0.04196715		1490.98	0.05280677		2020.99	-0.0150984		2550.98	0.00956374		3081.01	0.00816109		3611	0.00346192		4141	-0.00515053
431.19	0.24432895		961.19	0.04276691		1491.18	0.05325931		2021.19	-0.01634701		2551.18	0.00977522		3081.21	0.00789153		3611.2	0.00396401		4141.2	-0.00506331
431.39	0.24458576		961.39	0.04197742		1491.38	0.05369422		2021.39	-0.01674159		2551.38	0.00899059		3081.41	0.00843346		3611.4	0.00391983		4141.4	-0.00511078
431.59	0.2444321		961.59	0.04138155		1491.58	0.05457026		2021.59	-0.01752216		2551.58	0.00897167		3081.61	0.00851904		3611.6	0.00429595		4141.6	-0.00460246
431.79	0.244889		961.79	0.04107852		1491.78	0.05552116		2021.79	-0.0180114		2551.78	0.00817838		3081.81	0.00896213		3611.8	0.00344793		4141.8	-0.00452988
431.99	0.24427902		961.99	0.04005661		1491.98	0.05588362		2021.99	-0.01851619		2551.98	0.00880417		3082.01	0.00875395		3612	0.00292777		4142	-0.00517317
432.19	0.24418415		962.19	0.03982212		1492.18	0.05554705		2022.19	-0.0183339		2552.18	0.00888754		3082.21	0.00912845		3612.2	0.00240005		4142.2	-0.00603559
432.39	0.24430237		962.39	0.04040827		1492.38	0.05577625		2022.39	-0.01812859		2552.38	0.00883633		3082.41	0.00968644		3612.4	0.00262695		4142.4	-0.0065315
432.59	0.2437124		962.59	0.04028796		1492.58	0.05617907		2022.59	-0.01832841		2552.58	0.00910826		3082.61	0.01034274		3612.6	0.00290269		4142.6	-0.00787358
432.79	0.24280603		962.79	0.04002243		1492.78	0.05586689		2022.79	-0.01787895		2552.78	0.00950026		3082.81	0.01006396		3612.8	0.00298932		4142.8	-0.00894466
432.99	0.24258638		962.99	0.03902629		1492.98	0.05453524		2022.99	-0.0168892		2552.98	0.00935213		3083.01	0.0097606		3613	0.00287729		4143	-0.00941556
433.19	0.24162737		963.19	0.03808743		1493.18	0.05382546		2023.19	-0.01672629		2553.18	0.00918054		3083.21	0.00933028		3613.2	0.00286706		4143.2	-0.01000372
433.39	0.24015124		963.39	0.03770544		1493.38	0.0528882		2023.39	-0.01545436		2553.38	0.0094841		3083.41	0.00909577		3613.4	0.00291748		4143.4	-0.01003218
433.59	0.24023654		963.59	0.03742845		1493.58	0.0525765		2023.59	-0.01516101		2553.58	0.01050207		3083.61	0.00937158		3613.6	0.00342283		4143.6	-0.00887285
433.79	0.24003267		963.79	0.03719485		1493.78	0.05246401		2023.79	-0.0140502		2553.78	0.01060327		3083.81	0.00959651		3613.8	0.00283273		4143.8	-0.00879315
433.99	0.24054796		963.99	0.03645395		1493.98	0.05232732		2023.99	-0.01369533		2553.98	0.01056355		3084.01	0.01009055		3614	0.00350953		4144	-0.00775862
434.19	0.24081424		964.19	0.03658287		1494.18	0.05194791		2024.19	-0.01324604		2554.18	0.01064173		3084.21	0.00983107		3614.2	0.00336068		4144.2	-0.00817213
434.39	0.24122119		964.39	0.03658707		1494.38	0.0521051		2024.39	-0.01295232		2554.38	0.01009742		3084.41	0.00999198		3614.4	0.0028358		4144.4	-0.00785974
434.59	0.24140005		964.59	0.03783891		1494.58	0.05217436		2024.59	-0.01218675		2554.58	0.01085069		3084.61	0.00994081		3614.6	0.00161989		4144.6	-0.00720001
434.79	0.2419555		964.79	0.03868757		1494.78	0.05221475		2024.79	-0.01130185		2554.78	0.01018453		3084.81	0.00874817		3614.8	0.00203734		4144.8	-0.00709056
434.99	0.24070435		964.99	0.03937535		1494.98	0.0533003		2024.99	-0.01097604		2554.98	0.01030526		3085.01	0.00826114		3615	0.00282191		4145	-0.00769825
435.19	0.24011171		965.19	0.03988091		1495.18	0.05340556		2025.19	-0.01105004		2555.18	0.01015191		3085.21	0.00776479		3615.2	0.00214095		4145.2	-0.00708894
435.39	0.24097273		965.39	0.03976647		1495.38	0.05346991		2025.39	-0.00983849		2555.38	0.00933799		3085.41	0.0085176		3615.4	0.002298		4145.4	-0.00715714
435.59	0.24187433		965.59	0.04042477		1495.58	0.05379038		2025.59	-0.01020157		2555.58	0.00953939		3085.61	0.00865536		3615.6	0.00194908		4145.6	-0.00672604
435.79	0.24206156		965.79	0.04125577		1495.78	0.05353929		2025.79	-0.01034024		2555.78	0.00910324		3085.81	0.00841747		3615.8	0.00133096		4145.8	-0.00708607
435.99	0.24190693		965.99	0.04128429		1495.98	0.05356419		2025.99	-0.01025178		2555.98	0.01029635		3086.01	0.0079802		3616	0.00136064		4146	-0.0077449
436.19	0.24184204		966.19	0.04192977		1496.18	0.05299012		2026.19	-0.01087148		2556.18	0.01054841		3086.21	0.00784582		3616.2	0.00178543		4146.2	-0.00763275
436.39	0.24100196		966.39	0.04263931		1496.38	0.05294132		2026.39	-0.01091913		2556.38	0.01068573		3086.41	0.00743443		3616.4	0.00224655		4146.4	-0.00762288
436.59	0.2404748		966.59	0.04215319		1496.58	0.05200353		2026.59	-0.0108274		2556.58	0.01096203		3086.61	0.00737319		3616.6	0.00230117		4146.6	-0.00802189
436.79	0.24118197		966.79	0.04116938		1496.78	0.05095676		2026.79	-0.01010964		2556.78	0.01160108		3086.81	0.00679709		3616.8	0.00186662		4146.8	-0.00838342
436.99	0.24158644		966.99	0.04079251		1496.98	0.05065529		2026.99	-0.01013764		2556.98	0.011414		3087.01	0.00703055		3617	0.001716		4147	-0.00798632
437.19	0.2410776		967.19	0.04041982		1497.18	0.05160514		2027.19	-0.01006919		2557.18	0.01120343		3087.21	0.00717297		3617.2	0.00234757		4147.2	-0.00753791
437.39	0.24036392		967.39	0.04080967		1497.38	0.05114099		2027.39	-0.01064232		2557.38	0.01155396		3087.41	0.00855197		3617.4	0.00363982		4147.4	-0.00671852
437.59	0.24026185		967.59	0.04097758		1497.58	0.05181049		2027.59	-0.01120004		2557.58	0.01170849		3087.61	0.00911156		3617.6	0.00362393		4147.6	-0.00544112
437.79	0.23982917		967.79	0.04107893		1497.78	0.0513436		2027.79	-0.01097077		2557.78	0.01121295		3087.81	0.00919021		3617.8	0.00377233		4147.8	-0.00603147
437.99	0.24043892		967.99	0.04085949		1497.98	0.05154105		2027.99	-0.01111496		2557.98	0.01151748		3088.01	0.00998938		3618	0.0048942		4148	-0.00579719
438.19	0.24087043		968.19	0.04055086		1498.18	0.05138026		2028.19	-0.01060184		2558.18	0.01118012		3088.21	0.01018396		3618.2	0.00461825		4148.2	-0.00526351
438.39	0.24164817		968.39	0.04049152		1498.38	0.0522527		2028.39	-0.01082479		2558.38	0.01048566		3088.41	0.01094785		3618.4	0.0047077		4148.4	-0.00540344
438.59	0.24167069		968.59	0.04142034		1498.58	0.05338596		2028.59	-0.01053514		2558.58	0.00973102		3088.61	0.01022397		3618.6	0.00448358		4148.6	-0.00500839
438.79	0.2411557		968.79	0.04127469		1498.78	0.05303497		2028.79	-0.0109441		2558.78	0.00934379		3088.81	0.00895056		3618.8	0.00496607		4148.8	-0.00466218
438.99	0.24039553		968.99	0.04098089		1498.98	0.05328235		2028.99	-0.01094718		2558.98	0.00912311		3089.01	0.00895289		3619	0.00483577		4149	-0.00473259
439.19	0.24158897		969.19	0.04103879		1499.18	0.05279018		2029.19	-0.01175579		2559.18	0.00862052		3089.21	0.00938181		3619.2	0.00408663		4149.2	-0.00411625
439.39	0.24167776		969.39	0.04068781		1499.38	0.05246178		2029.39	-0.01209697		2559.38	0.00886667		3089.41	0.01000544		3619.4	0.00469689		4149.4	-0.00491118
439.59	0.24271835		969.59	0.04051256		1499.58	0.05234735		2029.59	-0.01398767		2559.58	0.00847599		3089.61	0.01083637		3619.6	0.00389053		4149.6	-0.00505083
439.79	0.24226216		969.79	0.04080384		1499.78	0.05215274		2029.79	-0.01538725		2559.78	0.00870498		3089.81	0.01021236		3619.8	0.00416255		4149.8	-0.00541661
439.99	0.24253844		969.99	0.04101879		1499.98	0.05178633		2029.99	-0.01618109		2559.98	0.0083405		3090.01	0.00972222		3620	0.00515297		4150	-0.00554189
440.19	0.24245906		970.19	0.04108992		1500.18	0.05068239		2030.19	-0.01723406		2560.18	0.0082193		3090.21	0.00946643		3620.2	0.00572642		4150.2	-0.00604349
440.39	0.24263665		970.39	0.04066101		1500.38	0.05016461		2030.39	-0.01664184		2560.38	0.00797029		3090.41	0.00884493		3620.4	0.00591502		4150.4	-0.00636719
440.59	0.24276937		970.59	0.04039575		1500.58	0.04919308		2030.59	-0.01655317		2560.58	0.00830868		3090.61	0.00925209		3620.6	0.00571053		4150.6	-0.00714828
440.79	0.24318016		970.79	0.03985612		1500.78	0.04997892		2030.79	-0.01697076		2560.78	0.00886346		3090.81	0.00971059		3620.8	0.00470814		4150.8	-0.00789306
440.99	0.24292055		970.99	0.04037801		1500.98	0.05004837		2030.99	-0.01714732		2560.98	0.00963376		3091.01	0.01003541		3621	0.00510128		4151	-0.00831979
441.19	0.24263609		971.19	0.0399242		1501.18	0.04975		2031.19	-0.01644678		2561.18	0.00943316		3091.21	0.01004545		3621.2	0.00519061		4151.2	-0.00912471
441.39	0.24173306		971.39	0.04005985		1501.38	0.048934		2031.39	-0.01669417		2561.38	0.01014297		3091.41	0.0111318		3621.4	0.00543302		4151.4	-0.00935242
441.59	0.24112225		971.59	0.03888454		1501.58	0.04900116		2031.59	-0.01532942		2561.58	0.0102758		3091.61	0.0106052		3621.6	0.00440147		4151.6	-0.00968039
441.79	0.24100767		971.79	0.03873463		1501.78	0.04838672		2031.79	-0.01443587		2561.78	0.0104273		3091.81	0.01034345		3621.8	0.00443534		4151.8	-0.01086813
441.99	0.24085588		971.99	0.03799339		1501.98	0.04863323		2031.99	-0.01418027		2561.98	0.01075843		3092.01	0.01055057		3622	0.0040934		4152	-0.01090544
442.19	0.24074605		972.19	0.03755543		1502.18	0.04906639		2032.19	-0.01334868		2562.18	0.01054121		3092.21	0.00965978		3622.2	0.00347992		4152.2	-0.01066407
442.39	0.24103633		972.39	0.0370237		1502.38	0.04978623		2032.39	-0.01289012		2562.38	0.01018116		3092.41	0.00868298		3622.4	0.00335968		4152.4	-0.01086578
442.59	0.24037769		972.59	0.03744733		1502.58	0.05010611		2032.59	-0.01247785		2562.58	0.00958183		3092.61	0.00796387		3622.6	0.00292972		4152.6	-0.01025783
442.79	0.23993722		972.79	0.03724253		1502.78	0.05060036		2032.79	-0.01231239		2562.78	0.00949415		3092.81	0.00667429		3622.8	0.00187342		4152.8	-0.00964336
442.99	0.24050315		972.99	0.03635716		1502.98	0.05153061		2032.99	-0.0128041		2562.98	0.00903503		3093.01	0.00638571		3623	0.00088226		4153	-0.01016402
443.19	0.24061397		973.19	0.03688306		1503.18	0.05202842		2033.19	-0.01316421		2563.18	0.00842317		3093.21	0.0064761		3623.2	0.00085272		4153.2	-0.00995277
443.39	0.23980809		973.39	0.03751685		1503.38	0.05231456		2033.39	-0.01377134		2563.38	0.00798055		3093.41	0.00631967		3623.4	0.00033232		4153.4	-0.01043899
443.59	0.24104635		973.59	0.03882826		1503.58	0.0524202		2033.59	-0.01525192		2563.58	0.00798606		3093.61	0.00631305		3623.6	-0.00014461		4153.6	-0.01023871
443.79	0.24059962		973.79	0.03967011		1503.78	0.05219484		2033.79	-0.01518635		2563.78	0.00813312		3093.81	0.00580734		3623.8	0.00065075		4153.8	-0.01011418
443.99	0.24126366		973.99	0.03954534		1503.98	0.05258735		2033.99	-0.01475003		2563.98	0.00738198		3094.01	0.00640706		3624	0.00114005		4154	-0.00988983
444.19	0.2407666		974.19	0.03903614		1504.18	0.05216512		2034.19	-0.01529757		2564.18	0.00766589		3094.21	0.00696044		3624.2	0.001423		4154.2	-0.00964137
444.39	0.2412847		974.39	0.03843901		1504.38	0.05224322		2034.39	-0.0155033		2564.38	0.0068874		3094.41	0.00667548		3624.4	0.00186629		4154.4	-0.00932775
444.59	0.24101145		974.59	0.03793546		1504.58	0.05273822		2034.59	-0.01632087		2564.58	0.00718819		3094.61	0.00709117		3624.6	0.00122671		4154.6	-0.00990951
444.79	0.24132142		974.79	0.03694122		1504.78	0.05366746		2034.79	-0.01684623		2564.78	0.00806512		3094.81	0.00776884		3624.8	0.00096131		4154.8	-0.01053061
444.99	0.24105966		974.99	0.03714263		1504.98	0.05262718		2034.99	-0.01630973		2564.98	0.00814594		3095.01	0.00726569		3625	0.00216273		4155	-0.00971696
445.19	0.24084916		975.19	0.03666688		1505.18	0.05287891		2035.19	-0.01540818		2565.18	0.00814787		3095.21	0.00828859		3625.2	0.00198821		4155.2	-0.00897203
445.39	0.24123705		975.39	0.03681113		1505.38	0.05248354		2035.39	-0.01516375		2565.38	0.00909143		3095.41	0.00886295		3625.4	0.00287393		4155.4	-0.0088049
445.59	0.24113699		975.59	0.03630266		1505.58	0.05242961		2035.59	-0.0153023		2565.58	0.00974616		3095.61	0.00899631		3625.6	0.00351379		4155.6	-0.00853704
445.79	0.24136983		975.79	0.0374408		1505.78	0.05215512		2035.79	-0.0153056		2565.78	0.01075946		3095.81	0.00877724		3625.8	0.0041287		4155.8	-0.00801185
445.99	0.24163999		975.99	0.03756587		1505.98	0.05219409		2035.99	-0.01536978		2565.98	0.01108964		3096.01	0.00851258		3626	0.00450714		4156	-0.00803051
446.19	0.24152732		976.19	0.03879725		1506.18	0.0519517		2036.19	-0.0149463		2566.18	0.0113548		3096.21	0.00815177		3626.2	0.00456267		4156.2	-0.00725553
446.39	0.24176203		976.39	0.03894701		1506.38	0.0514133		2036.39	-0.01505833		2566.38	0.01137097		3096.41	0.00777991		3626.4	0.00487215		4156.4	-0.00692996
446.59	0.24128331		976.59	0.03965714		1506.58	0.05185693		2036.59	-0.01519202		2566.58	0.01067062		3096.61	0.00761102		3626.6	0.00475411		4156.6	-0.00611294
446.79	0.24258074		976.79	0.04017071		1506.78	0.0523218		2036.79	-0.01535687		2566.78	0.01034987		3096.81	0.00731864		3626.8	0.0042967		4156.8	-0.00650482
446.99	0.24250833		976.99	0.03982492		1506.98	0.05268477		2036.99	-0.01598344		2566.98	0.00977998		3097.01	0.00772926		3627	0.00430217		4157	-0.00707278
447.19	0.24156626		977.19	0.04090507		1507.18	0.05175651		2037.19	-0.01537312		2567.18	0.00882269		3097.21	0.00825358		3627.2	0.004418		4157.2	-0.00729528
447.39	0.2414985		977.39	0.04151582		1507.38	0.05136036		2037.39	-0.01624829		2567.38	0.00874705		3097.41	0.00863942		3627.4	0.00347304		4157.4	-0.00703746
447.59	0.24205025		977.59	0.04210214		1507.58	0.05124227		2037.59	-0.01564869		2567.58	0.00867583		3097.61	0.00855046		3627.6	0.0037087		4157.6	-0.00718964
447.79	0.24112699		977.79	0.04146638		1507.78	0.0514888		2037.79	-0.01434539		2567.78	0.00759177		3097.81	0.00936806		3627.8	0.0034891		4157.8	-0.00817121
447.99	0.24140487		977.99	0.04135698		1507.98	0.05153037		2037.99	-0.0149987		2567.98	0.00706528		3098.01	0.00939979		3628	0.00267088		4158	-0.0086654
448.19	0.24112527		978.19	0.04087566		1508.18	0.05060588		2038.19	-0.01517119		2568.18	0.00609897		3098.21	0.00946234		3628.2	0.00199484		4158.2	-0.00941646
448.39	0.2418263		978.39	0.04033625		1508.38	0.05104283		2038.39	-0.01499794		2568.38	0.00477893		3098.41	0.00927811		3628.4	0.00145897		4158.4	-0.00906771
448.59	0.24180353		978.59	0.04092301		1508.58	0.05088365		2038.59	-0.01555035		2568.58	0.00481828		3098.61	0.00950325		3628.6	0.00076302		4158.6	-0.00998074
448.79	0.24201713		978.79	0.04052331		1508.78	0.05066983		2038.79	-0.01523325		2568.78	0.00499299		3098.81	0.00948359		3628.8	0.00069056		4158.8	-0.00982148
448.99	0.24210996		978.99	0.04035854		1508.98	0.05014773		2038.99	-0.0148922		2568.98	0.00449883		3099.01	0.00877345		3629	0.00077273		4159	-0.00898166
449.19	0.24259996		979.19	0.04052705		1509.18	0.05083257		2039.19	-0.01432542		2569.18	0.00542518		3099.21	0.00959235		3629.2	0.00001813		4159.2	-0.00912365
449.39	0.24353345		979.39	0.0410243		1509.38	0.05085454		2039.39	-0.01489141		2569.38	0.00574917		3099.41	0.00928667		3629.4	0.00044463		4159.4	-0.00954435
449.59	0.24287723		979.59	0.04115935		1509.58	0.05027205		2039.59	-0.0152312		2569.58	0.00633284		3099.61	0.00885909		3629.6	0.00054573		4159.6	-0.00912462
449.79	0.24277354		979.79	0.04238874		1509.78	0.04921002		2039.79	-0.01489823		2569.78	0.00706275		3099.81	0.00792755		3629.8	0.0008497		4159.8	-0.00970461
449.99	0.24299334		979.99	0.04207538		1509.98	0.04902935		2039.99	-0.01553214		2569.98	0.00725375		3100.01	0.00792346		3630	0.00133848		4160	-0.01014757
450.19	0.2420073		980.19	0.04249772		1510.18	0.04910735		2040.19	-0.01558513		2570.18	0.00843839		3100.21	0.00815242		3630.2	0.00195421		4160.2	-0.0092985
450.39	0.242374		980.39	0.04131986		1510.38	0.04962484		2040.39	-0.01583336		2570.38	0.00947539		3100.41	0.00820085		3630.4	0.0026621		4160.4	-0.00892332
450.59	0.24201611		980.59	0.04093416		1510.58	0.05013361		2040.59	-0.01554781		2570.58	0.00984545		3100.61	0.00800793		3630.6	0.0030716		4160.6	-0.00861391
450.79	0.241757		980.79	0.04102983		1510.78	0.04985422		2040.79	-0.014991		2570.78	0.01010968		3100.81	0.00884908		3630.8	0.00324989		4160.8	-0.01000066
450.99	0.24045898		980.99	0.04060534		1510.98	0.05027353		2040.99	-0.0148781		2570.98	0.01088968		3101.01	0.00911767		3631	0.00329079		4161	-0.00952747
451.19	0.23964065		981.19	0.04083446		1511.18	0.05023718		2041.19	-0.01448934		2571.18	0.01124703		3101.21	0.00829463		3631.2	0.00339032		4161.2	-0.00851029
451.39	0.23970255		981.39	0.04052122		1511.38	0.05123784		2041.39	-0.0146461		2571.38	0.01094387		3101.41	0.00824513		3631.4	0.0035796		4161.4	-0.00891646
451.59	0.23880722		981.59	0.03990185		1511.58	0.0519522		2041.59	-0.01396291		2571.58	0.01043458		3101.61	0.00788797		3631.6	0.00430779		4161.6	-0.0091651
451.79	0.23780242		981.79	0.04024091		1511.78	0.05263122		2041.79	-0.01379685		2571.78	0.01013711		3101.81	0.00817627		3631.8	0.00470861		4161.8	-0.01031471
451.99	0.2382404		981.99	0.04110705		1511.98	0.05246204		2041.99	-0.0137171		2571.98	0.01088647		3102.01	0.00758112		3632	0.00487528		4162	-0.01046886
452.19	0.23882987		982.19	0.04131988		1512.18	0.05264306		2042.19	-0.01296592		2572.18	0.01039978		3102.21	0.00800639		3632.2	0.00499484		4162.2	-0.01033785
452.39	0.23871886		982.39	0.0412115		1512.38	0.05326671		2042.39	-0.01261892		2572.38	0.01054389		3102.41	0.00786312		3632.4	0.00487971		4162.4	-0.00905491
452.59	0.23931276		982.59	0.0416387		1512.58	0.05304734		2042.59	-0.01353459		2572.58	0.01063146		3102.61	0.00756818		3632.6	0.00437768		4162.6	-0.01095455
452.79	0.23939481		982.79	0.0408129		1512.78	0.05316133		2042.79	-0.01266728		2572.78	0.01043806		3102.81	0.00758854		3632.8	0.00266811		4162.8	-0.01071745
452.99	0.23970325		982.99	0.04092007		1512.98	0.05317192		2042.99	-0.01257124		2572.98	0.01045011		3103.01	0.00774864		3633	0.00122145		4163	-0.01078289
453.19	0.24033181		983.19	0.04139643		1513.18	0.05331923		2043.19	-0.01203931		2573.18	0.01098549		3103.21	0.00760799		3633.2	0.0013352		4163.2	-0.01095302
453.39	0.24105011		983.39	0.04110905		1513.38	0.05327106		2043.39	-0.0123933		2573.38	0.01037638		3103.41	0.00695353		3633.4	0.00147795		4163.4	-0.01038642
453.59	0.2414377		983.59	0.04097413		1513.58	0.05213839		2043.59	-0.01255081		2573.58	0.01039413		3103.61	0.00631072		3633.6	0.00191667		4163.6	-0.0106443
453.79	0.24206743		983.79	0.04143686		1513.78	0.05133749		2043.79	-0.0132015		2573.78	0.0110067		3103.81	0.00622979		3633.8	0.00202559		4163.8	-0.01013607
453.99	0.24261406		983.99	0.04066073		1513.98	0.05141715		2043.99	-0.01403059		2573.98	0.01071772		3104.01	0.00641417		3634	0.00266992		4164	-0.00986682
454.19	0.24230265		984.19	0.04009501		1514.18	0.05210046		2044.19	-0.01407624		2574.18	0.01135979		3104.21	0.00689843		3634.2	0.00355771		4164.2	-0.0089262
454.39	0.24274812		984.39	0.03987889		1514.38	0.05160298		2044.39	-0.01455996		2574.38	0.0116499		3104.41	0.00675453		3634.4	0.00334553		4164.4	-0.00888786
454.59	0.24276759		984.59	0.04004032		1514.58	0.05144418		2044.59	-0.01462114		2574.58	0.01168347		3104.61	0.00653369		3634.6	0.00349888		4164.6	-0.00914554
454.79	0.24298946		984.79	0.04010576		1514.78	0.05062671		2044.79	-0.01489404		2574.78	0.010971		3104.81	0.00595267		3634.8	0.00313431		4164.8	-0.0083519
454.99	0.24361808		984.99	0.03960677		1514.98	0.05086204		2044.99	-0.01530492		2574.98	0.01118208		3105.01	0.0053164		3635	0.00313431		4165	-0.00736876
455.19	0.24328222		985.19	0.03937394		1515.18	0.05095374		2045.19	-0.01513059		2575.18	0.01030904		3105.21	0.00500617		3635.2	0.00398246		4165.2	-0.00728938
455.39	0.24359053		985.39	0.0391179		1515.38	0.05061237		2045.39	-0.0158977		2575.38	0.00933527		3105.41	0.00567494		3635.4	0.00429658		4165.4	-0.00838576
455.59	0.24270028		985.59	0.03937602		1515.58	0.05022709		2045.59	-0.01636299		2575.58	0.00900421		3105.61	0.00580482		3635.6	0.00469764		4165.6	-0.0086421
455.79	0.24273322		985.79	0.03930969		1515.78	0.05039884		2045.79	-0.01666228		2575.78	0.00934388		3105.81	0.00562186		3635.8	0.00554347		4165.8	-0.00948778
455.99	0.24225832		985.99	0.03877843		1515.98	0.04983645		2045.99	-0.01609149		2575.98	0.00874694		3106.01	0.00505503		3636	0.00556163		4166	-0.00978819
456.19	0.24236466		986.19	0.03800461		1516.18	0.04953592		2046.19	-0.01598764		2576.18	0.00859528		3106.21	0.00562057		3636.2	0.00545137		4166.2	-0.0097456
456.39	0.24163842		986.39	0.03721009		1516.38	0.04999351		2046.39	-0.01585189		2576.38	0.00923572		3106.41	0.00530947		3636.4	0.00439152		4166.4	-0.00996242
456.59	0.24149437		986.59	0.03665446		1516.58	0.05049657		2046.59	-0.01562467		2576.58	0.00951849		3106.61	0.00598113		3636.6	0.00299716		4166.6	-0.01157392
456.79	0.24138512		986.79	0.03736484		1516.78	0.05117076		2046.79	-0.01434074		2576.78	0.00952655		3106.81	0.00688887		3636.8	0.00180027		4166.8	-0.01132685
456.99	0.24083985		986.99	0.0376282		1516.98	0.05109618		2046.99	-0.01465032		2576.98	0.01025667		3107.01	0.00753714		3637	0.00150565		4167	-0.01039438
457.19	0.2411649		987.19	0.03817267		1517.18	0.05151929		2047.19	-0.01428294		2577.18	0.01005411		3107.21	0.00780911		3637.2	0.00104731		4167.2	-0.00983231
457.39	0.24092223		987.39	0.03857867		1517.38	0.05212834		2047.39	-0.01403209		2577.38	0.00967515		3107.41	0.00826845		3637.4	0.00078082		4167.4	-0.00854319
457.59	0.24087772		987.59	0.03921787		1517.58	0.05224444		2047.59	-0.01418331		2577.58	0.00956135		3107.61	0.00895953		3637.6	0.00063825		4167.6	-0.00805021
457.79	0.24077322		987.79	0.04026125		1517.78	0.05281844		2047.79	-0.0141819		2577.78	0.0097699		3107.81	0.00923884		3637.8	0.00040908		4167.8	-0.00754491
457.99	0.2405839		987.99	0.04017202		1517.98	0.05329897		2047.99	-0.01410283		2577.98	0.00903958		3108.01	0.00926429		3638	0.00043646		4168	-0.0074188
458.19	0.24088318		988.19	0.04074357		1518.18	0.05431325		2048.19	-0.01478187		2578.18	0.00935409		3108.21	0.01004448		3638.2	0.00079641		4168.2	-0.00740024
458.39	0.24107558		988.39	0.04083584		1518.38	0.05452804		2048.39	-0.0150434		2578.38	0.00900086		3108.41	0.01000464		3638.4	-0.00015191		4168.4	-0.00834523
458.59	0.24174268		988.59	0.04145162		1518.58	0.05438402		2048.59	-0.01425022		2578.58	0.00857506		3108.61	0.00937931		3638.6	-0.00016947		4168.6	-0.00839925
458.79	0.24188597		988.79	0.0418367		1518.78	0.05328731		2048.79	-0.01468749		2578.78	0.00785741		3108.81	0.00898696		3638.8	-0.00049479		4168.8	-0.00827713
458.99	0.24143781		988.99	0.04158182		1518.98	0.05320222		2048.99	-0.01533292		2578.98	0.00808467		3109.01	0.0097708		3639	0.00045247		4169	-0.00875695
459.19	0.24065615		989.19	0.0419811		1519.18	0.05254887		2049.19	-0.01588103		2579.18	0.00764603		3109.21	0.01067648		3639.2	0.00096971		4169.2	-0.00909863
459.39	0.24078704		989.39	0.04224786		1519.38	0.05135292		2049.39	-0.01678493		2579.38	0.00774822		3109.41	0.01066871		3639.4	0.0004776		4169.4	-0.00986317
459.59	0.23977228		989.59	0.04165056		1519.58	0.05057199		2049.59	-0.01669798		2579.58	0.00745811		3109.61	0.00927006		3639.6	0.00080225		4169.6	-0.01055959
459.79	0.23959182		989.79	0.04071623		1519.78	0.05025845		2049.79	-0.01699364		2579.78	0.00690153		3109.81	0.00806247		3639.8	0.00238425		4169.8	-0.0112434
459.99	0.23908813		989.99	0.04057333		1519.98	0.04926318		2049.99	-0.01763465		2579.98	0.00603925		3110.01	0.00709867		3640	0.00263216		4170	-0.0117252
460.19	0.23989971		990.19	0.03963215		1520.18	0.04850838		2050.19	-0.01774563		2580.18	0.00669459		3110.21	0.0073495		3640.2	0.00278323		4170.2	-0.01170691
460.39	0.23898949		990.39	0.03934947		1520.38	0.04827899		2050.39	-0.01773398		2580.38	0.00716185		3110.41	0.00679051		3640.4	0.00218818		4170.4	-0.01209349
460.59	0.23876489		990.59	0.03948098		1520.58	0.04866562		2050.59	-0.0169466		2580.58	0.00717294		3110.61	0.00734487		3640.6	0.00230685		4170.6	-0.01237825
460.79	0.23875855		990.79	0.04015184		1520.78	0.04827526		2050.79	-0.01652242		2580.78	0.00719887		3110.81	0.0076974		3640.8	0.00241689		4170.8	-0.01140988
460.99	0.23792701		990.99	0.03974415		1520.98	0.04731034		2050.99	-0.0162175		2580.98	0.0072233		3111.01	0.0081829		3641	0.00266731		4171	-0.01006265
461.19	0.23849248		991.19	0.04060224		1521.18	0.04796541		2051.19	-0.01535594		2581.18	0.00724738		3111.21	0.00821018		3641.2	0.00249153		4171.2	-0.00952192
461.39	0.238392		991.39	0.03984847		1521.38	0.04884655		2051.39	-0.0149063		2581.38	0.00821163		3111.41	0.0077072		3641.4	0.00328759		4171.4	-0.00907537
461.59	0.23896187		991.59	0.03965811		1521.58	0.04990558		2051.59	-0.01528552		2581.58	0.00844913		3111.61	0.00712235		3641.6	0.00240862		4171.6	-0.00946383
461.79	0.2393249		991.79	0.03997956		1521.78	0.05064459		2051.79	-0.01445768		2581.78	0.00852324		3111.81	0.00600181		3641.8	0.00184619		4171.8	-0.01051264
461.99	0.2402485		991.99	0.03944405		1521.98	0.0513321		2051.99	-0.01406358		2581.98	0.00864798		3112.01	0.00621279		3642	0.00107432		4172	-0.01054408
462.19	0.24055568		992.19	0.03977225		1522.18	0.05237821		2052.19	-0.01376378		2582.18	0.00792591		3112.21	0.00645083		3642.2	0.00113685		4172.2	-0.0111345
462.39	0.24040799		992.39	0.03970593		1522.38	0.05322186		2052.39	-0.01302656		2582.38	0.00751558		3112.41	0.00709645		3642.4	0.00061342		4172.4	-0.01095767
462.59	0.24020979		992.59	0.04049014		1522.58	0.05357336		2052.59	-0.01231628		2582.58	0.00792958		3112.61	0.00732503		3642.6	0.00094081		4172.6	-0.01078803
462.79	0.24015386		992.79	0.04059632		1522.78	0.05416808		2052.79	-0.01353885		2582.78	0.00746823		3112.81	0.00821833		3642.8	0.00123936		4172.8	-0.01033688
462.99	0.23981909		992.99	0.04020598		1522.98	0.05464187		2052.99	-0.01462928		2582.98	0.00714654		3113.01	0.00833515		3643	0.00139835		4173	-0.00974277
463.19	0.23878964		993.19	0.03975459		1523.18	0.05474511		2053.19	-0.01436321		2583.18	0.0074887		3113.21	0.00801847		3643.2	0.00159216		4173.2	-0.00994092
463.39	0.2389871		993.39	0.03936436		1523.38	0.05442368		2053.39	-0.01512414		2583.38	0.00764096		3113.41	0.00720593		3643.4	0.00191224		4173.4	-0.00994358
463.59	0.23854842		993.59	0.03908287		1523.58	0.05498521		2053.59	-0.01575668		2583.58	0.00672249		3113.61	0.00576083		3643.6	0.00284557		4173.6	-0.00944809
463.79	0.23833087		993.79	0.03834146		1523.78	0.05459401		2053.79	-0.01693245		2583.78	0.00667112		3113.81	0.00642876		3643.8	0.00313132		4173.8	-0.00950133
463.99	0.23748307		993.99	0.03744024		1523.98	0.05355882		2053.99	-0.01782282		2583.98	0.00653117		3114.01	0.00604764		3644	0.00188473		4174	-0.00962048
464.19	0.23769547		994.19	0.03654873		1524.18	0.05275548		2054.19	-0.01733026		2584.18	0.006065		3114.21	0.00586798		3644.2	0.00192639		4174.2	-0.0088161
464.39	0.23655189		994.39	0.03682733		1524.38	0.05224083		2054.39	-0.0168397		2584.38	0.00599267		3114.41	0.005825		3644.4	0.00218246		4174.4	-0.00908248
464.59	0.2367118		994.59	0.03690099		1524.58	0.05233477		2054.59	-0.01563155		2584.58	0.00665925		3114.61	0.00568182		3644.6	0.00185457		4174.6	-0.00926148
464.79	0.23710436		994.79	0.03723811		1524.78	0.05152013		2054.79	-0.014811		2584.78	0.00709659		3114.81	0.00535765		3644.8	0.00179344		4174.8	-0.00914579
464.99	0.23691618		994.99	0.03647677		1524.98	0.05141263		2054.99	-0.01444256		2584.98	0.00763883		3115.01	0.00527069		3645	0.00167928		4175	-0.00937711
465.19	0.23686097		995.19	0.03725049		1525.18	0.05123473		2055.19	-0.01435018		2585.18	0.00842013		3115.21	0.00521058		3645.2	0.00091553		4175.2	-0.00943714
465.39	0.23752898		995.39	0.03685671		1525.38	0.05153351		2055.39	-0.01437584		2585.38	0.00918439		3115.41	0.00419757		3645.4	-0.00036236		4175.4	-0.00978043
465.59	0.2385095		995.59	0.03761362		1525.58	0.05178476		2055.59	-0.01350939		2585.58	0.00871195		3115.61	0.00457501		3645.6	-0.00121984		4175.6	-0.01090125
465.79	0.23934032		995.79	0.03818007		1525.78	0.05194625		2055.79	-0.0127703		2585.78	0.00906597		3115.81	0.00357059		3645.8	-0.00155997		4175.8	-0.0113096
465.99	0.23961119		995.99	0.03867377		1525.98	0.05203781		2055.99	-0.01281261		2585.98	0.00902305		3116.01	0.00405831		3646	-0.0018795		4176	-0.01098012
466.19	0.23911643		996.19	0.03955047		1526.18	0.05226298		2056.19	-0.01292065		2586.18	0.00840065		3116.21	0.00533188		3646.2	-0.00212091		4176.2	-0.01060248
466.39	0.23888042		996.39	0.04036234		1526.38	0.05272642		2056.39	-0.01318878		2586.38	0.00827687		3116.41	0.00677012		3646.4	-0.00218252		4176.4	-0.01096978
466.59	0.23935723		996.59	0.04104827		1526.58	0.0527573		2056.59	-0.01321028		2586.58	0.00845033		3116.61	0.00725013		3646.6	-0.00227525		4176.6	-0.01178709
466.79	0.23988746		996.79	0.04141442		1526.78	0.05325502		2056.79	-0.01393918		2586.78	0.00803128		3116.81	0.00766715		3646.8	-0.00197435		4176.8	-0.01180183
466.99	0.24014667		996.99	0.04078515		1526.98	0.05355546		2056.99	-0.01473056		2586.98	0.00796984		3117.01	0.00741101		3647	-0.00113996		4177	-0.01206468
467.19	0.23960662		997.19	0.04030947		1527.18	0.05365036		2057.19	-0.01532108		2587.18	0.00836791		3117.21	0.00760647		3647.2	-0.00000351		4177.2	-0.01260003
467.39	0.24001215		997.39	0.04045497		1527.38	0.05315593		2057.39	-0.01614481		2587.38	0.00763197		3117.41	0.00821655		3647.4	-0.00016587		4177.4	-0.01237733
467.59	0.24014574		997.59	0.04064337		1527.58	0.05318849		2057.59	-0.0170686		2587.58	0.00770467		3117.61	0.00867806		3647.6	0.00020848		4177.6	-0.0127611
467.79	0.23939133		997.79	0.0399878		1527.78	0.05196165		2057.79	-0.01722354		2587.78	0.0079698		3117.81	0.00937094		3647.8	-0.00098639		4177.8	-0.01339396
467.99	0.23890267		997.99	0.03937741		1527.98	0.05132069		2057.99	-0.01705204		2587.98	0.00756374		3118.01	0.00839694		3648	-0.00104945		4178	-0.01290195
468.19	0.23892694		998.19	0.03891411		1528.18	0.05143018		2058.19	-0.0162456		2588.18	0.00688577		3118.21	0.00784019		3648.2	-0.00045981		4178.2	-0.01289043
468.39	0.23794046		998.39	0.03899611		1528.38	0.05106296		2058.39	-0.01525974		2588.38	0.00700875		3118.41	0.00778925		3648.4	0.00037869		4178.4	-0.01351749
468.59	0.23815488		998.59	0.03885746		1528.58	0.05036096		2058.59	-0.01455649		2588.58	0.00726858		3118.61	0.00785325		3648.6	0.00011267		4178.6	-0.01289054
468.79	0.237991		998.79	0.03834905		1528.78	0.05027433		2058.79	-0.01347747		2588.78	0.00726567		3118.81	0.00848173		3648.8	0.00059864		4178.8	-0.01210751
468.99	0.23765493		998.99	0.03733862		1528.98	0.05043611		2058.99	-0.01316518		2588.98	0.0072176		3119.01	0.00842498		3649	-0.0001175		4179	-0.01120961
469.19	0.23773036		999.19	0.03734323		1529.18	0.04993114		2059.19	-0.0131377		2589.18	0.00750208		3119.21	0.00873281		3649.2	-0.00025525		4179.2	-0.00984527
469.39	0.23809538		999.39	0.03713481		1529.38	0.05086473		2059.39	-0.01346096		2589.38	0.00752004		3119.41	0.00757765		3649.4	-0.00058099		4179.4	-0.00897107
469.59	0.23809111		999.59	0.03715146		1529.58	0.05083549		2059.59	-0.01338644		2589.58	0.00679565		3119.61	0.00725181		3649.6	0.00017041		4179.6	-0.00868286
469.79	0.2378316		999.79	0.03729908		1529.78	0.05079921		2059.79	-0.0143452		2589.78	0.00665144		3119.81	0.00579309		3649.8	0.00057931		4179.8	-0.00759064
469.99	0.23710072		999.99	0.03719556		1529.98	0.05082059		2059.99	-0.01439619		2589.98	0.00584533		3120.01	0.00594082		3650	-0.00007898		4180	-0.00701888
470.19	0.23684514		1000.19	0.03712193		1530.18	0.05127754		2060.19	-0.01489204		2590.18	0.00567867		3120.21	0.00668472		3650.2	-0.00017661		4180.2	-0.00674003
470.39	0.23698422		1000.39	0.03694273		1530.38	0.05045899		2060.39	-0.01489159		2590.38	0.00567905		3120.41	0.00646717		3650.4	0.00037377		4180.4	-0.00709632
470.59	0.23759939		1000.59	0.03643503		1530.58	0.05132552		2060.59	-0.0146398		2590.58	0.00619431		3120.61	0.00631102		3650.6	-0.00003093		4180.6	-0.00680279
470.79	0.23797724		1000.79	0.03670202		1530.78	0.05192935		2060.79	-0.0149562		2590.78	0.0065713		3120.81	0.00581494		3650.8	0.00007349		4180.8	-0.00630279
470.99	0.23877832		1000.99	0.03651636		1530.98	0.0529416		2060.99	-0.01595875		2590.98	0.0060117		3121.01	0.00552334		3651	0.00028803		4181	-0.00660053
471.19	0.2379036		1001.19	0.03645797		1531.18	0.05290086		2061.19	-0.01727606		2591.18	0.00653475		3121.21	0.00520938		3651.2	0.00040551		4181.2	-0.00742476
471.39	0.23787753		1001.39	0.03675872		1531.38	0.05277581		2061.39	-0.01719096		2591.38	0.00610184		3121.41	0.00488731		3651.4	0.00024731		4181.4	-0.0070138
471.59	0.23890188		1001.59	0.03689856		1531.58	0.05301375		2061.59	-0.01792575		2591.58	0.00644169		3121.61	0.00497222		3651.6	0.00119283		4181.6	-0.00742856
471.79	0.23900322		1001.79	0.03644485		1531.78	0.05269787		2061.79	-0.01756088		2591.78	0.00659904		3121.81	0.00452791		3651.8	0.00050739		4181.8	-0.00804239
471.99	0.23828384		1001.99	0.03609555		1531.98	0.05252733		2061.99	-0.0175295		2591.98	0.00603341		3122.01	0.00418181		3652	0.00107588		4182	-0.00841297
472.19	0.23790776		1002.19	0.03637861		1532.18	0.05296375		2062.19	-0.01755291		2592.18	0.00599508		3122.21	0.00392886		3652.2	0.00133174		4182.2	-0.00944265
472.39	0.2377517		1002.39	0.03654437		1532.38	0.05292424		2062.39	-0.01722979		2592.38	0.00662466		3122.41	0.00420877		3652.4	0.00262434		4182.4	-0.00936608
472.59	0.23777835		1002.59	0.03657185		1532.58	0.05262087		2062.59	-0.01709698		2592.58	0.00714213		3122.61	0.00524819		3652.6	0.00256521		4182.6	-0.00940965
472.79	0.23742611		1002.79	0.03622931		1532.78	0.05240476		2062.79	-0.01667534		2592.78	0.00702317		3122.81	0.00577834		3652.8	0.00284367		4182.8	-0.00978843
472.99	0.23798318		1002.99	0.03689735		1532.98	0.05277948		2062.99	-0.01663184		2592.98	0.00692891		3123.01	0.00571034		3653	0.00213806		4183	-0.00980427
473.19	0.23824381		1003.19	0.037643		1533.18	0.05263264		2063.19	-0.01673374		2593.18	0.00730135		3123.21	0.00607393		3653.2	0.00192985		4183.2	-0.01019417
473.39	0.23766066		1003.39	0.03849506		1533.38	0.05253131		2063.39	-0.01681394		2593.38	0.00682883		3123.41	0.00594311		3653.4	0.00121132		4183.4	-0.01039652
473.59	0.23790597		1003.59	0.03955852		1533.58	0.05152318		2063.59	-0.01694908		2593.58	0.00693245		3123.61	0.00621658		3653.6	0.00139644		4183.6	-0.01142398
473.79	0.23819666		1003.79	0.03936599		1533.78	0.05131619		2063.79	-0.01741454		2593.78	0.00687754		3123.81	0.00596031		3653.8	0.00119943		4183.8	-0.01190894
473.99	0.2380544		1003.99	0.04013148		1533.98	0.05054694		2063.99	-0.01790093		2593.98	0.0070354		3124.01	0.00563273		3654	0.00089601		4184	-0.0122522
474.19	0.23792645		1004.19	0.03983587		1534.18	0.04971826		2064.19	-0.0176697		2594.18	0.00770786		3124.21	0.00540313		3654.2	0.00097594		4184.2	-0.01223811
474.39	0.23791021		1004.39	0.04011017		1534.38	0.04858396		2064.39	-0.01665646		2594.38	0.00804903		3124.41	0.00600216		3654.4	0.00042968		4184.4	-0.01120656
474.59	0.23809529		1004.59	0.04034647		1534.58	0.04900547		2064.59	-0.01711251		2594.58	0.00820571		3124.61	0.00539054		3654.6	-0.00008068		4184.6	-0.01097558
474.79	0.2389862		1004.79	0.04092885		1534.78	0.04861095		2064.79	-0.01782611		2594.78	0.00820589		3124.81	0.00475025		3654.8	0.00007635		4184.8	-0.01104165
474.99	0.23872619		1004.99	0.04079706		1534.98	0.04915574		2064.99	-0.0184635		2594.98	0.0075716		3125.01	0.00458171		3655	-0.00044427		4185	-0.0116891
475.19	0.23888978		1005.19	0.04060515		1535.18	0.04845285		2065.19	-0.01862592		2595.18	0.00733359		3125.21	0.00390527		3655.2	-0.00023214		4185.2	-0.01195011
475.39	0.23985938		1005.39	0.04065752		1535.38	0.04821681		2065.39	-0.01874782		2595.38	0.00660965		3125.41	0.00375261		3655.4	-0.00137978		4185.4	-0.01123785
475.59	0.24083739		1005.59	0.0399073		1535.58	0.04873809		2065.59	-0.01872168		2595.58	0.0066164		3125.61	0.00397522		3655.6	-0.001612		4185.6	-0.01241566
475.79	0.24126779		1005.79	0.03945777		1535.78	0.04887614		2065.79	-0.01830494		2595.78	0.00595927		3125.81	0.00383144		3655.8	-0.0023864		4185.8	-0.01295301
475.99	0.24072134		1005.99	0.03931641		1535.98	0.04886213		2065.99	-0.01851871		2595.98	0.00530654		3126.01	0.00374116		3656	-0.0022502		4186	-0.01353327
476.19	0.24028459		1006.19	0.03908006		1536.18	0.0496082		2066.19	-0.01767106		2596.18	0.00538174		3126.21	0.00368521		3656.2	-0.00169442		4186.2	-0.01264968
476.39	0.23971168		1006.39	0.0388851		1536.38	0.05028153		2066.39	-0.01729823		2596.38	0.00527831		3126.41	0.00348188		3656.4	-0.00125335		4186.4	-0.01262078
476.59	0.23958309		1006.59	0.03853651		1536.58	0.05038639		2066.59	-0.01736556		2596.58	0.00434275		3126.61	0.00385963		3656.6	-0.0014381		4186.6	-0.01327517
476.79	0.23965778		1006.79	0.03788182		1536.78	0.04946511		2066.79	-0.0167948		2596.78	0.00350913		3126.81	0.00428074		3656.8	-0.00215636		4186.8	-0.01309886
476.99	0.23982043		1006.99	0.03809867		1536.98	0.05106202		2066.99	-0.0164454		2596.98	0.00422579		3127.01	0.0038859		3657	-0.00278755		4187	-0.01368768
477.19	0.23969008		1007.19	0.03834286		1537.18	0.05084136		2067.19	-0.01606451		2597.18	0.00444504		3127.21	0.00451379		3657.2	-0.0025738		4187.2	-0.01357587
477.39	0.23872516		1007.39	0.03791617		1537.38	0.05145647		2067.39	-0.01580182		2597.38	0.00406745		3127.41	0.0054648		3657.4	-0.00279268		4187.4	-0.01332947
477.59	0.23929125		1007.59	0.03830661		1537.58	0.05178392		2067.59	-0.01663132		2597.58	0.00402246		3127.61	0.00628241		3657.6	-0.0024983		4187.6	-0.01359759
477.79	0.23936821		1007.79	0.03827829		1537.78	0.05203908		2067.79	-0.01719442		2597.78	0.00450809		3127.81	0.00705962		3657.8	-0.00164741		4187.8	-0.01248581
477.99	0.23876544		1007.99	0.0388811		1537.98	0.05127273		2067.99	-0.01744877		2597.98	0.0050271		3128.01	0.00839572		3658	-0.00093981		4188	-0.01162479
478.19	0.23874842		1008.19	0.03865845		1538.18	0.05111256		2068.19	-0.0165027		2598.18	0.00504444		3128.21	0.00874096		3658.2	-0.00142366		4188.2	-0.01037165
478.39	0.23862223		1008.39	0.03865182		1538.38	0.05099345		2068.39	-0.01717118		2598.38	0.00489503		3128.41	0.0098432		3658.4	-0.00092256		4188.4	-0.00950237
478.59	0.23913181		1008.59	0.03880938		1538.58	0.05055138		2068.59	-0.0179702		2598.58	0.0049875		3128.61	0.00869449		3658.6	-0.00106253		4188.6	-0.00961886
478.79	0.24021072		1008.79	0.03916089		1538.78	0.05063237		2068.79	-0.01789166		2598.78	0.00512653		3128.81	0.00826059		3658.8	-0.00100903		4188.8	-0.00968985
478.99	0.24039377		1008.99	0.03871008		1538.98	0.05052024		2068.99	-0.01715031		2598.98	0.00500429		3129.01	0.00832891		3659	-0.00215867		4189	-0.00945108
479.19	0.24117853		1009.19	0.03894344		1539.18	0.05018863		2069.19	-0.01701396		2599.18	0.00499984		3129.21	0.00838412		3659.2	-0.00153911		4189.2	-0.01005516
479.39	0.24069588		1009.39	0.03885431		1539.38	0.04995042		2069.39	-0.01728747		2599.38	0.00540063		3129.41	0.00760068		3659.4	-0.00199213		4189.4	-0.0103735
479.59	0.24073382		1009.59	0.03858019		1539.58	0.05052571		2069.59	-0.01643415		2599.58	0.00509757		3129.61	0.00721356		3659.6	-0.00121996		4189.6	-0.01088146
479.79	0.24119063		1009.79	0.03852592		1539.78	0.05088486		2069.79	-0.01647563		2599.78	0.00494981		3129.81	0.00644408		3659.8	-0.00134756		4189.8	-0.01086706
479.99	0.24108254		1009.99	0.03844527		1539.98	0.05143352		2069.99	-0.01635778		2599.98	0.00496356		3130.01	0.00634511		3660	-0.00103075		4190	-0.01106693
480.19	0.240904		1010.19	0.03846288		1540.18	0.05116128		2070.19	-0.01555431		2600.18	0.00464802		3130.21	0.00627278		3660.2	-0.00080423		4190.2	-0.01071272
480.39	0.24088739		1010.39	0.03803928		1540.38	0.05219594		2070.39	-0.01588573		2600.38	0.00511941		3130.41	0.00509925		3660.4	-0.00104589		4190.4	-0.01147159
480.59	0.24121221		1010.59	0.03714531		1540.58	0.05169225		2070.59	-0.01595621		2600.58	0.00564986		3130.61	0.00465404		3660.6	-0.00038032		4190.6	-0.01178785
480.79	0.24095774		1010.79	0.03647997		1540.78	0.05137461		2070.79	-0.01611286		2600.78	0.00602404		3130.81	0.00380422		3660.8	-0.00073998		4190.8	-0.01219513
480.99	0.24062208		1010.99	0.03656055		1540.98	0.05214236		2070.99	-0.01685976		2600.98	0.00662756		3131.01	0.00310699		3661	-0.00100701		4191	-0.0125389
481.19	0.23969633		1011.19	0.03669065		1541.18	0.05200466		2071.19	-0.0176053		2601.18	0.00623828		3131.21	0.00347169		3661.2	-0.00084648		4191.2	-0.01182824
481.39	0.23904736		1011.39	0.03674058		1541.38	0.05320198		2071.39	-0.01801239		2601.38	0.00640278		3131.41	0.00389258		3661.4	-0.00141471		4191.4	-0.01158029
481.59	0.23869349		1011.59	0.03648125		1541.58	0.05340983		2071.59	-0.01872002		2601.58	0.00618016		3131.61	0.00459934		3661.6	-0.00208019		4191.6	-0.01125259
481.79	0.23844291		1011.79	0.03697302		1541.78	0.05252586		2071.79	-0.01978784		2601.78	0.00710248		3131.81	0.00497207		3661.8	-0.00152659		4191.8	-0.01036714
481.99	0.23872796		1011.99	0.03697587		1541.98	0.05142105		2071.99	-0.02066725		2601.98	0.00632527		3132.01	0.00511708		3662	-0.00216402		4192	-0.01036268
482.19	0.23888671		1012.19	0.03728313		1542.18	0.0514073		2072.19	-0.02004981		2602.18	0.0060592		3132.21	0.00414296		3662.2	-0.00294388		4192.2	-0.01053632
482.39	0.23952335		1012.39	0.03777298		1542.38	0.05193882		2072.39	-0.02062618		2602.38	0.00578526		3132.41	0.00374376		3662.4	-0.00303524		4192.4	-0.01103691
482.59	0.23974867		1012.59	0.03832437		1542.58	0.05103614		2072.59	-0.0200795		2602.58	0.00609818		3132.61	0.00290166		3662.6	-0.00354003		4192.6	-0.0113112
482.79	0.23998474		1012.79	0.03834833		1542.78	0.05065293		2072.79	-0.01950911		2602.78	0.00581492		3132.81	0.00312522		3662.8	-0.00354898		4192.8	-0.01163688
482.99	0.23965675		1012.99	0.03758802		1542.98	0.05102833		2072.99	-0.02012616		2602.98	0.0053163		3133.01	0.00345402		3663	-0.00363364		4193	-0.0129137
483.19	0.23961912		1013.19	0.03841124		1543.18	0.05129259		2073.19	-0.02053071		2603.18	0.00472123		3133.21	0.00339875		3663.2	-0.00292503		4193.2	-0.01416416
483.39	0.23873941		1013.39	0.03798317		1543.38	0.05083844		2073.39	-0.01993933		2603.38	0.00445121		3133.41	0.00325588		3663.4	-0.00224906		4193.4	-0.01355086
483.59	0.23884546		1013.59	0.03759405		1543.58	0.05130101		2073.59	-0.01953424		2603.58	0.00400559		3133.61	0.00391185		3663.6	-0.00183491		4193.6	-0.01309605
483.79	0.23962494		1013.79	0.03731914		1543.78	0.05063918		2073.79	-0.01970216		2603.78	0.00403167		3133.81	0.00451063		3663.8	-0.0021843		4193.8	-0.01281598
483.99	0.24025661		1013.99	0.03692447		1543.98	0.05100734		2073.99	-0.0196608		2603.98	0.00412659		3134.01	0.00536694		3664	-0.00157751		4194	-0.01243019
484.19	0.24039334		1014.19	0.03650558		1544.18	0.05067449		2074.19	-0.01900524		2604.18	0.00408907		3134.21	0.00588521		3664.2	-0.00079074		4194.2	-0.01217197
484.39	0.23982842		1014.39	0.03584645		1544.38	0.05132238		2074.39	-0.0186531		2604.38	0.00447902		3134.41	0.00569125		3664.4	-0.00026135		4194.4	-0.01159058
484.59	0.23977765		1014.59	0.03612967		1544.58	0.05095793		2074.59	-0.01952881		2604.58	0.00453337		3134.61	0.00562855		3664.6	-0.00020947		4194.6	-0.01089801
484.79	0.23897481		1014.79	0.03650674		1544.78	0.05112073		2074.79	-0.02016966		2604.78	0.00452513		3134.81	0.00616043		3664.8	-0.00102255		4194.8	-0.0110849
484.99	0.23885273		1014.99	0.03677263		1544.98	0.05113325		2074.99	-0.02021488		2604.98	0.00479109		3135.01	0.0065842		3665	-0.00088254		4195	-0.01041553
485.19	0.23823343		1015.19	0.03632921		1545.18	0.05181362		2075.19	-0.02067048		2605.18	0.00418114		3135.21	0.00626855		3665.2	-0.00062386		4195.2	-0.01001783
485.39	0.23808901		1015.39	0.0360276		1545.38	0.05156063		2075.39	-0.019806		2605.38	0.00518739		3135.41	0.00601109		3665.4	-0.0006289		4195.4	-0.00971024
485.59	0.23732778		1015.59	0.03520281		1545.58	0.05068211		2075.59	-0.01929636		2605.58	0.00512229		3135.61	0.00586557		3665.6	-0.00083036		4195.6	-0.00933618
485.79	0.23758333		1015.79	0.03604294		1545.78	0.04954243		2075.79	-0.01998122		2605.78	0.00550845		3135.81	0.00503531		3665.8	-0.00083025		4195.8	-0.009662
485.99	0.23831679		1015.99	0.0359579		1545.98	0.04941479		2075.99	-0.01917866		2605.98	0.00481221		3136.01	0.00447703		3666	-0.00116248		4196	-0.01024465
486.19	0.23805153		1016.19	0.03629763		1546.18	0.0504652		2076.19	-0.01835154		2606.18	0.00558853		3136.21	0.00487321		3666.2	-0.00148754		4196.2	-0.0110306
486.39	0.23786036		1016.39	0.03697643		1546.38	0.05028555		2076.39	-0.01895337		2606.38	0.00602194		3136.41	0.00385214		3666.4	-0.00081783		4196.4	-0.01126346
486.59	0.23755348		1016.59	0.03662812		1546.58	0.04973034		2076.59	-0.01866778		2606.58	0.00611828		3136.61	0.00314055		3666.6	-0.00083141		4196.6	-0.01179005
486.79	0.23774065		1016.79	0.03675038		1546.78	0.04970991		2076.79	-0.01918701		2606.78	0.00603384		3136.81	0.00279675		3666.8	-0.00028929		4196.8	-0.01223381
486.99	0.23763957		1016.99	0.03677617		1546.98	0.05010302		2076.99	-0.01992595		2606.98	0.00563994		3137.01	0.00276046		3667	0.00041079		4197	-0.01333727
487.19	0.23701357		1017.19	0.03711713		1547.18	0.04942509		2077.19	-0.01841152		2607.18	0.00571372		3137.21	0.00258635		3667.2	0.0007884		4197.2	-0.01281513
487.39	0.23638954		1017.39	0.03775185		1547.38	0.04858748		2077.39	-0.01738296		2607.38	0.00572349		3137.41	0.00266502		3667.4	0.00156864		4197.4	-0.01290241
487.59	0.23694482		1017.59	0.03820383		1547.58	0.04827005		2077.59	-0.01725644		2607.58	0.00568463		3137.61	0.00400086		3667.6	0.00150377		4197.6	-0.0132995
487.79	0.23769984		1017.79	0.03869043		1547.78	0.04808483		2077.79	-0.01759552		2607.78	0.00564441		3137.81	0.00393703		3667.8	0.00167496		4197.8	-0.01269058
487.99	0.23791498		1017.99	0.03868869		1547.98	0.04937478		2077.99	-0.01764231		2607.98	0.00539289		3138.01	0.00412331		3668	0.00209108		4198	-0.01284958
488.19	0.23784971		1018.19	0.03913115		1548.18	0.0497838		2078.19	-0.01727418		2608.18	0.00509159		3138.21	0.00433637		3668.2	0.00222679		4198.2	-0.01269914
488.39	0.23723549		1018.39	0.03973819		1548.38	0.05030749		2078.39	-0.01833919		2608.38	0.00526227		3138.41	0.0040554		3668.4	0.00103799		4198.4	-0.01305903
488.59	0.23691348		1018.59	0.04014573		1548.58	0.05087582		2078.59	-0.01830112		2608.58	0.00500377		3138.61	0.00367903		3668.6	0.00002576		4198.6	-0.01269644
488.79	0.23707544		1018.79	0.04042226		1548.78	0.05159787		2078.79	-0.0180648		2608.78	0.00528683		3138.81	0.004147		3668.8	-0.00041282		4198.8	-0.01298377
488.99	0.23792429		1018.99	0.03983787		1548.98	0.05130289		2078.99	-0.01731979		2608.98	0.00551693		3139.01	0.00424806		3669	0.00040129		4199	-0.01301229
489.19	0.23803614		1019.19	0.03921096		1549.18	0.05055651		2079.19	-0.01692893		2609.18	0.00574765		3139.21	0.00379207		3669.2	-0.00017523		4199.2	-0.01274448
489.39	0.2383339		1019.39	0.03825846		1549.38	0.05034329		2079.39	-0.0166195		2609.38	0.00689374		3139.41	0.00377478		3669.4	-0.00030673		4199.4	-0.0128613
489.59	0.2382623		1019.59	0.03725242		1549.58	0.05028921		2079.59	-0.01680716		2609.58	0.00654818		3139.61	0.00405567		3669.6	-0.00046656		4199.6	-0.01307677
489.79	0.23930029		1019.79	0.03736682		1549.78	0.0502045		2079.79	-0.01720409		2609.78	0.00613879		3139.81	0.00417035		3669.8	-0.00106042		4199.8	-0.01379159
489.99	0.23952199		1019.99	0.03646267		1549.98	0.05028647		2079.99	-0.01809066		2609.98	0.00641893		3140.01	0.00455999		3670	-0.00085184		4200	-0.0137207
490.19	0.23931953		1020.19	0.0363891		1550.18	0.05019114		2080.19	-0.01838886		2610.18	0.00760095		3140.21	0.00483565		3670.2	-0.00098417		4200.2	-0.01392178
490.39	0.24025285		1020.39	0.0365859		1550.38	0.04931354		2080.39	-0.01884196		2610.38	0.00774902		3140.41	0.00374962		3670.4	-0.00120614		4200.4	-0.01315427
490.59	0.24041003		1020.59	0.03694011		1550.58	0.04880898		2080.59	-0.01890886		2610.58	0.00783875		3140.61	0.00361469		3670.6	-0.00094517		4200.6	-0.0131571
490.79	0.24064403		1020.79	0.03704484		1550.78	0.04801714		2080.79	-0.01967599		2610.78	0.00828855		3140.81	0.0035471		3670.8	-0.00072259		4200.8	-0.01416706
490.99	0.23980313		1020.99	0.03668143		1550.98	0.0473873		2080.99	-0.0190642		2610.98	0.00737547		3141.01	0.00363779		3671	-0.00069097		4201	-0.01424885
491.19	0.23903974		1021.19	0.03655922		1551.18	0.04704411		2081.19	-0.01859376		2611.18	0.00728661		3141.21	0.00314256		3671.2	-0.00080948		4201.2	-0.01417839
491.39	0.23897625		1021.39	0.0371586		1551.38	0.04688991		2081.39	-0.01802864		2611.38	0.00677049		3141.41	0.00306975		3671.4	-0.00059956		4201.4	-0.01480999
491.59	0.23873984		1021.59	0.03669072		1551.58	0.04640343		2081.59	-0.01813175		2611.58	0.00649992		3141.61	0.00364875		3671.6	-0.00091118		4201.6	-0.01448817
491.79	0.23889832		1021.79	0.03665251		1551.78	0.04673527		2081.79	-0.01786019		2611.78	0.00593802		3141.81	0.00219289		3671.8	-0.00076108		4201.8	-0.01341274
491.99	0.2385291		1021.99	0.03578352		1551.98	0.04723801		2081.99	-0.01800251		2611.98	0.0054839		3142.01	0.00206087		3672	-0.00052298		4202	-0.01342872
492.19	0.23811307		1022.19	0.03507938		1552.18	0.04747935		2082.19	-0.01804819		2612.18	0.00620498		3142.21	0.00115585		3672.2	-0.00045109		4202.2	-0.01321173
492.39	0.23814321		1022.39	0.03534361		1552.38	0.04765747		2082.39	-0.01827449		2612.38	0.00578176		3142.41	0.00083811		3672.4	-0.00079388		4202.4	-0.01234602
492.59	0.23871104		1022.59	0.03503358		1552.58	0.04781125		2082.59	-0.01749999		2612.58	0.00513685		3142.61	0.00013801		3672.6	-0.00095243		4202.6	-0.01074669
492.79	0.23935703		1022.79	0.03446507		1552.78	0.04825017		2082.79	-0.0175935		2612.78	0.00511299		3142.81	0.00051427		3672.8	-0.00103825		4202.8	-0.010793
492.99	0.23983444		1022.99	0.03386946		1552.98	0.04760027		2082.99	-0.01707972		2612.98	0.00546819		3143.01	0.00080126		3673	-0.00096764		4203	-0.01075789
493.19	0.24069555		1023.19	0.03383479		1553.18	0.0479115		2083.19	-0.01658307		2613.18	0.00441546		3143.21	0.00031681		3673.2	-0.00107735		4203.2	-0.0107935
493.39	0.24149544		1023.39	0.03367652		1553.38	0.04875392		2083.39	-0.01690291		2613.38	0.00416602		3143.41	0.00106809		3673.4	-0.00153672		4203.4	-0.00974442
493.59	0.24122749		1023.59	0.0332845		1553.58	0.04969603		2083.59	-0.01677269		2613.58	0.00401987		3143.61	0.00162165		3673.6	-0.0020345		4203.6	-0.00968426
493.79	0.24154474		1023.79	0.03306842		1553.78	0.04961475		2083.79	-0.0169594		2613.78	0.00389278		3143.81	0.00161849		3673.8	-0.00221913		4203.8	-0.00832456
493.99	0.24141979		1023.99	0.03199322		1553.98	0.05028713		2083.99	-0.0172926		2613.98	0.00448785		3144.01	0.00194321		3674	-0.00202304		4204	-0.00827065
494.19	0.24198682		1024.19	0.03257832		1554.18	0.04965359		2084.19	-0.01661644		2614.18	0.00489901		3144.21	0.00182854		3674.2	-0.00285259		4204.2	-0.00814484
494.39	0.2424445		1024.39	0.03267628		1554.38	0.04998272		2084.39	-0.01735554		2614.38	0.00518597		3144.41	0.00149438		3674.4	-0.00416512		4204.4	-0.00727413
494.59	0.24181615		1024.59	0.03315675		1554.58	0.04963414		2084.59	-0.01684551		2614.58	0.00567221		3144.61	0.00133589		3674.6	-0.00408431		4204.6	-0.00813224
494.79	0.24192717		1024.79	0.03332813		1554.78	0.04922925		2084.79	-0.01720258		2614.78	0.00500767		3144.81	0.00111067		3674.8	-0.00456216		4204.8	-0.00860526
494.99	0.24084127		1024.99	0.03336509		1554.98	0.04925343		2084.99	-0.01705689		2614.98	0.00458002		3145.01	0.00132325		3675	-0.00469926		4205	-0.007913
495.19	0.2403732		1025.19	0.03388556		1555.18	0.04953493		2085.19	-0.01711288		2615.18	0.00488703		3145.21	0.00078376		3675.2	-0.00441846		4205.2	-0.00833713
495.39	0.24018687		1025.39	0.03388666		1555.38	0.04904966		2085.39	-0.01685399		2615.38	0.0052072		3145.41	0.00039267		3675.4	-0.00405934		4205.4	-0.00929998
495.59	0.23966694		1025.59	0.03436238		1555.58	0.04890383		2085.59	-0.01736738		2615.58	0.00527989		3145.61	0.0009314		3675.6	-0.00389437		4205.6	-0.00928852
495.79	0.23956634		1025.79	0.03438344		1555.78	0.04898626		2085.79	-0.0171923		2615.78	0.0055221		3145.81	0.00084128		3675.8	-0.00392534		4205.8	-0.00993876
495.99	0.23975489		1025.99	0.03454243		1555.98	0.04860931		2085.99	-0.01741419		2615.98	0.00510626		3146.01	0.00118626		3676	-0.0029586		4206	-0.01124585
496.19	0.2397427		1026.19	0.03523821		1556.18	0.04779505		2086.19	-0.01777154		2616.18	0.00581837		3146.21	0.00080453		3676.2	-0.00238703		4206.2	-0.01253651
496.39	0.23926794		1026.39	0.03560756		1556.38	0.04767288		2086.39	-0.01887064		2616.38	0.00545866		3146.41	0.00154918		3676.4	-0.00214982		4206.4	-0.01292582
496.59	0.23920103		1026.59	0.03516456		1556.58	0.04786461		2086.59	-0.0189029		2616.58	0.00491072		3146.61	0.00136688		3676.6	-0.0022549		4206.6	-0.01340548
496.79	0.23931444		1026.79	0.03509108		1556.78	0.04723067		2086.79	-0.01884137		2616.78	0.0049718		3146.81	0.00198079		3676.8	-0.00202944		4206.8	-0.01503662
496.99	0.23976553		1026.99	0.03588962		1556.98	0.0474124		2086.99	-0.01969227		2616.98	0.0048933		3147.01	0.00250069		3677	-0.00221025		4207	-0.01578554
497.19	0.24028955		1027.19	0.03628676		1557.18	0.04737668		2087.19	-0.01999768		2617.18	0.00453005		3147.21	0.0031762		3677.2	-0.00165279		4207.2	-0.01637663
497.39	0.2394289		1027.39	0.03610267		1557.38	0.04797287		2087.39	-0.02016189		2617.38	0.00419972		3147.41	0.00380354		3677.4	-0.00116232		4207.4	-0.01541655
497.59	0.23890152		1027.59	0.03564793		1557.58	0.04905382		2087.59	-0.02043198		2617.58	0.00369717		3147.61	0.00354677		3677.6	-0.00057719		4207.6	-0.01516659
497.79	0.23885514		1027.79	0.03546269		1557.78	0.04932902		2087.79	-0.02045837		2617.78	0.00379159		3147.81	0.00258433		3677.8	0.00051528		4207.8	-0.01436166
497.99	0.2389001		1027.99	0.03517264		1557.98	0.04903435		2087.99	-0.02066556		2617.98	0.00428043		3148.01	0.001845		3678	-0.00012141		4208	-0.01501234
498.19	0.2391442		1028.19	0.03533561		1558.18	0.04886676		2088.19	-0.02097295		2618.18	0.00513358		3148.21	0.00125689		3678.2	-0.00137441		4208.2	-0.01470009
498.39	0.23958469		1028.39	0.03557581		1558.38	0.04909963		2088.39	-0.02101165		2618.38	0.00468745		3148.41	0.00071745		3678.4	-0.00200186		4208.4	-0.0138264
498.59	0.23960636		1028.59	0.03633074		1558.58	0.04942167		2088.59	-0.02074334		2618.58	0.0041482		3148.61	0.00172413		3678.6	-0.00160057		4208.6	-0.01455762
498.79	0.2399622		1028.79	0.03748356		1558.78	0.04937921		2088.79	-0.02214373		2618.78	0.0041767		3148.81	0.0020276		3678.8	-0.00136443		4208.8	-0.01415858
498.99	0.23998692		1028.99	0.03772185		1558.98	0.05017274		2088.99	-0.02273267		2618.98	0.00462442		3149.01	0.00244223		3679	-0.00162233		4209	-0.01506942
499.19	0.24031597		1029.19	0.0379097		1559.18	0.05016451		2089.19	-0.02295405		2619.18	0.00488024		3149.21	0.00168888		3679.2	-0.00180046		4209.2	-0.01494373
499.39	0.23972044		1029.39	0.03798825		1559.38	0.05064872		2089.39	-0.02243875		2619.38	0.00488991		3149.41	0.00157594		3679.4	-0.00242701		4209.4	-0.01444867
499.59	0.24030789		1029.59	0.03845137		1559.58	0.05114717		2089.59	-0.02157437		2619.58	0.0038233		3149.61	0.00178786		3679.6	-0.00318322		4209.6	-0.01422312
499.79	0.24124871		1029.79	0.03790103		1559.78	0.05006339		2089.79	-0.02173856		2619.78	0.00408649		3149.81	0.00088596		3679.8	-0.00307469		4209.8	-0.01510241
499.99	0.24170324		1029.99	0.03765277		1559.98	0.05028168		2089.99	-0.02154728		2619.98	0.00263116		3150.01	0.00099692		3680	-0.00219388		4210	-0.01456118
500.19	0.24193655		1030.19	0.03705645		1560.18	0.05025689		2090.19	-0.02114804		2620.18	0.00340646		3150.21	0.00091583		3680.2	-0.00209052		4210.2	-0.0149107
500.39	0.2418527		1030.39	0.0357062		1560.38	0.05022787		2090.39	-0.02127763		2620.38	0.00299395		3150.41	0.00226832		3680.4	-0.00135015		4210.4	-0.01397433
500.59	0.24271591		1030.59	0.03596826		1560.58	0.05045815		2090.59	-0.02048313		2620.58	0.00245428		3150.61	0.00277269		3680.6	-0.00120494		4210.6	-0.01353175
500.79	0.2431939		1030.79	0.03590983		1560.78	0.05021262		2090.79	-0.02031788		2620.78	0.00291097		3150.81	0.00374778		3680.8	-0.00097637		4210.8	-0.01367013
500.99	0.24280906		1030.99	0.03561486		1560.98	0.05079916		2090.99	-0.02085917		2620.98	0.00300551		3151.01	0.00487636		3681	-0.00081695		4211	-0.01329405
501.19	0.24243742		1031.19	0.03595842		1561.18	0.05117067		2091.19	-0.02061904		2621.18	0.00264037		3151.21	0.00508941		3681.2	0.00026975		4211.2	-0.01342295
501.39	0.24121326		1031.39	0.03588902		1561.38	0.05124486		2091.39	-0.0204662		2621.38	0.00161456		3151.41	0.00492008		3681.4	0.000532		4211.4	-0.01234952
501.59	0.2416739		1031.59	0.03581313		1561.58	0.05111429		2091.59	-0.02018293		2621.58	0.00152743		3151.61	0.00520423		3681.6	-0.00022769		4211.6	-0.01183163
501.79	0.24120273		1031.79	0.03483489		1561.78	0.05107579		2091.79	-0.01983768		2621.78	0.00222529		3151.81	0.00553265		3681.8	-0.00045483		4211.8	-0.01190324
501.99	0.24045455		1031.99	0.03527226		1561.98	0.05024168		2091.99	-0.02052783		2621.98	0.00221068		3152.01	0.00610034		3682	-0.0011828		4212	-0.0122303
502.19	0.23978858		1032.19	0.03494272		1562.18	0.05012451		2092.19	-0.02081953		2622.18	0.00230823		3152.21	0.00610801		3682.2	-0.00130354		4212.2	-0.01264525
502.39	0.23982619		1032.39	0.03522871		1562.38	0.04902686		2092.39	-0.02136431		2622.38	0.00235425		3152.41	0.00706272		3682.4	-0.00142329		4212.4	-0.01277223
502.59	0.23982261		1032.59	0.03549209		1562.58	0.04912004		2092.59	-0.02089976		2622.58	0.00292283		3152.61	0.00823548		3682.6	-0.00068541		4212.6	-0.01330691
502.79	0.240007		1032.79	0.03606668		1562.78	0.04838467		2092.79	-0.02182588		2622.78	0.00330446		3152.81	0.00751882		3682.8	-0.00152635		4212.8	-0.01340803
502.99	0.23962397		1032.99	0.03602052		1562.98	0.04822		2092.99	-0.0218536		2622.98	0.00338216		3153.01	0.00724755		3683	-0.00214765		4213	-0.01394072
503.19	0.24001739		1033.19	0.03641066		1563.18	0.04800987		2093.19	-0.02123132		2623.18	0.00313011		3153.21	0.00619554		3683.2	-0.00255942		4213.2	-0.01350362
503.39	0.23976857		1033.39	0.03737043		1563.38	0.0482748		2093.39	-0.02036643		2623.38	0.00227581		3153.41	0.00599324		3683.4	-0.00256239		4213.4	-0.01382368
503.59	0.24102847		1033.59	0.0370274		1563.58	0.04729763		2093.59	-0.0204684		2623.58	0.00134839		3153.61	0.00501976		3683.6	-0.00215827		4213.6	-0.0143256
503.79	0.24142845		1033.79	0.03693384		1563.78	0.04662807		2093.79	-0.02073198		2623.78	0.00150124		3153.81	0.00466475		3683.8	-0.00170296		4213.8	-0.01371048
503.99	0.24140959		1033.99	0.03806726		1563.98	0.04702726		2093.99	-0.02002174		2623.98	0.00045871		3154.01	0.00497891		3684	-0.00160325		4214	-0.01340959
504.19	0.24202603		1034.19	0.03830717		1564.18	0.04579698		2094.19	-0.01955306		2624.18	0.00084195		3154.21	0.00422116		3684.2	-0.00137271		4214.2	-0.01310242
504.39	0.2412518		1034.39	0.03808575		1564.38	0.04656365		2094.39	-0.020025		2624.38	0.00069567		3154.41	0.0042131		3684.4	-0.00114159		4214.4	-0.0125345
504.59	0.24046486		1034.59	0.03871539		1564.58	0.04760029		2094.59	-0.01954681		2624.58	0.00140634		3154.61	0.0037668		3684.6	-0.00095826		4214.6	-0.01245527
504.79	0.24030753		1034.79	0.03886813		1564.78	0.04807615		2094.79	-0.01951612		2624.78	0.00167357		3154.81	0.00341902		3684.8	-0.00188565		4214.8	-0.01294944
504.99	0.23989878		1034.99	0.03898743		1564.98	0.04829965		2094.99	-0.01953421		2624.98	0.00176683		3155.01	0.00377485		3685	-0.00200053		4215	-0.01276307
505.19	0.23856717		1035.19	0.03948638		1565.18	0.04904823		2095.19	-0.01952952		2625.18	0.00127788		3155.21	0.00254227		3685.2	-0.00232069		4215.2	-0.01379909
505.39	0.23812474		1035.39	0.03853497		1565.38	0.04865745		2095.39	-0.0195816		2625.38	0.00170598		3155.41	0.00263695		3685.4	-0.00332595		4215.4	-0.01346268
505.59	0.23882333		1035.59	0.03779714		1565.58	0.04920316		2095.59	-0.0198772		2625.58	0.00201016		3155.61	0.00343873		3685.6	-0.0038965		4215.6	-0.0136179
505.79	0.23838004		1035.79	0.03656992		1565.78	0.04906776		2095.79	-0.02057541		2625.78	0.0021063		3155.81	0.00358027		3685.8	-0.00348009		4215.8	-0.01375108
505.99	0.23709717		1035.99	0.03678396		1565.98	0.04932697		2095.99	-0.02105552		2625.98	0.00136657		3156.01	0.00325839		3686	-0.00339162		4216	-0.0140792
506.19	0.23685972		1036.19	0.03566098		1566.18	0.0490976		2096.19	-0.02119945		2626.18	0.0017416		3156.21	0.00199838		3686.2	-0.0034102		4216.2	-0.01411004
506.39	0.23800732		1036.39	0.03495745		1566.38	0.04888012		2096.39	-0.0211302		2626.38	0.00220639		3156.41	0.00338658		3686.4	-0.00332313		4216.4	-0.0140403
506.59	0.23812389		1036.59	0.03450881		1566.58	0.04975971		2096.59	-0.02058963		2626.58	0.0020051		3156.61	0.0032316		3686.6	-0.00339338		4216.6	-0.0144878
506.79	0.23745593		1036.79	0.03420748		1566.78	0.04935907		2096.79	-0.02206108		2626.78	0.00157585		3156.81	0.0024919		3686.8	-0.00399211		4216.8	-0.01586918
506.99	0.23774941		1036.99	0.0344426		1566.98	0.04886062		2096.99	-0.02205551		2626.98	0.00195565		3157.01	0.00263854		3687	-0.00420119		4217	-0.01651665
507.19	0.23904455		1037.19	0.03494854		1567.18	0.04905494		2097.19	-0.02144965		2627.18	0.00153761		3157.21	0.00330343		3687.2	-0.00419895		4217.2	-0.017185
507.39	0.23906088		1037.39	0.03561206		1567.38	0.04912941		2097.39	-0.02159299		2627.38	0.00145405		3157.41	0.00377961		3687.4	-0.00329754		4217.4	-0.01695831
507.59	0.23948508		1037.59	0.03559306		1567.58	0.04854546		2097.59	-0.02161158		2627.58	0.0020196		3157.61	0.00461397		3687.6	-0.00334751		4217.6	-0.01633568
507.79	0.23977387		1037.79	0.03621143		1567.78	0.04864595		2097.79	-0.0216192		2627.78	0.00265867		3157.81	0.00535249		3687.8	-0.00361303		4217.8	-0.01544324
507.99	0.23994418		1037.99	0.03719021		1567.98	0.04831736		2097.99	-0.02194598		2627.98	0.00327059		3158.01	0.00540966		3688	-0.00340448		4218	-0.01492974
508.19	0.23991908		1038.19	0.03637051		1568.18	0.04758072		2098.19	-0.02198927		2628.18	0.00399307		3158.21	0.00548376		3688.2	-0.00325884		4218.2	-0.01332274
508.39	0.23884717		1038.39	0.03644582		1568.38	0.04850966		2098.39	-0.02216667		2628.38	0.00433961		3158.41	0.00618332		3688.4	-0.00280576		4218.4	-0.01402484
508.59	0.23897786		1038.59	0.03715496		1568.58	0.04816605		2098.59	-0.0211322		2628.58	0.00441668		3158.61	0.00615056		3688.6	-0.00240362		4218.6	-0.01361652
508.79	0.23887543		1038.79	0.03699423		1568.78	0.0478873		2098.79	-0.02123453		2628.78	0.00381749		3158.81	0.00557406		3688.8	-0.00309604		4218.8	-0.01408995
508.99	0.23856645		1038.99	0.03716842		1568.98	0.04719205		2098.99	-0.02076926		2628.98	0.00354066		3159.01	0.00563684		3689	-0.00214494		4219	-0.01418509
509.19	0.23768563		1039.19	0.03721624		1569.18	0.04723071		2099.19	-0.02094453		2629.18	0.00336519		3159.21	0.00420619		3689.2	-0.0016698		4219.2	-0.0150589
509.39	0.23921988		1039.39	0.03651964		1569.38	0.04682189		2099.39	-0.02024925		2629.38	0.00378796		3159.41	0.00480757		3689.4	-0.00151329		4219.4	-0.01434058
509.59	0.23923546		1039.59	0.03629819		1569.58	0.04712062		2099.59	-0.02091513		2629.58	0.00399654		3159.61	0.00549209		3689.6	-0.00164464		4219.6	-0.01358144
509.79	0.2394998		1039.79	0.03571931		1569.78	0.0467494		2099.79	-0.02026913		2629.78	0.00360115		3159.81	0.00503515		3689.8	-0.00128982		4219.8	-0.01301858
509.99	0.23971153		1039.99	0.03637209		1569.98	0.04755922		2099.99	-0.01939373		2629.98	0.00313846		3160.01	0.00414555		3690	-0.00117562		4220	-0.01290781
510.19	0.2403509		1040.19	0.03594191		1570.18	0.04776719		2100.19	-0.01978284		2630.18	0.00398687		3160.21	0.00374014		3690.2	-0.00101262		4220.2	-0.01301665
510.39	0.24107112		1040.39	0.03454091		1570.38	0.04880467		2100.39	-0.01942225		2630.38	0.00380775		3160.41	0.00346022		3690.4	-0.00141947		4220.4	-0.01307006
510.59	0.24114475		1040.59	0.03401711		1570.58	0.04958619		2100.59	-0.01958072		2630.58	0.00413949		3160.61	0.00287572		3690.6	-0.0012167		4220.6	-0.01341636
510.79	0.24178108		1040.79	0.0341216		1570.78	0.04913536		2100.79	-0.0191326		2630.78	0.00423602		3160.81	0.00266524		3690.8	-0.00069671		4220.8	-0.01364488
510.99	0.24275656		1040.99	0.03432018		1570.98	0.04996961		2100.99	-0.018433		2630.98	0.00491735		3161.01	0.00251649		3691	-0.00097854		4221	-0.01290212
511.19	0.24398014		1041.19	0.03406783		1571.18	0.05046931		2101.19	-0.0181491		2631.18	0.00489876		3161.21	0.00264921		3691.2	-0.00090357		4221.2	-0.01261509
511.39	0.243201		1041.39	0.03427511		1571.38	0.05168686		2101.39	-0.01832293		2631.38	0.00550616		3161.41	0.0020421		3691.4	-0.00089506		4221.4	-0.01202809
511.59	0.24369563		1041.59	0.03396143		1571.58	0.05135948		2101.59	-0.01795061		2631.58	0.00639814		3161.61	0.00303856		3691.6	-0.00134687		4221.6	-0.01158696
511.79	0.24348593		1041.79	0.03362665		1571.78	0.05194165		2101.79	-0.01755929		2631.78	0.00577385		3161.81	0.00269384		3691.8	-0.00184172		4221.8	-0.01121867
511.99	0.24315722		1041.99	0.0339225		1571.98	0.05148176		2101.99	-0.01804415		2631.98	0.00514158		3162.01	0.00297585		3692	-0.00228485		4222	-0.01103191
512.19	0.24211966		1042.19	0.03378346		1572.18	0.05099696		2102.19	-0.01840704		2632.18	0.00572938		3162.21	0.0027661		3692.2	-0.00183516		4222.2	-0.01085886
512.39	0.24137619		1042.39	0.03437116		1572.38	0.05111989		2102.39	-0.01865092		2632.38	0.00557424		3162.41	0.00226633		3692.4	-0.00202074		4222.4	-0.01199677
512.59	0.24075248		1042.59	0.0346413		1572.58	0.05020429		2102.59	-0.01787834		2632.58	0.00522688		3162.61	0.00204193		3692.6	-0.00237043		4222.6	-0.01176172
512.79	0.23948921		1042.79	0.03466068		1572.78	0.04981341		2102.79	-0.01848708		2632.78	0.005064		3162.81	0.00187528		3692.8	-0.00271459		4222.8	-0.01242929
512.99	0.23862021		1042.99	0.03571316		1572.98	0.04918225		2102.99	-0.01901858		2632.98	0.00522117		3163.01	0.00191936		3693	-0.00294341		4223	-0.0134648
513.19	0.23859255		1043.19	0.03637725		1573.18	0.04897143		2103.19	-0.01929014		2633.18	0.00529117		3163.21	0.00180062		3693.2	-0.00276761		4223.2	-0.01364358
513.39	0.23850755		1043.39	0.03665829		1573.38	0.04867239		2103.39	-0.01989062		2633.38	0.00543411		3163.41	0.00218931		3693.4	-0.00318044		4223.4	-0.01348694
513.59	0.23724138		1043.59	0.03706393		1573.58	0.04819535		2103.59	-0.02141991		2633.58	0.0051718		3163.61	0.00252577		3693.6	-0.00368702		4223.6	-0.01322993
513.79	0.23735038		1043.79	0.03746024		1573.78	0.04711534		2103.79	-0.02146462		2633.78	0.00477909		3163.81	0.00216421		3693.8	-0.00329408		4223.8	-0.01365588
513.99	0.23692296		1043.99	0.03715801		1573.98	0.04669585		2103.99	-0.02197422		2633.98	0.00470792		3164.01	0.00219519		3694	-0.00274649		4224	-0.0144672
514.19	0.2368182		1044.19	0.03640288		1574.18	0.0463936		2104.19	-0.02246332		2634.18	0.00464508		3164.21	0.00282979		3694.2	-0.00299235		4224.2	-0.01469972
514.39	0.23689615		1044.39	0.03593892		1574.38	0.04690848		2104.39	-0.02165849		2634.38	0.0037124		3164.41	0.00316397		3694.4	-0.00286069		4224.4	-0.01437805
514.59	0.23649197		1044.59	0.03557808		1574.58	0.04611355		2104.59	-0.02096784		2634.58	0.00394561		3164.61	0.00405433		3694.6	-0.00225853		4224.6	-0.01434411
514.79	0.2375259		1044.79	0.03620535		1574.78	0.04609167		2104.79	-0.02038719		2634.78	0.00351783		3164.81	0.00367972		3694.8	-0.00178345		4224.8	-0.01413254
514.99	0.23726203		1044.99	0.03509546		1574.98	0.04617578		2104.99	-0.02026308		2634.98	0.00250319		3165.01	0.00296786		3695	-0.00179106		4225	-0.01366291
515.19	0.23733599		1045.19	0.03412534		1575.18	0.0459534		2105.19	-0.02025812		2635.18	0.00229305		3165.21	0.002524		3695.2	-0.0020036		4225.2	-0.0135454
515.39	0.23696615		1045.39	0.03349566		1575.38	0.04639839		2105.39	-0.02049436		2635.38	0.0028357		3165.41	0.00234845		3695.4	-0.00216379		4225.4	-0.01369949
515.59	0.2382006		1045.59	0.03284384		1575.58	0.0454103		2105.59	-0.02096482		2635.58	0.00242721		3165.61	0.00286959		3695.6	-0.00225076		4225.6	-0.01343336
515.79	0.23842349		1045.79	0.03251707		1575.78	0.04576764		2105.79	-0.02147797		2635.78	0.00143249		3165.81	0.00241653		3695.8	-0.00348609		4225.8	-0.01370566
515.99	0.23901228		1045.99	0.03171942		1575.98	0.04628174		2105.99	-0.02217271		2635.98	0.00177013		3166.01	0.00254798		3696	-0.00355438		4226	-0.01321786
516.19	0.2394213		1046.19	0.03120023		1576.18	0.0464967		2106.19	-0.0221663		2636.18	0.00285196		3166.21	0.00275089		3696.2	-0.00326139		4226.2	-0.01248046
516.39	0.24010028		1046.39	0.03077459		1576.38	0.04638763		2106.39	-0.02148217		2636.38	0.00198436		3166.41	0.00296444		3696.4	-0.00391474		4226.4	-0.01261716
516.59	0.23979009		1046.59	0.03038127		1576.58	0.0461267		2106.59	-0.02168328		2636.58	0.00203515		3166.61	0.00351228		3696.6	-0.00418886		4226.6	-0.01253357
516.79	0.23963532		1046.79	0.03033751		1576.78	0.04733998		2106.79	-0.02213775		2636.78	0.00134446		3166.81	0.00330426		3696.8	-0.00448086		4226.8	-0.01318462
516.99	0.23891654		1046.99	0.03099402		1576.98	0.04766986		2106.99	-0.02252197		2636.98	0.00079531		3167.01	0.00272054		3697	-0.00504453		4227	-0.01417181
517.19	0.2389841		1047.19	0.03152078		1577.18	0.04826432		2107.19	-0.02312029		2637.18	0.0003856		3167.21	0.0026878		3697.2	-0.00455469		4227.2	-0.01456492
517.39	0.23818694		1047.39	0.03078335		1577.38	0.04786528		2107.39	-0.02384376		2637.38	0.00042907		3167.41	0.00229278		3697.4	-0.00460031		4227.4	-0.01445144
517.59	0.23825196		1047.59	0.03116593		1577.58	0.0472714		2107.59	-0.02383274		2637.58	-0.00004181		3167.61	0.00197489		3697.6	-0.00510662		4227.6	-0.01440915
517.79	0.23862792		1047.79	0.0308914		1577.78	0.04648526		2107.79	-0.0230776		2637.78	0.00105039		3167.81	0.00241286		3697.8	-0.00511721		4227.8	-0.01454566
517.99	0.23859985		1047.99	0.0309432		1577.98	0.0468231		2107.99	-0.02226666		2637.98	0.00087109		3168.01	0.00242795		3698	-0.00584144		4228	-0.0148718
518.19	0.23868471		1048.19	0.03200889		1578.18	0.04738246		2108.19	-0.02123636		2638.18	0.00073071		3168.21	0.0025452		3698.2	-0.00634466		4228.2	-0.01498701
518.39	0.23865654		1048.39	0.03233098		1578.38	0.04761038		2108.39	-0.01962203		2638.38	0.00111634		3168.41	0.00294123		3698.4	-0.00578143		4228.4	-0.01498551
518.59	0.23892293		1048.59	0.03218688		1578.58	0.04812584		2108.59	-0.01881646		2638.58	0.00132692		3168.61	0.00275056		3698.6	-0.00529537		4228.6	-0.01506067
518.79	0.23977748		1048.79	0.03301786		1578.78	0.04864196		2108.79	-0.01816778		2638.78	0.00086702		3168.81	0.00272294		3698.8	-0.00502654		4228.8	-0.01525502
518.99	0.23901491		1048.99	0.03196003		1578.98	0.04889658		2108.99	-0.01819136		2638.98	0.00121391		3169.01	0.00298923		3699	-0.00567509		4229	-0.01585518
519.19	0.23898729		1049.19	0.03179545		1579.18	0.0490995		2109.19	-0.01822019		2639.18	0.00315809		3169.21	0.0039012		3699.2	-0.00548886		4229.2	-0.01614123
519.39	0.23944296		1049.39	0.03175686		1579.38	0.04849042		2109.39	-0.01978658		2639.38	0.00368531		3169.41	0.004014		3699.4	-0.00527998		4229.4	-0.0158259
519.59	0.24087985		1049.59	0.03163831		1579.58	0.04932193		2109.59	-0.02032729		2639.58	0.00386135		3169.61	0.00392596		3699.6	-0.00548609		4229.6	-0.01493797
519.79	0.24126868		1049.79	0.03215965		1579.78	0.04961055		2109.79	-0.02077939		2639.78	0.00399968		3169.81	0.00434427		3699.8	-0.00560242		4229.8	-0.01555883
519.99	0.24146704		1049.99	0.03180326		1579.98	0.05006903		2109.99	-0.02032176		2639.98	0.00464649		3170.01	0.0050939		3700	-0.00425703		4230	-0.0145141
520.19	0.24161558		1050.19	0.03258434		1580.18	0.04978851		2110.19	-0.02030031		2640.18	0.00470902		3170.21	0.00565231		3700.2	-0.00396021		4230.2	-0.01399049
520.39	0.24134473		1050.39	0.03233594		1580.38	0.04917444		2110.39	-0.02051718		2640.38	0.0042758		3170.41	0.00616272		3700.4	-0.00405373		4230.4	-0.01403318
520.59	0.23985497		1050.59	0.03156618		1580.58	0.0491487		2110.59	-0.02123554		2640.58	0.00447886		3170.61	0.00561258		3700.6	-0.00336908		4230.6	-0.01370286
520.79	0.23853216		1050.79	0.03181844		1580.78	0.04909737		2110.79	-0.02189406		2640.78	0.00386548		3170.81	0.00555084		3700.8	-0.00295581		4230.8	-0.01355719
520.99	0.23752868		1050.99	0.03240592		1580.98	0.04813213		2110.99	-0.0232359		2640.98	0.00392297		3171.01	0.00493692		3701	-0.00264651		4231	-0.01331867
521.19	0.23746632		1051.19	0.03196893		1581.18	0.0474555		2111.19	-0.02363723		2641.18	0.0044263		3171.21	0.00481393		3701.2	-0.0022997		4231.2	-0.01284703
521.39	0.23745495		1051.39	0.03151231		1581.38	0.04656852		2111.39	-0.02464576		2641.38	0.00420431		3171.41	0.00398393		3701.4	-0.00235991		4231.4	-0.01218885
521.59	0.23790672		1051.59	0.03185692		1581.58	0.04581316		2111.59	-0.02517434		2641.58	0.00369119		3171.61	0.00344558		3701.6	-0.00262566		4231.6	-0.01185981
521.79	0.23819547		1051.79	0.03192319		1581.78	0.04537436		2111.79	-0.0254776		2641.78	0.00456854		3171.81	0.00359045		3701.8	-0.00273815		4231.8	-0.01165127
521.99	0.23782272		1051.99	0.03258877		1581.98	0.04578222		2111.99	-0.02609091		2641.98	0.00369926		3172.01	0.00285406		3702	-0.00270291		4232	-0.0128134
522.19	0.23782381		1052.19	0.03329941		1582.18	0.04564534		2112.19	-0.0261851		2642.18	0.00353748		3172.21	0.00276261		3702.2	-0.00277487		4232.2	-0.01380021
522.39	0.23844912		1052.39	0.03266056		1582.38	0.04510104		2112.39	-0.02565005		2642.38	0.0030465		3172.41	0.00231018		3702.4	-0.00306013		4232.4	-0.01417551
522.59	0.23859469		1052.59	0.03255007		1582.58	0.04547228		2112.59	-0.02604535		2642.58	0.00279609		3172.61	0.0024272		3702.6	-0.00373833		4232.6	-0.01473823
522.79	0.23862962		1052.79	0.03272494		1582.78	0.0458539		2112.79	-0.02609392		2642.78	0.00245205		3172.81	0.00258122		3702.8	-0.00411039		4232.8	-0.01491832
522.99	0.23900671		1052.99	0.03207596		1582.98	0.04635462		2112.99	-0.02729602		2642.98	0.00351174		3173.01	0.00216115		3703	-0.00424926		4233	-0.01540115
523.19	0.23897298		1053.19	0.03271429		1583.18	0.04624532		2113.19	-0.02730435		2643.18	0.00458681		3173.21	0.00159543		3703.2	-0.00347384		4233.2	-0.01494705
523.39	0.2394896		1053.39	0.03291806		1583.38	0.04637121		2113.39	-0.02762237		2643.38	0.00449216		3173.41	0.000268		3703.4	-0.00304802		4233.4	-0.01455573
523.59	0.24029772		1053.59	0.03333145		1583.58	0.04760561		2113.59	-0.02607291		2643.58	0.00499815		3173.61	0.00065365		3703.6	-0.00382661		4233.6	-0.01485924
523.79	0.2396001		1053.79	0.03465799		1583.78	0.04780118		2113.79	-0.02562036		2643.78	0.00485216		3173.81	0.00052877		3703.8	-0.0035058		4233.8	-0.01564659
523.99	0.23894233		1053.99	0.03546919		1583.98	0.04859211		2113.99	-0.02472386		2643.98	0.00506416		3174.01	0.00012819		3704	-0.00372159		4234	-0.01520409
524.19	0.2381447		1054.19	0.03610663		1584.18	0.04872539		2114.19	-0.02475301		2644.18	0.00500422		3174.21	0.00051136		3704.2	-0.00428823		4234.2	-0.01517715
524.39	0.2369433		1054.39	0.03595219		1584.38	0.04790058		2114.39	-0.02433102		2644.38	0.00568478		3174.41	0.00138172		3704.4	-0.00467303		4234.4	-0.0157738
524.59	0.23517957		1054.59	0.03530212		1584.58	0.04759051		2114.59	-0.0235761		2644.58	0.00539752		3174.61	0.00060033		3704.6	-0.00418068		4234.6	-0.0162994
524.79	0.2339235		1054.79	0.03568809		1584.78	0.04722399		2114.79	-0.02372133		2644.78	0.00509498		3174.81	0.00118837		3704.8	-0.003799		4234.8	-0.01652171
524.99	0.23332042		1054.99	0.03537882		1584.98	0.04702276		2114.99	-0.02319504		2644.98	0.00471896		3175.01	0.00125048		3705	-0.0036083		4235	-0.01678552
525.19	0.23343491		1055.19	0.03441322		1585.18	0.0467293		2115.19	-0.022064		2645.18	0.00453564		3175.21	0.00200545		3705.2	-0.00310032		4235.2	-0.01672947
525.39	0.23265371		1055.39	0.03450884		1585.38	0.04662044		2115.39	-0.02204532		2645.38	0.00381648		3175.41	0.00231243		3705.4	-0.00249975		4235.4	-0.01644465
525.59	0.23294707		1055.59	0.03335949		1585.58	0.0460891		2115.59	-0.02120496		2645.58	0.0036035		3175.61	0.00317713		3705.6	-0.00253752		4235.6	-0.01672129
525.79	0.23366735		1055.79	0.03325426		1585.78	0.04556259		2115.79	-0.02107417		2645.78	0.00336012		3175.81	0.00322907		3705.8	-0.00244757		4235.8	-0.01724278
525.99	0.23418742		1055.99	0.03224451		1585.98	0.04508216		2115.99	-0.02017652		2645.98	0.0032131		3176.01	0.003213		3706	-0.00259478		4236	-0.01820596
526.19	0.23475973		1056.19	0.03234134		1586.18	0.04529258		2116.19	-0.01985449		2646.18	0.00323917		3176.21	0.00286609		3706.2	-0.00289933		4236.2	-0.01798186
526.39	0.23591625		1056.39	0.03156311		1586.38	0.04457031		2116.39	-0.01921386		2646.38	0.00317768		3176.41	0.00294151		3706.4	-0.00354332		4236.4	-0.01751155
526.59	0.2365667		1056.59	0.03116606		1586.58	0.04441368		2116.59	-0.0197041		2646.58	0.00358723		3176.61	0.00309532		3706.6	-0.00388624		4236.6	-0.01728689
526.79	0.23805652		1056.79	0.03082965		1586.78	0.04450986		2116.79	-0.01966389		2646.78	0.00344864		3176.81	0.00217475		3706.8	-0.0037675		4236.8	-0.01664582
526.99	0.23940616		1056.99	0.031052		1586.98	0.04472284		2116.99	-0.01971513		2646.98	0.00429503		3177.01	0.0015829		3707	-0.00329512		4237	-0.01646378
527.19	0.23988594		1057.19	0.03144627		1587.18	0.04488947		2117.19	-0.01908989		2647.18	0.00423648		3177.21	0.0014174		3707.2	-0.0032859		4237.2	-0.0156605
527.39	0.24039252		1057.39	0.03149308		1587.38	0.04520735		2117.39	-0.01875335		2647.38	0.00387454		3177.41	0.00198192		3707.4	-0.00348289		4237.4	-0.01564995
527.59	0.24069762		1057.59	0.03165637		1587.58	0.04509685		2117.59	-0.01866909		2647.58	0.00351538		3177.61	0.00198702		3707.6	-0.00440372		4237.6	-0.01526545
527.79	0.23994938		1057.79	0.03240549		1587.78	0.04586128		2117.79	-0.01927127		2647.78	0.00343361		3177.81	0.00091999		3707.8	-0.00511449		4237.8	-0.01571179
527.99	0.23901579		1057.99	0.03303021		1587.98	0.04573601		2117.99	-0.02056358		2647.98	0.00370537		3178.01	0.00103615		3708	-0.00686944		4238	-0.015182
528.19	0.23848182		1058.19	0.03275915		1588.18	0.04489047		2118.19	-0.02118036		2648.18	0.00361361		3178.21	0.00181569		3708.2	-0.00626119		4238.2	-0.01445873
528.39	0.23831257		1058.39	0.03293035		1588.38	0.0447109		2118.39	-0.02139661		2648.38	0.00428719		3178.41	0.00204228		3708.4	-0.00653315		4238.4	-0.01434109
528.59	0.23779076		1058.59	0.03288138		1588.58	0.04436405		2118.59	-0.02192207		2648.58	0.00367694		3178.61	0.00176916		3708.6	-0.00592402		4238.6	-0.01399289
528.79	0.23735374		1058.79	0.03374089		1588.78	0.04497136		2118.79	-0.02150016		2648.78	0.00329752		3178.81	0.00180595		3708.8	-0.00519531		4238.8	-0.01314822
528.99	0.23738378		1058.99	0.03375069		1588.98	0.0445318		2118.99	-0.02147813		2648.98	0.00328799		3179.01	0.00222221		3709	-0.00509166		4239	-0.01285932
529.19	0.23688206		1059.19	0.03325072		1589.18	0.04383245		2119.19	-0.0217138		2649.18	0.00255042		3179.21	0.00253936		3709.2	-0.0046437		4239.2	-0.01220915
529.39	0.23630411		1059.39	0.03323547		1589.38	0.04443999		2119.39	-0.02134928		2649.38	0.0020343		3179.41	0.00262355		3709.4	-0.00370958		4239.4	-0.01196286
529.59	0.23736782		1059.59	0.03222367		1589.58	0.04457985		2119.59	-0.02100401		2649.58	0.0019546		3179.61	0.00259098		3709.6	-0.0038576		4239.6	-0.01213156
529.79	0.23688423		1059.79	0.0324555		1589.78	0.04406752		2119.79	-0.02133675		2649.78	0.00237097		3179.81	0.00223599		3709.8	-0.00366621		4239.8	-0.01213145
529.99	0.23646816		1059.99	0.03240123		1589.98	0.0440362		2119.99	-0.02050651		2649.98	0.0031272		3180.01	0.00241879		3710	-0.00389648		4240	-0.01238128
530.19	0.23638078		1060.19	0.03255054		1590.18	0.04489602		2120.19	-0.02087318		2650.18	0.00317529		3180.21	0.00174013		3710.2	-0.00408003		4240.2	-0.01192478
530.39	0.23615782		1060.39	0.03228033		1590.38	0.04501579		2120.39	-0.02087051		2650.38	0.00394451		3180.41	0.00218061		3710.4	-0.00503041		4240.4	-0.01251978
530.59	0.23607674		1060.59	0.03191099		1590.58	0.04567553		2120.59	-0.02069591		2650.58	0.00366058		3180.61	0.00174116		3710.6	-0.00486578		4240.6	-0.01301505
530.79	0.23653113		1060.79	0.03194181		1590.78	0.0470036		2120.79	-0.02120173		2650.78	0.00384004		3180.81	0.00127879		3710.8	-0.00439948		4240.8	-0.01367252
530.99	0.23678452		1060.99	0.03239914		1590.98	0.04842089		2120.99	-0.02129694		2650.98	0.0036759		3181.01	0.00137026		3711	-0.00427622		4241	-0.0137642
531.19	0.23662952		1061.19	0.03234596		1591.18	0.04810705		2121.19	-0.02158648		2651.18	0.0032468		3181.21	0.00130665		3711.2	-0.00447675		4241.2	-0.01412524
531.39	0.23628718		1061.39	0.03241972		1591.38	0.04758329		2121.39	-0.02193653		2651.38	0.00245178		3181.41	0.00091772		3711.4	-0.00474889		4241.4	-0.01458293
531.59	0.2362743		1061.59	0.03217441		1591.58	0.04764033		2121.59	-0.02242302		2651.58	0.00180061		3181.61	0.00039627		3711.6	-0.00523427		4241.6	-0.01460813
531.79	0.23579659		1061.79	0.03237736		1591.78	0.04847098		2121.79	-0.02294696		2651.78	0.00117061		3181.81	0.00102075		3711.8	-0.00577746		4241.8	-0.01473075
531.99	0.23571726		1061.99	0.03248608		1591.98	0.04801359		2121.99	-0.0233213		2651.98	0.00074704		3182.01	0.00123313		3712	-0.00555707		4242	-0.0141793
532.19	0.23623432		1062.19	0.03297971		1592.18	0.04773409		2122.19	-0.02344461		2652.18	0.00044797		3182.21	0.00159785		3712.2	-0.00452752		4242.2	-0.0146731
532.39	0.23665662		1062.39	0.03330504		1592.38	0.04792901		2122.39	-0.02348939		2652.38	0.00124137		3182.41	0.00248119		3712.4	-0.00509573		4242.4	-0.0149084
532.59	0.23669067		1062.59	0.03360433		1592.58	0.04703671		2122.59	-0.0230557		2652.58	0.00084689		3182.61	0.00198822		3712.6	-0.00553394		4242.6	-0.01567858
532.79	0.23722029		1062.79	0.03365242		1592.78	0.0467102		2122.79	-0.02280805		2652.78	0.00044482		3182.81	0.00146321		3712.8	-0.00505058		4242.8	-0.01621054
532.99	0.23712076		1062.99	0.03286085		1592.98	0.04587394		2122.99	-0.02436944		2652.98	0.00042312		3183.01	0.0019472		3713	-0.00481925		4243	-0.01695182
533.19	0.23691078		1063.19	0.03307462		1593.18	0.04478448		2123.19	-0.02455281		2653.18	-0.00010976		3183.21	0.00198698		3713.2	-0.00486943		4243.2	-0.01633582
533.39	0.23708985		1063.39	0.03356416		1593.38	0.04543807		2123.39	-0.02449978		2653.38	0.00078494		3183.41	0.00258838		3713.4	-0.00413114		4243.4	-0.01645705
533.59	0.23680601		1063.59	0.03327011		1593.58	0.0444934		2123.59	-0.02477257		2653.58	0.00142384		3183.61	0.00345237		3713.6	-0.00553544		4243.6	-0.0168336
533.79	0.2357331		1063.79	0.03286079		1593.78	0.04406697		2123.79	-0.02501039		2653.78	0.00154587		3183.81	0.00422415		3713.8	-0.00623901		4243.8	-0.0172486
533.99	0.23593185		1063.99	0.03296299		1593.98	0.04398274		2123.99	-0.02405392		2653.98	0.00166517		3184.01	0.00443047		3714	-0.00660476		4244	-0.01723569
534.19	0.2368099		1064.19	0.03267123		1594.18	0.04444662		2124.19	-0.02395354		2654.18	0.00244199		3184.21	0.0046812		3714.2	-0.00644981		4244.2	-0.01735053
534.39	0.23654219		1064.39	0.03215446		1594.38	0.04524288		2124.39	-0.02428033		2654.38	0.00307446		3184.41	0.00535029		3714.4	-0.00639456		4244.4	-0.01728654
534.59	0.23749474		1064.59	0.03170693		1594.58	0.04549876		2124.59	-0.02347832		2654.58	0.00244658		3184.61	0.00508173		3714.6	-0.00624025		4244.6	-0.01683817
534.79	0.23894523		1064.79	0.03186492		1594.78	0.04585677		2124.79	-0.02386025		2654.78	0.00321175		3184.81	0.00507891		3714.8	-0.0063725		4244.8	-0.01707911
534.99	0.23994772		1064.99	0.03185088		1594.98	0.04597934		2124.99	-0.02351481		2654.98	0.00310621		3185.01	0.00537535		3715	-0.0060319		4245	-0.01640959
535.19	0.24068741		1065.19	0.03199572		1595.18	0.04602875		2125.19	-0.02380289		2655.18	0.00313501		3185.21	0.00570292		3715.2	-0.00501633		4245.2	-0.01596868
535.39	0.24107758		1065.39	0.03155691		1595.38	0.04629038		2125.39	-0.02296683		2655.38	0.00338585		3185.41	0.00536358		3715.4	-0.00558486		4245.4	-0.01503143
535.59	0.24208591		1065.59	0.03187647		1595.58	0.04763803		2125.59	-0.02276282		2655.58	0.00257529		3185.61	0.00493686		3715.6	-0.0055139		4245.6	-0.01498058
535.79	0.2420781		1065.79	0.03143632		1595.78	0.04809922		2125.79	-0.02201826		2655.78	0.0025598		3185.81	0.00491691		3715.8	-0.00486621		4245.8	-0.01449771
535.99	0.24132285		1065.99	0.03119174		1595.98	0.04811704		2125.99	-0.02120903		2655.98	0.00257828		3186.01	0.00454688		3716	-0.00497832		4246	-0.01488924
536.19	0.24057532		1066.19	0.03168012		1596.18	0.04796478		2126.19	-0.02079956		2656.18	0.00209492		3186.21	0.0044842		3716.2	-0.00476401		4246.2	-0.01542007
536.39	0.23966317		1066.39	0.0323627		1596.38	0.04854924		2126.39	-0.02069139		2656.38	0.00262		3186.41	0.00429527		3716.4	-0.00541364		4246.4	-0.01492547
536.59	0.23871888		1066.59	0.03304231		1596.58	0.04849787		2126.59	-0.0209236		2656.58	0.0022896		3186.61	0.00287988		3716.6	-0.00513956		4246.6	-0.01571872
536.79	0.23855589		1066.79	0.03307071		1596.78	0.04839557		2126.79	-0.02180901		2656.78	0.00253826		3186.81	0.00249833		3716.8	-0.0046686		4246.8	-0.01609967
536.99	0.23756604		1066.99	0.03378077		1596.98	0.04734553		2126.99	-0.02228045		2656.98	0.00247075		3187.01	0.00229723		3717	-0.00435758		4247	-0.01573439
537.19	0.23639112		1067.19	0.03461975		1597.18	0.04694164		2127.19	-0.02230952		2657.18	0.00223976		3187.21	0.00155672		3717.2	-0.00451365		4247.2	-0.0151682
537.39	0.23452466		1067.39	0.0348038		1597.38	0.04786493		2127.39	-0.02311438		2657.38	0.00265783		3187.41	0.0010714		3717.4	-0.00447643		4247.4	-0.01550486
537.59	0.23319454		1067.59	0.03420315		1597.58	0.04760856		2127.59	-0.0236918		2657.58	0.00228234		3187.61	0.00130073		3717.6	-0.00587323		4247.6	-0.01565366
537.79	0.23283475		1067.79	0.03420065		1597.78	0.04784174		2127.79	-0.02343451		2657.78	0.00217507		3187.81	0.00077879		3717.8	-0.00694495		4247.8	-0.01585544
537.99	0.23323347		1067.99	0.03377735		1597.98	0.04805255		2127.99	-0.02339972		2657.98	0.00280915		3188.01	0.00006115		3718	-0.00685885		4248	-0.01624375
538.19	0.2333754		1068.19	0.03357017		1598.18	0.04788384		2128.19	-0.02391267		2658.18	0.00334081		3188.21	0.00045096		3718.2	-0.00630897		4248.2	-0.01567699
538.39	0.23318939		1068.39	0.03302027		1598.38	0.04775325		2128.39	-0.02361552		2658.38	0.00357794		3188.41	0.00008772		3718.4	-0.00672318		4248.4	-0.01423259
538.59	0.23416769		1068.59	0.03296943		1598.58	0.04707914		2128.59	-0.0229487		2658.58	0.0040061		3188.61	0.00042507		3718.6	-0.00675982		4248.6	-0.01429856
538.79	0.23513284		1068.79	0.03290113		1598.78	0.04675999		2128.79	-0.02293711		2658.78	0.00449228		3188.81	0.0006158		3718.8	-0.00679275		4248.8	-0.01462207
538.99	0.23544271		1068.99	0.03259496		1598.98	0.04696781		2128.99	-0.02340076		2658.98	0.00467315		3189.01	0.00016722		3719	-0.00679236		4249	-0.01414698
539.19	0.23565365		1069.19	0.03217593		1599.18	0.04709653		2129.19	-0.02290136		2659.18	0.00439392		3189.21	0.00062693		3719.2	-0.006115		4249.2	-0.01418336
539.39	0.23581671		1069.39	0.03221413		1599.38	0.04631263		2129.39	-0.02217936		2659.38	0.00377845		3189.41	0.00015722		3719.4	-0.00716722		4249.4	-0.01465632
539.59	0.23617		1069.59	0.03218316		1599.58	0.04679942		2129.59	-0.02128675		2659.58	0.00206173		3189.61	0.00033337		3719.6	-0.00612733		4249.6	-0.01519078
539.79	0.23540791		1069.79	0.03211243		1599.78	0.04657771		2129.79	-0.02047406		2659.78	0.00225073		3189.81	0.00093139		3719.8	-0.00534557		4249.8	-0.0150309
539.99	0.23512261		1069.99	0.03256589		1599.98	0.04646013		2129.99	-0.01941409		2659.98	0.00109472		3190.01	0.00156483		3720	-0.00564876		4250	-0.01619146
540.19	0.23496075		1070.19	0.03338034		1600.18	0.04578904		2130.19	-0.01942045		2660.18	0.0005642		3190.21	0.0018227		3720.2	-0.00513858		4250.2	-0.01680876
540.39	0.23441941		1070.39	0.03381071		1600.38	0.04579801		2130.39	-0.0195345		2660.38	0.00143622		3190.41	0.00274784		3720.4	-0.00509419		4250.4	-0.01754455
540.59	0.23419694		1070.59	0.03326398		1600.58	0.04425745		2130.59	-0.01941123		2660.58	0.00091322		3190.61	0.00264124		3720.6	-0.00434941		4250.6	-0.01875553
540.79	0.23446906		1070.79	0.03357846		1600.78	0.04337106		2130.79	-0.01896717		2660.78	0.00102369		3190.81	0.00280638		3720.8	-0.00425731		4250.8	-0.01908108
540.99	0.23396784		1070.99	0.03396765		1600.98	0.04315072		2130.99	-0.01896206		2660.98	0.00014805		3191.01	0.00342321		3721	-0.00352751		4251	-0.01930987
541.19	0.23322381		1071.19	0.03327941		1601.18	0.04292276		2131.19	-0.01953848		2661.18	0.00023707		3191.21	0.00361572		3721.2	-0.00433112		4251.2	-0.01987423
541.39	0.23229437		1071.39	0.03360207		1601.38	0.04315037		2131.39	-0.01960909		2661.38	0.00037002		3191.41	0.00386098		3721.4	-0.00505249		4251.4	-0.02022617
541.59	0.23247809		1071.59	0.03339962		1601.58	0.04307306		2131.59	-0.02056939		2661.58	0.00070162		3191.61	0.00437623		3721.6	-0.00682709		4251.6	-0.01976243
541.79	0.23357489		1071.79	0.0332547		1601.78	0.04373193		2131.79	-0.01990592		2661.78	0.00120681		3191.81	0.00389447		3721.8	-0.00728096		4251.8	-0.01981297
541.99	0.23450555		1071.99	0.0328239		1601.98	0.04400727		2131.99	-0.0202814		2661.98	0.00185112		3192.01	0.00404688		3722	-0.00737104		4252	-0.01908735
542.19	0.23459372		1072.19	0.03366862		1602.18	0.04378709		2132.19	-0.02038969		2662.18	0.00257729		3192.21	0.00481673		3722.2	-0.00680497		4252.2	-0.01768334
542.39	0.23505328		1072.39	0.03353145		1602.38	0.04393132		2132.39	-0.0196878		2662.38	0.00320673		3192.41	0.00462897		3722.4	-0.007336		4252.4	-0.01726543
542.59	0.2363775		1072.59	0.03364012		1602.58	0.04381117		2132.59	-0.02067357		2662.58	0.00314114		3192.61	0.0038327		3722.6	-0.00757385		4252.6	-0.01728885
542.79	0.23702214		1072.79	0.0330177		1602.78	0.04384277		2132.79	-0.02134932		2662.78	0.00253042		3192.81	0.00294037		3722.8	-0.00860783		4252.8	-0.01705721
542.99	0.23686702		1072.99	0.03257632		1602.98	0.04433367		2132.99	-0.02126936		2662.98	0.0028567		3193.01	0.00231445		3723	-0.00865547		4253	-0.01686222
543.19	0.23704473		1073.19	0.03256975		1603.18	0.04460008		2133.19	-0.02143805		2663.18	0.00198022		3193.21	0.00285347		3723.2	-0.00768677		4253.2	-0.0161556
543.39	0.23735278		1073.39	0.03344597		1603.38	0.04475599		2133.39	-0.02108775		2663.38	0.00118511		3193.41	0.00207218		3723.4	-0.00777468		4253.4	-0.01577248
543.59	0.23798135		1073.59	0.03321196		1603.58	0.04532885		2133.59	-0.02043751		2663.58	0.00132639		3193.61	0.00227881		3723.6	-0.00737889		4253.6	-0.01532062
543.79	0.23786135		1073.79	0.03379214		1603.78	0.04591166		2133.79	-0.02127949		2663.78	0.00146434		3193.81	0.00178164		3723.8	-0.00719356		4253.8	-0.01459662
543.99	0.2371952		1073.99	0.0334822		1603.98	0.04551451		2133.99	-0.02131645		2663.98	0.00032849		3194.01	0.00197005		3724	-0.00731171		4254	-0.01515624
544.19	0.2366673		1074.19	0.03284938		1604.18	0.04435666		2134.19	-0.02198108		2664.18	0.00076939		3194.21	0.00152965		3724.2	-0.00672526		4254.2	-0.01517004
544.39	0.23614675		1074.39	0.03261536		1604.38	0.04380624		2134.39	-0.0216743		2664.38	0.0007899		3194.41	0.00186761		3724.4	-0.00632052		4254.4	-0.01589479
544.59	0.23541984		1074.59	0.03211744		1604.58	0.04298686		2134.59	-0.02246393		2664.58	0.00039346		3194.61	0.00152443		3724.6	-0.00572065		4254.6	-0.01590204
544.79	0.23424081		1074.79	0.03251281		1604.78	0.04303882		2134.79	-0.02214942		2664.78	0.00076334		3194.81	0.00187334		3724.8	-0.00560175		4254.8	-0.01661632
544.99	0.23413648		1074.99	0.0315225		1604.98	0.04271584		2134.99	-0.0227404		2664.98	0.00071309		3195.01	0.00215777		3725	-0.0052214		4255	-0.01723301
545.19	0.23397006		1075.19	0.03099562		1605.18	0.04165843		2135.19	-0.02364048		2665.18	0.00183142		3195.21	0.00154287		3725.2	-0.00573112		4255.2	-0.01736541
545.39	0.23370611		1075.39	0.03096983		1605.38	0.04226088		2135.39	-0.02389584		2665.38	0.0019234		3195.41	0.0016465		3725.4	-0.00531203		4255.4	-0.0169325
545.59	0.23453959		1075.59	0.02992742		1605.58	0.04272612		2135.59	-0.02489265		2665.58	0.00232415		3195.61	0.00113588		3725.6	-0.00573546		4255.6	-0.01602906
545.79	0.23493103		1075.79	0.02936188		1605.78	0.0436212		2135.79	-0.02388548		2665.78	0.00294408		3195.81	0.00157069		3725.8	-0.00593003		4255.8	-0.01597791
545.99	0.23564644		1075.99	0.02948031		1605.98	0.04405616		2135.99	-0.02446009		2665.98	0.00398474		3196.01	0.00210755		3726	-0.00629681		4256	-0.01547695
546.19	0.23569787		1076.19	0.02984616		1606.18	0.04404993		2136.19	-0.02419173		2666.18	0.00407057		3196.21	0.00249333		3726.2	-0.0052021		4256.2	-0.01530271
546.39	0.2356192		1076.39	0.02937297		1606.38	0.04527299		2136.39	-0.02443121		2666.38	0.00364017		3196.41	0.00265072		3726.4	-0.00571554		4256.4	-0.01540484
546.59	0.23625378		1076.59	0.02922796		1606.58	0.04548775		2136.59	-0.02545521		2666.58	0.0030919		3196.61	0.00148465		3726.6	-0.00594392		4256.6	-0.01559722
546.79	0.23586238		1076.79	0.02881952		1606.78	0.04660972		2136.79	-0.02515451		2666.78	0.00241225		3196.81	0.00135126		3726.8	-0.00647931		4256.8	-0.01546153
546.99	0.23539611		1076.99	0.03031244		1606.98	0.04772371		2136.99	-0.02467343		2666.98	0.00216622		3197.01	0.00161275		3727	-0.0056414		4257	-0.01522092
547.19	0.23597982		1077.19	0.03125623		1607.18	0.04843581		2137.19	-0.02514827		2667.18	0.00112299		3197.21	0.00187868		3727.2	-0.0049502		4257.2	-0.01509029
547.39	0.23547474		1077.39	0.0329367		1607.38	0.04856324		2137.39	-0.02374639		2667.38	0.00029826		3197.41	0.00168981		3727.4	-0.00525586		4257.4	-0.01552381
547.59	0.23529154		1077.59	0.03297375		1607.58	0.04900488		2137.59	-0.02340021		2667.58	0.00010377		3197.61	0.00182857		3727.6	-0.00631543		4257.6	-0.01515369
547.79	0.23440322		1077.79	0.03303838		1607.78	0.04871059		2137.79	-0.02309922		2667.78	-0.00099195		3197.81	0.0014767		3727.8	-0.00601788		4257.8	-0.0149605
547.99	0.2337865		1077.99	0.03364489		1607.98	0.04803768		2137.99	-0.02169412		2667.98	-0.00174697		3198.01	0.00054373		3728	-0.00575949		4258	-0.01601964
548.19	0.23432865		1078.19	0.03346319		1608.18	0.04746477		2138.19	-0.02122095		2668.18	-0.00189923		3198.21	0.00009932		3728.2	-0.00626969		4258.2	-0.0166568
548.39	0.23362865		1078.39	0.03391568		1608.38	0.04709455		2138.39	-0.02107022		2668.38	-0.00267869		3198.41	0.00019943		3728.4	-0.00630568		4258.4	-0.01697366
548.59	0.23319797		1078.59	0.03317781		1608.58	0.0464347		2138.59	-0.0214637		2668.58	-0.00321055		3198.61	-0.00027886		3728.6	-0.00597927		4258.6	-0.01700516
548.79	0.23349986		1078.79	0.03326672		1608.78	0.04554108		2138.79	-0.02092548		2668.78	-0.00290653		3198.81	-0.00015076		3728.8	-0.00637779		4258.8	-0.0182562
548.99	0.23454555		1078.99	0.03236628		1608.98	0.04494779		2138.99	-0.02168787		2668.98	-0.00212743		3199.01	-0.00027865		3729	-0.0065349		4259	-0.01823068
549.19	0.23449902		1079.19	0.03233702		1609.18	0.04371609		2139.19	-0.02197757		2669.18	-0.0012955		3199.21	-0.00052048		3729.2	-0.0068647		4259.2	-0.01886676
549.39	0.23444514		1079.39	0.03159046		1609.38	0.04327589		2139.39	-0.02252147		2669.38	-0.00117719		3199.41	-0.00017177		3729.4	-0.00634369		4259.4	-0.01790619
549.59	0.23513656		1079.59	0.03084352		1609.58	0.04341514		2139.59	-0.02328085		2669.58	0.00010119		3199.61	0.00047059		3729.6	-0.00670631		4259.6	-0.01717386
549.79	0.23534705		1079.79	0.03076007		1609.78	0.04400914		2139.79	-0.02345432		2669.78	0.00147607		3199.81	0.00127464		3729.8	-0.00649202		4259.8	-0.01718177
549.99	0.23586145		1079.99	0.03048264		1609.98	0.04430011		2139.99	-0.02414606		2669.98	0.00224918		3200.01	0.0013066		3730	-0.00558329		4260	-0.01687408
550.19	0.23544118		1080.19	0.02962892		1610.18	0.04489441		2140.19	-0.02427662		2670.18	0.00242636		3200.21	0.00192676		3730.2	-0.00524483		4260.2	-0.01593901
550.39	0.2346057		1080.39	0.02906717		1610.38	0.04573996		2140.39	-0.02496142		2670.38	0.00260643		3200.41	0.00244349		3730.4	-0.00556003		4260.4	-0.01549391
550.59	0.23450915		1080.59	0.02929178		1610.58	0.04550838		2140.59	-0.02517512		2670.58	0.00234491		3200.61	0.00202419		3730.6	-0.00562157		4260.6	-0.01496592
550.79	0.23453792		1080.79	0.03037766		1610.78	0.04586007		2140.79	-0.02535705		2670.78	0.00189255		3200.81	0.00235868		3730.8	-0.00570155		4260.8	-0.01450928
550.99	0.23499168		1080.99	0.03118845		1610.98	0.04614065		2140.99	-0.02567823		2670.98	0.00204071		3201.01	0.00282359		3731	-0.00555413		4261	-0.01421976
551.19	0.23542868		1081.19	0.0310599		1611.18	0.04584773		2141.19	-0.02504095		2671.18	0.00219298		3201.21	0.00229147		3731.2	-0.00593407		4261.2	-0.01422521
551.39	0.23481977		1081.39	0.03162794		1611.38	0.04575238		2141.39	-0.02364954		2671.38	0.00230423		3201.41	0.00136077		3731.4	-0.0070206		4261.4	-0.01384294
551.59	0.23496354		1081.59	0.03119673		1611.58	0.04635371		2141.59	-0.02283409		2671.58	0.00168817		3201.61	0.0008197		3731.6	-0.0079115		4261.6	-0.01377829
551.79	0.23481585		1081.79	0.03124036		1611.78	0.0466353		2141.79	-0.02157532		2671.78	0.0008268		3201.81	0.00037236		3731.8	-0.0079672		4261.8	-0.01431467
551.99	0.23500994		1081.99	0.0319357		1611.98	0.04699753		2141.99	-0.02054104		2671.98	0.00033574		3202.01	-0.00066992		3732	-0.00829376		4262	-0.0150794
552.19	0.23466679		1082.19	0.03079494		1612.18	0.04704946		2142.19	-0.02115365		2672.18	-0.00026108		3202.21	0.00014208		3732.2	-0.00996615		4262.2	-0.01490438
552.39	0.23396035		1082.39	0.03153452		1612.38	0.04677828		2142.39	-0.02087008		2672.38	-0.00126317		3202.41	0.00054022		3732.4	-0.01014405		4262.4	-0.01576404
552.59	0.23491203		1082.59	0.03052723		1612.58	0.04630886		2142.59	-0.02111887		2672.58	-0.00179355		3202.61	0.00036202		3732.6	-0.01023902		4262.6	-0.0160708
552.79	0.23470476		1082.79	0.03044743		1612.78	0.046109		2142.79	-0.02111335		2672.78	-0.00140496		3202.81	0.0007242		3732.8	-0.01146761		4262.8	-0.01697602
552.99	0.23472583		1082.99	0.03047664		1612.98	0.045355		2142.99	-0.0210036		2672.98	-0.00089818		3203.01	0.00092124		3733	-0.0114872		4263	-0.0169419
553.19	0.23441072		1083.19	0.03022233		1613.18	0.04457632		2143.19	-0.0213128		2673.18	-0.00054527		3203.21	0.00136579		3733.2	-0.01105951		4263.2	-0.01704387
553.39	0.23495387		1083.39	0.02987315		1613.38	0.04487077		2143.39	-0.02282778		2673.38	-0.00035792		3203.41	0.00184602		3733.4	-0.01000504		4263.4	-0.01584527
553.59	0.23646825		1083.59	0.02956337		1613.58	0.04495633		2143.59	-0.02375953		2673.58	0.00086564		3203.61	0.00229295		3733.6	-0.00985121		4263.6	-0.01614054
553.79	0.23667197		1083.79	0.03017794		1613.78	0.04501174		2143.79	-0.02426163		2673.78	0.00166903		3203.81	0.0021967		3733.8	-0.00889043		4263.8	-0.01618311
553.99	0.23664674		1083.99	0.03044044		1613.98	0.04496744		2143.99	-0.02443815		2673.98	0.00190283		3204.01	0.00273346		3734	-0.00903814		4264	-0.01593835
554.19	0.23646712		1084.19	0.03088193		1614.18	0.04495846		2144.19	-0.0246212		2674.18	0.0018693		3204.21	0.00330383		3734.2	-0.00908097		4264.2	-0.01523743
554.39	0.23652625		1084.39	0.03165128		1614.38	0.04416511		2144.39	-0.02479474		2674.38	0.00084777		3204.41	0.00319176		3734.4	-0.00864866		4264.4	-0.0153044
554.59	0.23742016		1084.59	0.03237884		1614.58	0.04399237		2144.59	-0.0250852		2674.58	0.00040359		3204.61	0.00378669		3734.6	-0.00891101		4264.6	-0.01557723
554.79	0.23827613		1084.79	0.03306878		1614.78	0.04378941		2144.79	-0.02524447		2674.78	-0.00000717		3204.81	0.00293567		3734.8	-0.00878198		4264.8	-0.01571078
554.99	0.23882936		1084.99	0.03302282		1614.98	0.04358358		2144.99	-0.02431976		2674.98	0.00022532		3205.01	0.00283443		3735	-0.00864463		4265	-0.01551809
555.19	0.23919247		1085.19	0.03372316		1615.18	0.04370994		2145.19	-0.02308637		2675.18	-0.00006187		3205.21	0.00250559		3735.2	-0.00874481		4265.2	-0.01559126
555.39	0.23854938		1085.39	0.03447762		1615.38	0.04367952		2145.39	-0.02197847		2675.38	-0.00014668		3205.41	0.00225412		3735.4	-0.00847886		4265.4	-0.01528801
555.59	0.23792791		1085.59	0.03475		1615.58	0.04473805		2145.59	-0.02130358		2675.58	-0.00107719		3205.61	0.00279289		3735.6	-0.00849455		4265.6	-0.01525705
555.79	0.23745819		1085.79	0.03434437		1615.78	0.04500073		2145.79	-0.02120223		2675.78	-0.00131936		3205.81	0.00367913		3735.8	-0.00831862		4265.8	-0.01577007
555.99	0.23719884		1085.99	0.0341448		1615.98	0.04477257		2145.99	-0.02128788		2675.98	-0.00106328		3206.01	0.00300057		3736	-0.00786789		4266	-0.01653319
556.19	0.23622896		1086.19	0.03344638		1616.18	0.04464335		2146.19	-0.02194277		2676.18	-0.00114291		3206.21	0.0029901		3736.2	-0.00760163		4266.2	-0.01691262
556.39	0.23637642		1086.39	0.03380092		1616.38	0.04421946		2146.39	-0.02181432		2676.38	-0.00105652		3206.41	0.00294009		3736.4	-0.00700955		4266.4	-0.01763802
556.59	0.23637459		1086.59	0.03239926		1616.58	0.04382454		2146.59	-0.02230017		2676.58	-0.0007659		3206.61	0.00235552		3736.6	-0.00704845		4266.6	-0.01690657
556.79	0.23563705		1086.79	0.03142385		1616.78	0.04374104		2146.79	-0.02250764		2676.78	-0.00004152		3206.81	0.00237663		3736.8	-0.00744705		4266.8	-0.01655161
556.99	0.23562983		1086.99	0.03102634		1616.98	0.04349423		2146.99	-0.02305768		2676.98	0.00112117		3207.01	0.00241003		3737	-0.00673618		4267	-0.01647514
557.19	0.23535591		1087.19	0.03033202		1617.18	0.04330676		2147.19	-0.02440574		2677.18	0.00125669		3207.21	0.00219598		3737.2	-0.00710315		4267.2	-0.01640603
557.39	0.2359922		1087.39	0.0306907		1617.38	0.04305782		2147.39	-0.02615282		2677.38	0.00189285		3207.41	0.00220716		3737.4	-0.00700707		4267.4	-0.01617736
557.59	0.23702123		1087.59	0.03096435		1617.58	0.04290951		2147.59	-0.02654214		2677.58	0.00234935		3207.61	0.00239548		3737.6	-0.00673669		4267.6	-0.01630789
557.79	0.23673138		1087.79	0.03130824		1617.78	0.04307274		2147.79	-0.0266183		2677.78	0.0023904		3207.81	0.00214532		3737.8	-0.00649585		4267.8	-0.01632562
557.99	0.23694413		1087.99	0.03111767		1617.98	0.04345767		2147.99	-0.02671819		2677.98	0.00195516		3208.01	0.00183359		3738	-0.00662799		4268	-0.01681137
558.19	0.23719119		1088.19	0.0308794		1618.18	0.04336432		2148.19	-0.02676321		2678.18	0.00160947		3208.21	0.00139264		3738.2	-0.00631153		4268.2	-0.01690758
558.39	0.23770327		1088.39	0.03065714		1618.38	0.04342195		2148.39	-0.02670847		2678.38	0.00129899		3208.41	0.00103309		3738.4	-0.00635489		4268.4	-0.01721208
558.59	0.23802303		1088.59	0.03067655		1618.58	0.04348235		2148.59	-0.02659015		2678.58	0.00169187		3208.61	0.0012656		3738.6	-0.00658221		4268.6	-0.01743055
558.79	0.23832047		1088.79	0.03076046		1618.78	0.04337426		2148.79	-0.02600559		2678.78	0.00151338		3208.81	0.00049814		3738.8	-0.006228		4268.8	-0.01698246
558.99	0.23857584		1088.99	0.03082495		1618.98	0.04327262		2148.99	-0.02528059		2678.98	0.00189002		3209.01	0.00118266		3739	-0.00617385		4269	-0.01656075
559.19	0.23892637		1089.19	0.03140999		1619.18	0.04370647		2149.19	-0.0248724		2679.18	0.00188993		3209.21	0.0014158		3739.2	-0.00628508		4269.2	-0.0160552
559.39	0.23829397		1089.39	0.03175731		1619.38	0.04354383		2149.39	-0.02450821		2679.38	0.00223504		3209.41	0.00152629		3739.4	-0.00590876		4269.4	-0.01552503
559.59	0.23822127		1089.59	0.03151589		1619.58	0.04412916		2149.59	-0.02456235		2679.58	0.00230567		3209.61	0.00186163		3739.6	-0.00602258		4269.6	-0.01549351
559.79	0.23856709		1089.79	0.03155784		1619.78	0.04369123		2149.79	-0.02452309		2679.78	0.0027586		3209.81	0.00183702		3739.8	-0.00571352		4269.8	-0.01594884
