# Supplementary material for: Functional development of a V3/glycan-specific broadly neutralizing antibody isolated from a case of HIV superinfection
Source: eLife journal article supplement (doi:10.7554/elife.68110), 2021-07-15
Supplement: fig2-data2 [file E1.xls]

Vers 3.43 Data Simulation
Conc1	3.125E-08	3.125E-08	3.125E-08	3.125E-08
Start1	200.03	730.02	1260.02	1790.01
Stop1	559.82	1089.82	1619.82	2149.81
Time1	Data1	Sim1	Time2	Data2	Sim2	Time3	Data3	Sim3	Time4	Data4	Sim4
200.03	0.00977124		730.02	-0.00662529		1260.02	0.00401052		1790.01	0.00111925
200.23	0.0102213		730.22	-0.00680359		1260.22	0.00431012		1790.21	0.00034367
200.43	0.00996669		730.42	-0.00665027		1260.42	0.00380751		1790.41	-0.00033842
200.63	0.00912607		730.62	-0.00621676		1260.62	0.00408514		1790.61	-0.00013969
200.83	0.00822514		730.82	-0.00594428		1260.82	0.00366116		1790.81	-0.00011878
201.03	0.00817022		731.02	-0.00501085		1261.02	0.00355913		1791.01	0.00028884
201.23	0.00825235		731.22	-0.00400763		1261.22	0.00315106		1791.21	0.00092344
201.43	0.00727955		731.42	-0.00296056		1261.42	0.00261461		1791.41	0.00103549
201.63	0.00729053		731.62	-0.0022997		1261.62	0.00162045		1791.61	0.00099598
201.83	0.00717283		731.82	-0.00207893		1261.82	0.00152453		1791.81	0.00163619
202.03	0.00705041		732.02	-0.00163691		1262.02	0.00040865		1792.01	0.00345644
202.23	0.00668835		732.22	-0.00066652		1262.22	0.00062757		1792.21	0.00429763
202.43	0.00791737		732.42	-0.00133783		1262.42	0.00159184		1792.41	0.00424524
202.63	0.00894474		732.62	-0.00179719		1262.62	0.0015049		1792.61	0.00455347
202.83	0.0099634		732.82	-0.00168946		1262.82	0.00171758		1792.81	0.00336382
203.03	0.00990931		733.02	-0.00236465		1263.02	0.00244803		1793.01	0.00303136
203.23	0.01097682		733.22	-0.00165988		1263.22	0.00221328		1793.21	0.00269068
203.43	0.0116207		733.42	-0.00200679		1263.42	0.00206621		1793.41	0.00256948
203.63	0.01260184		733.62	-0.00198415		1263.62	0.00183954		1793.61	0.00280606
203.83	0.01399843		733.82	-0.00308506		1263.82	0.00188903		1793.81	0.00169786
204.03	0.01546458		734.02	-0.00378599		1264.02	0.00318562		1794.01	0.00067983
204.23	0.01616507		734.22	-0.00475602		1264.22	0.00294762		1794.21	0.00023885
204.43	0.01609574		734.42	-0.00471622		1264.42	0.00261548		1794.41	-0.00007015
204.63	0.01570299		734.62	-0.0047688		1264.62	0.00275758		1794.61	0.0000551
204.83	0.01589228		734.82	-0.00485469		1264.82	0.00217693		1794.81	-0.00101239
205.03	0.01649393		735.02	-0.0041592		1265.02	0.00222428		1795.01	-0.00100995
205.23	0.01584244		735.22	-0.00368811		1265.22	0.00168489		1795.21	-0.00162067
205.43	0.01579722		735.42	-0.0038441		1265.42	0.00053372		1795.41	-0.0022552
205.63	0.01623397		735.62	-0.00350317		1265.62	0.00058787		1795.61	-0.00253105
205.83	0.01649432		735.82	-0.00376476		1265.82	0.00092648		1795.81	-0.00218245
206.03	0.01762507		736.02	-0.00349317		1266.02	0.00029474		1796.01	-0.00104192
206.23	0.01814781		736.22	-0.00267574		1266.22	0.00119444		1796.21	-0.00174172
206.43	0.01949377		736.42	-0.00355755		1266.42	0.00074706		1796.41	-0.00166915
206.63	0.01982145		736.62	-0.00330555		1266.62	-0.00003052		1796.61	-0.00143859
206.83	0.01980775		736.82	-0.00266441		1266.82	0.00045018		1796.81	-0.00208147
207.03	0.01947705		737.02	-0.00262862		1267.02	0.00129511		1797.01	-0.00178162
207.23	0.02017719		737.22	-0.00160442		1267.22	0.00185101		1797.21	-0.00114083
207.43	0.02103254		737.42	-0.00134582		1267.42	0.00238156		1797.41	-0.0007324
207.63	0.02144452		737.62	-0.00144079		1267.62	0.00365157		1797.61	0.00017126
207.83	0.02168642		737.82	-0.00165328		1267.82	0.00445964		1797.81	0.00089102
208.03	0.0212983		738.02	-0.00085259		1268.02	0.00587565		1798.01	0.00086117
208.23	0.02082016		738.22	-0.00113415		1268.22	0.00584343		1798.21	0.00050461
208.43	0.02060609		738.42	-0.00078681		1268.42	0.00550596		1798.41	0.00097727
208.63	0.01996232		738.62	-0.00080975		1268.62	0.00547492		1798.61	0.00169415
208.83	0.02038338		738.82	-0.00042083		1268.82	0.00534409		1798.81	0.00151289
209.03	0.02049415		739.02	0.00042725		1269.02	0.00530031		1799.01	0.00250139
209.23	0.02086541		739.22	0.00041309		1269.22	0.00423247		1799.21	0.00190224
209.43	0.02229157		739.42	-0.00003074		1269.42	0.00284902		1799.41	0.00242305
209.63	0.02247198		739.62	0.00013889		1269.62	0.00240793		1799.61	0.00183064
209.83	0.02344761		739.82	-0.00008478		1269.82	0.00120029		1799.81	0.00203779
210.03	0.02493729		740.02	-0.00006219		1270.02	0.00029319		1800.01	0.00179695
210.23	0.02457464		740.22	0.00002899		1270.22	-0.0005391		1800.21	0.00146453
210.43	0.02497438		740.42	-0.00048121		1270.42	-0.00143103		1800.41	0.0012061
210.63	0.02519343		740.62	-0.00066951		1270.62	-0.00153359		1800.61	0.00144168
210.83	0.02586458		740.82	-0.00014782		1270.82	-0.00142288		1800.81	0.00127809
211.03	0.02575624		741.02	-0.00041719		1271.02	-0.00182603		1801.01	0.00173656
211.23	0.02630411		741.22	-0.00004555		1271.22	-0.00169234		1801.21	0.00248229
211.43	0.02573773		741.42	-0.00062736		1271.42	-0.00117432		1801.41	0.00254295
211.63	0.02536507		741.62	-0.00125082		1271.62	0.00055641		1801.61	0.00303065
211.83	0.02508604		741.82	-0.00120702		1271.82	0.00162862		1801.81	0.00311495
212.03	0.02546844		742.02	-0.00184266		1272.02	0.00213748		1802.01	0.00260759
212.23	0.02634182		742.22	-0.00310494		1272.22	0.00148703		1802.21	0.00152028
212.43	0.02742717		742.42	-0.00268218		1272.42	0.00187704		1802.41	0.00118976
212.63	0.02755391		742.62	-0.00266667		1272.62	0.00223		1802.61	0.00079107
212.83	0.02798776		742.82	-0.00238329		1272.82	0.00229825		1802.81	-0.00049368
213.03	0.02841062		743.02	-0.00243917		1273.02	0.00223151		1803.01	-0.00126387
213.23	0.02904142		743.22	-0.00259186		1273.22	0.00151096		1803.21	-0.00090142
213.43	0.02899092		743.42	-0.00268091		1273.42	0.00163816		1803.41	-0.00025058
213.63	0.02793845		743.62	-0.00266517		1273.62	0.00199782		1803.61	-0.0009129
213.83	0.02922104		743.82	-0.0025419		1273.82	0.00231092		1803.81	-0.00142952
214.03	0.02891877		744.02	-0.00233135		1274.02	0.00165537		1804.01	-0.00207331
214.23	0.02926288		744.22	-0.00273039		1274.22	0.00038297		1804.21	-0.00172736
214.43	0.02992478		744.42	-0.00286536		1274.42	0.00071177		1804.41	-0.00144529
214.63	0.03018551		744.62	-0.00308547		1274.62	0.00092691		1804.61	-0.00060205
214.83	0.03092234		744.82	-0.00297056		1274.82	0.0007139		1804.81	-0.00020387
215.03	0.03103637		745.02	-0.0032726		1275.02	0.0008428		1805.01	-0.00025696
215.23	0.03191766		745.22	-0.00342629		1275.22	0.00090055		1805.21	0.00057838
215.43	0.03210435		745.42	-0.00262609		1275.42	0.00182601		1805.41	0.00110132
215.63	0.03238168		745.62	-0.00219515		1275.62	0.00228648		1805.61	0.00083839
215.83	0.03295247		745.82	-0.0025245		1275.82	0.00234551		1805.81	0.00105385
216.03	0.0345917		746.02	-0.00318378		1276.02	0.00225063		1806.01	0.00047704
216.23	0.03564592		746.22	-0.00307903		1276.22	0.00103332		1806.21	-0.0007889
216.43	0.03529551		746.42	-0.00297726		1276.42	0.0010481		1806.41	-0.00102043
216.63	0.03388112		746.62	-0.00273666		1276.62	0.00026016		1806.61	-0.00012218
216.83	0.03338554		746.82	-0.00276797		1276.82	0.00059811		1806.81	0.000409
217.03	0.03367791		747.02	-0.00278489		1277.02	0.00055614		1807.01	0.00131478
217.23	0.03244576		747.22	-0.00294309		1277.22	0.00093553		1807.21	0.00284171
217.43	0.03158013		747.42	-0.00290074		1277.42	0.00086498		1807.41	0.00269647
217.63	0.03182371		747.62	-0.00179942		1277.62	0.00033759		1807.61	0.00252104
217.83	0.03282265		747.82	-0.00078533		1277.82	0.0003788		1807.81	0.0021505
218.03	0.03207246		748.02	-0.00065315		1278.02	-0.00047152		1808.01	0.0020822
218.23	0.03291326		748.22	-0.00155775		1278.22	-0.00120979		1808.21	0.00298922
218.43	0.03290851		748.42	-0.0006888		1278.42	0.00028551		1808.41	0.00291755
218.63	0.03316061		748.62	-0.00143741		1278.62	-0.00019765		1808.61	0.00291465
218.83	0.0340018		748.82	-0.00139547		1278.82	-0.00048468		1808.81	0.00208449
219.03	0.03430623		749.02	-0.00094612		1279.02	-0.00097245		1809.01	0.0013534
219.23	0.03420322		749.22	-0.00097245		1279.22	-0.00089386		1809.21	0.00118148
219.43	0.03445007		749.42	-0.00097021		1279.42	-0.00041051		1809.41	0.00006278
219.63	0.03541387		749.62	-0.00218037		1279.62	-0.00038561		1809.61	-0.00057174
219.83	0.03702249		749.82	-0.00252539		1279.82	0.00019669		1809.81	0.00003425
220.03	0.03794958		750.02	-0.00277278		1280.02	0.00060952		1810.01	-0.0003156
220.23	0.03819784		750.22	-0.00368194		1280.22	-0.00067138		1810.21	-0.00088807
220.43	0.03676755		750.42	-0.00439351		1280.42	-0.00084081		1810.41	-0.00012214
220.63	0.03654006		750.62	-0.00433168		1280.62	-0.00099057		1810.61	0.0008002
220.83	0.03649689		750.82	-0.00490371		1280.82	-0.00102053		1810.81	0.00032489
221.03	0.03637604		751.02	-0.0060352		1281.02	-0.00141029		1811.01	0.00073056
221.23	0.03572595		751.22	-0.00628098		1281.22	-0.00128469		1811.21	0.00090132
221.43	0.03590069		751.42	-0.00616468		1281.42	-0.00089779		1811.41	0.00194066
221.63	0.03550616		751.62	-0.00573958		1281.62	-0.00025169		1811.61	0.00285651
221.83	0.0350387		751.82	-0.00608754		1281.82	0.00023838		1811.81	0.00317771
222.03	0.03512855		752.02	-0.00593167		1282.02	0.00057043		1812.01	0.00329298
222.23	0.03527103		752.22	-0.00588153		1282.22	0.00159284		1812.21	0.00333607
222.43	0.03585694		752.42	-0.00490162		1282.42	0.00274371		1812.41	0.00243628
222.63	0.03588193		752.62	-0.00498617		1282.62	0.00261814		1812.61	0.00178484
222.83	0.03709074		752.82	-0.00346559		1282.82	0.00299327		1812.81	0.0013749
223.03	0.03683132		753.02	-0.00240056		1283.02	0.00286931		1813.01	0.00205287
223.23	0.03724373		753.22	-0.00175636		1283.22	0.0034168		1813.21	0.00178398
223.43	0.03920875		753.42	-0.0011165		1283.42	0.00346601		1813.41	0.00234892
223.63	0.04094234		753.62	-0.00019362		1283.62	0.00411655		1813.61	0.00326635
223.83	0.04205114		753.82	0.00102836		1283.82	0.00337679		1813.81	0.00411566
224.03	0.04293422		754.02	0.00177684		1284.02	0.00236779		1814.01	0.00365487
224.23	0.04362615		754.22	0.00158304		1284.22	0.00031241		1814.21	0.00411305
224.43	0.04347924		754.42	0.00164711		1284.42	-0.00047224		1814.41	0.00453595
224.63	0.04494893		754.62	0.00213983		1284.62	-0.00181317		1814.61	0.00394884
224.83	0.04596462		754.82	0.00205654		1284.82	-0.00228301		1814.81	0.00341801
225.03	0.04574168		755.02	0.00179638		1285.02	-0.00288072		1815.01	0.0043336
225.23	0.04705834		755.22	0.00070689		1285.22	-0.0021607		1815.21	0.00361419
225.43	0.04716282		755.42	-0.00039605		1285.42	-0.0021159		1815.41	0.00405929
225.63	0.04664788		755.62	-0.00141859		1285.62	-0.00274888		1815.61	0.0031788
225.83	0.0474115		755.82	-0.00151356		1285.82	-0.00282937		1815.81	0.00187862
226.03	0.04784822		756.02	-0.00144706		1286.02	-0.00250687		1816.01	0.00015717
226.23	0.04803333		756.22	-0.00211495		1286.22	-0.00201485		1816.21	-0.00137417
226.43	0.04784855		756.42	-0.00267852		1286.42	-0.00196513		1816.41	-0.0026994
226.63	0.0477008		756.62	-0.00273337		1286.62	-0.0021515		1816.61	-0.00452248
226.83	0.04737342		756.82	-0.00277307		1286.82	-0.00235459		1816.81	-0.00375755
227.03	0.04588666		757.02	-0.00272285		1287.02	-0.0015837		1817.01	-0.00295609
227.23	0.04612234		757.22	-0.00295369		1287.22	-0.00101879		1817.21	-0.00294249
227.43	0.0471557		757.42	-0.00268801		1287.42	-0.00020951		1817.41	-0.00198405
227.63	0.04714415		757.62	-0.00207495		1287.62	-0.00049358		1817.61	-0.00110789
227.83	0.04629525		757.82	-0.00210206		1287.82	-0.0010343		1817.81	0.00082749
228.03	0.04615164		758.02	-0.00123763		1288.02	-0.00057038		1818.01	0.00113148
228.23	0.04563962		758.22	-0.00182875		1288.22	-0.00059194		1818.21	0.00185775
228.43	0.04605426		758.42	-0.0017874		1288.42	-0.0003525		1818.41	0.00202367
228.63	0.04654758		758.62	-0.00099482		1288.62	-0.00085639		1818.61	0.0028778
228.83	0.04638139		758.82	-0.00083931		1288.82	-0.00076786		1818.81	0.00318848
229.03	0.04577087		759.02	-0.00003261		1289.02	-0.00057942		1819.01	0.00361513
229.23	0.04757074		759.22	-0.00174207		1289.22	-0.00004287		1819.21	0.00309973
229.43	0.04774268		759.42	-0.00084175		1289.42	-0.00096351		1819.41	0.00315519
229.63	0.04780315		759.62	-0.00081764		1289.62	-0.00112911		1819.61	0.00256715
229.83	0.04900094		759.82	-0.00001768		1289.82	-0.00109765		1819.81	0.00326102
230.03	0.04994994		760.02	0.00026784		1290.02	-0.0014545		1820.01	0.00287659
230.23	0.05106271		760.22	0.00001961		1290.22	-0.00059839		1820.21	0.00219567
230.43	0.05175476		760.42	-0.00113282		1290.42	-0.00100611		1820.41	0.0015687
230.63	0.05307535		760.62	-0.00099918		1290.62	-0.0004656		1820.61	0.00151917
230.83	0.05265759		760.82	-0.00138869		1290.82	0.00074463		1820.81	0.00206349
231.03	0.053027		761.02	-0.00154489		1291.02	0.00253092		1821.01	0.00236411
231.23	0.05433558		761.22	-0.0010238		1291.22	0.00238918		1821.21	0.002507
231.43	0.0545021		761.42	-0.00031314		1291.42	0.00327533		1821.41	0.00382837
231.63	0.05455358		761.62	-0.000612		1291.62	0.00305313		1821.61	0.00419758
231.83	0.05444585		761.82	-0.00171007		1291.82	0.00403314		1821.81	0.00480634
232.03	0.05466526		762.02	-0.00125517		1292.02	0.00456075		1822.01	0.00441631
232.23	0.05407211		762.22	-0.00195166		1292.22	0.00430928		1822.21	0.00415438
232.43	0.0545958		762.42	-0.00235922		1292.42	0.00469041		1822.41	0.00452797
232.63	0.05435683		762.62	-0.00232144		1292.62	0.00330729		1822.61	0.00446288
232.83	0.05359003		762.82	-0.00244702		1292.82	0.00176045		1822.81	0.00432596
233.03	0.05337846		763.02	-0.00211818		1293.02	0.00214261		1823.01	0.00313092
233.23	0.05414523		763.22	-0.00368678		1293.22	0.00191616		1823.21	0.00321085
233.43	0.05409865		763.42	-0.00298105		1293.42	0.0016616		1823.41	0.00300515
233.63	0.05412398		763.62	-0.00266238		1293.62	0.00222415		1823.61	0.00307445
233.83	0.05510868		763.82	-0.00209595		1293.82	0.00346051		1823.81	0.00357531
234.03	0.05552777		764.02	-0.00267708		1294.02	0.00327695		1824.01	0.00134686
234.23	0.05603789		764.22	-0.00296029		1294.22	0.00384658		1824.21	-0.00036017
234.43	0.05693141		764.42	-0.00287657		1294.42	0.00360469		1824.41	-0.00012256
234.63	0.05850075		764.62	-0.00219196		1294.62	0.00480604		1824.61	-0.00046145
234.83	0.05779109		764.82	-0.00229947		1294.82	0.00503392		1824.81	-0.00066125
235.03	0.05925153		765.02	-0.00205967		1295.02	0.00428546		1825.01	-0.00053225
235.23	0.06093753		765.22	-0.00138399		1295.22	0.00311125		1825.21	-0.00066231
235.43	0.06114177		765.42	-0.00168494		1295.42	0.00254094		1825.41	0.00003782
235.63	0.06168919		765.62	-0.00219594		1295.62	0.00184151		1825.61	-0.00055257
235.83	0.06213019		765.82	-0.00220447		1295.82	0.00218498		1825.81	-0.00012909
236.03	0.06197873		766.02	-0.00199778		1296.02	0.00216483		1826.01	0.00031713
236.23	0.06249442		766.22	-0.0018789		1296.22	0.00115352		1826.21	0.00074788
236.43	0.06358811		766.42	-0.00130692		1296.42	0.00053767		1826.41	0.00158213
236.63	0.06382576		766.62	-0.00136856		1296.62	-0.00108127		1826.61	0.00203026
236.83	0.06289667		766.82	-0.0019484		1296.82	-0.00182795		1826.81	0.00294365
237.03	0.0630678		767.02	-0.00164047		1297.02	-0.00065758		1827.01	0.0026166
237.23	0.06312868		767.22	-0.0017536		1297.22	0.00071219		1827.21	0.00326157
237.43	0.06347826		767.42	-0.00100914		1297.42	0.00179927		1827.41	0.00286194
237.63	0.06338198		767.62	0.00047535		1297.62	0.00307239		1827.61	0.00220255
237.83	0.06351932		767.82	0.00084918		1297.82	0.00428991		1827.81	0.00241427
238.03	0.06241973		768.02	0.00045219		1298.02	0.00374351		1828.01	0.0015277
238.23	0.06263525		768.22	0.00148386		1298.22	0.00423879		1828.21	0.00223827
238.43	0.06288567		768.42	0.00149915		1298.42	0.00414605		1828.41	0.00367177
238.63	0.06249152		768.62	0.00022796		1298.62	0.0043446		1828.61	0.00339584
238.83	0.06099946		768.82	-0.00034794		1298.82	0.00460862		1828.81	0.00396124
239.03	0.06171718		769.02	-0.00060458		1299.02	0.00381168		1829.01	0.00338599
239.23	0.06142728		769.22	-0.00126393		1299.22	0.00324419		1829.21	0.00339492
239.43	0.06065916		769.42	-0.00153233		1299.42	0.00223574		1829.41	0.00381707
239.63	0.06056262		769.62	-0.0018588		1299.62	0.00137982		1829.61	0.00364008
239.83	0.06055195		769.82	-0.00192938		1299.82	0.00171918		1829.81	0.00358538
240.03	0.06036036		770.02	-0.00312071		1300.02	0.00119553		1830.01	0.0042182
240.23	0.06106116		770.22	-0.00322222		1300.22	0.00008663		1830.21	0.00438555
240.43	0.06153505		770.42	-0.00421179		1300.42	-0.00031449		1830.41	0.00480856
240.63	0.06110521		770.62	-0.00538369		1300.62	-0.00086373		1830.61	0.00561686
240.83	0.06133391		770.82	-0.00535674		1300.82	-0.00097241		1830.81	0.00642974
241.03	0.06249814		771.02	-0.00397202		1301.02	0.00017468		1831.01	0.0062357
241.23	0.06332491		771.22	-0.00366484		1301.22	0.00161696		1831.21	0.00492672
241.43	0.06407309		771.42	-0.0023036		1301.42	0.00197977		1831.41	0.00464504
241.63	0.06394578		771.62	-0.00104035		1301.62	0.00220823		1831.61	0.00442272
241.83	0.06402636		771.82	-0.00106847		1301.82	0.00269662		1831.81	0.00481569
242.03	0.06327933		772.02	-0.00107033		1302.02	0.00219832		1832.01	0.0049802
242.23	0.06372679		772.22	-0.00099862		1302.22	0.00287422		1832.21	0.00458718
242.43	0.06381511		772.42	-0.00108327		1302.42	0.00295514		1832.41	0.00394282
242.63	0.06345596		772.62	-0.00096527		1302.62	0.00322999		1832.61	0.00303187
242.83	0.06320041		772.82	-0.00014136		1302.82	0.00397685		1832.81	0.00267781
243.03	0.06376758		773.02	0.00070929		1303.02	0.00339824		1833.01	0.00119882
243.23	0.06416097		773.22	0.00136425		1303.22	0.00229245		1833.21	0.00088432
243.43	0.06496845		773.42	0.00278035		1303.42	0.00228346		1833.41	0.00024985
243.63	0.06501138		773.62	0.00260848		1303.62	0.00160559		1833.61	-0.00032555
243.83	0.06465666		773.82	0.00273517		1303.82	0.00192418		1833.81	-0.00048687
244.03	0.06487391		774.02	0.00160673		1304.02	0.00069856		1834.01	-0.00050732
244.23	0.06514921		774.22	0.00210301		1304.22	-0.00025277		1834.21	-0.00064742
244.43	0.06427708		774.42	0.00219232		1304.42	-0.00000239		1834.41	0.00003737
244.63	0.06464872		774.62	0.0027517		1304.62	0.00004988		1834.61	0.00029697
244.83	0.06511403		774.82	0.00325274		1304.82	0.0003182		1834.81	0.0002752
245.03	0.06540908		775.02	0.00398924		1305.02	0.00082583		1835.01	0.00004892
245.23	0.06527496		775.22	0.00351448		1305.22	0.00109903		1835.21	-0.00039306
245.43	0.06539566		775.42	0.00333208		1305.42	0.00075108		1835.41	-0.00010912
245.63	0.06589463		775.62	0.00308871		1305.62	0.0010738		1835.61	-0.00061475
245.83	0.06641864		775.82	0.00156111		1305.82	0.00163525		1835.81	0.00024696
246.03	0.06624316		776.02	0.0009826		1306.02	0.00157159		1836.01	0.00098615
246.23	0.06670819		776.22	0.00100198		1306.22	0.00260229		1836.21	0.00120709
246.43	0.06774373		776.42	0.00060552		1306.42	0.00190803		1836.41	0.00237898
246.63	0.06828118		776.62	-0.00003413		1306.62	0.0025921		1836.61	0.00295088
246.83	0.06958105		776.82	-0.00030541		1306.82	0.00348895		1836.81	0.00293032
247.03	0.07113197		777.02	0.00021441		1307.02	0.0031759		1837.01	0.00267044
247.23	0.07227904		777.22	0.00028634		1307.22	0.00257637		1837.21	0.00366427
247.43	0.07313975		777.42	0.00035895		1307.42	0.00290934		1837.41	0.00451124
247.63	0.07321732		777.62	0.00007506		1307.62	0.00172155		1837.61	0.0049794
247.83	0.07375621		777.82	0.00036638		1307.82	0.00134482		1837.81	0.00478571
248.03	0.07463125		778.02	0.00108929		1308.02	-0.00023803		1838.01	0.0039482
248.23	0.07536481		778.22	0.00221814		1308.22	0.00039485		1838.21	0.00413886
248.43	0.07501293		778.42	0.00187947		1308.42	0.0002167		1838.41	0.00364207
248.63	0.07534204		778.62	0.00159493		1308.62	0.00001163		1838.61	0.00375191
248.83	0.07458137		778.82	0.00121169		1308.82	-0.00062402		1838.81	0.00424181
249.03	0.07501592		779.02	0.00170161		1309.02	-0.00049864		1839.01	0.00463898
249.23	0.07530449		779.22	0.00228148		1309.22	0.00023974		1839.21	0.00492311
249.43	0.07580849		779.42	0.00266546		1309.42	0.00038624		1839.41	0.00445504
249.63	0.07619535		779.62	0.00298074		1309.62	0.00100645		1839.61	0.00412745
249.83	0.07590863		779.82	0.00211991		1309.82	0.00154675		1839.81	0.00502064
250.03	0.07500146		780.02	0.00305152		1310.02	0.00146982		1840.01	0.00524924
250.23	0.0760049		780.22	0.00321626		1310.22	0.00198377		1840.21	0.0062892
250.43	0.07649211		780.42	0.00327718		1310.42	0.00150499		1840.41	0.00624161
250.63	0.07538555		780.62	0.00300432		1310.62	0.00245634		1840.61	0.00610339
250.83	0.0760886		780.82	0.00340239		1310.82	0.00226245		1840.81	0.00560412
251.03	0.07605598		781.02	0.00394273		1311.02	0.00251928		1841.01	0.00568955
251.23	0.0760208		781.22	0.00416682		1311.22	0.00172187		1841.21	0.00600282
251.43	0.07606782		781.42	0.00458555		1311.42	0.00149086		1841.41	0.00521885
251.63	0.07660177		781.62	0.00423669		1311.62	0.00073359		1841.61	0.00491275
251.83	0.07679432		781.82	0.0034194		1311.82	0.0007936		1841.81	0.0035201
252.03	0.07668458		782.02	0.00372514		1312.02	0.00035054		1842.01	0.00284679
252.23	0.07600236		782.22	0.00252491		1312.22	0.00112999		1842.21	0.00327913
252.43	0.07573152		782.42	0.00091078		1312.42	0.00048399		1842.41	0.00303403
252.63	0.07609674		782.62	0.00082427		1312.62	0.0009264		1842.61	0.00374902
252.83	0.07644882		782.82	0.00071822		1312.82	0.000774		1842.81	0.0037963
253.03	0.07750164		783.02	0.00154092		1313.02	0.00128684		1843.01	0.0038357
253.23	0.07789675		783.22	0.00246298		1313.22	0.00158095		1843.21	0.00417436
253.43	0.07782768		783.42	0.00180579		1313.42	0.00157097		1843.41	0.00329237
253.63	0.07803925		783.62	0.00224513		1313.62	0.0016074		1843.61	0.00347245
253.83	0.0781948		783.82	0.00162677		1313.82	0.0018537		1843.81	0.00369611
254.03	0.07805394		784.02	0.00142606		1314.02	0.00137054		1844.01	0.00384027
254.23	0.07870108		784.22	0.00096416		1314.22	0.00072873		1844.21	0.00399757
254.43	0.07827591		784.42	0.00036893		1314.42	0.00048173		1844.41	0.00276005
254.63	0.07811908		784.62	-0.00045654		1314.62	0.00053566		1844.61	0.00281232
254.83	0.07936009		784.82	-0.00063269		1314.82	0.00009192		1844.81	0.00232378
255.03	0.07934252		785.02	-0.0006786		1315.02	-0.00001885		1845.01	0.00249455
255.23	0.07922064		785.22	-0.00012613		1315.22	-0.00174492		1845.21	0.0029848
255.43	0.07927295		785.42	-0.0011283		1315.42	-0.00102265		1845.41	0.00292417
255.63	0.08054468		785.62	-0.00234548		1315.62	-0.00134718		1845.61	0.00334239
255.83	0.08069837		785.82	-0.00294234		1315.82	-0.00069954		1845.81	0.00229044
256.03	0.07998086		786.02	-0.00278844		1316.02	-0.00062472		1846.01	0.00296811
256.23	0.08039791		786.22	-0.00304211		1316.22	-0.00047997		1846.21	0.00348761
256.43	0.08190157		786.42	-0.00309946		1316.42	0.00034244		1846.41	0.00359282
256.63	0.08230602		786.62	-0.00139965		1316.62	0.00060692		1846.61	0.00390842
256.83	0.08191945		786.82	-0.00050392		1316.82	0.00058708		1846.81	0.00436261
257.03	0.08322701		787.02	0.00066634		1317.02	0.00084684		1847.01	0.00469175
257.23	0.08354416		787.22	0.00182264		1317.22	0.00090584		1847.21	0.00407406
257.43	0.08425549		787.42	0.00180321		1317.42	0.00184262		1847.41	0.00386727
257.63	0.08521753		787.62	0.00275924		1317.62	0.00196771		1847.61	0.00450272
257.83	0.08501655		787.82	0.00259737		1317.82	0.00209926		1847.81	0.00418009
258.03	0.084775		788.02	0.00293991		1318.02	0.00185981		1848.01	0.00376365
258.23	0.08447589		788.22	0.00360046		1318.22	0.00247781		1848.21	0.00323288
258.43	0.08480199		788.42	0.00396321		1318.42	0.0028984		1848.41	0.00202544
258.63	0.0845226		788.62	0.00460739		1318.62	0.00184448		1848.61	0.00244575
258.83	0.08451925		788.82	0.00504484		1318.82	0.00062405		1848.81	0.00231037
259.03	0.0838257		789.02	0.00537587		1319.02	0.00015368		1849.01	0.00299853
259.23	0.083118		789.22	0.00630098		1319.22	-0.00091257		1849.21	0.00355043
259.43	0.08387864		789.42	0.00430772		1319.42	-0.00019705		1849.41	0.00318912
259.63	0.0847094		789.62	0.00365232		1319.62	-0.00111624		1849.61	0.00315558
259.83	0.08385875		789.82	0.00301532		1319.82	-0.0007018		1849.81	0.00243321
260.03	0.08438452		790.02	0.00264302		1320.02	-0.00099951		1850.01	0.00347071
260.23	0.0844079		790.22	0.00228888		1320.22	-0.00131639		1850.21	0.00392838
260.43	0.08566399		790.42	0.00225142		1320.42	-0.0009866		1850.41	0.00448032
260.63	0.08604998		790.62	0.00274845		1320.62	-0.00064894		1850.61	0.00456294
260.83	0.08601009		790.82	0.00275589		1320.82	-0.00046607		1850.81	0.00568308
261.03	0.08723908		791.02	0.00222892		1321.02	0.00063938		1851.01	0.00560082
261.23	0.08767928		791.22	0.0014159		1321.22	-0.0003155		1851.21	0.00551255
261.43	0.08832072		791.42	0.00074817		1321.42	0.00018078		1851.41	0.00523183
261.63	0.08919497		791.62	0.00064857		1321.62	-0.00011793		1851.61	0.00548707
261.83	0.08921246		791.82	0.00088841		1321.82	-0.0006592		1851.81	0.00448363
262.03	0.089868		792.02	0.00117577		1322.02	-0.00050044		1852.01	0.00424934
262.23	0.0897714		792.22	0.00200137		1322.22	0.00007489		1852.21	0.00414033
262.43	0.0914282		792.42	0.0034053		1322.42	-0.00170715		1852.41	0.0027955
262.63	0.09161221		792.62	0.00357637		1322.62	-0.0026673		1852.61	0.00298541
262.83	0.09219159		792.82	0.0038463		1322.82	-0.00292734		1852.81	0.00219042
263.03	0.0920448		793.02	0.00343244		1323.02	-0.00303006		1853.01	0.00281083
263.23	0.0924846		793.22	0.0029407		1323.22	-0.00311246		1853.21	0.00253435
263.43	0.09349746		793.42	0.00187378		1323.42	-0.00207819		1853.41	0.001838
263.63	0.09338278		793.62	0.00206694		1323.62	-0.00200111		1853.61	0.00147182
263.83	0.0933683		793.82	0.0014542		1323.82	-0.00088375		1853.81	0.001247
264.03	0.09359297		794.02	0.00179824		1324.02	-0.00045942		1854.01	0.00163682
264.23	0.09261236		794.22	0.00185755		1324.22	-0.00025477		1854.21	0.00115032
264.43	0.09383017		794.42	0.00142102		1324.42	0.00037048		1854.41	0.00108915
264.63	0.09326454		794.62	0.00100313		1324.62	0.00060286		1854.61	0.00136408
264.83	0.09229957		794.82	0.00069678		1324.82	0.00032		1854.81	0.00131829
265.03	0.09135622		795.02	-0.0002458		1325.02	0.00055857		1855.01	0.00118851
265.23	0.09108387		795.22	-0.00089673		1325.22	-0.00099387		1855.21	0.00217588
265.43	0.0914017		795.42	-0.00082991		1325.42	-0.00068434		1855.41	0.00172832
265.63	0.09222711		795.62	0.00002064		1325.62	-0.00186017		1855.61	0.00188155
265.83	0.09176733		795.82	0.00088234		1325.82	-0.00228174		1855.81	0.00189284
266.03	0.09153773		796.02	0.0013607		1326.02	-0.0023375		1856.01	0.00291218
266.23	0.0911216		796.22	0.00230124		1326.22	-0.00297415		1856.21	0.00338325
266.43	0.09209952		796.42	0.00345855		1326.42	-0.00368949		1856.41	0.00326007
266.63	0.09068569		796.62	0.00298392		1326.62	-0.00329355		1856.61	0.00473641
266.83	0.09101238		796.82	0.00274834		1326.82	-0.00263053		1856.81	0.00636611
267.03	0.09146329		797.02	0.00261472		1327.02	-0.0018997		1857.01	0.00752535
267.23	0.09151783		797.22	0.00120327		1327.22	-0.00125584		1857.21	0.00703513
267.43	0.091891		797.42	0.00134225		1327.42	-0.00008975		1857.41	0.00713092
267.63	0.09140592		797.62	0.00029165		1327.62	0.00049763		1857.61	0.00740142
267.83	0.09072187		797.82	0.00029404		1327.82	0.00164767		1857.81	0.00790636
268.03	0.09092616		798.02	-0.00031586		1328.02	0.00183544		1858.01	0.00651706
268.23	0.09201226		798.22	-0.00132195		1328.22	0.00164734		1858.21	0.00646658
268.43	0.09319489		798.42	-0.00176922		1328.42	0.00148711		1858.41	0.00663522
268.63	0.09299104		798.62	-0.00170819		1328.62	0.00116045		1858.61	0.00567647
268.83	0.0927693		798.82	-0.00147391		1328.82	0.00191503		1858.81	0.00448166
269.03	0.09235589		799.02	-0.00180398		1329.02	0.00249603		1859.01	0.00400063
269.23	0.09363409		799.22	-0.0017336		1329.22	0.00263336		1859.21	0.00357512
269.43	0.09438626		799.42	-0.00058793		1329.42	0.0027801		1859.41	0.00261542
269.63	0.09484011		799.62	0.00016184		1329.62	0.0017094		1859.61	0.00163178
269.83	0.09457959		799.82	0.00088664		1329.82	0.0019363		1859.81	0.00206525
270.03	0.09525205		800.02	0.00162963		1330.02	0.00084486		1860.01	0.00188494
270.23	0.09553288		800.22	0.00251762		1330.22	0.00029947		1860.21	0.00166214
270.43	0.09583509		800.42	0.00305358		1330.42	0.00016387		1860.41	0.00247453
270.63	0.09533318		800.62	0.0033884		1330.62	-0.00089286		1860.61	0.00369728
270.83	0.0966431		800.82	0.00380682		1330.82	-0.0005409		1860.81	0.00460074
271.03	0.09726583		801.02	0.0037155		1331.02	-0.00157576		1861.01	0.0043813
271.23	0.09759812		801.22	0.00306313		1331.22	-0.00258655		1861.21	0.0038976
271.43	0.0981767		801.42	0.003332		1331.42	-0.00285418		1861.41	0.00486849
271.63	0.09841199		801.62	0.00224778		1331.62	-0.00383604		1861.61	0.00535893
271.83	0.09856724		801.82	0.00301634		1331.82	-0.00379591		1861.81	0.00578172
272.03	0.10022829		802.02	0.00173781		1332.02	-0.00412203		1862.01	0.00508565
272.23	0.10084433		802.22	0.00169403		1332.22	-0.00441677		1862.21	0.0056963
272.43	0.10066066		802.42	0.00131941		1332.42	-0.00425702		1862.41	0.00598129
272.63	0.10015917		802.62	0.00113422		1332.62	-0.00422553		1862.61	0.00547433
272.83	0.09925044		802.82	0.00120839		1332.82	-0.00363386		1862.81	0.00523133
273.03	0.09885654		803.02	0.00071082		1333.02	-0.00304454		1863.01	0.00371415
273.23	0.09888361		803.22	0.00072638		1333.22	-0.00229482		1863.21	0.00365501
273.43	0.09802068		803.42	0.00149981		1333.42	-0.00221508		1863.41	0.00428087
273.63	0.09805057		803.62	0.00124426		1333.62	-0.00241713		1863.61	0.00343439
273.83	0.09815349		803.82	0.00223358		1333.82	-0.0021362		1863.81	0.00264664
274.03	0.09780647		804.02	0.00259746		1334.02	-0.0020063		1864.01	0.00267066
274.23	0.09745484		804.22	0.00305647		1334.22	-0.00181035		1864.21	0.00313089
274.43	0.0974835		804.42	0.00268664		1334.42	-0.00174723		1864.41	0.00363501
274.63	0.09750608		804.62	0.00329697		1334.62	-0.0016946		1864.61	0.00345759
274.83	0.09807155		804.82	0.00367951		1334.82	-0.00121142		1864.81	0.00320964
275.03	0.09876223		805.02	0.00332397		1335.02	-0.00181476		1865.01	0.00353682
275.23	0.09977554		805.22	0.00380674		1335.22	-0.00188009		1865.21	0.00340964
275.43	0.1009483		805.42	0.00326384		1335.42	-0.00237115		1865.41	0.00423657
275.63	0.10123441		805.62	0.00294931		1335.62	-0.00200439		1865.61	0.00414208
275.83	0.10214867		805.82	0.00323304		1335.82	-0.00159715		1865.81	0.00360285
276.03	0.10354761		806.02	0.00310147		1336.02	-0.00148123		1866.01	0.00422892
276.23	0.10411618		806.22	0.00242679		1336.22	-0.00080943		1866.21	0.0046467
276.43	0.10419982		806.42	0.00251551		1336.42	0.00003331		1866.41	0.00567924
276.63	0.10396928		806.62	0.00268646		1336.62	-0.00037063		1866.61	0.0056254
276.83	0.10367048		806.82	0.00226721		1336.82	0.00009747		1866.81	0.00516932
277.03	0.10317031		807.02	0.00234683		1337.02	0.00063861		1867.01	0.00480451
277.23	0.10324297		807.22	0.00237251		1337.22	0.00057334		1867.21	0.00518251
277.43	0.10247518		807.42	0.00267435		1337.42	0.00047154		1867.41	0.00547096
277.63	0.10290198		807.62	0.00270173		1337.62	-0.00005008		1867.61	0.00564283
277.83	0.1025241		807.82	0.00295028		1337.82	-0.00022185		1867.81	0.00569394
278.03	0.10167966		808.02	0.00297836		1338.02	0.00033255		1868.01	0.00650809
278.23	0.10235088		808.22	0.0021009		1338.22	-0.000223		1868.21	0.00685142
278.43	0.10217919		808.42	0.00116375		1338.42	-0.00053938		1868.41	0.00658903
278.63	0.10165275		808.62	0.00174736		1338.62	-0.00069427		1868.61	0.00628176
278.83	0.10223905		808.82	0.00170996		1338.82	-0.0010944		1868.81	0.00590509
279.03	0.10249052		809.02	0.00185651		1339.02	-0.00135432		1869.01	0.00541161
279.23	0.10310128		809.22	0.00265235		1339.22	-0.00184404		1869.21	0.00534661
279.43	0.10373222		809.42	0.00327794		1339.42	-0.00187134		1869.41	0.00446985
279.63	0.10303664		809.62	0.00381201		1339.62	-0.00133426		1869.61	0.00470378
279.83	0.10329156		809.82	0.00405152		1339.82	-0.00118187		1869.81	0.00376688
280.03	0.10324737		810.02	0.0054665		1340.02	-0.00051761		1870.01	0.00350165
280.23	0.10347134		810.22	0.00475428		1340.22	0.00026961		1870.21	0.0031491
280.43	0.10342345		810.42	0.00559849		1340.42	0.00033955		1870.41	0.00306921
280.63	0.10306397		810.62	0.00556878		1340.62	0.00050022		1870.61	0.00197082
280.83	0.10313028		810.82	0.00621993		1340.82	0.00122662		1870.81	0.00203352
281.03	0.10303785		811.02	0.00632064		1341.02	0.00031558		1871.01	0.00152964
281.23	0.10341273		811.22	0.00601758		1341.22	0.00008793		1871.21	0.00149893
281.43	0.10435647		811.42	0.00589395		1341.42	0.00002511		1871.41	0.00211816
281.63	0.10611701		811.62	0.00517896		1341.62	-0.00099389		1871.61	0.00307453
281.83	0.10645526		811.82	0.00385632		1341.82	-0.00100817		1871.81	0.00290815
282.03	0.10692864		812.02	0.00322241		1342.02	-0.00112168		1872.01	0.00424398
282.23	0.10733761		812.22	0.00206726		1342.22	-0.00292531		1872.21	0.00495893
282.43	0.10781415		812.42	0.00166097		1342.42	-0.00313344		1872.41	0.00512064
282.63	0.1083108		812.62	0.00044285		1342.62	-0.00389202		1872.61	0.00507916
282.83	0.10868748		812.82	-0.00034938		1342.82	-0.00408454		1872.81	0.00528217
283.03	0.10821091		813.02	-0.00011954		1343.02	-0.00441339		1873.01	0.00609066
283.23	0.10751392		813.22	0.00042432		1343.22	-0.00429353		1873.21	0.00691463
283.43	0.10700135		813.42	0.00062801		1343.42	-0.00417071		1873.41	0.00662232
283.63	0.10645663		813.62	-0.00000094		1343.62	-0.00373603		1873.61	0.00722713
283.83	0.10593649		813.82	-0.0000836		1343.82	-0.00346717		1873.81	0.00585667
284.03	0.1057903		814.02	0.00045323		1344.02	-0.00291458		1874.01	0.00486956
284.23	0.10598783		814.22	-0.00048021		1344.22	-0.00225651		1874.21	0.00525655
284.43	0.10543723		814.42	0.00069848		1344.42	-0.00171604		1874.41	0.00385542
284.63	0.10593146		814.62	0.00093762		1344.62	-0.00133474		1874.61	0.00284441
284.83	0.10698938		814.82	0.00136157		1344.82	-0.00146291		1874.81	0.00358825
285.03	0.10793627		815.02	0.00143942		1345.02	-0.00250619		1875.01	0.0032918
285.23	0.10848609		815.22	0.00187506		1345.22	-0.00169239		1875.21	0.00367721
285.43	0.11020076		815.42	0.00304144		1345.42	-0.00195538		1875.41	0.00409156
285.63	0.1101861		815.62	0.00367186		1345.62	-0.0022362		1875.61	0.00410904
285.83	0.11005879		815.82	0.00415929		1345.82	-0.00239939		1875.81	0.00361472
286.03	0.11034463		816.02	0.00495606		1346.02	-0.00286677		1876.01	0.00478521
286.23	0.11031932		816.22	0.00517893		1346.22	-0.00293522		1876.21	0.00487823
286.43	0.11125303		816.42	0.00503267		1346.42	-0.00223562		1876.41	0.00562848
286.63	0.11146223		816.62	0.00431613		1346.62	-0.00263011		1876.61	0.0058091
286.83	0.1112787		816.82	0.00452334		1346.82	-0.00210897		1876.81	0.00584005
287.03	0.11144498		817.02	0.0038641		1347.02	-0.00157316		1877.01	0.00590248
287.23	0.11181314		817.22	0.00306537		1347.22	-0.00101997		1877.21	0.00539008
287.43	0.11202932		817.42	0.00315818		1347.42	-0.00134018		1877.41	0.00466141
287.63	0.11215983		817.62	0.00258524		1347.62	-0.00143632		1877.61	0.00395641
287.83	0.11141935		817.82	0.00210435		1347.82	-0.00205518		1877.81	0.00292251
288.03	0.11070119		818.02	0.00176244		1348.02	-0.00184391		1878.01	0.00251879
288.23	0.10987473		818.22	0.00128245		1348.22	-0.00197712		1878.21	0.0021646
288.43	0.10942541		818.42	0.00150412		1348.42	-0.00151561		1878.41	0.00096978
288.63	0.11006468		818.62	0.00115456		1348.62	-0.00170939		1878.61	0.00145394
288.83	0.11050306		818.82	0.00130519		1348.82	-0.00214464		1878.81	0.00241496
289.03	0.1103372		819.02	0.00183865		1349.02	-0.00275407		1879.01	0.0017554
289.23	0.1099747		819.22	0.00233812		1349.22	-0.00274261		1879.21	0.00112133
289.43	0.1101713		819.42	0.00299609		1349.42	-0.00313562		1879.41	0.00137139
289.63	0.10982441		819.62	0.00260785		1349.62	-0.00303479		1879.61	0.00172475
289.83	0.10996334		819.82	0.002683		1349.82	-0.00329809		1879.81	0.00158699
290.03	0.11046312		820.02	0.00274834		1350.02	-0.00328813		1880.01	0.00320477
290.23	0.11051289		820.22	0.00215168		1350.22	-0.00280021		1880.21	0.00347927
290.43	0.11158156		820.42	0.00165207		1350.42	-0.00281639		1880.41	0.00304633
290.63	0.11192187		820.62	0.00152747		1350.62	-0.00250975		1880.61	0.00300833
290.83	0.11279356		820.82	0.00124802		1350.82	-0.00227401		1880.81	0.00283829
291.03	0.11332769		821.02	0.00106591		1351.02	-0.00119047		1881.01	0.00305112
291.23	0.11403834		821.22	0.00259697		1351.22	-0.00062283		1881.21	0.00327531
291.43	0.11425721		821.42	0.00246696		1351.42	-0.00122751		1881.41	0.00286762
291.63	0.11454749		821.62	0.00233716		1351.62	-0.00141425		1881.61	0.00268205
291.83	0.11436648		821.82	0.00276134		1351.82	-0.00125142		1881.81	0.0027586
292.03	0.1148259		822.02	0.00303251		1352.02	-0.00031572		1882.01	0.00281636
292.23	0.11522616		822.22	0.0037314		1352.22	0.00038546		1882.21	0.00282916
292.43	0.11602559		822.42	0.00507362		1352.42	0.00037683		1882.41	0.00382753
292.63	0.11610657		822.62	0.00598695		1352.62	-0.00013526		1882.61	0.00467418
292.83	0.11623515		822.82	0.00568023		1352.82	-0.00076748		1882.81	0.00516506
293.03	0.11614953		823.02	0.00614436		1353.02	-0.0009018		1883.01	0.00541736
293.23	0.115772		823.22	0.00638931		1353.22	-0.00088229		1883.21	0.00605207
293.43	0.11556218		823.42	0.0059404		1353.42	-0.00078273		1883.41	0.00714306
293.63	0.11558285		823.62	0.00559727		1353.62	-0.0004988		1883.61	0.00764056
293.83	0.11587737		823.82	0.00632497		1353.82	-0.00169156		1883.81	0.00723104
294.03	0.11526552		824.02	0.00486301		1354.02	-0.00248999		1884.01	0.00774854
294.23	0.1151556		824.22	0.00401931		1354.22	-0.00273218		1884.21	0.00735361
294.43	0.11452477		824.42	0.00415281		1354.42	-0.00310877		1884.41	0.00738188
294.63	0.11427667		824.62	0.00327456		1354.62	-0.00283184		1884.61	0.00796599
294.83	0.11488143		824.82	0.0037498		1354.82	-0.00288649		1884.81	0.00783029
295.03	0.11444433		825.02	0.00434191		1355.02	-0.00280206		1885.01	0.00727606
295.23	0.11495193		825.22	0.00405476		1355.22	-0.00313938		1885.21	0.00681712
295.43	0.11505431		825.42	0.00334843		1355.42	-0.00334118		1885.41	0.00593264
295.63	0.11502336		825.62	0.00448205		1355.62	-0.00330675		1885.61	0.00571951
295.83	0.11515217		825.82	0.00499792		1355.82	-0.00305703		1885.81	0.00525961
296.03	0.11542195		826.02	0.00417271		1356.02	-0.00227908		1886.01	0.0048979
296.23	0.11522989		826.22	0.00474757		1356.22	-0.00245192		1886.21	0.00538513
296.43	0.11524871		826.42	0.00443727		1356.42	-0.00258573		1886.41	0.00545993
296.63	0.11436562		826.62	0.00421663		1356.62	-0.00204907		1886.61	0.00534361
296.83	0.11525445		826.82	0.00242204		1356.82	-0.00160095		1886.81	0.00592957
297.03	0.11656968		827.02	0.00291342		1357.02	-0.00078137		1887.01	0.00683408
297.23	0.11757892		827.22	0.00325137		1357.22	-0.00002671		1887.21	0.00669921
297.43	0.11914259		827.42	0.00306706		1357.42	-0.00050311		1887.41	0.0066406
297.63	0.12046478		827.62	0.00251325		1357.62	-0.00039904		1887.61	0.00652139
297.83	0.12186883		827.82	0.00285492		1357.82	-0.00089948		1887.81	0.00639378
298.03	0.12280132		828.02	0.00120855		1358.02	-0.00002151		1888.01	0.00655407
298.23	0.12432003		828.22	0.00180699		1358.22	0.00006413		1888.21	0.00631701
298.43	0.12429624		828.42	0.00272746		1358.42	0.00051941		1888.41	0.00603343
298.63	0.12568273		828.62	0.00270839		1358.62	0.00029357		1888.61	0.00447776
298.83	0.12546816		828.82	0.00417408		1358.82	-0.00068093		1888.81	0.00415846
299.03	0.12556033		829.02	0.00439182		1359.02	-0.00210776		1889.01	0.00371631
299.23	0.12577621		829.22	0.00426154		1359.22	-0.00253938		1889.21	0.00248685
299.43	0.12497535		829.42	0.00565703		1359.42	-0.0023136		1889.41	0.00239424
299.63	0.12430442		829.62	0.00585957		1359.62	-0.00285076		1889.61	0.00188726
299.83	0.12377915		829.82	0.00476135		1359.82	-0.00272368		1889.81	0.00115323
300.03	0.12279901		830.02	0.00351552		1360.02	-0.00275522		1890.01	0.00144792
300.23	0.12235675		830.22	0.00390085		1360.22	-0.00335299		1890.21	0.00137024
300.43	0.12165598		830.42	0.00333816		1360.42	-0.00392291		1890.41	0.00151385
300.63	0.12086867		830.62	0.00377277		1360.62	-0.00429919		1890.61	0.00264126
300.83	0.12195208		830.82	0.0034484		1360.82	-0.00442183		1890.81	0.00352684
301.03	0.1224893		831.02	0.00453649		1361.02	-0.00476312		1891.01	0.00517005
301.23	0.12276185		831.22	0.00576134		1361.22	-0.00546322		1891.21	0.00529751
301.43	0.1237655		831.42	0.00522365		1361.42	-0.0057177		1891.41	0.00592292
301.63	0.12444936		831.62	0.00406029		1361.62	-0.00496267		1891.61	0.00759949
301.83	0.12576853		831.82	0.00403819		1361.82	-0.00352773		1891.81	0.00748253
302.03	0.12713015		832.02	0.00334794		1362.02	-0.00194243		1892.01	0.00774527
302.23	0.12749932		832.22	0.00425925		1362.22	-0.00168831		1892.21	0.00769842
302.43	0.12801516		832.42	0.00545193		1362.42	-0.00160742		1892.41	0.00739723
302.63	0.12892164		832.62	0.00546944		1362.62	-0.00200542		1892.61	0.00748707
302.83	0.12856802		832.82	0.00554622		1362.82	-0.00223946		1892.81	0.00865801
303.03	0.12905859		833.02	0.0054643		1363.02	-0.00250324		1893.01	0.00883405
303.23	0.12875511		833.22	0.00607589		1363.22	-0.00114		1893.21	0.00770837
303.43	0.12788587		833.42	0.00725282		1363.42	-0.00040049		1893.41	0.00756015
303.63	0.12744015		833.62	0.00737227		1363.62	-0.00136228		1893.61	0.00611275
303.83	0.12773058		833.82	0.00650661		1363.82	-0.00120905		1893.81	0.0062445
304.03	0.12661863		834.02	0.00678454		1364.02	-0.00224221		1894.01	0.00581152
304.23	0.12630196		834.22	0.00724067		1364.22	-0.00345644		1894.21	0.0048804
304.43	0.12554261		834.42	0.00751196		1364.42	-0.00468575		1894.41	0.00506321
304.63	0.12506853		834.62	0.00789927		1364.62	-0.00538236		1894.61	0.00568493
304.83	0.12526819		834.82	0.00756666		1364.82	-0.00680601		1894.81	0.00553714
305.03	0.12558639		835.02	0.00692869		1365.02	-0.00775545		1895.01	0.00651603
305.23	0.12687628		835.22	0.00641704		1365.22	-0.00767343		1895.21	0.00606269
305.43	0.12776191		835.42	0.00478352		1365.42	-0.00728072		1895.41	0.00653902
305.63	0.12829128		835.62	0.00305195		1365.62	-0.0072096		1895.61	0.00760383
305.83	0.12928679		835.82	0.00276404		1365.82	-0.0059462		1895.81	0.00628485
306.03	0.13084222		836.02	0.00241068		1366.02	-0.00608036		1896.01	0.00679629
306.23	0.13159803		836.22	0.00292892		1366.22	-0.00698443		1896.21	0.00636593
306.43	0.1324201		836.42	0.00361083		1366.42	-0.00725827		1896.41	0.00724852
306.63	0.13210039		836.62	0.00390391		1366.62	-0.00616518		1896.61	0.0077077
306.83	0.1316607		836.82	0.00389797		1366.82	-0.00582779		1896.81	0.00677332
307.03	0.13138495		837.02	0.00471259		1367.02	-0.00548188		1897.01	0.0062963
307.23	0.13171389		837.22	0.00611528		1367.22	-0.00502704		1897.21	0.0057009
307.43	0.13102657		837.42	0.00679021		1367.42	-0.00525041		1897.41	0.00508037
307.63	0.13115703		837.62	0.00663498		1367.62	-0.00513102		1897.61	0.00404356
307.83	0.1301264		837.82	0.00597577		1367.82	-0.00458195		1897.81	0.00405472
308.03	0.12997303		838.02	0.0057595		1368.02	-0.00561221		1898.01	0.00336436
308.23	0.12968405		838.22	0.00523591		1368.22	-0.00497741		1898.21	0.00339686
308.43	0.12928586		838.42	0.00529451		1368.42	-0.00523185		1898.41	0.00429924
308.63	0.12876831		838.62	0.00456032		1368.62	-0.00503348		1898.61	0.00495786
308.83	0.12840137		838.82	0.00346455		1368.82	-0.00434767		1898.81	0.00519315
309.03	0.12839544		839.02	0.00240642		1369.02	-0.00407714		1899.01	0.00548387
309.23	0.12848248		839.22	0.00166505		1369.22	-0.00305078		1899.21	0.00612677
309.43	0.12872882		839.42	0.0007705		1369.42	-0.0028872		1899.41	0.00693351
309.63	0.1292072		839.62	0.0009167		1369.62	-0.00175701		1899.61	0.00738763
309.83	0.12971006		839.82	0.00053711		1369.82	-0.00095796		1899.81	0.0062769
310.03	0.13030216		840.02	0.0014449		1370.02	-0.00149428		1900.01	0.00726107
310.23	0.13050106		840.22	0.00201756		1370.22	-0.0018923		1900.21	0.0073843
310.43	0.13022958		840.42	0.00245653		1370.42	-0.00152712		1900.41	0.00810895
310.63	0.13074102		840.62	0.00336701		1370.62	-0.00122482		1900.61	0.00747345
310.83	0.13159692		840.82	0.00408744		1370.82	-0.00135184		1900.81	0.00657455
311.03	0.13173647		841.02	0.00469337		1371.02	-0.00158222		1901.01	0.00649527
311.23	0.13201467		841.22	0.00561833		1371.22	-0.00134781		1901.21	0.00544606
311.43	0.13258091		841.42	0.00566947		1371.42	-0.00049346		1901.41	0.00511914
311.63	0.13374331		841.62	0.00598355		1371.62	-0.00022591		1901.61	0.00377471
311.83	0.13345072		841.82	0.00533161		1371.82	-0.00030431		1901.81	0.00310475
312.03	0.13506277		842.02	0.00514719		1372.02	-0.00045754		1902.01	0.00367027
312.23	0.13445177		842.22	0.00460039		1372.22	0.00050204		1902.21	0.00402033
312.43	0.13396254		842.42	0.00455663		1372.42	-0.00033354		1902.41	0.00354148
312.63	0.13353566		842.62	0.00384911		1372.62	-0.00035382		1902.61	0.0031963
312.83	0.13396457		842.82	0.00313849		1372.82	-0.00031417		1902.81	0.00353388
313.03	0.13376341		843.02	0.00247708		1373.02	-0.001208		1903.01	0.00358167
313.23	0.13404449		843.22	0.00240576		1373.22	-0.00053717		1903.21	0.00441275
313.43	0.13431825		843.42	0.00251601		1373.42	-0.0007926		1903.41	0.00535337
313.63	0.13394874		843.62	0.0027883		1373.62	-0.00076428		1903.61	0.00583104
313.83	0.13346099		843.82	0.00234854		1373.82	-0.00155767		1903.81	0.00579962
314.03	0.13368091		844.02	0.00284801		1374.02	-0.0025944		1904.01	0.00665234
314.23	0.13358522		844.22	0.00237321		1374.22	-0.00316334		1904.21	0.00700618
314.43	0.13381809		844.42	0.00285278		1374.42	-0.00357098		1904.41	0.00642824
314.63	0.13393879		844.62	0.00372215		1374.62	-0.00368594		1904.61	0.00599414
314.83	0.13445634		844.82	0.00362405		1374.82	-0.00377553		1904.81	0.00511763
315.03	0.1343781		845.02	0.00414236		1375.02	-0.00337166		1905.01	0.00436539
315.23	0.13553571		845.22	0.00502007		1375.22	-0.00338284		1905.21	0.00491834
315.43	0.13654839		845.42	0.00470654		1375.42	-0.00316354		1905.41	0.00582447
315.63	0.13656908		845.62	0.00492295		1375.62	-0.0031284		1905.61	0.00549566
315.83	0.13585373		845.82	0.00475784		1375.82	-0.00370206		1905.81	0.00519493
316.03	0.13560756		846.02	0.00561276		1376.02	-0.00373447		1906.01	0.00651362
316.23	0.13465518		846.22	0.00553321		1376.22	-0.00345762		1906.21	0.00537592
316.43	0.13430232		846.42	0.00542725		1376.42	-0.00371474		1906.41	0.0050037
316.63	0.13508279		846.62	0.00544698		1376.62	-0.00328363		1906.61	0.00550528
316.83	0.13531529		846.82	0.005795		1376.82	-0.00379046		1906.81	0.0065119
317.03	0.13460789		847.02	0.00651728		1377.02	-0.00429984		1907.01	0.00697805
317.23	0.13498232		847.22	0.00669018		1377.22	-0.00395511		1907.21	0.00893087
317.43	0.13446964		847.42	0.00669345		1377.42	-0.00346596		1907.41	0.00970942
317.63	0.13452781		847.62	0.00640948		1377.62	-0.00366001		1907.61	0.00945042
317.83	0.13440053		847.82	0.00700035		1377.82	-0.00335892		1907.81	0.00903966
318.03	0.13499941		848.02	0.00690955		1378.02	-0.00313826		1908.01	0.00959715
318.23	0.13556697		848.22	0.00763225		1378.22	-0.0028706		1908.21	0.00948917
318.43	0.13629505		848.42	0.00841072		1378.42	-0.0025654		1908.41	0.00873459
318.63	0.13698939		848.62	0.00788313		1378.62	-0.00216067		1908.61	0.00823753
318.83	0.13863521		848.82	0.00682054		1378.82	-0.00134342		1908.81	0.00810731
319.03	0.13909059		849.02	0.00773273		1379.02	-0.00011913		1909.01	0.00763169
319.23	0.13966501		849.22	0.00797966		1379.22	-0.00120654		1909.21	0.00735221
319.43	0.13901667		849.42	0.00683747		1379.42	-0.0002726		1909.41	0.00696473
319.63	0.13887246		849.62	0.00742469		1379.62	-0.00006241		1909.61	0.00578139
319.83	0.13874841		849.82	0.00784881		1379.82	-0.00026298		1909.81	0.00387524
320.03	0.13892084		850.02	0.00812431		1380.02	0.00034538		1910.01	0.00416301
320.23	0.13820513		850.22	0.00757494		1380.22	0.00047957		1910.21	0.00324508
320.43	0.13826341		850.42	0.00772539		1380.42	0.00000446		1910.41	0.0031994
320.63	0.138898		850.62	0.00818524		1380.62	-0.0012994		1910.61	0.0035751
320.83	0.13848662		850.82	0.00846578		1380.82	-0.00331314		1910.81	0.00384535
321.03	0.13859451		851.02	0.00895212		1381.02	-0.00342796		1911.01	0.0043758
321.23	0.13919809		851.22	0.00927998		1381.22	-0.0031104		1911.21	0.00497632
321.43	0.13946308		851.42	0.00942597		1381.42	-0.00298986		1911.41	0.00464174
321.63	0.13978639		851.62	0.0086609		1381.62	-0.00424405		1911.61	0.00514963
321.83	0.13990931		851.82	0.0092303		1381.82	-0.00450742		1911.81	0.00486908
322.03	0.14079868		852.02	0.00908963		1382.02	-0.00468517		1912.01	0.00592399
322.23	0.14112518		852.22	0.00845584		1382.22	-0.00485927		1912.21	0.0053395
322.43	0.14091321		852.42	0.00805428		1382.42	-0.00549364		1912.41	0.00471584
322.63	0.1409352		852.62	0.00638772		1382.62	-0.00484934		1912.61	0.00478439
322.83	0.14087396		852.82	0.00574632		1382.82	-0.00440984		1912.81	0.00514195
323.03	0.14102693		853.02	0.00570321		1383.02	-0.00419497		1913.01	0.00447944
323.23	0.1399528		853.22	0.00522047		1383.22	-0.00440273		1913.21	0.0047532
323.43	0.13884794		853.42	0.00411264		1383.42	-0.00338619		1913.41	0.00558096
323.63	0.13865111		853.62	0.00451684		1383.62	-0.00288613		1913.61	0.00559456
323.83	0.13815018		853.82	0.00416726		1383.82	-0.00236323		1913.81	0.00526443
324.03	0.13836756		854.02	0.00351205		1384.02	-0.00174202		1914.01	0.00661241
324.23	0.13819678		854.22	0.0034865		1384.22	-0.0009092		1914.21	0.00642528
324.43	0.13910784		854.42	0.00355081		1384.42	-0.000486		1914.41	0.00666912
324.63	0.13963062		854.62	0.0035936		1384.62	-0.00133174		1914.61	0.00765782
324.83	0.14031919		854.82	0.00357609		1384.82	-0.00170667		1914.81	0.00771891
325.03	0.14179737		855.02	0.00442782		1385.02	-0.00155789		1915.01	0.00838116
325.23	0.14339622		855.22	0.00479224		1385.22	-0.00149575		1915.21	0.00848383
325.43	0.14377012		855.42	0.00466594		1385.42	-0.00219008		1915.41	0.00887746
325.63	0.14352199		855.62	0.00377969		1385.62	-0.00294315		1915.61	0.00890582
325.83	0.14361171		855.82	0.00418902		1385.82	-0.00396217		1915.81	0.00814888
326.03	0.14483868		856.02	0.00449241		1386.02	-0.00414045		1916.01	0.00822774
326.23	0.14438895		856.22	0.00498653		1386.22	-0.00435563		1916.21	0.0070948
326.43	0.14347833		856.42	0.00511919		1386.42	-0.00546249		1916.41	0.00568801
326.63	0.14363285		856.62	0.00489548		1386.62	-0.00459406		1916.61	0.00652866
326.83	0.14292324		856.82	0.00551523		1386.82	-0.00524364		1916.81	0.00639914
327.03	0.14215811		857.02	0.00628345		1387.02	-0.00503554		1917.01	0.00612262
327.23	0.14076778		857.22	0.00694925		1387.22	-0.00518885		1917.21	0.00624172
327.43	0.14037415		857.42	0.00700581		1387.42	-0.00522022		1917.41	0.00664666
327.63	0.14038833		857.62	0.00678704		1387.62	-0.00518506		1917.61	0.00633072
327.83	0.14110711		857.82	0.00609446		1387.82	-0.00528111		1917.81	0.00524154
328.03	0.14202176		858.02	0.0061696		1388.02	-0.00497046		1918.01	0.00586778
328.23	0.14259068		858.22	0.00687295		1388.22	-0.00477495		1918.21	0.00622404
328.43	0.14411176		858.42	0.00673328		1388.42	-0.00501191		1918.41	0.00700062
328.63	0.14491439		858.62	0.00640548		1388.62	-0.00528706		1918.61	0.00719286
328.83	0.14566073		858.82	0.00579177		1388.82	-0.00455408		1918.81	0.00786161
329.03	0.14749692		859.02	0.00570282		1389.02	-0.00381005		1919.01	0.00792259
329.23	0.14856394		859.22	0.00583688		1389.22	-0.00323658		1919.21	0.00768666
329.43	0.1492146		859.42	0.0056176		1389.42	-0.00263384		1919.41	0.00790614
329.63	0.14981734		859.62	0.00457423		1389.62	-0.00233044		1919.61	0.0084997
329.83	0.15024766		859.82	0.00474533		1389.82	-0.00177653		1919.81	0.00824809
330.03	0.151357		860.02	0.00526782		1390.02	-0.00101613		1920.01	0.00769937
330.23	0.15093523		860.22	0.00562129		1390.22	-0.00170995		1920.21	0.00713647
330.43	0.15080913		860.42	0.00590087		1390.42	-0.0016519		1920.41	0.00705537
330.63	0.15105211		860.62	0.00642629		1390.62	-0.00122327		1920.61	0.00701771
330.83	0.1502867		860.82	0.00719451		1390.82	-0.00178734		1920.81	0.00646005
331.03	0.14993146		861.02	0.00758979		1391.02	-0.00142301		1921.01	0.00568101
331.23	0.14978206		861.22	0.00711518		1391.22	-0.00264347		1921.21	0.00459324
331.43	0.1504469		861.42	0.00773646		1391.42	-0.00340818		1921.41	0.004702
331.63	0.15103045		861.62	0.00684135		1391.62	-0.0041267		1921.61	0.00391376
331.83	0.15122237		861.82	0.00661189		1391.82	-0.00480355		1921.81	0.00418639
332.03	0.15123575		862.02	0.00756647		1392.02	-0.00598796		1922.01	0.00453779
332.23	0.15047959		862.22	0.00835332		1392.22	-0.00697153		1922.21	0.004805
332.43	0.15009074		862.42	0.00848924		1392.42	-0.00712405		1922.41	0.00496163
332.63	0.14985021		862.62	0.00815312		1392.62	-0.00656147		1922.61	0.00491769
332.83	0.14944178		862.82	0.00822868		1392.82	-0.00625785		1922.81	0.00536561
333.03	0.15007306		863.02	0.00818062		1393.02	-0.0067335		1923.01	0.00439019
333.23	0.14985833		863.22	0.00763133		1393.22	-0.00647497		1923.21	0.00486265
333.43	0.14976497		863.42	0.00709966		1393.42	-0.00530367		1923.41	0.00520548
333.63	0.14969621		863.62	0.00675224		1393.62	-0.00557684		1923.61	0.00586264
333.83	0.15013012		863.82	0.0068051		1393.82	-0.00512201		1923.81	0.00529122
334.03	0.15072088		864.02	0.0074483		1394.02	-0.00521291		1924.01	0.00560975
334.23	0.15053709		864.22	0.00767873		1394.22	-0.00538447		1924.21	0.0057538
334.43	0.15078903		864.42	0.00775648		1394.42	-0.00461862		1924.41	0.00579818
334.63	0.15117188		864.62	0.00850479		1394.62	-0.00490107		1924.61	0.00573081
334.83	0.15131355		864.82	0.00861706		1394.82	-0.00456527		1924.81	0.00570806
335.03	0.15270921		865.02	0.00819806		1395.02	-0.00420452		1925.01	0.00466589
335.23	0.15407135		865.22	0.00716901		1395.22	-0.00507481		1925.21	0.00489529
335.43	0.15495112		865.42	0.00760106		1395.42	-0.0048659		1925.41	0.00564176
335.63	0.15498843		865.62	0.00653602		1395.62	-0.00476981		1925.61	0.00535087
335.83	0.15489723		865.82	0.00667596		1395.82	-0.00528912		1925.81	0.00569576
336.03	0.15428553		866.02	0.00723472		1396.02	-0.00551793		1926.01	0.00608058
336.23	0.15335426		866.22	0.00715323		1396.22	-0.00518108		1926.21	0.00670266
336.43	0.15290854		866.42	0.00724555		1396.42	-0.00437308		1926.41	0.00689997
336.63	0.15234874		866.62	0.00673841		1396.62	-0.00383645		1926.61	0.0071572
336.83	0.15107223		866.82	0.00635931		1396.82	-0.00369895		1926.81	0.00737653
337.03	0.15079153		867.02	0.00558761		1397.02	-0.00304048		1927.01	0.00655446
337.23	0.15016691		867.22	0.00545134		1397.22	-0.00225924		1927.21	0.00703588
337.43	0.14983199		867.42	0.00559865		1397.42	-0.00126094		1927.41	0.00673088
337.63	0.14987219		867.62	0.00457727		1397.62	-0.00178206		1927.61	0.00639533
337.83	0.14999886		867.82	0.00512925		1397.82	-0.00172717		1927.81	0.00535398
338.03	0.14939157		868.02	0.00532318		1398.02	-0.00225555		1928.01	0.00532104
338.23	0.14899955		868.22	0.00509975		1398.22	-0.00220287		1928.21	0.00480342
338.43	0.14896245		868.42	0.00566154		1398.42	-0.00292427		1928.41	0.0058901
338.63	0.14966485		868.62	0.00577517		1398.62	-0.00353551		1928.61	0.0058868
338.83	0.14893047		868.82	0.00520451		1398.82	-0.00400154		1928.81	0.00466649
339.03	0.14985988		869.02	0.00585696		1399.02	-0.00500913		1929.01	0.00423241
339.23	0.15092304		869.22	0.00652706		1399.22	-0.00528813		1929.21	0.00518159
339.43	0.15163629		869.42	0.00687552		1399.42	-0.0056023		1929.41	0.00502987
339.63	0.15242869		869.62	0.00703255		1399.62	-0.00519509		1929.61	0.00488977
339.83	0.15290166		869.82	0.00762695		1399.82	-0.00552175		1929.81	0.00551123
340.03	0.15262705		870.02	0.00828567		1400.02	-0.00553391		1930.01	0.00619979
340.23	0.15376136		870.22	0.00905889		1400.22	-0.00566195		1930.21	0.00687239
340.43	0.15413594		870.42	0.01037404		1400.42	-0.00555914		1930.41	0.00853839
340.63	0.15467335		870.62	0.01006944		1400.62	-0.00551469		1930.61	0.0091445
340.83	0.15574634		870.82	0.01024659		1400.82	-0.00580546		1930.81	0.00949461
341.03	0.15655785		871.02	0.01006278		1401.02	-0.00561124		1931.01	0.0097621
341.23	0.15591736		871.22	0.00967047		1401.22	-0.00520866		1931.21	0.00935891
341.43	0.1564931		871.42	0.00893783		1401.42	-0.00478091		1931.41	0.00884633
341.63	0.15698456		871.62	0.00839182		1401.62	-0.00492368		1931.61	0.00745842
341.83	0.15740784		871.82	0.00868647		1401.82	-0.00402193		1931.81	0.00707125
342.03	0.15746668		872.02	0.00763596		1402.02	-0.0040789		1932.01	0.00629584
342.23	0.15760332		872.22	0.00751342		1402.22	-0.00261221		1932.21	0.00627549
342.43	0.15694249		872.42	0.00707555		1402.42	-0.0031796		1932.41	0.00627644
342.63	0.15720224		872.62	0.00634445		1402.62	-0.00264512		1932.61	0.00493068
342.83	0.15541891		872.82	0.00694561		1402.82	-0.00255607		1932.81	0.00380835
343.03	0.15569272		873.02	0.00789068		1403.02	-0.00260936		1933.01	0.00361957
343.23	0.15684167		873.22	0.00788524		1403.22	-0.0026452		1933.21	0.00351392
343.43	0.15686019		873.42	0.00787149		1403.42	-0.0026927		1933.41	0.0024529
343.63	0.15678544		873.62	0.00929391		1403.62	-0.00268178		1933.61	0.00246174
343.83	0.15729866		873.82	0.00991195		1403.82	-0.00327927		1933.81	0.00298497
344.03	0.15732893		874.02	0.01171298		1404.02	-0.0041079		1934.01	0.00321424
344.23	0.15818401		874.22	0.01267157		1404.22	-0.00481695		1934.21	0.00439446
344.43	0.15843632		874.42	0.01228652		1404.42	-0.00542418		1934.41	0.00583917
344.63	0.15816795		874.62	0.01179264		1404.62	-0.00610147		1934.61	0.00570614
344.83	0.15781529		874.82	0.01174691		1404.82	-0.00621159		1934.81	0.00670765
345.03	0.15765435		875.02	0.01185167		1405.02	-0.00622824		1935.01	0.00696035
345.23	0.15776309		875.22	0.01149725		1405.22	-0.00535802		1935.21	0.00598122
345.43	0.15790547		875.42	0.01080417		1405.42	-0.00496835		1935.41	0.00547964
345.63	0.15803233		875.62	0.01064275		1405.62	-0.00531504		1935.61	0.0046885
345.83	0.15822714		875.82	0.01022662		1405.82	-0.00517909		1935.81	0.00551884
346.03	0.15844995		876.02	0.01060628		1406.02	-0.00550911		1936.01	0.00417672
346.23	0.15936744		876.22	0.01030366		1406.22	-0.0038472		1936.21	0.00373121
346.43	0.15911358		876.42	0.00994655		1406.42	-0.00438105		1936.41	0.00367428
346.63	0.15939496		876.62	0.00958278		1406.62	-0.00394537		1936.61	0.00308725
346.83	0.15873217		876.82	0.0097731		1406.82	-0.00402063		1936.81	0.00199986
347.03	0.15959972		877.02	0.00983102		1407.02	-0.00379		1937.01	0.00155167
347.23	0.16069725		877.22	0.00910965		1407.22	-0.00418307		1937.21	0.00121444
347.43	0.16149286		877.42	0.00907589		1407.42	-0.00484742		1937.41	0.00112415
347.63	0.16130683		877.62	0.0084357		1407.62	-0.00426425		1937.61	0.00165746
347.83	0.16153688		877.82	0.00852625		1407.82	-0.00459705		1937.81	0.00227096
348.03	0.16130775		878.02	0.00884613		1408.02	-0.00510209		1938.01	0.00280411
348.23	0.16148944		878.22	0.00731366		1408.22	-0.00452068		1938.21	0.00337454
348.43	0.16102006		878.42	0.00765999		1408.42	-0.00399953		1938.41	0.00464425
348.63	0.15932056		878.62	0.00764334		1408.62	-0.00363956		1938.61	0.00549718
348.83	0.15890253		878.82	0.00819362		1408.82	-0.00302334		1938.81	0.00587154
349.03	0.1595875		879.02	0.00892216		1409.02	-0.00268339		1939.01	0.00636441
349.23	0.15965505		879.22	0.00894884		1409.22	-0.00240451		1939.21	0.00618094
349.43	0.15939395		879.42	0.0092525		1409.42	-0.00232758		1939.41	0.0068092
349.63	0.15894949		879.62	0.0097363		1409.62	-0.00454102		1939.61	0.00709507
349.83	0.15940477		879.82	0.01027534		1409.82	-0.0044128		1939.81	0.00726198
350.03	0.15971347		880.02	0.01074622		1410.02	-0.00451419		1940.01	0.00628253
350.23	0.16098683		880.22	0.01007057		1410.22	-0.0046185		1940.21	0.00562272
350.43	0.16187389		880.42	0.00982303		1410.42	-0.00556411		1940.41	0.00634177
350.63	0.16238679		880.62	0.00917718		1410.62	-0.00521505		1940.61	0.00669989
350.83	0.16255427		880.82	0.00852197		1410.82	-0.00603141		1940.81	0.00683164
351.03	0.16352465		881.02	0.00772464		1411.02	-0.00682136		1941.01	0.00641839
351.23	0.16400964		881.22	0.00682207		1411.22	-0.00733383		1941.21	0.00678075
351.43	0.16419942		881.42	0.0063936		1411.42	-0.0076619		1941.41	0.00637852
351.63	0.16293389		881.62	0.00561173		1411.62	-0.00701651		1941.61	0.00582921
351.83	0.1634445		881.82	0.00564275		1411.82	-0.0075574		1941.81	0.00581772
352.03	0.16374225		882.02	0.00472138		1412.02	-0.00671301		1942.01	0.00602326
352.23	0.16312226		882.22	0.00490517		1412.22	-0.00521557		1942.21	0.005822
352.43	0.16214166		882.42	0.00670961		1412.42	-0.00523007		1942.41	0.00625589
352.63	0.16113862		882.62	0.00685024		1412.62	-0.00497953		1942.61	0.00663051
352.83	0.16170463		882.82	0.00752539		1412.82	-0.00468889		1942.81	0.00632495
353.03	0.16252205		883.02	0.00745695		1413.02	-0.00460324		1943.01	0.00655425
353.23	0.16255276		883.22	0.00758948		1413.22	-0.00447867		1943.21	0.00702249
353.43	0.16304902		883.42	0.00794017		1413.42	-0.00478491		1943.41	0.00696872
353.63	0.16226406		883.62	0.00818915		1413.62	-0.00532208		1943.61	0.00661906
353.83	0.16330369		883.82	0.00935059		1413.82	-0.00463088		1943.81	0.00554491
354.03	0.16378279		884.02	0.00901003		1414.02	-0.00458816		1944.01	0.00506798
354.23	0.16519364		884.22	0.00821193		1414.22	-0.00465883		1944.21	0.00487754
354.43	0.16605468		884.42	0.00790395		1414.42	-0.00414182		1944.41	0.00544952
354.63	0.16617016		884.62	0.00728279		1414.62	-0.00461441		1944.61	0.00611081
354.83	0.16679206		884.82	0.00713851		1414.82	-0.00560513		1944.81	0.00431204
355.03	0.1675796		885.02	0.00756804		1415.02	-0.00525249		1945.01	0.00278667
355.23	0.16737396		885.22	0.0076468		1415.22	-0.00446494		1945.21	0.00285136
355.43	0.16749873		885.42	0.00727821		1415.42	-0.00440283		1945.41	0.00262593
355.63	0.16727867		885.62	0.006626		1415.62	-0.00446235		1945.61	0.00301267
355.83	0.16833983		885.82	0.00573272		1415.82	-0.00362226		1945.81	0.00398101
356.03	0.16786929		886.02	0.00623816		1416.02	-0.00252761		1946.01	0.00443668
356.23	0.16754894		886.22	0.00701687		1416.22	-0.00177472		1946.21	0.0056816
356.43	0.16807325		886.42	0.00738401		1416.42	-0.00220458		1946.41	0.00614925
356.63	0.16763025		886.62	0.00771124		1416.62	-0.00211306		1946.61	0.00746716
356.83	0.1679283		886.82	0.00778392		1416.82	-0.00230196		1946.81	0.00806852
357.03	0.16815231		887.02	0.00792324		1417.02	-0.00258063		1947.01	0.00884623
357.23	0.16847295		887.22	0.00841735		1417.22	-0.00173058		1947.21	0.01060001
357.43	0.16867183		887.42	0.00937564		1417.42	-0.002703		1947.41	0.01036032
357.63	0.16810166		887.62	0.00983649		1417.62	-0.00239099		1947.61	0.01072949
357.83	0.16839421		887.82	0.01054717		1417.82	-0.00230599		1947.81	0.01053605
358.03	0.16820604		888.02	0.00922208		1418.02	-0.00245718		1948.01	0.01056059
358.23	0.16746718		888.22	0.00897867		1418.22	-0.00241858		1948.21	0.0105928
358.43	0.16662854		888.42	0.00864337		1418.42	-0.00309486		1948.41	0.01027624
358.63	0.1665919		888.62	0.00869064		1418.62	-0.00428124		1948.61	0.00960807
358.83	0.16718153		888.82	0.00884673		1418.82	-0.00449405		1948.81	0.00841197
359.03	0.16652441		889.02	0.00923509		1419.02	-0.00402674		1949.01	0.00865808
359.23	0.16630342		889.22	0.00915863		1419.22	-0.00347243		1949.21	0.0085352
359.43	0.16623957		889.42	0.00877852		1419.42	-0.00251251		1949.41	0.00862339
359.63	0.1660825		889.62	0.00867198		1419.62	-0.00184752		1949.61	0.00858581
359.83	0.16649735		889.82	0.00877087		1419.82	-0.00134604		1949.81	0.00830698
360.03	0.16557934		890.02	0.00988445		1420.02	-0.00039309		1950.01	0.00692233
360.23	0.16613682		890.22	0.00888487		1420.22	-0.00002607		1950.21	0.00734717
360.43	0.1669522		890.42	0.00914563		1420.42	-0.00004841		1950.41	0.00580873
360.63	0.16692734		890.62	0.0095476		1420.62	0.00006561		1950.61	0.00505198
360.83	0.16809559		890.82	0.01118939		1420.82	-0.0001503		1950.81	0.00488242
361.03	0.16817814		891.02	0.01141759		1421.02	-0.00043258		1951.01	0.00443466
361.23	0.16880992		891.22	0.01146185		1421.22	-0.00004379		1951.21	0.0043139
361.43	0.16853827		891.42	0.01131883		1421.42	-0.00075281		1951.41	0.00360334
361.63	0.168488		891.62	0.01094185		1421.62	-0.0001716		1951.61	0.00343868
361.83	0.16905362		891.82	0.01051308		1421.82	0.00017599		1951.81	0.00375266
362.03	0.16822631		892.02	0.00873029		1422.02	-0.00033894		1952.01	0.00374447
362.23	0.16665169		892.22	0.00871097		1422.22	-0.00073638		1952.21	0.00428343
362.43	0.16609631		892.42	0.00828482		1422.42	-0.00153703		1952.41	0.00458737
362.63	0.16708507		892.62	0.00849762		1422.62	-0.00208153		1952.61	0.00516868
362.83	0.16874595		892.82	0.0075949		1422.82	-0.00263024		1952.81	0.00559058
363.03	0.16810073		893.02	0.00773947		1423.02	-0.00275417		1953.01	0.00609245
363.23	0.1680844		893.22	0.00780112		1423.22	-0.00309216		1953.21	0.00639954
363.43	0.16776471		893.42	0.00845054		1423.42	-0.00259967		1953.41	0.00722288
363.63	0.16767813		893.62	0.00875135		1423.62	-0.00289827		1953.61	0.00829072
363.83	0.16815032		893.82	0.00947133		1423.82	-0.00346123		1953.81	0.00712449
364.03	0.16766741		894.02	0.01049712		1424.02	-0.00392076		1954.01	0.00575722
364.23	0.16912575		894.22	0.01073288		1424.22	-0.00396379		1954.21	0.00585384
364.43	0.17064284		894.42	0.01209937		1424.42	-0.00396191		1954.41	0.00519016
364.63	0.17170022		894.62	0.01304553		1424.62	-0.00404789		1954.61	0.00495325
364.83	0.17235682		894.82	0.01489185		1424.82	-0.00465329		1954.81	0.00532429
365.03	0.17283262		895.02	0.01475829		1425.02	-0.00463805		1955.01	0.0050552
365.23	0.1731952		895.22	0.01431104		1425.22	-0.00420934		1955.21	0.00492269
365.43	0.17349191		895.42	0.01360812		1425.42	-0.00378621		1955.41	0.00497621
365.63	0.17428103		895.62	0.01334346		1425.62	-0.00361353		1955.61	0.00506141
365.83	0.17433019		895.82	0.01253591		1425.82	-0.00324662		1955.81	0.004928
366.03	0.17338546		896.02	0.01180775		1426.02	-0.00358919		1956.01	0.00491489
366.23	0.17320506		896.22	0.01225784		1426.22	-0.00386277		1956.21	0.00516284
366.43	0.17409741		896.42	0.01120823		1426.42	-0.00374854		1956.41	0.00628296
366.63	0.1749076		896.62	0.00982031		1426.62	-0.00402365		1956.61	0.00682125
366.83	0.17503175		896.82	0.00933043		1426.82	-0.00374385		1956.81	0.00709317
367.03	0.17349624		897.02	0.00886572		1427.02	-0.00360346		1957.01	0.0078466
367.23	0.17308956		897.22	0.00930766		1427.22	-0.00293364		1957.21	0.00878241
367.43	0.17208443		897.42	0.01002579		1427.42	-0.00165683		1957.41	0.00914717
367.63	0.17131345		897.62	0.0095967		1427.62	-0.00252817		1957.61	0.0097367
367.83	0.17117163		897.82	0.01033943		1427.82	-0.0019803		1957.81	0.00875859
368.03	0.17168581		898.02	0.01049947		1428.02	-0.00197613		1958.01	0.00893745
368.23	0.17177343		898.22	0.01102065		1428.22	-0.00150683		1958.21	0.00944833
368.43	0.17248089		898.42	0.0110936		1428.42	-0.00207385		1958.41	0.00934806
368.63	0.17310766		898.62	0.01164678		1428.62	-0.00186663		1958.61	0.00979201
368.83	0.1732587		898.82	0.01126778		1428.82	-0.0022016		1958.81	0.01001252
369.03	0.17373799		899.02	0.01157793		1429.02	-0.00210462		1959.01	0.00951695
369.23	0.17353297		899.22	0.01151614		1429.22	-0.00212263		1959.21	0.00862298
369.43	0.17393323		899.42	0.01141779		1429.42	-0.00197195		1959.41	0.00730573
369.63	0.1745067		899.62	0.01192972		1429.62	-0.00274823		1959.61	0.00593203
369.83	0.17455042		899.82	0.01191351		1429.82	-0.00348315		1959.81	0.00524602
370.03	0.17547174		900.02	0.01214208		1430.02	-0.00392522		1960.01	0.00433465
370.23	0.17648575		900.22	0.01169271		1430.22	-0.00386256		1960.21	0.0042419
370.43	0.17601747		900.42	0.01092451		1430.42	-0.00414193		1960.41	0.00438025
370.63	0.17606655		900.62	0.01101083		1430.62	-0.0038343		1960.61	0.00333811
370.83	0.17602172		900.82	0.01141383		1430.82	-0.00443423		1960.81	0.00380679
371.03	0.17581301		901.02	0.01133813		1431.02	-0.004844		1961.01	0.00406132
371.23	0.17585266		901.22	0.0117553		1431.22	-0.00524554		1961.21	0.00500586
371.43	0.1752621		901.42	0.01203759		1431.42	-0.00524053		1961.41	0.00628636
371.63	0.17601888		901.62	0.01099135		1431.62	-0.00627347		1961.61	0.00735099
371.83	0.17631546		901.82	0.01091394		1431.82	-0.00537105		1961.81	0.00818322
372.03	0.17674902		902.02	0.01119201		1432.02	-0.00559725		1962.01	0.00876098
372.23	0.17651602		902.22	0.01127715		1432.22	-0.0051814		1962.21	0.00986502
372.43	0.17698125		902.42	0.01123339		1432.42	-0.00452429		1962.41	0.01147003
372.63	0.17770675		902.62	0.01131428		1432.62	-0.00334694		1962.61	0.01267821
372.83	0.17775431		902.82	0.01025255		1432.82	-0.00319365		1962.81	0.01262226
373.03	0.17791187		903.02	0.01027672		1433.02	-0.00267218		1963.01	0.01221539
373.23	0.17758128		903.22	0.01029599		1433.22	-0.00209504		1963.21	0.01125234
373.43	0.17744076		903.42	0.00982893		1433.42	-0.00261981		1963.41	0.01069949
373.63	0.17792952		903.62	0.00925183		1433.62	-0.00247829		1963.61	0.00974791
373.83	0.17829732		903.82	0.00849797		1433.82	-0.00225791		1963.81	0.00922749
374.03	0.17852778		904.02	0.00846755		1434.02	-0.00189243		1964.01	0.00760705
374.23	0.17868432		904.22	0.00750086		1434.22	-0.00214836		1964.21	0.00718339
374.43	0.177517		904.42	0.00774228		1434.42	-0.00251792		1964.41	0.00650845
374.63	0.17772066		904.62	0.00806187		1434.62	-0.00239084		1964.61	0.00576452
374.83	0.17721089		904.82	0.00837919		1434.82	-0.00251983		1964.81	0.00547086
375.03	0.17704598		905.02	0.00844631		1435.02	-0.00243504		1965.01	0.00545713
375.23	0.17709892		905.22	0.00854994		1435.22	-0.00309592		1965.21	0.0060752
375.43	0.17777052		905.42	0.00942918		1435.42	-0.00233675		1965.41	0.00683262
375.63	0.17823817		905.62	0.00951755		1435.62	-0.00236784		1965.61	0.00660342
375.83	0.17806049		905.82	0.0111256		1435.82	-0.00152876		1965.81	0.00686751
376.03	0.17782268		906.02	0.01241019		1436.02	-0.00097045		1966.01	0.00709107
376.23	0.1779198		906.22	0.01163083		1436.22	-0.00041356		1966.21	0.00819047
376.43	0.17715315		906.42	0.01196142		1436.42	-0.00082732		1966.41	0.0082937
376.63	0.17848128		906.62	0.01205604		1436.62	-0.0017023		1966.61	0.00831653
376.83	0.17873799		906.82	0.01126277		1436.82	-0.00193285		1966.81	0.00785704
377.03	0.17950191		907.02	0.01094517		1437.02	-0.0017995		1967.01	0.00762561
377.23	0.18052672		907.22	0.01085847		1437.22	-0.00160976		1967.21	0.00672777
377.43	0.18133812		907.42	0.01026783		1437.42	-0.00206031		1967.41	0.00701038
377.63	0.18244871		907.62	0.0095982		1437.62	-0.00201883		1967.61	0.00642093
377.83	0.18270183		907.82	0.00976928		1437.82	-0.00306339		1967.81	0.00629048
378.03	0.18256053		908.02	0.00991092		1438.02	-0.00389652		1968.01	0.00597478
378.23	0.18265687		908.22	0.00976843		1438.22	-0.00461769		1968.21	0.00597436
378.43	0.1820472		908.42	0.01059848		1438.42	-0.00478315		1968.41	0.0058315
378.63	0.18195776		908.62	0.01144933		1438.62	-0.0050854		1968.61	0.00561219
378.83	0.18189571		908.82	0.01222252		1438.82	-0.00543676		1968.81	0.00561257
379.03	0.1816168		909.02	0.01279755		1439.02	-0.00632796		1969.01	0.00630745
379.23	0.18161107		909.22	0.01418639		1439.22	-0.00698126		1969.21	0.00674947
379.43	0.18149698		909.42	0.01565063		1439.42	-0.00704388		1969.41	0.0068853
379.63	0.18071426		909.62	0.01679623		1439.62	-0.00752024		1969.61	0.00696632
379.83	0.18006936		909.82	0.01789373		1439.82	-0.00790993		1969.81	0.00729718
380.02	0.18006936		910.02	0.01789373		1440.02	-0.00790993		1970.01	0.00729718
380.22	0.18043932		910.22	0.01898592		1440.22	-0.00878443		1970.21	0.00672006
380.42	0.18109739		910.42	0.01995228		1440.42	-0.00932119		1970.41	0.00649447
380.62	0.18179492		910.62	0.0208719		1440.62	-0.00990458		1970.61	0.00614133
380.82	0.18280851		910.82	0.02179199		1440.82	-0.01059048		1970.81	0.00614785
381.02	0.18371274		911.02	0.02200996		1441.02	-0.00989053		1971.01	0.00546958
381.22	0.18372775		911.22	0.02306405		1441.22	-0.00981526		1971.21	0.00503008
381.42	0.18452259		911.42	0.02358824		1441.42	-0.0097868		1971.41	0.00513697
381.62	0.18472794		911.62	0.02313326		1441.62	-0.00858361		1971.61	0.00474526
381.82	0.18519404		911.82	0.02360335		1441.82	-0.00784374		1971.81	0.00547055
382.02	0.18491445		912.02	0.02318893		1442.02	-0.00727627		1972.01	0.00607149
382.22	0.18371724		912.22	0.023017		1442.22	-0.00657077		1972.21	0.00730384
382.42	0.18374711		912.42	0.02254787		1442.42	-0.00535252		1972.41	0.00754327
382.62	0.18374968		912.62	0.02234974		1442.62	-0.00576389		1972.61	0.00636062
382.82	0.1829483		912.82	0.02102835		1442.82	-0.00459085		1972.81	0.00644171
383.02	0.18379271		913.02	0.02012977		1443.02	-0.00385006		1973.01	0.00500837
383.22	0.1832971		913.22	0.01884403		1443.22	-0.00375049		1973.21	0.00522638
383.42	0.18227175		913.42	0.01854404		1443.42	-0.00403961		1973.41	0.00506295
383.62	0.18281846		913.62	0.01829225		1443.62	-0.00530308		1973.61	0.0048185
383.82	0.18230696		913.82	0.01804579		1443.82	-0.00516347		1973.81	0.00448988
384.02	0.18191528		914.02	0.0178587		1444.02	-0.0057605		1974.01	0.00388585
384.22	0.18142935		914.22	0.01935822		1444.22	-0.00654955		1974.21	0.00329448
384.42	0.18132551		914.42	0.01946017		1444.42	-0.00641226		1974.41	0.00349736
384.62	0.18051482		914.62	0.01961963		1444.62	-0.0064519		1974.61	0.00269195
384.82	0.18058747		914.82	0.01968141		1444.82	-0.00675448		1974.81	0.00289655
385.02	0.18008505		915.02	0.01978835		1445.02	-0.00686583		1975.01	0.00227927
385.22	0.17863236		915.22	0.02051428		1445.22	-0.00797345		1975.21	0.00276691
385.42	0.17879501		915.42	0.02045163		1445.42	-0.00800466		1975.41	0.00289435
385.62	0.17842295		915.62	0.02055307		1445.62	-0.00800635		1975.61	0.00247161
385.82	0.17845067		915.82	0.02113758		1445.82	-0.00870853		1975.81	0.00295655
386.02	0.17710423		916.02	0.02059487		1446.02	-0.0088482		1976.01	0.00407947
386.22	0.17656283		916.22	0.02045396		1446.22	-0.00843346		1976.21	0.00534012
386.42	0.17631218		916.42	0.02027197		1446.42	-0.00794597		1976.41	0.00533837
386.62	0.17658187		916.62	0.02094631		1446.62	-0.00847975		1976.61	0.0045619
386.82	0.17680886		916.82	0.02076115		1446.82	-0.00659091		1976.81	0.00414007
387.02	0.17740603		917.02	0.02104429		1447.02	-0.00651528		1977.01	0.00381565
387.22	0.17770458		917.22	0.02147518		1447.22	-0.00681003		1977.21	0.00446299
387.42	0.17776209		917.42	0.02187235		1447.42	-0.00591135		1977.41	0.0042643
387.62	0.17869691		917.62	0.0211995		1447.62	-0.00509071		1977.61	0.00398166
387.82	0.17929271		917.82	0.02066977		1447.82	-0.00388379		1977.81	0.00414722
388.02	0.17948006		918.02	0.02227292		1448.02	-0.00337276		1978.01	0.00322445
388.22	0.17915682		918.22	0.02338124		1448.22	-0.00338327		1978.21	0.00385551
388.42	0.17911816		918.42	0.02298656		1448.42	-0.00293043		1978.41	0.00374381
388.62	0.17993131		918.62	0.02315796		1448.62	-0.00262002		1978.61	0.00338888
388.82	0.1807142		918.82	0.0231376		1448.82	-0.00378594		1978.81	0.00404548
389.02	0.18024702		919.02	0.02376773		1449.02	-0.00455165		1979.01	0.0045459
389.22	0.1796087		919.22	0.02379153		1449.22	-0.00505286		1979.21	0.00423274
389.42	0.1803898		919.42	0.02522622		1449.42	-0.00508498		1979.41	0.00411158
389.62	0.18010177		919.62	0.02562677		1449.62	-0.00527047		1979.61	0.00439189
389.82	0.18117179		919.82	0.02492098		1449.82	-0.00564806		1979.81	0.00474971
390.02	0.18128739		920.02	0.02431473		1450.02	-0.00630114		1980.01	0.00640898
390.22	0.18172083		920.22	0.02383197		1450.22	-0.00696993		1980.21	0.00696592
390.42	0.18147172		920.42	0.0232809		1450.42	-0.00735443		1980.41	0.00685953
390.62	0.18142891		920.62	0.02346324		1450.62	-0.00774142		1980.61	0.00643283
390.82	0.18164475		920.82	0.02306417		1450.82	-0.00746613		1980.81	0.00641178
391.02	0.18235601		921.02	0.02196833		1451.02	-0.00841421		1981.01	0.00664301
391.22	0.18287122		921.22	0.02081912		1451.22	-0.00901012		1981.21	0.00707271
391.42	0.18265375		921.42	0.02021772		1451.42	-0.00860059		1981.41	0.00716127
391.62	0.18234458		921.62	0.01860893		1451.62	-0.00864826		1981.61	0.00663743
391.82	0.18272907		921.82	0.01843022		1451.82	-0.00900141		1981.81	0.00638399
392.02	0.1823594		922.02	0.01909387		1452.02	-0.00936065		1982.01	0.00542009
392.22	0.18228271		922.22	0.01838238		1452.22	-0.00984501		1982.21	0.00573671
392.42	0.18216608		922.42	0.01832266		1452.42	-0.01017844		1982.41	0.00487809
392.62	0.18187916		922.62	0.01799458		1452.62	-0.00967295		1982.61	0.0043984
392.82	0.18078137		922.82	0.01778614		1452.82	-0.00963965		1982.81	0.0045879
393.02	0.18097367		923.02	0.018566		1453.02	-0.00875049		1983.01	0.00429266
393.22	0.18103118		923.22	0.01910859		1453.22	-0.00847779		1983.21	0.00360818
393.42	0.18160341		923.42	0.02026908		1453.42	-0.00833626		1983.41	0.00409421
393.62	0.18042644		923.62	0.02045205		1453.62	-0.00822181		1983.61	0.00407931
393.82	0.18118854		923.82	0.02105061		1453.82	-0.00843556		1983.81	0.00419021
394.02	0.18059301		924.02	0.0214022		1454.02	-0.00821819		1984.01	0.00464984
394.22	0.18013948		924.22	0.02141166		1454.22	-0.0083339		1984.21	0.0048921
394.42	0.18005773		924.42	0.02166566		1454.42	-0.00859254		1984.41	0.0043259
394.62	0.18004629		924.62	0.02234889		1454.62	-0.00877431		1984.61	0.00425872
394.82	0.18114269		924.82	0.02180711		1454.82	-0.00867729		1984.81	0.00436778
395.02	0.18161373		925.02	0.02114186		1455.02	-0.00909317		1985.01	0.00409105
395.22	0.18033352		925.22	0.02077054		1455.22	-0.00958467		1985.21	0.00469989
395.42	0.18035233		925.42	0.02064641		1455.42	-0.01029695		1985.41	0.00428902
395.62	0.18006621		925.62	0.02017789		1455.62	-0.01087458		1985.61	0.00472747
395.82	0.18083039		925.82	0.02049612		1455.82	-0.0103501		1985.81	0.00437627
396.02	0.18084619		926.02	0.02017225		1456.02	-0.010306		1986.01	0.00442486
396.22	0.18057393		926.22	0.02000454		1456.22	-0.01098796		1986.21	0.00485916
396.42	0.17959145		926.42	0.01949284		1456.42	-0.01111439		1986.41	0.00515176
396.62	0.1789769		926.62	0.01848587		1456.62	-0.00977777		1986.61	0.00526922
396.82	0.17981103		926.82	0.01756517		1456.82	-0.00927743		1986.81	0.00579234
397.02	0.1802548		927.02	0.01782894		1457.02	-0.00957234		1987.01	0.00656444
397.22	0.18066313		927.22	0.01788762		1457.22	-0.01019366		1987.21	0.00627942
397.42	0.18005754		927.42	0.01809232		1457.42	-0.01013161		1987.41	0.0065773
397.62	0.17904238		927.62	0.01857694		1457.62	-0.00966451		1987.61	0.0065306
397.82	0.17951825		927.82	0.01877786		1457.82	-0.0090852		1987.81	0.00640063
398.02	0.18044429		928.02	0.01799501		1458.02	-0.0083866		1988.01	0.00614293
398.22	0.18085009		928.22	0.01758829		1458.22	-0.0085393		1988.21	0.00670713
398.42	0.18069951		928.42	0.01754675		1458.42	-0.00835994		1988.41	0.00535395
398.62	0.18162436		928.62	0.01726111		1458.62	-0.00791548		1988.61	0.00515909
398.82	0.18130253		928.82	0.01723615		1458.82	-0.00762918		1988.81	0.00409144
399.02	0.18027514		929.02	0.01706048		1459.02	-0.00718912		1989.01	0.00389328
399.22	0.17933414		929.22	0.01838651		1459.22	-0.00704005		1989.21	0.00321617
399.42	0.17973646		929.42	0.01864819		1459.42	-0.00689386		1989.41	0.00272546
399.62	0.18040846		929.62	0.01923162		1459.62	-0.00530319		1989.61	0.00200524
399.82	0.18171399		929.82	0.01985123		1459.82	-0.0048659		1989.81	0.00190496
400.02	0.1815368		930.02	0.02017779		1460.02	-0.00563235		1990.01	0.00233469
400.22	0.1813015		930.22	0.02034104		1460.22	-0.00613146		1990.21	0.00265049
400.42	0.18003799		930.42	0.02021441		1460.42	-0.00617643		1990.41	0.00352703
400.62	0.17974081		930.62	0.01976157		1460.62	-0.00619227		1990.61	0.00338429
400.82	0.17971629		930.82	0.02010044		1460.82	-0.00637491		1990.81	0.00353576
401.02	0.17868552		931.02	0.0205526		1461.02	-0.00740383		1991.01	0.00446113
401.22	0.17987853		931.22	0.02101004		1461.22	-0.00840657		1991.21	0.00438984
401.42	0.17928876		931.42	0.02010312		1461.42	-0.00871821		1991.41	0.00563258
401.62	0.17951662		931.62	0.01980562		1461.62	-0.00964481		1991.61	0.00610975
401.82	0.18031682		931.82	0.01955603		1461.82	-0.00992861		1991.81	0.00674463
402.02	0.18086862		932.02	0.0195163		1462.02	-0.01025756		1992.01	0.00792772
402.22	0.1799359		932.22	0.01967142		1462.22	-0.01154757		1992.21	0.00853421
402.42	0.17891836		932.42	0.020408		1462.42	-0.01116351		1992.41	0.00785853
402.62	0.17948993		932.62	0.02099893		1462.62	-0.01085558		1992.61	0.00814158
402.82	0.17904596		932.82	0.02136517		1462.82	-0.01024611		1992.81	0.00713683
403.02	0.17903614		933.02	0.02109023		1463.02	-0.0095135		1993.01	0.00725957
403.22	0.17985249		933.22	0.02176411		1463.22	-0.00877449		1993.21	0.00628183
403.42	0.1812881		933.42	0.02127809		1463.42	-0.00871176		1993.41	0.00598643
403.62	0.1822404		933.62	0.02135425		1463.62	-0.00803736		1993.61	0.00422655
403.82	0.18242914		933.82	0.0214542		1463.82	-0.00936377		1993.81	0.00408366
404.02	0.18239654		934.02	0.02062074		1464.02	-0.01000136		1994.01	0.00298473
404.22	0.18266003		934.22	0.02054029		1464.22	-0.01044238		1994.21	0.00283792
404.42	0.18188789		934.42	0.02024816		1464.42	-0.01081357		1994.41	0.0027929
404.62	0.18222262		934.62	0.01919621		1464.62	-0.01054351		1994.61	0.00294161
404.82	0.18279431		934.82	0.0192482		1464.82	-0.00958016		1994.81	0.00276045
405.02	0.18224687		935.02	0.01856694		1465.02	-0.01076669		1995.01	0.00305994
405.22	0.18338322		935.22	0.01867337		1465.22	-0.01119217		1995.21	0.00314646
405.42	0.18338172		935.42	0.01773909		1465.42	-0.01139353		1995.41	0.00303655
405.62	0.18415481		935.62	0.01824084		1465.62	-0.01146579		1995.61	0.00288686
405.82	0.1846966		935.82	0.01795913		1465.82	-0.01115754		1995.81	0.00392703
406.02	0.18346542		936.02	0.01868161		1466.02	-0.01084308		1996.01	0.00501918
406.22	0.18231349		936.22	0.01910067		1466.22	-0.00981966		1996.21	0.00534322
406.42	0.1814422		936.42	0.01970626		1466.42	-0.00838038		1996.41	0.00480676
406.62	0.18221021		936.62	0.01946871		1466.62	-0.00843536		1996.61	0.00526519
406.82	0.18224002		936.82	0.01940508		1466.82	-0.00844768		1996.81	0.00468017
407.02	0.18185351		937.02	0.01903002		1467.02	-0.00757506		1997.01	0.00505586
407.22	0.18269275		937.22	0.01910201		1467.22	-0.00712639		1997.21	0.00386471
407.42	0.18327939		937.42	0.01877748		1467.42	-0.00729223		1997.41	0.00267998
407.62	0.18234765		937.62	0.0179212		1467.62	-0.00680035		1997.61	0.00176328
407.82	0.18223499		937.82	0.01756187		1467.82	-0.00829945		1997.81	0.00095971
408.02	0.18230442		938.02	0.01643818		1468.02	-0.00838618		1998.01	0.0012957
408.22	0.18217823		938.22	0.01620113		1468.22	-0.00929416		1998.21	0.00228652
408.42	0.1812723		938.42	0.01488699		1468.42	-0.00992544		1998.41	0.0026138
408.62	0.18117668		938.62	0.01354803		1468.62	-0.01011222		1998.61	0.0028094
408.82	0.18040692		938.82	0.01317		1468.82	-0.01084605		1998.81	0.00279995
409.02	0.1792053		939.02	0.01291825		1469.02	-0.01251022		1999.01	0.00222867
409.22	0.17969518		939.22	0.01298959		1469.22	-0.01436571		1999.21	0.00227992
409.42	0.17918168		939.42	0.01304424		1469.42	-0.01473383		1999.41	0.00235152
409.62	0.17872013		939.62	0.01388993		1469.62	-0.01457374		1999.61	0.00297822
409.82	0.17799658		939.82	0.01438894		1469.82	-0.01493644		1999.81	0.00406955
410.02	0.1768113		940.02	0.01555472		1470.02	-0.01395688		2000.01	0.00368575
410.22	0.17701332		940.22	0.01627942		1470.22	-0.01309718		2000.21	0.00288657
410.42	0.17716469		940.42	0.0167027		1470.42	-0.01344615		2000.41	0.00179532
410.62	0.17811849		940.62	0.0181097		1470.62	-0.01312646		2000.61	0.00180809
410.82	0.17877624		940.82	0.01827459		1470.82	-0.01225459		2000.81	0.0012696
411.02	0.17888394		941.02	0.01850455		1471.02	-0.01143261		2001.01	0.00138918
411.22	0.17992438		941.22	0.01882767		1471.22	-0.01081516		2001.21	0.00077771
411.42	0.18111528		941.42	0.01873893		1471.42	-0.01027442		2001.41	0.00173253
411.62	0.18051889		941.62	0.01949125		1471.62	-0.00921424		2001.61	0.00207751
411.82	0.18112119		941.82	0.01983622		1471.82	-0.00950954		2001.81	0.00279173
412.02	0.18075087		942.02	0.01844682		1472.02	-0.0090891		2002.01	0.00393401
412.22	0.18140761		942.22	0.01825162		1472.22	-0.01058043		2002.21	0.00446794
412.42	0.18086236		942.42	0.01724251		1472.42	-0.01087456		2002.41	0.00442454
412.62	0.1802758		942.62	0.01644105		1472.62	-0.0108084		2002.61	0.00429947
412.82	0.17993357		942.82	0.01658655		1472.82	-0.01215223		2002.81	0.0050314
413.02	0.17954122		943.02	0.01676482		1473.02	-0.01263257		2003.01	0.0050825
413.22	0.17898314		943.22	0.01694471		1473.22	-0.01303431		2003.21	0.00511347
413.42	0.17794197		943.42	0.01777868		1473.42	-0.0118898		2003.41	0.00608602
413.62	0.17810968		943.62	0.01908528		1473.62	-0.01148402		2003.61	0.00576955
413.82	0.1779757		943.82	0.01970946		1473.82	-0.01100578		2003.81	0.00486141
414.02	0.1787201		944.02	0.02014977		1474.02	-0.01056539		2004.01	0.00348618
414.22	0.17931351		944.22	0.01980911		1474.22	-0.01095213		2004.21	0.00244982
414.42	0.17936635		944.42	0.02044355		1474.42	-0.01128021		2004.41	0.00194387
414.62	0.18006505		944.62	0.02076048		1474.62	-0.01039586		2004.61	0.00146905
414.82	0.18021756		944.82	0.02031868		1474.82	-0.01054286		2004.81	0.00124857
415.02	0.17958429		945.02	0.02056098		1475.02	-0.01056455		2005.01	0.00152512
415.22	0.18005711		945.22	0.02002932		1475.22	-0.01114948		2005.21	0.00149586
415.42	0.18038871		945.42	0.0200689		1475.42	-0.01067073		2005.41	0.00204205
415.62	0.17942046		945.62	0.01951848		1475.62	-0.01090819		2005.61	0.00122115
415.82	0.17931089		945.82	0.01806686		1475.82	-0.01208735		2005.81	0.00147435
416.02	0.17915551		946.02	0.01690039		1476.02	-0.01253428		2006.01	0.00090618
416.22	0.1793737		946.22	0.01598145		1476.22	-0.01320897		2006.21	0.00062267
416.42	0.17871933		946.42	0.01491686		1476.42	-0.01300698		2006.41	0.00049025
416.62	0.17873569		946.62	0.01422124		1476.62	-0.01306694		2006.61	0.00074656
416.82	0.17866309		946.82	0.01405375		1476.82	-0.01341861		2006.81	0.00145653
417.02	0.17911022		947.02	0.01380968		1477.02	-0.01279139		2007.01	0.00214526
417.22	0.1788198		947.22	0.0144963		1477.22	-0.01248857		2007.21	0.0013306
417.42	0.17894262		947.42	0.01526194		1477.42	-0.0118209		2007.41	0.00133783
417.62	0.17944351		947.62	0.01600371		1477.62	-0.01114009		2007.61	0.00035859
417.82	0.18026779		947.82	0.01595465		1477.82	-0.01136422		2007.81	0.0005225
418.02	0.18142035		948.02	0.01576553		1478.02	-0.01186731		2008.01	0.00048736
418.22	0.18157211		948.22	0.01628854		1478.22	-0.01203062		2008.21	0.0005069
418.42	0.18114322		948.42	0.01809339		1478.42	-0.01164683		2008.41	0.00058029
418.62	0.18065982		948.62	0.01838219		1478.62	-0.0108527		2008.61	-0.00022775
418.82	0.18067741		948.82	0.02013118		1478.82	-0.01111121		2008.81	-0.00007956
419.02	0.17991783		949.02	0.02011443		1479.02	-0.01062369		2009.01	0.00061446
419.22	0.18020134		949.22	0.01965741		1479.22	-0.01104301		2009.21	0.00035023
419.42	0.18021273		949.42	0.02004218		1479.42	-0.01073778		2009.41	0.00087177
419.62	0.17895613		949.62	0.01967648		1479.62	-0.01215948		2009.61	0.00060831
419.82	0.17912739		949.82	0.02006232		1479.82	-0.01207836		2009.81	0.00184791
420.02	0.17831136		950.02	0.01994777		1480.02	-0.0123734		2010.01	0.00219616
420.22	0.17861922		950.22	0.02010485		1480.22	-0.01286947		2010.21	0.00255913
420.42	0.17832986		950.42	0.01967527		1480.42	-0.01235331		2010.41	0.00355063
420.62	0.17797924		950.62	0.01915081		1480.62	-0.0125261		2010.61	0.00460367
420.82	0.17745954		950.82	0.01879381		1480.82	-0.01329433		2010.81	0.0050488
421.02	0.1778834		951.02	0.01891661		1481.02	-0.01254334		2011.01	0.00485865
421.22	0.17737493		951.22	0.01928134		1481.22	-0.01266921		2011.21	0.00374669
421.42	0.17773766		951.42	0.01931521		1481.42	-0.01232386		2011.41	0.00335363
421.62	0.1788215		951.62	0.01887579		1481.62	-0.01213102		2011.61	0.00302981
421.82	0.17951695		951.82	0.01858587		1481.82	-0.0121681		2011.81	0.00283859
422.02	0.17879575		952.02	0.01858971		1482.02	-0.01207545		2012.01	0.00244062
422.22	0.17930002		952.22	0.01861475		1482.22	-0.01218272		2012.21	0.00204162
422.42	0.17899526		952.42	0.01831218		1482.42	-0.01140661		2012.41	0.00182915
422.62	0.1792531		952.62	0.01768148		1482.62	-0.01098521		2012.61	0.00053962
422.82	0.17995061		952.82	0.01774195		1482.82	-0.01095723		2012.81	0.00060681
423.02	0.17912529		953.02	0.01603471		1483.02	-0.01056239		2013.01	-0.00031505
423.22	0.17902225		953.22	0.01504959		1483.22	-0.01096606		2013.21	-0.00135377
423.42	0.17789065		953.42	0.01526906		1483.42	-0.01177371		2013.41	-0.00156567
423.62	0.17634551		953.62	0.0146554		1483.62	-0.01175513		2013.61	-0.00113932
423.82	0.17634822		953.82	0.0142837		1483.82	-0.01187056		2013.81	-0.00111639
424.02	0.17606768		954.02	0.01464733		1484.02	-0.01336927		2014.01	-0.00131724
424.22	0.17613976		954.22	0.01515711		1484.22	-0.01362995		2014.21	-0.00081055
424.42	0.17511742		954.42	0.0156392		1484.42	-0.01310275		2014.41	-0.00084709
424.62	0.17525515		954.62	0.01663778		1484.62	-0.01413208		2014.61	0.00006779
424.82	0.17476727		954.82	0.01785684		1484.82	-0.01468695		2014.81	-0.00001678
425.02	0.1748717		955.02	0.01795346		1485.02	-0.01384256		2015.01	0.00026651
425.22	0.1759248		955.22	0.01834028		1485.22	-0.01391102		2015.21	0.0003738
425.42	0.17677496		955.42	0.01838197		1485.42	-0.013133		2015.41	0.00032092
425.62	0.1778877		955.62	0.01789189		1485.62	-0.01220726		2015.61	0.00074337
425.82	0.17880015		955.82	0.01817253		1485.82	-0.0112052		2015.81	0.00095421
426.02	0.17956357		956.02	0.01814088		1486.02	-0.01091315		2016.01	0.00221884
426.22	0.18073142		956.22	0.01752297		1486.22	-0.01087989		2016.21	0.00327375
426.42	0.18149172		956.42	0.01764518		1486.42	-0.01003872		2016.41	0.00337704
426.62	0.18166574		956.62	0.01776172		1486.62	-0.01028566		2016.61	0.00314974
426.82	0.1807589		956.82	0.01726847		1486.82	-0.00967211		2016.81	0.00347875
427.02	0.18067118		957.02	0.01662675		1487.02	-0.00835318		2017.01	0.00365432
427.22	0.17970326		957.22	0.01627415		1487.22	-0.00804444		2017.21	0.00403987
427.42	0.17862248		957.42	0.01645467		1487.42	-0.00891059		2017.41	0.00323137
427.62	0.1780659		957.62	0.01546632		1487.62	-0.00852238		2017.61	0.0033367
427.82	0.17858929		957.82	0.01587852		1487.82	-0.00982736		2017.81	0.00232678
428.02	0.17942323		958.02	0.01717363		1488.02	-0.01132143		2018.01	0.00239516
428.22	0.17815812		958.22	0.01815692		1488.22	-0.01166036		2018.21	0.00140542
428.42	0.17721652		958.42	0.01865671		1488.42	-0.01204034		2018.41	0.00103164
428.62	0.17658416		958.62	0.01921296		1488.62	-0.01296897		2018.61	0.00185814
428.82	0.17572635		958.82	0.01932328		1488.82	-0.01317632		2018.81	0.00203475
429.02	0.17585425		959.02	0.01908261		1489.02	-0.01375587		2019.01	0.00276028
429.22	0.17652019		959.22	0.01929067		1489.22	-0.01428818		2019.21	0.00197931
429.42	0.17729695		959.42	0.01947503		1489.42	-0.01425033		2019.41	0.00132451
429.62	0.17759826		959.62	0.01963903		1489.62	-0.01426897		2019.61	0.0008181
429.82	0.17896779		959.82	0.01955773		1489.82	-0.01427658		2019.81	0.00032526
430.02	0.17911513		960.02	0.0203622		1490.02	-0.01522556		2020.01	0.00106697
430.22	0.17949269		960.22	0.02020199		1490.22	-0.01535582		2020.21	0.00136302
430.42	0.18010579		960.42	0.02129195		1490.42	-0.01445992		2020.41	0.00092362
430.62	0.17952091		960.62	0.02139848		1490.62	-0.01367803		2020.61	0.00118925
430.82	0.17951993		960.82	0.02114896		1490.82	-0.01288905		2020.81	0.00137924
431.02	0.18020365		961.02	0.02163716		1491.02	-0.0116835		2021.01	0.00185604
431.22	0.17941001		961.22	0.02225024		1491.22	-0.01200996		2021.21	0.00235409
431.42	0.17848254		961.42	0.02170806		1491.42	-0.01157129		2021.41	0.00155428
431.62	0.17790566		961.62	0.02071787		1491.62	-0.0105362		2021.61	0.00266019
431.82	0.17809273		961.82	0.02090879		1491.82	-0.01066553		2021.81	0.00297695
432.02	0.17754075		962.02	0.02020568		1492.02	-0.0103199		2022.01	0.00300699
432.22	0.176829		962.22	0.01937314		1492.22	-0.01031181		2022.21	0.00270889
432.42	0.17619209		962.42	0.01826551		1492.42	-0.00992926		2022.41	0.00424851
432.62	0.17516755		962.62	0.01784217		1492.62	-0.01015606		2022.61	0.00464681
432.82	0.17510306		962.82	0.01679103		1492.82	-0.00991188		2022.81	0.00530684
433.02	0.1742367		963.02	0.01570121		1493.02	-0.01056155		2023.01	0.00473762
433.22	0.17520017		963.22	0.01435992		1493.22	-0.01135182		2023.21	0.00380948
433.42	0.17619319		963.42	0.01348066		1493.42	-0.01131805		2023.41	0.00260801
433.62	0.17729295		963.62	0.01313989		1493.62	-0.01203042		2023.61	0.00247451
433.82	0.17739067		963.82	0.01306205		1493.82	-0.0135784		2023.81	0.00203378
434.02	0.17670306		964.02	0.01381974		1494.02	-0.01478087		2024.01	0.00215403
434.22	0.17689805		964.22	0.01446853		1494.22	-0.01525168		2024.21	0.00166051
434.42	0.17704805		964.42	0.01534736		1494.42	-0.01484291		2024.41	0.00109889
434.62	0.1766458		964.62	0.01584122		1494.62	-0.01528295		2024.61	0.00114582
434.82	0.17657044		964.82	0.01680566		1494.82	-0.01522743		2024.81	0.00112095
435.02	0.17538147		965.02	0.01782525		1495.02	-0.01467752		2025.01	0.00095236
435.22	0.17527208		965.22	0.0175929		1495.22	-0.01519919		2025.21	0.00170505
435.42	0.17507405		965.42	0.01726498		1495.42	-0.01472169		2025.41	0.00160484
435.62	0.17460619		965.62	0.01801533		1495.62	-0.01498965		2025.61	0.00250089
435.82	0.1751932		965.82	0.01854843		1495.82	-0.01473807		2025.81	0.00185679
436.02	0.17505703		966.02	0.01830821		1496.02	-0.01458781		2026.01	0.00198001
436.22	0.17469029		966.22	0.01914937		1496.22	-0.0146427		2026.21	0.0018113
436.42	0.17362892		966.42	0.01864873		1496.42	-0.01421108		2026.41	0.00321731
436.62	0.17420599		966.62	0.01769261		1496.62	-0.01413349		2026.61	0.00298359
436.82	0.17476044		966.82	0.01703522		1496.82	-0.013726		2026.81	0.00303859
437.02	0.17531159		967.02	0.01589028		1497.02	-0.01404893		2027.01	0.00245171
437.22	0.17683162		967.22	0.01581813		1497.22	-0.01372187		2027.21	0.00285396
437.42	0.17772823		967.42	0.0158717		1497.42	-0.01261621		2027.41	0.00262643
437.62	0.17830619		967.62	0.01647602		1497.62	-0.01233951		2027.61	0.00390755
437.82	0.17753269		967.82	0.01640117		1497.82	-0.01191213		2027.81	0.00343313
438.02	0.17765448		968.02	0.01634271		1498.02	-0.01155557		2028.01	0.0037085
438.22	0.17832558		968.22	0.01646215		1498.22	-0.01084705		2028.21	0.00362051
438.42	0.17903256		968.42	0.01624179		1498.42	-0.0100783		2028.41	0.00374899
438.62	0.17909666		968.62	0.01637817		1498.62	-0.01023435		2028.61	0.00324714
438.82	0.17889017		968.82	0.01640301		1498.82	-0.00989774		2028.81	0.00268008
439.02	0.17916635		969.02	0.01636136		1499.02	-0.01102966		2029.01	0.0022266
439.22	0.18012019		969.22	0.01574585		1499.22	-0.01161512		2029.21	0.00156468
439.42	0.17945333		969.42	0.01554971		1499.42	-0.01192637		2029.41	0.00179279
439.62	0.17849441		969.62	0.01612765		1499.62	-0.01186213		2029.61	0.00153984
439.82	0.17859088		969.82	0.01589659		1499.82	-0.01305622		2029.81	0.00050918
440.02	0.1777633		970.02	0.01611905		1500.02	-0.0145709		2030.01	0.00049572
440.22	0.17639714		970.22	0.01646012		1500.22	-0.01513998		2030.21	-0.00052805
440.42	0.17664072		970.42	0.01578567		1500.42	-0.01628286		2030.41	0.00005992
440.62	0.17784373		970.62	0.01615635		1500.62	-0.01690372		2030.61	0.00004096
440.82	0.17745313		970.82	0.01637323		1500.82	-0.01705186		2030.81	0.00058267
441.02	0.17687788		971.02	0.01687572		1501.02	-0.01696509		2031.01	0.00126113
441.22	0.17585446		971.22	0.01734327		1501.22	-0.01649907		2031.21	0.00261669
441.42	0.17565133		971.42	0.01720011		1501.42	-0.0158319		2031.41	0.00294063
441.62	0.17486263		971.62	0.01773553		1501.62	-0.01543172		2031.61	0.00275636
441.82	0.17521361		971.82	0.01731927		1501.82	-0.01426928		2031.81	0.0022391
442.02	0.17463941		972.02	0.01753716		1502.02	-0.01405524		2032.01	0.00205741
442.22	0.17592352		972.22	0.01723365		1502.22	-0.01331258		2032.21	0.00206697
442.42	0.17664775		972.42	0.01786095		1502.42	-0.01332822		2032.41	0.0017786
442.62	0.17724509		972.62	0.01758735		1502.62	-0.01322414		2032.61	0.00074611
442.82	0.17734067		972.82	0.01840025		1502.82	-0.0143881		2032.81	0.00008111
443.02	0.17736276		973.02	0.01738982		1503.02	-0.01417932		2033.01	-0.00099277
443.22	0.17755101		973.22	0.01660951		1503.22	-0.01329241		2033.21	-0.0014487
443.42	0.17716811		973.42	0.01595375		1503.42	-0.01346401		2033.41	-0.00121177
443.62	0.17785095		973.62	0.01658882		1503.62	-0.01328886		2033.61	-0.00170026
443.82	0.17786504		973.82	0.01598902		1503.82	-0.0146857		2033.81	-0.00161564
444.02	0.17744154		974.02	0.01632047		1504.02	-0.01475579		2034.01	-0.00201289
444.22	0.17747252		974.22	0.01661583		1504.22	-0.01437213		2034.21	-0.00157849
444.42	0.17827234		974.42	0.01630573		1504.42	-0.01468025		2034.41	-0.00059087
444.62	0.17899839		974.62	0.01679599		1504.62	-0.01422619		2034.61	0.00102637
444.82	0.17820158		974.82	0.01655018		1504.82	-0.01317681		2034.81	0.00201545
445.02	0.17727521		975.02	0.01667486		1505.02	-0.01262902		2035.01	0.00258895
445.22	0.17726915		975.22	0.01601185		1505.22	-0.01297553		2035.21	0.00374788
445.42	0.17725815		975.42	0.01579391		1505.42	-0.01270794		2035.41	0.00271254
445.62	0.17739639		975.62	0.01619516		1505.62	-0.01207723		2035.61	0.00236318
445.82	0.17795803		975.82	0.01592942		1505.82	-0.01155312		2035.81	0.00292231
446.02	0.17834081		976.02	0.01599328		1506.02	-0.01219199		2036.01	0.00386553
446.22	0.17939156		976.22	0.01588911		1506.22	-0.01311248		2036.21	0.00372666
446.42	0.17946951		976.42	0.01623627		1506.42	-0.01455971		2036.41	0.00363632
446.62	0.17889302		976.62	0.01609558		1506.62	-0.0162934		2036.61	0.0019046
446.82	0.17785435		976.82	0.01669749		1506.82	-0.01740694		2036.81	0.00200832
447.02	0.17655981		977.02	0.01582752		1507.02	-0.01726698		2037.01	0.00172848
447.22	0.17657702		977.22	0.01560877		1507.22	-0.01739141		2037.21	0.00135588
447.42	0.17600166		977.42	0.01470246		1507.42	-0.01837322		2037.41	0.00055535
447.62	0.17577844		977.62	0.01480319		1507.62	-0.01822343		2037.61	-0.00025532
447.82	0.17501483		977.82	0.01400735		1507.82	-0.01790158		2037.81	-0.00050733
448.02	0.17456653		978.02	0.01401034		1508.02	-0.01785046		2038.01	-0.0011925
448.22	0.17369144		978.22	0.01349268		1508.22	-0.01710931		2038.21	-0.00091575
448.42	0.1735162		978.42	0.01294724		1508.42	-0.01548563		2038.41	-0.00132596
448.62	0.17396769		978.62	0.01314796		1508.62	-0.01404906		2038.61	-0.00054108
448.82	0.17455768		978.82	0.0126259		1508.82	-0.01339757		2038.81	-0.00048503
449.02	0.17534864		979.02	0.01224829		1509.02	-0.01289099		2039.01	0.00088043
449.22	0.17660041		979.22	0.01229907		1509.22	-0.01284219		2039.21	0.00210112
449.42	0.17661378		979.42	0.01228758		1509.42	-0.01183769		2039.41	0.00131337
449.62	0.17723678		979.62	0.01324882		1509.62	-0.01130855		2039.61	0.00233244
449.82	0.17729342		979.82	0.0135359		1509.82	-0.01087868		2039.81	0.00259514
450.02	0.17774949		980.02	0.01404089		1510.02	-0.01087729		2040.01	0.0030414
450.22	0.17724736		980.22	0.0147017		1510.22	-0.01073076		2040.21	0.00122916
450.42	0.17593114		980.42	0.01458766		1510.42	-0.01132422		2040.41	0.00093985
450.62	0.17436823		980.62	0.01544389		1510.62	-0.0106946		2040.61	0.00062824
450.82	0.17372989		980.82	0.01541951		1510.82	-0.01011137		2040.81	0.00144879
451.02	0.17348355		981.02	0.01570478		1511.02	-0.01061728		2041.01	0.00036281
451.22	0.17277818		981.22	0.01593577		1511.22	-0.0101908		2041.21	-0.00021159
451.42	0.17255011		981.42	0.015682		1511.42	-0.0100514		2041.41	-0.00071576
451.62	0.17207905		981.62	0.01592961		1511.62	-0.01032641		2041.61	-0.0024176
451.82	0.17169408		981.82	0.01533539		1511.82	-0.01009313		2041.81	-0.00284027
452.02	0.17079928		982.02	0.01515195		1512.02	-0.01100185		2042.01	-0.00364701
452.22	0.17105358		982.22	0.01491744		1512.22	-0.01027716		2042.21	-0.00365383
452.42	0.17242903		982.42	0.01447727		1512.42	-0.01058016		2042.41	-0.00432921
452.62	0.1747115		982.62	0.01442154		1512.62	-0.01164942		2042.61	-0.00308317
452.82	0.17588258		982.82	0.01420449		1512.82	-0.01247159		2042.81	-0.00278628
453.02	0.17660641		983.02	0.01417626		1513.02	-0.01357698		2043.01	-0.00147158
453.22	0.1778086		983.22	0.01465253		1513.22	-0.01396642		2043.21	-0.00144352
453.42	0.17779562		983.42	0.01471024		1513.42	-0.01434413		2043.41	-0.00149819
453.62	0.17798263		983.62	0.01569128		1513.62	-0.0145224		2043.61	-0.00032612
453.82	0.17820089		983.82	0.01552561		1513.82	-0.01539325		2043.81	-0.00054323
454.02	0.17846533		984.02	0.01577807		1514.02	-0.01554487		2044.01	0.00028651
454.22	0.17791749		984.22	0.01570121		1514.22	-0.01591972		2044.21	0.00055079
454.42	0.17783709		984.42	0.01545811		1514.42	-0.01679644		2044.41	0.00255924
454.62	0.17828256		984.62	0.01504209		1514.62	-0.01656952		2044.61	0.00362304
454.82	0.17806452		984.82	0.01468293		1514.82	-0.01782511		2044.81	0.00389821
455.02	0.17812207		985.02	0.0142175		1515.02	-0.01851051		2045.01	0.00371793
455.22	0.1777875		985.22	0.0134249		1515.22	-0.0176067		2045.21	0.00435964
455.42	0.17754275		985.42	0.01210364		1515.42	-0.01774961		2045.41	0.00421003
455.62	0.17646512		985.62	0.01108116		1515.62	-0.01772049		2045.61	0.00271526
455.82	0.17639831		985.82	0.01038067		1515.82	-0.01655876		2045.81	0.00313769
456.02	0.17621237		986.02	0.00961274		1516.02	-0.01646884		2046.01	0.00298307
456.22	0.17676777		986.22	0.01006452		1516.22	-0.01503326		2046.21	0.00318575
456.42	0.17693245		986.42	0.01040851		1516.42	-0.01411257		2046.41	0.00292716
456.62	0.17781693		986.62	0.01162901		1516.62	-0.0136002		2046.61	0.00335828
456.82	0.17691943		986.82	0.01323176		1516.82	-0.01308039		2046.81	0.00190925
457.02	0.17739109		987.02	0.01393189		1517.02	-0.01322389		2047.01	0.00109396
457.22	0.17761577		987.22	0.0145654		1517.22	-0.01214806		2047.21	0.00075559
457.42	0.17676564		987.42	0.01487091		1517.42	-0.01212736		2047.41	0.00075282
457.62	0.17614403		987.62	0.01581236		1517.62	-0.01198102		2047.61	0.00135458
457.82	0.1754234		987.82	0.01635855		1517.82	-0.01351882		2047.81	0.00157378
458.02	0.17527554		988.02	0.0163061		1518.02	-0.01373591		2048.01	0.00161097
458.22	0.17514704		988.22	0.01672412		1518.22	-0.01493575		2048.21	0.00219222
458.42	0.1756659		988.42	0.01604077		1518.42	-0.01588658		2048.41	0.00234602
458.62	0.17518395		988.62	0.01533673		1518.62	-0.01607055		2048.61	0.00192823
458.82	0.17481114		988.82	0.01505737		1518.82	-0.01715204		2048.81	0.00175755
459.02	0.17454909		989.02	0.01386631		1519.02	-0.0171678		2049.01	0.00129569
459.22	0.1750659		989.22	0.01375415		1519.22	-0.01688166		2049.21	0.00226099
459.42	0.17527525		989.42	0.01362075		1519.42	-0.01773044		2049.41	0.00142163
459.62	0.17600881		989.62	0.01301314		1519.62	-0.01740173		2049.61	0.0007203
459.82	0.17729011		989.82	0.01378248		1519.82	-0.01733594		2049.81	0.00044298
460.02	0.17804332		990.02	0.01402698		1520.02	-0.01679389		2050.01	-0.00004969
460.22	0.1780794		990.22	0.01481283		1520.22	-0.01628698		2050.21	-0.00046285
460.42	0.17777115		990.42	0.01563221		1520.42	-0.01578703		2050.41	-0.00031188
460.62	0.17869514		990.62	0.01599177		1520.62	-0.01619081		2050.61	-0.00031838
460.82	0.17841872		990.82	0.01578555		1520.82	-0.01580415		2050.81	-0.00034758
461.02	0.17816967		991.02	0.01516782		1521.02	-0.01601013		2051.01	0.00039227
461.22	0.17791278		991.22	0.01518358		1521.22	-0.0161344		2051.21	0.00176648
461.42	0.17695243		991.42	0.01479144		1521.42	-0.01548164		2051.41	0.00232162
461.62	0.17717044		991.62	0.01499041		1521.62	-0.01520857		2051.61	0.00283255
461.82	0.17694194		991.82	0.01558875		1521.82	-0.01624476		2051.81	0.00225195
462.02	0.17762298		992.02	0.01484043		1522.02	-0.01568463		2052.01	0.00172755
462.22	0.1774451		992.22	0.01510772		1522.22	-0.0158226		2052.21	0.00126905
462.42	0.17732541		992.42	0.01397855		1522.42	-0.01591875		2052.41	0.00081577
462.62	0.17784303		992.62	0.01406103		1522.62	-0.01524524		2052.61	0.00065769
462.82	0.17771311		992.82	0.01386834		1522.82	-0.01542656		2052.81	-0.00018093
463.02	0.17789594		993.02	0.01388104		1523.02	-0.01558174		2053.01	-0.00115248
463.22	0.179299		993.22	0.01364912		1523.22	-0.01638982		2053.21	-0.00141746
463.42	0.17971633		993.42	0.01416869		1523.42	-0.017625		2053.41	-0.0021583
463.62	0.17997035		993.62	0.01406137		1523.62	-0.01729429		2053.61	-0.00294317
463.82	0.18016846		993.82	0.01490141		1523.82	-0.01711857		2053.81	-0.00404906
464.02	0.1795379		994.02	0.01418392		1524.02	-0.01660495		2054.01	-0.00418217
464.22	0.17841415		994.22	0.01330271		1524.22	-0.01759555		2054.21	-0.00316561
464.42	0.17774994		994.42	0.0131944		1524.42	-0.01731537		2054.41	-0.00151861
464.62	0.17846791		994.62	0.01204243		1524.62	-0.01804917		2054.61	-0.00013061
464.82	0.17752566		994.82	0.01125809		1524.82	-0.01820145		2054.81	0.00020901
465.02	0.17720238		995.02	0.0114466		1525.02	-0.01858196		2055.01	0.00078297
465.22	0.1777358		995.22	0.01189571		1525.22	-0.01902513		2055.21	0.00060315
465.42	0.17752706		995.42	0.01167518		1525.42	-0.01797472		2055.41	0.00031082
465.62	0.17744023		995.62	0.01149062		1525.62	-0.01698831		2055.61	0.00011968
465.82	0.17684398		995.82	0.01142074		1525.82	-0.01679852		2055.81	0.00023236
466.02	0.17595486		996.02	0.01097638		1526.02	-0.01621848		2056.01	-0.00030859
466.22	0.17585938		996.22	0.01133467		1526.22	-0.0161915		2056.21	-0.0006366
466.42	0.17580588		996.42	0.01149187		1526.42	-0.01589671		2056.41	0.00028546
466.62	0.17577711		996.62	0.01142233		1526.62	-0.01566305		2056.61	0.00113781
466.82	0.17490274		996.82	0.01230616		1526.82	-0.01560709		2056.81	0.00216676
467.02	0.17474477		997.02	0.01299321		1527.02	-0.01569357		2057.01	0.00244042
467.22	0.174751		997.22	0.01396412		1527.22	-0.0159438		2057.21	0.00270027
467.42	0.17454567		997.42	0.01449747		1527.42	-0.01553057		2057.41	0.00284538
467.62	0.17471949		997.62	0.0146887		1527.62	-0.01564092		2057.61	0.00200886
467.82	0.17445404		997.82	0.01507636		1527.82	-0.01581731		2057.81	0.00257442
468.02	0.17462942		998.02	0.01574842		1528.02	-0.0160773		2058.01	0.00261793
468.22	0.17543262		998.22	0.01551824		1528.22	-0.01690676		2058.21	0.00316723
468.42	0.17659814		998.42	0.01566327		1528.42	-0.01659433		2058.41	0.00306401
468.62	0.17666455		998.62	0.01588999		1528.62	-0.01783504		2058.61	0.00281968
468.82	0.17668868		998.82	0.01580148		1528.82	-0.01744559		2058.81	0.00185478
469.02	0.17756625		999.02	0.01693272		1529.02	-0.01750278		2059.01	0.00179301
469.22	0.17778446		999.22	0.01744957		1529.22	-0.01737444		2059.21	0.00130455
469.42	0.17792862		999.42	0.01666224		1529.42	-0.0160253		2059.41	0.00082943
469.62	0.17794646		999.62	0.01702396		1529.62	-0.01468792		2059.61	0.00001142
469.82	0.17783143		999.82	0.01707457		1529.82	-0.01468683		2059.81	-0.00071459
470.02	0.17752002		1000.02	0.01699745		1530.02	-0.01417819		2060.01	-0.00120858
470.22	0.17750492		1000.22	0.01633884		1530.22	-0.01444241		2060.21	-0.0006157
470.42	0.17661297		1000.42	0.01561993		1530.42	-0.01444683		2060.41	0.00032567
470.62	0.17640312		1000.62	0.01581997		1530.62	-0.01435226		2060.61	0.00057381
470.82	0.17648965		1000.82	0.01617794		1530.82	-0.01359664		2060.81	0.00083989
471.02	0.17653154		1001.02	0.01524537		1531.02	-0.01342858		2061.01	0.00055951
471.22	0.17667285		1001.22	0.01467113		1531.22	-0.01497193		2061.21	0.0005141
471.42	0.17697772		1001.42	0.01359891		1531.42	-0.01576627		2061.41	0.00003862
471.62	0.17722518		1001.62	0.01355864		1531.62	-0.0166259		2061.61	-0.00004432
471.82	0.17782189		1001.82	0.01428895		1531.82	-0.01594008		2061.81	0.00015211
472.02	0.17960771		1002.02	0.01405702		1532.02	-0.01642177		2062.01	-0.00062642
472.22	0.18011189		1002.22	0.01251199		1532.22	-0.01678409		2062.21	-0.00098718
472.42	0.17965109		1002.42	0.01120359		1532.42	-0.01621788		2062.41	-0.0008591
472.62	0.17879436		1002.62	0.01102349		1532.62	-0.0165973		2062.61	-0.00066015
472.82	0.17942123		1002.82	0.01033341		1532.82	-0.01489278		2062.81	-0.000627
473.02	0.17970907		1003.02	0.01144901		1533.02	-0.01509736		2063.01	-0.00074307
473.22	0.17882586		1003.22	0.01154539		1533.22	-0.01474959		2063.21	-0.00147618
473.42	0.17857784		1003.42	0.01143052		1533.42	-0.01387833		2063.41	-0.00275235
473.62	0.17767137		1003.62	0.01196569		1533.62	-0.01445113		2063.61	-0.0033968
473.82	0.17708288		1003.82	0.01131957		1533.82	-0.01465122		2063.81	-0.00352958
474.02	0.17616047		1004.02	0.01098051		1534.02	-0.01429154		2064.01	-0.00324678
474.22	0.17486668		1004.22	0.01040587		1534.22	-0.01532598		2064.21	-0.00400167
474.42	0.17455425		1004.42	0.01077511		1534.42	-0.01539411		2064.41	-0.00369043
474.62	0.17509281		1004.62	0.01211867		1534.62	-0.01538513		2064.61	-0.00368661
474.82	0.17523973		1004.82	0.01153349		1534.82	-0.01475414		2064.81	-0.00308806
475.02	0.17510861		1005.02	0.01227807		1535.02	-0.01514258		2065.01	-0.00249976
475.22	0.17526158		1005.22	0.01262149		1535.22	-0.01596648		2065.21	-0.00278558
475.42	0.17455637		1005.42	0.01271324		1535.42	-0.01546158		2065.41	-0.00325345
475.62	0.17489046		1005.62	0.01323548		1535.62	-0.01600957		2065.61	-0.00260527
475.82	0.17631572		1005.82	0.01256981		1535.82	-0.01599417		2065.81	-0.00234289
476.02	0.17733775		1006.02	0.01147704		1536.02	-0.01708588		2066.01	-0.00152033
476.22	0.17601185		1006.22	0.01027685		1536.22	-0.01713924		2066.21	-0.00160894
476.42	0.17596186		1006.42	0.00980088		1536.42	-0.01665286		2066.41	-0.0007119
476.62	0.17627953		1006.62	0.01075886		1536.62	-0.01664098		2066.61	-0.00034682
476.82	0.17692273		1006.82	0.01132772		1536.82	-0.01650222		2066.81	-0.00003155
477.02	0.17636455		1007.02	0.01210676		1537.02	-0.01722527		2067.01	-0.00017321
477.22	0.17639689		1007.22	0.01196607		1537.22	-0.01715605		2067.21	-0.00045233
477.42	0.17732536		1007.42	0.01185998		1537.42	-0.01775208		2067.41	-0.00012423
477.62	0.17773375		1007.62	0.01268115		1537.62	-0.01809708		2067.61	0.00058638
477.82	0.1777549		1007.82	0.01321579		1537.82	-0.01796365		2067.81	0.00073563
478.02	0.17801976		1008.02	0.01359754		1538.02	-0.01735613		2068.01	0.00114698
478.22	0.17809246		1008.22	0.01376929		1538.22	-0.01756059		2068.21	0.00113968
478.42	0.17885316		1008.42	0.01443297		1538.42	-0.01778187		2068.41	0.00171702
478.62	0.17971082		1008.62	0.01424565		1538.62	-0.01717186		2068.61	0.0015241
478.82	0.17944097		1008.82	0.01420903		1538.82	-0.01659543		2068.81	0.00105885
479.02	0.17945189		1009.02	0.01532875		1539.02	-0.01639479		2069.01	0.00076081
479.22	0.1790742		1009.22	0.01514261		1539.22	-0.01551311		2069.21	0.00044604
479.42	0.17837828		1009.42	0.01505831		1539.42	-0.0157672		2069.41	-0.00036724
479.62	0.1786708		1009.62	0.01438899		1539.62	-0.01736434		2069.61	-0.00011938
479.82	0.17838125		1009.82	0.01392417		1539.82	-0.01770255		2069.81	-0.00027019
480.02	0.17720577		1010.02	0.01415259		1540.02	-0.01863257		2070.01	-0.00079892
480.22	0.17569335		1010.22	0.01347604		1540.22	-0.01945845		2070.21	-0.00190457
480.42	0.17483817		1010.42	0.01371818		1540.42	-0.01991132		2070.41	-0.00222952
480.62	0.17379584		1010.62	0.01434968		1540.62	-0.01971314		2070.61	-0.00234803
480.82	0.17340432		1010.82	0.01501625		1540.82	-0.01968355		2070.81	-0.00262815
481.02	0.17252717		1011.02	0.01487716		1541.02	-0.01922834		2071.01	-0.00248888
481.22	0.17251177		1011.22	0.01447126		1541.22	-0.01883692		2071.21	-0.00231518
481.42	0.17262107		1011.42	0.01485998		1541.42	-0.01899691		2071.41	-0.001495
481.62	0.1723716		1011.62	0.01565918		1541.62	-0.01838952		2071.61	-0.00122551
481.82	0.17121282		1011.82	0.01527022		1541.82	-0.01831577		2071.81	-0.00069942
482.02	0.17223671		1012.02	0.01503052		1542.02	-0.01749135		2072.01	-0.00086333
482.22	0.17246001		1012.22	0.01446912		1542.22	-0.01769382		2072.21	-0.00056929
482.42	0.17326447		1012.42	0.01392268		1542.42	-0.01790462		2072.41	-0.00066308
482.62	0.1745287		1012.62	0.01347515		1542.62	-0.01698089		2072.61	-0.00131056
482.82	0.17576365		1012.82	0.01465854		1542.82	-0.01675351		2072.81	-0.00074847
483.02	0.17734105		1013.02	0.01543951		1543.02	-0.01630488		2073.01	-0.00105052
483.22	0.17778745		1013.22	0.01533907		1543.22	-0.01563669		2073.21	-0.00112281
483.42	0.1789141		1013.42	0.01491553		1543.42	-0.01650228		2073.41	-0.00172941
483.62	0.17883342		1013.62	0.01474641		1543.62	-0.01686213		2073.61	-0.00217614
483.82	0.17988701		1013.82	0.01541124		1543.82	-0.01643893		2073.81	-0.0021905
484.02	0.18008148		1014.02	0.01454233		1544.02	-0.01536531		2074.01	-0.00337009
484.22	0.17981532		1014.22	0.0150128		1544.22	-0.01557083		2074.21	-0.00325783
484.42	0.17947519		1014.42	0.01580436		1544.42	-0.01494843		2074.41	-0.00334948
484.62	0.17909894		1014.62	0.01615601		1544.62	-0.01418145		2074.61	-0.00318682
484.82	0.17886253		1014.82	0.01603054		1544.82	-0.01377879		2074.81	-0.00346655
485.02	0.17821769		1015.02	0.01544582		1545.02	-0.01423164		2075.01	-0.00267554
485.22	0.17720036		1015.22	0.0151507		1545.22	-0.01457356		2075.21	-0.00269714
485.42	0.17648727		1015.42	0.01555363		1545.42	-0.01437418		2075.41	-0.00153322
485.62	0.17470503		1015.62	0.0153213		1545.62	-0.01398842		2075.61	-0.00116042
485.82	0.17278548		1015.82	0.01468878		1545.82	-0.01418172		2075.81	-0.00030927
486.02	0.17267682		1016.02	0.01467394		1546.02	-0.01516476		2076.01	-0.00051528
486.22	0.17187817		1016.22	0.01437434		1546.22	-0.01625758		2076.21	0.00001364
486.42	0.17156451		1016.42	0.01575953		1546.42	-0.01715952		2076.41	0.00045387
486.62	0.17166678		1016.62	0.01622195		1546.62	-0.01797462		2076.61	0.0000363
486.82	0.17202272		1016.82	0.01753328		1546.82	-0.01887006		2076.81	0.00051566
487.02	0.17196312		1017.02	0.01693842		1547.02	-0.01987764		2077.01	0.00029072
487.22	0.17147167		1017.22	0.01653465		1547.22	-0.01989751		2077.21	0.00045195
487.42	0.17214879		1017.42	0.01672908		1547.42	-0.02012171		2077.41	0.00004132
487.62	0.17323282		1017.62	0.01650752		1547.62	-0.02013579		2077.61	-0.00053681
487.82	0.1741168		1017.82	0.01672017		1547.82	-0.02063993		2077.81	0.00022434
488.02	0.17459967		1018.02	0.01628066		1548.02	-0.01989661		2078.01	-0.0001262
488.22	0.17547788		1018.22	0.01711652		1548.22	-0.02042246		2078.21	-0.00054952
488.42	0.17595364		1018.42	0.01671871		1548.42	-0.02010441		2078.41	-0.00150566
488.62	0.17579062		1018.62	0.01557923		1548.62	-0.02018501		2078.61	-0.00253906
488.82	0.17595116		1018.82	0.01539605		1548.82	-0.01995067		2078.81	-0.00279086
489.02	0.17489769		1019.02	0.01515551		1549.02	-0.02007503		2079.01	-0.00214831
489.22	0.17480418		1019.22	0.01465244		1549.22	-0.01931933		2079.21	-0.00188893
489.42	0.17433153		1019.42	0.01426955		1549.42	-0.01859661		2079.41	-0.00159191
489.62	0.17337667		1019.62	0.0142464		1549.62	-0.01879148		2079.61	-0.001604
489.82	0.17311532		1019.82	0.01376792		1549.82	-0.01951035		2079.81	-0.00130575
490.02	0.17400844		1020.02	0.0140959		1550.02	-0.01951593		2080.01	-0.00162177
490.22	0.17457166		1020.22	0.01431819		1550.22	-0.01922797		2080.21	-0.00209633
490.42	0.17453135		1020.42	0.01550474		1550.42	-0.01909021		2080.41	-0.00267717
490.62	0.17431442		1020.62	0.01413921		1550.62	-0.01987655		2080.61	-0.00348608
490.82	0.17399321		1020.82	0.014145		1550.82	-0.02010022		2080.81	-0.00274628
491.02	0.1737824		1021.02	0.01317203		1551.02	-0.02080475		2081.01	-0.00233575
491.22	0.17395121		1021.22	0.01294934		1551.22	-0.02060185		2081.21	-0.0013336
491.42	0.1752378		1021.42	0.01383107		1551.42	-0.02049082		2081.41	-0.0006358
491.62	0.17563068		1021.62	0.01311477		1551.62	-0.02086623		2081.61	-0.00082322
491.82	0.17555772		1021.82	0.01426926		1551.82	-0.02069924		2081.81	-0.00017401
492.02	0.17629025		1022.02	0.01409472		1552.02	-0.01930333		2082.01	-0.00037878
492.22	0.17628908		1022.22	0.01386472		1552.22	-0.01951364		2082.21	-0.00090895
492.42	0.1760947		1022.42	0.01311146		1552.42	-0.01870572		2082.41	-0.00165401
492.62	0.17549618		1022.62	0.0126917		1552.62	-0.01895955		2082.61	-0.0004235
492.82	0.17526402		1022.82	0.01339178		1552.82	-0.0180804		2082.81	0.00043726
493.02	0.17487884		1023.02	0.01308898		1553.02	-0.01848729		2083.01	0.00012259
493.22	0.1743719		1023.22	0.0128896		1553.22	-0.01861636		2083.21	-0.00003522
493.42	0.17376664		1023.42	0.01333033		1553.42	-0.01875134		2083.41	0.0001405
493.62	0.17385052		1023.62	0.01340835		1553.62	-0.01916479		2083.61	0.00066158
493.82	0.17449407		1023.82	0.01195872		1553.82	-0.01859158		2083.81	0.00036002
494.02	0.17530828		1024.02	0.01209303		1554.02	-0.01847844		2084.01	0.0003058
494.22	0.17574343		1024.22	0.01189038		1554.22	-0.01860817		2084.21	-0.00090339
494.42	0.17459264		1024.42	0.0119914		1554.42	-0.0184904		2084.41	-0.00101977
494.62	0.17379535		1024.62	0.01126571		1554.62	-0.01940149		2084.61	-0.00088881
494.82	0.17464092		1024.82	0.01206437		1554.82	-0.01825546		2084.81	-0.00055173
495.02	0.17511432		1025.02	0.01303421		1555.02	-0.01827706		2085.01	-0.00107883
495.22	0.17533656		1025.22	0.01341669		1555.22	-0.01830275		2085.21	-0.00108794
495.42	0.17482777		1025.42	0.01358106		1555.42	-0.01793027		2085.41	-0.00152724
495.62	0.17378888		1025.62	0.01285493		1555.62	-0.01778384		2085.61	-0.00251229
495.82	0.17420075		1025.82	0.01374783		1555.82	-0.01633283		2085.81	-0.00334574
496.02	0.1734163		1026.02	0.01360962		1556.02	-0.01628608		2086.01	-0.00286643
496.22	0.17255778		1026.22	0.01405261		1556.22	-0.01636737		2086.21	-0.00286258
496.42	0.17268593		1026.42	0.01509596		1556.42	-0.01534735		2086.41	-0.002348
496.62	0.17255811		1026.62	0.01599446		1556.62	-0.0158745		2086.61	-0.00196407
496.82	0.17249486		1026.82	0.01638806		1556.82	-0.01634491		2086.81	-0.00322514
497.02	0.1716012		1027.02	0.01564882		1557.02	-0.01770352		2087.01	-0.00317144
497.22	0.17026274		1027.22	0.01493999		1557.22	-0.01775358		2087.21	-0.00219584
497.42	0.17066677		1027.42	0.01518858		1557.42	-0.01775866		2087.41	-0.00169749
497.62	0.17081684		1027.62	0.01438914		1557.62	-0.01814436		2087.61	-0.0014452
497.82	0.17064405		1027.82	0.0134495		1557.82	-0.01791689		2087.81	-0.00110114
498.02	0.17041797		1028.02	0.01319929		1558.02	-0.01882814		2088.01	-0.00025484
498.22	0.17063175		1028.22	0.01334648		1558.22	-0.01865423		2088.21	0.00018332
498.42	0.17017086		1028.42	0.01336755		1558.42	-0.018033		2088.41	0.00095087
498.62	0.1711813		1028.62	0.01330427		1558.62	-0.01834529		2088.61	0.00132421
498.82	0.17340625		1028.82	0.01284543		1558.82	-0.01853912		2088.81	0.00181501
499.02	0.17329055		1029.02	0.01307725		1559.02	-0.01967475		2089.01	0.00156225
499.22	0.17223768		1029.22	0.01298909		1559.22	-0.01981284		2089.21	0.00129996
499.42	0.17181469		1029.42	0.0123462		1559.42	-0.01908166		2089.41	0.00100949
499.62	0.17206663		1029.62	0.01242828		1559.62	-0.01804588		2089.61	0.00093226
499.82	0.17177158		1029.82	0.01347085		1559.82	-0.01755012		2089.81	0.00054739
500.02	0.17139689		1030.02	0.01355292		1560.02	-0.01865658		2090.01	0.0015875
500.22	0.17168149		1030.22	0.01453026		1560.22	-0.01852654		2090.21	0.00006341
500.42	0.17273595		1030.42	0.01545231		1560.42	-0.01875779		2090.41	0.0001674
500.62	0.17247986		1030.62	0.01537022		1560.62	-0.01927632		2090.61	-0.00109942
500.82	0.17213288		1030.82	0.01568417		1560.82	-0.02041731		2090.81	-0.00059636
501.02	0.17209068		1031.02	0.01531635		1561.02	-0.02024744		2091.01	-0.000554
501.22	0.17186686		1031.22	0.0150599		1561.22	-0.01929602		2091.21	-0.00124079
501.42	0.17225645		1031.42	0.01578052		1561.42	-0.01915486		2091.41	-0.0015256
501.62	0.17299536		1031.62	0.01559511		1561.62	-0.0195532		2091.61	-0.00201668
501.82	0.1731229		1031.82	0.01486822		1561.82	-0.01996771		2091.81	-0.00162532
502.02	0.17275669		1032.02	0.01449048		1562.02	-0.01966735		2092.01	-0.00177149
502.22	0.1727201		1032.22	0.01454996		1562.22	-0.01870612		2092.21	-0.00215859
502.42	0.17347708		1032.42	0.01424903		1562.42	-0.01764607		2092.41	-0.00215327
502.62	0.1743779		1032.62	0.01389443		1562.62	-0.0178697		2092.61	-0.00108999
502.82	0.17544872		1032.82	0.01342907		1562.82	-0.01785529		2092.81	-0.00174744
503.02	0.17457711		1033.02	0.01422492		1563.02	-0.01785385		2093.01	-0.00235897
503.22	0.17368022		1033.22	0.01400801		1563.22	-0.01651108		2093.21	-0.00221348
503.42	0.1734818		1033.42	0.01342031		1563.42	-0.01603614		2093.41	-0.00179082
503.62	0.17380466		1033.62	0.01307388		1563.62	-0.01542637		2093.61	-0.00084715
503.82	0.17319827		1033.82	0.01341688		1563.82	-0.01605456		2093.81	-0.00078996
504.02	0.17301854		1034.02	0.01356154		1564.02	-0.01624912		2094.01	0.00019122
504.22	0.17302686		1034.22	0.01497104		1564.22	-0.01637389		2094.21	0.00021335
504.42	0.17284086		1034.42	0.01472434		1564.42	-0.01728662		2094.41	0.00222471
504.62	0.172431		1034.62	0.01433136		1564.62	-0.01719743		2094.61	0.00298711
504.82	0.17222735		1034.82	0.01457852		1564.82	-0.01862507		2094.81	0.00355885
505.02	0.17233062		1035.02	0.01354959		1565.02	-0.01840422		2095.01	0.00276132
505.22	0.17179942		1035.22	0.01332995		1565.22	-0.01843824		2095.21	0.00337137
505.42	0.17212436		1035.42	0.01313738		1565.42	-0.01928427		2095.41	0.00324097
505.62	0.17230533		1035.62	0.0125755		1565.62	-0.01986414		2095.61	0.00289064
505.82	0.17201327		1035.82	0.01259205		1565.82	-0.01967806		2095.81	0.00332072
506.02	0.17204475		1036.02	0.01273238		1566.02	-0.01980545		2096.01	0.00278162
506.22	0.17227233		1036.22	0.01263253		1566.22	-0.01923162		2096.21	0.00283456
506.42	0.1722586		1036.42	0.01188606		1566.42	-0.01901277		2096.41	0.00382977
506.62	0.17248351		1036.62	0.01192993		1566.62	-0.01914709		2096.61	0.00367966
506.82	0.17306076		1036.82	0.01265242		1566.82	-0.01959895		2096.81	0.00243637
507.02	0.17301197		1037.02	0.01359663		1567.02	-0.01950916		2097.01	0.00255489
507.22	0.17202331		1037.22	0.01370987		1567.22	-0.0188749		2097.21	0.00282192
507.42	0.171833		1037.42	0.01357752		1567.42	-0.01985776		2097.41	0.00247353
507.62	0.17287214		1037.62	0.01287868		1567.62	-0.01934456		2097.61	0.00280485
507.82	0.17205734		1037.82	0.01306978		1567.82	-0.01986777		2097.81	0.00246638
508.02	0.17182167		1038.02	0.01366269		1568.02	-0.02004584		2098.01	0.00236071
508.22	0.17238234		1038.22	0.01381336		1568.22	-0.02025681		2098.21	0.00191308
508.42	0.17191067		1038.42	0.01305593		1568.42	-0.0205586		2098.41	0.0012603
508.62	0.17096721		1038.62	0.01257077		1568.62	-0.02028027		2098.61	0.00086878
508.82	0.17015843		1038.82	0.01180701		1568.82	-0.02039688		2098.81	-0.00089918
509.02	0.16938493		1039.02	0.0113377		1569.02	-0.01981982		2099.01	-0.00097349
509.22	0.16901071		1039.22	0.01187879		1569.22	-0.01997753		2099.21	-0.0009884
509.42	0.16908814		1039.42	0.01221832		1569.42	-0.01965786		2099.41	-0.00119815
509.62	0.16903844		1039.62	0.01293259		1569.62	-0.01928897		2099.61	-0.00100013
509.82	0.16914562		1039.82	0.01317522		1569.82	-0.01926393		2099.81	-0.00111321
510.02	0.16966643		1040.02	0.01380474		1570.02	-0.02085651		2100.01	-0.0005672
510.22	0.1696955		1040.22	0.01417445		1570.22	-0.02068512		2100.21	0.00011657
510.42	0.16926765		1040.42	0.01467072		1570.42	-0.02064129		2100.41	0.00111272
510.62	0.17018606		1040.62	0.01565316		1570.62	-0.02095019		2100.61	0.00209808
510.82	0.17107878		1040.82	0.01620063		1570.82	-0.02095489		2100.81	0.00292855
511.02	0.17118714		1041.02	0.01661112		1571.02	-0.01954933		2101.01	0.00371144
511.22	0.17076092		1041.22	0.01624484		1571.22	-0.01970711		2101.21	0.00441824
511.42	0.17185663		1041.42	0.01525636		1571.42	-0.01887628		2101.41	0.00519069
511.62	0.17263173		1041.62	0.01380973		1571.62	-0.01784778		2101.61	0.0060319
511.82	0.1726499		1041.82	0.01368813		1571.82	-0.0169491		2101.81	0.00545373
512.02	0.17285705		1042.02	0.01383716		1572.02	-0.01579215		2102.01	0.00516806
512.22	0.17358666		1042.22	0.01362066		1572.22	-0.01558264		2102.21	0.00522332
512.42	0.17266222		1042.42	0.01225254		1572.42	-0.014439		2102.41	0.00388762
512.62	0.17153912		1042.62	0.01151708		1572.62	-0.01430833		2102.61	0.00357428
512.82	0.17176479		1042.82	0.0109935		1572.82	-0.01368874		2102.81	0.0025494
513.02	0.17196711		1043.02	0.01140716		1573.02	-0.014277		2103.01	0.00260604
513.22	0.171589		1043.22	0.01172332		1573.22	-0.01500274		2103.21	0.0014865
513.42	0.17076428		1043.42	0.01148088		1573.42	-0.01509283		2103.41	0.00165871
513.62	0.17072817		1043.62	0.01156251		1573.62	-0.01679969		2103.61	0.0007323
513.82	0.17022218		1043.82	0.01150773		1573.82	-0.01814355		2103.81	-0.00070218
514.02	0.17037194		1044.02	0.01238913		1574.02	-0.02017273		2104.01	-0.00051169
514.22	0.17066237		1044.22	0.01261072		1574.22	-0.02085522		2104.21	0.00007858
514.42	0.1700299		1044.42	0.01320503		1574.42	-0.02070607		2104.41	0.00034177
514.62	0.17102785		1044.62	0.01296439		1574.62	-0.02107457		2104.61	0.00049751
514.82	0.17084456		1044.82	0.01279455		1574.82	-0.0207581		2104.81	-0.00017948
515.02	0.17130046		1045.02	0.01346862		1575.02	-0.02096287		2105.01	-0.00046867
515.22	0.17145342		1045.22	0.01400743		1575.22	-0.02153128		2105.21	-0.00088275
515.42	0.17140791		1045.42	0.01376873		1575.42	-0.02109884		2105.41	-0.00088332
515.62	0.17119795		1045.62	0.0123582		1575.62	-0.02060486		2105.61	-0.00138739
515.82	0.17081801		1045.82	0.01285092		1575.82	-0.02039362		2105.81	-0.00149331
516.02	0.17110689		1046.02	0.01389322		1576.02	-0.02071098		2106.01	-0.0014235
516.22	0.17125917		1046.22	0.01461925		1576.22	-0.02097642		2106.21	-0.00110199
516.42	0.17008572		1046.42	0.01338036		1576.42	-0.01971986		2106.41	-0.00202334
516.62	0.17073762		1046.62	0.01387999		1576.62	-0.0196226		2106.61	-0.00169216
516.82	0.17176495		1046.82	0.01386489		1576.82	-0.01959989		2106.81	-0.00086749
517.02	0.17148266		1047.02	0.01430513		1577.02	-0.01975538		2107.01	0.00009575
517.22	0.17039223		1047.22	0.01332542		1577.22	-0.01953174		2107.21	0.00057689
517.42	0.16951497		1047.42	0.01291342		1577.42	-0.01921012		2107.41	0.00179519
517.62	0.16928972		1047.62	0.01260031		1577.62	-0.02023747		2107.61	0.00119323
517.82	0.16900605		1047.82	0.01217556		1577.82	-0.01981697		2107.81	0.00206032
518.02	0.16996615		1048.02	0.01213795		1578.02	-0.01905847		2108.01	0.00288638
518.22	0.17069036		1048.22	0.01268621		1578.22	-0.01824401		2108.21	0.00415999
518.42	0.17070328		1048.42	0.01212644		1578.42	-0.01739362		2108.41	0.00355412
518.62	0.17098412		1048.62	0.01133123		1578.62	-0.01660061		2108.61	0.00292987
518.82	0.17069876		1048.82	0.01063434		1578.82	-0.01610505		2108.81	0.0019869
519.02	0.17203471		1049.02	0.01093803		1579.02	-0.01616573		2109.01	0.00195475
519.22	0.17190171		1049.22	0.01120028		1579.22	-0.01643212		2109.21	0.00203733
519.42	0.17061114		1049.42	0.01093786		1579.42	-0.01684372		2109.41	0.00125982
519.62	0.17086503		1049.62	0.01067727		1579.62	-0.01676137		2109.61	0.00115806
519.82	0.17147818		1049.82	0.01122247		1579.82	-0.01742214		2109.81	0.00112862
520.02	0.17256474		1050.02	0.01290994		1580.02	-0.01752025		2110.01	0.00019358
520.22	0.17201963		1050.22	0.01287183		1580.22	-0.01769788		2110.21	-0.00069063
520.42	0.17255216		1050.42	0.01180259		1580.42	-0.01858144		2110.41	-0.00163493
520.62	0.17328778		1050.62	0.01270755		1580.62	-0.01887355		2110.61	-0.00208601
520.82	0.17230155		1050.82	0.01257605		1580.82	-0.01973549		2110.81	-0.00129958
521.02	0.17140458		1051.02	0.0131378		1581.02	-0.02031911		2111.01	-0.0012643
521.22	0.17135757		1051.22	0.01266422		1581.22	-0.02101925		2111.21	-0.00077518
521.42	0.17035673		1051.42	0.01301306		1581.42	-0.02117686		2111.41	0.0000421
521.62	0.17045116		1051.62	0.01376263		1581.62	-0.02211735		2111.61	0.00033699
521.82	0.17091989		1051.82	0.01482269		1581.82	-0.02137544		2111.81	0.00178501
522.02	0.17140217		1052.02	0.01501947		1582.02	-0.02002655		2112.01	0.00235279
522.22	0.17134573		1052.22	0.01583137		1582.22	-0.02068068		2112.21	0.00297106
522.42	0.171589		1052.42	0.01559992		1582.42	-0.02044609		2112.41	0.00164735
522.62	0.17167175		1052.62	0.01607633		1582.62	-0.01943452		2112.61	0.00144073
522.82	0.17184723		1052.82	0.01626959		1582.82	-0.01920117		2112.81	0.00102494
523.02	0.17249267		1053.02	0.01651386		1583.02	-0.0191731		2113.01	0.00164153
523.22	0.17227607		1053.22	0.01733862		1583.22	-0.01919009		2113.21	0.00180788
523.42	0.17162412		1053.42	0.01797692		1583.42	-0.01888721		2113.41	0.00009034
523.62	0.17293306		1053.62	0.01800237		1583.62	-0.01893641		2113.61	-0.00045557
523.82	0.17284218		1053.82	0.01732011		1583.82	-0.01955199		2113.81	-0.00067959
524.02	0.1726118		1054.02	0.01770316		1584.02	-0.01970962		2114.01	-0.00175275
524.22	0.17194664		1054.22	0.01678551		1584.22	-0.02022156		2114.21	-0.00260608
524.42	0.17204492		1054.42	0.01642601		1584.42	-0.02189471		2114.41	-0.00369817
524.62	0.17088222		1054.62	0.01622117		1584.62	-0.02148817		2114.61	-0.00458442
524.82	0.1701983		1054.82	0.01620537		1584.82	-0.02269918		2114.81	-0.0048718
525.02	0.17104984		1055.02	0.0162803		1585.02	-0.02352595		2115.01	-0.00476061
525.22	0.17136493		1055.22	0.0158579		1585.22	-0.02307447		2115.21	-0.00326204
525.42	0.1704237		1055.42	0.01527999		1585.42	-0.0225508		2115.41	-0.00201125
525.62	0.17027		1055.62	0.01545508		1585.62	-0.0231932		2115.61	-0.00078187
525.82	0.17076841		1055.82	0.01445303		1585.82	-0.02188458		2115.81	0.00030649
526.02	0.17017999		1056.02	0.01331569		1586.02	-0.02118248		2116.01	0.00142033
526.22	0.17073309		1056.22	0.01359467		1586.22	-0.02156594		2116.21	0.00108948
526.42	0.17053098		1056.42	0.01308487		1586.42	-0.02108382		2116.41	0.00038393
526.62	0.17022265		1056.62	0.01340663		1586.62	-0.01957408		2116.61	0.00121048
526.82	0.16971818		1056.82	0.01327332		1586.82	-0.01994771		2116.81	0.00030364
527.02	0.17009282		1057.02	0.01385436		1587.02	-0.01979308		2117.01	0.00071046
527.22	0.16986511		1057.22	0.01518929		1587.22	-0.01985034		2117.21	0.00044372
527.42	0.16933404		1057.42	0.01523712		1587.42	-0.01960781		2117.41	-0.00034139
527.62	0.16945347		1057.62	0.01520887		1587.62	-0.0195774		2117.61	-0.00094998
527.82	0.16872061		1057.82	0.01486571		1587.82	-0.01921007		2117.81	-0.00067581
528.02	0.16869822		1058.02	0.01536233		1588.02	-0.01901358		2118.01	-0.00145173
528.22	0.1682236		1058.22	0.0154258		1588.22	-0.01880492		2118.21	-0.00257932
528.42	0.16731727		1058.42	0.0158622		1588.42	-0.0197855		2118.41	-0.00314287
528.62	0.16695422		1058.62	0.01555017		1588.62	-0.01947839		2118.61	-0.00350879
528.82	0.16780553		1058.82	0.01523169		1588.82	-0.02031419		2118.81	-0.00314873
529.02	0.16792365		1059.02	0.01375463		1589.02	-0.02027706		2119.01	-0.0021417
529.22	0.16714653		1059.22	0.0133823		1589.22	-0.01908729		2119.21	-0.00109919
529.42	0.16675919		1059.42	0.01214842		1589.42	-0.01943151		2119.41	-0.00084567
529.62	0.16671759		1059.62	0.01202758		1589.62	-0.01926295		2119.61	-0.00068256
529.82	0.16624705		1059.82	0.01136477		1589.82	-0.01810147		2119.81	-0.00006395
530.02	0.16636475		1060.02	0.0109821		1590.02	-0.01869478		2120.01	-0.00061224
530.22	0.16651613		1060.22	0.01150184		1590.22	-0.01873699		2120.21	-0.0015558
530.42	0.16552404		1060.42	0.01198468		1590.42	-0.01896385		2120.41	-0.00192083
530.62	0.16569099		1060.62	0.01377076		1590.62	-0.01873586		2120.61	-0.00168663
530.82	0.16615691		1060.82	0.01358139		1590.82	-0.0194424		2120.81	-0.00288597
531.02	0.16693263		1061.02	0.01469156		1591.02	-0.01873247		2121.01	-0.00242625
531.22	0.16795148		1061.22	0.01477484		1591.22	-0.0186375		2121.21	-0.00291569
531.42	0.16905423		1061.42	0.01512749		1591.42	-0.01858547		2121.41	-0.00323615
531.62	0.17026721		1061.62	0.01576966		1591.62	-0.01907611		2121.61	-0.00385425
531.82	0.16980361		1061.82	0.01543264		1591.82	-0.0203652		2121.81	-0.00329128
532.02	0.16977046		1062.02	0.01561469		1592.02	-0.02127898		2122.01	-0.00344555
532.22	0.17054927		1062.22	0.01632451		1592.22	-0.02171325		2122.21	-0.00268634
532.42	0.17111468		1062.42	0.01617964		1592.42	-0.02213129		2122.41	-0.00184808
532.62	0.17119453		1062.62	0.01532993		1592.62	-0.02234233		2122.61	-0.00120493
532.82	0.17208955		1062.82	0.01521485		1592.82	-0.02277065		2122.81	-0.00110919
533.02	0.17247147		1063.02	0.01444226		1593.02	-0.02232333		2123.01	-0.00099421
533.22	0.17343466		1063.22	0.01440612		1593.22	-0.02215322		2123.21	-0.00094466
533.42	0.17368804		1063.42	0.01394169		1593.42	-0.02326532		2123.41	-0.00113936
533.62	0.17344657		1063.62	0.01457192		1593.62	-0.02336437		2123.61	-0.00075309
533.82	0.17296403		1063.82	0.01423992		1593.82	-0.02291804		2123.81	-0.00103929
534.02	0.1723599		1064.02	0.01431987		1594.02	-0.02319427		2124.01	-0.00209048
534.22	0.17151202		1064.22	0.01437841		1594.22	-0.02236314		2124.21	-0.00164494
534.42	0.17113862		1064.42	0.01489328		1594.42	-0.02209142		2124.41	-0.00103718
534.62	0.1707507		1064.62	0.01515883		1594.62	-0.02170183		2124.61	-0.00161167
534.82	0.16980578		1064.82	0.01401445		1594.82	-0.02087593		2124.81	-0.00235414
535.02	0.16878956		1065.02	0.0139884		1595.02	-0.02051166		2125.01	-0.00206577
535.22	0.16903062		1065.22	0.01337079		1595.22	-0.02107878		2125.21	-0.00214269
535.42	0.16789458		1065.42	0.0141099		1595.42	-0.0204537		2125.41	-0.00201026
535.62	0.16669643		1065.62	0.01307359		1595.62	-0.02038028		2125.61	-0.00124399
535.82	0.16483245		1065.82	0.0129851		1595.82	-0.02097002		2125.81	-0.00116194
536.02	0.16490636		1066.02	0.01326264		1596.02	-0.0199018		2126.01	-0.00132445
536.22	0.16579039		1066.22	0.01388802		1596.22	-0.01961036		2126.21	-0.00093652
536.42	0.16522819		1066.42	0.01383253		1596.42	-0.01922079		2126.41	-0.00118593
536.62	0.16579698		1066.62	0.01363021		1596.62	-0.01939289		2126.61	-0.00097359
536.82	0.16755327		1066.82	0.01359234		1596.82	-0.01880284		2126.81	-0.0008807
537.02	0.16844672		1067.02	0.01269732		1597.02	-0.01894637		2127.01	-0.00067433
537.22	0.16901063		1067.22	0.01281199		1597.22	-0.01901533		2127.21	-0.00103273
537.42	0.17002355		1067.42	0.0126345		1597.42	-0.01994653		2127.41	-0.00097908
537.62	0.17042495		1067.62	0.01336882		1597.62	-0.02027172		2127.61	-0.00122762
537.82	0.17127457		1067.82	0.0132095		1597.82	-0.01959888		2127.81	-0.00139117
538.02	0.17165745		1068.02	0.01228807		1598.02	-0.01995818		2128.01	-0.00141561
538.22	0.17298397		1068.22	0.01237627		1598.22	-0.02004395		2128.21	-0.00135886
538.42	0.17269667		1068.42	0.01247388		1598.42	-0.02078448		2128.41	-0.0007729
538.62	0.17221699		1068.62	0.011916		1598.62	-0.02104505		2128.61	-0.00195077
538.82	0.17164059		1068.82	0.01165641		1598.82	-0.02071217		2128.81	-0.00197108
539.02	0.17045022		1069.02	0.01091751		1599.02	-0.02068391		2129.01	-0.00133795
539.22	0.17019255		1069.22	0.01077976		1599.22	-0.01991312		2129.21	-0.00104014
539.42	0.16922064		1069.42	0.01102461		1599.42	-0.01869818		2129.41	-0.00067589
539.62	0.16895209		1069.62	0.01109369		1599.62	-0.01913259		2129.61	-0.00099401
539.82	0.16832589		1069.82	0.01147863		1599.82	-0.02020425		2129.81	-0.00201157
540.02	0.16890761		1070.02	0.01163538		1600.02	-0.02063903		2130.01	-0.00180164
540.22	0.16844739		1070.22	0.01199845		1600.22	-0.02176731		2130.21	-0.00134122
540.42	0.16850092		1070.42	0.01145295		1600.42	-0.02258471		2130.41	-0.0009157
540.62	0.16918395		1070.62	0.01123387		1600.62	-0.02287265		2130.61	-0.00075296
540.82	0.16894744		1070.82	0.01135119		1600.82	-0.02267091		2130.81	-0.00026349
541.02	0.16894186		1071.02	0.01193777		1601.02	-0.023236		2131.01	-0.00073246
541.22	0.16913733		1071.22	0.01292736		1601.22	-0.02245387		2131.21	-0.00165573
541.42	0.17023707		1071.42	0.01270971		1601.42	-0.0237367		2131.41	-0.00100879
541.62	0.16935346		1071.62	0.01362919		1601.62	-0.02423263		2131.61	-0.00033
541.82	0.16943241		1071.82	0.01314716		1601.82	-0.02370161		2131.81	-0.00007229
542.02	0.16931132		1072.02	0.01241566		1602.02	-0.02409713		2132.01	-0.00037954
542.22	0.16911665		1072.22	0.0128669		1602.22	-0.02546735		2132.21	-0.00089639
542.42	0.16859893		1072.42	0.01168589		1602.42	-0.02612428		2132.41	-0.00016563
542.62	0.16809821		1072.62	0.01131732		1602.62	-0.02595821		2132.61	-0.00127183
542.82	0.1676044		1072.82	0.01120162		1602.82	-0.02614435		2132.81	-0.00128825
543.02	0.1670079		1073.02	0.01117163		1603.02	-0.02623741		2133.01	-0.00207089
543.22	0.16703147		1073.22	0.01151586		1603.22	-0.02544178		2133.21	-0.003025
543.42	0.16741607		1073.42	0.01192235		1603.42	-0.02589187		2133.41	-0.00419157
543.62	0.16816543		1073.62	0.01244064		1603.62	-0.02579856		2133.61	-0.00532859
543.82	0.16875111		1073.82	0.01237157		1603.82	-0.02574023		2133.81	-0.00530086
544.02	0.16942165		1074.02	0.01240181		1604.02	-0.02486979		2134.01	-0.00439688
544.22	0.16958833		1074.22	0.01173127		1604.22	-0.02534636		2134.21	-0.00335157
544.42	0.17099211		1074.42	0.01128018		1604.42	-0.02491511		2134.41	-0.00356375
544.62	0.17152814		1074.62	0.01232309		1604.62	-0.02421634		2134.61	-0.00367184
544.82	0.17233254		1074.82	0.01281298		1604.82	-0.02443909		2134.81	-0.00337048
545.02	0.17303062		1075.02	0.0130811		1605.02	-0.02363259		2135.01	-0.00270649
545.22	0.17328702		1075.22	0.01432101		1605.22	-0.02316942		2135.21	-0.00277919
545.42	0.17352544		1075.42	0.01400196		1605.42	-0.02289223		2135.41	-0.00132591
545.62	0.17266989		1075.62	0.01498568		1605.62	-0.02296633		2135.61	-0.00142034
545.82	0.17291588		1075.82	0.01450837		1605.82	-0.02222146		2135.81	-0.00179604
546.02	0.17360092		1076.02	0.01404082		1606.02	-0.02279077		2136.01	-0.00263258
546.22	0.17390257		1076.22	0.01379302		1606.22	-0.02352363		2136.21	-0.00260263
546.42	0.17256518		1076.42	0.0134251		1606.42	-0.02266314		2136.41	-0.0022166
546.62	0.17094422		1076.62	0.01427229		1606.62	-0.0228308		2136.61	-0.00298763
546.82	0.170583		1076.82	0.01400193		1606.82	-0.02299893		2136.81	-0.00353947
547.02	0.1694142		1077.02	0.0147277		1607.02	-0.02206656		2137.01	-0.00477921
547.22	0.16745298		1077.22	0.01414393		1607.22	-0.02153088		2137.21	-0.00479019
547.42	0.16650863		1077.42	0.01426378		1607.42	-0.02098989		2137.41	-0.00536594
547.62	0.16679349		1077.62	0.01412831		1607.62	-0.01938532		2137.61	-0.00504333
547.82	0.16634987		1077.82	0.0135992		1607.82	-0.01914566		2137.81	-0.00449461
548.02	0.16569201		1078.02	0.0130088		1608.02	-0.01909049		2138.01	-0.00333195
548.22	0.1659411		1078.22	0.01192086		1608.22	-0.02054872		2138.21	-0.00255831
548.42	0.16655484		1078.42	0.01224735		1608.42	-0.02030726		2138.41	-0.00239657
548.62	0.16702372		1078.62	0.01258636		1608.62	-0.02060504		2138.61	-0.00262786
548.82	0.16849546		1078.82	0.01247377		1608.82	-0.02211037		2138.81	-0.00163885
549.02	0.16852018		1079.02	0.01255782		1609.02	-0.02110862		2139.01	-0.00172947
549.22	0.16970796		1079.22	0.01313747		1609.22	-0.02104494		2139.21	-0.00175822
549.42	0.1709995		1079.42	0.01219733		1609.42	-0.02130807		2139.41	-0.00150966
549.62	0.17142949		1079.62	0.01216583		1609.62	-0.02243474		2139.61	-0.00192973
549.82	0.17240768		1079.82	0.01158171		1609.82	-0.02255827		2139.81	-0.00271507
550.02	0.17296545		1080.02	0.01140098		1610.02	-0.0227035		2140.01	-0.00320433
550.22	0.17263156		1080.22	0.01145863		1610.22	-0.02308182		2140.21	-0.0031304
550.42	0.17114829		1080.42	0.01143134		1610.42	-0.02297822		2140.41	-0.00343208
550.62	0.1710282		1080.62	0.01233104		1610.62	-0.02289558		2140.61	-0.00294942
550.82	0.17138432		1080.82	0.01294392		1610.82	-0.02247657		2140.81	-0.00312619
551.02	0.17099538		1081.02	0.01337566		1611.02	-0.02174268		2141.01	-0.00308078
551.22	0.1703258		1081.22	0.0130398		1611.22	-0.02202434		2141.21	-0.00270691
551.42	0.17000695		1081.42	0.01292929		1611.42	-0.02158002		2141.41	-0.00330877
551.62	0.17092745		1081.62	0.01239422		1611.62	-0.02081704		2141.61	-0.00324138
551.82	0.17060195		1081.82	0.01180326		1611.82	-0.02112567		2141.81	-0.00306886
552.02	0.16963576		1082.02	0.01195977		1612.02	-0.02067508		2142.01	-0.00275481
552.22	0.170521		1082.22	0.0117685		1612.22	-0.02122564		2142.21	-0.00159747
552.42	0.17045395		1082.42	0.01239701		1612.42	-0.02112848		2142.41	-0.00131288
552.62	0.17065855		1082.62	0.01252614		1612.62	-0.02096141		2142.61	-0.00160783
552.82	0.17052206		1082.82	0.01237418		1612.82	-0.02089373		2142.81	-0.00134252
553.02	0.17039725		1083.02	0.01223878		1613.02	-0.02000888		2143.01	-0.00119692
553.22	0.17110505		1083.22	0.01169484		1613.22	-0.01980876		2143.21	-0.00005968
553.42	0.17046568		1083.42	0.010659		1613.42	-0.02024884		2143.41	-0.00013636
553.62	0.16923995		1083.62	0.01021241		1613.62	-0.01965284		2143.61	-0.00063676
553.82	0.16866586		1083.82	0.01027908		1613.82	-0.01905219		2143.81	-0.00052915
554.02	0.16871605		1084.02	0.00987614		1614.02	-0.01790236		2144.01	0.0000781
554.22	0.1678112		1084.22	0.01053296		1614.22	-0.01928516		2144.21	0.00040382
554.42	0.16731328		1084.42	0.01049702		1614.42	-0.01883795		2144.41	0.00169594
554.62	0.16738358		1084.62	0.01088182		1614.62	-0.01770514		2144.61	0.00208806
554.82	0.16706104		1084.82	0.01103441		1614.82	-0.01783449		2144.81	0.00126172
555.02	0.1674434		1085.02	0.00927804		1615.02	-0.01736921		2145.01	0.00117954
555.22	0.16703433		1085.22	0.00941901		1615.22	-0.0174211		2145.21	0.00066838
555.42	0.16699322		1085.42	0.00885372		1615.42	-0.0171219		2145.41	-0.00061075
555.62	0.16775796		1085.62	0.00904151		1615.62	-0.01684072		2145.61	-0.00152589
555.82	0.16823782		1085.82	0.00873595		1615.82	-0.01740955		2145.81	-0.00187
556.02	0.16753915		1086.02	0.00978595		1616.02	-0.01812033		2146.01	-0.00263962
556.22	0.16814484		1086.22	0.01068338		1616.22	-0.0187279		2146.21	-0.00210221
556.42	0.16816481		1086.42	0.01100975		1616.42	-0.0196438		2146.41	-0.00331258
556.62	0.16908253		1086.62	0.01180658		1616.62	-0.01954245		2146.61	-0.0033959
556.82	0.16909627		1086.82	0.01235153		1616.82	-0.02007209		2146.81	-0.00390388
557.02	0.16952152		1087.02	0.01317988		1617.02	-0.02111315		2147.01	-0.0032959
557.22	0.16957344		1087.22	0.01421501		1617.22	-0.02211862		2147.21	-0.00337004
557.42	0.16960554		1087.42	0.0136073		1617.42	-0.02331664		2147.41	-0.00309028
557.62	0.16966916		1087.62	0.01420297		1617.62	-0.02301256		2147.61	-0.00326924
557.82	0.16961313		1087.82	0.01455649		1617.82	-0.02300355		2147.81	-0.00285604
558.02	0.16982896		1088.02	0.01442233		1618.02	-0.02278711		2148.01	-0.00289597
558.22	0.16908814		1088.22	0.01477577		1618.22	-0.0234863		2148.21	-0.00256343
558.42	0.1690445		1088.42	0.01402975		1618.42	-0.02196173		2148.41	-0.00219807
558.62	0.16906556		1088.62	0.01368841		1618.62	-0.02068516		2148.61	-0.00267946
558.82	0.16895267		1088.82	0.01329981		1618.82	-0.01994293		2148.81	-0.00278703
559.02	0.16930915		1089.02	0.01284898		1619.02	-0.01852915		2149.01	-0.00268392
559.22	0.16930013		1089.22	0.01334067		1619.22	-0.01761415		2149.21	-0.00313834
559.42	0.16957081		1089.42	0.01317685		1619.42	-0.01658611		2149.41	-0.00379893
559.62	0.16980105		1089.62	0.01329424		1619.62	-0.0156305		2149.61	-0.00379929
559.82	0.17001745		1089.82	0.01301427		1619.82	-0.01500511		2149.81	-0.0036212
