# Supplementary material for: Functional development of a V3/glycan-specific broadly neutralizing antibody isolated from a case of HIV superinfection
Source: eLife journal article supplement (doi:10.7554/elife.68110), 2021-07-15
Supplement: fig2-data2 [file E1.xls]

Vers 3.43 Data Simulation
Conc1	3.125E-08	3.125E-08	3.125E-08	3.125E-08	3.125E-08
Start1	200	729.99	1260	1790	2320
Stop1	559.8	1089.79	1619.8	2149.8	2679.8
Time1	Data1	Sim1	Time2	Data2	Sim2	Time3	Data3	Sim3	Time4	Data4	Sim4	Time5	Data5	Sim5
200	0.00962999		729.99	0.00333442		1260	0.00950755		1790	-0.0054899		2320	-0.00293547
200.2	0.0094359		730.19	0.0037575		1260.2	0.00994855		1790.2	-0.00619712		2320.2	-0.00250498
200.4	0.00913276		730.39	0.00509297		1260.4	0.01021258		1790.4	-0.00670549		2320.4	-0.00192334
200.6	0.00904877		730.59	0.00568525		1260.6	0.01053087		1790.6	-0.00754977		2320.6	-0.00030231
200.8	0.0089559		730.79	0.00606589		1260.8	0.01086986		1790.8	-0.0090333		2320.8	0.00062262
201	0.00828912		730.99	0.00630925		1261	0.01079053		1791	-0.01003714		2321	0.00156137
201.2	0.00818049		731.19	0.00659439		1261.2	0.01122857		1791.2	-0.01071431		2321.2	0.00192755
201.4	0.00824475		731.39	0.00626252		1261.4	0.01166892		1791.4	-0.01155623		2321.4	0.00207792
201.6	0.0077912		731.59	0.00625277		1261.6	0.01203542		1791.6	-0.0118491		2321.6	0.00269187
201.8	0.00762059		731.79	0.00654782		1261.8	0.01200057		1791.8	-0.01228544		2321.8	0.00271436
202	0.00732902		731.99	0.00705318		1262	0.01218928		1792	-0.01190867		2322	0.00251505
202.2	0.00757458		732.19	0.00686605		1262.2	0.01173049		1792.2	-0.01157197		2322.2	0.00271522
202.4	0.00752199		732.39	0.00623515		1262.4	0.01221902		1792.4	-0.01275437		2322.4	0.00239183
202.6	0.00774444		732.59	0.00652066		1262.6	0.0115524		1792.6	-0.01335157		2322.6	0.0012302
202.8	0.00796059		732.79	0.00679815		1262.8	0.01134757		1792.8	-0.01317307		2322.8	-0.00018361
203	0.00889536		732.99	0.00729192		1263	0.01056566		1793	-0.01385691		2323	-0.00045943
203.2	0.00996859		733.19	0.00660984		1263.2	0.01025626		1793.2	-0.01361574		2323.2	-0.00127196
203.4	0.01126219		733.39	0.00687966		1263.4	0.01038873		1793.4	-0.01311439		2323.4	-0.00271905
203.6	0.01121164		733.59	0.00594719		1263.6	0.01087391		1793.6	-0.01285817		2323.6	-0.00355636
203.8	0.01246		733.79	0.00669689		1263.8	0.01048047		1793.8	-0.01274556		2323.8	-0.00417833
204	0.01299758		733.99	0.00667006		1264	0.01141027		1794	-0.01166297		2324	-0.00480197
204.2	0.01220853		734.19	0.00657238		1264.2	0.01152238		1794.2	-0.0104814		2324.2	-0.00506144
204.4	0.01276986		734.39	0.00691754		1264.4	0.01246343		1794.4	-0.00977937		2324.4	-0.00448411
204.6	0.01305477		734.59	0.00569813		1264.6	0.01355691		1794.6	-0.00916377		2324.6	-0.00337874
204.8	0.0134277		734.79	0.00490428		1264.8	0.01402157		1794.8	-0.00952531		2324.8	-0.00369944
205	0.01290696		734.99	0.00483761		1265	0.01417321		1795	-0.00872441		2325	-0.00320625
205.2	0.01229789		735.19	0.00444875		1265.2	0.01502936		1795.2	-0.00832835		2325.2	-0.00275413
205.4	0.01177968		735.39	0.00369791		1265.4	0.01488094		1795.4	-0.0084794		2325.4	-0.0018159
205.6	0.0110919		735.59	0.00420528		1265.6	0.01412627		1795.6	-0.00834586		2325.6	-0.00037393
205.8	0.01078596		735.79	0.00387068		1265.8	0.01303164		1795.8	-0.00843228		2325.8	0.00071602
206	0.01054071		735.99	0.00419858		1266	0.01238325		1796	-0.00854174		2326	0.0015893
206.2	0.01018592		736.19	0.00407585		1266.2	0.0113905		1796.2	-0.00975472		2326.2	0.00220219
206.4	0.0097292		736.39	0.0046188		1266.4	0.01113295		1796.4	-0.0104242		2326.4	0.00129029
206.6	0.01043006		736.59	0.00489257		1266.6	0.01011177		1796.6	-0.011207		2326.6	0.00055183
206.8	0.01007709		736.79	0.00490095		1266.8	0.0091144		1796.8	-0.01193917		2326.8	0.00083865
207	0.01026569		736.99	0.00483994		1267	0.00896517		1797	-0.0133911		2327	0.00095241
207.2	0.00999565		737.19	0.00517045		1267.2	0.00878165		1797.2	-0.01379627		2327.2	0.00070348
207.4	0.01011		737.39	0.00594507		1267.4	0.00850243		1797.4	-0.01403187		2327.4	0.00010833
207.6	0.00938129		737.59	0.00637421		1267.6	0.0078153		1797.6	-0.01339398		2327.6	-0.00017168
207.8	0.00921679		737.79	0.0074356		1267.8	0.00701496		1797.8	-0.01273338		2327.8	-0.00075876
208	0.0095612		737.99	0.00769246		1268	0.0074413		1798	-0.01145894		2328	-0.00119756
208.2	0.00907443		738.19	0.00773757		1268.2	0.00814489		1798.2	-0.01058066		2328.2	-0.00129017
208.4	0.00939406		738.39	0.00797076		1268.4	0.00965446		1798.4	-0.01017474		2328.4	-0.00201588
208.6	0.00963547		738.59	0.00821297		1268.6	0.010425		1798.6	-0.00992973		2328.6	-0.00264331
208.8	0.00989369		738.79	0.00945527		1268.8	0.01058095		1798.8	-0.00963317		2328.8	-0.00352706
209	0.01007332		738.99	0.01013612		1269	0.01102267		1799	-0.00846144		2329	-0.00382682
209.2	0.00965777		739.19	0.00972847		1269.2	0.01120153		1799.2	-0.00852367		2329.2	-0.00381429
209.4	0.01010364		739.39	0.00898378		1269.4	0.01075122		1799.4	-0.0080884		2329.4	-0.00319625
209.6	0.0110599		739.59	0.00905318		1269.6	0.01028274		1799.6	-0.00757192		2329.6	-0.00238274
209.8	0.01187497		739.79	0.00856657		1269.8	0.01018167		1799.8	-0.00729692		2329.8	-0.00185375
210	0.0130284		739.99	0.00859787		1270	0.01074569		1800	-0.00787653		2330	-0.001651
210.2	0.01359482		740.19	0.00865421		1270.2	0.00996012		1800.2	-0.00838505		2330.2	-0.00080586
210.4	0.01462652		740.39	0.00860915		1270.4	0.00993977		1800.4	-0.00914925		2330.4	-0.00016881
210.6	0.01532931		740.59	0.00755071		1270.6	0.00987967		1800.6	-0.01043872		2330.6	0.00055169
210.8	0.01485785		740.79	0.00688933		1270.8	0.00933438		1800.8	-0.01148006		2330.8	0.00120046
211	0.01555555		740.99	0.00693483		1271	0.00966197		1801	-0.01167652		2331	0.00147221
211.2	0.01596532		741.19	0.00758224		1271.2	0.00932907		1801.2	-0.01131694		2331.2	0.00185723
211.4	0.01696499		741.39	0.00730577		1271.4	0.00889058		1801.4	-0.01011153		2331.4	0.0019289
211.6	0.01648127		741.59	0.00724612		1271.6	0.00813919		1801.6	-0.01008775		2331.6	0.00184794
211.8	0.01698974		741.79	0.00667845		1271.8	0.00840202		1801.8	-0.01023611		2331.8	0.00197674
212	0.01774285		741.99	0.00713973		1272	0.00839944		1802	-0.00988013		2332	0.00246407
212.2	0.01683195		742.19	0.00790234		1272.2	0.0097831		1802.2	-0.00928848		2332.2	0.00166514
212.4	0.01693892		742.39	0.00761983		1272.4	0.01018286		1802.4	-0.00904633		2332.4	-0.00028285
212.6	0.01701302		742.59	0.00817525		1272.6	0.0107557		1802.6	-0.0089419		2332.6	-0.00078879
212.8	0.01718583		742.79	0.00823197		1272.8	0.01101505		1802.8	-0.00828117		2332.8	-0.00205028
213	0.01682095		742.99	0.00737909		1273	0.01149548		1803	-0.00779661		2333	-0.00192923
213.2	0.01583711		743.19	0.00683808		1273.2	0.0113778		1803.2	-0.00734038		2333.2	-0.00153304
213.4	0.01563459		743.39	0.00640434		1273.4	0.01206209		1803.4	-0.00685028		2333.4	-0.00109422
213.6	0.0156467		743.59	0.00630977		1273.6	0.01171895		1803.6	-0.00750304		2333.6	-0.00087383
213.8	0.0158667		743.79	0.00580036		1273.8	0.01198664		1803.8	-0.00681368		2333.8	-0.00090338
214	0.01564747		743.99	0.00571926		1274	0.0120978		1804	-0.00748795		2334	-0.00002121
214.2	0.01513152		744.19	0.005835		1274.2	0.01147464		1804.2	-0.00786059		2334.2	0.00030539
214.4	0.01463239		744.39	0.005521		1274.4	0.01189305		1804.4	-0.00833192		2334.4	0.00022111
214.6	0.01410094		744.59	0.00520066		1274.6	0.01170089		1804.6	-0.00807063		2334.6	0.00003876
214.8	0.01391441		744.79	0.00533887		1274.8	0.01142341		1804.8	-0.00904562		2334.8	-0.0004458
215	0.01404948		744.99	0.00530015		1275	0.01130927		1805	-0.00924949		2335	-0.00079618
215.2	0.01452906		745.19	0.00442902		1275.2	0.01088415		1805.2	-0.00887903		2335.2	-0.00139303
215.4	0.01537792		745.39	0.00453525		1275.4	0.01075125		1805.4	-0.00979847		2335.4	-0.00186322
215.6	0.0158216		745.59	0.00474128		1275.6	0.00990179		1805.6	-0.01027731		2335.6	-0.00231129
215.8	0.01644462		745.79	0.00511483		1275.8	0.0096445		1805.8	-0.01025939		2335.8	-0.00282058
216	0.01628131		745.99	0.00551419		1276	0.00845457		1806	-0.01006289		2336	-0.00339156
216.2	0.01594585		746.19	0.00546134		1276.2	0.00939428		1806.2	-0.01020568		2336.2	-0.00371096
216.4	0.01655721		746.39	0.00466554		1276.4	0.00895847		1806.4	-0.01063625		2336.4	-0.0040565
216.6	0.01701001		746.59	0.00470546		1276.6	0.00885787		1806.6	-0.01089999		2336.6	-0.00418448
216.8	0.01826777		746.79	0.00458481		1276.8	0.00813493		1806.8	-0.01055388		2336.8	-0.00382631
217	0.0174862		746.99	0.00465883		1277	0.00743598		1807	-0.01006569		2337	-0.00212991
217.2	0.01736164		747.19	0.00499858		1277.2	0.00770289		1807.2	-0.01010215		2337.2	-0.00158319
217.4	0.0164043		747.39	0.00559529		1277.4	0.00835864		1807.4	-0.01026557		2337.4	-0.00118602
217.6	0.01583365		747.59	0.0056764		1277.6	0.00771598		1807.6	-0.01014472		2337.6	-0.0006064
217.8	0.01589158		747.79	0.0058359		1277.8	0.00861776		1807.8	-0.00938652		2337.8	0.00045914
218	0.01593076		747.99	0.00691876		1278	0.00906293		1808	-0.00984841		2338	0.00070892
218.2	0.01545513		748.19	0.00711903		1278.2	0.00894234		1808.2	-0.00964326		2338.2	0.00055278
218.4	0.01535573		748.39	0.00741366		1278.4	0.00945714		1808.4	-0.00948857		2338.4	0.00061126
218.6	0.0153048		748.59	0.00747364		1278.6	0.0105654		1808.6	-0.00942399		2338.6	0.00040666
218.8	0.01549261		748.79	0.00737066		1278.8	0.01068071		1808.8	-0.00960063		2338.8	-0.00014597
219	0.01598072		748.99	0.00715986		1279	0.0106072		1809	-0.00961969		2339	-0.00048093
219.2	0.0165952		749.19	0.00655809		1279.2	0.01138347		1809.2	-0.00904723		2339.2	-0.00064017
219.4	0.01689043		749.39	0.00743798		1279.4	0.01156057		1809.4	-0.00939322		2339.4	-0.00203415
219.6	0.017382		749.59	0.00696553		1279.6	0.01146675		1809.6	-0.00851188		2339.6	-0.00258808
219.8	0.01682676		749.79	0.00685913		1279.8	0.01186766		1809.8	-0.00903723		2339.8	-0.00238528
220	0.01624869		749.99	0.00671241		1280	0.01222252		1810	-0.00866679		2340	-0.00275889
220.2	0.01685436		750.19	0.00619351		1280.2	0.01288543		1810.2	-0.00925383		2340.2	-0.00207112
220.4	0.0176197		750.39	0.00522454		1280.4	0.01246071		1810.4	-0.00928639		2340.4	-0.00236928
220.6	0.01743825		750.59	0.00484417		1280.6	0.01158644		1810.6	-0.008945		2340.6	-0.00283192
220.8	0.01632604		750.79	0.00471338		1280.8	0.01034511		1810.8	-0.00901443		2340.8	-0.00219369
221	0.01487819		750.99	0.00420309		1281	0.0110084		1811	-0.00892585		2341	-0.00164834
221.2	0.01476049		751.19	0.00473421		1281.2	0.01134325		1811.2	-0.00856806		2341.2	-0.00177992
221.4	0.01373836		751.39	0.00500133		1281.4	0.01053055		1811.4	-0.00830342		2341.4	-0.00250483
221.6	0.01360065		751.59	0.00452291		1281.6	0.01032138		1811.6	-0.00857773		2341.6	-0.0022615
221.8	0.01394973		751.79	0.00440897		1281.8	0.01023203		1811.8	-0.00869497		2341.8	-0.00217591
222	0.01421072		751.99	0.00467516		1282	0.00931523		1812	-0.00881079		2342	-0.00271506
222.2	0.0140119		752.19	0.00434053		1282.2	0.00830591		1812.2	-0.00894395		2342.2	-0.00194167
222.4	0.01377045		752.39	0.00434998		1282.4	0.00840937		1812.4	-0.00903758		2342.4	-0.00190612
222.6	0.01382514		752.59	0.00422381		1282.6	0.00906439		1812.6	-0.00917451		2342.6	-0.00238619
222.8	0.0138242		752.79	0.0050386		1282.8	0.00883596		1812.8	-0.00942642		2342.8	-0.00222846
223	0.01420486		752.99	0.00564644		1283	0.0089099		1813	-0.00975874		2343	-0.0019064
223.2	0.01443696		753.19	0.00577806		1283.2	0.00958388		1813.2	-0.00982102		2343.2	-0.00227536
223.4	0.01465478		753.39	0.00587772		1283.4	0.00951402		1813.4	-0.00960855		2343.4	-0.00281784
223.6	0.01521011		753.59	0.00579629		1283.6	0.01001455		1813.6	-0.0094551		2343.6	-0.00190837
223.8	0.01522032		753.79	0.00609649		1283.8	0.01036558		1813.8	-0.01003236		2343.8	-0.00100569
224	0.01573194		753.99	0.00583562		1284	0.01042428		1814	-0.00959502		2344	-0.00066578
224.2	0.01643369		754.19	0.00504449		1284.2	0.01042298		1814.2	-0.01028041		2344.2	-0.00003758
224.4	0.01638529		754.39	0.00460637		1284.4	0.00934362		1814.4	-0.01022947		2344.4	-0.00102645
224.6	0.01748073		754.59	0.00433315		1284.6	0.00953712		1814.6	-0.01061857		2344.6	-0.00150594
224.8	0.01821993		754.79	0.00425061		1284.8	0.01028064		1814.8	-0.01113682		2344.8	-0.00108955
225	0.01928922		754.99	0.00429759		1285	0.01129518		1815	-0.01093288		2345	-0.00095877
225.2	0.0193887		755.19	0.0052116		1285.2	0.01122063		1815.2	-0.01089497		2345.2	-0.00122089
225.4	0.01863179		755.39	0.00486106		1285.4	0.01129345		1815.4	-0.01181991		2345.4	-0.00118043
225.6	0.01855792		755.59	0.00525096		1285.6	0.01147973		1815.6	-0.01277848		2345.6	-0.00109867
225.8	0.01894414		755.79	0.00531474		1285.8	0.01112519		1815.8	-0.01323302		2345.8	-0.00197479
226	0.01872326		755.99	0.005345		1286	0.01001413		1816	-0.01329422		2346	-0.00203473
226.2	0.01830854		756.19	0.00569876		1286.2	0.00971188		1816.2	-0.01247251		2346.2	-0.00215658
226.4	0.01794426		756.39	0.00623386		1286.4	0.01027738		1816.4	-0.0120715		2346.4	-0.00234955
226.6	0.01796013		756.59	0.00709229		1286.6	0.01020748		1816.6	-0.01192743		2346.6	-0.00165153
226.8	0.01763955		756.79	0.008487		1286.8	0.00983034		1816.8	-0.01121726		2346.8	-0.00122938
227	0.01699298		756.99	0.00922736		1287	0.00910205		1817	-0.01050663		2347	-0.0014706
227.2	0.01703609		757.19	0.0092065		1287.2	0.01000375		1817.2	-0.01048986		2347.2	-0.00210402
227.4	0.01680647		757.39	0.00989691		1287.4	0.00905563		1817.4	-0.00994242		2347.4	-0.00158262
227.6	0.01668706		757.59	0.01041676		1287.6	0.00912202		1817.6	-0.00933632		2347.6	-0.00201701
227.8	0.01730647		757.79	0.01058066		1287.8	0.00911534		1817.8	-0.00876333		2347.8	-0.00201132
228	0.01813646		757.99	0.01049311		1288	0.00892441		1818	-0.00687681		2348	-0.00246856
228.2	0.01878723		758.19	0.01014518		1288.2	0.00959774		1818.2	-0.00611878		2348.2	-0.0036295
228.4	0.01947571		758.39	0.00942212		1288.4	0.00951848		1818.4	-0.00634279		2348.4	-0.00438249
228.6	0.01986019		758.59	0.00819792		1288.6	0.01054217		1818.6	-0.00649838		2348.6	-0.00436246
228.8	0.02001067		758.79	0.0084155		1288.8	0.01017866		1818.8	-0.00650166		2348.8	-0.00425858
229	0.01942697		758.99	0.00762876		1289	0.01060885		1819	-0.00649668		2349	-0.00357043
229.2	0.01895881		759.19	0.00728751		1289.2	0.01163512		1819.2	-0.007054		2349.2	-0.00398904
229.4	0.0192307		759.39	0.00634694		1289.4	0.01125305		1819.4	-0.00791613		2349.4	-0.00380806
229.6	0.01943227		759.59	0.00663498		1289.6	0.01068778		1819.6	-0.00770871		2349.6	-0.00430363
229.8	0.01938301		759.79	0.00558349		1289.8	0.01073095		1819.8	-0.00736502		2349.8	-0.00433956
230	0.0192404		759.99	0.00465152		1290	0.01035219		1820	-0.00740422		2350	-0.00406068
230.2	0.01849143		760.19	0.00412696		1290.2	0.01039214		1820.2	-0.00713152		2350.2	-0.00280889
230.4	0.01877032		760.39	0.00406794		1290.4	0.01026134		1820.4	-0.00787314		2350.4	-0.00189917
230.6	0.01862533		760.59	0.00460947		1290.6	0.00994947		1820.6	-0.00806155		2350.6	-0.00133229
230.8	0.01921138		760.79	0.00506565		1290.8	0.01054822		1820.8	-0.00802224		2350.8	-0.00203803
231	0.01880969		760.99	0.00601511		1291	0.01082973		1821	-0.00881417		2351	-0.00184425
231.2	0.01932952		761.19	0.00585497		1291.2	0.01122987		1821.2	-0.00968408		2351.2	-0.00218286
231.4	0.02040154		761.39	0.00659558		1291.4	0.0097272		1821.4	-0.00952592		2351.4	-0.00208068
231.6	0.02082399		761.59	0.00641208		1291.6	0.01026832		1821.6	-0.00896035		2351.6	-0.00312921
231.8	0.02139377		761.79	0.00657019		1291.8	0.01074803		1821.8	-0.00854451		2351.8	-0.00316615
232	0.02192218		761.99	0.00645974		1292	0.01087612		1822	-0.00790188		2352	-0.00302563
232.2	0.02140743		762.19	0.00624523		1292.2	0.010615		1822.2	-0.00830145		2352.2	-0.00389233
232.4	0.02126115		762.39	0.00659722		1292.4	0.00995004		1822.4	-0.00894108		2352.4	-0.00378272
232.6	0.02058768		762.59	0.00689491		1292.6	0.00982451		1822.6	-0.00984048		2352.6	-0.00403701
232.8	0.02079883		762.79	0.00816319		1292.8	0.01002926		1822.8	-0.00999085		2352.8	-0.00335892
233	0.02015712		762.99	0.00710721		1293	0.01184729		1823	-0.01021793		2353	-0.00243217
233.2	0.02004969		763.19	0.00723857		1293.2	0.01189135		1823.2	-0.01017143		2353.2	-0.00352056
233.4	0.01986238		763.39	0.00709549		1293.4	0.01133497		1823.4	-0.00915719		2353.4	-0.00341224
233.6	0.01931906		763.59	0.00736485		1293.6	0.0111574		1823.6	-0.00863093		2353.6	-0.00365495
233.8	0.01848911		763.79	0.00671622		1293.8	0.01159628		1823.8	-0.0086204		2353.8	-0.00352634
234	0.01852832		763.99	0.00638985		1294	0.01183554		1824	-0.00834676		2354	-0.00345283
234.2	0.01780345		764.19	0.00619351		1294.2	0.01152757		1824.2	-0.00768585		2354.2	-0.00270483
234.4	0.01880726		764.39	0.00630715		1294.4	0.01204222		1824.4	-0.00754816		2354.4	-0.00294974
234.6	0.01869004		764.59	0.0063263		1294.6	0.01222498		1824.6	-0.00708983		2354.6	-0.00281308
234.8	0.01887934		764.79	0.00594566		1294.8	0.01207958		1824.8	-0.00713481		2354.8	-0.00267266
235	0.01871536		764.99	0.00561574		1295	0.01153217		1825	-0.00727827		2355	-0.00241958
235.2	0.0187273		765.19	0.00482986		1295.2	0.01135046		1825.2	-0.00657362		2355.2	-0.00289366
235.4	0.01954295		765.39	0.00412069		1295.4	0.01048746		1825.4	-0.00609262		2355.4	-0.00269582
235.6	0.01913956		765.59	0.00362234		1295.6	0.0107364		1825.6	-0.0064066		2355.6	-0.00284007
235.8	0.0191722		765.79	0.00399221		1295.8	0.01192433		1825.8	-0.00584599		2355.8	-0.00241687
236	0.01938753		765.99	0.00406307		1296	0.01151985		1826	-0.00616639		2356	-0.00190537
236.2	0.01837453		766.19	0.00415021		1296.2	0.01166292		1826.2	-0.00614658		2356.2	-0.0018255
236.4	0.01871823		766.39	0.00416414		1296.4	0.01234686		1826.4	-0.00705571		2356.4	-0.00179362
236.6	0.01806516		766.59	0.00441932		1296.6	0.01233868		1826.6	-0.00759316		2356.6	-0.00154775
236.8	0.01771218		766.79	0.00474894		1296.8	0.01250956		1826.8	-0.00688439		2356.8	-0.0011948
237	0.01796617		766.99	0.00412235		1297	0.01206001		1827	-0.00709576		2357	-0.00101024
237.2	0.01779036		767.19	0.00463225		1297.2	0.01092929		1827.2	-0.00673816		2357.2	-0.00197306
237.4	0.01778052		767.39	0.0050857		1297.4	0.01126138		1827.4	-0.00673606		2357.4	-0.0033204
237.6	0.01835454		767.59	0.00579541		1297.6	0.01135935		1827.6	-0.00723904		2357.6	-0.00401676
237.8	0.01849409		767.79	0.00566143		1297.8	0.01143487		1827.8	-0.00644064		2357.8	-0.00383976
238	0.01922024		767.99	0.00471766		1298	0.01110024		1828	-0.00644001		2358	-0.00384449
238.2	0.01941269		768.19	0.00469046		1298.2	0.0103387		1828.2	-0.00608628		2358.2	-0.00425835
238.4	0.02043328		768.39	0.00504006		1298.4	0.01035724		1828.4	-0.00579532		2358.4	-0.00422371
238.6	0.01984699		768.59	0.00482017		1298.6	0.01060221		1828.6	-0.00577917		2358.6	-0.00480874
238.8	0.02025081		768.79	0.0046151		1298.8	0.01082561		1828.8	-0.00567665		2358.8	-0.00508125
239	0.0206906		768.99	0.00470074		1299	0.01034766		1829	-0.00566138		2359	-0.00524037
239.2	0.02067909		769.19	0.00482819		1299.2	0.01047271		1829.2	-0.00523472		2359.2	-0.00552392
239.4	0.02167755		769.39	0.00445233		1299.4	0.00985021		1829.4	-0.00640059		2359.4	-0.00558221
239.6	0.0219202		769.59	0.00503165		1299.6	0.01027202		1829.6	-0.00630939		2359.6	-0.00635155
239.8	0.02147401		769.79	0.00505679		1299.8	0.01143596		1829.8	-0.00644465		2359.8	-0.00553386
240	0.02182466		769.99	0.00477801		1300	0.01058798		1830	-0.00808331		2360	-0.00470525
240.2	0.0210337		770.19	0.00426695		1300.2	0.00985664		1830.2	-0.00826272		2360.2	-0.00473216
240.4	0.02142746		770.39	0.00470774		1300.4	0.00925033		1830.4	-0.00920096		2360.4	-0.00512009
240.6	0.02122207		770.59	0.00467489		1300.6	0.00801855		1830.6	-0.00988542		2360.6	-0.00443767
240.8	0.0202876		770.79	0.00451273		1300.8	0.00780345		1830.8	-0.01070598		2360.8	-0.00376858
241	0.02018194		770.99	0.00504032		1301	0.00709487		1831	-0.01209362		2361	-0.00350519
241.2	0.02009589		771.19	0.00480265		1301.2	0.00750944		1831.2	-0.01201237		2361.2	-0.00380803
241.4	0.02016943		771.39	0.00514616		1301.4	0.00850081		1831.4	-0.01259374		2361.4	-0.00417048
241.6	0.02045304		771.59	0.00500707		1301.6	0.00821801		1831.6	-0.01243311		2361.6	-0.00365548
241.8	0.01896508		771.79	0.00522876		1301.8	0.00834146		1831.8	-0.01145173		2361.8	-0.00294408
242	0.01853535		771.99	0.00478525		1302	0.00830404		1832	-0.01173301		2362	-0.00254417
242.2	0.01861047		772.19	0.00596666		1302.2	0.00821732		1832.2	-0.01051441		2362.2	-0.00218156
242.4	0.01885619		772.39	0.00601462		1302.4	0.00938268		1832.4	-0.00931595		2362.4	-0.00198893
242.6	0.01859094		772.59	0.00614571		1302.6	0.01020195		1832.6	-0.00894253		2362.6	-0.00260732
242.8	0.01878581		772.79	0.00637513		1302.8	0.01009642		1832.8	-0.00828899		2362.8	-0.00277873
243	0.0186876		772.99	0.00649537		1303	0.0095985		1833	-0.0078363		2363	-0.00327769
243.2	0.01944332		773.19	0.00635039		1303.2	0.01048665		1833.2	-0.00767564		2363.2	-0.00360073
243.4	0.02046699		773.39	0.00728196		1303.4	0.0111695		1833.4	-0.00811851		2363.4	-0.00443599
243.6	0.02083522		773.59	0.00755413		1303.6	0.01228658		1833.6	-0.00751203		2363.6	-0.00488768
243.8	0.02122003		773.79	0.00717554		1303.8	0.01300933		1833.8	-0.0082241		2363.8	-0.00496958
244	0.02189332		773.99	0.00742472		1304	0.01254658		1834	-0.00860107		2364	-0.00510499
244.2	0.02152213		774.19	0.00791955		1304.2	0.01227365		1834.2	-0.00842352		2364.2	-0.00605505
244.4	0.02187553		774.39	0.00814858		1304.4	0.01293808		1834.4	-0.00900941		2364.4	-0.00630526
244.6	0.02122712		774.59	0.00787029		1304.6	0.01314802		1834.6	-0.0091418		2364.6	-0.00616768
244.8	0.02035215		774.79	0.00835391		1304.8	0.01371179		1834.8	-0.00896019		2364.8	-0.00553401
245	0.02114337		774.99	0.00874953		1305	0.01454456		1835	-0.00851866		2365	-0.0059285
245.2	0.0218604		775.19	0.00764925		1305.2	0.01526055		1835.2	-0.00801347		2365.2	-0.00519417
245.4	0.02146252		775.39	0.008268		1305.4	0.01604748		1835.4	-0.00811805		2365.4	-0.00536893
245.6	0.02085003		775.59	0.00821874		1305.6	0.01487992		1835.6	-0.00756224		2365.6	-0.00482757
245.8	0.01987037		775.79	0.00898365		1305.8	0.01514125		1835.8	-0.00648543		2365.8	-0.0046584
246	0.02031883		775.99	0.00895039		1306	0.0145955		1836	-0.00619484		2366	-0.00491629
246.2	0.02103005		776.19	0.00916678		1306.2	0.01400178		1836.2	-0.00494175		2366.2	-0.00447987
246.4	0.02096203		776.39	0.00885423		1306.4	0.01343285		1836.4	-0.00360543		2366.4	-0.00510866
246.6	0.02040765		776.59	0.00792346		1306.6	0.01304199		1836.6	-0.00310514		2366.6	-0.00562385
246.8	0.01998626		776.79	0.00757589		1306.8	0.01302754		1836.8	-0.00259954		2366.8	-0.0057627
247	0.02061581		776.99	0.00676259		1307	0.01234146		1837	-0.00243932		2367	-0.00607482
247.2	0.02146339		777.19	0.00630844		1307.2	0.01200231		1837.2	-0.00283191		2367.2	-0.00611825
247.4	0.02193209		777.39	0.00651453		1307.4	0.01160463		1837.4	-0.00271069		2367.4	-0.00721294
247.6	0.02186978		777.59	0.00560202		1307.6	0.01142863		1837.6	-0.00265825		2367.6	-0.00696971
247.8	0.02203179		777.79	0.00522159		1307.8	0.01026189		1837.8	-0.00241301		2367.8	-0.00650932
248	0.02134565		777.99	0.0050072		1308	0.0093573		1838	-0.00273483		2368	-0.00608677
248.2	0.02089027		778.19	0.0058299		1308.2	0.00948488		1838.2	-0.00298542		2368.2	-0.00602922
248.4	0.02069991		778.39	0.00598413		1308.4	0.00926491		1838.4	-0.00303392		2368.4	-0.00585512
248.6	0.02015889		778.59	0.00639053		1308.6	0.00855767		1838.6	-0.00337821		2368.6	-0.00509605
248.8	0.0208745		778.79	0.0068561		1308.8	0.00794764		1838.8	-0.00457191		2368.8	-0.00471508
249	0.02171406		778.99	0.00617315		1309	0.00768742		1839	-0.00482797		2369	-0.00440118
249.2	0.02144337		779.19	0.00560161		1309.2	0.00669599		1839.2	-0.00570057		2369.2	-0.00363227
249.4	0.02107818		779.39	0.00586555		1309.4	0.00660185		1839.4	-0.00669434		2369.4	-0.0035199
249.6	0.02130897		779.59	0.00479797		1309.6	0.00608806		1839.6	-0.00761883		2369.6	-0.00301597
249.8	0.02215876		779.79	0.0054569		1309.8	0.00665901		1839.8	-0.00791747		2369.8	-0.00420818
250	0.0220215		779.99	0.00521605		1310	0.00644701		1840	-0.00864596		2370	-0.00449346
250.2	0.02207835		780.19	0.00419893		1310.2	0.00706169		1840.2	-0.0087418		2370.2	-0.00409899
250.4	0.02191055		780.39	0.00316786		1310.4	0.0077024		1840.4	-0.00845769		2370.4	-0.00466558
250.6	0.02168138		780.59	0.00169663		1310.6	0.00884		1840.6	-0.00867156		2370.6	-0.00446225
250.8	0.02169125		780.79	0.00140256		1310.8	0.00947069		1840.8	-0.00949907		2370.8	-0.00381875
251	0.02144214		780.99	0.00130831		1311	0.00947154		1841	-0.00980531		2371	-0.00350155
251.2	0.02105327		781.19	0.00169884		1311.2	0.00996804		1841.2	-0.01001696		2371.2	-0.00320301
251.4	0.02085305		781.39	0.00177492		1311.4	0.01111993		1841.4	-0.00998161		2371.4	-0.00360683
251.6	0.02042274		781.59	0.00264176		1311.6	0.01168327		1841.6	-0.0093866		2371.6	-0.00310421
251.8	0.02040571		781.79	0.00327961		1311.8	0.01197869		1841.8	-0.00821902		2371.8	-0.00281434
252	0.02006098		781.99	0.00508041		1312	0.01274637		1842	-0.00827061		2372	-0.00303119
252.2	0.01998179		782.19	0.00636671		1312.2	0.01303362		1842.2	-0.00835921		2372.2	-0.00291465
252.4	0.02053594		782.39	0.00699485		1312.4	0.01200097		1842.4	-0.00761675		2372.4	-0.00298308
252.6	0.02061929		782.59	0.00788998		1312.6	0.01156903		1842.6	-0.00795527		2372.6	-0.00356609
252.8	0.02068138		782.79	0.00894457		1312.8	0.01077488		1842.8	-0.00764126		2372.8	-0.00357968
253	0.01984096		782.99	0.0083794		1313	0.01107048		1843	-0.00669068		2373	-0.00318645
253.2	0.02017414		783.19	0.00839353		1313.2	0.01140794		1843.2	-0.00741039		2373.2	-0.00330138
253.4	0.02092534		783.39	0.00807161		1313.4	0.0120078		1843.4	-0.00793233		2373.4	-0.00424782
253.6	0.02190483		783.59	0.00807228		1313.6	0.01183193		1843.6	-0.00783832		2373.6	-0.00487976
253.8	0.02213032		783.79	0.00856007		1313.8	0.01219392		1843.8	-0.00713468		2373.8	-0.00580784
254	0.02167733		783.99	0.0077066		1314	0.01222508		1844	-0.0072101		2374	-0.00583557
254.2	0.02246877		784.19	0.00708713		1314.2	0.0130079		1844.2	-0.00645534		2374.2	-0.00623429
254.4	0.0232348		784.39	0.00572214		1314.4	0.01298534		1844.4	-0.00579079		2374.4	-0.00717141
254.6	0.02294084		784.59	0.00571609		1314.6	0.01213664		1844.6	-0.00580092		2374.6	-0.00711959
254.8	0.02358851		784.79	0.00572533		1314.8	0.01168567		1844.8	-0.00605664		2374.8	-0.00666997
255	0.02337395		784.99	0.00598277		1315	0.01083338		1845	-0.00593423		2375	-0.00681635
255.2	0.02402296		785.19	0.00601645		1315.2	0.00962252		1845.2	-0.00570185		2375.2	-0.00737252
255.4	0.02409088		785.39	0.00599328		1315.4	0.0088436		1845.4	-0.00504992		2375.4	-0.00766236
255.6	0.02494957		785.59	0.0065186		1315.6	0.00859404		1845.6	-0.00384709		2375.6	-0.00705649
255.8	0.02508882		785.79	0.00689939		1315.8	0.00846456		1845.8	-0.0033626		2375.8	-0.00644456
256	0.02497045		785.99	0.0071783		1316	0.00725957		1846	-0.00400109		2376	-0.00615555
256.2	0.02508734		786.19	0.00669972		1316.2	0.00654636		1846.2	-0.00380856		2376.2	-0.00577823
256.4	0.0255933		786.39	0.00700457		1316.4	0.00617709		1846.4	-0.00356958		2376.4	-0.00546953
256.6	0.02480618		786.59	0.00738406		1316.6	0.00610041		1846.6	-0.00431694		2376.6	-0.00595877
256.8	0.02381578		786.79	0.00696883		1316.8	0.00581592		1846.8	-0.0039955		2376.8	-0.00438536
257	0.0233933		786.99	0.00653499		1317	0.00719768		1847	-0.00386002		2377	-0.00318032
257.2	0.02384224		787.19	0.00587615		1317.2	0.00729029		1847.2	-0.00488723		2377.2	-0.00332794
257.4	0.02255376		787.39	0.00518259		1317.4	0.00831453		1847.4	-0.00513146		2377.4	-0.00370731
257.6	0.02241164		787.59	0.00581652		1317.6	0.00835451		1847.6	-0.00535098		2377.6	-0.00330226
257.8	0.02125531		787.79	0.00500598		1317.8	0.00910544		1847.8	-0.00488702		2377.8	-0.00412773
258	0.02121535		787.99	0.00428105		1318	0.00913636		1848	-0.00577265		2378	-0.00479838
258.2	0.02093776		788.19	0.00446377		1318.2	0.00993684		1848.2	-0.00535311		2378.2	-0.00618837
258.4	0.02092348		788.39	0.00441222		1318.4	0.01017275		1848.4	-0.00552749		2378.4	-0.00621727
258.6	0.0209569		788.59	0.00514604		1318.6	0.00963622		1848.6	-0.00609228		2378.6	-0.00588769
258.8	0.02178152		788.79	0.00537693		1318.8	0.00999561		1848.8	-0.00638759		2378.8	-0.00559396
259	0.02110075		788.99	0.00566519		1319	0.00986409		1849	-0.00685302		2379	-0.00619031
259.2	0.02161309		789.19	0.00545224		1319.2	0.00947066		1849.2	-0.00649288		2379.2	-0.00708397
259.4	0.02188539		789.39	0.00562902		1319.4	0.00974589		1849.4	-0.00653243		2379.4	-0.00653652
259.6	0.0224821		789.59	0.00597814		1319.6	0.01060108		1849.6	-0.00626364		2379.6	-0.00637654
259.8	0.02269198		789.79	0.00680478		1319.8	0.01117441		1849.8	-0.00626804		2379.8	-0.00620169
260	0.02332615		789.99	0.00658027		1320	0.01104721		1850	-0.0065004		2380	-0.00604605
260.2	0.02423278		790.19	0.00705699		1320.2	0.01117756		1850.2	-0.00639609		2380.2	-0.00522033
260.4	0.02412569		790.39	0.00751649		1320.4	0.01153234		1850.4	-0.00696635		2380.4	-0.00558543
260.6	0.02403251		790.59	0.00762921		1320.6	0.01059709		1850.6	-0.00705371		2380.6	-0.00519965
260.8	0.0236094		790.79	0.00722718		1320.8	0.0111476		1850.8	-0.0065952		2380.8	-0.00403365
261	0.02385265		790.99	0.0071419		1321	0.01154726		1851	-0.00671673		2381	-0.00420067
261.2	0.02359156		791.19	0.00697003		1321.2	0.01087918		1851.2	-0.00714544		2381.2	-0.00445663
261.4	0.02228968		791.39	0.00663158		1321.4	0.01148122		1851.4	-0.00728804		2381.4	-0.00463691
261.6	0.02267328		791.59	0.00665298		1321.6	0.01091465		1851.6	-0.00723179		2381.6	-0.00402316
261.8	0.02229002		791.79	0.00594407		1321.8	0.01113082		1851.8	-0.00695466		2381.8	-0.00489417
262	0.02276067		791.99	0.0059597		1322	0.01111246		1852	-0.00707512		2382	-0.00424918
262.2	0.02224087		792.19	0.00745112		1322.2	0.01147043		1852.2	-0.00665563		2382.2	-0.00345188
262.4	0.0231723		792.39	0.00666528		1322.4	0.01096774		1852.4	-0.00650859		2382.4	-0.00309294
262.6	0.02319972		792.59	0.00717707		1322.6	0.01028655		1852.6	-0.00608859		2382.6	-0.00289884
262.8	0.02319041		792.79	0.00797665		1322.8	0.01026072		1852.8	-0.00653225		2382.8	-0.00328616
263	0.02339782		792.99	0.00734834		1323	0.00932208		1853	-0.00718847		2383	-0.0040619
263.2	0.02342906		793.19	0.007084		1323.2	0.00877341		1853.2	-0.00675521		2383.2	-0.00394632
263.4	0.02388635		793.39	0.00672883		1323.4	0.00886721		1853.4	-0.00712279		2383.4	-0.00324218
263.6	0.02420793		793.59	0.00655049		1323.6	0.0092437		1853.6	-0.00662489		2383.6	-0.00272044
263.8	0.02529728		793.79	0.00733038		1323.8	0.00990943		1853.8	-0.00657394		2383.8	-0.00256572
264	0.02584487		793.99	0.00662161		1324	0.00966082		1854	-0.00661694		2384	-0.00194094
264.2	0.02604441		794.19	0.00650222		1324.2	0.00944606		1854.2	-0.00672105		2384.2	-0.0019884
264.4	0.02547574		794.39	0.00609893		1324.4	0.01054188		1854.4	-0.00695085		2384.4	-0.00370576
264.6	0.02577296		794.59	0.00574567		1324.6	0.00975421		1854.6	-0.00682406		2384.6	-0.00422007
264.8	0.02516185		794.79	0.00470996		1324.8	0.01063702		1854.8	-0.00711848		2384.8	-0.00500368
265	0.0252724		794.99	0.00434842		1325	0.01072116		1855	-0.00753302		2385	-0.00574609
265.2	0.0248801		795.19	0.00492477		1325.2	0.01089903		1855.2	-0.00761674		2385.2	-0.00554859
265.4	0.02383262		795.39	0.00438965		1325.4	0.01112039		1855.4	-0.00732822		2385.4	-0.00621251
265.6	0.02389741		795.59	0.00468311		1325.6	0.01031526		1855.6	-0.00667176		2385.6	-0.00561576
265.8	0.02374593		795.79	0.00478928		1325.8	0.00944558		1855.8	-0.00593372		2385.8	-0.00653879
266	0.023439		795.99	0.00527899		1326	0.00952562		1856	-0.00629947		2386	-0.00616205
266.2	0.02305022		796.19	0.00625754		1326.2	0.0091532		1856.2	-0.00588961		2386.2	-0.00640809
266.4	0.02385734		796.39	0.00653516		1326.4	0.00851718		1856.4	-0.00537315		2386.4	-0.00729594
266.6	0.02319758		796.59	0.00814372		1326.6	0.00721585		1856.6	-0.00552309		2386.6	-0.00714637
266.8	0.02299704		796.79	0.00884122		1326.8	0.00690413		1856.8	-0.00572702		2386.8	-0.00708145
267	0.02296833		796.99	0.00908742		1327	0.00642909		1857	-0.00560915		2387	-0.00670507
267.2	0.0228747		797.19	0.00968874		1327.2	0.0065507		1857.2	-0.00512907		2387.2	-0.00596704
267.4	0.02299597		797.39	0.00918657		1327.4	0.00599788		1857.4	-0.00502951		2387.4	-0.00577345
267.6	0.0221834		797.59	0.00956566		1327.6	0.00570351		1857.6	-0.00476524		2387.6	-0.00560394
267.8	0.02251854		797.79	0.01029218		1327.8	0.00592324		1857.8	-0.00447546		2387.8	-0.00593513
268	0.02273864		797.99	0.00946566		1328	0.00686668		1858	-0.00491653		2388	-0.00546988
268.2	0.02280307		798.19	0.00963421		1328.2	0.00737758		1858.2	-0.00471		2388.2	-0.00630757
268.4	0.02272695		798.39	0.0093975		1328.4	0.00799052		1858.4	-0.00480998		2388.4	-0.00733274
268.6	0.0228479		798.59	0.00875915		1328.6	0.00793655		1858.6	-0.00508546		2388.6	-0.00670994
268.8	0.02221943		798.79	0.00755018		1328.8	0.00826654		1858.8	-0.0064667		2388.8	-0.00624952
269	0.02306635		798.99	0.00748548		1329	0.00844097		1859	-0.00671843		2389	-0.00558186
269.2	0.02319212		799.19	0.00757166		1329.2	0.00830682		1859.2	-0.00733219		2389.2	-0.00462245
269.4	0.02298631		799.39	0.00665277		1329.4	0.00822393		1859.4	-0.00731217		2389.4	-0.0044052
269.6	0.02295735		799.59	0.00534291		1329.6	0.0078556		1859.6	-0.00784358		2389.6	-0.00484714
269.8	0.02383345		799.79	0.00505232		1329.8	0.00850886		1859.8	-0.00874877		2389.8	-0.00561268
270	0.02377399		799.99	0.0056532		1330	0.00918918		1860	-0.0097169		2390	-0.0056134
270.2	0.02442408		800.19	0.00532621		1330.2	0.00941153		1860.2	-0.00868669		2390.2	-0.00545742
270.4	0.02496073		800.39	0.00551775		1330.4	0.00978049		1860.4	-0.00863853		2390.4	-0.00500848
270.6	0.0245474		800.59	0.00517497		1330.6	0.00963404		1860.6	-0.00849321		2390.6	-0.00430606
270.8	0.02480494		800.79	0.00551459		1330.8	0.01054472		1860.8	-0.0081534		2390.8	-0.00390043
271	0.02452483		800.99	0.00544872		1331	0.01029652		1861	-0.00811738		2391	-0.00435039
271.2	0.0245829		801.19	0.00446269		1331.2	0.00960617		1861.2	-0.00813067		2391.2	-0.00444959
271.4	0.02408895		801.39	0.00423155		1331.4	0.0086042		1861.4	-0.00784531		2391.4	-0.00482894
271.6	0.02436549		801.59	0.00413089		1331.6	0.00799658		1861.6	-0.00701304		2391.6	-0.00494823
271.8	0.0248493		801.79	0.00474695		1331.8	0.00852139		1861.8	-0.00603951		2391.8	-0.00506585
272	0.02521935		801.99	0.00493722		1332	0.0088581		1862	-0.00568388		2392	-0.00495063
272.2	0.02457768		802.19	0.0051816		1332.2	0.00807269		1862.2	-0.00490375		2392.2	-0.00587101
272.4	0.0245238		802.39	0.00499913		1332.4	0.00790952		1862.4	-0.0044923		2392.4	-0.00668788
272.6	0.02502361		802.59	0.00418298		1332.6	0.00730019		1862.6	-0.00437583		2392.6	-0.00641879
272.8	0.02530151		802.79	0.004256		1332.8	0.00737845		1862.8	-0.00426252		2392.8	-0.00616017
273	0.02620921		802.99	0.00435195		1333	0.00804572		1863	-0.00432611		2393	-0.00614066
273.2	0.02561016		803.19	0.00385123		1333.2	0.00835705		1863.2	-0.00466827		2393.2	-0.00599951
273.4	0.02633172		803.39	0.00365988		1333.4	0.00806703		1863.4	-0.00421198		2393.4	-0.00711781
273.6	0.02648322		803.59	0.00351585		1333.6	0.0083205		1863.6	-0.00379257		2393.6	-0.00811705
273.8	0.02690685		803.79	0.00459107		1333.8	0.00934146		1863.8	-0.00401324		2393.8	-0.00777083
274	0.02602201		803.99	0.00508925		1334	0.01016963		1864	-0.00341782		2394	-0.00817451
274.2	0.02634547		804.19	0.00533966		1334.2	0.01139766		1864.2	-0.00307354		2394.2	-0.00783038
274.4	0.02607941		804.39	0.00674507		1334.4	0.01185264		1864.4	-0.00366362		2394.4	-0.00750835
274.6	0.02603066		804.59	0.00664429		1334.6	0.0124338		1864.6	-0.00405925		2394.6	-0.00739076
274.8	0.02550793		804.79	0.00647617		1334.8	0.01220196		1864.8	-0.00529266		2394.8	-0.00811833
275	0.0248413		804.99	0.0065027		1335	0.01154556		1865	-0.00589035		2395	-0.00844674
275.2	0.02442978		805.19	0.00542143		1335.2	0.01087034		1865.2	-0.00614962		2395.2	-0.00815048
275.4	0.02378337		805.39	0.00538778		1335.4	0.01008399		1865.4	-0.00633755		2395.4	-0.00847195
275.6	0.02345402		805.59	0.00486799		1335.6	0.00970372		1865.6	-0.00634002		2395.6	-0.00758989
275.8	0.02200983		805.79	0.0054625		1335.8	0.01056161		1865.8	-0.00680709		2395.8	-0.00759952
276	0.02256572		805.99	0.00558445		1336	0.00942379		1866	-0.00777617		2396	-0.00729689
276.2	0.0221205		806.19	0.00533625		1336.2	0.00904593		1866.2	-0.00809631		2396.2	-0.00733242
276.4	0.02266479		806.39	0.00496315		1336.4	0.00885156		1866.4	-0.00792126		2396.4	-0.00785454
276.6	0.02293231		806.59	0.00469391		1336.6	0.00861903		1866.6	-0.00786333		2396.6	-0.00688546
276.8	0.0229803		806.79	0.0045341		1336.8	0.00963834		1866.8	-0.00803768		2396.8	-0.00659387
277	0.02280274		806.99	0.00465712		1337	0.00908289		1867	-0.00824441		2397	-0.00694724
277.2	0.02380265		807.19	0.00459938		1337.2	0.00859123		1867.2	-0.00807597		2397.2	-0.00707718
277.4	0.02491453		807.39	0.00570944		1337.4	0.00884099		1867.4	-0.00727799		2397.4	-0.00724208
277.6	0.02474473		807.59	0.00633608		1337.6	0.01024647		1867.6	-0.00638472		2397.6	-0.00717238
277.8	0.02423501		807.79	0.0070231		1337.8	0.01112506		1867.8	-0.0069287		2397.8	-0.0072616
278	0.02456591		807.99	0.00718432		1338	0.01173243		1868	-0.00711008		2398	-0.00797842
278.2	0.02516855		808.19	0.00787982		1338.2	0.0121002		1868.2	-0.00738845		2398.2	-0.00805302
278.4	0.02543339		808.39	0.00806411		1338.4	0.01221258		1868.4	-0.00775902		2398.4	-0.00830651
278.6	0.02556255		808.59	0.00741257		1338.6	0.01187839		1868.6	-0.00779786		2398.6	-0.008819
278.8	0.02447478		808.79	0.00705087		1338.8	0.01126669		1868.8	-0.0082282		2398.8	-0.00880459
279	0.02452449		808.99	0.00693048		1339	0.01193037		1869	-0.00751889		2399	-0.00853176
279.2	0.02410552		809.19	0.00603622		1339.2	0.01248562		1869.2	-0.00718637		2399.2	-0.00757009
279.4	0.02395934		809.39	0.00592055		1339.4	0.01227403		1869.4	-0.00744103		2399.4	-0.00767619
279.6	0.02367181		809.59	0.00561413		1339.6	0.011947		1869.6	-0.00781244		2399.6	-0.00659026
279.8	0.02351787		809.79	0.00566137		1339.8	0.01233266		1869.8	-0.0078692		2399.8	-0.00613688
280	0.02382409		809.99	0.00523003		1340	0.01161446		1870	-0.00788429		2400	-0.00563593
280.2	0.02307914		810.19	0.00517037		1340.2	0.01150435		1870.2	-0.00692662		2400.2	-0.00548487
280.4	0.02300463		810.39	0.00470257		1340.4	0.01145703		1870.4	-0.00631952		2400.4	-0.00604794
280.6	0.02274288		810.59	0.00478501		1340.6	0.01136023		1870.6	-0.00577956		2400.6	-0.00566166
280.8	0.02249102		810.79	0.00521336		1340.8	0.01150421		1870.8	-0.00527128		2400.8	-0.00639475
281	0.02275533		810.99	0.00581627		1341	0.01093773		1871	-0.0049128		2401	-0.00730098
281.2	0.02393564		811.19	0.00599819		1341.2	0.0110026		1871.2	-0.00478909		2401.2	-0.00792355
281.4	0.02345783		811.39	0.00663959		1341.4	0.0116521		1871.4	-0.00442968		2401.4	-0.00875584
281.6	0.02325603		811.59	0.00701674		1341.6	0.01174305		1871.6	-0.00481483		2401.6	-0.009422
281.8	0.02289232		811.79	0.00623813		1341.8	0.01132716		1871.8	-0.0053127		2401.8	-0.01016431
282	0.02351622		811.99	0.00569399		1342	0.01174579		1872	-0.00595523		2402	-0.01102449
282.2	0.02365856		812.19	0.00573715		1342.2	0.01099823		1872.2	-0.00630941		2402.2	-0.01143295
282.4	0.02415382		812.39	0.00557461		1342.4	0.0101958		1872.4	-0.00644848		2402.4	-0.01178221
282.6	0.023846		812.59	0.00500498		1342.6	0.00999163		1872.6	-0.00646795		2402.6	-0.01112296
282.8	0.02441074		812.79	0.00495793		1342.8	0.01022231		1872.8	-0.00620103		2402.8	-0.01010396
283	0.02497561		812.99	0.0053734		1343	0.01075452		1873	-0.00623609		2403	-0.00934852
283.2	0.02554351		813.19	0.00521004		1343.2	0.01083148		1873.2	-0.00667281		2403.2	-0.00868968
283.4	0.02523197		813.39	0.00490734		1343.4	0.00955594		1873.4	-0.00664088		2403.4	-0.00818862
283.6	0.02524481		813.59	0.00473864		1343.6	0.00978468		1873.6	-0.00716429		2403.6	-0.00634067
283.8	0.02539472		813.79	0.00523373		1343.8	0.01053528		1873.8	-0.00689134		2403.8	-0.00545894
284	0.02434325		813.99	0.00553222		1344	0.01071992		1874	-0.00645826		2404	-0.00561776
284.2	0.02403911		814.19	0.00583371		1344.2	0.01024015		1874.2	-0.00597812		2404.2	-0.00530735
284.4	0.02489087		814.39	0.00597836		1344.4	0.00968365		1874.4	-0.00489075		2404.4	-0.00542785
284.6	0.0248559		814.59	0.00616738		1344.6	0.00956603		1874.6	-0.00534256		2404.6	-0.00521723
284.8	0.02515954		814.79	0.00701753		1344.8	0.00951582		1874.8	-0.00480113		2404.8	-0.00543515
285	0.02563081		814.99	0.00694538		1345	0.0097771		1875	-0.00445644		2405	-0.00588411
285.2	0.02535717		815.19	0.0071708		1345.2	0.01033825		1875.2	-0.00444184		2405.2	-0.00701848
285.4	0.02578132		815.39	0.00724185		1345.4	0.01097262		1875.4	-0.00531319		2405.4	-0.00801368
285.6	0.02578257		815.59	0.00724251		1345.6	0.01085377		1875.6	-0.00527209		2405.6	-0.0090104
285.8	0.02596343		815.79	0.00635205		1345.8	0.01085736		1875.8	-0.00529527		2405.8	-0.00971303
286	0.02708828		815.99	0.00593596		1346	0.01131464		1876	-0.0057997		2406	-0.01070119
286.2	0.02792795		816.19	0.00552255		1346.2	0.0107223		1876.2	-0.00596507		2406.2	-0.01179678
286.4	0.02810125		816.39	0.00603222		1346.4	0.01023673		1876.4	-0.00609637		2406.4	-0.01175415
286.6	0.02857228		816.59	0.00598964		1346.6	0.01035216		1876.6	-0.00679733		2406.6	-0.01184276
286.8	0.02987832		816.79	0.00671289		1346.8	0.00984019		1876.8	-0.00694656		2406.8	-0.01171978
287	0.02967382		816.99	0.00644628		1347	0.00916471		1877	-0.00831786		2407	-0.01083505
287.2	0.02949255		817.19	0.00578142		1347.2	0.00877779		1877.2	-0.0086431		2407.2	-0.0105469
287.4	0.02910117		817.39	0.00535409		1347.4	0.00818744		1877.4	-0.0085996		2407.4	-0.00972148
287.6	0.02894292		817.59	0.00534786		1347.6	0.0093206		1877.6	-0.0090024		2407.6	-0.00904599
287.8	0.02898751		817.79	0.00546703		1347.8	0.00866863		1877.8	-0.00895199		2407.8	-0.00975651
288	0.02781711		817.99	0.00518481		1348	0.00793369		1878	-0.00900455		2408	-0.0096311
288.2	0.02818647		818.19	0.00554849		1348.2	0.00710226		1878.2	-0.00885743		2408.2	-0.00908825
288.4	0.02920078		818.39	0.00594506		1348.4	0.00657789		1878.4	-0.00746873		2408.4	-0.0081366
288.6	0.02885521		818.59	0.00608737		1348.6	0.00742038		1878.6	-0.00843523		2408.6	-0.00725307
288.8	0.02911454		818.79	0.00636739		1348.8	0.00803134		1878.8	-0.00730083		2408.8	-0.00691491
289	0.02835979		818.99	0.00633126		1349	0.00848346		1879	-0.00651897		2409	-0.00721115
289.2	0.02829156		819.19	0.00569072		1349.2	0.00932041		1879.2	-0.006532		2409.2	-0.00860446
289.4	0.02853082		819.39	0.0056731		1349.4	0.0094845		1879.4	-0.0064927		2409.4	-0.00795702
289.6	0.02732153		819.59	0.00549304		1349.6	0.0094661		1879.6	-0.00584622		2409.6	-0.00801267
289.8	0.02768704		819.79	0.00537412		1349.8	0.00949656		1879.8	-0.0067531		2409.8	-0.0076933
290	0.02796582		819.99	0.00490493		1350	0.00973288		1880	-0.00642775		2410	-0.0083764
290.2	0.02745906		820.19	0.00459544		1350.2	0.01003873		1880.2	-0.00671408		2410.2	-0.00808532
290.4	0.02714234		820.39	0.00518773		1350.4	0.00949925		1880.4	-0.0076713		2410.4	-0.00749712
290.6	0.02760132		820.59	0.0054607		1350.6	0.00931292		1880.6	-0.00822524		2410.6	-0.00801188
290.8	0.02727449		820.79	0.00605876		1350.8	0.00875516		1880.8	-0.00772388		2410.8	-0.0075396
291	0.02641572		820.99	0.00656712		1351	0.00852146		1881	-0.00762429		2411	-0.00720836
291.2	0.02531112		821.19	0.00585973		1351.2	0.0091262		1881.2	-0.00671394		2411.2	-0.00756816
291.4	0.02571068		821.39	0.00590138		1351.4	0.00944371		1881.4	-0.00645		2411.4	-0.00713908
291.6	0.02571914		821.59	0.00578615		1351.6	0.00984525		1881.6	-0.00728739		2411.6	-0.0073459
291.8	0.02587617		821.79	0.00658371		1351.8	0.00911962		1881.8	-0.00733144		2411.8	-0.00775
292	0.02571783		821.99	0.00702535		1352	0.00907217		1882	-0.00652966		2412	-0.00802791
292.2	0.02543305		822.19	0.00757131		1352.2	0.00861402		1882.2	-0.00607264		2412.2	-0.00788018
292.4	0.02557321		822.39	0.00787782		1352.4	0.00867617		1882.4	-0.00567013		2412.4	-0.00700472
292.6	0.02592982		822.59	0.00776683		1352.6	0.00986122		1882.6	-0.00543314		2412.6	-0.0074622
292.8	0.02623527		822.79	0.00700064		1352.8	0.0100342		1882.8	-0.00479576		2412.8	-0.00795988
293	0.02584327		822.99	0.00658608		1353	0.00964771		1883	-0.00430844		2413	-0.00851087
293.2	0.02581884		823.19	0.00491877		1353.2	0.01046295		1883.2	-0.0042998		2413.2	-0.00861232
293.4	0.0255018		823.39	0.00480751		1353.4	0.01076223		1883.4	-0.00522057		2413.4	-0.00745207
293.6	0.02539548		823.59	0.00425616		1353.6	0.01062048		1883.6	-0.00581713		2413.6	-0.00791394
293.8	0.02628931		823.79	0.00332242		1353.8	0.00979149		1883.8	-0.0064238		2413.8	-0.00790488
294	0.02678413		823.99	0.00213231		1354	0.00982306		1884	-0.00566742		2414	-0.00752458
294.2	0.02623577		824.19	0.00196478		1354.2	0.00984331		1884.2	-0.00703101		2414.2	-0.00688343
294.4	0.02663873		824.39	0.00274383		1354.4	0.0093274		1884.4	-0.00718552		2414.4	-0.00750707
294.6	0.02631285		824.59	0.00330092		1354.6	0.008784		1884.6	-0.00665708		2414.6	-0.00656111
294.8	0.02570319		824.79	0.00340263		1354.8	0.00936882		1884.8	-0.00625001		2414.8	-0.00670068
295	0.02502533		824.99	0.00315938		1355	0.01011668		1885	-0.00594934		2415	-0.00662079
295.2	0.02581939		825.19	0.00314885		1355.2	0.01036384		1885.2	-0.00665009		2415.2	-0.00675739
295.4	0.02630954		825.39	0.00406969		1355.4	0.01038344		1885.4	-0.00747209		2415.4	-0.00690601
295.6	0.02626485		825.59	0.00392032		1355.6	0.01003075		1885.6	-0.0077996		2415.6	-0.00766177
295.8	0.02645412		825.79	0.00534852		1355.8	0.01004176		1885.8	-0.00677136		2415.8	-0.00799743
296	0.0268229		825.99	0.0054682		1356	0.01015022		1886	-0.00653793		2416	-0.00787607
296.2	0.02639267		826.19	0.00613713		1356.2	0.00966234		1886.2	-0.00708501		2416.2	-0.00801868
296.4	0.02744517		826.39	0.00596684		1356.4	0.0098426		1886.4	-0.0069264		2416.4	-0.00810608
296.6	0.02838236		826.59	0.00552734		1356.6	0.01004003		1886.6	-0.00594585		2416.6	-0.00899761
296.8	0.02858038		826.79	0.00510982		1356.8	0.00931243		1886.8	-0.0057076		2416.8	-0.00985217
297	0.02882173		826.99	0.0049292		1357	0.00858013		1887	-0.00555533		2417	-0.00997785
297.2	0.02935737		827.19	0.00476921		1357.2	0.00865184		1887.2	-0.00541344		2417.2	-0.01027969
297.4	0.02906392		827.39	0.00540268		1357.4	0.00837237		1887.4	-0.00566325		2417.4	-0.01056386
297.6	0.029232		827.59	0.00547301		1357.6	0.00688836		1887.6	-0.00554908		2417.6	-0.01033386
297.8	0.02956681		827.79	0.00532096		1357.8	0.00598337		1887.8	-0.00513737		2417.8	-0.01051825
298	0.0293292		827.99	0.00471431		1358	0.00617816		1888	-0.00558798		2418	-0.01040908
298.2	0.02851062		828.19	0.00548287		1358.2	0.00621076		1888.2	-0.0057497		2418.2	-0.01037721
298.4	0.0279265		828.39	0.00536345		1358.4	0.0063537		1888.4	-0.00472706		2418.4	-0.01017341
298.6	0.02767259		828.59	0.00487932		1358.6	0.00675719		1888.6	-0.00447596		2418.6	-0.00898793
298.8	0.02741444		828.79	0.00434567		1358.8	0.00768052		1888.8	-0.00492177		2418.8	-0.00876918
299	0.02700753		828.99	0.0056363		1359	0.00740391		1889	-0.00507127		2419	-0.00817683
299.2	0.0282587		829.19	0.00673303		1359.2	0.00756904		1889.2	-0.00507948		2419.2	-0.00806349
299.4	0.02791587		829.39	0.00652963		1359.4	0.00739432		1889.4	-0.00525412		2419.4	-0.00815216
299.6	0.02848193		829.59	0.00676634		1359.6	0.00753993		1889.6	-0.00570026		2419.6	-0.00742593
299.8	0.02840563		829.79	0.00744311		1359.8	0.00831883		1889.8	-0.00586913		2419.8	-0.006658
300	0.02815698		829.99	0.00758855		1360	0.00846219		1890	-0.00645727		2420	-0.00610437
300.2	0.02840214		830.19	0.00773988		1360.2	0.00852109		1890.2	-0.0070655		2420.2	-0.00730431
300.4	0.02859793		830.39	0.0067523		1360.4	0.00921426		1890.4	-0.00717062		2420.4	-0.0067006
300.6	0.02885115		830.59	0.00620345		1360.6	0.009885		1890.6	-0.00728729		2420.6	-0.0071326
300.8	0.02835065		830.79	0.006147		1360.8	0.0102857		1890.8	-0.00762853		2420.8	-0.00783665
301	0.02918825		830.99	0.0057094		1361	0.00962322		1891	-0.00768386		2421	-0.00773743
301.2	0.02887157		831.19	0.00564348		1361.2	0.0094732		1891.2	-0.00823599		2421.2	-0.00798019
301.4	0.02836693		831.39	0.005782		1361.4	0.0091369		1891.4	-0.00794817		2421.4	-0.00811575
301.6	0.02833931		831.59	0.0056625		1361.6	0.00926497		1891.6	-0.00784865		2421.6	-0.00834428
301.8	0.0285221		831.79	0.00489466		1361.8	0.01003207		1891.8	-0.00721051		2421.8	-0.00903545
302	0.02826573		831.99	0.00423492		1362	0.00970932		1892	-0.00721587		2422	-0.00845194
302.2	0.02774651		832.19	0.00427341		1362.2	0.00953653		1892.2	-0.00581579		2422.2	-0.00833932
302.4	0.02677166		832.39	0.00312572		1362.4	0.00927056		1892.4	-0.00509746		2422.4	-0.00796574
302.6	0.0278297		832.59	0.00326229		1362.6	0.00893984		1892.6	-0.00477495		2422.6	-0.00761388
302.8	0.02797882		832.79	0.0031251		1362.8	0.00856832		1892.8	-0.00405881		2422.8	-0.00691096
303	0.0281339		832.99	0.00436045		1363	0.00816775		1893	-0.00341846		2423	-0.00756592
303.2	0.02875821		833.19	0.00433714		1363.2	0.00838853		1893.2	-0.00250038		2423.2	-0.00801552
303.4	0.02905216		833.39	0.00425345		1363.4	0.00802987		1893.4	-0.00257608		2423.4	-0.00784629
303.6	0.02901003		833.59	0.00444529		1363.6	0.00833913		1893.6	-0.00208415		2423.6	-0.00737201
303.8	0.02869996		833.79	0.00469475		1363.8	0.00867858		1893.8	-0.00153864		2423.8	-0.00794576
304	0.02884829		833.99	0.00418082		1364	0.00965814		1894	-0.00230167		2424	-0.00842762
304.2	0.02971751		834.19	0.00418611		1364.2	0.01058792		1894.2	-0.00263548		2424.2	-0.00887362
304.4	0.03011954		834.39	0.00361979		1364.4	0.01092473		1894.4	-0.00317691		2424.4	-0.00923292
304.6	0.03072407		834.59	0.00348513		1364.6	0.01135463		1894.6	-0.00357185		2424.6	-0.01015363
304.8	0.03118201		834.79	0.00418484		1364.8	0.01103019		1894.8	-0.00418523		2424.8	-0.01036365
305	0.03168304		834.99	0.00361106		1365	0.0100248		1895	-0.00484012		2425	-0.01037023
305.2	0.03105815		835.19	0.00400113		1365.2	0.00984914		1895.2	-0.00568613		2425.2	-0.01040714
305.4	0.0317835		835.39	0.00366594		1365.4	0.00923737		1895.4	-0.00564524		2425.4	-0.01031904
305.6	0.03183198		835.59	0.00410068		1365.6	0.00946749		1895.6	-0.00658218		2425.6	-0.01055034
305.8	0.03193067		835.79	0.00447169		1365.8	0.00866603		1895.8	-0.00761725		2425.8	-0.01031457
306	0.0308932		835.99	0.00483933		1366	0.00781251		1896	-0.00822835		2426	-0.00953348
306.2	0.03038064		836.19	0.004391		1366.2	0.00813829		1896.2	-0.00865045		2426.2	-0.00898777
306.4	0.02997639		836.39	0.00390136		1366.4	0.00792482		1896.4	-0.00919947		2426.4	-0.00866893
306.6	0.03063534		836.59	0.00413567		1366.6	0.00804966		1896.6	-0.00988057		2426.6	-0.00833227
306.8	0.0299593		836.79	0.0041974		1366.8	0.00862634		1896.8	-0.00996869		2426.8	-0.00803486
307	0.0294759		836.99	0.00504179		1367	0.00950102		1897	-0.01044746		2427	-0.00825597
307.2	0.02919351		837.19	0.00439205		1367.2	0.00982116		1897.2	-0.00944419		2427.2	-0.00759077
307.4	0.02914405		837.39	0.00469555		1367.4	0.01018819		1897.4	-0.00905417		2427.4	-0.00731087
307.6	0.02842934		837.59	0.00422163		1367.6	0.01077502		1897.6	-0.00836888		2427.6	-0.00691667
307.8	0.02799763		837.79	0.00494889		1367.8	0.01137566		1897.8	-0.00878108		2427.8	-0.00679122
308	0.02793944		837.99	0.00516829		1368	0.01128877		1898	-0.00845167		2428	-0.00641995
308.2	0.02858322		838.19	0.00652835		1368.2	0.01118874		1898.2	-0.00732557		2428.2	-0.00652467
308.4	0.02788555		838.39	0.00631832		1368.4	0.01101965		1898.4	-0.00727326		2428.4	-0.00731627
308.6	0.02834634		838.59	0.00649276		1368.6	0.01078157		1898.6	-0.00689673		2428.6	-0.0067795
308.8	0.02806775		838.79	0.00653975		1368.8	0.00959068		1898.8	-0.00603865		2428.8	-0.00651355
309	0.0278203		838.99	0.0055704		1369	0.0084447		1899	-0.00554407		2429	-0.00668159
309.2	0.02887189		839.19	0.00655672		1369.2	0.00832764		1899.2	-0.00498632		2429.2	-0.00719685
309.4	0.02963911		839.39	0.00621724		1369.4	0.0075703		1899.4	-0.00505021		2429.4	-0.00756707
309.6	0.02914758		839.59	0.0073872		1369.6	0.00796493		1899.6	-0.00503591		2429.6	-0.00853601
309.8	0.02868292		839.79	0.00697679		1369.8	0.0079958		1899.8	-0.00536443		2429.8	-0.00908251
310	0.02805076		839.99	0.00593607		1370	0.00788122		1900	-0.00521637		2430	-0.00808208
310.2	0.02888871		840.19	0.00536058		1370.2	0.00773174		1900.2	-0.00621655		2430.2	-0.00853474
310.4	0.02947229		840.39	0.00477606		1370.4	0.00704167		1900.4	-0.00595276		2430.4	-0.00957654
310.6	0.03001668		840.59	0.0052905		1370.6	0.00757116		1900.6	-0.00634413		2430.6	-0.01028092
310.8	0.0302022		840.79	0.00560167		1370.8	0.00773013		1900.8	-0.00648412		2430.8	-0.01073208
311	0.03089129		840.99	0.00493924		1371	0.0081764		1901	-0.00558381		2431	-0.01105338
311.2	0.03156586		841.19	0.00382677		1371.2	0.0081317		1901.2	-0.00434161		2431.2	-0.01128305
311.4	0.03142903		841.39	0.00457743		1371.4	0.00888143		1901.4	-0.00437783		2431.4	-0.01179211
311.6	0.03031711		841.59	0.00390022		1371.6	0.0095461		1901.6	-0.004753		2431.6	-0.01138034
311.8	0.02993465		841.79	0.00442474		1371.8	0.01002247		1901.8	-0.00484907		2431.8	-0.01085629
312	0.03086389		841.99	0.00407535		1372	0.01025667		1902	-0.00485286		2432	-0.01096984
312.2	0.03139279		842.19	0.00360394		1372.2	0.01022455		1902.2	-0.00491678		2432.2	-0.01125034
312.4	0.0304308		842.39	0.0025522		1372.4	0.00981966		1902.4	-0.00573721		2432.4	-0.01100441
312.6	0.03073586		842.59	0.00226931		1372.6	0.00946916		1902.6	-0.00637853		2432.6	-0.01039057
312.8	0.02987704		842.79	0.0021798		1372.8	0.00957107		1902.8	-0.00670833		2432.8	-0.01038053
313	0.03046326		842.99	0.00171729		1373	0.009057		1903	-0.00729542		2433	-0.01040361
313.2	0.03049944		843.19	0.00284299		1373.2	0.0088595		1903.2	-0.00775669		2433.2	-0.010107
313.4	0.02996505		843.39	0.0026537		1373.4	0.00948743		1903.4	-0.00799931		2433.4	-0.00956746
313.6	0.0293984		843.59	0.00314335		1373.6	0.00933904		1903.6	-0.00785356		2433.6	-0.00918988
313.8	0.02958251		843.79	0.00289415		1373.8	0.00899601		1903.8	-0.00811287		2433.8	-0.0081868
314	0.02903113		843.99	0.00374086		1374	0.00881299		1904	-0.00820243		2434	-0.00759553
314.2	0.02924109		844.19	0.004746		1374.2	0.00845824		1904.2	-0.00841861		2434.2	-0.00856533
314.4	0.02969439		844.39	0.00555789		1374.4	0.00910791		1904.4	-0.00748482		2434.4	-0.00887602
314.6	0.03061041		844.59	0.00642121		1374.6	0.01024207		1904.6	-0.00716226		2434.6	-0.00921542
314.8	0.03101608		844.79	0.00690787		1374.8	0.0100913		1904.8	-0.00603036		2434.8	-0.00906313
315	0.03077294		844.99	0.0064868		1375	0.01073865		1905	-0.00480519		2435	-0.00990749
315.2	0.03166174		845.19	0.00659384		1375.2	0.01122746		1905.2	-0.00417273		2435.2	-0.00994247
315.4	0.0315605		845.39	0.00728923		1375.4	0.01166647		1905.4	-0.00379877		2435.4	-0.00954139
315.6	0.03105984		845.59	0.00650387		1375.6	0.01185626		1905.6	-0.00364478		2435.6	-0.00956296
315.8	0.03247494		845.79	0.00643215		1375.8	0.01146378		1905.8	-0.0034755		2435.8	-0.00998068
316	0.03291703		845.99	0.00507267		1376	0.01096101		1906	-0.00389127		2436	-0.01052169
316.2	0.03185436		846.19	0.00447131		1376.2	0.01076005		1906.2	-0.00422364		2436.2	-0.0109794
316.4	0.03114656		846.39	0.00460731		1376.4	0.01092788		1906.4	-0.00487082		2436.4	-0.01041513
316.6	0.03131066		846.59	0.00419967		1376.6	0.010548		1906.6	-0.0050583		2436.6	-0.01027228
316.8	0.0311557		846.79	0.00347268		1376.8	0.01018373		1906.8	-0.00511485		2436.8	-0.01058923
317	0.03098853		846.99	0.00281128		1377	0.00880632		1907	-0.00477024		2437	-0.01021749
317.2	0.03005359		847.19	0.00311938		1377.2	0.00822453		1907.2	-0.00466864		2437.2	-0.00999567
317.4	0.03000487		847.39	0.00301952		1377.4	0.00861578		1907.4	-0.00474562		2437.4	-0.01047739
317.6	0.02905411		847.59	0.00333509		1377.6	0.00745941		1907.6	-0.00461356		2437.6	-0.0097933
317.8	0.028995		847.79	0.00406907		1377.8	0.00779757		1907.8	-0.00536458		2437.8	-0.0095522
318	0.02848213		847.99	0.00519896		1378	0.00836932		1908	-0.0058197		2438	-0.00981244
318.2	0.02833519		848.19	0.00593607		1378.2	0.00839039		1908.2	-0.00625276		2438.2	-0.00918704
318.4	0.02923506		848.39	0.00628731		1378.4	0.00863015		1908.4	-0.00654471		2438.4	-0.00890522
318.6	0.02981641		848.59	0.00614418		1378.6	0.00979718		1908.6	-0.00677543		2438.6	-0.00904213
318.8	0.0295886		848.79	0.005807		1378.8	0.00976711		1908.8	-0.0065707		2438.8	-0.00901414
319	0.02948316		848.99	0.00526833		1379	0.00939099		1909	-0.00658531		2439	-0.00993892
319.2	0.03141579		849.19	0.00554445		1379.2	0.00944742		1909.2	-0.00696374		2439.2	-0.00909915
319.4	0.03135194		849.39	0.00553147		1379.4	0.00934478		1909.4	-0.00737867		2439.4	-0.00894566
319.6	0.0308233		849.59	0.00494183		1379.6	0.00947333		1909.6	-0.00797986		2439.6	-0.00986428
319.8	0.03190312		849.79	0.00477797		1379.8	0.00941291		1909.8	-0.00803724		2439.8	-0.00958046
320	0.03171495		849.99	0.00441287		1380	0.0098803		1910	-0.00758668		2440	-0.00898507
320.2	0.03178753		850.19	0.00549441		1380.2	0.0104761		1910.2	-0.0074032		2440.2	-0.00887677
320.4	0.03201543		850.39	0.00566402		1380.4	0.0105519		1910.4	-0.00635993		2440.4	-0.00858096
320.6	0.0314721		850.59	0.00493447		1380.6	0.01000922		1910.6	-0.00636943		2440.6	-0.00886536
320.8	0.03106584		850.79	0.00526297		1380.8	0.00984327		1910.8	-0.00634372		2440.8	-0.0092296
321	0.0308913		850.99	0.00491621		1381	0.00898935		1911	-0.00601077		2441	-0.00884776
321.2	0.03044064		851.19	0.00515629		1381.2	0.00813901		1911.2	-0.00556826		2441.2	-0.00903219
321.4	0.03015007		851.39	0.00520985		1381.4	0.00790151		1911.4	-0.00480896		2441.4	-0.00926754
321.6	0.02998531		851.59	0.00572187		1381.6	0.00792875		1911.6	-0.0047554		2441.6	-0.00869632
321.8	0.03002211		851.79	0.00622388		1381.8	0.00792415		1911.8	-0.00525957		2441.8	-0.00870202
322	0.03044892		851.99	0.00666749		1382	0.00705496		1912	-0.00531695		2442	-0.00844825
322.2	0.02983249		852.19	0.00687319		1382.2	0.00645244		1912.2	-0.00590718		2442.2	-0.00852885
322.4	0.03022377		852.39	0.00638082		1382.4	0.00639139		1912.4	-0.00553865		2442.4	-0.00987299
322.6	0.02994978		852.59	0.00623022		1382.6	0.00722354		1912.6	-0.00541676		2442.6	-0.01059746
322.8	0.0297312		852.79	0.00562126		1382.8	0.00659917		1912.8	-0.00537123		2442.8	-0.01159222
323	0.0304326		852.99	0.0047727		1383	0.00621058		1913	-0.0052695		2443	-0.01140064
323.2	0.03109229		853.19	0.00439588		1383.2	0.00770799		1913.2	-0.00586655		2443.2	-0.01101599
323.4	0.03084646		853.39	0.00366966		1383.4	0.0080771		1913.4	-0.00618638		2443.4	-0.01128798
323.6	0.03124581		853.59	0.0036187		1383.6	0.00853738		1913.6	-0.0061864		2443.6	-0.01135523
323.8	0.03247703		853.79	0.00381973		1383.8	0.00863656		1913.8	-0.00584577		2443.8	-0.01019418
324	0.03209677		853.99	0.00425506		1384	0.0092975		1914	-0.00585367		2444	-0.01081186
324.2	0.03155592		854.19	0.0049222		1384.2	0.00958616		1914.2	-0.00626263		2444.2	-0.01000231
324.4	0.03144264		854.39	0.00479952		1384.4	0.01031951		1914.4	-0.00576311		2444.4	-0.00991066
324.6	0.03257811		854.59	0.00503744		1384.6	0.00979246		1914.6	-0.00671331		2444.6	-0.00936176
324.8	0.03297703		854.79	0.00452373		1384.8	0.0092746		1914.8	-0.00636897		2444.8	-0.00799617
325	0.03352468		854.99	0.00325166		1385	0.00893425		1915	-0.00676505		2445	-0.00753629
325.2	0.03292808		855.19	0.00333213		1385.2	0.0088977		1915.2	-0.00662824		2445.2	-0.00724665
325.4	0.03249318		855.39	0.00298733		1385.4	0.00949457		1915.4	-0.00612993		2445.4	-0.00803889
325.6	0.03214511		855.59	0.00242165		1385.6	0.00980503		1915.6	-0.00703217		2445.6	-0.00806468
325.8	0.03156997		855.79	0.00233769		1385.8	0.0092858		1915.8	-0.00732968		2445.8	-0.00852919
326	0.0317441		855.99	0.00229064		1386	0.00850843		1916	-0.00803942		2446	-0.0085597
326.2	0.0309109		856.19	0.00226041		1386.2	0.00830193		1916.2	-0.00793091		2446.2	-0.00909449
326.4	0.03112006		856.39	0.0025657		1386.4	0.008279		1916.4	-0.00805564		2446.4	-0.00951856
326.6	0.03084879		856.59	0.00247962		1386.6	0.00839464		1916.6	-0.00812572		2446.6	-0.01005039
326.8	0.03113957		856.79	0.0022983		1386.8	0.00824413		1916.8	-0.00827		2446.8	-0.01015426
327	0.03133593		856.99	0.00149021		1387	0.00792919		1917	-0.0077361		2447	-0.00973962
327.2	0.03065803		857.19	0.00306509		1387.2	0.00874916		1917.2	-0.00772316		2447.2	-0.01041374
327.4	0.03074061		857.39	0.00328475		1387.4	0.00821179		1917.4	-0.00770153		2447.4	-0.0105394
327.6	0.03070049		857.59	0.00409919		1387.6	0.00842484		1917.6	-0.00748685		2447.6	-0.00971554
327.8	0.03026969		857.79	0.00496375		1387.8	0.00810082		1917.8	-0.00638026		2447.8	-0.00917495
328	0.03087719		857.99	0.00577013		1388	0.00830719		1918	-0.00614663		2448	-0.01016154
328.2	0.03176439		858.19	0.00668027		1388.2	0.00771564		1918.2	-0.00612095		2448.2	-0.00958179
328.4	0.03326243		858.39	0.00698713		1388.4	0.00764326		1918.4	-0.00555781		2448.4	-0.01008775
328.6	0.03426894		858.59	0.00667042		1388.6	0.00722337		1918.6	-0.00618665		2448.6	-0.0102105
328.8	0.0336902		858.79	0.00648265		1388.8	0.00665074		1918.8	-0.0058694		2448.8	-0.00963302
329	0.03370958		858.99	0.00636738		1389	0.00669085		1919	-0.00577015		2449	-0.01024163
329.2	0.0333798		859.19	0.0059731		1389.2	0.00705087		1919.2	-0.00538501		2449.2	-0.01066026
329.4	0.03328471		859.39	0.005412		1389.4	0.00660623		1919.4	-0.00557883		2449.4	-0.01126614
329.6	0.03325501		859.59	0.00432068		1389.6	0.00650116		1919.6	-0.00559987		2449.6	-0.01098045
329.8	0.03359391		859.79	0.00449683		1389.8	0.00667956		1919.8	-0.00558774		2449.8	-0.01097679
330	0.03407041		859.99	0.00486139		1390	0.00673107		1920	-0.006397		2450	-0.00971016
330.2	0.03471114		860.19	0.00461917		1390.2	0.00718703		1920.2	-0.00626302		2450.2	-0.00975932
330.4	0.0353252		860.39	0.0046658		1390.4	0.00836496		1920.4	-0.00719476		2450.4	-0.0099856
330.6	0.03513672		860.59	0.00433389		1390.6	0.0087835		1920.6	-0.00664449		2450.6	-0.01090468
330.8	0.03522219		860.79	0.00449871		1390.8	0.00815926		1920.8	-0.00665575		2450.8	-0.01061459
331	0.03476298		860.99	0.00388159		1391	0.00762392		1921	-0.00575075		2451	-0.01045978
331.2	0.03473356		861.19	0.00415777		1391.2	0.00811994		1921.2	-0.00534004		2451.2	-0.00981876
331.4	0.03399437		861.39	0.00341278		1391.4	0.00747492		1921.4	-0.00507183		2451.4	-0.01006016
331.6	0.03337516		861.59	0.00392776		1391.6	0.0077338		1921.6	-0.00493822		2451.6	-0.00953592
331.8	0.03278519		861.79	0.00448921		1391.8	0.00763212		1921.8	-0.00391454		2451.8	-0.00957019
332	0.03316599		861.99	0.00443742		1392	0.00717321		1922	-0.00412862		2452	-0.0103462
332.2	0.03297214		862.19	0.00380143		1392.2	0.00708843		1922.2	-0.00433035		2452.2	-0.01100522
332.4	0.03259711		862.39	0.00315833		1392.4	0.00749348		1922.4	-0.00464435		2452.4	-0.01082443
332.6	0.03140941		862.59	0.00295362		1392.6	0.00752486		1922.6	-0.00479434		2452.6	-0.01075325
332.8	0.03022953		862.79	0.00344939		1392.8	0.00717318		1922.8	-0.0045311		2452.8	-0.01096817
333	0.02990855		862.99	0.00292903		1393	0.00699897		1923	-0.00433452		2453	-0.01115824
333.2	0.0302882		863.19	0.00266012		1393.2	0.00698785		1923.2	-0.00501042		2453.2	-0.01066264
333.4	0.03055689		863.39	0.00287668		1393.4	0.0066839		1923.4	-0.00470596		2453.4	-0.01057916
333.6	0.03152694		863.59	0.00305869		1393.6	0.00688369		1923.6	-0.00381254		2453.6	-0.00974793
333.8	0.03207775		863.79	0.00338056		1393.8	0.00737684		1923.8	-0.00434459		2453.8	-0.0095141
334	0.03267418		863.99	0.00446047		1394	0.00753195		1924	-0.00527218		2454	-0.00921106
334.2	0.0335666		864.19	0.00402279		1394.2	0.00807297		1924.2	-0.00466751		2454.2	-0.00995701
334.4	0.03394263		864.39	0.00488511		1394.4	0.00811555		1924.4	-0.00469703		2454.4	-0.0099455
334.6	0.03410872		864.59	0.00548013		1394.6	0.00707829		1924.6	-0.00435		2454.6	-0.00956311
334.8	0.03404641		864.79	0.00501055		1394.8	0.00614088		1924.8	-0.00460622		2454.8	-0.00849903
335	0.03430377		864.99	0.00505197		1395	0.00563313		1925	-0.00459486		2455	-0.00818044
335.2	0.03394602		865.19	0.00553219		1395.2	0.00599866		1925.2	-0.00556615		2455.2	-0.0077728
335.4	0.03320512		865.39	0.00697615		1395.4	0.00595987		1925.4	-0.00589895		2455.4	-0.00792385
335.6	0.03362189		865.59	0.00696823		1395.6	0.0060262		1925.6	-0.00572049		2455.6	-0.00739878
335.8	0.03396429		865.79	0.00655208		1395.8	0.00649959		1925.8	-0.00556172		2455.8	-0.00665419
336	0.03432759		865.99	0.00625559		1396	0.0063573		1926	-0.00559715		2456	-0.00742787
336.2	0.03478321		866.19	0.00586324		1396.2	0.00763039		1926.2	-0.00569334		2456.2	-0.00794376
336.4	0.03382925		866.39	0.0057423		1396.4	0.00794491		1926.4	-0.00641317		2456.4	-0.00754483
336.6	0.03313979		866.59	0.00628824		1396.6	0.0083014		1926.6	-0.0065112		2456.6	-0.00797053
336.8	0.03318798		866.79	0.00586612		1396.8	0.00825447		1926.8	-0.00671473		2456.8	-0.00886567
337	0.03322063		866.99	0.00465879		1397	0.00795319		1927	-0.00647752		2457	-0.00852687
337.2	0.03352194		867.19	0.00446551		1397.2	0.0078911		1927.2	-0.00607098		2457.2	-0.0077724
337.4	0.03350417		867.39	0.00417897		1397.4	0.0075441		1927.4	-0.00590494		2457.4	-0.00849019
337.6	0.03380932		867.59	0.00405003		1397.6	0.00744666		1927.6	-0.00512012		2457.6	-0.00837092
337.8	0.03330377		867.79	0.00413032		1397.8	0.00758442		1927.8	-0.00576911		2457.8	-0.00917127
338	0.03325668		867.99	0.00495184		1398	0.00744157		1928	-0.00520391		2458	-0.00940897
338.2	0.03371752		868.19	0.00492711		1398.2	0.00697799		1928.2	-0.00396515		2458.2	-0.01021759
338.4	0.03313561		868.39	0.00535394		1398.4	0.00675196		1928.4	-0.00436252		2458.4	-0.00967216
338.6	0.03299745		868.59	0.00475007		1398.6	0.00680906		1928.6	-0.00437631		2458.6	-0.00953308
338.8	0.03234962		868.79	0.00438287		1398.8	0.00669604		1928.8	-0.00485911		2458.8	-0.00954215
339	0.03227042		868.99	0.00504599		1399	0.00648636		1929	-0.00550954		2459	-0.01055183
339.2	0.03185672		869.19	0.0051385		1399.2	0.0060462		1929.2	-0.00600337		2459.2	-0.01029037
339.4	0.0322158		869.39	0.00559611		1399.4	0.00619027		1929.4	-0.00563734		2459.4	-0.00956196
339.6	0.03355805		869.59	0.00499004		1399.6	0.00561107		1929.6	-0.00562547		2459.6	-0.00946597
339.8	0.03437243		869.79	0.00477451		1399.8	0.00664029		1929.8	-0.00622769		2459.8	-0.00972039
340	0.03450577		869.99	0.00513694		1400	0.00695586		1930	-0.00599276		2460	-0.01023025
340.2	0.03429277		870.19	0.00449166		1400.2	0.00737703		1930.2	-0.00613944		2460.2	-0.01068359
340.4	0.0333787		870.39	0.0040094		1400.4	0.00705838		1930.4	-0.00717775		2460.4	-0.01061773
340.6	0.03286857		870.59	0.00330866		1400.6	0.00677807		1930.6	-0.0078679		2460.6	-0.01055484
340.8	0.03266013		870.79	0.00238932		1400.8	0.00684832		1930.8	-0.00870252		2460.8	-0.00980858
341	0.03178963		870.99	0.00158485		1401	0.00781094		1931	-0.00853349		2461	-0.00909913
341.2	0.03150953		871.19	0.00170898		1401.2	0.00814081		1931.2	-0.00888047		2461.2	-0.00900721
341.4	0.03141302		871.39	0.00161781		1401.4	0.00818721		1931.4	-0.00914721		2461.4	-0.00942114
341.6	0.03092462		871.59	0.00187799		1401.6	0.00825153		1931.6	-0.0086892		2461.6	-0.00969358
341.8	0.03079525		871.79	0.00162046		1401.8	0.00844182		1931.8	-0.00860627		2461.8	-0.01103411
342	0.03065347		871.99	0.00134684		1402	0.00842528		1932	-0.00763952		2462	-0.01146132
342.2	0.030852		872.19	0.00151758		1402.2	0.00805899		1932.2	-0.00677525		2462.2	-0.01199885
342.4	0.03080117		872.39	0.00116727		1402.4	0.00740133		1932.4	-0.00657919		2462.4	-0.01197966
342.6	0.03190765		872.59	0.00130631		1402.6	0.00783863		1932.6	-0.00566127		2462.6	-0.01217325
342.8	0.03241057		872.79	0.0021959		1402.8	0.00702745		1932.8	-0.00575342		2462.8	-0.01208309
343	0.032599		872.99	0.00157619		1403	0.00610587		1933	-0.00568288		2463	-0.01279658
343.2	0.03346378		873.19	0.00183933		1403.2	0.00523997		1933.2	-0.00520707		2463.2	-0.01248115
343.4	0.03446004		873.39	0.00280136		1403.4	0.00505451		1933.4	-0.00464328		2463.4	-0.01161391
343.6	0.03566228		873.59	0.0032915		1403.6	0.00478269		1933.6	-0.00420841		2463.6	-0.01175809
343.8	0.0360526		873.79	0.00346971		1403.8	0.00545007		1933.8	-0.00391411		2463.8	-0.01212437
344	0.03609829		873.99	0.00397332		1404	0.00488418		1934	-0.00449141		2464	-0.01117037
344.2	0.03580897		874.19	0.00404172		1404.2	0.0053539		1934.2	-0.0049164		2464.2	-0.01124456
344.4	0.03562321		874.39	0.00396873		1404.4	0.00549672		1934.4	-0.00578863		2464.4	-0.01021185
344.6	0.03454436		874.59	0.00366702		1404.6	0.00568472		1934.6	-0.00641649		2464.6	-0.00876825
344.8	0.03429706		874.79	0.00405715		1404.8	0.00667094		1934.8	-0.0072669		2464.8	-0.00801309
345	0.0339407		874.99	0.00414574		1405	0.00703837		1935	-0.00786496		2465	-0.0087643
345.2	0.0329982		875.19	0.00448438		1405.2	0.00734133		1935.2	-0.00819012		2465.2	-0.00909546
345.4	0.03244169		875.39	0.00464608		1405.4	0.00721117		1935.4	-0.00863723		2465.4	-0.00968426
345.6	0.0312934		875.59	0.00437631		1405.6	0.00684132		1935.6	-0.00910943		2465.6	-0.01124596
345.8	0.03142766		875.79	0.00345747		1405.8	0.00733163		1935.8	-0.00820187		2465.8	-0.01271601
346	0.03128526		875.99	0.00343333		1406	0.00734813		1936	-0.00732261		2466	-0.01211218
346.2	0.03104487		876.19	0.00363436		1406.2	0.00644745		1936.2	-0.00703268		2466.2	-0.01285364
346.4	0.03104693		876.39	0.00271362		1406.4	0.00669001		1936.4	-0.00650693		2466.4	-0.0131764
346.6	0.03165513		876.59	0.00300078		1406.6	0.00791769		1936.6	-0.00595928		2466.6	-0.01377071
346.8	0.031498		876.79	0.00278462		1406.8	0.00710653		1936.8	-0.00606973		2466.8	-0.01454319
347	0.03176013		876.99	0.00140926		1407	0.0060336		1937	-0.00565704		2467	-0.01464018
347.2	0.03246232		877.19	0.00189328		1407.2	0.00585434		1937.2	-0.00528374		2467.2	-0.01486061
347.4	0.0327489		877.39	0.00250869		1407.4	0.00542548		1937.4	-0.00529328		2467.4	-0.01489446
347.6	0.03372715		877.59	0.00236259		1407.6	0.00582488		1937.6	-0.0046228		2467.6	-0.01436825
347.8	0.03466176		877.79	0.00208606		1407.8	0.00558358		1937.8	-0.00528812		2467.8	-0.01377566
348	0.03483688		877.99	0.00168437		1408	0.00585712		1938	-0.00532496		2468	-0.01202579
348.2	0.03464558		878.19	0.00256104		1408.2	0.00686999		1938.2	-0.00509902		2468.2	-0.01159454
348.4	0.03484218		878.39	0.00257617		1408.4	0.00670821		1938.4	-0.00465211		2468.4	-0.01078732
348.6	0.03433092		878.59	0.00357537		1408.6	0.00654387		1938.6	-0.00520538		2468.6	-0.01058479
348.8	0.03446844		878.79	0.00441911		1408.8	0.00717088		1938.8	-0.00532551		2468.8	-0.01059955
349	0.03438403		878.99	0.00505233		1409	0.00718764		1939	-0.00554678		2469	-0.01076326
349.2	0.03433968		879.19	0.00542516		1409.2	0.00754792		1939.2	-0.00494233		2469.2	-0.01066838
349.4	0.03494675		879.39	0.00557681		1409.4	0.00711863		1939.4	-0.00518446		2469.4	-0.01089441
349.6	0.03528608		879.59	0.0052259		1409.6	0.00652204		1939.6	-0.0048582		2469.6	-0.01125499
349.8	0.03499924		879.79	0.00493718		1409.8	0.00749195		1939.8	-0.00390662		2469.8	-0.01048044
350	0.03432779		879.99	0.00539037		1410	0.00714323		1940	-0.00363425		2470	-0.00976221
350.2	0.03376841		880.19	0.00424607		1410.2	0.0066607		1940.2	-0.00338662		2470.2	-0.00984553
350.4	0.03314388		880.39	0.00346161		1410.4	0.00756689		1940.4	-0.00301329		2470.4	-0.00979387
350.6	0.03243134		880.59	0.00354918		1410.6	0.00711973		1940.6	-0.00344415		2470.6	-0.0112668
350.8	0.03180675		880.79	0.0029472		1410.8	0.00654512		1940.8	-0.00363112		2470.8	-0.01154381
351	0.03175225		880.99	0.00260478		1411	0.00563183		1941	-0.00345661		2471	-0.01156487
351.2	0.03135156		881.19	0.00274004		1411.2	0.00554455		1941.2	-0.00463375		2471.2	-0.01295359
351.4	0.03126293		881.39	0.00300396		1411.4	0.00544306		1941.4	-0.00512663		2471.4	-0.01359933
351.6	0.03155235		881.59	0.00281294		1411.6	0.00607411		1941.6	-0.0050174		2471.6	-0.0134773
351.8	0.03157613		881.79	0.00313995		1411.8	0.00585807		1941.8	-0.00574673		2471.8	-0.01396713
352	0.03159329		881.99	0.00427263		1412	0.0068293		1942	-0.00478671		2472	-0.01365638
352.2	0.0313211		882.19	0.00522824		1412.2	0.00700729		1942.2	-0.00519554		2472.2	-0.01456876
352.4	0.03218714		882.39	0.00600634		1412.4	0.00677537		1942.4	-0.00465073		2472.4	-0.0147379
352.6	0.0320304		882.59	0.00572377		1412.6	0.00707392		1942.6	-0.00577937		2472.6	-0.01524942
352.8	0.03252988		882.79	0.0054558		1412.8	0.00702949		1942.8	-0.00483975		2472.8	-0.0149694
353	0.03338977		882.99	0.00552505		1413	0.00660123		1943	-0.0051352		2473	-0.01478245
353.2	0.03453514		883.19	0.00467095		1413.2	0.00673985		1943.2	-0.0043217		2473.2	-0.01420176
353.4	0.03551365		883.39	0.00351612		1413.4	0.00656061		1943.4	-0.00467668		2473.4	-0.01334317
353.6	0.03657578		883.59	0.00270094		1413.6	0.00680251		1943.6	-0.00376534		2473.6	-0.01328026
353.8	0.03609021		883.79	0.00254903		1413.8	0.00658787		1943.8	-0.00273172		2473.8	-0.01293992
354	0.03670375		883.99	0.0025213		1414	0.00574397		1944	-0.00240185		2474	-0.01262209
354.2	0.03593605		884.19	0.00152536		1414.2	0.00534523		1944.2	-0.00218582		2474.2	-0.0121484
354.4	0.03539545		884.39	0.00132336		1414.4	0.00472793		1944.4	-0.00207647		2474.4	-0.01237602
354.6	0.03442082		884.59	0.00126812		1414.6	0.00383246		1944.6	-0.00236903		2474.6	-0.01303017
354.8	0.0342636		884.79	0.00191992		1414.8	0.00393799		1944.8	-0.00210129		2474.8	-0.0125493
355	0.03458949		884.99	0.00199		1415	0.00361928		1945	-0.00255428		2475	-0.01250378
355.2	0.03500749		885.19	0.00199505		1415.2	0.00465697		1945.2	-0.00344203		2475.2	-0.01273515
355.4	0.03506967		885.39	0.00253887		1415.4	0.00533594		1945.4	-0.00389223		2475.4	-0.0135088
355.6	0.03421567		885.59	0.00278037		1415.6	0.00577992		1945.6	-0.00395167		2475.6	-0.0138802
355.8	0.03387947		885.79	0.00308043		1415.8	0.00593142		1945.8	-0.00403861		2475.8	-0.01356161
356	0.03369971		885.99	0.00324447		1416	0.00658226		1946	-0.00398684		2476	-0.01317599
356.2	0.03296123		886.19	0.00274814		1416.2	0.00691728		1946.2	-0.00424163		2476.2	-0.01298716
356.4	0.03307286		886.39	0.0032609		1416.4	0.00689849		1946.4	-0.00500031		2476.4	-0.01301389
356.6	0.03256634		886.59	0.00181679		1416.6	0.0076749		1946.6	-0.0055466		2476.6	-0.01389993
356.8	0.03227467		886.79	0.0021351		1416.8	0.00782223		1946.8	-0.00497156		2476.8	-0.01410857
357	0.03211365		886.99	0.0016068		1417	0.00858024		1947	-0.0053375		2477	-0.01430047
357.2	0.03304085		887.19	0.00019959		1417.2	0.00871608		1947.2	-0.00514698		2477.2	-0.01371815
357.4	0.03413336		887.39	-0.00029992		1417.4	0.00899814		1947.4	-0.00547672		2477.4	-0.014295
357.6	0.03485051		887.59	0.00069539		1417.6	0.00908707		1947.6	-0.00427431		2477.6	-0.01481384
357.8	0.03446471		887.79	0.00070357		1417.8	0.00827013		1947.8	-0.00421304		2477.8	-0.01459747
358	0.03448058		887.99	0.00115143		1418	0.00805318		1948	-0.00426318		2478	-0.01392862
358.2	0.03392565		888.19	0.00068153		1418.2	0.00750265		1948.2	-0.00386805		2478.2	-0.01291065
358.4	0.03468682		888.39	0.0008592		1418.4	0.00706901		1948.4	-0.00263558		2478.4	-0.01225122
358.6	0.03452923		888.59	0.00085464		1418.6	0.00762187		1948.6	-0.00294321		2478.6	-0.01224727
358.8	0.03484238		888.79	0.00091967		1418.8	0.00821318		1948.8	-0.00337336		2478.8	-0.01219552
359	0.03568274		888.99	0.00001115		1419	0.00817063		1949	-0.00342646		2479	-0.01228014
359.2	0.03522654		889.19	0.00087912		1419.2	0.00789727		1949.2	-0.00321578		2479.2	-0.01196228
359.4	0.03452366		889.39	0.00119428		1419.4	0.00786159		1949.4	-0.0042239		2479.4	-0.01173555
359.6	0.03441141		889.59	0.00130151		1419.6	0.00745685		1949.6	-0.00415563		2479.6	-0.01074881
359.8	0.03523032		889.79	0.00191922		1419.8	0.00707583		1949.8	-0.00437489		2479.8	-0.00957151
360	0.03521085		889.99	0.00155139		1420	0.00741421		1950	-0.0047968		2480	-0.00926635
360.2	0.03500289		890.19	0.00220056		1420.2	0.00713875		1950.2	-0.00443737		2480.2	-0.00932552
360.4	0.03503541		890.39	0.0026807		1420.4	0.00688477		1950.4	-0.00528038		2480.4	-0.01007702
360.6	0.0355379		890.59	0.00321957		1420.6	0.00751529		1950.6	-0.00449338		2480.6	-0.01125587
360.8	0.03520144		890.79	0.00346999		1420.8	0.00751068		1950.8	-0.00456025		2480.8	-0.0121273
361	0.03565862		890.99	0.00331386		1421	0.00774635		1951	-0.00506007		2481	-0.012786
361.2	0.03595313		891.19	0.00325487		1421.2	0.00768769		1951.2	-0.00501715		2481.2	-0.01289237
361.4	0.0364807		891.39	0.00354084		1421.4	0.00759134		1951.4	-0.00535239		2481.4	-0.0139482
361.6	0.03622063		891.59	0.00446711		1421.6	0.00708076		1951.6	-0.00498041		2481.6	-0.01481511
361.8	0.03520598		891.79	0.00423729		1421.8	0.00694939		1951.8	-0.00430825		2481.8	-0.0148478
362	0.03467852		891.99	0.0049665		1422	0.00724728		1952	-0.00369893		2482	-0.01494713
362.2	0.03501781		892.19	0.00441178		1422.2	0.00738201		1952.2	-0.0032836		2482.2	-0.01535685
362.4	0.03454339		892.39	0.00431864		1422.4	0.00724584		1952.4	-0.0034063		2482.4	-0.01574609
362.6	0.03376054		892.59	0.00438858		1422.6	0.00730261		1952.6	-0.00427744		2482.6	-0.01632459
362.8	0.03332209		892.79	0.00439864		1422.8	0.00747585		1952.8	-0.00438401		2482.8	-0.01616025
363	0.0329714		892.99	0.00522749		1423	0.00722205		1953	-0.00386462		2483	-0.01568565
363.2	0.03215912		893.19	0.00554896		1423.2	0.00784863		1953.2	-0.00396755		2483.2	-0.01451931
363.4	0.03193635		893.39	0.00548542		1423.4	0.00920498		1953.4	-0.00491621		2483.4	-0.01325547
363.6	0.03207341		893.59	0.00607799		1423.6	0.0088036		1953.6	-0.0047792		2483.6	-0.0128452
363.8	0.03223185		893.79	0.00619869		1423.8	0.00950225		1953.8	-0.0048399		2483.8	-0.01164865
364	0.03159907		893.99	0.00606465		1424	0.01027996		1954	-0.00432267		2484	-0.01122374
364.2	0.03251901		894.19	0.00654814		1424.2	0.01011999		1954.2	-0.00426807		2484.2	-0.01101765
364.4	0.03319197		894.39	0.00652279		1424.4	0.01078994		1954.4	-0.00521653		2484.4	-0.01035859
364.6	0.03373226		894.59	0.00720847		1424.6	0.01149242		1954.6	-0.00523877		2484.6	-0.01049401
364.8	0.03398534		894.79	0.00634389		1424.8	0.01150716		1954.8	-0.00535175		2484.8	-0.01107876
365	0.03440037		894.99	0.00577379		1425	0.01156682		1955	-0.0060602		2485	-0.01076984
365.2	0.03472968		895.19	0.00577226		1425.2	0.01061079		1955.2	-0.00558046		2485.2	-0.01091604
365.4	0.0348921		895.39	0.00530448		1425.4	0.00956989		1955.4	-0.00583837		2485.4	-0.01200547
365.6	0.03420847		895.59	0.00461634		1425.6	0.00889218		1955.6	-0.00449		2485.6	-0.01261411
365.8	0.03390881		895.79	0.00399248		1425.8	0.00885027		1955.8	-0.00413129		2485.8	-0.01273661
366	0.03412889		895.99	0.00338512		1426	0.0076201		1956	-0.00392799		2486	-0.01393513
366.2	0.03365241		896.19	0.00231809		1426.2	0.00668447		1956.2	-0.00408674		2486.2	-0.01431456
366.4	0.03300114		896.39	0.00237786		1426.4	0.00662072		1956.4	-0.00381741		2486.4	-0.01349598
366.6	0.03308222		896.59	0.00302371		1426.6	0.00661884		1956.6	-0.00296		2486.6	-0.01429857
366.8	0.03327118		896.79	0.00243566		1426.8	0.00644437		1956.8	-0.00287421		2486.8	-0.01484758
367	0.03306781		896.99	0.00277074		1427	0.00710189		1957	-0.00316538		2487	-0.01500522
367.2	0.03286159		897.19	0.0023795		1427.2	0.0069963		1957.2	-0.00322772		2487.2	-0.01451761
367.4	0.03261952		897.39	0.00328808		1427.4	0.00679782		1957.4	-0.00321878		2487.4	-0.0140695
367.6	0.03276546		897.59	0.00362569		1427.6	0.00595741		1957.6	-0.00334055		2487.6	-0.01391743
367.8	0.03317644		897.79	0.00374891		1427.8	0.0063886		1957.8	-0.00383268		2487.8	-0.01249035
368	0.03356881		897.99	0.00348864		1428	0.00614096		1958	-0.00422354		2488	-0.01205684
368.2	0.03434136		898.19	0.00305585		1428.2	0.00647853		1958.2	-0.00558714		2488.2	-0.01153666
368.4	0.03456982		898.39	0.00275903		1428.4	0.00698655		1958.4	-0.00608542		2488.4	-0.0113868
368.6	0.03499227		898.59	0.00225123		1428.6	0.00751248		1958.6	-0.00593938		2488.6	-0.01061478
368.8	0.03540606		898.79	0.00148432		1428.8	0.00772337		1958.8	-0.00532495		2488.8	-0.01074582
369	0.0362915		898.99	0.00136058		1429	0.00750432		1959	-0.00633642		2489	-0.01084178
369.2	0.03672622		899.19	0.00186026		1429.2	0.00744522		1959.2	-0.00556427		2489.2	-0.01134964
369.4	0.03624979		899.39	0.00062502		1429.4	0.00754321		1959.4	-0.00592601		2489.4	-0.01255447
369.6	0.03619265		899.59	0.00018269		1429.6	0.00788031		1959.6	-0.00524882		2489.6	-0.01220559
369.8	0.03629688		899.79	0.00008417		1429.8	0.00800537		1959.8	-0.00498626		2489.8	-0.0130291
370	0.0362678		899.99	0.00046211		1430	0.0072967		1960	-0.00416217		2490	-0.01375274
370.2	0.03583471		900.19	0.00064164		1430.2	0.00864843		1960.2	-0.00414152		2490.2	-0.01326377
370.4	0.0361387		900.39	0.00166106		1430.4	0.00874582		1960.4	-0.00304406		2490.4	-0.01305178
370.6	0.03647853		900.59	0.00206614		1430.6	0.00871243		1960.6	-0.00264423		2490.6	-0.01466745
370.8	0.03679083		900.79	0.00220127		1430.8	0.00823667		1960.8	-0.00381191		2490.8	-0.0147147
371	0.03720867		900.99	0.00320003		1431	0.00880392		1961	-0.00387257		2491	-0.0148375
371.2	0.03807177		901.19	0.00405159		1431.2	0.00737221		1961.2	-0.0042631		2491.2	-0.0153929
371.4	0.03791944		901.39	0.00479992		1431.4	0.0072942		1961.4	-0.00420545		2491.4	-0.01483723
371.6	0.03780091		901.59	0.00522436		1431.6	0.00621398		1961.6	-0.00498342		2491.6	-0.01420873
371.8	0.03756217		901.79	0.00583036		1431.8	0.00710017		1961.8	-0.00493578		2491.8	-0.01319287
372	0.0376816		901.99	0.0050423		1432	0.00705738		1962	-0.00512233		2492	-0.01351865
372.2	0.03783245		902.19	0.00554633		1432.2	0.00792622		1962.2	-0.00445978		2492.2	-0.0130103
372.4	0.0377014		902.39	0.00536886		1432.4	0.00833743		1962.4	-0.00416161		2492.4	-0.01284494
372.6	0.0374308		902.59	0.00488414		1432.6	0.00847665		1962.6	-0.00396696		2492.6	-0.01106678
372.8	0.03691919		902.79	0.0048953		1432.8	0.00877114		1962.8	-0.00351744		2492.8	-0.01142355
373	0.03643775		902.99	0.00445075		1433	0.00829631		1963	-0.00382222		2493	-0.01221254
373.2	0.0355539		903.19	0.00362784		1433.2	0.00827591		1963.2	-0.00328271		2493.2	-0.0124773
373.4	0.03500573		903.39	0.0025449		1433.4	0.00796059		1963.4	-0.00283969		2493.4	-0.01310893
373.6	0.03436797		903.59	0.00185014		1433.6	0.00759692		1963.6	-0.00264115		2493.6	-0.0125222
373.8	0.03385205		903.79	0.00088829		1433.8	0.00692915		1963.8	-0.00182697		2493.8	-0.01329875
374	0.03302996		903.99	0.00125712		1434	0.00699818		1964	-0.00190784		2494	-0.01323458
374.2	0.03343438		904.19	0.00110932		1434.2	0.00736973		1964.2	-0.00158896		2494.2	-0.01286382
374.4	0.03351364		904.39	0.00055071		1434.4	0.00628644		1964.4	-0.00131555		2494.4	-0.01305969
374.6	0.0342885		904.59	0.00010484		1434.6	0.00602494		1964.6	-0.00262473		2494.6	-0.01360086
374.8	0.03485515		904.79	0.00075881		1434.8	0.00546815		1964.8	-0.00398425		2494.8	-0.01440014
375	0.03548085		904.99	0.00166424		1435	0.00527863		1965	-0.00464383		2495	-0.01506007
375.2	0.03556122		905.19	0.00198522		1435.2	0.0050993		1965.2	-0.00538285		2495.2	-0.01514121
375.4	0.03511861		905.39	0.0025181		1435.4	0.00477768		1965.4	-0.00558312		2495.4	-0.01376681
375.6	0.03570063		905.59	0.00267825		1435.6	0.00467806		1965.6	-0.00592278		2495.6	-0.01362749
375.8	0.03630134		905.79	0.00379437		1435.8	0.00561779		1965.8	-0.00586582		2495.8	-0.01323453
376	0.0365795		905.99	0.00385737		1436	0.00503663		1966	-0.00686767		2496	-0.01314538
376.2	0.03722955		906.19	0.00460923		1436.2	0.00510604		1966.2	-0.00660433		2496.2	-0.01277702
376.4	0.03655007		906.39	0.00471284		1436.4	0.0045427		1966.4	-0.00769354		2496.4	-0.01260768
376.6	0.03658673		906.59	0.0046894		1436.6	0.00432754		1966.6	-0.00708393		2496.6	-0.01148719
376.8	0.03617785		906.79	0.00437499		1436.8	0.00465753		1966.8	-0.00647264		2496.8	-0.01158557
377	0.03519046		906.99	0.0037194		1437	0.00479386		1967	-0.0063811		2497	-0.01198385
377.2	0.03528417		907.19	0.00351638		1437.2	0.00578786		1967.2	-0.00632747		2497.2	-0.01147416
377.4	0.034768		907.39	0.00388094		1437.4	0.0065048		1967.4	-0.00587773		2497.4	-0.01147181
377.6	0.03466352		907.59	0.0034184		1437.6	0.00663173		1967.6	-0.00570773		2497.6	-0.01061941
377.8	0.03502315		907.79	0.00384323		1437.8	0.00753409		1967.8	-0.00468827		2497.8	-0.01135764
378	0.03538073		907.99	0.00422313		1438	0.00851358		1968	-0.00428425		2498	-0.01155994
378.2	0.03644559		908.19	0.00375075		1438.2	0.00836487		1968.2	-0.00362509		2498.2	-0.01184646
378.4	0.03605455		908.39	0.00291994		1438.4	0.00768838		1968.4	-0.00358947		2498.4	-0.01226368
378.6	0.03615881		908.59	0.00288921		1438.6	0.00719446		1968.6	-0.00387177		2498.6	-0.01255519
378.8	0.03565854		908.79	0.00287016		1438.8	0.00680255		1968.8	-0.00348725		2498.8	-0.01329259
379	0.03511659		908.99	0.00199701		1439	0.00610335		1969	-0.00324071		2499	-0.01300787
379.2	0.03457142		909.19	0.00078388		1439.2	0.0052348		1969.2	-0.00284378		2499.2	-0.01286621
379.4	0.03460193		909.39	-0.00009669		1439.4	0.00362695		1969.4	-0.00283292		2499.4	-0.01251232
379.6	0.03451274		909.59	-0.00104372		1439.6	0.00243865		1969.6	-0.00279024		2499.6	-0.01286163
379.8	0.03419966		909.79	-0.00132786		1439.8	0.00069624		1969.8	-0.00315448		2499.8	-0.01258279
380	0.03419966		909.99	-0.00132786		1440	0.00069624		1970	-0.00315448		2500	-0.01258279
380.2	0.033039		910.19	-0.0021521		1440.2	-0.00097603		1970.2	-0.00210994		2500.2	-0.01287344
380.4	0.03179762		910.39	-0.00216726		1440.4	-0.00207736		1970.4	-0.0015047		2500.4	-0.01320736
380.6	0.03096486		910.59	-0.00283302		1440.6	-0.00344484		1970.6	-0.00043096		2500.6	-0.01368781
380.8	0.03090928		910.79	-0.00377005		1440.8	-0.00361682		1970.8	0.0004434		2500.8	-0.01379048
381	0.03008345		910.99	-0.00404366		1441	-0.00400848		1971	0.00095841		2501	-0.01404268
381.2	0.02962908		911.19	-0.00404281		1441.2	-0.00399011		1971.2	0.00140605		2501.2	-0.01338173
381.4	0.02863073		911.39	-0.00340182		1441.4	-0.00426294		1971.4	0.00164951		2501.4	-0.01288293
381.6	0.02812281		911.59	-0.00319377		1441.6	-0.0044576		1971.6	0.0013439		2501.6	-0.01260552
381.8	0.02726196		911.79	-0.00249465		1441.8	-0.0036803		1971.8	0.00089417		2501.8	-0.01266533
382	0.02733875		911.99	-0.00221766		1442	-0.00343215		1972	0.00038906		2502	-0.01250105
382.2	0.02848017		912.19	-0.00185315		1442.2	-0.00358075		1972.2	0.00012065		2502.2	-0.01211175
382.4	0.02878007		912.39	-0.0023033		1442.4	-0.00464214		1972.4	-0.00068317		2502.4	-0.01155232
382.6	0.02899978		912.59	-0.00095958		1442.6	-0.00517133		1972.6	-0.00184364		2502.6	-0.01161909
382.8	0.02945432		912.79	-0.00122086		1442.8	-0.00527755		1972.8	-0.0023787		2502.8	-0.01096664
383	0.03048111		912.99	-0.00158511		1443	-0.00622075		1973	-0.00250447		2503	-0.010985
383.2	0.03086555		913.19	-0.00188076		1443.2	-0.00658129		1973.2	-0.00233976		2503.2	-0.01165268
383.4	0.0309231		913.39	-0.00220376		1443.4	-0.00613367		1973.4	-0.00239344		2503.4	-0.01247077
383.6	0.03072634		913.59	-0.00226593		1443.6	-0.00647569		1973.6	-0.00187946		2503.6	-0.01287215
383.8	0.03083119		913.79	-0.0022139		1443.8	-0.00657554		1973.8	-0.0016115		2503.8	-0.01349148
384	0.0302863		913.99	-0.00277419		1444	-0.00713788		1974	-0.00164605		2504	-0.01370878
384.2	0.0293508		914.19	-0.00323885		1444.2	-0.00784514		1974.2	-0.00057873		2504.2	-0.01446313
384.4	0.0291591		914.39	-0.00405748		1444.4	-0.00725988		1974.4	0.00044494		2504.4	-0.01507118
384.6	0.02966139		914.59	-0.0053827		1444.6	-0.00600445		1974.6	0.00086608		2504.6	-0.01528333
384.8	0.03017147		914.79	-0.00577541		1444.8	-0.00470922		1974.8	0.00064056		2504.8	-0.01522803
385	0.02871703		914.99	-0.00497671		1445	-0.0041447		1975	0.00015381		2505	-0.01500703
385.2	0.02781722		915.19	-0.00424145		1445.2	-0.00343694		1975.2	-0.00019765		2505.2	-0.01429564
385.4	0.02698554		915.39	-0.00307451		1445.4	-0.0034849		1975.4	-0.00022026		2505.4	-0.01440459
385.6	0.02648491		915.59	-0.00241546		1445.6	-0.00358406		1975.6	-0.00045448		2505.6	-0.01409775
385.8	0.02564724		915.79	-0.0018933		1445.8	-0.00349707		1975.8	-0.00080097		2505.8	-0.01419651
386	0.02592917		915.99	-0.00201767		1446	-0.00469705		1976	-0.00126329		2506	-0.0140647
386.2	0.0267324		916.19	-0.00159162		1446.2	-0.00597993		1976.2	-0.00186063		2506.2	-0.01334999
386.4	0.02589476		916.39	-0.00180561		1446.4	-0.00745858		1976.4	-0.00260797		2506.4	-0.01219335
386.6	0.02578844		916.59	-0.00118193		1446.6	-0.00792683		1976.6	-0.00345158		2506.6	-0.01246503
386.8	0.02612198		916.79	-0.00274804		1446.8	-0.00777457		1976.8	-0.00281176		2506.8	-0.01135376
387	0.02619983		916.99	-0.00305935		1447	-0.0081333		1977	-0.00255049		2507	-0.01125962
387.2	0.02534198		917.19	-0.00211054		1447.2	-0.00748343		1977.2	-0.00255763		2507.2	-0.0113394
387.4	0.02458156		917.39	-0.00129724		1447.4	-0.00802478		1977.4	-0.00241479		2507.4	-0.01081579
387.6	0.02406721		917.59	-0.00156122		1447.6	-0.00793709		1977.6	-0.00280609		2507.6	-0.00991257
387.8	0.02306494		917.79	-0.0014666		1447.8	-0.00831787		1977.8	-0.0023842		2507.8	-0.00964323
388	0.02241991		917.99	-0.0020223		1448	-0.00766082		1978	-0.00257159		2508	-0.00942603
388.2	0.02265622		918.19	-0.00239845		1448.2	-0.00807201		1978.2	-0.00228021		2508.2	-0.00991435
388.4	0.02224731		918.39	-0.00242265		1448.4	-0.00704232		1978.4	-0.00181284		2508.4	-0.0101087
388.6	0.02234645		918.59	-0.00229472		1448.6	-0.00652246		1978.6	-0.00265984		2508.6	-0.0094723
388.8	0.02233859		918.79	-0.00114224		1448.8	-0.00699125		1978.8	-0.00295476		2508.8	-0.00964605
389	0.02215717		918.99	-0.0009402		1449	-0.00686104		1979	-0.00224134		2509	-0.00992102
389.2	0.02269759		919.19	-0.00002362		1449.2	-0.00697355		1979.2	-0.00193045		2509.2	-0.01007272
389.4	0.02366376		919.39	0.00126501		1449.4	-0.00769501		1979.4	-0.00217063		2509.4	-0.01113899
389.6	0.02388706		919.59	0.00142384		1449.6	-0.0080301		1979.6	-0.00236238		2509.6	-0.01175071
389.8	0.02438659		919.79	0.00179842		1449.8	-0.0080452		1979.8	-0.00293056		2509.8	-0.01274558
390	0.0258992		919.99	0.00176223		1450	-0.0082204		1980	-0.00344377		2510	-0.01356512
390.2	0.02726222		920.19	0.00126719		1450.2	-0.00864121		1980.2	-0.00359171		2510.2	-0.01381942
390.4	0.02737473		920.39	0.00018842		1450.4	-0.00927648		1980.4	-0.00312659		2510.4	-0.01448822
390.6	0.02806379		920.59	-0.00103252		1450.6	-0.00870727		1980.6	-0.00235877		2510.6	-0.01601067
390.8	0.02822333		920.79	-0.00221814		1450.8	-0.00811466		1980.8	-0.00204395		2510.8	-0.01503621
391	0.02812344		920.99	-0.00213765		1451	-0.00815058		1981	-0.00262599		2511	-0.01515267
391.2	0.02780291		921.19	-0.00170014		1451.2	-0.00747643		1981.2	-0.00210683		2511.2	-0.01525289
391.4	0.0271277		921.39	-0.00211445		1451.4	-0.00735741		1981.4	-0.00218776		2511.4	-0.0151834
391.6	0.02705589		921.59	-0.00287808		1451.6	-0.00628402		1981.6	-0.00251825		2511.6	-0.01481115
391.8	0.02594588		921.79	-0.0034277		1451.8	-0.00528257		1981.8	-0.00217053		2511.8	-0.01520394
392	0.02604607		921.99	-0.00363624		1452	-0.00466971		1982	-0.00223906		2512	-0.01550763
392.2	0.02602456		922.19	-0.0042725		1452.2	-0.0045696		1982.2	-0.00184683		2512.2	-0.01567396
392.4	0.02468021		922.39	-0.00386619		1452.4	-0.0041116		1982.4	-0.00176061		2512.4	-0.01517686
392.6	0.02473467		922.59	-0.00452322		1452.6	-0.00439566		1982.6	-0.00203209		2512.6	-0.01471425
392.8	0.02455049		922.79	-0.00418852		1452.8	-0.00479467		1982.8	-0.00176801		2512.8	-0.01415913
393	0.02434103		922.99	-0.00509908		1453	-0.00468118		1983	-0.00106898		2513	-0.01477682
393.2	0.02384347		923.19	-0.00488544		1453.2	-0.00525125		1983.2	-0.00180048		2513.2	-0.01446169
393.4	0.02365216		923.39	-0.00473153		1453.4	-0.005002		1983.4	-0.00264029		2513.4	-0.01502931
393.6	0.02352437		923.59	-0.00413176		1453.6	-0.00502461		1983.6	-0.00323284		2513.6	-0.01448756
393.8	0.02389976		923.79	-0.00291767		1453.8	-0.00468078		1983.8	-0.00319472		2513.8	-0.01434962
394	0.02496497		923.99	-0.00313489		1454	-0.00429229		1984	-0.00323269		2514	-0.01486347
394.2	0.02522861		924.19	-0.00340843		1454.2	-0.00532043		1984.2	-0.00302304		2514.2	-0.01454301
394.4	0.02546596		924.39	-0.00323716		1454.4	-0.00598304		1984.4	-0.00232449		2514.4	-0.01460453
394.6	0.0253486		924.59	-0.00254085		1454.6	-0.0061529		1984.6	-0.00231639		2514.6	-0.01380729
394.8	0.02519063		924.79	-0.00228773		1454.8	-0.0060126		1984.8	-0.00224391		2514.8	-0.0133397
395	0.0255314		924.99	-0.00221689		1455	-0.00654736		1985	-0.00181343		2515	-0.01354102
395.2	0.02493031		925.19	-0.00181112		1455.2	-0.0063506		1985.2	-0.00094261		2515.2	-0.01377596
395.4	0.02440656		925.39	-0.0028092		1455.4	-0.00660804		1985.4	-0.00155354		2515.4	-0.01415111
395.6	0.02385862		925.59	-0.00270818		1455.6	-0.00632765		1985.6	-0.00117162		2515.6	-0.01366357
395.8	0.02312792		925.79	-0.00307229		1455.8	-0.00538986		1985.8	-0.00139412		2515.8	-0.01399997
396	0.02386657		925.99	-0.0033281		1456	-0.00590801		1986	-0.00205282		2516	-0.01346856
396.2	0.02409783		926.19	-0.00365247		1456.2	-0.00587933		1986.2	-0.00274086		2516.2	-0.01333224
396.4	0.02331798		926.39	-0.00380351		1456.4	-0.00633229		1986.4	-0.00317731		2516.4	-0.01455069
396.6	0.02334255		926.59	-0.00498057		1456.6	-0.00651134		1986.6	-0.00330335		2516.6	-0.0146271
396.8	0.0233388		926.79	-0.00558821		1456.8	-0.00693507		1986.8	-0.00322246		2516.8	-0.01490862
397	0.02326666		926.99	-0.00615154		1457	-0.00705566		1987	-0.0028319		2517	-0.01623362
397.2	0.02232091		927.19	-0.00651375		1457.2	-0.00666934		1987.2	-0.00352505		2517.2	-0.01606837
397.4	0.02249564		927.39	-0.00645345		1457.4	-0.00673637		1987.4	-0.00422493		2517.4	-0.0160326
397.6	0.02357955		927.59	-0.00564694		1457.6	-0.00757583		1987.6	-0.00438952		2517.6	-0.01644169
397.8	0.02400683		927.79	-0.00582081		1457.8	-0.00718899		1987.8	-0.00453286		2517.8	-0.01713182
398	0.02512234		927.99	-0.00618794		1458	-0.00692492		1988	-0.00510895		2518	-0.01750134
398.2	0.02582704		928.19	-0.00614368		1458.2	-0.007424		1988.2	-0.00503507		2518.2	-0.01758003
398.4	0.02622862		928.39	-0.00536649		1458.4	-0.00716898		1988.4	-0.00437201		2518.4	-0.01777334
398.6	0.02632313		928.59	-0.00497308		1458.6	-0.00774632		1988.6	-0.00505812		2518.6	-0.01747048
398.8	0.0258892		928.79	-0.0058582		1458.8	-0.00786507		1988.8	-0.00411393		2518.8	-0.01835629
399	0.02608504		928.99	-0.00573489		1459	-0.0083351		1989	-0.00417783		2519	-0.01828697
399.2	0.02523242		929.19	-0.00549906		1459.2	-0.00834722		1989.2	-0.00392398		2519.2	-0.01834411
399.4	0.02421686		929.39	-0.00627797		1459.4	-0.00845923		1989.4	-0.00381764		2519.4	-0.01748885
399.6	0.02349561		929.59	-0.00519612		1459.6	-0.00755582		1989.6	-0.0043393		2519.6	-0.01676919
399.8	0.02382471		929.79	-0.00451994		1459.8	-0.0077697		1989.8	-0.00479946		2519.8	-0.01705626
400	0.02389839		929.99	-0.00395025		1460	-0.00831448		1990	-0.00502058		2520	-0.0161284
400.2	0.0245253		930.19	-0.00334691		1460.2	-0.00872874		1990.2	-0.00512343		2520.2	-0.01669232
400.4	0.02412225		930.39	-0.00323321		1460.4	-0.00862458		1990.4	-0.00443056		2520.4	-0.0170186
400.6	0.02441746		930.59	-0.00374268		1460.6	-0.00923977		1990.6	-0.00421425		2520.6	-0.01635788
400.8	0.0240044		930.79	-0.00326476		1460.8	-0.0100258		1990.8	-0.00391976		2520.8	-0.01646627
401	0.02311033		930.99	-0.00403155		1461	-0.00962585		1991	-0.00365585		2521	-0.01608083
401.2	0.02273395		931.19	-0.0041749		1461.2	-0.00929141		1991.2	-0.00377438		2521.2	-0.01557821
401.4	0.02382503		931.39	-0.00497438		1461.4	-0.00969923		1991.4	-0.00412826		2521.4	-0.01603059
401.6	0.02434007		931.59	-0.00460976		1461.6	-0.00890724		1991.6	-0.00441451		2521.6	-0.01683721
401.8	0.02380595		931.79	-0.00523038		1461.8	-0.00826804		1991.8	-0.00491774		2521.8	-0.01707835
402	0.02390776		931.99	-0.0053836		1462	-0.0071544		1992	-0.00473186		2522	-0.01709717
402.2	0.02382285		932.19	-0.0059679		1462.2	-0.0072085		1992.2	-0.00388918		2522.2	-0.0173898
402.4	0.02386839		932.39	-0.00601116		1462.4	-0.00745924		1992.4	-0.00384814		2522.4	-0.01761551
402.6	0.0236249		932.59	-0.00628154		1462.6	-0.00765062		1992.6	-0.00437509		2522.6	-0.0183905
402.8	0.02235713		932.79	-0.00633598		1462.8	-0.00711007		1992.8	-0.00323588		2522.8	-0.01929468
403	0.02146342		932.99	-0.00649619		1463	-0.00661031		1993	-0.00314137		2523	-0.01875997
403.2	0.02076341		933.19	-0.00629762		1463.2	-0.00651014		1993.2	-0.00288066		2523.2	-0.01847766
403.4	0.01931518		933.39	-0.00593058		1463.4	-0.00669185		1993.4	-0.00210829		2523.4	-0.01832061
403.6	0.01934682		933.59	-0.00541577		1463.6	-0.00719082		1993.6	-0.00216037		2523.6	-0.01868816
403.8	0.01925182		933.79	-0.00470226		1463.8	-0.00770151		1993.8	-0.00198785		2523.8	-0.01917094
404	0.01913234		933.99	-0.0038362		1464	-0.00742936		1994	-0.00163479		2524	-0.01866661
404.2	0.02007646		934.19	-0.00328114		1464.2	-0.00823165		1994.2	-0.00087859		2524.2	-0.01891107
404.4	0.02023665		934.39	-0.00358083		1464.4	-0.00811981		1994.4	-0.00039965		2524.4	-0.01825907
404.6	0.02014873		934.59	-0.0037701		1464.6	-0.00865919		1994.6	-0.00099127		2524.6	-0.01794434
404.8	0.02088178		934.79	-0.00350033		1464.8	-0.00853556		1994.8	-0.00167865		2524.8	-0.01841113
405	0.0215954		934.99	-0.00381188		1465	-0.00760078		1995	-0.00229892		2525	-0.01842549
405.2	0.02235768		935.19	-0.00367103		1465.2	-0.00791719		1995.2	-0.00322805		2525.2	-0.01887788
405.4	0.02261067		935.39	-0.00436697		1465.4	-0.00755516		1995.4	-0.00465556		2525.4	-0.01950218
405.6	0.02282633		935.59	-0.00441051		1465.6	-0.00812696		1995.6	-0.00567354		2525.6	-0.01920472
405.8	0.02338119		935.79	-0.00494745		1465.8	-0.00912214		1995.8	-0.00589278		2525.8	-0.01903199
406	0.02342602		935.99	-0.00539765		1466	-0.00892216		1996	-0.00653273		2526	-0.01899874
406.2	0.0236989		936.19	-0.00636497		1466.2	-0.01007076		1996.2	-0.00672238		2526.2	-0.01958208
406.4	0.02348582		936.39	-0.00648966		1466.4	-0.01058917		1996.4	-0.00704362		2526.4	-0.01935573
406.6	0.02273388		936.59	-0.00657143		1466.6	-0.01102953		1996.6	-0.00729576		2526.6	-0.01947396
406.8	0.02222827		936.79	-0.00700786		1466.8	-0.01224814		1996.8	-0.00658665		2526.8	-0.01847229
407	0.02135047		936.99	-0.00777389		1467	-0.01278168		1997	-0.00675398		2527	-0.01753111
407.2	0.02082974		937.19	-0.00754973		1467.2	-0.01293002		1997.2	-0.00626338		2527.2	-0.01666673
407.4	0.01939723		937.39	-0.0083808		1467.4	-0.01239976		1997.4	-0.00509128		2527.4	-0.01743358
407.6	0.01912581		937.59	-0.00827926		1467.6	-0.01225745		1997.6	-0.00454254		2527.6	-0.01744801
407.8	0.01892325		937.79	-0.00697488		1467.8	-0.01146886		1997.8	-0.00415243		2527.8	-0.01671591
408	0.01912681		937.99	-0.00632794		1468	-0.01078916		1998	-0.00357712		2528	-0.01622867
408.2	0.01957417		938.19	-0.00602978		1468.2	-0.01068449		1998.2	-0.00284204		2528.2	-0.01611941
408.4	0.02017416		938.39	-0.00520097		1468.4	-0.00987312		1998.4	-0.00344745		2528.4	-0.01666696
408.6	0.02021407		938.59	-0.00460222		1468.6	-0.00902585		1998.6	-0.00331347		2528.6	-0.01666423
408.8	0.02118797		938.79	-0.00399173		1468.8	-0.00847447		1998.8	-0.00385593		2528.8	-0.01675644
409	0.02125191		938.99	-0.00353873		1469	-0.00844437		1999	-0.00412499		2529	-0.01717109
409.2	0.02181371		939.19	-0.00366278		1469.2	-0.0086784		1999.2	-0.00448793		2529.2	-0.01669757
409.4	0.02218621		939.39	-0.00395753		1469.4	-0.00835911		1999.4	-0.00428211		2529.4	-0.01666507
409.6	0.02321733		939.59	-0.00390383		1469.6	-0.00831626		1999.6	-0.00425509		2529.6	-0.01685601
409.8	0.02313348		939.79	-0.00319751		1469.8	-0.00851951		1999.8	-0.00379215		2529.8	-0.01688135
410	0.02188237		939.99	-0.00360649		1470	-0.00795427		2000	-0.00400993		2530	-0.01693743
410.2	0.02107154		940.19	-0.00359083		1470.2	-0.00838335		2000.2	-0.00430125		2530.2	-0.01634903
410.4	0.02065019		940.39	-0.00323756		1470.4	-0.00899799		2000.4	-0.00472391		2530.4	-0.01495361
410.6	0.02046224		940.59	-0.00392535		1470.6	-0.00896359		2000.6	-0.00510543		2530.6	-0.01501213
410.8	0.02063382		940.79	-0.00445757		1470.8	-0.01035035		2000.8	-0.00554541		2530.8	-0.01507929
411	0.01930216		940.99	-0.00552816		1471	-0.01007815		2001	-0.0057396		2531	-0.01554629
411.2	0.01897102		941.19	-0.00580559		1471.2	-0.00942622		2001.2	-0.00548415		2531.2	-0.01521472
411.4	0.01846534		941.39	-0.00620784		1471.4	-0.0087537		2001.4	-0.00542789		2531.4	-0.01659654
411.6	0.01797185		941.59	-0.00626734		1471.6	-0.00946546		2001.6	-0.00564037		2531.6	-0.01721572
411.8	0.01805597		941.79	-0.00682315		1471.8	-0.00948639		2001.8	-0.00554213		2531.8	-0.0169864
412	0.01807095		941.99	-0.00701225		1472	-0.00951245		2002	-0.00583555		2532	-0.01758857
412.2	0.01921862		942.19	-0.00622588		1472.2	-0.00962372		2002.2	-0.00570924		2532.2	-0.01834879
412.4	0.01986324		942.39	-0.00619795		1472.4	-0.010075		2002.4	-0.00561418		2532.4	-0.01916671
412.6	0.02022916		942.59	-0.00619916		1472.6	-0.01087856		2002.6	-0.00480766		2532.6	-0.01865288
412.8	0.02104203		942.79	-0.00644432		1472.8	-0.01129625		2002.8	-0.00561546		2532.8	-0.01908428
413	0.02155268		942.99	-0.00663433		1473	-0.01133369		2003	-0.00501744		2533	-0.01973634
413.2	0.02227066		943.19	-0.00691159		1473.2	-0.01088135		2003.2	-0.00450698		2533.2	-0.01908528
413.4	0.02210202		943.39	-0.00731583		1473.4	-0.011015		2003.4	-0.00339422		2533.4	-0.01953725
413.6	0.02230133		943.59	-0.00629804		1473.6	-0.00983531		2003.6	-0.00370843		2533.6	-0.01984556
413.8	0.02084294		943.79	-0.00562016		1473.8	-0.00973056		2003.8	-0.00344878		2533.8	-0.01934342
414	0.02019811		943.99	-0.00533116		1474	-0.00930384		2004	-0.00418191		2534	-0.01885763
414.2	0.01964919		944.19	-0.00442033		1474.2	-0.00934523		2004.2	-0.00441524		2534.2	-0.0175975
414.4	0.01903147		944.39	-0.00431126		1474.4	-0.00994374		2004.4	-0.00513792		2534.4	-0.01761503
414.6	0.01879556		944.59	-0.00426995		1474.6	-0.00907164		2004.6	-0.00512617		2534.6	-0.01763723
414.8	0.01886562		944.79	-0.003537		1474.8	-0.00974342		2004.8	-0.00552182		2534.8	-0.0178307
415	0.01819023		944.99	-0.00339916		1475	-0.00942307		2005	-0.00470598		2535	-0.01677672
415.2	0.01782038		945.19	-0.00320278		1475.2	-0.00878471		2005.2	-0.00475458		2535.2	-0.01658053
415.4	0.01763752		945.39	-0.00399229		1475.4	-0.0087089		2005.4	-0.00426499		2535.4	-0.01673882
415.6	0.0180102		945.59	-0.00469105		1475.6	-0.0086676		2005.6	-0.0043604		2535.6	-0.0167037
415.8	0.01865764		945.79	-0.00514176		1475.8	-0.00790841		2005.8	-0.00385542		2535.8	-0.01606827
416	0.01977242		945.99	-0.00440652		1476	-0.00780118		2006	-0.00436756		2536	-0.01561358
416.2	0.02093152		946.19	-0.00463134		1476.2	-0.00748013		2006.2	-0.00446384		2536.2	-0.01532613
416.4	0.0210015		946.39	-0.00577719		1476.4	-0.00772514		2006.4	-0.00412356		2536.4	-0.0154161
416.6	0.02139656		946.59	-0.00626427		1476.6	-0.00784682		2006.6	-0.00386295		2536.6	-0.01571718
416.8	0.02201269		946.79	-0.00720533		1476.8	-0.00700895		2006.8	-0.00426085		2536.8	-0.01647278
417	0.02149699		946.99	-0.00735114		1477	-0.00716872		2007	-0.0038201		2537	-0.01743317
417.2	0.02168936		947.19	-0.00782234		1477.2	-0.00746645		2007.2	-0.00339568		2537.2	-0.01809661
417.4	0.02154707		947.39	-0.00815506		1477.4	-0.00782929		2007.4	-0.00305819		2537.4	-0.01906385
417.6	0.02147501		947.59	-0.00775991		1477.6	-0.0070382		2007.6	-0.00333486		2537.6	-0.01985941
417.8	0.02056232		947.79	-0.00769278		1477.8	-0.00764864		2007.8	-0.00293274		2537.8	-0.01984166
418	0.02104167		947.99	-0.00666962		1478	-0.00784596		2008	-0.00323278		2538	-0.01964087
418.2	0.02027898		948.19	-0.0057794		1478.2	-0.00826029		2008.2	-0.0025996		2538.2	-0.01967676
418.4	0.01921922		948.39	-0.0055331		1478.4	-0.00889775		2008.4	-0.00295631		2538.4	-0.02012035
418.6	0.01986914		948.59	-0.00501185		1478.6	-0.00867501		2008.6	-0.00265559		2538.6	-0.01999607
418.8	0.01980012		948.79	-0.00484326		1478.8	-0.00895942		2008.8	-0.00280152		2538.8	-0.01975181
419	0.01885188		948.99	-0.00501009		1479	-0.00957049		2009	-0.00269717		2539	-0.01941998
419.2	0.01798691		949.19	-0.00517793		1479.2	-0.00909226		2009.2	-0.00267168		2539.2	-0.01984932
419.4	0.01845068		949.39	-0.00515875		1479.4	-0.00882191		2009.4	-0.0027414		2539.4	-0.01933799
419.6	0.0180897		949.59	-0.00500532		1479.6	-0.0084146		2009.6	-0.00339248		2539.6	-0.01936112
419.8	0.01781161		949.79	-0.00541596		1479.8	-0.00812874		2009.8	-0.00327815		2539.8	-0.01909104
420	0.01798137		949.99	-0.00525003		1480	-0.00815356		2010	-0.0042336		2540	-0.01783807
420.2	0.01806062		950.19	-0.00593857		1480.2	-0.00743086		2010.2	-0.00381679		2540.2	-0.0170173
420.4	0.01799485		950.39	-0.00628157		1480.4	-0.00751918		2010.4	-0.00381891		2540.4	-0.01674841
420.6	0.01820145		950.59	-0.0060674		1480.6	-0.00762384		2010.6	-0.00440074		2540.6	-0.01690062
420.8	0.01821279		950.79	-0.00642309		1480.8	-0.00803795		2010.8	-0.00508794		2540.8	-0.01663373
421	0.01798541		950.99	-0.00600532		1481	-0.00885171		2011	-0.0047753		2541	-0.01627388
421.2	0.01859687		951.19	-0.00617088		1481.2	-0.00909469		2011.2	-0.00499605		2541.2	-0.01673447
421.4	0.0186228		951.39	-0.00594391		1481.4	-0.00894999		2011.4	-0.00519943		2541.4	-0.01708042
421.6	0.01881778		951.59	-0.00587798		1481.6	-0.00988899		2011.6	-0.00479484		2541.6	-0.01620245
421.8	0.01837307		951.79	-0.00504903		1481.8	-0.00971784		2011.8	-0.00510962		2541.8	-0.01532969
422	0.0186796		951.99	-0.00493694		1482	-0.00968387		2012	-0.00499862		2542	-0.01546959
422.2	0.01815048		952.19	-0.00494757		1482.2	-0.0100425		2012.2	-0.00540508		2542.2	-0.01582354
422.4	0.0179147		952.39	-0.00550427		1482.4	-0.01027246		2012.4	-0.00570084		2542.4	-0.01529632
422.6	0.01875708		952.59	-0.00586333		1482.6	-0.00971827		2012.6	-0.00548181		2542.6	-0.01496547
422.8	0.01797798		952.79	-0.00586266		1482.8	-0.0093073		2012.8	-0.00531297		2542.8	-0.01490552
423	0.01724155		952.99	-0.00553086		1483	-0.00943218		2013	-0.00463271		2543	-0.01576786
423.2	0.01746729		953.19	-0.00507276		1483.2	-0.00945771		2013.2	-0.00417888		2543.2	-0.01572276
423.4	0.01776562		953.39	-0.00548029		1483.4	-0.00949422		2013.4	-0.00394017		2543.4	-0.01621179
423.6	0.01683061		953.59	-0.0064078		1483.6	-0.01001778		2013.6	-0.00363329		2543.6	-0.01659875
423.8	0.01709502		953.79	-0.00714946		1483.8	-0.00995724		2013.8	-0.00342201		2543.8	-0.01686534
424	0.01736458		953.99	-0.00709494		1484	-0.01006892		2014	-0.00351003		2544	-0.0167597
424.2	0.01792605		954.19	-0.00785148		1484.2	-0.00975087		2014.2	-0.00260844		2544.2	-0.01666165
424.4	0.01776176		954.39	-0.008306		1484.4	-0.0099143		2014.4	-0.00326885		2544.4	-0.01696347
424.6	0.017605		954.59	-0.00878807		1484.6	-0.01008167		2014.6	-0.00370572		2544.6	-0.01755774
424.8	0.01807319		954.79	-0.00914642		1484.8	-0.01003788		2014.8	-0.00365987		2544.8	-0.01816844
425	0.01848742		954.99	-0.0084109		1485	-0.01015741		2015	-0.00332436		2545	-0.01961702
425.2	0.0185383		955.19	-0.00853403		1485.2	-0.01011587		2015.2	-0.0039753		2545.2	-0.02103851
425.4	0.01792531		955.39	-0.0079177		1485.4	-0.01054489		2015.4	-0.00432437		2545.4	-0.02077777
425.6	0.0174987		955.59	-0.00810825		1485.6	-0.01159136		2015.6	-0.00490853		2545.6	-0.0209364
425.8	0.01695574		955.79	-0.00765479		1485.8	-0.01065621		2015.8	-0.00593916		2545.8	-0.02103114
426	0.01767346		955.99	-0.00838734		1486	-0.0098793		2016	-0.00672792		2546	-0.02079963
426.2	0.01776686		956.19	-0.00842513		1486.2	-0.00963001		2016.2	-0.00820447		2546.2	-0.01981663
426.4	0.01750959		956.39	-0.00789072		1486.4	-0.00916516		2016.4	-0.00841839		2546.4	-0.0187577
426.6	0.0179824		956.59	-0.00788096		1486.6	-0.00843417		2016.6	-0.00817171		2546.6	-0.01807638
426.8	0.01781805		956.79	-0.00728572		1486.8	-0.00825243		2016.8	-0.00756916		2546.8	-0.0175812
427	0.01805635		956.99	-0.00674833		1487	-0.00921367		2017	-0.00738599		2547	-0.01730814
427.2	0.0179718		957.19	-0.00697592		1487.2	-0.00972485		2017.2	-0.00678963		2547.2	-0.01684842
427.4	0.01748911		957.39	-0.0070514		1487.4	-0.00951804		2017.4	-0.00680099		2547.4	-0.01652824
427.6	0.01757636		957.59	-0.00662276		1487.6	-0.00938051		2017.6	-0.00642921		2547.6	-0.01589155
427.8	0.01846969		957.79	-0.00636475		1487.8	-0.00924094		2017.8	-0.00567656		2547.8	-0.01597785
428	0.01857255		957.99	-0.00568024		1488	-0.00956074		2018	-0.00562978		2548	-0.01593539
428.2	0.01953346		958.19	-0.00596615		1488.2	-0.00941357		2018.2	-0.0049898		2548.2	-0.01544213
428.4	0.02041131		958.39	-0.00598209		1488.4	-0.00907207		2018.4	-0.00519384		2548.4	-0.01620103
428.6	0.02042202		958.59	-0.00587935		1488.6	-0.00909961		2018.6	-0.00538289		2548.6	-0.01709792
428.8	0.02051858		958.79	-0.00559096		1488.8	-0.00901512		2018.8	-0.00522134		2548.8	-0.01750029
429	0.02027534		958.99	-0.00523919		1489	-0.00930904		2019	-0.00526822		2549	-0.01832551
429.2	0.0208238		959.19	-0.00495143		1489.2	-0.01003158		2019.2	-0.00557874		2549.2	-0.01834531
429.4	0.02070851		959.39	-0.00485578		1489.4	-0.01025555		2019.4	-0.00614876		2549.4	-0.0184819
429.6	0.01999891		959.59	-0.00585749		1489.6	-0.01080823		2019.6	-0.00625453		2549.6	-0.01901308
429.8	0.01932861		959.79	-0.00652189		1489.8	-0.01041713		2019.8	-0.00648769		2549.8	-0.01871091
430	0.02006144		959.99	-0.00716343		1490	-0.01039694		2020	-0.00669465		2550	-0.01768288
430.2	0.01918513		960.19	-0.00845846		1490.2	-0.01102591		2020.2	-0.00598677		2550.2	-0.01753579
430.4	0.01828727		960.39	-0.00784684		1490.4	-0.01085998		2020.4	-0.00574917		2550.4	-0.0176868
430.6	0.01809416		960.59	-0.00869319		1490.6	-0.01096019		2020.6	-0.00525103		2550.6	-0.01683461
430.8	0.01772764		960.79	-0.00903663		1490.8	-0.01140024		2020.8	-0.00455603		2550.8	-0.01619416
431	0.01770502		960.99	-0.00874411		1491	-0.01241982		2021	-0.00493517		2551	-0.01614844
431.2	0.01727222		961.19	-0.00904771		1491.2	-0.01207238		2021.2	-0.00436375		2551.2	-0.01605125
431.4	0.01764443		961.39	-0.00807057		1491.4	-0.01198541		2021.4	-0.00471994		2551.4	-0.01530698
431.6	0.01814944		961.59	-0.00770635		1491.6	-0.0117083		2021.6	-0.00343967		2551.6	-0.01558182
431.8	0.01820668		961.79	-0.00791339		1491.8	-0.01197467		2021.8	-0.00311005		2551.8	-0.01600017
432	0.01777162		961.99	-0.00732858		1492	-0.01214892		2022	-0.00399337		2552	-0.01615561
432.2	0.01766808		962.19	-0.00732297		1492.2	-0.01199855		2022.2	-0.00434734		2552.2	-0.01661282
432.4	0.01745947		962.39	-0.00686439		1492.4	-0.01129401		2022.4	-0.0049722		2552.4	-0.01741189
432.6	0.01665489		962.59	-0.00663237		1492.6	-0.01078518		2022.6	-0.00548365		2552.6	-0.01761922
432.8	0.01647699		962.79	-0.00603202		1492.8	-0.01010306		2022.8	-0.00604155		2552.8	-0.01724261
433	0.01709612		962.99	-0.00563488		1493	-0.00955923		2023	-0.00637225		2553	-0.01795959
433.2	0.01752979		963.19	-0.00619043		1493.2	-0.00981488		2023.2	-0.00641718		2553.2	-0.01867007
433.4	0.01657056		963.39	-0.00654601		1493.4	-0.00947552		2023.4	-0.00640978		2553.4	-0.01916515
433.6	0.01501294		963.59	-0.00723579		1493.6	-0.00947838		2023.6	-0.005722		2553.6	-0.01951617
433.8	0.01549112		963.79	-0.007449		1493.8	-0.00923886		2023.8	-0.00534992		2553.8	-0.01939522
434	0.01661037		963.99	-0.00749879		1494	-0.00901979		2024	-0.00550256		2554	-0.01951138
434.2	0.01639354		964.19	-0.00864096		1494.2	-0.00889703		2024.2	-0.0046746		2554.2	-0.01962457
434.4	0.01736232		964.39	-0.00767675		1494.4	-0.00892469		2024.4	-0.0052992		2554.4	-0.01949179
434.6	0.01820496		964.59	-0.00843777		1494.6	-0.00865553		2024.6	-0.00465071		2554.6	-0.01854698
434.8	0.01878517		964.79	-0.00747643		1494.8	-0.00919639		2024.8	-0.00383633		2554.8	-0.01803301
435	0.01913257		964.99	-0.00661425		1495	-0.00926006		2025	-0.00338271		2555	-0.0181515
435.2	0.01945824		965.19	-0.00711692		1495.2	-0.00890362		2025.2	-0.00298217		2555.2	-0.01823178
435.4	0.0196716		965.39	-0.0066664		1495.4	-0.00883304		2025.4	-0.00274033		2555.4	-0.0182356
435.6	0.02015434		965.59	-0.00734097		1495.6	-0.00921201		2025.6	-0.00225397		2555.6	-0.01928396
435.8	0.02040025		965.79	-0.00731273		1495.8	-0.00906454		2025.8	-0.00288692		2555.8	-0.01970058
436	0.01946506		965.99	-0.00680725		1496	-0.00930062		2026	-0.00309126		2556	-0.01955743
436.2	0.01928862		966.19	-0.00706169		1496.2	-0.00961699		2026.2	-0.00400292		2556.2	-0.01987652
436.4	0.01944237		966.39	-0.00651394		1496.4	-0.00885149		2026.4	-0.00447343		2556.4	-0.01946034
436.6	0.019149		966.59	-0.00642002		1496.6	-0.00815064		2026.6	-0.00503927		2556.6	-0.0189189
436.8	0.01819757		966.79	-0.00621126		1496.8	-0.00810856		2026.8	-0.00538472		2556.8	-0.0187491
437	0.01692164		966.99	-0.00674543		1497	-0.00876682		2027	-0.00595098		2557	-0.01924173
437.2	0.01631717		967.19	-0.00775345		1497.2	-0.00910021		2027.2	-0.00647734		2557.2	-0.01909547
437.4	0.01534029		967.39	-0.00761318		1497.4	-0.0090053		2027.4	-0.00720909		2557.4	-0.01843824
437.6	0.01370883		967.59	-0.00853436		1497.6	-0.00875691		2027.6	-0.00678334		2557.6	-0.01789095
437.8	0.01401006		967.79	-0.00899929		1497.8	-0.00871319		2027.8	-0.0062847		2557.8	-0.01706636
438	0.01436376		967.99	-0.00904918		1498	-0.00894556		2028	-0.00640563		2558	-0.01684344
438.2	0.01449434		968.19	-0.009286		1498.2	-0.00974752		2028.2	-0.00499155		2558.2	-0.01560023
438.4	0.01517978		968.39	-0.00835094		1498.4	-0.00976073		2028.4	-0.00462047		2558.4	-0.01567805
438.6	0.01498976		968.59	-0.00824512		1498.6	-0.00960848		2028.6	-0.00351235		2558.6	-0.01510858
438.8	0.01443146		968.79	-0.00735669		1498.8	-0.00979276		2028.8	-0.00342355		2558.8	-0.01503218
439	0.01479378		968.99	-0.00810485		1499	-0.0091906		2029	-0.00243841		2559	-0.01613599
439.2	0.01613295		969.19	-0.00894663		1499.2	-0.00867504		2029.2	-0.00184509		2559.2	-0.01747439
439.4	0.0172237		969.39	-0.0092988		1499.4	-0.0094102		2029.4	-0.00174075		2559.4	-0.01802278
439.6	0.01894756		969.59	-0.00998948		1499.6	-0.01001016		2029.6	-0.00212839		2559.6	-0.01905362
439.8	0.01926073		969.79	-0.01028143		1499.8	-0.01017525		2029.8	-0.00264052		2559.8	-0.01902001
440	0.01945993		969.99	-0.01078016		1500	-0.01062368		2030	-0.00251175		2560	-0.01886451
440.2	0.01985688		970.19	-0.01095047		1500.2	-0.01051738		2030.2	-0.00338275		2560.2	-0.01899821
440.4	0.0202039		970.39	-0.01016384		1500.4	-0.00977262		2030.4	-0.00413654		2560.4	-0.01904917
440.6	0.02025419		970.59	-0.00941784		1500.6	-0.00990297		2030.6	-0.00390082		2560.6	-0.01935681
440.8	0.01898278		970.79	-0.00921027		1500.8	-0.01098776		2030.8	-0.003968		2560.8	-0.01953705
441	0.01846732		970.99	-0.00978737		1501	-0.01106654		2031	-0.00404315		2561	-0.01955497
441.2	0.01892123		971.19	-0.00980163		1501.2	-0.01080775		2031.2	-0.00423526		2561.2	-0.01942127
441.4	0.01806109		971.39	-0.01041047		1501.4	-0.01040282		2031.4	-0.0038596		2561.4	-0.02004142
441.6	0.01644395		971.59	-0.0107078		1501.6	-0.0103456		2031.6	-0.00247875		2561.6	-0.02019677
441.8	0.01673446		971.79	-0.01007338		1501.8	-0.01007524		2031.8	-0.00233257		2561.8	-0.0192736
442	0.01704021		971.99	-0.00917663		1502	-0.00988112		2032	-0.00242109		2562	-0.01982894
442.2	0.01643873		972.19	-0.00843899		1502.2	-0.00937784		2032.2	-0.00212838		2562.2	-0.01977381
442.4	0.01634202		972.39	-0.00807208		1502.4	-0.009087		2032.4	-0.00163953		2562.4	-0.02026263
442.6	0.01626416		972.59	-0.00777942		1502.6	-0.00924498		2032.6	-0.00090353		2562.6	-0.02018022
442.8	0.01582195		972.79	-0.00835454		1502.8	-0.00945262		2032.8	-0.00146088		2562.8	-0.02061001
443	0.01559915		972.99	-0.00821078		1503	-0.00991674		2033	-0.00112617		2563	-0.02171617
443.2	0.01629985		973.19	-0.00844618		1503.2	-0.01016456		2033.2	-0.00132516		2563.2	-0.02208405
443.4	0.01625591		973.39	-0.00831291		1503.4	-0.01114338		2033.4	-0.00331752		2563.4	-0.02129919
443.6	0.0168377		973.59	-0.00784002		1503.6	-0.01175485		2033.6	-0.00354486		2563.6	-0.0214018
443.8	0.01736002		973.79	-0.00803744		1503.8	-0.0124141		2033.8	-0.00437285		2563.8	-0.02142134
444	0.0177787		973.99	-0.00814602		1504	-0.01167161		2034	-0.00399854		2564	-0.0208497
444.2	0.01828839		974.19	-0.00759106		1504.2	-0.0127003		2034.2	-0.00487273		2564.2	-0.02071339
444.4	0.01960797		974.39	-0.00704507		1504.4	-0.01267642		2034.4	-0.00566005		2564.4	-0.02030356
444.6	0.01945217		974.59	-0.00745964		1504.6	-0.01308359		2034.6	-0.00566473		2564.6	-0.01993148
444.8	0.01914559		974.79	-0.00808972		1504.8	-0.01303864		2034.8	-0.00577847		2564.8	-0.02000306
445	0.01928099		974.99	-0.00891459		1505	-0.0124361		2035	-0.00585125		2565	-0.02050472
445.2	0.01967682		975.19	-0.00965575		1505.2	-0.01206466		2035.2	-0.00648916		2565.2	-0.02082116
445.4	0.01945042		975.39	-0.01103628		1505.4	-0.01137206		2035.4	-0.00542071		2565.4	-0.02012933
445.6	0.01905194		975.59	-0.01106206		1505.6	-0.01055505		2035.6	-0.00523391		2565.6	-0.01912554
445.8	0.01943557		975.79	-0.01083953		1505.8	-0.00979258		2035.8	-0.00507933		2565.8	-0.0184629
446	0.01895318		975.99	-0.01128947		1506	-0.00926131		2036	-0.00453667		2566	-0.01858046
446.2	0.01875046		976.19	-0.01126831		1506.2	-0.00878041		2036.2	-0.00404684		2566.2	-0.01800254
446.4	0.01854342		976.39	-0.01155562		1506.4	-0.00865827		2036.4	-0.0035158		2566.4	-0.01697998
446.6	0.0180071		976.59	-0.01065086		1506.6	-0.00924211		2036.6	-0.00309115		2566.6	-0.01692221
446.8	0.01729256		976.79	-0.01087549		1506.8	-0.00978761		2036.8	-0.00343163		2566.8	-0.01721558
447	0.01652373		976.99	-0.01028273		1507	-0.01012115		2037	-0.00326872		2567	-0.01804166
447.2	0.01713232		977.19	-0.00962704		1507.2	-0.00986905		2037.2	-0.00307116		2567.2	-0.01802447
447.4	0.01744489		977.39	-0.00813952		1507.4	-0.01028964		2037.4	-0.003944		2567.4	-0.01789477
447.6	0.0184398		977.59	-0.00794685		1507.6	-0.01057809		2037.6	-0.00321644		2567.6	-0.01840402
447.8	0.01882109		977.79	-0.00812537		1507.8	-0.01096631		2037.8	-0.00378989		2567.8	-0.01850161
448	0.01858062		977.99	-0.00740968		1508	-0.00991111		2038	-0.00372638		2568	-0.01826945
448.2	0.01847067		978.19	-0.00735674		1508.2	-0.01099468		2038.2	-0.00439784		2568.2	-0.01863406
448.4	0.01807654		978.39	-0.00765126		1508.4	-0.01097624		2038.4	-0.00454753		2568.4	-0.01828755
448.6	0.01696418		978.59	-0.00772992		1508.6	-0.01133712		2038.6	-0.00488834		2568.6	-0.01875514
448.8	0.01697667		978.79	-0.00723722		1508.8	-0.0111309		2038.8	-0.00467531		2568.8	-0.02026371
449	0.01715503		978.99	-0.00858434		1509	-0.0117414		2039	-0.0050907		2569	-0.01994993
449.2	0.01698854		979.19	-0.00984423		1509.2	-0.0113658		2039.2	-0.00461297		2569.2	-0.02006656
449.4	0.01669101		979.39	-0.01076447		1509.4	-0.01148406		2039.4	-0.00413614		2569.4	-0.01926288
449.6	0.01584745		979.59	-0.0107578		1509.6	-0.01070023		2039.6	-0.00405854		2569.6	-0.01994314
449.8	0.01602277		979.79	-0.01101454		1509.8	-0.01125455		2039.8	-0.00372304		2569.8	-0.02017614
450	0.01529963		979.99	-0.01124961		1510	-0.0109367		2040	-0.00372653		2570	-0.02032109
450.2	0.01569294		980.19	-0.01056211		1510.2	-0.01092046		2040.2	-0.00376938		2570.2	-0.02019582
450.4	0.01550598		980.39	-0.00987237		1510.4	-0.01055582		2040.4	-0.00379001		2570.4	-0.02040681
450.6	0.01565326		980.59	-0.00859003		1510.6	-0.01082299		2040.6	-0.00383521		2570.6	-0.0211851
450.8	0.01586854		980.79	-0.00927529		1510.8	-0.01069091		2040.8	-0.00396133		2570.8	-0.02220402
451	0.01592119		980.99	-0.00896078		1511	-0.010826		2041	-0.00395709		2571	-0.02243706
451.2	0.01681368		981.19	-0.00819435		1511.2	-0.01027613		2041.2	-0.00436841		2571.2	-0.0222654
451.4	0.01716722		981.39	-0.00790663		1511.4	-0.01031601		2041.4	-0.0046958		2571.4	-0.02203992
451.6	0.01706974		981.59	-0.00791621		1511.6	-0.00997429		2041.6	-0.00437203		2571.6	-0.02249519
451.8	0.0175603		981.79	-0.00792437		1511.8	-0.01042892		2041.8	-0.00500148		2571.8	-0.02248958
452	0.0169381		981.99	-0.00824625		1512	-0.00943908		2042	-0.00488032		2572	-0.02286537
452.2	0.01595006		982.19	-0.00868377		1512.2	-0.01042952		2042.2	-0.00445551		2572.2	-0.02312606
452.4	0.01613014		982.39	-0.00868885		1512.4	-0.01096334		2042.4	-0.00439366		2572.4	-0.02294111
452.6	0.01557811		982.59	-0.00931737		1512.6	-0.0111119		2042.6	-0.00475843		2572.6	-0.02401514
452.8	0.01585668		982.79	-0.01006319		1512.8	-0.01112061		2042.8	-0.00418044		2572.8	-0.02476124
453	0.01536311		982.99	-0.01185198		1513	-0.01107363		2043	-0.00390523		2573	-0.02376292
453.2	0.01404967		983.19	-0.01237728		1513.2	-0.01036054		2043.2	-0.00314328		2573.2	-0.02386693
453.4	0.01342032		983.39	-0.01256053		1513.4	-0.01152869		2043.4	-0.00339088		2573.4	-0.0226302
453.6	0.01314798		983.59	-0.01191171		1513.6	-0.01179473		2043.6	-0.00292182		2573.6	-0.02244612
453.8	0.01267813		983.79	-0.01174188		1513.8	-0.0121003		2043.8	-0.00302819		2573.8	-0.02173425
454	0.0119729		983.99	-0.01132041		1514	-0.01155053		2044	-0.00353921		2574	-0.0214247
454.2	0.01227418		984.19	-0.01064015		1514.2	-0.01110569		2044.2	-0.00466822		2574.2	-0.02074913
454.4	0.0130239		984.39	-0.01053455		1514.4	-0.01004099		2044.4	-0.00470124		2574.4	-0.01984836
454.6	0.01324323		984.59	-0.00975209		1514.6	-0.00961197		2044.6	-0.00490449		2574.6	-0.01898237
454.8	0.01359763		984.79	-0.00967007		1514.8	-0.00936327		2044.8	-0.0048515		2574.8	-0.01892167
455	0.01452897		984.99	-0.00856443		1515	-0.00836957		2045	-0.00509787		2575	-0.01775783
455.2	0.01537861		985.19	-0.00792599		1515.2	-0.00829746		2045.2	-0.00566938		2575.2	-0.01796686
455.4	0.01607881		985.39	-0.00761465		1515.4	-0.00878434		2045.4	-0.00592095		2575.4	-0.01816347
455.6	0.01619866		985.59	-0.00718824		1515.6	-0.00903117		2045.6	-0.0058221		2575.6	-0.01885963
455.8	0.01642397		985.79	-0.00768063		1515.8	-0.00894166		2045.8	-0.00580443		2575.8	-0.01966784
456	0.0163926		985.99	-0.00776266		1516	-0.00865978		2046	-0.00483645		2576	-0.02037604
456.2	0.01599942		986.19	-0.0067448		1516.2	-0.00957755		2046.2	-0.00455183		2576.2	-0.0206654
456.4	0.01653398		986.39	-0.00699697		1516.4	-0.00928947		2046.4	-0.00437895		2576.4	-0.02125725
456.6	0.01564586		986.59	-0.00765923		1516.6	-0.00941232		2046.6	-0.00388713		2576.6	-0.02214708
456.8	0.01557889		986.79	-0.00873891		1516.8	-0.00955521		2046.8	-0.00289337		2576.8	-0.02158687
457	0.01404671		986.99	-0.00970275		1517	-0.00995057		2047	-0.00244425		2577	-0.02124397
457.2	0.01334154		987.19	-0.01017108		1517.2	-0.01080196		2047.2	-0.0024439		2577.2	-0.02144832
457.4	0.01301656		987.39	-0.01070643		1517.4	-0.01246443		2047.4	-0.00229384		2577.4	-0.0208057
457.6	0.01288913		987.59	-0.0113459		1517.6	-0.01285347		2047.6	-0.00208318		2577.6	-0.02083122
457.8	0.01205377		987.79	-0.01211835		1517.8	-0.01244218		2047.8	-0.00225065		2577.8	-0.01993694
458	0.01314182		987.99	-0.01298349		1518	-0.0123483		2048	-0.00304698		2578	-0.01984139
458.2	0.0144291		988.19	-0.01298178		1518.2	-0.01281223		2048.2	-0.00368277		2578.2	-0.0194131
458.4	0.01521704		988.39	-0.01332699		1518.4	-0.01246656		2048.4	-0.00363789		2578.4	-0.01877557
458.6	0.01445104		988.59	-0.01246587		1518.6	-0.0121449		2048.6	-0.00375992		2578.6	-0.01929846
458.8	0.01483402		988.79	-0.01185906		1518.8	-0.01114247		2048.8	-0.0044395		2578.8	-0.0188498
459	0.01533265		988.99	-0.01200833		1519	-0.01099145		2049	-0.00514757		2579	-0.01869454
459.2	0.01524263		989.19	-0.01181627		1519.2	-0.01206136		2049.2	-0.00548814		2579.2	-0.01981655
459.4	0.01561519		989.39	-0.01194801		1519.4	-0.01226948		2049.4	-0.00546567		2579.4	-0.01950531
459.6	0.01576375		989.59	-0.01166626		1519.6	-0.01247787		2049.6	-0.00570106		2579.6	-0.0202871
459.8	0.01621901		989.79	-0.01120994		1519.8	-0.01241882		2049.8	-0.00491597		2579.8	-0.02095367
460	0.01733592		989.99	-0.01091271		1520	-0.01308677		2050	-0.00465701		2580	-0.02135911
460.2	0.01610106		990.19	-0.01027591		1520.2	-0.01327473		2050.2	-0.0043494		2580.2	-0.02110949
460.4	0.01648304		990.39	-0.01051105		1520.4	-0.01303834		2050.4	-0.00352938		2580.4	-0.02176677
460.6	0.01574157		990.59	-0.01134408		1520.6	-0.01342448		2050.6	-0.00384271		2580.6	-0.02118522
460.8	0.01523966		990.79	-0.01177601		1520.8	-0.01362111		2050.8	-0.00428231		2580.8	-0.02146436
461	0.01411673		990.99	-0.01151064		1521	-0.01408729		2051	-0.00391623		2581	-0.02152628
461.2	0.0139599		991.19	-0.01167746		1521.2	-0.0137252		2051.2	-0.00357175		2581.2	-0.02118413
461.4	0.01394729		991.39	-0.01177875		1521.4	-0.01343338		2051.4	-0.00317732		2581.4	-0.02048254
461.6	0.01413007		991.59	-0.01192031		1521.6	-0.01356591		2051.6	-0.0042876		2581.6	-0.01973237
461.8	0.01441312		991.79	-0.01212399		1521.8	-0.01321428		2051.8	-0.00507463		2581.8	-0.01991201
462	0.01564286		991.99	-0.01197229		1522	-0.01234223		2052	-0.00586046		2582	-0.02025666
462.2	0.01564775		992.19	-0.01123825		1522.2	-0.01222173		2052.2	-0.00607155		2582.2	-0.02006024
462.4	0.01439942		992.39	-0.0112653		1522.4	-0.01083914		2052.4	-0.00690086		2582.4	-0.02033736
462.6	0.0136742		992.59	-0.01056226		1522.6	-0.01018959		2052.6	-0.0070839		2582.6	-0.0206123
462.8	0.01423707		992.79	-0.01027516		1522.8	-0.00942848		2052.8	-0.00713026		2582.8	-0.02024327
463	0.01488616		992.99	-0.00967068		1523	-0.00975402		2053	-0.00806181		2583	-0.02051332
463.2	0.01611273		993.19	-0.00918282		1523.2	-0.00920753		2053.2	-0.00818823		2583.2	-0.02028597
463.4	0.01754815		993.39	-0.00908204		1523.4	-0.00965493		2053.4	-0.00855066		2583.4	-0.01968539
463.6	0.01828678		993.59	-0.00876826		1523.6	-0.00983578		2053.6	-0.008411		2583.6	-0.02009934
463.8	0.01851753		993.79	-0.00849195		1523.8	-0.00979534		2053.8	-0.0068309		2583.8	-0.02003329
464	0.0189317		993.99	-0.00885299		1524	-0.01073378		2054	-0.00591936		2584	-0.02058161
464.2	0.01771081		994.19	-0.00975501		1524.2	-0.01145542		2054.2	-0.00549654		2584.2	-0.02029447
464.4	0.01760704		994.39	-0.00960652		1524.4	-0.0118508		2054.4	-0.00512978		2584.4	-0.02023394
464.6	0.01657127		994.59	-0.00991458		1524.6	-0.01200816		2054.6	-0.0050957		2584.6	-0.01954872
464.8	0.01611315		994.79	-0.01010472		1524.8	-0.01215226		2054.8	-0.00410353		2584.8	-0.01960762
465	0.01398254		994.99	-0.01056268		1525	-0.01221255		2055	-0.00378464		2585	-0.01913935
465.2	0.01306358		995.19	-0.0116989		1525.2	-0.01142428		2055.2	-0.00368358		2585.2	-0.01954228
465.4	0.01276605		995.39	-0.01194893		1525.4	-0.01183481		2055.4	-0.00384362		2585.4	-0.01968356
465.6	0.0123218		995.59	-0.01260726		1525.6	-0.01240977		2055.6	-0.00451393		2585.6	-0.02028306
465.8	0.01197888		995.79	-0.01299108		1525.8	-0.01217612		2055.8	-0.00472798		2585.8	-0.02131134
466	0.01114642		995.99	-0.01359089		1526	-0.01166307		2056	-0.00441843		2586	-0.02104662
466.2	0.01066721		996.19	-0.01342364		1526.2	-0.01201669		2056.2	-0.00442645		2586.2	-0.02167984
466.4	0.01018761		996.39	-0.01277967		1526.4	-0.01257405		2056.4	-0.00566825		2586.4	-0.02238361
466.6	0.00987132		996.59	-0.01164197		1526.6	-0.01272855		2056.6	-0.00624386		2586.6	-0.02265077
466.8	0.01064494		996.79	-0.01115571		1526.8	-0.01280189		2056.8	-0.00636678		2586.8	-0.02338561
467	0.01075002		996.99	-0.01068657		1527	-0.01237912		2057	-0.00745035		2587	-0.02361069
467.2	0.01186211		997.19	-0.01129607		1527.2	-0.01184986		2057.2	-0.00710315		2587.2	-0.02309001
467.4	0.01204342		997.39	-0.01150441		1527.4	-0.01253111		2057.4	-0.00737884		2587.4	-0.02333067
467.6	0.01177095		997.59	-0.01131929		1527.6	-0.01223922		2057.6	-0.00717298		2587.6	-0.0236462
467.8	0.01239272		997.79	-0.01095355		1527.8	-0.01319612		2057.8	-0.00744048		2587.8	-0.02392552
468	0.01264973		997.99	-0.01061013		1528	-0.01387139		2058	-0.00709121		2588	-0.02390894
468.2	0.01211037		998.19	-0.01074539		1528.2	-0.01366937		2058.2	-0.00755861		2588.2	-0.02354537
468.4	0.01280498		998.39	-0.01011103		1528.4	-0.01330821		2058.4	-0.00756821		2588.4	-0.02364515
468.6	0.01265811		998.59	-0.0102942		1528.6	-0.0136641		2058.6	-0.00706933		2588.6	-0.02254685
468.8	0.01321322		998.79	-0.01030901		1528.8	-0.01330508		2058.8	-0.00645356		2588.8	-0.02228349
469	0.01240036		998.99	-0.010206		1529	-0.01237798		2059	-0.00644292		2589	-0.0219074
469.2	0.01309712		999.19	-0.0102429		1529.2	-0.01177306		2059.2	-0.0057231		2589.2	-0.02235051
469.4	0.01257674		999.39	-0.00963831		1529.4	-0.01200639		2059.4	-0.00581751		2589.4	-0.02204498
469.6	0.01201885		999.59	-0.01014235		1529.6	-0.01187145		2059.6	-0.00628106		2589.6	-0.02186457
469.8	0.01210746		999.79	-0.00958689		1529.8	-0.0114583		2059.8	-0.00603897		2589.8	-0.02168808
470	0.01243771		999.99	-0.00977683		1530	-0.01122669		2060	-0.00587971		2590	-0.02136719
470.2	0.01353934		1000.19	-0.0091308		1530.2	-0.01121738		2060.2	-0.00663816		2590.2	-0.02201775
470.4	0.01332723		1000.39	-0.00855167		1530.4	-0.01132142		2060.4	-0.00684466		2590.4	-0.02266635
470.6	0.01360179		1000.59	-0.00872452		1530.6	-0.01040993		2060.6	-0.00698334		2590.6	-0.02393094
470.8	0.01352158		1000.79	-0.00879754		1530.8	-0.01048696		2060.8	-0.00646337		2590.8	-0.02501374
471	0.01319436		1000.99	-0.00912033		1531	-0.01040875		2061	-0.00580052		2591	-0.02502768
471.2	0.01380688		1001.19	-0.00933616		1531.2	-0.01106774		2061.2	-0.00600532		2591.2	-0.02452254
471.4	0.01393256		1001.39	-0.0093337		1531.4	-0.01147858		2061.4	-0.00621713		2591.4	-0.02438466
471.6	0.01399289		1001.59	-0.00830206		1531.6	-0.01262486		2061.6	-0.00631923		2591.6	-0.02380255
471.8	0.0146788		1001.79	-0.00729828		1531.8	-0.01357989		2061.8	-0.00687368		2591.8	-0.02353428
472	0.01488359		1001.99	-0.00743568		1532	-0.0139429		2062	-0.00634204		2592	-0.02356539
472.2	0.01494166		1002.19	-0.00803776		1532.2	-0.01483398		2062.2	-0.00688931		2592.2	-0.02384085
472.4	0.01548875		1002.39	-0.00874473		1532.4	-0.01551311		2062.4	-0.00719248		2592.4	-0.02372075
472.6	0.01502738		1002.59	-0.00900361		1532.6	-0.01621474		2062.6	-0.00619626		2592.6	-0.02294557
472.8	0.01619334		1002.79	-0.00967248		1532.8	-0.01610591		2062.8	-0.00529821		2592.8	-0.02310819
473	0.01572341		1002.99	-0.00992341		1533	-0.01565092		2063	-0.00532226		2593	-0.02316574
473.2	0.01551054		1003.19	-0.00978806		1533.2	-0.01548357		2063.2	-0.00544935		2593.2	-0.0235037
473.4	0.01476191		1003.39	-0.00925486		1533.4	-0.01536922		2063.4	-0.00508111		2593.4	-0.0233152
473.6	0.01519921		1003.59	-0.00983059		1533.6	-0.01438939		2063.6	-0.00530727		2593.6	-0.02322388
473.8	0.0160774		1003.79	-0.00958484		1533.8	-0.0138662		2063.8	-0.00540822		2593.8	-0.02345019
474	0.01624488		1003.99	-0.01067277		1534	-0.01327306		2064	-0.00544805		2594	-0.02402266
474.2	0.01687018		1004.19	-0.01086419		1534.2	-0.01284993		2064.2	-0.00594447		2594.2	-0.02438765
474.4	0.01684687		1004.39	-0.01057546		1534.4	-0.01279686		2064.4	-0.00571914		2594.4	-0.0246054
474.6	0.01708873		1004.59	-0.0099396		1534.6	-0.01241566		2064.6	-0.00558243		2594.6	-0.02462744
474.8	0.016139		1004.79	-0.0087047		1534.8	-0.01268772		2064.8	-0.00512893		2594.8	-0.02399886
475	0.01601847		1004.99	-0.00855308		1535	-0.01227975		2065	-0.0054086		2595	-0.02410064
475.2	0.01563842		1005.19	-0.00825854		1535.2	-0.01299552		2065.2	-0.00587378		2595.2	-0.023435
475.4	0.01545592		1005.39	-0.00802048		1535.4	-0.01330848		2065.4	-0.00575324		2595.4	-0.02240779
475.6	0.01484207		1005.59	-0.00804496		1535.6	-0.0132657		2065.6	-0.00691139		2595.6	-0.02218978
475.8	0.01383908		1005.79	-0.00875201		1535.8	-0.01344687		2065.8	-0.00710821		2595.8	-0.02242138
476	0.01255724		1005.99	-0.00934481		1536	-0.01378465		2066	-0.0072513		2596	-0.02235269
476.2	0.01092511		1006.19	-0.01047921		1536.2	-0.01391016		2066.2	-0.00825585		2596.2	-0.02222379
476.4	0.01074851		1006.39	-0.01176183		1536.4	-0.01318555		2066.4	-0.00854862		2596.4	-0.02273797
476.6	0.00994501		1006.59	-0.01224978		1536.6	-0.01276175		2066.6	-0.00841831		2596.6	-0.02338073
476.8	0.00981208		1006.79	-0.01221957		1536.8	-0.01233549		2066.8	-0.00841788		2596.8	-0.02295573
477	0.00980791		1006.99	-0.01257246		1537	-0.01108605		2067	-0.00822197		2597	-0.02277248
477.2	0.01016897		1007.19	-0.01247847		1537.2	-0.0107244		2067.2	-0.00814202		2597.2	-0.02199425
477.4	0.01037397		1007.39	-0.0120957		1537.4	-0.01048421		2067.4	-0.0074258		2597.4	-0.02171509
477.6	0.01135517		1007.59	-0.01314086		1537.6	-0.01047791		2067.6	-0.00780228		2597.6	-0.02122475
477.8	0.01196486		1007.79	-0.01351261		1537.8	-0.01118543		2067.8	-0.00782147		2597.8	-0.02037893
478	0.0125705		1007.99	-0.01276447		1538	-0.01131338		2068	-0.00727109		2598	-0.02077621
478.2	0.01410448		1008.19	-0.01220331		1538.2	-0.01181504		2068.2	-0.00783394		2598.2	-0.02053045
478.4	0.01499672		1008.39	-0.01229356		1538.4	-0.01247467		2068.4	-0.00734274		2598.4	-0.0210372
478.6	0.01616361		1008.59	-0.01156066		1538.6	-0.01296905		2068.6	-0.0066194		2598.6	-0.02154138
478.8	0.0160838		1008.79	-0.01179598		1538.8	-0.0129219		2068.8	-0.00692457		2598.8	-0.02190709
479	0.01592837		1008.99	-0.01164217		1539	-0.01364982		2069	-0.00707775		2599	-0.02231236
479.2	0.01624473		1009.19	-0.01185354		1539.2	-0.01404484		2069.2	-0.00675833		2599.2	-0.02181596
479.4	0.01639583		1009.39	-0.01179791		1539.4	-0.01412628		2069.4	-0.00679066		2599.4	-0.02150414
479.6	0.01581836		1009.59	-0.01221328		1539.6	-0.0140821		2069.6	-0.0067718		2599.6	-0.0219541
479.8	0.01431402		1009.79	-0.01225256		1539.8	-0.01470594		2069.8	-0.00662735		2599.8	-0.02225035
480	0.01385076		1009.99	-0.01181483		1540	-0.01427844		2070	-0.00680194		2600	-0.02174013
480.2	0.01334507		1010.19	-0.01288746		1540.2	-0.0138748		2070.2	-0.00720629		2600.2	-0.02222582
480.4	0.01291843		1010.39	-0.01228018		1540.4	-0.01348789		2070.4	-0.00704878		2600.4	-0.02238636
480.6	0.01172746		1010.59	-0.01193099		1540.6	-0.01309825		2070.6	-0.0071236		2600.6	-0.02310023
480.8	0.01166857		1010.79	-0.01172924		1540.8	-0.0125631		2070.8	-0.00662972		2600.8	-0.02257883
481	0.01229874		1010.99	-0.01216324		1541	-0.01209808		2071	-0.00659843		2601	-0.02193714
481.2	0.01134764		1011.19	-0.01196453		1541.2	-0.01233759		2071.2	-0.00716721		2601.2	-0.02205706
481.4	0.01114285		1011.39	-0.01202126		1541.4	-0.01217798		2071.4	-0.00731788		2601.4	-0.0227473
481.6	0.01108418		1011.59	-0.01240882		1541.6	-0.01269847		2071.6	-0.00681177		2601.6	-0.02297742
481.8	0.01076566		1011.79	-0.01265476		1541.8	-0.01310413		2071.8	-0.00723858		2601.8	-0.02340242
482	0.01179722		1011.99	-0.01242207		1542	-0.01272578		2072	-0.00718003		2602	-0.02391879
482.2	0.01235129		1012.19	-0.01362102		1542.2	-0.01328771		2072.2	-0.00735411		2602.2	-0.0237966
482.4	0.01302509		1012.39	-0.01426164		1542.4	-0.01422835		2072.4	-0.00732977		2602.4	-0.02436192
482.6	0.0132051		1012.59	-0.0142389		1542.6	-0.01418605		2072.6	-0.0076631		2602.6	-0.02450714
482.8	0.01240614		1012.79	-0.01471258		1542.8	-0.0140198		2072.8	-0.00794247		2602.8	-0.02391866
483	0.01270982		1012.99	-0.01408326		1543	-0.01431354		2073	-0.00715477		2603	-0.02271738
483.2	0.01325825		1013.19	-0.014178		1543.2	-0.01364404		2073.2	-0.00713305		2603.2	-0.02251344
483.4	0.01331491		1013.39	-0.01292052		1543.4	-0.01452093		2073.4	-0.0063775		2603.4	-0.0219514
483.6	0.01368783		1013.59	-0.01244842		1543.6	-0.01473053		2073.6	-0.00653157		2603.6	-0.02130388
483.8	0.01372369		1013.79	-0.01183211		1543.8	-0.01450177		2073.8	-0.00629443		2603.8	-0.0201956
484	0.01421439		1013.99	-0.01158636		1544	-0.01463023		2074	-0.00572876		2604	-0.01937742
484.2	0.01407833		1014.19	-0.01101937		1544.2	-0.01496344		2074.2	-0.00535134		2604.2	-0.01921739
484.4	0.01405695		1014.39	-0.00990802		1544.4	-0.01565627		2074.4	-0.00507699		2604.4	-0.01942747
484.6	0.01349694		1014.59	-0.00937142		1544.6	-0.0155916		2074.6	-0.00460647		2604.6	-0.02060755
484.8	0.01363267		1014.79	-0.00947384		1544.8	-0.01530897		2074.8	-0.00400825		2604.8	-0.02067448
485	0.01305976		1014.99	-0.0091661		1545	-0.014192		2075	-0.00395924		2605	-0.02113493
485.2	0.01125429		1015.19	-0.00993333		1545.2	-0.01435975		2075.2	-0.00469659		2605.2	-0.021921
485.4	0.01102409		1015.39	-0.00958074		1545.4	-0.01430428		2075.4	-0.00445819		2605.4	-0.02260916
485.6	0.01071939		1015.59	-0.01036722		1545.6	-0.01522909		2075.6	-0.00463887		2605.6	-0.02253358
485.8	0.01054371		1015.79	-0.01084556		1545.8	-0.0146059		2075.8	-0.00570292		2605.8	-0.0234243
486	0.011034		1015.99	-0.0110361		1546	-0.01428877		2076	-0.00604517		2606	-0.02368046
486.2	0.01140903		1016.19	-0.01117848		1546.2	-0.01441441		2076.2	-0.00653638		2606.2	-0.02446115
486.4	0.01116641		1016.39	-0.01210792		1546.4	-0.0148751		2076.4	-0.00728189		2606.4	-0.02622073
486.6	0.01078226		1016.59	-0.01291442		1546.6	-0.01431609		2076.6	-0.00736395		2606.6	-0.02698111
486.8	0.01141791		1016.79	-0.01314432		1546.8	-0.01446013		2076.8	-0.00701279		2606.8	-0.02668257
487	0.01295221		1016.99	-0.01326265		1547	-0.01399775		2077	-0.00691483		2607	-0.02626607
487.2	0.01356286		1017.19	-0.0135252		1547.2	-0.01389767		2077.2	-0.0071552		2607.2	-0.02658517
487.4	0.01433762		1017.39	-0.01292768		1547.4	-0.01457283		2077.4	-0.00783822		2607.4	-0.02645011
487.6	0.01490828		1017.59	-0.0132008		1547.6	-0.01463554		2077.6	-0.00919892		2607.6	-0.02581226
487.8	0.01472371		1017.79	-0.01334922		1547.8	-0.01456272		2077.8	-0.00846075		2607.8	-0.02449812
488	0.01427858		1017.99	-0.01302306		1548	-0.01437485		2078	-0.00830994		2608	-0.02417282
488.2	0.01443643		1018.19	-0.01257455		1548.2	-0.01503821		2078.2	-0.007361		2608.2	-0.02350223
488.4	0.01474791		1018.39	-0.01260894		1548.4	-0.01501491		2078.4	-0.00695861		2608.4	-0.02264117
488.6	0.01407943		1018.59	-0.01217769		1548.6	-0.01484859		2078.6	-0.00632744		2608.6	-0.02162476
488.8	0.01341786		1018.79	-0.01257727		1548.8	-0.01430268		2078.8	-0.00520207		2608.8	-0.02028698
489	0.01211449		1018.99	-0.01226301		1549	-0.01296973		2079	-0.00569562		2609	-0.01907928
489.2	0.01095438		1019.19	-0.01234511		1549.2	-0.0133694		2079.2	-0.00672757		2609.2	-0.01784875
489.4	0.01116728		1019.39	-0.01131831		1549.4	-0.01305189		2079.4	-0.00688667		2609.4	-0.01744154
489.6	0.0107565		1019.59	-0.01219791		1549.6	-0.01320249		2079.6	-0.00818962		2609.6	-0.01742563
489.8	0.01079542		1019.79	-0.01174431		1549.8	-0.01316491		2079.8	-0.00785954		2609.8	-0.01856722
490	0.01129014		1019.99	-0.01143761		1550	-0.01352759		2080	-0.00822276		2610	-0.01852017
490.2	0.01103209		1020.19	-0.01156917		1550.2	-0.0133298		2080.2	-0.00796695		2610.2	-0.01952372
490.4	0.01072263		1020.39	-0.01138904		1550.4	-0.01386141		2080.4	-0.00837447		2610.4	-0.02157254
490.6	0.01135533		1020.59	-0.01194135		1550.6	-0.01361147		2080.6	-0.00817395		2610.6	-0.02198708
490.8	0.01233266		1020.79	-0.01156512		1550.8	-0.01343006		2080.8	-0.0083775		2610.8	-0.0220612
491	0.01325352		1020.99	-0.01161687		1551	-0.01361336		2081	-0.00859652		2611	-0.0230954
491.2	0.01263041		1021.19	-0.01167284		1551.2	-0.01266191		2081.2	-0.00819373		2611.2	-0.02416055
491.4	0.0126768		1021.39	-0.01065064		1551.4	-0.01242471		2081.4	-0.00853706		2611.4	-0.02464696
491.6	0.01263477		1021.59	-0.01051301		1551.6	-0.01133944		2081.6	-0.00815253		2611.6	-0.02317565
491.8	0.01170425		1021.79	-0.00976096		1551.8	-0.0109858		2081.8	-0.00679693		2611.8	-0.0222514
492	0.01181906		1021.99	-0.0102046		1552	-0.01142993		2082	-0.00615164		2612	-0.02306454
492.2	0.01247333		1022.19	-0.01061531		1552.2	-0.01214505		2082.2	-0.00514207		2612.2	-0.02268272
492.4	0.01276216		1022.39	-0.01035545		1552.4	-0.01170144		2082.4	-0.00522223		2612.4	-0.02195362
492.6	0.01236663		1022.59	-0.00991124		1552.6	-0.01226272		2082.6	-0.00558159		2612.6	-0.02147564
492.8	0.01217778		1022.79	-0.01025114		1552.8	-0.01242339		2082.8	-0.00508769		2612.8	-0.02130652
493	0.01201051		1022.99	-0.01091327		1553	-0.01266751		2083	-0.00594096		2613	-0.02110225
493.2	0.01209425		1023.19	-0.01081963		1553.2	-0.01372717		2083.2	-0.00594456		2613.2	-0.02151328
493.4	0.01247501		1023.39	-0.01065974		1553.4	-0.01443726		2083.4	-0.00662422		2613.4	-0.02169338
493.6	0.01304206		1023.59	-0.01072161		1553.6	-0.0148906		2083.6	-0.00710853		2613.6	-0.02200475
493.8	0.01339532		1023.79	-0.01052639		1553.8	-0.01528535		2083.8	-0.00685974		2613.8	-0.02209152
494	0.01341831		1023.99	-0.01077134		1554	-0.01550172		2084	-0.00829335		2614	-0.02250289
494.2	0.01313715		1024.19	-0.01089908		1554.2	-0.01566091		2084.2	-0.00921755		2614.2	-0.02400704
494.4	0.01321513		1024.39	-0.01111633		1554.4	-0.01616328		2084.4	-0.00998565		2614.4	-0.02589785
494.6	0.01241512		1024.59	-0.01208307		1554.6	-0.01664016		2084.6	-0.01044138		2614.6	-0.02640337
494.8	0.01187311		1024.79	-0.01135673		1554.8	-0.01624857		2084.8	-0.01093851		2614.8	-0.0268751
495	0.0115005		1024.99	-0.01189041		1555	-0.01584213		2085	-0.00989969		2615	-0.02729742
495.2	0.01063934		1025.19	-0.01222157		1555.2	-0.01443522		2085.2	-0.0092419		2615.2	-0.0264616
495.4	0.01154479		1025.39	-0.01288058		1555.4	-0.01429484		2085.4	-0.00901449		2615.4	-0.02581081
495.6	0.01157344		1025.59	-0.01385246		1555.6	-0.01365933		2085.6	-0.00876685		2615.6	-0.02550317
495.8	0.01037596		1025.79	-0.01435502		1555.8	-0.01432719		2085.8	-0.00827091		2615.8	-0.02589276
496	0.01124763		1025.99	-0.01534248		1556	-0.0144792		2086	-0.00756023		2616	-0.02604152
496.2	0.01193559		1026.19	-0.01492374		1556.2	-0.01382361		2086.2	-0.00691831		2616.2	-0.02566122
496.4	0.0121149		1026.39	-0.01434669		1556.4	-0.01290469		2086.4	-0.00725182		2616.4	-0.02457753
496.6	0.01298426		1026.59	-0.01442799		1556.6	-0.01249033		2086.6	-0.00773364		2616.6	-0.02405135
496.8	0.01417415		1026.79	-0.0146737		1556.8	-0.01294019		2086.8	-0.00683548		2616.8	-0.02387143
497	0.01487867		1026.99	-0.01416143		1557	-0.01253759		2087	-0.0061459		2617	-0.02417711
497.2	0.0165728		1027.19	-0.01289006		1557.2	-0.01170455		2087.2	-0.00623833		2617.2	-0.02444733
497.4	0.01733601		1027.39	-0.01189457		1557.4	-0.01174989		2087.4	-0.0061991		2617.4	-0.02369472
497.6	0.01825374		1027.59	-0.01091904		1557.6	-0.01223511		2087.6	-0.00586255		2617.6	-0.0227699
497.8	0.01892367		1027.79	-0.0107093		1557.8	-0.01261167		2087.8	-0.00620637		2617.8	-0.02184037
498	0.01926207		1027.99	-0.01017307		1558	-0.01363258		2088	-0.00704263		2618	-0.02236008
498.2	0.01847742		1028.19	-0.0100602		1558.2	-0.01393624		2088.2	-0.00697245		2618.2	-0.02283423
498.4	0.01725955		1028.39	-0.01010209		1558.4	-0.01517057		2088.4	-0.00696727		2618.4	-0.02353042
498.6	0.0163229		1028.59	-0.01000027		1558.6	-0.01530736		2088.6	-0.00740896		2618.6	-0.02286682
498.8	0.01501642		1028.79	-0.01014941		1558.8	-0.01488638		2088.8	-0.00797992		2618.8	-0.02195536
499	0.01429902		1028.99	-0.01113644		1559	-0.01508572		2089	-0.00707624		2619	-0.02148541
499.2	0.01365623		1029.19	-0.01181222		1559.2	-0.01455295		2089.2	-0.00784241		2619.2	-0.0214696
499.4	0.01367762		1029.39	-0.01320417		1559.4	-0.01435359		2089.4	-0.00732737		2619.4	-0.02225581
499.6	0.01221248		1029.59	-0.01343589		1559.6	-0.01459604		2089.6	-0.00721847		2619.6	-0.02268796
499.8	0.01162285		1029.79	-0.01416511		1559.8	-0.01367077		2089.8	-0.00697551		2619.8	-0.02195783
500	0.01173418		1029.99	-0.01506738		1560	-0.01236862		2090	-0.00755832		2620	-0.02175533
500.2	0.01094228		1030.19	-0.01514706		1560.2	-0.01201417		2090.2	-0.00825077		2620.2	-0.02217733
500.4	0.0108217		1030.39	-0.01575699		1560.4	-0.01129552		2090.4	-0.00821162		2620.4	-0.0220447
500.6	0.0110685		1030.59	-0.01568214		1560.6	-0.01196396		2090.6	-0.00924054		2620.6	-0.02345231
500.8	0.0109275		1030.79	-0.01518578		1560.8	-0.01247247		2090.8	-0.00929782		2620.8	-0.0248139
501	0.01049876		1030.99	-0.01393473		1561	-0.01268651		2091	-0.00956345		2621	-0.02633574
501.2	0.01108336		1031.19	-0.01311404		1561.2	-0.01346817		2091.2	-0.0105121		2621.2	-0.02668341
501.4	0.01075316		1031.39	-0.01277671		1561.4	-0.01486756		2091.4	-0.01091338		2621.4	-0.02715968
501.6	0.01083481		1031.59	-0.01187438		1561.6	-0.01527318		2091.6	-0.01154447		2621.6	-0.02698718
501.8	0.01093519		1031.79	-0.01158241		1561.8	-0.01522139		2091.8	-0.010943		2621.8	-0.02809152
502	0.01024133		1031.99	-0.01122042		1562	-0.01543693		2092	-0.01050214		2622	-0.02859203
502.2	0.00985988		1032.19	-0.01095067		1562.2	-0.01602441		2092.2	-0.01041151		2622.2	-0.02935189
502.4	0.01037422		1032.39	-0.01047141		1562.4	-0.01669383		2092.4	-0.01000025		2622.4	-0.02925164
502.6	0.01079983		1032.59	-0.00992977		1562.6	-0.01648454		2092.6	-0.00958839		2622.6	-0.02904725
502.8	0.01033773		1032.79	-0.00946907		1562.8	-0.01568594		2092.8	-0.00960893		2622.8	-0.02918491
503	0.01053949		1032.99	-0.00923859		1563	-0.01577112		2093	-0.00851533		2623	-0.02923661
503.2	0.01088106		1033.19	-0.00913863		1563.2	-0.01554058		2093.2	-0.00845229		2623.2	-0.02938327
503.4	0.0110667		1033.39	-0.00967161		1563.4	-0.01535934		2093.4	-0.0072071		2623.4	-0.02887947
503.6	0.01123861		1033.59	-0.00918553		1563.6	-0.01507073		2093.6	-0.00705573		2623.6	-0.02741116
503.8	0.01138944		1033.79	-0.00994795		1563.8	-0.01336201		2093.8	-0.00691567		2623.8	-0.02657628
504	0.01120159		1033.99	-0.01093764		1564	-0.01378846		2094	-0.00759792		2624	-0.02597084
504.2	0.01113975		1034.19	-0.01113447		1564.2	-0.0144872		2094.2	-0.00684609		2624.2	-0.02586809
504.4	0.01130467		1034.39	-0.01202038		1564.4	-0.01453397		2094.4	-0.00643545		2624.4	-0.02552853
504.6	0.01125805		1034.59	-0.01240045		1564.6	-0.01587736		2094.6	-0.00780053		2624.6	-0.02489282
504.8	0.01046341		1034.79	-0.01273681		1564.8	-0.01599134		2094.8	-0.00802759		2624.8	-0.02477301
505	0.01045875		1034.99	-0.01260797		1565	-0.01635929		2095	-0.00806888		2625	-0.0244462
505.2	0.01110639		1035.19	-0.01332075		1565.2	-0.01642378		2095.2	-0.00827395		2625.2	-0.02473103
505.4	0.01036789		1035.39	-0.01415805		1565.4	-0.0166589		2095.4	-0.00853634		2625.4	-0.02475689
505.6	0.00991064		1035.59	-0.01433293		1565.6	-0.01660056		2095.6	-0.00871996		2625.6	-0.02447596
505.8	0.0097504		1035.79	-0.01454011		1565.8	-0.01638694		2095.8	-0.00849661		2625.8	-0.02462381
506	0.00981394		1035.99	-0.01428631		1566	-0.01685055		2096	-0.00899614		2626	-0.02457602
506.2	0.01026857		1036.19	-0.01356312		1566.2	-0.01672679		2096.2	-0.00931538		2626.2	-0.02539028
506.4	0.01034575		1036.39	-0.01397285		1566.4	-0.01592129		2096.4	-0.00921012		2626.4	-0.02532861
506.6	0.0100533		1036.59	-0.01305745		1566.6	-0.01543179		2096.6	-0.0096111		2626.6	-0.02556371
506.8	0.00929762		1036.79	-0.01328887		1566.8	-0.01500192		2096.8	-0.00914324		2626.8	-0.02588914
507	0.00977565		1036.99	-0.01381013		1567	-0.01529929		2097	-0.00998272		2627	-0.02662562
507.2	0.0096009		1037.19	-0.01466188		1567.2	-0.01511376		2097.2	-0.01025899		2627.2	-0.02639967
507.4	0.00932336		1037.39	-0.01440064		1567.4	-0.01462208		2097.4	-0.0107564		2627.4	-0.02626289
507.6	0.00980478		1037.59	-0.01361044		1567.6	-0.01403531		2097.6	-0.01055463		2627.6	-0.02635739
507.8	0.00960154		1037.79	-0.01368365		1567.8	-0.01369572		2097.8	-0.01050125		2627.8	-0.02707867
508	0.00999872		1037.99	-0.0130825		1568	-0.01435453		2098	-0.0102403		2628	-0.02667342
508.2	0.01020286		1038.19	-0.01278852		1568.2	-0.01402093		2098.2	-0.00933362		2628.2	-0.02750445
508.4	0.010432		1038.39	-0.01307017		1568.4	-0.01417789		2098.4	-0.00937189		2628.4	-0.02685094
508.6	0.0115769		1038.59	-0.01284166		1568.6	-0.01501832		2098.6	-0.00860745		2628.6	-0.02654099
508.8	0.01183499		1038.79	-0.01225677		1568.8	-0.01491396		2098.8	-0.00738845		2628.8	-0.02671194
509	0.01236233		1038.99	-0.01168349		1569	-0.01481994		2099	-0.00681421		2629	-0.02681415
509.2	0.01251356		1039.19	-0.0115397		1569.2	-0.01532749		2099.2	-0.00688102		2629.2	-0.02638469
509.4	0.01204988		1039.39	-0.01133934		1569.4	-0.01548187		2099.4	-0.00735656		2629.4	-0.02542539
509.6	0.01151948		1039.59	-0.01085031		1569.6	-0.01580024		2099.6	-0.00805138		2629.6	-0.02518921
509.8	0.01099598		1039.79	-0.01011083		1569.8	-0.01505163		2099.8	-0.00799367		2629.8	-0.02462867
510	0.01031599		1039.99	-0.01011292		1570	-0.01492062		2100	-0.00806157		2630	-0.02487085
510.2	0.00959344		1040.19	-0.00965561		1570.2	-0.01312095		2100.2	-0.00805307		2630.2	-0.02414665
510.4	0.00890218		1040.39	-0.00981596		1570.4	-0.01287266		2100.4	-0.00835283		2630.4	-0.0232514
510.6	0.00882642		1040.59	-0.00972838		1570.6	-0.01321525		2100.6	-0.00855903		2630.6	-0.02271064
510.8	0.00810368		1040.79	-0.01145039		1570.8	-0.01303099		2100.8	-0.00814565		2630.8	-0.02313372
511	0.00807629		1040.99	-0.01255011		1571	-0.01254203		2101	-0.00906707		2631	-0.02247438
511.2	0.00735547		1041.19	-0.0133918		1571.2	-0.01283405		2101.2	-0.0089297		2631.2	-0.02231581
511.4	0.00794859		1041.39	-0.0132681		1571.4	-0.01312362		2101.4	-0.01011515		2631.4	-0.02343268
511.6	0.00864314		1041.59	-0.01335		1571.6	-0.01308784		2101.6	-0.00952196		2631.6	-0.02376787
511.8	0.0093157		1041.79	-0.01329764		1571.8	-0.01352482		2101.8	-0.0095159		2631.8	-0.02364326
512	0.00977935		1041.99	-0.0129949		1572	-0.01390661		2102	-0.00882957		2632	-0.02427631
512.2	0.01100357		1042.19	-0.01388021		1572.2	-0.01416511		2102.2	-0.00795582		2632.2	-0.02525972
512.4	0.01302061		1042.39	-0.01480612		1572.4	-0.0148143		2102.4	-0.00803297		2632.4	-0.0252008
512.6	0.0140195		1042.59	-0.01483517		1572.6	-0.01570598		2102.6	-0.00668314		2632.6	-0.02574528
512.8	0.01466801		1042.79	-0.01544642		1572.8	-0.01633518		2102.8	-0.00670492		2632.8	-0.02593946
513	0.0151183		1042.99	-0.01550068		1573	-0.01618105		2103	-0.00655674		2633	-0.02643326
513.2	0.01577323		1043.19	-0.01562638		1573.2	-0.01668		2103.2	-0.00665236		2633.2	-0.02695532
513.4	0.01512595		1043.39	-0.01554581		1573.4	-0.01675347		2103.4	-0.00705734		2633.4	-0.02681506
513.6	0.01445598		1043.59	-0.01462535		1573.6	-0.0171949		2103.6	-0.00659102		2633.6	-0.02680618
513.8	0.01374711		1043.79	-0.01419739		1573.8	-0.01669809		2103.8	-0.0064332		2633.8	-0.02627562
514	0.01333396		1043.99	-0.01419626		1574	-0.01651212		2104	-0.00632753		2634	-0.02595987
514.2	0.01230508		1044.19	-0.01348912		1574.2	-0.01609187		2104.2	-0.00643699		2634.2	-0.0260063
514.4	0.01150513		1044.39	-0.01324441		1574.4	-0.01680246		2104.4	-0.00651751		2634.4	-0.02558524
514.6	0.01079609		1044.59	-0.01385172		1574.6	-0.01686042		2104.6	-0.00674358		2634.6	-0.02572234
514.8	0.00945841		1044.79	-0.01423337		1574.8	-0.01662197		2104.8	-0.00651631		2634.8	-0.02601228
515	0.00913913		1044.99	-0.01427102		1575	-0.01676895		2105	-0.00695231		2635	-0.02573249
515.2	0.00854385		1045.19	-0.01439301		1575.2	-0.01692028		2105.2	-0.00751364		2635.2	-0.02694852
515.4	0.00888305		1045.39	-0.01417557		1575.4	-0.01672356		2105.4	-0.00824885		2635.4	-0.02634285
515.6	0.00890614		1045.59	-0.01434104		1575.6	-0.01676344		2105.6	-0.0081786		2635.6	-0.02615996
515.8	0.00831978		1045.79	-0.01429393		1575.8	-0.0162833		2105.8	-0.00791468		2635.8	-0.02590841
516	0.00812983		1045.99	-0.01463786		1576	-0.0160823		2106	-0.00773042		2636	-0.02666835
516.2	0.00885748		1046.19	-0.0148195		1576.2	-0.01557358		2106.2	-0.00848442		2636.2	-0.02638144
516.4	0.00882262		1046.39	-0.01542116		1576.4	-0.01544745		2106.4	-0.00897666		2636.4	-0.02686705
516.6	0.00763865		1046.59	-0.01504511		1576.6	-0.01574237		2106.6	-0.00813848		2636.6	-0.02693431
516.8	0.00819129		1046.79	-0.01541266		1576.8	-0.01589254		2106.8	-0.0081426		2636.8	-0.02705481
517	0.00849217		1046.99	-0.01519922		1577	-0.01511815		2107	-0.00795288		2637	-0.02732966
517.2	0.00805652		1047.19	-0.0146541		1577.2	-0.01613203		2107.2	-0.00864425		2637.2	-0.02749995
517.4	0.00756339		1047.39	-0.01328898		1577.4	-0.0160262		2107.4	-0.00883257		2637.4	-0.02689929
517.6	0.00759098		1047.59	-0.01273733		1577.6	-0.0160483		2107.6	-0.00849248		2637.6	-0.0268833
517.8	0.00793641		1047.79	-0.01247137		1577.8	-0.0161023		2107.8	-0.00822716		2637.8	-0.02684879
518	0.00870066		1047.99	-0.01282196		1578	-0.01550576		2108	-0.00815348		2638	-0.02649535
518.2	0.00885826		1048.19	-0.01300272		1578.2	-0.01567599		2108.2	-0.00820948		2638.2	-0.0262504
518.4	0.00940947		1048.39	-0.0137087		1578.4	-0.01594793		2108.4	-0.00814595		2638.4	-0.02606823
518.6	0.01021362		1048.59	-0.01377152		1578.6	-0.01618367		2108.6	-0.00844098		2638.6	-0.02541049
518.8	0.01069383		1048.79	-0.01338896		1578.8	-0.01664746		2108.8	-0.00748379		2638.8	-0.0248823
519	0.01151118		1048.99	-0.01384681		1579	-0.01720648		2109	-0.00668693		2639	-0.02485125
519.2	0.01152853		1049.19	-0.01374743		1579.2	-0.0177336		2109.2	-0.00701112		2639.2	-0.0242295
519.4	0.01246957		1049.39	-0.01416218		1579.4	-0.01887649		2109.4	-0.00684227		2639.4	-0.02303044
519.6	0.01254426		1049.59	-0.01450875		1579.6	-0.01878605		2109.6	-0.00740235		2639.6	-0.02272858
519.8	0.01315653		1049.79	-0.01439592		1579.8	-0.01848754		2109.8	-0.00776321		2639.8	-0.02222565
520	0.01397276		1049.99	-0.01502601		1580	-0.01822074		2110	-0.00860224		2640	-0.02272968
520.2	0.01359491		1050.19	-0.01445963		1580.2	-0.01799926		2110.2	-0.00943439		2640.2	-0.02248739
520.4	0.01286945		1050.39	-0.0149977		1580.4	-0.01767394		2110.4	-0.00868379		2640.4	-0.02295023
520.6	0.01298313		1050.59	-0.0144712		1580.6	-0.01734985		2110.6	-0.00876273		2640.6	-0.02317999
520.8	0.01270935		1050.79	-0.01492017		1580.8	-0.01678947		2110.8	-0.00805035		2640.8	-0.02393701
521	0.01156008		1050.99	-0.01488855		1581	-0.01622252		2111	-0.00895011		2641	-0.02420361
521.2	0.01078893		1051.19	-0.01451327		1581.2	-0.01641452		2111.2	-0.00855277		2641.2	-0.0242445
521.4	0.01004373		1051.39	-0.01400133		1581.4	-0.01559386		2111.4	-0.00884669		2641.4	-0.02441299
521.6	0.00970345		1051.59	-0.0144282		1581.6	-0.01447222		2111.6	-0.00878729		2641.6	-0.02434549
521.8	0.0097931		1051.79	-0.01385736		1581.8	-0.01443589		2111.8	-0.00814133		2641.8	-0.02485808
522	0.00940039		1051.99	-0.01422584		1582	-0.01368141		2112	-0.00812139		2642	-0.02487753
522.2	0.00912828		1052.19	-0.01465853		1582.2	-0.01306827		2112.2	-0.00829178		2642.2	-0.02500095
522.4	0.00930851		1052.39	-0.01487106		1582.4	-0.01319648		2112.4	-0.00800978		2642.4	-0.02541701
522.6	0.00918324		1052.59	-0.01439459		1582.6	-0.01336846		2112.6	-0.00728867		2642.6	-0.02428699
522.8	0.00909638		1052.79	-0.01485865		1582.8	-0.01348122		2112.8	-0.00664767		2642.8	-0.02397075
523	0.0086785		1052.99	-0.01528591		1583	-0.01394305		2113	-0.00652222		2643	-0.02405513
523.2	0.0085325		1053.19	-0.01474884		1583.2	-0.01468321		2113.2	-0.0067324		2643.2	-0.02275889
523.4	0.00938697		1053.39	-0.01530178		1583.4	-0.01543195		2113.4	-0.00618117		2643.4	-0.0226791
523.6	0.01034242		1053.59	-0.01448438		1583.6	-0.01515129		2113.6	-0.00635662		2643.6	-0.02282043
523.8	0.01136389		1053.79	-0.01459786		1583.8	-0.01556891		2113.8	-0.00674351		2643.8	-0.0230358
524	0.01147464		1053.99	-0.01497491		1584	-0.01530911		2114	-0.00705711		2644	-0.02279014
524.2	0.01131393		1054.19	-0.0141368		1584.2	-0.01580344		2114.2	-0.00717559		2644.2	-0.02362831
524.4	0.01214113		1054.39	-0.01433121		1584.4	-0.01532039		2114.4	-0.00692499		2644.4	-0.02396542
524.6	0.01206213		1054.59	-0.01349448		1584.6	-0.01609589		2114.6	-0.00754621		2644.6	-0.0243194
524.8	0.01084106		1054.79	-0.01358476		1584.8	-0.0163051		2114.8	-0.00656762		2644.8	-0.0247381
525	0.0105517		1054.99	-0.0134		1585	-0.01680744		2115	-0.0072371		2645	-0.02525037
525.2	0.01046471		1055.19	-0.01284182		1585.2	-0.01728048		2115.2	-0.00733833		2645.2	-0.0251113
525.4	0.01005347		1055.39	-0.01235827		1585.4	-0.01731456		2115.4	-0.00852359		2645.4	-0.0247251
525.6	0.00976802		1055.59	-0.01171971		1585.6	-0.01699719		2115.6	-0.00893366		2645.6	-0.02506967
525.8	0.00906845		1055.79	-0.01128133		1585.8	-0.01736983		2115.8	-0.00978277		2645.8	-0.02538537
526	0.00922237		1055.99	-0.0116411		1586	-0.01634215		2116	-0.00971184		2646	-0.02521425
526.2	0.00890334		1056.19	-0.01179299		1586.2	-0.01580772		2116.2	-0.00975437		2646.2	-0.02484573
526.4	0.00916885		1056.39	-0.01219908		1586.4	-0.01566666		2116.4	-0.01012918		2646.4	-0.02430894
526.6	0.00879026		1056.59	-0.0123097		1586.6	-0.01531949		2116.6	-0.01014626		2646.6	-0.02323906
526.8	0.00816584		1056.79	-0.01322966		1586.8	-0.01446302		2116.8	-0.01026336		2646.8	-0.02265611
527	0.00764684		1056.99	-0.0139871		1587	-0.01466655		2117	-0.00940055		2647	-0.02275613
527.2	0.00771838		1057.19	-0.01435058		1587.2	-0.01485555		2117.2	-0.00902784		2647.2	-0.02301056
527.4	0.007918		1057.39	-0.01470844		1587.4	-0.01471806		2117.4	-0.00833783		2647.4	-0.02285637
527.6	0.00815962		1057.59	-0.01387746		1587.6	-0.01417124		2117.6	-0.00819978		2647.6	-0.02243582
527.8	0.00891709		1057.79	-0.0148604		1587.8	-0.01426578		2117.8	-0.00866575		2647.8	-0.02176572
528	0.00869028		1057.99	-0.01565438		1588	-0.01401764		2118	-0.00886245		2648	-0.02178982
528.2	0.00796364		1058.19	-0.0149822		1588.2	-0.01513782		2118.2	-0.00853196		2648.2	-0.02351496
528.4	0.00798667		1058.39	-0.01456043		1588.4	-0.01571139		2118.4	-0.00815952		2648.4	-0.02362299
528.6	0.00711214		1058.59	-0.0135497		1588.6	-0.01653663		2118.6	-0.00795603		2648.6	-0.02461689
528.8	0.0066323		1058.79	-0.01330685		1588.8	-0.01648726		2118.8	-0.00789784		2648.8	-0.02588259
529	0.00679251		1058.99	-0.01307743		1589	-0.01712844		2119	-0.00813247		2649	-0.02641348
529.2	0.00625825		1059.19	-0.01198707		1589.2	-0.01806368		2119.2	-0.00879558		2649.2	-0.02617452
529.4	0.00616098		1059.39	-0.01155025		1589.4	-0.01872513		2119.4	-0.00930713		2649.4	-0.02541953
529.6	0.00562507		1059.59	-0.0118316		1589.6	-0.01851123		2119.6	-0.00952782		2649.6	-0.02550514
529.8	0.0052777		1059.79	-0.01215009		1589.8	-0.01820513		2119.8	-0.01002853		2649.8	-0.02519788
530	0.00491065		1059.99	-0.01222001		1590	-0.01735371		2120	-0.00956422		2650	-0.02500511
530.2	0.00471212		1060.19	-0.01283783		1590.2	-0.01751373		2120.2	-0.01005215		2650.2	-0.02439099
530.4	0.0048702		1060.39	-0.01318712		1590.4	-0.01737551		2120.4	-0.01129113		2650.4	-0.02360345
530.6	0.00557571		1060.59	-0.0132405		1590.6	-0.01716552		2120.6	-0.01106458		2650.6	-0.02308147
530.8	0.00559242		1060.79	-0.01395814		1590.8	-0.01654408		2120.8	-0.01049849		2650.8	-0.02341267
531	0.00628555		1060.99	-0.01462544		1591	-0.01667819		2121	-0.00997634		2651	-0.02406273
531.2	0.00668806		1061.19	-0.01460904		1591.2	-0.01658522		2121.2	-0.00985473		2651.2	-0.02310618
531.4	0.00729189		1061.39	-0.01477906		1591.4	-0.01578168		2121.4	-0.00887999		2651.4	-0.02145412
531.6	0.00796721		1061.59	-0.01456806		1591.6	-0.0153555		2121.6	-0.00911877		2651.6	-0.02138336
531.8	0.0082116		1061.79	-0.01505168		1591.8	-0.01544975		2121.8	-0.00907403		2651.8	-0.02171386
532	0.00703626		1061.99	-0.01433146		1592	-0.01588198		2122	-0.00932361		2652	-0.02280986
532.2	0.00670331		1062.19	-0.01375272		1592.2	-0.01695016		2122.2	-0.00859279		2652.2	-0.02406015
532.4	0.00705449		1062.39	-0.01304903		1592.4	-0.01796381		2122.4	-0.00803369		2652.4	-0.02507495
532.6	0.00656944		1062.59	-0.01243863		1592.6	-0.01798901		2122.6	-0.00789311		2652.6	-0.02595122
532.8	0.00658017		1062.79	-0.01256751		1592.8	-0.01870908		2122.8	-0.00803019		2652.8	-0.02604386
533	0.00668941		1062.99	-0.01266916		1593	-0.01923757		2123	-0.00760352		2653	-0.02583634
533.2	0.00665897		1063.19	-0.01269145		1593.2	-0.01930371		2123.2	-0.00768552		2653.2	-0.02614846
533.4	0.00595873		1063.39	-0.01332207		1593.4	-0.01935278		2123.4	-0.00783335		2653.4	-0.02566888
533.6	0.00505204		1063.59	-0.01372022		1593.6	-0.01852978		2123.6	-0.00799904		2653.6	-0.02571624
533.8	0.00426612		1063.79	-0.0136026		1593.8	-0.01792111		2123.8	-0.00881722		2653.8	-0.02530675
534	0.00428711		1063.99	-0.01417381		1594	-0.0175945		2124	-0.00966971		2654	-0.02480994
534.2	0.00493321		1064.19	-0.01460395		1594.2	-0.01764489		2124.2	-0.01018818		2654.2	-0.0245243
534.4	0.0053687		1064.39	-0.01406204		1594.4	-0.01681366		2124.4	-0.01076526		2654.4	-0.02472641
534.6	0.00640994		1064.59	-0.01481509		1594.6	-0.01600717		2124.6	-0.01046167		2654.6	-0.02443457
534.8	0.00690698		1064.79	-0.01543217		1594.8	-0.01527417		2124.8	-0.00974736		2654.8	-0.02451525
535	0.00698989		1064.99	-0.01534745		1595	-0.01422759		2125	-0.00935678		2655	-0.02416427
535.2	0.0072684		1065.19	-0.01502367		1595.2	-0.01382004		2125.2	-0.00916461		2655.2	-0.02308537
535.4	0.00764254		1065.39	-0.0144871		1595.4	-0.01329534		2125.4	-0.00855408		2655.4	-0.02326205
535.6	0.00699656		1065.59	-0.01382409		1595.6	-0.01363647		2125.6	-0.00886839		2655.6	-0.02410722
535.8	0.00718043		1065.79	-0.01380462		1595.8	-0.0136348		2125.8	-0.00941954		2655.8	-0.02480376
536	0.00745859		1065.99	-0.01313727		1596	-0.01459917		2126	-0.00859326		2656	-0.02570312
536.2	0.00820872		1066.19	-0.01299329		1596.2	-0.01565915		2126.2	-0.00844328		2656.2	-0.02616748
536.4	0.00865925		1066.39	-0.01224118		1596.4	-0.01730365		2126.4	-0.00814746		2656.4	-0.02691646
536.6	0.00882567		1066.59	-0.01244547		1596.6	-0.01706044		2126.6	-0.00812918		2656.6	-0.02682642
536.8	0.00991076		1066.79	-0.01232554		1596.8	-0.01755702		2126.8	-0.00831757		2656.8	-0.02645738
537	0.01054954		1066.99	-0.01221776		1597	-0.01799561		2127	-0.00676377		2657	-0.0274679
537.2	0.01021402		1067.19	-0.01299158		1597.2	-0.01789292		2127.2	-0.00645774		2657.2	-0.02806016
537.4	0.00977274		1067.39	-0.0125524		1597.4	-0.01866005		2127.4	-0.00589499		2657.4	-0.02810592
537.6	0.01015602		1067.59	-0.01208375		1597.6	-0.01840012		2127.6	-0.00547861		2657.6	-0.02787791
537.8	0.00994704		1067.79	-0.01171075		1597.8	-0.01859869		2127.8	-0.00547816		2657.8	-0.02838811
538	0.00993867		1067.99	-0.01230594		1598	-0.01944804		2128	-0.0060471		2658	-0.02857008
538.2	0.00964626		1068.19	-0.01242911		1598.2	-0.0189653		2128.2	-0.00534603		2658.2	-0.02887346
538.4	0.00936009		1068.39	-0.01305063		1598.4	-0.0185857		2128.4	-0.00547573		2658.4	-0.02898831
538.6	0.00857122		1068.59	-0.01353236		1598.6	-0.01824142		2128.6	-0.0059436		2658.6	-0.02829611
538.8	0.00890371		1068.79	-0.01309632		1598.8	-0.01737831		2128.8	-0.00594519		2658.8	-0.0281623
539	0.00837259		1068.99	-0.01319375		1599	-0.01633903		2129	-0.00626655		2659	-0.02780357
539.2	0.00808082		1069.19	-0.01304631		1599.2	-0.01684681		2129.2	-0.00669448		2659.2	-0.02678214
539.4	0.008005		1069.39	-0.01328819		1599.4	-0.01577451		2129.4	-0.00694121		2659.4	-0.02635072
539.6	0.00720121		1069.59	-0.01380368		1599.6	-0.01571752		2129.6	-0.00807229		2659.6	-0.02666185
539.8	0.00781148		1069.79	-0.0142507		1599.8	-0.01598864		2129.8	-0.00936243		2659.8	-0.02661558
540	0.00765853		1069.99	-0.01324554		1600	-0.01631404		2130	-0.01008292		2660	-0.026831
540.2	0.00784372		1070.19	-0.01324848		1600.2	-0.01705651		2130.2	-0.01095393		2660.2	-0.02673304
540.4	0.00763488		1070.39	-0.01368369		1600.4	-0.01681592		2130.4	-0.01137998		2660.4	-0.02668268
540.6	0.00715544		1070.59	-0.014342		1600.6	-0.0165942		2130.6	-0.01113381		2660.6	-0.02649338
540.8	0.00765543		1070.79	-0.01469277		1600.8	-0.01651693		2130.8	-0.0107265		2660.8	-0.02638327
541	0.00719926		1070.99	-0.01469569		1601	-0.01663506		2131	-0.00896563		2661	-0.0263983
541.2	0.00658074		1071.19	-0.01465417		1601.2	-0.01575662		2131.2	-0.00894914		2661.2	-0.02618665
541.4	0.00705839		1071.39	-0.01371613		1601.4	-0.01674354		2131.4	-0.00847753		2661.4	-0.02638567
541.6	0.00758413		1071.59	-0.01341105		1601.6	-0.01705981		2131.6	-0.00836858		2661.6	-0.02648805
541.8	0.00741399		1071.79	-0.01375376		1601.8	-0.0185261		2131.8	-0.00852914		2661.8	-0.02662207
542	0.00746785		1071.99	-0.01492341		1602	-0.01906172		2132	-0.00853816		2662	-0.02678762
542.2	0.00691569		1072.19	-0.01545509		1602.2	-0.01868893		2132.2	-0.00842361		2662.2	-0.02679901
542.4	0.00703314		1072.39	-0.01551465		1602.4	-0.01838282		2132.4	-0.00880712		2662.4	-0.02637502
542.6	0.00761596		1072.59	-0.01527855		1602.6	-0.01797844		2132.6	-0.01012836		2662.6	-0.02617644
542.8	0.00809917		1072.79	-0.01481467		1602.8	-0.01774624		2132.8	-0.00946401		2662.8	-0.02640165
543	0.00818527		1072.99	-0.01538596		1603	-0.01704491		2133	-0.00989189		2663	-0.02665365
543.2	0.00820301		1073.19	-0.01448233		1603.2	-0.01686668		2133.2	-0.01024359		2663.2	-0.02620999
543.4	0.00899556		1073.39	-0.01475142		1603.4	-0.01567414		2133.4	-0.00984786		2663.4	-0.02684198
543.6	0.00909153		1073.59	-0.01439991		1603.6	-0.01667753		2133.6	-0.01070025		2663.6	-0.02741442
543.8	0.00869408		1073.79	-0.0145838		1603.8	-0.01745369		2133.8	-0.0111706		2663.8	-0.02810408
544	0.00834001		1073.99	-0.01414751		1604	-0.01683881		2134	-0.01151741		2664	-0.02857189
544.2	0.00759701		1074.19	-0.01517235		1604.2	-0.01708385		2134.2	-0.01083753		2664.2	-0.02819064
544.4	0.00718468		1074.39	-0.01507445		1604.4	-0.01615215		2134.4	-0.0107297		2664.4	-0.02789238
544.6	0.00649224		1074.59	-0.01512164		1604.6	-0.01622712		2134.6	-0.00915254		2664.6	-0.02798471
544.8	0.00673771		1074.79	-0.01469533		1604.8	-0.01564356		2134.8	-0.00771543		2664.8	-0.02790656
545	0.00645367		1074.99	-0.01469469		1605	-0.01523372		2135	-0.00684696		2665	-0.02701764
545.2	0.00600487		1075.19	-0.0151812		1605.2	-0.01437322		2135.2	-0.00687037		2665.2	-0.02728518
545.4	0.0061315		1075.39	-0.01578394		1605.4	-0.01488671		2135.4	-0.00687525		2665.4	-0.02750264
545.6	0.00629167		1075.59	-0.01664697		1605.6	-0.01496162		2135.6	-0.00624851		2665.6	-0.02710865
545.8	0.00569389		1075.79	-0.01678084		1605.8	-0.01552311		2135.8	-0.00607264		2665.8	-0.02639336
546	0.00561633		1075.99	-0.01691577		1606	-0.01536685		2136	-0.00592534		2666	-0.02692151
546.2	0.00596062		1076.19	-0.01672851		1606.2	-0.01447239		2136.2	-0.0061055		2666.2	-0.02668249
546.4	0.00708564		1076.39	-0.01642376		1606.4	-0.01426395		2136.4	-0.00602249		2666.4	-0.02664149
546.6	0.00706798		1076.59	-0.0163186		1606.6	-0.01547831		2136.6	-0.00650934		2666.6	-0.0272854
546.8	0.00682723		1076.79	-0.01587623		1606.8	-0.01600739		2136.8	-0.0062089		2666.8	-0.02750508
547	0.0072528		1076.99	-0.01603348		1607	-0.01556768		2137	-0.00761913		2667	-0.02732266
547.2	0.00778312		1077.19	-0.01535254		1607.2	-0.01615904		2137.2	-0.0080301		2667.2	-0.02799828
547.4	0.0087445		1077.39	-0.01601076		1607.4	-0.01625683		2137.4	-0.0072774		2667.4	-0.02819461
547.6	0.00882394		1077.59	-0.01543797		1607.6	-0.01800721		2137.6	-0.0082841		2667.6	-0.02805875
547.8	0.00791197		1077.79	-0.01529713		1607.8	-0.01761242		2137.8	-0.00891865		2667.8	-0.02921868
548	0.00792317		1077.99	-0.01451563		1608	-0.01732701		2138	-0.00932536		2668	-0.02845329
548.2	0.00730044		1078.19	-0.01499906		1608.2	-0.01665555		2138.2	-0.0096755		2668.2	-0.02775788
548.4	0.00725828		1078.39	-0.01428909		1608.4	-0.01672321		2138.4	-0.00944198		2668.4	-0.02776133
548.6	0.00670185		1078.59	-0.01450204		1608.6	-0.01677002		2138.6	-0.00945252		2668.6	-0.02734859
548.8	0.00717723		1078.79	-0.01456028		1608.8	-0.01658643		2138.8	-0.00967324		2668.8	-0.02702107
549	0.00748077		1078.99	-0.0151041		1609	-0.01598234		2139	-0.01066997		2669	-0.02658015
549.2	0.006069		1079.19	-0.01487531		1609.2	-0.01530709		2139.2	-0.01097586		2669.2	-0.02647294
549.4	0.00590326		1079.39	-0.01480003		1609.4	-0.01559651		2139.4	-0.01058468		2669.4	-0.02672467
549.6	0.00625172		1079.59	-0.01582818		1609.6	-0.01524663		2139.6	-0.01042598		2669.6	-0.02656882
549.8	0.00602683		1079.79	-0.01579634		1609.8	-0.01542423		2139.8	-0.01101389		2669.8	-0.02630155
550	0.00696165		1079.99	-0.01703773		1610	-0.01480628		2140	-0.0104391		2670	-0.026637
550.2	0.00737505		1080.19	-0.01693833		1610.2	-0.01477252		2140.2	-0.01065232		2670.2	-0.02678287
550.4	0.00661467		1080.39	-0.01812966		1610.4	-0.015712		2140.4	-0.01015065		2670.4	-0.02615596
550.6	0.00629708		1080.59	-0.01816128		1610.6	-0.01658343		2140.6	-0.01017329		2670.6	-0.02540174
550.8	0.00615075		1080.79	-0.01862673		1610.8	-0.0164005		2140.8	-0.01051444		2670.8	-0.02550171
551	0.00612606		1080.99	-0.01880625		1611	-0.01634664		2141	-0.01032392		2671	-0.02599256
551.2	0.00739571		1081.19	-0.01836395		1611.2	-0.01730582		2141.2	-0.01012413		2671.2	-0.02723628
551.4	0.00716923		1081.39	-0.01845074		1611.4	-0.01757798		2141.4	-0.00957646		2671.4	-0.02703268
551.6	0.00726816		1081.59	-0.01732421		1611.6	-0.0182179		2141.6	-0.00995686		2671.6	-0.02711253
551.8	0.00652092		1081.79	-0.01676933		1611.8	-0.01777515		2141.8	-0.00979952		2671.8	-0.02775732
552	0.00584925		1081.99	-0.01657943		1612	-0.01807945		2142	-0.01009666		2672	-0.02646453
552.2	0.00539542		1082.19	-0.01677074		1612.2	-0.01834249		2142.2	-0.01005911		2672.2	-0.02628525
552.4	0.00496835		1082.39	-0.01616432		1612.4	-0.01877074		2142.4	-0.00981894		2672.4	-0.02620305
552.6	0.00488449		1082.59	-0.01560152		1612.6	-0.01811189		2142.6	-0.01046491		2672.6	-0.02564307
552.8	0.00484746		1082.79	-0.01556148		1612.8	-0.01874798		2142.8	-0.00990308		2672.8	-0.02570017
553	0.00493379		1082.99	-0.01521338		1613	-0.0185989		2143	-0.00918299		2673	-0.02565979
553.2	0.00335127		1083.19	-0.01535479		1613.2	-0.01794233		2143.2	-0.0086922		2673.2	-0.02559362
553.4	0.00336344		1083.39	-0.01633547		1613.4	-0.01736726		2143.4	-0.00963137		2673.4	-0.02585263
553.6	0.00357222		1083.59	-0.01732918		1613.6	-0.01698079		2143.6	-0.01018559		2673.6	-0.02600803
553.8	0.00294897		1083.79	-0.01700426		1613.8	-0.01674695		2143.8	-0.01034524		2673.8	-0.02561267
554	0.00336968		1083.99	-0.0176176		1614	-0.01535302		2144	-0.00966804		2674	-0.02545752
554.2	0.00295682		1084.19	-0.01639168		1614.2	-0.01503744		2144.2	-0.01023247		2674.2	-0.0258421
554.4	0.00314405		1084.39	-0.01739485		1614.4	-0.01512017		2144.4	-0.00979378		2674.4	-0.02596679
554.6	0.00328207		1084.59	-0.01681548		1614.6	-0.01517901		2144.6	-0.01001286		2674.6	-0.02606786
554.8	0.00362148		1084.79	-0.01713013		1614.8	-0.0156387		2144.8	-0.00957367		2674.8	-0.02702805
555	0.00387729		1084.99	-0.01651307		1615	-0.01637557		2145	-0.00979441		2675	-0.02716906
555.2	0.00547605		1085.19	-0.01621939		1615.2	-0.01720977		2145.2	-0.01088616		2675.2	-0.02786148
555.4	0.00523615		1085.39	-0.01617664		1615.4	-0.01772374		2145.4	-0.01066467		2675.4	-0.02834436
555.6	0.00543855		1085.59	-0.01560548		1615.6	-0.0177124		2145.6	-0.01066526		2675.6	-0.02790199
555.8	0.00551719		1085.79	-0.01572562		1615.8	-0.01857784		2145.8	-0.01082902		2675.8	-0.02782925
556	0.00561479		1085.99	-0.01588391		1616	-0.01865482		2146	-0.01067216		2676	-0.02700814
556.2	0.00624278		1086.19	-0.01571018		1616.2	-0.01862288		2146.2	-0.01044774		2676.2	-0.02712405
556.4	0.00681317		1086.39	-0.01600532		1616.4	-0.01778292		2146.4	-0.01015295		2676.4	-0.02659961
556.6	0.00703647		1086.59	-0.01553132		1616.6	-0.0186378		2146.6	-0.00975993		2676.6	-0.02629397
556.8	0.00765007		1086.79	-0.01613385		1616.8	-0.01910255		2146.8	-0.00891889		2676.8	-0.02690184
557	0.00811347		1086.99	-0.01543994		1617	-0.01888256		2147	-0.00907813		2677	-0.02714594
557.2	0.00740842		1087.19	-0.01592599		1617.2	-0.01878551		2147.2	-0.00945876		2677.2	-0.02728161
557.4	0.00744215		1087.39	-0.0163444		1617.4	-0.01854736		2147.4	-0.00968661		2677.4	-0.02715439
557.6	0.00733112		1087.59	-0.0167435		1617.6	-0.0181731		2147.6	-0.00935717		2677.6	-0.02680672
557.8	0.00711864		1087.79	-0.01668265		1617.8	-0.01710935		2147.8	-0.00952803		2677.8	-0.02728482
558	0.00710647		1087.99	-0.01690349		1618	-0.01638976		2148	-0.0096867		2678	-0.02806129
558.2	0.00686372		1088.19	-0.01642328		1618.2	-0.01643676		2148.2	-0.01012222		2678.2	-0.02889241
558.4	0.00680885		1088.39	-0.01707194		1618.4	-0.01705884		2148.4	-0.01027422		2678.4	-0.02901845
558.6	0.00597789		1088.59	-0.01685946		1618.6	-0.01710823		2148.6	-0.01057288		2678.6	-0.02862826
558.8	0.00595529		1088.79	-0.01691397		1618.8	-0.01756241		2148.8	-0.01085815		2678.8	-0.02846403
559	0.00543608		1088.99	-0.01677285		1619	-0.01784148		2149	-0.01182013		2679	-0.02801111
559.2	0.0055421		1089.19	-0.01679574		1619.2	-0.0181879		2149.2	-0.01226925		2679.2	-0.02779352
559.4	0.00454838		1089.39	-0.01653378		1619.4	-0.01850599		2149.4	-0.0122525		2679.4	-0.02712504
559.6	0.00403034		1089.59	-0.01635268		1619.6	-0.01862043		2149.6	-0.0127501		2679.6	-0.02583205
559.8	0.00423541		1089.79	-0.01647486		1619.8	-0.01927567		2149.8	-0.01316857		2679.8	-0.0250554
