# Supplementary material for: Functional development of a V3/glycan-specific broadly neutralizing antibody isolated from a case of HIV superinfection
Source: eLife journal article supplement (doi:10.7554/elife.68110), 2021-07-15
Supplement: fig2-data2 [file E1.xls]

Vers 3.43 Data Simulation
Conc1	1.25E-07	1.25E-07	1.25E-07	1.25E-07	1.25E-07
Start1	199.99	730	1259.99	1790	2320
Stop1	559.79	1089.8	1619.79	2149.8	2679.8
Time1	Data1	Sim1	Time2	Data2	Sim2	Time3	Data3	Sim3	Time4	Data4	Sim4	Time5	Data5	Sim5
199.99	-0.00128856		730	-0.00691281		1259.99	-0.00538305		1790	0.00560132		2320	0.00171802
200.19	-0.00094655		730.2	-0.00777466		1260.19	-0.00569686		1790.2	0.00444532		2320.2	0.00062435
200.39	-0.00041513		730.4	-0.00943567		1260.39	-0.00722184		1790.4	0.00393935		2320.4	-0.0001974
200.59	-0.00061253		730.6	-0.00963444		1260.59	-0.00820107		1790.6	0.00332693		2320.6	-0.00088847
200.79	-0.00073779		730.8	-0.01009365		1260.79	-0.00914176		1790.8	0.00276306		2320.8	-0.00159965
200.99	-0.00048916		731	-0.00989522		1260.99	-0.00974532		1791	0.00238242		2321	-0.00215987
201.19	0.00068399		731.2	-0.00956631		1261.19	-0.01027626		1791.2	0.0021746		2321.2	-0.00143904
201.39	0.00107866		731.4	-0.00914002		1261.39	-0.01094985		1791.4	0.00231411		2321.4	-0.00116843
201.59	0.00154152		731.6	-0.0092958		1261.59	-0.01120894		1791.6	0.00274429		2321.6	-0.00133308
201.79	0.0017931		731.8	-0.0089671		1261.79	-0.01080298		1791.8	0.00320989		2321.8	-0.00141246
201.99	0.00230564		732	-0.00886645		1261.99	-0.0103311		1792	0.00333485		2322	-0.00077606
202.19	0.00261972		732.2	-0.0088419		1262.19	-0.01062084		1792.2	0.00378141		2322.2	0.00011939
202.39	0.00220769		732.4	-0.00853089		1262.39	-0.01182803		1792.4	0.00446612		2322.4	0.00078109
202.59	0.00229629		732.6	-0.00823412		1262.59	-0.0116928		1792.6	0.00469818		2322.6	0.00062405
202.79	0.00295593		732.8	-0.00910407		1262.79	-0.01162171		1792.8	0.00504906		2322.8	0.00030316
202.99	0.0042846		733	-0.00868624		1262.99	-0.01175544		1793	0.0050137		2323	0.0002306
203.19	0.00449481		733.2	-0.0093365		1263.19	-0.01200249		1793.2	0.00460051		2323.2	0.00024496
203.39	0.00574703		733.4	-0.00864378		1263.39	-0.01158215		1793.4	0.00517716		2323.4	0.00040707
203.59	0.00593768		733.6	-0.01021865		1263.59	-0.01223839		1793.6	0.00564864		2323.6	-0.00017591
203.79	0.00679043		733.8	-0.01101707		1263.79	-0.01248549		1793.8	0.00534665		2323.8	-0.00116657
203.99	0.00722456		734	-0.01092585		1263.99	-0.01282801		1794	0.00585422		2324	-0.0008721
204.19	0.00737012		734.2	-0.01045422		1264.19	-0.01374336		1794.2	0.0058996		2324.2	-0.00176634
204.39	0.00711823		734.4	-0.01065204		1264.39	-0.01498024		1794.4	0.00638175		2324.4	-0.00189015
204.59	0.00615825		734.6	-0.00876299		1264.59	-0.0145477		1794.6	0.00692559		2324.6	-0.00217414
204.79	0.00630262		734.8	-0.00888541		1264.79	-0.01453099		1794.8	0.00703585		2324.8	-0.00251769
204.99	0.00601532		735	-0.00798671		1264.99	-0.01502986		1795	0.0080908		2325	-0.00247906
205.19	0.00619492		735.2	-0.00723789		1265.19	-0.01378069		1795.2	0.00859548		2325.2	-0.0015592
205.39	0.00488166		735.4	-0.0071384		1265.39	-0.01299828		1795.4	0.00934919		2325.4	-0.00161444
205.59	0.00453463		735.6	-0.0075545		1265.59	-0.01154143		1795.6	0.01071217		2325.6	-0.00165639
205.79	0.00411333		735.8	-0.00773805		1265.79	-0.01111596		1795.8	0.01192336		2325.8	-0.00103828
205.99	0.00362338		736	-0.00760574		1265.99	-0.01084547		1796	0.01217723		2326	-0.00015739
206.19	0.00373087		736.2	-0.00819828		1266.19	-0.01124781		1796.2	0.01191225		2326.2	-0.0000992
206.39	0.00431638		736.4	-0.00862888		1266.39	-0.01146461		1796.4	0.01191615		2326.4	0.00046576
206.59	0.00547117		736.6	-0.00916583		1266.59	-0.00966785		1796.6	0.01190936		2326.6	0.0004178
206.79	0.00545519		736.8	-0.00888819		1266.79	-0.00901045		1796.8	0.01221729		2326.8	0.00063744
206.99	0.0068801		737	-0.00884601		1266.99	-0.00872604		1797	0.01070723		2327	0.00157086
207.19	0.00711859		737.2	-0.00857605		1267.19	-0.00878555		1797.2	0.00985012		2327.2	0.00190922
207.39	0.0077969		737.4	-0.00881221		1267.39	-0.00789844		1797.4	0.00925688		2327.4	0.00163905
207.59	0.00772372		737.6	-0.00895683		1267.59	-0.00784261		1797.6	0.00856191		2327.6	0.00138664
207.79	0.00857318		737.8	-0.00854921		1267.79	-0.00848843		1797.8	0.00738553		2327.8	0.0003604
207.99	0.00895333		738	-0.00834402		1267.99	-0.0086525		1798	0.00727678		2328	0.00036589
208.19	0.00845447		738.2	-0.00826282		1268.19	-0.00881		1798.2	0.0057178		2328.2	0.00013834
208.39	0.00823261		738.4	-0.0089356		1268.39	-0.00909941		1798.4	0.00499843		2328.4	-0.00044075
208.59	0.00799216		738.6	-0.00862857		1268.59	-0.008249		1798.6	0.00529241		2328.6	-0.0007547
208.79	0.00775547		738.8	-0.00955348		1268.79	-0.00827585		1798.8	0.0054129		2328.8	-0.00127488
208.99	0.00704785		739	-0.00923325		1268.99	-0.00844086		1799	0.00564078		2329	-0.00074431
209.19	0.00666668		739.2	-0.00927698		1269.19	-0.00761847		1799.2	0.00674381		2329.2	0.00004821
209.39	0.00676222		739.4	-0.01092235		1269.39	-0.00868435		1799.4	0.00721135		2329.4	0.00046902
209.59	0.00705776		739.6	-0.01122588		1269.59	-0.00932772		1799.6	0.00857257		2329.6	0.00017346
209.79	0.00735922		739.8	-0.0111351		1269.79	-0.01057665		1799.8	0.0098846		2329.8	-0.00004579
209.99	0.00712881		740	-0.01144556		1269.99	-0.01000523		1800	0.00985998		2330	-0.00023029
210.19	0.00767248		740.2	-0.0122836		1270.19	-0.01008079		1800.2	0.01036757		2330.2	-0.00055913
210.39	0.00782305		740.4	-0.01215509		1270.39	-0.01000493		1800.4	0.0106765		2330.4	-0.00024868
210.59	0.00745956		740.6	-0.01119599		1270.59	-0.00944674		1800.6	0.01114882		2330.6	-0.00060087
210.79	0.00679338		740.8	-0.00980979		1270.79	-0.00906419		1800.8	0.0107409		2330.8	0.00030482
210.99	0.00748756		741	-0.00955697		1270.99	-0.00941426		1801	0.00981415		2331	0.00113479
211.19	0.00842663		741.2	-0.00797377		1271.19	-0.00980526		1801.2	0.00929243		2331.2	0.00075131
211.39	0.00903504		741.4	-0.00828811		1271.39	-0.00933156		1801.4	0.00936565		2331.4	0.00093153
211.59	0.00895256		741.6	-0.00773388		1271.59	-0.00909716		1801.6	0.00895601		2331.6	0.00078361
211.79	0.00942729		741.8	-0.00767605		1271.79	-0.00867404		1801.8	0.00834256		2331.8	0.00037931
211.99	0.00931984		742	-0.00735281		1271.99	-0.00847665		1802	0.00835379		2332	0.0007975
212.19	0.00946037		742.2	-0.00727943		1272.19	-0.00897233		1802.2	0.00731752		2332.2	0.00113747
212.39	0.01002502		742.4	-0.00765666		1272.39	-0.00929259		1802.4	0.00755715		2332.4	0.00093317
212.59	0.01071026		742.6	-0.00729181		1272.59	-0.00862089		1802.6	0.00805741		2332.6	0.00105053
212.79	0.01098436		742.8	-0.00755462		1272.79	-0.00943054		1802.8	0.00810279		2332.8	0.00118658
212.99	0.01082729		743	-0.00744093		1272.99	-0.00992473		1803	0.00786628		2333	0.00091314
213.19	0.01120516		743.2	-0.0084899		1273.19	-0.01079749		1803.2	0.00844384		2333.2	-0.00040291
213.39	0.01131247		743.4	-0.01009928		1273.39	-0.01137076		1803.4	0.00774747		2333.4	-0.0009101
213.59	0.01102419		743.6	-0.00943142		1273.59	-0.0121102		1803.6	0.00809348		2333.6	-0.00133412
213.79	0.01140001		743.8	-0.00972516		1273.79	-0.01242498		1803.8	0.00819758		2333.8	-0.00172864
213.99	0.01079524		744	-0.00954124		1273.99	-0.01194481		1804	0.00794015		2334	-0.0021691
214.19	0.01115437		744.2	-0.00855874		1274.19	-0.01200367		1804.2	0.00826005		2334.2	-0.00242257
214.39	0.01099346		744.4	-0.00846707		1274.39	-0.01194865		1804.4	0.00866103		2334.4	-0.00241841
214.59	0.01101281		744.6	-0.00801021		1274.59	-0.01179432		1804.6	0.00863024		2334.6	-0.002166
214.79	0.01147395		744.8	-0.00813443		1274.79	-0.0112424		1804.8	0.0074775		2334.8	-0.00189191
214.99	0.01227797		745	-0.00813202		1274.99	-0.01202878		1805	0.00747132		2335	-0.00203498
215.19	0.01408268		745.2	-0.00772492		1275.19	-0.01144591		1805.2	0.0066409		2335.2	-0.00137381
215.39	0.0138039		745.4	-0.00793093		1275.39	-0.01037962		1805.4	0.00615601		2335.4	-0.00109438
215.59	0.01443178		745.6	-0.00765495		1275.59	-0.00923221		1805.6	0.00553589		2335.6	-0.00127146
215.79	0.01588774		745.8	-0.00713082		1275.79	-0.00849368		1805.8	0.00550754		2335.8	-0.00110707
215.99	0.01642407		746	-0.00734837		1275.99	-0.00810614		1806	0.00554098		2336	-0.00057362
216.19	0.01842702		746.2	-0.00713438		1276.19	-0.00754128		1806.2	0.00513399		2336.2	-0.00069674
216.39	0.01923777		746.4	-0.00764106		1276.39	-0.0071458		1806.4	0.00508255		2336.4	-0.00057782
216.59	0.01950612		746.6	-0.00715197		1276.59	-0.00624189		1806.6	0.00554176		2336.6	-0.00028313
216.79	0.01875674		746.8	-0.00688765		1276.79	-0.00593497		1806.8	0.00601262		2336.8	-0.00051297
216.99	0.01862667		747	-0.00735616		1276.99	-0.00530338		1807	0.00680061		2337	-0.00127649
217.19	0.0188989		747.2	-0.00810937		1277.19	-0.00590391		1807.2	0.00751947		2337.2	-0.00179993
217.39	0.01817548		747.4	-0.00859102		1277.39	-0.00599106		1807.4	0.00838049		2337.4	-0.0012672
217.59	0.01873044		747.6	-0.00845132		1277.59	-0.00676873		1807.6	0.00871754		2337.6	-0.00181744
217.79	0.01828921		747.8	-0.00858307		1277.79	-0.00757295		1807.8	0.00982236		2337.8	-0.00304022
217.99	0.01696384		748	-0.00814108		1277.99	-0.00805254		1808	0.01032456		2338	-0.00297879
218.19	0.01659746		748.2	-0.00798933		1278.19	-0.00824642		1808.2	0.01089668		2338.2	-0.00280743
218.39	0.0162261		748.4	-0.00901755		1278.39	-0.0085464		1808.4	0.0116378		2338.4	-0.00244639
218.59	0.0157315		748.6	-0.0079588		1278.59	-0.00933205		1808.6	0.01134831		2338.6	-0.00224333
218.79	0.01539305		748.8	-0.00834669		1278.79	-0.00994115		1808.8	0.01137592		2338.8	-0.00302744
218.99	0.0156316		749	-0.00814019		1278.99	-0.01046113		1809	0.01168722		2339	-0.00286353
219.19	0.0161103		749.2	-0.00825597		1279.19	-0.0094669		1809.2	0.01089998		2339.2	-0.00211725
219.39	0.01512053		749.4	-0.00796502		1279.39	-0.00934762		1809.4	0.00997313		2339.4	-0.00239327
219.59	0.01603372		749.6	-0.0083434		1279.59	-0.00948697		1809.6	0.00949013		2339.6	-0.00312013
219.79	0.01634703		749.8	-0.00834798		1279.79	-0.01007776		1809.8	0.00828097		2339.8	-0.00316197
219.99	0.01625726		750	-0.00838676		1279.99	-0.00848899		1810	0.00706846		2340	-0.00350934
220.19	0.01641397		750.2	-0.00803889		1280.19	-0.0095872		1810.2	0.00716125		2340.2	-0.00296965
220.39	0.01518523		750.4	-0.00855661		1280.39	-0.00994262		1810.4	0.00668888		2340.4	-0.00145906
220.59	0.01482625		750.6	-0.00815716		1280.59	-0.00984552		1810.6	0.00741634		2340.6	-0.00134719
220.79	0.01426264		750.8	-0.00835748		1280.79	-0.00940149		1810.8	0.00767863		2340.8	-0.00144121
220.99	0.01438277		751	-0.00861536		1280.99	-0.00944515		1811	0.00842048		2341	-0.0014538
221.19	0.01434544		751.2	-0.00891815		1281.19	-0.0100774		1811.2	0.00910005		2341.2	-0.00217567
221.39	0.01427544		751.4	-0.00999482		1281.39	-0.0093417		1811.4	0.00905826		2341.4	-0.00216695
221.59	0.0143732		751.6	-0.01053679		1281.59	-0.00901661		1811.6	0.00895761		2341.6	-0.00224557
221.79	0.01365668		751.8	-0.0103424		1281.79	-0.00945589		1811.8	0.0095154		2341.8	-0.0026492
221.99	0.01349743		752	-0.00982548		1281.99	-0.00872107		1812	0.00980663		2342	-0.00169355
222.19	0.01393433		752.2	-0.00855799		1282.19	-0.00792727		1812.2	0.00995853		2342.2	-0.00197353
222.39	0.01504261		752.4	-0.00861813		1282.39	-0.008041		1812.4	0.01024422		2342.4	-0.00263013
222.59	0.01505623		752.6	-0.00786586		1282.59	-0.00751543		1812.6	0.01042949		2342.6	-0.00288653
222.79	0.01577935		752.8	-0.00882572		1282.79	-0.00725688		1812.8	0.00953311		2342.8	-0.00367078
222.99	0.01688244		753	-0.00886969		1282.99	-0.00765881		1813	0.00904656		2343	-0.00412978
223.19	0.01723535		753.2	-0.00899517		1283.19	-0.00763979		1813.2	0.00863548		2343.2	-0.00481997
223.39	0.01754106		753.4	-0.00888443		1283.39	-0.00822258		1813.4	0.00732007		2343.4	-0.00573943
223.59	0.01834887		753.6	-0.00897058		1283.59	-0.00833404		1813.6	0.0068323		2343.6	-0.00700574
223.79	0.01834926		753.8	-0.00914151		1283.79	-0.0079229		1813.8	0.00633419		2343.8	-0.00672668
223.99	0.01890379		754	-0.00971563		1283.99	-0.00710812		1814	0.0062786		2344	-0.00603472
224.19	0.01846994		754.2	-0.0087618		1284.19	-0.00794075		1814.2	0.00692658		2344.2	-0.00476645
224.39	0.01821849		754.4	-0.00947366		1284.39	-0.00721441		1814.4	0.00797919		2344.4	-0.00472267
224.59	0.01872651		754.6	-0.00938649		1284.59	-0.00683702		1814.6	0.00868563		2344.6	-0.00484925
224.79	0.01799404		754.8	-0.00899804		1284.79	-0.00711028		1814.8	0.00873715		2344.8	-0.00339575
224.99	0.01759851		755	-0.00896918		1284.99	-0.00782707		1815	0.00917618		2345	-0.00237569
225.19	0.01677021		755.2	-0.00973776		1285.19	-0.00774024		1815.2	0.00865238		2345.2	-0.00155124
225.39	0.01639265		755.4	-0.01052899		1285.39	-0.00693436		1815.4	0.00828643		2345.4	-0.00089843
225.59	0.01664576		755.6	-0.01000616		1285.59	-0.0071667		1815.6	0.0085134		2345.6	0.00018161
225.79	0.0166496		755.8	-0.00958246		1285.79	-0.00707385		1815.8	0.00901952		2345.8	-0.00020928
225.99	0.01632662		756	-0.00933273		1285.99	-0.00702664		1816	0.00958355		2346	0.00022118
226.19	0.01672215		756.2	-0.00885537		1286.19	-0.00766531		1816.2	0.00915805		2346.2	-0.00007524
226.39	0.01697559		756.4	-0.00935816		1286.39	-0.0079032		1816.4	0.00910917		2346.4	-0.00016364
226.59	0.01642201		756.6	-0.009549		1286.59	-0.00751283		1816.6	0.00889372		2346.6	-0.0000085
226.79	0.01694864		756.8	-0.00917095		1286.79	-0.00798352		1816.8	0.0083854		2346.8	-0.00014316
226.99	0.01736851		757	-0.00867651		1286.99	-0.0094081		1817	0.00939791		2347	-0.0003494
227.19	0.01737336		757.2	-0.00865966		1287.19	-0.00915748		1817.2	0.00929931		2347.2	-0.00093026
227.39	0.01715955		757.4	-0.00886138		1287.39	-0.0093509		1817.4	0.00827928		2347.4	-0.0012389
227.59	0.0163037		757.6	-0.00831704		1287.59	-0.00897761		1817.6	0.00841408		2347.6	-0.00151809
227.79	0.01665696		757.8	-0.00901543		1287.79	-0.00878502		1817.8	0.00827201		2347.8	-0.00134051
227.99	0.01669162		758	-0.00830983		1287.99	-0.00895335		1818	0.00824731		2348	-0.00148281
228.19	0.01687066		758.2	-0.00768664		1288.19	-0.00927496		1818.2	0.00879834		2348.2	-0.00208816
228.39	0.01744002		758.4	-0.00840696		1288.39	-0.00921432		1818.4	0.0096475		2348.4	-0.00292565
228.59	0.01818757		758.6	-0.00813705		1288.59	-0.00978274		1818.6	0.00997588		2348.6	-0.00239658
228.79	0.01852567		758.8	-0.00795886		1288.79	-0.01030786		1818.8	0.00997461		2348.8	-0.00236272
228.99	0.01896654		759	-0.00903718		1288.99	-0.01081343		1819	0.01046899		2349	-0.00260413
229.19	0.01862781		759.2	-0.00876834		1289.19	-0.01119434		1819.2	0.01025092		2349.2	-0.00220035
229.39	0.01945304		759.4	-0.00878127		1289.39	-0.01097323		1819.4	0.01145133		2349.4	-0.00229939
229.59	0.01976828		759.6	-0.00888014		1289.59	-0.01117273		1819.6	0.01183179		2349.6	-0.00115545
229.79	0.01917692		759.8	-0.00874263		1289.79	-0.01043411		1819.8	0.01189926		2349.8	-0.00191103
229.99	0.0194974		760	-0.00878145		1289.99	-0.01065841		1820	0.0121368		2350	-0.00142315
230.19	0.02035869		760.2	-0.00820443		1290.19	-0.00994462		1820.2	0.01162794		2350.2	-0.00116478
230.39	0.01997804		760.4	-0.00801403		1290.39	-0.00895629		1820.4	0.01134017		2350.4	-0.00072032
230.59	0.02019579		760.6	-0.00713432		1290.59	-0.00854019		1820.6	0.01171341		2350.6	-0.00066947
230.79	0.02036485		760.8	-0.00680412		1290.79	-0.00874957		1820.8	0.01126709		2350.8	0.00029198
230.99	0.0198106		761	-0.00688768		1290.99	-0.00866914		1821	0.01130315		2351	0.00070925
231.19	0.01949305		761.2	-0.00733877		1291.19	-0.00845612		1821.2	0.01055343		2351.2	0.00080787
231.39	0.01885514		761.4	-0.00677468		1291.39	-0.00866506		1821.4	0.01023492		2351.4	0.00069037
231.59	0.01853481		761.6	-0.00620027		1291.59	-0.00900151		1821.6	0.01094489		2351.6	0.00009132
231.79	0.01905184		761.8	-0.00661988		1291.79	-0.00932917		1821.8	0.0111593		2351.8	-0.00020538
231.99	0.01841149		762	-0.00648804		1291.99	-0.01058136		1822	0.01094499		2352	-0.00058829
232.19	0.01983303		762.2	-0.00742225		1292.19	-0.01066008		1822.2	0.01121408		2352.2	-0.00166299
232.39	0.02024187		762.4	-0.00817802		1292.39	-0.01038334		1822.4	0.012056		2352.4	-0.00194149
232.59	0.02089966		762.6	-0.00899091		1292.59	-0.01095081		1822.6	0.01318456		2352.6	-0.00178445
232.79	0.02148292		762.8	-0.00876229		1292.79	-0.01045836		1822.8	0.01313474		2352.8	-0.00207115
232.99	0.02189315		763	-0.00942579		1292.99	-0.01036374		1823	0.0129627		2353	-0.00139795
233.19	0.02180382		763.2	-0.00823409		1293.19	-0.01005699		1823.2	0.01256569		2353.2	-0.00080296
233.39	0.02226191		763.4	-0.00857131		1293.39	-0.00847802		1823.4	0.01340955		2353.4	-0.00032054
233.59	0.02175211		763.6	-0.00891333		1293.59	-0.00829916		1823.6	0.01234796		2353.6	-0.0002723
233.79	0.02226155		763.8	-0.00847418		1293.79	-0.00726828		1823.8	0.01120916		2353.8	-0.00070626
233.99	0.02308259		764	-0.00827344		1293.99	-0.0059729		1824	0.01033514		2354	-0.00013661
234.19	0.02270438		764.2	-0.00751156		1294.19	-0.00564936		1824.2	0.00933152		2354.2	0.00041082
234.39	0.0225329		764.4	-0.00768871		1294.39	-0.00534792		1824.4	0.00865451		2354.4	0.00115504
234.59	0.02196965		764.6	-0.0075542		1294.59	-0.00545568		1824.6	0.00829194		2354.6	0.00099654
234.79	0.02119882		764.8	-0.00805854		1294.79	-0.00526467		1824.8	0.0081103		2354.8	0.00141667
234.99	0.02021783		765	-0.00720787		1294.99	-0.00503633		1825	0.00904626		2355	0.00118335
235.19	0.01931921		765.2	-0.00718117		1295.19	-0.00603299		1825.2	0.0095716		2355.2	0.00058327
235.39	0.01920986		765.4	-0.00661208		1295.39	-0.00634945		1825.4	0.00951659		2355.4	0.00001121
235.59	0.01863411		765.6	-0.006389		1295.59	-0.0073959		1825.6	0.01033957		2355.6	-0.00059295
235.79	0.01830597		765.8	-0.00680742		1295.79	-0.00718589		1825.8	0.01001858		2355.8	-0.00043868
235.99	0.01771685		766	-0.00749448		1295.99	-0.00791883		1826	0.01007972		2356	-0.00133089
236.19	0.01853428		766.2	-0.00762105		1296.19	-0.00738651		1826.2	0.01075319		2356.2	-0.00201044
236.39	0.01858709		766.4	-0.00862296		1296.39	-0.00775965		1826.4	0.01093149		2356.4	-0.00127838
236.59	0.01898783		766.6	-0.00787491		1296.59	-0.00720886		1826.6	0.01150096		2356.6	-0.0014649
236.79	0.02032116		766.8	-0.0067696		1296.79	-0.00617931		1826.8	0.0106632		2356.8	-0.00159003
236.99	0.02162556		767	-0.00731773		1296.99	-0.00634214		1827	0.01047555		2357	-0.00183138
237.19	0.02244629		767.2	-0.00671936		1297.19	-0.00586634		1827.2	0.01095428		2357.2	-0.00190305
237.39	0.02353961		767.4	-0.00741521		1297.39	-0.00592936		1827.4	0.01070489		2357.4	-0.0007858
237.59	0.02404154		767.6	-0.00718782		1297.59	-0.00681073		1827.6	0.0096898		2357.6	-0.00062891
237.79	0.02498179		767.8	-0.00745448		1297.79	-0.0061385		1827.8	0.00976471		2357.8	-0.00054655
237.99	0.02486101		768	-0.00756674		1297.99	-0.00654891		1828	0.00902757		2358	-0.0001443
238.19	0.02385802		768.2	-0.00779182		1298.19	-0.0077291		1828.2	0.00809554		2358.2	-0.00025785
238.39	0.02429798		768.4	-0.00816542		1298.39	-0.00766593		1828.4	0.00784313		2358.4	-0.00082798
238.59	0.02317893		768.6	-0.00755745		1298.59	-0.00853862		1828.6	0.00801729		2358.6	-0.0018102
238.79	0.02271762		768.8	-0.00691815		1298.79	-0.00890403		1828.8	0.00841096		2358.8	-0.00248684
238.99	0.02216087		769	-0.00601833		1298.99	-0.00923704		1829	0.00803239		2359	-0.00272499
239.19	0.0227231		769.2	-0.00668358		1299.19	-0.00908409		1829.2	0.00732875		2359.2	-0.00365493
239.39	0.02355618		769.4	-0.00629747		1299.39	-0.00998283		1829.4	0.0075565		2359.4	-0.00364712
239.59	0.02317648		769.6	-0.0063854		1299.59	-0.0097746		1829.6	0.00784123		2359.6	-0.00405696
239.79	0.02336611		769.8	-0.00665998		1299.79	-0.00967135		1829.8	0.00752193		2359.8	-0.00389051
239.99	0.02259276		770	-0.00654583		1299.99	-0.01005883		1830	0.00797116		2360	-0.00388678
240.19	0.02394409		770.2	-0.00691733		1300.19	-0.00953563		1830.2	0.00831224		2360.2	-0.00355313
240.39	0.02423838		770.4	-0.0066476		1300.39	-0.0095736		1830.4	0.00861737		2360.4	-0.00297702
240.59	0.02408042		770.6	-0.0056638		1300.59	-0.00906133		1830.6	0.00917931		2360.6	-0.00285488
240.79	0.02478579		770.8	-0.00557719		1300.79	-0.00920536		1830.8	0.00870168		2360.8	-0.00283227
240.99	0.02444681		771	-0.0051251		1300.99	-0.0098605		1831	0.00834332		2361	-0.00284456
241.19	0.02521912		771.2	-0.00498916		1301.19	-0.01046675		1831.2	0.00819516		2361.2	-0.00225632
241.39	0.02563668		771.4	-0.00481502		1301.39	-0.0111336		1831.4	0.00761112		2361.4	-0.0018858
241.59	0.02451595		771.6	-0.0048612		1301.59	-0.01098631		1831.6	0.00792833		2361.6	-0.00182228
241.79	0.02395705		771.8	-0.00539432		1301.79	-0.01036721		1831.8	0.00787109		2361.8	-0.00241121
241.99	0.02304661		772	-0.00543064		1301.99	-0.01099624		1832	0.00656066		2362	-0.00337759
242.19	0.0225425		772.2	-0.00590131		1302.19	-0.01027822		1832.2	0.0063576		2362.2	-0.0042968
242.39	0.02285959		772.4	-0.00616736		1302.39	-0.0101557		1832.4	0.00672395		2362.4	-0.00435109
242.59	0.02213498		772.6	-0.00618984		1302.59	-0.0103771		1832.6	0.00633902		2362.6	-0.00511403
242.79	0.02214592		772.8	-0.00682044		1302.79	-0.00947555		1832.8	0.006483		2362.8	-0.00534198
242.99	0.02227205		773	-0.00720397		1302.99	-0.00867626		1833	0.00660261		2363	-0.00434528
243.19	0.02241533		773.2	-0.00712259		1303.19	-0.00792817		1833.2	0.00677518		2363.2	-0.0042372
243.39	0.02278879		773.4	-0.00777887		1303.39	-0.00811436		1833.4	0.00776916		2363.4	-0.00334084
243.59	0.02272273		773.6	-0.00801574		1303.59	-0.0073578		1833.6	0.00785004		2363.6	-0.00262838
243.79	0.0226722		773.8	-0.00756101		1303.79	-0.00705001		1833.8	0.00765755		2363.8	-0.0018443
243.99	0.0222301		774	-0.0076644		1303.99	-0.00615872		1834	0.008087		2364	-0.00075245
244.19	0.0234637		774.2	-0.00688245		1304.19	-0.00528532		1834.2	0.00831921		2364.2	-0.00048323
244.39	0.02230321		774.4	-0.00604363		1304.39	-0.00531882		1834.4	0.00853456		2364.4	0.00029719
244.59	0.02189298		774.6	-0.00558086		1304.59	-0.00539758		1834.6	0.00873272		2364.6	0.00062962
244.79	0.02241169		774.8	-0.00476932		1304.79	-0.00701077		1834.8	0.00900082		2364.8	0.00009135
244.99	0.02234232		775	-0.00421606		1304.99	-0.00797169		1835	0.00900007		2365	0.00011311
245.19	0.0231393		775.2	-0.00404272		1305.19	-0.0082442		1835.2	0.00959987		2365.2	-0.00058099
245.39	0.0236286		775.4	-0.0040802		1305.39	-0.00841302		1835.4	0.00973824		2365.4	-0.00116826
245.59	0.02400049		775.6	-0.00364153		1305.59	-0.00830087		1835.6	0.01026098		2365.6	-0.00186762
245.79	0.02522342		775.8	-0.00326009		1305.79	-0.00861928		1835.8	0.01107754		2365.8	-0.00356112
245.99	0.02593071		776	-0.00323087		1305.99	-0.00843625		1836	0.01104377		2366	-0.00458912
246.19	0.02654437		776.2	-0.00379089		1306.19	-0.00841084		1836.2	0.01152807		2366.2	-0.00469147
246.39	0.02714226		776.4	-0.00383379		1306.39	-0.00926683		1836.4	0.01179609		2366.4	-0.00495932
246.59	0.02760815		776.6	-0.0037837		1306.59	-0.00864604		1836.6	0.01236882		2366.6	-0.00570918
246.79	0.02760674		776.8	-0.00478426		1306.79	-0.00803256		1836.8	0.01179526		2366.8	-0.00520478
246.99	0.02770987		777	-0.00452107		1306.99	-0.00719245		1837	0.01110459		2367	-0.00450787
247.19	0.02757404		777.2	-0.00491559		1307.19	-0.00656334		1837.2	0.01100937		2367.2	-0.00476218
247.39	0.02807745		777.4	-0.00592313		1307.39	-0.00632331		1837.4	0.01085975		2367.4	-0.00463048
247.59	0.02751406		777.6	-0.00562383		1307.59	-0.00544292		1837.6	0.01013267		2367.6	-0.00472341
247.79	0.02762761		777.8	-0.00539253		1307.79	-0.00461728		1837.8	0.00889856		2367.8	-0.00472611
247.99	0.02740454		778	-0.00618259		1307.99	-0.00428454		1838	0.00784941		2368	-0.00411107
248.19	0.02754354		778.2	-0.00576884		1308.19	-0.00404339		1838.2	0.00736018		2368.2	-0.00421175
248.39	0.02639374		778.4	-0.00631206		1308.39	-0.00455606		1838.4	0.00713542		2368.4	-0.00406249
248.59	0.02665386		778.6	-0.00638422		1308.59	-0.00612731		1838.6	0.00744751		2368.6	-0.00353908
248.79	0.02694015		778.8	-0.00617252		1308.79	-0.00670441		1838.8	0.00740965		2368.8	-0.00394145
248.99	0.02665297		779	-0.00616057		1308.99	-0.00602992		1839	0.00769751		2369	-0.00384378
249.19	0.02725676		779.2	-0.00581178		1309.19	-0.00575956		1839.2	0.00756224		2369.2	-0.00442263
249.39	0.02773145		779.4	-0.00505962		1309.39	-0.0053999		1839.4	0.00737468		2369.4	-0.00425107
249.59	0.02804537		779.6	-0.00424223		1309.59	-0.00496944		1839.6	0.00807562		2369.6	-0.00479727
249.79	0.02786633		779.8	-0.00433364		1309.79	-0.00544368		1839.8	0.00889383		2369.8	-0.00453686
249.99	0.02777178		780	-0.00413383		1309.99	-0.00529533		1840	0.00889896		2370	-0.00375321
250.19	0.02782434		780.2	-0.00371399		1310.19	-0.00538766		1840.2	0.00949094		2370.2	-0.00364496
250.39	0.02899914		780.4	-0.00369001		1310.39	-0.0060618		1840.4	0.01003708		2370.4	-0.00316892
250.59	0.02864634		780.6	-0.00442742		1310.59	-0.00586871		1840.6	0.01087656		2370.6	-0.0024653
250.79	0.02805018		780.8	-0.00542734		1310.79	-0.00602302		1840.8	0.01008685		2370.8	-0.00237172
250.99	0.02814752		781	-0.00537192		1310.99	-0.00518201		1841	0.01065327		2371	-0.00299545
251.19	0.02851959		781.2	-0.00574119		1311.19	-0.00509246		1841.2	0.01116767		2371.2	-0.00379796
251.39	0.02853014		781.4	-0.00548254		1311.39	-0.00406615		1841.4	0.01153441		2371.4	-0.00412716
251.59	0.02815734		781.6	-0.00538134		1311.59	-0.00388322		1841.6	0.01155451		2371.6	-0.00501356
251.79	0.0286907		781.8	-0.00634242		1311.79	-0.0041965		1841.8	0.01048557		2371.8	-0.00548831
251.99	0.02891962		782	-0.0074712		1311.99	-0.00499792		1842	0.0100387		2372	-0.00628026
252.19	0.02842788		782.2	-0.00805136		1312.19	-0.00545731		1842.2	0.01018393		2372.2	-0.00608914
252.39	0.02759261		782.4	-0.00795116		1312.39	-0.00623972		1842.4	0.01019982		2372.4	-0.00598231
252.59	0.02712616		782.6	-0.00824764		1312.59	-0.0064873		1842.6	0.01061269		2372.6	-0.00516032
252.79	0.0269316		782.8	-0.00783252		1312.79	-0.0059639		1842.8	0.01043742		2372.8	-0.00504345
252.99	0.02627148		783	-0.0080011		1312.99	-0.0056421		1843	0.01058377		2373	-0.0044689
253.19	0.02648572		783.2	-0.00844228		1313.19	-0.00574589		1843.2	0.00976003		2373.2	-0.00332684
253.39	0.02614416		783.4	-0.00782152		1313.39	-0.00563237		1843.4	0.00944093		2373.4	-0.00287969
253.59	0.02622848		783.6	-0.00862701		1313.59	-0.00656267		1843.6	0.01029305		2373.6	-0.00223402
253.79	0.02566177		783.8	-0.00892514		1313.79	-0.0065815		1843.8	0.01025866		2373.8	-0.00141862
253.99	0.02605834		784	-0.00856084		1313.99	-0.0062553		1844	0.0104482		2374	-0.0003389
254.19	0.02665445		784.2	-0.00840243		1314.19	-0.00604225		1844.2	0.01036769		2374.2	0.00053283
254.39	0.02720537		784.4	-0.00775524		1314.39	-0.00646756		1844.4	0.01039772		2374.4	0.00125915
254.59	0.02714857		784.6	-0.00795405		1314.59	-0.00678053		1844.6	0.01024081		2374.6	0.00204486
254.79	0.02782954		784.8	-0.00770739		1314.79	-0.00689268		1844.8	0.01006649		2374.8	0.00161234
254.99	0.02847927		785	-0.00688612		1314.99	-0.00658753		1845	0.00960693		2375	0.00165767
255.19	0.02902849		785.2	-0.00579795		1315.19	-0.00619014		1845.2	0.00971102		2375.2	0.00149182
255.39	0.03002562		785.4	-0.00542616		1315.39	-0.00592652		1845.4	0.01000351		2375.4	0.00096368
255.59	0.03033432		785.6	-0.00557931		1315.59	-0.00621707		1845.6	0.00952333		2375.6	0.00037743
255.79	0.03069065		785.8	-0.00683677		1315.79	-0.00630716		1845.8	0.00972944		2375.8	-0.00053978
255.99	0.02994803		786	-0.0069861		1315.99	-0.00646274		1846	0.00992245		2376	-0.00116391
256.19	0.02939179		786.2	-0.00695834		1316.19	-0.00617073		1846.2	0.01045172		2376.2	-0.00062011
256.39	0.02973705		786.4	-0.00669394		1316.39	-0.00626019		1846.4	0.00982491		2376.4	-0.00087724
256.59	0.02940158		786.6	-0.00782758		1316.59	-0.00613591		1846.6	0.00947764		2376.6	-0.00057494
256.79	0.02952366		786.8	-0.00758227		1316.79	-0.00597017		1846.8	0.00953197		2376.8	-0.00068961
256.99	0.02909544		787	-0.00831789		1316.99	-0.00529973		1847	0.00929667		2377	-0.00095082
257.19	0.029336		787.2	-0.00911313		1317.19	-0.00581953		1847.2	0.00875903		2377.2	-0.00098451
257.39	0.02949214		787.4	-0.00871336		1317.39	-0.00521575		1847.4	0.00973459		2377.4	-0.00119458
257.59	0.02899788		787.6	-0.00879104		1317.59	-0.00539289		1847.6	0.00965054		2377.6	-0.00185421
257.79	0.02870357		787.8	-0.00842347		1317.79	-0.00499728		1847.8	0.00941661		2377.8	-0.0023189
257.99	0.02897335		788	-0.00805849		1317.99	-0.00519008		1848	0.00925007		2378	-0.0016642
258.19	0.02866376		788.2	-0.00817408		1318.19	-0.00539193		1848.2	0.00903459		2378.2	-0.00209818
258.39	0.02828909		788.4	-0.00740693		1318.39	-0.00533676		1848.4	0.00912068		2378.4	-0.00246942
258.59	0.02943964		788.6	-0.0077306		1318.59	-0.00643793		1848.6	0.0082243		2378.6	-0.00193841
258.79	0.02937885		788.8	-0.00767597		1318.79	-0.00632504		1848.8	0.00824466		2378.8	-0.00287372
258.99	0.02927775		789	-0.00675916		1318.99	-0.00473455		1849	0.00807323		2379	-0.00286402
259.19	0.02930107		789.2	-0.00637577		1319.19	-0.00433499		1849.2	0.00827989		2379.2	-0.00336748
259.39	0.02937305		789.4	-0.00619736		1319.39	-0.00410251		1849.4	0.00809705		2379.4	-0.00339881
259.59	0.02847321		789.6	-0.00687637		1319.59	-0.0034156		1849.6	0.00787404		2379.6	-0.00248473
259.79	0.02830902		789.8	-0.00692034		1319.79	-0.00349627		1849.8	0.00726479		2379.8	-0.00258492
259.99	0.02846551		790	-0.00683287		1319.99	-0.00348745		1850	0.00689123		2380	-0.00187353
260.19	0.02931971		790.2	-0.00693595		1320.19	-0.00329565		1850.2	0.00721646		2380.2	-0.00138468
260.39	0.02941345		790.4	-0.00815712		1320.39	-0.00315472		1850.4	0.00618188		2380.4	-0.00090134
260.59	0.028907		790.6	-0.00858792		1320.59	-0.00294234		1850.6	0.0059242		2380.6	-0.00075523
260.79	0.02871362		790.8	-0.00816411		1320.79	-0.00275252		1850.8	0.0060458		2380.8	-0.00101225
260.99	0.02768835		791	-0.00940409		1320.99	-0.00296597		1851	0.00604361		2381	-0.0013565
261.19	0.02689999		791.2	-0.00944741		1321.19	-0.00353534		1851.2	0.00564114		2381.2	-0.00121236
261.39	0.02707987		791.4	-0.00837048		1321.39	-0.00334493		1851.4	0.00637655		2381.4	-0.00154661
261.59	0.02697416		791.6	-0.00830847		1321.59	-0.00406804		1851.6	0.0059048		2381.6	-0.00181624
261.79	0.02718004		791.8	-0.00866086		1321.79	-0.00473844		1851.8	0.0061385		2381.8	-0.00212462
261.99	0.02599911		792	-0.00911323		1321.99	-0.00471828		1852	0.00670832		2382	-0.00184173
262.19	0.02599006		792.2	-0.00903748		1322.19	-0.00495216		1852.2	0.00752946		2382.2	-0.00286309
262.39	0.02591549		792.4	-0.00853749		1322.39	-0.00485539		1852.4	0.00787879		2382.4	-0.00297065
262.59	0.02682043		792.6	-0.00800562		1322.59	-0.00555415		1852.6	0.00751455		2382.6	-0.00376372
262.79	0.02666154		792.8	-0.00785094		1322.79	-0.00517454		1852.8	0.0075877		2382.8	-0.00464758
262.99	0.02683998		793	-0.00731481		1322.99	-0.00433601		1853	0.00795247		2383	-0.00551466
263.19	0.02693682		793.2	-0.00707302		1323.19	-0.0040596		1853.2	0.00740834		2383.2	-0.00582809
263.39	0.02822098		793.4	-0.00574552		1323.39	-0.00353145		1853.4	0.00761005		2383.4	-0.00517369
263.59	0.02933232		793.6	-0.00624396		1323.59	-0.00335998		1853.6	0.00775535		2383.6	-0.00429973
263.79	0.03011557		793.8	-0.00527013		1323.79	-0.00479131		1853.8	0.00715		2383.8	-0.00502489
263.99	0.03026804		794	-0.00490682		1323.99	-0.00482764		1854	0.00800814		2384	-0.0051608
264.19	0.0300261		794.2	-0.0054223		1324.19	-0.00481848		1854.2	0.00785562		2384.2	-0.00525694
264.39	0.0302598		794.4	-0.00573063		1324.39	-0.00500794		1854.4	0.00698736		2384.4	-0.00508469
264.59	0.03007839		794.6	-0.00582736		1324.59	-0.00579122		1854.6	0.00636852		2384.6	-0.00539724
264.79	0.02962384		794.8	-0.00660066		1324.79	-0.00609885		1854.8	0.00684631		2384.8	-0.00546562
264.99	0.02865878		795	-0.00747252		1324.99	-0.00608531		1855	0.00708235		2385	-0.00524637
265.19	0.02910503		795.2	-0.00765622		1325.19	-0.0062803		1855.2	0.00719214		2385.2	-0.0050771
265.39	0.03050249		795.4	-0.00727338		1325.39	-0.00649214		1855.4	0.00759882		2385.4	-0.00475829
265.59	0.0308689		795.6	-0.00754962		1325.59	-0.00582003		1855.6	0.00797628		2385.6	-0.00385244
265.79	0.03020219		795.8	-0.00758999		1325.79	-0.0061542		1855.8	0.00896137		2385.8	-0.00435893
265.99	0.02927435		796	-0.00669646		1325.99	-0.00609136		1856	0.01000736		2386	-0.00365559
266.19	0.02971191		796.2	-0.00683099		1326.19	-0.00606666		1856.2	0.00997936		2386.2	-0.00319356
266.39	0.02984596		796.4	-0.00655524		1326.39	-0.00660106		1856.4	0.01005625		2386.4	-0.00233369
266.59	0.02998085		796.6	-0.006379		1326.59	-0.00718764		1856.6	0.01055813		2386.6	-0.00307785
266.79	0.03018599		796.8	-0.00616132		1326.79	-0.00646587		1856.8	0.01123444		2386.8	-0.0025027
266.99	0.0299841		797	-0.00613601		1326.99	-0.00617267		1857	0.01138244		2387	-0.00313614
267.19	0.03044071		797.2	-0.00518738		1327.19	-0.00497244		1857.2	0.01150549		2387.2	-0.00299179
267.39	0.0311812		797.4	-0.00462977		1327.39	-0.00462751		1857.4	0.01267393		2387.4	-0.00281224
267.59	0.03039354		797.6	-0.00514275		1327.59	-0.00572494		1857.6	0.01257694		2387.6	-0.00338328
267.79	0.02978937		797.8	-0.00438669		1327.79	-0.00609275		1857.8	0.01234183		2387.8	-0.00396176
267.99	0.02899696		798	-0.00399034		1327.99	-0.00519903		1858	0.01255459		2388	-0.0039907
268.19	0.02886651		798.2	-0.00450988		1328.19	-0.00555763		1858.2	0.01179343		2388.2	-0.00401469
268.39	0.02900217		798.4	-0.00434755		1328.39	-0.00587183		1858.4	0.01149583		2388.4	-0.00439018
268.59	0.02882303		798.6	-0.00554405		1328.59	-0.0056661		1858.6	0.01175019		2388.6	-0.00449364
268.79	0.02905127		798.8	-0.00632996		1328.79	-0.00584048		1858.8	0.0118821		2388.8	-0.00373236
268.99	0.02935342		799	-0.00698838		1328.99	-0.00540859		1859	0.01094672		2389	-0.00295853
269.19	0.02995908		799.2	-0.00733739		1329.19	-0.00491272		1859.2	0.01069101		2389.2	-0.00207437
269.39	0.03039623		799.4	-0.00691048		1329.39	-0.00442416		1859.4	0.00977319		2389.4	-0.00122673
269.59	0.02959709		799.6	-0.00689071		1329.59	-0.00362545		1859.6	0.01040506		2389.6	-0.00103618
269.79	0.02881549		799.8	-0.00676235		1329.79	-0.00334327		1859.8	0.01028448		2389.8	-0.00112357
269.99	0.02884629		800	-0.00665197		1329.99	-0.00364541		1860	0.00970802		2390	0.00006004
270.19	0.02934887		800.2	-0.00828873		1330.19	-0.00371871		1860.2	0.00878435		2390.2	0.00082777
270.39	0.02932271		800.4	-0.00748972		1330.39	-0.00371983		1860.4	0.00874153		2390.4	0.00117612
270.59	0.02883567		800.6	-0.00754753		1330.59	-0.00320848		1860.6	0.00916645		2390.6	0.00019614
270.79	0.02931828		800.8	-0.00748073		1330.79	-0.00283196		1860.8	0.00906039		2390.8	-0.00006245
270.99	0.0296125		801	-0.00853843		1330.99	-0.00321915		1861	0.00867413		2391	-0.00150867
271.19	0.03035037		801.2	-0.00844144		1331.19	-0.00267498		1861.2	0.00913326		2391.2	-0.00329019
271.39	0.03066436		801.4	-0.00894216		1331.39	-0.00244864		1861.4	0.0095023		2391.4	-0.00401545
271.59	0.03082825		801.6	-0.00877424		1331.59	-0.00308157		1861.6	0.0094576		2391.6	-0.00408748
271.79	0.03061093		801.8	-0.00804132		1331.79	-0.00235852		1861.8	0.00968661		2391.8	-0.00384283
271.99	0.03057648		802	-0.00777377		1331.99	-0.00226727		1862	0.00943211		2392	-0.00393562
272.19	0.03078483		802.2	-0.0076162		1332.19	-0.0027878		1862.2	0.0089656		2392.2	-0.00430567
272.39	0.03148207		802.4	-0.00753156		1332.39	-0.00335229		1862.4	0.00938883		2392.4	-0.00439831
272.59	0.0322569		802.6	-0.00770792		1332.59	-0.00321081		1862.6	0.00900246		2392.6	-0.00415804
272.79	0.03196917		802.8	-0.00780702		1332.79	-0.00434484		1862.8	0.00869295		2392.8	-0.0036619
272.99	0.03232715		803	-0.00739861		1332.99	-0.00487777		1863	0.00885016		2393	-0.00329238
273.19	0.03279396		803.2	-0.00586788		1333.19	-0.00475169		1863.2	0.00885657		2393.2	-0.0025905
273.39	0.03286388		803.4	-0.00465617		1333.39	-0.00578954		1863.4	0.00820246		2393.4	-0.00304222
273.59	0.03196563		803.6	-0.0035694		1333.59	-0.0057741		1863.6	0.00851182		2393.6	-0.0031863
273.79	0.03229668		803.8	-0.00396654		1333.79	-0.00542135		1863.8	0.00861043		2393.8	-0.0034264
273.99	0.03237551		804	-0.00410618		1333.99	-0.00677515		1864	0.00886983		2394	-0.0032263
274.19	0.03168745		804.2	-0.00413535		1334.19	-0.00647046		1864.2	0.00893406		2394.2	-0.00366372
274.39	0.03050894		804.4	-0.00312757		1334.39	-0.00623667		1864.4	0.00948906		2394.4	-0.00411586
274.59	0.02994664		804.6	-0.00314487		1334.59	-0.00682615		1864.6	0.00911931		2394.6	-0.00500804
274.79	0.03004193		804.8	-0.0040163		1334.79	-0.00731137		1864.8	0.00936742		2394.8	-0.00560398
274.99	0.02933387		805	-0.00508602		1334.99	-0.00639483		1865	0.00936837		2395	-0.00597406
275.19	0.02891114		805.2	-0.00521929		1335.19	-0.00536391		1865.2	0.00931703		2395.2	-0.0058342
275.39	0.02899461		805.4	-0.0052006		1335.39	-0.00407938		1865.4	0.00922491		2395.4	-0.00483855
275.59	0.02875058		805.6	-0.00557908		1335.59	-0.00405737		1865.6	0.0091874		2395.6	-0.00384045
275.79	0.02832693		805.8	-0.00545482		1335.79	-0.00309412		1865.8	0.00890419		2395.8	-0.00341917
275.99	0.02877555		806	-0.00578482		1335.99	-0.00221767		1866	0.00926559		2396	-0.00317822
276.19	0.02920366		806.2	-0.00548871		1336.19	-0.00212763		1866.2	0.00859832		2396.2	-0.0020658
276.39	0.03032729		806.4	-0.00590893		1336.39	-0.0018673		1866.4	0.00920717		2396.4	-0.00101112
276.59	0.03039876		806.6	-0.00589158		1336.59	-0.00174719		1866.6	0.00967853		2396.6	-0.00030248
276.79	0.03072337		806.8	-0.00591696		1336.79	-0.00241608		1866.8	0.01065981		2396.8	-0.00002364
276.99	0.03147395		807	-0.00565623		1336.99	-0.00267104		1867	0.01085577		2397	0.00026309
277.19	0.0324008		807.2	-0.00541971		1337.19	-0.00210467		1867.2	0.01033526		2397.2	0.00076641
277.39	0.03276883		807.4	-0.00691156		1337.39	-0.00269583		1867.4	0.01018536		2397.4	-0.00084908
277.59	0.03321527		807.6	-0.00755609		1337.59	-0.00202732		1867.6	0.01077979		2397.6	-0.00167162
277.79	0.03430995		807.8	-0.00923794		1337.79	-0.00246509		1867.8	0.01140735		2397.8	-0.00290226
277.99	0.03413074		808	-0.00908025		1337.99	-0.0035713		1868	0.01113612		2398	-0.00382083
278.19	0.03414857		808.2	-0.00933033		1338.19	-0.00339895		1868.2	0.01089604		2398.2	-0.00427397
278.39	0.03411968		808.4	-0.00966076		1338.39	-0.00350607		1868.4	0.00975074		2398.4	-0.0049649
278.59	0.03395802		808.6	-0.0098476		1338.59	-0.00345943		1868.6	0.0081871		2398.6	-0.00580507
278.79	0.03388771		808.8	-0.01126081		1338.79	-0.0028083		1868.8	0.00797067		2398.8	-0.00608741
278.99	0.03347402		809	-0.01124024		1338.99	-0.00155078		1869	0.0076132		2399	-0.00612432
279.19	0.03390418		809.2	-0.01099625		1339.19	-0.00137969		1869.2	0.00753036		2399.2	-0.00652771
279.39	0.03392589		809.4	-0.01111474		1339.39	-0.00123568		1869.4	0.00704476		2399.4	-0.00745578
279.59	0.03344508		809.6	-0.01124367		1339.59	-0.00116841		1869.6	0.00724773		2399.6	-0.0069541
279.79	0.03289919		809.8	-0.01093847		1339.79	-0.00018311		1869.8	0.00802005		2399.8	-0.0059124
279.99	0.03327755		810	-0.0103		1339.99	-0.00046011		1870	0.00872061		2400	-0.00487834
280.19	0.03323814		810.2	-0.00948987		1340.19	-0.00039128		1870.2	0.0092391		2400.2	-0.00239581
280.39	0.03287986		810.4	-0.00924219		1340.39	-0.00099259		1870.4	0.01112517		2400.4	-0.00148514
280.59	0.032741		810.6	-0.0078383		1340.59	-0.00146941		1870.6	0.01160993		2400.6	-0.00149043
280.79	0.03299031		810.8	-0.00673621		1340.79	-0.0018266		1870.8	0.01222066		2400.8	-0.00208333
280.99	0.03319575		811	-0.00644773		1340.99	-0.00138644		1871	0.01234983		2401	-0.00219966
281.19	0.03327431		811.2	-0.00645706		1341.19	-0.00146709		1871.2	0.01261113		2401.2	-0.00229813
281.39	0.03302785		811.4	-0.00613039		1341.39	-0.002101		1871.4	0.01290779		2401.4	-0.00318836
281.59	0.03368956		811.6	-0.00543122		1341.59	-0.00217708		1871.6	0.01262526		2401.6	-0.00328551
281.79	0.03365111		811.8	-0.00517038		1341.79	-0.00271137		1871.8	0.01263928		2401.8	-0.00358377
281.99	0.03385635		812	-0.00484207		1341.99	-0.0023647		1872	0.01236437		2402	-0.00443771
282.19	0.03371242		812.2	-0.00526043		1342.19	-0.00247986		1872.2	0.01194736		2402.2	-0.0044018
282.39	0.0337213		812.4	-0.00533499		1342.39	-0.00294153		1872.4	0.01104568		2402.4	-0.00526542
282.59	0.03378736		812.6	-0.00607926		1342.59	-0.00247019		1872.6	0.01027175		2402.6	-0.0058283
282.79	0.03390924		812.8	-0.00635469		1342.79	-0.00253703		1872.8	0.01032127		2402.8	-0.00534008
282.99	0.03368499		813	-0.00657918		1342.99	-0.00286863		1873	0.0104307		2403	-0.00593342
283.19	0.03401374		813.2	-0.00689707		1343.19	-0.00375304		1873.2	0.00996518		2403.2	-0.00533928
283.39	0.03339053		813.4	-0.00808048		1343.39	-0.00437717		1873.4	0.00937242		2403.4	-0.00507772
283.59	0.03343153		813.6	-0.00857307		1343.59	-0.00410502		1873.6	0.0097438		2403.6	-0.00451451
283.79	0.03319783		813.8	-0.00904483		1343.79	-0.00497545		1873.8	0.00952427		2403.8	-0.00375578
283.99	0.0344846		814	-0.0088281		1343.99	-0.00569874		1874	0.00904707		2404	-0.00312841
284.19	0.03467898		814.2	-0.00936164		1344.19	-0.00571211		1874.2	0.00858951		2404.2	-0.00168498
284.39	0.03433654		814.4	-0.00871627		1344.39	-0.00570921		1874.4	0.00879482		2404.4	-0.00081589
284.59	0.03527205		814.6	-0.00712954		1344.59	-0.00604956		1874.6	0.00818356		2404.6	-0.00068182
284.79	0.03555747		814.8	-0.00615747		1344.79	-0.00569766		1874.8	0.0081498		2404.8	-0.00069791
284.99	0.03634658		815	-0.00588306		1344.99	-0.00550875		1875	0.00799548		2405	-0.00056407
285.19	0.03633108		815.2	-0.0057434		1345.19	-0.00524743		1875.2	0.00762117		2405.2	0.00015568
285.39	0.03655961		815.4	-0.00528258		1345.39	-0.00492366		1875.4	0.00746899		2405.4	0.00009367
285.59	0.03682352		815.6	-0.00576234		1345.59	-0.00458934		1875.6	0.00774185		2405.6	-0.00019551
285.79	0.03659585		815.8	-0.00607025		1345.79	-0.00480204		1875.8	0.00908836		2405.8	-0.00085805
285.99	0.03665706		816	-0.00627319		1345.99	-0.00434698		1876	0.00925687		2406	-0.00265232
286.19	0.03624294		816.2	-0.00691462		1346.19	-0.00497432		1876.2	0.00938086		2406.2	-0.00330049
286.39	0.0361609		816.4	-0.00660761		1346.39	-0.0042746		1876.4	0.01053307		2406.4	-0.00392514
286.59	0.03562089		816.6	-0.00616596		1346.59	-0.00336093		1876.6	0.0111482		2406.6	-0.0044108
286.79	0.03474078		816.8	-0.00581654		1346.79	-0.00433019		1876.8	0.01201731		2406.8	-0.00473405
286.99	0.03385267		817	-0.00695734		1346.99	-0.00456505		1877	0.01221205		2407	-0.0056483
287.19	0.03379836		817.2	-0.00733621		1347.19	-0.00485131		1877.2	0.01155044		2407.2	-0.00582748
287.39	0.03367635		817.4	-0.00751521		1347.39	-0.00457985		1877.4	0.01182795		2407.4	-0.00682718
287.59	0.0332875		817.6	-0.00787485		1347.59	-0.00374417		1877.6	0.01125679		2407.6	-0.00781821
287.79	0.03312624		817.8	-0.00774849		1347.79	-0.00377161		1877.8	0.01069778		2407.8	-0.00725703
287.99	0.03343596		818	-0.00764885		1347.99	-0.00348083		1878	0.01095335		2408	-0.00730527
288.19	0.03301982		818.2	-0.0079999		1348.19	-0.00286027		1878.2	0.01066934		2408.2	-0.00608131
288.39	0.03264112		818.4	-0.00675374		1348.39	-0.00244312		1878.4	0.01126802		2408.4	-0.00596642
288.59	0.03320086		818.6	-0.00645068		1348.59	-0.00296019		1878.6	0.01083782		2408.6	-0.00626244
288.79	0.03367329		818.8	-0.00631976		1348.79	-0.00308427		1878.8	0.00992507		2408.8	-0.00618504
288.99	0.03423134		819	-0.00613407		1348.99	-0.00374978		1879	0.00934329		2409	-0.00561905
289.19	0.03438728		819.2	-0.00641446		1349.19	-0.00355545		1879.2	0.00953163		2409.2	-0.00479453
289.39	0.03426421		819.4	-0.00573484		1349.39	-0.00446016		1879.4	0.00990648		2409.4	-0.00475095
289.59	0.03415843		819.6	-0.0060208		1349.59	-0.00479519		1879.6	0.00987139		2409.6	-0.00445843
289.79	0.03350037		819.8	-0.00546902		1349.79	-0.00529585		1879.8	0.0099769		2409.8	-0.00430463
289.99	0.03329568		820	-0.0043888		1349.99	-0.0057636		1880	0.00836018		2410	-0.00402809
290.19	0.03349166		820.2	-0.00437826		1350.19	-0.0058119		1880.2	0.00890981		2410.2	-0.00297959
290.39	0.03256843		820.4	-0.00422626		1350.39	-0.00600774		1880.4	0.00919195		2410.4	-0.00269111
290.59	0.0319057		820.6	-0.0037953		1350.59	-0.00624135		1880.6	0.00923518		2410.6	-0.00290065
290.79	0.03160413		820.8	-0.00477656		1350.79	-0.00615215		1880.8	0.00963431		2410.8	-0.00332089
290.99	0.03162273		821	-0.00506387		1350.99	-0.00556197		1881	0.00971596		2411	-0.00331509
291.19	0.03238122		821.2	-0.00512178		1351.19	-0.00632293		1881.2	0.00964585		2411.2	-0.00316777
291.39	0.03313691		821.4	-0.00469747		1351.39	-0.00611455		1881.4	0.00994262		2411.4	-0.00311567
291.59	0.0334147		821.6	-0.00516131		1351.59	-0.00595894		1881.6	0.00936394		2411.6	-0.0037952
291.79	0.03418302		821.8	-0.00535582		1351.79	-0.00514873		1881.8	0.01065497		2411.8	-0.00361768
291.99	0.03436827		822	-0.00601523		1351.99	-0.0048566		1882	0.01135272		2412	-0.00387076
292.19	0.03399209		822.2	-0.00740084		1352.19	-0.00430168		1882.2	0.01188311		2412.2	-0.00379134
292.39	0.03422801		822.4	-0.00726466		1352.39	-0.00450189		1882.4	0.01171319		2412.4	-0.00387568
292.59	0.03511125		822.6	-0.00714104		1352.59	-0.00483484		1882.6	0.01161217		2412.6	-0.00374966
292.79	0.03513801		822.8	-0.00729082		1352.79	-0.00491128		1882.8	0.01173016		2412.8	-0.00379037
292.99	0.03612024		823	-0.00670703		1352.99	-0.00446146		1883	0.01208696		2413	-0.00371727
293.19	0.0371139		823.2	-0.00708765		1353.19	-0.00420676		1883.2	0.0128983		2413.2	-0.00406719
293.39	0.03789049		823.4	-0.00690453		1353.39	-0.00463976		1883.4	0.01288735		2413.4	-0.00361724
293.59	0.03807954		823.6	-0.00752014		1353.59	-0.00427969		1883.6	0.01210099		2413.6	-0.00380925
293.79	0.03790058		823.8	-0.00691355		1353.79	-0.00523916		1883.8	0.01192294		2413.8	-0.00291569
293.99	0.0377926		824	-0.00569014		1353.99	-0.00621226		1884	0.01203224		2414	-0.00225186
294.19	0.03780182		824.2	-0.00535128		1354.19	-0.00612706		1884.2	0.01342494		2414.2	-0.00273991
294.39	0.03673813		824.4	-0.00544236		1354.39	-0.00656034		1884.4	0.01317339		2414.4	-0.00332862
294.59	0.03694019		824.6	-0.00461144		1354.59	-0.00604832		1884.6	0.01380744		2414.6	-0.0030274
294.79	0.03688123		824.8	-0.0050345		1354.79	-0.00532405		1884.8	0.01534677		2414.8	-0.00338243
294.99	0.03649474		825	-0.00587039		1354.99	-0.00511187		1885	0.01544354		2415	-0.00315458
295.19	0.03599062		825.2	-0.00668		1355.19	-0.00577261		1885.2	0.01540096		2415.2	-0.00331671
295.39	0.03499505		825.4	-0.00699756		1355.39	-0.00544335		1885.4	0.01539422		2415.4	-0.00298731
295.59	0.03355228		825.6	-0.00751887		1355.59	-0.00536413		1885.6	0.01511404		2415.6	-0.00339763
295.79	0.03259434		825.8	-0.0089695		1355.79	-0.004584		1885.8	0.01558634		2415.8	-0.00288513
295.99	0.03148389		826	-0.00889096		1355.99	-0.00497192		1886	0.01446835		2416	-0.00263905
296.19	0.0311972		826.2	-0.00889567		1356.19	-0.00491006		1886.2	0.01338494		2416.2	-0.00297629
296.39	0.03219015		826.4	-0.0078772		1356.39	-0.00400209		1886.4	0.01266966		2416.4	-0.00242121
296.59	0.03264248		826.6	-0.00726687		1356.59	-0.00399935		1886.6	0.0117977		2416.6	-0.00334543
296.79	0.03195543		826.8	-0.00728712		1356.79	-0.00343458		1886.8	0.01148688		2416.8	-0.00403249
296.99	0.03309914		827	-0.00672343		1356.99	-0.00334496		1887	0.01077315		2417	-0.00445989
297.19	0.03421301		827.2	-0.00793938		1357.19	-0.00349065		1887.2	0.01015259		2417.2	-0.00470595
297.39	0.03369602		827.4	-0.00814924		1357.39	-0.00376455		1887.4	0.01009747		2417.4	-0.00421916
297.59	0.0336583		827.6	-0.00733777		1357.59	-0.00312729		1887.6	0.00915671		2417.6	-0.00507775
297.79	0.03369025		827.8	-0.00620277		1357.79	-0.00349999		1887.8	0.00911278		2417.8	-0.0049016
297.99	0.03363496		828	-0.00497287		1357.99	-0.00392587		1888	0.00929757		2418	-0.00480271
298.19	0.03525891		828.2	-0.00463722		1358.19	-0.0033255		1888.2	0.00923554		2418.2	-0.00468934
298.39	0.03581882		828.4	-0.00518669		1358.39	-0.00279928		1888.4	0.00930846		2418.4	-0.00424077
298.59	0.03583691		828.6	-0.00535912		1358.59	-0.00305109		1888.6	0.00972943		2418.6	-0.00450678
298.79	0.03499252		828.8	-0.00625473		1358.79	-0.00288434		1888.8	0.01008291		2418.8	-0.00518475
298.99	0.03445577		829	-0.00830502		1358.99	-0.00359074		1889	0.00964505		2419	-0.00559736
299.19	0.03369825		829.2	-0.00884874		1359.19	-0.00395954		1889.2	0.00985002		2419.2	-0.00554702
299.39	0.03354729		829.4	-0.00894648		1359.39	-0.0046521		1889.4	0.00995022		2419.4	-0.00462835
299.59	0.03353126		829.6	-0.00880811		1359.59	-0.00528638		1889.6	0.01021831		2419.6	-0.00451014
299.79	0.03476076		829.8	-0.00962364		1359.79	-0.00558257		1889.8	0.01068905		2419.8	-0.00367196
299.99	0.0345843		830	-0.00812573		1359.99	-0.00546359		1890	0.01033725		2420	-0.00326065
300.19	0.03488372		830.2	-0.00782232		1360.19	-0.0049841		1890.2	0.01135551		2420.2	-0.0042025
300.39	0.03544908		830.4	-0.00733654		1360.39	-0.00465756		1890.4	0.01318218		2420.4	-0.00413663
300.59	0.03539426		830.6	-0.00693081		1360.59	-0.00551533		1890.6	0.01272337		2420.6	-0.00511472
300.79	0.03468667		830.8	-0.00670585		1360.79	-0.0044352		1890.8	0.01343102		2420.8	-0.00517202
300.99	0.0346123		831	-0.00695694		1360.99	-0.00391241		1891	0.0132821		2421	-0.00504989
301.19	0.03458655		831.2	-0.007774		1361.19	-0.00365835		1891.2	0.01237377		2421.2	-0.00476526
301.39	0.03374455		831.4	-0.00688034		1361.39	-0.00376912		1891.4	0.01270813		2421.4	-0.0045545
301.59	0.03388626		831.6	-0.00633558		1361.59	-0.00295835		1891.6	0.01135796		2421.6	-0.00524064
301.79	0.0337754		831.8	-0.00623605		1361.79	-0.00249516		1891.8	0.01125521		2421.8	-0.00483908
301.99	0.03407903		832	-0.00602119		1361.99	-0.00322411		1892	0.01113449		2422	-0.00402295
302.19	0.03469912		832.2	-0.00573208		1362.19	-0.00233032		1892.2	0.01149119		2422.2	-0.00345369
302.39	0.03351707		832.4	-0.00647717		1362.39	-0.00216226		1892.4	0.01095415		2422.4	-0.00400995
302.59	0.03225799		832.6	-0.0058971		1362.59	-0.00278579		1892.6	0.01001068		2422.6	-0.00461684
302.79	0.03239653		832.8	-0.00680137		1362.79	-0.00213051		1892.8	0.00835525		2422.8	-0.00512996
302.99	0.03185095		833	-0.00750171		1362.99	-0.00227472		1893	0.00787242		2423	-0.00542126
303.19	0.03187734		833.2	-0.00728083		1363.19	-0.00240282		1893.2	0.00815261		2423.2	-0.00510213
303.39	0.03277998		833.4	-0.00711891		1363.39	-0.00299147		1893.4	0.00805516		2423.4	-0.00398841
303.59	0.03270175		833.6	-0.00724973		1363.59	-0.00272522		1893.6	0.00840314		2423.6	-0.00375144
303.79	0.03310851		833.8	-0.00780148		1363.79	-0.00226763		1893.8	0.00856771		2423.8	-0.00349294
303.99	0.03264961		834	-0.00695674		1363.99	-0.00192627		1894	0.0093337		2424	-0.00386467
304.19	0.03343674		834.2	-0.00650428		1364.19	-0.00114922		1894.2	0.00983343		2424.2	-0.00464341
304.39	0.03462788		834.4	-0.00658952		1364.39	-0.00137604		1894.4	0.00961921		2424.4	-0.00531597
304.59	0.03472607		834.6	-0.00644602		1364.59	-0.00137233		1894.6	0.00861743		2424.6	-0.00576399
304.79	0.03466373		834.8	-0.00641015		1364.79	-0.00086145		1894.8	0.00889848		2424.8	-0.00598114
304.99	0.03513666		835	-0.0066945		1364.99	-0.00106992		1895	0.00899296		2425	-0.00609982
305.19	0.03648602		835.2	-0.00623012		1365.19	-0.00170582		1895.2	0.0086278		2425.2	-0.0062247
305.39	0.03703767		835.4	-0.00538617		1365.39	-0.00240467		1895.4	0.00957013		2425.4	-0.00592838
305.59	0.0368178		835.6	-0.00542771		1365.59	-0.00231852		1895.6	0.00957802		2425.6	-0.00588074
305.79	0.037279		835.8	-0.00464365		1365.79	-0.00261568		1895.8	0.0102924		2425.8	-0.0053449
305.99	0.03786503		836	-0.00393531		1365.99	-0.00354571		1896	0.01090659		2426	-0.00480752
306.19	0.03691479		836.2	-0.0039161		1366.19	-0.00270861		1896.2	0.01133124		2426.2	-0.00431365
306.39	0.03631141		836.4	-0.00415481		1366.39	-0.00319227		1896.4	0.01115705		2426.4	-0.00493086
306.59	0.03597539		836.6	-0.0037469		1366.59	-0.00288981		1896.6	0.0100693		2426.6	-0.00492365
306.79	0.03585041		836.8	-0.00443913		1366.79	-0.00355863		1896.8	0.00939983		2426.8	-0.00444742
306.99	0.03450245		837	-0.00463952		1366.99	-0.00463681		1897	0.010572		2427	-0.00466186
307.19	0.03454015		837.2	-0.00529321		1367.19	-0.00515341		1897.2	0.01123424		2427.2	-0.00485897
307.39	0.03461674		837.4	-0.00594673		1367.39	-0.00549409		1897.4	0.01077585		2427.4	-0.00429842
307.59	0.03426196		837.6	-0.00645807		1367.59	-0.00535645		1897.6	0.01044944		2427.6	-0.00408312
307.79	0.03386766		837.8	-0.00674281		1367.79	-0.00508931		1897.8	0.01059427		2427.8	-0.00434135
307.99	0.03366091		838	-0.00668809		1367.99	-0.00447539		1898	0.01011431		2428	-0.00435418
308.19	0.0337022		838.2	-0.00754273		1368.19	-0.0039876		1898.2	0.00885611		2428.2	-0.00454094
308.39	0.03399083		838.4	-0.00788492		1368.39	-0.00431471		1898.4	0.00826686		2428.4	-0.00585696
308.59	0.03442087		838.6	-0.00780052		1368.59	-0.00391872		1898.6	0.00812999		2428.6	-0.00501747
308.79	0.03424818		838.8	-0.00795963		1368.79	-0.0034144		1898.8	0.00878065		2428.8	-0.00575929
308.99	0.03421441		839	-0.00856527		1368.99	-0.0034341		1899	0.00929367		2429	-0.00531573
309.19	0.03467311		839.2	-0.00839971		1369.19	-0.00325172		1899.2	0.00925168		2429.2	-0.00569202
309.39	0.03422193		839.4	-0.00855395		1369.39	-0.00364868		1899.4	0.01009232		2429.4	-0.00526984
309.59	0.03452256		839.6	-0.00928799		1369.59	-0.00303822		1899.6	0.01037942		2429.6	-0.00543882
309.79	0.03399751		839.8	-0.00884905		1369.79	-0.00291452		1899.8	0.01041928		2429.8	-0.00572314
309.99	0.03369516		840	-0.00900836		1369.99	-0.00304255		1900	0.01127687		2430	-0.00599434
310.19	0.03350786		840.2	-0.00985899		1370.19	-0.00336874		1900.2	0.01193667		2430.2	-0.00645242
310.39	0.03389703		840.4	-0.00978016		1370.39	-0.0037712		1900.4	0.0110807		2430.4	-0.00648772
310.59	0.03387009		840.6	-0.00944104		1370.59	-0.00422272		1900.6	0.0111637		2430.6	-0.0053917
310.79	0.03379505		840.8	-0.00924633		1370.79	-0.00525741		1900.8	0.01219858		2430.8	-0.00481043
310.99	0.03373684		841	-0.00899858		1370.99	-0.00577207		1901	0.01356737		2431	-0.00596879
311.19	0.03420495		841.2	-0.00814652		1371.19	-0.00601542		1901.2	0.01359821		2431.2	-0.0057869
311.39	0.03494528		841.4	-0.00757048		1371.39	-0.0062971		1901.4	0.01339011		2431.4	-0.00479694
311.59	0.0352011		841.6	-0.00690475		1371.59	-0.00590822		1901.6	0.01341884		2431.6	-0.00500945
311.79	0.03539138		841.8	-0.00624776		1371.79	-0.0067531		1901.8	0.01308269		2431.8	-0.00520482
311.99	0.03675048		842	-0.00624564		1371.99	-0.00698725		1902	0.01207351		2432	-0.00517916
312.19	0.03715645		842.2	-0.00655252		1372.19	-0.00723703		1902.2	0.01177746		2432.2	-0.00554131
312.39	0.03796113		842.4	-0.00503255		1372.39	-0.00727642		1902.4	0.0116398		2432.4	-0.00547271
312.59	0.03800076		842.6	-0.00519829		1372.59	-0.00718463		1902.6	0.01110249		2432.6	-0.00502338
312.79	0.03740523		842.8	-0.00553235		1372.79	-0.00703435		1902.8	0.0104216		2432.8	-0.00545266
312.99	0.03689117		843	-0.00647933		1372.99	-0.00649366		1903	0.00993861		2433	-0.00497806
313.19	0.03679613		843.2	-0.00700369		1373.19	-0.00572787		1903.2	0.00895823		2433.2	-0.00542829
313.39	0.03675606		843.4	-0.00801969		1373.39	-0.0058533		1903.4	0.00885181		2433.4	-0.00604614
313.59	0.03597544		843.6	-0.00847336		1373.59	-0.00506269		1903.6	0.00861259		2433.6	-0.00614018
313.79	0.03484948		843.8	-0.00805867		1373.79	-0.00476553		1903.8	0.00894197		2433.8	-0.00643919
313.99	0.0342316		844	-0.00848467		1373.99	-0.00435425		1904	0.00936904		2434	-0.00658189
314.19	0.0345422		844.2	-0.0092084		1374.19	-0.00363591		1904.2	0.00929492		2434.2	-0.00562071
314.39	0.03372546		844.4	-0.00837104		1374.39	-0.0027491		1904.4	0.0089307		2434.4	-0.00452213
314.59	0.03340747		844.6	-0.00825063		1374.59	-0.00229145		1904.6	0.01003087		2434.6	-0.00410458
314.79	0.03255861		844.8	-0.00800365		1374.79	-0.00227349		1904.8	0.01058722		2434.8	-0.00434891
314.99	0.03230879		845	-0.00680603		1374.99	-0.00221822		1905	0.01148389		2435	-0.00422638
315.19	0.03234246		845.2	-0.00618974		1375.19	-0.00220784		1905.2	0.01214831		2435.2	-0.00376824
315.39	0.03280969		845.4	-0.00604094		1375.39	-0.00256292		1905.4	0.01306087		2435.4	-0.00349282
315.59	0.03344576		845.6	-0.00624653		1375.59	-0.00381173		1905.6	0.0140757		2435.6	-0.00453196
315.79	0.03443793		845.8	-0.00627618		1375.79	-0.00526434		1905.8	0.01398848		2435.8	-0.00395487
315.99	0.03516552		846	-0.00684869		1375.99	-0.00474935		1906	0.01465842		2436	-0.00360386
316.19	0.03484172		846.2	-0.00700902		1376.19	-0.00463061		1906.2	0.01472832		2436.2	-0.00321539
316.39	0.03516063		846.4	-0.00646594		1376.39	-0.00554055		1906.4	0.01457127		2436.4	-0.00301383
316.59	0.03486825		846.6	-0.00703648		1376.59	-0.00574964		1906.6	0.01334422		2436.6	-0.00387468
316.79	0.03501016		846.8	-0.00746463		1376.79	-0.00518433		1906.8	0.01230215		2436.8	-0.00378702
316.99	0.03505425		847	-0.00737172		1376.99	-0.00412632		1907	0.01160304		2437	-0.00410173
317.19	0.03494751		847.2	-0.00813967		1377.19	-0.00371777		1907.2	0.01131798		2437.2	-0.00465392
317.39	0.03521346		847.4	-0.00879215		1377.39	-0.00417958		1907.4	0.01126779		2437.4	-0.00562316
317.59	0.03515527		847.6	-0.00786093		1377.59	-0.00357421		1907.6	0.01123508		2437.6	-0.00468555
317.79	0.03633005		847.8	-0.0080566		1377.79	-0.00263057		1907.8	0.01088741		2437.8	-0.00526293
317.99	0.03608889		848	-0.00792945		1377.99	-0.00234612		1908	0.01035244		2438	-0.00507745
318.19	0.03648285		848.2	-0.00830716		1378.19	-0.00191493		1908.2	0.01014253		2438.2	-0.00445578
318.39	0.03674795		848.4	-0.00738634		1378.39	-0.00195731		1908.4	0.00994778		2438.4	-0.0035458
318.59	0.0371418		848.6	-0.00710156		1378.59	-0.00225381		1908.6	0.00995191		2438.6	-0.00417334
318.79	0.03718197		848.8	-0.00659836		1378.79	-0.00264023		1908.8	0.01017723		2438.8	-0.00429946
318.99	0.03758815		849	-0.00584553		1378.99	-0.00142514		1909	0.01120294		2439	-0.00373808
319.19	0.03803173		849.2	-0.00547305		1379.19	-0.00139752		1909.2	0.01202655		2439.2	-0.00355377
319.39	0.03889417		849.4	-0.0062695		1379.39	-0.00219343		1909.4	0.01260995		2439.4	-0.00312175
319.59	0.03921258		849.6	-0.00644994		1379.59	-0.00277244		1909.6	0.01303165		2439.6	-0.00352054
319.79	0.0390071		849.8	-0.00607299		1379.79	-0.00248455		1909.8	0.01298526		2439.8	-0.00271618
319.99	0.03895051		850	-0.00711036		1379.99	-0.0027743		1910	0.0137031		2440	-0.00305156
320.19	0.03883237		850.2	-0.00687655		1380.19	-0.00361716		1910.2	0.01317839		2440.2	-0.00329396
320.39	0.03776253		850.4	-0.00604496		1380.39	-0.00425012		1910.4	0.0132147		2440.4	-0.00455944
320.59	0.0362261		850.6	-0.00575311		1380.59	-0.00351819		1910.6	0.01258256		2440.6	-0.0048669
320.79	0.03573139		850.8	-0.00515181		1380.79	-0.00234242		1910.8	0.0131915		2440.8	-0.00556104
320.99	0.0354064		851	-0.00537475		1380.99	-0.00227914		1911	0.01259454		2441	-0.00629723
321.19	0.03430631		851.2	-0.00658871		1381.19	-0.00262094		1911.2	0.01280435		2441.2	-0.00641465
321.39	0.03435011		851.4	-0.00636745		1381.39	-0.00344861		1911.4	0.0117623		2441.4	-0.0065887
321.59	0.03381756		851.6	-0.00545459		1381.59	-0.00330618		1911.6	0.01141556		2441.6	-0.00660089
321.79	0.03266559		851.8	-0.00551186		1381.79	-0.00312145		1911.8	0.01118412		2441.8	-0.00697048
321.99	0.03183719		852	-0.00531356		1381.99	-0.00312542		1912	0.01169742		2442	-0.00720759
322.19	0.03186088		852.2	-0.00548636		1382.19	-0.00285162		1912.2	0.01152806		2442.2	-0.00697591
322.39	0.03295411		852.4	-0.00450623		1382.39	-0.0023093		1912.4	0.01161335		2442.4	-0.00713609
322.59	0.03364051		852.6	-0.00468484		1382.59	-0.00183849		1912.6	0.01187129		2442.6	-0.00818821
322.79	0.03437368		852.8	-0.00531728		1382.79	-0.00043536		1912.8	0.01141498		2442.8	-0.00807913
322.99	0.03499268		853	-0.00603105		1382.99	0.00029634		1913	0.01134265		2443	-0.00757196
323.19	0.03580095		853.2	-0.00593205		1383.19	-0.0003276		1913.2	0.01034035		2443.2	-0.00703168
323.39	0.0372988		853.4	-0.00670076		1383.39	-0.00106898		1913.4	0.00991158		2443.4	-0.0066761
323.59	0.03751078		853.6	-0.00575008		1383.59	-0.00127471		1913.6	0.01000242		2443.6	-0.00623238
323.79	0.03840399		853.8	-0.00584044		1383.79	-0.00160837		1913.8	0.00955823		2443.8	-0.00564504
323.99	0.04000684		854	-0.00642794		1383.99	-0.00300612		1914	0.00887438		2444	-0.00565771
324.19	0.04014185		854.2	-0.00617926		1384.19	-0.00351459		1914.2	0.00849308		2444.2	-0.00527032
324.39	0.03944615		854.4	-0.00557705		1384.39	-0.00353858		1914.4	0.00864488		2444.4	-0.00509375
324.59	0.03885921		854.6	-0.0055456		1384.59	-0.00361679		1914.6	0.00846041		2444.6	-0.00388064
324.79	0.03846556		854.8	-0.00435593		1384.79	-0.00405843		1914.8	0.00947157		2444.8	-0.00324812
324.99	0.03817363		855	-0.00511736		1384.99	-0.00502263		1915	0.00918182		2445	-0.00214602
325.19	0.03769092		855.2	-0.00413824		1385.19	-0.00503205		1915.2	0.00998786		2445.2	-0.00110859
325.39	0.03732218		855.4	-0.00329724		1385.39	-0.00489786		1915.4	0.00996244		2445.4	-0.0002997
325.59	0.03663393		855.6	-0.00318719		1385.59	-0.0051253		1915.6	0.01133009		2445.6	-0.0004359
325.79	0.03535562		855.8	-0.00287435		1385.79	-0.00481317		1915.8	0.01236285		2445.8	-0.00053904
325.99	0.03608323		856	-0.00320282		1385.99	-0.00521419		1916	0.01268621		2446	-0.00136935
326.19	0.03576487		856.2	-0.00301918		1386.19	-0.0044183		1916.2	0.01338314		2446.2	-0.00162897
326.39	0.03605829		856.4	-0.00337751		1386.39	-0.0040383		1916.4	0.01347706		2446.4	-0.00282464
326.59	0.03664072		856.6	-0.00383909		1386.59	-0.00403768		1916.6	0.01307946		2446.6	-0.00265123
326.79	0.03620288		856.8	-0.00368779		1386.79	-0.00335624		1916.8	0.0126443		2446.8	-0.00280247
326.99	0.03660961		857	-0.00405166		1386.99	-0.0036631		1917	0.01267785		2447	-0.00329041
327.19	0.03634358		857.2	-0.00400738		1387.19	-0.0036873		1917.2	0.01291223		2447.2	-0.00411974
327.39	0.03690481		857.4	-0.00364649		1387.39	-0.00418494		1917.4	0.01276201		2447.4	-0.00441646
327.59	0.03623227		857.6	-0.00403833		1387.59	-0.00440506		1917.6	0.01316622		2447.6	-0.00507715
327.79	0.03643882		857.8	-0.0046401		1387.79	-0.00417635		1917.8	0.01247035		2447.8	-0.00532398
327.99	0.03640169		858	-0.00482664		1387.99	-0.00454468		1918	0.01186291		2448	-0.00616181
328.19	0.03541797		858.2	-0.00547522		1388.19	-0.00423748		1918.2	0.01152361		2448.2	-0.00592575
328.39	0.03565843		858.4	-0.00547523		1388.39	-0.00400284		1918.4	0.01233116		2448.4	-0.00574004
328.59	0.03485895		858.6	-0.00494743		1388.59	-0.00363902		1918.6	0.0122623		2448.6	-0.00580445
328.79	0.0351279		858.8	-0.00436393		1388.79	-0.00307301		1918.8	0.01277049		2448.8	-0.00545852
328.99	0.03644812		859	-0.00518573		1388.99	-0.00241395		1919	0.01333958		2449	-0.0050163
329.19	0.03717876		859.2	-0.00445565		1389.19	-0.00180971		1919.2	0.01326223		2449.2	-0.00479184
329.39	0.03712566		859.4	-0.00531969		1389.39	-0.00147662		1919.4	0.01388373		2449.4	-0.00442112
329.59	0.03765433		859.6	-0.00647663		1389.59	-0.00222668		1919.6	0.01467238		2449.6	-0.00454443
329.79	0.03767452		859.8	-0.00656798		1389.79	-0.00209675		1919.8	0.01400013		2449.8	-0.00523139
329.99	0.03877989		860	-0.00687645		1389.99	-0.00152187		1920	0.01416175		2450	-0.00517697
330.19	0.03852253		860.2	-0.00685237		1390.19	-0.00107186		1920.2	0.01470535		2450.2	-0.00551838
330.39	0.03825419		860.4	-0.00710036		1390.39	-0.00134453		1920.4	0.013526		2450.4	-0.00579124
330.59	0.0381102		860.6	-0.00642993		1390.59	-0.00100535		1920.6	0.0132157		2450.6	-0.00554987
330.79	0.0378259		860.8	-0.00616805		1390.79	-0.00134735		1920.8	0.01350386		2450.8	-0.00549958
330.99	0.0380508		861	-0.00616412		1390.99	-0.00138366		1921	0.01378013		2451	-0.00627388
331.19	0.03682629		861.2	-0.00586525		1391.19	-0.00160698		1921.2	0.01338176		2451.2	-0.00610129
331.39	0.03674694		861.4	-0.00560047		1391.39	-0.00148113		1921.4	0.01260365		2451.4	-0.00543295
331.59	0.03598544		861.6	-0.00584443		1391.59	-0.00122739		1921.6	0.01287811		2451.6	-0.00563411
331.79	0.0357601		861.8	-0.00569102		1391.79	-0.00176901		1921.8	0.01256545		2451.8	-0.005221
331.99	0.03554157		862	-0.00588765		1391.99	-0.00187609		1922	0.01217402		2452	-0.00511198
332.19	0.03615188		862.2	-0.00643097		1392.19	-0.00139437		1922.2	0.01273527		2452.2	-0.0038875
332.39	0.03725917		862.4	-0.00605234		1392.39	-0.00067582		1922.4	0.01357329		2452.4	-0.00387856
332.59	0.03769116		862.6	-0.00555907		1392.59	-0.0003332		1922.6	0.01258162		2452.6	-0.00364157
332.79	0.03913296		862.8	-0.00555641		1392.79	0.00027174		1922.8	0.01266057		2452.8	-0.00287575
332.99	0.03947369		863	-0.00524717		1392.99	-0.00023088		1923	0.01332345		2453	-0.00259464
333.19	0.04015509		863.2	-0.00500762		1393.19	-0.00023454		1923.2	0.01323064		2453.2	-0.00240333
333.39	0.04006575		863.4	-0.00537698		1393.39	-0.00036667		1923.4	0.01436975		2453.4	-0.00195954
333.59	0.04063301		863.6	-0.0059313		1393.59	-0.00054025		1923.6	0.01465224		2453.6	-0.00201194
333.79	0.04099415		863.8	-0.00502179		1393.79	-0.00049439		1923.8	0.0150302		2453.8	-0.00245544
333.99	0.04128431		864	-0.00504725		1393.99	-0.00071396		1924	0.01523342		2454	-0.0033939
334.19	0.04052127		864.2	-0.00469869		1394.19	-0.00080401		1924.2	0.01449222		2454.2	-0.00437716
334.39	0.03965906		864.4	-0.00477964		1394.39	-0.00120877		1924.4	0.01360062		2454.4	-0.00438432
334.59	0.03955632		864.6	-0.00400085		1394.59	-0.00159194		1924.6	0.0127288		2454.6	-0.00485176
334.79	0.03950292		864.8	-0.00348634		1394.79	-0.00294323		1924.8	0.01236314		2454.8	-0.00498153
334.99	0.03937354		865	-0.00327753		1394.99	-0.00263845		1925	0.01131941		2455	-0.0055232
335.19	0.0378502		865.2	-0.00439718		1395.19	-0.00311365		1925.2	0.01081646		2455.2	-0.00509831
335.39	0.03815096		865.4	-0.00530906		1395.39	-0.00369845		1925.4	0.01030095		2455.4	-0.00634184
335.59	0.03732729		865.6	-0.00593774		1395.59	-0.00423036		1925.6	0.0102938		2455.6	-0.00651696
335.79	0.03688592		865.8	-0.00693037		1395.79	-0.00391526		1925.8	0.01086987		2455.8	-0.00560629
335.99	0.03651218		866	-0.00753564		1395.99	-0.0037378		1926	0.01047558		2456	-0.00533935
336.19	0.03653625		866.2	-0.00797268		1396.19	-0.00299345		1926.2	0.01026242		2456.2	-0.00496971
336.39	0.0362752		866.4	-0.00748797		1396.39	-0.00301318		1926.4	0.00924546		2456.4	-0.00533055
336.59	0.03610462		866.6	-0.00713437		1396.59	-0.00318059		1926.6	0.00897542		2456.6	-0.00546094
336.79	0.03585846		866.8	-0.00726016		1396.79	-0.00377423		1926.8	0.0088743		2456.8	-0.00498673
336.99	0.03547414		867	-0.00654009		1396.99	-0.00412059		1927	0.00946706		2457	-0.00499882
337.19	0.03587473		867.2	-0.00613004		1397.19	-0.00361104		1927.2	0.00944867		2457.2	-0.0040847
337.39	0.03499656		867.4	-0.00550405		1397.39	-0.00375365		1927.4	0.01015642		2457.4	-0.00395877
337.59	0.03506142		867.6	-0.00504062		1397.59	-0.00330843		1927.6	0.0105717		2457.6	-0.00439219
337.79	0.03580434		867.8	-0.00441198		1397.79	-0.00369443		1927.8	0.01124821		2457.8	-0.004505
337.99	0.03615159		868	-0.00453215		1397.99	-0.00419171		1928	0.0106752		2458	-0.00498263
338.19	0.03557513		868.2	-0.00386924		1398.19	-0.00387395		1928.2	0.01021568		2458.2	-0.00494044
338.39	0.03572292		868.4	-0.00448911		1398.39	-0.00501398		1928.4	0.01046059		2458.4	-0.00472371
338.59	0.03641113		868.6	-0.00416966		1398.59	-0.00568566		1928.6	0.00944488		2458.6	-0.00517638
338.79	0.0364984		868.8	-0.00416498		1398.79	-0.00573799		1928.8	0.00946596		2458.8	-0.0054001
338.99	0.03650443		869	-0.00455176		1398.99	-0.00546389		1929	0.00988573		2459	-0.00550735
339.19	0.03588945		869.2	-0.00467448		1399.19	-0.00521384		1929.2	0.01100097		2459.2	-0.00616974
339.39	0.03699598		869.4	-0.00400504		1399.39	-0.00475543		1929.4	0.01121306		2459.4	-0.00739468
339.59	0.03637811		869.6	-0.00459437		1399.59	-0.00426844		1929.6	0.01161211		2459.6	-0.00722689
339.79	0.03655099		869.8	-0.00535945		1399.79	-0.00311341		1929.8	0.01195158		2459.8	-0.00741889
339.99	0.03649848		870	-0.00534405		1399.99	-0.00202571		1930	0.01158858		2460	-0.00772387
340.19	0.0363769		870.2	-0.00561582		1400.19	-0.0016334		1930.2	0.01196182		2460.2	-0.00810183
340.39	0.03595063		870.4	-0.00622514		1400.39	-0.00143525		1930.4	0.01200997		2460.4	-0.00895216
340.59	0.03586316		870.6	-0.00702282		1400.59	-0.00109088		1930.6	0.01162134		2460.6	-0.00915781
340.79	0.03562458		870.8	-0.0073228		1400.79	-0.00017855		1930.8	0.01137548		2460.8	-0.00852718
340.99	0.03579695		871	-0.00713561		1400.99	0.00082011		1931	0.01233518		2461	-0.00845373
341.19	0.03583438		871.2	-0.0072385		1401.19	0.00151286		1931.2	0.01186659		2461.2	-0.0081606
341.39	0.03583544		871.4	-0.00757568		1401.39	0.00200841		1931.4	0.01234316		2461.4	-0.00754248
341.59	0.03665665		871.6	-0.0078324		1401.59	0.00207303		1931.6	0.0117267		2461.6	-0.00642681
341.79	0.03667969		871.8	-0.00804689		1401.79	0.00184474		1931.8	0.01174554		2461.8	-0.00610252
341.99	0.03682676		872	-0.00877985		1401.99	0.00081435		1932	0.01094033		2462	-0.00636639
342.19	0.03658517		872.2	-0.00918262		1402.19	0.00009093		1932.2	0.01099331		2462.2	-0.00667879
342.39	0.03712277		872.4	-0.00964668		1402.39	-0.00058268		1932.4	0.01137506		2462.4	-0.00609336
342.59	0.03719511		872.6	-0.00880597		1402.59	-0.00126384		1932.6	0.01107862		2462.6	-0.00562385
342.79	0.03681557		872.8	-0.00764333		1402.79	-0.00107531		1932.8	0.01165759		2462.8	-0.00536586
342.99	0.03706029		873	-0.00675161		1402.99	-0.00210918		1933	0.01292128		2463	-0.00504112
343.19	0.03749299		873.2	-0.00511185		1403.19	-0.00277449		1933.2	0.01327523		2463.2	-0.00474195
343.39	0.03747846		873.4	-0.00456719		1403.39	-0.00319074		1933.4	0.01314713		2463.4	-0.00446693
343.59	0.037812		873.6	-0.00482718		1403.59	-0.00335182		1933.6	0.01331502		2463.6	-0.00459732
343.79	0.03803687		873.8	-0.0042911		1403.79	-0.00283824		1933.8	0.01360682		2463.8	-0.00406803
343.99	0.03805543		874	-0.00419069		1403.99	-0.00278363		1934	0.01477977		2464	-0.00459648
344.19	0.03815921		874.2	-0.00502932		1404.19	-0.00339423		1934.2	0.01584944		2464.2	-0.00529104
344.39	0.03820181		874.4	-0.00564553		1404.39	-0.00321567		1934.4	0.01535697		2464.4	-0.00516862
344.59	0.03745337		874.6	-0.00547494		1404.59	-0.00309602		1934.6	0.01503275		2464.6	-0.00502686
344.79	0.03734993		874.8	-0.00512857		1404.79	-0.00223463		1934.8	0.01546205		2464.8	-0.00468915
344.99	0.03825862		875	-0.00535106		1404.99	-0.00198367		1935	0.01576502		2465	-0.00519568
345.19	0.03838776		875.2	-0.00492958		1405.19	-0.00107243		1935.2	0.01481279		2465.2	-0.00576858
345.39	0.03845009		875.4	-0.00514863		1405.39	-0.00106845		1935.4	0.01429393		2465.4	-0.0052045
345.59	0.03849256		875.6	-0.00527799		1405.59	-0.0009507		1935.6	0.01350201		2465.6	-0.00569492
345.79	0.03834217		875.8	-0.00523927		1405.79	-0.00139992		1935.8	0.01352095		2465.8	-0.00672639
345.99	0.0382586		876	-0.00614927		1405.99	-0.00146536		1936	0.01331927		2466	-0.00735937
346.19	0.03790997		876.2	-0.00620265		1406.19	-0.00143086		1936.2	0.01343599		2466.2	-0.00703405
346.39	0.03795233		876.4	-0.00648048		1406.39	-0.0015685		1936.4	0.0125263		2466.4	-0.0064828
346.59	0.03767847		876.6	-0.00639495		1406.59	-0.00153725		1936.6	0.01205007		2466.6	-0.00625357
346.79	0.03744311		876.8	-0.00616835		1406.79	-0.00147417		1936.8	0.01211068		2466.8	-0.00638978
346.99	0.03725759		877	-0.00650665		1406.99	-0.00219408		1937	0.01209148		2467	-0.00528398
347.19	0.03728352		877.2	-0.00643374		1407.19	-0.00213029		1937.2	0.01071403		2467.2	-0.00425686
347.39	0.03701499		877.4	-0.00627664		1407.39	-0.00188344		1937.4	0.01041991		2467.4	-0.0041591
347.59	0.03779935		877.6	-0.0059403		1407.59	-0.0018288		1937.6	0.01086217		2467.6	-0.00459546
347.79	0.03812527		877.8	-0.0059036		1407.79	-0.00240812		1937.8	0.01013202		2467.8	-0.00494075
347.99	0.03871496		878	-0.00658673		1407.99	-0.00228751		1938	0.01103129		2468	-0.00562899
348.19	0.03936287		878.2	-0.00684565		1408.19	-0.00246829		1938.2	0.01156156		2468.2	-0.0048976
348.39	0.03963259		878.4	-0.00703908		1408.39	-0.00297977		1938.4	0.01113269		2468.4	-0.0048819
348.59	0.03953117		878.6	-0.00720896		1408.59	-0.00267187		1938.6	0.01135167		2468.6	-0.00532781
348.79	0.04150645		878.8	-0.00713619		1408.79	-0.00207674		1938.8	0.01130361		2468.8	-0.00598479
348.99	0.04197893		879	-0.00695765		1408.99	-0.00167633		1939	0.01132216		2469	-0.00670381
349.19	0.04188105		879.2	-0.00620046		1409.19	-0.00155476		1939.2	0.01137415		2469.2	-0.00750278
349.39	0.04112659		879.4	-0.00547452		1409.39	-0.00220837		1939.4	0.01134764		2469.4	-0.00728275
349.59	0.04147643		879.6	-0.00479024		1409.59	-0.0023286		1939.6	0.01152909		2469.6	-0.00697353
349.79	0.04103703		879.8	-0.00448923		1409.79	-0.00314096		1939.8	0.01107456		2469.8	-0.0072156
349.99	0.03995532		880	-0.0049121		1409.99	-0.00231513		1940	0.01129133		2470	-0.00726887
350.19	0.0385626		880.2	-0.00533093		1410.19	-0.00281275		1940.2	0.01115365		2470.2	-0.00651743
350.39	0.03786021		880.4	-0.00565002		1410.39	-0.00382905		1940.4	0.01143363		2470.4	-0.00586058
350.59	0.03691397		880.6	-0.00532649		1410.59	-0.0032678		1940.6	0.01154264		2470.6	-0.00553936
350.79	0.03593626		880.8	-0.00488371		1410.79	-0.00351573		1940.8	0.01252589		2470.8	-0.00549778
350.99	0.03467065		881	-0.00514085		1410.99	-0.00339635		1941	0.01258015		2471	-0.00443064
351.19	0.0343099		881.2	-0.00420829		1411.19	-0.00332075		1941.2	0.01265448		2471.2	-0.00514593
351.39	0.03411393		881.4	-0.00388836		1411.39	-0.00390547		1941.4	0.01309094		2471.4	-0.00576018
351.59	0.03429239		881.6	-0.0038875		1411.59	-0.00353847		1941.6	0.01323502		2471.6	-0.00646795
351.79	0.03425351		881.8	-0.00433468		1411.79	-0.00345813		1941.8	0.01196335		2471.8	-0.00657205
351.99	0.03488388		882	-0.00449236		1411.99	-0.00288717		1942	0.01252635		2472	-0.00660676
352.19	0.03518059		882.2	-0.00475119		1412.19	-0.00285912		1942.2	0.01193101		2472.2	-0.00703064
352.39	0.03596759		882.4	-0.00522127		1412.39	-0.0026945		1942.4	0.01122561		2472.4	-0.00712726
352.59	0.03732056		882.6	-0.00505126		1412.59	-0.00201932		1942.6	0.01063172		2472.6	-0.00769692
352.79	0.03856332		882.8	-0.00446832		1412.79	-0.00112423		1942.8	0.01018556		2472.8	-0.00845562
352.99	0.03900895		883	-0.00452986		1412.99	-0.00119353		1943	0.01056243		2473	-0.008522
353.19	0.03990831		883.2	-0.00420545		1413.19	-0.00107795		1943.2	0.01094419		2473.2	-0.00888638
353.39	0.0405165		883.4	-0.00317218		1413.39	-0.00161706		1943.4	0.0101624		2473.4	-0.00812267
353.59	0.04214253		883.6	-0.00367825		1413.59	-0.00187737		1943.6	0.01068838		2473.6	-0.00789042
353.79	0.04169444		883.8	-0.00447461		1413.79	-0.00166431		1943.8	0.01139817		2473.8	-0.00887813
353.99	0.04111836		884	-0.0043474		1413.99	-0.00108478		1944	0.01232376		2474	-0.00796203
354.19	0.04025918		884.2	-0.00522148		1414.19	-0.00175976		1944.2	0.01252061		2474.2	-0.00699221
354.39	0.03996046		884.4	-0.00506305		1414.39	-0.00172074		1944.4	0.01329838		2474.4	-0.0068438
354.59	0.03966845		884.6	-0.00561958		1414.59	-0.00105723		1944.6	0.01314282		2474.6	-0.00628897
354.79	0.03847057		884.8	-0.00550408		1414.79	-0.00072053		1944.8	0.01452378		2474.8	-0.00627416
354.99	0.0379091		885	-0.00587002		1414.99	-0.00045442		1945	0.01480726		2475	-0.00548143
355.19	0.03767571		885.2	-0.00599999		1415.19	-0.00126008		1945.2	0.01419143		2475.2	-0.00558033
355.39	0.03756776		885.4	-0.00680786		1415.39	-0.00210816		1945.4	0.01346612		2475.4	-0.0054347
355.59	0.03730898		885.6	-0.0064075		1415.59	-0.00145901		1945.6	0.01209254		2475.6	-0.00468183
355.79	0.03678656		885.8	-0.00624653		1415.79	-0.00140202		1945.8	0.01127408		2475.8	-0.00426425
355.99	0.03675131		886	-0.0053634		1415.99	-0.00193562		1946	0.01112395		2476	-0.00499056
356.19	0.03677725		886.2	-0.00553175		1416.19	-0.00171392		1946.2	0.01010918		2476.2	-0.00548461
356.39	0.03696676		886.4	-0.00502062		1416.39	-0.00274169		1946.4	0.01015012		2476.4	-0.00528882
356.59	0.03678742		886.6	-0.00478784		1416.59	-0.00193983		1946.6	0.00955517		2476.6	-0.00644297
356.79	0.03759772		886.8	-0.0039194		1416.79	-0.00080551		1946.8	0.01006522		2476.8	-0.00730612
356.99	0.03836748		887	-0.0044825		1416.99	-0.00186403		1947	0.01087153		2477	-0.0078926
357.19	0.03813272		887.2	-0.00410876		1417.19	-0.00192121		1947.2	0.01135394		2477.2	-0.00862326
357.39	0.0387239		887.4	-0.0031833		1417.39	-0.00302856		1947.4	0.01207537		2477.4	-0.00891903
357.59	0.03865615		887.6	-0.00411604		1417.59	-0.00307945		1947.6	0.01341996		2477.6	-0.00987705
357.79	0.03780078		887.8	-0.0036386		1417.79	-0.00311376		1947.8	0.0142753		2477.8	-0.00974378
357.99	0.03698271		888	-0.0035536		1417.99	-0.00316596		1948	0.01465291		2478	-0.00913558
358.19	0.03649681		888.2	-0.00458088		1418.19	-0.00309665		1948.2	0.01480785		2478.2	-0.00877694
358.39	0.03585708		888.4	-0.0050428		1418.39	-0.00189843		1948.4	0.01536853		2478.4	-0.00830131
358.59	0.03610115		888.6	-0.00574503		1418.59	-0.00107862		1948.6	0.01472585		2478.6	-0.00747047
358.79	0.03516628		888.8	-0.00537712		1418.79	-0.00067268		1948.8	0.01498836		2478.8	-0.00676858
358.99	0.03626425		889	-0.00626078		1418.99	-0.00071599		1949	0.01472828		2479	-0.00525996
359.19	0.03562498		889.2	-0.00696488		1419.19	-0.00069665		1949.2	0.01409182		2479.2	-0.00497623
359.39	0.03561844		889.4	-0.00778846		1419.39	-0.00000304		1949.4	0.01399759		2479.4	-0.00493781
359.59	0.03621455		889.6	-0.00724488		1419.59	0.00054937		1949.6	0.01222541		2479.6	-0.0037731
359.79	0.03543706		889.8	-0.00684633		1419.79	0.00076864		1949.8	0.01263952		2479.8	-0.00395484
359.99	0.03604006		890	-0.00613514		1419.99	0.0008623		1950	0.01212617		2480	-0.00392432
360.19	0.03685738		890.2	-0.00684092		1420.19	0.00162773		1950.2	0.01125161		2480.2	-0.00380725
360.39	0.03670505		890.4	-0.00660734		1420.39	0.001577		1950.4	0.01084511		2480.4	-0.00398924
360.59	0.03712071		890.6	-0.00699837		1420.59	0.00201373		1950.6	0.01036631		2480.6	-0.00447972
360.79	0.03843432		890.8	-0.00600987		1420.79	0.00182321		1950.8	0.01043425		2480.8	-0.00450916
360.99	0.03859719		891	-0.00628486		1420.99	0.00026347		1951	0.01075553		2481	-0.00457609
361.19	0.03843035		891.2	-0.00566265		1421.19	0.00034669		1951.2	0.01171076		2481.2	-0.00437965
361.39	0.03863526		891.4	-0.00543272		1421.39	-0.00056502		1951.4	0.01243387		2481.4	-0.00381466
361.59	0.03854693		891.6	-0.00561248		1421.59	-0.00070619		1951.6	0.01284882		2481.6	-0.00359192
361.79	0.03930264		891.8	-0.00541673		1421.79	-0.00159143		1951.8	0.01327493		2481.8	-0.00319797
361.99	0.03797144		892	-0.00582295		1421.99	-0.00160385		1952	0.01333257		2482	-0.00353167
362.19	0.03810738		892.2	-0.00592887		1422.19	-0.00163167		1952.2	0.01337776		2482.2	-0.00370875
362.39	0.03709704		892.4	-0.0060286		1422.39	-0.000936		1952.4	0.01299775		2482.4	-0.00398018
362.59	0.03731772		892.6	-0.00567836		1422.59	-0.00130798		1952.6	0.0126846		2482.6	-0.00387018
362.79	0.03661801		892.8	-0.00568092		1422.79	-0.00123286		1952.8	0.01290989		2482.8	-0.00345427
362.99	0.03680778		893	-0.00546229		1422.99	-0.00096452		1953	0.01216161		2483	-0.00327507
363.19	0.0358275		893.2	-0.00518935		1423.19	-0.00102713		1953.2	0.0123176		2483.2	-0.00410762
363.39	0.03568792		893.4	-0.00563938		1423.39	-0.00003016		1953.4	0.0116772		2483.4	-0.00401508
363.59	0.03693511		893.6	-0.00458511		1423.59	-0.00071378		1953.6	0.01112656		2483.6	-0.00315564
363.79	0.0361656		893.8	-0.00480794		1423.79	-0.00090317		1953.8	0.01200185		2483.8	-0.00349551
363.99	0.03720858		894	-0.00527941		1423.99	-0.00080951		1954	0.01197819		2484	-0.00265859
364.19	0.03809367		894.2	-0.00645648		1424.19	-0.00106714		1954.2	0.01143095		2484.2	-0.00325577
364.39	0.03864414		894.4	-0.00675675		1424.39	-0.00128632		1954.4	0.01115152		2484.4	-0.00293351
364.59	0.03880037		894.6	-0.00649596		1424.59	-0.00238243		1954.6	0.01099736		2484.6	-0.00260399
364.79	0.03930969		894.8	-0.00669126		1424.79	-0.00265911		1954.8	0.0110765		2484.8	-0.00268599
364.99	0.0399649		895	-0.0074543		1424.99	-0.00354353		1955	0.01184492		2485	-0.00237465
365.19	0.03981692		895.2	-0.00712377		1425.19	-0.00350019		1955.2	0.01225666		2485.2	-0.00229164
365.39	0.04033059		895.4	-0.00771624		1425.39	-0.00374836		1955.4	0.01227809		2485.4	-0.00259945
365.59	0.04111756		895.6	-0.00822887		1425.59	-0.00375678		1955.6	0.01294558		2485.6	-0.00357606
365.79	0.04159397		895.8	-0.00784796		1425.79	-0.00298147		1955.8	0.0127285		2485.8	-0.00419438
365.99	0.04051557		896	-0.00736759		1425.99	-0.00247644		1956	0.01246877		2486	-0.00479259
366.19	0.04111375		896.2	-0.00692701		1426.19	-0.00136374		1956.2	0.01190558		2486.2	-0.00564354
366.39	0.04006049		896.4	-0.00689522		1426.39	0.00026831		1956.4	0.01137615		2486.4	-0.0056679
366.59	0.04043641		896.6	-0.00673926		1426.59	0.00053083		1956.6	0.01145289		2486.6	-0.00534185
366.79	0.04022191		896.8	-0.00640707		1426.79	0.00096649		1956.8	0.01080527		2486.8	-0.00618973
366.99	0.04057785		897	-0.00536547		1426.99	0.001371		1957	0.01073787		2487	-0.00651075
367.19	0.04024657		897.2	-0.00516169		1427.19	0.00212946		1957.2	0.01159493		2487.2	-0.00640044
367.39	0.03987579		897.4	-0.00628419		1427.39	0.00256387		1957.4	0.01118088		2487.4	-0.00641236
367.59	0.04083154		897.6	-0.00574687		1427.59	0.00188841		1957.6	0.01183615		2487.6	-0.00636645
367.79	0.040384		897.8	-0.00660857		1427.79	0.00174268		1957.8	0.01129513		2487.8	-0.00733395
367.99	0.04165977		898	-0.00627477		1427.99	0.0017611		1958	0.01106127		2488	-0.00717838
368.19	0.04203464		898.2	-0.00640119		1428.19	0.00070262		1958.2	0.01083126		2488.2	-0.00760016
368.39	0.04225598		898.4	-0.00655544		1428.39	0.00000013		1958.4	0.01091229		2488.4	-0.00700777
368.59	0.04205384		898.6	-0.00589755		1428.59	-0.00082967		1958.6	0.01122467		2488.6	-0.00739456
368.79	0.04219913		898.8	-0.00602398		1428.79	-0.00171409		1958.8	0.01238579		2488.8	-0.00768415
368.99	0.04213083		899	-0.00576074		1428.99	-0.00203007		1959	0.01250817		2489	-0.00779155
369.19	0.04185134		899.2	-0.0058034		1429.19	-0.00129267		1959.2	0.01202242		2489.2	-0.00826183
369.39	0.04173395		899.4	-0.00592771		1429.39	-0.00103363		1959.4	0.0120583		2489.4	-0.00781724
369.59	0.04139662		899.6	-0.00510006		1429.59	-0.00129698		1959.6	0.01221706		2489.6	-0.00746695
369.79	0.04119959		899.8	-0.00407374		1429.79	-0.00101591		1959.8	0.0118435		2489.8	-0.00663024
369.99	0.04096742		900	-0.00443488		1429.99	-0.00169071		1960	0.01143516		2490	-0.00580864
370.19	0.04042394		900.2	-0.00459678		1430.19	-0.00098105		1960.2	0.0109699		2490.2	-0.00569611
370.39	0.03964583		900.4	-0.00564016		1430.39	-0.00019152		1960.4	0.01145198		2490.4	-0.0050336
370.59	0.03959241		900.6	-0.00524455		1430.59	-0.00050137		1960.6	0.01179808		2490.6	-0.00503918
370.79	0.03899004		900.8	-0.00595395		1430.79	-0.00053035		1960.8	0.01199238		2490.8	-0.005242
370.99	0.03844234		901	-0.00550002		1430.99	0.00089404		1961	0.01263017		2491	-0.00443234
371.19	0.03769735		901.2	-0.00598848		1431.19	0.00013379		1961.2	0.01224449		2491.2	-0.00361235
371.39	0.03749631		901.4	-0.00681543		1431.39	-0.00065594		1961.4	0.01159491		2491.4	-0.00406338
371.59	0.03728842		901.6	-0.00656378		1431.59	-0.00027574		1961.6	0.01208647		2491.6	-0.00338922
371.79	0.03713802		901.8	-0.00617202		1431.79	-0.00041183		1961.8	0.01250846		2491.8	-0.00344189
371.99	0.03693583		902	-0.00590385		1431.99	-0.00078892		1962	0.01304928		2492	-0.00206729
372.19	0.03654315		902.2	-0.00707864		1432.19	-0.00163958		1962.2	0.01326131		2492.2	-0.00201106
372.39	0.03629097		902.4	-0.00645714		1432.39	-0.00224381		1962.4	0.01356339		2492.4	-0.00182819
372.59	0.03564649		902.6	-0.00542769		1432.59	-0.00249608		1962.6	0.01364305		2492.6	-0.00236933
372.79	0.0349745		902.8	-0.00492912		1432.79	-0.00293294		1962.8	0.01434025		2492.8	-0.00216841
372.99	0.034881		903	-0.00534704		1432.99	-0.00307357		1963	0.0136917		2493	-0.00221063
373.19	0.03528415		903.2	-0.00538678		1433.19	-0.00338397		1963.2	0.01437803		2493.2	-0.00205274
373.39	0.03540878		903.4	-0.00465668		1433.39	-0.00371949		1963.4	0.01389003		2493.4	-0.00255278
373.59	0.03642978		903.6	-0.00399279		1433.59	-0.00392953		1963.6	0.01371707		2493.6	-0.00228021
373.79	0.03717927		903.8	-0.00403404		1433.79	-0.00425254		1963.8	0.01446714		2493.8	-0.00235002
373.99	0.03768377		904	-0.0046574		1433.99	-0.00412242		1964	0.01485695		2494	-0.00268303
374.19	0.03858953		904.2	-0.00445064		1434.19	-0.00392092		1964.2	0.01569584		2494.2	-0.00430164
374.39	0.04019844		904.4	-0.00437986		1434.39	-0.00329965		1964.4	0.0161096		2494.4	-0.00542779
374.59	0.04062466		904.6	-0.00352673		1434.59	-0.00334974		1964.6	0.01610174		2494.6	-0.00592738
374.79	0.04118131		904.8	-0.00407318		1434.79	-0.00217541		1964.8	0.01575169		2494.8	-0.00626472
374.99	0.04167716		905	-0.00370361		1434.99	-0.00131753		1965	0.01617878		2495	-0.00605961
375.19	0.04194032		905.2	-0.00472991		1435.19	-0.00206498		1965.2	0.0163494		2495.2	-0.00599546
375.39	0.04170129		905.4	-0.0055651		1435.39	-0.00084741		1965.4	0.01612358		2495.4	-0.006745
375.59	0.0415071		905.6	-0.00609915		1435.59	-0.00013227		1965.6	0.01624635		2495.6	-0.00570771
375.79	0.04150861		905.8	-0.00589615		1435.79	0.00026474		1965.8	0.01578855		2495.8	-0.00486907
375.99	0.04087518		906	-0.00673075		1435.99	-0.00002943		1966	0.0147567		2496	-0.00444141
376.19	0.0403989		906.2	-0.00714582		1436.19	-0.0004087		1966.2	0.0139387		2496.2	-0.00451242
376.39	0.03988617		906.4	-0.00631555		1436.39	-0.00067063		1966.4	0.01347831		2496.4	-0.00382856
376.59	0.03957967		906.6	-0.00747645		1436.59	-0.000837		1966.6	0.0133137		2496.6	-0.00368701
376.79	0.04002986		906.8	-0.00766064		1436.79	-0.00141505		1966.8	0.01387362		2496.8	-0.00276559
376.99	0.04075491		907	-0.00824857		1436.99	-0.00114992		1967	0.01372669		2497	-0.00330448
377.19	0.04178355		907.2	-0.00867614		1437.19	-0.0012595		1967.2	0.01381505		2497.2	-0.00295146
377.39	0.04166904		907.4	-0.00887968		1437.39	-0.00113412		1967.4	0.01242876		2497.4	-0.0034103
377.59	0.04160119		907.6	-0.0085535		1437.59	-0.00124221		1967.6	0.0128612		2497.6	-0.0025368
377.79	0.04126382		907.8	-0.00874113		1437.79	-0.00241154		1967.8	0.0139906		2497.8	-0.00334425
377.99	0.04129034		908	-0.00848973		1437.99	-0.00268666		1968	0.01411027		2498	-0.00424001
378.19	0.04186409		908.2	-0.00759859		1438.19	-0.00317544		1968.2	0.01434264		2498.2	-0.005534
378.39	0.04197848		908.4	-0.0068504		1438.39	-0.00286625		1968.4	0.01379317		2498.4	-0.00615611
378.59	0.04135448		908.6	-0.00626622		1438.59	-0.00252351		1968.6	0.01349391		2498.6	-0.00635309
378.79	0.04161217		908.8	-0.00593591		1438.79	-0.00144208		1968.8	0.01339383		2498.8	-0.00714712
378.99	0.04133001		909	-0.00570887		1438.99	-0.00116335		1969	0.01375064		2499	-0.00745551
379.19	0.0412551		909.2	-0.0055306		1439.19	-0.00083221		1969.2	0.0131633		2499.2	-0.00798811
379.39	0.04112834		909.4	-0.00503268		1439.39	0.00008666		1969.4	0.0119109		2499.4	-0.00842488
379.59	0.04119212		909.6	-0.00417955		1439.59	0.00064278		1969.6	0.01100298		2499.6	-0.00790769
379.79	0.04085251		909.8	-0.0032211		1439.79	0.00147909		1969.8	0.01035368		2499.8	-0.00807582
379.99	0.04085251		910	-0.0032211		1439.99	0.00147909		1970	0.01035368		2500	-0.00807582
380.19	0.04053878		910.2	-0.00229087		1440.19	0.00115443		1970.2	0.00952476		2500.2	-0.00812167
380.39	0.04021701		910.4	-0.00158535		1440.39	0.00147215		1970.4	0.0086651		2500.4	-0.00890877
380.59	0.04038746		910.6	-0.00077023		1440.59	0.00191763		1970.6	0.00774914		2500.6	-0.00980265
380.79	0.03986616		910.8	0.00050748		1440.79	0.00263242		1970.8	0.00670499		2500.8	-0.01022023
380.99	0.03874925		911	0.00085398		1440.99	0.00302163		1971	0.0062288		2501	-0.01015822
381.19	0.0389641		911.2	0.00192433		1441.19	0.00381615		1971.2	0.00634105		2501.2	-0.01024834
381.39	0.03823944		911.4	0.00331152		1441.39	0.00370905		1971.4	0.0066948		2501.4	-0.0105036
381.59	0.03804602		911.6	0.00380783		1441.59	0.00446918		1971.6	0.00641407		2501.6	-0.01051031
381.79	0.03775685		911.8	0.00403537		1441.79	0.0047548		1971.8	0.00679975		2501.8	-0.01070842
381.99	0.03782048		912	0.00475856		1441.99	0.00491947		1972	0.00693899		2502	-0.0111585
382.19	0.03780215		912.2	0.00408622		1442.19	0.00555556		1972.2	0.00743012		2502.2	-0.01145461
382.39	0.03775114		912.4	0.00404472		1442.39	0.00505265		1972.4	0.00825892		2502.4	-0.01138071
382.59	0.0379367		912.6	0.00408434		1442.59	0.0046414		1972.6	0.00841881		2502.6	-0.01130071
382.79	0.03810958		912.8	0.00396175		1442.79	0.00462813		1972.8	0.00827216		2502.8	-0.01155193
382.99	0.0374189		913	0.00447155		1442.99	0.00503918		1973	0.00808463		2503	-0.01114994
383.19	0.03726379		913.2	0.00456739		1443.19	0.00494695		1973.2	0.00809777		2503.2	-0.01105205
383.39	0.03675291		913.4	0.00436463		1443.39	0.00526315		1973.4	0.00773375		2503.4	-0.01105076
383.59	0.03681467		913.6	0.00383261		1443.59	0.00533235		1973.6	0.00769152		2503.6	-0.01007193
383.79	0.03598245		913.8	0.0033255		1443.79	0.00570508		1973.8	0.00700352		2503.8	-0.00963726
383.99	0.03540016		914	0.00308355		1443.99	0.00493738		1974	0.00668548		2504	-0.00942725
384.19	0.03426185		914.2	0.00302987		1444.19	0.00366025		1974.2	0.0066369		2504.2	-0.0091276
384.39	0.03448824		914.4	0.00256457		1444.39	0.00414466		1974.4	0.00604681		2504.4	-0.00970732
384.59	0.03426832		914.6	0.00187372		1444.59	0.00419687		1974.6	0.0052734		2504.6	-0.00925268
384.79	0.03297723		914.8	0.00140443		1444.79	0.00389075		1974.8	0.00515629		2504.8	-0.00828339
384.99	0.03182574		915	0.00123374		1444.99	0.00325023		1975	0.00521028		2505	-0.00886418
385.19	0.03261892		915.2	0.00250738		1445.19	0.00275311		1975.2	0.00524944		2505.2	-0.00957023
385.39	0.03141254		915.4	0.00266646		1445.39	0.00199733		1975.4	0.0049609		2505.4	-0.00996447
385.59	0.0325454		915.6	0.0027806		1445.59	0.00244761		1975.6	0.00403293		2505.6	-0.00932331
385.79	0.03309284		915.8	0.00305908		1445.79	0.00226316		1975.8	0.00399515		2505.8	-0.00935985
385.99	0.0342198		916	0.00232797		1445.99	0.00250405		1976	0.00363299		2506	-0.00990715
386.19	0.03464194		916.2	0.00131796		1446.19	0.00272862		1976.2	0.0043418		2506.2	-0.00911684
386.39	0.03599967		916.4	0.00095994		1446.39	0.00182291		1976.4	0.00552798		2506.4	-0.00826391
386.59	0.03584637		916.6	0.00085991		1446.59	0.00120069		1976.6	0.00569172		2506.6	-0.00750374
386.79	0.03477142		916.8	0.0008663		1446.79	0.00153936		1976.8	0.00580506		2506.8	-0.00698764
386.99	0.03461833		917	0.00128326		1446.99	0.00190455		1977	0.00590546		2507	-0.00709322
387.19	0.03406965		917.2	0.00103204		1447.19	0.00186361		1977.2	0.00672646		2507.2	-0.00733592
387.39	0.0341522		917.4	0.00049127		1447.39	0.00143634		1977.4	0.0074675		2507.4	-0.00716538
387.59	0.03306602		917.6	0.0006156		1447.59	0.00177502		1977.6	0.00798757		2507.6	-0.00716648
387.79	0.03226063		917.8	0.00056191		1447.79	0.0021147		1977.8	0.0082632		2507.8	-0.00725603
387.99	0.03227316		918	0.0002508		1447.99	0.00290589		1978	0.00807271		2508	-0.00689974
388.19	0.03121535		918.2	0.00037722		1448.19	0.00312758		1978.2	0.0083117		2508.2	-0.00730947
388.39	0.03050933		918.4	0.00026174		1448.39	0.0042192		1978.4	0.00778302		2508.4	-0.00733325
388.59	0.02939211		918.6	0.00025054		1448.59	0.00380936		1978.6	0.00860329		2508.6	-0.00789235
388.79	0.02869672		918.8	0.00094485		1448.79	0.00424134		1978.8	0.00823139		2508.8	-0.00935567
388.99	0.02814976		919	0.00223464		1448.99	0.0043839		1979	0.00732282		2509	-0.01058899
389.19	0.02885265		919.2	0.00328076		1449.19	0.00440737		1979.2	0.00671778		2509.2	-0.01054579
389.39	0.02846515		919.4	0.00416451		1449.39	0.00461825		1979.4	0.00661353		2509.4	-0.01015298
389.59	0.0300805		919.6	0.00533088		1449.59	0.00522347		1979.6	0.00605072		2509.6	-0.00883296
389.79	0.03010853		919.8	0.00473367		1449.79	0.00610383		1979.8	0.00595265		2509.8	-0.00874316
389.99	0.03085211		920	0.00335431		1449.99	0.00665857		1980	0.00574152		2510	-0.00855802
390.19	0.03093375		920.2	0.00421654		1450.19	0.00686965		1980.2	0.0060191		2510.2	-0.00718588
390.39	0.03205238		920.4	0.00457041		1450.39	0.00640316		1980.4	0.00688881		2510.4	-0.00638662
390.59	0.03161058		920.6	0.0047958		1450.59	0.00580567		1980.6	0.00703842		2510.6	-0.00563086
390.79	0.03232684		920.8	0.00447792		1450.79	0.00579068		1980.8	0.00744505		2510.8	-0.0059308
390.99	0.03266213		921	0.00480503		1450.99	0.00535678		1981	0.00831411		2511	-0.00623695
391.19	0.03181642		921.2	0.00421984		1451.19	0.00465604		1981.2	0.0087257		2511.2	-0.00627993
391.39	0.03261263		921.4	0.00448454		1451.39	0.00498959		1981.4	0.00948322		2511.4	-0.00632432
391.59	0.03132291		921.6	0.00443155		1451.59	0.00581842		1981.6	0.0093306		2511.6	-0.00638102
391.79	0.03098345		921.8	0.00450593		1451.79	0.00544022		1981.8	0.00929554		2511.8	-0.00679268
391.99	0.03041825		922	0.00451577		1451.99	0.00589227		1982	0.00943226		2512	-0.00728034
392.19	0.02969673		922.2	0.00540441		1452.19	0.00603004		1982.2	0.00964881		2512.2	-0.00817328
392.39	0.02906557		922.4	0.00478479		1452.39	0.00588119		1982.4	0.00946915		2512.4	-0.00790558
392.59	0.02968146		922.6	0.00537619		1452.59	0.00484884		1982.6	0.00996439		2512.6	-0.00925509
392.79	0.02963546		922.8	0.00549867		1452.79	0.00506133		1982.8	0.00885398		2512.8	-0.00957351
392.99	0.02912184		923	0.00562137		1452.99	0.00383581		1983	0.00874986		2513	-0.00947528
393.19	0.02948154		923.2	0.00492096		1453.19	0.00343289		1983.2	0.00840115		2513.2	-0.01032395
393.39	0.02841501		923.4	0.00488752		1453.39	0.00379148		1983.4	0.00840742		2513.4	-0.00998722
393.59	0.02855091		923.6	0.00436166		1453.59	0.00417261		1983.6	0.00813217		2513.6	-0.00965571
393.79	0.02759874		923.8	0.00424927		1453.79	0.00500719		1983.8	0.00825696		2513.8	-0.01100567
393.99	0.02818411		924	0.00382911		1453.99	0.00549308		1984	0.00776691		2514	-0.01140547
394.19	0.02786151		924.2	0.00458101		1454.19	0.00534432		1984.2	0.00859674		2514.2	-0.01124841
394.39	0.02916182		924.4	0.00464906		1454.39	0.00543458		1984.4	0.00899262		2514.4	-0.01053227
394.59	0.0287761		924.6	0.00407314		1454.59	0.00592499		1984.6	0.00867938		2514.6	-0.01150492
394.79	0.02768239		924.8	0.00410715		1454.79	0.00605808		1984.8	0.00889994		2514.8	-0.01124624
394.99	0.02702956		925	0.00391816		1454.99	0.00613451		1985	0.00991274		2515	-0.0112228
395.19	0.02736949		925.2	0.00396137		1455.19	0.00657965		1985.2	0.01050994		2515.2	-0.01141638
395.39	0.0279859		925.4	0.0049254		1455.39	0.00752754		1985.4	0.01059643		2515.4	-0.01123545
395.59	0.0283479		925.6	0.00509503		1455.59	0.00748968		1985.6	0.01029678		2515.6	-0.0106017
395.79	0.02831827		925.8	0.00506901		1455.79	0.00692086		1985.8	0.01066586		2515.8	-0.01083437
395.99	0.02870999		926	0.00489502		1455.99	0.00753453		1986	0.01104176		2516	-0.01020268
396.19	0.02966188		926.2	0.00541241		1456.19	0.00698677		1986.2	0.0100579		2516.2	-0.01017939
396.39	0.03038163		926.4	0.00452994		1456.39	0.00575006		1986.4	0.01008912		2516.4	-0.00870558
396.59	0.03157508		926.6	0.0043861		1456.59	0.00492561		1986.6	0.00979892		2516.6	-0.00846196
396.79	0.03094507		926.8	0.00319255		1456.79	0.00484962		1986.8	0.00966562		2516.8	-0.008745
396.99	0.03028993		927	0.00279098		1456.99	0.0038922		1987	0.00932422		2517	-0.00851734
397.19	0.03027005		927.2	0.0011125		1457.19	0.00476208		1987.2	0.00841867		2517.2	-0.0078693
397.39	0.02891505		927.4	0.00086378		1457.39	0.00485033		1987.4	0.00838194		2517.4	-0.00768274
397.59	0.02892651		927.6	0.00050907		1457.59	0.00464485		1987.6	0.00758304		2517.6	-0.00803301
397.79	0.02813917		927.8	0.00063421		1457.79	0.00487795		1987.8	0.00645904		2517.8	-0.00888874
397.99	0.02819399		928	-0.00051069		1457.99	0.00480978		1988	0.00549916		2518	-0.00880061
398.19	0.02816042		928.2	-0.00061161		1458.19	0.00422836		1988.2	0.00625713		2518.2	-0.0091468
398.39	0.02825446		928.4	-0.000706		1458.39	0.0050411		1988.4	0.00676521		2518.4	-0.00921458
398.59	0.02707016		928.6	-0.00113076		1458.59	0.00589336		1988.6	0.00620292		2518.6	-0.00995183
398.79	0.02615546		928.8	-0.00025513		1458.79	0.005835		1988.8	0.00644672		2518.8	-0.0088194
398.99	0.02685677		929	0.00042446		1458.99	0.00534893		1989	0.00735745		2519	-0.00904262
399.19	0.02708199		929.2	0.00139667		1459.19	0.00460591		1989.2	0.0076226		2519.2	-0.00903371
399.39	0.0274433		929.4	0.00220973		1459.39	0.00420232		1989.4	0.00703105		2519.4	-0.00902744
399.59	0.0279558		929.6	0.00204844		1459.59	0.00405003		1989.6	0.00795277		2519.6	-0.00863654
399.79	0.02780138		929.8	0.00211564		1459.79	0.00364704		1989.8	0.00885385		2519.8	-0.00870919
399.99	0.02846045		930	0.00371988		1459.99	0.00419154		1990	0.00871862		2520	-0.00881953
400.19	0.02944888		930.2	0.005194		1460.19	0.00451924		1990.2	0.00824263		2520.2	-0.00861865
400.39	0.03015057		930.4	0.00590619		1460.39	0.00550889		1990.4	0.00868895		2520.4	-0.00784992
400.59	0.03022701		930.6	0.00627077		1460.59	0.0055378		1990.6	0.00858383		2520.6	-0.00855195
400.79	0.02929584		930.8	0.00716949		1460.79	0.00591103		1990.8	0.0094479		2520.8	-0.00934732
400.99	0.0287966		931	0.00762832		1460.99	0.00563454		1991	0.00921079		2521	-0.0082698
401.19	0.02882742		931.2	0.00685397		1461.19	0.00629615		1991.2	0.00855022		2521.2	-0.00856472
401.39	0.02831928		931.4	0.00714448		1461.39	0.00523019		1991.4	0.00887831		2521.4	-0.00856488
401.59	0.02807456		931.6	0.00758421		1461.59	0.0055546		1991.6	0.0078882		2521.6	-0.00825277
401.79	0.02816629		931.8	0.00738857		1461.79	0.00528521		1991.8	0.00719028		2521.8	-0.00835218
401.99	0.02834808		932	0.00614884		1461.99	0.00566177		1992	0.00731525		2522	-0.00801183
402.19	0.02827912		932.2	0.00571588		1462.19	0.00584118		1992.2	0.00803763		2522.2	-0.00783667
402.39	0.02825719		932.4	0.00512981		1462.39	0.00668048		1992.4	0.00831299		2522.4	-0.00739045
402.59	0.02792292		932.6	0.00457635		1462.59	0.00670805		1992.6	0.00706944		2522.6	-0.00640548
402.79	0.02721098		932.8	0.00464826		1462.79	0.00620001		1992.8	0.00785173		2522.8	-0.00635371
402.99	0.02755262		933	0.00482821		1462.99	0.00599614		1993	0.00852689		2523	-0.00608263
403.19	0.0267914		933.2	0.00327045		1463.19	0.00598288		1993.2	0.0089679		2523.2	-0.00636163
403.39	0.02650528		933.4	0.00280805		1463.39	0.00581431		1993.4	0.00890143		2523.4	-0.00686941
403.59	0.02641942		933.6	0.00236752		1463.59	0.00632847		1993.6	0.00929817		2523.6	-0.0068265
403.79	0.02719568		933.8	0.00254677		1463.79	0.00728926		1993.8	0.00885562		2523.8	-0.0070743
403.99	0.02612267		934	0.00287041		1463.99	0.00909806		1994	0.0078462		2524	-0.00760912
404.19	0.02597493		934.2	0.00327165		1464.19	0.00931997		1994.2	0.00730926		2524.2	-0.00785965
404.39	0.02590974		934.4	0.00386593		1464.39	0.01039013		1994.4	0.00718409		2524.4	-0.00871513
404.59	0.02572352		934.6	0.00365293		1464.59	0.01029472		1994.6	0.00695985		2524.6	-0.00926447
404.79	0.02544628		934.8	0.00466416		1464.79	0.01050495		1994.8	0.00677427		2524.8	-0.00954612
404.99	0.0254636		935	0.00469762		1464.99	0.01081671		1995	0.00587076		2525	-0.00909987
405.19	0.02480895		935.2	0.00509164		1465.19	0.01124676		1995.2	0.00549538		2525.2	-0.00907848
405.39	0.02463736		935.4	0.00617724		1465.39	0.01159214		1995.4	0.00615048		2525.4	-0.00828022
405.59	0.02483094		935.6	0.00548808		1465.59	0.01077606		1995.6	0.00584164		2525.6	-0.00816868
405.79	0.0250053		935.8	0.00519703		1465.79	0.01025534		1995.8	0.00649783		2525.8	-0.00776361
405.99	0.0248418		936	0.00505523		1465.99	0.00974086		1996	0.00703774		2526	-0.00752662
406.19	0.02570616		936.2	0.00509819		1466.19	0.00899306		1996.2	0.00770943		2526.2	-0.00783676
406.39	0.02699592		936.4	0.0047673		1466.39	0.00856345		1996.4	0.00808684		2526.4	-0.00807734
406.59	0.02731624		936.6	0.00457761		1466.59	0.00787223		1996.6	0.0084424		2526.6	-0.00767005
406.79	0.02783293		936.8	0.00427043		1466.79	0.00820839		1996.8	0.00978767		2526.8	-0.00725763
406.99	0.02819033		937	0.00363703		1466.99	0.00790329		1997	0.01030002		2527	-0.00708261
407.19	0.02737152		937.2	0.00266272		1467.19	0.00678132		1997.2	0.01025161		2527.2	-0.00820319
407.39	0.02668221		937.4	0.00276376		1467.39	0.00537965		1997.4	0.01081514		2527.4	-0.00825705
407.59	0.02673229		937.6	0.00263466		1467.59	0.00508898		1997.6	0.01144339		2527.6	-0.00885819
407.79	0.02699925		937.8	0.00283396		1467.79	0.00532501		1997.8	0.01077583		2527.8	-0.00839395
407.99	0.02533808		938	0.00346991		1467.99	0.00527003		1998	0.01008848		2528	-0.00922614
408.19	0.02551091		938.2	0.00447976		1468.19	0.00461994		1998.2	0.01073059		2528.2	-0.00934601
408.39	0.0258447		938.4	0.00615596		1468.39	0.00579891		1998.4	0.01079093		2528.4	-0.00893979
408.59	0.02589029		938.6	0.00696874		1468.59	0.00716243		1998.6	0.01046058		2528.6	-0.00911746
408.79	0.02619133		938.8	0.00824214		1468.79	0.00726136		1998.8	0.00968425		2528.8	-0.00947454
408.99	0.02616041		939	0.00779548		1468.99	0.00794492		1999	0.0094022		2529	-0.00900337
409.19	0.02542683		939.2	0.00807477		1469.19	0.0083245		1999.2	0.00930169		2529.2	-0.0090368
409.39	0.0250837		939.4	0.0086102		1469.39	0.00812705		1999.4	0.00905239		2529.4	-0.00888281
409.59	0.02507918		939.6	0.00712407		1469.59	0.00701184		1999.6	0.00887768		2529.6	-0.00847084
409.79	0.02436406		939.8	0.00798235		1469.79	0.0079093		1999.8	0.00848187		2529.8	-0.00892319
409.99	0.02520123		940	0.00778997		1469.99	0.00781195		2000	0.0075945		2530	-0.0092174
410.19	0.02624068		940.2	0.00770336		1470.19	0.00724535		2000.2	0.00667961		2530.2	-0.00912297
410.39	0.02683063		940.4	0.00712572		1470.39	0.00757996		2000.4	0.00627584		2530.4	-0.00856431
410.59	0.02733692		940.6	0.00594802		1470.59	0.00729486		2000.6	0.00640636		2530.6	-0.00819846
410.79	0.02712505		940.8	0.00521726		1470.79	0.00765684		2000.8	0.00613277		2530.8	-0.00727242
410.99	0.02622746		941	0.00415437		1470.99	0.00638188		2001	0.00572946		2531	-0.00720273
411.19	0.02562133		941.2	0.0038179		1471.19	0.00586907		2001.2	0.00607507		2531.2	-0.00687237
411.39	0.02493654		941.4	0.00340849		1471.39	0.00454067		2001.4	0.00672006		2531.4	-0.00614958
411.59	0.02556713		941.6	0.00390026		1471.59	0.00458182		2001.6	0.00671095		2531.6	-0.00650967
411.79	0.02535305		941.8	0.00459957		1471.79	0.00494062		2001.8	0.00637228		2531.8	-0.0061322
411.99	0.02441928		942	0.00482732		1471.99	0.00504047		2002	0.00762845		2532	-0.00635128
412.19	0.02438995		942.2	0.00498692		1472.19	0.00507041		2002.2	0.00819432		2532.2	-0.00586051
412.39	0.02517715		942.4	0.00572144		1472.39	0.00637638		2002.4	0.00818456		2532.4	-0.00606692
412.59	0.02572739		942.6	0.00475717		1472.59	0.00729754		2002.6	0.00798248		2532.6	-0.00689173
412.79	0.0254038		942.8	0.00387945		1472.79	0.00665341		2002.8	0.00849781		2532.8	-0.00689244
412.99	0.0244549		943	0.00296415		1472.99	0.00695507		2003	0.00829686		2533	-0.00618147
413.19	0.02418106		943.2	0.0033026		1473.19	0.00677713		2003.2	0.0087392		2533.2	-0.00611155
413.39	0.02362789		943.4	0.00374832		1473.39	0.0064348		2003.4	0.00891273		2533.4	-0.0054002
413.59	0.02340177		943.6	0.00340924		1473.59	0.00648191		2003.6	0.00919051		2533.6	-0.00570204
413.79	0.02286867		943.8	0.00439743		1473.79	0.00644399		2003.8	0.0096124		2533.8	-0.00682456
413.99	0.02379569		944	0.00450159		1473.99	0.00611594		2004	0.01021426		2534	-0.00713207
414.19	0.02372793		944.2	0.00422432		1474.19	0.00594591		2004.2	0.01029653		2534.2	-0.00696599
414.39	0.02344634		944.4	0.00350814		1474.39	0.00620842		2004.4	0.01054641		2534.4	-0.00699312
414.59	0.02333746		944.6	0.00267449		1474.59	0.00577618		2004.6	0.01055572		2534.6	-0.00722987
414.79	0.02273539		944.8	0.00394957		1474.79	0.00523561		2004.8	0.00986633		2534.8	-0.00631306
414.99	0.02254623		945	0.00352429		1474.99	0.00505035		2005	0.00949268		2535	-0.00644773
415.19	0.02295249		945.2	0.00371425		1475.19	0.00522143		2005.2	0.0085047		2535.2	-0.00734485
415.39	0.02227864		945.4	0.00443818		1475.39	0.00454436		2005.4	0.00757937		2535.4	-0.00763967
415.59	0.02271055		945.6	0.00489563		1475.59	0.00504196		2005.6	0.00690441		2535.6	-0.00793453
415.79	0.022607		945.8	0.00485324		1475.79	0.00481174		2005.8	0.00651334		2535.8	-0.00828131
415.99	0.02302596		946	0.00455528		1475.99	0.00420432		2006	0.00713529		2536	-0.00796575
416.19	0.02418084		946.2	0.00399273		1476.19	0.00409843		2006.2	0.00592512		2536.2	-0.00887948
416.39	0.02519968		946.4	0.00367017		1476.39	0.00408921		2006.4	0.0055601		2536.4	-0.00896624
416.59	0.02541517		946.6	0.00375026		1476.59	0.00400911		2006.6	0.00568935		2536.6	-0.00905785
416.79	0.02555315		946.8	0.00361769		1476.79	0.00456307		2006.8	0.00593131		2536.8	-0.00831348
416.99	0.02598102		947	0.00438026		1476.99	0.00446898		2007	0.00492473		2537	-0.00831243
417.19	0.02667188		947.2	0.00505931		1477.19	0.00368765		2007.2	0.00560541		2537.2	-0.00853268
417.39	0.02615426		947.4	0.00584822		1477.39	0.00399364		2007.4	0.00553099		2537.4	-0.00822022
417.59	0.02505917		947.6	0.00625263		1477.59	0.00457485		2007.6	0.005736		2537.6	-0.008086
417.79	0.02515058		947.8	0.00606763		1477.79	0.0051995		2007.8	0.00678111		2537.8	-0.00821551
417.99	0.02568361		948	0.00622241		1477.99	0.00544863		2008	0.00675535		2538	-0.00811604
418.19	0.02522753		948.2	0.00680874		1478.19	0.00617773		2008.2	0.00674636		2538.2	-0.00747718
418.39	0.02466767		948.4	0.00673688		1478.39	0.00605009		2008.4	0.00656341		2538.4	-0.00718357
418.59	0.02439081		948.6	0.00657249		1478.59	0.00655965		2008.6	0.0075016		2538.6	-0.00644558
418.79	0.02402057		948.8	0.00700222		1478.79	0.00721291		2008.8	0.00695174		2538.8	-0.00574822
418.99	0.02439606		949	0.00633236		1478.99	0.00829478		2009	0.00698842		2539	-0.00600854
419.19	0.02417399		949.2	0.00654415		1479.19	0.0083885		2009.2	0.00791229		2539.2	-0.00600422
419.39	0.02381805		949.4	0.00753498		1479.39	0.00808922		2009.4	0.00867399		2539.4	-0.00461624
419.59	0.02428368		949.6	0.00673667		1479.59	0.00756494		2009.6	0.00903504		2539.6	-0.0037796
419.79	0.02421075		949.8	0.006178		1479.79	0.00713449		2009.8	0.00965773		2539.8	-0.00470765
419.99	0.02480579		950	0.00565828		1479.99	0.00716638		2010	0.01044051		2540	-0.00429143
420.19	0.02487328		950.2	0.00538992		1480.19	0.00712009		2010.2	0.01022953		2540.2	-0.00471892
420.39	0.02482881		950.4	0.00512057		1480.39	0.00664441		2010.4	0.0104026		2540.4	-0.00497762
420.59	0.02570844		950.6	0.0053929		1480.59	0.00672629		2010.6	0.01084442		2540.6	-0.00522847
420.79	0.0252779		950.8	0.00466128		1480.79	0.00688263		2010.8	0.01048123		2540.8	-0.00568463
420.99	0.02513816		951	0.00509873		1480.99	0.00612196		2011	0.01045994		2541	-0.00661469
421.19	0.02419199		951.2	0.00403701		1481.19	0.00606926		2011.2	0.01028128		2541.2	-0.00716649
421.39	0.02369422		951.4	0.00320748		1481.39	0.00642694		2011.4	0.00995261		2541.4	-0.00669029
421.59	0.02267107		951.6	0.00261135		1481.59	0.00666291		2011.6	0.00964943		2541.6	-0.00715159
421.79	0.02283647		951.8	0.00238184		1481.79	0.00692796		2011.8	0.00887477		2541.8	-0.00741806
421.99	0.02312515		952	0.00314897		1481.99	0.00697994		2012	0.0077496		2542	-0.0082201
422.19	0.0223309		952.2	0.00388067		1482.19	0.00725872		2012.2	0.00708211		2542.2	-0.00851133
422.39	0.02159396		952.4	0.00353761		1482.39	0.00728946		2012.4	0.00610744		2542.4	-0.00845535
422.59	0.02143661		952.6	0.00408147		1482.59	0.00759419		2012.6	0.00592124		2542.6	-0.00791665
422.79	0.02238438		952.8	0.00530841		1482.79	0.00703265		2012.8	0.00526081		2542.8	-0.00793393
422.99	0.02214905		953	0.00702914		1482.99	0.00769527		2013	0.00528918		2543	-0.00790083
423.19	0.02243882		953.2	0.00791664		1483.19	0.00705181		2013.2	0.00567029		2543.2	-0.00701204
423.39	0.02290744		953.4	0.00892299		1483.39	0.00656774		2013.4	0.00517558		2543.4	-0.00572101
423.59	0.02353268		953.6	0.00848083		1483.59	0.00614462		2013.6	0.00491817		2543.6	-0.00501845
423.79	0.02427579		953.8	0.00948199		1483.79	0.00668187		2013.8	0.00526494		2543.8	-0.00567462
423.99	0.02518138		954	0.00969099		1483.99	0.00686754		2014	0.00565166		2544	-0.00555312
424.19	0.02462766		954.2	0.00970557		1484.19	0.00590935		2014.2	0.00600651		2544.2	-0.00556893
424.39	0.02468902		954.4	0.00945309		1484.39	0.00583182		2014.4	0.00694645		2544.4	-0.0061185
424.59	0.02555969		954.6	0.0088323		1484.59	0.00537145		2014.6	0.00719741		2544.6	-0.00663511
424.79	0.02434288		954.8	0.00775069		1484.79	0.00597867		2014.8	0.00782421		2544.8	-0.00767046
424.99	0.02424127		955	0.00766917		1484.99	0.00666498		2015	0.00851663		2545	-0.00738907
425.19	0.02301744		955.2	0.0058916		1485.19	0.00728952		2015.2	0.00798608		2545.2	-0.00747184
425.39	0.02253666		955.4	0.00584391		1485.39	0.00768719		2015.4	0.0078538		2545.4	-0.00788163
425.59	0.0212851		955.6	0.00573945		1485.59	0.00825762		2015.6	0.00703609		2545.6	-0.00889115
425.79	0.02144503		955.8	0.00557886		1485.79	0.00829343		2015.8	0.00729127		2545.8	-0.00916744
425.99	0.02121667		956	0.00546321		1485.99	0.00841349		2016	0.00657718		2546	-0.00961663
426.19	0.0195098		956.2	0.0061687		1486.19	0.00832665		2016.2	0.00653705		2546.2	-0.01030378
426.39	0.01945493		956.4	0.00631957		1486.39	0.00776055		2016.4	0.00639242		2546.4	-0.01006768
426.59	0.01955033		956.6	0.00698303		1486.59	0.00784132		2016.6	0.00637001		2546.6	-0.00959545
426.79	0.01985673		956.8	0.00743629		1486.79	0.00779405		2016.8	0.00635707		2546.8	-0.01028245
426.99	0.0189274		957	0.00815056		1486.99	0.00837766		2017	0.00663659		2547	-0.0091217
427.19	0.02028391		957.2	0.0081165		1487.19	0.00750015		2017.2	0.00633626		2547.2	-0.0084197
427.39	0.02031518		957.4	0.00853871		1487.39	0.00719289		2017.4	0.00620423		2547.4	-0.0076375
427.59	0.02067262		957.6	0.0081778		1487.59	0.00690532		2017.6	0.00627294		2547.6	-0.00728041
427.79	0.02127083		957.8	0.00834358		1487.79	0.00667345		2017.8	0.00794218		2547.8	-0.00736784
427.99	0.02084927		958	0.00741451		1487.99	0.00580441		2018	0.00867637		2548	-0.00743599
428.19	0.02033613		958.2	0.00645016		1488.19	0.00571126		2018.2	0.00886054		2548.2	-0.00733524
428.39	0.02018331		958.4	0.00544515		1488.39	0.00633521		2018.4	0.00982018		2548.4	-0.00755459
428.59	0.02068494		958.6	0.00449546		1488.59	0.00617631		2018.6	0.00994159		2548.6	-0.00854362
428.79	0.02030584		958.8	0.0041298		1488.79	0.00712891		2018.8	0.0105282		2548.8	-0.00788554
428.99	0.01958834		959	0.00391141		1488.99	0.00751623		2019	0.00971947		2549	-0.00761752
429.19	0.01963692		959.2	0.00276911		1489.19	0.00837917		2019.2	0.00886311		2549.2	-0.00848592
429.39	0.0201218		959.4	0.0038534		1489.39	0.00774554		2019.4	0.00809356		2549.4	-0.00904323
429.59	0.02043553		959.6	0.00336302		1489.59	0.00746897		2019.6	0.00789608		2549.6	-0.00898093
429.79	0.02094402		959.8	0.00372052		1489.79	0.00746479		2019.8	0.00864638		2549.8	-0.00897124
429.99	0.02024331		960	0.00427121		1489.99	0.00755167		2020	0.00793776		2550	-0.00901936
430.19	0.01997312		960.2	0.00455502		1490.19	0.00769651		2020.2	0.00913147		2550.2	-0.00968337
430.39	0.02043755		960.4	0.00518709		1490.39	0.00833429		2020.4	0.00943812		2550.4	-0.00985843
430.59	0.02038918		960.6	0.00514088		1490.59	0.00958326		2020.6	0.00963666		2550.6	-0.00912333
430.79	0.01976701		960.8	0.00520755		1490.79	0.01017497		2020.8	0.00974655		2550.8	-0.00983609
430.99	0.0198		961	0.00629811		1490.99	0.00988022		2021	0.00956179		2551	-0.00918851
431.19	0.020338		961.2	0.00667055		1491.19	0.00924466		2021.2	0.00913164		2551.2	-0.00936278
431.39	0.02058651		961.4	0.00583589		1491.39	0.00863949		2021.4	0.00900616		2551.4	-0.00853945
431.59	0.02099884		961.6	0.00544662		1491.59	0.00841325		2021.6	0.00989156		2551.6	-0.00810632
431.79	0.02158616		961.8	0.00550918		1491.79	0.00821229		2021.8	0.0112466		2551.8	-0.00765338
431.99	0.02127204		962	0.0046483		1491.99	0.0084409		2022	0.01148643		2552	-0.00692268
432.19	0.0210771		962.2	0.00393969		1492.19	0.00851826		2022.2	0.01195736		2552.2	-0.00655584
432.39	0.02138369		962.4	0.00276556		1492.39	0.00923615		2022.4	0.01257876		2552.4	-0.00591461
432.59	0.02199888		962.6	0.00275742		1492.59	0.00973655		2022.6	0.01306629		2552.6	-0.0060487
432.79	0.02313109		962.8	0.00248344		1492.79	0.01053407		2022.8	0.01197986		2552.8	-0.00549978
432.99	0.02222516		963	0.00161021		1492.99	0.01048978		2023	0.01013011		2553	-0.00583601
433.19	0.02266841		963.2	0.00187088		1493.19	0.01113158		2023.2	0.00931051		2553.2	-0.00589531
433.39	0.02313718		963.4	0.00368616		1493.39	0.00987074		2023.4	0.00749302		2553.4	-0.005579
433.59	0.02262744		963.6	0.00310975		1493.59	0.01019525		2023.6	0.00738731		2553.6	-0.00615055
433.79	0.0227618		963.8	0.00372645		1493.79	0.0097485		2023.8	0.00678846		2553.8	-0.00625392
433.99	0.02155817		964	0.00457793		1493.99	0.00875276		2024	0.00634087		2554	-0.00630989
434.19	0.0215692		964.2	0.00439447		1494.19	0.00857426		2024.2	0.0070884		2554.2	-0.00685411
434.39	0.02074415		964.4	0.00531133		1494.39	0.00880557		2024.4	0.00691356		2554.4	-0.00772982
434.59	0.02031931		964.6	0.00465585		1494.59	0.00800787		2024.6	0.00679835		2554.6	-0.00758535
434.79	0.01976883		964.8	0.00493054		1494.79	0.00719859		2024.8	0.00596725		2554.8	-0.00911413
434.99	0.02010991		965	0.00555617		1494.99	0.00620209		2025	0.00598749		2555	-0.00900141
435.19	0.0202799		965.2	0.00534693		1495.19	0.00526712		2025.2	0.0068546		2555.2	-0.00872517
435.39	0.02030875		965.4	0.00517839		1495.39	0.00539429		2025.4	0.00645308		2555.4	-0.00863075
435.59	0.01987661		965.6	0.00560207		1495.59	0.00540213		2025.6	0.00804918		2555.6	-0.00894971
435.79	0.020163		965.8	0.00537319		1495.79	0.00497778		2025.8	0.00908176		2555.8	-0.00764699
435.99	0.01974015		966	0.0050849		1495.99	0.00447473		2026	0.00946387		2556	-0.00670057
436.19	0.01957022		966.2	0.0042121		1496.19	0.00466831		2026.2	0.00935431		2556.2	-0.0067343
436.39	0.01959685		966.4	0.00419355		1496.39	0.00588223		2026.4	0.00952745		2556.4	-0.00640908
436.59	0.01954588		966.6	0.00424049		1496.59	0.00658088		2026.6	0.00889251		2556.6	-0.00609051
436.79	0.01974586		966.8	0.00392389		1496.79	0.00749075		2026.8	0.00780119		2556.8	-0.00681001
436.99	0.01861991		967	0.00370426		1496.99	0.00845514		2027	0.00684756		2557	-0.00684041
437.19	0.01877453		967.2	0.00419543		1497.19	0.00949714		2027.2	0.00710286		2557.2	-0.00701934
437.39	0.01958084		967.4	0.00489712		1497.39	0.00864726		2027.4	0.00655021		2557.4	-0.00712856
437.59	0.01961344		967.6	0.00475972		1497.59	0.00873931		2027.6	0.00715796		2557.6	-0.00687402
437.79	0.02023122		967.8	0.00490085		1497.79	0.00827306		2027.8	0.00676482		2557.8	-0.00671179
437.99	0.01952741		968	0.00508072		1497.99	0.00802517		2028	0.00729867		2558	-0.00693849
438.19	0.01979403		968.2	0.00486833		1498.19	0.00790036		2028.2	0.00762607		2558.2	-0.00776602
438.39	0.02023954		968.4	0.00546189		1498.39	0.00791409		2028.4	0.00807511		2558.4	-0.00762541
438.59	0.01995985		968.6	0.00522816		1498.59	0.00750462		2028.6	0.00896162		2558.6	-0.00778003
438.79	0.02016739		968.8	0.00503961		1498.79	0.00690891		2028.8	0.00963954		2558.8	-0.00785979
438.99	0.02044536		969	0.00503755		1498.99	0.00734286		2029	0.01098924		2559	-0.00761217
439.19	0.02066146		969.2	0.00472175		1499.19	0.00714428		2029.2	0.01131265		2559.2	-0.00788232
439.39	0.02041119		969.4	0.00476195		1499.39	0.0071312		2029.4	0.01108341		2559.4	-0.0082927
439.59	0.0202522		969.6	0.00419776		1499.59	0.0069134		2029.6	0.0118375		2559.6	-0.00818671
439.79	0.02007116		969.8	0.0039329		1499.79	0.00665021		2029.8	0.01121074		2559.8	-0.00705043
439.99	0.01944857		970	0.00366988		1499.99	0.00683421		2030	0.01108387		2560	-0.0080577
440.19	0.01953229		970.2	0.00302007		1500.19	0.00731389		2030.2	0.01093818		2560.2	-0.00764453
440.39	0.01894487		970.4	0.00302403		1500.39	0.00785434		2030.4	0.01052084		2560.4	-0.00753247
440.59	0.0188074		970.6	0.00339617		1500.59	0.00875628		2030.6	0.01010951		2560.6	-0.00721459
440.79	0.01830732		970.8	0.00381645		1500.79	0.00864747		2030.8	0.01104262		2560.8	-0.00743267
440.99	0.01800919		971	0.00404138		1500.99	0.00892259		2031	0.01027132		2561	-0.00706311
441.19	0.01839577		971.2	0.00380124		1501.19	0.00852397		2031.2	0.0105232		2561.2	-0.00693946
441.39	0.01912147		971.4	0.00383617		1501.39	0.00786125		2031.4	0.01040441		2561.4	-0.00682629
441.59	0.01920636		971.6	0.00399166		1501.59	0.00812163		2031.6	0.01001521		2561.6	-0.00622526
441.79	0.02020484		971.8	0.00361914		1501.79	0.00774109		2031.8	0.00925768		2561.8	-0.00732584
441.99	0.02052686		972	0.00396388		1501.99	0.00697846		2032	0.00892871		2562	-0.00734874
442.19	0.02084254		972.2	0.00515269		1502.19	0.00675683		2032.2	0.00845777		2562.2	-0.00738118
442.39	0.02075757		972.4	0.00533695		1502.39	0.00657965		2032.4	0.00861035		2562.4	-0.00733941
442.59	0.02001359		972.6	0.00573705		1502.59	0.00596784		2032.6	0.00894711		2562.6	-0.0088249
442.79	0.02012451		972.8	0.00500306		1502.79	0.00553394		2032.8	0.00874674		2562.8	-0.00903695
442.99	0.0194003		973	0.00552477		1502.99	0.00670959		2033	0.00815793		2563	-0.00928215
443.19	0.01883696		973.2	0.00529997		1503.19	0.00687424		2033.2	0.00708513		2563.2	-0.01003147
443.39	0.01794398		973.4	0.00552424		1503.39	0.00648426		2033.4	0.00641404		2563.4	-0.01018392
443.59	0.01787195		973.6	0.00529226		1503.59	0.00655582		2033.6	0.00625174		2563.6	-0.01016968
443.79	0.01643248		973.8	0.00519873		1503.79	0.00720122		2033.8	0.00563644		2563.8	-0.00945086
443.99	0.01637967		974	0.00453241		1503.99	0.00723626		2034	0.00731329		2564	-0.00893062
444.19	0.01652399		974.2	0.00358483		1504.19	0.00719709		2034.2	0.00734657		2564.2	-0.00775016
444.39	0.01620939		974.4	0.00342328		1504.39	0.00843076		2034.4	0.00804658		2564.4	-0.00690755
444.59	0.0156692		974.6	0.00404417		1504.59	0.00890406		2034.6	0.00921733		2564.6	-0.00548838
444.79	0.01464214		974.8	0.00304167		1504.79	0.00894196		2034.8	0.00983878		2564.8	-0.00464593
444.99	0.01494645		975	0.00303929		1504.99	0.01015872		2035	0.00888068		2565	-0.00378291
445.19	0.01536703		975.2	0.00262546		1505.19	0.01014907		2035.2	0.00915942		2565.2	-0.00275662
445.39	0.0160858		975.4	0.00326956		1505.39	0.0109002		2035.4	0.00987651		2565.4	-0.0021606
445.59	0.0173735		975.6	0.00407516		1505.59	0.01098971		2035.6	0.00967806		2565.6	-0.00203705
445.79	0.01863853		975.8	0.0034916		1505.79	0.0103112		2035.8	0.01027468		2565.8	-0.00294509
445.99	0.01892659		976	0.00401762		1505.99	0.01063227		2036	0.01029594		2566	-0.00313567
446.19	0.01915722		976.2	0.00454346		1506.19	0.0115653		2036.2	0.01010614		2566.2	-0.00316996
446.39	0.01867132		976.4	0.00466313		1506.39	0.01118121		2036.4	0.00942532		2566.4	-0.00354013
446.59	0.01877318		976.6	0.0048803		1506.59	0.01004635		2036.6	0.00939249		2566.6	-0.00528194
446.79	0.01851984		976.8	0.00443693		1506.79	0.01007983		2036.8	0.00897961		2566.8	-0.00543044
446.99	0.01807632		977	0.00524094		1506.99	0.01041497		2037	0.00798994		2567	-0.0058926
447.19	0.01841707		977.2	0.00489373		1507.19	0.00969898		2037.2	0.00765048		2567.2	-0.00652961
447.39	0.01838406		977.4	0.00562419		1507.39	0.0088919		2037.4	0.0070809		2567.4	-0.00651702
447.59	0.01835419		977.6	0.00636041		1507.59	0.00852675		2037.6	0.00748582		2567.6	-0.00683482
447.79	0.01747276		977.8	0.00617542		1507.79	0.00828471		2037.8	0.00747796		2567.8	-0.00669306
447.99	0.01825986		978	0.00488907		1507.99	0.0082515		2038	0.008718		2568	-0.00674058
448.19	0.01798456		978.2	0.00522936		1508.19	0.00761869		2038.2	0.0082682		2568.2	-0.00704638
448.39	0.01735901		978.4	0.00507292		1508.39	0.00887782		2038.4	0.00902756		2568.4	-0.00693297
448.59	0.01662226		978.6	0.00493509		1508.59	0.00806555		2038.6	0.00921564		2568.6	-0.0072616
448.79	0.01611069		978.8	0.00479843		1508.79	0.0086361		2038.8	0.00981475		2568.8	-0.00707653
448.99	0.0152642		979	0.00461268		1508.99	0.00923658		2039	0.01051121		2569	-0.00685775
449.19	0.01538999		979.2	0.00458095		1509.19	0.00874724		2039.2	0.01046674		2569.2	-0.00755794
449.39	0.01644338		979.4	0.00470212		1509.39	0.00911311		2039.4	0.01110526		2569.4	-0.00837067
449.59	0.01665879		979.6	0.00466371		1509.59	0.0087436		2039.6	0.01090825		2569.6	-0.00958939
449.79	0.01667709		979.8	0.00377197		1509.79	0.00838195		2039.8	0.01071755		2569.8	-0.01009456
449.99	0.01743166		980	0.0045013		1509.99	0.00940691		2040	0.00958431		2570	-0.0096784
450.19	0.01806384		980.2	0.00402108		1510.19	0.00895499		2040.2	0.00876599		2570.2	-0.00904823
450.39	0.01801477		980.4	0.00412022		1510.39	0.00749186		2040.4	0.00795961		2570.4	-0.00899675
450.59	0.01874447		980.6	0.00460616		1510.59	0.00721679		2040.6	0.00829421		2570.6	-0.00983335
450.79	0.01908257		980.8	0.00462432		1510.79	0.0071987		2040.8	0.00793929		2570.8	-0.00944618
450.99	0.01995473		981	0.00557437		1510.99	0.00702273		2041	0.0074648		2571	-0.00909821
451.19	0.02034441		981.2	0.0057325		1511.19	0.00640234		2041.2	0.00747491		2571.2	-0.00884621
451.39	0.02007508		981.4	0.00709666		1511.39	0.00650864		2041.4	0.0073377		2571.4	-0.00945101
451.59	0.01975163		981.6	0.00769379		1511.59	0.00612026		2041.6	0.0075452		2571.6	-0.00964235
451.79	0.01918864		981.8	0.00647544		1511.79	0.00529278		2041.8	0.00785067		2571.8	-0.00989043
451.99	0.01818015		982	0.00582732		1511.99	0.00540683		2042	0.007995		2572	-0.00942842
452.19	0.01795412		982.2	0.00634173		1512.19	0.00485609		2042.2	0.00841076		2572.2	-0.00907515
452.39	0.0177645		982.4	0.00544352		1512.39	0.00626298		2042.4	0.00952234		2572.4	-0.00838507
452.59	0.01761703		982.6	0.00584799		1512.59	0.00616589		2042.6	0.01090492		2572.6	-0.00798098
452.79	0.01697994		982.8	0.00527769		1512.79	0.00739893		2042.8	0.01193789		2572.8	-0.00749406
452.99	0.01584298		983	0.00457392		1512.99	0.00787281		2043	0.01194231		2573	-0.00808982
453.19	0.01626779		983.2	0.00522904		1513.19	0.00763353		2043.2	0.01150192		2573.2	-0.00898226
453.39	0.01593836		983.4	0.00576433		1513.39	0.00787062		2043.4	0.01122732		2573.4	-0.00894417
453.59	0.01555979		983.6	0.00540299		1513.59	0.00853548		2043.6	0.01072268		2573.6	-0.00941684
453.79	0.01564379		983.8	0.00405484		1513.79	0.00843425		2043.8	0.01069298		2573.8	-0.008666
453.99	0.01654371		984	0.00380254		1513.99	0.00877618		2044	0.01003833		2574	-0.00829032
454.19	0.01692314		984.2	0.00287269		1514.19	0.00826335		2044.2	0.00991957		2574.2	-0.00772613
454.39	0.01643571		984.4	0.00315634		1514.39	0.00805155		2044.4	0.00930938		2574.4	-0.00794235
454.59	0.01629744		984.6	0.00305271		1514.59	0.00864441		2044.6	0.00933437		2574.6	-0.00787772
454.79	0.01638095		984.8	0.00291743		1514.79	0.00827201		2044.8	0.00870591		2574.8	-0.00806033
454.99	0.01671566		985	0.00321258		1514.99	0.00742052		2045	0.00884571		2575	-0.0085502
455.19	0.01672879		985.2	0.00299296		1515.19	0.00708721		2045.2	0.00839495		2575.2	-0.00890432
455.39	0.01717481		985.4	0.00337184		1515.39	0.00708269		2045.4	0.00847975		2575.4	-0.0092238
455.59	0.01700692		985.6	0.00312487		1515.59	0.0063406		2045.6	0.00811847		2575.6	-0.00821962
455.79	0.01651183		985.8	0.00256194		1515.79	0.00583152		2045.8	0.00850493		2575.8	-0.00804112
455.99	0.01627762		986	0.00275039		1515.99	0.00637229		2046	0.00855984		2576	-0.00769137
456.19	0.01727312		986.2	0.00358867		1516.19	0.00665137		2046.2	0.00918044		2576.2	-0.00684474
456.39	0.01803808		986.4	0.0037987		1516.39	0.00739652		2046.4	0.00899046		2576.4	-0.00686403
456.59	0.01791771		986.6	0.00479449		1516.59	0.00747043		2046.6	0.00954441		2576.6	-0.00684826
456.79	0.01780262		986.8	0.00504731		1516.79	0.00766035		2046.8	0.00909589		2576.8	-0.00726689
456.99	0.01787883		987	0.0060845		1516.99	0.0071586		2047	0.00819688		2577	-0.00733365
457.19	0.01806686		987.2	0.00695138		1517.19	0.00762074		2047.2	0.00804387		2577.2	-0.00734844
457.39	0.01791821		987.4	0.00692688		1517.39	0.00843144		2047.4	0.00832199		2577.4	-0.00817208
457.59	0.01785151		987.6	0.00529662		1517.59	0.00863519		2047.6	0.0086412		2577.6	-0.00855415
457.79	0.01735088		987.8	0.00514193		1517.79	0.00785608		2047.8	0.00968478		2577.8	-0.00804735
457.99	0.01708723		988	0.00480304		1517.99	0.00790733		2048	0.00886043		2578	-0.00782885
458.19	0.01630502		988.2	0.00484724		1518.19	0.00810424		2048.2	0.00951448		2578.2	-0.00691026
458.39	0.01593684		988.4	0.00536143		1518.39	0.00883544		2048.4	0.00907419		2578.4	-0.00667264
458.59	0.01609362		988.6	0.00481161		1518.59	0.00950806		2048.6	0.00956752		2578.6	-0.0062301
458.79	0.01645302		988.8	0.00500514		1518.79	0.00901836		2048.8	0.00926133		2578.8	-0.00609111
458.99	0.01669499		989	0.00474755		1518.99	0.00861417		2049	0.00973211		2579	-0.00645299
459.19	0.01755467		989.2	0.00517321		1519.19	0.00871683		2049.2	0.0099125		2579.2	-0.00610552
459.39	0.01801341		989.4	0.00489618		1519.39	0.00889186		2049.4	0.00980508		2579.4	-0.00599044
459.59	0.01802585		989.6	0.00535171		1519.59	0.00852977		2049.6	0.00970986		2579.6	-0.00539114
459.79	0.01791181		989.8	0.00546569		1519.79	0.00882575		2049.8	0.00985812		2579.8	-0.00667509
459.99	0.01801787		990	0.00558453		1519.99	0.00872051		2050	0.01012753		2580	-0.00656261
460.19	0.01814564		990.2	0.00597153		1520.19	0.00810083		2050.2	0.01017296		2580.2	-0.00547559
460.39	0.01772212		990.4	0.00564652		1520.39	0.00785307		2050.4	0.00919534		2580.4	-0.00579189
460.59	0.01720558		990.6	0.00618044		1520.59	0.00770754		2050.6	0.00931499		2580.6	-0.00530832
460.79	0.01689206		990.8	0.00667849		1520.79	0.00796		2050.8	0.00902798		2580.8	-0.00420256
460.99	0.01668708		991	0.00666365		1520.99	0.00747461		2051	0.00895593		2581	-0.00398346
461.19	0.01582478		991.2	0.00607471		1521.19	0.00790567		2051.2	0.00929707		2581.2	-0.00464287
461.39	0.01583334		991.4	0.00637042		1521.39	0.0080793		2051.4	0.01067144		2581.4	-0.00563608
461.59	0.01539133		991.6	0.00585787		1521.59	0.00671401		2051.6	0.00999244		2581.6	-0.00523278
461.79	0.01483312		991.8	0.00608352		1521.79	0.00710151		2051.8	0.01027922		2581.8	-0.00484814
461.99	0.01417472		992	0.00566085		1521.99	0.00773949		2052	0.00986929		2582	-0.00537971
462.19	0.01424489		992.2	0.00634517		1522.19	0.00815419		2052.2	0.01055027		2582.2	-0.00479329
462.39	0.01371447		992.4	0.00677069		1522.39	0.00919631		2052.4	0.01042841		2582.4	-0.00463471
462.59	0.01355979		992.6	0.00641181		1522.59	0.00875616		2052.6	0.01005694		2582.6	-0.00511671
462.79	0.0133458		992.8	0.00683461		1522.79	0.00937948		2052.8	0.01006186		2582.8	-0.00552849
462.99	0.01390019		993	0.00668759		1522.99	0.00876147		2053	0.01004433		2583	-0.0067765
463.19	0.01502597		993.2	0.00694969		1523.19	0.00816736		2053.2	0.01002784		2583.2	-0.0069648
463.39	0.01572198		993.4	0.00657961		1523.39	0.00820145		2053.4	0.00931449		2583.4	-0.00764393
463.59	0.01561178		993.6	0.00682481		1523.59	0.00778663		2053.6	0.00990453		2583.6	-0.0083669
463.79	0.01538974		993.8	0.00655777		1523.79	0.00778905		2053.8	0.00914791		2583.8	-0.0089596
463.99	0.01445014		994	0.00597765		1523.99	0.00756391		2054	0.0093763		2584	-0.00807494
464.19	0.0136086		994.2	0.00593312		1524.19	0.00767287		2054.2	0.00852488		2584.2	-0.0079977
464.39	0.01296562		994.4	0.00535922		1524.39	0.00786438		2054.4	0.00761456		2584.4	-0.00808226
464.59	0.01354747		994.6	0.00540205		1524.59	0.00823686		2054.6	0.00762587		2584.6	-0.00744997
464.79	0.01291663		994.8	0.00539232		1524.79	0.00838886		2054.8	0.00752155		2584.8	-0.00677253
464.99	0.01293261		995	0.00452567		1524.99	0.00802286		2055	0.00760052		2585	-0.00747875
465.19	0.01275604		995.2	0.00462029		1525.19	0.00816413		2055.2	0.00708682		2585.2	-0.00762726
465.39	0.01423962		995.4	0.00459477		1525.39	0.00805555		2055.4	0.00744858		2585.4	-0.00743749
465.59	0.01432868		995.6	0.00382815		1525.59	0.00763601		2055.6	0.00689395		2585.6	-0.00695251
465.79	0.01396856		995.8	0.00366273		1525.79	0.00823545		2055.8	0.00768399		2585.8	-0.00685004
465.99	0.01424589		996	0.00442011		1525.99	0.0079409		2056	0.00813269		2586	-0.00732736
466.19	0.01420375		996.2	0.00468058		1526.19	0.00780404		2056.2	0.00867072		2586.2	-0.00708243
466.39	0.01396349		996.4	0.00483586		1526.39	0.00746856		2056.4	0.00836966		2586.4	-0.00697879
466.59	0.01526191		996.6	0.00479683		1526.59	0.00692991		2056.6	0.00806599		2586.6	-0.00680977
466.79	0.01547392		996.8	0.00511406		1526.79	0.00728103		2056.8	0.00799785		2586.8	-0.00636798
466.99	0.01701554		997	0.0042153		1526.99	0.00592393		2057	0.00783844		2587	-0.00633423
467.19	0.01811344		997.2	0.00341172		1527.19	0.00634421		2057.2	0.00851445		2587.2	-0.00594308
467.39	0.01792451		997.4	0.00310701		1527.39	0.0064969		2057.4	0.00921962		2587.4	-0.00615352
467.59	0.01808879		997.6	0.00306338		1527.59	0.00622134		2057.6	0.00951014		2587.6	-0.00567643
467.79	0.01828577		997.8	0.0026197		1527.79	0.00678585		2057.8	0.00929709		2587.8	-0.00499852
467.99	0.01704491		998	0.00284493		1527.99	0.00704089		2058	0.00979617		2588	-0.00577351
468.19	0.01613409		998.2	0.00214827		1528.19	0.00759702		2058.2	0.00983095		2588.2	-0.00532754
468.39	0.01569809		998.4	0.00142122		1528.39	0.00738006		2058.4	0.01006874		2588.4	-0.00503068
468.59	0.01600796		998.6	0.00159023		1528.59	0.00821159		2058.6	0.00980869		2588.6	-0.00483732
468.79	0.01513596		998.8	0.0021452		1528.79	0.00838023		2058.8	0.00968733		2588.8	-0.00500132
468.99	0.01468005		999	0.00191451		1528.99	0.00912617		2059	0.00934013		2589	-0.00593226
469.19	0.01460454		999.2	0.00201638		1529.19	0.00997423		2059.2	0.00901006		2589.2	-0.00654363
469.39	0.01500074		999.4	0.00219405		1529.39	0.01011187		2059.4	0.00946416		2589.4	-0.0070721
469.59	0.01456826		999.6	0.00293279		1529.59	0.01055602		2059.6	0.0094233		2589.6	-0.00758552
469.79	0.01408995		999.8	0.00348506		1529.79	0.01062116		2059.8	0.01004088		2589.8	-0.00838705
469.99	0.01470968		1000	0.00380106		1529.99	0.01141357		2060	0.01000788		2590	-0.00857105
470.19	0.01454778		1000.2	0.00304405		1530.19	0.01115868		2060.2	0.01026345		2590.2	-0.00922347
470.39	0.01502488		1000.4	0.00332592		1530.39	0.01105487		2060.4	0.00906329		2590.4	-0.00866852
470.59	0.01582752		1000.6	0.00323285		1530.59	0.01095408		2060.6	0.00957032		2590.6	-0.00827746
470.79	0.015577		1000.8	0.00323324		1530.79	0.01025788		2060.8	0.00946227		2590.8	-0.00802124
470.99	0.01699689		1001	0.00206109		1530.99	0.00939787		2061	0.01006779		2591	-0.00703372
471.19	0.01684021		1001.2	0.00207988		1531.19	0.00889103		2061.2	0.01059797		2591.2	-0.0066921
471.39	0.01706809		1001.4	0.00267951		1531.39	0.00808882		2061.4	0.01152155		2591.4	-0.00722227
471.59	0.01731132		1001.6	0.00249835		1531.59	0.00777693		2061.6	0.01155358		2591.6	-0.00678352
471.79	0.016776		1001.8	0.00246199		1531.79	0.00769226		2061.8	0.01194317		2591.8	-0.00771503
471.99	0.01645277		1002	0.00337492		1531.99	0.0069672		2062	0.01192188		2592	-0.00757741
472.19	0.0161986		1002.2	0.00303627		1532.19	0.00738218		2062.2	0.01226256		2592.2	-0.00624701
472.39	0.01628766		1002.4	0.00392666		1532.39	0.00715468		2062.4	0.0111688		2592.4	-0.00588239
472.59	0.01671225		1002.6	0.00456109		1532.59	0.00762468		2062.6	0.01084618		2592.6	-0.00675901
472.79	0.017169		1002.8	0.00504437		1532.79	0.00756789		2062.8	0.01088152		2592.8	-0.00724684
472.99	0.01779079		1003	0.00504046		1532.99	0.00910187		2063	0.010161		2593	-0.00770532
473.19	0.01817409		1003.2	0.00551907		1533.19	0.00936656		2063.2	0.01013236		2593.2	-0.00824822
473.39	0.01835894		1003.4	0.00612732		1533.39	0.00905738		2063.4	0.00987147		2593.4	-0.00899712
473.59	0.01809362		1003.6	0.00595262		1533.59	0.01003517		2063.6	0.00975041		2593.6	-0.00837363
473.79	0.01821773		1003.8	0.00623878		1533.79	0.01011353		2063.8	0.01017729		2593.8	-0.00857192
473.99	0.01907008		1004	0.00557876		1533.99	0.01123165		2064	0.00933839		2594	-0.00857453
474.19	0.01829558		1004.2	0.00532205		1534.19	0.01102114		2064.2	0.0089156		2594.2	-0.00885257
474.39	0.01872003		1004.4	0.00536694		1534.39	0.01052495		2064.4	0.00849892		2594.4	-0.00837362
474.59	0.0187873		1004.6	0.0049518		1534.59	0.00942923		2064.6	0.00914495		2594.6	-0.00819918
474.79	0.01824807		1004.8	0.0053558		1534.79	0.00817742		2064.8	0.00943846		2594.8	-0.00792017
474.99	0.01854863		1005	0.00435666		1534.99	0.00751055		2065	0.01009573		2595	-0.00757974
475.19	0.01805408		1005.2	0.00426107		1535.19	0.00739306		2065.2	0.00950427		2595.2	-0.00834825
475.39	0.01797321		1005.4	0.00367292		1535.39	0.00697353		2065.4	0.01017524		2595.4	-0.00883997
475.59	0.0175736		1005.6	0.00419273		1535.59	0.00713223		2065.6	0.00963206		2595.6	-0.00896338
475.79	0.01789217		1005.8	0.00396688		1535.79	0.00759084		2065.8	0.0102023		2595.8	-0.00956257
475.99	0.01817144		1006	0.00411295		1535.99	0.00807269		2066	0.01018937		2596	-0.00868588
476.19	0.01819161		1006.2	0.00414609		1536.19	0.00841872		2066.2	0.0101098		2596.2	-0.00845185
476.39	0.01809104		1006.4	0.00446989		1536.39	0.00792668		2066.4	0.00933464		2596.4	-0.00871515
476.59	0.01875181		1006.6	0.00453521		1536.59	0.00798823		2066.6	0.00954762		2596.6	-0.00942808
476.79	0.01844965		1006.8	0.00425099		1536.79	0.00759964		2066.8	0.00915459		2596.8	-0.00820893
476.99	0.01826744		1007	0.00378529		1536.99	0.00750577		2067	0.00874382		2597	-0.0081184
477.19	0.01838418		1007.2	0.00348514		1537.19	0.00704723		2067.2	0.00852878		2597.2	-0.00843716
477.39	0.01847796		1007.4	0.00276868		1537.39	0.00717049		2067.4	0.00890681		2597.4	-0.00847527
477.59	0.01836086		1007.6	0.00277762		1537.59	0.00832601		2067.6	0.00904732		2597.6	-0.00799142
477.79	0.01906007		1007.8	0.00262049		1537.79	0.00764114		2067.8	0.00964645		2597.8	-0.00843245
477.99	0.01910594		1008	0.0018175		1537.99	0.00893371		2068	0.00912778		2598	-0.00792677
478.19	0.01844026		1008.2	0.00244287		1538.19	0.00911199		2068.2	0.00890447		2598.2	-0.00756518
478.39	0.01882761		1008.4	0.0024672		1538.39	0.0081302		2068.4	0.00810846		2598.4	-0.00749169
478.59	0.01785316		1008.6	0.00216706		1538.59	0.00719489		2068.6	0.00770864		2598.6	-0.00730891
478.79	0.01751316		1008.8	0.00244229		1538.79	0.00631883		2068.8	0.00853287		2598.8	-0.00731371
478.99	0.01682465		1009	0.0020117		1538.99	0.0060539		2069	0.00824717		2599	-0.00738656
479.19	0.01636221		1009.2	0.00188332		1539.19	0.0066081		2069.2	0.00796637		2599.2	-0.00754295
479.39	0.01532001		1009.4	0.0021523		1539.39	0.00716949		2069.4	0.00785863		2599.4	-0.00812325
479.59	0.01515777		1009.6	0.00269088		1539.59	0.00824657		2069.6	0.00753781		2599.6	-0.00898171
479.79	0.01501584		1009.8	0.00213695		1539.79	0.00973187		2069.8	0.00909693		2599.8	-0.00881039
479.99	0.01443062		1010	0.00243467		1539.99	0.00955164		2070	0.00905792		2600	-0.00875944
480.19	0.01471254		1010.2	0.00238515		1540.19	0.00945727		2070.2	0.00887945		2600.2	-0.0091622
480.39	0.01390773		1010.4	0.0022466		1540.39	0.00983338		2070.4	0.00890913		2600.4	-0.00917761
480.59	0.01335866		1010.6	0.0024309		1540.59	0.01015811		2070.6	0.00947207		2600.6	-0.00896236
480.79	0.01291472		1010.8	0.00119357		1540.79	0.00894058		2070.8	0.00958537		2600.8	-0.00859978
480.99	0.01360586		1011	0.0012572		1540.99	0.00934199		2071	0.00960914		2601	-0.00856617
481.19	0.01402725		1011.2	0.00114808		1541.19	0.00949495		2071.2	0.00997699		2601.2	-0.00827219
481.39	0.01390858		1011.4	0.00108297		1541.39	0.009592		2071.4	0.01076804		2601.4	-0.00864038
481.59	0.01465104		1011.6	0.00092864		1541.59	0.00986355		2071.6	0.01139696		2601.6	-0.00787072
481.79	0.01548521		1011.8	0.00071898		1541.79	0.00964027		2071.8	0.01167542		2601.8	-0.00811883
481.99	0.01537604		1012	0.00151491		1541.99	0.01016377		2072	0.01098408		2602	-0.00770251
482.19	0.01531605		1012.2	0.00170845		1542.19	0.00938544		2072.2	0.01047384		2602.2	-0.00776595
482.39	0.01496524		1012.4	0.00198102		1542.39	0.00829525		2072.4	0.00998879		2602.4	-0.00686592
482.59	0.01477197		1012.6	0.00199645		1542.59	0.00770375		2072.6	0.01058282		2602.6	-0.00682483
482.79	0.01533341		1012.8	0.00298013		1542.79	0.00784503		2072.8	0.01128095		2602.8	-0.00669934
482.99	0.01435084		1013	0.00292998		1542.99	0.00837991		2073	0.01108106		2603	-0.00740013
483.19	0.0147884		1013.2	0.00316609		1543.19	0.00884765		2073.2	0.01121477		2603.2	-0.00762385
483.39	0.01509072		1013.4	0.00368054		1543.39	0.00918168		2073.4	0.01089805		2603.4	-0.00710268
483.59	0.01495891		1013.6	0.00415173		1543.59	0.00950581		2073.6	0.01218175		2603.6	-0.00708058
483.79	0.01475212		1013.8	0.00455771		1543.79	0.00962855		2073.8	0.01330471		2603.8	-0.00667913
483.99	0.01460691		1014	0.0049313		1543.99	0.00937534		2074	0.01323407		2604	-0.00701564
484.19	0.01524052		1014.2	0.00482646		1544.19	0.00914664		2074.2	0.01325204		2604.2	-0.0063315
484.39	0.01479659		1014.4	0.00533256		1544.39	0.0095974		2074.4	0.01275988		2604.4	-0.00577964
484.59	0.01461435		1014.6	0.00534842		1544.59	0.0092898		2074.6	0.01189811		2604.6	-0.00612286
484.79	0.01404319		1014.8	0.00446641		1544.79	0.008412		2074.8	0.01164931		2604.8	-0.00616986
484.99	0.01453266		1015	0.0043055		1544.99	0.00930027		2075	0.01153438		2605	-0.00615675
485.19	0.01481866		1015.2	0.00389814		1545.19	0.00853986		2075.2	0.01143701		2605.2	-0.00667789
485.39	0.01445322		1015.4	0.00348607		1545.39	0.00844539		2075.4	0.01070624		2605.4	-0.00666564
485.59	0.01547004		1015.6	0.00299098		1545.59	0.00865349		2075.6	0.01025995		2605.6	-0.00690694
485.79	0.01535796		1015.8	0.00310841		1545.79	0.00898497		2075.8	0.00973144		2605.8	-0.0068263
485.99	0.01513579		1016	0.00299439		1545.99	0.00892189		2076	0.00930303		2606	-0.00669846
486.19	0.0154786		1016.2	0.00232136		1546.19	0.009242		2076.2	0.00879006		2606.2	-0.00672482
486.39	0.01511033		1016.4	0.00334062		1546.39	0.00948222		2076.4	0.00886576		2606.4	-0.00684406
486.59	0.01525823		1016.6	0.00277499		1546.59	0.00942998		2076.6	0.00972647		2606.6	-0.00796679
486.79	0.01561052		1016.8	0.00295855		1546.79	0.00950105		2076.8	0.01010393		2606.8	-0.00863847
486.99	0.01523955		1017	0.0021882		1546.99	0.00887468		2077	0.01079169		2607	-0.01026082
487.19	0.01466377		1017.2	0.00237793		1547.19	0.00851518		2077.2	0.01106375		2607.2	-0.0109119
487.39	0.01487714		1017.4	0.00267306		1547.39	0.0078094		2077.4	0.01121972		2607.4	-0.01074329
487.59	0.01431299		1017.6	0.00334255		1547.59	0.00743658		2077.6	0.01102115		2607.6	-0.01070917
487.79	0.01415858		1017.8	0.00391791		1547.79	0.00691517		2077.8	0.01146829		2607.8	-0.01058405
487.99	0.01490281		1018	0.0044317		1547.99	0.0065197		2078	0.01252565		2608	-0.00967677
488.19	0.01591432		1018.2	0.00458322		1548.19	0.00522482		2078.2	0.01234851		2608.2	-0.00907161
488.39	0.01565814		1018.4	0.00501952		1548.39	0.00585857		2078.4	0.01160016		2608.4	-0.00913531
488.59	0.01497624		1018.6	0.00481099		1548.59	0.00579659		2078.6	0.01132138		2608.6	-0.00914228
488.79	0.0155042		1018.8	0.00435971		1548.79	0.00567156		2078.8	0.01232022		2608.8	-0.00890125
488.99	0.01629964		1019	0.00477444		1548.99	0.00587065		2079	0.01282308		2609	-0.00879085
489.19	0.01664477		1019.2	0.0051698		1549.19	0.00642061		2079.2	0.01163059		2609.2	-0.00902146
489.39	0.01634773		1019.4	0.00560643		1549.39	0.00680162		2079.4	0.01151344		2609.4	-0.00850243
489.59	0.01747961		1019.6	0.00672263		1549.59	0.00714294		2079.6	0.01200685		2609.6	-0.00839593
489.79	0.01706108		1019.8	0.00723713		1549.79	0.00684675		2079.8	0.01242941		2609.8	-0.00711035
489.99	0.01736463		1020	0.00708265		1549.99	0.00775006		2080	0.01163313		2610	-0.00778332
490.19	0.01783208		1020.2	0.00625919		1550.19	0.00790333		2080.2	0.01098437		2610.2	-0.00792277
490.39	0.01705166		1020.4	0.00632412		1550.39	0.00708353		2080.4	0.01228185		2610.4	-0.00835158
490.59	0.01719785		1020.6	0.00558059		1550.59	0.00700289		2080.6	0.01274082		2610.6	-0.00819342
490.79	0.01711277		1020.8	0.00530901		1550.79	0.00772341		2080.8	0.01279967		2610.8	-0.00879179
490.99	0.01566765		1021	0.00472731		1550.99	0.00767714		2081	0.01265106		2611	-0.0090523
491.19	0.01427056		1021.2	0.004679		1551.19	0.00793449		2081.2	0.01206168		2611.2	-0.00866733
491.39	0.01430941		1021.4	0.0043792		1551.39	0.00784689		2081.4	0.01170536		2611.4	-0.0079744
491.59	0.01404142		1021.6	0.00445441		1551.59	0.00813538		2081.6	0.01131384		2611.6	-0.0081504
491.79	0.01316814		1021.8	0.0043945		1551.79	0.00728356		2081.8	0.01228248		2611.8	-0.00859889
491.99	0.01315189		1022	0.00408535		1551.99	0.00705822		2082	0.01310494		2612	-0.00759172
492.19	0.01276376		1022.2	0.00396442		1552.19	0.00721653		2082.2	0.01223801		2612.2	-0.00780413
492.39	0.01180795		1022.4	0.00376338		1552.39	0.007756		2082.4	0.01215076		2612.4	-0.00659544
492.59	0.01092144		1022.6	0.00333155		1552.59	0.00717485		2082.6	0.0122252		2612.6	-0.00659835
492.79	0.01077359		1022.8	0.00351361		1552.79	0.0074803		2082.8	0.01352534		2612.8	-0.00619621
492.99	0.01004989		1023	0.00393983		1552.99	0.00687987		2083	0.01360946		2613	-0.00599873
493.19	0.01054438		1023.2	0.00393178		1553.19	0.00696388		2083.2	0.01282858		2613.2	-0.00608696
493.39	0.01073484		1023.4	0.00445253		1553.39	0.00546589		2083.4	0.01339633		2613.4	-0.00564817
493.59	0.01087187		1023.6	0.00433282		1553.59	0.00443702		2083.6	0.01342811		2613.6	-0.00514442
493.79	0.01011467		1023.8	0.00437897		1553.79	0.00475239		2083.8	0.01302397		2613.8	-0.00511428
493.99	0.01104869		1024	0.00312453		1553.99	0.00530741		2084	0.01288747		2614	-0.00529155
494.19	0.01163805		1024.2	0.00224905		1554.19	0.00456305		2084.2	0.01294379		2614.2	-0.00562216
494.39	0.01152277		1024.4	0.00253293		1554.39	0.00438706		2084.4	0.01310544		2614.4	-0.00519973
494.59	0.01215811		1024.6	0.00216042		1554.59	0.00526998		2084.6	0.01224286		2614.6	-0.00541588
494.79	0.01228708		1024.8	0.0017408		1554.79	0.00626176		2084.8	0.01139802		2614.8	-0.00631662
494.99	0.01178118		1025	0.00165731		1554.99	0.00669121		2085	0.0109617		2615	-0.0064712
495.19	0.0130081		1025.2	0.00163925		1555.19	0.00789779		2085.2	0.01076682		2615.2	-0.00675273
495.39	0.01347354		1025.4	0.00133497		1555.39	0.00904688		2085.4	0.01084628		2615.4	-0.00744432
495.59	0.014104		1025.6	0.00181528		1555.59	0.00893688		2085.6	0.01101904		2615.6	-0.00900536
495.79	0.01377554		1025.8	0.00165741		1555.79	0.00866952		2085.8	0.01082278		2615.8	-0.00902432
495.99	0.01394492		1026	0.00084324		1555.99	0.00896392		2086	0.01074721		2616	-0.0085127
496.19	0.01367065		1026.2	0.00091522		1556.19	0.00885837		2086.2	0.01039232		2616.2	-0.00862956
496.39	0.01378406		1026.4	0.00114236		1556.39	0.00845294		2086.4	0.01102384		2616.4	-0.00836154
496.59	0.01361326		1026.6	0.00153785		1556.59	0.00855402		2086.6	0.0105478		2616.6	-0.00963935
496.79	0.01308836		1026.8	0.00249855		1556.79	0.00820018		2086.8	0.01053358		2616.8	-0.0100252
496.99	0.01333784		1027	0.00189655		1556.99	0.00744827		2087	0.01005223		2617	-0.01083302
497.19	0.01403339		1027.2	0.00185318		1557.19	0.00721406		2087.2	0.00950347		2617.2	-0.01194675
497.39	0.01399643		1027.4	0.00233936		1557.39	0.00670802		2087.4	0.00929925		2617.4	-0.01180867
497.59	0.01324666		1027.6	0.00267857		1557.59	0.00599378		2087.6	0.00947784		2617.6	-0.01177019
497.79	0.01388854		1027.8	0.00321884		1557.79	0.00630119		2087.8	0.01007326		2617.8	-0.01149122
497.99	0.01478957		1028	0.00264743		1557.99	0.00575134		2088	0.01032236		2618	-0.01131789
498.19	0.01437226		1028.2	0.0032556		1558.19	0.00594473		2088.2	0.0096633		2618.2	-0.01078372
498.39	0.01414196		1028.4	0.00415918		1558.39	0.00607473		2088.4	0.00920675		2618.4	-0.01018053
498.59	0.01329007		1028.6	0.00386383		1558.59	0.00669021		2088.6	0.00973269		2618.6	-0.01002387
498.79	0.01283154		1028.8	0.0043096		1558.79	0.00749079		2088.8	0.00979025		2618.8	-0.00959924
498.99	0.01271828		1029	0.00433855		1558.99	0.00818732		2089	0.01031075		2619	-0.00884347
499.19	0.01385158		1029.2	0.00478904		1559.19	0.00977549		2089.2	0.01068377		2619.2	-0.00830041
499.39	0.01325234		1029.4	0.00478029		1559.39	0.0102017		2089.4	0.01104753		2619.4	-0.00851057
499.59	0.01238689		1029.6	0.00470624		1559.59	0.00981552		2089.6	0.01098332		2619.6	-0.00848994
499.79	0.01233058		1029.8	0.00422635		1559.79	0.01004396		2089.8	0.01069113		2619.8	-0.00716293
499.99	0.01247029		1030	0.00324351		1559.99	0.00995915		2090	0.01121923		2620	-0.00726418
500.19	0.0124349		1030.2	0.00339531		1560.19	0.0095443		2090.2	0.01132802		2620.2	-0.00757395
500.39	0.01320324		1030.4	0.00276264		1560.39	0.00945221		2090.4	0.01118591		2620.4	-0.00838661
500.59	0.01289207		1030.6	0.00238537		1560.59	0.00949446		2090.6	0.01049826		2620.6	-0.00971441
500.79	0.0124268		1030.8	0.00177107		1560.79	0.00868802		2090.8	0.01029852		2620.8	-0.01018442
500.99	0.01292953		1031	0.0002076		1560.99	0.00878649		2091	0.01013321		2621	-0.01065312
501.19	0.0131246		1031.2	-0.00002088		1561.19	0.00786584		2091.2	0.00975075		2621.2	-0.01088287
501.39	0.01382248		1031.4	0.0002586		1561.39	0.00704418		2091.4	0.00894761		2621.4	-0.0107501
501.59	0.01427676		1031.6	0.00069875		1561.59	0.00574896		2091.6	0.00826901		2621.6	-0.01081421
501.79	0.01437876		1031.8	0.00069242		1561.79	0.00620971		2091.8	0.00852844		2621.8	-0.01025187
501.99	0.01329086		1032	0.0014809		1561.99	0.00674879		2092	0.0086904		2622	-0.01058955
502.19	0.01276145		1032.2	0.00148774		1562.19	0.00710317		2092.2	0.00862935		2622.2	-0.0091016
502.39	0.01162787		1032.4	0.00159899		1562.39	0.00806632		2092.4	0.00888943		2622.4	-0.00949633
502.59	0.01060154		1032.6	0.00122668		1562.59	0.00785713		2092.6	0.00793249		2622.6	-0.00930634
502.79	0.010824		1032.8	0.0018736		1562.79	0.00837689		2092.8	0.00780046		2622.8	-0.0094726
502.99	0.01050617		1033	0.00244333		1562.99	0.00888887		2093	0.00752267		2623	-0.00910563
503.19	0.01064417		1033.2	0.00409169		1563.19	0.01011914		2093.2	0.00748781		2623.2	-0.00920531
503.39	0.00984912		1033.4	0.0044729		1563.39	0.01029848		2093.4	0.00753758		2623.4	-0.00877652
503.59	0.01010118		1033.6	0.00461156		1563.59	0.01030853		2093.6	0.00755386		2623.6	-0.00828222
503.79	0.01080178		1033.8	0.00512984		1563.79	0.01071633		2093.8	0.00801228		2623.8	-0.00847483
503.99	0.0102726		1034	0.00538063		1563.99	0.01070387		2094	0.00802384		2624	-0.00800017
504.19	0.00983129		1034.2	0.0051692		1564.19	0.01083924		2094.2	0.0088243		2624.2	-0.00821694
504.39	0.01077185		1034.4	0.00441154		1564.39	0.011498		2094.4	0.00988534		2624.4	-0.00875316
504.59	0.01019353		1034.6	0.00378872		1564.59	0.01206183		2094.6	0.01045103		2624.6	-0.00853641
504.79	0.00992578		1034.8	0.00321842		1564.79	0.01183536		2094.8	0.01072657		2624.8	-0.00825788
504.99	0.01038021		1035	0.00301496		1564.99	0.01192801		2095	0.01162695		2625	-0.00900227
505.19	0.01029607		1035.2	0.00292926		1565.19	0.01108553		2095.2	0.01241809		2625.2	-0.00957823
505.39	0.01108165		1035.4	0.00297073		1565.39	0.01079522		2095.4	0.01207932		2625.4	-0.00900392
505.59	0.01047804		1035.6	0.0031446		1565.59	0.01153776		2095.6	0.01229796		2625.6	-0.00866555
505.79	0.00943942		1035.8	0.00281726		1565.79	0.01168211		2095.8	0.0134342		2625.8	-0.00780568
505.99	0.00976497		1036	0.00257448		1565.99	0.01179209		2096	0.01354147		2626	-0.00726219
506.19	0.0106153		1036.2	0.00184059		1566.19	0.01106494		2096.2	0.01252906		2626.2	-0.00613624
506.39	0.01015674		1036.4	0.00188298		1566.39	0.01113117		2096.4	0.01206611		2626.4	-0.0073821
506.59	0.01026397		1036.6	0.0026588		1566.59	0.01026013		2096.6	0.01089335		2626.6	-0.00734515
506.79	0.01031605		1036.8	0.00328061		1566.79	0.01039182		2096.8	0.01105184		2626.8	-0.00731999
506.99	0.01008754		1037	0.0037065		1566.99	0.00974504		2097	0.01056092		2627	-0.00742941
507.19	0.01064153		1037.2	0.00442963		1567.19	0.00947252		2097.2	0.00989347		2627.2	-0.00790491
507.39	0.01092008		1037.4	0.00485098		1567.39	0.00928912		2097.4	0.00878923		2627.4	-0.00791471
507.59	0.0119043		1037.6	0.00501535		1567.59	0.00805431		2097.6	0.00774206		2627.6	-0.00793427
507.79	0.01158722		1037.8	0.00498733		1567.79	0.0078031		2097.8	0.00798425		2627.8	-0.0083469
507.99	0.01107622		1038	0.00444722		1567.99	0.00846668		2098	0.00795296		2628	-0.00814403
508.19	0.01185053		1038.2	0.00351116		1568.19	0.00861466		2098.2	0.00840562		2628.2	-0.00903773
508.39	0.0123872		1038.4	0.00303622		1568.39	0.00842865		2098.4	0.00856978		2628.4	-0.00902095
508.59	0.01182727		1038.6	0.00273928		1568.59	0.00864831		2098.6	0.00876021		2628.6	-0.00929555
508.79	0.01174845		1038.8	0.00312318		1568.79	0.00810374		2098.8	0.00977222		2628.8	-0.01033198
508.99	0.01233826		1039	0.00255008		1568.99	0.00830152		2099	0.01024749		2629	-0.01065718
509.19	0.01127353		1039.2	0.00224222		1569.19	0.00797254		2099.2	0.00966649		2629.2	-0.01014024
509.39	0.01144126		1039.4	0.00219462		1569.39	0.00774374		2099.4	0.00884404		2629.4	-0.00933329
509.59	0.01088005		1039.6	0.00234873		1569.59	0.00775717		2099.6	0.00909719		2629.6	-0.01001121
509.79	0.01096263		1039.8	0.00174502		1569.79	0.00687545		2099.8	0.00970542		2629.8	-0.00943076
509.99	0.01103094		1040	0.00130784		1569.99	0.00778361		2100	0.00902369		2630	-0.00905372
510.19	0.01161104		1040.2	0.00121063		1570.19	0.00720945		2100.2	0.00868762		2630.2	-0.00961559
510.39	0.01161304		1040.4	0.00106304		1570.39	0.00766008		2100.4	0.0088719		2630.4	-0.01070377
510.59	0.01139902		1040.6	0.00157144		1570.59	0.00800494		2100.6	0.00834058		2630.6	-0.01091076
510.79	0.01176609		1040.8	0.00159947		1570.79	0.00793089		2100.8	0.00882999		2630.8	-0.01093416
510.99	0.01182707		1041	0.00106109		1570.99	0.00806928		2101	0.00818046		2631	-0.01061486
511.19	0.01215203		1041.2	0.0019325		1571.19	0.00827699		2101.2	0.00808408		2631.2	-0.01048287
511.39	0.01208339		1041.4	0.00201153		1571.39	0.00816105		2101.4	0.00753812		2631.4	-0.01072471
511.59	0.01267877		1041.6	0.00183932		1571.59	0.00762482		2101.6	0.00790948		2631.6	-0.01061944
511.79	0.01225694		1041.8	0.00141986		1571.79	0.0085654		2101.8	0.00902742		2631.8	-0.01060037
511.99	0.0112446		1042	0.00131472		1571.99	0.00920978		2102	0.00948518		2632	-0.01005674
512.19	0.01189061		1042.2	0.00129847		1572.19	0.00930774		2102.2	0.01055742		2632.2	-0.00962922
512.39	0.01110349		1042.4	0.00122685		1572.39	0.00904161		2102.4	0.01106848		2632.4	-0.00983807
512.59	0.01105231		1042.6	0.00162724		1572.59	0.00929021		2102.6	0.01141626		2632.6	-0.01035259
512.79	0.01100904		1042.8	0.00081802		1572.79	0.00846058		2102.8	0.01163745		2632.8	-0.00951596
512.99	0.01071924		1043	0.00083997		1572.99	0.0086278		2103	0.01112909		2633	-0.00817467
513.19	0.01014372		1043.2	0.00151614		1573.19	0.00844747		2103.2	0.01050048		2633.2	-0.00801849
513.39	0.01074654		1043.4	0.00162231		1573.39	0.00788969		2103.4	0.01024336		2633.4	-0.00784505
513.59	0.01131834		1043.6	0.00183815		1573.59	0.00762966		2103.6	0.01124716		2633.6	-0.00804893
513.79	0.01219627		1043.8	0.00130871		1573.79	0.0075962		2103.8	0.01003623		2633.8	-0.00785394
513.99	0.01202486		1044	0.00169423		1573.99	0.00828231		2104	0.00962137		2634	-0.00720524
514.19	0.01289356		1044.2	0.00174961		1574.19	0.00760783		2104.2	0.00980631		2634.2	-0.00789515
514.39	0.0129887		1044.4	0.00145584		1574.39	0.00793774		2104.4	0.00891833		2634.4	-0.00864321
514.59	0.01274212		1044.6	0.00169176		1574.59	0.00787325		2104.6	0.00856863		2634.6	-0.00912922
514.79	0.01270624		1044.8	0.00189142		1574.79	0.00763475		2104.8	0.0085655		2634.8	-0.00876536
514.99	0.01204607		1045	0.00113133		1574.99	0.0075617		2105	0.00771333		2635	-0.00891647
515.19	0.01078461		1045.2	0.00203051		1575.19	0.00754486		2105.2	0.00767633		2635.2	-0.0090166
515.39	0.00980758		1045.4	0.00259263		1575.39	0.00688086		2105.4	0.00778441		2635.4	-0.00995749
515.59	0.00906714		1045.6	0.00342288		1575.59	0.00662606		2105.6	0.0080836		2635.6	-0.010184
515.79	0.00882416		1045.8	0.00368549		1575.79	0.00593647		2105.8	0.00870079		2635.8	-0.01041881
515.99	0.00775924		1046	0.00439138		1575.99	0.00641851		2106	0.00912728		2636	-0.01052154
516.19	0.00828217		1046.2	0.00386295		1576.19	0.00627917		2106.2	0.00915135		2636.2	-0.01071448
516.39	0.00769353		1046.4	0.00426021		1576.39	0.0053736		2106.4	0.00808978		2636.4	-0.01115128
516.59	0.00784458		1046.6	0.00457245		1576.59	0.0050813		2106.6	0.00845395		2636.6	-0.01091884
516.79	0.00772746		1046.8	0.00420957		1576.79	0.00453444		2106.8	0.00938829		2636.8	-0.00983488
516.99	0.00792386		1047	0.00464416		1576.99	0.0045648		2107	0.00892038		2637	-0.00925996
517.19	0.00851522		1047.2	0.0043142		1577.19	0.00502684		2107.2	0.00919064		2637.2	-0.00985413
517.39	0.00898069		1047.4	0.00345676		1577.39	0.00503751		2107.4	0.0086372		2637.4	-0.00952818
517.59	0.0099078		1047.6	0.00338517		1577.59	0.00547339		2107.6	0.00861845		2637.6	-0.00965456
517.79	0.01046026		1047.8	0.00249684		1577.79	0.00606917		2107.8	0.00831898		2637.8	-0.00924455
517.99	0.01058641		1048	0.00189296		1577.99	0.00727842		2108	0.00927968		2638	-0.00906374
518.19	0.01092607		1048.2	0.00095894		1578.19	0.00698553		2108.2	0.00872212		2638.2	-0.01027971
518.39	0.01150282		1048.4	-0.00014347		1578.39	0.00738726		2108.4	0.00794279		2638.4	-0.01112725
518.59	0.01124738		1048.6	-0.00001071		1578.59	0.00740385		2108.6	0.00854805		2638.6	-0.01098305
518.79	0.01137004		1048.8	-0.00029368		1578.79	0.00760447		2108.8	0.00829591		2638.8	-0.01068655
518.99	0.0107511		1049	-0.00027943		1578.99	0.00780781		2109	0.00903223		2639	-0.01019089
519.19	0.00963178		1049.2	0.0004101		1579.19	0.00747834		2109.2	0.0091145		2639.2	-0.00923982
519.39	0.00944135		1049.4	0.00055403		1579.39	0.00721959		2109.4	0.01019322		2639.4	-0.00967097
519.59	0.00995521		1049.6	0.00069438		1579.59	0.00774842		2109.6	0.01077246		2639.6	-0.00883174
519.79	0.01020375		1049.8	0.00114984		1579.79	0.00697702		2109.8	0.01122125		2639.8	-0.00897556
519.99	0.01015694		1050	0.00136282		1579.99	0.00796829		2110	0.01066229		2640	-0.00950697
520.19	0.01034715		1050.2	0.00219634		1580.19	0.00754919		2110.2	0.01010193		2640.2	-0.01035806
520.39	0.0110108		1050.4	0.00317695		1580.39	0.00675257		2110.4	0.00991246		2640.4	-0.0102411
520.59	0.01109267		1050.6	0.0028567		1580.59	0.00718434		2110.6	0.0105056		2640.6	-0.0099284
520.79	0.01136577		1050.8	0.00186682		1580.79	0.00773031		2110.8	0.01157882		2640.8	-0.00935472
520.99	0.012		1051	0.00213148		1580.99	0.0079444		2111	0.0110363		2641	-0.00885024
521.19	0.01218782		1051.2	0.0021716		1581.19	0.00826108		2111.2	0.01185952		2641.2	-0.00878144
521.39	0.01217655		1051.4	0.00226732		1581.39	0.00902909		2111.4	0.01171837		2641.4	-0.00808706
521.59	0.01244541		1051.6	0.00286345		1581.59	0.00901906		2111.6	0.01161127		2641.6	-0.0084322
521.79	0.01313355		1051.8	0.0026695		1581.79	0.00923715		2111.8	0.01195355		2641.8	-0.00864972
521.99	0.01332839		1052	0.00221637		1581.99	0.00916018		2112	0.0119077		2642	-0.00979651
522.19	0.01308433		1052.2	0.00257528		1582.19	0.0089017		2112.2	0.01178513		2642.2	-0.00982613
522.39	0.01303282		1052.4	0.00262607		1582.39	0.00997073		2112.4	0.01146644		2642.4	-0.00928768
522.59	0.0124925		1052.6	0.00224239		1582.59	0.01066714		2112.6	0.01211025		2642.6	-0.00891128
522.79	0.01245718		1052.8	0.00209717		1582.79	0.01077079		2112.8	0.01200419		2642.8	-0.00820162
522.99	0.01148294		1053	0.00138827		1582.99	0.01077459		2113	0.0126364		2643	-0.007399
523.19	0.01043769		1053.2	-0.00015052		1583.19	0.01001792		2113.2	0.012932		2643.2	-0.00636093
523.39	0.01002602		1053.4	-0.00069875		1583.39	0.00948281		2113.4	0.01296565		2643.4	-0.00597932
523.59	0.01010084		1053.6	-0.00053556		1583.59	0.0084175		2113.6	0.01272252		2643.6	-0.00557664
523.79	0.00889651		1053.8	-0.0013602		1583.79	0.0071021		2113.8	0.01259645		2643.8	-0.00747034
523.99	0.00811392		1054	-0.00143796		1583.99	0.00663075		2114	0.01145634		2644	-0.00838288
524.19	0.0084534		1054.2	-0.00024463		1584.19	0.00648958		2114.2	0.01144033		2644.2	-0.00822408
524.39	0.00913248		1054.4	-0.00103153		1584.39	0.00583034		2114.4	0.01191205		2644.4	-0.00814465
524.59	0.00905647		1054.6	-0.0015228		1584.59	0.00700866		2114.6	0.01223465		2644.6	-0.00769565
524.79	0.00905778		1054.8	-0.00234919		1584.79	0.00653942		2114.8	0.01291678		2644.8	-0.00712874
524.99	0.00927447		1055	-0.00151535		1584.99	0.00599562		2115	0.01222593		2645	-0.0073331
525.19	0.00959008		1055.2	-0.00147506		1585.19	0.00636677		2115.2	0.01226517		2645.2	-0.00708087
525.39	0.01001301		1055.4	-0.00140235		1585.39	0.00635581		2115.4	0.0118802		2645.4	-0.00854952
525.59	0.00954342		1055.6	-0.00100687		1585.59	0.00569405		2115.6	0.01162847		2645.6	-0.00883301
525.79	0.01017734		1055.8	-0.00068401		1585.79	0.00660755		2115.8	0.01153534		2645.8	-0.00980733
525.99	0.01004993		1056	-0.00039063		1585.99	0.00785028		2116	0.01110412		2646	-0.01022877
526.19	0.0097418		1056.2	0.00150711		1586.19	0.00895517		2116.2	0.01040637		2646.2	-0.01043353
526.39	0.00917919		1056.4	0.0021683		1586.39	0.00987635		2116.4	0.00996753		2646.4	-0.010704
526.59	0.01021318		1056.6	0.0022714		1586.59	0.01003353		2116.6	0.01060898		2646.6	-0.01128089
526.79	0.01025387		1056.8	0.00262943		1586.79	0.01020493		2116.8	0.01016372		2646.8	-0.01082357
526.99	0.01024495		1057	0.00189088		1586.99	0.01033672		2117	0.00991631		2647	-0.01103649
527.19	0.00964238		1057.2	0.00186148		1587.19	0.00894244		2117.2	0.00991678		2647.2	-0.01113718
527.39	0.00944978		1057.4	0.00274597		1587.39	0.00846004		2117.4	0.0094699		2647.4	-0.01087967
527.59	0.00956573		1057.6	0.00312767		1587.59	0.00774305		2117.6	0.00933562		2647.6	-0.01083793
527.79	0.00893816		1057.8	0.00288087		1587.79	0.00763194		2117.8	0.00951634		2647.8	-0.01189575
527.99	0.00933027		1058	0.00383699		1587.99	0.0073901		2118	0.0089764		2648	-0.01141765
528.19	0.01086907		1058.2	0.00423163		1588.19	0.00792342		2118.2	0.00949231		2648.2	-0.01114985
528.39	0.01134401		1058.4	0.00394693		1588.39	0.00796481		2118.4	0.00930299		2648.4	-0.01097642
528.59	0.01164972		1058.6	0.00297832		1588.59	0.00764863		2118.6	0.00888723		2648.6	-0.01075469
528.79	0.011211		1058.8	0.00281597		1588.79	0.00678771		2118.8	0.00915543		2648.8	-0.01033313
528.99	0.01174172		1059	0.002594		1588.99	0.00676042		2119	0.00963888		2649	-0.01036228
529.19	0.01158854		1059.2	0.00225036		1589.19	0.00672462		2119.2	0.01031756		2649.2	-0.00975338
529.39	0.01153951		1059.4	0.0018853		1589.39	0.00646532		2119.4	0.01120606		2649.4	-0.01019763
529.59	0.01034906		1059.6	0.00202802		1589.59	0.00671988		2119.6	0.01248275		2649.6	-0.00826557
529.79	0.01074252		1059.8	0.00226565		1589.79	0.00774117		2119.8	0.01272446		2649.8	-0.00896914
529.99	0.01097559		1060	0.00275287		1589.99	0.00865755		2120	0.01195118		2650	-0.00917769
530.19	0.01072055		1060.2	0.00396865		1590.19	0.00824761		2120.2	0.01163426		2650.2	-0.00949889
530.39	0.01001889		1060.4	0.00348532		1590.39	0.00831844		2120.4	0.01252349		2650.4	-0.00931042
530.59	0.0104462		1060.6	0.00349805		1590.59	0.00856916		2120.6	0.01326094		2650.6	-0.00864892
530.79	0.00921107		1060.8	0.00329959		1590.79	0.00834844		2120.8	0.01269054		2650.8	-0.00817412
530.99	0.00901733		1061	0.00385248		1590.99	0.00847171		2121	0.01151672		2651	-0.00808767
531.19	0.00759153		1061.2	0.00487004		1591.19	0.00792881		2121.2	0.0105445		2651.2	-0.00745407
531.39	0.0082821		1061.4	0.00529569		1591.39	0.00827156		2121.4	0.00998221		2651.4	-0.00672997
531.59	0.0084336		1061.6	0.0055993		1591.59	0.00850372		2121.6	0.00949421		2651.6	-0.00683415
531.79	0.0083097		1061.8	0.00503402		1591.79	0.00826142		2121.8	0.00898951		2651.8	-0.00696139
531.99	0.00886544		1062	0.00420047		1591.99	0.00853261		2122	0.00896029		2652	-0.00659564
532.19	0.00900319		1062.2	0.00329142		1592.19	0.00873583		2122.2	0.00810428		2652.2	-0.00637464
532.39	0.00916738		1062.4	0.00263101		1592.39	0.00915489		2122.4	0.00797209		2652.4	-0.00639932
532.59	0.00906192		1062.6	0.00193205		1592.59	0.00829036		2122.6	0.00817975		2652.6	-0.00614115
532.79	0.0092029		1062.8	0.0019551		1592.79	0.00845413		2122.8	0.00966812		2652.8	-0.0053544
532.99	0.00987844		1063	0.00125588		1592.99	0.00851203		2123	0.0105164		2653	-0.00550953
533.19	0.0096234		1063.2	0.00100947		1593.19	0.00883822		2123.2	0.0107587		2653.2	-0.00550596
533.39	0.00967843		1063.4	0.00047196		1593.39	0.00857498		2123.4	0.01131895		2653.4	-0.00547062
533.59	0.00919705		1063.6	0.00064573		1593.59	0.00867601		2123.6	0.01129925		2653.6	-0.0052935
533.79	0.00954824		1063.8	0.00132393		1593.79	0.00918932		2123.8	0.01136357		2653.8	-0.00629798
533.99	0.01045071		1064	0.00094253		1593.99	0.00893416		2124	0.01052329		2654	-0.00651334
534.19	0.00983149		1064.2	0.00098541		1594.19	0.00905598		2124.2	0.01070031		2654.2	-0.00563141
534.39	0.00913197		1064.4	0.00039557		1594.39	0.00914984		2124.4	0.01120092		2654.4	-0.00628149
534.59	0.00909671		1064.6	0.00185361		1594.59	0.00864622		2124.6	0.01152467		2654.6	-0.0058126
534.79	0.00954477		1064.8	0.00301647		1594.79	0.00821652		2124.8	0.01091372		2654.8	-0.00669639
534.99	0.00965385		1065	0.00400749		1594.99	0.00875766		2125	0.01003713		2655	-0.00710755
535.19	0.0088878		1065.2	0.00421398		1595.19	0.00825812		2125.2	0.00975879		2655.2	-0.00689119
535.39	0.00942209		1065.4	0.00334291		1595.39	0.00768536		2125.4	0.01046082		2655.4	-0.0075883
535.59	0.0080818		1065.6	0.00293729		1595.59	0.00805993		2125.6	0.01030076		2655.6	-0.00815306
535.79	0.00750255		1065.8	0.00097602		1595.79	0.00725587		2125.8	0.01023201		2655.8	-0.00847732
535.99	0.00766246		1066	-0.00015402		1595.99	0.00838735		2126	0.01037549		2656	-0.00948747
536.19	0.0069164		1066.2	-0.00016749		1596.19	0.00901519		2126.2	0.00976065		2656.2	-0.00981442
536.39	0.00731638		1066.4	-0.00060788		1596.39	0.00899806		2126.4	0.00994954		2656.4	-0.01002999
536.59	0.00729278		1066.6	-0.00023589		1596.59	0.00849723		2126.6	0.00974552		2656.6	-0.01053303
536.79	0.00734425		1066.8	-0.00109957		1596.79	0.0084262		2126.8	0.01041679		2656.8	-0.01141817
536.99	0.00615461		1067	-0.00124727		1596.99	0.00821024		2127	0.0107597		2657	-0.01115918
537.19	0.0059303		1067.2	-0.00075523		1597.19	0.00824384		2127.2	0.01033488		2657.2	-0.01131508
537.39	0.006023		1067.4	-0.00112305		1597.39	0.00812306		2127.4	0.01034423		2657.4	-0.011642
537.59	0.00575868		1067.6	-0.00100207		1597.59	0.0083449		2127.6	0.01016957		2657.6	-0.01090015
537.79	0.00632262		1067.8	-0.00120365		1597.79	0.00857333		2127.8	0.01054035		2657.8	-0.01047047
537.99	0.00685355		1068	-0.00202502		1597.99	0.00860444		2128	0.01016395		2658	-0.00962111
538.19	0.00719061		1068.2	-0.00151242		1598.19	0.00880436		2128.2	0.01027799		2658.2	-0.00908523
538.39	0.00725241		1068.4	-0.00090874		1598.39	0.00830037		2128.4	0.01007554		2658.4	-0.00933404
538.59	0.00797984		1068.6	0.0002166		1598.59	0.00745185		2128.6	0.01069673		2658.6	-0.00850348
538.79	0.00870153		1068.8	0.00035537		1598.79	0.00761899		2128.8	0.01050857		2658.8	-0.00862739
538.99	0.00780736		1069	0.00036818		1598.99	0.00756656		2129	0.01016748		2659	-0.00876269
539.19	0.00700317		1069.2	0.00076436		1599.19	0.00726614		2129.2	0.01005542		2659.2	-0.00852407
539.39	0.00684645		1069.4	0.00102659		1599.39	0.00770877		2129.4	0.01024056		2659.4	-0.0086095
539.59	0.00680739		1069.6	0.00056027		1599.59	0.00870159		2129.6	0.00905043		2659.6	-0.00862405
539.79	0.00699979		1069.8	-0.00004116		1599.79	0.00884439		2129.8	0.00914757		2659.8	-0.00865746
539.99	0.00832559		1070	0.00097422		1599.99	0.00944845		2130	0.00841977		2660	-0.00939135
540.19	0.00830162		1070.2	0.00168372		1600.19	0.00970598		2130.2	0.00844143		2660.2	-0.00940187
540.39	0.00916613		1070.4	0.00166291		1600.39	0.00908054		2130.4	0.00788723		2660.4	-0.00968423
540.59	0.00933491		1070.6	0.00170163		1600.59	0.00933716		2130.6	0.00794911		2660.6	-0.00993289
540.79	0.00913913		1070.8	0.00171169		1600.79	0.00892068		2130.8	0.00860893		2660.8	-0.00962439
540.99	0.00901133		1071	0.00218439		1600.99	0.00872334		2131	0.00920577		2661	-0.00981047
541.19	0.00998683		1071.2	0.00367217		1601.19	0.0085013		2131.2	0.00952846		2661.2	-0.01004646
541.39	0.01029373		1071.4	0.00333504		1601.39	0.00837472		2131.4	0.00971536		2661.4	-0.00993908
541.59	0.00985253		1071.6	0.00312713		1601.59	0.00738303		2131.6	0.00947745		2661.6	-0.00941183
541.79	0.00970879		1071.8	0.00331054		1601.79	0.00732232		2131.8	0.00910125		2661.8	-0.00929712
541.99	0.00910199		1072	0.00348541		1601.99	0.00719543		2132	0.0094238		2662	-0.00893962
542.19	0.00953667		1072.2	0.0040032		1602.19	0.00708093		2132.2	0.00954123		2662.2	-0.00839642
542.39	0.00872296		1072.4	0.00383252		1602.39	0.00741745		2132.4	0.00968449		2662.4	-0.00808764
542.59	0.00773886		1072.6	0.00289484		1602.59	0.00778679		2132.6	0.00946429		2662.6	-0.00823861
542.79	0.00595106		1072.8	0.00223717		1602.79	0.00820691		2132.8	0.00915429		2662.8	-0.00860705
542.99	0.0045541		1073	0.00190348		1602.99	0.00817651		2133	0.00931871		2663	-0.00840453
543.19	0.00464499		1073.2	0.00215413		1603.19	0.00757422		2133.2	0.00880525		2663.2	-0.00818472
543.39	0.00434847		1073.4	0.00193836		1603.39	0.0074513		2133.4	0.009086		2663.4	-0.0075364
543.59	0.00455344		1073.6	0.00087528		1603.59	0.00673186		2133.6	0.0084038		2663.6	-0.00693773
543.79	0.00436193		1073.8	0.00101284		1603.79	0.00667491		2133.8	0.00848346		2663.8	-0.00746449
543.99	0.00404644		1074	0.00078496		1603.99	0.00723335		2134	0.00855269		2664	-0.00808908
544.19	0.00325634		1074.2	0.00014526		1604.19	0.00784623		2134.2	0.00934767		2664.2	-0.00810136
544.39	0.00293813		1074.4	-0.00054753		1604.39	0.00760477		2134.4	0.00806442		2664.4	-0.00850703
544.59	0.00294467		1074.6	-0.001115		1604.59	0.00764807		2134.6	0.00802497		2664.6	-0.0083201
544.79	0.00302723		1074.8	-0.00071521		1604.79	0.00771335		2134.8	0.00805791		2664.8	-0.00856251
544.99	0.00312096		1075	-0.00141332		1604.99	0.00780371		2135	0.00828152		2665	-0.00870992
545.19	0.00317405		1075.2	-0.00023785		1605.19	0.00782743		2135.2	0.00824874		2665.2	-0.00840526
545.39	0.00230758		1075.4	-0.00118		1605.39	0.0084502		2135.4	0.00798566		2665.4	-0.00841348
545.59	0.00216354		1075.6	-0.00119913		1605.59	0.00881936		2135.6	0.00755088		2665.6	-0.00873022
545.79	0.00220326		1075.8	-0.00105758		1605.79	0.00982204		2135.8	0.00809471		2665.8	-0.00781346
545.99	0.00290529		1076	-0.00097027		1605.99	0.01058256		2136	0.00872048		2666	-0.00768513
546.19	0.0033405		1076.2	-0.0009543		1606.19	0.01113191		2136.2	0.00883337		2666.2	-0.00699326
546.39	0.00331211		1076.4	-0.00110808		1606.39	0.01023175		2136.4	0.00851867		2666.4	-0.00696094
546.59	0.00320755		1076.6	-0.00183678		1606.59	0.009695		2136.6	0.00761621		2666.6	-0.00682847
546.79	0.00348312		1076.8	-0.00154637		1606.79	0.00954262		2136.8	0.00811907		2666.8	-0.00637539
546.99	0.00445758		1077	-0.00100553		1606.99	0.0086179		2137	0.0091875		2667	-0.0058442
547.19	0.00554552		1077.2	-0.00040889		1607.19	0.00797959		2137.2	0.00924356		2667.2	-0.00609853
547.39	0.00604354		1077.4	-0.00002176		1607.39	0.00793159		2137.4	0.00967593		2667.4	-0.00604429
547.59	0.0070367		1077.6	0.00019089		1607.59	0.00815576		2137.6	0.00974343		2667.6	-0.0057339
547.79	0.0071948		1077.8	0.00061686		1607.79	0.00835443		2137.8	0.01005167		2667.8	-0.00627738
547.99	0.00670811		1078	0.00098781		1607.99	0.00841799		2138	0.01105995		2668	-0.00643725
548.19	0.00671611		1078.2	0.00148983		1608.19	0.00799157		2138.2	0.01080917		2668.2	-0.00670306
548.39	0.00679583		1078.4	0.00153325		1608.39	0.00745743		2138.4	0.01021429		2668.4	-0.00734151
548.59	0.00696059		1078.6	0.00227299		1608.59	0.00647876		2138.6	0.01151002		2668.6	-0.00699127
548.79	0.00664378		1078.8	0.00211876		1608.79	0.00719366		2138.8	0.01209823		2668.8	-0.00702744
548.99	0.00621835		1079	0.00227879		1608.99	0.00675258		2139	0.01167276		2669	-0.00721381
549.19	0.00573211		1079.2	0.00372711		1609.19	0.00710411		2139.2	0.01235705		2669.2	-0.00791524
549.39	0.00509344		1079.4	0.00330912		1609.39	0.00754854		2139.4	0.01262704		2669.4	-0.00857574
549.59	0.00650999		1079.6	0.00353403		1609.59	0.00778869		2139.6	0.01328394		2669.6	-0.0093516
549.79	0.00663698		1079.8	0.00291522		1609.79	0.00748917		2139.8	0.01382659		2669.8	-0.00889911
549.99	0.0078121		1080	0.00258035		1609.99	0.0073681		2140	0.01254232		2670	-0.00975461
550.19	0.00688766		1080.2	0.00300085		1610.19	0.00705064		2140.2	0.01216462		2670.2	-0.00970778
550.39	0.00744209		1080.4	0.00269856		1610.39	0.00595929		2140.4	0.01058302		2670.4	-0.00985786
550.59	0.00793952		1080.6	0.00261091		1610.59	0.006478		2140.6	0.00996458		2670.6	-0.00988127
550.79	0.00828347		1080.8	0.0018249		1610.79	0.00684025		2140.8	0.00921457		2670.8	-0.00985106
550.99	0.00826177		1081	0.00160425		1610.99	0.0064027		2141	0.0087253		2671	-0.01027012
551.19	0.00921072		1081.2	0.00072496		1611.19	0.00697052		2141.2	0.00729016		2671.2	-0.01015974
551.39	0.00942082		1081.4	0.00084573		1611.39	0.00712538		2141.4	0.00592942		2671.4	-0.0102037
551.59	0.0091121		1081.6	0.0000847		1611.59	0.00676717		2141.6	0.00595236		2671.6	-0.0097813
551.79	0.00838286		1081.8	-0.00024845		1611.79	0.00642976		2141.8	0.00558645		2671.8	-0.009637
551.99	0.0074212		1082	0.00025789		1611.99	0.00695894		2142	0.00590339		2672	-0.00943764
552.19	0.00673531		1082.2	0.00074306		1612.19	0.00728085		2142.2	0.00561291		2672.2	-0.00959212
552.39	0.00682319		1082.4	0.00106023		1612.39	0.00753704		2142.4	0.00542225		2672.4	-0.00947376
552.59	0.00664682		1082.6	0.00149819		1612.59	0.00740216		2142.6	0.00549362		2672.6	-0.00904641
552.79	0.00662164		1082.8	0.00142055		1612.79	0.00757512		2142.8	0.00561651		2672.8	-0.00907736
552.99	0.0067196		1083	0.00264304		1612.99	0.00769625		2143	0.00571799		2673	-0.00861076
553.19	0.00599955		1083.2	0.00303834		1613.19	0.00831117		2143.2	0.00731315		2673.2	-0.00858098
553.39	0.00686404		1083.4	0.00231391		1613.39	0.0084625		2143.4	0.00771483		2673.4	-0.00814826
553.59	0.00736868		1083.6	0.00297358		1613.59	0.0090792		2143.6	0.00850537		2673.6	-0.00780101
553.79	0.00744264		1083.8	0.00248387		1613.79	0.00820823		2143.8	0.00912302		2673.8	-0.0070874
553.99	0.00737941		1084	0.00327056		1613.99	0.00847615		2144	0.00871401		2674	-0.00695429
554.19	0.00742871		1084.2	0.00383014		1614.19	0.00817365		2144.2	0.0094972		2674.2	-0.00632632
554.39	0.00873609		1084.4	0.00348606		1614.39	0.00783684		2144.4	0.00879368		2674.4	-0.00645357
554.59	0.00825507		1084.6	0.00283015		1614.59	0.00790403		2144.6	0.00902963		2674.6	-0.00614783
554.79	0.00821258		1084.8	0.00205794		1614.79	0.00769787		2144.8	0.00900441		2674.8	-0.0069461
554.99	0.00791948		1085	0.00200375		1614.99	0.0072163		2145	0.01007358		2675	-0.00673047
555.19	0.00810629		1085.2	0.00136438		1615.19	0.00761763		2145.2	0.01026868		2675.2	-0.00628448
555.39	0.00748509		1085.4	0.00145797		1615.39	0.00735602		2145.4	0.01082347		2675.4	-0.00707315
555.59	0.00727923		1085.6	0.00099894		1615.59	0.00703766		2145.6	0.01214811		2675.6	-0.00745818
555.79	0.00698318		1085.8	0.00019819		1615.79	0.00691042		2145.8	0.01260696		2675.8	-0.00830454
555.99	0.00711376		1086	-0.00013024		1615.99	0.00771454		2146	0.01322382		2676	-0.00883797
556.19	0.00767864		1086.2	-0.0005185		1616.19	0.00804937		2146.2	0.01303371		2676.2	-0.00956404
556.39	0.0072531		1086.4	-0.00062134		1616.39	0.00803404		2146.4	0.0130549		2676.4	-0.01010513
556.59	0.00691572		1086.6	-0.00097148		1616.59	0.00756277		2146.6	0.01303957		2676.6	-0.00993432
556.79	0.00683197		1086.8	-0.00063577		1616.79	0.00715814		2146.8	0.01395327		2676.8	-0.01074604
556.99	0.00602761		1087	-0.00035816		1616.99	0.00730086		2147	0.01342509		2677	-0.01001343
557.19	0.00529924		1087.2	-0.00066718		1617.19	0.00775577		2147.2	0.01272291		2677.2	-0.01037766
557.39	0.00493402		1087.4	0.00015979		1617.39	0.00829728		2147.4	0.01168331		2677.4	-0.0103682
557.59	0.00420459		1087.6	0.0018876		1617.59	0.00792911		2147.6	0.01100868		2677.6	-0.01060969
557.79	0.00397709		1087.8	0.00158802		1617.79	0.00762891		2147.8	0.01052799		2677.8	-0.0106295
557.99	0.00355826		1088	0.00262385		1617.99	0.00823117		2148	0.00904347		2678	-0.01050215
558.19	0.00431092		1088.2	0.00282553		1618.19	0.00808111		2148.2	0.00828909		2678.2	-0.01031886
558.39	0.00386617		1088.4	0.0030862		1618.39	0.00779002		2148.4	0.00722501		2678.4	-0.01035106
558.59	0.00319726		1088.6	0.00337961		1618.59	0.0073816		2148.6	0.00694403		2678.6	-0.0097692
558.79	0.0038201		1088.8	0.00447502		1618.79	0.00680467		2148.8	0.00702041		2678.8	-0.00983909
558.99	0.00419808		1089	0.00508336		1618.99	0.00593192		2149	0.00725246		2679	-0.00873504
559.19	0.00464214		1089.2	0.00584471		1619.19	0.00550155		2149.2	0.00717844		2679.2	-0.00850485
559.39	0.00539924		1089.4	0.00634382		1619.39	0.00423334		2149.4	0.00759411		2679.4	-0.00865914
559.59	0.00610418		1089.6	0.00628684		1619.59	0.00319571		2149.6	0.00818719		2679.6	-0.00802347
559.79	0.00690273		1089.8	0.00548096		1619.79	0.00221593		2149.8	0.0086086		2679.8	-0.00767408
