# Supplementary material for: Functional development of a V3/glycan-specific broadly neutralizing antibody isolated from a case of HIV superinfection
Source: eLife journal article supplement (doi:10.7554/elife.68110), 2021-07-15
Supplement: fig2-data2 [file E3.xls]

Vers 3.43 Data Simulation
Conc1	3.125E-08	3.125E-08	3.125E-08	3.125E-08	3.125E-08
Start1	200	729.99	1259.99	1789.98	2320.01
Stop1	559.8	1089.79	1619.78	2149.78	2679.81
Time1	Data1	Sim1	Time2	Data2	Sim2	Time3	Data3	Sim3	Time4	Data4	Sim4	Time5	Data5	Sim5
200	0.01110959		729.99	0.00257696		1259.99	0.00329995		1789.98	-0.00361326		2320.01	-0.00247117
200.2	0.01177587		730.19	0.00349224		1260.19	0.00290674		1790.18	-0.00384137		2320.21	-0.00207427
200.4	0.01286892		730.39	0.00484442		1260.39	0.00206223		1790.38	-0.00468093		2320.41	-0.00079971
200.6	0.01334507		730.59	0.00618128		1260.59	0.00201361		1790.58	-0.00518013		2320.61	-0.00026879
200.8	0.01378963		730.79	0.00768987		1260.79	0.00178425		1790.78	-0.00590717		2320.81	0.00023438
201	0.01398389		730.99	0.00762956		1260.99	0.00150737		1790.98	-0.00592888		2321.01	0.00093003
201.2	0.01418334		731.19	0.00812712		1261.19	0.00104203		1791.18	-0.00644539		2321.21	0.00101336
201.4	0.01476464		731.39	0.00822623		1261.39	0.00097007		1791.38	-0.00658227		2321.41	0.00125175
201.6	0.01349356		731.59	0.00835371		1261.59	0.00074135		1791.58	-0.00668383		2321.61	0.00163126
201.8	0.01348072		731.79	0.00816375		1261.79	0.00112609		1791.78	-0.00646771		2321.81	0.00176855
202	0.01381607		731.99	0.007582		1261.99	0.00205197		1791.98	-0.00622216		2322.01	0.00215534
202.2	0.01401995		732.19	0.006796		1262.19	0.00184935		1792.18	-0.00595859		2322.21	0.00185246
202.4	0.01481556		732.39	0.00680061		1262.39	0.00113847		1792.38	-0.00673594		2322.41	0.00221167
202.6	0.01465899		732.59	0.00627634		1262.59	0.00109924		1792.58	-0.00721872		2322.61	0.00181797
202.8	0.01441944		732.79	0.00589981		1262.79	0.00168614		1792.78	-0.00695319		2322.81	0.00093756
203	0.01441274		732.99	0.00627461		1262.99	0.00212129		1792.98	-0.00659349		2323.01	0.00000582
203.2	0.01447979		733.19	0.00662292		1263.19	0.00255579		1793.18	-0.00671587		2323.21	-0.0000242
203.4	0.01534416		733.39	0.00590325		1263.39	0.00303184		1793.38	-0.00714813		2323.41	0.00047511
203.6	0.01650359		733.59	0.00647998		1263.59	0.0035452		1793.58	-0.00671506		2323.61	0.00128658
203.8	0.01686635		733.79	0.00603737		1263.79	0.00364253		1793.78	-0.0070447		2323.81	0.00098594
204	0.01723607		733.99	0.00542381		1263.99	0.00343084		1793.98	-0.00751587		2324.01	0.0020945
204.2	0.0185839		734.19	0.00547946		1264.19	0.00287341		1794.18	-0.00695654		2324.21	0.0025677
204.4	0.01950826		734.39	0.00594852		1264.39	0.00253983		1794.38	-0.00750672		2324.41	0.00346192
204.6	0.01987311		734.59	0.00537426		1264.59	0.00305564		1794.58	-0.00749878		2324.61	0.00317172
204.8	0.02035273		734.79	0.00479725		1264.79	0.00247531		1794.78	-0.00820332		2324.81	0.00399972
205	0.02059769		734.99	0.00338487		1264.99	0.00197972		1794.98	-0.00841898		2325.01	0.00401658
205.2	0.02066974		735.19	0.00391678		1265.19	0.0011513		1795.18	-0.00875549		2325.21	0.00365028
205.4	0.02020955		735.39	0.00428776		1265.39	0.00141061		1795.38	-0.00825901		2325.41	0.00417312
205.6	0.02003353		735.59	0.00478416		1265.59	0.00139249		1795.58	-0.00827327		2325.61	0.00380607
205.8	0.02126137		735.79	0.00513217		1265.79	0.00145466		1795.78	-0.00806307		2325.81	0.00390709
206	0.02102412		735.99	0.00544142		1265.99	0.00091665		1795.98	-0.00858856		2326.01	0.00472454
206.2	0.02103091		736.19	0.00475975		1266.19	-0.00024054		1796.18	-0.0087682		2326.21	0.00396048
206.4	0.02074195		736.39	0.00464618		1266.39	-0.00028116		1796.38	-0.00906719		2326.41	0.00347426
206.6	0.02059848		736.59	0.00485638		1266.59	0.0004105		1796.58	-0.00842015		2326.61	0.00303622
206.8	0.01973441		736.79	0.00496695		1266.79	0.00109356		1796.78	-0.00756817		2326.81	0.00229981
207	0.02056353		736.99	0.0055015		1266.99	0.00167782		1796.98	-0.00716013		2327.01	0.00193704
207.2	0.02097149		737.19	0.00552542		1267.19	0.00259359		1797.18	-0.00702933		2327.21	0.00172363
207.4	0.0212119		737.39	0.00509937		1267.39	0.00277411		1797.38	-0.00726856		2327.41	0.0015596
207.6	0.02126538		737.59	0.00540567		1267.59	0.00312342		1797.58	-0.0064981		2327.61	0.00171932
207.8	0.02127721		737.79	0.00507748		1267.79	0.0035471		1797.78	-0.0074892		2327.81	0.00154495
208	0.02109381		737.99	0.00497833		1267.99	0.00342829		1797.98	-0.00722732		2328.01	0.00245079
208.2	0.02073059		738.19	0.00573111		1268.19	0.00286904		1798.18	-0.00688611		2328.21	0.00186005
208.4	0.02078291		738.39	0.00557897		1268.39	0.00276527		1798.38	-0.00669902		2328.41	0.0009851
208.6	0.0208958		738.59	0.00484366		1268.59	0.00178892		1798.58	-0.0064266		2328.61	-0.0002007
208.8	0.02179865		738.79	0.00532079		1268.79	0.00105103		1798.78	-0.00692898		2328.81	0.00065728
209	0.02272365		738.99	0.00618356		1268.99	0.00081389		1798.98	-0.00686928		2329.01	0.00127982
209.2	0.02321454		739.19	0.00666403		1269.19	0.0000688		1799.18	-0.00667279		2329.21	0.00164763
209.4	0.02373581		739.39	0.00664459		1269.39	0.00002659		1799.38	-0.00686873		2329.41	0.00163651
209.6	0.02481332		739.59	0.00655175		1269.59	-0.00063904		1799.58	-0.00723077		2329.61	0.00197144
209.8	0.02472452		739.79	0.00708964		1269.79	-0.00161458		1799.78	-0.00756073		2329.81	0.00276495
210	0.02507416		739.99	0.00675074		1269.99	-0.0016463		1799.98	-0.00795507		2330.01	0.00310835
210.2	0.02582346		740.19	0.00601448		1270.19	-0.00148372		1800.18	-0.00807177		2330.21	0.00184912
210.4	0.02595211		740.39	0.00653014		1270.39	-0.00061025		1800.38	-0.0077318		2330.41	0.00096874
210.6	0.0265141		740.59	0.00647808		1270.59	0.00091264		1800.58	-0.0078653		2330.61	0.00129614
210.8	0.02660215		740.79	0.00677701		1270.79	0.00133331		1800.78	-0.00799663		2330.81	0.00035447
211	0.02857782		740.99	0.0065858		1270.99	0.00248034		1800.98	-0.00873318		2331.01	-0.00000731
211.2	0.02948538		741.19	0.00626019		1271.19	0.00221573		1801.18	-0.00889411		2331.21	-0.00049324
211.4	0.03028898		741.39	0.00551385		1271.39	0.00209757		1801.38	-0.00969811		2331.41	-0.00116472
211.6	0.03057974		741.59	0.0057609		1271.59	0.00214693		1801.58	-0.00965697		2331.61	-0.00162539
211.8	0.03023126		741.79	0.00598453		1271.79	0.00223026		1801.78	-0.00948456		2331.81	-0.00196473
212	0.02946592		741.99	0.00645763		1271.99	0.00190293		1801.98	-0.00819162		2332.01	-0.00193887
212.2	0.02982022		742.19	0.0066686		1272.19	0.00144609		1802.18	-0.00755951		2332.21	-0.00389159
212.4	0.03035805		742.39	0.00633559		1272.39	0.00043092		1802.38	-0.00621684		2332.41	-0.00492459
212.6	0.03134324		742.59	0.00620173		1272.59	-0.00015611		1802.58	-0.00592256		2332.61	-0.00479224
212.8	0.03288976		742.79	0.00637219		1272.79	0.00019497		1802.78	-0.00625449		2332.81	-0.003711
213	0.03391732		742.99	0.00721715		1272.99	-0.00022951		1802.98	-0.00561798		2333.01	-0.00349289
213.2	0.03414673		743.19	0.00631332		1273.19	-0.00063866		1803.18	-0.00521735		2333.21	-0.00355816
213.4	0.03427049		743.39	0.00567757		1273.39	-0.00115994		1803.38	-0.00500647		2333.41	-0.00369901
213.6	0.0349719		743.59	0.00560707		1273.59	-0.00204603		1803.58	-0.00512104		2333.61	-0.00298448
213.8	0.03567707		743.79	0.00651432		1273.79	-0.0016019		1803.78	-0.0052679		2333.81	-0.00272537
214	0.03607271		743.99	0.00649641		1273.99	-0.00113247		1803.98	-0.00520528		2334.01	-0.00262676
214.2	0.03587582		744.19	0.00677369		1274.19	-0.00123222		1804.18	-0.00508113		2334.21	-0.00235946
214.4	0.03580157		744.39	0.00695227		1274.39	-0.00066563		1804.38	-0.00502484		2334.41	-0.00151978
214.6	0.03621242		744.59	0.00739574		1274.59	-0.00067717		1804.58	-0.00547582		2334.61	-0.00008803
214.8	0.03649871		744.79	0.00836577		1274.79	-0.00068879		1804.78	-0.00532699		2334.81	-0.00035034
215	0.03691217		744.99	0.00810479		1274.99	-0.00021254		1804.98	-0.00610628		2335.01	-0.00026749
215.2	0.03632265		745.19	0.00832774		1275.19	-0.00181754		1805.18	-0.00655456		2335.21	-0.00031262
215.4	0.0361898		745.39	0.00822833		1275.39	-0.00179087		1805.38	-0.00784274		2335.41	-0.00037247
215.6	0.03582435		745.59	0.00898592		1275.59	-0.00181594		1805.58	-0.00793596		2335.61	-0.00061662
215.8	0.0349536		745.79	0.00934814		1275.79	-0.00141357		1805.78	-0.00728601		2335.81	0.00016316
216	0.03488561		745.99	0.01003623		1275.99	-0.0008594		1805.98	-0.00723358		2336.01	0.00032615
216.2	0.03567773		746.19	0.00988427		1276.19	-0.0007084		1806.18	-0.00817299		2336.21	0.00008072
216.4	0.03602201		746.39	0.009905		1276.39	0.00013127		1806.38	-0.00743625		2336.41	-0.00005637
216.6	0.03670822		746.59	0.01034482		1276.59	0.00122683		1806.58	-0.00730299		2336.61	0.00032108
216.8	0.03820784		746.79	0.01080597		1276.79	0.00090111		1806.78	-0.00759302		2336.81	-0.0002415
217	0.03977895		746.99	0.01123657		1276.99	0.00089992		1806.98	-0.00667747		2337.01	-0.00006898
217.2	0.04081231		747.19	0.01023839		1277.19	0.00135803		1807.18	-0.00708068		2337.21	0.00020827
217.4	0.04175551		747.39	0.00946924		1277.39	0.00206671		1807.38	-0.00724012		2337.41	-0.00015636
217.6	0.04272162		747.59	0.00918363		1277.59	0.00188667		1807.58	-0.00713961		2337.61	-0.00000327
217.8	0.0430123		747.79	0.00978817		1277.79	0.00364871		1807.78	-0.00729956		2337.81	0.00005554
218	0.04337096		747.99	0.00889412		1277.99	0.00404127		1807.98	-0.00688747		2338.01	-0.00084541
218.2	0.04399162		748.19	0.00852982		1278.19	0.00454376		1808.18	-0.00692019		2338.21	-0.00078247
218.4	0.04443436		748.39	0.00799053		1278.39	0.0045246		1808.38	-0.00722125		2338.41	-0.00096848
218.6	0.04480543		748.59	0.0078776		1278.59	0.00403821		1808.58	-0.00675708		2338.61	-0.00028969
218.8	0.04536485		748.79	0.00758044		1278.79	0.00387429		1808.78	-0.00671193		2338.81	-0.00107877
219	0.04523204		748.99	0.00679967		1278.99	0.00302233		1808.98	-0.00798011		2339.01	-0.0012708
219.2	0.04468479		749.19	0.00607924		1279.19	0.0020481		1809.18	-0.00822793		2339.21	-0.00128158
219.4	0.04454283		749.39	0.00552518		1279.39	0.00147119		1809.38	-0.00887762		2339.41	-0.00107309
219.6	0.04476887		749.59	0.00617129		1279.59	0.00120264		1809.58	-0.0088819		2339.61	-0.00094721
219.8	0.04469524		749.79	0.00663707		1279.79	0.00105465		1809.78	-0.00807763		2339.81	-0.00038412
220	0.04524335		749.99	0.00841564		1279.99	0.00033483		1809.98	-0.00801771		2340.01	-0.00016528
220.2	0.04560512		750.19	0.00860776		1280.19	-0.00009822		1810.18	-0.00802845		2340.21	0.00007261
220.4	0.04590818		750.39	0.00934713		1280.39	-0.00024263		1810.38	-0.0069964		2340.41	0.00059256
220.6	0.04674299		750.59	0.01011465		1280.59	-0.00156493		1810.58	-0.00739292		2340.61	0.0014015
220.8	0.04774061		750.79	0.00977138		1280.79	-0.00286431		1810.78	-0.00735942		2340.81	0.00186171
221	0.0480614		750.99	0.0107544		1280.99	-0.00273666		1810.98	-0.00673373		2341.01	0.00169457
221.2	0.04937801		751.19	0.01079467		1281.19	-0.00266764		1811.18	-0.00717175		2341.21	0.00167952
221.4	0.04897293		751.39	0.01053406		1281.39	-0.00240552		1811.38	-0.00709104		2341.41	0.00111571
221.6	0.04885442		751.59	0.01014876		1281.59	-0.0027164		1811.58	-0.00611442		2341.61	-0.00003252
221.8	0.04881503		751.79	0.01010505		1281.79	-0.00075475		1811.78	-0.00602741		2341.81	-0.00145155
222	0.04904698		751.99	0.00912495		1281.99	-0.00036117		1811.98	-0.00580265		2342.01	-0.00304876
222.2	0.04904295		752.19	0.0089585		1282.19	-0.00024514		1812.18	-0.00636943		2342.21	-0.00333389
222.4	0.04931152		752.39	0.00792868		1282.39	-0.00023132		1812.38	-0.00616044		2342.41	-0.00372765
222.6	0.04945012		752.59	0.00675242		1282.59	0.00091007		1812.58	-0.00557523		2342.61	-0.00342366
222.8	0.05021014		752.79	0.00570785		1282.79	0.00179811		1812.78	-0.00546016		2342.81	-0.00437535
223	0.04978544		752.99	0.00513482		1282.99	0.00178909		1812.98	-0.00600683		2343.01	-0.00395068
223.2	0.04978665		753.19	0.00436774		1283.19	0.00189687		1813.18	-0.00509431		2343.21	-0.00416441
223.4	0.04954265		753.39	0.00407905		1283.39	0.00131678		1813.38	-0.00503949		2343.41	-0.00364573
223.6	0.05024086		753.59	0.00503044		1283.59	0.0020768		1813.58	-0.00442569		2343.61	-0.00430435
223.8	0.05096346		753.79	0.00528751		1283.79	0.00214396		1813.78	-0.00466257		2343.81	-0.00397281
224	0.05120999		753.99	0.00622134		1283.99	0.00183078		1813.98	-0.00562327		2344.01	-0.00291732
224.2	0.05159218		754.19	0.00593777		1284.19	0.0019835		1814.18	-0.00721544		2344.21	-0.00176779
224.4	0.05183426		754.39	0.0065791		1284.39	0.00176904		1814.38	-0.00824323		2344.41	-0.00025327
224.6	0.05218726		754.59	0.00683394		1284.59	0.00206449		1814.58	-0.00932437		2344.61	0.00065764
224.8	0.05149333		754.79	0.00708202		1284.79	0.00220752		1814.78	-0.00857828		2344.81	0.00091967
225	0.05193817		754.99	0.00834427		1284.99	0.00181948		1814.98	-0.00940707		2345.01	0.00065347
225.2	0.05335487		755.19	0.00836132		1285.19	0.00141856		1815.18	-0.01044482		2345.21	0.00065714
225.4	0.05273926		755.39	0.00858152		1285.39	0.00096326		1815.38	-0.01034787		2345.41	0.0000374
225.6	0.05266115		755.59	0.00876086		1285.59	0.00067994		1815.58	-0.01020634		2345.61	-0.000513
225.8	0.05284042		755.79	0.0091097		1285.79	0.00047914		1815.78	-0.01025446		2345.81	-0.00080621
226	0.05270286		755.99	0.00944252		1285.99	-0.00038517		1815.98	-0.00994574		2346.01	-0.00084335
226.2	0.05278266		756.19	0.00960996		1286.19	-0.00021803		1816.18	-0.00970521		2346.21	-0.00073566
226.4	0.05373327		756.39	0.00960017		1286.39	0.000139		1816.38	-0.00855857		2346.41	-0.00109518
226.6	0.05394806		756.59	0.00943772		1286.59	0.00046177		1816.58	-0.00699056		2346.61	-0.0010783
226.8	0.05372142		756.79	0.01015042		1286.79	-0.00020053		1816.78	-0.00626718		2346.81	-0.00151706
227	0.05283042		756.99	0.01033864		1286.99	-0.00127937		1816.98	-0.00672434		2347.01	-0.0014412
227.2	0.05209753		757.19	0.0112102		1287.19	-0.0016217		1817.18	-0.00633568		2347.21	-0.00226253
227.4	0.05235322		757.39	0.01226862		1287.39	-0.00207361		1817.38	-0.00726934		2347.41	-0.00222069
227.6	0.0528636		757.59	0.01331332		1287.59	-0.00178768		1817.58	-0.00730888		2347.61	-0.00275161
227.8	0.05366228		757.79	0.01363301		1287.79	-0.00262779		1817.78	-0.00918912		2347.81	-0.00239091
228	0.05428108		757.99	0.01361647		1287.99	-0.00169781		1817.98	-0.0099826		2348.01	-0.00242227
228.2	0.05499578		758.19	0.01339491		1288.19	-0.00125078		1818.18	-0.01021341		2348.21	-0.00250765
228.4	0.05561006		758.39	0.01397059		1288.39	-0.00031526		1818.38	-0.01034771		2348.41	-0.00257529
228.6	0.0568397		758.59	0.01325826		1288.59	0.00031804		1818.58	-0.00999628		2348.61	-0.00254396
228.8	0.05717348		758.79	0.01302968		1288.79	0.00117324		1818.78	-0.0093815		2348.81	-0.00333704
229	0.05864298		758.99	0.01346403		1288.99	0.00044772		1818.98	-0.00969466		2349.01	-0.0034601
229.2	0.06082878		759.19	0.01265418		1289.19	0.00053216		1819.18	-0.00978188		2349.21	-0.00456295
229.4	0.06135292		759.39	0.0119689		1289.39	-0.00083458		1819.38	-0.00915112		2349.41	-0.00488639
229.6	0.06256154		759.59	0.01179489		1289.59	-0.00159411		1819.58	-0.00869927		2349.61	-0.00455279
229.8	0.06369749		759.79	0.01124574		1289.79	-0.00189632		1819.78	-0.00756516		2349.81	-0.00401766
230	0.06462106		759.99	0.01103176		1289.99	-0.00211702		1819.98	-0.00721534		2350.01	-0.0037749
230.2	0.06545276		760.19	0.01094184		1290.19	-0.00214671		1820.18	-0.007672		2350.21	-0.00326525
230.4	0.0656996		760.39	0.01072084		1290.39	-0.00217532		1820.38	-0.00689016		2350.41	-0.00299055
230.6	0.06527824		760.59	0.01025958		1290.59	-0.00226104		1820.58	-0.00680776		2350.61	-0.00316489
230.8	0.06413947		760.79	0.01149954		1290.79	-0.00229421		1820.78	-0.00838634		2350.81	-0.00260603
231	0.06304279		760.99	0.01169266		1290.99	-0.00238405		1820.98	-0.00942578		2351.01	-0.00252403
231.2	0.06267615		761.19	0.0125482		1291.19	-0.00246136		1821.18	-0.00965744		2351.21	-0.00310343
231.4	0.06276203		761.39	0.01348596		1291.39	-0.0026435		1821.38	-0.01027576		2351.41	-0.002283
231.6	0.06253831		761.59	0.01297836		1291.59	-0.00238031		1821.58	-0.01094235		2351.61	-0.00241983
231.8	0.06265157		761.79	0.01369395		1291.79	-0.00217053		1821.78	-0.01166884		2351.81	-0.00278464
232	0.06320083		761.99	0.01307784		1291.99	-0.0007377		1821.98	-0.01141703		2352.01	-0.00340643
232.2	0.06348478		762.19	0.01301332		1292.19	-0.0004541		1822.18	-0.01037455		2352.21	-0.00337703
232.4	0.06324723		762.39	0.01364664		1292.39	-0.00036133		1822.38	-0.00994314		2352.41	-0.00357687
232.6	0.0635037		762.59	0.01336084		1292.59	-0.00001756		1822.58	-0.00927217		2352.61	-0.00369402
232.8	0.06331389		762.79	0.0135226		1292.79	0.00115408		1822.78	-0.00904614		2352.81	-0.00442009
233	0.06380773		762.99	0.01283201		1292.99	0.00001606		1822.98	-0.00891665		2353.01	-0.00449128
233.2	0.06396081		763.19	0.01186855		1293.19	0.00015739		1823.18	-0.00908083		2353.21	-0.00498495
233.4	0.06340932		763.39	0.01227317		1293.39	-0.00101176		1823.38	-0.00784906		2353.41	-0.00459577
233.6	0.06439334		763.59	0.01217984		1293.59	-0.00068996		1823.58	-0.00822344		2353.61	-0.00454283
233.8	0.06455134		763.79	0.0117878		1293.79	-0.00117968		1823.78	-0.00843386		2353.81	-0.00436024
234	0.06547886		763.99	0.01188592		1293.99	-0.00097132		1823.98	-0.00850936		2354.01	-0.00404615
234.2	0.06569201		764.19	0.012671		1294.19	0.00014717		1824.18	-0.00832452		2354.21	-0.00370769
234.4	0.06586557		764.39	0.01330602		1294.39	0.00123264		1824.38	-0.00701997		2354.41	-0.00391746
234.6	0.06710584		764.59	0.0130631		1294.59	0.00152189		1824.58	-0.00623927		2354.61	-0.00437844
234.8	0.06697696		764.79	0.01389977		1294.79	0.00236708		1824.78	-0.0061476		2354.81	-0.00386905
235	0.06681602		764.99	0.01348356		1294.99	0.00185013		1824.98	-0.00563203		2355.01	-0.00506341
235.2	0.06784484		765.19	0.01342953		1295.19	0.00197096		1825.18	-0.00619271		2355.21	-0.00521527
235.4	0.06782438		765.39	0.01408571		1295.39	0.00154723		1825.38	-0.00665712		2355.41	-0.00407046
235.6	0.06844093		765.59	0.01371245		1295.59	0.00161833		1825.58	-0.00739427		2355.61	-0.00410673
235.8	0.0686781		765.79	0.01453718		1295.79	0.00168968		1825.78	-0.00658413		2355.81	-0.0043651
236	0.06906853		765.99	0.01448379		1295.99	0.00175495		1825.98	-0.00661314		2356.01	-0.00440613
236.2	0.06940955		766.19	0.01446738		1296.19	0.00122596		1826.18	-0.00644543		2356.21	-0.0032806
236.4	0.06929813		766.39	0.01527728		1296.39	0.00059224		1826.38	-0.00687705		2356.41	-0.0033935
236.6	0.07025243		766.59	0.01561146		1296.59	0.001122		1826.58	-0.00688983		2356.61	-0.00298495
236.8	0.07019428		766.79	0.0154959		1296.79	0.00197851		1826.78	-0.00758527		2356.81	-0.00323158
237	0.07069745		766.99	0.01513406		1296.99	0.00128209		1826.98	-0.00851511		2357.01	-0.00356098
237.2	0.07049509		767.19	0.01555612		1297.19	0.00136033		1827.18	-0.00818317		2357.21	-0.00358192
237.4	0.07042887		767.39	0.01600271		1297.39	0.00074319		1827.38	-0.00813726		2357.41	-0.00342116
237.6	0.0713552		767.59	0.01576177		1297.59	0.00036561		1827.58	-0.00855609		2357.61	-0.00359071
237.8	0.07112935		767.79	0.01567027		1297.79	0.00047714		1827.78	-0.0080742		2357.81	-0.00371939
238	0.07207306		767.99	0.01576816		1297.99	0.00131084		1827.98	-0.00805591		2358.01	-0.00404015
238.2	0.07349337		768.19	0.01698822		1298.19	0.00196829		1828.18	-0.00678437		2358.21	-0.00504506
238.4	0.07528855		768.39	0.01702116		1298.39	0.00217075		1828.38	-0.00523951		2358.41	-0.00581775
238.6	0.07667748		768.59	0.01571098		1298.59	0.00201553		1828.58	-0.00540003		2358.61	-0.00590103
238.8	0.07652045		768.79	0.01577299		1298.79	0.00212886		1828.78	-0.00571176		2358.81	-0.00648798
239	0.07661237		768.99	0.01477694		1298.99	0.00126217		1828.98	-0.00638255		2359.01	-0.00654272
239.2	0.07667259		769.19	0.014162		1299.19	0.00201609		1829.18	-0.00694162		2359.21	-0.00592498
239.4	0.07618922		769.39	0.01397532		1299.39	0.0013999		1829.38	-0.00710647		2359.41	-0.005809
239.6	0.07605396		769.59	0.01396392		1299.59	0.00142891		1829.58	-0.00682824		2359.61	-0.00586268
239.8	0.07515922		769.79	0.01427695		1299.79	0.00190997		1829.78	-0.00690266		2359.81	-0.00639572
240	0.07470589		769.99	0.01507237		1299.99	0.00182792		1829.98	-0.00785061		2360.01	-0.00614607
240.2	0.07502388		770.19	0.01573919		1300.19	0.00179242		1830.18	-0.00855048		2360.21	-0.00538166
240.4	0.07419625		770.39	0.01530851		1300.39	0.00222466		1830.38	-0.00889698		2360.41	-0.00517067
240.6	0.07378002		770.59	0.01465141		1300.59	0.00290551		1830.58	-0.0088822		2360.61	-0.00565182
240.8	0.07346523		770.79	0.01432839		1300.79	0.00342142		1830.78	-0.00923954		2360.81	-0.00593517
241	0.07398933		770.99	0.01403226		1300.99	0.00244563		1830.98	-0.0090703		2361.01	-0.00637473
241.2	0.07409038		771.19	0.01425023		1301.19	0.00208187		1831.18	-0.00824204		2361.21	-0.00559603
241.4	0.07322564		771.39	0.01463297		1301.39	0.00169839		1831.38	-0.00762187		2361.41	-0.00534495
241.6	0.07375434		771.59	0.0138176		1301.59	0.00145897		1831.58	-0.00652004		2361.61	-0.00595784
241.8	0.07359008		771.79	0.01367328		1301.79	0.00232156		1831.78	-0.00651858		2361.81	-0.00675497
242	0.07463225		771.99	0.01435303		1301.99	0.00239981		1831.98	-0.00623656		2362.01	-0.00628231
242.2	0.07557553		772.19	0.0148207		1302.19	0.00232839		1832.18	-0.00506668		2362.21	-0.00626486
242.4	0.07638377		772.39	0.01469971		1302.39	0.00200801		1832.38	-0.00503284		2362.41	-0.0057946
242.6	0.07596692		772.59	0.0142206		1302.59	0.00184087		1832.58	-0.0061838		2362.61	-0.00562091
242.8	0.07603718		772.79	0.01404885		1302.79	0.00138427		1832.78	-0.00569864		2362.81	-0.00570688
243	0.07666283		772.99	0.0136505		1302.99	0.0009108		1832.98	-0.00607381		2363.01	-0.00541879
243.2	0.07648487		773.19	0.01431327		1303.19	0.00119815		1833.18	-0.00578111		2363.21	-0.00643503
243.4	0.07665742		773.39	0.01485634		1303.39	0.0005763		1833.38	-0.00611261		2363.41	-0.006418
243.6	0.07655784		773.59	0.01480777		1303.59	0.00019832		1833.58	-0.0058331		2363.61	-0.00599252
243.8	0.07649209		773.79	0.01527809		1303.79	0.00077142		1833.78	-0.00690073		2363.81	-0.00713668
244	0.07729017		773.99	0.01590413		1303.99	0.00062161		1833.98	-0.00741591		2364.01	-0.00679805
244.2	0.07753691		774.19	0.01528147		1304.19	0.0008906		1834.18	-0.00810238		2364.21	-0.00663064
244.4	0.07790598		774.39	0.0146717		1304.39	0.00103354		1834.38	-0.00826279		2364.41	-0.00729139
244.6	0.07873472		774.59	0.015183		1304.59	0.00097224		1834.58	-0.0081304		2364.61	-0.0082687
244.8	0.08004225		774.79	0.01590192		1304.79	0.00062052		1834.78	-0.00796269		2364.81	-0.00814634
245	0.08050205		774.99	0.01655118		1304.99	0.00011048		1834.98	-0.00750385		2365.01	-0.00817243
245.2	0.08135154		775.19	0.01727879		1305.19	-0.00000213		1835.18	-0.00773913		2365.21	-0.00785772
245.4	0.08114062		775.39	0.01814126		1305.39	0.00078997		1835.38	-0.00754478		2365.41	-0.00764035
245.6	0.0818741		775.59	0.01893511		1305.59	0.00126294		1835.58	-0.0076396		2365.61	-0.00756402
245.8	0.08212325		775.79	0.01996105		1305.79	0.00184355		1835.78	-0.00856475		2365.81	-0.00700336
246	0.0821368		775.99	0.02099188		1305.99	0.00178128		1835.98	-0.00834476		2366.01	-0.00594688
246.2	0.08300428		776.19	0.02172689		1306.19	0.00149121		1836.18	-0.00852274		2366.21	-0.00552661
246.4	0.08327279		776.39	0.02221822		1306.39	0.00155667		1836.38	-0.00890532		2366.41	-0.00458208
246.6	0.08239942		776.59	0.02194775		1306.59	0.00237581		1836.58	-0.00910531		2366.61	-0.00492451
246.8	0.08337811		776.79	0.02183529		1306.79	0.00205852		1836.78	-0.0089671		2366.81	-0.00403056
247	0.08353709		776.99	0.02209035		1306.99	0.00152398		1836.98	-0.00848626		2367.01	-0.00435384
247.2	0.08376921		777.19	0.0211912		1307.19	0.00199287		1837.18	-0.00834079		2367.21	-0.00457397
247.4	0.08394913		777.39	0.0207854		1307.39	0.00169515		1837.38	-0.0082374		2367.41	-0.00427596
247.6	0.08406225		777.59	0.02000234		1307.59	0.00130643		1837.58	-0.00787613		2367.61	-0.00467946
247.8	0.08438601		777.79	0.01969627		1307.79	0.00180706		1837.78	-0.0083054		2367.81	-0.0051172
248	0.08416089		777.99	0.01906062		1307.99	0.00234545		1837.98	-0.00876612		2368.01	-0.00475838
248.2	0.08406862		778.19	0.01797113		1308.19	0.00223386		1838.18	-0.01012637		2368.21	-0.0058375
248.4	0.08481436		778.39	0.01756979		1308.39	0.00242576		1838.38	-0.010192		2368.41	-0.00647696
248.6	0.08488921		778.59	0.01736284		1308.59	0.00086788		1838.58	-0.0100167		2368.61	-0.00650624
248.8	0.0849526		778.79	0.01736317		1308.79	0.00131999		1838.78	-0.01008421		2368.81	-0.00636485
249	0.08555207		778.99	0.01657004		1308.99	0.00100748		1838.98	-0.00980043		2369.01	-0.00641989
249.2	0.08644971		779.19	0.01661292		1309.19	0.00070441		1839.18	-0.01051448		2369.21	-0.00671586
249.4	0.0862727		779.39	0.01666542		1309.39	0.00153082		1839.38	-0.01010727		2369.41	-0.00649276
249.6	0.08639556		779.59	0.01738294		1309.59	0.00174899		1839.58	-0.01017759		2369.61	-0.00614519
249.8	0.08677471		779.79	0.0172889		1309.79	0.0020199		1839.78	-0.01085509		2369.81	-0.00597464
250	0.08703349		779.99	0.0178402		1309.99	0.00254091		1839.98	-0.01027043		2370.01	-0.00577766
250.2	0.08748195		780.19	0.0181876		1310.19	0.0030105		1840.18	-0.0105477		2370.21	-0.00604984
250.4	0.08706189		780.39	0.01858231		1310.39	0.00340367		1840.38	-0.0104031		2370.41	-0.00585956
250.6	0.08744686		780.59	0.01853531		1310.59	0.00398997		1840.58	-0.00998599		2370.61	-0.00617931
250.8	0.08834581		780.79	0.01899342		1310.79	0.00296786		1840.78	-0.00973024		2370.81	-0.00577726
251	0.08778476		780.99	0.01941646		1310.99	0.00271586		1840.98	-0.00878475		2371.01	-0.00639132
251.2	0.08857269		781.19	0.019348		1311.19	0.00292333		1841.18	-0.0083033		2371.21	-0.00669485
251.4	0.08808704		781.39	0.02096898		1311.39	0.00285008		1841.38	-0.00773599		2371.41	-0.00760754
251.6	0.08810394		781.59	0.02086736		1311.59	0.00248623		1841.58	-0.00744459		2371.61	-0.00722935
251.8	0.08876012		781.79	0.02056437		1311.79	0.00288981		1841.78	-0.00792262		2371.81	-0.00702894
252	0.08912158		781.99	0.0203691		1311.99	0.00287962		1841.98	-0.00858014		2372.01	-0.00703599
252.2	0.0898394		782.19	0.02038582		1312.19	0.0012877		1842.18	-0.00859779		2372.21	-0.0074405
252.4	0.0911842		782.39	0.02056478		1312.39	0.00072292		1842.38	-0.00719376		2372.41	-0.00682786
252.6	0.0915949		782.59	0.02106011		1312.59	-0.00040648		1842.58	-0.00742431		2372.61	-0.00675206
252.8	0.09205968		782.79	0.02044175		1312.79	0.00064458		1842.78	-0.00727686		2372.81	-0.00656141
253	0.09279459		782.99	0.0195127		1312.99	0.00044343		1842.98	-0.00698804		2373.01	-0.00740424
253.2	0.09276764		783.19	0.01933047		1313.19	0.00064208		1843.18	-0.00658266		2373.21	-0.00668216
253.4	0.09282864		783.39	0.0196342		1313.39	0.00097379		1843.38	-0.00557769		2373.41	-0.00647353
253.6	0.09388063		783.59	0.01995495		1313.59	0.00082729		1843.58	-0.00645049		2373.61	-0.00576857
253.8	0.09441467		783.79	0.0189604		1313.79	0.00083342		1843.78	-0.00714323		2373.81	-0.00570938
254	0.09475638		783.99	0.01941157		1313.99	0.00060186		1843.98	-0.00698692		2374.01	-0.00559619
254.2	0.09484614		784.19	0.01925349		1314.19	0.0003493		1844.18	-0.00760417		2374.21	-0.00549778
254.4	0.09593836		784.39	0.01971065		1314.39	0.00010782		1844.38	-0.0074021		2374.41	-0.00483064
254.6	0.09596656		784.59	0.01959037		1314.59	-0.00064835		1844.58	-0.00696347		2374.61	-0.0045438
254.8	0.09559107		784.79	0.01979608		1314.79	-0.00131351		1844.78	-0.00726962		2374.81	-0.00453695
255	0.09540605		784.99	0.01955533		1314.99	-0.00142541		1844.98	-0.00718324		2375.01	-0.0043807
255.2	0.09526751		785.19	0.01937445		1315.19	-0.00131692		1845.18	-0.00744489		2375.21	-0.00502068
255.4	0.09493671		785.39	0.01968102		1315.39	-0.00068098		1845.38	-0.00805624		2375.41	-0.00523813
255.6	0.09519867		785.59	0.01794942		1315.59	-0.00106211		1845.58	-0.00816783		2375.61	-0.00486489
255.8	0.09573672		785.79	0.01752933		1315.79	-0.00145216		1845.78	-0.0095501		2375.81	-0.00521305
256	0.09584418		785.99	0.01776663		1315.99	-0.00191665		1845.98	-0.00912305		2376.01	-0.00585087
256.2	0.09549668		786.19	0.01813175		1316.19	-0.0020167		1846.18	-0.00873209		2376.21	-0.00643484
256.4	0.09558067		786.39	0.01745449		1316.39	-0.00155683		1846.38	-0.00850064		2376.41	-0.00655886
256.6	0.09460221		786.59	0.01682134		1316.59	-0.0010622		1846.58	-0.00961414		2376.61	-0.00695895
256.8	0.09386577		786.79	0.0170731		1316.79	0.00009062		1846.78	-0.00950133		2376.81	-0.00645943
257	0.09337495		786.99	0.01800095		1316.99	0.00073797		1846.98	-0.00950531		2377.01	-0.00710646
257.2	0.0937807		787.19	0.01846856		1317.19	0.00092989		1847.18	-0.00847563		2377.21	-0.00638005
257.4	0.09435749		787.39	0.02011163		1317.39	0.00082275		1847.38	-0.00855861		2377.41	-0.00688214
257.6	0.09515433		787.59	0.02003811		1317.59	0.00149282		1847.58	-0.00894093		2377.61	-0.00652099
257.8	0.09559679		787.79	0.02032425		1317.79	0.00211924		1847.78	-0.00907323		2377.81	-0.00732303
258	0.09690563		787.99	0.02156648		1317.99	0.00272155		1847.98	-0.00895532		2378.01	-0.00793881
258.2	0.09795327		788.19	0.02148768		1318.19	0.00248634		1848.18	-0.00895077		2378.21	-0.0078683
258.4	0.09816325		788.39	0.02171842		1318.39	0.0021193		1848.38	-0.00792728		2378.41	-0.00768303
258.6	0.09800575		788.59	0.02170541		1318.59	0.00177716		1848.58	-0.00807981		2378.61	-0.00807995
258.8	0.09840158		788.79	0.02187524		1318.79	0.00217605		1848.78	-0.00855414		2378.81	-0.00767789
259	0.09895723		788.99	0.02136112		1318.99	0.00224479		1848.98	-0.00821769		2379.01	-0.00816679
259.2	0.09905942		789.19	0.02144188		1319.19	0.0029534		1849.18	-0.00811613		2379.21	-0.00876302
259.4	0.1002673		789.39	0.02138846		1319.39	0.00377268		1849.38	-0.00747771		2379.41	-0.00851131
259.6	0.10070444		789.59	0.02031163		1319.59	0.00270821		1849.58	-0.00726803		2379.61	-0.0086902
259.8	0.10134574		789.79	0.02096381		1319.79	0.00173365		1849.78	-0.00770677		2379.81	-0.00879863
260	0.10149669		789.99	0.02072822		1319.99	0.00161654		1849.98	-0.00738123		2380.01	-0.00884957
260.2	0.10142562		790.19	0.020813		1320.19	0.00077134		1850.18	-0.00776578		2380.21	-0.00809045
260.4	0.1016354		790.39	0.02056037		1320.39	0.00004404		1850.38	-0.00719888		2380.41	-0.00757574
260.6	0.10177663		790.59	0.02156915		1320.59	0.00071226		1850.58	-0.00798386		2380.61	-0.00680225
260.8	0.1019695		790.79	0.02234115		1320.79	0.00112026		1850.78	-0.00874681		2380.81	-0.00658037
261	0.10219429		790.99	0.02313358		1320.99	0.00102457		1850.98	-0.00828297		2381.01	-0.0068988
261.2	0.10250319		791.19	0.02401083		1321.19	0.00116131		1851.18	-0.00842468		2381.21	-0.00697949
261.4	0.10347793		791.39	0.02432678		1321.39	0.00114176		1851.38	-0.00901901		2381.41	-0.00738157
261.6	0.10403302		791.59	0.02344389		1321.59	0.00125463		1851.58	-0.0092105		2381.61	-0.00704137
261.8	0.10428902		791.79	0.02382334		1321.79	0.00137033		1851.78	-0.00986935		2381.81	-0.00802917
262	0.10489826		791.99	0.02369885		1321.99	0.00041385		1851.98	-0.00931556		2382.01	-0.00795711
262.2	0.10385179		792.19	0.02287536		1322.19	-0.00058759		1852.18	-0.00913159		2382.21	-0.00751415
262.4	0.10333376		792.39	0.02236197		1322.39	-0.00048747		1852.38	-0.00912938		2382.41	-0.00771395
262.6	0.1035778		792.59	0.02242523		1322.59	0.00018362		1852.58	-0.00988848		2382.61	-0.00836824
262.8	0.10335158		792.79	0.0218482		1322.79	0.00056017		1852.78	-0.01009532		2382.81	-0.00781753
263	0.10321366		792.99	0.02110267		1322.99	0.00129885		1852.98	-0.0098113		2383.01	-0.00757611
263.2	0.10346583		793.19	0.02125918		1323.19	0.00191875		1853.18	-0.00943256		2383.21	-0.00735993
263.4	0.10359791		793.39	0.02091171		1323.39	0.00196466		1853.38	-0.00937348		2383.41	-0.00688113
263.6	0.10339888		793.59	0.02009409		1323.59	0.00095093		1853.58	-0.01010484		2383.61	-0.00685356
263.8	0.10373753		793.79	0.01966433		1323.79	0.00168256		1853.78	-0.01019529		2383.81	-0.00634269
264	0.10337366		793.99	0.01933504		1323.99	0.00196628		1853.98	-0.01009533		2384.01	-0.00680015
264.2	0.10317582		794.19	0.02033638		1324.19	0.00239999		1854.18	-0.00952085		2384.21	-0.00651081
264.4	0.10370891		794.39	0.02041349		1324.39	0.00357792		1854.38	-0.00935343		2384.41	-0.00684105
264.6	0.10419254		794.59	0.02152727		1324.59	0.00420541		1854.58	-0.00996461		2384.61	-0.00642101
264.8	0.10441498		794.79	0.02113948		1324.79	0.00383136		1854.78	-0.01015203		2384.81	-0.00643505
265	0.10368197		794.99	0.02142307		1324.99	0.0040257		1854.98	-0.00899941		2385.01	-0.00556631
265.2	0.10471364		795.19	0.02203605		1325.19	0.00378062		1855.18	-0.00937939		2385.21	-0.0061805
265.4	0.10548812		795.39	0.02177392		1325.39	0.00384348		1855.38	-0.00883452		2385.41	-0.00627065
265.6	0.10560859		795.59	0.0210809		1325.59	0.00325551		1855.58	-0.00940411		2385.61	-0.00636348
265.8	0.10526932		795.79	0.02159203		1325.79	0.00244278		1855.78	-0.0087873		2385.81	-0.00672758
266	0.10581726		795.99	0.02150282		1325.99	0.00132523		1855.98	-0.00863101		2386.01	-0.00656004
266.2	0.10587875		796.19	0.02131671		1326.19	0.00171151		1856.18	-0.00900584		2386.21	-0.00692164
266.4	0.10700046		796.39	0.02175988		1326.39	0.00071894		1856.38	-0.00917622		2386.41	-0.00654482
266.6	0.10757944		796.59	0.02280561		1326.59	0.00023996		1856.58	-0.00952926		2386.61	-0.00697627
266.8	0.1081022		796.79	0.02356311		1326.79	0.00013059		1856.78	-0.00985622		2386.81	-0.00699103
267	0.10867923		796.99	0.02438786		1326.99	-0.00011778		1856.98	-0.00965184		2387.01	-0.0066871
267.2	0.10909838		797.19	0.02508385		1327.19	-0.00159926		1857.18	-0.00999263		2387.21	-0.0078881
267.4	0.10936044		797.39	0.02520823		1327.39	-0.00199635		1857.38	-0.0097636		2387.41	-0.0079843
267.6	0.10993514		797.59	0.02581286		1327.59	-0.0018872		1857.58	-0.01004585		2387.61	-0.00831967
267.8	0.11028556		797.79	0.02548554		1327.79	-0.00077734		1857.78	-0.00992055		2387.81	-0.00800001
268	0.10978596		797.99	0.02534602		1327.99	-0.00062975		1857.98	-0.00941871		2388.01	-0.0084725
268.2	0.10950857		798.19	0.02626881		1328.19	0.00031798		1858.18	-0.00961524		2388.21	-0.00730749
268.4	0.10970584		798.39	0.02644708		1328.39	0.00068281		1858.38	-0.00897123		2388.41	-0.00725234
268.6	0.10985218		798.59	0.02696445		1328.59	0.00108865		1858.58	-0.00889663		2388.61	-0.00680278
268.8	0.1095519		798.79	0.02706879		1328.79	0.00165005		1858.78	-0.0088674		2388.81	-0.00617792
269	0.10987488		798.99	0.02787109		1328.99	0.00269212		1858.98	-0.00907969		2389.01	-0.00522075
269.2	0.1107093		799.19	0.0280119		1329.19	0.00308416		1859.18	-0.00952055		2389.21	-0.00548546
269.4	0.1098262		799.39	0.02730964		1329.39	0.00309994		1859.38	-0.01000006		2389.41	-0.00508364
269.6	0.10955599		799.59	0.02600064		1329.59	0.00229138		1859.58	-0.01085805		2389.61	-0.00474324
269.8	0.10893208		799.79	0.02597214		1329.79	0.00178426		1859.78	-0.01031311		2389.81	-0.00491846
270	0.10946402		799.99	0.02574055		1329.99	0.00259885		1859.98	-0.01100814		2390.01	-0.00533055
270.2	0.10933274		800.19	0.02573815		1330.19	0.00150958		1860.18	-0.01075043		2390.21	-0.00486018
270.4	0.10985903		800.39	0.02750607		1330.39	0.0006761		1860.38	-0.00969989		2390.41	-0.00506815
270.6	0.11085638		800.59	0.02841153		1330.59	0.00077392		1860.58	-0.00997014		2390.61	-0.00621238
270.8	0.11070692		800.79	0.02782368		1330.79	0.00090798		1860.78	-0.00963952		2390.81	-0.00660035
271	0.110883		800.99	0.02697369		1330.99	0.00045477		1860.98	-0.00891114		2391.01	-0.00611832
271.2	0.1114219		801.19	0.02720143		1331.19	-0.0002535		1861.18	-0.00866544		2391.21	-0.00673622
271.4	0.11249013		801.39	0.02643856		1331.39	-0.00012576		1861.38	-0.00735231		2391.41	-0.00692163
271.6	0.11334928		801.59	0.02603613		1331.59	-0.0002684		1861.58	-0.0077251		2391.61	-0.0074187
271.8	0.11420853		801.79	0.02488816		1331.79	0.0003457		1861.78	-0.00680207		2391.81	-0.00694129
272	0.11435648		801.99	0.02454804		1331.99	0.00009513		1861.98	-0.00601517		2392.01	-0.00718111
272.2	0.11510262		802.19	0.02513866		1332.19	0.00020553		1862.18	-0.00676004		2392.21	-0.0071049
272.4	0.11550099		802.39	0.02451545		1332.39	0.00037425		1862.38	-0.00607174		2392.41	-0.00696992
272.6	0.11591553		802.59	0.02449298		1332.59	0.00042736		1862.58	-0.0068107		2392.61	-0.00686356
272.8	0.11637398		802.79	0.02492161		1332.79	0.00023781		1862.78	-0.0075362		2392.81	-0.00702261
273	0.11694298		802.99	0.02436575		1332.99	-0.00016988		1862.98	-0.00782643		2393.01	-0.00674018
273.2	0.11621879		803.19	0.02366809		1333.19	-0.00052502		1863.18	-0.00844917		2393.21	-0.00711056
273.4	0.11571982		803.39	0.02328787		1333.39	-0.00130953		1863.38	-0.00963303		2393.41	-0.00737374
273.6	0.11608238		803.59	0.02240418		1333.59	-0.0010943		1863.58	-0.01019212		2393.61	-0.00812682
273.8	0.11583767		803.79	0.02253565		1333.79	-0.00061241		1863.78	-0.01014886		2393.81	-0.00839139
274	0.11532153		803.99	0.02344024		1333.99	-0.00051144		1863.98	-0.01059933		2394.01	-0.00853789
274.2	0.11490517		804.19	0.02401991		1334.19	-0.00099674		1864.18	-0.0096095		2394.21	-0.00786575
274.4	0.11534568		804.39	0.02515608		1334.39	-0.00063167		1864.38	-0.00968285		2394.41	-0.0082624
274.6	0.11544588		804.59	0.02426746		1334.59	-0.00024026		1864.58	-0.01021462		2394.61	-0.0081294
274.8	0.11459344		804.79	0.02409442		1334.79	0.00008077		1864.78	-0.00960109		2394.81	-0.00797752
275	0.11539262		804.99	0.0253612		1334.99	0.00092212		1864.98	-0.0090812		2395.01	-0.00766045
275.2	0.1151969		805.19	0.02676718		1335.19	0.00063603		1865.18	-0.00890423		2395.21	-0.00781596
275.4	0.11516285		805.39	0.0273819		1335.39	0.00108186		1865.38	-0.00838477		2395.41	-0.00790517
275.6	0.11555576		805.59	0.02806925		1335.59	0.00077726		1865.58	-0.00926841		2395.61	-0.00782615
275.8	0.1155901		805.79	0.02850679		1335.79	0.00062245		1865.78	-0.00935194		2395.81	-0.00735037
276	0.11510263		805.99	0.02885031		1335.99	0.00024779		1865.98	-0.00934662		2396.01	-0.00722493
276.2	0.11473833		806.19	0.02926328		1336.19	-0.00022391		1866.18	-0.00933509		2396.21	-0.00709106
276.4	0.1143438		806.39	0.0285151		1336.39	-0.00023938		1866.38	-0.00839802		2396.41	-0.00674836
276.6	0.11446339		806.59	0.0291216		1336.59	-0.0000879		1866.58	-0.00886152		2396.61	-0.0069624
276.8	0.11443023		806.79	0.02876171		1336.79	-0.00000528		1866.78	-0.00929503		2396.81	-0.00766076
277	0.11452488		806.99	0.02808687		1336.99	-0.00012534		1866.98	-0.00862043		2397.01	-0.0072295
277.2	0.1142692		807.19	0.02772924		1337.19	0.00036164		1867.18	-0.00960014		2397.21	-0.00727229
277.4	0.11459967		807.39	0.02724812		1337.39	0.00055953		1867.38	-0.0102657		2397.41	-0.00740017
277.6	0.11554534		807.59	0.02678138		1337.59	0.0005222		1867.58	-0.01044456		2397.61	-0.00718687
277.8	0.11580342		807.79	0.02719546		1337.79	0.00031929		1867.78	-0.01071334		2397.81	-0.00674407
278	0.11591837		807.99	0.02738707		1337.99	0.00032501		1867.98	-0.01143099		2398.01	-0.00679423
278.2	0.11702823		808.19	0.0271678		1338.19	0.00091587		1868.18	-0.01169185		2398.21	-0.00637053
278.4	0.11847981		808.39	0.02626184		1338.39	0.00043561		1868.38	-0.01307362		2398.41	-0.00670919
278.6	0.11864874		808.59	0.02551656		1338.59	0.00028922		1868.58	-0.01279705		2398.61	-0.00728369
278.8	0.11891659		808.79	0.02610224		1338.79	0.00092872		1868.78	-0.01264178		2398.81	-0.00767996
279	0.11936289		808.99	0.02663792		1338.99	0.00137982		1868.98	-0.01181145		2399.01	-0.00826799
279.2	0.11988657		809.19	0.02653498		1339.19	0.00089836		1869.18	-0.01242768		2399.21	-0.00836782
279.4	0.12033389		809.39	0.02654538		1339.39	0.00118445		1869.38	-0.01197611		2399.41	-0.00827212
279.6	0.12088147		809.59	0.02658815		1339.59	0.00010738		1869.58	-0.01205874		2399.61	-0.00845417
279.8	0.12067793		809.79	0.02685996		1339.79	-0.00077787		1869.78	-0.01169539		2399.81	-0.00807781
280	0.12059551		809.99	0.02713023		1339.99	-0.00116852		1869.98	-0.01095803		2400.01	-0.00785838
280.2	0.12074948		810.19	0.027146		1340.19	-0.00124166		1870.18	-0.00977005		2400.21	-0.00825334
280.4	0.12062842		810.39	0.02702058		1340.39	-0.0007551		1870.38	-0.00951332		2400.41	-0.00810533
280.6	0.12081931		810.59	0.02772376		1340.59	-0.00038199		1870.58	-0.00918253		2400.61	-0.00913842
280.8	0.12016941		810.79	0.0271455		1340.79	-0.00054485		1870.78	-0.00871946		2400.81	-0.00978316
281	0.12041395		810.99	0.02747875		1340.99	-0.00025673		1870.98	-0.00807326		2401.01	-0.00890399
281.2	0.12039156		811.19	0.02896099		1341.19	-0.00010373		1871.18	-0.00891597		2401.21	-0.00928218
281.4	0.120356		811.39	0.02896342		1341.39	-0.00051387		1871.38	-0.00841168		2401.41	-0.00881252
281.6	0.12116462		811.59	0.02929855		1341.59	-0.00046345		1871.58	-0.00804876		2401.61	-0.00797503
281.8	0.12096425		811.79	0.03045318		1341.79	-0.00053089		1871.78	-0.00821981		2401.81	-0.00839466
282	0.12106432		811.99	0.03097999		1341.99	0.00022545		1871.98	-0.00869269		2402.01	-0.00805
282.2	0.12102981		812.19	0.03098707		1342.19	0.00085515		1872.18	-0.00893883		2402.21	-0.00834436
282.4	0.12077917		812.39	0.03053627		1342.39	0.00059478		1872.38	-0.00884414		2402.41	-0.00904198
282.6	0.11948756		812.59	0.03046964		1342.59	0.00020708		1872.58	-0.0076913		2402.61	-0.00922254
282.8	0.11988247		812.79	0.03096014		1342.79	0.00152044		1872.78	-0.00658186		2402.81	-0.00896488
283	0.12015174		812.99	0.03087887		1342.99	0.0013357		1872.98	-0.00608458		2403.01	-0.00890966
283.2	0.12149331		813.19	0.03034247		1343.19	0.00179705		1873.18	-0.0065032		2403.21	-0.00862939
283.4	0.12112215		813.39	0.03028445		1343.39	0.00170744		1873.38	-0.00555086		2403.41	-0.00772013
283.6	0.12201799		813.59	0.03007362		1343.59	0.00084222		1873.58	-0.00657553		2403.61	-0.00770829
283.8	0.12238213		813.79	0.02938403		1343.79	-0.00003383		1873.78	-0.00710339		2403.81	-0.00705366
284	0.12280705		813.99	0.02943059		1343.99	0.00039895		1873.98	-0.00781327		2404.01	-0.00663362
284.2	0.12310342		814.19	0.02939411		1344.19	0.0002339		1874.18	-0.00767781		2404.21	-0.00687024
284.4	0.12368583		814.39	0.02929458		1344.39	-0.00013408		1874.38	-0.00896272		2404.41	-0.0077607
284.6	0.12524305		814.59	0.0290247		1344.59	-0.00058051		1874.58	-0.00940031		2404.61	-0.00893465
284.8	0.1254577		814.79	0.02879975		1344.79	0.00010019		1874.78	-0.01026972		2404.81	-0.00882972
285	0.12667195		814.99	0.02954838		1344.99	-0.00020592		1874.98	-0.00977018		2405.01	-0.00893914
285.2	0.12832299		815.19	0.02950993		1345.19	-0.00056146		1875.18	-0.01005784		2405.21	-0.00952262
285.4	0.12853511		815.39	0.02831125		1345.39	-0.00110781		1875.38	-0.00985001		2405.41	-0.00932912
285.6	0.1287937		815.59	0.02875629		1345.59	-0.00050785		1875.58	-0.01079813		2405.61	-0.00964602
285.8	0.12811093		815.79	0.02912018		1345.79	-0.00029056		1875.78	-0.01103308		2405.81	-0.0110278
286	0.12925632		815.99	0.02887378		1345.99	0.00083331		1875.98	-0.01128024		2406.01	-0.01162765
286.2	0.12878459		816.19	0.02839439		1346.19	0.00098221		1876.18	-0.01031558		2406.21	-0.01204217
286.4	0.12850022		816.39	0.02865641		1346.39	0.00052905		1876.38	-0.0098839		2406.41	-0.01267239
286.6	0.12747981		816.59	0.02779213		1346.59	0.00082409		1876.58	-0.00895859		2406.61	-0.01180439
286.8	0.12770951		816.79	0.02851134		1346.79	0.00137401		1876.78	-0.00835501		2406.81	-0.01120033
287	0.1274743		816.99	0.02837467		1346.99	0.00153607		1876.98	-0.00913603		2407.01	-0.0107283
287.2	0.12738683		817.19	0.0280051		1347.19	0.00145263		1877.18	-0.00925005		2407.21	-0.01043877
287.4	0.12658152		817.39	0.027864		1347.39	0.00083447		1877.38	-0.00975063		2407.41	-0.00992438
287.6	0.12668362		817.59	0.02776457		1347.59	0.00046996		1877.58	-0.01100358		2407.61	-0.0097129
287.8	0.1265506		817.79	0.02862356		1347.79	0.00091887		1877.78	-0.01097033		2407.81	-0.00955784
288	0.1256893		817.99	0.02914926		1347.99	0.00113956		1877.98	-0.01182513		2408.01	-0.00946784
288.2	0.1251211		818.19	0.02852314		1348.19	0.00088435		1878.18	-0.01180048		2408.21	-0.00975866
288.4	0.12596269		818.39	0.02872257		1348.39	0.00103173		1878.38	-0.01235563		2408.41	-0.01029738
288.6	0.12695138		818.59	0.02886658		1348.59	0.00083976		1878.58	-0.01148529		2408.61	-0.0099059
288.8	0.1276466		818.79	0.02942972		1348.79	0.00134066		1878.78	-0.01139829		2408.81	-0.01017307
289	0.12921789		818.99	0.03054151		1348.99	0.00080082		1878.98	-0.01070506		2409.01	-0.01036427
289.2	0.13091205		819.19	0.03095647		1349.19	0.00110082		1879.18	-0.01104564		2409.21	-0.01022583
289.4	0.13103213		819.39	0.03128752		1349.39	0.0010122		1879.38	-0.01126532		2409.41	-0.01067699
289.6	0.13115788		819.59	0.03143596		1349.59	0.00191964		1879.58	-0.01174382		2409.61	-0.01052315
289.8	0.13148612		819.79	0.03135658		1349.79	0.00224321		1879.78	-0.01069207		2409.81	-0.01200882
290	0.13274945		819.99	0.03149146		1349.99	0.00229913		1879.98	-0.01033316		2410.01	-0.01226852
290.2	0.13185155		820.19	0.03175883		1350.19	0.00203449		1880.18	-0.0100675		2410.21	-0.01191561
290.4	0.13189257		820.39	0.03213483		1350.39	0.00136016		1880.38	-0.00937208		2410.41	-0.01136361
290.6	0.13108604		820.59	0.03287525		1350.59	0.00178549		1880.58	-0.00944818		2410.61	-0.01028783
290.8	0.13179105		820.79	0.03389591		1350.79	0.00145067		1880.78	-0.00971511		2410.81	-0.0098928
291	0.13202812		820.99	0.03413894		1350.99	0.00132822		1880.98	-0.00986092		2411.01	-0.00942444
291.2	0.13176578		821.19	0.03370005		1351.19	0.00149935		1881.18	-0.00995743		2411.21	-0.00968565
291.4	0.13136698		821.39	0.03357467		1351.39	0.00114971		1881.38	-0.00983753		2411.41	-0.00977052
291.6	0.13156542		821.59	0.03352964		1351.59	0.00119406		1881.58	-0.00955692		2411.61	-0.00876585
291.8	0.13055329		821.79	0.03411035		1351.79	0.00080961		1881.78	-0.00886444		2411.81	-0.00896991
292	0.12977651		821.99	0.03365737		1351.99	-0.00001461		1881.98	-0.00945299		2412.01	-0.0087725
292.2	0.12965302		822.19	0.0335443		1352.19	-0.00004346		1882.18	-0.00919615		2412.21	-0.00801626
292.4	0.1310327		822.39	0.03405752		1352.39	-0.00048079		1882.38	-0.00914098		2412.41	-0.00807926
292.6	0.13182479		822.59	0.03401969		1352.59	-0.00124228		1882.58	-0.00928777		2412.61	-0.00760289
292.8	0.13224995		822.79	0.03375739		1352.79	-0.00194124		1882.78	-0.01014648		2412.81	-0.00810128
293	0.13293327		822.99	0.03478173		1352.99	-0.0021577		1882.98	-0.01023704		2413.01	-0.00824891
293.2	0.13360397		823.19	0.03474084		1353.19	-0.00216848		1883.18	-0.0101307		2413.21	-0.00867704
293.4	0.1338023		823.39	0.03437419		1353.39	-0.00209701		1883.38	-0.01086371		2413.41	-0.0085066
293.6	0.1338554		823.59	0.03442027		1353.59	-0.0017997		1883.58	-0.01080117		2413.61	-0.00914492
293.8	0.13404007		823.79	0.03378675		1353.79	-0.00174322		1883.78	-0.00894214		2413.81	-0.00976037
294	0.13340237		823.99	0.03370352		1353.99	-0.00122885		1883.98	-0.00890403		2414.01	-0.01005674
294.2	0.13370745		824.19	0.03440324		1354.19	-0.00053526		1884.18	-0.00884095		2414.21	-0.00911409
294.4	0.13437281		824.39	0.03496561		1354.39	-0.0005518		1884.38	-0.00798926		2414.41	-0.00867097
294.6	0.13487063		824.59	0.03582832		1354.59	0.00092567		1884.58	-0.00925298		2414.61	-0.00889316
294.8	0.13556081		824.79	0.0362357		1354.79	0.00122175		1884.78	-0.00844737		2414.81	-0.00961117
295	0.1360742		824.99	0.03624255		1354.99	0.00209112		1884.98	-0.00824312		2415.01	-0.01013117
295.2	0.13605068		825.19	0.03588496		1355.19	0.00301283		1885.18	-0.00846239		2415.21	-0.01044686
295.4	0.13613252		825.39	0.03635389		1355.39	0.00238914		1885.38	-0.00835061		2415.41	-0.01059861
295.6	0.13596875		825.59	0.03639533		1355.59	0.00329394		1885.58	-0.00838584		2415.61	-0.0102816
295.8	0.13540432		825.79	0.036245		1355.79	0.00335565		1885.78	-0.00890742		2415.81	-0.0107128
296	0.13537157		825.99	0.03554776		1355.99	0.00340435		1885.98	-0.0095497		2416.01	-0.01012443
296.2	0.1350055		826.19	0.03488649		1356.19	0.00301747		1886.18	-0.00981654		2416.21	-0.00917251
296.4	0.13482386		826.39	0.03397205		1356.39	0.00250053		1886.38	-0.0106063		2416.41	-0.00914222
296.6	0.13504581		826.59	0.03326433		1356.59	0.0014627		1886.58	-0.01148785		2416.61	-0.00904097
296.8	0.1349454		826.79	0.03318203		1356.79	0.00022		1886.78	-0.01114128		2416.81	-0.00917237
297	0.13507713		826.99	0.03375873		1356.99	-0.00004115		1886.98	-0.01148128		2417.01	-0.00864513
297.2	0.1355677		827.19	0.03271819		1357.19	-0.0010882		1887.18	-0.01182771		2417.21	-0.00836552
297.4	0.13581045		827.39	0.03286347		1357.39	-0.00181868		1887.38	-0.01178477		2417.41	-0.00731917
297.6	0.13571639		827.59	0.03284152		1357.59	-0.00199755		1887.58	-0.01023868		2417.61	-0.00694448
297.8	0.13518525		827.79	0.03215703		1357.79	-0.00182052		1887.78	-0.00941467		2417.81	-0.00604725
298	0.1348023		827.99	0.03264817		1357.99	-0.00144856		1887.98	-0.00881617		2418.01	-0.00576292
298.2	0.13571519		828.19	0.03356497		1358.19	-0.00191994		1888.18	-0.00895529		2418.21	-0.00468307
298.4	0.13654818		828.39	0.03372188		1358.39	-0.00228829		1888.38	-0.0084347		2418.41	-0.00541299
298.6	0.13656207		828.59	0.03402382		1358.59	-0.00142644		1888.58	-0.00870067		2418.61	-0.0050973
298.8	0.13660372		828.79	0.03542738		1358.79	-0.00139831		1888.78	-0.00737651		2418.81	-0.00569937
299	0.13738896		828.99	0.03470636		1358.99	-0.00041367		1888.98	-0.00749872		2419.01	-0.00633742
299.2	0.13701803		829.19	0.03509401		1359.19	-0.00069549		1889.18	-0.00733922		2419.21	-0.00668416
299.4	0.13751992		829.39	0.03502677		1359.39	-0.00035945		1889.38	-0.00744531		2419.41	-0.00721919
299.6	0.13732077		829.59	0.03427316		1359.59	0.00130464		1889.58	-0.0067586		2419.61	-0.00728937
299.8	0.13748893		829.79	0.0336921		1359.79	0.0014981		1889.78	-0.00701961		2419.81	-0.00664538
300	0.13743021		829.99	0.03348902		1359.99	0.0012921		1889.98	-0.00670482		2420.01	-0.00631144
300.2	0.13727968		830.19	0.03337414		1360.19	0.00177792		1890.18	-0.00782137		2420.21	-0.00611924
300.4	0.13785251		830.39	0.03248139		1360.39	0.00258436		1890.38	-0.00936853		2420.41	-0.00621182
300.6	0.13903172		830.59	0.03285852		1360.59	0.00206572		1890.58	-0.00968594		2420.61	-0.00648207
300.8	0.13872566		830.79	0.03324429		1360.79	0.00131285		1890.78	-0.01054093		2420.81	-0.00673683
301	0.13896011		830.99	0.03318148		1360.99	0.00081895		1890.98	-0.01207585		2421.01	-0.00727789
301.2	0.14019386		831.19	0.0328161		1361.19	0.00028221		1891.18	-0.01156751		2421.21	-0.00740323
301.4	0.14058985		831.39	0.03372754		1361.39	0.00083824		1891.38	-0.01074942		2421.41	-0.00733426
301.6	0.14052486		831.59	0.03356037		1361.59	0.00091372		1891.58	-0.0109578		2421.61	-0.00733257
301.8	0.1405813		831.79	0.03289172		1361.79	0.00095488		1891.78	-0.01065002		2421.81	-0.00750686
302	0.14098354		831.99	0.03317911		1361.99	0.00049923		1891.98	-0.01016423		2422.01	-0.00783609
302.2	0.14105679		832.19	0.03265827		1362.19	0.00020707		1892.18	-0.0114365		2422.21	-0.00846303
302.4	0.14148618		832.39	0.0319269		1362.39	0.00027069		1892.38	-0.01020128		2422.41	-0.00921174
302.6	0.14064792		832.59	0.03354242		1362.59	-0.00015487		1892.58	-0.01003108		2422.61	-0.0098145
302.8	0.14159034		832.79	0.03425569		1362.79	-0.00128927		1892.78	-0.00889667		2422.81	-0.0104683
303	0.14141673		832.99	0.03284543		1362.99	-0.00174651		1892.98	-0.00918002		2423.01	-0.01059997
303.2	0.141064		833.19	0.03381096		1363.19	-0.00284912		1893.18	-0.00919408		2423.21	-0.00998998
303.4	0.14092511		833.39	0.03396554		1363.39	-0.00236354		1893.38	-0.00960723		2423.41	-0.01117956
303.6	0.14108626		833.59	0.03408256		1363.59	-0.00237727		1893.58	-0.00935811		2423.61	-0.01159291
303.8	0.14117108		833.79	0.03400676		1363.79	-0.00273367		1893.78	-0.01033441		2423.81	-0.01158504
304	0.14098243		833.99	0.03443176		1363.99	-0.00315061		1893.98	-0.01101042		2424.01	-0.01122023
304.2	0.14090317		834.19	0.03393692		1364.19	-0.00350416		1894.18	-0.01151124		2424.21	-0.01139288
304.4	0.14047601		834.39	0.03400961		1364.39	-0.00369516		1894.38	-0.01200733		2424.41	-0.01148959
304.6	0.1393404		834.59	0.0348526		1364.59	-0.00389911		1894.58	-0.01170471		2424.61	-0.01181039
304.8	0.13884696		834.79	0.03507777		1364.79	-0.00388715		1894.78	-0.01246692		2424.81	-0.01190538
305	0.13949295		834.99	0.03563165		1364.99	-0.00289411		1894.98	-0.01264241		2425.01	-0.01182319
305.2	0.13950828		835.19	0.03538655		1365.19	-0.00162081		1895.18	-0.01152193		2425.21	-0.01140476
305.4	0.13955668		835.39	0.03590047		1365.39	-0.00125962		1895.38	-0.01121297		2425.41	-0.01121474
305.6	0.13960362		835.59	0.0358264		1365.59	-0.00075278		1895.58	-0.01220714		2425.61	-0.01089814
305.8	0.14015658		835.79	0.03536052		1365.79	-0.0001285		1895.78	-0.01162852		2425.81	-0.01037477
306	0.14038406		835.99	0.03553649		1365.99	-0.00070868		1895.98	-0.01090866		2426.01	-0.01109629
306.2	0.14151328		836.19	0.03494415		1366.19	-0.00063452		1896.18	-0.01071159		2426.21	-0.010975
306.4	0.14261696		836.39	0.03565759		1366.39	-0.00070427		1896.38	-0.0097552		2426.41	-0.01109586
306.6	0.14366087		836.59	0.03673624		1366.59	-0.00086923		1896.58	-0.0102249		2426.61	-0.01074578
306.8	0.14490867		836.79	0.03577272		1366.79	-0.00059335		1896.78	-0.01053616		2426.81	-0.00979047
307	0.14452032		836.99	0.035265		1366.99	0.00054398		1896.98	-0.01081808		2427.01	-0.00923946
307.2	0.14520466		837.19	0.03502418		1367.19	0.00075107		1897.18	-0.0108059		2427.21	-0.00993844
307.4	0.14583777		837.39	0.03507474		1367.39	0.00161169		1897.38	-0.01145258		2427.41	-0.0113851
307.6	0.14652409		837.59	0.03504357		1367.59	0.00099233		1897.58	-0.0116382		2427.61	-0.01076661
307.8	0.14692215		837.79	0.0350106		1367.79	0.00145614		1897.78	-0.01201785		2427.81	-0.01070018
308	0.14739719		837.99	0.03533192		1367.99	0.00173335		1897.98	-0.01186168		2428.01	-0.0105113
308.2	0.14737198		838.19	0.03504587		1368.19	0.00141395		1898.18	-0.01150596		2428.21	-0.01176368
308.4	0.14630467		838.39	0.03571278		1368.39	0.00234035		1898.38	-0.0121757		2428.41	-0.01081897
308.6	0.1465528		838.59	0.03589588		1368.59	0.00251779		1898.58	-0.0124013		2428.61	-0.01074
308.8	0.14690128		838.79	0.03577261		1368.79	0.00228543		1898.78	-0.01258885		2428.81	-0.01091226
309	0.14681481		838.99	0.03725405		1368.99	0.00280638		1898.98	-0.0123569		2429.01	-0.0105502
309.2	0.14669636		839.19	0.03765338		1369.19	0.00210637		1899.18	-0.011721		2429.21	-0.01079916
309.4	0.14641566		839.39	0.03869499		1369.39	0.00156527		1899.38	-0.01195524		2429.41	-0.01061196
309.6	0.14589319		839.59	0.03965247		1369.59	0.0019655		1899.58	-0.01243436		2429.61	-0.01070774
309.8	0.14567141		839.79	0.03905999		1369.79	0.00180488		1899.78	-0.01146189		2429.81	-0.0102229
310	0.14536524		839.99	0.03931195		1369.99	0.00008985		1899.98	-0.01101033		2430.01	-0.0105251
310.2	0.14545809		840.19	0.03933277		1370.19	0.00006441		1900.18	-0.01179992		2430.21	-0.01039581
310.4	0.14572573		840.39	0.03985592		1370.39	0.00016356		1900.38	-0.01180172		2430.41	-0.01044166
310.6	0.14541542		840.59	0.0397612		1370.59	0.00034794		1900.58	-0.01165041		2430.61	-0.01033507
310.8	0.14552132		840.79	0.03970104		1370.79	0.00061439		1900.78	-0.01106967		2430.81	-0.01031004
311	0.14457439		840.99	0.0393609		1370.99	0.00121029		1900.98	-0.01036084		2431.01	-0.0103758
311.2	0.14535351		841.19	0.03815621		1371.19	0.00095811		1901.18	-0.01043411		2431.21	-0.0109836
311.4	0.14678587		841.39	0.03804243		1371.39	0.00125887		1901.38	-0.01052188		2431.41	-0.01094806
311.6	0.14724057		841.59	0.0375915		1371.59	0.0014217		1901.58	-0.00948361		2431.61	-0.01027882
311.8	0.14877928		841.79	0.0365706		1371.79	0.00197849		1901.78	-0.00887657		2431.81	-0.01026659
312	0.14989128		841.99	0.03642627		1371.99	0.00202513		1901.98	-0.00873624		2432.01	-0.01122466
312.2	0.15070717		842.19	0.03543756		1372.19	0.00189164		1902.18	-0.00831321		2432.21	-0.01159185
312.4	0.15156509		842.39	0.03468168		1372.39	0.00226884		1902.38	-0.00757911		2432.41	-0.01065884
312.6	0.15155724		842.59	0.0344882		1372.59	0.00147328		1902.58	-0.00695034		2432.61	-0.01129993
312.8	0.15202058		842.79	0.03446627		1372.79	0.00142777		1902.78	-0.00720138		2432.81	-0.01153857
313	0.15252815		842.99	0.03476184		1372.99	0.00243711		1902.98	-0.00788625		2433.01	-0.01109054
313.2	0.15253808		843.19	0.03480103		1373.19	0.00253975		1903.18	-0.00886231		2433.21	-0.01175181
313.4	0.15217314		843.39	0.03548592		1373.39	0.00297987		1903.38	-0.00909376		2433.41	-0.01167012
313.6	0.15238328		843.59	0.03541263		1373.59	0.00345653		1903.58	-0.00924426		2433.61	-0.01229451
313.8	0.15244025		843.79	0.03525175		1373.79	0.00204643		1903.78	-0.0102318		2433.81	-0.01222091
314	0.15247159		843.99	0.03590742		1373.99	0.0002632		1903.98	-0.01102242		2434.01	-0.01329173
314.2	0.15276407		844.19	0.03650429		1374.19	0.00035229		1904.18	-0.01165188		2434.21	-0.0137757
314.4	0.15272313		844.39	0.03737971		1374.39	0.00013421		1904.38	-0.01162809		2434.41	-0.0135415
314.6	0.15233237		844.59	0.03792599		1374.59	-0.00003432		1904.58	-0.01174474		2434.61	-0.01403768
314.8	0.1530636		844.79	0.03883546		1374.79	-0.00080938		1904.78	-0.01156618		2434.81	-0.01396033
315	0.15217076		844.99	0.03872763		1374.99	-0.00123083		1904.98	-0.01151246		2435.01	-0.01428508
315.2	0.15157565		845.19	0.03831478		1375.19	-0.00112399		1905.18	-0.01113898		2435.21	-0.0139941
315.4	0.1519735		845.39	0.03888078		1375.39	-0.00146542		1905.38	-0.01004977		2435.41	-0.01367486
315.6	0.15158667		845.59	0.04010327		1375.59	-0.00076738		1905.58	-0.00851079		2435.61	-0.01365242
315.8	0.15180172		845.79	0.03980807		1375.79	-0.0016767		1905.78	-0.00832892		2435.81	-0.01419969
316	0.15245592		845.99	0.04020537		1375.99	-0.00137239		1905.98	-0.00787951		2436.01	-0.01450292
316.2	0.15263811		846.19	0.03920526		1376.19	0.00021372		1906.18	-0.00744938		2436.21	-0.01382495
316.4	0.15275791		846.39	0.03905718		1376.39	0.00044827		1906.38	-0.007611		2436.41	-0.01355917
316.6	0.15253829		846.59	0.03965499		1376.59	0.00074547		1906.58	-0.00860789		2436.61	-0.01397245
316.8	0.15394355		846.79	0.03971759		1376.79	0.00199333		1906.78	-0.00904377		2436.81	-0.01323968
317	0.1540327		846.99	0.03951671		1376.99	0.00284274		1906.98	-0.00987416		2437.01	-0.0130687
317.2	0.1546074		847.19	0.04099728		1377.19	0.00232622		1907.18	-0.01015153		2437.21	-0.01276432
317.4	0.15569585		847.39	0.04071196		1377.39	0.0020314		1907.38	-0.0098969		2437.41	-0.01295425
317.6	0.15616999		847.59	0.04054894		1377.59	0.00178206		1907.58	-0.01112768		2437.61	-0.01357064
317.8	0.15680995		847.79	0.04046259		1377.79	0.00076527		1907.78	-0.01113074		2437.81	-0.01363973
318	0.15726869		847.99	0.04024916		1377.99	-0.00039589		1907.98	-0.01110111		2438.01	-0.01362292
318.2	0.15728156		848.19	0.04044227		1378.19	-0.00044394		1908.18	-0.01084422		2438.21	-0.01302236
318.4	0.1571302		848.39	0.04080488		1378.39	-0.0012325		1908.38	-0.01048832		2438.41	-0.01283584
318.6	0.15769339		848.59	0.04178775		1378.59	-0.00189781		1908.58	-0.01089803		2438.61	-0.01327084
318.8	0.15744069		848.79	0.04184786		1378.79	-0.00200788		1908.78	-0.01127538		2438.81	-0.01331722
319	0.15573352		848.99	0.04156099		1378.99	-0.00215887		1908.98	-0.01123058		2439.01	-0.01291591
319.2	0.15507001		849.19	0.04132545		1379.19	-0.00221122		1909.18	-0.01102235		2439.21	-0.01266172
319.4	0.1560952		849.39	0.04108482		1379.39	-0.00220371		1909.38	-0.01108421		2439.41	-0.01280096
319.6	0.15619268		849.59	0.0413068		1379.59	-0.00147442		1909.58	-0.01033325		2439.61	-0.01325986
319.8	0.15611595		849.79	0.04066828		1379.79	-0.00126128		1909.78	-0.01134322		2439.81	-0.01302661
320	0.15689609		849.99	0.04007003		1379.99	0.00024248		1909.98	-0.01084914		2440.01	-0.01265069
320.2	0.15731052		850.19	0.039683		1380.19	0.00106048		1910.18	-0.01107161		2440.21	-0.01266387
320.4	0.15797282		850.39	0.03966969		1380.39	0.00118306		1910.38	-0.01177382		2440.41	-0.01226561
320.6	0.15814369		850.59	0.04093736		1380.59	0.00245628		1910.58	-0.01179453		2440.61	-0.0118944
320.8	0.15857025		850.79	0.04106301		1380.79	0.00334228		1910.78	-0.01165784		2440.81	-0.01053796
321	0.15876059		850.99	0.0415839		1380.99	0.00443865		1910.98	-0.01239424		2441.01	-0.01150952
321.2	0.159839		851.19	0.04237132		1381.19	0.00442497		1911.18	-0.01254873		2441.21	-0.01099693
321.4	0.16011111		851.39	0.04176527		1381.39	0.00452848		1911.38	-0.01226058		2441.41	-0.01173365
321.6	0.1599286		851.59	0.0419123		1381.59	0.0036006		1911.58	-0.01203086		2441.61	-0.01193843
321.8	0.15980699		851.79	0.04191861		1381.79	0.00268297		1911.78	-0.0111054		2441.81	-0.01218113
322	0.15972491		851.99	0.04249487		1381.99	0.00191684		1911.98	-0.01095401		2442.01	-0.01273019
322.2	0.15924393		852.19	0.04309646		1382.19	0.00217791		1912.18	-0.01019111		2442.21	-0.0129826
322.4	0.15978837		852.39	0.04388142		1382.39	0.00123736		1912.38	-0.0107076		2442.41	-0.0134724
322.6	0.15937013		852.59	0.04456862		1382.59	0.0008298		1912.58	-0.01117859		2442.61	-0.01432617
322.8	0.15933252		852.79	0.0432668		1382.79	-0.00028545		1912.78	-0.01067441		2442.81	-0.01471997
323	0.15937693		852.99	0.04346449		1382.99	-0.00071282		1912.98	-0.01055827		2443.01	-0.01418104
323.2	0.15949669		853.19	0.04393408		1383.19	-0.00045672		1913.18	-0.00996142		2443.21	-0.01456138
323.4	0.1600031		853.39	0.04401761		1383.39	-0.0004646		1913.38	-0.00992523		2443.41	-0.01444789
323.6	0.16007229		853.59	0.04413752		1383.59	-0.00052581		1913.58	-0.00993868		2443.61	-0.01433655
323.8	0.15994777		853.79	0.04363338		1383.79	-0.00005714		1913.78	-0.01072437		2443.81	-0.01391491
324	0.16034466		853.99	0.042763		1383.99	-0.0002496		1913.98	-0.00980531		2444.01	-0.01408799
324.2	0.16014535		854.19	0.04229336		1384.19	-0.00049649		1914.18	-0.01068804		2444.21	-0.01333158
324.4	0.16011878		854.39	0.04330513		1384.39	0.00052687		1914.38	-0.01143181		2444.41	-0.01256538
324.6	0.15983229		854.59	0.04338725		1384.59	0.00181682		1914.58	-0.01169605		2444.61	-0.01181014
324.8	0.16042287		854.79	0.04242024		1384.79	0.00239552		1914.78	-0.01251807		2444.81	-0.01130138
325	0.16077195		854.99	0.04259051		1384.99	0.00295805		1914.98	-0.01318172		2445.01	-0.01199421
325.2	0.16079121		855.19	0.04165159		1385.19	0.00247772		1915.18	-0.01317591		2445.21	-0.01089271
325.4	0.15967178		855.39	0.04055409		1385.39	0.00262412		1915.38	-0.01296381		2445.41	-0.01100776
325.6	0.15944299		855.59	0.04041396		1385.59	0.00268472		1915.58	-0.01312598		2445.61	-0.01143791
325.8	0.15926046		855.79	0.04036765		1385.79	0.0024824		1915.78	-0.01237148		2445.81	-0.01151015
326	0.15882068		855.99	0.04086106		1385.99	0.00195069		1915.98	-0.01185558		2446.01	-0.01105581
326.2	0.15823233		856.19	0.04089404		1386.19	0.0013493		1916.18	-0.01147005		2446.21	-0.01027374
326.4	0.15838643		856.39	0.04134788		1386.39	0.00063241		1916.38	-0.01055105		2446.41	-0.01050187
326.6	0.15906261		856.59	0.0416297		1386.59	0.00005852		1916.58	-0.01019691		2446.61	-0.01100149
326.8	0.159948		856.79	0.04105393		1386.79	-0.00066962		1916.78	-0.01014167		2446.81	-0.01049839
327	0.16007959		856.99	0.04168667		1386.99	-0.00009865		1916.98	-0.01045077		2447.01	-0.01003625
327.2	0.16084471		857.19	0.04247862		1387.19	-0.00053155		1917.18	-0.01002702		2447.21	-0.01003336
327.4	0.16197449		857.39	0.04241422		1387.39	-0.00085607		1917.38	-0.01070845		2447.41	-0.01022646
327.6	0.16199899		857.59	0.04196701		1387.59	-0.00020941		1917.58	-0.01120803		2447.61	-0.01055591
327.8	0.16218891		857.79	0.0418366		1387.79	0.00072173		1917.78	-0.01134674		2447.81	-0.01090354
328	0.16228193		857.99	0.04230862		1387.99	0.00007939		1917.98	-0.01084588		2448.01	-0.01153368
328.2	0.16218804		858.19	0.04209962		1388.19	0.00045535		1918.18	-0.01178048		2448.21	-0.01128038
328.4	0.16245264		858.39	0.04334741		1388.39	0.00087142		1918.38	-0.01164301		2448.41	-0.01081025
328.6	0.16351196		858.59	0.04284035		1388.59	0.00159484		1918.58	-0.01176395		2448.61	-0.01056319
328.8	0.16406353		858.79	0.04262978		1388.79	0.0014989		1918.78	-0.01185936		2448.81	-0.01137449
329	0.16434358		858.99	0.04219013		1388.99	0.00184599		1918.98	-0.01185959		2449.01	-0.01137074
329.2	0.16340815		859.19	0.04141709		1389.19	0.00210365		1919.18	-0.01154433		2449.21	-0.01049482
329.4	0.1628023		859.39	0.04153974		1389.39	0.00287938		1919.38	-0.0111278		2449.41	-0.01061204
329.6	0.16340064		859.59	0.04192931		1389.59	0.00284507		1919.58	-0.01025836		2449.61	-0.01127991
329.8	0.16229541		859.79	0.04149863		1389.79	0.00167257		1919.78	-0.00949597		2449.81	-0.01119187
330	0.16214225		859.99	0.04232718		1389.99	0.00144257		1919.98	-0.00920148		2450.01	-0.01046531
330.2	0.16224989		860.19	0.04204397		1390.19	0.00180306		1920.18	-0.00808388		2450.21	-0.01082664
330.4	0.16261539		860.39	0.04233558		1390.39	0.00196937		1920.38	-0.00732642		2450.41	-0.01129918
330.6	0.16373099		860.59	0.0423595		1390.59	0.00209865		1920.58	-0.00783813		2450.61	-0.01149967
330.8	0.16345718		860.79	0.04229828		1390.79	0.00208904		1920.78	-0.00854145		2450.81	-0.01088393
331	0.16349664		860.99	0.04342944		1390.99	0.00181203		1920.98	-0.00853108		2451.01	-0.01088864
331.2	0.16450448		861.19	0.04408215		1391.19	0.00161606		1921.18	-0.00769601		2451.21	-0.01038926
331.4	0.16510424		861.39	0.04445515		1391.39	0.00153207		1921.38	-0.00782404		2451.41	-0.0099255
331.6	0.16475264		861.59	0.04433244		1391.59	0.00125712		1921.58	-0.00771587		2451.61	-0.010437
331.8	0.16491633		861.79	0.04544508		1391.79	0.00042632		1921.78	-0.00736076		2451.81	-0.01023754
332	0.16446473		861.99	0.04652338		1391.99	-0.00131595		1921.98	-0.00731169		2452.01	-0.01045617
332.2	0.16495171		862.19	0.04700811		1392.19	-0.00057306		1922.18	-0.00845342		2452.21	-0.00961274
332.4	0.16531205		862.39	0.04796329		1392.39	-0.00041315		1922.38	-0.00898178		2452.41	-0.0092593
332.6	0.16655654		862.59	0.04813707		1392.59	0.00018159		1922.58	-0.00977135		2452.61	-0.00974901
332.8	0.16626168		862.79	0.04829942		1392.79	0.00036218		1922.78	-0.01029842		2452.81	-0.00953063
333	0.16695853		862.99	0.04818218		1392.99	0.00055699		1922.98	-0.0106782		2453.01	-0.00772209
333.2	0.16581002		863.19	0.04801347		1393.19	0.00076061		1923.18	-0.01106658		2453.21	-0.00745444
333.4	0.16542862		863.39	0.04821301		1393.39	0.00151249		1923.38	-0.01132617		2453.41	-0.00827832
333.6	0.16562056		863.59	0.04791342		1393.59	0.00128951		1923.58	-0.01115803		2453.61	-0.0090353
333.8	0.16519821		863.79	0.0476592		1393.79	0.00114668		1923.78	-0.01179918		2453.81	-0.00851583
334	0.16569487		863.99	0.04672574		1393.99	0.00239564		1923.98	-0.01134558		2454.01	-0.00866382
334.2	0.1650749		864.19	0.04606608		1394.19	0.00251595		1924.18	-0.0108033		2454.21	-0.0090457
334.4	0.16441642		864.39	0.0451429		1394.39	0.00282829		1924.38	-0.01152207		2454.41	-0.00898928
334.6	0.16437675		864.59	0.04443658		1394.59	0.00311533		1924.58	-0.01151072		2454.61	-0.00926807
334.8	0.16415302		864.79	0.04403643		1394.79	0.00251473		1924.78	-0.01238137		2454.81	-0.00921405
335	0.16483612		864.99	0.04349661		1394.99	0.00127537		1924.98	-0.01143664		2455.01	-0.00918102
335.2	0.16522218		865.19	0.04187295		1395.19	0.00022829		1925.18	-0.0101861		2455.21	-0.0086692
335.4	0.16567859		865.39	0.04113318		1395.39	-0.00091291		1925.38	-0.00996175		2455.41	-0.00884039
335.6	0.16498659		865.59	0.04093615		1395.59	-0.00092356		1925.58	-0.00943075		2455.61	-0.01000883
335.8	0.16517472		865.79	0.04175762		1395.79	-0.00180896		1925.78	-0.00912268		2455.81	-0.00997652
336	0.1654755		865.99	0.04118208		1395.99	-0.00203822		1925.98	-0.00961655		2456.01	-0.01081996
336.2	0.16650777		866.19	0.04158284		1396.19	-0.00138785		1926.18	-0.00928646		2456.21	-0.01068005
336.4	0.16691259		866.39	0.04231331		1396.39	-0.00219154		1926.38	-0.00974473		2456.41	-0.0106973
336.6	0.16743342		866.59	0.0431412		1396.59	-0.00193438		1926.58	-0.00910032		2456.61	-0.01026818
336.8	0.16719843		866.79	0.04379036		1396.79	-0.00211135		1926.78	-0.00861501		2456.81	-0.00925001
337	0.16718999		866.99	0.04408421		1396.99	-0.00230761		1926.98	-0.008077		2457.01	-0.00842841
337.2	0.16661874		867.19	0.04437379		1397.19	-0.00165721		1927.18	-0.00849965		2457.21	-0.00904146
337.4	0.16613983		867.39	0.04602958		1397.39	-0.00077025		1927.38	-0.00806978		2457.41	-0.00854755
337.6	0.16643829		867.59	0.0466864		1397.59	-0.00032672		1927.58	-0.00824509		2457.61	-0.0082098
337.8	0.16616703		867.79	0.04646955		1397.79	0.0002206		1927.78	-0.00836014		2457.81	-0.00727631
338	0.16613371		867.99	0.04608212		1397.99	0.00045219		1927.98	-0.00855489		2458.01	-0.0085255
338.2	0.16648794		868.19	0.04615314		1398.19	0.0001278		1928.18	-0.00914834		2458.21	-0.00922873
338.4	0.16679356		868.39	0.04623556		1398.39	0.00083786		1928.38	-0.01007908		2458.41	-0.00928636
338.6	0.16747601		868.59	0.04649446		1398.59	0.00177693		1928.58	-0.01011905		2458.61	-0.01035087
338.8	0.16868193		868.79	0.04710063		1398.79	0.0020589		1928.78	-0.01037853		2458.81	-0.01085735
339	0.16892113		868.99	0.04670784		1398.99	0.00167197		1928.98	-0.00972289		2459.01	-0.01106908
339.2	0.16884532		869.19	0.0462187		1399.19	0.00138313		1929.18	-0.00985655		2459.21	-0.01154308
339.4	0.16939231		869.39	0.04632261		1399.39	0.00147776		1929.38	-0.00994505		2459.41	-0.01267859
339.6	0.16835658		869.59	0.04646049		1399.59	0.00121728		1929.58	-0.01070546		2459.61	-0.01364572
339.8	0.16895152		869.79	0.04660776		1399.79	0.00020956		1929.78	-0.01106258		2459.81	-0.01367957
340	0.16923094		869.99	0.04593143		1399.99	-0.00022011		1929.98	-0.01065347		2460.01	-0.01293206
340.2	0.16943266		870.19	0.04650974		1400.19	-0.0003407		1930.18	-0.01009253		2460.21	-0.01218409
340.4	0.16921605		870.39	0.04592606		1400.39	-0.00046164		1930.38	-0.01083877		2460.41	-0.01176309
340.6	0.16866368		870.59	0.04531435		1400.59	0.00041971		1930.58	-0.01070164		2460.61	-0.01144865
340.8	0.16925353		870.79	0.04500642		1400.79	-0.00013684		1930.78	-0.01083332		2460.81	-0.01005778
341	0.16940889		870.99	0.0445175		1400.99	-0.00014243		1930.98	-0.01093857		2461.01	-0.00976956
341.2	0.16941397		871.19	0.04520652		1401.19	0.00022673		1931.18	-0.01119152		2461.21	-0.00961106
341.4	0.16941991		871.39	0.04531858		1401.39	0.00067921		1931.38	-0.01020324		2461.41	-0.00976822
341.6	0.17064879		871.59	0.04449079		1401.59	0.00012966		1931.58	-0.00993326		2461.61	-0.01018268
341.8	0.17140657		871.79	0.04445334		1401.79	0.00059215		1931.78	-0.00972208		2461.81	-0.01056471
342	0.17307279		871.99	0.04480268		1401.99	0.00029272		1931.98	-0.01037894		2462.01	-0.01184914
342.2	0.17325488		872.19	0.04505084		1402.19	0.00065588		1932.18	-0.01056846		2462.21	-0.01193204
342.4	0.17361866		872.39	0.04621195		1402.39	0.00066066		1932.38	-0.01071783		2462.41	-0.01222971
342.6	0.17361902		872.59	0.04620889		1402.59	0.0012397		1932.58	-0.01034091		2462.61	-0.01289008
342.8	0.17362742		872.79	0.04689658		1402.79	0.00056289		1932.78	-0.01029568		2462.81	-0.012303
343	0.17283589		872.99	0.04696856		1402.99	-0.00023278		1932.98	-0.01033312		2463.01	-0.01179084
343.2	0.1727604		873.19	0.04681671		1403.19	-0.00110644		1933.18	-0.01092859		2463.21	-0.01180753
343.4	0.17258974		873.39	0.04713937		1403.39	-0.00138119		1933.38	-0.01106288		2463.41	-0.01231532
343.6	0.17191433		873.59	0.04686836		1403.59	-0.00146295		1933.58	-0.01110463		2463.61	-0.01198839
343.8	0.1728983		873.79	0.04684337		1403.79	-0.00172872		1933.78	-0.01106929		2463.81	-0.01072603
344	0.17274577		873.99	0.04657899		1403.99	-0.0012917		1933.98	-0.01087093		2464.01	-0.01016609
344.2	0.17214472		874.19	0.04625906		1404.19	-0.0005851		1934.18	-0.01059728		2464.21	-0.01118021
344.4	0.17179325		874.39	0.04570366		1404.39	-0.0004196		1934.38	-0.01099105		2464.41	-0.01138266
344.6	0.17086254		874.59	0.04591418		1404.59	-0.00035432		1934.58	-0.01136465		2464.61	-0.01163336
344.8	0.17178328		874.79	0.04641144		1404.79	-0.00099122		1934.78	-0.01102527		2464.81	-0.01159878
345	0.17151483		874.99	0.04668546		1404.99	-0.00082368		1934.98	-0.01110818		2465.01	-0.01271489
345.2	0.17183774		875.19	0.04679948		1405.19	-0.00077702		1935.18	-0.01010338		2465.21	-0.01303515
345.4	0.17288836		875.39	0.04655611		1405.39	-0.00037266		1935.38	-0.00864589		2465.41	-0.01354815
345.6	0.17384865		875.59	0.04695904		1405.59	-0.00084553		1935.58	-0.0087831		2465.61	-0.01448611
345.8	0.17440716		875.79	0.04725097		1405.79	0.00004733		1935.78	-0.00862179		2465.81	-0.01489704
346	0.17468234		875.99	0.04707871		1405.99	-0.00079422		1935.98	-0.0088616		2466.01	-0.01482464
346.2	0.17412616		876.19	0.04731116		1406.19	-0.00076599		1936.18	-0.00917926		2466.21	-0.01511523
346.4	0.17511267		876.39	0.04765906		1406.39	-0.00016373		1936.38	-0.00992239		2466.41	-0.01524615
346.6	0.17524006		876.59	0.04706566		1406.59	0.00021459		1936.58	-0.01013092		2466.61	-0.01463841
346.8	0.17507738		876.79	0.04738292		1406.79	-0.00057739		1936.78	-0.01010373		2466.81	-0.01379652
347	0.17527665		876.99	0.04682218		1406.99	-0.00043394		1936.98	-0.0099722		2467.01	-0.01295226
347.2	0.17536872		877.19	0.04620048		1407.19	-0.00067302		1937.18	-0.00988147		2467.21	-0.01228877
347.4	0.17530888		877.39	0.04636542		1407.39	-0.00034267		1937.38	-0.00971621		2467.41	-0.01259952
347.6	0.1748093		877.59	0.0454027		1407.59	0.00003291		1937.58	-0.00909284		2467.61	-0.01192402
347.8	0.17409664		877.79	0.04541219		1407.79	-0.0001671		1937.78	-0.00960585		2467.81	-0.01149966
348	0.17363676		877.99	0.04534705		1407.99	0.00061037		1937.98	-0.00903672		2468.01	-0.0122915
348.2	0.17208287		878.19	0.04552836		1408.19	0.0006216		1938.18	-0.00924927		2468.21	-0.01192962
348.4	0.17183373		878.39	0.04631234		1408.39	-0.0001652		1938.38	-0.0098481		2468.41	-0.01169987
348.6	0.17132198		878.59	0.04673625		1408.59	-0.00001912		1938.58	-0.00971758		2468.61	-0.01172689
348.8	0.17236261		878.79	0.04717403		1408.79	0.00021254		1938.78	-0.00909537		2468.81	-0.01137936
349	0.17293153		878.99	0.04723583		1408.99	0.00016619		1938.98	-0.00891475		2469.01	-0.01119039
349.2	0.17327088		879.19	0.0467136		1409.19	0.000419		1939.18	-0.00874938		2469.21	-0.01135242
349.4	0.17370312		879.39	0.04740641		1409.39	0.00074159		1939.38	-0.00866029		2469.41	-0.01180256
349.6	0.17450812		879.59	0.0474781		1409.59	0.00023526		1939.58	-0.00989999		2469.61	-0.01271342
349.8	0.17540582		879.79	0.04741841		1409.79	0.00066013		1939.78	-0.0100321		2469.81	-0.01234492
350	0.1755811		879.99	0.04829904		1409.99	0.00037315		1939.98	-0.01091773		2470.01	-0.01221247
350.2	0.17676594		880.19	0.04955135		1410.19	0.00049196		1940.18	-0.0117606		2470.21	-0.01252709
350.4	0.17843303		880.39	0.05032757		1410.39	0.00093639		1940.38	-0.01219533		2470.41	-0.01232311
350.6	0.17933211		880.59	0.05012708		1410.59	-0.00020442		1940.58	-0.01213747		2470.61	-0.01300511
350.8	0.17929746		880.79	0.05080751		1410.79	-0.00069567		1940.78	-0.01128691		2470.81	-0.01296974
351	0.17916387		880.99	0.05095221		1410.99	-0.00040244		1940.98	-0.01123239		2471.01	-0.01242118
351.2	0.17903276		881.19	0.05131775		1411.19	-0.00082456		1941.18	-0.01097131		2471.21	-0.01265242
351.4	0.17835452		881.39	0.05080441		1411.39	-0.00086816		1941.38	-0.01069462		2471.41	-0.01309048
351.6	0.17783749		881.59	0.05074769		1411.59	-0.0010013		1941.58	-0.0099289		2471.61	-0.01248719
351.8	0.17715689		881.79	0.05175473		1411.79	-0.00048727		1941.78	-0.00938323		2471.81	-0.01280766
352	0.17652817		881.99	0.05197856		1411.99	0.00052491		1941.98	-0.00929124		2472.01	-0.01253675
352.2	0.17575831		882.19	0.05225374		1412.19	0.00049763		1942.18	-0.01035316		2472.21	-0.01230201
352.4	0.17553894		882.39	0.05167442		1412.39	0.00055627		1942.38	-0.00951242		2472.41	-0.01239362
352.6	0.17508949		882.59	0.05154595		1412.59	0.00103387		1942.58	-0.00844468		2472.61	-0.01196887
352.8	0.17561987		882.79	0.05103721		1412.79	0.00177337		1942.78	-0.00906777		2472.81	-0.01239347
353	0.17534216		882.99	0.0500136		1412.99	0.00277897		1942.98	-0.00875684		2473.01	-0.01285381
353.2	0.17485196		883.19	0.04909173		1413.19	0.00291705		1943.18	-0.00950572		2473.21	-0.01359097
353.4	0.17507353		883.39	0.04831396		1413.39	0.00282202		1943.38	-0.00907249		2473.41	-0.01371403
353.6	0.17557403		883.59	0.04791095		1413.59	0.00228404		1943.58	-0.00982556		2473.61	-0.01386952
353.8	0.17645495		883.79	0.04772534		1413.79	0.00276366		1943.78	-0.00951177		2473.81	-0.01399803
354	0.17740184		883.99	0.04757542		1413.99	0.00217541		1943.98	-0.00953197		2474.01	-0.01406174
354.2	0.17922998		884.19	0.04742593		1414.19	0.00146398		1944.18	-0.00993928		2474.21	-0.01434881
354.4	0.1800348		884.39	0.04652995		1414.39	0.00155821		1944.38	-0.00949651		2474.41	-0.01465604
354.6	0.18099315		884.59	0.04606259		1414.59	0.00105778		1944.58	-0.00975525		2474.61	-0.01505474
354.8	0.18141118		884.79	0.04625526		1414.79	0.00037011		1944.78	-0.0088122		2474.81	-0.01536716
355	0.18147571		884.99	0.04575408		1414.99	0.00049747		1944.98	-0.009209		2475.01	-0.01488237
355.2	0.18228479		885.19	0.04587145		1415.19	0.00006912		1945.18	-0.00889426		2475.21	-0.01422707
355.4	0.18218342		885.39	0.04648313		1415.39	-0.00025195		1945.38	-0.00820087		2475.41	-0.01315768
355.6	0.18267552		885.59	0.0473962		1415.59	-0.00038448		1945.58	-0.00795838		2475.61	-0.01197567
355.8	0.18232928		885.79	0.0482256		1415.79	0.00024923		1945.78	-0.00852768		2475.81	-0.01129204
356	0.18219177		885.99	0.04774656		1415.99	0.00053149		1945.98	-0.01015802		2476.01	-0.01038903
356.2	0.18298619		886.19	0.04771568		1416.19	0.00006902		1946.18	-0.01046859		2476.21	-0.01033399
356.4	0.18268642		886.39	0.04858037		1416.39	0.00020616		1946.38	-0.0099352		2476.41	-0.01034855
356.6	0.1820326		886.59	0.04995129		1416.59	0.00022792		1946.58	-0.0097593		2476.61	-0.01019974
356.8	0.18116221		886.79	0.05009016		1416.79	0.0009111		1946.78	-0.00980078		2476.81	-0.01040257
357	0.18084366		886.99	0.04921103		1416.99	0.00108472		1946.98	-0.00913585		2477.01	-0.0110255
357.2	0.18091302		887.19	0.04885604		1417.19	0.00078929		1947.18	-0.00910837		2477.21	-0.01164601
357.4	0.18034063		887.39	0.04839057		1417.39	0.000855		1947.38	-0.00861191		2477.41	-0.01209439
357.6	0.18044905		887.59	0.04902656		1417.59	0.00066494		1947.58	-0.00888906		2477.61	-0.01301465
357.8	0.18062306		887.79	0.04936066		1417.79	0.00019104		1947.78	-0.00882498		2477.81	-0.0133287
358	0.18051502		887.99	0.0489813		1417.99	-0.00014708		1947.98	-0.00876918		2478.01	-0.01412432
358.2	0.17940764		888.19	0.04907597		1418.19	-0.00049286		1948.18	-0.0088034		2478.21	-0.01422047
358.4	0.17907848		888.39	0.04875006		1418.39	0.00028467		1948.38	-0.00877076		2478.41	-0.01488545
358.6	0.1796007		888.59	0.04894495		1418.59	0.00051742		1948.58	-0.00903248		2478.61	-0.01487379
358.8	0.17913819		888.79	0.04968243		1418.79	0.00022417		1948.78	-0.00917997		2478.81	-0.01499333
359	0.17881448		888.99	0.050458		1418.99	0.00128289		1948.98	-0.00959557		2479.01	-0.01422982
359.2	0.17881258		889.19	0.05122851		1419.19	0.00193834		1949.18	-0.00979122		2479.21	-0.01370744
359.4	0.17893911		889.39	0.05120356		1419.39	0.00253257		1949.38	-0.00961676		2479.41	-0.01376143
359.6	0.17983932		889.59	0.05086816		1419.59	0.00339334		1949.58	-0.01092815		2479.61	-0.01296332
359.8	0.18040596		889.79	0.05105955		1419.79	0.00330681		1949.78	-0.0116089		2479.81	-0.01249948
360	0.18086312		889.99	0.05027705		1419.99	0.00322134		1949.98	-0.01171944		2480.01	-0.01166562
360.2	0.18185663		890.19	0.05102224		1420.19	0.00295322		1950.18	-0.01101787		2480.21	-0.01178284
360.4	0.18158149		890.39	0.05198434		1420.39	0.00264988		1950.38	-0.01017347		2480.41	-0.01228876
360.6	0.18153078		890.59	0.05198604		1420.59	0.00267358		1950.58	-0.00961429		2480.61	-0.01198219
360.8	0.18174474		890.79	0.05147342		1420.79	0.00214739		1950.78	-0.00996795		2480.81	-0.01215348
361	0.18280406		890.99	0.05035858		1420.99	0.0014808		1950.98	-0.01033835		2481.01	-0.0124435
361.2	0.18234527		891.19	0.05038253		1421.19	0.00128428		1951.18	-0.01016836		2481.21	-0.01259544
361.4	0.1824348		891.39	0.05022883		1421.39	-0.00017884		1951.38	-0.01027759		2481.41	-0.0122583
361.6	0.18334626		891.59	0.0503716		1421.59	-0.00097366		1951.58	-0.01028872		2481.61	-0.01265081
361.8	0.18300453		891.79	0.04997975		1421.79	-0.00226737		1951.78	-0.01046464		2481.81	-0.01279276
362	0.18322019		891.99	0.04995653		1421.99	-0.00181779		1951.98	-0.01019125		2482.01	-0.01319404
362.2	0.18391673		892.19	0.04982569		1422.19	-0.00268621		1952.18	-0.01060237		2482.21	-0.01311865
362.4	0.18472912		892.39	0.04925754		1422.39	-0.00245244		1952.38	-0.01065774		2482.41	-0.01297351
362.6	0.18466217		892.59	0.04953823		1422.59	-0.00180652		1952.58	-0.01082174		2482.61	-0.01209569
362.8	0.18474104		892.79	0.04990461		1422.79	-0.00119043		1952.78	-0.01176533		2482.81	-0.01191806
363	0.18530104		892.99	0.04968095		1422.99	-0.00054558		1952.98	-0.01152293		2483.01	-0.01136039
363.2	0.18543217		893.19	0.04966794		1423.19	0.00064792		1953.18	-0.01175408		2483.21	-0.01119503
363.4	0.18623962		893.39	0.04938188		1423.39	0.00180708		1953.38	-0.01059011		2483.41	-0.01150919
363.6	0.18654277		893.59	0.04992025		1423.59	0.00287715		1953.58	-0.01059251		2483.61	-0.01083664
363.8	0.18649461		893.79	0.05028582		1423.79	0.003084		1953.78	-0.00939457		2483.81	-0.0101904
364	0.18558579		893.99	0.05002321		1423.99	0.00390271		1953.98	-0.00816892		2484.01	-0.01001584
364.2	0.18583028		894.19	0.05096825		1424.19	0.00363592		1954.18	-0.00731398		2484.21	-0.01115878
364.4	0.18488498		894.39	0.0508609		1424.39	0.00348116		1954.38	-0.00646746		2484.41	-0.01181906
364.6	0.18459653		894.59	0.05065225		1424.59	0.0041889		1954.58	-0.0064874		2484.61	-0.01168545
364.8	0.18406081		894.79	0.0506157		1424.79	0.00388859		1954.78	-0.00681324		2484.81	-0.01137493
365	0.18387547		894.99	0.05040061		1424.99	0.00359685		1954.98	-0.0070011		2485.01	-0.01055973
365.2	0.18373041		895.19	0.05061839		1425.19	0.00357089		1955.18	-0.00794424		2485.21	-0.01033952
365.4	0.184162		895.39	0.05011747		1425.39	0.0027377		1955.38	-0.00685646		2485.41	-0.01001448
365.6	0.18475924		895.59	0.04995201		1425.59	0.00229506		1955.58	-0.00670694		2485.61	-0.0109748
365.8	0.18463051		895.79	0.04978102		1425.79	0.00173645		1955.78	-0.0073229		2485.81	-0.01121339
366	0.18504466		895.99	0.05010154		1425.99	0.00176898		1955.98	-0.00752788		2486.01	-0.01146854
366.2	0.18520709		896.19	0.04976136		1426.19	0.00030657		1956.18	-0.00840766		2486.21	-0.01159461
366.4	0.18461001		896.39	0.04946405		1426.39	-0.00008236		1956.38	-0.00912159		2486.41	-0.01092695
366.6	0.18329473		896.59	0.04916633		1426.59	-0.00067958		1956.58	-0.01007404		2486.61	-0.01052372
366.8	0.18393841		896.79	0.04894142		1426.79	-0.00104006		1956.78	-0.01068269		2486.81	-0.00988429
367	0.18435109		896.99	0.04900442		1426.99	-0.00189977		1956.98	-0.01043403		2487.01	-0.00976134
367.2	0.18417499		897.19	0.04923301		1427.19	-0.00198346		1957.18	-0.00970614		2487.21	-0.0102565
367.4	0.18423551		897.39	0.04979716		1427.39	-0.00154783		1957.38	-0.00873577		2487.41	-0.01039086
367.6	0.1838653		897.59	0.05094789		1427.59	-0.00085207		1957.58	-0.00844119		2487.61	-0.01040415
367.8	0.18371795		897.79	0.05111745		1427.79	-0.0009378		1957.78	-0.00878173		2487.81	-0.01042289
368	0.18340962		897.99	0.05091895		1427.99	-0.00101455		1957.98	-0.00873431		2488.01	-0.01157209
368.2	0.18391832		898.19	0.05069726		1428.19	-0.00114749		1958.18	-0.00915627		2488.21	-0.01286264
368.4	0.18428389		898.39	0.05041377		1428.39	-0.0010027		1958.38	-0.00980975		2488.41	-0.01312636
368.6	0.1852528		898.59	0.05045782		1428.59	-0.0004531		1958.58	-0.01042056		2488.61	-0.01343785
368.8	0.18626955		898.79	0.05126696		1428.79	-0.00030444		1958.78	-0.01099737		2488.81	-0.01453126
369	0.18673359		898.99	0.05098313		1428.99	0.00003032		1958.98	-0.01157114		2489.01	-0.01401195
369.2	0.18705286		899.19	0.05099998		1429.19	0.00035082		1959.18	-0.01104255		2489.21	-0.0142781
369.4	0.18697032		899.39	0.05077942		1429.39	0.00060876		1959.38	-0.00959523		2489.41	-0.01437222
369.6	0.18701228		899.59	0.05055786		1429.59	0.00074155		1959.58	-0.01105925		2489.61	-0.01503111
369.8	0.18667721		899.79	0.05029089		1429.79	0.00164621		1959.78	-0.01108328		2489.81	-0.01441504
370	0.18665645		899.99	0.04946428		1429.99	0.00141055		1959.98	-0.01128515		2490.01	-0.01429671
370.2	0.18705123		900.19	0.04970882		1430.19	0.00092961		1960.18	-0.01171494		2490.21	-0.01413842
370.4	0.18717435		900.39	0.04887444		1430.39	0.00180412		1960.38	-0.01232606		2490.41	-0.01399448
370.6	0.18641526		900.59	0.04852269		1430.59	0.00151945		1960.58	-0.01161145		2490.61	-0.01354472
370.8	0.1887078		900.79	0.04856688		1430.79	0.00229976		1960.78	-0.01110619		2490.81	-0.01341144
371	0.18915966		900.99	0.04870257		1430.99	0.00145088		1960.98	-0.01014353		2491.01	-0.01386205
371.2	0.18948434		901.19	0.0495705		1431.19	0.00149083		1961.18	-0.00908865		2491.21	-0.01391912
371.4	0.19030095		901.39	0.05107775		1431.39	0.00182135		1961.38	-0.00869875		2491.41	-0.01336216
371.6	0.19111418		901.59	0.05070818		1431.59	0.00179158		1961.58	-0.00926677		2491.61	-0.01335556
371.8	0.19169815		901.79	0.0509852		1431.79	0.0014621		1961.78	-0.00914185		2491.81	-0.01313523
372	0.19100436		901.99	0.05173468		1431.99	0.00102371		1961.98	-0.00847176		2492.01	-0.01340712
372.2	0.19118025		902.19	0.05290939		1432.19	0.00062422		1962.18	-0.0083403		2492.21	-0.0137329
372.4	0.19128262		902.39	0.05409408		1432.39	-0.00053405		1962.38	-0.0081153		2492.41	-0.0133494
372.6	0.1909372		902.59	0.05504628		1432.59	-0.00146413		1962.58	-0.00814017		2492.61	-0.01418642
372.8	0.19064745		902.79	0.05610167		1432.79	-0.00181768		1962.78	-0.00832034		2492.81	-0.01480203
373	0.18952449		902.99	0.05637987		1432.99	-0.00209683		1962.98	-0.00802345		2493.01	-0.01429804
373.2	0.18864707		903.19	0.05635837		1433.19	-0.00196618		1963.18	-0.00766339		2493.21	-0.01412423
373.4	0.18746881		903.39	0.05516859		1433.39	-0.00176185		1963.38	-0.00749606		2493.41	-0.01439452
373.6	0.18676246		903.59	0.05495116		1433.59	-0.0017869		1963.58	-0.00744313		2493.61	-0.01389743
373.8	0.18691704		903.79	0.05463709		1433.79	-0.00082263		1963.78	-0.00691676		2493.81	-0.01274255
374	0.18732729		903.99	0.05389636		1433.99	-0.00134463		1963.98	-0.00733443		2494.01	-0.01307268
374.2	0.18691532		904.19	0.05432938		1434.19	-0.001168		1964.18	-0.00757582		2494.21	-0.01419257
374.4	0.18655652		904.39	0.05301757		1434.39	-0.0003804		1964.38	-0.00822565		2494.41	-0.01476925
374.6	0.18676093		904.59	0.05269164		1434.59	-0.00016074		1964.58	-0.00800516		2494.61	-0.01468075
374.8	0.1882431		904.79	0.05303916		1434.79	0.00079957		1964.78	-0.00804069		2494.81	-0.01536201
375	0.1887399		904.99	0.05278336		1434.99	0.00144226		1964.98	-0.00875568		2495.01	-0.01592119
375.2	0.18941298		905.19	0.05280958		1435.19	0.00202051		1965.18	-0.00881618		2495.21	-0.01633329
375.4	0.19013164		905.39	0.05191496		1435.39	0.00240637		1965.38	-0.00901281		2495.41	-0.01614302
375.6	0.19019345		905.59	0.05184696		1435.59	0.00204974		1965.58	-0.00942147		2495.61	-0.01612273
375.8	0.18956419		905.79	0.05322466		1435.79	0.00199667		1965.78	-0.00855659		2495.81	-0.01590791
376	0.18930408		905.99	0.05329073		1435.99	0.00144246		1965.98	-0.00918068		2496.01	-0.01573956
376.2	0.18992993		906.19	0.05364016		1436.19	0.00095583		1966.18	-0.00938664		2496.21	-0.015502
376.4	0.189671		906.39	0.05411661		1436.39	0.00069387		1966.38	-0.01035045		2496.41	-0.01543072
376.6	0.18998962		906.59	0.05484244		1436.59	0.00002298		1966.58	-0.01129448		2496.61	-0.01597969
376.8	0.1909443		906.79	0.05563782		1436.79	0.00001365		1966.78	-0.01183946		2496.81	-0.0162655
377	0.19087809		906.99	0.05585676		1436.99	-0.0007589		1966.98	-0.01196245		2497.01	-0.01574535
377.2	0.19086376		907.19	0.05487982		1437.19	-0.00092234		1967.18	-0.01175403		2497.21	-0.0150086
377.4	0.19028763		907.39	0.05474167		1437.39	-0.00084985		1967.38	-0.01200748		2497.41	-0.01491822
377.6	0.19020481		907.59	0.05587539		1437.59	-0.00090845		1967.58	-0.01269994		2497.61	-0.0131597
377.8	0.19056697		907.79	0.05538512		1437.79	-0.00096041		1967.78	-0.01344597		2497.81	-0.01260899
378	0.19057656		907.99	0.0548672		1437.99	-0.00174529		1967.98	-0.01342954		2498.01	-0.01267523
378.2	0.19015168		908.19	0.05457781		1438.19	-0.00177671		1968.18	-0.01355051		2498.21	-0.01267475
378.4	0.19075807		908.39	0.05410637		1438.39	-0.00139009		1968.38	-0.01358132		2498.41	-0.01212975
378.6	0.19148471		908.59	0.05425792		1438.59	-0.00104862		1968.58	-0.01325378		2498.61	-0.01163571
378.8	0.19203299		908.79	0.05468115		1438.79	-0.00082723		1968.78	-0.01263225		2498.81	-0.01188575
379	0.19220366		908.99	0.05405502		1438.99	-0.0007968		1968.98	-0.01263162		2499.01	-0.01203232
379.2	0.19206922		909.19	0.05409536		1439.19	-0.00141592		1969.18	-0.0111765		2499.21	-0.01215389
379.4	0.19207795		909.39	0.0540536		1439.39	-0.00171486		1969.38	-0.01035931		2499.41	-0.01211531
379.6	0.19193806		909.59	0.05470128		1439.59	-0.00265115		1969.58	-0.00942432		2499.61	-0.01202255
379.8	0.19176013		909.79	0.05463441		1439.79	-0.00296932		1969.78	-0.00858447		2499.81	-0.01201592
380	0.19176013		909.99	0.05463441		1439.98	-0.00296932		1969.98	-0.00858447		2500.01	-0.01201592
380.2	0.19158566		910.19	0.05467464		1440.18	-0.00300345		1970.18	-0.00861114		2500.21	-0.01171887
380.4	0.19111101		910.39	0.05514557		1440.38	-0.00341129		1970.38	-0.00863544		2500.41	-0.01201417
380.6	0.19123901		910.59	0.05536228		1440.58	-0.00406702		1970.58	-0.00871043		2500.61	-0.01202602
380.8	0.19113157		910.79	0.0564872		1440.78	-0.00417987		1970.78	-0.00813928		2500.81	-0.01176464
381	0.19132535		910.99	0.05691995		1440.98	-0.00414131		1970.98	-0.00776884		2501.01	-0.01117794
381.2	0.19145489		911.19	0.05732721		1441.18	-0.00465383		1971.18	-0.00774507		2501.21	-0.01169217
381.4	0.19125462		911.39	0.05790618		1441.38	-0.00457277		1971.38	-0.00734544		2501.41	-0.01177726
381.6	0.19083423		911.59	0.05777461		1441.58	-0.00398747		1971.58	-0.00716389		2501.61	-0.01191564
381.8	0.19053573		911.79	0.05778156		1441.78	-0.00385143		1971.78	-0.00711565		2501.81	-0.0119907
382	0.18975525		911.99	0.05741566		1441.98	-0.00295174		1971.98	-0.00663077		2502.01	-0.01169671
382.2	0.1897077		912.19	0.05703495		1442.18	-0.00284528		1972.18	-0.00683989		2502.21	-0.01213621
382.4	0.18999983		912.39	0.05625889		1442.38	-0.00297435		1972.38	-0.00732156		2502.41	-0.01229792
382.6	0.18969581		912.59	0.05654866		1442.58	-0.00286907		1972.58	-0.00711382		2502.61	-0.01089808
382.8	0.19051264		912.79	0.05610085		1442.78	-0.00173002		1972.78	-0.00709375		2502.81	-0.0104453
383	0.19083768		912.99	0.05527112		1442.98	-0.00052869		1972.98	-0.00707381		2503.01	-0.01009816
383.2	0.19085776		913.19	0.05491243		1443.18	0.00001378		1973.18	-0.0072794		2503.21	-0.01004167
383.4	0.19001286		913.39	0.05464131		1443.38	0.00016688		1973.38	-0.00703208		2503.41	-0.00933569
383.6	0.19093685		913.59	0.05468562		1443.58	-0.0000968		1973.58	-0.00642169		2503.61	-0.00938053
383.8	0.19112208		913.79	0.05476333		1443.78	-0.00135782		1973.78	-0.00567968		2503.81	-0.0098744
384	0.19066398		913.99	0.05545125		1443.98	-0.00134752		1973.98	-0.0066074		2504.01	-0.01028471
384.2	0.19105635		914.19	0.05607367		1444.18	-0.00190044		1974.18	-0.00638885		2504.21	-0.01036048
384.4	0.19187693		914.39	0.05689602		1444.38	-0.00309368		1974.38	-0.00694206		2504.41	-0.01105753
384.6	0.19245438		914.59	0.05731539		1444.58	-0.00389216		1974.58	-0.00632532		2504.61	-0.01135396
384.8	0.19288792		914.79	0.05864843		1444.78	-0.00415531		1974.78	-0.00568783		2504.81	-0.01129971
385	0.19281337		914.99	0.05861372		1444.98	-0.00546126		1974.98	-0.00539222		2505.01	-0.01180761
385.2	0.19295464		915.19	0.05903418		1445.18	-0.00628783		1975.18	-0.00533541		2505.21	-0.01208008
385.4	0.19245811		915.39	0.05879456		1445.38	-0.00562796		1975.38	-0.00518191		2505.41	-0.01128105
385.6	0.19187176		915.59	0.05790162		1445.58	-0.0055796		1975.58	-0.00478925		2505.61	-0.01099453
385.8	0.19138813		915.79	0.05746872		1445.78	-0.0053117		1975.78	-0.00498781		2505.81	-0.01085276
386	0.1911473		915.99	0.05696407		1445.98	-0.00512079		1975.98	-0.00473843		2506.01	-0.01055193
386.2	0.1919164		916.19	0.0575224		1446.18	-0.00523483		1976.18	-0.00513337		2506.21	-0.0105287
386.4	0.19136544		916.39	0.05717899		1446.38	-0.00472439		1976.38	-0.00529757		2506.41	-0.01039019
386.6	0.19200326		916.59	0.05740766		1446.58	-0.0046283		1976.58	-0.00514123		2506.61	-0.00939992
386.8	0.19160765		916.79	0.05713888		1446.78	-0.00423239		1976.78	-0.00542729		2506.81	-0.00946843
387	0.19186095		916.99	0.05645453		1446.98	-0.00381193		1976.98	-0.00589818		2507.01	-0.0096429
387.2	0.1914496		917.19	0.05591601		1447.18	-0.00330255		1977.18	-0.00554412		2507.21	-0.00894314
387.4	0.19067965		917.39	0.05641525		1447.38	-0.00304053		1977.38	-0.0052099		2507.41	-0.00893029
387.6	0.19137692		917.59	0.05665957		1447.58	-0.00276257		1977.58	-0.00557134		2507.61	-0.00920036
387.8	0.1917912		917.79	0.05754969		1447.78	-0.00249713		1977.78	-0.00541403		2507.81	-0.00911089
388	0.19169686		917.99	0.05835051		1447.98	-0.0024143		1977.98	-0.00669474		2508.01	-0.00942131
388.2	0.19186591		918.19	0.05894077		1448.18	-0.00287238		1978.18	-0.00723536		2508.21	-0.00988549
388.4	0.19209388		918.39	0.0588331		1448.38	-0.00292346		1978.38	-0.00754684		2508.41	-0.01011418
388.6	0.19104131		918.59	0.05871616		1448.58	-0.00311833		1978.58	-0.00696202		2508.61	-0.01002568
388.8	0.19089041		918.79	0.05855412		1448.78	-0.00301663		1978.78	-0.00670582		2508.81	-0.01012285
389	0.19080496		918.99	0.0585665		1448.98	-0.00282336		1978.98	-0.00687372		2509.01	-0.01028016
389.2	0.19067479		919.19	0.0588768		1449.18	-0.00170532		1979.18	-0.00738425		2509.21	-0.00930745
389.4	0.19006583		919.39	0.05799757		1449.38	-0.00147159		1979.38	-0.00759058		2509.41	-0.00949459
389.6	0.19020354		919.59	0.0576508		1449.58	-0.00155428		1979.58	-0.00747409		2509.61	-0.00963164
389.8	0.19031109		919.79	0.05737859		1449.78	-0.00050556		1979.78	-0.00754733		2509.81	-0.00930047
390	0.19082871		919.99	0.05745482		1449.98	-0.000481		1979.98	-0.00666539		2510.01	-0.0090644
390.2	0.19164166		920.19	0.05815086		1450.18	-0.00063784		1980.18	-0.00665952		2510.21	-0.00950081
390.4	0.19161866		920.39	0.05745511		1450.38	-0.00079977		1980.38	-0.00649788		2510.41	-0.00940138
390.6	0.19165183		920.59	0.05727595		1450.58	-0.0003456		1980.58	-0.00667497		2510.61	-0.00979663
390.8	0.19084224		920.79	0.05686123		1450.78	0.00021499		1980.78	-0.00591335		2510.81	-0.01038021
391	0.19119637		920.99	0.05659988		1450.98	0.00013921		1980.98	-0.00551102		2511.01	-0.01036825
391.2	0.19224923		921.19	0.05686601		1451.18	-0.00012978		1981.18	-0.00566595		2511.21	-0.01042733
391.4	0.19218026		921.39	0.05773013		1451.38	-0.00071898		1981.38	-0.00588968		2511.41	-0.01089564
391.6	0.19313198		921.59	0.05790964		1451.58	-0.00124464		1981.58	-0.00612399		2511.61	-0.01117256
391.8	0.19298597		921.79	0.05897979		1451.78	-0.00224752		1981.78	-0.00581556		2511.81	-0.0115704
392	0.19224522		921.99	0.05871288		1451.98	-0.00320368		1981.98	-0.00627224		2512.01	-0.01167908
392.2	0.19175266		922.19	0.05856127		1452.18	-0.00229068		1982.18	-0.00667578		2512.21	-0.01100263
392.4	0.19209954		922.39	0.05795757		1452.38	-0.00276341		1982.38	-0.00657854		2512.41	-0.01057306
392.6	0.19226542		922.59	0.05833397		1452.58	-0.00289007		1982.58	-0.00659346		2512.61	-0.00981867
392.8	0.19281487		922.79	0.05873176		1452.78	-0.00230141		1982.78	-0.0069537		2512.81	-0.00997965
393	0.1931517		922.99	0.05923126		1452.98	-0.00120525		1982.98	-0.00701663		2513.01	-0.00951411
393.2	0.19302372		923.19	0.05879869		1453.18	-0.00111211		1983.18	-0.00771523		2513.21	-0.00869487
393.4	0.19276995		923.39	0.05831616		1453.38	-0.00121751		1983.38	-0.00827948		2513.41	-0.00893863
393.6	0.19362695		923.59	0.05785235		1453.58	-0.00043112		1983.58	-0.0083916		2513.61	-0.00776623
393.8	0.19345563		923.79	0.05836072		1453.78	-0.00025971		1983.78	-0.0085289		2513.81	-0.00695245
394	0.19381538		923.99	0.05798472		1453.98	-0.00025963		1983.98	-0.0081804		2514.01	-0.00733603
394.2	0.19383396		924.19	0.05874128		1454.18	0.00020036		1984.18	-0.00812584		2514.21	-0.00746969
394.4	0.19299126		924.39	0.05863991		1454.38	0.00082762		1984.38	-0.00751454		2514.41	-0.00730127
394.6	0.19116155		924.59	0.05892832		1454.58	0.00180656		1984.58	-0.00737337		2514.61	-0.00801675
394.8	0.19161409		924.79	0.05912592		1454.78	0.00139652		1984.78	-0.00638962		2514.81	-0.0074829
395	0.19117147		924.99	0.05937525		1454.98	0.00103928		1984.98	-0.00628515		2515.01	-0.00743306
395.2	0.1902834		925.19	0.0597677		1455.18	-0.00012984		1985.18	-0.00690236		2515.21	-0.00755905
395.4	0.18869765		925.39	0.06060644		1455.38	-0.00002762		1985.38	-0.00690511		2515.41	-0.0077748
395.6	0.18840151		925.59	0.06115453		1455.58	-0.00063298		1985.58	-0.00628133		2515.61	-0.00812062
395.8	0.18822542		925.79	0.06189086		1455.78	-0.00128309		1985.78	-0.00610202		2515.81	-0.00922141
396	0.18833857		925.99	0.06172825		1455.98	-0.00061049		1985.98	-0.00611939		2516.01	-0.0097142
396.2	0.18914342		926.19	0.06263506		1456.18	0.00065163		1986.18	-0.00599641		2516.21	-0.00941371
396.4	0.19013002		926.39	0.06326866		1456.38	-0.00014579		1986.38	-0.00554635		2516.41	-0.01010026
396.6	0.19013932		926.59	0.06322382		1456.58	-0.00014601		1986.58	-0.00509036		2516.61	-0.00982938
396.8	0.19085367		926.79	0.06223254		1456.78	-0.00024281		1986.78	-0.00517451		2516.81	-0.01036859
397	0.19114827		926.99	0.06171646		1456.98	0.00091165		1986.98	-0.00481705		2517.01	-0.01015837
397.2	0.19149168		927.19	0.06166112		1457.18	0.00046181		1987.18	-0.00585548		2517.21	-0.01086638
397.4	0.19112236		927.39	0.06185793		1457.38	0.0008704		1987.38	-0.00644461		2517.41	-0.01079261
397.6	0.19292419		927.59	0.06091385		1457.58	0.00069791		1987.58	-0.00651117		2517.61	-0.01036763
397.8	0.19262282		927.79	0.06082099		1457.78	0.00012134		1987.78	-0.00682719		2517.81	-0.01044772
398	0.19231102		927.99	0.05898883		1457.98	-0.00009373		1987.98	-0.00587023		2518.01	-0.01048068
398.2	0.19241266		928.19	0.0589871		1458.18	-0.00021525		1988.18	-0.00624274		2518.21	-0.01002285
398.4	0.19232891		928.39	0.0580788		1458.38	-0.0004418		1988.38	-0.00578271		2518.41	-0.00983109
398.6	0.19164683		928.59	0.05750602		1458.58	-0.00028644		1988.58	-0.00673503		2518.61	-0.00950552
398.8	0.19300904		928.79	0.05675111		1458.78	-0.00074152		1988.78	-0.0063819		2518.81	-0.00869888
399	0.19171621		928.99	0.05655497		1458.98	-0.00059919		1988.98	-0.00748199		2519.01	-0.00877225
399.2	0.19157878		929.19	0.0569323		1459.18	-0.0010887		1989.18	-0.00701238		2519.21	-0.00849098
399.4	0.19172273		929.39	0.05741481		1459.38	-0.00021143		1989.38	-0.00740647		2519.41	-0.00843316
399.6	0.19263848		929.59	0.05831228		1459.58	-0.00023469		1989.58	-0.00686947		2519.61	-0.00840113
399.8	0.19302914		929.79	0.0580922		1459.78	-0.00083068		1989.78	-0.00651466		2519.81	-0.00888356
400	0.19253221		929.99	0.05842105		1459.98	0.00023686		1989.98	-0.0054958		2520.01	-0.00814689
400.2	0.19310292		930.19	0.05874779		1460.18	0.0004419		1990.18	-0.00517628		2520.21	-0.00794881
400.4	0.19185898		930.39	0.05917145		1460.38	-0.00081119		1990.38	-0.00467906		2520.41	-0.00812344
400.6	0.19139827		930.59	0.05835148		1460.58	-0.00092524		1990.58	-0.00422516		2520.61	-0.00792776
400.8	0.19104574		930.79	0.05840333		1460.78	-0.00107955		1990.78	-0.00394409		2520.81	-0.00877325
401	0.18934901		930.99	0.05895155		1460.98	-0.00050227		1990.98	-0.00408969		2521.01	-0.00913786
401.2	0.18884629		931.19	0.05982121		1461.18	-0.0012678		1991.18	-0.00390528		2521.21	-0.00970735
401.4	0.18838146		931.39	0.05900985		1461.38	-0.00087701		1991.38	-0.00394233		2521.41	-0.00897838
401.6	0.18921788		931.59	0.05850743		1461.58	-0.00174492		1991.58	-0.00323357		2521.61	-0.00975329
401.8	0.18782836		931.79	0.0581252		1461.78	-0.00202855		1991.78	-0.00323818		2521.81	-0.00934307
402	0.18752417		931.99	0.05837886		1461.98	-0.00254248		1991.98	-0.00248757		2522.01	-0.00907587
402.2	0.18757463		932.19	0.05860533		1462.18	-0.00201721		1992.18	-0.00328706		2522.21	-0.00975406
402.4	0.18731954		932.39	0.05796905		1462.38	-0.0018592		1992.38	-0.00390368		2522.41	-0.01023335
402.6	0.18777948		932.59	0.05851963		1462.58	-0.00237579		1992.58	-0.00518018		2522.61	-0.01070058
402.8	0.1890202		932.79	0.05813071		1462.78	-0.00179679		1992.78	-0.00470603		2522.81	-0.01103028
403	0.18854114		932.99	0.05859704		1462.98	-0.00073256		1992.98	-0.00569303		2523.01	-0.01109001
403.2	0.19039528		933.19	0.05850065		1463.18	-0.00033814		1993.18	-0.00554699		2523.21	-0.01025378
403.4	0.19094423		933.39	0.05821499		1463.38	-0.00049517		1993.38	-0.00750965		2523.41	-0.00955182
403.6	0.19195432		933.59	0.05886329		1463.58	-0.00094352		1993.58	-0.00682153		2523.61	-0.00862348
403.8	0.19197539		933.79	0.05819881		1463.78	-0.00154318		1993.78	-0.00621571		2523.81	-0.0076163
404	0.1926857		933.99	0.05828682		1463.98	-0.00089205		1993.98	-0.00664866		2524.01	-0.00667975
404.2	0.19337593		934.19	0.05790058		1464.18	-0.00124018		1994.18	-0.00704487		2524.21	-0.00721908
404.4	0.19291008		934.39	0.05767918		1464.38	-0.00169175		1994.38	-0.00727023		2524.41	-0.00730541
404.6	0.19356758		934.59	0.0566262		1464.58	-0.00203337		1994.58	-0.0064668		2524.61	-0.00747491
404.8	0.19294586		934.79	0.05618626		1464.78	-0.00172751		1994.78	-0.00621617		2524.81	-0.00735505
405	0.1925257		934.99	0.05585984		1464.98	-0.00215393		1994.98	-0.00589125		2525.01	-0.00692095
405.2	0.19349309		935.19	0.05640559		1465.18	-0.00204627		1995.18	-0.00502743		2525.21	-0.00671494
405.4	0.19315544		935.39	0.05544946		1465.38	-0.00258024		1995.38	-0.00388319		2525.41	-0.0072934
405.6	0.19317996		935.59	0.05606774		1465.58	-0.0029701		1995.58	-0.00358694		2525.61	-0.00763475
405.8	0.19209358		935.79	0.0563616		1465.78	-0.0024661		1995.78	-0.00316778		2525.81	-0.00790033
406	0.19189096		935.99	0.05713503		1465.98	-0.00202897		1995.98	-0.00245786		2526.01	-0.00792754
406.2	0.19122086		936.19	0.05741611		1466.18	-0.00249752		1996.18	-0.00244609		2526.21	-0.00857955
406.4	0.19112513		936.39	0.05747337		1466.38	-0.00228549		1996.38	-0.00265728		2526.41	-0.00908385
406.6	0.19164925		936.59	0.05845211		1466.58	-0.00231294		1996.58	-0.00190681		2526.61	-0.00948172
406.8	0.1915107		936.79	0.05830936		1466.78	-0.00118521		1996.78	-0.00148934		2526.81	-0.00980409
407	0.19123041		936.99	0.05896025		1466.98	-0.00071006		1996.98	-0.00231953		2527.01	-0.00868924
407.2	0.19120031		937.19	0.05845546		1467.18	-0.00059918		1997.18	-0.00234267		2527.21	-0.00825715
407.4	0.19121443		937.39	0.05862185		1467.38	-0.00014495		1997.38	-0.00250889		2527.41	-0.0080635
407.6	0.19067531		937.59	0.05878461		1467.58	0.00039029		1997.58	-0.00162112		2527.61	-0.00770636
407.8	0.18992724		937.79	0.0582333		1467.78	0.00122012		1997.78	-0.00218238		2527.81	-0.00778032
408	0.19003544		937.99	0.05809417		1467.98	0.00201764		1997.98	-0.00253654		2528.01	-0.00732648
408.2	0.19064476		938.19	0.05765423		1468.18	0.0018773		1998.18	-0.00254013		2528.21	-0.00749955
408.4	0.19030172		938.39	0.05750874		1468.38	0.0022418		1998.38	-0.00284626		2528.41	-0.00741248
408.6	0.18972014		938.59	0.05737134		1468.58	0.00211922		1998.58	-0.00193814		2528.61	-0.00730114
408.8	0.18937563		938.79	0.05723774		1468.78	0.00305684		1998.78	-0.00196987		2528.81	-0.00720002
409	0.18886846		938.99	0.05732588		1468.98	0.00145576		1998.98	-0.00207885		2529.01	-0.00771437
409.2	0.1891398		939.19	0.05752467		1469.18	0.00080804		1999.18	-0.00185611		2529.21	-0.00803486
409.4	0.18918596		939.39	0.05739061		1469.38	-0.00066597		1999.38	-0.00209709		2529.41	-0.00803081
409.6	0.18981773		939.59	0.05782933		1469.58	-0.00059363		1999.58	-0.00270458		2529.61	-0.00778558
409.8	0.19006139		939.79	0.05819981		1469.78	-0.00001151		1999.78	-0.00208631		2529.81	-0.00859735
410	0.19041285		939.99	0.0587619		1469.98	-0.000644		1999.98	-0.00263459		2530.01	-0.00894733
410.2	0.19070897		940.19	0.05940875		1470.18	-0.00199104		2000.18	-0.00259579		2530.21	-0.00954697
410.4	0.19036534		940.39	0.05988997		1470.38	-0.00184566		2000.38	-0.00297556		2530.41	-0.01003251
410.6	0.18979474		940.59	0.06103303		1470.58	-0.00188926		2000.58	-0.00280696		2530.61	-0.0100038
410.8	0.18975104		940.79	0.06171757		1470.78	-0.00263269		2000.78	-0.00311357		2530.81	-0.0101132
411	0.19016994		940.99	0.06169301		1470.98	-0.00213351		2000.98	-0.00329506		2531.01	-0.00975483
411.2	0.18978917		941.19	0.06133216		1471.18	-0.00136793		2001.18	-0.00303513		2531.21	-0.01133471
411.4	0.19085416		941.39	0.06083905		1471.38	-0.00054422		2001.38	-0.00310074		2531.41	-0.01231055
411.6	0.19046609		941.59	0.06034956		1471.58	0.00057794		2001.58	-0.00251715		2531.61	-0.01237851
411.8	0.19054127		941.79	0.05985507		1471.78	0.00127905		2001.78	-0.00243215		2531.81	-0.01231012
412	0.19121835		941.99	0.05975939		1471.98	0.00197201		2001.98	-0.00195158		2532.01	-0.01119414
412.2	0.19151729		942.19	0.05972809		1472.18	0.00189449		2002.18	-0.00211864		2532.21	-0.01123122
412.4	0.19071974		942.39	0.05893272		1472.38	0.00307767		2002.38	-0.00211163		2532.41	-0.01118995
412.6	0.18948316		942.59	0.0586493		1472.58	0.00290558		2002.58	-0.00196412		2532.61	-0.01104026
412.8	0.18916877		942.79	0.05806143		1472.78	0.00310203		2002.78	-0.00154864		2532.81	-0.01086733
413	0.18853258		942.99	0.05757159		1472.98	0.00244814		2002.98	-0.00204894		2533.01	-0.01059482
413.2	0.18921615		943.19	0.05663345		1473.18	0.00261634		2003.18	-0.00178711		2533.21	-0.00971454
413.4	0.18936816		943.39	0.05640446		1473.38	0.00209095		2003.38	-0.00228687		2533.41	-0.00882747
413.6	0.18924236		943.59	0.05598706		1473.58	0.00214097		2003.58	-0.00268375		2533.61	-0.00884648
413.8	0.1892915		943.79	0.05550223		1473.78	0.00224458		2003.78	-0.00273718		2533.81	-0.00839668
414	0.18876971		943.99	0.05576528		1473.98	0.00104198		2003.98	-0.00335836		2534.01	-0.00752543
414.2	0.18816738		944.19	0.05616086		1474.18	0.00001983		2004.18	-0.00327756		2534.21	-0.00686125
414.4	0.18790686		944.39	0.05646699		1474.38	-0.00037397		2004.38	-0.00378309		2534.41	-0.00626772
414.6	0.18777772		944.59	0.05610822		1474.58	-0.00130982		2004.58	-0.00390393		2534.61	-0.00618057
414.8	0.18915275		944.79	0.05694873		1474.78	-0.00225132		2004.78	-0.00418775		2534.81	-0.0059268
415	0.18982605		944.99	0.05616814		1474.98	-0.00132675		2004.98	-0.00376459		2535.01	-0.00631202
415.2	0.19005513		945.19	0.05576977		1475.18	-0.00140223		2005.18	-0.00382367		2535.21	-0.00780429
415.4	0.19144735		945.39	0.05589901		1475.38	-0.00137619		2005.38	-0.00348949		2535.41	-0.00714513
415.6	0.1923856		945.59	0.05663843		1475.58	-0.00169213		2005.58	-0.00306054		2535.61	-0.00667545
415.8	0.19264573		945.79	0.05722849		1475.78	-0.00219729		2005.78	-0.00369733		2535.81	-0.00675245
416	0.19245695		945.99	0.05791925		1475.98	-0.00201997		2005.98	-0.004406		2536.01	-0.0060534
416.2	0.1927197		946.19	0.05806581		1476.18	-0.00111109		2006.18	-0.00438296		2536.21	-0.006741
416.4	0.19246633		946.39	0.0572034		1476.38	0.00000731		2006.38	-0.00417599		2536.41	-0.00642459
416.6	0.19219704		946.59	0.05891865		1476.58	-0.00011448		2006.58	-0.00381976		2536.61	-0.00652836
416.8	0.19268442		946.79	0.05923826		1476.78	0.00106706		2006.78	-0.00341668		2536.81	-0.00703618
417	0.19264667		946.99	0.05899144		1476.98	0.0009525		2006.98	-0.00381628		2537.01	-0.00716547
417.2	0.19279887		947.19	0.0585777		1477.18	0.00121951		2007.18	-0.00351101		2537.21	-0.00737538
417.4	0.19221552		947.39	0.05850063		1477.38	0.00063947		2007.38	-0.00388766		2537.41	-0.006788
417.6	0.19152552		947.59	0.05863473		1477.58	0.00115085		2007.58	-0.0045082		2537.61	-0.00646285
417.8	0.19119832		947.79	0.05892835		1477.78	0.00157219		2007.78	-0.00370625		2537.81	-0.00673477
418	0.1904383		947.99	0.05947992		1477.98	0.00219044		2007.98	-0.00341423		2538.01	-0.00693097
418.2	0.1904196		948.19	0.05926414		1478.18	0.00246888		2008.18	-0.00242376		2538.21	-0.00801269
418.4	0.19083705		948.39	0.05858323		1478.38	0.00279145		2008.38	-0.00222109		2538.41	-0.00802029
418.6	0.19048489		948.59	0.05858879		1478.58	0.0023184		2008.58	-0.0016661		2538.61	-0.00808767
418.8	0.19020164		948.79	0.05981926		1478.78	0.00253471		2008.78	-0.00146778		2538.81	-0.00811249
419	0.1906957		948.99	0.05931284		1478.98	0.00234755		2008.98	-0.00093366		2539.01	-0.00865347
419.2	0.1911552		949.19	0.05940086		1479.18	0.00147257		2009.18	-0.00125408		2539.21	-0.00882384
419.4	0.19158498		949.39	0.05933389		1479.38	0.00079995		2009.38	-0.00106106		2539.41	-0.00863907
419.6	0.19094274		949.59	0.05857193		1479.58	0.00058876		2009.58	-0.00127378		2539.61	-0.0088374
419.8	0.1907489		949.79	0.05809379		1479.78	0.00106467		2009.78	-0.00151358		2539.81	-0.00904095
420	0.19070059		949.99	0.05733877		1479.98	0.00197041		2009.98	-0.0011228		2540.01	-0.00919547
420.2	0.19155086		950.19	0.05691922		1480.18	0.00238793		2010.18	-0.00046114		2540.21	-0.00901646
420.4	0.19139968		950.39	0.05710637		1480.38	0.0024583		2010.38	-0.00131806		2540.41	-0.00853701
420.6	0.1918731		950.59	0.05801723		1480.58	0.00207346		2010.58	-0.00255227		2540.61	-0.00868734
420.8	0.19236142		950.79	0.05708767		1480.78	0.00188089		2010.78	-0.00328363		2540.81	-0.0078594
421	0.19287827		950.99	0.05615861		1480.98	0.00121646		2010.98	-0.00392811		2541.01	-0.00788006
421.2	0.19279438		951.19	0.05640864		1481.18	0.00127671		2011.18	-0.00460854		2541.21	-0.00681276
421.4	0.19268431		951.39	0.05632238		1481.38	0.00033959		2011.38	-0.00531751		2541.41	-0.00583716
421.6	0.19205194		951.59	0.05769024		1481.58	0.00043324		2011.58	-0.00592597		2541.61	-0.00588106
421.8	0.19223881		951.79	0.05761189		1481.78	-0.00020962		2011.78	-0.00569648		2541.81	-0.00603002
422	0.19253923		951.99	0.05832053		1481.98	-0.00060094		2011.98	-0.00527108		2542.01	-0.0054183
422.2	0.19269955		952.19	0.05806552		1482.18	-0.00097757		2012.18	-0.0049215		2542.21	-0.00521906
422.4	0.19196945		952.39	0.05815233		1482.38	-0.00153062		2012.38	-0.00592633		2542.41	-0.00463575
422.6	0.19166211		952.59	0.05854315		1482.58	-0.0019721		2012.58	-0.00541436		2542.61	-0.00420159
422.8	0.19107105		952.79	0.05875299		1482.78	-0.00264593		2012.78	-0.00610154		2542.81	-0.00404516
423	0.19087908		952.99	0.0587243		1482.98	-0.0021972		2012.98	-0.00646227		2543.01	-0.00424083
423.2	0.18913442		953.19	0.05783049		1483.18	-0.00226179		2013.18	-0.00651843		2543.21	-0.00500012
423.4	0.18856544		953.39	0.05781698		1483.38	-0.0018005		2013.38	-0.00622059		2543.41	-0.00621245
423.6	0.18858094		953.59	0.05763616		1483.58	-0.00101243		2013.58	-0.00631561		2543.61	-0.00628366
423.8	0.18829364		953.79	0.0574299		1483.78	-0.00050203		2013.78	-0.00572139		2543.81	-0.00765562
424	0.18738864		953.99	0.05746095		1483.98	-0.00021457		2013.98	-0.00558628		2544.01	-0.0082472
424.2	0.18697979		954.19	0.05735596		1484.18	-0.00028906		2014.18	-0.00631065		2544.21	-0.00850527
424.4	0.18710517		954.39	0.05784804		1484.38	0.00087477		2014.38	-0.00694768		2544.41	-0.00904657
424.6	0.18706697		954.59	0.05750018		1484.58	0.00104225		2014.58	-0.00672941		2544.61	-0.00863684
424.8	0.18760503		954.79	0.05761415		1484.78	0.00179066		2014.78	-0.0066799		2544.81	-0.00836255
425	0.18834084		954.99	0.05792556		1484.98	0.00311293		2014.98	-0.00696026		2545.01	-0.00968405
425.2	0.18871239		955.19	0.05866096		1485.18	0.00319682		2015.18	-0.00688222		2545.21	-0.00890877
425.4	0.18922749		955.39	0.05795071		1485.38	0.00361009		2015.38	-0.00690019		2545.41	-0.00908286
425.6	0.19002735		955.59	0.05851491		1485.58	0.00290333		2015.58	-0.0068806		2545.61	-0.00915169
425.8	0.19103807		955.79	0.05792506		1485.78	0.00181372		2015.78	-0.0066829		2545.81	-0.00844556
426	0.19179607		955.99	0.05859106		1485.98	0.00162564		2015.98	-0.00660737		2546.01	-0.0080108
426.2	0.19274797		956.19	0.05758504		1486.18	0.00176648		2016.18	-0.0066664		2546.21	-0.00738924
426.4	0.19303824		956.39	0.05770104		1486.38	0.0013364		2016.38	-0.00649211		2546.41	-0.00714288
426.6	0.1932383		956.59	0.05754594		1486.58	0.00104048		2016.58	-0.00619532		2546.61	-0.0071957
426.8	0.19285267		956.79	0.05751504		1486.78	0.00010041		2016.78	-0.00625873		2546.81	-0.00663926
427	0.19228032		956.99	0.05679371		1486.98	0.00014552		2016.98	-0.00576295		2547.01	-0.00687188
427.2	0.19140883		957.19	0.05581551		1487.18	0.00026414		2017.18	-0.00466372		2547.21	-0.00728079
427.4	0.19202786		957.39	0.05580289		1487.38	0.00062886		2017.38	-0.00419262		2547.41	-0.00706528
427.6	0.19221287		957.59	0.05531543		1487.58	0.00062064		2017.58	-0.00389414		2547.61	-0.00761695
427.8	0.19100013		957.79	0.05492908		1487.78	0.00091129		2017.78	-0.00269392		2547.81	-0.00870177
428	0.19018496		957.99	0.05535116		1487.98	0.00081796		2017.98	-0.00191334		2548.01	-0.0090052
428.2	0.18967708		958.19	0.05542034		1488.18	0.00100915		2018.18	-0.00176649		2548.21	-0.00898221
428.4	0.18976488		958.39	0.05636398		1488.38	0.00118848		2018.38	-0.00144745		2548.41	-0.00922659
428.6	0.1884385		958.59	0.05694178		1488.58	0.001031		2018.58	-0.00135645		2548.61	-0.0089677
428.8	0.1884245		958.79	0.05722985		1488.78	0.00146123		2018.78	-0.00188638		2548.81	-0.00926515
429	0.18848564		958.99	0.05814745		1488.98	0.00205577		2018.98	-0.00083817		2549.01	-0.01022264
429.2	0.18873203		959.19	0.05814028		1489.18	0.00173693		2019.18	-0.00087241		2549.21	-0.00976683
429.4	0.18832387		959.39	0.05816182		1489.38	0.00183921		2019.38	-0.00124692		2549.41	-0.00954381
429.6	0.18842457		959.59	0.05868065		1489.58	0.00114939		2019.58	-0.0016726		2549.61	-0.00952355
429.8	0.18847685		959.79	0.05824291		1489.78	0.00096736		2019.78	-0.00241714		2549.81	-0.00858945
430	0.18847773		959.99	0.05805334		1489.98	0.00136496		2019.98	-0.00297841		2550.01	-0.00827014
430.2	0.18881847		960.19	0.05754095		1490.18	0.00113534		2020.18	-0.003419		2550.21	-0.00775329
430.4	0.1887734		960.39	0.05703254		1490.38	0.00154447		2020.38	-0.00371879		2550.41	-0.00755505
430.6	0.18846734		960.59	0.05639277		1490.58	0.00121566		2020.58	-0.00453576		2550.61	-0.00756214
430.8	0.18828659		960.79	0.05595771		1490.78	0.00063744		2020.78	-0.0043961		2550.81	-0.00661192
431	0.1881823		960.99	0.05399857		1490.98	0.00069254		2020.98	-0.0050387		2551.01	-0.00652684
431.2	0.18802449		961.19	0.05333025		1491.18	0.0012974		2021.18	-0.0048083		2551.21	-0.00644364
431.4	0.18865202		961.39	0.05372639		1491.38	0.00128132		2021.38	-0.00523124		2551.41	-0.00622712
431.6	0.18840655		961.59	0.05413479		1491.58	0.00069049		2021.58	-0.00542182		2551.61	-0.00711249
431.8	0.18776536		961.79	0.05418671		1491.78	0.00119419		2021.78	-0.00527612		2551.81	-0.00717741
432	0.18777823		961.99	0.05471152		1491.98	0.00036513		2021.98	-0.00558706		2552.01	-0.00702103
432.2	0.18805685		962.19	0.05504073		1492.18	0.00001146		2022.18	-0.00554175		2552.21	-0.00661544
432.4	0.18844569		962.39	0.05596906		1492.38	-0.00087402		2022.38	-0.0056997		2552.41	-0.00653389
432.6	0.18855274		962.59	0.05669995		1492.58	-0.0011224		2022.58	-0.00536694		2552.61	-0.006271
432.8	0.18883883		962.79	0.05739604		1492.78	-0.00075665		2022.78	-0.00558625		2552.81	-0.00635182
433	0.18876884		962.99	0.05910625		1492.98	0.00022408		2022.98	-0.00530572		2553.01	-0.00705829
433.2	0.18917377		963.19	0.05957238		1493.18	0.0003807		2023.18	-0.00599499		2553.21	-0.0065057
433.4	0.18907448		963.39	0.06047603		1493.38	0.00056263		2023.38	-0.00638656		2553.41	-0.00689409
433.6	0.18931161		963.59	0.06062232		1493.58	-0.00000458		2023.58	-0.00617285		2553.61	-0.00653984
433.8	0.18961697		963.79	0.05989053		1493.78	-0.00105677		2023.78	-0.00627904		2553.81	-0.00586529
434	0.1895883		963.99	0.05976796		1493.98	-0.00089291		2023.98	-0.0069713		2554.01	-0.00521528
434.2	0.1900395		964.19	0.0594357		1494.18	-0.00056819		2024.18	-0.00732578		2554.21	-0.00540126
434.4	0.19069613		964.39	0.05896107		1494.38	-0.00017619		2024.38	-0.00701229		2554.41	-0.00590553
434.6	0.18979142		964.59	0.05939274		1494.58	-0.00146473		2024.58	-0.00763582		2554.61	-0.00558822
434.8	0.18941508		964.79	0.0595166		1494.78	-0.00152169		2024.78	-0.00760883		2554.81	-0.00589325
435	0.18957878		964.99	0.05864664		1494.98	-0.00162127		2024.98	-0.00725184		2555.01	-0.00584969
435.2	0.18912363		965.19	0.05843448		1495.18	-0.0012677		2025.18	-0.00706699		2555.21	-0.00607083
435.4	0.18853629		965.39	0.05872804		1495.38	-0.00115108		2025.38	-0.00700549		2555.41	-0.00665752
435.6	0.18721371		965.59	0.0579959		1495.58	-0.00151474		2025.58	-0.006464		2555.61	-0.00686849
435.8	0.18719261		965.79	0.05721149		1495.78	-0.00066466		2025.78	-0.00700243		2555.81	-0.00731888
436	0.18706412		965.99	0.05672531		1495.98	-0.00102955		2025.98	-0.00630501		2556.01	-0.00850683
436.2	0.18666642		966.19	0.05722109		1496.18	-0.00063868		2026.18	-0.00620103		2556.21	-0.00847858
436.4	0.18655749		966.39	0.0581642		1496.38	-0.00043559		2026.38	-0.00669805		2556.41	-0.0084226
436.6	0.18683398		966.59	0.05809959		1496.58	0.00024756		2026.58	-0.00626567		2556.61	-0.00862563
436.8	0.18647659		966.79	0.05860205		1496.78	0.00048311		2026.78	-0.00550159		2556.81	-0.00910646
437	0.1868473		966.99	0.05888261		1496.98	0.00128119		2026.98	-0.00560616		2557.01	-0.00916537
437.2	0.18735365		967.19	0.05904166		1497.18	0.00050701		2027.18	-0.00485886		2557.21	-0.0090585
437.4	0.18719826		967.39	0.059508		1497.38	-0.00014995		2027.38	-0.00478067		2557.41	-0.008513
437.6	0.18661369		967.59	0.05943546		1497.58	-0.00163963		2027.58	-0.0035412		2557.61	-0.00708627
437.8	0.18700042		967.79	0.05910307		1497.78	-0.00144927		2027.78	-0.00431216		2557.81	-0.00675221
438	0.18745905		967.99	0.05957066		1497.98	-0.0010345		2027.98	-0.00552303		2558.01	-0.00664135
438.2	0.18770939		968.19	0.05993732		1498.18	-0.00117355		2028.18	-0.00549034		2558.21	-0.00643626
438.4	0.1876945		968.39	0.06029803		1498.38	-0.00063108		2028.38	-0.00609842		2558.41	-0.00652643
438.6	0.18729106		968.59	0.0606866		1498.58	-0.00041111		2028.58	-0.00652656		2558.61	-0.00630082
438.8	0.18773338		968.79	0.06080392		1498.78	0.00093763		2028.78	-0.00641761		2558.81	-0.00661834
439	0.18814627		968.99	0.06024633		1498.98	0.00171186		2028.98	-0.00645482		2559.01	-0.00635485
439.2	0.18737686		969.19	0.05958254		1499.18	0.00245062		2029.18	-0.00700588		2559.21	-0.00576243
439.4	0.18699985		969.39	0.05919905		1499.38	0.00289892		2029.38	-0.00703249		2559.41	-0.00648814
439.6	0.18651796		969.59	0.05928682		1499.58	0.00288541		2029.58	-0.00683351		2559.61	-0.0066462
439.8	0.18673002		969.79	0.05907566		1499.78	0.00358888		2029.78	-0.00750451		2559.81	-0.00759119
440	0.18672678		969.99	0.05960274		1499.98	0.00294781		2029.98	-0.00718823		2560.01	-0.00801626
440.2	0.18687122		970.19	0.06025485		1500.18	0.0027473		2030.18	-0.00798153		2560.21	-0.00778621
440.4	0.18784478		970.39	0.05967963		1500.38	0.0017509		2030.38	-0.00753366		2560.41	-0.0086995
440.6	0.18850561		970.59	0.05910319		1500.58	0.00095763		2030.58	-0.00622977		2560.61	-0.00903577
440.8	0.18890518		970.79	0.05833169		1500.78	0.00009219		2030.78	-0.00620988		2560.81	-0.00879166
441	0.18911623		970.99	0.05752718		1500.98	-0.00020436		2030.98	-0.00649997		2561.01	-0.00830103
441.2	0.18879411		971.19	0.05682635		1501.18	-0.00130643		2031.18	-0.00520649		2561.21	-0.00812006
441.4	0.18778627		971.39	0.05696321		1501.38	-0.00138374		2031.38	-0.00588695		2561.41	-0.00754251
441.6	0.18780217		971.59	0.05680944		1501.58	-0.00193135		2031.58	-0.00672674		2561.61	-0.00787747
441.8	0.18778318		971.79	0.05706544		1501.78	-0.00134444		2031.78	-0.00778448		2561.81	-0.00872543
442	0.18822768		971.99	0.05638572		1501.98	-0.00183509		2031.98	-0.00853231		2562.01	-0.00899853
442.2	0.18741977		972.19	0.05672647		1502.18	-0.00127768		2032.18	-0.00894369		2562.21	-0.00870097
442.4	0.18777186		972.39	0.05654559		1502.38	-0.00084259		2032.38	-0.00919999		2562.41	-0.00915178
442.6	0.18689719		972.59	0.05635083		1502.58	-0.0000618		2032.58	-0.00889934		2562.61	-0.00916086
442.8	0.18687814		972.79	0.0566003		1502.78	-0.0000766		2032.78	-0.0091626		2562.81	-0.00889131
443	0.18720794		972.99	0.05623417		1502.98	0.00023957		2032.98	-0.00940316		2563.01	-0.00870182
443.2	0.18672594		973.19	0.05662162		1503.18	0.00051684		2033.18	-0.00901462		2563.21	-0.0081523
443.4	0.18635316		973.39	0.05718924		1503.38	0.00079909		2033.38	-0.00849775		2563.41	-0.0089456
443.6	0.18597687		973.59	0.05808287		1503.58	0.00133406		2033.58	-0.00760635		2563.61	-0.00887619
443.8	0.18629116		973.79	0.05792134		1503.78	0.00163749		2033.78	-0.00782385		2563.81	-0.00870637
444	0.18705338		973.99	0.05846793		1503.98	0.00140082		2033.98	-0.0083529		2564.01	-0.00808522
444.2	0.1869776		974.19	0.05805229		1504.18	0.00136103		2034.18	-0.00845195		2564.21	-0.00835059
444.4	0.18668963		974.39	0.05723578		1504.38	0.00002345		2034.38	-0.00785639		2564.41	-0.00821297
444.6	0.18652958		974.59	0.05648601		1504.58	-0.0003491		2034.58	-0.00747404		2564.61	-0.00720135
444.8	0.18605238		974.79	0.05489752		1504.78	-0.00096349		2034.78	-0.00706361		2564.81	-0.00627185
445	0.18584979		974.99	0.05529473		1504.98	0.00024804		2034.98	-0.00643007		2565.01	-0.00610522
445.2	0.18514548		975.19	0.05516184		1505.18	0.00045182		2035.18	-0.00599435		2565.21	-0.00549359
445.4	0.18482609		975.39	0.05587767		1505.38	0.00028111		2035.38	-0.00622063		2565.41	-0.0049103
445.6	0.18509336		975.59	0.05627297		1505.58	0.00025081		2035.58	-0.00546091		2565.61	-0.00449843
445.8	0.1851119		975.79	0.0565294		1505.78	0.00038143		2035.78	-0.00506208		2565.81	-0.00478077
446	0.18507738		975.99	0.05633329		1505.98	0.00048495		2035.98	-0.00493471		2566.01	-0.0043954
446.2	0.18486711		976.19	0.05733198		1506.18	0.00078404		2036.18	-0.00455076		2566.21	-0.00446879
446.4	0.18535831		976.39	0.05658776		1506.38	0.00057773		2036.38	-0.00391222		2566.41	-0.00479138
446.6	0.18523256		976.59	0.05695234		1506.58	0.00044072		2036.58	-0.00422638		2566.61	-0.00563672
446.8	0.18631224		976.79	0.0569261		1506.78	-0.00004627		2036.78	-0.00440014		2566.81	-0.00645635
447	0.18684723		976.99	0.05702703		1506.98	0.00018904		2036.98	-0.00470172		2567.01	-0.00669883
447.2	0.18736258		977.19	0.05720623		1507.18	-0.00066165		2037.18	-0.00398245		2567.21	-0.00744071
447.4	0.18761487		977.39	0.05734889		1507.38	-0.00047827		2037.38	-0.00413507		2567.41	-0.00800103
447.6	0.18810332		977.59	0.05605869		1507.58	-0.00032247		2037.58	-0.00386368		2567.61	-0.008608
447.8	0.18881941		977.79	0.05567708		1507.78	-0.00116467		2037.78	-0.00469924		2567.81	-0.00886848
448	0.18844751		977.99	0.05561323		1507.98	-0.00138871		2037.98	-0.00517987		2568.01	-0.00897297
448.2	0.187705		978.19	0.05561404		1508.18	-0.00219228		2038.18	-0.00546315		2568.21	-0.00877507
448.4	0.18728734		978.39	0.05518881		1508.38	-0.00256378		2038.38	-0.0055516		2568.41	-0.0089599
448.6	0.18708049		978.59	0.05485927		1508.58	-0.00203723		2038.58	-0.00523482		2568.61	-0.00866395
448.8	0.18636341		978.79	0.05502801		1508.78	-0.00185558		2038.78	-0.00502187		2568.81	-0.00891132
449	0.18670008		978.99	0.05652361		1508.98	-0.00112683		2038.98	-0.00522836		2569.01	-0.00777263
449.2	0.18594093		979.19	0.05626102		1509.18	-0.00170715		2039.18	-0.00455639		2569.21	-0.00695325
449.4	0.18574728		979.39	0.05652852		1509.38	-0.00107206		2039.38	-0.00461239		2569.41	-0.0063301
449.6	0.18555287		979.59	0.0565949		1509.58	0.00007535		2039.58	-0.00506371		2569.61	-0.00641998
449.8	0.18614153		979.79	0.05618153		1509.78	0.00139808		2039.78	-0.00521297		2569.81	-0.00585318
450	0.18576566		979.99	0.05658073		1509.98	0.00232462		2039.98	-0.00496752		2570.01	-0.00574092
450.2	0.18606039		980.19	0.05685307		1510.18	0.00330154		2040.18	-0.00502177		2570.21	-0.00655027
450.4	0.18608592		980.39	0.05634872		1510.38	0.00352399		2040.38	-0.00546814		2570.41	-0.00722443
450.6	0.18633642		980.59	0.05706415		1510.58	0.00340381		2040.58	-0.00591446		2570.61	-0.00745681
450.8	0.18598225		980.79	0.05698301		1510.78	0.00406841		2040.78	-0.00574248		2570.81	-0.0083507
451	0.18698189		980.99	0.05732311		1510.98	0.0029048		2040.98	-0.00560285		2571.01	-0.00883252
451.2	0.18785774		981.19	0.05705512		1511.18	0.0019981		2041.18	-0.00574444		2571.21	-0.00943168
451.4	0.18810376		981.39	0.05657676		1511.38	0.00185004		2041.38	-0.00541389		2571.41	-0.00906175
451.6	0.18795032		981.59	0.05575053		1511.58	0.00137528		2041.58	-0.00495438		2571.61	-0.00947286
451.8	0.18829696		981.79	0.05670943		1511.78	0.00059186		2041.78	-0.00488469		2571.81	-0.0086397
452	0.18805236		981.99	0.05769052		1511.98	0.00065416		2041.98	-0.00414842		2572.01	-0.00786892
452.2	0.18789283		982.19	0.05868094		1512.18	-0.00050787		2042.18	-0.0042598		2572.21	-0.00769061
452.4	0.18760079		982.39	0.05802508		1512.38	-0.00058427		2042.38	-0.00441327		2572.41	-0.00738116
452.6	0.18702834		982.59	0.05757631		1512.58	-0.00137918		2042.58	-0.00357944		2572.61	-0.00698546
452.8	0.18685094		982.79	0.0583799		1512.78	-0.00156344		2042.78	-0.0039163		2572.81	-0.00666132
453	0.18696042		982.99	0.05833946		1512.98	-0.00170991		2042.98	-0.00338023		2573.01	-0.00446153
453.2	0.18725333		983.19	0.05764611		1513.18	-0.0019048		2043.18	-0.00373184		2573.21	-0.00460682
453.4	0.18781031		983.39	0.05773388		1513.38	-0.00077406		2043.38	-0.00446154		2573.41	-0.00424714
453.6	0.18772663		983.59	0.0571222		1513.58	-0.00100531		2043.58	-0.00406598		2573.61	-0.00373113
453.8	0.18807263		983.79	0.057316		1513.78	-0.0007181		2043.78	-0.00344212		2573.81	-0.00309187
454	0.18678343		983.99	0.05780843		1513.98	-0.00047136		2043.98	-0.00437546		2574.01	-0.00396049
454.2	0.18600085		984.19	0.05749789		1514.18	0.00065813		2044.18	-0.0044398		2574.21	-0.00529127
454.4	0.18608267		984.39	0.05760852		1514.38	0.00019566		2044.38	-0.00484369		2574.41	-0.0065649
454.6	0.18544075		984.59	0.05880916		1514.58	0.0005314		2044.58	-0.00445185		2574.61	-0.00700549
454.8	0.18469362		984.79	0.05930592		1514.78	0.00011652		2044.78	-0.00486601		2574.81	-0.00811956
455	0.18509612		984.99	0.05886991		1514.98	-0.00088929		2044.98	-0.00573917		2575.01	-0.00834616
455.2	0.18475746		985.19	0.0584876		1515.18	-0.00059977		2045.18	-0.0065317		2575.21	-0.0087336
455.4	0.18491723		985.39	0.05771107		1515.38	-0.0010352		2045.38	-0.00630944		2575.41	-0.00892876
455.6	0.18425788		985.59	0.05712556		1515.58	-0.00139607		2045.58	-0.00653605		2575.61	-0.00944254
455.8	0.1849513		985.79	0.05694235		1515.78	-0.00244051		2045.78	-0.00667166		2575.81	-0.00835667
456	0.18451255		985.99	0.05700248		1515.98	-0.00289859		2045.98	-0.00602079		2576.01	-0.00853795
456.2	0.18400354		986.19	0.05630674		1516.18	-0.00383444		2046.18	-0.00695229		2576.21	-0.00895896
456.4	0.18392824		986.39	0.05474812		1516.38	-0.00393674		2046.38	-0.00672504		2576.41	-0.00810817
456.6	0.18430506		986.59	0.0552551		1516.58	-0.00427665		2046.58	-0.0059223		2576.61	-0.00800611
456.8	0.18447599		986.79	0.05618042		1516.78	-0.00383014		2046.78	-0.00569846		2576.81	-0.00712664
457	0.18519484		986.99	0.05606358		1516.98	-0.00363493		2046.98	-0.00537092		2577.01	-0.00627758
457.2	0.18621072		987.19	0.05659737		1517.18	-0.00386782		2047.18	-0.00550113		2577.21	-0.00626101
457.4	0.18649534		987.39	0.05644182		1517.38	-0.0023666		2047.38	-0.00527235		2577.41	-0.00563613
457.6	0.18654417		987.59	0.05581577		1517.58	-0.00264332		2047.58	-0.00503093		2577.61	-0.00537605
457.8	0.1865704		987.79	0.05575201		1517.78	-0.00256283		2047.78	-0.00557121		2577.81	-0.00511707
458	0.18585156		987.99	0.05550942		1517.98	-0.00168319		2047.98	-0.00497693		2578.01	-0.00558833
458.2	0.18567942		988.19	0.05567353		1518.18	-0.00174315		2048.18	-0.00421539		2578.21	-0.0060158
458.4	0.18652952		988.39	0.05688827		1518.38	-0.00116715		2048.38	-0.00443412		2578.41	-0.00587728
458.6	0.18533393		988.59	0.05825994		1518.58	-0.00030234		2048.58	-0.00301225		2578.61	-0.00509603
458.8	0.18500346		988.79	0.05738239		1518.78	0.00012309		2048.78	-0.00304026		2578.81	-0.00478516
459	0.18497869		988.99	0.05741528		1518.98	0.00061954		2048.98	-0.00334856		2579.01	-0.00531739
459.2	0.18532368		989.19	0.05773831		1519.18	0.00073945		2049.18	-0.00246729		2579.21	-0.00615193
459.4	0.18575863		989.39	0.05670602		1519.38	0.00112881		2049.38	-0.0022159		2579.41	-0.00667946
459.6	0.1848499		989.59	0.05664911		1519.58	0.00070771		2049.58	-0.00206043		2579.61	-0.00670847
459.8	0.18594675		989.79	0.05728993		1519.78	0.00121404		2049.78	-0.00221742		2579.81	-0.00741984
460	0.18576823		989.99	0.05731749		1519.98	0.00106799		2049.98	-0.0020146		2580.01	-0.00838348
460.2	0.1857447		990.19	0.05706578		1520.18	0.00059532		2050.18	-0.00311665		2580.21	-0.00902924
460.4	0.1858711		990.39	0.05713307		1520.38	0.00068638		2050.38	-0.00379142		2580.41	-0.00930983
460.6	0.18662035		990.59	0.05788203		1520.58	0.00070159		2050.58	-0.00456438		2580.61	-0.0093141
460.8	0.18611539		990.79	0.05776384		1520.78	0.00202184		2050.78	-0.0055951		2580.81	-0.0089362
461	0.18612027		990.99	0.05733664		1520.98	0.00236408		2050.98	-0.00684244		2581.01	-0.00844855
461.2	0.1864208		991.19	0.05642785		1521.18	0.00196844		2051.18	-0.00782173		2581.21	-0.0077739
461.4	0.18656717		991.39	0.05543854		1521.38	0.00274548		2051.38	-0.00848786		2581.41	-0.00724134
461.6	0.18630417		991.59	0.05493976		1521.58	0.00185714		2051.58	-0.00915489		2581.61	-0.00727106
461.8	0.18538294		991.79	0.0545685		1521.78	0.00144677		2051.78	-0.00963149		2581.81	-0.00688144
462	0.18433043		991.99	0.05458282		1521.98	0.00143517		2051.98	-0.00885293		2582.01	-0.00738856
462.2	0.18382506		992.19	0.05451004		1522.18	0.00036573		2052.18	-0.00867855		2582.21	-0.00700626
462.4	0.18358726		992.39	0.05544124		1522.38	0.00041222		2052.38	-0.00766192		2582.41	-0.00676892
462.6	0.18269024		992.59	0.0555308		1522.58	0.00024613		2052.58	-0.00604445		2582.61	-0.0063836
462.8	0.18244146		992.79	0.05516073		1522.78	0.00006709		2052.78	-0.00504501		2582.81	-0.00624121
463	0.18267143		992.99	0.05684539		1522.98	0.00042962		2052.98	-0.00443526		2583.01	-0.00683964
463.2	0.18291792		993.19	0.05804167		1523.18	0.00072915		2053.18	-0.00357919		2583.21	-0.0067436
463.4	0.18273877		993.39	0.05903665		1523.38	0.00122247		2053.38	-0.00310625		2583.41	-0.00777307
463.6	0.18203399		993.59	0.0599275		1523.58	0.00125759		2053.58	-0.00315187		2583.61	-0.00854334
463.8	0.18277031		993.79	0.06080673		1523.78	0.00079408		2053.78	-0.00348021		2583.81	-0.00892396
464	0.18214692		993.99	0.06063213		1523.98	0.00039041		2053.98	-0.00366281		2584.01	-0.00856931
464.2	0.18217427		994.19	0.06070498		1524.18	0.00033011		2054.18	-0.00478278		2584.21	-0.00946781
464.4	0.18227041		994.39	0.06029144		1524.38	0.00055469		2054.38	-0.00518602		2584.41	-0.0093265
464.6	0.18241168		994.59	0.05964079		1524.58	0.0007839		2054.58	-0.00541983		2584.61	-0.00870225
464.8	0.18210845		994.79	0.05932732		1524.78	0.00104535		2054.78	-0.00607143		2584.81	-0.00802746
465	0.18190044		994.99	0.05951847		1524.98	0.00078928		2054.98	-0.00597838		2585.01	-0.00778521
465.2	0.18241885		995.19	0.05877724		1525.18	0.00032724		2055.18	-0.00725059		2585.21	-0.00764715
465.4	0.18223529		995.39	0.05899313		1525.38	0.00007994		2055.38	-0.00829451		2585.41	-0.00772802
465.6	0.18210334		995.59	0.05942032		1525.58	-0.0002024		2055.58	-0.00869263		2585.61	-0.00926114
465.8	0.18261125		995.79	0.05898406		1525.78	-0.00079584		2055.78	-0.0076069		2585.81	-0.00949624
466	0.18298789		995.99	0.05830898		1525.98	-0.00191618		2055.98	-0.0073631		2586.01	-0.01017465
466.2	0.18356271		996.19	0.05885578		1526.18	-0.00260243		2056.18	-0.00690016		2586.21	-0.01035642
466.4	0.18471568		996.39	0.05859513		1526.38	-0.00185437		2056.38	-0.00613263		2586.41	-0.01116228
466.6	0.18487056		996.59	0.05848181		1526.58	-0.00103691		2056.58	-0.0047108		2586.61	-0.01146684
466.8	0.18486821		996.79	0.05902579		1526.78	-0.00001348		2056.78	-0.00398035		2586.81	-0.01120764
467	0.18614094		996.99	0.06004898		1526.98	0.00126766		2056.98	-0.00436167		2587.01	-0.0114287
467.2	0.18613034		997.19	0.06056696		1527.18	0.00158818		2057.18	-0.00424013		2587.21	-0.01134616
467.4	0.18587064		997.39	0.06051813		1527.38	0.00142655		2057.38	-0.0040823		2587.41	-0.01172078
467.6	0.18486293		997.59	0.05986409		1527.58	0.00207031		2057.58	-0.00453299		2587.61	-0.01096255
467.8	0.18478689		997.79	0.05986952		1527.78	0.00125299		2057.78	-0.00416738		2587.81	-0.00998077
468	0.18387971		997.99	0.05931239		1527.98	0.00204425		2057.98	-0.00378921		2588.01	-0.0097231
468.2	0.18378861		998.19	0.05894441		1528.18	0.00129114		2058.18	-0.00383662		2588.21	-0.01010198
468.4	0.18329313		998.39	0.0589593		1528.38	0.00160405		2058.38	-0.00375774		2588.41	-0.00890749
468.6	0.1830794		998.59	0.05799837		1528.58	0.00179519		2058.58	-0.00464623		2588.61	-0.00840489
468.8	0.18309638		998.79	0.05837628		1528.78	0.00087608		2058.78	-0.00539115		2588.81	-0.00764951
469	0.18234501		998.99	0.05836754		1528.98	0.00068974		2058.98	-0.00594715		2589.01	-0.00815725
469.2	0.18279628		999.19	0.05887354		1529.18	0.00039583		2059.18	-0.00717484		2589.21	-0.00772249
469.4	0.18322814		999.39	0.05929662		1529.38	0.00017476		2059.38	-0.00748558		2589.41	-0.00839108
469.6	0.1843718		999.59	0.0590918		1529.58	-0.0001095		2059.58	-0.00689463		2589.61	-0.00915519
469.8	0.18505918		999.79	0.05861199		1529.78	-0.00080928		2059.78	-0.00614274		2589.81	-0.00896615
470	0.18557596		999.99	0.05864156		1529.98	-0.00075191		2059.98	-0.00666054		2590.01	-0.00983384
470.2	0.18646612		1000.19	0.05870523		1530.18	-0.00059354		2060.18	-0.00599508		2590.21	-0.01070548
470.4	0.18660955		1000.39	0.05811703		1530.38	-0.00053059		2060.38	-0.00515022		2590.41	-0.01208463
470.6	0.18706801		1000.59	0.05854792		1530.58	-0.00088453		2060.58	-0.0044325		2590.61	-0.01113634
470.8	0.18771431		1000.79	0.05856909		1530.78	-0.0002316		2060.78	-0.00497466		2590.81	-0.01032409
471	0.18813652		1000.99	0.05861114		1530.98	-0.00063212		2060.98	-0.00404878		2591.01	-0.01027105
471.2	0.18760757		1001.19	0.0581631		1531.18	-0.00137628		2061.18	-0.00338091		2591.21	-0.00941385
471.4	0.1862546		1001.39	0.05761626		1531.38	-0.00128807		2061.38	-0.00328679		2591.41	-0.00867837
471.6	0.18490131		1001.59	0.05742335		1531.58	-0.00079171		2061.58	-0.00260946		2591.61	-0.00831963
471.8	0.18424787		1001.79	0.05701912		1531.78	-0.00126097		2061.78	-0.00196725		2591.81	-0.00820621
472	0.18290934		1001.99	0.05706888		1531.98	-0.00112985		2061.98	-0.00210214		2592.01	-0.00854313
472.2	0.18282567		1002.19	0.05676423		1532.18	-0.00120232		2062.18	-0.00275381		2592.21	-0.00847173
472.4	0.18207605		1002.39	0.05708858		1532.38	-0.00043549		2062.38	-0.00350373		2592.41	-0.00794643
472.6	0.18246599		1002.59	0.05596227		1532.58	-0.00054015		2062.58	-0.0037781		2592.61	-0.00797225
472.8	0.18164448		1002.79	0.05616234		1532.78	-0.00028973		2062.78	-0.00472968		2592.81	-0.00709882
473	0.18152879		1002.99	0.05634345		1532.98	0.00064588		2062.98	-0.00541138		2593.01	-0.00783626
473.2	0.18173244		1003.19	0.05706569		1533.18	0.00127485		2063.18	-0.00527209		2593.21	-0.00741622
473.4	0.18224699		1003.39	0.05656982		1533.38	0.00087136		2063.38	-0.00625375		2593.41	-0.00772447
473.6	0.18298171		1003.59	0.05634417		1533.58	0.00064615		2063.58	-0.00620995		2593.61	-0.00804026
473.8	0.18347608		1003.79	0.05719854		1533.78	0.00098971		2063.78	-0.00616548		2593.81	-0.00871994
474	0.18408661		1003.99	0.05736883		1533.98	0.00086764		2063.98	-0.00567807		2594.01	-0.00909807
474.2	0.18431629		1004.19	0.05763302		1534.18	0.00129922		2064.18	-0.00577494		2594.21	-0.01023057
474.4	0.18398196		1004.39	0.05866026		1534.38	0.00122082		2064.38	-0.00560792		2594.41	-0.01021104
474.6	0.18527523		1004.59	0.05849217		1534.58	0.00135574		2064.58	-0.00498298		2594.61	-0.00948708
474.8	0.18491722		1004.79	0.05917103		1534.78	0.00187549		2064.78	-0.00446854		2594.81	-0.01021829
475	0.18491229		1004.99	0.05920117		1534.98	0.00175276		2064.98	-0.00415565		2595.01	-0.01055111
475.2	0.18506132		1005.19	0.05891922		1535.18	0.0013551		2065.18	-0.00411962		2595.21	-0.01026945
475.4	0.18422262		1005.39	0.05845093		1535.38	0.00246159		2065.38	-0.00376644		2595.41	-0.01066295
475.6	0.1835415		1005.59	0.05804959		1535.58	0.00160998		2065.58	-0.00402515		2595.61	-0.01167366
475.8	0.1833331		1005.79	0.0576139		1535.78	0.00108068		2065.78	-0.00382676		2595.81	-0.01187287
476	0.18348143		1005.99	0.057741		1535.98	0.00058153		2065.98	-0.00447267		2596.01	-0.0119014
476.2	0.18358045		1006.19	0.05704486		1536.18	0.00046559		2066.18	-0.00481544		2596.21	-0.01107553
476.4	0.1836172		1006.39	0.05669441		1536.38	0.00067377		2066.38	-0.00542568		2596.41	-0.01077363
476.6	0.18444734		1006.59	0.05596244		1536.58	0.00138691		2066.58	-0.0056276		2596.61	-0.01028716
476.8	0.18333676		1006.79	0.05585039		1536.78	0.00226447		2066.78	-0.00600824		2596.81	-0.00969028
477	0.18437293		1006.99	0.0560557		1536.98	0.0029511		2066.98	-0.00537441		2597.01	-0.00956941
477.2	0.18475556		1007.19	0.0562092		1537.18	0.00242887		2067.18	-0.00492992		2597.21	-0.00858998
477.4	0.18526267		1007.39	0.05619001		1537.38	0.00251207		2067.38	-0.00487244		2597.41	-0.00895354
477.6	0.18589728		1007.59	0.05679203		1537.58	0.00263165		2067.58	-0.00431075		2597.61	-0.01012134
477.8	0.18665764		1007.79	0.05720694		1537.78	0.00268396		2067.78	-0.00408775		2597.81	-0.01035788
478	0.18640304		1007.99	0.05770873		1537.98	0.00277334		2067.98	-0.00331352		2598.01	-0.0105895
478.2	0.18694488		1008.19	0.05796129		1538.18	0.0032097		2068.18	-0.00340179		2598.21	-0.01061662
478.4	0.18764751		1008.39	0.0586908		1538.38	0.00287345		2068.38	-0.00286612		2598.41	-0.01047349
478.6	0.18820942		1008.59	0.05889848		1538.58	0.00308284		2068.58	-0.00227161		2598.61	-0.01061915
478.8	0.18749593		1008.79	0.05977335		1538.78	0.00296508		2068.78	-0.00231931		2598.81	-0.01042781
479	0.18744478		1008.99	0.05918593		1538.98	0.0025555		2068.98	-0.00186091		2599.01	-0.01030736
479.2	0.18727608		1009.19	0.05895861		1539.18	0.00182615		2069.18	-0.00019956		2599.21	-0.01092971
479.4	0.18640218		1009.39	0.05862172		1539.38	0.0003963		2069.38	-0.00027822		2599.41	-0.01178538
479.6	0.1858264		1009.59	0.05812239		1539.58	-0.00117774		2069.58	-0.0012677		2599.61	-0.01184046
479.8	0.18575614		1009.79	0.05826666		1539.78	-0.00094075		2069.78	-0.00137645		2599.81	-0.01108615
480	0.18518462		1009.99	0.0582096		1539.98	-0.00158754		2069.98	-0.00285135		2600.01	-0.01047594
480.2	0.184682		1010.19	0.05766685		1540.18	-0.00172591		2070.18	-0.00338238		2600.21	-0.01031302
480.4	0.18301022		1010.39	0.05748959		1540.38	-0.00072734		2070.38	-0.00399423		2600.41	-0.01045813
480.6	0.18232191		1010.59	0.05812404		1540.58	-0.00072908		2070.58	-0.00462052		2600.61	-0.01104298
480.8	0.18148658		1010.79	0.05731457		1540.78	-0.00036833		2070.78	-0.00528717		2600.81	-0.01042076
481	0.18171693		1010.99	0.05704348		1540.98	-0.00062107		2070.98	-0.00547321		2601.01	-0.00999599
481.2	0.18207274		1011.19	0.05782237		1541.18	-0.0007021		2071.18	-0.00599695		2601.21	-0.01021661
481.4	0.18156461		1011.39	0.05816152		1541.38	-0.00008302		2071.38	-0.00615456		2601.41	-0.01149503
481.6	0.18191579		1011.59	0.05878196		1541.58	0.00000625		2071.58	-0.00619636		2601.61	-0.01132999
481.8	0.18241804		1011.79	0.05898624		1541.78	0.00004663		2071.78	-0.00570098		2601.81	-0.01079386
482	0.18180644		1011.99	0.06029903		1541.98	0.00065985		2071.98	-0.00546672		2602.01	-0.01060887
482.2	0.18253833		1012.19	0.05993494		1542.18	0.00088187		2072.18	-0.00512647		2602.21	-0.00964748
482.4	0.18240508		1012.39	0.0604769		1542.38	0.00077658		2072.38	-0.00463363		2602.41	-0.00997326
482.6	0.18207951		1012.59	0.06109871		1542.58	0.00072299		2072.58	-0.00418889		2602.61	-0.00913328
482.8	0.18089329		1012.79	0.06135539		1542.78	0.00046763		2072.78	-0.00304131		2602.81	-0.0092355
483	0.18186624		1012.99	0.060712		1542.98	0.00088584		2072.98	-0.00209909		2603.01	-0.00945489
483.2	0.18238558		1013.19	0.06006919		1543.18	0.00043134		2073.18	-0.00172788		2603.21	-0.00870103
483.4	0.18249784		1013.39	0.06000838		1543.38	-0.00025139		2073.38	-0.00233453		2603.41	-0.00814574
483.6	0.18288037		1013.59	0.05927709		1543.58	0.00013396		2073.58	-0.00287451		2603.61	-0.00775171
483.8	0.18284555		1013.79	0.05883289		1543.78	0.00081858		2073.78	-0.00333802		2603.81	-0.00770873
484	0.18201346		1013.99	0.05781224		1543.98	0.00073913		2073.98	-0.00337205		2604.01	-0.00721162
484.2	0.18173431		1014.19	0.05740007		1544.18	0.00075312		2074.18	-0.00452247		2604.21	-0.00841779
484.4	0.18097347		1014.39	0.05655757		1544.38	0.00173327		2074.38	-0.00572529		2604.41	-0.00854243
484.6	0.18250458		1014.59	0.05575833		1544.58	0.00062513		2074.58	-0.00703238		2604.61	-0.00921813
484.8	0.18344431		1014.79	0.05496763		1544.78	0.00110381		2074.78	-0.00726212		2604.81	-0.00876683
485	0.18405442		1014.99	0.0551988		1544.98	0.00065859		2074.98	-0.00725261		2605.01	-0.00909935
485.2	0.18435495		1015.19	0.05644838		1545.18	0.00096699		2075.18	-0.00774616		2605.21	-0.00947416
485.4	0.18432988		1015.39	0.0566032		1545.38	0.0000784		2075.38	-0.00766056		2605.41	-0.00993985
485.6	0.18475852		1015.59	0.05567909		1545.58	0.00014405		2075.58	-0.00690933		2605.61	-0.00980805
485.8	0.18530466		1015.79	0.05633315		1545.78	-0.00045952		2075.78	-0.00617488		2605.81	-0.01024202
486	0.18492782		1015.99	0.05724055		1545.98	0.00021814		2075.98	-0.00660684		2606.01	-0.01016523
486.2	0.18558099		1016.19	0.05686484		1546.18	-0.00035356		2076.18	-0.00660794		2606.21	-0.01001962
486.4	0.18527949		1016.39	0.05764852		1546.38	-0.00134338		2076.38	-0.00640124		2606.41	-0.01062724
486.6	0.18576014		1016.59	0.05835287		1546.58	-0.00086076		2076.58	-0.00611793		2606.61	-0.0102636
486.8	0.18520117		1016.79	0.05845956		1546.78	-0.00023047		2076.78	-0.00500164		2606.81	-0.01030188
487	0.18542396		1016.99	0.05878992		1546.98	0.00031936		2076.98	-0.00479371		2607.01	-0.00899343
487.2	0.18484413		1017.19	0.05837734		1547.18	0.00054037		2077.18	-0.00436213		2607.21	-0.0082775
487.4	0.18431922		1017.39	0.05857787		1547.38	0.00079684		2077.38	-0.0038076		2607.41	-0.00862692
487.6	0.18357511		1017.59	0.058285		1547.58	0.00164852		2077.58	-0.00396519		2607.61	-0.00893222
487.8	0.18227532		1017.79	0.05768854		1547.78	0.00216061		2077.78	-0.00368639		2607.81	-0.00864467
488	0.18086096		1017.99	0.05781689		1547.98	0.00218849		2077.98	-0.00281872		2608.01	-0.00888953
488.2	0.18078974		1018.19	0.05770654		1548.18	0.00232877		2078.18	-0.00413954		2608.21	-0.00930598
488.4	0.18059791		1018.39	0.05713427		1548.38	0.00242449		2078.38	-0.00420748		2608.41	-0.00880532
488.6	0.18052154		1018.59	0.0570729		1548.58	0.00150494		2078.58	-0.00406335		2608.61	-0.00912915
488.8	0.17991968		1018.79	0.05790298		1548.78	0.0012712		2078.78	-0.00391243		2608.81	-0.00901121
489	0.17964022		1018.99	0.05790516		1548.98	0.00042907		2078.98	-0.00382532		2609.01	-0.00904465
489.2	0.17978858		1019.19	0.05825346		1549.18	-0.00040679		2079.18	-0.00359595		2609.21	-0.00991489
489.4	0.1801184		1019.39	0.05724909		1549.38	-0.00126084		2079.38	-0.00409677		2609.41	-0.00973109
489.6	0.18076878		1019.59	0.05644017		1549.58	-0.00138863		2079.58	-0.00359408		2609.61	-0.01075204
489.8	0.18139086		1019.79	0.0568631		1549.78	-0.00133949		2079.78	-0.00328803		2609.81	-0.01097417
490	0.18056563		1019.99	0.05641609		1549.98	-0.0008069		2079.98	-0.00313341		2610.01	-0.01146451
490.2	0.18087871		1020.19	0.0560033		1550.18	-0.00213711		2080.18	-0.00268609		2610.21	-0.01257221
490.4	0.18117652		1020.39	0.0557726		1550.38	-0.00218464		2080.38	-0.00203905		2610.41	-0.01309589
490.6	0.1814952		1020.59	0.05519372		1550.58	-0.00195011		2080.58	-0.00220641		2610.61	-0.01288044
490.8	0.18104358		1020.79	0.05585433		1550.78	-0.00153577		2080.78	-0.00230717		2610.81	-0.01187427
491	0.18099815		1020.99	0.05604919		1550.98	-0.00053648		2080.98	-0.00319244		2611.01	-0.01136975
491.2	0.18148862		1021.19	0.05533038		1551.18	-0.00048618		2081.18	-0.00308865		2611.21	-0.01129783
491.4	0.18168734		1021.39	0.0553646		1551.38	-0.00023289		2081.38	-0.00366073		2611.41	-0.01148487
491.6	0.18197632		1021.59	0.05574746		1551.58	0.00018223		2081.58	-0.00444565		2611.61	-0.01143831
491.8	0.18131395		1021.79	0.05504121		1551.78	-0.00053156		2081.78	-0.00492051		2611.81	-0.01200685
492	0.18156797		1021.99	0.05529388		1551.98	0.00007982		2081.98	-0.00490046		2612.01	-0.01243328
492.2	0.18227372		1022.19	0.05524468		1552.18	0.00055814		2082.18	-0.00605003		2612.21	-0.01144444
492.4	0.18274424		1022.39	0.0556696		1552.38	0.0003333		2082.38	-0.00607854		2612.41	-0.0114224
492.6	0.18301753		1022.59	0.05623436		1552.58	-0.00029913		2082.58	-0.00658987		2612.61	-0.01087798
492.8	0.18320149		1022.79	0.05628923		1552.78	-0.00079227		2082.78	-0.00583979		2612.81	-0.01056734
493	0.18358425		1022.99	0.0562145		1552.98	-0.00111267		2082.98	-0.00622283		2613.01	-0.01029486
493.2	0.18404765		1023.19	0.05652082		1553.18	-0.00119537		2083.18	-0.00651857		2613.21	-0.01045679
493.4	0.18375127		1023.39	0.05727338		1553.38	-0.00141588		2083.38	-0.00703795		2613.41	-0.01032149
493.6	0.1839198		1023.59	0.05779299		1553.58	-0.00148746		2083.58	-0.00543784		2613.61	-0.01093228
493.8	0.18343842		1023.79	0.05676559		1553.78	-0.00085414		2083.78	-0.00447371		2613.81	-0.01000346
494	0.18221333		1023.99	0.05729935		1553.98	-0.00115362		2083.98	-0.0040297		2614.01	-0.00993497
494.2	0.18218874		1024.19	0.05827125		1554.18	-0.0010342		2084.18	-0.00391779		2614.21	-0.00883542
494.4	0.1825162		1024.39	0.05880284		1554.38	-0.00071176		2084.38	-0.00332412		2614.41	-0.0077504
494.6	0.18264397		1024.59	0.05978091		1554.58	-0.00084797		2084.58	-0.00377065		2614.61	-0.00765972
494.8	0.18302229		1024.79	0.06083648		1554.78	-0.00008013		2084.78	-0.00392321		2614.81	-0.00656491
495	0.18322339		1024.99	0.06075272		1554.98	0.00048175		2084.98	-0.0043849		2615.01	-0.00700056
495.2	0.18302481		1025.19	0.06107513		1555.18	0.00008135		2085.18	-0.00411838		2615.21	-0.00674359
495.4	0.18290474		1025.39	0.06059074		1555.38	-0.00069239		2085.38	-0.00502078		2615.41	-0.00763969
495.6	0.18309036		1025.59	0.06043183		1555.58	-0.00042928		2085.58	-0.00581494		2615.61	-0.00820562
495.8	0.18280615		1025.79	0.05988493		1555.78	-0.00045559		2085.78	-0.00603163		2615.81	-0.00978358
496	0.18370765		1025.99	0.0597223		1555.98	0.00058903		2085.98	-0.00585201		2616.01	-0.01035606
496.2	0.18440119		1026.19	0.05866647		1556.18	-0.00036577		2086.18	-0.00618589		2616.21	-0.01025333
496.4	0.18428789		1026.39	0.05778847		1556.38	0.00009518		2086.38	-0.00620166		2616.41	-0.01038932
496.6	0.18366221		1026.59	0.05713985		1556.58	-0.00053597		2086.58	-0.00645324		2616.61	-0.01056015
496.8	0.18379063		1026.79	0.05671244		1556.78	-0.00105212		2086.78	-0.00643119		2616.81	-0.01104202
497	0.18315782		1026.99	0.05664333		1556.98	-0.0022317		2086.98	-0.0077286		2617.01	-0.01166523
497.2	0.18319668		1027.19	0.05689481		1557.18	-0.00320061		2087.18	-0.00803437		2617.21	-0.0122818
497.4	0.18247287		1027.39	0.05627647		1557.38	-0.00458411		2087.38	-0.00747404		2617.41	-0.01153585
497.6	0.18226139		1027.59	0.05575656		1557.58	-0.00477594		2087.58	-0.00627283		2617.61	-0.01075072
497.8	0.18234954		1027.79	0.05456433		1557.78	-0.00402074		2087.78	-0.00585443		2617.81	-0.01033889
498	0.18174624		1027.99	0.0554651		1557.98	-0.00403912		2087.98	-0.00519243		2618.01	-0.00999182
498.2	0.18190652		1028.19	0.05558993		1558.18	-0.00298355		2088.18	-0.00477591		2618.21	-0.00898912
498.4	0.18217342		1028.39	0.05614763		1558.38	-0.00266771		2088.38	-0.00417694		2618.41	-0.00877096
498.6	0.18226278		1028.59	0.05609283		1558.58	-0.00178534		2088.58	-0.00372236		2618.61	-0.00894155
498.8	0.18127125		1028.79	0.05589858		1558.78	-0.00169388		2088.78	-0.00309925		2618.81	-0.00794292
499	0.18114666		1028.99	0.05632891		1558.98	-0.00099252		2088.98	-0.00393531		2619.01	-0.00779294
499.2	0.18094505		1029.19	0.05653065		1559.18	-0.00089623		2089.18	-0.00315721		2619.21	-0.00709307
499.4	0.18162656		1029.39	0.05617769		1559.38	-0.00046343		2089.38	-0.00367481		2619.41	-0.00791848
499.6	0.18232318		1029.59	0.05656799		1559.58	0.00064671		2089.58	-0.00395998		2619.61	-0.00774653
499.8	0.18243511		1029.79	0.05659327		1559.78	0.00130234		2089.78	-0.0037904		2619.81	-0.00783424
500	0.18172105		1029.99	0.05623851		1559.98	0.00172902		2089.98	-0.00418243		2620.01	-0.00751003
500.2	0.18107944		1030.19	0.05558352		1560.18	0.00162855		2090.18	-0.00487099		2620.21	-0.00701125
500.4	0.17983805		1030.39	0.05583466		1560.38	0.00311304		2090.38	-0.00506731		2620.41	-0.00699276
500.6	0.17999791		1030.59	0.05628326		1560.58	0.00224804		2090.58	-0.00556881		2620.61	-0.008482
500.8	0.18016035		1030.79	0.05679696		1560.78	0.00169273		2090.78	-0.00590285		2620.81	-0.00898964
501	0.17911816		1030.99	0.05710855		1560.98	0.00049975		2090.98	-0.00623034		2621.01	-0.00870439
501.2	0.17933517		1031.19	0.05725411		1561.18	0.00025158		2091.18	-0.00628791		2621.21	-0.00778718
501.4	0.17920973		1031.39	0.05692039		1561.38	0.00008034		2091.38	-0.00626576		2621.41	-0.00733772
501.6	0.17937223		1031.59	0.05734981		1561.58	0.00068474		2091.58	-0.00644385		2621.61	-0.0075848
501.8	0.17968471		1031.79	0.05733313		1561.78	0.00050842		2091.78	-0.00646583		2621.81	-0.00875306
502	0.17966889		1031.99	0.0576013		1561.98	0.00017765		2091.98	-0.0063092		2622.01	-0.00898166
502.2	0.18043636		1032.19	0.05800558		1562.18	0.00089366		2092.18	-0.00646987		2622.21	-0.00869767
502.4	0.18073255		1032.39	0.0581491		1562.38	0.00044382		2092.38	-0.00625532		2622.41	-0.00876769
502.6	0.18061301		1032.59	0.05737701		1562.58	0.00056483		2092.58	-0.00644271		2622.61	-0.0091096
502.8	0.18100851		1032.79	0.05708964		1562.78	0.00113925		2092.78	-0.0068727		2622.81	-0.0094061
503	0.18176706		1032.99	0.05678938		1562.98	0.00210948		2092.98	-0.00770409		2623.01	-0.00956781
503.2	0.18229378		1033.19	0.05680799		1563.18	0.00230132		2093.18	-0.006706		2623.21	-0.00947892
503.4	0.183074		1033.39	0.05615932		1563.38	0.00315677		2093.38	-0.00689539		2623.41	-0.0094105
503.6	0.18294921		1033.59	0.05617577		1563.58	0.00296274		2093.58	-0.00647273		2623.61	-0.0092802
503.8	0.18210182		1033.79	0.05643593		1563.78	0.00351239		2093.78	-0.00641058		2623.81	-0.00975829
504	0.18135795		1033.99	0.05563537		1563.98	0.0034666		2093.98	-0.00653758		2624.01	-0.01027
504.2	0.18085408		1034.19	0.05517915		1564.18	0.00346308		2094.18	-0.00629196		2624.21	-0.01041071
504.4	0.1800535		1034.39	0.05522464		1564.38	0.00328248		2094.38	-0.00522235		2624.41	-0.01097281
504.6	0.18011245		1034.59	0.05604827		1564.58	0.00280976		2094.58	-0.00473516		2624.61	-0.01161912
504.8	0.17944		1034.79	0.05678181		1564.78	0.00251784		2094.78	-0.00448616		2624.81	-0.01108704
505	0.17827951		1034.99	0.05655376		1564.98	0.00184592		2094.98	-0.00453701		2625.01	-0.01077853
505.2	0.17868582		1035.19	0.05596527		1565.18	0.00177863		2095.18	-0.00481305		2625.21	-0.01104983
505.4	0.17859221		1035.39	0.05614208		1565.38	0.00030762		2095.38	-0.00538398		2625.41	-0.01095306
505.6	0.17914692		1035.59	0.05689096		1565.58	-0.00060918		2095.58	-0.00517363		2625.61	-0.0110194
505.8	0.17991925		1035.79	0.05830951		1565.78	-0.00158477		2095.78	-0.00508889		2625.81	-0.01147284
506	0.18012992		1035.99	0.05845509		1565.98	-0.00132573		2095.98	-0.00525652		2626.01	-0.01123917
506.2	0.18037365		1036.19	0.05835364		1566.18	-0.00190689		2096.18	-0.00509143		2626.21	-0.01085425
506.4	0.18007035		1036.39	0.05732843		1566.38	-0.00182405		2096.38	-0.00598459		2626.41	-0.01067963
506.6	0.18010608		1036.59	0.05712622		1566.58	-0.00079212		2096.58	-0.00688255		2626.61	-0.01074474
506.8	0.18125319		1036.79	0.05662979		1566.78	-0.00034321		2096.78	-0.0066783		2626.81	-0.01078418
507	0.1811276		1036.99	0.05643989		1566.98	0.00011284		2096.98	-0.00637128		2627.01	-0.01073518
507.2	0.18171464		1037.19	0.05683052		1567.18	-0.00021946		2097.18	-0.00675411		2627.21	-0.01067476
507.4	0.18207297		1037.39	0.05630438		1567.38	-0.00030022		2097.38	-0.0066719		2627.41	-0.01031906
507.6	0.18269582		1037.59	0.05671723		1567.58	-0.00023109		2097.58	-0.00663896		2627.61	-0.01033485
507.8	0.18232067		1037.79	0.05701202		1567.78	-0.00061995		2097.78	-0.00663725		2627.81	-0.0104786
508	0.18256539		1037.99	0.0568199		1567.98	-0.00106608		2097.98	-0.0062256		2628.01	-0.01087897
508.2	0.18172646		1038.19	0.05714975		1568.18	-0.00204417		2098.18	-0.00566096		2628.21	-0.01073896
508.4	0.18108676		1038.39	0.05675939		1568.38	-0.00235157		2098.38	-0.00495594		2628.41	-0.0106843
508.6	0.18079159		1038.59	0.05658797		1568.58	-0.00242406		2098.58	-0.00557947		2628.61	-0.01008527
508.8	0.17993666		1038.79	0.05606666		1568.78	-0.00248824		2098.78	-0.00532128		2628.81	-0.01050611
509	0.17972361		1038.99	0.05556031		1568.98	-0.00265281		2098.98	-0.00491855		2629.01	-0.0104395
509.2	0.17996285		1039.19	0.05530782		1569.18	-0.00334684		2099.18	-0.00568639		2629.21	-0.01086956
509.4	0.18036556		1039.39	0.05590267		1569.38	-0.0044288		2099.38	-0.00579489		2629.41	-0.01056617
509.6	0.18027548		1039.59	0.05630638		1569.58	-0.00460566		2099.58	-0.00543502		2629.61	-0.01124991
509.8	0.18049496		1039.79	0.05705409		1569.78	-0.00437889		2099.78	-0.00614097		2629.81	-0.01205818
510	0.17957564		1039.99	0.05590526		1569.98	-0.0036216		2099.98	-0.00652064		2630.01	-0.01279439
510.2	0.17968761		1040.19	0.05594752		1570.18	-0.00388493		2100.18	-0.00672356		2630.21	-0.01330856
510.4	0.17985434		1040.39	0.05609889		1570.38	-0.00318121		2100.38	-0.00686087		2630.41	-0.01369443
510.6	0.1796961		1040.59	0.05727296		1570.58	-0.00291678		2100.58	-0.00634659		2630.61	-0.01390869
510.8	0.18029729		1040.79	0.05735896		1570.78	-0.00222233		2100.78	-0.00619841		2630.81	-0.01388136
511	0.17998216		1040.99	0.05754921		1570.98	-0.00085689		2100.98	-0.00668971		2631.01	-0.01382406
511.2	0.17963485		1041.19	0.05741537		1571.18	-0.0011745		2101.18	-0.00709337		2631.21	-0.01340084
511.4	0.18008672		1041.39	0.05763352		1571.38	-0.00088079		2101.38	-0.00638592		2631.41	-0.01205295
511.6	0.18026635		1041.59	0.05793407		1571.58	-0.00026529		2101.58	-0.00519278		2631.61	-0.01171637
511.8	0.18041148		1041.79	0.05870481		1571.78	0.00037036		2101.78	-0.00474541		2631.81	-0.01146375
512	0.18097748		1041.99	0.05867109		1571.98	0.00103503		2101.98	-0.0043664		2632.01	-0.01092421
512.2	0.18030778		1042.19	0.05791748		1572.18	0.00094893		2102.18	-0.00409161		2632.21	-0.00994839
512.4	0.18022807		1042.39	0.05751721		1572.38	0.00135191		2102.38	-0.00395971		2632.41	-0.00862767
512.6	0.17964069		1042.59	0.05779437		1572.58	0.00198978		2102.58	-0.00414036		2632.61	-0.00800246
512.8	0.17893884		1042.79	0.05742706		1572.78	0.00148489		2102.78	-0.00318146		2632.81	-0.00778111
513	0.17918482		1042.99	0.05729163		1572.98	0.00092575		2102.98	-0.00347717		2633.01	-0.00695632
513.2	0.1786309		1043.19	0.05578527		1573.18	-0.0001139		2103.18	-0.0036647		2633.21	-0.00719976
513.4	0.17883274		1043.39	0.05482868		1573.38	-0.00056576		2103.38	-0.00331833		2633.41	-0.00668992
513.6	0.17903345		1043.59	0.05425898		1573.58	-0.00152526		2103.58	-0.0035607		2633.61	-0.00742849
513.8	0.17912615		1043.79	0.05407342		1573.78	-0.00144182		2103.78	-0.00398217		2633.81	-0.00775224
514	0.17924467		1043.99	0.05323732		1573.98	-0.00210219		2103.98	-0.00468144		2634.01	-0.00782062
514.2	0.17965884		1044.19	0.05397393		1574.18	-0.00211183		2104.18	-0.00451732		2634.21	-0.00816388
514.4	0.17987881		1044.39	0.05382821		1574.38	-0.00231928		2104.38	-0.00454291		2634.41	-0.00852823
514.6	0.17979319		1044.59	0.05482552		1574.58	-0.00245376		2104.58	-0.00529535		2634.61	-0.00898992
514.8	0.18075066		1044.79	0.05429826		1574.78	-0.00184154		2104.78	-0.00624105		2634.81	-0.00963824
515	0.18034141		1044.99	0.05368765		1574.98	-0.00211654		2104.98	-0.00688307		2635.01	-0.01059191
515.2	0.18050907		1045.19	0.05370513		1575.18	-0.00260969		2105.18	-0.00666687		2635.21	-0.01135638
515.4	0.18198657		1045.39	0.05469153		1575.38	-0.00252309		2105.38	-0.00637003		2635.41	-0.01141351
515.6	0.18257393		1045.59	0.05492268		1575.58	-0.0021214		2105.58	-0.00591541		2635.61	-0.01200727
515.8	0.18390478		1045.79	0.05614915		1575.78	-0.00160256		2105.78	-0.00618767		2635.81	-0.01167635
516	0.18392988		1045.99	0.05550006		1575.98	-0.00244093		2105.98	-0.00675875		2636.01	-0.0119445
516.2	0.18342613		1046.19	0.05613666		1576.18	-0.0031592		2106.18	-0.00694536		2636.21	-0.01230955
516.4	0.18365735		1046.39	0.05665851		1576.38	-0.00356081		2106.38	-0.0070188		2636.41	-0.01164529
516.6	0.18248321		1046.59	0.0570333		1576.58	-0.00389013		2106.58	-0.00666681		2636.61	-0.01136337
516.8	0.18176359		1046.79	0.05744264		1576.78	-0.00405508		2106.78	-0.00578148		2636.81	-0.01097346
517	0.18059701		1046.99	0.05717999		1576.98	-0.00440602		2106.98	-0.00607191		2637.01	-0.01064895
517.2	0.17965375		1047.19	0.05639139		1577.18	-0.00489977		2107.18	-0.00600471		2637.21	-0.01061761
517.4	0.17963912		1047.39	0.05657157		1577.38	-0.00383013		2107.38	-0.00581965		2637.41	-0.01070993
517.6	0.1794001		1047.59	0.05699699		1577.58	-0.00374746		2107.58	-0.00544901		2637.61	-0.01076365
517.8	0.17884007		1047.79	0.05776302		1577.78	-0.00318627		2107.78	-0.00561984		2637.81	-0.01024762
518	0.17935219		1047.99	0.0582923		1577.98	-0.00278746		2107.98	-0.00572071		2638.01	-0.00985561
518.2	0.1791931		1048.19	0.05839197		1578.18	-0.00224741		2108.18	-0.00530948		2638.21	-0.00947042
518.4	0.17921078		1048.39	0.05785779		1578.38	-0.00288083		2108.38	-0.00594964		2638.41	-0.01033038
518.6	0.17906335		1048.59	0.05740853		1578.58	-0.00225409		2108.58	-0.00608433		2638.61	-0.0106892
518.8	0.17928293		1048.79	0.05649227		1578.78	-0.00219914		2108.78	-0.00584105		2638.81	-0.0109207
519	0.1788401		1048.99	0.05605287		1578.98	-0.00259544		2108.98	-0.00594145		2639.01	-0.01103403
519.2	0.1791627		1049.19	0.05612322		1579.18	-0.0026086		2109.18	-0.00634638		2639.21	-0.01142849
519.4	0.17981513		1049.39	0.05506357		1579.38	-0.00241734		2109.38	-0.00647926		2639.41	-0.01101301
519.6	0.1787572		1049.59	0.05392543		1579.58	-0.00198939		2109.58	-0.00602897		2639.61	-0.01109423
519.8	0.17892523		1049.79	0.0532652		1579.78	-0.00161926		2109.78	-0.00667284		2639.81	-0.01120425
520	0.1786739		1049.99	0.0520984		1579.98	-0.0020045		2109.98	-0.00715605		2640.01	-0.01091625
520.2	0.17774671		1050.19	0.05213772		1580.18	-0.00169462		2110.18	-0.00665482		2640.21	-0.01073792
520.4	0.17783132		1050.39	0.0519975		1580.38	-0.0011567		2110.38	-0.00625458		2640.41	-0.01036063
520.6	0.17707304		1050.59	0.05245888		1580.58	-0.0007686		2110.58	-0.00627945		2640.61	-0.01007512
520.8	0.1768337		1050.79	0.05330061		1580.78	0.00029221		2110.78	-0.00612524		2640.81	-0.01028001
521	0.17629693		1050.99	0.05358634		1580.98	-0.00014097		2110.98	-0.00652757		2641.01	-0.00977306
521.2	0.17623241		1051.19	0.05444496		1581.18	0.00085278		2111.18	-0.00634526		2641.21	-0.01033773
521.4	0.17664139		1051.39	0.05589971		1581.38	0.00170238		2111.38	-0.00652318		2641.41	-0.01096246
521.6	0.1765625		1051.59	0.05618114		1581.58	0.00149643		2111.58	-0.00633511		2641.61	-0.01058463
521.8	0.17702426		1051.79	0.05683472		1581.78	0.00206827		2111.78	-0.00644698		2641.81	-0.01049875
522	0.17728203		1051.99	0.05727761		1581.98	0.0011337		2111.98	-0.00610957		2642.01	-0.00971105
522.2	0.17800794		1052.19	0.05650732		1582.18	0.00008044		2112.18	-0.00643963		2642.21	-0.01027254
522.4	0.17797936		1052.39	0.05626807		1582.38	-0.00003178		2112.38	-0.00615495		2642.41	-0.01059059
522.6	0.17829599		1052.59	0.05589363		1582.58	0.00003102		2112.58	-0.00610033		2642.61	-0.01084949
522.8	0.17853056		1052.79	0.05553948		1582.78	-0.00181039		2112.78	-0.00626473		2642.81	-0.0111063
523	0.17920284		1052.99	0.0552253		1582.98	-0.00210014		2112.98	-0.00692885		2643.01	-0.01105285
523.2	0.17936443		1053.19	0.05489166		1583.18	-0.00216067		2113.18	-0.00782704		2643.21	-0.01098214
523.4	0.17991333		1053.39	0.0534217		1583.38	-0.0019029		2113.38	-0.00743176		2643.41	-0.01017347
523.6	0.18008725		1053.59	0.05334901		1583.58	-0.00159471		2113.58	-0.00671135		2643.61	-0.00977572
523.8	0.18095888		1053.79	0.05257601		1583.78	-0.00171322		2113.78	-0.00709491		2643.81	-0.00853296
524	0.18056838		1053.99	0.05304982		1583.98	-0.00152469		2113.98	-0.00661715		2644.01	-0.00792458
524.2	0.18013268		1054.19	0.05329338		1584.18	-0.0011607		2114.18	-0.00631117		2644.21	-0.00745343
524.4	0.18127963		1054.39	0.0539911		1584.38	-0.00085402		2114.38	-0.0059933		2644.41	-0.00740835
524.6	0.1816151		1054.59	0.05499635		1584.58	-0.00146485		2114.58	-0.00622814		2644.61	-0.00707797
524.8	0.18173554		1054.79	0.05624125		1584.78	-0.0007223		2114.78	-0.00612009		2644.81	-0.00690313
525	0.18163558		1054.99	0.05659001		1584.98	-0.00034702		2114.98	-0.00604198		2645.01	-0.00696502
525.2	0.18129619		1055.19	0.05711146		1585.18	0.00039709		2115.18	-0.00683251		2645.21	-0.00786039
525.4	0.18143641		1055.39	0.05757119		1585.38	0.0003348		2115.38	-0.00801247		2645.41	-0.00819037
525.6	0.1813944		1055.59	0.05739498		1585.58	0.00056268		2115.58	-0.00805661		2645.61	-0.00826996
525.8	0.18181589		1055.79	0.05754385		1585.78	0.00058534		2115.78	-0.00885014		2645.81	-0.0085289
526	0.18190161		1055.99	0.05753315		1585.98	-0.00075668		2115.98	-0.00908843		2646.01	-0.00925005
526.2	0.18222407		1056.19	0.05678065		1586.18	-0.00085022		2116.18	-0.00893427		2646.21	-0.01038736
526.4	0.18143915		1056.39	0.05657782		1586.38	-0.00133306		2116.38	-0.00883864		2646.41	-0.01088772
526.6	0.18177497		1056.59	0.05621172		1586.58	-0.00177278		2116.58	-0.00993369		2646.61	-0.01222222
526.8	0.18171147		1056.79	0.0555844		1586.78	-0.00223757		2116.78	-0.01026469		2646.81	-0.01260608
527	0.18195806		1056.99	0.05535763		1586.98	-0.00238695		2116.98	-0.01098985		2647.01	-0.01259551
527.2	0.18099801		1057.19	0.05456913		1587.18	-0.00177545		2117.18	-0.01107088		2647.21	-0.0122095
527.4	0.18164906		1057.39	0.05372909		1587.38	-0.00175027		2117.38	-0.0111392		2647.41	-0.01247493
527.6	0.18081509		1057.59	0.05332631		1587.58	-0.00118975		2117.58	-0.00999313		2647.61	-0.01241261
527.8	0.17992275		1057.79	0.05302067		1587.78	-0.00087994		2117.78	-0.0090852		2647.81	-0.0116374
528	0.17891209		1057.99	0.05413282		1587.98	0.00013039		2117.98	-0.00818994		2648.01	-0.01174788
528.2	0.17927432		1058.19	0.05398175		1588.18	0.00003003		2118.18	-0.00727327		2648.21	-0.01133008
528.4	0.18000129		1058.39	0.05518938		1588.38	-0.00002912		2118.38	-0.00649947		2648.41	-0.01148579
528.6	0.17943967		1058.59	0.05540844		1588.58	-0.00029583		2118.58	-0.00682277		2648.61	-0.01154356
528.8	0.17945609		1058.79	0.05597557		1588.78	0.00057316		2118.78	-0.00585276		2648.81	-0.01095925
529	0.17893661		1058.99	0.05620401		1588.98	0.00102491		2118.98	-0.00553391		2649.01	-0.01137414
529.2	0.17892534		1059.19	0.05662013		1589.18	0.00084114		2119.18	-0.00618388		2649.21	-0.01076856
529.4	0.17848591		1059.39	0.0563964		1589.38	0.00033448		2119.38	-0.00637224		2649.41	-0.01067145
529.6	0.17904216		1059.59	0.05607828		1589.58	0.00021049		2119.58	-0.00576072		2649.61	-0.01119267
529.8	0.17978248		1059.79	0.05656699		1589.78	-0.00024556		2119.78	-0.00540122		2649.81	-0.01135902
530	0.18049465		1059.99	0.05618653		1589.98	-0.00107557		2119.98	-0.00478033		2650.01	-0.01174131
530.2	0.18073103		1060.19	0.05597171		1590.18	-0.00108103		2120.18	-0.00459221		2650.21	-0.0125778
530.4	0.18121844		1060.39	0.0555593		1590.38	-0.00148123		2120.38	-0.00513768		2650.41	-0.01296364
530.6	0.18208501		1060.59	0.05500604		1590.58	-0.00135184		2120.58	-0.00549985		2650.61	-0.01273877
530.8	0.18131453		1060.79	0.05439225		1590.78	-0.00172376		2120.78	-0.00567334		2650.81	-0.01294348
531	0.18135048		1060.99	0.05384854		1590.98	-0.00323422		2120.98	-0.00518665		2651.01	-0.01264596
531.2	0.18097176		1061.19	0.05377642		1591.18	-0.00257459		2121.18	-0.00578613		2651.21	-0.01292866
531.4	0.18140829		1061.39	0.05418962		1591.38	-0.0023508		2121.38	-0.00534502		2651.41	-0.012432
531.6	0.18025179		1061.59	0.05460815		1591.58	-0.00193997		2121.58	-0.00429008		2651.61	-0.01172824
531.8	0.18004763		1061.79	0.05553008		1591.78	-0.00241415		2121.78	-0.00423221		2651.81	-0.01077526
532	0.17974075		1061.99	0.05653761		1591.98	-0.00255849		2121.98	-0.00378138		2652.01	-0.01016873
532.2	0.17944102		1062.19	0.05691982		1592.18	-0.00270227		2122.18	-0.00505652		2652.21	-0.00964547
532.4	0.17872336		1062.39	0.05822607		1592.38	-0.00284359		2122.38	-0.00570232		2652.41	-0.00952645
532.6	0.17806538		1062.59	0.05812697		1592.58	-0.00340012		2122.58	-0.00601439		2652.61	-0.00943997
532.8	0.17734874		1062.79	0.05815437		1592.78	-0.00337057		2122.78	-0.00601057		2652.81	-0.00910658
533	0.17745367		1062.99	0.05787132		1592.98	-0.00330708		2122.98	-0.00680105		2653.01	-0.00897929
533.2	0.17729097		1063.19	0.05772162		1593.18	-0.0030033		2123.18	-0.00675285		2653.21	-0.00788029
533.4	0.17655148		1063.39	0.05719381		1593.38	-0.00253745		2123.38	-0.00616713		2653.41	-0.00840011
533.6	0.17808141		1063.59	0.05673625		1593.58	-0.00172886		2123.58	-0.00643544		2653.61	-0.00956056
533.8	0.17936241		1063.79	0.0566778		1593.78	-0.00116288		2123.78	-0.0064355		2653.81	-0.00989879
534	0.18009838		1063.99	0.05534211		1593.98	-0.00026325		2123.98	-0.00757564		2654.01	-0.01002556
534.2	0.18025871		1064.19	0.05421647		1594.18	0.00053142		2124.18	-0.00814349		2654.21	-0.01030551
534.4	0.18095352		1064.39	0.05329388		1594.38	-0.00006897		2124.38	-0.00840051		2654.41	-0.01012441
534.6	0.18189669		1064.59	0.05254051		1594.58	-0.00015092		2124.58	-0.00890656		2654.61	-0.01049271
534.8	0.18184434		1064.79	0.05218655		1594.78	-0.00120198		2124.78	-0.00980645		2654.81	-0.01121911
535	0.18231126		1064.99	0.05165018		1594.98	-0.00113257		2124.98	-0.00882988		2655.01	-0.01153866
535.2	0.18243021		1065.19	0.05233852		1595.18	-0.0005673		2125.18	-0.00929549		2655.21	-0.0115301
535.4	0.18278892		1065.39	0.05257413		1595.38	-0.00010177		2125.38	-0.00877238		2655.41	-0.0099471
535.6	0.18183738		1065.59	0.05235987		1595.58	-0.00045835		2125.58	-0.00956425		2655.61	-0.00980661
535.8	0.18139724		1065.79	0.05310718		1595.78	-0.00147141		2125.78	-0.00975423		2655.81	-0.0094386
536	0.18070293		1065.99	0.05391053		1595.98	-0.00145587		2125.98	-0.00986921		2656.01	-0.0086565
536.2	0.17921398		1066.19	0.05573855		1596.18	-0.0013591		2126.18	-0.01051076		2656.21	-0.00783565
536.4	0.17850537		1066.39	0.0563727		1596.38	-0.00150498		2126.38	-0.00953879		2656.41	-0.00774392
536.6	0.17832496		1066.59	0.056201		1596.58	-0.0019025		2126.58	-0.00905709		2656.61	-0.00758419
536.8	0.17789735		1066.79	0.05624159		1596.78	-0.00102139		2126.78	-0.00851156		2656.81	-0.007263
537	0.17863621		1066.99	0.05693637		1596.98	-0.00080795		2126.98	-0.00847491		2657.01	-0.00752283
537.2	0.17760808		1067.19	0.0570024		1597.18	0.00027529		2127.18	-0.00760285		2657.21	-0.00738003
537.4	0.17702638		1067.39	0.05698158		1597.38	0.00018601		2127.38	-0.00728389		2657.41	-0.00785824
537.6	0.17797605		1067.59	0.0570248		1597.58	0.00019766		2127.58	-0.00773319		2657.61	-0.00837411
537.8	0.17822307		1067.79	0.05708476		1597.78	-0.00007009		2127.78	-0.00836652		2657.81	-0.00841031
538	0.17767492		1067.99	0.05685228		1597.98	-0.00052723		2127.98	-0.00877584		2658.01	-0.00852083
538.2	0.17678788		1068.19	0.05636653		1598.18	-0.00090397		2128.18	-0.00885912		2658.21	-0.00933528
538.4	0.17748641		1068.39	0.05596464		1598.38	-0.00137421		2128.38	-0.00878452		2658.41	-0.01024395
538.6	0.17857952		1068.59	0.05585878		1598.58	-0.00183489		2128.58	-0.00949299		2658.61	-0.01096364
538.8	0.177776		1068.79	0.05505733		1598.78	-0.00266745		2128.78	-0.00920947		2658.81	-0.01136803
539	0.17779786		1068.99	0.05482662		1598.98	-0.00214282		2128.98	-0.00891245		2659.01	-0.01181583
539.2	0.17765207		1069.19	0.05493418		1599.18	-0.00288809		2129.18	-0.00999701		2659.21	-0.01024771
539.4	0.17746744		1069.39	0.05450265		1599.38	-0.00253374		2129.38	-0.01068124		2659.41	-0.00991131
539.6	0.17636779		1069.59	0.05420072		1599.58	-0.00310362		2129.58	-0.01140042		2659.61	-0.01068444
539.8	0.17609589		1069.79	0.05498538		1599.78	-0.00370625		2129.78	-0.01073898		2659.81	-0.01070116
540	0.17597996		1069.99	0.0546919		1599.98	-0.00335191		2129.98	-0.01031632		2660.01	-0.01064239
540.2	0.17545049		1070.19	0.05480562		1600.18	-0.00287815		2130.18	-0.00940931		2660.21	-0.01075049
540.4	0.17543382		1070.39	0.05299676		1600.38	-0.00281864		2130.38	-0.00877911		2660.41	-0.01081607
540.6	0.17638235		1070.59	0.05221327		1600.58	-0.00264165		2130.58	-0.00853948		2660.61	-0.01061817
540.8	0.17724539		1070.79	0.05186643		1600.78	-0.00142554		2130.78	-0.00732313		2660.81	-0.01123824
541	0.17751307		1070.99	0.0507578		1600.98	-0.00172168		2130.98	-0.00748061		2661.01	-0.01240436
541.2	0.17791751		1071.19	0.05054644		1601.18	-0.001287		2131.18	-0.00563268		2661.21	-0.01145974
541.4	0.17873617		1071.39	0.04987418		1601.38	-0.00193636		2131.38	-0.0048659		2661.41	-0.01153184
541.6	0.17919782		1071.59	0.04961365		1601.58	-0.00185466		2131.58	-0.00510974		2661.61	-0.01170828
541.8	0.17891427		1071.79	0.0488352		1601.78	-0.0023451		2131.78	-0.00542227		2661.81	-0.01191492
542	0.17803045		1071.99	0.04856351		1601.98	-0.00263004		2131.98	-0.00489655		2662.01	-0.01161619
542.2	0.17839875		1072.19	0.04876499		1602.18	-0.00247733		2132.18	-0.00557903		2662.21	-0.01117937
542.4	0.17899656		1072.39	0.04848597		1602.38	-0.00232238		2132.38	-0.00552644		2662.41	-0.01065897
542.6	0.17875922		1072.59	0.04938544		1602.58	-0.00271565		2132.58	-0.00523977		2662.61	-0.00998766
542.8	0.17905413		1072.79	0.04997432		1602.78	-0.00237063		2132.78	-0.00514428		2662.81	-0.01006876
543	0.17987885		1072.99	0.05133591		1602.98	-0.00164597		2132.98	-0.00581452		2663.01	-0.0097914
543.2	0.17947275		1073.19	0.05211954		1603.18	-0.00126281		2133.18	-0.00630763		2663.21	-0.00943158
543.4	0.17933889		1073.39	0.05350698		1603.38	-0.00080289		2133.38	-0.0060646		2663.41	-0.01002244
543.6	0.17897393		1073.59	0.05422794		1603.58	-0.00086506		2133.58	-0.00650053		2663.61	-0.00957083
543.8	0.17884124		1073.79	0.05560082		1603.78	-0.00028558		2133.78	-0.00611603		2663.81	-0.00937848
544	0.17888404		1073.99	0.05551548		1603.98	0.00003179		2133.98	-0.00637662		2664.01	-0.00965681
544.2	0.1788882		1074.19	0.0562135		1604.18	0.00047091		2134.18	-0.00702284		2664.21	-0.00988033
544.4	0.1784886		1074.39	0.05613452		1604.38	0.00100199		2134.38	-0.00707217		2664.41	-0.0097753
544.6	0.17901604		1074.59	0.05600837		1604.58	0.00170935		2134.58	-0.00638887		2664.61	-0.0099244
544.8	0.17939804		1074.79	0.05576905		1604.78	0.00200538		2134.78	-0.00609684		2664.81	-0.01095012
545	0.17922231		1074.99	0.05518977		1604.98	0.00149215		2134.98	-0.00637887		2665.01	-0.01045291
545.2	0.17970861		1075.19	0.05498789		1605.18	0.00183048		2135.18	-0.00600152		2665.21	-0.01019814
545.4	0.17913016		1075.39	0.05403307		1605.38	0.00171704		2135.38	-0.00690733		2665.41	-0.01081216
545.6	0.17840767		1075.59	0.05438861		1605.58	0.00123416		2135.58	-0.00734667		2665.61	-0.01066034
545.8	0.17795181		1075.79	0.05301018		1605.78	0.00007944		2135.78	-0.0075928		2665.81	-0.01041465
546	0.17817769		1075.99	0.0530001		1605.98	-0.00023597		2135.98	-0.00801685		2666.01	-0.00976192
546.2	0.17785081		1076.19	0.05259386		1606.18	0.00014606		2136.18	-0.00823847		2666.21	-0.01040575
546.4	0.17717987		1076.39	0.0523549		1606.38	0.0003865		2136.38	-0.00733223		2666.41	-0.01043345
546.6	0.17768528		1076.59	0.0526268		1606.58	-0.00000167		2136.58	-0.00679343		2666.61	-0.01075963
546.8	0.17764628		1076.79	0.05319381		1606.78	-0.00065912		2136.78	-0.00697547		2666.81	-0.0111562
547	0.17683788		1076.99	0.05301133		1606.98	-0.00053636		2136.98	-0.00703348		2667.01	-0.0111994
547.2	0.17645025		1077.19	0.05324563		1607.18	-0.00043391		2137.18	-0.00681441		2667.21	-0.01151653
547.4	0.17604076		1077.39	0.0536853		1607.38	-0.00073921		2137.38	-0.00647514		2667.41	-0.01105329
547.6	0.17574992		1077.59	0.05421533		1607.58	-0.00145019		2137.58	-0.00616359		2667.61	-0.01162034
547.8	0.17535026		1077.79	0.05464627		1607.78	-0.0020537		2137.78	-0.00617116		2667.81	-0.01186396
548	0.17524578		1077.99	0.05457395		1607.98	-0.00213967		2137.98	-0.00717194		2668.01	-0.01235418
548.2	0.1758281		1078.19	0.05471844		1608.18	-0.00209207		2138.18	-0.00794767		2668.21	-0.01187811
548.4	0.17473823		1078.39	0.05476649		1608.38	-0.00161249		2138.38	-0.00756844		2668.41	-0.01172616
548.6	0.17546962		1078.59	0.05381072		1608.58	-0.00187059		2138.58	-0.00715466		2668.61	-0.01143196
548.8	0.17575251		1078.79	0.05363109		1608.78	-0.0023676		2138.78	-0.00772867		2668.81	-0.01143949
549	0.17547517		1078.99	0.05334045		1608.98	-0.00259462		2138.98	-0.00825033		2669.01	-0.01066325
549.2	0.17605838		1079.19	0.05305819		1609.18	-0.00239632		2139.18	-0.00904206		2669.21	-0.01176681
549.4	0.17574514		1079.39	0.05352893		1609.38	-0.00276837		2139.38	-0.00985816		2669.41	-0.01122368
549.6	0.17600397		1079.59	0.0532072		1609.58	-0.00357029		2139.58	-0.00984619		2669.61	-0.01187284
549.8	0.17641283		1079.79	0.05238633		1609.78	-0.00363488		2139.78	-0.01036776		2669.81	-0.01141292
550	0.17700508		1079.99	0.05258714		1609.98	-0.00351667		2139.98	-0.01034355		2670.01	-0.0115905
550.2	0.17648169		1080.19	0.05200472		1610.18	-0.00424247		2140.18	-0.01059515		2670.21	-0.01187878
550.4	0.17685171		1080.39	0.05178465		1610.38	-0.00494708		2140.38	-0.00992275		2670.41	-0.01210844
550.6	0.17716294		1080.59	0.05135984		1610.58	-0.00510427		2140.58	-0.00982191		2670.61	-0.0126742
550.8	0.17677786		1080.79	0.05184899		1610.78	-0.00528118		2140.78	-0.00987836		2670.81	-0.01257262
551	0.17751954		1080.99	0.05147033		1610.98	-0.0051554		2140.98	-0.00955397		2671.01	-0.0133438
551.2	0.17805455		1081.19	0.05141155		1611.18	-0.00486759		2141.18	-0.00915963		2671.21	-0.01433114
551.4	0.17743683		1081.39	0.05206566		1611.38	-0.00504434		2141.38	-0.00805095		2671.41	-0.01481571
551.6	0.17742172		1081.59	0.0523495		1611.58	-0.00503985		2141.58	-0.00783947		2671.61	-0.01574491
551.8	0.1771646		1081.79	0.05237069		1611.78	-0.00484386		2141.78	-0.00812764		2671.81	-0.01567903
552	0.17722937		1081.99	0.05304933		1611.98	-0.00284599		2141.98	-0.00845659		2672.01	-0.01583279
552.2	0.1772907		1082.19	0.05316218		1612.18	-0.00211182		2142.18	-0.00787225		2672.21	-0.01550341
552.4	0.17704566		1082.39	0.05373156		1612.38	-0.0008908		2142.38	-0.00815798		2672.41	-0.01623697
552.6	0.17759678		1082.59	0.0531145		1612.58	-0.00071083		2142.58	-0.00853002		2672.61	-0.01631368
552.8	0.17764527		1082.79	0.05350932		1612.78	-0.00069373		2142.78	-0.00987463		2672.81	-0.01640995
553	0.17760722		1082.99	0.05328953		1612.98	-0.00035105		2142.98	-0.0107938		2673.01	-0.01659402
553.2	0.177473		1083.19	0.05360978		1613.18	0.00023199		2143.18	-0.01125688		2673.21	-0.01658095
553.4	0.17659016		1083.39	0.0535324		1613.38	0.00025147		2143.38	-0.01131134		2673.41	-0.01611779
553.6	0.17639864		1083.59	0.05348628		1613.58	0.00044594		2143.58	-0.01117704		2673.61	-0.01617298
553.8	0.17685342		1083.79	0.05314669		1613.78	0.00035701		2143.78	-0.01061276		2673.81	-0.01450091
554	0.17602934		1083.99	0.05259643		1613.98	-0.00032481		2143.98	-0.01065404		2674.01	-0.01393649
554.2	0.17581115		1084.19	0.05139444		1614.18	-0.0007929		2144.18	-0.01034773		2674.21	-0.01338392
554.4	0.17548956		1084.39	0.05128454		1614.38	-0.00067119		2144.38	-0.01010034		2674.41	-0.01337378
554.6	0.17515716		1084.59	0.05066166		1614.58	-0.00107986		2144.58	-0.00988948		2674.61	-0.01262847
554.8	0.1750163		1084.79	0.05130044		1614.78	-0.0012035		2144.78	-0.00979157		2674.81	-0.01225303
555	0.17531986		1084.99	0.05093925		1614.98	-0.00114738		2144.98	-0.00952175		2675.01	-0.01246866
555.2	0.17530469		1085.19	0.05073702		1615.18	-0.00029585		2145.18	-0.00863577		2675.21	-0.01236724
555.4	0.17449631		1085.39	0.05072352		1615.38	-0.00035848		2145.38	-0.00766233		2675.41	-0.01209258
555.6	0.17516202		1085.59	0.05037219		1615.58	-0.00055327		2145.58	-0.00813979		2675.61	-0.01201527
555.8	0.17507586		1085.79	0.05032046		1615.78	-0.00093223		2145.78	-0.00768239		2675.81	-0.01228554
556	0.17601922		1085.99	0.0507362		1615.98	0.00005428		2145.98	-0.00765814		2676.01	-0.01147968
556.2	0.17732705		1086.19	0.05052122		1616.18	-0.00099303		2146.18	-0.00707988		2676.21	-0.01145716
556.4	0.17842442		1086.39	0.05073871		1616.38	-0.00117578		2146.38	-0.00769865		2676.41	-0.01152348
556.6	0.1796374		1086.59	0.05070673		1616.58	-0.001815		2146.58	-0.00763564		2676.61	-0.01161848
556.8	0.18016725		1086.79	0.05108608		1616.78	-0.00182298		2146.78	-0.00794147		2676.81	-0.01185941
557	0.18070039		1086.99	0.0512527		1616.98	-0.00218659		2146.98	-0.00721561		2677.01	-0.0118963
557.2	0.18090444		1087.19	0.05115502		1617.18	-0.00243346		2147.18	-0.00635648		2677.21	-0.01129796
557.4	0.18070567		1087.39	0.05104484		1617.38	-0.00275581		2147.38	-0.00596753		2677.41	-0.01116388
557.6	0.18044656		1087.59	0.05113716		1617.58	-0.00334521		2147.58	-0.00567608		2677.61	-0.01023845
557.8	0.1802474		1087.79	0.0513233		1617.78	-0.00381268		2147.78	-0.00576465		2677.81	-0.00980439
558	0.17918957		1087.99	0.0518125		1617.98	-0.00401287		2147.98	-0.00656388		2678.01	-0.00982592
558.2	0.17899616		1088.19	0.05225938		1618.18	-0.0040012		2148.18	-0.00659985		2678.21	-0.00996757
558.4	0.17807003		1088.39	0.05326079		1618.38	-0.00425607		2148.38	-0.00754494		2678.41	-0.01008831
558.6	0.17732979		1088.59	0.05364523		1618.58	-0.00455325		2148.58	-0.00754422		2678.61	-0.01039604
558.8	0.17731389		1088.79	0.05464446		1618.78	-0.00383727		2148.78	-0.00791891		2678.81	-0.01094049
559	0.1770101		1088.99	0.05452545		1618.98	-0.0036473		2148.98	-0.00839821		2679.01	-0.0114252
559.2	0.17639459		1089.19	0.05449526		1619.18	-0.00372323		2149.18	-0.00837172		2679.21	-0.01153692
559.4	0.17555838		1089.39	0.05426		1619.38	-0.00422652		2149.38	-0.00884829		2679.41	-0.01193617
559.6	0.1759438		1089.59	0.05454447		1619.58	-0.00460812		2149.58	-0.00924332		2679.61	-0.01217753
559.8	0.17564304		1089.79	0.05431065		1619.78	-0.00475184		2149.78	-0.00916878		2679.81	-0.01263233
