# Supplementary material for: Functional development of a V3/glycan-specific broadly neutralizing antibody isolated from a case of HIV superinfection
Source: eLife journal article supplement (doi:10.7554/elife.68110), 2021-07-15
Supplement: fig2-data2 [file E3.xls]

Vers 3.43 Data Simulation
Conc1	3.125E-08	3.125E-08	3.125E-08	3.125E-08	3.125E-08	3.125E-08	3.125E-08
Start1	290	879.99	1469.99	2059.99	2650	3240	3830
Stop1	649.8	1239.79	1829.8	2419.79	3009.8	3599.8	4189.8
Time1	Data1	Sim1	Time2	Data2	Sim2	Time3	Data3	Sim3	Time4	Data4	Sim4	Time5	Data5	Sim5	Time6	Data6	Sim6	Time7	Data7	Sim7
290	-0.00697804		879.99	-0.00006843		1469.99	0.0040215		2059.99	-0.0055185		2650	0.00142802		3240	0.00788234		3830	-0.00327121
290.2	-0.00751136		880.19	0.00084149		1470.19	0.00464938		2060.19	-0.00540049		2650.2	0.00049939		3240.2	0.00782167		3830.2	-0.00124872
290.4	-0.00834893		880.39	0.00025415		1470.39	0.00492677		2060.39	-0.0057025		2650.4	0.00060726		3240.4	0.00794734		3830.4	-0.00002787
290.6	-0.00840017		880.59	0.00035205		1470.59	0.00532614		2060.59	-0.00505481		2650.6	0.0010396		3240.6	0.00774222		3830.6	0.00140153
290.8	-0.00852931		880.79	0.00058584		1470.79	0.00488446		2060.79	-0.0041399		2650.8	0.00098839		3240.8	0.00774712		3830.8	0.00329287
291	-0.00879055		880.99	0.00092675		1470.99	0.00500162		2060.99	-0.00344101		2651	0.00132675		3241	0.00778432		3831	0.00496266
291.2	-0.00866388		881.19	0.00064291		1471.19	0.00541845		2061.19	-0.00362543		2651.2	0.00150323		3241.2	0.00779482		3831.2	0.00600161
291.4	-0.00803684		881.39	0.00084966		1471.39	0.00575321		2061.39	-0.00331898		2651.4	0.00181027		3241.4	0.00824929		3831.4	0.00682055
291.6	-0.00655491		881.59	0.00114378		1471.59	0.00654867		2061.59	-0.00372763		2651.6	0.00133398		3241.6	0.00793447		3831.6	0.00762042
291.8	-0.00583264		881.79	0.00151525		1471.79	0.00699365		2061.79	-0.00348509		2651.8	0.00103401		3241.8	0.00840173		3831.8	0.00771042
292	-0.00453352		881.99	0.00213307		1471.99	0.00777247		2061.99	-0.00397049		2652	0.00127536		3242	0.00873823		3832	0.0076028
292.2	-0.00328972		882.19	0.00274906		1472.19	0.0083409		2062.19	-0.00407386		2652.2	0.00153742		3242.2	0.00983084		3832.2	0.00701653
292.4	-0.00193786		882.39	0.00378389		1472.39	0.00911896		2062.39	-0.00495684		2652.4	0.00193872		3242.4	0.01047723		3832.4	0.00695835
292.6	-0.00055469		882.59	0.00473969		1472.59	0.00959953		2062.59	-0.00520137		2652.6	0.00217202		3242.6	0.01040172		3832.6	0.00714635
292.8	0.00014954		882.79	0.00536513		1472.79	0.00970569		2062.79	-0.00488428		2652.8	0.00209318		3242.8	0.01031874		3832.8	0.00721463
293	0.00113483		882.99	0.00535103		1472.99	0.00948361		2062.99	-0.00487608		2653	0.00202135		3243	0.0106693		3833	0.00755472
293.2	0.00113192		883.19	0.00584504		1473.19	0.00906669		2063.19	-0.00475147		2653.2	0.00169169		3243.2	0.01092012		3833.2	0.00686156
293.4	0.00240586		883.39	0.00588725		1473.39	0.00862747		2063.39	-0.0045239		2653.4	0.00106921		3243.4	0.01005024		3833.4	0.00749545
293.6	0.00261468		883.59	0.00573556		1473.59	0.00841495		2063.59	-0.00418273		2653.6	0.00071697		3243.6	0.01000228		3833.6	0.00734853
293.8	0.00243183		883.79	0.00601242		1473.79	0.00797405		2063.79	-0.0043818		2653.8	0.00072292		3243.8	0.01157303		3833.8	0.00630471
294	0.00182411		883.99	0.00684075		1473.99	0.00826891		2063.99	-0.00468525		2654	0.00140911		3244	0.01240551		3834	0.0064604
294.2	0.00130058		884.19	0.00684691		1474.19	0.00881429		2064.19	-0.00464397		2654.2	0.00186363		3244.2	0.01425237		3834.2	0.00564581
294.4	0.00085757		884.39	0.00588391		1474.39	0.00859855		2064.39	-0.0044553		2654.4	0.00257372		3244.4	0.01496184		3834.4	0.0049396
294.6	0.00088435		884.59	0.00638613		1474.59	0.00800136		2064.59	-0.0036284		2654.6	0.00283454		3244.6	0.01449748		3834.6	0.00440712
294.8	0.00148543		884.79	0.00669604		1474.79	0.00752968		2064.79	-0.00358108		2654.8	0.00286269		3244.8	0.01435275		3834.8	0.00472803
295	0.00132164		884.99	0.00636395		1474.99	0.00718366		2064.99	-0.00413041		2655	0.00281201		3245	0.01478658		3835	0.00434415
295.2	0.00217327		885.19	0.00634095		1475.19	0.00731581		2065.19	-0.00485503		2655.2	0.00240794		3245.2	0.01443196		3835.2	0.00418567
295.4	0.00310842		885.39	0.00733294		1475.39	0.00735425		2065.39	-0.00417524		2655.4	0.00189152		3245.4	0.01418399		3835.4	0.00422248
295.6	0.00389982		885.59	0.00769266		1475.59	0.00801641		2065.59	-0.00483252		2655.6	0.00127927		3245.6	0.01321843		3835.6	0.00419505
295.8	0.00396101		885.79	0.0085593		1475.79	0.00842889		2065.79	-0.0041188		2655.8	0.00063878		3245.8	0.01332361		3835.8	0.00383401
296	0.00494031		885.99	0.0093545		1475.99	0.00887885		2065.99	-0.00396134		2656	0.00056057		3246	0.01368712		3836	0.00341622
296.2	0.00536895		886.19	0.00877907		1476.19	0.0095592		2066.19	-0.00364717		2656.2	0.00098304		3246.2	0.01380616		3836.2	0.00476625
296.4	0.00639544		886.39	0.00880109		1476.39	0.00976879		2066.39	-0.00342559		2656.4	0.00109242		3246.4	0.01397344		3836.4	0.00479105
296.6	0.00746525		886.59	0.00806268		1476.59	0.00973822		2066.59	-0.00283971		2656.6	0.00098126		3246.6	0.01264808		3836.6	0.00547744
296.8	0.0075706		886.79	0.00765073		1476.79	0.00879321		2066.79	-0.00279237		2656.8	0.00098461		3246.8	0.01226971		3836.8	0.00577308
297	0.00750184		886.99	0.00727772		1476.99	0.00900653		2066.99	-0.00238414		2657	0.00155751		3247	0.01255255		3837	0.00578441
297.2	0.0080242		887.19	0.00644908		1477.19	0.00887216		2067.19	-0.00163056		2657.2	0.00121684		3247.2	0.01234622		3837.2	0.0052422
297.4	0.00891431		887.39	0.00609202		1477.39	0.00936645		2067.39	-0.00097454		2657.4	0.00108712		3247.4	0.01156728		3837.4	0.00528368
297.6	0.00908081		887.59	0.00608235		1477.59	0.00982896		2067.59	-0.00077558		2657.6	0.00172255		3247.6	0.01251842		3837.6	0.00499764
297.8	0.0092063		887.79	0.0056026		1477.79	0.01029177		2067.79	-0.00007152		2657.8	0.00200214		3247.8	0.01286977		3837.8	0.00471474
298	0.01014322		887.99	0.00556312		1477.99	0.01010603		2067.99	0.0005141		2658	0.00314799		3248	0.01219197		3838	0.00504107
298.2	0.01087581		888.19	0.00606612		1478.19	0.01069971		2068.19	0.00070762		2658.2	0.00285371		3248.2	0.01196324		3838.2	0.00550621
298.4	0.0118078		888.39	0.00631153		1478.39	0.01031063		2068.39	0.00080615		2658.4	0.00199548		3248.4	0.01160838		3838.4	0.00642514
298.6	0.01266139		888.59	0.00736876		1478.59	0.01015656		2068.59	0.00109938		2658.6	0.00144601		3248.6	0.01030468		3838.6	0.00646221
298.8	0.01337131		888.79	0.00791518		1478.79	0.01032757		2068.79	0.00002458		2658.8	0.00158105		3248.8	0.01047538		3838.8	0.00767607
299	0.01332286		888.99	0.00800977		1478.99	0.01007673		2068.99	-0.00018584		2659	0.0015906		3249	0.01125178		3839	0.00759758
299.2	0.01463112		889.19	0.00875514		1479.19	0.01081307		2069.19	-0.00089032		2659.2	0.00224553		3249.2	0.01062921		3839.2	0.00796286
299.4	0.01430782		889.39	0.00932534		1479.39	0.01090092		2069.39	-0.0001951		2659.4	0.0030069		3249.4	0.01103888		3839.4	0.00836647
299.6	0.01445882		889.59	0.00984091		1479.59	0.01091104		2069.59	-0.00047818		2659.6	0.00364117		3249.6	0.0113804		3839.6	0.00845258
299.8	0.01505198		889.79	0.01078408		1479.79	0.01064389		2069.79	0.00002313		2659.8	0.00437464		3249.8	0.0117076		3839.8	0.00851631
300	0.01612485		889.99	0.01026665		1479.99	0.01031277		2069.99	0.0003063		2660	0.00526019		3250	0.0118769		3840	0.00811519
300.2	0.01574604		890.19	0.00920955		1480.19	0.01057437		2070.19	0.00053127		2660.2	0.00621107		3250.2	0.01078266		3840.2	0.00913332
300.4	0.01677344		890.39	0.01053639		1480.39	0.00932088		2070.39	0.00081344		2660.4	0.00603367		3250.4	0.01185995		3840.4	0.00792071
300.6	0.01638299		890.59	0.01047513		1480.59	0.00886564		2070.59	0.00099982		2660.6	0.00579094		3250.6	0.01083381		3840.6	0.00866405
300.8	0.01591271		890.79	0.01061275		1480.79	0.00853974		2070.79	0.00132699		2660.8	0.00579209		3250.8	0.01266887		3840.8	0.00833571
301	0.01627217		890.99	0.01043897		1480.99	0.00994167		2070.99	0.00172918		2661	0.00632136		3251	0.01313376		3841	0.00771403
301.2	0.0175247		891.19	0.01002357		1481.19	0.00996135		2071.19	0.00109072		2661.2	0.00563663		3251.2	0.0135251		3841.2	0.00756463
301.4	0.01816408		891.39	0.0099893		1481.39	0.01000377		2071.39	0.00282916		2661.4	0.00547599		3251.4	0.01451033		3841.4	0.00753352
301.6	0.01845435		891.59	0.01005705		1481.59	0.01051973		2071.59	0.00285179		2661.6	0.00571326		3251.6	0.01489788		3841.6	0.00706402
301.8	0.01894352		891.79	0.01051549		1481.79	0.01082078		2071.79	0.00294065		2661.8	0.00583497		3251.8	0.01475238		3841.8	0.00715149
302	0.01921976		891.99	0.01193169		1481.99	0.01086734		2071.99	0.00300211		2662	0.0047769		3252	0.01379819		3842	0.00745305
302.2	0.01931553		892.19	0.01340865		1482.19	0.01174871		2072.19	0.0026477		2662.2	0.00424331		3252.2	0.01357641		3842.2	0.00705899
302.4	0.019603		892.39	0.01361146		1482.39	0.0118736		2072.39	0.00244709		2662.4	0.00400798		3252.4	0.01425975		3842.4	0.00767212
302.6	0.01950668		892.59	0.01399431		1482.59	0.01291384		2072.59	0.00111149		2662.6	0.00342555		3252.6	0.0135456		3842.6	0.00699634
302.8	0.01968233		892.79	0.01294405		1482.79	0.0135291		2072.79	-0.00077095		2662.8	0.00482457		3252.8	0.01459826		3842.8	0.00698093
303	0.02047671		892.99	0.01263836		1482.99	0.01429424		2072.99	-0.0007432		2663	0.00538947		3253	0.01498391		3843	0.00655319
303.2	0.02137336		893.19	0.01212339		1483.19	0.01465134		2073.19	-0.00142128		2663.2	0.00599596		3253.2	0.01476143		3843.2	0.00680979
303.4	0.02134879		893.39	0.01264687		1483.39	0.01408643		2073.39	-0.00096595		2663.4	0.00605871		3253.4	0.01522172		3843.4	0.0074184
303.6	0.02193831		893.59	0.01312401		1483.59	0.01354075		2073.59	-0.00126939		2663.6	0.00690824		3253.6	0.01462254		3843.6	0.00709
303.8	0.02227399		893.79	0.01309783		1483.79	0.01326701		2073.79	-0.00113434		2663.8	0.00807581		3253.8	0.01407284		3843.8	0.00701679
304	0.02281491		893.99	0.01288507		1483.99	0.01293688		2073.99	-0.00115941		2664	0.00758514		3254	0.01374396		3844	0.00659357
304.2	0.02269708		894.19	0.01228559		1484.19	0.01222071		2074.19	-0.00126229		2664.2	0.00732244		3254.2	0.0141304		3844.2	0.00731565
304.4	0.02394107		894.39	0.01261301		1484.39	0.01119447		2074.39	-0.00188198		2664.4	0.007004		3254.4	0.01548123		3844.4	0.0073454
304.6	0.02389232		894.59	0.01172398		1484.59	0.01040266		2074.59	-0.00126951		2664.6	0.00664863		3254.6	0.01450398		3844.6	0.00815294
304.8	0.02434037		894.79	0.0106017		1484.79	0.01036455		2074.79	-0.00063094		2664.8	0.00668017		3254.8	0.01568767		3844.8	0.00769749
305	0.02504917		894.99	0.01013893		1484.99	0.01078385		2074.99	-0.00064362		2665	0.00651391		3255	0.01588678		3845	0.00737463
305.2	0.02597703		895.19	0.01008234		1485.19	0.01008082		2075.19	-0.00038803		2665.2	0.00611174		3255.2	0.0155742		3845.2	0.00730441
305.4	0.02647383		895.39	0.0102893		1485.39	0.00942867		2075.39	0.00139517		2665.4	0.00592423		3255.4	0.01546938		3845.4	0.00706862
305.6	0.02674264		895.59	0.01128956		1485.59	0.01041659		2075.59	0.00009987		2665.6	0.00608892		3255.6	0.01415267		3845.6	0.00618181
305.8	0.02693155		895.79	0.01304297		1485.79	0.010049		2075.79	0.00096846		2665.8	0.00601234		3255.8	0.01383063		3845.8	0.00614295
306	0.02726611		895.99	0.01375238		1485.99	0.01018342		2075.99	0.00046739		2666	0.00624897		3256	0.01274901		3846	0.00560656
306.2	0.02776403		896.19	0.01375591		1486.19	0.01054494		2076.19	0.00052274		2666.2	0.00724045		3256.2	0.01273237		3846.2	0.00518236
306.4	0.0280195		896.39	0.01330255		1486.39	0.01134913		2076.39	-0.00041695		2666.4	0.00698293		3256.4	0.01300382		3846.4	0.00591371
306.6	0.02832633		896.59	0.01383687		1486.59	0.01159732		2076.59	-0.00050506		2666.6	0.00625112		3256.6	0.01366142		3846.6	0.00538348
306.8	0.02886804		896.79	0.01367192		1486.79	0.01176767		2076.79	-0.00049849		2666.8	0.00696795		3256.8	0.01491728		3846.8	0.00590029
307	0.02867606		896.99	0.01429188		1486.99	0.01243826		2076.99	-0.0001487		2667	0.00720373		3257	0.01505846		3847	0.00553809
307.2	0.02970855		897.19	0.01498522		1487.19	0.01296687		2077.19	0.00056342		2667.2	0.00727535		3257.2	0.01557637		3847.2	0.00537207
307.4	0.03035353		897.39	0.01560311		1487.39	0.01246279		2077.39	0.000624		2667.4	0.00709777		3257.4	0.0162214		3847.4	0.00527179
307.6	0.03020113		897.59	0.01588842		1487.59	0.01309591		2077.59	0.00039035		2667.6	0.00748399		3257.6	0.0165003		3847.6	0.00533057
307.8	0.03107787		897.79	0.01573961		1487.79	0.0139121		2077.79	0.00047802		2667.8	0.00725691		3257.8	0.01743446		3847.8	0.00596921
308	0.03226839		897.99	0.01506471		1487.99	0.01443903		2077.99	0.00003435		2668	0.00628539		3258	0.01830744		3848	0.00674527
308.2	0.03348158		898.19	0.01412163		1488.19	0.01388006		2078.19	0.00036533		2668.2	0.00591453		3258.2	0.01876637		3848.2	0.0076025
308.4	0.03353348		898.39	0.01425437		1488.39	0.01375743		2078.39	0.00051841		2668.4	0.00532633		3258.4	0.01849853		3848.4	0.00785705
308.6	0.03406232		898.59	0.0137006		1488.59	0.01382282		2078.59	0.00172298		2668.6	0.00461886		3258.6	0.0177961		3848.6	0.00841247
308.8	0.03443374		898.79	0.01238386		1488.79	0.01409196		2078.79	0.00199785		2668.8	0.0039952		3258.8	0.01845851		3848.8	0.00814161
309	0.03467242		898.99	0.01240372		1488.99	0.01458203		2078.99	0.00131599		2669	0.00465818		3259	0.01800575		3849	0.00763277
309.2	0.03503716		899.19	0.0122918		1489.19	0.01514934		2079.19	0.00151191		2669.2	0.00545982		3259.2	0.01704773		3849.2	0.00830397
309.4	0.03541009		899.39	0.01265091		1489.39	0.01494915		2079.39	0.00166038		2669.4	0.00527109		3259.4	0.01669818		3849.4	0.00761454
309.6	0.03521302		899.59	0.01284213		1489.59	0.01550381		2079.59	0.00156815		2669.6	0.00543323		3259.6	0.0156623		3849.6	0.00780868
309.8	0.03539852		899.79	0.01306762		1489.79	0.01450397		2079.79	0.00237029		2669.8	0.00574153		3259.8	0.01540631		3849.8	0.00796926
310	0.03567409		899.99	0.01249718		1489.99	0.01478967		2079.99	0.00194002		2670	0.00564329		3260	0.01497271		3850	0.00814809
310.2	0.03580072		900.19	0.01201285		1490.19	0.01438253		2080.19	0.00256174		2670.2	0.00594716		3260.2	0.0152047		3850.2	0.0081643
310.4	0.03592862		900.39	0.0127724		1490.39	0.01462166		2080.39	0.00288371		2670.4	0.00563101		3260.4	0.01572317		3850.4	0.00820961
310.6	0.03538372		900.59	0.01413037		1490.59	0.01367177		2080.59	0.00294106		2670.6	0.00570643		3260.6	0.01625854		3850.6	0.00807857
310.8	0.03581717		900.79	0.01397211		1490.79	0.01324707		2080.79	0.00197783		2670.8	0.00678356		3260.8	0.01667214		3850.8	0.00751576
311	0.0362594		900.99	0.01442408		1490.99	0.01314246		2080.99	0.0026487		2671	0.00788659		3261	0.01736181		3851	0.00682978
311.2	0.03734774		901.19	0.01542376		1491.19	0.01242226		2081.19	0.00321892		2671.2	0.00743364		3261.2	0.0178379		3851.2	0.00750004
311.4	0.03781734		901.39	0.01505242		1491.39	0.01195132		2081.39	0.0019556		2671.4	0.00702227		3261.4	0.0180629		3851.4	0.00715678
311.6	0.03833495		901.59	0.01571701		1491.59	0.01219331		2081.59	0.00138494		2671.6	0.00722799		3261.6	0.01787724		3851.6	0.00800386
311.8	0.03978478		901.79	0.0152611		1491.79	0.0126425		2081.79	0.00146627		2671.8	0.00704363		3261.8	0.01861121		3851.8	0.00836517
312	0.03971989		901.99	0.01521518		1491.99	0.01264753		2081.99	0.00096201		2672	0.00668735		3262	0.01876294		3852	0.00848734
312.2	0.04010869		902.19	0.01567866		1492.19	0.01295762		2082.19	0.0012078		2672.2	0.0067295		3262.2	0.0182057		3852.2	0.00871334
312.4	0.04045395		902.39	0.01529217		1492.39	0.01301636		2082.39	0.00070249		2672.4	0.00730775		3262.4	0.01750861		3852.4	0.00819656
312.6	0.04087625		902.59	0.01502694		1492.59	0.01357514		2082.59	0.00014118		2672.6	0.00737329		3262.6	0.01728753		3852.6	0.00843855
312.8	0.04045159		902.79	0.0141665		1492.79	0.01368503		2082.79	-0.00040677		2672.8	0.00796747		3262.8	0.01832611		3852.8	0.0078094
313	0.04003492		902.99	0.01443541		1492.99	0.01434435		2082.99	-0.00096869		2673	0.00818831		3263	0.01734363		3853	0.0073014
313.2	0.04065628		903.19	0.01442795		1493.19	0.01543466		2083.19	-0.00045308		2673.2	0.0082543		3263.2	0.01744167		3853.2	0.00760603
313.4	0.04085159		903.39	0.01501424		1493.39	0.01516167		2083.39	-0.00013251		2673.4	0.00770838		3263.4	0.01719502		3853.4	0.00625191
313.6	0.0405694		903.59	0.01468167		1493.59	0.01548193		2083.59	0.00031249		2673.6	0.0074651		3263.6	0.01740679		3853.6	0.00660216
313.8	0.041144		903.79	0.01473899		1493.79	0.01523765		2083.79	0.0001533		2673.8	0.00654858		3263.8	0.01717402		3853.8	0.00584152
314	0.04240258		903.99	0.01544426		1493.99	0.01548038		2083.99	0.00012707		2674	0.00613521		3264	0.01694317		3854	0.00610812
314.2	0.04372994		904.19	0.01608873		1494.19	0.01549088		2084.19	0.00092968		2674.2	0.00596094		3264.2	0.01753225		3854.2	0.00570614
314.4	0.04437589		904.39	0.017395		1494.39	0.01581044		2084.39	0.0008931		2674.4	0.00486369		3264.4	0.01756446		3854.4	0.0056057
314.6	0.04447597		904.59	0.01782047		1494.59	0.01571479		2084.59	-0.00011738		2674.6	0.00473329		3264.6	0.01813273		3854.6	0.00629114
314.8	0.04501094		904.79	0.01817568		1494.79	0.0151348		2084.79	0.00001936		2674.8	0.00451062		3264.8	0.01868701		3854.8	0.00658325
315	0.04567546		904.99	0.01870888		1494.99	0.01475836		2084.99	0.00089437		2675	0.00416884		3265	0.0186207		3855	0.00711587
315.2	0.04677649		905.19	0.01943543		1495.19	0.01447469		2085.19	0.00011612		2675.2	0.0029353		3265.2	0.01839112		3855.2	0.00767015
315.4	0.04782601		905.39	0.0195684		1495.39	0.01471735		2085.39	-0.00012578		2675.4	0.00278254		3265.4	0.01870197		3855.4	0.00703417
315.6	0.04876434		905.59	0.02004973		1495.59	0.01433649		2085.59	0.00044636		2675.6	0.00290392		3265.6	0.01862481		3855.6	0.00710505
315.8	0.04968945		905.79	0.0195383		1495.79	0.01480999		2085.79	0.00054204		2675.8	0.00230837		3265.8	0.01883939		3855.8	0.0070883
316	0.04922968		905.99	0.01963117		1495.99	0.01468405		2085.99	-0.00013901		2676	0.0021356		3266	0.01858205		3856	0.00742917
316.2	0.05076531		906.19	0.01792083		1496.19	0.0153636		2086.19	0.0000818		2676.2	0.00251961		3266.2	0.01841162		3856.2	0.00771486
316.4	0.05145393		906.39	0.01732313		1496.39	0.01481255		2086.39	-0.00014637		2676.4	0.00298821		3266.4	0.01777874		3856.4	0.00755744
316.6	0.05152897		906.59	0.01711006		1496.59	0.01555103		2086.59	-0.0016308		2676.6	0.00326281		3266.6	0.01743804		3856.6	0.00755202
316.8	0.05138368		906.79	0.0163696		1496.79	0.0156646		2086.79	-0.0012233		2676.8	0.00390701		3266.8	0.01773181		3856.8	0.00694695
317	0.05102879		906.99	0.01732374		1496.99	0.01615012		2086.99	-0.00058216		2677	0.00419521		3267	0.01730652		3857	0.00676527
317.2	0.05074432		907.19	0.01746909		1497.19	0.01691798		2087.19	-0.00060912		2677.2	0.00556487		3267.2	0.01840285		3857.2	0.00625985
317.4	0.05001204		907.39	0.01734085		1497.39	0.01721787		2087.39	-0.00064516		2677.4	0.00619305		3267.4	0.01803614		3857.4	0.00471545
317.6	0.04991681		907.59	0.01662847		1497.59	0.01753396		2087.59	-0.00058521		2677.6	0.00691447		3267.6	0.0179015		3857.6	0.00463134
317.8	0.05027206		907.79	0.01690882		1497.79	0.01756136		2087.79	-0.00107223		2677.8	0.00755727		3267.8	0.01763314		3857.8	0.00433675
318	0.05126915		907.99	0.0167993		1497.99	0.01818472		2087.99	-0.00117602		2678	0.00883727		3268	0.01764883		3858	0.00466384
318.2	0.05041318		908.19	0.01637137		1498.19	0.01896747		2088.19	-0.00011472		2678.2	0.00978324		3268.2	0.01766981		3858.2	0.00445559
318.4	0.04946248		908.39	0.01650539		1498.39	0.01999741		2088.39	-0.00063946		2678.4	0.01019001		3268.4	0.01748594		3858.4	0.0044511
318.6	0.04901325		908.59	0.01636973		1498.59	0.0205455		2088.59	-0.00119463		2678.6	0.01067256		3268.6	0.01761131		3858.6	0.0052367
318.8	0.04987789		908.79	0.0167373		1498.79	0.0199782		2088.79	-0.00064163		2678.8	0.01077599		3268.8	0.01735129		3858.8	0.0049149
319	0.05021572		908.99	0.01668671		1498.99	0.02021835		2088.99	-0.00019252		2679	0.01119075		3269	0.01717016		3859	0.00514492
319.2	0.05157185		909.19	0.01764549		1499.19	0.01988347		2089.19	-0.00016057		2679.2	0.01121787		3269.2	0.01763765		3859.2	0.00520782
319.4	0.05224306		909.39	0.01817224		1499.39	0.01952744		2089.39	0.00169713		2679.4	0.01114882		3269.4	0.01790422		3859.4	0.00499744
319.6	0.05251339		909.59	0.01812089		1499.59	0.01962494		2089.59	0.00145862		2679.6	0.01094785		3269.6	0.01706866		3859.6	0.00455083
319.8	0.05303696		909.79	0.01822249		1499.79	0.01957672		2089.79	0.00116194		2679.8	0.00896978		3269.8	0.01651458		3859.8	0.00496719
320	0.05357857		909.99	0.01850949		1499.99	0.01970593		2089.99	0.00215492		2680	0.00813151		3270	0.01701374		3860	0.00486268
320.2	0.05519568		910.19	0.01799917		1500.19	0.01965753		2090.19	0.00320331		2680.2	0.00793607		3270.2	0.01703073		3860.2	0.00441191
320.4	0.05572948		910.39	0.01908604		1500.39	0.01899962		2090.39	0.00406328		2680.4	0.00781075		3270.4	0.01609323		3860.4	0.00319019
320.6	0.05736304		910.59	0.02021662		1500.59	0.0191055		2090.59	0.00442202		2680.6	0.00760081		3270.6	0.01635124		3860.6	0.00274626
320.8	0.05708826		910.79	0.02125658		1500.79	0.01888547		2090.79	0.00600532		2680.8	0.0073478		3270.8	0.0166965		3860.8	0.00248629
321	0.05738057		910.99	0.02214372		1500.99	0.01893596		2090.99	0.00604569		2681	0.00763686		3271	0.01744855		3861	0.00234187
321.2	0.05764061		911.19	0.02247443		1501.19	0.01960747		2091.19	0.00545868		2681.2	0.00786572		3271.2	0.01847861		3861.2	0.00224409
321.4	0.05818716		911.39	0.02252708		1501.39	0.01985045		2091.39	0.00551859		2681.4	0.00777322		3271.4	0.01872597		3861.4	0.0023815
321.6	0.05924919		911.59	0.02321572		1501.59	0.01974508		2091.59	0.00513037		2681.6	0.00794274		3271.6	0.01899094		3861.6	0.00349522
321.8	0.05994596		911.79	0.02435916		1501.79	0.02025263		2091.79	0.00384057		2681.8	0.00851236		3271.8	0.01895063		3861.8	0.00434162
322	0.0608528		911.99	0.02456426		1501.99	0.02118377		2091.99	0.00267801		2682	0.00821677		3272	0.01895724		3862	0.00481736
322.2	0.06051856		912.19	0.02501408		1502.19	0.0215123		2092.19	0.00240274		2682.2	0.00836543		3272.2	0.01928192		3862.2	0.00571704
322.4	0.06135604		912.39	0.02509103		1502.39	0.02230272		2092.39	0.00117738		2682.4	0.00877322		3272.4	0.01923821		3862.4	0.00652012
322.6	0.06260964		912.59	0.02503164		1502.59	0.02295277		2092.59	-0.00032861		2682.6	0.00887135		3272.6	0.01833049		3862.6	0.00748732
322.8	0.06355898		912.79	0.02485564		1502.79	0.02241587		2092.79	-0.00082012		2682.8	0.00926757		3272.8	0.01882245		3862.8	0.00803968
323	0.0633804		912.99	0.02482121		1502.99	0.02155479		2092.99	-0.00118798		2683	0.0096575		3273	0.01875738		3863	0.00889837
323.2	0.06425511		913.19	0.02475176		1503.19	0.02066419		2093.19	-0.00135163		2683.2	0.00945098		3273.2	0.0185842		3863.2	0.0088517
323.4	0.06455426		913.39	0.02394594		1503.39	0.020731		2093.39	-0.00117235		2683.4	0.00914846		3273.4	0.01798885		3863.4	0.00943331
323.6	0.06444202		913.59	0.02324279		1503.59	0.02098646		2093.59	-0.00243553		2683.6	0.00867154		3273.6	0.01726519		3863.6	0.00869452
323.8	0.06442596		913.79	0.02337195		1503.79	0.02035653		2093.79	-0.0016256		2683.8	0.00727012		3273.8	0.01775528		3863.8	0.00912827
324	0.064559		913.99	0.02316355		1503.99	0.01989493		2093.99	-0.00048905		2684	0.00739585		3274	0.01843236		3864	0.00888782
324.2	0.06470962		914.19	0.02264926		1504.19	0.01980209		2094.19	-0.00028216		2684.2	0.00755791		3274.2	0.019017		3864.2	0.00820405
324.4	0.06427274		914.39	0.02294899		1504.39	0.02005967		2094.39	0.00186571		2684.4	0.00724159		3274.4	0.01866818		3864.4	0.00782114
324.6	0.06445773		914.59	0.02370115		1504.59	0.02029687		2094.59	0.00218927		2684.6	0.00761693		3274.6	0.01962524		3864.6	0.00854143
324.8	0.06402835		914.79	0.02368587		1504.79	0.01985333		2094.79	0.00247666		2684.8	0.00755736		3274.8	0.0199004		3864.8	0.00784841
325	0.06465785		914.99	0.02415825		1504.99	0.01945795		2094.99	0.00233696		2685	0.00732639		3275	0.02021876		3865	0.00803167
325.2	0.06461382		915.19	0.02509883		1505.19	0.01984614		2095.19	0.00305888		2685.2	0.00656919		3275.2	0.02133001		3865.2	0.00783936
325.4	0.06534276		915.39	0.02564857		1505.39	0.01945098		2095.39	0.00261225		2685.4	0.00595422		3275.4	0.02131995		3865.4	0.00701028
325.6	0.06536982		915.59	0.0268039		1505.59	0.0192982		2095.59	0.00217701		2685.6	0.00536209		3275.6	0.0214365		3865.6	0.00701934
325.8	0.0655955		915.79	0.02700305		1505.79	0.01996363		2095.79	0.00136118		2685.8	0.00533941		3275.8	0.02190323		3865.8	0.00695228
326	0.06534005		915.99	0.02651527		1505.99	0.02055137		2095.99	0.00113433		2686	0.00479284		3276	0.02198839		3866	0.0071199
326.2	0.06636763		916.19	0.02666859		1506.19	0.02126678		2096.19	0.00158341		2686.2	0.00598046		3276.2	0.02221839		3866.2	0.00730306
326.4	0.06696858		916.39	0.0266989		1506.39	0.02127497		2096.39	0.00136324		2686.4	0.00693774		3276.4	0.02194044		3866.4	0.00651986
326.6	0.06721911		916.59	0.0268639		1506.59	0.02185177		2096.59	0.0004516		2686.6	0.00607544		3276.6	0.02188073		3866.6	0.00625219
326.8	0.06826523		916.79	0.02685042		1506.79	0.02168801		2096.79	0.00080039		2686.8	0.00616754		3276.8	0.02280942		3866.8	0.00622997
327	0.06882289		916.99	0.02729223		1506.99	0.0209802		2096.99	0.00126575		2687	0.00674592		3277	0.02204126		3867	0.00585047
327.2	0.06933834		917.19	0.02670192		1507.19	0.02073362		2097.19	0.00113206		2687.2	0.00744003		3277.2	0.02188601		3867.2	0.00558164
327.4	0.06989415		917.39	0.02626412		1507.39	0.02092082		2097.39	0.000571		2687.4	0.00769838		3277.4	0.02111676		3867.4	0.00597352
327.6	0.06982836		917.59	0.02669704		1507.59	0.02030522		2097.59	0.00060524		2687.6	0.00720095		3277.6	0.02040813		3867.6	0.00555639
327.8	0.06946444		917.79	0.02707457		1507.79	0.02135501		2097.79	0.00085286		2687.8	0.0076236		3277.8	0.01950304		3867.8	0.00493771
328	0.06926112		917.99	0.02705185		1507.99	0.02192704		2097.99	0.00129881		2688	0.00773917		3278	0.0191189		3868	0.00512776
328.2	0.06906913		918.19	0.0259092		1508.19	0.02231471		2098.19	0.00185058		2688.2	0.00767741		3278.2	0.01998649		3868.2	0.00516044
328.4	0.06863601		918.39	0.02637094		1508.39	0.02177163		2098.39	0.00281872		2688.4	0.0081384		3278.4	0.0192682		3868.4	0.00596736
328.6	0.06833096		918.59	0.0266919		1508.59	0.02125989		2098.59	0.00206675		2688.6	0.00920258		3278.6	0.01934474		3868.6	0.00633332
328.8	0.06893143		918.79	0.0264019		1508.79	0.02054048		2098.79	0.00289591		2688.8	0.00851357		3278.8	0.01866091		3868.8	0.00578944
329	0.06836702		918.99	0.02669947		1508.99	0.02085359		2098.99	0.00290619		2689	0.00880065		3279	0.01793584		3869	0.00677496
329.2	0.06772902		919.19	0.02687923		1509.19	0.02088429		2099.19	0.00255348		2689.2	0.00824606		3279.2	0.01871297		3869.2	0.00744625
329.4	0.06788955		919.39	0.02636789		1509.39	0.02134974		2099.39	0.00136136		2689.4	0.00843811		3279.4	0.01862219		3869.4	0.00776292
329.6	0.06802082		919.59	0.0261823		1509.59	0.02148392		2099.59	0.00122237		2689.6	0.0082349		3279.6	0.0192271		3869.6	0.00851624
329.8	0.06805868		919.79	0.0254644		1509.79	0.02271395		2099.79	0.0012827		2689.8	0.00888153		3279.8	0.02002949		3869.8	0.00892739
330	0.06895866		919.99	0.02600412		1509.99	0.02373967		2099.99	0.00224465		2690	0.00930731		3280	0.02057602		3870	0.00928659
330.2	0.07050029		920.19	0.02620552		1510.19	0.02349806		2100.19	0.00250161		2690.2	0.01025963		3280.2	0.02160533		3870.2	0.00960729
330.4	0.07059087		920.39	0.02684277		1510.39	0.0229826		2100.39	0.00216884		2690.4	0.01032656		3280.4	0.02222368		3870.4	0.01055328
330.6	0.07153638		920.59	0.02741628		1510.59	0.02367965		2100.59	0.00214935		2690.6	0.00988475		3280.6	0.02216824		3870.6	0.01092441
330.8	0.07259216		920.79	0.02787053		1510.79	0.02325464		2100.79	0.00243032		2690.8	0.01001128		3280.8	0.0222339		3870.8	0.01058655
331	0.07299731		920.99	0.02728615		1510.99	0.02213715		2100.99	0.00221326		2691	0.01020495		3281	0.02172922		3871	0.01085769
331.2	0.07423307		921.19	0.02685632		1511.19	0.02136888		2101.19	0.00116157		2691.2	0.01009577		3281.2	0.02192549		3871.2	0.01067674
331.4	0.07491457		921.39	0.02730735		1511.39	0.02112933		2101.39	0.00032514		2691.4	0.00976573		3281.4	0.02102098		3871.4	0.00968778
331.6	0.07596966		921.59	0.02766819		1511.59	0.02109845		2101.59	0.00094262		2691.6	0.00979192		3281.6	0.0197396		3871.6	0.00921494
331.8	0.07616304		921.79	0.02726833		1511.79	0.02193146		2101.79	0.00082995		2691.8	0.01023005		3281.8	0.01921414		3871.8	0.00771568
332	0.0767285		921.99	0.02711681		1511.99	0.02084032		2101.99	0.00109062		2692	0.00965792		3282	0.01893508		3872	0.00813569
332.2	0.07649938		922.19	0.02578595		1512.19	0.02005888		2102.19	0.00125941		2692.2	0.00907628		3282.2	0.01933361		3872.2	0.0069339
332.4	0.07645928		922.39	0.02716009		1512.39	0.01990628		2102.39	0.00193291		2692.4	0.00987904		3282.4	0.01865309		3872.4	0.00624319
332.6	0.07707638		922.59	0.02729779		1512.59	0.02036863		2102.59	0.00150879		2692.6	0.00934226		3282.6	0.01839441		3872.6	0.00616438
332.8	0.07736247		922.79	0.02703591		1512.79	0.02092126		2102.79	0.00213815		2692.8	0.00874168		3282.8	0.01870778		3872.8	0.00590273
333	0.07696576		922.99	0.02811654		1512.99	0.02155316		2102.99	0.00168679		2693	0.00942466		3283	0.01933827		3873	0.0060975
333.2	0.0772091		923.19	0.02845581		1513.19	0.02123785		2103.19	0.00062691		2693.2	0.0097638		3283.2	0.02036036		3873.2	0.00564057
333.4	0.07694201		923.39	0.02845847		1513.39	0.02212578		2103.39	0.00050339		2693.4	0.01003641		3283.4	0.02066109		3873.4	0.0045479
333.6	0.07731101		923.59	0.02911365		1513.59	0.02231342		2103.59	0.0016795		2693.6	0.01007188		3283.6	0.02173583		3873.6	0.00366691
333.8	0.07651206		923.79	0.02946679		1513.79	0.0233765		2103.79	0.00238412		2693.8	0.01040215		3283.8	0.02316455		3873.8	0.00362727
334	0.07788703		923.99	0.02991728		1513.99	0.02325465		2103.99	0.0024935		2694	0.01028227		3284	0.02361415		3874	0.00413792
334.2	0.07730083		924.19	0.02988825		1514.19	0.02291277		2104.19	0.00235622		2694.2	0.00993142		3284.2	0.02448796		3874.2	0.00494075
334.4	0.07696057		924.39	0.02971446		1514.39	0.02318477		2104.39	0.00239361		2694.4	0.00875404		3284.4	0.02481709		3874.4	0.00577201
334.6	0.07684765		924.59	0.02957978		1514.59	0.02371191		2104.59	0.00318194		2694.6	0.00855113		3284.6	0.02492307		3874.6	0.00528264
334.8	0.07666255		924.79	0.02950473		1514.79	0.02306126		2104.79	0.00294809		2694.8	0.00784663		3284.8	0.02478396		3874.8	0.00606086
335	0.07739485		924.99	0.02862234		1514.99	0.02320133		2104.99	0.00337236		2695	0.00743952		3285	0.02519447		3875	0.00684774
335.2	0.07832029		925.19	0.02942008		1515.19	0.02368475		2105.19	0.00364134		2695.2	0.00689182		3285.2	0.02623913		3875.2	0.00730715
335.4	0.07833683		925.39	0.02979616		1515.39	0.02421216		2105.39	0.00379597		2695.4	0.00718575		3285.4	0.02624203		3875.4	0.00726061
335.6	0.07922		925.59	0.02965937		1515.59	0.02541441		2105.59	0.00441085		2695.6	0.00735141		3285.6	0.02570064		3875.6	0.00858596
335.8	0.07999316		925.79	0.02952816		1515.79	0.02492984		2105.79	0.00426542		2695.8	0.0068588		3285.8	0.02516166		3875.8	0.00898621
336	0.08090326		925.99	0.02964499		1515.99	0.02415921		2105.99	0.00441683		2696	0.00706687		3286	0.02447683		3876	0.00930243
336.2	0.08072665		926.19	0.02935754		1516.19	0.02378617		2106.19	0.00418388		2696.2	0.00710253		3286.2	0.02489001		3876.2	0.00863607
336.4	0.08203034		926.39	0.02985073		1516.39	0.02430037		2106.39	0.00352427		2696.4	0.00715209		3286.4	0.02466661		3876.4	0.00977629
336.6	0.08323025		926.59	0.02989911		1516.59	0.0243674		2106.59	0.00181117		2696.6	0.00720363		3286.6	0.02412249		3876.6	0.01052667
336.8	0.08311259		926.79	0.02980314		1516.79	0.02368001		2106.79	0.00182571		2696.8	0.00835168		3286.8	0.02453266		3876.8	0.01010528
337	0.08313135		926.99	0.03039477		1516.99	0.02299005		2106.99	0.00028439		2697	0.00945071		3287	0.02429789		3877	0.00934397
337.2	0.08348003		927.19	0.0300161		1517.19	0.02250067		2107.19	0.00027625		2697.2	0.0097462		3287.2	0.02413661		3877.2	0.00901295
337.4	0.08431598		927.39	0.02990891		1517.39	0.02248363		2107.39	0.00029784		2697.4	0.00882949		3287.4	0.02334838		3877.4	0.00854254
337.6	0.08517265		927.59	0.02997671		1517.59	0.02231753		2107.59	0.00059918		2697.6	0.00882749		3287.6	0.02293055		3877.6	0.00818797
337.8	0.08542228		927.79	0.02990323		1517.79	0.02316942		2107.79	-0.00031395		2697.8	0.00775358		3287.8	0.02277072		3877.8	0.00801238
338	0.08626149		927.99	0.02962667		1517.99	0.02372642		2107.99	-0.00094138		2698	0.00789073		3288	0.02259838		3878	0.00798959
338.2	0.08646585		928.19	0.02856173		1518.19	0.02463567		2108.19	-0.00074644		2698.2	0.00762405		3288.2	0.02284438		3878.2	0.00808135
338.4	0.08640612		928.39	0.0275569		1518.39	0.02441522		2108.39	-0.00052314		2698.4	0.00777782		3288.4	0.02280752		3878.4	0.00767841
338.6	0.08672868		928.59	0.02748377		1518.59	0.02449558		2108.59	0.00026344		2698.6	0.00849541		3288.6	0.02215523		3878.6	0.00741462
338.8	0.08728329		928.79	0.02781517		1518.79	0.02494558		2108.79	0.00122658		2698.8	0.00779071		3288.8	0.02283409		3878.8	0.0077354
339	0.08740834		928.99	0.02729819		1518.99	0.02524966		2108.99	0.00207465		2699	0.00795209		3289	0.02362313		3879	0.00727118
339.2	0.08811258		929.19	0.02743044		1519.19	0.0256966		2109.19	0.00212556		2699.2	0.00821124		3289.2	0.0245019		3879.2	0.00703331
339.4	0.08784551		929.39	0.0281973		1519.39	0.0257574		2109.39	0.00258461		2699.4	0.00916799		3289.4	0.0244935		3879.4	0.00652979
339.6	0.08853546		929.59	0.02719991		1519.59	0.02586935		2109.59	0.00341335		2699.6	0.00943537		3289.6	0.02477312		3879.6	0.00699787
339.8	0.0892622		929.79	0.02756024		1519.79	0.02428164		2109.79	0.00388492		2699.8	0.00982604		3289.8	0.02480315		3879.8	0.00720253
340	0.08861291		929.99	0.02775868		1519.99	0.02411791		2109.99	0.00361956		2700	0.01129953		3290	0.02495378		3880	0.00672907
340.2	0.08811417		930.19	0.02764806		1520.19	0.02411465		2110.19	0.00304715		2700.2	0.0117777		3290.2	0.02495174		3880.2	0.00650415
340.4	0.08896086		930.39	0.02770628		1520.39	0.02388941		2110.39	0.00259142		2700.4	0.01214703		3290.4	0.02506439		3880.4	0.00746172
340.6	0.08965972		930.59	0.02832335		1520.59	0.02230664		2110.59	0.0020838		2700.6	0.01309891		3290.6	0.0250407		3880.6	0.00623205
340.8	0.08950379		930.79	0.02843829		1520.79	0.0211768		2110.79	0.00216009		2700.8	0.01401651		3290.8	0.02514128		3880.8	0.00538963
341	0.0898491		930.99	0.0286667		1520.99	0.02063766		2110.99	0.00180301		2701	0.01420953		3291	0.02498239		3881	0.00515807
341.2	0.09065431		931.19	0.02918544		1521.19	0.02044219		2111.19	0.00233316		2701.2	0.01404845		3291.2	0.02383706		3881.2	0.00472352
341.4	0.09188548		931.39	0.02937769		1521.39	0.02060814		2111.39	0.00174672		2701.4	0.01354455		3291.4	0.02350322		3881.4	0.00489152
341.6	0.09160106		931.59	0.03092875		1521.59	0.02157881		2111.59	0.00195106		2701.6	0.01393976		3291.6	0.02277445		3881.6	0.00549716
341.8	0.09307955		931.79	0.03143665		1521.79	0.02220517		2111.79	0.00097694		2701.8	0.01364901		3291.8	0.02253067		3881.8	0.00506289
342	0.09335356		931.99	0.03222983		1521.99	0.02235785		2111.99	0.00050586		2702	0.01416141		3292	0.02234272		3882	0.00559601
342.2	0.09435767		932.19	0.0318323		1522.19	0.02243832		2112.19	0.00041148		2702.2	0.01334594		3292.2	0.02258267		3882.2	0.00546891
342.4	0.09454409		932.39	0.03165487		1522.39	0.02165882		2112.39	0.00042386		2702.4	0.01203149		3292.4	0.02279296		3882.4	0.00560056
342.6	0.09508279		932.59	0.03244493		1522.59	0.02171892		2112.59	0.00016102		2702.6	0.01075409		3292.6	0.02265233		3882.6	0.00624489
342.8	0.09588161		932.79	0.03254062		1522.79	0.02218064		2112.79	0.000679		2702.8	0.00968848		3292.8	0.02372514		3882.8	0.00753864
343	0.09627523		932.99	0.03196532		1522.99	0.02219859		2112.99	0.00081974		2703	0.00905807		3293	0.02320076		3883	0.00817284
343.2	0.09738123		933.19	0.03259058		1523.19	0.02250731		2113.19	0.00095049		2703.2	0.00843873		3293.2	0.02378348		3883.2	0.00870295
343.4	0.09703036		933.39	0.03305156		1523.39	0.02270626		2113.39	0.00162743		2703.4	0.00782964		3293.4	0.02358118		3883.4	0.00952498
343.6	0.09698897		933.59	0.03202361		1523.59	0.02378586		2113.59	0.00168403		2703.6	0.00730737		3293.6	0.02388187		3883.6	0.01029009
343.8	0.09724207		933.79	0.03311358		1523.79	0.02367304		2113.79	0.00109606		2703.8	0.00827304		3293.8	0.02386609		3883.8	0.01064894
344	0.09717006		933.99	0.03331759		1523.99	0.02413893		2113.99	0.00055843		2704	0.00831884		3294	0.02378452		3884	0.00969815
344.2	0.09738613		934.19	0.03351873		1524.19	0.02462395		2114.19	0.00028233		2704.2	0.00828134		3294.2	0.02402667		3884.2	0.0094159
344.4	0.09796959		934.39	0.03377713		1524.39	0.02443493		2114.39	0.00032524		2704.4	0.00810272		3294.4	0.02437404		3884.4	0.00884767
344.6	0.0980369		934.59	0.03340455		1524.59	0.02396997		2114.59	-0.00027048		2704.6	0.00954902		3294.6	0.02468834		3884.6	0.00831084
344.8	0.09759417		934.79	0.03338081		1524.79	0.02381246		2114.79	-0.0002522		2704.8	0.00978985		3294.8	0.02436929		3884.8	0.00799261
345	0.09825295		934.99	0.0336258		1524.99	0.02400061		2114.99	-0.00025232		2705	0.01080045		3295	0.02420365		3885	0.00785314
345.2	0.0982989		935.19	0.03402785		1525.19	0.0240501		2115.19	-0.00034332		2705.2	0.01152708		3295.2	0.02328036		3885.2	0.00803655
345.4	0.09849718		935.39	0.03416063		1525.39	0.02369043		2115.39	-0.00022976		2705.4	0.01196573		3295.4	0.02332674		3885.4	0.0087309
345.6	0.09839442		935.59	0.03525816		1525.59	0.02341923		2115.59	0.00040152		2705.6	0.01299422		3295.6	0.02314527		3885.6	0.00898231
345.8	0.0992071		935.79	0.03545238		1525.79	0.02307421		2115.79	0.00048839		2705.8	0.01282418		3295.8	0.02298665		3885.8	0.00756209
346	0.09921385		935.99	0.03606113		1525.99	0.02330323		2115.99	0.00052425		2706	0.01219677		3296	0.02401875		3886	0.00720157
346.2	0.09932147		936.19	0.03594115		1526.19	0.02294324		2116.19	0.00121975		2706.2	0.01141928		3296.2	0.02477044		3886.2	0.00626339
346.4	0.0986419		936.39	0.03518955		1526.39	0.02213595		2116.39	0.00217374		2706.4	0.01054339		3296.4	0.02468353		3886.4	0.00717355
346.6	0.09865768		936.59	0.03540793		1526.59	0.02163881		2116.59	0.00198269		2706.6	0.01132986		3296.6	0.02510505		3886.6	0.00726798
346.8	0.09938894		936.79	0.03451496		1526.79	0.02215381		2116.79	0.00282538		2706.8	0.01160463		3296.8	0.02510096		3886.8	0.00793213
347	0.09969529		936.99	0.03417765		1526.99	0.02189362		2116.99	0.00366296		2707	0.01169027		3297	0.02430327		3887	0.00784995
347.2	0.10015298		937.19	0.03421837		1527.19	0.0215512		2117.19	0.00393225		2707.2	0.01226484		3297.2	0.02460192		3887.2	0.00855062
347.4	0.10021237		937.39	0.03334837		1527.39	0.02126081		2117.39	0.00399386		2707.4	0.01189439		3297.4	0.02484914		3887.4	0.00814255
347.6	0.1000061		937.59	0.0339871		1527.59	0.02198996		2117.59	0.00395949		2707.6	0.01218918		3297.6	0.02497741		3887.6	0.00802243
347.8	0.10086743		937.79	0.03451274		1527.79	0.02249306		2117.79	0.00381138		2707.8	0.01229961		3297.8	0.02495202		3887.8	0.00711626
348	0.1005191		937.99	0.03448583		1527.99	0.02433922		2117.99	0.00360857		2708	0.01147406		3298	0.02505854		3888	0.0057799
348.2	0.10086932		938.19	0.03507514		1528.19	0.02541457		2118.19	0.00270989		2708.2	0.01176476		3298.2	0.02496761		3888.2	0.0060721
348.4	0.10192514		938.39	0.03517886		1528.39	0.02569416		2118.39	0.00225217		2708.4	0.01158477		3298.4	0.02538621		3888.4	0.00538578
348.6	0.10173631		938.59	0.03512212		1528.59	0.02618437		2118.59	0.00128194		2708.6	0.01172181		3298.6	0.02602028		3888.6	0.00628942
348.8	0.102237		938.79	0.03597743		1528.79	0.02619979		2118.79	0.00116773		2708.8	0.01054835		3298.8	0.02573958		3888.8	0.00575018
349	0.10271454		938.99	0.03614797		1528.99	0.02632891		2118.99	0.00126529		2709	0.01136573		3299	0.02548539		3889	0.00589504
349.2	0.10271013		939.19	0.03606012		1529.19	0.02688126		2119.19	0.00145692		2709.2	0.01104147		3299.2	0.02516156		3889.2	0.00636002
349.4	0.10229086		939.39	0.036475		1529.39	0.0270113		2119.39	0.0014355		2709.4	0.01037506		3299.4	0.02463615		3889.4	0.00653153
349.6	0.10257553		939.59	0.03693163		1529.59	0.02706168		2119.59	0.0025551		2709.6	0.01025708		3299.6	0.02494966		3889.6	0.00660537
349.8	0.10333728		939.79	0.03693423		1529.79	0.02780955		2119.79	0.00182751		2709.8	0.0089955		3299.8	0.02484188		3889.8	0.00562782
350	0.10346394		939.99	0.03719503		1529.99	0.02844454		2119.99	0.00163277		2710	0.00823445		3300	0.02517131		3890	0.00469521
350.2	0.10286098		940.19	0.03766233		1530.19	0.02778543		2120.19	0.00290231		2710.2	0.00763032		3300.2	0.02435425		3890.2	0.00509383
350.4	0.10260575		940.39	0.036952		1530.39	0.02711678		2120.39	0.00326499		2710.4	0.00803531		3300.4	0.02363135		3890.4	0.00596523
350.6	0.10360861		940.59	0.03670539		1530.59	0.02564387		2120.59	0.00264623		2710.6	0.00884201		3300.6	0.02342362		3890.6	0.00591142
350.8	0.10416007		940.79	0.03594562		1530.79	0.02507409		2120.79	0.00338525		2710.8	0.00955159		3300.8	0.02276358		3890.8	0.00648967
351	0.10436068		940.99	0.03481965		1530.99	0.02394914		2120.99	0.00375173		2711	0.01038611		3301	0.02246075		3891	0.00727047
351.2	0.10508389		941.19	0.03493826		1531.19	0.02397554		2121.19	0.00361438		2711.2	0.01154196		3301.2	0.02311067		3891.2	0.00810203
351.4	0.10552581		941.39	0.03488216		1531.39	0.02386507		2121.39	0.0033738		2711.4	0.0115332		3301.4	0.0236979		3891.4	0.00758832
351.6	0.10546976		941.59	0.03506355		1531.59	0.02442457		2121.59	0.00372856		2711.6	0.01204424		3301.6	0.02406785		3891.6	0.00747915
351.8	0.10550131		941.79	0.03468999		1531.79	0.02501366		2121.79	0.00345712		2711.8	0.01183237		3301.8	0.02473359		3891.8	0.00743357
352	0.10581523		941.99	0.03503456		1531.99	0.02553617		2121.99	0.00386057		2712	0.01199251		3302	0.02519523		3892	0.00801048
352.2	0.10646277		942.19	0.03592339		1532.19	0.02514174		2122.19	0.00339371		2712.2	0.01162755		3302.2	0.02522866		3892.2	0.00832344
352.4	0.10761729		942.39	0.03614947		1532.39	0.02506262		2122.39	0.00334913		2712.4	0.01104118		3302.4	0.02642527		3892.4	0.00788245
352.6	0.10772535		942.59	0.03628213		1532.59	0.02518471		2122.59	0.00338099		2712.6	0.01085286		3302.6	0.0264604		3892.6	0.00897906
352.8	0.10839185		942.79	0.03649247		1532.79	0.02448861		2122.79	0.00342138		2712.8	0.01098423		3302.8	0.02684507		3892.8	0.00834404
353	0.10932991		942.99	0.03709409		1532.99	0.02430706		2122.99	0.00350183		2713	0.01070114		3303	0.02682603		3893	0.00896658
353.2	0.10961514		943.19	0.03729593		1533.19	0.02474741		2123.19	0.00306651		2713.2	0.01011951		3303.2	0.02727566		3893.2	0.00942576
353.4	0.10922044		943.39	0.03787051		1533.39	0.02370621		2123.39	0.00270546		2713.4	0.0098476		3303.4	0.02681336		3893.4	0.00975979
353.6	0.10962386		943.59	0.03821094		1533.59	0.02384492		2123.59	0.00265997		2713.6	0.01002505		3303.6	0.02781787		3893.6	0.00893463
353.8	0.10972942		943.79	0.03812873		1533.79	0.0248116		2123.79	0.00190627		2713.8	0.00992957		3303.8	0.02764244		3893.8	0.00766077
354	0.10932032		943.99	0.0391822		1533.99	0.02466794		2123.99	0.00277603		2714	0.00917388		3304	0.02701557		3894	0.00676384
354.2	0.10978318		944.19	0.04004159		1534.19	0.02443646		2124.19	0.00234087		2714.2	0.00903122		3304.2	0.02708891		3894.2	0.00746288
354.4	0.11057653		944.39	0.04016047		1534.39	0.02426604		2124.39	0.00202484		2714.4	0.01016167		3304.4	0.02641675		3894.4	0.0074941
354.6	0.11061631		944.59	0.0403084		1534.59	0.02396709		2124.59	0.00147019		2714.6	0.01126236		3304.6	0.02587367		3894.6	0.00654893
354.8	0.11068856		944.79	0.03967531		1534.79	0.02417738		2124.79	0.00185608		2714.8	0.01214044		3304.8	0.02490801		3894.8	0.00686695
355	0.11023026		944.99	0.03962887		1534.99	0.02534223		2124.99	0.00193934		2715	0.01395441		3305	0.02423993		3895	0.00707927
355.2	0.11088023		945.19	0.04018721		1535.19	0.02620929		2125.19	0.00187645		2715.2	0.01526663		3305.2	0.02367968		3895.2	0.00631518
355.4	0.11139492		945.39	0.0392692		1535.39	0.02598916		2125.39	0.00182485		2715.4	0.01480893		3305.4	0.02375699		3895.4	0.006157
355.6	0.11147182		945.59	0.03898224		1535.59	0.02637546		2125.59	0.00196306		2715.6	0.01349369		3305.6	0.02264872		3895.6	0.00601368
355.8	0.11142072		945.79	0.03972401		1535.79	0.02654667		2125.79	0.00245728		2715.8	0.01271094		3305.8	0.02187344		3895.8	0.00616915
356	0.11187254		945.99	0.04046303		1535.99	0.02601511		2125.99	0.00341747		2716	0.01233153		3306	0.0212586		3896	0.00637357
356.2	0.11269077		946.19	0.04052683		1536.19	0.02638313		2126.19	0.00249799		2716.2	0.01203905		3306.2	0.02057919		3896.2	0.00654921
356.4	0.11448033		946.39	0.04030267		1536.39	0.02656449		2126.39	0.00282759		2716.4	0.01242327		3306.4	0.02059459		3896.4	0.00729889
356.6	0.11529707		946.59	0.03963602		1536.59	0.02657532		2126.59	0.00362879		2716.6	0.01245441		3306.6	0.02022939		3896.6	0.00798301
356.8	0.11561988		946.79	0.03979766		1536.79	0.0258277		2126.79	0.00270057		2716.8	0.01214078		3306.8	0.02211331		3896.8	0.00768446
357	0.11628145		946.99	0.04080018		1536.99	0.02556687		2126.99	0.00206094		2717	0.01095989		3307	0.0226351		3897	0.00849812
357.2	0.11594995		947.19	0.04074393		1537.19	0.02522578		2127.19	0.00167878		2717.2	0.0111865		3307.2	0.02382026		3897.2	0.00895992
357.4	0.11575406		947.39	0.04037759		1537.39	0.02474598		2127.39	0.00186736		2717.4	0.01141551		3307.4	0.02466512		3897.4	0.00851452
357.6	0.11512178		947.59	0.03994091		1537.59	0.02522107		2127.59	0.00119436		2717.6	0.01142946		3307.6	0.02654124		3897.6	0.00845419
357.8	0.11527905		947.79	0.03932474		1537.79	0.02590338		2127.79	0.00134332		2717.8	0.01054663		3307.8	0.027577		3897.8	0.00814365
358	0.11523244		947.99	0.04029759		1537.99	0.02556411		2127.99	0.00130315		2718	0.0089203		3308	0.02892934		3898	0.00804611
358.2	0.1153673		948.19	0.03972608		1538.19	0.02693012		2128.19	0.00172296		2718.2	0.00916289		3308.2	0.02947494		3898.2	0.00907008
358.4	0.11540496		948.39	0.03983644		1538.39	0.02706034		2128.39	0.0026255		2718.4	0.01000725		3308.4	0.0285396		3898.4	0.00947955
358.6	0.11461167		948.59	0.03962072		1538.59	0.02730963		2128.59	0.00230776		2718.6	0.01026817		3308.6	0.02873905		3898.6	0.00948496
358.8	0.11473759		948.79	0.03967756		1538.79	0.02727551		2128.79	0.00319014		2718.8	0.01018162		3308.8	0.02783427		3898.8	0.01096801
359	0.11446103		948.99	0.04029152		1538.99	0.02858444		2128.99	0.0031707		2719	0.01137116		3309	0.02788287		3899	0.01063038
359.2	0.11496547		949.19	0.04078674		1539.19	0.02894262		2129.19	0.00318102		2719.2	0.01184245		3309.2	0.02731125		3899.2	0.01031978
359.4	0.11491341		949.39	0.04133196		1539.39	0.02907763		2129.39	0.00305986		2719.4	0.01073898		3309.4	0.02735923		3899.4	0.01021984
359.6	0.11468711		949.59	0.04220877		1539.59	0.02931076		2129.59	0.00376165		2719.6	0.00983276		3309.6	0.02621068		3899.6	0.00907766
359.8	0.11511037		949.79	0.04306817		1539.79	0.02891562		2129.79	0.00464485		2719.8	0.01143055		3309.8	0.0261817		3899.8	0.0095202
360	0.1156081		949.99	0.04342047		1539.99	0.02874322		2129.99	0.00452964		2720	0.01169209		3310	0.02554782		3900	0.01044937
360.2	0.11728728		950.19	0.04307817		1540.19	0.02974704		2130.19	0.0048143		2720.2	0.01250697		3310.2	0.02474172		3900.2	0.01060823
360.4	0.11849176		950.39	0.04280146		1540.39	0.02981241		2130.39	0.00546626		2720.4	0.0126593		3310.4	0.02482644		3900.4	0.0091909
360.6	0.119691		950.59	0.0425281		1540.59	0.02933552		2130.59	0.00512158		2720.6	0.01252414		3310.6	0.02541521		3900.6	0.00758481
360.8	0.11959101		950.79	0.04357703		1540.79	0.02929507		2130.79	0.00366479		2720.8	0.01279482		3310.8	0.02624063		3900.8	0.00639775
361	0.11997691		950.99	0.04390519		1540.99	0.02891791		2130.99	0.00311366		2721	0.01248051		3311	0.02550912		3901	0.0062377
361.2	0.12031903		951.19	0.04365756		1541.19	0.02799163		2131.19	0.0034879		2721.2	0.01291089		3311.2	0.02557667		3901.2	0.00533852
361.4	0.12019609		951.39	0.04286458		1541.39	0.02770985		2131.39	0.00374792		2721.4	0.01288401		3311.4	0.02593302		3901.4	0.00460974
361.6	0.12005491		951.59	0.04286975		1541.59	0.02835762		2131.59	0.0033934		2721.6	0.01197542		3311.6	0.02628262		3901.6	0.00450984
361.8	0.12044136		951.79	0.04256624		1541.79	0.02880034		2131.79	0.00451791		2721.8	0.0112808		3311.8	0.02659545		3901.8	0.00390401
362	0.12015207		951.99	0.04363367		1541.99	0.02892828		2131.99	0.00456371		2722	0.01131478		3312	0.02673413		3902	0.00452741
362.2	0.12107681		952.19	0.04295031		1542.19	0.02921106		2132.19	0.00530493		2722.2	0.01197056		3312.2	0.02610358		3902.2	0.0050089
362.4	0.12210191		952.39	0.04321312		1542.39	0.0286601		2132.39	0.00406844		2722.4	0.01151725		3312.4	0.02619222		3902.4	0.00527609
362.6	0.12221031		952.59	0.04332045		1542.59	0.02858064		2132.59	0.00227441		2722.6	0.01185459		3312.6	0.02685472		3902.6	0.00583516
362.8	0.12198847		952.79	0.0435833		1542.79	0.02930529		2132.79	0.00206076		2722.8	0.01262276		3312.8	0.02662765		3902.8	0.00601212
363	0.12178495		952.99	0.04289378		1542.99	0.03071815		2132.99	0.00181481		2723	0.01317972		3313	0.02718571		3903	0.00559532
363.2	0.12153986		953.19	0.04313709		1543.19	0.03124131		2133.19	0.00175301		2723.2	0.01419511		3313.2	0.0275323		3903.2	0.00698833
363.4	0.1213627		953.39	0.04351682		1543.39	0.03177941		2133.39	0.00131469		2723.4	0.01432886		3313.4	0.02789572		3903.4	0.00648406
363.6	0.12201986		953.59	0.04408083		1543.59	0.03200736		2133.59	0.00128696		2723.6	0.01479335		3313.6	0.02795257		3903.6	0.00704011
363.8	0.1225964		953.79	0.04481319		1543.79	0.03195799		2133.79	0.00104456		2723.8	0.01605861		3313.8	0.02867599		3903.8	0.00775116
364	0.12295627		953.99	0.04526569		1543.99	0.03193667		2133.99	0.00175514		2724	0.0160241		3314	0.02891956		3904	0.00820928
364.2	0.12401183		954.19	0.04475521		1544.19	0.03213101		2134.19	0.00230143		2724.2	0.01642573		3314.2	0.02966903		3904.2	0.0082494
364.4	0.12470159		954.39	0.04428781		1544.39	0.03177401		2134.39	0.00210384		2724.4	0.01600627		3314.4	0.0297754		3904.4	0.00734401
364.6	0.1239739		954.59	0.04469432		1544.59	0.03224197		2134.59	0.00163351		2724.6	0.01529291		3314.6	0.03023065		3904.6	0.00683645
364.8	0.12331934		954.79	0.04543885		1544.79	0.03263449		2134.79	0.00192523		2724.8	0.01435351		3314.8	0.02951733		3904.8	0.00701255
365	0.12425615		954.99	0.04529036		1544.99	0.03232788		2134.99	0.00296935		2725	0.01345489		3315	0.02836094		3905	0.00788823
365.2	0.12464281		955.19	0.04623299		1545.19	0.03226211		2135.19	0.00428921		2725.2	0.01247632		3315.2	0.02778963		3905.2	0.00804283
365.4	0.12456099		955.39	0.04660817		1545.39	0.03252702		2135.39	0.00514276		2725.4	0.01150694		3315.4	0.0272144		3905.4	0.00855601
365.6	0.12486063		955.59	0.04668616		1545.59	0.03245722		2135.59	0.00590411		2725.6	0.01000174		3315.6	0.02699779		3905.6	0.0086741
365.8	0.12489792		955.79	0.04700155		1545.79	0.03261468		2135.79	0.00564379		2725.8	0.00987555		3315.8	0.02725234		3905.8	0.009007
366	0.12574107		955.99	0.04700684		1545.99	0.03239975		2135.99	0.00491531		2726	0.00920778		3316	0.02622063		3906	0.00920512
366.2	0.12644049		956.19	0.04569256		1546.19	0.03195749		2136.19	0.00514004		2726.2	0.00864372		3316.2	0.02546851		3906.2	0.00900721
366.4	0.12669356		956.39	0.04556573		1546.39	0.03216866		2136.39	0.00429895		2726.4	0.00747331		3316.4	0.02511621		3906.4	0.00968947
366.6	0.1257231		956.59	0.04458022		1546.59	0.03307556		2136.59	0.00314632		2726.6	0.00892145		3316.6	0.02442974		3906.6	0.00939676
366.8	0.12552379		956.79	0.04363777		1546.79	0.03423042		2136.79	0.00289359		2726.8	0.00909269		3316.8	0.02416866		3906.8	0.00944755
367	0.12528515		956.99	0.04254845		1546.99	0.03404331		2136.99	0.00335113		2727	0.00987		3317	0.02441577		3907	0.00941626
367.2	0.12497122		957.19	0.04381633		1547.19	0.03430354		2137.19	0.00220803		2727.2	0.01092601		3317.2	0.02524451		3907.2	0.00958518
367.4	0.12532037		957.39	0.04485105		1547.39	0.03468287		2137.39	0.00183533		2727.4	0.01127897		3317.4	0.02519654		3907.4	0.00804766
367.6	0.12646066		957.59	0.04498654		1547.59	0.03425993		2137.59	0.00161623		2727.6	0.01243422		3317.6	0.02590735		3907.6	0.00813417
367.8	0.12688084		957.79	0.04456461		1547.79	0.03447125		2137.79	0.00141232		2727.8	0.01352113		3317.8	0.02705052		3907.8	0.00765168
368	0.1271682		957.99	0.04457573		1547.99	0.03448708		2137.99	0.0021886		2728	0.01387503		3318	0.02703397		3908	0.0080228
368.2	0.12787982		958.19	0.04404282		1548.19	0.03459554		2138.19	0.00183738		2728.2	0.0135268		3318.2	0.02755284		3908.2	0.00757298
368.4	0.12791838		958.39	0.04432434		1548.39	0.0337122		2138.39	0.00236239		2728.4	0.01361211		3318.4	0.02750064		3908.4	0.00677313
368.6	0.12770473		958.59	0.04542655		1548.59	0.03416068		2138.59	0.00297021		2728.6	0.01360245		3318.6	0.02811825		3908.6	0.00681348
368.8	0.12932928		958.79	0.04572318		1548.79	0.03410938		2138.79	0.00392608		2728.8	0.0136299		3318.8	0.02735825		3908.8	0.00712151
369	0.13019625		958.99	0.04580253		1548.99	0.03349673		2138.99	0.00388732		2729	0.0144125		3319	0.02752014		3909	0.007273
369.2	0.13077655		959.19	0.04632306		1549.19	0.03235604		2139.19	0.00381474		2729.2	0.0139531		3319.2	0.02796426		3909.2	0.0071229
369.4	0.13061076		959.39	0.04590843		1549.39	0.03052953		2139.39	0.00471044		2729.4	0.01338744		3319.4	0.02863752		3909.4	0.00632985
369.6	0.13127086		959.59	0.04539557		1549.59	0.02978818		2139.59	0.00466835		2729.6	0.01292682		3319.6	0.02956791		3909.6	0.00639394
369.8	0.13152096		959.79	0.04506167		1549.79	0.029825		2139.79	0.00390238		2729.8	0.0122666		3319.8	0.02967602		3909.8	0.00664831
370	0.13202743		959.99	0.04469196		1549.99	0.02952172		2139.99	0.00445415		2730	0.01240171		3320	0.02897872		3910	0.00735172
370.2	0.1318488		960.19	0.04459783		1550.19	0.02945329		2140.19	0.00424679		2730.2	0.01274695		3320.2	0.02930938		3910.2	0.00694203
370.4	0.13230941		960.39	0.04515037		1550.39	0.02927658		2140.39	0.00331503		2730.4	0.0125751		3320.4	0.02939634		3910.4	0.00633227
370.6	0.13129725		960.59	0.04433595		1550.59	0.02958918		2140.59	0.00337803		2730.6	0.01406594		3320.6	0.02913147		3910.6	0.00538236
370.8	0.13123065		960.79	0.04516181		1550.79	0.02941915		2140.79	0.00231157		2730.8	0.01410949		3320.8	0.02949889		3910.8	0.00633286
371	0.13150368		960.99	0.04587158		1550.99	0.02876172		2140.99	0.00221274		2731	0.01451452		3321	0.02959152		3911	0.00669394
371.2	0.13177597		961.19	0.04721055		1551.19	0.02987697		2141.19	0.00100735		2731.2	0.01429422		3321.2	0.02877218		3911.2	0.00614013
371.4	0.13290202		961.39	0.04770932		1551.39	0.03077031		2141.39	0.00059076		2731.4	0.01426918		3321.4	0.02766196		3911.4	0.00597391
371.6	0.13345906		961.59	0.04749894		1551.59	0.03123644		2141.59	0.00050884		2731.6	0.01508586		3321.6	0.02686371		3911.6	0.00590079
371.8	0.13357602		961.79	0.04803056		1551.79	0.0323621		2141.79	-0.00036738		2731.8	0.01465597		3321.8	0.02584408		3911.8	0.00623615
372	0.13392092		961.99	0.04813063		1551.99	0.0328229		2141.99	0.00018413		2732	0.01363145		3322	0.02410734		3912	0.0065757
372.2	0.13440982		962.19	0.0482251		1552.19	0.03279473		2142.19	0.00031292		2732.2	0.0131573		3322.2	0.02375295		3912.2	0.00696139
372.4	0.13456191		962.39	0.04856225		1552.39	0.03327527		2142.39	0.00078203		2732.4	0.01357776		3322.4	0.02337725		3912.4	0.00828892
372.6	0.13491709		962.59	0.04891978		1552.59	0.03379265		2142.59	0.00161896		2732.6	0.01457947		3322.6	0.02359518		3912.6	0.0087857
372.8	0.13530393		962.79	0.04858845		1552.79	0.03412433		2142.79	0.00189046		2732.8	0.01421853		3322.8	0.02376787		3912.8	0.00841303
373	0.13489303		962.99	0.04864275		1552.99	0.03348284		2142.99	0.00197408		2733	0.01389112		3323	0.0245893		3913	0.00844279
373.2	0.1349491		963.19	0.04865311		1553.19	0.03299572		2143.19	0.00258215		2733.2	0.01296431		3323.2	0.02480916		3913.2	0.00836193
373.4	0.13389639		963.39	0.04840643		1553.39	0.03328277		2143.39	0.00371328		2733.4	0.01298159		3323.4	0.02553492		3913.4	0.00875924
373.6	0.13443566		963.59	0.04813807		1553.59	0.03406143		2143.59	0.00426906		2733.6	0.01269278		3323.6	0.02671884		3913.6	0.00912063
373.8	0.13412481		963.79	0.04780041		1553.79	0.03413348		2143.79	0.0046986		2733.8	0.0130455		3323.8	0.0283582		3913.8	0.0097309
374	0.13412419		963.99	0.04729997		1553.99	0.03444425		2143.99	0.00543262		2734	0.01380519		3324	0.02916834		3914	0.00953742
374.2	0.13359684		964.19	0.04680908		1554.19	0.03434308		2144.19	0.00500559		2734.2	0.01383265		3324.2	0.02974489		3914.2	0.00824656
374.4	0.13365506		964.39	0.04724266		1554.39	0.0342299		2144.39	0.00576518		2734.4	0.01446073		3324.4	0.03076776		3914.4	0.00816111
374.6	0.13259088		964.59	0.04747621		1554.59	0.03441166		2144.59	0.0066781		2734.6	0.01498325		3324.6	0.03083962		3914.6	0.00831673
374.8	0.13326286		964.79	0.04774645		1554.79	0.03423065		2144.79	0.00526003		2734.8	0.01465203		3324.8	0.03080331		3914.8	0.00867796
375	0.13361562		964.99	0.04810787		1554.99	0.03355136		2144.99	0.00523273		2735	0.01436527		3325	0.03075291		3915	0.00768827
375.2	0.13381053		965.19	0.04765552		1555.19	0.03377917		2145.19	0.00456211		2735.2	0.01452547		3325.2	0.02962721		3915.2	0.0068218
375.4	0.13424635		965.39	0.04756575		1555.39	0.03328205		2145.39	0.00388396		2735.4	0.01454564		3325.4	0.029036		3915.4	0.00725944
375.6	0.13432477		965.59	0.04765495		1555.59	0.03235466		2145.59	0.00343748		2735.6	0.01468219		3325.6	0.02810406		3915.6	0.0073799
375.8	0.13553213		965.79	0.04755248		1555.79	0.0319379		2145.79	0.00164387		2735.8	0.01410378		3325.8	0.02762964		3915.8	0.00848365
376	0.13668793		965.99	0.04713478		1555.99	0.03138867		2145.99	0.00159831		2736	0.01373123		3326	0.02749632		3916	0.00894841
376.2	0.13725143		966.19	0.0475654		1556.19	0.03048122		2146.19	0.00067346		2736.2	0.01398251		3326.2	0.02784455		3916.2	0.00961295
376.4	0.13803831		966.39	0.04732926		1556.39	0.03001871		2146.39	0.00057465		2736.4	0.01398547		3326.4	0.02764891		3916.4	0.01056789
376.6	0.13903742		966.59	0.04731879		1556.59	0.02943923		2146.59	0.0014078		2736.6	0.01447472		3326.6	0.02754778		3916.6	0.01029654
376.8	0.13962244		966.79	0.04799196		1556.79	0.02894374		2146.79	0.00152782		2736.8	0.01400364		3326.8	0.027108		3916.8	0.01027003
377	0.14072461		966.99	0.04827502		1556.99	0.02821112		2146.99	0.00139537		2737	0.01390054		3327	0.02737001		3917	0.01079835
377.2	0.14162311		967.19	0.04947943		1557.19	0.02841552		2147.19	0.00134266		2737.2	0.01369614		3327.2	0.02782746		3917.2	0.01061487
377.4	0.14171106		967.39	0.04963302		1557.39	0.02980441		2147.39	0.00209552		2737.4	0.01441784		3327.4	0.0281087		3917.4	0.01189346
377.6	0.1420201		967.59	0.04927922		1557.59	0.02930514		2147.59	0.00284959		2737.6	0.01443503		3327.6	0.02899119		3917.6	0.01122903
377.8	0.14154385		967.79	0.04959135		1557.79	0.02998177		2147.79	0.00329829		2737.8	0.01575507		3327.8	0.02938572		3917.8	0.01142105
378	0.14095703		967.99	0.04972128		1557.99	0.03072849		2147.99	0.0037859		2738	0.01584357		3328	0.02920074		3918	0.01106287
378.2	0.14056741		968.19	0.05040421		1558.19	0.03178267		2148.19	0.00406717		2738.2	0.01539529		3328.2	0.0293718		3918.2	0.01062949
378.4	0.13989115		968.39	0.05117361		1558.39	0.03225113		2148.39	0.00482558		2738.4	0.01540968		3328.4	0.03004971		3918.4	0.01005948
378.6	0.1388206		968.59	0.05120969		1558.59	0.03321826		2148.59	0.0051883		2738.6	0.01509378		3328.6	0.02960023		3918.6	0.00973603
378.8	0.13917083		968.79	0.05097249		1558.79	0.03331174		2148.79	0.00484365		2738.8	0.01524048		3328.8	0.02886547		3918.8	0.00860384
379	0.13844315		968.99	0.05108028		1558.99	0.03415387		2148.99	0.00510723		2739	0.01512639		3329	0.02875315		3919	0.00772787
379.2	0.13859378		969.19	0.05105761		1559.19	0.03429562		2149.19	0.00491489		2739.2	0.01512213		3329.2	0.0279727		3919.2	0.00760186
379.4	0.13909832		969.39	0.05228841		1559.39	0.03415155		2149.39	0.00420704		2739.4	0.01479502		3329.4	0.02734431		3919.4	0.00675754
379.6	0.13955667		969.59	0.05333447		1559.59	0.03460863		2149.59	0.00425923		2739.6	0.01512728		3329.6	0.02810575		3919.6	0.00617982
379.8	0.14036637		969.79	0.05302634		1559.79	0.03466425		2149.79	0.00357763		2739.8	0.01487757		3329.8	0.02812778		3919.8	0.00530845
380	0.14080914		969.99	0.05293857		1559.99	0.03451526		2149.99	0.00373006		2740	0.01487936		3330	0.02818661		3920	0.00482673
380.2	0.14124213		970.19	0.05252213		1560.19	0.03387771		2150.19	0.00340579		2740.2	0.0139547		3330.2	0.02785949		3920.2	0.00449027
380.4	0.14199388		970.39	0.05189876		1560.39	0.03404034		2150.39	0.00334954		2740.4	0.01349105		3330.4	0.02774896		3920.4	0.00440165
380.6	0.14316443		970.59	0.05247422		1560.59	0.03429776		2150.59	0.00428542		2740.6	0.01334775		3330.6	0.02755887		3920.6	0.00423336
380.8	0.14406611		970.79	0.05260539		1560.79	0.03362896		2150.79	0.00459862		2740.8	0.01290866		3330.8	0.02786724		3920.8	0.00477118
381	0.14486943		970.99	0.05226869		1560.99	0.03381712		2150.99	0.00406647		2741	0.01267275		3331	0.0286182		3921	0.00498888
381.2	0.14541256		971.19	0.05264374		1561.19	0.03474484		2151.19	0.00329892		2741.2	0.01296422		3331.2	0.02843055		3921.2	0.00474146
381.4	0.14472762		971.39	0.05204681		1561.39	0.03589653		2151.39	0.00295868		2741.4	0.01381599		3331.4	0.02812828		3921.4	0.00546499
381.6	0.14509286		971.59	0.05163743		1561.59	0.03539618		2151.59	0.00299882		2741.6	0.01413433		3331.6	0.02862521		3921.6	0.00591328
381.8	0.1449408		971.79	0.05178311		1561.79	0.03605529		2151.79	0.00235437		2741.8	0.01475598		3331.8	0.02888008		3921.8	0.00642557
382	0.14527706		971.99	0.0511523		1561.99	0.03649937		2151.99	0.00209688		2742	0.01486757		3332	0.02919223		3922	0.00772234
382.2	0.14540381		972.19	0.05090961		1562.19	0.03668801		2152.19	0.00226842		2742.2	0.01463436		3332.2	0.029644		3922.2	0.00748799
382.4	0.1453035		972.39	0.05049399		1562.39	0.03703306		2152.39	0.00179245		2742.4	0.0149374		3332.4	0.029359		3922.4	0.00706474
382.6	0.14554741		972.59	0.05082325		1562.59	0.03784259		2152.59	0.0022309		2742.6	0.01607755		3332.6	0.02828272		3922.6	0.00820322
382.8	0.14662707		972.79	0.05108556		1562.79	0.03758636		2152.79	0.0019521		2742.8	0.0164185		3332.8	0.02793248		3922.8	0.00705473
383	0.14676052		972.99	0.05184185		1562.99	0.03749412		2152.99	0.00196146		2743	0.01647227		3333	0.02823308		3923	0.00731696
383.2	0.14715608		973.19	0.05339162		1563.19	0.03650367		2153.19	0.00218705		2743.2	0.01615048		3333.2	0.02794374		3923.2	0.00750533
383.4	0.14822784		973.39	0.05379738		1563.39	0.0363639		2153.39	0.00189277		2743.4	0.01569437		3333.4	0.02786005		3923.4	0.00759762
383.6	0.14812575		973.59	0.05337138		1563.59	0.03674236		2153.59	0.00285029		2743.6	0.01621718		3333.6	0.02906735		3923.6	0.00770234
383.8	0.14837878		973.79	0.05284172		1563.79	0.0354431		2153.79	0.00254265		2743.8	0.01496499		3333.8	0.02880242		3923.8	0.00712811
384	0.14875054		973.99	0.05261714		1563.99	0.03480853		2153.99	0.00242021		2744	0.01455905		3334	0.02972926		3924	0.0078603
384.2	0.14899908		974.19	0.05249429		1564.19	0.03430715		2154.19	0.00193561		2744.2	0.01395224		3334.2	0.02952973		3924.2	0.00831107
384.4	0.14909464		974.39	0.0524343		1564.39	0.03440579		2154.39	0.00182944		2744.4	0.01363217		3334.4	0.02911087		3924.4	0.00836174
384.6	0.14922704		974.59	0.05249584		1564.59	0.03385165		2154.59	0.00263714		2744.6	0.01287719		3334.6	0.02884913		3924.6	0.00830337
384.8	0.14912019		974.79	0.05187687		1564.79	0.03444729		2154.79	0.00258854		2744.8	0.01278613		3334.8	0.0295697		3924.8	0.00755928
385	0.14977881		974.99	0.05153477		1564.99	0.03518679		2154.99	0.00175714		2745	0.01250374		3335	0.02991826		3925	0.00747928
385.2	0.1498159		975.19	0.05163128		1565.19	0.03565383		2155.19	0.00174002		2745.2	0.01243419		3335.2	0.03016464		3925.2	0.00749815
385.4	0.14928349		975.39	0.0520465		1565.39	0.03535738		2155.39	0.00228444		2745.4	0.01218383		3335.4	0.03040811		3925.4	0.007404
385.6	0.14965397		975.59	0.05167237		1565.59	0.03516865		2155.59	0.00214186		2745.6	0.01264846		3335.6	0.0303417		3925.6	0.0071988
385.8	0.14830632		975.79	0.05120404		1565.79	0.03480888		2155.79	0.00216568		2745.8	0.01311335		3335.8	0.03003972		3925.8	0.00648463
386	0.14870664		975.99	0.05237901		1565.99	0.03461849		2155.99	0.00264868		2746	0.01333959		3336	0.02999879		3926	0.00658135
386.2	0.14826847		976.19	0.05327136		1566.19	0.03453569		2156.19	0.00329312		2746.2	0.01313681		3336.2	0.02971298		3926.2	0.0053995
386.4	0.14844665		976.39	0.05383784		1566.39	0.03491331		2156.39	0.00312452		2746.4	0.01377376		3336.4	0.0288759		3926.4	0.00524712
386.6	0.14866812		976.59	0.05558072		1566.59	0.03515249		2156.59	0.00392545		2746.6	0.01410623		3336.6	0.02877797		3926.6	0.00550021
386.8	0.14907267		976.79	0.05604287		1566.79	0.03498179		2156.79	0.00350028		2746.8	0.01398412		3336.8	0.0285901		3926.8	0.00503251
387	0.14864302		976.99	0.05658679		1566.99	0.0346156		2156.99	0.00340507		2747	0.01399341		3337	0.02825109		3927	0.00504782
387.2	0.14911308		977.19	0.05698545		1567.19	0.03433117		2157.19	0.00282569		2747.2	0.01374137		3337.2	0.02751161		3927.2	0.00503226
387.4	0.15031612		977.39	0.05634961		1567.39	0.03449708		2157.39	0.00261519		2747.4	0.01408729		3337.4	0.02787945		3927.4	0.00517855
387.6	0.1504134		977.59	0.05559017		1567.59	0.03498449		2157.59	0.00239206		2747.6	0.01417998		3337.6	0.02835629		3927.6	0.00526892
387.8	0.15067469		977.79	0.05458025		1567.79	0.03472953		2157.79	0.00178059		2747.8	0.01416023		3337.8	0.02840342		3927.8	0.00509888
388	0.15120323		977.99	0.05405207		1567.99	0.03504419		2157.99	0.00198702		2748	0.01476275		3338	0.02824367		3928	0.00566747
388.2	0.15241442		978.19	0.05343493		1568.19	0.03589046		2158.19	0.00148346		2748.2	0.01489766		3338.2	0.02773831		3928.2	0.00538081
388.4	0.15321151		978.39	0.05321558		1568.39	0.0365754		2158.39	0.00199854		2748.4	0.01480118		3338.4	0.02837329		3928.4	0.00598418
388.6	0.15437534		978.59	0.05221059		1568.59	0.03767958		2158.59	0.00248345		2748.6	0.01534448		3338.6	0.02868781		3928.6	0.00587521
388.8	0.15493273		978.79	0.05220521		1568.79	0.03936625		2158.79	0.00336612		2748.8	0.01517199		3338.8	0.02965266		3928.8	0.00601678
389	0.15528205		978.99	0.05236556		1568.99	0.03947182		2158.99	0.00407371		2749	0.01495882		3339	0.02906907		3929	0.00753996
389.2	0.15454521		979.19	0.05274048		1569.19	0.03923978		2159.19	0.0048867		2749.2	0.0154338		3339.2	0.02947831		3929.2	0.00780968
389.4	0.15424485		979.39	0.05327043		1569.39	0.03964539		2159.39	0.00546816		2749.4	0.0155971		3339.4	0.03034951		3929.4	0.00809832
389.6	0.15357411		979.59	0.05342934		1569.59	0.03948892		2159.59	0.00561641		2749.6	0.01525776		3339.6	0.03120303		3929.6	0.00817875
389.8	0.15331953		979.79	0.05412856		1569.79	0.03929935		2159.79	0.00595134		2749.8	0.01412963		3339.8	0.03170146		3929.8	0.00885933
390	0.15401721		979.99	0.05473107		1569.99	0.03906098		2159.99	0.00663052		2750	0.01387068		3340	0.03253487		3930	0.00988614
390.2	0.1539964		980.19	0.05445338		1570.19	0.03970002		2160.19	0.00690366		2750.2	0.01414483		3340.2	0.03228041		3930.2	0.00996682
390.4	0.15461622		980.39	0.05497607		1570.39	0.03906422		2160.39	0.00673775		2750.4	0.01434346		3340.4	0.03261183		3930.4	0.01000545
390.6	0.15466396		980.59	0.05597872		1570.59	0.03894811		2160.59	0.0063214		2750.6	0.01388005		3340.6	0.03254141		3930.6	0.00977136
390.8	0.15542856		980.79	0.05577676		1570.79	0.03852429		2160.79	0.0049831		2750.8	0.01411256		3340.8	0.03276809		3930.8	0.00996928
391	0.15548626		980.99	0.05577342		1570.99	0.03803825		2160.99	0.00455423		2751	0.01406592		3341	0.03312109		3931	0.00950301
391.2	0.15610558		981.19	0.05582698		1571.19	0.03715794		2161.19	0.00391755		2751.2	0.01444387		3341.2	0.03282966		3931.2	0.00974927
391.4	0.1567273		981.39	0.05622282		1571.39	0.03751881		2161.39	0.00429968		2751.4	0.01446065		3341.4	0.03319545		3931.4	0.00950554
391.6	0.1564964		981.59	0.05522048		1571.59	0.03732948		2161.59	0.00352308		2751.6	0.01540851		3341.6	0.03388784		3931.6	0.00962607
391.8	0.15721528		981.79	0.05477279		1571.79	0.03689681		2161.79	0.00420477		2751.8	0.01575181		3341.8	0.03409517		3931.8	0.00988093
392	0.15806442		981.99	0.05544712		1571.99	0.03673741		2161.99	0.00456195		2752	0.01613653		3342	0.03342882		3932	0.01027983
392.2	0.15872478		982.19	0.05546003		1572.19	0.03733354		2162.19	0.00426186		2752.2	0.0166642		3342.2	0.03347014		3932.2	0.01082906
392.4	0.15916764		982.39	0.05637433		1572.39	0.03780069		2162.39	0.00446158		2752.4	0.01659434		3342.4	0.03357208		3932.4	0.01222431
392.6	0.15882377		982.59	0.05579491		1572.59	0.0386203		2162.59	0.00513248		2752.6	0.01697691		3342.6	0.0327025		3932.6	0.01187458
392.8	0.15779889		982.79	0.05596184		1572.79	0.03885679		2162.79	0.00587325		2752.8	0.01658773		3342.8	0.03240223		3932.8	0.01197048
393	0.15650441		982.99	0.05703253		1572.99	0.03894489		2162.99	0.00586636		2753	0.01765642		3343	0.03177525		3933	0.01191303
393.2	0.15606601		983.19	0.05690444		1573.19	0.03942257		2163.19	0.00597236		2753.2	0.01743806		3343.2	0.03291589		3933.2	0.01219865
393.4	0.15532527		983.39	0.05753051		1573.39	0.03946762		2163.39	0.00634524		2753.4	0.01714106		3343.4	0.03394996		3933.4	0.01185757
393.6	0.15501294		983.59	0.0577524		1573.59	0.0395165		2163.59	0.00585481		2753.6	0.01721447		3343.6	0.03342686		3933.6	0.01145601
393.8	0.15536882		983.79	0.05758223		1573.79	0.03942614		2163.79	0.0058292		2753.8	0.01664984		3343.8	0.03315542		3933.8	0.01067186
394	0.15503568		983.99	0.05740428		1573.99	0.04057764		2163.99	0.00669728		2754	0.01691827		3344	0.03324039		3934	0.00988225
394.2	0.15486892		984.19	0.0577764		1574.19	0.04100118		2164.19	0.00617381		2754.2	0.01756214		3344.2	0.03255322		3934.2	0.00852994
394.4	0.15555362		984.39	0.05801935		1574.39	0.04107981		2164.39	0.00585238		2754.4	0.01690912		3344.4	0.03200272		3934.4	0.00827278
394.6	0.15602232		984.59	0.05803142		1574.59	0.04096811		2164.59	0.00515465		2754.6	0.01759277		3344.6	0.03195957		3934.6	0.00765357
394.8	0.15746774		984.79	0.05791419		1574.79	0.04074461		2164.79	0.00511223		2754.8	0.01735592		3344.8	0.0319763		3934.8	0.00710419
395	0.15761426		984.99	0.05804541		1574.99	0.04037779		2164.99	0.00570796		2755	0.01734309		3345	0.03135171		3935	0.00654992
395.2	0.15795638		985.19	0.05846436		1575.19	0.04018976		2165.19	0.0052403		2755.2	0.01650463		3345.2	0.03138196		3935.2	0.00537627
395.4	0.15882777		985.39	0.05850381		1575.39	0.04058668		2165.39	0.00462831		2755.4	0.01665579		3345.4	0.03189416		3935.4	0.00515671
395.6	0.15973102		985.59	0.057561		1575.59	0.04033226		2165.59	0.00386625		2755.6	0.01735278		3345.6	0.03348279		3935.6	0.00531333
395.8	0.16066194		985.79	0.05704006		1575.79	0.04010952		2165.79	0.00352877		2755.8	0.01615741		3345.8	0.0333622		3935.8	0.00574006
396	0.16113335		985.99	0.05750749		1575.99	0.04071663		2165.99	0.0029043		2756	0.0166761		3346	0.03316879		3936	0.00647886
396.2	0.16143719		986.19	0.05627443		1576.19	0.04041554		2166.19	0.00306241		2756.2	0.01579903		3346.2	0.03260032		3936.2	0.00689581
396.4	0.16174351		986.39	0.05630348		1576.39	0.0406909		2166.39	0.00255385		2756.4	0.01507833		3346.4	0.03226473		3936.4	0.00780196
396.6	0.16170222		986.59	0.05510384		1576.59	0.04084418		2166.59	0.00267532		2756.6	0.01504775		3346.6	0.03194047		3936.6	0.00735223
396.8	0.16175895		986.79	0.05564909		1576.79	0.04036514		2166.79	0.00239453		2756.8	0.01468492		3346.8	0.03148506		3936.8	0.00681403
397	0.16092274		986.99	0.05605561		1576.99	0.040697		2166.99	0.00249778		2757	0.01526121		3347	0.03203538		3937	0.00643461
397.2	0.16127397		987.19	0.05553589		1577.19	0.03942233		2167.19	0.00247925		2757.2	0.01391753		3347.2	0.03317431		3937.2	0.00720521
397.4	0.16163122		987.39	0.0563391		1577.39	0.03876796		2167.39	0.00191904		2757.4	0.01420388		3347.4	0.0331946		3937.4	0.00674887
397.6	0.16140349		987.59	0.05742943		1577.59	0.04000291		2167.59	0.00068232		2757.6	0.01428732		3347.6	0.0324878		3937.6	0.00679355
397.8	0.16061216		987.79	0.05810638		1577.79	0.03993369		2167.79	0.0005645		2757.8	0.01385621		3347.8	0.03235353		3937.8	0.00632778
398	0.16007758		987.99	0.05972258		1577.99	0.04052489		2167.99	0.00063162		2758	0.01400806		3348	0.03222207		3938	0.00674234
398.2	0.15984374		988.19	0.06047455		1578.19	0.03951619		2168.19	0.00002612		2758.2	0.01400962		3348.2	0.03158259		3938.2	0.0066604
398.4	0.15998308		988.39	0.06082449		1578.39	0.03954501		2168.39	0.00055359		2758.4	0.0133614		3348.4	0.03104104		3938.4	0.00680069
398.6	0.16048198		988.59	0.06173108		1578.59	0.03813445		2168.59	0.0001291		2758.6	0.0142946		3348.6	0.03155689		3938.6	0.00597422
398.8	0.16049084		988.79	0.0622335		1578.79	0.03752984		2168.79	0.00036215		2758.8	0.01369134		3348.8	0.03135774		3938.8	0.00518879
399	0.16095383		988.99	0.06308202		1578.99	0.03776756		2168.99	0.00056671		2759	0.01354536		3349	0.03209784		3939	0.00628867
399.2	0.1607285		989.19	0.06270135		1579.19	0.0380637		2169.19	-0.00000905		2759.2	0.01314519		3349.2	0.03286718		3939.2	0.00632286
399.4	0.1613378		989.39	0.0619952		1579.39	0.03843377		2169.39	0.00106785		2759.4	0.01420501		3349.4	0.03357281		3939.4	0.00708295
399.6	0.1617725		989.59	0.06152242		1579.59	0.03860395		2169.59	0.00136296		2759.6	0.01455719		3349.6	0.03486679		3939.6	0.00746497
399.8	0.16154118		989.79	0.06168211		1579.79	0.03826609		2169.79	0.00149446		2759.8	0.01430219		3349.8	0.03524255		3939.8	0.00823718
400	0.16160513		989.99	0.06138413		1579.99	0.03824373		2169.99	0.00241564		2760	0.01453116		3350	0.03474118		3940	0.00887519
400.2	0.16190486		990.19	0.06051507		1580.19	0.03770496		2170.19	0.00352955		2760.2	0.01490181		3350.2	0.03373084		3940.2	0.00943518
400.4	0.16231075		990.39	0.05999414		1580.39	0.03827645		2170.39	0.00351407		2760.4	0.01507623		3350.4	0.03346043		3940.4	0.00976228
400.6	0.16282382		990.59	0.05903037		1580.59	0.03846439		2170.59	0.00376925		2760.6	0.01539311		3350.6	0.0331334		3940.6	0.00950149
400.8	0.16277229		990.79	0.05876456		1580.79	0.03863429		2170.79	0.00436356		2760.8	0.01551166		3350.8	0.03319647		3940.8	0.00969394
401	0.16260439		990.99	0.05770295		1580.99	0.03960049		2170.99	0.00551083		2761	0.01612775		3351	0.03369602		3941	0.01026782
401.2	0.16342143		991.19	0.05749462		1581.19	0.03972151		2171.19	0.00598009		2761.2	0.01574826		3351.2	0.03387283		3941.2	0.01115201
401.4	0.16408		991.39	0.05816454		1581.39	0.04082937		2171.39	0.00540911		2761.4	0.01697002		3351.4	0.03323022		3941.4	0.01172818
401.6	0.16380272		991.59	0.05897431		1581.59	0.04201658		2171.59	0.00490585		2761.6	0.01706183		3351.6	0.03288668		3941.6	0.01163613
401.8	0.16376489		991.79	0.05888621		1581.79	0.04185612		2171.79	0.00505016		2761.8	0.01654422		3351.8	0.03195282		3941.8	0.01185835
402	0.16404271		991.99	0.06007341		1581.99	0.04197083		2171.99	0.00554319		2762	0.01656768		3352	0.03211792		3942	0.01189432
402.2	0.16397314		992.19	0.06037021		1582.19	0.04238731		2172.19	0.00510043		2762.2	0.01641293		3352.2	0.03154458		3942.2	0.0105575
402.4	0.16450095		992.39	0.05999199		1582.39	0.04275032		2172.39	0.0051421		2762.4	0.01671218		3352.4	0.03164914		3942.4	0.01024277
402.6	0.16557431		992.59	0.06015623		1582.59	0.04198058		2172.59	0.00469863		2762.6	0.01664097		3352.6	0.03129545		3942.6	0.00883567
402.8	0.16622281		992.79	0.06053306		1582.79	0.04246785		2172.79	0.00497218		2762.8	0.0158711		3352.8	0.03124007		3942.8	0.00828756
403	0.16678106		992.99	0.06086816		1582.99	0.04365386		2172.99	0.00550939		2763	0.01637881		3353	0.03182925		3943	0.00846484
403.2	0.16692311		993.19	0.06072268		1583.19	0.04312987		2173.19	0.00639377		2763.2	0.01533569		3353.2	0.03205859		3943.2	0.00687138
403.4	0.16681655		993.39	0.06179364		1583.39	0.04302722		2173.39	0.00773068		2763.4	0.01549773		3353.4	0.03263328		3943.4	0.00641229
403.6	0.16658968		993.59	0.06253781		1583.59	0.04259044		2173.59	0.00724353		2763.6	0.01548646		3353.6	0.03325921		3943.6	0.005621
403.8	0.16648215		993.79	0.06313823		1583.79	0.04120344		2173.79	0.00700845		2763.8	0.01499231		3353.8	0.03291134		3943.8	0.00497617
404	0.16725454		993.99	0.06291792		1583.99	0.04058557		2173.99	0.0069275		2764	0.01497043		3354	0.03297613		3944	0.00458724
404.2	0.16751456		994.19	0.06259792		1584.19	0.04035278		2174.19	0.00663445		2764.2	0.01542428		3354.2	0.0332911		3944.2	0.00452666
404.4	0.16771188		994.39	0.06238877		1584.39	0.0404386		2174.39	0.00588867		2764.4	0.0153116		3354.4	0.03302699		3944.4	0.00406662
404.6	0.16725196		994.59	0.06290847		1584.59	0.04088285		2174.59	0.0058843		2764.6	0.01521594		3354.6	0.0332097		3944.6	0.00400211
404.8	0.16747667		994.79	0.06299681		1584.79	0.04070062		2174.79	0.00563845		2764.8	0.01525309		3354.8	0.03334106		3944.8	0.00485033
405	0.16828434		994.99	0.06386782		1584.99	0.04122189		2174.99	0.00502865		2765	0.01620515		3355	0.03359785		3945	0.00545542
405.2	0.16934055		995.19	0.06423705		1585.19	0.04111602		2175.19	0.00460584		2765.2	0.01611125		3355.2	0.03332699		3945.2	0.00636745
405.4	0.17024937		995.39	0.06567693		1585.39	0.04079706		2175.39	0.00428719		2765.4	0.01662637		3355.4	0.03334729		3945.4	0.00733653
405.6	0.16968556		995.59	0.06555218		1585.59	0.04183188		2175.59	0.0037313		2765.6	0.0163282		3355.6	0.03325717		3945.6	0.00758012
405.8	0.16988653		995.79	0.06542484		1585.79	0.04189206		2175.79	0.00413887		2765.8	0.01683696		3355.8	0.03257602		3945.8	0.0085098
406	0.17002945		995.99	0.06595626		1585.99	0.04162765		2175.99	0.00371716		2766	0.01800821		3356	0.03258454		3946	0.00861335
406.2	0.17040832		996.19	0.06576186		1586.19	0.04275877		2176.19	0.00388225		2766.2	0.01762004		3356.2	0.03218268		3946.2	0.00784578
406.4	0.17154173		996.39	0.06471155		1586.39	0.04278692		2176.39	0.00358374		2766.4	0.01743224		3356.4	0.03207758		3946.4	0.00777598
406.6	0.17232056		996.59	0.06481215		1586.59	0.04284166		2176.59	0.00402885		2766.6	0.01751944		3356.6	0.03115329		3946.6	0.00677519
406.8	0.17303533		996.79	0.0649791		1586.79	0.04385553		2176.79	0.0045697		2766.8	0.01762069		3356.8	0.03150501		3946.8	0.00675928
407	0.17242628		996.99	0.06462394		1586.99	0.04443089		2176.99	0.00519046		2767	0.01793882		3357	0.03132059		3947	0.00676146
407.2	0.17233249		997.19	0.06474608		1587.19	0.04358701		2177.19	0.00536017		2767.2	0.01765278		3357.2	0.03120689		3947.2	0.00678155
407.4	0.17185702		997.39	0.06445664		1587.39	0.04355193		2177.39	0.00590706		2767.4	0.0181751		3357.4	0.03105356		3947.4	0.00745328
407.6	0.17115054		997.59	0.0636718		1587.59	0.04333776		2177.59	0.00522552		2767.6	0.01784688		3357.6	0.03068264		3947.6	0.00709265
407.8	0.17101022		997.79	0.06321193		1587.79	0.04283284		2177.79	0.00502033		2767.8	0.01782455		3357.8	0.03036566		3947.8	0.00750059
408	0.17086406		997.99	0.06269129		1587.99	0.04285765		2177.99	0.00424352		2768	0.01738569		3358	0.03184347		3948	0.00797355
408.2	0.1699225		998.19	0.06170923		1588.19	0.04297366		2178.19	0.00387899		2768.2	0.01682181		3358.2	0.03202873		3948.2	0.00745277
408.4	0.16990593		998.39	0.06124054		1588.39	0.04276922		2178.39	0.00387176		2768.4	0.01715521		3358.4	0.03153687		3948.4	0.00738803
408.6	0.16920502		998.59	0.06110175		1588.59	0.04305732		2178.59	0.00372329		2768.6	0.0161012		3358.6	0.03243528		3948.6	0.00808726
408.8	0.16933996		998.79	0.0604281		1588.79	0.0423846		2178.79	0.00301897		2768.8	0.01618184		3358.8	0.03294614		3948.8	0.00910926
409	0.16916564		998.99	0.06116961		1588.99	0.04273958		2178.99	0.00319747		2769	0.01627033		3359	0.03385178		3949	0.00964131
409.2	0.1694216		999.19	0.0615264		1589.19	0.04234987		2179.19	0.00379098		2769.2	0.01565423		3359.2	0.03389808		3949.2	0.01043056
409.4	0.16938597		999.39	0.06292277		1589.39	0.0425858		2179.39	0.00449804		2769.4	0.01603904		3359.4	0.03403329		3949.4	0.01090448
409.6	0.16979178		999.59	0.0626604		1589.59	0.04260287		2179.59	0.00426708		2769.6	0.01558196		3359.6	0.03434631		3949.6	0.01103426
409.8	0.17135151		999.79	0.06331009		1589.79	0.04182123		2179.79	0.00532578		2769.8	0.01605552		3359.8	0.03389069		3949.8	0.01053054
410	0.172219		999.99	0.0633489		1589.99	0.04122778		2179.99	0.00480758		2770	0.01548938		3360	0.03359637		3950	0.00913255
410.2	0.17353693		1000.19	0.06331439		1590.19	0.04209765		2180.19	0.005134		2770.2	0.01502084		3360.2	0.03373158		3950.2	0.00833953
410.4	0.17467452		1000.39	0.06273737		1590.39	0.04174297		2180.39	0.00468204		2770.4	0.0155606		3360.4	0.03310382		3950.4	0.00831028
410.6	0.17556744		1000.59	0.06333239		1590.59	0.04184596		2180.59	0.0051529		2770.6	0.01580605		3360.6	0.03245319		3950.6	0.0078082
410.8	0.1764744		1000.79	0.06313364		1590.79	0.04121451		2180.79	0.00533913		2770.8	0.01559927		3360.8	0.0323597		3950.8	0.00804936
411	0.17710241		1000.99	0.06379401		1590.99	0.04063286		2180.99	0.0051072		2771	0.01513678		3361	0.03118538		3951	0.0077467
411.2	0.17707736		1001.19	0.06459917		1591.19	0.0404043		2181.19	0.0050617		2771.2	0.01540522		3361.2	0.03120149		3951.2	0.00772241
411.4	0.17749024		1001.39	0.06427562		1591.39	0.04012354		2181.39	0.00545256		2771.4	0.0144947		3361.4	0.03101261		3951.4	0.00723222
411.6	0.17707317		1001.59	0.06497267		1591.59	0.04008908		2181.59	0.00495933		2771.6	0.0149641		3361.6	0.03128434		3951.6	0.00656817
411.8	0.17791669		1001.79	0.06550975		1591.79	0.04034652		2181.79	0.0052009		2771.8	0.01557016		3361.8	0.03186262		3951.8	0.00633177
412	0.17818614		1001.99	0.06512694		1591.99	0.04056049		2181.99	0.00449064		2772	0.01571338		3362	0.03239388		3952	0.00616397
412.2	0.17891518		1002.19	0.06548701		1592.19	0.04041468		2182.19	0.00463587		2772.2	0.01572207		3362.2	0.03199722		3952.2	0.00521964
412.4	0.17872976		1002.39	0.06467184		1592.39	0.0408558		2182.39	0.00494512		2772.4	0.01681794		3362.4	0.03156677		3952.4	0.00525107
412.6	0.17775104		1002.59	0.06560883		1592.59	0.04164204		2182.59	0.00480718		2772.6	0.01608691		3362.6	0.0328653		3952.6	0.00635695
412.8	0.1778596		1002.79	0.0660784		1592.79	0.04223388		2182.79	0.00521528		2772.8	0.01629251		3362.8	0.03304202		3952.8	0.00594193
413	0.1777306		1002.99	0.06766117		1592.99	0.04234822		2182.99	0.00486295		2773	0.01664875		3363	0.03345947		3953	0.00604446
413.2	0.17887234		1003.19	0.06741463		1593.19	0.0423418		2183.19	0.00504718		2773.2	0.01693664		3363.2	0.03316656		3953.2	0.00509203
413.4	0.17981844		1003.39	0.06793982		1593.39	0.04367183		2183.39	0.00475758		2773.4	0.01751273		3363.4	0.03291537		3953.4	0.0053722
413.6	0.18027901		1003.59	0.06741632		1593.59	0.04406273		2183.59	0.00507768		2773.6	0.01735468		3363.6	0.03264107		3953.6	0.00515837
413.8	0.1797137		1003.79	0.06703429		1593.79	0.04506353		2183.79	0.00461708		2773.8	0.01704851		3363.8	0.03268489		3953.8	0.00472707
414	0.1792684		1003.99	0.06655394		1593.99	0.04466605		2183.99	0.00414894		2774	0.01683363		3364	0.03301166		3954	0.00452074
414.2	0.17917518		1004.19	0.06656143		1594.19	0.04518457		2184.19	0.0042002		2774.2	0.01661088		3364.2	0.03335837		3954.2	0.00557322
414.4	0.17920418		1004.39	0.06663806		1594.39	0.04507027		2184.39	0.00415966		2774.4	0.01629716		3364.4	0.03333885		3954.4	0.00595612
414.6	0.17898633		1004.59	0.06635321		1594.59	0.04433199		2184.59	0.00333434		2774.6	0.01513057		3364.6	0.03392483		3954.6	0.00590267
414.8	0.17830696		1004.79	0.06626858		1594.79	0.04371517		2184.79	0.0038868		2774.8	0.01494937		3364.8	0.03361511		3954.8	0.00691457
415	0.17770944		1004.99	0.06638723		1594.99	0.04375892		2184.99	0.00354642		2775	0.01534225		3365	0.03396652		3955	0.00659137
415.2	0.17681886		1005.19	0.06569407		1595.19	0.04387129		2185.19	0.00384597		2775.2	0.01519323		3365.2	0.0350078		3955.2	0.00772611
415.4	0.17650054		1005.39	0.0650895		1595.39	0.04362023		2185.39	0.0043122		2775.4	0.01543152		3365.4	0.03547746		3955.4	0.00780148
415.6	0.17619727		1005.59	0.06573957		1595.59	0.04380762		2185.59	0.00387398		2775.6	0.01616662		3365.6	0.03653048		3955.6	0.00828963
415.8	0.17605738		1005.79	0.06633585		1595.79	0.04374835		2185.79	0.00413355		2775.8	0.01632883		3365.8	0.03636768		3955.8	0.00852745
416	0.17590567		1005.99	0.06608009		1595.99	0.04320337		2185.99	0.00426705		2776	0.01640968		3366	0.03678603		3956	0.00920953
416.2	0.17591559		1006.19	0.06605841		1596.19	0.04319283		2186.19	0.00407172		2776.2	0.01554831		3366.2	0.03627789		3956.2	0.00850764
416.4	0.17484475		1006.39	0.06502657		1596.39	0.04384457		2186.39	0.00430179		2776.4	0.01568532		3366.4	0.03609817		3956.4	0.00785178
416.6	0.17491161		1006.59	0.06615795		1596.59	0.0435911		2186.59	0.00435064		2776.6	0.01507558		3366.6	0.03680291		3956.6	0.00846105
416.8	0.17581921		1006.79	0.06577003		1596.79	0.04353779		2186.79	0.00404276		2776.8	0.01499013		3366.8	0.03678539		3956.8	0.00674408
417	0.17571296		1006.99	0.06517014		1596.99	0.04317646		2186.99	0.00425436		2777	0.01470659		3367	0.03661307		3957	0.00564899
417.2	0.1767707		1007.19	0.06461028		1597.19	0.04371889		2187.19	0.00452528		2777.2	0.01495663		3367.2	0.03553206		3957.2	0.00462651
417.4	0.17710373		1007.39	0.06472238		1597.39	0.04433557		2187.39	0.00389254		2777.4	0.01461068		3367.4	0.03498401		3957.4	0.00514354
417.6	0.17771554		1007.59	0.06460706		1597.59	0.0438258		2187.59	0.00533028		2777.6	0.01364576		3367.6	0.03458327		3957.6	0.00558501
417.8	0.17780609		1007.79	0.06472456		1597.79	0.04360798		2187.79	0.0058621		2777.8	0.01327041		3367.8	0.0350688		3957.8	0.00536573
418	0.17917891		1007.99	0.06513479		1597.99	0.04319049		2187.99	0.00717391		2778	0.01418192		3368	0.03487432		3958	0.00462164
418.2	0.18037437		1008.19	0.06594479		1598.19	0.04383813		2188.19	0.00699682		2778.2	0.01379898		3368.2	0.03507385		3958.2	0.00474508
418.4	0.18172423		1008.39	0.06665249		1598.39	0.04368931		2188.39	0.0063451		2778.4	0.01423899		3368.4	0.03509213		3958.4	0.00396235
418.6	0.18115295		1008.59	0.06627025		1598.59	0.04433578		2188.59	0.00592187		2778.6	0.01496523		3368.6	0.03491044		3958.6	0.00370937
418.8	0.18172956		1008.79	0.06576025		1598.79	0.04517396		2188.79	0.00662618		2778.8	0.01668665		3368.8	0.03436664		3958.8	0.00454859
419	0.18216429		1008.99	0.06557144		1598.99	0.04511606		2188.99	0.00583284		2779	0.01743259		3369	0.03518981		3959	0.004994
419.2	0.18265156		1009.19	0.06620937		1599.19	0.04516247		2189.19	0.00604692		2779.2	0.01718394		3369.2	0.03526411		3959.2	0.00573027
419.4	0.18342457		1009.39	0.06718788		1599.39	0.0454886		2189.39	0.00569915		2779.4	0.01804633		3369.4	0.03562409		3959.4	0.00608804
419.6	0.18390507		1009.59	0.0678469		1599.59	0.04513671		2189.59	0.00542354		2779.6	0.01816964		3369.6	0.03568752		3959.6	0.0062944
419.8	0.18338338		1009.79	0.06797107		1599.79	0.04473255		2189.79	0.00547433		2779.8	0.01789919		3369.8	0.03599413		3959.8	0.00628546
420	0.1836865		1009.99	0.06836659		1599.99	0.04479423		2189.99	0.00486393		2780	0.01780355		3370	0.03613006		3960	0.00625019
420.2	0.18386874		1010.19	0.06829738		1600.19	0.04518196		2190.19	0.00418931		2780.2	0.0170987		3370.2	0.03562866		3960.2	0.00504031
420.4	0.18320683		1010.39	0.06896458		1600.39	0.04549972		2190.39	0.00378153		2780.4	0.01793759		3370.4	0.03597098		3960.4	0.00526073
420.6	0.18339046		1010.59	0.06904386		1600.59	0.04585549		2190.59	0.00373044		2780.6	0.01798093		3370.6	0.03695944		3960.6	0.00587088
420.8	0.18339635		1010.79	0.06864615		1600.79	0.04607009		2190.79	0.00340152		2780.8	0.01762004		3370.8	0.03681068		3960.8	0.00536274
421	0.18264939		1010.99	0.06861907		1600.99	0.04613489		2190.99	0.00411931		2781	0.0173573		3371	0.03660976		3961	0.00570312
421.2	0.18286259		1011.19	0.06889845		1601.19	0.04598833		2191.19	0.00361052		2781.2	0.01777483		3371.2	0.03690569		3961.2	0.00594552
421.4	0.18229138		1011.39	0.06832494		1601.39	0.045425		2191.39	0.00431679		2781.4	0.01748653		3371.4	0.03786886		3961.4	0.00625197
421.6	0.18277155		1011.59	0.06880901		1601.59	0.04492557		2191.59	0.0045236		2781.6	0.01700612		3371.6	0.03858807		3961.6	0.00651214
421.8	0.18202176		1011.79	0.06857967		1601.79	0.04576588		2191.79	0.00469487		2781.8	0.01835303		3371.8	0.03827153		3961.8	0.00550878
422	0.18254165		1011.99	0.06840429		1601.99	0.04687961		2191.99	0.00443482		2782	0.01860687		3372	0.03823824		3962	0.00512913
422.2	0.18326882		1012.19	0.06849769		1602.19	0.04748138		2192.19	0.00355875		2782.2	0.01748265		3372.2	0.0385623		3962.2	0.00620985
422.4	0.18290617		1012.39	0.06791457		1602.39	0.04720729		2192.39	0.00333467		2782.4	0.01796126		3372.4	0.03834515		3962.4	0.00562432
422.6	0.18217984		1012.59	0.06684946		1602.59	0.048874		2192.59	0.00341288		2782.6	0.01881899		3372.6	0.03846976		3962.6	0.00639033
422.8	0.18245142		1012.79	0.06644645		1602.79	0.048658		2192.79	0.0029588		2782.8	0.01860957		3372.8	0.03897656		3962.8	0.00721617
423	0.18255281		1012.99	0.06812077		1602.99	0.04826109		2192.99	0.00283933		2783	0.01861335		3373	0.03900738		3963	0.00759968
423.2	0.18291367		1013.19	0.06809634		1603.19	0.04818192		2193.19	0.00306605		2783.2	0.01865227		3373.2	0.03949278		3963.2	0.00780549
423.4	0.18361031		1013.39	0.06854707		1603.39	0.04822797		2193.39	0.00370037		2783.4	0.01894675		3373.4	0.03913577		3963.4	0.00847631
423.6	0.18373007		1013.59	0.06932958		1603.59	0.0480275		2193.59	0.003933		2783.6	0.01898467		3373.6	0.03907323		3963.6	0.00843965
423.8	0.18338493		1013.79	0.06889456		1603.79	0.04783524		2193.79	0.00344692		2783.8	0.0190824		3373.8	0.03919475		3963.8	0.00851565
424	0.18466772		1013.99	0.07012485		1603.99	0.04748483		2193.99	0.00359281		2784	0.01848059		3374	0.03877037		3964	0.00854738
424.2	0.18512889		1014.19	0.07017155		1604.19	0.04696538		2194.19	0.00343462		2784.2	0.01767023		3374.2	0.0389298		3964.2	0.00866317
424.4	0.18589944		1014.39	0.07046484		1604.39	0.04717286		2194.39	0.00339541		2784.4	0.0182561		3374.4	0.03854038		3964.4	0.00931078
424.6	0.18651733		1014.59	0.0702079		1604.59	0.04713613		2194.59	0.00398004		2784.6	0.01763872		3374.6	0.0385363		3964.6	0.00900413
424.8	0.18660219		1014.79	0.07103727		1604.79	0.04611617		2194.79	0.00342217		2784.8	0.0176271		3374.8	0.03795278		3964.8	0.00885203
425	0.18672672		1014.99	0.07069065		1604.99	0.04586248		2194.99	0.00363698		2785	0.01754462		3375	0.03754678		3965	0.00789066
425.2	0.18801748		1015.19	0.07116288		1605.19	0.04511961		2195.19	0.00358054		2785.2	0.01740514		3375.2	0.03758556		3965.2	0.00741234
425.4	0.18852467		1015.39	0.07053067		1605.39	0.04457753		2195.39	0.0036378		2785.4	0.01629551		3375.4	0.03734925		3965.4	0.00765108
425.6	0.18884642		1015.59	0.07105699		1605.59	0.04435178		2195.59	0.00315349		2785.6	0.01572417		3375.6	0.0363564		3965.6	0.00764596
425.8	0.18836399		1015.79	0.07061021		1605.79	0.04512245		2195.79	0.0039155		2785.8	0.0157596		3375.8	0.03601743		3965.8	0.00728594
426	0.18893887		1015.99	0.07018164		1605.99	0.04555008		2195.99	0.00399762		2786	0.0138547		3376	0.03681387		3966	0.00837283
426.2	0.18923112		1016.19	0.06978729		1606.19	0.04632484		2196.19	0.00382327		2786.2	0.01327227		3376.2	0.03734707		3966.2	0.00908634
426.4	0.18868581		1016.39	0.06942592		1606.39	0.04675765		2196.39	0.00421483		2786.4	0.01340413		3376.4	0.03760477		3966.4	0.00858178
426.6	0.18878685		1016.59	0.06936974		1606.59	0.04815849		2196.59	0.00474071		2786.6	0.01355667		3376.6	0.03749674		3966.6	0.00969241
426.8	0.18807472		1016.79	0.06937161		1606.79	0.04822479		2196.79	0.00410724		2786.8	0.0135101		3376.8	0.03774178		3966.8	0.00979403
427	0.18776739		1016.99	0.06984836		1606.99	0.04906908		2196.99	0.00451476		2787	0.01398227		3377	0.03730501		3967	0.00994411
427.2	0.18691016		1017.19	0.06940483		1607.19	0.04933839		2197.19	0.00444222		2787.2	0.01499796		3377.2	0.03723896		3967.2	0.01022798
427.4	0.1871085		1017.39	0.07102677		1607.39	0.04981584		2197.39	0.00420665		2787.4	0.01615632		3377.4	0.03721308		3967.4	0.00977819
427.6	0.18710027		1017.59	0.0712126		1607.59	0.04990539		2197.59	0.00302402		2787.6	0.01610496		3377.6	0.03735289		3967.6	0.00980089
427.8	0.18707636		1017.79	0.07075619		1607.79	0.04949198		2197.79	0.00213332		2787.8	0.01658607		3377.8	0.03698037		3967.8	0.0096923
428	0.18818949		1017.99	0.07129806		1607.99	0.04935672		2197.99	0.0020291		2788	0.01739588		3378	0.03727386		3968	0.00884076
428.2	0.18873801		1018.19	0.07145965		1608.19	0.04939269		2198.19	0.00112986		2788.2	0.01817735		3378.2	0.03695317		3968.2	0.00843011
428.4	0.189212		1018.39	0.07146431		1608.39	0.04914336		2198.39	0.00061361		2788.4	0.0188863		3378.4	0.0362731		3968.4	0.0080331
428.6	0.18887421		1018.59	0.07203331		1608.59	0.0482331		2198.59	0.00018425		2788.6	0.01913821		3378.6	0.03706489		3968.6	0.00697086
428.8	0.18978485		1018.79	0.07140327		1608.79	0.04761268		2198.79	-0.00012979		2788.8	0.01960218		3378.8	0.0366996		3968.8	0.00720513
429	0.19122567		1018.99	0.0704154		1608.99	0.0471174		2198.99	-0.00020108		2789	0.0193025		3379	0.03565603		3969	0.00726893
429.2	0.19276589		1019.19	0.07039695		1609.19	0.04613972		2199.19	-0.00052543		2789.2	0.01905475		3379.2	0.03550256		3969.2	0.00728501
429.4	0.19229326		1019.39	0.07028191		1609.39	0.04535771		2199.39	-0.00024585		2789.4	0.0183781		3379.4	0.03601949		3969.4	0.00749099
429.6	0.19166248		1019.59	0.07118815		1609.59	0.04473376		2199.59	0.00014221		2789.6	0.01817632		3379.6	0.03651187		3969.6	0.00691773
429.8	0.19126124		1019.79	0.07135757		1609.79	0.04498508		2199.79	0.00097535		2789.8	0.01765544		3379.8	0.03835388		3969.8	0.00659342
430	0.1918218		1019.99	0.07055266		1609.99	0.04483687		2199.99	0.00140981		2790	0.01708816		3380	0.038603		3970	0.00691517
430.2	0.19211751		1020.19	0.06974921		1610.19	0.04554701		2200.19	0.00187068		2790.2	0.01651082		3380.2	0.03866661		3970.2	0.00714286
430.4	0.19186995		1020.39	0.06950514		1610.39	0.04540795		2200.39	0.00253777		2790.4	0.01540322		3380.4	0.03883294		3970.4	0.00694431
430.6	0.19077955		1020.59	0.06925802		1610.59	0.04550679		2200.59	0.00343497		2790.6	0.01600264		3380.6	0.03894659		3970.6	0.0072801
430.8	0.19017907		1020.79	0.06943169		1610.79	0.04566747		2200.79	0.00338655		2790.8	0.01693237		3380.8	0.03904015		3970.8	0.00650891
431	0.1899044		1020.99	0.06996144		1610.99	0.04562037		2200.99	0.00337153		2791	0.01787926		3381	0.03832738		3971	0.00669781
431.2	0.18977651		1021.19	0.07094871		1611.19	0.04558447		2201.19	0.0031977		2791.2	0.01868157		3381.2	0.03825228		3971.2	0.00652189
431.4	0.19088126		1021.39	0.07149043		1611.39	0.04628951		2201.39	0.00253768		2791.4	0.01895228		3381.4	0.03860415		3971.4	0.00659909
431.6	0.19079049		1021.59	0.07110576		1611.59	0.04661657		2201.59	0.00176612		2791.6	0.01907893		3381.6	0.03783785		3971.6	0.00740037
431.8	0.19108873		1021.79	0.07139186		1611.79	0.04624157		2201.79	0.00109485		2791.8	0.0210854		3381.8	0.03751051		3971.8	0.00753214
432	0.19135834		1021.99	0.07153157		1611.99	0.04646202		2201.99	0.00075664		2792	0.02149851		3382	0.03785024		3972	0.0075595
432.2	0.19209031		1022.19	0.07196959		1612.19	0.0467167		2202.19	-0.00004669		2792.2	0.0207584		3382.2	0.03712225		3972.2	0.00734106
432.4	0.19236431		1022.39	0.07214633		1612.39	0.04685823		2202.39	0.00003565		2792.4	0.02138647		3382.4	0.03755995		3972.4	0.00711765
432.6	0.19352967		1022.59	0.07257312		1612.59	0.04664164		2202.59	0.00111038		2792.6	0.02153835		3382.6	0.03782838		3972.6	0.0068034
432.8	0.19442488		1022.79	0.07116779		1612.79	0.04599099		2202.79	0.00161355		2792.8	0.02191716		3382.8	0.03740848		3972.8	0.0075728
433	0.19495241		1022.99	0.07224555		1612.99	0.0450894		2202.99	0.00185085		2793	0.02191724		3383	0.0369569		3973	0.0070617
433.2	0.19545777		1023.19	0.07346771		1613.19	0.04495868		2203.19	0.0020843		2793.2	0.02146938		3383.2	0.0370205		3973.2	0.00649778
433.4	0.19515181		1023.39	0.07353816		1613.39	0.04470542		2203.39	0.00314059		2793.4	0.0209944		3383.4	0.0367209		3973.4	0.00683813
433.6	0.19573471		1023.59	0.07440348		1613.59	0.0444867		2203.59	0.00403956		2793.6	0.01950502		3383.6	0.03729463		3973.6	0.00625397
433.8	0.19595388		1023.79	0.07441306		1613.79	0.04439925		2203.79	0.00471131		2793.8	0.01870136		3383.8	0.03739879		3973.8	0.00592856
434	0.19594837		1023.99	0.0736418		1613.99	0.04417346		2203.99	0.00525256		2794	0.01772415		3384	0.03685712		3974	0.00572656
434.2	0.19647013		1024.19	0.07367398		1614.19	0.04447993		2204.19	0.00497691		2794.2	0.01635999		3384.2	0.03758664		3974.2	0.00612376
434.4	0.19621743		1024.39	0.07408711		1614.39	0.04440776		2204.39	0.00512606		2794.4	0.01665169		3384.4	0.03782301		3974.4	0.00533383
434.6	0.19637357		1024.59	0.07398149		1614.59	0.04476935		2204.59	0.00540847		2794.6	0.01731948		3384.6	0.03782054		3974.6	0.00503766
434.8	0.19698702		1024.79	0.07386481		1614.79	0.04508402		2204.79	0.00584744		2794.8	0.01701103		3384.8	0.0374521		3974.8	0.00514299
435	0.19695648		1024.99	0.07385453		1614.99	0.04494288		2204.99	0.00588606		2795	0.01677934		3385	0.03739987		3975	0.00619174
435.2	0.19731559		1025.19	0.07416746		1615.19	0.04560939		2205.19	0.00570489		2795.2	0.0164863		3385.2	0.03815683		3975.2	0.00678406
435.4	0.1971674		1025.39	0.07392272		1615.39	0.04659826		2205.39	0.00454137		2795.4	0.01694699		3385.4	0.03826697		3975.4	0.00730464
435.6	0.19582518		1025.59	0.07368623		1615.59	0.04647368		2205.59	0.0038757		2795.6	0.01809385		3385.6	0.03848897		3975.6	0.00681832
435.8	0.19497958		1025.79	0.07392839		1615.79	0.04661199		2205.79	0.00233565		2795.8	0.01870516		3385.8	0.03933163		3975.8	0.0066624
436	0.19518615		1025.99	0.07387875		1615.99	0.04755201		2205.99	0.00142303		2796	0.01881868		3386	0.03953672		3976	0.00622295
436.2	0.19542648		1026.19	0.07394005		1616.19	0.04854058		2206.19	0.00106646		2796.2	0.0199229		3386.2	0.03966321		3976.2	0.00512019
436.4	0.19463426		1026.39	0.07385251		1616.39	0.0494196		2206.39	0.00220278		2796.4	0.02129034		3386.4	0.04024889		3976.4	0.00530442
436.6	0.19458632		1026.59	0.07379949		1616.59	0.04899506		2206.59	0.00251355		2796.6	0.02064336		3386.6	0.04058644		3976.6	0.00593089
436.8	0.19413232		1026.79	0.07241563		1616.79	0.04857793		2206.79	0.00202667		2796.8	0.02177445		3386.8	0.04050285		3976.8	0.00608869
437	0.19435331		1026.99	0.07308569		1616.99	0.04871411		2206.99	0.0011217		2797	0.02149865		3387	0.04026131		3977	0.00529095
437.2	0.19449478		1027.19	0.07215403		1617.19	0.0486253		2207.19	0.00053176		2797.2	0.02091702		3387.2	0.03941667		3977.2	0.00540098
437.4	0.19500132		1027.39	0.07125303		1617.39	0.04934682		2207.39	0.00093844		2797.4	0.02040497		3387.4	0.03922817		3977.4	0.00513036
437.6	0.19484729		1027.59	0.07189632		1617.59	0.04878661		2207.59	0.0008194		2797.6	0.01940942		3387.6	0.04037576		3977.6	0.00438213
437.8	0.19404059		1027.79	0.07167368		1617.79	0.04834628		2207.79	0.00055823		2797.8	0.01973273		3387.8	0.04017763		3977.8	0.00481818
438	0.19357764		1027.99	0.07144801		1617.99	0.04810409		2207.99	0.00107399		2798	0.0189311		3388	0.03987042		3978	0.00515476
438.2	0.19504465		1028.19	0.07175726		1618.19	0.04785625		2208.19	0.00054308		2798.2	0.01821632		3388.2	0.0401854		3978.2	0.00552529
438.4	0.1955293		1028.39	0.07198603		1618.39	0.0475773		2208.39	0.00173678		2798.4	0.01791811		3388.4	0.03996479		3978.4	0.00557497
438.6	0.19647314		1028.59	0.07234277		1618.59	0.04708594		2208.59	0.00257089		2798.6	0.01747751		3388.6	0.03994873		3978.6	0.00606579
438.8	0.19695191		1028.79	0.07249071		1618.79	0.04693004		2208.79	0.00282069		2798.8	0.01696076		3388.8	0.03897391		3978.8	0.00727125
439	0.19821683		1028.99	0.07299241		1618.99	0.04715769		2208.99	0.00381465		2799	0.01804106		3389	0.03837054		3979	0.00775402
439.2	0.19887311		1029.19	0.07372057		1619.19	0.04794121		2209.19	0.00391019		2799.2	0.01842675		3389.2	0.03882468		3979.2	0.00821546
439.4	0.19825316		1029.39	0.07392613		1619.39	0.04838211		2209.39	0.00393837		2799.4	0.01913361		3389.4	0.03859652		3979.4	0.00754099
439.6	0.19847591		1029.59	0.07388782		1619.59	0.0488006		2209.59	0.00419175		2799.6	0.02007108		3389.6	0.03871628		3979.6	0.00683084
439.8	0.19859068		1029.79	0.07473334		1619.79	0.0490347		2209.79	0.00438068		2799.8	0.01985551		3389.8	0.03874828		3979.8	0.00686319
440	0.19886752		1029.99	0.07565464		1619.99	0.04883721		2209.99	0.00482891		2800	0.02031749		3390	0.0376981		3980	0.00650617
440.2	0.19862941		1030.19	0.07580848		1620.19	0.049444		2210.19	0.00554465		2800.2	0.01970489		3390.2	0.03877606		3980.2	0.00656297
440.4	0.19849923		1030.39	0.07582361		1620.39	0.05018075		2210.39	0.0059394		2800.4	0.01998719		3390.4	0.0386889		3980.4	0.0070439
440.6	0.19935222		1030.59	0.07546293		1620.59	0.04937623		2210.59	0.004582		2800.6	0.02005983		3390.6	0.03860786		3980.6	0.00721899
440.8	0.19967596		1030.79	0.07471639		1620.79	0.04942182		2210.79	0.00390228		2800.8	0.0207415		3390.8	0.03817442		3980.8	0.00677552
441	0.20032196		1030.99	0.07484606		1620.99	0.04955257		2210.99	0.00333125		2801	0.01999366		3391	0.03920465		3981	0.00640898
441.2	0.20001435		1031.19	0.07500937		1621.19	0.04992122		2211.19	0.00269932		2801.2	0.0193988		3391.2	0.038817		3981.2	0.00670423
441.4	0.20099789		1031.39	0.07569679		1621.39	0.04984325		2211.39	0.00245951		2801.4	0.01891241		3391.4	0.03885877		3981.4	0.00620835
441.6	0.1997627		1031.59	0.0757577		1621.59	0.04840297		2211.59	0.00196771		2801.6	0.01850298		3391.6	0.0396045		3981.6	0.00629108
441.8	0.19985258		1031.79	0.07601818		1621.79	0.04831524		2211.79	0.00215609		2801.8	0.01836192		3391.8	0.03966773		3981.8	0.00696562
442	0.20049379		1031.99	0.07546867		1621.99	0.04861452		2211.99	0.0020039		2802	0.01800189		3392	0.03874942		3982	0.00669971
442.2	0.20090247		1032.19	0.07584468		1622.19	0.04830632		2212.19	0.00160114		2802.2	0.01807215		3392.2	0.03972871		3982.2	0.00715956
442.4	0.20096429		1032.39	0.07611085		1622.39	0.04848058		2212.39	0.00221928		2802.4	0.01833412		3392.4	0.03975955		3982.4	0.00742983
442.6	0.20230071		1032.59	0.07671134		1622.59	0.04854779		2212.59	0.00105485		2802.6	0.01925249		3392.6	0.03890407		3982.6	0.00780289
442.8	0.20339731		1032.79	0.07708494		1622.79	0.04928242		2212.79	0.00075842		2802.8	0.01989199		3392.8	0.03789042		3982.8	0.00884907
443	0.20369423		1032.99	0.0771249		1622.99	0.05052492		2212.99	0.00131214		2803	0.0204746		3393	0.03800713		3983	0.00872272
443.2	0.20375876		1033.19	0.07694163		1623.19	0.05071632		2213.19	0.00181032		2803.2	0.02011846		3393.2	0.0382049		3983.2	0.00862493
443.4	0.2029741		1033.39	0.07675678		1623.39	0.05153064		2213.39	0.00185033		2803.4	0.0207741		3393.4	0.03793792		3983.4	0.00790549
443.6	0.20302492		1033.59	0.077243		1623.59	0.05213811		2213.59	0.00221307		2803.6	0.02083064		3393.6	0.03779623		3983.6	0.00681095
443.8	0.20217009		1033.79	0.0779919		1623.79	0.05176739		2213.79	0.00312518		2803.8	0.02128428		3393.8	0.0377802		3983.8	0.00654508
444	0.20309998		1033.99	0.07767987		1623.99	0.05094533		2213.99	0.0031351		2804	0.02174844		3394	0.03787313		3984	0.00663945
444.2	0.20294439		1034.19	0.07654819		1624.19	0.0513969		2214.19	0.00361601		2804.2	0.02201145		3394.2	0.03896965		3984.2	0.00694176
444.4	0.20382034		1034.39	0.07612357		1624.39	0.05051739		2214.39	0.00311986		2804.4	0.0231525		3394.4	0.0388101		3984.4	0.00673317
444.6	0.20349471		1034.59	0.07558209		1624.59	0.04932906		2214.59	0.00339462		2804.6	0.02343103		3394.6	0.03904113		3984.6	0.00657244
444.8	0.20348394		1034.79	0.07543708		1624.79	0.04896102		2214.79	0.00370637		2804.8	0.02321108		3394.8	0.03913219		3984.8	0.00688139
445	0.20406928		1034.99	0.07470954		1624.99	0.04859105		2214.99	0.00363288		2805	0.02316236		3395	0.03985355		3985	0.00679282
445.2	0.20352996		1035.19	0.07496222		1625.19	0.04726332		2215.19	0.00283767		2805.2	0.02248635		3395.2	0.03949232		3985.2	0.00640117
445.4	0.20417192		1035.39	0.07416931		1625.39	0.04627885		2215.39	0.0027473		2805.4	0.02256578		3395.4	0.03963573		3985.4	0.00653721
445.6	0.20329368		1035.59	0.07327621		1625.59	0.04546578		2215.59	0.00211855		2805.6	0.02341611		3395.6	0.04012702		3985.6	0.00687015
445.8	0.2028348		1035.79	0.0737862		1625.79	0.04601391		2215.79	0.00269524		2805.8	0.02365778		3395.8	0.04038151		3985.8	0.00647062
446	0.20217887		1035.99	0.07336749		1625.99	0.04676598		2215.99	0.00302823		2806	0.02359504		3396	0.04054442		3986	0.00614842
446.2	0.20181824		1036.19	0.07433081		1626.19	0.04725824		2216.19	0.00342511		2806.2	0.02290505		3396.2	0.04132737		3986.2	0.007564
446.4	0.20286482		1036.39	0.0751156		1626.39	0.0481627		2216.39	0.00366867		2806.4	0.02245427		3396.4	0.04160993		3986.4	0.00730649
446.6	0.2042099		1036.59	0.07628797		1626.59	0.04856318		2216.59	0.00287966		2806.6	0.02202163		3396.6	0.04075449		3986.6	0.00730134
446.8	0.20445424		1036.79	0.07704786		1626.79	0.04994709		2216.79	0.00344209		2806.8	0.02172851		3396.8	0.04047388		3986.8	0.00816629
447	0.20460238		1036.99	0.07768377		1626.99	0.05099462		2216.99	0.00369251		2807	0.02152734		3397	0.03989199		3987	0.00811104
447.2	0.20508496		1037.19	0.07849917		1627.19	0.05161496		2217.19	0.00486405		2807.2	0.02097054		3397.2	0.03970459		3987.2	0.00726333
447.4	0.20469169		1037.39	0.07867771		1627.39	0.05253215		2217.39	0.00441866		2807.4	0.02117709		3397.4	0.03914873		3987.4	0.00640742
447.6	0.20489683		1037.59	0.07942655		1627.59	0.05313551		2217.59	0.00507712		2807.6	0.02107942		3397.6	0.03871413		3987.6	0.00585258
447.8	0.20493279		1037.79	0.07927016		1627.79	0.05249626		2217.79	0.00489887		2807.8	0.02052247		3397.8	0.03852081		3987.8	0.00619846
448	0.20646142		1037.99	0.07850448		1627.99	0.05301944		2217.99	0.00491228		2808	0.01999338		3398	0.0382404		3988	0.00563729
448.2	0.20679822		1038.19	0.07795218		1628.19	0.0529202		2218.19	0.00578626		2808.2	0.01949244		3398.2	0.03797151		3988.2	0.00490355
448.4	0.20764565		1038.39	0.07824298		1628.39	0.05189711		2218.39	0.0057266		2808.4	0.01927721		3398.4	0.03778218		3988.4	0.0045006
448.6	0.20784829		1038.59	0.0776922		1628.59	0.05185936		2218.59	0.0060417		2808.6	0.01947951		3398.6	0.03777966		3988.6	0.00402038
448.8	0.20841877		1038.79	0.07739789		1628.79	0.05108126		2218.79	0.00603756		2808.8	0.01948278		3398.8	0.03839795		3988.8	0.00476539
449	0.20782428		1038.99	0.07645659		1628.99	0.0514989		2218.99	0.00555947		2809	0.01966902		3399	0.03903774		3989	0.00453786
449.2	0.20699964		1039.19	0.07623554		1629.19	0.05108963		2219.19	0.00523681		2809.2	0.02040149		3399.2	0.03947664		3989.2	0.00425505
449.4	0.20759526		1039.39	0.07554641		1629.39	0.0515027		2219.39	0.0055339		2809.4	0.02146482		3399.4	0.04035055		3989.4	0.00477534
449.6	0.20747232		1039.59	0.07525987		1629.59	0.05047424		2219.59	0.00475338		2809.6	0.02201987		3399.6	0.04115486		3989.6	0.00504043
449.8	0.20728551		1039.79	0.07540791		1629.79	0.05129358		2219.79	0.0047353		2809.8	0.02159846		3399.8	0.04261357		3989.8	0.00550715
450	0.20738048		1039.99	0.07525756		1629.99	0.05200912		2219.99	0.00367003		2810	0.02168222		3400	0.04349911		3990	0.00550205
450.2	0.20743309		1040.19	0.07620083		1630.19	0.05210655		2220.19	0.00282966		2810.2	0.02135441		3400.2	0.04357301		3990.2	0.00688594
450.4	0.20792605		1040.39	0.07619334		1630.39	0.05239196		2220.39	0.00255732		2810.4	0.02093869		3400.4	0.0444128		3990.4	0.00690145
450.6	0.20813877		1040.59	0.07697342		1630.59	0.05261629		2220.59	0.00195515		2810.6	0.02023412		3400.6	0.04396106		3990.6	0.00752328
450.8	0.20788369		1040.79	0.07824311		1630.79	0.05316074		2220.79	0.00231688		2810.8	0.02084279		3400.8	0.04403797		3990.8	0.00824328
451	0.20786255		1040.99	0.07872859		1630.99	0.05325599		2220.99	0.00273336		2811	0.02115323		3401	0.04391152		3991	0.00816228
451.2	0.20743721		1041.19	0.07942059		1631.19	0.05404335		2221.19	0.00255692		2811.2	0.01971841		3401.2	0.04354407		3991.2	0.00789192
451.4	0.20750561		1041.39	0.07967437		1631.39	0.05375302		2221.39	0.00261153		2811.4	0.01989347		3401.4	0.04226863		3991.4	0.00808458
451.6	0.20650437		1041.59	0.08053769		1631.59	0.05350723		2221.59	0.0029717		2811.6	0.01897398		3401.6	0.041275		3991.6	0.00876653
451.8	0.20616129		1041.79	0.08019473		1631.79	0.05273353		2221.79	0.00273834		2811.8	0.01840395		3401.8	0.0405784		3991.8	0.0090032
452	0.20779786		1041.99	0.08010577		1631.99	0.05326475		2221.99	0.00378453		2812	0.01840416		3402	0.03990664		3992	0.00799441
452.2	0.20769745		1042.19	0.08040276		1632.19	0.05238144		2222.19	0.00469945		2812.2	0.01909684		3402.2	0.03978868		3992.2	0.00829356
452.4	0.20770619		1042.39	0.08061919		1632.39	0.0520566		2222.39	0.00494525		2812.4	0.01907262		3402.4	0.03982723		3992.4	0.00830505
452.6	0.20815263		1042.59	0.07907344		1632.59	0.05192214		2222.59	0.00541429		2812.6	0.01977874		3402.6	0.03990776		3992.6	0.0076893
452.8	0.20825986		1042.79	0.07872703		1632.79	0.05210273		2222.79	0.00538845		2812.8	0.02006652		3402.8	0.03941918		3992.8	0.00771594
453	0.20813166		1042.99	0.07815055		1632.99	0.05295191		2222.99	0.00541864		2813	0.02098696		3403	0.03929008		3993	0.00703774
453.2	0.20882935		1043.19	0.07797635		1633.19	0.0526788		2223.19	0.00575762		2813.2	0.02251064		3403.2	0.03993975		3993.2	0.00716185
453.4	0.21012759		1043.39	0.07818072		1633.39	0.05206311		2223.39	0.00532374		2813.4	0.02229603		3403.4	0.04081314		3993.4	0.00757588
453.6	0.20968911		1043.59	0.07811739		1633.59	0.05090264		2223.59	0.00462888		2813.6	0.02178983		3403.6	0.04110404		3993.6	0.0076059
453.8	0.20935106		1043.79	0.07851771		1633.79	0.05168131		2223.79	0.00390873		2813.8	0.0212874		3403.8	0.04136753		3993.8	0.00794566
454	0.20815045		1043.99	0.07965975		1633.99	0.05178271		2223.99	0.00261752		2814	0.02055037		3404	0.0409102		3994	0.00663704
454.2	0.2081464		1044.19	0.07963451		1634.19	0.05158639		2224.19	0.00269615		2814.2	0.02058551		3404.2	0.04098833		3994.2	0.0069841
454.4	0.208409		1044.39	0.07943395		1634.39	0.05206876		2224.39	0.00230557		2814.4	0.0197529		3404.4	0.04129736		3994.4	0.00636707
454.6	0.20843167		1044.59	0.08108926		1634.59	0.05183588		2224.59	0.00212399		2814.6	0.01950143		3404.6	0.04079167		3994.6	0.0063909
454.8	0.20839106		1044.79	0.08153647		1634.79	0.05267902		2224.79	0.0024209		2814.8	0.02053797		3404.8	0.04022971		3994.8	0.00674996
455	0.20839426		1044.99	0.0820359		1634.99	0.05302573		2224.99	0.0026922		2815	0.01976212		3405	0.0401181		3995	0.00656569
455.2	0.20961407		1045.19	0.08343318		1635.19	0.05291198		2225.19	0.00214361		2815.2	0.01864543		3405.2	0.03929498		3995.2	0.00676706
455.4	0.20986133		1045.39	0.08372777		1635.39	0.05264604		2225.39	0.00206811		2815.4	0.01876617		3405.4	0.03857723		3995.4	0.00709804
455.6	0.20993923		1045.59	0.08339572		1635.59	0.0526295		2225.59	0.00196147		2815.6	0.01797737		3405.6	0.03803869		3995.6	0.00734358
455.8	0.2105904		1045.79	0.08281243		1635.79	0.05322373		2225.79	0.00220667		2815.8	0.0178651		3405.8	0.03879299		3995.8	0.00673715
456	0.21157302		1045.99	0.08270311		1635.99	0.05324643		2225.99	0.00225527		2816	0.01804223		3406	0.03838413		3996	0.00584361
456.2	0.2115035		1046.19	0.08220422		1636.19	0.05312479		2226.19	0.00191213		2816.2	0.01818685		3406.2	0.03798238		3996.2	0.00654257
456.4	0.21239336		1046.39	0.08071353		1636.39	0.05297055		2226.39	0.00272639		2816.4	0.01791641		3406.4	0.03776741		3996.4	0.005863
456.6	0.21315247		1046.59	0.07946414		1636.59	0.05325744		2226.59	0.00244816		2816.6	0.01873002		3406.6	0.03759582		3996.6	0.00595648
456.8	0.21342531		1046.79	0.07971479		1636.79	0.05442636		2226.79	0.00300204		2816.8	0.01941923		3406.8	0.0378717		3996.8	0.00624125
457	0.21323115		1046.99	0.08018286		1636.99	0.05458134		2226.99	0.00304738		2817	0.0200513		3407	0.03904973		3997	0.00644699
457.2	0.21382771		1047.19	0.08054451		1637.19	0.05486616		2227.19	0.00263978		2817.2	0.02085934		3407.2	0.03892418		3997.2	0.00689234
457.4	0.21316129		1047.39	0.08035762		1637.39	0.05446804		2227.39	0.00262638		2817.4	0.02014667		3407.4	0.03985741		3997.4	0.00704293
457.6	0.21185842		1047.59	0.08113936		1637.59	0.05486566		2227.59	0.00305653		2817.6	0.02067355		3407.6	0.04056643		3997.6	0.00733842
457.8	0.21154037		1047.79	0.08166165		1637.79	0.05549017		2227.79	0.00292686		2817.8	0.02143514		3407.8	0.04155445		3997.8	0.00636972
458	0.21083451		1047.99	0.08256698		1637.99	0.05532578		2227.99	0.00269602		2818	0.0223978		3408	0.04160867		3998	0.00539742
458.2	0.21124622		1048.19	0.0820263		1638.19	0.05504312		2228.19	0.00369736		2818.2	0.02340203		3408.2	0.04213755		3998.2	0.00553354
458.4	0.21114672		1048.39	0.08218125		1638.39	0.05504582		2228.39	0.00308365		2818.4	0.02399548		3408.4	0.04174916		3998.4	0.00591902
458.6	0.21202594		1048.59	0.08309928		1638.59	0.0545267		2228.59	0.00326479		2818.6	0.02527695		3408.6	0.04150423		3998.6	0.00663055
458.8	0.21218866		1048.79	0.0827443		1638.79	0.05465769		2228.79	0.00328743		2818.8	0.02601956		3408.8	0.04134117		3998.8	0.00682113
459	0.21248502		1048.99	0.08321139		1638.99	0.0541722		2228.99	0.00266087		2819	0.02562979		3409	0.04213234		3999	0.00595173
459.2	0.21288764		1049.19	0.08322009		1639.19	0.0538397		2229.19	0.0025512		2819.2	0.02588387		3409.2	0.04147846		3999.2	0.00641612
459.4	0.21287678		1049.39	0.08255962		1639.39	0.05354163		2229.39	0.00271825		2819.4	0.02555214		3409.4	0.0411118		3999.4	0.00659044
459.6	0.21291219		1049.59	0.08179569		1639.59	0.05339749		2229.59	0.00272848		2819.6	0.02484567		3409.6	0.04061367		3999.6	0.00649944
459.8	0.21268974		1049.79	0.08135501		1639.79	0.05275078		2229.79	0.002166		2819.8	0.02472009		3409.8	0.04110709		3999.8	0.0059324
460	0.21282682		1049.99	0.08072501		1639.99	0.05164112		2229.99	0.00175546		2820	0.02325729		3410	0.04072852		4000	0.00545461
460.2	0.2137561		1050.19	0.07998625		1640.19	0.05151134		2230.19	0.00143828		2820.2	0.02248044		3410.2	0.04029531		4000.2	0.00552619
460.4	0.21367986		1050.39	0.07949628		1640.39	0.05190661		2230.39	0.00184636		2820.4	0.02217077		3410.4	0.04077535		4000.4	0.00525574
460.6	0.21388123		1050.59	0.08031833		1640.59	0.05221269		2230.59	0.00090751		2820.6	0.02172435		3410.6	0.04062226		4000.6	0.00556533
460.8	0.21363378		1050.79	0.08061347		1640.79	0.05313815		2230.79	0.00082998		2820.8	0.02154776		3410.8	0.04131076		4000.8	0.00579206
461	0.21430646		1050.99	0.08085324		1640.99	0.0533553		2230.99	0.00000924		2821	0.02073611		3411	0.04116148		4001	0.00547253
461.2	0.21517684		1051.19	0.08117407		1641.19	0.05364411		2231.19	-0.000083		2821.2	0.02047439		3411.2	0.04050404		4001.2	0.00576411
461.4	0.21435382		1051.39	0.08191558		1641.39	0.05436112		2231.39	-0.00014274		2821.4	0.01933399		3411.4	0.04269561		4001.4	0.00573517
461.6	0.21472531		1051.59	0.08355685		1641.59	0.05500872		2231.59	0.00018521		2821.6	0.0191404		3411.6	0.04388004		4001.6	0.00525233
461.8	0.21506092		1051.79	0.08425063		1641.79	0.05532012		2231.79	0.00148063		2821.8	0.0184857		3411.8	0.04461815		4001.8	0.00382823
462	0.21476485		1051.99	0.08482623		1641.99	0.05565711		2231.99	0.0016719		2822	0.01847222		3412	0.04431516		4002	0.00442401
462.2	0.21502374		1052.19	0.08551379		1642.19	0.05631851		2232.19	0.00172477		2822.2	0.01855093		3412.2	0.04429273		4002.2	0.00515941
462.4	0.2146608		1052.39	0.08576224		1642.39	0.05680959		2232.39	0.00099545		2822.4	0.01955763		3412.4	0.04416233		4002.4	0.00451342
462.6	0.21555674		1052.59	0.08635419		1642.59	0.05737411		2232.59	0.00133866		2822.6	0.01992721		3412.6	0.04389161		4002.6	0.00529571
462.8	0.21504414		1052.79	0.08673515		1642.79	0.05772306		2232.79	0.0020638		2822.8	0.02018183		3412.8	0.04361503		4002.8	0.00566513
463	0.2144803		1052.99	0.08666956		1642.99	0.05777308		2232.99	0.00199015		2823	0.02049826		3413	0.04367726		4003	0.00593772
463.2	0.21367457		1053.19	0.08631337		1643.19	0.057762		2233.19	0.00304168		2823.2	0.02060442		3413.2	0.04318524		4003.2	0.00665553
463.4	0.21382653		1053.39	0.08645966		1643.39	0.05683976		2233.39	0.0031055		2823.4	0.02025701		3413.4	0.04310975		4003.4	0.0067971
463.6	0.2131483		1053.59	0.08644913		1643.59	0.05740933		2233.59	0.00294301		2823.6	0.02030699		3413.6	0.04307501		4003.6	0.00687744
463.8	0.21386068		1053.79	0.08707577		1643.79	0.0574843		2233.79	0.00343347		2823.8	0.02009488		3413.8	0.04352135		4003.8	0.00650106
464	0.21385445		1053.99	0.08721162		1643.99	0.05697379		2233.99	0.00393033		2824	0.01911987		3414	0.04376412		4004	0.00610267
464.2	0.21441639		1054.19	0.08628238		1644.19	0.05648745		2234.19	0.00306764		2824.2	0.01979635		3414.2	0.0429783		4004.2	0.00648315
464.4	0.21440891		1054.39	0.08647102		1644.39	0.0567624		2234.39	0.00276478		2824.4	0.01987731		3414.4	0.0425506		4004.4	0.00683298
464.6	0.21466128		1054.59	0.08687156		1644.59	0.05634596		2234.59	0.00259655		2824.6	0.02014154		3414.6	0.04218213		4004.6	0.00695441
464.8	0.21496382		1054.79	0.08621156		1644.79	0.05625993		2234.79	0.00263798		2824.8	0.0204549		3414.8	0.04249166		4004.8	0.00696672
465	0.2158354		1054.99	0.08617706		1644.99	0.05618991		2234.99	0.00291572		2825	0.02001114		3415	0.04241026		4005	0.00650843
465.2	0.21609593		1055.19	0.08690233		1645.19	0.05511916		2235.19	0.00280118		2825.2	0.01998453		3415.2	0.04223399		4005.2	0.00638456
465.4	0.21591899		1055.39	0.087764		1645.39	0.05516038		2235.39	0.00284588		2825.4	0.01871177		3415.4	0.04406774		4005.4	0.00636323
465.6	0.21658618		1055.59	0.08727607		1645.59	0.05542509		2235.59	0.0029938		2825.6	0.01819373		3415.6	0.04411548		4005.6	0.00580409
465.8	0.21693191		1055.79	0.08700765		1645.79	0.05613513		2235.79	0.00317175		2825.8	0.01856794		3415.8	0.04377473		4005.8	0.00536652
466	0.21715281		1055.99	0.08650289		1645.99	0.05562911		2235.99	0.00265411		2826	0.01920647		3416	0.04426946		4006	0.00540485
466.2	0.21700468		1056.19	0.08655195		1646.19	0.05561442		2236.19	0.00163746		2826.2	0.01934992		3416.2	0.044141		4006.2	0.00561757
466.4	0.21778238		1056.39	0.08656379		1646.39	0.05538729		2236.39	0.00102098		2826.4	0.0200983		3416.4	0.04413022		4006.4	0.00492747
466.6	0.21904414		1056.59	0.08695057		1646.59	0.05614178		2236.59	0.00115695		2826.6	0.02051165		3416.6	0.04363244		4006.6	0.00626381
466.8	0.2188861		1056.79	0.08720751		1646.79	0.05502849		2236.79	0.00125308		2826.8	0.02130242		3416.8	0.04311355		4006.8	0.00634636
467	0.21853896		1056.99	0.0863509		1646.99	0.05464145		2236.99	0.00072802		2827	0.0220971		3417	0.04293884		4007	0.00651867
467.2	0.21914745		1057.19	0.08531183		1647.19	0.05513088		2237.19	0.00128769		2827.2	0.02235505		3417.2	0.04316853		4007.2	0.0070034
467.4	0.21968821		1057.39	0.08582555		1647.39	0.05484613		2237.39	0.00131206		2827.4	0.02266105		3417.4	0.04165969		4007.4	0.00700262
467.6	0.21935657		1057.59	0.08524165		1647.59	0.05648738		2237.59	0.0014347		2827.6	0.02338741		3417.6	0.04183598		4007.6	0.00749269
467.8	0.21958019		1057.79	0.08476585		1647.79	0.05639019		2237.79	0.00150716		2827.8	0.02298162		3417.8	0.04119442		4007.8	0.00735968
468	0.21894303		1057.99	0.0837502		1647.99	0.05561957		2237.99	0.00105334		2828	0.02287308		3418	0.0407198		4008	0.0072326
468.2	0.21900618		1058.19	0.0824677		1648.19	0.05600098		2238.19	0.00061591		2828.2	0.02306766		3418.2	0.03984337		4008.2	0.00733093
468.4	0.21899591		1058.39	0.08279272		1648.39	0.05661907		2238.39	0.00115128		2828.4	0.02322093		3418.4	0.03926902		4008.4	0.00717118
468.6	0.21881103		1058.59	0.08276531		1648.59	0.05661805		2238.59	0.00199811		2828.6	0.02316998		3418.6	0.03936643		4008.6	0.00693969
468.8	0.21892963		1058.79	0.08251925		1648.79	0.05692386		2238.79	0.00265479		2828.8	0.02304369		3418.8	0.03945719		4008.8	0.00682298
469	0.21922338		1058.99	0.0827725		1648.99	0.05711259		2238.99	0.00356631		2829	0.02267243		3419	0.03956725		4009	0.00691486
469.2	0.2193754		1059.19	0.08319533		1649.19	0.05696055		2239.19	0.00448028		2829.2	0.02234293		3419.2	0.03939774		4009.2	0.00702631
469.4	0.22017279		1059.39	0.08340148		1649.39	0.05801812		2239.39	0.00534641		2829.4	0.02147874		3419.4	0.0401127		4009.4	0.00716345
469.6	0.22107748		1059.59	0.08310279		1649.59	0.05891443		2239.59	0.00584537		2829.6	0.02151433		3419.6	0.04034749		4009.6	0.00672505
469.8	0.22178157		1059.79	0.08377224		1649.79	0.05878768		2239.79	0.00675641		2829.8	0.0219045		3419.8	0.04088198		4009.8	0.00682569
470	0.22178157		1059.99	0.08377224		1650	0.05878768		2239.99	0.00675641		2830	0.0219045		3420	0.04088198		4010	0.00682569
470.2	0.22297688		1060.19	0.08381874		1650.2	0.05871687		2240.19	0.0070123		2830.2	0.02108622		3420.2	0.03916135		4010.2	0.0070358
470.4	0.22382948		1060.39	0.08352165		1650.4	0.05793044		2240.39	0.00687539		2830.4	0.02096254		3420.4	0.03794008		4010.4	0.00698014
470.6	0.22483686		1060.59	0.08344257		1650.6	0.05697228		2240.59	0.00728856		2830.6	0.02095205		3420.6	0.03650313		4010.6	0.00577131
470.8	0.22561604		1060.79	0.08278667		1650.8	0.05595307		2240.79	0.00784175		2830.8	0.02021683		3420.8	0.03462129		4010.8	0.00571539
471	0.22638116		1060.99	0.08265812		1651	0.05522872		2240.99	0.00866717		2831	0.0200802		3421	0.03300057		4011	0.00561381
471.2	0.22771814		1061.19	0.08278009		1651.2	0.05477907		2241.19	0.00887316		2831.2	0.02035821		3421.2	0.03182549		4011.2	0.004693
471.4	0.22889845		1061.39	0.08329888		1651.4	0.05444667		2241.39	0.00866897		2831.4	0.01999601		3421.4	0.03199031		4011.4	0.0038852
471.6	0.22907653		1061.59	0.08370347		1651.6	0.05422832		2241.59	0.00834673		2831.6	0.0201035		3421.6	0.03072979		4011.6	0.00342044
471.8	0.22943455		1061.79	0.08379351		1651.8	0.0537559		2241.79	0.007442		2831.8	0.02048863		3421.8	0.03070228		4011.8	0.00271001
472	0.23011724		1061.99	0.08385008		1652	0.0534275		2241.99	0.00675894		2832	0.02034622		3422	0.03117381		4012	0.00198125
472.2	0.2297191		1062.19	0.08331917		1652.2	0.05315108		2242.19	0.00573858		2832.2	0.02037956		3422.2	0.03176532		4012.2	0.00186253
472.4	0.23040004		1062.39	0.08327179		1652.4	0.05230578		2242.39	0.00519796		2832.4	0.01988856		3422.4	0.03201552		4012.4	0.00269297
472.6	0.22939446		1062.59	0.0839656		1652.6	0.05228755		2242.59	0.00490578		2832.6	0.01990702		3422.6	0.03247266		4012.6	0.00197842
472.8	0.22905673		1062.79	0.08464867		1652.8	0.05230272		2242.79	0.00471188		2832.8	0.01987129		3422.8	0.03212873		4012.8	0.00222752
473	0.22815372		1062.99	0.08441583		1653	0.05231696		2242.99	0.00395366		2833	0.02004345		3423	0.03191387		4013	0.00283984
473.2	0.22718415		1063.19	0.08402424		1653.2	0.05160735		2243.19	0.00427695		2833.2	0.01886841		3423.2	0.03246974		4013.2	0.00352119
473.4	0.22625635		1063.39	0.08444094		1653.4	0.0513558		2243.39	0.00441349		2833.4	0.01839063		3423.4	0.03289223		4013.4	0.00376014
473.6	0.22549503		1063.59	0.08492847		1653.6	0.05123798		2243.59	0.00481865		2833.6	0.0184915		3423.6	0.03261236		4013.6	0.00391782
473.8	0.22428844		1063.79	0.08519005		1653.8	0.05103838		2243.79	0.00494878		2833.8	0.01847321		3423.8	0.03167356		4013.8	0.00386947
474	0.22467794		1063.99	0.08524115		1654	0.05135066		2243.99	0.00439244		2834	0.01739982		3424	0.03019719		4014	0.00395785
474.2	0.22454639		1064.19	0.08471423		1654.2	0.05138102		2244.19	0.00401642		2834.2	0.01729249		3424.2	0.0300333		4014.2	0.00322614
474.4	0.2240578		1064.39	0.08425202		1654.4	0.05065696		2244.39	0.00392228		2834.4	0.01783454		3424.4	0.02985199		4014.4	0.00293608
474.6	0.22440904		1064.59	0.08414696		1654.6	0.04976713		2244.59	0.00484193		2834.6	0.01777716		3424.6	0.02963715		4014.6	0.00254312
474.8	0.22442016		1064.79	0.08336494		1654.8	0.04938523		2244.79	0.00542513		2834.8	0.01791423		3424.8	0.02921265		4014.8	0.00375585
475	0.22429894		1064.99	0.08305063		1655	0.04903631		2244.99	0.00575945		2835	0.01867589		3425	0.02895375		4015	0.00417495
475.2	0.22478849		1065.19	0.08217975		1655.2	0.0487497		2245.19	0.00560142		2835.2	0.01931382		3425.2	0.02867443		4015.2	0.00434086
475.4	0.22445395		1065.39	0.08246918		1655.4	0.04829964		2245.39	0.00555336		2835.4	0.01944695		3425.4	0.02881877		4015.4	0.00391893
475.6	0.22387478		1065.59	0.08153051		1655.6	0.04788989		2245.59	0.00513657		2835.6	0.01970114		3425.6	0.02810712		4015.6	0.0041073
475.8	0.22474534		1065.79	0.08081584		1655.8	0.04807427		2245.79	0.0048578		2835.8	0.0198437		3425.8	0.03005248		4015.8	0.00352358
476	0.22507748		1065.99	0.0800336		1656	0.04818269		2245.99	0.0048588		2836	0.01972563		3426	0.03007372		4016	0.00330907
476.2	0.22425094		1066.19	0.07896727		1656.2	0.04791091		2246.19	0.00414975		2836.2	0.01997872		3426.2	0.02990586		4016.2	0.00380262
476.4	0.22387017		1066.39	0.07916552		1656.4	0.04739383		2246.39	0.00335399		2836.4	0.01987615		3426.4	0.02988385		4016.4	0.00320002
476.6	0.22253797		1066.59	0.07855011		1656.6	0.04781857		2246.59	0.00311605		2836.6	0.01979108		3426.6	0.03014657		4016.6	0.0025295
476.8	0.2220777		1066.79	0.0790086		1656.8	0.0485994		2246.79	0.00332687		2836.8	0.01908799		3426.8	0.02993937		4016.8	0.00347651
477	0.22168044		1066.99	0.07903468		1657	0.04866815		2246.99	0.00364905		2837	0.01888444		3427	0.03034635		4017	0.00318409
477.2	0.22124822		1067.19	0.0787141		1657.2	0.04856922		2247.19	0.00399145		2837.2	0.01753013		3427.2	0.03089722		4017.2	0.00237812
477.4	0.22087348		1067.39	0.07963315		1657.4	0.04894425		2247.39	0.00464423		2837.4	0.0176755		3427.4	0.03121147		4017.4	0.00211912
477.6	0.2208475		1067.59	0.08032807		1657.6	0.04947444		2247.59	0.00453962		2837.6	0.01713038		3427.6	0.03135294		4017.6	0.00173054
477.8	0.22128615		1067.79	0.08033832		1657.8	0.04983297		2247.79	0.00404936		2837.8	0.01718669		3427.8	0.03109553		4017.8	0.00085807
478	0.2219907		1067.99	0.08115942		1658	0.05104164		2247.99	0.00377105		2838	0.01540204		3428	0.02983097		4018	0.00037259
478.2	0.22284281		1068.19	0.08149417		1658.2	0.05098314		2248.19	0.003802		2838.2	0.01563388		3428.2	0.02997791		4018.2	-0.00088581
478.4	0.22366999		1068.39	0.08210916		1658.4	0.0506847		2248.39	0.00350586		2838.4	0.01617936		3428.4	0.02968009		4018.4	0.00030712
478.6	0.22463761		1068.59	0.08228839		1658.6	0.05049264		2248.59	0.00316121		2838.6	0.0168578		3428.6	0.02907449		4018.6	0.00071477
478.8	0.22446525		1068.79	0.08222276		1658.8	0.04986996		2248.79	0.00266205		2838.8	0.01686669		3428.8	0.02815876		4018.8	0.00149811
479	0.22488236		1068.99	0.08236341		1659	0.04899593		2248.99	0.00214574		2839	0.01644778		3429	0.02756831		4019	0.00181341
479.2	0.22619739		1069.19	0.08218815		1659.2	0.04853741		2249.19	0.00249389		2839.2	0.01640474		3429.2	0.02742893		4019.2	0.0011553
479.4	0.22579244		1069.39	0.08275733		1659.4	0.04798522		2249.39	0.00274258		2839.4	0.01660314		3429.4	0.02755656		4019.4	0.00013833
479.6	0.22653725		1069.59	0.08259472		1659.6	0.04835752		2249.59	0.0026548		2839.6	0.01675896		3429.6	0.02811636		4019.6	0.00076462
479.8	0.22659462		1069.79	0.08152741		1659.8	0.0478242		2249.79	0.0024489		2839.8	0.01743738		3429.8	0.02745056		4019.8	0.00053787
480	0.2261982		1069.99	0.08088191		1660	0.0468913		2249.99	0.00223371		2840	0.01753965		3430	0.02591672		4020	0.00043916
480.2	0.22538943		1070.19	0.08050468		1660.2	0.0467238		2250.19	0.00196249		2840.2	0.01744835		3430.2	0.02515778		4020.2	0.00087343
480.4	0.22453331		1070.39	0.0803105		1660.4	0.04667125		2250.39	0.00178022		2840.4	0.0176193		3430.4	0.02502677		4020.4	0.00103006
480.6	0.22373018		1070.59	0.07992722		1660.6	0.04725196		2250.59	0.00211431		2840.6	0.01725269		3430.6	0.02574354		4020.6	0.00074957
480.8	0.22350098		1070.79	0.08061673		1660.8	0.04704827		2250.79	0.00335246		2840.8	0.01760152		3430.8	0.02552104		4020.8	0.00064715
481	0.22284344		1070.99	0.08002166		1661	0.04698173		2250.99	0.00326449		2841	0.01767037		3431	0.02543297		4021	-0.00009585
481.2	0.22233753		1071.19	0.07958976		1661.2	0.04718613		2251.19	0.003745		2841.2	0.0171644		3431.2	0.02502543		4021.2	-0.00009227
481.4	0.22248304		1071.39	0.07934313		1661.4	0.04733635		2251.39	0.0033654		2841.4	0.01714014		3431.4	0.02545608		4021.4	0.00033747
481.6	0.2225601		1071.59	0.0786654		1661.6	0.04783625		2251.59	0.00285286		2841.6	0.01622105		3431.6	0.02584618		4021.6	0.00141319
481.8	0.22288673		1071.79	0.07833391		1661.8	0.04806721		2251.79	0.00297649		2841.8	0.0167745		3431.8	0.02682296		4021.8	0.00120575
482	0.22222293		1071.99	0.07910317		1662	0.04842517		2251.99	0.00348763		2842	0.0157462		3432	0.02640689		4022	0.00097561
482.2	0.22253747		1072.19	0.07923949		1662.2	0.04802509		2252.19	0.00370967		2842.2	0.01579201		3432.2	0.02692751		4022.2	0.00113639
482.4	0.22288026		1072.39	0.07860127		1662.4	0.04751832		2252.39	0.00307054		2842.4	0.0160415		3432.4	0.0268068		4022.4	0.00201982
482.6	0.22271461		1072.59	0.07816898		1662.6	0.04790096		2252.59	0.00184317		2842.6	0.01565673		3432.6	0.0267356		4022.6	0.00239513
482.8	0.2227307		1072.79	0.07804847		1662.8	0.04684716		2252.79	0.00158807		2842.8	0.01416407		3432.8	0.02721782		4022.8	0.00195677
483	0.22332563		1072.99	0.07776871		1663	0.04622859		2252.99	0.00178838		2843	0.01353441		3433	0.02799803		4023	0.0013495
483.2	0.22332617		1073.19	0.07800669		1663.2	0.0454645		2253.19	0.00241205		2843.2	0.01423735		3433.2	0.02865264		4023.2	0.00061748
483.4	0.22227761		1073.39	0.07835062		1663.4	0.04465503		2253.39	0.00248742		2843.4	0.01400545		3433.4	0.02881936		4023.4	0.00054249
483.6	0.22387549		1073.59	0.07801792		1663.6	0.0440639		2253.59	0.0028773		2843.6	0.0142928		3433.6	0.02937751		4023.6	0.00039146
483.8	0.22396633		1073.79	0.0779676		1663.8	0.0426422		2253.79	0.00224006		2843.8	0.01481056		3433.8	0.02848303		4023.8	-0.00056915
484	0.22430596		1073.99	0.0791338		1664	0.04350528		2253.99	0.00235443		2844	0.01469481		3434	0.02894633		4024	-0.00035058
484.2	0.22374286		1074.19	0.07971492		1664.2	0.0440171		2254.19	0.00235252		2844.2	0.0146443		3434.2	0.02870591		4024.2	0.00021136
484.4	0.22358698		1074.39	0.07937415		1664.4	0.04461546		2254.39	0.00289793		2844.4	0.01526686		3434.4	0.02815744		4024.4	0.00020421
484.6	0.22322817		1074.59	0.07887785		1664.6	0.04424619		2254.59	0.00329381		2844.6	0.01531358		3434.6	0.02801343		4024.6	-0.00073677
484.8	0.22275835		1074.79	0.07915758		1664.8	0.04441067		2254.79	0.00446389		2844.8	0.01575086		3434.8	0.02693549		4024.8	-0.00032884
485	0.22158491		1074.99	0.07889712		1665	0.04523353		2254.99	0.00384366		2845	0.01566701		3435	0.02630007		4025	-0.00059393
485.2	0.22196622		1075.19	0.07877188		1665.2	0.04473371		2255.19	0.0032871		2845.2	0.01489924		3435.2	0.02579151		4025.2	0
485.4	0.22145623		1075.39	0.07902		1665.4	0.04527123		2255.39	0.00312064		2845.4	0.01415462		3435.4	0.02705142		4025.4	-0.00027123
485.6	0.22102936		1075.59	0.07959813		1665.6	0.04574337		2255.59	0.00297399		2845.6	0.01392807		3435.6	0.02735395		4025.6	0.00067814
485.8	0.22068384		1075.79	0.08047229		1665.8	0.04633971		2255.79	0.00306383		2845.8	0.01496663		3435.8	0.02739261		4025.8	-0.00044505
486	0.22065131		1075.99	0.0814681		1666	0.04705119		2255.99	0.0027373		2846	0.01511576		3436	0.0267261		4026	-0.00007573
486.2	0.2207122		1076.19	0.08166659		1666.2	0.04722221		2256.19	0.00177728		2846.2	0.01450744		3436.2	0.02779271		4026.2	-0.00021552
486.4	0.22087794		1076.39	0.08144497		1666.4	0.0478513		2256.39	0.00143803		2846.4	0.01417925		3436.4	0.02759466		4026.4	-0.00016631
486.6	0.22045921		1076.59	0.08226867		1666.6	0.04880204		2256.59	0.00060022		2846.6	0.01399559		3436.6	0.02781405		4026.6	-0.00088715
486.8	0.22126427		1076.79	0.08296801		1666.8	0.04819736		2256.79	0.00025247		2846.8	0.01416921		3436.8	0.02789606		4026.8	-0.00170819
487	0.22148509		1076.99	0.08331714		1667	0.04826511		2256.99	0.00044842		2847	0.0153376		3437	0.02829631		4027	-0.00176774
487.2	0.22180188		1077.19	0.08492695		1667.2	0.04783949		2257.19	-0.00035127		2847.2	0.01611551		3437.2	0.02928204		4027.2	-0.00196314
487.4	0.22252114		1077.39	0.08516829		1667.4	0.04780898		2257.39	-0.00017113		2847.4	0.01594809		3437.4	0.02963009		4027.4	-0.00215942
487.6	0.22347529		1077.59	0.08522577		1667.6	0.04705904		2257.59	0.0003318		2847.6	0.0164275		3437.6	0.02993085		4027.6	-0.00216757
487.8	0.22343118		1077.79	0.08654931		1667.8	0.04687772		2257.79	-0.00083827		2847.8	0.01675184		3437.8	0.02991182		4027.8	-0.00136873
488	0.22312631		1077.99	0.08649041		1668	0.04735686		2257.99	-0.00028454		2848	0.01586432		3438	0.03016595		4028	-0.00015856
488.2	0.222893		1078.19	0.08593222		1668.2	0.04670526		2258.19	0.00078055		2848.2	0.01565558		3438.2	0.02939574		4028.2	-0.00007525
488.4	0.22320055		1078.39	0.08589606		1668.4	0.04620122		2258.39	0.00039357		2848.4	0.01621647		3438.4	0.02893274		4028.4	-0.00005606
488.6	0.22293018		1078.59	0.08568271		1668.6	0.04521375		2258.59	-0.00051502		2848.6	0.01610623		3438.6	0.02897868		4028.6	0.00024873
488.8	0.22256995		1078.79	0.0848675		1668.8	0.0443884		2258.79	-0.00030065		2848.8	0.01640866		3438.8	0.02849222		4028.8	0.00049779
489	0.22281006		1078.99	0.08383724		1669	0.04381526		2258.99	-0.00200411		2849	0.01642457		3439	0.02747963		4029	0.00054321
489.2	0.22266809		1079.19	0.08316382		1669.2	0.04320905		2259.19	-0.00210519		2849.2	0.01658768		3439.2	0.02739294		4029.2	0.00075811
489.4	0.22231646		1079.39	0.08228148		1669.4	0.04446057		2259.39	-0.00192582		2849.4	0.01636156		3439.4	0.02787712		4029.4	0.00034953
489.6	0.22257355		1079.59	0.08152746		1669.6	0.04459357		2259.59	-0.00326481		2849.6	0.01684868		3439.6	0.02736354		4029.6	0.00122235
489.8	0.22220029		1079.79	0.08071996		1669.8	0.04435253		2259.79	-0.00321135		2849.8	0.01708269		3439.8	0.0275276		4029.8	0.00047862
490	0.22132847		1079.99	0.08015279		1670	0.04424488		2259.99	-0.004121		2850	0.01624624		3440	0.02768877		4030	0.00022512
490.2	0.22064876		1080.19	0.07948946		1670.2	0.04461464		2260.19	-0.00325915		2850.2	0.01495051		3440.2	0.02954361		4030.2	0.00035318
490.4	0.22040509		1080.39	0.07908983		1670.4	0.04605371		2260.39	-0.00315035		2850.4	0.0142461		3440.4	0.02840453		4030.4	0.00021613
490.6	0.22009822		1080.59	0.07868351		1670.6	0.04624478		2260.59	-0.00309859		2850.6	0.01371829		3440.6	0.02857761		4030.6	-0.00055147
490.8	0.22023699		1080.79	0.07723664		1670.8	0.04514397		2260.79	-0.00324684		2850.8	0.01424037		3440.8	0.02845954		4030.8	-0.00082595
491	0.21955996		1080.99	0.07741484		1671	0.04591526		2260.99	-0.00228091		2851	0.0142031		3441	0.02814281		4031	-0.0014112
491.2	0.21897003		1081.19	0.07807697		1671.2	0.0462579		2261.19	-0.00232783		2851.2	0.01396463		3441.2	0.0282211		4031.2	-0.00177892
491.4	0.21906136		1081.39	0.07746328		1671.4	0.04703199		2261.39	-0.00154742		2851.4	0.01344568		3441.4	0.02727951		4031.4	-0.00158102
491.6	0.21929049		1081.59	0.07779789		1671.6	0.04697007		2261.59	-0.00122223		2851.6	0.01331036		3441.6	0.02657493		4031.6	-0.00175769
491.8	0.2198076		1081.79	0.07821185		1671.8	0.04741598		2261.79	-0.00171132		2851.8	0.01356196		3441.8	0.02679494		4031.8	-0.0017591
492	0.21989937		1081.99	0.07860913		1672	0.04767253		2261.99	-0.00020046		2852	0.01341724		3442	0.02609821		4032	-0.00152268
492.2	0.22028212		1082.19	0.07887576		1672.2	0.04740095		2262.19	-0.00037111		2852.2	0.01420123		3442.2	0.02605988		4032.2	-0.00217227
492.4	0.2213498		1082.39	0.0802588		1672.4	0.04704267		2262.39	-0.00140523		2852.4	0.01468687		3442.4	0.02712712		4032.4	-0.00284228
492.6	0.22126347		1082.59	0.08009354		1672.6	0.04714045		2262.59	-0.00165983		2852.6	0.01548751		3442.6	0.02690149		4032.6	-0.00292169
492.8	0.22118009		1082.79	0.07973685		1672.8	0.046259		2262.79	-0.00111718		2852.8	0.01603095		3442.8	0.02676065		4032.8	-0.00247163
493	0.22102103		1082.99	0.08042304		1673	0.04685248		2262.99	-0.00165369		2853	0.0167108		3443	0.02686578		4033	-0.00222318
493.2	0.22199872		1083.19	0.08018392		1673.2	0.04638449		2263.19	-0.00079626		2853.2	0.01686952		3443.2	0.02761427		4033.2	-0.00307859
493.4	0.22261261		1083.39	0.08028738		1673.4	0.04684679		2263.39	-0.00141385		2853.4	0.01662751		3443.4	0.02836384		4033.4	-0.00302661
493.6	0.22287919		1083.59	0.08107263		1673.6	0.04597792		2263.59	-0.0012162		2853.6	0.01604025		3443.6	0.0288034		4033.6	-0.00262609
493.8	0.22206679		1083.79	0.08122416		1673.8	0.04548159		2263.79	-0.00078609		2853.8	0.0149768		3443.8	0.02903285		4033.8	-0.00348709
494	0.22181606		1083.99	0.08103704		1674	0.04578395		2263.99	-0.00086747		2854	0.01446173		3444	0.02878536		4034	-0.0033797
494.2	0.22203575		1084.19	0.08058209		1674.2	0.04573168		2264.19	-0.00001263		2854.2	0.01364175		3444.2	0.02965942		4034.2	-0.00352716
494.4	0.22201443		1084.39	0.08093423		1674.4	0.04477607		2264.39	-0.00032584		2854.4	0.01330119		3444.4	0.02774954		4034.4	-0.00427452
494.6	0.22190108		1084.59	0.08014413		1674.6	0.04330098		2264.59	-0.00059392		2854.6	0.01285234		3444.6	0.02752955		4034.6	-0.00447667
494.8	0.22132403		1084.79	0.0800332		1674.8	0.04241143		2264.79	0.00011144		2854.8	0.01297517		3444.8	0.02726509		4034.8	-0.00409653
495	0.22097453		1084.99	0.08087357		1675	0.04285756		2264.99	0.00053637		2855	0.01221083		3445	0.02639117		4035	-0.00387599
495.2	0.22045451		1085.19	0.07973017		1675.2	0.04286188		2265.19	0.00048743		2855.2	0.01227067		3445.2	0.02628865		4035.2	-0.00360166
495.4	0.22022323		1085.39	0.07933213		1675.4	0.04257492		2265.39	0.00073044		2855.4	0.01205847		3445.4	0.0249571		4035.4	-0.00223727
495.6	0.21995235		1085.59	0.07929618		1675.6	0.04252764		2265.59	0.00038219		2855.6	0.01164191		3445.6	0.0246452		4035.6	-0.00163623
495.8	0.22002375		1085.79	0.07888156		1675.8	0.04234475		2265.79	0.00050422		2855.8	0.01138057		3445.8	0.02497026		4035.8	0.00000433
496	0.22042713		1085.99	0.07897601		1676	0.04244766		2265.99	0.00073488		2856	0.01129482		3446	0.02494266		4036	0.00057118
496.2	0.22028809		1086.19	0.07903084		1676.2	0.04293796		2266.19	0.00040497		2856.2	0.01162019		3446.2	0.02570369		4036.2	0.00031086
496.4	0.22026255		1086.39	0.07989049		1676.4	0.04380082		2266.39	0.00005107		2856.4	0.01158549		3446.4	0.02641468		4036.4	0.00055424
496.6	0.21956856		1086.59	0.07970527		1676.6	0.04489398		2266.59	-0.00029751		2856.6	0.01192413		3446.6	0.02595808		4036.6	0.00057574
496.8	0.2193134		1086.79	0.07930875		1676.8	0.04442693		2266.79	-0.000387		2856.8	0.01162871		3446.8	0.02588876		4036.8	0.00102943
497	0.2204636		1086.99	0.07981884		1677	0.04489632		2266.99	-0.00038795		2857	0.0123709		3447	0.0265579		4037	0.00026351
497.2	0.22178921		1087.19	0.079494		1677.2	0.04521764		2267.19	-0.00081759		2857.2	0.0127596		3447.2	0.02703922		4037.2	-0.00081699
497.4	0.22199407		1087.39	0.07954156		1677.4	0.04603416		2267.39	-0.0017537		2857.4	0.01314989		3447.4	0.02775713		4037.4	-0.0013961
497.6	0.22243736		1087.59	0.0797876		1677.6	0.04651886		2267.59	-0.00157868		2857.6	0.01299539		3447.6	0.02784222		4037.6	-0.00235454
497.8	0.2225208		1087.79	0.0796614		1677.8	0.04667769		2267.79	-0.00239917		2857.8	0.01465297		3447.8	0.02798475		4037.8	-0.00364178
498	0.22311348		1087.99	0.07959996		1678	0.0464874		2267.99	-0.00230951		2858	0.01540954		3448	0.02768222		4038	-0.00453886
498.2	0.22371643		1088.19	0.07985767		1678.2	0.046246		2268.19	-0.00240366		2858.2	0.01528933		3448.2	0.02767214		4038.2	-0.00484735
498.4	0.22314337		1088.39	0.08021534		1678.4	0.04532537		2268.39	-0.00229727		2858.4	0.01564911		3448.4	0.02639407		4038.4	-0.00417117
498.6	0.22196289		1088.59	0.07988466		1678.6	0.04539214		2268.59	-0.00201201		2858.6	0.01464949		3448.6	0.02752544		4038.6	-0.00408786
498.8	0.2218136		1088.79	0.08014247		1678.8	0.04527782		2268.79	-0.00048856		2858.8	0.01452056		3448.8	0.02792906		4038.8	-0.00459959
499	0.22137374		1088.99	0.07981713		1679	0.04500322		2268.99	-0.00037777		2859	0.01386851		3449	0.02712861		4039	-0.00437726
499.2	0.22015713		1089.19	0.0787012		1679.2	0.04482992		2269.19	0.00015411		2859.2	0.01358738		3449.2	0.02704869		4039.2	-0.00388829
499.4	0.21984328		1089.39	0.07853357		1679.4	0.04402039		2269.39	0.00036323		2859.4	0.01290885		3449.4	0.02620867		4039.4	-0.00253795
499.6	0.21974152		1089.59	0.07728607		1679.6	0.04392323		2269.59	-0.00039212		2859.6	0.01162935		3449.6	0.02555685		4039.6	-0.00191343
499.8	0.22002689		1089.79	0.07731061		1679.8	0.04374797		2269.79	-0.00009245		2859.8	0.01206775		3449.8	0.02544901		4039.8	-0.00116278
500	0.22013		1089.99	0.077271		1680	0.04349695		2269.99	-0.00047618		2860	0.01110402		3450	0.02497352		4040	-0.00096916
500.2	0.22031988		1090.19	0.07755129		1680.2	0.04481402		2270.19	-0.00083334		2860.2	0.01084655		3450.2	0.02466838		4040.2	-0.00074774
500.4	0.22021134		1090.39	0.07764264		1680.4	0.04520211		2270.39	-0.00212354		2860.4	0.01021415		3450.4	0.0251073		4040.4	-0.00045387
500.6	0.22017051		1090.59	0.07680759		1680.6	0.04496125		2270.59	-0.00280059		2860.6	0.00933554		3450.6	0.02440016		4040.6	-0.00114905
500.8	0.22029506		1090.79	0.07633464		1680.8	0.04363774		2270.79	-0.00342314		2860.8	0.0093169		3450.8	0.02435072		4040.8	-0.00031967
501	0.22064388		1090.99	0.0771726		1681	0.04402576		2270.99	-0.00437061		2861	0.00996344		3451	0.02518915		4041	-0.00070543
501.2	0.22074542		1091.19	0.0778836		1681.2	0.04463966		2271.19	-0.00541707		2861.2	0.0112037		3451.2	0.02557569		4041.2	-0.00207522
501.4	0.22054025		1091.39	0.07734163		1681.4	0.04448486		2271.39	-0.00562559		2861.4	0.01195465		3451.4	0.02560355		4041.4	-0.00273795
501.6	0.22011991		1091.59	0.07821661		1681.6	0.04509861		2271.59	-0.00551908		2861.6	0.01332721		3451.6	0.02607484		4041.6	-0.00302654
501.8	0.21978858		1091.79	0.0784238		1681.8	0.04486666		2271.79	-0.00641993		2861.8	0.01464736		3451.8	0.02640818		4041.8	-0.00271966
502	0.21895432		1091.99	0.07884361		1682	0.04528017		2271.99	-0.00522902		2862	0.01497879		3452	0.0262721		4042	-0.00349026
502.2	0.21885469		1092.19	0.07839674		1682.2	0.04523987		2272.19	-0.00499512		2862.2	0.01496105		3452.2	0.0265014		4042.2	-0.00356052
502.4	0.21817549		1092.39	0.07909933		1682.4	0.04517883		2272.39	-0.00448675		2862.4	0.01472875		3452.4	0.02647656		4042.4	-0.00394137
502.6	0.21791434		1092.59	0.07944647		1682.6	0.0461923		2272.59	-0.00421713		2862.6	0.01551304		3452.6	0.02697443		4042.6	-0.00468915
502.8	0.21869785		1092.79	0.0794461		1682.8	0.04616108		2272.79	-0.00364534		2862.8	0.01527679		3452.8	0.02632273		4042.8	-0.00429143
503	0.21768762		1092.99	0.07940363		1683	0.04544322		2272.99	-0.00266811		2863	0.01516089		3453	0.0265674		4043	-0.00319657
503.2	0.2180422		1093.19	0.07890852		1683.2	0.04520154		2273.19	-0.00248301		2863.2	0.01456938		3453.2	0.02711673		4043.2	-0.00330966
503.4	0.21868569		1093.39	0.078985		1683.4	0.04496751		2273.39	-0.00196128		2863.4	0.01395885		3453.4	0.02685756		4043.4	-0.00345618
503.6	0.21945047		1093.59	0.07937484		1683.6	0.04522869		2273.59	-0.00175524		2863.6	0.0138		3453.6	0.02695589		4043.6	-0.00321744
503.8	0.2197614		1093.79	0.08044684		1683.8	0.04553387		2273.79	-0.00132174		2863.8	0.01411621		3453.8	0.02745165		4043.8	-0.00267587
504	0.22056246		1093.99	0.08085292		1684	0.0455055		2273.99	-0.00118119		2864	0.01223279		3454	0.02783779		4044	-0.00219596
504.2	0.22097917		1094.19	0.08193336		1684.2	0.04586929		2274.19	-0.00179016		2864.2	0.0118102		3454.2	0.02884054		4044.2	-0.00239787
504.4	0.2207776		1094.39	0.08144831		1684.4	0.04451278		2274.39	-0.00215066		2864.4	0.01014346		3454.4	0.02885339		4044.4	-0.0021029
504.6	0.22084558		1094.59	0.08108472		1684.6	0.04440232		2274.59	-0.00188119		2864.6	0.00889371		3454.6	0.02867672		4044.6	-0.00233557
504.8	0.22067602		1094.79	0.08160513		1684.8	0.04425843		2274.79	-0.00174937		2864.8	0.00885765		3454.8	0.02880293		4044.8	-0.00146334
505	0.2205068		1094.99	0.08280602		1685	0.04515351		2274.99	-0.00223957		2865	0.00862788		3455	0.02907006		4045	-0.00169797
505.2	0.22079984		1095.19	0.08243271		1685.2	0.04519431		2275.19	-0.0014588		2865.2	0.00900141		3455.2	0.02931603		4045.2	-0.00247862
505.4	0.2198627		1095.39	0.08191753		1685.4	0.04545587		2275.39	-0.00132719		2865.4	0.00996234		3455.4	0.02896144		4045.4	-0.00272208
505.6	0.21947767		1095.59	0.08179328		1685.6	0.04583411		2275.59	-0.00201151		2865.6	0.01072359		3455.6	0.02895556		4045.6	-0.0021294
505.8	0.2191044		1095.79	0.08131824		1685.8	0.04571825		2275.79	-0.00279381		2865.8	0.01198854		3455.8	0.02853668		4045.8	-0.00275354
506	0.21843182		1095.99	0.08117815		1686	0.04564766		2275.99	-0.00206776		2866	0.01255571		3456	0.02840289		4046	-0.00377912
506.2	0.2191384		1096.19	0.08040849		1686.2	0.04545339		2276.19	-0.00315773		2866.2	0.01283363		3456.2	0.02843631		4046.2	-0.00355377
506.4	0.21912101		1096.39	0.08036676		1686.4	0.04522843		2276.39	-0.00332274		2866.4	0.01275393		3456.4	0.02811668		4046.4	-0.00364513
506.6	0.21862129		1096.59	0.07934075		1686.6	0.04539077		2276.59	-0.00381375		2866.6	0.01389734		3456.6	0.02766301		4046.6	-0.0025567
506.8	0.2181295		1096.79	0.0795161		1686.8	0.04499316		2276.79	-0.00346063		2866.8	0.01288496		3456.8	0.02756929		4046.8	-0.00209205
507	0.21713575		1096.99	0.07960989		1687	0.04411955		2276.99	-0.0033007		2867	0.01369488		3457	0.02735919		4047	-0.00178522
507.2	0.21755284		1097.19	0.07943095		1687.2	0.04468307		2277.19	-0.00373257		2867.2	0.01330129		3457.2	0.02691316		4047.2	-0.00260954
507.4	0.21724013		1097.39	0.08040212		1687.4	0.04511703		2277.39	-0.00338617		2867.4	0.01371933		3457.4	0.02608325		4047.4	-0.0022167
507.6	0.21745456		1097.59	0.08092645		1687.6	0.04531243		2277.59	-0.00290664		2867.6	0.01419158		3457.6	0.02619501		4047.6	-0.00235596
507.8	0.21662586		1097.79	0.0816102		1687.8	0.04547308		2277.79	-0.00322865		2867.8	0.01380169		3457.8	0.02581302		4047.8	-0.00196459
508	0.21698496		1097.99	0.08230592		1688	0.04495835		2277.99	-0.00344083		2868	0.01209845		3458	0.02670342		4048	-0.00265793
508.2	0.21620753		1098.19	0.08315182		1688.2	0.04417689		2278.19	-0.00392409		2868.2	0.01126855		3458.2	0.0260475		4048.2	-0.00216218
508.4	0.21619407		1098.39	0.08211192		1688.4	0.0443739		2278.39	-0.00384076		2868.4	0.00955682		3458.4	0.02503472		4048.4	-0.00231794
508.6	0.21619483		1098.59	0.08192834		1688.6	0.04552384		2278.59	-0.00372409		2868.6	0.00895196		3458.6	0.02487421		4048.6	-0.00197787
508.8	0.21605107		1098.79	0.0818268		1688.8	0.04547044		2278.79	-0.00450961		2868.8	0.0084027		3458.8	0.02433648		4048.8	-0.00175635
509	0.21669032		1098.99	0.08178108		1689	0.04617581		2278.99	-0.00499427		2869	0.00785036		3459	0.02435433		4049	-0.00166621
509.2	0.21688238		1099.19	0.08092302		1689.2	0.04554078		2279.19	-0.00505571		2869.2	0.00805358		3459.2	0.02439178		4049.2	-0.00201084
509.4	0.21730624		1099.39	0.08066931		1689.4	0.04560221		2279.39	-0.00559751		2869.4	0.00906395		3459.4	0.0242673		4049.4	-0.00166824
509.6	0.21812027		1099.59	0.07932556		1689.6	0.04554211		2279.59	-0.00546529		2869.6	0.00909579		3459.6	0.02415335		4049.6	-0.00146569
509.8	0.21796166		1099.79	0.07891176		1689.8	0.04507766		2279.79	-0.00515394		2869.8	0.00990538		3459.8	0.02469141		4049.8	-0.00151496
510	0.21794646		1099.99	0.07740826		1690	0.04481475		2279.99	-0.00450435		2870	0.00948015		3460	0.02580307		4050	-0.00117022
510.2	0.21851035		1100.19	0.07604988		1690.2	0.04499634		2280.19	-0.00472241		2870.2	0.00955549		3460.2	0.02563755		4050.2	-0.00067016
510.4	0.2187297		1100.39	0.07500751		1690.4	0.04486256		2280.39	-0.00469977		2870.4	0.0090767		3460.4	0.02608625		4050.4	-0.00085492
510.6	0.21919036		1100.59	0.07508939		1690.6	0.04484319		2280.59	-0.00502221		2870.6	0.00945287		3460.6	0.02566969		4050.6	-0.00101383
510.8	0.21888623		1100.79	0.07539942		1690.8	0.04435962		2280.79	-0.00445612		2870.8	0.00942818		3460.8	0.02524971		4050.8	-0.00194305
511	0.21865293		1100.99	0.07521701		1691	0.04409317		2280.99	-0.00479437		2871	0.00964086		3461	0.02464655		4051	-0.00168727
511.2	0.21888448		1101.19	0.07596062		1691.2	0.0450757		2281.19	-0.00459994		2871.2	0.00977797		3461.2	0.02455446		4051.2	-0.00170309
511.4	0.21843263		1101.39	0.07651261		1691.4	0.04412714		2281.39	-0.00471919		2871.4	0.01012715		3461.4	0.02425619		4051.4	-0.00184089
511.6	0.21881125		1101.59	0.07657119		1691.6	0.0445471		2281.59	-0.00412809		2871.6	0.00958311		3461.6	0.0239337		4051.6	-0.0023646
511.8	0.21825867		1101.79	0.07792301		1691.8	0.0446241		2281.79	-0.00489814		2871.8	0.00938986		3461.8	0.02346405		4051.8	-0.00299966
512	0.21822509		1101.99	0.07814555		1692	0.04409549		2281.99	-0.00534556		2872	0.00890737		3462	0.02327167		4052	-0.00407299
512.2	0.2173537		1102.19	0.07878575		1692.2	0.04425905		2282.19	-0.00572039		2872.2	0.00817288		3462.2	0.0225404		4052.2	-0.00438543
512.4	0.21834671		1102.39	0.07838159		1692.4	0.04457186		2282.39	-0.00567521		2872.4	0.00881505		3462.4	0.02271165		4052.4	-0.0056727
512.6	0.21843219		1102.59	0.0790757		1692.6	0.04498088		2282.59	-0.00579305		2872.6	0.00955395		3462.6	0.02173269		4052.6	-0.00690833
512.8	0.21859869		1102.79	0.07937087		1692.8	0.04509088		2282.79	-0.00633106		2872.8	0.01045342		3462.8	0.02229357		4052.8	-0.00759514
513	0.21926212		1102.99	0.07995879		1693	0.04557146		2282.99	-0.0058161		2873	0.01120244		3463	0.02152864		4053	-0.00770493
513.2	0.21983147		1103.19	0.0796883		1693.2	0.04486205		2283.19	-0.00635402		2873.2	0.01167502		3463.2	0.02195185		4053.2	-0.00765117
513.4	0.21994694		1103.39	0.07933984		1693.4	0.0450388		2283.39	-0.00649707		2873.4	0.01189373		3463.4	0.02204146		4053.4	-0.00726665
513.6	0.21970274		1103.59	0.07960801		1693.6	0.04597132		2283.59	-0.00607126		2873.6	0.0118399		3463.6	0.02265211		4053.6	-0.00699072
513.8	0.21923841		1103.79	0.08000419		1693.8	0.04591445		2283.79	-0.00501741		2873.8	0.01238831		3463.8	0.0227073		4053.8	-0.00625326
514	0.21869741		1103.99	0.07988075		1694	0.04531445		2283.99	-0.00504834		2874	0.01192443		3464	0.02347731		4054	-0.00591296
514.2	0.21919577		1104.19	0.07982838		1694.2	0.0450359		2284.19	-0.00480624		2874.2	0.01180538		3464.2	0.0236128		4054.2	-0.00589468
514.4	0.21956752		1104.39	0.07982792		1694.4	0.04520968		2284.39	-0.0050057		2874.4	0.01209224		3464.4	0.02372458		4054.4	-0.00570728
514.6	0.21951047		1104.59	0.07991473		1694.6	0.0450386		2284.59	-0.00453753		2874.6	0.0118956		3464.6	0.02304914		4054.6	-0.00573293
514.8	0.21945618		1104.79	0.07913207		1694.8	0.04524257		2284.79	-0.00429337		2874.8	0.0114146		3464.8	0.02362647		4054.8	-0.00432403
515	0.21925854		1104.99	0.07893033		1695	0.0457851		2284.99	-0.00408789		2875	0.01006305		3465	0.02438872		4055	-0.00326161
515.2	0.21897581		1105.19	0.07896986		1695.2	0.04547282		2285.19	-0.00444636		2875.2	0.00993251		3465.2	0.02441128		4055.2	-0.00179491
515.4	0.2185685		1105.39	0.07862298		1695.4	0.0451022		2285.39	-0.00532283		2875.4	0.00963347		3465.4	0.0248731		4055.4	-0.00215977
515.6	0.21858149		1105.59	0.07812586		1695.6	0.04562478		2285.59	-0.00569737		2875.6	0.00784282		3465.6	0.02408547		4055.6	-0.00176124
515.8	0.218164		1105.79	0.07806416		1695.8	0.04507874		2285.79	-0.00611255		2875.8	0.00730289		3465.8	0.02421322		4055.8	-0.0020544
516	0.21822123		1105.99	0.07709461		1696	0.04454256		2285.99	-0.00662425		2876	0.00646334		3466	0.02412047		4056	-0.00171198
516.2	0.21788243		1106.19	0.07752128		1696.2	0.04502285		2286.19	-0.00629723		2876.2	0.00658271		3466.2	0.02427318		4056.2	-0.00219729
516.4	0.21833028		1106.39	0.07640015		1696.4	0.04471449		2286.39	-0.00502987		2876.4	0.00772595		3466.4	0.02413559		4056.4	-0.00269102
516.6	0.21791267		1106.59	0.07655406		1696.6	0.04529738		2286.59	-0.00513698		2876.6	0.00806023		3466.6	0.02309015		4056.6	-0.00342661
516.8	0.21782688		1106.79	0.0754328		1696.8	0.04570764		2286.79	-0.00521378		2876.8	0.00868106		3466.8	0.02342896		4056.8	-0.00313449
517	0.21803194		1106.99	0.07525553		1697	0.04561921		2286.99	-0.00592598		2877	0.00884095		3467	0.022369		4057	-0.00344857
517.2	0.21843264		1107.19	0.07510231		1697.2	0.0452814		2287.19	-0.00668542		2877.2	0.0077568		3467.2	0.02279863		4057.2	-0.00386982
517.4	0.21826195		1107.39	0.0752235		1697.4	0.04606493		2287.39	-0.00625821		2877.4	0.00758125		3467.4	0.02243206		4057.4	-0.00341214
517.6	0.2186205		1107.59	0.07484741		1697.6	0.04635724		2287.59	-0.00517796		2877.6	0.0080597		3467.6	0.02286755		4057.6	-0.0034327
517.8	0.21886972		1107.79	0.07430487		1697.8	0.04549038		2287.79	-0.00405103		2877.8	0.00883809		3467.8	0.02220751		4057.8	-0.00465168
518	0.21873437		1107.99	0.07432445		1698	0.04444059		2287.99	-0.00457898		2878	0.00949737		3468	0.02347966		4058	-0.00516797
518.2	0.21930024		1108.19	0.07354187		1698.2	0.04523774		2288.19	-0.00390955		2878.2	0.01031386		3468.2	0.02366867		4058.2	-0.00493064
518.4	0.21927317		1108.39	0.07343123		1698.4	0.04558672		2288.39	-0.00378215		2878.4	0.01164071		3468.4	0.02288863		4058.4	-0.00482958
518.6	0.21837986		1108.59	0.07312277		1698.6	0.04593151		2288.59	-0.00361918		2878.6	0.01141075		3468.6	0.02348542		4058.6	-0.00521114
518.8	0.21919678		1108.79	0.07340041		1698.8	0.04593512		2288.79	-0.00440641		2878.8	0.01199069		3468.8	0.02422504		4058.8	-0.00489486
519	0.21870957		1108.99	0.07450705		1699	0.04519354		2288.99	-0.00460807		2879	0.01172909		3469	0.02389832		4059	-0.00527147
519.2	0.21875882		1109.19	0.07559909		1699.2	0.04411656		2289.19	-0.00628674		2879.2	0.0123143		3469.2	0.02396019		4059.2	-0.00475645
519.4	0.21908976		1109.39	0.07542937		1699.4	0.0438238		2289.39	-0.00630317		2879.4	0.01274623		3469.4	0.02522616		4059.4	-0.00515086
519.6	0.21907839		1109.59	0.07497047		1699.6	0.04215911		2289.59	-0.006911		2879.6	0.01210097		3469.6	0.02560497		4059.6	-0.00497408
519.8	0.21940757		1109.79	0.07558465		1699.8	0.04101907		2289.79	-0.00695172		2879.8	0.01226693		3469.8	0.02591441		4059.8	-0.00450328
520	0.21909579		1109.99	0.07587525		1700	0.0405909		2289.99	-0.0070999		2880	0.01187242		3470	0.02533621		4060	-0.00456599
520.2	0.21788322		1110.19	0.0764688		1700.2	0.04033272		2290.19	-0.00620482		2880.2	0.01171955		3470.2	0.02533169		4060.2	-0.00539415
520.4	0.21788741		1110.39	0.0762977		1700.4	0.04022464		2290.39	-0.00632309		2880.4	0.01151745		3470.4	0.02481436		4060.4	-0.00580075
520.6	0.21744276		1110.59	0.07634215		1700.6	0.04136217		2290.59	-0.00687464		2880.6	0.01119103		3470.6	0.02485969		4060.6	-0.00568622
520.8	0.21772291		1110.79	0.07603213		1700.8	0.04104521		2290.79	-0.00691565		2880.8	0.01068132		3470.8	0.02514945		4060.8	-0.00637531
521	0.21824069		1110.99	0.0766265		1701	0.04169733		2290.99	-0.00665564		2881	0.00994145		3471	0.02515668		4061	-0.0067186
521.2	0.2178101		1111.19	0.07688809		1701.2	0.04299787		2291.19	-0.00608793		2881.2	0.00926326		3471.2	0.02461868		4061.2	-0.00572308
521.4	0.21765419		1111.39	0.0766108		1701.4	0.04382613		2291.39	-0.00547594		2881.4	0.00994657		3471.4	0.02515545		4061.4	-0.00473296
521.6	0.21822408		1111.59	0.07607258		1701.6	0.04425914		2291.59	-0.004679		2881.6	0.00914344		3471.6	0.02540441		4061.6	-0.00443286
521.8	0.21830353		1111.79	0.07647124		1701.8	0.04414441		2291.79	-0.00477057		2881.8	0.00896523		3471.8	0.0254667		4061.8	-0.00422124
522	0.21819968		1111.99	0.07669953		1702	0.0445728		2291.99	-0.00518345		2882	0.00884117		3472	0.02520688		4062	-0.00333549
522.2	0.21779959		1112.19	0.07620354		1702.2	0.04504273		2292.19	-0.00555322		2882.2	0.00895581		3472.2	0.02470236		4062.2	-0.00231365
522.4	0.21826892		1112.39	0.07789415		1702.4	0.04509578		2292.39	-0.00577609		2882.4	0.00889737		3472.4	0.02446634		4062.4	-0.00277069
522.6	0.21815051		1112.59	0.07859901		1702.6	0.04638949		2292.59	-0.00648683		2882.6	0.00817984		3472.6	0.02502207		4062.6	-0.00228737
522.8	0.21896325		1112.79	0.0791859		1702.8	0.04627402		2292.79	-0.00779755		2882.8	0.00807127		3472.8	0.0246414		4062.8	-0.00162406
523	0.21891566		1112.99	0.07917897		1703	0.04551919		2292.99	-0.00779799		2883	0.00734119		3473	0.02488438		4063	-0.00060065
523.2	0.2194253		1113.19	0.07912292		1703.2	0.04434786		2293.19	-0.00842319		2883.2	0.00803488		3473.2	0.02667091		4063.2	-0.00052086
523.4	0.21995486		1113.39	0.0789575		1703.4	0.04404167		2293.39	-0.00805142		2883.4	0.00833993		3473.4	0.0274415		4063.4	-0.00047651
523.6	0.22027408		1113.59	0.07827995		1703.6	0.04352937		2293.59	-0.00874711		2883.6	0.00797982		3473.6	0.02742845		4063.6	-0.00070652
523.8	0.22028584		1113.79	0.0780623		1703.8	0.04342488		2293.79	-0.00935396		2883.8	0.00677905		3473.8	0.02702247		4063.8	-0.00092573
524	0.219933		1113.99	0.07752511		1704	0.04296976		2293.99	-0.0095947		2884	0.00627454		3474	0.02649951		4064	-0.00196334
524.2	0.21958952		1114.19	0.07752353		1704.2	0.04254997		2294.19	-0.00957716		2884.2	0.00610784		3474.2	0.0262274		4064.2	-0.00310291
524.4	0.21967276		1114.39	0.07708679		1704.4	0.04337369		2294.39	-0.01046019		2884.4	0.00641419		3474.4	0.02588149		4064.4	-0.0040036
524.6	0.21881761		1114.59	0.07574679		1704.6	0.04315151		2294.59	-0.01024727		2884.6	0.00602112		3474.6	0.02624203		4064.6	-0.00452011
524.8	0.21900941		1114.79	0.07590744		1704.8	0.04298346		2294.79	-0.00994417		2884.8	0.00568376		3474.8	0.02610117		4064.8	-0.00593135
525	0.21822374		1114.99	0.07589847		1705	0.04385362		2294.99	-0.00902883		2885	0.00580362		3475	0.02578213		4065	-0.00603516
525.2	0.21777216		1115.19	0.07589435		1705.2	0.04417498		2295.19	-0.00885961		2885.2	0.00659354		3475.2	0.02535126		4065.2	-0.00633363
525.4	0.2180578		1115.39	0.07600011		1705.4	0.04397136		2295.39	-0.00884275		2885.4	0.00670602		3475.4	0.02608036		4065.4	-0.0070581
525.6	0.21802208		1115.59	0.07518564		1705.6	0.04408149		2295.59	-0.00864165		2885.6	0.00619584		3475.6	0.0250784		4065.6	-0.00762468
525.8	0.21809442		1115.79	0.07482166		1705.8	0.04345815		2295.79	-0.00801088		2885.8	0.0064238		3475.8	0.02527349		4065.8	-0.00841607
526	0.21855937		1115.99	0.07376671		1706	0.04356215		2295.99	-0.00789693		2886	0.00659189		3476	0.02473498		4066	-0.00863254
526.2	0.21896223		1116.19	0.0745319		1706.2	0.04345362		2296.19	-0.0083286		2886.2	0.00663401		3476.2	0.02478049		4066.2	-0.00905137
526.4	0.21985049		1116.39	0.07537188		1706.4	0.04395627		2296.39	-0.00854651		2886.4	0.00518506		3476.4	0.02485142		4066.4	-0.00803709
526.6	0.21971521		1116.59	0.07482264		1706.6	0.04414294		2296.59	-0.00891089		2886.6	0.00516556		3476.6	0.02448797		4066.6	-0.00712795
526.8	0.21998629		1116.79	0.07434242		1706.8	0.04341307		2296.79	-0.00890118		2886.8	0.00487041		3476.8	0.02368702		4066.8	-0.00716032
527	0.21991923		1116.99	0.07455829		1707	0.04336313		2296.99	-0.008448		2887	0.00447338		3477	0.02434893		4067	-0.00637982
527.2	0.2204307		1117.19	0.07471663		1707.2	0.04319631		2297.19	-0.00783572		2887.2	0.00533321		3477.2	0.02477335		4067.2	-0.00773225
527.4	0.22053188		1117.39	0.07472107		1707.4	0.04433749		2297.39	-0.00750632		2887.4	0.00521727		3477.4	0.02383562		4067.4	-0.00747934
527.6	0.22090297		1117.59	0.07351796		1707.6	0.04434378		2297.59	-0.00772885		2887.6	0.00534579		3477.6	0.02340142		4067.6	-0.0074225
527.8	0.22036113		1117.79	0.07404595		1707.8	0.04397814		2297.79	-0.00883472		2887.8	0.00530189		3477.8	0.02333944		4067.8	-0.00759347
528	0.21972982		1117.99	0.0735827		1708	0.04364166		2297.99	-0.0081555		2888	0.00641307		3478	0.0230059		4068	-0.00713693
528.2	0.21873825		1118.19	0.07394611		1708.2	0.04367114		2298.19	-0.00797955		2888.2	0.00700432		3478.2	0.02271447		4068.2	-0.00677864
528.4	0.21859356		1118.39	0.07434417		1708.4	0.04434845		2298.39	-0.00818001		2888.4	0.00724442		3478.4	0.02299303		4068.4	-0.00679069
528.6	0.21729028		1118.59	0.07423043		1708.6	0.04391413		2298.59	-0.0083612		2888.6	0.0073699		3478.6	0.02317239		4068.6	-0.00561737
528.8	0.21708191		1118.79	0.07511215		1708.8	0.04414219		2298.79	-0.0082339		2888.8	0.00745577		3478.8	0.02366633		4068.8	-0.00582991
529	0.21707477		1118.99	0.07583398		1709	0.04426941		2298.99	-0.00823603		2889	0.00867086		3479	0.02413046		4069	-0.00617836
529.2	0.2173482		1119.19	0.07587568		1709.2	0.04453428		2299.19	-0.00885792		2889.2	0.00976379		3479.2	0.0250244		4069.2	-0.00640728
529.4	0.21812654		1119.39	0.07627411		1709.4	0.04435199		2299.39	-0.00896695		2889.4	0.01010137		3479.4	0.02485253		4069.4	-0.00555738
529.6	0.21750354		1119.59	0.07603655		1709.6	0.04381169		2299.59	-0.00835251		2889.6	0.0105096		3479.6	0.02467532		4069.6	-0.00533606
529.8	0.21862274		1119.79	0.07621837		1709.8	0.04365429		2299.79	-0.00741259		2889.8	0.00991292		3479.8	0.02470254		4069.8	-0.00490463
530	0.21877353		1119.99	0.07647825		1710	0.04317435		2299.99	-0.00858306		2890	0.01055412		3480	0.02422172		4070	-0.00366308
530.2	0.21888317		1120.19	0.07719499		1710.2	0.04261101		2300.19	-0.00866733		2890.2	0.01045249		3480.2	0.02377026		4070.2	-0.00343945
530.4	0.21936186		1120.39	0.07676531		1710.4	0.04197086		2300.39	-0.00918056		2890.4	0.00951322		3480.4	0.02295341		4070.4	-0.00237725
530.6	0.219761		1120.59	0.07721431		1710.6	0.04045803		2300.59	-0.00959316		2890.6	0.0096786		3480.6	0.0224406		4070.6	-0.00353855
530.8	0.22031594		1120.79	0.0775381		1710.8	0.04033251		2300.79	-0.00947543		2890.8	0.00834027		3480.8	0.02188264		4070.8	-0.00381759
531	0.22005022		1120.99	0.07785424		1711	0.04027577		2300.99	-0.00979968		2891	0.00812102		3481	0.02210467		4071	-0.00403439
531.2	0.21956383		1121.19	0.07812959		1711.2	0.03955526		2301.19	-0.00898509		2891.2	0.0082855		3481.2	0.02231527		4071.2	-0.00540839
531.4	0.219534		1121.39	0.07780837		1711.4	0.03912366		2301.39	-0.00945611		2891.4	0.00772373		3481.4	0.02253726		4071.4	-0.00597011
531.6	0.21864805		1121.59	0.07707161		1711.6	0.03939844		2301.59	-0.00931632		2891.6	0.0080267		3481.6	0.02281756		4071.6	-0.00653501
531.8	0.21772997		1121.79	0.07647514		1711.8	0.04055608		2301.79	-0.00935912		2891.8	0.00790134		3481.8	0.02254467		4071.8	-0.00688716
532	0.21718873		1121.99	0.07509505		1712	0.04101626		2301.99	-0.00786531		2892	0.00811684		3482	0.02258355		4072	-0.00754165
532.2	0.21706226		1122.19	0.07520365		1712.2	0.04187125		2302.19	-0.0085273		2892.2	0.00805849		3482.2	0.02266782		4072.2	-0.00770892
532.4	0.21824371		1122.39	0.07543728		1712.4	0.04243796		2302.39	-0.00849882		2892.4	0.00819082		3482.4	0.02227904		4072.4	-0.00839756
532.6	0.21780382		1122.59	0.07487168		1712.6	0.04322172		2302.59	-0.008498		2892.6	0.00812251		3482.6	0.02237789		4072.6	-0.00836491
532.8	0.21836424		1122.79	0.07475477		1712.8	0.04392278		2302.79	-0.00800719		2892.8	0.00810906		3482.8	0.02293272		4072.8	-0.00867224
533	0.21890566		1122.99	0.07439477		1713	0.04433991		2302.99	-0.00824136		2893	0.00911504		3483	0.02326081		4073	-0.00937688
533.2	0.21923027		1123.19	0.07331289		1713.2	0.04425269		2303.19	-0.00834539		2893.2	0.00949664		3483.2	0.02265239		4073.2	-0.00914163
533.4	0.2197976		1123.39	0.07374102		1713.4	0.04442054		2303.39	-0.00760107		2893.4	0.00920389		3483.4	0.02137783		4073.4	-0.00867563
533.6	0.21958373		1123.59	0.07361618		1713.6	0.04399671		2303.59	-0.00662247		2893.6	0.00941177		3483.6	0.02089398		4073.6	-0.00852192
533.8	0.21964337		1123.79	0.07288508		1713.8	0.04402052		2303.79	-0.00580597		2893.8	0.00947854		3483.8	0.02069717		4073.8	-0.00790697
534	0.21899252		1123.99	0.07213858		1714	0.04335938		2303.99	-0.00596807		2894	0.00965414		3484	0.02097676		4074	-0.00716538
534.2	0.21908919		1124.19	0.07161471		1714.2	0.0432468		2304.19	-0.00627026		2894.2	0.0088495		3484.2	0.0208281		4074.2	-0.00720856
534.4	0.21930975		1124.39	0.07148971		1714.4	0.04282491		2304.39	-0.00751406		2894.4	0.0087424		3484.4	0.02078385		4074.4	-0.00653641
534.6	0.21965216		1124.59	0.07303004		1714.6	0.04185927		2304.59	-0.00829272		2894.6	0.00783337		3484.6	0.02137461		4074.6	-0.00689827
534.8	0.22007157		1124.79	0.07365278		1714.8	0.04311082		2304.79	-0.00915256		2894.8	0.00763975		3484.8	0.02196932		4074.8	-0.00697364
535	0.21978623		1124.99	0.07419774		1715	0.04217131		2304.99	-0.00941613		2895	0.007417		3485	0.02232695		4075	-0.00765098
535.2	0.21958204		1125.19	0.07446754		1715.2	0.04204651		2305.19	-0.00905927		2895.2	0.00656886		3485.2	0.02290617		4075.2	-0.00852076
535.4	0.22029235		1125.39	0.07418612		1715.4	0.04254079		2305.39	-0.00976129		2895.4	0.00658242		3485.4	0.02292668		4075.4	-0.00956237
535.6	0.22002569		1125.59	0.07330925		1715.6	0.04347935		2305.59	-0.00891869		2895.6	0.00728189		3485.6	0.02274736		4075.6	-0.0094118
535.8	0.22104818		1125.79	0.07305416		1715.8	0.04418087		2305.79	-0.00883061		2895.8	0.00751178		3485.8	0.02205992		4075.8	-0.00979294
536	0.22089814		1125.99	0.07281562		1716	0.04401849		2305.99	-0.00873792		2896	0.0078173		3486	0.02271935		4076	-0.01037584
536.2	0.22156874		1126.19	0.07357492		1716.2	0.04475559		2306.19	-0.00874574		2896.2	0.0079731		3486.2	0.02296906		4076.2	-0.00983549
536.4	0.22219623		1126.39	0.07357094		1716.4	0.0445953		2306.39	-0.00838305		2896.4	0.00862412		3486.4	0.02276842		4076.4	-0.01060106
536.6	0.22175337		1126.59	0.07300923		1716.6	0.04557128		2306.59	-0.00839418		2896.6	0.00925044		3486.6	0.02331672		4076.6	-0.00983833
536.8	0.22196818		1126.79	0.07266854		1716.8	0.04617525		2306.79	-0.00908886		2896.8	0.01021878		3486.8	0.02331743		4076.8	-0.00996795
537	0.22246627		1126.99	0.0721325		1717	0.04518409		2306.99	-0.00949182		2897	0.01028371		3487	0.02285461		4077	-0.01044486
537.2	0.22194997		1127.19	0.07177928		1717.2	0.04500107		2307.19	-0.0093985		2897.2	0.01034023		3487.2	0.02219478		4077.2	-0.00956198
537.4	0.22177482		1127.39	0.07166459		1717.4	0.04454055		2307.39	-0.00850271		2897.4	0.00994392		3487.4	0.02154242		4077.4	-0.00878897
537.6	0.22091709		1127.59	0.07128869		1717.6	0.04382964		2307.59	-0.00886573		2897.6	0.00980677		3487.6	0.02122823		4077.6	-0.00752936
537.8	0.21905255		1127.79	0.07139065		1717.8	0.04377767		2307.79	-0.00918432		2897.8	0.00896338		3487.8	0.02160569		4077.8	-0.00650197
538	0.21887446		1127.99	0.07128624		1718	0.04372592		2307.99	-0.00910052		2898	0.00821486		3488	0.02080089		4078	-0.00596742
538.2	0.21871208		1128.19	0.07206345		1718.2	0.04355931		2308.19	-0.00989154		2898.2	0.00749211		3488.2	0.02076317		4078.2	-0.00583379
538.4	0.21845837		1128.39	0.07329202		1718.4	0.04366876		2308.39	-0.00970225		2898.4	0.00740985		3488.4	0.02110031		4078.4	-0.00534789
538.6	0.21835102		1128.59	0.07431329		1718.6	0.04341277		2308.59	-0.01073637		2898.6	0.00645317		3488.6	0.02084586		4078.6	-0.00607564
538.8	0.21884869		1128.79	0.07433241		1718.8	0.04359969		2308.79	-0.01143998		2898.8	0.00571235		3488.8	0.02083475		4078.8	-0.00666945
539	0.21848561		1128.99	0.07434742		1719	0.04222507		2308.99	-0.01126866		2899	0.004535		3489	0.01981015		4079	-0.00708661
539.2	0.21767135		1129.19	0.07413416		1719.2	0.04225201		2309.19	-0.01149933		2899.2	0.00427276		3489.2	0.01869704		4079.2	-0.0080537
539.4	0.21757498		1129.39	0.07356748		1719.4	0.04215696		2309.39	-0.01188888		2899.4	0.0048951		3489.4	0.01910225		4079.4	-0.00843952
539.6	0.21736175		1129.59	0.0728398		1719.6	0.0420604		2309.59	-0.01126552		2899.6	0.00481458		3489.6	0.01908525		4079.6	-0.0073819
539.8	0.21705818		1129.79	0.07377009		1719.8	0.04155324		2309.79	-0.01081235		2899.8	0.00546808		3489.8	0.01941867		4079.8	-0.00768691
540	0.21631989		1129.99	0.07443869		1720	0.04154089		2309.99	-0.01091385		2900	0.0049565		3490	0.02007519		4080	-0.00812113
540.2	0.21675768		1130.19	0.07449612		1720.2	0.04226261		2310.19	-0.010083		2900.2	0.00508328		3490.2	0.02020261		4080.2	-0.00784413
540.4	0.21627512		1130.39	0.07392864		1720.4	0.042741		2310.39	-0.01042715		2900.4	0.00540292		3490.4	0.02076089		4080.4	-0.00831433
540.6	0.21653541		1130.59	0.07363415		1720.6	0.04380621		2310.59	-0.0098918		2900.6	0.0062584		3490.6	0.02100499		4080.6	-0.00729344
540.8	0.21704404		1130.79	0.0738687		1720.8	0.04418685		2310.79	-0.01041273		2900.8	0.00617979		3490.8	0.02165506		4080.8	-0.00769415
541	0.21738862		1130.99	0.07368561		1721	0.04300703		2310.99	-0.01014438		2901	0.00469889		3491	0.02195055		4081	-0.00708123
541.2	0.21630083		1131.19	0.07366334		1721.2	0.04310869		2311.19	-0.0095092		2901.2	0.00500507		3491.2	0.02185628		4081.2	-0.00605883
541.4	0.21597493		1131.39	0.07431204		1721.4	0.04252367		2311.39	-0.00909819		2901.4	0.00455431		3491.4	0.02178309		4081.4	-0.00584241
541.6	0.21541519		1131.59	0.07535407		1721.6	0.04202702		2311.59	-0.00994189		2901.6	0.00449122		3491.6	0.0219004		4081.6	-0.00545847
541.8	0.21599049		1131.79	0.07607475		1721.8	0.04160547		2311.79	-0.00889203		2901.8	0.00389853		3491.8	0.02171151		4081.8	-0.00561779
542	0.21676613		1131.99	0.07628253		1722	0.04204616		2311.99	-0.00860377		2902	0.00370067		3492	0.02133621		4082	-0.00539984
542.2	0.21669706		1132.19	0.07671698		1722.2	0.04157758		2312.19	-0.00847893		2902.2	0.00372724		3492.2	0.02143272		4082.2	-0.00516523
542.4	0.21641079		1132.39	0.07666656		1722.4	0.04169714		2312.39	-0.00881797		2902.4	0.00429961		3492.4	0.02216894		4082.4	-0.0053912
542.6	0.21648888		1132.59	0.07578325		1722.6	0.04149		2312.59	-0.00872397		2902.6	0.00429132		3492.6	0.02198895		4082.6	-0.00621773
542.8	0.21635548		1132.79	0.07502874		1722.8	0.04110106		2312.79	-0.00917612		2902.8	0.00334168		3492.8	0.02202331		4082.8	-0.0072473
543	0.2153932		1132.99	0.07353756		1723	0.04074823		2312.99	-0.00920972		2903	0.00400777		3493	0.02167765		4083	-0.0075277
543.2	0.21486887		1133.19	0.07247641		1723.2	0.040703		2313.19	-0.0095007		2903.2	0.00469876		3493.2	0.021675		4083.2	-0.00801271
543.4	0.21472706		1133.39	0.07148146		1723.4	0.04100902		2313.39	-0.00899309		2903.4	0.00547287		3493.4	0.02266323		4083.4	-0.00800054
543.6	0.21498016		1133.59	0.07100382		1723.6	0.04042305		2313.59	-0.00892806		2903.6	0.0056075		3493.6	0.02296841		4083.6	-0.00810616
543.8	0.21472847		1133.79	0.07086565		1723.8	0.04044986		2313.79	-0.00834367		2903.8	0.00666138		3493.8	0.02308064		4083.8	-0.00935692
544	0.21539603		1133.99	0.07009102		1724	0.04079185		2313.99	-0.00864198		2904	0.00630735		3494	0.02227399		4084	-0.01033156
544.2	0.21689511		1134.19	0.06774346		1724.2	0.04042488		2314.19	-0.00792146		2904.2	0.00703537		3494.2	0.02236793		4084.2	-0.01060226
544.4	0.21698901		1134.39	0.06690454		1724.4	0.0404118		2314.39	-0.00774024		2904.4	0.0073296		3494.4	0.02256181		4084.4	-0.0112476
544.6	0.21735656		1134.59	0.06727049		1724.6	0.04052782		2314.59	-0.00673427		2904.6	0.00793396		3494.6	0.02245071		4084.6	-0.01141416
544.8	0.21792254		1134.79	0.06785709		1724.8	0.04080788		2314.79	-0.00688564		2904.8	0.0079654		3494.8	0.02166631		4084.8	-0.01168649
545	0.21824067		1134.99	0.06773618		1725	0.03977243		2314.99	-0.00642211		2905	0.00702584		3495	0.0208919		4085	-0.01154296
545.2	0.21817673		1135.19	0.06853598		1725.2	0.03936437		2315.19	-0.0059011		2905.2	0.00761821		3495.2	0.02063396		4085.2	-0.01128817
545.4	0.21807676		1135.39	0.07022127		1725.4	0.03850755		2315.39	-0.00540054		2905.4	0.00740488		3495.4	0.02021795		4085.4	-0.01126303
545.6	0.21864408		1135.59	0.07010736		1725.6	0.03854943		2315.59	-0.00535974		2905.6	0.0074697		3495.6	0.0201854		4085.6	-0.01128346
545.8	0.21884135		1135.79	0.07072172		1725.8	0.0388047		2315.79	-0.00512645		2905.8	0.00742992		3495.8	0.02045916		4085.8	-0.01021334
546	0.21891602		1135.99	0.07184881		1726	0.03921301		2315.99	-0.00538295		2906	0.00746207		3496	0.02099055		4086	-0.00985622
546.2	0.21854109		1136.19	0.07193961		1726.2	0.03921915		2316.19	-0.0058912		2906.2	0.00770746		3496.2	0.02124404		4086.2	-0.00933975
546.4	0.21819596		1136.39	0.07198158		1726.4	0.03995783		2316.39	-0.00647058		2906.4	0.00668638		3496.4	0.02182966		4086.4	-0.00957932
546.6	0.21793397		1136.59	0.0724147		1726.6	0.04059394		2316.59	-0.00621118		2906.6	0.00584616		3496.6	0.02242359		4086.6	-0.00985973
546.8	0.21703019		1136.79	0.07291575		1726.8	0.04010768		2316.79	-0.00753995		2906.8	0.0048783		3496.8	0.02300446		4086.8	-0.0096176
547	0.21636443		1136.99	0.07278274		1727	0.04073488		2316.99	-0.00789218		2907	0.00514345		3497	0.02368517		4087	-0.00901714
547.2	0.21603522		1137.19	0.07209722		1727.2	0.04121512		2317.19	-0.00897771		2907.2	0.00457794		3497.2	0.02423825		4087.2	-0.00920636
547.4	0.21484991		1137.39	0.07190354		1727.4	0.04107853		2317.39	-0.0098324		2907.4	0.00455024		3497.4	0.02481691		4087.4	-0.00906623
547.6	0.21413515		1137.59	0.07175869		1727.6	0.04034962		2317.59	-0.01107101		2907.6	0.00453526		3497.6	0.02489868		4087.6	-0.0100478
547.8	0.21378102		1137.79	0.07146533		1727.8	0.04124498		2317.79	-0.01114099		2907.8	0.00447715		3497.8	0.02402528		4087.8	-0.01016399
548	0.21453613		1137.99	0.07008639		1728	0.04094871		2317.99	-0.01172463		2908	0.00529988		3498	0.02326095		4088	-0.01069681
548.2	0.21480353		1138.19	0.0692903		1728.2	0.04110681		2318.19	-0.01176023		2908.2	0.00581555		3498.2	0.0231928		4088.2	-0.01059268
548.4	0.21384655		1138.39	0.06988738		1728.4	0.04185751		2318.39	-0.01116439		2908.4	0.00547151		3498.4	0.02249351		4088.4	-0.0109288
548.6	0.21349153		1138.59	0.0700869		1728.6	0.04251242		2318.59	-0.01058944		2908.6	0.00604865		3498.6	0.02107841		4088.6	-0.01022048
548.8	0.21400089		1138.79	0.06999589		1728.8	0.04332749		2318.79	-0.01151944		2908.8	0.00668608		3498.8	0.01931375		4088.8	-0.00984219
549	0.2141083		1138.99	0.06980003		1729	0.0425881		2318.99	-0.01131095		2909	0.00596416		3499	0.01909137		4089	-0.01001613
549.2	0.21448105		1139.19	0.07040839		1729.2	0.04290305		2319.19	-0.01086658		2909.2	0.00624903		3499.2	0.0190591		4089.2	-0.01006198
549.4	0.21450003		1139.39	0.06977343		1729.4	0.04198477		2319.39	-0.01051407		2909.4	0.00621785		3499.4	0.01866331		4089.4	-0.00969733
549.6	0.21461431		1139.59	0.06883565		1729.6	0.04200269		2319.59	-0.01033633		2909.6	0.00642346		3499.6	0.01968286		4089.6	-0.00966609
549.8	0.2146914		1139.79	0.07011817		1729.8	0.04228343		2319.79	-0.0108527		2909.8	0.0058674		3499.8	0.01926364		4089.8	-0.00914459
550	0.21463884		1139.99	0.07041476		1730	0.04233461		2319.99	-0.01076216		2910	0.00596246		3500	0.01942969		4090	-0.00927567
550.2	0.21452136		1140.19	0.07045818		1730.2	0.04277411		2320.19	-0.01054117		2910.2	0.00595522		3500.2	0.01947954		4090.2	-0.00968052
550.4	0.21435297		1140.39	0.07063479		1730.4	0.04203481		2320.39	-0.00999961		2910.4	0.00517059		3500.4	0.01987401		4090.4	-0.00990664
550.6	0.21359521		1140.59	0.07113551		1730.6	0.04108926		2320.59	-0.01023709		2910.6	0.0053026		3500.6	0.02035342		4090.6	-0.01013211
550.8	0.21349657		1140.79	0.0717126		1730.8	0.0394418		2320.79	-0.01116385		2910.8	0.00509174		3500.8	0.02070843		4090.8	-0.00992035
551	0.21313583		1140.99	0.07116752		1731	0.0387976		2320.99	-0.01202064		2911	0.00460846		3501	0.02149871		4091	-0.00983051
551.2	0.2131495		1141.19	0.07046191		1731.2	0.03808965		2321.19	-0.01168997		2911.2	0.00449758		3501.2	0.02188373		4091.2	-0.01017241
551.4	0.21222075		1141.39	0.07098758		1731.4	0.03728817		2321.39	-0.0118452		2911.4	0.00577408		3501.4	0.02265448		4091.4	-0.01024914
551.6	0.21215951		1141.59	0.07134311		1731.6	0.03726563		2321.59	-0.01175643		2911.6	0.00541705		3501.6	0.02257204		4091.6	-0.00996382
551.8	0.21305946		1141.79	0.07123183		1731.8	0.03846928		2321.79	-0.0119219		2911.8	0.00585985		3501.8	0.02226985		4091.8	-0.01003239
552	0.21341495		1141.99	0.06997727		1732	0.03837617		2321.99	-0.01228656		2912	0.00755804		3502	0.02196508		4092	-0.00986931
552.2	0.21364215		1142.19	0.07088012		1732.2	0.03911971		2322.19	-0.01240172		2912.2	0.00699343		3502.2	0.0211794		4092.2	-0.00978033
552.4	0.21348851		1142.39	0.07053576		1732.4	0.03978779		2322.39	-0.0121184		2912.4	0.00706405		3502.4	0.02040088		4092.4	-0.01012401
552.6	0.21427602		1142.59	0.06987739		1732.6	0.04057469		2322.59	-0.0119426		2912.6	0.00739815		3502.6	0.01949094		4092.6	-0.00911054
552.8	0.21502279		1142.79	0.0700584		1732.8	0.04215912		2322.79	-0.01223871		2912.8	0.00702712		3502.8	0.0188922		4092.8	-0.00975263
553	0.21507245		1142.99	0.06937448		1733	0.04212285		2322.99	-0.01141568		2913	0.00657631		3503	0.01816446		4093	-0.00919892
553.2	0.21488566		1143.19	0.06928187		1733.2	0.04293694		2323.19	-0.01149348		2913.2	0.00696074		3503.2	0.01883648		4093.2	-0.00919124
553.4	0.21514408		1143.39	0.06870901		1733.4	0.04302189		2323.39	-0.01079399		2913.4	0.0061606		3503.4	0.01886657		4093.4	-0.00912507
553.6	0.21491621		1143.59	0.06917975		1733.6	0.04445375		2323.59	-0.01016152		2913.6	0.00562531		3503.6	0.01843873		4093.6	-0.00959254
553.8	0.21592532		1143.79	0.06991605		1733.8	0.04588795		2323.79	-0.01050057		2913.8	0.00504296		3503.8	0.01747259		4093.8	-0.01014071
554	0.21614647		1143.99	0.07048207		1734	0.04531734		2323.99	-0.00965682		2914	0.00575561		3504	0.01770385		4094	-0.01023012
554.2	0.21667646		1144.19	0.07066666		1734.2	0.04436982		2324.19	-0.00845481		2914.2	0.00549251		3504.2	0.01821027		4094.2	-0.01145475
554.4	0.21595458		1144.39	0.07024936		1734.4	0.04307762		2324.39	-0.00882883		2914.4	0.00485959		3504.4	0.01846451		4094.4	-0.01178506
554.6	0.21629887		1144.59	0.07044539		1734.6	0.04209894		2324.59	-0.00915387		2914.6	0.00419641		3504.6	0.0186438		4094.6	-0.01206364
554.8	0.21692522		1144.79	0.07009766		1734.8	0.04125508		2324.79	-0.00847892		2914.8	0.00371444		3504.8	0.01948014		4094.8	-0.01291924
555	0.21657384		1144.99	0.06894478		1735	0.04050076		2324.99	-0.00763831		2915	0.00270585		3505	0.01986033		4095	-0.01312102
555.2	0.21707359		1145.19	0.06874799		1735.2	0.04048428		2325.19	-0.00648107		2915.2	0.0036563		3505.2	0.01938725		4095.2	-0.01339959
555.4	0.21596718		1145.39	0.0693987		1735.4	0.03947474		2325.39	-0.00682713		2915.4	0.00426805		3505.4	0.01930055		4095.4	-0.01333275
555.6	0.2154224		1145.59	0.06969799		1735.6	0.03934549		2325.59	-0.00789962		2915.6	0.00407695		3505.6	0.01933268		4095.6	-0.01290116
555.8	0.21512563		1145.79	0.06943993		1735.8	0.03910011		2325.79	-0.0083114		2915.8	0.00504109		3505.8	0.01827676		4095.8	-0.01239544
556	0.21404104		1145.99	0.06948077		1736	0.03771544		2325.99	-0.00833281		2916	0.00617359		3506	0.01829218		4096	-0.01120684
556.2	0.2136183		1146.19	0.07058479		1736.2	0.038024		2326.19	-0.00863504		2916.2	0.00585025		3506.2	0.01797091		4096.2	-0.0106694
556.4	0.21365447		1146.39	0.06966926		1736.4	0.0383774		2326.39	-0.00793049		2916.4	0.00690989		3506.4	0.01767848		4096.4	-0.01004427
556.6	0.21367787		1146.59	0.06936417		1736.6	0.03902059		2326.59	-0.0076444		2916.6	0.0068699		3506.6	0.017222		4096.6	-0.00871389
556.8	0.21224132		1146.79	0.06946674		1736.8	0.03940883		2326.79	-0.00792812		2916.8	0.00739007		3506.8	0.01705394		4096.8	-0.00812412
557	0.21154961		1146.99	0.06954541		1737	0.0390523		2326.99	-0.00752883		2917	0.007063		3507	0.01648595		4097	-0.006871
557.2	0.21195273		1147.19	0.07097459		1737.2	0.04015003		2327.19	-0.00787315		2917.2	0.00787259		3507.2	0.01674649		4097.2	-0.00683062
557.4	0.2127007		1147.39	0.07128846		1737.4	0.04034747		2327.39	-0.00792265		2917.4	0.00668683		3507.4	0.01628718		4097.4	-0.00629784
557.6	0.21372014		1147.59	0.07163517		1737.6	0.04195241		2327.59	-0.00884728		2917.6	0.00662578		3507.6	0.01572521		4097.6	-0.00661412
557.8	0.2143632		1147.79	0.07205007		1737.8	0.04265611		2327.79	-0.0087769		2917.8	0.00651042		3507.8	0.01600012		4097.8	-0.00653657
558	0.21466744		1147.99	0.07167692		1738	0.04186177		2327.99	-0.00875971		2918	0.00606814		3508	0.01701061		4098	-0.0066482
558.2	0.21500017		1148.19	0.06992347		1738.2	0.04147731		2328.19	-0.00844927		2918.2	0.00519328		3508.2	0.01721571		4098.2	-0.00834966
558.4	0.21527769		1148.39	0.06833473		1738.4	0.04203996		2328.39	-0.00892601		2918.4	0.00376941		3508.4	0.01780919		4098.4	-0.0093106
558.6	0.21676313		1148.59	0.06753502		1738.6	0.04193638		2328.59	-0.00863001		2918.6	0.0023824		3508.6	0.01942094		4098.6	-0.00987201
558.8	0.21690034		1148.79	0.0666742		1738.8	0.0423655		2328.79	-0.00763743		2918.8	0.00251342		3508.8	0.01994054		4098.8	-0.01061438
559	0.21676988		1148.99	0.06605684		1739	0.042052		2328.99	-0.00781558		2919	0.00218942		3509	0.02078679		4099	-0.01070768
559.2	0.21698249		1149.19	0.0663248		1739.2	0.04198735		2329.19	-0.00815754		2919.2	0.00345713		3509.2	0.02099821		4099.2	-0.0107832
559.4	0.21623565		1149.39	0.0669188		1739.4	0.04192883		2329.39	-0.00921732		2919.4	0.00314851		3509.4	0.02210843		4099.4	-0.01097858
559.6	0.21647259		1149.59	0.06694382		1739.6	0.04137966		2329.59	-0.01063768		2919.6	0.00288942		3509.6	0.02212454		4099.6	-0.01087353
559.8	0.21594229		1149.79	0.06686124		1739.8	0.04024515		2329.79	-0.0110546		2919.8	0.00373357		3509.8	0.02212871		4099.8	-0.00937209
560	0.21526355		1149.99	0.06733483		1740	0.04018037		2329.99	-0.0113778		2920	0.00428139		3510	0.02282161		4100	-0.01012272
560.2	0.21670311		1150.19	0.06781207		1740.2	0.04049393		2330.19	-0.01149066		2920.2	0.00447591		3510.2	0.022586		4100.2	-0.00996438
560.4	0.21631066		1150.39	0.06795544		1740.4	0.04026442		2330.39	-0.01105801		2920.4	0.00496066		3510.4	0.02215349		4100.4	-0.00957
560.6	0.21597611		1150.59	0.06857942		1740.6	0.04069506		2330.59	-0.01121118		2920.6	0.00423108		3510.6	0.02261749		4100.6	-0.00784461
560.8	0.21488512		1150.79	0.07001209		1740.8	0.0396402		2330.79	-0.01145739		2920.8	0.00430352		3510.8	0.02175247		4100.8	-0.00693296
561	0.21473153		1150.99	0.07017054		1741	0.03955397		2330.99	-0.0110702		2921	0.00363797		3511	0.02105446		4101	-0.0064324
561.2	0.21550959		1151.19	0.07170381		1741.2	0.0397207		2331.19	-0.01151634		2921.2	0.00471193		3511.2	0.02013502		4101.2	-0.00664247
561.4	0.21491388		1151.39	0.07130424		1741.4	0.03933241		2331.39	-0.01189717		2921.4	0.0037101		3511.4	0.01947564		4101.4	-0.00625884
561.6	0.21442025		1151.59	0.07085924		1741.6	0.03966462		2331.59	-0.01198031		2921.6	0.0037054		3511.6	0.01893036		4101.6	-0.00694597
561.8	0.21336205		1151.79	0.0699015		1741.8	0.0394712		2331.79	-0.01178167		2921.8	0.00325269		3511.8	0.01851535		4101.8	-0.00692359
562	0.21348554		1151.99	0.06868523		1742	0.03901241		2331.99	-0.01163801		2922	0.00304594		3512	0.01777085		4102	-0.00740996
562.2	0.2135324		1152.19	0.06789576		1742.2	0.0386905		2332.19	-0.01101083		2922.2	0.00259177		3512.2	0.01676559		4102.2	-0.00815905
562.4	0.21369015		1152.39	0.06798851		1742.4	0.03839469		2332.39	-0.01111055		2922.4	0.00258878		3512.4	0.0169779		4102.4	-0.00789514
562.6	0.2134786		1152.59	0.06862285		1742.6	0.03894607		2332.59	-0.01089329		2922.6	0.00233532		3512.6	0.0166689		4102.6	-0.00806951
562.8	0.21309617		1152.79	0.0685064		1742.8	0.03912353		2332.79	-0.01061292		2922.8	0.00359763		3512.8	0.0158049		4102.8	-0.00760181
563	0.21274818		1152.99	0.0682319		1743	0.03867619		2332.99	-0.01132326		2923	0.00369279		3513	0.01588842		4103	-0.00796586
563.2	0.21245819		1153.19	0.06792914		1743.2	0.0382756		2333.19	-0.01193114		2923.2	0.00405539		3513.2	0.01595405		4103.2	-0.00726566
563.4	0.21236943		1153.39	0.06829605		1743.4	0.03870795		2333.39	-0.0127082		2923.4	0.00394576		3513.4	0.01613986		4103.4	-0.0072868
563.6	0.2122237		1153.59	0.06802597		1743.6	0.03819069		2333.59	-0.01374575		2923.6	0.00457254		3513.6	0.01572571		4103.6	-0.00726149
563.8	0.21152199		1153.79	0.06690125		1743.8	0.03884989		2333.79	-0.01407552		2923.8	0.00584508		3513.8	0.01650378		4103.8	-0.00720582
564	0.21181088		1153.99	0.06651548		1744	0.0393448		2333.99	-0.01347669		2924	0.0052323		3514	0.01699288		4104	-0.00807395
564.2	0.21249413		1154.19	0.0671592		1744.2	0.0396747		2334.19	-0.01336165		2924.2	0.00500448		3514.2	0.01877628		4104.2	-0.00849617
564.4	0.21205586		1154.39	0.06720092		1744.4	0.04026711		2334.39	-0.0140359		2924.4	0.00503598		3514.4	0.02021323		4104.4	-0.00808277
564.6	0.21194543		1154.59	0.06737561		1744.6	0.04112144		2334.59	-0.01466666		2924.6	0.00479223		3514.6	0.02185813		4104.6	-0.00703259
564.8	0.21100052		1154.79	0.06694428		1744.8	0.04003012		2334.79	-0.01483192		2924.8	0.00453433		3514.8	0.0215438		4104.8	-0.00753884
565	0.2111488		1154.99	0.06647877		1745	0.0405427		2334.99	-0.01472611		2925	0.004057		3515	0.02320441		4105	-0.00833614
565.2	0.21186315		1155.19	0.06734037		1745.2	0.04030195		2335.19	-0.0146033		2925.2	0.00357895		3515.2	0.02342507		4105.2	-0.00914299
565.4	0.21227954		1155.39	0.06676211		1745.4	0.03969231		2335.39	-0.01520342		2925.4	0.002174		3515.4	0.02427948		4105.4	-0.00894597
565.6	0.21288345		1155.59	0.0674585		1745.6	0.03943014		2335.59	-0.01556302		2925.6	0.00163314		3515.6	0.02501544		4105.6	-0.01007995
565.8	0.21261953		1155.79	0.06785774		1745.8	0.03969244		2335.79	-0.01520022		2925.8	0.00089818		3515.8	0.02475706		4105.8	-0.01042452
566	0.21273604		1155.99	0.06842167		1746	0.03893753		2335.99	-0.01432007		2926	0.0005862		3516	0.02366134		4106	-0.00996443
566.2	0.21300399		1156.19	0.06894919		1746.2	0.03819674		2336.19	-0.01409827		2926.2	-0.00017137		3516.2	0.02301088		4106.2	-0.00942648
566.4	0.21394793		1156.39	0.06946898		1746.4	0.03737758		2336.39	-0.01370063		2926.4	-0.0001591		3516.4	0.02129418		4106.4	-0.00888914
566.6	0.2125679		1156.59	0.06995904		1746.6	0.03754282		2336.59	-0.01355554		2926.6	-0.00054251		3516.6	0.02017819		4106.6	-0.00885992
566.8	0.2128581		1156.79	0.06970392		1746.8	0.03653608		2336.79	-0.01334796		2926.8	0.00006099		3516.8	0.01895759		4106.8	-0.00830644
567	0.21215772		1156.99	0.06999807		1747	0.03505174		2336.99	-0.01317097		2927	0.00002111		3517	0.01801036		4107	-0.0083641
567.2	0.21238071		1157.19	0.0698535		1747.2	0.03455488		2337.19	-0.01276928		2927.2	0.00087466		3517.2	0.01783259		4107.2	-0.00707143
567.4	0.21304972		1157.39	0.07008412		1747.4	0.03453299		2337.39	-0.01221121		2927.4	0.00214428		3517.4	0.01730012		4107.4	-0.00712958
567.6	0.21359105		1157.59	0.06973763		1747.6	0.0338187		2337.59	-0.0122151		2927.6	0.00356169		3517.6	0.01688535		4107.6	-0.00741862
567.8	0.21396631		1157.79	0.06864211		1747.8	0.03350025		2337.79	-0.01171275		2927.8	0.00407204		3517.8	0.01759399		4107.8	-0.00778805
568	0.21474408		1157.99	0.06831458		1748	0.03332573		2337.99	-0.01188632		2928	0.00446642		3518	0.01814368		4108	-0.00797648
568.2	0.21559148		1158.19	0.06896104		1748.2	0.03407647		2338.19	-0.01179519		2928.2	0.00476965		3518.2	0.01884737		4108.2	-0.00913887
568.4	0.21539517		1158.39	0.06830335		1748.4	0.03352668		2338.39	-0.01292028		2928.4	0.00484603		3518.4	0.01920611		4108.4	-0.00871585
568.6	0.21457988		1158.59	0.06710052		1748.6	0.03304291		2338.59	-0.01253546		2928.6	0.00487589		3518.6	0.01934882		4108.6	-0.00824883
568.8	0.21464538		1158.79	0.06631498		1748.8	0.03299641		2338.79	-0.01275664		2928.8	0.00458895		3518.8	0.01888921		4108.8	-0.00859555
569	0.21514245		1158.99	0.06663987		1749	0.03476641		2338.99	-0.01360547		2929	0.00449927		3519	0.01992981		4109	-0.00921722
569.2	0.21558672		1159.19	0.06704586		1749.2	0.03401953		2339.19	-0.01368464		2929.2	0.00385492		3519.2	0.01982324		4109.2	-0.00902467
569.4	0.21635643		1159.39	0.06729143		1749.4	0.03392767		2339.39	-0.01473698		2929.4	0.00329941		3519.4	0.01987287		4109.4	-0.00897991
569.6	0.2157846		1159.59	0.06763072		1749.6	0.03404018		2339.59	-0.01460714		2929.6	0.00335048		3519.6	0.01979933		4109.6	-0.00947645
569.8	0.21514821		1159.79	0.06804592		1749.8	0.03426233		2339.79	-0.0139577		2929.8	0.00300477		3519.8	0.01961748		4109.8	-0.00959245
570	0.21517948		1159.99	0.06821247		1750	0.03492678		2339.99	-0.01332372		2930	0.00324456		3520	0.01903955		4110	-0.00846875
570.2	0.21461494		1160.19	0.06829101		1750.2	0.03604051		2340.19	-0.0137863		2930.2	0.00320296		3520.2	0.01863802		4110.2	-0.00855137
570.4	0.21478044		1160.39	0.0682369		1750.4	0.03654832		2340.39	-0.01400449		2930.4	0.0040058		3520.4	0.01767141		4110.4	-0.00822378
570.6	0.21378993		1160.59	0.06858912		1750.6	0.03700146		2340.59	-0.01349424		2930.6	0.00415361		3520.6	0.01710025		4110.6	-0.00817034
570.8	0.21356603		1160.79	0.06845027		1750.8	0.03782319		2340.79	-0.01243652		2930.8	0.00416733		3520.8	0.01656861		4110.8	-0.00777617
571	0.21322645		1160.99	0.0684297		1751	0.03710206		2340.99	-0.01138334		2931	0.00474545		3521	0.01621529		4111	-0.00770914
571.2	0.21349445		1161.19	0.06797545		1751.2	0.03755278		2341.19	-0.01095887		2931.2	0.00496752		3521.2	0.01717061		4111.2	-0.00710399
571.4	0.21383927		1161.39	0.06735114		1751.4	0.03720964		2341.39	-0.01038872		2931.4	0.00553583		3521.4	0.01670678		4111.4	-0.00719652
571.6	0.2134447		1161.59	0.06729238		1751.6	0.03646385		2341.59	-0.01001329		2931.6	0.00579155		3521.6	0.01621198		4111.6	-0.00792165
571.8	0.21344352		1161.79	0.06689284		1751.8	0.0374195		2341.79	-0.01036863		2931.8	0.00511026		3521.8	0.01647207		4111.8	-0.00827307
572	0.21313956		1161.99	0.06675559		1752	0.03825028		2341.99	-0.01084416		2932	0.00531215		3522	0.0162051		4112	-0.0086596
572.2	0.21302813		1162.19	0.06603411		1752.2	0.03821576		2342.19	-0.01105321		2932.2	0.00441259		3522.2	0.01652862		4112.2	-0.00983983
572.4	0.21207637		1162.39	0.06479117		1752.4	0.03771514		2342.39	-0.01192411		2932.4	0.00459781		3522.4	0.01664409		4112.4	-0.00909667
572.6	0.21255813		1162.59	0.06409699		1752.6	0.03825781		2342.59	-0.01195908		2932.6	0.00531295		3522.6	0.01636272		4112.6	-0.00933773
572.8	0.21305533		1162.79	0.0646697		1752.8	0.03873092		2342.79	-0.01328083		2932.8	0.0044643		3522.8	0.0165658		4112.8	-0.00950958
573	0.21293568		1162.99	0.06441167		1753	0.0392836		2342.99	-0.01380477		2933	0.00423728		3523	0.01773139		4113	-0.00957911
573.2	0.21318709		1163.19	0.06478296		1753.2	0.03730884		2343.19	-0.01390224		2933.2	0.00333856		3523.2	0.01801241		4113.2	-0.00946047
573.4	0.21301584		1163.39	0.06537377		1753.4	0.03744029		2343.39	-0.01450277		2933.4	0.00299885		3523.4	0.01891018		4113.4	-0.01007679
573.6	0.21316447		1163.59	0.0655976		1753.6	0.03727164		2343.59	-0.01447634		2933.6	0.00312457		3523.6	0.01952002		4113.6	-0.01010174
573.8	0.21355596		1163.79	0.06661353		1753.8	0.03693641		2343.79	-0.01472956		2933.8	0.00240817		3523.8	0.01902215		4113.8	-0.01063157
574	0.21348972		1163.99	0.06705658		1754	0.03740813		2343.99	-0.01526011		2934	0.00297286		3524	0.01963711		4114	-0.01033804
574.2	0.21351795		1164.19	0.06686225		1754.2	0.03684304		2344.19	-0.01603008		2934.2	0.00280759		3524.2	0.02030115		4114.2	-0.01080824
574.4	0.21401588		1164.39	0.06680969		1754.4	0.03605018		2344.39	-0.01603107		2934.4	0.00371869		3524.4	0.020593		4114.4	-0.01045292
574.6	0.21307789		1164.59	0.06705138		1754.6	0.03570818		2344.59	-0.01426479		2934.6	0.00333286		3524.6	0.02039466		4114.6	-0.01078436
574.8	0.21279299		1164.79	0.06703058		1754.8	0.03558589		2344.79	-0.01359863		2934.8	0.00273905		3524.8	0.02024066		4114.8	-0.01050837
575	0.21329382		1164.99	0.0666362		1755	0.03412046		2344.99	-0.01283137		2935	0.00295078		3525	0.02006577		4115	-0.00992184
575.2	0.2130153		1165.19	0.06661188		1755.2	0.03413873		2345.19	-0.01263194		2935.2	0.00341853		3525.2	0.02058852		4115.2	-0.00904316
575.4	0.21245994		1165.39	0.06657317		1755.4	0.03407657		2345.39	-0.01229656		2935.4	0.0044213		3525.4	0.01932358		4115.4	-0.00924753
575.6	0.21151732		1165.59	0.06661518		1755.6	0.03349653		2345.59	-0.01188354		2935.6	0.00518714		3525.6	0.01912824		4115.6	-0.00974258
575.8	0.21135163		1165.79	0.06705034		1755.8	0.03371785		2345.79	-0.01279996		2935.8	0.00603616		3525.8	0.01896164		4115.8	-0.01002367
576	0.21145131		1165.99	0.06645279		1756	0.03381134		2345.99	-0.01295828		2936	0.0068425		3526	0.0182898		4116	-0.01054389
576.2	0.2119855		1166.19	0.06549206		1756.2	0.03318284		2346.19	-0.01316268		2936.2	0.00741244		3526.2	0.01828519		4116.2	-0.01132513
576.4	0.21207061		1166.39	0.06589621		1756.4	0.03324129		2346.39	-0.01339309		2936.4	0.00773483		3526.4	0.01779446		4116.4	-0.01025088
576.6	0.21223693		1166.59	0.0657273		1756.6	0.03397367		2346.59	-0.01337793		2936.6	0.00661932		3526.6	0.01718333		4116.6	-0.01174235
576.8	0.21218728		1166.79	0.06578582		1756.8	0.03353958		2346.79	-0.01262018		2936.8	0.00495384		3526.8	0.01759368		4116.8	-0.01218144
577	0.21181119		1166.99	0.06554629		1757	0.03306908		2346.99	-0.01246012		2937	0.00420832		3527	0.01729375		4117	-0.01273485
577.2	0.21228303		1167.19	0.0659254		1757.2	0.03277374		2347.19	-0.01293897		2937.2	0.00266611		3527.2	0.01671009		4117.2	-0.01341902
577.4	0.21227775		1167.39	0.06652802		1757.4	0.03300536		2347.39	-0.01312984		2937.4	0.00133883		3527.4	0.01591689		4117.4	-0.01449279
577.6	0.21297966		1167.59	0.06582561		1757.6	0.03308291		2347.59	-0.01278686		2937.6	0.00081941		3527.6	0.01507933		4117.6	-0.01429343
577.8	0.21364022		1167.79	0.06593479		1757.8	0.03297747		2347.79	-0.01293413		2937.8	-0.00041019		3527.8	0.01448664		4117.8	-0.0154473
578	0.21355883		1167.99	0.06576326		1758	0.0324737		2347.99	-0.01292612		2938	-0.0008897		3528	0.01513079		4118	-0.0154554
578.2	0.21305293		1168.19	0.065803		1758.2	0.03256536		2348.19	-0.01280273		2938.2	-0.00181494		3528.2	0.01506244		4118.2	-0.01564267
578.4	0.21309603		1168.39	0.06596847		1758.4	0.03292092		2348.39	-0.01204628		2938.4	-0.00168135		3528.4	0.01491053		4118.4	-0.01490963
578.6	0.21281429		1168.59	0.0657687		1758.6	0.03395077		2348.59	-0.01110852		2938.6	-0.00272674		3528.6	0.01490505		4118.6	-0.01411982
578.8	0.21312027		1168.79	0.06544577		1758.8	0.03412907		2348.79	-0.01137167		2938.8	-0.00241907		3528.8	0.01488891		4118.8	-0.01193745
579	0.21232046		1168.99	0.06585184		1759	0.03450468		2348.99	-0.01111655		2939	-0.00115559		3529	0.01652213		4119	-0.01070072
579.2	0.21225568		1169.19	0.0659616		1759.2	0.03493336		2349.19	-0.01151263		2939.2	-0.00017627		3529.2	0.01777829		4119.2	-0.00917478
579.4	0.21138849		1169.39	0.06630522		1759.4	0.03510963		2349.39	-0.01303269		2939.4	0.0004661		3529.4	0.01835033		4119.4	-0.00906364
579.6	0.21041989		1169.59	0.06686152		1759.6	0.03397705		2349.59	-0.01347434		2939.6	0.00170259		3529.6	0.01936159		4119.6	-0.00828538
579.8	0.20987489		1169.79	0.06683615		1759.8	0.03424852		2349.79	-0.01387883		2939.8	0.00227058		3529.8	0.01956765		4119.8	-0.00781041
580	0.20920303		1169.99	0.06674392		1760	0.03451085		2349.99	-0.01406616		2940	0.00258976		3530	0.02029043		4120	-0.00764844
580.2	0.20853461		1170.19	0.06708742		1760.2	0.03443535		2350.19	-0.01478228		2940.2	0.0031456		3530.2	0.02136243		4120.2	-0.00732554
580.4	0.20836124		1170.39	0.06726668		1760.4	0.03495462		2350.39	-0.01490659		2940.4	0.0039547		3530.4	0.02097375		4120.4	-0.0072269
580.6	0.20892095		1170.59	0.06587304		1760.6	0.03473614		2350.59	-0.01460611		2940.6	0.00382657		3530.6	0.02086698		4120.6	-0.00824806
580.8	0.20971479		1170.79	0.06634856		1760.8	0.03439822		2350.79	-0.01441992		2940.8	0.00397134		3530.8	0.02075325		4120.8	-0.00935019
581	0.21004125		1170.99	0.06609934		1761	0.03421122		2350.99	-0.01428431		2941	0.00356983		3531	0.01948936		4121	-0.01002086
581.2	0.2104264		1171.19	0.06561534		1761.2	0.03575765		2351.19	-0.01450181		2941.2	0.00382091		3531.2	0.01966706		4121.2	-0.01032643
581.4	0.2104379		1171.39	0.06496654		1761.4	0.0359827		2351.39	-0.01373161		2941.4	0.00366802		3531.4	0.01973169		4121.4	-0.01111107
581.6	0.21093127		1171.59	0.06475158		1761.6	0.03662621		2351.59	-0.01361473		2941.6	0.00379964		3531.6	0.02023067		4121.6	-0.01149484
581.8	0.21141292		1171.79	0.06435658		1761.8	0.03666563		2351.79	-0.01379804		2941.8	0.00289471		3531.8	0.02051453		4121.8	-0.01296442
582	0.21156929		1171.99	0.06443597		1762	0.03670352		2351.99	-0.01359042		2942	0.00230521		3532	0.02057716		4122	-0.01242896
582.2	0.21185552		1172.19	0.06511799		1762.2	0.0377851		2352.19	-0.01343448		2942.2	0.00279329		3532.2	0.02028187		4122.2	-0.01125818
582.4	0.21211032		1172.39	0.06457345		1762.4	0.03758623		2352.39	-0.01315293		2942.4	0.0030897		3532.4	0.01977698		4122.4	-0.01094205
582.6	0.21159265		1172.59	0.06386126		1762.6	0.03841396		2352.59	-0.01349514		2942.6	0.00308666		3532.6	0.01948065		4122.6	-0.01044118
582.8	0.21097935		1172.79	0.0640543		1762.8	0.03866617		2352.79	-0.01393571		2942.8	0.00325751		3532.8	0.01907795		4122.8	-0.00954669
583	0.21081932		1172.99	0.06485675		1763	0.03908525		2352.99	-0.01371851		2943	0.00353312		3533	0.01979682		4123	-0.00897644
583.2	0.21074887		1173.19	0.06465453		1763.2	0.03891418		2353.19	-0.01381864		2943.2	0.00337398		3533.2	0.01983166		4123.2	-0.00856157
583.4	0.2099749		1173.39	0.06512406		1763.4	0.03927991		2353.39	-0.01452945		2943.4	0.00282387		3533.4	0.02023725		4123.4	-0.00812066
583.6	0.20850173		1173.59	0.06523113		1763.6	0.03767725		2353.59	-0.01385837		2943.6	0.00314808		3533.6	0.02049426		4123.6	-0.00727113
583.8	0.20788841		1173.79	0.06455223		1763.8	0.03778345		2353.79	-0.01348385		2943.8	0.00276685		3533.8	0.01961823		4123.8	-0.00668823
584	0.20762682		1173.99	0.06532627		1764	0.03697571		2353.99	-0.01439553		2944	0.00254152		3534	0.02010504		4124	-0.00729357
584.2	0.20867047		1174.19	0.06475521		1764.2	0.03717964		2354.19	-0.01552062		2944.2	0.00349565		3534.2	0.01952904		4124.2	-0.00822839
584.4	0.20956976		1174.39	0.06407447		1764.4	0.03671473		2354.39	-0.01535135		2944.4	0.00431986		3534.4	0.01877405		4124.4	-0.00943083
584.6	0.21055186		1174.59	0.06289331		1764.6	0.03671365		2354.59	-0.01593725		2944.6	0.00417803		3534.6	0.01842916		4124.6	-0.00996071
584.8	0.21077589		1174.79	0.06315401		1764.8	0.03689175		2354.79	-0.0157225		2944.8	0.00452034		3534.8	0.01765955		4124.8	-0.01180882
585	0.21089874		1174.99	0.0621434		1765	0.03662967		2354.99	-0.01590734		2945	0.00405425		3535	0.01738889		4125	-0.01214046
585.2	0.21118336		1175.19	0.06115873		1765.2	0.03738785		2355.19	-0.01585893		2945.2	0.0043738		3535.2	0.01789581		4125.2	-0.01286636
585.4	0.21151225		1175.39	0.06038063		1765.4	0.03677097		2355.39	-0.01514282		2945.4	0.00394984		3535.4	0.01794201		4125.4	-0.01408199
585.6	0.21183007		1175.59	0.06004217		1765.6	0.03684769		2355.59	-0.01509179		2945.6	0.00402536		3535.6	0.01876527		4125.6	-0.01521953
585.8	0.21169364		1175.79	0.0599849		1765.8	0.03660079		2355.79	-0.01418978		2945.8	0.00480918		3535.8	0.01878104		4125.8	-0.01542321
586	0.2116656		1175.99	0.06031824		1766	0.03648308		2355.99	-0.01466359		2946	0.00516695		3536	0.01871837		4126	-0.01460713
586.2	0.21150056		1176.19	0.06097102		1766.2	0.03659595		2356.19	-0.01413926		2946.2	0.00515098		3536.2	0.01863714		4126.2	-0.01387705
586.4	0.2106529		1176.39	0.06053844		1766.4	0.0366945		2356.39	-0.01385544		2946.4	0.00498521		3536.4	0.01800899		4126.4	-0.01434286
586.6	0.2098108		1176.59	0.06054828		1766.6	0.0370854		2356.59	-0.01377279		2946.6	0.00430606		3536.6	0.01827484		4126.6	-0.01348837
586.8	0.2090902		1176.79	0.06161788		1766.8	0.03688005		2356.79	-0.01390364		2946.8	0.00364436		3536.8	0.01761697		4126.8	-0.01206639
587	0.20897659		1176.99	0.06303752		1767	0.03663149		2356.99	-0.01385923		2947	0.00338588		3537	0.01765305		4127	-0.01126164
587.2	0.20833815		1177.19	0.06317674		1767.2	0.03643038		2357.19	-0.01377138		2947.2	0.00246654		3537.2	0.01768643		4127.2	-0.01059791
587.4	0.20796591		1177.39	0.0638155		1767.4	0.0358528		2357.39	-0.01388859		2947.4	0.00112879		3537.4	0.01754186		4127.4	-0.00957709
587.6	0.20793066		1177.59	0.06496043		1767.6	0.03476606		2357.59	-0.01401657		2947.6	0.00057453		3537.6	0.0176575		4127.6	-0.00876989
587.8	0.20787488		1177.79	0.0650529		1767.8	0.03444262		2357.79	-0.01485564		2947.8	-0.00008547		3537.8	0.01723707		4127.8	-0.00889238
588	0.20852494		1177.99	0.06610343		1768	0.03482696		2357.99	-0.01568708		2948	-0.00047322		3538	0.01858967		4128	-0.00947243
588.2	0.20902617		1178.19	0.06571771		1768.2	0.03508033		2358.19	-0.01652495		2948.2	0.0005007		3538.2	0.01948534		4128.2	-0.01001324
588.4	0.20952901		1178.39	0.06603485		1768.4	0.03552723		2358.39	-0.01678759		2948.4	0.00004804		3538.4	0.01987272		4128.4	-0.01047688
588.6	0.2101361		1178.59	0.06684719		1768.6	0.03531228		2358.59	-0.01669696		2948.6	0.00100424		3538.6	0.0198538		4128.6	-0.01060314
588.8	0.21027565		1178.79	0.06683862		1768.8	0.03436698		2358.79	-0.01637387		2948.8	0.0013362		3538.8	0.01957357		4128.8	-0.01159158
589	0.21057364		1178.99	0.06590105		1769	0.03440252		2358.99	-0.01611532		2949	0.00074486		3539	0.01893426		4129	-0.01130977
589.2	0.21048333		1179.19	0.06526809		1769.2	0.03528378		2359.19	-0.01459751		2949.2	0.00183446		3539.2	0.01903687		4129.2	-0.01122648
589.4	0.20948282		1179.39	0.0646181		1769.4	0.03483996		2359.39	-0.01321542		2949.4	0.00310843		3539.4	0.01920729		4129.4	-0.01186769
589.6	0.20828522		1179.59	0.06405243		1769.6	0.03483238		2359.59	-0.01265376		2949.6	0.00393262		3539.6	0.01926063		4129.6	-0.01196013
589.8	0.20788982		1179.79	0.06509542		1769.8	0.03479286		2359.79	-0.01137186		2949.8	0.00473023		3539.8	0.01942828		4129.8	-0.01123211
590	0.20762949		1179.99	0.06469304		1770	0.03525098		2359.99	-0.01204876		2950	0.00485701		3540	0.01955746		4130	-0.01080281
590.2	0.20723089		1180.19	0.06413635		1770.2	0.03520325		2360.19	-0.01094645		2950.2	0.00426521		3540.2	0.01920855		4130.2	-0.01014604
590.4	0.20737732		1180.39	0.06351149		1770.4	0.03493822		2360.39	-0.01140554		2950.4	0.00466291		3540.4	0.0186737		4130.4	-0.00966786
590.6	0.2070084		1180.59	0.0635197		1770.6	0.03335174		2360.59	-0.0110501		2950.6	0.00451253		3540.6	0.01841154		4130.6	-0.00950851
590.8	0.20777234		1180.79	0.06365927		1770.8	0.03290655		2360.79	-0.01240016		2950.8	0.00510432		3540.8	0.01735947		4130.8	-0.00885699
591	0.20833811		1180.99	0.06352006		1771	0.03309301		2360.99	-0.0135062		2951	0.00432837		3541	0.01679639		4131	-0.0091518
591.2	0.20938657		1181.19	0.06327618		1771.2	0.03262199		2361.19	-0.01438632		2951.2	0.00384798		3541.2	0.01654771		4131.2	-0.00891262
591.4	0.21019058		1181.39	0.06354002		1771.4	0.03150096		2361.39	-0.01587855		2951.4	0.00349916		3541.4	0.01581458		4131.4	-0.00842084
591.6	0.21132408		1181.59	0.06398616		1771.6	0.03102287		2361.59	-0.01692725		2951.6	0.00350721		3541.6	0.01640884		4131.6	-0.0073754
591.8	0.21151104		1181.79	0.06389214		1771.8	0.03042751		2361.79	-0.01743549		2951.8	0.00272863		3541.8	0.01669172		4131.8	-0.00798551
592	0.21238634		1181.99	0.06384931		1772	0.03026786		2361.99	-0.0175063		2952	0.00261265		3542	0.01767664		4132	-0.00831893
592.2	0.21296325		1182.19	0.06359897		1772.2	0.02942951		2362.19	-0.01842186		2952.2	0.00206441		3542.2	0.0186885		4132.2	-0.0096646
592.4	0.21380318		1182.39	0.06436043		1772.4	0.02905969		2362.39	-0.01852986		2952.4	0.00110371		3542.4	0.01913911		4132.4	-0.01082571
592.6	0.21359762		1182.59	0.06555065		1772.6	0.02809798		2362.59	-0.0180287		2952.6	0.00177589		3542.6	0.0196029		4132.6	-0.01105653
592.8	0.21290403		1182.79	0.06477556		1772.8	0.02831081		2362.79	-0.01810855		2952.8	0.00089637		3542.8	0.01965225		4132.8	-0.01084679
593	0.21245847		1182.99	0.06441604		1773	0.02856514		2362.99	-0.01779499		2953	0.00027041		3543	0.02037178		4133	-0.0101706
593.2	0.21113274		1183.19	0.06441305		1773.2	0.02861027		2363.19	-0.01678453		2953.2	0.00117295		3543.2	0.02094743		4133.2	-0.01029922
593.4	0.20984229		1183.39	0.06389338		1773.4	0.02855926		2363.39	-0.01581321		2953.4	0.00135643		3543.4	0.0214532		4133.4	-0.01063595
593.6	0.20923563		1183.59	0.06389194		1773.6	0.0291274		2363.59	-0.01541431		2953.6	0.00093109		3543.6	0.02059162		4133.6	-0.00992474
593.8	0.21011095		1183.79	0.06431122		1773.8	0.02983517		2363.79	-0.01412382		2953.8	0.00084065		3543.8	0.02114843		4133.8	-0.00944586
594	0.20975594		1183.99	0.06331161		1774	0.02989597		2363.99	-0.01427261		2954	0.00091571		3544	0.02075964		4134	-0.00928918
594.2	0.20996974		1184.19	0.06243706		1774.2	0.02987178		2364.19	-0.01323806		2954.2	0.00119875		3544.2	0.02091267		4134.2	-0.0087955
594.4	0.21002855		1184.39	0.06242364		1774.4	0.03025711		2364.39	-0.01294134		2954.4	0.00137782		3544.4	0.02080679		4134.4	-0.00899733
594.6	0.20981376		1184.59	0.06159239		1774.6	0.02952593		2364.59	-0.01218127		2954.6	0.00109873		3544.6	0.02066259		4134.6	-0.00914958
594.8	0.20972694		1184.79	0.0613949		1774.8	0.03054183		2364.79	-0.01308541		2954.8	0.00180703		3544.8	0.02004652		4134.8	-0.00889539
595	0.21051501		1184.99	0.06149838		1775	0.03114015		2364.99	-0.01259839		2955	0.00131137		3545	0.01965737		4135	-0.00851815
595.2	0.21058054		1185.19	0.06197491		1775.2	0.03092178		2365.19	-0.01360538		2955.2	0.00223057		3545.2	0.01946133		4135.2	-0.0077116
595.4	0.21079272		1185.39	0.06238441		1775.4	0.03133197		2365.39	-0.01453776		2955.4	0.00286855		3545.4	0.01810223		4135.4	-0.00697979
595.6	0.21118737		1185.59	0.06193933		1775.6	0.0321518		2365.59	-0.01409792		2955.6	0.00234792		3545.6	0.01806546		4135.6	-0.00642672
595.8	0.21100485		1185.79	0.06187391		1775.8	0.03245185		2365.79	-0.01379867		2955.8	0.00150075		3545.8	0.01742586		4135.8	-0.00764414
596	0.21096702		1185.99	0.06191162		1776	0.03302582		2365.99	-0.01441616		2956	0.0018004		3546	0.01748158		4136	-0.00888667
596.2	0.21149514		1186.19	0.06222548		1776.2	0.0336977		2366.19	-0.01541787		2956.2	0.00126508		3546.2	0.01799631		4136.2	-0.00983466
596.4	0.21069091		1186.39	0.06190321		1776.4	0.03419214		2366.39	-0.0158874		2956.4	0.0018823		3546.4	0.0177298		4136.4	-0.01115522
596.6	0.21057381		1186.59	0.06207102		1776.6	0.03523505		2366.59	-0.01564953		2956.6	0.00217214		3546.6	0.01775054		4136.6	-0.01090475
596.8	0.21029776		1186.79	0.06149387		1776.8	0.0356511		2366.79	-0.01585776		2956.8	0.00203934		3546.8	0.01717663		4136.8	-0.01093009
597	0.2098453		1186.99	0.06176773		1777	0.03574526		2366.99	-0.01598145		2957	0.00324372		3547	0.01748872		4137	-0.01112076
597.2	0.20917778		1187.19	0.06165435		1777.2	0.03583083		2367.19	-0.01554915		2957.2	0.00344277		3547.2	0.01701809		4137.2	-0.01092924
597.4	0.20976187		1187.39	0.06174299		1777.4	0.03615189		2367.39	-0.01480874		2957.4	0.00346288		3547.4	0.01701628		4137.4	-0.01103681
597.6	0.21090194		1187.59	0.06104246		1777.6	0.03572686		2367.59	-0.01504074		2957.6	0.00253828		3547.6	0.0170957		4137.6	-0.01091972
597.8	0.21097009		1187.79	0.06103254		1777.8	0.0354611		2367.79	-0.014665		2957.8	0.00239365		3547.8	0.01750808		4137.8	-0.01115521
598	0.21020952		1187.99	0.06079927		1778	0.03462614		2367.99	-0.01431418		2958	0.00291663		3548	0.01732		4138	-0.0106137
598.2	0.20987576		1188.19	0.06087803		1778.2	0.03448708		2368.19	-0.01393827		2958.2	0.00317617		3548.2	0.01746321		4138.2	-0.01040333
598.4	0.20922515		1188.39	0.06086378		1778.4	0.03418174		2368.39	-0.01277877		2958.4	0.00276155		3548.4	0.01690279		4138.4	-0.0107008
598.6	0.2099523		1188.59	0.0607091		1778.6	0.03261271		2368.59	-0.01203213		2958.6	0.00261262		3548.6	0.01756067		4138.6	-0.01073979
598.8	0.20942889		1188.79	0.06118502		1778.8	0.03222785		2368.79	-0.01172715		2958.8	0.00309649		3548.8	0.01740823		4138.8	-0.01054567
599	0.20988778		1188.99	0.06174271		1779	0.03182361		2368.99	-0.01180576		2959	0.00238175		3549	0.01820252		4139	-0.00994553
599.2	0.20988832		1189.19	0.06208855		1779.2	0.03190518		2369.19	-0.01265924		2959.2	0.00276168		3549.2	0.01766423		4139.2	-0.00978313
599.4	0.21106203		1189.39	0.06242257		1779.4	0.03251906		2369.39	-0.01286022		2959.4	0.0024594		3549.4	0.01794333		4139.4	-0.00990279
599.6	0.21065683		1189.59	0.06157813		1779.6	0.03303734		2369.59	-0.01325479		2959.6	0.00220356		3549.6	0.018265		4139.6	-0.00968219
599.8	0.21021705		1189.79	0.06207745		1779.8	0.03296645		2369.79	-0.01399029		2959.8	0.00193712		3549.8	0.01723705		4139.8	-0.01121986
600	0.21000537		1189.99	0.06198469		1780	0.03405206		2369.99	-0.01499419		2960	0.00234423		3550	0.01781892		4140	-0.01129354
600.2	0.21054087		1190.19	0.06068729		1780.2	0.0341433		2370.19	-0.01577704		2960.2	0.00327048		3550.2	0.01754965		4140.2	-0.01155208
600.4	0.20944513		1190.39	0.06056309		1780.4	0.03517531		2370.39	-0.0155463		2960.4	0.00362668		3550.4	0.01750091		4140.4	-0.01262899
600.6	0.20998238		1190.59	0.0610095		1780.6	0.03531032		2370.59	-0.01509883		2960.6	0.00339162		3550.6	0.01698839		4140.6	-0.01246543
600.8	0.20981609		1190.79	0.06131283		1780.8	0.03555471		2370.79	-0.0153636		2960.8	0.00395728		3550.8	0.01666876		4140.8	-0.01310845
601	0.2100558		1190.99	0.061489		1781	0.03576635		2370.99	-0.01542554		2961	0.00413168		3551	0.0171215		4141	-0.01351015
601.2	0.20943175		1191.19	0.06146521		1781.2	0.03588592		2371.19	-0.01521335		2961.2	0.00296017		3551.2	0.01772058		4141.2	-0.01396452
601.4	0.20957985		1191.39	0.06133147		1781.4	0.03512333		2371.39	-0.01528614		2961.4	0.00299503		3551.4	0.01743447		4141.4	-0.01411485
601.6	0.20951741		1191.59	0.06040844		1781.6	0.03495816		2371.59	-0.01609236		2961.6	0.00248189		3551.6	0.01764125		4141.6	-0.01407156
601.8	0.20831022		1191.79	0.06124052		1781.8	0.03466087		2371.79	-0.0158819		2961.8	0.00321885		3551.8	0.01732183		4141.8	-0.01360321
602	0.20843836		1191.99	0.06131918		1782	0.03331449		2371.99	-0.01570723		2962	0.00369412		3552	0.0175328		4142	-0.01265023
602.2	0.20853723		1192.19	0.06126983		1782.2	0.03304467		2372.19	-0.01639334		2962.2	0.00367968		3552.2	0.0175938		4142.2	-0.01286803
602.4	0.20866202		1192.39	0.06078036		1782.4	0.03260857		2372.39	-0.01597496		2962.4	0.00342635		3552.4	0.01667459		4142.4	-0.01343565
602.6	0.20986827		1192.59	0.06095236		1782.6	0.0314538		2372.59	-0.0166312		2962.6	0.00267601		3552.6	0.01750646		4142.6	-0.01316557
602.8	0.20998745		1192.79	0.06108191		1782.8	0.03119833		2372.79	-0.01756698		2962.8	0.00165624		3552.8	0.01727658		4142.8	-0.01272089
603	0.21074422		1192.99	0.06064165		1783	0.03050488		2372.99	-0.01880455		2963	0.00083686		3553	0.01708988		4143	-0.01251389
603.2	0.21186319		1193.19	0.06042864		1783.2	0.03002131		2373.19	-0.01991253		2963.2	0.00196798		3553.2	0.01670297		4143.2	-0.01270057
603.4	0.21245105		1193.39	0.06055201		1783.4	0.0299275		2373.39	-0.02048399		2963.4	0.00195433		3553.4	0.01684857		4143.4	-0.01232083
603.6	0.21171071		1193.59	0.06030243		1783.6	0.02974528		2373.59	-0.02087289		2963.6	0.00240895		3553.6	0.01672213		4143.6	-0.01228693
603.8	0.21107187		1193.79	0.06094285		1783.8	0.02973151		2373.79	-0.02104433		2963.8	0.00167368		3553.8	0.01625896		4143.8	-0.01243746
604	0.21015372		1193.99	0.06078022		1784	0.03050961		2373.99	-0.02032691		2964	0.00153327		3554	0.01694373		4144	-0.01156503
604.2	0.20953455		1194.19	0.06051213		1784.2	0.03035293		2374.19	-0.0203352		2964.2	0.00081627		3554.2	0.01663671		4144.2	-0.01154289
604.4	0.20851437		1194.39	0.06065286		1784.4	0.03070234		2374.39	-0.01944482		2964.4	0.00004652		3554.4	0.01737469		4144.4	-0.01206984
604.6	0.20793108		1194.59	0.06024635		1784.6	0.03106952		2374.59	-0.01891793		2964.6	-0.0003526		3554.6	0.01671771		4144.6	-0.01298852
604.8	0.20738609		1194.79	0.05969886		1784.8	0.03098936		2374.79	-0.01827319		2964.8	-0.00074051		3554.8	0.01693289		4144.8	-0.01353814
605	0.20677581		1194.99	0.05959903		1785	0.03101842		2374.99	-0.0183777		2965	-0.00078999		3555	0.01666631		4145	-0.01316566
605.2	0.20560554		1195.19	0.05996395		1785.2	0.03173007		2375.19	-0.01773384		2965.2	-0.00156756		3555.2	0.01691455		4145.2	-0.01260992
605.4	0.20535556		1195.39	0.05974769		1785.4	0.03171971		2375.39	-0.0177257		2965.4	-0.0014543		3555.4	0.01589557		4145.4	-0.01235886
605.6	0.20578133		1195.59	0.05902538		1785.6	0.03269815		2375.59	-0.01636028		2965.6	-0.00046516		3555.6	0.01674051		4145.6	-0.01185527
605.8	0.20567394		1195.79	0.05999619		1785.8	0.03248792		2375.79	-0.01566624		2965.8	0.00031487		3555.8	0.01763405		4145.8	-0.01186892
606	0.20634235		1195.99	0.06013261		1786	0.03303367		2375.99	-0.01580134		2966	0.00034535		3556	0.01743223		4146	-0.01236265
606.2	0.20761162		1196.19	0.06071319		1786.2	0.0344571		2376.19	-0.01617968		2966.2	-0.00055356		3556.2	0.01768638		4146.2	-0.01243396
606.4	0.20869898		1196.39	0.06039245		1786.4	0.03480374		2376.39	-0.01693841		2966.4	-0.00009915		3556.4	0.01799727		4146.4	-0.01263893
606.6	0.20931493		1196.59	0.060426		1786.6	0.03525881		2376.59	-0.01772163		2966.6	0.00036737		3556.6	0.0182562		4146.6	-0.01263958
606.8	0.20945313		1196.79	0.06023756		1786.8	0.03500527		2376.79	-0.01956263		2966.8	0.00006473		3556.8	0.01803075		4146.8	-0.01274574
607	0.21026856		1196.99	0.05977798		1787	0.03481128		2376.99	-0.02016778		2967	0.00068313		3557	0.01762813		4147	-0.01367664
607.2	0.21120009		1197.19	0.06006465		1787.2	0.03454469		2377.19	-0.0208647		2967.2	0.00117064		3557.2	0.01890842		4147.2	-0.01384816
607.4	0.21176503		1197.39	0.06075564		1787.4	0.03467702		2377.39	-0.02026537		2967.4	0.00128656		3557.4	0.01884522		4147.4	-0.01407115
607.6	0.21119187		1197.59	0.0609017		1787.6	0.03351698		2377.59	-0.01960507		2967.6	0.00151159		3557.6	0.01932702		4147.6	-0.01431718
607.8	0.2109328		1197.79	0.06125805		1787.8	0.03220255		2377.79	-0.01979969		2967.8	0.00085429		3557.8	0.01905988		4147.8	-0.01322164
608	0.21002951		1197.99	0.06055006		1788	0.03160114		2377.99	-0.0189387		2968	0.00080976		3558	0.01875358		4148	-0.01276285
608.2	0.20911497		1198.19	0.06021106		1788.2	0.03019719		2378.19	-0.01881259		2968.2	0.00028837		3558.2	0.01830011		4148.2	-0.01302602
608.4	0.20834847		1198.39	0.06004727		1788.4	0.02961569		2378.39	-0.01799926		2968.4	0.00083933		3558.4	0.01782573		4148.4	-0.01311793
608.6	0.20769198		1198.59	0.06000709		1788.6	0.02933684		2378.59	-0.01701342		2968.6	0.00090151		3558.6	0.01711985		4148.6	-0.01310004
608.8	0.20765546		1198.79	0.06065024		1788.8	0.02870266		2378.79	-0.01581979		2968.8	0.00105583		3558.8	0.01543351		4148.8	-0.01235965
609	0.20777849		1198.99	0.0610284		1789	0.02926364		2378.99	-0.01601181		2969	0.00168425		3559	0.01485198		4149	-0.01121532
609.2	0.20804792		1199.19	0.06067788		1789.2	0.02964733		2379.19	-0.01544308		2969.2	0.00148789		3559.2	0.01489899		4149.2	-0.01099364
609.4	0.2076282		1199.39	0.05981519		1789.4	0.0303261		2379.39	-0.01520557		2969.4	0.00199299		3559.4	0.01411738		4149.4	-0.01101857
609.6	0.20788358		1199.59	0.06034179		1789.6	0.03094528		2379.59	-0.01547641		2969.6	0.00269724		3559.6	0.01427904		4149.6	-0.01088618
609.8	0.20766875		1199.79	0.06143584		1789.8	0.03179038		2379.79	-0.01628512		2969.8	0.00317517		3559.8	0.01406268		4149.8	-0.0116081
610	0.20737758		1199.99	0.06161998		1790	0.03288378		2379.99	-0.01728013		2970	0.00317844		3560	0.01408924		4150	-0.0115332
610.2	0.20778802		1200.19	0.06200212		1790.2	0.03396342		2380.19	-0.01766626		2970.2	0.00263735		3560.2	0.01531251		4150.2	-0.01216495
610.4	0.20708732		1200.39	0.06157446		1790.4	0.0350277		2380.39	-0.01859128		2970.4	0.00275886		3560.4	0.01567077		4150.4	-0.01359699
610.6	0.20592454		1200.59	0.06149515		1790.6	0.03577352		2380.59	-0.01863751		2970.6	0.00208919		3560.6	0.01524997		4150.6	-0.01453166
610.8	0.20689655		1200.79	0.06189814		1790.8	0.0357647		2380.79	-0.01942036		2970.8	0.00042378		3560.8	0.01615395		4150.8	-0.0153282
611	0.20752446		1200.99	0.06183063		1791	0.03594762		2380.99	-0.01902398		2971	0.0002132		3561	0.01652576		4151	-0.01619652
611.2	0.20780947		1201.19	0.06204418		1791.2	0.03607025		2381.19	-0.01917027		2971.2	-0.00017291		3561.2	0.01748912		4151.2	-0.01632473
611.4	0.20772627		1201.39	0.06196644		1791.4	0.03562374		2381.39	-0.01870915		2971.4	0.00001261		3561.4	0.01690328		4151.4	-0.01637731
611.6	0.20781189		1201.59	0.06155448		1791.6	0.03497447		2381.59	-0.01826987		2971.6	-0.00040141		3561.6	0.01724647		4151.6	-0.01565068
611.8	0.2080161		1201.79	0.0615227		1791.8	0.03341258		2381.79	-0.01826775		2971.8	-0.0006455		3561.8	0.01695632		4151.8	-0.01435947
612	0.20829963		1201.99	0.06039571		1792	0.03374328		2381.99	-0.01751783		2972	-0.0000742		3562	0.01707974		4152	-0.01509101
612.2	0.20794715		1202.19	0.05999023		1792.2	0.03305425		2382.19	-0.01719127		2972.2	-0.00109221		3562.2	0.016892		4152.2	-0.01422861
612.4	0.20769741		1202.39	0.05949621		1792.4	0.03266012		2382.39	-0.01684008		2972.4	-0.00073459		3562.4	0.01678776		4152.4	-0.01424384
612.6	0.20761084		1202.59	0.0595358		1792.6	0.03222587		2382.59	-0.01513828		2972.6	0.00021691		3562.6	0.01695694		4152.6	-0.0132225
612.8	0.20745187		1202.79	0.05962339		1792.8	0.03226638		2382.79	-0.01482967		2972.8	0.00063053		3562.8	0.01660212		4152.8	-0.0133633
613	0.20792346		1202.99	0.05862858		1793	0.03173012		2382.99	-0.01584304		2973	0.00074748		3563	0.01641829		4153	-0.01311836
613.2	0.20836707		1203.19	0.05840807		1793.2	0.03111555		2383.19	-0.01528861		2973.2	0.00143761		3563.2	0.01647224		4153.2	-0.01242707
613.4	0.20737476		1203.39	0.0584835		1793.4	0.03152129		2383.39	-0.01606997		2973.4	0.00154287		3563.4	0.01587433		4153.4	-0.01148081
613.6	0.20688829		1203.59	0.05900974		1793.6	0.03093408		2383.59	-0.017041		2973.6	0.00199535		3563.6	0.01595051		4153.6	-0.01122516
613.8	0.20648003		1203.79	0.0603005		1793.8	0.03090958		2383.79	-0.01702758		2973.8	0.00180903		3563.8	0.01623542		4153.8	-0.01099232
614	0.20559302		1203.99	0.06160453		1794	0.03081968		2383.99	-0.01679519		2974	0.0011543		3564	0.01672327		4154	-0.01090616
614.2	0.20565928		1204.19	0.06173851		1794.2	0.03162139		2384.19	-0.01677759		2974.2	0.00002221		3564.2	0.01770305		4154.2	-0.01152216
614.4	0.20553607		1204.39	0.062683		1794.4	0.03190367		2384.39	-0.01707591		2974.4	-0.00117514		3564.4	0.01738954		4154.4	-0.01181958
614.6	0.205638		1204.59	0.06301838		1794.6	0.03168185		2384.59	-0.01732089		2974.6	-0.00143481		3564.6	0.01754612		4154.6	-0.01218061
614.8	0.20607566		1204.79	0.06352725		1794.8	0.03126923		2384.79	-0.01753997		2974.8	-0.00220372		3564.8	0.01750945		4154.8	-0.01227663
615	0.20638825		1204.99	0.0641871		1795	0.03117345		2384.99	-0.01780664		2975	-0.00228799		3565	0.01771167		4155	-0.01243539
615.2	0.20678938		1205.19	0.06413474		1795.2	0.03129223		2385.19	-0.01793381		2975.2	-0.00296578		3565.2	0.01841606		4155.2	-0.01263186
615.4	0.20653092		1205.39	0.06390953		1795.4	0.03162225		2385.39	-0.01878608		2975.4	-0.00282642		3565.4	0.01875722		4155.4	-0.01256216
615.6	0.20635653		1205.59	0.06360283		1795.6	0.0312251		2385.59	-0.01884421		2975.6	-0.00309278		3565.6	0.01950332		4155.6	-0.01232127
615.8	0.20668357		1205.79	0.06250526		1795.8	0.03075171		2385.79	-0.01952449		2975.8	-0.0026345		3565.8	0.01944567		4155.8	-0.01374315
616	0.20637967		1205.99	0.06099959		1796	0.03195295		2385.99	-0.019148		2976	-0.00186192		3566	0.02014655		4156	-0.01439003
616.2	0.20527095		1206.19	0.06036836		1796.2	0.03145021		2386.19	-0.01865019		2976.2	-0.00165642		3566.2	0.01930731		4156.2	-0.01420083
616.4	0.20454692		1206.39	0.0600294		1796.4	0.03079193		2386.39	-0.0185079		2976.4	0.00002967		3566.4	0.01904719		4156.4	-0.01568958
616.6	0.2040028		1206.59	0.06045622		1796.6	0.03042294		2386.59	-0.01729661		2976.6	0.00124501		3566.6	0.01857183		4156.6	-0.01495689
616.8	0.20345288		1206.79	0.06035919		1796.8	0.03015016		2386.79	-0.01764664		2976.8	0.001379		3566.8	0.0173349		4156.8	-0.01505903
617	0.20413326		1206.99	0.06048053		1797	0.02936722		2386.99	-0.01711111		2977	0.00163063		3567	0.01635418		4157	-0.01399479
617.2	0.20395492		1207.19	0.05995766		1797.2	0.02914031		2387.19	-0.01654926		2977.2	0.00265045		3567.2	0.01639354		4157.2	-0.01202193
617.4	0.20385333		1207.39	0.06008311		1797.4	0.02922818		2387.39	-0.01701059		2977.4	0.00257341		3567.4	0.0160865		4157.4	-0.01063514
617.6	0.20528085		1207.59	0.05969456		1797.6	0.02870218		2387.59	-0.01643709		2977.6	0.00312433		3567.6	0.01571925		4157.6	-0.01010477
617.8	0.20615498		1207.79	0.06099007		1797.8	0.0290467		2387.79	-0.01704953		2977.8	0.00285638		3567.8	0.01558334		4157.8	-0.00956003
618	0.2060061		1207.99	0.06063693		1798	0.02953075		2387.99	-0.0171318		2978	0.00323747		3568	0.01510435		4158	-0.00944588
618.2	0.20608585		1208.19	0.05941164		1798.2	0.03007233		2388.19	-0.01837436		2978.2	0.00308145		3568.2	0.01524651		4158.2	-0.00907181
618.4	0.20639517		1208.39	0.05986998		1798.4	0.02896393		2388.39	-0.01831602		2978.4	0.0032135		3568.4	0.01510397		4158.4	-0.00955887
618.6	0.20660679		1208.59	0.0600411		1798.6	0.0287928		2388.59	-0.01894089		2978.6	0.00326485		3568.6	0.01571742		4158.6	-0.01021944
618.8	0.20723227		1208.79	0.0603839		1798.8	0.02822709		2388.79	-0.01867725		2978.8	0.00291531		3568.8	0.01570304		4158.8	-0.01001341
619	0.20815579		1208.99	0.06051573		1799	0.02851447		2388.99	-0.01949246		2979	0.00175469		3569	0.01609427		4159	-0.01065601
619.2	0.20779045		1209.19	0.06006963		1799.2	0.02969981		2389.19	-0.01950918		2979.2	0.00151051		3569.2	0.01717741		4159.2	-0.01178536
619.4	0.20710447		1209.39	0.06022614		1799.4	0.03106698		2389.39	-0.01999185		2979.4	0.00202259		3569.4	0.01738847		4159.4	-0.01271566
619.6	0.20655138		1209.59	0.05951884		1799.6	0.03166683		2389.59	-0.01971477		2979.6	0.00084516		3569.6	0.01784471		4159.6	-0.01381796
619.8	0.20702593		1209.79	0.05896761		1799.8	0.0325472		2389.79	-0.01929246		2979.8	0.00064619		3569.8	0.01749901		4159.8	-0.01558914
620	0.20652735		1209.99	0.05826344		1800	0.03333694		2389.99	-0.01790875		2980	0.00008208		3570	0.01714388		4160	-0.01499485
620.2	0.20741658		1210.19	0.0586746		1800.2	0.03315832		2390.19	-0.01785252		2980.2	-0.00073592		3570.2	0.01601079		4160.2	-0.01567818
620.4	0.20704036		1210.39	0.05856471		1800.4	0.03327856		2390.39	-0.01782995		2980.4	-0.00079305		3570.4	0.01502669		4160.4	-0.01566663
620.6	0.20687273		1210.59	0.05883103		1800.6	0.03308721		2390.59	-0.01760823		2980.6	-0.00143636		3570.6	0.01472984		4160.6	-0.0150863
620.8	0.20730335		1210.79	0.05856862		1800.8	0.03379585		2390.79	-0.01725973		2980.8	-0.00145435		3570.8	0.01337693		4160.8	-0.01477964
621	0.20854074		1210.99	0.05837232		1801	0.03341787		2390.99	-0.01650196		2981	-0.00150198		3571	0.01349349		4161	-0.01528732
621.2	0.20941367		1211.19	0.05783193		1801.2	0.03335407		2391.19	-0.01668803		2981.2	-0.00175009		3571.2	0.01302847		4161.2	-0.01445876
621.4	0.21026212		1211.39	0.05843749		1801.4	0.03359838		2391.39	-0.01629727		2981.4	-0.00112391		3571.4	0.01264856		4161.4	-0.01433563
621.6	0.21084518		1211.59	0.05767853		1801.6	0.03266159		2391.59	-0.01598439		2981.6	0.00026751		3571.6	0.0119789		4161.6	-0.01431679
621.8	0.21051579		1211.79	0.05867237		1801.8	0.03140187		2391.79	-0.01675153		2981.8	0.00048374		3571.8	0.01128103		4161.8	-0.01407673
622	0.20938838		1211.99	0.05816719		1802	0.03028001		2391.99	-0.01687398		2982	0.00115132		3572	0.01121791		4162	-0.01353686
622.2	0.20919071		1212.19	0.05775032		1802.2	0.02925364		2392.19	-0.01804175		2982.2	0.00168367		3572.2	0.01156641		4162.2	-0.01335481
622.4	0.20947353		1212.39	0.05810716		1802.4	0.02731363		2392.39	-0.01748191		2982.4	0.00328867		3572.4	0.01218548		4162.4	-0.01370683
622.6	0.20955428		1212.59	0.05822832		1802.6	0.02766313		2392.59	-0.0194276		2982.6	0.00419191		3572.6	0.01202717		4162.6	-0.01418433
622.8	0.21022117		1212.79	0.05738186		1802.8	0.02699736		2392.79	-0.01984879		2982.8	0.0048919		3572.8	0.01130672		4162.8	-0.01446275
623	0.20975115		1212.99	0.05782932		1803	0.02774475		2392.99	-0.02026237		2983	0.00472418		3573	0.01146649		4163	-0.01529162
623.2	0.20932266		1213.19	0.05839933		1803.2	0.02851296		2393.19	-0.01998864		2983.2	0.00521634		3573.2	0.01173823		4163.2	-0.01551613
623.4	0.20897118		1213.39	0.05891144		1803.4	0.02911906		2393.39	-0.0201522		2983.4	0.00504417		3573.4	0.01237038		4163.4	-0.01571576
623.6	0.20786217		1213.59	0.05923811		1803.6	0.029905		2393.59	-0.01992224		2983.6	0.00400104		3573.6	0.01277517		4163.6	-0.01601531
623.8	0.20712488		1213.79	0.0592408		1803.8	0.02959819		2393.79	-0.01938028		2983.8	0.00360717		3573.8	0.01305482		4163.8	-0.01559241
624	0.20649378		1213.99	0.05898799		1804	0.03069528		2393.99	-0.02001662		2984	0.00266078		3574	0.01311114		4164	-0.01490747
624.2	0.20690765		1214.19	0.05924353		1804.2	0.030704		2394.19	-0.01974904		2984.2	0.00171793		3574.2	0.01317891		4164.2	-0.01471535
624.4	0.20547199		1214.39	0.0588425		1804.4	0.03072125		2394.39	-0.01958181		2984.4	0.00149802		3574.4	0.01382645		4164.4	-0.01480918
624.6	0.20527584		1214.59	0.05941741		1804.6	0.03090686		2394.59	-0.01922017		2984.6	0.00039271		3574.6	0.01459128		4164.6	-0.01523398
624.8	0.20512295		1214.79	0.05855182		1804.8	0.03136783		2394.79	-0.01852892		2984.8	-0.00054553		3574.8	0.01422572		4164.8	-0.0149434
625	0.20498146		1214.99	0.05834985		1805	0.03164272		2394.99	-0.018575		2985	-0.00132268		3575	0.01476921		4165	-0.01492191
625.2	0.20462696		1215.19	0.0579964		1805.2	0.03226868		2395.19	-0.01791257		2985.2	-0.00233815		3575.2	0.01545712		4165.2	-0.0136865
625.4	0.20334418		1215.39	0.0581848		1805.4	0.03243897		2395.39	-0.01764589		2985.4	-0.00228162		3575.4	0.01534737		4165.4	-0.01382739
625.6	0.20312753		1215.59	0.0586786		1805.6	0.03162527		2395.59	-0.01724495		2985.6	-0.00234578		3575.6	0.01554994		4165.6	-0.01361935
625.8	0.20313755		1215.79	0.05936199		1805.8	0.03094925		2395.79	-0.01777489		2985.8	-0.00257867		3575.8	0.01527447		4165.8	-0.01355037
626	0.20339603		1215.99	0.05876206		1806	0.0307474		2395.99	-0.01781734		2986	-0.00251464		3576	0.01650673		4166	-0.01356706
626.2	0.20492083		1216.19	0.05822499		1806.2	0.03016899		2396.19	-0.01844803		2986.2	-0.00214638		3576.2	0.01613721		4166.2	-0.01428855
626.4	0.20523108		1216.39	0.05802583		1806.4	0.0297339		2396.39	-0.01833283		2986.4	-0.00073028		3576.4	0.01598601		4166.4	-0.01476306
626.6	0.20546343		1216.59	0.05739262		1806.6	0.02986082		2396.59	-0.01966681		2986.6	0.00020253		3576.6	0.0148506		4166.6	-0.01571853
626.8	0.20658396		1216.79	0.05768379		1806.8	0.02937062		2396.79	-0.01872558		2986.8	0.0000895		3576.8	0.01498598		4166.8	-0.01618525
627	0.20636935		1216.99	0.05859821		1807	0.02964111		2396.99	-0.01824484		2987	0.00030111		3577	0.01567996		4167	-0.01620227
627.2	0.20682716		1217.19	0.05896822		1807.2	0.02981987		2397.19	-0.01759404		2987.2	0.00090605		3577.2	0.01558012		4167.2	-0.01605886
627.4	0.20596897		1217.39	0.05858778		1807.4	0.03046893		2397.39	-0.01749171		2987.4	0.00115486		3577.4	0.01597313		4167.4	-0.01644689
627.6	0.20569888		1217.59	0.0587316		1807.6	0.03000954		2397.59	-0.01752824		2987.6	0.00200428		3577.6	0.01553561		4167.6	-0.01669263
627.8	0.20601393		1217.79	0.05794283		1807.8	0.02940744		2397.79	-0.01724936		2987.8	0.00252963		3577.8	0.01534303		4167.8	-0.01650068
628	0.20574704		1217.99	0.0574863		1808	0.02950258		2397.99	-0.01767132		2988	0.00276834		3578	0.01522538		4168	-0.0161248
628.2	0.2054365		1218.19	0.0576274		1808.2	0.02970829		2398.19	-0.01682117		2988.2	0.00336368		3578.2	0.0149605		4168.2	-0.01641819
628.4	0.20545733		1218.39	0.057937		1808.4	0.02923635		2398.39	-0.01741323		2988.4	0.00300645		3578.4	0.01502709		4168.4	-0.01634714
628.6	0.20569631		1218.59	0.05751463		1808.6	0.02906401		2398.59	-0.01809544		2988.6	0.00284618		3578.6	0.01509499		4168.6	-0.01592
628.8	0.20556725		1218.79	0.05621981		1808.8	0.03019467		2398.79	-0.01896037		2988.8	0.00258187		3578.8	0.01547392		4168.8	-0.014882
629	0.20572828		1218.99	0.05634026		1809	0.03043744		2398.99	-0.01936003		2989	0.00218395		3579	0.01587737		4169	-0.01468344
629.2	0.20537727		1219.19	0.05645208		1809.2	0.03015586		2399.19	-0.0199052		2989.2	0.00144347		3579.2	0.01607673		4169.2	-0.01490038
629.4	0.20520053		1219.39	0.05710259		1809.4	0.03052051		2399.39	-0.02131309		2989.4	0.00075305		3579.4	0.01534678		4169.4	-0.01550486
629.6	0.20610095		1219.59	0.05741668		1809.6	0.03012252		2399.59	-0.02158179		2989.6	0.00049996		3579.6	0.01545091		4169.6	-0.01528622
629.8	0.20671269		1219.79	0.05716409		1809.8	0.02987156		2399.79	-0.02176685		2989.8	-0.00000288		3579.8	0.01523389		4169.8	-0.01527574
630	0.2074952		1219.99	0.05734245		1810	0.02969432		2399.99	-0.02144408		2990	-0.00110747		3580	0.0149469		4170	-0.01507395
630.2	0.20793135		1220.19	0.05741001		1810.2	0.02931352		2400.19	-0.02214938		2990.2	-0.00163638		3580.2	0.01433347		4170.2	-0.01476826
630.4	0.20739867		1220.39	0.05765591		1810.4	0.02964447		2400.39	-0.0223401		2990.4	-0.00146914		3580.4	0.013834		4170.4	-0.01460989
630.6	0.20713062		1220.59	0.05824981		1810.6	0.02951688		2400.59	-0.02260379		2990.6	-0.00183384		3580.6	0.0140056		4170.6	-0.01452838
630.8	0.20691876		1220.79	0.05830729		1810.8	0.02936692		2400.79	-0.02123614		2990.8	-0.00297321		3580.8	0.01463509		4170.8	-0.01435209
631	0.20659491		1220.99	0.05736795		1811	0.02988273		2400.99	-0.02051298		2991	-0.0022512		3581	0.01482108		4171	-0.01481335
631.2	0.20681609		1221.19	0.05710263		1811.2	0.03028499		2401.19	-0.02034399		2991.2	-0.00148648		3581.2	0.01462134		4171.2	-0.01518008
631.4	0.20575753		1221.39	0.05617722		1811.4	0.02941289		2401.39	-0.01984053		2991.4	-0.00149616		3581.4	0.01490459		4171.4	-0.01523154
631.6	0.20641063		1221.59	0.05652958		1811.6	0.02896609		2401.59	-0.01916004		2991.6	-0.00072477		3581.6	0.01488485		4171.6	-0.01598681
631.8	0.20581028		1221.79	0.05653625		1811.8	0.02874752		2401.79	-0.01845894		2991.8	-0.00059924		3581.8	0.01564408		4171.8	-0.01620977
632	0.20512412		1221.99	0.0568434		1812	0.02867221		2401.99	-0.01781195		2992	0.00030245		3582	0.01622631		4172	-0.01564657
632.2	0.20471012		1222.19	0.05783378		1812.2	0.02886307		2402.19	-0.01738763		2992.2	0.00096758		3582.2	0.01660484		4172.2	-0.01579454
632.4	0.20540498		1222.39	0.0575526		1812.4	0.02819444		2402.39	-0.01751138		2992.4	0.00001043		3582.4	0.01721918		4172.4	-0.01468513
632.6	0.20536972		1222.59	0.05698193		1812.6	0.02802688		2402.59	-0.01768053		2992.6	0.00031947		3582.6	0.01806675		4172.6	-0.01414751
632.8	0.20498585		1222.79	0.05725226		1812.8	0.0283889		2402.79	-0.01767151		2992.8	-0.00001172		3582.8	0.01862941		4172.8	-0.01390574
633	0.20529287		1222.99	0.05747229		1813	0.02703868		2402.99	-0.01753973		2993	0.00000914		3583	0.01828231		4173	-0.01383014
633.2	0.20471773		1223.19	0.05730853		1813.2	0.02742303		2403.19	-0.01835164		2993.2	0.00028645		3583.2	0.01777152		4173.2	-0.01412031
633.4	0.20508906		1223.39	0.05751673		1813.4	0.02767458		2403.39	-0.01910426		2993.4	-0.00009765		3583.4	0.01694637		4173.4	-0.01402847
633.6	0.20492297		1223.59	0.05795141		1813.6	0.02709666		2403.59	-0.01952023		2993.6	-0.00015263		3583.6	0.01648929		4173.6	-0.01339758
633.8	0.20500526		1223.79	0.05851161		1813.8	0.02715834		2403.79	-0.019597		2993.8	-0.00026062		3583.8	0.01597736		4173.8	-0.01309142
634	0.20465994		1223.99	0.05974911		1814	0.02755673		2403.99	-0.02037558		2994	-0.00061254		3584	0.01544764		4174	-0.01267282
634.2	0.20362796		1224.19	0.0599876		1814.2	0.02786419		2404.19	-0.02084222		2994.2	-0.00039152		3584.2	0.01529216		4174.2	-0.01262776
634.4	0.20318381		1224.39	0.05955818		1814.4	0.0281115		2404.39	-0.02073047		2994.4	-0.00065871		3584.4	0.01420171		4174.4	-0.01271193
634.6	0.20215065		1224.59	0.05930236		1814.6	0.02876075		2404.59	-0.02089929		2994.6	-0.00075239		3584.6	0.01423836		4174.6	-0.01326539
634.8	0.20162371		1224.79	0.05784839		1814.8	0.02947565		2404.79	-0.01998904		2994.8	-0.00044234		3584.8	0.01386418		4174.8	-0.0139373
635	0.20120895		1224.99	0.05689699		1815	0.0298334		2404.99	-0.02035796		2995	-0.00059787		3585	0.0139696		4175	-0.01490964
635.2	0.20100637		1225.19	0.05705823		1815.2	0.02975382		2405.19	-0.01989722		2995.2	-0.00018527		3585.2	0.01325298		4175.2	-0.01475848
635.4	0.20055366		1225.39	0.05647666		1815.4	0.03039597		2405.39	-0.01877297		2995.4	-0.00126554		3585.4	0.01352025		4175.4	-0.01485708
635.6	0.20112583		1225.59	0.05625108		1815.6	0.03167773		2405.59	-0.01828662		2995.6	-0.00130346		3585.6	0.01289932		4175.6	-0.01584871
635.8	0.20098276		1225.79	0.05592287		1815.8	0.03106247		2405.79	-0.01813492		2995.8	-0.00196784		3585.8	0.01372169		4175.8	-0.01528111
636	0.20224275		1225.99	0.05593543		1816	0.03128542		2405.99	-0.01773358		2996	-0.00179441		3586	0.01407439		4176	-0.01454626
636.2	0.20274229		1226.19	0.05616417		1816.2	0.0320191		2406.19	-0.01765636		2996.2	-0.0024991		3586.2	0.01414823		4176.2	-0.01395586
636.4	0.2038062		1226.39	0.0559626		1816.4	0.03233422		2406.39	-0.01798565		2996.4	-0.00309635		3586.4	0.01427058		4176.4	-0.01327707
636.6	0.20455077		1226.59	0.05653821		1816.6	0.03174905		2406.59	-0.01790045		2996.6	-0.0025997		3586.6	0.01449802		4176.6	-0.01348068
636.8	0.20523074		1226.79	0.05774987		1816.8	0.03143897		2406.79	-0.01779034		2996.8	-0.00263284		3586.8	0.01480877		4176.8	-0.01349536
637	0.20591436		1226.99	0.05820792		1817	0.03058845		2406.99	-0.01808985		2997	-0.00194548		3587	0.01498242		4177	-0.01322334
637.2	0.20603174		1227.19	0.0591885		1817.2	0.03007723		2407.19	-0.01883055		2997.2	-0.00165358		3587.2	0.01520744		4177.2	-0.01294547
637.4	0.20646446		1227.39	0.06036012		1817.4	0.029299		2407.39	-0.02080165		2997.4	-0.00147405		3587.4	0.01454603		4177.4	-0.01328699
637.6	0.20684997		1227.59	0.06113785		1817.6	0.02893095		2407.59	-0.02137442		2997.6	-0.00100319		3587.6	0.01519775		4177.6	-0.01362843
637.8	0.20755044		1227.79	0.06162032		1817.8	0.02806834		2407.79	-0.02169481		2997.8	-0.00109995		3587.8	0.01495613		4177.8	-0.01404327
638	0.2073116		1227.99	0.06241773		1818	0.02880356		2407.99	-0.02145453		2998	-0.00139354		3588	0.01490041		4178	-0.01399987
638.2	0.2068125		1228.19	0.06146541		1818.2	0.02866317		2408.19	-0.02101524		2998.2	-0.00168706		3588.2	0.01414706		4178.2	-0.01475406
638.4	0.20694721		1228.39	0.0604323		1818.4	0.02875177		2408.39	-0.02190749		2998.4	-0.00202225		3588.4	0.01358092		4178.4	-0.01573872
638.6	0.20585624		1228.59	0.05970471		1818.6	0.02892591		2408.59	-0.02180553		2998.6	-0.0006662		3588.6	0.01386574		4178.6	-0.01585372
638.8	0.20480082		1228.79	0.0579062		1818.8	0.02903129		2408.79	-0.02084217		2998.8	-0.00121584		3588.8	0.01358785		4178.8	-0.01555146
639	0.20408609		1228.99	0.0570857		1819	0.02816559		2408.99	-0.0201403		2999	-0.00181819		3589	0.01304333		4179	-0.01573266
639.2	0.20452441		1229.19	0.05585609		1819.2	0.02838248		2409.19	-0.01913042		2999.2	-0.00131471		3589.2	0.01192471		4179.2	-0.01534787
639.4	0.20435131		1229.39	0.05372808		1819.4	0.02946154		2409.39	-0.01827104		2999.4	-0.00126291		3589.4	0.01247976		4179.4	-0.01628911
639.6	0.20418764		1229.59	0.05314086		1819.6	0.02908985		2409.59	-0.01775756		2999.6	-0.00075255		3589.6	0.01213153		4179.6	-0.01702125
639.8	0.20386397		1229.79	0.05282004		1819.8	0.02922418		2409.79	-0.01786543		2999.8	-0.00049815		3589.8	0.01296481		4179.8	-0.016636
640	0.2035948		1229.99	0.05333712		1820	0.0297488		2409.99	-0.01736976		3000	0.00020014		3590	0.01359333		4180	-0.01665103
640.2	0.20362727		1230.19	0.0533703		1820.2	0.03063307		2410.19	-0.01767514		3000.2	0.00006843		3590.2	0.01412818		4180.2	-0.01664317
640.4	0.20345555		1230.39	0.05414841		1820.4	0.03011635		2410.39	-0.01750063		3000.4	0.00037635		3590.4	0.01490268		4180.4	-0.01689184
640.6	0.20371522		1230.59	0.0549225		1820.6	0.02934875		2410.59	-0.01718691		3000.6	0.00030715		3590.6	0.01563538		4180.6	-0.01625937
640.8	0.20424239		1230.79	0.05580319		1820.8	0.02879139		2410.79	-0.01707912		3000.8	0.00045347		3590.8	0.01675277		4180.8	-0.0160924
641	0.20462486		1230.99	0.05636122		1821	0.02778804		2410.99	-0.01794983		3001	0.001901		3591	0.01764918		4181	-0.01641257
641.2	0.20485417		1231.19	0.05823658		1821.2	0.02774373		2411.19	-0.01866314		3001.2	0.00233711		3591.2	0.01664049		4181.2	-0.01628126
641.4	0.20411111		1231.39	0.05861558		1821.4	0.02751421		2411.39	-0.01990272		3001.4	0.00099583		3591.4	0.01608786		4181.4	-0.0168316
641.6	0.20347327		1231.59	0.05906716		1821.6	0.02791497		2411.59	-0.01960899		3001.6	-0.00042107		3591.6	0.01699224		4181.6	-0.01791884
641.8	0.20306233		1231.79	0.05943753		1821.8	0.02768856		2411.79	-0.01970232		3001.8	-0.00193877		3591.8	0.01683126		4181.8	-0.01796235
642	0.20289895		1231.99	0.05985506		1822	0.02770959		2411.99	-0.01954458		3002	-0.00317755		3592	0.0168328		4182	-0.01745109
642.2	0.201955		1232.19	0.0597122		1822.2	0.02711991		2412.19	-0.01996676		3002.2	-0.00396189		3592.2	0.01590164		4182.2	-0.01810585
642.4	0.20125198		1232.39	0.05984419		1822.4	0.0270247		2412.39	-0.02041055		3002.4	-0.00451738		3592.4	0.01614315		4182.4	-0.01860937
642.6	0.20085636		1232.59	0.05961685		1822.6	0.02632065		2412.59	-0.02009367		3002.6	-0.00438455		3592.6	0.01595437		4182.6	-0.01752777
642.8	0.20088741		1232.79	0.05842167		1822.8	0.02538435		2412.79	-0.01911742		3002.8	-0.00514772		3592.8	0.01568582		4182.8	-0.01793032
643	0.20071666		1232.99	0.0585165		1823	0.02453593		2412.99	-0.01851739		3003	-0.00474938		3593	0.01533074		4183	-0.01914759
643.2	0.2008928		1233.19	0.05743468		1823.2	0.02437885		2413.19	-0.0180331		3003.2	-0.00435		3593.2	0.0150173		4183.2	-0.01903298
643.4	0.20085735		1233.39	0.05722933		1823.4	0.02517023		2413.39	-0.01831766		3003.4	-0.00383684		3593.4	0.01553666		4183.4	-0.02007071
643.6	0.20138519		1233.59	0.05717042		1823.6	0.02529493		2413.59	-0.01915092		3003.6	-0.00391636		3593.6	0.01517511		4183.6	-0.0202036
643.8	0.20122976		1233.79	0.05734514		1823.8	0.02578718		2413.79	-0.01867827		3003.8	-0.00311406		3593.8	0.01575274		4183.8	-0.01979451
644	0.20171949		1233.99	0.05799646		1824	0.02595993		2413.99	-0.01902117		3004	-0.00300738		3594	0.01602364		4184	-0.01901032
644.2	0.20272726		1234.19	0.05766754		1824.2	0.026826		2414.19	-0.02006593		3004.2	-0.00274196		3594.2	0.01635221		4184.2	-0.01824648
644.4	0.20311665		1234.39	0.0573043		1824.4	0.02631792		2414.39	-0.02029398		3004.4	-0.00198893		3594.4	0.01700885		4184.4	-0.0180648
644.6	0.20427592		1234.59	0.05724314		1824.6	0.02713682		2414.59	-0.02126884		3004.6	-0.00210872		3594.6	0.01776925		4184.6	-0.01709379
644.8	0.20518422		1234.79	0.05682839		1824.8	0.02740425		2414.79	-0.02211171		3004.8	-0.00147524		3594.8	0.01782459		4184.8	-0.01693858
645	0.20541616		1234.99	0.0558429		1825	0.0275867		2414.99	-0.02240107		3005	-0.00094485		3595	0.01719105		4185	-0.01701949
645.2	0.20442869		1235.19	0.05676252		1825.2	0.02832549		2415.19	-0.02261435		3005.2	-0.00226193		3595.2	0.01633617		4185.2	-0.0163323
645.4	0.20378894		1235.39	0.05561153		1825.4	0.02777621		2415.39	-0.02302928		3005.4	-0.00407768		3595.4	0.01700859		4185.4	-0.01713486
645.6	0.20299722		1235.59	0.05547217		1825.6	0.02816767		2415.59	-0.02283032		3005.6	-0.00444026		3595.6	0.01679379		4185.6	-0.01667434
645.8	0.20265868		1235.79	0.0548771		1825.8	0.02827869		2415.79	-0.02229082		3005.8	-0.00451773		3595.8	0.01672272		4185.8	-0.01639045
646	0.20219489		1235.99	0.05519586		1826	0.02848747		2415.99	-0.02155163		3006	-0.00515989		3596	0.01607148		4186	-0.01598246
646.2	0.20168678		1236.19	0.05515601		1826.2	0.02966272		2416.19	-0.0216437		3006.2	-0.0046222		3596.2	0.0150838		4186.2	-0.01681427
646.4	0.20237798		1236.39	0.05464976		1826.4	0.03034045		2416.39	-0.02096575		3006.4	-0.00420666		3596.4	0.01554147		4186.4	-0.01687631
646.6	0.20310422		1236.59	0.05429544		1826.6	0.03012351		2416.59	-0.01975172		3006.6	-0.00432734		3596.6	0.01447684		4186.6	-0.01717529
646.8	0.20258863		1236.79	0.05356939		1826.8	0.02950126		2416.79	-0.01890294		3006.8	-0.00350125		3596.8	0.01414079		4186.8	-0.01839194
647	0.2024511		1236.99	0.0540426		1827	0.02916898		2416.99	-0.01911502		3007	-0.00207488		3597	0.01354398		4187	-0.01804437
647.2	0.20293688		1237.19	0.05402555		1827.2	0.02908079		2417.19	-0.01921632		3007.2	-0.00168817		3597.2	0.01311414		4187.2	-0.01755797
647.4	0.2034018		1237.39	0.0547387		1827.4	0.02871666		2417.39	-0.02025691		3007.4	-0.00127857		3597.4	0.01258142		4187.4	-0.01786467
647.6	0.20368549		1237.59	0.05481917		1827.6	0.02928723		2417.59	-0.01964942		3007.6	0.00004362		3597.6	0.01257208		4187.6	-0.01677301
647.8	0.20335161		1237.79	0.05577342		1827.8	0.02902027		2417.79	-0.01902653		3007.8	0.00115399		3597.8	0.01251271		4187.8	-0.01592235
648	0.2034155		1237.99	0.05632922		1828	0.02924096		2417.99	-0.01978734		3008	0.0016578		3598	0.01241072		4188	-0.01509128
648.2	0.20331905		1238.19	0.05631265		1828.2	0.02917507		2418.19	-0.02026813		3008.2	0.00234983		3598.2	0.01279165		4188.2	-0.01442949
648.4	0.20362063		1238.39	0.05652023		1828.4	0.0288525		2418.39	-0.020533		3008.4	0.00235649		3598.4	0.01354103		4188.4	-0.01440145
648.6	0.20379324		1238.59	0.05717849		1828.6	0.02922871		2418.59	-0.02099471		3008.6	0.00192038		3598.6	0.0138632		4188.6	-0.01343341
648.8	0.20358997		1238.79	0.05724195		1828.8	0.02859771		2418.79	-0.02115347		3008.8	0.00214045		3598.8	0.01401016		4188.8	-0.01315784
649	0.20316744		1238.99	0.05757641		1829	0.0282919		2418.99	-0.02080722		3009	0.00202348		3599	0.01444921		4189	-0.01331265
649.2	0.20280651		1239.19	0.05895441		1829.2	0.02816017		2419.19	-0.02126649		3009.2	0.00179126		3599.2	0.0151554		4189.2	-0.01288066
649.4	0.20287907		1239.39	0.05885902		1829.4	0.02779304		2419.39	-0.02129602		3009.4	0.00182272		3599.4	0.01580143		4189.4	-0.01302998
649.6	0.20223623		1239.59	0.05927604		1829.6	0.02830627		2419.59	-0.02083143		3009.6	0.00192971		3599.6	0.01594324		4189.6	-0.0119559
649.8	0.20204841		1239.79	0.05939684		1829.8	0.02901348		2419.79	-0.02046415		3009.8	0.001824		3599.8	0.01704778		4189.8	-0.01263759
