# Supplementary material for: Functional development of a V3/glycan-specific broadly neutralizing antibody isolated from a case of HIV superinfection
Source: eLife journal article supplement (doi:10.7554/elife.68110), 2021-07-15
Supplement: fig2-data2 [file E3.xls]

Vers 3.43 Data Simulation
Conc1	6.25E-08	6.25E-08	6.25E-08	6.25E-08	6.25E-08	6.25E-08
Start1	290	879.99	1469.99	2059.98	2649.98	3239.98
Stop1	649.8	1239.79	1829.79	2419.78	3009.78	3599.78
Time1	Data1	Sim1	Time2	Data2	Sim2	Time3	Data3	Sim3	Time4	Data4	Sim4	Time5	Data5	Sim5	Time6	Data6	Sim6
290	0.00009863		879.99	0.00061738		1469.99	-0.0023539		2059.98	-0.01021099		2649.98	0.00331083		3239.98	-0.00628975
290.2	-0.0000375		880.19	0.00078324		1470.19	-0.00136046		2060.18	-0.00982604		2650.18	0.00294026		3240.18	-0.00482128
290.4	-0.00067006		880.39	0.0006654		1470.39	-0.00093508		2060.38	-0.00967611		2650.38	0.00232127		3240.38	-0.00439333
290.6	-0.00049075		880.59	0.00018558		1470.59	-0.00035563		2060.58	-0.01009359		2650.58	0.00110725		3240.58	-0.00343374
290.8	-0.00039546		880.79	0.00050463		1470.79	-0.00007261		2060.78	-0.01015862		2650.78	0.00102257		3240.78	-0.00254447
291	-0.00021252		880.99	0.001174		1470.99	-0.00001518		2060.98	-0.00979353		2650.98	0.0002649		3240.98	-0.0027989
291.2	-0.0004461		881.19	0.00129946		1471.19	0.00016963		2061.18	-0.00992449		2651.18	0.00048421		3241.18	-0.00231198
291.4	-0.00046753		881.39	0.00198613		1471.39	0.00044671		2061.38	-0.00991855		2651.38	0.00044044		3241.38	-0.00284985
291.6	-0.00065653		881.59	0.00279783		1471.59	-0.00023699		2061.58	-0.00969779		2651.58	0.00061715		3241.58	-0.00243975
291.8	-0.00150195		881.79	0.00327134		1471.79	-0.00084181		2061.78	-0.00959549		2651.78	0.00069178		3241.78	-0.00268072
292	-0.00196836		881.99	0.00370532		1471.99	-0.00083589		2061.98	-0.00952975		2651.98	0.00132677		3241.98	-0.00211929
292.2	-0.00269048		882.19	0.00378942		1472.19	-0.00084438		2062.18	-0.0098405		2652.18	0.00071116		3242.18	-0.00169467
292.4	-0.00230733		882.39	0.00440205		1472.39	-0.00082177		2062.38	-0.00893502		2652.38	-0.00036482		3242.38	-0.00187439
292.6	-0.00275345		882.59	0.00488242		1472.59	0.00012281		2062.58	-0.00858163		2652.58	0.00018566		3242.58	-0.00262894
292.8	-0.00174561		882.79	0.00505055		1472.79	0.00046472		2062.78	-0.00709237		2652.78	0.00023398		3242.78	-0.00244637
293	-0.00168084		882.99	0.00392869		1472.99	0.00125548		2062.98	-0.00733142		2652.98	0.00082773		3242.98	-0.00288677
293.2	-0.00135803		883.19	0.00337301		1473.19	0.00172631		2063.18	-0.00767457		2653.18	0.00124065		3243.18	-0.00309292
293.4	-0.0001953		883.39	0.0026079		1473.39	0.00182671		2063.38	-0.00723631		2653.38	0.00193829		3243.38	-0.00326529
293.6	-0.00011867		883.59	0.00183238		1473.59	0.00187813		2063.58	-0.00752633		2653.58	0.00219054		3243.58	-0.00365641
293.8	-0.00013974		883.79	0.00141795		1473.79	0.00236779		2063.78	-0.00667869		2653.78	0.00188408		3243.78	-0.00278263
294	0.00035648		883.99	0.00165927		1473.99	0.00284527		2063.98	-0.007137		2653.98	0.0030115		3243.98	-0.00267628
294.2	-0.00039818		884.19	0.00185177		1474.19	0.00394002		2064.18	-0.00693823		2654.18	0.003239		3244.18	-0.00246064
294.4	-0.00076886		884.39	0.00267334		1474.39	0.00439868		2064.38	-0.00698097		2654.38	0.00316776		3244.38	-0.00295654
294.6	-0.0001386		884.59	0.00283699		1474.59	0.00451307		2064.58	-0.00709561		2654.58	0.00337793		3244.58	-0.00318736
294.8	-0.00027473		884.79	0.00373118		1474.79	0.00446252		2064.78	-0.00636052		2654.78	0.0040773		3244.78	-0.0040611
295	0.00033727		884.99	0.00431049		1474.99	0.00352544		2064.98	-0.00589609		2654.98	0.0035564		3244.98	-0.00556999
295.2	0.00048466		885.19	0.00537874		1475.19	0.00324935		2065.18	-0.00656621		2655.18	0.00391275		3245.18	-0.00542483
295.4	0.00040014		885.39	0.00697107		1475.39	0.0025927		2065.38	-0.00658131		2655.38	0.0029383		3245.38	-0.00628897
295.6	-0.00002207		885.59	0.00799731		1475.59	0.00140415		2065.58	-0.00647756		2655.58	0.00289557		3245.58	-0.0058476
295.8	-0.00090122		885.79	0.0079163		1475.79	0.00119475		2065.78	-0.00660365		2655.78	0.00203066		3245.78	-0.00519634
296	-0.00061163		885.99	0.00815322		1475.99	0.00157281		2065.98	-0.00676337		2655.98	0.00133283		3245.98	-0.00405616
296.2	-0.0009652		886.19	0.00772243		1476.19	0.00132977		2066.18	-0.00716096		2656.18	-0.00019087		3246.18	-0.00339284
296.4	0.00029888		886.39	0.0069302		1476.39	0.00165003		2066.38	-0.00656017		2656.38	-0.00064473		3246.38	-0.00342909
296.6	-0.00035904		886.59	0.00604681		1476.59	0.00333377		2066.58	-0.00607082		2656.58	-0.00016015		3246.58	-0.00350037
296.8	-0.00008191		886.79	0.00507223		1476.79	0.00338117		2066.78	-0.00537595		2656.78	0.00042675		3246.78	-0.00268474
297	0.00004193		886.99	0.00324755		1476.99	0.0040035		2066.98	-0.00591737		2656.98	0.00085486		3246.98	-0.00260716
297.2	0.00015114		887.19	0.00250338		1477.19	0.0033701		2067.18	-0.00607237		2657.18	0.00129844		3247.18	-0.0030807
297.4	0.00062124		887.39	0.00206531		1477.39	0.00277		2067.38	-0.00517519		2657.38	0.0020293		3247.38	-0.00329773
297.6	-0.00036966		887.59	0.00121941		1477.59	0.00332098		2067.58	-0.00488485		2657.58	0.00235145		3247.58	-0.00324609
297.8	-0.00025672		887.79	0.00152105		1477.79	0.00378869		2067.78	-0.00525932		2657.78	0.00299711		3247.78	-0.00181449
298	-0.00050529		887.99	0.00184122		1477.99	0.00367011		2067.98	-0.00530414		2657.98	0.00375891		3247.98	-0.00245336
298.2	-0.0005643		888.19	0.0023156		1478.19	0.00375238		2068.18	-0.00460446		2658.18	0.00368383		3248.18	-0.00252121
298.4	-0.00035182		888.39	0.0030313		1478.39	0.00368589		2068.38	-0.00420651		2658.38	0.00407033		3248.38	-0.00229163
298.6	0.00021152		888.59	0.00295863		1478.59	0.00364803		2068.58	-0.00390739		2658.58	0.00401599		3248.58	-0.00241933
298.8	0.00037514		888.79	0.00412069		1478.79	0.00335496		2068.78	-0.00313237		2658.78	0.0036087		3248.78	-0.0022951
299	0.00114511		888.99	0.00520194		1478.99	0.00259912		2068.98	-0.00282661		2658.98	0.0032681		3248.98	-0.00184539
299.2	0.00162438		889.19	0.00680955		1479.19	0.00167776		2069.18	-0.00243931		2659.18	0.00241228		3249.18	-0.00099885
299.4	0.0019805		889.39	0.00748117		1479.39	0.00107049		2069.38	-0.0025361		2659.38	0.00177989		3249.38	-0.00096001
299.6	0.00298371		889.59	0.00756816		1479.59	0.00094383		2069.58	-0.00205035		2659.58	0.00255628		3249.58	-0.00073094
299.8	0.00370864		889.79	0.00707665		1479.79	0.00080141		2069.78	-0.00180723		2659.78	0.00193848		3249.78	-0.00022109
300	0.00412943		889.99	0.00655002		1479.99	0.00042086		2069.98	-0.00173878		2659.98	0.00244367		3249.98	-0.000078
300.2	0.00437794		890.19	0.0061708		1480.19	0.00072372		2070.18	-0.00151425		2660.18	0.00280865		3250.18	0.00031308
300.4	0.00454863		890.39	0.00496925		1480.39	0.00172593		2070.38	-0.00023949		2660.38	0.00343919		3250.38	-0.00040725
300.6	0.00446361		890.59	0.00430697		1480.59	0.00258076		2070.58	-0.00019359		2660.58	0.0038844		3250.58	-0.0005244
300.8	0.00465131		890.79	0.00339896		1480.79	0.00209125		2070.78	0.00011636		2660.78	0.00392831		3250.78	-0.00103852
301	0.0052069		890.99	0.00158097		1480.99	0.00248322		2070.98	-0.00098625		2660.98	0.00325426		3250.98	-0.00172368
301.2	0.00538938		891.19	0.00057182		1481.19	0.00201333		2071.18	-0.00198297		2661.18	0.00333119		3251.18	-0.00257114
301.4	0.00550074		891.39	0.00014055		1481.39	0.00165888		2071.38	-0.00289554		2661.38	0.00320668		3251.38	-0.00306378
301.6	0.00485307		891.59	-0.0012716		1481.59	0.00209056		2071.58	-0.00417981		2661.58	0.00311694		3251.58	-0.00339898
301.8	0.00453803		891.79	-0.00055352		1481.79	0.00175424		2071.78	-0.00650505		2661.78	0.00342763		3251.78	-0.00363152
302	0.00416993		891.99	-0.00062384		1481.99	0.00124059		2071.98	-0.00757392		2661.98	0.00320848		3251.98	-0.00436729
302.2	0.00406252		892.19	0.00032971		1482.19	0.0010896		2072.18	-0.00793538		2662.18	0.00390379		3252.18	-0.00359114
302.4	0.00336158		892.39	0.00130248		1482.39	0.00100701		2072.38	-0.00853644		2662.38	0.00353557		3252.38	-0.00284122
302.6	0.00312551		892.59	0.00243851		1482.59	0.00094651		2072.58	-0.00855462		2662.58	0.00321034		3252.58	-0.00129132
302.8	0.00237578		892.79	0.00354679		1482.79	0.00081777		2072.78	-0.00869232		2662.78	0.00294159		3252.78	-0.00149642
303	0.00286997		892.99	0.00420068		1482.99	-0.00011918		2072.98	-0.00958399		2662.98	0.00266389		3252.98	-0.00139142
303.2	0.00292867		893.19	0.00469353		1483.19	-0.00032339		2073.18	-0.00989779		2663.18	0.00276859		3253.18	-0.00196174
303.4	0.0032192		893.39	0.00567451		1483.39	0.0003089		2073.38	-0.01058062		2663.38	0.00323771		3253.38	-0.00311497
303.6	0.00327311		893.59	0.00615085		1483.59	0.00069162		2073.58	-0.01000629		2663.58	0.00350004		3253.58	-0.00410466
303.8	0.00292508		893.79	0.00642381		1483.79	0.00096597		2073.78	-0.00965856		2663.78	0.00295351		3253.78	-0.00487991
304	0.0031967		893.99	0.00593657		1483.99	0.0017759		2073.98	-0.00896299		2663.98	0.00344893		3253.98	-0.00496548
304.2	0.00406348		894.19	0.00640857		1484.19	0.00279664		2074.18	-0.00891119		2664.18	0.00368536		3254.18	-0.00519838
304.4	0.00400525		894.39	0.00558927		1484.39	0.00332889		2074.38	-0.00777462		2664.38	0.0041104		3254.38	-0.00564442
304.6	0.0049693		894.59	0.00472184		1484.59	0.00374077		2074.58	-0.00780386		2664.58	0.00311238		3254.58	-0.00498827
304.8	0.00462411		894.79	0.00411702		1484.79	0.00438188		2074.78	-0.00760779		2664.78	0.00229884		3254.78	-0.00466441
305	0.00493499		894.99	0.00291376		1484.99	0.00457		2074.98	-0.00866538		2664.98	0.00239896		3254.98	-0.00442604
305.2	0.00445831		895.19	0.00237709		1485.19	0.00403466		2075.18	-0.00877809		2665.18	0.00231478		3255.18	-0.0047498
305.4	0.0044046		895.39	0.00160819		1485.39	0.0034067		2075.38	-0.0090982		2665.38	0.00277233		3255.38	-0.00495581
305.6	0.00425866		895.59	0.00030068		1485.59	0.0033756		2075.58	-0.00938331		2665.58	0.00299335		3255.58	-0.00529716
305.8	0.0044395		895.79	0.00116261		1485.79	0.00301263		2075.78	-0.00968561		2665.78	0.00339646		3255.78	-0.00423045
306	0.0047708		895.99	0.00078138		1485.99	0.00256619		2075.98	-0.00893997		2665.98	0.00402729		3255.98	-0.00342439
306.2	0.00513192		896.19	0.00119629		1486.19	0.00200001		2076.18	-0.00768003		2666.18	0.00424214		3256.18	-0.00248215
306.4	0.00517439		896.39	0.00069885		1486.39	0.00150302		2076.38	-0.00755397		2666.38	0.00371189		3256.38	-0.00161106
306.6	0.00555786		896.59	0.00050487		1486.59	0.0013153		2076.58	-0.00733995		2666.58	0.00397054		3256.58	-0.00162822
306.8	0.00509387		896.79	0.00044359		1486.79	0.00148979		2076.78	-0.00695191		2666.78	0.00405661		3256.78	-0.00337148
307	0.00498052		896.99	0.00042646		1486.99	0.00165384		2076.98	-0.00671131		2666.98	0.004159		3256.98	-0.00367525
307.2	0.00372961		897.19	0.00113323		1487.19	0.00259874		2077.18	-0.00558913		2667.18	0.00491322		3257.18	-0.00396824
307.4	0.00423745		897.39	0.00231036		1487.39	0.00265976		2077.38	-0.0055551		2667.38	0.00494172		3257.38	-0.00472844
307.6	0.00392386		897.59	0.00248269		1487.59	0.00348935		2077.58	-0.00447886		2667.58	0.00454573		3257.58	-0.00560522
307.8	0.00434582		897.79	0.00268678		1487.79	0.00380495		2077.78	-0.00338862		2667.78	0.00480412		3257.78	-0.00511049
308	0.00553777		897.99	0.00281059		1487.99	0.00430093		2077.98	-0.00282305		2667.98	0.00593621		3257.98	-0.00425287
308.2	0.0055099		898.19	0.00385683		1488.19	0.00356721		2078.18	-0.00305163		2668.18	0.00649488		3258.18	-0.00348733
308.4	0.00587131		898.39	0.00373202		1488.39	0.00380478		2078.38	-0.00279597		2668.38	0.00699103		3258.38	-0.00314486
308.6	0.00589684		898.59	0.00375885		1488.59	0.00420757		2078.58	-0.00305622		2668.58	0.00595581		3258.58	-0.00270734
308.8	0.00480244		898.79	0.00406807		1488.79	0.0048783		2078.78	-0.00305609		2668.78	0.00581658		3258.78	-0.00305942
309	0.00445332		898.99	0.00487952		1488.99	0.00471641		2078.98	-0.00351305		2668.98	0.00587821		3258.98	-0.00344934
309.2	0.00356995		899.19	0.00467281		1489.19	0.00472947		2079.18	-0.00320089		2669.18	0.0055499		3259.18	-0.00445137
309.4	0.00385244		899.39	0.00474846		1489.39	0.00523424		2079.38	-0.00401877		2669.38	0.00532842		3259.38	-0.00446621
309.6	0.00403991		899.59	0.00505263		1489.59	0.00574662		2079.58	-0.00424994		2669.58	0.00491703		3259.58	-0.00455861
309.8	0.00390181		899.79	0.00620467		1489.79	0.00625969		2079.78	-0.00485102		2669.78	0.00406283		3259.78	-0.00467607
310	0.00404522		899.99	0.00609572		1489.99	0.00603834		2079.98	-0.00491006		2669.98	0.00387772		3259.98	-0.00539571
310.2	0.00408362		900.19	0.00644167		1490.19	0.00550984		2080.18	-0.00556067		2670.18	0.00329019		3260.18	-0.00533624
310.4	0.00412518		900.39	0.00608928		1490.39	0.00561164		2080.38	-0.00627826		2670.38	0.00364762		3260.38	-0.00549112
310.6	0.00409466		900.59	0.00669184		1490.59	0.00531107		2080.58	-0.00686126		2670.58	0.00327332		3260.58	-0.00613555
310.8	0.00395243		900.79	0.00706615		1490.79	0.00554795		2080.78	-0.00602429		2670.78	0.00349356		3260.78	-0.00535609
311	0.00451329		900.99	0.0071489		1490.99	0.00560371		2080.98	-0.0064262		2670.98	0.0031393		3260.98	-0.00385175
311.2	0.00467699		901.19	0.0075083		1491.19	0.00597655		2081.18	-0.00640332		2671.18	0.00426889		3261.18	-0.00369945
311.4	0.00576591		901.39	0.00713763		1491.39	0.0054849		2081.38	-0.00703595		2671.38	0.00455889		3261.38	-0.00376055
311.6	0.0054041		901.59	0.007278		1491.59	0.00465653		2081.58	-0.00608469		2671.58	0.00474423		3261.58	-0.00379571
311.8	0.00583158		901.79	0.00719829		1491.79	0.0031014		2081.78	-0.00593863		2671.78	0.00553886		3261.78	-0.002251
312	0.00585941		901.99	0.0070869		1491.99	0.002484		2081.98	-0.00628909		2671.98	0.00567326		3261.98	-0.00135861
312.2	0.00521529		902.19	0.00663963		1492.19	0.00113098		2082.18	-0.00662518		2672.18	0.00572581		3262.18	-0.0015056
312.4	0.00614397		902.39	0.00511237		1492.39	0.00155776		2082.38	-0.00750907		2672.38	0.00550599		3262.38	-0.00201204
312.6	0.00562735		902.59	0.00434644		1492.59	0.00197493		2082.58	-0.00627071		2672.58	0.00533318		3262.58	-0.0026362
312.8	0.00502414		902.79	0.00383744		1492.79	0.00170678		2082.78	-0.00496147		2672.78	0.00581134		3262.78	-0.00338807
313	0.00485787		902.99	0.00430424		1492.99	0.00166157		2082.98	-0.00512435		2672.98	0.00532792		3262.98	-0.00364876
313.2	0.0043863		903.19	0.00356695		1493.19	0.00178169		2083.18	-0.00478011		2673.18	0.00466657		3263.18	-0.00433248
313.4	0.00409295		903.39	0.00355684		1493.39	0.00217004		2083.38	-0.00515703		2673.38	0.00444354		3263.38	-0.00437394
313.6	0.00368891		903.59	0.0035669		1493.59	0.00271437		2083.58	-0.00478002		2673.58	0.0046002		3263.58	-0.00470089
313.8	0.00335831		903.79	0.00410665		1493.79	0.00308073		2083.78	-0.00550774		2673.78	0.00456411		3263.78	-0.0051574
314	0.00361546		903.99	0.00443207		1493.99	0.00295362		2083.98	-0.00545985		2673.98	0.00603353		3263.98	-0.00504943
314.2	0.00445695		904.19	0.00544388		1494.19	0.00278275		2084.18	-0.00648283		2674.18	0.00599312		3264.18	-0.00493759
314.4	0.00469786		904.39	0.00554209		1494.39	0.00282145		2084.38	-0.00644104		2674.38	0.00676526		3264.38	-0.00490229
314.6	0.00459161		904.59	0.00663792		1494.59	0.00285789		2084.58	-0.0060897		2674.58	0.00655691		3264.58	-0.00468457
314.8	0.00494742		904.79	0.00694957		1494.79	0.00354567		2084.78	-0.00492975		2674.78	0.00667155		3264.78	-0.0038528
315	0.00499288		904.99	0.00689798		1494.99	0.00370498		2084.98	-0.00524104		2674.98	0.00635799		3264.98	-0.00408103
315.2	0.00478932		905.19	0.00745175		1495.19	0.00439151		2085.18	-0.00422708		2675.18	0.00654629		3265.18	-0.00428659
315.4	0.0051015		905.39	0.0075926		1495.39	0.00359823		2085.38	-0.00411781		2675.38	0.00564056		3265.38	-0.00422576
315.6	0.00440383		905.59	0.00767359		1495.59	0.00381872		2085.58	-0.00419077		2675.58	0.00549289		3265.58	-0.00455221
315.8	0.00519487		905.79	0.00758423		1495.79	0.00407283		2085.78	-0.00540249		2675.78	0.00487786		3265.78	-0.00423418
316	0.00498854		905.99	0.00722478		1495.99	0.00492115		2085.98	-0.00590468		2675.98	0.00455659		3265.98	-0.0047606
316.2	0.00552331		906.19	0.00627495		1496.19	0.0051293		2086.18	-0.00600254		2676.18	0.00461636		3266.18	-0.00511456
316.4	0.0071184		906.39	0.00502721		1496.39	0.00557758		2086.38	-0.00637962		2676.38	0.0044189		3266.38	-0.00524623
316.6	0.00733819		906.59	0.00459479		1496.59	0.00594077		2086.58	-0.00579096		2676.58	0.0050196		3266.58	-0.0051623
316.8	0.00757158		906.79	0.00448188		1496.79	0.00521449		2086.78	-0.00564711		2676.78	0.00444278		3266.78	-0.00468507
317	0.00795986		906.99	0.00460496		1496.99	0.0057039		2086.98	-0.00630027		2676.98	0.00420012		3266.98	-0.00403179
317.2	0.00853598		907.19	0.00439205		1497.19	0.00577554		2087.18	-0.00607045		2677.18	0.00438143		3267.18	-0.00436629
317.4	0.00803046		907.39	0.0043547		1497.39	0.00548824		2087.38	-0.00641533		2677.38	0.00524197		3267.38	-0.00412014
317.6	0.00800338		907.59	0.00443479		1497.59	0.00582986		2087.58	-0.00674385		2677.58	0.00594429		3267.58	-0.00376079
317.8	0.00893788		907.79	0.00509099		1497.79	0.00560383		2087.78	-0.00737196		2677.78	0.00645732		3267.78	-0.00358091
318	0.00831582		907.99	0.00573043		1497.99	0.00502431		2087.98	-0.00666099		2677.98	0.00768166		3267.98	-0.00370638
318.2	0.00756785		908.19	0.00586078		1498.19	0.00526389		2088.18	-0.00632184		2678.18	0.0077585		3268.18	-0.00378691
318.4	0.00662875		908.39	0.00601403		1498.39	0.00516663		2088.38	-0.00593236		2678.38	0.0084423		3268.38	-0.00320175
318.6	0.00590556		908.59	0.0067256		1498.59	0.00542492		2088.58	-0.00527424		2678.58	0.00806589		3268.58	-0.003999
318.8	0.0055314		908.79	0.0067337		1498.79	0.00521608		2088.78	-0.00455919		2678.78	0.00832176		3268.78	-0.00410614
319	0.00433939		908.99	0.00686895		1498.99	0.00537711		2088.98	-0.00329316		2678.98	0.00790617		3268.98	-0.0046724
319.2	0.00445555		909.19	0.00684812		1499.19	0.0052589		2089.18	-0.00171459		2679.18	0.00804167		3269.18	-0.00503942
319.4	0.00411733		909.39	0.00638417		1499.39	0.00485979		2089.38	-0.00221688		2679.38	0.00832215		3269.38	-0.005948
319.6	0.00330781		909.59	0.0061316		1499.59	0.00513911		2089.58	-0.0025808		2679.58	0.00859361		3269.58	-0.00664615
319.8	0.00438459		909.79	0.00597062		1499.79	0.00444205		2089.78	-0.00288437		2679.78	0.00801473		3269.78	-0.00730396
320	0.00426951		909.99	0.00483646		1499.99	0.00387039		2089.98	-0.0025862		2679.98	0.00699585		3269.98	-0.00762045
320.2	0.00449187		910.19	0.00431792		1500.19	0.00364724		2090.18	-0.00284436		2680.18	0.00644883		3270.18	-0.00705148
320.4	0.00443223		910.39	0.00423072		1500.39	0.00320211		2090.38	-0.00279432		2680.38	0.00625635		3270.38	-0.00711935
320.6	0.00422855		910.59	0.00507111		1500.59	0.00389014		2090.58	-0.00284845		2680.58	0.00576233		3270.58	-0.00608548
320.8	0.00440311		910.79	0.00548187		1500.79	0.00429803		2090.78	-0.00213691		2680.78	0.0051676		3270.78	-0.00589164
321	0.00534922		910.99	0.00566818		1500.99	0.00428989		2090.98	-0.00184677		2680.98	0.00551623		3270.98	-0.00496909
321.2	0.00532744		911.19	0.00598443		1501.19	0.00388505		2091.18	-0.00226144		2681.18	0.0055706		3271.18	-0.0050344
321.4	0.00478149		911.39	0.00657346		1501.39	0.00405063		2091.38	-0.0028245		2681.38	0.00514324		3271.38	-0.00468287
321.6	0.00549243		911.59	0.00723469		1501.59	0.00524301		2091.58	-0.003091		2681.58	0.00525152		3271.58	-0.00439281
321.8	0.00593547		911.79	0.00816092		1501.79	0.00569697		2091.78	-0.00443102		2681.78	0.00496452		3271.78	-0.00376566
322	0.00545829		911.99	0.00769888		1501.99	0.00574196		2091.98	-0.00414606		2681.98	0.00544782		3271.98	-0.00301698
322.2	0.00567558		912.19	0.00789501		1502.19	0.00657381		2092.18	-0.00484635		2682.18	0.00613381		3272.18	-0.00274338
322.4	0.00612881		912.39	0.00948155		1502.39	0.00624957		2092.38	-0.00540674		2682.38	0.00668621		3272.38	-0.00293419
322.6	0.00635094		912.59	0.00889188		1502.59	0.00623246		2092.58	-0.00519143		2682.58	0.0068942		3272.58	-0.00353138
322.8	0.00641987		912.79	0.00847072		1502.79	0.00631048		2092.78	-0.00507394		2682.78	0.00690249		3272.78	-0.00403516
323	0.00565235		912.99	0.00806247		1502.99	0.00610067		2092.98	-0.0041314		2682.98	0.00654077		3272.98	-0.00397675
323.2	0.00626314		913.19	0.00782445		1503.19	0.00602918		2093.18	-0.00436155		2683.18	0.00663749		3273.18	-0.00476663
323.4	0.00616669		913.39	0.00708872		1503.39	0.00588282		2093.38	-0.00500624		2683.38	0.00642695		3273.38	-0.00491808
323.6	0.00626447		913.59	0.00596137		1503.59	0.00620686		2093.58	-0.00514709		2683.58	0.00620231		3273.58	-0.00521267
323.8	0.00689672		913.79	0.0047139		1503.79	0.00542364		2093.78	-0.0057251		2683.78	0.0054932		3273.78	-0.00538319
324	0.0058363		913.99	0.0035008		1503.99	0.00535754		2093.98	-0.00594716		2683.98	0.00463876		3273.98	-0.00490345
324.2	0.00504751		914.19	0.00315421		1504.19	0.00552513		2094.18	-0.00577418		2684.18	0.00487208		3274.18	-0.00486602
324.4	0.00470261		914.39	0.00234615		1504.39	0.00454935		2094.38	-0.00494334		2684.38	0.00513763		3274.38	-0.00446885
324.6	0.00441076		914.59	0.00177608		1504.59	0.00476949		2094.58	-0.00425108		2684.58	0.00590265		3274.58	-0.00441279
324.8	0.00427575		914.79	0.00191173		1504.79	0.00499344		2094.78	-0.0041172		2684.78	0.00667151		3274.78	-0.00427445
325	0.00437386		914.99	0.0021727		1504.99	0.00459885		2094.98	-0.00400852		2684.98	0.00735551		3274.98	-0.00363856
325.2	0.0037375		915.19	0.00318399		1505.19	0.00461875		2095.18	-0.00479929		2685.18	0.00826528		3275.18	-0.00371724
325.4	0.00318688		915.39	0.00446565		1505.39	0.00566847		2095.38	-0.00572673		2685.38	0.00820752		3275.38	-0.00378892
325.6	0.00373608		915.59	0.00496371		1505.59	0.00555149		2095.58	-0.00577047		2685.58	0.00823158		3275.58	-0.0031741
325.8	0.00430103		915.79	0.00614622		1505.79	0.0047294		2095.78	-0.00646454		2685.78	0.00813451		3275.78	-0.0027843
326	0.00443009		915.99	0.00654219		1505.99	0.00353002		2095.98	-0.00530052		2685.98	0.00931922		3275.98	-0.00227452
326.2	0.00404883		916.19	0.00819996		1506.19	0.00345997		2096.18	-0.00591001		2686.18	0.01071332		3276.18	-0.00241766
326.4	0.00447041		916.39	0.00898249		1506.39	0.00344914		2096.38	-0.00556132		2686.38	0.01021699		3276.38	-0.00190731
326.6	0.00401473		916.59	0.00796441		1506.59	0.00326557		2096.58	-0.00641771		2686.58	0.00967417		3276.58	-0.00187706
326.8	0.00401654		916.79	0.00809273		1506.79	0.00295372		2096.78	-0.00624056		2686.78	0.00924433		3276.78	-0.00274678
327	0.00423044		916.99	0.0084623		1506.99	0.00293634		2096.98	-0.00610279		2686.98	0.00923712		3276.98	-0.00248955
327.2	0.00448952		917.19	0.00819544		1507.19	0.00344255		2097.18	-0.00662777		2687.18	0.00910688		3277.18	-0.00312612
327.4	0.00571317		917.39	0.00787544		1507.39	0.00381059		2097.38	-0.00561343		2687.38	0.00912878		3277.38	-0.00303607
327.6	0.00675416		917.59	0.00768708		1507.59	0.00501216		2097.58	-0.00530768		2687.58	0.00847942		3277.58	-0.00268396
327.8	0.00722553		917.79	0.00742062		1507.79	0.00428436		2097.78	-0.0059958		2687.78	0.00780422		3277.78	-0.00302786
328	0.00768697		917.99	0.00713259		1507.99	0.00408089		2097.98	-0.00615502		2687.98	0.00676866		3277.98	-0.00319932
328.2	0.00888989		918.19	0.00663168		1508.19	0.0031467		2098.18	-0.00624503		2688.18	0.00698964		3278.18	-0.00306579
328.4	0.00913215		918.39	0.00491459		1508.39	0.00304583		2098.38	-0.00552048		2688.38	0.00775825		3278.38	-0.00295078
328.6	0.00888925		918.59	0.00403109		1508.59	0.00390069		2098.58	-0.00514521		2688.58	0.00813503		3278.58	-0.00415064
328.8	0.00925481		918.79	0.00479251		1508.79	0.00433265		2098.78	-0.00560113		2688.78	0.00780635		3278.78	-0.00425173
329	0.0099111		918.99	0.00452701		1508.99	0.0041701		2098.98	-0.00478104		2688.98	0.00775718		3278.98	-0.00455147
329.2	0.0097062		919.19	0.00465873		1509.19	0.00398763		2099.18	-0.00429223		2689.18	0.00769883		3279.18	-0.00373362
329.4	0.0094373		919.39	0.00464297		1509.39	0.00447767		2099.38	-0.00379752		2689.38	0.00699472		3279.38	-0.00317545
329.6	0.00928842		919.59	0.00402329		1509.59	0.00356175		2099.58	-0.00324403		2689.58	0.0067229		3279.58	-0.00252512
329.8	0.00829564		919.79	0.00458156		1509.79	0.00334405		2099.78	-0.00340086		2689.78	0.0063058		3279.78	-0.00213312
330	0.00688726		919.99	0.00396662		1509.99	0.00409894		2099.98	-0.00349567		2689.98	0.00659186		3279.98	-0.00130521
330.2	0.00689926		920.19	0.00405935		1510.19	0.00518907		2100.18	-0.00439586		2690.18	0.00619668		3280.18	-0.00160765
330.4	0.00704007		920.39	0.00387746		1510.39	0.00547277		2100.38	-0.00461674		2690.38	0.005105		3280.38	-0.00195443
330.6	0.00602828		920.59	0.00382344		1510.59	0.00589508		2100.58	-0.00553301		2690.58	0.00461731		3280.58	-0.00183724
330.8	0.00625927		920.79	0.00468725		1510.79	0.00584883		2100.78	-0.00494554		2690.78	0.0045325		3280.78	-0.00105597
331	0.00617136		920.99	0.00574796		1510.99	0.00604934		2100.98	-0.00453294		2690.98	0.00424112		3280.98	-0.0004347
331.2	0.00685774		921.19	0.00684575		1511.19	0.00603898		2101.18	-0.0043844		2691.18	0.00396453		3281.18	0.00020228
331.4	0.00693365		921.39	0.00834968		1511.39	0.00648493		2101.38	-0.00382596		2691.38	0.00349275		3281.38	0.00015335
331.6	0.00720808		921.59	0.00942268		1511.59	0.00701965		2101.58	-0.00448002		2691.58	0.00282381		3281.58	0.00005258
331.8	0.00686882		921.79	0.00981679		1511.79	0.00562078		2101.78	-0.00579982		2691.78	0.00324143		3281.78	-0.00038116
332	0.00724233		921.99	0.01000763		1511.99	0.0050837		2101.98	-0.00602909		2691.98	0.0030729		3281.98	-0.00108729
332.2	0.00814295		922.19	0.00958173		1512.19	0.00495016		2102.18	-0.00566706		2692.18	0.00405076		3282.18	-0.00089677
332.4	0.00813962		922.39	0.0089343		1512.39	0.0059606		2102.38	-0.00431147		2692.38	0.00492573		3282.38	-0.00210383
332.6	0.00826036		922.59	0.0095583		1512.59	0.00601914		2102.58	-0.0040455		2692.58	0.00521047		3282.58	-0.00283602
332.8	0.00856173		922.79	0.01047741		1512.79	0.00582952		2102.78	-0.0038927		2692.78	0.00568222		3282.78	-0.00278493
333	0.00893879		922.99	0.01016281		1512.99	0.00563155		2102.98	-0.00309462		2692.98	0.00624989		3282.98	-0.00283552
333.2	0.00819233		923.19	0.00958907		1513.19	0.00650584		2103.18	-0.00315961		2693.18	0.00680549		3283.18	-0.00233264
333.4	0.00755314		923.39	0.00906825		1513.39	0.0071381		2103.38	-0.00337072		2693.38	0.00756935		3283.38	-0.00188429
333.6	0.00674652		923.59	0.0082576		1513.59	0.00774043		2103.58	-0.0038664		2693.58	0.00789867		3283.58	-0.00188461
333.8	0.0065142		923.79	0.00838494		1513.79	0.00882376		2103.78	-0.0037923		2693.78	0.00777425		3283.78	-0.00226497
334	0.00662714		923.99	0.0078407		1513.99	0.00991587		2103.98	-0.00398739		2693.98	0.00802146		3283.98	-0.0028635
334.2	0.00691446		924.19	0.00771129		1514.19	0.00979201		2104.18	-0.00478823		2694.18	0.00714419		3284.18	-0.00352406
334.4	0.00684852		924.39	0.00807642		1514.39	0.01013371		2104.38	-0.00495467		2694.38	0.0065649		3284.38	-0.00260095
334.6	0.00618753		924.59	0.00805119		1514.59	0.00968293		2104.58	-0.00509077		2694.58	0.0057558		3284.58	-0.00232445
334.8	0.00566857		924.79	0.00846016		1514.79	0.00872808		2104.78	-0.00456594		2694.78	0.00497222		3284.78	-0.0015137
335	0.00573061		924.99	0.00843173		1514.99	0.00785052		2104.98	-0.00452309		2694.98	0.00489441		3284.98	-0.00206546
335.2	0.00632482		925.19	0.00839587		1515.19	0.00782625		2105.18	-0.00445965		2695.18	0.00516356		3285.18	-0.00176117
335.4	0.00618622		925.39	0.00852463		1515.39	0.00756769		2105.38	-0.00488696		2695.38	0.00484107		3285.38	-0.00243645
335.6	0.00704202		925.59	0.00758699		1515.59	0.00700836		2105.58	-0.00434985		2695.58	0.0048275		3285.58	-0.00267173
335.8	0.0078101		925.79	0.00754512		1515.79	0.00589546		2105.78	-0.004358		2695.78	0.00532141		3285.78	-0.00246483
336	0.00859101		925.99	0.00695014		1515.99	0.00497808		2105.98	-0.0037819		2695.98	0.00526658		3285.98	-0.00310409
336.2	0.00937603		926.19	0.00730363		1516.19	0.00492443		2106.18	-0.0034267		2696.18	0.00660299		3286.18	-0.00303166
336.4	0.00961455		926.39	0.00746302		1516.39	0.00472102		2106.38	-0.00424596		2696.38	0.00768356		3286.38	-0.0036356
336.6	0.00919776		926.59	0.00740204		1516.59	0.00400978		2106.58	-0.0047492		2696.58	0.00805772		3286.58	-0.00372809
336.8	0.0083296		926.79	0.00740684		1516.79	0.00448333		2106.78	-0.00511701		2696.78	0.00876342		3286.78	-0.0039071
337	0.00852728		926.99	0.00658976		1516.99	0.00556262		2106.98	-0.00515296		2696.98	0.00888687		3286.98	-0.00353206
337.2	0.00889352		927.19	0.00672325		1517.19	0.00614047		2107.18	-0.0050514		2697.18	0.0091618		3287.18	-0.00259374
337.4	0.00853737		927.39	0.00730977		1517.39	0.00548818		2107.38	-0.00463199		2697.38	0.0091013		3287.38	-0.00206493
337.6	0.00923255		927.59	0.00700618		1517.59	0.00588561		2107.58	-0.00384906		2697.58	0.0084372		3287.58	-0.00240358
337.8	0.00918226		927.79	0.00786728		1517.79	0.00573461		2107.78	-0.00396494		2697.78	0.00785132		3287.78	-0.00272029
338	0.00941984		927.99	0.0071816		1517.99	0.00501218		2107.98	-0.00397216		2697.98	0.00686433		3287.98	-0.00286965
338.2	0.00906703		928.19	0.00717692		1518.19	0.00455614		2108.18	-0.00437996		2698.18	0.00611731		3288.18	-0.00246755
338.4	0.00853502		928.39	0.00714591		1518.39	0.00341525		2108.38	-0.0040251		2698.38	0.00537043		3288.38	-0.00201165
338.6	0.00813106		928.59	0.00715628		1518.59	0.00205792		2108.58	-0.00345358		2698.58	0.00459853		3288.58	-0.00263241
338.8	0.00794851		928.79	0.00806713		1518.79	0.00149853		2108.78	-0.00240273		2698.78	0.00439682		3288.78	-0.00250001
339	0.00852276		928.99	0.00889449		1518.99	0.00091954		2108.98	-0.00251869		2698.98	0.00465431		3288.98	-0.00287756
339.2	0.00972513		929.19	0.00882293		1519.19	0.00097118		2109.18	-0.00194318		2699.18	0.00462998		3289.18	-0.00323996
339.4	0.00963422		929.39	0.00902597		1519.39	0.00109457		2109.38	-0.00232907		2699.38	0.0044245		3289.38	-0.00385
339.6	0.00905574		929.59	0.0079229		1519.59	0.00114661		2109.58	-0.00078475		2699.58	0.00509279		3289.58	-0.00422952
339.8	0.0090858		929.79	0.00753026		1519.79	0.00117943		2109.78	-0.00061527		2699.78	0.00540067		3289.78	-0.00512696
340	0.00878115		929.99	0.00708383		1519.99	0.00179808		2109.98	-0.00104857		2699.98	0.00586369		3289.98	-0.00548666
340.2	0.00902927		930.19	0.00688966		1520.19	0.00232398		2110.18	-0.00199018		2700.18	0.00756998		3290.18	-0.00550568
340.4	0.0094633		930.39	0.006643		1520.39	0.00274283		2110.38	-0.00260883		2700.38	0.0080647		3290.38	-0.00662641
340.6	0.00913277		930.59	0.00591764		1520.59	0.00382284		2110.58	-0.00169709		2700.58	0.00799034		3290.58	-0.00697688
340.8	0.00894933		930.79	0.00568293		1520.79	0.00517532		2110.78	-0.0018237		2700.78	0.00840333		3290.78	-0.00613084
341	0.00991993		930.99	0.00516379		1520.99	0.00629405		2110.98	-0.00206529		2700.98	0.00835977		3290.98	-0.00575027
341.2	0.01066841		931.19	0.00582832		1521.19	0.00621832		2111.18	-0.00127985		2701.18	0.00826189		3291.18	-0.00557011
341.4	0.01087852		931.39	0.00544311		1521.39	0.00588053		2111.38	-0.00176533		2701.38	0.00792657		3291.38	-0.00568546
341.6	0.01196478		931.59	0.00523613		1521.59	0.00657681		2111.58	-0.00201736		2701.58	0.0075498		3291.58	-0.00542916
341.8	0.01190002		931.79	0.00518659		1521.79	0.00621338		2111.78	-0.00314181		2701.78	0.00704242		3291.78	-0.00564384
342	0.01217446		931.99	0.00394755		1521.99	0.0055422		2111.98	-0.00303238		2701.98	0.00667415		3291.98	-0.00493294
342.2	0.01091829		932.19	0.00430383		1522.19	0.00477246		2112.18	-0.00358703		2702.18	0.00676846		3292.18	-0.00361373
342.4	0.01079173		932.39	0.00460597		1522.39	0.00320426		2112.38	-0.00342243		2702.38	0.00582735		3292.38	-0.00246642
342.6	0.01084273		932.59	0.00548713		1522.59	0.00329932		2112.58	-0.00373727		2702.58	0.00571105		3292.58	-0.00230551
342.8	0.00983058		932.79	0.00693244		1522.79	0.00235432		2112.78	-0.00443988		2702.78	0.00593194		3292.78	-0.00274791
343	0.00964191		932.99	0.00732032		1522.99	0.00203712		2112.98	-0.00470061		2702.98	0.00493507		3292.98	-0.00255494
343.2	0.0089322		933.19	0.00719126		1523.19	0.0031241		2113.18	-0.00367207		2703.18	0.00542662		3293.18	-0.00284702
343.4	0.00753254		933.39	0.00700353		1523.39	0.00331587		2113.38	-0.00290449		2703.38	0.00593755		3293.38	-0.00316618
343.6	0.00708624		933.59	0.00633397		1523.59	0.00350681		2113.58	-0.00247236		2703.58	0.00651462		3293.58	-0.00329493
343.8	0.00809092		933.79	0.00555272		1523.79	0.00434194		2113.78	-0.00263328		2703.78	0.00751907		3293.78	-0.00353991
344	0.00896141		933.99	0.00620163		1523.99	0.00477372		2113.98	-0.00304314		2703.98	0.00808924		3293.98	-0.00243396
344.2	0.00961722		934.19	0.00581825		1524.19	0.0047963		2114.18	-0.0032711		2704.18	0.00854275		3294.18	-0.00239376
344.4	0.00995073		934.39	0.00641163		1524.39	0.00494635		2114.38	-0.00298118		2704.38	0.00913741		3294.38	-0.00311385
344.6	0.00999234		934.59	0.00610883		1524.59	0.00527344		2114.58	-0.00311281		2704.58	0.00918349		3294.58	-0.00230588
344.8	0.00997132		934.79	0.00681396		1524.79	0.00593286		2114.78	-0.00377059		2704.78	0.0096266		3294.78	-0.00156494
345	0.00943668		934.99	0.00736046		1524.99	0.00695246		2114.98	-0.0038123		2704.98	0.00977364		3294.98	-0.00168412
345.2	0.01027683		935.19	0.00701773		1525.19	0.00726416		2115.18	-0.00339229		2705.18	0.00927192		3295.18	-0.0012823
345.4	0.01084609		935.39	0.00712535		1525.39	0.00783399		2115.38	-0.00449578		2705.38	0.00903351		3295.38	-0.00120329
345.6	0.01042486		935.59	0.00760882		1525.59	0.00809756		2115.58	-0.00481985		2705.58	0.00888554		3295.58	-0.00133744
345.8	0.00971712		935.79	0.00751909		1525.79	0.00736553		2115.78	-0.00504959		2705.78	0.00863444		3295.78	-0.00145455
346	0.00982159		935.99	0.00761168		1525.99	0.00651578		2115.98	-0.00458387		2705.98	0.00861798		3295.98	-0.00052287
346.2	0.00957416		936.19	0.00850099		1526.19	0.0060852		2116.18	-0.00468423		2706.18	0.00822882		3296.18	0.00105979
346.4	0.01041798		936.39	0.00891731		1526.39	0.00620627		2116.38	-0.00415866		2706.38	0.00730579		3296.38	0.00086043
346.6	0.01067802		936.59	0.00954918		1526.59	0.00676756		2116.58	-0.00405316		2706.58	0.00656698		3296.58	-0.00013841
346.8	0.00956862		936.79	0.01037177		1526.79	0.00643505		2116.78	-0.00381625		2706.78	0.0068666		3296.78	-0.00124161
347	0.01049702		936.99	0.01001859		1526.99	0.00699758		2116.98	-0.00259301		2706.98	0.00681935		3296.98	-0.00186567
347.2	0.01033431		937.19	0.01003785		1527.19	0.00765071		2117.18	-0.00216997		2707.18	0.00769474		3297.18	-0.00254554
347.4	0.01068921		937.39	0.00939567		1527.39	0.00730487		2117.38	-0.00278848		2707.38	0.00853513		3297.38	-0.00312858
347.6	0.01108281		937.59	0.0091523		1527.59	0.00774428		2117.58	-0.0041455		2707.58	0.00827191		3297.58	-0.00385241
347.8	0.01224985		937.79	0.00909181		1527.79	0.00837424		2117.78	-0.00440382		2707.78	0.00886815		3297.78	-0.00382719
348	0.01239949		937.99	0.00980226		1527.99	0.00815142		2117.98	-0.00472435		2707.98	0.00854869		3297.98	-0.00319733
348.2	0.01243437		938.19	0.00945114		1528.19	0.00809601		2118.18	-0.00469824		2708.18	0.00839996		3298.18	-0.00270576
348.4	0.01265395		938.39	0.00940979		1528.39	0.00795794		2118.38	-0.00489911		2708.38	0.00921043		3298.38	-0.00314565
348.6	0.01231465		938.59	0.00934849		1528.59	0.00817254		2118.58	-0.00544248		2708.58	0.00931476		3298.58	-0.00248915
348.8	0.01148368		938.79	0.00992904		1528.79	0.00863791		2118.78	-0.00604961		2708.78	0.00933315		3298.78	-0.00244276
349	0.01084826		938.99	0.00891644		1528.99	0.00866464		2118.98	-0.00510239		2708.98	0.00902447		3298.98	-0.00187544
349.2	0.01094474		939.19	0.00749682		1529.19	0.0089003		2119.18	-0.00500639		2709.18	0.00919329		3299.18	-0.00162465
349.4	0.01049158		939.39	0.00696387		1529.39	0.00851818		2119.38	-0.00507092		2709.38	0.00961116		3299.38	-0.00180688
349.6	0.00940724		939.59	0.00699583		1529.59	0.00758174		2119.58	-0.00448174		2709.58	0.01013262		3299.58	-0.00154358
349.8	0.00955228		939.79	0.00692174		1529.79	0.00657942		2119.78	-0.00443034		2709.78	0.01036051		3299.78	-0.00159594
350	0.00991476		939.99	0.00646513		1529.99	0.00609748		2119.98	-0.00331731		2709.98	0.01029648		3299.98	-0.00184617
350.2	0.01005757		940.19	0.00666412		1530.19	0.00624753		2120.18	-0.00322299		2710.18	0.01029324		3300.18	-0.00219178
350.4	0.00963874		940.39	0.00645789		1530.39	0.00630637		2120.38	-0.0027204		2710.38	0.01039113		3300.38	-0.00299665
350.6	0.00880544		940.59	0.00645141		1530.59	0.00586777		2120.58	-0.00257341		2710.58	0.00977718		3300.58	-0.00364302
350.8	0.00792595		940.79	0.00609211		1530.79	0.00478263		2120.78	-0.00290696		2710.78	0.01036473		3300.78	-0.00502573
351	0.00847889		940.99	0.00623855		1530.99	0.00531633		2120.98	-0.00345861		2710.98	0.00987243		3300.98	-0.00525382
351.2	0.00769358		941.19	0.00628569		1531.19	0.00560894		2121.18	-0.00415901		2711.18	0.00970834		3301.18	-0.00564881
351.4	0.00770488		941.39	0.00628163		1531.39	0.00560818		2121.38	-0.00492957		2711.38	0.00891227		3301.38	-0.00601462
351.6	0.00788263		941.59	0.00823905		1531.59	0.00607462		2121.58	-0.00599556		2711.58	0.00794451		3301.58	-0.00588853
351.8	0.00858644		941.79	0.00842764		1531.79	0.00659103		2121.78	-0.0056585		2711.78	0.00843067		3301.78	-0.0054619
352	0.00857789		941.99	0.00890181		1531.99	0.00632322		2121.98	-0.00568524		2711.98	0.00862559		3301.98	-0.00471047
352.2	0.00904224		942.19	0.00897323		1532.19	0.00623786		2122.18	-0.00587025		2712.18	0.0083746		3302.18	-0.0042801
352.4	0.00899598		942.39	0.00907553		1532.39	0.00681172		2122.38	-0.00599514		2712.38	0.00913638		3302.38	-0.00444521
352.6	0.0089681		942.59	0.00922468		1532.59	0.00630348		2122.58	-0.00603436		2712.58	0.00916436		3302.58	-0.00348652
352.8	0.0090911		942.79	0.00947623		1532.79	0.00589107		2122.78	-0.00487033		2712.78	0.00910814		3302.78	-0.00396465
353	0.00963185		942.99	0.00833302		1532.99	0.00598905		2122.98	-0.00334069		2712.98	0.00888418		3302.98	-0.00343013
353.2	0.00941866		943.19	0.00794496		1533.19	0.0057075		2123.18	-0.00317568		2713.18	0.00959966		3303.18	-0.00382128
353.4	0.01003476		943.39	0.00835341		1533.39	0.00513596		2123.38	-0.00232943		2713.38	0.01012602		3303.38	-0.00420814
353.6	0.00977831		943.59	0.00899648		1533.59	0.0051102		2123.58	-0.00234859		2713.58	0.00983653		3303.58	-0.00399558
353.8	0.01072089		943.79	0.00838575		1533.79	0.00384612		2123.78	-0.00210203		2713.78	0.00994969		3303.78	-0.00509157
354	0.01139981		943.99	0.00772456		1533.99	0.00331598		2123.98	-0.0014009		2713.98	0.01001779		3303.98	-0.0055063
354.2	0.0116024		944.19	0.00726522		1534.19	0.00282288		2124.18	-0.00141655		2714.18	0.00953703		3304.18	-0.00623418
354.4	0.01043677		944.39	0.00661645		1534.39	0.002571		2124.38	-0.00118286		2714.38	0.00912746		3304.38	-0.00575489
354.6	0.01031131		944.59	0.0061802		1534.59	0.00284279		2124.58	-0.00139214		2714.58	0.00905945		3304.58	-0.00598939
354.8	0.01132212		944.79	0.00600957		1534.79	0.00335039		2124.78	-0.00160569		2714.78	0.00927781		3304.78	-0.00634155
355	0.01084544		944.99	0.00629249		1534.99	0.00509599		2124.98	-0.00244615		2714.98	0.00907173		3304.98	-0.00616674
355.2	0.01064364		945.19	0.00635755		1535.19	0.00507838		2125.18	-0.00290079		2715.18	0.00924241		3305.18	-0.00651496
355.4	0.01165911		945.39	0.00644316		1535.39	0.00575428		2125.38	-0.0027771		2715.38	0.00958206		3305.38	-0.00607304
355.6	0.01182411		945.59	0.00740313		1535.59	0.00649467		2125.58	-0.00244128		2715.58	0.01063093		3305.58	-0.00551936
355.8	0.01213257		945.79	0.00672861		1535.79	0.00622069		2125.78	-0.00294421		2715.78	0.01144794		3305.78	-0.00553461
356	0.01195396		945.99	0.00697648		1535.99	0.00556103		2125.98	-0.00345238		2715.98	0.01129058		3305.98	-0.00444177
356.2	0.01273588		946.19	0.00795003		1536.19	0.00583589		2126.18	-0.00419066		2716.18	0.01153725		3306.18	-0.00391206
356.4	0.01236231		946.39	0.00814285		1536.39	0.00683757		2126.38	-0.0035841		2716.38	0.01216305		3306.38	-0.00373243
356.6	0.01217852		946.59	0.00910229		1536.59	0.0062294		2126.58	-0.00401747		2716.58	0.01258529		3306.58	-0.00302776
356.8	0.01221505		946.79	0.00988639		1536.79	0.00650115		2126.78	-0.00298746		2716.78	0.01237703		3306.78	-0.00298191
357	0.01145151		946.99	0.00996211		1536.99	0.0061098		2126.98	-0.00269631		2716.98	0.01210366		3306.98	-0.00258684
357.2	0.01119725		947.19	0.0109024		1537.19	0.00573763		2127.18	-0.00301897		2717.18	0.01167516		3307.18	-0.00312583
357.4	0.01211217		947.39	0.01077897		1537.39	0.00566472		2127.38	-0.00280555		2717.38	0.01087936		3307.38	-0.00358009
357.6	0.01175766		947.59	0.00988953		1537.59	0.00530931		2127.58	-0.00324812		2717.58	0.00992352		3307.58	-0.00407999
357.8	0.01264769		947.79	0.00855184		1537.79	0.00426594		2127.78	-0.00293945		2717.78	0.00986867		3307.78	-0.00493065
358	0.01258165		947.99	0.00839308		1537.99	0.00406555		2127.98	-0.00346211		2717.98	0.00989597		3307.98	-0.00530171
358.2	0.01123495		948.19	0.00756078		1538.19	0.00338354		2128.18	-0.0031894		2718.18	0.00921018		3308.18	-0.00614704
358.4	0.0102961		948.39	0.00690609		1538.39	0.00388975		2128.38	-0.00377438		2718.38	0.00918145		3308.38	-0.00592718
358.6	0.01031851		948.59	0.00691476		1538.59	0.00365022		2128.58	-0.00414992		2718.58	0.00902191		3308.58	-0.00648623
358.8	0.01038326		948.79	0.00686831		1538.79	0.00436453		2128.78	-0.00456434		2718.78	0.00844194		3308.78	-0.00695859
359	0.00914151		948.99	0.00714214		1538.99	0.00458508		2128.98	-0.00468556		2718.98	0.0089096		3308.98	-0.00759598
359.2	0.00988471		949.19	0.00675306		1539.19	0.00428698		2129.18	-0.00507253		2719.18	0.00931847		3309.18	-0.0072955
359.4	0.01088541		949.39	0.00618348		1539.39	0.00523393		2129.38	-0.00535115		2719.38	0.01041203		3309.38	-0.00619463
359.6	0.01009289		949.59	0.00635515		1539.59	0.00515873		2129.58	-0.00540846		2719.58	0.01069128		3309.58	-0.00624641
359.8	0.01061506		949.79	0.00688372		1539.79	0.00563587		2129.78	-0.00699008		2719.78	0.01038486		3309.78	-0.00571623
360	0.01107462		949.99	0.00732552		1539.99	0.00620257		2129.98	-0.00711996		2719.98	0.00975585		3309.98	-0.00535961
360.2	0.01169887		950.19	0.00870187		1540.19	0.0081101		2130.18	-0.00779813		2720.18	0.00993919		3310.18	-0.00452872
360.4	0.01228701		950.39	0.00939865		1540.39	0.00902403		2130.38	-0.00774081		2720.38	0.00998735		3310.38	-0.00330876
360.6	0.01301513		950.59	0.00975878		1540.59	0.00898799		2130.58	-0.00773224		2720.58	0.00992026		3310.58	-0.00229287
360.8	0.01396296		950.79	0.010533		1540.79	0.00925769		2130.78	-0.00754117		2720.78	0.00988761		3310.78	-0.0015496
361	0.0134136		950.99	0.01015193		1540.99	0.00885405		2130.98	-0.00692506		2720.98	0.00989177		3310.98	-0.00186146
361.2	0.01411024		951.19	0.01039444		1541.19	0.00866493		2131.18	-0.00668744		2721.18	0.00994945		3311.18	-0.00222662
361.4	0.0149496		951.39	0.00952287		1541.39	0.00818023		2131.38	-0.00655083		2721.38	0.0090127		3311.38	-0.00214688
361.6	0.01512428		951.59	0.0088051		1541.59	0.00800007		2131.58	-0.00585314		2721.58	0.00938776		3311.58	-0.00252058
361.8	0.01603821		951.79	0.00854018		1541.79	0.00646126		2131.78	-0.00484661		2721.78	0.00931035		3311.78	-0.0025742
362	0.01573438		951.99	0.00972116		1541.99	0.0054065		2131.98	-0.00391335		2721.98	0.00923164		3311.98	-0.00256915
362.2	0.01528145		952.19	0.0087177		1542.19	0.00462199		2132.18	-0.00315762		2722.18	0.00863139		3312.18	-0.00297947
362.4	0.0147944		952.39	0.00855766		1542.39	0.0045175		2132.38	-0.00316535		2722.38	0.00891829		3312.38	-0.00321659
362.6	0.0139014		952.59	0.00866912		1542.59	0.00311092		2132.58	-0.00289274		2722.58	0.00902296		3312.58	-0.00384983
362.8	0.01305559		952.79	0.00836476		1542.79	0.00340571		2132.78	-0.00236735		2722.78	0.00964885		3312.78	-0.00407938
363	0.01295087		952.99	0.00859346		1542.99	0.00315814		2132.98	-0.00191873		2722.98	0.01025859		3312.98	-0.0051772
363.2	0.01265299		953.19	0.00730844		1543.19	0.0027323		2133.18	-0.00252029		2723.18	0.01018066		3313.18	-0.00519906
363.4	0.01154062		953.39	0.00743592		1543.39	0.00282037		2133.38	-0.0023897		2723.38	0.00991095		3313.38	-0.00491393
363.6	0.00975562		953.59	0.00760636		1543.59	0.00313455		2133.58	-0.00222112		2723.58	0.00943851		3313.58	-0.00542076
363.8	0.00947705		953.79	0.00869903		1543.79	0.00413438		2133.78	-0.0021899		2723.78	0.00871857		3313.78	-0.00554115
364	0.0091311		953.99	0.00981569		1543.99	0.00490771		2133.98	-0.00222038		2723.98	0.00867057		3313.98	-0.00458386
364.2	0.00912902		954.19	0.01057798		1544.19	0.00526485		2134.18	-0.00254932		2724.18	0.00902564		3314.18	-0.00374866
364.4	0.00887838		954.39	0.01128804		1544.39	0.00482983		2134.38	-0.0031401		2724.38	0.00999205		3314.38	-0.00330939
364.6	0.00839277		954.59	0.0110363		1544.59	0.00525673		2134.58	-0.0028365		2724.58	0.01004046		3314.58	-0.00336814
364.8	0.0084952		954.79	0.01155829		1544.79	0.00498376		2134.78	-0.00354267		2724.78	0.00960046		3314.78	-0.00326119
365	0.00772544		954.99	0.01133296		1544.99	0.00498023		2134.98	-0.00330525		2724.98	0.00954472		3314.98	-0.00403494
365.2	0.00829016		955.19	0.01130715		1545.19	0.00478329		2135.18	-0.00360906		2725.18	0.00959352		3315.18	-0.00364176
365.4	0.00946153		955.39	0.01081391		1545.39	0.00505515		2135.38	-0.00301631		2725.38	0.00831598		3315.38	-0.00430935
365.6	0.01098926		955.59	0.00986632		1545.59	0.00533329		2135.58	-0.00248013		2725.58	0.00871268		3315.58	-0.00373999
365.8	0.01140243		955.79	0.00987614		1545.79	0.00503997		2135.78	-0.00201618		2725.78	0.00901021		3315.78	-0.0043068
366	0.0114825		955.99	0.00985067		1545.99	0.00575241		2135.98	-0.0023541		2725.98	0.00979227		3315.98	-0.00466427
366.2	0.01161043		956.19	0.0082787		1546.19	0.0054111		2136.18	-0.00253413		2726.18	0.01065418		3316.18	-0.00535055
366.4	0.01131333		956.39	0.00728114		1546.39	0.00539816		2136.38	-0.00285991		2726.38	0.01159005		3316.38	-0.00569449
366.6	0.0110932		956.59	0.00667878		1546.59	0.00510759		2136.58	-0.00275543		2726.58	0.01193467		3316.58	-0.00629549
366.8	0.01102044		956.79	0.00652993		1546.79	0.00534631		2136.78	-0.00280985		2726.78	0.01269634		3316.78	-0.00697988
367	0.01193032		956.99	0.00600011		1546.99	0.00550929		2136.98	-0.0030143		2726.98	0.01225708		3316.98	-0.00710931
367.2	0.01182812		957.19	0.00528519		1547.19	0.00468133		2137.18	-0.0033185		2727.18	0.01207941		3317.18	-0.00654485
367.4	0.01193997		957.39	0.00564398		1547.39	0.00511696		2137.38	-0.00273318		2727.38	0.0114256		3317.38	-0.00590541
367.6	0.01184305		957.59	0.005498		1547.59	0.00648816		2137.58	-0.00312735		2727.58	0.01139181		3317.58	-0.00570605
367.8	0.01196332		957.79	0.00634137		1547.79	0.0068005		2137.78	-0.00328707		2727.78	0.01158013		3317.78	-0.00500507
368	0.01208541		957.99	0.00713077		1547.99	0.00691914		2137.98	-0.00436389		2727.98	0.01237792		3317.98	-0.00409381
368.2	0.01273714		958.19	0.00727109		1548.19	0.00672709		2138.18	-0.00443861		2728.18	0.01245653		3318.18	-0.00437202
368.4	0.01251645		958.39	0.00834753		1548.39	0.00692435		2138.38	-0.00462146		2728.38	0.0120894		3318.38	-0.00405568
368.6	0.01341239		958.59	0.00855966		1548.59	0.00685218		2138.58	-0.00438715		2728.58	0.01064776		3318.58	-0.00395063
368.8	0.01333709		958.79	0.0089687		1548.79	0.00649873		2138.78	-0.00481111		2728.78	0.00956065		3318.78	-0.0036714
369	0.01249058		958.99	0.00984113		1548.99	0.00680857		2138.98	-0.00483198		2728.98	0.00943014		3318.98	-0.00369215
369.2	0.01282802		959.19	0.00965034		1549.19	0.00627779		2139.18	-0.00402011		2729.18	0.00861059		3319.18	-0.00372625
369.4	0.01324684		959.39	0.0098029		1549.39	0.00565154		2139.38	-0.0036078		2729.38	0.00836823		3319.38	-0.00416944
369.6	0.01372645		959.59	0.00981423		1549.59	0.00498714		2139.58	-0.0044839		2729.58	0.00811062		3319.58	-0.00327131
369.8	0.01253904		959.79	0.00994143		1549.79	0.00450992		2139.78	-0.00403681		2729.78	0.00845249		3319.78	-0.00474386
370	0.01227081		959.99	0.01013641		1549.99	0.00437619		2139.98	-0.00462526		2729.98	0.0092914		3319.98	-0.00510319
370.2	0.01124401		960.19	0.01013557		1550.19	0.00411465		2140.18	-0.00464906		2730.18	0.00953999		3320.18	-0.0049878
370.4	0.01012044		960.39	0.01023922		1550.39	0.00494906		2140.38	-0.00586317		2730.38	0.01016969		3320.38	-0.00436685
370.6	0.00947648		960.59	0.00955797		1550.59	0.00506429		2140.58	-0.00650528		2730.58	0.01071324		3320.58	-0.00498862
370.8	0.00966743		960.79	0.00962807		1550.79	0.00444905		2140.78	-0.00732318		2730.78	0.01133129		3320.78	-0.0049047
371	0.01037235		960.99	0.0093673		1550.99	0.00396536		2140.98	-0.00780326		2730.98	0.01106958		3320.98	-0.00472069
371.2	0.01071175		961.19	0.00847028		1551.19	0.00428185		2141.18	-0.00719899		2731.18	0.01137243		3321.18	-0.00453808
371.4	0.01066678		961.39	0.00774316		1551.39	0.00519155		2141.38	-0.00713362		2731.38	0.01142106		3321.38	-0.0045226
371.6	0.01112614		961.59	0.00732547		1551.59	0.00547099		2141.58	-0.00784915		2731.58	0.0124151		3321.58	-0.00409416
371.8	0.01112194		961.79	0.00786148		1551.79	0.00589286		2141.78	-0.00786141		2731.78	0.01322813		3321.78	-0.00333112
372	0.01153332		961.99	0.00803596		1551.99	0.00635191		2141.98	-0.00704591		2731.98	0.01379505		3321.98	-0.00361432
372.2	0.01233259		962.19	0.00850195		1552.19	0.00674406		2142.18	-0.00612775		2732.18	0.01369191		3322.18	-0.0028483
372.4	0.01194766		962.39	0.00917114		1552.39	0.00716609		2142.38	-0.00484384		2732.38	0.01356016		3322.38	-0.0025138
372.6	0.01194038		962.59	0.00943483		1552.59	0.00763711		2142.58	-0.00446604		2732.58	0.0128685		3322.58	-0.00241132
372.8	0.01256405		962.79	0.00959513		1552.79	0.00792547		2142.78	-0.00360835		2732.78	0.01272382		3322.78	-0.00230504
373	0.01330023		962.99	0.01042842		1552.99	0.00783511		2142.98	-0.00361947		2732.98	0.0121874		3322.98	-0.00331134
373.2	0.01416115		963.19	0.01094646		1553.19	0.00718229		2143.18	-0.00245516		2733.18	0.01192172		3323.18	-0.00374669
373.4	0.01509677		963.39	0.0104917		1553.39	0.00660973		2143.38	-0.0017655		2733.38	0.01124099		3323.38	-0.00405851
373.6	0.01556161		963.59	0.01025793		1553.59	0.00652404		2143.58	-0.00112792		2733.58	0.01009171		3323.58	-0.00467189
373.8	0.01455146		963.79	0.01059743		1553.79	0.00556432		2143.78	-0.00046813		2733.78	0.0103107		3323.78	-0.00572965
374	0.01501207		963.99	0.0110609		1553.99	0.00595459		2143.98	-0.00050607		2733.98	0.00985025		3323.98	-0.00593803
374.2	0.01449084		964.19	0.01122048		1554.19	0.00533165		2144.18	-0.00055196		2734.18	0.00927806		3324.18	-0.00595908
374.4	0.01468987		964.39	0.01160664		1554.39	0.00508295		2144.38	-0.00156923		2734.38	0.00989773		3324.38	-0.00596713
374.6	0.01438558		964.59	0.01123294		1554.59	0.00427788		2144.58	-0.00182084		2734.58	0.00934988		3324.58	-0.00706265
374.8	0.01404809		964.79	0.01151629		1554.79	0.00364865		2144.78	-0.0018374		2734.78	0.00976613		3324.78	-0.00646318
375	0.01319763		964.99	0.01156271		1554.99	0.0039114		2144.98	-0.0021961		2734.98	0.00954647		3324.98	-0.00609449
375.2	0.0125051		965.19	0.01064762		1555.19	0.00411109		2145.18	-0.00186309		2735.18	0.00940206		3325.18	-0.00589827
375.4	0.01212206		965.39	0.01023463		1555.39	0.00471666		2145.38	-0.00279759		2735.38	0.00943905		3325.38	-0.00585193
375.6	0.01223694		965.59	0.00957024		1555.59	0.0047549		2145.58	-0.00329104		2735.58	0.01032787		3325.58	-0.00590989
375.8	0.01124059		965.79	0.00883592		1555.79	0.00517613		2145.78	-0.00369848		2735.78	0.01028295		3325.78	-0.00485267
376	0.0107322		965.99	0.00829085		1555.99	0.00423204		2145.98	-0.00391188		2735.98	0.01058262		3325.98	-0.00527083
376.2	0.01036995		966.19	0.00824769		1556.19	0.00496434		2146.18	-0.00372844		2736.18	0.01042058		3326.18	-0.00390049
376.4	0.00998496		966.39	0.0078543		1556.39	0.00544765		2146.38	-0.0034631		2736.38	0.01100702		3326.38	-0.0028862
376.6	0.00936956		966.59	0.00816439		1556.59	0.00577868		2146.58	-0.00361759		2736.58	0.01087141		3326.58	-0.00304494
376.8	0.01021721		966.79	0.00859229		1556.79	0.00594952		2146.78	-0.00346486		2736.78	0.01122006		3326.78	-0.00303763
377	0.00978463		966.99	0.00871255		1556.99	0.00597336		2146.98	-0.0038196		2736.98	0.01020352		3326.98	-0.00341147
377.2	0.0102347		967.19	0.00865329		1557.19	0.00587061		2147.18	-0.00259802		2737.18	0.00964261		3327.18	-0.0035144
377.4	0.01024195		967.39	0.00837714		1557.39	0.0052749		2147.38	-0.00123248		2737.38	0.00906591		3327.38	-0.0036901
377.6	0.00995517		967.59	0.00953725		1557.59	0.00414731		2147.58	-0.00077144		2737.58	0.00834474		3327.58	-0.00431132
377.8	0.01011406		967.79	0.01012833		1557.79	0.00344192		2147.78	0.00006006		2737.78	0.00795698		3327.78	-0.00472975
378	0.01110241		967.99	0.01035486		1557.99	0.00365823		2147.98	0.00107008		2737.98	0.00754324		3327.98	-0.00516184
378.2	0.01086107		968.19	0.011074		1558.19	0.00348558		2148.18	0.00144024		2738.18	0.00827583		3328.18	-0.00576156
378.4	0.01057011		968.39	0.01186489		1558.39	0.00400827		2148.38	0.00176558		2738.38	0.00861307		3328.38	-0.00572649
378.6	0.00948716		968.59	0.01187936		1558.59	0.00453527		2148.58	0.00200845		2738.58	0.00865481		3328.58	-0.00604426
378.8	0.00845956		968.79	0.01205549		1558.79	0.00520996		2148.78	0.00202517		2738.78	0.00900025		3328.78	-0.00613674
379	0.00831227		968.99	0.01238912		1558.99	0.0055125		2148.98	0.00067727		2738.98	0.00916427		3328.98	-0.00679327
379.2	0.00817212		969.19	0.0111717		1559.19	0.00537314		2149.18	0.00036266		2739.18	0.00988242		3329.18	-0.00716898
379.4	0.00908832		969.39	0.01071343		1559.39	0.00643227		2149.38	-0.00072254		2739.38	0.01029002		3329.38	-0.00725866
379.6	0.00954919		969.59	0.00889598		1559.59	0.00587112		2149.58	-0.00155988		2739.58	0.01103251		3329.58	-0.00718503
379.8	0.00951982		969.79	0.0078322		1559.79	0.0062384		2149.78	-0.0025203		2739.78	0.01088013		3329.78	-0.00665428
380	0.01000713		969.99	0.00743304		1559.99	0.00637004		2149.98	-0.00282052		2739.98	0.01125673		3329.98	-0.00727482
380.2	0.01048405		970.19	0.00775249		1560.19	0.00735604		2150.18	-0.00327841		2740.18	0.01161579		3330.18	-0.006368
380.4	0.01020591		970.39	0.00748234		1560.39	0.00677441		2150.38	-0.00446292		2740.38	0.01250371		3330.38	-0.00679046
380.6	0.00975839		970.59	0.00789484		1560.59	0.0074918		2150.58	-0.00492385		2740.58	0.01229373		3330.58	-0.00701891
380.8	0.01037989		970.79	0.00844739		1560.79	0.00797921		2150.78	-0.0052278		2740.78	0.01232262		3330.78	-0.00593312
381	0.0111768		970.99	0.00819666		1560.99	0.00765281		2150.98	-0.0054556		2740.98	0.01192088		3330.98	-0.00561215
381.2	0.01127515		971.19	0.00881105		1561.19	0.00702589		2151.18	-0.00521345		2741.18	0.01204281		3331.18	-0.00524989
381.4	0.01141957		971.39	0.00921502		1561.39	0.00652662		2151.38	-0.00454448		2741.38	0.01190627		3331.38	-0.00475117
381.6	0.01110093		971.59	0.00941701		1561.59	0.00650109		2151.58	-0.00420165		2741.58	0.01145848		3331.58	-0.00410976
381.8	0.01137424		971.79	0.00885021		1561.79	0.00659805		2151.78	-0.00361348		2741.78	0.01108146		3331.78	-0.00302097
382	0.01114311		971.99	0.00867241		1561.99	0.00651861		2151.98	-0.00343814		2741.98	0.01144699		3331.98	-0.00244036
382.2	0.01032265		972.19	0.0086261		1562.19	0.00699308		2152.18	-0.00345359		2742.18	0.01125407		3332.18	-0.0013605
382.4	0.00978265		972.39	0.0096217		1562.39	0.00679104		2152.38	-0.00362129		2742.38	0.0116707		3332.38	-0.00061939
382.6	0.00848678		972.59	0.01064775		1562.59	0.00671786		2152.58	-0.00363427		2742.58	0.01186677		3332.58	-0.00036888
382.8	0.00789416		972.79	0.01102692		1562.79	0.00616193		2152.78	-0.00387254		2742.78	0.01138017		3332.78	-0.00026157
383	0.00863341		972.99	0.0109932		1562.99	0.0062066		2152.98	-0.00443484		2742.98	0.01222091		3332.98	0.000671
383.2	0.00839225		973.19	0.01123637		1563.19	0.00592506		2153.18	-0.00416406		2743.18	0.01217		3333.18	0.00076407
383.4	0.00891554		973.39	0.01179522		1563.39	0.00666674		2153.38	-0.00449681		2743.38	0.01159858		3333.38	0.00071044
383.6	0.00892877		973.59	0.01113386		1563.59	0.00701496		2153.58	-0.00533786		2743.58	0.01158436		3333.58	0.00027259
383.8	0.00908375		973.79	0.01225577		1563.79	0.00815619		2153.78	-0.00542043		2743.78	0.01138713		3333.78	-0.00151597
384	0.00892837		973.99	0.01303099		1563.99	0.00866147		2153.98	-0.00445055		2743.98	0.01173575		3333.98	-0.00271269
384.2	0.00907604		974.19	0.01336236		1564.19	0.00894029		2154.18	-0.00388498		2744.18	0.01171085		3334.18	-0.00316924
384.4	0.0090651		974.39	0.012404		1564.39	0.00868228		2154.38	-0.00290434		2744.38	0.01194915		3334.38	-0.00473187
384.6	0.00949493		974.59	0.01260957		1564.59	0.00874482		2154.58	-0.00183857		2744.58	0.01169187		3334.58	-0.00537919
384.8	0.01025358		974.79	0.01278512		1564.79	0.00830111		2154.78	-0.00088327		2744.78	0.01166633		3334.78	-0.0062588
385	0.01073927		974.99	0.01237855		1564.99	0.00782187		2154.98	-0.00110664		2744.98	0.01172225		3334.98	-0.00705318
385.2	0.01094931		975.19	0.01161824		1565.19	0.00750967		2155.18	-0.00026781		2745.18	0.01126199		3335.18	-0.00730238
385.4	0.01123634		975.39	0.01125797		1565.39	0.00704416		2155.38	0.00089537		2745.38	0.01126473		3335.38	-0.00724759
385.6	0.01053541		975.59	0.0104407		1565.59	0.00747104		2155.58	0.00167682		2745.58	0.01133916		3335.58	-0.0065629
385.8	0.01082416		975.79	0.00959134		1565.79	0.00720463		2155.78	0.00122002		2745.78	0.01002842		3335.78	-0.00593283
386	0.01041827		975.99	0.00888919		1565.99	0.0076226		2155.98	0.00079253		2745.98	0.01046334		3335.98	-0.0056694
386.2	0.01076323		976.19	0.00886856		1566.19	0.00682838		2156.18	0.00146838		2746.18	0.01095548		3336.18	-0.00557826
386.4	0.01112476		976.39	0.00951985		1566.39	0.00613784		2156.38	0.00155966		2746.38	0.01102942		3336.38	-0.0051433
386.6	0.0105842		976.59	0.00911339		1566.59	0.00553501		2156.58	0.00090574		2746.58	0.01027964		3336.58	-0.00503499
386.8	0.01104518		976.79	0.00875515		1566.79	0.0048854		2156.78	-0.00025966		2746.78	0.01104792		3336.78	-0.00436728
387	0.01093557		976.99	0.00942977		1566.99	0.00487531		2156.98	-0.00097124		2746.98	0.01114702		3336.98	-0.00295084
387.2	0.01094124		977.19	0.00985368		1567.19	0.005457		2157.18	-0.00213767		2747.18	0.01117615		3337.18	-0.00309637
387.4	0.01006669		977.39	0.01031934		1567.39	0.00688095		2157.38	-0.00278955		2747.38	0.01113788		3337.38	-0.00345553
387.6	0.01009521		977.59	0.01080698		1567.59	0.00774285		2157.58	-0.00374176		2747.58	0.01183804		3337.58	-0.00387513
387.8	0.00971811		977.79	0.01082171		1567.79	0.00826001		2157.78	-0.0033932		2747.78	0.01227042		3337.78	-0.00411444
388	0.00957816		977.99	0.01005834		1567.99	0.00803555		2157.98	-0.00286526		2747.98	0.01242488		3337.98	-0.00402217
388.2	0.00991126		978.19	0.00984059		1568.19	0.0076753		2158.18	-0.00309095		2748.18	0.01198025		3338.18	-0.00348181
388.4	0.00999649		978.39	0.009541		1568.39	0.00710882		2158.38	-0.00302488		2748.38	0.01272348		3338.38	-0.00545451
388.6	0.00998178		978.59	0.00990847		1568.59	0.00702357		2158.58	-0.00323412		2748.58	0.01268092		3338.58	-0.00599241
388.8	0.00944115		978.79	0.01001728		1568.79	0.00759308		2158.78	-0.0030355		2748.78	0.01302305		3338.78	-0.00566436
389	0.00941251		978.99	0.00999976		1568.99	0.0071967		2158.98	-0.00319294		2748.98	0.01286962		3338.98	-0.00548596
389.2	0.00997784		979.19	0.00983129		1569.19	0.00665346		2159.18	-0.00237869		2749.18	0.01217066		3339.18	-0.00550418
389.4	0.00982421		979.39	0.01014126		1569.39	0.00640291		2159.38	-0.00132513		2749.38	0.01173258		3339.38	-0.00550476
389.6	0.00956595		979.59	0.01023927		1569.59	0.00654222		2159.58	-0.00162918		2749.58	0.01155008		3339.58	-0.00462443
389.8	0.01014615		979.79	0.0104406		1569.79	0.00628831		2159.78	-0.00250559		2749.78	0.01069914		3339.78	-0.00410599
390	0.01086407		979.99	0.01074734		1569.99	0.00566237		2159.98	-0.00159166		2749.98	0.01111014		3339.98	-0.00418111
390.2	0.01235902		980.19	0.01169924		1570.19	0.00444955		2160.18	-0.00055579		2750.18	0.0104883		3340.18	-0.00431003
390.4	0.0127599		980.39	0.01163657		1570.39	0.00378144		2160.38	-0.00139342		2750.38	0.00973311		3340.38	-0.00364426
390.6	0.0129526		980.59	0.01152551		1570.59	0.00288136		2160.58	-0.00232998		2750.58	0.01006137		3340.58	-0.00364274
390.8	0.01325179		980.79	0.01165711		1570.79	0.00242739		2160.78	-0.00214741		2750.78	0.01039026		3340.78	-0.0032
391	0.01344314		980.99	0.01158958		1570.99	0.00310963		2160.98	-0.00190877		2750.98	0.00952369		3340.98	-0.00235223
391.2	0.0142091		981.19	0.01157113		1571.19	0.00350694		2161.18	-0.00246034		2751.18	0.00990049		3341.18	-0.00285238
391.4	0.01342272		981.39	0.01182106		1571.39	0.00348271		2161.38	-0.00331441		2751.38	0.0094035		3341.38	-0.00355644
391.6	0.01430895		981.59	0.01154348		1571.59	0.00397637		2161.58	-0.00409945		2751.58	0.00943018		3341.58	-0.0030482
391.8	0.01394846		981.79	0.01021987		1571.79	0.00411957		2161.78	-0.00441021		2751.78	0.00888244		3341.78	-0.00236447
392	0.01434223		981.99	0.01006111		1571.99	0.00424715		2161.98	-0.00425534		2751.98	0.00856336		3341.98	-0.0029587
392.2	0.0142537		982.19	0.0100184		1572.19	0.00457059		2162.18	-0.00413571		2752.18	0.00883011		3342.18	-0.00318148
392.4	0.0145576		982.39	0.00942387		1572.39	0.00541055		2162.38	-0.00452614		2752.38	0.00928691		3342.38	-0.00327649
392.6	0.0145508		982.59	0.00943603		1572.59	0.00619842		2162.58	-0.00415581		2752.58	0.00918943		3342.58	-0.00279945
392.8	0.01419758		982.79	0.00930956		1572.79	0.00668407		2162.78	-0.00407698		2752.78	0.00868788		3342.78	-0.00252541
393	0.01442193		982.99	0.00886611		1572.99	0.00619279		2162.98	-0.00405321		2752.98	0.00783705		3342.98	-0.00309214
393.2	0.01504712		983.19	0.00901901		1573.19	0.00646415		2163.18	-0.00415247		2753.18	0.0083309		3343.18	-0.00351218
393.4	0.01477948		983.39	0.00894985		1573.39	0.00670175		2163.38	-0.0037628		2753.38	0.00843991		3343.38	-0.00338468
393.6	0.01436901		983.59	0.00918429		1573.59	0.00733646		2163.58	-0.00400421		2753.58	0.00916164		3343.58	-0.00314034
393.8	0.01408139		983.79	0.009452		1573.79	0.00741471		2163.78	-0.00363819		2753.78	0.00921229		3343.78	-0.00392702
394	0.01376529		983.99	0.0095922		1573.99	0.00712173		2163.98	-0.00220409		2753.98	0.00919097		3343.98	-0.00388939
394.2	0.01343323		984.19	0.01041664		1574.19	0.00636804		2164.18	-0.00153019		2754.18	0.00932245		3344.18	-0.00445991
394.4	0.01315734		984.39	0.00970884		1574.39	0.00626815		2164.38	-0.00162527		2754.38	0.00980755		3344.38	-0.00476034
394.6	0.01241555		984.59	0.01020445		1574.59	0.00596342		2164.58	-0.00076929		2754.58	0.00975257		3344.58	-0.0049267
394.8	0.0119682		984.79	0.01023925		1574.79	0.00654268		2164.78	0.00028004		2754.78	0.01001554		3344.78	-0.00568283
395	0.01199068		984.99	0.01044486		1574.99	0.00646426		2164.98	0.00072138		2754.98	0.01027502		3344.98	-0.00493435
395.2	0.01151851		985.19	0.01084125		1575.19	0.006309		2165.18	0.00043374		2755.18	0.01123269		3345.18	-0.00579589
395.4	0.01103189		985.39	0.01163456		1575.39	0.00645997		2165.38	0.00020776		2755.38	0.01139594		3345.38	-0.00609039
395.6	0.01105934		985.59	0.01195028		1575.59	0.00640688		2165.58	-0.00023515		2755.58	0.01137335		3345.58	-0.00591379
395.8	0.01118509		985.79	0.01159647		1575.79	0.00591023		2165.78	0.00013822		2755.78	0.01137928		3345.78	-0.0062295
396	0.0112891		985.99	0.01180781		1575.99	0.00559009		2165.98	0.00026558		2755.98	0.01175383		3345.98	-0.00682912
396.2	0.01112422		986.19	0.01195641		1576.19	0.00570886		2166.18	-0.00001418		2756.18	0.01238713		3346.18	-0.0065919
396.4	0.01196554		986.39	0.0122415		1576.39	0.0061653		2166.38	-0.00152276		2756.38	0.01193174		3346.38	-0.00580994
396.6	0.01196156		986.59	0.01227562		1576.59	0.0058004		2166.58	-0.00189409		2756.58	0.01223837		3346.58	-0.00644525
396.8	0.01279417		986.79	0.01174173		1576.79	0.0061457		2166.78	-0.0023293		2756.78	0.01187528		3346.78	-0.00665394
397	0.01321872		986.99	0.01121287		1576.99	0.00635344		2166.98	-0.00314283		2756.98	0.0132669		3346.98	-0.0064899
397.2	0.01411106		987.19	0.01085734		1577.19	0.0066432		2167.18	-0.0037085		2757.18	0.01420378		3347.18	-0.00618945
397.4	0.01390347		987.39	0.009846		1577.39	0.00668858		2167.38	-0.00441645		2757.38	0.01490852		3347.38	-0.00564416
397.6	0.01383445		987.59	0.00921572		1577.59	0.00717273		2167.58	-0.00458723		2757.58	0.01446122		3347.58	-0.0055503
397.8	0.01314348		987.79	0.00844413		1577.79	0.00657584		2167.78	-0.00488203		2757.78	0.01402494		3347.78	-0.00527409
398	0.01277578		987.99	0.00749791		1577.99	0.00640812		2167.98	-0.00444408		2757.98	0.01393397		3347.98	-0.00468947
398.2	0.01199638		988.19	0.00697733		1578.19	0.00642656		2168.18	-0.00413299		2758.18	0.0125246		3348.18	-0.0046931
398.4	0.01156394		988.39	0.00704107		1578.39	0.00693593		2168.38	-0.00442177		2758.38	0.01160624		3348.38	-0.00404355
398.6	0.01049546		988.59	0.00737967		1578.59	0.00673053		2168.58	-0.00440785		2758.58	0.01139091		3348.58	-0.00355812
398.8	0.01021517		988.79	0.00664863		1578.79	0.00735392		2168.78	-0.00415731		2758.78	0.01161168		3348.78	-0.00288935
399	0.00993319		988.99	0.00607471		1578.99	0.00690757		2168.98	-0.00442759		2758.98	0.01151658		3348.98	-0.00170282
399.2	0.00972534		989.19	0.00654425		1579.19	0.00694245		2169.18	-0.00460727		2759.18	0.01211281		3349.18	-0.00194067
399.4	0.00935085		989.39	0.00749981		1579.39	0.00678186		2169.38	-0.0054828		2759.38	0.01190712		3349.38	-0.00111286
399.6	0.00941951		989.59	0.00773321		1579.59	0.0066534		2169.58	-0.00511783		2759.58	0.01211707		3349.58	-0.00120951
399.8	0.00942522		989.79	0.00791217		1579.79	0.00670822		2169.78	-0.00401251		2759.78	0.01240456		3349.78	-0.0015346
400	0.00924498		989.99	0.00820592		1579.99	0.00675667		2169.98	-0.00408659		2759.98	0.01258888		3349.98	-0.00131204
400.2	0.00986294		990.19	0.0095763		1580.19	0.0067166		2170.18	-0.00381714		2760.18	0.01285146		3350.18	-0.00186762
400.4	0.01091466		990.39	0.0096657		1580.39	0.00682978		2170.38	-0.00403401		2760.38	0.01293695		3350.38	-0.00238039
400.6	0.01085323		990.59	0.01009084		1580.59	0.00653424		2170.58	-0.0031559		2760.58	0.0135635		3350.58	-0.00282249
400.8	0.01204247		990.79	0.00993524		1580.79	0.00688366		2170.78	-0.00286464		2760.78	0.01395992		3350.78	-0.0030708
401	0.01227782		990.99	0.01035491		1580.99	0.00702957		2170.98	-0.00267407		2760.98	0.01511584		3350.98	-0.00300121
401.2	0.0130358		991.19	0.01031382		1581.19	0.00740526		2171.18	-0.00205791		2761.18	0.01453767		3351.18	-0.00379717
401.4	0.01333645		991.39	0.01072043		1581.39	0.00776934		2171.38	-0.00245045		2761.38	0.0150206		3351.38	-0.00432248
401.6	0.01314112		991.59	0.01046597		1581.59	0.00806038		2171.58	-0.00161404		2761.58	0.01395274		3351.58	-0.00530249
401.8	0.01262546		991.79	0.00974385		1581.79	0.00786238		2171.78	-0.00053097		2761.78	0.01379082		3351.78	-0.00581105
402	0.01269539		991.99	0.00965841		1581.99	0.0072601		2171.98	0.00039509		2761.98	0.01352949		3351.98	-0.00567327
402.2	0.01220481		992.19	0.0099287		1582.19	0.00709536		2172.18	0.00042019		2762.18	0.01235611		3352.18	-0.00617142
402.4	0.01239924		992.39	0.01058568		1582.39	0.0070444		2172.38	-0.00037333		2762.38	0.01269322		3352.38	-0.00633971
402.6	0.01248243		992.59	0.00970086		1582.59	0.00659939		2172.58	-0.00042168		2762.58	0.01300704		3352.58	-0.00629375
402.8	0.0123325		992.79	0.00961083		1582.79	0.00709776		2172.78	-0.00067899		2762.78	0.01281244		3352.78	-0.00645177
403	0.0120483		992.99	0.00988149		1582.99	0.00742882		2172.98	-0.00167006		2762.98	0.012712		3352.98	-0.00692262
403.2	0.0122048		993.19	0.01086558		1583.19	0.00783638		2173.18	-0.00186431		2763.18	0.0128241		3353.18	-0.00694644
403.4	0.011574		993.39	0.01052237		1583.39	0.00746428		2173.38	-0.00144252		2763.38	0.01272982		3353.38	-0.0056691
403.6	0.01223407		993.59	0.01020131		1583.59	0.00736662		2173.58	-0.00046991		2763.58	0.01360522		3353.58	-0.00559434
403.8	0.01204886		993.79	0.01043876		1583.79	0.00782978		2173.78	-0.00107256		2763.78	0.01323628		3353.78	-0.00504488
404	0.01293974		993.99	0.01048511		1583.99	0.00778481		2173.98	-0.00135115		2763.98	0.01256893		3353.98	-0.00464883
404.2	0.01269402		994.19	0.01095722		1584.19	0.00766078		2174.18	-0.00101934		2764.18	0.0123272		3354.18	-0.00443749
404.4	0.0126019		994.39	0.01007867		1584.39	0.0074388		2174.38	-0.00131113		2764.38	0.01192649		3354.38	-0.00436506
404.6	0.01255546		994.59	0.00996367		1584.59	0.00730287		2174.58	-0.00163754		2764.58	0.01128572		3354.58	-0.00411682
404.8	0.01276449		994.79	0.00879896		1584.79	0.00763833		2174.78	-0.00246711		2764.78	0.01104836		3354.78	-0.0041779
405	0.01319633		994.99	0.00896231		1584.99	0.00781653		2174.98	-0.00229724		2764.98	0.01015932		3354.98	-0.00348188
405.2	0.01318827		995.19	0.00915641		1585.19	0.00843519		2175.18	-0.00272216		2765.18	0.00940745		3355.18	-0.00366796
405.4	0.01358035		995.39	0.00967767		1585.39	0.00904317		2175.38	-0.0031996		2765.38	0.00912016		3355.38	-0.00342386
405.6	0.01315951		995.59	0.00956557		1585.59	0.00893207		2175.58	-0.00265673		2765.58	0.00898935		3355.58	-0.00372637
405.8	0.01383788		995.79	0.01030325		1585.79	0.0081327		2175.78	-0.00319052		2765.78	0.00862473		3355.78	-0.00351244
406	0.01466179		995.99	0.01055039		1585.99	0.00782255		2175.98	-0.00323548		2765.98	0.0086516		3355.98	-0.00394239
406.2	0.01486973		996.19	0.01033189		1586.19	0.00834007		2176.18	-0.00365815		2766.18	0.00896131		3356.18	-0.00497092
406.4	0.01523364		996.39	0.0103457		1586.39	0.00886612		2176.38	-0.00387234		2766.38	0.00877605		3356.38	-0.00569404
406.6	0.01554985		996.59	0.01110191		1586.59	0.00868004		2176.58	-0.00359979		2766.58	0.00919197		3356.58	-0.00551308
406.8	0.0155558		996.79	0.01200614		1586.79	0.00880096		2176.78	-0.00418965		2766.78	0.00892956		3356.78	-0.00615475
407	0.01489882		996.99	0.01187408		1586.99	0.00844718		2176.98	-0.0044955		2766.98	0.00878647		3356.98	-0.00658116
407.2	0.01489338		997.19	0.01156603		1587.19	0.00806933		2177.18	-0.00436905		2767.18	0.00941628		3357.18	-0.00637234
407.4	0.01454368		997.39	0.01163497		1587.39	0.00808478		2177.38	-0.00389518		2767.38	0.00987571		3357.38	-0.00521357
407.6	0.01475868		997.59	0.01185226		1587.59	0.00873879		2177.58	-0.00445337		2767.58	0.01053999		3357.58	-0.00618922
407.8	0.01437221		997.79	0.01220999		1587.79	0.00873195		2177.78	-0.00449662		2767.78	0.01087942		3357.78	-0.00564686
408	0.01368425		997.99	0.01168233		1587.99	0.00809794		2177.98	-0.00417601		2767.98	0.01112104		3357.98	-0.00528898
408.2	0.01267438		998.19	0.01142597		1588.19	0.008299		2178.18	-0.00423964		2768.18	0.01116188		3358.18	-0.00534397
408.4	0.01224068		998.39	0.01066452		1588.39	0.00830784		2178.38	-0.00423576		2768.38	0.01056623		3358.38	-0.00526293
408.6	0.0117428		998.59	0.01042464		1588.59	0.00874419		2178.58	-0.00380976		2768.58	0.01095137		3358.58	-0.00525011
408.8	0.01076336		998.79	0.00950748		1588.79	0.00850142		2178.78	-0.00375802		2768.78	0.01191629		3358.78	-0.0047851
409	0.01055343		998.99	0.01031901		1588.99	0.00857146		2178.98	-0.00310603		2768.98	0.01150553		3358.98	-0.00408991
409.2	0.00952503		999.19	0.01092734		1589.19	0.00937071		2179.18	-0.00292021		2769.18	0.01121485		3359.18	-0.00459727
409.4	0.00972206		999.39	0.01162158		1589.39	0.00990586		2179.38	-0.00327581		2769.38	0.01150566		3359.38	-0.00458896
409.6	0.00953932		999.59	0.01233938		1589.59	0.00914463		2179.58	-0.00256502		2769.58	0.01160831		3359.58	-0.00432843
409.8	0.01053164		999.79	0.01322196		1589.79	0.00843884		2179.78	-0.00221368		2769.78	0.01148096		3359.78	-0.00490632
410	0.01144871		999.99	0.0120342		1589.99	0.00857856		2179.98	-0.00069313		2769.98	0.01237987		3359.98	-0.00596867
410.2	0.01171031		1000.19	0.01148994		1590.19	0.00842665		2180.18	-0.0006369		2770.18	0.01273683		3360.18	-0.0059165
410.4	0.01155945		1000.39	0.01238961		1590.39	0.00746348		2180.38	0.00048649		2770.38	0.01264449		3360.38	-0.00663693
410.6	0.01277161		1000.59	0.01248163		1590.59	0.00678201		2180.58	0.00148467		2770.58	0.0128722		3360.58	-0.00636157
410.8	0.012892		1000.79	0.01151931		1590.79	0.00641363		2180.78	0.00159732		2770.78	0.01290377		3360.78	-0.00707565
411	0.01315125		1000.99	0.01082734		1590.99	0.00572443		2180.98	0.00162952		2770.98	0.01284347		3360.98	-0.00779977
411.2	0.01387537		1001.19	0.01067703		1591.19	0.006134		2181.18	0.00125393		2771.18	0.01293232		3361.18	-0.00810814
411.4	0.01426837		1001.39	0.01079774		1591.39	0.00663169		2181.38	0.00128484		2771.38	0.01294562		3361.38	-0.00814793
411.6	0.01474912		1001.59	0.01029006		1591.59	0.00632244		2181.58	0.00112127		2771.58	0.01386591		3361.58	-0.00856445
411.8	0.01435803		1001.79	0.01025944		1591.79	0.00622531		2181.78	0.00184448		2771.78	0.01384829		3361.78	-0.00754938
412	0.01374157		1001.99	0.01023545		1591.99	0.00714647		2181.98	0.00102362		2771.98	0.01320062		3361.98	-0.00714794
412.2	0.01348395		1002.19	0.00995267		1592.19	0.00808884		2182.18	0.00075816		2772.18	0.01222542		3362.18	-0.00693952
412.4	0.0133082		1002.39	0.00939631		1592.39	0.00821589		2182.38	0.00046403		2772.38	0.01127702		3362.38	-0.00655108
412.6	0.01281529		1002.59	0.00957479		1592.59	0.00799207		2182.58	0.00060526		2772.58	0.0121629		3362.58	-0.00661475
412.8	0.01258868		1002.79	0.0095411		1592.79	0.00823481		2182.78	-0.00005738		2772.78	0.01241215		3362.78	-0.00617631
413	0.01195001		1002.99	0.01030311		1592.99	0.00833502		2182.98	-0.00023967		2772.98	0.01221266		3362.98	-0.00633726
413.2	0.01077835		1003.19	0.01013705		1593.19	0.00828709		2183.18	-0.00021468		2773.18	0.01184431		3363.18	-0.00733299
413.4	0.01082929		1003.39	0.01077481		1593.39	0.00850436		2183.38	-0.00132106		2773.38	0.01233686		3363.38	-0.00673141
413.6	0.0101286		1003.59	0.01083521		1593.59	0.00772584		2183.58	-0.00146335		2773.58	0.01165644		3363.58	-0.00585239
413.8	0.01025032		1003.79	0.01129966		1593.79	0.00725219		2183.78	-0.00165749		2773.78	0.01279438		3363.78	-0.00598945
414	0.01034772		1003.99	0.01074145		1593.99	0.00704344		2183.98	-0.00220288		2773.98	0.01322188		3363.98	-0.00625511
414.2	0.01029952		1004.19	0.01112568		1594.19	0.00728987		2184.18	-0.00223103		2774.18	0.01345152		3364.18	-0.00491885
414.4	0.01013269		1004.39	0.01136944		1594.39	0.00686106		2184.38	-0.00207738		2774.38	0.01398903		3364.38	-0.00539555
414.6	0.01099145		1004.59	0.0107968		1594.59	0.00671983		2184.58	-0.00208261		2774.58	0.01420161		3364.58	-0.00497729
414.8	0.01107854		1004.79	0.01039827		1594.79	0.00640734		2184.78	-0.00231935		2774.78	0.01478557		3364.78	-0.00485492
415	0.01173426		1004.99	0.01076193		1594.99	0.00667611		2184.98	-0.00241601		2774.98	0.01431986		3364.98	-0.00454741
415.2	0.0120107		1005.19	0.01183187		1595.19	0.00714884		2185.18	-0.00226002		2775.18	0.01411566		3365.18	-0.00464974
415.4	0.01240747		1005.39	0.0122426		1595.39	0.0075835		2185.38	-0.00261738		2775.38	0.01391704		3365.38	-0.00518487
415.6	0.01356554		1005.59	0.01244643		1595.59	0.00803104		2185.58	-0.0021946		2775.58	0.01356862		3365.58	-0.00488688
415.8	0.01309713		1005.79	0.01273296		1595.79	0.00833885		2185.78	-0.00208569		2775.78	0.01200445		3365.78	-0.00477998
416	0.01348248		1005.99	0.01303124		1595.99	0.00957079		2185.98	-0.0024596		2775.98	0.01123973		3365.98	-0.00504462
416.2	0.01401116		1006.19	0.01309241		1596.19	0.00912807		2186.18	-0.00169969		2776.18	0.01102245		3366.18	-0.00565698
416.4	0.01498704		1006.39	0.01424061		1596.39	0.00849086		2186.38	-0.00208941		2776.38	0.01038451		3366.38	-0.00626705
416.6	0.01504864		1006.59	0.01520836		1596.59	0.00836255		2186.58	-0.00160379		2776.58	0.01120027		3366.58	-0.00606505
416.8	0.01474017		1006.79	0.01540073		1596.79	0.00861201		2186.78	-0.00171387		2776.78	0.01156311		3366.78	-0.00623827
417	0.01437433		1006.99	0.01516977		1596.99	0.00781981		2186.98	-0.00208591		2776.98	0.01252889		3366.98	-0.00664485
417.2	0.01419558		1007.19	0.01555034		1597.19	0.00775079		2187.18	-0.00197299		2777.18	0.01222164		3367.18	-0.00756586
417.4	0.0144939		1007.39	0.01617955		1597.39	0.00723823		2187.38	-0.00302493		2777.38	0.01274142		3367.38	-0.0063041
417.6	0.01467157		1007.59	0.01550639		1597.59	0.0059837		2187.58	-0.00305523		2777.58	0.01260185		3367.58	-0.005654
417.8	0.01491606		1007.79	0.01567741		1597.79	0.00537206		2187.78	-0.00314913		2777.78	0.01441426		3367.78	-0.00518729
418	0.01492677		1007.99	0.01529469		1597.99	0.00479997		2187.98	-0.00351817		2777.98	0.01415309		3367.98	-0.00494017
418.2	0.01442328		1008.19	0.01502125		1598.19	0.00497383		2188.18	-0.00334812		2778.18	0.01456068		3368.18	-0.00369312
418.4	0.01378695		1008.39	0.01452832		1598.39	0.00440319		2188.38	-0.00406451		2778.38	0.01480388		3368.38	-0.00312208
418.6	0.01367024		1008.59	0.0141802		1598.59	0.00376818		2188.58	-0.00398513		2778.58	0.01495191		3368.58	-0.00234293
418.8	0.01393254		1008.79	0.0136519		1598.79	0.00366194		2188.78	-0.00328197		2778.78	0.01516283		3368.78	-0.00160378
419	0.01356322		1008.99	0.01397666		1598.99	0.00566237		2188.98	-0.00267041		2778.98	0.01494278		3368.98	-0.0011063
419.2	0.01340464		1009.19	0.01384243		1599.19	0.00594694		2189.18	-0.0022025		2779.18	0.01440715		3369.18	-0.00230876
419.4	0.01291987		1009.39	0.01253662		1599.39	0.00717454		2189.38	-0.0026912		2779.38	0.0129607		3369.38	-0.00252799
419.6	0.01288695		1009.59	0.01232698		1599.59	0.00798051		2189.58	-0.00199817		2779.58	0.01230616		3369.58	-0.00185204
419.8	0.01172776		1009.79	0.01197401		1599.79	0.00852257		2189.78	-0.00170861		2779.78	0.01138956		3369.78	-0.00191835
420	0.01252788		1009.99	0.01172626		1599.99	0.00965682		2189.98	-0.00048617		2779.98	0.01156138		3369.98	-0.00211705
420.2	0.01210501		1010.19	0.01135977		1600.19	0.0094853		2190.18	-0.00020542		2780.18	0.01178476		3370.18	-0.00262553
420.4	0.01216293		1010.39	0.01150745		1600.39	0.00947608		2190.38	0.00027254		2780.38	0.01118649		3370.38	-0.00226989
420.6	0.01192016		1010.59	0.01037911		1600.59	0.00998587		2190.58	0.00070618		2780.58	0.01202276		3370.58	-0.00221393
420.8	0.01236108		1010.79	0.00974773		1600.79	0.01002338		2190.78	0.00075632		2780.78	0.01260448		3370.78	-0.00280375
421	0.01320238		1010.99	0.00956617		1600.99	0.00980804		2190.98	0.0000154		2780.98	0.0133254		3370.98	-0.00295509
421.2	0.01333839		1011.19	0.01002237		1601.19	0.00942697		2191.18	-0.00040727		2781.18	0.01354682		3371.18	-0.00327127
421.4	0.01414042		1011.39	0.00898266		1601.39	0.00896306		2191.38	-0.0008684		2781.38	0.01349553		3371.38	-0.00317986
421.6	0.01454268		1011.59	0.00840135		1601.59	0.00853054		2191.58	-0.00121209		2781.58	0.01345885		3371.58	-0.00343278
421.8	0.0140846		1011.79	0.0094114		1601.79	0.00813182		2191.78	-0.00124218		2781.78	0.01397854		3371.78	-0.00422019
422	0.01429319		1011.99	0.00957088		1601.99	0.0076017		2191.98	-0.00130053		2781.98	0.01330973		3371.98	-0.00417626
422.2	0.01393693		1012.19	0.00971399		1602.19	0.00726678		2192.18	-0.00160005		2782.18	0.01352559		3372.18	-0.00353351
422.4	0.01530462		1012.39	0.00984169		1602.39	0.00644724		2192.38	-0.00199133		2782.38	0.01366456		3372.38	-0.00366024
422.6	0.01652539		1012.59	0.00997333		1602.59	0.00655453		2192.58	-0.00225091		2782.58	0.0143232		3372.58	-0.003854
422.8	0.01731986		1012.79	0.01042058		1602.79	0.00684248		2192.78	-0.00139223		2782.78	0.01469951		3372.78	-0.00434461
423	0.01686705		1012.99	0.01085691		1602.99	0.00775066		2192.98	-0.00155971		2782.98	0.01412295		3372.98	-0.00533551
423.2	0.01667635		1013.19	0.01070211		1603.19	0.00612678		2193.18	-0.00206735		2783.18	0.01272032		3373.18	-0.00539324
423.4	0.01617418		1013.39	0.0106804		1603.39	0.00614392		2193.38	-0.00206489		2783.38	0.01166152		3373.38	-0.0044245
423.6	0.01619308		1013.59	0.01136449		1603.59	0.00691571		2193.58	-0.00111922		2783.58	0.01144176		3373.58	-0.00396859
423.8	0.01564705		1013.79	0.01194374		1603.79	0.00703237		2193.78	-0.00108017		2783.78	0.01067938		3373.78	-0.00401252
424	0.01621134		1013.99	0.01189938		1603.99	0.00668025		2193.98	-0.00082949		2783.98	0.0107845		3373.98	-0.00374573
424.2	0.01591451		1014.19	0.01155756		1604.19	0.00601785		2194.18	-0.00099245		2784.18	0.00997409		3374.18	-0.00376292
424.4	0.01589379		1014.39	0.01100205		1604.39	0.00585752		2194.38	-0.00037467		2784.38	0.00962896		3374.38	-0.00344465
424.6	0.01594218		1014.59	0.01099443		1604.59	0.00653721		2194.58	-0.00009905		2784.58	0.01015349		3374.58	-0.00343838
424.8	0.01638128		1014.79	0.01112428		1604.79	0.00660349		2194.78	-0.00096551		2784.78	0.01067731		3374.78	-0.0036331
425	0.01604365		1014.99	0.01139365		1604.99	0.00703207		2194.98	-0.00208732		2784.98	0.01099579		3374.98	-0.00325421
425.2	0.01522263		1015.19	0.01179678		1605.19	0.00706678		2195.18	-0.00201918		2785.18	0.0108739		3375.18	-0.00314208
425.4	0.01520163		1015.39	0.01165944		1605.39	0.0083843		2195.38	-0.00203635		2785.38	0.01108729		3375.38	-0.00316697
425.6	0.01407619		1015.59	0.01250269		1605.59	0.00822732		2195.58	-0.00249243		2785.58	0.01185813		3375.58	-0.00318181
425.8	0.0137541		1015.79	0.01304038		1605.79	0.00795694		2195.78	-0.00163383		2785.78	0.01174028		3375.78	-0.00346159
426	0.01351832		1015.99	0.01237844		1605.99	0.00846436		2195.98	-0.00143532		2785.98	0.01214633		3375.98	-0.00296095
426.2	0.01353898		1016.19	0.01255383		1606.19	0.00815431		2196.18	-0.00168981		2786.18	0.0120199		3376.18	-0.00353843
426.4	0.014605		1016.39	0.01258612		1606.39	0.00861669		2196.38	-0.00184089		2786.38	0.01243695		3376.38	-0.00470026
426.6	0.01525887		1016.59	0.01262487		1606.59	0.00888151		2196.58	-0.00186213		2786.58	0.01260117		3376.58	-0.00413293
426.8	0.01523484		1016.79	0.01260254		1606.79	0.00885654		2196.78	-0.00148202		2786.78	0.01319601		3376.78	-0.00452336
427	0.01462657		1016.99	0.01204067		1606.99	0.00793237		2196.98	-0.00185584		2786.98	0.01320154		3376.98	-0.00445596
427.2	0.01483373		1017.19	0.01187229		1607.19	0.00718369		2197.18	-0.00142479		2787.18	0.01334445		3377.18	-0.00442787
427.4	0.01425241		1017.39	0.0114533		1607.39	0.00813649		2197.38	-0.00090696		2787.38	0.01307437		3377.38	-0.00458238
427.6	0.01440042		1017.59	0.01104443		1607.59	0.00917239		2197.58	-0.00123524		2787.58	0.01217542		3377.58	-0.00555474
427.8	0.01463898		1017.79	0.01076934		1607.79	0.00815911		2197.78	-0.00201065		2787.78	0.01214562		3377.78	-0.00705795
428	0.0148163		1017.99	0.00935276		1607.99	0.00770665		2197.98	-0.00141611		2787.98	0.01218234		3377.98	-0.00721062
428.2	0.01450118		1018.19	0.00898817		1608.19	0.00797324		2198.18	-0.00150142		2788.18	0.01136404		3378.18	-0.0071316
428.4	0.0144505		1018.39	0.00911729		1608.39	0.00839579		2198.38	-0.00149692		2788.38	0.01143582		3378.38	-0.0073341
428.6	0.01462424		1018.59	0.00956625		1608.59	0.00782979		2198.58	-0.00131496		2788.58	0.01234261		3378.58	-0.00800251
428.8	0.01501943		1018.79	0.00970715		1608.79	0.00781135		2198.78	-0.00249302		2788.78	0.01274801		3378.78	-0.00821472
429	0.01415559		1018.99	0.00998304		1608.99	0.00781764		2198.98	-0.00218836		2788.98	0.01242804		3378.98	-0.0078449
429.2	0.01408949		1019.19	0.01044934		1609.19	0.0066211		2199.18	-0.0025816		2789.18	0.0126344		3379.18	-0.00697837
429.4	0.01348429		1019.39	0.01011554		1609.39	0.0067091		2199.38	-0.003848		2789.38	0.01284964		3379.38	-0.00697278
429.6	0.01300919		1019.59	0.0100237		1609.59	0.00602436		2199.58	-0.00413355		2789.58	0.01197153		3379.58	-0.00724112
429.8	0.01273106		1019.79	0.0096478		1609.79	0.00583534		2199.78	-0.00412849		2789.78	0.01188684		3379.78	-0.00688818
430	0.01238385		1019.99	0.00958953		1609.99	0.00596045		2199.98	-0.00454735		2789.98	0.01189655		3379.98	-0.00696187
430.2	0.01300953		1020.19	0.00994188		1610.19	0.00568428		2200.18	-0.00544391		2790.18	0.01106815		3380.18	-0.0076154
430.4	0.01361821		1020.39	0.01055039		1610.39	0.00468555		2200.38	-0.00552124		2790.38	0.01185818		3380.38	-0.00652884
430.6	0.01369864		1020.59	0.01063817		1610.59	0.00414336		2200.58	-0.00606733		2790.58	0.01149631		3380.58	-0.00581483
430.8	0.0130706		1020.79	0.01082635		1610.79	0.00485637		2200.78	-0.00596112		2790.78	0.01195715		3380.78	-0.00585405
431	0.01364083		1020.99	0.01057518		1610.99	0.00411844		2200.98	-0.00571025		2790.98	0.01166825		3380.98	-0.00640008
431.2	0.01406912		1021.19	0.01057392		1611.19	0.00504247		2201.18	-0.00519012		2791.18	0.01138763		3381.18	-0.00685091
431.4	0.01373965		1021.39	0.01081309		1611.39	0.00598641		2201.38	-0.00536813		2791.38	0.01040273		3381.38	-0.0067397
431.6	0.01459397		1021.59	0.01084132		1611.59	0.00624349		2201.58	-0.00569654		2791.58	0.0099686		3381.58	-0.00724269
431.8	0.01514375		1021.79	0.0106518		1611.79	0.00609778		2201.78	-0.00462636		2791.78	0.0104449		3381.78	-0.00720993
432	0.01527926		1021.99	0.01101782		1611.99	0.00666558		2201.98	-0.00355978		2791.98	0.01040781		3381.98	-0.00683718
432.2	0.01582469		1022.19	0.01093534		1612.19	0.00715099		2202.18	-0.00340192		2792.18	0.01050331		3382.18	-0.00597124
432.4	0.01654208		1022.39	0.01067773		1612.39	0.00755214		2202.38	-0.00349601		2792.38	0.01178229		3382.38	-0.00567005
432.6	0.016774		1022.59	0.01034005		1612.59	0.00687898		2202.58	-0.00209586		2792.58	0.01294173		3382.58	-0.00545651
432.8	0.01750671		1022.79	0.01078266		1612.79	0.00810419		2202.78	-0.00191392		2792.78	0.01296212		3382.78	-0.00480795
433	0.01833232		1022.99	0.0106207		1612.99	0.00775957		2202.98	-0.0020507		2792.98	0.01284386		3382.98	-0.00466336
433.2	0.01867949		1023.19	0.01033372		1613.19	0.00763802		2203.18	-0.00302832		2793.18	0.01354141		3383.18	-0.00422998
433.4	0.01793233		1023.39	0.00970126		1613.39	0.00866582		2203.38	-0.00365691		2793.38	0.01316963		3383.38	-0.00445829
433.6	0.01785369		1023.59	0.00966117		1613.59	0.00865514		2203.58	-0.00380662		2793.58	0.01385623		3383.58	-0.00419953
433.8	0.01769146		1023.79	0.00905207		1613.79	0.00836004		2203.78	-0.00393333		2793.78	0.01479357		3383.78	-0.00367924
434	0.01734865		1023.99	0.0082638		1613.99	0.00779984		2203.98	-0.00327156		2793.98	0.01485757		3383.98	-0.0042632
434.2	0.01709215		1024.19	0.00855145		1614.19	0.00686034		2204.18	-0.00354444		2794.18	0.01512029		3384.18	-0.00502096
434.4	0.01617387		1024.39	0.00899634		1614.39	0.00547439		2204.38	-0.00313087		2794.38	0.01523578		3384.38	-0.00444527
434.6	0.01516192		1024.59	0.00886799		1614.59	0.00616132		2204.58	-0.00338587		2794.58	0.01463315		3384.58	-0.00546685
434.8	0.01474101		1024.79	0.00895473		1614.79	0.00614601		2204.78	-0.00241534		2794.78	0.01388438		3384.78	-0.00564584
435	0.01490627		1024.99	0.00931981		1614.99	0.00490169		2204.98	-0.00334911		2794.98	0.01373264		3384.98	-0.0059039
435.2	0.01419148		1025.19	0.00989483		1615.19	0.00447573		2205.18	-0.00380945		2795.18	0.01339819		3385.18	-0.00619156
435.4	0.0144292		1025.39	0.01045588		1615.39	0.00361545		2205.38	-0.00396147		2795.38	0.01236236		3385.38	-0.0065116
435.6	0.01450687		1025.59	0.01029093		1615.59	0.00262149		2205.58	-0.00382306		2795.58	0.01233639		3385.58	-0.00705834
435.8	0.01415876		1025.79	0.01011947		1615.79	0.00222002		2205.78	-0.00298997		2795.78	0.01245277		3385.78	-0.00843284
436	0.01334599		1025.99	0.01001789		1615.99	0.00186087		2205.98	-0.00258951		2795.98	0.01218457		3385.98	-0.00884046
436.2	0.013093		1026.19	0.00906817		1616.19	0.00175841		2206.18	-0.0015137		2796.18	0.01269932		3386.18	-0.00834818
436.4	0.01347256		1026.39	0.00996193		1616.39	0.00196807		2206.38	-0.00187002		2796.38	0.01266969		3386.38	-0.00814123
436.6	0.01338555		1026.59	0.01048514		1616.59	0.00240836		2206.58	-0.00089164		2796.58	0.01262555		3386.58	-0.00769581
436.8	0.01404864		1026.79	0.01146421		1616.79	0.00292633		2206.78	-0.00111364		2796.78	0.01237774		3386.78	-0.00796278
437	0.01447023		1026.99	0.01237822		1616.99	0.00218138		2206.98	-0.00169478		2796.98	0.01240888		3386.98	-0.00773501
437.2	0.01418887		1027.19	0.01170472		1617.19	0.00314189		2207.18	-0.00160496		2797.18	0.01249414		3387.18	-0.00673801
437.4	0.01432148		1027.39	0.01168501		1617.39	0.00445739		2207.38	-0.00154784		2797.38	0.01254909		3387.38	-0.00638385
437.6	0.01490948		1027.59	0.01148717		1617.59	0.00502147		2207.58	-0.00128713		2797.58	0.01355765		3387.58	-0.00600626
437.8	0.01546231		1027.79	0.01137442		1617.79	0.00543494		2207.78	-0.0004273		2797.78	0.01346351		3387.78	-0.00567419
438	0.01548349		1027.99	0.01165693		1617.99	0.00575576		2207.98	-0.00036994		2797.98	0.01376123		3387.98	-0.00561254
438.2	0.01565041		1028.19	0.0118742		1618.19	0.00646136		2208.18	0.00019651		2798.18	0.01385026		3388.18	-0.00535692
438.4	0.01573075		1028.39	0.01165439		1618.39	0.00720776		2208.38	0.00073309		2798.38	0.01362117		3388.38	-0.00477114
438.6	0.01575648		1028.59	0.01201166		1618.59	0.00735814		2208.58	0.00127474		2798.58	0.01341551		3388.58	-0.00521941
438.8	0.01638657		1028.79	0.01214333		1618.79	0.00712759		2208.78	0.00102804		2798.78	0.0128281		3388.78	-0.00468063
439	0.01552614		1028.99	0.01297293		1618.99	0.0071127		2208.98	0.00027015		2798.98	0.0127184		3388.98	-0.00466611
439.2	0.01582259		1029.19	0.01316938		1619.19	0.00744933		2209.18	0.00045445		2799.18	0.01249422		3389.18	-0.00542746
439.4	0.01541476		1029.39	0.013251		1619.39	0.00791183		2209.38	-0.00062691		2799.38	0.01195465		3389.38	-0.00558116
439.6	0.01445586		1029.59	0.01294465		1619.59	0.00709882		2209.58	-0.00126807		2799.58	0.01187493		3389.58	-0.00654699
439.8	0.01377499		1029.79	0.01281704		1619.79	0.00676408		2209.78	-0.00148954		2799.78	0.01123963		3389.78	-0.00673834
440	0.01312562		1029.99	0.01237108		1619.99	0.00582907		2209.98	-0.00168132		2799.98	0.01055241		3389.98	-0.00665522
440.2	0.01274967		1030.19	0.01240009		1620.19	0.00600547		2210.18	-0.00232246		2800.18	0.01130957		3390.18	-0.00723218
440.4	0.01340413		1030.39	0.01291342		1620.39	0.00624196		2210.38	-0.00340612		2800.38	0.01119276		3390.38	-0.00654931
440.6	0.01283207		1030.59	0.01283343		1620.59	0.00615866		2210.58	-0.00385695		2800.58	0.01167265		3390.58	-0.0064099
440.8	0.01353159		1030.79	0.01400995		1620.79	0.00464629		2210.78	-0.00470001		2800.78	0.01197122		3390.78	-0.00681057
441	0.01305991		1030.99	0.01404222		1620.99	0.00535272		2210.98	-0.00482185		2800.98	0.01237192		3390.98	-0.00702431
441.2	0.01380575		1031.19	0.01370706		1621.19	0.00715947		2211.18	-0.00508501		2801.18	0.01218103		3391.18	-0.00688392
441.4	0.01379806		1031.39	0.01467908		1621.39	0.0077455		2211.38	-0.00540751		2801.38	0.01295152		3391.38	-0.00717842
441.6	0.01494271		1031.59	0.01388456		1621.59	0.00782453		2211.58	-0.00593959		2801.58	0.01313971		3391.58	-0.00787453
441.8	0.01606194		1031.79	0.01370433		1621.79	0.00801639		2211.78	-0.00559113		2801.78	0.01323379		3391.78	-0.00838754
442	0.01638335		1031.99	0.01357129		1621.99	0.00903339		2211.98	-0.00503412		2801.98	0.01320746		3391.98	-0.00892732
442.2	0.01678166		1032.19	0.01298896		1622.19	0.00892733		2212.18	-0.0035652		2802.18	0.0138312		3392.18	-0.00999693
442.4	0.01746233		1032.39	0.01295064		1622.39	0.00862344		2212.38	-0.00275473		2802.38	0.0137996		3392.38	-0.01029674
442.6	0.01802644		1032.59	0.01314884		1622.59	0.00889768		2212.58	-0.00195859		2802.58	0.01306152		3392.58	-0.01085621
442.8	0.01798298		1032.79	0.01317719		1622.79	0.01024604		2212.78	-0.00202946		2802.78	0.01241787		3392.78	-0.01035855
443	0.01720795		1032.99	0.01342687		1622.99	0.01064351		2212.98	-0.00177405		2802.98	0.01236922		3392.98	-0.01094779
443.2	0.01731775		1033.19	0.01291121		1623.19	0.01072379		2213.18	-0.00237704		2803.18	0.01204672		3393.18	-0.01045574
443.4	0.01676496		1033.39	0.01225761		1623.39	0.01020843		2213.38	-0.00243674		2803.38	0.01160615		3393.38	-0.01036351
443.6	0.01720762		1033.59	0.01211691		1623.59	0.00897631		2213.58	-0.00206557		2803.58	0.01204129		3393.58	-0.01055247
443.8	0.01696117		1033.79	0.01197842		1623.79	0.00875687		2213.78	-0.00200113		2803.78	0.01252848		3393.78	-0.00941313
444	0.01657931		1033.99	0.01144189		1623.99	0.00814427		2213.98	-0.00265378		2803.98	0.01230879		3393.98	-0.00973896
444.2	0.01599008		1034.19	0.01173655		1624.19	0.00888853		2214.18	-0.00421025		2804.18	0.01294169		3394.18	-0.00879297
444.4	0.01618816		1034.39	0.01209964		1624.39	0.00870809		2214.38	-0.00423827		2804.38	0.01304176		3394.38	-0.00724453
444.6	0.01513485		1034.59	0.0126784		1624.59	0.00803895		2214.58	-0.00444599		2804.58	0.01350632		3394.58	-0.00688533
444.8	0.01497969		1034.79	0.01361902		1624.79	0.00783925		2214.78	-0.00461857		2804.78	0.01342798		3394.78	-0.00679554
445	0.01394864		1034.99	0.01352519		1624.99	0.0083414		2214.98	-0.00387249		2804.98	0.01408812		3394.98	-0.00603599
445.2	0.01387256		1035.19	0.01390548		1625.19	0.00848742		2215.18	-0.00433657		2805.18	0.01424881		3395.18	-0.00481884
445.4	0.01378699		1035.39	0.01321128		1625.39	0.00788579		2215.38	-0.00431432		2805.38	0.01480586		3395.38	-0.00482593
445.6	0.01427115		1035.59	0.0126097		1625.59	0.00782559		2215.58	-0.00396396		2805.58	0.0148842		3395.58	-0.00506503
445.8	0.01458398		1035.79	0.01290674		1625.79	0.0080292		2215.78	-0.0023858		2805.78	0.01483139		3395.78	-0.00473169
446	0.01464008		1035.99	0.01327341		1625.99	0.0083971		2215.98	-0.00264238		2805.98	0.01429165		3395.98	-0.00434281
446.2	0.01487		1036.19	0.01335052		1626.19	0.00743076		2216.18	-0.00219079		2806.18	0.01441051		3396.18	-0.00455038
446.4	0.01532777		1036.39	0.01256085		1626.39	0.00786774		2216.38	-0.00134244		2806.38	0.01410702		3396.38	-0.00435292
446.6	0.01568766		1036.59	0.01204874		1626.59	0.00855422		2216.58	-0.00202009		2806.58	0.0137822		3396.58	-0.00500741
446.8	0.01540181		1036.79	0.01252763		1626.79	0.00820422		2216.78	-0.00226871		2806.78	0.01330006		3396.78	-0.00519479
447	0.01623514		1036.99	0.01195887		1626.99	0.00744963		2216.98	-0.00154796		2806.98	0.01328289		3396.98	-0.00602921
447.2	0.01601843		1037.19	0.01147757		1627.19	0.00733366		2217.18	-0.00180128		2807.18	0.01222551		3397.18	-0.0060456
447.4	0.01670192		1037.39	0.01146017		1627.39	0.00665592		2217.38	-0.00169577		2807.38	0.01215964		3397.38	-0.00592045
447.6	0.01665791		1037.59	0.01160465		1627.59	0.00656194		2217.58	-0.00265529		2807.58	0.01240587		3397.58	-0.00668039
447.8	0.01680337		1037.79	0.01000015		1627.79	0.0056325		2217.78	-0.00277703		2807.78	0.01132466		3397.78	-0.00670697
448	0.01577252		1037.99	0.00995584		1627.99	0.00559894		2217.98	-0.0028028		2807.98	0.01113683		3397.98	-0.00783548
448.2	0.01583885		1038.19	0.01028441		1628.19	0.00585421		2218.18	-0.00346873		2808.18	0.01147104		3398.18	-0.0079702
448.4	0.01596023		1038.39	0.0100966		1628.39	0.00576003		2218.38	-0.00282841		2808.38	0.0114176		3398.38	-0.00839566
448.6	0.01585723		1038.59	0.01014427		1628.59	0.00512741		2218.58	-0.00217146		2808.58	0.01136981		3398.58	-0.0087556
448.8	0.01585566		1038.79	0.0104637		1628.79	0.00454893		2218.78	-0.00232615		2808.78	0.01129789		3398.78	-0.0082189
449	0.01596399		1038.99	0.01117354		1628.99	0.00454785		2218.98	-0.00168122		2808.98	0.01244449		3398.98	-0.00752081
449.2	0.01611588		1039.19	0.01136716		1629.19	0.00475099		2219.18	-0.00200087		2809.18	0.01222267		3399.18	-0.00694665
449.4	0.01628982		1039.39	0.01214976		1629.39	0.00428917		2219.38	-0.00160919		2809.38	0.01218183		3399.38	-0.00672495
449.6	0.01595863		1039.59	0.01275647		1629.59	0.00451273		2219.58	-0.00068461		2809.58	0.01143159		3399.58	-0.00564389
449.8	0.01604043		1039.79	0.01302269		1629.79	0.00509287		2219.78	-0.00050681		2809.78	0.01149956		3399.78	-0.00467219
450	0.01669427		1039.99	0.01296755		1629.99	0.00549105		2219.98	-0.00113782		2809.98	0.01170252		3399.98	-0.00405432
450.2	0.0164954		1040.19	0.01206475		1630.19	0.00544493		2220.18	-0.00025788		2810.18	0.01170268		3400.18	-0.00496949
450.4	0.01717929		1040.39	0.0113407		1630.39	0.00572681		2220.38	0.00004457		2810.38	0.0119315		3400.38	-0.00466238
450.6	0.01714795		1040.59	0.01183133		1630.59	0.00594681		2220.58	-0.00085407		2810.58	0.01202678		3400.58	-0.00509131
450.8	0.01675006		1040.79	0.01296952		1630.79	0.00620389		2220.78	-0.00089266		2810.78	0.01125002		3400.78	-0.0057798
451	0.01659413		1040.99	0.01234864		1630.99	0.00701892		2220.98	-0.00044073		2810.98	0.0109963		3400.98	-0.0057777
451.2	0.01595076		1041.19	0.01261291		1631.19	0.00760104		2221.18	-0.00123944		2811.18	0.01094261		3401.18	-0.00616756
451.4	0.01563305		1041.39	0.01225569		1631.39	0.0076048		2221.38	-0.00179291		2811.38	0.01084321		3401.38	-0.00647641
451.6	0.01514512		1041.59	0.01170523		1631.59	0.00758825		2221.58	-0.00178524		2811.58	0.01070498		3401.58	-0.00748201
451.8	0.01560834		1041.79	0.01161366		1631.79	0.00673761		2221.78	-0.00093286		2811.78	0.01108524		3401.78	-0.00745938
452	0.01445643		1041.99	0.01289477		1631.99	0.00699779		2221.98	-0.00072282		2811.98	0.01229582		3401.98	-0.00807803
452.2	0.01478359		1042.19	0.01342092		1632.19	0.00674543		2222.18	-0.0014535		2812.18	0.01239968		3402.18	-0.00743346
452.4	0.01473338		1042.39	0.01360757		1632.39	0.0058935		2222.38	-0.00129321		2812.38	0.01306918		3402.38	-0.0064412
452.6	0.01462188		1042.59	0.01400439		1632.59	0.00515098		2222.58	-0.00172358		2812.58	0.0131806		3402.58	-0.00535154
452.8	0.01499675		1042.79	0.01409789		1632.79	0.00479836		2222.78	-0.00222827		2812.78	0.01369769		3402.78	-0.00495402
453	0.01523711		1042.99	0.01434491		1632.99	0.00537052		2222.98	-0.00241281		2812.98	0.01417891		3402.98	-0.00427402
453.2	0.01545529		1043.19	0.01337207		1633.19	0.00516179		2223.18	-0.00309081		2813.18	0.0137627		3403.18	-0.00420409
453.4	0.01530714		1043.39	0.01320149		1633.39	0.0059621		2223.38	-0.00258962		2813.38	0.01380097		3403.38	-0.00327387
453.6	0.01576831		1043.59	0.01180271		1633.59	0.00694996		2223.58	-0.00250363		2813.58	0.01358296		3403.58	-0.002735
453.8	0.01573287		1043.79	0.01089632		1633.79	0.00730175		2223.78	-0.00261893		2813.78	0.0137727		3403.78	-0.00277311
454	0.01564359		1043.99	0.01031466		1633.99	0.00730287		2223.98	-0.00242761		2813.98	0.01367217		3403.98	-0.00371553
454.2	0.01497514		1044.19	0.00950862		1634.19	0.00722923		2224.18	-0.00228353		2814.18	0.01338519		3404.18	-0.0045694
454.4	0.01498463		1044.39	0.00954817		1634.39	0.00710538		2224.38	-0.00251883		2814.38	0.01334983		3404.38	-0.0039625
454.6	0.01445079		1044.59	0.00921318		1634.59	0.00748145		2224.58	-0.00262979		2814.58	0.01340271		3404.58	-0.00504614
454.8	0.01400187		1044.79	0.00892084		1634.79	0.00811593		2224.78	-0.00262929		2814.78	0.012909		3404.78	-0.00551056
455	0.0142117		1044.99	0.00807631		1634.99	0.00757036		2224.98	-0.00234123		2814.98	0.01317823		3404.98	-0.00525788
455.2	0.0139615		1045.19	0.00848678		1635.19	0.00733019		2225.18	-0.0025076		2815.18	0.01310954		3405.18	-0.00622262
455.4	0.01405192		1045.39	0.00831111		1635.39	0.0065827		2225.38	-0.00277922		2815.38	0.01329751		3405.38	-0.00622177
455.6	0.01438146		1045.59	0.00871327		1635.59	0.00621416		2225.58	-0.00232228		2815.58	0.01414898		3405.58	-0.00627723
455.8	0.01390429		1045.79	0.01002886		1635.79	0.00550855		2225.78	-0.00120456		2815.78	0.01382484		3405.78	-0.00606066
456	0.01345738		1045.99	0.01092639		1635.99	0.00502046		2225.98	-0.00131098		2815.98	0.01314829		3405.98	-0.00552311
456.2	0.01367877		1046.19	0.01135697		1636.19	0.00532449		2226.18	-0.00163033		2816.18	0.01272019		3406.18	-0.00445134
456.4	0.01430267		1046.39	0.0112888		1636.39	0.00475658		2226.38	-0.00245241		2816.38	0.0126765		3406.38	-0.00377815
456.6	0.01465253		1046.59	0.01173261		1636.59	0.00573168		2226.58	-0.00295574		2816.58	0.01193011		3406.58	-0.00404461
456.8	0.01549296		1046.79	0.0124358		1636.79	0.00580712		2226.78	-0.00266681		2816.78	0.0117371		3406.78	-0.00495339
457	0.01645279		1046.99	0.0120334		1636.99	0.00646617		2226.98	-0.00327506		2816.98	0.0121723		3406.98	-0.00511444
457.2	0.01680268		1047.19	0.01160835		1637.19	0.00685549		2227.18	-0.00373003		2817.18	0.01144926		3407.18	-0.0057748
457.4	0.01681696		1047.39	0.01228853		1637.39	0.0082756		2227.38	-0.00312513		2817.38	0.01202529		3407.38	-0.00535914
457.6	0.01749445		1047.59	0.01160594		1637.59	0.00856295		2227.58	-0.00354393		2817.58	0.01222897		3407.58	-0.00613016
457.8	0.01691838		1047.79	0.01119052		1637.79	0.00845725		2227.78	-0.00353071		2817.78	0.01151901		3407.78	-0.00671216
458	0.01666521		1047.99	0.01204408		1637.99	0.00879945		2227.98	-0.00394558		2817.98	0.01138457		3407.98	-0.00714487
458.2	0.01726775		1048.19	0.01142275		1638.19	0.00870676		2228.18	-0.00435493		2818.18	0.01140112		3408.18	-0.00709454
458.4	0.01801896		1048.39	0.01131539		1638.39	0.0091696		2228.38	-0.00527838		2818.38	0.01103677		3408.38	-0.00607204
458.6	0.01847893		1048.59	0.01101867		1638.59	0.00958657		2228.58	-0.00440601		2818.58	0.01122689		3408.58	-0.00651046
458.8	0.01851039		1048.79	0.01104092		1638.79	0.00965295		2228.78	-0.00402975		2818.78	0.01110135		3408.78	-0.00616396
459	0.01854649		1048.99	0.01129846		1638.99	0.00946411		2228.98	-0.00457637		2818.98	0.01149408		3408.98	-0.00591467
459.2	0.01773282		1049.19	0.01136584		1639.19	0.00975696		2229.18	-0.00451526		2819.18	0.01226392		3409.18	-0.00676756
459.4	0.01720956		1049.39	0.01074749		1639.39	0.00965563		2229.38	-0.00376114		2819.38	0.01259487		3409.38	-0.00587758
459.6	0.0163124		1049.59	0.01031721		1639.59	0.00903401		2229.58	-0.00278256		2819.58	0.01249488		3409.58	-0.00482257
459.8	0.01551339		1049.79	0.01083579		1639.79	0.00858084		2229.78	-0.00233055		2819.78	0.01141572		3409.78	-0.00361963
460	0.01473228		1049.99	0.01131417		1639.99	0.00881051		2229.98	-0.00326817		2819.98	0.01111696		3409.98	-0.00284023
460.2	0.01427065		1050.19	0.01103465		1640.19	0.00942383		2230.18	-0.0036587		2820.18	0.0107338		3410.18	-0.00302972
460.4	0.01443383		1050.39	0.01171253		1640.39	0.00886598		2230.38	-0.00442287		2820.38	0.01057096		3410.38	-0.00282085
460.6	0.01418375		1050.59	0.01272072		1640.59	0.00928961		2230.58	-0.00371527		2820.58	0.0106606		3410.58	-0.00328204
460.8	0.0144295		1050.79	0.01291546		1640.79	0.00877016		2230.78	-0.00283243		2820.78	0.01163639		3410.78	-0.00354813
461	0.01457395		1050.99	0.01243504		1640.99	0.0085443		2230.98	-0.00274575		2820.98	0.01259166		3410.98	-0.00341303
461.2	0.01425334		1051.19	0.01283023		1641.19	0.00814602		2231.18	-0.00227237		2821.18	0.0126678		3411.18	-0.00364304
461.4	0.01345806		1051.39	0.0129422		1641.39	0.00849617		2231.38	-0.00202117		2821.38	0.01303939		3411.38	-0.00430297
461.6	0.0142295		1051.59	0.01236522		1641.59	0.008046		2231.58	-0.00252936		2821.58	0.01304656		3411.58	-0.00520622
461.8	0.0146203		1051.79	0.01264114		1641.79	0.00795756		2231.78	-0.00274493		2821.78	0.01287102		3411.78	-0.0054239
462	0.01426522		1051.99	0.01311092		1641.99	0.00758309		2231.98	-0.00274672		2821.98	0.01338971		3411.98	-0.00621432
462.2	0.01456628		1052.19	0.01272615		1642.19	0.00777674		2232.18	-0.0020504		2822.18	0.01303699		3412.18	-0.00639388
462.4	0.01503364		1052.39	0.0128775		1642.39	0.00819578		2232.38	-0.00190228		2822.38	0.01291662		3412.38	-0.00572079
462.6	0.01531416		1052.59	0.0123964		1642.59	0.00792074		2232.58	-0.0003711		2822.58	0.01284783		3412.58	-0.00617089
462.8	0.01566105		1052.79	0.0118169		1642.79	0.00775462		2232.78	-0.00037648		2822.78	0.01196894		3412.78	-0.00561415
463	0.01598582		1052.99	0.01177528		1642.99	0.00731019		2232.98	-0.00034289		2822.98	0.01248381		3412.98	-0.00575036
463.2	0.01592488		1053.19	0.01139504		1643.19	0.00713442		2233.18	0.0002284		2823.18	0.01192234		3413.18	-0.00610836
463.4	0.01578275		1053.39	0.01144998		1643.39	0.00658792		2233.38	0.00034547		2823.38	0.0119932		3413.38	-0.00473397
463.6	0.01534561		1053.59	0.01100104		1643.59	0.00605313		2233.58	-0.00028936		2823.58	0.01296918		3413.58	-0.00436327
463.8	0.01568172		1053.79	0.01136112		1643.79	0.00708708		2233.78	-0.00039346		2823.78	0.01298763		3413.78	-0.00467
464	0.01510614		1053.99	0.0115764		1643.99	0.00775753		2233.98	0.00000728		2823.98	0.01316918		3413.98	-0.00456426
464.2	0.01574911		1054.19	0.01125162		1644.19	0.00758214		2234.18	0.00046863		2824.18	0.01340369		3414.18	-0.00489487
464.4	0.0165063		1054.39	0.01151937		1644.39	0.00829204		2234.38	0.00073296		2824.38	0.0144433		3414.38	-0.0045688
464.6	0.01639057		1054.59	0.01149059		1644.59	0.00890948		2234.58	0.00112835		2824.58	0.01506963		3414.58	-0.00529374
464.8	0.01629058		1054.79	0.01096224		1644.79	0.00925858		2234.78	0.00124958		2824.78	0.015524		3414.78	-0.0052211
465	0.01645049		1054.99	0.01112902		1644.99	0.0085658		2234.98	0.00102842		2824.98	0.01528188		3414.98	-0.00521674
465.2	0.01632177		1055.19	0.01053154		1645.19	0.00887432		2235.18	-0.00042612		2825.18	0.01522972		3415.18	-0.00615993
465.4	0.01517748		1055.39	0.01104011		1645.39	0.0089251		2235.38	-0.0024367		2825.38	0.01427034		3415.38	-0.00641532
465.6	0.01607844		1055.59	0.01092513		1645.59	0.00829252		2235.58	-0.002879		2825.58	0.01475286		3415.58	-0.00698728
465.8	0.01584288		1055.79	0.01166058		1645.79	0.00745079		2235.78	-0.00318136		2825.78	0.01423197		3415.78	-0.00735773
466	0.01504392		1055.99	0.011536		1645.99	0.00783313		2235.98	-0.00323108		2825.98	0.01406839		3415.98	-0.00753117
466.2	0.01525126		1056.19	0.0120829		1646.19	0.00813269		2236.18	-0.00300026		2826.18	0.0123831		3416.18	-0.00718973
466.4	0.01555449		1056.39	0.01191558		1646.39	0.00725272		2236.38	-0.00413682		2826.38	0.01292331		3416.38	-0.00743106
466.6	0.01584206		1056.59	0.011918		1646.59	0.00671937		2236.58	-0.00508058		2826.58	0.01183054		3416.58	-0.00834365
466.8	0.01684407		1056.79	0.01253152		1646.79	0.00608271		2236.78	-0.00488332		2826.78	0.01108056		3416.78	-0.00845131
467	0.01736675		1056.99	0.01262538		1646.99	0.0060324		2236.98	-0.00487076		2826.98	0.01177618		3416.98	-0.0087815
467.2	0.01729562		1057.19	0.0127284		1647.19	0.00656907		2237.18	-0.00507458		2827.18	0.01186056		3417.18	-0.00884105
467.4	0.01656561		1057.39	0.01300085		1647.39	0.00642889		2237.38	-0.00573379		2827.38	0.01326547		3417.38	-0.00909358
467.6	0.01652413		1057.59	0.0123597		1647.59	0.00640722		2237.58	-0.00520708		2827.58	0.01376003		3417.58	-0.00885786
467.8	0.01706025		1057.79	0.01248086		1647.79	0.00666949		2237.78	-0.0036243		2827.78	0.01444808		3417.78	-0.00883546
468	0.01674176		1057.99	0.0124		1647.99	0.00664062		2237.98	-0.00259047		2827.98	0.01530876		3417.98	-0.00874869
468.2	0.01697478		1058.19	0.01215888		1648.19	0.00677434		2238.18	-0.00197423		2828.18	0.01581231		3418.18	-0.00867655
468.4	0.0169671		1058.39	0.01196736		1648.39	0.00775354		2238.38	-0.001175		2828.38	0.01623844		3418.38	-0.00856676
468.6	0.01666587		1058.59	0.01185167		1648.59	0.00790969		2238.58	-0.00071389		2828.58	0.01583396		3418.58	-0.00826611
468.8	0.01648054		1058.79	0.01156274		1648.79	0.00815286		2238.78	0.00016185		2828.78	0.01546578		3418.78	-0.00713706
469	0.0166924		1058.99	0.01164368		1648.99	0.00805185		2238.98	0.00070066		2828.98	0.01509024		3418.98	-0.0065196
469.2	0.01636599		1059.19	0.01143043		1649.19	0.00883565		2239.18	0.0002732		2829.18	0.01450201		3419.18	-0.00612361
469.4	0.01583813		1059.39	0.01226804		1649.39	0.008802		2239.38	0.00071852		2829.38	0.0135276		3419.38	-0.00528576
469.6	0.01587316		1059.59	0.01216708		1649.59	0.00880338		2239.58	0.00201966		2829.58	0.01322446		3419.58	-0.00500922
469.8	0.01568839		1059.79	0.01305269		1649.79	0.00914412		2239.78	0.00241181		2829.78	0.01226282		3419.78	-0.0046854
470	0.01568839		1059.99	0.01305269		1649.99	0.00914412		2239.98	0.00241181		2829.98	0.01226282		3419.98	-0.0046854
470.2	0.01635374		1060.19	0.01186737		1650.19	0.00930837		2240.18	0.00328445		2830.18	0.01248322		3420.18	-0.00419345
470.4	0.01650447		1060.39	0.01120778		1650.39	0.00978189		2240.38	0.00502851		2830.38	0.01326294		3420.38	-0.00333223
470.6	0.01689641		1060.59	0.01046801		1650.59	0.00952731		2240.58	0.00591748		2830.58	0.012895		3420.58	-0.00260071
470.8	0.017183		1060.79	0.01051668		1650.79	0.00896882		2240.78	0.00691419		2830.78	0.01290756		3420.78	-0.00245601
471	0.01749942		1060.99	0.01010323		1650.99	0.00812354		2240.98	0.00746495		2830.98	0.01335101		3420.98	-0.00185361
471.2	0.01790939		1061.19	0.00981574		1651.19	0.00806395		2241.18	0.00865081		2831.18	0.01356091		3421.18	-0.00200316
471.4	0.01750568		1061.39	0.00985299		1651.39	0.00732456		2241.38	0.00906741		2831.38	0.01359947		3421.38	-0.00155233
471.6	0.01706429		1061.59	0.00948637		1651.59	0.00692423		2241.58	0.00892193		2831.58	0.01350968		3421.58	-0.00111989
471.8	0.016931		1061.79	0.00947147		1651.79	0.00717486		2241.78	0.00890142		2831.78	0.01353222		3421.78	-0.00194078
472	0.01679283		1061.99	0.00959754		1651.99	0.00751762		2241.98	0.0086845		2831.98	0.01309539		3421.98	-0.00183921
472.2	0.01637944		1062.19	0.00939315		1652.19	0.00826255		2242.18	0.00870385		2832.18	0.01296549		3422.18	-0.00157379
472.4	0.01665718		1062.39	0.00969091		1652.39	0.008697		2242.38	0.00949818		2832.38	0.01127196		3422.38	-0.00127725
472.6	0.01635037		1062.59	0.00906577		1652.59	0.00898606		2242.58	0.00936153		2832.58	0.0102344		3422.58	-0.00188614
472.8	0.01552004		1062.79	0.00967803		1652.79	0.00955405		2242.78	0.0096026		2832.78	0.00999055		3422.78	-0.00184894
473	0.0152319		1062.99	0.01025581		1652.99	0.00948167		2242.98	0.00876799		2832.98	0.00945953		3422.98	-0.00137496
473.2	0.01519825		1063.19	0.01116571		1653.19	0.00833068		2243.18	0.00866785		2833.18	0.00898855		3423.18	-0.00185365
473.4	0.01489024		1063.39	0.01049949		1653.39	0.00862626		2243.38	0.00836713		2833.38	0.00879548		3423.38	-0.00194894
473.6	0.01446869		1063.59	0.01087958		1653.59	0.00746825		2243.58	0.00707595		2833.58	0.00832853		3423.58	-0.00200876
473.8	0.01435548		1063.79	0.01079074		1653.79	0.0075118		2243.78	0.0068567		2833.78	0.00824024		3423.78	-0.00106899
474	0.01528775		1063.99	0.01087163		1653.99	0.00855235		2243.98	0.00592463		2833.98	0.00741287		3423.98	-0.00140625
474.2	0.01677879		1064.19	0.01052288		1654.19	0.0082667		2244.18	0.00584593		2834.18	0.00684818		3424.18	-0.00192212
474.4	0.01633375		1064.39	0.01089161		1654.39	0.00863756		2244.38	0.00590628		2834.38	0.00686401		3424.38	-0.00158011
474.6	0.0168044		1064.59	0.0107956		1654.59	0.00798982		2244.58	0.00467797		2834.58	0.0057282		3424.58	-0.00145552
474.8	0.01677943		1064.79	0.01123087		1654.79	0.00819978		2244.78	0.00488633		2834.78	0.00584318		3424.78	-0.00163782
475	0.01659324		1064.99	0.01055623		1654.99	0.00699645		2244.98	0.00482936		2834.98	0.00592378		3424.98	-0.00176984
475.2	0.01665874		1065.19	0.01047132		1655.19	0.0072999		2245.18	0.0053059		2835.18	0.00588567		3425.18	-0.00243684
475.4	0.01569858		1065.39	0.01013485		1655.39	0.00655095		2245.38	0.00536866		2835.38	0.00669001		3425.38	-0.00213299
475.6	0.01550853		1065.59	0.00902293		1655.59	0.00664636		2245.58	0.00587725		2835.58	0.00750356		3425.58	-0.00232851
475.8	0.01534967		1065.79	0.00873985		1655.79	0.00696125		2245.78	0.00663361		2835.78	0.00842553		3425.78	-0.00288485
476	0.0154139		1065.99	0.00828305		1655.99	0.00729365		2245.98	0.00702615		2835.98	0.0081008		3425.98	-0.001559
476.2	0.01465312		1066.19	0.00765356		1656.19	0.0075709		2246.18	0.00779193		2836.18	0.00827007		3426.18	-0.00231257
476.4	0.01466638		1066.39	0.00794504		1656.39	0.00700844		2246.38	0.00808248		2836.38	0.00826885		3426.38	-0.00262055
476.6	0.01400104		1066.59	0.00729868		1656.59	0.00672171		2246.58	0.00869093		2836.58	0.00965056		3426.58	-0.00292076
476.8	0.01376177		1066.79	0.0080225		1656.79	0.00600328		2246.78	0.00918647		2836.78	0.0097447		3426.78	-0.00242287
477	0.01346161		1066.99	0.00806864		1656.99	0.00487721		2246.98	0.00823259		2836.98	0.00984185		3426.98	-0.00229366
477.2	0.01463992		1067.19	0.00839863		1657.19	0.00494333		2247.18	0.00788496		2837.18	0.01009975		3427.18	-0.00300863
477.4	0.01482253		1067.39	0.00770432		1657.39	0.00488708		2247.38	0.00754119		2837.38	0.00960316		3427.38	-0.00358288
477.6	0.01537432		1067.59	0.00794727		1657.59	0.00429642		2247.58	0.00652076		2837.58	0.00942378		3427.58	-0.00351697
477.8	0.01562599		1067.79	0.00783631		1657.79	0.00662268		2247.78	0.0078638		2837.78	0.00948254		3427.78	-0.00290199
478	0.01698983		1067.99	0.00820871		1657.99	0.00770128		2247.98	0.00833749		2837.98	0.00831225		3427.98	-0.00315886
478.2	0.01725218		1068.19	0.007561		1658.19	0.00747946		2248.18	0.00804753		2838.18	0.0081012		3428.18	-0.00352588
478.4	0.01662829		1068.39	0.00739359		1658.39	0.00821312		2248.38	0.0081149		2838.38	0.00811033		3428.38	-0.00274532
478.6	0.01687914		1068.59	0.00757426		1658.59	0.00905326		2248.58	0.00840477		2838.58	0.00759354		3428.58	-0.00233249
478.8	0.01637536		1068.79	0.00827456		1658.79	0.00921071		2248.78	0.00858886		2838.78	0.00727173		3428.78	-0.00250275
479	0.01647174		1068.99	0.0082674		1658.99	0.00847012		2248.98	0.00882545		2838.98	0.00694301		3428.98	-0.00264275
479.2	0.01601818		1069.19	0.00908024		1659.19	0.00937945		2249.18	0.00869007		2839.18	0.00727844		3429.18	-0.00235627
479.4	0.01591334		1069.39	0.0100421		1659.39	0.00905017		2249.38	0.00863998		2839.38	0.00809755		3429.38	-0.00204912
479.6	0.01553458		1069.59	0.00996736		1659.59	0.00935805		2249.58	0.00817187		2839.58	0.00816247		3429.58	-0.00166642
479.8	0.01490307		1069.79	0.01030698		1659.79	0.00875694		2249.78	0.00756402		2839.78	0.00880919		3429.78	-0.00127629
480	0.01416891		1069.99	0.01134386		1659.99	0.00832125		2249.98	0.00722437		2839.98	0.00793409		3429.98	-0.0010727
480.2	0.01262893		1070.19	0.01110114		1660.19	0.00786389		2250.18	0.0069932		2840.18	0.00774498		3430.18	-0.00191744
480.4	0.01157293		1070.39	0.01121419		1660.39	0.00638216		2250.38	0.00666942		2840.38	0.00821832		3430.38	-0.00147388
480.6	0.01113645		1070.59	0.01108244		1660.59	0.00628162		2250.58	0.00641895		2840.58	0.00822279		3430.58	-0.00134521
480.8	0.01088395		1070.79	0.01141975		1660.79	0.0053296		2250.78	0.00597261		2840.78	0.00762244		3430.78	-0.00171577
481	0.01108585		1070.99	0.01112808		1660.99	0.00528861		2250.98	0.00527529		2840.98	0.00799575		3430.98	-0.00243806
481.2	0.01182164		1071.19	0.0110114		1661.19	0.00575207		2251.18	0.00499074		2841.18	0.00815018		3431.18	-0.00288299
481.4	0.01182838		1071.39	0.01010475		1661.39	0.00522066		2251.38	0.0055355		2841.38	0.00693922		3431.38	-0.0023336
481.6	0.01282579		1071.59	0.00923697		1661.59	0.00603538		2251.58	0.00547718		2841.58	0.00715095		3431.58	-0.00188017
481.8	0.01278376		1071.79	0.00874655		1661.79	0.00687724		2251.78	0.00683856		2841.78	0.00769223		3431.78	-0.0012367
482	0.01290835		1071.99	0.00823547		1661.99	0.00661701		2251.98	0.00671959		2841.98	0.00696262		3431.98	-0.00111804
482.2	0.01292187		1072.19	0.00744609		1662.19	0.00675979		2252.18	0.00604365		2842.18	0.00742225		3432.18	-0.00133166
482.4	0.01359035		1072.39	0.00743333		1662.39	0.00765683		2252.38	0.00640526		2842.38	0.00798552		3432.38	0.00010302
482.6	0.01325322		1072.59	0.00749061		1662.59	0.00874405		2252.58	0.00627447		2842.58	0.00803663		3432.58	0.00003484
482.8	0.01261826		1072.79	0.00773233		1662.79	0.00850181		2252.78	0.00501291		2842.78	0.00759459		3432.78	0.00010793
483	0.01232564		1072.99	0.00765307		1662.99	0.00861256		2252.98	0.0052871		2842.98	0.00805915		3432.98	0.00055907
483.2	0.01238073		1073.19	0.00805753		1663.19	0.00858622		2253.18	0.00419813		2843.18	0.00773674		3433.18	0.00003545
483.4	0.01243058		1073.39	0.00851668		1663.39	0.00858293		2253.38	0.00363523		2843.38	0.00829427		3433.38	-0.00058289
483.6	0.01220547		1073.59	0.00797938		1663.59	0.00932321		2253.58	0.00330533		2843.58	0.00852329		3433.58	-0.00009997
483.8	0.01197925		1073.79	0.0082654		1663.79	0.00852677		2253.78	0.00340517		2843.78	0.00918814		3433.78	-0.00055826
484	0.01183489		1073.99	0.00885014		1663.99	0.00756769		2253.98	0.00360916		2843.98	0.00861655		3433.98	-0.00066749
484.2	0.01146171		1074.19	0.00887577		1664.19	0.00734554		2254.18	0.0033138		2844.18	0.00906155		3434.18	-0.00131513
484.4	0.01123283		1074.39	0.00923688		1664.39	0.00632577		2254.38	0.00349192		2844.38	0.01034143		3434.38	-0.00215567
484.6	0.01163212		1074.59	0.00974351		1664.59	0.00618598		2254.58	0.00403705		2844.58	0.01142504		3434.58	-0.00262167
484.8	0.01116165		1074.79	0.00987446		1664.79	0.00546747		2254.78	0.00464008		2844.78	0.01112753		3434.78	-0.00363262
485	0.01081059		1074.99	0.00967069		1664.99	0.00591953		2254.98	0.00502126		2844.98	0.01179103		3434.98	-0.00300862
485.2	0.01107246		1075.19	0.0101212		1665.19	0.00593919		2255.18	0.00487955		2845.18	0.01161209		3435.18	-0.00194053
485.4	0.01040766		1075.39	0.01046833		1665.39	0.0059063		2255.38	0.00518525		2845.38	0.01083762		3435.38	-0.001772
485.6	0.01061347		1075.59	0.00993307		1665.59	0.00674002		2255.58	0.00576094		2845.58	0.01082122		3435.58	-0.00175547
485.8	0.00960719		1075.79	0.00999892		1665.79	0.00745299		2255.78	0.00630248		2845.78	0.01013904		3435.78	-0.00113011
486	0.00929915		1075.99	0.00967732		1665.99	0.00775374		2255.98	0.00637017		2845.98	0.00987661		3435.98	-0.00069192
486.2	0.01039685		1076.19	0.00967547		1666.19	0.00880472		2256.18	0.00581453		2846.18	0.01006949		3436.18	-0.00080249
486.4	0.01015186		1076.39	0.00924154		1666.39	0.00957126		2256.38	0.00545208		2846.38	0.00944068		3436.38	-0.00076558
486.6	0.00957684		1076.59	0.00932092		1666.59	0.00944628		2256.58	0.00454095		2846.58	0.00907852		3436.58	-0.00197182
486.8	0.00880118		1076.79	0.00968603		1666.79	0.00915565		2256.78	0.00269768		2846.78	0.00892373		3436.78	-0.00215435
487	0.00962376		1076.99	0.00985206		1666.99	0.0094389		2256.98	0.00278052		2846.98	0.00842087		3436.98	-0.00298092
487.2	0.01033639		1077.19	0.01010613		1667.19	0.00950265		2257.18	0.00206667		2847.18	0.0075769		3437.18	-0.00438803
487.4	0.01082736		1077.39	0.01009072		1667.39	0.00921833		2257.38	0.00146523		2847.38	0.00834517		3437.38	-0.00493387
487.6	0.01111912		1077.59	0.01025104		1667.59	0.00969315		2257.58	0.00149418		2847.58	0.00841859		3437.58	-0.00553536
487.8	0.01132239		1077.79	0.01069215		1667.79	0.00921313		2257.78	0.00130459		2847.78	0.00845549		3437.78	-0.00611677
488	0.01226006		1077.99	0.01097902		1667.99	0.00914764		2257.98	0.00225755		2847.98	0.00839123		3437.98	-0.0066084
488.2	0.01208226		1078.19	0.01103712		1668.19	0.00911154		2258.18	0.00187044		2848.18	0.00980379		3438.18	-0.00737018
488.4	0.01247678		1078.39	0.01078066		1668.39	0.00981841		2258.38	0.00201859		2848.38	0.01092236		3438.38	-0.00749797
488.6	0.01229088		1078.59	0.01019438		1668.59	0.00992334		2258.58	0.00244283		2848.58	0.01085598		3438.58	-0.0067874
488.8	0.01174261		1078.79	0.00988877		1668.79	0.01075599		2258.78	0.00239404		2848.78	0.01117674		3438.78	-0.00656742
489	0.01048333		1078.99	0.00881603		1668.99	0.0115686		2258.98	0.00280285		2848.98	0.01136956		3438.98	-0.00524097
489.2	0.01074436		1079.19	0.00835462		1669.19	0.01123561		2259.18	0.00251164		2849.18	0.01193183		3439.18	-0.0053506
489.4	0.00985544		1079.39	0.00729877		1669.39	0.01140356		2259.38	0.00309792		2849.38	0.0115187		3439.38	-0.00522081
489.6	0.00975907		1079.59	0.00611047		1669.59	0.01184501		2259.58	0.00378711		2849.58	0.01115044		3439.58	-0.00437554
489.8	0.00952403		1079.79	0.00583102		1669.79	0.01183713		2259.78	0.00446978		2849.78	0.01095035		3439.78	-0.0033531
490	0.01045019		1079.99	0.00522425		1669.99	0.01101733		2259.98	0.00518546		2849.98	0.01036482		3439.98	-0.00299041
490.2	0.01102002		1080.19	0.00496859		1670.19	0.01145993		2260.18	0.00475423		2850.18	0.01056594		3440.18	-0.00339446
490.4	0.01087459		1080.39	0.00437276		1670.39	0.01110612		2260.38	0.00449798		2850.38	0.00985738		3440.38	-0.0030289
490.6	0.01142413		1080.59	0.00439974		1670.59	0.0103168		2260.58	0.0038312		2850.58	0.01043622		3440.58	-0.00333609
490.8	0.01155276		1080.79	0.00391624		1670.79	0.01034867		2260.78	0.00281187		2850.78	0.01039699		3440.78	-0.00337465
491	0.012332		1080.99	0.00391767		1670.99	0.00999132		2260.98	0.00343513		2850.98	0.0093801		3440.98	-0.00416896
491.2	0.01215532		1081.19	0.00378774		1671.19	0.00858504		2261.18	0.00335708		2851.18	0.00958931		3441.18	-0.00468794
491.4	0.01228748		1081.39	0.00378991		1671.39	0.00804429		2261.38	0.00321308		2851.38	0.01005285		3441.38	-0.00447151
491.6	0.01214221		1081.59	0.00357446		1671.59	0.00781823		2261.58	0.00356881		2851.58	0.00947833		3441.58	-0.00481699
491.8	0.01220263		1081.79	0.00356907		1671.79	0.00715485		2261.78	0.00439558		2851.78	0.00871946		3441.78	-0.00454358
492	0.0122831		1081.99	0.00411078		1671.99	0.00612902		2261.98	0.0055537		2851.98	0.00866717		3441.98	-0.00534967
492.2	0.01216263		1082.19	0.00454832		1672.19	0.00509745		2262.18	0.00460195		2852.18	0.00903667		3442.18	-0.00538099
492.4	0.01264305		1082.39	0.00477436		1672.39	0.00492231		2262.38	0.00475369		2852.38	0.0091749		3442.38	-0.00563678
492.6	0.01198416		1082.59	0.00436631		1672.59	0.00415144		2262.58	0.00553739		2852.58	0.00821284		3442.58	-0.00616268
492.8	0.01184811		1082.79	0.00538675		1672.79	0.00349949		2262.78	0.00565209		2852.78	0.00802988		3442.78	-0.00678591
493	0.011316		1082.99	0.00489268		1672.99	0.00286551		2262.98	0.00605596		2852.98	0.00720491		3442.98	-0.00667422
493.2	0.01195967		1083.19	0.0051638		1673.19	0.00181543		2263.18	0.00582604		2853.18	0.00795302		3443.18	-0.00652227
493.4	0.01220677		1083.39	0.00575576		1673.39	0.00195743		2263.38	0.00502734		2853.38	0.007051		3443.38	-0.00601599
493.6	0.01283777		1083.59	0.0071478		1673.59	0.00158829		2263.58	0.00539543		2853.58	0.00732382		3443.58	-0.00576018
493.8	0.01354668		1083.79	0.00753044		1673.79	0.00192988		2263.78	0.00583287		2853.78	0.00695152		3443.78	-0.00474959
494	0.01336436		1083.99	0.00810555		1673.99	0.0022226		2263.98	0.00572456		2853.98	0.00614188		3443.98	-0.00459966
494.2	0.0126911		1084.19	0.00891141		1674.19	0.00290498		2264.18	0.00509283		2854.18	0.00616635		3444.18	-0.00492358
494.4	0.01204326		1084.39	0.00939239		1674.39	0.00331717		2264.38	0.00438875		2854.38	0.00574613		3444.38	-0.00536513
494.6	0.01142919		1084.59	0.00931038		1674.59	0.00393203		2264.58	0.00413496		2854.58	0.00591393		3444.58	-0.00518252
494.8	0.01045116		1084.79	0.00955486		1674.79	0.00418469		2264.78	0.00355228		2854.78	0.00578179		3444.78	-0.00507471
495	0.00907175		1084.99	0.00987375		1674.99	0.00442188		2264.98	0.00388538		2854.98	0.00556539		3444.98	-0.00505394
495.2	0.00865566		1085.19	0.01004387		1675.19	0.00440026		2265.18	0.00424569		2855.18	0.0062091		3445.18	-0.00423159
495.4	0.00776259		1085.39	0.0098567		1675.39	0.00494818		2265.38	0.00449247		2855.38	0.00634611		3445.38	-0.00361912
495.6	0.00711191		1085.59	0.00858697		1675.59	0.00454915		2265.58	0.00475746		2855.58	0.00595785		3445.58	-0.00288438
495.8	0.00608978		1085.79	0.00885234		1675.79	0.00474457		2265.78	0.00497313		2855.78	0.00609133		3445.78	-0.00293459
496	0.00576176		1085.99	0.00850486		1675.99	0.00394209		2265.98	0.00508322		2855.98	0.00628369		3445.98	-0.00300792
496.2	0.00606		1086.19	0.00755641		1676.19	0.00393368		2266.18	0.00461443		2856.18	0.00628442		3446.18	-0.00289662
496.4	0.00643717		1086.39	0.00643645		1676.39	0.00343511		2266.38	0.00410305		2856.38	0.00711939		3446.38	-0.00369532
496.6	0.00629229		1086.59	0.00573929		1676.59	0.00299422		2266.58	0.00510062		2856.58	0.00689269		3446.58	-0.00423029
496.8	0.00773875		1086.79	0.00562979		1676.79	0.00252979		2266.78	0.00447036		2856.78	0.00776635		3446.78	-0.00397202
497	0.00833846		1086.99	0.00476406		1676.99	0.00292953		2266.98	0.00426526		2856.98	0.00942433		3446.98	-0.00371181
497.2	0.00958279		1087.19	0.00383671		1677.19	0.00310436		2267.18	0.00368632		2857.18	0.01009498		3447.18	-0.00369635
497.4	0.0105223		1087.39	0.00391495		1677.39	0.00310157		2267.38	0.00302484		2857.38	0.01048759		3447.38	-0.00389325
497.6	0.01145927		1087.59	0.00420049		1677.59	0.00311361		2267.58	0.00341683		2857.58	0.01043847		3447.58	-0.00329033
497.8	0.01167779		1087.79	0.00460271		1677.79	0.00366739		2267.78	0.00323109		2857.78	0.00962911		3447.78	-0.00391212
498	0.01197091		1087.99	0.00561836		1677.99	0.00288792		2267.98	0.00318056		2857.98	0.00970228		3447.98	-0.00347558
498.2	0.01254037		1088.19	0.00574629		1678.19	0.00263173		2268.18	0.0032647		2858.18	0.00959763		3448.18	-0.0041032
498.4	0.0118006		1088.39	0.00669767		1678.39	0.00247612		2268.38	0.00366037		2858.38	0.00955493		3448.38	-0.00430787
498.6	0.01196119		1088.59	0.0064767		1678.59	0.00281584		2268.58	0.00472155		2858.58	0.00948138		3448.58	-0.00326399
498.8	0.01162539		1088.79	0.00713106		1678.79	0.00308701		2268.78	0.00486147		2858.78	0.00844623		3448.78	-0.0040723
499	0.01232666		1088.99	0.00763607		1678.99	0.00391909		2268.98	0.00486101		2858.98	0.00865452		3448.98	-0.00414363
499.2	0.01254196		1089.19	0.00790185		1679.19	0.00412093		2269.18	0.00522122		2859.18	0.00819227		3449.18	-0.00380702
499.4	0.01210722		1089.39	0.00741878		1679.39	0.00434723		2269.38	0.00476153		2859.38	0.00822435		3449.38	-0.00369261
499.6	0.01204025		1089.59	0.00661658		1679.59	0.00447504		2269.58	0.00492374		2859.58	0.00823196		3449.58	-0.00347249
499.8	0.01121257		1089.79	0.00626378		1679.79	0.00482661		2269.78	0.00443805		2859.78	0.00829315		3449.78	-0.00403758
500	0.01103681		1089.99	0.00640262		1679.99	0.0048516		2269.98	0.00468553		2859.98	0.00781713		3449.98	-0.00338902
500.2	0.01122733		1090.19	0.00657225		1680.19	0.00486287		2270.18	0.00445128		2860.18	0.00856534		3450.18	-0.00391717
500.4	0.01196909		1090.39	0.006786		1680.39	0.00473832		2270.38	0.00376479		2860.38	0.00947057		3450.38	-0.00449093
500.6	0.01190191		1090.59	0.00683429		1680.59	0.0047536		2270.58	0.00489803		2860.58	0.00985703		3450.58	-0.00434988
500.8	0.01252556		1090.79	0.00648839		1680.79	0.0045493		2270.78	0.00430157		2860.78	0.01057503		3450.78	-0.00439114
501	0.01196859		1090.99	0.00661376		1680.99	0.00531225		2270.98	0.00362667		2860.98	0.01061218		3450.98	-0.00470296
501.2	0.01112406		1091.19	0.00614377		1681.19	0.00535867		2271.18	0.00305079		2861.18	0.01022151		3451.18	-0.00466505
501.4	0.01030407		1091.39	0.00674197		1681.39	0.00473813		2271.38	0.00251545		2861.38	0.00986074		3451.38	-0.00451665
501.6	0.01010012		1091.59	0.00670775		1681.59	0.00420307		2271.58	0.00171233		2861.58	0.00822788		3451.58	-0.0040474
501.8	0.0092297		1091.79	0.00741427		1681.79	0.00391058		2271.78	0.00118667		2861.78	0.00793134		3451.78	-0.00468637
502	0.00914811		1091.99	0.00701274		1681.99	0.00298692		2271.98	0.00116863		2861.98	0.00768478		3451.98	-0.00306884
502.2	0.00862684		1092.19	0.00621657		1682.19	0.00299459		2272.18	0.0008539		2862.18	0.0073384		3452.18	-0.00308568
502.4	0.00736174		1092.39	0.00563213		1682.39	0.00343688		2272.38	0.00075688		2862.38	0.00635811		3452.38	-0.00289663
502.6	0.0072624		1092.59	0.00451241		1682.59	0.00376233		2272.58	0.00024216		2862.58	0.00533333		3452.58	-0.00280232
502.8	0.00749734		1092.79	0.00452624		1682.79	0.00371564		2272.78	-0.00080617		2862.78	0.0046939		3452.78	-0.00451868
503	0.00877142		1092.99	0.00428216		1682.99	0.00376588		2272.98	-0.00120827		2862.98	0.00530786		3452.98	-0.00488048
503.2	0.00861996		1093.19	0.00365374		1683.19	0.0036729		2273.18	-0.0011125		2863.18	0.00562163		3453.18	-0.00612125
503.4	0.0080512		1093.39	0.00299545		1683.39	0.00378145		2273.38	-0.00094761		2863.38	0.00588491		3453.38	-0.00707259
503.6	0.00778352		1093.59	0.00292081		1683.59	0.00353159		2273.58	-0.00053225		2863.58	0.00573309		3453.58	-0.00798907
503.8	0.00835523		1093.79	0.00312115		1683.79	0.00405845		2273.78	-0.00018488		2863.78	0.00574917		3453.78	-0.00815955
504	0.00985387		1093.99	0.00393902		1683.99	0.00408078		2273.98	0.000438		2863.98	0.00617181		3453.98	-0.00813206
504.2	0.01088647		1094.19	0.00340138		1684.19	0.00294891		2274.18	0.00160613		2864.18	0.00649671		3454.18	-0.00804119
504.4	0.0117605		1094.39	0.0032748		1684.39	0.00235984		2274.38	0.0017688		2864.38	0.00639052		3454.38	-0.00788054
504.6	0.01237949		1094.59	0.00318742		1684.59	0.00193648		2274.58	0.00223466		2864.58	0.00625974		3454.58	-0.00832889
504.8	0.01205651		1094.79	0.00232252		1684.79	0.00162081		2274.78	0.00228511		2864.78	0.00670047		3454.78	-0.00879094
505	0.01119524		1094.99	0.00312828		1684.99	0.00278475		2274.98	0.00155291		2864.98	0.00683858		3454.98	-0.00916623
505.2	0.01009362		1095.19	0.0030753		1685.19	0.00248953		2275.18	0.00184636		2865.18	0.0065419		3455.18	-0.00825919
505.4	0.01020177		1095.39	0.00365842		1685.39	0.00209022		2275.38	0.0017654		2865.38	0.00578727		3455.38	-0.00767225
505.6	0.0099298		1095.59	0.00403802		1685.59	0.00183194		2275.58	0.00119878		2865.58	0.00497903		3455.58	-0.00738529
505.8	0.00972411		1095.79	0.00445756		1685.79	0.00236394		2275.78	0.00157322		2865.78	0.00541112		3455.78	-0.00739847
506	0.00945692		1095.99	0.00399216		1685.99	0.00174435		2275.98	0.00114913		2865.98	0.00578182		3455.98	-0.00604779
506.2	0.0086488		1096.19	0.00395323		1686.19	0.00193057		2276.18	0.00137513		2866.18	0.00646492		3456.18	-0.00545324
506.4	0.00782338		1096.39	0.00336613		1686.39	0.00237828		2276.38	0.00102574		2866.38	0.00604294		3456.38	-0.00499639
506.6	0.00646039		1096.59	0.00331954		1686.59	0.00223851		2276.58	0.00066388		2866.58	0.00592754		3456.58	-0.00544496
506.8	0.00676076		1096.79	0.00382107		1686.79	0.00251978		2276.78	0.00095964		2866.78	0.00687206		3456.78	-0.00584509
507	0.00679697		1096.99	0.0037269		1686.99	0.00336875		2276.98	0.00132067		2866.98	0.00677298		3456.98	-0.00552707
507.2	0.00626187		1097.19	0.00312017		1687.19	0.00390263		2277.18	0.0019438		2867.18	0.00619452		3457.18	-0.0058302
507.4	0.00513165		1097.39	0.00277338		1687.39	0.00376197		2277.38	0.00252225		2867.38	0.00526287		3457.38	-0.00581136
507.6	0.00567918		1097.59	0.0029364		1687.59	0.00380652		2277.58	0.00222839		2867.58	0.005409		3457.58	-0.00541569
507.8	0.00710379		1097.79	0.00273395		1687.79	0.00370313		2277.78	0.00329935		2867.78	0.00531215		3457.78	-0.00515816
508	0.00734395		1097.99	0.00241604		1687.99	0.00240715		2277.98	0.00377252		2867.98	0.00598566		3457.98	-0.00393517
508.2	0.00734963		1098.19	0.00152114		1688.19	0.00186423		2278.18	0.00538506		2868.18	0.00520521		3458.18	-0.00322356
508.4	0.00725492		1098.39	0.00200906		1688.39	0.00167747		2278.38	0.00610163		2868.38	0.00560926		3458.38	-0.00451021
508.6	0.00738188		1098.59	0.00169766		1688.59	0.00194321		2278.58	0.0063252		2868.58	0.00629354		3458.58	-0.00529395
508.8	0.00752646		1098.79	0.00117611		1688.79	0.00240898		2278.78	0.00695346		2868.78	0.00631889		3458.78	-0.00535057
509	0.00804144		1098.99	0.00257992		1688.99	0.00233861		2278.98	0.00637655		2868.98	0.00639835		3458.98	-0.00551239
509.2	0.00929227		1099.19	0.00305869		1689.19	0.00204796		2279.18	0.00639423		2869.18	0.00634789		3459.18	-0.00456802
509.4	0.01024433		1099.39	0.00402622		1689.39	0.00152589		2279.38	0.00643912		2869.38	0.00700803		3459.38	-0.00502131
509.6	0.0105302		1099.59	0.00498308		1689.59	0.00139557		2279.58	0.0053068		2869.58	0.00747358		3459.58	-0.00601374
509.8	0.0106757		1099.79	0.00531628		1689.79	0.00213002		2279.78	0.00445623		2869.78	0.00912501		3459.78	-0.0063331
510	0.01018459		1099.99	0.00497265		1689.99	0.0019236		2279.98	0.0034621		2869.98	0.00986646		3459.98	-0.00595692
510.2	0.01045645		1100.19	0.00509557		1690.19	0.00286702		2280.18	0.00379449		2870.18	0.00958055		3460.18	-0.00614808
510.4	0.0096581		1100.39	0.00440379		1690.39	0.00348091		2280.38	0.00281768		2870.38	0.00928825		3460.38	-0.00571721
510.6	0.00859204		1100.59	0.00454563		1690.59	0.00370202		2280.58	0.00223245		2870.58	0.00983464		3460.58	-0.00633142
510.8	0.00917429		1100.79	0.00410098		1690.79	0.00392581		2280.78	0.00239403		2870.78	0.00886769		3460.78	-0.00605524
511	0.00881802		1100.99	0.00343772		1690.99	0.00494842		2280.98	0.00235361		2870.98	0.00853745		3460.98	-0.0063186
511.2	0.0081921		1101.19	0.00223258		1691.19	0.00539689		2281.18	0.00212882		2871.18	0.00866218		3461.18	-0.00701664
511.4	0.00736186		1101.39	0.00232884		1691.39	0.00519267		2281.38	0.00085269		2871.38	0.00878415		3461.38	-0.00666654
511.6	0.00761953		1101.59	0.00266266		1691.59	0.0048028		2281.58	0.00102633		2871.58	0.00880432		3461.58	-0.00635857
511.8	0.00718743		1101.79	0.00263061		1691.79	0.00323866		2281.78	0.00165259		2871.78	0.00852554		3461.78	-0.00694764
512	0.00606329		1101.99	0.00229724		1691.99	0.00331128		2281.98	0.00230748		2871.98	0.00887777		3461.98	-0.00676004
512.2	0.00550424		1102.19	0.00109676		1692.19	0.00366971		2282.18	0.00364142		2872.18	0.00780973		3462.18	-0.00767714
512.4	0.00611267		1102.39	0.00138919		1692.39	0.00359203		2282.38	0.00390374		2872.38	0.00814826		3462.38	-0.00822719
512.6	0.00629719		1102.59	0.00105065		1692.59	0.00371841		2282.58	0.00314864		2872.58	0.00816656		3462.58	-0.0072383
512.8	0.00610568		1102.79	0.001414		1692.79	0.00348912		2282.78	0.00291424		2872.78	0.00726795		3462.78	-0.00622077
513	0.0062708		1102.99	0.00279277		1692.99	0.00340399		2282.98	0.00236149		2872.98	0.00752316		3462.98	-0.00614016
513.2	0.0065811		1103.19	0.00280666		1693.19	0.00323698		2283.18	0.00236828		2873.18	0.00652106		3463.18	-0.00577493
513.4	0.00651991		1103.39	0.00312893		1693.39	0.00241991		2283.38	0.0024801		2873.38	0.00666314		3463.38	-0.00545746
513.6	0.00703482		1103.59	0.00311127		1693.59	0.00167305		2283.58	0.0013669		2873.58	0.00642599		3463.58	-0.00584592
513.8	0.00763541		1103.79	0.00293091		1693.79	0.00198689		2283.78	0.00103905		2873.78	0.00627069		3463.78	-0.00604288
514	0.00822761		1103.99	0.00312971		1693.99	0.00123726		2283.98	0.00127218		2873.98	0.00510754		3463.98	-0.00565123
514.2	0.00824303		1104.19	0.00365697		1694.19	0.00153766		2284.18	0.00154805		2874.18	0.00454556		3464.18	-0.00608383
514.4	0.00829165		1104.39	0.00373156		1694.39	0.00148712		2284.38	0.00104871		2874.38	0.00439651		3464.38	-0.00614327
514.6	0.00823597		1104.59	0.0040769		1694.59	0.00119662		2284.58	0.00155687		2874.58	0.00433518		3464.58	-0.00675286
514.8	0.008883		1104.79	0.00355423		1694.79	0.0005677		2284.78	0.00161953		2874.78	0.00388338		3464.78	-0.00623303
515	0.00888287		1104.99	0.00352062		1694.99	0.00154606		2284.98	0.00158689		2874.98	0.00571462		3464.98	-0.00639546
515.2	0.00890998		1105.19	0.00314755		1695.19	0.00173162		2285.18	0.00148321		2875.18	0.00616357		3465.18	-0.00619395
515.4	0.00877394		1105.39	0.00353094		1695.39	0.00161305		2285.38	0.00206475		2875.38	0.00653464		3465.38	-0.00517704
515.6	0.00838181		1105.59	0.00386993		1695.59	0.00159233		2285.58	0.00348869		2875.58	0.00687663		3465.58	-0.00532859
515.8	0.0084343		1105.79	0.00342429		1695.79	0.00231838		2285.78	0.00312318		2875.78	0.00680251		3465.78	-0.00537957
516	0.00897093		1105.99	0.00245974		1695.99	0.00380219		2285.98	0.00365066		2875.98	0.00735503		3465.98	-0.00522342
516.2	0.0092476		1106.19	0.00167806		1696.19	0.00409265		2286.18	0.00419996		2876.18	0.00722613		3466.18	-0.0050035
516.4	0.00948719		1106.39	0.00289452		1696.39	0.00444028		2286.38	0.00368531		2876.38	0.00789127		3466.38	-0.00473981
516.6	0.00865264		1106.59	0.0034971		1696.59	0.00355879		2286.58	0.00381736		2876.58	0.00766024		3466.58	-0.00411338
516.8	0.00785551		1106.79	0.00332203		1696.79	0.00429829		2286.78	0.0041278		2876.78	0.00727253		3466.78	-0.00480835
517	0.00817461		1106.99	0.0032698		1696.99	0.00466854		2286.98	0.00422044		2876.98	0.00635343		3466.98	-0.00581478
517.2	0.00758997		1107.19	0.00216478		1697.19	0.00405463		2287.18	0.00407256		2877.18	0.00589103		3467.18	-0.00580785
517.4	0.00742842		1107.39	0.00228818		1697.39	0.00273739		2287.38	0.00419165		2877.38	0.00623846		3467.38	-0.00609844
517.6	0.00723753		1107.59	0.00254705		1697.59	0.00230791		2287.58	0.00337913		2877.58	0.00654244		3467.58	-0.00719059
517.8	0.00606538		1107.79	0.00263196		1697.79	0.00282579		2287.78	0.00389756		2877.78	0.00656791		3467.78	-0.00731977
518	0.00558884		1107.99	0.00247775		1697.99	0.00180471		2287.98	0.00372005		2877.98	0.0064284		3467.98	-0.0074716
518.2	0.00478471		1108.19	0.00219361		1698.19	0.00156659		2288.18	0.00271653		2878.18	0.00563356		3468.18	-0.00803544
518.4	0.0043408		1108.39	0.00242384		1698.39	0.00172038		2288.38	0.00120886		2878.38	0.00552902		3468.38	-0.00789728
518.6	0.00329544		1108.59	0.00199667		1698.59	0.00086446		2288.58	0.00036022		2878.58	0.0057585		3468.58	-0.00820774
518.8	0.00260281		1108.79	0.00212336		1698.79	0.00076696		2288.78	-0.00156469		2878.78	0.00642899		3468.78	-0.00728907
519	0.00250624		1108.99	0.00187223		1698.99	0.00105596		2288.98	-0.00181215		2878.98	0.00687194		3468.98	-0.00670474
519.2	0.00231692		1109.19	0.00131761		1699.19	0.00128029		2289.18	-0.00161042		2879.18	0.00674784		3469.18	-0.00642505
519.4	0.00294145		1109.39	0.00126692		1699.39	0.00197288		2289.38	-0.00161371		2879.38	0.00712785		3469.38	-0.00657109
519.6	0.00342206		1109.59	0.00093547		1699.59	0.00309985		2289.58	-0.00143785		2879.58	0.00703329		3469.58	-0.0058842
519.8	0.00493541		1109.79	0.00057364		1699.79	0.00380802		2289.78	-0.0013176		2879.78	0.00622557		3469.78	-0.00602725
520	0.00513359		1109.99	0.00015381		1699.99	0.00386081		2289.98	-0.00065696		2879.98	0.00635005		3469.98	-0.00632477
520.2	0.00574553		1110.19	0.00018108		1700.19	0.00325699		2290.18	0.00045382		2880.18	0.00643362		3470.18	-0.006078
520.4	0.00612052		1110.39	0.00064627		1700.39	0.0029017		2290.38	0.00077152		2880.38	0.00653102		3470.38	-0.00620769
520.6	0.00633092		1110.59	0.00107167		1700.59	0.00257754		2290.58	0.00160961		2880.58	0.0060395		3470.58	-0.00625767
520.8	0.00639685		1110.79	0.00038479		1700.79	0.00386805		2290.78	0.00208267		2880.78	0.00679426		3470.78	-0.00693131
521	0.00619797		1110.99	0.00028941		1700.99	0.00384524		2290.98	0.00243297		2880.98	0.0062492		3470.98	-0.0075641
521.2	0.00611113		1111.19	0.00078902		1701.19	0.00366636		2291.18	0.00303266		2881.18	0.00699309		3471.18	-0.00765532
521.4	0.00545602		1111.39	0.0018913		1701.39	0.00306897		2291.38	0.00348802		2881.38	0.00719954		3471.38	-0.00803642
521.6	0.00470974		1111.59	0.00263673		1701.59	0.00265695		2291.58	0.00392116		2881.58	0.00755139		3471.58	-0.0081359
521.8	0.004514		1111.79	0.00253363		1701.79	0.00259018		2291.78	0.00445225		2881.78	0.00750833		3471.78	-0.00770967
522	0.00428739		1111.99	0.00286943		1701.99	0.00228527		2291.98	0.00312382		2881.98	0.00733474		3471.98	-0.00810116
522.2	0.00369855		1112.19	0.00348024		1702.19	0.00178271		2292.18	0.00180387		2882.18	0.00630787		3472.18	-0.00786391
522.4	0.00323298		1112.39	0.00437711		1702.39	0.00205009		2292.38	0.00039417		2882.38	0.00694567		3472.38	-0.00758457
522.6	0.00268572		1112.59	0.00555176		1702.59	0.00109667		2292.58	-0.00013023		2882.58	0.00702592		3472.58	-0.00851345
522.8	0.00314233		1112.79	0.00659442		1702.79	0.00190862		2292.78	-0.00006763		2882.78	0.00731322		3472.78	-0.00788302
523	0.00425686		1112.99	0.00709486		1702.99	0.00177008		2292.98	0.00028074		2882.98	0.00723756		3472.98	-0.00772502
523.2	0.00415605		1113.19	0.00743984		1703.19	0.00248692		2293.18	0.00006178		2883.18	0.00744825		3473.18	-0.00881589
523.4	0.00459899		1113.39	0.00774476		1703.39	0.00319499		2293.38	0.00037784		2883.38	0.00785667		3473.38	-0.00892524
523.6	0.00507534		1113.59	0.00783562		1703.59	0.00383382		2293.58	0.00102674		2883.58	0.00659108		3473.58	-0.00799099
523.8	0.00533926		1113.79	0.0074271		1703.79	0.00373271		2293.78	0.00139662		2883.78	0.00658085		3473.78	-0.00869991
524	0.00536532		1113.99	0.00672798		1703.99	0.00396947		2293.98	0.00077604		2883.98	0.00782971		3473.98	-0.00833456
524.2	0.00612348		1114.19	0.00596751		1704.19	0.00372813		2294.18	0.00077963		2884.18	0.00816688		3474.18	-0.00749789
524.4	0.00602899		1114.39	0.00549058		1704.39	0.0041007		2294.38	0.00029639		2884.38	0.00796784		3474.38	-0.0073584
524.6	0.00613624		1114.59	0.00466505		1704.59	0.00454948		2294.58	0.00087083		2884.58	0.00756133		3474.58	-0.00829339
524.8	0.00687117		1114.79	0.00365362		1704.79	0.00444921		2294.78	0.00151592		2884.78	0.00773593		3474.78	-0.0089841
525	0.00693821		1114.99	0.00317317		1704.99	0.00457077		2294.98	0.00129318		2884.98	0.00645283		3474.98	-0.00940219
525.2	0.00765123		1115.19	0.00276844		1705.19	0.00331324		2295.18	0.00074867		2885.18	0.00603891		3475.18	-0.0100033
525.4	0.00722533		1115.39	0.0025558		1705.39	0.00253722		2295.38	0.00088222		2885.38	0.00620289		3475.38	-0.01096925
525.6	0.0069504		1115.59	0.00169156		1705.59	0.00229818		2295.58	0.00062212		2885.58	0.0060968		3475.58	-0.01104834
525.8	0.00706665		1115.79	0.00020484		1705.79	0.00244472		2295.78	0.00020687		2885.78	0.0067492		3475.78	-0.01156872
526	0.00588294		1115.99	-0.00005948		1705.99	0.00163385		2295.98	0.00015065		2885.98	0.00644152		3475.98	-0.01151532
526.2	0.00527011		1116.19	0.00071096		1706.19	0.00151686		2296.18	0.0002944		2886.18	0.00634267		3476.18	-0.01164491
526.4	0.00430597		1116.39	0.00112241		1706.39	0.00263012		2296.38	-0.00005775		2886.38	0.00693553		3476.38	-0.01068684
526.6	0.0034842		1116.59	0.0021693		1706.59	0.00287389		2296.58	0.00025836		2886.58	0.00752516		3476.58	-0.01099461
526.8	0.00406458		1116.79	0.00173986		1706.79	0.00347928		2296.78	0.00084286		2886.78	0.00781685		3476.78	-0.01079453
527	0.00298182		1116.99	0.00259353		1706.99	0.00256522		2296.98	0.00067603		2886.98	0.00721637		3476.98	-0.01074397
527.2	0.00266679		1117.19	0.00262354		1707.19	0.0022475		2297.18	0.00045813		2887.18	0.00720368		3477.18	-0.01075451
527.4	0.002225		1117.39	0.00287966		1707.39	0.00164547		2297.38	0.00109318		2887.38	0.00707447		3477.38	-0.01048178
527.6	0.00222829		1117.59	0.00326188		1707.59	0.00198043		2297.58	0.00056672		2887.58	0.00624206		3477.58	-0.00952133
527.8	0.00214749		1117.79	0.00353652		1707.79	0.00151153		2297.78	0.00035596		2887.78	0.00718319		3477.78	-0.00966809
528	0.00183369		1117.99	0.0039487		1707.99	0.00136512		2297.98	0.00001599		2887.98	0.007359		3477.98	-0.00883897
528.2	0.00153972		1118.19	0.00333725		1708.19	0.00164149		2298.18	-0.00017561		2888.18	0.0066467		3478.18	-0.00775202
528.4	0.00146635		1118.39	0.00226191		1708.39	0.00126977		2298.38	-0.00048843		2888.38	0.00585767		3478.38	-0.00874061
528.6	0.00205522		1118.59	0.00237048		1708.59	0.00075519		2298.58	-0.00012884		2888.58	0.00552347		3478.58	-0.00938054
528.8	0.00238092		1118.79	0.00249881		1708.79	0.00077786		2298.78	-0.0008372		2888.78	0.00583588		3478.78	-0.00938045
529	0.00244309		1118.99	0.00226511		1708.99	-0.0000677		2298.98	-0.00109743		2888.98	0.00489715		3478.98	-0.00939691
529.2	0.00345467		1119.19	0.00218336		1709.19	-0.00077374		2299.18	-0.00119952		2889.18	0.00478932		3479.18	-0.0105299
529.4	0.00315445		1119.39	0.00251874		1709.39	-0.00060155		2299.38	0.00002443		2889.38	0.00535409		3479.38	-0.01073928
529.6	0.00304725		1119.59	0.00119476		1709.59	-0.00000301		2299.58	-0.00032509		2889.58	0.0054141		3479.58	-0.0104196
529.8	0.00348475		1119.79	0.00153678		1709.79	0.00033854		2299.78	-0.00022836		2889.78	0.00631566		3479.78	-0.01032201
530	0.00315277		1119.99	0.00297416		1709.99	0.00077797		2299.98	-0.00026031		2889.98	0.00673567		3479.98	-0.00938531
530.2	0.00290875		1120.19	0.00359721		1710.19	0.00178239		2300.18	-0.00010444		2890.18	0.00743547		3480.18	-0.00908748
530.4	0.00305476		1120.39	0.00312614		1710.39	0.00282826		2300.38	0.00013144		2890.38	0.00752053		3480.38	-0.00737787
530.6	0.00340677		1120.59	0.00302599		1710.59	0.00256032		2300.58	0.00018372		2890.58	0.0084379		3480.58	-0.00832062
530.8	0.00347042		1120.79	0.00282908		1710.79	0.00196914		2300.78	0.00084723		2890.78	0.00784501		3480.78	-0.00837087
531	0.00291237		1120.99	0.00348128		1710.99	0.00099775		2300.98	0.00169277		2890.98	0.00817938		3480.98	-0.00787025
531.2	0.00395329		1121.19	0.00402311		1711.19	0.0007731		2301.18	0.0023031		2891.18	0.00869636		3481.18	-0.0075098
531.4	0.00343236		1121.39	0.00485362		1711.39	0.00068977		2301.38	0.00269876		2891.38	0.00898225		3481.38	-0.00731946
531.6	0.00382052		1121.59	0.00614779		1711.59	0.00128294		2301.58	0.00293867		2891.58	0.00864969		3481.58	-0.00726447
531.8	0.00389468		1121.79	0.00674186		1711.79	0.00014445		2301.78	0.00330932		2891.78	0.00837039		3481.78	-0.00787368
532	0.0036293		1121.99	0.00655174		1711.99	0.00074896		2301.98	0.00292207		2891.98	0.00830913		3481.98	-0.00759758
532.2	0.00375259		1122.19	0.00573866		1712.19	0.00129127		2302.18	0.0020913		2892.18	0.00861058		3482.18	-0.00708626
532.4	0.00432157		1122.39	0.00497065		1712.39	0.00065293		2302.38	0.00175557		2892.38	0.00748601		3482.38	-0.00847891
532.6	0.00549626		1122.59	0.00529468		1712.59	0.00091696		2302.58	0.00145393		2892.58	0.00807993		3482.58	-0.00836081
532.8	0.00636161		1122.79	0.00439669		1712.79	0.00097454		2302.78	0.00128201		2892.78	0.00752174		3482.78	-0.00835325
533	0.00707105		1122.99	0.00390796		1712.99	0.00002036		2302.98	0.00113761		2892.98	0.00587218		3482.98	-0.009061
533.2	0.00829054		1123.19	0.00363642		1713.19	-0.00029224		2303.18	0.00104628		2893.18	0.00637082		3483.18	-0.00938242
533.4	0.00797493		1123.39	0.00291426		1713.39	-0.00045817		2303.38	0.00150661		2893.38	0.00607227		3483.38	-0.00900821
533.6	0.0083679		1123.59	0.00185513		1713.59	-0.00033316		2303.58	0.00066879		2893.58	0.00643066		3483.58	-0.00916868
533.8	0.00886912		1123.79	0.00217936		1713.79	-0.00088642		2303.78	-0.000019		2893.78	0.00631504		3483.78	-0.00891102
534	0.00880598		1123.99	0.00169836		1713.99	-0.00149502		2303.98	-0.00007051		2893.98	0.00616749		3483.98	-0.00927136
534.2	0.00842763		1124.19	0.00055091		1714.19	-0.00163037		2304.18	0.0001234		2894.18	0.00535391		3484.18	-0.00911691
534.4	0.00761726		1124.39	-0.00026036		1714.39	-0.0011027		2304.38	0.00000813		2894.38	0.00564726		3484.38	-0.00915682
534.6	0.00671942		1124.59	-0.00047444		1714.59	-0.00162843		2304.58	-0.00003889		2894.58	0.00608198		3484.58	-0.00928526
534.8	0.00596485		1124.79	-0.00006244		1714.79	-0.00174598		2304.78	0.00040184		2894.78	0.00577224		3484.78	-0.00822043
535	0.00511938		1124.99	0.00054745		1714.99	-0.00200044		2304.98	0.00118163		2894.98	0.00644921		3484.98	-0.00882324
535.2	0.00525375		1125.19	0.00097324		1715.19	-0.00142039		2305.18	0.00133388		2895.18	0.00645979		3485.18	-0.00869867
535.4	0.00416311		1125.39	0.00078023		1715.39	-0.00119094		2305.38	0.00174561		2895.38	0.00640683		3485.38	-0.00898252
535.6	0.00328888		1125.59	0.00139396		1715.59	-0.0013611		2305.58	0.0012371		2895.58	0.00653107		3485.58	-0.00940145
535.8	0.00349334		1125.79	0.0015651		1715.79	-0.00164421		2305.78	0.00092485		2895.78	0.00708804		3485.78	-0.00860205
536	0.0033664		1125.99	0.00204125		1715.99	-0.0005657		2305.98	0.00081474		2895.98	0.00692219		3485.98	-0.00819378
536.2	0.00319015		1126.19	0.00199931		1716.19	0.00030544		2306.18	0.00078997		2896.18	0.0074702		3486.18	-0.0073533
536.4	0.00379013		1126.39	0.00164588		1716.39	0.00039887		2306.38	0.000976		2896.38	0.0071106		3486.38	-0.00776421
536.6	0.00482341		1126.59	0.00188586		1716.59	0.00078796		2306.58	0.00113857		2896.58	0.00768808		3486.58	-0.00666131
536.8	0.00539999		1126.79	0.0018813		1716.79	0.00078162		2306.78	0.00097623		2896.78	0.00781136		3486.78	-0.00632656
537	0.00414289		1126.99	0.00208398		1716.99	0.00025675		2306.98	0.0005754		2896.98	0.00821317		3486.98	-0.00675213
537.2	0.00441794		1127.19	0.00168768		1717.19	-0.00018344		2307.18	0.00062809		2897.18	0.00912564		3487.18	-0.00621221
537.4	0.00410747		1127.39	0.00129332		1717.39	-0.00038357		2307.38	0.00114783		2897.38	0.00869192		3487.38	-0.00648335
537.6	0.00418839		1127.59	0.00152835		1717.59	-0.00099955		2307.58	0.00105597		2897.58	0.00815069		3487.58	-0.00696595
537.8	0.00394531		1127.79	0.00147322		1717.79	-0.00168351		2307.78	0.00035324		2897.78	0.00705774		3487.78	-0.00743354
538	0.00344491		1127.99	0.00129144		1717.99	-0.00207179		2307.98	0.00062856		2897.98	0.00698405		3487.98	-0.0077855
538.2	0.00381144		1128.19	0.00123246		1718.19	-0.00203972		2308.18	0.000392		2898.18	0.00666089		3488.18	-0.00777347
538.4	0.00334219		1128.39	0.0018464		1718.39	-0.00235111		2308.38	0.00071129		2898.38	0.00754158		3488.38	-0.00759002
538.6	0.00402036		1128.59	0.00248747		1718.59	-0.002473		2308.58	0.00185823		2898.58	0.00771992		3488.58	-0.00709373
538.8	0.00412312		1128.79	0.00229291		1718.79	-0.00261253		2308.78	0.00116367		2898.78	0.00746252		3488.78	-0.00778691
539	0.00327721		1128.99	0.00205333		1718.99	-0.00275447		2308.98	0.00175234		2898.98	0.0073636		3488.98	-0.00885078
539.2	0.0030873		1129.19	0.00133655		1719.19	-0.00211398		2309.18	0.00166271		2899.18	0.00754799		3489.18	-0.00903276
539.4	0.00314418		1129.39	0.0009918		1719.39	-0.0024262		2309.38	0.00095563		2899.38	0.00829011		3489.38	-0.0097325
539.6	0.00319685		1129.59	0.00097217		1719.59	-0.00217413		2309.58	-0.00022542		2899.58	0.00852599		3489.58	-0.00950611
539.8	0.00415972		1129.79	0.00190793		1719.79	-0.0008881		2309.78	-0.00019046		2899.78	0.00888776		3489.78	-0.00901211
540	0.00461601		1129.99	0.00147782		1719.99	0.00037093		2309.98	-0.00098166		2899.98	0.00828		3489.98	-0.00922017
540.2	0.00524762		1130.19	0.00158882		1720.19	0.00164112		2310.18	-0.00142994		2900.18	0.00911163		3490.18	-0.00881767
540.4	0.0062479		1130.39	0.00122353		1720.39	0.00107982		2310.38	-0.00150471		2900.38	0.00914805		3490.38	-0.00896533
540.6	0.00642481		1130.59	0.00147867		1720.59	0.00116231		2310.58	-0.00165604		2900.58	0.00927523		3490.58	-0.00816886
540.8	0.00627332		1130.79	0.00101955		1720.79	0.00057621		2310.78	-0.00200731		2900.78	0.00969708		3490.78	-0.00873994
541	0.00537833		1130.99	0.00021731		1720.99	0.00002554		2310.98	-0.00192826		2900.98	0.0088528		3490.98	-0.00840424
541.2	0.00585645		1131.19	0.00034196		1721.19	0.00054142		2311.18	-0.00151809		2901.18	0.00797967		3491.18	-0.00837785
541.4	0.00583135		1131.39	0.00104407		1721.39	-0.00040695		2311.38	-0.00146451		2901.38	0.00696143		3491.38	-0.00796099
541.6	0.00532219		1131.59	0.00090048		1721.59	-0.00028459		2311.58	-0.00276215		2901.58	0.00581592		3491.58	-0.0078209
541.8	0.00541642		1131.79	0.00089364		1721.79	-0.00065246		2311.78	-0.0032406		2901.78	0.00531		3491.78	-0.00713008
542	0.00531316		1131.99	0.00080872		1721.99	-0.00077648		2311.98	-0.00257791		2901.98	0.00466332		3491.98	-0.00617278
542.2	0.00557198		1132.19	0.00065517		1722.19	-0.00074257		2312.18	-0.00324988		2902.18	0.00440133		3492.18	-0.00627832
542.4	0.00565611		1132.39	0.00132373		1722.39	-0.00152303		2312.38	-0.00255525		2902.38	0.00446041		3492.38	-0.00547656
542.6	0.00609818		1132.59	0.00135405		1722.59	-0.00166574		2312.58	-0.00192388		2902.58	0.00469942		3492.58	-0.00536603
542.8	0.0057281		1132.79	0.00053713		1722.79	-0.00195275		2312.78	-0.0030036		2902.78	0.00469242		3492.78	-0.00559979
543	0.00493155		1132.99	-0.0002396		1722.99	-0.001894		2312.98	-0.00180021		2902.98	0.00449982		3492.98	-0.0061821
543.2	0.00525391		1133.19	-0.00086374		1723.19	-0.00085995		2313.18	-0.00163967		2903.18	0.00422625		3493.18	-0.00625281
543.4	0.00591605		1133.39	-0.00097968		1723.39	-0.00098431		2313.38	-0.00182284		2903.38	0.00432417		3493.38	-0.0061631
543.6	0.00572337		1133.59	-0.00122886		1723.59	0.00002526		2313.58	-0.00125669		2903.58	0.00402395		3493.58	-0.00572812
543.8	0.00569707		1133.79	-0.00048497		1723.79	0.00122443		2313.78	-0.00062571		2903.78	0.00430165		3493.78	-0.00621738
544	0.00637741		1133.99	-0.00101296		1723.99	0.00217905		2313.98	-0.00037313		2903.98	0.00461609		3493.98	-0.00656994
544.2	0.00633531		1134.19	-0.00081931		1724.19	0.00172808		2314.18	0.00117934		2904.18	0.00472454		3494.18	-0.00635461
544.4	0.0065745		1134.39	-0.00160566		1724.39	0.00109422		2314.38	0.00254443		2904.38	0.00585349		3494.38	-0.0062903
544.6	0.0063105		1134.59	-0.00142088		1724.59	0.00074241		2314.58	0.00351087		2904.58	0.0065044		3494.58	-0.00620693
544.8	0.0061417		1134.79	-0.00134868		1724.79	0.00086284		2314.78	0.0030961		2904.78	0.00646771		3494.78	-0.00705801
545	0.00573499		1134.99	-0.00064216		1724.99	0.00035557		2314.98	0.00390865		2904.98	0.00576084		3494.98	-0.00667548
545.2	0.00497971		1135.19	0.0000666		1725.19	0.00004715		2315.18	0.00430402		2905.18	0.00630481		3495.18	-0.0071385
545.4	0.0050855		1135.39	0.00076645		1725.39	-0.00084822		2315.38	0.00337851		2905.38	0.00601273		3495.38	-0.00728157
545.6	0.00445235		1135.59	0.00036339		1725.59	-0.00048752		2315.58	0.00251836		2905.58	0.00642675		3495.58	-0.00745477
545.8	0.00405661		1135.79	0.00156893		1725.79	-0.001444		2315.78	0.00414279		2905.78	0.00631255		3495.78	-0.0070574
546	0.00362843		1135.99	0.00199573		1725.99	-0.00173655		2315.98	0.00389178		2905.98	0.0070128		3495.98	-0.00777856
546.2	0.00359906		1136.19	0.00313523		1726.19	-0.00171825		2316.18	0.00265077		2906.18	0.00712437		3496.18	-0.00862813
546.4	0.00363425		1136.39	0.00362921		1726.39	-0.00223743		2316.38	0.00305696		2906.38	0.00823519		3496.38	-0.00861926
546.6	0.00323325		1136.59	0.0035715		1726.59	-0.00251738		2316.58	0.00161374		2906.58	0.00883713		3496.58	-0.00972234
546.8	0.00365633		1136.79	0.00292414		1726.79	-0.00273214		2316.78	0.00103038		2906.78	0.00915646		3496.78	-0.01029808
547	0.00359593		1136.99	0.00256352		1726.99	-0.00299442		2316.98	0.00059742		2906.98	0.00907195		3496.98	-0.00998031
547.2	0.00387868		1137.19	0.00280913		1727.19	-0.0020059		2317.18	-0.00005035		2907.18	0.00838828		3497.18	-0.01021935
547.4	0.00360733		1137.39	0.00343671		1727.39	-0.00182717		2317.38	-0.00047249		2907.38	0.00858162		3497.38	-0.01023595
547.6	0.0035199		1137.59	0.00368964		1727.59	-0.0008293		2317.58	-0.00112642		2907.58	0.00843053		3497.58	-0.00974688
547.8	0.00373966		1137.79	0.00323782		1727.79	-0.00038518		2317.78	-0.00130042		2907.78	0.00792259		3497.78	-0.0097704
548	0.00474593		1137.99	0.00199804		1727.99	0.00056901		2317.98	-0.00159532		2907.98	0.00815199		3497.98	-0.00959017
548.2	0.00521421		1138.19	0.00117643		1728.19	0.00012596		2318.18	-0.00110395		2908.18	0.00813806		3498.18	-0.00852678
548.4	0.00571061		1138.39	0.00093069		1728.39	0.00013373		2318.38	-0.00195113		2908.38	0.00893155		3498.38	-0.0085974
548.6	0.00555925		1138.59	0.0009849		1728.59	-0.00018696		2318.58	-0.00308663		2908.58	0.00806276		3498.58	-0.00850089
548.8	0.00512678		1138.79	0.00041923		1728.79	-0.0000185		2318.78	-0.0046153		2908.78	0.00719892		3498.78	-0.00808145
549	0.00513301		1138.99	-0.00007899		1728.99	-0.00123692		2318.98	-0.0041013		2908.98	0.0061712		3498.98	-0.00758667
549.2	0.00534993		1139.19	-0.00077909		1729.19	-0.00119505		2319.18	-0.00510549		2909.18	0.00640485		3499.18	-0.00807712
549.4	0.00476715		1139.39	0.00029973		1729.39	-0.00064303		2319.38	-0.00487873		2909.38	0.00530978		3499.38	-0.00823655
549.6	0.00427877		1139.59	-0.00020822		1729.59	-0.0006371		2319.58	-0.00475152		2909.58	0.0055667		3499.58	-0.00853386
549.8	0.00397419		1139.79	0.00088966		1729.79	-0.00050235		2319.78	-0.00401222		2909.78	0.00507349		3499.78	-0.00868309
550	0.00417713		1139.99	0.0014876		1729.99	0.00077763		2319.98	-0.00480981		2909.98	0.00486666		3499.98	-0.00860372
550.2	0.00435272		1140.19	0.00223658		1730.19	0.00065827		2320.18	-0.00464734		2910.18	0.00351776		3500.18	-0.00845571
550.4	0.00361608		1140.39	0.00203741		1730.39	0.00014729		2320.38	-0.00413873		2910.38	0.00331985		3500.38	-0.00880016
550.6	0.00371341		1140.59	0.00219253		1730.59	0.00022324		2320.58	-0.00515969		2910.58	0.00332782		3500.58	-0.00871184
550.8	0.00441123		1140.79	0.00192782		1730.79	0.00016943		2320.78	-0.00429318		2910.78	0.00392496		3500.78	-0.00883058
551	0.00451485		1140.99	0.00220005		1730.99	0.00017615		2320.98	-0.00445526		2910.98	0.00354885		3500.98	-0.00871415
551.2	0.00464444		1141.19	0.00252092		1731.19	0.00089415		2321.18	-0.0033271		2911.18	0.00308408		3501.18	-0.0093585
551.4	0.00415105		1141.39	0.0033803		1731.39	0.00075154		2321.38	-0.0026437		2911.38	0.00340386		3501.38	-0.00819648
551.6	0.00412042		1141.59	0.00278815		1731.59	0.0006107		2321.58	-0.00256083		2911.58	0.00316911		3501.58	-0.00759051
551.8	0.00450009		1141.79	0.00172767		1731.79	0.00057493		2321.78	-0.00089242		2911.78	0.0039063		3501.78	-0.00800113
552	0.0045136		1141.99	0.0020058		1731.99	-0.00000298		2321.98	-0.00109413		2911.98	0.00478766		3501.98	-0.00722655
552.2	0.00420029		1142.19	0.00167707		1732.19	-0.00093824		2322.18	-0.00106292		2912.18	0.00504627		3502.18	-0.00635677
552.4	0.00388487		1142.39	0.00204219		1732.39	-0.00193105		2322.38	-0.00138403		2912.38	0.00523078		3502.38	-0.00725856
552.6	0.00354727		1142.59	0.00152449		1732.59	-0.00209376		2322.58	-0.00183266		2912.58	0.00504982		3502.58	-0.00670321
552.8	0.00325855		1142.79	0.00079053		1732.79	-0.00252847		2322.78	-0.00264467		2912.78	0.00438856		3502.78	-0.00646817
553	0.00366864		1142.99	0.00016458		1732.99	-0.00385858		2322.98	-0.00252838		2912.98	0.00403822		3502.98	-0.00729975
553.2	0.00376262		1143.19	0.00013742		1733.19	-0.00393113		2323.18	-0.00273272		2913.18	0.0043901		3503.18	-0.00728007
553.4	0.00275196		1143.39	-0.00015909		1733.39	-0.00359189		2323.38	-0.00245165		2913.38	0.00426504		3503.38	-0.0068666
553.6	0.00326419		1143.59	-0.00038775		1733.59	-0.00374334		2323.58	-0.00343014		2913.58	0.00403193		3503.58	-0.00745037
553.8	0.0029413		1143.79	0.00034709		1733.79	-0.00326923		2323.78	-0.00373915		2913.78	0.00362558		3503.78	-0.00659183
554	0.00341552		1143.99	0.00010032		1733.99	-0.00299566		2323.98	-0.00311424		2913.98	0.00310988		3503.98	-0.00708439
554.2	0.00312411		1144.19	0.00005916		1734.19	-0.00393957		2324.18	-0.00195039		2914.18	0.00359268		3504.18	-0.00708224
554.4	0.00220107		1144.39	-0.00004436		1734.39	-0.00345293		2324.38	-0.00251911		2914.38	0.00378073		3504.38	-0.00805106
554.6	0.00254365		1144.59	-0.00073216		1734.59	-0.00284646		2324.58	-0.00262599		2914.58	0.00522369		3504.58	-0.00877073
554.8	0.00253469		1144.79	-0.00132068		1734.79	-0.00235295		2324.78	-0.00125415		2914.78	0.00536536		3504.78	-0.00955666
555	0.00239136		1144.99	-0.00174345		1734.99	-0.00109622		2324.98	-0.00032363		2914.98	0.00568198		3504.98	-0.01012008
555.2	0.00227629		1145.19	-0.00097612		1735.19	-0.00007484		2325.18	0.00097215		2915.18	0.00595848		3505.18	-0.010235
555.4	0.00137275		1145.39	-0.00061551		1735.39	0.00051699		2325.38	0.00189298		2915.38	0.00688238		3505.38	-0.01030305
555.6	0.0019284		1145.59	-0.00109007		1735.59	0.00137958		2325.58	0.00191505		2915.58	0.00696487		3505.58	-0.01060805
555.8	0.00219219		1145.79	-0.00064404		1735.79	0.00163365		2325.78	0.00249849		2915.78	0.00741633		3505.78	-0.01109284
556	0.00126419		1145.99	0.00001026		1735.99	0.00138424		2325.98	0.00171611		2915.98	0.00778674		3505.98	-0.01155336
556.2	0.00097657		1146.19	-0.00007794		1736.19	0.00249441		2326.18	0.00178675		2916.18	0.00712453		3506.18	-0.01179322
556.4	0.00087006		1146.39	0.00096109		1736.39	0.00259332		2326.38	0.00195687		2916.38	0.00720749		3506.38	-0.01204715
556.6	0.00134483		1146.59	0.00092156		1736.59	0.00233795		2326.58	0.00137869		2916.58	0.00665394		3506.58	-0.01139603
556.8	0.00216405		1146.79	-0.00000499		1736.79	0.00194532		2326.78	0.00052545		2916.78	0.00602573		3506.78	-0.01089895
557	0.00319836		1146.99	0.0002733		1736.99	0.00123782		2326.98	-0.00028223		2916.98	0.00672618		3506.98	-0.01068509
557.2	0.00357973		1147.19	0.00062596		1737.19	0.00142016		2327.18	-0.00064299		2917.18	0.00676916		3507.18	-0.00915577
557.4	0.00336461		1147.39	0.00048051		1737.39	0.00088905		2327.38	-0.00129782		2917.38	0.00652586		3507.38	-0.0085142
557.6	0.00331804		1147.59	0.00173967		1737.59	0.00058264		2327.58	-0.00175445		2917.58	0.00502063		3507.58	-0.00924585
557.8	0.00326911		1147.79	0.00181809		1737.79	-0.00018757		2327.78	-0.00239633		2917.78	0.00481577		3507.78	-0.00890833
558	0.00368554		1147.99	0.00052807		1737.99	-0.00081314		2327.98	-0.00256097		2917.98	0.00463461		3507.98	-0.00975949
558.2	0.00404957		1148.19	0.0006298		1738.19	-0.00138732		2328.18	-0.00341122		2918.18	0.00436622		3508.18	-0.00952598
558.4	0.00334862		1148.39	0.00053354		1738.39	-0.00165177		2328.38	-0.0042112		2918.38	0.00395039		3508.38	-0.01019966
558.6	0.00279563		1148.59	-0.0000393		1738.59	-0.00173514		2328.58	-0.00410594		2918.58	0.00385087		3508.58	-0.01004964
558.8	0.0011436		1148.79	-0.00098971		1738.79	-0.00137436		2328.78	-0.0036922		2918.78	0.00334313		3508.78	-0.00998808
559	0.00070477		1148.99	-0.00171632		1738.99	-0.00142477		2328.98	-0.00317263		2918.98	0.00291743		3508.98	-0.01067823
559.2	0.00038011		1149.19	-0.00178906		1739.19	-0.00189484		2329.18	-0.00259852		2919.18	0.00213179		3509.18	-0.01109857
559.4	0.00023192		1149.39	-0.00288969		1739.39	-0.00257621		2329.38	-0.00261948		2919.38	0.00236918		3509.38	-0.01102354
559.6	-0.00008521		1149.59	-0.00299296		1739.59	-0.00242704		2329.58	-0.00317495		2919.58	0.00227804		3509.58	-0.01064727
559.8	-0.00021123		1149.79	-0.00241592		1739.79	-0.00281762		2329.78	-0.00279018		2919.78	0.00243615		3509.78	-0.01051585
560	-0.00081642		1149.99	-0.00198231		1739.99	-0.0027447		2329.98	-0.00250684		2919.98	0.00274242		3509.98	-0.01091872
560.2	-0.00042615		1150.19	-0.00088077		1740.19	-0.00262731		2330.18	-0.00283777		2920.18	0.00246934		3510.18	-0.00982409
560.4	0.00053183		1150.39	-0.00065946		1740.39	-0.00311205		2330.38	-0.00230726		2920.38	0.003171		3510.38	-0.00972076
560.6	0.00177278		1150.59	0.00010094		1740.59	-0.00339028		2330.58	-0.00274178		2920.58	0.00437178		3510.58	-0.0091109
560.8	0.00295758		1150.79	-0.00038043		1740.79	-0.00333544		2330.78	-0.00283192		2920.78	0.00548887		3510.78	-0.00838513
561	0.0028316		1150.99	0.00079746		1740.99	-0.00376708		2330.98	-0.0029017		2920.98	0.00608942		3510.98	-0.00766639
561.2	0.00350288		1151.19	0.00070491		1741.19	-0.00365936		2331.18	-0.00243226		2921.18	0.00581927		3511.18	-0.00732936
561.4	0.00333141		1151.39	0.00174216		1741.39	-0.00421319		2331.38	-0.00254008		2921.38	0.00648362		3511.38	-0.00763098
561.6	0.00362224		1151.59	0.00290002		1741.59	-0.00333991		2331.58	-0.00297775		2921.58	0.00659685		3511.58	-0.00864694
561.8	0.0045778		1151.79	0.00258621		1741.79	-0.00301625		2331.78	-0.00361491		2921.78	0.00759582		3511.78	-0.00955177
562	0.00509266		1151.99	0.00196493		1741.99	-0.00180583		2331.98	-0.00417942		2921.98	0.00729841		3511.98	-0.00968021
562.2	0.00532422		1152.19	0.00211576		1742.19	-0.00167888		2332.18	-0.00521508		2922.18	0.00719396		3512.18	-0.00987406
562.4	0.00378474		1152.39	0.00185852		1742.39	-0.00235418		2332.38	-0.00517181		2922.38	0.00746133		3512.38	-0.01007617
562.6	0.00349773		1152.59	0.00111174		1742.59	-0.00197403		2332.58	-0.00550705		2922.58	0.00749696		3512.58	-0.01036567
562.8	0.00256435		1152.79	-0.00028879		1742.79	-0.00114674		2332.78	-0.00492754		2922.78	0.00682079		3512.78	-0.01110377
563	0.00275516		1152.99	-0.00151602		1742.99	-0.00104063		2332.98	-0.00462762		2922.98	0.00610097		3512.98	-0.01164591
563.2	0.00293978		1153.19	-0.00178446		1743.19	-0.00007468		2333.18	-0.00457767		2923.18	0.00544385		3513.18	-0.01188155
563.4	0.00291063		1153.39	-0.00182908		1743.39	-0.00036437		2333.38	-0.00430127		2923.38	0.00465571		3513.38	-0.01117437
563.6	0.0025941		1153.59	-0.00193523		1743.59	0.00039895		2333.58	-0.00417872		2923.58	0.00421913		3513.58	-0.01151761
563.8	0.00316937		1153.79	-0.00128953		1743.79	-0.00004719		2333.78	-0.00368088		2923.78	0.00304292		3513.78	-0.01126483
564	0.00318451		1153.99	-0.00178821		1743.99	-0.00039635		2333.98	-0.002719		2923.98	0.00285311		3513.98	-0.01206945
564.2	0.00296597		1154.19	-0.00190812		1744.19	-0.00075706		2334.18	-0.00282746		2924.18	0.00221852		3514.18	-0.01153478
564.4	0.00355636		1154.39	-0.0024413		1744.39	-0.00078981		2334.38	-0.00177928		2924.38	0.00223002		3514.38	-0.01132692
564.6	0.00395972		1154.59	-0.00284722		1744.59	-0.00138302		2334.58	-0.00211325		2924.58	0.00216147		3514.58	-0.01094546
564.8	0.00405552		1154.79	-0.00340006		1744.79	-0.00216263		2334.78	-0.00254671		2924.78	0.00193082		3514.78	-0.01064568
565	0.00373745		1154.99	-0.00299576		1744.99	-0.00273642		2334.98	-0.00182631		2924.98	0.00144002		3514.98	-0.01063332
565.2	0.00423788		1155.19	-0.00293322		1745.19	-0.00329397		2335.18	-0.00036259		2925.18	0.00178818		3515.18	-0.01157545
565.4	0.00332602		1155.39	-0.00197488		1745.39	-0.00350692		2335.38	0.00029698		2925.38	0.00324736		3515.38	-0.01101801
565.6	0.0033072		1155.59	-0.00102204		1745.59	-0.00351709		2335.58	0.00059392		2925.58	0.00388547		3515.58	-0.01171895
565.8	0.00358366		1155.79	-0.00012916		1745.79	-0.0043741		2335.78	0.00024109		2925.78	0.00376231		3515.78	-0.01149225
566	0.00318011		1155.99	0.00049791		1745.99	-0.00447077		2335.98	-0.00074046		2925.98	0.00356085		3515.98	-0.01070113
566.2	0.00344536		1156.19	0.00061816		1746.19	-0.00582803		2336.18	-0.00073422		2926.18	0.00441396		3516.18	-0.01110177
566.4	0.0032251		1156.39	0.00084183		1746.39	-0.0057262		2336.38	-0.00052871		2926.38	0.00474457		3516.38	-0.01113599
566.6	0.00372709		1156.59	0.00111692		1746.59	-0.00430406		2336.58	-0.00051714		2926.58	0.00558471		3516.58	-0.0110663
566.8	0.00313392		1156.79	0.00110769		1746.79	-0.00262858		2336.78	-0.0011275		2926.78	0.0053753		3516.78	-0.01064372
567	0.00364556		1156.99	0.00184979		1746.99	-0.00220697		2336.98	-0.00205516		2926.98	0.00582405		3516.98	-0.01041672
567.2	0.00304076		1157.19	0.00199398		1747.19	-0.0010187		2337.18	-0.00268064		2927.18	0.0059424		3517.18	-0.01055811
567.4	0.00230102		1157.39	0.00234828		1747.39	-0.00070491		2337.38	-0.00214431		2927.38	0.00642751		3517.38	-0.00960132
567.6	0.00232166		1157.59	0.00150769		1747.59	0.00036357		2337.58	-0.00321383		2927.58	0.00667129		3517.58	-0.00996601
567.8	0.00083692		1157.79	0.00139411		1747.79	-0.00003786		2337.78	-0.00349414		2927.78	0.00664554		3517.78	-0.00999317
568	-0.00006909		1157.99	0.00071573		1747.99	0.0001041		2337.98	-0.00347779		2927.98	0.00660325		3517.98	-0.01016362
568.2	-0.00089817		1158.19	0.00002677		1748.19	-0.00023743		2338.18	-0.00430697		2928.18	0.00627055		3518.18	-0.01032023
568.4	-0.00001942		1158.39	-0.00061855		1748.39	-0.00006276		2338.38	-0.00409257		2928.38	0.00550244		3518.38	-0.00988219
568.6	0.00017308		1158.59	-0.00143871		1748.59	-0.00058703		2338.58	-0.00456217		2928.58	0.00443106		3518.58	-0.00989174
568.8	0.00015947		1158.79	-0.00134741		1748.79	-0.00091685		2338.78	-0.00420552		2928.78	0.00497089		3518.78	-0.00989837
569	0.00025025		1158.99	-0.00272092		1748.99	-0.00141829		2338.98	-0.00246373		2928.98	0.00450782		3518.98	-0.01028068
569.2	0.00021474		1159.19	-0.00391869		1749.19	-0.00186954		2339.18	-0.00222806		2929.18	0.00390722		3519.18	-0.01013878
569.4	0.00007838		1159.39	-0.00359885		1749.39	-0.00196297		2339.38	-0.0026174		2929.38	0.00417254		3519.38	-0.00934061
569.6	0.00023052		1159.59	-0.00275112		1749.59	-0.00315224		2339.58	-0.00234906		2929.58	0.00361801		3519.58	-0.00952064
569.8	0.00081722		1159.79	-0.00299517		1749.79	-0.0039131		2339.78	-0.00223318		2929.78	0.00260489		3519.78	-0.00931764
570	0.00175083		1159.99	-0.00302996		1749.99	-0.00408207		2339.98	-0.00225913		2929.98	0.00286508		3519.98	-0.00962384
570.2	0.00293528		1160.19	-0.0032335		1750.19	-0.00358195		2340.18	-0.00090118		2930.18	0.00342117		3520.18	-0.01035083
570.4	0.00308618		1160.39	-0.00232963		1750.39	-0.00327283		2340.38	-0.00048321		2930.38	0.00440783		3520.38	-0.01046352
570.6	0.00356899		1160.59	-0.00182589		1750.59	-0.00260683		2340.58	-0.00008036		2930.58	0.00556102		3520.58	-0.01024822
570.8	0.00363256		1160.79	-0.00155341		1750.79	-0.00195428		2340.78	-0.00064817		2930.78	0.00615098		3520.78	-0.01012304
571	0.00403916		1160.99	-0.00094129		1750.99	-0.00189166		2340.98	-0.00091386		2930.98	0.00643453		3520.98	-0.01099133
571.2	0.0036745		1161.19	-0.00116649		1751.19	-0.00208436		2341.18	-0.00204263		2931.18	0.00740962		3521.18	-0.01160916
571.4	0.00391773		1161.39	-0.00089217		1751.39	-0.00190845		2341.38	-0.00211043		2931.38	0.00750249		3521.38	-0.01157268
571.6	0.004318		1161.59	-0.00038755		1751.59	-0.00250788		2341.58	-0.0027371		2931.58	0.0069564		3521.58	-0.01237199
571.8	0.00350598		1161.79	-0.00033449		1751.79	-0.0029527		2341.78	-0.0034151		2931.78	0.00609987		3521.78	-0.01241263
572	0.00291919		1161.99	0.00049505		1751.99	-0.00353106		2341.98	-0.00333173		2931.98	0.00573568		3521.98	-0.01218889
572.2	0.00214229		1162.19	0.00057931		1752.19	-0.00344691		2342.18	-0.00362587		2932.18	0.00509657		3522.18	-0.01206706
572.4	0.0022334		1162.39	0.00047571		1752.39	-0.00256787		2342.38	-0.00365556		2932.38	0.00376552		3522.38	-0.01117172
572.6	0.00174948		1162.59	0.00058849		1752.59	-0.00173703		2342.58	-0.00355144		2932.58	0.00299227		3522.58	-0.0111182
572.8	0.00140812		1162.79	-0.00046461		1752.79	-0.0010155		2342.78	-0.00388303		2932.78	0.00251497		3522.78	-0.01075803
573	0.00153209		1162.99	-0.00151765		1752.99	-0.00014533		2342.98	-0.00419955		2932.98	0.00102842		3522.98	-0.01031233
573.2	0.00112103		1163.19	-0.00126022		1753.19	0.00116996		2343.18	-0.00393444		2933.18	0.00068628		3523.18	-0.01016354
573.4	0.00044341		1163.39	-0.0010344		1753.39	0.00128743		2343.38	-0.00379252		2933.38	0.0012597		3523.38	-0.00947271
573.6	0.0001843		1163.59	-0.00108		1753.59	0.0019047		2343.58	-0.00331356		2933.58	0.00061868		3523.58	-0.00925599
573.8	0.00014261		1163.79	-0.00099783		1753.79	0.00169791		2343.78	-0.00244117		2933.78	0.00108346		3523.78	-0.00944589
574	0.00018528		1163.99	-0.00027162		1753.99	0.00218109		2343.98	-0.00288084		2933.98	0.00180061		3523.98	-0.00910828
574.2	-0.00028034		1164.19	-0.00040938		1754.19	0.00206147		2344.18	-0.00188192		2934.18	0.00240352		3524.18	-0.00954653
574.4	-0.00042289		1164.39	-0.00005965		1754.39	0.00189178		2344.38	-0.0014529		2934.38	0.00334016		3524.38	-0.00940167
574.6	0.00037327		1164.59	-0.00090595		1754.59	0.00152517		2344.58	-0.00099913		2934.58	0.00322149		3524.58	-0.00946227
574.8	0.00087637		1164.79	-0.00117561		1754.79	0.00077299		2344.78	-0.00170799		2934.78	0.00377372		3524.78	-0.01034464
575	0.00125303		1164.99	-0.00072087		1754.99	-0.00021752		2344.98	-0.00143205		2934.98	0.00399568		3524.98	-0.010879
575.2	0.00216802		1165.19	-0.0011985		1755.19	-0.00188503		2345.18	-0.00261206		2935.18	0.00451869		3525.18	-0.01081009
575.4	0.0028448		1165.39	-0.00170864		1755.39	-0.00211669		2345.38	-0.00218936		2935.38	0.00471959		3525.38	-0.01171173
575.6	0.00358904		1165.59	-0.00130569		1755.59	-0.00320452		2345.58	-0.00202549		2935.58	0.00407814		3525.58	-0.01137851
575.8	0.00341373		1165.79	-0.00209245		1755.79	-0.00353968		2345.78	-0.00237715		2935.78	0.00398091		3525.78	-0.01192238
576	0.00231337		1165.99	-0.00164128		1755.99	-0.00444089		2345.98	-0.00196191		2935.98	0.00390785		3525.98	-0.01263302
576.2	0.00156011		1166.19	-0.00167701		1756.19	-0.00442639		2346.18	-0.00223753		2936.18	0.00376088		3526.18	-0.01237421
576.4	0.00140707		1166.39	-0.00282551		1756.39	-0.00403957		2346.38	-0.00240588		2936.38	0.00343886		3526.38	-0.01279073
576.6	0.00131653		1166.59	-0.00321412		1756.59	-0.00402479		2346.58	-0.00264672		2936.58	0.0038365		3526.58	-0.0123294
576.8	0.00112993		1166.79	-0.00372176		1756.79	-0.00406129		2346.78	-0.00298965		2936.78	0.00303891		3526.78	-0.01175276
577	0.00100504		1166.99	-0.00243666		1756.99	-0.00315794		2346.98	-0.00308326		2936.98	0.00290481		3526.98	-0.01145768
577.2	0.00038361		1167.19	-0.00165547		1757.19	-0.00284561		2347.18	-0.00345893		2937.18	0.00342534		3527.18	-0.01149371
577.4	0.00017296		1167.39	-0.00161161		1757.39	-0.00348378		2347.38	-0.00462114		2937.38	0.00406774		3527.38	-0.01128408
577.6	0.00083574		1167.59	-0.00119833		1757.59	-0.00289493		2347.58	-0.00468507		2937.58	0.00339125		3527.58	-0.01171653
577.8	0.00060222		1167.79	-0.00096708		1757.79	-0.00346987		2347.78	-0.0048527		2937.78	0.00376022		3527.78	-0.01164414
578	0.00130392		1167.99	-0.00118831		1757.99	-0.00379474		2347.98	-0.00577769		2937.98	0.00297722		3527.98	-0.01140011
578.2	0.00210193		1168.19	-0.00058816		1758.19	-0.00457541		2348.18	-0.00464647		2938.18	0.00315003		3528.18	-0.01145082
578.4	0.00237201		1168.39	0.00058212		1758.39	-0.00429921		2348.38	-0.00384576		2938.38	0.00306388		3528.38	-0.01140251
578.6	0.0022806		1168.59	0.00112102		1758.59	-0.00509121		2348.58	-0.00365722		2938.58	0.00259057		3528.58	-0.01086792
578.8	0.00217624		1168.79	0.00200688		1758.79	-0.0053928		2348.78	-0.00331278		2938.78	0.003768		3528.78	-0.01059874
579	0.0024459		1168.99	0.00249069		1758.99	-0.00601267		2348.98	-0.00241718		2938.98	0.00399171		3528.98	-0.01008504
579.2	0.00243125		1169.19	0.00279991		1759.19	-0.00594025		2349.18	-0.00240935		2939.18	0.00408147		3529.18	-0.00997118
579.4	0.00290698		1169.39	0.00327876		1759.39	-0.00568823		2349.38	-0.0020502		2939.38	0.00443107		3529.38	-0.01058254
579.6	0.00351329		1169.59	0.00314816		1759.59	-0.0054475		2349.58	-0.00159066		2939.58	0.00407183		3529.58	-0.01041489
579.8	0.00371918		1169.79	0.00311582		1759.79	-0.00547858		2349.78	-0.00115147		2939.78	0.0049493		3529.78	-0.01122412
580	0.00263293		1169.99	0.00303169		1759.99	-0.00607902		2349.98	-0.00119961		2939.98	0.00506522		3529.98	-0.01196111
580.2	0.00213772		1170.19	0.00241347		1760.19	-0.00542331		2350.18	-0.00177602		2940.18	0.00575118		3530.18	-0.01221298
580.4	0.00142055		1170.39	0.00117142		1760.39	-0.00511051		2350.38	-0.00198871		2940.38	0.00552873		3530.38	-0.01246167
580.6	0.00080704		1170.59	0.00115798		1760.59	-0.004742		2350.58	-0.00212828		2940.58	0.0058064		3530.58	-0.01264316
580.8	0.00068143		1170.79	0.00115348		1760.79	-0.00417993		2350.78	-0.00251694		2940.78	0.00474317		3530.78	-0.01250776
581	0.00035739		1170.99	0.00148757		1760.99	-0.0038571		2350.98	-0.00379218		2940.98	0.00532304		3530.98	-0.01353082
581.2	0.00019552		1171.19	0.00069076		1761.19	-0.00406792		2351.18	-0.0043277		2941.18	0.00588536		3531.18	-0.01386869
581.4	0.00079491		1171.39	-0.0006541		1761.39	-0.00407854		2351.38	-0.00458362		2941.38	0.00606929		3531.38	-0.01424856
581.6	0.00135119		1171.59	-0.00148675		1761.59	-0.00464476		2351.58	-0.00415237		2941.58	0.00554003		3531.58	-0.01392647
581.8	0.00063343		1171.79	-0.00223851		1761.79	-0.00535913		2351.78	-0.00408762		2941.78	0.00526596		3531.78	-0.01473681
582	0.00145202		1171.99	-0.00245423		1761.99	-0.00565413		2351.98	-0.00275466		2941.98	0.00508922		3531.98	-0.0149553
582.2	0.00072781		1172.19	-0.00184026		1762.19	-0.00542965		2352.18	-0.00162117		2942.18	0.00472164		3532.18	-0.01503344
582.4	-0.00041705		1172.39	-0.001855		1762.39	-0.0057971		2352.38	-0.00182435		2942.38	0.00410614		3532.38	-0.01471509
582.6	-0.00064769		1172.59	-0.00225176		1762.59	-0.00629831		2352.58	-0.00061613		2942.58	0.00352949		3532.58	-0.01430249
582.8	-0.00036012		1172.79	-0.00244381		1762.79	-0.00661613		2352.78	0.00059145		2942.78	0.00338317		3532.78	-0.01425156
583	-0.0003276		1172.99	-0.00193352		1762.99	-0.00638023		2352.98	0.00032024		2942.98	0.00251018		3532.98	-0.01372992
583.2	-0.00098716		1173.19	-0.00128745		1763.19	-0.00551991		2353.18	0.00078414		2943.18	0.00241178		3533.18	-0.01254701
583.4	-0.00018869		1173.39	-0.00168913		1763.39	-0.0054082		2353.38	0.00088312		2943.38	0.00160311		3533.38	-0.01232963
583.6	0.00005197		1173.59	-0.00251417		1763.59	-0.00529661		2353.58	0.00048076		2943.58	0.00113914		3533.58	-0.0125014
583.8	-0.000131		1173.79	-0.00205246		1763.79	-0.00607241		2353.78	0.00045351		2943.78	0.0014793		3533.78	-0.01299026
584	-0.00103946		1173.99	-0.00245744		1763.99	-0.00580325		2353.98	-0.00030844		2943.98	0.00099014		3533.98	-0.01335481
584.2	-0.00106066		1174.19	-0.00216055		1764.19	-0.00515661		2354.18	-0.00060373		2944.18	0.00097958		3534.18	-0.01312818
584.4	-0.00145836		1174.39	-0.00215346		1764.39	-0.00492597		2354.38	-0.00115315		2944.38	0.00104412		3534.38	-0.01195442
584.6	-0.001622		1174.59	-0.00238471		1764.59	-0.00397152		2354.58	-0.00143859		2944.58	0.00160057		3534.58	-0.01232708
584.8	-0.00078376		1174.79	-0.001999		1764.79	-0.0040782		2354.78	-0.00241832		2944.78	0.00185521		3534.78	-0.01230333
585	-0.00084543		1174.99	-0.00157906		1764.99	-0.0033692		2354.98	-0.00257398		2944.98	0.00305578		3534.98	-0.01264981
585.2	-0.00118889		1175.19	-0.00127133		1765.19	-0.00397268		2355.18	-0.00297075		2945.18	0.00361338		3535.18	-0.0113643
585.4	-0.00074763		1175.39	-0.00127517		1765.39	-0.00411031		2355.38	-0.00382571		2945.38	0.00411113		3535.38	-0.01128426
585.6	-0.00076469		1175.59	-0.00062821		1765.59	-0.00507763		2355.58	-0.00370322		2945.58	0.00493966		3535.58	-0.01131005
585.8	-0.00134068		1175.79	-0.00049175		1765.79	-0.00504562		2355.78	-0.00346883		2945.78	0.00507238		3535.78	-0.01200716
586	-0.0014393		1175.99	0.00012276		1765.99	-0.00555481		2355.98	-0.0028965		2945.98	0.00524823		3535.98	-0.01136733
586.2	-0.00203917		1176.19	-0.00013408		1766.19	-0.00531322		2356.18	-0.00364407		2946.18	0.00535365		3536.18	-0.01066279
586.4	-0.00210112		1176.39	-0.00059826		1766.39	-0.00589541		2356.38	-0.003729		2946.38	0.00505255		3536.38	-0.010768
586.6	-0.00207995		1176.59	-0.00092815		1766.59	-0.0058766		2356.58	-0.00263737		2946.58	0.00452669		3536.58	-0.01069148
586.8	-0.00217135		1176.79	-0.00196603		1766.79	-0.00582332		2356.78	-0.00312501		2946.78	0.00418016		3536.78	-0.01076016
587	-0.0031374		1176.99	-0.00162945		1766.99	-0.00534259		2356.98	-0.00353796		2946.98	0.00407404		3536.98	-0.00988547
587.2	-0.00276349		1177.19	-0.00216897		1767.19	-0.00509769		2357.18	-0.00271507		2947.18	0.00467259		3537.18	-0.00924004
587.4	-0.00154635		1177.39	-0.00316253		1767.39	-0.00584811		2357.38	-0.00307699		2947.38	0.00445123		3537.38	-0.00948127
587.6	-0.00131187		1177.59	-0.00310753		1767.59	-0.00549323		2357.58	-0.00463671		2947.58	0.00470779		3537.58	-0.00983145
587.8	0.00005057		1177.79	-0.00306531		1767.79	-0.0050554		2357.78	-0.00446665		2947.78	0.00513325		3537.78	-0.00981023
588	0.00081337		1177.99	-0.00337327		1767.99	-0.0041355		2357.98	-0.00553116		2947.98	0.00459286		3537.98	-0.00918099
588.2	0.00167069		1178.19	-0.00326723		1768.19	-0.00394635		2358.18	-0.00568467		2948.18	0.00490177		3538.18	-0.0095014
588.4	0.00175647		1178.39	-0.00371479		1768.39	-0.00338989		2358.38	-0.00614621		2948.38	0.00518943		3538.38	-0.0094269
588.6	0.00225202		1178.59	-0.00439083		1768.59	-0.00319187		2358.58	-0.00595592		2948.58	0.00425475		3538.58	-0.01019334
588.8	0.00291593		1178.79	-0.00369792		1768.79	-0.0031772		2358.78	-0.00620153		2948.78	0.00372388		3538.78	-0.01049238
589	0.00311507		1178.99	-0.00256643		1768.99	-0.00330761		2358.98	-0.00654673		2948.98	0.00290672		3538.98	-0.01032863
589.2	0.00253368		1179.19	-0.00150111		1769.19	-0.00457841		2359.18	-0.00704206		2949.18	0.00245945		3539.18	-0.00907348
589.4	0.00231699		1179.39	-0.00142819		1769.39	-0.0044939		2359.38	-0.00674541		2949.38	0.00246782		3539.38	-0.00960018
589.6	0.00189277		1179.59	-0.00090908		1769.59	-0.005098		2359.58	-0.00582213		2949.58	0.00190563		3539.58	-0.00896301
589.8	0.00131769		1179.79	-0.0008512		1769.79	-0.00548027		2359.78	-0.00559218		2949.78	0.00113859		3539.78	-0.00883121
590	0.00068965		1179.99	-0.00097797		1769.99	-0.00626214		2359.98	-0.0055028		2949.98	0.00125792		3539.98	-0.00828457
590.2	0.0002697		1180.19	-0.00111566		1770.19	-0.00576243		2360.18	-0.00557185		2950.18	0.00117321		3540.18	-0.00802204
590.4	-0.00027487		1180.39	-0.00069419		1770.39	-0.00701827		2360.38	-0.00527929		2950.38	0.00031532		3540.38	-0.00885468
590.6	-0.00086664		1180.59	-0.00099555		1770.59	-0.00676082		2360.58	-0.00449888		2950.58	0.000389		3540.58	-0.00854452
590.8	-0.00130623		1180.79	-0.00158422		1770.79	-0.00607002		2360.78	-0.00386622		2950.78	0.00123185		3540.78	-0.00929212
591	-0.00119153		1180.99	-0.00049602		1770.99	-0.00571293		2360.98	-0.0029308		2950.98	0.00221268		3540.98	-0.00980091
591.2	-0.00085302		1181.19	-0.00072659		1771.19	-0.00493647		2361.18	-0.00296074		2951.18	0.00316196		3541.18	-0.01021376
591.4	-0.00043399		1181.39	-0.00050122		1771.39	-0.00443678		2361.38	-0.00305818		2951.38	0.0040632		3541.38	-0.01059181
591.6	0.00001154		1181.59	-0.00022417		1771.59	-0.00296787		2361.58	-0.00354593		2951.58	0.00470465		3541.58	-0.01116221
591.8	0.00063774		1181.79	-0.00109662		1771.79	-0.00283424		2361.78	-0.00291737		2951.78	0.00557162		3541.78	-0.01139414
592	-0.0000189		1181.99	-0.00143561		1771.99	-0.0028397		2361.98	-0.00212725		2951.98	0.00570926		3541.98	-0.01202911
592.2	-0.00048926		1182.19	-0.00182013		1772.19	-0.00269404		2362.18	-0.00204291		2952.18	0.00625456		3542.18	-0.01295575
592.4	-0.00106174		1182.39	-0.00141691		1772.39	-0.00324327		2362.38	-0.00158235		2952.38	0.00605967		3542.38	-0.01285299
592.6	-0.0005892		1182.59	-0.00230196		1772.59	-0.00296534		2362.58	-0.00162374		2952.58	0.00518513		3542.58	-0.01257744
592.8	-0.00117771		1182.79	-0.00040672		1772.79	-0.00262308		2362.78	-0.00093612		2952.78	0.00520525		3542.78	-0.01295242
593	-0.00118727		1182.99	0.00063155		1772.99	-0.00298924		2362.98	-0.00060112		2952.98	0.00471804		3542.98	-0.01277015
593.2	-0.00200427		1183.19	-0.00001108		1773.19	-0.00246002		2363.18	-0.00027829		2953.18	0.00479507		3543.18	-0.01182381
593.4	-0.00185997		1183.39	-0.00022947		1773.39	-0.00179003		2363.38	0.00009628		2953.38	0.00392898		3543.38	-0.01256006
593.6	-0.00197814		1183.59	-0.0001093		1773.59	-0.00236536		2363.58	-0.00018475		2953.58	0.00314113		3543.58	-0.01252757
593.8	-0.00168263		1183.79	0.00003733		1773.79	-0.00360896		2363.78	-0.00050623		2953.78	0.00314126		3543.78	-0.01285709
594	-0.00146271		1183.99	0.00060199		1773.99	-0.00437075		2363.98	-0.00088469		2953.98	0.00299221		3543.98	-0.01257048
594.2	-0.00191976		1184.19	0.00081626		1774.19	-0.00530679		2364.18	-0.00139271		2954.18	0.0018037		3544.18	-0.01270144
594.4	-0.00159616		1184.39	0.00053351		1774.39	-0.00516556		2364.38	-0.00159372		2954.38	0.00193942		3544.38	-0.01309466
594.6	-0.0013664		1184.59	0.00056524		1774.59	-0.00399453		2364.58	-0.0013348		2954.58	0.00196379		3544.58	-0.01300789
594.8	-0.00069701		1184.79	0.00086465		1774.79	-0.00331807		2364.78	-0.00168108		2954.78	0.00222743		3544.78	-0.01363332
595	0.00007889		1184.99	0.00067469		1774.99	-0.00368114		2364.98	-0.00223216		2954.98	0.00195913		3544.98	-0.01406244
595.2	0.00007492		1185.19	0.00075752		1775.19	-0.00311305		2365.18	-0.00289578		2955.18	0.00205015		3545.18	-0.01357397
595.4	0.00119294		1185.39	0.00142491		1775.39	-0.00307326		2365.38	-0.00260975		2955.38	0.00289646		3545.38	-0.01428678
595.6	0.0014574		1185.59	0.0012746		1775.59	-0.00370405		2365.58	-0.0032698		2955.58	0.0028113		3545.58	-0.01520293
595.8	0.00102477		1185.79	0.00105233		1775.79	-0.00421363		2365.78	-0.00326267		2955.78	0.00286616		3545.78	-0.01587475
596	0.00118103		1185.99	0.00164662		1775.99	-0.00456722		2365.98	-0.00318242		2955.98	0.00268024		3545.98	-0.01583508
596.2	0.00138907		1186.19	0.00228395		1776.19	-0.00406959		2366.18	-0.00391362		2956.18	0.00311341		3546.18	-0.01542903
596.4	0.00111476		1186.39	0.00186766		1776.39	-0.00395896		2366.38	-0.00307094		2956.38	0.00275833		3546.38	-0.01513628
596.6	0.00084733		1186.59	0.00167866		1776.59	-0.00356154		2366.58	-0.00273434		2956.58	0.00311344		3546.58	-0.01476909
596.8	0.00020256		1186.79	0.00220917		1776.79	-0.00321481		2366.78	-0.00191893		2956.78	0.0036444		3546.78	-0.01410208
597	0.00083776		1186.99	0.00092141		1776.99	-0.00316222		2366.98	-0.0021258		2956.98	0.00445357		3546.98	-0.01312435
597.2	0.00076325		1187.19	-0.0005724		1777.19	-0.00320683		2367.18	-0.00223183		2957.18	0.00445013		3547.18	-0.01232225
597.4	0.001036		1187.39	-0.00035788		1777.39	-0.0037257		2367.38	-0.00163268		2957.38	0.00441395		3547.38	-0.01230409
597.6	0.00068511		1187.59	-0.00076953		1777.59	-0.00507886		2367.58	-0.00233007		2957.58	0.00476659		3547.58	-0.0122972
597.8	0.00138947		1187.79	-0.00106214		1777.79	-0.00539084		2367.78	-0.00211171		2957.78	0.00494374		3547.78	-0.01145767
598	0.00077507		1187.99	-0.00096264		1777.99	-0.00519167		2367.98	-0.00217655		2957.98	0.00465696		3547.98	-0.0110648
598.2	0.00022797		1188.19	-0.00240072		1778.19	-0.00536368		2368.18	-0.00233678		2958.18	0.00426342		3548.18	-0.01063573
598.4	-0.00011531		1188.39	-0.00351451		1778.39	-0.00422781		2368.38	-0.00209009		2958.38	0.0044855		3548.38	-0.01111039
598.6	0.00002549		1188.59	-0.00389906		1778.59	-0.00359955		2368.58	-0.00232963		2958.58	0.00396565		3548.58	-0.01112342
598.8	0.00059231		1188.79	-0.00432583		1778.79	-0.00345565		2368.78	-0.00209969		2958.78	0.00300442		3548.78	-0.01110407
599	0.00076138		1188.99	-0.00492704		1778.99	-0.00361815		2368.98	-0.00285102		2958.98	0.00317249		3548.98	-0.0114574
599.2	-0.00000955		1189.19	-0.00370428		1779.19	-0.00391534		2369.18	-0.00275245		2959.18	0.00322194		3549.18	-0.01224797
599.4	-0.00079253		1189.39	-0.0028121		1779.39	-0.00400374		2369.38	-0.00343704		2959.38	0.00262835		3549.38	-0.01288362
599.6	-0.00109846		1189.59	-0.00214366		1779.59	-0.00484651		2369.58	-0.00484262		2959.58	0.00261275		3549.58	-0.01364482
599.8	-0.00147424		1189.79	-0.00166649		1779.79	-0.00473915		2369.78	-0.00506627		2959.78	0.00253279		3549.78	-0.0141299
600	-0.00149788		1189.99	-0.00125516		1779.99	-0.00570241		2369.98	-0.00537013		2959.98	0.00251044		3549.98	-0.01440908
600.2	-0.00142591		1190.19	-0.00163236		1780.19	-0.00541793		2370.18	-0.00467515		2960.18	0.00291105		3550.18	-0.01446748
600.4	-0.00200748		1190.39	-0.00275576		1780.39	-0.00537776		2370.38	-0.00472658		2960.38	0.00315624		3550.38	-0.01464664
600.6	-0.00203409		1190.59	-0.0024178		1780.59	-0.00589161		2370.58	-0.00515816		2960.58	0.00400488		3550.58	-0.01453127
600.8	-0.00129731		1190.79	-0.00263541		1780.79	-0.00496778		2370.78	-0.00534503		2960.78	0.0049208		3550.78	-0.01338549
601	-0.00084786		1190.99	-0.00310869		1780.99	-0.00500058		2370.98	-0.00568225		2960.98	0.00499483		3550.98	-0.01289205
601.2	-0.00145422		1191.19	-0.00261789		1781.19	-0.00531901		2371.18	-0.00508495		2961.18	0.00421236		3551.18	-0.01323342
601.4	-0.00217167		1191.39	-0.00189655		1781.39	-0.00523383		2371.38	-0.00523508		2961.38	0.00447219		3551.38	-0.01339765
601.6	-0.00174575		1191.59	-0.00149834		1781.59	-0.0052959		2371.58	-0.00581339		2961.58	0.00414182		3551.58	-0.01312756
601.8	-0.0014844		1191.79	-0.00141523		1781.79	-0.00608999		2371.78	-0.0052639		2961.78	0.00424053		3551.78	-0.01229163
602	-0.0020215		1191.99	-0.0019364		1781.99	-0.00670718		2371.98	-0.00544017		2961.98	0.0043746		3551.98	-0.01251158
602.2	-0.00193758		1192.19	-0.00267361		1782.19	-0.00672038		2372.18	-0.0054677		2962.18	0.00364238		3552.18	-0.01222324
602.4	-0.00251165		1192.39	-0.00234571		1782.39	-0.00598578		2372.38	-0.00500599		2962.38	0.00270398		3552.38	-0.01215098
602.6	-0.00167687		1192.59	-0.00189034		1782.59	-0.00628424		2372.58	-0.00517197		2962.58	0.00202751		3552.58	-0.01180176
602.8	-0.0011566		1192.79	-0.00107477		1782.79	-0.00686563		2372.78	-0.00489944		2962.78	0.0008837		3552.78	-0.01109941
603	-0.00127924		1192.99	-0.0006343		1782.99	-0.00674582		2372.98	-0.00499613		2962.98	0.00122845		3552.98	-0.01121057
603.2	-0.00245873		1193.19	0.00011284		1783.19	-0.00688783		2373.18	-0.00474022		2963.18	0.00166504		3553.18	-0.01102297
603.4	-0.00271462		1193.39	0.00036609		1783.39	-0.00752979		2373.38	-0.00520454		2963.38	0.00169072		3553.38	-0.01104318
603.6	-0.00255901		1193.59	0.00085079		1783.59	-0.00811329		2373.58	-0.00498024		2963.58	0.00192582		3553.58	-0.01238325
603.8	-0.00277839		1193.79	0.00054547		1783.79	-0.00820355		2373.78	-0.00472366		2963.78	0.00177093		3553.78	-0.01265276
604	-0.00250441		1193.99	-0.00011671		1783.99	-0.00948469		2373.98	-0.0056191		2963.98	0.00139967		3553.98	-0.01238982
604.2	-0.00207269		1194.19	-0.00165328		1784.19	-0.00901359		2374.18	-0.00564095		2964.18	0.00243107		3554.18	-0.01133199
604.4	-0.00275332		1194.39	-0.0026473		1784.39	-0.00862889		2374.38	-0.00621984		2964.38	0.00338072		3554.38	-0.01182061
604.6	-0.00238296		1194.59	-0.00252981		1784.59	-0.00788236		2374.58	-0.00580158		2964.58	0.00305242		3554.58	-0.01186497
604.8	-0.00204096		1194.79	-0.00299368		1784.79	-0.00692317		2374.78	-0.00568679		2964.78	0.00328762		3554.78	-0.01116464
605	-0.00240118		1194.99	-0.00372115		1784.99	-0.00661905		2374.98	-0.00491589		2964.98	0.00259565		3554.98	-0.01190528
605.2	-0.00339423		1195.19	-0.00327633		1785.19	-0.00714564		2375.18	-0.00436081		2965.18	0.00347709		3555.18	-0.01271819
605.4	-0.00314231		1195.39	-0.00375615		1785.39	-0.00683375		2375.38	-0.00427713		2965.38	0.00406941		3555.38	-0.01209695
605.6	-0.00189228		1195.59	-0.00406559		1785.59	-0.00736709		2375.58	-0.00459573		2965.58	0.0037635		3555.58	-0.01166472
605.8	-0.00236808		1195.79	-0.00487706		1785.79	-0.00782893		2375.78	-0.00436984		2965.78	0.00450862		3555.78	-0.01185941
606	-0.00256526		1195.99	-0.00487517		1785.99	-0.0075693		2375.98	-0.00427384		2965.98	0.00510082		3555.98	-0.0124818
606.2	-0.00213389		1196.19	-0.00395802		1786.19	-0.00677495		2376.18	-0.00423012		2966.18	0.0051804		3556.18	-0.0120736
606.4	-0.00140476		1196.39	-0.00320375		1786.39	-0.00644264		2376.38	-0.00374753		2966.38	0.00545149		3556.38	-0.01175523
606.6	-0.0015514		1196.59	-0.00292619		1786.59	-0.0071164		2376.58	-0.00320436		2966.58	0.00602292		3556.58	-0.01221871
606.8	-0.00152409		1196.79	-0.00263706		1786.79	-0.00669284		2376.78	-0.00298416		2966.78	0.00582544		3556.78	-0.01169473
607	-0.00169674		1196.99	-0.00271277		1786.99	-0.00554489		2376.98	-0.00203343		2966.98	0.00566494		3556.98	-0.01208267
607.2	-0.0021158		1197.19	-0.00247815		1787.19	-0.00512827		2377.18	-0.0023538		2967.18	0.00559028		3557.18	-0.01247886
607.4	-0.0022476		1197.39	-0.00239345		1787.39	-0.00485626		2377.38	-0.00206029		2967.38	0.00459885		3557.38	-0.0132575
607.6	-0.00260884		1197.59	-0.00365416		1787.59	-0.00449022		2377.58	-0.00227649		2967.58	0.00379144		3557.58	-0.01412828
607.8	-0.00305639		1197.79	-0.00424291		1787.79	-0.00380292		2377.78	-0.00262695		2967.78	0.00282849		3557.78	-0.01409593
608	-0.00260532		1197.99	-0.00540108		1787.99	-0.00346925		2377.98	-0.00275109		2967.98	0.00310511		3557.98	-0.01457508
608.2	-0.00285246		1198.19	-0.006249		1788.19	-0.00289186		2378.18	-0.00246807		2968.18	0.0032846		3558.18	-0.01499873
608.4	-0.00364469		1198.39	-0.00641122		1788.39	-0.00197081		2378.38	-0.00194334		2968.38	0.00292144		3558.38	-0.01614954
608.6	-0.00284562		1198.59	-0.00586469		1788.59	-0.00133139		2378.58	-0.00149605		2968.58	0.00180488		3558.58	-0.01606556
608.8	-0.00242098		1198.79	-0.00587674		1788.79	-0.00170224		2378.78	-0.00169571		2968.78	0.0017558		3558.78	-0.01592641
609	-0.00240391		1198.99	-0.00529435		1788.99	-0.00162538		2378.98	-0.00132848		2968.98	0.00112454		3558.98	-0.01665847
609.2	-0.0027251		1199.19	-0.00534193		1789.19	-0.00183582		2379.18	-0.00199814		2969.18	0.00176052		3559.18	-0.01612503
609.4	-0.00235004		1199.39	-0.00561322		1789.39	-0.00166626		2379.38	-0.00204063		2969.38	0.00114143		3559.38	-0.01649706
609.6	-0.00223989		1199.59	-0.0053793		1789.59	-0.00163263		2379.58	-0.00256573		2969.58	0.00115334		3559.58	-0.01674142
609.8	-0.00319748		1199.79	-0.00476929		1789.79	-0.002046		2379.78	-0.00289071		2969.78	0.00227724		3559.78	-0.01660588
610	-0.0028505		1199.99	-0.00446868		1789.99	-0.00309368		2379.98	-0.00279516		2969.98	0.00277758		3559.98	-0.01579313
610.2	-0.00174609		1200.19	-0.00358774		1790.19	-0.00331342		2380.18	-0.00318297		2970.18	0.00321046		3560.18	-0.01514484
610.4	-0.00179194		1200.39	-0.00339923		1790.39	-0.00482261		2380.38	-0.0027775		2970.38	0.00350169		3560.38	-0.01469337
610.6	-0.00193721		1200.59	-0.00287613		1790.59	-0.00602592		2380.58	-0.00306619		2970.58	0.00344655		3560.58	-0.01436164
610.8	-0.00099233		1200.79	-0.00313698		1790.79	-0.00665587		2380.78	-0.00364383		2970.78	0.00255366		3560.78	-0.01331377
611	-0.00070937		1200.99	-0.00320046		1790.99	-0.00615639		2380.98	-0.00371079		2970.98	0.00224554		3560.98	-0.01298468
611.2	-0.00105799		1201.19	-0.00370654		1791.19	-0.00613151		2381.18	-0.00443856		2971.18	0.00272689		3561.18	-0.01282376
611.4	-0.00153775		1201.39	-0.0045142		1791.39	-0.00675657		2381.38	-0.00481471		2971.38	0.00333029		3561.38	-0.01258515
611.6	-0.00196772		1201.59	-0.0053318		1791.59	-0.00732257		2381.58	-0.00555538		2971.58	0.00375259		3561.58	-0.01287447
611.8	-0.00238232		1201.79	-0.00455308		1791.79	-0.00741449		2381.78	-0.00524895		2971.78	0.00371474		3561.78	-0.01236959
612	-0.00171197		1201.99	-0.00492933		1791.99	-0.00775599		2381.98	-0.0055842		2971.98	0.00431274		3561.98	-0.0123728
612.2	-0.00226265		1202.19	-0.00488224		1792.19	-0.00833022		2382.18	-0.00491826		2972.18	0.00255411		3562.18	-0.01268825
612.4	-0.00281928		1202.39	-0.00537291		1792.39	-0.00750058		2382.38	-0.0047031		2972.38	0.00249309		3562.38	-0.01274932
612.6	-0.00201723		1202.59	-0.00547654		1792.59	-0.00796558		2382.58	-0.00422396		2972.58	0.00210543		3562.58	-0.01224293
612.8	-0.00219315		1202.79	-0.00571739		1792.79	-0.00770674		2382.78	-0.00444858		2972.78	0.00167951		3562.78	-0.01253829
613	-0.00271741		1202.99	-0.00602044		1792.99	-0.00690608		2382.98	-0.00429581		2972.98	0.00069329		3562.98	-0.01310258
613.2	-0.00354287		1203.19	-0.00665405		1793.19	-0.00616115		2383.18	-0.00466507		2973.18	-0.00000053		3563.18	-0.01279665
613.4	-0.00376957		1203.39	-0.00635793		1793.39	-0.00560789		2383.38	-0.00468309		2973.38	-0.0012504		3563.38	-0.01444797
613.6	-0.0037064		1203.59	-0.00662946		1793.59	-0.00502673		2383.58	-0.00401458		2973.58	-0.00058522		3563.58	-0.01392449
613.8	-0.00361417		1203.79	-0.00688666		1793.79	-0.00502178		2383.78	-0.00391371		2973.78	-0.00069219		3563.78	-0.0139295
614	-0.00391251		1203.99	-0.0072973		1793.99	-0.00450599		2383.98	-0.00399199		2973.98	-0.00076976		3563.98	-0.01464999
614.2	-0.0035893		1204.19	-0.00695613		1794.19	-0.00404627		2384.18	-0.00410192		2974.18	-0.00061158		3564.18	-0.01550089
614.4	-0.00369153		1204.39	-0.00723883		1794.39	-0.0043944		2384.38	-0.00414306		2974.38	-0.0007621		3564.38	-0.01590048
614.6	-0.00290148		1204.59	-0.00647215		1794.59	-0.00448907		2384.58	-0.00483683		2974.58	-0.00067008		3564.58	-0.01602595
614.8	-0.00277155		1204.79	-0.0067625		1794.79	-0.00472604		2384.78	-0.00542617		2974.78	-0.00010439		3564.78	-0.01533304
615	-0.00244538		1204.99	-0.00662564		1794.99	-0.00426628		2384.98	-0.00594409		2974.98	0.00045885		3564.98	-0.01544365
615.2	-0.0025581		1205.19	-0.00648004		1795.19	-0.00467608		2385.18	-0.00633918		2975.18	0.00162175		3565.18	-0.01525145
615.4	-0.0025189		1205.39	-0.006212		1795.39	-0.00531154		2385.38	-0.00649088		2975.38	0.00268431		3565.38	-0.01464001
615.6	-0.00224162		1205.59	-0.00564851		1795.59	-0.00522797		2385.58	-0.0063911		2975.58	0.00288887		3565.58	-0.01490951
615.8	-0.00240948		1205.79	-0.00575615		1795.79	-0.00521275		2385.78	-0.006047		2975.78	0.00340215		3565.78	-0.01411061
616	-0.00202434		1205.99	-0.0056651		1795.99	-0.0052544		2385.98	-0.00571603		2975.98	0.00276831		3565.98	-0.01451442
616.2	-0.0025652		1206.19	-0.00569611		1796.19	-0.00554079		2386.18	-0.00451929		2976.18	0.00209737		3566.18	-0.01455616
616.4	-0.00278741		1206.39	-0.00628059		1796.39	-0.00550572		2386.38	-0.00543415		2976.38	0.00275244		3566.38	-0.0139541
616.6	-0.00271689		1206.59	-0.00701686		1796.59	-0.00612586		2386.58	-0.00540122		2976.58	0.00227722		3566.58	-0.01346746
616.8	-0.00319561		1206.79	-0.00688678		1796.79	-0.00658935		2386.78	-0.00546912		2976.78	0.0016323		3566.78	-0.01427385
617	-0.0036524		1206.99	-0.00673706		1796.99	-0.00724332		2386.98	-0.00550997		2976.98	0.00058888		3566.98	-0.01492859
617.2	-0.00441091		1207.19	-0.0064435		1797.19	-0.00680381		2387.18	-0.0063989		2977.18	0.00007976		3567.18	-0.01509015
617.4	-0.00417991		1207.39	-0.00677472		1797.39	-0.00668917		2387.38	-0.0062595		2977.38	0.00050961		3567.38	-0.01580035
617.6	-0.00384904		1207.59	-0.00716354		1797.59	-0.00674539		2387.58	-0.00580945		2977.58	0.00188765		3567.58	-0.01622713
617.8	-0.00447487		1207.79	-0.00765589		1797.79	-0.00626423		2387.78	-0.00659166		2977.78	0.00075551		3567.78	-0.0161451
618	-0.00548562		1207.99	-0.00788437		1797.99	-0.00591422		2387.98	-0.00735331		2977.98	0.00067226		3567.98	-0.01669916
618.2	-0.0056747		1208.19	-0.00804165		1798.19	-0.00569859		2388.18	-0.00741689		2978.18	0.00058756		3568.18	-0.01678583
618.4	-0.00552867		1208.39	-0.00761946		1798.39	-0.00608446		2388.38	-0.00765978		2978.38	0.00135723		3568.38	-0.01640676
618.6	-0.00477289		1208.59	-0.00702532		1798.59	-0.00666178		2388.58	-0.00773717		2978.58	0.00212475		3568.58	-0.0156844
618.8	-0.00475418		1208.79	-0.00629312		1798.79	-0.00717845		2388.78	-0.00723926		2978.78	0.00227082		3568.78	-0.0145997
619	-0.00386875		1208.99	-0.0056471		1798.99	-0.00685858		2388.98	-0.00659656		2978.98	0.0017823		3568.98	-0.01474368
619.2	-0.00322093		1209.19	-0.00506192		1799.19	-0.00652532		2389.18	-0.00596155		2979.18	0.00273782		3569.18	-0.01438007
619.4	-0.00284833		1209.39	-0.00488235		1799.39	-0.00703		2389.38	-0.00457268		2979.38	0.00325102		3569.38	-0.01407859
619.6	-0.00241594		1209.59	-0.00416729		1799.59	-0.0064619		2389.58	-0.00426535		2979.58	0.00326229		3569.58	-0.01461162
619.8	-0.00240636		1209.79	-0.00425007		1799.79	-0.00619869		2389.78	-0.00383558		2979.78	0.00382583		3569.78	-0.01355689
620	-0.00171126		1209.99	-0.00381451		1799.99	-0.00654183		2389.98	-0.00326194		2979.98	0.00326095		3569.98	-0.01408176
620.2	-0.00136792		1210.19	-0.00396323		1800.19	-0.00710454		2390.18	-0.00220319		2980.18	0.0033991		3570.18	-0.01334082
620.4	-0.00135353		1210.39	-0.00456536		1800.39	-0.00706798		2390.38	-0.00249837		2980.38	0.00420888		3570.38	-0.01264899
620.6	-0.0015325		1210.59	-0.00463127		1800.59	-0.00707657		2390.58	-0.0020008		2980.58	0.00375658		3570.58	-0.01268215
620.8	-0.00121063		1210.79	-0.00422694		1800.79	-0.00723945		2390.78	-0.00133678		2980.78	0.00372144		3570.78	-0.01294986
621	-0.00098		1210.99	-0.00400289		1800.99	-0.00675305		2390.98	-0.00189509		2980.98	0.00394205		3570.98	-0.012959
621.2	-0.00143131		1211.19	-0.00417284		1801.19	-0.00616981		2391.18	-0.00254998		2981.18	0.00402098		3571.18	-0.01260755
621.4	-0.00119057		1211.39	-0.0042442		1801.39	-0.00573702		2391.38	-0.00330732		2981.38	0.00403316		3571.38	-0.01280724
621.6	-0.00083612		1211.59	-0.00428638		1801.59	-0.00516707		2391.58	-0.00352892		2981.58	0.00394089		3571.58	-0.01347861
621.8	-0.00180427		1211.79	-0.00508239		1801.79	-0.00485878		2391.78	-0.00396738		2981.78	0.00310888		3571.78	-0.01313056
622	-0.00239627		1211.99	-0.00489103		1801.99	-0.00372547		2391.98	-0.00391169		2981.98	0.00402763		3571.98	-0.01395152
622.2	-0.00280297		1212.19	-0.00528511		1802.19	-0.00384096		2392.18	-0.00444503		2982.18	0.0043376		3572.18	-0.01403273
622.4	-0.00272022		1212.39	-0.00482158		1802.39	-0.00456443		2392.38	-0.00496852		2982.38	0.00545522		3572.38	-0.01436704
622.6	-0.00298295		1212.59	-0.0041541		1802.59	-0.00473789		2392.58	-0.0051843		2982.58	0.00508873		3572.58	-0.0144756
622.8	-0.00443371		1212.79	-0.00376939		1802.79	-0.00475436		2392.78	-0.00580192		2982.78	0.00422426		3572.78	-0.0151322
623	-0.0045205		1212.99	-0.00372861		1802.99	-0.00428497		2392.98	-0.00555496		2982.98	0.00330365		3572.98	-0.01620505
623.2	-0.00435992		1213.19	-0.00368599		1803.19	-0.00464377		2393.18	-0.00528357		2983.18	0.00359152		3573.18	-0.01614465
623.4	-0.00495961		1213.39	-0.00375552		1803.39	-0.00587166		2393.38	-0.00468569		2983.38	0.00335696		3573.38	-0.01614729
623.6	-0.00509774		1213.59	-0.00343913		1803.59	-0.00597292		2393.58	-0.00490606		2983.58	0.00298836		3573.58	-0.01579709
623.8	-0.00484692		1213.79	-0.00368364		1803.79	-0.00681186		2393.78	-0.00442745		2983.78	0.00370716		3573.78	-0.01523865
624	-0.00451892		1213.99	-0.00423048		1803.99	-0.00750582		2393.98	-0.00357074		2983.98	0.00311269		3573.98	-0.01560902
624.2	-0.00439623		1214.19	-0.00442664		1804.19	-0.00760126		2394.18	-0.00257377		2984.18	0.00275119		3574.18	-0.01476645
624.4	-0.00439674		1214.39	-0.00476528		1804.39	-0.00672537		2394.38	-0.00262397		2984.38	0.00344052		3574.38	-0.01437522
624.6	-0.00395943		1214.59	-0.00495043		1804.59	-0.00577458		2394.58	-0.00213057		2984.58	0.00322305		3574.58	-0.0144834
624.8	-0.0039168		1214.79	-0.00557759		1804.79	-0.00526866		2394.78	-0.00307653		2984.78	0.00369492		3574.78	-0.01376524
625	-0.00416775		1214.99	-0.00586792		1804.99	-0.00481287		2394.98	-0.00362268		2984.98	0.00396592		3574.98	-0.01349476
625.2	-0.00449461		1215.19	-0.00554025		1805.19	-0.00497808		2395.18	-0.003746		2985.18	0.00302029		3575.18	-0.01352921
625.4	-0.00386551		1215.39	-0.00525355		1805.39	-0.00436313		2395.38	-0.00448251		2985.38	0.00270437		3575.38	-0.01353854
625.6	-0.00337801		1215.59	-0.00524192		1805.59	-0.0042954		2395.58	-0.00368215		2985.58	0.00206198		3575.58	-0.0136553
625.8	-0.00345216		1215.79	-0.00548197		1805.79	-0.0034102		2395.78	-0.00402164		2985.78	0.00192144		3575.78	-0.01421267
626	-0.00356757		1215.99	-0.00502636		1805.99	-0.00259485		2395.98	-0.00430466		2985.98	0.00206663		3575.98	-0.01373878
626.2	-0.00379644		1216.19	-0.00521511		1806.19	-0.0029734		2396.18	-0.00516611		2986.18	0.00185943		3576.18	-0.01442435
626.4	-0.00473171		1216.39	-0.00503417		1806.39	-0.00241871		2396.38	-0.00557389		2986.38	0.00209932		3576.38	-0.01418694
626.6	-0.00539099		1216.59	-0.00497808		1806.59	-0.0022531		2396.58	-0.005432		2986.58	0.00114184		3576.58	-0.01363061
626.8	-0.00678186		1216.79	-0.00549141		1806.79	-0.00300976		2396.78	-0.00510798		2986.78	-0.00090095		3576.78	-0.01350253
627	-0.00626771		1216.99	-0.0056737		1806.99	-0.00307083		2396.98	-0.00439603		2986.98	-0.00158347		3576.98	-0.01298093
627.2	-0.00622781		1217.19	-0.00597722		1807.19	-0.00384842		2397.18	-0.00415406		2987.18	-0.00102423		3577.18	-0.0126937
627.4	-0.00625728		1217.39	-0.00557689		1807.39	-0.00511416		2397.38	-0.00351479		2987.38	-0.00132314		3577.38	-0.01283828
627.6	-0.00621266		1217.59	-0.00566511		1807.59	-0.00592581		2397.58	-0.00365322		2987.58	-0.00171328		3577.58	-0.01245612
627.8	-0.00591551		1217.79	-0.00491889		1807.79	-0.00621939		2397.78	-0.00369963		2987.78	-0.00161309		3577.78	-0.01312231
628	-0.00511325		1217.99	-0.00530881		1807.99	-0.00635816		2397.98	-0.00357814		2987.98	-0.00252201		3577.98	-0.01355011
628.2	-0.00430791		1218.19	-0.00534519		1808.19	-0.00627877		2398.18	-0.00341997		2988.18	-0.00145547		3578.18	-0.01366612
628.4	-0.00347626		1218.39	-0.00564092		1808.39	-0.00536785		2398.38	-0.00337472		2988.38	-0.00019473		3578.38	-0.01391473
628.6	-0.00348521		1218.59	-0.0059636		1808.59	-0.00573248		2398.58	-0.00343437		2988.58	0.00078818		3578.58	-0.01443285
628.8	-0.00344251		1218.79	-0.00612208		1808.79	-0.00606474		2398.78	-0.00432738		2988.78	0.00101728		3578.78	-0.0150273
629	-0.00246548		1218.99	-0.00636863		1808.99	-0.0065197		2398.98	-0.00338457		2988.98	0.00089851		3578.98	-0.01557591
629.2	-0.00176015		1219.19	-0.00571904		1809.19	-0.00744035		2399.18	-0.00291381		2989.18	0.00125848		3579.18	-0.01580171
629.4	-0.0014191		1219.39	-0.00577187		1809.39	-0.00732067		2399.38	-0.00433361		2989.38	0.00227426		3579.38	-0.01611707
629.6	-0.00119018		1219.59	-0.00617935		1809.59	-0.00722449		2399.58	-0.00331102		2989.58	0.00266506		3579.58	-0.01655613
629.8	-0.00144137		1219.79	-0.00598841		1809.79	-0.00672962		2399.78	-0.00344069		2989.78	0.00362856		3579.78	-0.0162527
630	-0.00161707		1219.99	-0.0058839		1809.99	-0.00717134		2399.98	-0.00365947		2989.98	0.00399084		3579.98	-0.01518966
630.2	-0.00244437		1220.19	-0.00654358		1810.19	-0.00693239		2400.18	-0.00385177		2990.18	0.00512662		3580.18	-0.01615749
630.4	-0.00312691		1220.39	-0.00649514		1810.39	-0.00656572		2400.38	-0.00380127		2990.38	0.00447481		3580.38	-0.01521187
630.6	-0.00311284		1220.59	-0.00620738		1810.59	-0.00706239		2400.58	-0.00336727		2990.58	0.00447087		3580.58	-0.014882
630.8	-0.00371923		1220.79	-0.00683699		1810.79	-0.0074362		2400.78	-0.00345449		2990.78	0.00349774		3580.78	-0.01452291
631	-0.00356085		1220.99	-0.0069053		1810.99	-0.00714931		2400.98	-0.00283687		2990.98	0.0046387		3580.98	-0.0137145
631.2	-0.00402819		1221.19	-0.00679419		1811.19	-0.00799739		2401.18	-0.00274548		2991.18	0.00420239		3581.18	-0.01367214
631.4	-0.0047024		1221.39	-0.00594461		1811.39	-0.00808022		2401.38	-0.0032662		2991.38	0.00311441		3581.38	-0.01289034
631.6	-0.00522112		1221.59	-0.00583956		1811.59	-0.00796469		2401.58	-0.00442321		2991.58	0.00204439		3581.58	-0.01283363
631.8	-0.00501272		1221.79	-0.00471724		1811.79	-0.00720329		2401.78	-0.00503133		2991.78	0.00218267		3581.78	-0.01319758
632	-0.00396242		1221.99	-0.00580574		1811.99	-0.00760931		2401.98	-0.0059697		2991.98	0.00206511		3581.98	-0.01370099
632.2	-0.00391641		1222.19	-0.005672		1812.19	-0.00812153		2402.18	-0.00587455		2992.18	0.00220084		3582.18	-0.01363274
632.4	-0.00450332		1222.39	-0.00559805		1812.39	-0.0076669		2402.38	-0.00629323		2992.38	0.00121543		3582.38	-0.01450973
632.6	-0.00520443		1222.59	-0.00500433		1812.59	-0.00887201		2402.58	-0.00625753		2992.58	0.00087149		3582.58	-0.01554822
632.8	-0.00409314		1222.79	-0.00517135		1812.79	-0.00919717		2402.78	-0.00661498		2992.78	0.00032735		3582.78	-0.01672609
633	-0.00450406		1222.99	-0.00598221		1812.99	-0.01030059		2402.98	-0.00602042		2992.98	-0.00072142		3582.98	-0.01609202
633.2	-0.00438361		1223.19	-0.00644039		1813.19	-0.01086883		2403.18	-0.00646889		2993.18	-0.00006276		3583.18	-0.01653102
633.4	-0.00397442		1223.39	-0.00664975		1813.39	-0.01084902		2403.38	-0.00698808		2993.38	-0.00000969		3583.38	-0.01719856
633.6	-0.00371313		1223.59	-0.00690175		1813.59	-0.01029308		2403.58	-0.00538911		2993.58	-0.00043164		3583.58	-0.01749237
633.8	-0.00404267		1223.79	-0.0067675		1813.79	-0.01013943		2403.78	-0.00591778		2993.78	-0.00093185		3583.78	-0.01758982
634	-0.00357134		1223.99	-0.00694273		1813.99	-0.01028032		2403.98	-0.00663115		2993.98	-0.00068461		3583.98	-0.01747984
634.2	-0.00442868		1224.19	-0.0067189		1814.19	-0.00885334		2404.18	-0.00637092		2994.18	0.00018169		3584.18	-0.01873669
634.4	-0.00412977		1224.39	-0.00654341		1814.39	-0.00860471		2404.38	-0.00567992		2994.38	-0.00018922		3584.38	-0.0183283
634.6	-0.00424444		1224.59	-0.00734158		1814.59	-0.00799611		2404.58	-0.00478491		2994.58	0.00061697		3584.58	-0.01743764
634.8	-0.00447212		1224.79	-0.00792874		1814.79	-0.00753989		2404.78	-0.00406061		2994.78	0.00016025		3584.78	-0.01674247
635	-0.00437826		1224.99	-0.00721903		1814.99	-0.00734831		2404.98	-0.0031461		2994.98	0.0006099		3584.98	-0.01639407
635.2	-0.0042999		1225.19	-0.00693652		1815.19	-0.00677936		2405.18	-0.00337113		2995.18	0.00017544		3585.18	-0.01697338
635.4	-0.00499396		1225.39	-0.00599496		1815.39	-0.00619411		2405.38	-0.00367973		2995.38	0.00095974		3585.38	-0.01737592
635.6	-0.00522299		1225.59	-0.00651176		1815.59	-0.006038		2405.58	-0.00385833		2995.58	0.00095772		3585.58	-0.01766969
635.8	-0.00488036		1225.79	-0.00736831		1815.79	-0.00590895		2405.78	-0.00411652		2995.78	0.00092579		3585.78	-0.0172458
636	-0.00513402		1225.99	-0.00769827		1815.99	-0.00639882		2405.98	-0.00442932		2995.98	0.00050408		3585.98	-0.01795344
636.2	-0.00610645		1226.19	-0.0070296		1816.19	-0.00642881		2406.18	-0.00462715		2996.18	-0.00066407		3586.18	-0.01717346
636.4	-0.00561078		1226.39	-0.00688256		1816.39	-0.00591732		2406.38	-0.00530513		2996.38	-0.00103451		3586.38	-0.0175859
636.6	-0.0049311		1226.59	-0.00702271		1816.59	-0.00715214		2406.58	-0.00444558		2996.58	-0.00067227		3586.58	-0.01723037
636.8	-0.00383549		1226.79	-0.0082674		1816.79	-0.00735192		2406.78	-0.00424321		2996.78	-0.00020548		3586.78	-0.01592278
637	-0.00422468		1226.99	-0.0086226		1816.99	-0.00744548		2406.98	-0.00407466		2996.98	-0.00093677		3586.98	-0.01431303
637.2	-0.00279992		1227.19	-0.00845427		1817.19	-0.00689756		2407.18	-0.00466184		2997.18	0.00022755		3587.18	-0.01434154
637.4	-0.00245657		1227.39	-0.00778263		1817.39	-0.00647205		2407.38	-0.00451586		2997.38	0.00031507		3587.38	-0.01439775
637.6	-0.00271144		1227.59	-0.00757169		1817.59	-0.00587847		2407.58	-0.00489624		2997.58	0.00066816		3587.58	-0.01442443
637.8	-0.00285255		1227.79	-0.00707456		1817.79	-0.0059222		2407.78	-0.00528079		2997.78	0.00108907		3587.78	-0.01435188
638	-0.00239459		1227.99	-0.00677516		1817.99	-0.00681554		2407.98	-0.00597777		2997.98	0.00216316		3587.98	-0.01401444
638.2	-0.0025787		1228.19	-0.00655987		1818.19	-0.00656919		2408.18	-0.00525952		2998.18	0.00312502		3588.18	-0.01449059
638.4	-0.00285299		1228.39	-0.00687676		1818.39	-0.0073681		2408.38	-0.00540281		2998.38	0.0031126		3588.38	-0.0140061
638.6	-0.0040798		1228.59	-0.00646459		1818.59	-0.00702572		2408.58	-0.00461825		2998.58	0.0026497		3588.58	-0.01408355
638.8	-0.00350683		1228.79	-0.00546362		1818.79	-0.00725265		2408.78	-0.00419577		2998.78	0.00228083		3588.78	-0.01434078
639	-0.00397728		1228.99	-0.00499259		1818.99	-0.00724799		2408.98	-0.00385919		2998.98	0.00252909		3588.98	-0.01553435
639.2	-0.00423421		1229.19	-0.00517324		1819.19	-0.00734458		2409.18	-0.00333829		2999.18	0.00214618		3589.18	-0.01615919
639.4	-0.00531264		1229.39	-0.00486577		1819.39	-0.00769779		2409.38	-0.003617		2999.38	0.00223383		3589.38	-0.01640634
639.6	-0.00568509		1229.59	-0.00586258		1819.59	-0.00720882		2409.58	-0.00404541		2999.58	0.00179336		3589.58	-0.01644199
639.8	-0.00533916		1229.79	-0.00641624		1819.79	-0.00753928		2409.78	-0.00436616		2999.78	0.00154189		3589.78	-0.01686802
640	-0.0059956		1229.99	-0.00618785		1819.99	-0.00746004		2409.98	-0.0046312		2999.98	0.00152366		3589.98	-0.01684536
640.2	-0.00557576		1230.19	-0.00659531		1820.19	-0.00709582		2410.18	-0.00477039		3000.18	0.00106845		3590.18	-0.01533123
640.4	-0.00480949		1230.39	-0.00706366		1820.39	-0.00648166		2410.38	-0.00469524		3000.38	0.0020942		3590.38	-0.01545453
640.6	-0.00506087		1230.59	-0.00803423		1820.59	-0.00672093		2410.58	-0.00431646		3000.58	0.00198458		3590.58	-0.01498014
640.8	-0.00454632		1230.79	-0.00836761		1820.79	-0.0065567		2410.78	-0.00447312		3000.78	0.00205506		3590.78	-0.0144485
641	-0.00417567		1230.99	-0.0080317		1820.99	-0.00587743		2410.98	-0.00478483		3000.98	0.00183645		3590.98	-0.01484062
641.2	-0.00387323		1231.19	-0.00762117		1821.19	-0.00656554		2411.18	-0.00536033		3001.18	0.00229929		3591.18	-0.01512936
641.4	-0.00398937		1231.39	-0.00719597		1821.39	-0.00701063		2411.38	-0.00610912		3001.38	0.00265074		3591.38	-0.01488922
641.6	-0.00370088		1231.59	-0.00657209		1821.59	-0.00677808		2411.58	-0.00676967		3001.58	0.00275674		3591.58	-0.01515855
641.8	-0.00342084		1231.79	-0.00626838		1821.79	-0.00739692		2411.78	-0.00737666		3001.78	0.00274157		3591.78	-0.01485151
642	-0.0040326		1231.99	-0.00570943		1821.99	-0.00796645		2411.98	-0.0083535		3001.98	0.00270917		3591.98	-0.01483163
642.2	-0.00464904		1232.19	-0.00484751		1822.19	-0.00848597		2412.18	-0.00874772		3002.18	0.00243677		3592.18	-0.01464344
642.4	-0.00511481		1232.39	-0.00409801		1822.39	-0.00849569		2412.38	-0.00854178		3002.38	0.00129131		3592.38	-0.01489573
642.6	-0.005787		1232.59	-0.0037513		1822.59	-0.00883776		2412.58	-0.0081052		3002.58	0.00069673		3592.58	-0.01501508
642.8	-0.00531219		1232.79	-0.00375393		1822.79	-0.00816629		2412.78	-0.00847847		3002.78	0.00029266		3592.78	-0.01452529
643	-0.00612375		1232.99	-0.00464699		1822.99	-0.00797328		2412.98	-0.00803853		3002.98	0.00032458		3592.98	-0.01524323
643.2	-0.00577661		1233.19	-0.00382724		1823.19	-0.00811699		2413.18	-0.00756202		3003.18	0.0001105		3593.18	-0.01523928
643.4	-0.00664338		1233.39	-0.00342197		1823.39	-0.00875037		2413.38	-0.00769603		3003.38	0.00089472		3593.38	-0.01534703
643.6	-0.00614617		1233.59	-0.00436512		1823.59	-0.00866612		2413.58	-0.00799342		3003.58	0.0008896		3593.58	-0.01537942
643.8	-0.00665662		1233.79	-0.00501659		1823.79	-0.00877276		2413.78	-0.00755685		3003.78	0.00084107		3593.78	-0.01582039
644	-0.00746135		1233.99	-0.00539381		1823.99	-0.00899602		2413.98	-0.00733304		3003.98	0.00084403		3593.98	-0.01503243
644.2	-0.00725964		1234.19	-0.00599404		1824.19	-0.00836974		2414.18	-0.00673313		3004.18	0.00033153		3594.18	-0.01562665
644.4	-0.00734187		1234.39	-0.00608047		1824.39	-0.00761624		2414.38	-0.00612326		3004.38	0.00061384		3594.38	-0.01682043
644.6	-0.00737029		1234.59	-0.00641296		1824.59	-0.00835987		2414.58	-0.00574766		3004.58	-0.00066183		3594.58	-0.01675493
644.8	-0.00712782		1234.79	-0.00693161		1824.79	-0.00847481		2414.78	-0.00542094		3004.78	-0.00071929		3594.78	-0.01703647
645	-0.00662542		1234.99	-0.00766132		1824.99	-0.00829712		2414.98	-0.00566193		3004.98	-0.00061289		3594.98	-0.01718134
645.2	-0.00691051		1235.19	-0.00722386		1825.19	-0.00930429		2415.18	-0.0061668		3005.18	-0.00052855		3595.18	-0.01678715
645.4	-0.00682379		1235.39	-0.00698722		1825.39	-0.00837601		2415.38	-0.00708247		3005.38	-0.00089104		3595.38	-0.01659281
645.6	-0.00692398		1235.59	-0.00701633		1825.59	-0.00780379		2415.58	-0.00711445		3005.58	-0.00128066		3595.58	-0.01749681
645.8	-0.00726801		1235.79	-0.00677798		1825.79	-0.00799125		2415.78	-0.00779583		3005.78	-0.00133854		3595.78	-0.01742651
646	-0.00739437		1235.99	-0.00596307		1825.99	-0.00734884		2415.98	-0.00758924		3005.98	-0.00136786		3595.98	-0.01763273
646.2	-0.00647672		1236.19	-0.00580108		1826.19	-0.00801779		2416.18	-0.00774344		3006.18	-0.00072274		3596.18	-0.01793692
646.4	-0.00622335		1236.39	-0.00605271		1826.39	-0.00763162		2416.38	-0.00700205		3006.38	-0.00071361		3596.38	-0.01744776
646.6	-0.00601847		1236.59	-0.00645519		1826.59	-0.00793168		2416.58	-0.00805966		3006.58	-0.00032253		3596.58	-0.0167968
646.8	-0.00564848		1236.79	-0.00654486		1826.79	-0.00751484		2416.78	-0.0078489		3006.78	-0.0001475		3596.78	-0.01674634
647	-0.00513804		1236.99	-0.00634131		1826.99	-0.00844977		2416.98	-0.00762337		3006.98	0.00084046		3596.98	-0.01712742
647.2	-0.00487805		1237.19	-0.00501846		1827.19	-0.00873563		2417.18	-0.00714473		3007.18	0.00081735		3597.18	-0.01672933
647.4	-0.00519196		1237.39	-0.00508009		1827.39	-0.00913194		2417.38	-0.00733674		3007.38	0.00084488		3597.38	-0.01775256
647.6	-0.00475822		1237.59	-0.00497119		1827.59	-0.00807146		2417.58	-0.00664306		3007.58	0.00038816		3597.58	-0.01783571
647.8	-0.00529849		1237.79	-0.00470546		1827.79	-0.00755476		2417.78	-0.00641191		3007.78	0.00052541		3597.78	-0.01812324
648	-0.00541776		1237.99	-0.00456185		1827.99	-0.00757413		2417.98	-0.0061886		3007.98	0.00047705		3597.98	-0.01745413
648.2	-0.00537024		1238.19	-0.00471677		1828.19	-0.00668156		2418.18	-0.00548233		3008.18	0.00002556		3598.18	-0.01740957
648.4	-0.00581456		1238.39	-0.00460476		1828.39	-0.00618255		2418.38	-0.00487993		3008.38	0.00029961		3598.38	-0.01667652
648.6	-0.00615188		1238.59	-0.00510123		1828.59	-0.00638033		2418.58	-0.00468274		3008.58	-0.00027647		3598.58	-0.01583373
648.8	-0.00631256		1238.79	-0.00584887		1828.79	-0.00567943		2418.78	-0.00425241		3008.78	0.00008644		3598.78	-0.01541024
649	-0.00630959		1238.99	-0.00618949		1828.99	-0.00565279		2418.98	-0.0038199		3008.98	0.00012091		3598.98	-0.01492098
649.2	-0.00694593		1239.19	-0.0058401		1829.19	-0.0053953		2419.18	-0.00335712		3009.18	-0.00001202		3599.18	-0.01428213
649.4	-0.00712528		1239.39	-0.00630296		1829.39	-0.00487638		2419.38	-0.00296623		3009.38	-0.00039093		3599.38	-0.01416013
649.6	-0.0074206		1239.59	-0.00679898		1829.59	-0.00494137		2419.58	-0.00178273		3009.58	-0.00024012		3599.58	-0.01396812
649.8	-0.00719154		1239.79	-0.00698354		1829.79	-0.00485143		2419.78	-0.00117204		3009.78	0.00006426		3599.78	-0.01337402
