# Supplementary material for: Functional development of a V3/glycan-specific broadly neutralizing antibody isolated from a case of HIV superinfection
Source: eLife journal article supplement (doi:10.7554/elife.68110), 2021-07-15
Supplement: fig2-data2 [file E5.xls]

Vers 3.43 Data Simulation
Conc1	1.25E-07	1.25E-07	1.25E-07	1.25E-07	1.25E-07	1.25E-07	1.25E-07
Start1	290	880	1470	2060	2649.99	3239.99	3829.98
Stop1	649.8	1239.79	1829.8	2419.8	3009.79	3599.78	4189.78
Time1	Data1	Sim1	Time2	Data2	Sim2	Time3	Data3	Sim3	Time4	Data4	Sim4	Time5	Data5	Sim5	Time6	Data6	Sim6	Time7	Data7	Sim7
290	0.00581428		880	-0.00299734		1470	-0.00001884		2060	0.00141616		2649.99	-0.00568024		3239.99	0.00471678		3829.98	0.00020423
290.2	0.00648933		880.2	-0.00434463		1470.2	-0.00007835		2060.2	0.00221147		2650.19	-0.00680892		3240.19	0.00447492		3830.18	0.00016731
290.4	0.00741652		880.4	-0.00578144		1470.4	0.00047198		2060.4	0.00275955		2650.39	-0.00702585		3240.39	0.0047884		3830.38	-0.00027613
290.6	0.00780729		880.6	-0.00671661		1470.6	0.00020165		2060.6	0.0040142		2650.59	-0.00789932		3240.59	0.00449988		3830.58	0.00030347
290.8	0.00824886		880.8	-0.00688057		1470.8	-0.00033775		2060.8	0.00517008		2650.79	-0.00918235		3240.79	0.00471118		3830.78	0.00030362
291	0.00892205		881	-0.00718893		1471	-0.00007934		2061	0.00624974		2650.99	-0.01031215		3240.99	0.0050003		3830.98	0.00115512
291.2	0.00992653		881.2	-0.00689961		1471.2	0.00083667		2061.2	0.00698272		2651.19	-0.01067336		3241.19	0.00532333		3831.18	0.00125539
291.4	0.01046505		881.4	-0.00666868		1471.4	0.00157242		2061.4	0.007511		2651.39	-0.01031273		3241.39	0.00567085		3831.38	0.00133025
291.6	0.01042016		881.6	-0.00568497		1471.6	0.00106824		2061.6	0.00755549		2651.59	-0.01013251		3241.59	0.00574412		3831.58	0.00098576
291.8	0.01051487		881.8	-0.00541938		1471.8	0.00142321		2061.8	0.00750128		2651.79	-0.00983723		3241.79	0.0065197		3831.78	0.00078846
292	0.01043725		882	-0.00404988		1472	0.00104964		2062	0.00786493		2651.99	-0.00965155		3241.99	0.00756898		3831.98	0.00047733
292.2	0.0107262		882.2	-0.00250749		1472.2	0.0013908		2062.2	0.00738423		2652.19	-0.00911363		3242.19	0.00779481		3832.18	-0.00002688
292.4	0.01140142		882.4	-0.00185572		1472.4	0.00098913		2062.4	0.00724333		2652.39	-0.00833898		3242.39	0.00793089		3832.38	-0.00069174
292.6	0.01171659		882.6	-0.00070613		1472.6	0.00077632		2062.6	0.00629466		2652.59	-0.0082054		3242.59	0.00723804		3832.58	-0.00073177
292.8	0.01250096		882.8	0.00035031		1472.8	0.00191683		2062.8	0.00534829		2652.79	-0.00810027		3242.79	0.00672611		3832.78	-0.00136179
293	0.01351893		883	0.00070938		1473	0.00254975		2063	0.00504227		2652.99	-0.00877849		3242.99	0.00792163		3832.98	-0.00149121
293.2	0.01344685		883.2	0.00045172		1473.2	0.00327122		2063.2	0.00455242		2653.19	-0.00869686		3243.19	0.00759343		3833.18	-0.00145018
293.4	0.0142796		883.4	0.00104121		1473.4	0.00306909		2063.4	0.00514334		2653.39	-0.00916521		3243.39	0.00760754		3833.38	-0.00141108
293.6	0.01599176		883.6	0.00108866		1473.6	0.00216999		2063.6	0.00511533		2653.59	-0.00953006		3243.59	0.00735025		3833.58	-0.00157525
293.8	0.01650095		883.8	0.00085472		1473.8	0.00280745		2063.8	0.00604945		2653.79	-0.00919763		3243.79	0.00765133		3833.78	-0.00137787
294	0.01784906		884	-0.00032876		1474	0.00314916		2064	0.00611909		2653.99	-0.00953461		3243.99	0.00801959		3833.98	-0.00158197
294.2	0.01786615		884.2	-0.00023534		1474.2	0.0036154		2064.2	0.00633461		2654.19	-0.01011455		3244.19	0.00800784		3834.18	-0.00102786
294.4	0.01882723		884.4	-0.00047066		1474.4	0.00380639		2064.4	0.00674117		2654.39	-0.00997313		3244.39	0.00833224		3834.38	0.00000908
294.6	0.01916818		884.6	-0.00024052		1474.6	0.00357851		2064.6	0.00773091		2654.59	-0.01042102		3244.59	0.00799714		3834.58	0.001338
294.8	0.01901554		884.8	-0.00025469		1474.8	0.00416665		2064.8	0.00786025		2654.79	-0.01063101		3244.79	0.0085498		3834.78	0.00158854
295	0.02030511		885	-0.00012566		1475	0.00493107		2065	0.00775878		2654.99	-0.01092537		3244.99	0.00890239		3834.98	0.00159046
295.2	0.02137861		885.2	0.00045294		1475.2	0.0055816		2065.2	0.00744103		2655.19	-0.01050012		3245.19	0.00911615		3835.18	0.00119703
295.4	0.02148012		885.4	-0.00018019		1475.4	0.00551387		2065.4	0.00772793		2655.39	-0.00985483		3245.39	0.01036654		3835.38	0.00236058
295.6	0.02131203		885.6	-0.00054977		1475.6	0.00548556		2065.6	0.00773215		2655.59	-0.01000159		3245.59	0.01093406		3835.58	0.00177903
295.8	0.02159161		885.8	-0.00169442		1475.8	0.00593845		2065.8	0.0073724		2655.79	-0.00939435		3245.79	0.0121618		3835.78	0.002037
296	0.0217461		886	-0.00115327		1476	0.0052095		2066	0.00780961		2655.99	-0.00922863		3245.99	0.01241892		3835.98	0.00220352
296.2	0.02246513		886.2	-0.00181237		1476.2	0.0052336		2066.2	0.00737718		2656.19	-0.00846202		3246.19	0.01246052		3836.18	0.00216256
296.4	0.02296409		886.4	-0.00219985		1476.4	0.00536109		2066.4	0.00686072		2656.39	-0.00749254		3246.39	0.01242893		3836.38	0.00253084
296.6	0.02277456		886.6	-0.00236736		1476.6	0.0057961		2066.6	0.00705197		2656.59	-0.00673583		3246.59	0.01227273		3836.58	0.00296923
296.8	0.02310534		886.8	-0.00228124		1476.8	0.00617322		2066.8	0.00728319		2656.79	-0.00772803		3246.79	0.01246391		3836.78	0.00302447
297	0.02243943		887	-0.00245904		1477	0.00611234		2067	0.00919913		2656.99	-0.00825796		3246.99	0.01191752		3836.98	0.00331068
297.2	0.02176288		887.2	-0.00283625		1477.2	0.00546036		2067.2	0.00897424		2657.19	-0.00822008		3247.19	0.01158452		3837.18	0.00301839
297.4	0.02264674		887.4	-0.0024298		1477.4	0.00522363		2067.4	0.00894731		2657.39	-0.00807994		3247.39	0.0107397		3837.38	0.00428771
297.6	0.0227127		887.6	-0.00187216		1477.6	0.00513044		2067.6	0.00919352		2657.59	-0.00861375		3247.59	0.0095436		3837.58	0.00434813
297.8	0.02233602		887.8	-0.00184587		1477.8	0.00520403		2067.8	0.00937028		2657.79	-0.00839774		3247.79	0.00888899		3837.78	0.00479636
298	0.0225398		888	-0.00217264		1478	0.00532193		2068	0.00901902		2657.99	-0.00899081		3247.99	0.00829218		3837.98	0.00557269
298.2	0.02208839		888.2	-0.00133923		1478.2	0.00430232		2068.2	0.00810239		2658.19	-0.00871763		3248.19	0.00744915		3838.18	0.00708353
298.4	0.02275801		888.4	-0.00159823		1478.4	0.00451939		2068.4	0.00778441		2658.39	-0.00897347		3248.39	0.00668726		3838.38	0.007607
298.6	0.02258778		888.6	-0.00083331		1478.6	0.00541053		2068.6	0.00717003		2658.59	-0.00870505		3248.59	0.00619479		3838.58	0.00719808
298.8	0.0230274		888.8	0.00004992		1478.8	0.00630825		2068.8	0.00696184		2658.79	-0.0091759		3248.79	0.00657405		3838.78	0.00706973
299	0.02426111		889	0.00171811		1479	0.00606394		2069	0.0066196		2658.99	-0.01037719		3248.99	0.00700912		3838.98	0.00667299
299.2	0.02496308		889.2	0.00146489		1479.2	0.00669581		2069.2	0.00642782		2659.19	-0.00995734		3249.19	0.00718107		3839.18	0.00693172
299.4	0.02479997		889.4	0.00091963		1479.4	0.00694481		2069.4	0.00688206		2659.39	-0.00982977		3249.39	0.00869432		3839.38	0.006828
299.6	0.02517837		889.6	0.00092293		1479.6	0.00761539		2069.6	0.00650591		2659.59	-0.01026642		3249.59	0.00870903		3839.58	0.0060503
299.8	0.02578599		889.8	0.00102636		1479.8	0.00737533		2069.8	0.00603655		2659.79	-0.00961736		3249.79	0.00965896		3839.78	0.00614695
300	0.02644408		890	0.00108138		1480	0.00636481		2070	0.00633661		2659.99	-0.009504		3249.99	0.01054579		3839.98	0.00555421
300.2	0.02651911		890.2	0.0009731		1480.2	0.0067276		2070.2	0.00697854		2660.19	-0.00960562		3250.19	0.01140218		3840.18	0.0052226
300.4	0.02592154		890.4	0.0016017		1480.4	0.00721185		2070.4	0.00703993		2660.39	-0.00910724		3250.39	0.01205391		3840.38	0.0043112
300.6	0.02634811		890.6	0.00188774		1480.6	0.00722393		2070.6	0.00715577		2660.59	-0.00923956		3250.59	0.01172522		3840.58	0.00342515
300.8	0.02703379		890.8	0.00166026		1480.8	0.00721483		2070.8	0.0069881		2660.79	-0.00964647		3250.79	0.01168934		3840.78	0.00275991
301	0.02680585		891	0.0015046		1481	0.00808071		2071	0.00729217		2660.99	-0.00881693		3250.99	0.01140344		3840.98	0.00185147
301.2	0.02675333		891.2	0.00086767		1481.2	0.00756034		2071.2	0.00626875		2661.19	-0.00865823		3251.19	0.01122318		3841.18	0.00097602
301.4	0.02822974		891.4	0.00014543		1481.4	0.00725917		2071.4	0.00567428		2661.39	-0.00778446		3251.39	0.0103637		3841.38	0.00067798
301.6	0.02831002		891.6	-0.0003657		1481.6	0.00733253		2071.6	0.00579736		2661.59	-0.00764335		3251.59	0.00991115		3841.58	0.00045678
301.8	0.02827415		891.8	-0.00140182		1481.8	0.00626831		2071.8	0.00600717		2661.79	-0.00740764		3251.79	0.00934294		3841.78	0.0006644
302	0.02830908		892	-0.00147679		1482	0.00680711		2072	0.00551263		2661.99	-0.00676844		3251.99	0.00861899		3841.98	0.0012431
302.2	0.02925188		892.2	-0.00094984		1482.2	0.00644058		2072.2	0.00537174		2662.19	-0.00658475		3252.19	0.00888643		3842.18	0.00184618
302.4	0.02950961		892.4	-0.00059926		1482.4	0.00725997		2072.4	0.00635263		2662.39	-0.00595244		3252.39	0.00845893		3842.38	0.00133155
302.6	0.0298398		892.6	-0.00013707		1482.6	0.00790897		2072.6	0.00646716		2662.59	-0.00575188		3252.59	0.00757732		3842.58	0.00097958
302.8	0.03039995		892.8	-0.00026388		1482.8	0.00851654		2072.8	0.00634883		2662.79	-0.00609062		3252.79	0.00732096		3842.78	0.00152738
303	0.03065942		893	-0.00016781		1483	0.00793978		2073	0.00622215		2662.99	-0.00609112		3252.99	0.00776053		3842.98	0.00180591
303.2	0.03162319		893.2	-0.00103148		1483.2	0.00758642		2073.2	0.00585263		2663.19	-0.00648158		3253.19	0.00762103		3843.18	0.00203899
303.4	0.03218512		893.4	-0.00108019		1483.4	0.00695425		2073.4	0.00676016		2663.39	-0.00709783		3253.39	0.00779727		3843.38	0.00231742
303.6	0.03395335		893.6	-0.00123095		1483.6	0.00697249		2073.6	0.00664011		2663.59	-0.00741408		3253.59	0.00817237		3843.58	0.0033718
303.8	0.03438029		893.8	-0.00115396		1483.8	0.00705346		2073.8	0.00640416		2663.79	-0.00774972		3253.79	0.00838311		3843.78	0.00326973
304	0.03474585		894	-0.0016603		1484	0.00609901		2074	0.00669418		2663.99	-0.00810747		3253.99	0.00822356		3843.98	0.00352169
304.2	0.03395411		894.2	-0.00081043		1484.2	0.00696364		2074.2	0.00767093		2664.19	-0.00952395		3254.19	0.00795636		3844.18	0.00373384
304.4	0.03357339		894.4	-0.00085606		1484.4	0.00693391		2074.4	0.00815528		2664.39	-0.00921131		3254.39	0.0071492		3844.38	0.00390647
304.6	0.0335579		894.6	-0.0008173		1484.6	0.00719522		2074.6	0.00856413		2664.59	-0.01008158		3254.59	0.00663878		3844.58	0.00429083
304.8	0.03304053		894.8	-0.00128126		1484.8	0.00733472		2074.8	0.00945307		2664.79	-0.010425		3254.79	0.00763538		3844.78	0.00457886
305	0.03294844		895	-0.00079255		1485	0.00764927		2075	0.01002721		2664.99	-0.00976425		3254.99	0.00786978		3844.98	0.00406843
305.2	0.03280981		895.2	-0.00033714		1485.2	0.00738638		2075.2	0.01006659		2665.19	-0.00992523		3255.19	0.00815704		3845.18	0.00409693
305.4	0.03371542		895.4	-0.0001927		1485.4	0.00779616		2075.4	0.01018207		2665.39	-0.00929006		3255.39	0.00824136		3845.38	0.00445296
305.6	0.03311102		895.6	0.00022572		1485.6	0.0077885		2075.6	0.01115316		2665.59	-0.00939851		3255.59	0.00898517		3845.58	0.00522085
305.8	0.03300449		895.8	0.00041878		1485.8	0.00700582		2075.8	0.01161167		2665.79	-0.00974343		3255.79	0.00859505		3845.78	0.00551663
306	0.03362296		896	0.00091586		1486	0.00785738		2076	0.01183356		2665.99	-0.00917816		3255.99	0.00916858		3845.98	0.00526145
306.2	0.03325764		896.2	0.00053265		1486.2	0.00765881		2076.2	0.01216961		2666.19	-0.00868771		3256.19	0.00961787		3846.18	0.00433324
306.4	0.03251276		896.4	0.00001088		1486.4	0.00796714		2076.4	0.01264198		2666.39	-0.00799916		3256.39	0.00852909		3846.38	0.00451726
306.6	0.03230337		896.6	-0.00098692		1486.6	0.00856959		2076.6	0.0116073		2666.59	-0.0083584		3256.59	0.00694023		3846.58	0.00351065
306.8	0.03163754		896.8	-0.00070115		1486.8	0.00791772		2076.8	0.01144567		2666.79	-0.00744836		3256.79	0.00733497		3846.78	0.00384594
307	0.03183797		897	-0.000698		1487	0.00699571		2077	0.0111934		2666.99	-0.00690041		3256.99	0.00836097		3846.98	0.00388409
307.2	0.03243987		897.2	-0.00090247		1487.2	0.00673126		2077.2	0.0112707		2667.19	-0.00748289		3257.19	0.00849335		3847.18	0.00346611
307.4	0.03314952		897.4	-0.00137855		1487.4	0.00612936		2077.4	0.0112859		2667.39	-0.00703082		3257.39	0.00852139		3847.38	0.00380529
307.6	0.03374561		897.6	-0.00173506		1487.6	0.00644665		2077.6	0.01107134		2667.59	-0.00702724		3257.59	0.00934297		3847.58	0.00338208
307.8	0.03401177		897.8	-0.0020143		1487.8	0.0066938		2077.8	0.01083449		2667.79	-0.00713801		3257.79	0.00883178		3847.78	0.00312568
308	0.03462587		898	-0.00149659		1488	0.00575365		2078	0.01115901		2667.99	-0.00773528		3257.99	0.00868768		3847.98	0.00319068
308.2	0.03447641		898.2	-0.00051794		1488.2	0.00653294		2078.2	0.01195072		2668.19	-0.00877697		3258.19	0.00882839		3848.18	0.00281719
308.4	0.03429078		898.4	-0.00043479		1488.4	0.00647216		2078.4	0.01233453		2668.39	-0.00882477		3258.39	0.00806625		3848.38	0.00380554
308.6	0.03477164		898.6	0.00066366		1488.6	0.00615578		2078.6	0.01226013		2668.59	-0.01002745		3258.59	0.00820436		3848.58	0.00414453
308.8	0.03568508		898.8	0.00100408		1488.8	0.00659039		2078.8	0.01279232		2668.79	-0.00955699		3258.79	0.00928787		3848.78	0.00382564
309	0.03697227		899	0.00192888		1489	0.00737782		2079	0.01224856		2668.99	-0.00890509		3258.99	0.00967697		3848.98	0.00343015
309.2	0.03668419		899.2	0.00307861		1489.2	0.00775777		2079.2	0.01206669		2669.19	-0.00986928		3259.19	0.0102234		3849.18	0.00428848
309.4	0.03786735		899.4	0.00328063		1489.4	0.00805052		2079.4	0.01158684		2669.39	-0.00928474		3259.39	0.01060777		3849.38	0.00480709
309.6	0.03828314		899.6	0.00262913		1489.6	0.00852927		2079.6	0.01192073		2669.59	-0.009619		3259.59	0.01168318		3849.58	0.0058411
309.8	0.03945729		899.8	0.00255717		1489.8	0.00909445		2079.8	0.0120743		2669.79	-0.00953472		3259.79	0.01109804		3849.78	0.00571252
310	0.03965696		900	0.00223128		1490	0.00992716		2080	0.01093213		2669.99	-0.00906981		3259.99	0.01177658		3849.98	0.0052847
310.2	0.03938035		900.2	0.00188344		1490.2	0.00997786		2080.2	0.01107514		2670.19	-0.00870291		3260.19	0.01165653		3850.18	0.00524403
310.4	0.03970648		900.4	0.00176889		1490.4	0.01069212		2080.4	0.01057235		2670.39	-0.00838045		3260.39	0.01166402		3850.38	0.00588105
310.6	0.03964979		900.6	0.00148584		1490.6	0.01035182		2080.6	0.01048585		2670.59	-0.00765675		3260.59	0.01119789		3850.58	0.00508712
310.8	0.03955585		900.8	0.00132955		1490.8	0.01050895		2080.8	0.01014292		2670.79	-0.00703126		3260.79	0.01173735		3850.78	0.00639399
311	0.03936586		901	0.00045302		1491	0.01087303		2081	0.00929542		2670.99	-0.00713949		3260.99	0.0110659		3850.98	0.00664656
311.2	0.03974179		901.2	0.00038603		1491.2	0.01110146		2081.2	0.00889929		2671.19	-0.00640222		3261.19	0.01060245		3851.18	0.0065472
311.4	0.03978609		901.4	0.00030822		1491.4	0.01044821		2081.4	0.00839505		2671.39	-0.00581863		3261.39	0.00953147		3851.38	0.00674262
311.6	0.03974003		901.6	-0.000041		1491.6	0.01003036		2081.6	0.00973716		2671.59	-0.00581738		3261.59	0.009429		3851.58	0.00594258
311.8	0.04016142		901.8	0.00011911		1491.8	0.00991101		2081.8	0.00947985		2671.79	-0.00603821		3261.79	0.00846342		3851.78	0.00533075
312	0.04043199		902	0.00064023		1492	0.00955399		2082	0.00969086		2671.99	-0.00741292		3261.99	0.00777867		3851.98	0.00542746
312.2	0.04016674		902.2	0.00032505		1492.2	0.00936071		2082.2	0.00981999		2672.19	-0.0078567		3262.19	0.00785655		3852.18	0.00588574
312.4	0.0404798		902.4	-0.00003079		1492.4	0.00894607		2082.4	0.01036409		2672.39	-0.00872852		3262.39	0.0068091		3852.38	0.00646143
312.6	0.04202627		902.6	-0.00016818		1492.6	0.0086577		2082.6	0.01102295		2672.59	-0.00903455		3262.59	0.00644775		3852.58	0.00553505
312.8	0.04283035		902.8	-0.00014526		1492.8	0.00880546		2082.8	0.01197212		2672.79	-0.00880903		3262.79	0.00814519		3852.78	0.00480085
313	0.04287267		903	-0.00070445		1493	0.00892956		2083	0.01189312		2672.99	-0.00904775		3262.99	0.00768408		3852.98	0.00429348
313.2	0.04226246		903.2	-0.00045104		1493.2	0.00823505		2083.2	0.01239614		2673.19	-0.00984409		3263.19	0.00744932		3853.18	0.00462389
313.4	0.0431625		903.4	-0.00066193		1493.4	0.0093893		2083.4	0.01218484		2673.39	-0.00935183		3263.39	0.00736728		3853.38	0.00504134
313.6	0.04297644		903.6	-0.00069578		1493.6	0.00921927		2083.6	0.01282729		2673.59	-0.0091239		3263.59	0.00792913		3853.58	0.00566118
313.8	0.04320198		903.8	0.00029632		1493.8	0.00901779		2083.8	0.01220137		2673.79	-0.00902943		3263.79	0.00816175		3853.78	0.005847
314	0.04341274		904	0.00025711		1494	0.00857258		2084	0.01103571		2673.99	-0.00889517		3263.99	0.00901869		3853.98	0.00736041
314.2	0.04339463		904.2	0.00070196		1494.2	0.00779384		2084.2	0.01202435		2674.19	-0.0088273		3264.19	0.00987807		3854.18	0.00783028
314.4	0.04346856		904.4	0.00048197		1494.4	0.00896694		2084.4	0.01141736		2674.39	-0.00900944		3264.39	0.01056935		3854.38	0.00859832
314.6	0.04337092		904.6	0.00069978		1494.6	0.00891691		2084.6	0.0110763		2674.59	-0.00853155		3264.59	0.00988396		3854.58	0.00846498
314.8	0.04318634		904.8	0.00082416		1494.8	0.00918926		2084.8	0.0102521		2674.79	-0.00848052		3264.79	0.01017564		3854.78	0.00910984
315	0.04274277		905	0.00140428		1495	0.00918004		2085	0.00965825		2674.99	-0.00824069		3264.99	0.00963334		3854.98	0.00850186
315.2	0.04305342		905.2	0.00215875		1495.2	0.00864788		2085.2	0.0085493		2675.19	-0.00664243		3265.19	0.01061105		3855.18	0.00761277
315.4	0.04297685		905.4	0.00296521		1495.4	0.00902219		2085.4	0.00908529		2675.39	-0.00624301		3265.39	0.01062393		3855.38	0.00790807
315.6	0.04279852		905.6	0.00317342		1495.6	0.00870778		2085.6	0.00988196		2675.59	-0.00642413		3265.59	0.0110944		3855.58	0.00849298
315.8	0.04285968		905.8	0.00318016		1495.8	0.00952028		2085.8	0.00890598		2675.79	-0.00564315		3265.79	0.0109454		3855.78	0.00778546
316	0.04343431		906	0.00310701		1496	0.00897277		2086	0.00934832		2675.99	-0.00612516		3265.99	0.01097644		3855.98	0.00796239
316.2	0.04336408		906.2	0.0024225		1496.2	0.00842571		2086.2	0.00893123		2676.19	-0.00624434		3266.19	0.01138572		3856.18	0.00744102
316.4	0.0441505		906.4	0.00165065		1496.4	0.00895105		2086.4	0.00960658		2676.39	-0.00655296		3266.39	0.01134985		3856.38	0.00570678
316.6	0.04495606		906.6	0.00102667		1496.6	0.00884614		2086.6	0.00964106		2676.59	-0.00596936		3266.59	0.01177736		3856.58	0.0044969
316.8	0.04416882		906.8	0.00072116		1496.8	0.00854994		2086.8	0.00976481		2676.79	-0.00628274		3266.79	0.01236163		3856.78	0.00379245
317	0.04296602		907	-0.00017993		1497	0.00896798		2087	0.01034532		2676.99	-0.00608548		3266.99	0.01234138		3856.98	0.00255265
317.2	0.04283778		907.2	-0.00002105		1497.2	0.00881048		2087.2	0.01067408		2677.19	-0.00641855		3267.19	0.01280929		3857.18	0.00220445
317.4	0.04252141		907.4	0.00043874		1497.4	0.00990577		2087.4	0.01117595		2677.39	-0.00591749		3267.39	0.01211843		3857.38	0.00179019
317.6	0.04168147		907.6	0.00007851		1497.6	0.00789045		2087.6	0.01158406		2677.59	-0.00563068		3267.59	0.01165822		3857.58	0.00186328
317.8	0.04071322		907.8	-0.00023885		1497.8	0.00794416		2087.8	0.01082311		2677.79	-0.0062181		3267.79	0.01144542		3857.78	0.00292226
318	0.04093811		908	-0.00086189		1498	0.00734631		2088	0.01152593		2677.99	-0.00669327		3267.99	0.01119427		3857.98	0.00308067
318.2	0.04137095		908.2	-0.00031843		1498.2	0.00723352		2088.2	0.01242162		2678.19	-0.00748007		3268.19	0.01163889		3858.18	0.00301498
318.4	0.04120265		908.4	-0.00047415		1498.4	0.00784702		2088.4	0.01209655		2678.39	-0.00771282		3268.39	0.01097581		3858.38	0.00308521
318.6	0.04212633		908.6	-0.00031846		1498.6	0.00794076		2088.6	0.01185316		2678.59	-0.00733873		3268.59	0.01047004		3858.58	0.00308977
318.8	0.04276221		908.8	0.00060006		1498.8	0.00805268		2088.8	0.01187402		2678.79	-0.00687226		3268.79	0.01055379		3858.78	0.0037526
319	0.04320574		909	0.00131475		1499	0.00841251		2089	0.01089973		2678.99	-0.007011		3268.99	0.0105761		3858.98	0.00453568
319.2	0.04434925		909.2	0.00284299		1499.2	0.00860407		2089.2	0.01068881		2679.19	-0.00638284		3269.19	0.01091635		3859.18	0.00638407
319.4	0.04457122		909.4	0.00387335		1499.4	0.00984823		2089.4	0.01120809		2679.39	-0.00625197		3269.39	0.01067253		3859.38	0.00909038
319.6	0.04509667		909.6	0.00446497		1499.6	0.00976189		2089.6	0.01122596		2679.59	-0.00645154		3269.59	0.01018767		3859.58	0.01057735
319.8	0.04526641		909.8	0.0050522		1499.8	0.00989208		2089.8	0.01009868		2679.79	-0.00599754		3269.79	0.00932226		3859.78	0.01035934
320	0.04696116		910	0.00497899		1500	0.01101544		2090	0.01020943		2679.99	-0.00670342		3269.99	0.00900624		3859.98	0.0113471
320.2	0.04790148		910.2	0.00445814		1500.2	0.01123877		2090.2	0.00953398		2680.19	-0.00743491		3270.19	0.00900744		3860.18	0.0110609
320.4	0.0486196		910.4	0.00467307		1500.4	0.01112635		2090.4	0.0105195		2680.39	-0.00717481		3270.39	0.00898536		3860.38	0.01123561
320.6	0.04878434		910.6	0.00459327		1500.6	0.0118309		2090.6	0.01107996		2680.59	-0.00703073		3270.59	0.00921493		3860.58	0.01105431
320.8	0.04833102		910.8	0.00412592		1500.8	0.0108725		2090.8	0.0108595		2680.79	-0.0074516		3270.79	0.00931442		3860.78	0.00920117
321	0.04883552		911	0.004225		1501	0.01052103		2091	0.01222238		2680.99	-0.0074131		3270.99	0.00971406		3860.98	0.00802568
321.2	0.04845646		911.2	0.004049		1501.2	0.009757		2091.2	0.01274379		2681.19	-0.00796976		3271.19	0.00926918		3861.18	0.007434
321.4	0.04770772		911.4	0.00376329		1501.4	0.00954136		2091.4	0.0132765		2681.39	-0.00810836		3271.39	0.00804291		3861.38	0.00643329
321.6	0.04733686		911.6	0.00313383		1501.6	0.00872506		2091.6	0.01402877		2681.59	-0.00850533		3271.59	0.0086452		3861.58	0.00640973
321.8	0.04742201		911.8	0.00270536		1501.8	0.00787644		2091.8	0.01488034		2681.79	-0.00912076		3271.79	0.0087729		3861.78	0.00652587
322	0.04733953		912	0.00237553		1502	0.00775628		2092	0.01585683		2681.99	-0.00931443		3271.99	0.00913204		3861.98	0.0059236
322.2	0.04807878		912.2	0.00193943		1502.2	0.00887869		2092.2	0.01626976		2682.19	-0.00881662		3272.19	0.00975993		3862.18	0.00627184
322.4	0.04776036		912.4	0.00247494		1502.4	0.00861753		2092.4	0.01605593		2682.39	-0.00846964		3272.39	0.00945843		3862.38	0.00563285
322.6	0.04889539		912.6	0.00297157		1502.6	0.00849458		2092.6	0.01610766		2682.59	-0.00816926		3272.59	0.00941442		3862.58	0.00605234
322.8	0.04876248		912.8	0.00343437		1502.8	0.00897831		2092.8	0.01584824		2682.79	-0.00859514		3272.79	0.010305		3862.78	0.005707
323	0.04890055		913	0.00431183		1503	0.00949752		2093	0.01543347		2682.99	-0.00930444		3272.99	0.01063905		3862.98	0.00625671
323.2	0.04910913		913.2	0.00485163		1503.2	0.00935484		2093.2	0.01454218		2683.19	-0.00854031		3273.19	0.0109718		3863.18	0.00717116
323.4	0.04853106		913.4	0.00460546		1503.4	0.00990122		2093.4	0.01379453		2683.39	-0.00768244		3273.39	0.01172974		3863.38	0.00762037
323.6	0.04876091		913.6	0.00442606		1503.6	0.00995551		2093.6	0.01266334		2683.59	-0.00757681		3273.59	0.01239423		3863.58	0.00819957
323.8	0.04895227		913.8	0.00456002		1503.8	0.01079627		2093.8	0.01228404		2683.79	-0.00719713		3273.79	0.01186209		3863.78	0.00745555
324	0.05049406		914	0.0046735		1504	0.01148686		2094	0.01249442		2683.99	-0.0067831		3273.99	0.01288996		3863.98	0.00734033
324.2	0.05107305		914.2	0.00539716		1504.2	0.01124193		2094.2	0.01172337		2684.19	-0.00704865		3274.19	0.01316081		3864.18	0.0058171
324.4	0.05126804		914.4	0.004831		1504.4	0.01171093		2094.4	0.01173495		2684.39	-0.0061237		3274.39	0.01277365		3864.38	0.00555227
324.6	0.05177753		914.6	0.00437821		1504.6	0.01235946		2094.6	0.01213894		2684.59	-0.00602502		3274.59	0.01390855		3864.58	0.00382285
324.8	0.05240695		914.8	0.00372838		1504.8	0.01199971		2094.8	0.01207501		2684.79	-0.005964		3274.79	0.01362104		3864.78	0.00297182
325	0.05226477		915	0.0040655		1505	0.01202191		2095	0.01270088		2684.99	-0.00519545		3274.99	0.01398647		3864.98	0.00319209
325.2	0.05158115		915.2	0.00381033		1505.2	0.01248429		2095.2	0.01251731		2685.19	-0.00529279		3275.19	0.01362302		3865.18	0.00372543
325.4	0.05149468		915.4	0.00375865		1505.4	0.01214518		2095.4	0.01309434		2685.39	-0.00569773		3275.39	0.0143129		3865.38	0.00383904
325.6	0.05174565		915.6	0.00406926		1505.6	0.01209499		2095.6	0.013873		2685.59	-0.00599459		3275.59	0.01488242		3865.58	0.00435292
325.8	0.05163801		915.8	0.0034365		1505.8	0.01145006		2095.8	0.01438811		2685.79	-0.0063112		3275.79	0.01444659		3865.78	0.00534104
326	0.05162598		916	0.00291497		1506	0.0120977		2096	0.015279		2685.99	-0.00632519		3275.99	0.01516074		3865.98	0.00625512
326.2	0.0524022		916.2	0.0030981		1506.2	0.01269564		2096.2	0.01532645		2686.19	-0.00633783		3276.19	0.01460159		3866.18	0.00651789
326.4	0.05211707		916.4	0.00422734		1506.4	0.01237216		2096.4	0.01577569		2686.39	-0.00729461		3276.39	0.01454592		3866.38	0.00708741
326.6	0.05132847		916.6	0.0035653		1506.6	0.01238978		2096.6	0.01637173		2686.59	-0.00776218		3276.59	0.01439044		3866.58	0.00829214
326.8	0.05152224		916.8	0.00324332		1506.8	0.01284736		2096.8	0.01612079		2686.79	-0.0082883		3276.79	0.01445235		3866.78	0.00851742
327	0.05188677		917	0.00343429		1507	0.01193445		2097	0.01553452		2686.99	-0.00809404		3276.99	0.01491358		3866.98	0.00963122
327.2	0.05149738		917.2	0.00278805		1507.2	0.01096263		2097.2	0.01426794		2687.19	-0.00764952		3277.19	0.01506513		3867.18	0.01015586
327.4	0.05198512		917.4	0.00259207		1507.4	0.01105585		2097.4	0.01400534		2687.39	-0.00847386		3277.39	0.01576094		3867.38	0.01096204
327.6	0.05266284		917.6	0.00226706		1507.6	0.01027783		2097.6	0.01395185		2687.59	-0.00933623		3277.59	0.01563506		3867.58	0.01108457
327.8	0.05301893		917.8	0.00247847		1507.8	0.01009942		2097.8	0.01480071		2687.79	-0.00935462		3277.79	0.01413823		3867.78	0.00982487
328	0.05343844		918	0.0030104		1508	0.00921612		2098	0.01472291		2687.99	-0.00900885		3277.99	0.01480813		3867.98	0.00935919
328.2	0.05347121		918.2	0.00253799		1508.2	0.01029996		2098.2	0.01383418		2688.19	-0.00917654		3278.19	0.01405906		3868.18	0.00943095
328.4	0.05375133		918.4	0.00179615		1508.4	0.01052107		2098.4	0.01408261		2688.39	-0.00835416		3278.39	0.01255372		3868.38	0.00948814
328.6	0.05470622		918.6	0.0021635		1508.6	0.01030819		2098.6	0.01418044		2688.59	-0.00770082		3278.59	0.01282712		3868.58	0.00929986
328.8	0.05496448		918.8	0.00227307		1508.8	0.01033088		2098.8	0.01352832		2688.79	-0.00765916		3278.79	0.01161006		3868.78	0.00928443
329	0.05472941		919	0.002959		1509	0.00974224		2099	0.01371124		2688.99	-0.00662253		3278.99	0.01172969		3868.98	0.00813717
329.2	0.05502551		919.2	0.00253251		1509.2	0.0105833		2099.2	0.01362403		2689.19	-0.00688242		3279.19	0.01171356		3869.18	0.00801705
329.4	0.05561344		919.4	0.00290734		1509.4	0.00985747		2099.4	0.01403956		2689.39	-0.00667667		3279.39	0.01135714		3869.38	0.00759733
329.6	0.0564197		919.6	0.00338325		1509.6	0.01057654		2099.6	0.01391371		2689.59	-0.00563776		3279.59	0.01036654		3869.58	0.00698366
329.8	0.05705042		919.8	0.00333585		1509.8	0.01094212		2099.8	0.0151212		2689.79	-0.0047516		3279.79	0.01030431		3869.78	0.0069801
330	0.05825045		920	0.00411884		1510	0.01138001		2100	0.01567458		2689.99	-0.00416476		3279.99	0.01057719		3869.98	0.00666047
330.2	0.05845493		920.2	0.00454903		1510.2	0.01217325		2100.2	0.01548082		2690.19	-0.0039283		3280.19	0.010473		3870.18	0.00652302
330.4	0.05867774		920.4	0.00492131		1510.4	0.01265132		2100.4	0.016015		2690.39	-0.00355292		3280.39	0.01045126		3870.38	0.00629456
330.6	0.0584541		920.6	0.00465833		1510.6	0.01242605		2100.6	0.01572753		2690.59	-0.00289094		3280.59	0.01099686		3870.58	0.00649502
330.8	0.05943955		920.8	0.00413889		1510.8	0.01180393		2100.8	0.01541477		2690.79	-0.00247043		3280.79	0.01112627		3870.78	0.00604096
331	0.05886643		921	0.00392216		1511	0.01066274		2101	0.01465242		2690.99	-0.00188681		3280.99	0.01230264		3870.98	0.00574635
331.2	0.0586551		921.2	0.00340005		1511.2	0.00966446		2101.2	0.01429436		2691.19	-0.00195469		3281.19	0.01097918		3871.18	0.00471115
331.4	0.05992524		921.4	0.00343793		1511.4	0.00958249		2101.4	0.01455398		2691.39	-0.00272827		3281.39	0.01127981		3871.38	0.00438789
331.6	0.06006765		921.6	0.00254468		1511.6	0.00911164		2101.6	0.01549515		2691.59	-0.00284749		3281.59	0.01189488		3871.58	0.00421734
331.8	0.05952644		921.8	0.00301242		1511.8	0.00911056		2101.8	0.01508689		2691.79	-0.00291308		3281.79	0.01252832		3871.78	0.0042136
332	0.05930582		922	0.00299224		1512	0.00836573		2102	0.01418941		2691.99	-0.00349975		3281.99	0.01361882		3871.98	0.00468959
332.2	0.05954006		922.2	0.00265001		1512.2	0.00865263		2102.2	0.01356515		2692.19	-0.00403672		3282.19	0.01326115		3872.18	0.00552015
332.4	0.06004818		922.4	0.00264198		1512.4	0.00874867		2102.4	0.01289847		2692.39	-0.00471089		3282.39	0.01322357		3872.38	0.00583308
332.6	0.06074894		922.6	0.00265036		1512.6	0.00870657		2102.6	0.01253933		2692.59	-0.0056434		3282.59	0.01411748		3872.58	0.0060002
332.8	0.05997239		922.8	0.00245459		1512.8	0.00902224		2102.8	0.01352188		2692.79	-0.00683481		3282.79	0.01441735		3872.78	0.00623332
333	0.0592445		923	0.00238366		1513	0.00914929		2103	0.01397301		2692.99	-0.007085		3282.99	0.0148836		3872.98	0.00642254
333.2	0.05944225		923.2	0.00259206		1513.2	0.01001656		2103.2	0.01353937		2693.19	-0.00715358		3283.19	0.01405779		3873.18	0.00690246
333.4	0.06086188		923.4	0.00275793		1513.4	0.01006398		2103.4	0.01315338		2693.39	-0.00700072		3283.39	0.01237569		3873.38	0.00735422
333.6	0.06275457		923.6	0.00324319		1513.6	0.01121079		2103.6	0.01336496		2693.59	-0.00697055		3283.59	0.01212653		3873.58	0.00696357
333.8	0.06317316		923.8	0.00319965		1513.8	0.0118156		2103.8	0.01422867		2693.79	-0.00710818		3283.79	0.0115882		3873.78	0.0071658
334	0.06370715		924	0.00367464		1514	0.01206599		2104	0.01374121		2693.99	-0.00692231		3283.99	0.01171		3873.98	0.00768317
334.2	0.06365136		924.2	0.00335559		1514.2	0.01223261		2104.2	0.01369304		2694.19	-0.00698997		3284.19	0.01105226		3874.18	0.00789221
334.4	0.06398686		924.4	0.00382225		1514.4	0.01217128		2104.4	0.01405864		2694.39	-0.00632223		3284.39	0.00928956		3874.38	0.00701688
334.6	0.0628127		924.6	0.00440375		1514.6	0.0116366		2104.6	0.01420682		2694.59	-0.00500243		3284.59	0.00923572		3874.58	0.0074775
334.8	0.06283872		924.8	0.00406621		1514.8	0.01144489		2104.8	0.01369034		2694.79	-0.00372041		3284.79	0.00823767		3874.78	0.0071125
335	0.06349316		925	0.00448451		1515	0.01081374		2105	0.0137474		2694.99	-0.00293924		3284.99	0.00842866		3874.98	0.00735292
335.2	0.06318278		925.2	0.00483793		1515.2	0.00996801		2105.2	0.0136261		2695.19	-0.00345171		3285.19	0.0072945		3875.18	0.00720047
335.4	0.06387919		925.4	0.00519929		1515.4	0.01056965		2105.4	0.01372505		2695.39	-0.00307591		3285.39	0.00876272		3875.38	0.00712538
335.6	0.06360169		925.6	0.00589634		1515.6	0.01019379		2105.6	0.0134222		2695.59	-0.00263256		3285.59	0.00947225		3875.58	0.00695216
335.8	0.06323486		925.8	0.00713916		1515.8	0.00983568		2105.8	0.0123822		2695.79	-0.00261156		3285.79	0.01004326		3875.78	0.00740614
336	0.06180956		926	0.00679642		1516	0.00923986		2106	0.0122237		2695.99	-0.00290682		3285.99	0.01120504		3875.98	0.00736118
336.2	0.06130735		926.2	0.007051		1516.2	0.00987943		2106.2	0.01303105		2696.19	-0.00313182		3286.19	0.01086102		3876.18	0.00769699
336.4	0.06053894		926.4	0.00650125		1516.4	0.01092026		2106.4	0.01322135		2696.39	-0.00300596		3286.39	0.01205376		3876.38	0.00851349
336.6	0.06027908		926.6	0.00658034		1516.6	0.01071999		2106.6	0.01349152		2696.59	-0.00332894		3286.59	0.0124226		3876.58	0.00904453
336.8	0.05950363		926.8	0.00574823		1516.8	0.01036912		2106.8	0.01400019		2696.79	-0.00351869		3286.79	0.0119963		3876.78	0.01075409
337	0.05938456		927	0.00550183		1517	0.01097616		2107	0.01398822		2696.99	-0.00377053		3286.99	0.01211564		3876.98	0.01094564
337.2	0.05997517		927.2	0.00560763		1517.2	0.01256459		2107.2	0.01403891		2697.19	-0.00411842		3287.19	0.01151953		3877.18	0.01093629
337.4	0.06150344		927.4	0.00465993		1517.4	0.01335626		2107.4	0.01351809		2697.39	-0.00510609		3287.39	0.01159991		3877.38	0.01078513
337.6	0.06182675		927.6	0.00397086		1517.6	0.01434151		2107.6	0.01391574		2697.59	-0.00549289		3287.59	0.01181461		3877.58	0.00956012
337.8	0.06077067		927.8	0.00379447		1517.8	0.01479124		2107.8	0.01416543		2697.79	-0.00540984		3287.79	0.01196568		3877.78	0.01025871
338	0.06102301		928	0.00400728		1518	0.01518143		2108	0.01441183		2697.99	-0.00508609		3287.99	0.01161537		3877.98	0.01093979
338.2	0.06170378		928.2	0.00369		1518.2	0.01498315		2108.2	0.013939		2698.19	-0.00530266		3288.19	0.00986428		3878.18	0.01116823
338.4	0.06232936		928.4	0.00436409		1518.4	0.01431359		2108.4	0.0143162		2698.39	-0.00411589		3288.39	0.00902835		3878.38	0.01132627
338.6	0.06224731		928.6	0.0051672		1518.6	0.0137657		2108.6	0.01335801		2698.59	-0.00369788		3288.59	0.00925433		3878.58	0.01123735
338.8	0.06367132		928.8	0.00491326		1518.8	0.01414861		2108.8	0.01259392		2698.79	-0.00362657		3288.79	0.00934602		3878.78	0.01189771
339	0.06411236		929	0.00592898		1519	0.01263711		2109	0.01288521		2698.99	-0.00347624		3288.99	0.00913171		3878.98	0.01159658
339.2	0.06321535		929.2	0.00673976		1519.2	0.01231325		2109.2	0.01214489		2699.19	-0.00382121		3289.19	0.00810819		3879.18	0.01081115
339.4	0.06390957		929.4	0.0076357		1519.4	0.01179298		2109.4	0.01209788		2699.39	-0.00307407		3289.39	0.00829791		3879.38	0.00988213
339.6	0.06416769		929.6	0.00863231		1519.6	0.01132642		2109.6	0.01225053		2699.59	-0.00263718		3289.59	0.00777324		3879.58	0.00907877
339.8	0.06350217		929.8	0.00886204		1519.8	0.01171178		2109.8	0.0129782		2699.79	-0.00262785		3289.79	0.00829644		3879.78	0.00952139
340	0.06268803		930	0.00911406		1520	0.01206245		2110	0.01351842		2699.99	-0.00222621		3289.99	0.00855946		3879.98	0.00874445
340.2	0.0632762		930.2	0.00898754		1520.2	0.01184951		2110.2	0.01377128		2700.19	-0.00206886		3290.19	0.0083529		3880.18	0.00878679
340.4	0.06413973		930.4	0.00799678		1520.4	0.01119105		2110.4	0.01353843		2700.39	-0.00154209		3290.39	0.00887671		3880.38	0.0088836
340.6	0.06521832		930.6	0.00807988		1520.6	0.00994719		2110.6	0.01367353		2700.59	-0.00195245		3290.59	0.00815086		3880.58	0.00955261
340.8	0.06524286		930.8	0.00753613		1520.8	0.01031525		2110.8	0.01471238		2700.79	-0.00220445		3290.79	0.0082442		3880.78	0.00971662
341	0.0650949		931	0.0065862		1521	0.01135501		2111	0.01441835		2700.99	-0.00300602		3290.99	0.00835584		3880.98	0.0082936
341.2	0.06611542		931.2	0.0067697		1521.2	0.01189115		2111.2	0.01407214		2701.19	-0.0033267		3291.19	0.00817582		3881.18	0.0079257
341.4	0.06670201		931.4	0.00527087		1521.4	0.01241918		2111.4	0.01408438		2701.39	-0.0032518		3291.39	0.00805135		3881.38	0.00741428
341.6	0.06687613		931.6	0.00442072		1521.6	0.01240004		2111.6	0.01452786		2701.59	-0.00277884		3291.59	0.00849512		3881.58	0.00768298
341.8	0.06768375		931.8	0.00527728		1521.8	0.0129338		2111.8	0.0148613		2701.79	-0.00310707		3291.79	0.0078424		3881.78	0.00897709
342	0.0686674		932	0.00522498		1522	0.01278625		2112	0.01504201		2701.99	-0.00334033		3291.99	0.00690212		3881.98	0.00974536
342.2	0.06890457		932.2	0.00445455		1522.2	0.01192929		2112.2	0.0146354		2702.19	-0.00279179		3292.19	0.00704753		3882.18	0.00918286
342.4	0.06966557		932.4	0.00492146		1522.4	0.01128787		2112.4	0.01455659		2702.39	-0.00209399		3292.39	0.00775897		3882.38	0.00830315
342.6	0.06990021		932.6	0.00589082		1522.6	0.01140807		2112.6	0.01443434		2702.59	-0.00249143		3292.59	0.00867148		3882.58	0.00733374
342.8	0.07087332		932.8	0.00648073		1522.8	0.01122327		2112.8	0.0141903		2702.79	-0.00209454		3292.79	0.00845003		3882.78	0.00756174
343	0.07019773		933	0.00695704		1523	0.01115144		2113	0.01439185		2702.99	-0.00218223		3292.99	0.00829274		3882.98	0.00616965
343.2	0.06972346		933.2	0.00763718		1523.2	0.01170069		2113.2	0.01338852		2703.19	-0.00225352		3293.19	0.00872429		3883.18	0.00551175
343.4	0.0697546		933.4	0.00768468		1523.4	0.01162325		2113.4	0.01357839		2703.39	-0.00213471		3293.39	0.00958485		3883.38	0.00525889
343.6	0.06951006		933.6	0.00810492		1523.6	0.01280982		2113.6	0.01384918		2703.59	-0.00237422		3293.59	0.01019287		3883.58	0.00460985
343.8	0.06871805		933.8	0.00855441		1523.8	0.0140328		2113.8	0.01396777		2703.79	-0.00394085		3293.79	0.01103366		3883.78	0.00509486
344	0.06817368		934	0.00862049		1524	0.0130136		2114	0.01392428		2703.99	-0.00369601		3293.99	0.01145545		3883.98	0.00542734
344.2	0.06802469		934.2	0.0085022		1524.2	0.01227264		2114.2	0.01388029		2704.19	-0.0040388		3294.19	0.0116565		3884.18	0.00535185
344.4	0.06820704		934.4	0.00875352		1524.4	0.01281381		2114.4	0.01467348		2704.39	-0.0038772		3294.39	0.01120788		3884.38	0.00573695
344.6	0.06805654		934.6	0.0091662		1524.6	0.01292284		2114.6	0.01594844		2704.59	-0.00390597		3294.59	0.01073151		3884.58	0.00615147
344.8	0.0665743		934.8	0.00908455		1524.8	0.01344017		2114.8	0.01596796		2704.79	-0.00478154		3294.79	0.0104764		3884.78	0.00632774
345	0.06713057		935	0.00789834		1525	0.01381351		2115	0.01505201		2704.99	-0.0051461		3294.99	0.008566		3884.98	0.00692346
345.2	0.06767888		935.2	0.00743498		1525.2	0.01436139		2115.2	0.01620909		2705.19	-0.00460241		3295.19	0.00770675		3885.18	0.00771637
345.4	0.06692331		935.4	0.00630365		1525.4	0.01432632		2115.4	0.01658674		2705.39	-0.00480604		3295.39	0.00662952		3885.38	0.00816671
345.6	0.06672285		935.6	0.00658745		1525.6	0.01340978		2115.6	0.01701754		2705.59	-0.00413147		3295.59	0.00668594		3885.58	0.00903067
345.8	0.06650041		935.8	0.00674694		1525.8	0.01362879		2115.8	0.01695187		2705.79	-0.00384311		3295.79	0.00554379		3885.78	0.00907286
346	0.0655281		936	0.0054321		1526	0.01290526		2116	0.01680904		2705.99	-0.00281023		3295.99	0.00514393		3885.98	0.00931164
346.2	0.06525813		936.2	0.00480093		1526.2	0.01292229		2116.2	0.01702564		2706.19	-0.00208922		3296.19	0.00560028		3886.18	0.00841436
346.4	0.06608286		936.4	0.00556343		1526.4	0.01228059		2116.4	0.01662406		2706.39	-0.00189753		3296.39	0.0050127		3886.38	0.0073553
346.6	0.06685387		936.6	0.00709364		1526.6	0.01180336		2116.6	0.01576687		2706.59	-0.00139025		3296.59	0.00515134		3886.58	0.00685212
346.8	0.06715398		936.8	0.0069059		1526.8	0.01081066		2116.8	0.01526161		2706.79	-0.00160995		3296.79	0.00494102		3886.78	0.00684278
347	0.06671688		937	0.00725579		1527	0.01113728		2117	0.01493593		2706.99	-0.00195285		3296.99	0.00526048		3886.98	0.00572131
347.2	0.06686315		937.2	0.00760587		1527.2	0.01030075		2117.2	0.01353606		2707.19	-0.00185486		3297.19	0.00604406		3887.18	0.00528408
347.4	0.06768881		937.4	0.00657269		1527.4	0.01078326		2117.4	0.01370537		2707.39	-0.00256403		3297.39	0.00673085		3887.38	0.00505351
347.6	0.06785032		937.6	0.00686504		1527.6	0.01058387		2117.6	0.01280437		2707.59	-0.00230507		3297.59	0.0078332		3887.58	0.00463812
347.8	0.06909195		937.8	0.00703153		1527.8	0.01020283		2117.8	0.01290649		2707.79	-0.00319138		3297.79	0.0084666		3887.78	0.00500745
348	0.06920788		938	0.006399		1528	0.00967081		2118	0.01282115		2707.99	-0.00283794		3297.99	0.00854528		3887.98	0.00549142
348.2	0.07009593		938.2	0.00615569		1528.2	0.01078094		2118.2	0.01262805		2708.19	-0.00292053		3298.19	0.00924182		3888.18	0.00522162
348.4	0.07086784		938.4	0.00552283		1528.4	0.01163453		2118.4	0.01236673		2708.39	-0.00289168		3298.39	0.01032452		3888.38	0.00656982
348.6	0.07097138		938.6	0.00478674		1528.6	0.01093666		2118.6	0.01276458		2708.59	-0.00307983		3298.59	0.01043309		3888.58	0.00729929
348.8	0.06994885		938.8	0.00459766		1528.8	0.01145794		2118.8	0.01200665		2708.79	-0.00334735		3298.79	0.01022222		3888.78	0.00864074
349	0.07081511		939	0.00360562		1529	0.01189415		2119	0.012702		2708.99	-0.00241381		3298.99	0.01024089		3888.98	0.00944456
349.2	0.07135853		939.2	0.00347046		1529.2	0.01120567		2119.2	0.01366575		2709.19	-0.00230595		3299.19	0.01084216		3889.18	0.00897672
349.4	0.07143008		939.4	0.00331526		1529.4	0.01040652		2119.4	0.01398402		2709.39	-0.00186543		3299.39	0.01078748		3889.38	0.00853519
349.6	0.071567		939.6	0.00243981		1529.6	0.01077123		2119.6	0.01475917		2709.59	-0.00129896		3299.59	0.01083806		3889.58	0.00912681
349.8	0.0720458		939.8	0.00233237		1529.8	0.01092405		2119.8	0.01498216		2709.79	-0.00182906		3299.79	0.01125025		3889.78	0.00977033
350	0.07194832		940	0.00180243		1530	0.01100134		2120	0.0151524		2709.99	-0.00253447		3299.99	0.01115285		3889.98	0.01045481
350.2	0.07346766		940.2	0.00296572		1530.2	0.01195568		2120.2	0.01528497		2710.19	-0.00387635		3300.19	0.01151843		3890.18	0.0097759
350.4	0.0744331		940.4	0.00395929		1530.4	0.01105126		2120.4	0.01602629		2710.39	-0.00369314		3300.39	0.01141807		3890.38	0.00904405
350.6	0.07529625		940.6	0.00496678		1530.6	0.01047651		2120.6	0.01614836		2710.59	-0.00365834		3300.59	0.01181363		3890.58	0.00913736
350.8	0.07486363		940.8	0.00515355		1530.8	0.01088232		2120.8	0.01681865		2710.79	-0.00442041		3300.79	0.01204765		3890.78	0.009308
351	0.07463725		941	0.00598456		1531	0.01075192		2121	0.01693477		2710.99	-0.00521158		3300.99	0.01127618		3890.98	0.0074035
351.2	0.07465056		941.2	0.00612242		1531.2	0.01124788		2121.2	0.01644212		2711.19	-0.00537606		3301.19	0.01144221		3891.18	0.00725372
351.4	0.07439161		941.4	0.00620522		1531.4	0.0121957		2121.4	0.01585198		2711.39	-0.00529308		3301.39	0.01126392		3891.38	0.00670561
351.6	0.07473198		941.6	0.00714285		1531.6	0.0125417		2121.6	0.01480626		2711.59	-0.00532212		3301.59	0.01101361		3891.58	0.00589267
351.8	0.07437036		941.8	0.00837999		1531.8	0.0126159		2121.8	0.01471116		2711.79	-0.00610999		3301.79	0.00988968		3891.78	0.00544134
352	0.07332307		942	0.00759612		1532	0.01306158		2122	0.01388389		2711.99	-0.00616638		3301.99	0.01044708		3891.98	0.00597493
352.2	0.07328751		942.2	0.00745771		1532.2	0.01407041		2122.2	0.01313167		2712.19	-0.00625857		3302.19	0.01077114		3892.18	0.00613305
352.4	0.07304072		942.4	0.00737105		1532.4	0.01421633		2122.4	0.01250558		2712.39	-0.00547972		3302.39	0.01167768		3892.38	0.00673974
352.6	0.07255953		942.6	0.00757421		1532.6	0.01458475		2122.6	0.0123346		2712.59	-0.00591215		3302.59	0.01151806		3892.58	0.00638101
352.8	0.07202193		942.8	0.00756164		1532.8	0.01560063		2122.8	0.01231448		2712.79	-0.0047466		3302.79	0.01161584		3892.78	0.00661103
353	0.07312267		943	0.00722196		1533	0.01561436		2123	0.01390626		2712.99	-0.00431961		3302.99	0.01251419		3892.98	0.00603182
353.2	0.07358464		943.2	0.00739083		1533.2	0.0146862		2123.2	0.01386889		2713.19	-0.00467464		3303.19	0.01263176		3893.18	0.00541526
353.4	0.07363456		943.4	0.00651754		1533.4	0.01505363		2123.4	0.01434543		2713.39	-0.00432845		3303.39	0.01211386		3893.38	0.00590202
353.6	0.07406985		943.6	0.00557039		1533.6	0.01546557		2123.6	0.01429709		2713.59	-0.00437691		3303.59	0.01317792		3893.58	0.0063108
353.8	0.07442365		943.8	0.00566149		1533.8	0.01518191		2123.8	0.0145059		2713.79	-0.00421636		3303.79	0.01365372		3893.78	0.00745883
354	0.07516163		944	0.00473598		1534	0.01483329		2124	0.01488419		2713.99	-0.00340232		3303.99	0.01292625		3893.98	0.00776771
354.2	0.07646291		944.2	0.00439954		1534.2	0.01474672		2124.2	0.01476155		2714.19	-0.00407704		3304.19	0.01261978		3894.18	0.00698574
354.4	0.07649593		944.4	0.00547418		1534.4	0.01412394		2124.4	0.01582462		2714.39	-0.00305138		3304.39	0.01204645		3894.38	0.0075326
354.6	0.07641		944.6	0.00584848		1534.6	0.01431362		2124.6	0.01591752		2714.59	-0.00343204		3304.59	0.01246449		3894.58	0.00844709
354.8	0.07628138		944.8	0.00647859		1534.8	0.01430228		2124.8	0.01650049		2714.79	-0.00349874		3304.79	0.01176844		3894.78	0.0083952
355	0.07597953		945	0.00658421		1535	0.01398942		2125	0.01680459		2714.99	-0.00368529		3304.99	0.01112111		3894.98	0.00831113
355.2	0.07618713		945.2	0.00696064		1535.2	0.01410537		2125.2	0.01680971		2715.19	-0.0034279		3305.19	0.01084135		3895.18	0.00915524
355.4	0.07570937		945.4	0.00805657		1535.4	0.01409451		2125.4	0.01622303		2715.39	-0.00308918		3305.39	0.01081018		3895.38	0.00927808
355.6	0.07554293		945.6	0.00786198		1535.6	0.01425174		2125.6	0.01646848		2715.59	-0.00311262		3305.59	0.01081918		3895.58	0.00915666
355.8	0.07531443		945.8	0.00780656		1535.8	0.01383463		2125.8	0.01708218		2715.79	-0.00258019		3305.79	0.01133546		3895.78	0.00991563
356	0.07513004		946	0.00720144		1536	0.01375671		2126	0.01619411		2715.99	-0.00335934		3305.99	0.01168865		3895.98	0.0101907
356.2	0.07560957		946.2	0.00751863		1536.2	0.01527978		2126.2	0.01600439		2716.19	-0.00369742		3306.19	0.01088		3896.18	0.00932271
356.4	0.07605657		946.4	0.00685679		1536.4	0.01598996		2126.4	0.01671068		2716.39	-0.00316498		3306.39	0.0117077		3896.38	0.00921589
356.6	0.07668496		946.6	0.00585466		1536.6	0.01703826		2126.6	0.01770949		2716.59	-0.003785		3306.59	0.0114423		3896.58	0.00918438
356.8	0.07639344		946.8	0.00549194		1536.8	0.01687829		2126.8	0.01915726		2716.79	-0.00314983		3306.79	0.01173317		3896.78	0.00891487
357	0.07712264		947	0.00507934		1537	0.01677763		2127	0.01965915		2716.99	-0.00410716		3306.99	0.01215327		3896.98	0.008115
357.2	0.07713271		947.2	0.00533058		1537.2	0.01596556		2127.2	0.01928651		2717.19	-0.00431331		3307.19	0.01250332		3897.18	0.00877028
357.4	0.07755388		947.4	0.00444583		1537.4	0.01585639		2127.4	0.01949204		2717.39	-0.00403447		3307.39	0.01206269		3897.38	0.00919999
357.6	0.07880369		947.6	0.00381448		1537.6	0.01556506		2127.6	0.01888573		2717.59	-0.00320122		3307.59	0.01224005		3897.58	0.0090433
357.8	0.07984171		947.8	0.00285622		1537.8	0.0152912		2127.8	0.01823298		2717.79	-0.00285677		3307.79	0.01061613		3897.78	0.00939254
358	0.08118147		948	0.00280352		1538	0.01445617		2128	0.01768315		2717.99	-0.00170691		3307.99	0.01021456		3897.98	0.00969066
358.2	0.08111281		948.2	0.0030126		1538.2	0.01441332		2128.2	0.016346		2718.19	-0.00197272		3308.19	0.00907723		3898.18	0.00983696
358.4	0.08077311		948.4	0.00435768		1538.4	0.01468185		2128.4	0.01613532		2718.39	-0.00082402		3308.39	0.00853854		3898.38	0.01078909
358.6	0.08095854		948.6	0.00386745		1538.6	0.01411275		2128.6	0.01559508		2718.59	-0.00117386		3308.59	0.00930151		3898.58	0.01112802
358.8	0.081199		948.8	0.00374305		1538.8	0.01339854		2128.8	0.01481096		2718.79	-0.00088607		3308.79	0.00827844		3898.78	0.01063348
359	0.08070636		949	0.00416299		1539	0.01412069		2129	0.01391893		2718.99	-0.0009136		3308.99	0.00833417		3898.98	0.01042307
359.2	0.08037096		949.2	0.00433482		1539.2	0.01393803		2129.2	0.01345453		2719.19	-0.00014982		3309.19	0.00827078		3899.18	0.00988253
359.4	0.07935012		949.4	0.00526721		1539.4	0.01461785		2129.4	0.01211561		2719.39	0.00025098		3309.39	0.00872707		3899.38	0.01012047
359.6	0.07978736		949.6	0.00457948		1539.6	0.0140748		2129.6	0.01233697		2719.59	-0.00020528		3309.59	0.00906049		3899.58	0.01019591
359.8	0.08077158		949.8	0.005686		1539.8	0.01405277		2129.8	0.0129281		2719.79	-0.00045712		3309.79	0.00948818		3899.78	0.01097055
360	0.08018819		950	0.00678703		1540	0.01357084		2130	0.01246742		2719.99	-0.00054836		3309.99	0.00902103		3899.98	0.0102963
360.2	0.08032687		950.2	0.00772458		1540.2	0.0142187		2130.2	0.01347094		2720.19	-0.00076017		3310.19	0.00873601		3900.18	0.01031941
360.4	0.07972067		950.4	0.00794929		1540.4	0.01424566		2130.4	0.01439589		2720.39	-0.00071738		3310.39	0.00971872		3900.38	0.01168907
360.6	0.07902514		950.6	0.00818605		1540.6	0.0142446		2130.6	0.01510878		2720.59	-0.00098205		3310.59	0.0100174		3900.58	0.01164116
360.8	0.07913618		950.8	0.00855217		1540.8	0.01381227		2130.8	0.01604739		2720.79	-0.00182608		3310.79	0.01088508		3900.78	0.01060663
361	0.07998557		951	0.0087152		1541	0.01402897		2131	0.01644206		2720.99	-0.00246056		3310.99	0.01108469		3900.98	0.01117518
361.2	0.0795929		951.2	0.00912538		1541.2	0.01393631		2131.2	0.01740639		2721.19	-0.00274858		3311.19	0.01180004		3901.18	0.01166917
361.4	0.08034927		951.4	0.00861104		1541.4	0.01323778		2131.4	0.01761135		2721.39	-0.00296758		3311.39	0.0121003		3901.38	0.01179735
361.6	0.08095142		951.6	0.00853293		1541.6	0.01367772		2131.6	0.01677858		2721.59	-0.00328503		3311.59	0.01226083		3901.58	0.01168581
361.8	0.08170253		951.8	0.00784927		1541.8	0.01360804		2131.8	0.01611006		2721.79	-0.00356663		3311.79	0.01225666		3901.78	0.01197366
362	0.08152703		952	0.00828024		1542	0.0137376		2132	0.01640593		2721.99	-0.00256317		3311.99	0.01266933		3901.98	0.01237886
362.2	0.08099993		952.2	0.00768597		1542.2	0.01390215		2132.2	0.01580673		2722.19	-0.00342864		3312.19	0.01247982		3902.18	0.012322
362.4	0.08124445		952.4	0.00716083		1542.4	0.01458596		2132.4	0.01608501		2722.39	-0.00396611		3312.39	0.01234119		3902.38	0.01194214
362.6	0.08086097		952.6	0.00690186		1542.6	0.01432675		2132.6	0.01621955		2722.59	-0.0046031		3312.59	0.01348371		3902.58	0.01153991
362.8	0.08045901		952.8	0.00667681		1542.8	0.01402685		2132.8	0.01593637		2722.79	-0.00515569		3312.79	0.01348547		3902.78	0.010528
363	0.07990228		953	0.00668024		1543	0.01473105		2133	0.01570692		2722.99	-0.00491883		3312.99	0.01325991		3902.98	0.00958785
363.2	0.07997108		953.2	0.00599532		1543.2	0.01385776		2133.2	0.01620859		2723.19	-0.00373995		3313.19	0.01172761		3903.18	0.00889849
363.4	0.080604		953.4	0.00636234		1543.4	0.01371744		2133.4	0.01564205		2723.39	-0.00416252		3313.39	0.01218634		3903.38	0.00907162
363.6	0.08162875		953.6	0.00615966		1543.6	0.01305889		2133.6	0.01607077		2723.59	-0.00383266		3313.59	0.01226639		3903.58	0.00961163
363.8	0.08183988		953.8	0.00666713		1543.8	0.01268752		2133.8	0.01669905		2723.79	-0.00377321		3313.79	0.01195025		3903.78	0.01044908
364	0.08048591		954	0.00605745		1544	0.01162504		2134	0.01577268		2723.99	-0.00294552		3313.99	0.01088467		3903.98	0.01087569
364.2	0.07980133		954.2	0.00614069		1544.2	0.01252734		2134.2	0.01553424		2724.19	-0.00377218		3314.19	0.0104958		3904.18	0.01218201
364.4	0.07963658		954.4	0.00612608		1544.4	0.01337307		2134.4	0.01579857		2724.39	-0.00327511		3314.39	0.01121987		3904.38	0.01238402
364.6	0.08004974		954.6	0.00516789		1544.6	0.01387261		2134.6	0.01689492		2724.59	-0.00255715		3314.59	0.01079877		3904.58	0.01141905
364.8	0.08123164		954.8	0.00511275		1544.8	0.01434775		2134.8	0.01807827		2724.79	-0.00280747		3314.79	0.01106186		3904.78	0.01181145
365	0.08083544		955	0.00527321		1545	0.01485378		2135	0.01863947		2724.99	-0.00319356		3314.99	0.01085317		3904.98	0.01268069
365.2	0.08112244		955.2	0.00516021		1545.2	0.015098		2135.2	0.01934593		2725.19	-0.00327134		3315.19	0.01155248		3905.18	0.01221854
365.4	0.08208008		955.4	0.00547821		1545.4	0.01513954		2135.4	0.01964427		2725.39	-0.00398532		3315.39	0.01162707		3905.38	0.01283316
365.6	0.082005		955.6	0.00543887		1545.6	0.01631715		2135.6	0.01940463		2725.59	-0.00373253		3315.59	0.01146569		3905.58	0.01270801
365.8	0.08242859		955.8	0.00492322		1545.8	0.01626571		2135.8	0.01961282		2725.79	-0.00270687		3315.79	0.01195718		3905.78	0.01198798
366	0.08195227		956	0.00557434		1546	0.01615184		2136	0.02063328		2725.99	-0.00166313		3315.99	0.01235066		3905.98	0.01143291
366.2	0.08283373		956.2	0.00522604		1546.2	0.01634537		2136.2	0.02000201		2726.19	-0.0016299		3316.19	0.01224847		3906.18	0.01152547
366.4	0.083086		956.4	0.0057655		1546.4	0.01642717		2136.4	0.0200261		2726.39	-0.00124337		3316.39	0.01183048		3906.38	0.01192689
366.6	0.08295987		956.6	0.00664082		1546.6	0.01578451		2136.6	0.0195393		2726.59	-0.00140634		3316.59	0.01207993		3906.58	0.01187683
366.8	0.08295735		956.8	0.00672497		1546.8	0.01555386		2136.8	0.01903037		2726.79	-0.00141396		3316.79	0.01133384		3906.78	0.01145125
367	0.08345134		957	0.0065836		1547	0.0156869		2137	0.01793019		2726.99	-0.00035336		3316.99	0.01004479		3906.98	0.01131707
367.2	0.08474811		957.2	0.00670314		1547.2	0.01487314		2137.2	0.01729087		2727.19	0.00074203		3317.19	0.00910932		3907.18	0.0110323
367.4	0.08511552		957.4	0.006909		1547.4	0.01501069		2137.4	0.01636145		2727.39	0.00032992		3317.39	0.01029057		3907.38	0.01076774
367.6	0.08523749		957.6	0.00698151		1547.6	0.01491982		2137.6	0.01602387		2727.59	0.00020091		3317.59	0.00915443		3907.58	0.01110379
367.8	0.08466683		957.8	0.00691618		1547.8	0.01458272		2137.8	0.01647877		2727.79	-0.00019954		3317.79	0.00894762		3907.78	0.01081619
368	0.08459107		958	0.00684573		1548	0.01465606		2138	0.01547771		2727.99	-0.0008432		3317.99	0.00912632		3907.98	0.01093736
368.2	0.08436199		958.2	0.0069175		1548.2	0.01543393		2138.2	0.01632555		2728.19	-0.00185498		3318.19	0.00956074		3908.18	0.01111033
368.4	0.08459208		958.4	0.00766173		1548.4	0.01577702		2138.4	0.01672248		2728.39	-0.00217224		3318.39	0.00998906		3908.38	0.01009541
368.6	0.08478028		958.6	0.00740483		1548.6	0.01540662		2138.6	0.01773902		2728.59	-0.00255103		3318.59	0.00965705		3908.58	0.01074267
368.8	0.08516539		958.8	0.00817661		1548.8	0.01521912		2138.8	0.01814496		2728.79	-0.00282171		3318.79	0.01014079		3908.78	0.01105944
369	0.085443		959	0.00833922		1549	0.01522884		2139	0.01916462		2728.99	-0.00335688		3318.99	0.00970985		3908.98	0.01106795
369.2	0.08667		959.2	0.00866907		1549.2	0.01537195		2139.2	0.01977128		2729.19	-0.00416766		3319.19	0.01019101		3909.18	0.01056468
369.4	0.08701221		959.4	0.00920967		1549.4	0.01560636		2139.4	0.02008057		2729.39	-0.00484073		3319.39	0.0097614		3909.38	0.01013121
369.6	0.08723282		959.6	0.00912313		1549.6	0.01530062		2139.6	0.0200861		2729.59	-0.00403577		3319.59	0.00962514		3909.58	0.00901544
369.8	0.08717837		959.8	0.00926684		1549.8	0.01481536		2139.8	0.02040246		2729.79	-0.00348844		3319.79	0.01006887		3909.78	0.00788663
370	0.08716631		960	0.01001007		1550	0.01418227		2140	0.01981922		2729.99	-0.00376418		3319.99	0.00945047		3909.98	0.00823364
370.2	0.08725121		960.2	0.01024338		1550.2	0.01548144		2140.2	0.01842803		2730.19	-0.00383726		3320.19	0.00923258		3910.18	0.0081333
370.4	0.08701401		960.4	0.01114913		1550.4	0.01573487		2140.4	0.01797952		2730.39	-0.00411152		3320.39	0.00943355		3910.38	0.0086814
370.6	0.08663021		960.6	0.01096005		1550.6	0.01623626		2140.6	0.01749526		2730.59	-0.00447299		3320.59	0.00943082		3910.58	0.00908099
370.8	0.08705962		960.8	0.01005838		1550.8	0.01624943		2140.8	0.01713533		2730.79	-0.00489112		3320.79	0.00910903		3910.78	0.00910691
371	0.08790191		961	0.00929617		1551	0.01592249		2141	0.01664754		2730.99	-0.00420048		3320.99	0.00894609		3910.98	0.00943954
371.2	0.08789108		961.2	0.00896804		1551.2	0.01578053		2141.2	0.01599307		2731.19	-0.00357607		3321.19	0.009111		3911.18	0.00941451
371.4	0.08728231		961.4	0.00949121		1551.4	0.01656159		2141.4	0.01698561		2731.39	-0.00397898		3321.39	0.00928415		3911.38	0.00919091
371.6	0.08757497		961.6	0.00951436		1551.6	0.01737188		2141.6	0.01661519		2731.59	-0.00429962		3321.59	0.00889611		3911.58	0.00957059
371.8	0.08769896		961.8	0.01004927		1551.8	0.01743686		2141.8	0.01727126		2731.79	-0.00461824		3321.79	0.01076194		3911.78	0.00879315
372	0.0878479		962	0.01025373		1552	0.01682338		2142	0.01725528		2731.99	-0.00544276		3321.99	0.01101694		3911.98	0.0098538
372.2	0.08700757		962.2	0.00959424		1552.2	0.0166933		2142.2	0.01811907		2732.19	-0.00571408		3322.19	0.01072911		3912.18	0.01032022
372.4	0.08681921		962.4	0.01032819		1552.4	0.01667592		2142.4	0.01855142		2732.39	-0.00569637		3322.39	0.01073171		3912.38	0.00961846
372.6	0.08708904		962.6	0.00970562		1552.6	0.01585347		2142.6	0.01936333		2732.59	-0.00555178		3322.59	0.01024971		3912.58	0.01028756
372.8	0.08776999		962.8	0.0102463		1552.8	0.01613002		2142.8	0.01960718		2732.79	-0.00488485		3322.79	0.00985229		3912.78	0.01062853
373	0.08785742		963	0.0100653		1553	0.01666949		2143	0.01918049		2732.99	-0.00542197		3322.99	0.00931563		3912.98	0.01053229
373.2	0.08869437		963.2	0.00972689		1553.2	0.01724615		2143.2	0.01902431		2733.19	-0.00560962		3323.19	0.0094755		3913.18	0.01077202
373.4	0.08860365		963.4	0.01092359		1553.4	0.01686257		2143.4	0.01952485		2733.39	-0.00530231		3323.39	0.00864227		3913.38	0.01077391
373.6	0.08882595		963.6	0.01024093		1553.6	0.01654369		2143.6	0.01924729		2733.59	-0.00486427		3323.59	0.00814372		3913.58	0.01129323
373.8	0.08851674		963.8	0.0101082		1553.8	0.01588753		2143.8	0.01957007		2733.79	-0.00441761		3323.79	0.00752143		3913.78	0.01112464
374	0.08802091		964	0.01011223		1554	0.01559163		2144	0.01829288		2733.99	-0.00460755		3323.99	0.00728018		3913.98	0.01135943
374.2	0.08745266		964.2	0.00974505		1554.2	0.01640766		2144.2	0.01807436		2734.19	-0.00449135		3324.19	0.00800047		3914.18	0.01127189
374.4	0.0879781		964.4	0.00861226		1554.4	0.01555139		2144.4	0.01710646		2734.39	-0.0044411		3324.39	0.00812849		3914.38	0.01227507
374.6	0.08876453		964.6	0.00805912		1554.6	0.01558394		2144.6	0.01674442		2734.59	-0.00450985		3324.59	0.00721297		3914.58	0.01288819
374.8	0.08969519		964.8	0.00777514		1554.8	0.01497343		2144.8	0.01570023		2734.79	-0.004295		3324.79	0.00682422		3914.78	0.01246987
375	0.09002937		965	0.00764309		1555	0.01556545		2145	0.01539215		2734.99	-0.00327673		3324.99	0.00759116		3914.98	0.01265472
375.2	0.08990425		965.2	0.00840863		1555.2	0.01622885		2145.2	0.01444949		2735.19	-0.00305563		3325.19	0.00797874		3915.18	0.0126693
375.4	0.0901749		965.4	0.0086508		1555.4	0.01629031		2145.4	0.01504885		2735.39	-0.00306187		3325.39	0.00790226		3915.38	0.0123652
375.6	0.09108932		965.6	0.00792147		1555.6	0.01632183		2145.6	0.01482433		2735.59	-0.00314314		3325.59	0.00852555		3915.58	0.01165478
375.8	0.09099585		965.8	0.00819842		1555.8	0.01611549		2145.8	0.01571929		2735.79	-0.00360145		3325.79	0.00945502		3915.78	0.01083299
376	0.0904514		966	0.00750628		1556	0.01557945		2146	0.01574827		2735.99	-0.00415661		3325.99	0.00912712		3915.98	0.01020573
376.2	0.09006302		966.2	0.00663108		1556.2	0.01535098		2146.2	0.01617141		2736.19	-0.00453892		3326.19	0.00897709		3916.18	0.00948295
376.4	0.08975852		966.4	0.00695152		1556.4	0.01578066		2146.4	0.01667355		2736.39	-0.00423988		3326.39	0.00918156		3916.38	0.00873352
376.6	0.08996279		966.6	0.00637494		1556.6	0.01581486		2146.6	0.01697517		2736.59	-0.00469695		3326.59	0.009733		3916.58	0.00873783
376.8	0.09011653		966.8	0.00637145		1556.8	0.0164453		2146.8	0.01709659		2736.79	-0.00385379		3326.79	0.01050055		3916.78	0.00792966
377	0.08977713		967	0.00664616		1557	0.01623877		2147	0.01684126		2736.99	-0.0031353		3326.99	0.01064352		3916.98	0.00736624
377.2	0.09013893		967.2	0.00698216		1557.2	0.01608995		2147.2	0.01853202		2737.19	-0.00256065		3327.19	0.01159845		3917.18	0.00818204
377.4	0.09012476		967.4	0.00812132		1557.4	0.01567334		2147.4	0.01961049		2737.39	-0.00218963		3327.39	0.01108833		3917.38	0.00835993
377.6	0.09003152		967.6	0.0084312		1557.6	0.01533946		2147.6	0.01994283		2737.59	-0.00162674		3327.59	0.01078385		3917.58	0.00918752
377.8	0.08936424		967.8	0.00844379		1557.8	0.01431564		2147.8	0.0205975		2737.79	-0.00113468		3327.79	0.01042702		3917.78	0.0093958
378	0.08922714		968	0.00890374		1558	0.01459333		2148	0.01954457		2737.99	-0.00113789		3327.99	0.01063978		3917.98	0.00923614
378.2	0.08880751		968.2	0.00907631		1558.2	0.01475932		2148.2	0.01855365		2738.19	-0.00053821		3328.19	0.01036392		3918.18	0.00949347
378.4	0.08961637		968.4	0.009157		1558.4	0.01439811		2148.4	0.01787109		2738.39	-0.00007849		3328.39	0.01030358		3918.38	0.01011425
378.6	0.0897841		968.6	0.00980456		1558.6	0.01471991		2148.6	0.01777545		2738.59	0.00063851		3328.59	0.00986718		3918.58	0.00962663
378.8	0.08911451		968.8	0.01001243		1558.8	0.014635		2148.8	0.01637925		2738.79	0.00046051		3328.79	0.00968686		3918.78	0.00936853
379	0.08910368		969	0.00961546		1559	0.01602138		2149	0.01623412		2738.99	0.00010452		3328.99	0.0098065		3918.98	0.00998604
379.2	0.08885308		969.2	0.00879719		1559.2	0.01547482		2149.2	0.01616291		2739.19	0.00012682		3329.19	0.00928735		3919.18	0.01049966
379.4	0.08909687		969.4	0.00754371		1559.4	0.01447032		2149.4	0.01612727		2739.39	-0.0007212		3329.39	0.00872097		3919.38	0.01071476
379.6	0.08958804		969.6	0.00759937		1559.6	0.01486814		2149.6	0.01661802		2739.59	-0.00141163		3329.59	0.00859437		3919.58	0.01019738
379.8	0.08936853		969.8	0.00763978		1559.8	0.01510199		2149.8	0.01566215		2739.79	-0.00226523		3329.79	0.00838398		3919.78	0.0104561
380	0.08984446		970	0.00672211		1560	0.0145319		2150	0.01520074		2739.99	-0.00320848		3329.99	0.00855552		3919.98	0.0104726
380.2	0.09004713		970.2	0.00554781		1560.2	0.01468427		2150.2	0.01520136		2740.19	-0.00305197		3330.19	0.00838283		3920.18	0.01155721
380.4	0.09078755		970.4	0.00530111		1560.4	0.01577396		2150.4	0.01549689		2740.39	-0.0031821		3330.39	0.00799078		3920.38	0.01168779
380.6	0.09113121		970.6	0.00478123		1560.6	0.01553676		2150.6	0.01569598		2740.59	-0.00342382		3330.59	0.00763067		3920.58	0.01142752
380.8	0.09193828		970.8	0.00530111		1560.8	0.01576357		2150.8	0.01596458		2740.79	-0.00293303		3330.79	0.0078387		3920.78	0.0108066
381	0.09251988		971	0.00630579		1561	0.01588914		2151	0.01610331		2740.99	-0.0026908		3330.99	0.0076248		3920.98	0.01119157
381.2	0.09268874		971.2	0.00698469		1561.2	0.01693316		2151.2	0.01725113		2741.19	-0.00275849		3331.19	0.00821705		3921.18	0.01144252
381.4	0.09294749		971.4	0.00770435		1561.4	0.01689594		2151.4	0.01749393		2741.39	-0.00312462		3331.39	0.0075997		3921.38	0.01165489
381.6	0.09263799		971.6	0.00815283		1561.6	0.01619692		2151.6	0.01823166		2741.59	-0.00334913		3331.59	0.00812751		3921.58	0.01163632
381.8	0.09224005		971.8	0.00745345		1561.8	0.01637944		2151.8	0.01810654		2741.79	-0.00248384		3331.79	0.00801267		3921.78	0.01102114
382	0.09232601		972	0.00820338		1562	0.0167912		2152	0.0185035		2741.99	-0.00258496		3331.99	0.00778832		3921.98	0.00922731
382.2	0.09229475		972.2	0.00812053		1562.2	0.0169821		2152.2	0.01887755		2742.19	-0.0021325		3332.19	0.00899157		3922.18	0.00913602
382.4	0.09268684		972.4	0.00757796		1562.4	0.01773262		2152.4	0.01964592		2742.39	-0.00210352		3332.39	0.00966776		3922.38	0.00852705
382.6	0.09301764		972.6	0.00752748		1562.6	0.01861887		2152.6	0.01971669		2742.59	-0.00178639		3332.59	0.00957854		3922.58	0.00802324
382.8	0.0930094		972.8	0.00778913		1562.8	0.01891577		2152.8	0.01916778		2742.79	-0.00238126		3332.79	0.00914701		3922.78	0.00772049
383	0.09353265		973	0.00794401		1563	0.01873847		2153	0.01923394		2742.99	-0.0022988		3332.99	0.01017156		3922.98	0.00799036
383.2	0.09351319		973.2	0.00768054		1563.2	0.01788994		2153.2	0.01979503		2743.19	-0.00243862		3333.19	0.01032686		3923.18	0.00740222
383.4	0.09303702		973.4	0.00821937		1563.4	0.01739216		2153.4	0.01960892		2743.39	-0.00243069		3333.39	0.01044403		3923.38	0.0078137
383.6	0.09330116		973.6	0.0091136		1563.6	0.01756686		2153.6	0.01924581		2743.59	-0.00130078		3333.59	0.01084082		3923.58	0.0078222
383.8	0.09321115		973.8	0.00914161		1563.8	0.01695797		2153.8	0.01842082		2743.79	-0.0017296		3333.79	0.01140376		3923.78	0.00827005
384	0.09314154		974	0.0083098		1564	0.01597165		2154	0.01903789		2743.99	-0.00180938		3333.99	0.01155982		3923.98	0.00855175
384.2	0.09233863		974.2	0.00775065		1564.2	0.0158051		2154.2	0.01822703		2744.19	-0.00203513		3334.19	0.01124672		3924.18	0.00863823
384.4	0.09245802		974.4	0.00797846		1564.4	0.01573081		2154.4	0.01759093		2744.39	-0.00190688		3334.39	0.01028155		3924.38	0.00900693
384.6	0.09174397		974.6	0.00829226		1564.6	0.0149748		2154.6	0.01678385		2744.59	-0.00267241		3334.59	0.01018595		3924.58	0.00871588
384.8	0.09173476		974.8	0.00909581		1564.8	0.01512456		2154.8	0.0162689		2744.79	-0.00267882		3334.79	0.01042777		3924.78	0.0093817
385	0.09125707		975	0.00927568		1565	0.01459749		2155	0.01585416		2744.99	-0.00252427		3334.99	0.01041266		3924.98	0.00975136
385.2	0.09076898		975.2	0.00919306		1565.2	0.01435232		2155.2	0.01667742		2745.19	-0.00238975		3335.19	0.01006745		3925.18	0.01000959
385.4	0.09100302		975.4	0.00914838		1565.4	0.01323059		2155.4	0.01676824		2745.39	-0.0027124		3335.39	0.01048817		3925.38	0.01000853
385.6	0.09085837		975.6	0.00895943		1565.6	0.01324861		2155.6	0.01760956		2745.59	-0.00274228		3335.59	0.01063728		3925.58	0.00992518
385.8	0.09017105		975.8	0.00917543		1565.8	0.01342961		2155.8	0.01821289		2745.79	-0.0023674		3335.79	0.00989517		3925.78	0.01006223
386	0.09044961		976	0.00951371		1566	0.01349713		2156	0.01873503		2745.99	-0.0021108		3335.99	0.01032567		3925.98	0.01043577
386.2	0.09160921		976.2	0.00936029		1566.2	0.01410541		2156.2	0.01894902		2746.19	-0.00214371		3336.19	0.01113896		3926.18	0.01162507
386.4	0.09238831		976.4	0.00930116		1566.4	0.01571767		2156.4	0.01897001		2746.39	-0.00237834		3336.39	0.01052018		3926.38	0.01203864
386.6	0.09340925		976.6	0.01015921		1566.6	0.01564533		2156.6	0.01891556		2746.59	-0.00203575		3336.59	0.0108989		3926.58	0.01176061
386.8	0.09358758		976.8	0.01076294		1566.8	0.01510807		2156.8	0.01833019		2746.79	-0.00141451		3336.79	0.0104616		3926.78	0.01163345
387	0.09485505		977	0.01169673		1567	0.01489033		2157	0.01839461		2746.99	-0.00139111		3336.99	0.01079785		3926.98	0.01209937
387.2	0.09508512		977.2	0.01222202		1567.2	0.01572661		2157.2	0.01848627		2747.19	-0.00107326		3337.19	0.01085444		3927.18	0.01212014
387.4	0.09513752		977.4	0.0124337		1567.4	0.01555094		2157.4	0.01792676		2747.39	-0.00103897		3337.39	0.01089024		3927.38	0.01205987
387.6	0.09676868		977.6	0.01247343		1567.6	0.01562829		2157.6	0.01704242		2747.59	-0.00125151		3337.59	0.01151249		3927.58	0.01167042
387.8	0.09692497		977.8	0.01174626		1567.8	0.01548719		2157.8	0.01669672		2747.79	-0.00287166		3337.79	0.01066884		3927.78	0.01061162
388	0.09687912		978	0.01039068		1568	0.01516143		2158	0.0163305		2747.99	-0.0029145		3337.99	0.01104107		3927.98	0.01050283
388.2	0.09679216		978.2	0.0099695		1568.2	0.01564843		2158.2	0.01466428		2748.19	-0.00336185		3338.19	0.01142343		3928.18	0.0104416
388.4	0.0974529		978.4	0.00896879		1568.4	0.01614351		2158.4	0.01423362		2748.39	-0.0034787		3338.39	0.01103742		3928.38	0.01052655
388.6	0.09701697		978.6	0.00887144		1568.6	0.01633803		2158.6	0.01388943		2748.59	-0.00462256		3338.59	0.01103892		3928.58	0.01021999
388.8	0.09632324		978.8	0.00890008		1568.8	0.01673666		2158.8	0.01417984		2748.79	-0.00436246		3338.79	0.01123749		3928.78	0.01131076
389	0.09637998		979	0.00826962		1569	0.016139		2159	0.01450493		2748.99	-0.00505734		3338.99	0.01116073		3928.98	0.01035149
389.2	0.09585642		979.2	0.00887861		1569.2	0.0166123		2159.2	0.01517474		2749.19	-0.00526129		3339.19	0.01064501		3929.18	0.01072692
389.4	0.0957641		979.4	0.00934502		1569.4	0.0169314		2159.4	0.01554898		2749.39	-0.00475427		3339.39	0.0109354		3929.38	0.01052292
389.6	0.09537892		979.6	0.00976584		1569.6	0.0163646		2159.6	0.01654691		2749.59	-0.0047325		3339.59	0.01043237		3929.58	0.01114607
389.8	0.09463912		979.8	0.01007172		1569.8	0.01633508		2159.8	0.01726868		2749.79	-0.00398369		3339.79	0.01076315		3929.78	0.01155825
390	0.09489473		980	0.01100965		1570	0.01654029		2160	0.01783911		2749.99	-0.00244399		3339.99	0.01092544		3929.98	0.01260933
390.2	0.09549365		980.2	0.01144831		1570.2	0.01654313		2160.2	0.01874072		2750.19	-0.00304706		3340.19	0.01066047		3930.18	0.01327463
390.4	0.09545753		980.4	0.01128078		1570.4	0.01767651		2160.4	0.02005849		2750.39	-0.00218429		3340.39	0.01084978		3930.38	0.01377259
390.6	0.0958862		980.6	0.01183077		1570.6	0.01644472		2160.6	0.02084265		2750.59	-0.00134704		3340.59	0.01093322		3930.58	0.01368877
390.8	0.09607575		980.8	0.0114816		1570.8	0.0166091		2160.8	0.02126297		2750.79	-0.00059873		3340.79	0.01055569		3930.78	0.01353905
391	0.09770636		981	0.0123466		1571	0.01687402		2161	0.02191644		2750.99	-0.00078781		3340.99	0.01001443		3930.98	0.01340806
391.2	0.09830823		981.2	0.01159813		1571.2	0.01648742		2161.2	0.02179858		2751.19	-0.00117957		3341.19	0.00985632		3931.18	0.01224881
391.4	0.09872273		981.4	0.01089973		1571.4	0.01674214		2161.4	0.02151193		2751.39	-0.00186426		3341.39	0.00974248		3931.38	0.01190302
391.6	0.09970283		981.6	0.01019314		1571.6	0.01634957		2161.6	0.02100232		2751.59	-0.00137259		3341.59	0.0090503		3931.58	0.01223251
391.8	0.10011499		981.8	0.0089674		1571.8	0.01683786		2161.8	0.02049814		2751.79	-0.00177675		3341.79	0.00797823		3931.78	0.01166978
392	0.10029324		982	0.00826361		1572	0.0171263		2162	0.02016908		2751.99	-0.00189875		3341.99	0.00875266		3931.98	0.01168156
392.2	0.10158939		982.2	0.00775895		1572.2	0.01793591		2162.2	0.0190938		2752.19	-0.00174862		3342.19	0.00837806		3932.18	0.01163481
392.4	0.10170282		982.4	0.00678988		1572.4	0.01842551		2162.4	0.01889459		2752.39	-0.00227114		3342.39	0.00770379		3932.38	0.01065673
392.6	0.10074562		982.6	0.00685195		1572.6	0.01862623		2162.6	0.01800011		2752.59	-0.00295813		3342.59	0.00762359		3932.58	0.01101303
392.8	0.10033632		982.8	0.00633868		1572.8	0.0191404		2162.8	0.01793266		2752.79	-0.00296524		3342.79	0.00787807		3932.78	0.01112427
393	0.09975766		983	0.00548656		1573	0.01888921		2163	0.017234		2752.99	-0.0033168		3342.99	0.00777584		3932.98	0.01095725
393.2	0.09931121		983.2	0.00655991		1573.2	0.01924347		2163.2	0.01723504		2753.19	-0.00241017		3343.19	0.00715107		3933.18	0.01191743
393.4	0.09961098		983.4	0.00679207		1573.4	0.01898353		2163.4	0.01701896		2753.39	-0.00157259		3343.39	0.00716367		3933.38	0.01218865
393.6	0.09933477		983.6	0.00804193		1573.6	0.01900814		2163.6	0.01641274		2753.59	-0.00223774		3343.59	0.00767228		3933.58	0.0131032
393.8	0.09916215		983.8	0.00957631		1573.8	0.01979421		2163.8	0.01549262		2753.79	-0.00186858		3343.79	0.00839353		3933.78	0.01310662
394	0.09887162		984	0.01039097		1574	0.01918772		2164	0.01524652		2753.99	-0.00181428		3343.99	0.00842193		3933.98	0.01412637
394.2	0.09894406		984.2	0.01089552		1574.2	0.01949188		2164.2	0.01540792		2754.19	-0.00276227		3344.19	0.0092308		3934.18	0.01470613
394.4	0.09899484		984.4	0.01020254		1574.4	0.0198416		2164.4	0.01595197		2754.39	-0.00172194		3344.39	0.009195		3934.38	0.01459811
394.6	0.09932163		984.6	0.01044524		1574.6	0.01859016		2164.6	0.0155363		2754.59	-0.00251669		3344.59	0.00884607		3934.58	0.01378722
394.8	0.09928985		984.8	0.01080517		1574.8	0.01832347		2164.8	0.01535425		2754.79	-0.00268575		3344.79	0.00976349		3934.78	0.01286438
395	0.09940386		985	0.01149497		1575	0.01792432		2165	0.01547693		2754.99	-0.00313497		3344.99	0.00999825		3934.98	0.01270406
395.2	0.09985825		985.2	0.01112754		1575.2	0.01706348		2165.2	0.01547432		2755.19	-0.00357013		3345.19	0.0105285		3935.18	0.0125796
395.4	0.09941388		985.4	0.01122488		1575.4	0.01737593		2165.4	0.01557994		2755.39	-0.00286212		3345.39	0.01098036		3935.38	0.01335705
395.6	0.09937714		985.6	0.01132488		1575.6	0.01654721		2165.6	0.01590366		2755.59	-0.00256328		3345.59	0.00999306		3935.58	0.01291176
395.8	0.10034294		985.8	0.01149533		1575.8	0.01673517		2165.8	0.0167101		2755.79	-0.00256897		3345.79	0.00976518		3935.78	0.01229469
396	0.10046518		986	0.01127706		1576	0.01706907		2166	0.01755965		2755.99	-0.00222145		3345.99	0.00930193		3935.98	0.01138242
396.2	0.10178219		986.2	0.01084673		1576.2	0.01700899		2166.2	0.01757654		2756.19	-0.00194761		3346.19	0.00876645		3936.18	0.01050175
396.4	0.10112494		986.4	0.01067991		1576.4	0.01713513		2166.4	0.01843521		2756.39	-0.00153092		3346.39	0.0088329		3936.38	0.00997924
396.6	0.10116801		986.6	0.01097916		1576.6	0.01735464		2166.6	0.01885777		2756.59	-0.00182638		3346.59	0.00883272		3936.58	0.01029367
396.8	0.1016318		986.8	0.01080805		1576.8	0.01712925		2166.8	0.01893819		2756.79	-0.00069193		3346.79	0.00953449		3936.78	0.01019972
397	0.10107502		987	0.01063555		1577	0.01639811		2167	0.01898645		2756.99	-0.00042537		3346.99	0.00913315		3936.98	0.01098248
397.2	0.10256692		987.2	0.01090429		1577.2	0.01670082		2167.2	0.01949592		2757.19	-0.00021314		3347.19	0.00868859		3937.18	0.01149389
397.4	0.10213104		987.4	0.01097033		1577.4	0.01735342		2167.4	0.01929873		2757.39	-0.00093779		3347.39	0.00928189		3937.38	0.01185319
397.6	0.10194215		987.6	0.01153552		1577.6	0.01757249		2167.6	0.01837286		2757.59	-0.00100767		3347.59	0.00965442		3937.58	0.01171435
397.8	0.10204855		987.8	0.01153266		1577.8	0.01714065		2167.8	0.01761883		2757.79	-0.00065751		3347.79	0.01061829		3937.78	0.01193433
398	0.10131498		988	0.01130727		1578	0.01690577		2168	0.01733797		2757.99	-0.00068714		3347.99	0.01073686		3937.98	0.01229774
398.2	0.10165106		988.2	0.01105863		1578.2	0.01758575		2168.2	0.01720413		2758.19	-0.00013765		3348.19	0.01070996		3938.18	0.01205645
398.4	0.10166973		988.4	0.0105873		1578.4	0.01752779		2168.4	0.01641585		2758.39	-0.0001075		3348.39	0.0102603		3938.38	0.01160853
398.6	0.10076578		988.6	0.0108735		1578.6	0.01687175		2168.6	0.01589997		2758.59	-0.00080386		3348.59	0.011379		3938.58	0.01150261
398.8	0.09998186		988.8	0.01197351		1578.8	0.01662882		2168.8	0.0154362		2758.79	-0.000723		3348.79	0.01203317		3938.78	0.01180603
399	0.09907953		989	0.0114434		1579	0.01691619		2169	0.01566318		2758.99	-0.00119451		3348.99	0.01178614		3938.98	0.01237235
399.2	0.09970643		989.2	0.01107135		1579.2	0.01613309		2169.2	0.01575421		2759.19	-0.0013471		3349.19	0.01158919		3939.18	0.01344302
399.4	0.0992602		989.4	0.0106784		1579.4	0.01622131		2169.4	0.01557729		2759.39	-0.00187757		3349.39	0.01120288		3939.38	0.01320009
399.6	0.09979075		989.6	0.01129915		1579.6	0.01622157		2169.6	0.01656126		2759.59	-0.00219734		3349.59	0.01080125		3939.58	0.01316398
399.8	0.10105731		989.8	0.01156384		1579.8	0.01610135		2169.8	0.01775514		2759.79	-0.00140058		3349.79	0.01060715		3939.78	0.01298506
400	0.10170012		990	0.01062389		1580	0.01680356		2170	0.01829958		2759.99	-0.00108361		3349.99	0.01045766		3939.98	0.01251175
400.2	0.10290059		990.2	0.01113715		1580.2	0.01654753		2170.2	0.01869669		2760.19	-0.00214013		3350.19	0.01064897		3940.18	0.01267294
400.4	0.10333724		990.4	0.01144305		1580.4	0.01734209		2170.4	0.01960079		2760.39	-0.00137014		3350.39	0.0116773		3940.38	0.01294942
400.6	0.10435735		990.6	0.01136655		1580.6	0.01748922		2170.6	0.01992893		2760.59	-0.0011497		3350.59	0.01156777		3940.58	0.01301991
400.8	0.10459551		990.8	0.01086899		1580.8	0.01759541		2170.8	0.01972522		2760.79	-0.00084804		3350.79	0.01172711		3940.78	0.01385837
401	0.10454453		991	0.01073873		1581	0.01773902		2171	0.02086943		2760.99	-0.00104575		3350.99	0.01122219		3940.98	0.01382991
401.2	0.10491524		991.2	0.01046775		1581.2	0.01868849		2171.2	0.02128718		2761.19	-0.0014694		3351.19	0.01167216		3941.18	0.01355749
401.4	0.10410519		991.4	0.0109361		1581.4	0.01867204		2171.4	0.02211526		2761.39	-0.00103055		3351.39	0.01224713		3941.38	0.01352353
401.6	0.10432195		991.6	0.01059345		1581.6	0.01783874		2171.6	0.02197874		2761.59	-0.00114078		3351.59	0.0122257		3941.58	0.01319346
401.8	0.10432378		991.8	0.0100288		1581.8	0.01800051		2171.8	0.02225735		2761.79	-0.0014363		3351.79	0.01214762		3941.78	0.01320162
402	0.10398142		992	0.01068255		1582	0.01812208		2172	0.02240701		2761.99	-0.00144427		3351.99	0.01155285		3941.98	0.01289252
402.2	0.10355157		992.2	0.0102158		1582.2	0.01790274		2172.2	0.02253386		2762.19	-0.00133371		3352.19	0.01196599		3942.18	0.01246702
402.4	0.10321524		992.4	0.01028332		1582.4	0.01682641		2172.4	0.02229613		2762.39	-0.00131432		3352.39	0.01130052		3942.38	0.01163174
402.6	0.10201894		992.6	0.01020754		1582.6	0.01610249		2172.6	0.02248251		2762.59	-0.00087478		3352.59	0.01132667		3942.58	0.01135382
402.8	0.10218049		992.8	0.01001615		1582.8	0.01567417		2172.8	0.02197657		2762.79	-0.00078194		3352.79	0.00968984		3942.78	0.01207553
403	0.10112848		993	0.00895108		1583	0.01518391		2173	0.02205195		2762.99	-0.00174536		3352.99	0.00960583		3942.98	0.01223673
403.2	0.10188194		993.2	0.00856793		1583.2	0.01457787		2173.2	0.02129799		2763.19	-0.00203688		3353.19	0.01016359		3943.18	0.01271375
403.4	0.10181622		993.4	0.00797227		1583.4	0.01466113		2173.4	0.02057538		2763.39	-0.00188464		3353.39	0.01028742		3943.38	0.01205862
403.6	0.1017432		993.6	0.00824439		1583.6	0.01383614		2173.6	0.02050959		2763.59	-0.00161628		3353.59	0.01066882		3943.58	0.01231318
403.8	0.10253295		993.8	0.00771455		1583.8	0.01353216		2173.8	0.02006488		2763.79	-0.00095785		3353.79	0.01111288		3943.78	0.0129043
404	0.10320697		994	0.00679211		1584	0.01402191		2174	0.0196005		2763.99	-0.00137389		3353.99	0.01091096		3943.98	0.01278835
404.2	0.1036296		994.2	0.00729947		1584.2	0.01394234		2174.2	0.01889363		2764.19	-0.00125946		3354.19	0.01138937		3944.18	0.01329886
404.4	0.10473975		994.4	0.00666097		1584.4	0.01508746		2174.4	0.01846325		2764.39	-0.00055407		3354.39	0.01164399		3944.38	0.01258264
404.6	0.10534436		994.6	0.00762466		1584.6	0.01539211		2174.6	0.01772101		2764.59	-0.00021452		3354.59	0.01075707		3944.58	0.01238426
404.8	0.10569426		994.8	0.00773515		1584.8	0.01549008		2174.8	0.01766679		2764.79	-0.00024639		3354.79	0.01048405		3944.78	0.01257198
405	0.10694897		995	0.0086076		1585	0.01636159		2175	0.01787139		2764.99	0.00004108		3354.99	0.00995109		3944.98	0.01200763
405.2	0.10788904		995.2	0.0088871		1585.2	0.01696608		2175.2	0.01829214		2765.19	-0.00039879		3355.19	0.01015432		3945.18	0.01236908
405.4	0.10860588		995.4	0.00902722		1585.4	0.01736747		2175.4	0.0187573		2765.39	-0.00057515		3355.39	0.01031517		3945.38	0.01190015
405.6	0.10870123		995.6	0.00932094		1585.6	0.0173376		2175.6	0.01823459		2765.59	-0.00218875		3355.59	0.00929438		3945.58	0.01136438
405.8	0.10840218		995.8	0.00978341		1585.8	0.01742359		2175.8	0.01797168		2765.79	-0.0021552		3355.79	0.00826985		3945.78	0.01075271
406	0.10839819		996	0.01032157		1586	0.01729642		2176	0.01728032		2765.99	-0.00134609		3355.99	0.00838082		3945.98	0.01045865
406.2	0.10787808		996.2	0.00985211		1586.2	0.0164827		2176.2	0.01741		2766.19	-0.00134314		3356.19	0.00794816		3946.18	0.00981929
406.4	0.10764381		996.4	0.01027109		1586.4	0.01679769		2176.4	0.01783471		2766.39	-0.00103179		3356.39	0.00692148		3946.38	0.00951719
406.6	0.10735507		996.6	0.01092728		1586.6	0.01723318		2176.6	0.01799837		2766.59	-0.00115026		3356.59	0.0067124		3946.58	0.00999435
406.8	0.10741372		996.8	0.01015468		1586.8	0.01770489		2176.8	0.01801344		2766.79	-0.00166424		3356.79	0.00580813		3946.78	0.01034455
407	0.10626765		997	0.0098841		1587	0.01720517		2177	0.01862387		2766.99	-0.00290909		3356.99	0.00723083		3946.98	0.01000393
407.2	0.10655235		997.2	0.00908009		1587.2	0.01713491		2177.2	0.019025		2767.19	-0.00273141		3357.19	0.00827386		3947.18	0.01021847
407.4	0.10574425		997.4	0.00863141		1587.4	0.01645109		2177.4	0.01920967		2767.39	-0.00250536		3357.39	0.00834772		3947.38	0.00983117
407.6	0.10615261		997.6	0.00911664		1587.6	0.01532627		2177.6	0.01884461		2767.59	-0.00271961		3357.59	0.00890503		3947.58	0.01030882
407.8	0.10725798		997.8	0.00816632		1587.8	0.01585245		2177.8	0.01936716		2767.79	-0.00186845		3357.79	0.00916382		3947.78	0.01035638
408	0.10696005		998	0.00728154		1588	0.01628343		2178	0.02024935		2767.99	-0.00160415		3357.99	0.00972778		3947.98	0.01022621
408.2	0.10675596		998.2	0.00733645		1588.2	0.01642444		2178.2	0.02059753		2768.19	-0.00020004		3358.19	0.01060449		3948.18	0.01019729
408.4	0.10715702		998.4	0.00662332		1588.4	0.01670434		2178.4	0.02090745		2768.39	-0.00043383		3358.39	0.01073419		3948.38	0.0094847
408.6	0.10720076		998.6	0.00758532		1588.6	0.01643334		2178.6	0.02055181		2768.59	0.00076938		3358.59	0.01084214		3948.58	0.01045646
408.8	0.10748031		998.8	0.00678883		1588.8	0.01627835		2178.8	0.02109774		2768.79	0.00180665		3358.79	0.01133829		3948.78	0.01101365
409	0.1082682		999	0.00752837		1589	0.01774819		2179	0.02079876		2768.99	0.00169361		3358.99	0.01228785		3948.98	0.01137461
409.2	0.10804033		999.2	0.00749795		1589.2	0.01789101		2179.2	0.02087961		2769.19	0.00129256		3359.19	0.01288487		3949.18	0.01194719
409.4	0.10812425		999.4	0.00752507		1589.4	0.01802031		2179.4	0.02027348		2769.39	0.00147561		3359.39	0.01296517		3949.38	0.01149052
409.6	0.10739474		999.6	0.00844457		1589.6	0.01801405		2179.6	0.01973812		2769.59	0.00118834		3359.59	0.01182007		3949.58	0.01052113
409.8	0.10695955		999.8	0.00872451		1589.8	0.01748555		2179.8	0.01908743		2769.79	0.00218567		3359.79	0.0115426		3949.78	0.01038844
410	0.10731729		1000	0.00968396		1590	0.01768354		2180	0.01887301		2769.99	0.00218016		3359.99	0.01128529		3949.98	0.01002719
410.2	0.10694955		1000.2	0.0105754		1590.2	0.01745229		2180.2	0.01939036		2770.19	0.00131531		3360.19	0.01106303		3950.18	0.01019177
410.4	0.10709663		1000.4	0.01160289		1590.4	0.01773572		2180.4	0.01963203		2770.39	0.00098652		3360.39	0.01058604		3950.38	0.01052043
410.6	0.10762061		1000.6	0.0114819		1590.6	0.01711497		2180.6	0.01913291		2770.59	0.00081897		3360.59	0.00990565		3950.58	0.0112121
410.8	0.10773171		1000.8	0.01103824		1590.8	0.01687879		2180.8	0.01920367		2770.79	-0.00056521		3360.79	0.00923492		3950.78	0.01115015
411	0.10841501		1001	0.01136878		1591	0.0157052		2181	0.01922632		2770.99	-0.00193842		3360.99	0.00964633		3950.98	0.01138423
411.2	0.10903656		1001.2	0.01144965		1591.2	0.01511901		2181.2	0.01917676		2771.19	-0.00252237		3361.19	0.00922928		3951.18	0.01149789
411.4	0.1102425		1001.4	0.01222503		1591.4	0.01488112		2181.4	0.01904574		2771.39	-0.00280442		3361.39	0.00889368		3951.38	0.01158486
411.6	0.11051388		1001.6	0.01231011		1591.6	0.01439198		2181.6	0.01903875		2771.59	-0.00250031		3361.59	0.00898247		3951.58	0.01182961
411.8	0.1101397		1001.8	0.01115849		1591.8	0.01475237		2181.8	0.02000093		2771.79	-0.00237245		3361.79	0.00795231		3951.78	0.01239097
412	0.10890138		1002	0.01046062		1592	0.01535983		2182	0.0203733		2771.99	-0.00199925		3361.99	0.00804597		3951.98	0.01307466
412.2	0.10785639		1002.2	0.01029778		1592.2	0.01461753		2182.2	0.0201198		2772.19	-0.00185733		3362.19	0.00757094		3952.18	0.01344429
412.4	0.10775599		1002.4	0.0097394		1592.4	0.01530533		2182.4	0.01918095		2772.39	-0.00199222		3362.39	0.00807457		3952.38	0.01450501
412.6	0.10731204		1002.6	0.01039953		1592.6	0.01512895		2182.6	0.01826327		2772.59	-0.00089891		3362.59	0.00820157		3952.58	0.01552772
412.8	0.10674239		1002.8	0.00992641		1592.8	0.01562617		2182.8	0.01865212		2772.79	-0.00033986		3362.79	0.00913918		3952.78	0.01532109
413	0.10743871		1003	0.00958987		1593	0.01723611		2183	0.019131		2772.99	0.00020769		3362.99	0.0091371		3952.98	0.01612931
413.2	0.10705466		1003.2	0.00896754		1593.2	0.01796347		2183.2	0.01864926		2773.19	0.0007878		3363.19	0.00802875		3953.18	0.01600927
413.4	0.10757885		1003.4	0.00877609		1593.4	0.01906084		2183.4	0.01855161		2773.39	0.00118754		3363.39	0.00841637		3953.38	0.01552469
413.6	0.10742519		1003.6	0.00922447		1593.6	0.01952987		2183.6	0.01857637		2773.59	0.00210966		3363.59	0.00802316		3953.58	0.01370026
413.8	0.10757658		1003.8	0.00968746		1593.8	0.01955462		2183.8	0.01883234		2773.79	0.0028457		3363.79	0.00830984		3953.78	0.01455724
414	0.10786984		1004	0.00971242		1594	0.01975931		2184	0.01913165		2773.99	0.0031859		3363.99	0.00839659		3953.98	0.01412022
414.2	0.10805727		1004.2	0.00914768		1594.2	0.01919804		2184.2	0.01979355		2774.19	0.003951		3364.19	0.00984661		3954.18	0.01440853
414.4	0.10885589		1004.4	0.00923274		1594.4	0.01811627		2184.4	0.02019556		2774.39	0.00430662		3364.39	0.0100502		3954.38	0.01438694
414.6	0.11017981		1004.6	0.00942952		1594.6	0.01751741		2184.6	0.01989305		2774.59	0.00417074		3364.59	0.01067327		3954.58	0.01482554
414.8	0.11124321		1004.8	0.00998249		1594.8	0.01735296		2184.8	0.01962935		2774.79	0.00236223		3364.79	0.01182698		3954.78	0.01436779
415	0.11188145		1005	0.01052499		1595	0.01688545		2185	0.020241		2774.99	0.00177339		3364.99	0.01279518		3954.98	0.01490536
415.2	0.11195482		1005.2	0.01054083		1595.2	0.01668042		2185.2	0.02088513		2775.19	0.00156029		3365.19	0.01334379		3955.18	0.01453179
415.4	0.11237064		1005.4	0.01076944		1595.4	0.01699325		2185.4	0.02205141		2775.39	0.00127816		3365.39	0.01309555		3955.38	0.01437477
415.6	0.11086872		1005.6	0.01032975		1595.6	0.01703085		2185.6	0.02257912		2775.59	0.00141726		3365.59	0.01261019		3955.58	0.01408101
415.8	0.11007161		1005.8	0.00992459		1595.8	0.01656592		2185.8	0.02268356		2775.79	0.00010954		3365.79	0.01199752		3955.78	0.01416161
416	0.1096031		1006	0.01029798		1596	0.01643118		2186	0.02248603		2775.99	-0.00027229		3365.99	0.01219496		3955.98	0.01424528
416.2	0.10901367		1006.2	0.0106433		1596.2	0.01538536		2186.2	0.02177731		2776.19	-0.00128765		3366.19	0.01266072		3956.18	0.01470214
416.4	0.1096031		1006.4	0.01044367		1596.4	0.01578701		2186.4	0.02054859		2776.39	-0.00116366		3366.39	0.01296872		3956.38	0.01499504
416.6	0.10907998		1006.6	0.01092631		1596.6	0.01467028		2186.6	0.01972279		2776.59	-0.00108847		3366.59	0.01256557		3956.58	0.01493119
416.8	0.10897058		1006.8	0.01087038		1596.8	0.01483291		2186.8	0.0191596		2776.79	-0.00124678		3366.79	0.01189891		3956.78	0.01471508
417	0.10901681		1007	0.0107024		1597	0.01578697		2187	0.01786691		2776.99	-0.00121546		3366.99	0.01128735		3956.98	0.0147002
417.2	0.10848068		1007.2	0.01095819		1597.2	0.01611233		2187.2	0.01682455		2777.19	-0.00166076		3367.19	0.01020662		3957.18	0.01419532
417.4	0.10922725		1007.4	0.01084837		1597.4	0.01692642		2187.4	0.01660087		2777.39	-0.00255851		3367.39	0.01015824		3957.38	0.01418671
417.6	0.10930322		1007.6	0.01047537		1597.6	0.01725699		2187.6	0.01651862		2777.59	-0.00138536		3367.59	0.00929079		3957.58	0.01380773
417.8	0.10921135		1007.8	0.0103967		1597.8	0.01772913		2187.8	0.01633413		2777.79	-0.00197975		3367.79	0.00926807		3957.78	0.01447551
418	0.10929455		1008	0.01046152		1598	0.01772578		2188	0.01631144		2777.99	-0.00178786		3367.99	0.00942912		3957.98	0.01309547
418.2	0.10982399		1008.2	0.009887		1598.2	0.01794525		2188.2	0.01644261		2778.19	-0.00149209		3368.19	0.01072059		3958.18	0.01328585
418.4	0.11078104		1008.4	0.01047896		1598.4	0.01749546		2188.4	0.01613715		2778.39	-0.00160092		3368.39	0.01052303		3958.38	0.01337712
418.6	0.11183488		1008.6	0.01040131		1598.6	0.01855552		2188.6	0.01618853		2778.59	-0.001659		3368.59	0.01095392		3958.58	0.01329635
418.8	0.11082767		1008.8	0.01057487		1598.8	0.01913781		2188.8	0.01672546		2778.79	-0.00167644		3368.79	0.01149505		3958.78	0.01351996
419	0.11056263		1009	0.01098216		1599	0.01974882		2189	0.01835036		2778.99	-0.00039521		3368.99	0.01148873		3958.98	0.01375979
419.2	0.10977177		1009.2	0.01079206		1599.2	0.01994175		2189.2	0.01898355		2779.19	-0.00025072		3369.19	0.01119311		3959.18	0.01279308
419.4	0.10983833		1009.4	0.01081646		1599.4	0.02020592		2189.4	0.01951261		2779.39	0.00029063		3369.39	0.01040251		3959.38	0.01260426
419.6	0.11020448		1009.6	0.01058326		1599.6	0.0196715		2189.6	0.01989798		2779.59	0.001501		3369.59	0.01075128		3959.58	0.01248041
419.8	0.10989148		1009.8	0.01037945		1599.8	0.01902549		2189.8	0.02039869		2779.79	0.00136025		3369.79	0.01008431		3959.78	0.01285093
420	0.11078824		1010	0.01066978		1600	0.01884207		2190	0.02003358		2779.99	0.0019352		3369.99	0.01070066		3959.98	0.01329784
420.2	0.11091895		1010.2	0.01108616		1600.2	0.01857416		2190.2	0.01981873		2780.19	0.00239846		3370.19	0.01120889		3960.18	0.01349913
420.4	0.11208035		1010.4	0.01063557		1600.4	0.01742998		2190.4	0.01940973		2780.39	0.00272888		3370.39	0.01116209		3960.38	0.01367932
420.6	0.11197734		1010.6	0.01130586		1600.6	0.01695538		2190.6	0.0192038		2780.59	0.0029928		3370.59	0.01112276		3960.58	0.01405194
420.8	0.11238393		1010.8	0.01179013		1600.8	0.01708558		2190.8	0.01897931		2780.79	0.00292678		3370.79	0.01039568		3960.78	0.01420021
421	0.11251039		1011	0.01170178		1601	0.01750404		2191	0.01875853		2780.99	0.0028597		3370.99	0.01044109		3960.98	0.01458455
421.2	0.11305852		1011.2	0.01194593		1601.2	0.01776564		2191.2	0.0199027		2781.19	0.00167479		3371.19	0.01036939		3961.18	0.01521061
421.4	0.11411832		1011.4	0.01180996		1601.4	0.01821556		2191.4	0.01997934		2781.39	0.0011681		3371.39	0.01049429		3961.38	0.01575595
421.6	0.11410117		1011.6	0.01167633		1601.6	0.01830032		2191.6	0.02014582		2781.59	0.0006583		3371.59	0.01126738		3961.58	0.0163744
421.8	0.11471754		1011.8	0.01236513		1601.8	0.01758111		2191.8	0.02025173		2781.79	-0.00080355		3371.79	0.01142692		3961.78	0.01586706
422	0.11459857		1012	0.01260585		1602	0.01799833		2192	0.02009602		2781.99	-0.00135447		3371.99	0.01109426		3961.98	0.01565233
422.2	0.11547798		1012.2	0.01106012		1602.2	0.01832683		2192.2	0.02021263		2782.19	-0.00185464		3372.19	0.01159097		3962.18	0.01594406
422.4	0.11626116		1012.4	0.01121194		1602.4	0.01796434		2192.4	0.0203505		2782.39	-0.00153999		3372.39	0.01102143		3962.38	0.01537764
422.6	0.1169991		1012.6	0.01068394		1602.6	0.01832848		2192.6	0.02069336		2782.59	-0.00187507		3372.59	0.01098986		3962.58	0.01531051
422.8	0.1161438		1012.8	0.01104182		1602.8	0.01799746		2192.8	0.0210941		2782.79	-0.0013276		3372.79	0.0109499		3962.78	0.01496906
423	0.11656709		1013	0.0113252		1603	0.01744524		2193	0.02078539		2782.99	-0.00175755		3372.99	0.01125287		3962.98	0.01469195
423.2	0.11551342		1013.2	0.0110789		1603.2	0.01675044		2193.2	0.02068847		2783.19	-0.00180396		3373.19	0.01096979		3963.18	0.01468243
423.4	0.11654524		1013.4	0.01020515		1603.4	0.01682371		2193.4	0.02008602		2783.39	-0.00068023		3373.39	0.01122442		3963.38	0.01424974
423.6	0.11743845		1013.6	0.00961719		1603.6	0.01618597		2193.6	0.01992914		2783.59	0.00061181		3373.59	0.01136979		3963.58	0.01395091
423.8	0.11646953		1013.8	0.00895153		1603.8	0.01601617		2193.8	0.01896816		2783.79	0.00146178		3373.79	0.01139516		3963.78	0.01355908
424	0.11703216		1014	0.00901209		1604	0.01591836		2194	0.01768356		2783.99	0.00118286		3373.99	0.01283625		3963.98	0.01341126
424.2	0.11699616		1014.2	0.00938133		1604.2	0.0158864		2194.2	0.01761507		2784.19	0.00110426		3374.19	0.01329523		3964.18	0.01287525
424.4	0.11836822		1014.4	0.00947159		1604.4	0.01488867		2194.4	0.01671512		2784.39	0.00077406		3374.39	0.0125501		3964.38	0.01244599
424.6	0.11839986		1014.6	0.00971305		1604.6	0.01548473		2194.6	0.01586313		2784.59	0.00140817		3374.59	0.01189752		3964.58	0.01256555
424.8	0.11841777		1014.8	0.00991401		1604.8	0.01597774		2194.8	0.01513772		2784.79	0.00091133		3374.79	0.01184136		3964.78	0.01246111
425	0.11817119		1015	0.00982825		1605	0.01610731		2195	0.01459788		2784.99	0.00038844		3374.99	0.01260964		3964.98	0.01192396
425.2	0.1173573		1015.2	0.00996861		1605.2	0.01672351		2195.2	0.01523198		2785.19	0.00005439		3375.19	0.01337056		3965.18	0.01140293
425.4	0.11712519		1015.4	0.01010829		1605.4	0.01687745		2195.4	0.01467717		2785.39	-0.00038583		3375.39	0.01336293		3965.38	0.01137636
425.6	0.11576934		1015.6	0.00987457		1605.6	0.01726714		2195.6	0.01489913		2785.59	-0.00121782		3375.59	0.01339132		3965.58	0.01160413
425.8	0.11577728		1015.8	0.01077576		1605.8	0.0173591		2195.8	0.01459994		2785.79	-0.00167181		3375.79	0.01224697		3965.78	0.0112106
426	0.11534504		1016	0.01058128		1606	0.01885269		2196	0.01537633		2785.99	-0.0008549		3375.99	0.01156736		3965.98	0.01122773
426.2	0.11572299		1016.2	0.01006531		1606.2	0.01962213		2196.2	0.01662624		2786.19	-0.00161476		3376.19	0.011279		3966.18	0.01110144
426.4	0.11529972		1016.4	0.01011266		1606.4	0.02003542		2196.4	0.01737732		2786.39	-0.00144201		3376.39	0.01050147		3966.38	0.01130827
426.6	0.1163634		1016.6	0.01044032		1606.6	0.02042172		2196.6	0.01815934		2786.59	-0.00209411		3376.59	0.01023628		3966.58	0.01147786
426.8	0.11544334		1016.8	0.01087563		1606.8	0.0212391		2196.8	0.01913603		2786.79	-0.00173207		3376.79	0.01001293		3966.78	0.01141665
427	0.11456701		1017	0.01079263		1607	0.02176008		2197	0.01848123		2786.99	-0.00186839		3376.99	0.00998568		3966.98	0.01236186
427.2	0.113436		1017.2	0.01068368		1607.2	0.02161718		2197.2	0.01832114		2787.19	-0.00016846		3377.19	0.00978278		3967.18	0.01207828
427.4	0.11419692		1017.4	0.01076711		1607.4	0.02195725		2197.4	0.01764135		2787.39	0.0007757		3377.39	0.00972745		3967.38	0.01154884
427.6	0.11428926		1017.6	0.01115334		1607.6	0.02130607		2197.6	0.01792617		2787.59	0.00138277		3377.59	0.00958222		3967.58	0.01132747
427.8	0.1134531		1017.8	0.01010309		1607.8	0.02112107		2197.8	0.0175807		2787.79	0.00165746		3377.79	0.00988803		3967.78	0.01195417
428	0.11427537		1018	0.01087079		1608	0.02190178		2198	0.01800963		2787.99	0.00016386		3377.99	0.00938522		3967.98	0.01203858
428.2	0.11468874		1018.2	0.01162206		1608.2	0.02121002		2198.2	0.0183541		2788.19	-0.00004118		3378.19	0.00914079		3968.18	0.01149015
428.4	0.11551935		1018.4	0.01156636		1608.4	0.02069857		2198.4	0.01838232		2788.39	-0.00038174		3378.39	0.0078205		3968.38	0.01124972
428.6	0.11557356		1018.6	0.01177969		1608.6	0.02081121		2198.6	0.01826854		2788.59	-0.00057951		3378.59	0.00870996		3968.58	0.01111107
428.8	0.11552844		1018.8	0.01257711		1608.8	0.02049195		2198.8	0.01870192		2788.79	-0.00072345		3378.79	0.01028182		3968.78	0.0107847
429	0.11524888		1019	0.01336548		1609	0.01991918		2199	0.0193688		2788.99	-0.00076033		3378.99	0.0107219		3968.98	0.00988509
429.2	0.11407774		1019.2	0.01413493		1609.2	0.01947956		2199.2	0.01943314		2789.19	-0.0010776		3379.19	0.01129059		3969.18	0.01016538
429.4	0.11355373		1019.4	0.0151573		1609.4	0.01890176		2199.4	0.01915384		2789.39	-0.00153973		3379.39	0.01165865		3969.38	0.01080326
429.6	0.11308779		1019.6	0.01552854		1609.6	0.01919632		2199.6	0.0197157		2789.59	-0.00114852		3379.59	0.01087759		3969.58	0.01162511
429.8	0.11402229		1019.8	0.0165037		1609.8	0.01896521		2199.8	0.01963443		2789.79	-0.00132208		3379.79	0.01127965		3969.78	0.0118587
430	0.11457765		1020	0.01628142		1610	0.01942155		2200	0.02107101		2789.99	-0.00098643		3379.99	0.01180734		3969.98	0.01245723
430.2	0.11430583		1020.2	0.01596514		1610.2	0.01907535		2200.2	0.02144895		2790.19	-0.00150342		3380.19	0.01143211		3970.18	0.01263197
430.4	0.11507109		1020.4	0.01571879		1610.4	0.01889349		2200.4	0.02126517		2790.39	-0.00119235		3380.39	0.01106563		3970.38	0.0132596
430.6	0.11710621		1020.6	0.01578926		1610.6	0.01908195		2200.6	0.02028949		2790.59	-0.00138107		3380.59	0.01123037		3970.58	0.01370295
430.8	0.11659034		1020.8	0.01510954		1610.8	0.01961003		2200.8	0.02012727		2790.79	-0.00100862		3380.79	0.0114094		3970.78	0.01384955
431	0.1161133		1021	0.01466406		1611	0.0194186		2201	0.01906017		2790.99	-0.00078003		3380.99	0.01171666		3970.98	0.01348887
431.2	0.11667033		1021.2	0.01403945		1611.2	0.01815077		2201.2	0.01863609		2791.19	-0.00033132		3381.19	0.01115453		3971.18	0.01286261
431.4	0.11742819		1021.4	0.01425521		1611.4	0.01873783		2201.4	0.01856738		2791.39	-0.00015368		3381.39	0.011507		3971.38	0.01273128
431.6	0.11763912		1021.6	0.01377168		1611.6	0.01924789		2201.6	0.01847508		2791.59	-0.00038357		3381.59	0.0113701		3971.58	0.01258898
431.8	0.1172785		1021.8	0.01325153		1611.8	0.02029779		2201.8	0.01878283		2791.79	-0.00045068		3381.79	0.01128637		3971.78	0.01243109
432	0.11829703		1022	0.01323791		1612	0.02076275		2202	0.01907726		2791.99	-0.00206394		3381.99	0.01029599		3971.98	0.01206076
432.2	0.11811642		1022.2	0.01223778		1612.2	0.0204125		2202.2	0.02001535		2792.19	-0.00161634		3382.19	0.01059738		3972.18	0.01209533
432.4	0.11809954		1022.4	0.01149857		1612.4	0.02119155		2202.4	0.02081405		2792.39	-0.00188363		3382.39	0.01088788		3972.38	0.01243243
432.6	0.11800953		1022.6	0.01203702		1612.6	0.02087551		2202.6	0.02118239		2792.59	-0.00164925		3382.59	0.01117392		3972.58	0.01251985
432.8	0.11830658		1022.8	0.01166515		1612.8	0.02062347		2202.8	0.02249926		2792.79	-0.00108283		3382.79	0.01057733		3972.78	0.01216033
433	0.11820719		1023	0.01209461		1613	0.0197438		2203	0.02247769		2792.99	-0.00196493		3382.99	0.00992073		3972.98	0.01171658
433.2	0.11743254		1023.2	0.01141701		1613.2	0.01928809		2203.2	0.0222792		2793.19	-0.00155176		3383.19	0.01021271		3973.18	0.01271727
433.4	0.11732074		1023.4	0.01137894		1613.4	0.01928795		2203.4	0.02285471		2793.39	-0.00161571		3383.39	0.00928168		3973.38	0.01281818
433.6	0.11725881		1023.6	0.01123819		1613.6	0.0193131		2203.6	0.02285954		2793.59	-0.00194469		3383.59	0.00820992		3973.58	0.01334003
433.8	0.11793897		1023.8	0.01185782		1613.8	0.01830697		2203.8	0.02283336		2793.79	-0.00205151		3383.79	0.0087601		3973.78	0.01343189
434	0.11808853		1024	0.01176254		1614	0.01756549		2204	0.0225061		2793.99	-0.00202511		3383.99	0.0078484		3973.98	0.01402961
434.2	0.1180316		1024.2	0.01193638		1614.2	0.01657068		2204.2	0.02239979		2794.19	-0.002174		3384.19	0.00692763		3974.18	0.01432599
434.4	0.11925579		1024.4	0.01145551		1614.4	0.01656336		2204.4	0.02223809		2794.39	-0.00259968		3384.39	0.00690026		3974.38	0.01502168
434.6	0.12033344		1024.6	0.01068777		1614.6	0.01730041		2204.6	0.02165498		2794.59	-0.00373528		3384.59	0.00719458		3974.58	0.01505584
434.8	0.12000259		1024.8	0.01068944		1614.8	0.01744288		2204.8	0.02206722		2794.79	-0.00456536		3384.79	0.00792515		3974.78	0.01462698
435	0.11991113		1025	0.01000399		1615	0.01698541		2205	0.02142131		2794.99	-0.00479262		3384.99	0.00842336		3974.98	0.01419249
435.2	0.11989915		1025.2	0.00989443		1615.2	0.01723396		2205.2	0.02104544		2795.19	-0.00460365		3385.19	0.00824914		3975.18	0.01305816
435.4	0.1197783		1025.4	0.01081731		1615.4	0.01783942		2205.4	0.02072728		2795.39	-0.00463525		3385.39	0.00949265		3975.38	0.01231642
435.6	0.11989644		1025.6	0.01132392		1615.6	0.01771774		2205.6	0.0211309		2795.59	-0.00415345		3385.59	0.00981836		3975.58	0.01221731
435.8	0.11891115		1025.8	0.01176794		1615.8	0.01833888		2205.8	0.02070537		2795.79	-0.00431972		3385.79	0.01050623		3975.78	0.01216823
436	0.11912296		1026	0.01050339		1616	0.01837958		2206	0.02064053		2795.99	-0.00388155		3385.99	0.00993678		3975.98	0.0128799
436.2	0.11803773		1026.2	0.01043779		1616.2	0.01870002		2206.2	0.02100755		2796.19	-0.00273517		3386.19	0.01036083		3976.18	0.01340427
436.4	0.11809321		1026.4	0.00994873		1616.4	0.01918836		2206.4	0.02062682		2796.39	-0.00215734		3386.39	0.01144445		3976.38	0.01388068
436.6	0.11801149		1026.6	0.01006819		1616.6	0.01908802		2206.6	0.02108462		2796.59	-0.00100694		3386.59	0.01092535		3976.58	0.0131925
436.8	0.11850807		1026.8	0.0101848		1616.8	0.01916854		2206.8	0.02061672		2796.79	-0.0007949		3386.79	0.01100449		3976.78	0.01347701
437	0.11798236		1027	0.01077581		1617	0.01828223		2207	0.01897714		2796.99	-0.00061333		3386.99	0.01169994		3976.98	0.01324717
437.2	0.1176596		1027.2	0.01051287		1617.2	0.01859839		2207.2	0.01938968		2797.19	-0.00052009		3387.19	0.01227037		3977.18	0.01371381
437.4	0.11775668		1027.4	0.01207133		1617.4	0.01845035		2207.4	0.01932474		2797.39	-0.00054975		3387.39	0.01191256		3977.38	0.01342393
437.6	0.11773616		1027.6	0.01308111		1617.6	0.01815552		2207.6	0.01942858		2797.59	-0.00038033		3387.59	0.01239848		3977.58	0.0135512
437.8	0.11881827		1027.8	0.01397779		1617.8	0.01711481		2207.8	0.01943481		2797.79	0.00005994		3387.79	0.01276661		3977.78	0.01312998
438	0.11874112		1028	0.01391882		1618	0.01731041		2208	0.01964544		2797.99	-0.00041197		3387.99	0.01230121		3977.98	0.01331795
438.2	0.11876281		1028.2	0.01437017		1618.2	0.01724046		2208.2	0.02001518		2798.19	-0.00059438		3388.19	0.01229237		3978.18	0.01333005
438.4	0.11964244		1028.4	0.01474662		1618.4	0.01812443		2208.4	0.02047749		2798.39	-0.0005849		3388.39	0.01198287		3978.38	0.01307164
438.6	0.12010362		1028.6	0.01535838		1618.6	0.01870001		2208.6	0.02055676		2798.59	-0.00227364		3388.59	0.01239063		3978.58	0.01265524
438.8	0.12035067		1028.8	0.01572628		1618.8	0.01935241		2208.8	0.02093146		2798.79	-0.00218617		3388.79	0.01243446		3978.78	0.01225727
439	0.12052755		1029	0.0150189		1619	0.01900257		2209	0.02110674		2798.99	-0.00159359		3388.99	0.01208463		3978.98	0.01107472
439.2	0.11958766		1029.2	0.01473183		1619.2	0.01922124		2209.2	0.02122562		2799.19	-0.00149831		3389.19	0.01207622		3979.18	0.01085118
439.4	0.12049628		1029.4	0.01473315		1619.4	0.01837056		2209.4	0.02100042		2799.39	-0.00169461		3389.39	0.01223955		3979.38	0.01147776
439.6	0.12080115		1029.6	0.01461728		1619.6	0.01799434		2209.6	0.02167746		2799.59	-0.00077401		3389.59	0.01179292		3979.58	0.01194269
439.8	0.12051481		1029.8	0.01424042		1619.8	0.01779824		2209.8	0.02132112		2799.79	-0.0015803		3389.79	0.01078622		3979.78	0.0122846
440	0.12071348		1030	0.01308916		1620	0.01760384		2210	0.02180172		2799.99	-0.00081699		3389.99	0.00981122		3979.98	0.01231588
440.2	0.12004716		1030.2	0.0126944		1620.2	0.01739651		2210.2	0.02148925		2800.19	-0.00226799		3390.19	0.00956761		3980.18	0.01251599
440.4	0.12006359		1030.4	0.01193712		1620.4	0.01687886		2210.4	0.02164354		2800.39	-0.00206467		3390.39	0.00938252		3980.38	0.01254055
440.6	0.11985038		1030.6	0.01224897		1620.6	0.0167754		2210.6	0.02185278		2800.59	-0.00244132		3390.59	0.00877593		3980.58	0.01260012
440.8	0.12006353		1030.8	0.01181495		1620.8	0.01636272		2210.8	0.0210885		2800.79	-0.00309711		3390.79	0.00809517		3980.78	0.0126663
441	0.12050415		1031	0.01139063		1621	0.01638092		2211	0.02078891		2800.99	-0.00347936		3390.99	0.00769541		3980.98	0.01161917
441.2	0.12068109		1031.2	0.01149533		1621.2	0.01669409		2211.2	0.02212883		2801.19	-0.00376261		3391.19	0.00746197		3981.18	0.01145222
441.4	0.12054384		1031.4	0.01197221		1621.4	0.01649898		2211.4	0.02211258		2801.39	-0.00335795		3391.39	0.0072324		3981.38	0.01170406
441.6	0.12032169		1031.6	0.01202214		1621.6	0.01667374		2211.6	0.02267076		2801.59	-0.00378771		3391.59	0.0074229		3981.58	0.01185504
441.8	0.11995827		1031.8	0.01255281		1621.8	0.01676341		2211.8	0.02305737		2801.79	-0.00373099		3391.79	0.00807659		3981.78	0.01199209
442	0.11967972		1032	0.01271068		1622	0.01821439		2212	0.02358693		2801.99	-0.00348311		3391.99	0.00868605		3981.98	0.01178424
442.2	0.12000707		1032.2	0.01397797		1622.2	0.01884344		2212.2	0.02341591		2802.19	-0.00241586		3392.19	0.00899963		3982.18	0.01200318
442.4	0.12069397		1032.4	0.01541547		1622.4	0.01920592		2212.4	0.02338336		2802.39	-0.00188618		3392.39	0.00925131		3982.38	0.01186043
442.6	0.12045095		1032.6	0.01509092		1622.6	0.01954514		2212.6	0.02317649		2802.59	-0.0018103		3392.59	0.00981965		3982.58	0.0121873
442.8	0.120073		1032.8	0.01450053		1622.8	0.02011885		2212.8	0.02295375		2802.79	-0.00071343		3392.79	0.00942051		3982.78	0.01277953
443	0.12032704		1033	0.01473572		1623	0.01965684		2213	0.02259618		2802.99	-0.00024291		3392.99	0.00986535		3982.98	0.01299581
443.2	0.11983773		1033.2	0.01380843		1623.2	0.0199035		2213.2	0.02176219		2803.19	0.00004861		3393.19	0.01025739		3983.18	0.01431587
443.4	0.1210712		1033.4	0.01473784		1623.4	0.01967676		2213.4	0.02136119		2803.39	0.00041523		3393.39	0.01040629		3983.38	0.01477456
443.6	0.12158645		1033.6	0.01545661		1623.6	0.02011657		2213.6	0.02185269		2803.59	0.0008593		3393.59	0.01038608		3983.58	0.01455108
443.8	0.1216542		1033.8	0.01573616		1623.8	0.019452		2213.8	0.0211954		2803.79	0.00026151		3393.79	0.01022223		3983.78	0.01461195
444	0.1216041		1034	0.01535545		1624	0.01968714		2214	0.02088263		2803.99	0.0002517		3393.99	0.0097976		3983.98	0.01447783
444.2	0.12109865		1034.2	0.01543381		1624.2	0.01885411		2214.2	0.02098326		2804.19	-0.00041613		3394.19	0.00947612		3984.18	0.01494336
444.4	0.12142508		1034.4	0.01539337		1624.4	0.0187511		2214.4	0.02027183		2804.39	0.00102812		3394.39	0.00930063		3984.38	0.01499337
444.6	0.12202786		1034.6	0.01472917		1624.6	0.01969318		2214.6	0.01974244		2804.59	0.0005316		3394.59	0.0088008		3984.58	0.01529478
444.8	0.12230755		1034.8	0.01387464		1624.8	0.01965976		2214.8	0.01904935		2804.79	0.00046219		3394.79	0.0081403		3984.78	0.01485353
445	0.12288904		1035	0.01300912		1625	0.02027788		2215	0.01836992		2804.99	-0.00032206		3394.99	0.00815097		3984.98	0.01467809
445.2	0.1221661		1035.2	0.01271465		1625.2	0.02041197		2215.2	0.01856466		2805.19	-0.00058671		3395.19	0.00808816		3985.18	0.0144559
445.4	0.12188645		1035.4	0.01236577		1625.4	0.02016797		2215.4	0.01848648		2805.39	-0.00124085		3395.39	0.00819492		3985.38	0.01512433
445.6	0.12121614		1035.6	0.01226184		1625.6	0.02079315		2215.6	0.01879986		2805.59	-0.00069411		3395.59	0.00880164		3985.58	0.01481224
445.8	0.12122388		1035.8	0.01240974		1625.8	0.02118186		2215.8	0.01866436		2805.79	-0.00086128		3395.79	0.00957422		3985.78	0.01422054
446	0.12085579		1036	0.01162236		1626	0.0218852		2216	0.01875512		2805.99	-0.00099905		3395.99	0.00829341		3985.98	0.01403957
446.2	0.12069748		1036.2	0.0120144		1626.2	0.02125451		2216.2	0.01879249		2806.19	-0.00111692		3396.19	0.0075335		3986.18	0.01475284
446.4	0.12099965		1036.4	0.0122582		1626.4	0.02085246		2216.4	0.01953419		2806.39	-0.00159338		3396.39	0.00728954		3986.38	0.01391756
446.6	0.12168184		1036.6	0.01138558		1626.6	0.02102885		2216.6	0.02049283		2806.59	-0.00122506		3396.59	0.00712281		3986.58	0.01359844
446.8	0.12239576		1036.8	0.01106289		1626.8	0.02113301		2216.8	0.02097822		2806.79	-0.0014562		3396.79	0.00711745		3986.78	0.01328162
447	0.12333274		1037	0.01189091		1627	0.0210082		2217	0.02161127		2806.99	-0.00085243		3396.99	0.00823506		3986.98	0.01321238
447.2	0.123086		1037.2	0.01131957		1627.2	0.02077272		2217.2	0.02070627		2807.19	-0.00106005		3397.19	0.00850523		3987.18	0.01319287
447.4	0.12380891		1037.4	0.01167725		1627.4	0.02039248		2217.4	0.02065076		2807.39	-0.00111585		3397.39	0.00949087		3987.38	0.01312019
447.6	0.12456588		1037.6	0.01148874		1627.6	0.02004636		2217.6	0.02117922		2807.59	-0.00110733		3397.59	0.01024912		3987.58	0.01344602
447.8	0.12525939		1037.8	0.01089755		1627.8	0.01847593		2217.8	0.02110811		2807.79	-0.00102237		3397.79	0.01085087		3987.78	0.01347968
448	0.12588423		1038	0.01095444		1628	0.01788621		2218	0.02186062		2807.99	-0.00013204		3397.99	0.01113345		3987.98	0.01282196
448.2	0.12584349		1038.2	0.01073682		1628.2	0.01724106		2218.2	0.02132053		2808.19	0.00055567		3398.19	0.01175189		3988.18	0.0136162
448.4	0.12601857		1038.4	0.00990563		1628.4	0.01707523		2218.4	0.02099797		2808.39	0.00054678		3398.39	0.01225358		3988.38	0.01420495
448.6	0.12610678		1038.6	0.00904899		1628.6	0.01718134		2218.6	0.0207774		2808.59	-0.00034774		3398.59	0.0114276		3988.58	0.01500164
448.8	0.12633687		1038.8	0.00869478		1628.8	0.01626584		2218.8	0.02038951		2808.79	-0.00109768		3398.79	0.01215691		3988.78	0.01429494
449	0.12675645		1039	0.00899458		1629	0.0172315		2219	0.01993371		2808.99	-0.00133374		3398.99	0.01165884		3988.98	0.01392557
449.2	0.12569967		1039.2	0.00942836		1629.2	0.01710324		2219.2	0.02001858		2809.19	-0.00131526		3399.19	0.01152589		3989.18	0.01415673
449.4	0.12468546		1039.4	0.00973119		1629.4	0.01739713		2219.4	0.01988445		2809.39	-0.00124295		3399.39	0.01124625		3989.38	0.01473307
449.6	0.12423243		1039.6	0.00976276		1629.6	0.01907869		2219.6	0.01928135		2809.59	-0.00099225		3399.59	0.01085322		3989.58	0.01490608
449.8	0.1245209		1039.8	0.0099534		1629.8	0.0197859		2219.8	0.01893925		2809.79	-0.0011668		3399.79	0.00986136		3989.78	0.01475181
450	0.12432782		1040	0.01036754		1630	0.02124588		2220	0.01939684		2809.99	-0.00082305		3399.99	0.00863007		3989.98	0.01484103
450.2	0.12419227		1040.2	0.0114814		1630.2	0.02101364		2220.2	0.01926145		2810.19	-0.00082445		3400.19	0.00852186		3990.18	0.01429006
450.4	0.12456132		1040.4	0.012166		1630.4	0.02167974		2220.4	0.02087287		2810.39	-0.00076933		3400.39	0.00862668		3990.38	0.01337098
450.6	0.12471739		1040.6	0.01177397		1630.6	0.02192298		2220.6	0.02166087		2810.59	0.0004718		3400.59	0.00913962		3990.58	0.01357128
450.8	0.12429701		1040.8	0.01221228		1630.8	0.02200813		2220.8	0.0223833		2810.79	0.00080434		3400.79	0.00952589		3990.78	0.01379633
451	0.12329687		1041	0.01310701		1631	0.02194544		2221	0.02277012		2810.99	0.00141615		3400.99	0.01048932		3990.98	0.01441406
451.2	0.12326157		1041.2	0.01232802		1631.2	0.02132731		2221.2	0.02182911		2811.19	0.00072995		3401.19	0.00990183		3991.18	0.01403636
451.4	0.12336756		1041.4	0.01273793		1631.4	0.02123674		2221.4	0.02234099		2811.39	0.00039281		3401.39	0.01005832		3991.38	0.01381735
451.6	0.12406925		1041.6	0.01231251		1631.6	0.02076913		2221.6	0.02239389		2811.59	0.00038997		3401.59	0.01039795		3991.58	0.01399707
451.8	0.12481106		1041.8	0.01247288		1631.8	0.01988914		2221.8	0.02226515		2811.79	0.00017612		3401.79	0.01069866		3991.78	0.01216861
452	0.12460401		1042	0.01298581		1632	0.01994774		2222	0.02263567		2811.99	0.00008851		3401.99	0.01000688		3991.98	0.01227547
452.2	0.12442165		1042.2	0.01271362		1632.2	0.01950418		2222.2	0.0222617		2812.19	-0.00048575		3402.19	0.00950925		3992.18	0.013857
452.4	0.12462803		1042.4	0.01287122		1632.4	0.01887382		2222.4	0.02327472		2812.39	-0.0014694		3402.39	0.00879559		3992.38	0.01447511
452.6	0.1252248		1042.6	0.01439912		1632.6	0.01893145		2222.6	0.02278526		2812.59	-0.00164258		3402.59	0.00796305		3992.58	0.01449584
452.8	0.12483533		1042.8	0.01512083		1632.8	0.0187088		2222.8	0.02255199		2812.79	-0.00175554		3402.79	0.00780622		3992.78	0.01351511
453	0.12424933		1043	0.01518101		1633	0.01920999		2223	0.02293339		2812.99	-0.00117271		3402.99	0.00682361		3992.98	0.01373424
453.2	0.12357302		1043.2	0.01554005		1633.2	0.01935576		2223.2	0.02311968		2813.19	-0.00180603		3403.19	0.00748459		3993.18	0.01431609
453.4	0.12403717		1043.4	0.01569581		1633.4	0.02000244		2223.4	0.02220379		2813.39	-0.00128594		3403.39	0.00792933		3993.38	0.0143332
453.6	0.12463382		1043.6	0.01588981		1633.6	0.0201675		2223.6	0.02135393		2813.59	-0.00142523		3403.59	0.00809397		3993.58	0.01392025
453.8	0.12406511		1043.8	0.01694651		1633.8	0.01940868		2223.8	0.02090008		2813.79	-0.00106903		3403.79	0.00858329		3993.78	0.01380029
454	0.12373484		1044	0.01716049		1634	0.01930238		2224	0.02031076		2813.99	-0.00084435		3403.99	0.00933698		3993.98	0.01396799
454.2	0.12254787		1044.2	0.01700856		1634.2	0.01849139		2224.2	0.01991695		2814.19	-0.00109886		3404.19	0.00948369		3994.18	0.01425314
454.4	0.12285728		1044.4	0.01685311		1634.4	0.01862202		2224.4	0.0217173		2814.39	-0.00068907		3404.39	0.0098791		3994.38	0.01522618
454.6	0.12260976		1044.6	0.01620438		1634.6	0.0180205		2224.6	0.02209277		2814.59	-0.0003393		3404.59	0.01039507		3994.58	0.01621593
454.8	0.1228667		1044.8	0.01572954		1634.8	0.01755581		2224.8	0.0219802		2814.79	-0.00110341		3404.79	0.01046701		3994.78	0.01653173
455	0.1223058		1045	0.01549984		1635	0.01797003		2225	0.02201574		2814.99	-0.00190916		3404.99	0.01124582		3994.98	0.01689072
455.2	0.12294058		1045.2	0.01443498		1635.2	0.01718859		2225.2	0.02091184		2815.19	-0.00279906		3405.19	0.01063671		3995.18	0.01580426
455.4	0.12354957		1045.4	0.01394226		1635.4	0.01724618		2225.4	0.02049161		2815.39	-0.00392863		3405.39	0.01069681		3995.38	0.01574617
455.6	0.12444677		1045.6	0.01246878		1635.6	0.01689819		2225.6	0.01980645		2815.59	-0.00393804		3405.59	0.01118507		3995.58	0.01557084
455.8	0.12501361		1045.8	0.0126802		1635.8	0.01722302		2225.8	0.02070706		2815.79	-0.0043521		3405.79	0.01069492		3995.78	0.01524983
456	0.12520397		1046	0.01284087		1636	0.01754217		2226	0.02145787		2815.99	-0.00457608		3405.99	0.00945538		3995.98	0.01542475
456.2	0.12553687		1046.2	0.01337546		1636.2	0.01678834		2226.2	0.02165659		2816.19	-0.00475844		3406.19	0.00915603		3996.18	0.01564848
456.4	0.12584157		1046.4	0.01398066		1636.4	0.01713301		2226.4	0.02237576		2816.39	-0.00375809		3406.39	0.00858647		3996.38	0.01507998
456.6	0.12645852		1046.6	0.01450695		1636.6	0.01798283		2226.6	0.02256942		2816.59	-0.00291575		3406.59	0.00864681		3996.58	0.01469395
456.8	0.12615146		1046.8	0.01379185		1636.8	0.01891884		2226.8	0.02373683		2816.79	-0.00173491		3406.79	0.0085025		3996.78	0.01436148
457	0.12628403		1047	0.01374927		1637	0.01948624		2227	0.0251957		2816.99	-0.00155305		3406.99	0.00839754		3996.98	0.01409087
457.2	0.12650847		1047.2	0.01397409		1637.2	0.01987091		2227.2	0.02467235		2817.19	-0.00161548		3407.19	0.00852149		3997.18	0.01431003
457.4	0.12683234		1047.4	0.01391915		1637.4	0.0198194		2227.4	0.02419594		2817.39	-0.00021543		3407.39	0.00847762		3997.38	0.01393008
457.6	0.1264678		1047.6	0.0147707		1637.6	0.01953107		2227.6	0.02411341		2817.59	-0.00000865		3407.59	0.00860322		3997.58	0.01314263
457.8	0.12586578		1047.8	0.01485262		1637.8	0.02008075		2227.8	0.02477632		2817.79	0.0010598		3407.79	0.00896917		3997.78	0.01300464
458	0.12670165		1048	0.01429181		1638	0.02094826		2228	0.02432225		2817.99	0.00212333		3407.99	0.0085963		3997.98	0.0120789
458.2	0.12680284		1048.2	0.01482872		1638.2	0.02085607		2228.2	0.0248994		2818.19	0.00208099		3408.19	0.00863297		3998.18	0.01225288
458.4	0.12752694		1048.4	0.0143348		1638.4	0.02123403		2228.4	0.02567048		2818.39	0.00203788		3408.39	0.00864253		3998.38	0.01277313
458.6	0.12679686		1048.6	0.01363538		1638.6	0.02149078		2228.6	0.02458964		2818.59	0.00067772		3408.59	0.00942544		3998.58	0.01308154
458.8	0.1272207		1048.8	0.01324337		1638.8	0.02267309		2228.8	0.02459478		2818.79	0.00070898		3408.79	0.01018618		3998.78	0.01271178
459	0.12735833		1049	0.01238032		1639	0.02387579		2229	0.02370248		2818.99	0.00128683		3408.99	0.01068951		3998.98	0.01346609
459.2	0.12780094		1049.2	0.01184188		1639.2	0.02328986		2229.2	0.02267945		2819.19	0.00118206		3409.19	0.00988776		3999.18	0.01336297
459.4	0.12835146		1049.4	0.01221333		1639.4	0.02370618		2229.4	0.02296294		2819.39	0.00114172		3409.39	0.00952772		3999.38	0.01432503
459.6	0.12799387		1049.6	0.01198783		1639.6	0.02368306		2229.6	0.02238749		2819.59	0.00117772		3409.59	0.00924852		3999.58	0.01455668
459.8	0.12806359		1049.8	0.01252776		1639.8	0.02388005		2229.8	0.0225015		2819.79	0.00108403		3409.79	0.00873066		3999.78	0.01514604
460	0.12762745		1050	0.01282759		1640	0.02312471		2230	0.02224031		2819.99	0.00094547		3409.99	0.00789031		3999.98	0.01454139
460.2	0.12733448		1050.2	0.01267901		1640.2	0.0229568		2230.2	0.02214703		2820.19	0.0011411		3410.19	0.00808217		4000.18	0.01472114
460.4	0.1270294		1050.4	0.0126567		1640.4	0.0231422		2230.4	0.02203784		2820.39	0.00170409		3410.39	0.00847843		4000.38	0.01492079
460.6	0.12751659		1050.6	0.01181206		1640.6	0.02307736		2230.6	0.02265898		2820.59	0.00099652		3410.59	0.00951381		4000.58	0.01579547
460.8	0.1265681		1050.8	0.01128606		1640.8	0.02306445		2230.8	0.0224211		2820.79	0.00087105		3410.79	0.01074093		4000.78	0.01573945
461	0.12615687		1051	0.01169434		1641	0.02235969		2231	0.02191962		2820.99	0.0001497		3410.99	0.01052169		4000.98	0.01527491
461.2	0.125936		1051.2	0.01156833		1641.2	0.02161735		2231.2	0.02154454		2821.19	0.0003609		3411.19	0.00996563		4001.18	0.01526177
461.4	0.12562652		1051.4	0.01234168		1641.4	0.02078046		2231.4	0.02141132		2821.39	0.0012128		3411.39	0.0105034		4001.38	0.01389103
461.6	0.12552236		1051.6	0.0130592		1641.6	0.02068637		2231.6	0.02197897		2821.59	0.00134846		3411.59	0.01125976		4001.58	0.01281945
461.8	0.12523803		1051.8	0.01279344		1641.8	0.02031539		2231.8	0.02229646		2821.79	0.00125915		3411.79	0.01147606		4001.78	0.0121021
462	0.12576106		1052	0.01378623		1642	0.01990971		2232	0.02167963		2821.99	0.00092064		3411.99	0.01119718		4001.98	0.01181547
462.2	0.1260415		1052.2	0.0141807		1642.2	0.01899144		2232.2	0.02187623		2822.19	-0.00001661		3412.19	0.01172608		4002.18	0.01223168
462.4	0.12556371		1052.4	0.01352815		1642.4	0.01921278		2232.4	0.02180777		2822.39	-0.00036066		3412.39	0.01112978		4002.38	0.0119265
462.6	0.12497165		1052.6	0.01345281		1642.6	0.01955828		2232.6	0.02103023		2822.59	-0.00087473		3412.59	0.01170367		4002.58	0.01235756
462.8	0.1259278		1052.8	0.01368471		1642.8	0.01980702		2232.8	0.02162444		2822.79	0.00019013		3412.79	0.01204029		4002.78	0.01290093
463	0.12615135		1053	0.01285265		1643	0.01967699		2233	0.02076646		2822.99	-0.00033357		3412.99	0.01133231		4002.98	0.01330802
463.2	0.1261287		1053.2	0.01332586		1643.2	0.01914353		2233.2	0.02098982		2823.19	-0.00039957		3413.19	0.0107575		4003.18	0.01371902
463.4	0.12661817		1053.4	0.01377697		1643.4	0.01925685		2233.4	0.02106483		2823.39	-0.00099275		3413.39	0.01037226		4003.38	0.01416979
463.6	0.12644391		1053.6	0.01310126		1643.6	0.01880506		2233.6	0.02033064		2823.59	-0.00163001		3413.59	0.00956354		4003.58	0.01443597
463.8	0.12688582		1053.8	0.01398056		1643.8	0.01915486		2233.8	0.02061549		2823.79	-0.00107267		3413.79	0.00919547		4003.78	0.01429762
464	0.1265773		1054	0.01382122		1644	0.01866885		2234	0.02148394		2823.99	-0.00125871		3413.99	0.00879905		4003.98	0.01399885
464.2	0.12723833		1054.2	0.01293755		1644.2	0.01878663		2234.2	0.02217137		2824.19	-0.00125528		3414.19	0.00934031		4004.18	0.01321004
464.4	0.12737576		1054.4	0.01348117		1644.4	0.01840041		2234.4	0.02213146		2824.39	-0.00200903		3414.39	0.01048061		4004.38	0.01338604
464.6	0.12790995		1054.6	0.01315655		1644.6	0.01895047		2234.6	0.02196615		2824.59	-0.00239834		3414.59	0.01136582		4004.58	0.01306282
464.8	0.1277566		1054.8	0.01352594		1644.8	0.01956088		2234.8	0.02128941		2824.79	-0.00189228		3414.79	0.01194038		4004.78	0.01253645
465	0.12849445		1055	0.01426506		1645	0.0193963		2235	0.02133001		2824.99	-0.0017851		3414.99	0.01145849		4004.98	0.01226499
465.2	0.12837205		1055.2	0.01503426		1645.2	0.01949767		2235.2	0.02143406		2825.19	-0.00141873		3415.19	0.01149837		4005.18	0.01251167
465.4	0.12866806		1055.4	0.01498333		1645.4	0.0201761		2235.4	0.02102197		2825.39	-0.00130793		3415.39	0.0119309		4005.38	0.01245028
465.6	0.1285507		1055.6	0.01558847		1645.6	0.02085911		2235.6	0.02221736		2825.59	-0.00101509		3415.59	0.01107735		4005.58	0.0125047
465.8	0.12833306		1055.8	0.0160237		1645.8	0.02157838		2235.8	0.02300542		2825.79	-0.00079868		3415.79	0.01035021		4005.78	0.01317082
466	0.12860342		1056	0.01669605		1646	0.02276604		2236	0.02325466		2825.99	-0.00050942		3415.99	0.00921133		4005.98	0.01374739
466.2	0.1288055		1056.2	0.01609253		1646.2	0.0234223		2236.2	0.02381155		2826.19	0.00013496		3416.19	0.00782981		4006.18	0.01419736
466.4	0.12920775		1056.4	0.01607342		1646.4	0.02389854		2236.4	0.0244005		2826.39	0.00083294		3416.39	0.00725098		4006.38	0.01472081
466.6	0.12949173		1056.6	0.01590746		1646.6	0.02411993		2236.6	0.02357467		2826.59	0.00115954		3416.59	0.00699714		4006.58	0.01520886
466.8	0.12995635		1056.8	0.01585786		1646.8	0.02422376		2236.8	0.02353319		2826.79	0.00199832		3416.79	0.00748954		4006.78	0.01495831
467	0.13065512		1057	0.01526705		1647	0.02394246		2237	0.02369482		2826.99	0.00156516		3416.99	0.00665576		4006.98	0.0147727
467.2	0.13137763		1057.2	0.01465871		1647.2	0.02391616		2237.2	0.02346077		2827.19	0.0020897		3417.19	0.00686382		4007.18	0.01576331
467.4	0.13137231		1057.4	0.01461789		1647.4	0.02307908		2237.4	0.02336849		2827.39	0.00113948		3417.39	0.00668555		4007.38	0.01567255
467.6	0.13117699		1057.6	0.01411643		1647.6	0.02288394		2237.6	0.02329982		2827.59	0.00150402		3417.59	0.00636693		4007.58	0.01529604
467.8	0.13143713		1057.8	0.01455437		1647.8	0.02271591		2237.8	0.02360605		2827.79	0.00211303		3417.79	0.00664202		4007.78	0.01464613
468	0.13125342		1058	0.01395553		1648	0.02158578		2238	0.02391247		2827.99	0.00208873		3417.99	0.00683879		4007.98	0.01449378
468.2	0.13159227		1058.2	0.0135361		1648.2	0.02102829		2238.2	0.02390231		2828.19	0.00199276		3418.19	0.00706174		4008.18	0.01370382
468.4	0.13112407		1058.4	0.01393358		1648.4	0.02038725		2238.4	0.02330838		2828.39	0.00189014		3418.39	0.0075735		4008.38	0.01397707
468.6	0.13090903		1058.6	0.01372053		1648.6	0.01984502		2238.6	0.02270646		2828.59	0.00214983		3418.59	0.00757154		4008.58	0.01389905
468.8	0.13067528		1058.8	0.01347152		1648.8	0.01930906		2238.8	0.02255713		2828.79	0.00229628		3418.79	0.00773818		4008.78	0.01437163
469	0.13028457		1059	0.0133705		1649	0.01859617		2239	0.02235		2828.99	0.00191363		3418.99	0.00782127		4008.98	0.01469971
469.2	0.12952044		1059.2	0.01355332		1649.2	0.01845903		2239.2	0.02246656		2829.19	0.00167181		3419.19	0.00760904		4009.18	0.01532293
469.4	0.12902662		1059.4	0.01299064		1649.4	0.01861273		2239.4	0.02301694		2829.39	0.00168033		3419.39	0.00687093		4009.38	0.01571846
469.6	0.12778999		1059.6	0.0133418		1649.6	0.01854385		2239.6	0.0240407		2829.59	0.00204656		3419.59	0.00587777		4009.58	0.01592578
469.8	0.12736696		1059.8	0.01335716		1649.8	0.0193133		2239.8	0.02439916		2829.79	0.00227814		3419.79	0.00551015		4009.78	0.01692415
470	0.12736696		1059.99	0.01335716		1650	0.0193133		2240	0.02439916		2829.99	0.00227814		3419.98	0.00551015		4009.98	0.01692415
470.2	0.12677652		1060.19	0.01384901		1650.2	0.01997124		2240.2	0.02343055		2830.19	0.00231609		3420.18	0.00518881		4010.18	0.0167273
470.4	0.12750583		1060.39	0.01436602		1650.4	0.02064522		2240.4	0.02225111		2830.39	0.00278501		3420.38	0.00512456		4010.38	0.01664094
470.6	0.12775012		1060.59	0.01424741		1650.6	0.0207448		2240.6	0.02130128		2830.59	0.00327125		3420.58	0.00468537		4010.58	0.01516367
470.8	0.12783011		1060.79	0.01378906		1650.8	0.02062999		2240.8	0.02113735		2830.79	0.00442491		3420.78	0.00424194		4010.78	0.01434951
471	0.12818643		1060.99	0.01356543		1651	0.02023035		2241	0.02045342		2830.99	0.00498524		3420.98	0.00374335		4010.98	0.01376299
471.2	0.12851907		1061.19	0.01374948		1651.2	0.02052645		2241.2	0.0190913		2831.19	0.00535648		3421.18	0.00323581		4011.18	0.01301825
471.4	0.12830499		1061.39	0.01330255		1651.4	0.02077914		2241.4	0.01903613		2831.39	0.00533838		3421.38	0.00232562		4011.38	0.01261504
471.6	0.12829415		1061.59	0.01295557		1651.6	0.02061635		2241.6	0.01871978		2831.59	0.0064233		3421.58	0.00225621		4011.58	0.01289531
471.8	0.12838931		1061.79	0.01284162		1651.8	0.01973929		2241.8	0.01896097		2831.79	0.00708306		3421.78	0.00155273		4011.78	0.01205843
472	0.12823273		1061.99	0.01202222		1652	0.01837851		2242	0.01949309		2831.99	0.00705293		3421.98	0.00080189		4011.98	0.0124327
472.2	0.1276902		1062.19	0.01151034		1652.2	0.01710259		2242.2	0.01934711		2832.19	0.00714777		3422.18	0.00095408		4012.18	0.01256312
472.4	0.12852089		1062.39	0.01067985		1652.4	0.01726509		2242.4	0.0190901		2832.39	0.00698575		3422.38	0.0011165		4012.38	0.01188134
472.6	0.12847042		1062.59	0.01048492		1652.6	0.01678799		2242.6	0.01898214		2832.59	0.00735406		3422.58	0.00139919		4012.58	0.01215693
472.8	0.12963722		1062.79	0.01109002		1652.8	0.01697891		2242.8	0.01934673		2832.79	0.00693946		3422.78	0.00140261		4012.78	0.01197524
473	0.12999603		1062.99	0.01188699		1653	0.01657971		2243	0.01932407		2832.99	0.00617664		3422.98	0.00090212		4012.98	0.01260418
473.2	0.13101261		1063.19	0.01242921		1653.2	0.01701126		2243.2	0.01944153		2833.19	0.00605657		3423.18	0.00033908		4013.18	0.01362375
473.4	0.13032234		1063.39	0.01258846		1653.4	0.01634268		2243.4	0.02005516		2833.39	0.00470858		3423.38	0.00090369		4013.38	0.01351101
473.6	0.13046653		1063.59	0.01310882		1653.6	0.01593561		2243.6	0.01967602		2833.59	0.00482885		3423.58	0.00128407		4013.58	0.01420746
473.8	0.13019524		1063.79	0.01415302		1653.8	0.01679156		2243.8	0.01922454		2833.79	0.00501586		3423.78	0.00103342		4013.78	0.01466952
474	0.12929448		1063.99	0.01493543		1654	0.01708575		2244	0.0190703		2833.99	0.00443272		3423.98	0.00286125		4013.98	0.01428188
474.2	0.12901955		1064.19	0.01507444		1654.2	0.01679822		2244.2	0.01905271		2834.19	0.00472016		3424.18	0.00361726		4014.18	0.01497368
474.4	0.12911594		1064.39	0.01546589		1654.4	0.01603432		2244.4	0.01870766		2834.39	0.00449134		3424.38	0.00462726		4014.38	0.01502113
474.6	0.12853296		1064.59	0.01464028		1654.6	0.01564544		2244.6	0.01829229		2834.59	0.00485156		3424.58	0.00507185		4014.58	0.0142177
474.8	0.12783353		1064.79	0.01412304		1654.8	0.01579023		2244.8	0.01823808		2834.79	0.00499473		3424.78	0.00501273		4014.78	0.01375149
475	0.12763853		1064.99	0.01403264		1655	0.01587024		2245	0.01774708		2834.99	0.00429616		3424.98	0.00476502		4014.98	0.01321305
475.2	0.12693592		1065.19	0.01501128		1655.2	0.01671765		2245.2	0.01731255		2835.19	0.00340989		3425.18	0.00446208		4015.18	0.01271337
475.4	0.12683306		1065.39	0.01436599		1655.4	0.01679579		2245.4	0.01824171		2835.39	0.00377808		3425.38	0.00373222		4015.38	0.01290926
475.6	0.1267988		1065.59	0.01409149		1655.6	0.01650871		2245.6	0.01773663		2835.59	0.00441864		3425.58	0.00375008		4015.58	0.01272609
475.8	0.12638617		1065.79	0.01385261		1655.8	0.0159273		2245.8	0.01829664		2835.79	0.00346417		3425.78	0.00338927		4015.78	0.01174618
476	0.12669887		1065.99	0.01291456		1656	0.0152518		2246	0.01841499		2835.99	0.00357648		3425.98	0.00307876		4015.98	0.01213969
476.2	0.12585835		1066.19	0.01321188		1656.2	0.01512704		2246.2	0.01853054		2836.19	0.0035732		3426.18	0.00329185		4016.18	0.01180652
476.4	0.12671409		1066.39	0.01281268		1656.4	0.01517872		2246.4	0.01896096		2836.39	0.00288746		3426.38	0.00278046		4016.38	0.01164155
476.6	0.12652021		1066.59	0.01297126		1656.6	0.01594653		2246.6	0.01972374		2836.59	0.00247147		3426.58	0.00331477		4016.58	0.01264125
476.8	0.12680003		1066.79	0.01231878		1656.8	0.01693221		2246.8	0.01941472		2836.79	0.00196722		3426.78	0.00428649		4016.78	0.01328931
477	0.12640581		1066.99	0.01219715		1657	0.01768606		2247	0.01975498		2836.99	0.00232473		3426.98	0.00470582		4016.98	0.01263657
477.2	0.12698336		1067.19	0.01199079		1657.2	0.01826698		2247.2	0.0188887		2837.19	0.00183416		3427.18	0.00520456		4017.18	0.01248313
477.4	0.12620647		1067.39	0.01239778		1657.4	0.01816735		2247.4	0.01903745		2837.39	0.00180914		3427.38	0.00497026		4017.38	0.01189121
477.6	0.12595888		1067.59	0.01240153		1657.6	0.01792617		2247.6	0.01851411		2837.59	0.00253844		3427.58	0.00388689		4017.58	0.01280534
477.8	0.12525262		1067.79	0.01241342		1657.8	0.01831695		2247.8	0.01852011		2837.79	0.00289111		3427.78	0.00407472		4017.78	0.01258134
478	0.12513425		1067.99	0.0115433		1658	0.01781488		2248	0.01862948		2837.99	0.00237786		3427.98	0.00505195		4017.98	0.01273921
478.2	0.12514069		1068.19	0.01136757		1658.2	0.0175775		2248.2	0.01843481		2838.19	0.0033011		3428.18	0.00497832		4018.18	0.01468275
478.4	0.12455925		1068.39	0.01138788		1658.4	0.01694265		2248.4	0.01766634		2838.39	0.00243799		3428.38	0.0049203		4018.38	0.01476128
478.6	0.12546122		1068.59	0.01101751		1658.6	0.01747607		2248.6	0.01693388		2838.59	0.00350104		3428.58	0.00488816		4018.58	0.0141245
478.8	0.12541696		1068.79	0.01104958		1658.8	0.01774368		2248.8	0.01746232		2838.79	0.00365635		3428.78	0.0042039		4018.78	0.01292263
479	0.12530254		1068.99	0.01137408		1659	0.01739991		2249	0.01764113		2838.99	0.00338819		3428.98	0.00354495		4018.98	0.01295999
479.2	0.12539469		1069.19	0.01170076		1659.2	0.01742601		2249.2	0.01701211		2839.19	0.00405806		3429.18	0.0029764		4019.18	0.01315548
479.4	0.12537748		1069.39	0.01172016		1659.4	0.0175388		2249.4	0.01704926		2839.39	0.00494195		3429.38	0.00312864		4019.38	0.01294048
479.6	0.12534172		1069.59	0.011939		1659.6	0.01682004		2249.6	0.01665228		2839.59	0.00506248		3429.58	0.00337405		4019.58	0.01310091
479.8	0.12505011		1069.79	0.01214796		1659.8	0.01640834		2249.8	0.0170285		2839.79	0.0059097		3429.78	0.00303675		4019.78	0.01349547
480	0.12566163		1069.99	0.01215746		1660	0.01628982		2250	0.0177706		2839.99	0.00689156		3429.98	0.0024729		4019.98	0.01390943
480.2	0.12381715		1070.19	0.01275377		1660.2	0.0167129		2250.2	0.01810677		2840.19	0.00659575		3430.18	0.00174149		4020.18	0.01388924
480.4	0.12385097		1070.39	0.01278149		1660.4	0.01686029		2250.4	0.01768054		2840.39	0.00623186		3430.38	0.00142002		4020.38	0.01363274
480.6	0.12361445		1070.59	0.01311259		1660.6	0.01764458		2250.6	0.01731496		2840.59	0.00619679		3430.58	0.0029837		4020.58	0.01461887
480.8	0.12322658		1070.79	0.01283423		1660.8	0.0185673		2250.8	0.01627703		2840.79	0.00704425		3430.78	0.00309727		4020.78	0.01385679
481	0.12293691		1070.99	0.01328697		1661	0.01939127		2251	0.0155735		2840.99	0.00750903		3430.98	0.00203071		4020.98	0.01214297
481.2	0.12235163		1071.19	0.01338616		1661.2	0.01982638		2251.2	0.01499141		2841.19	0.00675972		3431.18	0.001599		4021.18	0.01226535
481.4	0.12204427		1071.39	0.01377619		1661.4	0.02026372		2251.4	0.01639654		2841.39	0.00737991		3431.38	0.00040009		4021.38	0.01170598
481.6	0.12097792		1071.59	0.01406365		1661.6	0.01985262		2251.6	0.01603512		2841.59	0.00774749		3431.58	-0.00024043		4021.58	0.01172751
481.8	0.12099732		1071.79	0.0138559		1661.8	0.01923469		2251.8	0.01608366		2841.79	0.00761107		3431.78	0.00042267		4021.78	0.01088659
482	0.12083244		1071.99	0.01381185		1662	0.01928333		2252	0.01600069		2841.99	0.00621839		3431.98	0.0004059		4021.98	0.01043032
482.2	0.12124483		1072.19	0.01418164		1662.2	0.01957557		2252.2	0.0157128		2842.19	0.00605746		3432.18	0.00039788		4022.18	0.011215
482.4	0.12123692		1072.39	0.01395422		1662.4	0.01924954		2252.4	0.01619391		2842.39	0.00539913		3432.38	0.00025313		4022.38	0.00977353
482.6	0.12146577		1072.59	0.01376574		1662.6	0.01939989		2252.6	0.01586681		2842.59	0.00525443		3432.58	0.00095683		4022.58	0.00895721
482.8	0.1212133		1072.79	0.01351712		1662.8	0.01876348		2252.8	0.01693807		2842.79	0.0046166		3432.78	0.0008796		4022.78	0.00925979
483	0.12101935		1072.99	0.01301928		1663	0.01770812		2253	0.01698782		2842.99	0.00255598		3432.98	0.00110793		4022.98	0.00999564
483.2	0.12156452		1073.19	0.01219685		1663.2	0.0171592		2253.2	0.01674213		2843.19	0.0026837		3433.18	0.00192178		4023.18	0.01071558
483.4	0.12131924		1073.39	0.01283411		1663.4	0.01630474		2253.4	0.01650328		2843.39	0.00219749		3433.38	0.00261247		4023.38	0.01132381
483.6	0.12124248		1073.59	0.01221681		1663.6	0.01515938		2253.6	0.01688513		2843.59	0.00176015		3433.58	0.00238289		4023.58	0.01228609
483.8	0.12075771		1073.79	0.01142213		1663.8	0.01456397		2253.8	0.01685013		2843.79	0.00138308		3433.78	0.00187045		4023.78	0.01240715
484	0.12078107		1073.99	0.01098281		1664	0.01374491		2254	0.01743043		2843.99	0.00095198		3433.98	0.00236959		4023.98	0.01311034
484.2	0.12054454		1074.19	0.01125261		1664.2	0.01318512		2254.2	0.01706223		2844.19	0.0009625		3434.18	0.00182019		4024.18	0.0132072
484.4	0.12150469		1074.39	0.01295253		1664.4	0.01245389		2254.4	0.01676584		2844.39	0.0006949		3434.38	0.00262442		4024.38	0.01373129
484.6	0.12200731		1074.59	0.01317578		1664.6	0.01303095		2254.6	0.01635079		2844.59	-0.00015065		3434.58	0.00339571		4024.58	0.01395914
484.8	0.1214862		1074.79	0.01269776		1664.8	0.01385867		2254.8	0.01582327		2844.79	0.0003891		3434.78	0.00337292		4024.78	0.01353504
485	0.12163731		1074.99	0.01388629		1665	0.01384963		2255	0.01594878		2844.99	0.00077202		3434.98	0.00298871		4024.98	0.01300664
485.2	0.12107893		1075.19	0.01385235		1665.2	0.01401801		2255.2	0.01734523		2845.19	0.00129192		3435.18	0.00368851		4025.18	0.01333024
485.4	0.12137322		1075.39	0.01440295		1665.4	0.01443454		2255.4	0.01793967		2845.39	0.00197863		3435.38	0.00293102		4025.38	0.01309536
485.6	0.12005566		1075.59	0.01447346		1665.6	0.01497325		2255.6	0.0168712		2845.59	0.00217554		3435.58	0.00337616		4025.58	0.01268141
485.8	0.120116		1075.79	0.01426513		1665.8	0.01494306		2255.8	0.01625197		2845.79	0.00202967		3435.78	0.00313574		4025.78	0.01199608
486	0.11982731		1075.99	0.01443513		1666	0.01663508		2256	0.01563159		2845.99	0.0018403		3435.98	0.00256973		4025.98	0.01137358
486.2	0.11939789		1076.19	0.01454431		1666.2	0.01724602		2256.2	0.01604564		2846.19	0.0024503		3436.18	0.00247186		4026.18	0.01138701
486.4	0.11878866		1076.39	0.0132112		1666.4	0.01759258		2256.4	0.0167589		2846.39	0.00267995		3436.38	0.0020476		4026.38	0.01187676
486.6	0.11859829		1076.59	0.01319401		1666.6	0.01770183		2256.6	0.01628944		2846.59	0.00222223		3436.58	0.00242596		4026.58	0.01258977
486.8	0.11895602		1076.79	0.01203926		1666.8	0.01804726		2256.8	0.01731097		2846.79	0.00231581		3436.78	0.00148405		4026.78	0.01335905
487	0.11916095		1076.99	0.01077134		1667	0.018518		2257	0.0168135		2846.99	0.00163043		3436.98	0.00126808		4026.98	0.01298037
487.2	0.11910474		1077.19	0.00968358		1667.2	0.01817993		2257.2	0.01634205		2847.19	0.00177017		3437.18	0.00072902		4027.18	0.01286619
487.4	0.11843794		1077.39	0.00966939		1667.4	0.01778548		2257.4	0.01602874		2847.39	0.00165891		3437.38	-0.00004984		4027.38	0.01277075
487.6	0.11729393		1077.59	0.00959974		1667.6	0.01738734		2257.6	0.0167341		2847.59	0.00176635		3437.58	-0.00041105		4027.58	0.01242456
487.8	0.11805196		1077.79	0.00896557		1667.8	0.01738265		2257.8	0.01620644		2847.79	0.00149589		3437.78	-0.0010807		4027.78	0.01195831
488	0.11902919		1077.99	0.00929409		1668	0.01684868		2258	0.01616226		2847.99	0.00219657		3437.98	-0.00103802		4027.98	0.01238533
488.2	0.11967794		1078.19	0.00992007		1668.2	0.01656465		2258.2	0.01579328		2848.19	0.00247731		3438.18	-0.00174377		4028.18	0.01167743
488.4	0.12045938		1078.39	0.01020564		1668.4	0.01695081		2258.4	0.01576987		2848.39	0.00186828		3438.38	-0.00121866		4028.38	0.0111661
488.6	0.12110357		1078.59	0.00967343		1668.6	0.01708626		2258.6	0.01536129		2848.59	0.00169181		3438.58	-0.00213687		4028.58	0.01071823
488.8	0.12125252		1078.79	0.00944145		1668.8	0.01626287		2258.8	0.01551407		2848.79	0.00268477		3438.78	-0.00164471		4028.78	0.01099398
489	0.12127828		1078.99	0.01012597		1669	0.01612918		2259	0.01621695		2848.99	0.00269749		3438.98	-0.00230538		4028.98	0.01091333
489.2	0.12045456		1079.19	0.0100464		1669.2	0.01619383		2259.2	0.01632213		2849.19	0.00291883		3439.18	-0.0020807		4029.18	0.01132317
489.4	0.11930473		1079.39	0.0104446		1669.4	0.01668833		2259.4	0.01484421		2849.39	0.00253461		3439.38	-0.00252224		4029.38	0.01031961
489.6	0.11843968		1079.59	0.00990104		1669.6	0.01656656		2259.6	0.01386168		2849.59	0.00269959		3439.58	-0.00159177		4029.58	0.00987763
489.8	0.11887405		1079.79	0.00987907		1669.8	0.01642084		2259.8	0.01404689		2849.79	0.00268112		3439.78	-0.0014623		4029.78	0.00870974
490	0.1182842		1079.99	0.01016294		1670	0.01675717		2260	0.01347041		2849.99	0.00271829		3439.98	-0.00132739		4029.98	0.00903149
490.2	0.11735429		1080.19	0.01045981		1670.2	0.01613695		2260.2	0.01434195		2850.19	0.00274955		3440.18	-0.00128706		4030.18	0.00895917
490.4	0.11734941		1080.39	0.00945184		1670.4	0.0165805		2260.4	0.01377638		2850.39	0.00272682		3440.38	-0.00063543		4030.38	0.0103277
490.6	0.11675523		1080.59	0.00931302		1670.6	0.01650077		2260.6	0.01294084		2850.59	0.00218771		3440.58	0.00034238		4030.58	0.0093049
490.8	0.11630069		1080.79	0.00784414		1670.8	0.01676418		2260.8	0.01261338		2850.79	0.00119554		3440.78	0.00014233		4030.78	0.00953896
491	0.11532082		1080.99	0.00717658		1671	0.01623902		2261	0.01180589		2850.99	0.00105225		3440.98	0.00127016		4030.98	0.00990295
491.2	0.11425545		1081.19	0.00679951		1671.2	0.01563729		2261.2	0.01202774		2851.19	-0.00033495		3441.18	0.00200823		4031.18	0.01009929
491.4	0.11364668		1081.39	0.00703314		1671.4	0.01574824		2261.4	0.01184725		2851.39	0.0000995		3441.38	0.00248284		4031.38	0.01061128
491.6	0.11264456		1081.59	0.00765441		1671.6	0.01541316		2261.6	0.01193594		2851.59	0.00094534		3441.58	0.00321346		4031.58	0.01073745
491.8	0.11364005		1081.79	0.00672313		1671.8	0.01623084		2261.8	0.01092463		2851.79	0.00088051		3441.78	0.00330644		4031.78	0.0101796
492	0.11440911		1081.99	0.00707161		1672	0.0154052		2262	0.01149925		2851.99	0.00182225		3441.98	0.0034328		4031.98	0.01017778
492.2	0.11463415		1082.19	0.00735636		1672.2	0.01506125		2262.2	0.01207623		2852.19	0.00185546		3442.18	0.00262481		4032.18	0.00980366
492.4	0.11598437		1082.39	0.00816314		1672.4	0.01564819		2262.4	0.01261435		2852.39	0.00175809		3442.38	0.0021281		4032.38	0.00973337
492.6	0.11592922		1082.59	0.00944606		1672.6	0.01504605		2262.6	0.01316529		2852.59	0.00174849		3442.58	0.00073751		4032.58	0.00984487
492.8	0.11652323		1082.79	0.00993499		1672.8	0.01415244		2262.8	0.01381422		2852.79	0.00221024		3442.78	0.00027393		4032.78	0.01039003
493	0.11686729		1082.99	0.01087456		1673	0.0142331		2263	0.0144524		2852.99	0.0024286		3442.98	-0.00084737		4032.98	0.01081127
493.2	0.11704939		1083.19	0.01116115		1673.2	0.01375595		2263.2	0.01451329		2853.19	0.00325328		3443.18	-0.00140368		4033.18	0.01143089
493.4	0.11769485		1083.39	0.01231477		1673.4	0.01459991		2263.4	0.01446685		2853.39	0.00293978		3443.38	-0.0023582		4033.38	0.01163557
493.6	0.1188014		1083.59	0.01218013		1673.6	0.01377393		2263.6	0.01508702		2853.59	0.0028228		3443.58	-0.00247088		4033.58	0.01272233
493.8	0.11937232		1083.79	0.01280027		1673.8	0.0144771		2263.8	0.0154123		2853.79	0.00222543		3443.78	-0.00291245		4033.78	0.01253415
494	0.11963656		1083.99	0.01378914		1674	0.0143542		2264	0.01498936		2853.99	0.00259917		3443.98	-0.00343818		4033.98	0.01357501
494.2	0.12016259		1084.19	0.01374931		1674.2	0.01408431		2264.2	0.01574074		2854.19	0.0027421		3444.18	-0.00348119		4034.18	0.0134462
494.4	0.11988244		1084.39	0.01317947		1674.4	0.01385034		2264.4	0.0157067		2854.39	0.0019246		3444.38	-0.00275787		4034.38	0.01386754
494.6	0.11887066		1084.59	0.01259858		1674.6	0.01358669		2264.6	0.01567523		2854.59	0.0009398		3444.58	-0.00204347		4034.58	0.01288175
494.8	0.11800234		1084.79	0.01125927		1674.8	0.01385673		2264.8	0.01556468		2854.79	0.00042369		3444.78	-0.00242797		4034.78	0.01396439
495	0.11680403		1084.99	0.01030301		1675	0.01505036		2265	0.01621119		2854.99	0.0007184		3444.98	-0.0013653		4034.98	0.01385573
495.2	0.11649853		1085.19	0.00997617		1675.2	0.01551081		2265.2	0.01649272		2855.19	-0.00031342		3445.18	-0.00098657		4035.18	0.01277584
495.4	0.11606417		1085.39	0.00937158		1675.4	0.0159394		2265.4	0.01600445		2855.39	0.00025961		3445.38	-0.00015049		4035.38	0.01284262
495.6	0.11534522		1085.59	0.00922746		1675.6	0.01584684		2265.6	0.01645372		2855.59	0.0009271		3445.58	0.00120728		4035.58	0.01255203
495.8	0.11561213		1085.79	0.00855362		1675.8	0.01624121		2265.8	0.01566215		2855.79	0.00025984		3445.78	0.00153991		4035.78	0.01113116
496	0.11568734		1085.99	0.008511		1676	0.01561711		2266	0.01629714		2855.99	0.00064695		3445.98	0.00169096		4035.98	0.01101045
496.2	0.11539475		1086.19	0.00849511		1676.2	0.01569259		2266.2	0.01590266		2856.19	0.00114435		3446.18	0.00178825		4036.18	0.01009234
496.4	0.11522895		1086.39	0.00914239		1676.4	0.0160619		2266.4	0.01510841		2856.39	0.00125532		3446.38	0.00235952		4036.38	0.00975427
496.6	0.11499428		1086.59	0.00814663		1676.6	0.0158287		2266.6	0.01494326		2856.59	0.00166531		3446.58	0.00273765		4036.58	0.00925303
496.8	0.11649577		1086.79	0.00880557		1676.8	0.01541167		2266.8	0.01434525		2856.79	0.00236289		3446.78	0.00226454		4036.78	0.01038391
497	0.11524625		1086.99	0.00957549		1677	0.01606401		2267	0.01378831		2856.99	0.00239008		3446.98	0.00288477		4036.98	0.01116568
497.2	0.11498413		1087.19	0.00950282		1677.2	0.01666912		2267.2	0.01375582		2857.19	0.00223183		3447.18	0.00278368		4037.18	0.01182598
497.4	0.11543639		1087.39	0.01047691		1677.4	0.01731868		2267.4	0.01294115		2857.39	0.00188002		3447.38	0.00205482		4037.38	0.01283638
497.6	0.11571267		1087.59	0.01018952		1677.6	0.01691045		2267.6	0.01311206		2857.59	0.00168447		3447.58	0.00177322		4037.58	0.01341602
497.8	0.11526799		1087.79	0.01122263		1677.8	0.0172676		2267.8	0.01263954		2857.79	0.00072189		3447.78	0.00176947		4037.78	0.01319523
498	0.11574547		1087.99	0.01140788		1678	0.0166757		2268	0.01225437		2857.99	0.00107346		3447.98	0.00175338		4037.98	0.01268992
498.2	0.11605714		1088.19	0.01137936		1678.2	0.0166652		2268.2	0.01291804		2858.19	-0.00008752		3448.18	0.00152919		4038.18	0.01234547
498.4	0.11558851		1088.39	0.0112049		1678.4	0.01613147		2268.4	0.01325501		2858.39	-0.00087793		3448.38	0.00067399		4038.38	0.01223551
498.6	0.11532166		1088.59	0.01035207		1678.6	0.01700375		2268.6	0.01296311		2858.59	-0.00126224		3448.58	-0.0000049		4038.58	0.01222694
498.8	0.11590628		1088.79	0.00984535		1678.8	0.0166477		2268.8	0.01314795		2858.79	-0.00184206		3448.78	-0.00122834		4038.78	0.01246944
499	0.11603984		1088.99	0.00991119		1679	0.01678262		2269	0.01391131		2858.99	-0.00272924		3448.98	-0.00103119		4038.98	0.01186541
499.2	0.11585637		1089.19	0.0097285		1679.2	0.01559973		2269.2	0.01392048		2859.19	-0.00312391		3449.18	-0.00134603		4039.18	0.01101289
499.4	0.11591045		1089.39	0.00968225		1679.4	0.01476313		2269.4	0.01416883		2859.39	-0.00325457		3449.38	-0.00182958		4039.38	0.01170825
499.6	0.11538807		1089.59	0.01011249		1679.6	0.01479319		2269.6	0.0149438		2859.59	-0.00346642		3449.58	-0.00290373		4039.58	0.01110632
499.8	0.11490806		1089.79	0.00963945		1679.8	0.01430063		2269.8	0.01475127		2859.79	-0.00365575		3449.78	-0.00381122		4039.78	0.01032027
500	0.11474469		1089.99	0.00869945		1680	0.01362001		2270	0.01443471		2859.99	-0.00275437		3449.98	-0.00381185		4039.98	0.00963317
500.2	0.1139443		1090.19	0.00901914		1680.2	0.01377559		2270.2	0.01424444		2860.19	-0.00186522		3450.18	-0.00403833		4040.18	0.00903687
500.4	0.11369841		1090.39	0.00820534		1680.4	0.01349486		2270.4	0.01423459		2860.39	-0.00199709		3450.38	-0.00398396		4040.38	0.00935554
500.6	0.11369146		1090.59	0.00768252		1680.6	0.013696		2270.6	0.01455097		2860.59	-0.00049413		3450.58	-0.00418774		4040.58	0.00904117
500.8	0.11376907		1090.79	0.0085887		1680.8	0.01402663		2270.8	0.01479943		2860.79	0.00048519		3450.78	-0.00509885		4040.78	0.0105196
501	0.11170652		1090.99	0.00881264		1681	0.01413698		2271	0.01473933		2860.99	0.00148856		3450.98	-0.00461571		4040.98	0.01034248
501.2	0.11127835		1091.19	0.00841877		1681.2	0.01426443		2271.2	0.01597504		2861.19	0.00199446		3451.18	-0.00388931		4041.18	0.01039714
501.4	0.11175867		1091.39	0.00746376		1681.4	0.01487651		2271.4	0.01520544		2861.39	0.00182027		3451.38	-0.00404992		4041.38	0.01050404
501.6	0.11216487		1091.59	0.00769266		1681.6	0.01456962		2271.6	0.01538347		2861.59	0.00135945		3451.58	-0.00322497		4041.58	0.0103187
501.8	0.11128667		1091.79	0.00814088		1681.8	0.01442127		2271.8	0.01447645		2861.79	0.00058954		3451.78	-0.00235293		4041.78	0.00990459
502	0.11182557		1091.99	0.00677405		1682	0.01467331		2272	0.01426495		2861.99	0.00127659		3451.98	-0.00168889		4041.98	0.00984933
502.2	0.1121527		1092.19	0.00701963		1682.2	0.01432403		2272.2	0.01485214		2862.19	0.00091693		3452.18	-0.00174551		4042.18	0.0095653
502.4	0.11139113		1092.39	0.00559323		1682.4	0.01346812		2272.4	0.01438645		2862.39	0.00099107		3452.38	-0.00094259		4042.38	0.00926419
502.6	0.11174352		1092.59	0.00608271		1682.6	0.01354294		2272.6	0.0141124		2862.59	0.00080791		3452.58	-0.0010852		4042.58	0.00933633
502.8	0.1125658		1092.79	0.00663215		1682.8	0.01324887		2272.8	0.0136505		2862.79	0.00010197		3452.78	-0.00098798		4042.78	0.00841615
503	0.11276948		1092.99	0.00766282		1683	0.01363831		2273	0.01412567		2862.99	0.00045291		3452.98	-0.00006071		4042.98	0.00828935
503.2	0.11289992		1093.19	0.00814608		1683.2	0.01320715		2273.2	0.01406517		2863.19	0.00017981		3453.18	0.00034416		4043.18	0.00776914
503.4	0.11391028		1093.39	0.00905973		1683.4	0.01357058		2273.4	0.0136661		2863.39	-0.00075679		3453.38	-0.00009779		4043.38	0.00848157
503.6	0.11379143		1093.59	0.01030585		1683.6	0.01448788		2273.6	0.01317659		2863.59	-0.00106322		3453.58	-0.0001319		4043.58	0.00726863
503.8	0.11440426		1093.79	0.01082638		1683.8	0.01423782		2273.8	0.01305401		2863.79	-0.00158368		3453.78	-0.00060782		4043.78	0.00754111
504	0.11514299		1093.99	0.01128197		1684	0.01409404		2274	0.01216994		2863.99	-0.00165046		3453.98	-0.00074431		4043.98	0.00725246
504.2	0.11538221		1094.19	0.01221312		1684.2	0.01412066		2274.2	0.01235173		2864.19	-0.00109395		3454.18	-0.00132483		4044.18	0.00806858
504.4	0.11627712		1094.39	0.01184858		1684.4	0.01417109		2274.4	0.0123404		2864.39	-0.00086282		3454.38	-0.00213112		4044.38	0.00825687
504.6	0.11720497		1094.59	0.01262979		1684.6	0.01521823		2274.6	0.01225444		2864.59	0.00028327		3454.58	-0.00300701		4044.58	0.00848511
504.8	0.1176124		1094.79	0.01304779		1684.8	0.01514198		2274.8	0.01275634		2864.79	0.00066834		3454.78	-0.00374869		4044.78	0.00910106
505	0.1172957		1094.99	0.01359222		1685	0.01427285		2275	0.01333784		2864.99	0.00016739		3454.98	-0.00288597		4044.98	0.00927617
505.2	0.11698175		1095.19	0.01304279		1685.2	0.01401445		2275.2	0.01407452		2865.19	-0.0008295		3455.18	-0.00166533		4045.18	0.00971017
505.4	0.11757644		1095.39	0.01206533		1685.4	0.01395981		2275.4	0.01320128		2865.39	-0.00139314		3455.38	-0.00149304		4045.38	0.00913455
505.6	0.11665015		1095.59	0.01173958		1685.6	0.01364894		2275.6	0.01325252		2865.59	-0.00222451		3455.58	-0.00111326		4045.58	0.00993759
505.8	0.11439587		1095.79	0.01148164		1685.8	0.01399725		2275.8	0.01245406		2865.79	-0.0026004		3455.78	-0.00106163		4045.78	0.0094393
506	0.11399231		1095.99	0.00992835		1686	0.0133471		2276	0.01183492		2865.99	-0.00173957		3455.98	-0.000502		4045.98	0.00951081
506.2	0.1127157		1096.19	0.00942178		1686.2	0.01250296		2276.2	0.01229162		2866.19	-0.0014865		3456.18	-0.00032766		4046.18	0.00937118
506.4	0.11154374		1096.39	0.00813801		1686.4	0.0124486		2276.4	0.01293463		2866.39	-0.00230553		3456.38	-0.00006184		4046.38	0.00960758
506.6	0.11204625		1096.59	0.00821983		1686.6	0.01267702		2276.6	0.01221898		2866.59	-0.00106842		3456.58	-0.0004907		4046.58	0.01067988
506.8	0.11127917		1096.79	0.00846234		1686.8	0.01300717		2276.8	0.0113586		2866.79	-0.00134518		3456.78	0.00031266		4046.78	0.0105898
507	0.11129752		1096.99	0.00885391		1687	0.01279211		2277	0.01167071		2866.99	-0.00064706		3456.98	0.00070549		4046.98	0.01146991
507.2	0.11106825		1097.19	0.00834102		1687.2	0.01280795		2277.2	0.01067474		2867.19	-0.0014442		3457.18	0.00099887		4047.18	0.01167515
507.4	0.11107075		1097.39	0.00821292		1687.4	0.01358177		2277.4	0.01003073		2867.39	-0.00113281		3457.38	0.00040942		4047.38	0.01201781
507.6	0.11120377		1097.59	0.0085726		1687.6	0.01442167		2277.6	0.0101434		2867.59	0.0001394		3457.58	-0.00015751		4047.58	0.01169715
507.8	0.11209318		1097.79	0.00833169		1687.8	0.0144473		2277.8	0.01083318		2867.79	0.00099869		3457.78	-0.0012138		4047.78	0.01234556
508	0.11301806		1097.99	0.00777729		1688	0.01378922		2278	0.01038391		2867.99	0.00239642		3457.98	-0.00111926		4047.98	0.01159233
508.2	0.11333098		1098.19	0.00697493		1688.2	0.01416101		2278.2	0.01057553		2868.19	0.0028427		3458.18	-0.00179942		4048.18	0.01040606
508.4	0.11405238		1098.39	0.00648315		1688.4	0.01464469		2278.4	0.0107491		2868.39	0.00365452		3458.38	-0.00277557		4048.38	0.00994799
508.6	0.11446165		1098.59	0.00655715		1688.6	0.01531993		2278.6	0.01187835		2868.59	0.00388159		3458.58	-0.00284327		4048.58	0.00935606
508.8	0.11417346		1098.79	0.00726239		1688.8	0.01417133		2278.8	0.01356819		2868.79	0.00363582		3458.78	-0.00255846		4048.78	0.00879453
509	0.1138192		1098.99	0.00737128		1689	0.01426903		2279	0.01436883		2868.99	0.00310962		3458.98	-0.00214759		4048.98	0.00909604
509.2	0.11377661		1099.19	0.00714772		1689.2	0.01410842		2279.2	0.01515695		2869.19	0.00233394		3459.18	-0.00220171		4049.18	0.00878026
509.4	0.11362538		1099.39	0.00696425		1689.4	0.01430353		2279.4	0.0156364		2869.39	0.00194153		3459.38	-0.00200469		4049.38	0.00797462
509.6	0.11260016		1099.59	0.00643947		1689.6	0.01442842		2279.6	0.01557867		2869.59	0.00070579		3459.58	-0.00213773		4049.58	0.00839072
509.8	0.11177885		1099.79	0.0068212		1689.8	0.0143162		2279.8	0.01511892		2869.79	0.00020473		3459.78	-0.00179797		4049.78	0.00783928
510	0.11132746		1099.99	0.00625087		1690	0.01329329		2280	0.0155216		2869.99	-0.00002073		3459.98	-0.00100061		4049.98	0.00779965
510.2	0.11010012		1100.19	0.0060996		1690.2	0.01335638		2280.2	0.01687171		2870.19	0.00018975		3460.18	-0.00110781		4050.18	0.00824632
510.4	0.10969629		1100.39	0.00663743		1690.4	0.01308669		2280.4	0.01745617		2870.39	-0.00116482		3460.38	-0.00094454		4050.38	0.0088591
510.6	0.10999441		1100.59	0.00633048		1690.6	0.01293562		2280.6	0.01619255		2870.59	-0.0007431		3460.58	-0.00063243		4050.58	0.0093211
510.8	0.1089083		1100.79	0.00691547		1690.8	0.01272953		2280.8	0.01529635		2870.79	-0.00111344		3460.78	-0.00054089		4050.78	0.00936783
511	0.10960351		1100.99	0.00732315		1691	0.01276914		2281	0.0153857		2870.99	-0.00122997		3460.98	-0.00072153		4050.98	0.00976433
511.2	0.10940254		1101.19	0.00711264		1691.2	0.01333787		2281.2	0.0148138		2871.19	-0.00072918		3461.18	-0.00059832		4051.18	0.0099938
511.4	0.10913157		1101.39	0.00696774		1691.4	0.01398392		2281.4	0.0148011		2871.39	0.00011379		3461.38	-0.00059904		4051.38	0.01026618
511.6	0.10971697		1101.59	0.00729767		1691.6	0.01495416		2281.6	0.01454952		2871.59	0.00118193		3461.58	-0.00015328		4051.58	0.01008207
511.8	0.11000014		1101.79	0.00770659		1691.8	0.01470653		2281.8	0.01361078		2871.79	0.0016595		3461.78	-0.00018271		4051.78	0.00993051
512	0.10941992		1101.99	0.00775745		1692	0.01509586		2282	0.01250194		2871.99	0.00111941		3461.98	0.00009195		4051.98	0.00929268
512.2	0.1094223		1102.19	0.00800355		1692.2	0.01660577		2282.2	0.01228081		2872.19	0.00061802		3462.18	-0.00044395		4052.18	0.00948207
512.4	0.11082414		1102.39	0.00863683		1692.4	0.01647066		2282.4	0.0119092		2872.39	0.0012229		3462.38	-0.00026902		4052.38	0.00982745
512.6	0.10991641		1102.59	0.00896906		1692.6	0.01669606		2282.6	0.01261695		2872.59	0.0013735		3462.58	-0.00015703		4052.58	0.00931362
512.8	0.11004644		1102.79	0.00925609		1692.8	0.01575934		2282.8	0.01322639		2872.79	0.00086751		3462.78	-0.00030637		4052.78	0.00948795
513	0.10982005		1102.99	0.00904887		1693	0.01664011		2283	0.01278362		2872.99	0.0005362		3462.98	-0.00059191		4052.98	0.00974563
513.2	0.11027135		1103.19	0.00943524		1693.2	0.01630531		2283.2	0.01253998		2873.19	0.00028551		3463.18	-0.00105541		4053.18	0.00978144
513.4	0.10993604		1103.39	0.00908242		1693.4	0.01664043		2283.4	0.01227535		2873.39	0.00017935		3463.38	-0.00024082		4053.38	0.00935229
513.6	0.10949274		1103.59	0.00857645		1693.6	0.01639349		2283.6	0.01237577		2873.59	-0.00010869		3463.58	-0.00010894		4053.58	0.00890669
513.8	0.1088555		1103.79	0.0086815		1693.8	0.01596123		2283.8	0.01232893		2873.79	-0.00032678		3463.78	0.00044395		4053.78	0.0081589
514	0.10917125		1103.99	0.00881642		1694	0.01531641		2284	0.0122414		2873.99	-0.00033723		3463.98	0.00133303		4053.98	0.00693935
514.2	0.10954875		1104.19	0.00884338		1694.2	0.01502749		2284.2	0.01284885		2874.19	-0.00035443		3464.18	0.00057776		4054.18	0.00703579
514.4	0.11016489		1104.39	0.00862099		1694.4	0.01442208		2284.4	0.01266348		2874.39	-0.00093737		3464.38	0.00044087		4054.38	0.00712717
514.6	0.10980991		1104.59	0.00715633		1694.6	0.01427151		2284.6	0.0117259		2874.59	-0.00024574		3464.58	-0.00046945		4054.58	0.0071319
514.8	0.10992412		1104.79	0.00780657		1694.8	0.01349236		2284.8	0.01164342		2874.79	0.00029997		3464.78	-0.00027165		4054.78	0.00736905
515	0.11028236		1104.99	0.00830628		1695	0.01373365		2285	0.01280702		2874.99	0.00010979		3464.98	-0.0006738		4054.98	0.00735238
515.2	0.11026418		1105.19	0.00729907		1695.2	0.01351488		2285.2	0.01296089		2875.19	0.00041929		3465.18	-0.0012404		4055.18	0.00777318
515.4	0.11016023		1105.39	0.00734248		1695.4	0.01323377		2285.4	0.01343512		2875.39	0.00060806		3465.38	-0.0015555		4055.38	0.0073686
515.6	0.10999965		1105.59	0.00735812		1695.6	0.01349351		2285.6	0.01337263		2875.59	0.00075617		3465.58	-0.00179936		4055.58	0.00755988
515.8	0.10963543		1105.79	0.00762659		1695.8	0.01339725		2285.8	0.01278405		2875.79	0.00067827		3465.78	-0.00204203		4055.78	0.00782889
516	0.10951508		1105.99	0.00698716		1696	0.0136529		2286	0.01342507		2875.99	0.00063249		3465.98	-0.00216857		4055.98	0.00767044
516.2	0.11025648		1106.19	0.00804648		1696.2	0.01431652		2286.2	0.01362457		2876.19	0.00073114		3466.18	-0.00316871		4056.18	0.00828185
516.4	0.11002783		1106.39	0.00798712		1696.4	0.01378227		2286.4	0.01399073		2876.39	0.00063745		3466.38	-0.00277342		4056.38	0.00830347
516.6	0.10846174		1106.59	0.00838343		1696.6	0.01397127		2286.6	0.01424542		2876.59	0.00066809		3466.58	-0.00326913		4056.58	0.00834357
516.8	0.10894545		1106.79	0.00871965		1696.8	0.01360076		2286.8	0.01471041		2876.79	-0.00000539		3466.78	-0.00354531		4056.78	0.00856497
517	0.10846037		1106.99	0.00940371		1697	0.01418611		2287	0.01393192		2876.99	0.00070453		3466.98	-0.00431237		4056.98	0.00861698
517.2	0.10840338		1107.19	0.01051444		1697.2	0.01431798		2287.2	0.012553		2877.19	0.00066904		3467.18	-0.00464006		4057.18	0.00915752
517.4	0.108785		1107.39	0.01060878		1697.4	0.01392352		2287.4	0.01351081		2877.39	0.0001155		3467.38	-0.00364597		4057.38	0.0085913
517.6	0.10899873		1107.59	0.01139094		1697.6	0.01269232		2287.6	0.01338009		2877.59	-0.00013005		3467.58	-0.00355574		4057.58	0.00856633
517.8	0.10981988		1107.79	0.01179004		1697.8	0.01262887		2287.8	0.01153777		2877.79	0.00014748		3467.78	-0.00406999		4057.78	0.00837392
518	0.11073011		1107.99	0.01165491		1698	0.01241449		2288	0.01110731		2877.99	0.00028022		3467.98	-0.0045668		4057.98	0.0083953
518.2	0.11110763		1108.19	0.01065566		1698.2	0.0128528		2288.2	0.01039995		2878.19	0.00021624		3468.18	-0.00541965		4058.18	0.00940797
518.4	0.11089514		1108.39	0.01027358		1698.4	0.01235533		2288.4	0.009879		2878.39	0.00074958		3468.38	-0.00558996		4058.38	0.00956853
518.6	0.11006237		1108.59	0.00967107		1698.6	0.01139753		2288.6	0.0094238		2878.59	0.00093501		3468.58	-0.00571479		4058.58	0.00987868
518.8	0.11110499		1108.79	0.01028235		1698.8	0.01105634		2288.8	0.01027283		2878.79	0.0001198		3468.78	-0.00549593		4058.78	0.00915339
519	0.11163872		1108.99	0.00972891		1699	0.01129911		2289	0.01022646		2878.99	-0.0002542		3468.98	-0.00576149		4058.98	0.00892529
519.2	0.11201125		1109.19	0.00945241		1699.2	0.01075049		2289.2	0.01002681		2879.19	-0.00052839		3469.18	-0.00578695		4059.18	0.00864211
519.4	0.11184267		1109.39	0.0094327		1699.4	0.01129209		2289.4	0.01070824		2879.39	-0.00036433		3469.38	-0.00595323		4059.38	0.00809758
519.6	0.11173364		1109.59	0.00896426		1699.6	0.01204234		2289.6	0.01036635		2879.59	-0.00111551		3469.58	-0.00563803		4059.58	0.0085702
519.8	0.11199514		1109.79	0.00904919		1699.8	0.01223568		2289.8	0.01137871		2879.79	-0.00174059		3469.78	-0.00559681		4059.78	0.00817946
520	0.11159608		1109.99	0.00817351		1700	0.01266404		2290	0.01307442		2879.99	-0.00234704		3469.98	-0.00573022		4059.98	0.00748207
520.2	0.11128419		1110.19	0.00882687		1700.2	0.01331438		2290.2	0.01312497		2880.19	-0.00268401		3470.18	-0.00610867		4060.18	0.00806063
520.4	0.110618		1110.39	0.00823578		1700.4	0.01345687		2290.4	0.01296444		2880.39	-0.00338228		3470.38	-0.00554996		4060.38	0.0077565
520.6	0.11074826		1110.59	0.00811232		1700.6	0.01376432		2290.6	0.013237		2880.59	-0.00307767		3470.58	-0.00561902		4060.58	0.00696136
520.8	0.11109582		1110.79	0.00778592		1700.8	0.01407771		2290.8	0.01416085		2880.79	-0.00328417		3470.78	-0.00539205		4060.78	0.00729026
521	0.11063365		1110.99	0.00809449		1701	0.01494145		2291	0.01352118		2880.99	-0.00357752		3470.98	-0.00500483		4060.98	0.00730107
521.2	0.11094147		1111.19	0.00849489		1701.2	0.01552295		2291.2	0.01377662		2881.19	-0.00405128		3471.18	-0.00399973		4061.18	0.00780343
521.4	0.11117257		1111.39	0.00845662		1701.4	0.01511608		2291.4	0.01399085		2881.39	-0.00384089		3471.38	-0.00329393		4061.38	0.00807008
521.6	0.11100922		1111.59	0.0079616		1701.6	0.01514243		2291.6	0.01322794		2881.59	-0.00289023		3471.58	-0.00322328		4061.58	0.0087283
521.8	0.11118354		1111.79	0.00637892		1701.8	0.01579507		2291.8	0.01270131		2881.79	-0.0019595		3471.78	-0.00357972		4061.78	0.00872401
522	0.11072698		1111.99	0.00583407		1702	0.01534283		2292	0.01346912		2881.99	-0.00147251		3471.98	-0.00307392		4061.98	0.00979516
522.2	0.11041781		1112.19	0.00539743		1702.2	0.01529572		2292.2	0.01260634		2882.19	-0.00099805		3472.18	-0.00204628		4062.18	0.01019354
522.4	0.10943319		1112.39	0.00651751		1702.4	0.01446376		2292.4	0.01266142		2882.39	-0.00063264		3472.38	-0.00179209		4062.38	0.01014343
522.6	0.11012908		1112.59	0.00588238		1702.6	0.01385772		2292.6	0.01305472		2882.59	-0.0008957		3472.58	-0.00188878		4062.58	0.01036822
522.8	0.1105666		1112.79	0.00624664		1702.8	0.0137383		2292.8	0.01304685		2882.79	-0.00109734		3472.78	-0.00249217		4062.78	0.01018874
523	0.11106466		1112.99	0.00675808		1703	0.01422554		2293	0.01213779		2882.99	-0.00066986		3472.98	-0.00274923		4062.98	0.01041762
523.2	0.11097949		1113.19	0.00727621		1703.2	0.01338636		2293.2	0.01249617		2883.19	-0.00072413		3473.18	-0.00322759		4063.18	0.00982836
523.4	0.11172782		1113.39	0.00719475		1703.4	0.01426465		2293.4	0.01239598		2883.39	-0.00174293		3473.38	-0.00389457		4063.38	0.010068
523.6	0.11129282		1113.59	0.00801155		1703.6	0.01363317		2293.6	0.01242777		2883.59	-0.00211207		3473.58	-0.00428909		4063.58	0.01059608
523.8	0.11027892		1113.79	0.00856075		1703.8	0.0138534		2293.8	0.01345364		2883.79	-0.00281818		3473.78	-0.00461609		4063.78	0.00950086
524	0.10987096		1113.99	0.00815431		1704	0.01350567		2294	0.01297272		2883.99	-0.00297727		3473.98	-0.00487554		4063.98	0.00951541
524.2	0.10918046		1114.19	0.00859185		1704.2	0.01340375		2294.2	0.01227918		2884.19	-0.00324359		3474.18	-0.00563723		4064.18	0.00961441
524.4	0.10893768		1114.39	0.0090918		1704.4	0.01377094		2294.4	0.01178531		2884.39	-0.00441656		3474.38	-0.00578525		4064.38	0.00876117
524.6	0.1090809		1114.59	0.00798288		1704.6	0.01404185		2294.6	0.01265536		2884.59	-0.00442597		3474.58	-0.00537681		4064.58	0.00792103
524.8	0.10857301		1114.79	0.0075105		1704.8	0.01451565		2294.8	0.01269977		2884.79	-0.00469482		3474.78	-0.00518305		4064.78	0.00780646
525	0.10857375		1114.99	0.0078016		1705	0.01470023		2295	0.01211383		2884.99	-0.00456047		3474.98	-0.00499455		4064.98	0.00784669
525.2	0.10839239		1115.19	0.00793912		1705.2	0.01393499		2295.2	0.01191853		2885.19	-0.00343262		3475.18	-0.00428468		4065.18	0.00808031
525.4	0.10796152		1115.39	0.00744041		1705.4	0.0144297		2295.4	0.01108503		2885.39	-0.00285594		3475.38	-0.00469523		4065.38	0.00812659
525.6	0.10809517		1115.59	0.00624926		1705.6	0.01411678		2295.6	0.01179751		2885.59	-0.00201392		3475.58	-0.00468534		4065.58	0.00780034
525.8	0.1077982		1115.79	0.00522331		1705.8	0.014312		2295.8	0.01196617		2885.79	-0.00177823		3475.78	-0.00463868		4065.78	0.00834377
526	0.10735754		1115.99	0.00415337		1706	0.01426329		2296	0.01187414		2885.99	-0.0012981		3475.98	-0.00470607		4065.98	0.00965793
526.2	0.10737842		1116.19	0.00316797		1706.2	0.01549653		2296.2	0.01163705		2886.19	-0.00114902		3476.18	-0.0039011		4066.18	0.00989283
526.4	0.10762152		1116.39	0.00260695		1706.4	0.01566305		2296.4	0.01252922		2886.39	-0.00155367		3476.38	-0.00453795		4066.38	0.01027581
526.6	0.10847046		1116.59	0.00103047		1706.6	0.01580515		2296.6	0.01310884		2886.59	-0.00134974		3476.58	-0.00471223		4066.58	0.01048153
526.8	0.10842727		1116.79	0.00061577		1706.8	0.01592784		2296.8	0.01325485		2886.79	-0.00069035		3476.78	-0.00487177		4066.78	0.01080543
527	0.10883792		1116.99	-0.00007064		1707	0.01683194		2297	0.01246739		2886.99	-0.00054178		3476.98	-0.00422122		4066.98	0.01032694
527.2	0.10918387		1117.19	0.00020218		1707.2	0.01623971		2297.2	0.01246956		2887.19	-0.00053089		3477.18	-0.00420459		4067.18	0.01006598
527.4	0.10919224		1117.39	0.00057522		1707.4	0.01694141		2297.4	0.01265706		2887.39	-0.00067266		3477.38	-0.00393555		4067.38	0.01105028
527.6	0.10831974		1117.59	0.00181995		1707.6	0.01593956		2297.6	0.01269197		2887.59	0.00038935		3477.58	-0.00317709		4067.58	0.01171191
527.8	0.10786118		1117.79	0.00264624		1707.8	0.01492095		2297.8	0.01280722		2887.79	-0.00000378		3477.78	-0.00276764		4067.78	0.01135776
528	0.10840584		1117.99	0.00319461		1708	0.0147654		2298	0.01224418		2887.99	-0.00027361		3477.98	-0.00345403		4067.98	0.01152762
528.2	0.10822597		1118.19	0.00415367		1708.2	0.0145506		2298.2	0.01241207		2888.19	-0.00055352		3478.18	-0.00321054		4068.18	0.01127021
528.4	0.10849308		1118.39	0.00400741		1708.4	0.01465585		2298.4	0.0126184		2888.39	-0.00001609		3478.38	-0.00277582		4068.38	0.01066571
528.6	0.10797254		1118.59	0.00369398		1708.6	0.01398953		2298.6	0.01185645		2888.59	0.00035144		3478.58	-0.00204913		4068.58	0.01067038
528.8	0.10878953		1118.79	0.00462571		1708.8	0.01346656		2298.8	0.01134582		2888.79	0.00047579		3478.78	-0.0017918		4068.78	0.01041383
529	0.10945349		1118.99	0.00539719		1709	0.01353986		2299	0.01091186		2888.99	0.00079602		3478.98	-0.00179603		4068.98	0.01078511
529.2	0.10925498		1119.19	0.0062445		1709.2	0.01265327		2299.2	0.01092176		2889.19	0.00099075		3479.18	-0.00197648		4069.18	0.01043761
529.4	0.10950486		1119.39	0.00655906		1709.4	0.01354047		2299.4	0.01099996		2889.39	0.00102787		3479.38	-0.00288231		4069.38	0.01069807
529.6	0.10925343		1119.59	0.00665694		1709.6	0.01334272		2299.6	0.01126108		2889.59	0.00068612		3479.58	-0.00351181		4069.58	0.01047702
529.8	0.10874145		1119.79	0.00698551		1709.8	0.01380148		2299.8	0.01041994		2889.79	0.00074904		3479.78	-0.00279643		4069.78	0.01140451
530	0.10832389		1119.99	0.00655231		1710	0.01444587		2300	0.0104068		2889.99	0.00022197		3479.98	-0.00316431		4069.98	0.01171139
530.2	0.10788118		1120.19	0.00684349		1710.2	0.01514731		2300.2	0.01038365		2890.19	-0.00020902		3480.18	-0.0027292		4070.18	0.01094433
530.4	0.10757726		1120.39	0.00659532		1710.4	0.01451934		2300.4	0.01055033		2890.39	-0.00094357		3480.38	-0.00337265		4070.38	0.01083685
530.6	0.10731647		1120.59	0.00669272		1710.6	0.0148709		2300.6	0.00986021		2890.59	-0.00140849		3480.58	-0.00307313		4070.58	0.01045372
530.8	0.10676277		1120.79	0.00721641		1710.8	0.01467746		2300.8	0.00988378		2890.79	-0.00176919		3480.78	-0.00288169		4070.78	0.00959029
531	0.10669554		1120.99	0.00729868		1711	0.01454657		2301	0.00940355		2890.99	-0.00203676		3480.98	-0.00258124		4070.98	0.0091875
531.2	0.10615623		1121.19	0.00768273		1711.2	0.01409078		2301.2	0.00996903		2891.19	-0.00207195		3481.18	-0.00334441		4071.18	0.00899111
531.4	0.10583644		1121.39	0.00842873		1711.4	0.0139062		2301.4	0.01035567		2891.39	-0.00259853		3481.38	-0.00261239		4071.38	0.00925058
531.6	0.10632479		1121.59	0.00909097		1711.6	0.01301013		2301.6	0.01023583		2891.59	-0.0027933		3481.58	-0.00171004		4071.58	0.00836018
531.8	0.10649507		1121.79	0.00861784		1711.8	0.01224661		2301.8	0.0107341		2891.79	-0.00355805		3481.78	-0.00265165		4071.78	0.00797502
532	0.10724132		1121.99	0.00814816		1712	0.01322685		2302	0.01109773		2891.99	-0.00364942		3481.98	-0.003372		4071.98	0.00752957
532.2	0.1073775		1122.19	0.00776894		1712.2	0.01298854		2302.2	0.01244586		2892.19	-0.00298997		3482.18	-0.00273849		4072.18	0.0079208
532.4	0.10731538		1122.39	0.00711767		1712.4	0.01327705		2302.4	0.01275932		2892.39	-0.00309285		3482.38	-0.00289744		4072.38	0.00755552
532.6	0.10721948		1122.59	0.00663842		1712.6	0.01324943		2302.6	0.01229887		2892.59	-0.00308067		3482.58	-0.00323561		4072.58	0.00791936
532.8	0.10748395		1122.79	0.00622542		1712.8	0.01384318		2302.8	0.01283219		2892.79	-0.00286623		3482.78	-0.00369281		4072.78	0.00728119
533	0.10631826		1122.99	0.00536677		1713	0.01404974		2303	0.01306652		2892.99	-0.00181898		3482.98	-0.00399492		4072.98	0.00760882
533.2	0.1056932		1123.19	0.00554466		1713.2	0.01328426		2303.2	0.01144962		2893.19	-0.00143906		3483.18	-0.00388161		4073.18	0.00758595
533.4	0.10517014		1123.39	0.0044666		1713.4	0.01345294		2303.4	0.01165919		2893.39	-0.00108458		3483.38	-0.00416752		4073.38	0.00717572
533.6	0.10425036		1123.59	0.00449021		1713.6	0.01248077		2303.6	0.01184348		2893.59	-0.00064617		3483.58	-0.00446094		4073.58	0.00671275
533.8	0.10314406		1123.79	0.00450004		1713.8	0.01153501		2303.8	0.01156286		2893.79	0.00016941		3483.78	-0.00446193		4073.78	0.00717622
534	0.10261828		1123.99	0.00391852		1714	0.01090288		2304	0.01249432		2893.99	0.00014432		3483.98	-0.00593276		4073.98	0.00736967
534.2	0.1025424		1124.19	0.00354819		1714.2	0.00955109		2304.2	0.01187858		2894.19	0.00063333		3484.18	-0.00573727		4074.18	0.00806418
534.4	0.10232816		1124.39	0.00366151		1714.4	0.00844171		2304.4	0.01253311		2894.39	0.00060657		3484.38	-0.00576725		4074.38	0.00872542
534.6	0.10191577		1124.59	0.00397264		1714.6	0.00842839		2304.6	0.01254216		2894.59	0.00107758		3484.58	-0.00592252		4074.58	0.00861533
534.8	0.10174214		1124.79	0.00469192		1714.8	0.00764054		2304.8	0.01308472		2894.79	0.00080024		3484.78	-0.00589387		4074.78	0.00840154
535	0.10176991		1124.99	0.0043221		1715	0.00758162		2305	0.01389045		2894.99	0.00084568		3484.98	-0.00606337		4074.98	0.0098832
535.2	0.10213935		1125.19	0.00424059		1715.2	0.00804611		2305.2	0.01387349		2895.19	0.00015869		3485.18	-0.00528092		4075.18	0.00991322
535.4	0.10308706		1125.39	0.00477249		1715.4	0.00838246		2305.4	0.01421247		2895.39	-0.00048753		3485.38	-0.00469576		4075.38	0.00983387
535.6	0.10380365		1125.59	0.00438038		1715.6	0.00951493		2305.6	0.01477048		2895.59	-0.00054324		3485.58	-0.00391921		4075.58	0.00950259
535.8	0.10443017		1125.79	0.0047728		1715.8	0.01049693		2305.8	0.0155192		2895.79	-0.00078992		3485.78	-0.00455557		4075.78	0.010755
536	0.10546438		1125.99	0.00523446		1716	0.01190933		2306	0.0160103		2895.99	-0.00176312		3485.98	-0.00438935		4075.98	0.01020028
536.2	0.10530908		1126.19	0.00611669		1716.2	0.01337841		2306.2	0.01566821		2896.19	-0.0015004		3486.18	-0.00294392		4076.18	0.01021718
536.4	0.10533006		1126.39	0.00607335		1716.4	0.01443241		2306.4	0.01449484		2896.39	-0.0017778		3486.38	-0.00261682		4076.38	0.01036198
536.6	0.10550303		1126.59	0.00636041		1716.6	0.01566472		2306.6	0.01316691		2896.59	-0.00143851		3486.58	-0.00312359		4076.58	0.01050191
536.8	0.10520161		1126.79	0.00731795		1716.8	0.01650079		2306.8	0.01141457		2896.79	-0.00148182		3486.78	-0.00233028		4076.78	0.00945954
537	0.10477386		1126.99	0.00749636		1717	0.01696176		2307	0.01024752		2896.99	-0.00161451		3486.98	-0.00165462		4076.98	0.00913472
537.2	0.10416548		1127.19	0.00783367		1717.2	0.01726431		2307.2	0.00863784		2897.19	-0.00246684		3487.18	-0.00148497		4077.18	0.00801035
537.4	0.10402779		1127.39	0.00766779		1717.4	0.01674876		2307.4	0.00994678		2897.39	-0.00262882		3487.38	-0.00160215		4077.38	0.00766036
537.6	0.10319117		1127.59	0.00851485		1717.6	0.01582643		2307.6	0.0095745		2897.59	-0.00237643		3487.58	-0.00198543		4077.58	0.00681023
537.8	0.10240823		1127.79	0.007984		1717.8	0.01625153		2307.8	0.00935562		2897.79	-0.00201481		3487.78	-0.00279692		4077.78	0.00707837
538	0.10350767		1127.99	0.00790046		1718	0.01536254		2308	0.00943493		2897.99	-0.00157898		3487.98	-0.00255625		4077.98	0.00792456
538.2	0.10344518		1128.19	0.00775103		1718.2	0.01432006		2308.2	0.00950098		2898.19	-0.00158421		3488.18	-0.00278149		4078.18	0.00860065
538.4	0.10328018		1128.39	0.00755032		1718.4	0.01389479		2308.4	0.00995105		2898.39	-0.00160838		3488.38	-0.00305857		4078.38	0.00777735
538.6	0.1035506		1128.59	0.00718179		1718.6	0.01356283		2308.6	0.01019406		2898.59	-0.00110852		3488.58	-0.00285752		4078.58	0.00795027
538.8	0.10336628		1128.79	0.00724255		1718.8	0.0128618		2308.8	0.01091439		2898.79	-0.00163104		3488.78	-0.00181067		4078.78	0.00826691
539	0.10404367		1128.99	0.00667365		1719	0.01283824		2309	0.01125851		2898.99	-0.00062537		3488.98	-0.00211268		4078.98	0.00862909
539.2	0.10490237		1129.19	0.00622102		1719.2	0.01301757		2309.2	0.01166878		2899.19	-0.00093889		3489.18	-0.0020093		4079.18	0.00838344
539.4	0.10511062		1129.39	0.00552981		1719.4	0.01327605		2309.4	0.01160241		2899.39	0.00009587		3489.38	-0.00237065		4079.38	0.00829969
539.6	0.10542542		1129.59	0.00503846		1719.6	0.01498849		2309.6	0.01179169		2899.59	0.00000068		3489.58	-0.00191651		4079.58	0.00901038
539.8	0.10635133		1129.79	0.0053355		1719.8	0.01455667		2309.8	0.01211042		2899.79	-0.00073526		3489.78	-0.00266282		4079.78	0.00973776
540	0.10624239		1129.99	0.00445363		1720	0.01513406		2310	0.01163194		2899.99	-0.00076398		3489.98	-0.00300639		4079.98	0.00957583
540.2	0.10614618		1130.19	0.00452396		1720.2	0.01477609		2310.2	0.01118566		2900.19	0.00001086		3490.18	-0.00271266		4080.18	0.00996526
540.4	0.10663627		1130.39	0.00418755		1720.4	0.0149471		2310.4	0.01096178		2900.39	-0.00018948		3490.38	-0.00364898		4080.38	0.01013633
540.6	0.10668466		1130.59	0.00416211		1720.6	0.01487448		2310.6	0.01042396		2900.59	-0.00059526		3490.58	-0.00457726		4080.58	0.00997266
540.8	0.10545646		1130.79	0.00424299		1720.8	0.01546674		2310.8	0.00995239		2900.79	-0.0008056		3490.78	-0.00412152		4080.78	0.01012397
541	0.10388577		1130.99	0.00423173		1721	0.01554286		2311	0.01018241		2900.99	-0.00112621		3490.98	-0.00446971		4080.98	0.01029935
541.2	0.10263055		1131.19	0.00458174		1721.2	0.01526326		2311.2	0.00972615		2901.19	-0.00139232		3491.18	-0.00478744		4081.18	0.00940741
541.4	0.10254061		1131.39	0.00454706		1721.4	0.01461677		2311.4	0.00932395		2901.39	-0.00012236		3491.38	-0.00492202		4081.38	0.00906414
541.6	0.10172447		1131.59	0.00415044		1721.6	0.01417258		2311.6	0.00866618		2901.59	-0.00014995		3491.58	-0.00509239		4081.58	0.00792864
541.8	0.10092001		1131.79	0.0043916		1721.8	0.01380384		2311.8	0.00863549		2901.79	-0.00033263		3491.78	-0.00557288		4081.78	0.00916758
542	0.10112191		1131.99	0.0045351		1722	0.01300318		2312	0.00904034		2901.99	-0.00024554		3491.98	-0.00518008		4081.98	0.01023733
542.2	0.10112816		1132.19	0.00491209		1722.2	0.01153266		2312.2	0.00977931		2902.19	-0.00034683		3492.18	-0.00565634		4082.18	0.00967726
542.4	0.10159854		1132.39	0.00560882		1722.4	0.01179827		2312.4	0.0097469		2902.39	-0.00042036		3492.38	-0.00426034		4082.38	0.00951332
542.6	0.10211302		1132.59	0.00633226		1722.6	0.01133951		2312.6	0.01036247		2902.59	-0.00053778		3492.58	-0.00407278		4082.58	0.01016592
542.8	0.10215116		1132.79	0.00729673		1722.8	0.01146011		2312.8	0.01050508		2902.79	-0.00059894		3492.78	-0.0033268		4082.78	0.00963657
543	0.10301541		1132.99	0.00698631		1723	0.01111491		2313	0.01069241		2902.99	-0.00006479		3492.98	-0.00369142		4082.98	0.00905167
543.2	0.104157		1133.19	0.00685839		1723.2	0.01152812		2313.2	0.01080024		2903.19	-0.00013898		3493.18	-0.00409857		4083.18	0.00981603
543.4	0.10455955		1133.39	0.00702697		1723.4	0.01187114		2313.4	0.01028409		2903.39	0.00026601		3493.38	-0.00365405		4083.38	0.00961657
543.6	0.10462577		1133.59	0.00648389		1723.6	0.01262854		2313.6	0.0109475		2903.59	-0.00038795		3493.58	-0.00348453		4083.58	0.00965875
543.8	0.10530558		1133.79	0.00693917		1723.8	0.01237255		2313.8	0.01134414		2903.79	-0.00070221		3493.78	-0.00353884		4083.78	0.00952223
544	0.10567509		1133.99	0.0064273		1724	0.01296819		2314	0.01123216		2903.99	-0.00061494		3493.98	-0.00321196		4083.98	0.00971737
544.2	0.10614764		1134.19	0.00617177		1724.2	0.01272497		2314.2	0.01128876		2904.19	-0.00091049		3494.18	-0.0035459		4084.18	0.00929588
544.4	0.10609315		1134.39	0.00598794		1724.4	0.01301235		2314.4	0.01099027		2904.39	-0.00107362		3494.38	-0.00362294		4084.38	0.00894345
544.6	0.10548018		1134.59	0.00458615		1724.6	0.01258966		2314.6	0.0107022		2904.59	-0.00090693		3494.58	-0.0033059		4084.58	0.0088351
544.8	0.1038774		1134.79	0.00379313		1724.8	0.01286338		2314.8	0.01049617		2904.79	-0.00134058		3494.78	-0.00376747		4084.78	0.00850613
545	0.10314937		1134.99	0.00259588		1725	0.01291555		2315	0.00979488		2904.99	-0.00104875		3494.98	-0.0039499		4084.98	0.00820138
545.2	0.10257222		1135.19	0.00259758		1725.2	0.01327745		2315.2	0.00896835		2905.19	-0.00081576		3495.18	-0.00430591		4085.18	0.00792052
545.4	0.10214042		1135.39	0.00151212		1725.4	0.01257582		2315.4	0.0089946		2905.39	-0.0000492		3495.38	-0.00493419		4085.38	0.00839723
545.6	0.10089259		1135.59	0.0007705		1725.6	0.01239654		2315.6	0.00882033		2905.59	-0.00101606		3495.58	-0.00517168		4085.58	0.00889516
545.8	0.09987283		1135.79	0.00129851		1725.8	0.01265909		2315.8	0.00928796		2905.79	-0.00156278		3495.78	-0.00566641		4085.78	0.00938321
546	0.10060226		1135.99	0.00146705		1726	0.01262178		2316	0.00987438		2905.99	-0.00137017		3495.98	-0.0050436		4085.98	0.01021323
546.2	0.10091335		1136.19	0.00188556		1726.2	0.01135086		2316.2	0.01089682		2906.19	-0.00206818		3496.18	-0.00572068		4086.18	0.00977129
546.4	0.10095453		1136.39	0.0020741		1726.4	0.01164626		2316.4	0.01082886		2906.39	-0.00268563		3496.38	-0.00534494		4086.38	0.01057552
546.6	0.10152405		1136.59	0.00236655		1726.6	0.01087676		2316.6	0.01153786		2906.59	-0.00264161		3496.58	-0.00655159		4086.58	0.01051867
546.8	0.10209285		1136.79	0.00268467		1726.8	0.01112951		2316.8	0.01236003		2906.79	-0.00286233		3496.78	-0.00575663		4086.78	0.01003893
547	0.10195325		1136.99	0.00289773		1727	0.01145914		2317	0.01294204		2906.99	-0.00330725		3496.98	-0.00590319		4086.98	0.00981692
547.2	0.10279232		1137.19	0.00355076		1727.2	0.01192007		2317.2	0.01276458		2907.19	-0.00330981		3497.18	-0.00665899		4087.18	0.01052312
547.4	0.10294134		1137.39	0.0044995		1727.4	0.01166121		2317.4	0.01342332		2907.39	-0.0033627		3497.38	-0.00606075		4087.38	0.00974565
547.6	0.10338427		1137.59	0.00385104		1727.6	0.01158013		2317.6	0.01403972		2907.59	-0.00310309		3497.58	-0.00535523		4087.58	0.00944442
547.8	0.1042081		1137.79	0.00464849		1727.8	0.0118333		2317.8	0.01342198		2907.79	-0.00289499		3497.78	-0.00457229		4087.78	0.0101495
548	0.10488086		1137.99	0.0046821		1728	0.01175864		2318	0.01317144		2907.99	-0.00298244		3497.98	-0.00401342		4087.98	0.00995158
548.2	0.10542289		1138.19	0.00507686		1728.2	0.0114127		2318.2	0.012928		2908.19	-0.00322595		3498.18	-0.0042682		4088.18	0.00895894
548.4	0.10577872		1138.39	0.00519586		1728.4	0.01116725		2318.4	0.0129269		2908.39	-0.00384814		3498.38	-0.00352446		4088.38	0.00899477
548.6	0.10508155		1138.59	0.00394152		1728.6	0.01176381		2318.6	0.01237422		2908.59	-0.00369537		3498.58	-0.0034115		4088.58	0.0095554
548.8	0.10440409		1138.79	0.00355093		1728.8	0.01184433		2318.8	0.01228435		2908.79	-0.00371049		3498.78	-0.00398047		4088.78	0.0098664
549	0.10334453		1138.99	0.00372692		1729	0.01281259		2319	0.01207575		2908.99	-0.00205996		3498.98	-0.00411109		4088.98	0.01013707
549.2	0.10181325		1139.19	0.00449975		1729.2	0.01280985		2319.2	0.01188883		2909.19	-0.00177362		3499.18	-0.00479228		4089.18	0.01008274
549.4	0.10169897		1139.39	0.00331043		1729.4	0.01278302		2319.4	0.01253312		2909.39	-0.00113159		3499.38	-0.00532855		4089.38	0.00994531
549.6	0.10088687		1139.59	0.00296358		1729.6	0.01274029		2319.6	0.01170754		2909.59	-0.00147911		3499.58	-0.00534115		4089.58	0.00935156
549.8	0.10104101		1139.79	0.00334272		1729.8	0.01229374		2319.8	0.01217249		2909.79	-0.00101671		3499.78	-0.00529808		4089.78	0.00901764
550	0.10173183		1139.99	0.00323568		1730	0.01214149		2320	0.01249847		2909.99	-0.00041202		3499.98	-0.00536485		4089.98	0.00940637
550.2	0.10200903		1140.19	0.00260535		1730.2	0.01193904		2320.2	0.01310372		2910.19	-0.00074606		3500.18	-0.0069605		4090.18	0.0087121
550.4	0.10285674		1140.39	0.00283912		1730.4	0.01203992		2320.4	0.01325389		2910.39	0.00004098		3500.38	-0.00705986		4090.38	0.00870709
550.6	0.10386893		1140.59	0.00324768		1730.6	0.01223178		2320.6	0.01381928		2910.59	-0.00060329		3500.58	-0.00731285		4090.58	0.00852551
550.8	0.10406577		1140.79	0.00370648		1730.8	0.0127229		2320.8	0.01341412		2910.79	-0.00082856		3500.78	-0.00710924		4090.78	0.00812148
551	0.10422424		1140.99	0.00369728		1731	0.01322524		2321	0.01256647		2910.99	-0.00031782		3500.98	-0.00721986		4090.98	0.00799333
551.2	0.10524888		1141.19	0.00411872		1731.2	0.01252473		2321.2	0.01297842		2911.19	0.00024318		3501.18	-0.00729867		4091.18	0.00772979
551.4	0.10634468		1141.39	0.00479572		1731.4	0.01143887		2321.4	0.01266732		2911.39	0.00147961		3501.38	-0.00650949		4091.38	0.0074048
551.6	0.1055357		1141.59	0.00444834		1731.6	0.01110408		2321.6	0.01194307		2911.59	0.00121366		3501.58	-0.00562336		4091.58	0.00701872
551.8	0.10585792		1141.79	0.00480892		1731.8	0.01152194		2321.8	0.01102988		2911.79	0.00117058		3501.78	-0.00555584		4091.78	0.00739878
552	0.1055137		1141.99	0.00515969		1732	0.01169186		2322	0.01142155		2911.99	0.00031998		3501.98	-0.00473734		4091.98	0.00796174
552.2	0.10528007		1142.19	0.00577119		1732.2	0.01174409		2322.2	0.01076362		2912.19	-0.00082627		3502.18	-0.00433334		4092.18	0.00824589
552.4	0.10438488		1142.39	0.00608679		1732.4	0.0121213		2322.4	0.01062508		2912.39	-0.00114089		3502.38	-0.00405822		4092.38	0.00947864
552.6	0.10305789		1142.59	0.00645248		1732.6	0.01249988		2322.6	0.01004329		2912.59	-0.00063683		3502.58	-0.00426551		4092.58	0.01039583
552.8	0.1025394		1142.79	0.00604368		1732.8	0.01207652		2322.8	0.01097904		2912.79	-0.00110722		3502.78	-0.00415577		4092.78	0.01102383
553	0.10087227		1142.99	0.00654662		1733	0.0127434		2323	0.01148571		2912.99	-0.00126816		3502.98	-0.00467173		4092.98	0.01069185
553.2	0.10029511		1143.19	0.00601916		1733.2	0.01261608		2323.2	0.01085834		2913.19	-0.00268024		3503.18	-0.00479007		4093.18	0.01052003
553.4	0.10051273		1143.39	0.0056899		1733.4	0.012839		2323.4	0.01084587		2913.39	-0.00286458		3503.38	-0.00470323		4093.38	0.01102696
553.6	0.09970002		1143.59	0.00558017		1733.6	0.01187075		2323.6	0.01070579		2913.59	-0.00393417		3503.58	-0.00526674		4093.58	0.01053372
553.8	0.1006094		1143.79	0.00606949		1733.8	0.01248797		2323.8	0.01153598		2913.79	-0.00380133		3503.78	-0.00574131		4093.78	0.01066125
554	0.10160717		1143.99	0.00540009		1734	0.0129895		2324	0.01208115		2913.99	-0.00404606		3503.98	-0.00639494		4093.98	0.01034243
554.2	0.10266369		1144.19	0.00467211		1734.2	0.01246605		2324.2	0.01182068		2914.19	-0.00468975		3504.18	-0.00733723		4094.18	0.01012908
554.4	0.1032578		1144.39	0.0045756		1734.4	0.01163912		2324.4	0.01226995		2914.39	-0.00367358		3504.38	-0.00673921		4094.38	0.01026257
554.6	0.10436894		1144.59	0.00428176		1734.6	0.01124774		2324.6	0.01205438		2914.59	-0.00420462		3504.58	-0.00715437		4094.58	0.00995976
554.8	0.10438983		1144.79	0.00462688		1734.8	0.01106964		2324.8	0.01159157		2914.79	-0.00305724		3504.78	-0.00735371		4094.78	0.00912234
555	0.105534		1144.99	0.0033628		1735	0.0106787		2325	0.01159226		2914.99	-0.00260322		3504.98	-0.00847588		4094.98	0.00848871
555.2	0.10564224		1145.19	0.00360088		1735.2	0.00947572		2325.2	0.01210467		2915.19	-0.00194668		3505.18	-0.00920675		4095.18	0.00804244
555.4	0.10485044		1145.39	0.00297176		1735.4	0.00935701		2325.4	0.01164407		2915.39	-0.0009579		3505.38	-0.00945795		4095.38	0.00783318
555.6	0.10335619		1145.59	0.00173234		1735.6	0.00949187		2325.6	0.01174935		2915.59	-0.00229927		3505.58	-0.00940416		4095.58	0.00718915
555.8	0.10362313		1145.79	0.00158094		1735.8	0.0105581		2325.8	0.01179108		2915.79	-0.0025309		3505.78	-0.00886246		4095.78	0.00778465
556	0.10260584		1145.99	0.00169518		1736	0.01095371		2326	0.01187729		2915.99	-0.00337469		3505.98	-0.00772363		4095.98	0.00881187
556.2	0.1021299		1146.19	0.00148737		1736.2	0.01078872		2326.2	0.01173003		2916.19	-0.00344763		3506.18	-0.00755467		4096.18	0.00921665
556.4	0.10167814		1146.39	0.00156329		1736.4	0.01070545		2326.4	0.01195101		2916.39	-0.00400278		3506.38	-0.00713759		4096.38	0.00915992
556.6	0.10167051		1146.59	0.00153533		1736.6	0.01139983		2326.6	0.01199984		2916.59	-0.00440575		3506.58	-0.00635048		4096.58	0.00988031
556.8	0.10118681		1146.79	0.00141127		1736.8	0.0111841		2326.8	0.01277879		2916.79	-0.00565543		3506.78	-0.00595489		4096.78	0.01069307
557	0.10007715		1146.99	0.00206311		1737	0.01098248		2327	0.01246283		2916.99	-0.00602755		3506.98	-0.00590841		4096.98	0.01058582
557.2	0.09982873		1147.19	0.00235185		1737.2	0.01084953		2327.2	0.01129781		2917.19	-0.00627792		3507.18	-0.00564971		4097.18	0.01148598
557.4	0.09960361		1147.39	0.00291709		1737.4	0.01040089		2327.4	0.01114756		2917.39	-0.00603681		3507.38	-0.0052995		4097.38	0.01254532
557.6	0.0996965		1147.59	0.00299641		1737.6	0.00969149		2327.6	0.01146477		2917.59	-0.00654883		3507.58	-0.00538849		4097.58	0.01189133
557.8	0.10037456		1147.79	0.00292432		1737.8	0.00933597		2327.8	0.01101371		2917.79	-0.00664876		3507.78	-0.00408937		4097.78	0.01280494
558	0.10046388		1147.99	0.00187982		1738	0.00928839		2328	0.01085362		2917.99	-0.00571906		3507.98	-0.00376387		4097.98	0.01286378
558.2	0.10167566		1148.19	0.00140166		1738.2	0.00877738		2328.2	0.01008115		2918.19	-0.00452916		3508.18	-0.00358446		4098.18	0.01346905
558.4	0.1019341		1148.39	0.00125276		1738.4	0.00824943		2328.4	0.00972397		2918.39	-0.00304533		3508.38	-0.00285802		4098.38	0.01420607
558.6	0.10271591		1148.59	0.00182276		1738.6	0.00884878		2328.6	0.00995745		2918.59	-0.0027188		3508.58	-0.00316628		4098.58	0.01454841
558.8	0.10252854		1148.79	0.00189692		1738.8	0.00921458		2328.8	0.00984233		2918.79	-0.0019455		3508.78	-0.00326443		4098.78	0.01456769
559	0.10270696		1148.99	0.00124304		1739	0.008862		2329	0.0095376		2918.99	-0.0008084		3508.98	-0.0045479		4098.98	0.01478389
559.2	0.10255176		1149.19	0.0016375		1739.2	0.00920457		2329.2	0.00936094		2919.19	0.00014043		3509.18	-0.00464144		4099.18	0.01451972
559.4	0.10243974		1149.39	0.00161776		1739.4	0.01038549		2329.4	0.0096811		2919.39	0.0003558		3509.38	-0.00392871		4099.38	0.01334281
559.6	0.10216612		1149.59	0.0017627		1739.6	0.01128034		2329.6	0.00938013		2919.59	-0.00044662		3509.58	-0.00351213		4099.58	0.0127067
559.8	0.10173819		1149.79	0.00157912		1739.8	0.01252588		2329.8	0.00893795		2919.79	-0.00017868		3509.78	-0.00368903		4099.78	0.01213082
560	0.10167335		1149.99	0.00149258		1740	0.01306612		2330	0.00871443		2919.99	0.00045165		3509.98	-0.00397869		4099.98	0.01133085
560.2	0.10174371		1150.19	0.00086613		1740.2	0.01284379		2330.2	0.00814506		2920.19	0.00107489		3510.18	-0.00435375		4100.18	0.01075503
560.4	0.10172488		1150.39	0.00125889		1740.4	0.01309112		2330.4	0.00819849		2920.39	0.00110882		3510.38	-0.00422933		4100.38	0.00851949
560.6	0.10143697		1150.59	0.00130731		1740.6	0.01358138		2330.6	0.00823447		2920.59	0.00052831		3510.58	-0.00519344		4100.58	0.00837343
560.8	0.10071871		1150.79	0.00132865		1740.8	0.01210406		2330.8	0.00883013		2920.79	0.00032378		3510.78	-0.00518612		4100.78	0.0084361
561	0.10077394		1150.99	0.0020411		1741	0.01160652		2331	0.0092471		2920.99	0.000395		3510.98	-0.00506246		4100.98	0.00744675
561.2	0.10069587		1151.19	0.00259018		1741.2	0.01181324		2331.2	0.00853522		2921.19	-0.00079502		3511.18	-0.0048739		4101.18	0.00718482
561.4	0.10035844		1151.39	0.00257641		1741.4	0.01175313		2331.4	0.00917579		2921.39	-0.00173042		3511.38	-0.00458221		4101.38	0.0066524
561.6	0.10020145		1151.59	0.00317671		1741.6	0.01089927		2331.6	0.00965661		2921.59	-0.00204713		3511.58	-0.00400323		4101.58	0.00687542
561.8	0.10002621		1151.79	0.00315293		1741.8	0.01051497		2331.8	0.01019268		2921.79	-0.00165066		3511.78	-0.00427572		4101.78	0.0074303
562	0.09954029		1151.99	0.00329114		1742	0.01114719		2332	0.01138988		2921.99	0.00020405		3511.98	-0.00461895		4101.98	0.00802253
562.2	0.10020587		1152.19	0.0035197		1742.2	0.00991838		2332.2	0.01156063		2922.19	0.00038659		3512.18	-0.00447157		4102.18	0.00900061
562.4	0.10002385		1152.39	0.00354717		1742.4	0.00915881		2332.4	0.01131016		2922.39	-0.00009418		3512.38	-0.00411422		4102.38	0.01000078
562.6	0.10063464		1152.59	0.00444088		1742.6	0.00967242		2332.6	0.0113229		2922.59	0.00042819		3512.58	-0.0045132		4102.58	0.01141188
562.8	0.10011453		1152.79	0.00460022		1742.8	0.00873429		2332.8	0.01030187		2922.79	0.00022854		3512.78	-0.00379854		4102.78	0.01235826
563	0.10046167		1152.99	0.00474357		1743	0.00876997		2333	0.00960333		2922.99	0.00040284		3512.98	-0.00437815		4102.98	0.01257115
563.2	0.10061513		1153.19	0.00473913		1743.2	0.00944072		2333.2	0.00948809		2923.19	0.00009147		3513.18	-0.0045975		4103.18	0.01216701
563.4	0.10055194		1153.39	0.00479069		1743.4	0.00982701		2333.4	0.01008281		2923.39	-0.00001388		3513.38	-0.00388836		4103.38	0.01210623
563.6	0.09924667		1153.59	0.00411294		1743.6	0.00960525		2333.6	0.00961664		2923.59	-0.00013481		3513.58	-0.00449877		4103.58	0.01237034
563.8	0.09977997		1153.79	0.00352211		1743.8	0.00940334		2333.8	0.00910655		2923.79	-0.00001001		3513.78	-0.00454218		4103.78	0.01212697
564	0.10046592		1153.99	0.00328393		1744	0.00989742		2334	0.0090167		2923.99	-0.00016814		3513.98	-0.0042641		4103.98	0.01211621
564.2	0.10003332		1154.19	0.00286759		1744.2	0.0093316		2334.2	0.00939674		2924.19	-0.00062411		3514.18	-0.00482805		4104.18	0.01233111
564.4	0.09989148		1154.39	0.0032054		1744.4	0.00951851		2334.4	0.00980096		2924.39	-0.00117059		3514.38	-0.00554572		4104.38	0.01139086
564.6	0.10025393		1154.59	0.00336839		1744.6	0.00942806		2334.6	0.01041522		2924.59	-0.00256949		3514.58	-0.00649976		4104.58	0.01194207
564.8	0.10068296		1154.79	0.00357959		1744.8	0.00857819		2334.8	0.01038408		2924.79	-0.00282203		3514.78	-0.00528312		4104.78	0.01158665
565	0.10096377		1154.99	0.00345278		1745	0.0090136		2335	0.0101365		2924.99	-0.00321232		3514.98	-0.00534384		4104.98	0.01034698
565.2	0.10098595		1155.19	0.00304582		1745.2	0.00929309		2335.2	0.01023201		2925.19	-0.00389525		3515.18	-0.00481227		4105.18	0.01048563
565.4	0.10157394		1155.39	0.00236882		1745.4	0.00945672		2335.4	0.01109484		2925.39	-0.00327964		3515.38	-0.00536758		4105.38	0.0109683
565.6	0.10214165		1155.59	0.00282283		1745.6	0.00870303		2335.6	0.01111877		2925.59	-0.00174696		3515.58	-0.0058962		4105.58	0.01100375
565.8	0.10180147		1155.79	0.00239557		1745.8	0.00953727		2335.8	0.01145635		2925.79	-0.00104364		3515.78	-0.00599275		4105.78	0.01028523
566	0.10215032		1155.99	0.0014716		1746	0.00981181		2336	0.01180695		2925.99	-0.00028618		3515.98	-0.00494767		4105.98	0.00999332
566.2	0.10329581		1156.19	0.00143144		1746.2	0.00896185		2336.2	0.0107285		2926.19	-0.00017346		3516.18	-0.00602321		4106.18	0.01017785
566.4	0.10397209		1156.39	0.00094883		1746.4	0.00897242		2336.4	0.00892247		2926.39	0.00029068		3516.38	-0.00578507		4106.38	0.01041128
566.6	0.10457041		1156.59	0.0010559		1746.6	0.00956127		2336.6	0.00794458		2926.59	0.00125479		3516.58	-0.00575493		4106.58	0.01060989
566.8	0.10432133		1156.79	0.0010763		1746.8	0.00973534		2336.8	0.00708391		2926.79	0.00127016		3516.78	-0.00582673		4106.78	0.01012914
567	0.10390685		1156.99	0.00063057		1747	0.01005052		2337	0.00716135		2926.99	0.00284699		3516.98	-0.00651276		4106.98	0.00947
567.2	0.10318329		1157.19	0.00042892		1747.2	0.00989608		2337.2	0.00738725		2927.19	0.00339908		3517.18	-0.00657889		4107.18	0.00959664
567.4	0.10230582		1157.39	0.00062628		1747.4	0.0097026		2337.4	0.00755997		2927.39	0.00322895		3517.38	-0.00614197		4107.38	0.00945951
567.6	0.10160667		1157.59	-0.00009993		1747.6	0.00982437		2337.6	0.00693378		2927.59	0.00197357		3517.58	-0.00608434		4107.58	0.00985768
567.8	0.10162781		1157.79	0.0013607		1747.8	0.00993211		2337.8	0.00677639		2927.79	0.00192579		3517.78	-0.00524257		4107.78	0.00989449
568	0.10044618		1157.99	0.00142575		1748	0.01015503		2338	0.0075263		2927.99	0.00128903		3517.98	-0.00595253		4107.98	0.0097815
568.2	0.10006634		1158.19	0.00201748		1748.2	0.00977433		2338.2	0.00788329		2928.19	0.00042944		3518.18	-0.00660865		4108.18	0.01067714
568.4	0.09996594		1158.39	0.00262204		1748.4	0.01013294		2338.4	0.00800023		2928.39	-0.00014321		3518.38	-0.00769413		4108.38	0.01069838
568.6	0.09958464		1158.59	0.00324055		1748.6	0.0097965		2338.6	0.0089386		2928.59	-0.00199678		3518.58	-0.00822879		4108.58	0.01057866
568.8	0.09857706		1158.79	0.00285504		1748.8	0.00892437		2338.8	0.00913411		2928.79	-0.00236867		3518.78	-0.00806085		4108.78	0.01096635
569	0.0997723		1158.99	0.00199382		1749	0.00866831		2339	0.00948561		2928.99	-0.00290908		3518.98	-0.00797387		4108.98	0.01128251
569.2	0.10048784		1159.19	0.00218106		1749.2	0.00893053		2339.2	0.01047909		2929.19	-0.00365761		3519.18	-0.00771516		4109.18	0.01153319
569.4	0.10123769		1159.39	0.00188708		1749.4	0.01023009		2339.4	0.01064647		2929.39	-0.0040397		3519.38	-0.00822454		4109.38	0.0121597
569.6	0.10074914		1159.59	0.00344516		1749.6	0.01051034		2339.6	0.01100556		2929.59	-0.00467295		3519.58	-0.00716506		4109.58	0.01147706
569.8	0.09996172		1159.79	0.00314116		1749.8	0.01073316		2339.8	0.01154075		2929.79	-0.00525949		3519.78	-0.00625065		4109.78	0.01136712
570	0.10109778		1159.99	0.00367225		1750	0.01017711		2340	0.01198299		2929.99	-0.00486065		3519.98	-0.00725918		4109.98	0.00978671
570.2	0.10196952		1160.19	0.00500885		1750.2	0.01036396		2340.2	0.01187345		2930.19	-0.00430897		3520.18	-0.00771364		4110.18	0.00998604
570.4	0.10271581		1160.39	0.00514003		1750.4	0.01106783		2340.4	0.01159988		2930.39	-0.00362174		3520.38	-0.00663822		4110.38	0.00940914
570.6	0.1028805		1160.59	0.00590967		1750.6	0.01119004		2340.6	0.01164568		2930.59	-0.00186657		3520.58	-0.00617293		4110.58	0.0092608
570.8	0.10220425		1160.79	0.00658607		1750.8	0.01091517		2340.8	0.01141714		2930.79	-0.00085348		3520.78	-0.00614977		4110.78	0.00908824
571	0.10188743		1160.99	0.00677786		1751	0.01010718		2341	0.01188593		2930.99	-0.00015569		3520.98	-0.00567389		4110.98	0.00838364
571.2	0.10149983		1161.19	0.00719932		1751.2	0.01037594		2341.2	0.01214317		2931.19	0.0002015		3521.18	-0.00511768		4111.18	0.00838925
571.4	0.10093876		1161.39	0.00711783		1751.4	0.01028419		2341.4	0.0119801		2931.39	-0.00079412		3521.38	-0.00419878		4111.38	0.00903117
571.6	0.10149819		1161.59	0.00709582		1751.6	0.01021192		2341.6	0.01176937		2931.59	-0.00067697		3521.58	-0.00372082		4111.58	0.00968076
571.8	0.10111284		1161.79	0.0081119		1751.8	0.00933668		2341.8	0.01153855		2931.79	0.00000973		3521.78	-0.00340395		4111.78	0.00878309
572	0.10090166		1161.99	0.00726985		1752	0.00873375		2342	0.01146181		2931.99	-0.00008055		3521.98	-0.00395082		4111.98	0.00900477
572.2	0.100884		1162.19	0.00703631		1752.2	0.00905898		2342.2	0.01056406		2932.19	-0.00038902		3522.18	-0.00350509		4112.18	0.00955446
572.4	0.09973403		1162.39	0.00746631		1752.4	0.00990597		2342.4	0.01016047		2932.39	-0.00141189		3522.38	-0.00386964		4112.38	0.0087388
572.6	0.0995159		1162.59	0.00719687		1752.6	0.00905085		2342.6	0.01042603		2932.59	-0.00281852		3522.58	-0.00353706		4112.58	0.00889856
572.8	0.09922334		1162.79	0.00536919		1752.8	0.00832936		2342.8	0.00984185		2932.79	-0.00238258		3522.78	-0.00309489		4112.78	0.00936266
573	0.10021517		1162.99	0.00416929		1753	0.00855003		2343	0.00970644		2932.99	-0.00324499		3522.98	-0.00277924		4112.98	0.00866927
573.2	0.09872505		1163.19	0.00370916		1753.2	0.00975027		2343.2	0.00943286		2933.19	-0.0037148		3523.18	-0.00336773		4113.18	0.00831614
573.4	0.09861819		1163.39	0.00401952		1753.4	0.0094547		2343.4	0.00951977		2933.39	-0.0040504		3523.38	-0.00367679		4113.38	0.00884346
573.6	0.09828933		1163.59	0.00372518		1753.6	0.0090933		2343.6	0.00969203		2933.59	-0.005056		3523.58	-0.00419515		4113.58	0.00819127
573.8	0.09834458		1163.79	0.00296907		1753.8	0.00885086		2343.8	0.00926186		2933.79	-0.00464652		3523.78	-0.00573751		4113.78	0.00734761
574	0.0985988		1163.99	0.00370788		1754	0.00835557		2344	0.00935484		2933.99	-0.00416429		3523.98	-0.00714951		4113.98	0.00621696
574.2	0.09831168		1164.19	0.00416593		1754.2	0.00901883		2344.2	0.00992819		2934.19	-0.00397469		3524.18	-0.00698562		4114.18	0.00735218
574.4	0.09745063		1164.39	0.00318319		1754.4	0.0089322		2344.4	0.00990122		2934.39	-0.00261605		3524.38	-0.00691924		4114.38	0.00746297
574.6	0.09698362		1164.59	0.00357949		1754.6	0.00847596		2344.6	0.01033447		2934.59	-0.00228531		3524.58	-0.00785371		4114.58	0.00742105
574.8	0.09648211		1164.79	0.0037302		1754.8	0.00825698		2344.8	0.0114352		2934.79	-0.00248744		3524.78	-0.00812263		4114.78	0.00678657
575	0.09673172		1164.99	0.00288927		1755	0.00811203		2345	0.0121963		2934.99	-0.00194147		3524.98	-0.00821561		4114.98	0.00578364
575.2	0.09631415		1165.19	0.00230719		1755.2	0.00841946		2345.2	0.01237319		2935.19	-0.00181978		3525.18	-0.00748677		4115.18	0.00625185
575.4	0.09651266		1165.39	0.00170423		1755.4	0.00788324		2345.4	0.01258943		2935.39	-0.00326872		3525.38	-0.00715829		4115.38	0.00634904
575.6	0.09710506		1165.59	0.00277821		1755.6	0.00790765		2345.6	0.0120488		2935.59	-0.00273561		3525.58	-0.00663939		4115.58	0.00547777
575.8	0.09707862		1165.79	0.00275075		1755.8	0.0077374		2345.8	0.01248946		2935.79	-0.00255193		3525.78	-0.00589688		4115.78	0.00473688
576	0.09776031		1165.99	0.00248319		1756	0.00741361		2346	0.01258692		2935.99	-0.00254619		3525.98	-0.00474772		4115.98	0.00463076
576.2	0.0976519		1166.19	0.00258321		1756.2	0.00809383		2346.2	0.01236831		2936.19	-0.00285242		3526.18	-0.00363766		4116.18	0.00397089
576.4	0.09789302		1166.39	0.00330093		1756.4	0.00875608		2346.4	0.01189189		2936.39	-0.00379557		3526.38	-0.00305657		4116.38	0.00373456
576.6	0.0983668		1166.59	0.00247198		1756.6	0.0088363		2346.6	0.01190332		2936.59	-0.00378392		3526.58	-0.00202804		4116.58	0.0039261
576.8	0.09860453		1166.79	0.0017875		1756.8	0.00884375		2346.8	0.01094217		2936.79	-0.00348914		3526.78	-0.00153473		4116.78	0.0037519
577	0.09881645		1166.99	0.00163954		1757	0.00974431		2347	0.01092542		2936.99	-0.003042		3526.98	-0.00148914		4116.98	0.00349822
577.2	0.09844925		1167.19	0.00133684		1757.2	0.00943522		2347.2	0.01003898		2937.19	-0.00333415		3527.18	-0.00195807		4117.18	0.00461654
577.4	0.09963097		1167.39	0.00198216		1757.4	0.00885048		2347.4	0.00999876		2937.39	-0.00291736		3527.38	-0.00282177		4117.38	0.00549352
577.6	0.09985569		1167.59	0.0013512		1757.6	0.00987614		2347.6	0.00961938		2937.59	-0.002604		3527.58	-0.00312554		4117.58	0.00633882
577.8	0.0996395		1167.79	0.00137209		1757.8	0.00959802		2347.8	0.00912166		2937.79	-0.00124685		3527.78	-0.00312725		4117.78	0.00666262
578	0.09928941		1167.99	0.00094623		1758	0.00946941		2348	0.00939915		2937.99	-0.00059898		3527.98	-0.00363325		4117.98	0.00801586
578.2	0.09890475		1168.19	0.00059636		1758.2	0.01034514		2348.2	0.0092042		2938.19	-0.00019348		3528.18	-0.0043435		4118.18	0.00899356
578.4	0.09901276		1168.39	-0.00025126		1758.4	0.01023686		2348.4	0.00961834		2938.39	0.00029921		3528.38	-0.00493697		4118.38	0.00914472
578.6	0.09961142		1168.59	-0.00100379		1758.6	0.01008772		2348.6	0.00925022		2938.59	0.00020321		3528.58	-0.00599277		4118.58	0.00924449
578.8	0.09903713		1168.79	-0.00124729		1758.8	0.00980192		2348.8	0.00966902		2938.79	0.00090008		3528.78	-0.00570252		4118.78	0.00889519
579	0.09848698		1168.99	-0.00158603		1759	0.00957261		2349	0.00942669		2938.99	0.00100366		3528.98	-0.00640435		4118.98	0.00883694
579.2	0.09868359		1169.19	-0.00163991		1759.2	0.00985531		2349.2	0.00868608		2939.19	0.00012274		3529.18	-0.00652048		4119.18	0.00963534
579.4	0.09866763		1169.39	-0.00193738		1759.4	0.00970261		2349.4	0.00918208		2939.39	-0.00013284		3529.38	-0.00692478		4119.38	0.00989739
579.6	0.09953138		1169.59	-0.00088772		1759.6	0.00915786		2349.6	0.00913755		2939.59	0.00009978		3529.58	-0.0070203		4119.58	0.01036002
579.8	0.09948759		1169.79	-0.00077361		1759.8	0.00862451		2349.8	0.01019984		2939.79	-0.00045305		3529.78	-0.00750535		4119.78	0.01124198
580	0.09933638		1169.99	-0.00058669		1760	0.00862189		2350	0.01026405		2939.99	-0.00120031		3529.98	-0.00755945		4119.98	0.01073999
580.2	0.09880061		1170.19	0.00019947		1760.2	0.00880455		2350.2	0.00946469		2940.19	-0.00244609		3530.18	-0.00713027		4120.18	0.01085962
580.4	0.09933092		1170.39	0.00078629		1760.4	0.00906579		2350.4	0.00884433		2940.39	-0.00381766		3530.38	-0.0067611		4120.38	0.01003263
580.6	0.09875505		1170.59	0.00068518		1760.6	0.00947932		2350.6	0.00840676		2940.59	-0.00383341		3530.58	-0.00603248		4120.58	0.0100474
580.8	0.09893475		1170.79	0.00041114		1760.8	0.00850521		2350.8	0.00759101		2940.79	-0.00436216		3530.78	-0.00596467		4120.78	0.00902887
581	0.09872172		1170.99	0.00019417		1761	0.00871559		2351	0.00725022		2940.99	-0.00448916		3530.98	-0.00676124		4120.98	0.00795258
581.2	0.09798009		1171.19	0.00014736		1761.2	0.00830653		2351.2	0.00708189		2941.19	-0.00533796		3531.18	-0.00712326		4121.18	0.00827753
581.4	0.09821996		1171.39	0.00048688		1761.4	0.00874868		2351.4	0.00715399		2941.39	-0.00459462		3531.38	-0.00731542		4121.38	0.00763796
581.6	0.09797236		1171.59	0.0013259		1761.6	0.00894973		2351.6	0.00764737		2941.59	-0.00475631		3531.58	-0.00652069		4121.58	0.00645645
581.8	0.09815176		1171.79	0.00220378		1761.8	0.00948771		2351.8	0.00781708		2941.79	-0.00452086		3531.78	-0.00592295		4121.78	0.00614959
582	0.09847583		1171.99	0.002206		1762	0.00971977		2352	0.00855129		2941.99	-0.00501785		3531.98	-0.00688606		4121.98	0.00699173
582.2	0.09817107		1172.19	0.0022337		1762.2	0.01018157		2352.2	0.00886876		2942.19	-0.00476849		3532.18	-0.0069653		4122.18	0.00624494
582.4	0.09788536		1172.39	0.00216127		1762.4	0.00977909		2352.4	0.00933253		2942.39	-0.0047894		3532.38	-0.00693283		4122.38	0.0062306
582.6	0.09771273		1172.59	0.00139679		1762.6	0.0098381		2352.6	0.00842919		2942.59	-0.00414923		3532.58	-0.0069524		4122.58	0.00565425
582.8	0.09702902		1172.79	0.0025191		1762.8	0.00995165		2352.8	0.00908772		2942.79	-0.00323438		3532.78	-0.0069325		4122.78	0.00565361
583	0.09687709		1172.99	0.00225349		1763	0.00971698		2353	0.00900307		2942.99	-0.00350858		3532.98	-0.00739989		4122.98	0.00629096
583.2	0.09768671		1173.19	0.00172085		1763.2	0.00966783		2353.2	0.0087912		2943.19	-0.0024334		3533.18	-0.00673233		4123.18	0.00717833
583.4	0.09739039		1173.39	0.00189595		1763.4	0.00924311		2353.4	0.00948583		2943.39	-0.00207193		3533.38	-0.00604848		4123.38	0.00804965
583.6	0.09797849		1173.59	0.00256648		1763.6	0.00848713		2353.6	0.0097846		2943.59	-0.00169398		3533.58	-0.00628319		4123.58	0.00867675
583.8	0.09724603		1173.79	0.00230608		1763.8	0.00953792		2353.8	0.00988241		2943.79	-0.00234263		3533.78	-0.00603111		4123.78	0.00903624
584	0.09740636		1173.99	0.00196219		1764	0.01018706		2354	0.01087509		2943.99	-0.00234192		3533.98	-0.00556095		4123.98	0.00813712
584.2	0.0979562		1174.19	0.00195173		1764.2	0.00941041		2354.2	0.01126593		2944.19	-0.00271438		3534.18	-0.0047574		4124.18	0.00836518
584.4	0.0979045		1174.39	0.00208341		1764.4	0.00958926		2354.4	0.01139239		2944.39	-0.00302346		3534.38	-0.00500069		4124.38	0.00796361
584.6	0.09799673		1174.59	0.00185903		1764.6	0.01026435		2354.6	0.01124846		2944.59	-0.00303306		3534.58	-0.0055377		4124.58	0.0079452
584.8	0.09771428		1174.79	0.00170379		1764.8	0.00936866		2354.8	0.01073735		2944.79	-0.00285517		3534.78	-0.00592824		4124.78	0.00748477
585	0.0967789		1174.99	0.00178936		1765	0.00954996		2355	0.01073891		2944.99	-0.00307532		3534.98	-0.00642909		4124.98	0.00710911
585.2	0.09577571		1175.19	0.001174		1765.2	0.0094758		2355.2	0.0103585		2945.19	-0.0030355		3535.18	-0.0064334		4125.18	0.00756902
585.4	0.09611829		1175.39	0.00210328		1765.4	0.00925728		2355.4	0.0107189		2945.39	-0.00271319		3535.38	-0.00703808		4125.38	0.00709153
585.6	0.09601508		1175.59	0.00394297		1765.6	0.00944575		2355.6	0.01088269		2945.59	-0.0038877		3535.58	-0.00606196		4125.58	0.00650906
585.8	0.09625118		1175.79	0.00316695		1765.8	0.00982701		2355.8	0.01102951		2945.79	-0.00396244		3535.78	-0.0056957		4125.78	0.00796987
586	0.09642653		1175.99	0.0017289		1766	0.00970326		2356	0.01078189		2945.99	-0.00417056		3535.98	-0.00687694		4125.98	0.00847325
586.2	0.09562166		1176.19	0.00092852		1766.2	0.01013937		2356.2	0.01043877		2946.19	-0.00418396		3536.18	-0.00661744		4126.18	0.0082114
586.4	0.09532288		1176.39	0.00118435		1766.4	0.00986676		2356.4	0.00955271		2946.39	-0.0046273		3536.38	-0.00678633		4126.38	0.00850512
586.6	0.09519428		1176.59	0.00107805		1766.6	0.00955736		2356.6	0.00921207		2946.59	-0.00446466		3536.58	-0.00714539		4126.58	0.00833349
586.8	0.09499788		1176.79	0.00127669		1766.8	0.00906698		2356.8	0.00907598		2946.79	-0.00438179		3536.78	-0.00669621		4126.78	0.00851633
587	0.09503367		1176.99	0.0002959		1767	0.00833851		2357	0.00838962		2946.99	-0.00429203		3536.98	-0.00628957		4126.98	0.00813291
587.2	0.09421356		1177.19	0.00033213		1767.2	0.00816711		2357.2	0.00813931		2947.19	-0.00337689		3537.18	-0.00512759		4127.18	0.00892949
587.4	0.09410469		1177.39	0.00029952		1767.4	0.00801496		2357.4	0.00843837		2947.39	-0.00411523		3537.38	-0.00453471		4127.38	0.00873353
587.6	0.09387999		1177.59	-0.00053437		1767.6	0.00822188		2357.6	0.00868021		2947.59	-0.00440605		3537.58	-0.00441152		4127.58	0.00935596
587.8	0.09320899		1177.79	-0.00081		1767.8	0.01005674		2357.8	0.00932059		2947.79	-0.00522302		3537.78	-0.00310074		4127.78	0.00923584
588	0.09353538		1177.99	-0.0007219		1768	0.01051952		2358	0.00968245		2947.99	-0.00491144		3537.98	-0.0029586		4127.98	0.00897994
588.2	0.09363812		1178.19	-0.00035462		1768.2	0.01066185		2358.2	0.00946345		2948.19	-0.00419653		3538.18	-0.00271925		4128.18	0.00915613
588.4	0.09365105		1178.39	-0.00049677		1768.4	0.01159807		2358.4	0.00855637		2948.39	-0.00402384		3538.38	-0.00312748		4128.38	0.00872245
588.6	0.09457194		1178.59	-0.00054		1768.6	0.01176283		2358.6	0.00832439		2948.59	-0.00302463		3538.58	-0.0038463		4128.58	0.00871678
588.8	0.09445441		1178.79	-0.00009745		1768.8	0.0101033		2358.8	0.00760567		2948.79	-0.00222465		3538.78	-0.0030916		4128.78	0.00953739
589	0.09539113		1178.99	-0.00058314		1769	0.00958898		2359	0.00746038		2948.99	-0.00221614		3538.98	-0.00332151		4128.98	0.00910288
589.2	0.09687834		1179.19	-0.00121475		1769.2	0.00879189		2359.2	0.00697895		2949.19	-0.00179661		3539.18	-0.00402116		4129.18	0.00862894
589.4	0.09780366		1179.39	-0.00014158		1769.4	0.00876479		2359.4	0.00697129		2949.39	-0.00149542		3539.38	-0.00410386		4129.38	0.00753302
589.6	0.09772119		1179.59	-0.00091642		1769.6	0.00909798		2359.6	0.00674803		2949.59	-0.00200739		3539.58	-0.00379785		4129.58	0.00761633
589.8	0.09810178		1179.79	-0.00222828		1769.8	0.00860132		2359.8	0.0059073		2949.79	-0.00180054		3539.78	-0.00526782		4129.78	0.00829088
590	0.09889441		1179.99	-0.00184077		1770	0.00896085		2360	0.00529383		2949.99	-0.00204682		3539.98	-0.00610832		4129.98	0.00836451
590.2	0.09927712		1180.19	-0.00139746		1770.2	0.00799316		2360.2	0.00529408		2950.19	-0.00307051		3540.18	-0.00626203		4130.18	0.00899958
590.4	0.1001534		1180.39	-0.00016263		1770.4	0.00721236		2360.4	0.00570939		2950.39	-0.00290602		3540.38	-0.00767311		4130.38	0.00853913
590.6	0.10029938		1180.59	-0.00058882		1770.6	0.00575077		2360.6	0.00566025		2950.59	-0.0034666		3540.58	-0.00813416		4130.58	0.00849255
590.8	0.10031388		1180.79	-0.0004802		1770.8	0.00569752		2360.8	0.00580139		2950.79	-0.00359922		3540.78	-0.00832417		4130.78	0.00792277
591	0.09961674		1180.99	-0.00058962		1771	0.00497073		2361	0.00615899		2950.99	-0.00401743		3540.98	-0.00909525		4130.98	0.00746929
591.2	0.0979361		1181.19	-0.00076798		1771.2	0.00476223		2361.2	0.00730231		2951.19	-0.00498785		3541.18	-0.00927939		4131.18	0.00863523
591.4	0.09725941		1181.39	-0.00145753		1771.4	0.00466613		2361.4	0.00750138		2951.39	-0.00559502		3541.38	-0.00883469		4131.38	0.00872177
591.6	0.09565399		1181.59	-0.00199867		1771.6	0.00578652		2361.6	0.00725026		2951.59	-0.00492259		3541.58	-0.00835223		4131.58	0.00946022
591.8	0.09429892		1181.79	-0.00113836		1771.8	0.0074166		2361.8	0.00792373		2951.79	-0.00528187		3541.78	-0.00752237		4131.78	0.00909662
592	0.09372432		1181.99	-0.00135927		1772	0.00743383		2362	0.00726561		2951.99	-0.00430264		3541.98	-0.00758906		4131.98	0.00951263
592.2	0.09346543		1182.19	-0.00071353		1772.2	0.0068492		2362.2	0.00709129		2952.19	-0.00355299		3542.18	-0.00710494		4132.18	0.00923761
592.4	0.09331457		1182.39	-0.00065001		1772.4	0.00627878		2362.4	0.00738663		2952.39	-0.00269816		3542.38	-0.00799785		4132.38	0.00873482
592.6	0.09367505		1182.59	0.00035015		1772.6	0.00568315		2362.6	0.00802261		2952.59	-0.00259728		3542.58	-0.00746941		4132.58	0.0089273
592.8	0.0943599		1182.79	0.00081906		1772.8	0.00540519		2362.8	0.00787934		2952.79	-0.00205142		3542.78	-0.00651298		4132.78	0.00945273
593	0.09473638		1182.99	0.00064749		1773	0.00658146		2363	0.00790216		2952.99	-0.0013433		3542.98	-0.0059997		4132.98	0.00945167
593.2	0.09399736		1183.19	0.00044438		1773.2	0.00670631		2363.2	0.00716504		2953.19	-0.00084398		3543.18	-0.00536188		4133.18	0.00832232
593.4	0.09321727		1183.39	0.00084656		1773.4	0.00791392		2363.4	0.00676034		2953.39	-0.00048092		3543.38	-0.00470774		4133.38	0.00853821
593.6	0.09279275		1183.59	-0.0004498		1773.6	0.00812817		2363.6	0.00630905		2953.59	-0.0008887		3543.58	-0.00481265		4133.58	0.00935554
593.8	0.09355355		1183.79	0.0000819		1773.8	0.00774459		2363.8	0.00536908		2953.79	-0.00098107		3543.78	-0.00456458		4133.78	0.01019237
594	0.09454838		1183.99	0.00096015		1774	0.00733667		2364	0.0062616		2953.99	-0.00168605		3543.98	-0.00393217		4133.98	0.01026343
594.2	0.09621487		1184.19	0.00076065		1774.2	0.00681387		2364.2	0.00639719		2954.19	-0.0021031		3544.18	-0.00451332		4134.18	0.01037365
594.4	0.09631078		1184.39	0.00067029		1774.4	0.00720206		2364.4	0.00680575		2954.39	-0.00189839		3544.38	-0.00591723		4134.38	0.0096629
594.6	0.09605416		1184.59	0.00007976		1774.6	0.00736529		2364.6	0.00698351		2954.59	-0.00188857		3544.58	-0.00580039		4134.58	0.00910321
594.8	0.09621596		1184.79	0.00060105		1774.8	0.00802935		2364.8	0.00678205		2954.79	-0.00203031		3544.78	-0.00656651		4134.78	0.00836449
595	0.09597429		1184.99	0.00008216		1775	0.0077583		2365	0.00715392		2954.99	-0.0031891		3544.98	-0.00763022		4134.98	0.0080907
595.2	0.0947026		1185.19	-0.00140882		1775.2	0.00878731		2365.2	0.0076325		2955.19	-0.00321629		3545.18	-0.0075352		4135.18	0.00876287
595.4	0.09454066		1185.39	-0.00140849		1775.4	0.00873962		2365.4	0.00753979		2955.39	-0.00354189		3545.38	-0.00742883		4135.38	0.00868846
595.6	0.09407277		1185.59	-0.00122271		1775.6	0.00883245		2365.6	0.00805884		2955.59	-0.00331105		3545.58	-0.0071397		4135.58	0.0087565
595.8	0.09325018		1185.79	-0.00137996		1775.8	0.00886458		2365.8	0.00867523		2955.79	-0.00417507		3545.78	-0.00733579		4135.78	0.00953929
596	0.09317777		1185.99	-0.00161906		1776	0.00820429		2366	0.00791963		2955.99	-0.00352967		3545.98	-0.00800073		4135.98	0.00950136
596.2	0.0928524		1186.19	-0.00094134		1776.2	0.00744254		2366.2	0.00831973		2956.19	-0.00373293		3546.18	-0.0079716		4136.18	0.00847775
596.4	0.09305262		1186.39	-0.00098933		1776.4	0.00723746		2366.4	0.00870862		2956.39	-0.00300943		3546.38	-0.00821927		4136.38	0.0086036
596.6	0.092948		1186.59	-0.00061732		1776.6	0.00797229		2366.6	0.00878924		2956.59	-0.00295478		3546.58	-0.00728414		4136.58	0.00891452
596.8	0.09277693		1186.79	-0.00059675		1776.8	0.00823979		2366.8	0.00767952		2956.79	-0.00218782		3546.78	-0.00653954		4136.78	0.00972335
597	0.09188286		1186.99	-0.00123098		1777	0.00835758		2367	0.00793634		2956.99	-0.00249738		3546.98	-0.0057348		4136.98	0.00980921
597.2	0.09119158		1187.19	-0.00060856		1777.2	0.00729176		2367.2	0.00693137		2957.19	-0.00310494		3547.18	-0.00561053		4137.18	0.00848153
597.4	0.09144333		1187.39	-0.00049177		1777.4	0.00722428		2367.4	0.00680891		2957.39	-0.00277594		3547.38	-0.00571623		4137.38	0.00920016
597.6	0.09154999		1187.59	-0.00061863		1777.6	0.00628121		2367.6	0.00600997		2957.59	-0.0027305		3547.58	-0.00620735		4137.58	0.00942737
597.8	0.09187476		1187.79	0.00053154		1777.8	0.00563175		2367.8	0.00630759		2957.79	-0.00234704		3547.78	-0.00613906		4137.78	0.00979684
598	0.09223684		1187.99	0.00198304		1778	0.00531296		2368	0.00684762		2957.99	-0.00271243		3547.98	-0.00538491		4137.98	0.00911298
598.2	0.09241921		1188.19	0.00152054		1778.2	0.00568758		2368.2	0.00701324		2958.19	-0.00166124		3548.18	-0.00559189		4138.18	0.00868828
598.4	0.091245		1188.39	0.00132673		1778.4	0.00546304		2368.4	0.00717782		2958.39	-0.00165663		3548.38	-0.00606962		4138.38	0.00850357
598.6	0.09210776		1188.59	0.00157656		1778.6	0.00473552		2368.6	0.00727307		2958.59	-0.00050042		3548.58	-0.0056027		4138.58	0.00800918
598.8	0.09249166		1188.79	0.00166794		1778.8	0.00526983		2368.8	0.00687122		2958.79	-0.00099649		3548.78	-0.00560283		4138.78	0.00760948
599	0.09288093		1188.99	0.00199876		1779	0.00591242		2369	0.00798399		2958.99	-0.00186223		3548.98	-0.00677389		4138.98	0.00746858
599.2	0.09318335		1189.19	0.00082348		1779.2	0.00684403		2369.2	0.00808162		2959.19	-0.00214373		3549.18	-0.00643966		4139.18	0.00728873
599.4	0.09417435		1189.39	0.00071282		1779.4	0.0067958		2369.4	0.00853294		2959.39	-0.00307941		3549.38	-0.00678487		4139.38	0.00725925
599.6	0.09473295		1189.59	0.00000361		1779.6	0.00722011		2369.6	0.00906469		2959.59	-0.00333076		3549.58	-0.00680804		4139.58	0.00750758
599.8	0.09569956		1189.79	-0.00050374		1779.8	0.00753278		2369.8	0.0085252		2959.79	-0.00365375		3549.78	-0.00715011		4139.78	0.00782212
600	0.0971206		1189.99	-0.00018072		1780	0.00759994		2370	0.00821601		2959.99	-0.00338314		3549.98	-0.00729343		4139.98	0.00814095
600.2	0.09838654		1190.19	-0.00082353		1780.2	0.00770296		2370.2	0.00890579		2960.19	-0.00350547		3550.18	-0.00739787		4140.18	0.008452
600.4	0.09954598		1190.39	-0.00151504		1780.4	0.00814645		2370.4	0.00931273		2960.39	-0.00312636		3550.38	-0.00798504		4140.38	0.00916073
600.6	0.09955007		1190.59	-0.00157282		1780.6	0.00879605		2370.6	0.00940602		2960.59	-0.00309921		3550.58	-0.00825144		4140.58	0.00940036
600.8	0.09977048		1190.79	-0.0022308		1780.8	0.00863298		2370.8	0.00937149		2960.79	-0.00335178		3550.78	-0.00877332		4140.78	0.00998757
601	0.09991262		1190.99	-0.00213025		1781	0.00815925		2371	0.00973102		2960.99	-0.00365879		3550.98	-0.00854267		4140.98	0.00977003
601.2	0.09980851		1191.19	-0.00096263		1781.2	0.00770045		2371.2	0.00899064		2961.19	-0.00348972		3551.18	-0.00899944		4141.18	0.00918203
601.4	0.09893377		1191.39	-0.0012967		1781.4	0.00753034		2371.4	0.00887835		2961.39	-0.00318898		3551.38	-0.00985911		4141.38	0.01037517
601.6	0.09826142		1191.59	-0.00137882		1781.6	0.00670866		2371.6	0.00920837		2961.59	-0.00367344		3551.58	-0.01025062		4141.58	0.01027446
601.8	0.09763168		1191.79	-0.00109359		1781.8	0.00666732		2371.8	0.00929071		2961.79	-0.00345775		3551.78	-0.0092601		4141.78	0.01057306
602	0.09680308		1191.99	-0.0010004		1782	0.00704637		2372	0.00890271		2961.99	-0.00428644		3551.98	-0.00812374		4141.98	0.01041653
602.2	0.09562369		1192.19	-0.00189857		1782.2	0.00623754		2372.2	0.00929816		2962.19	-0.00420621		3552.18	-0.00814258		4142.18	0.01007514
602.4	0.09426632		1192.39	-0.00197564		1782.4	0.00585882		2372.4	0.00841943		2962.39	-0.00479472		3552.38	-0.00824678		4142.38	0.00925217
602.6	0.0937611		1192.59	-0.00134941		1782.6	0.005961		2372.6	0.00764496		2962.59	-0.0040839		3552.58	-0.00803053		4142.58	0.00854543
602.8	0.0932729		1192.79	-0.00104307		1782.8	0.00731206		2372.8	0.00751612		2962.79	-0.00492656		3552.78	-0.007814		4142.78	0.00745344
603	0.09364637		1192.99	-0.00040929		1783	0.00738425		2373	0.00618324		2962.99	-0.00489916		3552.98	-0.0076113		4142.98	0.00681215
603.2	0.0940593		1193.19	-0.00107907		1783.2	0.00785636		2373.2	0.0049654		2963.19	-0.00515115		3553.18	-0.00671717		4143.18	0.00642046
603.4	0.09372015		1193.39	-0.00070839		1783.4	0.00767781		2373.4	0.00473243		2963.39	-0.00614543		3553.38	-0.00717312		4143.38	0.00693421
603.6	0.09351947		1193.59	-0.00046317		1783.6	0.00751305		2373.6	0.00496655		2963.59	-0.00516249		3553.58	-0.00661417		4143.58	0.00708553
603.8	0.09350934		1193.79	-0.00059731		1783.8	0.00746782		2373.8	0.00483282		2963.79	-0.00511909		3553.78	-0.00698071		4143.78	0.00717704
604	0.0939472		1193.99	-0.00061853		1784	0.00796469		2374	0.00533132		2963.99	-0.00450172		3553.98	-0.00751364		4143.98	0.00804567
604.2	0.0946275		1194.19	-0.00150989		1784.2	0.00814078		2374.2	0.0056477		2964.19	-0.0038376		3554.18	-0.00789409		4144.18	0.00891945
604.4	0.09408727		1194.39	-0.00130679		1784.4	0.00865822		2374.4	0.00673579		2964.39	-0.00361772		3554.38	-0.00822222		4144.38	0.00923348
604.6	0.09438592		1194.59	-0.00103021		1784.6	0.00774043		2374.6	0.00649065		2964.59	-0.00302677		3554.58	-0.00782555		4144.58	0.0090902
604.8	0.09410908		1194.79	-0.00147512		1784.8	0.00779837		2374.8	0.00673234		2964.79	-0.00321706		3554.78	-0.00769549		4144.78	0.00917666
605	0.09464124		1194.99	-0.00121922		1785	0.00697232		2375	0.00694928		2964.99	-0.0027974		3554.98	-0.00669172		4144.98	0.00909648
605.2	0.09479771		1195.19	-0.00151344		1785.2	0.0066554		2375.2	0.00720298		2965.19	-0.00327532		3555.18	-0.00756251		4145.18	0.0088455
605.4	0.09477748		1195.39	-0.00256215		1785.4	0.00650515		2375.4	0.00759447		2965.39	-0.00349935		3555.38	-0.00808568		4145.38	0.00988488
605.6	0.09509378		1195.59	-0.00275707		1785.6	0.00606486		2375.6	0.00876592		2965.59	-0.00289162		3555.58	-0.00800669		4145.58	0.00965676
605.8	0.09596893		1195.79	-0.00325335		1785.8	0.00672611		2375.8	0.00785259		2965.79	-0.00281799		3555.78	-0.00766467		4145.78	0.00931395
606	0.09574044		1195.99	-0.00347425		1786	0.00665251		2376	0.00881511		2965.99	-0.00376558		3555.98	-0.00841228		4145.98	0.00929694
606.2	0.0956764		1196.19	-0.00348394		1786.2	0.00637517		2376.2	0.00867955		2966.19	-0.0035559		3556.18	-0.00897022		4146.18	0.00837455
606.4	0.09545779		1196.39	-0.00322577		1786.4	0.00685828		2376.4	0.00818403		2966.39	-0.00410717		3556.38	-0.00911305		4146.38	0.00793745
606.6	0.09538131		1196.59	-0.00360595		1786.6	0.00659414		2376.6	0.00833974		2966.59	-0.00407936		3556.58	-0.00888329		4146.58	0.00808197
606.8	0.09572441		1196.79	-0.0037957		1786.8	0.00691589		2376.8	0.00785108		2966.79	-0.00480125		3556.78	-0.00854508		4146.78	0.00774652
607	0.0959414		1196.99	-0.00341746		1787	0.00625817		2377	0.00685761		2966.99	-0.00472117		3556.98	-0.00845186		4146.98	0.00794416
607.2	0.09559838		1197.19	-0.00329978		1787.2	0.00638172		2377.2	0.00660955		2967.19	-0.00550501		3557.18	-0.00923126		4147.18	0.00863751
607.4	0.09459241		1197.39	-0.00334812		1787.4	0.00593234		2377.4	0.00724227		2967.39	-0.00525952		3557.38	-0.00987115		4147.38	0.00944266
607.6	0.09410903		1197.59	-0.00306889		1787.6	0.00656542		2377.6	0.00734804		2967.59	-0.00357267		3557.58	-0.00930766		4147.58	0.0094074
607.8	0.0942478		1197.79	-0.003994		1787.8	0.00666343		2377.8	0.00663043		2967.79	-0.0034153		3557.78	-0.00930936		4147.78	0.00930922
608	0.09545363		1197.99	-0.00340465		1788	0.00665959		2378	0.00595615		2967.99	-0.00304207		3557.98	-0.00857898		4147.98	0.00984868
608.2	0.09580127		1198.19	-0.00353523		1788.2	0.0066832		2378.2	0.00489748		2968.19	-0.00255578		3558.18	-0.00828368		4148.18	0.00995144
608.4	0.09570567		1198.39	-0.00238404		1788.4	0.00646908		2378.4	0.005305		2968.39	-0.00243105		3558.38	-0.00755513		4148.38	0.00910687
608.6	0.09617866		1198.59	-0.00265781		1788.6	0.00592141		2378.6	0.00435552		2968.59	-0.00211887		3558.58	-0.00688671		4148.58	0.00941703
608.8	0.09594928		1198.79	-0.00185428		1788.8	0.00632743		2378.8	0.00473083		2968.79	-0.00165707		3558.78	-0.00683511		4148.78	0.01002595
609	0.09695194		1198.99	-0.00131021		1789	0.00575249		2379	0.00483191		2968.99	-0.00146541		3558.98	-0.0066008		4148.98	0.00915506
609.2	0.09688941		1199.19	-0.00126928		1789.2	0.00505001		2379.2	0.00402823		2969.19	-0.00160074		3559.18	-0.00760242		4149.18	0.00880542
609.4	0.09670476		1199.39	-0.00131539		1789.4	0.00538827		2379.4	0.00419146		2969.39	-0.00179151		3559.38	-0.00763593		4149.38	0.00937611
609.6	0.09625025		1199.59	-0.00096283		1789.6	0.00612083		2379.6	0.00418151		2969.59	-0.00189882		3559.58	-0.00804183		4149.58	0.00869943
609.8	0.09648007		1199.79	-0.00078055		1789.8	0.00730893		2379.8	0.00404329		2969.79	-0.00230546		3559.78	-0.00814276		4149.78	0.00850587
610	0.09572269		1199.99	-0.00006173		1790	0.00808565		2380	0.00441633		2969.99	-0.00321189		3559.98	-0.00866811		4149.98	0.0088124
610.2	0.09473452		1200.19	0.00023986		1790.2	0.00894076		2380.2	0.0041469		2970.19	-0.00394272		3560.18	-0.00845246		4150.18	0.00829539
610.4	0.09327934		1200.39	0.00036176		1790.4	0.01006269		2380.4	0.00548251		2970.39	-0.00460136		3560.38	-0.00722736		4150.38	0.0079611
610.6	0.09204727		1200.59	0.00005694		1790.6	0.00997032		2380.6	0.0059031		2970.59	-0.00471573		3560.58	-0.00665174		4150.58	0.00726905
610.8	0.09239544		1200.79	-0.00045027		1790.8	0.01020874		2380.8	0.00587148		2970.79	-0.00503814		3560.78	-0.00685132		4150.78	0.0066666
611	0.09168507		1200.99	-0.0010508		1791	0.01031537		2381	0.00570551		2970.99	-0.00569499		3560.98	-0.00777216		4150.98	0.00664861
611.2	0.09140203		1201.19	-0.0012064		1791.2	0.01047897		2381.2	0.00570336		2971.19	-0.00501591		3561.18	-0.00819704		4151.18	0.00681317
611.4	0.09159133		1201.39	-0.0011245		1791.4	0.01021809		2381.4	0.00600113		2971.39	-0.00415564		3561.38	-0.00757427		4151.38	0.00598603
611.6	0.09121937		1201.59	-0.00108252		1791.6	0.0105814		2381.6	0.00584935		2971.59	-0.00305912		3561.58	-0.00649364		4151.58	0.00482813
611.8	0.09215374		1201.79	-0.00175615		1791.8	0.01026364		2381.8	0.00576975		2971.79	-0.00222577		3561.78	-0.00604777		4151.78	0.00439076
612	0.09227055		1201.99	-0.00026544		1792	0.010197		2382	0.00647653		2971.99	-0.00190392		3561.98	-0.00535977		4151.98	0.00414105
612.2	0.09266519		1202.19	-0.00050676		1792.2	0.00984378		2382.2	0.00631919		2972.19	-0.00112736		3562.18	-0.00596764		4152.18	0.00419124
612.4	0.09329404		1202.39	-0.00019614		1792.4	0.00844548		2382.4	0.00729399		2972.39	-0.00058614		3562.38	-0.00563409		4152.38	0.00505143
612.6	0.0933614		1202.59	-0.00103298		1792.6	0.00754546		2382.6	0.0075068		2972.59	-0.00001528		3562.58	-0.00613121		4152.58	0.00542645
612.8	0.0940488		1202.79	-0.00014166		1792.8	0.00648174		2382.8	0.00830451		2972.79	0.00014594		3562.78	-0.00686682		4152.78	0.00547236
613	0.09466509		1202.99	-0.0014647		1793	0.00673789		2383	0.00754931		2972.99	0.0002184		3562.98	-0.00837976		4152.98	0.00495064
613.2	0.09492146		1203.19	-0.00156861		1793.2	0.00642304		2383.2	0.00709101		2973.19	-0.00091024		3563.18	-0.00923634		4153.18	0.00475205
613.4	0.09490867		1203.39	-0.00168141		1793.4	0.00732396		2383.4	0.00748414		2973.39	-0.00267293		3563.38	-0.00950384		4153.38	0.0046406
613.6	0.09501521		1203.59	-0.00176685		1793.6	0.00766546		2383.6	0.00772515		2973.59	-0.00229837		3563.58	-0.00965117		4153.58	0.00503265
613.8	0.09480879		1203.79	-0.000896		1793.8	0.0081761		2383.8	0.00796782		2973.79	-0.00216492		3563.78	-0.00920527		4153.78	0.00547571
614	0.094322		1203.99	-0.00101689		1794	0.00853386		2384	0.00710084		2973.99	-0.00274315		3563.98	-0.00953734		4153.98	0.00625098
614.2	0.09369298		1204.19	-0.00103002		1794.2	0.00870377		2384.2	0.0077039		2974.19	-0.00276307		3564.18	-0.00915984		4154.18	0.00683053
614.4	0.09344806		1204.39	-0.00140463		1794.4	0.00993938		2384.4	0.00821218		2974.39	-0.00216314		3564.38	-0.00845813		4154.38	0.00664038
614.6	0.09340979		1204.59	-0.00156282		1794.6	0.00981394		2384.6	0.00772349		2974.59	-0.00216813		3564.58	-0.00892555		4154.58	0.00694262
614.8	0.09324374		1204.79	-0.00253448		1794.8	0.01010993		2384.8	0.00761536		2974.79	-0.00236574		3564.78	-0.00947727		4154.78	0.00725118
615	0.092391		1204.99	-0.00289457		1795	0.01006243		2385	0.00780574		2974.99	-0.00292146		3564.98	-0.01048236		4154.98	0.00769458
615.2	0.09246002		1205.19	-0.00300913		1795.2	0.00989217		2385.2	0.00811481		2975.19	-0.00250752		3565.18	-0.01004948		4155.18	0.0078662
615.4	0.09262297		1205.39	-0.00264931		1795.4	0.00956027		2385.4	0.00737806		2975.39	-0.00274225		3565.38	-0.00897065		4155.38	0.00762955
615.6	0.09242934		1205.59	-0.00233533		1795.6	0.00885415		2385.6	0.00797275		2975.59	-0.00251573		3565.58	-0.00850436		4155.58	0.00815547
615.8	0.09279524		1205.79	-0.00237638		1795.8	0.00835355		2385.8	0.00758287		2975.79	-0.00288734		3565.78	-0.00793159		4155.78	0.00848816
616	0.09279619		1205.99	-0.00134297		1796	0.00723708		2386	0.0082052		2975.99	-0.00315675		3565.98	-0.00748028		4155.98	0.00822256
616.2	0.09393254		1206.19	-0.00169222		1796.2	0.0062915		2386.2	0.0077297		2976.19	-0.00313139		3566.18	-0.00716148		4156.18	0.00953049
616.4	0.09339312		1206.39	-0.00179712		1796.4	0.00524547		2386.4	0.00830442		2976.39	-0.00322261		3566.38	-0.00656047		4156.38	0.00962602
616.6	0.09323423		1206.59	-0.00253321		1796.6	0.00516039		2386.6	0.007732		2976.59	-0.00337159		3566.58	-0.00680748		4156.58	0.00905111
616.8	0.09411931		1206.79	-0.00198355		1796.8	0.00454654		2386.8	0.00767982		2976.79	-0.00395202		3566.78	-0.00731693		4156.78	0.00879358
617	0.09441813		1206.99	-0.00228834		1797	0.00445531		2387	0.00686808		2976.99	-0.0040404		3566.98	-0.00751526		4156.98	0.0080155
617.2	0.09440732		1207.19	-0.0013438		1797.2	0.00393589		2387.2	0.00657608		2977.19	-0.00539343		3567.18	-0.00666046		4157.18	0.00691303
617.4	0.09421264		1207.39	-0.00159086		1797.4	0.00373077		2387.4	0.00663074		2977.39	-0.0056343		3567.38	-0.00688616		4157.38	0.00673563
617.6	0.09433487		1207.59	-0.00143398		1797.6	0.00376841		2387.6	0.00684067		2977.59	-0.00400529		3567.58	-0.00622326		4157.58	0.00627653
617.8	0.09411193		1207.79	-0.00076899		1797.8	0.00453981		2387.8	0.00610137		2977.79	-0.00392678		3567.78	-0.00590023		4157.78	0.00623447
618	0.09400296		1207.99	-0.00040187		1798	0.00550468		2388	0.00584505		2977.99	-0.00363269		3567.98	-0.00642079		4157.98	0.00705204
618.2	0.09450263		1208.19	0.00092692		1798.2	0.0065293		2388.2	0.00666054		2978.19	-0.00285569		3568.18	-0.00595642		4158.18	0.00679471
618.4	0.09406671		1208.39	0.00089407		1798.4	0.00760557		2388.4	0.00692972		2978.39	-0.00231085		3568.38	-0.00609635		4158.38	0.00691395
618.6	0.0938795		1208.59	0.00090668		1798.6	0.00787112		2388.6	0.00668738		2978.59	-0.00148211		3568.58	-0.00718545		4158.58	0.00680037
618.8	0.09389772		1208.79	-0.00006713		1798.8	0.00842113		2388.8	0.00642635		2978.79	-0.00148529		3568.78	-0.00755818		4158.78	0.00645179
619	0.0936265		1208.99	-0.00078366		1799	0.00882382		2389	0.00652211		2978.99	-0.00191325		3568.98	-0.00802226		4158.98	0.00653524
619.2	0.09342232		1209.19	-0.00147763		1799.2	0.01009117		2389.2	0.00588326		2979.19	-0.00226973		3569.18	-0.00757371		4159.18	0.00705802
619.4	0.09254088		1209.39	-0.00155466		1799.4	0.009789		2389.4	0.0056406		2979.39	-0.00233973		3569.38	-0.00702287		4159.38	0.00695212
619.6	0.09267852		1209.59	-0.00234635		1799.6	0.01011406		2389.6	0.00636442		2979.59	-0.00218861		3569.58	-0.00720012		4159.58	0.00724264
619.8	0.09315286		1209.79	-0.00285597		1799.8	0.00999421		2389.8	0.00606738		2979.79	-0.0026149		3569.78	-0.00710298		4159.78	0.0065282
620	0.09345212		1209.99	-0.0030126		1800	0.01009838		2390	0.00655353		2979.99	-0.00271101		3569.98	-0.00685035		4159.98	0.00700573
620.2	0.09312335		1210.19	-0.00358933		1800.2	0.01019164		2390.2	0.00623254		2980.19	-0.00268256		3570.18	-0.00645888		4160.18	0.00858165
620.4	0.09223214		1210.39	-0.00361987		1800.4	0.00946522		2390.4	0.0059772		2980.39	-0.00329824		3570.38	-0.00676562		4160.38	0.00791333
620.6	0.09251889		1210.59	-0.00442141		1800.6	0.00948507		2390.6	0.00544425		2980.59	-0.00383575		3570.58	-0.00660203		4160.58	0.00775219
620.8	0.09271265		1210.79	-0.00383041		1800.8	0.00813143		2390.8	0.00576284		2980.79	-0.00349083		3570.78	-0.0066963		4160.78	0.0077704
621	0.09134854		1210.99	-0.00393016		1801	0.00804209		2391	0.00497805		2980.99	-0.00392156		3570.98	-0.00642269		4160.98	0.00795285
621.2	0.09091966		1211.19	-0.00416164		1801.2	0.00878563		2391.2	0.0049161		2981.19	-0.00390747		3571.18	-0.00650218		4161.18	0.00866745
621.4	0.09092466		1211.39	-0.00469817		1801.4	0.00900367		2391.4	0.00566217		2981.39	-0.00422015		3571.38	-0.00667473		4161.38	0.00839984
621.6	0.0910138		1211.59	-0.00360396		1801.6	0.00887538		2391.6	0.00578988		2981.59	-0.00398495		3571.58	-0.00652556		4161.58	0.008672
621.8	0.09075713		1211.79	-0.00286622		1801.8	0.00884202		2391.8	0.00598093		2981.79	-0.00441579		3571.78	-0.00699892		4161.78	0.00930302
622	0.09046195		1211.99	-0.00171791		1802	0.00852682		2392	0.00652216		2981.99	-0.00386868		3571.98	-0.00739435		4161.98	0.00917413
622.2	0.09086002		1212.19	-0.00066397		1802.2	0.00737663		2392.2	0.00702961		2982.19	-0.00374032		3572.18	-0.00748719		4162.18	0.00948381
622.4	0.09080334		1212.39	-0.00040352		1802.4	0.00641631		2392.4	0.00664937		2982.39	-0.00351462		3572.38	-0.00861071		4162.38	0.01037841
622.6	0.09102819		1212.59	-0.00083127		1802.6	0.0058986		2392.6	0.00633056		2982.59	-0.0033647		3572.58	-0.00915447		4162.58	0.01029862
622.8	0.09098056		1212.79	-0.00106166		1802.8	0.00547614		2392.8	0.00556108		2982.79	-0.00384663		3572.78	-0.0082958		4162.78	0.01062812
623	0.09026548		1212.99	-0.00074388		1803	0.00550013		2393	0.00595904		2982.99	-0.00351076		3572.98	-0.00847109		4162.98	0.0107238
623.2	0.08942109		1213.19	-0.00141475		1803.2	0.00597354		2393.2	0.00584717		2983.19	-0.003756		3573.18	-0.00848427		4163.18	0.01014985
623.4	0.08985419		1213.39	-0.0014542		1803.4	0.00549665		2393.4	0.00622239		2983.39	-0.00345173		3573.38	-0.00805339		4163.38	0.0088816
623.6	0.09091708		1213.59	-0.00178309		1803.6	0.00553493		2393.6	0.00596823		2983.59	-0.00363638		3573.58	-0.00786743		4163.58	0.00915113
623.8	0.09171371		1213.79	-0.00077437		1803.8	0.00522805		2393.8	0.0058339		2983.79	-0.00481175		3573.78	-0.00849733		4163.78	0.00837128
624	0.0922126		1213.99	-0.00031059		1804	0.00497075		2394	0.00574297		2983.99	-0.00529161		3573.98	-0.00839821		4163.98	0.00820232
624.2	0.09259184		1214.19	0.00029104		1804.2	0.00428261		2394.2	0.00509875		2984.19	-0.00528869		3574.18	-0.00821956		4164.18	0.00833473
624.4	0.09218946		1214.39	0.00065521		1804.4	0.0044896		2394.4	0.00458988		2984.39	-0.0059947		3574.38	-0.00814237		4164.38	0.00688912
624.6	0.09280512		1214.59	-0.00002566		1804.6	0.00489515		2394.6	0.0044449		2984.59	-0.00588738		3574.58	-0.00777628		4164.58	0.00725368
624.8	0.09237531		1214.79	0.00066201		1804.8	0.00519024		2394.8	0.00422048		2984.79	-0.00584611		3574.78	-0.00780412		4164.78	0.00678969
625	0.09248282		1214.99	0.00026762		1805	0.00670514		2395	0.00425493		2984.99	-0.00644207		3574.98	-0.0075458		4164.98	0.00698511
625.2	0.0927318		1215.19	-0.00049553		1805.2	0.00746601		2395.2	0.00426786		2985.19	-0.00599272		3575.18	-0.00770931		4165.18	0.00768314
625.4	0.09339077		1215.39	-0.00124704		1805.4	0.00768444		2395.4	0.00489709		2985.39	-0.00602632		3575.38	-0.00828968		4165.38	0.00641751
625.6	0.09238386		1215.59	-0.00114187		1805.6	0.00812342		2395.6	0.00498378		2985.59	-0.00623655		3575.58	-0.00867247		4165.58	0.00625138
625.8	0.09192412		1215.79	-0.00161829		1805.8	0.00804235		2395.8	0.00547684		2985.79	-0.00593099		3575.78	-0.00905613		4165.78	0.0062444
626	0.09163773		1215.99	-0.00177286		1806	0.0080547		2396	0.00590133		2985.99	-0.00442863		3575.98	-0.00958063		4165.98	0.00675626
626.2	0.09138662		1216.19	-0.0019172		1806.2	0.00756993		2396.2	0.00546163		2986.19	-0.00407849		3576.18	-0.00974186		4166.18	0.00771765
626.4	0.09189485		1216.39	-0.00233768		1806.4	0.00787322		2396.4	0.00496086		2986.39	-0.0037558		3576.38	-0.01007806		4166.38	0.00820039
626.6	0.09143692		1216.59	-0.00348562		1806.6	0.00843652		2396.6	0.00494538		2986.59	-0.00396809		3576.58	-0.00908557		4166.58	0.00780454
626.8	0.09136249		1216.79	-0.00349598		1806.8	0.00739554		2396.8	0.00501663		2986.79	-0.00332534		3576.78	-0.0083733		4166.78	0.00759529
627	0.09087106		1216.99	-0.00396487		1807	0.00717486		2397	0.00594848		2986.99	-0.00301539		3576.98	-0.00778985		4166.98	0.00705227
627.2	0.08980855		1217.19	-0.00425772		1807.2	0.00685681		2397.2	0.00613249		2987.19	-0.0037475		3577.18	-0.00713559		4167.18	0.00674787
627.4	0.09033791		1217.39	-0.00369693		1807.4	0.00659565		2397.4	0.00704849		2987.39	-0.00382977		3577.38	-0.00646993		4167.38	0.00715804
627.6	0.08987731		1217.59	-0.00328449		1807.6	0.00648789		2397.6	0.00675982		2987.59	-0.00424775		3577.58	-0.00653626		4167.58	0.00766711
627.8	0.09027237		1217.79	-0.00185221		1807.8	0.00544582		2397.8	0.00623521		2987.79	-0.00414196		3577.78	-0.006915		4167.78	0.00763601
628	0.09067093		1217.99	-0.00137788		1808	0.00399017		2398	0.00554008		2987.99	-0.00343203		3577.98	-0.00649603		4167.98	0.0079109
628.2	0.09070359		1218.19	-0.00023672		1808.2	0.00373055		2398.2	0.00558833		2988.19	-0.00397887		3578.18	-0.00568354		4168.18	0.00843268
628.4	0.09050317		1218.39	0.00016971		1808.4	0.0037175		2398.4	0.00580845		2988.39	-0.00416183		3578.38	-0.00599027		4168.38	0.00871681
628.6	0.09114636		1218.59	0.00122545		1808.6	0.00365006		2398.6	0.00622555		2988.59	-0.00407236		3578.58	-0.00646134		4168.58	0.00919008
628.8	0.09100718		1218.79	0.00185157		1808.8	0.00403411		2398.8	0.00617819		2988.79	-0.0045738		3578.78	-0.0073965		4168.78	0.0082136
629	0.09166076		1218.99	0.00129972		1809	0.00356882		2399	0.00712198		2988.99	-0.00442253		3578.98	-0.00773476		4168.98	0.00835435
629.2	0.09109913		1219.19	0.00055437		1809.2	0.002566		2399.2	0.00684849		2989.19	-0.00429548		3579.18	-0.00928525		4169.18	0.00850326
629.4	0.0914375		1219.39	-0.0003505		1809.4	0.00334499		2399.4	0.00706328		2989.39	-0.00417748		3579.38	-0.00985117		4169.38	0.00765202
629.6	0.09066989		1219.59	-0.00042488		1809.6	0.00401946		2399.6	0.0061884		2989.59	-0.0044729		3579.58	-0.01053493		4169.58	0.00767536
629.8	0.09130598		1219.79	-0.00087233		1809.8	0.00378645		2399.8	0.00607948		2989.79	-0.0037668		3579.78	-0.01156858		4169.78	0.00700176
630	0.09093169		1219.99	-0.00115208		1810	0.00441136		2400	0.00546324		2989.99	-0.0026987		3579.98	-0.01270929		4169.98	0.00661561
630.2	0.09171734		1220.19	-0.00181464		1810.2	0.0048113		2400.2	0.00442028		2990.19	-0.00335326		3580.18	-0.01277894		4170.18	0.00619858
630.4	0.09289465		1220.39	-0.00240447		1810.4	0.00558031		2400.4	0.00501583		2990.39	-0.00374304		3580.38	-0.0129181		4170.38	0.0049124
630.6	0.09257363		1220.59	-0.00254217		1810.6	0.00562561		2400.6	0.00556126		2990.59	-0.00428388		3580.58	-0.01220737		4170.58	0.00427587
630.8	0.0926425		1220.79	-0.00332641		1810.8	0.00458305		2400.8	0.0052616		2990.79	-0.00435594		3580.78	-0.01148967		4170.78	0.00472096
631	0.09208073		1220.99	-0.00422607		1811	0.00527624		2401	0.00545608		2990.99	-0.0048999		3580.98	-0.01109833		4170.98	0.00454079
631.2	0.09104005		1221.19	-0.0046945		1811.2	0.00500314		2401.2	0.00514381		2991.19	-0.00506415		3581.18	-0.01081194		4171.18	0.00449747
631.4	0.09052868		1221.39	-0.00524399		1811.4	0.00533278		2401.4	0.0053812		2991.39	-0.00472878		3581.38	-0.01075449		4171.38	0.00469368
631.6	0.09040178		1221.59	-0.00551989		1811.6	0.00560724		2401.6	0.00486704		2991.59	-0.00420165		3581.58	-0.01047949		4171.58	0.00390665
631.8	0.09029527		1221.79	-0.00504995		1811.8	0.00502455		2401.8	0.00438846		2991.79	-0.00355613		3581.78	-0.00996098		4171.78	0.0048219
632	0.0905886		1221.99	-0.00482806		1812	0.00555985		2402	0.00432528		2991.99	-0.00329626		3581.98	-0.00912469		4171.98	0.00491863
632.2	0.09102136		1222.19	-0.00420248		1812.2	0.00622373		2402.2	0.00451751		2992.19	-0.00331021		3582.18	-0.00821782		4172.18	0.0043771
632.4	0.09092945		1222.39	-0.00421213		1812.4	0.00607446		2402.4	0.004691		2992.39	-0.00272925		3582.38	-0.00854398		4172.38	0.00427139
632.6	0.09068485		1222.59	-0.00382974		1812.6	0.00630306		2402.6	0.00474936		2992.59	-0.00273608		3582.58	-0.00842361		4172.58	0.00371832
632.8	0.08992134		1222.79	-0.00427509		1812.8	0.00613134		2402.8	0.0047946		2992.79	-0.00235772		3582.78	-0.00815625		4172.78	0.0037418
633	0.08971324		1222.99	-0.0042459		1813	0.00572453		2403	0.00596053		2992.99	-0.00135659		3582.98	-0.00807263		4172.98	0.00418113
633.2	0.08938954		1223.19	-0.00374713		1813.2	0.0059367		2403.2	0.00542631		2993.19	-0.00097893		3583.18	-0.00853702		4173.18	0.00461014
633.4	0.08950722		1223.39	-0.00429718		1813.4	0.0070336		2403.4	0.0055657		2993.39	-0.0005866		3583.38	-0.00832265		4173.38	0.00443995
633.6	0.08983702		1223.59	-0.00396977		1813.6	0.00733449		2403.6	0.00578545		2993.59	-0.00090381		3583.58	-0.00813259		4173.58	0.00384607
633.8	0.09004296		1223.79	-0.00377433		1813.8	0.00708742		2403.8	0.00621327		2993.79	-0.00163676		3583.78	-0.00785817		4173.78	0.00310579
634	0.08990288		1223.99	-0.00325476		1814	0.00758388		2404	0.00671913		2993.99	-0.00207792		3583.98	-0.00880103		4173.98	0.003747
634.2	0.09046499		1224.19	-0.00323144		1814.2	0.00774224		2404.2	0.00689097		2994.19	-0.00316736		3584.18	-0.00929995		4174.18	0.00359328
634.4	0.09020386		1224.39	-0.00272146		1814.4	0.00766718		2404.4	0.00718319		2994.39	-0.00347834		3584.38	-0.00949308		4174.38	0.00389953
634.6	0.08980038		1224.59	-0.00147386		1814.6	0.00647457		2404.6	0.006621		2994.59	-0.00439097		3584.58	-0.00941273		4174.58	0.00459297
634.8	0.0898177		1224.79	-0.00160478		1814.8	0.00604641		2404.8	0.00610914		2994.79	-0.00527229		3584.78	-0.00957323		4174.78	0.00576187
635	0.08944301		1224.99	-0.00081151		1815	0.00565211		2405	0.00555484		2994.99	-0.00623085		3584.98	-0.01066106		4174.98	0.00627314
635.2	0.0884813		1225.19	-0.00084376		1815.2	0.00433192		2405.2	0.00520109		2995.19	-0.00663573		3585.18	-0.01089515		4175.18	0.00692637
635.4	0.08867406		1225.39	-0.00132985		1815.4	0.00481139		2405.4	0.00563098		2995.39	-0.00707739		3585.38	-0.01161169		4175.38	0.00803209
635.6	0.0886885		1225.59	-0.00181341		1815.6	0.00460202		2405.6	0.00551521		2995.59	-0.00729831		3585.58	-0.01127121		4175.58	0.00790524
635.8	0.0889629		1225.79	-0.00182897		1815.8	0.00426084		2405.8	0.00485891		2995.79	-0.00668186		3585.78	-0.01048589		4175.78	0.00788277
636	0.08939809		1225.99	-0.00277166		1816	0.00517944		2406	0.00502204		2995.99	-0.00616377		3585.98	-0.01041957		4175.98	0.00741283
636.2	0.09049082		1226.19	-0.00315087		1816.2	0.00499454		2406.2	0.00525662		2996.19	-0.00568142		3586.18	-0.00994748		4176.18	0.00722453
636.4	0.09012052		1226.39	-0.00354932		1816.4	0.00429494		2406.4	0.00566919		2996.39	-0.00484004		3586.38	-0.01002617		4176.38	0.00814325
636.6	0.08945785		1226.59	-0.00362545		1816.6	0.00468174		2406.6	0.00583909		2996.59	-0.00373323		3586.58	-0.00945288		4176.58	0.00865983
636.8	0.08903748		1226.79	-0.00329623		1816.8	0.00499963		2406.8	0.00604818		2996.79	-0.00261761		3586.78	-0.00982211		4176.78	0.00925045
637	0.09017653		1226.99	-0.00293675		1817	0.00416027		2407	0.00683022		2996.99	-0.00128334		3586.98	-0.00950216		4176.98	0.00980777
637.2	0.09017345		1227.19	-0.00307955		1817.2	0.0042113		2407.2	0.00738353		2997.19	-0.00126293		3587.18	-0.00859968		4177.18	0.00936134
637.4	0.09051143		1227.39	-0.00441833		1817.4	0.00467035		2407.4	0.00836965		2997.39	-0.0017772		3587.38	-0.00847951		4177.38	0.00873288
637.6	0.09037144		1227.59	-0.00445207		1817.6	0.00509323		2407.6	0.00869525		2997.59	-0.00227589		3587.58	-0.00752501		4177.58	0.00856204
637.8	0.09049967		1227.79	-0.00481134		1817.8	0.00568757		2407.8	0.00808367		2997.79	-0.00301245		3587.78	-0.00768007		4177.78	0.00833337
638	0.09034918		1227.99	-0.00473363		1818	0.00603777		2408	0.00858008		2997.99	-0.00198863		3587.98	-0.00873585		4177.98	0.00878695
638.2	0.09002168		1228.19	-0.00453846		1818.2	0.00538438		2408.2	0.0076504		2998.19	-0.00281448		3588.18	-0.00877328		4178.18	0.00865886
638.4	0.08972619		1228.39	-0.00387452		1818.4	0.00480464		2408.4	0.00726493		2998.39	-0.00249254		3588.38	-0.00832236		4178.38	0.00858732
638.6	0.08986321		1228.59	-0.00299757		1818.6	0.00410715		2408.6	0.00742903		2998.59	-0.00329887		3588.58	-0.00749211		4178.58	0.00788672
638.8	0.0901572		1228.79	-0.00207956		1818.8	0.00303879		2408.8	0.00754899		2998.79	-0.00406925		3588.78	-0.00689314		4178.78	0.00774501
639	0.09018362		1228.99	-0.00179293		1819	0.00268426		2409	0.00626248		2998.99	-0.0045503		3588.98	-0.00733867		4178.98	0.00728326
639.2	0.09014829		1229.19	-0.00208638		1819.2	0.00199799		2409.2	0.00637934		2999.19	-0.00455759		3589.18	-0.00658118		4179.18	0.0074888
639.4	0.09071072		1229.39	-0.00182298		1819.4	0.00203734		2409.4	0.00659959		2999.39	-0.00524881		3589.38	-0.00578432		4179.38	0.00710763
639.6	0.09047115		1229.59	-0.00120541		1819.6	0.00201901		2409.6	0.00753137		2999.59	-0.00498553		3589.58	-0.00588814		4179.58	0.00624464
639.8	0.09125249		1229.79	-0.00148093		1819.8	0.00278063		2409.8	0.00758175		2999.79	-0.00486142		3589.78	-0.00630676		4179.78	0.0057617
640	0.09129835		1229.99	-0.00258937		1820	0.00336273		2410	0.00890947		2999.99	-0.00484747		3589.98	-0.00798199		4179.98	0.00610106
640.2	0.09126582		1230.19	-0.00188521		1820.2	0.00283544		2410.2	0.00859789		3000.19	-0.00501173		3590.18	-0.00843165		4180.18	0.00720241
640.4	0.09048964		1230.39	-0.0009555		1820.4	0.00266223		2410.4	0.00935108		3000.39	-0.00442529		3590.38	-0.00943341		4180.38	0.0081016
640.6	0.08944668		1230.59	-0.00074665		1820.6	0.00326135		2410.6	0.009898		3000.59	-0.00446181		3590.58	-0.00975799		4180.58	0.00857917
640.8	0.08918399		1230.79	-0.00027932		1820.8	0.00401249		2410.8	0.00915026		3000.79	-0.00438059		3590.78	-0.01043192		4180.78	0.00916701
641	0.08990762		1230.99	-0.00078224		1821	0.00370161		2411	0.00991173		3000.99	-0.00422932		3590.98	-0.01077491		4180.98	0.00896345
641.2	0.08899074		1231.19	-0.00127279		1821.2	0.00485916		2411.2	0.00948325		3001.19	-0.0050364		3591.18	-0.01123842		4181.18	0.00822859
641.4	0.08886216		1231.39	-0.00204756		1821.4	0.00610595		2411.4	0.00857155		3001.39	-0.00634247		3591.38	-0.01160628		4181.38	0.0083068
641.6	0.08845706		1231.59	-0.00294059		1821.6	0.00631296		2411.6	0.00803818		3001.59	-0.00580065		3591.58	-0.01207673		4181.58	0.00830945
641.8	0.08896446		1231.79	-0.00393385		1821.8	0.00668814		2411.8	0.00761539		3001.79	-0.00601463		3591.78	-0.01258401		4181.78	0.00733423
642	0.08839108		1231.99	-0.00434734		1822	0.00645675		2412	0.0071142		3001.99	-0.00500327		3591.98	-0.01266463		4181.98	0.00721072
642.2	0.08774807		1232.19	-0.0049954		1822.2	0.00694161		2412.2	0.00641468		3002.19	-0.00584867		3592.18	-0.01231788		4182.18	0.00619244
642.4	0.08796139		1232.39	-0.00601927		1822.4	0.00656204		2412.4	0.0063406		3002.39	-0.00499888		3592.38	-0.01110977		4182.38	0.00542082
642.6	0.08824703		1232.59	-0.00676346		1822.6	0.0062489		2412.6	0.00606184		3002.59	-0.00478242		3592.58	-0.01004631		4182.58	0.00488759
642.8	0.08862557		1232.79	-0.00705826		1822.8	0.00485624		2412.8	0.00614601		3002.79	-0.00488241		3592.78	-0.00980694		4182.78	0.00387389
643	0.08885903		1232.99	-0.00752813		1823	0.00530454		2413	0.00586029		3002.99	-0.00486535		3592.98	-0.00895903		4182.98	0.00452444
643.2	0.08935263		1233.19	-0.00669156		1823.2	0.0044322		2413.2	0.00626643		3003.19	-0.00453999		3593.18	-0.00803012		4183.18	0.00515401
643.4	0.08917991		1233.39	-0.0063262		1823.4	0.00406716		2413.4	0.00655904		3003.39	-0.00505653		3593.38	-0.00753949		4183.38	0.00466622
643.6	0.08882662		1233.59	-0.0067168		1823.6	0.00433171		2413.6	0.0064525		3003.59	-0.00398421		3593.58	-0.00850502		4183.58	0.00476355
643.8	0.08849767		1233.79	-0.00751525		1823.8	0.00401815		2413.8	0.00580448		3003.79	-0.00394074		3593.78	-0.00916591		4183.78	0.00496688
644	0.08825195		1233.99	-0.00722957		1824	0.00324223		2414	0.00571412		3003.99	-0.00403394		3593.98	-0.0092363		4183.98	0.00548724
644.2	0.08759923		1234.19	-0.00637142		1824.2	0.0036756		2414.2	0.00484058		3004.19	-0.004543		3594.18	-0.00901083		4184.18	0.00666893
644.4	0.08717842		1234.39	-0.00647509		1824.4	0.00363989		2414.4	0.00517558		3004.39	-0.00414118		3594.38	-0.00945677		4184.38	0.00735169
644.6	0.08627738		1234.59	-0.00618467		1824.6	0.00369508		2414.6	0.00515187		3004.59	-0.00467192		3594.58	-0.00925245		4184.58	0.007457
644.8	0.08730147		1234.79	-0.00538985		1824.8	0.00331128		2414.8	0.00436354		3004.79	-0.00510188		3594.78	-0.00940292		4184.78	0.00809375
645	0.08751385		1234.99	-0.0056004		1825	0.00270724		2415	0.00501548		3004.99	-0.00585263		3594.98	-0.01064177		4184.98	0.00807269
645.2	0.08739406		1235.19	-0.00532418		1825.2	0.00367557		2415.2	0.00419226		3005.19	-0.00670945		3595.18	-0.01079194		4185.18	0.00797426
645.4	0.08745237		1235.39	-0.00523821		1825.4	0.00406392		2415.4	0.0043566		3005.39	-0.0074285		3595.38	-0.01182069		4185.38	0.00827724
645.6	0.08826007		1235.59	-0.00540879		1825.6	0.00424015		2415.6	0.00426735		3005.59	-0.00672603		3595.58	-0.01248563		4185.58	0.00812929
645.8	0.08878313		1235.79	-0.00509353		1825.8	0.00462202		2415.8	0.00444373		3005.79	-0.0068568		3595.78	-0.01323378		4185.78	0.007964
646	0.08866732		1235.99	-0.00483964		1826	0.00611678		2416	0.00406149		3005.99	-0.00648001		3595.98	-0.01358743		4185.98	0.00950913
646.2	0.08844744		1236.19	-0.00489394		1826.2	0.00702346		2416.2	0.00394749		3006.19	-0.00666879		3596.18	-0.01393533		4186.18	0.00920863
646.4	0.08871452		1236.39	-0.00537591		1826.4	0.00663853		2416.4	0.00448089		3006.39	-0.00623552		3596.38	-0.01363802		4186.38	0.00921036
646.6	0.08773283		1236.59	-0.00558978		1826.6	0.00698656		2416.6	0.00455856		3006.59	-0.00558823		3596.58	-0.01402543		4186.58	0.00937434
646.8	0.08780728		1236.79	-0.0049379		1826.8	0.00660606		2416.8	0.00616267		3006.79	-0.00550124		3596.78	-0.01346666		4186.78	0.00919858
647	0.08788735		1236.99	-0.004511		1827	0.00707196		2417	0.00681366		3006.99	-0.00542114		3596.98	-0.01282502		4186.98	0.01002815
647.2	0.08842899		1237.19	-0.00450989		1827.2	0.00694438		2417.2	0.00660975		3007.19	-0.00514513		3597.18	-0.01285009		4187.18	0.0095242
647.4	0.08806463		1237.39	-0.00429346		1827.4	0.00715439		2417.4	0.00645992		3007.39	-0.00514563		3597.38	-0.01227656		4187.38	0.00876975
647.6	0.08832811		1237.59	-0.0050629		1827.6	0.00818703		2417.6	0.00607911		3007.59	-0.00347753		3597.58	-0.01165799		4187.58	0.00805493
647.8	0.08863248		1237.79	-0.00533232		1827.8	0.00807753		2417.8	0.00606337		3007.79	-0.00348717		3597.78	-0.01112502		4187.78	0.00760021
648	0.0890716		1237.99	-0.0055469		1828	0.00787937		2418	0.00553684		3007.99	-0.00362761		3597.98	-0.01015494		4187.98	0.0070075
648.2	0.0888011		1238.19	-0.00608553		1828.2	0.00813347		2418.2	0.00523896		3008.19	-0.00378825		3598.18	-0.01002558		4188.18	0.00649478
648.4	0.0889505		1238.39	-0.00618639		1828.4	0.00724415		2418.4	0.00508197		3008.39	-0.00390741		3598.38	-0.00989118		4188.38	0.00605641
648.6	0.08922032		1238.59	-0.00550567		1828.6	0.00658468		2418.6	0.00500231		3008.59	-0.00465651		3598.58	-0.00902764		4188.58	0.00541708
648.8	0.08977338		1238.79	-0.00561043		1828.8	0.00593762		2418.8	0.00421517		3008.79	-0.00518712		3598.78	-0.0087048		4188.78	0.00542581
649	0.08941963		1238.99	-0.00557102		1829	0.00610945		2419	0.00366846		3008.99	-0.00590147		3598.98	-0.00896974		4188.98	0.00488691
649.2	0.09005079		1239.19	-0.00533799		1829.2	0.00642553		2419.2	0.00271046		3009.19	-0.00626117		3599.18	-0.00851818		4189.18	0.00454145
649.4	0.09020449		1239.39	-0.00473613		1829.4	0.00606258		2419.4	0.00206518		3009.39	-0.00665632		3599.38	-0.00857405		4189.38	0.00473374
649.6	0.09095664		1239.59	-0.00427091		1829.6	0.00588244		2419.6	0.00112624		3009.59	-0.00695968		3599.58	-0.00808316		4189.58	0.00482073
649.8	0.09079044		1239.79	-0.0037046		1829.8	0.00555783		2419.8	0.00060188		3009.79	-0.00753157		3599.78	-0.00842652		4189.78	0.00497739
