# Supplementary material for: Functional development of a V3/glycan-specific broadly neutralizing antibody isolated from a case of HIV superinfection
Source: eLife journal article supplement (doi:10.7554/elife.68110), 2021-07-15
Supplement: fig2-data2 [file E5.xls]

Vers 3.43 Data Simulation
Conc1	3.125E-08	3.125E-08	3.125E-08	3.125E-08	3.125E-08	3.125E-08
Start1	290	879.99	1470.01	2060	2650	3240
Stop1	649.8	1239.79	1829.81	2419.8	3009.8	3599.79
Time1	Data1	Sim1	Time2	Data2	Sim2	Time3	Data3	Sim3	Time4	Data4	Sim4	Time5	Data5	Sim5	Time6	Data6	Sim6
290	0.00240214		879.99	0.00039941		1470.01	-0.00519028		2060	0.00413675		2650	-0.00468384		3240	0.00250276
290.2	0.00296969		880.19	0.00014652		1470.21	-0.00502673		2060.2	0.00400161		2650.2	-0.00495793		3240.2	0.00345203
290.4	0.00327524		880.39	-0.00016281		1470.41	-0.00503408		2060.4	0.00402928		2650.4	-0.00490722		3240.4	0.00350785
290.6	0.0042612		880.59	-0.00018622		1470.61	-0.00439075		2060.6	0.00429958		2650.6	-0.00550271		3240.6	0.00376638
290.8	0.00483041		880.79	-0.00059327		1470.81	-0.00365244		2060.8	0.00511038		2650.8	-0.00596108		3240.8	0.00345026
291	0.00577529		880.99	-0.00073512		1471.01	-0.00309124		2061	0.00438348		2651	-0.0063675		3241	0.00359652
291.2	0.00662893		881.19	-0.00133706		1471.21	-0.00192205		2061.2	0.0049331		2651.2	-0.00577218		3241.2	0.00411826
291.4	0.00656116		881.39	-0.00169932		1471.41	-0.0013521		2061.4	0.00568921		2651.4	-0.00494279		3241.4	0.00444358
291.6	0.00740498		881.59	-0.00099172		1471.61	-0.0006501		2061.6	0.00582757		2651.6	-0.00498695		3241.6	0.00490469
291.8	0.00743138		881.79	-0.00114618		1471.81	-0.00060469		2061.8	0.00609048		2651.8	-0.00564769		3241.8	0.00508296
292	0.00800659		881.99	-0.00186327		1472.01	-0.00050044		2062	0.0061536		2652	-0.00610233		3242	0.00479136
292.2	0.00844324		882.19	-0.00236859		1472.21	-0.00060662		2062.2	0.00611217		2652.2	-0.00659549		3242.2	0.00432475
292.4	0.00846768		882.39	-0.00265167		1472.41	-0.00092777		2062.4	0.00604894		2652.4	-0.00739789		3242.4	0.00334805
292.6	0.00897298		882.59	-0.00345512		1472.61	-0.00175459		2062.6	0.00619381		2652.6	-0.00763483		3242.6	0.0042409
292.8	0.00977465		882.79	-0.00376211		1472.81	-0.00268837		2062.8	0.00600573		2652.8	-0.00783978		3242.8	0.00363406
293	0.01052706		882.99	-0.00383672		1473.01	-0.00340301		2063	0.00616534		2653	-0.00790866		3243	0.00418353
293.2	0.01013416		883.19	-0.00351353		1473.21	-0.00439179		2063.2	0.0065849		2653.2	-0.00877168		3243.2	0.00405558
293.4	0.01056144		883.39	-0.0026254		1473.41	-0.00559176		2063.4	0.00689589		2653.4	-0.00844866		3243.4	0.00501912
293.6	0.01047937		883.59	-0.00254534		1473.61	-0.00662053		2063.6	0.00734209		2653.6	-0.00826525		3243.6	0.00612585
293.8	0.01030237		883.79	-0.00232258		1473.81	-0.0071895		2063.8	0.00720546		2653.8	-0.00811952		3243.8	0.00667592
294	0.00994507		883.99	-0.00179795		1474.01	-0.00738038		2064	0.00715915		2654	-0.00837875		3244	0.00664216
294.2	0.01008793		884.19	-0.00169011		1474.21	-0.0075267		2064.2	0.0065101		2654.2	-0.00854737		3244.2	0.00670484
294.4	0.00979392		884.39	-0.00157446		1474.41	-0.00786583		2064.4	0.00607419		2654.4	-0.00815182		3244.4	0.00652439
294.6	0.00978513		884.59	-0.00085808		1474.61	-0.00729315		2064.6	0.0055354		2654.6	-0.0091055		3244.6	0.00644458
294.8	0.01036048		884.79	-0.00049128		1474.81	-0.00708829		2064.8	0.00521748		2654.8	-0.00893978		3244.8	0.00551405
295	0.01115144		884.99	-0.00023339		1475.01	-0.0071292		2065	0.00394848		2655	-0.00796363		3245	0.00526319
295.2	0.01150993		885.19	0.00020489		1475.21	-0.00702516		2065.2	0.0048896		2655.2	-0.00672423		3245.2	0.00557083
295.4	0.01129536		885.39	0.00062404		1475.41	-0.00682889		2065.4	0.00402101		2655.4	-0.00713091		3245.4	0.00486147
295.6	0.01206687		885.59	0.00183336		1475.61	-0.00733105		2065.6	0.00369798		2655.6	-0.00753584		3245.6	0.00485794
295.8	0.01215248		885.79	0.00145814		1475.81	-0.00733981		2065.8	0.00364509		2655.8	-0.00838768		3245.8	0.00456699
296	0.01235749		885.99	0.00216496		1476.01	-0.00676164		2066	0.0036849		2656	-0.00917153		3246	0.00423182
296.2	0.01276824		886.19	0.00240576		1476.21	-0.00631544		2066.2	0.00325418		2656.2	-0.00906457		3246.2	0.00363641
296.4	0.01247711		886.39	0.00262159		1476.41	-0.00514932		2066.4	0.00326508		2656.4	-0.00881105		3246.4	0.00352358
296.6	0.01225089		886.59	0.00179145		1476.61	-0.00558481		2066.6	0.00239017		2656.6	-0.00845298		3246.6	0.00425123
296.8	0.01221727		886.79	0.00248019		1476.81	-0.00492043		2066.8	0.00253396		2656.8	-0.00838767		3246.8	0.0044779
297	0.01223533		886.99	0.00214479		1477.01	-0.00487707		2067	0.00310258		2657	-0.00868517		3247	0.00493822
297.2	0.01200896		887.19	0.00164946		1477.21	-0.00507789		2067.2	0.00350487		2657.2	-0.00865329		3247.2	0.00477454
297.4	0.01190905		887.39	0.00123749		1477.41	-0.00391723		2067.4	0.00409231		2657.4	-0.00884354		3247.4	0.00568867
297.6	0.01187459		887.59	0.00141695		1477.61	-0.00337494		2067.6	0.0037964		2657.6	-0.00794553		3247.6	0.00466293
297.8	0.01175336		887.79	0.00121052		1477.81	-0.00252127		2067.8	0.00376642		2657.8	-0.00881215		3247.8	0.00418086
298	0.01198182		887.99	0.00154148		1478.01	-0.00231375		2068	0.00356197		2658	-0.0087381		3248	0.00392326
298.2	0.01214989		888.19	0.00137328		1478.21	-0.00214678		2068.2	0.00319623		2658.2	-0.00831116		3248.2	0.00304454
298.4	0.0119977		888.39	0.00105744		1478.41	-0.00205733		2068.4	0.00272766		2658.4	-0.00859135		3248.4	0.00281185
298.6	0.01276902		888.59	0.00148684		1478.61	-0.00222733		2068.6	0.00284076		2658.6	-0.00888537		3248.6	0.00188858
298.8	0.01330426		888.79	0.00088957		1478.81	-0.00288482		2068.8	0.00358737		2658.8	-0.00849375		3248.8	0.00105721
299	0.01320415		888.99	-0.000027		1479.01	-0.00366548		2069	0.00401427		2659	-0.00819662		3249	0.00116259
299.2	0.01263501		889.19	-0.00105247		1479.21	-0.00477672		2069.2	0.0039731		2659.2	-0.00833467		3249.2	0.00111705
299.4	0.01245298		889.39	-0.00135826		1479.41	-0.00475629		2069.4	0.00416086		2659.4	-0.0083916		3249.4	0.00057685
299.6	0.01304698		889.59	-0.00080257		1479.61	-0.00568578		2069.6	0.00590873		2659.6	-0.00840055		3249.6	0.00105531
299.8	0.01317675		889.79	-0.00072341		1479.81	-0.00536604		2069.8	0.00689399		2659.8	-0.00854304		3249.8	0.00102363
300	0.0124038		889.99	-0.00025645		1480.01	-0.00529499		2070	0.0071291		2660	-0.00841027		3250	0.00102789
300.2	0.01280759		890.19	-0.00056087		1480.21	-0.00554546		2070.2	0.0068449		2660.2	-0.00746583		3250.2	0.00094822
300.4	0.01217081		890.39	-0.00018238		1480.41	-0.005663		2070.4	0.00739085		2660.4	-0.00721253		3250.4	0.0018543
300.6	0.01218782		890.59	-0.00046083		1480.61	-0.00602909		2070.6	0.00697477		2660.6	-0.00677527		3250.6	0.00327665
300.8	0.01217682		890.79	-0.00059133		1480.81	-0.0057502		2070.8	0.00726782		2660.8	-0.00645051		3250.8	0.00368762
301	0.01239785		890.99	-0.00050521		1481.01	-0.00623623		2071	0.00732152		2661	-0.00611048		3251	0.00325774
301.2	0.01382365		891.19	-0.00071634		1481.21	-0.00629794		2071.2	0.00673073		2661.2	-0.00598055		3251.2	0.00285268
301.4	0.01370735		891.39	-0.00123597		1481.41	-0.00554351		2071.4	0.00556209		2661.4	-0.00559046		3251.4	0.00325867
301.6	0.0151905		891.59	-0.00054991		1481.61	-0.00616506		2071.6	0.00413356		2661.6	-0.00563342		3251.6	0.0033888
301.8	0.01565557		891.79	-0.00018479		1481.81	-0.00633934		2071.8	0.00425481		2661.8	-0.00606255		3251.8	0.00440868
302	0.01685564		891.99	0.00042801		1482.01	-0.00591732		2072	0.0035271		2662	-0.00598807		3252	0.00385516
302.2	0.01665556		892.19	0.00073425		1482.21	-0.00579778		2072.2	0.00328761		2662.2	-0.00564053		3252.2	0.00327771
302.4	0.01675988		892.39	0.00095322		1482.41	-0.00653861		2072.4	0.00297176		2662.4	-0.00603552		3252.4	0.00357526
302.6	0.01719515		892.59	0.00057961		1482.61	-0.0063461		2072.6	0.00377293		2662.6	-0.00606561		3252.6	0.00435921
302.8	0.01636703		892.79	-0.00014898		1482.81	-0.0058236		2072.8	0.00421143		2662.8	-0.00701532		3252.8	0.00444633
303	0.01638967		892.99	-0.00052801		1483.01	-0.00548594		2073	0.00458609		2663	-0.00731871		3253	0.00448578
303.2	0.0165769		893.19	-0.00156015		1483.21	-0.0056336		2073.2	0.00444162		2663.2	-0.00757205		3253.2	0.00405963
303.4	0.01718372		893.39	-0.00115393		1483.41	-0.004353		2073.4	0.00553886		2663.4	-0.0081614		3253.4	0.00360591
303.6	0.017651		893.59	-0.00104518		1483.61	-0.00388293		2073.6	0.00599646		2663.6	-0.00843874		3253.6	0.00398607
303.8	0.01698564		893.79	-0.00103012		1483.81	-0.00410166		2073.8	0.0055657		2663.8	-0.00769612		3253.8	0.00364308
304	0.01569221		893.99	-0.00158928		1484.01	-0.00419469		2074	0.00508273		2664	-0.00737432		3254	0.00324965
304.2	0.0151522		894.19	-0.00078396		1484.21	-0.00469206		2074.2	0.00530377		2664.2	-0.0073229		3254.2	0.00259884
304.4	0.01538333		894.39	-0.0014921		1484.41	-0.00481896		2074.4	0.00451657		2664.4	-0.00767253		3254.4	0.00283595
304.6	0.01581028		894.59	-0.00067886		1484.61	-0.00428486		2074.6	0.00391043		2664.6	-0.00758492		3254.6	0.00347802
304.8	0.01556341		894.79	-0.00067174		1484.81	-0.00411931		2074.8	0.00287154		2664.8	-0.00697136		3254.8	0.00293826
305	0.01573991		894.99	0.00025347		1485.01	-0.00427531		2075	0.00239356		2665	-0.00679269		3255	0.00323227
305.2	0.01696574		895.19	-0.00019235		1485.21	-0.00360189		2075.2	0.00187276		2665.2	-0.00655439		3255.2	0.00306177
305.4	0.01643169		895.39	-0.00050214		1485.41	-0.00300961		2075.4	0.00128869		2665.4	-0.00560462		3255.4	0.00393614
305.6	0.01782397		895.59	-0.00022439		1485.61	-0.00338301		2075.6	0.00132823		2665.6	-0.00633073		3255.6	0.0041659
305.8	0.01775698		895.79	0.00029127		1485.81	-0.00302396		2075.8	0.00160055		2665.8	-0.00503472		3255.8	0.00350282
306	0.01832954		895.99	0.00025512		1486.01	-0.00322717		2076	0.00173385		2666	-0.00466672		3256	0.00257363
306.2	0.01794694		896.19	0.00052953		1486.21	-0.00360297		2076.2	0.00258781		2666.2	-0.00468353		3256.2	0.00324111
306.4	0.01888341		896.39	0.00070776		1486.41	-0.00366453		2076.4	0.00317563		2666.4	-0.00547442		3256.4	0.00310282
306.6	0.01938584		896.59	0.00082363		1486.61	-0.00340429		2076.6	0.00424653		2666.6	-0.00566459		3256.6	0.00300861
306.8	0.01886752		896.79	0.00126165		1486.81	-0.00327753		2076.8	0.00455162		2666.8	-0.00653456		3256.8	0.00223169
307	0.01928122		896.99	0.00167287		1487.01	-0.00367945		2077	0.00506034		2667	-0.00629572		3257	0.00207749
307.2	0.02019715		897.19	0.00126898		1487.21	-0.00379514		2077.2	0.0049581		2667.2	-0.00648295		3257.2	0.00095199
307.4	0.02050368		897.39	0.00180213		1487.41	-0.00357887		2077.4	0.00537209		2667.4	-0.00678319		3257.4	0.00110984
307.6	0.02058432		897.59	0.00215518		1487.61	-0.00395428		2077.6	0.00555025		2667.6	-0.00630693		3257.6	0.00125065
307.8	0.02036184		897.79	0.00232903		1487.81	-0.00528348		2077.8	0.0055391		2667.8	-0.00698755		3257.8	0.00054854
308	0.01990082		897.99	0.00211556		1488.01	-0.00499869		2078	0.00567709		2668	-0.00719763		3258	0.00006156
308.2	0.01997393		898.19	0.00243916		1488.21	-0.00559064		2078.2	0.00512889		2668.2	-0.00728595		3258.2	-0.00046302
308.4	0.02059841		898.39	0.0024952		1488.41	-0.00577556		2078.4	0.00419941		2668.4	-0.00781934		3258.4	0.00026908
308.6	0.02039214		898.59	0.00333565		1488.61	-0.00570991		2078.6	0.0036355		2668.6	-0.00744086		3258.6	0.00034211
308.8	0.01963661		898.79	0.00321975		1488.81	-0.00620298		2078.8	0.00224535		2668.8	-0.0071146		3258.8	-0.00100999
309	0.01904845		898.99	0.0035583		1489.01	-0.00573466		2079	0.00263115		2669	-0.00704937		3259	-0.00178
309.2	0.01866951		899.19	0.00299249		1489.21	-0.00484293		2079.2	0.00287952		2669.2	-0.00670113		3259.2	-0.00299314
309.4	0.0185525		899.39	0.00257506		1489.41	-0.00470139		2079.4	0.00273189		2669.4	-0.0059326		3259.4	-0.00292888
309.6	0.01941819		899.59	0.0025086		1489.61	-0.00460035		2079.6	0.00180855		2669.6	-0.00627703		3259.6	-0.0026985
309.8	0.01990998		899.79	0.00287291		1489.81	-0.00524468		2079.8	0.00250751		2669.8	-0.00633103		3259.8	-0.00309118
310	0.02106111		899.99	0.00294611		1490.01	-0.0053512		2080	0.00262924		2670	-0.00724687		3260	-0.00250339
310.2	0.02231132		900.19	0.00370322		1490.21	-0.00510408		2080.2	0.00316317		2670.2	-0.00831589		3260.2	-0.00191765
310.4	0.02293752		900.39	0.00360689		1490.41	-0.00593926		2080.4	0.00348188		2670.4	-0.00842619		3260.4	-0.00238529
310.6	0.02259314		900.59	0.00347524		1490.61	-0.00580369		2080.6	0.00388361		2670.6	-0.00902543		3260.6	-0.00168557
310.8	0.0219824		900.79	0.00351542		1490.81	-0.00516513		2080.8	0.00425288		2670.8	-0.00922206		3260.8	-0.00044044
311	0.02289945		900.99	0.00279724		1491.01	-0.00449102		2081	0.0041997		2671	-0.00822795		3261	-0.00007512
311.2	0.02370383		901.19	0.00204238		1491.21	-0.00384505		2081.2	0.0041476		2671.2	-0.00789335		3261.2	0.00004294
311.4	0.02399742		901.39	0.00152876		1491.41	-0.00336317		2081.4	0.00559381		2671.4	-0.00790459		3261.4	0.00116049
311.6	0.02346034		901.59	0.00096504		1491.61	-0.00330483		2081.6	0.00604941		2671.6	-0.00761689		3261.6	0.0013862
311.8	0.02320389		901.79	0.00089723		1491.81	-0.00374637		2081.8	0.00584069		2671.8	-0.0075369		3261.8	0.00238317
312	0.02272492		901.99	0.000412		1492.01	-0.00355995		2082	0.00525298		2672	-0.00638728		3262	0.00292947
312.2	0.02232793		902.19	0.00021147		1492.21	-0.00463835		2082.2	0.00519183		2672.2	-0.00599925		3262.2	0.00259208
312.4	0.02249063		902.39	0.00069069		1492.41	-0.00506297		2082.4	0.00486141		2672.4	-0.00602213		3262.4	0.00235917
312.6	0.02238096		902.59	-0.00006483		1492.61	-0.00548403		2082.6	0.00424302		2672.6	-0.00541936		3262.6	0.00166738
312.8	0.02200943		902.79	0.00009384		1492.81	-0.00626654		2082.8	0.00379229		2672.8	-0.00550073		3262.8	0.0003663
313	0.02218685		902.99	-0.00013823		1493.01	-0.00673431		2083	0.00400748		2673	-0.00515213		3263	0.00045953
313.2	0.0213872		903.19	0.00006632		1493.21	-0.00716606		2083.2	0.0038762		2673.2	-0.0048886		3263.2	0.00060235
313.4	0.02180201		903.39	-0.00017669		1493.41	-0.00791923		2083.4	0.00383101		2673.4	-0.00473623		3263.4	0.00093442
313.6	0.02253966		903.59	0.00029287		1493.61	-0.00829926		2083.6	0.00342611		2673.6	-0.00565838		3263.6	0.00086192
313.8	0.02348268		903.79	-0.00018942		1493.81	-0.00915586		2083.8	0.00405549		2673.8	-0.00680552		3263.8	0.00002496
314	0.0244058		903.99	-0.0004012		1494.01	-0.0084707		2084	0.00329901		2674	-0.00800648		3264	0.00007786
314.2	0.02441209		904.19	-0.00029529		1494.21	-0.00837941		2084.2	0.00423156		2674.2	-0.00805112		3264.2	-0.0000565
314.4	0.02352045		904.39	-0.00067701		1494.41	-0.00851395		2084.4	0.00428478		2674.4	-0.00857368		3264.4	-0.00001119
314.6	0.02279574		904.59	-0.00114875		1494.61	-0.00770447		2084.6	0.00447328		2674.6	-0.00888622		3264.6	0.00082373
314.8	0.02313153		904.79	-0.00182004		1494.81	-0.00787997		2084.8	0.00451391		2674.8	-0.00805974		3264.8	0.00122463
315	0.02361182		904.99	-0.00199107		1495.01	-0.00700436		2085	0.0046374		2675	-0.00716129		3265	0.00097724
315.2	0.0237389		905.19	-0.00200433		1495.21	-0.00676178		2085.2	0.00531438		2675.2	-0.00705109		3265.2	0.00133326
315.4	0.02366033		905.39	-0.00242075		1495.41	-0.00617627		2085.4	0.0072082		2675.4	-0.00759519		3265.4	0.00147127
315.6	0.02290722		905.59	-0.0019734		1495.61	-0.00581653		2085.6	0.00708707		2675.6	-0.00718199		3265.6	0.00139193
315.8	0.02277702		905.79	-0.0014264		1495.81	-0.00565285		2085.8	0.00703093		2675.8	-0.00702663		3265.8	0.00206974
316	0.02280524		905.99	-0.00105432		1496.01	-0.00497574		2086	0.00684713		2676	-0.0074045		3266	0.00207646
316.2	0.02336069		906.19	-0.00102533		1496.21	-0.00533483		2086.2	0.00743901		2676.2	-0.00684197		3266.2	0.00135876
316.4	0.02403204		906.39	-0.00103879		1496.41	-0.00527022		2086.4	0.00669599		2676.4	-0.00554806		3266.4	0.00187679
316.6	0.02495705		906.59	-0.00097817		1496.61	-0.00506801		2086.6	0.0067837		2676.6	-0.00471437		3266.6	0.0024499
316.8	0.02473776		906.79	-0.00065318		1496.81	-0.00571898		2086.8	0.00670558		2676.8	-0.00460679		3266.8	0.00191557
317	0.02454266		906.99	-0.0000345		1497.01	-0.00604909		2087	0.00694966		2677	-0.00459928		3267	0.00264318
317.2	0.02464314		907.19	0.00050032		1497.21	-0.0049999		2087.2	0.00723322		2677.2	-0.00452058		3267.2	0.00339516
317.4	0.02489761		907.39	0.00069998		1497.41	-0.00447916		2087.4	0.00736039		2677.4	-0.00517965		3267.4	0.00284966
317.6	0.02516498		907.59	0.00164901		1497.61	-0.00435881		2087.6	0.00674894		2677.6	-0.00566834		3267.6	0.00307124
317.8	0.02475637		907.79	0.00130583		1497.81	-0.00437198		2087.8	0.00637984		2677.8	-0.00621208		3267.8	0.00275393
318	0.025071		907.99	0.00132417		1498.01	-0.00429378		2088	0.00644121		2678	-0.00668358		3268	0.00255304
318.2	0.0241867		908.19	0.0012791		1498.21	-0.00476024		2088.2	0.0063825		2678.2	-0.00671609		3268.2	0.00231903
318.4	0.02440023		908.39	0.00129207		1498.41	-0.00545598		2088.4	0.00549149		2678.4	-0.00700369		3268.4	0.00231513
318.6	0.02468915		908.59	0.00113983		1498.61	-0.00555838		2088.6	0.00534829		2678.6	-0.00687376		3268.6	0.00282201
318.8	0.0249458		908.79	0.00183474		1498.81	-0.00511188		2088.8	0.00522945		2678.8	-0.00659503		3268.8	0.0031637
319	0.02459658		908.99	0.00209867		1499.01	-0.00498797		2089	0.00552757		2679	-0.00734696		3269	0.00308963
319.2	0.0246731		909.19	0.00194839		1499.21	-0.00527773		2089.2	0.00513052		2679.2	-0.0077148		3269.2	0.00311348
319.4	0.02568147		909.39	0.00196086		1499.41	-0.00612822		2089.4	0.00563854		2679.4	-0.00781148		3269.4	0.00291269
319.6	0.02518145		909.59	0.0024765		1499.61	-0.00621841		2089.6	0.00441784		2679.6	-0.00795128		3269.6	0.00239112
319.8	0.02504761		909.79	0.00264915		1499.81	-0.00621614		2089.8	0.00437992		2679.8	-0.00809331		3269.8	0.00317574
320	0.02604464		909.99	0.00278903		1500.01	-0.00620762		2090	0.00349948		2680	-0.00762276		3270	0.00238924
320.2	0.02708965		910.19	0.00244712		1500.21	-0.00745122		2090.2	0.00343115		2680.2	-0.00641327		3270.2	0.00198124
320.4	0.02772841		910.39	0.00287891		1500.41	-0.00757121		2090.4	0.00268831		2680.4	-0.00608768		3270.4	0.00221816
320.6	0.02812342		910.59	0.00322159		1500.61	-0.00742853		2090.6	0.00322681		2680.6	-0.00578369		3270.6	0.00083666
320.8	0.02737652		910.79	0.00370624		1500.81	-0.00753427		2090.8	0.00429813		2680.8	-0.00607918		3270.8	-0.00013354
321	0.02716999		910.99	0.00347479		1501.01	-0.00704611		2091	0.00455093		2681	-0.00667643		3271	-0.00005089
321.2	0.02759236		911.19	0.00365601		1501.21	-0.00699743		2091.2	0.00520807		2681.2	-0.00611838		3271.2	0.00030499
321.4	0.02720929		911.39	0.00397956		1501.41	-0.00709769		2091.4	0.00548413		2681.4	-0.0061153		3271.4	-0.00113761
321.6	0.02794184		911.59	0.00436645		1501.61	-0.00777288		2091.6	0.00528616		2681.6	-0.00536556		3271.6	-0.00195169
321.8	0.0276631		911.79	0.00354427		1501.81	-0.00719299		2091.8	0.0057735		2681.8	-0.00507839		3271.8	-0.00276417
322	0.02788519		911.99	0.00375012		1502.01	-0.00765778		2092	0.00645474		2682	-0.00515188		3272	-0.00321311
322.2	0.02785928		912.19	0.00305876		1502.21	-0.00742677		2092.2	0.00608324		2682.2	-0.00524189		3272.2	-0.00262563
322.4	0.02901737		912.39	0.0023362		1502.41	-0.00736745		2092.4	0.00608256		2682.4	-0.00552331		3272.4	-0.00286472
322.6	0.02951426		912.59	0.00221389		1502.61	-0.00635834		2092.6	0.00591377		2682.6	-0.00507143		3272.6	-0.00268958
322.8	0.03034913		912.79	0.00230936		1502.81	-0.00550129		2092.8	0.00581179		2682.8	-0.00491564		3272.8	-0.0019566
323	0.03112729		912.99	0.00138466		1503.01	-0.00593472		2093	0.00549523		2683	-0.00576495		3273	-0.00170276
323.2	0.03180612		913.19	0.00140897		1503.21	-0.006426		2093.2	0.00512686		2683.2	-0.00509869		3273.2	-0.0016321
323.4	0.03259266		913.39	0.00171693		1503.41	-0.00671764		2093.4	0.00511051		2683.4	-0.00538785		3273.4	-0.00087556
323.6	0.03273505		913.59	0.00170724		1503.61	-0.00609987		2093.6	0.00416962		2683.6	-0.00599244		3273.6	-0.00067168
323.8	0.03385452		913.79	0.00135212		1503.81	-0.00540711		2093.8	0.00419204		2683.8	-0.00584066		3273.8	0.00006733
324	0.03443038		913.99	0.00105578		1504.01	-0.00566018		2094	0.00324231		2684	-0.0057907		3274	-0.0004745
324.2	0.03452025		914.19	0.00119573		1504.21	-0.00564834		2094.2	0.00345149		2684.2	-0.00630565		3274.2	0.00026802
324.4	0.03419008		914.39	0.00165236		1504.41	-0.00529513		2094.4	0.00354302		2684.4	-0.00699532		3274.4	-0.00002859
324.6	0.03394132		914.59	0.00182465		1504.61	-0.00567807		2094.6	0.00420882		2684.6	-0.0070409		3274.6	0.00024059
324.8	0.03332335		914.79	0.00157493		1504.81	-0.00606585		2094.8	0.00493221		2684.8	-0.00739489		3274.8	0.00190214
325	0.03191652		914.99	0.00157555		1505.01	-0.0071352		2095	0.00553793		2685	-0.00754662		3275	0.00261412
325.2	0.03113111		915.19	0.00273241		1505.21	-0.00832374		2095.2	0.00622241		2685.2	-0.00687767		3275.2	0.00319043
325.4	0.03092976		915.39	0.00308289		1505.41	-0.0082892		2095.4	0.0062079		2685.4	-0.0066165		3275.4	0.00269313
325.6	0.03080162		915.59	0.00362743		1505.61	-0.00861319		2095.6	0.00633643		2685.6	-0.00595138		3275.6	0.0027807
325.8	0.03015657		915.79	0.00383006		1505.81	-0.00772889		2095.8	0.00692858		2685.8	-0.00626399		3275.8	0.00293867
326	0.02946757		915.99	0.00461224		1506.01	-0.00848173		2096	0.00693472		2686	-0.00707581		3276	0.00370828
326.2	0.02947801		916.19	0.00375147		1506.21	-0.00830105		2096.2	0.00662238		2686.2	-0.00842331		3276.2	0.0041417
326.4	0.029935		916.39	0.00346136		1506.41	-0.00839703		2096.4	0.0066855		2686.4	-0.00842585		3276.4	0.00243556
326.6	0.03069115		916.59	0.00319404		1506.61	-0.00798125		2096.6	0.00708965		2686.6	-0.00761046		3276.6	0.00218952
326.8	0.03005456		916.79	0.00364558		1506.81	-0.00784698		2096.8	0.007196		2686.8	-0.00790222		3276.8	0.00139986
327	0.02991469		916.99	0.00328379		1507.01	-0.0075592		2097	0.00740698		2687	-0.00789311		3277	0.00067671
327.2	0.02973051		917.19	0.00355611		1507.21	-0.00772561		2097.2	0.00671058		2687.2	-0.0073966		3277.2	0.00016557
327.4	0.03055718		917.39	0.00348039		1507.41	-0.00736116		2097.4	0.00525784		2687.4	-0.00721683		3277.4	-0.00043385
327.6	0.03148788		917.59	0.0021257		1507.61	-0.00705829		2097.6	0.00502412		2687.6	-0.00681093		3277.6	-0.00180216
327.8	0.03136454		917.79	0.00136525		1507.81	-0.00598171		2097.8	0.00427383		2687.8	-0.00598236		3277.8	-0.00233136
328	0.03152688		917.99	0.00126178		1508.01	-0.00656978		2098	0.0044477		2688	-0.00582054		3278	-0.00313528
328.2	0.03191393		918.19	0.00146042		1508.21	-0.00641802		2098.2	0.00430473		2688.2	-0.00589672		3278.2	-0.00367989
328.4	0.03209617		918.39	0.00149895		1508.41	-0.00712182		2098.4	0.00461297		2688.4	-0.00603657		3278.4	-0.00423861
328.6	0.03230573		918.59	0.00137862		1508.61	-0.00753928		2098.6	0.00396446		2688.6	-0.00610799		3278.6	-0.003229
328.8	0.03240418		918.79	0.00135913		1508.81	-0.00790154		2098.8	0.00370558		2688.8	-0.00621507		3278.8	-0.00302215
329	0.03186812		918.99	0.00202112		1509.01	-0.00883538		2099	0.0041939		2689	-0.00615942		3279	-0.00361272
329.2	0.03258688		919.19	0.00219246		1509.21	-0.0084395		2099.2	0.00258957		2689.2	-0.0068241		3279.2	-0.00316833
329.4	0.03348168		919.39	0.00274244		1509.41	-0.00757012		2099.4	0.0027639		2689.4	-0.00704183		3279.4	-0.00276578
329.6	0.03435578		919.59	0.00386702		1509.61	-0.00739073		2099.6	0.00253704		2689.6	-0.00756444		3279.6	-0.00288381
329.8	0.03451958		919.79	0.00424612		1509.81	-0.00757178		2099.8	0.0026122		2689.8	-0.00872685		3279.8	-0.00358988
330	0.03394264		919.99	0.00389761		1510.01	-0.0083137		2100	0.00247902		2690	-0.00959678		3280	-0.00284992
330.2	0.03394187		920.19	0.00348421		1510.21	-0.00871247		2100.2	0.00297985		2690.2	-0.01034147		3280.2	-0.00236698
330.4	0.03432592		920.39	0.00321198		1510.41	-0.00872529		2100.4	0.00377308		2690.4	-0.01019638		3280.4	-0.00232028
330.6	0.03454345		920.59	0.00261075		1510.61	-0.00891556		2100.6	0.00404414		2690.6	-0.01084706		3280.6	-0.00146816
330.8	0.03432114		920.79	0.00312436		1510.81	-0.00897465		2100.8	0.004251		2690.8	-0.01065826		3280.8	-0.00124083
331	0.03517154		920.99	0.00294696		1511.01	-0.00917424		2101	0.00477646		2691	-0.01072475		3281	0.00007106
331.2	0.03527707		921.19	0.00265189		1511.21	-0.00917384		2101.2	0.00499179		2691.2	-0.0105632		3281.2	0.0004961
331.4	0.03514553		921.39	0.00273184		1511.41	-0.00890048		2101.4	0.00501392		2691.4	-0.00978638		3281.4	0.00000304
331.6	0.03565389		921.59	0.00198287		1511.61	-0.00825968		2101.6	0.00575365		2691.6	-0.00918014		3281.6	0.00070731
331.8	0.03555861		921.79	0.00234004		1511.81	-0.00800569		2101.8	0.00582821		2691.8	-0.00797814		3281.8	0.00118102
332	0.03535952		921.99	0.00171103		1512.01	-0.00887301		2102	0.00630802		2692	-0.00787434		3282	0.00040764
332.2	0.03556082		922.19	0.00212136		1512.21	-0.00730357		2102.2	0.00605131		2692.2	-0.00795251		3282.2	0.00024739
332.4	0.03577311		922.39	0.00192203		1512.41	-0.00693383		2102.4	0.00696081		2692.4	-0.00860578		3282.4	0.00071352
332.6	0.03508891		922.59	0.00154407		1512.61	-0.00589536		2102.6	0.00613965		2692.6	-0.0084753		3282.6	0.00144122
332.8	0.0349671		922.79	0.00191403		1512.81	-0.00593576		2102.8	0.0062918		2692.8	-0.00790796		3282.8	0.00133406
333	0.03460266		922.99	0.00205292		1513.01	-0.00519243		2103	0.00646325		2693	-0.0077728		3283	0.00089388
333.2	0.03521493		923.19	0.00244431		1513.21	-0.00388102		2103.2	0.00619951		2693.2	-0.00840264		3283.2	0.00139916
333.4	0.03521504		923.39	0.00321044		1513.41	-0.00384307		2103.4	0.00687833		2693.4	-0.0082099		3283.4	0.00068239
333.6	0.03535541		923.59	0.00307857		1513.61	-0.00368077		2103.6	0.00652443		2693.6	-0.00779385		3283.6	-0.00028827
333.8	0.03452399		923.79	0.00277383		1513.81	-0.00323732		2103.8	0.0062084		2693.8	-0.00757602		3283.8	-0.00086627
334	0.03461907		923.99	0.0024793		1514.01	-0.00342356		2104	0.00554561		2694	-0.00726715		3284	-0.00051159
334.2	0.03535901		924.19	0.00203146		1514.21	-0.00344077		2104.2	0.00558662		2694.2	-0.00777833		3284.2	-0.00073544
334.4	0.03592627		924.39	0.0014782		1514.41	-0.00233814		2104.4	0.00550382		2694.4	-0.00860361		3284.4	-0.00078866
334.6	0.03721738		924.59	0.00108236		1514.61	-0.0027195		2104.6	0.00507866		2694.6	-0.00893673		3284.6	-0.00105525
334.8	0.03753211		924.79	0.00111496		1514.81	-0.0031742		2104.8	0.00534751		2694.8	-0.00872311		3284.8	-0.00093679
335	0.03763144		924.99	0.00054698		1515.01	-0.00318335		2105	0.0050873		2695	-0.00903462		3285	-0.00106714
335.2	0.03736529		925.19	0.00050647		1515.21	-0.00310427		2105.2	0.00477999		2695.2	-0.00798737		3285.2	-0.00140338
335.4	0.03699223		925.39	0.00121517		1515.41	-0.00291098		2105.4	0.00383514		2695.4	-0.00733079		3285.4	-0.0027582
335.6	0.03817811		925.59	0.00039209		1515.61	-0.00350155		2105.6	0.00351402		2695.6	-0.00646329		3285.6	-0.00218729
335.8	0.03768358		925.79	0.0003984		1515.81	-0.00416882		2105.8	0.00339427		2695.8	-0.00618502		3285.8	-0.00301635
336	0.0379267		925.99	0.00015748		1516.01	-0.00404055		2106	0.00311147		2696	-0.0066869		3286	-0.0037271
336.2	0.03874817		926.19	0.00057646		1516.21	-0.00358443		2106.2	0.00405146		2696.2	-0.00675176		3286.2	-0.00239717
336.4	0.03797289		926.39	0.00093603		1516.41	-0.00415209		2106.4	0.0053149		2696.4	-0.00653069		3286.4	-0.00186405
336.6	0.03755596		926.59	0.0019128		1516.61	-0.00364771		2106.6	0.00521971		2696.6	-0.00555106		3286.6	-0.00071831
336.8	0.03764664		926.79	0.00283735		1516.81	-0.00394311		2106.8	0.00621032		2696.8	-0.00506101		3286.8	-0.00102079
337	0.03733233		926.99	0.00349435		1517.01	-0.00456114		2107	0.00657411		2697	-0.00540125		3287	-0.00071629
337.2	0.03721338		927.19	0.00285816		1517.21	-0.00556432		2107.2	0.00657604		2697.2	-0.00569331		3287.2	0.00009409
337.4	0.03667639		927.39	0.00271804		1517.41	-0.00604356		2107.4	0.00704254		2697.4	-0.00512759		3287.4	-0.00027414
337.6	0.03714949		927.59	0.00278249		1517.61	-0.00568827		2107.6	0.0073086		2697.6	-0.00566495		3287.6	-0.0004674
337.8	0.03743266		927.79	0.00312557		1517.81	-0.00626664		2107.8	0.00692161		2697.8	-0.00630455		3287.8	-0.00044246
338	0.03898448		927.99	0.00309631		1518.01	-0.00759633		2108	0.00698217		2698	-0.00659655		3288	-0.00112032
338.2	0.03966524		928.19	0.00249534		1518.21	-0.00754823		2108.2	0.00708444		2698.2	-0.0068478		3288.2	-0.0017786
338.4	0.03958568		928.39	0.00223845		1518.41	-0.00784622		2108.4	0.0069201		2698.4	-0.00736634		3288.4	-0.00138544
338.6	0.04022871		928.59	0.00179342		1518.61	-0.00991227		2108.6	0.00600746		2698.6	-0.00787344		3288.6	-0.00095065
338.8	0.04019591		928.79	0.00146332		1518.81	-0.00946933		2108.8	0.00530503		2698.8	-0.00773723		3288.8	-0.00059015
339	0.03998706		928.99	0.00031576		1519.01	-0.00961987		2109	0.00430688		2699	-0.00781376		3289	-0.00082987
339.2	0.04015727		929.19	-0.0000271		1519.21	-0.00982701		2109.2	0.00476903		2699.2	-0.00655197		3289.2	-0.00139741
339.4	0.03998269		929.39	0.00046304		1519.41	-0.009314		2109.4	0.00501744		2699.4	-0.00705179		3289.4	-0.00213587
339.6	0.0414911		929.59	-0.0005398		1519.61	-0.01014366		2109.6	0.00531761		2699.6	-0.00741237		3289.6	-0.00131243
339.8	0.04275518		929.79	-0.00026601		1519.81	-0.00946808		2109.8	0.00520248		2699.8	-0.00800967		3289.8	-0.00178314
340	0.04348295		929.99	0.00091727		1520.01	-0.0096905		2110	0.00553963		2700	-0.0081016		3290	-0.00182602
340.2	0.04386939		930.19	0.00148554		1520.21	-0.00967973		2110.2	0.00606608		2700.2	-0.00774206		3290.2	-0.00158214
340.4	0.04349474		930.39	0.00203077		1520.41	-0.00875077		2110.4	0.0061455		2700.4	-0.00833632		3290.4	-0.00180269
340.6	0.04291314		930.59	0.00214964		1520.61	-0.00860219		2110.6	0.00629825		2700.6	-0.00842081		3290.6	-0.00106261
340.8	0.04189773		930.79	0.00228647		1520.81	-0.00869007		2110.8	0.00677119		2700.8	-0.00833957		3290.8	-0.00167636
341	0.04066745		930.99	0.00197447		1521.01	-0.00978644		2111	0.00625499		2701	-0.00837267		3291	-0.00036789
341.2	0.04045586		931.19	0.00141536		1521.21	-0.00984582		2111.2	0.00629813		2701.2	-0.00797363		3291.2	-0.00055507
341.4	0.04074745		931.39	0.00175932		1521.41	-0.00891541		2111.4	0.00630636		2701.4	-0.00725506		3291.4	-0.00070491
341.6	0.04081233		931.59	0.00217033		1521.61	-0.00867291		2111.6	0.0060732		2701.6	-0.00754986		3291.6	-0.00055849
341.8	0.04128215		931.79	0.00225727		1521.81	-0.00861866		2111.8	0.00625477		2701.8	-0.00705852		3291.8	-0.00075554
342	0.04082887		931.99	0.00280572		1522.01	-0.00897731		2112	0.00684862		2702	-0.00703384		3292	-0.00170093
342.2	0.04095354		932.19	0.00279108		1522.21	-0.00897963		2112.2	0.0067655		2702.2	-0.00659058		3292.2	-0.00218995
342.4	0.039633		932.39	0.00308913		1522.41	-0.00877429		2112.4	0.0067521		2702.4	-0.00732881		3292.4	-0.00109944
342.6	0.03890074		932.59	0.00266458		1522.61	-0.00886323		2112.6	0.00634737		2702.6	-0.00720765		3292.6	-0.00032992
342.8	0.03922823		932.79	0.0032839		1522.81	-0.00746354		2112.8	0.00599489		2702.8	-0.00656223		3292.8	0.00033438
343	0.03912714		932.99	0.00279479		1523.01	-0.00757972		2113	0.00572378		2703	-0.00604808		3293	0.00070994
343.2	0.03930598		933.19	0.00324885		1523.21	-0.00681993		2113.2	0.00680974		2703.2	-0.00519417		3293.2	0.00081361
343.4	0.03960629		933.39	0.0041648		1523.41	-0.00620484		2113.4	0.00676553		2703.4	-0.00577371		3293.4	0.00114616
343.6	0.04102664		933.59	0.00385323		1523.61	-0.00652876		2113.6	0.00663878		2703.6	-0.00572884		3293.6	0.00196625
343.8	0.04192124		933.79	0.00416674		1523.81	-0.00564466		2113.8	0.00666909		2703.8	-0.00552416		3293.8	0.0020554
344	0.04146552		933.99	0.00371366		1524.01	-0.0067609		2114	0.00633318		2704	-0.00649536		3294	0.00227431
344.2	0.04165184		934.19	0.00299204		1524.21	-0.00667619		2114.2	0.00590912		2704.2	-0.00667876		3294.2	0.00246571
344.4	0.04093897		934.39	0.00279943		1524.41	-0.0071303		2114.4	0.00542836		2704.4	-0.00717292		3294.4	0.00290026
344.6	0.04131207		934.59	0.00274708		1524.61	-0.0075307		2114.6	0.00562278		2704.6	-0.0066654		3294.6	0.00351411
344.8	0.0423753		934.79	0.00229591		1524.81	-0.00754178		2114.8	0.00519695		2704.8	-0.00638156		3294.8	0.00355907
345	0.04300717		934.99	0.00190502		1525.01	-0.00804179		2115	0.00454485		2705	-0.00623783		3295	0.00360367
345.2	0.04437129		935.19	0.00168998		1525.21	-0.00796341		2115.2	0.00389669		2705.2	-0.00594275		3295.2	0.00302058
345.4	0.04472199		935.39	0.00057515		1525.41	-0.00688445		2115.4	0.00354956		2705.4	-0.00591961		3295.4	0.00296237
345.6	0.04438173		935.59	-0.00011633		1525.61	-0.00708079		2115.6	0.0035364		2705.6	-0.00644366		3295.6	0.00227045
345.8	0.04459135		935.79	0.00022567		1525.81	-0.00692035		2115.8	0.00357067		2705.8	-0.0074637		3295.8	0.00097486
346	0.04430936		935.99	0.00054072		1526.01	-0.00772208		2116	0.00367029		2706	-0.00796382		3296	0.00036446
346.2	0.04460692		936.19	0.00047886		1526.21	-0.0076529		2116.2	0.00320026		2706.2	-0.00731452		3296.2	-0.00017451
346.4	0.04329205		936.39	0.00078419		1526.41	-0.0075575		2116.4	0.00286185		2706.4	-0.00809939		3296.4	-0.00011004
346.6	0.04267923		936.59	0.00127654		1526.61	-0.00836446		2116.6	0.00223391		2706.6	-0.00765562		3296.6	-0.00050595
346.8	0.04290952		936.79	0.00204435		1526.81	-0.00796979		2116.8	0.00198621		2706.8	-0.00730608		3296.8	-0.00052607
347	0.0423576		936.99	0.00288568		1527.01	-0.00765497		2117	0.00177923		2707	-0.00709661		3297	-0.00120412
347.2	0.04204705		937.19	0.00336649		1527.21	-0.00707353		2117.2	0.00271932		2707.2	-0.00778024		3297.2	-0.0019716
347.4	0.04212392		937.39	0.00361514		1527.41	-0.00755056		2117.4	0.00290976		2707.4	-0.0078718		3297.4	-0.0021908
347.6	0.04203495		937.59	0.00335243		1527.61	-0.00810443		2117.6	0.00379506		2707.6	-0.00776415		3297.6	-0.00190781
347.8	0.041475		937.79	0.0027515		1527.81	-0.00844976		2117.8	0.00371579		2707.8	-0.00782636		3297.8	-0.00307236
348	0.04100023		937.99	0.00210491		1528.01	-0.0095691		2118	0.00413198		2708	-0.00867875		3298	-0.0035802
348.2	0.04152642		938.19	0.00299059		1528.21	-0.00959009		2118.2	0.00389485		2708.2	-0.00804167		3298.2	-0.00372562
348.4	0.04170144		938.39	0.00354143		1528.41	-0.00965736		2118.4	0.00392174		2708.4	-0.0081456		3298.4	-0.00388576
348.6	0.04259943		938.59	0.00329058		1528.61	-0.00930652		2118.6	0.00477742		2708.6	-0.00865636		3298.6	-0.0044121
348.8	0.04324393		938.79	0.00296064		1528.81	-0.01020168		2118.8	0.00431587		2708.8	-0.0087999		3298.8	-0.00481365
349	0.04308151		938.99	0.00314933		1529.01	-0.01026986		2119	0.00460303		2709	-0.0083666		3299	-0.00562373
349.2	0.04377474		939.19	0.00271246		1529.21	-0.01019689		2119.2	0.00490602		2709.2	-0.00784994		3299.2	-0.00541867
349.4	0.04365762		939.39	0.00180184		1529.41	-0.00932607		2119.4	0.00490803		2709.4	-0.00764486		3299.4	-0.00524533
349.6	0.04380227		939.59	0.00305354		1529.61	-0.01041412		2119.6	0.00444801		2709.6	-0.00743366		3299.6	-0.0047516
349.8	0.04385173		939.79	0.00295247		1529.81	-0.01006631		2119.8	0.00475618		2709.8	-0.0076968		3299.8	-0.0049599
350	0.04455471		939.99	0.00190257		1530.01	-0.01070438		2120	0.00391383		2710	-0.00627283		3300	-0.00443459
350.2	0.04464948		940.19	0.0016786		1530.21	-0.01049481		2120.2	0.0027897		2710.2	-0.005748		3300.2	-0.00430963
350.4	0.04430985		940.39	0.0023319		1530.41	-0.01046317		2120.4	0.00243472		2710.4	-0.00647249		3300.4	-0.00400189
350.6	0.04441864		940.59	0.00269224		1530.61	-0.01041002		2120.6	0.00230482		2710.6	-0.00560368		3300.6	-0.00343427
350.8	0.04495108		940.79	0.00297612		1530.81	-0.00891303		2120.8	0.00314683		2710.8	-0.00566199		3300.8	-0.00314275
351	0.04491662		940.99	0.00319064		1531.01	-0.00888357		2121	0.00347428		2711	-0.00534188		3301	-0.0040794
351.2	0.04461659		941.19	0.00272323		1531.21	-0.00827825		2121.2	0.00365062		2711.2	-0.00589078		3301.2	-0.00362184
351.4	0.04412983		941.39	0.0027746		1531.41	-0.00817829		2121.4	0.0036278		2711.4	-0.00527671		3301.4	-0.00282759
351.6	0.04425408		941.59	0.00247024		1531.61	-0.00718879		2121.6	0.00403887		2711.6	-0.00445309		3301.6	-0.00196253
351.8	0.04396325		941.79	0.00233669		1531.81	-0.0069788		2121.8	0.00300038		2711.8	-0.0051889		3301.8	-0.00144654
352	0.04453646		941.99	0.00261002		1532.01	-0.00631677		2122	0.00268304		2712	-0.00625889		3302	-0.00034847
352.2	0.04483197		942.19	0.00330781		1532.21	-0.00569642		2122.2	0.00250791		2712.2	-0.00685671		3302.2	0.00023506
352.4	0.04464016		942.39	0.0036088		1532.41	-0.0058366		2122.4	0.00240092		2712.4	-0.00742697		3302.4	0.00055194
352.6	0.04500329		942.59	0.00365631		1532.61	-0.00614934		2122.6	0.00325403		2712.6	-0.00769822		3302.6	-0.00004043
352.8	0.04543659		942.79	0.0033965		1532.81	-0.00745068		2122.8	0.003245		2712.8	-0.00725423		3302.8	0.0001527
353	0.04564654		942.99	0.00356398		1533.01	-0.00716452		2123	0.00424663		2713	-0.0074092		3303	0.00021338
353.2	0.04660085		943.19	0.00336303		1533.21	-0.00759146		2123.2	0.0043748		2713.2	-0.00716769		3303.2	0.00022413
353.4	0.04654751		943.39	0.00387551		1533.41	-0.00798297		2123.4	0.00420239		2713.4	-0.00671262		3303.4	0.00038048
353.6	0.04755373		943.59	0.00448024		1533.61	-0.00848975		2123.6	0.0050506		2713.6	-0.00677414		3303.6	-0.00000763
353.8	0.04722475		943.79	0.00299102		1533.81	-0.00835147		2123.8	0.00498852		2713.8	-0.00664239		3303.8	-0.0010923
354	0.04799197		943.99	0.00217791		1534.01	-0.00885523		2124	0.00420655		2714	-0.00643587		3304	-0.00139814
354.2	0.04757284		944.19	0.00332388		1534.21	-0.00915945		2124.2	0.00400254		2714.2	-0.0073335		3304.2	-0.00135905
354.4	0.04736658		944.39	0.00353733		1534.41	-0.00942655		2124.4	0.00413997		2714.4	-0.00705564		3304.4	-0.00171231
354.6	0.04814982		944.59	0.00257154		1534.61	-0.00923942		2124.6	0.00496833		2714.6	-0.0066151		3304.6	-0.00180682
354.8	0.0482593		944.79	0.00200998		1534.81	-0.00898296		2124.8	0.00582562		2714.8	-0.00623247		3304.8	-0.00188478
355	0.04837997		944.99	0.00143693		1535.01	-0.00940838		2125	0.00522311		2715	-0.00624864		3305	-0.00241737
355.2	0.04831337		945.19	0.00209202		1535.21	-0.00898896		2125.2	0.00468697		2715.2	-0.00598603		3305.2	-0.00131413
355.4	0.0490692		945.39	0.00193567		1535.41	-0.00817851		2125.4	0.00419377		2715.4	-0.00487648		3305.4	-0.00045238
355.6	0.0497124		945.59	0.00251543		1535.61	-0.00761546		2125.6	0.00413867		2715.6	-0.00480115		3305.6	-0.00031431
355.8	0.0499304		945.79	0.00231154		1535.81	-0.00758957		2125.8	0.00302964		2715.8	-0.0047984		3305.8	-0.00039112
356	0.05007523		945.99	0.00216096		1536.01	-0.00715653		2126	0.00389022		2716	-0.00474643		3306	-0.00143474
356.2	0.04979888		946.19	0.00335367		1536.21	-0.0069831		2126.2	0.00423232		2716.2	-0.00458979		3306.2	-0.00241191
356.4	0.04977719		946.39	0.00362592		1536.41	-0.00713276		2126.4	0.00387746		2716.4	-0.00385604		3306.4	-0.00235373
356.6	0.05000654		946.59	0.00327734		1536.61	-0.00747818		2126.6	0.00447621		2716.6	-0.00325532		3306.6	-0.00276559
356.8	0.05059532		946.79	0.00276004		1536.81	-0.00792851		2126.8	0.00343915		2716.8	-0.0029026		3306.8	-0.00317571
357	0.05038981		946.99	0.00286213		1537.01	-0.00776462		2127	0.00370132		2717	-0.0023473		3307	-0.00278295
357.2	0.04978722		947.19	0.00308018		1537.21	-0.00782492		2127.2	0.00432697		2717.2	-0.00137137		3307.2	-0.00373481
357.4	0.04968807		947.39	0.00349452		1537.41	-0.00707977		2127.4	0.00494855		2717.4	-0.00164709		3307.4	-0.0043158
357.6	0.05008441		947.59	0.00265319		1537.61	-0.00669053		2127.6	0.00539364		2717.6	-0.0018645		3307.6	-0.00404135
357.8	0.04990072		947.79	0.0021992		1537.81	-0.0066658		2127.8	0.00450429		2717.8	-0.00144062		3307.8	-0.00403156
358	0.04975435		947.99	0.0013477		1538.01	-0.00715548		2128	0.00403872		2718	-0.0019804		3308	-0.00393092
358.2	0.04927582		948.19	0.0019531		1538.21	-0.00764866		2128.2	0.00395733		2718.2	-0.00247218		3308.2	-0.00388618
358.4	0.04970473		948.39	0.00042412		1538.41	-0.00796189		2128.4	0.00434678		2718.4	-0.00322225		3308.4	-0.00405912
358.6	0.04993859		948.59	-0.00036392		1538.61	-0.00847855		2128.6	0.00496271		2718.6	-0.003937		3308.6	-0.00348262
358.8	0.04985479		948.79	0.00021368		1538.81	-0.00926315		2128.8	0.00514204		2718.8	-0.00387794		3308.8	-0.0032055
359	0.0504309		948.99	0.00096509		1539.01	-0.00992234		2129	0.00499042		2719	-0.00426988		3309	-0.00345794
359.2	0.05021628		949.19	0.00143274		1539.21	-0.00997223		2129.2	0.00522617		2719.2	-0.00418807		3309.2	-0.00374516
359.4	0.05048684		949.39	0.00134637		1539.41	-0.0093156		2129.4	0.00515429		2719.4	-0.00491455		3309.4	-0.00373434
359.6	0.05039225		949.59	0.00194428		1539.61	-0.00926184		2129.6	0.00582576		2719.6	-0.00571829		3309.6	-0.00473134
359.8	0.05054587		949.79	0.0017729		1539.81	-0.00894041		2129.8	0.00526397		2719.8	-0.00536408		3309.8	-0.00455503
360	0.04948414		949.99	0.00259092		1540.01	-0.00862737		2130	0.00560626		2720	-0.00653006		3310	-0.00507737
360.2	0.04908045		950.19	0.00429296		1540.21	-0.00842367		2130.2	0.00489202		2720.2	-0.00637503		3310.2	-0.00540954
360.4	0.0488927		950.39	0.00456682		1540.41	-0.00823177		2130.4	0.00440991		2720.4	-0.00620338		3310.4	-0.00458566
360.6	0.0495045		950.59	0.00404304		1540.61	-0.00837913		2130.6	0.0052934		2720.6	-0.00626916		3310.6	-0.00482323
360.8	0.0493865		950.79	0.00488975		1540.81	-0.00794845		2130.8	0.00470421		2720.8	-0.00588712		3310.8	-0.00581802
361	0.0486181		950.99	0.00571377		1541.01	-0.00742125		2131	0.00606476		2721	-0.00537065		3311	-0.00415502
361.2	0.0490706		951.19	0.00598564		1541.21	-0.00727667		2131.2	0.00680394		2721.2	-0.00501788		3311.2	-0.00406502
361.4	0.04956693		951.39	0.00517095		1541.41	-0.0065811		2131.4	0.00675864		2721.4	-0.00528457		3311.4	-0.00334265
361.6	0.05028355		951.59	0.00443624		1541.61	-0.00680128		2131.6	0.00633644		2721.6	-0.00425164		3311.6	-0.00167474
361.8	0.05059885		951.79	0.00395053		1541.81	-0.00630297		2131.8	0.00630744		2721.8	-0.00439529		3311.8	-0.00131407
362	0.04964713		951.99	0.00329446		1542.01	-0.00568126		2132	0.00733196		2722	-0.00463195		3312	-0.00068775
362.2	0.04913577		952.19	0.00315101		1542.21	-0.00548504		2132.2	0.0073817		2722.2	-0.00577167		3312.2	-0.00110241
362.4	0.04908217		952.39	0.00254615		1542.41	-0.00557347		2132.4	0.00759151		2722.4	-0.00629973		3312.4	-0.0009929
362.6	0.04929711		952.59	0.00256476		1542.61	-0.00675643		2132.6	0.00698727		2722.6	-0.00607699		3312.6	-0.00087802
362.8	0.04996379		952.79	0.00281722		1542.81	-0.00713065		2132.8	0.00754085		2722.8	-0.00611413		3312.8	-0.00072515
363	0.05054372		952.99	0.00221307		1543.01	-0.00706143		2133	0.00661708		2723	-0.00655899		3313	-0.00092908
363.2	0.05007952		953.19	0.00211401		1543.21	-0.0062034		2133.2	0.00617602		2723.2	-0.00732237		3313.2	-0.0005549
363.4	0.0502255		953.39	0.00220171		1543.41	-0.00605601		2133.4	0.00530152		2723.4	-0.00787914		3313.4	-0.00041741
363.6	0.0503778		953.59	0.00229997		1543.61	-0.0066603		2133.6	0.0042068		2723.6	-0.00794266		3313.6	-0.00058281
363.8	0.05035146		953.79	0.00262372		1543.81	-0.0065749		2133.8	0.00322223		2723.8	-0.00739793		3313.8	-0.00079249
364	0.05019754		953.99	0.00277937		1544.01	-0.00735611		2134	0.00261163		2724	-0.00703364		3314	-0.0014586
364.2	0.05131918		954.19	0.00283728		1544.21	-0.00905246		2134.2	0.002415		2724.2	-0.00661615		3314.2	-0.00208433
364.4	0.0508869		954.39	0.0030227		1544.41	-0.00956966		2134.4	0.00190565		2724.4	-0.00678659		3314.4	-0.00195189
364.6	0.05124902		954.59	0.00294815		1544.61	-0.01023401		2134.6	0.00285895		2724.6	-0.00629773		3314.6	-0.00259042
364.8	0.05150477		954.79	0.00417218		1544.81	-0.01061034		2134.8	0.0018093		2724.8	-0.00615393		3314.8	-0.00255631
365	0.05179393		954.99	0.00410201		1545.01	-0.01078356		2135	0.00251781		2725	-0.00564661		3315	-0.00078499
365.2	0.05224053		955.19	0.00374844		1545.21	-0.01101503		2135.2	0.00265137		2725.2	-0.00475323		3315.2	-0.00096324
365.4	0.05236346		955.39	0.00338562		1545.41	-0.01060693		2135.4	0.0032259		2725.4	-0.00518358		3315.4	-0.0014141
365.6	0.0522512		955.59	0.00326368		1545.61	-0.0102788		2135.6	0.00303652		2725.6	-0.00472775		3315.6	-0.00072276
365.8	0.0516171		955.79	0.00367898		1545.81	-0.00922343		2135.8	0.00393383		2725.8	-0.00485821		3315.8	-0.0010123
366	0.05127746		955.99	0.00337229		1546.01	-0.0086688		2136	0.00382864		2726	-0.00377079		3316	-0.00062635
366.2	0.05175853		956.19	0.00427413		1546.21	-0.00830086		2136.2	0.00329954		2726.2	-0.00463007		3316.2	-0.00200765
366.4	0.05342272		956.39	0.00400224		1546.41	-0.00817117		2136.4	0.00389619		2726.4	-0.00490729		3316.4	-0.00237229
366.6	0.0542681		956.59	0.0040554		1546.61	-0.00812206		2136.6	0.00397561		2726.6	-0.00483675		3316.6	-0.00210975
366.8	0.05488723		956.79	0.00460299		1546.81	-0.00710755		2136.8	0.0047853		2726.8	-0.0051669		3316.8	-0.00152464
367	0.05470805		956.99	0.00432659		1547.01	-0.00594057		2137	0.00375955		2727	-0.00573499		3317	-0.00085228
367.2	0.05508117		957.19	0.0047061		1547.21	-0.00497377		2137.2	0.00417123		2727.2	-0.00645328		3317.2	-0.00092013
367.4	0.05538146		957.39	0.00469898		1547.41	-0.00536697		2137.4	0.00392602		2727.4	-0.00727536		3317.4	-0.00079579
367.6	0.05532413		957.59	0.00467071		1547.61	-0.00530982		2137.6	0.00442017		2727.6	-0.00658259		3317.6	-0.00163362
367.8	0.05586662		957.79	0.00451258		1547.81	-0.00489882		2137.8	0.00435276		2727.8	-0.0059179		3317.8	-0.00125706
368	0.05589358		957.99	0.00379347		1548.01	-0.00589843		2138	0.00405955		2728	-0.00538115		3318	-0.00096627
368.2	0.05624982		958.19	0.00315139		1548.21	-0.00635851		2138.2	0.00371933		2728.2	-0.00639539		3318.2	-0.0010382
368.4	0.05563154		958.39	0.00337448		1548.41	-0.00590444		2138.4	0.00383427		2728.4	-0.00670538		3318.4	-0.00071999
368.6	0.05580019		958.59	0.00406726		1548.61	-0.00614912		2138.6	0.00432209		2728.6	-0.00637748		3318.6	-0.00053999
368.8	0.05607105		958.79	0.00350166		1548.81	-0.00578338		2138.8	0.0045671		2728.8	-0.00697601		3318.8	-0.00005172
369	0.05570787		958.99	0.00380649		1549.01	-0.00554408		2139	0.00533765		2729	-0.00680557		3319	-0.0002331
369.2	0.05624527		959.19	0.00338753		1549.21	-0.00584233		2139.2	0.00603746		2729.2	-0.00626802		3319.2	-0.00028845
369.4	0.05651749		959.39	0.00314861		1549.41	-0.0065463		2139.4	0.00671249		2729.4	-0.00674427		3319.4	-0.00089229
369.6	0.0564398		959.59	0.00313459		1549.61	-0.00657627		2139.6	0.00582789		2729.6	-0.0062184		3319.6	-0.00025077
369.8	0.0570841		959.79	0.00351599		1549.81	-0.00630214		2139.8	0.00598782		2729.8	-0.00576877		3319.8	-0.00098039
370	0.05728457		959.99	0.00283172		1550.01	-0.00588789		2140	0.0053911		2730	-0.00466444		3320	-0.0011907
370.2	0.05801323		960.19	0.00346457		1550.21	-0.00508185		2140.2	0.00581679		2730.2	-0.0054416		3320.2	-0.00164692
370.4	0.05847843		960.39	0.00313933		1550.41	-0.0053857		2140.4	0.00568042		2730.4	-0.00527136		3320.4	-0.00164786
370.6	0.05775796		960.59	0.00341342		1550.61	-0.00528579		2140.6	0.00617467		2730.6	-0.00447119		3320.6	-0.00064737
370.8	0.05710051		960.79	0.00360193		1550.81	-0.00532764		2140.8	0.0060397		2730.8	-0.00488494		3320.8	-0.00110311
371	0.05587016		960.99	0.00300191		1551.01	-0.00499281		2141	0.00525686		2731	-0.00507687		3321	-0.00119306
371.2	0.05600476		961.19	0.00268396		1551.21	-0.00432817		2141.2	0.00553726		2731.2	-0.00562548		3321.2	-0.00189937
371.4	0.05537629		961.39	0.00305587		1551.41	-0.0052408		2141.4	0.00566457		2731.4	-0.00584347		3321.4	-0.00155436
371.6	0.05490907		961.59	0.00265845		1551.61	-0.00548649		2141.6	0.0053451		2731.6	-0.00545828		3321.6	-0.00232684
371.8	0.05507934		961.79	0.0022665		1551.81	-0.00552439		2141.8	0.00437692		2731.8	-0.00493303		3321.8	-0.00107219
372	0.05459945		961.99	0.00247085		1552.01	-0.0068984		2142	0.00435064		2732	-0.00471728		3322	-0.00051315
372.2	0.05478054		962.19	0.0029172		1552.21	-0.00697707		2142.2	0.00415027		2732.2	-0.00491447		3322.2	-0.00154029
372.4	0.0548832		962.39	0.00339069		1552.41	-0.00691165		2142.4	0.00435932		2732.4	-0.00466116		3322.4	-0.00217947
372.6	0.05578337		962.59	0.00426795		1552.61	-0.00709727		2142.6	0.00429874		2732.6	-0.00517726		3322.6	-0.00187843
372.8	0.05623905		962.79	0.00409582		1552.81	-0.00706942		2142.8	0.00440562		2732.8	-0.00555433		3322.8	-0.00275267
373	0.05713403		962.99	0.00547873		1553.01	-0.00833796		2143	0.00486727		2733	-0.00616016		3323	-0.00236615
373.2	0.05844681		963.19	0.00578239		1553.21	-0.00839952		2143.2	0.00503536		2733.2	-0.00570999		3323.2	-0.00258291
373.4	0.05880983		963.39	0.00633258		1553.41	-0.00830816		2143.4	0.0047305		2733.4	-0.00642047		3323.4	-0.00284723
373.6	0.05885982		963.59	0.00669806		1553.61	-0.00853637		2143.6	0.00265397		2733.6	-0.00667564		3323.6	-0.00244361
373.8	0.05869052		963.79	0.00655369		1553.81	-0.00757566		2143.8	0.00258846		2733.8	-0.0064257		3323.8	-0.00239721
374	0.05848304		963.99	0.00600706		1554.01	-0.00758367		2144	0.00287117		2734	-0.0060041		3324	-0.00219048
374.2	0.05878128		964.19	0.00627788		1554.21	-0.00725		2144.2	0.00361632		2734.2	-0.00682424		3324.2	-0.00206879
374.4	0.05857376		964.39	0.00627133		1554.41	-0.00733143		2144.4	0.00376636		2734.4	-0.00703056		3324.4	-0.00268678
374.6	0.05720133		964.59	0.0058665		1554.61	-0.00681428		2144.6	0.00393975		2734.6	-0.00674383		3324.6	-0.00250744
374.8	0.05659417		964.79	0.00515247		1554.81	-0.00649597		2144.8	0.00343242		2734.8	-0.00754617		3324.8	-0.00277011
375	0.05600439		964.99	0.00408407		1555.01	-0.00558303		2145	0.00330493		2735	-0.00794123		3325	-0.0024009
375.2	0.05673609		965.19	0.00415721		1555.21	-0.00602687		2145.2	0.00361514		2735.2	-0.00888053		3325.2	-0.00251341
375.4	0.05648592		965.39	0.00425852		1555.41	-0.00659334		2145.4	0.00420838		2735.4	-0.00885043		3325.4	-0.0025629
375.6	0.0565126		965.59	0.00336419		1555.61	-0.00629838		2145.6	0.00442337		2735.6	-0.00862545		3325.6	-0.00254787
375.8	0.05717668		965.79	0.00351956		1555.81	-0.00634559		2145.8	0.00454351		2735.8	-0.0079968		3325.8	-0.00217524
376	0.0573499		965.99	0.00393491		1556.01	-0.00694632		2146	0.0038508		2736	-0.00825365		3326	-0.00284529
376.2	0.05755026		966.19	0.00363317		1556.21	-0.00720467		2146.2	0.00375161		2736.2	-0.00846346		3326.2	-0.0044893
376.4	0.05879054		966.39	0.00396129		1556.41	-0.00790322		2146.4	0.00392798		2736.4	-0.00904457		3326.4	-0.00438227
376.6	0.05921946		966.59	0.00499101		1556.61	-0.00744454		2146.6	0.00380808		2736.6	-0.00940129		3326.6	-0.00399884
376.8	0.0589435		966.79	0.0049586		1556.81	-0.00747315		2146.8	0.00430922		2736.8	-0.00934149		3326.8	-0.00472681
377	0.05940698		966.99	0.00619472		1557.01	-0.00720102		2147	0.00497201		2737	-0.00942008		3327	-0.00412442
377.2	0.05881078		967.19	0.00663842		1557.21	-0.00599217		2147.2	0.00474293		2737.2	-0.00845277		3327.2	-0.00473331
377.4	0.05811766		967.39	0.0066039		1557.41	-0.00594183		2147.4	0.00360112		2737.4	-0.00881473		3327.4	-0.00440175
377.6	0.05728564		967.59	0.00697716		1557.61	-0.00616501		2147.6	0.0024514		2737.6	-0.0084008		3327.6	-0.00448029
377.8	0.05715252		967.79	0.00756054		1557.81	-0.00609913		2147.8	0.00326955		2737.8	-0.00703271		3327.8	-0.00461962
378	0.05773709		967.99	0.00831719		1558.01	-0.00670652		2148	0.00382595		2738	-0.0065062		3328	-0.00471757
378.2	0.05797683		968.19	0.008681		1558.21	-0.0064756		2148.2	0.0037412		2738.2	-0.006748		3328.2	-0.00508423
378.4	0.05839103		968.39	0.00858613		1558.41	-0.00678109		2148.4	0.00316728		2738.4	-0.00640228		3328.4	-0.00493979
378.6	0.05824265		968.59	0.00866112		1558.61	-0.00657211		2148.6	0.00267242		2738.6	-0.00600997		3328.6	-0.00451294
378.8	0.05866074		968.79	0.00851129		1558.81	-0.00755585		2148.8	0.00296494		2738.8	-0.00574965		3328.8	-0.00300443
379	0.05941488		968.99	0.0079428		1559.01	-0.00752928		2149	0.00353362		2739	-0.00576985		3329	-0.00329598
379.2	0.06039936		969.19	0.00833861		1559.21	-0.00801182		2149.2	0.00358518		2739.2	-0.00605926		3329.2	-0.00361239
379.4	0.06149336		969.39	0.0073849		1559.41	-0.00746616		2149.4	0.00396975		2739.4	-0.00600223		3329.4	-0.00284533
379.6	0.06240981		969.59	0.00675609		1559.61	-0.00761905		2149.6	0.003164		2739.6	-0.00701864		3329.6	-0.00226749
379.8	0.06307699		969.79	0.00597828		1559.81	-0.00783464		2149.8	0.00265561		2739.8	-0.00742856		3329.8	-0.00189058
380	0.06343028		969.99	0.00557475		1560.01	-0.00850332		2150	0.0017972		2740	-0.00800409		3330	-0.00162844
380.2	0.06376268		970.19	0.00481941		1560.21	-0.00909682		2150.2	0.00274863		2740.2	-0.00756524		3330.2	-0.00100304
380.4	0.06372966		970.39	0.00462659		1560.41	-0.00890978		2150.4	0.00323341		2740.4	-0.00751213		3330.4	-0.00069933
380.6	0.06324705		970.59	0.00426138		1560.61	-0.00696181		2150.6	0.00287136		2740.6	-0.00712928		3330.6	-0.00022697
380.8	0.06308063		970.79	0.00423482		1560.81	-0.00710331		2150.8	0.00379838		2740.8	-0.00744265		3330.8	-0.00027814
381	0.06230476		970.99	0.00448616		1561.01	-0.00676477		2151	0.00454943		2741	-0.00648552		3331	0.00012
381.2	0.06147971		971.19	0.00476157		1561.21	-0.00624705		2151.2	0.00486882		2741.2	-0.00596156		3331.2	-0.00002502
381.4	0.06054943		971.39	0.00501431		1561.41	-0.00610744		2151.4	0.00420387		2741.4	-0.00532425		3331.4	-0.00084689
381.6	0.06034451		971.59	0.00620008		1561.61	-0.00641337		2151.6	0.00486231		2741.6	-0.00510256		3331.6	-0.00139627
381.8	0.06045132		971.79	0.00673742		1561.81	-0.00754324		2151.8	0.00500753		2741.8	-0.00436527		3331.8	-0.00147824
382	0.06045718		971.99	0.0069012		1562.01	-0.00734502		2152	0.00530133		2742	-0.00491896		3332	-0.00242412
382.2	0.05996895		972.19	0.00629169		1562.21	-0.00752857		2152.2	0.00580873		2742.2	-0.00549124		3332.2	-0.00293855
382.4	0.06047783		972.39	0.00657954		1562.41	-0.00842851		2152.4	0.00580077		2742.4	-0.00508765		3332.4	-0.0029695
382.6	0.06012556		972.59	0.00633159		1562.61	-0.00835363		2152.6	0.00568603		2742.6	-0.00554835		3332.6	-0.00261837
382.8	0.05995415		972.79	0.00599957		1562.81	-0.00889504		2152.8	0.00504972		2742.8	-0.00583825		3332.8	-0.00210804
383	0.06102857		972.99	0.00595574		1563.01	-0.00825223		2153	0.00501134		2743	-0.00682358		3333	-0.00299422
383.2	0.06090453		973.19	0.00646397		1563.21	-0.00841798		2153.2	0.00400726		2743.2	-0.00697141		3333.2	-0.00265825
383.4	0.0609468		973.39	0.00620674		1563.41	-0.00835863		2153.4	0.00319205		2743.4	-0.00740569		3333.4	-0.0020162
383.6	0.06086755		973.59	0.00619836		1563.61	-0.008064		2153.6	0.00275357		2743.6	-0.00800749		3333.6	-0.00188282
383.8	0.06177378		973.79	0.00563208		1563.81	-0.00777159		2153.8	0.00208888		2743.8	-0.00790568		3333.8	-0.0020706
384	0.06210971		973.99	0.00556512		1564.01	-0.00791587		2154	0.00192483		2744	-0.00791359		3334	-0.00124727
384.2	0.06270834		974.19	0.00542787		1564.21	-0.00767448		2154.2	0.00232295		2744.2	-0.00731834		3334.2	-0.0015851
384.4	0.0634244		974.39	0.00542524		1564.41	-0.00791185		2154.4	0.00233236		2744.4	-0.00825277		3334.4	-0.00172024
384.6	0.06371765		974.59	0.00537541		1564.61	-0.00823472		2154.6	0.00214271		2744.6	-0.00818879		3334.6	-0.00204945
384.8	0.0643201		974.79	0.00571596		1564.81	-0.00879779		2154.8	0.00355263		2744.8	-0.00790789		3334.8	-0.00312213
385	0.06472927		974.99	0.00578036		1565.01	-0.00903289		2155	0.00416454		2745	-0.00719178		3335	-0.00311174
385.2	0.06469382		975.19	0.00668621		1565.21	-0.0083324		2155.2	0.00478158		2745.2	-0.00685523		3335.2	-0.00430019
385.4	0.06437674		975.39	0.00643212		1565.41	-0.00789981		2155.4	0.00463417		2745.4	-0.00579713		3335.4	-0.00501341
385.6	0.06497503		975.59	0.00685527		1565.61	-0.00808263		2155.6	0.00619573		2745.6	-0.00603183		3335.6	-0.00550696
385.8	0.06504648		975.79	0.00624156		1565.81	-0.00752287		2155.8	0.00740923		2745.8	-0.00452891		3335.8	-0.00578713
386	0.06471924		975.99	0.00620498		1566.01	-0.00661438		2156	0.00851121		2746	-0.00484273		3336	-0.00619338
386.2	0.06445138		976.19	0.00596732		1566.21	-0.00719599		2156.2	0.0093199		2746.2	-0.00456756		3336.2	-0.00560137
386.4	0.06495029		976.39	0.00565757		1566.41	-0.00754569		2156.4	0.00923688		2746.4	-0.00441354		3336.4	-0.00505731
386.6	0.06476823		976.59	0.00541195		1566.61	-0.00691069		2156.6	0.00968136		2746.6	-0.00424785		3336.6	-0.00440201
386.8	0.06452466		976.79	0.00604846		1566.81	-0.00746517		2156.8	0.00936215		2746.8	-0.00389092		3336.8	-0.0034094
387	0.06517124		976.99	0.00625948		1567.01	-0.00742256		2157	0.00965454		2747	-0.00383806		3337	-0.00321591
387.2	0.06422691		977.19	0.0060811		1567.21	-0.00818895		2157.2	0.00977267		2747.2	-0.00350419		3337.2	-0.00256042
387.4	0.06400826		977.39	0.00591072		1567.41	-0.00760693		2157.4	0.00975518		2747.4	-0.00418233		3337.4	-0.00155407
387.6	0.06466046		977.59	0.00590803		1567.61	-0.00752152		2157.6	0.00998675		2747.6	-0.00447847		3337.6	-0.00079472
387.8	0.06528824		977.79	0.00481004		1567.81	-0.00794241		2157.8	0.0091752		2747.8	-0.00529525		3337.8	-0.00016448
388	0.06555413		977.99	0.00440879		1568.01	-0.00829823		2158	0.00966246		2748	-0.00540222		3338	0.00136135
388.2	0.06617069		978.19	0.00443278		1568.21	-0.00882472		2158.2	0.00937867		2748.2	-0.00566316		3338.2	0.00119153
388.4	0.0666745		978.39	0.00476816		1568.41	-0.00907266		2158.4	0.0092903		2748.4	-0.00593305		3338.4	0.00140035
388.6	0.06655028		978.59	0.0044647		1568.61	-0.00883969		2158.6	0.00871778		2748.6	-0.00593664		3338.6	0.00062572
388.8	0.06712634		978.79	0.00485326		1568.81	-0.0081288		2158.8	0.00883193		2748.8	-0.00601779		3338.8	0.00031105
389	0.06662101		978.99	0.00498214		1569.01	-0.00743509		2159	0.00802465		2749	-0.00546548		3339	0.0000871
389.2	0.06623474		979.19	0.00466863		1569.21	-0.00678509		2159.2	0.00754466		2749.2	-0.00503865		3339.2	-0.00066523
389.4	0.06530317		979.39	0.00447605		1569.41	-0.00684062		2159.4	0.00771655		2749.4	-0.00463326		3339.4	-0.00095488
389.6	0.0651699		979.59	0.00490017		1569.61	-0.00707261		2159.6	0.00778314		2749.6	-0.004942		3339.6	-0.00141991
389.8	0.06474118		979.79	0.00569536		1569.81	-0.00605073		2159.8	0.00757829		2749.8	-0.00496503		3339.8	-0.00174228
390	0.06403814		979.99	0.00635001		1570.01	-0.00594694		2160	0.0068636		2750	-0.00586972		3340	-0.00241542
390.2	0.06364343		980.19	0.00762136		1570.21	-0.00632701		2160.2	0.00634105		2750.2	-0.00584454		3340.2	-0.00330763
390.4	0.06421669		980.39	0.00806409		1570.41	-0.00532244		2160.4	0.00613184		2750.4	-0.00617393		3340.4	-0.00338616
390.6	0.06409431		980.59	0.00939358		1570.61	-0.00494245		2160.6	0.00601815		2750.6	-0.00581789		3340.6	-0.00372358
390.8	0.06379184		980.79	0.0100989		1570.81	-0.00604183		2160.8	0.00494298		2750.8	-0.00664396		3340.8	-0.00402685
391	0.06439039		980.99	0.01051092		1571.01	-0.00583848		2161	0.0048168		2751	-0.00732297		3341	-0.00555794
391.2	0.06441366		981.19	0.01040253		1571.21	-0.00632395		2161.2	0.00435875		2751.2	-0.00734313		3341.2	-0.00517648
391.4	0.06487312		981.39	0.01061571		1571.41	-0.00544849		2161.4	0.00343124		2751.4	-0.00809719		3341.4	-0.00472147
391.6	0.06597372		981.59	0.00993409		1571.61	-0.0067251		2161.6	0.00249469		2751.6	-0.00808315		3341.6	-0.00492533
391.8	0.06626192		981.79	0.00845163		1571.81	-0.00776759		2161.8	0.00183686		2751.8	-0.00761581		3341.8	-0.00409032
392	0.06670184		981.99	0.00857244		1572.01	-0.00815028		2162	0.00213984		2752	-0.00691871		3342	-0.00416065
392.2	0.06707466		982.19	0.00788683		1572.21	-0.00799322		2162.2	0.00211482		2752.2	-0.00708443		3342.2	-0.00441898
392.4	0.06811139		982.39	0.00783909		1572.41	-0.0073281		2162.4	0.00328672		2752.4	-0.00698331		3342.4	-0.00490718
392.6	0.06844382		982.59	0.00535069		1572.61	-0.00672754		2162.6	0.00369003		2752.6	-0.00754075		3342.6	-0.00513478
392.8	0.06867933		982.79	0.00468117		1572.81	-0.00736635		2162.8	0.0039003		2752.8	-0.00763758		3342.8	-0.00579525
393	0.06856914		982.99	0.00423442		1573.01	-0.00772371		2163	0.00444439		2753	-0.00784652		3343	-0.00524935
393.2	0.06895587		983.19	0.00294114		1573.21	-0.00804574		2163.2	0.00457515		2753.2	-0.00833782		3343.2	-0.00527755
393.4	0.06863732		983.39	0.00244918		1573.41	-0.00820263		2163.4	0.00580127		2753.4	-0.00809787		3343.4	-0.00480923
393.6	0.06927586		983.59	0.00324513		1573.61	-0.00840404		2163.6	0.00529454		2753.6	-0.00822969		3343.6	-0.00417959
393.8	0.06911744		983.79	0.0045608		1573.81	-0.00729757		2163.8	0.00590761		2753.8	-0.00751722		3343.8	-0.00414151
394	0.06870446		983.99	0.0055092		1574.01	-0.00737971		2164	0.00690338		2754	-0.00694727		3344	-0.00452262
394.2	0.06899551		984.19	0.00707168		1574.21	-0.00718119		2164.2	0.00676747		2754.2	-0.00702678		3344.2	-0.00415686
394.4	0.06863692		984.39	0.00663502		1574.41	-0.0059876		2164.4	0.00713375		2754.4	-0.00686038		3344.4	-0.00371175
394.6	0.06821808		984.59	0.00751301		1574.61	-0.00663024		2164.6	0.00682567		2754.6	-0.00684337		3344.6	-0.00338721
394.8	0.06842975		984.79	0.00855625		1574.81	-0.00681625		2164.8	0.00652898		2754.8	-0.00675899		3344.8	-0.0037447
395	0.06886731		984.99	0.00989021		1575.01	-0.00690241		2165	0.0059149		2755	-0.00701778		3345	-0.00406961
395.2	0.06905822		985.19	0.01051364		1575.21	-0.0074376		2165.2	0.00497937		2755.2	-0.00662555		3345.2	-0.00344628
395.4	0.07026661		985.39	0.01084644		1575.41	-0.00872231		2165.4	0.005178		2755.4	-0.00698916		3345.4	-0.00385914
395.6	0.07115787		985.59	0.01000407		1575.61	-0.00998661		2165.6	0.00458689		2755.6	-0.00634322		3345.6	-0.00407925
395.8	0.07149551		985.79	0.00974249		1575.81	-0.0097039		2165.8	0.00422646		2755.8	-0.00548345		3345.8	-0.00433705
396	0.07159722		985.99	0.01004964		1576.01	-0.00888048		2166	0.00441121		2756	-0.006002		3346	-0.00485275
396.2	0.07170046		986.19	0.0092577		1576.21	-0.0078382		2166.2	0.00463453		2756.2	-0.00639655		3346.2	-0.00531876
396.4	0.07062411		986.39	0.00868933		1576.41	-0.00737583		2166.4	0.00533718		2756.4	-0.00619525		3346.4	-0.00531757
396.6	0.07053868		986.59	0.00686637		1576.61	-0.00708939		2166.6	0.00525887		2756.6	-0.00665361		3346.6	-0.0046389
396.8	0.07044663		986.79	0.00714535		1576.81	-0.00706044		2166.8	0.00476232		2756.8	-0.00722206		3346.8	-0.00461978
397	0.06994359		986.99	0.0073856		1577.01	-0.00659059		2167	0.00535619		2757	-0.0077982		3347	-0.00400715
397.2	0.06949781		987.19	0.00604435		1577.21	-0.00625782		2167.2	0.00543428		2757.2	-0.00746285		3347.2	-0.00414567
397.4	0.06897204		987.39	0.00643145		1577.41	-0.00597058		2167.4	0.00587256		2757.4	-0.0065054		3347.4	-0.00386669
397.6	0.06821262		987.59	0.00693305		1577.61	-0.0051733		2167.6	0.00559992		2757.6	-0.00642594		3347.6	-0.00397698
397.8	0.06747941		987.79	0.00621535		1577.81	-0.0047964		2167.8	0.00573797		2757.8	-0.00560657		3347.8	-0.00461206
398	0.06622064		987.99	0.00557424		1578.01	-0.00491605		2168	0.00604736		2758	-0.00547403		3348	-0.00473679
398.2	0.06577402		988.19	0.00519784		1578.21	-0.00425284		2168.2	0.0054389		2758.2	-0.00581121		3348.2	-0.00440983
398.4	0.06507459		988.39	0.00485384		1578.41	-0.00340733		2168.4	0.00582838		2758.4	-0.00538607		3348.4	-0.00459216
398.6	0.06555247		988.59	0.00553636		1578.61	-0.00387482		2168.6	0.00578449		2758.6	-0.00534878		3348.6	-0.00465126
398.8	0.06589669		988.79	0.00613106		1578.81	-0.00476792		2168.8	0.00535244		2758.8	-0.00563978		3348.8	-0.00481279
399	0.06664071		988.99	0.00639741		1579.01	-0.00578155		2169	0.00487064		2759	-0.00687537		3349	-0.00443544
399.2	0.06796389		989.19	0.00586659		1579.21	-0.00651914		2169.2	0.00543394		2759.2	-0.00714423		3349.2	-0.0053086
399.4	0.06871279		989.39	0.00514451		1579.41	-0.00766554		2169.4	0.00533952		2759.4	-0.00728103		3349.4	-0.0057046
399.6	0.06928737		989.59	0.00505229		1579.61	-0.0071294		2169.6	0.00440596		2759.6	-0.00725316		3349.6	-0.00560264
399.8	0.06975345		989.79	0.00486401		1579.81	-0.00713733		2169.8	0.00388491		2759.8	-0.00727152		3349.8	-0.00572373
400	0.06983077		989.99	0.00483527		1580.01	-0.00656485		2170	0.0038539		2760	-0.00755092		3350	-0.00556394
400.2	0.07065834		990.19	0.00500784		1580.21	-0.00688559		2170.2	0.00360707		2760.2	-0.00682014		3350.2	-0.00577237
400.4	0.07075848		990.39	0.00523536		1580.41	-0.00749801		2170.4	0.00318692		2760.4	-0.00679483		3350.4	-0.00478275
400.6	0.07220767		990.59	0.00538193		1580.61	-0.00729278		2170.6	0.00372288		2760.6	-0.0066059		3350.6	-0.00428631
400.8	0.07234062		990.79	0.00573999		1580.81	-0.007191		2170.8	0.00385946		2760.8	-0.00661616		3350.8	-0.00363872
401	0.07269816		990.99	0.00590586		1581.01	-0.00746952		2171	0.00456381		2761	-0.00641453		3351	-0.00364909
401.2	0.07291858		991.19	0.00557377		1581.21	-0.00759474		2171.2	0.00487828		2761.2	-0.00606271		3351.2	-0.00353154
401.4	0.07307604		991.39	0.00458074		1581.41	-0.00712156		2171.4	0.00558301		2761.4	-0.0055277		3351.4	-0.0033081
401.6	0.07358767		991.59	0.00356973		1581.61	-0.00644702		2171.6	0.00590251		2761.6	-0.00456074		3351.6	-0.00384874
401.8	0.07391148		991.79	0.00304205		1581.81	-0.00723572		2171.8	0.00593216		2761.8	-0.00417895		3351.8	-0.00371154
402	0.07393131		991.99	0.00353209		1582.01	-0.00676135		2172	0.00670905		2762	-0.00427102		3352	-0.00313571
402.2	0.07395525		992.19	0.00386384		1582.21	-0.00676234		2172.2	0.00787882		2762.2	-0.00442677		3352.2	-0.00345559
402.4	0.07434964		992.39	0.00391223		1582.41	-0.00745729		2172.4	0.00848019		2762.4	-0.00395114		3352.4	-0.00361043
402.6	0.07428662		992.59	0.00387814		1582.61	-0.00789107		2172.6	0.00867075		2762.6	-0.00391957		3352.6	-0.00383322
402.8	0.07434435		992.79	0.00365161		1582.81	-0.00816053		2172.8	0.00821449		2762.8	-0.00515307		3352.8	-0.0040284
403	0.07368401		992.99	0.00356329		1583.01	-0.00731629		2173	0.00898383		2763	-0.00599208		3353	-0.00432275
403.2	0.0724723		993.19	0.00367861		1583.21	-0.00797249		2173.2	0.00913414		2763.2	-0.00640231		3353.2	-0.00468901
403.4	0.07117292		993.39	0.0042859		1583.41	-0.00824869		2173.4	0.00773127		2763.4	-0.00701455		3353.4	-0.00490825
403.6	0.07137175		993.59	0.0047616		1583.61	-0.0087611		2173.6	0.00772121		2763.6	-0.0076457		3353.6	-0.005053
403.8	0.07208043		993.79	0.00522892		1583.81	-0.00927293		2173.8	0.0073885		2763.8	-0.00753199		3353.8	-0.00525245
404	0.0719962		993.99	0.00604629		1584.01	-0.00859292		2174	0.00682262		2764	-0.00743943		3354	-0.00615725
404.2	0.07193244		994.19	0.00675877		1584.21	-0.00863772		2174.2	0.00570062		2764.2	-0.00697512		3354.2	-0.00635365
404.4	0.07148765		994.39	0.00701071		1584.41	-0.00832687		2174.4	0.00516408		2764.4	-0.00787206		3354.4	-0.00642084
404.6	0.07152353		994.59	0.00644365		1584.61	-0.00808654		2174.6	0.00548155		2764.6	-0.00752825		3354.6	-0.00615381
404.8	0.07085566		994.79	0.00611667		1584.81	-0.00754821		2174.8	0.00551089		2764.8	-0.00737513		3354.8	-0.00550101
405	0.07068894		994.99	0.00564877		1585.01	-0.00764368		2175	0.00456946		2765	-0.00772835		3355	-0.00601636
405.2	0.07094808		995.19	0.00539636		1585.21	-0.00782064		2175.2	0.00426112		2765.2	-0.00761185		3355.2	-0.00593893
405.4	0.07123662		995.39	0.00474045		1585.41	-0.0069685		2175.4	0.00430828		2765.4	-0.00746928		3355.4	-0.00614789
405.6	0.0719468		995.59	0.00453674		1585.61	-0.00708853		2175.6	0.00425986		2765.6	-0.00666717		3355.6	-0.00699261
405.8	0.0727648		995.79	0.00456545		1585.81	-0.00745938		2175.8	0.00387287		2765.8	-0.00658219		3355.8	-0.00594572
406	0.07333823		995.99	0.00456181		1586.01	-0.00740116		2176	0.00487857		2766	-0.00627473		3356	-0.00602404
406.2	0.0736575		996.19	0.00402331		1586.21	-0.00780897		2176.2	0.00518053		2766.2	-0.0061973		3356.2	-0.0061008
406.4	0.07394206		996.39	0.00342029		1586.41	-0.0078723		2176.4	0.00596929		2766.4	-0.0056037		3356.4	-0.00579259
406.6	0.07444941		996.59	0.00240824		1586.61	-0.00719374		2176.6	0.00556037		2766.6	-0.00511537		3356.6	-0.00491337
406.8	0.07366421		996.79	0.00156216		1586.81	-0.00643035		2176.8	0.00542756		2766.8	-0.0053592		3356.8	-0.00443312
407	0.07322057		996.99	0.00096479		1587.01	-0.00648153		2177	0.00494369		2767	-0.00466466		3357	-0.003433
407.2	0.07297608		997.19	0.00131684		1587.21	-0.00738571		2177.2	0.00473367		2767.2	-0.00443548		3357.2	-0.00317368
407.4	0.07303859		997.39	0.00093721		1587.41	-0.00847249		2177.4	0.00421956		2767.4	-0.00424236		3357.4	-0.00341356
407.6	0.07318777		997.59	0.00099482		1587.61	-0.00874799		2177.6	0.00425198		2767.6	-0.00416314		3357.6	-0.00325854
407.8	0.0735866		997.79	0.00172148		1587.81	-0.00875312		2177.8	0.00391504		2767.8	-0.00381452		3357.8	-0.0034795
408	0.07262094		997.99	0.00247776		1588.01	-0.00787267		2178	0.00355548		2768	-0.00383837		3358	-0.0039615
408.2	0.07204889		998.19	0.00349478		1588.21	-0.00816821		2178.2	0.00365775		2768.2	-0.00398449		3358.2	-0.00362781
408.4	0.07150862		998.39	0.00377921		1588.41	-0.0086345		2178.4	0.00423657		2768.4	-0.00442221		3358.4	-0.00375491
408.6	0.07091378		998.59	0.0045986		1588.61	-0.00908629		2178.6	0.00384461		2768.6	-0.00460527		3358.6	-0.003467
408.8	0.07002607		998.79	0.00574166		1588.81	-0.00861975		2178.8	0.00400538		2768.8	-0.00460545		3358.8	-0.00327201
409	0.07047518		998.99	0.00697756		1589.01	-0.00849934		2179	0.00313389		2769	-0.0052805		3359	-0.00365795
409.2	0.07109959		999.19	0.00751071		1589.21	-0.00839453		2179.2	0.00327532		2769.2	-0.00540492		3359.2	-0.00298944
409.4	0.07077379		999.39	0.00746749		1589.41	-0.0082752		2179.4	0.00394368		2769.4	-0.00542139		3359.4	-0.00284761
409.6	0.07105692		999.59	0.00725156		1589.61	-0.00886473		2179.6	0.00351832		2769.6	-0.00578882		3359.6	-0.00203775
409.8	0.0717136		999.79	0.00784325		1589.81	-0.00824758		2179.8	0.00399257		2769.8	-0.00595474		3359.8	-0.00146288
410	0.07176028		999.99	0.00772426		1590.01	-0.0083055		2180	0.00447424		2770	-0.00629621		3360	-0.00246768
410.2	0.07187187		1000.19	0.00786315		1590.21	-0.00923838		2180.2	0.00541032		2770.2	-0.00654202		3360.2	-0.00234656
410.4	0.07187749		1000.39	0.00738339		1590.41	-0.00973574		2180.4	0.00547437		2770.4	-0.00563612		3360.4	-0.00291978
410.6	0.07272015		1000.59	0.00644493		1590.61	-0.01036245		2180.6	0.00493105		2770.6	-0.00598962		3360.6	-0.00269318
410.8	0.07171967		1000.79	0.00644683		1590.81	-0.0108468		2180.8	0.00498533		2770.8	-0.00611911		3360.8	-0.00297677
411	0.07344858		1000.99	0.00645043		1591.01	-0.01199767		2181	0.00445936		2771	-0.00555932		3361	-0.00258673
411.2	0.07427716		1001.19	0.00565383		1591.21	-0.01253998		2181.2	0.00501074		2771.2	-0.00544418		3361.2	-0.0035158
411.4	0.07442591		1001.39	0.00429157		1591.41	-0.01336245		2181.4	0.00464384		2771.4	-0.00500355		3361.4	-0.00429643
411.6	0.07505929		1001.59	0.00512703		1591.61	-0.01242021		2181.6	0.00401952		2771.6	-0.00600859		3361.6	-0.00492449
411.8	0.07561785		1001.79	0.00594422		1591.81	-0.01283691		2181.8	0.0051083		2771.8	-0.0064692		3361.8	-0.00561903
412	0.07593016		1001.99	0.00667464		1592.01	-0.01183376		2182	0.00509656		2772	-0.00724006		3362	-0.00534503
412.2	0.07577184		1002.19	0.0073638		1592.21	-0.01157245		2182.2	0.00462163		2772.2	-0.00740441		3362.2	-0.00539923
412.4	0.07601351		1002.39	0.0070058		1592.41	-0.0103919		2182.4	0.00448042		2772.4	-0.00785936		3362.4	-0.00579246
412.6	0.07574537		1002.59	0.00757955		1592.61	-0.00943014		2182.6	0.00338905		2772.6	-0.00841193		3362.6	-0.00569999
412.8	0.07593143		1002.79	0.00760892		1592.81	-0.00826088		2182.8	0.00356152		2772.8	-0.008512		3362.8	-0.00513791
413	0.07697862		1002.99	0.0076794		1593.01	-0.00717303		2183	0.00322536		2773	-0.00875841		3363	-0.004736
413.2	0.07676048		1003.19	0.00726107		1593.21	-0.00734559		2183.2	0.00229142		2773.2	-0.00793438		3363.2	-0.00426197
413.4	0.07586871		1003.39	0.00756213		1593.41	-0.0071901		2183.4	0.00208467		2773.4	-0.0068479		3363.4	-0.00428538
413.6	0.07608067		1003.59	0.00789404		1593.61	-0.0065863		2183.6	0.00100091		2773.6	-0.00665448		3363.6	-0.00447135
413.8	0.07631563		1003.79	0.00857378		1593.81	-0.0062979		2183.8	0.00237421		2773.8	-0.00596846		3363.8	-0.00501635
414	0.07561538		1003.99	0.00926082		1594.01	-0.00679944		2184	0.00162793		2774	-0.0051072		3364	-0.00540256
414.2	0.07518243		1004.19	0.00951951		1594.21	-0.00773518		2184.2	0.00216446		2774.2	-0.00494954		3364.2	-0.00544765
414.4	0.07541812		1004.39	0.00866339		1594.41	-0.00799391		2184.4	0.00159414		2774.4	-0.00447424		3364.4	-0.00538626
414.6	0.07524214		1004.59	0.00880736		1594.61	-0.00835714		2184.6	0.00231185		2774.6	-0.00404943		3364.6	-0.00386582
414.8	0.07544205		1004.79	0.00923532		1594.81	-0.00925481		2184.8	0.00289053		2774.8	-0.00302916		3364.8	-0.00281349
415	0.07623443		1004.99	0.00919665		1595.01	-0.00908648		2185	0.00323196		2775	-0.00268205		3365	-0.00253668
415.2	0.07638125		1005.19	0.00819217		1595.21	-0.0098673		2185.2	0.00413696		2775.2	-0.00219112		3365.2	-0.00214568
415.4	0.075683		1005.39	0.00906841		1595.41	-0.00988124		2185.4	0.0042215		2775.4	-0.00204107		3365.4	-0.00201185
415.6	0.07625353		1005.59	0.00974398		1595.61	-0.01003585		2185.6	0.00444035		2775.6	-0.00283395		3365.6	-0.00184344
415.8	0.07557106		1005.79	0.00961366		1595.81	-0.01047908		2185.8	0.00528769		2775.8	-0.00361848		3365.8	-0.00219852
416	0.07568554		1005.99	0.010186		1596.01	-0.00945272		2186	0.00439547		2776	-0.00413233		3366	-0.00182975
416.2	0.07481078		1006.19	0.00978678		1596.21	-0.00912355		2186.2	0.0039978		2776.2	-0.00483193		3366.2	-0.00293641
416.4	0.07472627		1006.39	0.00835741		1596.41	-0.00825882		2186.4	0.00449663		2776.4	-0.00591088		3366.4	-0.0045087
416.6	0.07475642		1006.59	0.00932114		1596.61	-0.00866627		2186.6	0.00430466		2776.6	-0.00639858		3366.6	-0.00517352
416.8	0.075529		1006.79	0.00894741		1596.81	-0.00807851		2186.8	0.00453605		2776.8	-0.00634067		3366.8	-0.00558291
417	0.0761268		1006.99	0.00868001		1597.01	-0.00827434		2187	0.00440574		2777	-0.00580179		3367	-0.00644677
417.2	0.07601429		1007.19	0.00855076		1597.21	-0.00816717		2187.2	0.00373876		2777.2	-0.00419474		3367.2	-0.00771078
417.4	0.07693928		1007.39	0.00840913		1597.41	-0.00789048		2187.4	0.00489518		2777.4	-0.00374554		3367.4	-0.00814004
417.6	0.07792961		1007.59	0.00774		1597.61	-0.00813275		2187.6	0.00504633		2777.6	-0.00297103		3367.6	-0.00890607
417.8	0.07809285		1007.79	0.00749303		1597.81	-0.0079061		2187.8	0.00554239		2777.8	-0.00379193		3367.8	-0.00958806
418	0.07733349		1007.99	0.00743993		1598.01	-0.00785793		2188	0.00490518		2778	-0.00333189		3368	-0.00963134
418.2	0.07738226		1008.19	0.00635881		1598.21	-0.0067689		2188.2	0.00481302		2778.2	-0.00363924		3368.2	-0.00978994
418.4	0.07770111		1008.39	0.00631742		1598.41	-0.00642666		2188.4	0.00540313		2778.4	-0.00291589		3368.4	-0.00870126
418.6	0.07750608		1008.59	0.00725511		1598.61	-0.00670679		2188.6	0.00647219		2778.6	-0.0021302		3368.6	-0.00753286
418.8	0.07774649		1008.79	0.00720602		1598.81	-0.00685776		2188.8	0.00701148		2778.8	-0.00308103		3368.8	-0.00676157
419	0.07745165		1008.99	0.00692154		1599.01	-0.00624376		2189	0.00691361		2779	-0.00292983		3369	-0.00591754
419.2	0.07854237		1009.19	0.00639855		1599.21	-0.00676363		2189.2	0.00683893		2779.2	-0.00191969		3369.2	-0.00485449
419.4	0.07881603		1009.39	0.00662174		1599.41	-0.00638665		2189.4	0.00644831		2779.4	-0.00239018		3369.4	-0.00510113
419.6	0.07891645		1009.59	0.00556148		1599.61	-0.00703381		2189.6	0.00656793		2779.6	-0.0027385		3369.6	-0.00553873
419.8	0.07860848		1009.79	0.00593763		1599.81	-0.00664175		2189.8	0.0057228		2779.8	-0.00401044		3369.8	-0.00584078
420	0.07911467		1009.99	0.00610554		1600.01	-0.0062726		2190	0.00533524		2780	-0.00431999		3370	-0.00588184
420.2	0.07848944		1010.19	0.00525273		1600.21	-0.00627756		2190.2	0.00510845		2780.2	-0.00532106		3370.2	-0.00647562
420.4	0.07911651		1010.39	0.00574626		1600.41	-0.00645317		2190.4	0.0049724		2780.4	-0.00584586		3370.4	-0.00630736
420.6	0.07922928		1010.59	0.0063573		1600.61	-0.00716066		2190.6	0.00457045		2780.6	-0.00585498		3370.6	-0.00630056
420.8	0.07892523		1010.79	0.00631264		1600.81	-0.00683943		2190.8	0.00359171		2780.8	-0.00528646		3370.8	-0.00627004
421	0.07978545		1010.99	0.0060252		1601.01	-0.00774937		2191	0.00361127		2781	-0.00509518		3371	-0.00645892
421.2	0.07941062		1011.19	0.00630321		1601.21	-0.00750556		2191.2	0.00372456		2781.2	-0.00504041		3371.2	-0.00657099
421.4	0.07969119		1011.39	0.00649426		1601.41	-0.00849283		2191.4	0.00472067		2781.4	-0.00563482		3371.4	-0.00646331
421.6	0.07853612		1011.59	0.00593935		1601.61	-0.00833044		2191.6	0.00431103		2781.6	-0.00489683		3371.6	-0.00719333
421.8	0.07766347		1011.79	0.00578692		1601.81	-0.00737205		2191.8	0.00454165		2781.8	-0.0056532		3371.8	-0.00770721
422	0.076991		1011.99	0.00591853		1602.01	-0.00729435		2192	0.00512093		2782	-0.00511126		3372	-0.00713398
422.2	0.07644813		1012.19	0.00593885		1602.21	-0.00665535		2192.2	0.00588667		2782.2	-0.00469044		3372.2	-0.0066231
422.4	0.07698838		1012.39	0.00609078		1602.41	-0.00792322		2192.4	0.00683134		2782.4	-0.00383781		3372.4	-0.00606088
422.6	0.07623812		1012.59	0.00604976		1602.61	-0.00826286		2192.6	0.00675058		2782.6	-0.00346615		3372.6	-0.00532231
422.8	0.07660374		1012.79	0.00552107		1602.81	-0.00820314		2192.8	0.00682151		2782.8	-0.00359482		3372.8	-0.00479742
423	0.07727039		1012.99	0.00464191		1603.01	-0.00759607		2193	0.00711807		2783	-0.0024463		3373	-0.00450523
423.2	0.07801379		1013.19	0.00433764		1603.21	-0.0081365		2193.2	0.00772934		2783.2	-0.00263148		3373.2	-0.00445147
423.4	0.07832349		1013.39	0.00433615		1603.41	-0.00887996		2193.4	0.00855091		2783.4	-0.00268345		3373.4	-0.00514384
423.6	0.07826508		1013.59	0.00432693		1603.61	-0.00898959		2193.6	0.00876633		2783.6	-0.00229912		3373.6	-0.00576157
423.8	0.07859927		1013.79	0.00532779		1603.81	-0.00941119		2193.8	0.00822616		2783.8	-0.00281074		3373.8	-0.00541697
424	0.07881472		1013.99	0.00606779		1604.01	-0.0100476		2194	0.00781621		2784	-0.00274637		3374	-0.00486531
424.2	0.07870702		1014.19	0.00550924		1604.21	-0.00991206		2194.2	0.00659285		2784.2	-0.00380363		3374.2	-0.00443267
424.4	0.07974422		1014.39	0.00656445		1604.41	-0.01025193		2194.4	0.00618332		2784.4	-0.00440178		3374.4	-0.00431828
424.6	0.07996691		1014.59	0.00625191		1604.61	-0.00954163		2194.6	0.00552364		2784.6	-0.00505153		3374.6	-0.00450469
424.8	0.08086666		1014.79	0.00707763		1604.81	-0.0095267		2194.8	0.00467283		2784.8	-0.00506127		3374.8	-0.004716
425	0.08160999		1014.99	0.0068954		1605.01	-0.01020201		2195	0.00378671		2785	-0.00574236		3375	-0.00474944
425.2	0.080968		1015.19	0.00731807		1605.21	-0.01013691		2195.2	0.00363891		2785.2	-0.0070284		3375.2	-0.00481464
425.4	0.08228151		1015.39	0.00732421		1605.41	-0.01095875		2195.4	0.00344238		2785.4	-0.0069192		3375.4	-0.00563042
425.6	0.08219239		1015.59	0.00758511		1605.61	-0.01030377		2195.6	0.00296988		2785.6	-0.006764		3375.6	-0.00635491
425.8	0.08168016		1015.79	0.0077068		1605.81	-0.01011484		2195.8	0.00310779		2785.8	-0.00749612		3375.8	-0.00600571
426	0.08175115		1015.99	0.00689362		1606.01	-0.0108421		2196	0.00334844		2786	-0.00777634		3376	-0.00514283
426.2	0.08054476		1016.19	0.00633469		1606.21	-0.01063085		2196.2	0.00338244		2786.2	-0.00729932		3376.2	-0.00497212
426.4	0.08068794		1016.39	0.00587992		1606.41	-0.01116659		2196.4	0.00309797		2786.4	-0.00749124		3376.4	-0.00594726
426.6	0.07978144		1016.59	0.00594818		1606.61	-0.01072442		2196.6	0.00311902		2786.6	-0.00778777		3376.6	-0.00603262
426.8	0.08000709		1016.79	0.00592878		1606.81	-0.0105653		2196.8	0.00409048		2786.8	-0.00799636		3376.8	-0.00606585
427	0.07943074		1016.99	0.0051846		1607.01	-0.01020871		2197	0.0047413		2787	-0.00763663		3377	-0.00653072
427.2	0.07947285		1017.19	0.00496328		1607.21	-0.01065521		2197.2	0.00589505		2787.2	-0.00737499		3377.2	-0.00672617
427.4	0.07952503		1017.39	0.0054939		1607.41	-0.0107064		2197.4	0.00692975		2787.4	-0.00682159		3377.4	-0.00750802
427.6	0.07936124		1017.59	0.00568409		1607.61	-0.00968529		2197.6	0.00696462		2787.6	-0.00696157		3377.6	-0.00671548
427.8	0.07914832		1017.79	0.00582538		1607.81	-0.00952658		2197.8	0.00643569		2787.8	-0.00672075		3377.8	-0.00631575
428	0.07921029		1017.99	0.00626241		1608.01	-0.00882248		2198	0.00546342		2788	-0.00633025		3378	-0.00616499
428.2	0.07945194		1018.19	0.00515805		1608.21	-0.00808833		2198.2	0.0063849		2788.2	-0.00588262		3378.2	-0.00516631
428.4	0.08011268		1018.39	0.00637205		1608.41	-0.00771514		2198.4	0.00771189		2788.4	-0.00570744		3378.4	-0.00450037
428.6	0.08023447		1018.59	0.00603147		1608.61	-0.00705924		2198.6	0.00698482		2788.6	-0.00512115		3378.6	-0.00414217
428.8	0.08086811		1018.79	0.0063405		1608.81	-0.00776461		2198.8	0.00592186		2788.8	-0.00444713		3378.8	-0.00429105
429	0.08076896		1018.99	0.00667787		1609.01	-0.00817815		2199	0.00526714		2789	-0.00489223		3379	-0.0035007
429.2	0.08125088		1019.19	0.00709596		1609.21	-0.00879176		2199.2	0.00565909		2789.2	-0.00572391		3379.2	-0.00351897
429.4	0.08244277		1019.39	0.00724456		1609.41	-0.00953437		2199.4	0.00563321		2789.4	-0.0047367		3379.4	-0.00268197
429.6	0.08219815		1019.59	0.00715137		1609.61	-0.00954983		2199.6	0.0055948		2789.6	-0.00483199		3379.6	-0.00207066
429.8	0.08192566		1019.79	0.00661617		1609.81	-0.00910796		2199.8	0.00600266		2789.8	-0.00458048		3379.8	-0.00149619
430	0.08305805		1019.99	0.00571338		1610.01	-0.00989207		2200	0.00564037		2790	-0.00460928		3380	-0.00118536
430.2	0.08272038		1020.19	0.00528412		1610.21	-0.01000554		2200.2	0.00546847		2790.2	-0.00468994		3380.2	-0.00224034
430.4	0.08375736		1020.39	0.00582328		1610.41	-0.00994052		2200.4	0.00567203		2790.4	-0.00465084		3380.4	-0.00319009
430.6	0.08443858		1020.59	0.00477756		1610.61	-0.00986857		2200.6	0.00575182		2790.6	-0.00460066		3380.6	-0.00313403
430.8	0.08539657		1020.79	0.00473432		1610.81	-0.01027768		2200.8	0.00583836		2790.8	-0.00497593		3380.8	-0.00306187
431	0.08571652		1020.99	0.00411937		1611.01	-0.01033707		2201	0.0065135		2791	-0.00523369		3381	-0.00379149
431.2	0.08597827		1021.19	0.00498009		1611.21	-0.0104709		2201.2	0.00678567		2791.2	-0.00466608		3381.2	-0.00396554
431.4	0.08581157		1021.39	0.00557118		1611.41	-0.0110183		2201.4	0.00686955		2791.4	-0.00533755		3381.4	-0.00453838
431.6	0.08568079		1021.59	0.00599863		1611.61	-0.01106926		2201.6	0.00709013		2791.6	-0.00574509		3381.6	-0.00422379
431.8	0.08534193		1021.79	0.00703119		1611.81	-0.011135		2201.8	0.00624448		2791.8	-0.00539418		3381.8	-0.00478468
432	0.08460247		1021.99	0.00782051		1612.01	-0.01061835		2202	0.00683179		2792	-0.00558999		3382	-0.00495225
432.2	0.0841252		1022.19	0.0088875		1612.21	-0.01043837		2202.2	0.0080123		2792.2	-0.00600676		3382.2	-0.00452953
432.4	0.08387149		1022.39	0.00976867		1612.41	-0.01041927		2202.4	0.00786468		2792.4	-0.00586303		3382.4	-0.00509139
432.6	0.08325812		1022.59	0.00992952		1612.61	-0.01072158		2202.6	0.00634042		2792.6	-0.0060418		3382.6	-0.00594959
432.8	0.082705		1022.79	0.01029373		1612.81	-0.01058399		2202.8	0.00614752		2792.8	-0.00710345		3382.8	-0.00627851
433	0.08238726		1022.99	0.00972884		1613.01	-0.01071793		2203	0.00660353		2793	-0.00759334		3383	-0.0066173
433.2	0.08335123		1023.19	0.00999944		1613.21	-0.01075655		2203.2	0.00638284		2793.2	-0.00789013		3383.2	-0.00703497
433.4	0.08382427		1023.39	0.0097473		1613.41	-0.01084514		2203.4	0.00644664		2793.4	-0.00700304		3383.4	-0.00631931
433.6	0.08412789		1023.59	0.00939692		1613.61	-0.01118871		2203.6	0.0055458		2793.6	-0.00632788		3383.6	-0.0064966
433.8	0.08455083		1023.79	0.00919074		1613.81	-0.01022669		2203.8	0.00578054		2793.8	-0.00584032		3383.8	-0.00672877
434	0.08510893		1023.99	0.00836836		1614.01	-0.01077454		2204	0.00517219		2794	-0.00582225		3384	-0.00633131
434.2	0.08498462		1024.19	0.00770645		1614.21	-0.01039756		2204.2	0.00540397		2794.2	-0.00531383		3384.2	-0.00663522
434.4	0.08635493		1024.39	0.00754186		1614.41	-0.01014008		2204.4	0.00556177		2794.4	-0.00420282		3384.4	-0.00592805
434.6	0.08728709		1024.59	0.00643615		1614.61	-0.01007408		2204.6	0.00561739		2794.6	-0.00355974		3384.6	-0.00554128
434.8	0.08767702		1024.79	0.0067284		1614.81	-0.00974155		2204.8	0.00581101		2794.8	-0.00424931		3384.8	-0.00555177
435	0.08773151		1024.99	0.00652666		1615.01	-0.00928866		2205	0.00611824		2795	-0.00366325		3385	-0.00617972
435.2	0.08794107		1025.19	0.00701351		1615.21	-0.00947769		2205.2	0.00632254		2795.2	-0.00239398		3385.2	-0.00556328
435.4	0.08895221		1025.39	0.00683333		1615.41	-0.01008846		2205.4	0.00643325		2795.4	-0.00294725		3385.4	-0.00491271
435.6	0.09018738		1025.59	0.00734548		1615.61	-0.00959273		2205.6	0.0069703		2795.6	-0.00303587		3385.6	-0.00395662
435.8	0.09000072		1025.79	0.00803		1615.81	-0.00880786		2205.8	0.00632653		2795.8	-0.00287869		3385.8	-0.00366166
436	0.09034743		1025.99	0.00824482		1616.01	-0.00830624		2206	0.00709279		2796	-0.00330633		3386	-0.00375357
436.2	0.09182343		1026.19	0.00823773		1616.21	-0.00794964		2206.2	0.00704059		2796.2	-0.00379677		3386.2	-0.00372759
436.4	0.09189292		1026.39	0.00801725		1616.41	-0.00762626		2206.4	0.00635043		2796.4	-0.00307048		3386.4	-0.00320272
436.6	0.0906993		1026.59	0.00867811		1616.61	-0.00783861		2206.6	0.00602623		2796.6	-0.00425787		3386.6	-0.00372513
436.8	0.09050919		1026.79	0.00844172		1616.81	-0.00772568		2206.8	0.00591248		2796.8	-0.00514459		3386.8	-0.00422773
437	0.09062629		1026.99	0.00735875		1617.01	-0.00781881		2207	0.00631858		2797	-0.0054835		3387	-0.00471742
437.2	0.09029276		1027.19	0.00786043		1617.21	-0.0078082		2207.2	0.00594157		2797.2	-0.00554837		3387.2	-0.00468874
437.4	0.08917031		1027.39	0.00742808		1617.41	-0.0081511		2207.4	0.00603003		2797.4	-0.00576298		3387.4	-0.00429274
437.6	0.08815362		1027.59	0.00666538		1617.61	-0.00854665		2207.6	0.00624975		2797.6	-0.00533886		3387.6	-0.00429325
437.8	0.08725772		1027.79	0.00698834		1617.81	-0.00758168		2207.8	0.0063712		2797.8	-0.005763		3387.8	-0.00489845
438	0.08624246		1027.99	0.00703911		1618.01	-0.00799246		2208	0.00617773		2798	-0.00642004		3388	-0.00483534
438.2	0.0856101		1028.19	0.00730056		1618.21	-0.00815587		2208.2	0.00655351		2798.2	-0.00614027		3388.2	-0.00503785
438.4	0.08588214		1028.39	0.00756134		1618.41	-0.00791444		2208.4	0.0065891		2798.4	-0.0054984		3388.4	-0.00487893
438.6	0.08507028		1028.59	0.00728841		1618.61	-0.00749786		2208.6	0.00659945		2798.6	-0.00538873		3388.6	-0.00578544
438.8	0.08532127		1028.79	0.00738955		1618.81	-0.00728247		2208.8	0.00679992		2798.8	-0.00555112		3388.8	-0.00673091
439	0.08566643		1028.99	0.00729157		1619.01	-0.00804993		2209	0.00739384		2799	-0.00485627		3389	-0.00699101
439.2	0.08606283		1029.19	0.00710994		1619.21	-0.00885796		2209.2	0.0074248		2799.2	-0.00454027		3389.2	-0.0062008
439.4	0.0878362		1029.39	0.00732751		1619.41	-0.00957622		2209.4	0.00673409		2799.4	-0.00478438		3389.4	-0.00681545
439.6	0.08918843		1029.59	0.00781662		1619.61	-0.00951496		2209.6	0.00690123		2799.6	-0.00504587		3389.6	-0.00718857
439.8	0.0889675		1029.79	0.00840673		1619.81	-0.0094309		2209.8	0.00659344		2799.8	-0.00483314		3389.8	-0.00813397
440	0.09027064		1029.99	0.00857245		1620.01	-0.00934795		2210	0.00618542		2800	-0.00407832		3390	-0.00871219
440.2	0.09035305		1030.19	0.00845319		1620.21	-0.00902301		2210.2	0.00588974		2800.2	-0.00440024		3390.2	-0.00834117
440.4	0.09035738		1030.39	0.00959769		1620.41	-0.00947972		2210.4	0.0052405		2800.4	-0.00433237		3390.4	-0.00783859
440.6	0.09007011		1030.59	0.00991194		1620.61	-0.00989732		2210.6	0.00475096		2800.6	-0.00532773		3390.6	-0.00901772
440.8	0.09098022		1030.79	0.00983906		1620.81	-0.01047244		2210.8	0.00410845		2800.8	-0.00602616		3390.8	-0.00907397
441	0.09082401		1030.99	0.0095253		1621.01	-0.00983596		2211	0.00498826		2801	-0.0060735		3391	-0.0084982
441.2	0.09016174		1031.19	0.00903094		1621.21	-0.00969385		2211.2	0.00437496		2801.2	-0.00550718		3391.2	-0.008318
441.4	0.08978803		1031.39	0.00835562		1621.41	-0.01022911		2211.4	0.00466515		2801.4	-0.00645595		3391.4	-0.00816898
441.6	0.08922925		1031.59	0.0082182		1621.61	-0.00984718		2211.6	0.00460081		2801.6	-0.00599884		3391.6	-0.00741977
441.8	0.08858528		1031.79	0.00844362		1621.81	-0.00946446		2211.8	0.00351324		2801.8	-0.0065172		3391.8	-0.00744639
442	0.0891014		1031.99	0.00810903		1622.01	-0.00983365		2212	0.00390152		2802	-0.006618		3392	-0.0071468
442.2	0.08890675		1032.19	0.00817857		1622.21	-0.0089193		2212.2	0.00354224		2802.2	-0.00598514		3392.2	-0.00573053
442.4	0.08962012		1032.39	0.00786815		1622.41	-0.00838632		2212.4	0.00270445		2802.4	-0.00544484		3392.4	-0.0048863
442.6	0.08970697		1032.59	0.00682052		1622.61	-0.00921474		2212.6	0.00314072		2802.6	-0.00504552		3392.6	-0.00521924
442.8	0.09006363		1032.79	0.00638612		1622.81	-0.00899164		2212.8	0.00348579		2802.8	-0.00547254		3392.8	-0.0049128
443	0.08967514		1032.99	0.00630064		1623.01	-0.00984497		2213	0.00369795		2803	-0.00512202		3393	-0.0048507
443.2	0.09018863		1033.19	0.00634903		1623.21	-0.00994644		2213.2	0.00356405		2803.2	-0.00544307		3393.2	-0.00462955
443.4	0.09101276		1033.39	0.00657148		1623.41	-0.0097478		2213.4	0.00346053		2803.4	-0.00617578		3393.4	-0.00488342
443.6	0.09121263		1033.59	0.00628445		1623.61	-0.00945224		2213.6	0.00425195		2803.6	-0.00573375		3393.6	-0.00488054
443.8	0.09108202		1033.79	0.00674801		1623.81	-0.00870458		2213.8	0.00412217		2803.8	-0.00603096		3393.8	-0.0048949
444	0.09165095		1033.99	0.00671095		1624.01	-0.00935351		2214	0.00428603		2804	-0.00621693		3394	-0.00403305
444.2	0.09154668		1034.19	0.00636508		1624.21	-0.00893994		2214.2	0.00408595		2804.2	-0.00642889		3394.2	-0.00377756
444.4	0.09229319		1034.39	0.00681055		1624.41	-0.00927205		2214.4	0.00415393		2804.4	-0.00667323		3394.4	-0.00440124
444.6	0.09198535		1034.59	0.00711474		1624.61	-0.00911623		2214.6	0.00471717		2804.6	-0.00671468		3394.6	-0.00430931
444.8	0.09260835		1034.79	0.00749472		1624.81	-0.00963219		2214.8	0.00485921		2804.8	-0.00648113		3394.8	-0.00440241
445	0.09270559		1034.99	0.00667648		1625.01	-0.00916899		2215	0.00552838		2805	-0.00606963		3395	-0.00446654
445.2	0.0919444		1035.19	0.00637355		1625.21	-0.01033194		2215.2	0.00543095		2805.2	-0.00561775		3395.2	-0.00583236
445.4	0.09280471		1035.39	0.00656476		1625.41	-0.01027408		2215.4	0.00547797		2805.4	-0.00603901		3395.4	-0.00595898
445.6	0.09291364		1035.59	0.00608776		1625.61	-0.00963221		2215.6	0.00493925		2805.6	-0.00526428		3395.6	-0.00579962
445.8	0.09293607		1035.79	0.00525187		1625.81	-0.00916262		2215.8	0.00422495		2805.8	-0.00536084		3395.8	-0.00700185
446	0.09438231		1035.99	0.00571609		1626.01	-0.0089602		2216	0.00398492		2806	-0.00455959		3396	-0.00705055
446.2	0.09382718		1036.19	0.00540562		1626.21	-0.00827484		2216.2	0.00377353		2806.2	-0.00390253		3396.2	-0.00722146
446.4	0.09346732		1036.39	0.00532396		1626.41	-0.00905113		2216.4	0.00397683		2806.4	-0.00315437		3396.4	-0.00775863
446.6	0.09214036		1036.59	0.0048433		1626.61	-0.00948392		2216.6	0.00370947		2806.6	-0.00309122		3396.6	-0.00891741
446.8	0.09134425		1036.79	0.00573774		1626.81	-0.00874061		2216.8	0.00329003		2806.8	-0.00353778		3396.8	-0.00937196
447	0.09100011		1036.99	0.00593389		1627.01	-0.0093313		2217	0.0034982		2807	-0.00321786		3397	-0.00992165
447.2	0.09101416		1037.19	0.0060243		1627.21	-0.00983128		2217.2	0.00335791		2807.2	-0.00457781		3397.2	-0.00978765
447.4	0.09005507		1037.39	0.00597716		1627.41	-0.00984451		2217.4	0.00291587		2807.4	-0.0051909		3397.4	-0.00961907
447.6	0.08998273		1037.59	0.00606585		1627.61	-0.0097193		2217.6	0.00244624		2807.6	-0.00478473		3397.6	-0.00971125
447.8	0.08958206		1037.79	0.00693862		1627.81	-0.01039152		2217.8	0.00179134		2807.8	-0.00584033		3397.8	-0.00936198
448	0.08889448		1037.99	0.00654009		1628.01	-0.01072588		2218	0.00235249		2808	-0.00642625		3398	-0.00920769
448.2	0.0883453		1038.19	0.00730885		1628.21	-0.01049219		2218.2	0.00252839		2808.2	-0.00586497		3398.2	-0.00864973
448.4	0.08839561		1038.39	0.00832361		1628.41	-0.01065864		2218.4	0.00359212		2808.4	-0.00637559		3398.4	-0.00804538
448.6	0.08911293		1038.59	0.00892447		1628.61	-0.0109374		2218.6	0.00420594		2808.6	-0.00609389		3398.6	-0.00698729
448.8	0.09003048		1038.79	0.00870515		1628.81	-0.01115883		2218.8	0.00359489		2808.8	-0.00589297		3398.8	-0.00671711
449	0.09056462		1038.99	0.00801034		1629.01	-0.01117804		2219	0.00396463		2809	-0.00613179		3399	-0.0066162
449.2	0.09061964		1039.19	0.00799897		1629.21	-0.01188004		2219.2	0.00371608		2809.2	-0.0059965		3399.2	-0.00596917
449.4	0.09197525		1039.39	0.00661926		1629.41	-0.01048894		2219.4	0.00414679		2809.4	-0.00628428		3399.4	-0.00507686
449.6	0.09167584		1039.59	0.00607855		1629.61	-0.01033282		2219.6	0.0042021		2809.6	-0.0057295		3399.6	-0.00464584
449.8	0.09270096		1039.79	0.00550119		1629.81	-0.00975612		2219.8	0.00417421		2809.8	-0.00570061		3399.8	-0.00514727
450	0.09389653		1039.99	0.00587423		1630.01	-0.00945541		2220	0.00416244		2810	-0.00507912		3400	-0.00463335
450.2	0.09426736		1040.19	0.00515798		1630.21	-0.00917564		2220.2	0.00405829		2810.2	-0.00483949		3400.2	-0.00494769
450.4	0.0932748		1040.39	0.00515192		1630.41	-0.00872958		2220.4	0.00336549		2810.4	-0.00473917		3400.4	-0.00503408
450.6	0.09297793		1040.59	0.00509793		1630.61	-0.00797575		2220.6	0.00184958		2810.6	-0.00509029		3400.6	-0.00602966
450.8	0.09353132		1040.79	0.00544629		1630.81	-0.00795315		2220.8	0.00164634		2810.8	-0.00509951		3400.8	-0.0072905
451	0.09351948		1040.99	0.00493559		1631.01	-0.00849863		2221	0.00134226		2811	-0.00494425		3401	-0.00733613
451.2	0.09364191		1041.19	0.00550344		1631.21	-0.0087328		2221.2	0.00116813		2811.2	-0.00537923		3401.2	-0.00793139
451.4	0.09355203		1041.39	0.00549765		1631.41	-0.00812563		2221.4	0.0007004		2811.4	-0.00533092		3401.4	-0.008803
451.6	0.09418471		1041.59	0.00526541		1631.61	-0.00764179		2221.6	0.00099275		2811.6	-0.00516656		3401.6	-0.00971786
451.8	0.09398753		1041.79	0.00602434		1631.81	-0.00831405		2221.8	0.00179823		2811.8	-0.00528084		3401.8	-0.010324
452	0.09430735		1041.99	0.00643834		1632.01	-0.00764406		2222	0.00264955		2812	-0.00505965		3402	-0.01064095
452.2	0.09372872		1042.19	0.00792007		1632.21	-0.00721862		2222.2	0.00376208		2812.2	-0.00469834		3402.2	-0.01021295
452.4	0.09364907		1042.39	0.00784653		1632.41	-0.00755692		2222.4	0.00527786		2812.4	-0.00426703		3402.4	-0.01086175
452.6	0.09317284		1042.59	0.00746028		1632.61	-0.00839811		2222.6	0.00549601		2812.6	-0.00428439		3402.6	-0.01072084
452.8	0.09283857		1042.79	0.00694181		1632.81	-0.00848266		2222.8	0.00557859		2812.8	-0.00394069		3402.8	-0.01063004
453	0.09222063		1042.99	0.00612092		1633.01	-0.00792311		2223	0.006419		2813	-0.00434232		3403	-0.01008383
453.2	0.09259803		1043.19	0.00547965		1633.21	-0.00773238		2223.2	0.00643086		2813.2	-0.00459961		3403.2	-0.00889307
453.4	0.09187008		1043.39	0.00459802		1633.41	-0.00700714		2223.4	0.00810348		2813.4	-0.00445207		3403.4	-0.00897087
453.6	0.09180916		1043.59	0.00465752		1633.61	-0.00728906		2223.6	0.00795607		2813.6	-0.00437142		3403.6	-0.00788689
453.8	0.09216291		1043.79	0.0047905		1633.81	-0.00761869		2223.8	0.00754251		2813.8	-0.00512674		3403.8	-0.00706114
454	0.09218597		1043.99	0.00544569		1634.01	-0.00716349		2224	0.00683661		2814	-0.00598846		3404	-0.00589956
454.2	0.09248353		1044.19	0.00575398		1634.21	-0.00798008		2224.2	0.00596591		2814.2	-0.00665728		3404.2	-0.00542489
454.4	0.09168763		1044.39	0.00633375		1634.41	-0.00767295		2224.4	0.00526278		2814.4	-0.00740476		3404.4	-0.00551796
454.6	0.09247106		1044.59	0.00688487		1634.61	-0.00754881		2224.6	0.00503522		2814.6	-0.00839879		3404.6	-0.00537914
454.8	0.09258323		1044.79	0.00633594		1634.81	-0.00790276		2224.8	0.00501758		2814.8	-0.00871153		3404.8	-0.0054554
455	0.09327109		1044.99	0.00629344		1635.01	-0.00861436		2225	0.00517484		2815	-0.00895218		3405	-0.00443485
455.2	0.09444055		1045.19	0.00669058		1635.21	-0.00844354		2225.2	0.00493487		2815.2	-0.00994961		3405.2	-0.00493907
455.4	0.0953066		1045.39	0.00728664		1635.41	-0.00839716		2225.4	0.00504396		2815.4	-0.00969201		3405.4	-0.00600455
455.6	0.09609896		1045.59	0.00716107		1635.61	-0.00875912		2225.6	0.00586113		2815.6	-0.00949762		3405.6	-0.00624439
455.8	0.09663923		1045.79	0.0078839		1635.81	-0.00937699		2225.8	0.00566446		2815.8	-0.00927432		3405.8	-0.007122
456	0.09610853		1045.99	0.00852848		1636.01	-0.00966136		2226	0.00566863		2816	-0.00868245		3406	-0.00692249
456.2	0.09529765		1046.19	0.00910257		1636.21	-0.00997936		2226.2	0.00678363		2816.2	-0.00946184		3406.2	-0.00713733
456.4	0.0951575		1046.39	0.00900086		1636.41	-0.01040881		2226.4	0.00730639		2816.4	-0.00918278		3406.4	-0.00796043
456.6	0.09438508		1046.59	0.00879375		1636.61	-0.01099663		2226.6	0.00692385		2816.6	-0.00911078		3406.6	-0.00747138
456.8	0.09527626		1046.79	0.0087009		1636.81	-0.01089758		2226.8	0.00676038		2816.8	-0.0077045		3406.8	-0.00733528
457	0.09481131		1046.99	0.00839204		1637.01	-0.0098032		2227	0.00631529		2817	-0.00767468		3407	-0.00674639
457.2	0.09499319		1047.19	0.00894732		1637.21	-0.00982165		2227.2	0.00607009		2817.2	-0.00721994		3407.2	-0.00693863
457.4	0.09411702		1047.39	0.00883721		1637.41	-0.01015822		2227.4	0.00683383		2817.4	-0.00588735		3407.4	-0.00656491
457.6	0.09350762		1047.59	0.00935476		1637.61	-0.00989928		2227.6	0.00678822		2817.6	-0.00529213		3407.6	-0.00593272
457.8	0.09303274		1047.79	0.01016642		1637.81	-0.00956042		2227.8	0.00611638		2817.8	-0.00470179		3407.8	-0.00572002
458	0.09343759		1047.99	0.01082025		1638.01	-0.0092288		2228	0.00586284		2818	-0.00416165		3408	-0.00611196
458.2	0.09412133		1048.19	0.01122993		1638.21	-0.0093065		2228.2	0.0052469		2818.2	-0.00348911		3408.2	-0.00598841
458.4	0.09368102		1048.39	0.01140259		1638.41	-0.00890836		2228.4	0.00446712		2818.4	-0.00360718		3408.4	-0.00560623
458.6	0.09421932		1048.59	0.010939		1638.61	-0.00889809		2228.6	0.00479557		2818.6	-0.00336611		3408.6	-0.00624518
458.8	0.09344738		1048.79	0.00975462		1638.81	-0.00908291		2228.8	0.00479765		2818.8	-0.00349241		3408.8	-0.00542164
459	0.09452069		1048.99	0.00997104		1639.01	-0.00974004		2229	0.00483477		2819	-0.00355611		3409	-0.00545539
459.2	0.09533175		1049.19	0.01099785		1639.21	-0.00917503		2229.2	0.00515207		2819.2	-0.00384604		3409.2	-0.00629891
459.4	0.09531857		1049.39	0.01129397		1639.41	-0.00906446		2229.4	0.00564858		2819.4	-0.00351609		3409.4	-0.00726231
459.6	0.09604589		1049.59	0.01032679		1639.61	-0.00962799		2229.6	0.0052857		2819.6	-0.00321218		3409.6	-0.00741175
459.8	0.09662051		1049.79	0.00995404		1639.81	-0.01005257		2229.8	0.0048005		2819.8	-0.00327406		3409.8	-0.008129
460	0.09590395		1049.99	0.00964997		1640.01	-0.01120558		2230	0.00477723		2820	-0.0036564		3410	-0.00819772
460.2	0.09606822		1050.19	0.00949119		1640.21	-0.01124597		2230.2	0.00462181		2820.2	-0.00427792		3410.2	-0.0088108
460.4	0.09638785		1050.39	0.00945101		1640.41	-0.0108554		2230.4	0.00423209		2820.4	-0.00442861		3410.4	-0.00832585
460.6	0.0961082		1050.59	0.00833056		1640.61	-0.01139791		2230.6	0.00459859		2820.6	-0.00420012		3410.6	-0.00749485
460.8	0.09628047		1050.79	0.0078332		1640.81	-0.01152603		2230.8	0.00423391		2820.8	-0.00431103		3410.8	-0.00738586
461	0.095944		1050.99	0.00752019		1641.01	-0.0106106		2231	0.00374046		2821	-0.00541016		3411	-0.00712187
461.2	0.0966272		1051.19	0.00763612		1641.21	-0.01047485		2231.2	0.00389075		2821.2	-0.00452313		3411.2	-0.00712168
461.4	0.09651076		1051.39	0.00736949		1641.41	-0.01068301		2231.4	0.00412464		2821.4	-0.00364629		3411.4	-0.00676108
461.6	0.0968769		1051.59	0.00785234		1641.61	-0.01062916		2231.6	0.00441692		2821.6	-0.0032034		3411.6	-0.00708792
461.8	0.09719496		1051.79	0.00822818		1641.81	-0.01022125		2231.8	0.00381352		2821.8	-0.00294414		3411.8	-0.00677268
462	0.09717592		1051.99	0.00903243		1642.01	-0.01010457		2232	0.00406563		2822	-0.00312529		3412	-0.00703646
462.2	0.09731774		1052.19	0.00901659		1642.21	-0.00955334		2232.2	0.00393405		2822.2	-0.00337578		3412.2	-0.0065863
462.4	0.09694851		1052.39	0.00885326		1642.41	-0.01040709		2232.4	0.00460727		2822.4	-0.00351356		3412.4	-0.00596362
462.6	0.09765571		1052.59	0.00845626		1642.61	-0.0106525		2232.6	0.00552337		2822.6	-0.00452578		3412.6	-0.00651767
462.8	0.09748262		1052.79	0.00872694		1642.81	-0.00983877		2232.8	0.0059763		2822.8	-0.00497549		3412.8	-0.00605649
463	0.09860223		1052.99	0.00933206		1643.01	-0.0093142		2233	0.00623654		2823	-0.00448561		3413	-0.00678313
463.2	0.09884509		1053.19	0.01018774		1643.21	-0.00858482		2233.2	0.00627038		2823.2	-0.00426189		3413.2	-0.0070015
463.4	0.09835687		1053.39	0.01006862		1643.41	-0.00880854		2233.4	0.00599129		2823.4	-0.00357674		3413.4	-0.00743018
463.6	0.09902537		1053.59	0.0095733		1643.61	-0.00930941		2233.6	0.00540938		2823.6	-0.00332165		3413.6	-0.00813872
463.8	0.09924825		1053.79	0.00927968		1643.81	-0.00930327		2233.8	0.0051588		2823.8	-0.0031737		3413.8	-0.0087714
464	0.09851935		1053.99	0.0095324		1644.01	-0.00916904		2234	0.00481965		2824	-0.00340537		3414	-0.00936396
464.2	0.09906941		1054.19	0.00947789		1644.21	-0.0082619		2234.2	0.00471166		2824.2	-0.0036224		3414.2	-0.00935868
464.4	0.09960287		1054.39	0.00938639		1644.41	-0.00826462		2234.4	0.00552176		2824.4	-0.00387061		3414.4	-0.00907316
464.6	0.09887161		1054.59	0.00857012		1644.61	-0.0083953		2234.6	0.00655851		2824.6	-0.00424033		3414.6	-0.00972619
464.8	0.10005091		1054.79	0.00852304		1644.81	-0.0088439		2234.8	0.00578127		2824.8	-0.00474132		3414.8	-0.01019382
465	0.100508		1054.99	0.00878658		1645.01	-0.00816696		2235	0.00518162		2825	-0.0050923		3415	-0.01078525
465.2	0.10046805		1055.19	0.00850351		1645.21	-0.00810304		2235.2	0.00505387		2825.2	-0.0044949		3415.2	-0.01046373
465.4	0.10045251		1055.39	0.00868403		1645.41	-0.00806414		2235.4	0.0055454		2825.4	-0.00495624		3415.4	-0.01056541
465.6	0.10115802		1055.59	0.00949797		1645.61	-0.00755959		2235.6	0.00642962		2825.6	-0.00515415		3415.6	-0.01125048
465.8	0.10045859		1055.79	0.01004436		1645.81	-0.00783255		2235.8	0.00635253		2825.8	-0.00537348		3415.8	-0.01000947
466	0.10014985		1055.99	0.00987303		1646.01	-0.00777043		2236	0.0069605		2826	-0.00562659		3416	-0.01021062
466.2	0.10003568		1056.19	0.00963854		1646.21	-0.0077344		2236.2	0.00738987		2826.2	-0.00618006		3416.2	-0.00902277
466.4	0.0999706		1056.39	0.00989569		1646.41	-0.00831473		2236.4	0.00817599		2826.4	-0.00705579		3416.4	-0.00838165
466.6	0.09968179		1056.59	0.00998191		1646.61	-0.00738727		2236.6	0.00851299		2826.6	-0.00788524		3416.6	-0.00783306
466.8	0.09964669		1056.79	0.01067031		1646.81	-0.00700092		2236.8	0.00838757		2826.8	-0.00759034		3416.8	-0.00796852
467	0.09869645		1056.99	0.01053459		1647.01	-0.00754495		2237	0.00829416		2827	-0.00776038		3417	-0.00705943
467.2	0.09802207		1057.19	0.01027555		1647.21	-0.00748907		2237.2	0.00760744		2827.2	-0.00770995		3417.2	-0.00674469
467.4	0.09698655		1057.39	0.01103492		1647.41	-0.00820626		2237.4	0.00755689		2827.4	-0.00716986		3417.4	-0.00708294
467.6	0.0973438		1057.59	0.01069649		1647.61	-0.00796694		2237.6	0.00674655		2827.6	-0.00769422		3417.6	-0.00661403
467.8	0.09771961		1057.79	0.0114307		1647.81	-0.00840778		2237.8	0.00711289		2827.8	-0.00715473		3417.8	-0.00627438
468	0.0978764		1057.99	0.01208274		1648.01	-0.00883965		2238	0.00732835		2828	-0.00749381		3418	-0.00633025
468.2	0.09854645		1058.19	0.01215514		1648.21	-0.00949908		2238.2	0.00760009		2828.2	-0.00739203		3418.2	-0.00655858
468.4	0.09861891		1058.39	0.01250861		1648.41	-0.01025774		2238.4	0.00770595		2828.4	-0.00695318		3418.4	-0.00682997
468.6	0.09854799		1058.59	0.01223094		1648.61	-0.01036733		2238.6	0.00730288		2828.6	-0.00710189		3418.6	-0.00743777
468.8	0.09917143		1058.79	0.01207506		1648.81	-0.01048108		2238.8	0.00625194		2828.8	-0.00687416		3418.8	-0.00818462
469	0.09849908		1058.99	0.01177379		1649.01	-0.01006391		2239	0.00587868		2829	-0.00688989		3419	-0.00867661
469.2	0.09865896		1059.19	0.01096314		1649.21	-0.00982987		2239.2	0.00575723		2829.2	-0.00651435		3419.2	-0.0087331
469.4	0.09915329		1059.39	0.01101063		1649.41	-0.0096705		2239.4	0.0055466		2829.4	-0.00631073		3419.4	-0.00968982
469.6	0.09946153		1059.59	0.01101736		1649.61	-0.00983966		2239.6	0.00516514		2829.6	-0.00610534		3419.6	-0.01040046
469.8	0.09927081		1059.79	0.01015178		1649.81	-0.01024734		2239.8	0.0041512		2829.8	-0.00591144		3419.8	-0.0100255
470	0.09927081		1059.99	0.01015178		1650.01	-0.01024734		2240	0.0041512		2830	-0.00591144		3419.99	-0.0100255
470.2	0.1001298		1060.19	0.00983011		1650.21	-0.00994835		2240.2	0.0040715		2830.2	-0.00553075		3420.19	-0.0103619
470.4	0.100758		1060.39	0.00910525		1650.41	-0.00982268		2240.4	0.00435792		2830.4	-0.00433508		3420.39	-0.01015674
470.6	0.10183839		1060.59	0.00892603		1650.61	-0.00960817		2240.6	0.00439975		2830.6	-0.00394487		3420.59	-0.00972424
470.8	0.10212576		1060.79	0.00845143		1650.81	-0.00977799		2240.8	0.0043378		2830.8	-0.00298191		3420.79	-0.00895942
471	0.10254138		1060.99	0.0079965		1651.01	-0.00968229		2241	0.00387639		2831	-0.00276183		3420.99	-0.00942193
471.2	0.10292383		1061.19	0.00773239		1651.21	-0.00943928		2241.2	0.0038788		2831.2	-0.00251375		3421.19	-0.00925133
471.4	0.10349058		1061.39	0.00744228		1651.41	-0.00944255		2241.4	0.00364149		2831.4	-0.00150633		3421.39	-0.00941382
471.6	0.10424263		1061.59	0.00753634		1651.61	-0.00882544		2241.6	0.00349857		2831.6	-0.001543		3421.59	-0.00963525
471.8	0.10471686		1061.79	0.00764269		1651.81	-0.00874393		2241.8	0.00322618		2831.8	-0.00160912		3421.79	-0.00989349
472	0.10486265		1061.99	0.00723572		1652.01	-0.00824458		2242	0.0029125		2832	-0.00134927		3421.99	-0.00988916
472.2	0.10459446		1062.19	0.0078849		1652.21	-0.00804634		2242.2	0.00324551		2832.2	-0.00168273		3422.19	-0.0103933
472.4	0.10466104		1062.39	0.00713213		1652.41	-0.0073873		2242.4	0.00293229		2832.4	-0.00162593		3422.39	-0.0106733
472.6	0.10464594		1062.59	0.00684708		1652.61	-0.00686113		2242.6	0.0027963		2832.6	-0.00206705		3422.59	-0.01069905
472.8	0.1047521		1062.79	0.00715554		1652.81	-0.00685598		2242.8	0.00210125		2832.8	-0.0034724		3422.79	-0.01064768
473	0.10415317		1062.99	0.00653209		1653.01	-0.00582932		2243	0.00160979		2833	-0.00461539		3422.99	-0.01109994
473.2	0.10470403		1063.19	0.00741761		1653.21	-0.00538095		2243.2	0.00137807		2833.2	-0.00359868		3423.19	-0.01164739
473.4	0.10512838		1063.39	0.00814575		1653.41	-0.00571671		2243.4	0.00078192		2833.4	-0.00394452		3423.39	-0.01221142
473.6	0.10431019		1063.59	0.00899861		1653.61	-0.00565798		2243.6	0.00083446		2833.6	-0.00402023		3423.59	-0.01308487
473.8	0.10485336		1063.79	0.00899699		1653.81	-0.00611661		2243.8	0.00032458		2833.8	-0.00359549		3423.79	-0.01314111
474	0.10542077		1063.99	0.0089332		1654.01	-0.00536026		2244	0.00051168		2834	-0.00343339		3423.99	-0.01348837
474.2	0.10464533		1064.19	0.00887062		1654.21	-0.00503366		2244.2	0.00041281		2834.2	-0.00330619		3424.19	-0.0133484
474.4	0.10410798		1064.39	0.00827544		1654.41	-0.00524298		2244.4	0.00073344		2834.4	-0.00292021		3424.39	-0.01246947
474.6	0.10403141		1064.59	0.00843239		1654.61	-0.00487397		2244.6	0.00039145		2834.6	-0.00288202		3424.59	-0.01172475
474.8	0.1027811		1064.79	0.0084436		1654.81	-0.00484147		2244.8	0.00124848		2834.8	-0.00246084		3424.79	-0.01173347
475	0.10298193		1064.99	0.00870775		1655.01	-0.00480818		2245	0.00084935		2835	-0.00213758		3424.99	-0.01217793
475.2	0.10279198		1065.19	0.0090508		1655.21	-0.00469342		2245.2	0.00091976		2835.2	-0.00116518		3425.19	-0.01187187
475.4	0.10277885		1065.39	0.00942715		1655.41	-0.00429974		2245.4	0.00074157		2835.4	-0.00035598		3425.39	-0.01169298
475.6	0.10253392		1065.59	0.00993883		1655.61	-0.00334031		2245.6	0.00075603		2835.6	0.00019058		3425.59	-0.01095816
475.8	0.10235693		1065.79	0.00890571		1655.81	-0.00375951		2245.8	0.00116209		2835.8	0.00071784		3425.79	-0.01121269
476	0.10198474		1065.99	0.00826666		1656.01	-0.00322683		2246	0.00174601		2836	0.00121151		3425.99	-0.01056636
476.2	0.10175817		1066.19	0.00832115		1656.21	-0.00344737		2246.2	0.00214295		2836.2	0.00152706		3426.19	-0.01094369
476.4	0.10182554		1066.39	0.00798626		1656.41	-0.00360723		2246.4	0.00105327		2836.4	0.0023211		3426.39	-0.01022557
476.6	0.10180879		1066.59	0.00809797		1656.61	-0.00294616		2246.6	0.00031144		2836.6	0.00187502		3426.59	-0.01016015
476.8	0.10167529		1066.79	0.00773571		1656.81	-0.00344576		2246.8	-0.00055698		2836.8	0.00178383		3426.79	-0.01113984
477	0.10157315		1066.99	0.00752013		1657.01	-0.00335627		2247	-0.00061145		2837	0.00235588		3426.99	-0.01109795
477.2	0.1024394		1067.19	0.00859745		1657.21	-0.00401147		2247.2	-0.0007759		2837.2	0.00333177		3427.19	-0.01181496
477.4	0.10274483		1067.39	0.00815379		1657.41	-0.00477248		2247.4	-0.00028348		2837.4	0.00317907		3427.39	-0.01214213
477.6	0.10280943		1067.59	0.00791637		1657.61	-0.00469714		2247.6	-0.00023805		2837.6	0.00302806		3427.59	-0.01195465
477.8	0.10374864		1067.79	0.0075499		1657.81	-0.00477414		2247.8	0.00046659		2837.8	0.00203906		3427.79	-0.01177547
478	0.10340374		1067.99	0.00784141		1658.01	-0.00428904		2248	0.00076081		2838	0.0014284		3427.99	-0.01190777
478.2	0.10308122		1068.19	0.00774863		1658.21	-0.00291613		2248.2	0.00136277		2838.2	0.0010275		3428.19	-0.012267
478.4	0.10357365		1068.39	0.00835268		1658.41	-0.00320188		2248.4	0.00239713		2838.4	0.00026876		3428.39	-0.01191614
478.6	0.10364674		1068.59	0.00863013		1658.61	-0.00303263		2248.6	0.0026937		2838.6	0.00005648		3428.59	-0.01131978
478.8	0.10435684		1068.79	0.00958252		1658.81	-0.00351248		2248.8	0.00351727		2838.8	-0.00054023		3428.79	-0.01094635
479	0.10579456		1068.99	0.00954129		1659.01	-0.00399938		2249	0.0014232		2839	-0.00012581		3428.99	-0.01106397
479.2	0.10597127		1069.19	0.0102005		1659.21	-0.00430185		2249.2	0.00130024		2839.2	-0.00081551		3429.19	-0.01087041
479.4	0.10506794		1069.39	0.00958954		1659.41	-0.00441007		2249.4	0.00084254		2839.4	-0.00108895		3429.39	-0.01029086
479.6	0.10455299		1069.59	0.00897396		1659.61	-0.00480205		2249.6	0.00067916		2839.6	-0.00094886		3429.59	-0.01069205
479.8	0.10539661		1069.79	0.00769104		1659.81	-0.00560991		2249.8	0.00046035		2839.8	-0.00147605		3429.79	-0.0112465
480	0.10484727		1069.99	0.00776271		1660.01	-0.00562056		2250	-0.00034535		2840	-0.00088145		3429.99	-0.01112085
480.2	0.10450466		1070.19	0.0073123		1660.21	-0.00591951		2250.2	-0.00173747		2840.2	-0.00096271		3430.19	-0.01138808
480.4	0.10391101		1070.39	0.00748817		1660.41	-0.00623211		2250.4	-0.00311812		2840.4	-0.00089017		3430.39	-0.01060262
480.6	0.10253789		1070.59	0.00805785		1660.61	-0.0059241		2250.6	-0.00341464		2840.6	-0.000927		3430.59	-0.01116579
480.8	0.10232245		1070.79	0.00798313		1660.81	-0.00695854		2250.8	-0.00302112		2840.8	-0.00127502		3430.79	-0.01170765
481	0.102222		1070.99	0.00856558		1661.01	-0.00664621		2251	-0.00276886		2841	-0.00130122		3430.99	-0.01071193
481.2	0.10236146		1071.19	0.00866629		1661.21	-0.00560711		2251.2	-0.0028468		2841.2	-0.0006889		3431.19	-0.0112276
481.4	0.10226634		1071.39	0.00777492		1661.41	-0.00574886		2251.4	-0.00112485		2841.4	-0.00089949		3431.39	-0.01147638
481.6	0.10201898		1071.59	0.00800082		1661.61	-0.00498528		2251.6	-0.00026955		2841.6	-0.00141102		3431.59	-0.01146931
481.8	0.1016248		1071.79	0.00796047		1661.81	-0.00448544		2251.8	0.00041625		2841.8	-0.00145022		3431.79	-0.01248347
482	0.10052232		1071.99	0.00821965		1662.01	-0.00352275		2252	-0.0000039		2842	-0.00094328		3431.99	-0.01301221
482.2	0.10048713		1072.19	0.0081507		1662.21	-0.00248819		2252.2	0.00081429		2842.2	-0.00085192		3432.19	-0.01316189
482.4	0.10035175		1072.39	0.00901		1662.41	-0.00295629		2252.4	0.00095089		2842.4	-0.00084612		3432.39	-0.01223009
482.6	0.10048901		1072.59	0.00893606		1662.61	-0.0024125		2252.6	0.00157428		2842.6	-0.00124147		3432.59	-0.01176822
482.8	0.10090763		1072.79	0.00944		1662.81	-0.00296088		2252.8	0.00176553		2842.8	-0.00200366		3432.79	-0.01187549
483	0.10112303		1072.99	0.00922729		1663.01	-0.00337341		2253	0.00061624		2843	-0.0019374		3432.99	-0.01298127
483.2	0.10024795		1073.19	0.00952269		1663.21	-0.00373609		2253.2	0.00082726		2843.2	-0.00276099		3433.19	-0.01211455
483.4	0.10006476		1073.39	0.00859673		1663.41	-0.00354488		2253.4	0.00097556		2843.4	-0.00174805		3433.39	-0.01293034
483.6	0.100521		1073.59	0.00893185		1663.61	-0.00328883		2253.6	0.00095965		2843.6	-0.00101906		3433.59	-0.01346005
483.8	0.10176365		1073.79	0.00883212		1663.81	-0.00383355		2253.8	0.00059479		2843.8	-0.00069521		3433.79	-0.01347462
484	0.10235675		1073.99	0.00938609		1664.01	-0.0040038		2254	-0.00006748		2844	-0.00048825		3433.99	-0.01338562
484.2	0.10304493		1074.19	0.00951183		1664.21	-0.00412281		2254.2	-0.00038644		2844.2	-0.0015108		3434.19	-0.01270045
484.4	0.1033403		1074.39	0.00970892		1664.41	-0.00462825		2254.4	-0.00049762		2844.4	-0.00202097		3434.39	-0.01177641
484.6	0.10415076		1074.59	0.0105989		1664.61	-0.00422006		2254.6	-0.00124752		2844.6	-0.0028704		3434.59	-0.01261052
484.8	0.10477297		1074.79	0.0103468		1664.81	-0.00419733		2254.8	-0.00209081		2844.8	-0.00339715		3434.79	-0.01206964
485	0.10510278		1074.99	0.01067756		1665.01	-0.00384485		2255	-0.00233327		2845	-0.00304761		3434.99	-0.01198601
485.2	0.10532675		1075.19	0.0104338		1665.21	-0.00414291		2255.2	-0.00165935		2845.2	-0.00268749		3435.19	-0.01284961
485.4	0.10507695		1075.39	0.00981301		1665.41	-0.00461863		2255.4	-0.00075552		2845.4	-0.0016444		3435.39	-0.0135754
485.6	0.10417476		1075.59	0.00942484		1665.61	-0.00409702		2255.6	-0.0000179		2845.6	-0.00156142		3435.59	-0.01411743
485.8	0.10319513		1075.79	0.00843241		1665.81	-0.00407183		2255.8	-0.00029762		2845.8	-0.00082614		3435.79	-0.01517192
486	0.10346576		1075.99	0.00851452		1666.01	-0.00377053		2256	-0.00072992		2846	-0.00065223		3435.99	-0.0152196
486.2	0.10365273		1076.19	0.00887202		1666.21	-0.00374637		2256.2	0.00036135		2846.2	-0.00043254		3436.19	-0.01537281
486.4	0.10325661		1076.39	0.01005911		1666.41	-0.00430548		2256.4	0.00051219		2846.4	-0.00035115		3436.39	-0.01551541
486.6	0.10225499		1076.59	0.01026767		1666.61	-0.00420385		2256.6	0.00096664		2846.6	-0.00043355		3436.59	-0.0159872
486.8	0.10131603		1076.79	0.01110636		1666.81	-0.00437347		2256.8	0.0007411		2846.8	-0.00011393		3436.79	-0.01614045
487	0.10133923		1076.99	0.01134367		1667.01	-0.00407661		2257	0.00037321		2847	0.00041773		3436.99	-0.01521688
487.2	0.10104689		1077.19	0.01144832		1667.21	-0.00325742		2257.2	0.00031269		2847.2	0.00072928		3437.19	-0.01409594
487.4	0.10113323		1077.39	0.01130488		1667.41	-0.00279759		2257.4	0.00112456		2847.4	0.00158219		3437.39	-0.0140733
487.6	0.10123705		1077.59	0.01157899		1667.61	-0.00222575		2257.6	0.00026692		2847.6	0.00137192		3437.59	-0.01318723
487.8	0.10176763		1077.79	0.01144868		1667.81	-0.00239552		2257.8	0.00032289		2847.8	0.00070931		3437.79	-0.01200577
488	0.10194636		1077.99	0.01206937		1668.01	-0.00178496		2258	-0.00055639		2848	-0.00019537		3437.99	-0.01131958
488.2	0.10245316		1078.19	0.01201971		1668.21	-0.00147882		2258.2	-0.00092243		2848.2	-0.00077123		3438.19	-0.01074033
488.4	0.10275054		1078.39	0.01187992		1668.41	-0.00138722		2258.4	-0.0017872		2848.4	-0.00139927		3438.39	-0.01013484
488.6	0.10321012		1078.59	0.01218326		1668.61	-0.00097524		2258.6	-0.0028607		2848.6	-0.00092796		3438.59	-0.01012434
488.8	0.10268554		1078.79	0.01191521		1668.81	-0.00123255		2258.8	-0.00237953		2848.8	-0.00078808		3438.79	-0.00966097
489	0.10259129		1078.99	0.01169521		1669.01	-0.00164014		2259	-0.00131002		2849	-0.00051828		3438.99	-0.00982224
489.2	0.10248378		1079.19	0.01125074		1669.21	-0.00216139		2259.2	-0.00042021		2849.2	-0.00015486		3439.19	-0.01082774
489.4	0.1022711		1079.39	0.01062808		1669.41	-0.00209681		2259.4	0.00042584		2849.4	0.00017396		3439.39	-0.01115467
489.6	0.10262188		1079.59	0.00970105		1669.61	-0.00266491		2259.6	0.00135887		2849.6	0.0001858		3439.59	-0.01261544
489.8	0.10324319		1079.79	0.00911885		1669.81	-0.00340768		2259.8	0.0014103		2849.8	0.0010834		3439.79	-0.01379278
490	0.10424271		1079.99	0.00929051		1670.01	-0.00379675		2260	0.00154885		2850	0.0011629		3439.99	-0.01443936
490.2	0.10434886		1080.19	0.01020582		1670.21	-0.00436037		2260.2	0.00269559		2850.2	0.00140585		3440.19	-0.01549409
490.4	0.10439267		1080.39	0.01064198		1670.41	-0.00432992		2260.4	0.00214665		2850.4	0.00151511		3440.39	-0.01593473
490.6	0.10381385		1080.59	0.01061531		1670.61	-0.00448507		2260.6	0.0013141		2850.6	0.00148534		3440.59	-0.01619756
490.8	0.10502958		1080.79	0.0111095		1670.81	-0.00405248		2260.8	0.00115324		2850.8	0.00116659		3440.79	-0.01572962
491	0.10519307		1080.99	0.01047917		1671.01	-0.00433702		2261	0.00082414		2851	0.00019676		3440.99	-0.01526638
491.2	0.10551943		1081.19	0.01013283		1671.21	-0.00391486		2261.2	0.00051634		2851.2	-0.00023955		3441.19	-0.01491369
491.4	0.10517486		1081.39	0.00959201		1671.41	-0.00415783		2261.4	0.00029574		2851.4	-0.00044253		3441.39	-0.01402966
491.6	0.10556589		1081.59	0.00963327		1671.61	-0.00374473		2261.6	-0.00024223		2851.6	-0.00121564		3441.59	-0.0137573
491.8	0.10470415		1081.79	0.00936051		1671.81	-0.00325569		2261.8	-0.00008962		2851.8	-0.0017787		3441.79	-0.01324354
492	0.104235		1081.99	0.00999666		1672.01	-0.00242169		2262	-0.00064593		2852	-0.00248975		3441.99	-0.01367782
492.2	0.10455706		1082.19	0.00943443		1672.21	-0.00208444		2262.2	-0.00085449		2852.2	-0.00276852		3442.19	-0.01331346
492.4	0.10344991		1082.39	0.00898414		1672.41	-0.00208709		2262.4	-0.00040535		2852.4	-0.00306474		3442.39	-0.0124327
492.6	0.10246208		1082.59	0.00920432		1672.61	-0.00156451		2262.6	0.00053948		2852.6	-0.00232611		3442.59	-0.01329482
492.8	0.10196979		1082.79	0.00881304		1672.81	-0.00213336		2262.8	0.00113596		2852.8	-0.00302996		3442.79	-0.013036
493	0.10134989		1082.99	0.00846837		1673.01	-0.00289046		2263	0.00200328		2853	-0.00224207		3442.99	-0.01245169
493.2	0.10139523		1083.19	0.0078327		1673.21	-0.00337454		2263.2	0.00249596		2853.2	-0.00181862		3443.19	-0.01299949
493.4	0.10117421		1083.39	0.006947		1673.41	-0.00421169		2263.4	0.00248932		2853.4	-0.00072556		3443.39	-0.0125362
493.6	0.10191696		1083.59	0.00684579		1673.61	-0.00440039		2263.6	0.00268331		2853.6	0.00023813		3443.59	-0.01288726
493.8	0.10151782		1083.79	0.0069684		1673.81	-0.00435277		2263.8	0.00319797		2853.8	-0.00008317		3443.79	-0.01309476
494	0.10142869		1083.99	0.00703058		1674.01	-0.00447624		2264	0.00232272		2854	0.00056265		3443.99	-0.0123461
494.2	0.10158984		1084.19	0.00665873		1674.21	-0.00441341		2264.2	0.00218342		2854.2	0.00162628		3444.19	-0.01250784
494.4	0.10242249		1084.39	0.00610509		1674.41	-0.00462374		2264.4	0.00092259		2854.4	0.00299425		3444.39	-0.01207747
494.6	0.10284047		1084.59	0.00593584		1674.61	-0.00537417		2264.6	0.00034202		2854.6	0.00329209		3444.59	-0.01145174
494.8	0.10330397		1084.79	0.0059273		1674.81	-0.0054547		2264.8	-0.00017547		2854.8	0.00324629		3444.79	-0.01099552
495	0.10287288		1084.99	0.00563021		1675.01	-0.00570341		2265	-0.00018719		2855	0.00369139		3444.99	-0.01061541
495.2	0.10302557		1085.19	0.0056922		1675.21	-0.00521882		2265.2	-0.00088195		2855.2	0.00379669		3445.19	-0.00949443
495.4	0.10301803		1085.39	0.00549704		1675.41	-0.00530485		2265.4	-0.00150784		2855.4	0.00300804		3445.39	-0.00914441
495.6	0.10274225		1085.59	0.00553902		1675.61	-0.0049251		2265.6	-0.00186135		2855.6	0.00252723		3445.59	-0.00957025
495.8	0.10232238		1085.79	0.00498621		1675.81	-0.00383838		2265.8	-0.00174958		2855.8	0.00249262		3445.79	-0.00961582
496	0.10205885		1085.99	0.00543934		1676.01	-0.00357251		2266	-0.00174831		2856	0.00197606		3445.99	-0.00988496
496.2	0.1020095		1086.19	0.0046954		1676.21	-0.00336165		2266.2	-0.00170419		2856.2	0.00186729		3446.19	-0.01016846
496.4	0.10164355		1086.39	0.00525815		1676.41	-0.00265835		2266.4	-0.00094408		2856.4	0.00158987		3446.39	-0.01030179
496.6	0.10175301		1086.59	0.00589704		1676.61	-0.00258881		2266.6	-0.00027567		2856.6	0.00213174		3446.59	-0.01162106
496.8	0.10168539		1086.79	0.00588661		1676.81	-0.00336188		2266.8	-0.00025055		2856.8	0.00132562		3446.79	-0.01026008
497	0.10148898		1086.99	0.00678779		1677.01	-0.00345571		2267	0.00030177		2857	0.00183138		3446.99	-0.01035305
497.2	0.10104484		1087.19	0.00732062		1677.21	-0.00344512		2267.2	-0.00046596		2857.2	0.00164822		3447.19	-0.01089232
497.4	0.10078575		1087.39	0.00816561		1677.41	-0.0040253		2267.4	-0.00090935		2857.4	0.00142773		3447.39	-0.01090825
497.6	0.1014164		1087.59	0.00898002		1677.61	-0.00356221		2267.6	-0.00091358		2857.6	0.0004962		3447.59	-0.01112139
497.8	0.10108441		1087.79	0.00899726		1677.81	-0.00319735		2267.8	-0.00068641		2857.8	0.00024807		3447.79	-0.01225945
498	0.10157955		1087.99	0.00889489		1678.01	-0.00419417		2268	-0.00136505		2858	0.00169755		3447.99	-0.01175806
498.2	0.10192485		1088.19	0.00891389		1678.21	-0.00395936		2268.2	-0.00137411		2858.2	0.00233725		3448.19	-0.01186909
498.4	0.10323878		1088.39	0.00878748		1678.41	-0.00534397		2268.4	-0.00156579		2858.4	0.00246271		3448.39	-0.01129864
498.6	0.10314775		1088.59	0.00906212		1678.61	-0.00569651		2268.6	-0.00125496		2858.6	0.00131384		3448.59	-0.0106289
498.8	0.10218163		1088.79	0.00904578		1678.81	-0.00612955		2268.8	-0.00114202		2858.8	0.00087515		3448.79	-0.01089208
499	0.10328474		1088.99	0.00869746		1679.01	-0.00636939		2269	-0.00133201		2859	0.00186802		3448.99	-0.01118553
499.2	0.10382498		1089.19	0.00856423		1679.21	-0.00657537		2269.2	-0.001062		2859.2	0.00200745		3449.19	-0.01178794
499.4	0.10431825		1089.39	0.00861504		1679.41	-0.00734671		2269.4	-0.00097144		2859.4	0.00201638		3449.39	-0.0118539
499.6	0.10419855		1089.59	0.00882558		1679.61	-0.00811393		2269.6	-0.00104461		2859.6	0.00214123		3449.59	-0.01271743
499.8	0.10452837		1089.79	0.00811278		1679.81	-0.00868585		2269.8	-0.0004198		2859.8	0.00162484		3449.79	-0.01283977
500	0.1044498		1089.99	0.00866893		1680.01	-0.0087183		2270	-0.00025419		2860	0.00153674		3449.99	-0.01306818
500.2	0.10480706		1090.19	0.00838521		1680.21	-0.0086741		2270.2	0.00008778		2860.2	0.00128002		3450.19	-0.01312967
500.4	0.10486708		1090.39	0.00827665		1680.41	-0.0083369		2270.4	0.00096891		2860.4	0.00052565		3450.39	-0.01231099
500.6	0.10415921		1090.59	0.00819921		1680.61	-0.00867701		2270.6	0.00117228		2860.6	0.00128306		3450.59	-0.0122623
500.8	0.10329716		1090.79	0.0083453		1680.81	-0.00814339		2270.8	0.00105278		2860.8	0.00043049		3450.79	-0.01181543
501	0.10305518		1090.99	0.00847038		1681.01	-0.00716598		2271	0.00090948		2861	0.00053541		3450.99	-0.01196952
501.2	0.10271639		1091.19	0.00839517		1681.21	-0.00628236		2271.2	-0.00015281		2861.2	0.00054067		3451.19	-0.01205464
501.4	0.10226345		1091.39	0.00789074		1681.41	-0.00594273		2271.4	-0.00049488		2861.4	-0.00000094		3451.39	-0.01157863
501.6	0.10175365		1091.59	0.00835084		1681.61	-0.00498019		2271.6	-0.00039409		2861.6	0.00005737		3451.59	-0.01075373
501.8	0.10152337		1091.79	0.00804909		1681.81	-0.00406828		2271.8	0.00050898		2861.8	0.00021239		3451.79	-0.01109266
502	0.10169761		1091.99	0.00764102		1682.01	-0.00376746		2272	-0.0004152		2862	0.00033112		3451.99	-0.01079243
502.2	0.10181307		1092.19	0.00677782		1682.21	-0.00316127		2272.2	-0.00073113		2862.2	-0.00019966		3452.19	-0.01104821
502.4	0.10202598		1092.39	0.00648256		1682.41	-0.00372628		2272.4	-0.00030573		2862.4	-0.00021939		3452.39	-0.01078561
502.6	0.10090058		1092.59	0.00605448		1682.61	-0.00355853		2272.6	0.00029198		2862.6	-0.00045756		3452.59	-0.0104487
502.8	0.10044143		1092.79	0.00600965		1682.81	-0.00346107		2272.8	-0.00003621		2862.8	0.00081236		3452.79	-0.01191326
503	0.10180977		1092.99	0.0070963		1683.01	-0.00376607		2273	-0.00042399		2863	0.00145385		3452.99	-0.01256891
503.2	0.10144441		1093.19	0.00757429		1683.21	-0.00428515		2273.2	-0.00019245		2863.2	0.00172311		3453.19	-0.01252887
503.4	0.10186454		1093.39	0.00842794		1683.41	-0.00531019		2273.4	-0.0012099		2863.4	0.00062303		3453.39	-0.01234587
503.6	0.10217795		1093.59	0.00941907		1683.61	-0.00571653		2273.6	-0.00130989		2863.6	-0.00087383		3453.59	-0.01282867
503.8	0.10194728		1093.79	0.00954906		1683.81	-0.00604527		2273.8	-0.00063107		2863.8	-0.00160879		3453.79	-0.01297985
504	0.10163788		1093.99	0.01054939		1684.01	-0.00614483		2274	0.00002883		2864	-0.00169321		3453.99	-0.01280219
504.2	0.10133791		1094.19	0.01033436		1684.21	-0.00611695		2274.2	0.000727		2864.2	-0.00206604		3454.19	-0.01211328
504.4	0.10153719		1094.39	0.0101766		1684.41	-0.0056805		2274.4	0.0007775		2864.4	-0.00249534		3454.39	-0.01147434
504.6	0.10106553		1094.59	0.01055287		1684.61	-0.00527591		2274.6	-0.00011219		2864.6	-0.00158487		3454.59	-0.01142936
504.8	0.10143318		1094.79	0.01067022		1684.81	-0.00533594		2274.8	0.00019757		2864.8	-0.00229844		3454.79	-0.01114881
505	0.101109		1094.99	0.01049618		1685.01	-0.00504725		2275	0.0000022		2865	-0.00183726		3454.99	-0.01120264
505.2	0.10122108		1095.19	0.01057061		1685.21	-0.00503628		2275.2	-0.00008406		2865.2	-0.00169332		3455.19	-0.01113053
505.4	0.10058671		1095.39	0.00999983		1685.41	-0.00541334		2275.4	0.0007128		2865.4	-0.00203683		3455.39	-0.01126594
505.6	0.10020616		1095.59	0.00961015		1685.61	-0.00507503		2275.6	0.00110487		2865.6	-0.00113524		3455.59	-0.01161143
505.8	0.10099176		1095.79	0.00866249		1685.81	-0.00487143		2275.8	0.00129398		2865.8	-0.000782		3455.79	-0.01193099
506	0.1016857		1095.99	0.00739976		1686.01	-0.0041147		2276	-0.00000773		2866	-0.00067566		3455.99	-0.01272263
506.2	0.10198268		1096.19	0.00708711		1686.21	-0.00416639		2276.2	-0.0001745		2866.2	-0.00053086		3456.19	-0.01304814
506.4	0.10274651		1096.39	0.0075946		1686.41	-0.00452211		2276.4	-0.00006781		2866.4	-0.00040432		3456.39	-0.01260148
506.6	0.10265573		1096.59	0.00714738		1686.61	-0.00420294		2276.6	-0.00039376		2866.6	-0.00043388		3456.59	-0.01336416
506.8	0.10403183		1096.79	0.00754157		1686.81	-0.00340423		2276.8	-0.00062066		2866.8	-0.00032943		3456.79	-0.01422902
507	0.10423472		1096.99	0.00794467		1687.01	-0.00323772		2277	-0.00042084		2867	-0.00082083		3456.99	-0.01328263
507.2	0.10414646		1097.19	0.00781862		1687.21	-0.00328771		2277.2	-0.00076127		2867.2	0.00002857		3457.19	-0.012782
507.4	0.10465236		1097.39	0.00903767		1687.41	-0.00288035		2277.4	-0.00081832		2867.4	-0.00130733		3457.39	-0.01273716
507.6	0.10428839		1097.59	0.01045223		1687.61	-0.00243893		2277.6	-0.00049788		2867.6	-0.00208226		3457.59	-0.01222784
507.8	0.10357469		1097.79	0.01128936		1687.81	-0.0028547		2277.8	0.00052415		2867.8	-0.00242404		3457.79	-0.01294637
508	0.10363031		1097.99	0.01212658		1688.01	-0.00312748		2278	0.0011844		2868	-0.00149152		3457.99	-0.01263323
508.2	0.10256524		1098.19	0.01191441		1688.21	-0.00288135		2278.2	0.00070257		2868.2	-0.00179869		3458.19	-0.01216176
508.4	0.10286618		1098.39	0.01254508		1688.41	-0.0032914		2278.4	0.00066795		2868.4	-0.00203634		3458.39	-0.01196796
508.6	0.10212168		1098.59	0.01250542		1688.61	-0.00362345		2278.6	0.00105665		2868.6	-0.00182905		3458.59	-0.01160188
508.8	0.10207529		1098.79	0.01235278		1688.81	-0.00470886		2278.8	0.00135718		2868.8	-0.00236774		3458.79	-0.01135347
509	0.10112311		1098.99	0.01259679		1689.01	-0.00556776		2279	0.00192158		2869	-0.0019592		3458.99	-0.01219967
509.2	0.10165835		1099.19	0.01240533		1689.21	-0.00674379		2279.2	0.00236737		2869.2	-0.00155533		3459.19	-0.01241692
509.4	0.10079577		1099.39	0.01172558		1689.41	-0.00757315		2279.4	0.00236712		2869.4	-0.00157315		3459.39	-0.01302067
509.6	0.10123369		1099.59	0.01118649		1689.61	-0.00748601		2279.6	0.00264171		2869.6	-0.00087838		3459.59	-0.01301001
509.8	0.10201302		1099.79	0.01051628		1689.81	-0.00736096		2279.8	0.00236456		2869.8	-0.00151947		3459.79	-0.01258212
510	0.10353938		1099.99	0.01042137		1690.01	-0.00627398		2280	0.00157513		2870	-0.00123802		3459.99	-0.01298423
510.2	0.10425787		1100.19	0.01010901		1690.21	-0.0068643		2280.2	0.00134108		2870.2	-0.00112068		3460.19	-0.0132997
510.4	0.10477607		1100.39	0.00928755		1690.41	-0.0078679		2280.4	0.00117098		2870.4	-0.0008174		3460.39	-0.01326956
510.6	0.10507935		1100.59	0.00818214		1690.61	-0.0068124		2280.6	0.00154931		2870.6	-0.00075681		3460.59	-0.01455177
510.8	0.10525219		1100.79	0.0078135		1690.81	-0.00597805		2280.8	0.00177976		2870.8	-0.00095648		3460.79	-0.01333511
511	0.10418162		1100.99	0.0073898		1691.01	-0.00555324		2281	0.00075673		2871	-0.00092715		3460.99	-0.0127823
511.2	0.1037437		1101.19	0.00748542		1691.21	-0.00561944		2281.2	0.00080924		2871.2	-0.0010914		3461.19	-0.01230708
511.4	0.10412376		1101.39	0.00782836		1691.41	-0.00492192		2281.4	0.00066763		2871.4	-0.00180294		3461.39	-0.01189456
511.6	0.10392101		1101.59	0.00885775		1691.61	-0.00509478		2281.6	0.00026944		2871.6	-0.00149925		3461.59	-0.01228024
511.8	0.10356831		1101.79	0.00878432		1691.81	-0.00482936		2281.8	-0.00022415		2871.8	-0.00062237		3461.79	-0.01316203
512	0.1035084		1101.99	0.00857336		1692.01	-0.00488422		2282	-0.00080807		2872	0.00015902		3461.99	-0.01298803
512.2	0.1025094		1102.19	0.0085177		1692.21	-0.00498124		2282.2	-0.00159913		2872.2	-0.00102665		3462.19	-0.01264344
512.4	0.10286549		1102.39	0.00893425		1692.41	-0.00525225		2282.4	-0.0010755		2872.4	-0.00060312		3462.39	-0.01283295
512.6	0.10249797		1102.59	0.00892298		1692.61	-0.00510473		2282.6	-0.00151577		2872.6	-0.00057869		3462.59	-0.01270393
512.8	0.10163822		1102.79	0.00873179		1692.81	-0.00589596		2282.8	-0.00221682		2872.8	0.00008794		3462.79	-0.01248689
513	0.10153551		1102.99	0.00962384		1693.01	-0.00615865		2283	-0.00105821		2873	0.00030994		3462.99	-0.01276624
513.2	0.10202393		1103.19	0.00875047		1693.21	-0.00653636		2283.2	-0.00126307		2873.2	0.00014465		3463.19	-0.01251119
513.4	0.10117165		1103.39	0.008921		1693.41	-0.00587572		2283.4	-0.00083182		2873.4	-0.0006283		3463.39	-0.01275261
513.6	0.10219804		1103.59	0.00871381		1693.61	-0.00595969		2283.6	0.00000311		2873.6	-0.00037754		3463.59	-0.01263155
513.8	0.10204068		1103.79	0.00845114		1693.81	-0.00592511		2283.8	-0.00064447		2873.8	-0.00097225		3463.79	-0.01216332
514	0.10286151		1103.99	0.00857054		1694.01	-0.00584969		2284	0.00038615		2874	-0.0004045		3463.99	-0.01202129
514.2	0.1021352		1104.19	0.00800958		1694.21	-0.00690737		2284.2	0.00046637		2874.2	-0.00044896		3464.19	-0.0117943
514.4	0.10167497		1104.39	0.00702236		1694.41	-0.00682063		2284.4	0.00024411		2874.4	-0.00028857		3464.39	-0.01198185
514.6	0.10116333		1104.59	0.00682827		1694.61	-0.00607775		2284.6	0.0013886		2874.6	-0.00065542		3464.59	-0.01260278
514.8	0.10146454		1104.79	0.00712665		1694.81	-0.00598365		2284.8	0.00103523		2874.8	-0.0012591		3464.79	-0.01101555
515	0.10128292		1104.99	0.00632501		1695.01	-0.00559219		2285	0.00033084		2875	-0.00157508		3464.99	-0.01058869
515.2	0.10068383		1105.19	0.00684249		1695.21	-0.0053468		2285.2	0.00103318		2875.2	-0.0012642		3465.19	-0.01025072
515.4	0.10092763		1105.39	0.00664466		1695.41	-0.00542256		2285.4	0.00071529		2875.4	-0.00033444		3465.39	-0.01049532
515.6	0.10048935		1105.59	0.00737879		1695.61	-0.0057769		2285.6	0.00073434		2875.6	-0.00050173		3465.59	-0.01097288
515.8	0.10044671		1105.79	0.00659479		1695.81	-0.00609477		2285.8	0.00082086		2875.8	0.00000397		3465.79	-0.01113478
516	0.10034004		1105.99	0.00634354		1696.01	-0.00669431		2286	0.00093664		2876	-0.00059249		3465.99	-0.01051334
516.2	0.10036973		1106.19	0.00682232		1696.21	-0.00646757		2286.2	0.0006928		2876.2	-0.00120697		3466.19	-0.01070134
516.4	0.10045328		1106.39	0.00684845		1696.41	-0.00619687		2286.4	0.00044447		2876.4	-0.00066306		3466.39	-0.0111239
516.6	0.1007127		1106.59	0.00728795		1696.61	-0.00578921		2286.6	-0.00019399		2876.6	-0.0008849		3466.59	-0.01150326
516.8	0.1001378		1106.79	0.0069363		1696.81	-0.00550941		2286.8	-0.00075264		2876.8	-0.00109826		3466.79	-0.01188423
517	0.10144363		1106.99	0.00713251		1697.01	-0.00576644		2287	-0.00033999		2877	-0.00226875		3466.99	-0.01217103
517.2	0.10078185		1107.19	0.00666201		1697.21	-0.00538639		2287.2	-0.00052627		2877.2	-0.00206978		3467.19	-0.01238606
517.4	0.10055419		1107.39	0.00783911		1697.41	-0.00539876		2287.4	-0.00033701		2877.4	-0.00255096		3467.39	-0.01342735
517.6	0.10122252		1107.59	0.00774692		1697.61	-0.00534716		2287.6	-0.00010182		2877.6	-0.00271963		3467.59	-0.01360041
517.8	0.10138399		1107.79	0.0088691		1697.81	-0.00463087		2287.8	-0.00032335		2877.8	-0.00316122		3467.79	-0.01336772
518	0.10203334		1107.99	0.00918525		1698.01	-0.00466836		2288	0.00050948		2878	-0.00286137		3467.99	-0.01353566
518.2	0.10154035		1108.19	0.00929324		1698.21	-0.00455657		2288.2	-0.00013995		2878.2	-0.00275222		3468.19	-0.01365848
518.4	0.10159629		1108.39	0.00877796		1698.41	-0.00411347		2288.4	-0.0001322		2878.4	-0.00270164		3468.39	-0.01475836
518.6	0.10211784		1108.59	0.00946284		1698.61	-0.00399577		2288.6	0.00009015		2878.6	-0.00295916		3468.59	-0.01524339
518.8	0.10286745		1108.79	0.00941109		1698.81	-0.00372929		2288.8	-0.00042361		2878.8	-0.00327744		3468.79	-0.01507774
519	0.10231147		1108.99	0.00893015		1699.01	-0.00415341		2289	-0.00071576		2879	-0.00342921		3468.99	-0.01513627
519.2	0.10264685		1109.19	0.00908026		1699.21	-0.00457844		2289.2	-0.00021607		2879.2	-0.00253707		3469.19	-0.01549948
519.4	0.10297467		1109.39	0.00888988		1699.41	-0.00568024		2289.4	0.0002686		2879.4	-0.00271092		3469.39	-0.01509168
519.6	0.10293347		1109.59	0.00883201		1699.61	-0.0062439		2289.6	0.00039834		2879.6	-0.00298118		3469.59	-0.01458565
519.8	0.10234574		1109.79	0.00854404		1699.81	-0.00639516		2289.8	0.0000834		2879.8	-0.00224393		3469.79	-0.01446989
520	0.101996		1109.99	0.00883535		1700.01	-0.00650135		2290	-0.00059741		2880	-0.00264846		3469.99	-0.0136224
520.2	0.10216293		1110.19	0.00880652		1700.21	-0.0057756		2290.2	-0.00022137		2880.2	-0.00240693		3470.19	-0.01456003
520.4	0.10284887		1110.39	0.00848819		1700.41	-0.00608675		2290.4	0.0004136		2880.4	-0.00299213		3470.39	-0.01527689
520.6	0.10269797		1110.59	0.00795229		1700.61	-0.00587303		2290.6	0.00033921		2880.6	-0.00345568		3470.59	-0.01578777
520.8	0.10189612		1110.79	0.00747056		1700.81	-0.00567777		2290.8	-0.00005556		2880.8	-0.00339821		3470.79	-0.01544162
521	0.1024105		1110.99	0.00783847		1701.01	-0.00570046		2291	0.00083523		2881	-0.00308379		3470.99	-0.01521121
521.2	0.10135677		1111.19	0.00802622		1701.21	-0.00482489		2291.2	0.00142055		2881.2	-0.00196941		3471.19	-0.01551492
521.4	0.10213435		1111.39	0.00861893		1701.41	-0.00556256		2291.4	0.00183789		2881.4	-0.00180288		3471.39	-0.0163642
521.6	0.10239202		1111.59	0.00867741		1701.61	-0.00427574		2291.6	0.00198687		2881.6	-0.00151074		3471.59	-0.01619368
521.8	0.10330177		1111.79	0.00916882		1701.81	-0.00426828		2291.8	0.0022091		2881.8	-0.00116596		3471.79	-0.0157509
522	0.10378414		1111.99	0.00847844		1702.01	-0.00452628		2292	0.00260262		2882	-0.0015238		3471.99	-0.01609284
522.2	0.10387785		1112.19	0.00828423		1702.21	-0.00434692		2292.2	0.00290926		2882.2	-0.00127144		3472.19	-0.01675997
522.4	0.10390332		1112.39	0.00807385		1702.41	-0.00420645		2292.4	0.00287376		2882.4	-0.00164516		3472.39	-0.01692361
522.6	0.10342399		1112.59	0.00846267		1702.61	-0.0043982		2292.6	0.00234529		2882.6	-0.00176571		3472.59	-0.01669891
522.8	0.10257507		1112.79	0.00852137		1702.81	-0.00481346		2292.8	0.0024337		2882.8	-0.00186834		3472.79	-0.01572208
523	0.10271031		1112.99	0.00911328		1703.01	-0.00517083		2293	0.00163519		2883	-0.00110232		3472.99	-0.01601228
523.2	0.10272926		1113.19	0.00956552		1703.21	-0.00492547		2293.2	0.00147301		2883.2	-0.00051018		3473.19	-0.01496135
523.4	0.10172132		1113.39	0.01019945		1703.41	-0.00583915		2293.4	0.00102348		2883.4	-0.0017939		3473.39	-0.01392077
523.6	0.10124076		1113.59	0.01007295		1703.61	-0.00595044		2293.6	0.00012487		2883.6	-0.00093357		3473.59	-0.01367026
523.8	0.10061394		1113.79	0.01054345		1703.81	-0.0059811		2293.8	-0.00063237		2883.8	-0.00105251		3473.79	-0.0137818
524	0.10086839		1113.99	0.01069193		1704.01	-0.00588527		2294	-0.00001172		2884	-0.00183553		3473.99	-0.01335447
524.2	0.10063187		1114.19	0.00934655		1704.21	-0.00584186		2294.2	0.00050551		2884.2	-0.0016494		3474.19	-0.0131193
524.4	0.100878		1114.39	0.00934694		1704.41	-0.00645915		2294.4	-0.00016271		2884.4	-0.00234902		3474.39	-0.01356435
524.6	0.10002282		1114.59	0.00902794		1704.61	-0.00604557		2294.6	-0.00072071		2884.6	-0.00155713		3474.59	-0.01254001
524.8	0.10033514		1114.79	0.00932274		1704.81	-0.00577704		2294.8	-0.00134382		2884.8	-0.00100972		3474.79	-0.01271866
525	0.10124063		1114.99	0.00931352		1705.01	-0.00518311		2295	-0.00087844		2885	-0.00066957		3474.99	-0.01332587
525.2	0.10070597		1115.19	0.0087819		1705.21	-0.00536915		2295.2	-0.0005955		2885.2	-0.00005763		3475.19	-0.01343516
525.4	0.10168871		1115.39	0.00877205		1705.41	-0.0056005		2295.4	-0.00094053		2885.4	-0.00032954		3475.39	-0.01374494
525.6	0.10230436		1115.59	0.00828043		1705.61	-0.00539296		2295.6	-0.00100945		2885.6	-0.00062561		3475.59	-0.01351255
525.8	0.10346699		1115.79	0.00745813		1705.81	-0.00642122		2295.8	-0.00152089		2885.8	-0.00035455		3475.79	-0.01394889
526	0.10423188		1115.99	0.00755198		1706.01	-0.00641645		2296	-0.00205963		2886	-0.00061765		3475.99	-0.0145489
526.2	0.10436541		1116.19	0.00782208		1706.21	-0.00663468		2296.2	-0.00234515		2886.2	0.0000891		3476.19	-0.01500294
526.4	0.10437258		1116.39	0.00713071		1706.41	-0.00651314		2296.4	-0.00283448		2886.4	-0.00037849		3476.39	-0.01490604
526.6	0.10420588		1116.59	0.00808496		1706.61	-0.00634946		2296.6	-0.00323654		2886.6	-0.00035928		3476.59	-0.01534328
526.8	0.10486879		1116.79	0.00824725		1706.81	-0.00587096		2296.8	-0.00277459		2886.8	-0.00099587		3476.79	-0.01505583
527	0.10483779		1116.99	0.00873431		1707.01	-0.00557335		2297	-0.00328787		2887	-0.00031597		3476.99	-0.01527009
527.2	0.10508248		1117.19	0.00876694		1707.21	-0.0057298		2297.2	-0.00370688		2887.2	-0.00163558		3477.19	-0.01444787
527.4	0.10518964		1117.39	0.00923034		1707.41	-0.00615486		2297.4	-0.00390443		2887.4	-0.00254244		3477.39	-0.01424839
527.6	0.10495937		1117.59	0.00965448		1707.61	-0.00604289		2297.6	-0.00413274		2887.6	-0.00227439		3477.59	-0.01436178
527.8	0.1053606		1117.79	0.00976598		1707.81	-0.00635483		2297.8	-0.00367592		2887.8	-0.00307884		3477.79	-0.01438217
528	0.1050006		1117.99	0.00941922		1708.01	-0.00611444		2298	-0.00236312		2888	-0.00327473		3477.99	-0.01446042
528.2	0.10500576		1118.19	0.00856878		1708.21	-0.00672253		2298.2	-0.00267772		2888.2	-0.00302203		3478.19	-0.01441858
528.4	0.10465358		1118.39	0.00791934		1708.41	-0.00651403		2298.4	-0.00258721		2888.4	-0.00330556		3478.39	-0.01498968
528.6	0.10362773		1118.59	0.00732792		1708.61	-0.00549427		2298.6	-0.00143879		2888.6	-0.0030184		3478.59	-0.01441574
528.8	0.10297189		1118.79	0.0068412		1708.81	-0.00486884		2298.8	-0.00220378		2888.8	-0.00289648		3478.79	-0.01499934
529	0.10247032		1118.99	0.00636063		1709.01	-0.00447078		2299	-0.00168048		2889	-0.00303283		3478.99	-0.01444711
529.2	0.10184632		1119.19	0.00639604		1709.21	-0.00458243		2299.2	-0.00112675		2889.2	-0.00229494		3479.19	-0.01372094
529.4	0.10186977		1119.39	0.0066497		1709.41	-0.0051791		2299.4	-0.00154049		2889.4	-0.00200742		3479.39	-0.01395213
529.6	0.10179195		1119.59	0.00620129		1709.61	-0.00611012		2299.6	-0.00047263		2889.6	-0.00118194		3479.59	-0.01480184
529.8	0.10169247		1119.79	0.00583114		1709.81	-0.00620834		2299.8	-0.00073944		2889.8	-0.00056754		3479.79	-0.01421015
530	0.10218056		1119.99	0.00649357		1710.01	-0.00588973		2300	-0.00031985		2890	-0.00070773		3479.99	-0.01446123
530.2	0.10236822		1120.19	0.00597419		1710.21	-0.00580498		2300.2	0.00003785		2890.2	-0.00078951		3480.19	-0.01555536
530.4	0.10267178		1120.39	0.00564389		1710.41	-0.00557759		2300.4	0.00118067		2890.4	-0.0009736		3480.39	-0.01587021
530.6	0.10263517		1120.59	0.0067483		1710.61	-0.00518037		2300.6	0.00135715		2890.6	-0.00080037		3480.59	-0.01616846
530.8	0.10328189		1120.79	0.00631691		1710.81	-0.00537748		2300.8	0.00096381		2890.8	-0.0011969		3480.79	-0.0142679
531	0.10324447		1120.99	0.00729733		1711.01	-0.0052617		2301	0.00025959		2891	-0.00015211		3480.99	-0.01345209
531.2	0.10398841		1121.19	0.00738503		1711.21	-0.00575009		2301.2	0.0003215		2891.2	-0.00041672		3481.19	-0.01328589
531.4	0.10378193		1121.39	0.00821192		1711.41	-0.00587104		2301.4	0.00051739		2891.4	-0.00047997		3481.39	-0.01262566
531.6	0.10336742		1121.59	0.00883284		1711.61	-0.00588684		2301.6	0.00041502		2891.6	-0.00028891		3481.59	-0.01267661
531.8	0.10382301		1121.79	0.00840596		1711.81	-0.00693583		2301.8	0.00026501		2891.8	-0.00000581		3481.79	-0.01278794
532	0.10305147		1121.99	0.00812477		1712.01	-0.00747843		2302	0.00001522		2892	-0.00081699		3481.99	-0.01366791
532.2	0.10297864		1122.19	0.00850095		1712.21	-0.00763277		2302.2	-0.00123494		2892.2	-0.00098213		3482.19	-0.01365503
532.4	0.10217149		1122.39	0.00805572		1712.41	-0.00721173		2302.4	-0.00116946		2892.4	-0.00112227		3482.39	-0.01407832
532.6	0.10217309		1122.59	0.00832484		1712.61	-0.00683569		2302.6	-0.00210362		2892.6	-0.00026055		3482.59	-0.01346283
532.8	0.10198621		1122.79	0.00893923		1712.81	-0.00701752		2302.8	-0.00344017		2892.8	-0.00036338		3482.79	-0.01364387
533	0.1024389		1122.99	0.00989418		1713.01	-0.00740632		2303	-0.00303646		2893	-0.00030989		3482.99	-0.01327205
533.2	0.1027173		1123.19	0.00937292		1713.21	-0.00807252		2303.2	-0.00265132		2893.2	-0.0000728		3483.19	-0.01330397
533.4	0.10249739		1123.39	0.00934541		1713.41	-0.00830809		2303.4	-0.00184171		2893.4	-0.00005627		3483.39	-0.01373686
533.6	0.10288659		1123.59	0.00904056		1713.61	-0.00826116		2303.6	-0.00114069		2893.6	-0.00062516		3483.59	-0.01368131
533.8	0.10312051		1123.79	0.00907798		1713.81	-0.00777045		2303.8	-0.0008952		2893.8	-0.00123941		3483.79	-0.01264034
534	0.1022758		1123.99	0.0089685		1714.01	-0.00761581		2304	-0.00092975		2894	-0.00080217		3483.99	-0.01404004
534.2	0.10253384		1124.19	0.00855792		1714.21	-0.00766025		2304.2	-0.00094782		2894.2	-0.00071893		3484.19	-0.01462918
534.4	0.10189297		1124.39	0.0089898		1714.41	-0.00792762		2304.4	-0.00090266		2894.4	-0.00016168		3484.39	-0.01372949
534.6	0.10174024		1124.59	0.00906338		1714.61	-0.0079851		2304.6	-0.00138188		2894.6	-0.000359		3484.59	-0.01408623
534.8	0.10226136		1124.79	0.00785545		1714.81	-0.00799827		2304.8	-0.0022827		2894.8	-0.00062475		3484.79	-0.01329222
535	0.10223764		1124.99	0.00772926		1715.01	-0.0078101		2305	-0.00165603		2895	-0.00028368		3484.99	-0.01349382
535.2	0.10197351		1125.19	0.00686894		1715.21	-0.00846268		2305.2	-0.00162848		2895.2	-0.00037089		3485.19	-0.01373843
535.4	0.10087592		1125.39	0.00693889		1715.41	-0.00881403		2305.4	-0.00197077		2895.4	-0.00037535		3485.39	-0.01291898
535.6	0.10057037		1125.59	0.00677431		1715.61	-0.00919491		2305.6	-0.00243323		2895.6	-0.00028105		3485.59	-0.01283872
535.8	0.10046295		1125.79	0.00701686		1715.81	-0.01013285		2305.8	-0.00325921		2895.8	-0.00052793		3485.79	-0.01356369
536	0.09990153		1125.99	0.00691648		1716.01	-0.00978082		2306	-0.00346276		2896	-0.00101995		3485.99	-0.01414023
536.2	0.10020537		1126.19	0.00711772		1716.21	-0.00972502		2306.2	-0.00397073		2896.2	-0.00028071		3486.19	-0.01397421
536.4	0.10053377		1126.39	0.00638704		1716.41	-0.0100114		2306.4	-0.00375358		2896.4	-0.00025382		3486.39	-0.0142809
536.6	0.10115765		1126.59	0.00593267		1716.61	-0.01016298		2306.6	-0.00465149		2896.6	0.00079762		3486.59	-0.01405205
536.8	0.10072903		1126.79	0.00718072		1716.81	-0.01001692		2306.8	-0.00418561		2896.8	0.00067007		3486.79	-0.01502269
537	0.10165407		1126.99	0.00729179		1717.01	-0.01028252		2307	-0.00330514		2897	0.00046877		3486.99	-0.01455507
537.2	0.10209431		1127.19	0.00639264		1717.21	-0.0101954		2307.2	-0.00293215		2897.2	0.00063289		3487.19	-0.01430188
537.4	0.10226194		1127.39	0.00759226		1717.41	-0.00973922		2307.4	-0.00218439		2897.4	0.00096385		3487.39	-0.01441618
537.6	0.10286389		1127.59	0.00844281		1717.61	-0.0092773		2307.6	-0.00258398		2897.6	0.00083261		3487.59	-0.01412874
537.8	0.10225339		1127.79	0.00884295		1717.81	-0.00892836		2307.8	-0.00218967		2897.8	0.00044085		3487.79	-0.0141435
538	0.10175009		1127.99	0.00932408		1718.01	-0.00839966		2308	-0.00192254		2898	0.00111938		3487.99	-0.01486947
538.2	0.10223934		1128.19	0.00981715		1718.21	-0.00768778		2308.2	-0.00179867		2898.2	0.00043171		3488.19	-0.01473571
538.4	0.10162989		1128.39	0.00995672		1718.41	-0.00702398		2308.4	-0.00211959		2898.4	0.00054594		3488.39	-0.01420254
538.6	0.10153538		1128.59	0.00959206		1718.61	-0.00678195		2308.6	-0.00175943		2898.6	-0.00067508		3488.59	-0.01506576
538.8	0.10153013		1128.79	0.00834737		1718.81	-0.00698745		2308.8	-0.00184431		2898.8	-0.00158536		3488.79	-0.01489397
539	0.10151076		1128.99	0.00837468		1719.01	-0.00681315		2309	-0.00058213		2899	-0.00152223		3488.99	-0.01507005
539.2	0.10183787		1129.19	0.00818731		1719.21	-0.00775867		2309.2	-0.00029125		2899.2	-0.00139996		3489.19	-0.01503841
539.4	0.10228864		1129.39	0.00832024		1719.41	-0.00719595		2309.4	-0.00053409		2899.4	-0.00188202		3489.39	-0.01471784
539.6	0.10278504		1129.59	0.00862324		1719.61	-0.00689244		2309.6	-0.00081027		2899.6	-0.00205279		3489.59	-0.01516304
539.8	0.10280302		1129.79	0.00875309		1719.81	-0.00672083		2309.8	-0.00118946		2899.8	-0.00191718		3489.79	-0.01526627
540	0.10364986		1129.99	0.00822325		1720.01	-0.00729858		2310	-0.00094722		2900	-0.00219625		3489.99	-0.01543703
540.2	0.10394741		1130.19	0.00788945		1720.21	-0.0081286		2310.2	-0.00142883		2900.2	-0.00167341		3490.19	-0.01569111
540.4	0.10325727		1130.39	0.00813042		1720.41	-0.00824576		2310.4	-0.00182522		2900.4	-0.00158223		3490.39	-0.0158784
540.6	0.10331479		1130.59	0.0079101		1720.61	-0.00869978		2310.6	-0.00198404		2900.6	-0.00089386		3490.59	-0.01637413
540.8	0.10256605		1130.79	0.00792098		1720.81	-0.01005379		2310.8	-0.00143906		2900.8	-0.00107646		3490.79	-0.01597104
541	0.10344958		1130.99	0.00769431		1721.01	-0.01028785		2311	-0.00140584		2901	-0.0018855		3490.99	-0.01489151
541.2	0.10205397		1131.19	0.00744939		1721.21	-0.01060718		2311.2	-0.00133005		2901.2	-0.00174588		3491.19	-0.01517309
541.4	0.10174503		1131.39	0.00746189		1721.41	-0.01061003		2311.4	-0.0007708		2901.4	-0.0019971		3491.39	-0.01561488
541.6	0.1010867		1131.59	0.00751648		1721.61	-0.01036374		2311.6	-0.00070756		2901.6	-0.00197961		3491.59	-0.01532277
541.8	0.10054449		1131.79	0.00694567		1721.81	-0.0102841		2311.8	0.00011234		2901.8	-0.0022786		3491.79	-0.0154012
542	0.10082251		1131.99	0.00707193		1722.01	-0.00992014		2312	0.00077898		2902	-0.00217022		3491.99	-0.01547862
542.2	0.10009699		1132.19	0.00658409		1722.21	-0.01000675		2312.2	0.00009455		2902.2	-0.00236563		3492.19	-0.0150763
542.4	0.09951208		1132.39	0.00650639		1722.41	-0.01061666		2312.4	0.00032351		2902.4	-0.00270398		3492.39	-0.01469095
542.6	0.09922239		1132.59	0.00661419		1722.61	-0.01105445		2312.6	0.00052669		2902.6	-0.00327562		3492.59	-0.0150226
542.8	0.09978422		1132.79	0.00606112		1722.81	-0.01129538		2312.8	0.00045133		2902.8	-0.00359047		3492.79	-0.01532167
543	0.10141026		1132.99	0.00685315		1723.01	-0.01100332		2313	0.0005812		2903	-0.00325444		3492.99	-0.01609466
543.2	0.10271981		1133.19	0.00701975		1723.21	-0.01102155		2313.2	-0.00026237		2903.2	-0.00285872		3493.19	-0.0153844
543.4	0.10363833		1133.39	0.00709877		1723.41	-0.0096602		2313.4	-0.0015001		2903.4	-0.0035677		3493.39	-0.01510928
543.6	0.10418618		1133.59	0.00822937		1723.61	-0.00987844		2313.6	-0.00282326		2903.6	-0.0035713		3493.59	-0.01568942
543.8	0.10506311		1133.79	0.00820791		1723.81	-0.009447		2313.8	-0.00347709		2903.8	-0.00324455		3493.79	-0.01538665
544	0.10530368		1133.99	0.00880054		1724.01	-0.0093445		2314	-0.00394942		2904	-0.00332		3493.99	-0.01572762
544.2	0.10501951		1134.19	0.00877425		1724.21	-0.00931937		2314.2	-0.00429251		2904.2	-0.00283285		3494.19	-0.0153029
544.4	0.10417524		1134.39	0.00905623		1724.41	-0.00869917		2314.4	-0.00448518		2904.4	-0.002622		3494.39	-0.01558428
544.6	0.10470425		1134.59	0.00774331		1724.61	-0.00928248		2314.6	-0.00436017		2904.6	-0.00271047		3494.59	-0.01514451
544.8	0.10400933		1134.79	0.00760165		1724.81	-0.010145		2314.8	-0.00481215		2904.8	-0.00244747		3494.79	-0.01410289
545	0.10326202		1134.99	0.00779298		1725.01	-0.00906936		2315	-0.00455566		2905	-0.00331323		3494.99	-0.01380953
545.2	0.10129587		1135.19	0.00665678		1725.21	-0.00893122		2315.2	-0.00443022		2905.2	-0.00373189		3495.19	-0.01394762
545.4	0.100606		1135.39	0.00681884		1725.41	-0.00834912		2315.4	-0.00403435		2905.4	-0.00344038		3495.39	-0.014203
545.6	0.09930082		1135.59	0.00663495		1725.61	-0.0075554		2315.6	-0.00371257		2905.6	-0.00402917		3495.59	-0.01423237
545.8	0.09931891		1135.79	0.00678352		1725.81	-0.00778333		2315.8	-0.00334091		2905.8	-0.00426704		3495.79	-0.01366276
546	0.09824845		1135.99	0.00676014		1726.01	-0.00724319		2316	-0.00245151		2906	-0.00459754		3495.99	-0.01315296
546.2	0.09745909		1136.19	0.00681551		1726.21	-0.00689081		2316.2	-0.00216304		2906.2	-0.00482573		3496.19	-0.0132072
546.4	0.09696625		1136.39	0.00678074		1726.41	-0.0066308		2316.4	-0.00152649		2906.4	-0.00483411		3496.39	-0.01275579
546.6	0.09747681		1136.59	0.00684553		1726.61	-0.00652047		2316.6	-0.00182697		2906.6	-0.00431506		3496.59	-0.01341675
546.8	0.09826355		1136.79	0.00645138		1726.81	-0.00667937		2316.8	-0.00207632		2906.8	-0.00441452		3496.79	-0.01299758
547	0.09939336		1136.99	0.00692376		1727.01	-0.00633037		2317	-0.00193041		2907	-0.00360924		3496.99	-0.01312201
547.2	0.10008342		1137.19	0.00670152		1727.21	-0.00585095		2317.2	-0.00229375		2907.2	-0.00318765		3497.19	-0.01186262
547.4	0.10049587		1137.39	0.00643417		1727.41	-0.00592734		2317.4	-0.00301486		2907.4	-0.00371927		3497.39	-0.01224993
547.6	0.10089821		1137.59	0.00594661		1727.61	-0.00659874		2317.6	-0.00350387		2907.6	-0.00216571		3497.59	-0.01334977
547.8	0.10123265		1137.79	0.005233		1727.81	-0.00644587		2317.8	-0.00375763		2907.8	-0.00110979		3497.79	-0.0134343
548	0.10122755		1137.99	0.0053024		1728.01	-0.00652592		2318	-0.00386945		2908	-0.00040934		3497.99	-0.0144856
548.2	0.10190637		1138.19	0.00500864		1728.21	-0.00708696		2318.2	-0.00368897		2908.2	-0.00021587		3498.19	-0.01464184
548.4	0.10215125		1138.39	0.00465571		1728.41	-0.00751401		2318.4	-0.00340149		2908.4	0.00102928		3498.39	-0.01568046
548.6	0.10313692		1138.59	0.00449061		1728.61	-0.00800559		2318.6	-0.00336534		2908.6	0.00159669		3498.59	-0.01546838
548.8	0.10217832		1138.79	0.00574807		1728.81	-0.00778146		2318.8	-0.00374297		2908.8	0.00210476		3498.79	-0.01585697
549	0.10205372		1138.99	0.00590947		1729.01	-0.00752885		2319	-0.00380639		2909	0.00169384		3498.99	-0.01639597
549.2	0.10197371		1139.19	0.00638419		1729.21	-0.00785061		2319.2	-0.0036776		2909.2	0.00228994		3499.19	-0.01639538
549.4	0.10173674		1139.39	0.00779183		1729.41	-0.00789812		2319.4	-0.00346255		2909.4	0.0023726		3499.39	-0.01666444
549.6	0.10103481		1139.59	0.00763567		1729.61	-0.00785333		2319.6	-0.00359925		2909.6	0.00165114		3499.59	-0.01693085
549.8	0.10092906		1139.79	0.00797901		1729.81	-0.00772944		2319.8	-0.00310139		2909.8	0.00195484		3499.79	-0.01692542
550	0.1001557		1139.99	0.00848527		1730.01	-0.00682077		2320	-0.00257729		2910	0.00179085		3499.99	-0.01707883
550.2	0.0998177		1140.19	0.00876234		1730.21	-0.0069305		2320.2	-0.0028052		2910.2	0.00158161		3500.19	-0.01725028
550.4	0.10014845		1140.39	0.00883333		1730.41	-0.00678288		2320.4	-0.00268357		2910.4	0.00144589		3500.39	-0.01747561
550.6	0.10048333		1140.59	0.0085908		1730.61	-0.0066815		2320.6	-0.00267518		2910.6	0.00123168		3500.59	-0.01781669
550.8	0.10109708		1140.79	0.0091534		1730.81	-0.00617782		2320.8	-0.00263636		2910.8	0.00064577		3500.79	-0.01699061
551	0.10072838		1140.99	0.01000549		1731.01	-0.00513103		2321	-0.00185724		2911	0.00106485		3500.99	-0.01680342
551.2	0.10065659		1141.19	0.00962279		1731.21	-0.00469536		2321.2	-0.00178923		2911.2	0.00121913		3501.19	-0.01626434
551.4	0.10009232		1141.39	0.00841085		1731.41	-0.00505622		2321.4	-0.00166877		2911.4	0.00142432		3501.39	-0.01733332
551.6	0.09984251		1141.59	0.00793005		1731.61	-0.00517935		2321.6	-0.0009922		2911.6	0.00139329		3501.59	-0.01841151
551.8	0.09993404		1141.79	0.00837594		1731.81	-0.00401597		2321.8	-0.00138189		2911.8	0.00066828		3501.79	-0.01919396
552	0.09981725		1141.99	0.00785611		1732.01	-0.00352599		2322	-0.00045039		2912	0.00138871		3501.99	-0.01913771
552.2	0.09983822		1142.19	0.00791848		1732.21	-0.00446701		2322.2	0.00048156		2912.2	0.00112449		3502.19	-0.01897388
552.4	0.10087726		1142.39	0.00820642		1732.41	-0.00467532		2322.4	0.00127364		2912.4	0.0015428		3502.39	-0.0188701
552.6	0.10114512		1142.59	0.00872662		1732.61	-0.00389285		2322.6	0.00133968		2912.6	0.00114649		3502.59	-0.01908165
552.8	0.10108601		1142.79	0.00951572		1732.81	-0.00406516		2322.8	0.00112946		2912.8	0.00099096		3502.79	-0.01862052
553	0.10165213		1142.99	0.009128		1733.01	-0.00514683		2323	0.00099164		2913	0.00079867		3502.99	-0.01789366
553.2	0.10124536		1143.19	0.00947412		1733.21	-0.00602483		2323.2	0.00102961		2913.2	-0.00005839		3503.19	-0.01796228
553.4	0.10110705		1143.39	0.00884871		1733.41	-0.00672473		2323.4	-0.00023645		2913.4	-0.00113293		3503.39	-0.01809146
553.6	0.10065082		1143.59	0.00870018		1733.61	-0.00747325		2323.6	-0.00075213		2913.6	-0.0015114		3503.59	-0.01880969
553.8	0.10009865		1143.79	0.00906781		1733.81	-0.00833122		2323.8	-0.00053208		2913.8	-0.00191563		3503.79	-0.01893103
554	0.09954515		1143.99	0.009786		1734.01	-0.00943463		2324	-0.00083368		2914	-0.00233892		3503.99	-0.01885836
554.2	0.09967678		1144.19	0.00872552		1734.21	-0.00969788		2324.2	-0.00130323		2914.2	-0.00279182		3504.19	-0.01879593
554.4	0.1006182		1144.39	0.00889262		1734.41	-0.0099454		2324.4	-0.00132745		2914.4	-0.00363942		3504.39	-0.01925366
554.6	0.10025723		1144.59	0.00872652		1734.61	-0.00977421		2324.6	-0.00155546		2914.6	-0.00365779		3504.59	-0.01896489
554.8	0.10041515		1144.79	0.00965764		1734.81	-0.00947348		2324.8	-0.00110426		2914.8	-0.00370353		3504.79	-0.01871407
555	0.09935237		1144.99	0.00928511		1735.01	-0.0088893		2325	-0.0004864		2915	-0.00317629		3504.99	-0.01841574
555.2	0.09938477		1145.19	0.00928752		1735.21	-0.00880203		2325.2	-0.00122819		2915.2	-0.00300786		3505.19	-0.01873265
555.4	0.09941778		1145.39	0.00952556		1735.41	-0.00877313		2325.4	-0.00075247		2915.4	-0.00315562		3505.39	-0.01899985
555.6	0.09927409		1145.59	0.00963434		1735.61	-0.00757597		2325.6	-0.00089047		2915.6	-0.00273891		3505.59	-0.01900055
555.8	0.09994213		1145.79	0.00923349		1735.81	-0.00610774		2325.8	-0.001651		2915.8	-0.00190293		3505.79	-0.01781947
556	0.10053707		1145.99	0.00857168		1736.01	-0.00620391		2326	-0.00145404		2916	-0.00178414		3505.99	-0.01649334
556.2	0.10094793		1146.19	0.00852698		1736.21	-0.00637316		2326.2	-0.00134918		2916.2	-0.00274013		3506.19	-0.01655623
556.4	0.1016374		1146.39	0.00821415		1736.41	-0.00499221		2326.4	-0.00179015		2916.4	-0.00286011		3506.39	-0.01602619
556.6	0.10105772		1146.59	0.00804045		1736.61	-0.00385873		2326.6	-0.00181841		2916.6	-0.00222569		3506.59	-0.01610094
556.8	0.10113878		1146.79	0.00783362		1736.81	-0.0030511		2326.8	-0.0030223		2916.8	-0.0024646		3506.79	-0.01550477
557	0.10122467		1146.99	0.0073309		1737.01	-0.00326025		2327	-0.00314653		2917	-0.00222697		3506.99	-0.01581425
557.2	0.10025275		1147.19	0.00683886		1737.21	-0.00368078		2327.2	-0.0037121		2917.2	-0.00230547		3507.19	-0.01668216
557.4	0.10064241		1147.39	0.00654938		1737.41	-0.00428703		2327.4	-0.00467686		2917.4	-0.00189513		3507.39	-0.01719189
557.6	0.10046435		1147.59	0.00669401		1737.61	-0.00505534		2327.6	-0.00513332		2917.6	-0.0006216		3507.59	-0.01809529
557.8	0.09994122		1147.79	0.00708148		1737.81	-0.0052266		2327.8	-0.00471352		2917.8	-0.0010742		3507.79	-0.01879385
558	0.10038188		1147.99	0.00711013		1738.01	-0.00572828		2328	-0.00483429		2918	-0.00164986		3507.99	-0.01979734
558.2	0.10063386		1148.19	0.00707535		1738.21	-0.00672859		2328.2	-0.00504826		2918.2	-0.00188404		3508.19	-0.02017423
558.4	0.10066829		1148.39	0.00779116		1738.41	-0.00716185		2328.4	-0.00479191		2918.4	-0.00252892		3508.39	-0.02049998
558.6	0.09981077		1148.59	0.00824431		1738.61	-0.00745128		2328.6	-0.00493697		2918.6	-0.00160381		3508.59	-0.02005251
558.8	0.0997739		1148.79	0.00862457		1738.81	-0.00746479		2328.8	-0.00386843		2918.8	-0.00143424		3508.79	-0.02032897
559	0.10035621		1148.99	0.00800275		1739.01	-0.00775569		2329	-0.00251193		2919	-0.00183549		3508.99	-0.01968739
559.2	0.10117259		1149.19	0.00842209		1739.21	-0.00802706		2329.2	-0.00262076		2919.2	-0.0019406		3509.19	-0.01913668
559.4	0.10160216		1149.39	0.00767799		1739.41	-0.00770993		2329.4	-0.00209578		2919.4	-0.00222137		3509.39	-0.01815904
559.6	0.10208608		1149.59	0.00692638		1739.61	-0.00731697		2329.6	-0.00148724		2919.6	-0.00243936		3509.59	-0.01703278
559.8	0.10263861		1149.79	0.00634304		1739.81	-0.00737149		2329.8	-0.00140582		2919.8	-0.00311723		3509.79	-0.0158499
560	0.10323105		1149.99	0.00608605		1740.01	-0.00772418		2330	-0.00098836		2920	-0.00374516		3509.99	-0.01559735
560.2	0.10261151		1150.19	0.00559123		1740.21	-0.00686418		2330.2	-0.00058497		2920.2	-0.0035333		3510.19	-0.01524236
560.4	0.10254491		1150.39	0.00500025		1740.41	-0.0058761		2330.4	-0.0007839		2920.4	-0.00312818		3510.39	-0.01510865
560.6	0.10229832		1150.59	0.00487659		1740.61	-0.00568606		2330.6	-0.00109757		2920.6	-0.00272321		3510.59	-0.01501879
560.8	0.10188363		1150.79	0.00464903		1740.81	-0.00565949		2330.8	-0.00084584		2920.8	-0.00312578		3510.79	-0.01528806
561	0.10177421		1150.99	0.00380402		1741.01	-0.00671402		2331	0.00007472		2921	-0.00280211		3510.99	-0.01555948
561.2	0.10150592		1151.19	0.00286547		1741.21	-0.00702236		2331.2	-0.00022932		2921.2	-0.00266237		3511.19	-0.01617811
561.4	0.10226246		1151.39	0.00456714		1741.41	-0.00707409		2331.4	-0.00153367		2921.4	-0.00318509		3511.39	-0.01690463
561.6	0.10172976		1151.59	0.00445415		1741.61	-0.00648487		2331.6	-0.00192239		2921.6	-0.00302174		3511.59	-0.01700053
561.8	0.10166598		1151.79	0.00565047		1741.81	-0.00705248		2331.8	-0.00117592		2921.8	-0.00409432		3511.79	-0.01735498
562	0.10201012		1151.99	0.00590395		1742.01	-0.00772351		2332	-0.00199502		2922	-0.00423616		3511.99	-0.01843686
562.2	0.1010326		1152.19	0.00700157		1742.21	-0.00817586		2332.2	-0.00232157		2922.2	-0.00428967		3512.19	-0.01913777
562.4	0.1006928		1152.39	0.00747805		1742.41	-0.00806534		2332.4	-0.00300642		2922.4	-0.00339958		3512.39	-0.01915992
562.6	0.10070115		1152.59	0.0076601		1742.61	-0.00867666		2332.6	-0.00350864		2922.6	-0.00230187		3512.59	-0.01929363
562.8	0.10139724		1152.79	0.00745564		1742.81	-0.00816845		2332.8	-0.0029481		2922.8	-0.00209983		3512.79	-0.01961317
563	0.10216964		1152.99	0.00675135		1743.01	-0.00862994		2333	-0.00254468		2923	-0.00197707		3512.99	-0.0188547
563.2	0.10205311		1153.19	0.00712691		1743.21	-0.00849898		2333.2	-0.00353667		2923.2	-0.0021302		3513.19	-0.01831576
563.4	0.1014013		1153.39	0.00700886		1743.41	-0.00804142		2333.4	-0.00401429		2923.4	-0.0014295		3513.39	-0.01784163
563.6	0.10182895		1153.59	0.0073109		1743.61	-0.00840346		2333.6	-0.00404126		2923.6	-0.00055401		3513.59	-0.01753334
563.8	0.10211248		1153.79	0.00707882		1743.81	-0.00904033		2333.8	-0.00428843		2923.8	-0.00012481		3513.79	-0.01662805
564	0.10253151		1153.99	0.00725494		1744.01	-0.00901358		2334	-0.00400312		2924	0.00041333		3513.99	-0.01615078
564.2	0.10214351		1154.19	0.00718462		1744.21	-0.00863165		2334.2	-0.00374862		2924.2	0.00057821		3514.19	-0.01556028
564.4	0.10279011		1154.39	0.00664921		1744.41	-0.00953789		2334.4	-0.00300119		2924.4	0.00043318		3514.39	-0.01528735
564.6	0.10239684		1154.59	0.00646946		1744.61	-0.00983308		2334.6	-0.00284953		2924.6	0.00032971		3514.59	-0.01493143
564.8	0.10185613		1154.79	0.0061029		1744.81	-0.00901885		2334.8	-0.00108478		2924.8	-0.00006331		3514.79	-0.01452863
565	0.10220536		1154.99	0.00542939		1745.01	-0.00914536		2335	-0.00060487		2925	-0.00064807		3514.99	-0.01452232
565.2	0.10265622		1155.19	0.00558183		1745.21	-0.00888638		2335.2	-0.00059278		2925.2	-0.00059285		3515.19	-0.01542558
565.4	0.1024021		1155.39	0.006856		1745.41	-0.00887085		2335.4	-0.00080262		2925.4	-0.00084268		3515.39	-0.01537732
565.6	0.10182847		1155.59	0.00615608		1745.61	-0.00802996		2335.6	-0.00036722		2925.6	-0.00124374		3515.59	-0.01610384
565.8	0.10201046		1155.79	0.00689208		1745.81	-0.00823122		2335.8	-0.00007338		2925.8	-0.00171879		3515.79	-0.01712216
566	0.10203477		1155.99	0.00699413		1746.01	-0.00791004		2336	-0.0013242		2926	-0.00260011		3515.99	-0.01797047
566.2	0.10149865		1156.19	0.00742842		1746.21	-0.00728604		2336.2	-0.00167206		2926.2	-0.00334561		3516.19	-0.01903834
566.4	0.10189984		1156.39	0.00760823		1746.41	-0.00781197		2336.4	-0.00250019		2926.4	-0.0030047		3516.39	-0.01939278
566.6	0.10218219		1156.59	0.00809656		1746.61	-0.00738138		2336.6	-0.00305504		2926.6	-0.00231802		3516.59	-0.01966225
566.8	0.10179066		1156.79	0.00857855		1746.81	-0.00649394		2336.8	-0.00388564		2926.8	-0.00251128		3516.79	-0.01966688
567	0.10117178		1156.99	0.0084142		1747.01	-0.00590226		2337	-0.00392572		2927	-0.00165717		3516.99	-0.01860631
567.2	0.10120778		1157.19	0.00898856		1747.21	-0.00604416		2337.2	-0.00440348		2927.2	-0.00147799		3517.19	-0.01856924
567.4	0.10143841		1157.39	0.00938433		1747.41	-0.00556076		2337.4	-0.00430763		2927.4	-0.00102585		3517.39	-0.01856282
567.6	0.10224468		1157.59	0.00895779		1747.61	-0.00570864		2337.6	-0.00425472		2927.6	0.00023958		3517.59	-0.01848144
567.8	0.10250234		1157.79	0.00873669		1747.81	-0.00581006		2337.8	-0.00439499		2927.8	-0.00039415		3517.79	-0.01691267
568	0.10275321		1157.99	0.00840559		1748.01	-0.00516224		2338	-0.00403567		2928	-0.00022492		3517.99	-0.01665427
568.2	0.10255465		1158.19	0.00793336		1748.21	-0.00544196		2338.2	-0.00416091		2928.2	-0.00047328		3518.19	-0.01634933
568.4	0.10263571		1158.39	0.00729566		1748.41	-0.00586904		2338.4	-0.00370088		2928.4	-0.00066387		3518.39	-0.01596901
568.6	0.10232926		1158.59	0.00687389		1748.61	-0.0049614		2338.6	-0.00348102		2928.6	-0.00090137		3518.59	-0.01582103
568.8	0.10185995		1158.79	0.00627068		1748.81	-0.00513457		2338.8	-0.00318937		2928.8	-0.0006709		3518.79	-0.01457434
569	0.10241008		1158.99	0.00597982		1749.01	-0.00570385		2339	-0.0033476		2929	0.00008234		3518.99	-0.01486092
569.2	0.1029021		1159.19	0.00621625		1749.21	-0.0063084		2339.2	-0.00324198		2929.2	0.00054352		3519.19	-0.01544235
569.4	0.1022508		1159.39	0.00659721		1749.41	-0.00666562		2339.4	-0.00382066		2929.4	0.00043521		3519.39	-0.01470103
569.6	0.10161853		1159.59	0.00610493		1749.61	-0.00640122		2339.6	-0.00439059		2929.6	-0.00039958		3519.59	-0.01487202
569.8	0.10126592		1159.79	0.00589971		1749.81	-0.00665809		2339.8	-0.00438781		2929.8	-0.00066004		3519.79	-0.01431321
570	0.10106217		1159.99	0.005445		1750.01	-0.0061784		2340	-0.00497851		2930	-0.00112095		3519.99	-0.01394242
570.2	0.10122049		1160.19	0.00546759		1750.21	-0.00645718		2340.2	-0.00463911		2930.2	-0.00077785		3520.19	-0.01417368
570.4	0.10042392		1160.39	0.00587357		1750.41	-0.0069944		2340.4	-0.00480717		2930.4	-0.00053342		3520.39	-0.01397247
570.6	0.1005008		1160.59	0.00546043		1750.61	-0.00610564		2340.6	-0.00476873		2930.6	0.00021268		3520.59	-0.01369318
570.8	0.10037773		1160.79	0.00491558		1750.81	-0.00542565		2340.8	-0.00478848		2930.8	-0.0001813		3520.79	-0.01311858
571	0.09989667		1160.99	0.00438781		1751.01	-0.00582534		2341	-0.004117		2931	-0.00021801		3520.99	-0.01282784
571.2	0.0999331		1161.19	0.00488961		1751.21	-0.00675782		2341.2	-0.00432485		2931.2	-0.00125683		3521.19	-0.01403655
571.4	0.1002421		1161.39	0.0043693		1751.41	-0.00648443		2341.4	-0.0038521		2931.4	-0.00213049		3521.39	-0.01443724
571.6	0.10050204		1161.59	0.00384554		1751.61	-0.00655198		2341.6	-0.00463316		2931.6	-0.00136074		3521.59	-0.0147319
571.8	0.10065226		1161.79	0.00382508		1751.81	-0.00644339		2341.8	-0.00470317		2931.8	-0.00322832		3521.79	-0.01463619
572	0.10084683		1161.99	0.00399866		1752.01	-0.00641717		2342	-0.00456821		2932	-0.00352601		3521.99	-0.01510806
572.2	0.10045003		1162.19	0.00387786		1752.21	-0.00715907		2342.2	-0.00463724		2932.2	-0.00367684		3522.19	-0.01587564
572.4	0.10063604		1162.39	0.00412294		1752.41	-0.00755796		2342.4	-0.00438107		2932.4	-0.00505985		3522.39	-0.01609605
572.6	0.10034229		1162.59	0.00380163		1752.61	-0.00751626		2342.6	-0.00469614		2932.6	-0.00463974		3522.59	-0.01639056
572.8	0.10022906		1162.79	0.00410263		1752.81	-0.00771396		2342.8	-0.00495321		2932.8	-0.00460598		3522.79	-0.01608984
573	0.10101764		1162.99	0.0047961		1753.01	-0.00784773		2343	-0.0046857		2933	-0.00497915		3522.99	-0.01706885
573.2	0.10132599		1163.19	0.00559395		1753.21	-0.00794901		2343.2	-0.00386792		2933.2	-0.00557318		3523.19	-0.01778257
573.4	0.10190788		1163.39	0.00604961		1753.41	-0.0078312		2343.4	-0.00361746		2933.4	-0.00508918		3523.39	-0.01757391
573.6	0.10193438		1163.59	0.00571233		1753.61	-0.00797455		2343.6	-0.00364708		2933.6	-0.00503943		3523.59	-0.01712633
573.8	0.10232858		1163.79	0.00663363		1753.81	-0.00717405		2343.8	-0.00233815		2933.8	-0.00453522		3523.79	-0.01671678
574	0.10276206		1163.99	0.00712505		1754.01	-0.00716342		2344	-0.001659		2934	-0.00361097		3523.99	-0.01615538
574.2	0.10288688		1164.19	0.00729357		1754.21	-0.008323		2344.2	-0.00149872		2934.2	-0.0033559		3524.19	-0.01626906
574.4	0.10255766		1164.39	0.00709046		1754.41	-0.00782176		2344.4	-0.00169879		2934.4	-0.00334736		3524.39	-0.01596722
574.6	0.10367082		1164.59	0.00670301		1754.61	-0.00774043		2344.6	-0.00147496		2934.6	-0.00254882		3524.59	-0.01590587
574.8	0.10310283		1164.79	0.00653923		1754.81	-0.00814916		2344.8	-0.00197861		2934.8	-0.00234759		3524.79	-0.01553986
575	0.10231015		1164.99	0.00677447		1755.01	-0.00872656		2345	-0.00248018		2935	-0.00220909		3524.99	-0.01502261
575.2	0.10199307		1165.19	0.00739902		1755.21	-0.00914304		2345.2	-0.00279033		2935.2	-0.00195719		3525.19	-0.01481192
575.4	0.1017878		1165.39	0.0071053		1755.41	-0.00910557		2345.4	-0.00202016		2935.4	-0.0007907		3525.39	-0.01420399
575.6	0.10170779		1165.59	0.00731895		1755.61	-0.00963314		2345.6	-0.00215996		2935.6	-0.00037773		3525.59	-0.01419218
575.8	0.10108805		1165.79	0.00735058		1755.81	-0.00971468		2345.8	-0.00183601		2935.8	-0.00019633		3525.79	-0.01393821
576	0.10077764		1165.99	0.00791313		1756.01	-0.00972582		2346	-0.00223164		2936	0.00013463		3525.99	-0.01387168
576.2	0.10043569		1166.19	0.00745797		1756.21	-0.00996231		2346.2	-0.00303037		2936.2	0.00056215		3526.19	-0.0141845
576.4	0.09992772		1166.39	0.00762673		1756.41	-0.0096253		2346.4	-0.00323687		2936.4	-0.00018039		3526.39	-0.01472934
576.6	0.09944866		1166.59	0.00834849		1756.61	-0.00863512		2346.6	-0.00347276		2936.6	0.00077962		3526.59	-0.01536032
576.8	0.099388		1166.79	0.00830843		1756.81	-0.00854693		2346.8	-0.00343632		2936.8	-0.00013274		3526.79	-0.01608005
577	0.0995628		1166.99	0.00811997		1757.01	-0.00904804		2347	-0.00318879		2937	-0.0002165		3526.99	-0.01692567
577.2	0.09993887		1167.19	0.00776212		1757.21	-0.0081145		2347.2	-0.00354443		2937.2	-0.00036474		3527.19	-0.01799088
577.4	0.10051908		1167.39	0.00771563		1757.41	-0.00821178		2347.4	-0.00404591		2937.4	0.00002462		3527.39	-0.01811854
577.6	0.09973526		1167.59	0.00792819		1757.61	-0.00847462		2347.6	-0.00525031		2937.6	-0.0005501		3527.59	-0.01854947
577.8	0.10011525		1167.79	0.00878495		1757.81	-0.00804246		2347.8	-0.00503487		2937.8	-0.00058789		3527.79	-0.01891946
578	0.09874201		1167.99	0.00754007		1758.01	-0.00820689		2348	-0.00591658		2938	-0.00097107		3527.99	-0.01906044
578.2	0.09867605		1168.19	0.00705919		1758.21	-0.00775517		2348.2	-0.00681524		2938.2	-0.00118608		3528.19	-0.01984202
578.4	0.09923905		1168.39	0.00689364		1758.41	-0.00768349		2348.4	-0.00780127		2938.4	-0.0015518		3528.39	-0.01899078
578.6	0.09947929		1168.59	0.00591498		1758.61	-0.00740415		2348.6	-0.00816871		2938.6	-0.00208129		3528.59	-0.01906131
578.8	0.09943972		1168.79	0.00457226		1758.81	-0.00807224		2348.8	-0.00872191		2938.8	-0.00254697		3528.79	-0.01827815
579	0.09988848		1168.99	0.0049979		1759.01	-0.00877935		2349	-0.00746096		2939	-0.00282765		3528.99	-0.01743109
579.2	0.10021332		1169.19	0.00536655		1759.21	-0.00942389		2349.2	-0.00633321		2939.2	-0.00332838		3529.19	-0.01749682
579.4	0.10035773		1169.39	0.0044142		1759.41	-0.01049824		2349.4	-0.00548271		2939.4	-0.00292459		3529.39	-0.01744738
579.6	0.1013108		1169.59	0.0041358		1759.61	-0.01109145		2349.6	-0.0052247		2939.6	-0.00311532		3529.59	-0.01791625
579.8	0.10172944		1169.79	0.00436244		1759.81	-0.01057003		2349.8	-0.00552395		2939.8	-0.00291848		3529.79	-0.01742912
580	0.10256419		1169.99	0.00432026		1760.01	-0.01069329		2350	-0.00555014		2940	-0.00312553		3529.99	-0.01685394
580.2	0.10282691		1170.19	0.00431816		1760.21	-0.01041254		2350.2	-0.00521288		2940.2	-0.00252854		3530.19	-0.01687108
580.4	0.10241559		1170.39	0.00367907		1760.41	-0.00916244		2350.4	-0.00443718		2940.4	-0.00329657		3530.39	-0.01716075
580.6	0.10219565		1170.59	0.00427042		1760.61	-0.0097535		2350.6	-0.00445011		2940.6	-0.00330617		3530.59	-0.01667718
580.8	0.10134953		1170.79	0.00356576		1760.81	-0.01024284		2350.8	-0.00503271		2940.8	-0.00335104		3530.79	-0.01629257
581	0.09998101		1170.99	0.00441719		1761.01	-0.01034645		2351	-0.0052763		2941	-0.00297024		3530.99	-0.01610093
581.2	0.09919146		1171.19	0.00484797		1761.21	-0.00937759		2351.2	-0.00615965		2941.2	-0.00315916		3531.19	-0.01580027
581.4	0.09803289		1171.39	0.00542844		1761.41	-0.00933298		2351.4	-0.00680201		2941.4	-0.00294674		3531.39	-0.01558057
581.6	0.09639272		1171.59	0.00560941		1761.61	-0.00845237		2351.6	-0.00760295		2941.6	-0.00349939		3531.59	-0.01544261
581.8	0.09547514		1171.79	0.00560821		1761.81	-0.00740592		2351.8	-0.00722914		2941.8	-0.00365421		3531.79	-0.01489117
582	0.09454458		1171.99	0.00519517		1762.01	-0.00709826		2352	-0.00786649		2942	-0.00421337		3531.99	-0.01488519
582.2	0.09515636		1172.19	0.00585818		1762.21	-0.00756242		2352.2	-0.00762355		2942.2	-0.00413038		3532.19	-0.01506345
582.4	0.09535824		1172.39	0.00634206		1762.41	-0.00756888		2352.4	-0.00812312		2942.4	-0.00497558		3532.39	-0.01371105
582.6	0.09545953		1172.59	0.00594331		1762.61	-0.0077505		2352.6	-0.00770124		2942.6	-0.00470765		3532.59	-0.01508249
582.8	0.09585804		1172.79	0.0061052		1762.81	-0.00915986		2352.8	-0.00711675		2942.8	-0.00409897		3532.79	-0.01533403
583	0.09621347		1172.99	0.00763073		1763.01	-0.00874518		2353	-0.00614789		2943	-0.00494507		3532.99	-0.01682981
583.2	0.09705904		1173.19	0.00752606		1763.21	-0.00821541		2353.2	-0.00607752		2943.2	-0.00415223		3533.19	-0.01767819
583.4	0.09712287		1173.39	0.0067847		1763.41	-0.00864183		2353.4	-0.00567272		2943.4	-0.00365588		3533.39	-0.01817218
583.6	0.09852483		1173.59	0.00718501		1763.61	-0.00764409		2353.6	-0.00519156		2943.6	-0.00368497		3533.59	-0.01886933
583.8	0.09915245		1173.79	0.00719458		1763.81	-0.0071396		2353.8	-0.00491554		2943.8	-0.0039766		3533.79	-0.01844766
584	0.09950074		1173.99	0.00699571		1764.01	-0.00716975		2354	-0.00390921		2944	-0.00361276		3533.99	-0.01923802
584.2	0.09913313		1174.19	0.00642417		1764.21	-0.0064489		2354.2	-0.0029909		2944.2	-0.00259344		3534.19	-0.0195668
584.4	0.09981213		1174.39	0.005581		1764.41	-0.00640897		2354.4	-0.00215957		2944.4	-0.00284079		3534.39	-0.01911848
584.6	0.09988591		1174.59	0.00618268		1764.61	-0.0077583		2354.6	-0.00170422		2944.6	-0.00226475		3534.59	-0.01856519
584.8	0.09994778		1174.79	0.00638051		1764.81	-0.00768306		2354.8	-0.00187078		2944.8	-0.00132459		3534.79	-0.01790018
585	0.09945268		1174.99	0.00680071		1765.01	-0.00757425		2355	-0.00188333		2945	-0.000663		3534.99	-0.01786173
585.2	0.09910157		1175.19	0.00592478		1765.21	-0.00693489		2355.2	-0.00151802		2945.2	-0.00104033		3535.19	-0.0169203
585.4	0.09829389		1175.39	0.00514915		1765.41	-0.00671969		2355.4	-0.00136097		2945.4	-0.00095182		3535.39	-0.01695271
585.6	0.0986613		1175.59	0.00445024		1765.61	-0.00594319		2355.6	-0.00071527		2945.6	-0.00100707		3535.59	-0.01706385
585.8	0.09972696		1175.79	0.00372613		1765.81	-0.00642764		2355.8	-0.00031631		2945.8	-0.00151859		3535.79	-0.01703563
586	0.09992161		1175.99	0.00283067		1766.01	-0.00741237		2356	-0.00078889		2946	-0.00211472		3535.99	-0.01695769
586.2	0.09964621		1176.19	0.00294214		1766.21	-0.00788851		2356.2	-0.00093502		2946.2	-0.00123378		3536.19	-0.0171882
586.4	0.09982497		1176.39	0.00252543		1766.41	-0.00808159		2356.4	-0.00198023		2946.4	-0.00151819		3536.39	-0.01710564
586.6	0.0993409		1176.59	0.00140755		1766.61	-0.00871797		2356.6	-0.00223999		2946.6	-0.00147743		3536.59	-0.01796253
586.8	0.09955726		1176.79	0.00194836		1766.81	-0.00853027		2356.8	-0.00307421		2946.8	-0.00275874		3536.79	-0.0181955
587	0.09929672		1176.99	0.00230669		1767.01	-0.00788034		2357	-0.00391608		2947	-0.00412925		3536.99	-0.01903734
587.2	0.09969066		1177.19	0.00237519		1767.21	-0.00809616		2357.2	-0.00409516		2947.2	-0.00324324		3537.19	-0.01886835
587.4	0.09939045		1177.39	0.00259959		1767.41	-0.00861454		2357.4	-0.00448555		2947.4	-0.00318891		3537.39	-0.0191739
587.6	0.10099655		1177.59	0.00310074		1767.61	-0.0089339		2357.6	-0.00514421		2947.6	-0.00277155		3537.59	-0.01888094
587.8	0.10143522		1177.79	0.00325876		1767.81	-0.00855688		2357.8	-0.00554966		2947.8	-0.00202826		3537.79	-0.0186592
588	0.10094582		1177.99	0.00332811		1768.01	-0.00933528		2358	-0.0056		2948	-0.00155936		3537.99	-0.01848212
588.2	0.10071734		1178.19	0.00243358		1768.21	-0.00983132		2358.2	-0.00602646		2948.2	-0.00169477		3538.19	-0.01745795
588.4	0.1018287		1178.39	0.00388699		1768.41	-0.01091192		2358.4	-0.00544617		2948.4	-0.00236183		3538.39	-0.0169085
588.6	0.10080517		1178.59	0.0045611		1768.61	-0.01201615		2358.6	-0.00590966		2948.6	-0.00226891		3538.59	-0.01563511
588.8	0.10079332		1178.79	0.00517774		1768.81	-0.01226987		2358.8	-0.00626131		2948.8	-0.00254832		3538.79	-0.01502262
589	0.09992935		1178.99	0.00606779		1769.01	-0.01256252		2359	-0.00661915		2949	-0.00338602		3538.99	-0.01490212
589.2	0.09944288		1179.19	0.00552337		1769.21	-0.01238739		2359.2	-0.00557143		2949.2	-0.00392516		3539.19	-0.01454689
589.4	0.09982799		1179.39	0.00575159		1769.41	-0.01183154		2359.4	-0.00532086		2949.4	-0.00366737		3539.39	-0.0149595
589.6	0.09984897		1179.59	0.00497742		1769.61	-0.0118551		2359.6	-0.00517293		2949.6	-0.0035276		3539.59	-0.01497996
589.8	0.09965971		1179.79	0.00440444		1769.81	-0.01295348		2359.8	-0.00434842		2949.8	-0.00348413		3539.79	-0.01472085
590	0.09906119		1179.99	0.00440358		1770.01	-0.01308568		2360	-0.00377777		2950	-0.00261231		3539.99	-0.01511516
590.2	0.09872645		1180.19	0.00552859		1770.21	-0.01271024		2360.2	-0.00420931		2950.2	-0.00188015		3540.19	-0.01598823
590.4	0.09800102		1180.39	0.00503977		1770.41	-0.0123076		2360.4	-0.00334303		2950.4	-0.00260141		3540.39	-0.0162193
590.6	0.09705527		1180.59	0.0048509		1770.61	-0.01241121		2360.6	-0.00300894		2950.6	-0.00245776		3540.59	-0.0165279
590.8	0.09714104		1180.79	0.00578031		1770.81	-0.01213943		2360.8	-0.00315855		2950.8	-0.00303644		3540.79	-0.01789761
591	0.09609254		1180.99	0.00584815		1771.01	-0.01198143		2361	-0.00274215		2951	-0.002342		3540.99	-0.0186025
591.2	0.09652134		1181.19	0.00552027		1771.21	-0.01105279		2361.2	-0.002181		2951.2	-0.00064078		3541.19	-0.01884276
591.4	0.09669986		1181.39	0.00493044		1771.41	-0.01147113		2361.4	-0.00232285		2951.4	-0.00070674		3541.39	-0.01991666
591.6	0.09734436		1181.59	0.00505375		1771.61	-0.01162694		2361.6	-0.00246328		2951.6	0.00025687		3541.59	-0.02015501
591.8	0.09728717		1181.79	0.00487057		1771.81	-0.01042275		2361.8	-0.00300819		2951.8	-0.00010954		3541.79	-0.02022196
592	0.09688582		1181.99	0.00480225		1772.01	-0.01075588		2362	-0.00323615		2952	-0.00091689		3541.99	-0.01943329
592.2	0.09746952		1182.19	0.00451573		1772.21	-0.01134631		2362.2	-0.00389751		2952.2	-0.00224548		3542.19	-0.01941411
592.4	0.09817696		1182.39	0.00567095		1772.41	-0.01127893		2362.4	-0.00375084		2952.4	-0.00235141		3542.39	-0.01861208
592.6	0.09791439		1182.59	0.00589805		1772.61	-0.01130223		2362.6	-0.00418801		2952.6	-0.00217419		3542.59	-0.01812859
592.8	0.09907606		1182.79	0.00520312		1772.81	-0.01028134		2362.8	-0.00484983		2952.8	-0.00309076		3542.79	-0.0185208
593	0.09932416		1182.99	0.00504708		1773.01	-0.01033437		2363	-0.00508263		2953	-0.00329491		3542.99	-0.01788605
593.2	0.1005228		1183.19	0.00478094		1773.21	-0.00978095		2363.2	-0.00436624		2953.2	-0.00341973		3543.19	-0.01746181
593.4	0.1018121		1183.39	0.00496848		1773.41	-0.00964398		2363.4	-0.00482127		2953.4	-0.00317195		3543.39	-0.01728067
593.6	0.10215275		1183.59	0.0047026		1773.61	-0.00944246		2363.6	-0.00380699		2953.6	-0.00276763		3543.59	-0.0157661
593.8	0.10328121		1183.79	0.00466498		1773.81	-0.00946518		2363.8	-0.00381949		2953.8	-0.00297281		3543.79	-0.01498244
594	0.10328626		1183.99	0.00452651		1774.01	-0.00866137		2364	-0.00325905		2954	-0.00324307		3543.99	-0.01482804
594.2	0.10292451		1184.19	0.00502017		1774.21	-0.00842748		2364.2	-0.0030298		2954.2	-0.00352678		3544.19	-0.01451517
594.4	0.10247673		1184.39	0.00431473		1774.41	-0.00896897		2364.4	-0.00207032		2954.4	-0.00397621		3544.39	-0.01322557
594.6	0.10198958		1184.59	0.00410632		1774.61	-0.00951062		2364.6	-0.00202465		2954.6	-0.00298893		3544.59	-0.0128388
594.8	0.10137717		1184.79	0.0042268		1774.81	-0.01007916		2364.8	-0.00213157		2954.8	-0.00320976		3544.79	-0.01303728
595	0.10060086		1184.99	0.00393825		1775.01	-0.01012491		2365	-0.00204048		2955	-0.00207291		3544.99	-0.01309013
595.2	0.10024872		1185.19	0.00343098		1775.21	-0.01054529		2365.2	-0.00171074		2955.2	-0.00252883		3545.19	-0.01387999
595.4	0.09874203		1185.39	0.00369173		1775.41	-0.01171762		2365.4	-0.00215464		2955.4	-0.00283106		3545.39	-0.01552605
595.6	0.0985297		1185.59	0.00448207		1775.61	-0.01204077		2365.6	-0.00309182		2955.6	-0.00200609		3545.59	-0.01555802
595.8	0.09828143		1185.79	0.00447415		1775.81	-0.01228592		2365.8	-0.00381903		2955.8	-0.00338713		3545.79	-0.01593598
596	0.0982564		1185.99	0.00536625		1776.01	-0.01196446		2366	-0.0029813		2956	-0.0034553		3545.99	-0.01680848
596.2	0.09776394		1186.19	0.00521437		1776.21	-0.01195547		2366.2	-0.00318466		2956.2	-0.0040199		3546.19	-0.01760313
596.4	0.09778053		1186.39	0.0056418		1776.41	-0.0112107		2366.4	-0.00309673		2956.4	-0.00348973		3546.39	-0.01725031
596.6	0.09837812		1186.59	0.00610221		1776.61	-0.01112205		2366.6	-0.00307111		2956.6	-0.00361799		3546.59	-0.01758887
596.8	0.09819335		1186.79	0.00483583		1776.81	-0.01032677		2366.8	-0.00336382		2956.8	-0.00453509		3546.79	-0.01722506
597	0.0980043		1186.99	0.00577406		1777.01	-0.0102503		2367	-0.00287302		2957	-0.00496311		3546.99	-0.01738151
597.2	0.09917345		1187.19	0.00634326		1777.21	-0.00968764		2367.2	-0.00306972		2957.2	-0.00623293		3547.19	-0.01776367
597.4	0.09913953		1187.39	0.00631492		1777.41	-0.008847		2367.4	-0.00278832		2957.4	-0.00589428		3547.39	-0.01757717
597.6	0.09947655		1187.59	0.00598596		1777.61	-0.00768862		2367.6	-0.00174922		2957.6	-0.00596578		3547.59	-0.0167219
597.8	0.09954471		1187.79	0.00516993		1777.81	-0.00774206		2367.8	-0.00219434		2957.8	-0.00658375		3547.79	-0.01700609
598	0.09965872		1187.99	0.00548464		1778.01	-0.00756985		2368	-0.00165471		2958	-0.00711022		3547.99	-0.01729756
598.2	0.09965053		1188.19	0.00625275		1778.21	-0.00795913		2368.2	-0.00127781		2958.2	-0.00629801		3548.19	-0.01666752
598.4	0.09913719		1188.39	0.00567891		1778.41	-0.00864425		2368.4	-0.00148464		2958.4	-0.00664504		3548.39	-0.01618261
598.6	0.09901932		1188.59	0.00460594		1778.61	-0.0089115		2368.6	-0.00176791		2958.6	-0.0060652		3548.59	-0.01647552
598.8	0.09950939		1188.79	0.00501602		1778.81	-0.00953676		2368.8	-0.00285872		2958.8	-0.00623875		3548.79	-0.01673956
599	0.09957327		1188.99	0.00505714		1779.01	-0.01020518		2369	-0.00318928		2959	-0.005345		3548.99	-0.01700967
599.2	0.09914532		1189.19	0.00565101		1779.21	-0.01032582		2369.2	-0.00295502		2959.2	-0.00604716		3549.19	-0.01750598
599.4	0.09801403		1189.39	0.00605711		1779.41	-0.01018538		2369.4	-0.00331909		2959.4	-0.00536336		3549.39	-0.01820091
599.6	0.09853602		1189.59	0.00537592		1779.61	-0.01007133		2369.6	-0.00395449		2959.6	-0.00523307		3549.59	-0.01868211
599.8	0.09789879		1189.79	0.00452556		1779.81	-0.01070392		2369.8	-0.00498875		2959.8	-0.00498371		3549.79	-0.01902789
600	0.09742117		1189.99	0.00431906		1780.01	-0.00991535		2370	-0.00441042		2960	-0.00422592		3549.99	-0.01899362
600.2	0.09705063		1190.19	0.00379698		1780.21	-0.01006832		2370.2	-0.00449977		2960.2	-0.00339892		3550.19	-0.01882011
600.4	0.09698705		1190.39	0.00386707		1780.41	-0.01012503		2370.4	-0.00450393		2960.4	-0.00308413		3550.39	-0.01820233
600.6	0.09601439		1190.59	0.0033028		1780.61	-0.0098285		2370.6	-0.00413712		2960.6	-0.00287246		3550.59	-0.01783235
600.8	0.0942674		1190.79	0.00336049		1780.81	-0.00974109		2370.8	-0.00403316		2960.8	-0.00303091		3550.79	-0.01754164
601	0.09456311		1190.99	0.00306602		1781.01	-0.00930911		2371	-0.00393412		2961	-0.00274155		3550.99	-0.01776629
601.2	0.09459557		1191.19	0.00305727		1781.21	-0.00870527		2371.2	-0.00458732		2961.2	-0.00297765		3551.19	-0.01758666
601.4	0.09427809		1191.39	0.00286648		1781.41	-0.00814553		2371.4	-0.00390084		2961.4	-0.00207329		3551.39	-0.01786627
601.6	0.09561615		1191.59	0.00265514		1781.61	-0.0076366		2371.6	-0.00388291		2961.6	-0.0017148		3551.59	-0.0180582
601.8	0.09608885		1191.79	0.00378035		1781.81	-0.00793117		2371.8	-0.00428039		2961.8	-0.00250328		3551.79	-0.0183297
602	0.09687345		1191.99	0.00395993		1782.01	-0.00748697		2372	-0.00372362		2962	-0.00280843		3551.99	-0.01844323
602.2	0.09665393		1192.19	0.00440247		1782.21	-0.00756884		2372.2	-0.00307998		2962.2	-0.00232514		3552.19	-0.01805899
602.4	0.09739665		1192.39	0.00363537		1782.41	-0.00776948		2372.4	-0.00361726		2962.4	-0.00289958		3552.39	-0.01893311
602.6	0.0983177		1192.59	0.00396268		1782.61	-0.00758051		2372.6	-0.00408591		2962.6	-0.00279523		3552.59	-0.01913683
602.8	0.09911756		1192.79	0.00502549		1782.81	-0.00780466		2372.8	-0.00549138		2962.8	-0.00260777		3552.79	-0.01919719
603	0.0996572		1192.99	0.00498971		1783.01	-0.00801389		2373	-0.00564119		2963	-0.00256168		3552.99	-0.01940864
603.2	0.0995338		1193.19	0.00509215		1783.21	-0.0073742		2373.2	-0.00565037		2963.2	-0.00333045		3553.19	-0.01971115
603.4	0.09943936		1193.39	0.00506555		1783.41	-0.00678147		2373.4	-0.00620897		2963.4	-0.00362137		3553.39	-0.02046625
603.6	0.09956886		1193.59	0.00426303		1783.61	-0.00683105		2373.6	-0.00681327		2963.6	-0.00348819		3553.59	-0.02008385
603.8	0.09999637		1193.79	0.00394245		1783.81	-0.00784807		2373.8	-0.0071003		2963.8	-0.0036798		3553.79	-0.01927975
604	0.09944515		1193.99	0.00459988		1784.01	-0.00718779		2374	-0.00586252		2964	-0.00380153		3553.99	-0.01944228
604.2	0.09898439		1194.19	0.00513993		1784.21	-0.00718201		2374.2	-0.00503177		2964.2	-0.00310268		3554.19	-0.01924378
604.4	0.09756958		1194.39	0.00500073		1784.41	-0.00765729		2374.4	-0.00427923		2964.4	-0.00389597		3554.39	-0.01867915
604.6	0.09738059		1194.59	0.00448464		1784.61	-0.00778291		2374.6	-0.00357485		2964.6	-0.00415593		3554.59	-0.0177722
604.8	0.09760782		1194.79	0.00505182		1784.81	-0.00787766		2374.8	-0.00330531		2964.8	-0.00464554		3554.79	-0.01796352
605	0.09907008		1194.99	0.00452308		1785.01	-0.00799601		2375	-0.00314041		2965	-0.00443985		3554.99	-0.01753071
605.2	0.09893655		1195.19	0.00544493		1785.21	-0.00722775		2375.2	-0.00301715		2965.2	-0.00498718		3555.19	-0.01702357
605.4	0.09960128		1195.39	0.00529835		1785.41	-0.00744496		2375.4	-0.00280786		2965.4	-0.0046256		3555.39	-0.01689567
605.6	0.1007323		1195.59	0.00619662		1785.61	-0.00684859		2375.6	-0.00203565		2965.6	-0.00464203		3555.59	-0.01699278
605.8	0.10159625		1195.79	0.0061616		1785.81	-0.00669492		2375.8	-0.00221209		2965.8	-0.00501763		3555.79	-0.01717214
606	0.10182235		1195.99	0.00521625		1786.01	-0.00725557		2376	-0.001288		2966	-0.00417337		3555.99	-0.01738666
606.2	0.1018149		1196.19	0.00564959		1786.21	-0.00744773		2376.2	-0.0013641		2966.2	-0.00308662		3556.19	-0.01809198
606.4	0.10269141		1196.39	0.00511113		1786.41	-0.00794537		2376.4	-0.00172628		2966.4	-0.00277187		3556.39	-0.01884951
606.6	0.1019613		1196.59	0.00522602		1786.61	-0.00878319		2376.6	-0.00253291		2966.6	-0.00275279		3556.59	-0.01860255
606.8	0.10186398		1196.79	0.00449234		1786.81	-0.0099913		2376.8	-0.00345307		2966.8	-0.00287094		3556.79	-0.01840864
607	0.10193365		1196.99	0.00503192		1787.01	-0.00968826		2377	-0.00399583		2967	-0.003475		3556.99	-0.01884945
607.2	0.1015028		1197.19	0.00480171		1787.21	-0.00985589		2377.2	-0.00400392		2967.2	-0.00375476		3557.19	-0.01866301
607.4	0.10074403		1197.39	0.00507506		1787.41	-0.00930303		2377.4	-0.0037043		2967.4	-0.00362544		3557.39	-0.01848107
607.6	0.09996722		1197.59	0.00456676		1787.61	-0.009261		2377.6	-0.00371382		2967.6	-0.00286674		3557.59	-0.01734613
607.8	0.09964395		1197.79	0.00441098		1787.81	-0.00967057		2377.8	-0.00390353		2967.8	-0.0022084		3557.79	-0.01712643
608	0.09874935		1197.99	0.00502013		1788.01	-0.00935672		2378	-0.00425922		2968	-0.00094277		3557.99	-0.01698551
608.2	0.09799323		1198.19	0.00446571		1788.21	-0.01000639		2378.2	-0.00381814		2968.2	-0.00068063		3558.19	-0.01654835
608.4	0.09778472		1198.39	0.00342413		1788.41	-0.01112794		2378.4	-0.00317604		2968.4	-0.00092402		3558.39	-0.01666198
608.6	0.09771348		1198.59	0.00302838		1788.61	-0.01123		2378.6	-0.00310829		2968.6	-0.00152269		3558.59	-0.01728567
608.8	0.09767635		1198.79	0.0040243		1788.81	-0.01133881		2378.8	-0.00277416		2968.8	-0.0015692		3558.79	-0.01694257
609	0.09725223		1198.99	0.00433434		1789.01	-0.01173154		2379	-0.00283147		2969	-0.00208603		3558.99	-0.01598264
609.2	0.09669681		1199.19	0.00425306		1789.21	-0.01110304		2379.2	-0.00226265		2969.2	-0.00266095		3559.19	-0.01576312
609.4	0.09738368		1199.39	0.00442946		1789.41	-0.01124229		2379.4	-0.00224999		2969.4	-0.00279777		3559.39	-0.01698467
609.6	0.09765082		1199.59	0.00478519		1789.61	-0.01078846		2379.6	-0.00168053		2969.6	-0.00361238		3559.59	-0.01756506
609.8	0.09838128		1199.79	0.00338527		1789.81	-0.01070839		2379.8	-0.00158492		2969.8	-0.00410541		3559.79	-0.01843423
610	0.09783346		1199.99	0.00248278		1790.01	-0.01099789		2380	-0.00036093		2970	-0.00356375		3559.99	-0.01919772
610.2	0.09781605		1200.19	0.00261111		1790.21	-0.01018219		2380.2	-0.00049343		2970.2	-0.0035466		3560.19	-0.02025546
610.4	0.09739091		1200.39	0.00196632		1790.41	-0.01072559		2380.4	-0.00089904		2970.4	-0.00369774		3560.39	-0.02053945
610.6	0.09675633		1200.59	0.00136824		1790.61	-0.01128002		2380.6	-0.00087464		2970.6	-0.00388592		3560.59	-0.02106557
610.8	0.0971353		1200.79	0.00026749		1790.81	-0.01097427		2380.8	-0.00104843		2970.8	-0.00481333		3560.79	-0.02180712
611	0.09760022		1200.99	0.00079196		1791.01	-0.01047266		2381	-0.00173525		2971	-0.00553339		3560.99	-0.02188499
611.2	0.09790354		1201.19	0.00011768		1791.21	-0.01031098		2381.2	-0.00184152		2971.2	-0.00483154		3561.19	-0.02124737
611.4	0.09744608		1201.39	0.00044491		1791.41	-0.00991031		2381.4	-0.00206924		2971.4	-0.00459541		3561.39	-0.02064062
611.6	0.09718769		1201.59	0.00040474		1791.61	-0.00958329		2381.6	-0.00283107		2971.6	-0.00371792		3561.59	-0.01953804
611.8	0.09739538		1201.79	0.00095739		1791.81	-0.01002305		2381.8	-0.00394142		2971.8	-0.00347767		3561.79	-0.01919048
612	0.09819939		1201.99	0.00166968		1792.01	-0.01073183		2382	-0.00362427		2972	-0.00279715		3561.99	-0.0193707
612.2	0.09818192		1202.19	0.00152992		1792.21	-0.01094984		2382.2	-0.00314169		2972.2	-0.00346034		3562.19	-0.01985389
612.4	0.09794622		1202.39	0.00169159		1792.41	-0.01233846		2382.4	-0.00275137		2972.4	-0.00282662		3562.39	-0.02018578
612.6	0.09746876		1202.59	0.00271866		1792.61	-0.012389		2382.6	-0.00340374		2972.6	-0.00291704		3562.59	-0.02017505
612.8	0.09760237		1202.79	0.0040512		1792.81	-0.01241871		2382.8	-0.00397139		2972.8	-0.00224554		3562.79	-0.01926954
613	0.09767334		1202.99	0.00332696		1793.01	-0.01261378		2383	-0.00453849		2973	-0.00262503		3562.99	-0.01867561
613.2	0.0986662		1203.19	0.00303918		1793.21	-0.01247292		2383.2	-0.00447881		2973.2	-0.00226803		3563.19	-0.01913176
613.4	0.09921346		1203.39	0.00352816		1793.41	-0.01312702		2383.4	-0.00473862		2973.4	-0.00292167		3563.39	-0.01934975
613.6	0.09908788		1203.59	0.00321554		1793.61	-0.01275145		2383.6	-0.00454778		2973.6	-0.00330398		3563.59	-0.01896686
613.8	0.09952642		1203.79	0.00229647		1793.81	-0.01205875		2383.8	-0.00406624		2973.8	-0.00294524		3563.79	-0.01967922
614	0.09905873		1203.99	0.00258398		1794.01	-0.01129045		2384	-0.00401347		2974	-0.00253491		3563.99	-0.01953625
614.2	0.09955564		1204.19	0.00312392		1794.21	-0.01123515		2384.2	-0.00429056		2974.2	-0.0024379		3564.19	-0.01900843
614.4	0.09901629		1204.39	0.00228947		1794.41	-0.01128046		2384.4	-0.00472892		2974.4	-0.00246528		3564.39	-0.01764392
614.6	0.0998679		1204.59	0.0018902		1794.61	-0.01102138		2384.6	-0.00431023		2974.6	-0.0029344		3564.59	-0.01731625
614.8	0.09999012		1204.79	0.00152391		1794.81	-0.01126349		2384.8	-0.00471708		2974.8	-0.00390884		3564.79	-0.01639243
615	0.10041402		1204.99	0.00188533		1795.01	-0.01093335		2385	-0.00438457		2975	-0.00464746		3564.99	-0.01530176
615.2	0.10039976		1205.19	0.00185679		1795.21	-0.01047441		2385.2	-0.00383059		2975.2	-0.00434143		3565.19	-0.01530627
615.4	0.10013406		1205.39	0.00228783		1795.41	-0.00995431		2385.4	-0.00328444		2975.4	-0.00514022		3565.39	-0.01478542
615.6	0.09955553		1205.59	0.00312648		1795.61	-0.00954147		2385.6	-0.0030975		2975.6	-0.00479289		3565.59	-0.01494199
615.8	0.09944091		1205.79	0.00387768		1795.81	-0.0099769		2385.8	-0.00295253		2975.8	-0.00528019		3565.79	-0.01626997
616	0.09929394		1205.99	0.00449537		1796.01	-0.01010387		2386	-0.00135539		2976	-0.00473521		3565.99	-0.016969
616.2	0.09816356		1206.19	0.00486801		1796.21	-0.00919469		2386.2	-0.00134291		2976.2	-0.0051873		3566.19	-0.0178171
616.4	0.09713374		1206.39	0.00508021		1796.41	-0.01035687		2386.4	-0.0006938		2976.4	-0.00439017		3566.39	-0.01864519
616.6	0.09714451		1206.59	0.0049226		1796.61	-0.009825		2386.6	-0.00168454		2976.6	-0.00490779		3566.59	-0.01832533
616.8	0.09704015		1206.79	0.00462122		1796.81	-0.01029833		2386.8	-0.00196732		2976.8	-0.00510492		3566.79	-0.0184314
617	0.09710457		1206.99	0.00416811		1797.01	-0.00951218		2387	-0.00194304		2977	-0.0055185		3566.99	-0.01882078
617.2	0.09718158		1207.19	0.00405705		1797.21	-0.01012404		2387.2	-0.00117578		2977.2	-0.00574618		3567.19	-0.01984897
617.4	0.09621226		1207.39	0.00406574		1797.41	-0.01016149		2387.4	-0.00116465		2977.4	-0.00564892		3567.39	-0.01932336
617.6	0.09607652		1207.59	0.00398162		1797.61	-0.00906776		2387.6	-0.00169407		2977.6	-0.00539124		3567.59	-0.01969354
617.8	0.09572295		1207.79	0.0042232		1797.81	-0.00915331		2387.8	-0.00204299		2977.8	-0.0052569		3567.79	-0.02037999
618	0.09577446		1207.99	0.00397456		1798.01	-0.00893607		2388	-0.00243889		2978	-0.00554512		3567.99	-0.01978648
618.2	0.09621533		1208.19	0.00452447		1798.21	-0.00918665		2388.2	-0.00325646		2978.2	-0.00546711		3568.19	-0.01876779
618.4	0.09559233		1208.39	0.00422054		1798.41	-0.0094203		2388.4	-0.00395539		2978.4	-0.00517828		3568.39	-0.01855745
618.6	0.09596905		1208.59	0.00425723		1798.61	-0.00975216		2388.6	-0.00313632		2978.6	-0.00477165		3568.59	-0.01909106
618.8	0.09633905		1208.79	0.00381177		1798.81	-0.00989004		2388.8	-0.00379005		2978.8	-0.0044564		3568.79	-0.01855031
619	0.09670475		1208.99	0.00334009		1799.01	-0.00892547		2389	-0.00373794		2979	-0.00422398		3568.99	-0.01842564
619.2	0.09651554		1209.19	0.00371906		1799.21	-0.00911807		2389.2	-0.0035935		2979.2	-0.00376693		3569.19	-0.01889216
619.4	0.0966589		1209.39	0.00451083		1799.41	-0.0086235		2389.4	-0.00342024		2979.4	-0.00433459		3569.39	-0.0187084
619.6	0.09611306		1209.59	0.00471273		1799.61	-0.0086191		2389.6	-0.00343046		2979.6	-0.00243537		3569.59	-0.01918593
619.8	0.09603582		1209.79	0.003843		1799.81	-0.00867928		2389.8	-0.00370314		2979.8	-0.00261976		3569.79	-0.01886966
620	0.09595383		1209.99	0.00325668		1800.01	-0.00890158		2390	-0.0034243		2980	-0.00185878		3569.99	-0.01868182
620.2	0.09599846		1210.19	0.00353262		1800.21	-0.00903636		2390.2	-0.00389883		2980.2	-0.00214507		3570.19	-0.0187919
620.4	0.09602189		1210.39	0.00284179		1800.41	-0.0096008		2390.4	-0.00373645		2980.4	-0.00206989		3570.39	-0.01962285
620.6	0.09646403		1210.59	0.00240302		1800.61	-0.00930645		2390.6	-0.0050915		2980.6	-0.00252925		3570.59	-0.01920261
620.8	0.09691985		1210.79	0.00234181		1800.81	-0.0092571		2390.8	-0.00549701		2980.8	-0.00308591		3570.79	-0.02002107
621	0.09652245		1210.99	0.00195771		1801.01	-0.0086816		2391	-0.00524343		2981	-0.00323781		3570.99	-0.02060221
621.2	0.09647993		1211.19	0.0011905		1801.21	-0.00975751		2391.2	-0.00427732		2981.2	-0.00396458		3571.19	-0.02055677
621.4	0.09555043		1211.39	0.00218129		1801.41	-0.01016208		2391.4	-0.00437856		2981.4	-0.0040012		3571.39	-0.02037068
621.6	0.09583037		1211.59	0.00151849		1801.61	-0.01072334		2391.6	-0.0047687		2981.6	-0.00427585		3571.59	-0.02126003
621.8	0.09545616		1211.79	0.00164862		1801.81	-0.01149891		2391.8	-0.00428824		2981.8	-0.00418849		3571.79	-0.02121643
622	0.09593116		1211.99	0.00229417		1802.01	-0.01156165		2392	-0.0047927		2982	-0.00422914		3571.99	-0.02012344
622.2	0.09517928		1212.19	0.0033148		1802.21	-0.01225191		2392.2	-0.00507432		2982.2	-0.00382123		3572.19	-0.01974293
622.4	0.09588869		1212.39	0.00334714		1802.41	-0.0132609		2392.4	-0.00540863		2982.4	-0.0033873		3572.39	-0.02003601
622.6	0.0960482		1212.59	0.00334222		1802.61	-0.01380301		2392.6	-0.0049482		2982.6	-0.00342844		3572.59	-0.02040959
622.8	0.09643253		1212.79	0.00398656		1802.81	-0.01320316		2392.8	-0.00590394		2982.8	-0.00271683		3572.79	-0.01964919
623	0.09601994		1212.99	0.00490157		1803.01	-0.01319618		2393	-0.00547012		2983	-0.00321142		3572.99	-0.01947573
623.2	0.09607564		1213.19	0.00525467		1803.21	-0.01399861		2393.2	-0.00510416		2983.2	-0.00243664		3573.19	-0.01967284
623.4	0.09648018		1213.39	0.00586462		1803.41	-0.01431015		2393.4	-0.0052129		2983.4	-0.002673		3573.39	-0.01903313
623.6	0.09620647		1213.59	0.00530372		1803.61	-0.01475604		2393.6	-0.00542939		2983.6	-0.00150257		3573.59	-0.01880916
623.8	0.09580958		1213.79	0.0041018		1803.81	-0.01419566		2393.8	-0.00647405		2983.8	-0.00230456		3573.79	-0.01826207
624	0.0964675		1213.99	0.00437638		1804.01	-0.01423383		2394	-0.00628786		2984	-0.00200802		3573.99	-0.01871469
624.2	0.09679264		1214.19	0.00442071		1804.21	-0.01361402		2394.2	-0.00656607		2984.2	-0.00275497		3574.19	-0.01899924
624.4	0.09666836		1214.39	0.00356717		1804.41	-0.01349744		2394.4	-0.00645824		2984.4	-0.00283778		3574.39	-0.02033091
624.6	0.09693439		1214.59	0.00410006		1804.61	-0.01282315		2394.6	-0.00724756		2984.6	-0.00324284		3574.59	-0.02043
624.8	0.09725752		1214.79	0.00436146		1804.81	-0.01258829		2394.8	-0.00728993		2984.8	-0.00421882		3574.79	-0.02117117
625	0.09710004		1214.99	0.00413113		1805.01	-0.0123853		2395	-0.00656681		2985	-0.00430346		3574.99	-0.02147991
625.2	0.09738437		1215.19	0.00442343		1805.21	-0.01321394		2395.2	-0.00605994		2985.2	-0.00476039		3575.19	-0.02137466
625.4	0.09681301		1215.39	0.00438544		1805.41	-0.01339015		2395.4	-0.00634661		2985.4	-0.00480096		3575.39	-0.02173347
625.6	0.09724699		1215.59	0.00335761		1805.61	-0.01336569		2395.6	-0.00713817		2985.6	-0.00460767		3575.59	-0.02129303
625.8	0.09755975		1215.79	0.00335187		1805.81	-0.01384393		2395.8	-0.00717578		2985.8	-0.00432151		3575.79	-0.02073221
626	0.09738012		1215.99	0.00340351		1806.01	-0.01330777		2396	-0.00811238		2986	-0.0047181		3575.99	-0.02026366
626.2	0.09744215		1216.19	0.00270427		1806.21	-0.01406805		2396.2	-0.00768952		2986.2	-0.00466371		3576.19	-0.02032959
626.4	0.0986237		1216.39	0.0022615		1806.41	-0.01329728		2396.4	-0.00791388		2986.4	-0.00468971		3576.39	-0.02032056
626.6	0.09844992		1216.59	0.00193744		1806.61	-0.01269975		2396.6	-0.00740027		2986.6	-0.00439155		3576.59	-0.02009369
626.8	0.09884873		1216.79	0.00285861		1806.81	-0.01184835		2396.8	-0.00795684		2986.8	-0.00368894		3576.79	-0.01898537
627	0.09857967		1216.99	0.00271849		1807.01	-0.01223272		2397	-0.00755445		2987	-0.00364717		3576.99	-0.01902256
627.2	0.09910076		1217.19	0.00193131		1807.21	-0.01253756		2397.2	-0.0077713		2987.2	-0.00300294		3577.19	-0.01877998
627.4	0.09932572		1217.39	0.00181506		1807.41	-0.01238029		2397.4	-0.00691545		2987.4	-0.00380216		3577.39	-0.01811717
627.6	0.09909831		1217.59	0.00109621		1807.61	-0.01176831		2397.6	-0.00641783		2987.6	-0.00334202		3577.59	-0.01797161
627.8	0.09888187		1217.79	0.0003899		1807.81	-0.01074414		2397.8	-0.00579462		2987.8	-0.00347976		3577.79	-0.01725017
628	0.09958596		1217.99	0.00005897		1808.01	-0.01101777		2398	-0.0047248		2988	-0.00340378		3577.99	-0.01667547
628.2	0.09949631		1218.19	-0.00062455		1808.21	-0.01031402		2398.2	-0.00440576		2988.2	-0.00326995		3578.19	-0.01706082
628.4	0.099215		1218.39	-0.00036842		1808.41	-0.00989521		2398.4	-0.00401346		2988.4	-0.00274452		3578.39	-0.0179341
628.6	0.09964715		1218.59	0.00020858		1808.61	-0.00849293		2398.6	-0.00408642		2988.6	-0.00272483		3578.59	-0.01815847
628.8	0.09905759		1218.79	-0.00011402		1808.81	-0.00806923		2398.8	-0.00375177		2988.8	-0.00310878		3578.79	-0.01880754
629	0.09885491		1218.99	0.00020762		1809.01	-0.00747811		2399	-0.00447581		2989	-0.00264008		3578.99	-0.01899994
629.2	0.09834852		1219.19	0.0004752		1809.21	-0.00820052		2399.2	-0.0048661		2989.2	-0.00295082		3579.19	-0.01928023
629.4	0.09753036		1219.39	0.00035294		1809.41	-0.00816133		2399.4	-0.00538241		2989.4	-0.00298163		3579.39	-0.01963318
629.6	0.09717435		1219.59	0.00044651		1809.61	-0.00922915		2399.6	-0.00637453		2989.6	-0.00359434		3579.59	-0.0196472
629.8	0.09651255		1219.79	0.00047872		1809.81	-0.0092757		2399.8	-0.00713168		2989.8	-0.00390054		3579.79	-0.02005108
630	0.09575642		1219.99	0.00063143		1810.01	-0.00881117		2400	-0.00751999		2990	-0.00426783		3579.99	-0.01939056
630.2	0.09578586		1220.19	0.0008931		1810.21	-0.0095025		2400.2	-0.00736553		2990.2	-0.00379599		3580.19	-0.01894546
630.4	0.09518639		1220.39	0.00112583		1810.41	-0.00946571		2400.4	-0.00774901		2990.4	-0.00333672		3580.39	-0.01857884
630.6	0.09452778		1220.59	0.00170131		1810.61	-0.01036893		2400.6	-0.007471		2990.6	-0.0033216		3580.59	-0.01828079
630.8	0.0946426		1220.79	0.00226944		1810.81	-0.01083058		2400.8	-0.00828159		2990.8	-0.00306405		3580.79	-0.01790182
631	0.09449855		1220.99	0.00259842		1811.01	-0.01141356		2401	-0.007929		2991	-0.00333691		3580.99	-0.01809199
631.2	0.09519835		1221.19	0.00355664		1811.21	-0.01249481		2401.2	-0.00803461		2991.2	-0.00393661		3581.19	-0.01818959
631.4	0.0954477		1221.39	0.00345817		1811.41	-0.01278288		2401.4	-0.00657857		2991.4	-0.00465606		3581.39	-0.01734169
631.6	0.09499328		1221.59	0.0048256		1811.61	-0.0129106		2401.6	-0.00680755		2991.6	-0.0047047		3581.59	-0.0174322
631.8	0.09514659		1221.79	0.00480677		1811.81	-0.01303483		2401.8	-0.00564661		2991.8	-0.00475345		3581.79	-0.01707034
632	0.09580037		1221.99	0.00488594		1812.01	-0.01302579		2402	-0.00527924		2992	-0.00425078		3581.99	-0.0170521
632.2	0.09669417		1222.19	0.00544918		1812.21	-0.01217781		2402.2	-0.00500007		2992.2	-0.00459814		3582.19	-0.01745392
632.4	0.09648165		1222.39	0.00540349		1812.41	-0.01246383		2402.4	-0.00540028		2992.4	-0.00473039		3582.39	-0.01806719
632.6	0.09669886		1222.59	0.00502105		1812.61	-0.01156339		2402.6	-0.00531631		2992.6	-0.00443321		3582.59	-0.0175801
632.8	0.09649008		1222.79	0.00435344		1812.81	-0.01192454		2402.8	-0.00540076		2992.8	-0.00437352		3582.79	-0.01813161
633	0.09706054		1222.99	0.00489108		1813.01	-0.0123858		2403	-0.00633088		2993	-0.00375201		3582.99	-0.01853896
633.2	0.09718535		1223.19	0.00451845		1813.21	-0.0126169		2403.2	-0.00630529		2993.2	-0.00397617		3583.19	-0.01913626
633.4	0.09728808		1223.39	0.00365923		1813.41	-0.01306614		2403.4	-0.00677255		2993.4	-0.00358252		3583.39	-0.01966912
633.6	0.09735597		1223.59	0.00316263		1813.61	-0.01343775		2403.6	-0.00740487		2993.6	-0.00396289		3583.59	-0.02010268
633.8	0.09713196		1223.79	0.0022903		1813.81	-0.01303736		2403.8	-0.00727433		2993.8	-0.00336523		3583.79	-0.01993019
634	0.0971014		1223.99	0.00121781		1814.01	-0.01379865		2404	-0.00728248		2994	-0.00288103		3583.99	-0.01922043
634.2	0.09728873		1224.19	0.00107127		1814.21	-0.01428988		2404.2	-0.00679456		2994.2	-0.0024035		3584.19	-0.01906849
634.4	0.09720782		1224.39	-0.00005654		1814.41	-0.01548468		2404.4	-0.0065408		2994.4	-0.00185561		3584.39	-0.01919864
634.6	0.09684523		1224.59	-0.00010701		1814.61	-0.01506006		2404.6	-0.00654524		2994.6	-0.00172671		3584.59	-0.01906624
634.8	0.09791783		1224.79	-0.00026212		1814.81	-0.01509328		2404.8	-0.00723741		2994.8	-0.00171053		3584.79	-0.01860768
635	0.09788514		1224.99	0.00038413		1815.01	-0.01429946		2405	-0.0069684		2995	-0.00227014		3584.99	-0.01865042
635.2	0.09722998		1225.19	0.00043455		1815.21	-0.01461916		2405.2	-0.00680314		2995.2	-0.00292387		3585.19	-0.01867729
635.4	0.0966013		1225.39	-0.00087202		1815.41	-0.01406147		2405.4	-0.00672629		2995.4	-0.00401331		3585.39	-0.0177742
635.6	0.09610064		1225.59	0.0005881		1815.61	-0.01329032		2405.6	-0.00705912		2995.6	-0.0039317		3585.59	-0.01809462
635.8	0.09617304		1225.79	0.00048351		1815.81	-0.01282618		2405.8	-0.00687978		2995.8	-0.00368453		3585.79	-0.01705585
636	0.0965361		1225.99	0.00115492		1816.01	-0.01294551		2406	-0.00701477		2996	-0.00381947		3585.99	-0.01698261
636.2	0.09621974		1226.19	0.00128807		1816.21	-0.0121367		2406.2	-0.00765272		2996.2	-0.00501072		3586.19	-0.01678769
636.4	0.09618447		1226.39	0.00159857		1816.41	-0.01224778		2406.4	-0.00715366		2996.4	-0.00518706		3586.39	-0.01707217
636.6	0.09653392		1226.59	0.00270794		1816.61	-0.01161387		2406.6	-0.00666836		2996.6	-0.00452865		3586.59	-0.01732432
636.8	0.09763446		1226.79	0.00291018		1816.81	-0.01238866		2406.8	-0.00635476		2996.8	-0.0049315		3586.79	-0.01846835
637	0.09804281		1226.99	0.00413964		1817.01	-0.01281426		2407	-0.005687		2997	-0.00515533		3586.99	-0.01893622
637.2	0.09842889		1227.19	0.00449582		1817.21	-0.01272148		2407.2	-0.00527333		2997.2	-0.0050066		3587.19	-0.01948143
637.4	0.09810638		1227.39	0.00450231		1817.41	-0.01314011		2407.4	-0.00472566		2997.4	-0.00518144		3587.39	-0.02049294
637.6	0.0986764		1227.59	0.00477366		1817.61	-0.01304642		2407.6	-0.00437519		2997.6	-0.00522972		3587.59	-0.02067121
637.8	0.09820461		1227.79	0.00339138		1817.81	-0.01274634		2407.8	-0.00423948		2997.8	-0.00503568		3587.79	-0.02169589
638	0.09879527		1227.99	0.00375994		1818.01	-0.01315493		2408	-0.003819		2998	-0.00582321		3587.99	-0.02231731
638.2	0.09942225		1228.19	0.00376142		1818.21	-0.01302381		2408.2	-0.00390012		2998.2	-0.00514077		3588.19	-0.02281416
638.4	0.0994845		1228.39	0.00313667		1818.41	-0.01320863		2408.4	-0.00332623		2998.4	-0.00518681		3588.39	-0.02305625
638.6	0.09879223		1228.59	0.00319326		1818.61	-0.01165692		2408.6	-0.00357027		2998.6	-0.00523049		3588.59	-0.02321345
638.8	0.0987768		1228.79	0.0023258		1818.81	-0.01157937		2408.8	-0.00343759		2998.8	-0.00563048		3588.79	-0.02378696
639	0.09768642		1228.99	0.00206723		1819.01	-0.01096729		2409	-0.0032851		2999	-0.00567987		3588.99	-0.02366365
639.2	0.09663857		1229.19	0.00081322		1819.21	-0.01115903		2409.2	-0.00369605		2999.2	-0.00621729		3589.19	-0.02362668
639.4	0.09669904		1229.39	-0.0002836		1819.41	-0.01043083		2409.4	-0.00472969		2999.4	-0.00685218		3589.39	-0.02340499
639.6	0.09639183		1229.59	-0.00019931		1819.61	-0.00982951		2409.6	-0.00560244		2999.6	-0.00653729		3589.59	-0.02237847
639.8	0.09531445		1229.79	-0.0007426		1819.81	-0.00985721		2409.8	-0.0062446		2999.8	-0.00583637		3589.79	-0.02170128
640	0.09523899		1229.99	-0.00052399		1820.01	-0.01003518		2410	-0.00632223		3000	-0.00579311		3589.99	-0.0221194
640.2	0.09466112		1230.19	-0.00087872		1820.21	-0.00926452		2410.2	-0.00643389		3000.2	-0.00665633		3590.19	-0.02120739
640.4	0.09493014		1230.39	-0.00092966		1820.41	-0.01007598		2410.4	-0.0063135		3000.4	-0.00660714		3590.39	-0.02096958
640.6	0.09446412		1230.59	-0.00061844		1820.61	-0.01079649		2410.6	-0.00693108		3000.6	-0.00593061		3590.59	-0.02016968
640.8	0.09502282		1230.79	-0.0005264		1820.81	-0.01134848		2410.8	-0.00670465		3000.8	-0.00615827		3590.79	-0.02015424
641	0.09513719		1230.99	0.00004032		1821.01	-0.01220913		2411	-0.00635923		3001	-0.00572859		3590.99	-0.019466
641.2	0.09489913		1231.19	0.00061037		1821.21	-0.01223023		2411.2	-0.00627841		3001.2	-0.0051124		3591.19	-0.01973794
641.4	0.09524859		1231.39	0.0007897		1821.41	-0.01214226		2411.4	-0.00677639		3001.4	-0.00531557		3591.39	-0.01993699
641.6	0.09621025		1231.59	0.00054339		1821.61	-0.01169533		2411.6	-0.00793396		3001.6	-0.00474656		3591.59	-0.01987363
641.8	0.09632777		1231.79	-0.00007896		1821.81	-0.01128494		2411.8	-0.00766647		3001.8	-0.00491231		3591.79	-0.01961153
642	0.09678631		1231.99	0.00075143		1822.01	-0.01107864		2412	-0.00748088		3002	-0.00556955		3591.99	-0.0182965
642.2	0.09736787		1232.19	0.00083345		1822.21	-0.01105777		2412.2	-0.00774427		3002.2	-0.00508785		3592.19	-0.01744662
642.4	0.09749946		1232.39	0.00160164		1822.41	-0.01080995		2412.4	-0.00663145		3002.4	-0.00570836		3592.39	-0.01693309
642.6	0.09769204		1232.59	0.00221274		1822.61	-0.01055971		2412.6	-0.00646822		3002.6	-0.00538905		3592.59	-0.01742785
642.8	0.09782908		1232.79	0.00196371		1822.81	-0.01166432		2412.8	-0.00627447		3002.8	-0.00519449		3592.79	-0.01821247
643	0.09832234		1232.99	0.00264356		1823.01	-0.01162079		2413	-0.00661901		3003	-0.0049645		3592.99	-0.01795516
643.2	0.09870952		1233.19	0.00265497		1823.21	-0.01166724		2413.2	-0.00664421		3003.2	-0.00452633		3593.19	-0.0178189
643.4	0.09923608		1233.39	0.00271223		1823.41	-0.01153259		2413.4	-0.00663154		3003.4	-0.00529872		3593.39	-0.01761493
643.6	0.09842006		1233.59	0.0030826		1823.61	-0.01255176		2413.6	-0.00633993		3003.6	-0.0055922		3593.59	-0.01712464
643.8	0.09751316		1233.79	0.00307739		1823.81	-0.01239801		2413.8	-0.00523796		3003.8	-0.0057651		3593.79	-0.01802695
644	0.0978707		1233.99	0.00404005		1824.01	-0.01246757		2414	-0.0046811		3004	-0.00615586		3593.99	-0.01818423
644.2	0.09768243		1234.19	0.00265475		1824.21	-0.01270946		2414.2	-0.00498542		3004.2	-0.00696779		3594.19	-0.01806109
644.4	0.09758655		1234.39	0.00239959		1824.41	-0.012988		2414.4	-0.00575177		3004.4	-0.00723214		3594.39	-0.01869139
644.6	0.09744219		1234.59	0.00261485		1824.61	-0.01357293		2414.6	-0.00543701		3004.6	-0.00658273		3594.59	-0.01887052
644.8	0.09755712		1234.79	0.00340663		1824.81	-0.01404719		2414.8	-0.00547558		3004.8	-0.00710788		3594.79	-0.0199864
645	0.09741378		1234.99	0.00394392		1825.01	-0.01497089		2415	-0.00579931		3005	-0.00676333		3594.99	-0.01991095
645.2	0.09756324		1235.19	0.00370279		1825.21	-0.01471245		2415.2	-0.00598909		3005.2	-0.00634389		3595.19	-0.02033562
645.4	0.09783896		1235.39	0.00335176		1825.41	-0.01455263		2415.4	-0.00682963		3005.4	-0.0064208		3595.39	-0.02006193
645.6	0.0972769		1235.59	0.00296346		1825.61	-0.0132637		2415.6	-0.00747757		3005.6	-0.00645577		3595.59	-0.02016537
645.8	0.09721147		1235.79	0.00272534		1825.81	-0.01314347		2415.8	-0.00716602		3005.8	-0.00606018		3595.79	-0.01991875
646	0.09682265		1235.99	0.00248693		1826.01	-0.01253444		2416	-0.00783463		3006	-0.00562376		3595.99	-0.01950041
646.2	0.09772099		1236.19	0.00161049		1826.21	-0.01237561		2416.2	-0.00714754		3006.2	-0.00544535		3596.19	-0.02008001
646.4	0.09715789		1236.39	0.00171836		1826.41	-0.01286248		2416.4	-0.00673522		3006.4	-0.00474569		3596.39	-0.02066287
646.6	0.097289		1236.59	0.00106942		1826.61	-0.01346825		2416.6	-0.00682487		3006.6	-0.00432047		3596.59	-0.02186319
646.8	0.09713964		1236.79	0.00061467		1826.81	-0.01320073		2416.8	-0.00640036		3006.8	-0.00432823		3596.79	-0.02140276
647	0.09723634		1236.99	0.00159405		1827.01	-0.01255595		2417	-0.00552997		3007	-0.00422841		3596.99	-0.02084473
647.2	0.09655817		1237.19	0.00166908		1827.21	-0.01271277		2417.2	-0.00519738		3007.2	-0.004594		3597.19	-0.0199096
647.4	0.09608717		1237.39	0.00155407		1827.41	-0.01251153		2417.4	-0.00486121		3007.4	-0.00589445		3597.39	-0.02002731
647.6	0.09610327		1237.59	0.00084566		1827.61	-0.01265303		2417.6	-0.00494227		3007.6	-0.00661406		3597.59	-0.02082864
647.8	0.09652158		1237.79	0.00073632		1827.81	-0.01155194		2417.8	-0.00495161		3007.8	-0.00737501		3597.79	-0.020979
648	0.09717078		1237.99	0.00125993		1828.01	-0.01125386		2418	-0.00547169		3008	-0.00763158		3597.99	-0.02078341
648.2	0.09748575		1238.19	0.00046194		1828.21	-0.01110567		2418.2	-0.00674493		3008.2	-0.00812445		3598.19	-0.02079544
648.4	0.09780962		1238.39	0.00088281		1828.41	-0.01102289		2418.4	-0.00732846		3008.4	-0.00835202		3598.39	-0.0205736
648.6	0.09810484		1238.59	0.0012254		1828.61	-0.01154216		2418.6	-0.0073496		3008.6	-0.00776573		3598.59	-0.02016594
648.8	0.0981752		1238.79	0.00186892		1828.81	-0.01180381		2418.8	-0.00792002		3008.8	-0.00793395		3598.79	-0.01966672
649	0.09849808		1238.99	0.00188069		1829.01	-0.01194893		2419	-0.00845386		3009	-0.00686392		3598.99	-0.01893594
649.2	0.09897059		1239.19	0.00140754		1829.21	-0.01165258		2419.2	-0.00868452		3009.2	-0.00614851		3599.19	-0.01863983
649.4	0.09905192		1239.39	0.00156649		1829.41	-0.01151755		2419.4	-0.0090917		3009.4	-0.00549692		3599.39	-0.01825941
649.6	0.09915577		1239.59	0.00138593		1829.61	-0.01109365		2419.6	-0.00965172		3009.6	-0.00424216		3599.59	-0.01820197
649.8	0.09960122		1239.79	0.00097954		1829.81	-0.01181378		2419.8	-0.00973308		3009.8	-0.00265042		3599.79	-0.0178864
