# Supplementary material for: Functional development of a V3/glycan-specific broadly neutralizing antibody isolated from a case of HIV superinfection
Source: eLife journal article supplement (doi:10.7554/elife.68110), 2021-07-15
Supplement: fig2-data2 [file E5.xls]

Vers 3.43 Data Simulation
Conc1	1.25E-07	1.25E-07	1.25E-07	1.25E-07	1.25E-07
Start1	290.01	880.01	1470	2060	2650
Stop1	649.81	1239.81	1829.8	2419.8	3009.8
Time1	Data1	Sim1	Time2	Data2	Sim2	Time3	Data3	Sim3	Time4	Data4	Sim4	Time5	Data5	Sim5
290.01	0.00360797		880.01	-0.00093298		1470	-0.00587535		2060	-0.0007456		2650	0.01400804
290.21	0.00379089		880.21	-0.00119643		1470.2	-0.00588749		2060.2	0.00078159		2650.2	0.01526534
290.41	0.00370854		880.41	-0.00055736		1470.4	-0.00551852		2060.4	0.00209531		2650.4	0.01634312
290.61	0.00366558		880.61	-0.00038817		1470.6	-0.00441091		2060.6	0.00242312		2650.6	0.01740448
290.81	0.00406201		880.81	-0.00078237		1470.8	-0.00345232		2060.8	0.00365634		2650.8	0.01840079
291.01	0.00411458		881.01	-0.00052709		1471	-0.00251219		2061	0.00529677		2651	0.01984689
291.21	0.00438183		881.21	-0.00039789		1471.2	-0.00150014		2061.2	0.00634259		2651.2	0.02112219
291.41	0.00489955		881.41	-0.00031452		1471.4	-0.00130778		2061.4	0.00714392		2651.4	0.022117
291.61	0.00509598		881.61	-0.00045001		1471.6	-0.00014056		2061.6	0.0075702		2651.6	0.02305656
291.81	0.00618767		881.81	0.00002211		1471.8	0.00074383		2061.8	0.00852833		2651.8	0.02326743
292.01	0.00642865		882.01	0.00063003		1472	0.00183995		2062	0.00852655		2652	0.02433489
292.21	0.00682033		882.21	0.0006631		1472.2	0.00272825		2062.2	0.00839274		2652.2	0.02414493
292.41	0.00724187		882.41	0.00050409		1472.4	0.00314055		2062.4	0.00928781		2652.4	0.02431157
292.61	0.00754088		882.61	0.00018064		1472.6	0.00427065		2062.6	0.00935547		2652.6	0.02483144
292.81	0.0076912		882.81	0.00072023		1472.8	0.00414856		2062.8	0.01019513		2652.8	0.02537526
293.01	0.00870205		883.01	0.0016283		1473	0.00442093		2063	0.01003031		2653	0.02665354
293.21	0.00839512		883.21	0.00183341		1473.2	0.00495561		2063.2	0.01037878		2653.2	0.02728725
293.41	0.00885557		883.41	0.00273379		1473.4	0.00488912		2063.4	0.01083795		2653.4	0.02792092
293.61	0.00955052		883.61	0.00324328		1473.6	0.00473665		2063.6	0.01156861		2653.6	0.02861458
293.81	0.00970247		883.81	0.00398765		1473.8	0.0054446		2063.8	0.01220653		2653.8	0.02884538
294.01	0.00888318		884.01	0.00444945		1474	0.00530339		2064	0.01312008		2654	0.0300303
294.21	0.00956332		884.21	0.00430195		1474.2	0.00507013		2064.2	0.01276401		2654.2	0.0297956
294.41	0.00983411		884.41	0.00503118		1474.4	0.0065259		2064.4	0.01245138		2654.4	0.02985542
294.61	0.01050102		884.61	0.0052686		1474.6	0.00689004		2064.6	0.01218077		2654.6	0.02984829
294.81	0.01109496		884.81	0.00494905		1474.8	0.00662811		2064.8	0.01332591		2654.8	0.0303842
295.01	0.01093583		885.01	0.00576166		1475	0.00697596		2065	0.01402345		2655	0.03110911
295.21	0.01117322		885.21	0.00611131		1475.2	0.00749937		2065.2	0.01393277		2655.2	0.03103068
295.41	0.01135402		885.41	0.00624756		1475.4	0.00640398		2065.4	0.01379812		2655.4	0.03086141
295.61	0.01210179		885.61	0.00630195		1475.6	0.00765093		2065.6	0.01403329		2655.6	0.03123965
295.81	0.01338151		885.81	0.00656239		1475.8	0.00781917		2065.8	0.01447818		2655.8	0.03114384
296.01	0.01292992		886.01	0.00668828		1476	0.00890983		2066	0.0141326		2656	0.03117283
296.21	0.01270332		886.21	0.00599956		1476.2	0.00938383		2066.2	0.01479855		2656.2	0.03081146
296.41	0.01293507		886.41	0.0065153		1476.4	0.00983923		2066.4	0.01449677		2656.4	0.03080101
296.61	0.01276538		886.61	0.00729144		1476.6	0.01011772		2066.6	0.01453838		2656.6	0.03132308
296.81	0.01290783		886.81	0.0084042		1476.8	0.00997576		2066.8	0.01529334		2656.8	0.0309909
297.01	0.01268719		887.01	0.00893958		1477	0.00966321		2067	0.0149551		2657	0.03089457
297.21	0.01211172		887.21	0.00789911		1477.2	0.00849487		2067.2	0.01536581		2657.2	0.03089837
297.41	0.01206153		887.41	0.0078056		1477.4	0.0086394		2067.4	0.01607523		2657.4	0.03110262
297.61	0.01208499		887.61	0.00833486		1477.6	0.00818912		2067.6	0.01589326		2657.6	0.03154105
297.81	0.01083569		887.81	0.00821247		1477.8	0.00776826		2067.8	0.01631092		2657.8	0.03204935
298.01	0.00956309		888.01	0.0078296		1478	0.00711966		2068	0.01633004		2658	0.03194691
298.21	0.00879069		888.21	0.00729349		1478.2	0.00777134		2068.2	0.01601609		2658.2	0.03099994
298.41	0.00957314		888.41	0.00738197		1478.4	0.00775018		2068.4	0.01580674		2658.4	0.03163547
298.61	0.0095243		888.61	0.00727406		1478.6	0.00662976		2068.6	0.01600088		2658.6	0.03206261
298.81	0.00924723		888.81	0.00705993		1478.8	0.00717882		2068.8	0.01679253		2658.8	0.03236388
299.01	0.00841623		889.01	0.00736304		1479	0.00798859		2069	0.01683321		2659	0.03323674
299.21	0.00810346		889.21	0.00616427		1479.2	0.00790671		2069.2	0.0172383		2659.2	0.03308868
299.41	0.00895734		889.41	0.00576463		1479.4	0.00782519		2069.4	0.01699458		2659.4	0.03270069
299.61	0.01030972		889.61	0.00542449		1479.6	0.00972733		2069.6	0.01709163		2659.6	0.03217684
299.81	0.01070872		889.81	0.00494553		1479.8	0.01036988		2069.8	0.01652103		2659.8	0.03214367
300.01	0.01073629		890.01	0.00426545		1480	0.01129748		2070	0.0167172		2660	0.03161034
300.21	0.01023528		890.21	0.00352063		1480.2	0.01126064		2070.2	0.01669686		2660.2	0.03110976
300.41	0.01153829		890.41	0.0035747		1480.4	0.01095154		2070.4	0.0156617		2660.4	0.0304786
300.61	0.01201472		890.61	0.00370018		1480.6	0.01066208		2070.6	0.01608137		2660.6	0.03104782
300.81	0.0119857		890.81	0.00420945		1480.8	0.01107457		2070.8	0.01592889		2660.8	0.0304162
301.01	0.01236979		891.01	0.00361768		1481	0.0102054		2071	0.0152818		2661	0.03081269
301.21	0.01320609		891.21	0.00333818		1481.2	0.00932926		2071.2	0.01520381		2661.2	0.03179495
301.41	0.01276199		891.41	0.00433051		1481.4	0.00927128		2071.4	0.0154146		2661.4	0.03221932
301.61	0.01233938		891.61	0.0055041		1481.6	0.00873803		2071.6	0.01447348		2661.6	0.03212289
301.81	0.0112369		891.81	0.0061207		1481.8	0.00761668		2071.8	0.01438503		2661.8	0.03286497
302.01	0.01093889		892.01	0.00622433		1482	0.00689669		2072	0.01376903		2662	0.03287048
302.21	0.01077543		892.21	0.00691621		1482.2	0.00657873		2072.2	0.01359177		2662.2	0.03289193
302.41	0.01112626		892.41	0.00707729		1482.4	0.00601919		2072.4	0.01378183		2662.4	0.03386062
302.61	0.00994071		892.61	0.00734704		1482.6	0.00634434		2072.6	0.01412513		2662.6	0.03416532
302.81	0.00997907		892.81	0.00760403		1482.8	0.0069694		2072.8	0.01503851		2662.8	0.03420848
303.01	0.00941275		893.01	0.00723497		1483	0.00728709		2073	0.01599861		2663	0.03362634
303.21	0.01008176		893.21	0.00688163		1483.2	0.00776229		2073.2	0.01648356		2663.2	0.03287344
303.41	0.0106805		893.41	0.00765831		1483.4	0.00889935		2073.4	0.01639293		2663.4	0.03248576
303.61	0.01071908		893.61	0.00719538		1483.6	0.00907204		2073.6	0.01589064		2663.6	0.03177069
303.81	0.01026562		893.81	0.00681308		1483.8	0.00892496		2073.8	0.01509662		2663.8	0.03198241
304.01	0.01004949		894.01	0.00746136		1484	0.00896233		2074	0.01526273		2664	0.03129263
304.21	0.00966961		894.21	0.00723923		1484.2	0.00876568		2074.2	0.01479359		2664.2	0.03089052
304.41	0.01018478		894.41	0.00714019		1484.4	0.0089147		2074.4	0.01495274		2664.4	0.03108394
304.61	0.00978058		894.61	0.00699476		1484.6	0.00917477		2074.6	0.01455816		2664.6	0.03171648
304.81	0.00965993		894.81	0.00703404		1484.8	0.0093323		2074.8	0.01477213		2664.8	0.03186576
305.01	0.010475		895.01	0.00681905		1485	0.00850808		2075	0.01458068		2665	0.03275073
305.21	0.01086874		895.21	0.00669945		1485.2	0.00844044		2075.2	0.0142926		2665.2	0.03360855
305.41	0.01090339		895.41	0.00688191		1485.4	0.00818448		2075.4	0.01415177		2665.4	0.03387457
305.61	0.01097273		895.61	0.0065833		1485.6	0.00769666		2075.6	0.01405526		2665.6	0.0344577
305.81	0.01078484		895.81	0.00622329		1485.8	0.00691913		2075.8	0.01396497		2665.8	0.03481395
306.01	0.01067576		896.01	0.00550897		1486	0.00720499		2076	0.01412268		2666	0.03545713
306.21	0.01058066		896.21	0.00587136		1486.2	0.00803241		2076.2	0.01487752		2666.2	0.03613337
306.41	0.01076824		896.41	0.00593559		1486.4	0.0085206		2076.4	0.01480747		2666.4	0.03662982
306.61	0.01035323		896.61	0.00536895		1486.6	0.00921609		2076.6	0.01446952		2666.6	0.03671689
306.81	0.01090087		896.81	0.00553035		1486.8	0.00911322		2076.8	0.01559258		2666.8	0.03654173
307.01	0.01056058		897.01	0.00615154		1487	0.00931508		2077	0.0161048		2667	0.03547934
307.21	0.01068978		897.21	0.00637871		1487.2	0.00920712		2077.2	0.01575527		2667.2	0.03599073
307.41	0.0107386		897.41	0.00625732		1487.4	0.00940078		2077.4	0.01573816		2667.4	0.03553343
307.61	0.00990267		897.61	0.00686753		1487.6	0.00948683		2077.6	0.01522834		2667.6	0.03512073
307.81	0.00901074		897.81	0.00779084		1487.8	0.00897105		2077.8	0.01604706		2667.8	0.03550159
308.01	0.00878926		898.01	0.00873102		1488	0.00857956		2078	0.01627209		2668	0.03567391
308.21	0.00875655		898.21	0.0078543		1488.2	0.00772163		2078.2	0.0168333		2668.2	0.03535208
308.41	0.00888879		898.41	0.00751835		1488.4	0.0078756		2078.4	0.01672627		2668.4	0.03512615
308.61	0.00863782		898.61	0.0067735		1488.6	0.00752545		2078.6	0.01607242		2668.6	0.03504766
308.81	0.00932822		898.81	0.00668942		1488.8	0.00707002		2078.8	0.0171318		2668.8	0.03462648
309.01	0.01025294		899.01	0.00618489		1489	0.00655915		2079	0.01703411		2669	0.03413089
309.21	0.01079568		899.21	0.00484555		1489.2	0.00692428		2079.2	0.01663091		2669.2	0.03445155
309.41	0.01135079		899.41	0.004396		1489.4	0.00629225		2079.4	0.01653837		2669.4	0.03406697
309.61	0.01156729		899.61	0.00460095		1489.6	0.00611283		2079.6	0.01661715		2669.6	0.0332755
309.81	0.01129192		899.81	0.00523932		1489.8	0.00613369		2079.8	0.01599782		2669.8	0.03304483
310.01	0.01132905		900.01	0.0050594		1490	0.00642159		2080	0.01626093		2670	0.03353064
310.21	0.01152634		900.21	0.00557589		1490.2	0.00678929		2080.2	0.01618412		2670.2	0.03384036
310.41	0.01136683		900.41	0.00511018		1490.4	0.00654337		2080.4	0.01480871		2670.4	0.03437448
310.61	0.0109837		900.61	0.00486869		1490.6	0.00672974		2080.6	0.01500293		2670.6	0.03472897
310.81	0.01190141		900.81	0.00540955		1490.8	0.00681907		2080.8	0.01502911		2670.8	0.03434517
311.01	0.01193746		901.01	0.00598673		1491	0.00727723		2081	0.01459306		2671	0.03418907
311.21	0.01155552		901.21	0.00592674		1491.2	0.0075959		2081.2	0.01380069		2671.2	0.03491501
311.41	0.01098065		901.41	0.00607343		1491.4	0.00831696		2081.4	0.01390555		2671.4	0.03561748
311.61	0.00978261		901.61	0.0066127		1491.6	0.00799736		2081.6	0.01429315		2671.6	0.03624661
311.81	0.00956548		901.81	0.00634346		1491.8	0.00761359		2081.8	0.01495972		2671.8	0.0367982
312.01	0.01025036		902.01	0.00613789		1492	0.00780986		2082	0.01447236		2672	0.03697983
312.21	0.01089575		902.21	0.00586733		1492.2	0.00813488		2082.2	0.01536175		2672.2	0.0369649
312.41	0.01102938		902.41	0.0053343		1492.4	0.00902348		2082.4	0.01521347		2672.4	0.03714385
312.61	0.01147502		902.61	0.00498459		1492.6	0.00886144		2082.6	0.01598065		2672.6	0.03652234
312.81	0.0133144		902.81	0.0047254		1492.8	0.00895855		2082.8	0.01658637		2672.8	0.03631648
313.01	0.01402247		903.01	0.00426784		1493	0.00908144		2083	0.01595121		2673	0.03623688
313.21	0.01376102		903.21	0.00368891		1493.2	0.0096733		2083.2	0.01545148		2673.2	0.03596686
313.41	0.01352022		903.41	0.0043692		1493.4	0.00971546		2083.4	0.01603039		2673.4	0.03567916
313.61	0.01410695		903.61	0.00415003		1493.6	0.00970667		2083.6	0.01605312		2673.6	0.03532291
313.81	0.01292802		903.81	0.00420968		1493.8	0.01026616		2083.8	0.01579021		2673.8	0.03578079
314.01	0.01230422		904.01	0.00412773		1494	0.00998537		2084	0.01553019		2674	0.0356806
314.21	0.01177917		904.21	0.00400524		1494.2	0.01011197		2084.2	0.01516973		2674.2	0.03616135
314.41	0.01168218		904.41	0.00390176		1494.4	0.00923705		2084.4	0.01397069		2674.4	0.03601771
314.61	0.01127431		904.61	0.00417617		1494.6	0.00917311		2084.6	0.01403717		2674.6	0.0359722
314.81	0.01085703		904.81	0.00462055		1494.8	0.00861817		2084.8	0.01328581		2674.8	0.03593883
315.01	0.00940166		905.01	0.00527735		1495	0.00825047		2085	0.01282951		2675	0.03646986
315.21	0.0082534		905.21	0.00473106		1495.2	0.00793644		2085.2	0.01172624		2675.2	0.03668287
315.41	0.00792657		905.41	0.00386636		1495.4	0.00779622		2085.4	0.01244146		2675.4	0.03655908
315.61	0.0076368		905.61	0.00348223		1495.6	0.00736448		2085.6	0.01261835		2675.6	0.03632831
315.81	0.00824814		905.81	0.00415057		1495.8	0.00704419		2085.8	0.01259629		2675.8	0.0367929
316.01	0.00789651		906.01	0.00415751		1496	0.006995		2086	0.01276251		2676	0.03625042
316.21	0.00816138		906.21	0.00448465		1496.2	0.00711386		2086.2	0.01322545		2676.2	0.03626531
316.41	0.00827069		906.41	0.0045168		1496.4	0.00689459		2086.4	0.01257733		2676.4	0.03535896
316.61	0.00952591		906.61	0.00421725		1496.6	0.00606974		2086.6	0.01284754		2676.6	0.03496662
316.81	0.01040554		906.81	0.00428849		1496.8	0.00605663		2086.8	0.01291399		2676.8	0.03524046
317.01	0.01003696		907.01	0.00436289		1497	0.00637977		2087	0.01364927		2677	0.03536007
317.21	0.00888801		907.21	0.0037237		1497.2	0.00673612		2087.2	0.01445273		2677.2	0.0352311
317.41	0.00915308		907.41	0.00462263		1497.4	0.00651105		2087.4	0.01463908		2677.4	0.03541666
317.61	0.00896999		907.61	0.00477314		1497.6	0.00735483		2087.6	0.01472269		2677.6	0.03508795
317.81	0.00820126		907.81	0.00545539		1497.8	0.00774772		2087.8	0.01562457		2677.8	0.0356612
318.01	0.0082778		908.01	0.00585147		1498	0.00739131		2088	0.01680675		2678	0.03543209
318.21	0.00876411		908.21	0.0054102		1498.2	0.00753834		2088.2	0.01729189		2678.2	0.03573039
318.41	0.00910607		908.41	0.00554969		1498.4	0.00761245		2088.4	0.0174008		2678.4	0.03557475
318.61	0.00891578		908.61	0.00538185		1498.6	0.00847245		2088.6	0.01844679		2678.6	0.03616391
318.81	0.0089019		908.81	0.00598724		1498.8	0.00820795		2088.8	0.01874843		2678.8	0.03657066
319.01	0.00924096		909.01	0.00547491		1499	0.00894718		2089	0.01820431		2679	0.03641996
319.21	0.00959693		909.21	0.00440103		1499.2	0.00861059		2089.2	0.01838346		2679.2	0.03602435
319.41	0.01001665		909.41	0.00348929		1499.4	0.00847103		2089.4	0.01931932		2679.4	0.0353227
319.61	0.01039978		909.61	0.00361528		1499.6	0.00804313		2089.6	0.01965738		2679.6	0.03563678
319.81	0.01060223		909.81	0.00343398		1499.8	0.0072455		2089.8	0.01856036		2679.8	0.03556888
320.01	0.00998383		910.01	0.00273071		1500	0.0070212		2090	0.018527		2680	0.03431523
320.21	0.01076129		910.21	0.00262112		1500.2	0.00602267		2090.2	0.01832267		2680.2	0.03466847
320.41	0.011457		910.41	0.00181962		1500.4	0.00522894		2090.4	0.0176712		2680.4	0.03488653
320.61	0.01186877		910.61	0.00116478		1500.6	0.00413662		2090.6	0.01781331		2680.6	0.03582209
320.81	0.01148511		910.81	0.00081422		1500.8	0.00402146		2090.8	0.01777947		2680.8	0.03589553
321.01	0.01141604		911.01	0.00040265		1501	0.00418125		2091	0.01813057		2681	0.0362302
321.21	0.01109309		911.21	0.00094152		1501.2	0.00360847		2091.2	0.0174227		2681.2	0.03607097
321.41	0.01148455		911.41	0.00192502		1501.4	0.00276468		2091.4	0.01693233		2681.4	0.03601161
321.61	0.0112069		911.61	0.00208429		1501.6	0.00351587		2091.6	0.01663713		2681.6	0.03621662
321.81	0.0122367		911.81	0.00185902		1501.8	0.00397167		2091.8	0.01735647		2681.8	0.03667371
322.01	0.01199486		912.01	0.0025153		1502	0.00481712		2092	0.01687885		2682	0.0361159
322.21	0.01291758		912.21	0.00210081		1502.2	0.00484203		2092.2	0.01579862		2682.2	0.03548253
322.41	0.0133621		912.41	0.00170338		1502.4	0.00599374		2092.4	0.01607204		2682.4	0.03606057
322.61	0.01278497		912.61	0.00159457		1502.6	0.00644648		2092.6	0.01704589		2682.6	0.0362662
322.81	0.0128206		912.81	0.00230819		1502.8	0.00590906		2092.8	0.01650539		2682.8	0.0359885
323.01	0.01265088		913.01	0.00303553		1503	0.00647537		2093	0.0166579		2683	0.03504574
323.21	0.0121101		913.21	0.00257089		1503.2	0.00641623		2093.2	0.01676586		2683.2	0.03480473
323.41	0.01183519		913.41	0.00251987		1503.4	0.00680741		2093.4	0.01640863		2683.4	0.03431128
323.61	0.01165926		913.61	0.0036194		1503.6	0.0073965		2093.6	0.01621291		2683.6	0.03456996
323.81	0.01067378		913.81	0.00316477		1503.8	0.00700716		2093.8	0.01491603		2683.8	0.03348869
324.01	0.01108168		914.01	0.00313152		1504	0.0074941		2094	0.0154216		2684	0.03342324
324.21	0.01124823		914.21	0.0031293		1504.2	0.00727169		2094.2	0.01577999		2684.2	0.03407361
324.41	0.01055466		914.41	0.00282186		1504.4	0.00752683		2094.4	0.01645051		2684.4	0.03412535
324.61	0.00986919		914.61	0.00273476		1504.6	0.00768321		2094.6	0.0176653		2684.6	0.0338359
324.81	0.01001786		914.81	0.00260807		1504.8	0.00801488		2094.8	0.01740415		2684.8	0.03367989
325.01	0.01014527		915.01	0.00346989		1505	0.00742003		2095	0.01727584		2685	0.03370145
325.21	0.00964161		915.21	0.0042158		1505.2	0.00659964		2095.2	0.01663656		2685.2	0.03322751
325.41	0.00926838		915.41	0.00367348		1505.4	0.00596561		2095.4	0.0159235		2685.4	0.03365135
325.61	0.00933913		915.61	0.00366427		1505.6	0.00678329		2095.6	0.01483809		2685.6	0.03351182
325.81	0.00981953		915.81	0.00365328		1505.8	0.00767527		2095.8	0.01521054		2685.8	0.03387022
326.01	0.00990328		916.01	0.00346426		1506	0.00701575		2096	0.01429965		2686	0.03403472
326.21	0.01014583		916.21	0.0029358		1506.2	0.00679245		2096.2	0.01417554		2686.2	0.0345961
326.41	0.01076121		916.41	0.00219862		1506.4	0.0068233		2096.4	0.0145522		2686.4	0.03566453
326.61	0.0103364		916.61	0.00269572		1506.6	0.00589143		2096.6	0.01486863		2686.6	0.03471614
326.81	0.01083352		916.81	0.00305142		1506.8	0.00559609		2096.8	0.01404583		2686.8	0.03578888
327.01	0.01003525		917.01	0.0029821		1507	0.00590719		2097	0.01371052		2687	0.03603644
327.21	0.00963136		917.21	0.00290839		1507.2	0.00555265		2097.2	0.0129785		2687.2	0.03689819
327.41	0.01021511		917.41	0.00366996		1507.4	0.00546721		2097.4	0.01289087		2687.4	0.03674896
327.61	0.0104155		917.61	0.00357185		1507.6	0.00607784		2097.6	0.01336806		2687.6	0.0374296
327.81	0.01022082		917.81	0.00216715		1507.8	0.00590839		2097.8	0.0129389		2687.8	0.03740544
328.01	0.01009188		918.01	0.00189554		1508	0.00667875		2098	0.01295338		2688	0.03748802
328.21	0.00947801		918.21	0.00281345		1508.2	0.00594668		2098.2	0.01439786		2688.2	0.03774826
328.41	0.00830687		918.41	0.00382081		1508.4	0.00592641		2098.4	0.01505935		2688.4	0.03715375
328.61	0.0083701		918.61	0.00408341		1508.6	0.00613185		2098.6	0.01537939		2688.6	0.03727667
328.81	0.00862846		918.81	0.00472681		1508.8	0.00564151		2098.8	0.01483836		2688.8	0.03809501
329.01	0.00813838		919.01	0.00436868		1509	0.00518415		2099	0.01528757		2689	0.03823287
329.21	0.00845042		919.21	0.00358937		1509.2	0.00499753		2099.2	0.01546754		2689.2	0.03833544
329.41	0.00868737		919.41	0.00331759		1509.4	0.00554663		2099.4	0.01551037		2689.4	0.03875162
329.61	0.00863311		919.61	0.0030385		1509.6	0.00520828		2099.6	0.01525947		2689.6	0.03848969
329.81	0.00887257		919.81	0.00356684		1509.8	0.00578155		2099.8	0.01577858		2689.8	0.0389762
330.01	0.00939588		920.01	0.00319727		1510	0.00520341		2100	0.01488929		2690	0.03829304
330.21	0.00935566		920.21	0.00266831		1510.2	0.00577284		2100.2	0.01481091		2690.2	0.03795091
330.41	0.00977056		920.41	0.00164389		1510.4	0.00559343		2100.4	0.01492538		2690.4	0.03761183
330.61	0.00976438		920.61	0.00171346		1510.6	0.00584791		2100.6	0.01482909		2690.6	0.03671931
330.81	0.00930739		920.81	0.0009375		1510.8	0.00577399		2100.8	0.01441209		2690.8	0.03781088
331.01	0.00948978		921.01	0.00055636		1511	0.00535856		2101	0.01432961		2691	0.03635269
331.21	0.00939928		921.21	0.00036374		1511.2	0.00519252		2101.2	0.01478883		2691.2	0.03563074
331.41	0.00996524		921.41	-0.00008377		1511.4	0.00602339		2101.4	0.01490986		2691.4	0.03482292
331.61	0.00942622		921.61	-0.00058235		1511.6	0.00708872		2101.6	0.01453666		2691.6	0.03451491
331.81	0.00896562		921.81	-0.0008921		1511.8	0.00725944		2101.8	0.01400152		2691.8	0.03332622
332.01	0.00883799		922.01	-0.00033891		1512	0.00763235		2102	0.0137752		2692	0.0318818
332.21	0.00937084		922.21	0.00077602		1512.2	0.00723091		2102.2	0.01401234		2692.2	0.03173242
332.41	0.00899942		922.41	0.00223741		1512.4	0.0072486		2102.4	0.01375553		2692.4	0.03094137
332.61	0.00952439		922.61	0.00294319		1512.6	0.00644794		2102.6	0.01448608		2692.6	0.03095139
332.81	0.01006378		922.81	0.00341871		1512.8	0.00613628		2102.8	0.0145887		2692.8	0.03221344
333.01	0.00997995		923.01	0.00291039		1513	0.00603324		2103	0.01492686		2693	0.03235938
333.21	0.01065105		923.21	0.00401852		1513.2	0.00536265		2103.2	0.01470397		2693.2	0.03251214
333.41	0.01089883		923.41	0.00477316		1513.4	0.00518723		2103.4	0.01580518		2693.4	0.03368167
333.61	0.01107951		923.61	0.00443242		1513.6	0.00439732		2103.6	0.01517865		2693.6	0.03405434
333.81	0.01134544		923.81	0.00507068		1513.8	0.00561555		2103.8	0.01644658		2693.8	0.03479977
334.01	0.01133359		924.01	0.00434147		1514	0.00561582		2104	0.01602504		2694	0.035525
334.21	0.01105109		924.21	0.0037968		1514.2	0.00609856		2104.2	0.01694694		2694.2	0.03567534
334.41	0.01038782		924.41	0.00371456		1514.4	0.00581563		2104.4	0.01683108		2694.4	0.03614137
334.61	0.01071392		924.61	0.00361423		1514.6	0.00448087		2104.6	0.0164928		2694.6	0.03625779
334.81	0.01000843		924.81	0.00252285		1514.8	0.00381802		2104.8	0.01686966		2694.8	0.03605638
335.01	0.0097874		925.01	0.00221111		1515	0.00451167		2105	0.0173365		2695	0.0354333
335.21	0.00789816		925.21	0.00205889		1515.2	0.0051783		2105.2	0.01716089		2695.2	0.03519444
335.41	0.00780663		925.41	0.00231139		1515.4	0.00616181		2105.4	0.01614143		2695.4	0.0349367
335.61	0.00701953		925.61	0.00149389		1515.6	0.00627588		2105.6	0.01597175		2695.6	0.03432973
335.81	0.00698343		925.81	0.00144131		1515.8	0.00547228		2105.8	0.01502179		2695.8	0.03365613
336.01	0.00701653		926.01	0.00118252		1516	0.00599071		2106	0.01437903		2696	0.03328584
336.21	0.00675596		926.21	0.00164554		1516.2	0.00601643		2106.2	0.01389615		2696.2	0.03316012
336.41	0.00565592		926.41	0.00170345		1516.4	0.00546528		2106.4	0.0143035		2696.4	0.03269647
336.61	0.00571634		926.61	0.00160819		1516.6	0.00500735		2106.6	0.01424353		2696.6	0.03257034
336.81	0.0059207		926.81	0.00162757		1516.8	0.00559492		2106.8	0.0130667		2696.8	0.03336882
337.01	0.00588483		927.01	0.00240901		1517	0.00515775		2107	0.01247226		2697	0.03342785
337.21	0.00688108		927.21	0.00322251		1517.2	0.00546419		2107.2	0.01272536		2697.2	0.03393484
337.41	0.0074361		927.41	0.00233155		1517.4	0.00630443		2107.4	0.01357485		2697.4	0.03456167
337.61	0.00746344		927.61	0.00197987		1517.6	0.00725721		2107.6	0.01318625		2697.6	0.03430336
337.81	0.00768637		927.81	0.00298204		1517.8	0.00793769		2107.8	0.01414651		2697.8	0.03467729
338.01	0.00728877		928.01	0.00289335		1518	0.00824824		2108	0.01396036		2698	0.03540535
338.21	0.00696055		928.21	0.00294882		1518.2	0.00797341		2108.2	0.01450172		2698.2	0.03522935
338.41	0.00633768		928.41	0.00269755		1518.4	0.00812046		2108.4	0.01409377		2698.4	0.03535232
338.61	0.00691576		928.61	0.00231471		1518.6	0.00809604		2108.6	0.01401164		2698.6	0.03568125
338.81	0.00663932		928.81	0.00287387		1518.8	0.00921934		2108.8	0.01434992		2698.8	0.03472018
339.01	0.00657321		929.01	0.00372708		1519	0.01031204		2109	0.01416328		2699	0.03509268
339.21	0.00644368		929.21	0.0040371		1519.2	0.01027271		2109.2	0.01310173		2699.2	0.03489649
339.41	0.00739347		929.41	0.00331975		1519.4	0.01079048		2109.4	0.01316682		2699.4	0.03455388
339.61	0.00712775		929.61	0.00287335		1519.6	0.01019337		2109.6	0.014162		2699.6	0.03395478
339.81	0.00735463		929.81	0.00342533		1519.8	0.0096851		2109.8	0.01396207		2699.8	0.03405684
340.01	0.00762368		930.01	0.00300943		1520	0.00974799		2110	0.01458742		2700	0.03442592
340.21	0.00723002		930.21	0.0031688		1520.2	0.00942555		2110.2	0.01503235		2700.2	0.03448395
340.41	0.0075038		930.41	0.00238308		1520.4	0.00812378		2110.4	0.01505682		2700.4	0.03446096
340.61	0.00812894		930.61	0.00240708		1520.6	0.00762605		2110.6	0.01511232		2700.6	0.03499221
340.81	0.00877496		930.81	0.00315548		1520.8	0.00623817		2110.8	0.01526517		2700.8	0.03545536
341.01	0.0084053		931.01	0.00315068		1521	0.00586177		2111	0.01522901		2701	0.0361339
341.21	0.00930183		931.21	0.00250576		1521.2	0.00564706		2111.2	0.01569562		2701.2	0.03591488
341.41	0.0089224		931.41	0.00157098		1521.4	0.00516064		2111.4	0.01545277		2701.4	0.03617619
341.61	0.00864978		931.61	0.0015638		1521.6	0.00510541		2111.6	0.01580523		2701.6	0.03657552
341.81	0.00903286		931.81	0.00146821		1521.8	0.00459459		2111.8	0.01561056		2701.8	0.0372425
342.01	0.00862146		932.01	-0.00014356		1522	0.00447509		2112	0.01572225		2702	0.03758325
342.21	0.00907393		932.21	-0.00062546		1522.2	0.0044014		2112.2	0.01520602		2702.2	0.03756269
342.41	0.00912441		932.41	-0.00078344		1522.4	0.00516411		2112.4	0.01470936		2702.4	0.03742889
342.61	0.00931177		932.61	-0.00086123		1522.6	0.00469065		2112.6	0.01438191		2702.6	0.03708217
342.81	0.00897308		932.81	-0.00082508		1522.8	0.00475572		2112.8	0.01398822		2702.8	0.03630246
343.01	0.00822418		933.01	-0.00147318		1523	0.00512337		2113	0.01345488		2703	0.03615456
343.21	0.00775857		933.21	-0.00248659		1523.2	0.0054726		2113.2	0.01305914		2703.2	0.03596651
343.41	0.0084443		933.41	-0.00349614		1523.4	0.0060544		2113.4	0.01335488		2703.4	0.0345679
343.61	0.00797862		933.61	-0.00335569		1523.6	0.00640042		2113.6	0.01407822		2703.6	0.03404738
343.81	0.00804141		933.81	-0.00333953		1523.8	0.00717772		2113.8	0.01432338		2703.8	0.03421683
344.01	0.00745795		934.01	-0.00342642		1524	0.00797079		2114	0.01387978		2704	0.0343203
344.21	0.00708019		934.21	-0.00353554		1524.2	0.00882952		2114.2	0.01416078		2704.2	0.03418041
344.41	0.00716493		934.41	-0.00317727		1524.4	0.00881578		2114.4	0.0137859		2704.4	0.03438711
344.61	0.00631728		934.61	-0.00181486		1524.6	0.00853856		2114.6	0.0142961		2704.6	0.03482355
344.81	0.00597393		934.81	-0.00103646		1524.8	0.00870386		2114.8	0.01515153		2704.8	0.03569404
345.01	0.00491988		935.01	-0.00133576		1525	0.00922131		2115	0.01397897		2705	0.03534322
345.21	0.00497231		935.21	-0.00156215		1525.2	0.00898902		2115.2	0.01345652		2705.2	0.03559635
345.41	0.00461656		935.41	-0.0016471		1525.4	0.00938166		2115.4	0.01324778		2705.4	0.03593503
345.61	0.00501023		935.61	-0.00114891		1525.6	0.00908855		2115.6	0.01343194		2705.6	0.03665934
345.81	0.00536257		935.81	-0.0003079		1525.8	0.00884705		2115.8	0.01393537		2705.8	0.03723919
346.01	0.00509914		936.01	0.00002554		1526	0.00869445		2116	0.01414887		2706	0.03724341
346.21	0.0054792		936.21	0.00090332		1526.2	0.00814718		2116.2	0.014157		2706.2	0.03802264
346.41	0.00537715		936.41	0.00181573		1526.4	0.00736045		2116.4	0.01466134		2706.4	0.0384897
346.61	0.00510685		936.61	0.00175546		1526.6	0.00604299		2116.6	0.01412389		2706.6	0.03868082
346.81	0.00592808		936.81	0.00197763		1526.8	0.00543925		2116.8	0.01394394		2706.8	0.0392571
347.01	0.00637367		937.01	0.00179345		1527	0.00500547		2117	0.01397744		2707	0.03966264
347.21	0.00673966		937.21	0.00225613		1527.2	0.00455581		2117.2	0.01464862		2707.2	0.03970064
347.41	0.00824319		937.41	0.00220148		1527.4	0.00478241		2117.4	0.0141821		2707.4	0.03830398
347.61	0.00844958		937.61	0.00193037		1527.6	0.00550426		2117.6	0.01452623		2707.6	0.03826443
347.81	0.00862075		937.81	0.00119074		1527.8	0.00558521		2117.8	0.01435973		2707.8	0.0382342
348.01	0.00793766		938.01	0.00092324		1528	0.00591855		2118	0.01408297		2708	0.03838357
348.21	0.00875153		938.21	0.00083153		1528.2	0.00583704		2118.2	0.01402134		2708.2	0.03798803
348.41	0.00838223		938.41	0.00156215		1528.4	0.0060034		2118.4	0.013177		2708.4	0.03864262
348.61	0.00891956		938.61	0.00180056		1528.6	0.0054303		2118.6	0.014229		2708.6	0.03835962
348.81	0.00921078		938.81	0.00054825		1528.8	0.00662275		2118.8	0.01415846		2708.8	0.03796424
349.01	0.00871931		939.01	-0.0000977		1529	0.00687348		2119	0.01297338		2709	0.03694569
349.21	0.00876713		939.21	0.00021628		1529.2	0.00734789		2119.2	0.01302373		2709.2	0.03626856
349.41	0.00880032		939.41	0.00082011		1529.4	0.00779179		2119.4	0.01286858		2709.4	0.0352112
349.61	0.00868281		939.61	0.00133071		1529.6	0.0068474		2119.6	0.01349323		2709.6	0.03545308
349.81	0.00781053		939.81	0.00180741		1529.8	0.00698458		2119.8	0.01441201		2709.8	0.03446457
350.01	0.00706443		940.01	0.00164768		1530	0.00632244		2120	0.01385149		2710	0.03415287
350.21	0.00738056		940.21	0.00173342		1530.2	0.00575052		2120.2	0.01352241		2710.2	0.03434201
350.41	0.00686372		940.41	0.00243315		1530.4	0.00541753		2120.4	0.01323477		2710.4	0.03472745
350.61	0.0062837		940.61	0.00208244		1530.6	0.00457447		2120.6	0.01337695		2710.6	0.03489408
350.81	0.00641745		940.81	0.00258637		1530.8	0.00396518		2120.8	0.01402895		2710.8	0.03503613
351.01	0.00598647		941.01	0.0027063		1531	0.00371613		2121	0.01365982		2711	0.03505374
351.21	0.00551853		941.21	0.00366545		1531.2	0.00426417		2121.2	0.01376794		2711.2	0.03523998
351.41	0.00557629		941.41	0.00371077		1531.4	0.00495586		2121.4	0.01364666		2711.4	0.0351766
351.61	0.00524458		941.61	0.0040709		1531.6	0.00511577		2121.6	0.01434755		2711.6	0.03542564
351.81	0.00546152		941.81	0.004299		1531.8	0.00489981		2121.8	0.01468751		2711.8	0.03561355
352.01	0.00546734		942.01	0.00422566		1532	0.00511903		2122	0.01454602		2712	0.03605081
352.21	0.00532895		942.21	0.00426301		1532.2	0.00524146		2122.2	0.01392007		2712.2	0.03647168
352.41	0.00572693		942.41	0.00499473		1532.4	0.00553583		2122.4	0.01384658		2712.4	0.0368194
352.61	0.00672597		942.61	0.004467		1532.6	0.00582757		2122.6	0.01562171		2712.6	0.03671719
352.81	0.00642763		942.81	0.00445309		1532.8	0.00649644		2122.8	0.01505316		2712.8	0.03604116
353.01	0.00617563		943.01	0.00494724		1533	0.00652017		2123	0.01561939		2713	0.03543514
353.21	0.00613338		943.21	0.00520997		1533.2	0.00662035		2123.2	0.01586866		2713.2	0.03434026
353.41	0.00542154		943.41	0.00516056		1533.4	0.00660318		2123.4	0.01529807		2713.4	0.03352546
353.61	0.00502012		943.61	0.00506198		1533.6	0.00600987		2123.6	0.01502106		2713.6	0.03267995
353.81	0.0046543		943.81	0.00435805		1533.8	0.00653191		2123.8	0.01468819		2713.8	0.03135068
354.01	0.00419631		944.01	0.00356471		1534	0.00656816		2124	0.01382526		2714	0.03148519
354.21	0.00423866		944.21	0.00299759		1534.2	0.00702278		2124.2	0.01427828		2714.2	0.03049184
354.41	0.00394429		944.41	0.00314809		1534.4	0.00686495		2124.4	0.01455605		2714.4	0.03075788
354.61	0.00397584		944.61	0.00282329		1534.6	0.00654951		2124.6	0.01477759		2714.6	0.03068756
354.81	0.00408227		944.81	0.00253425		1534.8	0.0066266		2124.8	0.01402652		2714.8	0.03104851
355.01	0.00535153		945.01	0.0022794		1535	0.00748499		2125	0.01367337		2715	0.03183379
355.21	0.00512071		945.21	0.002152		1535.2	0.00784572		2125.2	0.01411402		2715.2	0.03213289
355.41	0.00523912		945.41	0.00235455		1535.4	0.00710872		2125.4	0.01404819		2715.4	0.03240299
355.61	0.00595513		945.61	0.0019466		1535.6	0.00660449		2125.6	0.01384119		2715.6	0.03290559
355.81	0.00676117		945.81	0.00212102		1535.8	0.00619385		2125.8	0.01308205		2715.8	0.03365381
356.01	0.00610189		946.01	0.00190827		1536	0.00571283		2126	0.01222303		2716	0.03515287
356.21	0.00607519		946.21	0.00173057		1536.2	0.00510936		2126.2	0.01214476		2716.2	0.03601889
356.41	0.00651399		946.41	0.00230668		1536.4	0.00453746		2126.4	0.01242982		2716.4	0.03653307
356.61	0.00645304		946.61	0.00244623		1536.6	0.00496716		2126.6	0.01352757		2716.6	0.03680022
356.81	0.00625905		946.81	0.00245558		1536.8	0.00454371		2126.8	0.01271748		2716.8	0.03603878
357.01	0.00697994		947.01	0.00278612		1537	0.00402694		2127	0.01304838		2717	0.03603772
357.21	0.0075589		947.21	0.00269424		1537.2	0.00464057		2127.2	0.01276181		2717.2	0.03568793
357.41	0.00720565		947.41	0.0027527		1537.4	0.00449151		2127.4	0.01271354		2717.4	0.0350782
357.61	0.00817507		947.61	0.00233072		1537.6	0.00467509		2127.6	0.01315464		2717.6	0.03444991
357.81	0.00859164		947.81	0.00102809		1537.8	0.00455077		2127.8	0.01397696		2717.8	0.03403454
358.01	0.00888982		948.01	0.0006096		1538	0.00503726		2128	0.01451108		2718	0.03455602
358.21	0.0092357		948.21	0.00084057		1538.2	0.00526282		2128.2	0.01523216		2718.2	0.03413256
358.41	0.00863768		948.41	0.00125971		1538.4	0.00453719		2128.4	0.01528281		2718.4	0.03493693
358.61	0.00916686		948.61	0.00068606		1538.6	0.00418274		2128.6	0.01462495		2718.6	0.03426761
358.81	0.00937652		948.81	-0.00022187		1538.8	0.00436292		2128.8	0.01435492		2718.8	0.03407966
359.01	0.00970064		949.01	-0.00054315		1539	0.00477306		2129	0.01429379		2719	0.03436743
359.21	0.00909753		949.21	-0.00042054		1539.2	0.00337041		2129.2	0.0146762		2719.2	0.0338191
359.41	0.00841816		949.41	-0.00002336		1539.4	0.00265594		2129.4	0.01357136		2719.4	0.03394296
359.61	0.00777577		949.61	0.00036716		1539.6	0.00245483		2129.6	0.0141838		2719.6	0.03463649
359.81	0.00639714		949.81	0.00081617		1539.8	0.0024702		2129.8	0.01367677		2719.8	0.03405562
360.01	0.00489581		950.01	0.00073521		1540	0.00155135		2130	0.01285127		2720	0.03430985
360.21	0.00463458		950.21	0.00043845		1540.2	0.00162454		2130.2	0.01330694		2720.2	0.03408433
360.41	0.00382262		950.41	0.00074054		1540.4	0.00226385		2130.4	0.01296704		2720.4	0.03471466
360.61	0.0042104		950.61	0.00119156		1540.6	0.00223043		2130.6	0.01278866		2720.6	0.0340037
360.81	0.00448798		950.81	0.00045563		1540.8	0.00205368		2130.8	0.01233396		2720.8	0.03348535
361.01	0.00505373		951.01	0.00072098		1541	0.00292407		2131	0.01263718		2721	0.03347737
361.21	0.00486383		951.21	0.00063356		1541.2	0.00396012		2131.2	0.01303847		2721.2	0.03328187
361.41	0.0045452		951.41	-0.00023492		1541.4	0.00483583		2131.4	0.01336114		2721.4	0.03370861
361.61	0.00488809		951.61	-0.0010089		1541.6	0.00627425		2131.6	0.01363896		2721.6	0.0338143
361.81	0.00521747		951.81	-0.00171064		1541.8	0.00687327		2131.8	0.01450928		2721.8	0.03449811
362.01	0.00546299		952.01	-0.0011564		1542	0.00780647		2132	0.01532943		2722	0.03507535
362.21	0.00485664		952.21	0.00008332		1542.2	0.00801296		2132.2	0.01558955		2722.2	0.03540029
362.41	0.00453385		952.41	0.00109689		1542.4	0.007949		2132.4	0.01598166		2722.4	0.03508041
362.61	0.0049725		952.61	0.00086849		1542.6	0.00764825		2132.6	0.01607498		2722.6	0.03431188
362.81	0.00429038		952.81	0.00151505		1542.8	0.0081822		2132.8	0.01584404		2722.8	0.03499312
363.01	0.00446647		953.01	0.0029781		1543	0.00816299		2133	0.01582174		2723	0.03518095
363.21	0.00380613		953.21	0.00323328		1543.2	0.00805673		2133.2	0.01676104		2723.2	0.03526272
363.41	0.00266955		953.41	0.00302599		1543.4	0.00857288		2133.4	0.01665883		2723.4	0.03576947
363.61	0.00196527		953.61	0.00290273		1543.6	0.0085131		2133.6	0.0171199		2723.6	0.03606341
363.81	0.00152672		953.81	0.00204199		1543.8	0.00756507		2133.8	0.01675696		2723.8	0.03542573
364.01	0.00164296		954.01	0.00155239		1544	0.00652949		2134	0.01683738		2724	0.03512178
364.21	0.00223641		954.21	0.00147068		1544.2	0.00654899		2134.2	0.01682805		2724.2	0.03513452
364.41	0.0027333		954.41	0.00086817		1544.4	0.00590636		2134.4	0.0161707		2724.4	0.03462387
364.61	0.00331054		954.61	0.00076067		1544.6	0.00423799		2134.6	0.01522154		2724.6	0.03352215
364.81	0.00317683		954.81	0.0000591		1544.8	0.0046966		2134.8	0.01462443		2724.8	0.03254377
365.01	0.00315224		955.01	-0.00037361		1545	0.0050876		2135	0.01393572		2725	0.03182196
365.21	0.00303261		955.21	-0.00042773		1545.2	0.00484984		2135.2	0.01361619		2725.2	0.03144961
365.41	0.0032428		955.41	-0.00152149		1545.4	0.00521452		2135.4	0.0132037		2725.4	0.03109889
365.61	0.00291205		955.61	-0.00160312		1545.6	0.00585456		2135.6	0.01308108		2725.6	0.03075664
365.81	0.00313753		955.81	-0.00161848		1545.8	0.00531022		2135.8	0.01311943		2725.8	0.03082537
366.01	0.00325064		956.01	-0.00174304		1546	0.00543176		2136	0.01299982		2726	0.03086718
366.21	0.00341939		956.21	-0.00147673		1546.2	0.00489738		2136.2	0.01288171		2726.2	0.03152532
366.41	0.0034958		956.41	-0.00134904		1546.4	0.00461437		2136.4	0.01296896		2726.4	0.0317489
366.61	0.00316667		956.61	-0.00136038		1546.6	0.00503451		2136.6	0.01305052		2726.6	0.03239338
366.81	0.0029163		956.81	-0.00171484		1546.8	0.00618612		2136.8	0.01274464		2726.8	0.0334084
367.01	0.00306561		957.01	-0.00148684		1547	0.00726951		2137	0.01323887		2727	0.0339134
367.21	0.00257474		957.21	-0.00220988		1547.2	0.0084999		2137.2	0.01343218		2727.2	0.03434868
367.41	0.00282063		957.41	-0.00271662		1547.4	0.00778641		2137.4	0.0136603		2727.4	0.03445653
367.61	0.00354845		957.61	-0.00310617		1547.6	0.00708088		2137.6	0.01283135		2727.6	0.03364538
367.81	0.0045376		957.81	-0.00311245		1547.8	0.00682559		2137.8	0.01309996		2727.8	0.03361007
368.01	0.00494487		958.01	-0.00376419		1548	0.00680837		2138	0.01345674		2728	0.03266658
368.21	0.00541354		958.21	-0.00324264		1548.2	0.00705349		2138.2	0.01294017		2728.2	0.03208559
368.41	0.00570047		958.41	-0.00315158		1548.4	0.00711453		2138.4	0.01287501		2728.4	0.0315373
368.61	0.00527401		958.61	-0.00256633		1548.6	0.00688498		2138.6	0.01260983		2728.6	0.03186425
368.81	0.00493896		958.81	-0.00184596		1548.8	0.00705002		2138.8	0.01171739		2728.8	0.03123444
369.01	0.00491272		959.01	-0.00157906		1549	0.00712746		2139	0.01137611		2729	0.0308002
369.21	0.00505524		959.21	-0.00061726		1549.2	0.00660941		2139.2	0.01141431		2729.2	0.03141802
369.41	0.00567407		959.41	-0.00080901		1549.4	0.00676731		2139.4	0.0108994		2729.4	0.03121475
369.61	0.00555703		959.61	-0.00007648		1549.6	0.00751788		2139.6	0.01081039		2729.6	0.03172449
369.81	0.00583675		959.81	-0.00047041		1549.8	0.0071818		2139.8	0.01102817		2729.8	0.03247646
370.01	0.00591		960.01	-0.00014586		1550	0.00771959		2140	0.01192423		2730	0.03268701
370.21	0.00561744		960.21	0.00074826		1550.2	0.00755636		2140.2	0.01251522		2730.2	0.03331435
370.41	0.00500869		960.41	0.00140167		1550.4	0.0079233		2140.4	0.01226859		2730.4	0.03398038
370.61	0.00501177		960.61	0.00148066		1550.6	0.00870092		2140.6	0.01297392		2730.6	0.03413516
370.81	0.0058523		960.81	0.0012513		1550.8	0.00879656		2140.8	0.01317256		2730.8	0.03453396
371.01	0.00618524		961.01	0.00186672		1551	0.00864374		2141	0.0133009		2731	0.03368881
371.21	0.00621372		961.21	0.00147109		1551.2	0.00847318		2141.2	0.01302786		2731.2	0.03374058
371.41	0.00659777		961.41	0.00026103		1551.4	0.00756076		2141.4	0.01357616		2731.4	0.03342136
371.61	0.00718109		961.61	-0.0004946		1551.6	0.00782537		2141.6	0.01322694		2731.6	0.0326974
371.81	0.00770907		961.81	-0.00102337		1551.8	0.00791419		2141.8	0.01358727		2731.8	0.03292739
372.01	0.00758913		962.01	-0.00163267		1552	0.00738844		2142	0.01346523		2732	0.03282024
372.21	0.00688012		962.21	-0.00117208		1552.2	0.00686729		2142.2	0.01339592		2732.2	0.03188692
372.41	0.00609976		962.41	-0.00171738		1552.4	0.00662586		2142.4	0.01286543		2732.4	0.03243505
372.61	0.00613171		962.61	-0.00213383		1552.6	0.00639958		2142.6	0.01244155		2732.6	0.03336528
372.81	0.00590641		962.81	-0.00215704		1552.8	0.00565478		2142.8	0.01145257		2732.8	0.03312005
373.01	0.00558038		963.01	-0.00236724		1553	0.0058325		2143	0.01195957		2733	0.03356325
373.21	0.00514541		963.21	-0.00231816		1553.2	0.00499854		2143.2	0.01187672		2733.2	0.03440527
373.41	0.00532518		963.41	-0.00205081		1553.4	0.00488018		2143.4	0.0121217		2733.4	0.03352767
373.61	0.0040774		963.61	-0.00150111		1553.6	0.00507179		2143.6	0.01257854		2733.6	0.03339995
373.81	0.0046178		963.81	-0.00207674		1553.8	0.00526841		2143.8	0.01335539		2733.8	0.03392805
374.01	0.00417641		964.01	-0.00125528		1554	0.00454143		2144	0.01362518		2734	0.03335653
374.21	0.00407457		964.21	-0.00055132		1554.2	0.00423854		2144.2	0.01258262		2734.2	0.03315281
374.41	0.00438576		964.41	-0.00059777		1554.4	0.00369457		2144.4	0.01207019		2734.4	0.03332631
374.61	0.0050199		964.61	-0.00045294		1554.6	0.00394894		2144.6	0.01240331		2734.6	0.0328281
374.81	0.00572644		964.81	-0.00020135		1554.8	0.00349201		2144.8	0.01272448		2734.8	0.03290441
375.01	0.0057273		965.01	-0.00128585		1555	0.00400329		2145	0.01305106		2735	0.0322785
375.21	0.00591251		965.21	-0.00130367		1555.2	0.0043987		2145.2	0.012366		2735.2	0.03246334
375.41	0.00620112		965.41	-0.00157764		1555.4	0.00500772		2145.4	0.01275039		2735.4	0.03137839
375.61	0.00625653		965.61	-0.00210418		1555.6	0.00566944		2145.6	0.01276351		2735.6	0.03190067
375.81	0.00721925		965.81	-0.00177439		1555.8	0.00536942		2145.8	0.01321552		2735.8	0.03225429
376.01	0.00726683		966.01	-0.00152895		1556	0.00476869		2146	0.01307016		2736	0.0331205
376.21	0.0068366		966.21	-0.00181416		1556.2	0.00466665		2146.2	0.01329291		2736.2	0.03263876
376.41	0.00736023		966.41	-0.00209991		1556.4	0.00552822		2146.4	0.01286013		2736.4	0.03473023
376.61	0.00749939		966.61	-0.00173817		1556.6	0.00552313		2146.6	0.01346412		2736.6	0.03566813
376.81	0.00604303		966.81	-0.00065537		1556.8	0.00608195		2146.8	0.01450407		2736.8	0.03574969
377.01	0.00526708		967.01	-0.0004769		1557	0.00573558		2147	0.01563606		2737	0.0364217
377.21	0.00438356		967.21	-0.00071048		1557.2	0.00533107		2147.2	0.01563492		2737.2	0.03651048
377.41	0.00466157		967.41	0.00007079		1557.4	0.00548372		2147.4	0.0161491		2737.4	0.03634248
377.61	0.00403946		967.61	-0.00024623		1557.6	0.00647993		2147.6	0.01666305		2737.6	0.03651778
377.81	0.00424934		967.81	-0.00047476		1557.8	0.0063789		2147.8	0.01702053		2737.8	0.03674878
378.01	0.00354715		968.01	-0.00008306		1558	0.00561685		2148	0.01650348		2738	0.0356172
378.21	0.00337951		968.21	-0.00038905		1558.2	0.00586533		2148.2	0.01508123		2738.2	0.03430407
378.41	0.00367508		968.41	-0.00147185		1558.4	0.00525382		2148.4	0.01525481		2738.4	0.03417817
378.61	0.00361898		968.61	-0.0013595		1558.6	0.00492526		2148.6	0.01512119		2738.6	0.03337524
378.81	0.0038529		968.81	-0.00159146		1558.8	0.00500284		2148.8	0.01499274		2738.8	0.03289531
379.01	0.00400885		969.01	-0.00148245		1559	0.00460368		2149	0.01357263		2739	0.03234451
379.21	0.00321812		969.21	-0.00095085		1559.2	0.00372304		2149.2	0.01246795		2739.2	0.03189085
379.41	0.00323259		969.41	-0.00088624		1559.4	0.00382099		2149.4	0.0124739		2739.4	0.03138188
379.61	0.00361349		969.61	-0.00113393		1559.6	0.00332974		2149.6	0.01193198		2739.6	0.03182263
379.81	0.00451343		969.81	-0.0002797		1559.8	0.00256148		2149.8	0.01170916		2739.8	0.03122636
380.01	0.00410556		970.01	0.00013673		1560	0.00226764		2150	0.01113295		2740	0.03151597
380.21	0.00437555		970.21	-0.00019672		1560.2	0.00238594		2150.2	0.01088611		2740.2	0.03166834
380.41	0.00536973		970.41	-0.00010886		1560.4	0.00237787		2150.4	0.01108444		2740.4	0.03263754
380.61	0.00460687		970.61	0.00055849		1560.6	0.00273335		2150.6	0.01156795		2740.6	0.03257029
380.81	0.00411728		970.81	0.00068371		1560.8	0.00364234		2150.8	0.01207871		2740.8	0.03242891
381.01	0.00411577		971.01	-0.00013035		1561	0.00390755		2151	0.01266627		2741	0.03343383
381.21	0.00397733		971.21	-0.00025287		1561.2	0.00488529		2151.2	0.01233337		2741.2	0.03324401
381.41	0.00369033		971.41	0.00005536		1561.4	0.00439014		2151.4	0.01287949		2741.4	0.03349047
381.61	0.00321027		971.61	-0.00029936		1561.6	0.0048424		2151.6	0.01410692		2741.6	0.03350272
381.81	0.00412541		971.81	-0.00070562		1561.8	0.00472247		2151.8	0.01467637		2741.8	0.03304742
382.01	0.00484827		972.01	-0.00108919		1562	0.00429203		2152	0.01499422		2742	0.03290215
382.21	0.00492514		972.21	-0.00182276		1562.2	0.00344706		2152.2	0.01501067		2742.2	0.03252483
382.41	0.00512535		972.41	-0.0015308		1562.4	0.00303775		2152.4	0.01493401		2742.4	0.03301052
382.61	0.00503153		972.61	-0.00122789		1562.6	0.00251214		2152.6	0.01516723		2742.6	0.03305361
382.81	0.00463916		972.81	-0.00165321		1562.8	0.00231782		2152.8	0.01462493		2742.8	0.0330327
383.01	0.0044906		973.01	-0.00151048		1563	0.00236898		2153	0.01361979		2743	0.03343947
383.21	0.00432259		973.21	-0.00150741		1563.2	0.00181598		2153.2	0.01417024		2743.2	0.0333098
383.41	0.00520652		973.41	-0.00127453		1563.4	0.00229736		2153.4	0.01452568		2743.4	0.03295715
383.61	0.0050794		973.61	-0.00175928		1563.6	0.00282736		2153.6	0.01427949		2743.6	0.0330377
383.81	0.00494057		973.81	-0.00183392		1563.8	0.00277432		2153.8	0.0146163		2743.8	0.03248942
384.01	0.00548301		974.01	-0.0026284		1564	0.0032269		2154	0.01474502		2744	0.03273944
384.21	0.0062025		974.21	-0.00295577		1564.2	0.00401626		2154.2	0.01517116		2744.2	0.032291
384.41	0.00626817		974.41	-0.00268306		1564.4	0.00489751		2154.4	0.0161255		2744.4	0.03264388
384.61	0.00612378		974.61	-0.00273038		1564.6	0.00646293		2154.6	0.01730929		2744.6	0.0327663
384.81	0.00624458		974.81	-0.00310472		1564.8	0.00734845		2154.8	0.01755027		2744.8	0.03272344
385.01	0.00622099		975.01	-0.00288818		1565	0.00793663		2155	0.01755856		2745	0.03336519
385.21	0.00603587		975.21	-0.00301199		1565.2	0.00795265		2155.2	0.01683387		2745.2	0.03315522
385.41	0.00481091		975.41	-0.00291732		1565.4	0.00720374		2155.4	0.01709044		2745.4	0.03305501
385.61	0.00497383		975.61	-0.00282167		1565.6	0.00750996		2155.6	0.01753794		2745.6	0.03359391
385.81	0.00611532		975.81	-0.00313435		1565.8	0.00710851		2155.8	0.01700592		2745.8	0.03336927
386.01	0.00562357		976.01	-0.00286815		1566	0.00654571		2156	0.01674974		2746	0.03401939
386.21	0.00544919		976.21	-0.00294998		1566.2	0.00636185		2156.2	0.01596873		2746.2	0.03347345
386.41	0.00468604		976.41	-0.00263305		1566.4	0.00629638		2156.4	0.01517691		2746.4	0.03304189
386.61	0.00439354		976.61	-0.00271069		1566.6	0.00582408		2156.6	0.0145492		2746.6	0.03256833
386.81	0.00368155		976.81	-0.00210963		1566.8	0.00623948		2156.8	0.01410022		2746.8	0.03300296
387.01	0.0032054		977.01	-0.00190281		1567	0.00624607		2157	0.01385622		2747	0.0337103
387.21	0.00288539		977.21	-0.00120363		1567.2	0.00458579		2157.2	0.01463816		2747.2	0.03345116
387.41	0.00288104		977.41	-0.00087997		1567.4	0.0045994		2157.4	0.01369906		2747.4	0.03382367
387.61	0.00226737		977.61	-0.00079848		1567.6	0.00450405		2157.6	0.01329055		2747.6	0.03399859
387.81	0.00279622		977.81	-0.00098681		1567.8	0.00448558		2157.8	0.01323987		2747.8	0.03384701
388.01	0.0037845		978.01	-0.00073875		1568	0.00461625		2158	0.01397662		2748	0.03366672
388.21	0.00311797		978.21	-0.00039265		1568.2	0.00494233		2158.2	0.01500102		2748.2	0.03298225
388.41	0.00261576		978.41	-0.00081809		1568.4	0.00532113		2158.4	0.01513913		2748.4	0.03356949
388.61	0.00256885		978.61	-0.00124258		1568.6	0.00631539		2158.6	0.01553015		2748.6	0.03329399
388.81	0.00228842		978.81	-0.00084461		1568.8	0.00544818		2158.8	0.01443702		2748.8	0.03280028
389.01	0.00215854		979.01	-0.00133329		1569	0.00643762		2159	0.01450925		2749	0.0327107
389.21	0.00165239		979.21	-0.00149071		1569.2	0.00592528		2159.2	0.01476368		2749.2	0.03281879
389.41	0.00195045		979.41	-0.00146187		1569.4	0.00529354		2159.4	0.01503353		2749.4	0.03213269
389.61	0.00350622		979.61	-0.00150288		1569.6	0.00458882		2159.6	0.01563729		2749.6	0.03218916
389.81	0.00523751		979.81	-0.00162364		1569.8	0.00420665		2159.8	0.01520329		2749.8	0.03204166
390.01	0.00588802		980.01	-0.00197801		1570	0.00389878		2160	0.01503028		2750	0.0325278
390.21	0.00654687		980.21	-0.00255067		1570.2	0.00441145		2160.2	0.01455439		2750.2	0.03148878
390.41	0.00572908		980.41	-0.00226488		1570.4	0.00410214		2160.4	0.01334953		2750.4	0.03108546
390.61	0.00557489		980.61	-0.00141345		1570.6	0.00384822		2160.6	0.01239422		2750.6	0.03164338
390.81	0.00521897		980.81	-0.00108361		1570.8	0.00388461		2160.8	0.01368903		2750.8	0.03246094
391.01	0.0044496		981.01	-0.00164057		1571	0.00329482		2161	0.01302714		2751	0.03272954
391.21	0.00364738		981.21	-0.00086594		1571.2	0.00302759		2161.2	0.01318438		2751.2	0.03222115
391.41	0.00337718		981.41	-0.00045597		1571.4	0.00378365		2161.4	0.01257247		2751.4	0.03317889
391.61	0.00291227		981.61	-0.00072562		1571.6	0.00398593		2161.6	0.0134361		2751.6	0.03367186
391.81	0.00341252		981.81	-0.00114439		1571.8	0.00406399		2161.8	0.01353066		2751.8	0.03378605
392.01	0.00302665		982.01	-0.00132976		1572	0.00378362		2162	0.01356784		2752	0.03337191
392.21	0.00161488		982.21	-0.00140037		1572.2	0.00398766		2162.2	0.01338914		2752.2	0.03260064
392.41	0.00127064		982.41	-0.00156998		1572.4	0.00418732		2162.4	0.01305475		2752.4	0.03279025
392.61	0.00111246		982.61	-0.00142032		1572.6	0.00472201		2162.6	0.01300796		2752.6	0.03273008
392.81	0.00125723		982.81	-0.0013342		1572.8	0.00432518		2162.8	0.01274316		2752.8	0.03301382
393.01	0.0014904		983.01	-0.00192665		1573	0.00479021		2163	0.01274551		2753	0.0328039
393.21	0.00196122		983.21	-0.00202201		1573.2	0.00317635		2163.2	0.0126538		2753.2	0.03221843
393.41	0.00317432		983.41	-0.00264474		1573.4	0.00313383		2163.4	0.01278082		2753.4	0.03229215
393.61	0.00407704		983.61	-0.00333642		1573.6	0.00269475		2163.6	0.01344067		2753.6	0.03282924
393.81	0.00554875		983.81	-0.00416802		1573.8	0.00279811		2163.8	0.01338927		2753.8	0.03383135
394.01	0.00508428		984.01	-0.00438258		1574	0.00284749		2164	0.01326844		2754	0.03422188
394.21	0.0050526		984.21	-0.00467918		1574.2	0.00421309		2164.2	0.01350059		2754.2	0.03422145
394.41	0.00376246		984.41	-0.00437535		1574.4	0.00413348		2164.4	0.01336481		2754.4	0.03434268
394.61	0.00345602		984.61	-0.00415924		1574.6	0.00408089		2164.6	0.01407239		2754.6	0.03481186
394.81	0.00331804		984.81	-0.00414306		1574.8	0.0047194		2164.8	0.01519401		2754.8	0.03463649
395.01	0.00306117		985.01	-0.00461647		1575	0.00480513		2165	0.01506812		2755	0.03478086
395.21	0.00229021		985.21	-0.00405784		1575.2	0.00492581		2165.2	0.01700924		2755.2	0.034567
395.41	0.00230426		985.41	-0.00394967		1575.4	0.00531711		2165.4	0.01822123		2755.4	0.03495155
395.61	0.00195389		985.61	-0.00368079		1575.6	0.00540742		2165.6	0.01945045		2755.6	0.03504931
395.81	0.00190314		985.81	-0.00274315		1575.8	0.00632942		2165.8	0.01981144		2755.8	0.03437878
396.01	0.00164853		986.01	-0.00258656		1576	0.00637232		2166	0.01981509		2756	0.03331865
396.21	0.0021919		986.21	-0.00206655		1576.2	0.00627353		2166.2	0.02051325		2756.2	0.03190002
396.41	0.00289027		986.41	-0.00252033		1576.4	0.00613127		2166.4	0.01992718		2756.4	0.03132507
396.61	0.00343567		986.61	-0.00209902		1576.6	0.0062655		2166.6	0.0195427		2756.6	0.03136955
396.81	0.00429553		986.81	-0.00239266		1576.8	0.00612362		2166.8	0.01819642		2756.8	0.03118475
397.01	0.00470721		987.01	-0.00259713		1577	0.00574963		2167	0.01681017		2757	0.03011123
397.21	0.00499678		987.21	-0.0027741		1577.2	0.0057498		2167.2	0.01663281		2757.2	0.02992625
397.41	0.00484061		987.41	-0.00337152		1577.4	0.00624664		2167.4	0.0164654		2757.4	0.03079605
397.61	0.00509604		987.61	-0.0032984		1577.6	0.00615238		2167.6	0.01568175		2757.6	0.03183335
397.81	0.00463005		987.81	-0.00240932		1577.8	0.00640016		2167.8	0.01459416		2757.8	0.03178572
398.01	0.00421156		988.01	-0.00249732		1578	0.00618063		2168	0.01393868		2758	0.03243249
398.21	0.00454189		988.21	-0.00280951		1578.2	0.0066176		2168.2	0.01332147		2758.2	0.03241385
398.41	0.00424024		988.41	-0.0025774		1578.4	0.00570363		2168.4	0.01264624		2758.4	0.03233696
398.61	0.00453472		988.61	-0.0019037		1578.6	0.00540207		2168.6	0.0116146		2758.6	0.03283843
398.81	0.00434609		988.81	-0.00186474		1578.8	0.00509213		2168.8	0.01139196		2758.8	0.03271038
399.01	0.00468511		989.01	-0.00199365		1579	0.0048573		2169	0.01176059		2759	0.03322159
399.21	0.00399326		989.21	-0.00147663		1579.2	0.00412372		2169.2	0.01196145		2759.2	0.03389887
399.41	0.00363607		989.41	-0.00093357		1579.4	0.00444095		2169.4	0.01158869		2759.4	0.03402392
399.61	0.00332159		989.61	-0.00071392		1579.6	0.00535558		2169.6	0.01148268		2759.6	0.03419234
399.81	0.00394994		989.81	-0.00045996		1579.8	0.00533061		2169.8	0.01150082		2759.8	0.03388649
400.01	0.00473585		990.01	-0.00124715		1580	0.00452087		2170	0.01104566		2760	0.03309512
400.21	0.00548646		990.21	-0.00141041		1580.2	0.00482338		2170.2	0.01139154		2760.2	0.03328891
400.41	0.00475968		990.41	-0.00140223		1580.4	0.004633		2170.4	0.01180751		2760.4	0.03358099
400.61	0.00515805		990.61	-0.00112591		1580.6	0.00472205		2170.6	0.01212585		2760.6	0.03394386
400.81	0.00441492		990.81	-0.00095126		1580.8	0.0050887		2170.8	0.01151573		2760.8	0.03403703
401.01	0.00381152		991.01	-0.00144108		1581	0.00438048		2171	0.0122378		2761	0.03359169
401.21	0.00371124		991.21	-0.0017064		1581.2	0.00459482		2171.2	0.01299471		2761.2	0.03361327
401.41	0.00340042		991.41	-0.0018074		1581.4	0.00439517		2171.4	0.01328454		2761.4	0.03290918
401.61	0.00372796		991.61	-0.00195064		1581.6	0.003652		2171.6	0.0130476		2761.6	0.03229408
401.81	0.00337656		991.81	-0.00188843		1581.8	0.00384628		2171.8	0.01343785		2761.8	0.03138647
402.01	0.0052432		992.01	-0.00325434		1582	0.00390737		2172	0.01363361		2762	0.03158896
402.21	0.00502014		992.21	-0.00256821		1582.2	0.00422927		2172.2	0.01325971		2762.2	0.03100052
402.41	0.00444668		992.41	-0.00252654		1582.4	0.00401081		2172.4	0.01316454		2762.4	0.03087587
402.61	0.00415216		992.61	-0.00240347		1582.6	0.00470652		2172.6	0.01299187		2762.6	0.03007763
402.81	0.00403654		992.81	-0.00308098		1582.8	0.00410334		2172.8	0.01335619		2762.8	0.03016863
403.01	0.00518092		993.01	-0.00278526		1583	0.00486353		2173	0.01353082		2763	0.03092539
403.21	0.00506118		993.21	-0.00275967		1583.2	0.00411624		2173.2	0.01345136		2763.2	0.03143707
403.41	0.00475488		993.41	-0.0029904		1583.4	0.0046278		2173.4	0.01371352		2763.4	0.03173018
403.61	0.00548242		993.61	-0.0038153		1583.6	0.00585092		2173.6	0.01322154		2763.6	0.03206426
403.81	0.00565174		993.81	-0.00357208		1583.8	0.00541492		2173.8	0.01314691		2763.8	0.03270466
404.01	0.00457246		994.01	-0.00432478		1584	0.00474946		2174	0.01290003		2764	0.03314932
404.21	0.00367108		994.21	-0.00443727		1584.2	0.0048981		2174.2	0.01381088		2764.2	0.03431529
404.41	0.0025781		994.41	-0.00486467		1584.4	0.00460981		2174.4	0.01400961		2764.4	0.03418107
404.61	0.00296494		994.61	-0.00481071		1584.6	0.00463186		2174.6	0.01361391		2764.6	0.03411167
404.81	0.00258767		994.81	-0.00438872		1584.8	0.0046792		2174.8	0.01372863		2764.8	0.03386415
405.01	0.00348989		995.01	-0.00418925		1585	0.00390253		2175	0.0144349		2765	0.03389457
405.21	0.00365025		995.21	-0.00474136		1585.2	0.00416986		2175.2	0.01429734		2765.2	0.03408166
405.41	0.00351531		995.41	-0.00509359		1585.4	0.00357434		2175.4	0.01468119		2765.4	0.03333628
405.61	0.00386678		995.61	-0.00571979		1585.6	0.00264113		2175.6	0.01422159		2765.6	0.03365823
405.81	0.00469606		995.81	-0.00488303		1585.8	0.00308719		2175.8	0.01384784		2765.8	0.0336566
406.01	0.00498949		996.01	-0.00502534		1586	0.00337604		2176	0.01390883		2766	0.03331734
406.21	0.00437181		996.21	-0.00432189		1586.2	0.00353873		2176.2	0.01369739		2766.2	0.03277336
406.41	0.00388636		996.41	-0.0043429		1586.4	0.00288754		2176.4	0.01371541		2766.4	0.03279025
406.61	0.00421495		996.61	-0.00480419		1586.6	0.00275577		2176.6	0.0140586		2766.6	0.03231389
406.81	0.00465954		996.81	-0.00528554		1586.8	0.00155016		2176.8	0.01402885		2766.8	0.03280853
407.01	0.00446231		997.01	-0.00464941		1587	0.00272929		2177	0.01356536		2767	0.03226442
407.21	0.0045473		997.21	-0.00558585		1587.2	0.00231524		2177.2	0.01299476		2767.2	0.03249548
407.41	0.00518239		997.41	-0.00545428		1587.4	0.00268384		2177.4	0.01239818		2767.4	0.03322815
407.61	0.00556368		997.61	-0.00590091		1587.6	0.00335479		2177.6	0.01154473		2767.6	0.03326027
407.81	0.00469605		997.81	-0.00591186		1587.8	0.00171017		2177.8	0.01136009		2767.8	0.03361556
408.01	0.00411502		998.01	-0.00575607		1588	0.00119475		2178	0.0108478		2768	0.03370085
408.21	0.00404547		998.21	-0.0049811		1588.2	0.00145888		2178.2	0.01044436		2768.2	0.03372794
408.41	0.00434876		998.41	-0.0050774		1588.4	0.00204535		2178.4	0.00999142		2768.4	0.03359289
408.61	0.00464079		998.61	-0.00429644		1588.6	0.00255496		2178.6	0.00995274		2768.6	0.03405401
408.81	0.00444397		998.81	-0.00345767		1588.8	0.00271216		2178.8	0.01028404		2768.8	0.03452439
409.01	0.00409415		999.01	-0.00373631		1589	0.00254317		2179	0.01072016		2769	0.03509684
409.21	0.00314307		999.21	-0.00455249		1589.2	0.00350921		2179.2	0.01058967		2769.2	0.03504546
409.41	0.00260391		999.41	-0.00361437		1589.4	0.00326297		2179.4	0.01118415		2769.4	0.03454461
409.61	0.00161686		999.61	-0.00303491		1589.6	0.00321047		2179.6	0.01136493		2769.6	0.03361433
409.81	0.00173683		999.81	-0.00218567		1589.8	0.00380273		2179.8	0.01149102		2769.8	0.03270405
410.01	0.00088076		1000.01	-0.00191498		1590	0.00428405		2180	0.01195599		2770	0.03261669
410.21	0.00099394		1000.21	-0.00165322		1590.2	0.00405458		2180.2	0.01203785		2770.2	0.03302459
410.41	0.00009705		1000.41	-0.00156104		1590.4	0.00432639		2180.4	0.01298592		2770.4	0.03326034
410.61	0.00009636		1000.61	-0.00187719		1590.6	0.00516387		2180.6	0.01317196		2770.6	0.03214923
410.81	0.00011958		1000.81	-0.00293033		1590.8	0.00510306		2180.8	0.01263754		2770.8	0.03215992
411.01	-0.00019591		1001.01	-0.00265322		1591	0.00616863		2181	0.01235537		2771	0.0314768
411.21	0.00101376		1001.21	-0.00348998		1591.2	0.00621669		2181.2	0.01162814		2771.2	0.03241271
411.41	0.00184621		1001.41	-0.00276588		1591.4	0.00616103		2181.4	0.0116936		2771.4	0.03218426
411.61	0.00166305		1001.61	-0.00305076		1591.6	0.00581384		2181.6	0.01135087		2771.6	0.03198629
411.81	0.00158535		1001.81	-0.00266939		1591.8	0.0042585		2181.8	0.01076292		2771.8	0.03206336
412.01	0.00220249		1002.01	-0.00215766		1592	0.0044787		2182	0.01116472		2772	0.03174316
412.21	0.00244976		1002.21	-0.0025713		1592.2	0.00442293		2182.2	0.01134656		2772.2	0.03291974
412.41	0.00268415		1002.41	-0.00329017		1592.4	0.00421966		2182.4	0.01097523		2772.4	0.03379512
412.61	0.00289318		1002.61	-0.00313505		1592.6	0.00384966		2182.6	0.01158041		2772.6	0.03430536
412.81	0.00284841		1002.81	-0.00336083		1592.8	0.0046074		2182.8	0.01163446		2772.8	0.03413063
413.01	0.00310273		1003.01	-0.00363964		1593	0.0053593		2183	0.01236145		2773	0.03320256
413.21	0.00300236		1003.21	-0.00248223		1593.2	0.00636227		2183.2	0.0129163		2773.2	0.03325684
413.41	0.00265479		1003.41	-0.00219926		1593.4	0.00535954		2183.4	0.01318794		2773.4	0.03303272
413.61	0.00208863		1003.61	-0.00238349		1593.6	0.00524825		2183.6	0.01326753		2773.6	0.03206638
413.81	0.00332056		1003.81	-0.00201171		1593.8	0.00606484		2183.8	0.01354965		2773.8	0.03203015
414.01	0.00417704		1004.01	-0.00255355		1594	0.00583914		2184	0.01328754		2774	0.0324573
414.21	0.00413453		1004.21	-0.00294051		1594.2	0.00555749		2184.2	0.01381484		2774.2	0.03330678
414.41	0.00323468		1004.41	-0.00325671		1594.4	0.0061704		2184.4	0.01474482		2774.4	0.03298182
414.61	0.00354451		1004.61	-0.00317366		1594.6	0.00579638		2184.6	0.01486837		2774.6	0.03199661
414.81	0.00324206		1004.81	-0.00358716		1594.8	0.00584648		2184.8	0.014759		2774.8	0.03215771
415.01	0.00263197		1005.01	-0.00272442		1595	0.00624123		2185	0.01423982		2775	0.03146417
415.21	0.00361285		1005.21	-0.00292021		1595.2	0.00630198		2185.2	0.0136769		2775.2	0.0311026
415.41	0.00376407		1005.41	-0.00250263		1595.4	0.00560622		2185.4	0.01350919		2775.4	0.03140451
415.61	0.00340077		1005.61	-0.00264859		1595.6	0.00594322		2185.6	0.01385418		2775.6	0.03257577
415.81	0.00325712		1005.81	-0.0030135		1595.8	0.00510593		2185.8	0.01393192		2775.8	0.03297556
416.01	0.00347179		1006.01	-0.00315595		1596	0.0051382		2186	0.01491506		2776	0.03389955
416.21	0.00342802		1006.21	-0.00408281		1596.2	0.00527453		2186.2	0.01474417		2776.2	0.03518106
416.41	0.00345314		1006.41	-0.00428641		1596.4	0.00529264		2186.4	0.01451712		2776.4	0.03495479
416.61	0.00360447		1006.61	-0.00496347		1596.6	0.00560378		2186.6	0.0151462		2776.6	0.034225
416.81	0.00287228		1006.81	-0.00492027		1596.8	0.00553318		2186.8	0.01492501		2776.8	0.03428041
417.01	0.00273769		1007.01	-0.00442036		1597	0.00545904		2187	0.01526547		2777	0.03402053
417.21	0.0026952		1007.21	-0.00438466		1597.2	0.0052228		2187.2	0.01530858		2777.2	0.03369358
417.41	0.00267425		1007.41	-0.00501681		1597.4	0.00406942		2187.4	0.01476382		2777.4	0.03353122
417.61	0.00223374		1007.61	-0.00497581		1597.6	0.00482362		2187.6	0.01507025		2777.6	0.03286402
417.81	0.0025529		1007.81	-0.00550386		1597.8	0.00545547		2187.8	0.01543106		2777.8	0.03341283
418.01	0.00229747		1008.01	-0.00641794		1598	0.00393835		2188	0.01453335		2778	0.03344881
418.21	0.00098055		1008.21	-0.00559127		1598.2	0.00443334		2188.2	0.01530114		2778.2	0.03436946
418.41	0.00080796		1008.41	-0.00424006		1598.4	0.00391756		2188.4	0.0151608		2778.4	0.03417581
418.61	0.0007142		1008.61	-0.00354635		1598.6	0.00390557		2188.6	0.01485692		2778.6	0.03373023
418.81	-0.000219		1008.81	-0.00351049		1598.8	0.00427291		2188.8	0.0139668		2778.8	0.03367072
419.01	-0.00063632		1009.01	-0.00283382		1599	0.00398		2189	0.01293829		2779	0.03334798
419.21	0.00003279		1009.21	-0.00258574		1599.2	0.00417287		2189.2	0.01174294		2779.2	0.03301684
419.41	-0.00013994		1009.41	-0.00176955		1599.4	0.00398104		2189.4	0.01168111		2779.4	0.03469923
419.61	-0.00009828		1009.61	-0.00197932		1599.6	0.00399675		2189.6	0.01183873		2779.6	0.03532765
419.81	-0.0002767		1009.81	-0.00208413		1599.8	0.00347935		2189.8	0.01096119		2779.8	0.03540331
420.01	0.00020187		1010.01	-0.00200324		1600	0.003283		2190	0.01102941		2780	0.03557562
420.21	-0.00007758		1010.21	-0.00282051		1600.2	0.00390819		2190.2	0.01028345		2780.2	0.03508585
420.41	0.00017384		1010.41	-0.00261301		1600.4	0.00416811		2190.4	0.01013534		2780.4	0.03454866
420.61	0.00028076		1010.61	-0.0028486		1600.6	0.00411546		2190.6	0.00990154		2780.6	0.03455698
420.81	0.00050859		1010.81	-0.00219399		1600.8	0.00390117		2190.8	0.01061201		2780.8	0.03531268
421.01	0.00101434		1011.01	-0.00239345		1601	0.00431234		2191	0.01120062		2781	0.0349737
421.21	0.0017274		1011.21	-0.00267416		1601.2	0.00452813		2191.2	0.01195493		2781.2	0.03435166
421.41	0.00166097		1011.41	-0.00302536		1601.4	0.00514791		2191.4	0.01180742		2781.4	0.03348253
421.61	0.00058258		1011.61	-0.0033439		1601.6	0.00579971		2191.6	0.01276048		2781.6	0.03307388
421.81	0.00023754		1011.81	-0.00416978		1601.8	0.00522241		2191.8	0.01304399		2781.8	0.03299335
422.01	-0.0001362		1012.01	-0.00387876		1602	0.00443612		2192	0.0127918		2782	0.03247667
422.21	-0.00001707		1012.21	-0.00366937		1602.2	0.00449237		2192.2	0.0132368		2782.2	0.03315973
422.41	-0.00000091		1012.41	-0.00326558		1602.4	0.00346724		2192.4	0.01372864		2782.4	0.03280822
422.61	-0.00166686		1012.61	-0.00413506		1602.6	0.00369397		2192.6	0.01466375		2782.6	0.03231059
422.81	-0.00223062		1012.81	-0.00430665		1602.8	0.00382841		2192.8	0.01445515		2782.8	0.03202681
423.01	-0.00188596		1013.01	-0.00421864		1603	0.00389678		2193	0.0144038		2783	0.0318382
423.21	-0.00197278		1013.21	-0.00415039		1603.2	0.00433645		2193.2	0.01411511		2783.2	0.03093711
423.41	-0.00182005		1013.41	-0.00395392		1603.4	0.0033784		2193.4	0.01523258		2783.4	0.03168478
423.61	-0.00182868		1013.61	-0.00438195		1603.6	0.00291515		2193.6	0.01517764		2783.6	0.03153139
423.81	-0.00235706		1013.81	-0.00382989		1603.8	0.00324175		2193.8	0.0144418		2783.8	0.03082399
424.01	-0.00186066		1014.01	-0.00324058		1604	0.00298595		2194	0.01480805		2784	0.03075899
424.21	-0.00210279		1014.21	-0.00276677		1604.2	0.00327047		2194.2	0.01446077		2784.2	0.030732
424.41	-0.00058431		1014.41	-0.00197391		1604.4	0.00336243		2194.4	0.0146869		2784.4	0.03158153
424.61	0.00016916		1014.61	-0.00157387		1604.6	0.00342951		2194.6	0.01466892		2784.6	0.03301049
424.81	0.00051594		1014.81	-0.0017871		1604.8	0.00345936		2194.8	0.0150009		2784.8	0.03288068
425.01	0.00071322		1015.01	-0.0020431		1605	0.00346381		2195	0.01418432		2785	0.03258827
425.21	0.0004613		1015.21	-0.00155241		1605.2	0.00429085		2195.2	0.01395538		2785.2	0.03246231
425.41	0.00042438		1015.41	-0.00169281		1605.4	0.00530554		2195.4	0.01339655		2785.4	0.03204628
425.61	-0.00021494		1015.61	-0.00198524		1605.6	0.00497263		2195.6	0.0134814		2785.6	0.03349145
425.81	0.0004367		1015.81	-0.00251439		1605.8	0.00500035		2195.8	0.0132587		2785.8	0.03413245
426.01	0.00101418		1016.01	-0.00286011		1606	0.00462878		2196	0.01336642		2786	0.03397366
426.21	0.00075047		1016.21	-0.00334035		1606.2	0.00403439		2196.2	0.01381773		2786.2	0.0342034
426.41	0.00052396		1016.41	-0.00285848		1606.4	0.00407048		2196.4	0.01444142		2786.4	0.03459301
426.61	0.00015411		1016.61	-0.00257664		1606.6	0.00378233		2196.6	0.0144839		2786.6	0.03470766
426.81	0.00015474		1016.81	-0.00254675		1606.8	0.00321251		2196.8	0.01446377		2786.8	0.03499934
427.01	0.00032485		1017.01	-0.00320393		1607	0.00218171		2197	0.01468474		2787	0.03474265
427.21	-0.00033675		1017.21	-0.00295992		1607.2	0.00175556		2197.2	0.01436279		2787.2	0.03417628
427.41	-0.00052175		1017.41	-0.00207165		1607.4	0.00079272		2197.4	0.01454659		2787.4	0.03470862
427.61	-0.00145417		1017.61	-0.00194586		1607.6	0.00102861		2197.6	0.01395152		2787.6	0.03354413
427.81	-0.00203573		1017.81	-0.00113458		1607.8	0.0012702		2197.8	0.01336323		2787.8	0.03277695
428.01	-0.00168988		1018.01	-0.00120806		1608	0.00100437		2198	0.01382895		2788	0.03338427
428.21	-0.00145344		1018.21	-0.00102352		1608.2	0.00062068		2198.2	0.01361866		2788.2	0.03354215
428.41	-0.00089754		1018.41	-0.00158579		1608.4	0.0009185		2198.4	0.01326571		2788.4	0.03382875
428.61	-0.00076758		1018.61	-0.00269373		1608.6	0.00129963		2198.6	0.01282285		2788.6	0.03402145
428.81	-0.00065288		1018.81	-0.00335222		1608.8	0.00163349		2198.8	0.01212318		2788.8	0.03304781
429.01	-0.00060482		1019.01	-0.0033909		1609	0.00164728		2199	0.01144745		2789	0.03328681
429.21	-0.00035268		1019.21	-0.00387616		1609.2	0.00225484		2199.2	0.01170628		2789.2	0.03353473
429.41	0.00025405		1019.41	-0.0045655		1609.4	0.00271548		2199.4	0.0109682		2789.4	0.03238376
429.61	0.00073859		1019.61	-0.00573714		1609.6	0.00258547		2199.6	0.01109942		2789.6	0.03249299
429.81	0.00166006		1019.81	-0.0069388		1609.8	0.00302764		2199.8	0.01070534		2789.8	0.03125482
430.01	0.00205965		1020.01	-0.00771434		1610	0.00324348		2200	0.01121409		2790	0.0300482
430.21	0.00218586		1020.21	-0.00697975		1610.2	0.00290775		2200.2	0.01106208		2790.2	0.03029059
430.41	0.00228307		1020.41	-0.0063811		1610.4	0.00260621		2200.4	0.01147492		2790.4	0.03035569
430.61	0.00211041		1020.61	-0.0055892		1610.6	0.00208049		2200.6	0.01182803		2790.6	0.03049125
430.81	0.00133648		1020.81	-0.00557951		1610.8	0.00210334		2200.8	0.01155585		2790.8	0.03019047
431.01	0.00145006		1021.01	-0.00572037		1611	0.00232884		2201	0.01123139		2791	0.02945447
431.21	0.00087368		1021.21	-0.00507098		1611.2	0.00317169		2201.2	0.01127664		2791.2	0.02980208
431.41	0.00040159		1021.41	-0.00426205		1611.4	0.00373437		2201.4	0.01199245		2791.4	0.03019045
431.61	-0.00065942		1021.61	-0.00435444		1611.6	0.00423137		2201.6	0.01215652		2791.6	0.02942129
431.81	0.00015757		1021.81	-0.00381408		1611.8	0.00465766		2201.8	0.01306393		2791.8	0.03032738
432.01	0.00055473		1022.01	-0.00422371		1612	0.00468029		2202	0.01307706		2792	0.0315943
432.21	0.00053752		1022.21	-0.00395863		1612.2	0.0054217		2202.2	0.01335124		2792.2	0.03242907
432.41	-0.00007706		1022.41	-0.00384006		1612.4	0.00570821		2202.4	0.01335023		2792.4	0.03353308
432.61	-0.00005372		1022.61	-0.00428253		1612.6	0.00605451		2202.6	0.01359133		2792.6	0.03432238
432.81	-0.00060583		1022.81	-0.00446597		1612.8	0.00678		2202.8	0.01261247		2792.8	0.03432594
433.01	-0.00125103		1023.01	-0.0048426		1613	0.00649594		2203	0.01267277		2793	0.03505805
433.21	-0.00155914		1023.21	-0.00577375		1613.2	0.00678505		2203.2	0.01304158		2793.2	0.03436915
433.41	-0.00182755		1023.41	-0.00604564		1613.4	0.00687502		2203.4	0.01359562		2793.4	0.0331449
433.61	-0.0013665		1023.61	-0.00639603		1613.6	0.00668039		2203.6	0.01446818		2793.6	0.03308569
433.81	-0.00142183		1023.81	-0.00690927		1613.8	0.00657994		2203.8	0.01421202		2793.8	0.0320822
434.01	-0.00130725		1024.01	-0.00728708		1614	0.00653367		2204	0.01450614		2794	0.03134543
434.21	-0.00112128		1024.21	-0.00692045		1614.2	0.00588983		2204.2	0.01378477		2794.2	0.03143894
434.41	-0.00237385		1024.41	-0.00706589		1614.4	0.00530431		2204.4	0.01316558		2794.4	0.03090148
434.61	-0.00194054		1024.61	-0.00682424		1614.6	0.00593051		2204.6	0.01242481		2794.6	0.03057812
434.81	-0.00201376		1024.81	-0.00640179		1614.8	0.00616385		2204.8	0.01162022		2794.8	0.02950132
435.01	-0.00208439		1025.01	-0.00688685		1615	0.00543605		2205	0.01230829		2795	0.02895086
435.21	-0.00226042		1025.21	-0.00674807		1615.2	0.00526452		2205.2	0.01207866		2795.2	0.02977387
435.41	-0.00251508		1025.41	-0.00696044		1615.4	0.00420784		2205.4	0.01123545		2795.4	0.0297934
435.61	-0.00319187		1025.61	-0.00641615		1615.6	0.00379358		2205.6	0.01092635		2795.6	0.02926694
435.81	-0.00342611		1025.81	-0.00633037		1615.8	0.00347232		2205.8	0.01136158		2795.8	0.03006717
436.01	-0.00401095		1026.01	-0.00632248		1616	0.00256801		2206	0.01084185		2796	0.03032214
436.21	-0.00447638		1026.21	-0.00579782		1616.2	0.00258622		2206.2	0.0118375		2796.2	0.0309514
436.41	-0.00454886		1026.41	-0.0053		1616.4	0.00220853		2206.4	0.01184499		2796.4	0.0317294
436.61	-0.00429123		1026.61	-0.00600899		1616.6	0.00237299		2206.6	0.01217207		2796.6	0.03223795
436.81	-0.00383618		1026.81	-0.00603906		1616.8	0.00254956		2206.8	0.01194365		2796.8	0.0329868
437.01	-0.00369492		1027.01	-0.00587232		1617	0.00216631		2207	0.01287802		2797	0.03291449
437.21	-0.00296829		1027.21	-0.00602291		1617.2	0.001842		2207.2	0.01341004		2797.2	0.0323222
437.41	-0.00258791		1027.41	-0.00629986		1617.4	0.00182789		2207.4	0.01464532		2797.4	0.03247474
437.61	-0.00159255		1027.61	-0.00633777		1617.6	0.00142966		2207.6	0.01458169		2797.6	0.03146462
437.81	-0.00095484		1027.81	-0.00671751		1617.8	0.00173995		2207.8	0.01436884		2797.8	0.0310055
438.01	0.00001447		1028.01	-0.00679598		1618	0.0019288		2208	0.0136692		2798	0.03051437
438.21	0.00038239		1028.21	-0.00646454		1618.2	0.00205216		2208.2	0.01308617		2798.2	0.03155907
438.41	-0.00030049		1028.41	-0.00591108		1618.4	0.00236818		2208.4	0.01231594		2798.4	0.0312283
438.61	0.00132219		1028.61	-0.0060428		1618.6	0.003567		2208.6	0.01163036		2798.6	0.03187578
438.81	0.00074703		1028.81	-0.00605723		1618.8	0.00407265		2208.8	0.01136053		2798.8	0.03188544
439.01	0.00071627		1029.01	-0.00659003		1619	0.00443367		2209	0.01122239		2799	0.03189121
439.21	0.00049491		1029.21	-0.00583091		1619.2	0.00433435		2209.2	0.0103296		2799.2	0.03219881
439.41	0.00078613		1029.41	-0.00584776		1619.4	0.00345078		2209.4	0.00982066		2799.4	0.03171722
439.61	-0.00027821		1029.61	-0.00530871		1619.6	0.00387688		2209.6	0.01027556		2799.6	0.03136624
439.81	-0.00083554		1029.81	-0.00437386		1619.8	0.00280943		2209.8	0.01049878		2799.8	0.0317672
440.01	-0.00071855		1030.01	-0.00304234		1620	0.00191761		2210	0.01063247		2800	0.03084866
440.21	-0.00067769		1030.21	-0.00272032		1620.2	0.00202203		2210.2	0.01071117		2800.2	0.0312541
440.41	-0.0003914		1030.41	-0.00240085		1620.4	0.00163074		2210.4	0.01100588		2800.4	0.03145656
440.61	-0.00052237		1030.61	-0.00239085		1620.6	0.00169759		2210.6	0.01120599		2800.6	0.03167217
440.81	0.00020246		1030.81	-0.00118095		1620.8	0.00148923		2210.8	0.01080368		2800.8	0.03103406
441.01	-0.0001113		1031.01	-0.00098476		1621	0.00132003		2211	0.01105216		2801	0.02992086
441.21	-0.00044549		1031.21	-0.00060741		1621.2	0.00115932		2211.2	0.01155529		2801.2	0.02980774
441.41	-0.00059944		1031.41	-0.00151888		1621.4	0.00066372		2211.4	0.01174679		2801.4	0.0291396
441.61	0.00024765		1031.61	-0.00188532		1621.6	0.00071576		2211.6	0.01116483		2801.6	0.02789901
441.81	-0.00007551		1031.81	-0.00273013		1621.8	0.00122309		2211.8	0.01100283		2801.8	0.02750668
442.01	-0.00015043		1032.01	-0.0034464		1622	0.00122054		2212	0.01017876		2802	0.02715554
442.21	-0.00029816		1032.21	-0.00369289		1622.2	0.00175597		2212.2	0.00900531		2802.2	0.02798723
442.41	-0.00111676		1032.41	-0.0046767		1622.4	0.00257835		2212.4	0.0078182		2802.4	0.02755655
442.61	-0.00049522		1032.61	-0.00604309		1622.6	0.00261609		2212.6	0.00745828		2802.6	0.02869681
442.81	-0.0010345		1032.81	-0.00662247		1622.8	0.00258784		2212.8	0.00787233		2802.8	0.02917962
443.01	-0.00072335		1033.01	-0.00712212		1623	0.0018655		2213	0.00816603		2803	0.02980573
443.21	-0.0013774		1033.21	-0.00711121		1623.2	0.0007135		2213.2	0.00809727		2803.2	0.02991007
443.41	-0.00134697		1033.41	-0.00823702		1623.4	0.0000125		2213.4	0.00758054		2803.4	0.03047181
443.61	-0.00211092		1033.61	-0.00826529		1623.6	-0.00046354		2213.6	0.00800702		2803.6	0.03108542
443.81	-0.00218512		1033.81	-0.00797699		1623.8	-0.00141222		2213.8	0.00858523		2803.8	0.03142468
444.01	-0.00123332		1034.01	-0.00814635		1624	-0.0015055		2214	0.00879094		2804	0.03146757
444.21	-0.00058564		1034.21	-0.00917231		1624.2	-0.00044082		2214.2	0.00895656		2804.2	0.03196593
444.41	0.00007323		1034.41	-0.00890695		1624.4	-0.00017288		2214.4	0.01022935		2804.4	0.03196897
444.61	0.00087875		1034.61	-0.00876641		1624.6	0.00084779		2214.6	0.00999605		2804.6	0.0323243
444.81	0.00179036		1034.81	-0.00797526		1624.8	0.00125868		2214.8	0.01003998		2804.8	0.03187878
445.01	0.00199684		1035.01	-0.00732842		1625	0.00186806		2215	0.01154214		2805	0.03181865
445.21	0.00190131		1035.21	-0.00677004		1625.2	0.00217446		2215.2	0.01158617		2805.2	0.03221297
445.41	0.00284601		1035.41	-0.00698129		1625.4	0.00169171		2215.4	0.01144764		2805.4	0.03195162
445.61	0.00251968		1035.61	-0.0066835		1625.6	0.00272031		2215.6	0.0125795		2805.6	0.03129065
445.81	0.00222738		1035.81	-0.00692991		1625.8	0.002943		2215.8	0.01283164		2805.8	0.03128514
446.01	0.00242212		1036.01	-0.00605897		1626	0.00224487		2216	0.01263127		2806	0.03122281
446.21	0.00218615		1036.21	-0.00461965		1626.2	0.00216434		2216.2	0.01291579		2806.2	0.03134886
446.41	0.00158618		1036.41	-0.00456927		1626.4	0.00226616		2216.4	0.01326641		2806.4	0.03119006
446.61	0.00169685		1036.61	-0.00398279		1626.6	0.00141554		2216.6	0.01410044		2806.6	0.03202123
446.81	0.00124026		1036.81	-0.00439591		1626.8	0.00208521		2216.8	0.0142754		2806.8	0.03231294
447.01	0.00080792		1037.01	-0.00413484		1627	0.00178836		2217	0.01377764		2807	0.03212724
447.21	-0.00002957		1037.21	-0.00449717		1627.2	0.00190685		2217.2	0.01305781		2807.2	0.03231661
447.41	-0.00020156		1037.41	-0.00515784		1627.4	0.00188892		2217.4	0.01390966		2807.4	0.03256806
447.61	-0.00014241		1037.61	-0.00551635		1627.6	0.00185028		2217.6	0.01414784		2807.6	0.03266165
447.81	0.00026388		1037.81	-0.00650619		1627.8	0.00262548		2217.8	0.01360658		2807.8	0.03260106
448.01	0.00117607		1038.01	-0.00675966		1628	0.0030157		2218	0.01342123		2808	0.03283634
448.21	0.00127218		1038.21	-0.00734382		1628.2	0.0035684		2218.2	0.01242171		2808.2	0.03234445
448.41	0.00166949		1038.41	-0.00743833		1628.4	0.00387175		2218.4	0.01195894		2808.4	0.03194584
448.61	0.00126321		1038.61	-0.00731918		1628.6	0.00460809		2218.6	0.01156022		2808.6	0.03189195
448.81	0.00034914		1038.81	-0.00698619		1628.8	0.00411511		2218.8	0.01132955		2808.8	0.03181795
449.01	0.00023683		1039.01	-0.00707931		1629	0.00369183		2219	0.01112088		2809	0.03231409
449.21	0.0003217		1039.21	-0.00759021		1629.2	0.00278818		2219.2	0.01042887		2809.2	0.03265653
449.41	0.00074829		1039.41	-0.00771032		1629.4	0.00253403		2219.4	0.01099863		2809.4	0.03213443
449.61	-0.000074		1039.61	-0.0084949		1629.6	0.00273092		2219.6	0.01120092		2809.6	0.03217757
449.81	0.00063864		1039.81	-0.00886705		1629.8	0.00275005		2219.8	0.01054304		2809.8	0.032587
450.01	0.00107283		1040.01	-0.00830963		1630	0.00194458		2220	0.01062671		2810	0.03214409
450.21	0.00150727		1040.21	-0.00772557		1630.2	0.00275505		2220.2	0.01115584		2810.2	0.03209623
450.41	0.0015064		1040.41	-0.00824012		1630.4	0.00363095		2220.4	0.0111841		2810.4	0.03261196
450.61	0.00122568		1040.61	-0.00810344		1630.6	0.00416323		2220.6	0.01095652		2810.6	0.03301768
450.81	0.00118528		1040.81	-0.00807225		1630.8	0.0049322		2220.8	0.01056723		2810.8	0.03247493
451.01	0.00141635		1041.01	-0.00748981		1631	0.00429716		2221	0.01051684		2811	0.03258354
451.21	0.00064588		1041.21	-0.00771045		1631.2	0.00437193		2221.2	0.01132922		2811.2	0.03332236
451.41	0.00023692		1041.41	-0.00695433		1631.4	0.00373218		2221.4	0.01235029		2811.4	0.03288374
451.61	0.00037921		1041.61	-0.00678845		1631.6	0.00372408		2221.6	0.01147318		2811.6	0.03289102
451.81	0.00036995		1041.81	-0.00627682		1631.8	0.00385889		2221.8	0.01186163		2811.8	0.03311585
452.01	0.00055418		1042.01	-0.00546556		1632	0.0030761		2222	0.01198576		2812	0.03304426
452.21	-0.00025054		1042.21	-0.00481887		1632.2	0.00262309		2222.2	0.0117549		2812.2	0.03227886
452.41	-0.0015181		1042.41	-0.00466396		1632.4	0.00287813		2222.4	0.01218555		2812.4	0.03150329
452.61	-0.00260118		1042.61	-0.00348731		1632.6	0.00253628		2222.6	0.01297853		2812.6	0.03078559
452.81	-0.0025587		1042.81	-0.00358884		1632.8	0.00161658		2222.8	0.01311518		2812.8	0.03078456
453.01	-0.00262881		1043.01	-0.00389084		1633	0.00135258		2223	0.0127947		2813	0.03095494
453.21	-0.00237642		1043.21	-0.00390545		1633.2	0.00081354		2223.2	0.01341641		2813.2	0.03091758
453.41	-0.00234206		1043.41	-0.00386321		1633.4	0.00103102		2223.4	0.01381263		2813.4	0.03060059
453.61	-0.00249421		1043.61	-0.00418123		1633.6	0.00099041		2223.6	0.01353484		2813.6	0.03076838
453.81	-0.00166983		1043.81	-0.00377656		1633.8	0.00140424		2223.8	0.01300559		2813.8	0.03040259
454.01	-0.00125586		1044.01	-0.00384949		1634	0.00097079		2224	0.01341158		2814	0.02931105
454.21	-0.00102382		1044.21	-0.00432772		1634.2	0.0014859		2224.2	0.01331794		2814.2	0.02926264
454.41	-0.00048867		1044.41	-0.00504413		1634.4	0.00141537		2224.4	0.01416441		2814.4	0.03057283
454.61	0.00015231		1044.61	-0.00512131		1634.6	0.00082835		2224.6	0.01314924		2814.6	0.03141455
454.81	0.00021268		1044.81	-0.00548497		1634.8	0.0004531		2224.8	0.01358859		2814.8	0.03131401
455.01	0.00089364		1045.01	-0.0058691		1635	-0.00039826		2225	0.01410247		2815	0.0322814
455.21	0.00083942		1045.21	-0.00601741		1635.2	0.00021785		2225.2	0.01379768		2815.2	0.03312855
455.41	0.0015115		1045.41	-0.00636777		1635.4	0.0001046		2225.4	0.01353977		2815.4	0.03423535
455.61	0.00209339		1045.61	-0.00709327		1635.6	0.0004306		2225.6	0.0130535		2815.6	0.03542482
455.81	0.00230803		1045.81	-0.00685623		1635.8	0.0004601		2225.8	0.01336381		2815.8	0.03634268
456.01	0.00276334		1046.01	-0.00731979		1636	0.00101189		2226	0.01275151		2816	0.03569363
456.21	0.00220519		1046.21	-0.00730721		1636.2	0.00158388		2226.2	0.01312787		2816.2	0.03599311
456.41	0.00225613		1046.41	-0.00753463		1636.4	0.00235902		2226.4	0.01223634		2816.4	0.03556078
456.61	0.00172817		1046.61	-0.00728453		1636.6	0.0031099		2226.6	0.01304291		2816.6	0.03523778
456.81	0.00143223		1046.81	-0.00732325		1636.8	0.00194037		2226.8	0.01289361		2816.8	0.0351216
457.01	0.00041806		1047.01	-0.00679212		1637	0.00144234		2227	0.01244713		2817	0.03477845
457.21	0.00052562		1047.21	-0.00618145		1637.2	0.00184454		2227.2	0.01255494		2817.2	0.03475337
457.41	0.00001314		1047.41	-0.00621471		1637.4	0.00209576		2227.4	0.01278939		2817.4	0.03436436
457.61	-0.00066573		1047.61	-0.00613483		1637.6	0.00242813		2227.6	0.0125394		2817.6	0.03394264
457.81	-0.00096597		1047.81	-0.0054754		1637.8	0.00330687		2227.8	0.01260138		2817.8	0.03292187
458.01	-0.00180539		1048.01	-0.00602319		1638	0.0026071		2228	0.01331383		2818	0.03234533
458.21	-0.00165535		1048.21	-0.00621768		1638.2	0.00343633		2228.2	0.01377468		2818.2	0.03231279
458.41	-0.00104402		1048.41	-0.00670429		1638.4	0.00325803		2228.4	0.01478672		2818.4	0.03241364
458.61	-0.00110959		1048.61	-0.00697559		1638.6	0.00345351		2228.6	0.01497752		2818.6	0.03214638
458.81	-0.00145304		1048.81	-0.0075831		1638.8	0.00347335		2228.8	0.01522623		2818.8	0.03179887
459.01	-0.00088336		1049.01	-0.00783848		1639	0.00282897		2229	0.01516781		2819	0.032265
459.21	-0.0006042		1049.21	-0.00799419		1639.2	0.00388977		2229.2	0.01487304		2819.2	0.03222491
459.41	-0.00013307		1049.41	-0.00852717		1639.4	0.00341213		2229.4	0.01406012		2819.4	0.03295101
459.61	-0.0001138		1049.61	-0.00818344		1639.6	0.00377118		2229.6	0.01354542		2819.6	0.03235535
459.81	0.0008545		1049.81	-0.00788191		1639.8	0.00419846		2229.8	0.01283147		2819.8	0.03182816
460.01	0.00047928		1050.01	-0.00894881		1640	0.00494035		2230	0.01241181		2820	0.03144349
460.21	0.00043726		1050.21	-0.00861708		1640.2	0.00510701		2230.2	0.01226714		2820.2	0.03182367
460.41	0.00001565		1050.41	-0.00860087		1640.4	0.00515026		2230.4	0.01197019		2820.4	0.03068304
460.61	-0.00043537		1050.61	-0.00804247		1640.6	0.00498384		2230.6	0.01251238		2820.6	0.03036221
460.81	0.0000215		1050.81	-0.00722924		1640.8	0.00354273		2230.8	0.0116733		2820.8	0.03001224
461.01	0.00057237		1051.01	-0.00649194		1641	0.00338634		2231	0.01179562		2821	0.03012477
461.21	0.00079378		1051.21	-0.00668214		1641.2	0.00374938		2231.2	0.0128068		2821.2	0.03107227
461.41	0.00057742		1051.41	-0.00719511		1641.4	0.00329453		2231.4	0.01356637		2821.4	0.03119163
461.61	0.00047958		1051.61	-0.00636861		1641.6	0.00325075		2231.6	0.01381864		2821.6	0.03118914
461.81	0.00091359		1051.81	-0.00627763		1641.8	0.00330364		2231.8	0.01458369		2821.8	0.03068119
462.01	0.00111614		1052.01	-0.00770889		1642	0.00273251		2232	0.014532		2822	0.03011326
462.21	0.00129635		1052.21	-0.00837967		1642.2	0.00339131		2232.2	0.0144336		2822.2	0.02964601
462.41	0.00198956		1052.41	-0.00956072		1642.4	0.00261524		2232.4	0.014234		2822.4	0.0292168
462.61	0.00186375		1052.61	-0.00979645		1642.6	0.00215125		2232.6	0.01484352		2822.6	0.02940432
462.81	0.00176057		1052.81	-0.00958738		1642.8	0.00163125		2232.8	0.01429921		2822.8	0.03043981
463.01	0.00177583		1053.01	-0.00891086		1643	0.00219644		2233	0.01427241		2823	0.03024006
463.21	0.00119381		1053.21	-0.00934937		1643.2	0.00288525		2233.2	0.01336353		2823.2	0.03001912
463.41	0.00122326		1053.41	-0.00981538		1643.4	0.00279105		2233.4	0.01234055		2823.4	0.03035061
463.61	0.00109764		1053.61	-0.01010226		1643.6	0.00374186		2233.6	0.01199102		2823.6	0.03002319
463.81	0.00027475		1053.81	-0.00943124		1643.8	0.00353825		2233.8	0.01133604		2823.8	0.02913545
464.01	-0.00092878		1054.01	-0.01006719		1644	0.00295307		2234	0.01116058		2824	0.0286865
464.21	-0.00143155		1054.21	-0.00900448		1644.2	0.00282819		2234.2	0.01073608		2824.2	0.02793377
464.41	-0.00179381		1054.41	-0.00813258		1644.4	0.00225245		2234.4	0.01091616		2824.4	0.02723069
464.61	-0.00159337		1054.61	-0.00734409		1644.6	0.00207356		2234.6	0.01125627		2824.6	0.02717506
464.81	-0.00189897		1054.81	-0.00732347		1644.8	0.00177485		2234.8	0.01131055		2824.8	0.02643353
465.01	-0.00204199		1055.01	-0.00696811		1645	0.00088023		2235	0.01141918		2825	0.02651743
465.21	-0.00218618		1055.21	-0.00711284		1645.2	0.00094264		2235.2	0.01219516		2825.2	0.02776557
465.41	-0.0020423		1055.41	-0.00703123		1645.4	0.00018689		2235.4	0.01234667		2825.4	0.02762531
465.61	-0.00164661		1055.61	-0.0071043		1645.6	0.00025188		2235.6	0.01177088		2825.6	0.02828497
465.81	-0.00142002		1055.81	-0.00775684		1645.8	-0.00022124		2235.8	0.01144515		2825.8	0.02858761
466.01	-0.00191975		1056.01	-0.0080975		1646	-0.00033108		2236	0.01084949		2826	0.02917589
466.21	-0.00293179		1056.21	-0.00819748		1646.2	0.00007587		2236.2	0.01168253		2826.2	0.03021132
466.41	-0.00232992		1056.41	-0.00842906		1646.4	-0.00002822		2236.4	0.01161576		2826.4	0.03016902
466.61	-0.00218715		1056.61	-0.00778269		1646.6	-0.00046711		2236.6	0.01165253		2826.6	0.03074866
466.81	-0.00198241		1056.81	-0.00720711		1646.8	-0.00001228		2236.8	0.01104279		2826.8	0.03118763
467.01	-0.0018139		1057.01	-0.00728956		1647	0.00012607		2237	0.01022505		2827	0.03058335
467.21	-0.00124163		1057.21	-0.00827181		1647.2	0.00039559		2237.2	0.00998343		2827.2	0.03152256
467.41	-0.00081719		1057.41	-0.008901		1647.4	0.00012861		2237.4	0.01012804		2827.4	0.03140047
467.61	-0.00180065		1057.61	-0.00944381		1647.6	0.00041709		2237.6	0.00998015		2827.6	0.03075563
467.81	-0.00214448		1057.81	-0.00886721		1647.8	-0.00030658		2237.8	0.00971539		2827.8	0.02971978
468.01	-0.00169562		1058.01	-0.00966822		1648	-0.00086866		2238	0.00944578		2828	0.0295287
468.21	-0.00179492		1058.21	-0.00915279		1648.2	-0.00043079		2238.2	0.0093393		2828.2	0.02894439
468.41	-0.00121826		1058.41	-0.00900544		1648.4	-0.00029917		2238.4	0.00971953		2828.4	0.02851937
468.61	-0.00114913		1058.61	-0.00927714		1648.6	0.00032055		2238.6	0.00997524		2828.6	0.02803819
468.81	-0.00141141		1058.81	-0.00964555		1648.8	0.00070036		2238.8	0.00966037		2828.8	0.02760783
469.01	-0.00127698		1059.01	-0.00968911		1649	0.00079163		2239	0.00946287		2829	0.0282084
469.21	-0.0009846		1059.21	-0.00979299		1649.2	0.00161793		2239.2	0.01019508		2829.2	0.02865174
469.41	-0.00100905		1059.41	-0.00985234		1649.4	0.00201889		2239.4	0.01050923		2829.4	0.02830449
469.61	-0.00095		1059.61	-0.0098658		1649.6	0.00312853		2239.6	0.01036509		2829.6	0.02868956
469.81	-0.0014438		1059.81	-0.00952026		1649.8	0.00368161		2239.8	0.01106143		2829.8	0.0286367
470.01	-0.0014438		1060.01	-0.00952026		1650	0.00368161		2240	0.01106143		2830	0.0286367
470.21	-0.00277267		1060.21	-0.00914546		1650.2	0.00245109		2240.2	0.01056587		2830.2	0.02709613
470.41	-0.00447671		1060.41	-0.00918527		1650.4	0.00114297		2240.4	0.00918568		2830.4	0.02469095
470.61	-0.00570505		1060.61	-0.00939697		1650.6	0.00034913		2240.6	0.00773662		2830.6	0.02239845
470.81	-0.00714126		1060.81	-0.01017343		1650.8	-0.00080278		2240.8	0.00591564		2830.8	0.01964025
471.01	-0.00840039		1061.01	-0.01090047		1651	-0.00103167		2241	0.00475046		2831	0.01715892
471.21	-0.00951818		1061.21	-0.01198788		1651.2	-0.00172284		2241.2	0.00294334		2831.2	0.01421501
471.41	-0.01088011		1061.41	-0.01317014		1651.4	-0.00204328		2241.4	0.00164127		2831.4	0.01150712
471.61	-0.01156853		1061.61	-0.01469102		1651.6	-0.00238529		2241.6	0.00042881		2831.6	0.00865085
471.81	-0.01224257		1061.81	-0.01559673		1651.8	-0.00338108		2241.8	-0.00015105		2831.8	0.00568623
472.01	-0.01254962		1062.01	-0.01674092		1652	-0.00324137		2242	-0.00048379		2832	0.00383716
472.21	-0.01270147		1062.21	-0.01793726		1652.2	-0.00320444		2242.2	-0.0012393		2832.2	0.00219588
472.41	-0.01374837		1062.41	-0.01816457		1652.4	-0.00267774		2242.4	-0.00076371		2832.4	0.0008208
472.61	-0.0145843		1062.61	-0.01849137		1652.6	-0.00241499		2242.6	-0.0004952		2832.6	0.00009574
472.81	-0.01499909		1062.81	-0.01914499		1652.8	-0.0017033		2242.8	-0.00018416		2832.8	-0.00042815
473.01	-0.01555252		1063.01	-0.01975286		1653	-0.00091863		2243	-0.00002661		2833	-0.00082141
473.21	-0.0162073		1063.21	-0.02014269		1653.2	-0.00081903		2243.2	0.00010023		2833.2	-0.0014505
473.41	-0.01679183		1063.41	-0.02134839		1653.4	-0.00069685		2243.4	0.00061429		2833.4	-0.00084564
473.61	-0.01713857		1063.61	-0.02200148		1653.6	-0.00033664		2243.6	0.00101354		2833.6	-0.00025726
473.81	-0.01784039		1063.81	-0.02179081		1653.8	-0.00109692		2243.8	0.0010269		2833.8	-0.00101784
474.01	-0.01769264		1064.01	-0.02018404		1654	-0.00131242		2244	0.00119197		2834	-0.00138337
474.21	-0.01793887		1064.21	-0.02013256		1654.2	-0.0016353		2244.2	0.00135815		2834.2	-0.00150007
474.41	-0.01816172		1064.41	-0.01999964		1654.4	-0.00201255		2244.4	0.00025379		2834.4	-0.00146843
474.61	-0.01868861		1064.61	-0.0198294		1654.6	-0.00147718		2244.6	-0.00001809		2834.6	-0.00121154
474.81	-0.01886161		1064.81	-0.01976268		1654.8	-0.00114429		2244.8	-0.00085829		2834.8	-0.00076551
475.01	-0.0188802		1065.01	-0.01969872		1655	-0.00032711		2245	-0.00098484		2835	0.00016665
475.21	-0.0179328		1065.21	-0.02016746		1655.2	-0.00081875		2245.2	-0.00132114		2835.2	-0.00086107
475.41	-0.01751979		1065.41	-0.02048381		1655.4	-0.00104421		2245.4	-0.00143016		2835.4	-0.00132456
475.61	-0.01699474		1065.61	-0.02023521		1655.6	-0.00156684		2245.6	-0.00129056		2835.6	-0.00097498
475.81	-0.01693216		1065.81	-0.01970747		1655.8	-0.00199162		2245.8	-0.00096175		2835.8	-0.00061145
476.01	-0.01697122		1066.01	-0.01955602		1656	-0.00196619		2246	-0.00058059		2836	-0.00054947
476.21	-0.01698636		1066.21	-0.01925693		1656.2	-0.00209258		2246.2	0.00048823		2836.2	-0.00043559
476.41	-0.01743123		1066.41	-0.01933617		1656.4	-0.00193064		2246.4	0.00152271		2836.4	-0.00110918
476.61	-0.01745169		1066.61	-0.01991767		1656.6	-0.00179526		2246.6	0.00168473		2836.6	-0.00042048
476.81	-0.01757479		1066.81	-0.01999814		1656.8	-0.00251659		2246.8	0.00167593		2836.8	-0.00056818
477.01	-0.01738213		1067.01	-0.01974186		1657	-0.00353687		2247	0.00206131		2837	-0.00066609
477.21	-0.01738818		1067.21	-0.0208133		1657.2	-0.00302103		2247.2	0.00284706		2837.2	-0.0006942
477.41	-0.01649674		1067.41	-0.02135269		1657.4	-0.00280265		2247.4	0.0027058		2837.4	-0.00066832
477.61	-0.01716765		1067.61	-0.0211907		1657.6	-0.00239688		2247.6	0.00206146		2837.6	-0.00028672
477.81	-0.0167551		1067.81	-0.02085798		1657.8	-0.00209828		2247.8	0.00171005		2837.8	-0.00078482
478.01	-0.01660499		1068.01	-0.02001307		1658	-0.0010516		2248	0.00259097		2838	-0.00096108
478.21	-0.01762196		1068.21	-0.02076854		1658.2	-0.00066207		2248.2	0.00214357		2838.2	-0.00136077
478.41	-0.01703628		1068.41	-0.0201621		1658.4	-0.00066971		2248.4	0.00182713		2838.4	-0.00062244
478.61	-0.01686398		1068.61	-0.02037281		1658.6	0.00027966		2248.6	0.00186723		2838.6	-0.00110901
478.81	-0.01587787		1068.81	-0.02025442		1658.8	0.00033026		2248.8	0.00150295		2838.8	-0.00033131
479.01	-0.0155087		1069.01	-0.01995069		1659	0.00029984		2249	0.00149912		2839	-0.00039093
479.21	-0.01449192		1069.21	-0.01973186		1659.2	-0.00018898		2249.2	0.00127128		2839.2	-0.00147643
479.41	-0.01448321		1069.41	-0.01921091		1659.4	-0.0006635		2249.4	0.00094024		2839.4	-0.00086144
479.61	-0.01442547		1069.61	-0.01802672		1659.6	-0.0007387		2249.6	0.00118439		2839.6	0.00072421
479.81	-0.01488922		1069.81	-0.01774995		1659.8	-0.00118774		2249.8	0.00118406		2839.8	0.00159215
480.01	-0.01500335		1070.01	-0.0169038		1660	-0.00212307		2250	0.00188823		2840	0.00115331
480.21	-0.0149272		1070.21	-0.01672556		1660.2	-0.00218755		2250.2	0.00182801		2840.2	0.00193777
480.41	-0.01462039		1070.41	-0.01647542		1660.4	-0.00283783		2250.4	0.0010465		2840.4	0.00239761
480.61	-0.01473727		1070.61	-0.0166329		1660.6	-0.0028111		2250.6	0.00051314		2840.6	0.00222311
480.81	-0.01490494		1070.81	-0.01578912		1660.8	-0.00326313		2250.8	0.00002036		2840.8	0.00178656
481.01	-0.01576606		1071.01	-0.01629236		1661	-0.0034064		2251	-0.00048531		2841	0.00145266
481.21	-0.01591678		1071.21	-0.01631486		1661.2	-0.00281284		2251.2	-0.00002564		2841.2	0.00175858
481.41	-0.01537055		1071.41	-0.01612638		1661.4	-0.00267256		2251.4	-0.00096813		2841.4	0.00115912
481.61	-0.01571086		1071.61	-0.01582465		1661.6	-0.00227108		2251.6	-0.00116119		2841.6	0.00067465
481.81	-0.01425478		1071.81	-0.01580954		1661.8	-0.00267083		2251.8	-0.00083467		2841.8	0.00056051
482.01	-0.01425902		1072.01	-0.01658127		1662	-0.0019552		2252	0.00051827		2842	0.00056212
482.21	-0.01387548		1072.21	-0.01742776		1662.2	-0.0022305		2252.2	0.00007151		2842.2	0.0003916
482.41	-0.01288821		1072.41	-0.01810639		1662.4	-0.00218896		2252.4	0.00124636		2842.4	-0.0006322
482.61	-0.01293306		1072.61	-0.01826319		1662.6	-0.00170397		2252.6	0.00156553		2842.6	-0.00044833
482.81	-0.01306157		1072.81	-0.01775921		1662.8	-0.0018939		2252.8	0.00135831		2842.8	0.00033588
483.01	-0.01340313		1073.01	-0.01727997		1663	-0.00141848		2253	0.00131995		2843	0.00051729
483.21	-0.01345593		1073.21	-0.01731026		1663.2	-0.00133801		2253.2	0.00159908		2843.2	0.00141879
483.41	-0.01366736		1073.41	-0.01735947		1663.4	-0.00129905		2253.4	0.00254917		2843.4	0.00244281
483.61	-0.01436475		1073.61	-0.01690092		1663.6	-0.00108384		2253.6	0.00223653		2843.6	0.00312712
483.81	-0.01424016		1073.81	-0.01659549		1663.8	-0.00091334		2253.8	0.00178688		2843.8	0.00349555
484.01	-0.01374595		1074.01	-0.01599042		1664	-0.0006339		2254	0.0024365		2844	0.00383146
484.21	-0.01333534		1074.21	-0.01562795		1664.2	-0.00091321		2254.2	0.0027609		2844.2	0.0047544
484.41	-0.01362949		1074.41	-0.01494959		1664.4	-0.00067844		2254.4	0.0026466		2844.4	0.00571091
484.61	-0.0142801		1074.61	-0.01480153		1664.6	-0.00057865		2254.6	0.00211197		2844.6	0.00522028
484.81	-0.01408578		1074.81	-0.01435229		1664.8	-0.00062363		2254.8	0.00223968		2844.8	0.00556284
485.01	-0.01465351		1075.01	-0.01444169		1665	-0.00116054		2255	0.00237213		2845	0.00551604
485.21	-0.01426933		1075.21	-0.01367069		1665.2	-0.00071733		2255.2	0.00271086		2845.2	0.00580862
485.41	-0.01313636		1075.41	-0.01408031		1665.4	-0.00037783		2255.4	0.0026693		2845.4	0.00522883
485.61	-0.01271464		1075.61	-0.01405627		1665.6	-0.000654		2255.6	0.00251153		2845.6	0.00526565
485.81	-0.01251534		1075.81	-0.01466942		1665.8	-0.00041004		2255.8	0.00267332		2845.8	0.00496702
486.01	-0.01253146		1076.01	-0.01625806		1666	0.00044582		2256	0.00350267		2846	0.00354556
486.21	-0.01356068		1076.21	-0.01601499		1666.2	0.00036503		2256.2	0.00297329		2846.2	0.00249009
486.41	-0.01449869		1076.41	-0.01598567		1666.4	0.00107833		2256.4	0.00318965		2846.4	0.00177807
486.61	-0.01511229		1076.61	-0.0156039		1666.6	0.00076392		2256.6	0.00257349		2846.6	0.00224186
486.81	-0.01597664		1076.81	-0.01578529		1666.8	0.00041325		2256.8	0.00227678		2846.8	0.00169782
487.01	-0.01684023		1077.01	-0.01587563		1667	-0.00025061		2257	0.002627		2847	0.0016899
487.21	-0.0169215		1077.21	-0.01627765		1667.2	-0.00077095		2257.2	0.00233429		2847.2	0.00136009
487.41	-0.01772363		1077.41	-0.01646999		1667.4	-0.00076499		2257.4	0.00244343		2847.4	0.00089445
487.61	-0.01820694		1077.61	-0.01670711		1667.6	-0.00143654		2257.6	0.00156205		2847.6	0.00143976
487.81	-0.01721381		1077.81	-0.01621694		1667.8	-0.00126708		2257.8	0.00167868		2847.8	0.00219674
488.01	-0.01628296		1078.01	-0.0157471		1668	-0.00234598		2258	0.00241445		2848	0.00258408
488.21	-0.01547453		1078.21	-0.01464669		1668.2	-0.00309884		2258.2	0.00259162		2848.2	0.00270194
488.41	-0.01504609		1078.41	-0.0143135		1668.4	-0.0028566		2258.4	0.00198887		2848.4	0.00358573
488.61	-0.0140022		1078.61	-0.01375263		1668.6	-0.00227423		2258.6	0.001746		2848.6	0.00406181
488.81	-0.01332992		1078.81	-0.01439403		1668.8	-0.00189115		2258.8	0.00216556		2848.8	0.00416084
489.01	-0.01288562		1079.01	-0.01400243		1669	-0.00186253		2259	0.00203967		2849	0.00473924
489.21	-0.01277415		1079.21	-0.01362507		1669.2	0.00000325		2259.2	0.00257123		2849.2	0.00424837
489.41	-0.01190562		1079.41	-0.01369314		1669.4	0.00090791		2259.4	0.00401159		2849.4	0.00384541
489.61	-0.01185156		1079.61	-0.0144242		1669.6	0.00177294		2259.6	0.00465552		2849.6	0.0040041
489.81	-0.01111779		1079.81	-0.01588505		1669.8	0.00311179		2259.8	0.0047098		2849.8	0.0034273
490.01	-0.01113622		1080.01	-0.01600509		1670	0.00374312		2260	0.00577115		2850	0.00307652
490.21	-0.01264893		1080.21	-0.01535286		1670.2	0.00439854		2260.2	0.00610605		2850.2	0.00316969
490.41	-0.01285296		1080.41	-0.01567725		1670.4	0.00484641		2260.4	0.0064842		2850.4	0.0031579
490.61	-0.01364701		1080.61	-0.0163598		1670.6	0.00396865		2260.6	0.00611996		2850.6	0.00197631
490.81	-0.01442334		1080.81	-0.01606208		1670.8	0.00410777		2260.8	0.00640818		2850.8	0.00199236
491.01	-0.01456483		1081.01	-0.01672006		1671	0.00325167		2261	0.00615811		2851	0.00214309
491.21	-0.01467201		1081.21	-0.01760161		1671.2	0.00269546		2261.2	0.00593629		2851.2	0.00209311
491.41	-0.01530158		1081.41	-0.01838625		1671.4	0.00291293		2261.4	0.00568964		2851.4	0.00203747
491.61	-0.01493171		1081.61	-0.01907868		1671.6	0.00113716		2261.6	0.00537662		2851.6	0.00221606
491.81	-0.01418493		1081.81	-0.01805337		1671.8	0.00135722		2261.8	0.00554315		2851.8	0.001309
492.01	-0.01357695		1082.01	-0.01796574		1672	0.00043311		2262	0.00504424		2852	0.00076047
492.21	-0.01407993		1082.21	-0.0175387		1672.2	0.00014071		2262.2	0.00474998		2852.2	0.0012423
492.41	-0.01413025		1082.41	-0.01729137		1672.4	0.00069056		2262.4	0.00407109		2852.4	0.00192862
492.61	-0.01482778		1082.61	-0.01709399		1672.6	0.00154616		2262.6	0.00358988		2852.6	0.00212565
492.81	-0.01517705		1082.81	-0.01770221		1672.8	0.00089912		2262.8	0.00377694		2852.8	0.00191794
493.01	-0.01511301		1083.01	-0.01750913		1673	0.00149699		2263	0.00380551		2853	0.00173026
493.21	-0.01555554		1083.21	-0.01707963		1673.2	0.00209732		2263.2	0.00391575		2853.2	0.0011527
493.41	-0.01473545		1083.41	-0.01670356		1673.4	0.00175844		2263.4	0.00410352		2853.4	0.00149858
493.61	-0.01400942		1083.61	-0.01761701		1673.6	0.00180456		2263.6	0.0032144		2853.6	0.00116879
493.81	-0.0133186		1083.81	-0.01765953		1673.8	0.0014764		2263.8	0.00267745		2853.8	0.0009737
494.01	-0.01352183		1084.01	-0.01624353		1674	0.00091452		2264	0.0029314		2854	0.00080803
494.21	-0.01356659		1084.21	-0.01681521		1674.2	0.00013209		2264.2	0.0019048		2854.2	0.00036944
494.41	-0.01348899		1084.41	-0.01696288		1674.4	-0.00005874		2264.4	0.00135564		2854.4	0.00049223
494.61	-0.01372675		1084.61	-0.01752085		1674.6	-0.00091486		2264.6	0.00041013		2854.6	-0.00016551
494.81	-0.0136548		1084.81	-0.01707839		1674.8	-0.00090211		2264.8	0.00113417		2854.8	0.00030416
495.01	-0.01291801		1085.01	-0.01779928		1675	-0.00128057		2265	0.00096631		2855	0.00070713
495.21	-0.01263942		1085.21	-0.01831269		1675.2	-0.001672		2265.2	0.00145792		2855.2	0.00118126
495.41	-0.01280105		1085.41	-0.01872455		1675.4	-0.00189451		2265.4	0.00192326		2855.4	0.00047171
495.61	-0.0132277		1085.61	-0.01824029		1675.6	-0.00198231		2265.6	0.00213672		2855.6	0.00124053
495.81	-0.01459615		1085.81	-0.01838181		1675.8	-0.00074082		2265.8	0.00244703		2855.8	0.00095593
496.01	-0.01536914		1086.01	-0.01831474		1676	-0.00062523		2266	0.00324415		2856	0.00196973
496.21	-0.01626246		1086.21	-0.01831987		1676.2	-0.00084692		2266.2	0.00421712		2856.2	0.00190992
496.41	-0.01706099		1086.41	-0.01819094		1676.4	0.00067443		2266.4	0.0045654		2856.4	0.00180462
496.61	-0.0182857		1086.61	-0.01878187		1676.6	0.00093008		2266.6	0.00534551		2856.6	0.00193827
496.81	-0.01800489		1086.81	-0.01850521		1676.8	0.00153679		2266.8	0.00506579		2856.8	0.00305444
497.01	-0.01749496		1087.01	-0.01850228		1677	0.00231126		2267	0.00517308		2857	0.00275912
497.21	-0.01784345		1087.21	-0.01752077		1677.2	0.00253438		2267.2	0.0044512		2857.2	0.00315375
497.41	-0.01786718		1087.41	-0.01766649		1677.4	0.00257654		2267.4	0.00450548		2857.4	0.00317692
497.61	-0.01751122		1087.61	-0.01865698		1677.6	0.00266613		2267.6	0.00396042		2857.6	0.00296798
497.81	-0.01763816		1087.81	-0.01807725		1677.8	0.00281194		2267.8	0.00385782		2857.8	0.00304004
498.01	-0.01702059		1088.01	-0.01765459		1678	0.00277731		2268	0.0035226		2858	0.00242102
498.21	-0.01733596		1088.21	-0.01740277		1678.2	0.00216778		2268.2	0.00315144		2858.2	0.00214382
498.41	-0.01732644		1088.41	-0.01674812		1678.4	0.00269718		2268.4	0.00272907		2858.4	0.0024292
498.61	-0.01626776		1088.61	-0.01702717		1678.6	0.00194177		2268.6	0.00239013		2858.6	0.00143026
498.81	-0.01621082		1088.81	-0.01642322		1678.8	0.00206905		2268.8	0.00261422		2858.8	0.00106557
499.01	-0.01572016		1089.01	-0.0162239		1679	0.0020944		2269	0.00162557		2859	0.00143069
499.21	-0.01559122		1089.21	-0.01551508		1679.2	0.00157512		2269.2	0.00147552		2859.2	0.00154847
499.41	-0.01583138		1089.41	-0.01587254		1679.4	0.0014441		2269.4	0.00176379		2859.4	0.00113953
499.61	-0.01569953		1089.61	-0.01582028		1679.6	0.0015169		2269.6	0.0011824		2859.6	0.0016732
499.81	-0.0157507		1089.81	-0.016389		1679.8	-0.00011134		2269.8	0.00206481		2859.8	0.00051705
500.01	-0.01533453		1090.01	-0.01658637		1680	-0.00014083		2270	0.00270488		2860	0.00057827
500.21	-0.0150221		1090.21	-0.01776261		1680.2	-0.0007303		2270.2	0.00246122		2860.2	-0.00042104
500.41	-0.01458036		1090.41	-0.01827567		1680.4	-0.00016181		2270.4	0.00263076		2860.4	-0.00064607
500.61	-0.01371063		1090.61	-0.01888858		1680.6	-0.00012756		2270.6	0.00334858		2860.6	-0.00062055
500.81	-0.01304223		1090.81	-0.019075		1680.8	0.00034628		2270.8	0.00272992		2860.8	-0.00067171
501.01	-0.01240685		1091.01	-0.02000345		1681	0.00029653		2271	0.00322659		2861	-0.00052667
501.21	-0.01308006		1091.21	-0.0204262		1681.2	0.00017009		2271.2	0.00320606		2861.2	-0.00065738
501.41	-0.0125298		1091.41	-0.02056236		1681.4	0.00012904		2271.4	0.00338633		2861.4	-0.00062804
501.61	-0.01238752		1091.61	-0.01987273		1681.6	0.00099294		2271.6	0.00351068		2861.6	-0.00144252
501.81	-0.01262857		1091.81	-0.01923569		1681.8	0.00089704		2271.8	0.00352572		2861.8	-0.00170919
502.01	-0.01206741		1092.01	-0.01874913		1682	0.00095508		2272	0.00369932		2862	-0.00189749
502.21	-0.01304867		1092.21	-0.01803267		1682.2	0.00063273		2272.2	0.00356017		2862.2	-0.00112483
502.41	-0.01314795		1092.41	-0.01865602		1682.4	0.0010494		2272.4	0.00337478		2862.4	-0.00185247
502.61	-0.01319736		1092.61	-0.01831724		1682.6	0.0010071		2272.6	0.00282397		2862.6	-0.00208715
502.81	-0.01443823		1092.81	-0.01755714		1682.8	0.0014116		2272.8	0.00239529		2862.8	-0.00113192
503.01	-0.01474549		1093.01	-0.0174256		1683	0.0015535		2273	0.00244748		2863	-0.00021945
503.21	-0.01445654		1093.21	-0.01726743		1683.2	0.0016039		2273.2	0.00306775		2863.2	0.00103723
503.41	-0.01488283		1093.41	-0.01807088		1683.4	0.00167264		2273.4	0.00316584		2863.4	0.00204995
503.61	-0.01502586		1093.61	-0.01823228		1683.6	0.00115829		2273.6	0.00265928		2863.6	0.00249776
503.81	-0.01526605		1093.81	-0.01840961		1683.8	0.00074103		2273.8	0.00287899		2863.8	0.00288563
504.01	-0.01547082		1094.01	-0.01899187		1684	0.00196175		2274	0.00256452		2864	0.00425339
504.21	-0.01581647		1094.21	-0.01885139		1684.2	0.002661		2274.2	0.00292727		2864.2	0.00497947
504.41	-0.01563863		1094.41	-0.01891006		1684.4	0.00234209		2274.4	0.0036727		2864.4	0.00537778
504.61	-0.01556536		1094.61	-0.01884812		1684.6	0.00204109		2274.6	0.00363078		2864.6	0.0054296
504.81	-0.01600316		1094.81	-0.01898327		1684.8	0.00182036		2274.8	0.00219586		2864.8	0.00543368
505.01	-0.01573381		1095.01	-0.01920957		1685	0.00140097		2275	0.00304763		2865	0.00500623
505.21	-0.01610405		1095.21	-0.01897287		1685.2	0.00156319		2275.2	0.00289602		2865.2	0.0034351
505.41	-0.0148026		1095.41	-0.01774282		1685.4	0.00180801		2275.4	0.00277904		2865.4	0.0030011
505.61	-0.01503909		1095.61	-0.0174998		1685.6	0.00154326		2275.6	0.002554		2865.6	0.00159869
505.81	-0.01497102		1095.81	-0.01843159		1685.8	0.00014763		2275.8	0.00229284		2865.8	0.00104868
506.01	-0.01446896		1096.01	-0.01852654		1686	-0.00048024		2276	0.00218079		2866	0.00011517
506.21	-0.01435395		1096.21	-0.0183925		1686.2	-0.00106418		2276.2	0.0015966		2866.2	-0.00064539
506.41	-0.01429312		1096.41	-0.01784634		1686.4	-0.00157984		2276.4	0.00162126		2866.4	-0.00267803
506.61	-0.01418289		1096.61	-0.01724713		1686.6	-0.0017099		2276.6	0.00076902		2866.6	-0.00319821
506.81	-0.01385851		1096.81	-0.0179454		1686.8	-0.00187057		2276.8	0.00152866		2866.8	-0.00424085
507.01	-0.01363292		1097.01	-0.01755387		1687	-0.0014321		2277	0.00197568		2867	-0.00449892
507.21	-0.01324944		1097.21	-0.01775092		1687.2	-0.00115108		2277.2	0.00138031		2867.2	-0.0038059
507.41	-0.01459343		1097.41	-0.01731827		1687.4	-0.00140339		2277.4	0.00096627		2867.4	-0.00321729
507.61	-0.01536925		1097.61	-0.01692211		1687.6	-0.00174628		2277.6	0.00073724		2867.6	-0.00276691
507.81	-0.01559386		1097.81	-0.01623139		1687.8	-0.00124077		2277.8	0.00105895		2867.8	-0.00165382
508.01	-0.01577734		1098.01	-0.01637133		1688	-0.00083239		2278	0.00059203		2868	-0.00056527
508.21	-0.01662639		1098.21	-0.01628214		1688.2	-0.00025075		2278.2	0.00145598		2868.2	0.00037294
508.41	-0.01644727		1098.41	-0.01605915		1688.4	-0.00170924		2278.4	0.00076949		2868.4	0.00035392
508.61	-0.01684358		1098.61	-0.01641744		1688.6	-0.00144968		2278.6	0.00081356		2868.6	0.00073136
508.81	-0.01746158		1098.81	-0.01626304		1688.8	-0.00109328		2278.8	0.00044514		2868.8	0.00065368
509.01	-0.01792839		1099.01	-0.01604273		1689	-0.00040305		2279	0.00153522		2869	0.00032467
509.21	-0.01766978		1099.21	-0.01618903		1689.2	-0.00003166		2279.2	0.00184577		2869.2	0.00064045
509.41	-0.01710982		1099.41	-0.01651496		1689.4	-0.00080517		2279.4	0.00125812		2869.4	0.0005074
509.61	-0.01788956		1099.61	-0.01721355		1689.6	-0.00134313		2279.6	0.00169561		2869.6	0.00022082
509.81	-0.0182071		1099.81	-0.01760337		1689.8	-0.00228975		2279.8	0.00170372		2869.8	0.0002492
510.01	-0.01779124		1100.01	-0.01755793		1690	-0.00254284		2280	0.00236283		2870	0.00038975
510.21	-0.01716435		1100.21	-0.01732014		1690.2	-0.00172798		2280.2	0.00256519		2870.2	0.00045908
510.41	-0.0177672		1100.41	-0.01780148		1690.4	-0.0012041		2280.4	0.00338179		2870.4	-0.00003682
510.61	-0.01764575		1100.61	-0.01913193		1690.6	-0.00081454		2280.6	0.00423566		2870.6	0.00039043
510.81	-0.01722745		1100.81	-0.01951768		1690.8	-0.00051002		2280.8	0.00466638		2870.8	0.00055553
511.01	-0.01769599		1101.01	-0.01945036		1691	-0.00114881		2281	0.00442275		2871	0.00186567
511.21	-0.01797871		1101.21	-0.01994505		1691.2	-0.00168197		2281.2	0.00422082		2871.2	0.00212155
511.41	-0.01886863		1101.41	-0.02043706		1691.4	-0.001566		2281.4	0.00460271		2871.4	0.00201436
511.61	-0.01849866		1101.61	-0.02145171		1691.6	-0.00118793		2281.6	0.0044545		2871.6	0.00294684
511.81	-0.01706846		1101.81	-0.02196352		1691.8	-0.00038627		2281.8	0.00444853		2871.8	0.0031813
512.01	-0.01676884		1102.01	-0.02223597		1692	-0.00036157		2282	0.00434859		2872	0.00435442
512.21	-0.01701784		1102.21	-0.02148086		1692.2	-0.000302		2282.2	0.00494554		2872.2	0.0052305
512.41	-0.01648742		1102.41	-0.0203836		1692.4	-0.00004548		2282.4	0.0032412		2872.4	0.00435025
512.61	-0.01687559		1102.61	-0.02046124		1692.6	0.00088247		2282.6	0.00372465		2872.6	0.00476043
512.81	-0.01788567		1102.81	-0.01949555		1692.8	0.0008082		2282.8	0.00364448		2872.8	0.00399763
513.01	-0.01792281		1103.01	-0.01913433		1693	0.00138927		2283	0.004109		2873	0.00361769
513.21	-0.01740313		1103.21	-0.0195978		1693.2	0.00177751		2283.2	0.00319873		2873.2	0.0026007
513.41	-0.01712614		1103.41	-0.01844825		1693.4	0.00219585		2283.4	0.00200155		2873.4	0.00149967
513.61	-0.01665886		1103.61	-0.01696292		1693.6	0.00223958		2283.6	0.00236307		2873.6	0.0016149
513.81	-0.01631275		1103.81	-0.01647591		1693.8	0.00215828		2283.8	0.00161347		2873.8	0.00106484
514.01	-0.01595774		1104.01	-0.01626092		1694	0.00220171		2284	0.00212548		2874	0.0005043
514.21	-0.01522665		1104.21	-0.01590189		1694.2	0.00243745		2284.2	0.00199366		2874.2	0.0008095
514.41	-0.01615275		1104.41	-0.01616039		1694.4	0.00103116		2284.4	0.00194134		2874.4	0.00038207
514.61	-0.01541314		1104.61	-0.0160736		1694.6	0.00006329		2284.6	0.00176706		2874.6	-0.00037626
514.81	-0.01508468		1104.81	-0.01596052		1694.8	-0.00060115		2284.8	0.00131723		2874.8	-0.00069317
515.01	-0.01523948		1105.01	-0.01708746		1695	-0.00159834		2285	0.00157368		2875	-0.0009388
515.21	-0.01544558		1105.21	-0.0174359		1695.2	-0.00231215		2285.2	0.00190898		2875.2	-0.00100476
515.41	-0.01517617		1105.41	-0.01878388		1695.4	-0.00282709		2285.4	0.00185776		2875.4	-0.00082203
515.61	-0.01449574		1105.61	-0.01887675		1695.6	-0.00327736		2285.6	0.00176022		2875.6	0.00046295
515.81	-0.01368507		1105.81	-0.01889227		1695.8	-0.00349184		2285.8	0.00181156		2875.8	-0.00052205
516.01	-0.01437005		1106.01	-0.01914721		1696	-0.00337152		2286	0.00216633		2876	0.00090394
516.21	-0.01527603		1106.21	-0.01931721		1696.2	-0.00341416		2286.2	0.00206113		2876.2	0.00019947
516.41	-0.01637825		1106.41	-0.01953903		1696.4	-0.00217709		2286.4	0.0014456		2876.4	-0.00059858
516.61	-0.0176429		1106.61	-0.01982759		1696.6	-0.00200256		2286.6	0.0020824		2876.6	-0.000565
516.81	-0.01787397		1106.81	-0.02003476		1696.8	-0.00158159		2286.8	0.0018936		2876.8	-0.00110665
517.01	-0.01724353		1107.01	-0.02041536		1697	-0.00042004		2287	0.00137734		2877	-0.0010651
517.21	-0.01658116		1107.21	-0.02050608		1697.2	0.00147403		2287.2	0.00054558		2877.2	-0.00108653
517.41	-0.01635973		1107.41	-0.0193717		1697.4	0.00200944		2287.4	0.00047339		2877.4	-0.00103519
517.61	-0.01643464		1107.61	-0.01876731		1697.6	0.00172228		2287.6	0.00091921		2877.6	-0.00046444
517.81	-0.01762441		1107.81	-0.01886458		1697.8	0.00162677		2287.8	0.00057153		2877.8	-0.0016
518.01	-0.01767869		1108.01	-0.01860788		1698	0.00080696		2288	0.00087779		2878	-0.0026486
518.21	-0.01792795		1108.21	-0.01850954		1698.2	0.00047859		2288.2	0.00076777		2878.2	-0.0018963
518.41	-0.01786447		1108.41	-0.01865861		1698.4	-0.00004784		2288.4	0.00095746		2878.4	-0.00172371
518.61	-0.01723859		1108.61	-0.01886345		1698.6	0.00013825		2288.6	0.00116181		2878.6	-0.00134028
518.81	-0.01741039		1108.81	-0.01977382		1698.8	-0.00008289		2288.8	0.00158809		2878.8	-0.00024222
519.01	-0.01693934		1109.01	-0.01991675		1699	-0.00031369		2289	0.00173805		2879	0.0004745
519.21	-0.01713207		1109.21	-0.0196094		1699.2	-0.00144001		2289.2	0.00141358		2879.2	0.00128526
519.41	-0.01646552		1109.41	-0.01998191		1699.4	-0.00151253		2289.4	0.00148938		2879.4	0.00121267
519.61	-0.01697367		1109.61	-0.01931476		1699.6	-0.00159059		2289.6	0.0014642		2879.6	0.00151008
519.81	-0.01712957		1109.81	-0.02021217		1699.8	-0.00174756		2289.8	0.00179248		2879.8	0.00095122
520.01	-0.01768693		1110.01	-0.0197972		1700	-0.00134827		2290	0.0017817		2880	0.00136287
520.21	-0.01837928		1110.21	-0.01937757		1700.2	-0.00141773		2290.2	0.00168382		2880.2	0.00058499
520.41	-0.01900321		1110.41	-0.01914699		1700.4	-0.00150074		2290.4	0.00135996		2880.4	0.00036884
520.61	-0.01864912		1110.61	-0.01852924		1700.6	-0.00137255		2290.6	0.0013882		2880.6	-0.00005079
520.81	-0.01753681		1110.81	-0.01888834		1700.8	-0.00103141		2290.8	0.00122572		2880.8	-0.00012902
521.01	-0.01684927		1111.01	-0.0185624		1701	-0.00025371		2291	0.00196282		2881	0.00010828
521.21	-0.01617862		1111.21	-0.01793534		1701.2	0.00069851		2291.2	0.00249103		2881.2	-0.00022135
521.41	-0.01660082		1111.41	-0.01753425		1701.4	0.00062518		2291.4	0.00177566		2881.4	-0.00090641
521.61	-0.01657228		1111.61	-0.01749749		1701.6	0.00027449		2291.6	0.0017491		2881.6	-0.00159924
521.81	-0.01692303		1111.81	-0.01778713		1701.8	-0.0004186		2291.8	0.00049004		2881.8	-0.00288523
522.01	-0.01642969		1112.01	-0.01826911		1702	-0.00075541		2292	0.00026607		2882	-0.00270103
522.21	-0.01694508		1112.21	-0.01848651		1702.2	-0.00030115		2292.2	-0.00004253		2882.2	-0.00124253
522.41	-0.01733498		1112.41	-0.01857244		1702.4	-0.00020976		2292.4	0.00028315		2882.4	-0.00131935
522.61	-0.01771114		1112.61	-0.01816358		1702.6	-0.00039063		2292.6	0.00001892		2882.6	-0.00119723
522.81	-0.01752655		1112.81	-0.01835311		1702.8	-0.0000356		2292.8	-0.00035486		2882.8	-0.0007245
523.01	-0.01698927		1113.01	-0.01860307		1703	-0.00025647		2293	-0.00162745		2883	-0.00142642
523.21	-0.01768245		1113.21	-0.01897281		1703.2	-0.00102451		2293.2	-0.00226442		2883.2	-0.00192857
523.41	-0.01786958		1113.41	-0.01916371		1703.4	-0.00113223		2293.4	-0.00212476		2883.4	-0.00217863
523.61	-0.01856627		1113.61	-0.01864853		1703.6	-0.00148474		2293.6	-0.00199807		2883.6	-0.00242266
523.81	-0.01819592		1113.81	-0.01906174		1703.8	-0.001158		2293.8	-0.00202737		2883.8	-0.00203266
524.01	-0.01871628		1114.01	-0.0185567		1704	-0.0008589		2294	-0.00199129		2884	-0.00205117
524.21	-0.01864753		1114.21	-0.0186647		1704.2	-0.0015058		2294.2	-0.00089822		2884.2	-0.00219473
524.41	-0.01856153		1114.41	-0.01883719		1704.4	-0.00144516		2294.4	-0.0005456		2884.4	-0.00237454
524.61	-0.0179071		1114.61	-0.01879473		1704.6	-0.00139956		2294.6	0.00055549		2884.6	-0.00205106
524.81	-0.01608662		1114.81	-0.01798793		1704.8	-0.00173319		2294.8	0.00188217		2884.8	-0.00215807
525.01	-0.01549678		1115.01	-0.01757751		1705	-0.00183881		2295	0.00274224		2885	-0.00229409
525.21	-0.01556416		1115.21	-0.01743202		1705.2	-0.00207299		2295.2	0.00327364		2885.2	-0.00210454
525.41	-0.01553319		1115.41	-0.01713252		1705.4	-0.00282279		2295.4	0.00328834		2885.4	-0.00138417
525.61	-0.01548184		1115.61	-0.01714464		1705.6	-0.00263703		2295.6	0.00436243		2885.6	-0.00216866
525.81	-0.01512229		1115.81	-0.01694808		1705.8	-0.00295703		2295.8	0.00440241		2885.8	-0.00219557
526.01	-0.01533748		1116.01	-0.01682103		1706	-0.0025098		2296	0.00488321		2886	-0.00233121
526.21	-0.0154908		1116.21	-0.01596293		1706.2	-0.00238172		2296.2	0.00529919		2886.2	-0.00300889
526.41	-0.01519559		1116.41	-0.0153012		1706.4	-0.00257281		2296.4	0.00559789		2886.4	-0.00454283
526.61	-0.01519952		1116.61	-0.01589221		1706.6	-0.00228947		2296.6	0.00584817		2886.6	-0.00341148
526.81	-0.01524356		1116.81	-0.01679273		1706.8	-0.00181372		2296.8	0.00503395		2886.8	-0.00259047
527.01	-0.01520494		1117.01	-0.01788977		1707	-0.00146321		2297	0.00446472		2887	-0.00373429
527.21	-0.01596633		1117.21	-0.01758707		1707.2	-0.00129667		2297.2	0.00466508		2887.2	-0.00267015
527.41	-0.01577369		1117.41	-0.01812921		1707.4	-0.00071341		2297.4	0.0049208		2887.4	-0.00249008
527.61	-0.01594125		1117.61	-0.01857237		1707.6	0.00049561		2297.6	0.00471678		2887.6	-0.00228472
527.81	-0.01630107		1117.81	-0.01965852		1707.8	0.00087842		2297.8	0.00466544		2887.8	-0.00114892
528.01	-0.01668508		1118.01	-0.02099726		1708	0.00157482		2298	0.00425505		2888	-0.0010739
528.21	-0.01705501		1118.21	-0.0213633		1708.2	0.00224866		2298.2	0.00409491		2888.2	-0.00087368
528.41	-0.01703494		1118.41	-0.02148005		1708.4	0.00310496		2298.4	0.003054		2888.4	-0.00040575
528.61	-0.01701572		1118.61	-0.02122756		1708.6	0.00240035		2298.6	0.00317021		2888.6	0.00066772
528.81	-0.017066		1118.81	-0.02101653		1708.8	0.0025895		2298.8	0.0033462		2888.8	0.00029782
529.01	-0.01799521		1119.01	-0.02187262		1709	0.0023939		2299	0.00241784		2889	0.00075734
529.21	-0.018054		1119.21	-0.02162226		1709.2	0.00238391		2299.2	0.00254749		2889.2	0.00055296
529.41	-0.0177875		1119.41	-0.02110609		1709.4	0.00182132		2299.4	0.00217607		2889.4	0.00068224
529.61	-0.01748857		1119.61	-0.02102314		1709.6	0.00236553		2299.6	0.00166503		2889.6	-0.00122234
529.81	-0.0172902		1119.81	-0.0201673		1709.8	0.0016451		2299.8	0.00011896		2889.8	-0.00168514
530.01	-0.01772471		1120.01	-0.01938814		1710	0.00103167		2300	-0.00076878		2890	-0.0024452
530.21	-0.01768443		1120.21	-0.01889182		1710.2	0.00106041		2300.2	-0.00085682		2890.2	-0.00273471
530.41	-0.01792608		1120.41	-0.01886218		1710.4	0.00096166		2300.4	-0.00154017		2890.4	-0.00244117
530.61	-0.01858352		1120.61	-0.01958343		1710.6	0.00035315		2300.6	-0.00171766		2890.6	-0.00055741
530.81	-0.0178132		1120.81	-0.01909637		1710.8	0.0003134		2300.8	-0.00180736		2890.8	-0.0001799
531.01	-0.01763169		1121.01	-0.01864876		1711	-0.00032691		2301	-0.00092396		2891	-0.00102321
531.21	-0.0176916		1121.21	-0.01748629		1711.2	-0.00061196		2301.2	-0.00039775		2891.2	-0.00094569
531.41	-0.01729906		1121.41	-0.01794392		1711.4	-0.0009416		2301.4	-0.0000536		2891.4	-0.00103619
531.61	-0.01666065		1121.61	-0.01750499		1711.6	-0.00025136		2301.6	0.00029814		2891.6	-0.00137425
531.81	-0.01695309		1121.81	-0.01742891		1711.8	-0.00073613		2301.8	0.00079732		2891.8	-0.00084749
532.01	-0.01719766		1122.01	-0.01744618		1712	0.00025497		2302	0.00066934		2892	-0.00105627
532.21	-0.01704997		1122.21	-0.01790367		1712.2	-0.00020406		2302.2	0.00121272		2892.2	-0.00090266
532.41	-0.01615671		1122.41	-0.01838894		1712.4	-0.00058599		2302.4	0.00125619		2892.4	-0.00112542
532.61	-0.01633917		1122.61	-0.01944752		1712.6	-0.00057921		2302.6	0.00237897		2892.6	-0.00070321
532.81	-0.01677212		1122.81	-0.02103412		1712.8	-0.00071481		2302.8	0.00225046		2892.8	-0.00162243
533.01	-0.01678833		1123.01	-0.02045938		1713	-0.0008077		2303	0.00280729		2893	-0.00144322
533.21	-0.01593455		1123.21	-0.01978034		1713.2	-0.0011124		2303.2	0.0029672		2893.2	-0.00195709
533.41	-0.01638734		1123.41	-0.01952937		1713.4	-0.00131524		2303.4	0.00282967		2893.4	-0.00200548
533.61	-0.01656608		1123.61	-0.01994295		1713.6	-0.00145314		2303.6	0.00297747		2893.6	-0.00277212
533.81	-0.01685409		1123.81	-0.01964177		1713.8	-0.00114797		2303.8	0.00224576		2893.8	-0.00251657
534.01	-0.01752721		1124.01	-0.02000791		1714	-0.00063785		2304	0.00138509		2894	-0.00237485
534.21	-0.01791727		1124.21	-0.02027118		1714.2	-0.00047779		2304.2	0.00126738		2894.2	-0.00191533
534.41	-0.01735725		1124.41	-0.02011287		1714.4	-0.00145773		2304.4	-0.00006512		2894.4	-0.00178522
534.61	-0.01718145		1124.61	-0.01911192		1714.6	-0.00208217		2304.6	-0.00001604		2894.6	-0.00153979
534.81	-0.01713555		1124.81	-0.01849342		1714.8	-0.00151389		2304.8	0.00074915		2894.8	-0.00146537
535.01	-0.01708882		1125.01	-0.01751521		1715	-0.00146594		2305	0.00063733		2895	-0.00183967
535.21	-0.01658065		1125.21	-0.01733913		1715.2	-0.0008726		2305.2	0.00050077		2895.2	-0.00184263
535.41	-0.01622295		1125.41	-0.01787618		1715.4	-0.00132206		2305.4	-0.00058393		2895.4	-0.00195563
535.61	-0.01503492		1125.61	-0.01765335		1715.6	-0.00134648		2305.6	-0.00034746		2895.6	-0.00240261
535.81	-0.01535817		1125.81	-0.01857687		1715.8	-0.00185144		2305.8	-0.00028592		2895.8	-0.00234747
536.01	-0.01474568		1126.01	-0.01979521		1716	-0.00168076		2306	-0.00028705		2896	-0.00253909
536.21	-0.01373123		1126.21	-0.02144582		1716.2	-0.0019843		2306.2	-0.00020268		2896.2	-0.00245507
536.41	-0.01367697		1126.41	-0.02138066		1716.4	-0.00150595		2306.4	-0.0005019		2896.4	-0.00313106
536.61	-0.014397		1126.61	-0.02219966		1716.6	-0.00096542		2306.6	0.0004453		2896.6	-0.00327346
536.81	-0.01512454		1126.81	-0.02248918		1716.8	-0.00135579		2306.8	0.00003846		2896.8	-0.00345216
537.01	-0.01505827		1127.01	-0.02206212		1717	-0.00106199		2307	0.00029721		2897	-0.00303628
537.21	-0.0150548		1127.21	-0.02163528		1717.2	-0.0015038		2307.2	0.00009877		2897.2	-0.00358651
537.41	-0.01547281		1127.41	-0.02242003		1717.4	-0.00143051		2307.4	0.00073517		2897.4	-0.00302826
537.61	-0.01578892		1127.61	-0.02331808		1717.6	-0.00188396		2307.6	0.0005802		2897.6	-0.00289642
537.81	-0.01609492		1127.81	-0.02282241		1717.8	-0.00151135		2307.8	0.00039542		2897.8	-0.00243391
538.01	-0.01713636		1128.01	-0.02263925		1718	-0.00156042		2308	0.00031495		2898	-0.00253559
538.21	-0.01663287		1128.21	-0.02194688		1718.2	-0.00236838		2308.2	0.00031995		2898.2	-0.0031102
538.41	-0.01589322		1128.41	-0.02062985		1718.4	-0.00232443		2308.4	0.00134959		2898.4	-0.00324664
538.61	-0.01720369		1128.61	-0.01949357		1718.6	-0.00191807		2308.6	0.00218207		2898.6	-0.00304677
538.81	-0.01668209		1128.81	-0.01991688		1718.8	-0.00108988		2308.8	0.00241831		2898.8	-0.00347988
539.01	-0.01681519		1129.01	-0.01973817		1719	-0.00118071		2309	0.00217017		2899	-0.00396087
539.21	-0.01676531		1129.21	-0.02024733		1719.2	-0.00115374		2309.2	0.00195054		2899.2	-0.00445412
539.41	-0.0169975		1129.41	-0.01958734		1719.4	-0.00067182		2309.4	0.00173889		2899.4	-0.0038953
539.61	-0.01684148		1129.61	-0.01963231		1719.6	-0.00079827		2309.6	0.00255344		2899.6	-0.00375782
539.81	-0.01757164		1129.81	-0.0197229		1719.8	-0.00059229		2309.8	0.00205755		2899.8	-0.00402874
540.01	-0.0180738		1130.01	-0.01939718		1720	0.00051364		2310	0.00171274		2900	-0.00406849
540.21	-0.01831024		1130.21	-0.01954575		1720.2	0.00146293		2310.2	0.00153878		2900.2	-0.00422754
540.41	-0.01857292		1130.41	-0.01878838		1720.4	0.00162603		2310.4	0.00062821		2900.4	-0.0054601
540.61	-0.01912093		1130.61	-0.01923256		1720.6	0.00262656		2310.6	0.00064951		2900.6	-0.00508982
540.81	-0.02018206		1130.81	-0.01951143		1720.8	0.00258545		2310.8	-0.00068137		2900.8	-0.0045981
541.01	-0.01937503		1131.01	-0.01947726		1721	0.00237648		2311	-0.00101646		2901	-0.00506347
541.21	-0.01958421		1131.21	-0.01844143		1721.2	0.00245013		2311.2	-0.00057916		2901.2	-0.00571964
541.41	-0.01856607		1131.41	-0.01970243		1721.4	0.00224702		2311.4	-0.00131599		2901.4	-0.0050479
541.61	-0.0181287		1131.61	-0.01974142		1721.6	0.00142467		2311.6	-0.00099028		2901.6	-0.00513341
541.81	-0.01739723		1131.81	-0.01867915		1721.8	0.00117583		2311.8	-0.0009477		2901.8	-0.00514492
542.01	-0.01729625		1132.01	-0.01821962		1722	0.00053243		2312	-0.00143644		2902	-0.00676911
542.21	-0.01671147		1132.21	-0.01787978		1722.2	-0.00102617		2312.2	-0.00179081		2902.2	-0.00735119
542.41	-0.01689849		1132.41	-0.01738762		1722.4	-0.00123236		2312.4	-0.00012146		2902.4	-0.00704033
542.61	-0.01786392		1132.61	-0.01752132		1722.6	-0.00203155		2312.6	-0.00066795		2902.6	-0.00701643
542.81	-0.01741807		1132.81	-0.01790438		1722.8	-0.0023692		2312.8	-0.00057801		2902.8	-0.00659701
543.01	-0.01828206		1133.01	-0.01754808		1723	-0.00340179		2313	-0.00056854		2903	-0.00614053
543.21	-0.0179446		1133.21	-0.01796404		1723.2	-0.00307661		2313.2	0.00005568		2903.2	-0.00467926
543.41	-0.01825571		1133.41	-0.01801471		1723.4	-0.00293114		2313.4	0.00111322		2903.4	-0.00288855
543.61	-0.01839835		1133.61	-0.01893125		1723.6	-0.00303205		2313.6	0.00162475		2903.6	-0.00229152
543.81	-0.01890311		1133.81	-0.01988324		1723.8	-0.00341727		2313.8	0.00119175		2903.8	-0.00177907
544.01	-0.0193714		1134.01	-0.02076898		1724	-0.00296845		2314	0.00147941		2904	-0.00088529
544.21	-0.01915634		1134.21	-0.02123327		1724.2	-0.00327285		2314.2	0.00146398		2904.2	-0.00127067
544.41	-0.01880962		1134.41	-0.02172957		1724.4	-0.00324821		2314.4	0.00161195		2904.4	-0.00128652
544.61	-0.01924405		1134.61	-0.02237413		1724.6	-0.00273932		2314.6	0.00203666		2904.6	0.00001685
544.81	-0.01960141		1134.81	-0.02302702		1724.8	-0.0025861		2314.8	0.00142069		2904.8	-0.00069851
545.01	-0.01829223		1135.01	-0.02293914		1725	-0.00152491		2315	0.00181882		2905	-0.00157864
545.21	-0.0180479		1135.21	-0.02261268		1725.2	-0.00114177		2315.2	0.00116078		2905.2	-0.00176296
545.41	-0.01726763		1135.41	-0.02300623		1725.4	-0.00161511		2315.4	0.0008975		2905.4	-0.00176076
545.61	-0.01782332		1135.61	-0.02289927		1725.6	-0.00156453		2315.6	0.00156199		2905.6	-0.00186178
545.81	-0.01879591		1135.81	-0.02217845		1725.8	-0.00183096		2315.8	0.0007672		2905.8	-0.00313484
546.01	-0.02022644		1136.01	-0.0216046		1726	-0.00230468		2316	0.00065639		2906	-0.00443437
546.21	-0.02129418		1136.21	-0.02182844		1726.2	-0.00236945		2316.2	0.00140029		2906.2	-0.00404949
546.41	-0.02222434		1136.41	-0.02112276		1726.4	-0.00209204		2316.4	0.00165657		2906.4	-0.00433539
546.61	-0.02294487		1136.61	-0.02060731		1726.6	-0.00256771		2316.6	0.00132413		2906.6	-0.00390369
546.81	-0.02289164		1136.81	-0.0207076		1726.8	-0.00213253		2316.8	0.00146661		2906.8	-0.0039346
547.01	-0.02297274		1137.01	-0.02050161		1727	-0.00243313		2317	0.00184223		2907	-0.00405285
547.21	-0.02296153		1137.21	-0.02082701		1727.2	-0.00108733		2317.2	0.00238161		2907.2	-0.00364639
547.41	-0.02253744		1137.41	-0.0216289		1727.4	-0.00118336		2317.4	0.00261339		2907.4	-0.00347835
547.61	-0.02264374		1137.61	-0.02228857		1727.6	-0.00110835		2317.6	0.00275184		2907.6	-0.00384039
547.81	-0.02284873		1137.81	-0.02231996		1727.8	-0.00193333		2317.8	0.00229322		2907.8	-0.00384604
548.01	-0.02264815		1138.01	-0.02190505		1728	-0.00182439		2318	0.00302112		2908	-0.00375645
548.21	-0.02141915		1138.21	-0.02129764		1728.2	-0.00189828		2318.2	0.00254348		2908.2	-0.0042467
548.41	-0.02107872		1138.41	-0.02185943		1728.4	-0.00132367		2318.4	0.00188935		2908.4	-0.00285914
548.61	-0.02005831		1138.61	-0.0220263		1728.6	-0.00067191		2318.6	0.00172003		2908.6	-0.0029294
548.81	-0.01935366		1138.81	-0.02223457		1728.8	-0.00055268		2318.8	0.00129089		2908.8	-0.00381684
549.01	-0.01944664		1139.01	-0.02124835		1729	-0.00027254		2319	0.0009471		2909	-0.003536
549.21	-0.01888609		1139.21	-0.02118465		1729.2	-0.0013431		2319.2	0.00097391		2909.2	-0.00346899
549.41	-0.01872738		1139.41	-0.02128847		1729.4	-0.00174626		2319.4	0.00111647		2909.4	-0.00308387
549.61	-0.01901118		1139.61	-0.02117554		1729.6	-0.00196302		2319.6	0.00153618		2909.6	-0.00227395
549.81	-0.01908615		1139.81	-0.02059646		1729.8	-0.00310874		2319.8	0.00134522		2909.8	-0.00267867
550.01	-0.01877044		1140.01	-0.02130868		1730	-0.00356901		2320	0.00214033		2910	-0.00272468
550.21	-0.01836132		1140.21	-0.02229152		1730.2	-0.00461621		2320.2	0.00242301		2910.2	-0.00277008
550.41	-0.01815021		1140.41	-0.02298387		1730.4	-0.0056197		2320.4	0.0013716		2910.4	-0.00323746
550.61	-0.0179944		1140.61	-0.02304749		1730.6	-0.00620571		2320.6	0.00164138		2910.6	-0.00386399
550.81	-0.01742051		1140.81	-0.02300636		1730.8	-0.00620268		2320.8	0.00097468		2910.8	-0.00517917
551.01	-0.0177737		1141.01	-0.02331196		1731	-0.00699042		2321	0.00072546		2911	-0.00582265
551.21	-0.01681968		1141.21	-0.02333116		1731.2	-0.00627757		2321.2	0.0002078		2911.2	-0.00640642
551.41	-0.01639615		1141.41	-0.02301083		1731.4	-0.00608023		2321.4	-0.00020937		2911.4	-0.00667326
551.61	-0.01683424		1141.61	-0.02266847		1731.6	-0.00539791		2321.6	-0.00018206		2911.6	-0.00717939
551.81	-0.0173364		1141.81	-0.02165717		1731.8	-0.00451159		2321.8	-0.0004232		2911.8	-0.00620143
552.01	-0.01729771		1142.01	-0.02142316		1732	-0.00326075		2322	-0.00040749		2912	-0.00620693
552.21	-0.01756712		1142.21	-0.02152987		1732.2	-0.00224185		2322.2	-0.00137017		2912.2	-0.00582528
552.41	-0.0182471		1142.41	-0.02204938		1732.4	-0.001475		2322.4	-0.00150308		2912.4	-0.00512925
552.61	-0.0182969		1142.61	-0.02180315		1732.6	-0.00013263		2322.6	-0.00137042		2912.6	-0.00559975
552.81	-0.01895775		1142.81	-0.02176286		1732.8	-0.00027834		2322.8	-0.00120752		2912.8	-0.00521369
553.01	-0.0192253		1143.01	-0.02128161		1733	-0.00055996		2323	-0.00143365		2913	-0.00447308
553.21	-0.01819193		1143.21	-0.02151968		1733.2	-0.00098822		2323.2	-0.00060171		2913.2	-0.00356445
553.41	-0.01856565		1143.41	-0.02140918		1733.4	-0.00104087		2323.4	-0.00110107		2913.4	-0.00232872
553.61	-0.01852929		1143.61	-0.02102739		1733.6	-0.00158394		2323.6	-0.00024386		2913.6	-0.00185295
553.81	-0.01831762		1143.81	-0.02192918		1733.8	-0.00187752		2323.8	-0.00016108		2913.8	-0.00270372
554.01	-0.0181904		1144.01	-0.0231607		1734	-0.00172971		2324	0.00097366		2914	-0.00286878
554.21	-0.01849218		1144.21	-0.02372758		1734.2	-0.00240762		2324.2	0.00097404		2914.2	-0.00352913
554.41	-0.01873956		1144.41	-0.02481615		1734.4	-0.00278706		2324.4	0.00078815		2914.4	-0.00398227
554.61	-0.01895816		1144.61	-0.02344624		1734.6	-0.00306263		2324.6	0.00089683		2914.6	-0.00477216
554.81	-0.0186393		1144.81	-0.02301289		1734.8	-0.00266165		2324.8	0.00027376		2914.8	-0.00531775
555.01	-0.01872725		1145.01	-0.02369619		1735	-0.00281691		2325	0.00028276		2915	-0.00508061
555.21	-0.01782708		1145.21	-0.02333002		1735.2	-0.00265921		2325.2	-0.00043994		2915.2	-0.00551177
555.41	-0.018697		1145.41	-0.02301871		1735.4	-0.00229985		2325.4	-0.00132904		2915.4	-0.00601946
555.61	-0.01912824		1145.61	-0.02241709		1735.6	-0.00154276		2325.6	-0.00090524		2915.6	-0.00681395
555.81	-0.02028968		1145.81	-0.02204824		1735.8	-0.00019407		2325.8	-0.00087555		2915.8	-0.00716864
556.01	-0.01989551		1146.01	-0.02196814		1736	0.00047162		2326	-0.00075971		2916	-0.00758523
556.21	-0.01990265		1146.21	-0.02190374		1736.2	0.00070023		2326.2	-0.00070014		2916.2	-0.00767309
556.41	-0.01953215		1146.41	-0.02211153		1736.4	0.00012589		2326.4	-0.00069764		2916.4	-0.00757324
556.61	-0.01927095		1146.61	-0.02182889		1736.6	0.00039721		2326.6	-0.00032461		2916.6	-0.00747292
556.81	-0.0187768		1146.81	-0.02210875		1736.8	-0.00043912		2326.8	0.00016737		2916.8	-0.00732675
557.01	-0.0191358		1147.01	-0.02174753		1737	-0.00143807		2327	0.00035587		2917	-0.00697571
557.21	-0.01956071		1147.21	-0.02118193		1737.2	-0.00185906		2327.2	0.00089367		2917.2	-0.00601291
557.41	-0.02009985		1147.41	-0.02125942		1737.4	-0.00209243		2327.4	0.0006147		2917.4	-0.00558954
557.61	-0.01972894		1147.61	-0.02153753		1737.6	-0.00193333		2327.6	0.00145196		2917.6	-0.00590187
557.81	-0.01958136		1147.81	-0.02250167		1737.8	-0.00206647		2327.8	0.00157381		2917.8	-0.00637797
558.01	-0.0197041		1148.01	-0.02275186		1738	-0.00244688		2328	0.00265605		2918	-0.00621503
558.21	-0.01936078		1148.21	-0.02305915		1738.2	-0.00349885		2328.2	0.00331157		2918.2	-0.00532526
558.41	-0.01942235		1148.41	-0.02307047		1738.4	-0.00477853		2328.4	0.00390348		2918.4	-0.00481028
558.61	-0.01875447		1148.61	-0.02254518		1738.6	-0.00502336		2328.6	0.0038743		2918.6	-0.0037381
558.81	-0.01767077		1148.81	-0.02327711		1738.8	-0.00509659		2328.8	0.00323399		2918.8	-0.00332193
559.01	-0.0176638		1149.01	-0.02316623		1739	-0.00640198		2329	0.00309411		2919	-0.00326159
559.21	-0.01739512		1149.21	-0.02236326		1739.2	-0.00698586		2329.2	0.00233523		2919.2	-0.00386174
559.41	-0.01782578		1149.41	-0.0213787		1739.4	-0.00636641		2329.4	0.0018916		2919.4	-0.00403048
559.61	-0.01738469		1149.61	-0.0202853		1739.6	-0.00561005		2329.6	0.00125165		2919.6	-0.00370264
559.81	-0.01688499		1149.81	-0.02005095		1739.8	-0.00556371		2329.8	0.00039887		2919.8	-0.00371543
560.01	-0.01609651		1150.01	-0.01967472		1740	-0.00540962		2330	-0.00017087		2920	-0.00343564
560.21	-0.01544572		1150.21	-0.01911952		1740.2	-0.00534298		2330.2	-0.00048089		2920.2	-0.00278886
560.41	-0.01567794		1150.41	-0.01980143		1740.4	-0.00558196		2330.4	-0.00033223		2920.4	-0.00270504
560.61	-0.01462768		1150.61	-0.01949768		1740.6	-0.00530337		2330.6	-0.00031398		2920.6	-0.00246308
560.81	-0.01432252		1150.81	-0.01966589		1740.8	-0.00545163		2330.8	-0.00133864		2920.8	-0.00221984
561.01	-0.0143506		1151.01	-0.01954595		1741	-0.00575413		2331	-0.00200474		2921	-0.00240107
561.21	-0.01432195		1151.21	-0.01946715		1741.2	-0.00545666		2331.2	-0.00218465		2921.2	-0.00238169
561.41	-0.01424511		1151.41	-0.0204169		1741.4	-0.00499132		2331.4	-0.00249041		2921.4	-0.00282604
561.61	-0.01422173		1151.61	-0.02104668		1741.6	-0.00410358		2331.6	-0.00298483		2921.6	-0.00287324
561.81	-0.01497849		1151.81	-0.02170594		1741.8	-0.0049586		2331.8	-0.00303756		2921.8	-0.00351695
562.01	-0.01524031		1152.01	-0.02200239		1742	-0.00508277		2332	-0.00221832		2922	-0.0036065
562.21	-0.01608612		1152.21	-0.02235515		1742.2	-0.00510757		2332.2	-0.00197717		2922.2	-0.00357772
562.41	-0.01716163		1152.41	-0.02231266		1742.4	-0.00555108		2332.4	-0.002334		2922.4	-0.0041397
562.61	-0.01746555		1152.61	-0.02305271		1742.6	-0.00468094		2332.6	-0.00281089		2922.6	-0.00399039
562.81	-0.01840739		1152.81	-0.02327256		1742.8	-0.00431407		2332.8	-0.00249213		2922.8	-0.00465636
563.01	-0.02052989		1153.01	-0.02261714		1743	-0.00371486		2333	-0.00146128		2923	-0.00507361
563.21	-0.02117639		1153.21	-0.0226506		1743.2	-0.00295256		2333.2	-0.00078466		2923.2	-0.0054716
563.41	-0.02226674		1153.41	-0.02230899		1743.4	-0.00259247		2333.4	-0.00099339		2923.4	-0.00512936
563.61	-0.02288444		1153.61	-0.02219914		1743.6	-0.00214197		2333.6	-0.00161652		2923.6	-0.00497163
563.81	-0.02379928		1153.81	-0.02165313		1743.8	-0.00216444		2333.8	-0.00126804		2923.8	-0.00645642
564.01	-0.02465615		1154.01	-0.02227154		1744	-0.00119646		2334	-0.00101923		2924	-0.00700129
564.21	-0.0241906		1154.21	-0.02263154		1744.2	-0.0016498		2334.2	0.00006406		2924.2	-0.00669314
564.41	-0.0240612		1154.41	-0.02319623		1744.4	-0.00259662		2334.4	0.0007161		2924.4	-0.00724224
564.61	-0.0228793		1154.61	-0.0224418		1744.6	-0.00326185		2334.6	0.00062622		2924.6	-0.00714457
564.81	-0.022173		1154.81	-0.02206813		1744.8	-0.002915		2334.8	-0.00039615		2924.8	-0.00688953
565.01	-0.02156254		1155.01	-0.02235312		1745	-0.00243245		2335	-0.000067		2925	-0.00675129
565.21	-0.02108237		1155.21	-0.02276274		1745.2	-0.00213473		2335.2	0.00052738		2925.2	-0.00633489
565.41	-0.02073827		1155.41	-0.02332915		1745.4	-0.00228435		2335.4	0.0009422		2925.4	-0.00608106
565.61	-0.02062937		1155.61	-0.02332072		1745.6	-0.00194346		2335.6	0.00068375		2925.6	-0.00558983
565.81	-0.02072642		1155.81	-0.02295028		1745.8	-0.00285127		2335.8	0.00075215		2925.8	-0.00583525
566.01	-0.0199988		1156.01	-0.02187288		1746	-0.00286373		2336	0.00029356		2926	-0.00531697
566.21	-0.02011317		1156.21	-0.02194449		1746.2	-0.00255919		2336.2	-0.00051164		2926.2	-0.0051762
566.41	-0.01986113		1156.41	-0.02278894		1746.4	-0.00267695		2336.4	-0.00097228		2926.4	-0.00468875
566.61	-0.0192601		1156.61	-0.02352308		1746.6	-0.00173179		2336.6	-0.00030459		2926.6	-0.00443057
566.81	-0.01879969		1156.81	-0.02338816		1746.8	-0.00171548		2336.8	0.00003376		2926.8	-0.00387384
567.01	-0.0188583		1157.01	-0.02290433		1747	-0.00100505		2337	0.00104984		2927	-0.00363618
567.21	-0.01877514		1157.21	-0.02274308		1747.2	-0.00173738		2337.2	0.001855		2927.2	-0.00369406
567.41	-0.01937656		1157.41	-0.02187496		1747.4	-0.00160774		2337.4	0.00158723		2927.4	-0.00336694
567.61	-0.01935441		1157.61	-0.02141252		1747.6	-0.00191601		2337.6	0.00077179		2927.6	-0.00445736
567.81	-0.02010843		1157.81	-0.02167777		1747.8	-0.002122		2337.8	0.00040056		2927.8	-0.00517978
568.01	-0.01902978		1158.01	-0.02232112		1748	-0.00236737		2338	0.0006182		2928	-0.00510527
568.21	-0.01855209		1158.21	-0.02232577		1748.2	-0.00263378		2338.2	0.00097321		2928.2	-0.00524852
568.41	-0.01868613		1158.41	-0.02230774		1748.4	-0.00269026		2338.4	0.00103918		2928.4	-0.00603589
568.61	-0.01865039		1158.61	-0.02216294		1748.6	-0.00198703		2338.6	0.00030304		2928.6	-0.00654007
568.81	-0.01833668		1158.81	-0.0220475		1748.8	-0.0012779		2338.8	0.000243		2928.8	-0.00638896
569.01	-0.01783517		1159.01	-0.0229334		1749	-0.00064624		2339	0.00152198		2929	-0.00627807
569.21	-0.01802159		1159.21	-0.02316637		1749.2	0.0000174		2339.2	0.00282258		2929.2	-0.00674301
569.41	-0.01832513		1159.41	-0.02378764		1749.4	0.00038536		2339.4	0.00334583		2929.4	-0.00727221
569.61	-0.01834722		1159.61	-0.0238254		1749.6	-0.00014983		2339.6	0.00265932		2929.6	-0.00667098
569.81	-0.01822818		1159.81	-0.02348569		1749.8	-0.00065347		2339.8	0.00210468		2929.8	-0.00626655
570.01	-0.01876963		1160.01	-0.02348383		1750	-0.0009838		2340	0.00206382		2930	-0.00548227
570.21	-0.01830819		1160.21	-0.02428732		1750.2	-0.00136175		2340.2	0.00199147		2930.2	-0.00543732
570.41	-0.01866051		1160.41	-0.02427118		1750.4	-0.00150298		2340.4	0.00184291		2930.4	-0.00450632
570.61	-0.01872109		1160.61	-0.02392698		1750.6	-0.00108549		2340.6	0.00148707		2930.6	-0.00440049
570.81	-0.01897103		1160.81	-0.02348944		1750.8	-0.00122156		2340.8	0.00122721		2930.8	-0.00409835
571.01	-0.01996667		1161.01	-0.02309115		1751	-0.00121908		2341	0.00189206		2931	-0.00420804
571.21	-0.02112992		1161.21	-0.02288279		1751.2	-0.0019395		2341.2	0.00109233		2931.2	-0.00432568
571.41	-0.02060049		1161.41	-0.02226149		1751.4	-0.00146679		2341.4	0.00014995		2931.4	-0.00432324
571.61	-0.01975203		1161.61	-0.02261114		1751.6	-0.00162911		2341.6	-0.00083349		2931.6	-0.0051877
571.81	-0.01958452		1161.81	-0.02289408		1751.8	-0.00130025		2341.8	-0.00083473		2931.8	-0.00501577
572.01	-0.01899664		1162.01	-0.0226399		1752	-0.00169557		2342	-0.00050397		2932	-0.00584412
572.21	-0.01881249		1162.21	-0.02275269		1752.2	-0.00113693		2342.2	-0.00097698		2932.2	-0.00640821
572.41	-0.01872081		1162.41	-0.02245589		1752.4	-0.00109741		2342.4	-0.00151445		2932.4	-0.00734208
572.61	-0.01856642		1162.61	-0.02151002		1752.6	-0.00133876		2342.6	-0.00196186		2932.6	-0.00873624
572.81	-0.01854133		1162.81	-0.02143605		1752.8	-0.00164265		2342.8	-0.00136616		2932.8	-0.00866055
573.01	-0.01783768		1163.01	-0.02156266		1753	-0.00137377		2343	-0.00062175		2933	-0.0093331
573.21	-0.01836389		1163.21	-0.02122701		1753.2	-0.00111154		2343.2	-0.00035481		2933.2	-0.00978003
573.41	-0.01835652		1163.41	-0.0213149		1753.4	-0.00196588		2343.4	-0.00097354		2933.4	-0.00945267
573.61	-0.01819127		1163.61	-0.02185939		1753.6	-0.00278622		2343.6	-0.00111329		2933.6	-0.00854598
573.81	-0.01841662		1163.81	-0.02220816		1753.8	-0.00285557		2343.8	-0.00065006		2933.8	-0.00797253
574.01	-0.01927757		1164.01	-0.02145958		1754	-0.00351821		2344	-0.00013424		2934	-0.00684429
574.21	-0.01958001		1164.21	-0.02129472		1754.2	-0.00356762		2344.2	-0.00021387		2934.2	-0.00579496
574.41	-0.02110638		1164.41	-0.02188387		1754.4	-0.0032053		2344.4	-0.00076452		2934.4	-0.00491877
574.61	-0.02186142		1164.61	-0.02252589		1754.6	-0.00365313		2344.6	-0.00021736		2934.6	-0.00508267
574.81	-0.02324365		1164.81	-0.0230236		1754.8	-0.00445538		2344.8	-0.00037254		2934.8	-0.00425582
575.01	-0.0237895		1165.01	-0.0232186		1755	-0.00433635		2345	-0.00046192		2935	-0.00385493
575.21	-0.02325098		1165.21	-0.02331513		1755.2	-0.00393655		2345.2	-0.00099768		2935.2	-0.00376532
575.41	-0.02217356		1165.41	-0.02369558		1755.4	-0.00349076		2345.4	0.00003691		2935.4	-0.00351833
575.61	-0.02200008		1165.61	-0.02450214		1755.6	-0.00387904		2345.6	0.00059439		2935.6	-0.00422151
575.81	-0.02166053		1165.81	-0.02412577		1755.8	-0.00378072		2345.8	0.000142		2935.8	-0.00397561
576.01	-0.02105095		1166.01	-0.0242716		1756	-0.00483355		2346	0.00005845		2936	-0.00443592
576.21	-0.02013068		1166.21	-0.0243324		1756.2	-0.00497489		2346.2	-0.00029106		2936.2	-0.0037992
576.41	-0.02000041		1166.41	-0.02400214		1756.4	-0.00608438		2346.4	-0.00024512		2936.4	-0.00459749
576.61	-0.01912426		1166.61	-0.02328912		1756.6	-0.00616744		2346.6	-0.00039794		2936.6	-0.00512359
576.81	-0.01879711		1166.81	-0.02322154		1756.8	-0.00652729		2346.8	0.00017295		2936.8	-0.00520963
577.01	-0.01788466		1167.01	-0.0228626		1757	-0.00638998		2347	0.00100827		2937	-0.00597245
577.21	-0.01758362		1167.21	-0.02266714		1757.2	-0.00561921		2347.2	0.00099177		2937.2	-0.00554637
577.41	-0.01664905		1167.41	-0.02318116		1757.4	-0.00529907		2347.4	0.00155162		2937.4	-0.0061367
577.61	-0.01637693		1167.61	-0.02446419		1757.6	-0.00464109		2347.6	0.00218554		2937.6	-0.00569393
577.81	-0.01654805		1167.81	-0.02429903		1757.8	-0.00488427		2347.8	0.00243179		2937.8	-0.00539103
578.01	-0.01737826		1168.01	-0.02392149		1758	-0.00507627		2348	0.00286485		2938	-0.00565102
578.21	-0.01796866		1168.21	-0.02465705		1758.2	-0.00560673		2348.2	0.00255324		2938.2	-0.00600387
578.41	-0.0192329		1168.41	-0.02486464		1758.4	-0.00596241		2348.4	0.00227852		2938.4	-0.00608528
578.61	-0.02005054		1168.61	-0.02441894		1758.6	-0.00661135		2348.6	0.00249267		2938.6	-0.00627861
578.81	-0.02111384		1168.81	-0.02440795		1758.8	-0.00546782		2348.8	0.00215891		2938.8	-0.00595466
579.01	-0.02114917		1169.01	-0.02368009		1759	-0.00462858		2349	0.00240921		2939	-0.00671809
579.21	-0.02185893		1169.21	-0.02347932		1759.2	-0.0047319		2349.2	0.00249354		2939.2	-0.00715532
579.41	-0.02242755		1169.41	-0.02409207		1759.4	-0.00440107		2349.4	0.00331592		2939.4	-0.00679009
579.61	-0.02358741		1169.61	-0.02392962		1759.6	-0.00464229		2349.6	0.00299566		2939.6	-0.00722574
579.81	-0.02339102		1169.81	-0.02325189		1759.8	-0.00512593		2349.8	0.00202006		2939.8	-0.00628356
580.01	-0.02346812		1170.01	-0.02317675		1760	-0.00671113		2350	0.00211111		2940	-0.00581849
580.21	-0.0232868		1170.21	-0.02297128		1760.2	-0.00702566		2350.2	0.00246813		2940.2	-0.0048854
580.41	-0.02281308		1170.41	-0.02275055		1760.4	-0.00758859		2350.4	0.00235968		2940.4	-0.00477641
580.61	-0.02194202		1170.61	-0.0219435		1760.6	-0.00688009		2350.6	0.00224298		2940.6	-0.0047904
580.81	-0.02188055		1170.81	-0.0222556		1760.8	-0.00728931		2350.8	0.00213946		2940.8	-0.00531361
581.01	-0.02109985		1171.01	-0.02258818		1761	-0.00702346		2351	0.00256752		2941	-0.00570418
581.21	-0.02083036		1171.21	-0.02300193		1761.2	-0.0067767		2351.2	0.00172704		2941.2	-0.00557799
581.41	-0.02094457		1171.41	-0.02424801		1761.4	-0.00604455		2351.4	0.00152646		2941.4	-0.00582838
581.61	-0.02127591		1171.61	-0.02540538		1761.6	-0.00550298		2351.6	0.00130503		2941.6	-0.0051815
581.81	-0.02126259		1171.81	-0.02604819		1761.8	-0.00490404		2351.8	0.00086499		2941.8	-0.00627356
582.01	-0.02179112		1172.01	-0.02659825		1762	-0.00421739		2352	0.0003775		2942	-0.0063409
582.21	-0.02111656		1172.21	-0.02682824		1762.2	-0.0045827		2352.2	-0.0000961		2942.2	-0.0061483
582.41	-0.02220842		1172.41	-0.02731879		1762.4	-0.00349625		2352.4	0.00022406		2942.4	-0.00611163
582.61	-0.02207711		1172.61	-0.02742685		1762.6	-0.00210506		2352.6	0.00063171		2942.6	-0.00733474
582.81	-0.02224781		1172.81	-0.02713806		1762.8	-0.00144346		2352.8	0.00074188		2942.8	-0.00814598
583.01	-0.02267148		1173.01	-0.02673593		1763	-0.00173487		2353	0.00036616		2943	-0.00921938
583.21	-0.02225409		1173.21	-0.0271004		1763.2	-0.00113515		2353.2	0.00045925		2943.2	-0.00898016
583.41	-0.02204353		1173.41	-0.02666541		1763.4	-0.00078027		2353.4	0.0011354		2943.4	-0.0086001
583.61	-0.02225572		1173.61	-0.02630153		1763.6	-0.00145953		2353.6	0.00114552		2943.6	-0.00855865
583.81	-0.02122785		1173.81	-0.02483082		1763.8	-0.00246438		2353.8	0.00090202		2943.8	-0.00796581
584.01	-0.02087207		1174.01	-0.02401887		1764	-0.00242651		2354	0.00085169		2944	-0.0076887
584.21	-0.0195836		1174.21	-0.0229889		1764.2	-0.0029521		2354.2	0.00040075		2944.2	-0.00762842
584.41	-0.01864486		1174.41	-0.02236367		1764.4	-0.00337839		2354.4	-0.00012864		2944.4	-0.00750965
584.61	-0.01778427		1174.61	-0.02090496		1764.6	-0.00422517		2354.6	-0.00048156		2944.6	-0.00782436
584.81	-0.01730725		1174.81	-0.02031046		1764.8	-0.00554552		2354.8	-0.00109639		2944.8	-0.00744996
585.01	-0.01673081		1175.01	-0.01976372		1765	-0.00598656		2355	-0.00036347		2945	-0.0075574
585.21	-0.01685706		1175.21	-0.02077852		1765.2	-0.00625711		2355.2	-0.00061218		2945.2	-0.00707366
585.41	-0.01697936		1175.41	-0.0214417		1765.4	-0.00545413		2355.4	-0.00068535		2945.4	-0.00672849
585.61	-0.01756695		1175.61	-0.02099211		1765.6	-0.00543539		2355.6	-0.00056983		2945.6	-0.00665184
585.81	-0.01805305		1175.81	-0.02140706		1765.8	-0.00569385		2355.8	-0.00104498		2945.8	-0.00659613
586.01	-0.0183324		1176.01	-0.02247922		1766	-0.00634996		2356	-0.00138478		2946	-0.00542939
586.21	-0.01945789		1176.21	-0.0234926		1766.2	-0.00697368		2356.2	-0.00035308		2946.2	-0.00610287
586.41	-0.02094219		1176.41	-0.02478633		1766.4	-0.00676189		2356.4	-0.00055098		2946.4	-0.00680932
586.61	-0.0216314		1176.61	-0.02517537		1766.6	-0.00707486		2356.6	-0.00009788		2946.6	-0.00718617
586.81	-0.02257984		1176.81	-0.02520568		1766.8	-0.0076131		2356.8	-0.00044919		2946.8	-0.0079021
587.01	-0.0238653		1177.01	-0.02539925		1767	-0.00642901		2357	0.00044899		2947	-0.00816403
587.21	-0.02405465		1177.21	-0.02536522		1767.2	-0.00569		2357.2	0.00034799		2947.2	-0.00769073
587.41	-0.02542368		1177.41	-0.02577589		1767.4	-0.00521157		2357.4	0.00040533		2947.4	-0.00779894
587.61	-0.02555404		1177.61	-0.02646828		1767.6	-0.00517437		2357.6	0.00024931		2947.6	-0.00782739
587.81	-0.02518124		1177.81	-0.02594212		1767.8	-0.00488428		2357.8	0.00069527		2947.8	-0.00859966
588.01	-0.02541442		1178.01	-0.02619469		1768	-0.00420542		2358	0.00039766		2948	-0.00881877
588.21	-0.02519593		1178.21	-0.02557551		1768.2	-0.0041694		2358.2	-0.00031695		2948.2	-0.00839862
588.41	-0.02502537		1178.41	-0.02491997		1768.4	-0.00442024		2358.4	-0.00049445		2948.4	-0.00883387
588.61	-0.0247864		1178.61	-0.02379136		1768.6	-0.00444495		2358.6	-0.00025425		2948.6	-0.00835589
588.81	-0.02399221		1178.81	-0.02343014		1768.8	-0.00386663		2358.8	-0.0004165		2948.8	-0.0081936
589.01	-0.02401292		1179.01	-0.02380962		1769	-0.00345801		2359	-0.00007543		2949	-0.00850226
589.21	-0.02413777		1179.21	-0.02418704		1769.2	-0.00326596		2359.2	0.00036977		2949.2	-0.00782013
589.41	-0.02334005		1179.41	-0.02357132		1769.4	-0.0028633		2359.4	-0.00024239		2949.4	-0.00762417
589.61	-0.02347896		1179.61	-0.02336021		1769.6	-0.00355747		2359.6	-0.00062857		2949.6	-0.00749188
589.81	-0.02258161		1179.81	-0.02447276		1769.8	-0.00383544		2359.8	-0.0011833		2949.8	-0.0075402
590.01	-0.02215226		1180.01	-0.02480912		1770	-0.00404142		2360	-0.00117727		2950	-0.00715075
590.21	-0.0222156		1180.21	-0.0250384		1770.2	-0.00487738		2360.2	-0.00111773		2950.2	-0.00740167
590.41	-0.02088655		1180.41	-0.02526289		1770.4	-0.00582258		2360.4	-0.00153305		2950.4	-0.00719748
590.61	-0.02124839		1180.61	-0.02611197		1770.6	-0.00622597		2360.6	-0.00115386		2950.6	-0.00699888
590.81	-0.02089912		1180.81	-0.02636414		1770.8	-0.00614207		2360.8	-0.00158108		2950.8	-0.00762353
591.01	-0.02120918		1181.01	-0.02664401		1771	-0.00596492		2361	-0.0021283		2951	-0.00784095
591.21	-0.02074662		1181.21	-0.02712062		1771.2	-0.00626709		2361.2	-0.00293361		2951.2	-0.00847006
591.41	-0.0209798		1181.41	-0.02889335		1771.4	-0.00569954		2361.4	-0.0031744		2951.4	-0.00832958
591.61	-0.02050628		1181.61	-0.02844499		1771.6	-0.00623099		2361.6	-0.00259906		2951.6	-0.00807838
591.81	-0.02036527		1181.81	-0.02818987		1771.8	-0.00595498		2361.8	-0.00186175		2951.8	-0.00894739
592.01	-0.02108534		1182.01	-0.02750103		1772	-0.00510893		2362	-0.00265075		2952	-0.00939809
592.21	-0.02077833		1182.21	-0.02648105		1772.2	-0.00491564		2362.2	-0.00265135		2952.2	-0.00927261
592.41	-0.02019359		1182.41	-0.02577429		1772.4	-0.00532868		2362.4	-0.00248305		2952.4	-0.00978785
592.61	-0.01998008		1182.61	-0.02533234		1772.6	-0.00466428		2362.6	-0.00212149		2952.6	-0.00930494
592.81	-0.0197929		1182.81	-0.02506489		1772.8	-0.00430457		2362.8	-0.00232764		2952.8	-0.0087408
593.01	-0.02005081		1183.01	-0.02475351		1773	-0.00431094		2363	-0.00150164		2953	-0.0090556
593.21	-0.01954383		1183.21	-0.02440187		1773.2	-0.0036722		2363.2	-0.00136111		2953.2	-0.00826597
593.41	-0.01862251		1183.41	-0.02431248		1773.4	-0.0034933		2363.4	-0.00133935		2953.4	-0.00817503
593.61	-0.01849462		1183.61	-0.02396014		1773.6	-0.00394916		2363.6	-0.00187697		2953.6	-0.00847237
593.81	-0.01862026		1183.81	-0.02400366		1773.8	-0.0036025		2363.8	-0.00171047		2953.8	-0.00834404
594.01	-0.01870771		1184.01	-0.02401764		1774	-0.00448525		2364	-0.00120234		2954	-0.00789413
594.21	-0.01895711		1184.21	-0.02478041		1774.2	-0.00460625		2364.2	-0.00170755		2954.2	-0.00783037
594.41	-0.01948212		1184.41	-0.0252021		1774.4	-0.004474		2364.4	-0.00187889		2954.4	-0.00744778
594.61	-0.02061045		1184.61	-0.02632725		1774.6	-0.00430403		2364.6	-0.00228246		2954.6	-0.00692693
594.81	-0.02099652		1184.81	-0.02657634		1774.8	-0.00456134		2364.8	-0.00287319		2954.8	-0.00703695
595.01	-0.02212481		1185.01	-0.0271378		1775	-0.00461494		2365	-0.00324207		2955	-0.00674896
595.21	-0.02325137		1185.21	-0.02685563		1775.2	-0.00418129		2365.2	-0.00273833		2955.2	-0.00641906
595.41	-0.02453552		1185.41	-0.02645153		1775.4	-0.00378373		2365.4	-0.00287514		2955.4	-0.00469157
595.61	-0.02425723		1185.61	-0.02618554		1775.6	-0.0039218		2365.6	-0.00258969		2955.6	-0.00545505
595.81	-0.0242623		1185.81	-0.02653268		1775.8	-0.00375103		2365.8	-0.00247949		2955.8	-0.00608924
596.01	-0.0241391		1186.01	-0.02614865		1776	-0.00359591		2366	-0.00236839		2956	-0.0068505
596.21	-0.02322595		1186.21	-0.02592876		1776.2	-0.00450716		2366.2	-0.00200195		2956.2	-0.0069704
596.41	-0.02257122		1186.41	-0.02562599		1776.4	-0.0047745		2366.4	-0.00204318		2956.4	-0.00710756
596.61	-0.02170388		1186.61	-0.02614899		1776.6	-0.00496731		2366.6	-0.00187829		2956.6	-0.00687505
596.81	-0.02138592		1186.81	-0.02589698		1776.8	-0.00523331		2366.8	-0.00175428		2956.8	-0.00612033
597.01	-0.02029902		1187.01	-0.02631177		1777	-0.00516413		2367	-0.00214145		2957	-0.00650964
597.21	-0.01996215		1187.21	-0.02630546		1777.2	-0.0050777		2367.2	-0.00210482		2957.2	-0.00576909
597.41	-0.0198532		1187.41	-0.02610109		1777.4	-0.00517829		2367.4	-0.00265612		2957.4	-0.00624682
597.61	-0.02056383		1187.61	-0.02523677		1777.6	-0.005709		2367.6	-0.00297108		2957.6	-0.00777526
597.81	-0.02134928		1187.81	-0.02515797		1777.8	-0.00579732		2367.8	-0.00310406		2957.8	-0.00766754
598.01	-0.02133769		1188.01	-0.02509246		1778	-0.00591132		2368	-0.00340269		2958	-0.00829509
598.21	-0.02164496		1188.21	-0.02554785		1778.2	-0.00564396		2368.2	-0.00412601		2958.2	-0.00793691
598.41	-0.02252262		1188.41	-0.02510059		1778.4	-0.00526745		2368.4	-0.00359024		2958.4	-0.00829339
598.61	-0.02375087		1188.61	-0.02541804		1778.6	-0.00488469		2368.6	-0.00278816		2958.6	-0.00865994
598.81	-0.02464497		1188.81	-0.02526411		1778.8	-0.00575333		2368.8	-0.00247069		2958.8	-0.00879985
599.01	-0.02448087		1189.01	-0.0249976		1779	-0.00557967		2369	-0.00195911		2959	-0.00851159
599.21	-0.02496574		1189.21	-0.02473337		1779.2	-0.00515352		2369.2	-0.00176841		2959.2	-0.00889892
599.41	-0.02524167		1189.41	-0.02505434		1779.4	-0.00549625		2369.4	-0.00195729		2959.4	-0.0094896
599.61	-0.02385558		1189.61	-0.02528934		1779.6	-0.00534582		2369.6	-0.00177127		2959.6	-0.01082899
599.81	-0.02506748		1189.81	-0.02556581		1779.8	-0.0057916		2369.8	-0.00181059		2959.8	-0.01075644
600.01	-0.02410138		1190.01	-0.02585156		1780	-0.00628444		2370	-0.00149778		2960	-0.01102475
600.21	-0.02374633		1190.21	-0.02631826		1780.2	-0.00685786		2370.2	-0.0014908		2960.2	-0.01096093
600.41	-0.02259667		1190.41	-0.0264719		1780.4	-0.00595792		2370.4	-0.00121877		2960.4	-0.01038697
600.61	-0.02181042		1190.61	-0.02694623		1780.6	-0.00621901		2370.6	-0.00071266		2960.6	-0.00947038
600.81	-0.02137281		1190.81	-0.02649155		1780.8	-0.00679248		2370.8	-0.00111243		2960.8	-0.00851211
601.01	-0.02067587		1191.01	-0.02656469		1781	-0.0067856		2371	-0.00182687		2961	-0.00848827
601.21	-0.02106248		1191.21	-0.02495976		1781.2	-0.00634513		2371.2	-0.001928		2961.2	-0.00794988
601.41	-0.02097464		1191.41	-0.02444516		1781.4	-0.00630878		2371.4	-0.00249472		2961.4	-0.00811558
601.61	-0.02060479		1191.61	-0.02395313		1781.6	-0.00641742		2371.6	-0.00237833		2961.6	-0.00877038
601.81	-0.02028028		1191.81	-0.02432591		1781.8	-0.00706924		2371.8	-0.00269944		2961.8	-0.00811962
602.01	-0.01990304		1192.01	-0.02485278		1782	-0.00710711		2372	-0.00217522		2962	-0.00833012
602.21	-0.02053969		1192.21	-0.02452379		1782.2	-0.00717302		2372.2	-0.00167849		2962.2	-0.00768856
602.41	-0.0216949		1192.41	-0.02426131		1782.4	-0.00642028		2372.4	-0.00150829		2962.4	-0.00867051
602.61	-0.02176543		1192.61	-0.02508129		1782.6	-0.00647671		2372.6	-0.00099762		2962.6	-0.00854563
602.81	-0.02179512		1192.81	-0.02520974		1782.8	-0.00687338		2372.8	-0.00183835		2962.8	-0.00778065
603.01	-0.02119255		1193.01	-0.02513158		1783	-0.00599437		2373	-0.00171924		2963	-0.00885607
603.21	-0.02149498		1193.21	-0.02577454		1783.2	-0.00640418		2373.2	-0.00284168		2963.2	-0.00935941
603.41	-0.02227284		1193.41	-0.0260847		1783.4	-0.0062876		2373.4	-0.00345072		2963.4	-0.00945838
603.61	-0.02185275		1193.61	-0.02597652		1783.6	-0.00611244		2373.6	-0.00351135		2963.6	-0.00946156
603.81	-0.02292659		1193.81	-0.02635918		1783.8	-0.0067121		2373.8	-0.00390012		2963.8	-0.00963247
604.01	-0.02182307		1194.01	-0.02693954		1784	-0.0062812		2374	-0.00445336		2964	-0.00918666
604.21	-0.02220522		1194.21	-0.02649891		1784.2	-0.00609657		2374.2	-0.00481857		2964.2	-0.00941746
604.41	-0.022318		1194.41	-0.02636902		1784.4	-0.00501562		2374.4	-0.00440827		2964.4	-0.00883831
604.61	-0.02262281		1194.61	-0.02551549		1784.6	-0.00573065		2374.6	-0.00387296		2964.6	-0.00856134
604.81	-0.02317921		1194.81	-0.02477761		1784.8	-0.00582359		2374.8	-0.00410779		2964.8	-0.00823827
605.01	-0.02406605		1195.01	-0.02421251		1785	-0.00553379		2375	-0.00389053		2965	-0.00770692
605.21	-0.024594		1195.21	-0.02387964		1785.2	-0.00501348		2375.2	-0.00382412		2965.2	-0.00774414
605.41	-0.02459924		1195.41	-0.02485895		1785.4	-0.00557763		2375.4	-0.00325633		2965.4	-0.00890158
605.61	-0.02468188		1195.61	-0.02500559		1785.6	-0.00518931		2375.6	-0.00276873		2965.6	-0.00913591
605.81	-0.02542227		1195.81	-0.02569038		1785.8	-0.00544729		2375.8	-0.00267496		2965.8	-0.00867263
606.01	-0.02582083		1196.01	-0.02603856		1786	-0.00444622		2376	-0.00232627		2966	-0.00909342
606.21	-0.02629991		1196.21	-0.02631176		1786.2	-0.00358289		2376.2	-0.00155495		2966.2	-0.00979265
606.41	-0.02581907		1196.41	-0.0267685		1786.4	-0.00304448		2376.4	-0.0018173		2966.4	-0.00969079
606.61	-0.02507198		1196.61	-0.02806095		1786.6	-0.0022838		2376.6	-0.00150101		2966.6	-0.00984665
606.81	-0.02508215		1196.81	-0.02863433		1786.8	-0.0024418		2376.8	-0.00156639		2966.8	-0.01001455
607.01	-0.02402433		1197.01	-0.02831586		1787	-0.00292297		2377	-0.00142536		2967	-0.01075219
607.21	-0.02302914		1197.21	-0.02857992		1787.2	-0.00391188		2377.2	-0.00246618		2967.2	-0.01054686
607.41	-0.0234911		1197.41	-0.02872808		1787.4	-0.00396708		2377.4	-0.00230386		2967.4	-0.0112905
607.61	-0.0229052		1197.61	-0.02776576		1787.6	-0.00438852		2377.6	-0.00273772		2967.6	-0.01184905
607.81	-0.02249866		1197.81	-0.02752208		1787.8	-0.00535391		2377.8	-0.00326176		2967.8	-0.01186892
608.01	-0.0226794		1198.01	-0.02789484		1788	-0.00540121		2378	-0.00369849		2968	-0.01117971
608.21	-0.02252004		1198.21	-0.02693578		1788.2	-0.00594055		2378.2	-0.00352919		2968.2	-0.01053472
608.41	-0.02294204		1198.41	-0.02676381		1788.4	-0.00573947		2378.4	-0.00314904		2968.4	-0.01021877
608.61	-0.02353568		1198.61	-0.025699		1788.6	-0.00569305		2378.6	-0.00291313		2968.6	-0.00941471
608.81	-0.02435953		1198.81	-0.02545274		1788.8	-0.00597257		2378.8	-0.00240292		2968.8	-0.00863771
609.01	-0.02471026		1199.01	-0.02572881		1789	-0.00615639		2379	-0.00182541		2969	-0.00792417
609.21	-0.02504277		1199.21	-0.02569478		1789.2	-0.0058192		2379.2	-0.00239637		2969.2	-0.00835431
609.41	-0.02558354		1199.41	-0.02589937		1789.4	-0.00640434		2379.4	-0.00268589		2969.4	-0.00776782
609.61	-0.0259618		1199.61	-0.02557096		1789.6	-0.00542398		2379.6	-0.00265603		2969.6	-0.00707686
609.81	-0.02585406		1199.81	-0.02577843		1789.8	-0.00535035		2379.8	-0.00299144		2969.8	-0.00749399
610.01	-0.02462626		1200.01	-0.02618897		1790	-0.00485188		2380	-0.00251798		2970	-0.00784317
610.21	-0.02335225		1200.21	-0.02694616		1790.2	-0.00522499		2380.2	-0.00202431		2970.2	-0.00801941
610.41	-0.02269604		1200.41	-0.02716908		1790.4	-0.00502999		2380.4	-0.00258492		2970.4	-0.00768044
610.61	-0.02175653		1200.61	-0.02764589		1790.6	-0.00515247		2380.6	-0.00319542		2970.6	-0.00857922
610.81	-0.02124647		1200.81	-0.02712317		1790.8	-0.00618678		2380.8	-0.00295751		2970.8	-0.00916371
611.01	-0.02020467		1201.01	-0.02604228		1791	-0.00629234		2381	-0.00329439		2971	-0.01009891
611.21	-0.0202047		1201.21	-0.02622063		1791.2	-0.00644438		2381.2	-0.00326854		2971.2	-0.01090399
611.41	-0.02011052		1201.41	-0.02672049		1791.4	-0.00667078		2381.4	-0.00338474		2971.4	-0.01162602
611.61	-0.02013319		1201.61	-0.02642726		1791.6	-0.00632795		2381.6	-0.00374868		2971.6	-0.01104797
611.81	-0.01988859		1201.81	-0.02676097		1791.8	-0.00600771		2381.8	-0.00346934		2971.8	-0.01046348
612.01	-0.02037451		1202.01	-0.02687807		1792	-0.00518383		2382	-0.00229682		2972	-0.01003855
612.21	-0.02059015		1202.21	-0.02671855		1792.2	-0.00453801		2382.2	-0.00180255		2972.2	-0.0093234
612.41	-0.02145996		1202.41	-0.02664856		1792.4	-0.00408412		2382.4	-0.00146412		2972.4	-0.00950059
612.61	-0.02238424		1202.61	-0.02554058		1792.6	-0.00423529		2382.6	-0.00057126		2972.6	-0.00809013
612.81	-0.02258866		1202.81	-0.02545107		1792.8	-0.00488916		2382.8	0.00001722		2972.8	-0.00745421
613.01	-0.02285328		1203.01	-0.02539816		1793	-0.00501131		2383	0.0000713		2973	-0.00714262
613.21	-0.02340424		1203.21	-0.02484301		1793.2	-0.00532159		2383.2	-0.00048207		2973.2	-0.00711935
613.41	-0.02412122		1203.41	-0.02497952		1793.4	-0.00600612		2383.4	-0.00084777		2973.4	-0.0075634
613.61	-0.0242842		1203.61	-0.02503996		1793.6	-0.00626525		2383.6	-0.00092787		2973.6	-0.00752382
613.81	-0.02460912		1203.81	-0.02580131		1793.8	-0.00636147		2383.8	-0.00153278		2973.8	-0.00779579
614.01	-0.02491864		1204.01	-0.02647871		1794	-0.00675344		2384	-0.00269603		2974	-0.00774824
614.21	-0.02601775		1204.21	-0.02619438		1794.2	-0.00705633		2384.2	-0.00272604		2974.2	-0.00852136
614.41	-0.02625516		1204.41	-0.02562385		1794.4	-0.006671		2384.4	-0.00355722		2974.4	-0.00979927
614.61	-0.02597095		1204.61	-0.0243659		1794.6	-0.00673996		2384.6	-0.0037538		2974.6	-0.01029365
614.81	-0.02564476		1204.81	-0.02429954		1794.8	-0.00630111		2384.8	-0.00330012		2974.8	-0.01141598
615.01	-0.02506755		1205.01	-0.02424488		1795	-0.00534708		2385	-0.00326484		2975	-0.01227068
615.21	-0.02501318		1205.21	-0.02437217		1795.2	-0.00555225		2385.2	-0.0040303		2975.2	-0.01209877
615.41	-0.02460465		1205.41	-0.02458703		1795.4	-0.00503941		2385.4	-0.0044183		2975.4	-0.01308368
615.61	-0.02478866		1205.61	-0.02476245		1795.6	-0.00408622		2385.6	-0.00453404		2975.6	-0.01207884
615.81	-0.02368772		1205.81	-0.02499604		1795.8	-0.00419723		2385.8	-0.00410975		2975.8	-0.01179441
616.01	-0.0240932		1206.01	-0.02623915		1796	-0.00490645		2386	-0.00382675		2976	-0.01107697
616.21	-0.02409298		1206.21	-0.02656962		1796.2	-0.00545554		2386.2	-0.00483362		2976.2	-0.01086217
616.41	-0.02376787		1206.41	-0.02656502		1796.4	-0.00635588		2386.4	-0.00594038		2976.4	-0.01028337
616.61	-0.02347044		1206.61	-0.02653024		1796.6	-0.00674965		2386.6	-0.00577569		2976.6	-0.00950165
616.81	-0.02364885		1206.81	-0.02713819		1796.8	-0.00658761		2386.8	-0.00539356		2976.8	-0.00882997
617.01	-0.02315129		1207.01	-0.02674359		1797	-0.00663832		2387	-0.00470584		2977	-0.0087493
617.21	-0.02318759		1207.21	-0.02654325		1797.2	-0.00726757		2387.2	-0.00485843		2977.2	-0.0088534
617.41	-0.02407741		1207.41	-0.02657634		1797.4	-0.00746804		2387.4	-0.00545194		2977.4	-0.00911803
617.61	-0.02513305		1207.61	-0.02712645		1797.6	-0.00730281		2387.6	-0.00560902		2977.6	-0.00853033
617.81	-0.02627956		1207.81	-0.02743199		1797.8	-0.00622706		2387.8	-0.00612269		2977.8	-0.00852879
618.01	-0.02621754		1208.01	-0.02637146		1798	-0.00618292		2388	-0.00646543		2978	-0.00854934
618.21	-0.02646047		1208.21	-0.02540231		1798.2	-0.00623247		2388.2	-0.00599586		2978.2	-0.00900926
618.41	-0.02557498		1208.41	-0.02534056		1798.4	-0.0059801		2388.4	-0.00553598		2978.4	-0.00952358
618.61	-0.02614301		1208.61	-0.02473008		1798.6	-0.00511445		2388.6	-0.00409843		2978.6	-0.00949376
618.81	-0.02544172		1208.81	-0.02461446		1798.8	-0.00500532		2388.8	-0.00402839		2978.8	-0.01013802
619.01	-0.02593551		1209.01	-0.02475279		1799	-0.00587079		2389	-0.00378805		2979	-0.01062653
619.21	-0.02586426		1209.21	-0.02417246		1799.2	-0.0072732		2389.2	-0.00451319		2979.2	-0.01137136
619.41	-0.02568396		1209.41	-0.02493168		1799.4	-0.00722037		2389.4	-0.00395946		2979.4	-0.01157733
619.61	-0.02469632		1209.61	-0.02593262		1799.6	-0.00780417		2389.6	-0.00398079		2979.6	-0.01059458
619.81	-0.02420552		1209.81	-0.02640514		1799.8	-0.0082553		2389.8	-0.00483823		2979.8	-0.01133312
620.01	-0.02468863		1210.01	-0.02738893		1800	-0.0087648		2390	-0.00513202		2980	-0.01103707
620.21	-0.02385913		1210.21	-0.02775		1800.2	-0.00883974		2390.2	-0.00588095		2980.2	-0.01083967
620.41	-0.02352252		1210.41	-0.0282107		1800.4	-0.00797116		2390.4	-0.00571709		2980.4	-0.0095899
620.61	-0.02277743		1210.61	-0.02852196		1800.6	-0.00706515		2390.6	-0.00517422		2980.6	-0.00920279
620.81	-0.02250384		1210.81	-0.02824794		1800.8	-0.00663449		2390.8	-0.00474668		2980.8	-0.00869153
621.01	-0.0217797		1211.01	-0.0274919		1801	-0.00680066		2391	-0.00473566		2981	-0.00901423
621.21	-0.02187471		1211.21	-0.0278774		1801.2	-0.00589526		2391.2	-0.00578927		2981.2	-0.00919353
621.41	-0.02231489		1211.41	-0.02755134		1801.4	-0.00499826		2391.4	-0.00561373		2981.4	-0.00895437
621.61	-0.02211121		1211.61	-0.0271158		1801.6	-0.00387165		2391.6	-0.00578875		2981.6	-0.0088097
621.81	-0.02161832		1211.81	-0.02708098		1801.8	-0.00301275		2391.8	-0.00561821		2981.8	-0.00852099
622.01	-0.02083004		1212.01	-0.02616442		1802	-0.00270364		2392	-0.0051813		2982	-0.00892368
622.21	-0.02080589		1212.21	-0.02583689		1802.2	-0.00252974		2392.2	-0.00481864		2982.2	-0.00965981
622.41	-0.02039686		1212.41	-0.02600223		1802.4	-0.00228618		2392.4	-0.00408294		2982.4	-0.00946626
622.61	-0.0208304		1212.61	-0.02540361		1802.6	-0.0018847		2392.6	-0.00333441		2982.6	-0.00951703
622.81	-0.02018806		1212.81	-0.02478446		1802.8	-0.0036313		2392.8	-0.00339001		2982.8	-0.00995373
623.01	-0.02052705		1213.01	-0.02506537		1803	-0.00504059		2393	-0.00293019		2983	-0.01043459
623.21	-0.01973538		1213.21	-0.02522031		1803.2	-0.00554076		2393.2	-0.00313661		2983.2	-0.0110954
623.41	-0.01976794		1213.41	-0.02562222		1803.4	-0.00589543		2393.4	-0.0027756		2983.4	-0.01084836
623.61	-0.01986898		1213.61	-0.02514653		1803.6	-0.00595964		2393.6	-0.00318912		2983.6	-0.01120536
623.81	-0.02046626		1213.81	-0.02542129		1803.8	-0.00698939		2393.8	-0.00297885		2983.8	-0.01058761
624.01	-0.02145791		1214.01	-0.02537885		1804	-0.00832837		2394	-0.00296377		2984	-0.00969721
624.21	-0.02132573		1214.21	-0.02513298		1804.2	-0.00870895		2394.2	-0.00355279		2984.2	-0.00879952
624.41	-0.02232592		1214.41	-0.0252823		1804.4	-0.00839441		2394.4	-0.00399552		2984.4	-0.00847068
624.61	-0.0233672		1214.61	-0.0245312		1804.6	-0.00891813		2394.6	-0.00433546		2984.6	-0.00796231
624.81	-0.02463295		1214.81	-0.02413779		1804.8	-0.00817527		2394.8	-0.0045517		2984.8	-0.00813741
625.01	-0.02534932		1215.01	-0.02360549		1805	-0.00812783		2395	-0.00448306		2985	-0.00737212
625.21	-0.02514909		1215.21	-0.02368558		1805.2	-0.00709714		2395.2	-0.00536953		2985.2	-0.00706159
625.41	-0.02567904		1215.41	-0.02278156		1805.4	-0.00675992		2395.4	-0.00513356		2985.4	-0.0077349
625.61	-0.02575834		1215.61	-0.02277857		1805.6	-0.00600398		2395.6	-0.00555811		2985.6	-0.00794126
625.81	-0.02569619		1215.81	-0.02401898		1805.8	-0.00596415		2395.8	-0.00561382		2985.8	-0.00837106
626.01	-0.02517629		1216.01	-0.02364893		1806	-0.00446512		2396	-0.00589963		2986	-0.00899237
626.21	-0.02518076		1216.21	-0.02405899		1806.2	-0.00382148		2396.2	-0.00641045		2986.2	-0.00940737
626.41	-0.02464773		1216.41	-0.02476568		1806.4	-0.00349417		2396.4	-0.00673325		2986.4	-0.00936153
626.61	-0.0243443		1216.61	-0.02536676		1806.6	-0.00332688		2396.6	-0.00619132		2986.6	-0.01008449
626.81	-0.02408088		1216.81	-0.02629412		1806.8	-0.00494027		2396.8	-0.00614699		2986.8	-0.01075737
627.01	-0.02314416		1217.01	-0.02763105		1807	-0.00509431		2397	-0.00610245		2987	-0.01026907
627.21	-0.02266537		1217.21	-0.02863539		1807.2	-0.00584859		2397.2	-0.00601471		2987.2	-0.01050179
627.41	-0.02308878		1217.41	-0.02841851		1807.4	-0.006521		2397.4	-0.00607406		2987.4	-0.01081362
627.61	-0.02338616		1217.61	-0.02855056		1807.6	-0.00739969		2397.6	-0.00527822		2987.6	-0.01035097
627.81	-0.02389168		1217.81	-0.0291853		1807.8	-0.00895322		2397.8	-0.00526676		2987.8	-0.00964503
628.01	-0.02498789		1218.01	-0.02903105		1808	-0.00983386		2398	-0.00573684		2988	-0.01003192
628.21	-0.02584869		1218.21	-0.02820695		1808.2	-0.01077218		2398.2	-0.00473303		2988.2	-0.01029299
628.41	-0.02703277		1218.41	-0.02912331		1808.4	-0.01079728		2398.4	-0.00438918		2988.4	-0.00997891
628.61	-0.02807088		1218.61	-0.02864985		1808.6	-0.01126463		2398.6	-0.00300942		2988.6	-0.0100755
628.81	-0.02798893		1218.81	-0.02830365		1808.8	-0.00992708		2398.8	-0.00273535		2988.8	-0.01000546
629.01	-0.02799194		1219.01	-0.02787466		1809	-0.010302		2399	-0.00167395		2989	-0.00920738
629.21	-0.0282229		1219.21	-0.02806065		1809.2	-0.00947433		2399.2	-0.00236501		2989.2	-0.00986607
629.41	-0.02917382		1219.41	-0.02825588		1809.4	-0.0092634		2399.4	-0.00235328		2989.4	-0.00987799
629.61	-0.02888769		1219.61	-0.02873106		1809.6	-0.00901936		2399.6	-0.00262849		2989.6	-0.00998724
629.81	-0.02809938		1219.81	-0.02905178		1809.8	-0.00824528		2399.8	-0.00309582		2989.8	-0.01022021
630.01	-0.02814735		1220.01	-0.02863448		1810	-0.0069716		2400	-0.00303773		2990	-0.0106371
630.21	-0.02861328		1220.21	-0.02854406		1810.2	-0.00711546		2400.2	-0.00364108		2990.2	-0.01087856
630.41	-0.02822661		1220.41	-0.02816008		1810.4	-0.00656292		2400.4	-0.00440036		2990.4	-0.01123179
630.61	-0.02837606		1220.61	-0.02767128		1810.6	-0.00673746		2400.6	-0.00464619		2990.6	-0.01135457
630.81	-0.0282068		1220.81	-0.02802132		1810.8	-0.0072689		2400.8	-0.00558905		2990.8	-0.01177333
631.01	-0.02732601		1221.01	-0.02802727		1811	-0.00720296		2401	-0.00546478		2991	-0.01147157
631.21	-0.0284952		1221.21	-0.02833334		1811.2	-0.00772489		2401.2	-0.00586133		2991.2	-0.01164062
631.41	-0.02861183		1221.41	-0.02764332		1811.4	-0.00780508		2401.4	-0.00615831		2991.4	-0.01164958
631.61	-0.02855616		1221.61	-0.02738651		1811.6	-0.00797295		2401.6	-0.00605703		2991.6	-0.01137794
631.81	-0.02874205		1221.81	-0.02828633		1811.8	-0.00768659		2401.8	-0.00682863		2991.8	-0.01126348
632.01	-0.02815898		1222.01	-0.02863955		1812	-0.00823208		2402	-0.00630706		2992	-0.01169682
632.21	-0.02787333		1222.21	-0.02829047		1812.2	-0.00915776		2402.2	-0.00588762		2992.2	-0.01137017
632.41	-0.02747873		1222.41	-0.02924419		1812.4	-0.00925057		2402.4	-0.0065424		2992.4	-0.01108321
632.61	-0.02703209		1222.61	-0.02948708		1812.6	-0.00868227		2402.6	-0.00590814		2992.6	-0.01104138
632.81	-0.02686248		1222.81	-0.02948145		1812.8	-0.00754832		2402.8	-0.00617098		2992.8	-0.01067328
633.01	-0.02677322		1223.01	-0.02948692		1813	-0.00765226		2403	-0.00535793		2993	-0.01043737
633.21	-0.02696464		1223.21	-0.02936596		1813.2	-0.00803989		2403.2	-0.00615514		2993.2	-0.01131861
633.41	-0.02689582		1223.41	-0.02891742		1813.4	-0.00829691		2403.4	-0.00575955		2993.4	-0.01160595
633.61	-0.02627679		1223.61	-0.02871549		1813.6	-0.00730998		2403.6	-0.00495517		2993.6	-0.01232991
633.81	-0.0260101		1223.81	-0.02848331		1813.8	-0.0060847		2403.8	-0.00531883		2993.8	-0.01239422
634.01	-0.02628856		1224.01	-0.02791082		1814	-0.00603032		2404	-0.00505651		2994	-0.01278212
634.21	-0.02688178		1224.21	-0.02728506		1814.2	-0.00620582		2404.2	-0.00546751		2994.2	-0.01323659
634.41	-0.02695773		1224.41	-0.02657212		1814.4	-0.00561787		2404.4	-0.00539795		2994.4	-0.01319316
634.61	-0.02713765		1224.61	-0.02665323		1814.6	-0.00534558		2404.6	-0.0054551		2994.6	-0.01336452
634.81	-0.02721317		1224.81	-0.02704606		1814.8	-0.00583919		2404.8	-0.00450806		2994.8	-0.01453666
635.01	-0.02728976		1225.01	-0.02696086		1815	-0.0063569		2405	-0.00386398		2995	-0.01380192
635.21	-0.02812013		1225.21	-0.02709258		1815.2	-0.00682823		2405.2	-0.00396606		2995.2	-0.01266761
635.41	-0.02744557		1225.41	-0.0272326		1815.4	-0.0077734		2405.4	-0.00391268		2995.4	-0.01185873
635.61	-0.0270499		1225.61	-0.0277169		1815.6	-0.0080886		2405.6	-0.00433791		2995.6	-0.01140399
635.81	-0.02662882		1225.81	-0.02863258		1815.8	-0.00847675		2405.8	-0.00413458		2995.8	-0.01053271
636.01	-0.0259528		1226.01	-0.02961998		1816	-0.00921745		2406	-0.00444051		2996	-0.01024943
636.21	-0.02662176		1226.21	-0.02960725		1816.2	-0.00882069		2406.2	-0.00496688		2996.2	-0.00914206
636.41	-0.02665162		1226.41	-0.03032421		1816.4	-0.00851981		2406.4	-0.00529046		2996.4	-0.00896681
636.61	-0.02673454		1226.61	-0.03085858		1816.6	-0.00807679		2406.6	-0.00501086		2996.6	-0.00860919
636.81	-0.02720796		1226.81	-0.03097919		1816.8	-0.008302		2406.8	-0.00522702		2996.8	-0.00904422
637.01	-0.02720422		1227.01	-0.03042843		1817	-0.00794937		2407	-0.00416874		2997	-0.0093773
637.21	-0.02743156		1227.21	-0.03049032		1817.2	-0.00776015		2407.2	-0.00441087		2997.2	-0.00979361
637.41	-0.02654292		1227.41	-0.03072971		1817.4	-0.00679496		2407.4	-0.00387969		2997.4	-0.01022019
637.61	-0.02648456		1227.61	-0.03161769		1817.6	-0.00668474		2407.6	-0.00396472		2997.6	-0.01078705
637.81	-0.02612234		1227.81	-0.03151232		1817.8	-0.00655448		2407.8	-0.00497255		2997.8	-0.01059185
638.01	-0.02590026		1228.01	-0.03093433		1818	-0.00702895		2408	-0.00467638		2998	-0.01130538
638.21	-0.02636265		1228.21	-0.03039149		1818.2	-0.00750272		2408.2	-0.0048838		2998.2	-0.0116419
638.41	-0.02638644		1228.41	-0.02988746		1818.4	-0.00722801		2408.4	-0.00470426		2998.4	-0.01238178
638.61	-0.02688302		1228.61	-0.02981244		1818.6	-0.00668972		2408.6	-0.00495031		2998.6	-0.01284321
638.81	-0.02681943		1228.81	-0.0296124		1818.8	-0.00749296		2408.8	-0.00436376		2998.8	-0.01393341
639.01	-0.02660588		1229.01	-0.02894221		1819	-0.00769729		2409	-0.00523008		2999	-0.01412361
639.21	-0.02649039		1229.21	-0.02836999		1819.2	-0.0084392		2409.2	-0.00547395		2999.2	-0.01354436
639.41	-0.02600252		1229.41	-0.02828903		1819.4	-0.00902307		2409.4	-0.00590409		2999.4	-0.01323724
639.61	-0.02585169		1229.61	-0.02828118		1819.6	-0.00905078		2409.6	-0.00605865		2999.6	-0.01351263
639.81	-0.0252585		1229.81	-0.02884681		1819.8	-0.00869763		2409.8	-0.00592185		2999.8	-0.01370023
640.01	-0.02524571		1230.01	-0.02988484		1820	-0.00848355		2410	-0.00609093		3000	-0.01355491
640.21	-0.0253707		1230.21	-0.02903972		1820.2	-0.0091948		2410.2	-0.00617101		3000.2	-0.01256454
640.41	-0.0247739		1230.41	-0.02962859		1820.4	-0.00936869		2410.4	-0.00644366		3000.4	-0.01208373
640.61	-0.02491839		1230.61	-0.02991518		1820.6	-0.00877962		2410.6	-0.00602197		3000.6	-0.01151775
640.81	-0.02461091		1230.81	-0.03042676		1820.8	-0.00762719		2410.8	-0.00550004		3000.8	-0.01187015
641.01	-0.02387598		1231.01	-0.03084371		1821	-0.00652352		2411	-0.0042501		3001	-0.01110543
641.21	-0.02309455		1231.21	-0.03236148		1821.2	-0.00624042		2411.2	-0.00435055		3001.2	-0.01073567
641.41	-0.02253699		1231.41	-0.03246998		1821.4	-0.00686213		2411.4	-0.00435767		3001.4	-0.01007257
641.61	-0.02316032		1231.61	-0.03272923		1821.6	-0.00737329		2411.6	-0.00411471		3001.6	-0.00987253
641.81	-0.02316907		1231.81	-0.03230047		1821.8	-0.00611623		2411.8	-0.0038508		3001.8	-0.00872503
642.01	-0.02398531		1232.01	-0.03172475		1822	-0.00610395		2412	-0.0036187		3002	-0.0098942
642.21	-0.02450282		1232.21	-0.03123242		1822.2	-0.00606084		2412.2	-0.00296209		3002.2	-0.00965053
642.41	-0.02523117		1232.41	-0.03076202		1822.4	-0.00507122		2412.4	-0.00275915		3002.4	-0.01045717
642.61	-0.02583316		1232.61	-0.03072003		1822.6	-0.00442477		2412.6	-0.00269491		3002.6	-0.01066635
642.81	-0.02559417		1232.81	-0.03008651		1822.8	-0.00479318		2412.8	-0.00244344		3002.8	-0.01235422
643.01	-0.02587538		1233.01	-0.02912021		1823	-0.00574709		2413	-0.00217354		3003	-0.01302795
643.21	-0.02585843		1233.21	-0.02925259		1823.2	-0.00666304		2413.2	-0.00231016		3003.2	-0.01229622
643.41	-0.02548061		1233.41	-0.02910399		1823.4	-0.00735931		2413.4	-0.00180765		3003.4	-0.01245194
643.61	-0.02551318		1233.61	-0.02941557		1823.6	-0.00911254		2413.6	-0.00168408		3003.6	-0.01329571
643.81	-0.02484732		1233.81	-0.02919853		1823.8	-0.00999569		2413.8	-0.00236261		3003.8	-0.01398406
644.01	-0.0253681		1234.01	-0.02825618		1824	-0.01089584		2414	-0.00235612		3004	-0.01433871
644.21	-0.02557051		1234.21	-0.02852363		1824.2	-0.01214364		2414.2	-0.00298043		3004.2	-0.01380556
644.41	-0.02566253		1234.41	-0.02882199		1824.4	-0.01081607		2414.4	-0.00275175		3004.4	-0.01450343
644.61	-0.02673217		1234.61	-0.02830027		1824.6	-0.01111705		2414.6	-0.00216915		3004.6	-0.0145533
644.81	-0.02712545		1234.81	-0.02811478		1824.8	-0.01110324		2414.8	-0.00261682		3004.8	-0.0150984
645.01	-0.02702758		1235.01	-0.02827882		1825	-0.01102037		2415	-0.00225258		3005	-0.01468676
645.21	-0.02757078		1235.21	-0.02840942		1825.2	-0.01062796		2415.2	-0.0020944		3005.2	-0.01451459
645.41	-0.02796516		1235.41	-0.02734344		1825.4	-0.00974771		2415.4	-0.00220614		3005.4	-0.01391045
645.61	-0.02766336		1235.61	-0.02647392		1825.6	-0.00823473		2415.6	-0.00182727		3005.6	-0.01415213
645.81	-0.02754734		1235.81	-0.02624843		1825.8	-0.00707335		2415.8	-0.00256551		3005.8	-0.01424383
646.01	-0.0271231		1236.01	-0.02648972		1826	-0.0070422		2416	-0.00304357		3006	-0.01498617
646.21	-0.02642396		1236.21	-0.0267179		1826.2	-0.00663089		2416.2	-0.00237977		3006.2	-0.01412527
646.41	-0.0261837		1236.41	-0.0266528		1826.4	-0.00659663		2416.4	-0.00274202		3006.4	-0.01454074
646.61	-0.0262709		1236.61	-0.02721381		1826.6	-0.00678891		2416.6	-0.00246028		3006.6	-0.01479656
646.81	-0.02633162		1236.81	-0.02705967		1826.8	-0.00660638		2416.8	-0.00284031		3006.8	-0.01495759
647.01	-0.02673153		1237.01	-0.0273973		1827	-0.00731126		2417	-0.00294829		3007	-0.01459575
647.21	-0.02627588		1237.21	-0.02860284		1827.2	-0.00751691		2417.2	-0.00376958		3007.2	-0.0133429
647.41	-0.02638629		1237.41	-0.02922118		1827.4	-0.0086193		2417.4	-0.00353824		3007.4	-0.01331947
647.61	-0.02642719		1237.61	-0.02962762		1827.6	-0.00959655		2417.6	-0.00477479		3007.6	-0.01341543
647.81	-0.02646293		1237.81	-0.02987775		1827.8	-0.0094264		2417.8	-0.00626741		3007.8	-0.01300271
648.01	-0.02704985		1238.01	-0.03011756		1828	-0.00939617		2418	-0.00684376		3008	-0.01238759
648.21	-0.02757216		1238.21	-0.03119085		1828.2	-0.00964707		2418.2	-0.00755228		3008.2	-0.0116477
648.41	-0.02831696		1238.41	-0.03076491		1828.4	-0.00944263		2418.4	-0.00776097		3008.4	-0.01185704
648.61	-0.02926008		1238.61	-0.03014194		1828.6	-0.01004053		2418.6	-0.00829493		3008.6	-0.01133051
648.81	-0.02945808		1238.81	-0.02991423		1828.8	-0.00960206		2418.8	-0.00861522		3008.8	-0.01146837
649.01	-0.02975407		1239.01	-0.02956612		1829	-0.00898859		2419	-0.00808775		3009	-0.01153739
649.21	-0.03000722		1239.21	-0.0290695		1829.2	-0.00831106		2419.2	-0.00777352		3009.2	-0.01130887
649.41	-0.02992845		1239.41	-0.02831285		1829.4	-0.0076634		2419.4	-0.00773683		3009.4	-0.01172967
649.61	-0.02951725		1239.61	-0.02769384		1829.6	-0.0075991		2419.6	-0.00754067		3009.6	-0.01208745
649.81	-0.02960857		1239.81	-0.02815509		1829.8	-0.00791575		2419.8	-0.00748319		3009.8	-0.01287035
