# Supplementary material for: Functional development of a V3/glycan-specific broadly neutralizing antibody isolated from a case of HIV superinfection
Source: eLife journal article supplement (doi:10.7554/elife.68110), 2021-07-15
Supplement: fig2-data2 [file E7.xls]

Vers 3.43 Data Simulation
Conc1	6.25E-08	6.25E-08	6.25E-08	6.25E-08	6.25E-08	6.25E-08	6.25E-08
Start1	200	730.02	1260.01	1790.04	2320.04	2850.04	3380.04
Stop1	559.79	1089.82	1619.81	2149.84	2679.84	3209.84	3739.84
Time1	Data1	Sim1	Time2	Data2	Sim2	Time3	Data3	Sim3	Time4	Data4	Sim4	Time5	Data5	Sim5	Time6	Data6	Sim6	Time7	Data7	Sim7
200	-0.00216001		730.02	0.00178912		1260.01	0.0052074		1790.04	0.00306464		2320.04	0.00116815		2850.04	-0.00151167		3380.04	-0.00511249
200.2	-0.00148168		730.22	0.00280283		1260.21	0.00623389		1790.24	0.002495		2320.24	0.00141868		2850.24	-0.00177436		3380.24	-0.00480863
200.4	-0.00120354		730.42	0.00293668		1260.41	0.00665492		1790.44	0.00238815		2320.44	0.00105256		2850.44	-0.00214276		3380.44	-0.00425359
200.6	-0.00139069		730.62	0.00339447		1260.61	0.00714888		1790.64	0.00276068		2320.64	0.00049628		2850.64	-0.00284945		3380.64	-0.00354145
200.8	-0.00094702		730.82	0.00471549		1260.81	0.00780435		1790.84	0.00278671		2320.84	-0.00001895		2850.84	-0.0034433		3380.84	-0.00304797
201	-0.00110905		731.02	0.00535475		1261.01	0.0077726		1791.04	0.0025273		2321.04	0.00048187		2851.04	-0.00351256		3381.04	-0.00242728
201.2	-0.00065209		731.22	0.00619455		1261.21	0.00847459		1791.24	0.00201422		2321.24	0.00008768		2851.24	-0.00364395		3381.24	-0.00231896
201.4	-0.00028077		731.42	0.00665004		1261.41	0.00849156		1791.44	0.00182108		2321.44	-0.00006097		2851.44	-0.00386342		3381.44	-0.00254416
201.6	0.00050768		731.62	0.00673625		1261.61	0.00784758		1791.64	0.00205639		2321.64	0.00059875		2851.64	-0.0042308		3381.64	-0.00251003
201.8	0.00065246		731.82	0.00654572		1261.81	0.00763588		1791.84	0.00230511		2321.84	-0.00007053		2851.84	-0.00448573		3381.84	-0.00236234
202	0.00059265		732.02	0.00678572		1262.01	0.00728932		1792.04	0.00263234		2322.04	-0.00049423		2852.04	-0.00522827		3382.04	-0.0019896
202.2	0.00049579		732.22	0.00661122		1262.21	0.00628592		1792.24	0.00254774		2322.24	-0.00102013		2852.24	-0.00513059		3382.24	-0.00146502
202.4	0.00054005		732.42	0.00612924		1262.41	0.00685669		1792.44	0.00228575		2322.44	-0.00073232		2852.44	-0.00485991		3382.44	-0.00110026
202.6	0.00024812		732.62	0.00557295		1262.61	0.0066865		1792.64	0.00305862		2322.64	-0.00108287		2852.64	-0.0049481		3382.64	-0.00157045
202.8	0.00091198		732.82	0.00593722		1262.81	0.00685294		1792.84	0.00312126		2322.84	-0.00025424		2852.84	-0.00496423		3382.84	-0.00064814
203	0.00054169		733.02	0.00511401		1263.01	0.00648967		1793.04	0.00342266		2323.04	-0.00090801		2853.04	-0.00464376		3383.04	-0.00124115
203.2	-0.00014143		733.22	0.00476518		1263.21	0.00795219		1793.24	0.00293625		2323.24	-0.00143931		2853.24	-0.00579083		3383.24	-0.00080257
203.4	-0.00050831		733.42	0.0045273		1263.41	0.00895222		1793.44	0.00297106		2323.44	-0.00114115		2853.44	-0.00693019		3383.44	-0.00186215
203.6	-0.00080383		733.62	0.00374191		1263.61	0.00905073		1793.64	0.00277875		2323.64	-0.00134714		2853.64	-0.00759168		3383.64	-0.00145685
203.8	-0.00095312		733.82	0.00355721		1263.81	0.00912817		1793.84	0.00274712		2323.84	-0.00127276		2853.84	-0.00759675		3383.84	-0.00131857
204	-0.00047378		734.02	0.0029284		1264.01	0.00848559		1794.04	0.00217652		2324.04	-0.00144332		2854.04	-0.00715972		3384.04	-0.00126418
204.2	-0.00064095		734.22	0.00354543		1264.21	0.00878115		1794.24	0.00134198		2324.24	-0.0015918		2854.24	-0.00746683		3384.24	-0.00152141
204.4	-0.00074882		734.42	0.0033152		1264.41	0.00817449		1794.44	0.00136073		2324.44	-0.00200521		2854.44	-0.00797586		3384.44	-0.00126364
204.6	-0.00091548		734.62	0.00473075		1264.61	0.00831544		1794.64	0.00143675		2324.64	-0.00192331		2854.64	-0.0088115		3384.64	-0.00181118
204.8	-0.00052729		734.82	0.00555062		1264.81	0.0086733		1794.84	0.00078927		2324.84	-0.00196232		2854.84	-0.00826641		3384.84	-0.00212318
205	-0.00149833		735.02	0.00572131		1265.01	0.00856828		1795.04	0.00093043		2325.04	-0.00134557		2855.04	-0.00773502		3385.04	-0.00236558
205.2	-0.00074234		735.22	0.00637585		1265.21	0.00891835		1795.24	0.00058013		2325.24	-0.00185951		2855.24	-0.00751603		3385.24	-0.00385515
205.4	0.00027865		735.42	0.00658799		1265.41	0.00823432		1795.44	0.00040445		2325.44	-0.00131595		2855.44	-0.00770038		3385.44	-0.00463522
205.6	0.00022377		735.62	0.00665998		1265.61	0.00832667		1795.64	0.00111965		2325.64	-0.00205555		2855.64	-0.00708804		3385.64	-0.00599529
205.8	-0.00014895		735.82	0.00719331		1265.81	0.00853501		1795.84	0.00129311		2325.84	-0.00290525		2855.84	-0.00658132		3385.84	-0.00621367
206	0.00013985		736.02	0.00833086		1266.01	0.00830061		1796.04	0.00164582		2326.04	-0.00279		2856.04	-0.00624714		3386.04	-0.00553705
206.2	0.00038096		736.22	0.0084272		1266.21	0.00800611		1796.24	0.00180661		2326.24	-0.00236114		2856.24	-0.00552212		3386.24	-0.00532844
206.4	0.0007439		736.42	0.00879709		1266.41	0.00829311		1796.44	0.00186954		2326.44	-0.00282922		2856.44	-0.00512331		3386.44	-0.00525971
206.6	0.00151347		736.62	0.00852214		1266.61	0.00789861		1796.64	0.00260886		2326.64	-0.00282961		2856.64	-0.00585385		3386.64	-0.00529158
206.8	0.00233982		736.82	0.00892548		1266.81	0.00878607		1796.84	0.00269972		2326.84	-0.00199536		2856.84	-0.00543098		3386.84	-0.00551185
207	0.00159762		737.02	0.00787531		1267.01	0.00853598		1797.04	0.0030939		2327.04	-0.00290344		2857.04	-0.0053396		3387.04	-0.0053353
207.2	0.00162511		737.22	0.0075178		1267.21	0.0088836		1797.24	0.00326048		2327.24	-0.00290389		2857.24	-0.00634149		3387.24	-0.00581055
207.4	0.00095321		737.42	0.00630119		1267.41	0.00810298		1797.44	0.00450576		2327.44	-0.00295655		2857.44	-0.00656774		3387.44	-0.00675782
207.6	0.00024494		737.62	0.00527014		1267.61	0.00771244		1797.64	0.00416679		2327.64	-0.00279189		2857.64	-0.00529156		3387.64	-0.00655413
207.8	-0.00002551		737.82	0.00516561		1267.81	0.00732259		1797.84	0.00399996		2327.84	-0.00265868		2857.84	-0.00461558		3387.84	-0.00651012
208	0.0005669		738.02	0.00437891		1268.01	0.00681598		1798.04	0.00341854		2328.04	-0.00203218		2858.04	-0.00446107		3388.04	-0.0065426
208.2	0.00064537		738.22	0.00436067		1268.21	0.00618695		1798.24	0.00334645		2328.24	-0.00240624		2858.24	-0.00469962		3388.24	-0.00653721
208.4	0.00072017		738.42	0.00401249		1268.41	0.00574426		1798.44	0.00359407		2328.44	-0.00204487		2858.44	-0.00471534		3388.44	-0.00631596
208.6	0.00138311		738.62	0.00371907		1268.61	0.00607629		1798.64	0.00354595		2328.64	-0.00278822		2858.64	-0.0043526		3388.64	-0.00674434
208.8	0.0017587		738.82	0.00263623		1268.81	0.00641717		1798.84	0.00414573		2328.84	-0.00259867		2858.84	-0.00372564		3388.84	-0.00606004
209	0.00151561		739.02	0.00273987		1269.01	0.00650028		1799.04	0.00402592		2329.04	-0.00217627		2859.04	-0.00353186		3389.04	-0.00620167
209.2	0.00291456		739.22	0.00317084		1269.21	0.00593647		1799.24	0.00396144		2329.24	-0.00198482		2859.24	-0.0026999		3389.24	-0.0071696
209.4	0.00352282		739.42	0.00352639		1269.41	0.00523877		1799.44	0.00418502		2329.44	-0.00133333		2859.44	-0.00311676		3389.44	-0.0073013
209.6	0.00307045		739.62	0.00300593		1269.61	0.00554436		1799.64	0.00470494		2329.64	-0.00210724		2859.64	-0.00269558		3389.64	-0.00840727
209.8	0.00356813		739.82	0.00411492		1269.81	0.00499187		1799.84	0.00447958		2329.84	-0.00165914		2859.84	-0.0032682		3389.84	-0.00698558
210	0.00398056		740.02	0.00533238		1270.01	0.00516966		1800.04	0.00411499		2330.04	-0.00250499		2860.04	-0.00290253		3390.04	-0.00572063
210.2	0.00398494		740.22	0.00551172		1270.21	0.00543379		1800.24	0.00371136		2330.24	-0.00133173		2860.24	-0.00343284		3390.24	-0.00596573
210.4	0.00435694		740.42	0.00581544		1270.41	0.00515122		1800.44	0.00311459		2330.44	-0.00143917		2860.44	-0.00374312		3390.44	-0.00574315
210.6	0.00547963		740.62	0.00535337		1270.61	0.00573349		1800.64	0.00257234		2330.64	-0.00049438		2860.64	-0.00371144		3390.64	-0.00521364
210.8	0.00482868		740.82	0.00488792		1270.81	0.00652458		1800.84	0.00262256		2330.84	-0.00053455		2860.84	-0.00269098		3390.84	-0.00534794
211	0.00402894		741.02	0.0045823		1271.01	0.00567174		1801.04	0.00256765		2331.04	-0.00113934		2861.04	-0.00300508		3391.04	-0.00525518
211.2	0.00323657		741.22	0.0036635		1271.21	0.00578589		1801.24	0.00198475		2331.24	-0.00072437		2861.24	-0.00329781		3391.24	-0.00594352
211.4	0.0016461		741.42	0.0029865		1271.41	0.00568367		1801.44	0.00200921		2331.44	-0.00083022		2861.44	-0.00403246		3391.44	-0.00604637
211.6	0.00057505		741.62	0.00277941		1271.61	0.00556015		1801.64	0.00092751		2331.64	-0.00015236		2861.64	-0.00353152		3391.64	-0.00605279
211.8	0.000248		741.82	0.00276399		1271.81	0.00510018		1801.84	0.00079432		2331.84	0.00007356		2861.84	-0.00322168		3391.84	-0.0056723
212	-0.00028786		742.02	0.00262016		1272.01	0.00511633		1802.04	0.00002431		2332.04	0.00070512		2862.04	-0.00280113		3392.04	-0.0048276
212.2	-0.0006459		742.22	0.00308524		1272.21	0.00551523		1802.24	0.00021702		2332.24	0.00026436		2862.24	-0.0021075		3392.24	-0.00490447
212.4	-0.0006187		742.42	0.00218567		1272.41	0.00599608		1802.44	-0.0001164		2332.44	0.00032472		2862.44	-0.00201757		3392.44	-0.00539851
212.6	0.00049865		742.62	0.0018436		1272.61	0.00639035		1802.64	-0.00006073		2332.64	0.00032117		2862.64	-0.00185652		3392.64	-0.00551405
212.8	-0.00002567		742.82	0.00206859		1272.81	0.00670769		1802.84	0.00021215		2332.84	0.00075657		2862.84	-0.00187732		3392.84	-0.00605406
213	0.0004461		743.02	0.00291014		1273.01	0.00648693		1803.04	-0.00047332		2333.04	0.00103622		2863.04	-0.00224995		3393.04	-0.00626999
213.2	0.00076925		743.22	0.00351881		1273.21	0.00667689		1803.24	0.00036461		2333.24	0.00118229		2863.24	-0.00198042		3393.24	-0.00722726
213.4	0.00079737		743.42	0.00434881		1273.41	0.00640625		1803.44	0.00008125		2333.44	0.00083245		2863.44	-0.00293743		3393.44	-0.00774249
213.6	0.00026958		743.62	0.00416343		1273.61	0.00639878		1803.64	-0.00034796		2333.64	0.00009891		2863.64	-0.00391773		3393.64	-0.00805504
213.8	0.00023008		743.82	0.00602514		1273.81	0.00646358		1803.84	-0.00039657		2333.84	0.00004229		2863.84	-0.00404113		3393.84	-0.00717549
214	0.00077276		744.02	0.00608652		1274.01	0.00620209		1804.04	0.00001176		2334.04	-0.00042678		2864.04	-0.00403146		3394.04	-0.00707935
214.2	0.00128881		744.22	0.00610008		1274.21	0.00622998		1804.24	0.00004095		2334.24	0.00090686		2864.24	-0.0050927		3394.24	-0.00742367
214.4	0.00174816		744.42	0.005913		1274.41	0.00626071		1804.44	0.00053049		2334.44	-0.00002698		2864.44	-0.00561666		3394.44	-0.00694533
214.6	0.0022619		744.62	0.00537377		1274.61	0.00660554		1804.64	0.00070005		2334.64	-0.00060154		2864.64	-0.00534072		3394.64	-0.00706671
214.8	0.00138425		744.82	0.0047891		1274.81	0.00610394		1804.84	0.00198184		2334.84	-0.00032789		2864.84	-0.00537919		3394.84	-0.0076195
215	0.00080015		745.02	0.00441958		1275.01	0.00544989		1805.04	0.00334242		2335.04	-0.00006331		2865.04	-0.00583373		3395.04	-0.00763718
215.2	0.0003639		745.22	0.00301094		1275.21	0.00557955		1805.24	0.00416238		2335.24	-0.00009479		2865.24	-0.00624518		3395.24	-0.00759679
215.4	0.00014155		745.42	0.00288379		1275.41	0.0048656		1805.44	0.00511097		2335.44	0.00006069		2865.44	-0.00626896		3395.44	-0.00804794
215.6	0.00031258		745.62	0.0026567		1275.61	0.00390966		1805.64	0.00534863		2335.64	0.000215		2865.64	-0.00516248		3395.64	-0.00803681
215.8	0.00022688		745.82	0.0032124		1275.81	0.00400908		1805.84	0.00537316		2335.84	0.00035992		2865.84	-0.00456055		3395.84	-0.00725044
216	0.0004179		746.02	0.00301061		1276.01	0.00397137		1806.04	0.00535754		2336.04	0.00081264		2866.04	-0.00452842		3396.04	-0.00741526
216.2	0.00132033		746.22	0.00324953		1276.21	0.00414061		1806.24	0.0055495		2336.24	0.00027145		2866.24	-0.0042529		3396.24	-0.00823292
216.4	0.00160005		746.42	0.0032214		1276.41	0.00396653		1806.44	0.00579033		2336.44	0.00006164		2866.44	-0.00439313		3396.44	-0.0089227
216.6	0.00281204		746.62	0.0037717		1276.61	0.00374671		1806.64	0.00607187		2336.64	0.00015685		2866.64	-0.00486133		3396.64	-0.00905271
216.8	0.00297664		746.82	0.00465516		1276.81	0.00439041		1806.84	0.00613272		2336.84	-0.00082146		2866.84	-0.00422737		3396.84	-0.00969511
217	0.00383896		747.02	0.00552533		1277.01	0.00511872		1807.04	0.00564459		2337.04	-0.00133092		2867.04	-0.00423247		3397.04	-0.0095518
217.2	0.00315042		747.22	0.00623521		1277.21	0.00601004		1807.24	0.00574545		2337.24	-0.00155117		2867.24	-0.00462928		3397.24	-0.01057069
217.4	0.00303611		747.42	0.00781004		1277.41	0.00581378		1807.44	0.00440674		2337.44	-0.00126575		2867.44	-0.00533661		3397.44	-0.01032739
217.6	0.00238428		747.62	0.00776177		1277.61	0.00614177		1807.64	0.00463226		2337.64	-0.00107801		2867.64	-0.00556407		3397.64	-0.01015975
217.8	0.00236596		747.82	0.00820648		1277.81	0.00667545		1807.84	0.00436427		2337.84	-0.00162558		2867.84	-0.00455006		3397.84	-0.01015262
218	0.00230858		748.02	0.00753599		1278.01	0.00745116		1808.04	0.00434684		2338.04	-0.00219037		2868.04	-0.00534213		3398.04	-0.01030509
218.2	0.00188473		748.22	0.00738941		1278.21	0.00842727		1808.24	0.0033703		2338.24	-0.00149072		2868.24	-0.00575402		3398.24	-0.00990344
218.4	0.00123545		748.42	0.00710943		1278.41	0.0093165		1808.44	0.00417438		2338.44	-0.00145573		2868.44	-0.00502293		3398.44	-0.0100197
218.6	0.00072331		748.62	0.00674504		1278.61	0.00930832		1808.64	0.00392359		2338.64	-0.00153802		2868.64	-0.00454159		3398.64	-0.0097017
218.8	0.00033695		748.82	0.00671803		1278.81	0.00949613		1808.84	0.00456234		2338.84	-0.00141498		2868.84	-0.00443589		3398.84	-0.00884919
219	-0.00009339		749.02	0.00560691		1279.01	0.0104966		1809.04	0.0048655		2339.04	-0.00103012		2869.04	-0.00394402		3399.04	-0.0077405
219.2	0.00011019		749.22	0.00382337		1279.21	0.01057395		1809.24	0.00413896		2339.24	-0.00062592		2869.24	-0.00406475		3399.24	-0.00738494
219.4	-0.00028318		749.42	0.00348933		1279.41	0.01024735		1809.44	0.00387875		2339.44	-0.0007513		2869.44	-0.00342907		3399.44	-0.00717412
219.6	0.00029927		749.62	0.00312504		1279.61	0.01002897		1809.64	0.0035504		2339.64	-0.00091919		2869.64	-0.00425252		3399.64	-0.0058686
219.8	-0.00042086		749.82	0.00415477		1279.81	0.00938426		1809.84	0.00396118		2339.84	-0.00077227		2869.84	-0.00357432		3399.84	-0.00556854
220	-0.00077409		750.02	0.00429751		1280.01	0.00951079		1810.04	0.00337868		2340.04	-0.00027428		2870.04	-0.00366726		3400.04	-0.0059819
220.2	-0.00036191		750.22	0.00452742		1280.21	0.00947619		1810.24	0.00393404		2340.24	-0.00083707		2870.24	-0.00374807		3400.24	-0.0059326
220.4	-0.00029057		750.42	0.00536324		1280.41	0.00912023		1810.44	0.00484994		2340.44	-0.00066815		2870.44	-0.00387786		3400.44	-0.00568971
220.6	0.00039682		750.62	0.00555796		1280.61	0.00873039		1810.64	0.00452448		2340.64	-0.00046276		2870.64	-0.00419252		3400.64	-0.00585626
220.8	0.00066813		750.82	0.00515991		1280.81	0.00906397		1810.84	0.00488563		2340.84	-0.00085101		2870.84	-0.00338992		3400.84	-0.00559123
221	0.00046345		751.02	0.00576358		1281.01	0.00849835		1811.04	0.00441686		2341.04	-0.00065095		2871.04	-0.00438669		3401.04	-0.00522664
221.2	-0.00017463		751.22	0.00618981		1281.21	0.00788395		1811.24	0.00427819		2341.24	0.00026819		2871.24	-0.00463107		3401.24	-0.00538809
221.4	0.00018124		751.42	0.00652658		1281.41	0.00790729		1811.44	0.00312006		2341.44	0.00048764		2871.44	-0.00410689		3401.44	-0.00544946
221.6	0.00060245		751.62	0.00617704		1281.61	0.00753065		1811.64	0.0029269		2341.64	0.00037939		2871.64	-0.00379408		3401.64	-0.00625387
221.8	0.00086402		751.82	0.00619129		1281.81	0.00736641		1811.84	0.00205813		2341.84	0.00032847		2871.84	-0.00378168		3401.84	-0.00721248
222	0.00130192		752.02	0.00624072		1282.01	0.00732689		1812.04	0.00181741		2342.04	0.00169015		2872.04	-0.0045127		3402.04	-0.00762093
222.2	0.00211066		752.22	0.0063251		1282.21	0.00761278		1812.24	0.00132309		2342.24	0.00219746		2872.24	-0.00425585		3402.24	-0.00701349
222.4	0.00225393		752.42	0.00682445		1282.41	0.00746239		1812.44	0.00166347		2342.44	0.00227935		2872.44	-0.00360884		3402.44	-0.00795918
222.6	0.00233978		752.62	0.00688336		1282.61	0.00672664		1812.64	0.00148861		2342.64	0.00235567		2872.64	-0.00423384		3402.64	-0.00784021
222.8	0.00264391		752.82	0.00664873		1282.81	0.00702065		1812.84	0.00200007		2342.84	0.00273722		2872.84	-0.00513101		3402.84	-0.00759854
223	0.00285832		753.02	0.00590898		1283.01	0.00736744		1813.04	0.0021279		2343.04	0.00267185		2873.04	-0.00566729		3403.04	-0.00750989
223.2	0.00327713		753.22	0.00515982		1283.21	0.0072249		1813.24	0.00275476		2343.24	0.00211452		2873.24	-0.00619986		3403.24	-0.00746557
223.4	0.00361169		753.42	0.00583651		1283.41	0.00700575		1813.44	0.00369299		2343.44	0.00127342		2873.44	-0.00649853		3403.44	-0.00889519
223.6	0.00455398		753.62	0.00631262		1283.61	0.00675634		1813.64	0.00338033		2343.64	0.0019326		2873.64	-0.00707182		3403.64	-0.00902384
223.8	0.00374631		753.82	0.00749113		1283.81	0.00653862		1813.84	0.00347071		2343.84	0.00121833		2873.84	-0.00522644		3403.84	-0.00974586
224	0.00380441		754.02	0.00644147		1284.01	0.00708043		1814.04	0.00270101		2344.04	0.00125594		2874.04	-0.00538698		3404.04	-0.01014126
224.2	0.00398918		754.22	0.00570367		1284.21	0.0067213		1814.24	0.00339347		2344.24	0.00018164		2874.24	-0.00507419		3404.24	-0.01034998
224.4	0.00402883		754.42	0.00565277		1284.41	0.00622613		1814.44	0.00350299		2344.44	-0.00021264		2874.44	-0.00471666		3404.44	-0.01096433
224.6	0.00324772		754.62	0.00505074		1284.61	0.00595929		1814.64	0.00271578		2344.64	-0.00088117		2874.64	-0.00396534		3404.64	-0.0101845
224.8	0.00344274		754.82	0.00440693		1284.81	0.00618837		1814.84	0.00258021		2344.84	-0.00117853		2874.84	-0.0037232		3404.84	-0.0093749
225	0.00251442		755.02	0.00459249		1285.01	0.00631679		1815.04	0.00216698		2345.04	-0.00175164		2875.04	-0.00350147		3405.04	-0.00941765
225.2	0.00115403		755.22	0.00422741		1285.21	0.00606333		1815.24	0.00184654		2345.24	-0.00175165		2875.24	-0.00240338		3405.24	-0.00891379
225.4	0.00136047		755.42	0.00423308		1285.41	0.00648114		1815.44	0.00118876		2345.44	-0.00220293		2875.44	-0.00291966		3405.44	-0.00947575
225.6	0.00166722		755.62	0.00431826		1285.61	0.00667212		1815.64	0.00101456		2345.64	-0.001677		2875.64	-0.00335704		3405.64	-0.0091137
225.8	0.00170863		755.82	0.00513176		1285.81	0.00757531		1815.84	0.00181605		2345.84	-0.0019388		2875.84	-0.00301415		3405.84	-0.0090016
226	0.00187672		756.02	0.00566202		1286.01	0.00785363		1816.04	0.00197585		2346.04	-0.00151001		2876.04	-0.00289998		3406.04	-0.00768806
226.2	0.00101526		756.22	0.005872		1286.21	0.00893453		1816.24	0.00201682		2346.24	-0.00183887		2876.24	-0.00301576		3406.24	-0.00706537
226.4	0.00074853		756.42	0.00660202		1286.41	0.00834467		1816.44	0.00298375		2346.44	-0.00144685		2876.44	-0.00349445		3406.44	-0.0077615
226.6	0.00015539		756.62	0.00688913		1286.61	0.00877573		1816.64	0.00347125		2346.64	-0.00134495		2876.64	-0.0039727		3406.64	-0.00752287
226.8	0.00032097		756.82	0.00737764		1286.81	0.00933851		1816.84	0.00386063		2346.84	-0.0019352		2876.84	-0.00447083		3406.84	-0.00738458
227	0.00067561		757.02	0.00791946		1287.01	0.00969637		1817.04	0.00432543		2347.04	-0.00234634		2877.04	-0.00490707		3407.04	-0.00871742
227.2	0.00119609		757.22	0.00802448		1287.21	0.00937113		1817.24	0.00419862		2347.24	-0.00221047		2877.24	-0.0053104		3407.24	-0.00966469
227.4	0.00184346		757.42	0.00892775		1287.41	0.0091732		1817.44	0.0043948		2347.44	-0.00171932		2877.44	-0.00507166		3407.44	-0.01120624
227.6	0.00279269		757.62	0.00917152		1287.61	0.00850146		1817.64	0.0038584		2347.64	-0.00122232		2877.64	-0.0042744		3407.64	-0.01143158
227.8	0.00269795		757.82	0.00939594		1287.81	0.00804408		1817.84	0.00364594		2347.84	-0.00237843		2877.84	-0.00327416		3407.84	-0.01168014
228	0.00328859		758.02	0.00833138		1288.01	0.00728051		1818.04	0.00374366		2348.04	-0.00184333		2878.04	-0.00269835		3408.04	-0.01191134
228.2	0.00425784		758.22	0.00797474		1288.21	0.00723438		1818.24	0.00449424		2348.24	-0.00164578		2878.24	-0.00300437		3408.24	-0.01242744
228.4	0.00528658		758.42	0.00785205		1288.41	0.00712819		1818.44	0.00405005		2348.44	-0.00152612		2878.44	-0.00285658		3408.44	-0.0126469
228.6	0.00580861		758.62	0.00752353		1288.61	0.00698348		1818.64	0.0031516		2348.64	-0.00196095		2878.64	-0.0024998		3408.64	-0.01088124
228.8	0.00651095		758.82	0.00705044		1288.81	0.00763516		1818.84	0.0035908		2348.84	-0.00154757		2878.84	-0.00318923		3408.84	-0.01168186
229	0.00654197		759.02	0.00564441		1289.01	0.00758839		1819.04	0.00271838		2349.04	-0.00166982		2879.04	-0.00275624		3409.04	-0.01141604
229.2	0.00664154		759.22	0.00483574		1289.21	0.00671776		1819.24	0.00154812		2349.24	-0.00161035		2879.24	-0.00257838		3409.24	-0.01069131
229.4	0.00701655		759.42	0.00464844		1289.41	0.00743942		1819.44	0.00122387		2349.44	-0.00163187		2879.44	-0.00383964		3409.44	-0.01087739
229.6	0.00689432		759.62	0.00466581		1289.61	0.00727037		1819.64	0.00050827		2349.64	-0.00138386		2879.64	-0.0042597		3409.64	-0.01033383
229.8	0.00664312		759.82	0.00491483		1289.81	0.00715667		1819.84	-0.00006985		2349.84	-0.00163301		2879.84	-0.00456161		3409.84	-0.00994318
230	0.00621982		760.02	0.00514563		1290.01	0.00706534		1820.04	-0.00094834		2350.04	-0.00166965		2880.04	-0.00480727		3410.04	-0.00957218
230.2	0.00531626		760.22	0.00476228		1290.21	0.00724656		1820.24	-0.00146841		2350.24	-0.00177552		2880.24	-0.00557171		3410.24	-0.00992076
230.4	0.00581548		760.42	0.00528686		1290.41	0.00719209		1820.44	-0.00129388		2350.44	-0.00176445		2880.44	-0.00584226		3410.44	-0.00994239
230.6	0.00448048		760.62	0.00570889		1290.61	0.00737035		1820.64	-0.00190522		2350.64	-0.0015353		2880.64	-0.00570436		3410.64	-0.0097415
230.8	0.00350978		760.82	0.00676644		1290.81	0.00765199		1820.84	-0.00190947		2350.84	-0.00183829		2880.84	-0.00616675		3410.84	-0.01039691
231	0.00322339		761.02	0.00743206		1291.01	0.00757593		1821.04	-0.00167324		2351.04	-0.00168355		2881.04	-0.00661856		3411.04	-0.01064322
231.2	0.00256717		761.22	0.00751514		1291.21	0.00787811		1821.24	-0.00174948		2351.24	-0.00206977		2881.24	-0.00638466		3411.24	-0.01047531
231.4	0.00192027		761.42	0.0076476		1291.41	0.00900777		1821.44	-0.00026213		2351.44	-0.00166834		2881.44	-0.00566817		3411.44	-0.01036544
231.6	0.00172614		761.62	0.00747129		1291.61	0.00854593		1821.64	0.00039892		2351.64	-0.00189439		2881.64	-0.00586213		3411.64	-0.01011491
231.8	0.00196375		761.82	0.00678561		1291.81	0.00829608		1821.84	0.00038036		2351.84	-0.0021946		2881.84	-0.00585621		3411.84	-0.00883144
232	0.00307193		762.02	0.00701878		1292.01	0.0085561		1822.04	0.00146901		2352.04	-0.00124059		2882.04	-0.00501631		3412.04	-0.00859977
232.2	0.00387022		762.22	0.00644788		1292.21	0.00884109		1822.24	0.00180973		2352.24	-0.00075403		2882.24	-0.00680859		3412.24	-0.00889293
232.4	0.00382679		762.42	0.00621332		1292.41	0.00921424		1822.44	0.00137671		2352.44	-0.00069993		2882.44	-0.00641122		3412.44	-0.00896487
232.6	0.00454178		762.62	0.00567374		1292.61	0.00978015		1822.64	0.0027358		2352.64	-0.00122467		2882.64	-0.00630795		3412.64	-0.00793434
232.8	0.00448546		762.82	0.00428929		1292.81	0.00918628		1822.84	0.00236732		2352.84	-0.00114514		2882.84	-0.00583655		3412.84	-0.00846229
233	0.00505004		763.02	0.00362644		1293.01	0.00838966		1823.04	0.00143708		2353.04	-0.00155421		2883.04	-0.0051046		3413.04	-0.00850321
233.2	0.0050842		763.22	0.00268132		1293.21	0.00819621		1823.24	0.00053313		2353.24	-0.00135624		2883.24	-0.00568139		3413.24	-0.00850236
233.4	0.00462848		763.42	0.00284972		1293.41	0.00858338		1823.44	0.0005765		2353.44	-0.00112552		2883.44	-0.0067358		3413.44	-0.00875737
233.6	0.00466707		763.62	0.00329178		1293.61	0.00779717		1823.64	0.00030377		2353.64	-0.00128532		2883.64	-0.00715329		3413.64	-0.00917158
233.8	0.00417303		763.82	0.00299169		1293.81	0.00778847		1823.84	-0.00090895		2353.84	-0.00078232		2883.84	-0.00797829		3413.84	-0.00931167
234	0.00397935		764.02	0.00368525		1294.01	0.00800062		1824.04	0.00008569		2354.04	-0.00171513		2884.04	-0.00773208		3414.04	-0.01023392
234.2	0.00386323		764.22	0.00293145		1294.21	0.00784306		1824.24	0.00030757		2354.24	-0.0013364		2884.24	-0.00791218		3414.24	-0.01042374
234.4	0.00331559		764.42	0.00333173		1294.41	0.0083428		1824.44	0.00026523		2354.44	-0.00070583		2884.44	-0.00733057		3414.44	-0.01048291
234.6	0.00336666		764.62	0.00360905		1294.61	0.00852167		1824.64	0.00059737		2354.64	-0.00044112		2884.64	-0.00753466		3414.64	-0.00995214
234.8	0.00330028		764.82	0.00426649		1294.81	0.00935186		1824.84	0.00100169		2354.84	-0.00038139		2884.84	-0.00721086		3414.84	-0.01087603
235	0.00323348		765.02	0.0045323		1295.01	0.00989571		1825.04	0.00204354		2355.04	0.0000487		2885.04	-0.00720196		3415.04	-0.01016404
235.2	0.00291508		765.22	0.00432942		1295.21	0.01087894		1825.24	0.00265986		2355.24	-0.00009091		2885.24	-0.00695437		3415.24	-0.01053017
235.4	0.00359306		765.42	0.00442825		1295.41	0.01132821		1825.44	0.00292029		2355.44	-0.0003867		2885.44	-0.0067066		3415.44	-0.01065747
235.6	0.00441544		765.62	0.00440957		1295.61	0.0107995		1825.64	0.00294577		2355.64	-0.0006044		2885.64	-0.00647867		3415.64	-0.01101382
235.8	0.0047226		765.82	0.00498766		1295.81	0.01092197		1825.84	0.00253013		2355.84	-0.00103821		2885.84	-0.00633779		3415.84	-0.01058197
236	0.00510417		766.02	0.00612305		1296.01	0.0110676		1826.04	0.0030545		2356.04	-0.00052399		2886.04	-0.00626796		3416.04	-0.01106214
236.2	0.00464002		766.22	0.00581846		1296.21	0.01134092		1826.24	0.00283203		2356.24	-0.00109437		2886.24	-0.00684769		3416.24	-0.01135398
236.4	0.00441749		766.42	0.00572576		1296.41	0.01233975		1826.44	0.00299844		2356.44	-0.00152999		2886.44	-0.00642481		3416.44	-0.01160191
236.6	0.00503832		766.62	0.00613251		1296.61	0.01184738		1826.64	0.00330463		2356.64	-0.00146971		2886.64	-0.00621259		3416.64	-0.01118658
236.8	0.00527593		766.82	0.00620173		1296.81	0.0110002		1826.84	0.00211302		2356.84	-0.00155378		2886.84	-0.00599214		3416.84	-0.0117185
237	0.00558189		767.02	0.00710131		1297.01	0.01111735		1827.04	0.00188134		2357.04	-0.00141237		2887.04	-0.00604608		3417.04	-0.01169307
237.2	0.00511749		767.22	0.00698811		1297.21	0.01154108		1827.24	0.00089901		2357.24	-0.00127161		2887.24	-0.00724588		3417.24	-0.0117398
237.4	0.00477442		767.42	0.00864823		1297.41	0.01107567		1827.44	0.00116912		2357.44	-0.00195003		2887.44	-0.00790279		3417.44	-0.01066107
237.6	0.0044422		767.62	0.00853845		1297.61	0.01047483		1827.64	0.00092587		2357.64	-0.00120283		2887.64	-0.00868002		3417.64	-0.01058494
237.8	0.00392636		767.82	0.00781446		1297.81	0.00936823		1827.84	0.0009327		2357.84	-0.00098971		2887.84	-0.00942012		3417.84	-0.01180273
238	0.00424647		768.02	0.00745277		1298.01	0.00841392		1828.04	0.00199483		2358.04	-0.00214805		2888.04	-0.00923155		3418.04	-0.01267513
238.2	0.0041158		768.22	0.00627696		1298.21	0.00748171		1828.24	0.00106244		2358.24	-0.00202617		2888.24	-0.00885874		3418.24	-0.01273113
238.4	0.0049419		768.42	0.00536344		1298.41	0.00734117		1828.44	0.00085721		2358.44	-0.00190211		2888.44	-0.00871054		3418.44	-0.01199926
238.6	0.00585917		768.62	0.0047679		1298.61	0.00688775		1828.64	0.00169022		2358.64	-0.00210042		2888.64	-0.0083467		3418.64	-0.0120929
238.8	0.00587261		768.82	0.00453761		1298.81	0.00611472		1828.84	0.00153827		2358.84	-0.00147582		2888.84	-0.00715787		3418.84	-0.01233609
239	0.00586284		769.02	0.0043322		1299.01	0.00511215		1829.04	0.00219851		2359.04	-0.00097566		2889.04	-0.0073033		3419.04	-0.0117647
239.2	0.00641237		769.22	0.00420096		1299.21	0.00522356		1829.24	0.0023273		2359.24	-0.00157368		2889.24	-0.00599205		3419.24	-0.01248444
239.4	0.00615452		769.42	0.00407567		1299.41	0.0050184		1829.44	0.00160552		2359.44	-0.00209965		2889.44	-0.00612007		3419.44	-0.0134414
239.6	0.0054831		769.62	0.00357565		1299.61	0.00499437		1829.64	0.00198081		2359.64	-0.00168846		2889.64	-0.0065063		3419.64	-0.01395323
239.8	0.00527837		769.82	0.00373203		1299.81	0.00531331		1829.84	0.00212526		2359.84	-0.0020686		2889.84	-0.00682781		3419.84	-0.01357648
240	0.00534672		770.02	0.00334785		1300.01	0.00497116		1830.04	0.00283827		2360.04	-0.00153339		2890.04	-0.00627953		3420.04	-0.01367113
240.2	0.00517446		770.22	0.00359745		1300.21	0.00590276		1830.24	0.00355035		2360.24	-0.00146432		2890.24	-0.00625099		3420.24	-0.01342584
240.4	0.00483158		770.42	0.00336695		1300.41	0.00681375		1830.44	0.00335409		2360.44	-0.00103205		2890.44	-0.00637777		3420.44	-0.01329406
240.6	0.00474197		770.62	0.0042994		1300.61	0.00708289		1830.64	0.00379166		2360.64	0.0002273		2890.64	-0.00654994		3420.64	-0.0123182
240.8	0.00337974		770.82	0.004971		1300.81	0.00789445		1830.84	0.00367354		2360.84	0.00086538		2890.84	-0.00624412		3420.84	-0.01185329
241	0.00214762		771.02	0.00588723		1301.01	0.00808899		1831.04	0.00294983		2361.04	0.00098179		2891.04	-0.00687009		3421.04	-0.01054759
241.2	0.00135246		771.22	0.00717346		1301.21	0.00868359		1831.24	0.0023868		2361.24	0.00030317		2891.24	-0.00826159		3421.24	-0.01020974
241.4	0.00157632		771.42	0.00782146		1301.41	0.00880679		1831.44	0.00256812		2361.44	0.00043566		2891.44	-0.00862067		3421.44	-0.00975507
241.6	0.00172997		771.62	0.00694163		1301.61	0.00889949		1831.64	0.00293229		2361.64	0.00103292		2891.64	-0.00947013		3421.64	-0.01126225
241.8	0.00204989		771.82	0.0070079		1301.81	0.00784632		1831.84	0.00391213		2361.84	0.00153059		2891.84	-0.0096638		3421.84	-0.01259506
242	0.00263211		772.02	0.00644394		1302.01	0.00754988		1832.04	0.00389421		2362.04	0.00064788		2892.04	-0.0088332		3422.04	-0.0121601
242.2	0.00282146		772.22	0.00515603		1302.21	0.00731533		1832.24	0.0032602		2362.24	0.0002884		2892.24	-0.00875806		3422.24	-0.01150951
242.4	0.00378593		772.42	0.0037203		1302.41	0.0077783		1832.44	0.00327291		2362.44	0.00077948		2892.44	-0.00820154		3422.44	-0.01036627
242.6	0.00376431		772.62	0.0044849		1302.61	0.00784073		1832.64	0.0030966		2362.64	0.00087646		2892.64	-0.00792893		3422.64	-0.01022738
242.8	0.00377781		772.82	0.00422524		1302.81	0.00681359		1832.84	0.00215877		2362.84	0.00142463		2892.84	-0.00811144		3422.84	-0.00961063
243	0.00302254		773.02	0.00452076		1303.01	0.00730958		1833.04	0.00258198		2363.04	0.00166765		2893.04	-0.00890563		3423.04	-0.01034932
243.2	0.00289658		773.22	0.00478908		1303.21	0.00868659		1833.24	0.00225739		2363.24	0.00056769		2893.24	-0.00841086		3423.24	-0.01041765
243.4	0.00242853		773.42	0.00420067		1303.41	0.00843411		1833.44	0.00211676		2363.44	0.00068462		2893.44	-0.00914172		3423.44	-0.01100579
243.6	0.00256443		773.62	0.00371072		1303.61	0.00841217		1833.64	0.00284135		2363.64	0.0010584		2893.64	-0.00878403		3423.64	-0.01093146
243.8	0.00373356		773.82	0.00394411		1303.81	0.00824591		1833.84	0.00269925		2363.84	0.00087773		2893.84	-0.00748916		3423.84	-0.01078206
244	0.00361047		774.02	0.00375959		1304.01	0.00732307		1834.04	0.00327956		2364.04	0.00069843		2894.04	-0.0067463		3424.04	-0.01084338
244.2	0.00395878		774.22	0.00404952		1304.21	0.00720484		1834.24	0.00352552		2364.24	0.00047956		2894.24	-0.0062203		3424.24	-0.01037239
244.4	0.00401666		774.42	0.00341893		1304.41	0.00724892		1834.44	0.00307836		2364.44	0.00037989		2894.44	-0.00588411		3424.44	-0.01031788
244.6	0.00361776		774.62	0.00434465		1304.61	0.00674929		1834.64	0.00305198		2364.64	0.00037811		2894.64	-0.00563954		3424.64	-0.00940171
244.8	0.00317213		774.82	0.00492748		1304.81	0.00669606		1834.84	0.00237321		2364.84	0.00016043		2894.84	-0.00444357		3424.84	-0.00971214
245	0.00376403		775.02	0.00531933		1305.01	0.00591647		1835.04	0.00136045		2365.04	-0.00112428		2895.04	-0.00481926		3425.04	-0.01007038
245.2	0.00446947		775.22	0.00571004		1305.21	0.00580565		1835.24	0.00210681		2365.24	-0.00164583		2895.24	-0.00454562		3425.24	-0.0107421
245.4	0.00503621		775.42	0.00570776		1305.41	0.00564729		1835.44	0.00318047		2365.44	-0.0012625		2895.44	-0.00392415		3425.44	-0.01134411
245.6	0.00558535		775.62	0.00557564		1305.61	0.00576123		1835.64	0.00438756		2365.64	-0.00069552		2895.64	-0.00470358		3425.64	-0.01169653
245.8	0.00559768		775.82	0.00487147		1305.81	0.00544703		1835.84	0.00399684		2365.84	-0.00015554		2895.84	-0.00446963		3425.84	-0.01133256
246	0.00595279		776.02	0.00465208		1306.01	0.00596049		1836.04	0.0045631		2366.04	-0.00130056		2896.04	-0.00480711		3426.04	-0.0105844
246.2	0.00580604		776.22	0.00466565		1306.21	0.00634662		1836.24	0.00450046		2366.24	-0.00095216		2896.24	-0.00535122		3426.24	-0.01053591
246.4	0.00543932		776.42	0.00548336		1306.41	0.00689053		1836.44	0.0046193		2366.44	-0.00029155		2896.44	-0.00556466		3426.44	-0.01027402
246.6	0.00586728		776.62	0.00614978		1306.61	0.00714615		1836.64	0.00501523		2366.64	-0.00032989		2896.64	-0.006426		3426.64	-0.01000953
246.8	0.00558939		776.82	0.00577754		1306.81	0.00764675		1836.84	0.00482377		2366.84	-0.00014244		2896.84	-0.00693957		3426.84	-0.01023587
247	0.00487939		777.02	0.00620087		1307.01	0.00930768		1837.04	0.00573108		2367.04	-0.00021483		2897.04	-0.00715909		3427.04	-0.01054744
247.2	0.00510109		777.22	0.00554788		1307.21	0.00994591		1837.24	0.00478101		2367.24	-0.00142863		2897.24	-0.00724215		3427.24	-0.01033256
247.4	0.00518268		777.42	0.00480966		1307.41	0.00953615		1837.44	0.00519668		2367.44	-0.00063707		2897.44	-0.00783177		3427.44	-0.01113217
247.6	0.00593376		777.62	0.00440135		1307.61	0.00958409		1837.64	0.00496005		2367.64	-0.00005542		2897.64	-0.00738889		3427.64	-0.01123394
247.8	0.00685216		777.82	0.00418759		1307.81	0.00907774		1837.84	0.00415251		2367.84	-0.00069032		2897.84	-0.00627296		3427.84	-0.01194424
248	0.00658757		778.02	0.00337624		1308.01	0.00754362		1838.04	0.00443823		2368.04	-0.00035708		2898.04	-0.00608909		3428.04	-0.01234847
248.2	0.00762128		778.22	0.00231392		1308.21	0.00683207		1838.24	0.00320671		2368.24	-0.00016588		2898.24	-0.00574748		3428.24	-0.01188955
248.4	0.00828314		778.42	0.00193846		1308.41	0.00659308		1838.44	0.00227913		2368.44	-0.00028512		2898.44	-0.00538439		3428.44	-0.0117342
248.6	0.00821773		778.62	0.00271628		1308.61	0.00639659		1838.64	0.00160944		2368.64	-0.00084145		2898.64	-0.00465885		3428.64	-0.01167442
248.8	0.0087198		778.82	0.0030374		1308.81	0.0055822		1838.84	0.00057885		2368.84	-0.00043696		2898.84	-0.00329147		3428.84	-0.01226551
249	0.00862419		779.02	0.00269527		1309.01	0.00521264		1839.04	0.00050017		2369.04	-0.00059067		2899.04	-0.00380556		3429.04	-0.01245415
249.2	0.00870696		779.22	0.00292268		1309.21	0.00540311		1839.24	0.00035229		2369.24	0.00001727		2899.24	-0.00307487		3429.24	-0.01212679
249.4	0.00867149		779.42	0.00371899		1309.41	0.00564441		1839.44	0.00024751		2369.44	0.00128427		2899.44	-0.00325376		3429.44	-0.0118977
249.6	0.00854998		779.62	0.00398396		1309.61	0.00572471		1839.64	-0.00018888		2369.64	0.00155622		2899.64	-0.0040442		3429.64	-0.01193093
249.8	0.00744495		779.82	0.00416137		1309.81	0.00582915		1839.84	-0.00110875		2369.84	0.00070243		2899.84	-0.00379196		3429.84	-0.01089802
250	0.00786128		780.02	0.00540338		1310.01	0.00630109		1840.04	0.00010328		2370.04	0.0001695		2900.04	-0.00427133		3430.04	-0.01065083
250.2	0.00725192		780.22	0.0059008		1310.21	0.00572576		1840.24	0.00003863		2370.24	0.00020019		2900.24	-0.00373931		3430.24	-0.01115017
250.4	0.00613303		780.42	0.00646025		1310.41	0.00606906		1840.44	-0.00021251		2370.44	-0.00051007		2900.44	-0.0041085		3430.44	-0.01036094
250.6	0.00573801		780.62	0.00605513		1310.61	0.00682522		1840.64	0.00025323		2370.64	-0.00112297		2900.64	-0.00350068		3430.64	-0.01037033
250.8	0.00520815		780.82	0.00643565		1310.81	0.00720021		1840.84	0.00024241		2370.84	-0.00111191		2900.84	-0.00384488		3430.84	-0.01052906
251	0.00412925		781.02	0.00577793		1311.01	0.00801298		1841.04	0.00099343		2371.04	-0.00106581		2901.04	-0.00408434		3431.04	-0.01036881
251.2	0.00478223		781.22	0.00504738		1311.21	0.00821104		1841.24	0.00121337		2371.24	-0.00200286		2901.24	-0.00428212		3431.24	-0.01027238
251.4	0.00486187		781.42	0.00419884		1311.41	0.00840254		1841.44	0.00213242		2371.44	-0.00164783		2901.44	-0.00486155		3431.44	-0.0099607
251.6	0.00527824		781.62	0.0038343		1311.61	0.00832345		1841.64	0.00236512		2371.64	-0.00203568		2901.64	-0.00473624		3431.64	-0.00984244
251.8	0.0046436		781.82	0.00396529		1311.81	0.00807177		1841.84	0.00296372		2371.84	-0.00282756		2901.84	-0.0047739		3431.84	-0.01061033
252	0.00540477		782.02	0.00352041		1312.01	0.00830483		1842.04	0.00301425		2372.04	-0.00227786		2902.04	-0.00588332		3432.04	-0.0105141
252.2	0.0063885		782.22	0.00304741		1312.21	0.00800018		1842.24	0.00244534		2372.24	-0.00213945		2902.24	-0.00631914		3432.24	-0.010743
252.4	0.00652148		782.42	0.00354029		1312.41	0.00785885		1842.44	0.00293538		2372.44	-0.00182824		2902.44	-0.00642698		3432.44	-0.01061673
252.6	0.00630466		782.62	0.00347613		1312.61	0.00794265		1842.64	0.00285206		2372.64	-0.00178062		2902.64	-0.00631893		3432.64	-0.01075521
252.8	0.00659303		782.82	0.00326746		1312.81	0.00698881		1842.84	0.00307915		2372.84	-0.00081581		2902.84	-0.00612094		3432.84	-0.01106441
253	0.00639625		783.02	0.00300184		1313.01	0.0074747		1843.04	0.00420054		2373.04	-0.00021281		2903.04	-0.00692535		3433.04	-0.01059178
253.2	0.00656887		783.22	0.00380078		1313.21	0.00776437		1843.24	0.00389208		2373.24	0.00012978		2903.24	-0.00712774		3433.24	-0.01085042
253.4	0.00707705		783.42	0.00479675		1313.41	0.00772733		1843.44	0.00430146		2373.44	0.00129228		2903.44	-0.00882982		3433.44	-0.01052907
253.6	0.007378		783.62	0.00440716		1313.61	0.00738043		1843.64	0.00333894		2373.64	0.00003702		2903.64	-0.0091676		3433.64	-0.00963964
253.8	0.00760657		783.82	0.00535233		1313.81	0.00712175		1843.84	0.00259928		2373.84	-0.00137161		2903.84	-0.00948457		3433.84	-0.00896696
254	0.00763471		784.02	0.00609169		1314.01	0.00662782		1844.04	0.00221727		2374.04	-0.0015223		2904.04	-0.0093457		3434.04	-0.00869199
254.2	0.00721028		784.22	0.00604224		1314.21	0.00617838		1844.24	0.00102047		2374.24	-0.00168456		2904.24	-0.00885111		3434.24	-0.0090347
254.4	0.00693289		784.42	0.00575467		1314.41	0.00687785		1844.44	0.00062657		2374.44	-0.00146232		2904.44	-0.00875108		3434.44	-0.00872645
254.6	0.00706067		784.62	0.00527661		1314.61	0.00696488		1844.64	0.00075543		2374.64	-0.00045403		2904.64	-0.00789785		3434.64	-0.00945444
254.8	0.00727033		784.82	0.0055088		1314.81	0.00677159		1844.84	0.00003931		2374.84	0.00013079		2904.84	-0.00795289		3434.84	-0.00942502
255	0.00766111		785.02	0.00466558		1315.01	0.00752494		1845.04	0.00015908		2375.04	0.00037323		2905.04	-0.00737812		3435.04	-0.00973044
255.2	0.00773634		785.22	0.00481086		1315.21	0.0076526		1845.24	0.00052685		2375.24	-0.00026344		2905.24	-0.00718102		3435.24	-0.00950067
255.4	0.00727784		785.42	0.00494164		1315.41	0.00778481		1845.44	0.00071325		2375.44	-0.0001524		2905.44	-0.00841721		3435.44	-0.00972455
255.6	0.00717486		785.62	0.00538137		1315.61	0.00764441		1845.64	0.00124432		2375.64	-0.00063932		2905.64	-0.00854335		3435.64	-0.01015793
255.8	0.00631083		785.82	0.00545238		1315.81	0.00804083		1845.84	0.00177318		2375.84	-0.00058638		2905.84	-0.00879887		3435.84	-0.01057033
256	0.00664517		786.02	0.00474813		1316.01	0.00740474		1846.04	0.00234266		2376.04	-0.00041136		2906.04	-0.00871807		3436.04	-0.01064592
256.2	0.0057127		786.22	0.00391082		1316.21	0.0059187		1846.24	0.00353381		2376.24	-0.00003801		2906.24	-0.00838517		3436.24	-0.01148344
256.4	0.00554142		786.42	0.00269972		1316.41	0.0058406		1846.44	0.00376678		2376.44	-0.00015462		2906.44	-0.0088079		3436.44	-0.01120201
256.6	0.00474662		786.62	0.00199178		1316.61	0.0058359		1846.64	0.00445935		2376.64	-0.00055324		2906.64	-0.00866054		3436.64	-0.01128646
256.8	0.00421465		786.82	0.00135357		1316.81	0.00590364		1846.84	0.0057144		2376.84	-0.00003123		2906.84	-0.00893216		3436.84	-0.01061955
257	0.00401274		787.02	0.00091045		1317.01	0.00673751		1847.04	0.00583456		2377.04	-0.00047628		2907.04	-0.00933278		3437.04	-0.01019766
257.2	0.00405163		787.22	0.00127617		1317.21	0.00667439		1847.24	0.00512245		2377.24	-0.00075461		2907.24	-0.01014808		3437.24	-0.01052874
257.4	0.00495737		787.42	0.0013896		1317.41	0.00597249		1847.44	0.00578732		2377.44	-0.00140766		2907.44	-0.01122331		3437.44	-0.00980802
257.6	0.00568896		787.62	0.00161338		1317.61	0.00580273		1847.64	0.00525773		2377.64	-0.00338564		2907.64	-0.01070575		3437.64	-0.00986136
257.8	0.00542011		787.82	0.00292943		1317.81	0.00539437		1847.84	0.00502076		2377.84	-0.0043828		2907.84	-0.01064477		3437.84	-0.01011371
258	0.00525938		788.02	0.00286523		1318.01	0.00616684		1848.04	0.00514333		2378.04	-0.00442016		2908.04	-0.00961226		3438.04	-0.00929543
258.2	0.00630737		788.22	0.00204703		1318.21	0.00698155		1848.24	0.00484108		2378.24	-0.00498021		2908.24	-0.00993631		3438.24	-0.00964009
258.4	0.00683994		788.42	0.00176044		1318.41	0.00707797		1848.44	0.00447696		2378.44	-0.00393996		2908.44	-0.01018441		3438.44	-0.01013787
258.6	0.00755761		788.62	0.00238476		1318.61	0.00712737		1848.64	0.00351151		2378.64	-0.0040772		2908.64	-0.01021373		3438.64	-0.01000171
258.8	0.00786275		788.82	0.00349968		1318.81	0.00749502		1848.84	0.00218149		2378.84	-0.00391971		2908.84	-0.01012643		3438.84	-0.00997694
259	0.00839458		789.02	0.00391942		1319.01	0.0078164		1849.04	0.00177296		2379.04	-0.00408759		2909.04	-0.01067085		3439.04	-0.00972149
259.2	0.00772569		789.22	0.00510404		1319.21	0.00818408		1849.24	0.00113958		2379.24	-0.00418604		2909.24	-0.01166808		3439.24	-0.00954941
259.4	0.00717293		789.42	0.00606801		1319.41	0.00780767		1849.44	0.00073894		2379.44	-0.00385022		2909.44	-0.01203216		3439.44	-0.01001621
259.6	0.00706786		789.62	0.006247		1319.61	0.00732087		1849.64	-0.000375		2379.64	-0.00405749		2909.64	-0.0112973		3439.64	-0.00991062
259.8	0.0065436		789.82	0.00619897		1319.81	0.00732797		1849.84	0.00023264		2379.84	-0.00354109		2909.84	-0.01146843		3439.84	-0.0101688
260	0.00732329		790.02	0.00592484		1320.01	0.00652677		1850.04	0.00029259		2380.04	-0.00279808		2910.04	-0.00975969		3440.04	-0.01070992
260.2	0.00664616		790.22	0.00513919		1320.21	0.00624392		1850.24	0.00004333		2380.24	-0.00219971		2910.24	-0.00912887		3440.24	-0.01151348
260.4	0.00706267		790.42	0.00453317		1320.41	0.00609251		1850.44	-0.00112876		2380.44	-0.00157646		2910.44	-0.00858329		3440.44	-0.01192807
260.6	0.00602178		790.62	0.00416669		1320.61	0.00679497		1850.64	-0.00101545		2380.64	-0.00137634		2910.64	-0.00687811		3440.64	-0.01219749
260.8	0.00544022		790.82	0.00360289		1320.81	0.00730901		1850.84	-0.00135681		2380.84	-0.00052673		2910.84	-0.00640131		3440.84	-0.01255685
261	0.00524941		791.02	0.00377147		1321.01	0.00755516		1851.04	-0.00177031		2381.04	-0.00083654		2911.04	-0.00548136		3441.04	-0.01343225
261.2	0.00445868		791.22	0.00414851		1321.21	0.00714451		1851.24	-0.00240855		2381.24	-0.00023744		2911.24	-0.00408673		3441.24	-0.01485783
261.4	0.00460336		791.42	0.00381226		1321.41	0.00746149		1851.44	-0.00202948		2381.44	-0.00039725		2911.44	-0.00357655		3441.44	-0.01537195
261.6	0.00445168		791.62	0.0039373		1321.61	0.00735533		1851.64	-0.0023306		2381.64	0.0001591		2911.64	-0.00218049		3441.64	-0.01533121
261.8	0.00344019		791.82	0.00316398		1321.81	0.00729184		1851.84	-0.00206536		2381.84	0.00081116		2911.84	-0.00154941		3441.84	-0.0151649
262	0.00344941		792.02	0.00255602		1322.01	0.00769275		1852.04	-0.00106728		2382.04	0.00168918		2912.04	-0.0012312		3442.04	-0.01438578
262.2	0.00410862		792.22	0.00214711		1322.21	0.00736393		1852.24	-0.0004601		2382.24	0.00150989		2912.24	-0.0018788		3442.24	-0.01396276
262.4	0.00398743		792.42	0.00267423		1322.41	0.00659508		1852.44	-0.00043538		2382.44	0.00178454		2912.44	-0.00313535		3442.44	-0.01355336
262.6	0.00387884		792.62	0.00333118		1322.61	0.0064493		1852.64	-0.00100359		2382.64	0.00125057		2912.64	-0.00364646		3442.64	-0.01302152
262.8	0.00428423		792.82	0.00447712		1322.81	0.0063461		1852.84	-0.00024938		2382.84	0.00127211		2912.84	-0.00416488		3442.84	-0.01287366
263	0.00458252		793.02	0.00521607		1323.01	0.00604519		1853.04	0.000699		2383.04	0.00079788		2913.04	-0.00596888		3443.04	-0.01294891
263.2	0.00485509		793.22	0.00566595		1323.21	0.00616922		1853.24	0.0005584		2383.24	0.0004559		2913.24	-0.00694438		3443.24	-0.01359372
263.4	0.00566749		793.42	0.00673629		1323.41	0.00554207		1853.44	0.00125612		2383.44	0.00082917		2913.44	-0.0073506		3443.44	-0.01357595
263.6	0.00644644		793.62	0.0068179		1323.61	0.00628679		1853.64	0.00171023		2383.64	0.00087434		2913.64	-0.00816844		3443.64	-0.01295054
263.8	0.00593518		793.82	0.0075816		1323.81	0.00708599		1853.84	0.00310127		2383.84	0.00038095		2913.84	-0.00829239		3443.84	-0.01294036
264	0.00665152		794.02	0.00807053		1324.01	0.00749426		1854.04	0.00383528		2384.04	0.00083005		2914.04	-0.00774256		3444.04	-0.01281407
264.2	0.00656255		794.22	0.00707797		1324.21	0.00797198		1854.24	0.00441299		2384.24	0.00050082		2914.24	-0.00801424		3444.24	-0.0127263
264.4	0.00706107		794.42	0.00813954		1324.41	0.00818717		1854.44	0.00455397		2384.44	-0.00068287		2914.44	-0.00848691		3444.44	-0.01238966
264.6	0.00745431		794.62	0.00801069		1324.61	0.00927932		1854.64	0.00532387		2384.64	-0.00170735		2914.64	-0.00866997		3444.64	-0.01196799
264.8	0.00801431		794.82	0.00801876		1324.81	0.0097311		1854.84	0.00500959		2384.84	-0.00244622		2914.84	-0.00923998		3444.84	-0.01218688
265	0.00845565		795.02	0.00783755		1325.01	0.01001653		1855.04	0.00480869		2385.04	-0.00241409		2915.04	-0.00859726		3445.04	-0.01178026
265.2	0.00891497		795.22	0.00727237		1325.21	0.00988267		1855.24	0.00352205		2385.24	-0.00274155		2915.24	-0.00772968		3445.24	-0.01108522
265.4	0.00913971		795.42	0.00598223		1325.41	0.01034246		1855.44	0.00337931		2385.44	-0.00258757		2915.44	-0.00715434		3445.44	-0.01059998
265.6	0.00940752		795.62	0.00523377		1325.61	0.0103236		1855.64	0.003575		2385.64	-0.00173065		2915.64	-0.00622462		3445.64	-0.00976598
265.8	0.0091127		795.82	0.00474716		1325.81	0.00955021		1855.84	0.00374351		2385.84	-0.00192766		2915.84	-0.00583316		3445.84	-0.01018616
266	0.00949707		796.02	0.00403424		1326.01	0.00888596		1856.04	0.00366136		2386.04	-0.00232671		2916.04	-0.00495323		3446.04	-0.00953738
266.2	0.01000804		796.22	0.00372933		1326.21	0.00853766		1856.24	0.0028375		2386.24	-0.00330101		2916.24	-0.00522		3446.24	-0.00937982
266.4	0.00989031		796.42	0.00337974		1326.41	0.00835379		1856.44	0.00206488		2386.44	-0.00361657		2916.44	-0.00516697		3446.44	-0.01019331
266.6	0.00955808		796.62	0.00310498		1326.61	0.00773446		1856.64	0.00136872		2386.64	-0.00346065		2916.64	-0.00447235		3446.64	-0.01117809
266.8	0.00936681		796.82	0.00399501		1326.81	0.0080939		1856.84	0.00175714		2386.84	-0.00303456		2916.84	-0.00516635		3446.84	-0.01141294
267	0.00898399		797.02	0.00385042		1327.01	0.00782802		1857.04	0.00076493		2387.04	-0.00232937		2917.04	-0.00586951		3447.04	-0.0122914
267.2	0.00840075		797.22	0.00410498		1327.21	0.00762238		1857.24	0.00018802		2387.24	-0.00261321		2917.24	-0.0063824		3447.24	-0.01289448
267.4	0.00795394		797.42	0.00457281		1327.41	0.00740919		1857.44	0.00072995		2387.44	-0.00147489		2917.44	-0.00696651		3447.44	-0.01305065
267.6	0.00685559		797.62	0.00418399		1327.61	0.00728001		1857.64	0.00072106		2387.64	-0.00157972		2917.64	-0.00685039		3447.64	-0.01399474
267.8	0.00647836		797.82	0.00461064		1327.81	0.00750399		1857.84	0.00103903		2387.84	-0.00267781		2917.84	-0.0061753		3447.84	-0.01462267
268	0.00622498		798.02	0.00370469		1328.01	0.008078		1858.04	0.00158075		2388.04	-0.00246675		2918.04	-0.00692786		3448.04	-0.01498004
268.2	0.00658466		798.22	0.00369787		1328.21	0.00771768		1858.24	0.00099423		2388.24	-0.00240668		2918.24	-0.00678941		3448.24	-0.01574615
268.4	0.00678613		798.42	0.00493474		1328.41	0.0075754		1858.44	0.00168728		2388.44	-0.00316132		2918.44	-0.00746075		3448.44	-0.01545835
268.6	0.0073407		798.62	0.00431667		1328.61	0.00839267		1858.64	0.00205977		2388.64	-0.00263144		2918.64	-0.00794264		3448.64	-0.01544124
268.8	0.00774644		798.82	0.004259		1328.81	0.00907903		1858.84	0.00198309		2388.84	-0.00247549		2918.84	-0.00746134		3448.84	-0.01530569
269	0.00805486		799.02	0.00502484		1329.01	0.00878121		1859.04	0.00197347		2389.04	-0.00141499		2919.04	-0.00704055		3449.04	-0.01433757
269.2	0.00810372		799.22	0.00540618		1329.21	0.00851905		1859.24	0.00194805		2389.24	-0.00156147		2919.24	-0.0063773		3449.24	-0.01404127
269.4	0.00807498		799.42	0.00519518		1329.41	0.0089212		1859.44	0.00252455		2389.44	-0.000797		2919.44	-0.00625207		3449.44	-0.01444014
269.6	0.00884816		799.62	0.00550142		1329.61	0.00939267		1859.64	0.00259862		2389.64	-0.00071994		2919.64	-0.00588064		3449.64	-0.01411738
269.8	0.00859032		799.82	0.00547161		1329.81	0.00896454		1859.84	0.00270389		2389.84	-0.00209688		2919.84	-0.00550841		3449.84	-0.01505483
270	0.00946672		800.02	0.00545265		1330.01	0.00928172		1860.04	0.00254955		2390.04	-0.00286144		2920.04	-0.00512548		3450.04	-0.01456644
270.2	0.00976024		800.22	0.00570488		1330.21	0.00970678		1860.24	0.0021529		2390.24	-0.00236019		2920.24	-0.00536203		3450.24	-0.0140304
270.4	0.00993276		800.42	0.00542367		1330.41	0.00951507		1860.44	0.00203895		2390.44	-0.00208729		2920.44	-0.00560556		3450.44	-0.01425438
270.6	0.00993742		800.62	0.00573968		1330.61	0.00945384		1860.64	0.00130749		2390.64	-0.00223123		2920.64	-0.00525491		3450.64	-0.01361396
270.8	0.00999874		800.82	0.0064022		1330.81	0.00952317		1860.84	0.00051234		2390.84	-0.00194922		2920.84	-0.00549077		3450.84	-0.012962
271	0.01088159		801.02	0.00624639		1331.01	0.00862131		1861.04	0.00027495		2391.04	-0.00269592		2921.04	-0.00578645		3451.04	-0.01275406
271.2	0.01057878		801.22	0.00661145		1331.21	0.00765333		1861.24	0.0004928		2391.24	-0.00286694		2921.24	-0.00607998		3451.24	-0.01286699
271.4	0.0108354		801.42	0.00661334		1331.41	0.00765973		1861.44	0.00039994		2391.44	-0.00302383		2921.44	-0.00521245		3451.44	-0.01266896
271.6	0.01149949		801.62	0.00585673		1331.61	0.00722937		1861.64	0.00014914		2391.64	-0.00314984		2921.64	-0.00426897		3451.64	-0.01309001
271.8	0.0119755		801.82	0.00545161		1331.81	0.00795147		1861.84	-0.00027269		2391.84	-0.00294026		2921.84	-0.00421608		3451.84	-0.0128539
272	0.01130215		802.02	0.00522947		1332.01	0.00747852		1862.04	-0.0004181		2392.04	-0.00274959		2922.04	-0.00435997		3452.04	-0.01317018
272.2	0.01120028		802.22	0.00597943		1332.21	0.00732348		1862.24	0.00015044		2392.24	-0.00174107		2922.24	-0.00388921		3452.24	-0.01391086
272.4	0.01043234		802.42	0.005782		1332.41	0.00771686		1862.44	0.00109237		2392.44	-0.00170898		2922.44	-0.00409954		3452.44	-0.01375067
272.6	0.00948923		802.62	0.0056333		1332.61	0.00807237		1862.64	0.00118284		2392.64	-0.00092604		2922.64	-0.00403115		3452.64	-0.01400728
272.8	0.00902088		802.82	0.00544574		1332.81	0.00799245		1862.84	0.00155291		2392.84	-0.00101661		2922.84	-0.0044212		3452.84	-0.0145717
273	0.00854091		803.02	0.00620574		1333.01	0.00784258		1863.04	0.00160565		2393.04	-0.00060062		2923.04	-0.00518493		3453.04	-0.01486248
273.2	0.00750356		803.22	0.00617454		1333.21	0.00809186		1863.24	0.00174626		2393.24	-0.00049988		2923.24	-0.00564415		3453.24	-0.01587758
273.4	0.00663994		803.42	0.00575841		1333.41	0.00868609		1863.44	0.00161916		2393.44	-0.00025857		2923.44	-0.00621071		3453.44	-0.01548147
273.6	0.00583199		803.62	0.00532995		1333.61	0.00913904		1863.64	0.00182586		2393.64	-0.00094929		2923.64	-0.00686165		3453.64	-0.01536257
273.8	0.00500363		803.82	0.00494163		1333.81	0.00960291		1863.84	0.00139983		2393.84	-0.00088965		2923.84	-0.00704147		3453.84	-0.01579748
274	0.00558801		804.02	0.0046001		1334.01	0.01021444		1864.04	0.00135213		2394.04	-0.00085184		2924.04	-0.0076211		3454.04	-0.01384897
274.2	0.00500585		804.22	0.00420287		1334.21	0.01036196		1864.24	0.00155118		2394.24	-0.0002004		2924.24	-0.00694927		3454.24	-0.01418555
274.4	0.00543027		804.42	0.00322424		1334.41	0.0110109		1864.44	0.00088611		2394.44	-0.00120188		2924.44	-0.00699025		3454.44	-0.01376736
274.6	0.00604654		804.62	0.00313483		1334.61	0.01090833		1864.64	0.0002138		2394.64	-0.00202852		2924.64	-0.00619577		3454.64	-0.01263404
274.8	0.00633698		804.82	0.00298808		1334.81	0.01116759		1864.84	-0.00032955		2394.84	-0.00206134		2924.84	-0.00623627		3454.84	-0.01222786
275	0.00725453		805.02	0.00328834		1335.01	0.01156681		1865.04	0.00047067		2395.04	-0.00276232		2925.04	-0.00652739		3455.04	-0.01111017
275.2	0.0068636		805.22	0.00317072		1335.21	0.01238968		1865.24	-0.00008598		2395.24	-0.00252888		2925.24	-0.00607297		3455.24	-0.0108576
275.4	0.00778309		805.42	0.0032537		1335.41	0.01270968		1865.44	0.00030432		2395.44	-0.00335703		2925.44	-0.00628281		3455.44	-0.01047991
275.6	0.00842063		805.62	0.00277998		1335.61	0.01214603		1865.64	0.00068668		2395.64	-0.00309569		2925.64	-0.00648557		3455.64	-0.01067649
275.8	0.00870395		805.82	0.00329128		1335.81	0.01209585		1865.84	0.00052162		2395.84	-0.00309551		2925.84	-0.0071282		3455.84	-0.01024486
276	0.00915912		806.02	0.00323919		1336.01	0.01164885		1866.04	0.00146096		2396.04	-0.0039361		2926.04	-0.00672201		3456.04	-0.01053505
276.2	0.00866841		806.22	0.00446037		1336.21	0.01240017		1866.24	0.00182567		2396.24	-0.00379413		2926.24	-0.00666133		3456.24	-0.01168255
276.4	0.00875682		806.42	0.00435325		1336.41	0.01189721		1866.44	0.00159426		2396.44	-0.00373716		2926.44	-0.00700276		3456.44	-0.01259689
276.6	0.00881677		806.62	0.00476833		1336.61	0.01188962		1866.64	0.00175481		2396.64	-0.00371604		2926.64	-0.00716811		3456.64	-0.01395278
276.8	0.00828211		806.82	0.00554105		1336.81	0.01105798		1866.84	0.00160574		2396.84	-0.00391586		2926.84	-0.00813002		3456.84	-0.01489606
277	0.00832742		807.02	0.00615772		1337.01	0.01017729		1867.04	0.00175568		2397.04	-0.00329786		2927.04	-0.00813161		3457.04	-0.01519957
277.2	0.0077488		807.22	0.00568176		1337.21	0.0095524		1867.24	0.001281		2397.24	-0.003175		2927.24	-0.00818589		3457.24	-0.01517096
277.4	0.0076515		807.42	0.00561788		1337.41	0.00921457		1867.44	0.00160106		2397.44	-0.00301284		2927.44	-0.00770811		3457.44	-0.01508907
277.6	0.007523		807.62	0.00507696		1337.61	0.00910768		1867.64	0.00130989		2397.64	-0.00376812		2927.64	-0.00858226		3457.64	-0.01504287
277.8	0.00761741		807.82	0.00424867		1337.81	0.00899639		1867.84	0.00149122		2397.84	-0.00277811		2927.84	-0.00773441		3457.84	-0.01535527
278	0.00824715		808.02	0.00465629		1338.01	0.00845214		1868.04	0.00159332		2398.04	-0.00290834		2928.04	-0.00763189		3458.04	-0.01442336
278.2	0.00791218		808.22	0.0044145		1338.21	0.00773541		1868.24	0.00206441		2398.24	-0.00281314		2928.24	-0.00666161		3458.24	-0.01461232
278.4	0.00893535		808.42	0.00344799		1338.41	0.00794211		1868.44	0.00116643		2398.44	-0.00280923		2928.44	-0.00693821		3458.44	-0.01361118
278.6	0.00895568		808.62	0.00310022		1338.61	0.00696817		1868.64	0.0010476		2398.64	-0.00249279		2928.64	-0.00699934		3458.64	-0.01328125
278.8	0.00882128		808.82	0.00228679		1338.81	0.00710679		1868.84	0.00053563		2398.84	-0.00162365		2928.84	-0.00687788		3458.84	-0.01393952
279	0.00942088		809.02	0.00230339		1339.01	0.00704204		1869.04	0.00013335		2399.04	-0.00109167		2929.04	-0.0069354		3459.04	-0.01301781
279.2	0.00854108		809.22	0.00106231		1339.21	0.00683246		1869.24	-0.0000055		2399.24	-0.00097288		2929.24	-0.00736288		3459.24	-0.0136058
279.4	0.00863281		809.42	0.00162249		1339.41	0.00594422		1869.44	0.00078193		2399.44	-0.00018187		2929.44	-0.00773821		3459.44	-0.01433707
279.6	0.00909958		809.62	0.00148891		1339.61	0.00562431		1869.64	0.00106241		2399.64	0.0009393		2929.64	-0.00792307		3459.64	-0.01427188
279.8	0.00969526		809.82	0.00201099		1339.81	0.00610604		1869.84	0.00007183		2399.84	0.00117715		2929.84	-0.0083089		3459.84	-0.01418908
280	0.01092309		810.02	0.00202526		1340.01	0.00635174		1870.04	-0.00040744		2400.04	0.00047147		2930.04	-0.00809892		3460.04	-0.01518803
280.2	0.01033645		810.22	0.00324371		1340.21	0.00736606		1870.24	-0.00129131		2400.24	0.00048916		2930.24	-0.00814138		3460.24	-0.01597294
280.4	0.0103957		810.42	0.00314666		1340.41	0.00753389		1870.44	-0.00137634		2400.44	0.00085307		2930.44	-0.0087882		3460.44	-0.01605494
280.6	0.00876681		810.62	0.00443568		1340.61	0.00774713		1870.64	-0.00042772		2400.64	0.00015178		2930.64	-0.00883466		3460.64	-0.01623382
280.8	0.00819643		810.82	0.00545955		1340.81	0.00766317		1870.84	-0.00027884		2400.84	-0.0004728		2930.84	-0.00885552		3460.84	-0.01492845
281	0.00793648		811.02	0.00536904		1341.01	0.00774661		1871.04	0.00047695		2401.04	-0.00045698		2931.04	-0.00781688		3461.04	-0.01496798
281.2	0.00739856		811.22	0.00483347		1341.21	0.00804028		1871.24	0.00029841		2401.24	-0.00155812		2931.24	-0.00730936		3461.24	-0.01509209
281.4	0.00680633		811.42	0.00536792		1341.41	0.00818891		1871.44	0.0000992		2401.44	-0.00173742		2931.44	-0.00652885		3461.44	-0.01575867
281.6	0.00674812		811.62	0.00532247		1341.61	0.00829201		1871.64	0.00019673		2401.64	-0.00191257		2931.64	-0.00701833		3461.64	-0.01495713
281.8	0.00638017		811.82	0.0060217		1341.81	0.00905173		1871.84	0.00130441		2401.84	-0.00134617		2931.84	-0.00639839		3461.84	-0.01498844
282	0.00640338		812.02	0.0065644		1342.01	0.0097093		1872.04	0.00104003		2402.04	-0.00269462		2932.04	-0.00645971		3462.04	-0.01399768
282.2	0.00611037		812.22	0.00616063		1342.21	0.0097095		1872.24	0.00172313		2402.24	-0.00303971		2932.24	-0.00646025		3462.24	-0.01313303
282.4	0.00679353		812.42	0.00550194		1342.41	0.00925154		1872.44	0.00150685		2402.44	-0.00302376		2932.44	-0.00592086		3462.44	-0.01316099
282.6	0.006005		812.62	0.0057303		1342.61	0.00927703		1872.64	0.00206426		2402.64	-0.00347764		2932.64	-0.00605447		3462.64	-0.01341221
282.8	0.00623095		812.82	0.0053248		1342.81	0.00832134		1872.84	0.00168404		2402.84	-0.00307815		2932.84	-0.00620645		3462.84	-0.01368177
283	0.00674833		813.02	0.00533492		1343.01	0.00827833		1873.04	0.00142603		2403.04	-0.00326607		2933.04	-0.00613639		3463.04	-0.01352661
283.2	0.00626796		813.22	0.00484695		1343.21	0.00767335		1873.24	0.00276126		2403.24	-0.00344683		2933.24	-0.00650633		3463.24	-0.01371022
283.4	0.00632997		813.42	0.00549174		1343.41	0.00754569		1873.44	0.00251986		2403.44	-0.00216717		2933.44	-0.00689523		3463.44	-0.01405562
283.6	0.00681516		813.62	0.00491913		1343.61	0.00688901		1873.64	0.00186765		2403.64	-0.00249556		2933.64	-0.00772069		3463.64	-0.01316564
283.8	0.00721705		813.82	0.00514184		1343.81	0.00691075		1873.84	0.00145422		2403.84	-0.00310881		2933.84	-0.0080563		3463.84	-0.01296815
284	0.00768585		814.02	0.00491803		1344.01	0.00656075		1874.04	0.00153757		2404.04	-0.0027502		2934.04	-0.00908988		3464.04	-0.01303583
284.2	0.00685243		814.22	0.00541126		1344.21	0.00682869		1874.24	0.00148398		2404.24	-0.00256831		2934.24	-0.0086841		3464.24	-0.01261054
284.4	0.00709877		814.42	0.00523711		1344.41	0.00691496		1874.44	0.00146937		2404.44	-0.00169395		2934.44	-0.0091783		3464.44	-0.01228804
284.6	0.00633816		814.62	0.00582058		1344.61	0.00642004		1874.64	0.0015918		2404.64	-0.00219452		2934.64	-0.00893491		3464.64	-0.01203093
284.8	0.00702702		814.82	0.005847		1344.81	0.00640552		1874.84	0.00049829		2404.84	-0.0022584		2934.84	-0.00913949		3464.84	-0.0118523
285	0.00720839		815.02	0.0054944		1345.01	0.00601896		1875.04	0.00036843		2405.04	-0.00166075		2935.04	-0.00794227		3465.04	-0.01317445
285.2	0.00800547		815.22	0.00502469		1345.21	0.00640122		1875.24	-0.00031295		2405.24	-0.00157675		2935.24	-0.00761573		3465.24	-0.01401235
285.4	0.00796909		815.42	0.00565342		1345.41	0.00717676		1875.44	-0.00087958		2405.44	-0.00068502		2935.44	-0.007381		3465.44	-0.0146078
285.6	0.0088787		815.62	0.00701706		1345.61	0.00772057		1875.64	-0.00049241		2405.64	-0.00039755		2935.64	-0.00640218		3465.64	-0.014387
285.8	0.00874361		815.82	0.00770129		1345.81	0.00889612		1875.84	-0.00062098		2405.84	-0.00123061		2935.84	-0.00601483		3465.84	-0.01488444
286	0.00884769		816.02	0.00743291		1346.01	0.00913236		1876.04	-0.00103582		2406.04	-0.00216051		2936.04	-0.00575289		3466.04	-0.01449736
286.2	0.00936372		816.22	0.0082846		1346.21	0.00880879		1876.24	-0.00163219		2406.24	-0.00239314		2936.24	-0.00563632		3466.24	-0.01444163
286.4	0.00910273		816.42	0.00843709		1346.41	0.00889333		1876.44	-0.00199695		2406.44	-0.0024961		2936.44	-0.00491253		3466.44	-0.01484629
286.6	0.00870617		816.62	0.00893957		1346.61	0.00961011		1876.64	-0.00193876		2406.64	-0.00330208		2936.64	-0.00527111		3466.64	-0.01510389
286.8	0.00884588		816.82	0.00862422		1346.81	0.00944213		1876.84	-0.00348285		2406.84	-0.00357356		2936.84	-0.00509124		3466.84	-0.01548901
287	0.00894707		817.02	0.0083947		1347.01	0.00963913		1877.04	-0.0035585		2407.04	-0.00371315		2937.04	-0.0048444		3467.04	-0.01565747
287.2	0.00828906		817.22	0.00763901		1347.21	0.00936833		1877.24	-0.00299003		2407.24	-0.00373023		2937.24	-0.00571788		3467.24	-0.01512943
287.4	0.00856076		817.42	0.00727352		1347.41	0.00905158		1877.44	-0.00340982		2407.44	-0.00322621		2937.44	-0.00655679		3467.44	-0.01489914
287.6	0.00827584		817.62	0.00752238		1347.61	0.00854432		1877.64	-0.00326026		2407.64	-0.00303825		2937.64	-0.00789312		3467.64	-0.01373802
287.8	0.00882461		817.82	0.00714757		1347.81	0.00874872		1877.84	-0.00300124		2407.84	-0.00223534		2937.84	-0.00873996		3467.84	-0.0143278
288	0.00849139		818.02	0.00648801		1348.01	0.00868782		1878.04	-0.00267259		2408.04	-0.00191417		2938.04	-0.01021715		3468.04	-0.01477641
288.2	0.00866662		818.22	0.00644526		1348.21	0.00849089		1878.24	-0.00195214		2408.24	-0.00187563		2938.24	-0.01029874		3468.24	-0.01429506
288.4	0.00962499		818.42	0.00522885		1348.41	0.00900921		1878.44	-0.00175872		2408.44	-0.00124384		2938.44	-0.01130179		3468.44	-0.01432938
288.6	0.00957338		818.62	0.00494056		1348.61	0.00838759		1878.64	-0.00117072		2408.64	-0.00141739		2938.64	-0.01176169		3468.64	-0.01377454
288.8	0.00947545		818.82	0.00461005		1348.81	0.00840183		1878.84	-0.0007226		2408.84	-0.00175848		2938.84	-0.01170386		3468.84	-0.01389473
289	0.00962004		819.02	0.00416178		1349.01	0.00890409		1879.04	0.00011793		2409.04	-0.00198323		2939.04	-0.0110629		3469.04	-0.01453209
289.2	0.01011196		819.22	0.00384228		1349.21	0.00845674		1879.24	0.00041335		2409.24	-0.00187895		2939.24	-0.01135337		3469.24	-0.01449223
289.4	0.00963417		819.42	0.00414417		1349.41	0.00848708		1879.44	0.00037126		2409.44	-0.00183238		2939.44	-0.01060968		3469.44	-0.01409628
289.6	0.00969022		819.62	0.00436244		1349.61	0.00788046		1879.64	0.00056169		2409.64	-0.00241542		2939.64	-0.00976213		3469.64	-0.01358564
289.8	0.00962304		819.82	0.00366174		1349.81	0.00794037		1879.84	0.00096729		2409.84	-0.00325683		2939.84	-0.00931771		3469.84	-0.0138823
290	0.0095333		820.02	0.00319967		1350.01	0.00786735		1880.04	0.00040761		2410.04	-0.00305637		2940.04	-0.00833763		3470.04	-0.0139083
290.2	0.00965619		820.22	0.00375341		1350.21	0.00733516		1880.24	0.00029674		2410.24	-0.00277998		2940.24	-0.00747274		3470.24	-0.01340565
290.4	0.00886003		820.42	0.0033446		1350.41	0.0073392		1880.44	0.0007888		2410.44	-0.00276598		2940.44	-0.00648235		3470.44	-0.01314583
290.6	0.00910295		820.62	0.00328888		1350.61	0.00665378		1880.64	0.00045658		2410.64	-0.00305144		2940.64	-0.00556914		3470.64	-0.01339239
290.8	0.01001033		820.82	0.00306105		1350.81	0.00662143		1880.84	-0.00073916		2410.84	-0.00286703		2940.84	-0.00485603		3470.84	-0.01418619
291	0.01033244		821.02	0.0032606		1351.01	0.00564255		1881.04	-0.00044514		2411.04	-0.00240431		2941.04	-0.00484616		3471.04	-0.01485344
291.2	0.0104403		821.22	0.00312319		1351.21	0.00533238		1881.24	-0.00079314		2411.24	-0.00184847		2941.24	-0.00531739		3471.24	-0.01542269
291.4	0.01166988		821.42	0.00431465		1351.41	0.00512733		1881.44	-0.00140068		2411.44	-0.00171714		2941.44	-0.00502518		3471.44	-0.0153667
291.6	0.01167131		821.62	0.00512452		1351.61	0.00532596		1881.64	-0.00182312		2411.64	-0.00131977		2941.64	-0.00495676		3471.64	-0.01592623
291.8	0.01235843		821.82	0.00446882		1351.81	0.00546361		1881.84	-0.00186658		2411.84	-0.00194113		2941.84	-0.00476924		3471.84	-0.0173061
292	0.01219685		822.02	0.00510874		1352.01	0.00587649		1882.04	-0.00125929		2412.04	-0.00228151		2942.04	-0.00529098		3472.04	-0.01797555
292.2	0.01215319		822.22	0.00553275		1352.21	0.00616343		1882.24	-0.00104068		2412.24	-0.00190477		2942.24	-0.00502145		3472.24	-0.01779561
292.4	0.01257794		822.42	0.00539258		1352.41	0.0071238		1882.44	-0.00081016		2412.44	-0.0028024		2942.44	-0.00509363		3472.44	-0.01719678
292.6	0.01295791		822.62	0.00565328		1352.61	0.00722817		1882.64	-0.00018327		2412.64	-0.0034773		2942.64	-0.00507975		3472.64	-0.01754152
292.8	0.0125404		822.82	0.00594943		1352.81	0.00686648		1882.84	0.00011761		2412.84	-0.00437119		2942.84	-0.00481636		3472.84	-0.01743717
293	0.01247847		823.02	0.00509746		1353.01	0.0072802		1883.04	0.00028451		2413.04	-0.00396825		2943.04	-0.00562024		3473.04	-0.01788622
293.2	0.01186961		823.22	0.00439846		1353.21	0.00673351		1883.24	0.00066496		2413.24	-0.00367751		2943.24	-0.00655602		3473.24	-0.0178725
293.4	0.01115278		823.42	0.00446125		1353.41	0.00715362		1883.44	0.00024678		2413.44	-0.00327431		2943.44	-0.00673573		3473.44	-0.01842651
293.6	0.01057174		823.62	0.00413193		1353.61	0.00666137		1883.64	0.00100349		2413.64	-0.00281854		2943.64	-0.00754392		3473.64	-0.0186057
293.8	0.01052133		823.82	0.00370694		1353.81	0.00653498		1883.84	0.00192664		2413.84	-0.00240216		2943.84	-0.00782811		3473.84	-0.01886343
294	0.00993834		824.02	0.00336109		1354.01	0.00677042		1884.04	0.00191352		2414.04	-0.00149294		2944.04	-0.00844918		3474.04	-0.01751182
294.2	0.00876085		824.22	0.00327304		1354.21	0.00651924		1884.24	0.00234634		2414.24	-0.00149129		2944.24	-0.0083513		3474.24	-0.01604483
294.4	0.00816322		824.42	0.00238004		1354.41	0.00673309		1884.44	0.00283289		2414.44	-0.00123355		2944.44	-0.00870942		3474.44	-0.01604965
294.6	0.00747858		824.62	0.00272085		1354.61	0.00617012		1884.64	0.00251945		2414.64	-0.00070876		2944.64	-0.0086754		3474.64	-0.01574951
294.8	0.00786585		824.82	0.00303987		1354.81	0.00615412		1884.84	0.00241752		2414.84	-0.00053959		2944.84	-0.00914525		3474.84	-0.01598816
295	0.00731055		825.02	0.00328763		1355.01	0.00616689		1885.04	0.00249226		2415.04	-0.00055694		2945.04	-0.00920673		3475.04	-0.01608552
295.2	0.00672318		825.22	0.00320489		1355.21	0.00674584		1885.24	0.00234241		2415.24	-0.00040933		2945.24	-0.00912506		3475.24	-0.01545571
295.4	0.00705861		825.42	0.00377773		1355.41	0.00725416		1885.44	0.00178837		2415.44	-0.00098074		2945.44	-0.00858073		3475.44	-0.0156096
295.6	0.00704042		825.62	0.00380174		1355.61	0.007645		1885.64	0.00171723		2415.64	-0.0013468		2945.64	-0.00815689		3475.64	-0.01505602
295.8	0.00762502		825.82	0.00351626		1355.81	0.00856657		1885.84	0.00168594		2415.84	-0.00172139		2945.84	-0.00828401		3475.84	-0.0155345
296	0.00730359		826.02	0.00436132		1356.01	0.00988147		1886.04	0.00149502		2416.04	-0.0020391		2946.04	-0.00824088		3476.04	-0.01554608
296.2	0.00757426		826.22	0.00367248		1356.21	0.00996706		1886.24	0.00186832		2416.24	-0.00230441		2946.24	-0.008092		3476.24	-0.01547481
296.4	0.00919474		826.42	0.00395108		1356.41	0.01030604		1886.44	0.002164		2416.44	-0.00392931		2946.44	-0.00769584		3476.44	-0.01533931
296.6	0.00995308		826.62	0.00418815		1356.61	0.00991965		1886.64	0.0017679		2416.64	-0.00394289		2946.64	-0.00745098		3476.64	-0.01659932
296.8	0.00990206		826.82	0.0038604		1356.81	0.0097422		1886.84	0.00071518		2416.84	-0.00341806		2946.84	-0.00672881		3476.84	-0.0166251
297	0.00970333		827.02	0.00351729		1357.01	0.01082783		1887.04	0.00038286		2417.04	-0.00304597		2947.04	-0.00656504		3477.04	-0.01746605
297.2	0.00938141		827.22	0.00379763		1357.21	0.0107138		1887.24	-0.00015202		2417.24	-0.00326656		2947.24	-0.00745319		3477.24	-0.01790423
297.4	0.01009653		827.42	0.00339475		1357.41	0.01037215		1887.44	-0.00067601		2417.44	-0.0025433		2947.44	-0.00726193		3477.44	-0.0183038
297.6	0.01060359		827.62	0.00304797		1357.61	0.00988515		1887.64	-0.00021925		2417.64	-0.00273959		2947.64	-0.0069979		3477.64	-0.01859117
297.8	0.01079718		827.82	0.00258147		1357.81	0.00959881		1887.84	-0.00038395		2417.84	-0.00305046		2947.84	-0.0062472		3477.84	-0.01846672
298	0.01098638		828.02	0.00252341		1358.01	0.0095422		1888.04	-0.0006247		2418.04	-0.00251216		2948.04	-0.00623237		3478.04	-0.01751977
298.2	0.01057813		828.22	0.00239595		1358.21	0.00966709		1888.24	-0.00107176		2418.24	-0.00216146		2948.24	-0.00576043		3478.24	-0.01710072
298.4	0.01089138		828.42	0.00182028		1358.41	0.00949024		1888.44	-0.00028225		2418.44	-0.00091713		2948.44	-0.00628435		3478.44	-0.01719991
298.6	0.01091677		828.62	0.0021128		1358.61	0.0092147		1888.64	-0.00065557		2418.64	-0.00086202		2948.64	-0.0063088		3478.64	-0.01548366
298.8	0.01140404		828.82	0.00216568		1358.81	0.00900793		1888.84	-0.00014608		2418.84	-0.00029454		2948.84	-0.00714895		3478.84	-0.01527976
299	0.01166687		829.02	0.00159491		1359.01	0.0090851		1889.04	-0.00044539		2419.04	0.00026405		2949.04	-0.00765024		3479.04	-0.01543886
299.2	0.01175515		829.22	0.00133832		1359.21	0.00911746		1889.24	-0.00074872		2419.24	0.00134626		2949.24	-0.00831371		3479.24	-0.01574898
299.4	0.01191049		829.42	0.00143633		1359.41	0.00884345		1889.44	-0.00099933		2419.44	0.00201956		2949.44	-0.00808496		3479.44	-0.01554486
299.6	0.01229632		829.62	0.00102132		1359.61	0.00915748		1889.64	-0.00039954		2419.64	0.00184995		2949.64	-0.00869108		3479.64	-0.01541182
299.8	0.01174446		829.82	0.00131673		1359.81	0.00938694		1889.84	-0.00111952		2419.84	0.00249878		2949.84	-0.0088148		3479.84	-0.01605899
300	0.01042088		830.02	0.00206013		1360.01	0.00901788		1890.04	-0.00124387		2420.04	0.00205506		2950.04	-0.00875445		3480.04	-0.01588414
300.2	0.01015823		830.22	0.00226342		1360.21	0.00898838		1890.24	-0.00081211		2420.24	0.0021778		2950.24	-0.00893698		3480.24	-0.01625192
300.4	0.01035619		830.42	0.003035		1360.41	0.0084244		1890.44	-0.00105973		2420.44	0.0013251		2950.44	-0.00874684		3480.44	-0.0165641
300.6	0.00986853		830.62	0.0032753		1360.61	0.00819456		1890.64	-0.00184765		2420.64	0.00150301		2950.64	-0.00861373		3480.64	-0.01652723
300.8	0.00979489		830.82	0.00367672		1360.81	0.0087303		1890.84	-0.00200264		2420.84	0.00148121		2950.84	-0.00760058		3480.84	-0.01652969
301	0.00903098		831.02	0.00435236		1361.01	0.00845389		1891.04	-0.0019054		2421.04	0.00079258		2951.04	-0.00799671		3481.04	-0.0162685
301.2	0.00899223		831.22	0.00462084		1361.21	0.00749445		1891.24	-0.00161507		2421.24	0.00078992		2951.24	-0.00923947		3481.24	-0.01625759
301.4	0.00904047		831.42	0.0042597		1361.41	0.00680915		1891.44	-0.00087584		2421.44	0.00040442		2951.44	-0.00799599		3481.44	-0.01652326
301.6	0.00861789		831.62	0.00582102		1361.61	0.00686769		1891.64	-0.00016528		2421.64	-0.00048456		2951.64	-0.00768265		3481.64	-0.01701683
301.8	0.00817922		831.82	0.00607696		1361.81	0.00634964		1891.84	-0.00004138		2421.84	-0.00093367		2951.84	-0.00724585		3481.84	-0.01599502
302	0.00902986		832.02	0.00669447		1362.01	0.00595904		1892.04	0.00047035		2422.04	-0.00092325		2952.04	-0.00764566		3482.04	-0.01574937
302.2	0.00860851		832.22	0.00713934		1362.21	0.00640227		1892.24	0.00095523		2422.24	-0.00092565		2952.24	-0.00753964		3482.24	-0.01461491
302.4	0.0094085		832.42	0.00585078		1362.41	0.00600683		1892.44	0.00120845		2422.44	-0.00127122		2952.44	-0.00786975		3482.44	-0.01466922
302.6	0.00994821		832.62	0.00561473		1362.61	0.00619807		1892.64	0.00157389		2422.64	-0.00158542		2952.64	-0.00902696		3482.64	-0.01371156
302.8	0.01056467		832.82	0.0050459		1362.81	0.00559169		1892.84	0.00160628		2422.84	-0.00129348		2952.84	-0.00945882		3482.84	-0.01296702
303	0.01142549		833.02	0.00425856		1363.01	0.00535363		1893.04	0.00115507		2423.04	-0.00105302		2953.04	-0.00980566		3483.04	-0.01335145
303.2	0.0115731		833.22	0.00372163		1363.21	0.00628159		1893.24	0.00052107		2423.24	-0.00081048		2953.24	-0.01009817		3483.24	-0.01273896
303.4	0.01137873		833.42	0.00346932		1363.41	0.00614281		1893.44	0.00045562		2423.44	-0.00047538		2953.44	-0.00961864		3483.44	-0.01187409
303.6	0.01101629		833.62	0.00280624		1363.61	0.00654711		1893.64	0.00006411		2423.64	-0.00053583		2953.64	-0.01053877		3483.64	-0.012539
303.8	0.01038312		833.82	0.00283734		1363.81	0.00649692		1893.84	-0.0010474		2423.84	-0.00060023		2953.84	-0.0105365		3483.84	-0.01261128
304	0.01091416		834.02	0.00187369		1364.01	0.00661853		1894.04	-0.00118962		2424.04	-0.00051012		2954.04	-0.01087682		3484.04	-0.01316562
304.2	0.01110133		834.22	0.00191904		1364.21	0.00770515		1894.24	-0.00090115		2424.24	-0.00016249		2954.24	-0.01074976		3484.24	-0.01387917
304.4	0.0112505		834.42	0.00147385		1364.41	0.00766232		1894.44	-0.00060086		2424.44	-0.00042268		2954.44	-0.0104845		3484.44	-0.01495332
304.6	0.01132238		834.62	0.00158583		1364.61	0.00852134		1894.64	-0.00140796		2424.64	-0.00086749		2954.64	-0.01043216		3484.64	-0.01479076
304.8	0.0114635		834.82	0.00216356		1364.81	0.0088792		1894.84	-0.00075967		2424.84	-0.00066571		2954.84	-0.00976746		3484.84	-0.01565068
305	0.01137025		835.02	0.00241112		1365.01	0.00916215		1895.04	-0.00077136		2425.04	-0.00108067		2955.04	-0.00930396		3485.04	-0.01603014
305.2	0.0111791		835.22	0.00302339		1365.21	0.00870893		1895.24	0.00014708		2425.24	-0.00079418		2955.24	-0.00869944		3485.24	-0.0170586
305.4	0.01102698		835.42	0.00397771		1365.41	0.00853604		1895.44	0.00109463		2425.44	-0.00049764		2955.44	-0.00725435		3485.44	-0.01836282
305.6	0.0106355		835.62	0.00440939		1365.61	0.00816927		1895.64	0.00147891		2425.64	-0.00091125		2955.64	-0.00716203		3485.64	-0.01855915
305.8	0.01086753		835.82	0.00453511		1365.81	0.00773463		1895.84	0.00166114		2425.84	-0.00090809		2955.84	-0.00652306		3485.84	-0.0183194
306	0.01092164		836.02	0.00517479		1366.01	0.00730452		1896.04	0.0017573		2426.04	-0.0008722		2956.04	-0.00640433		3486.04	-0.01820564
306.2	0.0105889		836.22	0.00508801		1366.21	0.00688246		1896.24	0.00131316		2426.24	-0.000907		2956.24	-0.00640673		3486.24	-0.01809262
306.4	0.01128201		836.42	0.00418101		1366.41	0.00686473		1896.44	0.00099966		2426.44	-0.00111175		2956.44	-0.00678926		3486.44	-0.01782611
306.6	0.01135565		836.62	0.00549239		1366.61	0.00695269		1896.64	0.00082103		2426.64	-0.0003529		2956.64	-0.00783372		3486.64	-0.01659706
306.8	0.0117985		836.82	0.00589558		1366.81	0.00617927		1896.84	0.00003548		2426.84	0.00025442		2956.84	-0.00783259		3486.84	-0.01525571
307	0.01142764		837.02	0.00657549		1367.01	0.00657383		1897.04	0.00035283		2427.04	0.00064482		2957.04	-0.00847182		3487.04	-0.01530255
307.2	0.01161025		837.22	0.00666487		1367.21	0.00670444		1897.24	-0.00040066		2427.24	0.00097102		2957.24	-0.00880709		3487.24	-0.01431971
307.4	0.01100413		837.42	0.0061071		1367.41	0.00648934		1897.44	-0.00032125		2427.44	0.00170399		2957.44	-0.00873966		3487.44	-0.0138378
307.6	0.01027419		837.62	0.00591195		1367.61	0.00661872		1897.64	-0.00060439		2427.64	0.00164671		2957.64	-0.00985671		3487.64	-0.0149719
307.8	0.01050152		837.82	0.00594737		1367.81	0.00628262		1897.84	-0.00086352		2427.84	0.00164983		2957.84	-0.01003524		3487.84	-0.01547613
308	0.01132165		838.02	0.00606362		1368.01	0.00666566		1898.04	-0.00085516		2428.04	0.00171689		2958.04	-0.01028995		3488.04	-0.01509067
308.2	0.0099263		838.22	0.00677978		1368.21	0.00718853		1898.24	0.00022676		2428.24	0.00144052		2958.24	-0.0097277		3488.24	-0.01581233
308.4	0.00997048		838.42	0.00712399		1368.41	0.0070372		1898.44	0.00007641		2428.44	-0.00012669		2958.44	-0.00923526		3488.44	-0.0165384
308.6	0.0098908		838.62	0.00684496		1368.61	0.00799971		1898.64	0.00021805		2428.64	-0.00045714		2958.64	-0.00886858		3488.64	-0.01614599
308.8	0.00995371		838.82	0.00732431		1368.81	0.00858656		1898.84	0.00115472		2428.84	-0.00029306		2958.84	-0.00859188		3488.84	-0.01643573
309	0.00923651		839.02	0.00770282		1369.01	0.0092896		1899.04	0.00133344		2429.04	-0.00034934		2959.04	-0.00834629		3489.04	-0.01716915
309.2	0.00898089		839.22	0.00755627		1369.21	0.00885307		1899.24	0.00193226		2429.24	-0.00029652		2959.24	-0.00780392		3489.24	-0.01768154
309.4	0.00894791		839.42	0.00760768		1369.41	0.00836443		1899.44	0.00282973		2429.44	-0.00035743		2959.44	-0.00807947		3489.44	-0.01855861
309.6	0.00881361		839.62	0.00678017		1369.61	0.00867483		1899.64	0.00272096		2429.64	-0.00115901		2959.64	-0.00788596		3489.64	-0.01808806
309.8	0.01025362		839.82	0.0064984		1369.81	0.00903934		1899.84	0.00264326		2429.84	-0.00097624		2959.84	-0.00765105		3489.84	-0.01810603
310	0.0107061		840.02	0.00596632		1370.01	0.00858273		1900.04	0.00248169		2430.04	-0.00084023		2960.04	-0.00729018		3490.04	-0.01746616
310.2	0.01105527		840.22	0.00570278		1370.21	0.00839788		1900.24	0.00231429		2430.24	-0.00009733		2960.24	-0.0080223		3490.24	-0.01821262
310.4	0.0120644		840.42	0.0056495		1370.41	0.00985114		1900.44	0.0029773		2430.44	0.00013641		2960.44	-0.00790371		3490.44	-0.01680259
310.6	0.01253716		840.62	0.00610704		1370.61	0.0096569		1900.64	0.00258573		2430.64	0.00059962		2960.64	-0.0086914		3490.64	-0.01659995
310.8	0.01307121		840.82	0.00495766		1370.81	0.00980693		1900.84	0.00334001		2430.84	0.00082309		2960.84	-0.00846784		3490.84	-0.01586791
311	0.01227434		841.02	0.00502207		1371.01	0.01005513		1901.04	0.00356367		2431.04	0.00050569		2961.04	-0.00840613		3491.04	-0.01468364
311.2	0.01255951		841.22	0.00397618		1371.21	0.01046783		1901.24	0.0034647		2431.24	0.00090009		2961.24	-0.00855607		3491.24	-0.01394223
311.4	0.01194768		841.42	0.00371276		1371.41	0.0103255		1901.44	0.00319456		2431.44	0.00120436		2961.44	-0.00861554		3491.44	-0.01351355
311.6	0.01185913		841.62	0.00396957		1371.61	0.00874635		1901.64	0.0030164		2431.64	0.0010646		2961.64	-0.00929894		3491.64	-0.01373871
311.8	0.01158308		841.82	0.00428139		1371.81	0.00853054		1901.84	0.00138283		2431.84	0.00122893		2961.84	-0.00887277		3491.84	-0.01337319
312	0.01135267		842.02	0.00434558		1372.01	0.0094172		1902.04	0.00100365		2432.04	0.00038928		2962.04	-0.00892335		3492.04	-0.01245544
312.2	0.00990704		842.22	0.00436421		1372.21	0.00927524		1902.24	0.00102412		2432.24	0.00031288		2962.24	-0.00848416		3492.24	-0.01269326
312.4	0.00970508		842.42	0.00478925		1372.41	0.00897974		1902.44	0.00079867		2432.44	-0.00040004		2962.44	-0.00894232		3492.44	-0.01292036
312.6	0.00938686		842.62	0.00396579		1372.61	0.0101496		1902.64	0.00157834		2432.64	0.00008916		2962.64	-0.009293		3492.64	-0.01254596
312.8	0.00919845		842.82	0.00476077		1372.81	0.01031977		1902.84	0.00097619		2432.84	-0.0003462		2962.84	-0.00965111		3492.84	-0.01286594
313	0.00860666		843.02	0.00483258		1373.01	0.01109068		1903.04	-0.00004123		2433.04	0.00006222		2963.04	-0.00930804		3493.04	-0.01305541
313.2	0.0093717		843.22	0.00521697		1373.21	0.01080339		1903.24	0.0006753		2433.24	-0.00071646		2963.24	-0.00847641		3493.24	-0.01324874
313.4	0.01018358		843.42	0.00526214		1373.41	0.01049282		1903.44	0.00118092		2433.44	-0.00086059		2963.44	-0.0090328		3493.44	-0.01456322
313.6	0.01126461		843.62	0.00462275		1373.61	0.01069628		1903.64	0.00030501		2433.64	-0.00042194		2963.64	-0.00877191		3493.64	-0.01516672
313.8	0.01172026		843.82	0.00458255		1373.81	0.01048057		1903.84	0.00046433		2433.84	-0.00046928		2963.84	-0.00819021		3493.84	-0.01548731
314	0.01170789		844.02	0.00519674		1374.01	0.0106191		1904.04	-0.00008281		2434.04	-0.00041777		2964.04	-0.00787871		3494.04	-0.01588225
314.2	0.01159897		844.22	0.00485919		1374.21	0.01034361		1904.24	0.00031816		2434.24	-0.00040684		2964.24	-0.00881042		3494.24	-0.01664528
314.4	0.01241048		844.42	0.00443293		1374.41	0.01131812		1904.44	0.00035541		2434.44	-0.00154727		2964.44	-0.00788634		3494.44	-0.01590528
314.6	0.01272699		844.62	0.00342922		1374.61	0.01106443		1904.64	-0.00013826		2434.64	-0.00200059		2964.64	-0.008593		3494.64	-0.01676518
314.8	0.01266538		844.82	0.00272116		1374.81	0.01131581		1904.84	0.00071456		2434.84	-0.00214913		2964.84	-0.00846419		3494.84	-0.01654531
315	0.01202524		845.02	0.00287028		1375.01	0.00990419		1905.04	-0.00016059		2435.04	-0.00245358		2965.04	-0.00862673		3495.04	-0.01645244
315.2	0.01198652		845.22	0.00264845		1375.21	0.00997927		1905.24	0.00003263		2435.24	-0.00161758		2965.24	-0.00815432		3495.24	-0.01665751
315.4	0.01136764		845.42	0.00305876		1375.41	0.00921659		1905.44	-0.00024019		2435.44	-0.00158214		2965.44	-0.00794517		3495.44	-0.01640362
315.6	0.01052361		845.62	0.00353488		1375.61	0.0082225		1905.64	-0.00036706		2435.64	-0.00117649		2965.64	-0.00758588		3495.64	-0.01649189
315.8	0.00972074		845.82	0.00413097		1375.81	0.00807259		1905.84	-0.00140338		2435.84	-0.00069185		2965.84	-0.00631266		3495.84	-0.01741769
316	0.00912317		846.02	0.00374302		1376.01	0.00857979		1906.04	-0.00074564		2436.04	-0.00034978		2966.04	-0.00633786		3496.04	-0.01773265
316.2	0.00880474		846.22	0.00425702		1376.21	0.00735184		1906.24	0.00052582		2436.24	0.00043995		2966.24	-0.0069928		3496.24	-0.01831806
316.4	0.00892375		846.42	0.00445313		1376.41	0.00771285		1906.44	0.00154873		2436.44	0.00104796		2966.44	-0.00744404		3496.44	-0.01897439
316.6	0.00891684		846.62	0.00441495		1376.61	0.00817957		1906.64	0.0019831		2436.64	0.00093106		2966.64	-0.00700086		3496.64	-0.0181225
316.8	0.00912352		846.82	0.00419097		1376.81	0.00796783		1906.84	0.00140869		2436.84	0.00097477		2966.84	-0.00674812		3496.84	-0.01749536
317	0.0092606		847.02	0.00469347		1377.01	0.00768865		1907.04	0.0020649		2437.04	0.00155665		2967.04	-0.00701389		3497.04	-0.0176605
317.2	0.00980101		847.22	0.00505864		1377.21	0.00765071		1907.24	0.00341059		2437.24	0.00110901		2967.24	-0.00677698		3497.24	-0.01807015
317.4	0.01047604		847.42	0.00501418		1377.41	0.00713371		1907.44	0.00371851		2437.44	0.00079966		2967.44	-0.00692359		3497.44	-0.01860043
317.6	0.01056468		847.62	0.00496826		1377.61	0.00669538		1907.64	0.00231956		2437.64	0.00061602		2967.64	-0.00733444		3497.64	-0.0190612
317.8	0.00989404		847.82	0.00557358		1377.81	0.00684149		1907.84	0.00249874		2437.84	-0.00007269		2967.84	-0.00733025		3497.84	-0.01796432
318	0.010447		848.02	0.00568968		1378.01	0.00678803		1908.04	0.0017332		2438.04	-0.00111576		2968.04	-0.00753216		3498.04	-0.018076
318.2	0.00962623		848.22	0.00463704		1378.21	0.00665236		1908.24	0.00192118		2438.24	-0.00133962		2968.24	-0.00789779		3498.24	-0.01775296
318.4	0.01014819		848.42	0.00390442		1378.41	0.00693968		1908.44	0.00071948		2438.44	-0.00211093		2968.44	-0.00756116		3498.44	-0.01730352
318.6	0.01012845		848.62	0.00312749		1378.61	0.00632414		1908.64	0.00019664		2438.64	-0.00221556		2968.64	-0.00850332		3498.64	-0.01742386
318.8	0.00941379		848.82	0.00301214		1378.81	0.00599419		1908.84	-0.00041955		2438.84	-0.00142316		2968.84	-0.00890877		3498.84	-0.01640185
319	0.00929504		849.02	0.00355884		1379.01	0.00505078		1909.04	-0.0016938		2439.04	-0.00100735		2969.04	-0.00900853		3499.04	-0.01584549
319.2	0.00887435		849.22	0.00356077		1379.21	0.00589018		1909.24	-0.00170813		2439.24	-0.00021754		2969.24	-0.00865417		3499.24	-0.01524244
319.4	0.00881854		849.42	0.00393127		1379.41	0.00568342		1909.44	-0.00285182		2439.44	-0.00056697		2969.44	-0.00882447		3499.44	-0.0155517
319.6	0.0087444		849.62	0.00407916		1379.61	0.00525328		1909.64	-0.00337973		2439.64	0.00002227		2969.64	-0.00843206		3499.64	-0.01619806
319.8	0.00891758		849.82	0.0042292		1379.81	0.00568221		1909.84	-0.00372785		2439.84	0.0006623		2969.84	-0.00834574		3499.84	-0.0175367
320	0.00933526		850.02	0.00416062		1380.01	0.00692146		1910.04	-0.00347277		2440.04	0.00072204		2970.04	-0.00872216		3500.04	-0.01720963
320.2	0.00987655		850.22	0.00470475		1380.21	0.00675296		1910.24	-0.00226861		2440.24	0.00141443		2970.24	-0.00890283		3500.24	-0.01660831
320.4	0.00932381		850.42	0.00440725		1380.41	0.00746801		1910.44	-0.0019938		2440.44	0.00116661		2970.44	-0.00821519		3500.44	-0.01638373
320.6	0.00970949		850.62	0.00370061		1380.61	0.00719829		1910.64	-0.00214899		2440.64	0.00053872		2970.64	-0.00741096		3500.64	-0.0161113
320.8	0.01084531		850.82	0.00349879		1380.81	0.00772763		1910.84	-0.00163336		2440.84	0.00068842		2970.84	-0.00643494		3500.84	-0.01617961
321	0.01141306		851.02	0.00373297		1381.01	0.00816551		1911.04	-0.00065645		2441.04	0.00098817		2971.04	-0.0061934		3501.04	-0.01723495
321.2	0.01137719		851.22	0.00351479		1381.21	0.00840101		1911.24	-0.00080873		2441.24	0.00127396		2971.24	-0.00600248		3501.24	-0.01775559
321.4	0.0114066		851.42	0.00359589		1381.41	0.0084441		1911.44	-0.00067263		2441.44	0.00094699		2971.44	-0.0062066		3501.44	-0.01873772
321.6	0.01129232		851.62	0.00362703		1381.61	0.00885978		1911.64	-0.0008392		2441.64	0.00121819		2971.64	-0.00628094		3501.64	-0.01916252
321.8	0.01098969		851.82	0.0042959		1381.81	0.00936866		1911.84	-0.0000925		2441.84	0.00118155		2971.84	-0.0060702		3501.84	-0.01882174
322	0.01141209		852.02	0.00427894		1382.01	0.00942741		1912.04	-0.00015165		2442.04	0.0001255		2972.04	-0.0054584		3502.04	-0.01901602
322.2	0.01114522		852.22	0.00332885		1382.21	0.00906489		1912.24	-0.00009592		2442.24	0.00027428		2972.24	-0.00552918		3502.24	-0.01906682
322.4	0.01185803		852.42	0.00340802		1382.41	0.00910158		1912.44	-0.00021546		2442.44	-0.00003829		2972.44	-0.00579821		3502.44	-0.01895334
322.6	0.01101078		852.62	0.00370457		1382.61	0.00919438		1912.64	-0.00042346		2442.64	0.00000932		2972.64	-0.00653689		3502.64	-0.0180398
322.8	0.0113581		852.82	0.00436484		1382.81	0.00895252		1912.84	-0.00032441		2442.84	-0.00000871		2972.84	-0.00629629		3502.84	-0.01762876
323	0.01178506		853.02	0.00500774		1383.01	0.0089404		1913.04	0.00000888		2443.04	-0.00100104		2973.04	-0.00660268		3503.04	-0.01736368
323.2	0.01230566		853.22	0.00470667		1383.21	0.00901588		1913.24	-0.00005958		2443.24	-0.00097883		2973.24	-0.00685209		3503.24	-0.01721527
323.4	0.01247613		853.42	0.00437778		1383.41	0.00873259		1913.44	0.00026972		2443.44	-0.00116203		2973.44	-0.00662887		3503.44	-0.01712145
323.6	0.01367032		853.62	0.00337098		1383.61	0.00900723		1913.64	0.00005282		2443.64	-0.00124426		2973.64	-0.006149		3503.64	-0.01754095
323.8	0.01429905		853.82	0.00358025		1383.81	0.0093434		1913.84	0.00049755		2443.84	-0.00181266		2973.84	-0.0069516		3503.84	-0.01745124
324	0.01484569		854.02	0.003858		1384.01	0.0088094		1914.04	0.00098421		2444.04	-0.00288013		2974.04	-0.0068256		3504.04	-0.01668278
324.2	0.01379872		854.22	0.00405608		1384.21	0.00864021		1914.24	0.00213705		2444.24	-0.00302767		2974.24	-0.00685969		3504.24	-0.01616397
324.4	0.01293231		854.42	0.00380416		1384.41	0.00870904		1914.44	0.00232828		2444.44	-0.00408955		2974.44	-0.00648179		3504.44	-0.01672014
324.6	0.01414192		854.62	0.00318639		1384.61	0.00890664		1914.64	0.00166718		2444.64	-0.00410393		2974.64	-0.00692106		3504.64	-0.0170274
324.8	0.01420767		854.82	0.00331068		1384.81	0.00871781		1914.84	0.00173278		2444.84	-0.00375804		2974.84	-0.00607239		3504.84	-0.01731275
325	0.01368302		855.02	0.00363746		1385.01	0.00854541		1915.04	0.00074797		2445.04	-0.0036182		2975.04	-0.0062742		3505.04	-0.01875899
325.2	0.01305169		855.22	0.00403769		1385.21	0.00828829		1915.24	-0.0003777		2445.24	-0.00210271		2975.24	-0.0059182		3505.24	-0.01936972
325.4	0.01280985		855.42	0.00323418		1385.41	0.00857405		1915.44	-0.00028871		2445.44	-0.00195848		2975.44	-0.00613553		3505.44	-0.01911816
325.6	0.01307322		855.62	0.00383215		1385.61	0.00833025		1915.64	-0.0002469		2445.64	-0.00183125		2975.64	-0.00563758		3505.64	-0.0193286
325.8	0.0128925		855.82	0.00381698		1385.81	0.00845206		1915.84	-0.00091375		2445.84	-0.00245152		2975.84	-0.00538716		3505.84	-0.02003438
326	0.01282667		856.02	0.00374196		1386.01	0.00839099		1916.04	-0.0018869		2446.04	-0.00292425		2976.04	-0.0058723		3506.04	-0.02028184
326.2	0.01138885		856.22	0.00384294		1386.21	0.00784303		1916.24	-0.00196974		2446.24	-0.00237954		2976.24	-0.00555049		3506.24	-0.02022012
326.4	0.010872		856.42	0.00420378		1386.41	0.00870816		1916.44	-0.00252704		2446.44	-0.00248256		2976.44	-0.00557308		3506.44	-0.02006134
326.6	0.01053226		856.62	0.00480959		1386.61	0.00799795		1916.64	-0.00305148		2446.64	-0.00298788		2976.64	-0.00532645		3506.64	-0.02014628
326.8	0.01137139		856.82	0.00543061		1386.81	0.00756927		1916.84	-0.00239823		2446.84	-0.00341785		2976.84	-0.0050271		3506.84	-0.02042219
327	0.01107313		857.02	0.0046946		1387.01	0.00767674		1917.04	-0.0021996		2447.04	-0.00269443		2977.04	-0.00607144		3507.04	-0.01997794
327.2	0.01175363		857.22	0.0042876		1387.21	0.00694997		1917.24	-0.00207208		2447.24	-0.00146258		2977.24	-0.00610864		3507.24	-0.02000313
327.4	0.01158786		857.42	0.00348323		1387.41	0.00707238		1917.44	-0.00160988		2447.44	-0.00124865		2977.44	-0.00639362		3507.44	-0.01998163
327.6	0.01241115		857.62	0.00394346		1387.61	0.00737938		1917.64	-0.00212436		2447.64	-0.00141316		2977.64	-0.00691107		3507.64	-0.02096462
327.8	0.01181103		857.82	0.00474451		1387.81	0.00741475		1917.84	-0.00066241		2447.84	-0.00104443		2977.84	-0.00737305		3507.84	-0.02026619
328	0.012042		858.02	0.00492112		1388.01	0.00691902		1918.04	-0.00003532		2448.04	-0.00043087		2978.04	-0.00831543		3508.04	-0.01940725
328.2	0.01151685		858.22	0.00454213		1388.21	0.0068251		1918.24	0.00041371		2448.24	0.00098727		2978.24	-0.00817698		3508.24	-0.01893123
328.4	0.01193586		858.42	0.00430433		1388.41	0.00670608		1918.44	-0.00000703		2448.44	0.00112087		2978.44	-0.00856752		3508.44	-0.01945833
328.6	0.01191334		858.62	0.00381242		1388.61	0.00662511		1918.64	-0.00007062		2448.64	0.00159168		2978.64	-0.00900779		3508.64	-0.01872505
328.8	0.01230981		858.82	0.00363516		1388.81	0.00641665		1918.84	-0.00030337		2448.84	0.00248007		2978.84	-0.00772972		3508.84	-0.0178203
329	0.01188344		859.02	0.00348554		1389.01	0.00628473		1919.04	-0.00072413		2449.04	0.00319828		2979.04	-0.008137		3509.04	-0.01748848
329.2	0.01173493		859.22	0.00283598		1389.21	0.00686778		1919.24	-0.00039084		2449.24	0.00431147		2979.24	-0.00802018		3509.24	-0.01621306
329.4	0.0115938		859.42	0.00227038		1389.41	0.00595233		1919.44	0.00009651		2449.44	0.00353818		2979.44	-0.00935595		3509.44	-0.01628999
329.6	0.01165988		859.62	0.00288872		1389.61	0.00610378		1919.64	0.00002235		2449.64	0.0027258		2979.64	-0.00984898		3509.64	-0.01703678
329.8	0.01106122		859.82	0.00251729		1389.81	0.00597453		1919.84	-0.0008134		2449.84	0.00155875		2979.84	-0.00999503		3509.84	-0.01723147
330	0.01040107		860.02	0.00362184		1390.01	0.0061197		1920.04	-0.00086665		2450.04	0.00072456		2980.04	-0.01095424		3510.04	-0.01707021
330.2	0.00931735		860.22	0.00353758		1390.21	0.00611564		1920.24	-0.00084781		2450.24	0.00055614		2980.24	-0.01001696		3510.24	-0.01626349
330.4	0.00970938		860.42	0.00352757		1390.41	0.0064641		1920.44	-0.00128592		2450.44	0.00013443		2980.44	-0.00994522		3510.44	-0.0165319
330.6	0.00973836		860.62	0.0039776		1390.61	0.00634967		1920.64	-0.00150345		2450.64	-0.00041053		2980.64	-0.00938611		3510.64	-0.01639388
330.8	0.00982975		860.82	0.00441864		1390.81	0.00762042		1920.84	-0.00094462		2450.84	-0.0010508		2980.84	-0.00931037		3510.84	-0.01593654
331	0.00927005		861.02	0.00449227		1391.01	0.00788999		1921.04	-0.00119557		2451.04	-0.00108046		2981.04	-0.00952657		3511.04	-0.01639116
331.2	0.0092848		861.22	0.00565237		1391.21	0.00770643		1921.24	-0.00066671		2451.24	-0.00154747		2981.24	-0.00922921		3511.24	-0.0165903
331.4	0.01048449		861.42	0.00613168		1391.41	0.00886137		1921.44	-0.00122527		2451.44	-0.00212221		2981.44	-0.00886452		3511.44	-0.01673193
331.6	0.01144515		861.62	0.00728563		1391.61	0.00914381		1921.64	-0.00130069		2451.64	-0.00283983		2981.64	-0.00827568		3511.64	-0.01774588
331.8	0.01255177		861.82	0.0069623		1391.81	0.00950685		1921.84	-0.00113406		2451.84	-0.00348554		2981.84	-0.00717943		3511.84	-0.01761239
332	0.01372384		862.02	0.00666729		1392.01	0.009121		1922.04	-0.00077459		2452.04	-0.00338151		2982.04	-0.0078335		3512.04	-0.01788823
332.2	0.01379253		862.22	0.00619554		1392.21	0.00872165		1922.24	-0.0011062		2452.24	-0.00290754		2982.24	-0.00649972		3512.24	-0.01833704
332.4	0.01395465		862.42	0.00583509		1392.41	0.00835907		1922.44	-0.00168601		2452.44	-0.00308189		2982.44	-0.00710753		3512.44	-0.01772087
332.6	0.01398236		862.62	0.00597454		1392.61	0.00828403		1922.64	-0.00092397		2452.64	-0.00287255		2982.64	-0.00695766		3512.64	-0.01703856
332.8	0.01501748		862.82	0.00581507		1392.81	0.00806949		1922.84	-0.00063043		2452.84	-0.00284697		2982.84	-0.00734983		3512.84	-0.01650922
333	0.01445396		863.02	0.00541057		1393.01	0.00747045		1923.04	-0.0004479		2453.04	-0.00322505		2983.04	-0.00825231		3513.04	-0.01685493
333.2	0.01448462		863.22	0.0050656		1393.21	0.00745618		1923.24	0.00038417		2453.24	-0.00339992		2983.24	-0.00886828		3513.24	-0.01685984
333.4	0.01497165		863.42	0.00491286		1393.41	0.00646893		1923.44	0.00028616		2453.44	-0.00394353		2983.44	-0.0091339		3513.44	-0.01766998
333.6	0.01474805		863.62	0.00429595		1393.61	0.00650037		1923.64	-0.00007129		2453.64	-0.00420402		2983.64	-0.00949991		3513.64	-0.01760085
333.8	0.01348049		863.82	0.00333746		1393.81	0.0064954		1923.84	0.00092469		2453.84	-0.00459247		2983.84	-0.00946464		3513.84	-0.01769126
334	0.01243095		864.02	0.00285004		1394.01	0.007083		1924.04	0.00199236		2454.04	-0.00341927		2984.04	-0.00887264		3514.04	-0.0175709
334.2	0.01178718		864.22	0.00065895		1394.21	0.00704605		1924.24	0.00230839		2454.24	-0.00165104		2984.24	-0.00765534		3514.24	-0.01679426
334.4	0.01124368		864.42	0.00031038		1394.41	0.00741517		1924.44	0.00204709		2454.44	-0.00095485		2984.44	-0.00799955		3514.44	-0.01715788
334.6	0.01079097		864.62	0.00019411		1394.61	0.00831599		1924.64	0.00105697		2454.64	-0.00086741		2984.64	-0.00757273		3514.64	-0.01637465
334.8	0.01067217		864.82	0.00084926		1394.81	0.00850666		1924.84	0.00138034		2454.84	-0.00040062		2984.84	-0.00736054		3514.84	-0.01688275
335	0.0103248		865.02	0.00091365		1395.01	0.00791788		1925.04	0.00140168		2455.04	0.00030249		2985.04	-0.00744944		3515.04	-0.01686493
335.2	0.01049802		865.22	0.0013716		1395.21	0.00810653		1925.24	0.0018067		2455.24	0.00063197		2985.24	-0.00710743		3515.24	-0.01676965
335.4	0.0117181		865.42	0.00174669		1395.41	0.00840573		1925.44	0.00136056		2455.44	0.00061956		2985.44	-0.00696283		3515.44	-0.01766002
335.6	0.01124557		865.62	0.0025297		1395.61	0.00857696		1925.64	0.00179787		2455.64	-0.00000726		2985.64	-0.00812942		3515.64	-0.0183648
335.8	0.01161692		865.82	0.00160098		1395.81	0.00859492		1925.84	0.0006282		2455.84	0.00020939		2985.84	-0.00792489		3515.84	-0.0181324
336	0.01071199		866.02	0.00215407		1396.01	0.00776618		1926.04	0.00071495		2456.04	0.00055349		2986.04	-0.008194		3516.04	-0.01791917
336.2	0.01029683		866.22	0.00335295		1396.21	0.00776145		1926.24	-0.00032778		2456.24	0.00063631		2986.24	-0.00869359		3516.24	-0.01693418
336.4	0.01075756		866.42	0.00437269		1396.41	0.00766604		1926.44	0.00015359		2456.44	0.00081806		2986.44	-0.01025811		3516.44	-0.01630548
336.6	0.01057647		866.62	0.00600827		1396.61	0.00862477		1926.64	0.00154381		2456.64	0.00057651		2986.64	-0.01102342		3516.64	-0.0164205
336.8	0.0105857		866.82	0.00559725		1396.81	0.00946313		1926.84	0.00169995		2456.84	-0.00027345		2986.84	-0.01128264		3516.84	-0.01652643
337	0.01077261		867.02	0.00591683		1397.01	0.00891831		1927.04	0.00177128		2457.04	-0.00013717		2987.04	-0.011073		3517.04	-0.01688119
337.2	0.01052375		867.22	0.00612028		1397.21	0.00910737		1927.24	0.00269173		2457.24	-0.00064506		2987.24	-0.01124259		3517.24	-0.01708792
337.4	0.01112652		867.42	0.00646338		1397.41	0.00932243		1927.44	0.00270706		2457.44	-0.00112445		2987.44	-0.0106024		3517.44	-0.01782437
337.6	0.0104289		867.62	0.00555466		1397.61	0.00904157		1927.64	0.0025413		2457.64	-0.00144		2987.64	-0.01021428		3517.64	-0.01829012
337.8	0.00995247		867.82	0.00484483		1397.81	0.00889036		1927.84	0.00372021		2457.84	-0.0010542		2987.84	-0.00903912		3517.84	-0.01848245
338	0.01059379		868.02	0.00481151		1398.01	0.00860703		1928.04	0.0038142		2458.04	-0.00021704		2988.04	-0.00731766		3518.04	-0.01814244
338.2	0.01048308		868.22	0.00462663		1398.21	0.00866269		1928.24	0.00292571		2458.24	0.00016708		2988.24	-0.00709115		3518.24	-0.01886979
338.4	0.01047173		868.42	0.00535226		1398.41	0.00863584		1928.44	0.00206111		2458.44	0.00033103		2988.44	-0.00704443		3518.44	-0.01988027
338.6	0.01037419		868.62	0.00542793		1398.61	0.00829692		1928.64	0.0013162		2458.64	0.00063733		2988.64	-0.00627129		3518.64	-0.02025207
338.8	0.01048448		868.82	0.00566477		1398.81	0.00741645		1928.84	0.00219021		2458.84	0.00098559		2988.84	-0.00662809		3518.84	-0.02156507
339	0.01022034		869.02	0.00534417		1399.01	0.00761645		1929.04	0.00255437		2459.04	0.00029359		2989.04	-0.00608134		3519.04	-0.02162425
339.2	0.0100862		869.22	0.00508198		1399.21	0.00769722		1929.24	0.00231821		2459.24	-0.00005758		2989.24	-0.00646785		3519.24	-0.02188054
339.4	0.01021959		869.42	0.0053078		1399.41	0.00737477		1929.44	0.0022007		2459.44	-0.00034571		2989.44	-0.00785096		3519.44	-0.02220473
339.6	0.00974568		869.62	0.0044346		1399.61	0.00740434		1929.64	0.00139048		2459.64	-0.00076132		2989.64	-0.00841525		3519.64	-0.0218204
339.8	0.01038732		869.82	0.00349257		1399.81	0.00704494		1929.84	0.00031236		2459.84	-0.00061749		2989.84	-0.00815486		3519.84	-0.02124695
340	0.01080384		870.02	0.00455863		1400.01	0.00680173		1930.04	-0.00028547		2460.04	-0.00009823		2990.04	-0.00789698		3520.04	-0.02067339
340.2	0.01141887		870.22	0.00462194		1400.21	0.00641163		1930.24	-0.0009912		2460.24	0.00009811		2990.24	-0.00839808		3520.24	-0.01953063
340.4	0.01245247		870.42	0.00384554		1400.41	0.00618126		1930.44	-0.00018859		2460.44	0.0001465		2990.44	-0.00891452		3520.44	-0.01930008
340.6	0.01279597		870.62	0.00320306		1400.61	0.00669463		1930.64	-0.00019006		2460.64	0.00017615		2990.64	-0.00907733		3520.64	-0.01882456
340.8	0.0134233		870.82	0.00256162		1400.81	0.0063782		1930.84	-0.00043699		2460.84	-0.00085618		2990.84	-0.00867167		3520.84	-0.0180515
341	0.01375853		871.02	0.00232037		1401.01	0.00569519		1931.04	0.00019811		2461.04	-0.00135755		2991.04	-0.00864945		3521.04	-0.0182964
341.2	0.01352783		871.22	0.00121716		1401.21	0.00538903		1931.24	0.00027436		2461.24	-0.00252337		2991.24	-0.00832588		3521.24	-0.017844
341.4	0.01409576		871.42	0.00096843		1401.41	0.00493006		1931.44	0.00009925		2461.44	-0.00283541		2991.44	-0.00714226		3521.44	-0.01760907
341.6	0.01353674		871.62	0.0009577		1401.61	0.00518725		1931.64	0.00090002		2461.64	-0.00337212		2991.64	-0.00696683		3521.64	-0.01761139
341.8	0.01385942		871.82	0.0012338		1401.81	0.00617371		1931.84	0.00140449		2461.84	-0.00273393		2991.84	-0.00672021		3521.84	-0.01673633
342	0.01381132		872.02	0.00211393		1402.01	0.00725838		1932.04	0.00117511		2462.04	-0.00256812		2992.04	-0.00608792		3522.04	-0.01737914
342.2	0.01323472		872.22	0.00234701		1402.21	0.00844172		1932.24	0.00055023		2462.24	-0.00209126		2992.24	-0.00604465		3522.24	-0.0183463
342.4	0.01317021		872.42	0.00322638		1402.41	0.00891718		1932.44	0.00065327		2462.44	-0.0021548		2992.44	-0.00644387		3522.44	-0.01900269
342.6	0.0124525		872.62	0.00295626		1402.61	0.00907035		1932.64	0.00076522		2462.64	-0.00267861		2992.64	-0.00699718		3522.64	-0.02045983
342.8	0.01219983		872.82	0.00373687		1402.81	0.01000581		1932.84	0.00132942		2462.84	-0.00160863		2992.84	-0.00817859		3522.84	-0.02023497
343	0.01123435		873.02	0.00407958		1403.01	0.01116783		1933.04	0.00097951		2463.04	-0.00077168		2993.04	-0.00808017		3523.04	-0.02037911
343.2	0.01131436		873.22	0.0046658		1403.21	0.0108365		1933.24	0.00077455		2463.24	0.00047815		2993.24	-0.00896031		3523.24	-0.02017454
343.4	0.01146366		873.42	0.00510944		1403.41	0.01122854		1933.44	0.00050766		2463.44	0.00117308		2993.44	-0.00877224		3523.44	-0.02050678
343.6	0.01104927		873.62	0.00542881		1403.61	0.01077405		1933.64	-0.00061794		2463.64	0.00138119		2993.64	-0.00777711		3523.64	-0.02059375
343.8	0.01170538		873.82	0.00585352		1403.81	0.01010981		1933.84	-0.00151973		2463.84	0.00149233		2993.84	-0.00808182		3523.84	-0.0206028
344	0.01170805		874.02	0.00617045		1404.01	0.00948412		1934.04	-0.00310586		2464.04	0.00154292		2994.04	-0.00837608		3524.04	-0.02045047
344.2	0.01176685		874.22	0.0052526		1404.21	0.00866405		1934.24	-0.00316816		2464.24	0.00036019		2994.24	-0.00945287		3524.24	-0.01973847
344.4	0.01226432		874.42	0.00496254		1404.41	0.00895065		1934.44	-0.0033426		2464.44	-0.00020761		2994.44	-0.01003108		3524.44	-0.01946499
344.6	0.01189407		874.62	0.00531604		1404.61	0.00895858		1934.64	-0.00342327		2464.64	-0.00043067		2994.64	-0.00992069		3524.64	-0.01832296
344.8	0.01223702		874.82	0.00505027		1404.81	0.00782918		1934.84	-0.00305171		2464.84	-0.00187881		2994.84	-0.01013243		3524.84	-0.01771003
345	0.01117567		875.02	0.00419297		1405.01	0.00736213		1935.04	-0.0020948		2465.04	-0.00209994		2995.04	-0.00980421		3525.04	-0.01844358
345.2	0.0119172		875.22	0.00347277		1405.21	0.00721129		1935.24	-0.00127625		2465.24	-0.00293314		2995.24	-0.00936208		3525.24	-0.01833404
345.4	0.01230721		875.42	0.00378793		1405.41	0.00781174		1935.44	-0.00056877		2465.44	-0.00288734		2995.44	-0.00909146		3525.44	-0.0188524
345.6	0.01201391		875.62	0.00389631		1405.61	0.0089713		1935.64	0.00018352		2465.64	-0.00397295		2995.64	-0.00951366		3525.64	-0.01918066
345.8	0.01184622		875.82	0.00412241		1405.81	0.00984343		1935.84	-0.00033736		2465.84	-0.00405465		2995.84	-0.00833027		3525.84	-0.01827402
346	0.01177315		876.02	0.00522942		1406.01	0.00993307		1936.04	0.00053158		2466.04	-0.00421184		2996.04	-0.00733408		3526.04	-0.01938789
346.2	0.01182727		876.22	0.00511533		1406.21	0.00998747		1936.24	0.00094833		2466.24	-0.00426567		2996.24	-0.00728298		3526.24	-0.01965437
346.4	0.0119896		876.42	0.00582475		1406.41	0.00953635		1936.44	0.00096652		2466.44	-0.00403345		2996.44	-0.00780747		3526.44	-0.0200441
346.6	0.01173457		876.62	0.0056191		1406.61	0.00901486		1936.64	0.00117096		2466.64	-0.00342296		2996.64	-0.00763651		3526.64	-0.01981369
346.8	0.01126514		876.82	0.00631893		1406.81	0.00928516		1936.84	0.00159338		2466.84	-0.00220905		2996.84	-0.00730339		3526.84	-0.01855689
347	0.01124053		877.02	0.00626227		1407.01	0.00922659		1937.04	0.00139681		2467.04	-0.00234429		2997.04	-0.00637345		3527.04	-0.01837927
347.2	0.01164552		877.22	0.00625775		1407.21	0.00845043		1937.24	0.00223277		2467.24	-0.00221959		2997.24	-0.00609477		3527.24	-0.01755129
347.4	0.01070019		877.42	0.00642163		1407.41	0.00844776		1937.44	0.00139711		2467.44	-0.00244855		2997.44	-0.00661762		3527.44	-0.01781323
347.6	0.00999253		877.62	0.00624177		1407.61	0.00806179		1937.64	0.00103726		2467.64	-0.00235415		2997.64	-0.00772626		3527.64	-0.01814704
347.8	0.01060676		877.82	0.00615563		1407.81	0.00773548		1937.84	0.00108636		2467.84	-0.00226524		2997.84	-0.00872081		3527.84	-0.01741914
348	0.01026308		878.02	0.00637916		1408.01	0.00750151		1938.04	0.00023409		2468.04	-0.00220985		2998.04	-0.00936153		3528.04	-0.01757903
348.2	0.01071989		878.22	0.00575068		1408.21	0.00735651		1938.24	0.00007794		2468.24	-0.00199876		2998.24	-0.00977259		3528.24	-0.01715435
348.4	0.01007475		878.42	0.00629729		1408.41	0.00777049		1938.44	-0.00000968		2468.44	-0.00141585		2998.44	-0.00963498		3528.44	-0.01686726
348.6	0.01015867		878.62	0.00553903		1408.61	0.00740277		1938.64	-0.00007465		2468.64	-0.00112706		2998.64	-0.00941013		3528.64	-0.01699308
348.8	0.01018187		878.82	0.00461865		1408.81	0.00725047		1938.84	-0.00041243		2468.84	-0.00091878		2998.84	-0.01024487		3528.84	-0.01745223
349	0.00931609		879.02	0.00363865		1409.01	0.00821926		1939.04	0.00041114		2469.04	-0.0003761		2999.04	-0.01029578		3529.04	-0.01807002
349.2	0.01030369		879.22	0.0029698		1409.21	0.00922802		1939.24	0.0005761		2469.24	-0.00070498		2999.24	-0.01050618		3529.24	-0.01824594
349.4	0.01009978		879.42	0.00256575		1409.41	0.00927552		1939.44	-0.00023552		2469.44	-0.00063029		2999.44	-0.01017013		3529.44	-0.01845035
349.6	0.00903494		879.62	0.00209378		1409.61	0.00925353		1939.64	-0.00033714		2469.64	-0.00134279		2999.64	-0.00945622		3529.64	-0.01834251
349.8	0.0091525		879.82	0.00181931		1409.81	0.00916063		1939.84	-0.00008172		2469.84	-0.00131165		2999.84	-0.00854386		3529.84	-0.0183957
350	0.0091067		880.02	0.00149418		1410.01	0.0089935		1940.04	0.00047302		2470.04	-0.00134545		3000.04	-0.00792008		3530.04	-0.01852727
350.2	0.00937742		880.22	0.00081207		1410.21	0.00847714		1940.24	0.00001126		2470.24	-0.00219423		3000.24	-0.00757207		3530.24	-0.01913417
350.4	0.00959176		880.42	0.00151507		1410.41	0.00829547		1940.44	0.00052204		2470.44	-0.00205167		3000.44	-0.00750592		3530.44	-0.01938583
350.6	0.0096		880.62	0.00080872		1410.61	0.00796105		1940.64	0.00109306		2470.64	-0.0020127		3000.64	-0.0062524		3530.64	-0.01979064
350.8	0.00955992		880.82	0.00014105		1410.81	0.00800644		1940.84	0.00128118		2470.84	-0.00191483		3000.84	-0.00578871		3530.84	-0.0202781
351	0.0101679		881.02	0.00015855		1411.01	0.0081734		1941.04	0.00120382		2471.04	-0.00163417		3001.04	-0.00675535		3531.04	-0.02014412
351.2	0.01015091		881.22	0.0005529		1411.21	0.00747738		1941.24	0.00106862		2471.24	-0.0009003		3001.24	-0.00725738		3531.24	-0.01975225
351.4	0.00984142		881.42	0.00091029		1411.41	0.00702575		1941.44	-0.00019756		2471.44	-0.00036262		3001.44	-0.00837922		3531.44	-0.02048066
351.6	0.01068859		881.62	0.00157754		1411.61	0.00651217		1941.64	-0.00022725		2471.64	-0.00038939		3001.64	-0.00827678		3531.64	-0.02008277
351.8	0.01128339		881.82	0.00223213		1411.81	0.00559116		1941.84	0.00004463		2471.84	-0.00114429		3001.84	-0.00789217		3531.84	-0.01988345
352	0.01035013		882.02	0.00199806		1412.01	0.00556168		1942.04	-0.00038799		2472.04	-0.00091711		3002.04	-0.00773945		3532.04	-0.02041325
352.2	0.01063245		882.22	0.00222254		1412.21	0.00566117		1942.24	-0.00088332		2472.24	-0.00158534		3002.24	-0.00864312		3532.24	-0.02000999
352.4	0.01055436		882.42	0.00328545		1412.41	0.0067671		1942.44	-0.00098331		2472.44	-0.00096408		3002.44	-0.00841761		3532.44	-0.01896348
352.6	0.01136275		882.62	0.00270379		1412.61	0.00670717		1942.64	-0.00179751		2472.64	-0.00021817		3002.64	-0.00821015		3532.64	-0.01879886
352.8	0.01121836		882.82	0.00305502		1412.81	0.00692219		1942.84	-0.00227064		2472.84	-0.00002968		3002.84	-0.00863232		3532.84	-0.01819421
353	0.01126683		883.02	0.00364296		1413.01	0.00746742		1943.04	-0.00180936		2473.04	0.00004674		3003.04	-0.00875597		3533.04	-0.01788103
353.2	0.01150696		883.22	0.00380553		1413.21	0.0072024		1943.24	-0.0022552		2473.24	0.00050007		3003.24	-0.00811851		3533.24	-0.01750539
353.4	0.01124771		883.42	0.00390726		1413.41	0.00674234		1943.44	-0.00242843		2473.44	-0.00007187		3003.44	-0.00735377		3533.44	-0.0174877
353.6	0.01109144		883.62	0.00411733		1413.61	0.00677072		1943.64	-0.00247992		2473.64	0.00007417		3003.64	-0.00679566		3533.64	-0.01727788
353.8	0.01103525		883.82	0.00437013		1413.81	0.00713186		1943.84	-0.00268052		2473.84	-0.00054408		3003.84	-0.00624079		3533.84	-0.01632968
354	0.01047308		884.02	0.00465184		1414.01	0.00671458		1944.04	-0.00224445		2474.04	-0.0004851		3004.04	-0.00573366		3534.04	-0.01588263
354.2	0.01095557		884.22	0.00475421		1414.21	0.00695417		1944.24	-0.00177235		2474.24	-0.0007792		3004.24	-0.0048925		3534.24	-0.0168139
354.4	0.01108475		884.42	0.00513548		1414.41	0.00772256		1944.44	-0.00065297		2474.44	-0.0008134		3004.44	-0.00490411		3534.44	-0.01747545
354.6	0.01083541		884.62	0.00464591		1414.61	0.00753409		1944.64	-0.00077611		2474.64	-0.0003909		3004.64	-0.00428044		3534.64	-0.01804189
354.8	0.01052957		884.82	0.00494057		1414.81	0.00712726		1944.84	-0.00104552		2474.84	-0.00065092		3004.84	-0.00424367		3534.84	-0.018197
355	0.01055227		885.02	0.00575692		1415.01	0.0070314		1945.04	-0.00025688		2475.04	-0.00077955		3005.04	-0.00427986		3535.04	-0.01791416
355.2	0.01032199		885.22	0.00552931		1415.21	0.00668654		1945.24	-0.00030503		2475.24	-0.00137916		3005.24	-0.00404775		3535.24	-0.01806062
355.4	0.01047699		885.42	0.00543411		1415.41	0.00653154		1945.44	0.00014369		2475.44	-0.00170216		3005.44	-0.00401296		3535.44	-0.01881905
355.6	0.01060619		885.62	0.00579385		1415.61	0.00635765		1945.64	0.00019663		2475.64	-0.00241613		3005.64	-0.00384311		3535.64	-0.01857477
355.8	0.0106538		885.82	0.00500066		1415.81	0.00690563		1945.84	0.00078352		2475.84	-0.00259536		3005.84	-0.00471637		3535.84	-0.01887051
356	0.0096123		886.02	0.00487383		1416.01	0.00762276		1946.04	0.00027766		2476.04	-0.00307389		3006.04	-0.00491752		3536.04	-0.01907985
356.2	0.0106142		886.22	0.00545604		1416.21	0.00779586		1946.24	-0.00014046		2476.24	-0.00345337		3006.24	-0.00606858		3536.24	-0.01937978
356.4	0.01058357		886.42	0.0054794		1416.41	0.0086894		1946.44	0.00007527		2476.44	-0.00268234		3006.44	-0.00581894		3536.44	-0.01926816
356.6	0.01026597		886.62	0.00463276		1416.61	0.00774008		1946.64	-0.00061443		2476.64	-0.00287442		3006.64	-0.00608425		3536.64	-0.02020768
356.8	0.00991149		886.82	0.00458692		1416.81	0.00766102		1946.84	-0.00103176		2476.84	-0.0029668		3006.84	-0.00660877		3536.84	-0.02014695
357	0.00957997		887.02	0.00502176		1417.01	0.00770514		1947.04	-0.00114694		2477.04	-0.00263549		3007.04	-0.007561		3537.04	-0.02049251
357.2	0.00979527		887.22	0.00428789		1417.21	0.00746476		1947.24	-0.0012228		2477.24	-0.00257021		3007.24	-0.0086845		3537.24	-0.02005354
357.4	0.01056573		887.42	0.00387996		1417.41	0.00713158		1947.44	-0.00150256		2477.44	-0.00319187		3007.44	-0.00908315		3537.44	-0.02029388
357.6	0.01184292		887.62	0.0040284		1417.61	0.00695699		1947.64	-0.0025877		2477.64	-0.00337541		3007.64	-0.00945706		3537.64	-0.02009574
357.8	0.01195597		887.82	0.00425568		1417.81	0.00617605		1947.84	-0.00284647		2477.84	-0.00341275		3007.84	-0.00935764		3537.84	-0.01944593
358	0.01216332		888.02	0.00441443		1418.01	0.00541779		1948.04	-0.00216424		2478.04	-0.00382384		3008.04	-0.0096821		3538.04	-0.02036965
358.2	0.0122294		888.22	0.00313849		1418.21	0.00587178		1948.24	-0.00256112		2478.24	-0.00405619		3008.24	-0.00955304		3538.24	-0.02031063
358.4	0.01175852		888.42	0.00306925		1418.41	0.00658963		1948.44	-0.00245192		2478.44	-0.00405083		3008.44	-0.00959333		3538.44	-0.02052363
358.6	0.01151236		888.62	0.00335407		1418.61	0.00588154		1948.64	-0.00289815		2478.64	-0.00358584		3008.64	-0.00917554		3538.64	-0.02087795
358.8	0.0113856		888.82	0.00303802		1418.81	0.00586324		1948.84	-0.00256556		2478.84	-0.00346295		3008.84	-0.00882147		3538.84	-0.02042623
359	0.01228091		889.02	0.00220618		1419.01	0.00559693		1949.04	-0.00214324		2479.04	-0.00296376		3009.04	-0.00852758		3539.04	-0.02052361
359.2	0.01232033		889.22	0.00134658		1419.21	0.00502347		1949.24	-0.00229431		2479.24	-0.00323446		3009.24	-0.00867751		3539.24	-0.02040102
359.4	0.01242575		889.42	0.00178428		1419.41	0.00488562		1949.44	-0.00213537		2479.44	-0.00274377		3009.44	-0.00793815		3539.44	-0.02005137
359.6	0.01196688		889.62	0.00175577		1419.61	0.00466401		1949.64	-0.00292781		2479.64	-0.00256652		3009.64	-0.00844076		3539.64	-0.01985287
359.8	0.01223753		889.82	0.00070372		1419.81	0.00459236		1949.84	-0.00243242		2479.84	-0.00238944		3009.84	-0.00872058		3539.84	-0.01969559
360	0.01194097		890.02	0.00064698		1420.01	0.00478471		1950.04	-0.00150946		2480.04	-0.00307248		3010.04	-0.00829838		3540.04	-0.01951098
360.2	0.0118009		890.22	0.00119386		1420.21	0.00531936		1950.24	-0.00091749		2480.24	-0.00221998		3010.24	-0.00853412		3540.24	-0.02000986
360.4	0.01111216		890.42	0.00152171		1420.41	0.00632174		1950.44	-0.00019777		2480.44	-0.00268152		3010.44	-0.00807206		3540.44	-0.02002373
360.6	0.01104946		890.62	0.0003083		1420.61	0.00533972		1950.64	0.00017266		2480.64	-0.00225112		3010.64	-0.00777608		3540.64	-0.01983788
360.8	0.01129048		890.82	0.00119211		1420.81	0.0053368		1950.84	0.00102639		2480.84	-0.00236696		3010.84	-0.00741973		3540.84	-0.01842491
361	0.01228477		891.02	0.00144176		1421.01	0.00505326		1951.04	0.00144169		2481.04	-0.00227433		3011.04	-0.00707307		3541.04	-0.018972
361.2	0.01309104		891.22	0.0017798		1421.21	0.00533198		1951.24	0.00142564		2481.24	-0.00212793		3011.24	-0.00678923		3541.24	-0.01773386
361.4	0.01366848		891.42	0.00143633		1421.41	0.00448466		1951.44	0.00105896		2481.44	-0.00175936		3011.44	-0.00631108		3541.44	-0.01775469
361.6	0.01414777		891.62	0.00267173		1421.61	0.00392938		1951.64	0.00130353		2481.64	-0.00141878		3011.64	-0.00588944		3541.64	-0.01727499
361.8	0.01337122		891.82	0.00329443		1421.81	0.00331168		1951.84	0.00146014		2481.84	-0.00086103		3011.84	-0.00561435		3541.84	-0.017711
362	0.01257768		892.02	0.00301511		1422.01	0.00396987		1952.04	0.00111812		2482.04	-0.00099476		3012.04	-0.0054366		3542.04	-0.01845807
362.2	0.01268776		892.22	0.00330071		1422.21	0.00467374		1952.24	-0.00003621		2482.24	-0.00007531		3012.24	-0.00501021		3542.24	-0.01801471
362.4	0.0122771		892.42	0.00413193		1422.41	0.00529193		1952.44	-0.00012578		2482.44	-0.00024423		3012.44	-0.0044964		3542.44	-0.01816498
362.6	0.01233827		892.62	0.00488625		1422.61	0.00548614		1952.64	-0.00075332		2482.64	-0.00007977		3012.64	-0.00458861		3542.64	-0.0186174
362.8	0.01199145		892.82	0.00357837		1422.81	0.00564802		1952.84	-0.00105247		2482.84	-0.00001147		3012.84	-0.00430058		3542.84	-0.01783157
363	0.0118509		893.02	0.00317366		1423.01	0.0044641		1953.04	-0.0014254		2483.04	-0.00051503		3013.04	-0.00433644		3543.04	-0.01877489
363.2	0.01128775		893.22	0.00318511		1423.21	0.004095		1953.24	-0.00095413		2483.24	-0.00164593		3013.24	-0.00430936		3543.24	-0.01935929
363.4	0.01105341		893.42	0.00356386		1423.41	0.00450504		1953.44	-0.00075471		2483.44	-0.00255219		3013.44	-0.00393116		3543.44	-0.01902935
363.6	0.01116036		893.62	0.00293293		1423.61	0.00497934		1953.64	-0.0008996		2483.64	-0.00346235		3013.64	-0.00482106		3543.64	-0.01975708
363.8	0.01142992		893.82	0.0023798		1423.81	0.00589307		1953.84	-0.00071286		2483.84	-0.00368491		3013.84	-0.00501505		3543.84	-0.0196466
364	0.01087542		894.02	0.00315054		1424.01	0.00652829		1954.04	0.0002757		2484.04	-0.00426		3014.04	-0.00459528		3544.04	-0.02010569
364.2	0.01098932		894.22	0.00345408		1424.21	0.00673949		1954.24	0.0003444		2484.24	-0.00434336		3014.24	-0.00493409		3544.24	-0.02082999
364.4	0.012218		894.42	0.00291293		1424.41	0.00700462		1954.44	0.00092352		2484.44	-0.00477749		3014.44	-0.00504164		3544.44	-0.02080353
364.6	0.01187373		894.62	0.00187807		1424.61	0.00531856		1954.64	0.00121546		2484.64	-0.00391862		3014.64	-0.00484075		3544.64	-0.0201046
364.8	0.01207325		894.82	0.00277571		1424.81	0.00497503		1954.84	0.00192868		2484.84	-0.00420841		3014.84	-0.00492846		3544.84	-0.01933592
365	0.01244858		895.02	0.00226757		1425.01	0.00451356		1955.04	0.00199399		2485.04	-0.00386365		3015.04	-0.00510026		3545.04	-0.02011601
365.2	0.01232085		895.22	0.00230234		1425.21	0.00498925		1955.24	0.00161538		2485.24	-0.00312862		3015.24	-0.00557035		3545.24	-0.01889644
365.4	0.0129057		895.42	0.00154902		1425.41	0.00452218		1955.44	0.00166935		2485.44	-0.00226723		3015.44	-0.00657601		3545.44	-0.01928575
365.6	0.01282569		895.62	0.0023691		1425.61	0.00491617		1955.64	0.0021233		2485.64	-0.00160708		3015.64	-0.00632016		3545.64	-0.01987226
365.8	0.01269072		895.82	0.00311656		1425.81	0.00485169		1955.84	0.00142539		2485.84	-0.00086714		3015.84	-0.00699632		3545.84	-0.02013086
366	0.01245392		896.02	0.0037256		1426.01	0.00454195		1956.04	0.00115111		2486.04	0.00040334		3016.04	-0.00718068		3546.04	-0.01965818
366.2	0.01275644		896.22	0.00466007		1426.21	0.00472021		1956.24	0.00067259		2486.24	0.00133299		3016.24	-0.00812896		3546.24	-0.01970305
366.4	0.0128804		896.42	0.00494802		1426.41	0.00512785		1956.44	0.00080912		2486.44	0.0012848		3016.44	-0.0085467		3546.44	-0.0198571
366.6	0.01328213		896.62	0.00545818		1426.61	0.00550608		1956.64	0.00007753		2486.64	0.00198543		3016.64	-0.00827565		3546.64	-0.02070183
366.8	0.01348013		896.82	0.00473795		1426.81	0.00586484		1956.84	-0.00074599		2486.84	0.00119722		3016.84	-0.00789764		3546.84	-0.02111927
367	0.01310045		897.02	0.00573444		1427.01	0.00504298		1957.04	-0.00077645		2487.04	0.0005797		3017.04	-0.00869751		3547.04	-0.0225898
367.2	0.01380299		897.22	0.00559889		1427.21	0.00541289		1957.24	-0.00020213		2487.24	0.0001185		3017.24	-0.00836876		3547.24	-0.02293437
367.4	0.01429618		897.42	0.00603254		1427.41	0.00589189		1957.44	0.00017296		2487.44	0.00009858		3017.44	-0.0083209		3547.44	-0.02267763
367.6	0.01464115		897.62	0.00554707		1427.61	0.00671675		1957.64	0.00000542		2487.64	0.0005394		3017.64	-0.00833195		3547.64	-0.02338593
367.8	0.01431439		897.82	0.00541762		1427.81	0.00671729		1957.84	-0.00001383		2487.84	0.00034898		3017.84	-0.00782051		3547.84	-0.02286992
368	0.01497805		898.02	0.00605786		1428.01	0.00618834		1958.04	0.00045672		2488.04	0.00053239		3018.04	-0.0068839		3548.04	-0.02332936
368.2	0.01537975		898.22	0.00456794		1428.21	0.00618062		1958.24	0.00056958		2488.24	0.00046726		3018.24	-0.00693512		3548.24	-0.02307448
368.4	0.01472903		898.42	0.00340196		1428.41	0.00689536		1958.44	0.00023179		2488.44	0.00078316		3018.44	-0.00665734		3548.44	-0.02282786
368.6	0.01369938		898.62	0.00320881		1428.61	0.00630802		1958.64	-0.00005269		2488.64	0.00082067		3018.64	-0.00666396		3548.64	-0.02133808
368.8	0.01393265		898.82	0.00337252		1428.81	0.00695688		1958.84	0.0003064		2488.84	0.00044235		3018.84	-0.00673737		3548.84	-0.02048022
369	0.01352186		899.02	0.00289137		1429.01	0.00711754		1959.04	0.00001979		2489.04	-0.0000962		3019.04	-0.0065214		3549.04	-0.0197746
369.2	0.0138912		899.22	0.00322133		1429.21	0.00783788		1959.24	-0.00069311		2489.24	0.00059093		3019.24	-0.00712271		3549.24	-0.01874038
369.4	0.01298172		899.42	0.00275609		1429.41	0.00803472		1959.44	-0.00094704		2489.44	0.00065323		3019.44	-0.00812894		3549.44	-0.0182308
369.6	0.01200921		899.62	0.00340522		1429.61	0.00790058		1959.64	-0.00152418		2489.64	0.00095655		3019.64	-0.00736948		3549.64	-0.01787498
369.8	0.01176461		899.82	0.00376998		1429.81	0.00789249		1959.84	-0.00183761		2489.84	0.00122483		3019.84	-0.00786702		3549.84	-0.01687196
370	0.01084478		900.02	0.00375615		1430.01	0.00785233		1960.04	-0.00221706		2490.04	0.0014259		3020.04	-0.00794944		3550.04	-0.0160313
370.2	0.01069453		900.22	0.00397358		1430.21	0.00810459		1960.24	-0.00185908		2490.24	0.0006874		3020.24	-0.00772656		3550.24	-0.01661832
370.4	0.01095204		900.42	0.00486981		1430.41	0.00742007		1960.44	-0.0023666		2490.44	0.00016651		3020.44	-0.00682241		3550.44	-0.01606492
370.6	0.01073308		900.62	0.00588852		1430.61	0.00775411		1960.64	-0.00238319		2490.64	-0.00059063		3020.64	-0.00609628		3550.64	-0.01537974
370.8	0.01104039		900.82	0.00676321		1430.81	0.00800968		1960.84	-0.00272441		2490.84	-0.00168485		3020.84	-0.00568259		3550.84	-0.0147215
371	0.01088577		901.02	0.00748151		1431.01	0.00726827		1961.04	-0.00159524		2491.04	-0.00184496		3021.04	-0.00590811		3551.04	-0.01526583
371.2	0.0113872		901.22	0.00784694		1431.21	0.00711452		1961.24	-0.00139255		2491.24	-0.00166142		3021.24	-0.00489242		3551.24	-0.01460659
371.4	0.01121404		901.42	0.00775631		1431.41	0.00653652		1961.44	-0.00081388		2491.44	-0.0019096		3021.44	-0.00434462		3551.44	-0.01417578
371.6	0.01082869		901.62	0.00872633		1431.61	0.00724653		1961.64	-0.0016174		2491.64	-0.00178095		3021.64	-0.00361662		3551.64	-0.01443751
371.8	0.0112531		901.82	0.0081651		1431.81	0.00685046		1961.84	-0.00166923		2491.84	-0.00232979		3021.84	-0.00354702		3551.84	-0.01439362
372	0.01146665		902.02	0.0080458		1432.01	0.00683943		1962.04	-0.00275894		2492.04	-0.00200794		3022.04	-0.00327604		3552.04	-0.01522625
372.2	0.01106399		902.22	0.00626732		1432.21	0.00756577		1962.24	-0.00282077		2492.24	-0.00282708		3022.24	-0.00343847		3552.24	-0.01458006
372.4	0.0113063		902.42	0.00644124		1432.41	0.00821451		1962.44	-0.00315493		2492.44	-0.00277409		3022.44	-0.00420419		3552.44	-0.01421475
372.6	0.01146356		902.62	0.00596297		1432.61	0.00808466		1962.64	-0.00290459		2492.64	-0.00329851		3022.64	-0.00441538		3552.64	-0.01362236
372.8	0.01248973		902.82	0.00537031		1432.81	0.00861125		1962.84	-0.00208597		2492.84	-0.00294873		3022.84	-0.00477997		3552.84	-0.01414788
373	0.01262209		903.02	0.00441275		1433.01	0.00830499		1963.04	-0.00222917		2493.04	-0.00293027		3023.04	-0.00544484		3553.04	-0.01545528
373.2	0.01274227		903.22	0.00463363		1433.21	0.00775553		1963.24	-0.00172003		2493.24	-0.00290086		3023.24	-0.00562198		3553.24	-0.01597892
373.4	0.01216794		903.42	0.00393311		1433.41	0.00719196		1963.44	-0.00194561		2493.44	-0.00261377		3023.44	-0.00603039		3553.44	-0.01677987
373.6	0.01239047		903.62	0.00303612		1433.61	0.00750554		1963.64	-0.00153004		2493.64	-0.00304885		3023.64	-0.00565878		3553.64	-0.01795276
373.8	0.01201364		903.82	0.00256228		1433.81	0.0082175		1963.84	-0.00120161		2493.84	-0.0035672		3023.84	-0.00670393		3553.84	-0.01888812
374	0.01166808		904.02	0.00273411		1434.01	0.00788004		1964.04	0.00001174		2494.04	-0.00348562		3024.04	-0.00623041		3554.04	-0.01972577
374.2	0.01117296		904.22	0.00294454		1434.21	0.00776522		1964.24	0.00064984		2494.24	-0.00353624		3024.24	-0.00634524		3554.24	-0.02022639
374.4	0.01152201		904.42	0.00340114		1434.41	0.00812135		1964.44	0.0002925		2494.44	-0.00349994		3024.44	-0.00644935		3554.44	-0.01986573
374.6	0.01149228		904.62	0.00400311		1434.61	0.0089196		1964.64	0.00113085		2494.64	-0.00368403		3024.64	-0.00681319		3554.64	-0.0199027
374.8	0.01214832		904.82	0.00432811		1434.81	0.00901012		1964.84	0.00071225		2494.84	-0.00307634		3024.84	-0.00705176		3554.84	-0.02056843
375	0.01177933		905.02	0.00452919		1435.01	0.00858178		1965.04	0.00136748		2495.04	-0.00266902		3025.04	-0.00765764		3555.04	-0.02093412
375.2	0.01141382		905.22	0.00487222		1435.21	0.00836099		1965.24	0.00108946		2495.24	-0.00157662		3025.24	-0.00730047		3555.24	-0.01998033
375.4	0.01124684		905.42	0.00426856		1435.41	0.00788586		1965.44	0.00114764		2495.44	-0.00142795		3025.44	-0.00719785		3555.44	-0.02015658
375.6	0.01172627		905.62	0.00507605		1435.61	0.00755687		1965.64	0.00010225		2495.64	-0.00056431		3025.64	-0.00674287		3555.64	-0.0202817
375.8	0.01201625		905.82	0.00419481		1435.81	0.00661412		1965.84	-0.00075293		2495.84	-0.00118592		3025.84	-0.00699696		3555.84	-0.02032382
376	0.01216029		906.02	0.00395704		1436.01	0.00616885		1966.04	-0.0011538		2496.04	-0.0011846		3026.04	-0.00690962		3556.04	-0.0200657
376.2	0.01266904		906.22	0.00438434		1436.21	0.00683934		1966.24	-0.001034		2496.24	-0.00123993		3026.24	-0.00681945		3556.24	-0.01942312
376.4	0.01320852		906.42	0.00466286		1436.41	0.00702409		1966.44	-0.00113109		2496.44	-0.00158545		3026.44	-0.00674706		3556.44	-0.01921556
376.6	0.01310577		906.62	0.0048226		1436.61	0.00687477		1966.64	-0.0009306		2496.64	-0.00195609		3026.64	-0.00598484		3556.64	-0.01911842
376.8	0.01359967		906.82	0.00493819		1436.81	0.00757372		1966.84	-0.00111088		2496.84	-0.00182058		3026.84	-0.0060219		3556.84	-0.01958237
377	0.0136692		907.02	0.00416384		1437.01	0.00687184		1967.04	-0.00149759		2497.04	-0.0014968		3027.04	-0.00593959		3557.04	-0.01930249
377.2	0.01404156		907.22	0.00418073		1437.21	0.00666793		1967.24	-0.00087716		2497.24	-0.00168514		3027.24	-0.00552585		3557.24	-0.01861765
377.4	0.01368715		907.42	0.00399352		1437.41	0.00757522		1967.44	-0.00167535		2497.44	-0.00161356		3027.44	-0.00527202		3557.44	-0.01869066
377.6	0.01339353		907.62	0.00320131		1437.61	0.00886281		1967.64	-0.00166301		2497.64	-0.00227378		3027.64	-0.00539701		3557.64	-0.01873744
377.8	0.01350194		907.82	0.00396392		1437.81	0.00908419		1967.84	-0.00152912		2497.84	-0.00291663		3027.84	-0.00538935		3557.84	-0.01920796
378	0.01367208		908.02	0.00388048		1438.01	0.00920158		1968.04	-0.00079121		2498.04	-0.00314628		3028.04	-0.00490089		3558.04	-0.01926738
378.2	0.013578		908.22	0.00352316		1438.21	0.00958562		1968.24	-0.00149257		2498.24	-0.00354558		3028.24	-0.00541782		3558.24	-0.01897407
378.4	0.01414747		908.42	0.0031089		1438.41	0.00985016		1968.44	-0.00137834		2498.44	-0.00385214		3028.44	-0.00529823		3558.44	-0.01906232
378.6	0.01430462		908.62	0.00260256		1438.61	0.00971059		1968.64	-0.00132781		2498.64	-0.00374119		3028.64	-0.00571225		3558.64	-0.01889161
378.8	0.01489893		908.82	0.002002		1438.81	0.0097163		1968.84	-0.00145617		2498.84	-0.00345345		3028.84	-0.00594703		3558.84	-0.01837041
379	0.01480392		909.02	0.00111217		1439.01	0.00911094		1969.04	-0.00129749		2499.04	-0.00334673		3029.04	-0.00606184		3559.04	-0.01777433
379.2	0.01492762		909.22	-0.00008565		1439.21	0.00884354		1969.24	-0.00171536		2499.24	-0.00280183		3029.24	-0.00554858		3559.24	-0.01725891
379.4	0.01521186		909.42	-0.00112815		1439.41	0.00774158		1969.44	-0.00250623		2499.44	-0.00304279		3029.44	-0.00537174		3559.44	-0.01716197
379.6	0.01547932		909.62	-0.00155363		1439.61	0.00709555		1969.64	-0.00338322		2499.64	-0.00266329		3029.64	-0.00528631		3559.64	-0.01661954
379.8	0.01524941		909.82	-0.00227411		1439.81	0.00680183		1969.84	-0.00417097		2499.84	-0.00282599		3029.84	-0.00570265		3559.84	-0.01649532
379.99	0.01524941		910.02	-0.00227411		1440.01	0.00680183		1970.04	-0.00417097		2500.04	-0.00282599		3030.04	-0.00570265		3560.04	-0.01649532
380.19	0.01558955		910.22	-0.00158289		1440.21	0.00626574		1970.24	-0.00464785		2500.24	-0.00314331		3030.24	-0.00577185		3560.24	-0.01668388
380.39	0.01572842		910.42	-0.00129983		1440.41	0.00536272		1970.44	-0.00447702		2500.44	-0.00350995		3030.44	-0.0053052		3560.44	-0.0165695
380.59	0.01588438		910.62	-0.00084222		1440.61	0.0049388		1970.64	-0.00452489		2500.64	-0.00348025		3030.64	-0.0044982		3560.64	-0.01649283
380.79	0.01652537		910.82	0.00019197		1440.81	0.0045759		1970.84	-0.00434835		2500.84	-0.00336371		3030.84	-0.00389323		3560.84	-0.01603627
380.99	0.01631869		911.02	0.0008696		1441.01	0.00388069		1971.04	-0.00414288		2501.04	-0.00409824		3031.04	-0.00412584		3561.04	-0.0155963
381.19	0.01706473		911.22	0.00027071		1441.21	0.00323441		1971.24	-0.00374738		2501.24	-0.00487788		3031.24	-0.00402381		3561.24	-0.01614876
381.39	0.01684426		911.42	-0.00002769		1441.41	0.00297756		1971.44	-0.0033923		2501.44	-0.00509811		3031.44	-0.00412438		3561.44	-0.0160003
381.59	0.01660947		911.62	0.00039024		1441.61	0.00261068		1971.64	-0.0035103		2501.64	-0.00538397		3031.64	-0.00497034		3561.64	-0.01557366
381.79	0.01683459		911.82	0.00072494		1441.81	0.00287632		1971.84	-0.00319469		2501.84	-0.00538418		3031.84	-0.00482579		3561.84	-0.01508011
381.99	0.01719254		912.02	0.0000288		1442.01	0.00279738		1972.04	-0.00334028		2502.04	-0.00530422		3032.04	-0.00526468		3562.04	-0.01590684
382.19	0.0170436		912.22	-0.00049453		1442.21	0.00311448		1972.24	-0.00288737		2502.24	-0.00492004		3032.24	-0.00509719		3562.24	-0.01597648
382.39	0.01709541		912.42	-0.000809		1442.41	0.00309117		1972.44	-0.00253332		2502.44	-0.00441539		3032.44	-0.00593765		3562.44	-0.01603549
382.59	0.01768958		912.62	-0.00183518		1442.61	0.0022068		1972.64	-0.00219549		2502.64	-0.00406454		3032.64	-0.00674692		3562.64	-0.01578433
382.79	0.0184784		912.82	-0.00187566		1442.81	0.00191688		1972.84	-0.00140032		2502.84	-0.00428113		3032.84	-0.00768594		3562.84	-0.01557237
382.99	0.01785257		913.02	-0.00241968		1443.01	0.00221721		1973.04	-0.00071365		2503.04	-0.00413071		3033.04	-0.0079338		3563.04	-0.01591776
383.19	0.01719749		913.22	-0.00207113		1443.21	0.00173548		1973.24	-0.00033828		2503.24	-0.00291864		3033.24	-0.00783876		3563.24	-0.01577819
383.39	0.01673223		913.42	-0.00278042		1443.41	0.001527		1973.44	0.0000262		2503.44	-0.0025398		3033.44	-0.00703654		3563.44	-0.01557767
383.59	0.01674975		913.62	-0.00208859		1443.61	0.00203294		1973.64	-0.00040832		2503.64	-0.00287306		3033.64	-0.00667661		3563.64	-0.01547288
383.79	0.01670348		913.82	-0.00244915		1443.81	0.00212503		1973.84	-0.00159652		2503.84	-0.00300722		3033.84	-0.00647482		3563.84	-0.01554508
383.99	0.01729081		914.02	-0.00244986		1444.01	0.00191126		1974.04	-0.00209377		2504.04	-0.00183103		3034.04	-0.00590693		3564.04	-0.01546206
384.19	0.01615247		914.22	-0.00176037		1444.21	0.00141566		1974.24	-0.00246434		2504.24	-0.00210951		3034.24	-0.00575028		3564.24	-0.01695248
384.39	0.01571579		914.42	-0.00101608		1444.41	0.00134067		1974.44	-0.00227779		2504.44	-0.00153759		3034.44	-0.00455968		3564.44	-0.0172551
384.59	0.01616808		914.62	0.00036224		1444.61	0.00157985		1974.64	-0.00205463		2504.64	-0.00136881		3034.64	-0.0034471		3564.64	-0.01759102
384.79	0.01665392		914.82	0.00085511		1444.81	0.00126325		1974.84	-0.00195887		2504.84	-0.00199262		3034.84	-0.00334609		3564.84	-0.01810751
384.99	0.01537771		915.02	0.00076336		1445.01	0.00107684		1975.04	-0.00235448		2505.04	-0.0034527		3035.04	-0.00360147		3565.04	-0.01881151
385.19	0.01566443		915.22	0.00041535		1445.21	0.00079668		1975.24	-0.00237717		2505.24	-0.0039725		3035.24	-0.003057		3565.24	-0.01926015
385.39	0.01539672		915.42	0.00145351		1445.41	0.00107779		1975.44	-0.00287171		2505.44	-0.00394344		3035.44	-0.00336682		3565.44	-0.01856299
385.59	0.01557437		915.62	0.00273969		1445.61	0.00154939		1975.64	-0.00281577		2505.64	-0.00486588		3035.64	-0.00409459		3565.64	-0.01805944
385.79	0.015727		915.82	0.00343848		1445.81	0.00208145		1975.84	-0.0025455		2505.84	-0.00534457		3035.84	-0.00381812		3565.84	-0.01802201
385.99	0.01596201		916.02	0.00307159		1446.01	0.0021809		1976.04	-0.00349609		2506.04	-0.0055019		3036.04	-0.00426301		3566.04	-0.01848224
386.19	0.01610745		916.22	0.00339729		1446.21	0.00277767		1976.24	-0.00290726		2506.24	-0.00576798		3036.24	-0.0047187		3566.24	-0.01760562
386.39	0.01641013		916.42	0.00342285		1446.41	0.00264682		1976.44	-0.00349966		2506.44	-0.00570593		3036.44	-0.0062513		3566.44	-0.0168025
386.59	0.01636343		916.62	0.0028012		1446.61	0.00204955		1976.64	-0.00321894		2506.64	-0.00646787		3036.64	-0.00696854		3566.64	-0.01545806
386.79	0.01582803		916.82	0.00291386		1446.81	0.00178833		1976.84	-0.00278196		2506.84	-0.00739499		3036.84	-0.00677694		3566.84	-0.01474901
386.99	0.01583956		917.02	0.00373841		1447.01	0.00270072		1977.04	-0.0029647		2507.04	-0.00710968		3037.04	-0.00709553		3567.04	-0.01370348
387.19	0.01490054		917.22	0.00205729		1447.21	0.00208018		1977.24	-0.00358729		2507.24	-0.00627218		3037.24	-0.00718507		3567.24	-0.01288849
387.39	0.01496808		917.42	0.00125473		1447.41	0.0026352		1977.44	-0.0038975		2507.44	-0.00649754		3037.44	-0.00705498		3567.44	-0.01198692
387.59	0.01522862		917.62	0.00065586		1447.61	0.00246667		1977.64	-0.00522188		2507.64	-0.00589276		3037.64	-0.005743		3567.64	-0.01177076
387.79	0.01475101		917.82	0.00043143		1447.81	0.0022448		1977.84	-0.0056695		2507.84	-0.00490672		3037.84	-0.00653245		3567.84	-0.01197216
387.99	0.01406297		918.02	0.00089535		1448.01	0.00222013		1978.04	-0.00549465		2508.04	-0.00410251		3038.04	-0.00557454		3568.04	-0.01228499
388.19	0.01281914		918.22	0.00022042		1448.21	0.00187691		1978.24	-0.00509498		2508.24	-0.00398757		3038.24	-0.00575859		3568.24	-0.01409138
388.39	0.0129363		918.42	0.00023441		1448.41	0.00237803		1978.44	-0.00534168		2508.44	-0.00344153		3038.44	-0.00465369		3568.44	-0.01463435
388.59	0.01298088		918.62	0.0003316		1448.61	0.0022807		1978.64	-0.0054172		2508.64	-0.0040191		3038.64	-0.00409397		3568.64	-0.01535751
388.79	0.01231554		918.82	-0.00084763		1448.81	0.00231674		1978.84	-0.00593398		2508.84	-0.00458173		3038.84	-0.00354868		3568.84	-0.01674428
388.99	0.0120899		919.02	-0.00109957		1449.01	0.00226892		1979.04	-0.00645097		2509.04	-0.00488471		3039.04	-0.00216466		3569.04	-0.01700652
389.19	0.01225632		919.22	-0.00096503		1449.21	0.00253474		1979.24	-0.00551626		2509.24	-0.00523526		3039.24	-0.001671		3569.24	-0.01701788
389.39	0.01288003		919.42	-0.00038341		1449.41	0.0031046		1979.44	-0.00522217		2509.44	-0.00600908		3039.44	-0.00162036		3569.44	-0.01674137
389.59	0.01264074		919.62	-0.00013404		1449.61	0.00416403		1979.64	-0.00415434		2509.64	-0.00668519		3039.64	-0.0013516		3569.64	-0.01743181
389.79	0.01357703		919.82	-0.00013892		1449.81	0.00412694		1979.84	-0.00330387		2509.84	-0.00639461		3039.84	-0.0012901		3569.84	-0.01734128
389.99	0.01464833		920.02	-0.00013171		1450.01	0.0051866		1980.04	-0.00356641		2510.04	-0.00647711		3040.04	-0.00167246		3570.04	-0.01778355
390.19	0.01569135		920.22	-0.00023234		1450.21	0.00517989		1980.24	-0.00289525		2510.24	-0.00675939		3040.24	-0.00155714		3570.24	-0.01786722
390.39	0.01621864		920.42	0.00008374		1450.41	0.00497386		1980.44	-0.00246409		2510.44	-0.00724016		3040.44	-0.0026109		3570.44	-0.01758332
390.59	0.01661594		920.62	0.00028317		1450.61	0.00477724		1980.64	-0.00193113		2510.64	-0.00775047		3040.64	-0.00245264		3570.64	-0.0177814
390.79	0.01716173		920.82	0.00086983		1450.81	0.00391902		1980.84	-0.00207832		2510.84	-0.00749661		3040.84	-0.00156755		3570.84	-0.0174219
390.99	0.01691454		921.02	0.00094542		1451.01	0.00463705		1981.04	-0.00183856		2511.04	-0.00679557		3041.04	-0.00226304		3571.04	-0.0177141
391.19	0.0164882		921.22	-0.00006917		1451.21	0.00456204		1981.24	-0.00267818		2511.24	-0.0057395		3041.24	-0.003001		3571.24	-0.01785324
391.39	0.01732326		921.42	0.0009449		1451.41	0.00492994		1981.44	-0.00246759		2511.44	-0.00508508		3041.44	-0.00274901		3571.44	-0.01689569
391.59	0.01780767		921.62	0.00038452		1451.61	0.00363619		1981.64	-0.00252385		2511.64	-0.00475199		3041.64	-0.00254955		3571.64	-0.01655485
391.79	0.01756974		921.82	0.00052916		1451.81	0.00372755		1981.84	-0.00227712		2511.84	-0.00462326		3041.84	-0.00376925		3571.84	-0.016408
391.99	0.01722384		922.02	-0.00030504		1452.01	0.00274978		1982.04	-0.00274179		2512.04	-0.00456021		3042.04	-0.00381488		3572.04	-0.01626593
392.19	0.01680636		922.22	-0.00020962		1452.21	0.00251797		1982.24	-0.00353291		2512.24	-0.00462338		3042.24	-0.00497863		3572.24	-0.01680362
392.39	0.01624128		922.42	-0.0002805		1452.41	0.00240742		1982.44	-0.00472713		2512.44	-0.00515858		3042.44	-0.00529387		3572.44	-0.01672751
392.59	0.01589543		922.62	-0.00008863		1452.61	0.00191138		1982.64	-0.0051604		2512.64	-0.00564108		3042.64	-0.00571849		3572.64	-0.01679125
392.79	0.01530881		922.82	-0.00121055		1452.81	0.00240279		1982.84	-0.00531944		2512.84	-0.00472018		3042.84	-0.00511233		3572.84	-0.01684656
392.99	0.01496465		923.02	-0.00180677		1453.01	0.00233698		1983.04	-0.00537035		2513.04	-0.00508468		3043.04	-0.00469609		3573.04	-0.01660249
393.19	0.01412614		923.22	-0.00223116		1453.21	0.0021692		1983.24	-0.00410472		2513.24	-0.00547905		3043.24	-0.00542037		3573.24	-0.01675077
393.39	0.01414379		923.42	-0.00225751		1453.41	0.00167		1983.44	-0.0039916		2513.44	-0.00542799		3043.44	-0.00598181		3573.44	-0.01653085
393.59	0.01377274		923.62	-0.00272991		1453.61	0.00252885		1983.64	-0.00411298		2513.64	-0.00471928		3043.64	-0.00602521		3573.64	-0.01678182
393.79	0.0142517		923.82	-0.00250879		1453.81	0.00276848		1983.84	-0.0035641		2513.84	-0.0043066		3043.84	-0.00612183		3573.84	-0.01672216
393.99	0.01390131		924.02	-0.00106816		1454.01	0.00322657		1984.04	-0.00328435		2514.04	-0.00481181		3044.04	-0.00579401		3574.04	-0.01727474
394.19	0.0139554		924.22	-0.00116607		1454.21	0.00328653		1984.24	-0.0026201		2514.24	-0.00518291		3044.24	-0.00540436		3574.24	-0.01856196
394.39	0.01334648		924.42	-0.00116181		1454.41	0.00379356		1984.44	-0.00174728		2514.44	-0.00491695		3044.44	-0.00558229		3574.44	-0.01889396
394.59	0.01310283		924.62	-0.00042888		1454.61	0.00487299		1984.64	-0.00169533		2514.64	-0.00408575		3044.64	-0.00457485		3574.64	-0.01885439
394.79	0.01261584		924.82	0.00022356		1454.81	0.00566432		1984.84	-0.00116969		2514.84	-0.00393556		3044.84	-0.00402299		3574.84	-0.01863739
394.99	0.01220543		925.02	0.00038282		1455.01	0.00591548		1985.04	-0.00108698		2515.04	-0.00326424		3045.04	-0.00503174		3575.04	-0.01897964
395.19	0.01256238		925.22	0.00103084		1455.21	0.00583424		1985.24	-0.00131129		2515.24	-0.00335962		3045.24	-0.00417064		3575.24	-0.01817575
395.39	0.01366491		925.42	0.0013205		1455.41	0.00451484		1985.44	0.00032845		2515.44	-0.0048938		3045.44	-0.00371037		3575.44	-0.01759058
395.59	0.01404795		925.62	0.00139574		1455.61	0.00318007		1985.64	0.00037162		2515.64	-0.00576284		3045.64	-0.00343322		3575.64	-0.01732629
395.79	0.01440411		925.82	0.00177124		1455.81	0.00354852		1985.84	-0.0002985		2515.84	-0.00600829		3045.84	-0.00371802		3575.84	-0.01735369
395.99	0.0149883		926.02	0.00141512		1456.01	0.00291584		1986.04	-0.0012934		2516.04	-0.00594435		3046.04	-0.00438634		3576.04	-0.01704437
396.19	0.01472289		926.22	0.00153487		1456.21	0.0026785		1986.24	-0.0017247		2516.24	-0.00640875		3046.24	-0.00390093		3576.24	-0.01782342
396.39	0.01507458		926.42	0.00086842		1456.41	0.00245179		1986.44	-0.00220755		2516.44	-0.00666558		3046.44	-0.0037674		3576.44	-0.01796733
396.59	0.01551102		926.62	0.00054251		1456.61	0.00220938		1986.64	-0.00247969		2516.64	-0.00651721		3046.64	-0.00326817		3576.64	-0.01728205
396.79	0.0158867		926.82	-0.00077648		1456.81	0.00241951		1986.84	-0.00348536		2516.84	-0.00599224		3046.84	-0.00338076		3576.84	-0.01601471
396.99	0.01630497		927.02	-0.00078428		1457.01	0.0010251		1987.04	-0.00364337		2517.04	-0.00652911		3047.04	-0.00338532		3577.04	-0.0159185
397.19	0.01661622		927.22	-0.00118564		1457.21	0.00034851		1987.24	-0.00411307		2517.24	-0.00619302		3047.24	-0.00363327		3577.24	-0.01529721
397.39	0.01676667		927.42	-0.00111845		1457.41	-0.00029802		1987.44	-0.00473711		2517.44	-0.00601625		3047.44	-0.00401616		3577.44	-0.01450642
397.59	0.0167528		927.62	-0.00169502		1457.61	0.0000555		1987.64	-0.00541649		2517.64	-0.00568654		3047.64	-0.00272433		3577.64	-0.01420754
397.79	0.016063		927.82	-0.00153363		1457.81	-0.00008989		1987.84	-0.00419146		2517.84	-0.00517945		3047.84	-0.00256122		3577.84	-0.01417348
397.99	0.01643283		928.02	-0.00120078		1458.01	-0.00067949		1988.04	-0.00401778		2518.04	-0.0055642		3048.04	-0.00255329		3578.04	-0.01473693
398.19	0.015994		928.22	-0.00191021		1458.21	0.00036629		1988.24	-0.00482564		2518.24	-0.00467785		3048.24	-0.00260811		3578.24	-0.01543238
398.39	0.01512176		928.42	-0.00114915		1458.41	0.00059695		1988.44	-0.00488587		2518.44	-0.00372107		3048.44	-0.00243346		3578.44	-0.01461285
398.59	0.01488233		928.62	-0.00034688		1458.61	0.00126422		1988.64	-0.0048817		2518.64	-0.00384679		3048.64	-0.00284768		3578.64	-0.01499895
398.79	0.01377604		928.82	-0.00030549		1458.81	0.00140636		1988.84	-0.0046724		2518.84	-0.0033744		3048.84	-0.00388414		3578.84	-0.01519308
398.99	0.01306915		929.02	-0.00016963		1459.01	0.00061813		1989.04	-0.00452351		2519.04	-0.00281251		3049.04	-0.00528918		3579.04	-0.01557914
399.19	0.01256013		929.22	0.00016496		1459.21	0.00112685		1989.24	-0.00477186		2519.24	-0.00354833		3049.24	-0.00497763		3579.24	-0.01512387
399.39	0.013081		929.42	0.00023597		1459.41	0.00062456		1989.44	-0.0050178		2519.44	-0.00415408		3049.44	-0.00602955		3579.44	-0.01531804
399.59	0.01252786		929.62	0.00014051		1459.61	0.00151249		1989.64	-0.00544658		2519.64	-0.00377863		3049.64	-0.00717588		3579.64	-0.01543371
399.79	0.01246328		929.82	-0.00002248		1459.81	0.00260725		1989.84	-0.00597929		2519.84	-0.00382838		3049.84	-0.00862072		3579.84	-0.01610602
399.99	0.01223574		930.02	-0.0005009		1460.01	0.00284799		1990.04	-0.00634024		2520.04	-0.00430547		3050.04	-0.00996153		3580.04	-0.01636654
400.19	0.01192551		930.22	0.00056264		1460.21	0.00269311		1990.24	-0.00584658		2520.24	-0.00478368		3050.24	-0.010266		3580.24	-0.01632062
400.39	0.01222494		930.42	0.00058703		1460.41	0.00294158		1990.44	-0.00650411		2520.44	-0.00457161		3050.44	-0.01110709		3580.44	-0.01664917
400.59	0.01207013		930.62	0.00056852		1460.61	0.00244369		1990.64	-0.00614052		2520.64	-0.00531892		3050.64	-0.01077871		3580.64	-0.01547749
400.79	0.01320034		930.82	0.00063283		1460.81	0.00187337		1990.84	-0.00611623		2520.84	-0.00591418		3050.84	-0.01090376		3580.84	-0.01563845
400.99	0.01330644		931.02	0.0016401		1461.01	0.00140856		1991.04	-0.00474499		2521.04	-0.00615032		3051.04	-0.01041421		3581.04	-0.01668279
401.19	0.01321915		931.22	0.00162955		1461.21	0.00099912		1991.24	-0.00429846		2521.24	-0.00681534		3051.24	-0.01026721		3581.24	-0.01712255
401.39	0.01339794		931.42	0.00137797		1461.41	0.0000396		1991.44	-0.00349767		2521.44	-0.00705816		3051.44	-0.01026105		3581.44	-0.01624802
401.59	0.01411594		931.62	0.00117496		1461.61	0.00022728		1991.64	-0.00344094		2521.64	-0.00698403		3051.64	-0.0092259		3581.64	-0.01635269
401.79	0.01477988		931.82	0.00190422		1461.81	0.00013504		1991.84	-0.00269801		2521.84	-0.00749057		3051.84	-0.00963098		3581.84	-0.01627217
401.99	0.01607192		932.02	0.00222717		1462.01	-0.0001155		1992.04	-0.00309734		2522.04	-0.00817392		3052.04	-0.00912703		3582.04	-0.01640433
402.19	0.01551352		932.22	0.0029161		1462.21	0.00066236		1992.24	-0.00289777		2522.24	-0.00742762		3052.24	-0.00815759		3582.24	-0.0163075
402.39	0.01583061		932.42	0.00274346		1462.41	-0.00018227		1992.44	-0.00194521		2522.44	-0.00805967		3052.44	-0.00711369		3582.44	-0.01672779
402.59	0.01540974		932.62	0.00198127		1462.61	-0.00049492		1992.64	-0.00190457		2522.64	-0.00736656		3052.64	-0.0061571		3582.64	-0.01723642
402.79	0.01469296		932.82	0.00174005		1462.81	0.00013562		1992.84	-0.00246429		2522.84	-0.00642295		3052.84	-0.00590879		3582.84	-0.01675268
402.99	0.0134207		933.02	0.00109961		1463.01	-0.00006631		1993.04	-0.00322319		2523.04	-0.00602311		3053.04	-0.0053985		3583.04	-0.01704973
403.19	0.01336521		933.22	0.00019917		1463.21	0.00029354		1993.24	-0.00420461		2523.24	-0.00546482		3053.24	-0.00434881		3583.24	-0.01646091
403.39	0.01287045		933.42	-0.00103898		1463.41	0.00048194		1993.44	-0.00467986		2523.44	-0.005222		3053.44	-0.00453794		3583.44	-0.01640669
403.59	0.01214931		933.62	-0.00162282		1463.61	0.0012113		1993.64	-0.00522306		2523.64	-0.00458453		3053.64	-0.00538517		3583.64	-0.01665962
403.79	0.0120686		933.82	-0.00205012		1463.81	0.00164886		1993.84	-0.00553686		2523.84	-0.00410253		3053.84	-0.00590434		3583.84	-0.01665861
403.99	0.01139619		934.02	-0.00180563		1464.01	0.00169434		1994.04	-0.00717057		2524.04	-0.00394815		3054.04	-0.0063184		3584.04	-0.01722725
404.19	0.0112745		934.22	-0.00148017		1464.21	0.00093952		1994.24	-0.00743938		2524.24	-0.00357099		3054.24	-0.00592755		3584.24	-0.01650267
404.39	0.01111875		934.42	-0.00185006		1464.41	0.00045362		1994.44	-0.00805679		2524.44	-0.00357345		3054.44	-0.00559336		3584.44	-0.01768366
404.59	0.01143704		934.62	-0.00200621		1464.61	0.00014737		1994.64	-0.00761981		2524.64	-0.00455683		3054.64	-0.00565817		3584.64	-0.01699692
404.79	0.0119521		934.82	-0.00195875		1464.81	-0.00041864		1994.84	-0.00759902		2524.84	-0.00582428		3054.84	-0.00644243		3584.84	-0.01759937
404.99	0.01179837		935.02	-0.00127911		1465.01	0.00039105		1995.04	-0.00663789		2525.04	-0.00674479		3055.04	-0.00768394		3585.04	-0.01800973
405.19	0.01196451		935.22	-0.00141833		1465.21	-0.00014811		1995.24	-0.00705964		2525.24	-0.00778824		3055.24	-0.00879859		3585.24	-0.01750878
405.39	0.01306073		935.42	-0.00173501		1465.41	-0.00039889		1995.44	-0.00749509		2525.44	-0.00877449		3055.44	-0.00996122		3585.44	-0.01657641
405.59	0.0140698		935.62	-0.00130583		1465.61	-0.00047908		1995.64	-0.00703473		2525.64	-0.00946158		3055.64	-0.01003348		3585.64	-0.01723219
405.79	0.01430836		935.82	-0.0001241		1465.81	-0.00072661		1995.84	-0.00645117		2525.84	-0.01062123		3055.84	-0.01015279		3585.84	-0.01804793
405.99	0.01486218		936.02	0.00020388		1466.01	-0.0008659		1996.04	-0.00541334		2526.04	-0.01103033		3056.04	-0.00960811		3586.04	-0.01812305
406.19	0.01495835		936.22	0.00027444		1466.21	-0.00090009		1996.24	-0.00510007		2526.24	-0.01138736		3056.24	-0.00951481		3586.24	-0.01908827
406.39	0.0152452		936.42	-0.00010121		1466.41	-0.00241524		1996.44	-0.0046328		2526.44	-0.01148284		3056.44	-0.00947029		3586.44	-0.01884256
406.59	0.01469477		936.62	0.00072249		1466.61	-0.00200775		1996.64	-0.00526991		2526.64	-0.01085214		3056.64	-0.01002276		3586.64	-0.01928508
406.79	0.01450806		936.82	0.00085934		1466.81	-0.00177215		1996.84	-0.00517917		2526.84	-0.0101745		3056.84	-0.00977407		3586.84	-0.01946521
406.99	0.01393927		937.02	0.00054983		1467.01	-0.00200774		1997.04	-0.00491412		2527.04	-0.00959865		3057.04	-0.0096349		3587.04	-0.01972593
407.19	0.01423264		937.22	0.00090477		1467.21	-0.00166134		1997.24	-0.00484932		2527.24	-0.00932541		3057.24	-0.00859494		3587.24	-0.01924935
407.39	0.01417168		937.42	0.00086291		1467.41	-0.0013791		1997.44	-0.00503661		2527.44	-0.00905421		3057.44	-0.0084332		3587.44	-0.01919643
407.59	0.01426729		937.62	0.00110572		1467.61	-0.00081086		1997.64	-0.00520682		2527.64	-0.00793077		3057.64	-0.00841715		3587.64	-0.01943397
407.79	0.01401502		937.82	0.00049967		1467.81	-0.00037089		1997.84	-0.00542673		2527.84	-0.00699653		3057.84	-0.00800091		3587.84	-0.01949108
407.99	0.01304708		938.02	0.00067277		1468.01	-0.00044514		1998.04	-0.0065714		2528.04	-0.00629047		3058.04	-0.00743112		3588.04	-0.02011916
408.19	0.01322076		938.22	0.00061648		1468.21	-0.00077955		1998.24	-0.00593571		2528.24	-0.00588701		3058.24	-0.00676842		3588.24	-0.01863686
408.39	0.01263048		938.42	0.00046218		1468.41	-0.00009799		1998.44	-0.00561106		2528.44	-0.00506134		3058.44	-0.00619641		3588.44	-0.01853721
408.59	0.01223256		938.62	-0.00073923		1468.61	0.00051865		1998.64	-0.00512721		2528.64	-0.00497389		3058.64	-0.0062041		3588.64	-0.01769179
408.79	0.01161429		938.82	-0.00059647		1468.81	0.00130094		1998.84	-0.00486217		2528.84	-0.00522533		3058.84	-0.00626914		3588.84	-0.01785763
408.99	0.01271607		939.02	-0.00116418		1469.01	0.0021013		1999.04	-0.00467095		2529.04	-0.00556493		3059.04	-0.00736548		3589.04	-0.01782993
409.19	0.01171938		939.22	-0.00269546		1469.21	0.00153328		1999.24	-0.00549097		2529.24	-0.0053212		3059.24	-0.00734197		3589.24	-0.01737752
409.39	0.01156558		939.42	-0.00303256		1469.41	0.00202729		1999.44	-0.00519479		2529.44	-0.00494221		3059.44	-0.00728167		3589.44	-0.01763381
409.59	0.01086743		939.62	-0.00252261		1469.61	0.00230005		1999.64	-0.00460266		2529.64	-0.00467788		3059.64	-0.00751632		3589.64	-0.01789533
409.79	0.01054136		939.82	-0.00247329		1469.81	0.00274076		1999.84	-0.00458001		2529.84	-0.00428429		3059.84	-0.00757211		3589.84	-0.01789049
409.99	0.01071221		940.02	-0.00255205		1470.01	0.00232942		2000.04	-0.00456694		2530.04	-0.00389494		3060.04	-0.00814329		3590.04	-0.01782611
410.19	0.01006046		940.22	-0.00246715		1470.21	0.00169333		2000.24	-0.00528701		2530.24	-0.00397418		3060.24	-0.00936479		3590.24	-0.01821555
410.39	0.01076727		940.42	-0.00173555		1470.41	0.00100597		2000.44	-0.0052261		2530.44	-0.00301319		3060.44	-0.00919656		3590.44	-0.0177469
410.59	0.01131574		940.62	-0.00155504		1470.61	0.00188575		2000.64	-0.00561396		2530.64	-0.00325596		3060.64	-0.00880508		3590.64	-0.0179062
410.79	0.01123335		940.82	-0.0016867		1470.81	0.00175718		2000.84	-0.0054453		2530.84	-0.002983		3060.84	-0.00722873		3590.84	-0.0183427
410.99	0.01179281		941.02	-0.00160514		1471.01	0.00142097		2001.04	-0.00556256		2531.04	-0.00394559		3061.04	-0.00723755		3591.04	-0.01757276
411.19	0.01153346		941.22	-0.00134103		1471.21	0.00144458		2001.24	-0.00633894		2531.24	-0.00422104		3061.24	-0.00637286		3591.24	-0.0177949
411.39	0.01189942		941.42	-0.00150062		1471.41	0.0009953		2001.44	-0.0067724		2531.44	-0.00514148		3061.44	-0.00615863		3591.44	-0.01870578
411.59	0.01194103		941.62	-0.00203891		1471.61	0.00120134		2001.64	-0.00667357		2531.64	-0.00550175		3061.64	-0.00579874		3591.64	-0.01857411
411.79	0.01148271		941.82	-0.00253964		1471.81	0.00061693		2001.84	-0.00678099		2531.84	-0.00580485		3061.84	-0.00567941		3591.84	-0.01927805
411.99	0.0110699		942.02	-0.00200252		1472.01	0.00062189		2002.04	-0.0072222		2532.04	-0.00577745		3062.04	-0.00556584		3592.04	-0.01916834
412.19	0.01154481		942.22	-0.0019479		1472.21	0.00055938		2002.24	-0.006985		2532.24	-0.00639601		3062.24	-0.00503801		3592.24	-0.0192076
412.39	0.01098418		942.42	-0.00177704		1472.41	0.00100496		2002.44	-0.00690245		2532.44	-0.00570242		3062.44	-0.00435518		3592.44	-0.0194992
412.59	0.01140842		942.62	-0.00134941		1472.61	0.00142298		2002.64	-0.00719024		2532.64	-0.00617691		3062.64	-0.00440746		3592.64	-0.02024903
412.79	0.01316531		942.82	-0.00097418		1472.81	0.00246808		2002.84	-0.00713098		2532.84	-0.00655747		3062.84	-0.00489918		3592.84	-0.02048486
412.99	0.01381318		943.02	-0.0018968		1473.01	0.00241509		2003.04	-0.00728666		2533.04	-0.00684472		3063.04	-0.00481263		3593.04	-0.01996872
413.19	0.01174147		943.22	-0.00217788		1473.21	0.00271731		2003.24	-0.00730391		2533.24	-0.00635156		3063.24	-0.00458566		3593.24	-0.0196202
413.39	0.01134339		943.42	-0.00154838		1473.41	0.00345578		2003.44	-0.00693243		2533.44	-0.00585923		3063.44	-0.00495796		3593.44	-0.0196305
413.59	0.01075983		943.62	-0.00040703		1473.61	0.00326275		2003.64	-0.00627759		2533.64	-0.00553147		3063.64	-0.00581159		3593.64	-0.01990038
413.79	0.0104937		943.82	-0.00017986		1473.81	0.00364108		2003.84	-0.00618547		2533.84	-0.00513494		3063.84	-0.00616649		3593.84	-0.01958828
413.99	0.01081004		944.02	0.00046595		1474.01	0.00249037		2004.04	-0.00566399		2534.04	-0.00512294		3064.04	-0.00720076		3594.04	-0.01967117
414.19	0.01114171		944.22	0.00037897		1474.21	0.00232599		2004.24	-0.00493599		2534.24	-0.00469872		3064.24	-0.007117		3594.24	-0.01959535
414.39	0.0116983		944.42	0.00034492		1474.41	0.00268716		2004.44	-0.00486173		2534.44	-0.00488095		3064.44	-0.00652282		3594.44	-0.01971491
414.59	0.01151267		944.62	-0.00036668		1474.61	0.00308711		2004.64	-0.00447782		2534.64	-0.00504496		3064.64	-0.00587268		3594.64	-0.01927735
414.79	0.01121838		944.82	0.00017297		1474.81	0.00278477		2004.84	-0.00452983		2534.84	-0.00492912		3064.84	-0.00644442		3594.84	-0.01980187
414.99	0.01150309		945.02	-0.00006865		1475.01	0.00243763		2005.04	-0.00409696		2535.04	-0.00529725		3065.04	-0.00701935		3595.04	-0.01842733
415.19	0.01099808		945.22	-0.00067252		1475.21	0.00198704		2005.24	-0.0040141		2535.24	-0.00623761		3065.24	-0.00769751		3595.24	-0.01878586
415.39	0.01093348		945.42	-0.00104912		1475.41	0.00163283		2005.44	-0.00371508		2535.44	-0.00755946		3065.44	-0.00772212		3595.44	-0.01817103
415.59	0.01075995		945.62	-0.00139477		1475.61	0.00094191		2005.64	-0.00303267		2535.64	-0.00765823		3065.64	-0.00832955		3595.64	-0.01768793
415.79	0.01046859		945.82	-0.0020344		1475.81	0.00013302		2005.84	-0.003342		2535.84	-0.00777695		3065.84	-0.00866745		3595.84	-0.01821482
415.99	0.01056087		946.02	-0.00191644		1476.01	-0.00010987		2006.04	-0.00367235		2536.04	-0.00775608		3066.04	-0.00868422		3596.04	-0.01784864
416.19	0.01033967		946.22	-0.0015235		1476.21	0.00012087		2006.24	-0.00418634		2536.24	-0.00801297		3066.24	-0.00818191		3596.24	-0.018644
416.39	0.01035536		946.42	-0.00211715		1476.41	0.00000677		2006.44	-0.0038092		2536.44	-0.00745938		3066.44	-0.00818412		3596.44	-0.01830052
416.59	0.01162281		946.62	-0.00222667		1476.61	0.00018636		2006.64	-0.00395662		2536.64	-0.00760518		3066.64	-0.00821981		3596.64	-0.01822306
416.79	0.01261293		946.82	-0.00356265		1476.81	0.00031722		2006.84	-0.00369291		2536.84	-0.00775779		3066.84	-0.00880852		3596.84	-0.01748446
416.99	0.01146927		947.02	-0.00453569		1477.01	-0.000527		2007.04	-0.00429739		2537.04	-0.00694006		3067.04	-0.00792246		3597.04	-0.01734783
417.19	0.01060428		947.22	-0.00462293		1477.21	-0.00103827		2007.24	-0.00451999		2537.24	-0.00678564		3067.24	-0.00821112		3597.24	-0.01696221
417.39	0.01105236		947.42	-0.00546189		1477.41	-0.00140422		2007.44	-0.00561035		2537.44	-0.00638437		3067.44	-0.00832417		3597.44	-0.01719583
417.59	0.01174864		947.62	-0.004521		1477.61	-0.00199132		2007.64	-0.00559199		2537.64	-0.00651428		3067.64	-0.00831074		3597.64	-0.01727712
417.79	0.01178294		947.82	-0.00524356		1477.81	-0.00153922		2007.84	-0.00659205		2537.84	-0.00646038		3067.84	-0.00901827		3597.84	-0.01692483
417.99	0.011737		948.02	-0.00525598		1478.01	-0.00215963		2008.04	-0.0062271		2538.04	-0.00617471		3068.04	-0.00900181		3598.04	-0.01741308
418.19	0.01091843		948.22	-0.00519652		1478.21	-0.00114779		2008.24	-0.00664179		2538.24	-0.00602591		3068.24	-0.00788373		3598.24	-0.01836914
418.39	0.01077153		948.42	-0.004346		1478.41	-0.00060875		2008.44	-0.00736277		2538.44	-0.00676611		3068.44	-0.00778569		3598.44	-0.01881837
418.59	0.01162618		948.62	-0.00384723		1478.61	-0.00038908		2008.64	-0.00759503		2538.64	-0.00615219		3068.64	-0.00762871		3598.64	-0.01846336
418.79	0.0113786		948.82	-0.0027124		1478.81	-0.00012174		2008.84	-0.00725077		2538.84	-0.00648051		3068.84	-0.00750463		3598.84	-0.01946823
418.99	0.01172787		949.02	-0.00268413		1479.01	0.00075654		2009.04	-0.00667589		2539.04	-0.00790901		3069.04	-0.00710199		3599.04	-0.01889543
419.19	0.01156224		949.22	-0.00263721		1479.21	0.00016312		2009.24	-0.0062801		2539.24	-0.0088766		3069.24	-0.00798578		3599.24	-0.01883979
419.39	0.0115219		949.42	-0.00245506		1479.41	0.00053266		2009.44	-0.00664235		2539.44	-0.00887915		3069.44	-0.00754756		3599.44	-0.01846747
419.59	0.0113129		949.62	-0.0023411		1479.61	0.00024592		2009.64	-0.00541184		2539.64	-0.00902756		3069.64	-0.00800612		3599.64	-0.01860841
419.79	0.01132369		949.82	-0.00206679		1479.81	0.0006934		2009.84	-0.00552601		2539.84	-0.00901022		3069.84	-0.00807426		3599.84	-0.01790975
419.99	0.01102765		950.02	-0.00139356		1480.01	0.00074735		2010.04	-0.00555444		2540.04	-0.00825098		3070.04	-0.00840979		3600.04	-0.01851224
420.19	0.01135945		950.22	-0.00041409		1480.21	0.00081451		2010.24	-0.00534554		2540.24	-0.00830682		3070.24	-0.00809421		3600.24	-0.01847989
420.39	0.01136811		950.42	-0.0007202		1480.41	-0.00026471		2010.44	-0.00425105		2540.44	-0.0082994		3070.44	-0.00889427		3600.44	-0.01798882
420.59	0.01179782		950.62	-0.00093697		1480.61	-0.00045882		2010.64	-0.00502195		2540.64	-0.0079938		3070.64	-0.00978968		3600.64	-0.01751114
420.79	0.01067156		950.82	-0.00212802		1480.81	-0.00100434		2010.84	-0.00541099		2540.84	-0.00731297		3070.84	-0.0099458		3600.84	-0.01678955
420.99	0.01016686		951.02	-0.0024521		1481.01	-0.00175631		2011.04	-0.00682743		2541.04	-0.0067067		3071.04	-0.0086353		3601.04	-0.01663314
421.19	0.01008022		951.22	-0.00276546		1481.21	-0.00227031		2011.24	-0.00733565		2541.24	-0.00716282		3071.24	-0.00877851		3601.24	-0.01598065
421.39	0.01044952		951.42	-0.00365727		1481.41	-0.00136861		2011.44	-0.00845839		2541.44	-0.00733665		3071.44	-0.00859573		3601.44	-0.01566903
421.59	0.00997537		951.62	-0.00296765		1481.61	-0.00118714		2011.64	-0.00803528		2541.64	-0.00722328		3071.64	-0.00810634		3601.64	-0.01557684
421.79	0.00955028		951.82	-0.00307848		1481.81	-0.00045792		2011.84	-0.00786814		2541.84	-0.00703127		3071.84	-0.00863013		3601.84	-0.01499163
421.99	0.00931061		952.02	-0.00305962		1482.01	-0.00008986		2012.04	-0.00727666		2542.04	-0.0074363		3072.04	-0.00804756		3602.04	-0.01520898
422.19	0.00953906		952.22	-0.00329274		1482.21	-0.0000278		2012.24	-0.00752854		2542.24	-0.00763332		3072.24	-0.00742544		3602.24	-0.01561077
422.39	0.01019505		952.42	-0.00296405		1482.41	0.00017288		2012.44	-0.00719388		2542.44	-0.00750566		3072.44	-0.00683661		3602.44	-0.0157525
422.59	0.01045404		952.62	-0.00300642		1482.61	0.00103494		2012.64	-0.00643777		2542.64	-0.00774974		3072.64	-0.00649826		3602.64	-0.0164359
422.79	0.01058924		952.82	-0.00271194		1482.81	0.00091416		2012.84	-0.00596097		2542.84	-0.00828945		3072.84	-0.00608252		3602.84	-0.01712394
422.99	0.01105818		953.02	-0.00302333		1483.01	0.00087474		2013.04	-0.00599243		2543.04	-0.00875802		3073.04	-0.00668933		3603.04	-0.01667305
423.19	0.0106491		953.22	-0.00361589		1483.21	0.00093207		2013.24	-0.00619109		2543.24	-0.00806183		3073.24	-0.00718785		3603.24	-0.01724255
423.39	0.01069164		953.42	-0.00326293		1483.41	0.00118965		2013.44	-0.00616474		2543.44	-0.00736911		3073.44	-0.00668912		3603.44	-0.01761036
423.59	0.01130614		953.62	-0.00266442		1483.61	0.00050932		2013.64	-0.00494761		2543.64	-0.00755115		3073.64	-0.00708771		3603.64	-0.01778859
423.79	0.01148349		953.82	-0.00213681		1483.81	0.0000229		2013.84	-0.00594354		2543.84	-0.00758599		3073.84	-0.00748477		3603.84	-0.01823966
423.99	0.01179521		954.02	-0.00225889		1484.01	-0.00048976		2014.04	-0.00584544		2544.04	-0.00792517		3074.04	-0.00751504		3604.04	-0.01952798
424.19	0.01235868		954.22	-0.00184539		1484.21	-0.00062606		2014.24	-0.00549924		2544.24	-0.00883531		3074.24	-0.00809571		3604.24	-0.01884415
424.39	0.01159109		954.42	-0.0023602		1484.41	-0.00161021		2014.44	-0.00620349		2544.44	-0.00888912		3074.44	-0.00956617		3604.44	-0.01960713
424.59	0.01168876		954.62	-0.00320678		1484.61	-0.00220012		2014.64	-0.0067177		2544.64	-0.00948722		3074.64	-0.00995107		3604.64	-0.02033856
424.79	0.01135082		954.82	-0.00288379		1484.81	-0.00238506		2014.84	-0.00706359		2544.84	-0.0099977		3074.84	-0.00928655		3604.84	-0.02060275
424.99	0.01200472		955.02	-0.00262526		1485.01	-0.00242708		2015.04	-0.00758907		2545.04	-0.00974729		3075.04	-0.00945525		3605.04	-0.02137856
425.19	0.0116301		955.22	-0.00253178		1485.21	-0.00209943		2015.24	-0.00760156		2545.24	-0.01010372		3075.24	-0.01003364		3605.24	-0.02125871
425.39	0.01217397		955.42	-0.00258484		1485.41	-0.00131664		2015.44	-0.00726214		2545.44	-0.00998957		3075.44	-0.00970801		3605.44	-0.02072565
425.59	0.01218506		955.62	-0.00200735		1485.61	-0.00191527		2015.64	-0.00746316		2545.64	-0.00996375		3075.64	-0.00975069		3605.64	-0.02037955
425.79	0.01200718		955.82	-0.00191955		1485.81	-0.00185883		2015.84	-0.00771074		2545.84	-0.01073114		3075.84	-0.00946167		3605.84	-0.01983483
425.99	0.01145775		956.02	-0.00208885		1486.01	-0.00198537		2016.04	-0.00833908		2546.04	-0.01056494		3076.04	-0.00849264		3606.04	-0.02046547
426.19	0.01140076		956.22	-0.00199801		1486.21	-0.002498		2016.24	-0.00868072		2546.24	-0.01041419		3076.24	-0.00861135		3606.24	-0.020757
426.39	0.01109483		956.42	-0.00237032		1486.41	-0.00154339		2016.44	-0.00805387		2546.44	-0.00922334		3076.44	-0.00766506		3606.44	-0.02064737
426.59	0.0118026		956.62	-0.00144319		1486.61	-0.00185225		2016.64	-0.00768618		2546.64	-0.00926606		3076.64	-0.0077515		3606.64	-0.01985293
426.79	0.01164013		956.82	-0.0013229		1486.81	-0.00230488		2016.84	-0.0085568		2546.84	-0.00793961		3076.84	-0.00774029		3606.84	-0.01961297
426.99	0.01104077		957.02	-0.00172705		1487.01	-0.00191027		2017.04	-0.00843305		2547.04	-0.00691607		3077.04	-0.00788634		3607.04	-0.01868321
427.19	0.01106829		957.22	-0.0017495		1487.21	-0.00180256		2017.24	-0.00847867		2547.24	-0.00597062		3077.24	-0.00812076		3607.24	-0.01882203
427.39	0.01165562		957.42	-0.00124442		1487.41	-0.00234872		2017.44	-0.0080997		2547.44	-0.00545765		3077.44	-0.00811911		3607.44	-0.01783557
427.59	0.01137869		957.62	-0.00132371		1487.61	-0.00308925		2017.64	-0.00776477		2547.64	-0.00530985		3077.64	-0.00852769		3607.64	-0.01738081
427.79	0.01057099		957.82	-0.00175398		1487.81	-0.00245074		2017.84	-0.00767473		2547.84	-0.00525908		3077.84	-0.00884369		3607.84	-0.01754031
427.99	0.01107131		958.02	-0.0023806		1488.01	-0.00271564		2018.04	-0.00801044		2548.04	-0.00568801		3078.04	-0.00823606		3608.04	-0.01786088
428.19	0.01124606		958.22	-0.00290793		1488.21	-0.00219508		2018.24	-0.00765562		2548.24	-0.00493835		3078.24	-0.00903842		3608.24	-0.01725841
428.39	0.01227136		958.42	-0.00297016		1488.41	-0.00203808		2018.44	-0.00775921		2548.44	-0.00548033		3078.44	-0.00958385		3608.44	-0.0180622
428.59	0.01248838		958.62	-0.00309965		1488.61	-0.00169867		2018.64	-0.00716495		2548.64	-0.00564944		3078.64	-0.00958587		3608.64	-0.01883653
428.79	0.01194678		958.82	-0.00214103		1488.81	-0.00104265		2018.84	-0.00756716		2548.84	-0.00579571		3078.84	-0.00985461		3608.84	-0.01864616
428.99	0.01175982		959.02	-0.00264198		1489.01	-0.00056868		2019.04	-0.00739083		2549.04	-0.00514417		3079.04	-0.01050887		3609.04	-0.01892072
429.19	0.01170551		959.22	-0.00253852		1489.21	-0.00039336		2019.24	-0.00694428		2549.24	-0.00626708		3079.24	-0.01030678		3609.24	-0.01841986
429.39	0.01219401		959.42	-0.0020517		1489.41	0.00001453		2019.44	-0.00631333		2549.44	-0.00701379		3079.44	-0.00979621		3609.44	-0.01903593
429.59	0.0111777		959.62	-0.00232617		1489.61	0.00016529		2019.64	-0.00643807		2549.64	-0.00773149		3079.64	-0.00967262		3609.64	-0.01904586
429.79	0.01041		959.82	-0.00237321		1489.81	0.00036932		2019.84	-0.00587065		2549.84	-0.00916388		3079.84	-0.00938822		3609.84	-0.01980983
429.99	0.01068455		960.02	-0.00228187		1490.01	0.00027061		2020.04	-0.00558238		2550.04	-0.00927298		3080.04	-0.00915625		3610.04	-0.02012623
430.19	0.01098408		960.22	-0.00290419		1490.21	0.00015237		2020.24	-0.00442038		2550.24	-0.01006453		3080.24	-0.00941462		3610.24	-0.02022815
430.39	0.0112004		960.42	-0.00309038		1490.41	0.00064721		2020.44	-0.00372015		2550.44	-0.00948035		3080.44	-0.00895152		3610.44	-0.02015623
430.59	0.01129332		960.62	-0.0025386		1490.61	0.00010468		2020.64	-0.00372837		2550.64	-0.00980395		3080.64	-0.00979222		3610.64	-0.01925621
430.79	0.01124692		960.82	-0.00316089		1490.81	0.00049011		2020.84	-0.0047828		2550.84	-0.00887584		3080.84	-0.01006925		3610.84	-0.02006086
430.99	0.01152644		961.02	-0.00401053		1491.01	-0.00071427		2021.04	-0.00488071		2551.04	-0.00953651		3081.04	-0.00973505		3611.04	-0.02026075
431.19	0.01198197		961.22	-0.00362979		1491.21	-0.00172073		2021.24	-0.0044844		2551.24	-0.00870862		3081.24	-0.00954183		3611.24	-0.02031586
431.39	0.01253562		961.42	-0.00377013		1491.41	-0.00151479		2021.44	-0.00473919		2551.44	-0.00864369		3081.44	-0.00901605		3611.44	-0.01964046
431.59	0.01201404		961.62	-0.0033643		1491.61	-0.00196394		2021.64	-0.00510569		2551.64	-0.00751121		3081.64	-0.00803977		3611.64	-0.01973807
431.79	0.01290898		961.82	-0.00358986		1491.81	-0.00139566		2021.84	-0.00570802		2551.84	-0.00746127		3081.84	-0.00819888		3611.84	-0.01986127
431.99	0.01339483		962.02	-0.00369484		1492.01	-0.00180705		2022.04	-0.00706601		2552.04	-0.00737451		3082.04	-0.00733789		3612.04	-0.01940966
432.19	0.0139296		962.22	-0.00299239		1492.21	-0.00134888		2022.24	-0.00670117		2552.24	-0.00735106		3082.24	-0.00794598		3612.24	-0.01849958
432.39	0.01459209		962.42	-0.00225714		1492.41	-0.00104253		2022.44	-0.00793611		2552.44	-0.00759843		3082.44	-0.00827478		3612.44	-0.01914081
432.59	0.01359269		962.62	-0.00165198		1492.61	-0.00173947		2022.64	-0.00837758		2552.64	-0.00725015		3082.64	-0.00822997		3612.64	-0.01892259
432.79	0.01334597		962.82	-0.00089298		1492.81	-0.0023428		2022.84	-0.0093533		2552.84	-0.00832111		3082.84	-0.00852141		3612.84	-0.01840872
432.99	0.0132772		963.02	-0.00110563		1493.01	-0.00223642		2023.04	-0.00929389		2553.04	-0.00848631		3083.04	-0.00801522		3613.04	-0.01827172
433.19	0.01345982		963.22	-0.00095103		1493.21	-0.00230435		2023.24	-0.0089275		2553.24	-0.00922225		3083.24	-0.00784854		3613.24	-0.0180016
433.39	0.01341851		963.42	-0.00029834		1493.41	-0.00145396		2023.44	-0.00877176		2553.44	-0.00925439		3083.44	-0.00785794		3613.44	-0.01874692
433.59	0.01296531		963.62	-0.0016943		1493.61	-0.00103985		2023.64	-0.00817075		2553.64	-0.00927796		3083.64	-0.00840799		3613.64	-0.0183295
433.79	0.01292036		963.82	-0.00219503		1493.81	-0.00108411		2023.84	-0.00813887		2553.84	-0.00965045		3083.84	-0.00834452		3613.84	-0.01880834
433.99	0.01299881		964.02	-0.00152938		1494.01	-0.00114594		2024.04	-0.0083145		2554.04	-0.00858924		3084.04	-0.00884684		3614.04	-0.01888652
434.19	0.01224162		964.22	-0.00189854		1494.21	-0.00152939		2024.24	-0.0081742		2554.24	-0.00860812		3084.24	-0.00904386		3614.24	-0.01887501
434.39	0.01205988		964.42	-0.00248695		1494.41	-0.00154418		2024.44	-0.00862581		2554.44	-0.00805444		3084.44	-0.01016385		3614.44	-0.01960503
434.59	0.01211804		964.62	-0.00324127		1494.61	-0.00261418		2024.64	-0.00830614		2554.64	-0.00791475		3084.64	-0.01086657		3614.64	-0.01989271
434.79	0.01254249		964.82	-0.00413704		1494.81	-0.0032312		2024.84	-0.008061		2554.84	-0.00744195		3084.84	-0.01009808		3614.84	-0.021667
434.99	0.01162059		965.02	-0.0047097		1495.01	-0.00401729		2025.04	-0.00720615		2555.04	-0.00783334		3085.04	-0.00967872		3615.04	-0.0223322
435.19	0.01104104		965.22	-0.00418788		1495.21	-0.0038327		2025.24	-0.00676735		2555.24	-0.00697485		3085.24	-0.00958391		3615.24	-0.02193532
435.39	0.010786		965.42	-0.00470482		1495.41	-0.00366985		2025.44	-0.00685058		2555.44	-0.00685959		3085.44	-0.00919452		3615.44	-0.02176854
435.59	0.00957861		965.62	-0.00473594		1495.61	-0.00363096		2025.64	-0.00669494		2555.64	-0.00650944		3085.64	-0.00926684		3615.64	-0.0215467
435.79	0.01006795		965.82	-0.0052209		1495.81	-0.00301029		2025.84	-0.00650637		2555.84	-0.00702639		3085.84	-0.0100767		3615.84	-0.02117629
435.99	0.00976925		966.02	-0.00532146		1496.01	-0.00362801		2026.04	-0.00626044		2556.04	-0.00727028		3086.04	-0.00878995		3616.04	-0.02077532
436.19	0.00916133		966.22	-0.00475819		1496.21	-0.00357009		2026.24	-0.00652396		2556.24	-0.00702961		3086.24	-0.00822252		3616.24	-0.02080333
436.39	0.00910764		966.42	-0.00456768		1496.41	-0.00340105		2026.44	-0.00760908		2556.44	-0.00663589		3086.44	-0.00799199		3616.44	-0.02053591
436.59	0.00866132		966.62	-0.00413323		1496.61	-0.00418271		2026.64	-0.00821246		2556.64	-0.00784186		3086.64	-0.00802631		3616.64	-0.01935404
436.79	0.00926285		966.82	-0.0046544		1496.81	-0.00505375		2026.84	-0.0085588		2556.84	-0.00886859		3086.84	-0.00742402		3616.84	-0.01950362
436.99	0.0085635		967.02	-0.00486061		1497.01	-0.00436871		2027.04	-0.00959469		2557.04	-0.00929025		3087.04	-0.0064137		3617.04	-0.01941332
437.19	0.00879915		967.22	-0.00409416		1497.21	-0.00363038		2027.24	-0.00958942		2557.24	-0.01045841		3087.24	-0.00682336		3617.24	-0.01925451
437.39	0.00871352		967.42	-0.00358939		1497.41	-0.00250374		2027.44	-0.00922712		2557.44	-0.01066906		3087.44	-0.00678192		3617.44	-0.01961055
437.59	0.00879317		967.62	-0.00373622		1497.61	-0.00241		2027.64	-0.0096086		2557.64	-0.01057193		3087.64	-0.00653105		3617.64	-0.01995446
437.79	0.00886837		967.82	-0.00313139		1497.81	-0.00271794		2027.84	-0.01008959		2557.84	-0.01077809		3087.84	-0.00578438		3617.84	-0.02017017
437.99	0.00861884		968.02	-0.00198895		1498.01	-0.00255465		2028.04	-0.00967422		2558.04	-0.01038906		3088.04	-0.00683259		3618.04	-0.02059673
438.19	0.00803058		968.22	-0.00228209		1498.21	-0.00259148		2028.24	-0.0093314		2558.24	-0.01163725		3088.24	-0.00665625		3618.24	-0.02006721
438.39	0.00810366		968.42	-0.00239516		1498.41	-0.00273957		2028.44	-0.00879326		2558.44	-0.01131845		3088.44	-0.00769785		3618.44	-0.02091259
438.59	0.00804166		968.62	-0.00204678		1498.61	-0.00284958		2028.64	-0.0079804		2558.64	-0.01135712		3088.64	-0.00818454		3618.64	-0.02135588
438.79	0.00811377		968.82	-0.00186024		1498.81	-0.00280059		2028.84	-0.00733091		2558.84	-0.01104508		3088.84	-0.00796078		3618.84	-0.02211352
438.99	0.00781067		969.02	-0.00081623		1499.01	-0.00302507		2029.04	-0.0075807		2559.04	-0.01157685		3089.04	-0.00887675		3619.04	-0.02150521
439.19	0.00741269		969.22	-0.00048462		1499.21	-0.00331232		2029.24	-0.00781952		2559.24	-0.01018387		3089.24	-0.00938106		3619.24	-0.02110581
439.39	0.0069929		969.42	-0.00099212		1499.41	-0.00291296		2029.44	-0.00740251		2559.44	-0.00928977		3089.44	-0.00961458		3619.44	-0.02119177
439.59	0.00729237		969.62	-0.00212187		1499.61	-0.00232864		2029.64	-0.00754453		2559.64	-0.00967675		3089.64	-0.01027919		3619.64	-0.02080084
439.79	0.00854825		969.82	-0.00254315		1499.81	-0.00169708		2029.84	-0.00721909		2559.84	-0.00870872		3089.84	-0.01083316		3619.84	-0.02119023
439.99	0.00894798		970.02	-0.00252609		1500.01	-0.00150641		2030.04	-0.00733139		2560.04	-0.00869556		3090.04	-0.00974998		3620.04	-0.02141848
440.19	0.00868568		970.22	-0.00236462		1500.21	-0.00133948		2030.24	-0.00734013		2560.24	-0.0087049		3090.24	-0.00992566		3620.24	-0.02144542
440.39	0.00943701		970.42	-0.00255367		1500.41	-0.0016521		2030.44	-0.00782569		2560.44	-0.00942351		3090.44	-0.01003868		3620.44	-0.02139848
440.59	0.0091682		970.62	-0.00287638		1500.61	-0.00202656		2030.64	-0.00856279		2560.64	-0.00985703		3090.64	-0.01090787		3620.64	-0.02117595
440.79	0.00969795		970.82	-0.00346852		1500.81	-0.00152634		2030.84	-0.00873476		2560.84	-0.01017422		3090.84	-0.01052995		3620.84	-0.02133297
440.99	0.00959238		971.02	-0.0038922		1501.01	-0.00010877		2031.04	-0.00914384		2561.04	-0.0105084		3091.04	-0.01011877		3621.04	-0.02030797
441.19	0.01007126		971.22	-0.0031982		1501.21	0.00019589		2031.24	-0.00868099		2561.24	-0.01141331		3091.24	-0.01015322		3621.24	-0.02017213
441.39	0.01024554		971.42	-0.00374412		1501.41	0.00038438		2031.44	-0.00816959		2561.44	-0.01104709		3091.44	-0.00904914		3621.44	-0.02029694
441.59	0.01094012		971.62	-0.00316878		1501.61	-0.00042647		2031.64	-0.00914048		2561.64	-0.01159721		3091.64	-0.00842649		3621.64	-0.02013659
441.79	0.01080263		971.82	-0.00313028		1501.81	-0.0004294		2031.84	-0.00926602		2561.84	-0.01260897		3091.84	-0.00787258		3621.84	-0.02064326
441.99	0.00997983		972.02	-0.00315297		1502.01	0.00020792		2032.04	-0.00877956		2562.04	-0.01266551		3092.04	-0.00821359		3622.04	-0.02034262
442.19	0.00991373		972.22	-0.00253581		1502.21	-0.00030081		2032.24	-0.00903562		2562.24	-0.01280559		3092.24	-0.00820516		3622.24	-0.01965304
442.39	0.00940741		972.42	-0.00250565		1502.41	-0.00059624		2032.44	-0.00903889		2562.44	-0.01188162		3092.44	-0.00862833		3622.44	-0.02045249
442.59	0.00912505		972.62	-0.00192349		1502.61	-0.00086474		2032.64	-0.00914678		2562.64	-0.01212833		3092.64	-0.0084045		3622.64	-0.02007411
442.79	0.00961137		972.82	-0.00153649		1502.81	-0.00132411		2032.84	-0.00930675		2562.84	-0.01227165		3092.84	-0.00847598		3622.84	-0.01986896
442.99	0.00832422		973.02	-0.00103732		1503.01	-0.00122534		2033.04	-0.01033146		2563.04	-0.0122729		3093.04	-0.00917769		3623.04	-0.01903495
443.19	0.00742483		973.22	-0.00108764		1503.21	-0.00091727		2033.24	-0.00942332		2563.24	-0.01157679		3093.24	-0.00840821		3623.24	-0.01951417
443.39	0.00770921		973.42	-0.00181451		1503.41	-0.00036		2033.44	-0.00962383		2563.44	-0.01161423		3093.44	-0.00792697		3623.44	-0.01962522
443.59	0.00761937		973.62	-0.00181771		1503.61	-0.00064331		2033.64	-0.0100127		2563.64	-0.01230984		3093.64	-0.00856679		3623.64	-0.01986127
443.79	0.00774432		973.82	-0.00177377		1503.81	-0.00067546		2033.84	-0.00999706		2563.84	-0.01171909		3093.84	-0.00875484		3623.84	-0.02078036
443.99	0.00724584		974.02	-0.00238731		1504.01	0.00013159		2034.04	-0.01061846		2564.04	-0.01171304		3094.04	-0.00826914		3624.04	-0.02123719
444.19	0.00724817		974.22	-0.00313108		1504.21	-0.00020385		2034.24	-0.01053216		2564.24	-0.01176961		3094.24	-0.00841561		3624.24	-0.02173215
444.39	0.00692414		974.42	-0.00330945		1504.41	-0.00031984		2034.44	-0.01160277		2564.44	-0.011383		3094.44	-0.00882348		3624.44	-0.02245717
444.59	0.00787345		974.62	-0.00419353		1504.61	0.0001463		2034.64	-0.01242925		2564.64	-0.01036839		3094.64	-0.00943135		3624.64	-0.02297987
444.79	0.00868257		974.82	-0.00395776		1504.81	0.00113512		2034.84	-0.01293398		2564.84	-0.00990619		3094.84	-0.00926791		3624.84	-0.02257352
444.99	0.00931343		975.02	-0.00419553		1505.01	0.00085539		2035.04	-0.01263249		2565.04	-0.00885122		3095.04	-0.00888296		3625.04	-0.02202252
445.19	0.00917441		975.22	-0.00385797		1505.21	-0.00038348		2035.24	-0.01303856		2565.24	-0.00807025		3095.24	-0.00820578		3625.24	-0.02196813
445.39	0.0093179		975.42	-0.00400289		1505.41	-0.00049118		2035.44	-0.01272346		2565.44	-0.00760133		3095.44	-0.00784503		3625.44	-0.0213991
445.59	0.00947788		975.62	-0.00316011		1505.61	-0.00094833		2035.64	-0.01342317		2565.64	-0.00799293		3095.64	-0.00865787		3625.64	-0.02140636
445.79	0.00954205		975.82	-0.00293171		1505.81	-0.00030037		2035.84	-0.01233797		2565.84	-0.00694687		3095.84	-0.00879856		3625.84	-0.0219471
445.99	0.00979806		976.02	-0.00307944		1506.01	0.00010104		2036.04	-0.0112822		2566.04	-0.00612825		3096.04	-0.00993422		3626.04	-0.02130595
446.19	0.00957399		976.22	-0.00237681		1506.21	-0.00043205		2036.24	-0.01067794		2566.24	-0.00548589		3096.24	-0.0106753		3626.24	-0.02135187
446.39	0.00963692		976.42	-0.00224854		1506.41	-0.00022125		2036.44	-0.00977511		2566.44	-0.00511391		3096.44	-0.01095064		3626.44	-0.02065282
446.59	0.01039106		976.62	-0.00164452		1506.61	-0.00069567		2036.64	-0.00935789		2566.64	-0.00512333		3096.64	-0.0114652		3626.64	-0.01979816
446.79	0.0103813		976.82	-0.00149204		1506.81	-0.00036059		2036.84	-0.00830945		2566.84	-0.00580285		3096.84	-0.01244978		3626.84	-0.02000759
446.99	0.00936531		977.02	-0.00091159		1507.01	-0.0009748		2037.04	-0.00784809		2567.04	-0.00585555		3097.04	-0.01330188		3627.04	-0.01946642
447.19	0.00904323		977.22	-0.00077556		1507.21	-0.00146967		2037.24	-0.00618022		2567.24	-0.00652978		3097.24	-0.01321236		3627.24	-0.01989789
447.39	0.00887258		977.42	-0.00037577		1507.41	-0.00232791		2037.44	-0.00634561		2567.44	-0.00749358		3097.44	-0.01394563		3627.44	-0.01971909
447.59	0.00832844		977.62	-0.00080283		1507.61	-0.00309261		2037.64	-0.00610264		2567.64	-0.00852048		3097.64	-0.01481749		3627.64	-0.02050718
447.79	0.00854444		977.82	-0.00162397		1507.81	-0.00335736		2037.84	-0.00659523		2567.84	-0.00911865		3097.84	-0.01513913		3627.84	-0.02035152
447.99	0.0078808		978.02	-0.00207557		1508.01	-0.00265392		2038.04	-0.00712698		2568.04	-0.00912637		3098.04	-0.01584371		3628.04	-0.02080639
448.19	0.00868788		978.22	-0.00168842		1508.21	-0.00327714		2038.24	-0.00701199		2568.24	-0.00987764		3098.24	-0.01519138		3628.24	-0.02132221
448.39	0.00860168		978.42	-0.00167059		1508.41	-0.00328943		2038.44	-0.00779599		2568.44	-0.00965753		3098.44	-0.01506982		3628.44	-0.021719
448.59	0.00867794		978.62	-0.00150181		1508.61	-0.00275074		2038.64	-0.00886883		2568.64	-0.00934335		3098.64	-0.01517222		3628.64	-0.02242062
448.79	0.00757786		978.82	-0.00062001		1508.81	-0.00280673		2038.84	-0.00909735		2568.84	-0.00984663		3098.84	-0.01426674		3628.84	-0.02233106
448.99	0.00711343		979.02	-0.00094339		1509.01	-0.00335796		2039.04	-0.00922999		2569.04	-0.00992721		3099.04	-0.0129724		3629.04	-0.02259515
449.19	0.00585708		979.22	-0.0015657		1509.21	-0.0034476		2039.24	-0.01029749		2569.24	-0.01021002		3099.24	-0.01165333		3629.24	-0.0223374
449.39	0.00546125		979.42	-0.00162837		1509.41	-0.00275413		2039.44	-0.01011839		2569.44	-0.01057086		3099.44	-0.0122215		3629.44	-0.02237682
449.59	0.00557929		979.62	-0.00150325		1509.61	-0.00268968		2039.64	-0.01055896		2569.64	-0.01086638		3099.64	-0.01281906		3629.64	-0.02248822
449.79	0.00547544		979.82	-0.00145611		1509.81	-0.001816		2039.84	-0.00990319		2569.84	-0.01009084		3099.84	-0.01299661		3629.84	-0.02244337
449.99	0.00517067		980.02	-0.00190765		1510.01	-0.00240235		2040.04	-0.01006485		2570.04	-0.00999069		3100.04	-0.01343893		3630.04	-0.02145777
450.19	0.00466061		980.22	-0.00272247		1510.21	-0.0018583		2040.24	-0.00979143		2570.24	-0.00944965		3100.24	-0.01339372		3630.24	-0.02093051
450.39	0.00490765		980.42	-0.00332628		1510.41	-0.00172519		2040.44	-0.00935863		2570.44	-0.0085861		3100.44	-0.01360336		3630.44	-0.02043808
450.59	0.00517126		980.62	-0.00367457		1510.61	-0.00230116		2040.64	-0.00967242		2570.64	-0.00731501		3100.64	-0.01439302		3630.64	-0.02036526
450.79	0.00421664		980.82	-0.00425761		1510.81	-0.00230675		2040.84	-0.00976083		2570.84	-0.00695894		3100.84	-0.01421178		3630.84	-0.02097339
450.99	0.00406369		981.02	-0.00408221		1511.01	-0.00231904		2041.04	-0.00999759		2571.04	-0.0064345		3101.04	-0.01348122		3631.04	-0.02047701
451.19	0.0036116		981.22	-0.00472636		1511.21	-0.00186631		2041.24	-0.0099304		2571.24	-0.00656645		3101.24	-0.01291644		3631.24	-0.02041646
451.39	0.00439902		981.42	-0.00506255		1511.41	-0.00178805		2041.44	-0.01001051		2571.44	-0.00667487		3101.44	-0.01315267		3631.44	-0.02035445
451.59	0.00532682		981.62	-0.005484		1511.61	-0.00137255		2041.64	-0.01046812		2571.64	-0.00599162		3101.64	-0.01313472		3631.64	-0.01988433
451.79	0.00571626		981.82	-0.00503205		1511.81	-0.00097345		2041.84	-0.01090096		2571.84	-0.0061879		3101.84	-0.01322711		3631.84	-0.01909915
451.99	0.00608407		982.02	-0.00510271		1512.01	0.00003256		2042.04	-0.01071393		2572.04	-0.00606493		3102.04	-0.01282864		3632.04	-0.01846225
452.19	0.00646984		982.22	-0.00420953		1512.21	-0.0001399		2042.24	-0.01053817		2572.24	-0.00660154		3102.24	-0.01149205		3632.24	-0.01869902
452.39	0.00692124		982.42	-0.00419945		1512.41	-0.00073913		2042.44	-0.0114186		2572.44	-0.00718464		3102.44	-0.01088582		3632.44	-0.01894734
452.59	0.00685204		982.62	-0.00346032		1512.61	-0.00143727		2042.64	-0.011801		2572.64	-0.00794053		3102.64	-0.01073972		3632.64	-0.0202818
452.79	0.00744808		982.82	-0.00318839		1512.81	-0.00189476		2042.84	-0.0115389		2572.84	-0.0088326		3102.84	-0.00947479		3632.84	-0.02089326
452.99	0.00776682		983.02	-0.00309538		1513.01	-0.00208535		2043.04	-0.01188749		2573.04	-0.00859847		3103.04	-0.0094632		3633.04	-0.02135349
453.19	0.00814578		983.22	-0.0040832		1513.21	-0.00251996		2043.24	-0.01182161		2573.24	-0.00924816		3103.24	-0.00962435		3633.24	-0.02212019
453.39	0.00861638		983.42	-0.00408037		1513.41	-0.00268525		2043.44	-0.01104369		2573.44	-0.00950652		3103.44	-0.01078505		3633.44	-0.0232756
453.59	0.00866415		983.62	-0.00407691		1513.61	-0.00332463		2043.64	-0.01070842		2573.64	-0.00979384		3103.64	-0.01111176		3633.64	-0.02382539
453.79	0.0086019		983.82	-0.00430699		1513.81	-0.0036832		2043.84	-0.01051632		2573.84	-0.00867106		3103.84	-0.01184619		3633.84	-0.02457911
453.99	0.0090782		984.02	-0.00464445		1514.01	-0.00442147		2044.04	-0.01062737		2574.04	-0.00866925		3104.04	-0.01189192		3634.04	-0.02493008
454.19	0.00879606		984.22	-0.00496007		1514.21	-0.00401383		2044.24	-0.01033696		2574.24	-0.00824186		3104.24	-0.0115197		3634.24	-0.02543346
454.39	0.00823752		984.42	-0.00482178		1514.41	-0.00526727		2044.44	-0.00963327		2574.44	-0.00791467		3104.44	-0.01168711		3634.44	-0.02606976
454.59	0.00739028		984.62	-0.00493992		1514.61	-0.00576581		2044.64	-0.01012201		2574.64	-0.00681583		3104.64	-0.01201164		3634.64	-0.02582673
454.79	0.00701057		984.82	-0.0057259		1514.81	-0.00551389		2044.84	-0.00994184		2574.84	-0.0070073		3104.84	-0.01132375		3634.84	-0.02639568
454.99	0.00671753		985.02	-0.0053001		1515.01	-0.00542703		2045.04	-0.00908455		2575.04	-0.00664955		3105.04	-0.01108888		3635.04	-0.02567562
455.19	0.00669344		985.22	-0.00588387		1515.21	-0.00522406		2045.24	-0.00915006		2575.24	-0.00633992		3105.24	-0.01158087		3635.24	-0.02572558
455.39	0.00672227		985.42	-0.00589879		1515.41	-0.00554943		2045.44	-0.00895019		2575.44	-0.00604473		3105.44	-0.01221761		3635.44	-0.02512652
455.59	0.00617811		985.62	-0.00572876		1515.61	-0.00511005		2045.64	-0.00831837		2575.64	-0.00661727		3105.64	-0.01178396		3635.64	-0.02421612
455.79	0.00551714		985.82	-0.00550921		1515.81	-0.00470669		2045.84	-0.00829266		2575.84	-0.0074731		3105.84	-0.0111315		3635.84	-0.02410532
455.99	0.00512121		986.02	-0.00515869		1516.01	-0.00471639		2046.04	-0.00818342		2576.04	-0.00744931		3106.04	-0.01074885		3636.04	-0.02358067
456.19	0.00499965		986.22	-0.00442173		1516.21	-0.00513471		2046.24	-0.00838135		2576.24	-0.0086233		3106.24	-0.01099639		3636.24	-0.02406249
456.39	0.00540652		986.42	-0.00444237		1516.41	-0.00494442		2046.44	-0.00897961		2576.44	-0.00887189		3106.44	-0.01058552		3636.44	-0.02407572
456.59	0.00533041		986.62	-0.00447184		1516.61	-0.0046906		2046.64	-0.00972597		2576.64	-0.00908968		3106.64	-0.01079615		3636.64	-0.02442222
456.79	0.00569236		986.82	-0.00471832		1516.81	-0.00471327		2046.84	-0.00987802		2576.84	-0.00903801		3106.84	-0.01052796		3636.84	-0.02343316
456.99	0.00589151		987.02	-0.00504783		1517.01	-0.00452882		2047.04	-0.00905998		2577.04	-0.00933332		3107.04	-0.0104221		3637.04	-0.02386978
457.19	0.00595605		987.22	-0.0053625		1517.21	-0.0047164		2047.24	-0.00886516		2577.24	-0.01043806		3107.24	-0.01039726		3637.24	-0.0241203
457.39	0.00591479		987.42	-0.00468283		1517.41	-0.00487043		2047.44	-0.00952419		2577.44	-0.01038967		3107.44	-0.01028235		3637.44	-0.02359171
457.59	0.00590326		987.62	-0.00459075		1517.61	-0.0058644		2047.64	-0.01006007		2577.64	-0.01051948		3107.64	-0.01001305		3637.64	-0.02339692
457.79	0.00584218		987.82	-0.00468716		1517.81	-0.00579481		2047.84	-0.01111698		2577.84	-0.01054332		3107.84	-0.01048561		3637.84	-0.02333288
457.99	0.00552612		988.02	-0.00409014		1518.01	-0.00504151		2048.04	-0.01150572		2578.04	-0.0111676		3108.04	-0.00938028		3638.04	-0.02327739
458.19	0.00470048		988.22	-0.00448409		1518.21	-0.00512297		2048.24	-0.01105239		2578.24	-0.01127462		3108.24	-0.00933485		3638.24	-0.02333493
458.39	0.00367143		988.42	-0.00535916		1518.41	-0.00511407		2048.44	-0.01133899		2578.44	-0.01171309		3108.44	-0.0101247		3638.44	-0.02370885
458.59	0.00320339		988.62	-0.00536252		1518.61	-0.00433586		2048.64	-0.01206608		2578.64	-0.01153412		3108.64	-0.01048117		3638.64	-0.02380164
458.79	0.00429355		988.82	-0.00541468		1518.81	-0.00416662		2048.84	-0.01120795		2578.84	-0.01183311		3108.84	-0.01115279		3638.84	-0.02380524
458.99	0.00385883		989.02	-0.00543603		1519.01	-0.00325382		2049.04	-0.01021064		2579.04	-0.01114093		3109.04	-0.01163965		3639.04	-0.02429025
459.19	0.00401147		989.22	-0.00670545		1519.21	-0.00228671		2049.24	-0.009606		2579.24	-0.0115171		3109.24	-0.01166883		3639.24	-0.02421319
459.39	0.0036022		989.42	-0.00690086		1519.41	-0.00272375		2049.44	-0.00848873		2579.44	-0.01117692		3109.44	-0.01222051		3639.44	-0.02394151
459.59	0.00326319		989.62	-0.00744215		1519.61	-0.00198619		2049.64	-0.00736558		2579.64	-0.01113235		3109.64	-0.01142821		3639.64	-0.02481755
459.79	0.00346737		989.82	-0.00764505		1519.81	-0.00150699		2049.84	-0.0072364		2579.84	-0.01070247		3109.84	-0.01127961		3639.84	-0.02555495
459.99	0.00420497		990.02	-0.00761131		1520.01	-0.00132607		2050.04	-0.00623059		2580.04	-0.0094432		3110.04	-0.01249303		3640.04	-0.02620221
460.19	0.0042749		990.22	-0.00741905		1520.21	-0.00086704		2050.24	-0.00609107		2580.24	-0.00977176		3110.24	-0.01226518		3640.24	-0.02636607
460.39	0.00428401		990.42	-0.00795038		1520.41	-0.0013		2050.44	-0.00614455		2580.44	-0.00889087		3110.44	-0.01190805		3640.44	-0.02616318
460.59	0.00440751		990.62	-0.00821456		1520.61	-0.0015479		2050.64	-0.00645063		2580.64	-0.0082833		3110.64	-0.01189371		3640.64	-0.0261403
460.79	0.00525987		990.82	-0.00798832		1520.81	-0.00195017		2050.84	-0.00567267		2580.84	-0.00831706		3110.84	-0.01201751		3640.84	-0.02575376
460.99	0.00589182		991.02	-0.00735432		1521.01	-0.0017263		2051.04	-0.00572865		2581.04	-0.00839562		3111.04	-0.01219053		3641.04	-0.02533513
461.19	0.00649392		991.22	-0.00595776		1521.21	-0.00233822		2051.24	-0.00718483		2581.24	-0.00889943		3111.24	-0.01186748		3641.24	-0.02357713
461.39	0.00686154		991.42	-0.00507409		1521.41	-0.00391052		2051.44	-0.00840132		2581.44	-0.0095983		3111.44	-0.01126906		3641.44	-0.02251399
461.59	0.00677088		991.62	-0.005101		1521.61	-0.00449833		2051.64	-0.00808258		2581.64	-0.01026831		3111.64	-0.01104377		3641.64	-0.02262327
461.79	0.00663274		991.82	-0.00508337		1521.81	-0.00411254		2051.84	-0.00851394		2581.84	-0.01006348		3111.84	-0.01106255		3641.84	-0.02245166
461.99	0.00705529		992.02	-0.00446869		1522.01	-0.00404811		2052.04	-0.00931094		2582.04	-0.01051413		3112.04	-0.00992628		3642.04	-0.0234855
462.19	0.00744898		992.22	-0.00442634		1522.21	-0.0039612		2052.24	-0.01110955		2582.24	-0.01038623		3112.24	-0.01039615		3642.24	-0.02364618
462.39	0.0071193		992.42	-0.00391292		1522.41	-0.00453945		2052.44	-0.01290275		2582.44	-0.01079012		3112.44	-0.01043996		3642.44	-0.02305411
462.59	0.00806764		992.62	-0.00272731		1522.61	-0.00479155		2052.64	-0.01328079		2582.64	-0.01093597		3112.64	-0.01075828		3642.64	-0.02305818
462.79	0.00824618		992.82	-0.00279522		1522.81	-0.00453299		2052.84	-0.0127625		2582.84	-0.01011329		3112.84	-0.0115324		3642.84	-0.02334584
462.99	0.00746518		993.02	-0.00290504		1523.01	-0.00404617		2053.04	-0.01254892		2583.04	-0.00970386		3113.04	-0.01148288		3643.04	-0.02390739
463.19	0.00691454		993.22	-0.00324574		1523.21	-0.00466008		2053.24	-0.01252014		2583.24	-0.01044656		3113.24	-0.01116109		3643.24	-0.02402142
463.39	0.0060387		993.42	-0.00292567		1523.41	-0.00517688		2053.44	-0.01187385		2583.44	-0.00970315		3113.44	-0.01153326		3643.44	-0.02465988
463.59	0.00575897		993.62	-0.00311361		1523.61	-0.00487331		2053.64	-0.01112822		2583.64	-0.00933392		3113.64	-0.01188782		3643.64	-0.02518377
463.79	0.00536544		993.82	-0.00337034		1523.81	-0.0045814		2053.84	-0.01082351		2583.84	-0.00879406		3113.84	-0.01239496		3643.84	-0.02548668
463.99	0.00513554		994.02	-0.00302962		1524.01	-0.00443885		2054.04	-0.01052689		2584.04	-0.00795735		3114.04	-0.01317961		3644.04	-0.02655222
464.19	0.00457488		994.22	-0.00359027		1524.21	-0.00480073		2054.24	-0.01100333		2584.24	-0.00818442		3114.24	-0.01317037		3644.24	-0.02528817
464.39	0.00500761		994.42	-0.00404683		1524.41	-0.00456219		2054.44	-0.01127025		2584.44	-0.00826875		3114.44	-0.01470512		3644.44	-0.02469955
464.59	0.00517347		994.62	-0.00426768		1524.61	-0.00335076		2054.64	-0.01098286		2584.64	-0.00807724		3114.64	-0.0153303		3644.64	-0.02491957
464.79	0.00610534		994.82	-0.00477971		1524.81	-0.00332065		2054.84	-0.01059268		2584.84	-0.00902346		3114.84	-0.01524738		3644.84	-0.02459493
464.99	0.00596836		995.02	-0.00431712		1525.01	-0.00378414		2055.04	-0.01142535		2585.04	-0.00942551		3115.04	-0.01440162		3645.04	-0.0238224
465.19	0.0058844		995.22	-0.00341138		1525.21	-0.004121		2055.24	-0.01148042		2585.24	-0.01051305		3115.24	-0.01377444		3645.24	-0.02339902
465.39	0.00608343		995.42	-0.00347631		1525.41	-0.00461677		2055.44	-0.01143814		2585.44	-0.0119216		3115.44	-0.01260181		3645.44	-0.02293023
465.59	0.00630723		995.62	-0.00434463		1525.61	-0.00416024		2055.64	-0.01106325		2585.64	-0.01256594		3115.64	-0.01203483		3645.64	-0.02221423
465.79	0.00648268		995.82	-0.00444235		1525.81	-0.00435022		2055.84	-0.01101223		2585.84	-0.01259033		3115.84	-0.01185006		3645.84	-0.02243964
465.99	0.00635227		996.02	-0.00436855		1526.01	-0.00505386		2056.04	-0.01117935		2586.04	-0.01321813		3116.04	-0.01122434		3646.04	-0.02181924
466.19	0.00728681		996.22	-0.00493681		1526.21	-0.00499091		2056.24	-0.01236645		2586.24	-0.01356437		3116.24	-0.01060236		3646.24	-0.02085126
466.39	0.00691999		996.42	-0.0054267		1526.41	-0.00645429		2056.44	-0.01110789		2586.44	-0.01367374		3116.44	-0.01006801		3646.44	-0.02068673
466.59	0.00748406		996.62	-0.00533587		1526.61	-0.00685172		2056.64	-0.01073321		2586.64	-0.0133544		3116.64	-0.01026818		3646.64	-0.02168977
466.79	0.00719147		996.82	-0.00617359		1526.81	-0.00686757		2056.84	-0.01038862		2586.84	-0.01285621		3116.84	-0.00983507		3646.84	-0.02237348
466.99	0.00670783		997.02	-0.0067935		1527.01	-0.00792649		2057.04	-0.01026983		2587.04	-0.01177004		3117.04	-0.01044057		3647.04	-0.02259253
467.19	0.0064894		997.22	-0.00766376		1527.21	-0.00945792		2057.24	-0.01031241		2587.24	-0.0118952		3117.24	-0.01046841		3647.24	-0.02249418
467.39	0.00597429		997.42	-0.00778574		1527.41	-0.00927156		2057.44	-0.01021639		2587.44	-0.01068274		3117.44	-0.0119211		3647.44	-0.02225528
467.59	0.00647513		997.62	-0.00782995		1527.61	-0.00934128		2057.64	-0.01062192		2587.64	-0.00994064		3117.64	-0.01226658		3647.64	-0.02210052
467.79	0.00599297		997.82	-0.00834533		1527.81	-0.00935723		2057.84	-0.0110537		2587.84	-0.00903316		3117.84	-0.01139772		3647.84	-0.02271663
467.99	0.00584297		998.02	-0.00829264		1528.01	-0.00926846		2058.04	-0.01104722		2588.04	-0.00880727		3118.04	-0.01172305		3648.04	-0.02250256
468.19	0.00671109		998.22	-0.00797536		1528.21	-0.00883396		2058.24	-0.01072631		2588.24	-0.0093865		3118.24	-0.01203713		3648.24	-0.02175092
468.39	0.00693457		998.42	-0.00777991		1528.41	-0.00719871		2058.44	-0.01070242		2588.44	-0.01033388		3118.44	-0.01221778		3648.44	-0.02190766
468.59	0.00732819		998.62	-0.0078319		1528.61	-0.00692158		2058.64	-0.0100883		2588.64	-0.01050749		3118.64	-0.01185591		3648.64	-0.02282203
468.79	0.00799832		998.82	-0.00702049		1528.81	-0.0062994		2058.84	-0.01034194		2588.84	-0.01071507		3118.84	-0.01083293		3648.84	-0.02284307
468.99	0.00746785		999.02	-0.00599262		1529.01	-0.00522916		2059.04	-0.0114149		2589.04	-0.0109913		3119.04	-0.01041295		3649.04	-0.02316806
469.19	0.00684961		999.22	-0.00591712		1529.21	-0.00441596		2059.24	-0.0105777		2589.24	-0.011683		3119.24	-0.01036348		3649.24	-0.02284526
469.39	0.00708722		999.42	-0.00586714		1529.41	-0.00426694		2059.44	-0.01039714		2589.44	-0.01267923		3119.44	-0.01039296		3649.44	-0.02253146
469.59	0.00618398		999.62	-0.00591498		1529.61	-0.00441169		2059.64	-0.00935141		2589.64	-0.01303927		3119.64	-0.01084957		3649.64	-0.0228123
469.79	0.00555676		999.82	-0.00486172		1529.81	-0.00437377		2059.84	-0.00876644		2589.84	-0.01319442		3119.84	-0.01170027		3649.84	-0.02335465
469.99	0.00529611		1000.02	-0.00486997		1530.01	-0.00476732		2060.04	-0.00873871		2590.04	-0.01387254		3120.04	-0.01093317		3650.04	-0.02360337
470.19	0.00621185		1000.22	-0.00507425		1530.21	-0.00510996		2060.24	-0.00935555		2590.24	-0.01349148		3120.24	-0.0104401		3650.24	-0.02409077
470.39	0.00578393		1000.42	-0.00463164		1530.41	-0.00645767		2060.44	-0.00805588		2590.44	-0.01280157		3120.44	-0.01096976		3650.44	-0.02521095
470.59	0.0064279		1000.62	-0.00493763		1530.61	-0.00685792		2060.64	-0.00858354		2590.64	-0.0120762		3120.64	-0.01134957		3650.64	-0.02556432
470.79	0.0062575		1000.82	-0.00488181		1530.81	-0.00712699		2060.84	-0.00862137		2590.84	-0.01114594		3120.84	-0.01193078		3650.84	-0.02513378
470.99	0.00593341		1001.02	-0.00486947		1531.01	-0.00782806		2061.04	-0.00880781		2591.04	-0.01029374		3121.04	-0.01347656		3651.04	-0.02433699
471.19	0.00534559		1001.22	-0.00439475		1531.21	-0.0082269		2061.24	-0.01006656		2591.24	-0.01075357		3121.24	-0.01507406		3651.24	-0.02356551
471.39	0.00511029		1001.42	-0.00379429		1531.41	-0.00815109		2061.44	-0.01043854		2591.44	-0.01028205		3121.44	-0.01599334		3651.44	-0.02363356
471.59	0.00573207		1001.62	-0.00385145		1531.61	-0.00876583		2061.64	-0.0105573		2591.64	-0.01058027		3121.64	-0.01541144		3651.64	-0.02361547
471.79	0.00474118		1001.82	-0.00403195		1531.81	-0.00855554		2061.84	-0.01050901		2591.84	-0.01004385		3121.84	-0.01452511		3651.84	-0.02437956
471.99	0.00539285		1002.02	-0.00391602		1532.01	-0.00771994		2062.04	-0.01140195		2592.04	-0.01035399		3122.04	-0.01459602		3652.04	-0.02416258
472.19	0.00709534		1002.22	-0.00403218		1532.21	-0.00708529		2062.24	-0.01149503		2592.24	-0.01085194		3122.24	-0.0145811		3652.24	-0.02443158
472.39	0.00713237		1002.42	-0.00557333		1532.41	-0.00620339		2062.44	-0.01278976		2592.44	-0.01157665		3122.44	-0.01507117		3652.44	-0.02396685
472.59	0.00817365		1002.62	-0.00588815		1532.61	-0.00589158		2062.64	-0.01235077		2592.64	-0.01096715		3122.64	-0.01494809		3652.64	-0.02405727
472.79	0.00802623		1002.82	-0.00632678		1532.81	-0.00531475		2062.84	-0.0120617		2592.84	-0.01106233		3122.84	-0.01440606		3652.84	-0.02415049
472.99	0.00828472		1003.02	-0.00722664		1533.01	-0.00527519		2063.04	-0.01178204		2593.04	-0.01142962		3123.04	-0.01394488		3653.04	-0.02428785
473.19	0.00764833		1003.22	-0.00786992		1533.21	-0.00608319		2063.24	-0.01005602		2593.24	-0.01184301		3123.24	-0.01352796		3653.24	-0.02438059
473.39	0.00772869		1003.42	-0.00833765		1533.41	-0.00594994		2063.44	-0.01009174		2593.44	-0.0117318		3123.44	-0.01373242		3653.44	-0.02407198
473.59	0.00764683		1003.62	-0.00822832		1533.61	-0.00617818		2063.64	-0.00966218		2593.64	-0.01221657		3123.64	-0.01272747		3653.64	-0.02425987
473.79	0.00677473		1003.82	-0.00800239		1533.81	-0.00614793		2063.84	-0.00990204		2593.84	-0.01245125		3123.84	-0.01215873		3653.84	-0.02406547
473.99	0.00750695		1004.02	-0.00812714		1534.01	-0.00668404		2064.04	-0.00930079		2594.04	-0.01239467		3124.04	-0.01061865		3654.04	-0.02461822
474.19	0.0077339		1004.22	-0.00687795		1534.21	-0.00688732		2064.24	-0.00930746		2594.24	-0.0124999		3124.24	-0.01076637		3654.24	-0.02441606
474.39	0.00711037		1004.42	-0.0063345		1534.41	-0.0064914		2064.44	-0.00890819		2594.44	-0.013108		3124.44	-0.0107948		3654.44	-0.02476873
474.59	0.00641687		1004.62	-0.00588816		1534.61	-0.00566156		2064.64	-0.00873183		2594.64	-0.01324927		3124.64	-0.01077881		3654.64	-0.0241148
474.79	0.00575924		1004.82	-0.00527004		1534.81	-0.00523454		2064.84	-0.00780328		2594.84	-0.0140867		3124.84	-0.01087031		3654.84	-0.02290732
474.99	0.00584581		1005.02	-0.00530453		1535.01	-0.00469032		2065.04	-0.00826887		2595.04	-0.0145437		3125.04	-0.01149282		3655.04	-0.0222849
475.19	0.00501083		1005.22	-0.00469045		1535.21	-0.0048266		2065.24	-0.00841675		2595.24	-0.01441717		3125.24	-0.01257293		3655.24	-0.02172664
475.39	0.00529184		1005.42	-0.0041857		1535.41	-0.00536618		2065.44	-0.0076874		2595.44	-0.01398781		3125.44	-0.01177178		3655.44	-0.02141348
475.59	0.00524589		1005.62	-0.0038738		1535.61	-0.0050358		2065.64	-0.00824233		2595.64	-0.01448952		3125.64	-0.01169729		3655.64	-0.02126327
475.79	0.00343074		1005.82	-0.00328649		1535.81	-0.00451628		2065.84	-0.00874359		2595.84	-0.01398999		3125.84	-0.01092517		3655.84	-0.02171154
475.99	0.00437071		1006.02	-0.00295448		1536.01	-0.00483714		2066.04	-0.00961434		2596.04	-0.01346162		3126.04	-0.01185152		3656.04	-0.0207893
476.19	0.00404875		1006.22	-0.00300023		1536.21	-0.00506953		2066.24	-0.00977238		2596.24	-0.01362071		3126.24	-0.01261108		3656.24	-0.02052947
476.39	0.00299829		1006.42	-0.00410421		1536.41	-0.00478375		2066.44	-0.01042914		2596.44	-0.01328932		3126.44	-0.01282428		3656.44	-0.02009825
476.59	0.00315178		1006.62	-0.00399017		1536.61	-0.00531044		2066.64	-0.00973603		2596.64	-0.01254364		3126.64	-0.01192532		3656.64	-0.02000293
476.79	0.00375387		1006.82	-0.00466878		1536.81	-0.00612947		2066.84	-0.01058273		2596.84	-0.01305701		3126.84	-0.01138767		3656.84	-0.02000326
476.99	0.00440258		1007.02	-0.00551864		1537.01	-0.00697313		2067.04	-0.01116205		2597.04	-0.01267621		3127.04	-0.01178498		3657.04	-0.02030951
477.19	0.00335352		1007.22	-0.00637886		1537.21	-0.00680608		2067.24	-0.01138945		2597.24	-0.0128034		3127.24	-0.01205414		3657.24	-0.02053361
477.39	0.00387669		1007.42	-0.00737429		1537.41	-0.00634761		2067.44	-0.01222659		2597.44	-0.012458		3127.44	-0.01219066		3657.44	-0.02057815
477.59	0.0046506		1007.62	-0.00767351		1537.61	-0.00770116		2067.64	-0.01272478		2597.64	-0.01231847		3127.64	-0.01127064		3657.64	-0.02126754
477.79	0.00415273		1007.82	-0.0076701		1537.81	-0.00749145		2067.84	-0.0125893		2597.84	-0.01275508		3127.84	-0.01085381		3657.84	-0.02201648
477.99	0.00520835		1008.02	-0.00784482		1538.01	-0.00756899		2068.04	-0.01300321		2598.04	-0.01329716		3128.04	-0.01103709		3658.04	-0.02292054
478.19	0.00528475		1008.22	-0.00749471		1538.21	-0.00671842		2068.24	-0.01338623		2598.24	-0.0137716		3128.24	-0.01173358		3658.24	-0.02308385
478.39	0.00505466		1008.42	-0.00797135		1538.41	-0.00596161		2068.44	-0.01336088		2598.44	-0.01407791		3128.44	-0.0115149		3658.44	-0.02333169
478.59	0.00557701		1008.62	-0.00808706		1538.61	-0.00587205		2068.64	-0.01239513		2598.64	-0.01456043		3128.64	-0.01108947		3658.64	-0.02362953
478.79	0.00606407		1008.82	-0.00827324		1538.81	-0.00591414		2068.84	-0.01211529		2598.84	-0.01390693		3128.84	-0.01052065		3658.84	-0.02377413
478.99	0.00660031		1009.02	-0.00818861		1539.01	-0.00483397		2069.04	-0.01171409		2599.04	-0.01328127		3129.04	-0.0106049		3659.04	-0.0243808
479.19	0.00557155		1009.22	-0.0081397		1539.21	-0.0052935		2069.24	-0.01049133		2599.24	-0.01320149		3129.24	-0.01007374		3659.24	-0.02498376
479.39	0.0054466		1009.42	-0.00801019		1539.41	-0.00459668		2069.44	-0.00989261		2599.44	-0.01279232		3129.44	-0.00986836		3659.44	-0.0258105
479.59	0.00525428		1009.62	-0.00769137		1539.61	-0.00444224		2069.64	-0.00905101		2599.64	-0.01336279		3129.64	-0.01050732		3659.64	-0.0255642
479.79	0.00378363		1009.82	-0.00775758		1539.81	-0.00413844		2069.84	-0.00869251		2599.84	-0.01316431		3129.84	-0.01010119		3659.84	-0.02617576
479.99	0.00439728		1010.02	-0.00727274		1540.01	-0.00375495		2070.04	-0.00916968		2600.04	-0.01263817		3130.04	-0.01073869		3660.04	-0.02679165
480.19	0.00341461		1010.22	-0.00745666		1540.21	-0.002793		2070.24	-0.00927699		2600.24	-0.01318808		3130.24	-0.010517		3660.24	-0.02684353
480.39	0.0033294		1010.42	-0.00801636		1540.41	-0.00315344		2070.44	-0.0089057		2600.44	-0.01264142		3130.44	-0.01068417		3660.44	-0.02660453
480.59	0.00432573		1010.62	-0.00790334		1540.61	-0.00349918		2070.64	-0.0088421		2600.64	-0.01373512		3130.64	-0.01098637		3660.64	-0.02666802
480.79	0.0049105		1010.82	-0.00796136		1540.81	-0.00391756		2070.84	-0.00901025		2600.84	-0.01400947		3130.84	-0.0113502		3660.84	-0.02669729
480.99	0.00490796		1011.02	-0.00752189		1541.01	-0.0035536		2071.04	-0.00924534		2601.04	-0.01433696		3131.04	-0.01252457		3661.04	-0.02660926
481.19	0.00544255		1011.22	-0.0080041		1541.21	-0.00230129		2071.24	-0.00910542		2601.24	-0.01439327		3131.24	-0.01275501		3661.24	-0.02656748
481.39	0.00675008		1011.42	-0.00873502		1541.41	-0.00239989		2071.44	-0.00871312		2601.44	-0.01380105		3131.44	-0.01253429		3661.44	-0.0256963
481.59	0.0070678		1011.62	-0.00842654		1541.61	-0.00320993		2071.64	-0.00915929		2601.64	-0.01404633		3131.64	-0.01229423		3661.64	-0.02513309
481.79	0.00727893		1011.82	-0.00786636		1541.81	-0.00284989		2071.84	-0.00903106		2601.84	-0.01428658		3131.84	-0.01324615		3661.84	-0.02399233
481.99	0.00776172		1012.02	-0.00784299		1542.01	-0.00336051		2072.04	-0.00994386		2602.04	-0.01335347		3132.04	-0.01356875		3662.04	-0.02321602
482.19	0.0074867		1012.22	-0.00711529		1542.21	-0.00320336		2072.24	-0.01018789		2602.24	-0.01372633		3132.24	-0.01348215		3662.24	-0.02165464
482.39	0.00707772		1012.42	-0.00661908		1542.41	-0.00423175		2072.44	-0.01027538		2602.44	-0.01414379		3132.44	-0.01338732		3662.44	-0.02103425
482.59	0.00660089		1012.62	-0.00704542		1542.61	-0.00535856		2072.64	-0.01118972		2602.64	-0.01373461		3132.64	-0.01323129		3662.64	-0.0206665
482.79	0.00625547		1012.82	-0.00782861		1542.81	-0.00601051		2072.84	-0.011816		2602.84	-0.01302667		3132.84	-0.01385045		3662.84	-0.0200608
482.99	0.00643701		1013.02	-0.00887192		1543.01	-0.00603857		2073.04	-0.01087614		2603.04	-0.01251954		3133.04	-0.01395362		3663.04	-0.02028667
483.19	0.00574355		1013.22	-0.00906526		1543.21	-0.0067228		2073.24	-0.01073691		2603.24	-0.01231919		3133.24	-0.01406125		3663.24	-0.02022941
483.39	0.00603485		1013.42	-0.00883499		1543.41	-0.0063679		2073.44	-0.01010495		2603.44	-0.01179602		3133.44	-0.01468969		3663.44	-0.02075303
483.59	0.00585282		1013.62	-0.0091244		1543.61	-0.00702209		2073.64	-0.00990302		2603.64	-0.01176894		3133.64	-0.01528878		3663.64	-0.02025594
483.79	0.0049399		1013.82	-0.00937273		1543.81	-0.00743444		2073.84	-0.01076935		2603.84	-0.01096377		3133.84	-0.01453575		3663.84	-0.02119724
483.99	0.00506967		1014.02	-0.00893711		1544.01	-0.00687729		2074.04	-0.01104943		2604.04	-0.01075174		3134.04	-0.01470413		3664.04	-0.02189953
484.19	0.00451135		1014.22	-0.00863472		1544.21	-0.00707062		2074.24	-0.01050122		2604.24	-0.01080531		3134.24	-0.01492908		3664.24	-0.02155026
484.39	0.00396385		1014.42	-0.00837418		1544.41	-0.00764623		2074.44	-0.00980297		2604.44	-0.01090111		3134.44	-0.0157306		3664.44	-0.02215008
484.59	0.00416885		1014.62	-0.00734459		1544.61	-0.00701681		2074.64	-0.00983263		2604.64	-0.01168452		3134.64	-0.01539999		3664.64	-0.0226803
484.79	0.004254		1014.82	-0.00706259		1544.81	-0.00611626		2074.84	-0.00948832		2604.84	-0.01094428		3134.84	-0.01511822		3664.84	-0.02267199
484.99	0.0041152		1015.02	-0.00713613		1545.01	-0.0041991		2075.04	-0.01014842		2605.04	-0.01120111		3135.04	-0.01547748		3665.04	-0.02314068
485.19	0.00439103		1015.22	-0.00750803		1545.21	-0.00327637		2075.24	-0.01004815		2605.24	-0.01042252		3135.24	-0.01519087		3665.24	-0.02438667
485.39	0.00462414		1015.42	-0.00738926		1545.41	-0.00272644		2075.44	-0.00968357		2605.44	-0.01000977		3135.44	-0.01432654		3665.44	-0.02409962
485.59	0.00412587		1015.62	-0.00670283		1545.61	-0.00301338		2075.64	-0.01030969		2605.64	-0.01008004		3135.64	-0.0131365		3665.64	-0.02447723
485.79	0.00423382		1015.82	-0.00646111		1545.81	-0.00288075		2075.84	-0.01029176		2605.84	-0.01007086		3135.84	-0.01267905		3665.84	-0.02410659
485.99	0.0045182		1016.02	-0.00678707		1546.01	-0.00238525		2076.04	-0.0107877		2606.04	-0.0105583		3136.04	-0.01246395		3666.04	-0.02464601
486.19	0.0043137		1016.22	-0.00682427		1546.21	-0.0025703		2076.24	-0.01150134		2606.24	-0.01201963		3136.24	-0.01265551		3666.24	-0.02485156
486.39	0.00506557		1016.42	-0.00695025		1546.41	-0.00313466		2076.44	-0.01234071		2606.44	-0.01249217		3136.44	-0.01190162		3666.44	-0.02519543
486.59	0.00527242		1016.62	-0.00783238		1546.61	-0.00334303		2076.64	-0.01290214		2606.64	-0.01272669		3136.64	-0.01137346		3666.64	-0.0246719
486.79	0.00497915		1016.82	-0.00840554		1546.81	-0.00430076		2076.84	-0.01250173		2606.84	-0.01356859		3136.84	-0.01183567		3666.84	-0.02526488
486.99	0.00436367		1017.02	-0.0079024		1547.01	-0.00498182		2077.04	-0.01202145		2607.04	-0.0128965		3137.04	-0.01125271		3667.04	-0.02582273
487.19	0.00443757		1017.22	-0.00779462		1547.21	-0.0055078		2077.24	-0.01272095		2607.24	-0.01379031		3137.24	-0.01132427		3667.24	-0.02564928
487.39	0.00370415		1017.42	-0.00783555		1547.41	-0.00579635		2077.44	-0.01234314		2607.44	-0.01371201		3137.44	-0.01100133		3667.44	-0.02572127
487.59	0.00291827		1017.62	-0.00892178		1547.61	-0.00632448		2077.64	-0.01281146		2607.64	-0.0138964		3137.64	-0.01119737		3667.64	-0.02579743
487.79	0.001979		1017.82	-0.00855895		1547.81	-0.00640228		2077.84	-0.0131821		2607.84	-0.0135248		3137.84	-0.01008893		3667.84	-0.02584431
487.99	0.00126558		1018.02	-0.00847795		1548.01	-0.00614904		2078.04	-0.01320874		2608.04	-0.0145626		3138.04	-0.0101712		3668.04	-0.02598277
488.19	0.00138871		1018.22	-0.00792341		1548.21	-0.00647022		2078.24	-0.01247		2608.24	-0.01423228		3138.24	-0.01037919		3668.24	-0.02556785
488.39	0.00125332		1018.42	-0.00741049		1548.41	-0.00592242		2078.44	-0.01255653		2608.44	-0.01471928		3138.44	-0.01111794		3668.44	-0.02543839
488.59	0.001699		1018.62	-0.00640419		1548.61	-0.00541098		2078.64	-0.01248007		2608.64	-0.01487543		3138.64	-0.0108381		3668.64	-0.0252546
488.79	0.0021465		1018.82	-0.00667849		1548.81	-0.00456201		2078.84	-0.01191765		2608.84	-0.01390454		3138.84	-0.01126772		3668.84	-0.02497367
488.99	0.0014079		1019.02	-0.00602271		1549.01	-0.00414965		2079.04	-0.01215418		2609.04	-0.01385445		3139.04	-0.01239986		3669.04	-0.02533147
489.19	0.00227549		1019.22	-0.00605977		1549.21	-0.00397629		2079.24	-0.01205297		2609.24	-0.01381791		3139.24	-0.01246714		3669.24	-0.02616549
489.39	0.00304029		1019.42	-0.00641475		1549.41	-0.00438664		2079.44	-0.01107275		2609.44	-0.014289		3139.44	-0.01280921		3669.44	-0.02563487
489.59	0.00359947		1019.62	-0.00596905		1549.61	-0.00502868		2079.64	-0.01117972		2609.64	-0.01460304		3139.64	-0.01314845		3669.64	-0.02585084
489.79	0.00461146		1019.82	-0.00607184		1549.81	-0.00486084		2079.84	-0.01031964		2609.84	-0.01556587		3139.84	-0.01443461		3669.84	-0.02640991
489.99	0.00661648		1020.02	-0.00584114		1550.01	-0.0048515		2080.04	-0.01070564		2610.04	-0.01557244		3140.04	-0.01520274		3670.04	-0.02662072
490.19	0.00704138		1020.22	-0.00542916		1550.21	-0.00555028		2080.24	-0.01158036		2610.24	-0.01547012		3140.24	-0.014778		3670.24	-0.02692817
490.39	0.00782292		1020.42	-0.00514199		1550.41	-0.00631102		2080.44	-0.01124918		2610.44	-0.01554686		3140.44	-0.01366391		3670.44	-0.02698563
490.59	0.00716122		1020.62	-0.00553286		1550.61	-0.00656727		2080.64	-0.0108538		2610.64	-0.01559515		3140.64	-0.01377003		3670.64	-0.02647282
490.79	0.00621162		1020.82	-0.0056088		1550.81	-0.00788677		2080.84	-0.01091667		2610.84	-0.01654981		3140.84	-0.01501025		3670.84	-0.02628884
490.99	0.00595147		1021.02	-0.00528041		1551.01	-0.00828556		2081.04	-0.01094799		2611.04	-0.01588632		3141.04	-0.0147641		3671.04	-0.02606809
491.19	0.00572435		1021.22	-0.00625293		1551.21	-0.008537		2081.24	-0.01098671		2611.24	-0.01643333		3141.24	-0.01423865		3671.24	-0.02608369
491.39	0.004344		1021.42	-0.0063696		1551.41	-0.00836124		2081.44	-0.0104661		2611.44	-0.01567138		3141.44	-0.01349678		3671.44	-0.02530468
491.59	0.00402239		1021.62	-0.00705522		1551.61	-0.00863218		2081.64	-0.0117601		2611.64	-0.01518614		3141.64	-0.01303747		3671.64	-0.02591279
491.79	0.00394524		1021.82	-0.00650535		1551.81	-0.00861548		2081.84	-0.01203532		2611.84	-0.01449921		3141.84	-0.01275233		3671.84	-0.02503191
491.99	0.0037959		1022.02	-0.00698413		1552.01	-0.00883484		2082.04	-0.01172509		2612.04	-0.0144411		3142.04	-0.01284223		3672.04	-0.02460906
492.19	0.00470813		1022.22	-0.00680341		1552.21	-0.00844631		2082.24	-0.01077014		2612.24	-0.01366437		3142.24	-0.01262321		3672.24	-0.0249202
492.39	0.00444957		1022.42	-0.00680132		1552.41	-0.00793488		2082.44	-0.01083292		2612.44	-0.01317327		3142.44	-0.01236254		3672.44	-0.02450707
492.59	0.0041731		1022.62	-0.00685047		1552.61	-0.00799441		2082.64	-0.00994729		2612.64	-0.01179982		3142.64	-0.01266834		3672.64	-0.02403703
492.79	0.00335871		1022.82	-0.00698976		1552.81	-0.00781899		2082.84	-0.0103661		2612.84	-0.01037311		3142.84	-0.01341947		3672.84	-0.02445344
492.99	0.00240307		1023.02	-0.00669498		1553.01	-0.00866026		2083.04	-0.01086398		2613.04	-0.01016817		3143.04	-0.01380611		3673.04	-0.02451365
493.19	0.0029817		1023.22	-0.0076617		1553.21	-0.00931194		2083.24	-0.01062378		2613.24	-0.01013596		3143.24	-0.01389619		3673.24	-0.02545515
493.39	0.00274143		1023.42	-0.00790901		1553.41	-0.00959378		2083.44	-0.01036964		2613.44	-0.01062254		3143.44	-0.01435589		3673.44	-0.0255234
493.59	0.00276801		1023.62	-0.00895553		1553.61	-0.01010748		2083.64	-0.01069855		2613.64	-0.01035311		3143.64	-0.01456059		3673.64	-0.02574267
493.79	0.00281211		1023.82	-0.00944382		1553.81	-0.00981493		2083.84	-0.01086908		2613.84	-0.01039734		3143.84	-0.01458949		3673.84	-0.02672569
493.99	0.00297956		1024.02	-0.00859795		1554.01	-0.00937228		2084.04	-0.01172846		2614.04	-0.0104129		3144.04	-0.01404961		3674.04	-0.02670099
494.19	0.00266043		1024.22	-0.00865803		1554.21	-0.00912436		2084.24	-0.01170839		2614.24	-0.01019336		3144.24	-0.01457266		3674.24	-0.02726171
494.39	0.00318164		1024.42	-0.00864487		1554.41	-0.0085428		2084.44	-0.01087539		2614.44	-0.0107751		3144.44	-0.0140681		3674.44	-0.02783816
494.59	0.00267977		1024.62	-0.00901985		1554.61	-0.0085321		2084.64	-0.01075864		2614.64	-0.01165612		3144.64	-0.0136863		3674.64	-0.0272666
494.79	0.00206394		1024.82	-0.00886557		1554.81	-0.00935901		2084.84	-0.01072016		2614.84	-0.01240954		3144.84	-0.01432181		3674.84	-0.02702366
494.99	0.00172817		1025.02	-0.00831301		1555.01	-0.00849951		2085.04	-0.00982454		2615.04	-0.01277191		3145.04	-0.01345245		3675.04	-0.02804532
495.19	0.00167691		1025.22	-0.00855331		1555.21	-0.00765165		2085.24	-0.00922923		2615.24	-0.01295668		3145.24	-0.01320215		3675.24	-0.02810179
495.39	0.00173803		1025.42	-0.00810479		1555.41	-0.00664094		2085.44	-0.00944565		2615.44	-0.01252965		3145.44	-0.01358279		3675.44	-0.02720867
495.59	0.00171174		1025.62	-0.00845002		1555.61	-0.00663781		2085.64	-0.00974026		2615.64	-0.01306674		3145.64	-0.01352339		3675.64	-0.02735127
495.79	0.00180372		1025.82	-0.00832738		1555.81	-0.00613328		2085.84	-0.00910285		2615.84	-0.01326211		3145.84	-0.01361345		3675.84	-0.02706734
495.99	0.00122994		1026.02	-0.00849818		1556.01	-0.00594166		2086.04	-0.00892588		2616.04	-0.01334951		3146.04	-0.01338203		3676.04	-0.0269131
496.19	0.0018634		1026.22	-0.00866729		1556.21	-0.0064378		2086.24	-0.00850534		2616.24	-0.01320941		3146.24	-0.01369199		3676.24	-0.02662919
496.39	0.00188064		1026.42	-0.00797064		1556.41	-0.00715446		2086.44	-0.00882175		2616.44	-0.01245224		3146.44	-0.01340015		3676.44	-0.02527695
496.59	0.00192837		1026.62	-0.00731841		1556.61	-0.00742863		2086.64	-0.00930433		2616.64	-0.01245076		3146.64	-0.01475685		3676.64	-0.02507714
496.79	0.00195907		1026.82	-0.00696202		1556.81	-0.00863138		2086.84	-0.0101669		2616.84	-0.01274199		3146.84	-0.01392095		3676.84	-0.02503794
496.99	0.00259836		1027.02	-0.00713944		1557.01	-0.00939296		2087.04	-0.00975914		2617.04	-0.01356657		3147.04	-0.01372257		3677.04	-0.02435403
497.19	0.00271299		1027.22	-0.00807279		1557.21	-0.0095053		2087.24	-0.01089628		2617.24	-0.01439107		3147.24	-0.01393065		3677.24	-0.02463294
497.39	0.00206568		1027.42	-0.00902687		1557.41	-0.0087094		2087.44	-0.01238143		2617.44	-0.01406062		3147.44	-0.01360478		3677.44	-0.02400096
497.59	0.00306649		1027.62	-0.00927443		1557.61	-0.00908569		2087.64	-0.01309388		2617.64	-0.01326962		3147.64	-0.01373361		3677.64	-0.02286985
497.79	0.00366957		1027.82	-0.00786408		1557.81	-0.00914995		2087.84	-0.01374503		2617.84	-0.01301466		3147.84	-0.01382896		3677.84	-0.0231926
497.99	0.00366359		1028.02	-0.00800619		1558.01	-0.0091193		2088.04	-0.01370852		2618.04	-0.0133524		3148.04	-0.0137215		3678.04	-0.02278673
498.19	0.0040961		1028.22	-0.00824724		1558.21	-0.0088306		2088.24	-0.01322588		2618.24	-0.01284533		3148.24	-0.01444386		3678.24	-0.02272789
498.39	0.00412039		1028.42	-0.00854457		1558.41	-0.00860776		2088.44	-0.01265801		2618.44	-0.01232217		3148.44	-0.01414733		3678.44	-0.02274503
498.59	0.00358687		1028.62	-0.0080497		1558.61	-0.00920528		2088.64	-0.01218609		2618.64	-0.01276743		3148.64	-0.0140155		3678.64	-0.02287818
498.79	0.0032211		1028.82	-0.00754954		1558.81	-0.00803849		2088.84	-0.01168302		2618.84	-0.01284921		3148.84	-0.01459297		3678.84	-0.02288514
498.99	0.00282114		1029.02	-0.00723111		1559.01	-0.00638558		2089.04	-0.01041682		2619.04	-0.01280956		3149.04	-0.01432693		3679.04	-0.02399914
499.19	0.00291989		1029.22	-0.00773622		1559.21	-0.00536853		2089.24	-0.01005505		2619.24	-0.01276659		3149.24	-0.01444443		3679.24	-0.02451058
499.39	0.00229565		1029.42	-0.00766515		1559.41	-0.00532169		2089.44	-0.01001218		2619.44	-0.01295746		3149.44	-0.0149461		3679.44	-0.02503381
499.59	0.00235514		1029.62	-0.00902697		1559.61	-0.00619284		2089.64	-0.01036892		2619.64	-0.01351671		3149.64	-0.01545872		3679.64	-0.02559951
499.79	0.00209799		1029.82	-0.0093429		1559.81	-0.0064042		2089.84	-0.01091933		2619.84	-0.01309161		3149.84	-0.01551054		3679.84	-0.0259743
499.99	0.00208438		1030.02	-0.00970791		1560.01	-0.00662832		2090.04	-0.01148467		2620.04	-0.01301874		3150.04	-0.01620269		3680.04	-0.0260224
500.19	0.0025127		1030.22	-0.01018974		1560.21	-0.00736327		2090.24	-0.01173582		2620.24	-0.0130849		3150.24	-0.01682554		3680.24	-0.02640982
500.39	0.00254215		1030.42	-0.00946121		1560.41	-0.00783764		2090.44	-0.01232879		2620.44	-0.01300049		3150.44	-0.01671353		3680.44	-0.0271213
500.59	0.00210219		1030.62	-0.010172		1560.61	-0.00820512		2090.64	-0.01250125		2620.64	-0.0134246		3150.64	-0.0177926		3680.64	-0.02775561
500.79	0.0016101		1030.82	-0.01022764		1560.81	-0.0085042		2090.84	-0.01260252		2620.84	-0.01319386		3150.84	-0.01675669		3680.84	-0.02798868
500.99	0.00125285		1031.02	-0.01108474		1561.01	-0.00876121		2091.04	-0.01287197		2621.04	-0.01308982		3151.04	-0.01627471		3681.04	-0.027711
501.19	0.00091556		1031.22	-0.01162454		1561.21	-0.00800117		2091.24	-0.01395598		2621.24	-0.01284051		3151.24	-0.01621888		3681.24	-0.02782421
501.39	0.00057021		1031.42	-0.01182607		1561.41	-0.00752611		2091.44	-0.01378413		2621.44	-0.01211216		3151.44	-0.01610666		3681.44	-0.02716896
501.59	0.00129025		1031.62	-0.01135962		1561.61	-0.00721222		2091.64	-0.0129592		2621.64	-0.01231882		3151.64	-0.01593882		3681.64	-0.026673
501.79	0.00120141		1031.82	-0.01113862		1561.81	-0.00780779		2091.84	-0.01331685		2621.84	-0.01306194		3151.84	-0.01534337		3681.84	-0.02675461
501.99	0.00080947		1032.02	-0.01149087		1562.01	-0.00727671		2092.04	-0.01258611		2622.04	-0.01318921		3152.04	-0.01472585		3682.04	-0.02664654
502.19	0.00040857		1032.22	-0.01045394		1562.21	-0.0069411		2092.24	-0.01212239		2622.24	-0.01353925		3152.24	-0.01462083		3682.24	-0.02699689
502.39	0.00034063		1032.42	-0.01069667		1562.41	-0.00635223		2092.44	-0.01115464		2622.44	-0.01316327		3152.44	-0.01383129		3682.44	-0.0272252
502.59	-0.00049676		1032.62	-0.00952898		1562.61	-0.00670225		2092.64	-0.0105851		2622.64	-0.01384781		3152.64	-0.01342289		3682.64	-0.02827788
502.79	-0.00037225		1032.82	-0.00949997		1562.81	-0.00578372		2092.84	-0.0096168		2622.84	-0.01396317		3152.84	-0.0132308		3682.84	-0.02819866
502.99	-0.00120348		1033.02	-0.00933391		1563.01	-0.0056567		2093.04	-0.00924972		2623.04	-0.01389224		3153.04	-0.01258519		3683.04	-0.02923519
503.19	-0.00091511		1033.22	-0.00880289		1563.21	-0.00616717		2093.24	-0.00828151		2623.24	-0.01400857		3153.24	-0.01326595		3683.24	-0.02919759
503.39	-0.00077301		1033.42	-0.00847009		1563.41	-0.00736377		2093.44	-0.00821746		2623.44	-0.01399465		3153.44	-0.01383443		3683.44	-0.02868802
503.59	0.00016079		1033.62	-0.00959012		1563.61	-0.0074711		2093.64	-0.00856614		2623.64	-0.01507897		3153.64	-0.01422407		3683.64	-0.02932186
503.79	-0.00004479		1033.82	-0.00901893		1563.81	-0.00823324		2093.84	-0.00851114		2623.84	-0.01532938		3153.84	-0.01472093		3683.84	-0.02977697
503.99	0.00086589		1034.02	-0.00825749		1564.01	-0.00836556		2094.04	-0.00897653		2624.04	-0.01608323		3154.04	-0.01533972		3684.04	-0.02972655
504.19	0.00133904		1034.22	-0.00790931		1564.21	-0.00835182		2094.24	-0.0083594		2624.24	-0.01615382		3154.24	-0.01639228		3684.24	-0.02918811
504.39	0.00202552		1034.42	-0.00785468		1564.41	-0.00914489		2094.44	-0.00845422		2624.44	-0.01626309		3154.44	-0.01653114		3684.44	-0.02914533
504.59	0.00204329		1034.62	-0.00901565		1564.61	-0.009814		2094.64	-0.00862597		2624.64	-0.01667737		3154.64	-0.01662599		3684.64	-0.02843821
504.79	0.00278536		1034.82	-0.00850348		1564.81	-0.00999997		2094.84	-0.00865525		2624.84	-0.01674829		3154.84	-0.01612072		3684.84	-0.02770204
504.99	0.00332324		1035.02	-0.00907451		1565.01	-0.00981158		2095.04	-0.00900189		2625.04	-0.01660926		3155.04	-0.01592		3685.04	-0.02680675
505.19	0.00411423		1035.22	-0.00930867		1565.21	-0.00898622		2095.24	-0.00955845		2625.24	-0.01687007		3155.24	-0.0159599		3685.24	-0.02637395
505.39	0.00372635		1035.42	-0.00929123		1565.41	-0.00898648		2095.44	-0.00986722		2625.44	-0.01710634		3155.44	-0.0159933		3685.44	-0.02664809
505.59	0.00362979		1035.62	-0.00920106		1565.61	-0.00822184		2095.64	-0.00996201		2625.64	-0.01690133		3155.64	-0.01618243		3685.64	-0.02567163
505.79	0.00367037		1035.82	-0.00893409		1565.81	-0.00923768		2095.84	-0.01122701		2625.84	-0.01747016		3155.84	-0.0159762		3685.84	-0.02533852
505.99	0.0037298		1036.02	-0.00865202		1566.01	-0.00867438		2096.04	-0.01059778		2626.04	-0.01706061		3156.04	-0.01561829		3686.04	-0.02575007
506.19	0.00357642		1036.22	-0.00895912		1566.21	-0.00800817		2096.24	-0.01148629		2626.24	-0.01670338		3156.24	-0.01518963		3686.24	-0.02602035
506.39	0.00331803		1036.42	-0.01017889		1566.41	-0.0079454		2096.44	-0.01145345		2626.44	-0.01552035		3156.44	-0.01427754		3686.44	-0.0260129
506.59	0.00282573		1036.62	-0.00987888		1566.61	-0.00821614		2096.64	-0.01149576		2626.64	-0.01545658		3156.64	-0.01425465		3686.64	-0.02571866
506.79	0.0029992		1036.82	-0.01060496		1566.81	-0.00809733		2096.84	-0.01120236		2626.84	-0.01524625		3156.84	-0.01427378		3686.84	-0.02482809
506.99	0.00155764		1037.02	-0.01074756		1567.01	-0.00788267		2097.04	-0.01217887		2627.04	-0.01474173		3157.04	-0.01364642		3687.04	-0.02459406
507.19	0.00212578		1037.22	-0.01057963		1567.21	-0.00770369		2097.24	-0.01224816		2627.24	-0.01412518		3157.24	-0.01351786		3687.24	-0.02400844
507.39	0.0023679		1037.42	-0.01140695		1567.41	-0.00701039		2097.44	-0.01314413		2627.44	-0.01447069		3157.44	-0.01418791		3687.44	-0.02402084
507.59	0.00200677		1037.62	-0.01173936		1567.61	-0.00721817		2097.64	-0.01348422		2627.64	-0.01508434		3157.64	-0.01537374		3687.64	-0.02470236
507.79	0.00165589		1037.82	-0.01077153		1567.81	-0.00762274		2097.84	-0.01343606		2627.84	-0.01494722		3157.84	-0.01576644		3687.84	-0.02456484
507.99	0.00188309		1038.02	-0.01046702		1568.01	-0.00717624		2098.04	-0.01394387		2628.04	-0.01531324		3158.04	-0.01530547		3688.04	-0.02467027
508.19	0.00212658		1038.22	-0.0106769		1568.21	-0.00705515		2098.24	-0.0134475		2628.24	-0.01517951		3158.24	-0.01500662		3688.24	-0.02339633
508.39	0.00183244		1038.42	-0.01121392		1568.41	-0.00858536		2098.44	-0.01414413		2628.44	-0.01491943		3158.44	-0.01424827		3688.44	-0.02354783
508.59	0.00211604		1038.62	-0.01116131		1568.61	-0.00927469		2098.64	-0.01370131		2628.64	-0.01528107		3158.64	-0.01416387		3688.64	-0.02327265
508.79	0.00221493		1038.82	-0.01088964		1568.81	-0.00901939		2098.84	-0.01335179		2628.84	-0.01552479		3158.84	-0.01464478		3688.84	-0.02419107
508.99	0.00181035		1039.02	-0.0116394		1569.01	-0.00885945		2099.04	-0.0138008		2629.04	-0.01568944		3159.04	-0.0148019		3689.04	-0.02540138
509.19	0.00214391		1039.22	-0.0113899		1569.21	-0.00968335		2099.24	-0.01358161		2629.24	-0.01560615		3159.24	-0.01530775		3689.24	-0.02652143
509.39	0.00160664		1039.42	-0.01112324		1569.41	-0.0095221		2099.44	-0.01290389		2629.44	-0.01568345		3159.44	-0.01637085		3689.44	-0.02854403
509.59	0.00196585		1039.62	-0.01039623		1569.61	-0.00912199		2099.64	-0.01258631		2629.64	-0.01563811		3159.64	-0.01729365		3689.64	-0.02821954
509.79	0.00274005		1039.82	-0.01032011		1569.81	-0.00967248		2099.84	-0.01203304		2629.84	-0.01615695		3159.84	-0.01646173		3689.84	-0.02915428
509.99	0.00321762		1040.02	-0.01010227		1570.01	-0.00921433		2100.04	-0.01152497		2630.04	-0.01603645		3160.04	-0.01666594		3690.04	-0.02996572
510.19	0.00331233		1040.22	-0.0107133		1570.21	-0.00903887		2100.24	-0.01226298		2630.24	-0.01612894		3160.24	-0.01578238		3690.24	-0.03037493
510.39	0.00393816		1040.42	-0.01089609		1570.41	-0.00888145		2100.44	-0.01157369		2630.44	-0.01573865		3160.44	-0.01572311		3690.44	-0.03020933
510.59	0.00441083		1040.62	-0.00992337		1570.61	-0.00858414		2100.64	-0.01172784		2630.64	-0.01604859		3160.64	-0.01580457		3690.64	-0.02923601
510.79	0.00454171		1040.82	-0.00997055		1570.81	-0.00841971		2100.84	-0.01221443		2630.84	-0.0155666		3160.84	-0.01596478		3690.84	-0.02920407
510.99	0.00459916		1041.02	-0.00973534		1571.01	-0.007346		2101.04	-0.01284977		2631.04	-0.01486027		3161.04	-0.01553183		3691.04	-0.02885078
511.19	0.00465898		1041.22	-0.00953552		1571.21	-0.00745393		2101.24	-0.01337406		2631.24	-0.01457379		3161.24	-0.01541521		3691.24	-0.02941376
511.39	0.00394029		1041.42	-0.00909131		1571.41	-0.00758697		2101.44	-0.01414936		2631.44	-0.01408051		3161.44	-0.01704882		3691.44	-0.02894747
511.59	0.00304345		1041.62	-0.00876956		1571.61	-0.00844952		2101.64	-0.01468629		2631.64	-0.01412772		3161.64	-0.01691349		3691.64	-0.02908486
511.79	0.00311103		1041.82	-0.00812336		1571.81	-0.00882054		2101.84	-0.01531231		2631.84	-0.01407193		3161.84	-0.01579809		3691.84	-0.02944462
511.99	0.00322418		1042.02	-0.00881449		1572.01	-0.00888861		2102.04	-0.0158393		2632.04	-0.01355782		3162.04	-0.01553368		3692.04	-0.02847817
512.19	0.00273191		1042.22	-0.00873384		1572.21	-0.00969162		2102.24	-0.01549571		2632.24	-0.01294119		3162.24	-0.01506146		3692.24	-0.02718653
512.39	0.0025274		1042.42	-0.00856927		1572.41	-0.01033121		2102.44	-0.01539719		2632.44	-0.01311077		3162.44	-0.0151808		3692.44	-0.02769782
512.59	0.00313758		1042.62	-0.00871614		1572.61	-0.01049027		2102.64	-0.01457942		2632.64	-0.01361949		3162.64	-0.01489705		3692.64	-0.02852406
512.79	0.00278499		1042.82	-0.00950299		1572.81	-0.01122757		2102.84	-0.01446282		2632.84	-0.0139584		3162.84	-0.01481573		3692.84	-0.03005416
512.99	0.00225428		1043.02	-0.00924683		1573.01	-0.01189391		2103.04	-0.01463032		2633.04	-0.01401707		3163.04	-0.01474933		3693.04	-0.03032737
513.19	0.00211048		1043.22	-0.00852672		1573.21	-0.01191496		2103.24	-0.01345105		2633.24	-0.01422164		3163.24	-0.01476911		3693.24	-0.03031916
513.39	0.00186909		1043.42	-0.0086265		1573.41	-0.01197176		2103.44	-0.01240768		2633.44	-0.01514974		3163.44	-0.01486075		3693.44	-0.03046859
513.59	0.0024145		1043.62	-0.00887081		1573.61	-0.01237557		2103.64	-0.01204672		2633.64	-0.01578135		3163.64	-0.01480322		3693.64	-0.02950656
513.79	0.00241788		1043.82	-0.00904245		1573.81	-0.01221674		2103.84	-0.01166044		2633.84	-0.01644764		3163.84	-0.01388315		3693.84	-0.02906458
513.99	0.00160651		1044.02	-0.00871453		1574.01	-0.01227122		2104.04	-0.01113572		2634.04	-0.01646009		3164.04	-0.01435225		3694.04	-0.02904734
514.19	0.00049333		1044.22	-0.00854381		1574.21	-0.01156592		2104.24	-0.01089707		2634.24	-0.01614602		3164.24	-0.0136722		3694.24	-0.02866443
514.39	0.00080404		1044.42	-0.00791123		1574.41	-0.01085441		2104.44	-0.01005875		2634.44	-0.01587473		3164.44	-0.01386195		3694.44	-0.02817258
514.59	-0.00022704		1044.62	-0.00784194		1574.61	-0.01139104		2104.64	-0.01085239		2634.64	-0.01659052		3164.64	-0.01327951		3694.64	-0.0287364
514.79	-0.00109784		1044.82	-0.00832369		1574.81	-0.01152008		2104.84	-0.01126368		2634.84	-0.01619339		3164.84	-0.01428724		3694.84	-0.02893859
514.99	-0.00125		1045.02	-0.00803673		1575.01	-0.01215793		2105.04	-0.01189394		2635.04	-0.01594986		3165.04	-0.01438699		3695.04	-0.02930852
515.19	-0.00253681		1045.22	-0.00839811		1575.21	-0.01214133		2105.24	-0.01236937		2635.24	-0.01567284		3165.24	-0.01493317		3695.24	-0.02958906
515.39	-0.00271663		1045.42	-0.00847465		1575.41	-0.01171662		2105.44	-0.01289536		2635.44	-0.01509617		3165.44	-0.01610966		3695.44	-0.02914051
515.59	-0.00295651		1045.62	-0.00964349		1575.61	-0.01161187		2105.64	-0.01332565		2635.64	-0.01559981		3165.64	-0.01627303		3695.64	-0.02991265
515.79	-0.00261116		1045.82	-0.0093492		1575.81	-0.0116145		2105.84	-0.01432173		2635.84	-0.01529002		3165.84	-0.01668621		3695.84	-0.02981235
515.99	-0.00190483		1046.02	-0.00961305		1576.01	-0.01047958		2106.04	-0.01370741		2636.04	-0.0151054		3166.04	-0.01741229		3696.04	-0.0298931
516.19	-0.00267019		1046.22	-0.00918876		1576.21	-0.0108349		2106.24	-0.01397943		2636.24	-0.01530979		3166.24	-0.01823081		3696.24	-0.03018264
516.39	-0.00191858		1046.42	-0.00959028		1576.41	-0.01085715		2106.44	-0.01432291		2636.44	-0.0155027		3166.44	-0.01882074		3696.44	-0.03084392
516.59	-0.00164209		1046.62	-0.00973773		1576.61	-0.01089658		2106.64	-0.01410506		2636.64	-0.01490954		3166.64	-0.01867764		3696.64	-0.03106878
516.79	-0.00127828		1046.82	-0.00931374		1576.81	-0.01072997		2106.84	-0.01426125		2636.84	-0.01475776		3166.84	-0.01938397		3696.84	-0.03079903
516.99	-0.00090932		1047.02	-0.0087203		1577.01	-0.01022656		2107.04	-0.01391876		2637.04	-0.01570106		3167.04	-0.01974531		3697.04	-0.03015168
517.19	-0.00036823		1047.22	-0.00856029		1577.21	-0.00966569		2107.24	-0.01280215		2637.24	-0.01648829		3167.24	-0.0193887		3697.24	-0.03039392
517.39	0.00112613		1047.42	-0.00915399		1577.41	-0.01054292		2107.44	-0.01212579		2637.44	-0.0169787		3167.44	-0.01940182		3697.44	-0.02965946
517.59	0.00190337		1047.62	-0.0092131		1577.61	-0.00994924		2107.64	-0.01218784		2637.64	-0.01687252		3167.64	-0.01883974		3697.64	-0.02957194
517.79	0.00210384		1047.82	-0.00899385		1577.81	-0.00926287		2107.84	-0.01161171		2637.84	-0.01705424		3167.84	-0.01830567		3697.84	-0.0292502
517.99	0.0013244		1048.02	-0.00916526		1578.01	-0.00971638		2108.04	-0.01110988		2638.04	-0.01656752		3168.04	-0.01779168		3698.04	-0.02940016
518.19	0.00097297		1048.22	-0.00956377		1578.21	-0.00950614		2108.24	-0.01096553		2638.24	-0.0170503		3168.24	-0.01713599		3698.24	-0.02871961
518.39	0.00151		1048.42	-0.01007712		1578.41	-0.01016185		2108.44	-0.01048378		2638.44	-0.0172684		3168.44	-0.01587836		3698.44	-0.02943365
518.59	0.00107139		1048.62	-0.0105731		1578.61	-0.01136301		2108.64	-0.01045394		2638.64	-0.01697862		3168.64	-0.01468668		3698.64	-0.02903421
518.79	0.00066587		1048.82	-0.01064094		1578.81	-0.01192727		2108.84	-0.0104535		2638.84	-0.01532708		3168.84	-0.01424322		3698.84	-0.02772845
518.99	0.00106783		1049.02	-0.01110642		1579.01	-0.0117361		2109.04	-0.01077607		2639.04	-0.01452942		3169.04	-0.01335146		3699.04	-0.02747634
519.19	0.00034586		1049.22	-0.01160827		1579.21	-0.011183		2109.24	-0.01066116		2639.24	-0.01472438		3169.24	-0.01332811		3699.24	-0.02781917
519.39	0.0004935		1049.42	-0.01109997		1579.41	-0.01137887		2109.44	-0.01099889		2639.44	-0.01505695		3169.44	-0.01299381		3699.44	-0.02802856
519.59	0.00021922		1049.62	-0.01145095		1579.61	-0.01154078		2109.64	-0.01106427		2639.64	-0.01630517		3169.64	-0.01267085		3699.64	-0.02805755
519.79	0.00013834		1049.82	-0.01029096		1579.81	-0.01115184		2109.84	-0.01181312		2639.84	-0.01652282		3169.84	-0.01198118		3699.84	-0.02776748
519.99	0.00017421		1050.02	-0.01084306		1580.01	-0.01050331		2110.04	-0.01128909		2640.04	-0.01712224		3170.04	-0.01237037		3700.04	-0.02743014
520.19	-0.00089949		1050.22	-0.01066723		1580.21	-0.01110796		2110.24	-0.0125368		2640.24	-0.01733864		3170.24	-0.01248798		3700.24	-0.02642016
520.39	-0.00082518		1050.42	-0.01066278		1580.41	-0.01155031		2110.44	-0.01226707		2640.44	-0.01720704		3170.44	-0.0122575		3700.44	-0.02689315
520.59	-0.00142667		1050.62	-0.00934357		1580.61	-0.01151755		2110.64	-0.01192436		2640.64	-0.01735352		3170.64	-0.01241483		3700.64	-0.02690214
520.79	-0.00154391		1050.82	-0.00852052		1580.81	-0.0111767		2110.84	-0.01302243		2640.84	-0.01799896		3170.84	-0.01323511		3700.84	-0.02727889
520.99	-0.00160088		1051.02	-0.00906379		1581.01	-0.01150349		2111.04	-0.01314886		2641.04	-0.01881081		3171.04	-0.01375612		3701.04	-0.02816729
521.19	-0.00156353		1051.22	-0.00860182		1581.21	-0.01067803		2111.24	-0.01378531		2641.24	-0.01834434		3171.24	-0.01507027		3701.24	-0.02871546
521.39	-0.00086713		1051.42	-0.00879736		1581.41	-0.01122515		2111.44	-0.01408753		2641.44	-0.01801395		3171.44	-0.01549231		3701.44	-0.02854934
521.59	-0.0012594		1051.62	-0.00837505		1581.61	-0.01073591		2111.64	-0.01553336		2641.64	-0.01822336		3171.64	-0.01688841		3701.64	-0.02962938
521.79	-0.00086068		1051.82	-0.00851431		1581.81	-0.00986584		2111.84	-0.01577815		2641.84	-0.01886275		3171.84	-0.01816552		3701.84	-0.02925056
521.99	-0.00046687		1052.02	-0.00899815		1582.01	-0.0102087		2112.04	-0.01596034		2642.04	-0.01878822		3172.04	-0.01932695		3702.04	-0.02944008
522.19	-0.00029674		1052.22	-0.00966439		1582.21	-0.00979633		2112.24	-0.01523947		2642.24	-0.019164		3172.24	-0.01994877		3702.24	-0.02859581
522.39	0.00045144		1052.42	-0.00922768		1582.41	-0.00989184		2112.44	-0.01509083		2642.44	-0.01780549		3172.44	-0.01950121		3702.44	-0.02924377
522.59	0.0012174		1052.62	-0.00938033		1582.61	-0.00999407		2112.64	-0.01495222		2642.64	-0.0165722		3172.64	-0.01881562		3702.64	-0.02783902
522.79	0.00156781		1052.82	-0.01021929		1582.81	-0.01045919		2112.84	-0.01547915		2642.84	-0.01623054		3172.84	-0.01894611		3702.84	-0.02709552
522.99	0.00242576		1053.02	-0.01131412		1583.01	-0.00956966		2113.04	-0.01552233		2643.04	-0.01701374		3173.04	-0.01871823		3703.04	-0.02812429
523.19	0.00221783		1053.22	-0.01108973		1583.21	-0.00926562		2113.24	-0.01540441		2643.24	-0.01826859		3173.24	-0.01838874		3703.24	-0.02859654
523.39	0.00217155		1053.42	-0.0110632		1583.41	-0.00899137		2113.44	-0.01458696		2643.44	-0.01909205		3173.44	-0.01753915		3703.44	-0.02755551
523.59	0.00271455		1053.62	-0.01148952		1583.61	-0.00922027		2113.64	-0.01349688		2643.64	-0.0200716		3173.64	-0.01713309		3703.64	-0.02669354
523.79	0.0032909		1053.82	-0.01155264		1583.81	-0.00882075		2113.84	-0.01374945		2643.84	-0.01984197		3173.84	-0.01584671		3703.84	-0.02564548
523.99	0.00365023		1054.02	-0.01226223		1584.01	-0.00916428		2114.04	-0.01249636		2644.04	-0.02006916		3174.04	-0.0160317		3704.04	-0.02528387
524.19	0.00322477		1054.22	-0.01207408		1584.21	-0.01009671		2114.24	-0.01211989		2644.24	-0.01957925		3174.24	-0.01524093		3704.24	-0.02578706
524.39	0.00257613		1054.42	-0.01204377		1584.41	-0.01054067		2114.44	-0.01123526		2644.44	-0.01929211		3174.44	-0.01533865		3704.44	-0.02693429
524.59	0.00147923		1054.62	-0.01159135		1584.61	-0.01095063		2114.64	-0.0121897		2644.64	-0.01905331		3174.64	-0.01507745		3704.64	-0.02727499
524.79	0.00137941		1054.82	-0.01191721		1584.81	-0.0102844		2114.84	-0.01306079		2644.84	-0.01894362		3174.84	-0.0154389		3704.84	-0.02821392
524.99	0.00116192		1055.02	-0.01268333		1585.01	-0.01020744		2115.04	-0.01260716		2645.04	-0.01832126		3175.04	-0.01566425		3705.04	-0.02842025
525.19	0.00083953		1055.22	-0.01183307		1585.21	-0.00945702		2115.24	-0.01223213		2645.24	-0.01742005		3175.24	-0.01641961		3705.24	-0.02847146
525.39	0.00057623		1055.42	-0.0120107		1585.41	-0.00919287		2115.44	-0.01223933		2645.44	-0.01768391		3175.44	-0.01622655		3705.44	-0.028859
525.59	0.00018811		1055.62	-0.01174066		1585.61	-0.00814689		2115.64	-0.01245601		2645.64	-0.01833749		3175.64	-0.01772477		3705.64	-0.02885774
525.79	0.00033682		1055.82	-0.01134257		1585.81	-0.00699783		2115.84	-0.01146383		2645.84	-0.01849616		3175.84	-0.01863314		3705.84	-0.02928669
525.99	-0.00003231		1056.02	-0.01090912		1586.01	-0.00696284		2116.04	-0.01090508		2646.04	-0.01876434		3176.04	-0.0191505		3706.04	-0.02977342
526.19	-0.00062403		1056.22	-0.01070517		1586.21	-0.00639657		2116.24	-0.01060852		2646.24	-0.01882008		3176.24	-0.01890963		3706.24	-0.03044751
526.39	-0.00016385		1056.42	-0.00990671		1586.41	-0.00564791		2116.44	-0.01080555		2646.44	-0.01812302		3176.44	-0.01823877		3706.44	-0.03085902
526.59	-0.00085144		1056.62	-0.00979479		1586.61	-0.00511441		2116.64	-0.01076964		2646.64	-0.01748742		3176.64	-0.01779987		3706.64	-0.03112493
526.79	-0.001306		1056.82	-0.01002733		1586.81	-0.00500677		2116.84	-0.01129061		2646.84	-0.01781305		3176.84	-0.01828985		3706.84	-0.03194335
526.99	-0.00179793		1057.02	-0.00984084		1587.01	-0.00397112		2117.04	-0.01136208		2647.04	-0.0175448		3177.04	-0.01743303		3707.04	-0.03268101
527.19	-0.00286284		1057.22	-0.00900176		1587.21	-0.00439356		2117.24	-0.01139462		2647.24	-0.01710192		3177.24	-0.01790458		3707.24	-0.03207501
527.39	-0.00317838		1057.42	-0.00838431		1587.41	-0.00509406		2117.44	-0.01057363		2647.44	-0.01727784		3177.44	-0.01719148		3707.44	-0.0317198
527.59	-0.00211782		1057.62	-0.0086435		1587.61	-0.00578677		2117.64	-0.01120593		2647.64	-0.01700499		3177.64	-0.01686726		3707.64	-0.03216025
527.79	-0.00249021		1057.82	-0.0085637		1587.81	-0.00650087		2117.84	-0.01156161		2647.84	-0.01651187		3177.84	-0.01593845		3707.84	-0.03168784
527.99	-0.00236155		1058.02	-0.00838779		1588.01	-0.00737443		2118.04	-0.01125716		2648.04	-0.01561244		3178.04	-0.01557853		3708.04	-0.03255404
528.19	-0.00219442		1058.22	-0.00881913		1588.21	-0.00821303		2118.24	-0.01225791		2648.24	-0.01508983		3178.24	-0.01483197		3708.24	-0.03339217
528.39	-0.00196773		1058.42	-0.00829101		1588.41	-0.00860143		2118.44	-0.01316173		2648.44	-0.01426962		3178.44	-0.01465906		3708.44	-0.03295056
528.59	-0.00158128		1058.62	-0.00834331		1588.61	-0.00913941		2118.64	-0.01445096		2648.64	-0.01374883		3178.64	-0.01407555		3708.64	-0.03246554
528.79	-0.00080762		1058.82	-0.00812938		1588.81	-0.00962098		2118.84	-0.01496178		2648.84	-0.01268905		3178.84	-0.01352109		3708.84	-0.03243762
528.99	-0.00063522		1059.02	-0.00835893		1589.01	-0.01085897		2119.04	-0.01567222		2649.04	-0.01248401		3179.04	-0.01307107		3709.04	-0.03161538
529.19	-0.0012385		1059.22	-0.00885615		1589.21	-0.01082319		2119.24	-0.01621297		2649.24	-0.01235204		3179.24	-0.01267453		3709.24	-0.03133921
529.39	-0.00093754		1059.42	-0.00868444		1589.41	-0.01088165		2119.44	-0.01786639		2649.44	-0.01350323		3179.44	-0.01276248		3709.44	-0.03080966
529.59	-0.00060393		1059.62	-0.00894702		1589.61	-0.01145439		2119.64	-0.01827651		2649.64	-0.01393343		3179.64	-0.01394383		3709.64	-0.03067316
529.79	-0.00043016		1059.82	-0.00837158		1589.81	-0.01182174		2119.84	-0.01815453		2649.84	-0.01459821		3179.84	-0.01498271		3709.84	-0.0305394
529.99	-0.00048994		1060.02	-0.00852554		1590.01	-0.01243416		2120.04	-0.01832257		2650.04	-0.01518866		3180.04	-0.01559029		3710.04	-0.03038411
530.19	-0.00075893		1060.22	-0.00918363		1590.21	-0.01302404		2120.24	-0.01824378		2650.24	-0.0154606		3180.24	-0.01628085		3710.24	-0.03039767
530.39	-0.00153227		1060.42	-0.00891349		1590.41	-0.01299478		2120.44	-0.01821891		2650.44	-0.01532369		3180.44	-0.01704196		3710.44	-0.02946337
530.59	-0.00309942		1060.62	-0.00876401		1590.61	-0.01322254		2120.64	-0.0181883		2650.64	-0.01563197		3180.64	-0.01780485		3710.64	-0.02980725
530.79	-0.00342665		1060.82	-0.00914196		1590.81	-0.01410092		2120.84	-0.01862232		2650.84	-0.01629688		3180.84	-0.01846816		3710.84	-0.02895325
530.99	-0.00407749		1061.02	-0.00899881		1591.01	-0.01478091		2121.04	-0.01794661		2651.04	-0.01712276		3181.04	-0.01838277		3711.04	-0.028121
531.19	-0.00435823		1061.22	-0.00919732		1591.21	-0.01531024		2121.24	-0.0167601		2651.24	-0.01790705		3181.24	-0.01853962		3711.24	-0.02852767
531.39	-0.00459006		1061.42	-0.00901962		1591.41	-0.01475267		2121.44	-0.01561317		2651.44	-0.0194254		3181.44	-0.01835948		3711.44	-0.02903517
531.59	-0.00443375		1061.62	-0.00958542		1591.61	-0.01444334		2121.64	-0.01474607		2651.64	-0.01936741		3181.64	-0.01814244		3711.64	-0.02843689
531.79	-0.00428486		1061.82	-0.00869912		1591.81	-0.0139031		2121.84	-0.01361359		2651.84	-0.02039205		3181.84	-0.01752008		3711.84	-0.0277798
531.99	-0.00313952		1062.02	-0.00919081		1592.01	-0.01314433		2122.04	-0.01313538		2652.04	-0.02020266		3182.04	-0.01715172		3712.04	-0.02878197
532.19	-0.00228741		1062.22	-0.00903883		1592.21	-0.01255385		2122.24	-0.01276589		2652.24	-0.02048379		3182.24	-0.01735085		3712.24	-0.02964024
532.39	-0.00130378		1062.42	-0.00862136		1592.41	-0.01100719		2122.44	-0.01215239		2652.44	-0.01982197		3182.44	-0.01781323		3712.44	-0.02924264
532.59	-0.00025943		1062.62	-0.0085955		1592.61	-0.01048259		2122.64	-0.01219123		2652.64	-0.01997684		3182.64	-0.01762472		3712.64	-0.029855
532.79	0.00054616		1062.82	-0.00785549		1592.81	-0.01014969		2122.84	-0.01279582		2652.84	-0.01914596		3182.84	-0.01679322		3712.84	-0.03041373
532.99	0.00077988		1063.02	-0.00826866		1593.01	-0.009699		2123.04	-0.01303878		2653.04	-0.01898941		3183.04	-0.01712193		3713.04	-0.03066553
533.19	0.00068146		1063.22	-0.0088292		1593.21	-0.00872509		2123.24	-0.01330817		2653.24	-0.01862994		3183.24	-0.01721323		3713.24	-0.03036666
533.39	0.00174507		1063.42	-0.00879419		1593.41	-0.00864109		2123.44	-0.01429615		2653.44	-0.01833441		3183.44	-0.01846685		3713.44	-0.03074231
533.59	0.0020283		1063.62	-0.00968783		1593.61	-0.00868917		2123.64	-0.01403648		2653.64	-0.01768915		3183.64	-0.01937858		3713.64	-0.03142136
533.79	0.00236164		1063.82	-0.00960276		1593.81	-0.00878489		2123.84	-0.01468692		2653.84	-0.01720728		3183.84	-0.01945175		3713.84	-0.03106614
533.99	0.00285336		1064.02	-0.01089812		1594.01	-0.0094839		2124.04	-0.01545555		2654.04	-0.01689225		3184.04	-0.01869656		3714.04	-0.03158653
534.19	0.00221247		1064.22	-0.01153176		1594.21	-0.00948142		2124.24	-0.01601546		2654.24	-0.01678474		3184.24	-0.01881119		3714.24	-0.03189693
534.39	0.00164854		1064.42	-0.0121605		1594.41	-0.00926023		2124.44	-0.01633279		2654.44	-0.01657744		3184.44	-0.0185428		3714.44	-0.0315808
534.59	0.00085003		1064.62	-0.01248402		1594.61	-0.00962992		2124.64	-0.01702577		2654.64	-0.01727932		3184.64	-0.01771414		3714.64	-0.03134146
534.79	0.00023699		1064.82	-0.01319474		1594.81	-0.00981905		2124.84	-0.0181963		2654.84	-0.01724556		3184.84	-0.01658476		3714.84	-0.03099685
534.99	-0.00062516		1065.02	-0.01306007		1595.01	-0.01050105		2125.04	-0.01735292		2655.04	-0.0180585		3185.04	-0.01615337		3715.04	-0.03137483
535.19	-0.0013709		1065.22	-0.01351383		1595.21	-0.01059112		2125.24	-0.01639084		2655.24	-0.01793743		3185.24	-0.01629797		3715.24	-0.03237142
535.39	-0.00206793		1065.42	-0.01326342		1595.41	-0.0107946		2125.44	-0.01567138		2655.44	-0.01825025		3185.44	-0.01634891		3715.44	-0.03191857
535.59	-0.00301053		1065.62	-0.0128518		1595.61	-0.01081451		2125.64	-0.01493407		2655.64	-0.01867225		3185.64	-0.01519739		3715.64	-0.03113894
535.79	-0.00302626		1065.82	-0.0119167		1595.81	-0.01145694		2125.84	-0.01521386		2655.84	-0.02049123		3185.84	-0.01470929		3715.84	-0.03190493
535.99	-0.00343952		1066.02	-0.01218373		1596.01	-0.01221158		2126.04	-0.01453684		2656.04	-0.02059188		3186.04	-0.01453531		3716.04	-0.03252803
536.19	-0.00352531		1066.22	-0.01099352		1596.21	-0.01215737		2126.24	-0.01395182		2656.24	-0.02011408		3186.24	-0.01572318		3716.24	-0.03290112
536.39	-0.00344101		1066.42	-0.01039196		1596.41	-0.01146546		2126.44	-0.01303696		2656.44	-0.02030989		3186.44	-0.01626899		3716.44	-0.03333305
536.59	-0.00397058		1066.62	-0.00901381		1596.61	-0.011975		2126.64	-0.01273198		2656.64	-0.02026074		3186.64	-0.01609356		3716.64	-0.03409551
536.79	-0.00505874		1066.82	-0.00832517		1596.81	-0.01226918		2126.84	-0.01302332		2656.84	-0.01941549		3186.84	-0.01682422		3716.84	-0.03395656
536.99	-0.00548785		1067.02	-0.00756548		1597.01	-0.0121529		2127.04	-0.01321878		2657.04	-0.01926895		3187.04	-0.01780139		3717.04	-0.0334832
537.19	-0.00559469		1067.22	-0.00731836		1597.21	-0.01167428		2127.24	-0.01280687		2657.24	-0.0194513		3187.24	-0.01867557		3717.24	-0.03348919
537.39	-0.00550453		1067.42	-0.0071897		1597.41	-0.01199467		2127.44	-0.0133598		2657.44	-0.01884148		3187.44	-0.01910897		3717.44	-0.03417499
537.59	-0.00452922		1067.62	-0.00789489		1597.61	-0.01231694		2127.64	-0.01350993		2657.64	-0.01858347		3187.64	-0.01897699		3717.64	-0.03358508
537.79	-0.00347268		1067.82	-0.00823798		1597.81	-0.01229731		2127.84	-0.01437027		2657.84	-0.01799624		3187.84	-0.01876822		3717.84	-0.03316315
537.99	-0.00245969		1068.02	-0.00959441		1598.01	-0.01228646		2128.04	-0.01445931		2658.04	-0.01785467		3188.04	-0.01841442		3718.04	-0.0329094
538.19	-0.00261224		1068.22	-0.00948827		1598.21	-0.01288742		2128.24	-0.01520682		2658.24	-0.0177462		3188.24	-0.01822828		3718.24	-0.03224588
538.39	-0.00272355		1068.42	-0.00996855		1598.41	-0.012707		2128.44	-0.01495917		2658.44	-0.01778357		3188.44	-0.01765114		3718.44	-0.03107878
538.59	-0.00274754		1068.62	-0.01013112		1598.61	-0.01308524		2128.64	-0.01503906		2658.64	-0.01779311		3188.64	-0.01735928		3718.64	-0.03050132
538.79	-0.00288929		1068.82	-0.01082497		1598.81	-0.01320777		2128.84	-0.01499976		2658.84	-0.01714757		3188.84	-0.01723344		3718.84	-0.03101344
538.99	-0.00333783		1069.02	-0.01087002		1599.01	-0.01363673		2129.04	-0.01387144		2659.04	-0.0172481		3189.04	-0.01827076		3719.04	-0.03110764
539.19	-0.00344713		1069.22	-0.01187632		1599.21	-0.01350009		2129.24	-0.01380165		2659.24	-0.01638858		3189.24	-0.01889707		3719.24	-0.03046325
539.39	-0.00317398		1069.42	-0.01157947		1599.41	-0.01331897		2129.44	-0.01416313		2659.44	-0.01654618		3189.44	-0.01857519		3719.44	-0.02981065
539.59	-0.00386617		1069.62	-0.0115691		1599.61	-0.01386841		2129.64	-0.01455287		2659.64	-0.01739874		3189.64	-0.01797542		3719.64	-0.03010997
539.79	-0.00342		1069.82	-0.01145554		1599.81	-0.01472258		2129.84	-0.01483014		2659.84	-0.0174902		3189.84	-0.018069		3719.84	-0.03031908
539.99	-0.00367744		1070.02	-0.01146315		1600.01	-0.01462051		2130.04	-0.01381859		2660.04	-0.01698359		3190.04	-0.01832092		3720.04	-0.03092529
540.19	-0.00376819		1070.22	-0.01057501		1600.21	-0.01430052		2130.24	-0.01354541		2660.24	-0.01628135		3190.24	-0.01931665		3720.24	-0.03141237
540.39	-0.00454782		1070.42	-0.01069794		1600.41	-0.01376994		2130.44	-0.01391926		2660.44	-0.0166512		3190.44	-0.01880455		3720.44	-0.03104109
540.59	-0.00559541		1070.62	-0.00947209		1600.61	-0.01421831		2130.64	-0.01427598		2660.64	-0.0170586		3190.64	-0.01874301		3720.64	-0.0310499
540.79	-0.00610144		1070.82	-0.00999557		1600.81	-0.01414804		2130.84	-0.01440713		2660.84	-0.01705028		3190.84	-0.01936352		3720.84	-0.03066893
540.99	-0.00562032		1071.02	-0.00944891		1601.01	-0.01424945		2131.04	-0.01461747		2661.04	-0.01737099		3191.04	-0.01912272		3721.04	-0.03011032
541.19	-0.00568568		1071.22	-0.0095276		1601.21	-0.01428541		2131.24	-0.01330079		2661.24	-0.01753722		3191.24	-0.01872752		3721.24	-0.02991959
541.39	-0.00588353		1071.42	-0.01040897		1601.41	-0.01472268		2131.44	-0.01392602		2661.44	-0.01781429		3191.44	-0.01806387		3721.44	-0.03059289
541.59	-0.00498173		1071.62	-0.01166634		1601.61	-0.01466886		2131.64	-0.01414635		2661.64	-0.0173487		3191.64	-0.01765757		3721.64	-0.03049492
541.79	-0.00520133		1071.82	-0.01195418		1601.81	-0.01492134		2131.84	-0.01477356		2661.84	-0.0176653		3191.84	-0.01739468		3721.84	-0.03041567
541.99	-0.00497003		1072.02	-0.01236302		1602.01	-0.01610423		2132.04	-0.01458745		2662.04	-0.01818251		3192.04	-0.0172861		3722.04	-0.03019579
542.19	-0.00485789		1072.22	-0.01190489		1602.21	-0.01653264		2132.24	-0.01486556		2662.24	-0.01817487		3192.24	-0.01623768		3722.24	-0.03024899
542.39	-0.0044085		1072.42	-0.01246648		1602.41	-0.01560648		2132.44	-0.01432847		2662.44	-0.01874202		3192.44	-0.01659083		3722.44	-0.03028987
542.59	-0.00418041		1072.62	-0.0124912		1602.61	-0.01532464		2132.64	-0.01411356		2662.64	-0.0182317		3192.64	-0.01653336		3722.64	-0.03040014
542.79	-0.00380406		1072.82	-0.01283515		1602.81	-0.0164566		2132.84	-0.01404555		2662.84	-0.01861374		3192.84	-0.01638604		3722.84	-0.03093114
542.99	-0.00421001		1073.02	-0.01275045		1603.01	-0.01590135		2133.04	-0.01416353		2663.04	-0.01878541		3193.04	-0.0160969		3723.04	-0.0303368
543.19	-0.00346339		1073.22	-0.01307552		1603.21	-0.01562865		2133.24	-0.0144159		2663.24	-0.01867332		3193.24	-0.01547513		3723.24	-0.03032442
543.39	-0.00176194		1073.42	-0.01262913		1603.41	-0.01519985		2133.44	-0.01496723		2663.44	-0.01893416		3193.44	-0.01527388		3723.44	-0.03101894
543.59	-0.00088222		1073.62	-0.0132317		1603.61	-0.01577582		2133.64	-0.01545668		2663.64	-0.01902066		3193.64	-0.01500277		3723.64	-0.03125707
543.79	0.00034123		1073.82	-0.01327277		1603.81	-0.01537374		2133.84	-0.01535156		2663.84	-0.01877282		3193.84	-0.01577433		3723.84	-0.03055623
543.99	0.00099619		1074.02	-0.01371078		1604.01	-0.01486635		2134.04	-0.01524173		2664.04	-0.01910684		3194.04	-0.01578442		3724.04	-0.03094636
544.19	0.00216146		1074.22	-0.01363607		1604.21	-0.01431711		2134.24	-0.01573294		2664.24	-0.01935926		3194.24	-0.01585165		3724.24	-0.03063725
544.39	0.00175036		1074.42	-0.01305257		1604.41	-0.01382616		2134.44	-0.01589248		2664.44	-0.02022737		3194.44	-0.01628165		3724.44	-0.02945094
544.59	0.00179596		1074.62	-0.01247929		1604.61	-0.01442263		2134.64	-0.01452659		2664.64	-0.02103528		3194.64	-0.01634052		3724.64	-0.02991471
544.79	0.0023156		1074.82	-0.01391093		1604.81	-0.0138456		2134.84	-0.01355218		2664.84	-0.02147887		3194.84	-0.01739279		3724.84	-0.02961332
544.99	0.00255422		1075.02	-0.01284037		1605.01	-0.01388301		2135.04	-0.01370053		2665.04	-0.02108242		3195.04	-0.01746475		3725.04	-0.02937699
545.19	0.00149674		1075.22	-0.01299947		1605.21	-0.01329187		2135.24	-0.01218802		2665.24	-0.02166606		3195.24	-0.01793535		3725.24	-0.02987415
545.39	0.00162767		1075.42	-0.01336251		1605.41	-0.01325		2135.44	-0.01242171		2665.44	-0.02185219		3195.44	-0.01796471		3725.44	-0.0305102
545.59	0.00090746		1075.62	-0.01313998		1605.61	-0.01259631		2135.64	-0.01235055		2665.64	-0.02143363		3195.64	-0.01787498		3725.64	-0.03005976
545.79	-0.00010917		1075.82	-0.01302794		1605.81	-0.01249655		2135.84	-0.01243637		2665.84	-0.02169551		3195.84	-0.0178603		3725.84	-0.02987092
545.99	-0.00053704		1076.02	-0.01263564		1606.01	-0.01257407		2136.04	-0.01233434		2666.04	-0.02134465		3196.04	-0.01760733		3726.04	-0.03043744
546.19	-0.00098032		1076.22	-0.01223129		1606.21	-0.01091786		2136.24	-0.01256646		2666.24	-0.02119225		3196.24	-0.01742638		3726.24	-0.0303744
546.39	-0.00224255		1076.42	-0.01227984		1606.41	-0.0109125		2136.44	-0.01300912		2666.44	-0.02097332		3196.44	-0.01721027		3726.44	-0.02945256
546.59	-0.0029721		1076.62	-0.01219317		1606.61	-0.01119506		2136.64	-0.01318649		2666.64	-0.02021675		3196.64	-0.01646062		3726.64	-0.02941257
546.79	-0.00323521		1076.82	-0.01213231		1606.81	-0.01195966		2136.84	-0.01392065		2666.84	-0.02030538		3196.84	-0.01680836		3726.84	-0.02949831
546.99	-0.00416465		1077.02	-0.01210044		1607.01	-0.0109961		2137.04	-0.01469653		2667.04	-0.01910605		3197.04	-0.01623672		3727.04	-0.02984265
547.19	-0.00373238		1077.22	-0.01229766		1607.21	-0.01091995		2137.24	-0.01621117		2667.24	-0.01887386		3197.24	-0.01607314		3727.24	-0.02995121
547.39	-0.0030059		1077.42	-0.01211227		1607.41	-0.01084218		2137.44	-0.01706892		2667.44	-0.01865068		3197.44	-0.01573815		3727.44	-0.03015588
547.59	-0.00299384		1077.62	-0.01244326		1607.61	-0.01132479		2137.64	-0.01775276		2667.64	-0.01820156		3197.64	-0.01621165		3727.64	-0.0300463
547.79	-0.00310229		1077.82	-0.01252024		1607.81	-0.01113792		2137.84	-0.01856891		2667.84	-0.01811745		3197.84	-0.01695675		3727.84	-0.02991355
547.99	-0.00318394		1078.02	-0.01257516		1608.01	-0.01134876		2138.04	-0.019218		2668.04	-0.01829948		3198.04	-0.01677484		3728.04	-0.03073226
548.19	-0.00285684		1078.22	-0.0119914		1608.21	-0.01196454		2138.24	-0.01823153		2668.24	-0.01809353		3198.24	-0.01774698		3728.24	-0.03066585
548.39	-0.0038093		1078.42	-0.0115812		1608.41	-0.01302183		2138.44	-0.0178182		2668.44	-0.01893792		3198.44	-0.01825411		3728.44	-0.02985299
548.59	-0.00399242		1078.62	-0.01219854		1608.61	-0.01473754		2138.64	-0.01686622		2668.64	-0.01799298		3198.64	-0.0190017		3728.64	-0.03115719
548.79	-0.00341698		1078.82	-0.0118324		1608.81	-0.01537484		2138.84	-0.01656305		2668.84	-0.01800295		3198.84	-0.02011413		3728.84	-0.03169552
548.99	-0.00351582		1079.02	-0.01077796		1609.01	-0.01681695		2139.04	-0.01611072		2669.04	-0.01674394		3199.04	-0.02068771		3729.04	-0.03225402
549.19	-0.00424493		1079.22	-0.01157859		1609.21	-0.01691285		2139.24	-0.01469335		2669.24	-0.01779761		3199.24	-0.02107761		3729.24	-0.03238586
549.39	-0.00426685		1079.42	-0.01110112		1609.41	-0.01755273		2139.44	-0.01460706		2669.44	-0.01779479		3199.44	-0.020154		3729.44	-0.03183607
549.59	-0.00461639		1079.62	-0.01094938		1609.61	-0.01628321		2139.64	-0.01428178		2669.64	-0.01793199		3199.64	-0.01966096		3729.64	-0.03166407
549.79	-0.00469786		1079.82	-0.01141384		1609.81	-0.01580191		2139.84	-0.01434125		2669.84	-0.01794794		3199.84	-0.01917244		3729.84	-0.03148573
549.99	-0.00491749		1080.02	-0.01148211		1610.01	-0.01624365		2140.04	-0.01449449		2670.04	-0.01831335		3200.04	-0.01805557		3730.04	-0.03102621
550.19	-0.00541916		1080.22	-0.01147757		1610.21	-0.01555507		2140.24	-0.01477293		2670.24	-0.01891567		3200.24	-0.01718966		3730.24	-0.03032739
550.39	-0.005747		1080.42	-0.01222004		1610.41	-0.01521263		2140.44	-0.01504731		2670.44	-0.01805187		3200.44	-0.01624147		3730.44	-0.02951201
550.59	-0.00556635		1080.62	-0.01307051		1610.61	-0.01558542		2140.64	-0.01446941		2670.64	-0.0193827		3200.64	-0.01573942		3730.64	-0.03039661
550.79	-0.00569864		1080.82	-0.01300713		1610.81	-0.01460871		2140.84	-0.01404313		2670.84	-0.0198683		3200.84	-0.0154929		3730.84	-0.03048998
550.99	-0.00486665		1081.02	-0.01326323		1611.01	-0.0143334		2141.04	-0.01440709		2671.04	-0.02039899		3201.04	-0.01468216		3731.04	-0.0310395
551.19	-0.00449481		1081.22	-0.01383119		1611.21	-0.01377818		2141.24	-0.01521764		2671.24	-0.0211246		3201.24	-0.01381967		3731.24	-0.03092225
551.39	-0.00394845		1081.42	-0.01363447		1611.41	-0.0131639		2141.44	-0.01534971		2671.44	-0.02108409		3201.44	-0.01272841		3731.44	-0.03123968
551.59	-0.00402804		1081.62	-0.01404342		1611.61	-0.01248622		2141.64	-0.01613606		2671.64	-0.02103221		3201.64	-0.01294428		3731.64	-0.03100641
551.79	-0.00386335		1081.82	-0.01452026		1611.81	-0.01252994		2141.84	-0.01679617		2671.84	-0.02124208		3201.84	-0.01235143		3731.84	-0.03183819
551.99	-0.00310682		1082.02	-0.01472934		1612.01	-0.01259725		2142.04	-0.01633965		2672.04	-0.02108721		3202.04	-0.01264386		3732.04	-0.03198463
552.19	-0.00279572		1082.22	-0.01468062		1612.21	-0.01300643		2142.24	-0.01525837		2672.24	-0.02087855		3202.24	-0.01291308		3732.24	-0.0319288
552.39	-0.00337826		1082.42	-0.01436898		1612.41	-0.01329778		2142.44	-0.01513638		2672.44	-0.02060512		3202.44	-0.01332176		3732.44	-0.03206529
552.59	-0.00278177		1082.62	-0.01445938		1612.61	-0.01373813		2142.64	-0.01435631		2672.64	-0.01923449		3202.64	-0.01406184		3732.64	-0.03381767
552.79	-0.00254737		1082.82	-0.01414204		1612.81	-0.01338739		2142.84	-0.01431338		2672.84	-0.0194127		3202.84	-0.01556236		3732.84	-0.03329116
552.99	-0.00263387		1083.02	-0.01461756		1613.01	-0.01351001		2143.04	-0.01375293		2673.04	-0.01883846		3203.04	-0.0170529		3733.04	-0.03293172
553.19	-0.0034385		1083.22	-0.01542362		1613.21	-0.01291588		2143.24	-0.01381617		2673.24	-0.01954088		3203.24	-0.01754004		3733.24	-0.03266661
553.39	-0.00429565		1083.42	-0.01482401		1613.41	-0.01311581		2143.44	-0.01461568		2673.44	-0.01955228		3203.44	-0.01753192		3733.44	-0.03157619
553.59	-0.00451635		1083.62	-0.01445823		1613.61	-0.01224502		2143.64	-0.01428006		2673.64	-0.01980299		3203.64	-0.01845771		3733.64	-0.03161035
553.79	-0.00512041		1083.82	-0.01426633		1613.81	-0.01324561		2143.84	-0.0142597		2673.84	-0.01944228		3203.84	-0.01920915		3733.84	-0.03101196
553.99	-0.00561435		1084.02	-0.01450307		1614.01	-0.01365187		2144.04	-0.01367227		2674.04	-0.01939638		3204.04	-0.01975187		3734.04	-0.03119643
554.19	-0.00592488		1084.22	-0.01385239		1614.21	-0.01335013		2144.24	-0.01409726		2674.24	-0.0196152		3204.24	-0.02076621		3734.24	-0.03130648
554.39	-0.00561567		1084.42	-0.01392682		1614.41	-0.0132738		2144.44	-0.01358925		2674.44	-0.01914213		3204.44	-0.02181127		3734.44	-0.03179187
554.59	-0.00589781		1084.62	-0.0142863		1614.61	-0.01451462		2144.64	-0.01278922		2674.64	-0.02020572		3204.64	-0.0222915		3734.64	-0.03313206
554.79	-0.00552971		1084.82	-0.01354002		1614.81	-0.01456306		2144.84	-0.01377692		2674.84	-0.02051989		3204.84	-0.0233325		3734.84	-0.03334218
554.99	-0.00475583		1085.02	-0.01329391		1615.01	-0.01501042		2145.04	-0.01532738		2675.04	-0.02068431		3205.04	-0.02381313		3735.04	-0.03308753
555.19	-0.00507655		1085.22	-0.01334633		1615.21	-0.01483861		2145.24	-0.01539116		2675.24	-0.02026852		3205.24	-0.02352321		3735.24	-0.03318572
555.39	-0.00479938		1085.42	-0.013314		1615.41	-0.01447236		2145.44	-0.01534081		2675.44	-0.0201421		3205.44	-0.02249757		3735.44	-0.03350432
555.59	-0.00546156		1085.62	-0.01275772		1615.61	-0.01336951		2145.64	-0.01537069		2675.64	-0.02035443		3205.64	-0.02159832		3735.64	-0.03365814
555.79	-0.00478462		1085.82	-0.01261654		1615.81	-0.01371462		2145.84	-0.0157113		2675.84	-0.02051593		3205.84	-0.02111166		3735.84	-0.03385438
555.99	-0.00447869		1086.02	-0.01229244		1616.01	-0.01360602		2146.04	-0.01577688		2676.04	-0.02060725		3206.04	-0.02111019		3736.04	-0.0333853
556.19	-0.00508969		1086.22	-0.01187889		1616.21	-0.01426376		2146.24	-0.01553741		2676.24	-0.02068064		3206.24	-0.02002743		3736.24	-0.03315865
556.39	-0.00514907		1086.42	-0.01224614		1616.41	-0.01422853		2146.44	-0.01571031		2676.44	-0.02035952		3206.44	-0.01967601		3736.44	-0.03351217
556.59	-0.00414984		1086.62	-0.01323631		1616.61	-0.01462484		2146.64	-0.01602211		2676.64	-0.0205214		3206.64	-0.0184695		3736.64	-0.03408593
556.79	-0.00434658		1086.82	-0.01339241		1616.81	-0.01478367		2146.84	-0.01660409		2676.84	-0.02014805		3206.84	-0.01780684		3736.84	-0.03313081
556.99	-0.00420112		1087.02	-0.01351055		1617.01	-0.0148586		2147.04	-0.01621955		2677.04	-0.02010434		3207.04	-0.01712766		3737.04	-0.03402851
557.19	-0.00412946		1087.22	-0.01428286		1617.21	-0.0148989		2147.24	-0.01706085		2677.24	-0.02071036		3207.24	-0.01683972		3737.24	-0.0339673
557.39	-0.00426544		1087.42	-0.01391953		1617.41	-0.01491691		2147.44	-0.01674984		2677.44	-0.02128084		3207.44	-0.0163201		3737.44	-0.03352594
557.59	-0.00427341		1087.62	-0.01403158		1617.61	-0.01543773		2147.64	-0.01631677		2677.64	-0.02099784		3207.64	-0.01686148		3737.64	-0.03405956
557.79	-0.00365351		1087.82	-0.01483128		1617.81	-0.0154332		2147.84	-0.01628717		2677.84	-0.02117292		3207.84	-0.01665337		3737.84	-0.03402488
557.99	-0.00347869		1088.02	-0.01550952		1618.01	-0.01488338		2148.04	-0.01629659		2678.04	-0.02193486		3208.04	-0.01648906		3738.04	-0.03469472
558.19	-0.00340129		1088.22	-0.01532025		1618.21	-0.01531581		2148.24	-0.01719091		2678.24	-0.02262994		3208.24	-0.01637082		3738.24	-0.03485563
558.39	-0.00312435		1088.42	-0.01561171		1618.41	-0.01571189		2148.44	-0.01712057		2678.44	-0.02283853		3208.44	-0.01645196		3738.44	-0.03544421
558.59	-0.00341274		1088.62	-0.01587851		1618.61	-0.01627354		2148.64	-0.01733181		2678.64	-0.02339698		3208.64	-0.01669087		3738.64	-0.03553185
558.79	-0.00340906		1088.82	-0.01541171		1618.81	-0.01677432		2148.84	-0.01822863		2678.84	-0.02404661		3208.84	-0.01719254		3738.84	-0.03512316
558.99	-0.00367512		1089.02	-0.01506943		1619.01	-0.01648904		2149.04	-0.01800249		2679.04	-0.02395072		3209.04	-0.01713594		3739.04	-0.03459006
559.19	-0.0042533		1089.22	-0.01491101		1619.21	-0.0165767		2149.24	-0.01739974		2679.24	-0.02391729		3209.24	-0.01727077		3739.24	-0.0349501
559.39	-0.00491204		1089.42	-0.01470185		1619.41	-0.01648226		2149.44	-0.01771496		2679.44	-0.02411912		3209.44	-0.01696622		3739.44	-0.03491537
559.59	-0.00564182		1089.62	-0.0135041		1619.61	-0.0167558		2149.64	-0.01830902		2679.64	-0.02410646		3209.64	-0.01731032		3739.64	-0.03447863
559.79	-0.00568882		1089.82	-0.01330766		1619.81	-0.01807503		2149.84	-0.01886962		2679.84	-0.02412917		3209.84	-0.01795237		3739.84	-0.03411143
