# Supplementary material for: Functional development of a V3/glycan-specific broadly neutralizing antibody isolated from a case of HIV superinfection
Source: eLife journal article supplement (doi:10.7554/elife.68110), 2021-07-15
Supplement: fig2-data2 [file E7.xls]

Vers 3.43 Data Simulation
Conc1	1.25E-07	1.25E-07	1.25E-07	1.25E-07	1.25E-07	1.25E-07	1.25E-07	1.25E-07
Start1	200	729.99	1259.99	1789.98	2319.98	2849.98	3379.98	3909.98
Stop1	559.79	1089.79	1619.79	2149.78	2679.78	3209.78	3739.78	4269.78
Time1	Data1	Sim1	Time2	Data2	Sim2	Time3	Data3	Sim3	Time4	Data4	Sim4	Time5	Data5	Sim5	Time6	Data6	Sim6	Time7	Data7	Sim7	Time8	Data8	Sim8
200	0.00303077		729.99	0.00788447		1259.99	-0.0014951		1789.98	0.00234063		2319.98	0.00997847		2849.98	0.0092368		3379.98	0.01019759		3909.98	0.00556645
200.2	0.00280499		730.19	0.00821772		1260.19	-0.00125051		1790.18	0.00319818		2320.18	0.00959497		2850.18	0.00885489		3380.18	0.01024654		3910.18	0.00569967
200.4	0.00241958		730.39	0.0082149		1260.39	-0.00175776		1790.38	0.00326011		2320.38	0.00922813		2850.38	0.00861175		3380.38	0.01058083		3910.38	0.00490627
200.6	0.00231403		730.59	0.00870342		1260.59	-0.00184909		1790.58	0.00357744		2320.58	0.00882588		2850.58	0.00861596		3380.58	0.0105431		3910.58	0.00441346
200.8	0.00245886		730.79	0.00883428		1260.79	-0.00173269		1790.78	0.00408733		2320.78	0.00796188		2850.78	0.00844779		3380.78	0.00985486		3910.78	0.00371452
201	0.00211425		730.99	0.00973234		1260.99	-0.00090006		1790.98	0.00430317		2320.98	0.00823949		2850.98	0.00782615		3380.98	0.01005937		3910.98	0.00303417
201.2	0.00145299		731.19	0.01030643		1261.19	-0.00128896		1791.18	0.00458432		2321.18	0.00767208		2851.18	0.00683523		3381.18	0.00942229		3911.18	0.0025727
201.4	0.00155223		731.39	0.01106832		1261.39	-0.00091275		1791.38	0.00460749		2321.38	0.00735054		2851.38	0.00621311		3381.38	0.00951277		3911.38	0.00229245
201.6	0.0023734		731.59	0.01168663		1261.59	0.00018278		1791.58	0.00413335		2321.58	0.00750267		2851.58	0.00576811		3381.58	0.00874332		3911.58	0.00212156
201.8	0.00227034		731.79	0.01253866		1261.79	-0.0003384		1791.78	0.00378929		2321.78	0.00807369		2851.78	0.00553933		3381.78	0.00777501		3911.78	0.00197525
202	0.00219258		731.99	0.01299973		1261.99	-0.0001227		1791.98	0.00377867		2321.98	0.00763798		2851.98	0.00490862		3381.98	0.00659303		3911.98	0.002361
202.2	0.00277699		732.19	0.0128548		1262.19	-0.00001104		1792.18	0.00296197		2322.18	0.00742108		2852.18	0.0045442		3382.18	0.00620229		3912.18	0.00275586
202.4	0.00249664		732.39	0.01269595		1262.39	-0.00125237		1792.38	0.00288213		2322.38	0.00740821		2852.38	0.00378044		3382.38	0.00468018		3912.38	0.00331311
202.6	0.00417926		732.59	0.01196517		1262.59	-0.00053064		1792.58	0.00279527		2322.58	0.00832075		2852.58	0.00408454		3382.58	0.00461295		3912.58	0.00384405
202.8	0.00379851		732.79	0.01272639		1262.79	0.00006902		1792.78	0.00261612		2322.78	0.00849489		2852.78	0.00435989		3382.78	0.0041429		3912.78	0.004146
203	0.00344988		732.99	0.01235658		1262.99	0.00018187		1792.98	0.00250864		2322.98	0.00797453		2852.98	0.00512547		3382.98	0.00402577		3912.98	0.0043795
203.2	0.0040416		733.19	0.0124109		1263.19	-0.0005235		1793.18	0.00255717		2323.18	0.00659229		2853.18	0.00521508		3383.18	0.00442547		3913.18	0.00463387
203.4	0.0031164		733.39	0.01173105		1263.39	-0.00023696		1793.38	0.00307652		2323.38	0.00594844		2853.38	0.00534419		3383.38	0.003459		3913.38	0.00537597
203.6	0.00247077		733.59	0.01163386		1263.59	-0.00036885		1793.58	0.00200258		2323.58	0.00630239		2853.58	0.00596958		3383.58	0.00388627		3913.58	0.00452567
203.8	0.00326422		733.79	0.0118879		1263.79	-0.00056438		1793.78	0.00154473		2323.78	0.00569983		2853.78	0.00635074		3383.78	0.00519357		3913.78	0.00433761
204	0.00249046		733.99	0.01173664		1263.99	-0.00055273		1793.98	0.00122077		2323.98	0.00506993		2853.98	0.006821		3383.98	0.00544749		3913.98	0.00397964
204.2	0.002744		734.19	0.01209831		1264.19	-0.00158469		1794.18	0.00134999		2324.18	0.00503627		2854.18	0.00762511		3384.18	0.00602119		3914.18	0.00414396
204.4	0.00274946		734.39	0.01147435		1264.39	-0.0027232		1794.38	0.00057634		2324.38	0.0049299		2854.38	0.00831535		3384.38	0.00692213		3914.38	0.00333741
204.6	0.00307582		734.59	0.01215338		1264.59	-0.00236383		1794.58	-0.00009293		2324.58	0.00541488		2854.58	0.009057		3384.58	0.00734531		3914.58	0.00306538
204.8	0.00340948		734.79	0.01249405		1264.79	-0.00228323		1794.78	-0.00003796		2324.78	0.00580764		2854.78	0.00981848		3384.78	0.00819832		3914.78	0.00212337
205	0.00313988		734.99	0.01335016		1264.99	-0.0023806		1794.98	-0.0005622		2324.98	0.00671822		2854.98	0.00938425		3384.98	0.00931901		3914.98	0.00118641
205.2	0.0035286		735.19	0.01371798		1265.19	-0.00341752		1795.18	-0.00083425		2325.18	0.00678591		2855.18	0.00898337		3385.18	0.00877512		3915.18	0.00128899
205.4	0.00410357		735.39	0.01449374		1265.39	-0.00294416		1795.38	-0.00083532		2325.38	0.00734911		2855.38	0.00910644		3385.38	0.00887015		3915.38	0.00049575
205.6	0.00483253		735.59	0.01519121		1265.59	-0.00316534		1795.58	-0.00125563		2325.58	0.00868308		2855.58	0.00902749		3385.58	0.00859999		3915.58	-0.00046891
205.8	0.00486225		735.79	0.01541165		1265.79	-0.00504068		1795.78	-0.00099404		2325.78	0.00900885		2855.78	0.00786609		3385.78	0.00829322		3915.78	-0.00124493
206	0.00516051		735.99	0.0143417		1265.99	-0.00421792		1795.98	-0.00023699		2325.98	0.00885474		2855.98	0.0073465		3385.98	0.00828565		3915.98	-0.00144658
206.2	0.00604004		736.19	0.01345111		1266.19	-0.00396401		1796.18	0.00001195		2326.18	0.00935957		2856.18	0.00768483		3386.18	0.00815619		3916.18	-0.00105839
206.4	0.0058593		736.39	0.01256931		1266.39	-0.00303293		1796.38	0.00114096		2326.38	0.00875292		2856.38	0.00821815		3386.38	0.0071941		3916.38	-0.00104968
206.6	0.00565235		736.59	0.01145062		1266.59	-0.00150744		1796.58	0.00139197		2326.58	0.00962439		2856.58	0.00801479		3386.58	0.00731739		3916.58	-0.00110848
206.8	0.00455355		736.79	0.01141617		1266.79	-0.00088849		1796.78	0.00256106		2326.78	0.00986321		2856.78	0.00867961		3386.78	0.00702208		3916.78	-0.00038881
207	0.00362217		736.99	0.01118683		1266.99	0.00084724		1796.98	0.00297218		2326.98	0.00909795		2856.98	0.00849766		3386.98	0.0075504		3916.98	-0.00020474
207.2	0.00323249		737.19	0.01081298		1267.19	0.00199516		1797.18	0.00217791		2327.18	0.00885789		2857.18	0.00868512		3387.18	0.00685152		3917.18	0.0002052
207.4	0.00228806		737.39	0.01033049		1267.39	0.00334701		1797.38	0.00257505		2327.38	0.0094806		2857.38	0.00805004		3387.38	0.00677131		3917.38	0.00115856
207.6	0.00135577		737.59	0.00998927		1267.59	0.00474041		1797.58	0.00168023		2327.58	0.00944206		2857.58	0.00800456		3387.58	0.00715956		3917.58	0.00027268
207.8	0.00117922		737.79	0.00968623		1267.79	0.00469553		1797.78	0.0025004		2327.78	0.00839465		2857.78	0.00823622		3387.78	0.00732063		3917.78	0.00009451
208	0.00002956		737.99	0.00951256		1267.99	0.00447697		1797.98	0.00288513		2327.98	0.00837746		2857.98	0.00863476		3387.98	0.00688935		3917.98	0.00096407
208.2	0.00011268		738.19	0.00928976		1268.19	0.00360294		1798.18	0.00296272		2328.18	0.00915699		2858.18	0.00923882		3388.18	0.00627477		3918.18	0.00108542
208.4	0.0001262		738.39	0.00926972		1268.39	0.00370778		1798.38	0.00304561		2328.38	0.00942239		2858.38	0.00934079		3388.38	0.0062654		3918.38	0.00126845
208.6	-0.00059542		738.59	0.01029695		1268.59	0.00368705		1798.58	0.00250151		2328.58	0.00990824		2858.58	0.00986144		3388.58	0.00609037		3918.58	0.00161366
208.8	-0.00053195		738.79	0.01075894		1268.79	0.00205385		1798.78	0.00262329		2328.78	0.00955384		2858.78	0.00936387		3388.78	0.00609281		3918.78	0.00117806
209	0.00041075		738.99	0.01100557		1268.99	0.00083555		1798.98	0.00201156		2328.98	0.00954588		2858.98	0.00874847		3388.98	0.0055141		3918.98	0.000862
209.2	0.00085435		739.19	0.01066692		1269.19	-0.00044255		1799.18	0.0015806		2329.18	0.00987587		2859.18	0.00830372		3389.18	0.00484608		3919.18	0.0003901
209.4	0.0013735		739.39	0.01114123		1269.39	-0.00141867		1799.38	0.00148746		2329.38	0.00994734		2859.38	0.00892923		3389.38	0.00513048		3919.38	-0.00007218
209.6	0.00318315		739.59	0.01110907		1269.59	-0.003661		1799.58	0.00090177		2329.58	0.01035433		2859.58	0.00867857		3389.58	0.00475663		3919.58	-0.00012133
209.8	0.00451479		739.79	0.01025467		1269.79	-0.00491488		1799.78	-0.00011151		2329.78	0.00925786		2859.78	0.00881644		3389.78	0.00429667		3919.78	-0.0005507
210	0.00508697		739.99	0.00984715		1269.99	-0.00423305		1799.98	0.00003755		2329.98	0.0090567		2859.98	0.01011507		3389.98	0.00377999		3919.98	-0.00048699
210.2	0.00543021		740.19	0.00940415		1270.19	-0.00530322		1800.18	0.00061475		2330.18	0.00797191		2860.18	0.01064701		3390.18	0.00279426		3920.18	-0.00003714
210.4	0.00474589		740.39	0.00882934		1270.39	-0.00541526		1800.38	0.00134605		2330.38	0.00667289		2860.38	0.01036112		3390.38	0.00301071		3920.38	-0.00101724
210.6	0.00423217		740.59	0.00876286		1270.59	-0.00557446		1800.58	0.00111497		2330.58	0.00636922		2860.58	0.0106079		3390.58	0.00347186		3920.58	-0.00202659
210.8	0.00375072		740.79	0.00824676		1270.79	-0.00540055		1800.78	0.00163545		2330.78	0.00645144		2860.78	0.01182772		3390.78	0.00490795		3920.78	-0.00133299
211	0.00213676		740.99	0.00870669		1270.99	-0.00419049		1800.98	0.00130186		2330.98	0.00496545		2860.98	0.01137774		3390.98	0.00554022		3920.98	-0.00077502
211.2	0.00169929		741.19	0.00884658		1271.19	-0.00449842		1801.18	0.00041665		2331.18	0.00483304		2861.18	0.01137915		3391.18	0.00562427		3921.18	-0.00109203
211.4	0.00127863		741.39	0.00936439		1271.39	-0.00385652		1801.38	0.00147208		2331.38	0.00399044		2861.38	0.01151495		3391.38	0.00711646		3921.38	-0.00091024
211.6	0.0002647		741.59	0.01020395		1271.59	-0.00326211		1801.58	0.00182631		2331.58	0.00340678		2861.58	0.01171566		3391.58	0.00771381		3921.58	-0.00204512
211.8	-0.00015939		741.79	0.01107484		1271.79	-0.00342784		1801.78	0.00266276		2331.78	0.0031395		2861.78	0.01321361		3391.78	0.00770552		3921.78	-0.00098983
212	-0.00128912		741.99	0.01104079		1271.99	-0.00355061		1801.98	0.00346473		2331.98	0.00408647		2861.98	0.0143882		3391.98	0.00732157		3921.98	-0.0006249
212.2	-0.00133101		742.19	0.0123419		1272.19	-0.00315966		1802.18	0.00341071		2332.18	0.00450689		2862.18	0.01467589		3392.18	0.00750149		3922.18	-0.00074007
212.4	-0.00207579		742.39	0.012861		1272.39	-0.00273837		1802.38	0.00421103		2332.38	0.00506711		2862.38	0.01402149		3392.38	0.00731044		3922.38	-0.00081716
212.6	-0.0023337		742.59	0.01250517		1272.59	-0.00292684		1802.58	0.00347011		2332.58	0.00545097		2862.58	0.014214		3392.58	0.00832506		3922.58	-0.00076866
212.8	-0.00175423		742.79	0.01243154		1272.79	-0.00213812		1802.78	0.00289862		2332.78	0.00586947		2862.78	0.0136575		3392.78	0.0082896		3922.78	-0.00162231
213	-0.00118554		742.99	0.01198732		1272.99	-0.00124304		1802.98	0.00307073		2332.98	0.00670439		2862.98	0.01390947		3392.98	0.00778498		3922.98	-0.00164927
213.2	-0.00111121		743.19	0.01148964		1273.19	-0.00095442		1803.18	0.00256426		2333.18	0.00779028		2863.18	0.01367513		3393.18	0.00722643		3923.18	-0.00150918
213.4	-0.00044438		743.39	0.01147436		1273.39	-0.00059102		1803.38	0.00214087		2333.38	0.00797028		2863.38	0.01400232		3393.38	0.006844		3923.38	-0.00095852
213.6	0.00065485		743.59	0.01043801		1273.59	-0.00104696		1803.58	0.00183879		2333.58	0.00848328		2863.58	0.01377262		3393.58	0.00508693		3923.58	-0.00066962
213.8	0.00082206		743.79	0.00957221		1273.79	-0.00009616		1803.78	0.0022596		2333.78	0.00799872		2863.78	0.01362634		3393.78	0.00478501		3923.78	-0.00114139
214	0.00083562		743.99	0.00871351		1273.99	0.00029997		1803.98	0.00277342		2333.98	0.00826542		2863.98	0.01298479		3393.98	0.0038817		3923.98	-0.00079601
214.2	0.00162138		744.19	0.00731553		1274.19	0.0003767		1804.18	0.00332483		2334.18	0.00737216		2864.18	0.01296155		3394.18	0.00333911		3924.18	-0.00041707
214.4	0.00156658		744.39	0.00734253		1274.39	0.00109254		1804.38	0.00321818		2334.38	0.00698862		2864.38	0.01260844		3394.38	0.00416317		3924.38	-0.00110901
214.6	0.00174219		744.59	0.00694225		1274.59	0.00221604		1804.58	0.00270671		2334.58	0.00637629		2864.58	0.01259408		3394.58	0.00424038		3924.58	-0.00134953
214.8	0.0015356		744.79	0.00725702		1274.79	0.00226028		1804.78	0.00277643		2334.78	0.00572492		2864.78	0.01179834		3394.78	0.00431028		3924.78	0.00003328
215	0.00186548		744.99	0.00812575		1274.99	0.0020925		1804.98	0.00224172		2334.98	0.00423791		2864.98	0.01125738		3394.98	0.00482567		3924.98	-0.00026483
215.2	0.00202101		745.19	0.00875144		1275.19	0.00171905		1805.18	0.00241553		2335.18	0.00393087		2865.18	0.01096865		3395.18	0.00541491		3925.18	-0.00036822
215.4	0.0018175		745.39	0.00952556		1275.39	0.00113545		1805.38	0.00303736		2335.38	0.00394547		2865.38	0.01111122		3395.38	0.005991		3925.38	-0.00089841
215.6	0.00206627		745.59	0.01034108		1275.59	0.00072051		1805.58	0.00205296		2335.58	0.00388018		2865.58	0.01085245		3395.58	0.0062457		3925.58	-0.00002322
215.8	0.00140664		745.79	0.01040128		1275.79	0.00012596		1805.78	0.00183814		2335.78	0.0032636		2865.78	0.01121276		3395.78	0.00601818		3925.78	0.00035605
216	0.00123175		745.99	0.01048182		1275.99	-0.00106451		1805.98	0.00178049		2335.98	0.00282966		2865.98	0.01118169		3395.98	0.00671151		3925.98	-0.00086641
216.2	0.00149654		746.19	0.01155751		1276.19	-0.00220109		1806.18	0.00159745		2336.18	0.00313962		2866.18	0.01135137		3396.18	0.00696797		3926.18	-0.0015318
216.4	0.00164128		746.39	0.01066875		1276.39	-0.00257089		1806.38	0.00219148		2336.38	0.00281713		2866.38	0.0111683		3396.38	0.00679062		3926.38	-0.00241583
216.6	0.00136382		746.59	0.01059352		1276.59	-0.00321805		1806.58	0.00226022		2336.58	0.0025724		2866.58	0.01135996		3396.58	0.00787474		3926.58	-0.00325774
216.8	0.00100254		746.79	0.01041368		1276.79	-0.00262891		1806.78	0.00238643		2336.78	0.00250207		2866.78	0.01187074		3396.78	0.00737554		3926.78	-0.00324817
217	0.00112801		746.99	0.01037512		1276.99	-0.00381181		1806.98	0.00240028		2336.98	0.0027863		2866.98	0.01207572		3396.98	0.00608808		3926.98	-0.00281342
217.2	0.00067186		747.19	0.01022812		1277.19	-0.00344632		1807.18	0.00247584		2337.18	0.00336056		2867.18	0.01233159		3397.18	0.00584137		3927.18	-0.00292377
217.4	0.00064785		747.39	0.00941805		1277.39	-0.00307239		1807.38	0.00272264		2337.38	0.00324477		2867.38	0.01277534		3397.38	0.0054662		3927.38	-0.00254722
217.6	0.00153624		747.59	0.00855268		1277.59	-0.00275273		1807.58	0.00354176		2337.58	0.00381305		2867.58	0.01330076		3397.58	0.00443006		3927.58	-0.00157611
217.8	0.00169437		747.79	0.00777826		1277.79	-0.00161273		1807.78	0.00424851		2337.78	0.00319152		2867.78	0.01350298		3397.78	0.00440512		3927.78	-0.0017342
218	0.00217695		747.99	0.00723377		1277.99	-0.00171437		1807.98	0.00404062		2337.98	0.00353979		2867.98	0.01483136		3397.98	0.00485212		3927.98	-0.00140805
218.2	0.00289151		748.19	0.00648396		1278.19	-0.00089151		1808.18	0.0038758		2338.18	0.00340143		2868.18	0.01650208		3398.18	0.00382695		3928.18	-0.00112366
218.4	0.00234066		748.39	0.00716034		1278.39	-0.00066672		1808.38	0.00360487		2338.38	0.00308869		2868.38	0.01685326		3398.38	0.00453825		3928.38	-0.00102162
218.6	0.0010729		748.59	0.00610613		1278.59	0.00043788		1808.58	0.00416005		2338.58	0.00240342		2868.58	0.01658394		3398.58	0.00346034		3928.58	-0.00059393
218.8	0.00120082		748.79	0.00687413		1278.79	0.00069191		1808.78	0.00380463		2338.78	0.00259744		2868.78	0.01649412		3398.78	0.00342192		3928.78	0.00009446
219	0.00057592		748.99	0.00722283		1278.99	0.00045109		1808.98	0.00279501		2338.98	0.00300595		2868.98	0.01682544		3398.98	0.00421251		3928.98	-0.00038439
219.2	-0.00015609		749.19	0.00794532		1279.19	0.00005613		1809.18	0.00232748		2339.18	0.00392653		2869.18	0.01677165		3399.18	0.004456		3929.18	-0.00035303
219.4	0.00020314		749.39	0.00852608		1279.39	-0.00073339		1809.38	0.00197936		2339.38	0.00524932		2869.38	0.01700727		3399.38	0.0050937		3929.38	-0.00010185
219.6	-0.00020675		749.59	0.00925235		1279.59	-0.00067114		1809.58	0.00136812		2339.58	0.00443119		2869.58	0.0165399		3399.58	0.00551379		3929.58	0.00121369
219.8	-0.00078892		749.79	0.010079		1279.79	-0.00123258		1809.78	0.00267851		2339.78	0.00427357		2869.78	0.01601231		3399.78	0.00508225		3929.78	0.00047286
220	0.00017766		749.99	0.01070487		1279.99	-0.00195445		1809.98	0.00268016		2339.98	0.00509746		2869.98	0.01563598		3399.98	0.00535174		3929.98	-0.00053385
220.2	0.00035633		750.19	0.01134455		1280.19	-0.00200923		1810.18	0.00288191		2340.18	0.00581514		2870.18	0.01564364		3400.18	0.00448908		3930.18	-0.00100437
220.4	-0.00041213		750.39	0.01151358		1280.39	-0.0019446		1810.38	0.00274186		2340.38	0.00571452		2870.38	0.01505541		3400.38	0.00426057		3930.38	-0.00095817
220.6	-0.00059093		750.59	0.01196867		1280.59	-0.00293739		1810.58	0.00309811		2340.58	0.00628578		2870.58	0.01427414		3400.58	0.00457503		3930.58	-0.00179063
220.8	-0.00008714		750.79	0.0119639		1280.79	-0.00264899		1810.78	0.00217958		2340.78	0.00625788		2870.78	0.01419878		3400.78	0.00464876		3930.78	-0.0017818
221	-0.00063974		750.99	0.01300692		1280.99	-0.00313368		1810.98	0.00221841		2340.98	0.0060981		2870.98	0.01274596		3400.98	0.00394257		3930.98	-0.00206868
221.2	-0.00003412		751.19	0.01294281		1281.19	-0.00226229		1811.18	0.00194699		2341.18	0.00593856		2871.18	0.01217418		3401.18	0.0043446		3931.18	-0.00265415
221.4	0.00100473		751.39	0.01241902		1281.39	-0.00225371		1811.38	0.00149341		2341.38	0.00514107		2871.38	0.01182488		3401.38	0.00443801		3931.38	-0.00161571
221.6	0.00221147		751.59	0.01169836		1281.59	-0.00209566		1811.58	0.00160128		2341.58	0.00497914		2871.58	0.01249545		3401.58	0.00486563		3931.58	-0.00134895
221.8	0.00172101		751.79	0.01105481		1281.79	-0.00203197		1811.78	0.00237212		2341.78	0.00420408		2871.78	0.01239625		3401.78	0.00542389		3931.78	-0.00167224
222	0.00177385		751.99	0.01077106		1281.99	-0.00293995		1811.98	0.00215281		2341.98	0.00339869		2871.98	0.01298179		3401.98	0.00674475		3931.98	-0.00177846
222.2	0.00187045		752.19	0.01081245		1282.19	-0.00275612		1812.18	0.00155478		2342.18	0.00271099		2872.18	0.01334751		3402.18	0.00583161		3932.18	-0.0025193
222.4	0.00175619		752.39	0.01088687		1282.39	-0.00214289		1812.38	0.00163534		2342.38	0.00203618		2872.38	0.01304058		3402.38	0.00631885		3932.38	-0.00236504
222.6	0.00108217		752.59	0.0102244		1282.59	-0.00294544		1812.58	0.00235237		2342.58	0.00103126		2872.58	0.0128828		3402.58	0.00510446		3932.58	-0.00298901
222.8	0.00197332		752.79	0.01090203		1282.79	-0.00314314		1812.78	0.0008295		2342.78	0.00156754		2872.78	0.01343999		3402.78	0.00505496		3932.78	-0.00268544
223	0.00126254		752.99	0.01114333		1282.99	-0.00471492		1812.98	-0.00049832		2342.98	0.00135727		2872.98	0.01402095		3402.98	0.00576901		3932.98	-0.00390428
223.2	0.0018935		753.19	0.01060159		1283.19	-0.00533659		1813.18	-0.00061104		2343.18	0.0013868		2873.18	0.01490075		3403.18	0.00612058		3933.18	-0.00435268
223.4	0.00176855		753.39	0.01046021		1283.39	-0.00523645		1813.38	-0.00013339		2343.38	0.00099109		2873.38	0.01557978		3403.38	0.00631193		3933.38	-0.00382842
223.6	0.00135033		753.59	0.01060766		1283.59	-0.00486982		1813.58	0.00009895		2343.58	0.00099142		2873.58	0.01556517		3403.58	0.00620197		3933.58	-0.00331339
223.8	0.00150773		753.79	0.01021455		1283.79	-0.00544345		1813.78	0.0004966		2343.78	0.00060694		2873.78	0.01599701		3403.78	0.00593623		3933.78	-0.00397
224	0.00190263		753.99	0.00960187		1283.99	-0.00568129		1813.98	-0.00048788		2343.98	0.00123335		2873.98	0.01598309		3403.98	0.00599573		3933.98	-0.0044292
224.2	0.0009656		754.19	0.00923138		1284.19	-0.00534804		1814.18	-0.00027413		2344.18	0.00161193		2874.18	0.01655855		3404.18	0.00612111		3934.18	-0.00385822
224.4	0.00026795		754.39	0.00931635		1284.39	-0.00507615		1814.38	-0.0007327		2344.38	0.00181003		2874.38	0.01623707		3404.38	0.00667182		3934.38	-0.00304028
224.6	-0.0000284		754.59	0.00921524		1284.59	-0.00477998		1814.58	0.00008245		2344.58	0.00171647		2874.58	0.01560125		3404.58	0.00737479		3934.58	-0.00394438
224.8	0.00003232		754.79	0.00981415		1284.79	-0.00444921		1814.78	0.00140299		2344.78	0.00221471		2874.78	0.01512157		3404.78	0.00785769		3934.78	-0.00241182
225	-0.00024661		754.99	0.00993619		1284.99	-0.00463734		1814.98	0.0015685		2344.98	0.00238249		2874.98	0.01449656		3404.98	0.00816248		3934.98	-0.00215569
225.2	0.00079871		755.19	0.01024138		1285.19	-0.00351774		1815.18	0.00176302		2345.18	0.00308945		2875.18	0.01444684		3405.18	0.00835903		3935.18	-0.00087411
225.4	0.00030116		755.39	0.011112		1285.39	-0.00298628		1815.38	0.00370832		2345.38	0.00357114		2875.38	0.01431672		3405.38	0.00801263		3935.38	0.00023872
225.6	0.00041189		755.59	0.01100268		1285.59	-0.00246192		1815.58	0.00412498		2345.58	0.00413555		2875.58	0.01483392		3405.58	0.00816046		3935.58	0.00065203
225.8	-0.00007361		755.79	0.01205178		1285.79	-0.00249789		1815.78	0.00541065		2345.78	0.00355265		2875.78	0.01432358		3405.78	0.00775298		3935.78	0.00052893
226	0.00013231		755.99	0.01308146		1285.99	-0.00346753		1815.98	0.00634067		2345.98	0.00287397		2875.98	0.01517661		3405.98	0.00728354		3935.98	0.0005602
226.2	0.00083939		756.19	0.01359591		1286.19	-0.00346632		1816.18	0.00626053		2346.18	0.00292511		2876.18	0.0157591		3406.18	0.00547126		3936.18	0.00053653
226.4	0.00146292		756.39	0.01348424		1286.39	-0.00318284		1816.38	0.00700474		2346.38	0.00295532		2876.38	0.01586145		3406.38	0.00410172		3936.38	0.00084444
226.6	0.00148146		756.59	0.01375368		1286.59	-0.00441641		1816.58	0.00706567		2346.58	0.00227229		2876.58	0.01615979		3406.58	0.0032332		3936.58	0.000325
226.8	0.00098966		756.79	0.0135946		1286.79	-0.004526		1816.78	0.00596874		2346.78	0.00260663		2876.78	0.01616896		3406.78	0.00282835		3936.78	0.00032387
227	-0.0002387		756.99	0.01435335		1286.99	-0.0050436		1816.98	0.00577957		2346.98	0.0019649		2876.98	0.01660046		3406.98	0.00239862		3936.98	-0.00147521
227.2	-0.00024326		757.19	0.01419164		1287.19	-0.00453833		1817.18	0.00520029		2347.18	0.00164027		2877.18	0.01712639		3407.18	0.00238586		3937.18	-0.00199066
227.4	-0.00055226		757.39	0.01401118		1287.39	-0.0041794		1817.38	0.00515426		2347.38	0.00056019		2877.38	0.01747731		3407.38	0.00308346		3937.38	-0.00142925
227.6	-0.00054978		757.59	0.01311346		1287.59	-0.00466866		1817.58	0.00456161		2347.58	0.00107693		2877.58	0.01742037		3407.58	0.00287927		3937.58	-0.00091607
227.8	-0.00085698		757.79	0.01202059		1287.79	-0.00464917		1817.78	0.00392401		2347.78	0.00036408		2877.78	0.01742016		3407.78	0.00327556		3937.78	-0.00187775
228	-0.00038906		757.99	0.01186345		1287.99	-0.00420124		1817.98	0.0034091		2347.98	0.00089057		2877.98	0.01712496		3407.98	0.00406459		3937.98	-0.00211011
228.2	-0.00112602		758.19	0.01140704		1288.19	-0.00334148		1818.18	0.00279084		2348.18	0.00110336		2878.18	0.01647551		3408.18	0.00467376		3938.18	-0.00139813
228.4	-0.00174077		758.39	0.01131706		1288.39	-0.00330839		1818.38	0.00226396		2348.38	0.00134245		2878.38	0.0150882		3408.38	0.00527807		3938.38	-0.00155852
228.6	-0.00215801		758.59	0.01105345		1288.59	-0.0036912		1818.58	0.00256221		2348.58	0.00173699		2878.58	0.01514549		3408.58	0.00608642		3938.58	-0.00241344
228.8	-0.00145429		758.79	0.01118069		1288.79	-0.00368925		1818.78	0.00279839		2348.78	0.00286806		2878.78	0.01465749		3408.78	0.00624601		3938.78	-0.00204873
229	-0.0015174		758.99	0.01080464		1288.99	-0.00348995		1818.98	0.00193637		2348.98	0.00333202		2878.98	0.01463354		3408.98	0.0070741		3938.98	-0.00323517
229.2	-0.00113893		759.19	0.01148675		1289.19	-0.00169192		1819.18	0.00280633		2349.18	0.00450178		2879.18	0.01472663		3409.18	0.00631654		3939.18	-0.00237219
229.4	-0.00104065		759.39	0.01190039		1289.39	-0.00159319		1819.38	0.00252585		2349.38	0.00547292		2879.38	0.01537513		3409.38	0.00489256		3939.38	-0.0029129
229.6	-0.00074481		759.59	0.01192098		1289.59	-0.00180334		1819.58	0.00212153		2349.58	0.00526204		2879.58	0.01629831		3409.58	0.00502684		3939.58	-0.00185739
229.8	-0.00046099		759.79	0.01232806		1289.79	-0.00195159		1819.78	0.00299312		2349.78	0.00496224		2879.78	0.0166054		3409.78	0.00498991		3939.78	-0.00203066
230	-0.00007282		759.99	0.01192182		1289.99	-0.00273098		1819.98	0.00375401		2349.98	0.00480007		2879.98	0.01720359		3409.98	0.0049987		3939.98	-0.00233952
230.2	0.00103057		760.19	0.01153368		1290.19	-0.00215141		1820.18	0.00283168		2350.18	0.00503911		2880.18	0.0172291		3410.18	0.00450985		3940.18	-0.00235042
230.4	0.00175808		760.39	0.01222223		1290.39	-0.00232113		1820.38	0.00337224		2350.38	0.00556218		2880.38	0.01755356		3410.38	0.00452011		3940.38	-0.00253226
230.6	0.00136368		760.59	0.0125933		1290.59	-0.00263855		1820.58	0.00322214		2350.58	0.00473333		2880.58	0.01747538		3410.58	0.00468521		3940.58	-0.00236015
230.8	0.00116029		760.79	0.01333113		1290.79	-0.00270566		1820.78	0.00322249		2350.78	0.00434577		2880.78	0.01777775		3410.78	0.00438154		3940.78	-0.00240818
231	0.00082091		760.99	0.01440485		1290.99	-0.00160999		1820.98	0.0036216		2350.98	0.00476183		2880.98	0.01772638		3410.98	0.0037876		3940.98	-0.00312824
231.2	0.00125619		761.19	0.01386396		1291.19	-0.00216713		1821.18	0.00287831		2351.18	0.00364298		2881.18	0.01715115		3411.18	0.00461742		3941.18	-0.00375144
231.4	0.00086232		761.39	0.01364292		1291.39	-0.00253243		1821.38	0.00267921		2351.38	0.00314591		2881.38	0.01724422		3411.38	0.00547135		3941.38	-0.00292499
231.6	0.00105765		761.59	0.01316791		1291.59	-0.00325462		1821.58	0.00285947		2351.58	0.0044716		2881.58	0.01639456		3411.58	0.00541004		3941.58	-0.00346224
231.8	0.00107443		761.79	0.01305899		1291.79	-0.0032488		1821.78	0.00337057		2351.78	0.00418712		2881.78	0.01623992		3411.78	0.00537665		3941.78	-0.00384771
232	0.00080527		761.99	0.0122474		1291.99	-0.00412646		1821.98	0.00313228		2351.98	0.00407724		2881.98	0.01556536		3411.98	0.00548518		3941.98	-0.00341784
232.2	0.00064004		762.19	0.01085298		1292.19	-0.00493309		1822.18	0.00281046		2352.18	0.0037683		2882.18	0.01495549		3412.18	0.00531957		3942.18	-0.0027998
232.4	0.00021361		762.39	0.0106697		1292.39	-0.00533308		1822.38	0.00355777		2352.38	0.00354459		2882.38	0.01498909		3412.38	0.00548901		3942.38	-0.00339834
232.6	-0.00051318		762.59	0.00946748		1292.59	-0.00582311		1822.58	0.0032215		2352.58	0.00345606		2882.58	0.01617144		3412.58	0.00521418		3942.58	-0.00306352
232.8	-0.00069879		762.79	0.00922492		1292.79	-0.00535522		1822.78	0.00322604		2352.78	0.00283907		2882.78	0.01663742		3412.78	0.00404115		3942.78	-0.00262438
233	-0.00071489		762.99	0.00948646		1292.99	-0.00571258		1822.98	0.00359354		2352.98	0.0033758		2882.98	0.01740646		3412.98	0.00358596		3942.98	-0.00123971
233.2	-0.00016804		763.19	0.01010581		1293.19	-0.00594284		1823.18	0.00361316		2353.18	0.00324223		2883.18	0.01777506		3413.18	0.00218733		3943.18	-0.00025747
233.4	-0.00091714		763.39	0.01098399		1293.39	-0.00620098		1823.38	0.0024104		2353.38	0.00267699		2883.38	0.01857815		3413.38	0.00224608		3943.38	-0.0002532
233.6	-0.00115209		763.59	0.01159951		1293.59	-0.0059166		1823.58	0.00216073		2353.58	0.00171845		2883.58	0.01900951		3413.58	0.0029104		3943.58	0.00019813
233.8	-0.00143913		763.79	0.01196556		1293.79	-0.00563153		1823.78	0.0010629		2353.78	0.00180356		2883.78	0.01932894		3413.78	0.00337794		3943.78	-0.00017816
234	-0.00061645		763.99	0.01217173		1293.99	-0.00588771		1823.98	0.00063304		2353.98	0.00159015		2883.98	0.02002681		3413.98	0.00289047		3943.98	0.0003956
234.2	-0.00024397		764.19	0.01349611		1294.19	-0.00562157		1824.18	-0.00048748		2354.18	0.00130085		2884.18	0.0198592		3414.18	0.00195576		3944.18	0.00116665
234.4	-0.00018909		764.39	0.01444911		1294.39	-0.00547578		1824.38	-0.00015034		2354.38	0.00137667		2884.38	0.02008721		3414.38	0.00266017		3944.38	0.00056599
234.6	-0.00053529		764.59	0.01516965		1294.59	-0.00478818		1824.58	0.00020317		2354.58	0.00140196		2884.58	0.02007618		3414.58	0.00292799		3944.58	0.00015561
234.8	0.00048365		764.79	0.01548106		1294.79	-0.00398831		1824.78	-0.00033445		2354.78	0.00293755		2884.78	0.02006005		3414.78	0.00253095		3944.78	-0.00093001
235	0.00062993		764.99	0.01515591		1294.99	-0.00382059		1824.98	0.00070769		2354.98	0.00397281		2884.98	0.01852663		3414.98	0.00260616		3944.98	-0.00176122
235.2	0.00118562		765.19	0.01503539		1295.19	-0.00399323		1825.18	0.00045449		2355.18	0.00318791		2885.18	0.01880771		3415.18	0.00349541		3945.18	-0.00260095
235.4	0.00186813		765.39	0.01550065		1295.39	-0.00314712		1825.38	0.00145485		2355.38	0.00403304		2885.38	0.01869724		3415.38	0.00422131		3945.38	-0.002432
235.6	0.00295393		765.59	0.01439182		1295.59	-0.00338451		1825.58	0.00274621		2355.58	0.00472092		2885.58	0.01801075		3415.58	0.00430143		3945.58	-0.00360565
235.8	0.00241483		765.79	0.01294099		1295.79	-0.00354963		1825.78	0.00257055		2355.78	0.00415985		2885.78	0.01782401		3415.78	0.00425732		3945.78	-0.00421606
236	0.00242998		765.99	0.01217558		1295.99	-0.00302969		1825.98	0.00223696		2355.98	0.00318711		2885.98	0.01724288		3415.98	0.00482645		3945.98	-0.00402874
236.2	0.00260178		766.19	0.01176081		1296.19	-0.00236319		1826.18	0.00275529		2356.18	0.00235234		2886.18	0.01788014		3416.18	0.00436767		3946.18	-0.00429624
236.4	0.00203482		766.39	0.01179004		1296.39	-0.00213755		1826.38	0.00355834		2356.38	0.0020354		2886.38	0.01859231		3416.38	0.00490171		3946.38	-0.00501728
236.6	0.00174037		766.59	0.0111345		1296.59	-0.00186426		1826.58	0.00375986		2356.58	0.00152398		2886.58	0.01861083		3416.58	0.00455966		3946.58	-0.0049471
236.8	0.00211973		766.79	0.01148276		1296.79	-0.00154943		1826.78	0.00359164		2356.78	0.00075417		2886.78	0.01915301		3416.78	0.00396515		3946.78	-0.00507916
237	0.00187992		766.99	0.01183368		1296.99	-0.00196803		1826.98	0.00383139		2356.98	0.00143301		2886.98	0.01946232		3416.98	0.00367075		3946.98	-0.00469847
237.2	0.00099717		767.19	0.01169888		1297.19	-0.00194895		1827.18	0.0033054		2357.18	0.00086516		2887.18	0.01977303		3417.18	0.00296623		3947.18	-0.00501487
237.4	-0.00038593		767.39	0.01188912		1297.39	-0.00044698		1827.38	0.00202176		2357.38	0.00080947		2887.38	0.02027333		3417.38	0.00428952		3947.38	-0.00517202
237.6	-0.00176102		767.59	0.01185657		1297.59	-0.00064046		1827.58	0.00085752		2357.58	0.00112147		2887.58	0.02025204		3417.58	0.00325657		3947.58	-0.00391382
237.8	-0.00186555		767.79	0.01126176		1297.79	-0.00102929		1827.78	0.0001547		2357.78	0.0011956		2887.78	0.02034689		3417.78	0.00317054		3947.78	-0.00346432
238	-0.00176862		767.99	0.01141772		1297.99	-0.00135323		1827.98	0.00058407		2357.98	0.00081687		2887.98	0.02064431		3417.98	0.00291648		3947.98	-0.0024472
238.2	-0.00225021		768.19	0.01144204		1298.19	-0.00130696		1828.18	0.00035902		2358.18	0.0011693		2888.18	0.02010082		3418.18	0.00388381		3948.18	-0.00290332
238.4	-0.00230694		768.39	0.01102931		1298.39	-0.00149569		1828.38	0.00141304		2358.38	0.00182551		2888.38	0.02045796		3418.38	0.00526727		3948.38	-0.00306856
238.6	-0.00215852		768.59	0.01013678		1298.59	-0.00216843		1828.58	0.00147771		2358.58	0.00211549		2888.58	0.02099006		3418.58	0.0051332		3948.58	-0.00331457
238.8	-0.00207165		768.79	0.00913649		1298.79	-0.00268415		1828.78	0.00238302		2358.78	0.00226741		2888.78	0.02063049		3418.78	0.00587991		3948.78	-0.00405705
239	-0.00228667		768.99	0.00891389		1298.99	-0.00381826		1828.98	0.00363921		2358.98	0.00202645		2888.98	0.02009167		3418.98	0.0064481		3948.98	-0.00335333
239.2	-0.00217581		769.19	0.00846519		1299.19	-0.00293127		1829.18	0.00330978		2359.18	0.00186612		2889.18	0.02079655		3419.18	0.00677544		3949.18	-0.00325575
239.4	-0.00183213		769.39	0.00887395		1299.39	-0.00313367		1829.38	0.0034097		2359.38	0.0014717		2889.38	0.02100355		3419.38	0.00742318		3949.38	-0.00379585
239.6	-0.00277418		769.59	0.00762744		1299.59	-0.00365577		1829.58	0.0031553		2359.58	0.00018312		2889.58	0.02088047		3419.58	0.0078751		3949.58	-0.00381423
239.8	-0.00390212		769.79	0.00716989		1299.79	-0.00420512		1829.78	0.00183363		2359.78	-0.00089926		2889.78	0.02180142		3419.78	0.00856071		3949.78	-0.00400188
240	-0.00270561		769.99	0.00716846		1299.99	-0.00388242		1829.98	0.00194966		2359.98	-0.00194831		2889.98	0.02234922		3419.98	0.00837279		3949.98	-0.00344488
240.2	-0.00261413		770.19	0.00783221		1300.19	-0.00477765		1830.18	0.00239164		2360.18	-0.00239846		2890.18	0.02262597		3420.18	0.0074944		3950.18	-0.00387576
240.4	-0.0025896		770.39	0.00769405		1300.39	-0.00514832		1830.38	0.00290187		2360.38	-0.00232548		2890.38	0.02256497		3420.38	0.00777638		3950.38	-0.0042255
240.6	-0.00265503		770.59	0.00784388		1300.59	-0.00496248		1830.58	0.00316693		2360.58	-0.00227738		2890.58	0.02258776		3420.58	0.00734052		3950.58	-0.00408493
240.8	-0.00249257		770.79	0.00804792		1300.79	-0.00519657		1830.78	0.00345538		2360.78	-0.00168298		2890.78	0.02388556		3420.78	0.00694935		3950.78	-0.0038255
241	-0.00302967		770.99	0.00840511		1300.99	-0.00470922		1830.98	0.00345394		2360.98	-0.00072777		2890.98	0.02511085		3420.98	0.00641493		3950.98	-0.00375331
241.2	-0.00291988		771.19	0.00857435		1301.19	-0.00446343		1831.18	0.00305418		2361.18	-0.00067365		2891.18	0.02513365		3421.18	0.00573411		3951.18	-0.00344833
241.4	-0.00295318		771.39	0.00917233		1301.39	-0.00426517		1831.38	0.00274024		2361.38	-0.00012694		2891.38	0.02521007		3421.38	0.00710347		3951.38	-0.00316516
241.6	-0.00288986		771.59	0.00936338		1301.59	-0.00507056		1831.58	0.00283548		2361.58	0.0008034		2891.58	0.0253651		3421.58	0.00530478		3951.58	-0.0017852
241.8	-0.0018888		771.79	0.00931807		1301.79	-0.00501186		1831.78	0.00295366		2361.78	0.00179143		2891.78	0.02551918		3421.78	0.00574486		3951.78	-0.00301972
242	-0.00206024		771.99	0.00980814		1301.99	-0.0049002		1831.98	0.00292209		2361.98	0.00164122		2891.98	0.02618432		3421.98	0.00658778		3951.98	-0.00299123
242.2	-0.00118436		772.19	0.0096912		1302.19	-0.00471139		1832.18	0.00314658		2362.18	0.00209666		2892.18	0.02537676		3422.18	0.00648366		3952.18	-0.00399826
242.4	-0.00040754		772.39	0.00926515		1302.39	-0.00503419		1832.38	0.00287572		2362.38	0.00207038		2892.38	0.02572962		3422.38	0.00606867		3952.38	-0.00443561
242.6	0.0000444		772.59	0.00855482		1302.59	-0.00500983		1832.58	0.00257952		2362.58	0.00199776		2892.58	0.02538696		3422.58	0.00610078		3952.58	-0.00552045
242.8	-0.00021045		772.79	0.00908516		1302.79	-0.00474499		1832.78	0.00264041		2362.78	0.00227463		2892.78	0.02550483		3422.78	0.00597983		3952.78	-0.00554941
243	0.00039291		772.99	0.00940356		1302.99	-0.00506761		1832.98	0.00135617		2362.98	0.00295808		2892.98	0.02612672		3422.98	0.00488168		3952.98	-0.00519548
243.2	0.00057886		773.19	0.00888751		1303.19	-0.00369418		1833.18	0.00056127		2363.18	0.0033915		2893.18	0.02591333		3423.18	0.004109		3953.18	-0.00656195
243.4	0.00056125		773.39	0.00959417		1303.39	-0.00337086		1833.38	0.00020708		2363.38	0.00203244		2893.38	0.02560047		3423.38	0.00439752		3953.38	-0.00676099
243.6	0.00039877		773.59	0.00887245		1303.59	-0.0029331		1833.58	0.00099062		2363.58	0.00147853		2893.58	0.02506101		3423.58	0.00379275		3953.58	-0.00642964
243.8	0.00141216		773.79	0.00936006		1303.79	-0.00355883		1833.78	0.00051141		2363.78	0.00195613		2893.78	0.02562692		3423.78	0.00338739		3953.78	-0.00665865
244	0.00291824		773.99	0.00899043		1303.99	-0.00371097		1833.98	0.00125942		2363.98	0.00122021		2893.98	0.02428367		3423.98	0.00223313		3953.98	-0.00558728
244.2	0.00214604		774.19	0.0095964		1304.19	-0.00456259		1834.18	0.00140917		2364.18	0.00088046		2894.18	0.02349596		3424.18	0.00132023		3954.18	-0.00509261
244.4	0.00227743		774.39	0.00937956		1304.39	-0.0043544		1834.38	0.00194583		2364.38	0.00061558		2894.38	0.02355719		3424.38	0.00162553		3954.38	-0.00449511
244.6	0.00206411		774.59	0.00970146		1304.59	-0.00450485		1834.58	0.00181559		2364.58	-0.00003883		2894.58	0.0237666		3424.58	0.00149958		3954.58	-0.00351866
244.8	0.00183425		774.79	0.0092059		1304.79	-0.00400979		1834.78	0.00193803		2364.78	0.00033075		2894.78	0.02538592		3424.78	0.00145504		3954.78	-0.00311145
245	0.001142		774.99	0.0098127		1304.99	-0.00385091		1834.98	0.00141271		2364.98	0.00004861		2894.98	0.0251765		3424.98	0.00138776		3954.98	-0.00291696
245.2	0.00061471		775.19	0.00996879		1305.19	-0.00436534		1835.18	0.00200579		2365.18	0.00010063		2895.18	0.02457457		3425.18	0.00135981		3955.18	-0.00233757
245.4	-0.00054092		775.39	0.01035064		1305.39	-0.00535521		1835.38	0.00226495		2365.38	0.00038669		2895.38	0.02489937		3425.38	0.00222816		3955.38	-0.00197968
245.6	-0.00129394		775.59	0.00955175		1305.59	-0.00501906		1835.58	0.00237229		2365.58	0.00151985		2895.58	0.02459665		3425.58	0.00120843		3955.58	-0.00148355
245.8	-0.00202046		775.79	0.00938448		1305.79	-0.00455062		1835.78	0.0022146		2365.78	0.00163106		2895.78	0.02449536		3425.78	0.00242657		3955.78	-0.00283084
246	-0.00285746		775.99	0.00921067		1305.99	-0.00387695		1835.98	0.00216614		2365.98	0.00081182		2895.98	0.02496766		3425.98	0.0027632		3955.98	-0.00293575
246.2	-0.00177088		776.19	0.00905511		1306.19	-0.00459189		1836.18	0.00212102		2366.18	0.0012058		2896.18	0.02398075		3426.18	0.00233259		3956.18	-0.00375317
246.4	-0.00182132		776.39	0.00770496		1306.39	-0.00452878		1836.38	0.00149664		2366.38	0.00140466		2896.38	0.02446135		3426.38	0.00277223		3956.38	-0.00377632
246.6	-0.00177892		776.59	0.0083545		1306.59	-0.00387563		1836.58	0.00170209		2366.58	0.00082681		2896.58	0.02381442		3426.58	0.00290445		3956.58	-0.00416718
246.8	-0.00225629		776.79	0.00861823		1306.79	-0.00418097		1836.78	0.00109234		2366.78	0.00182743		2896.78	0.02511921		3426.78	0.00239503		3956.78	-0.00536634
247	-0.00116857		776.99	0.00873546		1306.99	-0.0044573		1836.98	0.00061194		2366.98	0.00208888		2896.98	0.02458804		3426.98	0.00217024		3956.98	-0.00579774
247.2	-0.00184554		777.19	0.00867146		1307.19	-0.00335846		1837.18	0.00051711		2367.18	0.0027703		2897.18	0.02323367		3427.18	0.00253061		3957.18	-0.00673911
247.4	-0.00166809		777.39	0.00897125		1307.39	-0.0033386		1837.38	0.00116995		2367.38	0.0019208		2897.38	0.02266696		3427.38	0.00389454		3957.38	-0.0064597
247.6	-0.0009284		777.59	0.00925883		1307.59	-0.00326877		1837.58	0.00118317		2367.58	0.00269192		2897.58	0.02212851		3427.58	0.00412828		3957.58	-0.00666528
247.8	-0.00020373		777.79	0.00946561		1307.79	-0.00299737		1837.78	0.00049318		2367.78	0.00290212		2897.78	0.02179292		3427.78	0.00469408		3957.78	-0.00553251
248	-0.00044417		777.99	0.00914785		1307.99	-0.00276268		1837.98	0.00011048		2367.98	0.00192137		2897.98	0.02091097		3427.98	0.00524766		3957.98	-0.00514999
248.2	-0.00048581		778.19	0.01018154		1308.19	-0.00310334		1838.18	0.00081925		2368.18	0.00093885		2898.18	0.0206452		3428.18	0.00546074		3958.18	-0.00539334
248.4	0.00021949		778.39	0.010718		1308.39	-0.00304434		1838.38	0.00086978		2368.38	0.00069183		2898.38	0.02059152		3428.38	0.00570739		3958.38	-0.00534826
248.6	-0.00074954		778.59	0.01086293		1308.59	-0.0035828		1838.58	0.00042991		2368.58	0.00027284		2898.58	0.02103331		3428.58	0.006215		3958.58	-0.00573017
248.8	-0.0009695		778.79	0.01080844		1308.79	-0.00374736		1838.78	0.00090179		2368.78	0.00047326		2898.78	0.02182233		3428.78	0.00684771		3958.78	-0.00596003
249	-0.00174757		778.99	0.01224791		1308.99	-0.0040327		1838.98	0.00088494		2368.98	-0.00037963		2898.98	0.02143741		3428.98	0.00679723		3958.98	-0.00564332
249.2	-0.00176351		779.19	0.01102899		1309.19	-0.0044829		1839.18	0.00188055		2369.18	-0.00031133		2899.18	0.02203067		3429.18	0.00640811		3959.18	-0.00562736
249.4	-0.00183147		779.39	0.01154843		1309.39	-0.00453979		1839.38	0.00283798		2369.38	-0.00051699		2899.38	0.02168428		3429.38	0.00716764		3959.38	-0.00578083
249.6	-0.00150004		779.59	0.01180204		1309.59	-0.00334918		1839.58	0.00362457		2369.58	-0.00005935		2899.58	0.02172242		3429.58	0.00691672		3959.58	-0.00511467
249.8	-0.00167073		779.79	0.01174919		1309.79	-0.00297198		1839.78	0.00414681		2369.78	-0.00048994		2899.78	0.02263253		3429.78	0.0076495		3959.78	-0.0050575
250	-0.00151891		779.99	0.01144641		1309.99	-0.00236157		1839.98	0.00433171		2369.98	-0.00015424		2899.98	0.02247103		3429.98	0.00699454		3959.98	-0.00497255
250.2	-0.00006175		780.19	0.01096636		1310.19	-0.00327816		1840.18	0.00480424		2370.18	-0.00029515		2900.18	0.02207702		3430.18	0.00720449		3960.18	-0.00523251
250.4	-0.00054216		780.39	0.01120694		1310.39	-0.00247834		1840.38	0.00500764		2370.38	-0.00052745		2900.38	0.02276183		3430.38	0.00656563		3960.38	-0.0052321
250.6	0.00005804		780.59	0.01208344		1310.59	-0.00224125		1840.58	0.00486611		2370.58	-0.00054216		2900.58	0.02250492		3430.58	0.005407		3960.58	-0.00619732
250.8	0.0007582		780.79	0.01152137		1310.79	-0.00253272		1840.78	0.00383787		2370.78	0.00019824		2900.78	0.02424092		3430.78	0.00487719		3960.78	-0.00694598
251	0.00147293		780.99	0.01172055		1310.99	-0.00231252		1840.98	0.00294649		2370.98	-0.00053326		2900.98	0.02428472		3430.98	0.0049983		3960.98	-0.00621986
251.2	0.00032922		781.19	0.0122338		1311.19	-0.00176586		1841.18	0.00206417		2371.18	-0.00090845		2901.18	0.02511644		3431.18	0.00592759		3961.18	-0.00640847
251.4	-0.00014171		781.39	0.01215365		1311.39	-0.00176428		1841.38	0.00197173		2371.38	-0.00188396		2901.38	0.02598103		3431.38	0.00590082		3961.38	-0.00586492
251.6	-0.00041628		781.59	0.01202268		1311.59	-0.0010479		1841.58	0.00141367		2371.58	-0.00219537		2901.58	0.02573059		3431.58	0.00553184		3961.58	-0.00565636
251.8	-0.00067959		781.79	0.01190984		1311.79	-0.00086148		1841.78	0.00193645		2371.78	-0.00250404		2901.78	0.02575526		3431.78	0.00509437		3961.78	-0.00513009
252	-0.0006739		781.99	0.0123501		1311.99	-0.00179343		1841.98	0.00106074		2371.98	-0.00329177		2901.98	0.02609752		3431.98	0.00440553		3961.98	-0.00593367
252.2	-0.00072668		782.19	0.01253758		1312.19	-0.00277305		1842.18	0.00145365		2372.18	-0.00333415		2902.18	0.02662019		3432.18	0.00387423		3962.18	-0.00613528
252.4	-0.0009282		782.39	0.01257365		1312.39	-0.00378476		1842.38	0.00054011		2372.38	-0.00318212		2902.38	0.02768109		3432.38	0.00351903		3962.38	-0.0061052
252.6	-0.0014468		782.59	0.01199938		1312.59	-0.00496248		1842.58	0.00055714		2372.58	-0.0031241		2902.58	0.02854014		3432.58	0.00422683		3962.58	-0.00715306
252.8	-0.00124212		782.79	0.01215707		1312.79	-0.00579646		1842.78	0.00047458		2372.78	-0.00300125		2902.78	0.02847397		3432.78	0.00440899		3962.78	-0.00689066
253	-0.00131241		782.99	0.01212227		1312.99	-0.00591969		1842.98	0.0000394		2372.98	-0.00310274		2902.98	0.02808559		3432.98	0.00413775		3962.98	-0.00589593
253.2	-0.00050143		783.19	0.01127233		1313.19	-0.00665561		1843.18	0.00105677		2373.18	-0.00236821		2903.18	0.02764187		3433.18	0.00422493		3963.18	-0.00619622
253.4	-0.00093886		783.39	0.01170978		1313.39	-0.00666617		1843.38	0.00174452		2373.38	-0.00157766		2903.38	0.02658971		3433.38	0.00536581		3963.38	-0.00592628
253.6	-0.00097928		783.59	0.01077524		1313.59	-0.00649004		1843.58	0.00185951		2373.58	-0.00049988		2903.58	0.02607237		3433.58	0.00497231		3963.58	-0.00567449
253.8	-0.00186985		783.79	0.00990313		1313.79	-0.00684641		1843.78	0.00228294		2373.78	0.00017021		2903.78	0.0245637		3433.78	0.00520737		3963.78	-0.00584795
254	-0.00177444		783.99	0.00898138		1313.99	-0.0066079		1843.98	0.00388829		2373.98	0.00065384		2903.98	0.02344441		3433.98	0.0055029		3963.98	-0.00622789
254.2	-0.00222736		784.19	0.00902768		1314.19	-0.00699347		1844.18	0.00453802		2374.18	0.00113228		2904.18	0.02238839		3434.18	0.00561856		3964.18	-0.00597136
254.4	-0.00267046		784.39	0.00916739		1314.39	-0.00628742		1844.38	0.00458487		2374.38	0.00166244		2904.38	0.02181779		3434.38	0.00509942		3964.38	-0.00644306
254.6	-0.00217336		784.59	0.00890751		1314.59	-0.00565041		1844.58	0.00513101		2374.58	0.00211534		2904.58	0.02097537		3434.58	0.00521198		3964.58	-0.00595106
254.8	-0.0018068		784.79	0.00892198		1314.79	-0.00506878		1844.78	0.00503164		2374.78	0.00148232		2904.78	0.02161099		3434.78	0.00552918		3964.78	-0.00583064
255	-0.00199528		784.99	0.00962166		1314.99	-0.00472509		1844.98	0.00406505		2374.98	0.00062142		2904.98	0.02202568		3434.98	0.00553658		3964.98	-0.00512601
255.2	-0.00190652		785.19	0.01029692		1315.19	-0.0046323		1845.18	0.00420282		2375.18	-0.00000104		2905.18	0.02131645		3435.18	0.0049944		3965.18	-0.00574389
255.4	-0.00213147		785.39	0.00929002		1315.39	-0.00434636		1845.38	0.00441262		2375.38	-0.00046019		2905.38	0.02142968		3435.38	0.00464176		3965.38	-0.0053756
255.6	-0.00189811		785.59	0.00909301		1315.59	-0.00464956		1845.58	0.00417699		2375.58	-0.00032315		2905.58	0.02133434		3435.58	0.00468649		3965.58	-0.00534065
255.8	-0.0021328		785.79	0.00896903		1315.79	-0.00518167		1845.78	0.00406717		2375.78	0.00010624		2905.78	0.02214619		3435.78	0.00417247		3965.78	-0.00518944
256	-0.00172641		785.99	0.00885608		1315.99	-0.00617607		1845.98	0.0027268		2375.98	-0.00030282		2905.98	0.02332472		3435.98	0.00432674		3965.98	-0.00566114
256.2	-0.0016922		786.19	0.00901448		1316.19	-0.00586008		1846.18	0.00285675		2376.18	-0.00036325		2906.18	0.02418057		3436.18	0.00418707		3966.18	-0.00647632
256.4	-0.00126371		786.39	0.00911595		1316.39	-0.00579133		1846.38	0.00261646		2376.38	-0.00079138		2906.38	0.02540961		3436.38	0.0046679		3966.38	-0.00655078
256.6	-0.0001249		786.59	0.0088786		1316.59	-0.00579145		1846.58	0.00226322		2376.58	-0.0014288		2906.58	0.02598668		3436.58	0.00530104		3966.58	-0.00758889
256.8	0.00036618		786.79	0.00988616		1316.79	-0.00578291		1846.78	0.00159345		2376.78	-0.00175075		2906.78	0.02688905		3436.78	0.0047532		3966.78	-0.00689705
257	0.00047989		786.99	0.00905674		1316.99	-0.00496403		1846.98	0.00137143		2376.98	-0.00163971		2906.98	0.02732618		3436.98	0.00361261		3966.98	-0.00610401
257.2	0.00024166		787.19	0.0092787		1317.19	-0.00402893		1847.18	0.00145077		2377.18	-0.00176335		2907.18	0.02773185		3437.18	0.003402		3967.18	-0.00626654
257.4	-0.00027526		787.39	0.00908345		1317.39	-0.00381454		1847.38	0.00201356		2377.38	-0.00138437		2907.38	0.0270864		3437.38	0.00404368		3967.38	-0.0064649
257.6	-0.00024868		787.59	0.00907831		1317.59	-0.00358351		1847.58	0.00232287		2377.58	-0.00172137		2907.58	0.02686068		3437.58	0.00372108		3967.58	-0.00679395
257.8	-0.0005783		787.79	0.01044526		1317.79	-0.00271527		1847.78	0.00253159		2377.78	-0.00247426		2907.78	0.02677255		3437.78	0.00403057		3967.78	-0.00645984
258	-0.00091156		787.99	0.01047352		1317.99	-0.00113273		1847.98	0.00277386		2377.98	-0.00281347		2907.98	0.02695907		3437.98	0.00443935		3967.98	-0.00566151
258.2	-0.00044311		788.19	0.011137		1318.19	-0.0007295		1848.18	0.00243745		2378.18	-0.00179811		2908.18	0.02598251		3438.18	0.00401424		3968.18	-0.00483619
258.4	-0.00016975		788.39	0.01135688		1318.39	0.00018887		1848.38	0.00207282		2378.38	-0.00146315		2908.38	0.02550644		3438.38	0.0043741		3968.38	-0.00444955
258.6	0.00045562		788.59	0.01216438		1318.59	0.00065859		1848.58	0.00152023		2378.58	-0.00068083		2908.58	0.02528523		3438.58	0.00511793		3968.58	-0.00382607
258.8	0.00119151		788.79	0.01266118		1318.79	0.00046856		1848.78	0.00080275		2378.78	-0.00066608		2908.78	0.02572697		3438.78	0.00470297		3968.78	-0.00430459
259	0.00143953		788.99	0.01246717		1318.99	0.00034308		1848.98	-0.00076054		2378.98	-0.00017224		2908.98	0.02550479		3438.98	0.00499203		3968.98	-0.00406903
259.2	0.00206239		789.19	0.01272123		1319.19	0.00002302		1849.18	-0.0007951		2379.18	0.00036978		2909.18	0.02407404		3439.18	0.00544751		3969.18	-0.00423607
259.4	0.00177479		789.39	0.01225949		1319.39	-0.0006494		1849.38	-0.00112151		2379.38	0.0013553		2909.38	0.02489929		3439.38	0.00562214		3969.38	-0.00296462
259.6	0.00123515		789.59	0.01154112		1319.59	-0.00105537		1849.58	-0.0025049		2379.58	0.00221338		2909.58	0.02527848		3439.58	0.00617078		3969.58	-0.00282157
259.8	0.00120353		789.79	0.01149965		1319.79	-0.00166351		1849.78	-0.00228556		2379.78	0.00260074		2909.78	0.02536601		3439.78	0.00632024		3969.78	-0.00294236
260	0.00102786		789.99	0.01098147		1319.99	-0.00245261		1849.98	-0.00296973		2379.98	0.00142573		2909.98	0.02511851		3439.98	0.00703878		3969.98	-0.00306534
260.2	0.00061768		790.19	0.0105099		1320.19	-0.00276939		1850.18	-0.00228768		2380.18	0.00160776		2910.18	0.02600255		3440.18	0.00721447		3970.18	-0.00309632
260.4	0.00022326		790.39	0.0094093		1320.39	-0.00328653		1850.38	-0.00151663		2380.38	0.00173383		2910.38	0.02712584		3440.38	0.00813118		3970.38	-0.00267611
260.6	0.00006623		790.59	0.00874198		1320.59	-0.00276707		1850.58	-0.00141965		2380.58	0.00252217		2910.58	0.02723363		3440.58	0.00746858		3970.58	-0.00259336
260.8	-0.00044276		790.79	0.0084679		1320.79	-0.00242223		1850.78	-0.00046842		2380.78	0.00311378		2910.78	0.02780152		3440.78	0.00738821		3970.78	-0.00171467
261	-0.00134034		790.99	0.00731626		1320.99	-0.00225422		1850.98	0.00092849		2380.98	0.00388221		2910.98	0.02729633		3440.98	0.00667981		3970.98	-0.00182403
261.2	-0.00160069		791.19	0.00760066		1321.19	-0.00293069		1851.18	0.00177573		2381.18	0.00266813		2911.18	0.02674443		3441.18	0.00650509		3971.18	-0.00242387
261.4	-0.00108324		791.39	0.00701414		1321.39	-0.00358342		1851.38	0.00280786		2381.38	0.00193747		2911.38	0.02685606		3441.38	0.00585957		3971.38	-0.00313564
261.6	-0.00094854		791.59	0.00740814		1321.59	-0.00345443		1851.58	0.00302457		2381.58	0.00116537		2911.58	0.02639613		3441.58	0.00602518		3971.58	-0.00320318
261.8	-0.00087684		791.79	0.00781466		1321.79	-0.00342512		1851.78	0.00328179		2381.78	0.00113537		2911.78	0.02629452		3441.78	0.00560507		3971.78	-0.0033572
262	-0.00097781		791.99	0.0076322		1321.99	-0.00328806		1851.98	0.00400438		2381.98	0.00077652		2911.98	0.02587767		3441.98	0.00486967		3971.98	-0.00350017
262.2	-0.00028887		792.19	0.00763937		1322.19	-0.00404137		1852.18	0.00470393		2382.18	0.00165437		2912.18	0.02580844		3442.18	0.00440528		3972.18	-0.00378027
262.4	-0.00030306		792.39	0.00811722		1322.39	-0.00375415		1852.38	0.00514412		2382.38	0.00211031		2912.38	0.02558319		3442.38	0.0046917		3972.38	-0.00376969
262.6	0.00076154		792.59	0.00962781		1322.59	-0.00332062		1852.58	0.00445381		2382.58	0.0024087		2912.58	0.02649802		3442.58	0.00507175		3972.58	-0.00399457
262.8	0.00095687		792.79	0.01038095		1322.79	-0.00377667		1852.78	0.00500591		2382.78	0.0013089		2912.78	0.02620142		3442.78	0.00455029		3972.78	-0.00404294
263	0.00111709		792.99	0.01028976		1322.99	-0.00373891		1852.98	0.00435368		2382.98	0.0007738		2912.98	0.02612611		3442.98	0.00439661		3972.98	-0.00346387
263.2	0.00114213		793.19	0.01164901		1323.19	-0.00443045		1853.18	0.00474362		2383.18	0.0006042		2913.18	0.02600986		3443.18	0.0040706		3973.18	-0.00267713
263.4	0.00121457		793.39	0.01254264		1323.39	-0.00451661		1853.38	0.00442487		2383.38	0.00092236		2913.38	0.02706013		3443.38	0.00386175		3973.38	-0.0027218
263.6	0.00095981		793.59	0.01272765		1323.59	-0.00450405		1853.58	0.0031533		2383.58	0.00055158		2913.58	0.02774966		3443.58	0.005166		3973.58	-0.0025912
263.8	-0.00022836		793.79	0.01369432		1323.79	-0.00555699		1853.78	0.00318409		2383.78	0.00023997		2913.78	0.02817333		3443.78	0.0047662		3973.78	-0.00240565
264	-0.0007114		793.99	0.01371243		1323.99	-0.00610142		1853.98	0.00276405		2383.98	-0.00026124		2913.98	0.02940189		3443.98	0.00548215		3973.98	-0.00217732
264.2	-0.00115869		794.19	0.01426902		1324.19	-0.00668105		1854.18	0.00270451		2384.18	-0.00014469		2914.18	0.02984608		3444.18	0.00514538		3974.18	-0.00157672
264.4	-0.00196711		794.39	0.01432912		1324.39	-0.0066492		1854.38	0.00222293		2384.38	-0.00034241		2914.38	0.02979838		3444.38	0.00485671		3974.38	-0.00154594
264.6	-0.0026965		794.59	0.01472321		1324.59	-0.00635117		1854.58	0.00177549		2384.58	0.00022434		2914.58	0.02898034		3444.58	0.00401384		3974.58	-0.00114721
264.8	-0.00296026		794.79	0.01463514		1324.79	-0.00701328		1854.78	0.00153313		2384.78	-0.00060006		2914.78	0.02864496		3444.78	0.00391939		3974.78	-0.0010289
265	-0.00312281		794.99	0.01407471		1324.99	-0.00860365		1854.98	0.00183271		2384.98	-0.00029687		2914.98	0.02848561		3444.98	0.00289208		3974.98	-0.00083877
265.2	-0.00364405		795.19	0.01345123		1325.19	-0.00912933		1855.18	0.00159536		2385.18	-0.00159125		2915.18	0.02771993		3445.18	0.00238505		3975.18	-0.00141682
265.4	-0.00299092		795.39	0.01214026		1325.39	-0.00847941		1855.38	0.00166115		2385.38	-0.00186932		2915.38	0.026843		3445.38	0.00225647		3975.38	-0.00108785
265.6	-0.00347093		795.59	0.01141035		1325.59	-0.00887917		1855.58	0.00141817		2385.58	-0.00137648		2915.58	0.02562335		3445.58	0.00284392		3975.58	-0.00105991
265.8	-0.00362707		795.79	0.01130393		1325.79	-0.00792396		1855.78	0.00160844		2385.78	-0.00140845		2915.78	0.02564407		3445.78	0.0019222		3975.78	-0.00069531
266	-0.00302533		795.99	0.01111896		1325.99	-0.00668021		1855.98	0.00131428		2385.98	-0.00153748		2915.98	0.02544791		3445.98	0.00285248		3975.98	-0.00126243
266.2	-0.00262752		796.19	0.01099317		1326.19	-0.0060993		1856.18	0.00117078		2386.18	-0.00094261		2916.18	0.02599967		3446.18	0.00371338		3976.18	-0.00125424
266.4	-0.00242071		796.39	0.01075132		1326.39	-0.00488741		1856.38	0.00189938		2386.38	-0.00108881		2916.38	0.02595109		3446.38	0.00417552		3976.38	-0.00109247
266.6	-0.00219099		796.59	0.01135738		1326.59	-0.00409281		1856.58	0.00163507		2386.58	-0.00064391		2916.58	0.02612799		3446.58	0.00512501		3976.58	-0.00132711
266.8	-0.00172769		796.79	0.01113094		1326.79	-0.00410833		1856.78	0.00258949		2386.78	-0.00124569		2916.78	0.02615762		3446.78	0.00562104		3976.78	-0.00168371
267	-0.0008783		796.99	0.01074617		1326.99	-0.00336051		1856.98	0.00269924		2386.98	-0.00069662		2916.98	0.02678234		3446.98	0.00614808		3976.98	-0.00208611
267.2	-0.00027783		797.19	0.01102509		1327.19	-0.00313267		1857.18	0.00328599		2387.18	0.00025971		2917.18	0.02713505		3447.18	0.0076562		3977.18	-0.00290945
267.4	0.00060874		797.39	0.01161284		1327.39	-0.00335342		1857.38	0.00310439		2387.38	0.00076946		2917.38	0.0281482		3447.38	0.00875323		3977.38	-0.00446706
267.6	0.00067704		797.59	0.01173978		1327.59	-0.00293875		1857.58	0.00247996		2387.58	0.00033203		2917.58	0.02878614		3447.58	0.01020708		3977.58	-0.00507041
267.8	0.00013216		797.79	0.01153343		1327.79	-0.00329154		1857.78	0.00299842		2387.78	0.00009028		2917.78	0.02938091		3447.78	0.01056318		3977.78	-0.00607882
268	0.00080522		797.99	0.01159075		1327.99	-0.00344226		1857.98	0.00381834		2387.98	-0.00022695		2917.98	0.02948842		3447.98	0.0107677		3977.98	-0.00651224
268.2	0.00106608		798.19	0.0120015		1328.19	-0.00354915		1858.18	0.00375668		2388.18	-0.00164034		2918.18	0.02953359		3448.18	0.00938238		3978.18	-0.00733363
268.4	0.00008148		798.39	0.01196185		1328.39	-0.00381783		1858.38	0.00344575		2388.38	-0.00204459		2918.38	0.03001638		3448.38	0.00869993		3978.38	-0.00753538
268.6	-0.00014924		798.59	0.01120054		1328.59	-0.00377141		1858.58	0.00329943		2388.58	-0.00121304		2918.58	0.02967043		3448.58	0.00799452		3978.58	-0.0077078
268.8	-0.00043265		798.79	0.01044764		1328.79	-0.00440614		1858.78	0.00314263		2388.78	-0.00120771		2918.78	0.02910817		3448.78	0.00739135		3978.78	-0.00808191
269	-0.00028163		798.99	0.0097072		1328.99	-0.00528258		1858.98	0.00317602		2388.98	-0.00187224		2918.98	0.02848852		3448.98	0.00656894		3978.98	-0.00844241
269.2	-0.00115088		799.19	0.00841058		1329.19	-0.00462873		1859.18	0.00324574		2389.18	-0.00269911		2919.18	0.02771516		3449.18	0.00592776		3979.18	-0.00895758
269.4	0.0007746		799.39	0.00730012		1329.39	-0.00481191		1859.38	0.00371617		2389.38	-0.00292915		2919.38	0.02710943		3449.38	0.00512397		3979.38	-0.00801537
269.6	0.00083007		799.59	0.00754233		1329.59	-0.00490865		1859.58	0.00310344		2389.58	-0.00281679		2919.58	0.02739069		3449.58	0.00367599		3979.58	-0.00745908
269.8	0.00119756		799.79	0.00821124		1329.79	-0.0047987		1859.78	0.002862		2389.78	-0.00361252		2919.78	0.02806335		3449.78	0.0026572		3979.78	-0.00792523
270	0.00123624		799.99	0.00802584		1329.99	-0.00544495		1859.98	0.0027262		2389.98	-0.00347274		2919.98	0.02830558		3449.98	0.00296241		3979.98	-0.00822946
270.2	0.00102365		800.19	0.00791271		1330.19	-0.00547699		1860.18	0.00346407		2390.18	-0.00359284		2920.18	0.0294001		3450.18	0.00245473		3980.18	-0.00754004
270.4	0.00080229		800.39	0.00800912		1330.39	-0.00568961		1860.38	0.00290575		2390.38	-0.0028466		2920.38	0.02884612		3450.38	0.00200471		3980.38	-0.00736105
270.6	0.00018665		800.59	0.00850879		1330.59	-0.00559823		1860.58	0.00214649		2390.58	-0.00186511		2920.58	0.02904952		3450.58	0.00213031		3980.58	-0.00725576
270.8	0.00119023		800.79	0.00944717		1330.79	-0.00537094		1860.78	0.00200569		2390.78	-0.00193229		2920.78	0.03020878		3450.78	0.00195347		3980.78	-0.00661978
271	0.00065626		800.99	0.00985184		1330.99	-0.00531715		1860.98	0.00168401		2390.98	-0.00160754		2920.98	0.03087643		3450.98	0.00167688		3980.98	-0.00646731
271.2	0.00104215		801.19	0.00966512		1331.19	-0.00579602		1861.18	0.00087708		2391.18	-0.00128638		2921.18	0.0314123		3451.18	0.00241794		3981.18	-0.00584967
271.4	0.0006479		801.39	0.01046209		1331.39	-0.00569934		1861.38	0.00079563		2391.38	-0.00084623		2921.38	0.03161399		3451.38	0.00276334		3981.38	-0.00544382
271.6	0.00097505		801.59	0.01027421		1331.59	-0.00423182		1861.58	0.00085878		2391.58	-0.00090186		2921.58	0.03072336		3451.58	0.00364608		3981.58	-0.00468372
271.8	0.00050449		801.79	0.00981557		1331.79	-0.00444423		1861.78	0.00175249		2391.78	-0.00120425		2921.78	0.03113172		3451.78	0.00375441		3981.78	-0.00424298
272	0.00053001		801.99	0.00981275		1331.99	-0.00414775		1861.98	0.00179466		2391.98	-0.00094056		2921.98	0.03055392		3451.98	0.00326389		3981.98	-0.00387679
272.2	0.00054793		802.19	0.01038498		1332.19	-0.00417395		1862.18	0.00133435		2392.18	-0.00125134		2922.18	0.03090505		3452.18	0.00337245		3982.18	-0.00369829
272.4	0.00053306		802.39	0.00954318		1332.39	-0.00355504		1862.38	0.00175489		2392.38	-0.00058528		2922.38	0.02996203		3452.38	0.00425416		3982.38	-0.00307657
272.6	0.001215		802.59	0.00848795		1332.59	-0.00347788		1862.58	0.0022935		2392.58	0.00065114		2922.58	0.02963284		3452.58	0.00446089		3982.58	-0.00335889
272.8	0.00201305		802.79	0.00817777		1332.79	-0.00307438		1862.78	0.00270449		2392.78	0.00034565		2922.78	0.02878921		3452.78	0.00468709		3982.78	-0.00268127
273	0.00336652		802.99	0.00853342		1332.99	-0.00303924		1862.98	0.00356896		2392.98	-0.00047834		2922.98	0.02775567		3452.98	0.00474525		3982.98	-0.00191526
273.2	0.00371088		803.19	0.00832103		1333.19	-0.00293397		1863.18	0.00405213		2393.18	0.00028856		2923.18	0.02831238		3453.18	0.00548676		3983.18	-0.00202305
273.4	0.00468299		803.39	0.0085099		1333.39	-0.00437163		1863.38	0.00416246		2393.38	0.00104324		2923.38	0.02866201		3453.38	0.00559306		3983.38	-0.00233246
273.6	0.00423238		803.59	0.00924585		1333.59	-0.00512546		1863.58	0.00304191		2393.58	0.00090137		2923.58	0.02873679		3453.58	0.00515036		3983.58	-0.00287636
273.8	0.00361568		803.79	0.00956194		1333.79	-0.00681238		1863.78	0.0029682		2393.78	0.00069057		2923.78	0.02844426		3453.78	0.00581647		3983.78	-0.00449499
274	0.00333698		803.99	0.0093539		1333.99	-0.00625448		1863.98	0.00255616		2393.98	0.0007972		2923.98	0.02862882		3453.98	0.00753737		3983.98	-0.0039204
274.2	0.00336217		804.19	0.00929964		1334.19	-0.00668566		1864.18	0.00184925		2394.18	0.00048317		2924.18	0.02899605		3454.18	0.0083607		3984.18	-0.00414801
274.4	0.00228689		804.39	0.00929301		1334.39	-0.00733773		1864.38	0.00012702		2394.38	0.00128623		2924.38	0.0288093		3454.38	0.00780665		3984.38	-0.0043367
274.6	0.00219682		804.59	0.00852508		1334.59	-0.00722432		1864.58	-0.00036612		2394.58	0.00081677		2924.58	0.03048473		3454.58	0.0071576		3984.58	-0.00399286
274.8	0.00198615		804.79	0.00835613		1334.79	-0.00718418		1864.78	-0.00040274		2394.78	0.00085802		2924.78	0.03098562		3454.78	0.00745153		3984.78	-0.0035106
275	0.00074528		804.99	0.00825036		1334.99	-0.00693604		1864.98	-0.00104317		2394.98	0.00092264		2924.98	0.03094797		3454.98	0.00730918		3984.98	-0.00404706
275.2	0.00141947		805.19	0.00762344		1335.19	-0.00655698		1865.18	-0.00144915		2395.18	0.00076209		2925.18	0.03063754		3455.18	0.00832949		3985.18	-0.00382296
275.4	0.00128754		805.39	0.00749664		1335.39	-0.00570594		1865.38	-0.0010692		2395.38	0.00008395		2925.38	0.03012677		3455.38	0.00849868		3985.38	-0.00335447
275.6	0.00182633		805.59	0.0065718		1335.59	-0.00531151		1865.58	-0.00050277		2395.58	-0.00078524		2925.58	0.02997862		3455.58	0.0088898		3985.58	-0.00338767
275.8	0.00115715		805.79	0.00624702		1335.79	-0.00558907		1865.78	-0.00039495		2395.78	-0.00148558		2925.78	0.03105557		3455.78	0.00891643		3985.78	-0.00266447
276	0.0014822		805.99	0.00549293		1335.99	-0.00563309		1865.98	-0.00018455		2395.98	-0.00199946		2925.98	0.0307088		3455.98	0.00942967		3985.98	-0.00291319
276.2	0.00118259		806.19	0.00603291		1336.19	-0.00506887		1866.18	0.00049748		2396.18	-0.00238468		2926.18	0.03062879		3456.18	0.00958708		3986.18	-0.00332665
276.4	0.00214295		806.39	0.005371		1336.39	-0.00420539		1866.38	0.00237507		2396.38	-0.00170995		2926.38	0.03104471		3456.38	0.00930022		3986.38	-0.00337933
276.6	0.00270124		806.59	0.0053022		1336.59	-0.00512692		1866.58	0.00371258		2396.58	-0.00211158		2926.58	0.03208532		3456.58	0.00850387		3986.58	-0.00345534
276.8	0.0027647		806.79	0.0060836		1336.79	-0.00463712		1866.78	0.00481973		2396.78	-0.00318395		2926.78	0.03211177		3456.78	0.00807223		3986.78	-0.00307619
277	0.00197259		806.99	0.00717335		1336.99	-0.00521661		1866.98	0.00585448		2396.98	-0.00359976		2926.98	0.03212222		3456.98	0.00749616		3986.98	-0.00419481
277.2	0.00139705		807.19	0.00735462		1337.19	-0.00582238		1867.18	0.00588931		2397.18	-0.00303305		2927.18	0.03311974		3457.18	0.00705961		3987.18	-0.004592
277.4	0.0010323		807.39	0.00818171		1337.39	-0.00649541		1867.38	0.00627488		2397.38	-0.00321092		2927.38	0.03352129		3457.38	0.00623531		3987.38	-0.00504716
277.6	0.00038859		807.59	0.00894854		1337.59	-0.00708402		1867.58	0.00633608		2397.58	-0.00387721		2927.58	0.03297839		3457.58	0.00486212		3987.58	-0.00492118
277.8	-0.00031897		807.79	0.00960957		1337.79	-0.00703919		1867.78	0.00648434		2397.78	-0.00411462		2927.78	0.03356551		3457.78	0.00521367		3987.78	-0.00540891
278	-0.00019512		807.99	0.00916195		1337.99	-0.00628005		1867.98	0.00690378		2397.98	-0.00299305		2927.98	0.03435638		3457.98	0.00524615		3987.98	-0.00487292
278.2	-0.00046824		808.19	0.0093307		1338.19	-0.0067677		1868.18	0.00706082		2398.18	-0.00219047		2928.18	0.0342094		3458.18	0.00493888		3988.18	-0.00441809
278.4	-0.00137633		808.39	0.0092318		1338.39	-0.00672228		1868.38	0.00630262		2398.38	-0.00134588		2928.38	0.03498018		3458.38	0.00405043		3988.38	-0.00439162
278.6	-0.00074912		808.59	0.00934003		1338.59	-0.0062435		1868.58	0.00614939		2398.58	-0.00135772		2928.58	0.03508429		3458.58	0.00429425		3988.58	-0.00494319
278.8	-0.00106045		808.79	0.00980198		1338.79	-0.00565487		1868.78	0.00563468		2398.78	-0.00023156		2928.78	0.03390504		3458.78	0.00553399		3988.78	-0.00481062
279	-0.00136743		808.99	0.00968544		1338.99	-0.00425666		1868.98	0.00538825		2398.98	0.00071726		2928.98	0.03348474		3458.98	0.00538293		3988.98	-0.00374356
279.2	-0.00109561		809.19	0.00946079		1339.19	-0.0035172		1869.18	0.00488625		2399.18	0.00056058		2929.18	0.03286871		3459.18	0.00663857		3989.18	-0.00267597
279.4	-0.00064405		809.39	0.00877439		1339.39	-0.00271024		1869.38	0.00421844		2399.38	0.00017466		2929.38	0.03213753		3459.38	0.00763705		3989.38	-0.00208819
279.6	-0.00041927		809.59	0.00797964		1339.59	-0.0020777		1869.58	0.0040634		2399.58	0.00059798		2929.58	0.03214422		3459.58	0.00825765		3989.58	-0.00225747
279.8	0.00013672		809.79	0.00802935		1339.79	-0.00166239		1869.78	0.00344794		2399.78	0.00125798		2929.78	0.03112035		3459.78	0.00775172		3989.78	-0.0021624
280	0.00061995		809.99	0.00751593		1339.99	-0.00113338		1869.98	0.00308522		2399.98	0.0010677		2929.98	0.0305036		3459.98	0.00764081		3989.98	-0.00285003
280.2	0.00043284		810.19	0.0073777		1340.19	-0.00052101		1870.18	0.00317291		2400.18	0.00232451		2930.18	0.02990807		3460.18	0.00699107		3990.18	-0.0029253
280.4	0.00058813		810.39	0.00656571		1340.39	-0.00095705		1870.38	0.00310755		2400.38	0.00220057		2930.38	0.03004626		3460.38	0.00715887		3990.38	-0.00348083
280.6	0.0004013		810.59	0.00594263		1340.59	-0.00203257		1870.58	0.00327153		2400.58	0.00083421		2930.58	0.0300462		3460.58	0.00619684		3990.58	-0.00365988
280.8	-0.00045629		810.79	0.00663766		1340.79	-0.00196887		1870.78	0.00268765		2400.78	-0.00016343		2930.78	0.03031894		3460.78	0.00595402		3990.78	-0.00340073
281	-0.00033525		810.99	0.0066152		1340.99	-0.00244193		1870.98	0.0024		2400.98	-0.00036867		2930.98	0.0310283		3460.98	0.00546161		3990.98	-0.0034053
281.2	-0.00021855		811.19	0.00680097		1341.19	-0.00227094		1871.18	0.00237642		2401.18	-0.00078658		2931.18	0.03182438		3461.18	0.00490032		3991.18	-0.00313818
281.4	-0.00085493		811.39	0.00678686		1341.39	-0.00291649		1871.38	0.00276494		2401.38	-0.00160404		2931.38	0.03266427		3461.38	0.00455492		3991.38	-0.00390259
281.6	-0.00137511		811.59	0.00622762		1341.59	-0.0033704		1871.58	0.00277914		2401.58	-0.00195037		2931.58	0.03275006		3461.58	0.00440378		3991.58	-0.00392291
281.8	-0.00205649		811.79	0.00614654		1341.79	-0.00339664		1871.78	0.00267642		2401.78	-0.00252784		2931.78	0.03317845		3461.78	0.004841		3991.78	-0.00435256
282	-0.00105655		811.99	0.00591567		1341.99	-0.00396582		1871.98	0.00342387		2401.98	-0.00175611		2931.98	0.0330211		3461.98	0.00487793		3991.98	-0.00479656
282.2	-0.00072406		812.19	0.00587096		1342.19	-0.00417911		1872.18	0.00295834		2402.18	-0.00207416		2932.18	0.03316112		3462.18	0.00559579		3992.18	-0.00529093
282.4	-0.00043761		812.39	0.00525562		1342.39	-0.00486756		1872.38	0.00295003		2402.38	-0.00276075		2932.38	0.03390378		3462.38	0.00522388		3992.38	-0.00659574
282.6	0.00035735		812.59	0.00641048		1342.59	-0.00481443		1872.58	0.00398484		2402.58	-0.00239314		2932.58	0.03341697		3462.58	0.00491458		3992.58	-0.00729569
282.8	0.00088558		812.79	0.00630566		1342.79	-0.00438174		1872.78	0.00392456		2402.78	-0.00226573		2932.78	0.03275296		3462.78	0.00487098		3992.78	-0.00631685
283	0.0002839		812.99	0.0062134		1342.99	-0.00486175		1872.98	0.00448583		2402.98	-0.0024748		2932.98	0.03285238		3462.98	0.0046918		3992.98	-0.00543583
283.2	0.00038996		813.19	0.00685022		1343.19	-0.00498402		1873.18	0.0043932		2403.18	-0.00271859		2933.18	0.03258579		3463.18	0.00569449		3993.18	-0.00602401
283.4	0.00107647		813.39	0.00731098		1343.39	-0.0052512		1873.38	0.00420447		2403.38	-0.00338143		2933.38	0.03211196		3463.38	0.00568595		3993.38	-0.00651424
283.6	0.00101089		813.59	0.00839753		1343.59	-0.00549065		1873.58	0.00473965		2403.58	-0.00313704		2933.58	0.0322032		3463.58	0.00547998		3993.58	-0.00688571
283.8	0.00180241		813.79	0.00920727		1343.79	-0.00588111		1873.78	0.00498534		2403.78	-0.00301905		2933.78	0.0322916		3463.78	0.00470592		3993.78	-0.00745369
284	0.0019117		813.99	0.00998416		1343.99	-0.00613711		1873.98	0.00439194		2403.98	-0.00269772		2933.98	0.03226709		3463.98	0.0052397		3993.98	-0.00733285
284.2	0.00200743		814.19	0.01059265		1344.19	-0.00653572		1874.18	0.00450026		2404.18	-0.00289028		2934.18	0.03269328		3464.18	0.00578109		3994.18	-0.00677827
284.4	0.00206388		814.39	0.01121563		1344.39	-0.00703477		1874.38	0.00336813		2404.38	-0.00412095		2934.38	0.03284943		3464.38	0.00688039		3994.38	-0.00670855
284.6	0.00221242		814.59	0.01160869		1344.59	-0.00749566		1874.58	0.00318979		2404.58	-0.00406316		2934.58	0.03292544		3464.58	0.00729714		3994.58	-0.0061687
284.8	0.00263411		814.79	0.01205619		1344.79	-0.00741553		1874.78	0.00233111		2404.78	-0.00359334		2934.78	0.03351942		3464.78	0.00861264		3994.78	-0.00559353
285	0.00235361		814.99	0.01226573		1344.99	-0.00770038		1874.98	0.00110888		2404.98	-0.00277931		2934.98	0.03339797		3464.98	0.00827523		3994.98	-0.0043349
285.2	0.00113301		815.19	0.01221203		1345.19	-0.00771204		1875.18	0.00070173		2405.18	-0.00237011		2935.18	0.03324167		3465.18	0.00808607		3995.18	-0.00375833
285.4	0.00117331		815.39	0.011842		1345.39	-0.00871874		1875.38	0.00045956		2405.38	-0.00215652		2935.38	0.03367716		3465.38	0.00830968		3995.38	-0.00370902
285.6	0.00086062		815.59	0.01141808		1345.59	-0.00850725		1875.58	-0.00098202		2405.58	-0.00214655		2935.58	0.03262243		3465.58	0.00740778		3995.58	-0.00422979
285.8	-0.00001402		815.79	0.01139194		1345.79	-0.00765086		1875.78	-0.00171157		2405.78	-0.00236752		2935.78	0.03250725		3465.78	0.00766602		3995.78	-0.00427651
286	0.0010838		815.99	0.01064697		1345.99	-0.0066023		1875.98	-0.00152797		2405.98	-0.00168751		2935.98	0.03250374		3465.98	0.00791313		3995.98	-0.00472528
286.2	0.00077326		816.19	0.00881156		1346.19	-0.00660169		1876.18	-0.00154088		2406.18	-0.00154539		2936.18	0.03304087		3466.18	0.00753285		3996.18	-0.00454828
286.4	0.00032791		816.39	0.00861355		1346.39	-0.00590186		1876.38	-0.00164961		2406.38	-0.00202891		2936.38	0.03311563		3466.38	0.00639192		3996.38	-0.00424273
286.6	-0.00045444		816.59	0.00914269		1346.59	-0.00598931		1876.58	-0.00125811		2406.58	-0.00145231		2936.58	0.03320804		3466.58	0.00522682		3996.58	-0.00389041
286.8	-0.00059297		816.79	0.0076552		1346.79	-0.00557328		1876.78	-0.0020827		2406.78	-0.00266069		2936.78	0.03221769		3466.78	0.00509005		3996.78	-0.0033282
287	-0.00088955		816.99	0.00725429		1346.99	-0.00572347		1876.98	-0.00295286		2406.98	-0.00269303		2936.98	0.03331052		3466.98	0.0044196		3996.98	-0.00420995
287.2	-0.00154386		817.19	0.00722907		1347.19	-0.00490247		1877.18	-0.00354604		2407.18	-0.00217344		2937.18	0.03345555		3467.18	0.00426309		3997.18	-0.00545931
287.4	-0.00212519		817.39	0.0078518		1347.39	-0.00528174		1877.38	-0.00382755		2407.38	-0.00237312		2937.38	0.03358652		3467.38	0.0037443		3997.38	-0.00584731
287.6	-0.00191482		817.59	0.00809042		1347.59	-0.00551975		1877.58	-0.00336887		2407.58	-0.00269144		2937.58	0.03399559		3467.58	0.00430828		3997.58	-0.00707159
287.8	-0.00182043		817.79	0.00788658		1347.79	-0.00575556		1877.78	-0.00275229		2407.78	-0.00227043		2937.78	0.03460088		3467.78	0.0040636		3997.78	-0.00755802
288	-0.0018042		817.99	0.00877446		1347.99	-0.00614309		1877.98	-0.00238729		2407.98	-0.00189554		2937.98	0.03465251		3467.98	0.00493486		3997.98	-0.00711086
288.2	-0.00211		818.19	0.00807584		1348.19	-0.00624701		1878.18	-0.00127768		2408.18	-0.00294764		2938.18	0.03536234		3468.18	0.00565372		3998.18	-0.00752032
288.4	-0.0016165		818.39	0.00779297		1348.39	-0.00616518		1878.38	-0.00050663		2408.38	-0.00280229		2938.38	0.03440497		3468.38	0.00595629		3998.38	-0.00710129
288.6	-0.00133784		818.59	0.00756466		1348.59	-0.00670175		1878.58	-0.00010703		2408.58	-0.00180576		2938.58	0.03463301		3468.58	0.00669035		3998.58	-0.00751471
288.8	-0.00093742		818.79	0.00795056		1348.79	-0.00672868		1878.78	0.00057076		2408.78	-0.00079354		2938.78	0.03414398		3468.78	0.00720643		3998.78	-0.0064652
289	-0.00095011		818.99	0.00876085		1348.99	-0.00740255		1878.98	0.00074114		2408.98	0.00017751		2938.98	0.03317854		3468.98	0.00692892		3998.98	-0.00567597
289.2	-0.00131859		819.19	0.00898561		1349.19	-0.00723159		1879.18	0.00141124		2409.18	0.00026047		2939.18	0.03368615		3469.18	0.00679541		3999.18	-0.00594851
289.4	-0.00084802		819.39	0.00914469		1349.39	-0.00725754		1879.38	0.00130741		2409.38	0.00024202		2939.38	0.03354594		3469.38	0.00667782		3999.38	-0.00633512
289.6	-0.00068651		819.59	0.0094115		1349.59	-0.00671058		1879.58	0.00151215		2409.58	0.00093547		2939.58	0.03250101		3469.58	0.00682708		3999.58	-0.00585343
289.8	-0.00116091		819.79	0.00923021		1349.79	-0.00556675		1879.78	0.00229622		2409.78	0.00103719		2939.78	0.03342603		3469.78	0.00856405		3999.78	-0.00462221
290	-0.00069102		819.99	0.00915556		1349.99	-0.00497617		1879.98	0.00250593		2409.98	0.0011952		2939.98	0.03318444		3469.98	0.00882292		3999.98	-0.00397871
290.2	-0.00103033		820.19	0.00894469		1350.19	-0.00548222		1880.18	0.00238166		2410.18	0.00103797		2940.18	0.03438304		3470.18	0.00831679		4000.18	-0.00308467
290.4	-0.00102584		820.39	0.00954391		1350.39	-0.00483846		1880.38	0.00167107		2410.38	0.00045301		2940.38	0.03474682		3470.38	0.00838265		4000.38	-0.00272743
290.6	-0.00093181		820.59	0.00911034		1350.59	-0.00499818		1880.58	0.00128453		2410.58	-0.0003652		2940.58	0.03481623		3470.58	0.00822784		4000.58	-0.00224006
290.8	-0.00043407		820.79	0.00854694		1350.79	-0.00392064		1880.78	0.00052603		2410.78	-0.00174451		2940.78	0.03432513		3470.78	0.00873774		4000.78	-0.00210761
291	-0.00007888		820.99	0.00901583		1350.99	-0.00376981		1880.98	0.00027392		2410.98	-0.00122196		2940.98	0.03596131		3470.98	0.00877231		4000.98	-0.00283303
291.2	-0.00085422		821.19	0.00878865		1351.19	-0.00353777		1881.18	0.00018948		2411.18	-0.00114004		2941.18	0.03558443		3471.18	0.00944286		4001.18	-0.00322091
291.4	-0.00021083		821.39	0.00860298		1351.39	-0.00396409		1881.38	0.00032707		2411.38	-0.00175091		2941.38	0.03506856		3471.38	0.00926558		4001.38	-0.00405593
291.6	0.00076114		821.59	0.00863335		1351.59	-0.00396892		1881.58	0.00122		2411.58	-0.00231294		2941.58	0.03493378		3471.58	0.00970963		4001.58	-0.00503936
291.8	0.0001808		821.79	0.00861578		1351.79	-0.00481201		1881.78	0.00182836		2411.78	-0.00227292		2941.78	0.03537365		3471.78	0.00966465		4001.78	-0.00535801
292	0.00024906		821.99	0.00884173		1351.99	-0.00527155		1881.98	0.00308096		2411.98	-0.00243798		2941.98	0.03516068		3471.98	0.00920024		4001.98	-0.00649702
292.2	0.00065776		822.19	0.00810667		1352.19	-0.00582419		1882.18	0.00368137		2412.18	-0.00279196		2942.18	0.0347286		3472.18	0.00907169		4002.18	-0.00726199
292.4	0.00147536		822.39	0.00822306		1352.39	-0.00577894		1882.38	0.00418654		2412.38	-0.00240336		2942.38	0.03397801		3472.38	0.008858		4002.38	-0.00746082
292.6	0.00134374		822.59	0.00846785		1352.59	-0.00528849		1882.58	0.00360179		2412.58	-0.00273895		2942.58	0.03468199		3472.58	0.00937862		4002.58	-0.00827963
292.8	0.00071014		822.79	0.00885514		1352.79	-0.00574169		1882.78	0.00464297		2412.78	-0.00304705		2942.78	0.03431869		3472.78	0.00911528		4002.78	-0.00801873
293	0.00075803		822.99	0.00880007		1352.99	-0.00649621		1882.98	0.00397474		2412.98	-0.00313048		2942.98	0.03429272		3472.98	0.00819951		4002.98	-0.00868721
293.2	0.00003817		823.19	0.00874016		1353.19	-0.00686774		1883.18	0.00372268		2413.18	-0.00407893		2943.18	0.03490139		3473.18	0.00657005		4003.18	-0.00907749
293.4	0.0001479		823.39	0.00916745		1353.39	-0.00760745		1883.38	0.00325845		2413.38	-0.00399514		2943.38	0.03459774		3473.38	0.00667656		4003.38	-0.00862492
293.6	0.00007016		823.59	0.00964473		1353.59	-0.00746166		1883.58	0.00352632		2413.58	-0.00370018		2943.58	0.03476277		3473.58	0.00678779		4003.58	-0.00886997
293.8	-0.00114593		823.79	0.00979973		1353.79	-0.00698978		1883.78	0.00258902		2413.78	-0.00361323		2943.78	0.0349012		3473.78	0.00644465		4003.78	-0.00856465
294	-0.00147297		823.99	0.01037933		1353.99	-0.00604468		1883.98	0.00221724		2413.98	-0.00298946		2943.98	0.03409416		3473.98	0.00580501		4003.98	-0.00791297
294.2	-0.00158625		824.19	0.01073515		1354.19	-0.00645426		1884.18	0.00179263		2414.18	-0.00395714		2944.18	0.03459		3474.18	0.00477184		4004.18	-0.00676693
294.4	-0.00174664		824.39	0.01075298		1354.39	-0.00555949		1884.38	0.00156203		2414.38	-0.00435095		2944.38	0.03441338		3474.38	0.00400875		4004.38	-0.00614378
294.6	-0.00260322		824.59	0.01070489		1354.59	-0.00480952		1884.58	0.00129064		2414.58	-0.00480048		2944.58	0.03456434		3474.58	0.00410198		4004.58	-0.00581014
294.8	-0.0026571		824.79	0.00997485		1354.79	-0.00473022		1884.78	0.001715		2414.78	-0.00493128		2944.78	0.03471626		3474.78	0.0041752		4004.78	-0.00572579
295	-0.00278085		824.99	0.00963373		1354.99	-0.00567042		1884.98	0.00239014		2414.98	-0.00368651		2944.98	0.03448464		3474.98	0.00394912		4004.98	-0.00573222
295.2	-0.00326404		825.19	0.00943362		1355.19	-0.00535555		1885.18	0.00288406		2415.18	-0.00400806		2945.18	0.03344889		3475.18	0.00455399		4005.18	-0.00643741
295.4	-0.00233275		825.39	0.00985143		1355.39	-0.00566738		1885.38	0.00348599		2415.38	-0.00365567		2945.38	0.03291644		3475.38	0.00368917		4005.38	-0.00744061
295.6	-0.00262342		825.59	0.01022334		1355.59	-0.00601039		1885.58	0.00366237		2415.58	-0.00343055		2945.58	0.0333429		3475.58	0.00353418		4005.58	-0.00715668
295.8	-0.00271439		825.79	0.01024484		1355.79	-0.00688001		1885.78	0.00365712		2415.78	-0.00257833		2945.78	0.03306192		3475.78	0.0037769		4005.78	-0.00760205
296	-0.00229406		825.99	0.0096274		1355.99	-0.00683737		1885.98	0.00448747		2415.98	-0.00186392		2945.98	0.03293035		3475.98	0.00390576		4005.98	-0.00759953
296.2	-0.00224171		826.19	0.00936024		1356.19	-0.00737631		1886.18	0.00408062		2416.18	-0.00208946		2946.18	0.03304645		3476.18	0.0049467		4006.18	-0.00692834
296.4	-0.00239147		826.39	0.00895099		1356.39	-0.00678281		1886.38	0.00393045		2416.38	-0.00256739		2946.38	0.03323632		3476.38	0.00523842		4006.38	-0.00699305
296.6	-0.00216901		826.59	0.00921482		1356.59	-0.0066232		1886.58	0.00341642		2416.58	-0.00402575		2946.58	0.03440615		3476.58	0.00531974		4006.58	-0.00644442
296.8	-0.00198965		826.79	0.00853496		1356.79	-0.00798872		1886.78	0.00297405		2416.78	-0.00497219		2946.78	0.03517163		3476.78	0.00559552		4006.78	-0.00614751
297	-0.00140351		826.99	0.00828158		1356.99	-0.00828494		1886.98	0.00148958		2416.98	-0.00562094		2946.98	0.03555731		3476.98	0.0059969		4006.98	-0.0063307
297.2	-0.00068101		827.19	0.00833351		1357.19	-0.00840247		1887.18	0.00204305		2417.18	-0.0063356		2947.18	0.03618693		3477.18	0.00664078		4007.18	-0.00530708
297.4	-0.00059846		827.39	0.00883332		1357.39	-0.00798524		1887.38	0.00190303		2417.38	-0.00703211		2947.38	0.03623688		3477.38	0.00803933		4007.38	-0.00480269
297.6	-0.00093841		827.59	0.00931942		1357.59	-0.00663454		1887.58	0.00189519		2417.58	-0.00620915		2947.58	0.03557542		3477.58	0.00799866		4007.58	-0.00530733
297.8	-0.00062186		827.79	0.00868729		1357.79	-0.00623337		1887.78	0.0010799		2417.78	-0.00575827		2947.78	0.03496755		3477.78	0.00862205		4007.78	-0.00437746
298	-0.00022779		827.99	0.00850054		1357.99	-0.00535902		1887.98	0.00194748		2417.98	-0.00610192		2947.98	0.03470531		3477.98	0.00853132		4007.98	-0.00365568
298.2	0.00022545		828.19	0.00805973		1358.19	-0.00517491		1888.18	0.00183145		2418.18	-0.00674329		2948.18	0.03492707		3478.18	0.00736726		4008.18	-0.00319136
298.4	-0.00034444		828.39	0.00724647		1358.39	-0.00403682		1888.38	0.00212985		2418.38	-0.00595261		2948.38	0.03502507		3478.38	0.00699583		4008.38	-0.00396498
298.6	-0.0003927		828.59	0.00730378		1358.59	-0.00449045		1888.58	0.0025639		2418.58	-0.00605626		2948.58	0.03547935		3478.58	0.00770905		4008.58	-0.00430869
298.8	-0.00067318		828.79	0.00666696		1358.79	-0.0043967		1888.78	0.00349287		2418.78	-0.00558207		2948.78	0.03480814		3478.78	0.00792249		4008.78	-0.00403208
299	-0.00106239		828.99	0.00689489		1358.99	-0.00488611		1888.98	0.00454355		2418.98	-0.00461677		2948.98	0.03514808		3478.98	0.00845714		4008.98	-0.00453632
299.2	-0.00099258		829.19	0.00778587		1359.19	-0.00423342		1889.18	0.00479683		2419.18	-0.00491827		2949.18	0.03522565		3479.18	0.0095566		4009.18	-0.00488536
299.4	0.0000795		829.39	0.00791726		1359.39	-0.00459693		1889.38	0.00453793		2419.38	-0.00388124		2949.38	0.03531275		3479.38	0.0084771		4009.38	-0.00472259
299.6	0.00063204		829.59	0.00804332		1359.59	-0.00467967		1889.58	0.00417376		2419.58	-0.00347843		2949.58	0.03571911		3479.58	0.00898861		4009.58	-0.00464568
299.8	0.00125615		829.79	0.00818798		1359.79	-0.00507279		1889.78	0.00473846		2419.78	-0.00188676		2949.78	0.03565207		3479.78	0.00907075		4009.78	-0.00454788
300	0.00187602		829.99	0.00815453		1359.99	-0.00535474		1889.98	0.00548867		2419.98	-0.00167261		2949.98	0.03581623		3479.98	0.00837734		4009.98	-0.00547622
300.2	0.00197879		830.19	0.0085122		1360.19	-0.00525651		1890.18	0.0054428		2420.18	-0.00138727		2950.18	0.0360586		3480.18	0.00861061		4010.18	-0.0064104
300.4	0.0019247		830.39	0.00869114		1360.39	-0.00564794		1890.38	0.00549235		2420.38	-0.00130965		2950.38	0.03617947		3480.38	0.00859361		4010.38	-0.00701598
300.6	0.0029524		830.59	0.00891875		1360.59	-0.0066583		1890.58	0.00476078		2420.58	-0.0011885		2950.58	0.03704644		3480.58	0.0089883		4010.58	-0.00759489
300.8	0.00307902		830.79	0.00903114		1360.79	-0.00752132		1890.78	0.00368708		2420.78	-0.00121916		2950.78	0.03756996		3480.78	0.00991626		4010.78	-0.00801936
301	0.00254007		830.99	0.00909899		1360.99	-0.00744655		1890.98	0.00374612		2420.98	-0.00138085		2950.98	0.03804051		3480.98	0.0108689		4010.98	-0.00824795
301.2	0.00274341		831.19	0.0085565		1361.19	-0.00754707		1891.18	0.00444642		2421.18	-0.0009507		2951.18	0.03850142		3481.18	0.01097244		4011.18	-0.00823824
301.4	0.00108612		831.39	0.00902842		1361.39	-0.00755459		1891.38	0.00399258		2421.38	-0.00122011		2951.38	0.03779581		3481.38	0.01146724		4011.38	-0.00855975
301.6	0.00073909		831.59	0.00885976		1361.59	-0.00731459		1891.58	0.00354282		2421.58	-0.00181587		2951.58	0.0380649		3481.58	0.01124018		4011.58	-0.00801878
301.8	0.00044846		831.79	0.00802309		1361.79	-0.0076458		1891.78	0.00328999		2421.78	-0.0028747		2951.78	0.03818974		3481.78	0.01098008		4011.78	-0.00730602
302	-0.0005351		831.99	0.0080637		1361.99	-0.00734888		1891.98	0.00376145		2421.98	-0.00472008		2951.98	0.03844594		3481.98	0.01039216		4011.98	-0.00687976
302.2	-0.00090733		832.19	0.00708141		1362.19	-0.00686745		1892.18	0.00273205		2422.18	-0.0046598		2952.18	0.03814972		3482.18	0.00912064		4012.18	-0.00676831
302.4	-0.00177305		832.39	0.0070633		1362.39	-0.00643824		1892.38	0.00197846		2422.38	-0.00489066		2952.38	0.03824356		3482.38	0.0093197		4012.38	-0.00746913
302.6	-0.00138863		832.59	0.00692453		1362.59	-0.00610311		1892.58	0.0016807		2422.58	-0.00509888		2952.58	0.0389538		3482.58	0.00856558		4012.58	-0.00657698
302.8	-0.00222804		832.79	0.00593394		1362.79	-0.00474331		1892.78	0.00106701		2422.78	-0.00541358		2952.78	0.03832534		3482.78	0.00894692		4012.78	-0.00582383
303	-0.00248505		832.99	0.00570026		1362.99	-0.00510407		1892.98	0.00038876		2422.98	-0.00509016		2952.98	0.03804048		3482.98	0.00852033		4012.98	-0.0055858
303.2	-0.00188153		833.19	0.00534623		1363.19	-0.00484223		1893.18	-0.00056186		2423.18	-0.00509549		2953.18	0.03793062		3483.18	0.00816161		4013.18	-0.00503088
303.4	-0.00098783		833.39	0.00502748		1363.39	-0.00463067		1893.38	-0.00033085		2423.38	-0.00482351		2953.38	0.03692845		3483.38	0.00708867		4013.38	-0.00495189
303.6	-0.00039194		833.59	0.00547507		1363.59	-0.0045797		1893.58	0.00001705		2423.58	-0.00533711		2953.58	0.03645565		3483.58	0.00693564		4013.58	-0.00507848
303.8	-0.00045176		833.79	0.0061928		1363.79	-0.00472982		1893.78	0.00028198		2423.78	-0.0048729		2953.78	0.03712466		3483.78	0.00565731		4013.78	-0.00552823
304	0.00059005		833.99	0.0063754		1363.99	-0.00385603		1893.98	0.00096433		2423.98	-0.00455265		2953.98	0.03662789		3483.98	0.00488445		4013.98	-0.00720823
304.2	0.00045709		834.19	0.00686995		1364.19	-0.00387173		1894.18	0.00156197		2424.18	-0.00433001		2954.18	0.03694583		3484.18	0.0053033		4014.18	-0.00752489
304.4	0.00080675		834.39	0.00788203		1364.39	-0.0044995		1894.38	0.00191247		2424.38	-0.00339618		2954.38	0.03744635		3484.38	0.0056116		4014.38	-0.0075723
304.6	0.00191113		834.59	0.00880864		1364.59	-0.00438553		1894.58	0.00120459		2424.58	-0.00333674		2954.58	0.03815437		3484.58	0.00664856		4014.58	-0.0082582
304.8	0.00161404		834.79	0.00922814		1364.79	-0.004045		1894.78	0.00215792		2424.78	-0.00362429		2954.78	0.03863625		3484.78	0.00689172		4014.78	-0.00848128
305	0.001223		834.99	0.00863277		1364.99	-0.00351479		1894.98	0.0025414		2424.98	-0.00325077		2954.98	0.03877365		3484.98	0.00769044		4014.98	-0.00782166
305.2	0.00058374		835.19	0.00857496		1365.19	-0.00361161		1895.18	0.00327105		2425.18	-0.00339522		2955.18	0.03868872		3485.18	0.00729858		4015.18	-0.00801557
305.4	0.00036552		835.39	0.00912309		1365.39	-0.00311192		1895.38	0.00408441		2425.38	-0.00430837		2955.38	0.0385354		3485.38	0.00747961		4015.38	-0.00727731
305.6	0.00054122		835.59	0.00867637		1365.59	-0.00283986		1895.58	0.00478844		2425.58	-0.0058817		2955.58	0.03895674		3485.58	0.00713972		4015.58	-0.00748291
305.8	-0.00057444		835.79	0.00880511		1365.79	-0.00313873		1895.78	0.00449623		2425.78	-0.00553201		2955.78	0.03889562		3485.78	0.00758403		4015.78	-0.00742707
306	-0.00089878		835.99	0.00876974		1365.99	-0.00365723		1895.98	0.0040183		2425.98	-0.00627548		2955.98	0.03878748		3485.98	0.00763317		4015.98	-0.00774036
306.2	-0.00033735		836.19	0.00842792		1366.19	-0.0035172		1896.18	0.00306425		2426.18	-0.00510096		2956.18	0.03831663		3486.18	0.00725726		4016.18	-0.00816606
306.4	-0.00088991		836.39	0.00875507		1366.39	-0.00358573		1896.38	0.00297751		2426.38	-0.00469073		2956.38	0.03810829		3486.38	0.00752494		4016.38	-0.00735779
306.6	-0.00060774		836.59	0.00816213		1366.59	-0.00324741		1896.58	0.00291527		2426.58	-0.00404762		2956.58	0.03845784		3486.58	0.00755505		4016.58	-0.00625165
306.8	-0.00128708		836.79	0.00805159		1366.79	-0.00323137		1896.78	0.00299082		2426.78	-0.00462345		2956.78	0.03735487		3486.78	0.00856503		4016.78	-0.00582016
307	-0.00192947		836.99	0.00822638		1366.99	-0.00378038		1896.98	0.00271016		2426.98	-0.00359507		2956.98	0.03740425		3486.98	0.00806419		4016.98	-0.00645044
307.2	-0.00156581		837.19	0.00873455		1367.19	-0.0035681		1897.18	0.00323505		2427.18	-0.00443361		2957.18	0.03757632		3487.18	0.00798907		4017.18	-0.00645791
307.4	-0.00193843		837.39	0.00863386		1367.39	-0.00420124		1897.38	0.00378771		2427.38	-0.00430379		2957.38	0.03699465		3487.38	0.00754298		4017.38	-0.00646373
307.6	-0.00206517		837.59	0.00834111		1367.59	-0.00573126		1897.58	0.00367138		2427.58	-0.00482917		2957.58	0.037172		3487.58	0.00718132		4017.58	-0.00670725
307.8	-0.00253497		837.79	0.00883825		1367.79	-0.00599657		1897.78	0.00419679		2427.78	-0.00415015		2957.78	0.03825064		3487.78	0.00636066		4017.78	-0.00705002
308	-0.00181983		837.99	0.00875064		1367.99	-0.00646656		1897.98	0.00474475		2427.98	-0.00453604		2957.98	0.0379953		3487.98	0.00596448		4017.98	-0.00703863
308.2	-0.00181419		838.19	0.00916075		1368.19	-0.00792043		1898.18	0.00447945		2428.18	-0.00465904		2958.18	0.03910702		3488.18	0.00613876		4018.18	-0.0064522
308.4	-0.00122668		838.39	0.00948666		1368.39	-0.00779557		1898.38	0.00404935		2428.38	-0.00469752		2958.38	0.04035546		3488.38	0.00609609		4018.38	-0.00609085
308.6	-0.00193744		838.59	0.00911275		1368.59	-0.00759938		1898.58	0.00439158		2428.58	-0.00474708		2958.58	0.04067595		3488.58	0.00672692		4018.58	-0.00609409
308.8	-0.00214037		838.79	0.00852776		1368.79	-0.00711397		1898.78	0.00424372		2428.78	-0.0043151		2958.78	0.04075879		3488.78	0.00608633		4018.78	-0.00650173
309	-0.00229526		838.99	0.00767212		1368.99	-0.00668062		1898.98	0.00360438		2428.98	-0.00425604		2958.98	0.04102851		3488.98	0.00641739		4018.98	-0.00659185
309.2	-0.00279961		839.19	0.00669556		1369.19	-0.0062726		1899.18	0.00380893		2429.18	-0.00450308		2959.18	0.04133388		3489.18	0.00587849		4019.18	-0.00757044
309.4	-0.00245776		839.39	0.00596698		1369.39	-0.00589437		1899.38	0.00358088		2429.38	-0.00416793		2959.38	0.04078783		3489.38	0.00543344		4019.38	-0.00681398
309.6	-0.00311979		839.59	0.0051364		1369.59	-0.00601264		1899.58	0.00238635		2429.58	-0.00473287		2959.58	0.04043404		3489.58	0.0063138		4019.58	-0.00680365
309.8	-0.00316082		839.79	0.00524767		1369.79	-0.00571321		1899.78	0.00153652		2429.78	-0.00400857		2959.78	0.04038826		3489.78	0.00646715		4019.78	-0.00593085
310	-0.00282603		839.99	0.00459935		1369.99	-0.00573498		1899.98	0.00071174		2429.98	-0.00342991		2959.98	0.03918785		3489.98	0.00704922		4019.98	-0.006238
310.2	-0.00242069		840.19	0.00507768		1370.19	-0.00489097		1900.18	-0.00012774		2430.18	-0.00318466		2960.18	0.03852971		3490.18	0.00761906		4020.18	-0.00636471
310.4	-0.00263711		840.39	0.00554367		1370.39	-0.00515625		1900.38	0.00002805		2430.38	-0.00273468		2960.38	0.03842529		3490.38	0.00760876		4020.38	-0.00584418
310.6	-0.00199287		840.59	0.00550117		1370.59	-0.00471562		1900.58	0.00019236		2430.58	-0.00275202		2960.58	0.03864503		3490.58	0.00807486		4020.58	-0.00643218
310.8	-0.00219748		840.79	0.00546403		1370.79	-0.0042493		1900.78	0.00055435		2430.78	-0.00225739		2960.78	0.03798993		3490.78	0.0081102		4020.78	-0.00662481
311	-0.00259257		840.99	0.00548548		1370.99	-0.00428828		1900.98	0.00011475		2430.98	-0.00222602		2960.98	0.0384134		3490.98	0.00735821		4020.98	-0.00688325
311.2	-0.002491		841.19	0.00551157		1371.19	-0.0054271		1901.18	-0.00026497		2431.18	-0.00312874		2961.18	0.03804607		3491.18	0.00674984		4021.18	-0.00627023
311.4	-0.00283355		841.39	0.00541833		1371.39	-0.00696822		1901.38	0.00057573		2431.38	-0.00211458		2961.38	0.03887711		3491.38	0.0053982		4021.38	-0.00621488
311.6	-0.0016804		841.59	0.00492106		1371.59	-0.00837181		1901.58	0.00093918		2431.58	-0.002883		2961.58	0.03865353		3491.58	0.00500955		4021.58	-0.0048951
311.8	-0.00107525		841.79	0.00603456		1371.79	-0.00881544		1901.78	0.00188521		2431.78	-0.00333704		2961.78	0.03954096		3491.78	0.00487099		4021.78	-0.0038403
312	-0.00000542		841.99	0.00613574		1371.99	-0.00914417		1901.98	0.00237915		2431.98	-0.00442855		2961.98	0.03992289		3491.98	0.00454708		4021.98	-0.00370084
312.2	0.00002359		842.19	0.00665099		1372.19	-0.00942477		1902.18	0.00266715		2432.18	-0.00411645		2962.18	0.04059142		3492.18	0.0046989		4022.18	-0.00386457
312.4	-0.00007203		842.39	0.00667446		1372.39	-0.00845916		1902.38	0.00324692		2432.38	-0.00539829		2962.38	0.04183689		3492.38	0.00457984		4022.38	-0.00358019
312.6	-0.00010309		842.59	0.00685583		1372.59	-0.00881235		1902.58	0.00396632		2432.58	-0.00565869		2962.58	0.04112737		3492.58	0.00549439		4022.58	-0.00421594
312.8	0.00005307		842.79	0.00628249		1372.79	-0.00858933		1902.78	0.00399877		2432.78	-0.00594509		2962.78	0.04135103		3492.78	0.00515501		4022.78	-0.00487454
313	0.0001597		842.99	0.00624931		1372.99	-0.00910335		1902.98	0.005711		2432.98	-0.00566166		2962.98	0.04198387		3492.98	0.00481697		4022.98	-0.00521069
313.2	0.00062579		843.19	0.00618436		1373.19	-0.009081		1903.18	0.00592372		2433.18	-0.00509077		2963.18	0.04163071		3493.18	0.00471109		4023.18	-0.00471603
313.4	0.00063785		843.39	0.00680239		1373.39	-0.00891451		1903.38	0.0062059		2433.38	-0.00460425		2963.38	0.04137424		3493.38	0.00477564		4023.38	-0.00458889
313.6	0.00052753		843.59	0.00729911		1373.59	-0.00856042		1903.58	0.00547553		2433.58	-0.00549492		2963.58	0.04163841		3493.58	0.00613879		4023.58	-0.0054039
313.8	0.00046143		843.79	0.00803972		1373.79	-0.00793015		1903.78	0.00558649		2433.78	-0.00491289		2963.78	0.04139892		3493.78	0.00582119		4023.78	-0.00583936
314	0.00045465		843.99	0.00818555		1373.99	-0.00821259		1903.98	0.00503671		2433.98	-0.00471369		2963.98	0.0412155		3493.98	0.00746892		4023.98	-0.00665771
314.2	0.00051581		844.19	0.00920512		1374.19	-0.00781439		1904.18	0.00507997		2434.18	-0.00458892		2964.18	0.04103773		3494.18	0.00747182		4024.18	-0.00662302
314.4	-0.00003531		844.39	0.00953409		1374.39	-0.00794523		1904.38	0.00453183		2434.38	-0.00378858		2964.38	0.04096372		3494.38	0.00735711		4024.38	-0.00632261
314.6	-0.00077657		844.59	0.00975781		1374.59	-0.00802977		1904.58	0.00408239		2434.58	-0.00291586		2964.58	0.04021609		3494.58	0.00789315		4024.58	-0.00681655
314.8	-0.00169037		844.79	0.00929667		1374.79	-0.00825175		1904.78	0.00365747		2434.78	-0.0027019		2964.78	0.04011801		3494.78	0.0081098		4024.78	-0.00670734
315	-0.00228007		844.99	0.00891687		1374.99	-0.00835333		1904.98	0.00222119		2434.98	-0.00328174		2964.98	0.04004771		3494.98	0.00761893		4024.98	-0.00631693
315.2	-0.0027218		845.19	0.00868144		1375.19	-0.00877874		1905.18	0.00166575		2435.18	-0.00295104		2965.18	0.04032447		3495.18	0.00803552		4025.18	-0.00568987
315.4	-0.00307918		845.39	0.00885082		1375.39	-0.00879603		1905.38	0.00263897		2435.38	-0.00243105		2965.38	0.0403407		3495.38	0.00823234		4025.38	-0.0052567
315.6	-0.00275599		845.59	0.00732764		1375.59	-0.00843866		1905.58	0.00077399		2435.58	-0.0035433		2965.58	0.03987957		3495.58	0.00837317		4025.58	-0.00442651
315.8	-0.00315479		845.79	0.00779833		1375.79	-0.00769732		1905.78	0.00112261		2435.78	-0.00443132		2965.78	0.03977827		3495.78	0.00915101		4025.78	-0.00466328
316	-0.00298807		845.99	0.00734843		1375.99	-0.00686622		1905.98	0.00154569		2435.98	-0.00551219		2965.98	0.0396736		3495.98	0.00886603		4025.98	-0.00492018
316.2	-0.00293906		846.19	0.00711928		1376.19	-0.00696639		1906.18	0.00084798		2436.18	-0.00601061		2966.18	0.04013217		3496.18	0.00896077		4026.18	-0.00444039
316.4	-0.00238289		846.39	0.00687585		1376.39	-0.00624682		1906.38	0.00081062		2436.38	-0.00791924		2966.38	0.03945149		3496.38	0.00879351		4026.38	-0.00370385
316.6	-0.00157038		846.59	0.00639351		1376.59	-0.00690352		1906.58	0.0014558		2436.58	-0.00789595		2966.58	0.0383128		3496.58	0.00927974		4026.58	-0.00318177
316.8	-0.00189577		846.79	0.00607925		1376.79	-0.00683129		1906.78	0.00199887		2436.78	-0.00795657		2966.78	0.03861451		3496.78	0.0081321		4026.78	-0.0035351
317	-0.00083978		846.99	0.0064656		1376.99	-0.00628761		1906.98	0.00286406		2436.98	-0.0070248		2966.98	0.03825602		3496.98	0.00769502		4026.98	-0.00416279
317.2	-0.00002248		847.19	0.00716192		1377.19	-0.00637236		1907.18	0.00316889		2437.18	-0.00731233		2967.18	0.03845176		3497.18	0.00770062		4027.18	-0.00335112
317.4	0.00029475		847.39	0.00780541		1377.39	-0.00586769		1907.38	0.00345815		2437.38	-0.00750608		2967.38	0.03868613		3497.38	0.00793671		4027.38	-0.00385994
317.6	0.00104645		847.59	0.00837231		1377.59	-0.00610539		1907.58	0.00384615		2437.58	-0.00820555		2967.58	0.03789879		3497.58	0.00801156		4027.58	-0.00399346
317.8	0.00180165		847.79	0.00835407		1377.79	-0.00617764		1907.78	0.00436739		2437.78	-0.0079558		2967.78	0.0378829		3497.78	0.00714372		4027.78	-0.00459987
318	0.00309423		847.99	0.00818154		1377.99	-0.00669577		1907.98	0.00456018		2437.98	-0.00778226		2967.98	0.03868244		3497.98	0.00746146		4027.98	-0.00499225
318.2	0.00338132		848.19	0.00840946		1378.19	-0.00691553		1908.18	0.00414581		2438.18	-0.00720161		2968.18	0.03813271		3498.18	0.00727174		4028.18	-0.00464075
318.4	0.00301827		848.39	0.00843144		1378.39	-0.00779173		1908.38	0.00381953		2438.38	-0.00665841		2968.38	0.03867737		3498.38	0.00700636		4028.38	-0.00471626
318.6	0.00347759		848.59	0.00887637		1378.59	-0.008332		1908.58	0.00407871		2438.58	-0.005959		2968.58	0.03948345		3498.58	0.0076364		4028.58	-0.0061955
318.8	0.00316155		848.79	0.00771525		1378.79	-0.00826506		1908.78	0.0040366		2438.78	-0.00626128		2968.78	0.03995213		3498.78	0.00777535		4028.78	-0.00666765
319	0.00183488		848.99	0.00808303		1378.99	-0.00805388		1908.98	0.00363581		2438.98	-0.00568787		2968.98	0.04039344		3498.98	0.00905024		4028.98	-0.00680739
319.2	0.00082429		849.19	0.00788254		1379.19	-0.00850358		1909.18	0.00376792		2439.18	-0.0057563		2969.18	0.04116263		3499.18	0.00920795		4029.18	-0.00693568
319.4	0.00002167		849.39	0.00722784		1379.39	-0.00886969		1909.38	0.00301934		2439.38	-0.00656977		2969.38	0.04130852		3499.38	0.00878965		4029.38	-0.00775494
319.6	-0.0009783		849.59	0.00655568		1379.59	-0.00921732		1909.58	0.00184844		2439.58	-0.00683271		2969.58	0.04186598		3499.58	0.00788121		4029.58	-0.00750638
319.8	-0.00162382		849.79	0.00620414		1379.79	-0.00868053		1909.78	0.00286424		2439.78	-0.00769012		2969.78	0.04158519		3499.78	0.00794859		4029.78	-0.00739752
320	-0.00197567		849.99	0.00635484		1379.99	-0.00821091		1909.98	0.00351126		2439.98	-0.0080665		2969.98	0.04129549		3499.98	0.00765443		4029.98	-0.00701452
320.2	-0.00231698		850.19	0.00666909		1380.19	-0.00821694		1910.18	0.00358843		2440.18	-0.00767363		2970.18	0.04135136		3500.18	0.00708656		4030.18	-0.00707968
320.4	-0.00331582		850.39	0.00707482		1380.39	-0.00747523		1910.38	0.00424819		2440.38	-0.00770391		2970.38	0.04071196		3500.38	0.00726142		4030.38	-0.00681642
320.6	-0.00336662		850.59	0.00711891		1380.59	-0.00801494		1910.58	0.00417724		2440.58	-0.00635659		2970.58	0.04108371		3500.58	0.00762266		4030.58	-0.00710505
320.8	-0.00377907		850.79	0.00728243		1380.79	-0.00769031		1910.78	0.00439411		2440.78	-0.00633132		2970.78	0.04037412		3500.78	0.00686083		4030.78	-0.00824448
321	-0.00270355		850.99	0.0065824		1380.99	-0.00728487		1910.98	0.0049201		2440.98	-0.00584073		2970.98	0.0400032		3500.98	0.00705938		4030.98	-0.00842167
321.2	-0.00260546		851.19	0.00743333		1381.19	-0.00782831		1911.18	0.00515312		2441.18	-0.00588704		2971.18	0.03938066		3501.18	0.00694836		4031.18	-0.00800464
321.4	-0.00198273		851.39	0.00717719		1381.39	-0.00753997		1911.38	0.0049994		2441.38	-0.00534501		2971.38	0.03846126		3501.38	0.00666233		4031.38	-0.00848595
321.6	-0.00087082		851.59	0.00729523		1381.59	-0.00764068		1911.58	0.00532701		2441.58	-0.00541833		2971.58	0.03747899		3501.58	0.00663429		4031.58	-0.00919396
321.8	0.00062562		851.79	0.00686925		1381.79	-0.00711234		1911.78	0.0054155		2441.78	-0.00478296		2971.78	0.03823328		3501.78	0.00648951		4031.78	-0.00979994
322	0.00184965		851.99	0.00721865		1381.99	-0.0066324		1911.98	0.00486118		2441.98	-0.00498873		2971.98	0.03903916		3501.98	0.00682739		4031.98	-0.01018344
322.2	0.00315431		852.19	0.00770463		1382.19	-0.00678466		1912.18	0.00461401		2442.18	-0.00437226		2972.18	0.0393812		3502.18	0.00705877		4032.18	-0.01014119
322.4	0.00347988		852.39	0.00849717		1382.39	-0.00643863		1912.38	0.00423038		2442.38	-0.00385084		2972.38	0.04073581		3502.38	0.00740016		4032.38	-0.0093994
322.6	0.00368803		852.59	0.00888219		1382.59	-0.00643892		1912.58	0.00299081		2442.58	-0.00397682		2972.58	0.04129181		3502.58	0.00870376		4032.58	-0.00918574
322.8	0.00330436		852.79	0.00927173		1382.79	-0.00641768		1912.78	0.00239328		2442.78	-0.00456566		2972.78	0.04106601		3502.78	0.00926977		4032.78	-0.00854308
323	0.00302889		852.99	0.00982419		1382.99	-0.00663841		1912.98	0.00166892		2442.98	-0.00437626		2972.98	0.04242175		3502.98	0.00961982		4032.98	-0.00761219
323.2	0.00283055		853.19	0.0085318		1383.19	-0.00639792		1913.18	0.00105639		2443.18	-0.00493108		2973.18	0.04327156		3503.18	0.0081628		4033.18	-0.00650247
323.4	0.00286707		853.39	0.00869996		1383.39	-0.00676893		1913.38	-0.0005413		2443.38	-0.00547562		2973.38	0.04435145		3503.38	0.0079883		4033.38	-0.00586063
323.6	0.00172723		853.59	0.00950232		1383.59	-0.00761742		1913.58	-0.00102295		2443.58	-0.00552775		2973.58	0.0446125		3503.58	0.00760379		4033.58	-0.00460762
323.8	0.00106586		853.79	0.0095934		1383.79	-0.00643077		1913.78	-0.00055538		2443.78	-0.00632867		2973.78	0.04396808		3503.78	0.00728654		4033.78	-0.00357972
324	0.00085222		853.99	0.0101511		1383.99	-0.00596809		1913.98	-0.00044317		2443.98	-0.00590296		2973.98	0.04392797		3503.98	0.00760218		4033.98	-0.00316991
324.2	0.00023419		854.19	0.00985926		1384.19	-0.00657936		1914.18	-0.00057032		2444.18	-0.00541051		2974.18	0.04476498		3504.18	0.00765542		4034.18	-0.00247183
324.4	-0.00100537		854.39	0.00924973		1384.39	-0.00683341		1914.38	0.00016155		2444.38	-0.00567839		2974.38	0.04540015		3504.38	0.00904135		4034.38	-0.00203701
324.6	-0.00079794		854.59	0.0088967		1384.59	-0.00713737		1914.58	0.00113278		2444.58	-0.00560883		2974.58	0.04573984		3504.58	0.00968911		4034.58	-0.00233719
324.8	-0.00145277		854.79	0.00820355		1384.79	-0.00739493		1914.78	0.00120651		2444.78	-0.00669273		2974.78	0.04523196		3504.78	0.01031587		4034.78	-0.0013765
325	-0.00126593		854.99	0.00723147		1384.99	-0.00786093		1914.98	0.0021148		2444.98	-0.00663583		2974.98	0.04442067		3504.98	0.01095083		4034.98	-0.00150641
325.2	-0.0027325		855.19	0.00720651		1385.19	-0.00780335		1915.18	0.0033004		2445.18	-0.00558596		2975.18	0.04346023		3505.18	0.01130227		4035.18	-0.00102633
325.4	-0.00283635		855.39	0.00712221		1385.39	-0.00779976		1915.38	0.0036808		2445.38	-0.00572848		2975.38	0.04337328		3505.38	0.01048529		4035.38	-0.00124834
325.6	-0.00272798		855.59	0.00688324		1385.59	-0.00846369		1915.58	0.00469324		2445.58	-0.00582771		2975.58	0.04233478		3505.58	0.01101305		4035.58	-0.00249686
325.8	-0.00228414		855.79	0.00642824		1385.79	-0.00844719		1915.78	0.0050537		2445.78	-0.00471716		2975.78	0.04224613		3505.78	0.01087334		4035.78	-0.0039715
326	-0.00269991		855.99	0.00664288		1385.99	-0.00854421		1915.98	0.00506879		2445.98	-0.00485358		2975.98	0.04186604		3505.98	0.010948		4035.98	-0.00592454
326.2	-0.00267349		856.19	0.00583678		1386.19	-0.0085743		1916.18	0.00559045		2446.18	-0.00488899		2976.18	0.04217264		3506.18	0.01087874		4036.18	-0.00597284
326.4	-0.00349962		856.39	0.00547092		1386.39	-0.00844008		1916.38	0.00572135		2446.38	-0.00481318		2976.38	0.04144343		3506.38	0.01112156		4036.38	-0.00636168
326.6	-0.0028029		856.59	0.00424889		1386.59	-0.00926117		1916.58	0.00610948		2446.58	-0.00601591		2976.58	0.04144767		3506.58	0.01168857		4036.58	-0.0068272
326.8	-0.00170833		856.79	0.0044483		1386.79	-0.00960316		1916.78	0.00600892		2446.78	-0.00632902		2976.78	0.04103418		3506.78	0.01091596		4036.78	-0.00694751
327	-0.00118132		856.99	0.00394446		1386.99	-0.00975044		1916.98	0.00553347		2446.98	-0.00629215		2976.98	0.04147466		3506.98	0.0099219		4036.98	-0.00699187
327.2	-0.00097935		857.19	0.00329121		1387.19	-0.00994181		1917.18	0.00617984		2447.18	-0.00642131		2977.18	0.04176922		3507.18	0.0094647		4037.18	-0.00661499
327.4	0.00037173		857.39	0.00399399		1387.39	-0.01024422		1917.38	0.00572359		2447.38	-0.00650954		2977.38	0.0415897		3507.38	0.0081371		4037.38	-0.00625895
327.6	0.00083809		857.59	0.00477082		1387.59	-0.00966445		1917.58	0.00551228		2447.58	-0.00670833		2977.58	0.04191699		3507.58	0.00785442		4037.58	-0.00644178
327.8	0.00097772		857.79	0.00456343		1387.79	-0.00828416		1917.78	0.00596072		2447.78	-0.00641874		2977.78	0.04183249		3507.78	0.00732146		4037.78	-0.00641673
328	0.00137402		857.99	0.00508174		1387.99	-0.00691313		1917.98	0.00554338		2447.98	-0.00589484		2977.98	0.04222163		3507.98	0.00743423		4037.98	-0.0060416
328.2	0.00171311		858.19	0.00550234		1388.19	-0.0072485		1918.18	0.00585759		2448.18	-0.00598648		2978.18	0.0426843		3508.18	0.00818602		4038.18	-0.00545279
328.4	0.00172286		858.39	0.00542105		1388.39	-0.00641556		1918.38	0.00590454		2448.38	-0.00490058		2978.38	0.04317592		3508.38	0.00834494		4038.38	-0.00603639
328.6	0.00223673		858.59	0.00679107		1388.59	-0.00595427		1918.58	0.00539557		2448.58	-0.00486439		2978.58	0.04373856		3508.58	0.00819215		4038.58	-0.00554484
328.8	0.00199899		858.79	0.00774426		1388.79	-0.00594439		1918.78	0.00458108		2448.78	-0.00481276		2978.78	0.04344551		3508.78	0.00823801		4038.78	-0.00455272
329	0.00144193		858.99	0.00807333		1388.99	-0.00589226		1918.98	0.00516103		2448.98	-0.00353254		2978.98	0.04349922		3508.98	0.00814967		4038.98	-0.00461082
329.2	0.0003096		859.19	0.00851582		1389.19	-0.00564959		1919.18	0.00443166		2449.18	-0.00301093		2979.18	0.04386088		3509.18	0.0076098		4039.18	-0.00482576
329.4	-0.00071229		859.39	0.00916667		1389.39	-0.00641691		1919.38	0.00338479		2449.38	-0.00300577		2979.38	0.04454418		3509.38	0.00676347		4039.38	-0.00527479
329.6	-0.00165504		859.59	0.00924377		1389.59	-0.00745931		1919.58	0.00359699		2449.58	-0.00245559		2979.58	0.04386		3509.58	0.00716558		4039.58	-0.00583765
329.8	-0.00250789		859.79	0.00958122		1389.79	-0.00727683		1919.78	0.00306734		2449.78	-0.00177598		2979.78	0.04454336		3509.78	0.00781111		4039.78	-0.00621678
330	-0.00360952		859.99	0.00950626		1389.99	-0.00739586		1919.98	0.00293641		2449.98	-0.00231771		2979.98	0.04496796		3509.98	0.00770905		4039.98	-0.00619652
330.2	-0.00440194		860.19	0.00934664		1390.19	-0.00757418		1920.18	0.0033582		2450.18	-0.00305623		2980.18	0.04538641		3510.18	0.00824391		4040.18	-0.00561562
330.4	-0.00432347		860.39	0.00913867		1390.39	-0.00844684		1920.38	0.00348976		2450.38	-0.00310702		2980.38	0.04480997		3510.38	0.00818071		4040.38	-0.00604071
330.6	-0.00371428		860.59	0.00864029		1390.59	-0.00882283		1920.58	0.00330691		2450.58	-0.00448922		2980.58	0.04485857		3510.58	0.00849555		4040.58	-0.00525076
330.8	-0.00405088		860.79	0.00855345		1390.79	-0.00949464		1920.78	0.00272332		2450.78	-0.00390679		2980.78	0.04413761		3510.78	0.00819326		4040.78	-0.00496563
331	-0.00358737		860.99	0.00856332		1390.99	-0.00938222		1920.98	0.00319502		2450.98	-0.00361886		2980.98	0.04401771		3510.98	0.00855641		4040.98	-0.00478146
331.2	-0.0028459		861.19	0.0075756		1391.19	-0.00961963		1921.18	0.00397796		2451.18	-0.0037545		2981.18	0.04421754		3511.18	0.00796095		4041.18	-0.0043887
331.4	-0.00157628		861.39	0.00708953		1391.39	-0.00883668		1921.38	0.00321223		2451.38	-0.00331332		2981.38	0.04384531		3511.38	0.00745737		4041.38	-0.00445933
331.6	-0.00117099		861.59	0.00685061		1391.59	-0.00784184		1921.58	0.00323751		2451.58	-0.00365389		2981.58	0.04417544		3511.58	0.0082114		4041.58	-0.00469202
331.8	-0.00170485		861.79	0.00650537		1391.79	-0.00741647		1921.78	0.00373793		2451.78	-0.00353404		2981.78	0.04336217		3511.78	0.0080503		4041.78	-0.00496141
332	-0.00080588		861.99	0.00597746		1391.99	-0.00698394		1921.98	0.00349859		2451.98	-0.0036303		2981.98	0.04314457		3511.98	0.00853663		4041.98	-0.00574082
332.2	-0.00010084		862.19	0.00506701		1392.19	-0.00697133		1922.18	0.00397258		2452.18	-0.00393575		2982.18	0.04249883		3512.18	0.00863643		4042.18	-0.00617048
332.4	0.0001094		862.39	0.00485919		1392.39	-0.00597322		1922.38	0.00379432		2452.38	-0.00428782		2982.38	0.042656		3512.38	0.00814817		4042.38	-0.00677506
332.6	-0.00026041		862.59	0.00546838		1392.59	-0.00698944		1922.58	0.00406788		2452.58	-0.00518263		2982.58	0.04263953		3512.58	0.00869436		4042.58	-0.00689803
332.8	-0.00091184		862.79	0.00551171		1392.79	-0.00702373		1922.78	0.00462778		2452.78	-0.00546778		2982.78	0.04215486		3512.78	0.00845178		4042.78	-0.00702825
333	-0.00167988		862.99	0.00590584		1392.99	-0.00738921		1922.98	0.00489846		2452.98	-0.00539348		2982.98	0.04191652		3512.98	0.0085332		4042.98	-0.00727052
333.2	-0.00158921		863.19	0.00545461		1393.19	-0.00861387		1923.18	0.00415603		2453.18	-0.00639042		2983.18	0.04191863		3513.18	0.00778515		4043.18	-0.00744632
333.4	-0.00237833		863.39	0.00599565		1393.39	-0.00920408		1923.38	0.00367822		2453.38	-0.00677333		2983.38	0.04252387		3513.38	0.00773241		4043.38	-0.00751419
333.6	-0.00230464		863.59	0.00637551		1393.59	-0.00977878		1923.58	0.00325327		2453.58	-0.00671591		2983.58	0.0428466		3513.58	0.0082185		4043.58	-0.00740505
333.8	-0.00239663		863.79	0.00696158		1393.79	-0.00999634		1923.78	0.00236434		2453.78	-0.0067331		2983.78	0.04452986		3513.78	0.00826933		4043.78	-0.00738198
334	-0.00263631		863.99	0.00789559		1393.99	-0.00991344		1923.98	0.00228896		2453.98	-0.00653897		2983.98	0.0446723		3513.98	0.00829824		4043.98	-0.00726153
334.2	-0.00295286		864.19	0.0082917		1394.19	-0.00923788		1924.18	0.00194269		2454.18	-0.0060053		2984.18	0.04474941		3514.18	0.00888896		4044.18	-0.00776458
334.4	-0.00260839		864.39	0.00859738		1394.39	-0.00856995		1924.38	0.00199469		2454.38	-0.00540673		2984.38	0.04511921		3514.38	0.00855024		4044.38	-0.00766221
334.6	-0.00297625		864.59	0.00790159		1394.59	-0.00760563		1924.58	0.00121573		2454.58	-0.00480612		2984.58	0.04533932		3514.58	0.00886107		4044.58	-0.00773718
334.8	-0.0027291		864.79	0.00840545		1394.79	-0.00673746		1924.78	0.00073676		2454.78	-0.00434595		2984.78	0.04564609		3514.78	0.00914877		4044.78	-0.00770402
335	-0.00214742		864.99	0.00805398		1394.99	-0.0054766		1924.98	0.00065116		2454.98	-0.00410244		2984.98	0.04584674		3514.98	0.00897996		4044.98	-0.00737646
335.2	-0.00211177		865.19	0.00746797		1395.19	-0.00449832		1925.18	0.00055108		2455.18	-0.00433747		2985.18	0.04579219		3515.18	0.007899		4045.18	-0.00757292
335.4	-0.00165783		865.39	0.00662568		1395.39	-0.00331416		1925.38	0.00066041		2455.38	-0.00426439		2985.38	0.04631553		3515.38	0.00798534		4045.38	-0.00729052
335.6	-0.00207476		865.59	0.00638405		1395.59	-0.00261689		1925.58	0.00125312		2455.58	-0.00476619		2985.58	0.04642423		3515.58	0.00757638		4045.58	-0.00758526
335.8	-0.00219143		865.79	0.0061267		1395.79	-0.00290154		1925.78	0.00164973		2455.78	-0.00433223		2985.78	0.04575041		3515.78	0.00717902		4045.78	-0.00769701
336	-0.00202169		865.99	0.00592183		1395.99	-0.00230953		1925.98	0.00203561		2455.98	-0.00475625		2985.98	0.04551585		3515.98	0.00694547		4045.98	-0.00779052
336.2	-0.00257417		866.19	0.00551861		1396.19	-0.00224594		1926.18	0.00270715		2456.18	-0.00526257		2986.18	0.04390849		3516.18	0.00700149		4046.18	-0.0076899
336.4	-0.00155712		866.39	0.00639445		1396.39	-0.00329304		1926.38	0.00243708		2456.38	-0.00544535		2986.38	0.04349751		3516.38	0.00714782		4046.38	-0.0075593
336.6	-0.00159751		866.59	0.00665604		1396.59	-0.00496698		1926.58	0.00272909		2456.58	-0.00500921		2986.58	0.04227117		3516.58	0.0073961		4046.58	-0.00774995
336.8	-0.00118423		866.79	0.00721508		1396.79	-0.00502472		1926.78	0.00278204		2456.78	-0.00559829		2986.78	0.04187624		3516.78	0.00735456		4046.78	-0.00779749
337	-0.0008212		866.99	0.00780241		1396.99	-0.0061147		1926.98	0.0021871		2456.98	-0.00592736		2986.98	0.04158335		3516.98	0.00771314		4046.98	-0.00762615
337.2	-0.00066484		867.19	0.00806003		1397.19	-0.00697287		1927.18	0.00152351		2457.18	-0.00679658		2987.18	0.04156843		3517.18	0.00666251		4047.18	-0.0082577
337.4	-0.00120695		867.39	0.00855903		1397.39	-0.0071291		1927.38	0.00059935		2457.38	-0.00687208		2987.38	0.04284295		3517.38	0.00650336		4047.38	-0.00892146
337.6	-0.00074442		867.59	0.00868997		1397.59	-0.0081892		1927.58	-0.00020575		2457.58	-0.00656968		2987.58	0.04463581		3517.58	0.0069095		4047.58	-0.00862298
337.8	-0.0003917		867.79	0.00945758		1397.79	-0.00833595		1927.78	-0.00065525		2457.78	-0.00681472		2987.78	0.04526829		3517.78	0.00698696		4047.78	-0.00835678
338	-0.00005777		867.99	0.00959715		1397.99	-0.00758017		1927.98	-0.0011571		2457.98	-0.00688089		2987.98	0.04541474		3517.98	0.00842715		4047.98	-0.00905786
338.2	-0.00051941		868.19	0.00918598		1398.19	-0.00770921		1928.18	-0.00172672		2458.18	-0.00678984		2988.18	0.04591499		3518.18	0.0088615		4048.18	-0.00884337
338.4	-0.00028505		868.39	0.00927618		1398.39	-0.0075242		1928.38	-0.00165952		2458.38	-0.00716331		2988.38	0.04697993		3518.38	0.00934155		4048.38	-0.00823415
338.6	-0.0008462		868.59	0.00856135		1398.59	-0.00728358		1928.58	-0.00260791		2458.58	-0.00651972		2988.58	0.04745001		3518.58	0.00983762		4048.58	-0.00855268
338.8	-0.00127878		868.79	0.00920117		1398.79	-0.0060237		1928.78	-0.00245369		2458.78	-0.00634098		2988.78	0.04711939		3518.78	0.00981944		4048.78	-0.00788333
339	-0.00172064		868.99	0.00736305		1398.99	-0.00598641		1928.98	-0.00196806		2458.98	-0.00670207		2988.98	0.04709218		3518.98	0.00906199		4048.98	-0.00757268
339.2	-0.00223868		869.19	0.0074086		1399.19	-0.00627172		1929.18	-0.00182102		2459.18	-0.00714691		2989.18	0.04721347		3519.18	0.00931002		4049.18	-0.00681677
339.4	-0.00219683		869.39	0.0067563		1399.39	-0.00659635		1929.38	-0.00130736		2459.38	-0.00611973		2989.38	0.04752104		3519.38	0.00992403		4049.38	-0.00571778
339.6	-0.00204495		869.59	0.00683016		1399.59	-0.00698149		1929.58	-0.00121554		2459.58	-0.00535387		2989.58	0.04699425		3519.58	0.00945471		4049.58	-0.00557276
339.8	-0.00178529		869.79	0.00646813		1399.79	-0.00688828		1929.78	0.0000519		2459.78	-0.00546815		2989.78	0.0464669		3519.78	0.0093043		4049.78	-0.00535992
340	-0.00180265		869.99	0.00672079		1399.99	-0.00702616		1929.98	0.00161838		2459.98	-0.00569308		2989.98	0.04588524		3519.98	0.00899912		4049.98	-0.00534461
340.2	-0.00185389		870.19	0.00596547		1400.19	-0.00756127		1930.18	0.00279924		2460.18	-0.00520606		2990.18	0.04477688		3520.18	0.00918954		4050.18	-0.00576212
340.4	-0.00118967		870.39	0.00661988		1400.39	-0.00769419		1930.38	0.00318227		2460.38	-0.00364563		2990.38	0.04399284		3520.38	0.0091216		4050.38	-0.00514196
340.6	-0.00097943		870.59	0.0062762		1400.59	-0.00814506		1930.58	0.00419542		2460.58	-0.0040018		2990.58	0.04324132		3520.58	0.00914869		4050.58	-0.00549072
340.8	-0.00123589		870.79	0.00690711		1400.79	-0.00769583		1930.78	0.00460611		2460.78	-0.00470565		2990.78	0.04283333		3520.78	0.00873891		4050.78	-0.00536966
341	-0.00187042		870.99	0.00765865		1400.99	-0.00795281		1930.98	0.00505406		2460.98	-0.00465254		2990.98	0.04175452		3520.98	0.00854948		4050.98	-0.00530263
341.2	-0.00212495		871.19	0.00704885		1401.19	-0.00795959		1931.18	0.00550507		2461.18	-0.0046358		2991.18	0.04226697		3521.18	0.00772366		4051.18	-0.00599554
341.4	-0.00164377		871.39	0.00707313		1401.39	-0.0080552		1931.38	0.00515978		2461.38	-0.00499767		2991.38	0.04365868		3521.38	0.00788276		4051.38	-0.00560951
341.6	-0.00080614		871.59	0.00749976		1401.59	-0.00774639		1931.58	0.00501684		2461.58	-0.00514136		2991.58	0.0441227		3521.58	0.00863564		4051.58	-0.00635572
341.8	-0.00087427		871.79	0.00781298		1401.79	-0.00756924		1931.78	0.00470608		2461.78	-0.00578947		2991.78	0.04438973		3521.78	0.00918665		4051.78	-0.00677519
342	-0.00025716		871.99	0.00769564		1401.99	-0.00731235		1931.98	0.00378505		2461.98	-0.00566607		2991.98	0.04506136		3521.98	0.0098525		4051.98	-0.00713251
342.2	-0.00050363		872.19	0.00750342		1402.19	-0.0073812		1932.18	0.0037428		2462.18	-0.00602143		2992.18	0.04517168		3522.18	0.00917913		4052.18	-0.00664159
342.4	-0.00081582		872.39	0.00760172		1402.39	-0.00661678		1932.38	0.00339392		2462.38	-0.00608894		2992.38	0.04604735		3522.38	0.00935248		4052.38	-0.00744054
342.6	-0.00057749		872.59	0.00719396		1402.59	-0.00641246		1932.58	0.00338176		2462.58	-0.00517547		2992.58	0.04655832		3522.58	0.00866289		4052.58	-0.00782761
342.8	-0.00081982		872.79	0.00676813		1402.79	-0.00571447		1932.78	0.0038806		2462.78	-0.00604534		2992.78	0.04740497		3522.78	0.00870789		4052.78	-0.00733905
343	-0.00016232		872.99	0.00596844		1402.99	-0.0065991		1932.98	0.00415879		2462.98	-0.00714948		2992.98	0.04801939		3522.98	0.00827487		4052.98	-0.0069503
343.2	-0.00034987		873.19	0.00666665		1403.19	-0.00754568		1933.18	0.00403755		2463.18	-0.00731654		2993.18	0.04900846		3523.18	0.0090085		4053.18	-0.00588956
343.4	0.00050679		873.39	0.00635423		1403.39	-0.00745302		1933.38	0.00379428		2463.38	-0.0071669		2993.38	0.04938831		3523.38	0.00915172		4053.38	-0.0053476
343.6	0.00026215		873.59	0.00647289		1403.59	-0.0065024		1933.58	0.00412245		2463.58	-0.00852046		2993.58	0.04961618		3523.58	0.00852945		4053.58	-0.00604211
343.8	-0.00026375		873.79	0.0067887		1403.79	-0.00659447		1933.78	0.00457835		2463.78	-0.00965317		2993.78	0.05011685		3523.78	0.00821535		4053.78	-0.0069228
344	0.00021762		873.99	0.00715511		1403.99	-0.00730668		1933.98	0.00421968		2463.98	-0.00878608		2993.98	0.04981838		3523.98	0.00745315		4053.98	-0.00692264
344.2	-0.00053029		874.19	0.00695346		1404.19	-0.00739549		1934.18	0.00378829		2464.18	-0.00788473		2994.18	0.04980932		3524.18	0.00743189		4054.18	-0.00745695
344.4	-0.00066309		874.39	0.00690641		1404.39	-0.00687163		1934.38	0.0029281		2464.38	-0.00737575		2994.38	0.04872351		3524.38	0.00758796		4054.38	-0.00713212
344.6	-0.00005825		874.59	0.00647664		1404.59	-0.00743001		1934.58	0.00291676		2464.58	-0.00826153		2994.58	0.04824042		3524.58	0.00749993		4054.58	-0.00670598
344.8	-0.00061947		874.79	0.00612155		1404.79	-0.00756178		1934.78	0.00323355		2464.78	-0.00769301		2994.78	0.04707637		3524.78	0.00794623		4054.78	-0.00673662
345	-0.00060274		874.99	0.00681854		1404.99	-0.00810391		1934.98	0.00219724		2464.98	-0.00700609		2994.98	0.0469453		3524.98	0.00842295		4054.98	-0.0069876
345.2	-0.00008393		875.19	0.00541987		1405.19	-0.00814085		1935.18	0.00126012		2465.18	-0.00711491		2995.18	0.04726144		3525.18	0.00926239		4055.18	-0.00756169
345.4	-0.00024302		875.39	0.0066485		1405.39	-0.00866407		1935.38	0.00092529		2465.38	-0.00710251		2995.38	0.04747975		3525.38	0.00996417		4055.38	-0.00804104
345.6	-0.00083298		875.59	0.0070555		1405.59	-0.00846479		1935.58	0.00059958		2465.58	-0.0066826		2995.58	0.04713761		3525.58	0.01058396		4055.58	-0.00896939
345.8	-0.00146316		875.79	0.00730014		1405.79	-0.00930644		1935.78	-0.00002968		2465.78	-0.00690277		2995.78	0.04771375		3525.78	0.0111542		4055.78	-0.00845136
346	-0.00140907		875.99	0.00699551		1405.99	-0.00830669		1935.98	-0.0009988		2465.98	-0.00569589		2995.98	0.04761581		3525.98	0.01123812		4055.98	-0.00840334
346.2	-0.0010059		876.19	0.0060284		1406.19	-0.00819856		1936.18	-0.0011246		2466.18	-0.00557801		2996.18	0.04746383		3526.18	0.01048292		4056.18	-0.00916965
346.4	-0.00108141		876.39	0.00642166		1406.39	-0.00754454		1936.38	-0.00063681		2466.38	-0.00453466		2996.38	0.04844937		3526.38	0.01029022		4056.38	-0.00917361
346.6	-0.00006375		876.59	0.0066694		1406.59	-0.00767956		1936.58	0.00011176		2466.58	-0.00455347		2996.58	0.04963119		3526.58	0.01016549		4056.58	-0.00813052
346.8	-0.00062462		876.79	0.00696012		1406.79	-0.00771635		1936.78	0.00111985		2466.78	-0.00441393		2996.78	0.05050367		3526.78	0.01162787		4056.78	-0.00789493
347	-0.0005531		876.99	0.00669909		1406.99	-0.00768033		1936.98	0.00172892		2466.98	-0.00452193		2996.98	0.05020176		3526.98	0.01076344		4056.98	-0.00777069
347.2	-0.00062489		877.19	0.00690466		1407.19	-0.00745178		1937.18	0.00212824		2467.18	-0.00500797		2997.18	0.05073164		3527.18	0.01106619		4057.18	-0.00741523
347.4	-0.00020545		877.39	0.00751675		1407.39	-0.00667293		1937.38	0.00280144		2467.38	-0.00517985		2997.38	0.05053959		3527.38	0.0111219		4057.38	-0.00753688
347.6	-0.00089725		877.59	0.00801769		1407.59	-0.00610568		1937.58	0.00372038		2467.58	-0.00495935		2997.58	0.05122802		3527.58	0.01063192		4057.58	-0.00787204
347.8	-0.0004776		877.79	0.0078904		1407.79	-0.00645232		1937.78	0.00354642		2467.78	-0.0047819		2997.78	0.0512366		3527.78	0.01048481		4057.78	-0.00889195
348	-0.00053515		877.99	0.00732742		1407.99	-0.00634205		1937.98	0.00366453		2467.98	-0.00419269		2997.98	0.05132752		3527.98	0.01019295		4057.98	-0.00879451
348.2	-0.0011121		878.19	0.0074927		1408.19	-0.0066142		1938.18	0.0046508		2468.18	-0.00411769		2998.18	0.05100144		3528.18	0.010166		4058.18	-0.00841768
348.4	-0.00115448		878.39	0.00768021		1408.39	-0.0064434		1938.38	0.00469456		2468.38	-0.00511089		2998.38	0.05015068		3528.38	0.01029779		4058.38	-0.00856474
348.6	-0.00083084		878.59	0.00751912		1408.59	-0.0067812		1938.58	0.00523318		2468.58	-0.00562061		2998.58	0.04940893		3528.58	0.01026706		4058.58	-0.00799847
348.8	-0.00047903		878.79	0.00760623		1408.79	-0.00724415		1938.78	0.00611537		2468.78	-0.00561547		2998.78	0.04839473		3528.78	0.01037127		4058.78	-0.00836194
349	-0.00060575		878.99	0.0085228		1408.99	-0.00786583		1938.98	0.0045954		2468.98	-0.00634279		2998.98	0.04912709		3528.98	0.0098127		4058.98	-0.00844023
349.2	-0.00151465		879.19	0.00805179		1409.19	-0.00863732		1939.18	0.00440814		2469.18	-0.00713555		2999.18	0.04851314		3529.18	0.01020288		4059.18	-0.00876636
349.4	-0.00270781		879.39	0.00904789		1409.39	-0.00902817		1939.38	0.00459515		2469.38	-0.00774264		2999.38	0.0474572		3529.38	0.00987356		4059.38	-0.00863259
349.6	-0.00334128		879.59	0.00860173		1409.59	-0.00854032		1939.58	0.00457293		2469.58	-0.00886146		2999.58	0.04699846		3529.58	0.00871351		4059.58	-0.00876983
349.8	-0.00460195		879.79	0.00855738		1409.79	-0.00938902		1939.78	0.00409591		2469.78	-0.0088637		2999.78	0.04759353		3529.78	0.00878571		4059.78	-0.00815095
350	-0.00470259		879.99	0.00770608		1409.99	-0.00894513		1939.98	0.00386734		2469.98	-0.00751746		2999.98	0.04704097		3529.98	0.00793683		4059.98	-0.00828314
350.2	-0.00484136		880.19	0.00865237		1410.19	-0.00874154		1940.18	0.00375487		2470.18	-0.00771555		3000.18	0.04665022		3530.18	0.00772087		4060.18	-0.00805657
350.4	-0.00580841		880.39	0.00951712		1410.39	-0.00763862		1940.38	0.00393009		2470.38	-0.00745369		3000.38	0.0472457		3530.38	0.00759366		4060.38	-0.00698553
350.6	-0.00613639		880.59	0.00919156		1410.59	-0.00814159		1940.58	0.00472055		2470.58	-0.00785305		3000.58	0.04808026		3530.58	0.00844425		4060.58	-0.00588708
350.8	-0.00632383		880.79	0.00831172		1410.79	-0.0078052		1940.78	0.00562894		2470.78	-0.00710129		3000.78	0.04862026		3530.78	0.00849614		4060.78	-0.00657815
351	-0.0062144		880.99	0.00756283		1410.99	-0.00795317		1940.98	0.00623959		2470.98	-0.0074364		3000.98	0.04866025		3530.98	0.00744054		4060.98	-0.00687543
351.2	-0.00613727		881.19	0.0072593		1411.19	-0.008199		1941.18	0.00622628		2471.18	-0.00706347		3001.18	0.04901155		3531.18	0.00834877		4061.18	-0.0060943
351.4	-0.00577758		881.39	0.00698467		1411.39	-0.00819416		1941.38	0.00659139		2471.38	-0.00673696		3001.38	0.04951194		3531.38	0.00881095		4061.38	-0.00604555
351.6	-0.00553535		881.59	0.00599931		1411.59	-0.00769775		1941.58	0.00710694		2471.58	-0.00668292		3001.58	0.0496343		3531.58	0.0097703		4061.58	-0.0063358
351.8	-0.00420821		881.79	0.00511513		1411.79	-0.00753088		1941.78	0.00765796		2471.78	-0.00606195		3001.78	0.04888058		3531.78	0.01010115		4061.78	-0.00680115
352	-0.00421483		881.99	0.00569167		1411.99	-0.00764526		1941.98	0.00705335		2471.98	-0.00586089		3001.98	0.04980419		3531.98	0.00949994		4061.98	-0.0069287
352.2	-0.0032941		882.19	0.00609229		1412.19	-0.00794239		1942.18	0.00711528		2472.18	-0.00529997		3002.18	0.04931688		3532.18	0.00973285		4062.18	-0.00647345
352.4	-0.003984		882.39	0.00615064		1412.39	-0.00805731		1942.38	0.00646108		2472.38	-0.00521923		3002.38	0.04969066		3532.38	0.00955961		4062.38	-0.00727894
352.6	-0.00353759		882.59	0.00620965		1412.59	-0.00773915		1942.58	0.00608248		2472.58	-0.00440001		3002.58	0.04959675		3532.58	0.00908118		4062.58	-0.00751642
352.8	-0.00296575		882.79	0.00671664		1412.79	-0.00911194		1942.78	0.00548162		2472.78	-0.00464157		3002.78	0.04981666		3532.78	0.00903467		4062.78	-0.00868541
353	-0.00329919		882.99	0.00731953		1412.99	-0.00896947		1942.98	0.00374964		2472.98	-0.00494833		3002.98	0.05008197		3532.98	0.00822002		4062.98	-0.00897903
353.2	-0.00264368		883.19	0.00729931		1413.19	-0.00898536		1943.18	0.00345142		2473.18	-0.00478145		3003.18	0.04948387		3533.18	0.0081435		4063.18	-0.00937132
353.4	-0.00260015		883.39	0.007339		1413.39	-0.00870203		1943.38	0.00292753		2473.38	-0.00513104		3003.38	0.04944774		3533.38	0.00830992		4063.38	-0.01010034
353.6	-0.00299936		883.59	0.00703189		1413.59	-0.00891973		1943.58	0.00297684		2473.58	-0.00558252		3003.58	0.05013738		3533.58	0.00801337		4063.58	-0.01073443
353.8	-0.00351671		883.79	0.00782498		1413.79	-0.00940259		1943.78	0.00219864		2473.78	-0.00491113		3003.78	0.05055212		3533.78	0.00876431		4063.78	-0.01008584
354	-0.00341905		883.99	0.00850645		1413.99	-0.00862322		1943.98	0.0018631		2473.98	-0.00480711		3003.98	0.05110437		3533.98	0.00975006		4063.98	-0.00936092
354.2	-0.00376602		884.19	0.00902182		1414.19	-0.00754475		1944.18	0.00163104		2474.18	-0.00506616		3004.18	0.05095496		3534.18	0.01061612		4064.18	-0.00861661
354.4	-0.00349603		884.39	0.00835229		1414.39	-0.00708433		1944.38	0.00131654		2474.38	-0.0050493		3004.38	0.05155157		3534.38	0.01040727		4064.38	-0.00827286
354.6	-0.00232443		884.59	0.00787511		1414.59	-0.00784524		1944.58	0.00186492		2474.58	-0.00629049		3004.58	0.05258769		3534.58	0.01064305		4064.58	-0.00808847
354.8	-0.00182007		884.79	0.0071037		1414.79	-0.00825807		1944.78	0.00190102		2474.78	-0.00614208		3004.78	0.05257607		3534.78	0.01096212		4064.78	-0.00880374
355	-0.00135197		884.99	0.00706293		1414.99	-0.0085498		1944.98	0.00147458		2474.98	-0.00698464		3004.98	0.05210646		3534.98	0.0108152		4064.98	-0.00840967
355.2	-0.00083107		885.19	0.00692913		1415.19	-0.00842996		1945.18	0.00116727		2475.18	-0.00764874		3005.18	0.05176628		3535.18	0.01159154		4065.18	-0.00803056
355.4	0.00026087		885.39	0.00741921		1415.39	-0.00843828		1945.38	0.00085635		2475.38	-0.00807814		3005.38	0.05217607		3535.38	0.0118602		4065.38	-0.00827195
355.6	0.00069716		885.59	0.00696326		1415.59	-0.00803634		1945.58	0.00191901		2475.58	-0.00903184		3005.58	0.05139775		3535.58	0.01259982		4065.58	-0.00882129
355.8	0.00101363		885.79	0.00654709		1415.79	-0.00743694		1945.78	0.00195679		2475.78	-0.00875927		3005.78	0.05139634		3535.78	0.01185334		4065.78	-0.00892207
356	0.00037575		885.99	0.00692957		1415.99	-0.00748566		1945.98	0.00125633		2475.98	-0.00897199		3005.98	0.05220185		3535.98	0.01167275		4065.98	-0.00902542
356.2	-0.00011033		886.19	0.00658396		1416.19	-0.00768449		1946.18	0.00107723		2476.18	-0.00886018		3006.18	0.0512507		3536.18	0.01238073		4066.18	-0.00825208
356.4	-0.00136892		886.39	0.00655769		1416.39	-0.00786848		1946.38	0.00062268		2476.38	-0.0091736		3006.38	0.05119925		3536.38	0.01194531		4066.38	-0.00866893
356.6	-0.0015176		886.59	0.00639576		1416.59	-0.0074624		1946.58	0.00031176		2476.58	-0.0092072		3006.58	0.05066099		3536.58	0.01052711		4066.58	-0.0085079
356.8	-0.00126063		886.79	0.00697439		1416.79	-0.00867746		1946.78	0.00038712		2476.78	-0.00996585		3006.78	0.0503655		3536.78	0.00988645		4066.78	-0.00833014
357	-0.00156576		886.99	0.00670534		1416.99	-0.00784969		1946.98	0.00068006		2476.98	-0.01000353		3006.98	0.04953484		3536.98	0.00920021		4066.98	-0.00722365
357.2	-0.00198459		887.19	0.00660909		1417.19	-0.00842765		1947.18	0.00148825		2477.18	-0.00948755		3007.18	0.04958072		3537.18	0.00965104		4067.18	-0.00779788
357.4	-0.00279276		887.39	0.00672373		1417.39	-0.00829304		1947.38	0.00134391		2477.38	-0.00952517		3007.38	0.049554		3537.38	0.00966849		4067.38	-0.00838813
357.6	-0.00261089		887.59	0.00576204		1417.59	-0.00860663		1947.58	0.00186559		2477.58	-0.00885397		3007.58	0.04857203		3537.58	0.00988849		4067.58	-0.00829548
357.8	-0.00183755		887.79	0.00639051		1417.79	-0.00895638		1947.78	0.00198095		2477.78	-0.00753024		3007.78	0.04955431		3537.78	0.01008023		4067.78	-0.00789129
358	-0.00248518		887.99	0.0060785		1417.99	-0.00779342		1947.98	0.00345427		2477.98	-0.00739644		3007.98	0.04884481		3537.98	0.01037915		4067.98	-0.0071396
358.2	-0.00294738		888.19	0.00562064		1418.19	-0.00809669		1948.18	0.00390182		2478.18	-0.00606261		3008.18	0.04800219		3538.18	0.00935138		4068.18	-0.00722021
358.4	-0.00280552		888.39	0.00598806		1418.39	-0.00764961		1948.38	0.00418306		2478.38	-0.00617475		3008.38	0.04861334		3538.38	0.00837322		4068.38	-0.00713174
358.6	-0.00276457		888.59	0.00612545		1418.59	-0.00823187		1948.58	0.00485475		2478.58	-0.00614976		3008.58	0.048976		3538.58	0.00767177		4068.58	-0.0079968
358.8	-0.00302633		888.79	0.00643074		1418.79	-0.00895749		1948.78	0.00497829		2478.78	-0.00520992		3008.78	0.04843765		3538.78	0.00702282		4068.78	-0.00881151
359	-0.0033776		888.99	0.00714879		1418.99	-0.0084774		1948.98	0.00494664		2478.98	-0.00537085		3008.98	0.04864954		3538.98	0.00669859		4068.98	-0.00929493
359.2	-0.00366925		889.19	0.00739701		1419.19	-0.00837949		1949.18	0.00479191		2479.18	-0.00572335		3009.18	0.04829067		3539.18	0.00739897		4069.18	-0.0096799
359.4	-0.00333179		889.39	0.00752513		1419.39	-0.00792534		1949.38	0.00474695		2479.38	-0.00624542		3009.38	0.04818107		3539.38	0.00775822		4069.38	-0.00992455
359.6	-0.00326108		889.59	0.00718433		1419.59	-0.00699644		1949.58	0.0050326		2479.58	-0.0072308		3009.58	0.0474797		3539.58	0.00800871		4069.58	-0.01033797
359.8	-0.00340226		889.79	0.00737316		1419.79	-0.00679535		1949.78	0.00457011		2479.78	-0.00756351		3009.78	0.04834089		3539.78	0.00858134		4069.78	-0.01044965
360	-0.0041013		889.99	0.00769234		1419.99	-0.00710967		1949.98	0.00316692		2479.98	-0.00710698		3009.98	0.04860549		3539.98	0.00964146		4069.98	-0.01062388
360.2	-0.00388807		890.19	0.00831583		1420.19	-0.00644025		1950.18	0.00182253		2480.18	-0.00767873		3010.18	0.04903787		3540.18	0.01055242		4070.18	-0.01046687
360.4	-0.00267922		890.39	0.00827949		1420.39	-0.0065698		1950.38	0.00125788		2480.38	-0.00744576		3010.38	0.04979413		3540.38	0.01067608		4070.38	-0.0093787
360.6	-0.00225406		890.59	0.00851435		1420.59	-0.00657555		1950.58	0.00048763		2480.58	-0.0075953		3010.58	0.05092901		3540.58	0.01046935		4070.58	-0.00894259
360.8	-0.00194976		890.79	0.00896106		1420.79	-0.00731677		1950.78	-0.00023738		2480.78	-0.00720243		3010.78	0.05101651		3540.78	0.0114428		4070.78	-0.00964498
361	-0.00156891		890.99	0.00892785		1420.99	-0.00680013		1950.98	-0.00019834		2480.98	-0.00713831		3010.98	0.0512262		3540.98	0.01188168		4070.98	-0.00907417
361.2	-0.00063983		891.19	0.00868515		1421.19	-0.00657546		1951.18	0.00013426		2481.18	-0.00629826		3011.18	0.05173436		3541.18	0.01219299		4071.18	-0.01028921
361.4	-0.00007994		891.39	0.00770664		1421.39	-0.00654227		1951.38	0.00045009		2481.38	-0.00552985		3011.38	0.05279814		3541.38	0.01223975		4071.38	-0.0101746
361.6	0.00121244		891.59	0.00745823		1421.59	-0.00733414		1951.58	0.00136315		2481.58	-0.00511512		3011.58	0.05290918		3541.58	0.01224468		4071.58	-0.00977914
361.8	0.00227006		891.79	0.00788598		1421.79	-0.00748609		1951.78	0.00272849		2481.78	-0.00479643		3011.78	0.05363985		3541.78	0.01161208		4071.78	-0.00893188
362	0.00069492		891.99	0.00717401		1421.99	-0.00712605		1951.98	0.00417778		2481.98	-0.00451538		3011.98	0.05296768		3541.98	0.01161192		4071.98	-0.00836542
362.2	0.0002986		892.19	0.00704997		1422.19	-0.00819714		1952.18	0.00445169		2482.18	-0.00359663		3012.18	0.05325545		3542.18	0.01074191		4072.18	-0.00801776
362.4	0.00029551		892.39	0.00666945		1422.39	-0.00806371		1952.38	0.00573457		2482.38	-0.00402036		3012.38	0.05374564		3542.38	0.0102992		4072.38	-0.00800784
362.6	-0.00003933		892.59	0.00712352		1422.59	-0.0084264		1952.58	0.00636311		2482.58	-0.00300847		3012.58	0.05351689		3542.58	0.00971617		4072.58	-0.00822511
362.8	-0.00067726		892.79	0.00688472		1422.79	-0.00936101		1952.78	0.00661267		2482.78	-0.00276934		3012.78	0.05318835		3542.78	0.0088525		4072.78	-0.00823725
363	-0.00148311		892.99	0.00653482		1422.99	-0.00934797		1952.98	0.00691198		2482.98	-0.00321989		3012.98	0.05301185		3542.98	0.00918336		4072.98	-0.00713086
363.2	-0.00146087		893.19	0.00618797		1423.19	-0.01008018		1953.18	0.00720502		2483.18	-0.00491705		3013.18	0.05259812		3543.18	0.00874275		4073.18	-0.00660259
363.4	-0.00131178		893.39	0.00590029		1423.39	-0.01040245		1953.38	0.00774739		2483.38	-0.00528706		3013.38	0.05187547		3543.38	0.00802761		4073.38	-0.00683899
363.6	-0.00206734		893.59	0.00622444		1423.59	-0.01030394		1953.58	0.00690042		2483.58	-0.00563482		3013.58	0.0524133		3543.58	0.00809142		4073.58	-0.00678418
363.8	-0.00331127		893.79	0.00613965		1423.79	-0.01003212		1953.78	0.00622228		2483.78	-0.00652636		3013.78	0.05244229		3543.78	0.00895587		4073.78	-0.00718023
364	-0.00389277		893.99	0.00620677		1423.99	-0.00938577		1953.98	0.00458917		2483.98	-0.00657295		3013.98	0.05217941		3543.98	0.0093117		4073.98	-0.00745829
364.2	-0.0036483		894.19	0.00703928		1424.19	-0.00853443		1954.18	0.00434628		2484.18	-0.00699997		3014.18	0.05307888		3544.18	0.00910226		4074.18	-0.00690824
364.4	-0.00314057		894.39	0.00701932		1424.39	-0.00929505		1954.38	0.00301841		2484.38	-0.00637288		3014.38	0.05259171		3544.38	0.00890877		4074.38	-0.00624824
364.6	-0.00347682		894.59	0.00756284		1424.59	-0.00922642		1954.58	0.00259379		2484.58	-0.00639559		3014.58	0.05182416		3544.58	0.00853162		4074.58	-0.00709641
364.8	-0.00343547		894.79	0.00807744		1424.79	-0.00949008		1954.78	0.00126287		2484.78	-0.00526837		3014.78	0.05120662		3544.78	0.00833177		4074.78	-0.00779018
365	-0.00183008		894.99	0.00773456		1424.99	-0.00843566		1954.98	0.00110798		2484.98	-0.00503797		3014.98	0.05137744		3544.98	0.00772238		4074.98	-0.00771349
365.2	-0.00107134		895.19	0.00718516		1425.19	-0.00744308		1955.18	0.00095029		2485.18	-0.00530962		3015.18	0.05134962		3545.18	0.00703046		4075.18	-0.00888731
365.4	-0.0013857		895.39	0.00748056		1425.39	-0.00761888		1955.38	0.00155817		2485.38	-0.00516937		3015.38	0.0515592		3545.38	0.00703722		4075.38	-0.0095543
365.6	0.00008197		895.59	0.00739549		1425.59	-0.00763032		1955.58	0.00149414		2485.58	-0.00563256		3015.58	0.05105281		3545.58	0.00589321		4075.58	-0.00951504
365.8	0.00070627		895.79	0.00654083		1425.79	-0.00698719		1955.78	0.00160929		2485.78	-0.00493294		3015.78	0.05051556		3545.78	0.00608235		4075.78	-0.01010378
366	-0.00016784		895.99	0.00631985		1425.99	-0.00586982		1955.98	0.00189526		2485.98	-0.00519544		3015.98	0.04938322		3545.98	0.00630994		4075.98	-0.01113204
366.2	-0.00044348		896.19	0.00628989		1426.19	-0.00605465		1956.18	0.00145741		2486.18	-0.00511514		3016.18	0.04835957		3546.18	0.00606946		4076.18	-0.01094629
366.4	-0.00115752		896.39	0.00663923		1426.39	-0.00609966		1956.38	0.00113227		2486.38	-0.00483886		3016.38	0.04854937		3546.38	0.00668516		4076.38	-0.0116124
366.6	-0.00158885		896.59	0.0072061		1426.59	-0.00630825		1956.58	0.00080484		2486.58	-0.00490245		3016.58	0.04896858		3546.58	0.0068408		4076.58	-0.01152806
366.8	-0.00194625		896.79	0.00672789		1426.79	-0.0074667		1956.78	0.00054178		2486.78	-0.00575129		3016.78	0.04910614		3546.78	0.00677493		4076.78	-0.01212971
367	-0.00220181		896.99	0.00691982		1426.99	-0.00769042		1956.98	0.00063835		2486.98	-0.00642729		3016.98	0.0493843		3546.98	0.00727593		4076.98	-0.01189214
367.2	-0.00238152		897.19	0.00674574		1427.19	-0.0080107		1957.18	0.0014189		2487.18	-0.0077736		3017.18	0.04979099		3547.18	0.0077136		4077.18	-0.01283284
367.4	-0.00302346		897.39	0.00715601		1427.39	-0.00749313		1957.38	0.00190147		2487.38	-0.00770185		3017.38	0.05000684		3547.38	0.00814791		4077.38	-0.0129801
367.6	-0.00374622		897.59	0.00801438		1427.59	-0.00780403		1957.58	0.00165251		2487.58	-0.00820134		3017.58	0.05027388		3547.58	0.00928631		4077.58	-0.01197122
367.8	-0.00472802		897.79	0.00767751		1427.79	-0.00728722		1957.78	0.00178037		2487.78	-0.00873397		3017.78	0.04963063		3547.78	0.00961766		4077.78	-0.0116235
368	-0.00467103		897.99	0.00792262		1427.99	-0.00792075		1957.98	0.00166261		2487.98	-0.00851243		3017.98	0.04958278		3547.98	0.00995957		4077.98	-0.01155409
368.2	-0.00475851		898.19	0.00910474		1428.19	-0.00867882		1958.18	0.00218888		2488.18	-0.00792389		3018.18	0.0497232		3548.18	0.00989152		4078.18	-0.01117299
368.4	-0.00367459		898.39	0.00921005		1428.39	-0.01030266		1958.38	0.00105074		2488.38	-0.00736067		3018.38	0.04914157		3548.38	0.00981821		4078.38	-0.01048334
368.6	-0.00289121		898.59	0.00907374		1428.59	-0.0105694		1958.58	0.00193957		2488.58	-0.00670709		3018.58	0.05005166		3548.58	0.01015819		4078.58	-0.01017802
368.8	-0.00230757		898.79	0.00880855		1428.79	-0.01075471		1958.78	0.00064511		2488.78	-0.00566059		3018.78	0.0514102		3548.78	0.01087441		4078.78	-0.00932991
369	-0.0011999		898.99	0.00830003		1428.99	-0.00911184		1958.98	0.00116282		2488.98	-0.00578917		3018.98	0.05148806		3548.98	0.01138225		4078.98	-0.00926229
369.2	-0.00099186		899.19	0.00779367		1429.19	-0.0090983		1959.18	0.0012566		2489.18	-0.00570887		3019.18	0.05167897		3549.18	0.01127347		4079.18	-0.00900667
369.4	-0.00117196		899.39	0.00785412		1429.39	-0.00935173		1959.38	0.00203836		2489.38	-0.00455481		3019.38	0.05161472		3549.38	0.01182787		4079.38	-0.00849434
369.6	-0.00008029		899.59	0.00627207		1429.59	-0.00907645		1959.58	0.00147037		2489.58	-0.00425753		3019.58	0.05191524		3549.58	0.01189162		4079.58	-0.008919
369.8	0.00020569		899.79	0.0051646		1429.79	-0.00894395		1959.78	0.0015417		2489.78	-0.00361757		3019.78	0.0511189		3549.78	0.01208684		4079.78	-0.00932979
370	-0.00024491		899.99	0.00595917		1429.99	-0.00851916		1959.98	0.0020044		2489.98	-0.00452872		3019.98	0.05111439		3549.98	0.01191098		4079.98	-0.00913995
370.2	-0.00056988		900.19	0.00560742		1430.19	-0.00874847		1960.18	0.0017277		2490.18	-0.00366489		3020.18	0.05186643		3550.18	0.01131764		4080.18	-0.00948643
370.4	-0.0006914		900.39	0.00579574		1430.39	-0.00793628		1960.38	0.00218513		2490.38	-0.00406803		3020.38	0.05210554		3550.38	0.01103702		4080.38	-0.00981187
370.6	-0.00059704		900.59	0.00517645		1430.59	-0.00805901		1960.58	0.00311859		2490.58	-0.0046389		3020.58	0.0528991		3550.58	0.01008906		4080.58	-0.01033209
370.8	-0.00075619		900.79	0.00450328		1430.79	-0.00798268		1960.78	0.00354638		2490.78	-0.00524674		3020.78	0.05275122		3550.78	0.00922573		4080.78	-0.01088996
371	-0.00075172		900.99	0.0053823		1430.99	-0.00758564		1960.98	0.0036913		2490.98	-0.00566625		3020.98	0.05325954		3550.98	0.00862823		4080.98	-0.011143
371.2	-0.00111449		901.19	0.00548869		1431.19	-0.00875503		1961.18	0.00442202		2491.18	-0.00676242		3021.18	0.0536106		3551.18	0.00806033		4081.18	-0.01145428
371.4	-0.0012767		901.39	0.00652176		1431.39	-0.00895354		1961.38	0.00445489		2491.38	-0.00621248		3021.38	0.05340528		3551.38	0.00785413		4081.38	-0.01175366
371.6	-0.00113875		901.59	0.00721266		1431.59	-0.01026873		1961.58	0.00407256		2491.58	-0.00614849		3021.58	0.05246887		3551.58	0.0074757		4081.58	-0.01127222
371.8	-0.00186752		901.79	0.00740412		1431.79	-0.00976366		1961.78	0.003654		2491.78	-0.00620246		3021.78	0.05241035		3551.78	0.00721975		4081.78	-0.01232067
372	-0.00178993		901.99	0.00780151		1431.99	-0.01014481		1961.98	0.00408041		2491.98	-0.00645044		3021.98	0.05265644		3551.98	0.00704946		4081.98	-0.01236927
372.2	-0.0017957		902.19	0.00813367		1432.19	-0.01024548		1962.18	0.00405279		2492.18	-0.00637891		3022.18	0.05270495		3552.18	0.00647893		4082.18	-0.01174835
372.4	-0.00216763		902.39	0.00768746		1432.39	-0.01015366		1962.38	0.0035343		2492.38	-0.00645898		3022.38	0.05247708		3552.38	0.00624171		4082.38	-0.01086077
372.6	-0.00231994		902.59	0.00694676		1432.59	-0.00931659		1962.58	0.00456893		2492.58	-0.00624327		3022.58	0.05276409		3552.58	0.00696692		4082.58	-0.01060564
372.8	-0.00273881		902.79	0.00662222		1432.79	-0.0092376		1962.78	0.00420589		2492.78	-0.00617153		3022.78	0.05229296		3552.78	0.00636632		4082.78	-0.00955195
373	-0.00198668		902.99	0.00636392		1432.99	-0.00790094		1962.98	0.00389191		2492.98	-0.0063313		3022.98	0.05147793		3552.98	0.00659683		4082.98	-0.00993701
373.2	-0.00223699		903.19	0.00574683		1433.19	-0.00843609		1963.18	0.00362201		2493.18	-0.00597864		3023.18	0.05165152		3553.18	0.00626403		4083.18	-0.00925718
373.4	-0.00178674		903.39	0.0050036		1433.39	-0.00795104		1963.38	0.00366846		2493.38	-0.00582247		3023.38	0.05147233		3553.38	0.00704828		4083.38	-0.00992938
373.6	-0.00146005		903.59	0.00330826		1433.59	-0.00792328		1963.58	0.00327457		2493.58	-0.00592781		3023.58	0.05182712		3553.58	0.00726385		4083.58	-0.00999468
373.8	-0.00175498		903.79	0.00308706		1433.79	-0.00676872		1963.78	0.00350597		2493.78	-0.00560236		3023.78	0.0512051		3553.78	0.00674912		4083.78	-0.00947542
374	-0.00124208		903.99	0.00346066		1433.99	-0.00512446		1963.98	0.00369885		2493.98	-0.00614596		3023.98	0.05123106		3553.98	0.00727319		4083.98	-0.00927786
374.2	-0.00064453		904.19	0.00185596		1434.19	-0.00395506		1964.18	0.00399191		2494.18	-0.00558455		3024.18	0.05089663		3554.18	0.00713585		4084.18	-0.00977582
374.4	-0.00121987		904.39	0.00192211		1434.39	-0.00341398		1964.38	0.00460395		2494.38	-0.005959		3024.38	0.05051214		3554.38	0.007097		4084.38	-0.00985225
374.6	-0.00125605		904.59	0.00211605		1434.59	-0.00429183		1964.58	0.00423263		2494.58	-0.00594845		3024.58	0.0518163		3554.58	0.00740439		4084.58	-0.01049532
374.8	-0.00095446		904.79	0.00299429		1434.79	-0.00471049		1964.78	0.00400448		2494.78	-0.00611847		3024.78	0.05159368		3554.78	0.00802585		4084.78	-0.01056938
375	-0.0008951		904.99	0.00395559		1434.99	-0.00544515		1964.98	0.00382973		2494.98	-0.00539903		3024.98	0.05145869		3554.98	0.00856812		4084.98	-0.01047014
375.2	-0.00112609		905.19	0.00542224		1435.19	-0.00664754		1965.18	0.0035152		2495.18	-0.00587099		3025.18	0.05071728		3555.18	0.00995057		4085.18	-0.01018979
375.4	-0.00063173		905.39	0.00720647		1435.39	-0.00676391		1965.38	0.00358689		2495.38	-0.00548229		3025.38	0.0507636		3555.38	0.01184433		4085.38	-0.0108695
375.6	-0.00068099		905.59	0.00807008		1435.59	-0.00748495		1965.58	0.00324061		2495.58	-0.00583401		3025.58	0.05124377		3555.58	0.01190614		4085.58	-0.01062763
375.8	-0.00113663		905.79	0.00889464		1435.79	-0.0062789		1965.78	0.00402167		2495.78	-0.00540662		3025.78	0.05127655		3555.78	0.01259376		4085.78	-0.01076573
376	-0.00047244		905.99	0.00986733		1435.99	-0.0054155		1965.98	0.0040819		2495.98	-0.00595547		3025.98	0.05147491		3555.98	0.01264354		4085.98	-0.01015259
376.2	-0.00010622		906.19	0.01027401		1436.19	-0.00572081		1966.18	0.00368588		2496.18	-0.00551327		3026.18	0.05157094		3556.18	0.01190305		4086.18	-0.00889517
376.4	-0.00078048		906.39	0.00986279		1436.39	-0.0058164		1966.38	0.00347724		2496.38	-0.0053457		3026.38	0.05085314		3556.38	0.01226974		4086.38	-0.00869541
376.6	-0.00013458		906.59	0.00911003		1436.59	-0.00633048		1966.58	0.0032236		2496.58	-0.00505464		3026.58	0.05064012		3556.58	0.01169921		4086.58	-0.00886772
376.8	-0.00029817		906.79	0.00871481		1436.79	-0.00649211		1966.78	0.00264021		2496.78	-0.00461106		3026.78	0.05089218		3556.78	0.01042682		4086.78	-0.00795369
377	0.00016676		906.99	0.00886111		1436.99	-0.0063243		1966.98	0.00239156		2496.98	-0.00465795		3026.98	0.05114494		3556.98	0.01049848		4086.98	-0.00782708
377.2	-0.00035403		907.19	0.00834798		1437.19	-0.00704182		1967.18	0.003503		2497.18	-0.00515369		3027.18	0.05142899		3557.18	0.01008853		4087.18	-0.00719636
377.4	0.00022305		907.39	0.0074574		1437.39	-0.00648841		1967.38	0.00302928		2497.38	-0.00496907		3027.38	0.0513486		3557.38	0.01073723		4087.38	-0.00781679
377.6	-0.00037515		907.59	0.00659941		1437.59	-0.00647883		1967.58	0.00343707		2497.58	-0.00499192		3027.58	0.05120688		3557.58	0.00988185		4087.58	-0.00705124
377.8	-0.00026094		907.79	0.00625958		1437.79	-0.00590162		1967.78	0.0032221		2497.78	-0.00503423		3027.78	0.05077245		3557.78	0.00964541		4087.78	-0.00793372
378	-0.00000086		907.99	0.00547128		1437.99	-0.00615646		1967.98	0.00310091		2497.98	-0.00576607		3027.98	0.05076297		3557.98	0.00967767		4087.98	-0.00822536
378.2	-0.00064251		908.19	0.0046268		1438.19	-0.00669806		1968.18	0.00325841		2498.18	-0.00591977		3028.18	0.05111354		3558.18	0.00933069		4088.18	-0.0088693
378.4	-0.00160198		908.39	0.00496762		1438.39	-0.00743373		1968.38	0.0032873		2498.38	-0.00645146		3028.38	0.0514618		3558.38	0.00893034		4088.38	-0.00947852
378.6	-0.00180364		908.59	0.00499566		1438.59	-0.00822399		1968.58	0.00299924		2498.58	-0.00704039		3028.58	0.05170313		3558.58	0.009127		4088.58	-0.00965629
378.8	-0.00231754		908.79	0.00467357		1438.79	-0.00866023		1968.78	0.00325075		2498.78	-0.00765435		3028.78	0.05075392		3558.78	0.00887141		4088.78	-0.00975105
379	-0.0032024		908.99	0.0045345		1438.99	-0.00896965		1968.98	0.00304735		2498.98	-0.00849099		3028.98	0.05035195		3558.98	0.00899311		4088.98	-0.0096915
379.2	-0.00351052		909.19	0.00551561		1439.19	-0.00896479		1969.18	0.00276779		2499.18	-0.01023271		3029.18	0.05004097		3559.18	0.00930231		4089.18	-0.00988104
379.4	-0.00409659		909.39	0.00517363		1439.39	-0.00881568		1969.38	0.00318137		2499.38	-0.01097198		3029.38	0.05048509		3559.38	0.00884585		4089.38	-0.01045677
379.6	-0.00459223		909.59	0.0050606		1439.59	-0.00825594		1969.58	0.00274112		2499.58	-0.01175026		3029.58	0.05025043		3559.58	0.00776841		4089.58	-0.01043003
379.8	-0.00486923		909.79	0.00537494		1439.79	-0.00733159		1969.78	0.0027891		2499.78	-0.01227795		3029.78	0.04986665		3559.78	0.00754575		4089.78	-0.0101559
379.99	-0.00486923		909.99	0.00537494		1439.99	-0.00733159		1969.98	0.0027891		2499.98	-0.01227795		3029.98	0.04986665		3559.98	0.00754575		4089.98	-0.0101559
380.19	-0.00308848		910.19	0.00428439		1440.19	-0.00795741		1970.18	0.00283518		2500.18	-0.012717		3030.18	0.05145267		3560.18	0.00686187		4090.18	-0.01034035
380.39	-0.00286275		910.39	0.00289033		1440.39	-0.0079132		1970.38	0.00318473		2500.38	-0.01341969		3030.38	0.05227585		3560.38	0.00631754		4090.38	-0.01086882
380.59	-0.00212952		910.59	0.0021024		1440.59	-0.00756193		1970.58	0.00361226		2500.58	-0.01369865		3030.58	0.05268905		3560.58	0.00720681		4090.58	-0.0108023
380.79	-0.00140617		910.79	0.00171822		1440.79	-0.00814289		1970.78	0.0032561		2500.78	-0.0147724		3030.78	0.05311683		3560.78	0.00709156		4090.78	-0.01090804
380.99	-0.0008019		910.99	0.00099723		1440.99	-0.00790917		1970.98	0.0030892		2500.98	-0.01569697		3030.98	0.05326367		3560.98	0.00734546		4090.98	-0.01117846
381.19	-0.00076499		911.19	0.00075013		1441.19	-0.00735565		1971.18	0.00380029		2501.18	-0.01655408		3031.18	0.05368406		3561.18	0.00683766		4091.18	-0.01150343
381.39	-0.00063151		911.39	0.00110378		1441.39	-0.00659238		1971.38	0.00442712		2501.38	-0.01788639		3031.38	0.05400352		3561.38	0.00657442		4091.38	-0.01174891
381.59	-0.0007793		911.59	0.0011163		1441.59	-0.00504601		1971.58	0.00411321		2501.58	-0.01872422		3031.58	0.05427835		3561.58	0.00628547		4091.58	-0.01191439
381.79	-0.0012511		911.79	0.00008729		1441.79	-0.00446675		1971.78	0.00388322		2501.78	-0.01915457		3031.78	0.05449134		3561.78	0.00597174		4091.78	-0.01133694
381.99	-0.00228424		911.99	-0.00018298		1441.99	-0.00382652		1971.98	0.00386356		2501.98	-0.01949412		3031.98	0.0538859		3561.98	0.00612047		4091.98	-0.01133995
382.19	-0.00293889		912.19	-0.00060332		1442.19	-0.0031367		1972.18	0.00348151		2502.18	-0.01962529		3032.18	0.0530589		3562.18	0.00660658		4092.18	-0.01100896
382.39	-0.00385223		912.39	-0.00053628		1442.39	-0.00289765		1972.38	0.00264198		2502.38	-0.01946703		3032.38	0.05276792		3562.38	0.00619534		4092.38	-0.01042161
382.59	-0.00389249		912.59	0.00032259		1442.59	-0.00387423		1972.58	0.00340141		2502.58	-0.01918395		3032.58	0.05208661		3562.58	0.00616074		4092.58	-0.00997722
382.79	-0.0043081		912.79	0.0012283		1442.79	-0.00345953		1972.78	0.00273373		2502.78	-0.01872873		3032.78	0.05187815		3562.78	0.00575438		4092.78	-0.00958401
382.99	-0.00390164		912.99	0.0024254		1442.99	-0.00235629		1972.98	0.00188501		2502.98	-0.01726252		3032.98	0.05134385		3562.98	0.0044994		4092.98	-0.00988231
383.19	-0.00431766		913.19	0.00215631		1443.19	-0.00316121		1973.18	0.00238852		2503.18	-0.01680045		3033.18	0.05134735		3563.18	0.00399306		4093.18	-0.01003101
383.39	-0.00461571		913.39	0.00184392		1443.39	-0.00379289		1973.38	0.00165851		2503.38	-0.01681392		3033.38	0.05067709		3563.38	0.00357482		4093.38	-0.00940872
383.59	-0.00454418		913.59	0.00177685		1443.59	-0.00430336		1973.58	0.0018669		2503.58	-0.01569772		3033.58	0.05099467		3563.58	0.00342045		4093.58	-0.00940885
383.79	-0.00498035		913.79	0.00178881		1443.79	-0.00502648		1973.78	0.00066779		2503.78	-0.01480835		3033.78	0.0509712		3563.78	0.00263612		4093.78	-0.0086883
383.99	-0.00576372		913.99	0.00055724		1443.99	-0.00529569		1973.98	0.00066771		2503.98	-0.01428749		3033.98	0.05086124		3563.98	0.00218713		4093.98	-0.00881792
384.19	-0.00535726		914.19	-0.00046235		1444.19	-0.00512388		1974.18	0.00078827		2504.18	-0.01332449		3034.18	0.05073656		3564.18	0.00221386		4094.18	-0.00902336
384.39	-0.00613583		914.39	-0.00068469		1444.39	-0.00439195		1974.38	0.00022415		2504.38	-0.01318862		3034.38	0.05070704		3564.38	0.00277982		4094.38	-0.00918671
384.59	-0.00607857		914.59	0.00006288		1444.59	-0.00435268		1974.58	-0.00008538		2504.58	-0.01261549		3034.58	0.05073506		3564.58	0.00347125		4094.58	-0.00861367
384.79	-0.00623148		914.79	0.00027047		1444.79	-0.00549367		1974.78	-0.00072928		2504.78	-0.01288108		3034.78	0.05130473		3564.78	0.00313365		4094.78	-0.00921594
384.99	-0.00553653		914.99	0.00102563		1444.99	-0.00474248		1974.98	-0.00049926		2504.98	-0.01207939		3034.98	0.05178386		3564.98	0.00295145		4094.98	-0.00927387
385.19	-0.00654638		915.19	0.00193906		1445.19	-0.00363374		1975.18	0.00061917		2505.18	-0.01378141		3035.18	0.05250264		3565.18	0.00254646		4095.18	-0.00921965
385.39	-0.00678762		915.39	0.00264069		1445.39	-0.00285035		1975.38	0.00087528		2505.38	-0.01463124		3035.38	0.05270433		3565.38	0.00351506		4095.38	-0.00920985
385.59	-0.00699223		915.59	0.0019107		1445.59	-0.00179886		1975.58	0.00022323		2505.58	-0.01583512		3035.58	0.05308332		3565.58	0.00412463		4095.58	-0.00947004
385.79	-0.00694914		915.79	0.00100859		1445.79	-0.00222875		1975.78	0.00090803		2505.78	-0.01627124		3035.78	0.05241374		3565.78	0.00437354		4095.78	-0.00965743
385.99	-0.00696559		915.99	0.00094429		1445.99	-0.00185358		1975.98	0.00164839		2505.98	-0.0169494		3035.98	0.05242869		3565.98	0.00460377		4095.98	-0.00959397
386.19	-0.00684401		916.19	0.00000894		1446.19	-0.00241436		1976.18	0.00151849		2506.18	-0.01762156		3036.18	0.05190875		3566.18	0.00576402		4096.18	-0.00889247
386.39	-0.00667968		916.39	0.00063457		1446.39	-0.00338411		1976.38	0.00207269		2506.38	-0.01710035		3036.38	0.05134416		3566.38	0.00592922		4096.38	-0.00893365
386.59	-0.00583859		916.59	0.00105679		1446.59	-0.00387389		1976.58	0.0025781		2506.58	-0.01636444		3036.58	0.05111398		3566.58	0.00743511		4096.58	-0.00846908
386.79	-0.00602148		916.79	0.00186994		1446.79	-0.00417726		1976.78	0.00256734		2506.78	-0.01563404		3036.78	0.05061907		3566.78	0.00721152		4096.78	-0.00933924
386.99	-0.00546113		916.99	0.00156782		1446.99	-0.00454303		1976.98	0.00217269		2506.98	-0.01524431		3036.98	0.05108697		3566.98	0.00710152		4096.98	-0.01022641
387.19	-0.00542927		917.19	0.0008028		1447.19	-0.00517716		1977.18	0.00213471		2507.18	-0.01491997		3037.18	0.05143399		3567.18	0.00790941		4097.18	-0.00991787
387.39	-0.00532921		917.39	0.00002743		1447.39	-0.00498039		1977.38	0.00121608		2507.38	-0.01544478		3037.38	0.05095687		3567.38	0.00792073		4097.38	-0.01037183
387.59	-0.00465064		917.59	-0.00058327		1447.59	-0.00559208		1977.58	0.00087261		2507.58	-0.01464796		3037.58	0.05103936		3567.58	0.00719445		4097.58	-0.01030296
387.79	-0.00382384		917.79	-0.00136546		1447.79	-0.00641631		1977.78	0.00024326		2507.78	-0.01511113		3037.78	0.05142141		3567.78	0.00714069		4097.78	-0.01057834
387.99	-0.00355958		917.99	-0.00187565		1447.99	-0.00640637		1977.98	0.00149048		2507.98	-0.01450323		3037.98	0.050844		3567.98	0.00700574		4097.98	-0.01032675
388.19	-0.00286004		918.19	-0.00140658		1448.19	-0.00625542		1978.18	0.00181059		2508.18	-0.01463409		3038.18	0.05115318		3568.18	0.00693576		4098.18	-0.01036698
388.39	-0.00255372		918.39	-0.00105501		1448.39	-0.00655769		1978.38	0.00118186		2508.38	-0.01455583		3038.38	0.05199981		3568.38	0.00689988		4098.38	-0.01060723
388.59	-0.00268194		918.59	-0.00071969		1448.59	-0.0067107		1978.58	0.00107691		2508.58	-0.01440523		3038.58	0.05180363		3568.58	0.00635022		4098.58	-0.01051388
388.79	-0.00196227		918.79	-0.00074072		1448.79	-0.00691556		1978.78	0.00065627		2508.78	-0.01492224		3038.78	0.05208322		3568.78	0.00541773		4098.78	-0.01047916
388.99	-0.00175174		918.99	0.00043781		1448.99	-0.00693297		1978.98	0.00113953		2508.98	-0.01514343		3038.98	0.05161414		3568.98	0.00479746		4098.98	-0.00983289
389.19	-0.00287927		919.19	0.00095994		1449.19	-0.00671067		1979.18	0.00170434		2509.18	-0.01695168		3039.18	0.05134085		3569.18	0.00533244		4099.18	-0.01035407
389.39	-0.00262935		919.39	0.00131355		1449.39	-0.00682094		1979.38	0.00222866		2509.38	-0.01639472		3039.38	0.05019833		3569.38	0.00567593		4099.38	-0.01119019
389.59	-0.00277719		919.59	0.00108906		1449.59	-0.00692834		1979.58	0.00222838		2509.58	-0.01696803		3039.58	0.04940301		3569.58	0.0056965		4099.58	-0.01206155
389.79	-0.00317176		919.79	0.00064403		1449.79	-0.00729259		1979.78	0.00335626		2509.78	-0.01685713		3039.78	0.04829437		3569.78	0.00573027		4099.78	-0.01225956
389.99	-0.0041451		919.99	0.00104089		1449.99	-0.00705103		1979.98	0.0035501		2509.98	-0.01770071		3039.98	0.04780072		3569.98	0.00633609		4099.98	-0.01171026
390.19	-0.00453008		920.19	0.00150131		1450.19	-0.00727124		1980.18	0.00389375		2510.18	-0.01729105		3040.18	0.04660641		3570.18	0.00726142		4100.18	-0.01175765
390.39	-0.00492574		920.39	0.00239693		1450.39	-0.00710477		1980.38	0.00429453		2510.38	-0.01729803		3040.38	0.0468493		3570.38	0.00789688		4100.38	-0.01253628
390.59	-0.00535543		920.59	0.00235429		1450.59	-0.00715442		1980.58	0.00320814		2510.58	-0.01727202		3040.58	0.04749705		3570.58	0.00884358		4100.58	-0.01315278
390.79	-0.0061122		920.79	0.00207938		1450.79	-0.00787606		1980.78	0.0032484		2510.78	-0.01629206		3040.78	0.04737071		3570.78	0.00864541		4100.78	-0.01433084
390.99	-0.00608977		920.99	0.00073826		1450.99	-0.00647463		1980.98	0.00285025		2510.98	-0.0161777		3040.98	0.04825478		3570.98	0.0088673		4100.98	-0.01455751
391.19	-0.00595358		921.19	0.00067126		1451.19	-0.00556995		1981.18	0.0025073		2511.18	-0.01609854		3041.18	0.04803518		3571.18	0.00911088		4101.18	-0.01388754
391.39	-0.00599205		921.39	0.00001104		1451.39	-0.00477813		1981.38	0.00189225		2511.38	-0.01616475		3041.38	0.04836696		3571.38	0.00890356		4101.38	-0.01430906
391.59	-0.00667145		921.59	-0.00053663		1451.59	-0.00547097		1981.58	0.00159959		2511.58	-0.01514689		3041.58	0.0488221		3571.58	0.00868179		4101.58	-0.0137655
391.79	-0.00680648		921.79	-0.00069371		1451.79	-0.00527284		1981.78	0.00192826		2511.78	-0.01486298		3041.78	0.0497949		3571.78	0.00893589		4101.78	-0.01371263
391.99	-0.00689961		921.99	-0.00098981		1451.99	-0.0045694		1981.98	0.00230372		2511.98	-0.01444607		3041.98	0.04967455		3571.98	0.00831763		4101.98	-0.01327612
392.19	-0.00658578		922.19	-0.00116774		1452.19	-0.00359676		1982.18	0.00166755		2512.18	-0.01501807		3042.18	0.05062683		3572.18	0.0084108		4102.18	-0.01263309
392.39	-0.00688314		922.39	-0.00146033		1452.39	-0.00336674		1982.38	0.00142231		2512.38	-0.01478991		3042.38	0.05163418		3572.38	0.00839422		4102.38	-0.01205903
392.59	-0.00682983		922.59	-0.00137822		1452.59	-0.00274875		1982.58	0.00105061		2512.58	-0.01550537		3042.58	0.05232642		3572.58	0.00739732		4102.58	-0.01055267
392.79	-0.00581237		922.79	-0.00194746		1452.79	-0.00342992		1982.78	0.00079468		2512.78	-0.01550693		3042.78	0.05247722		3572.78	0.00650533		4102.78	-0.00969306
392.99	-0.00555524		922.99	-0.00151469		1452.99	-0.00445305		1982.98	0.00144705		2512.98	-0.01525268		3042.98	0.05222106		3572.98	0.00626582		4102.98	-0.00902636
393.19	-0.00472576		923.19	-0.0020592		1453.19	-0.004313		1983.18	0.0007789		2513.18	-0.01528974		3043.18	0.05245676		3573.18	0.00687434		4103.18	-0.00964446
393.39	-0.00490492		923.39	-0.00236489		1453.39	-0.00481611		1983.38	0.00137509		2513.38	-0.01420471		3043.38	0.05244806		3573.38	0.00607634		4103.38	-0.00986411
393.59	-0.00459811		923.59	-0.00275849		1453.59	-0.00527141		1983.58	0.00170514		2513.58	-0.01377247		3043.58	0.05253789		3573.58	0.00600721		4103.58	-0.00898202
393.79	-0.00457611		923.79	-0.00228541		1453.79	-0.00489373		1983.78	0.00273037		2513.78	-0.01411908		3043.78	0.05174511		3573.78	0.00633469		4103.78	-0.00891892
393.99	-0.00437803		923.99	-0.0010448		1453.99	-0.00495268		1983.98	0.00268806		2513.98	-0.01400312		3043.98	0.0516583		3573.98	0.00608995		4103.98	-0.00808425
394.19	-0.00346484		924.19	-0.00089593		1454.19	-0.00471711		1984.18	0.00272014		2514.18	-0.01335756		3044.18	0.05156471		3574.18	0.005874		4104.18	-0.00824683
394.39	-0.00316657		924.39	-0.00054996		1454.39	-0.00402149		1984.38	0.00299192		2514.38	-0.01369082		3044.38	0.05194835		3574.38	0.00663715		4104.38	-0.00833095
394.59	-0.00212412		924.59	0.00016079		1454.59	-0.00443023		1984.58	0.00288542		2514.58	-0.01291493		3044.58	0.0522279		3574.58	0.00636405		4104.58	-0.00782136
394.79	-0.00213908		924.79	0.0001983		1454.79	-0.00466605		1984.78	0.00393233		2514.78	-0.01143236		3044.78	0.05158658		3574.78	0.0066608		4104.78	-0.00791399
394.99	-0.00153916		924.99	0.00083557		1454.99	-0.00427676		1984.98	0.00410705		2514.98	-0.01195035		3044.98	0.05123045		3574.98	0.00637307		4104.98	-0.00826043
395.19	-0.00198617		925.19	0.0013844		1455.19	-0.00430123		1985.18	0.0034584		2515.18	-0.01246967		3045.18	0.04994225		3575.18	0.00628214		4105.18	-0.00832788
395.39	-0.00336461		925.39	0.00180968		1455.39	-0.00512799		1985.38	0.00316627		2515.38	-0.0128735		3045.38	0.04936305		3575.38	0.00625103		4105.38	-0.00857969
395.59	-0.00399407		925.59	0.00208482		1455.59	-0.00576155		1985.58	0.00236219		2515.58	-0.01308199		3045.58	0.04845488		3575.58	0.00653469		4105.58	-0.00900688
395.79	-0.00405044		925.79	0.0023763		1455.79	-0.00598385		1985.78	0.00260034		2515.78	-0.0124574		3045.78	0.04879686		3575.78	0.00671802		4105.78	-0.00930494
395.99	-0.00464498		925.99	0.00373277		1455.99	-0.00573548		1985.98	0.00252116		2515.98	-0.01361103		3045.98	0.04845894		3575.98	0.00648282		4105.98	-0.01004318
396.19	-0.005483		926.19	0.00419763		1456.19	-0.00618447		1986.18	0.00109725		2516.18	-0.01402737		3046.18	0.04809207		3576.18	0.00686235		4106.18	-0.01070798
396.39	-0.00616527		926.39	0.00419696		1456.39	-0.00668428		1986.38	0.00151173		2516.38	-0.01448506		3046.38	0.04819511		3576.38	0.00617228		4106.38	-0.01180145
396.59	-0.00576056		926.59	0.0034995		1456.59	-0.00674818		1986.58	0.00060283		2516.58	-0.01583787		3046.58	0.04760719		3576.58	0.00620803		4106.58	-0.01192186
396.79	-0.00543172		926.79	0.00257599		1456.79	-0.00706106		1986.78	0.00052492		2516.78	-0.01569569		3046.78	0.04697438		3576.78	0.00624748		4106.78	-0.01251082
396.99	-0.00500931		926.99	0.00232763		1456.99	-0.00724051		1986.98	0.00047509		2516.98	-0.01679468		3046.98	0.0475208		3576.98	0.0065723		4106.98	-0.01257096
397.19	-0.00485929		927.19	0.00145285		1457.19	-0.0071545		1987.18	0.00000163		2517.18	-0.01598034		3047.18	0.04831883		3577.18	0.00636464		4107.18	-0.01313991
397.39	-0.00476424		927.39	0.00111702		1457.39	-0.00756412		1987.38	0.00070531		2517.38	-0.0153481		3047.38	0.04852147		3577.38	0.00577234		4107.38	-0.01346387
397.59	-0.00339109		927.59	0.00093177		1457.59	-0.00728575		1987.58	0.00185703		2517.58	-0.01576678		3047.58	0.04870037		3577.58	0.00622133		4107.58	-0.01294862
397.79	-0.00314239		927.79	0.00132451		1457.79	-0.00654404		1987.78	0.00262033		2517.78	-0.01618979		3047.78	0.04871084		3577.78	0.0068082		4107.78	-0.01308895
397.99	-0.00288677		927.99	0.0007868		1457.99	-0.00605338		1987.98	0.00231002		2517.98	-0.01561762		3047.98	0.049287		3577.98	0.00685761		4107.98	-0.01251962
398.19	-0.00227614		928.19	0.00033371		1458.19	-0.00471118		1988.18	0.00284334		2518.18	-0.01526159		3048.18	0.04949781		3578.18	0.00729456		4108.18	-0.01276358
398.39	-0.00090053		928.39	-0.00019708		1458.39	-0.00409592		1988.38	0.00403516		2518.38	-0.01508993		3048.38	0.04998053		3578.38	0.00719212		4108.38	-0.01168315
398.59	-0.00084409		928.59	-0.00054957		1458.59	-0.00492065		1988.58	0.00370223		2518.58	-0.01474342		3048.58	0.05048521		3578.58	0.00708004		4108.58	-0.01140498
398.79	-0.00169929		928.79	-0.00070396		1458.79	-0.00423423		1988.78	0.0043162		2518.78	-0.01473688		3048.78	0.05078739		3578.78	0.00666431		4108.78	-0.01137808
398.99	-0.00169742		928.99	0.00014427		1458.99	-0.00409062		1988.98	0.00454473		2518.98	-0.01634647		3048.98	0.0501141		3578.98	0.00567291		4108.98	-0.01134355
399.19	-0.00255789		929.19	0.00013899		1459.19	-0.00364371		1989.18	0.0041235		2519.18	-0.01740377		3049.18	0.05063695		3579.18	0.00551579		4109.18	-0.01095805
399.39	-0.00365123		929.39	0.00081243		1459.39	-0.0041188		1989.38	0.00401663		2519.38	-0.01783827		3049.38	0.04999141		3579.38	0.00607564		4109.38	-0.01064778
399.59	-0.00356891		929.59	0.00141137		1459.59	-0.00368483		1989.58	0.00456144		2519.58	-0.01782923		3049.58	0.04931122		3579.58	0.00640176		4109.58	-0.01080015
399.79	-0.00344489		929.79	0.00210159		1459.79	-0.00438096		1989.78	0.00457018		2519.78	-0.01778378		3049.78	0.04981467		3579.78	0.00621739		4109.78	-0.01100485
399.99	-0.00345275		929.99	0.00350242		1459.99	-0.00394542		1989.98	0.00428686		2519.98	-0.01945015		3049.98	0.04912687		3579.98	0.00594647		4109.98	-0.01139832
400.19	-0.00380371		930.19	0.00356218		1460.19	-0.0047354		1990.18	0.00389788		2520.18	-0.01965714		3050.18	0.04884257		3580.18	0.00583236		4110.18	-0.01190166
400.39	-0.00341078		930.39	0.00299296		1460.39	-0.00533848		1990.38	0.00461919		2520.38	-0.02030045		3050.38	0.0484954		3580.38	0.00552744		4110.38	-0.011622
400.59	-0.00263192		930.59	0.00252004		1460.59	-0.00584013		1990.58	0.00456926		2520.58	-0.02044791		3050.58	0.04771256		3580.58	0.0061894		4110.58	-0.01070767
400.79	-0.00309353		930.79	0.00274464		1460.79	-0.00616105		1990.78	0.00501631		2520.78	-0.02105749		3050.78	0.04766656		3580.78	0.00518564		4110.78	-0.00999509
400.99	-0.00191777		930.99	0.0021629		1460.99	-0.00714219		1990.98	0.00421391		2520.98	-0.02121614		3050.98	0.04776374		3580.98	0.00413607		4110.98	-0.00995886
401.19	-0.00153944		931.19	0.00194144		1461.19	-0.00707843		1991.18	0.00456015		2521.18	-0.01922726		3051.18	0.04719394		3581.18	0.00329304		4111.18	-0.01050279
401.39	-0.00118183		931.39	0.00190123		1461.39	-0.00737431		1991.38	0.00496524		2521.38	-0.01894091		3051.38	0.04589072		3581.38	0.00440007		4111.38	-0.01046858
401.59	-0.00116489		931.59	0.00160188		1461.59	-0.00734278		1991.58	0.00581174		2521.58	-0.01834626		3051.58	0.04637307		3581.58	0.00468356		4111.58	-0.00992358
401.79	-0.00088422		931.79	0.0012562		1461.79	-0.0074886		1991.78	0.00547068		2521.78	-0.01744021		3051.78	0.04663724		3581.78	0.00493088		4111.78	-0.0092299
401.99	-0.00089486		931.99	0.00074301		1461.99	-0.00701923		1991.98	0.00527676		2521.98	-0.01667455		3051.98	0.04653062		3581.98	0.00479791		4111.98	-0.0089452
402.19	-0.000136		932.19	-0.00029486		1462.19	-0.00709602		1992.18	0.00552484		2522.18	-0.01573419		3052.18	0.04625282		3582.18	0.00422054		4112.18	-0.00950712
402.39	-0.0002086		932.39	-0.00128089		1462.39	-0.00759416		1992.38	0.00536199		2522.38	-0.0154382		3052.38	0.04645176		3582.38	0.00335277		4112.38	-0.00976726
402.59	-0.00178402		932.59	-0.0013571		1462.59	-0.00697335		1992.58	0.00537574		2522.58	-0.01499316		3052.58	0.04746141		3582.58	0.00340694		4112.58	-0.00994847
402.79	-0.00220348		932.79	-0.00089156		1462.79	-0.00624562		1992.78	0.00560329		2522.78	-0.01490836		3052.78	0.04796468		3582.78	0.00258649		4112.78	-0.00965023
402.99	-0.00204392		932.99	-0.00058663		1462.99	-0.00662392		1992.98	0.00528393		2522.98	-0.01587318		3052.98	0.04809871		3582.98	0.00327784		4112.98	-0.00936224
403.19	-0.00273155		933.19	-0.00000834		1463.19	-0.00608784		1993.18	0.00449224		2523.18	-0.01629085		3053.18	0.049136		3583.18	0.00426132		4113.18	-0.00940897
403.39	-0.00316735		933.39	0.00121457		1463.39	-0.00567109		1993.38	0.00355483		2523.38	-0.01614939		3053.38	0.04872907		3583.38	0.00455696		4113.38	-0.00947522
403.59	-0.00341732		933.59	0.00148551		1463.59	-0.00461345		1993.58	0.00414433		2523.58	-0.01641469		3053.58	0.04929333		3583.58	0.00505543		4113.58	-0.01029179
403.79	-0.00265571		933.79	0.00197672		1463.79	-0.00458121		1993.78	0.00267607		2523.78	-0.01641766		3053.78	0.04990589		3583.78	0.00606202		4113.78	-0.01043644
403.99	-0.00310618		933.99	0.00245503		1463.99	-0.00364823		1993.98	0.002337		2523.98	-0.01636951		3053.98	0.0499431		3583.98	0.00696041		4113.98	-0.0112495
404.19	-0.00408799		934.19	0.00283372		1464.19	-0.0042625		1994.18	0.00220352		2524.18	-0.01686047		3054.18	0.04975029		3584.18	0.00703383		4114.18	-0.01139111
404.39	-0.00394411		934.39	0.00132966		1464.39	-0.0048723		1994.38	0.00138734		2524.38	-0.01783095		3054.38	0.04943862		3584.38	0.00666063		4114.38	-0.01173609
404.59	-0.00404196		934.59	0.00087014		1464.59	-0.00489548		1994.58	0.00144553		2524.58	-0.01875793		3054.58	0.04980222		3584.58	0.00648157		4114.58	-0.01176946
404.79	-0.00502159		934.79	0.00085433		1464.79	-0.00415605		1994.78	0.0007564		2524.78	-0.01883823		3054.78	0.05009897		3584.78	0.00516917		4114.78	-0.01155418
404.99	-0.00463514		934.99	0.00032109		1464.99	-0.00411145		1994.98	0.00084981		2524.98	-0.0174708		3054.98	0.04947434		3584.98	0.00588933		4114.98	-0.01148138
405.19	-0.0046181		935.19	0.00053887		1465.19	-0.00384948		1995.18	0.00158801		2525.18	-0.01635778		3055.18	0.0495333		3585.18	0.00638986		4115.18	-0.01146694
405.39	-0.00445698		935.39	0.00050107		1465.39	-0.00391856		1995.38	0.00195677		2525.38	-0.01655138		3055.38	0.04944106		3585.38	0.00716491		4115.38	-0.01142687
405.59	-0.00479158		935.59	0.00007954		1465.59	-0.00419637		1995.58	0.00246798		2525.58	-0.01620911		3055.58	0.05014426		3585.58	0.00724921		4115.58	-0.01087891
405.79	-0.00416417		935.79	0.00042406		1465.79	-0.00442387		1995.78	0.00227411		2525.78	-0.01632106		3055.78	0.05028937		3585.78	0.0065789		4115.78	-0.01043132
405.99	-0.00428393		935.99	0.00016949		1465.99	-0.00415967		1995.98	0.00288084		2525.98	-0.01603281		3055.98	0.04906823		3585.98	0.00610128		4115.98	-0.01039154
406.19	-0.00391035		936.19	-0.00065183		1466.19	-0.00404439		1996.18	0.00321705		2526.18	-0.01542436		3056.18	0.04875579		3586.18	0.00524347		4116.18	-0.01106073
406.39	-0.00536146		936.39	-0.00071517		1466.39	-0.00437009		1996.38	0.00269328		2526.38	-0.01615984		3056.38	0.04876848		3586.38	0.00455843		4116.38	-0.01025702
406.59	-0.00559759		936.59	-0.0008464		1466.59	-0.00428472		1996.58	0.00318037		2526.58	-0.01555906		3056.58	0.04795781		3586.58	0.00370073		4116.58	-0.01001758
406.79	-0.00561259		936.79	-0.0004925		1466.79	-0.00465612		1996.78	0.00345978		2526.78	-0.01521745		3056.78	0.04743188		3586.78	0.00331833		4116.78	-0.01027365
406.99	-0.00598808		936.99	-0.00043486		1466.99	-0.00498898		1996.98	0.00318113		2526.98	-0.01641444		3056.98	0.04771884		3586.98	0.00410624		4116.98	-0.00994652
407.19	-0.00596011		937.19	0.00087044		1467.19	-0.00376536		1997.18	0.00381284		2527.18	-0.01620453		3057.18	0.04761565		3587.18	0.00386229		4117.18	-0.0103595
407.39	-0.005862		937.39	0.00116743		1467.39	-0.00302261		1997.38	0.00333381		2527.38	-0.01704237		3057.38	0.04725282		3587.38	0.0037319		4117.38	-0.0106089
407.59	-0.0061735		937.59	0.0003014		1467.59	-0.00255368		1997.58	0.00372966		2527.58	-0.01758009		3057.58	0.0467959		3587.58	0.00445167		4117.58	-0.01092342
407.79	-0.00543889		937.79	0.00056271		1467.79	-0.00202148		1997.78	0.00296097		2527.78	-0.01707327		3057.78	0.04657332		3587.78	0.00473025		4117.78	-0.01084275
407.99	-0.00540224		937.99	0.00044521		1467.99	-0.00194909		1997.98	0.00312346		2527.98	-0.01726941		3057.98	0.04685241		3587.98	0.00459934		4117.98	-0.01240584
408.19	-0.00548739		938.19	0.00098049		1468.19	-0.00242863		1998.18	0.00296668		2528.18	-0.0174333		3058.18	0.04672936		3588.18	0.00417938		4118.18	-0.0123752
408.39	-0.00482086		938.39	0.00030753		1468.39	-0.00234717		1998.38	0.00374513		2528.38	-0.01768532		3058.38	0.04721936		3588.38	0.00402343		4118.38	-0.01316541
408.59	-0.00455371		938.59	0.00081174		1468.59	-0.00227062		1998.58	0.00381402		2528.58	-0.01774071		3058.58	0.04716414		3588.58	0.00475816		4118.58	-0.01282609
408.79	-0.00411495		938.79	0.00077269		1468.79	-0.00216989		1998.78	0.00407404		2528.78	-0.01662467		3058.78	0.04756702		3588.78	0.00515195		4118.78	-0.01193242
408.99	-0.00337418		938.99	0.00073087		1468.99	-0.00213429		1998.98	0.00465624		2528.98	-0.01647682		3058.98	0.04746746		3588.98	0.00667997		4118.98	-0.01160779
409.19	-0.002178		939.19	0.00102413		1469.19	-0.00243847		1999.18	0.00503039		2529.18	-0.01632388		3059.18	0.04839602		3589.18	0.00665387		4119.18	-0.01257371
409.39	-0.00201824		939.39	0.00121267		1469.39	-0.00282008		1999.38	0.00498332		2529.38	-0.0168375		3059.38	0.04838869		3589.38	0.00713511		4119.38	-0.0130634
409.59	-0.00198898		939.59	0.00127286		1469.59	-0.00398345		1999.58	0.00512		2529.58	-0.01708022		3059.58	0.04832813		3589.58	0.0069523		4119.58	-0.01231032
409.79	-0.00175792		939.79	0.00128293		1469.79	-0.00462843		1999.78	0.00452629		2529.78	-0.01678423		3059.78	0.04803213		3589.78	0.00723193		4119.78	-0.01209669
409.99	-0.00200517		939.99	0.00085811		1469.99	-0.00528564		1999.98	0.00446958		2529.98	-0.01651063		3059.98	0.04818659		3589.98	0.00768388		4119.98	-0.01210795
410.19	-0.0024075		940.19	0.00081252		1470.19	-0.00455487		2000.18	0.00395147		2530.18	-0.01660773		3060.18	0.04848514		3590.18	0.0080572		4120.18	-0.01186056
410.39	-0.00381288		940.39	0.00056222		1470.39	-0.00422755		2000.38	0.00270246		2530.38	-0.01693292		3060.38	0.04822035		3590.38	0.00781958		4120.38	-0.01167143
410.59	-0.00383536		940.59	0.00069304		1470.59	-0.00487856		2000.58	0.00267719		2530.58	-0.01595779		3060.58	0.04852372		3590.58	0.0078146		4120.58	-0.01247666
410.79	-0.00438207		940.79	0.00104509		1470.79	-0.00482413		2000.78	0.00182657		2530.78	-0.0157822		3060.78	0.04903044		3590.78	0.00887099		4120.78	-0.01304986
410.99	-0.0042186		940.99	0.00104082		1470.99	-0.00450633		2000.98	0.00093045		2530.98	-0.01606022		3060.98	0.04916155		3590.98	0.00874478		4120.98	-0.01253421
411.19	-0.00459973		941.19	0.00138829		1471.19	-0.00309987		2001.18	0.00110968		2531.18	-0.01574998		3061.18	0.04879984		3591.18	0.00782318		4121.18	-0.01237969
411.39	-0.00490149		941.39	0.00074343		1471.39	-0.00301764		2001.38	0.00034249		2531.38	-0.01612465		3061.38	0.04865132		3591.38	0.00700221		4121.38	-0.01198531
411.59	-0.00568709		941.59	0.00116		1471.59	-0.00341603		2001.58	-0.00001848		2531.58	-0.01581343		3061.58	0.04798985		3591.58	0.00595296		4121.58	-0.01221433
411.79	-0.00544584		941.79	0.00201669		1471.79	-0.00303986		2001.78	0.00076271		2531.78	-0.01523448		3061.78	0.04750423		3591.78	0.00551858		4121.78	-0.01256695
411.99	-0.00605435		941.99	0.00200089		1471.99	-0.00392478		2001.98	0.00152887		2531.98	-0.01469518		3061.98	0.04756091		3591.98	0.00503711		4121.98	-0.01250606
412.19	-0.00667108		942.19	0.0028191		1472.19	-0.00390796		2002.18	0.00158458		2532.18	-0.01350837		3062.18	0.04762291		3592.18	0.00499859		4122.18	-0.01179733
412.39	-0.00601761		942.39	0.00345715		1472.39	-0.0046544		2002.38	0.0024537		2532.38	-0.01458992		3062.38	0.04760652		3592.38	0.00421269		4122.38	-0.01089676
412.59	-0.00597633		942.59	0.00363225		1472.59	-0.00492482		2002.58	0.00230493		2532.58	-0.01445825		3062.58	0.04713807		3592.58	0.00389193		4122.58	-0.01076482
412.79	-0.00622697		942.79	0.0036417		1472.79	-0.00503282		2002.78	0.00300968		2532.78	-0.01557326		3062.78	0.04738807		3592.78	0.00326606		4122.78	-0.00979701
412.99	-0.00615012		942.99	0.00471899		1472.99	-0.0047085		2002.98	0.00381191		2532.98	-0.01636378		3062.98	0.04713045		3592.98	0.00349071		4122.98	-0.00932156
413.19	-0.00617957		943.19	0.00453234		1473.19	-0.00575807		2003.18	0.00452497		2533.18	-0.01647869		3063.18	0.04695118		3593.18	0.00312323		4123.18	-0.00995381
413.39	-0.00673924		943.39	0.00523377		1473.39	-0.00647162		2003.38	0.00469352		2533.38	-0.01807236		3063.38	0.04673214		3593.38	0.0030821		4123.38	-0.0103961
413.59	-0.00648706		943.59	0.00535697		1473.59	-0.00734358		2003.58	0.0049491		2533.58	-0.01862218		3063.58	0.04709772		3593.58	0.00367041		4123.58	-0.01063747
413.79	-0.00651127		943.79	0.00528046		1473.79	-0.00688812		2003.78	0.00422577		2533.78	-0.01775738		3063.78	0.04734373		3593.78	0.00418459		4123.78	-0.01039872
413.99	-0.00645818		943.99	0.00466127		1473.99	-0.00642811		2003.98	0.00427302		2533.98	-0.0183335		3063.98	0.04860408		3593.98	0.00478106		4123.98	-0.01090002
414.19	-0.0059462		944.19	0.00441382		1474.19	-0.00522203		2004.18	0.00436401		2534.18	-0.01867197		3064.18	0.04814113		3594.18	0.00514407		4124.18	-0.01057272
414.39	-0.00496019		944.39	0.00382803		1474.39	-0.00535823		2004.38	0.00413069		2534.38	-0.01845559		3064.38	0.04824372		3594.38	0.00458305		4124.38	-0.01161243
414.59	-0.00420947		944.59	0.00333367		1474.59	-0.00615009		2004.58	0.00329105		2534.58	-0.01757443		3064.58	0.04875439		3594.58	0.00478345		4124.58	-0.01162083
414.79	-0.0043728		944.79	0.00247845		1474.79	-0.00591404		2004.78	0.00325012		2534.78	-0.01682202		3064.78	0.04840213		3594.78	0.00520222		4124.78	-0.01204162
414.99	-0.00435772		944.99	0.00130258		1474.99	-0.00506994		2004.98	0.00354851		2534.98	-0.01719384		3064.98	0.04846158		3594.98	0.00513445		4124.98	-0.01197461
415.19	-0.00567941		945.19	0.00059202		1475.19	-0.00544709		2005.18	0.00352653		2535.18	-0.01724065		3065.18	0.04836389		3595.18	0.00494672		4125.18	-0.01177977
415.39	-0.00635692		945.39	-0.00001608		1475.39	-0.00546993		2005.38	0.00363097		2535.38	-0.0169539		3065.38	0.04820504		3595.38	0.00453193		4125.38	-0.01175154
415.59	-0.00660771		945.59	0.00030711		1475.59	-0.00581471		2005.58	0.00355424		2535.58	-0.01621019		3065.58	0.04778407		3595.58	0.00452309		4125.58	-0.0120142
415.79	-0.00699168		945.79	0.00004552		1475.79	-0.00622325		2005.78	0.00470864		2535.78	-0.01517001		3065.78	0.04813428		3595.78	0.00462755		4125.78	-0.01127046
415.99	-0.0070689		945.99	-0.00076103		1475.99	-0.00672776		2005.98	0.00428723		2535.98	-0.01501762		3065.98	0.04825171		3595.98	0.00472056		4125.98	-0.01074303
416.19	-0.00693353		946.19	-0.00016218		1476.19	-0.00691273		2006.18	0.00417101		2536.18	-0.01484502		3066.18	0.04919443		3596.18	0.00425792		4126.18	-0.01054637
416.39	-0.00664468		946.39	0.00040114		1476.39	-0.0067534		2006.38	0.00408377		2536.38	-0.01582804		3066.38	0.04886153		3596.38	0.00320298		4126.38	-0.00993412
416.59	-0.00691585		946.59	0.00049501		1476.59	-0.00684673		2006.58	0.00426646		2536.58	-0.0155204		3066.58	0.04864913		3596.58	0.00292114		4126.58	-0.01041619
416.79	-0.00762502		946.79	0.0005572		1476.79	-0.00716485		2006.78	0.00430701		2536.78	-0.01691523		3066.78	0.04871866		3596.78	0.00311899		4126.78	-0.00994541
416.99	-0.0073379		946.99	0.00211658		1476.99	-0.00720575		2006.98	0.00379862		2536.98	-0.01665634		3066.98	0.04801756		3596.98	0.00402317		4126.98	-0.00990562
417.19	-0.0076946		947.19	0.00268839		1477.19	-0.00719405		2007.18	0.00253913		2537.18	-0.01759128		3067.18	0.04824211		3597.18	0.00438601		4127.18	-0.00940753
417.39	-0.00667997		947.39	0.00359562		1477.39	-0.00667126		2007.38	0.00256247		2537.38	-0.01854555		3067.38	0.04860886		3597.38	0.00507343		4127.38	-0.010011
417.59	-0.00606921		947.59	0.00350057		1477.59	-0.00672313		2007.58	0.00172981		2537.58	-0.01772015		3067.58	0.04878372		3597.58	0.00462786		4127.58	-0.01008003
417.79	-0.00543557		947.79	0.00384007		1477.79	-0.00516921		2007.78	0.00068672		2537.78	-0.01732741		3067.78	0.04897509		3597.78	0.00440368		4127.78	-0.00939097
417.99	-0.00534883		947.99	0.00335886		1477.99	-0.00529631		2007.98	0.00039287		2537.98	-0.01763776		3067.98	0.04946748		3597.98	0.00488396		4127.98	-0.00922014
418.19	-0.00476501		948.19	0.0033632		1478.19	-0.00551674		2008.18	-0.00056322		2538.18	-0.01859503		3068.18	0.04889421		3598.18	0.00444865		4128.18	-0.00866894
418.39	-0.00432024		948.39	0.00280475		1478.39	-0.00556786		2008.38	-0.00056429		2538.38	-0.01821649		3068.38	0.04879192		3598.38	0.00520606		4128.38	-0.00921122
418.59	-0.00513782		948.59	0.00221581		1478.59	-0.00557298		2008.58	-0.00026903		2538.58	-0.01793163		3068.58	0.04912109		3598.58	0.00565688		4128.58	-0.00972708
418.79	-0.00599087		948.79	0.00113328		1478.79	-0.00530533		2008.78	0.000619		2538.78	-0.01757769		3068.78	0.04857563		3598.78	0.00588576		4128.78	-0.01032381
418.99	-0.0064591		948.99	0.00053271		1478.99	-0.00499669		2008.98	0.00086928		2538.98	-0.01783856		3068.98	0.0488268		3598.98	0.00605844		4128.98	-0.01038504
419.19	-0.0065409		949.19	0.00019784		1479.19	-0.00487909		2009.18	0.00113342		2539.18	-0.01762076		3069.18	0.04886275		3599.18	0.00518713		4129.18	-0.00951914
419.39	-0.00676986		949.39	-0.00048678		1479.39	-0.00439852		2009.38	0.00017331		2539.38	-0.01706425		3069.38	0.04920511		3599.38	0.00430641		4129.38	-0.01024615
419.59	-0.00635158		949.59	-0.00056485		1479.59	-0.00517288		2009.58	0.00100019		2539.58	-0.01624289		3069.58	0.0492481		3599.58	0.00455322		4129.58	-0.00989039
419.79	-0.00581214		949.79	-0.00035495		1479.79	-0.00518831		2009.78	0.00140227		2539.78	-0.01674722		3069.78	0.04884734		3599.78	0.00454985		4129.78	-0.00972336
419.99	-0.00510165		949.99	-0.00116683		1479.99	-0.00508736		2009.98	0.00158746		2539.98	-0.01691609		3069.98	0.04850981		3599.98	0.00425447		4129.98	-0.00979837
420.19	-0.00493439		950.19	-0.00125193		1480.19	-0.00534199		2010.18	0.00204055		2540.18	-0.01662625		3070.18	0.04875956		3600.18	0.00368594		4130.18	-0.00944067
420.39	-0.00544894		950.39	-0.00152858		1480.39	-0.0049688		2010.38	0.002046		2540.38	-0.01702714		3070.38	0.04828613		3600.38	0.00330804		4130.38	-0.01047207
420.59	-0.0044261		950.59	-0.00138711		1480.59	-0.00530292		2010.58	0.00285498		2540.58	-0.01689704		3070.58	0.0483459		3600.58	0.00361488		4130.58	-0.01113367
420.79	-0.00486394		950.79	-0.00116537		1480.79	-0.00512915		2010.78	0.00278126		2540.78	-0.01759002		3070.78	0.04808947		3600.78	0.00401462		4130.78	-0.0113744
420.99	-0.00446162		950.99	0.00022354		1480.99	-0.00431467		2010.98	0.00277134		2540.98	-0.01674154		3070.98	0.0477195		3600.98	0.00485741		4130.98	-0.0111228
421.19	-0.00473175		951.19	-0.00013783		1481.19	-0.00374206		2011.18	0.00306543		2541.18	-0.01694222		3071.18	0.04805108		3601.18	0.00503113		4131.18	-0.01099578
421.39	-0.00525992		951.39	-0.0004174		1481.39	-0.00300417		2011.38	0.00345196		2541.38	-0.01682363		3071.38	0.04800316		3601.38	0.00539866		4131.38	-0.01226601
421.59	-0.00627328		951.59	-0.00004454		1481.59	-0.00299066		2011.58	0.00272349		2541.58	-0.01605888		3071.58	0.04911398		3601.58	0.00556774		4131.58	-0.01240613
421.79	-0.00688563		951.79	-0.0002217		1481.79	-0.00232926		2011.78	0.00174851		2541.78	-0.01666618		3071.78	0.04981993		3601.78	0.00619041		4131.78	-0.01196398
421.99	-0.0074677		951.99	-0.00034351		1481.99	-0.00313498		2011.98	0.00151087		2541.98	-0.01711733		3071.98	0.0489979		3601.98	0.00680272		4131.98	-0.01237783
422.19	-0.00760763		952.19	-0.00021848		1482.19	-0.00303942		2012.18	0.00199367		2542.18	-0.0174923		3072.18	0.04761588		3602.18	0.00666954		4132.18	-0.01376855
422.39	-0.00780008		952.39	-0.00009614		1482.39	-0.00330142		2012.38	0.0031099		2542.38	-0.01656842		3072.38	0.04772898		3602.38	0.00695181		4132.38	-0.0149327
422.59	-0.00820702		952.59	-0.00009068		1482.59	-0.00341991		2012.58	0.00364283		2542.58	-0.01619463		3072.58	0.04700094		3602.58	0.00698978		4132.58	-0.01500694
422.79	-0.00853313		952.79	-0.00035342		1482.79	-0.00304653		2012.78	0.00331625		2542.78	-0.01565229		3072.78	0.04693705		3602.78	0.00721463		4132.78	-0.01440336
422.99	-0.00845063		952.99	-0.00013354		1482.99	-0.00367184		2012.98	0.00300753		2542.98	-0.01603837		3072.98	0.04732986		3602.98	0.00784978		4132.98	-0.01385578
423.19	-0.00767146		953.19	-0.00062452		1483.19	-0.00391908		2013.18	0.00300398		2543.18	-0.01553022		3073.18	0.04726106		3603.18	0.00849476		4133.18	-0.01333684
423.39	-0.00745391		953.39	-0.00063784		1483.39	-0.00463675		2013.38	0.00297261		2543.38	-0.01552921		3073.38	0.04664224		3603.38	0.00834993		4133.38	-0.01372375
423.59	-0.00724564		953.59	-0.00075397		1483.59	-0.00463897		2013.58	0.00362984		2543.58	-0.01519436		3073.58	0.04577948		3603.58	0.00863797		4133.58	-0.01317104
423.79	-0.00674712		953.79	-0.00036406		1483.79	-0.00479812		2013.78	0.0036326		2543.78	-0.01576141		3073.78	0.04583387		3603.78	0.0086233		4133.78	-0.01245181
423.99	-0.00722659		953.99	-0.00038003		1483.99	-0.00598099		2013.98	0.00387101		2543.98	-0.01565775		3073.98	0.04633745		3603.98	0.00791438		4133.98	-0.01131816
424.19	-0.00694728		954.19	-0.00012102		1484.19	-0.00711341		2014.18	0.0035379		2544.18	-0.01632327		3074.18	0.04596408		3604.18	0.00786817		4134.18	-0.01165057
424.39	-0.00660095		954.39	0.00020634		1484.39	-0.0070377		2014.38	0.00370971		2544.38	-0.01627275		3074.38	0.04627707		3604.38	0.00776231		4134.38	-0.01222063
424.59	-0.00669505		954.59	0.00108438		1484.59	-0.00800483		2014.58	0.00457117		2544.58	-0.01624505		3074.58	0.0454718		3604.58	0.00812158		4134.58	-0.01203015
424.79	-0.0071827		954.79	0.00141174		1484.79	-0.0081772		2014.78	0.0047626		2544.78	-0.01609951		3074.78	0.0452602		3604.78	0.0076512		4134.78	-0.0116807
424.99	-0.0068532		954.99	0.00137623		1484.99	-0.00847864		2014.98	0.00498097		2544.98	-0.01456761		3074.98	0.04500895		3604.98	0.00767249		4134.98	-0.01236967
425.19	-0.00735838		955.19	0.00098413		1485.19	-0.00875875		2015.18	0.00526505		2545.18	-0.01410305		3075.18	0.0447672		3605.18	0.00655555		4135.18	-0.01190321
425.39	-0.00853986		955.39	0.00132006		1485.39	-0.00946114		2015.38	0.00476002		2545.38	-0.01420907		3075.38	0.04491034		3605.38	0.00612155		4135.38	-0.01188264
425.59	-0.00869982		955.59	0.00174419		1485.59	-0.00967789		2015.58	0.00484544		2545.58	-0.01420833		3075.58	0.04630546		3605.58	0.00576661		4135.58	-0.01153025
425.79	-0.00919874		955.79	0.00099521		1485.79	-0.00995092		2015.78	0.00447465		2545.78	-0.01500618		3075.78	0.04553011		3605.78	0.00511179		4135.78	-0.01176252
425.99	-0.00952084		955.99	0.00129948		1485.99	-0.00960351		2015.98	0.0046335		2545.98	-0.01494296		3075.98	0.04476965		3605.98	0.0042712		4135.98	-0.01239465
426.19	-0.0093384		956.19	0.00072743		1486.19	-0.00911048		2016.18	0.0045909		2546.18	-0.01537747		3076.18	0.04515859		3606.18	0.00249913		4136.18	-0.01263633
426.39	-0.00962435		956.39	0.00111569		1486.39	-0.00864614		2016.38	0.00416184		2546.38	-0.0160759		3076.38	0.04643686		3606.38	0.00229912		4136.38	-0.01176649
426.59	-0.00952073		956.59	0.00152627		1486.59	-0.00746196		2016.58	0.00405529		2546.58	-0.01654672		3076.58	0.04553948		3606.58	0.00207525		4136.58	-0.01098222
426.79	-0.00947844		956.79	0.00162229		1486.79	-0.00693148		2016.78	0.00372396		2546.78	-0.0171552		3076.78	0.04624738		3606.78	0.00224995		4136.78	-0.01146452
426.99	-0.00861339		956.99	0.00046495		1486.99	-0.00765958		2016.98	0.00347011		2546.98	-0.01672629		3076.98	0.04592959		3606.98	0.00199559		4136.98	-0.01179613
427.19	-0.00785654		957.19	0.00061039		1487.19	-0.0071079		2017.18	0.00429373		2547.18	-0.01736938		3077.18	0.04503934		3607.18	0.00197614		4137.18	-0.01197591
427.39	-0.00680623		957.39	0.00082047		1487.39	-0.00723134		2017.38	0.0046289		2547.38	-0.01887445		3077.38	0.04444635		3607.38	0.00116785		4137.38	-0.01227011
427.59	-0.00685498		957.59	-0.00003228		1487.59	-0.00700568		2017.58	0.00400701		2547.58	-0.01870954		3077.58	0.04463696		3607.58	0.00148429		4137.58	-0.01287483
427.79	-0.00653679		957.79	0.00076005		1487.79	-0.00772726		2017.78	0.00383888		2547.78	-0.01892295		3077.78	0.04555653		3607.78	0.00190465		4137.78	-0.01248137
427.99	-0.00627484		957.99	0.00050629		1487.99	-0.00868644		2017.98	0.00345526		2547.98	-0.0193107		3077.98	0.04515833		3607.98	0.00148327		4137.98	-0.01178407
428.19	-0.00514139		958.19	0.00009971		1488.19	-0.00836449		2018.18	0.00324166		2548.18	-0.01892245		3078.18	0.04482748		3608.18	0.00221209		4138.18	-0.01311168
428.39	-0.00498774		958.39	0.00013831		1488.39	-0.00873983		2018.38	0.00290021		2548.38	-0.01917843		3078.38	0.04458315		3608.38	0.00307789		4138.38	-0.01359675
428.59	-0.00539591		958.59	-0.00022737		1488.59	-0.00873926		2018.58	0.00339817		2548.58	-0.01892265		3078.58	0.04466759		3608.58	0.00358185		4138.58	-0.01404634
428.79	-0.00379427		958.79	-0.0006323		1488.79	-0.00800215		2018.78	0.00234981		2548.78	-0.01756327		3078.78	0.04472885		3608.78	0.00355998		4138.78	-0.01492311
428.99	-0.00452494		958.99	-0.00089364		1488.99	-0.00886005		2018.98	0.00205282		2548.98	-0.01625638		3078.98	0.04462135		3608.98	0.00376311		4138.98	-0.01506824
429.19	-0.00486967		959.19	-0.00170934		1489.19	-0.00845301		2019.18	0.0022444		2549.18	-0.015825		3079.18	0.04550165		3609.18	0.00398783		4139.18	-0.01436146
429.39	-0.00607381		959.39	-0.00188912		1489.39	-0.00919799		2019.38	0.00261202		2549.38	-0.01580402		3079.38	0.04597857		3609.38	0.00450453		4139.38	-0.01460147
429.59	-0.0070768		959.59	-0.00204787		1489.59	-0.00913531		2019.58	0.00257416		2549.58	-0.01604933		3079.58	0.04634347		3609.58	0.00521481		4139.58	-0.01417352
429.79	-0.00748344		959.79	-0.00246619		1489.79	-0.00941141		2019.78	0.00252134		2549.78	-0.01599814		3079.78	0.04638009		3609.78	0.00457764		4139.78	-0.01440366
429.99	-0.00784625		959.99	-0.00236023		1489.99	-0.0085911		2019.98	0.00334105		2549.98	-0.01576737		3079.98	0.04680287		3609.98	0.00421062		4139.98	-0.01414945
430.19	-0.00785846		960.19	-0.00197671		1490.19	-0.00801855		2020.18	0.00345689		2550.18	-0.0161015		3080.18	0.04686657		3610.18	0.00389202		4140.18	-0.01335504
430.39	-0.00796591		960.39	-0.00105838		1490.39	-0.00695639		2020.38	0.00374154		2550.38	-0.01573598		3080.38	0.04634252		3610.38	0.00399788		4140.38	-0.01307513
430.59	-0.00760449		960.59	-0.00042499		1490.59	-0.00646184		2020.58	0.00425728		2550.58	-0.01569354		3080.58	0.04571154		3610.58	0.00370468		4140.58	-0.01267613
430.79	-0.00814812		960.79	-0.00019338		1490.79	-0.00703078		2020.78	0.00398381		2550.78	-0.01526703		3080.78	0.04489063		3610.78	0.00435266		4140.78	-0.01269842
430.99	-0.00795961		960.99	0.00031932		1490.99	-0.00714926		2020.98	0.00424955		2550.98	-0.01511161		3080.98	0.04384997		3610.98	0.00482881		4140.98	-0.01276674
431.19	-0.00740071		961.19	0.00138769		1491.19	-0.00651714		2021.18	0.00487099		2551.18	-0.01613573		3081.18	0.04281364		3611.18	0.00623664		4141.18	-0.01244088
431.39	-0.00610655		961.39	0.00103554		1491.39	-0.00672866		2021.38	0.0042707		2551.38	-0.01590119		3081.38	0.04201888		3611.38	0.00662003		4141.38	-0.01227342
431.59	-0.00630468		961.59	0.00034928		1491.59	-0.00674631		2021.58	0.00435228		2551.58	-0.01558097		3081.58	0.0412744		3611.58	0.00690399		4141.58	-0.01169423
431.79	-0.00584633		961.79	0.00039632		1491.79	-0.00696179		2021.78	0.00405534		2551.78	-0.01588897		3081.78	0.04117811		3611.78	0.00715123		4141.78	-0.01068843
431.99	-0.00568249		961.99	0.00004742		1491.99	-0.00676814		2021.98	0.0038915		2551.98	-0.01658027		3081.98	0.03993203		3611.98	0.00687632		4141.98	-0.00975022
432.19	-0.00517987		962.19	-0.00004635		1492.19	-0.00570702		2022.18	0.00294965		2552.18	-0.01735002		3082.18	0.04043394		3612.18	0.00712782		4142.18	-0.01042825
432.39	-0.00502731		962.39	-0.0002161		1492.39	-0.00639782		2022.38	0.00203883		2552.38	-0.01865836		3082.38	0.03991813		3612.38	0.00690896		4142.38	-0.01086737
432.59	-0.00457543		962.59	-0.0005412		1492.59	-0.00526158		2022.58	0.00180116		2552.58	-0.01861148		3082.58	0.04057824		3612.58	0.00576981		4142.58	-0.0105244
432.79	-0.00410687		962.79	-0.0009523		1492.79	-0.00539569		2022.78	0.00117815		2552.78	-0.01861911		3082.78	0.04063442		3612.78	0.00527651		4142.78	-0.01100042
432.99	-0.00508943		962.99	-0.00118995		1492.99	-0.00581717		2022.98	0.00133597		2552.98	-0.01836172		3082.98	0.04262473		3612.98	0.00458072		4142.98	-0.01113478
433.19	-0.00464209		963.19	-0.0021466		1493.19	-0.0048496		2023.18	0.00097154		2553.18	-0.01824973		3083.18	0.04432392		3613.18	0.00396804		4143.18	-0.01135247
433.39	-0.00526996		963.39	-0.00066498		1493.39	-0.00505424		2023.38	0.00149358		2553.38	-0.01873874		3083.38	0.04483178		3613.38	0.00348829		4143.38	-0.01092532
433.59	-0.00555292		963.59	0.00005031		1493.59	-0.00569451		2023.58	0.00146789		2553.58	-0.01898124		3083.58	0.04527187		3613.58	0.00225909		4143.58	-0.0105863
433.79	-0.00553348		963.79	0.00047603		1493.79	-0.00547833		2023.78	0.00178257		2553.78	-0.01931403		3083.78	0.04675374		3613.78	0.0004398		4143.78	-0.01161577
433.99	-0.00570289		963.99	-0.00026927		1493.99	-0.00473511		2023.98	0.00275267		2553.98	-0.01798274		3083.98	0.04717858		3613.98	0.00092038		4143.98	-0.0119056
434.19	-0.00606577		964.19	0.00016831		1494.19	-0.0042046		2024.18	0.0026711		2554.18	-0.01789748		3084.18	0.04739906		3614.18	0.00051385		4144.18	-0.01225784
434.39	-0.0060053		964.39	0.0008042		1494.39	-0.00416718		2024.38	0.00254993		2554.38	-0.01755419		3084.38	0.04782806		3614.38	0.0001163		4144.38	-0.01308213
434.59	-0.00668701		964.59	0.00189898		1494.59	-0.00485822		2024.58	0.00334641		2554.58	-0.01722134		3084.58	0.04856319		3614.58	0.00036874		4144.58	-0.01369487
434.79	-0.00728855		964.79	0.00214963		1494.79	-0.00496798		2024.78	0.00344899		2554.78	-0.01645956		3084.78	0.04874104		3614.78	0.00099979		4144.78	-0.01424895
434.99	-0.00665911		964.99	0.00213397		1494.99	-0.00416339		2024.98	0.00465899		2554.98	-0.01680562		3084.98	0.04846946		3614.98	0.00196582		4144.98	-0.01497682
435.19	-0.00658085		965.19	0.00167802		1495.19	-0.00456319		2025.18	0.00512852		2555.18	-0.0167033		3085.18	0.04782689		3615.18	0.00252785		4145.18	-0.01535458
435.39	-0.00654929		965.39	0.00143753		1495.39	-0.00513706		2025.38	0.00492989		2555.38	-0.01705818		3085.38	0.04637772		3615.38	0.00285192		4145.38	-0.01486778
435.59	-0.00762601		965.59	0.00048242		1495.59	-0.00597781		2025.58	0.00556958		2555.58	-0.01766016		3085.58	0.04578792		3615.58	0.00282866		4145.58	-0.01491356
435.79	-0.00770073		965.79	0.00079866		1495.79	-0.00615314		2025.78	0.00503182		2555.78	-0.01818126		3085.78	0.0453453		3615.78	0.00340035		4145.78	-0.01525049
435.99	-0.00777026		965.99	0.00041652		1495.99	-0.00653202		2025.98	0.00508966		2555.98	-0.0181322		3085.98	0.04421488		3615.98	0.00320851		4145.98	-0.0155899
436.19	-0.0075942		966.19	-0.00016871		1496.19	-0.00677441		2026.18	0.00469211		2556.18	-0.01910846		3086.18	0.04421432		3616.18	0.00420091		4146.18	-0.01559332
436.39	-0.00721234		966.39	-0.00100669		1496.39	-0.00742442		2026.38	0.0045497		2556.38	-0.01849534		3086.38	0.04290772		3616.38	0.0045339		4146.38	-0.01621836
436.59	-0.00679831		966.59	-0.00061665		1496.59	-0.00707649		2026.58	0.00456573		2556.58	-0.01782476		3086.58	0.04280597		3616.58	0.00481204		4146.58	-0.0154758
436.79	-0.00624918		966.79	-0.00064786		1496.79	-0.00761688		2026.78	0.00452229		2556.78	-0.01731566		3086.78	0.04275613		3616.78	0.0054806		4146.78	-0.01553062
436.99	-0.00634233		966.99	-0.00051311		1496.99	-0.00671907		2026.98	0.00379239		2556.98	-0.01749675		3086.98	0.04352656		3616.98	0.00580204		4146.98	-0.01534111
437.19	-0.00625513		967.19	-0.00025147		1497.19	-0.00658851		2027.18	0.00294345		2557.18	-0.0175743		3087.18	0.04422337		3617.18	0.0056249		4147.18	-0.01483527
437.39	-0.00664032		967.39	0.00077704		1497.39	-0.00705601		2027.38	0.00303328		2557.38	-0.01707182		3087.38	0.04437489		3617.38	0.005475		4147.38	-0.01385654
437.59	-0.00675507		967.59	0.00009687		1497.59	-0.00736486		2027.58	0.00308531		2557.58	-0.01691234		3087.58	0.04478213		3617.58	0.00487608		4147.58	-0.01387478
437.79	-0.00668626		967.79	-0.00016534		1497.79	-0.00586065		2027.78	0.00254268		2557.78	-0.01648536		3087.78	0.04577816		3617.78	0.00467382		4147.78	-0.01465808
437.99	-0.00662593		967.99	-0.00015114		1497.99	-0.00437049		2027.98	0.00275548		2557.98	-0.01520907		3087.98	0.04613042		3617.98	0.00483994		4147.98	-0.01468994
438.19	-0.00633066		968.19	0.00090249		1498.19	-0.00405144		2028.18	0.00227149		2558.18	-0.01518525		3088.18	0.04685169		3618.18	0.00432746		4148.18	-0.01389089
438.39	-0.00681745		968.39	0.00151061		1498.39	-0.00409152		2028.38	0.00221738		2558.38	-0.01496155		3088.38	0.04748881		3618.38	0.00418444		4148.38	-0.01451628
438.59	-0.00651913		968.59	0.00152737		1498.59	-0.00361899		2028.58	0.00332133		2558.58	-0.0153518		3088.58	0.04838583		3618.58	0.00404501		4148.58	-0.01485335
438.79	-0.00623887		968.79	0.00129594		1498.79	-0.00274552		2028.78	0.00376165		2558.78	-0.01541682		3088.78	0.0486455		3618.78	0.00357713		4148.78	-0.01465753
438.99	-0.00618702		968.99	0.00139235		1498.99	-0.00289697		2028.98	0.00470842		2558.98	-0.01656887		3088.98	0.04781597		3618.98	0.003315		4148.98	-0.01479995
439.19	-0.00631133		969.19	0.00164294		1499.19	-0.00309991		2029.18	0.00468606		2559.18	-0.01668026		3089.18	0.04717475		3619.18	0.0027339		4149.18	-0.01424147
439.39	-0.0064914		969.39	0.00161011		1499.39	-0.00314922		2029.38	0.0041729		2559.38	-0.01720963		3089.38	0.04620316		3619.38	0.00220477		4149.38	-0.01332144
439.59	-0.00661612		969.59	0.00129658		1499.59	-0.00366364		2029.58	0.0043029		2559.58	-0.01854084		3089.58	0.04622848		3619.58	0.00144138		4149.58	-0.01322382
439.79	-0.00599345		969.79	0.00163402		1499.79	-0.00397723		2029.78	0.00430316		2559.78	-0.01841261		3089.78	0.04501468		3619.78	0.00113374		4149.78	-0.01230949
439.99	-0.00519371		969.99	0.00055185		1499.99	-0.0048058		2029.98	0.00514408		2559.98	-0.01768256		3089.98	0.04338741		3619.98	0.00122683		4149.98	-0.01220542
440.19	-0.00420599		970.19	-0.00011088		1500.19	-0.00458181		2030.18	0.00468428		2560.18	-0.01797972		3090.18	0.04256699		3620.18	0.00212831		4150.18	-0.01140541
440.39	-0.00374653		970.39	-0.00063772		1500.39	-0.00491712		2030.38	0.00485602		2560.38	-0.01679198		3090.38	0.04121758		3620.38	0.00191059		4150.38	-0.01140675
440.59	-0.00342051		970.59	-0.00008294		1500.59	-0.00496849		2030.58	0.00463902		2560.58	-0.01642801		3090.58	0.04039912		3620.58	0.0014813		4150.58	-0.01168801
440.79	-0.00330993		970.79	-0.00089804		1500.79	-0.00534699		2030.78	0.00498099		2560.78	-0.01674219		3090.78	0.04009601		3620.78	0.00193597		4150.78	-0.0114004
440.99	-0.00361128		970.99	-0.00199784		1500.99	-0.00504517		2030.98	0.0043718		2560.98	-0.01671894		3090.98	0.04032109		3620.98	0.00224522		4150.98	-0.01210469
441.19	-0.0041639		971.19	-0.00184989		1501.19	-0.00578196		2031.18	0.00336328		2561.18	-0.01546664		3091.18	0.04106933		3621.18	0.00247107		4151.18	-0.01251537
441.39	-0.00433556		971.39	-0.00206252		1501.39	-0.00502945		2031.38	0.00369325		2561.38	-0.01436976		3091.38	0.04114577		3621.38	0.00321275		4151.38	-0.0128609
441.59	-0.00477101		971.59	-0.00269568		1501.59	-0.00513067		2031.58	0.00318838		2561.58	-0.01536348		3091.58	0.04076735		3621.58	0.00374018		4151.58	-0.01355857
441.79	-0.00467568		971.79	-0.0026252		1501.79	-0.00442468		2031.78	0.00288467		2561.78	-0.01523019		3091.78	0.04117213		3621.78	0.00352373		4151.78	-0.01301541
441.99	-0.00501199		971.99	-0.00136475		1501.99	-0.00499287		2031.98	0.00251594		2561.98	-0.01469134		3091.98	0.0412555		3621.98	0.00436929		4151.98	-0.01268374
442.19	-0.00413232		972.19	-0.00137257		1502.19	-0.00633181		2032.18	0.00233678		2562.18	-0.01427574		3092.18	0.0426466		3622.18	0.00538616		4152.18	-0.0121538
442.39	-0.00491406		972.39	-0.00285504		1502.39	-0.00690882		2032.38	0.00303078		2562.38	-0.01448286		3092.38	0.0439891		3622.38	0.00596512		4152.38	-0.01409806
442.59	-0.0038632		972.59	-0.00293904		1502.59	-0.00753237		2032.58	0.00321528		2562.58	-0.01475943		3092.58	0.04481566		3622.58	0.00656813		4152.58	-0.01430084
442.79	-0.00487994		972.79	-0.00297694		1502.79	-0.00811966		2032.78	0.00341874		2562.78	-0.01503756		3092.78	0.04499		3622.78	0.00652557		4152.78	-0.01451497
442.99	-0.00534203		972.99	-0.00244279		1502.99	-0.00860301		2032.98	0.00363394		2562.98	-0.01621855		3092.98	0.04432231		3622.98	0.00611113		4152.98	-0.01408664
443.19	-0.00525559		973.19	-0.00253543		1503.19	-0.00776845		2033.18	0.00342221		2563.18	-0.01685202		3093.18	0.0444704		3623.18	0.00629773		4153.18	-0.01423123
443.39	-0.00585906		973.39	-0.00208212		1503.39	-0.00758411		2033.38	0.00299631		2563.38	-0.01824505		3093.38	0.04496893		3623.38	0.00558234		4153.38	-0.01413776
443.59	-0.00552271		973.59	-0.00200567		1503.59	-0.0082978		2033.58	0.00368144		2563.58	-0.01895675		3093.58	0.04556728		3623.58	0.00514307		4153.58	-0.01418057
443.79	-0.00568414		973.79	-0.00203184		1503.79	-0.0083876		2033.78	0.00404082		2563.78	-0.0186573		3093.78	0.04511036		3623.78	0.00502388		4153.78	-0.01360344
443.99	-0.00561142		973.99	-0.00172791		1503.99	-0.00848429		2033.98	0.00378855		2563.98	-0.01885122		3093.98	0.04499548		3623.98	0.00446675		4153.98	-0.01351197
444.19	-0.00617847		974.19	-0.00176913		1504.19	-0.00725828		2034.18	0.00303635		2564.18	-0.01928966		3094.18	0.04450451		3624.18	0.00423108		4154.18	-0.01341197
444.39	-0.00650061		974.39	-0.00092818		1504.39	-0.00684854		2034.38	0.00348524		2564.38	-0.01847406		3094.38	0.04469552		3624.38	0.0036114		4154.38	-0.0144114
444.59	-0.00641856		974.59	-0.00023036		1504.59	-0.00658783		2034.58	0.00283295		2564.58	-0.01920224		3094.58	0.04464116		3624.58	0.00337235		4154.58	-0.01440481
444.79	-0.00674308		974.79	-0.00068611		1504.79	-0.00585236		2034.78	0.00293212		2564.78	-0.01980306		3094.78	0.04537373		3624.78	0.0034109		4154.78	-0.01356558
444.99	-0.00744223		974.99	-0.00083069		1504.99	-0.0047974		2034.98	0.00198267		2564.98	-0.01990365		3094.98	0.04527891		3624.98	0.00273201		4154.98	-0.013871
445.19	-0.00763574		975.19	-0.00011326		1505.19	-0.00474508		2035.18	0.00203895		2565.18	-0.02002408		3095.18	0.04483275		3625.18	0.00352049		4155.18	-0.01319291
445.39	-0.00723005		975.39	-0.00030599		1505.39	-0.0039455		2035.38	0.00230369		2565.38	-0.01999097		3095.38	0.04419919		3625.38	0.00409931		4155.38	-0.01345474
445.59	-0.00767626		975.59	-0.0006177		1505.59	-0.00511667		2035.58	0.00154613		2565.58	-0.02062599		3095.58	0.04295115		3625.58	0.00412833		4155.58	-0.01286894
445.79	-0.00730075		975.79	0.00030484		1505.79	-0.00483463		2035.78	0.00178938		2565.78	-0.0193751		3095.78	0.04420245		3625.78	0.00480417		4155.78	-0.01187102
445.99	-0.00755896		975.99	0.00041337		1505.99	-0.00554788		2035.98	0.00128875		2565.98	-0.01747494		3095.98	0.04391723		3625.98	0.00478921		4155.98	-0.01191541
446.19	-0.0069384		976.19	-0.00129746		1506.19	-0.00577611		2036.18	0.00193707		2566.18	-0.01640772		3096.18	0.04529553		3626.18	0.0050413		4156.18	-0.01224813
446.39	-0.00704036		976.39	-0.00273357		1506.39	-0.00608423		2036.38	0.00226304		2566.38	-0.01557976		3096.38	0.04531019		3626.38	0.00472462		4156.38	-0.01352302
446.59	-0.00658549		976.59	-0.00198157		1506.59	-0.00567934		2036.58	0.00259821		2566.58	-0.01525404		3096.58	0.04495705		3626.58	0.00554283		4156.58	-0.01298955
446.79	-0.00695076		976.79	-0.00229608		1506.79	-0.00484215		2036.78	0.00300108		2566.78	-0.01530252		3096.78	0.04496852		3626.78	0.00443524		4156.78	-0.01362102
446.99	-0.00691676		976.99	-0.002273		1506.99	-0.0049463		2036.98	0.00314428		2566.98	-0.01567647		3096.98	0.04433681		3626.98	0.00411974		4156.98	-0.01337393
447.19	-0.00678956		977.19	-0.00301777		1507.19	-0.00429855		2037.18	0.00311903		2567.18	-0.01597743		3097.18	0.04491477		3627.18	0.00416078		4157.18	-0.01306263
447.39	-0.00707571		977.39	-0.00233359		1507.39	-0.00461992		2037.38	0.00310725		2567.38	-0.01687099		3097.38	0.04562856		3627.38	0.00335377		4157.38	-0.01332546
447.59	-0.00684927		977.59	-0.00199689		1507.59	-0.00501518		2037.58	0.00304419		2567.58	-0.01708876		3097.58	0.04612489		3627.58	0.00388819		4157.58	-0.01295347
447.79	-0.00700605		977.79	-0.00174833		1507.79	-0.00497069		2037.78	0.00230545		2567.78	-0.0175254		3097.78	0.04493972		3627.78	0.00343419		4157.78	-0.01171618
447.99	-0.00674437		977.99	-0.00150844		1507.99	-0.00491802		2037.98	0.0009866		2567.98	-0.01787665		3097.98	0.04465298		3627.98	0.00331397		4157.98	-0.01183536
448.19	-0.00766807		978.19	-0.00141223		1508.19	-0.00475229		2038.18	0.00070425		2568.18	-0.01767636		3098.18	0.04357152		3628.18	0.00393096		4158.18	-0.01299233
448.39	-0.0072575		978.39	-0.00129701		1508.39	-0.00580844		2038.38	0.00075441		2568.38	-0.0178424		3098.38	0.04366748		3628.38	0.00470721		4158.38	-0.01333944
448.59	-0.0068675		978.59	-0.00155883		1508.59	-0.00636857		2038.58	0.00037055		2568.58	-0.01922924		3098.58	0.04378861		3628.58	0.00474335		4158.58	-0.01270896
448.79	-0.00686392		978.79	-0.00164244		1508.79	-0.00588526		2038.78	-0.0000947		2568.78	-0.01935872		3098.78	0.04386831		3628.78	0.00472102		4158.78	-0.01316404
448.99	-0.00734111		978.99	-0.00098975		1508.99	-0.00647342		2038.98	-0.00025273		2568.98	-0.01954663		3098.98	0.04393918		3628.98	0.00472475		4158.98	-0.01322592
449.19	-0.00646683		979.19	-0.00112117		1509.19	-0.00727157		2039.18	0.00020269		2569.18	-0.01944701		3099.18	0.04434449		3629.18	0.00574761		4159.18	-0.0132945
449.39	-0.00658921		979.39	-0.00147113		1509.39	-0.00713426		2039.38	0.00036733		2569.38	-0.01895049		3099.38	0.0448247		3629.38	0.00603024		4159.38	-0.01393884
449.59	-0.00654781		979.59	-0.0011804		1509.59	-0.00807818		2039.58	0.00073097		2569.58	-0.0193856		3099.58	0.0452263		3629.58	0.00614724		4159.58	-0.01372551
449.79	-0.00732447		979.79	-0.00103762		1509.79	-0.00796775		2039.78	0.00167733		2569.78	-0.01819948		3099.78	0.04680226		3629.78	0.00596042		4159.78	-0.0146709
449.99	-0.00776332		979.99	-0.00160732		1509.99	-0.00854058		2039.98	0.00218384		2569.98	-0.01660828		3099.98	0.04680039		3629.98	0.00567232		4159.98	-0.01563193
450.19	-0.00726155		980.19	-0.00140079		1510.19	-0.00850957		2040.18	0.00342071		2570.18	-0.01608432		3100.18	0.04813655		3630.18	0.0059236		4160.18	-0.01600795
450.39	-0.00693965		980.39	-0.00104291		1510.39	-0.00803339		2040.38	0.00436352		2570.38	-0.01630032		3100.38	0.04764413		3630.38	0.00520624		4160.38	-0.01686677
450.59	-0.00668584		980.59	-0.00040115		1510.59	-0.00671536		2040.58	0.00481967		2570.58	-0.01592668		3100.58	0.0484184		3630.58	0.00464864		4160.58	-0.01651116
450.79	-0.00693422		980.79	0.0001571		1510.79	-0.00702521		2040.78	0.00500927		2570.78	-0.01690381		3100.78	0.0486119		3630.78	0.00318827		4160.78	-0.01608532
450.99	-0.00748215		980.99	0.00038558		1510.99	-0.00677927		2040.98	0.00523197		2570.98	-0.01749585		3100.98	0.04837718		3630.98	0.00276934		4160.98	-0.01535963
451.19	-0.00772523		981.19	0.00107119		1511.19	-0.00603187		2041.18	0.00445409		2571.18	-0.01822935		3101.18	0.04823064		3631.18	0.0025161		4161.18	-0.01450415
451.39	-0.00739784		981.39	0.00210143		1511.39	-0.0058009		2041.38	0.00372585		2571.38	-0.01885361		3101.38	0.04744205		3631.38	0.0021403		4161.38	-0.01467296
451.59	-0.00703606		981.59	0.0020754		1511.59	-0.00579254		2041.58	0.00286493		2571.58	-0.01868568		3101.58	0.04628142		3631.58	0.00168797		4161.58	-0.01305768
451.79	-0.00677884		981.79	0.00156263		1511.79	-0.00537698		2041.78	0.00233743		2571.78	-0.01855313		3101.78	0.04417185		3631.78	0.00087515		4161.78	-0.01281922
451.99	-0.00685542		981.99	0.00075603		1511.99	-0.00512584		2041.98	0.00122425		2571.98	-0.01828114		3101.98	0.04443048		3631.98	0.0013202		4161.98	-0.01295377
452.19	-0.00828448		982.19	0.00103858		1512.19	-0.00571969		2042.18	0.00173349		2572.18	-0.01825767		3102.18	0.04413274		3632.18	0.00058541		4162.18	-0.01322538
452.39	-0.00840581		982.39	0.00069277		1512.39	-0.00565166		2042.38	0.0015614		2572.38	-0.01810127		3102.38	0.04396252		3632.38	0.00123925		4162.38	-0.01267191
452.59	-0.00804605		982.59	0.00084683		1512.59	-0.00546785		2042.58	0.00144159		2572.58	-0.01791151		3102.58	0.04404308		3632.58	0.00118223		4162.58	-0.01250509
452.79	-0.0082352		982.79	0.00115587		1512.79	-0.00603448		2042.78	0.00010161		2572.78	-0.01763695		3102.78	0.04425643		3632.78	0.0013109		4162.78	-0.01314715
452.99	-0.00882881		982.99	0.00012115		1512.99	-0.00666779		2042.98	0.00031562		2572.98	-0.01851218		3102.98	0.04434175		3632.98	0.0009785		4162.98	-0.01313509
453.19	-0.0083898		983.19	-0.00079282		1513.19	-0.00648587		2043.18	0.00078325		2573.18	-0.01803879		3103.18	0.04486794		3633.18	0.00120122		4163.18	-0.01377621
453.39	-0.00959025		983.39	-0.00102369		1513.39	-0.0062915		2043.38	0.00104414		2573.38	-0.01862948		3103.38	0.04542374		3633.38	0.00230481		4163.38	-0.01408648
453.59	-0.01012276		983.59	-0.00104252		1513.59	-0.00701316		2043.58	0.00223923		2573.58	-0.01894002		3103.58	0.04599731		3633.58	0.00302909		4163.58	-0.01457209
453.79	-0.01099031		983.79	-0.00190103		1513.79	-0.00724041		2043.78	0.00337805		2573.78	-0.01812852		3103.78	0.04634515		3633.78	0.00319346		4163.78	-0.01645695
453.99	-0.01077633		983.99	-0.00207303		1513.99	-0.00774894		2043.98	0.00339348		2573.98	-0.01778257		3103.98	0.04612221		3633.98	0.00374539		4163.98	-0.01732013
454.19	-0.01098547		984.19	-0.00177406		1514.19	-0.00788643		2044.18	0.00396396		2574.18	-0.01869721		3104.18	0.04692283		3634.18	0.00402859		4164.18	-0.01755923
454.39	-0.01109604		984.39	-0.00143539		1514.39	-0.0083131		2044.38	0.00427212		2574.38	-0.01978147		3104.38	0.04705363		3634.38	0.00455111		4164.38	-0.01821446
454.59	-0.01107337		984.59	-0.0009658		1514.59	-0.00854721		2044.58	0.00377036		2574.58	-0.01962031		3104.58	0.04768735		3634.58	0.00475543		4164.58	-0.01781137
454.79	-0.01194945		984.79	-0.00052046		1514.79	-0.0088799		2044.78	0.00435975		2574.78	-0.02024028		3104.78	0.04738322		3634.78	0.00527784		4164.78	-0.01749817
454.99	-0.01227105		984.99	-0.00091585		1514.99	-0.00801206		2044.98	0.00410732		2574.98	-0.01869116		3104.98	0.04694909		3634.98	0.00570249		4164.98	-0.01711619
455.19	-0.01249597		985.19	-0.00024951		1515.19	-0.00825565		2045.18	0.0032992		2575.18	-0.01893709		3105.18	0.04589138		3635.18	0.00594196		4165.18	-0.01599732
455.39	-0.01171641		985.39	-0.00094293		1515.39	-0.0087351		2045.38	0.00273615		2575.38	-0.01859039		3105.38	0.04473351		3635.38	0.00569134		4165.38	-0.01484383
455.59	-0.01127524		985.59	-0.00175589		1515.59	-0.00850218		2045.58	0.00162674		2575.58	-0.01845594		3105.58	0.04478396		3635.58	0.00544184		4165.58	-0.01351815
455.79	-0.01127277		985.79	-0.00194648		1515.79	-0.00814242		2045.78	0.00133812		2575.78	-0.0185395		3105.78	0.04434503		3635.78	0.00529383		4165.78	-0.01322011
455.99	-0.01148494		985.99	-0.00218267		1515.99	-0.00835656		2045.98	0.00080551		2575.98	-0.01838524		3105.98	0.04467828		3635.98	0.0044003		4165.98	-0.01203148
456.19	-0.01151289		986.19	-0.00166921		1516.19	-0.00856651		2046.18	0.0009052		2576.18	-0.01867492		3106.18	0.04400949		3636.18	0.00367231		4166.18	-0.01112368
456.39	-0.01077355		986.39	-0.00182176		1516.39	-0.00810034		2046.38	-0.00016144		2576.38	-0.01822072		3106.38	0.04251255		3636.38	0.00375196		4166.38	-0.01082353
456.59	-0.0099443		986.59	-0.00156649		1516.59	-0.00877531		2046.58	-0.00061476		2576.58	-0.01881056		3106.58	0.04143225		3636.58	0.00342069		4166.58	-0.01111514
456.79	-0.00908812		986.79	-0.00178209		1516.79	-0.00881579		2046.78	-0.00066833		2576.78	-0.0187178		3106.78	0.04087894		3636.78	0.00297021		4166.78	-0.01102674
456.99	-0.0089414		986.99	-0.00222476		1516.99	-0.00865927		2046.98	0.00031377		2576.98	-0.01912235		3106.98	0.04078519		3636.98	0.00255078		4166.98	-0.01093178
457.19	-0.00838908		987.19	-0.00209673		1517.19	-0.00818643		2047.18	0.00153434		2577.18	-0.01842876		3107.18	0.04121495		3637.18	0.00229783		4167.18	-0.01145696
457.39	-0.00831901		987.39	-0.00186382		1517.39	-0.0080522		2047.38	0.00157491		2577.38	-0.01906021		3107.38	0.04207882		3637.38	0.00292353		4167.38	-0.01129744
457.59	-0.00767659		987.59	-0.00210892		1517.59	-0.00894028		2047.58	0.00223699		2577.58	-0.01894892		3107.58	0.04190295		3637.58	0.00211955		4167.58	-0.01204657
457.79	-0.00666063		987.79	-0.00248301		1517.79	-0.00922672		2047.78	0.00255612		2577.78	-0.0194336		3107.78	0.04228904		3637.78	0.00169537		4167.78	-0.01394983
457.99	-0.00705087		987.99	-0.00293502		1517.99	-0.00950549		2047.98	0.00228102		2577.98	-0.01968895		3107.98	0.04312498		3637.98	0.00170529		4167.98	-0.01453779
458.19	-0.00677568		988.19	-0.00269246		1518.19	-0.00981798		2048.18	0.00263091		2578.18	-0.01975584		3108.18	0.04503301		3638.18	0.0027891		4168.18	-0.01515942
458.39	-0.00643431		988.39	-0.00270506		1518.39	-0.0101243		2048.38	0.00333754		2578.38	-0.01914138		3108.38	0.04486961		3638.38	0.00240741		4168.38	-0.0159145
458.59	-0.00653956		988.59	-0.00359062		1518.59	-0.01002429		2048.58	0.00325364		2578.58	-0.01811153		3108.58	0.04559663		3638.58	0.00273208		4168.58	-0.01659149
458.79	-0.00626873		988.79	-0.00361335		1518.79	-0.00995615		2048.78	0.00364108		2578.78	-0.01723637		3108.78	0.04577349		3638.78	0.00275878		4168.78	-0.01666044
458.99	-0.00658563		988.99	-0.0040118		1518.99	-0.01028649		2048.98	0.00278048		2578.98	-0.01656958		3108.98	0.04516927		3638.98	0.00313885		4168.98	-0.01638331
459.19	-0.00721949		989.19	-0.00367389		1519.19	-0.01077466		2049.18	0.00219201		2579.18	-0.01676145		3109.18	0.04542842		3639.18	0.00285026		4169.18	-0.0156857
459.39	-0.00722798		989.39	-0.00405507		1519.39	-0.01102418		2049.38	0.00184806		2579.38	-0.01615231		3109.38	0.04528599		3639.38	0.00332314		4169.38	-0.01491405
459.59	-0.0075829		989.59	-0.00324326		1519.59	-0.01094802		2049.58	0.0003132		2579.58	-0.01552497		3109.58	0.04522429		3639.58	0.00297489		4169.58	-0.01477978
459.79	-0.00787716		989.79	-0.00229745		1519.79	-0.01202689		2049.78	0.00109546		2579.78	-0.01597398		3109.78	0.04462239		3639.78	0.00232032		4169.78	-0.01393607
459.99	-0.00764269		989.99	-0.00126964		1519.99	-0.0120042		2049.98	0.00107031		2579.98	-0.01618871		3109.98	0.04393095		3639.98	0.00154621		4169.98	-0.01385879
460.19	-0.00739178		990.19	-0.00069263		1520.19	-0.01236535		2050.18	0.00114525		2580.18	-0.01690216		3110.18	0.04353703		3640.18	0.00235434		4170.18	-0.01319442
460.39	-0.00826707		990.39	0.00040254		1520.39	-0.01307813		2050.38	0.0010455		2580.38	-0.01829786		3110.38	0.04297294		3640.38	0.00310582		4170.38	-0.01297876
460.59	-0.00866961		990.59	0.00093284		1520.59	-0.01310694		2050.58	0.00115827		2580.58	-0.01928314		3110.58	0.04247726		3640.58	0.00354402		4170.58	-0.01261457
460.79	-0.00844399		990.79	0.00088155		1520.79	-0.01309627		2050.78	0.00136666		2580.78	-0.01875203		3110.78	0.04350773		3640.78	0.00306047		4170.78	-0.01252247
460.99	-0.00974217		990.99	0.00167348		1520.99	-0.01306996		2050.98	0.00092829		2580.98	-0.01964308		3110.98	0.04386771		3640.98	0.00221377		4170.98	-0.01285326
461.19	-0.00922637		991.19	0.00152209		1521.19	-0.0123568		2051.18	0.00110218		2581.18	-0.02053997		3111.18	0.0434251		3641.18	0.00152256		4171.18	-0.01199422
461.39	-0.00977144		991.39	0.00139862		1521.39	-0.01195918		2051.38	-0.00017608		2581.38	-0.02138664		3111.38	0.04481392		3641.38	0.00163534		4171.38	-0.01227304
461.59	-0.01033613		991.59	0.00130655		1521.59	-0.01155208		2051.58	0.00023526		2581.58	-0.02235672		3111.58	0.04468248		3641.58	0.00080852		4171.58	-0.01257374
461.79	-0.01061268		991.79	0.0003354		1521.79	-0.01101931		2051.78	0.00018312		2581.78	-0.02249178		3111.78	0.04518898		3641.78	0.00005603		4171.78	-0.0129223
461.99	-0.01096341		991.99	-0.00014417		1521.99	-0.01002799		2051.98	0.00049221		2581.98	-0.02157055		3111.98	0.04597534		3641.98	-0.00060446		4171.98	-0.01249854
462.19	-0.00972858		992.19	-0.00078771		1522.19	-0.00945532		2052.18	0.0005671		2582.18	-0.02122243		3112.18	0.04705397		3642.18	-0.00049507		4172.18	-0.0129966
462.39	-0.0103562		992.39	-0.00147129		1522.39	-0.00923626		2052.38	0.00104381		2582.38	-0.02002961		3112.38	0.04626996		3642.38	-0.00141713		4172.38	-0.01355147
462.59	-0.00968148		992.59	-0.00248014		1522.59	-0.00880403		2052.58	0.00029791		2582.58	-0.01928801		3112.58	0.04581173		3642.58	-0.00012329		4172.58	-0.01425499
462.79	-0.00851744		992.79	-0.00292375		1522.79	-0.00830023		2052.78	0.0003386		2582.78	-0.01854403		3112.78	0.04462513		3642.78	0.00009581		4172.78	-0.01405839
462.99	-0.00732897		992.99	-0.00371811		1522.99	-0.00794011		2052.98	0.00017759		2582.98	-0.01861236		3112.98	0.04398033		3642.98	0.0000553		4172.98	-0.01450103
463.19	-0.00710779		993.19	-0.00369326		1523.19	-0.00734495		2053.18	0.0000824		2583.18	-0.01670137		3113.18	0.04425772		3643.18	0.00022483		4173.18	-0.0145945
463.39	-0.00677881		993.39	-0.00397925		1523.39	-0.00657193		2053.38	-0.00021392		2583.38	-0.01630352		3113.38	0.04353393		3643.38	0.0009083		4173.38	-0.01470121
463.59	-0.00644691		993.59	-0.00325554		1523.59	-0.00719087		2053.58	-0.0003974		2583.58	-0.01627645		3113.58	0.04312553		3643.58	0.00179839		4173.58	-0.0153197
463.79	-0.00621569		993.79	-0.00238493		1523.79	-0.00684439		2053.78	0.00090303		2583.78	-0.01689632		3113.78	0.04314199		3643.78	0.00282814		4173.78	-0.0149613
463.99	-0.00613188		993.99	-0.00207132		1523.99	-0.00670817		2053.98	0.00152641		2583.98	-0.01730436		3113.98	0.04286447		3643.98	0.00369231		4173.98	-0.01533442
464.19	-0.00690148		994.19	-0.00229325		1524.19	-0.00690326		2054.18	0.00149241		2584.18	-0.01818313		3114.18	0.0429678		3644.18	0.00467229		4174.18	-0.01531163
464.39	-0.00778741		994.39	-0.00232744		1524.39	-0.00724723		2054.38	0.00210102		2584.38	-0.01921704		3114.38	0.04240683		3644.38	0.0045667		4174.38	-0.01563656
464.59	-0.00730972		994.59	-0.00275328		1524.59	-0.00690786		2054.58	0.0017621		2584.58	-0.01881896		3114.58	0.04269033		3644.58	0.00391039		4174.58	-0.01575276
464.79	-0.00752039		994.79	-0.00226637		1524.79	-0.0071081		2054.78	0.00189615		2584.78	-0.01880106		3114.78	0.04216334		3644.78	0.0028849		4174.78	-0.01608821
464.99	-0.0084815		994.99	-0.00136777		1524.99	-0.00692609		2054.98	0.00135418		2584.98	-0.01994602		3114.98	0.04057465		3644.98	0.0024811		4174.98	-0.01501106
465.19	-0.00822801		995.19	-0.00176591		1525.19	-0.00723976		2055.18	0.00181529		2585.18	-0.02110334		3115.18	0.04021918		3645.18	0.00260736		4175.18	-0.01389364
465.39	-0.0090866		995.39	-0.00158622		1525.39	-0.00749149		2055.38	0.00102025		2585.38	-0.02138101		3115.38	0.04078005		3645.38	0.00262518		4175.38	-0.01474814
465.59	-0.00995934		995.59	-0.00087785		1525.59	-0.00741921		2055.58	0.0016225		2585.58	-0.02111136		3115.58	0.03966208		3645.58	0.0018878		4175.58	-0.01381863
465.79	-0.00980161		995.79	-0.00136615		1525.79	-0.00831744		2055.78	0.00127833		2585.78	-0.02040086		3115.78	0.03953658		3645.78	0.00156359		4175.78	-0.01308276
465.99	-0.00970727		995.99	-0.00139095		1525.99	-0.00775792		2055.98	0.00151986		2585.98	-0.02027618		3115.98	0.03966677		3645.98	0.0016481		4175.98	-0.01292191
466.19	-0.0100158		996.19	-0.0025287		1526.19	-0.00797331		2056.18	0.00104483		2586.18	-0.02031146		3116.18	0.03953523		3646.18	0.00117391		4176.18	-0.01279218
466.39	-0.01109294		996.39	-0.00242835		1526.39	-0.00897596		2056.38	0.00095263		2586.38	-0.0194916		3116.38	0.03804317		3646.38	0.00111188		4176.38	-0.01291286
466.59	-0.01006949		996.59	-0.00263892		1526.59	-0.00964504		2056.58	0.00082208		2586.58	-0.01878688		3116.58	0.0379305		3646.58	0.00294621		4176.58	-0.01293047
466.79	-0.00907966		996.79	-0.00360748		1526.79	-0.0095639		2056.78	0.00032906		2586.78	-0.01853449		3116.78	0.03851139		3646.78	0.0031305		4176.78	-0.01300935
466.99	-0.0081026		996.99	-0.00426659		1526.99	-0.00922182		2056.98	0.00004906		2586.98	-0.01826563		3116.98	0.03900771		3646.98	0.00335414		4176.98	-0.0132514
467.19	-0.00883336		997.19	-0.00388069		1527.19	-0.00789849		2057.18	-0.00056045		2587.18	-0.01756051		3117.18	0.03917569		3647.18	0.00375574		4177.18	-0.01313597
467.39	-0.00877002		997.39	-0.00311313		1527.39	-0.00701801		2057.38	-0.00002535		2587.38	-0.01743759		3117.38	0.03935055		3647.38	0.00452582		4177.38	-0.01236714
467.59	-0.00918828		997.59	-0.00283837		1527.59	-0.00749592		2057.58	0.00052091		2587.58	-0.01745005		3117.58	0.03940997		3647.58	0.00476361		4177.58	-0.01252731
467.79	-0.00872765		997.79	-0.00309952		1527.79	-0.00648543		2057.78	0.00100689		2587.78	-0.01663201		3117.78	0.04017963		3647.78	0.0039924		4177.78	-0.0121361
467.99	-0.00767398		997.99	-0.00322464		1527.99	-0.00615578		2057.98	0.00218019		2587.98	-0.01663492		3117.98	0.04052703		3647.98	0.00350348		4177.98	-0.01207845
468.19	-0.00774619		998.19	-0.00296957		1528.19	-0.00562977		2058.18	0.00207114		2588.18	-0.01719843		3118.18	0.0410548		3648.18	0.00257633		4178.18	-0.01256254
468.39	-0.00763631		998.39	-0.00289268		1528.39	-0.00541466		2058.38	0.00292842		2588.38	-0.01742489		3118.38	0.04104643		3648.38	0.00194497		4178.38	-0.01215365
468.59	-0.00642396		998.59	-0.002095		1528.59	-0.00478989		2058.58	0.00267641		2588.58	-0.01795507		3118.58	0.04135544		3648.58	0.00032644		4178.58	-0.0116184
468.79	-0.00619081		998.79	-0.00118248		1528.79	-0.00454267		2058.78	0.00309615		2588.78	-0.01862829		3118.78	0.04044276		3648.78	-0.00029276		4178.78	-0.01245756
468.99	-0.00615851		998.99	0.00017005		1528.99	-0.00398047		2058.98	0.00335328		2588.98	-0.01909463		3118.98	0.0404687		3648.98	-0.00027785		4178.98	-0.01168885
469.19	-0.00673834		999.19	0.0003074		1529.19	-0.00341937		2059.18	0.00381266		2589.18	-0.01862888		3119.18	0.04058588		3649.18	-0.00077012		4179.18	-0.01245855
469.39	-0.00743954		999.39	0.00059152		1529.39	-0.0035213		2059.38	0.00332061		2589.38	-0.01853977		3119.38	0.04104925		3649.38	-0.00140377		4179.38	-0.01317709
469.59	-0.00810783		999.59	0.00165326		1529.59	-0.00327028		2059.58	0.00422528		2589.58	-0.01858815		3119.58	0.04082072		3649.58	-0.00194614		4179.58	-0.0123704
469.79	-0.00780489		999.79	0.00104489		1529.79	-0.0043066		2059.78	0.0034562		2589.78	-0.01841147		3119.78	0.04157329		3649.78	-0.00138906		4179.78	-0.01173511
469.99	-0.00783816		999.99	0.00069599		1529.99	-0.00415692		2059.98	0.002793		2589.98	-0.01846136		3119.98	0.04250774		3649.98	-0.00131181		4179.98	-0.01203453
470.19	-0.00842074		1000.19	0.0012944		1530.19	-0.00592689		2060.18	0.0030675		2590.18	-0.01882673		3120.18	0.04302768		3650.18	-0.00188847		4180.18	-0.0121982
470.39	-0.00900849		1000.39	0.00188915		1530.39	-0.00736363		2060.38	0.00306694		2590.38	-0.01727928		3120.38	0.0429662		3650.38	-0.00084335		4180.38	-0.0130368
470.59	-0.00840165		1000.59	0.0011967		1530.59	-0.00766961		2060.58	0.00266634		2590.58	-0.01666886		3120.58	0.04373332		3650.58	0.00040854		4180.58	-0.01407698
470.79	-0.0085896		1000.79	0.00094219		1530.79	-0.00789943		2060.78	0.00236216		2590.78	-0.01654537		3120.78	0.04310854		3650.78	0.00094742		4180.78	-0.01455169
470.99	-0.00879398		1000.99	0.00057378		1530.99	-0.00788514		2060.98	0.00236537		2590.98	-0.0157162		3120.98	0.04241658		3650.98	0.00108057		4180.98	-0.01542332
471.19	-0.00923599		1001.19	0.00089953		1531.19	-0.00800925		2061.18	0.00188086		2591.18	-0.01604407		3121.18	0.04184547		3651.18	0.00043416		4181.18	-0.0156271
471.39	-0.00978303		1001.39	0.00025003		1531.39	-0.00954614		2061.38	0.00176218		2591.38	-0.01552876		3121.38	0.04193642		3651.38	0.0014336		4181.38	-0.01587391
471.59	-0.00999229		1001.59	-0.00098591		1531.59	-0.01071805		2061.58	0.00122858		2591.58	-0.01532343		3121.58	0.04178264		3651.58	0.00122328		4181.58	-0.01655281
471.79	-0.00912373		1001.79	-0.00163904		1531.79	-0.01098885		2061.78	0.00170124		2591.78	-0.01562893		3121.78	0.0411917		3651.78	0.00230629		4181.78	-0.01663273
471.99	-0.00934402		1001.99	-0.00164105		1531.99	-0.01109371		2061.98	0.00141904		2591.98	-0.01666188		3121.98	0.04085079		3651.98	0.00259006		4181.98	-0.01755092
472.19	-0.00978387		1002.19	-0.00135571		1532.19	-0.0114812		2062.18	0.00085431		2592.18	-0.01771854		3122.18	0.04050154		3652.18	0.0026187		4182.18	-0.0176989
472.39	-0.01009968		1002.39	-0.00112838		1532.39	-0.01133836		2062.38	0.00084352		2592.38	-0.01848925		3122.38	0.04010894		3652.38	0.00287968		4182.38	-0.0171034
472.59	-0.01019277		1002.59	-0.00073843		1532.59	-0.0111058		2062.58	0.00034176		2592.58	-0.01900638		3122.58	0.0401538		3652.58	0.00328438		4182.58	-0.01734244
472.79	-0.01095023		1002.79	-0.00110502		1532.79	-0.01110736		2062.78	0.00014037		2592.78	-0.01958145		3122.78	0.03978558		3652.78	0.00415476		4182.78	-0.01743996
472.99	-0.01093584		1002.99	-0.00015507		1532.99	-0.00999784		2062.98	0.00032364		2592.98	-0.01904257		3122.98	0.03950567		3652.98	0.00496661		4182.98	-0.0170048
473.19	-0.01146301		1003.19	-0.00113749		1533.19	-0.0092631		2063.18	-0.00035206		2593.18	-0.01852521		3123.18	0.04002757		3653.18	0.00403617		4183.18	-0.01708831
473.39	-0.01128678		1003.39	-0.00110726		1533.39	-0.00926087		2063.38	0.00004148		2593.38	-0.01935341		3123.38	0.04077722		3653.38	0.00377152		4183.38	-0.01583981
473.59	-0.01103682		1003.59	-0.00042593		1533.59	-0.00903556		2063.58	-0.0000324		2593.58	-0.01911887		3123.58	0.04086658		3653.58	0.00374505		4183.58	-0.01469766
473.79	-0.0100258		1003.79	-0.00109676		1533.79	-0.00971605		2063.78	-0.00076271		2593.78	-0.0195004		3123.78	0.04180238		3653.78	0.0044026		4183.78	-0.0145652
473.99	-0.00898695		1003.99	-0.00058789		1533.99	-0.00976415		2063.98	-0.00046224		2593.98	-0.02040266		3123.98	0.04231374		3653.98	0.00439176		4183.98	-0.01464583
474.19	-0.00833174		1004.19	0.00010463		1534.19	-0.01045068		2064.18	0.00053432		2594.18	-0.02016063		3124.18	0.04232157		3654.18	0.0044488		4184.18	-0.01455274
474.39	-0.00749144		1004.39	-0.00056714		1534.39	-0.00974163		2064.38	0.00093769		2594.38	-0.01937622		3124.38	0.04183681		3654.38	0.0046572		4184.38	-0.01433532
474.59	-0.00654746		1004.59	-0.00119765		1534.59	-0.00903557		2064.58	0.0010186		2594.58	-0.01993866		3124.58	0.04164888		3654.58	0.00496853		4184.58	-0.01451145
474.79	-0.0070207		1004.79	-0.00077583		1534.79	-0.0093293		2064.78	0.00144632		2594.78	-0.01951894		3124.78	0.04148261		3654.78	0.00480763		4184.78	-0.01408142
474.99	-0.00671587		1004.99	-0.00091019		1534.99	-0.00878023		2064.98	0.00141424		2594.98	-0.01947679		3124.98	0.04179221		3654.98	0.00303692		4184.98	-0.01467828
475.19	-0.00767419		1005.19	-0.00080883		1535.19	-0.0089112		2065.18	0.00145		2595.18	-0.02096927		3125.18	0.04175485		3655.18	0.00214758		4185.18	-0.0151428
475.39	-0.00769359		1005.39	-0.00140166		1535.39	-0.00911115		2065.38	0.00163489		2595.38	-0.02072558		3125.38	0.04241487		3655.38	0.00249622		4185.38	-0.01627719
475.59	-0.0083638		1005.59	-0.00113533		1535.59	-0.00900173		2065.58	0.00213211		2595.58	-0.02084836		3125.58	0.04231292		3655.58	0.00165748		4185.58	-0.01633199
475.79	-0.00957768		1005.79	-0.00107029		1535.79	-0.0091005		2065.78	0.00264894		2595.78	-0.02064186		3125.78	0.04209965		3655.78	0.00147902		4185.78	-0.01664948
475.99	-0.01016581		1005.99	-0.00059017		1535.99	-0.00915752		2065.98	0.0019551		2595.98	-0.02032465		3125.98	0.04258541		3655.98	0.00125553		4185.98	-0.01733985
476.19	-0.01062493		1006.19	-0.00000132		1536.19	-0.00932468		2066.18	0.00173274		2596.18	-0.02054909		3126.18	0.04232468		3656.18	0.00215135		4186.18	-0.01608909
476.39	-0.01153398		1006.39	0.00008437		1536.39	-0.0100709		2066.38	0.00083734		2596.38	-0.02029659		3126.38	0.04230347		3656.38	0.00251409		4186.38	-0.01520981
476.59	-0.0114247		1006.59	-0.00002366		1536.59	-0.01011359		2066.58	-0.00007966		2596.58	-0.02077322		3126.58	0.04302851		3656.58	0.00306991		4186.58	-0.01519588
476.79	-0.01115383		1006.79	-0.00001038		1536.79	-0.01016349		2066.78	0.00015314		2596.78	-0.02145246		3126.78	0.04251716		3656.78	0.00333903		4186.78	-0.01455686
476.99	-0.01008692		1006.99	0.00009753		1536.99	-0.00992898		2066.98	0.00005369		2596.98	-0.02047865		3126.98	0.04248484		3656.98	0.00346079		4186.98	-0.01465683
477.19	-0.00947635		1007.19	-0.00012591		1537.19	-0.00942769		2067.18	-0.00012458		2597.18	-0.02123235		3127.18	0.04239105		3657.18	0.0026839		4187.18	-0.01447091
477.39	-0.0085715		1007.39	-0.00000784		1537.39	-0.00896705		2067.38	-0.00011152		2597.38	-0.021848		3127.38	0.04220372		3657.38	0.00291428		4187.38	-0.01476971
477.59	-0.00801566		1007.59	-0.00008748		1537.59	-0.00869479		2067.58	-0.00044263		2597.58	-0.0215116		3127.58	0.04148495		3657.58	0.00327969		4187.58	-0.01502679
477.79	-0.00688385		1007.79	-0.0006706		1537.79	-0.00959535		2067.78	-0.00031165		2597.78	-0.02180584		3127.78	0.04088398		3657.78	0.00358709		4187.78	-0.01509159
477.99	-0.00539331		1007.99	-0.00098362		1537.99	-0.00938293		2067.98	0.00000225		2597.98	-0.02065261		3127.98	0.04060081		3657.98	0.00399996		4187.98	-0.01531275
478.19	-0.00533954		1008.19	-0.00104219		1538.19	-0.00904709		2068.18	0.00039941		2598.18	-0.02034341		3128.18	0.0398137		3658.18	0.00409997		4188.18	-0.01527926
478.39	-0.00522492		1008.39	-0.00244981		1538.39	-0.00877682		2068.38	-0.00015182		2598.38	-0.02098677		3128.38	0.03908914		3658.38	0.00396177		4188.38	-0.01616784
478.59	-0.00540366		1008.59	-0.00283005		1538.59	-0.00827237		2068.58	-0.00013185		2598.58	-0.02054606		3128.58	0.03790798		3658.58	0.00430672		4188.58	-0.01699454
478.79	-0.00673221		1008.79	-0.00231834		1538.79	-0.00880131		2068.78	-0.0004566		2598.78	-0.0210399		3128.78	0.03842796		3658.78	0.00374809		4188.78	-0.01776023
478.99	-0.00780836		1008.99	-0.00168078		1538.99	-0.00840857		2068.98	0.00035826		2598.98	-0.02126659		3128.98	0.03807117		3658.98	0.00231978		4188.98	-0.01848781
479.19	-0.00876072		1009.19	-0.00167716		1539.19	-0.00884667		2069.18	0.00032378		2599.18	-0.02202079		3129.18	0.03780559		3659.18	0.00244809		4189.18	-0.01979052
479.39	-0.00901904		1009.39	-0.00223513		1539.39	-0.00947904		2069.38	-0.00001441		2599.38	-0.02135461		3129.38	0.03791069		3659.38	0.00173715		4189.38	-0.02101797
479.59	-0.01017534		1009.59	-0.00240356		1539.59	-0.00996529		2069.58	-0.0004539		2599.58	-0.02103489		3129.58	0.0376188		3659.58	0.00035156		4189.58	-0.02139614
479.79	-0.01068112		1009.79	-0.00247781		1539.79	-0.01093312		2069.78	-0.00013933		2599.78	-0.01971878		3129.78	0.03823359		3659.78	0.00074265		4189.78	-0.02188701
479.99	-0.01040149		1009.99	-0.00276901		1539.99	-0.01066879		2069.98	-0.00071078		2599.98	-0.01980008		3129.98	0.03811922		3659.98	0.00092983		4189.98	-0.0213513
480.19	-0.01111311		1010.19	-0.00308959		1540.19	-0.01139227		2070.18	-0.00093686		2600.18	-0.02012153		3130.18	0.03850378		3660.18	0.0007406		4190.18	-0.02100159
480.39	-0.01112865		1010.39	-0.00324045		1540.39	-0.0117541		2070.38	-0.00120961		2600.38	-0.02061369		3130.38	0.03984657		3660.38	-0.00030908		4190.38	-0.02095579
480.59	-0.01062655		1010.59	-0.00359703		1540.59	-0.01097652		2070.58	-0.00055895		2600.58	-0.02108878		3130.58	0.0413635		3660.58	0.00018393		4190.58	-0.02125249
480.79	-0.00999782		1010.79	-0.00358675		1540.79	-0.01101126		2070.78	0.00024524		2600.78	-0.02086362		3130.78	0.04157039		3660.78	-0.00016826		4190.78	-0.02028194
480.99	-0.00910691		1010.99	-0.00384797		1540.99	-0.01071692		2070.98	0.00062979		2600.98	-0.02022111		3130.98	0.04138251		3660.98	-0.00066903		4190.98	-0.0205508
481.19	-0.0086979		1011.19	-0.00357912		1541.19	-0.00955933		2071.18	-0.00000736		2601.18	-0.02007259		3131.18	0.04148415		3661.18	-0.00010309		4191.18	-0.02040235
481.39	-0.00815921		1011.39	-0.00412116		1541.39	-0.00921695		2071.38	0.00039336		2601.38	-0.01876603		3131.38	0.04218457		3661.38	-0.00024261		4191.38	-0.01938746
481.59	-0.00799864		1011.59	-0.00442302		1541.59	-0.00895784		2071.58	0.00082118		2601.58	-0.0171581		3131.58	0.042036		3661.58	-0.00038247		4191.58	-0.01809258
481.79	-0.00710329		1011.79	-0.00499762		1541.79	-0.00924465		2071.78	0.00074412		2601.78	-0.01698455		3131.78	0.04156962		3661.78	0.00023256		4191.78	-0.0169735
481.99	-0.00661776		1011.99	-0.00504995		1541.99	-0.00852286		2071.98	0.0004875		2601.98	-0.0164931		3131.98	0.04195221		3661.98	0.00111784		4191.98	-0.01721018
482.19	-0.00773706		1012.19	-0.00443696		1542.19	-0.00791915		2072.18	0.00042465		2602.18	-0.01768888		3132.18	0.0422774		3662.18	0.00084272		4192.18	-0.01720791
482.39	-0.00770322		1012.39	-0.00452591		1542.39	-0.0088931		2072.38	-0.00034735		2602.38	-0.01715219		3132.38	0.04140658		3662.38	0.00160458		4192.38	-0.017516
482.59	-0.0086262		1012.59	-0.00350718		1542.59	-0.00827127		2072.58	0.00020498		2602.58	-0.01763423		3132.58	0.04130288		3662.58	0.00177055		4192.58	-0.01685078
482.79	-0.0094566		1012.79	-0.00208212		1542.79	-0.00888535		2072.78	0.0010527		2602.78	-0.01788723		3132.78	0.04243876		3662.78	0.0026299		4192.78	-0.01647381
482.99	-0.00874676		1012.99	-0.00155175		1542.99	-0.00904261		2072.98	0.00155172		2602.98	-0.01774928		3132.98	0.04221695		3662.98	0.00271015		4192.98	-0.01599734
483.19	-0.00756546		1013.19	-0.00151824		1543.19	-0.01015063		2073.18	0.00103401		2603.18	-0.01808756		3133.18	0.04213201		3663.18	0.00388148		4193.18	-0.01723262
483.39	-0.0075024		1013.39	-0.00168083		1543.39	-0.0107377		2073.38	0.00048845		2603.38	-0.01781844		3133.38	0.04250125		3663.38	0.00339106		4193.38	-0.01801988
483.59	-0.00865889		1013.59	-0.00107995		1543.59	-0.01080332		2073.58	0.00026784		2603.58	-0.01824973		3133.58	0.04332558		3663.58	0.00313013		4193.58	-0.01792013
483.79	-0.00831213		1013.79	-0.00042145		1543.79	-0.01153646		2073.78	0.00032787		2603.78	-0.01850884		3133.78	0.04486438		3663.78	0.00350846		4193.78	-0.0175477
483.99	-0.00800325		1013.99	-0.00025077		1543.99	-0.01118766		2073.98	-0.0000814		2603.98	-0.01860047		3133.98	0.04540265		3663.98	0.00336912		4193.98	-0.01785461
484.19	-0.00838734		1014.19	-0.00000731		1544.19	-0.01136823		2074.18	-0.00003493		2604.18	-0.01947701		3134.18	0.04627802		3664.18	0.00300919		4194.18	-0.01859171
484.39	-0.00845125		1014.39	-0.00047085		1544.39	-0.01069201		2074.38	0.00004579		2604.38	-0.02101544		3134.38	0.04693411		3664.38	0.0024119		4194.38	-0.01857884
484.59	-0.00833465		1014.59	-0.00051571		1544.59	-0.01012899		2074.58	-0.00014858		2604.58	-0.02048479		3134.58	0.04562494		3664.58	0.00247832		4194.58	-0.01842134
484.79	-0.00834862		1014.79	-0.0005515		1544.79	-0.01075369		2074.78	-0.00027119		2604.78	-0.02061021		3134.78	0.04409604		3664.78	0.00174893		4194.78	-0.01797415
484.99	-0.00999689		1014.99	-0.00067697		1544.99	-0.01064771		2074.98	-0.00042927		2604.98	-0.02041308		3134.98	0.04266359		3664.98	0.00160719		4194.98	-0.01866168
485.19	-0.01094541		1015.19	-0.0007078		1545.19	-0.01054317		2075.18	-0.00109481		2605.18	-0.01976677		3135.18	0.04244994		3665.18	0.00197989		4195.18	-0.01796318
485.39	-0.01092		1015.39	-0.00093489		1545.39	-0.00981252		2075.38	-0.00036383		2605.38	-0.02009812		3135.38	0.04133452		3665.38	0.00146736		4195.38	-0.01764496
485.59	-0.01154726		1015.59	-0.00116956		1545.59	-0.00947559		2075.58	-0.00117943		2605.58	-0.02064366		3135.58	0.04052692		3665.58	0.00144615		4195.58	-0.01736707
485.79	-0.01163171		1015.79	-0.00208679		1545.79	-0.00877809		2075.78	-0.00103678		2605.78	-0.02093856		3135.78	0.0395491		3665.78	0.00144766		4195.78	-0.01769074
485.99	-0.01193526		1015.99	-0.00193442		1545.99	-0.0091638		2075.98	-0.00065144		2605.98	-0.02109969		3135.98	0.03817437		3665.98	0.00046893		4195.98	-0.01804093
486.19	-0.01235799		1016.19	-0.00211905		1546.19	-0.00882876		2076.18	0.00012638		2606.18	-0.02167574		3136.18	0.03770851		3666.18	-0.00093407		4196.18	-0.01793963
486.39	-0.01231031		1016.39	-0.00312601		1546.39	-0.00964705		2076.38	0.00053066		2606.38	-0.02085177		3136.38	0.03611936		3666.38	-0.00104875		4196.38	-0.01798761
486.59	-0.01284857		1016.59	-0.00233367		1546.59	-0.00926305		2076.58	0.00210671		2606.58	-0.02127222		3136.58	0.03678813		3666.58	-0.00111526		4196.58	-0.01774317
486.79	-0.01216491		1016.79	-0.00278625		1546.79	-0.01016975		2076.78	0.00263758		2606.78	-0.02076098		3136.78	0.0376979		3666.78	-0.00011914		4196.78	-0.01720219
486.99	-0.01185216		1016.99	-0.00399918		1546.99	-0.01097232		2076.98	0.00179967		2606.98	-0.02115464		3136.98	0.03850101		3666.98	-0.00088267		4196.98	-0.01647025
487.19	-0.01211412		1017.19	-0.00424187		1547.19	-0.01138737		2077.18	0.00099282		2607.18	-0.02173939		3137.18	0.03838852		3667.18	0.0000938		4197.18	-0.01750697
487.39	-0.01196717		1017.39	-0.00378986		1547.39	-0.01141886		2077.38	0.00100076		2607.38	-0.0222731		3137.38	0.03867539		3667.38	-0.00044516		4197.38	-0.01622426
487.59	-0.01205741		1017.59	-0.00382355		1547.59	-0.01067131		2077.58	0.00111737		2607.58	-0.02320624		3137.58	0.03949124		3667.58	-0.000069		4197.58	-0.01566633
487.79	-0.01108297		1017.79	-0.00447037		1547.79	-0.01070213		2077.78	0.00107304		2607.78	-0.02368787		3137.78	0.04009655		3667.78	-0.00000223		4197.78	-0.01526784
487.99	-0.01092922		1017.99	-0.00382845		1547.99	-0.00951421		2077.98	0.00162272		2607.98	-0.02499754		3137.98	0.04092547		3667.98	0.00045758		4197.98	-0.01570808
488.19	-0.01104787		1018.19	-0.00412602		1548.19	-0.0086921		2078.18	0.00128666		2608.18	-0.02618494		3138.18	0.04121728		3668.18	-0.00010301		4198.18	-0.0157937
488.39	-0.01117317		1018.39	-0.00467939		1548.39	-0.00852061		2078.38	0.00103412		2608.38	-0.02676975		3138.38	0.04105205		3668.38	0.00043057		4198.38	-0.01636877
488.59	-0.01176069		1018.59	-0.00437596		1548.59	-0.00830339		2078.58	0.0007378		2608.58	-0.02696088		3138.58	0.03995779		3668.58	-0.00000296		4198.58	-0.0162748
488.79	-0.01200867		1018.79	-0.00414549		1548.79	-0.00833158		2078.78	0.00035693		2608.78	-0.02827691		3138.78	0.03982587		3668.78	0.00050891		4198.78	-0.01722228
488.99	-0.01305325		1018.99	-0.00395877		1548.99	-0.00743569		2078.98	0.00024739		2608.98	-0.02908659		3138.98	0.03980012		3668.98	0.00110141		4198.98	-0.0174753
489.19	-0.01283766		1019.19	-0.00376904		1549.19	-0.00732165		2079.18	0.00045462		2609.18	-0.02883756		3139.18	0.0402729		3669.18	0.00186776		4199.18	-0.01823541
489.39	-0.01251315		1019.39	-0.00345601		1549.39	-0.00624668		2079.38	0.0010239		2609.38	-0.02973659		3139.38	0.03912518		3669.38	0.00215815		4199.38	-0.01815609
489.59	-0.01244363		1019.59	-0.00370083		1549.59	-0.00645337		2079.58	0.00098668		2609.58	-0.02883886		3139.58	0.04016066		3669.58	0.00238612		4199.58	-0.01719885
489.79	-0.0117671		1019.79	-0.00374708		1549.79	-0.00634459		2079.78	0.00136862		2609.78	-0.0279138		3139.78	0.03951814		3669.78	0.00215423		4199.78	-0.0177775
489.99	-0.01122666		1019.99	-0.00440732		1549.99	-0.00784406		2079.98	0.00168198		2609.98	-0.0280521		3139.98	0.03946915		3669.98	0.0022003		4199.98	-0.01788584
490.19	-0.01097577		1020.19	-0.00459532		1550.19	-0.00742523		2080.18	0.00154489		2610.18	-0.02758641		3140.18	0.0397944		3670.18	0.00228188		4200.18	-0.01900226
490.39	-0.0110996		1020.39	-0.00492503		1550.39	-0.00723678		2080.38	0.00165921		2610.38	-0.02595104		3140.38	0.04018883		3670.38	0.00296059		4200.38	-0.02024893
490.59	-0.01066872		1020.59	-0.00400641		1550.59	-0.00855371		2080.58	0.0012049		2610.58	-0.02556867		3140.58	0.04110328		3670.58	0.00372467		4200.58	-0.01983622
490.79	-0.01006674		1020.79	-0.00483246		1550.79	-0.00987514		2080.78	0.0009769		2610.78	-0.02551175		3140.78	0.04193098		3670.78	0.00344651		4200.78	-0.01970053
490.99	-0.00950221		1020.99	-0.00454797		1550.99	-0.01044654		2080.98	-0.000157		2610.98	-0.02564191		3140.98	0.04184333		3670.98	0.00296771		4200.98	-0.02005106
491.19	-0.00882029		1021.19	-0.00402792		1551.19	-0.01016226		2081.18	-0.00082649		2611.18	-0.02621771		3141.18	0.04146111		3671.18	0.00410742		4201.18	-0.02121736
491.39	-0.0078084		1021.39	-0.00397195		1551.39	-0.0104146		2081.38	-0.00045916		2611.38	-0.02529488		3141.38	0.04113813		3671.38	0.00288794		4201.38	-0.02045869
491.59	-0.00764274		1021.59	-0.00409817		1551.59	-0.00994379		2081.58	-0.00037474		2611.58	-0.02534527		3141.58	0.04168979		3671.58	0.00289675		4201.58	-0.02072058
491.79	-0.00751213		1021.79	-0.00367013		1551.79	-0.01050048		2081.78	-0.00018174		2611.78	-0.0259228		3141.78	0.04188028		3671.78	0.00231064		4201.78	-0.02003443
491.99	-0.00792661		1021.99	-0.00346679		1551.99	-0.00993447		2081.98	-0.0004524		2611.98	-0.02611258		3141.98	0.04215542		3671.98	0.00196266		4201.98	-0.02038202
492.19	-0.00765251		1022.19	-0.00426521		1552.19	-0.01076323		2082.18	-0.00080474		2612.18	-0.02471354		3142.18	0.04157265		3672.18	0.00088824		4202.18	-0.02074587
492.39	-0.00743901		1022.39	-0.00411861		1552.39	-0.01063628		2082.38	-0.00071036		2612.38	-0.02403896		3142.38	0.04108945		3672.38	0.00063028		4202.38	-0.0217765
492.59	-0.00766219		1022.59	-0.00375677		1552.59	-0.01033162		2082.58	-0.00066349		2612.58	-0.02403448		3142.58	0.04062107		3672.58	-0.00094497		4202.58	-0.02114916
492.79	-0.00709394		1022.79	-0.00360787		1552.79	-0.01052266		2082.78	-0.00126563		2612.78	-0.02332957		3142.78	0.03997262		3672.78	-0.00053999		4202.78	-0.02038632
492.99	-0.00735307		1022.99	-0.00443698		1552.99	-0.01045835		2082.98	-0.00066343		2612.98	-0.02244076		3142.98	0.03912275		3672.98	-0.00031601		4202.98	-0.01981839
493.19	-0.00722043		1023.19	-0.00435328		1553.19	-0.01157758		2083.18	-0.00033786		2613.18	-0.02205178		3143.18	0.03907682		3673.18	-0.00040327		4203.18	-0.01925624
493.39	-0.00696546		1023.39	-0.00394516		1553.39	-0.01090544		2083.38	-0.00062766		2613.38	-0.0222706		3143.38	0.03833944		3673.38	0.00005336		4203.38	-0.01786279
493.59	-0.00718318		1023.59	-0.00395849		1553.59	-0.01143991		2083.58	-0.00008864		2613.58	-0.02136158		3143.58	0.03889208		3673.58	0.00033966		4203.58	-0.01799989
493.79	-0.00784718		1023.79	-0.00429197		1553.79	-0.01129195		2083.78	0.00032768		2613.78	-0.02162604		3143.78	0.03838427		3673.78	0.00060863		4203.78	-0.01917517
493.99	-0.00825382		1023.99	-0.00488418		1553.99	-0.01163715		2083.98	0.00122728		2613.98	-0.02162253		3143.98	0.03792363		3673.98	0.00126919		4203.98	-0.0191904
494.19	-0.00945874		1024.19	-0.00418412		1554.19	-0.01076276		2084.18	0.00168732		2614.18	-0.02180822		3144.18	0.03770746		3674.18	0.00262405		4204.18	-0.02022341
494.39	-0.01027393		1024.39	-0.00422468		1554.39	-0.01100839		2084.38	0.00211538		2614.38	-0.02140366		3144.38	0.03867416		3674.38	0.0025373		4204.38	-0.02022368
494.59	-0.01086678		1024.59	-0.00394263		1554.59	-0.01198289		2084.58	0.00226357		2614.58	-0.02200539		3144.58	0.03864606		3674.58	0.00276594		4204.58	-0.01957856
494.79	-0.01148513		1024.79	-0.00401696		1554.79	-0.01195337		2084.78	0.00359171		2614.78	-0.02228121		3144.78	0.03847544		3674.78	0.00259716		4204.78	-0.02004205
494.99	-0.01156865		1024.99	-0.00328674		1554.99	-0.01092666		2084.98	0.00290245		2614.98	-0.02321248		3144.98	0.03777195		3674.98	0.00233187		4204.98	-0.02022731
495.19	-0.01231037		1025.19	-0.0035963		1555.19	-0.01024248		2085.18	0.00303462		2615.18	-0.02397941		3145.18	0.03748021		3675.18	0.00289358		4205.18	-0.02008003
495.39	-0.01224082		1025.39	-0.00386923		1555.39	-0.00932176		2085.38	0.00345236		2615.38	-0.02315598		3145.38	0.03690753		3675.38	0.00160361		4205.38	-0.01971352
495.59	-0.01215183		1025.59	-0.00369174		1555.59	-0.00912527		2085.58	0.00418635		2615.58	-0.02329963		3145.58	0.03771014		3675.58	0.00096857		4205.58	-0.01902864
495.79	-0.01236343		1025.79	-0.00424287		1555.79	-0.00881666		2085.78	0.00406547		2615.78	-0.0234502		3145.78	0.03754977		3675.78	-0.00015982		4205.78	-0.01811875
495.99	-0.01299062		1025.99	-0.00502857		1555.99	-0.00798987		2085.98	0.00350951		2615.98	-0.02259815		3145.98	0.03737083		3675.98	-0.00123585		4205.98	-0.01878124
496.19	-0.01210611		1026.19	-0.00556901		1556.19	-0.00745323		2086.18	0.00351853		2616.18	-0.02247079		3146.18	0.0382897		3676.18	-0.00229292		4206.18	-0.01897864
496.39	-0.01188642		1026.39	-0.00541396		1556.39	-0.0062708		2086.38	0.00291944		2616.38	-0.0216832		3146.38	0.0384228		3676.38	-0.00244282		4206.38	-0.01915165
496.59	-0.01160329		1026.59	-0.00503317		1556.59	-0.0059129		2086.58	0.00178931		2616.58	-0.02118077		3146.58	0.03906485		3676.58	-0.00209171		4206.58	-0.01758433
496.79	-0.01109514		1026.79	-0.005227		1556.79	-0.0059173		2086.78	0.00137056		2616.78	-0.02088026		3146.78	0.03875425		3676.78	-0.00167605		4206.78	-0.01691684
496.99	-0.0106393		1026.99	-0.00539662		1556.99	-0.00580324		2086.98	0.00084182		2616.98	-0.02068831		3146.98	0.03844272		3676.98	-0.00099175		4206.98	-0.01631775
497.19	-0.01054797		1027.19	-0.00435907		1557.19	-0.00603067		2087.18	0.00008425		2617.18	-0.02126167		3147.18	0.03960491		3677.18	-0.00066853		4207.18	-0.01670996
497.39	-0.01057638		1027.39	-0.00451178		1557.39	-0.00547683		2087.38	0.00002369		2617.38	-0.02089304		3147.38	0.03994736		3677.38	0.00120112		4207.38	-0.01720761
497.59	-0.01147055		1027.59	-0.00399677		1557.59	-0.00583475		2087.58	0.0004573		2617.58	-0.01990694		3147.58	0.04004694		3677.58	0.00184202		4207.58	-0.01635686
497.79	-0.01264602		1027.79	-0.00388103		1557.79	-0.00625441		2087.78	-0.00000097		2617.78	-0.01993277		3147.78	0.04022108		3677.78	0.00194202		4207.78	-0.01646468
497.99	-0.01268854		1027.99	-0.00292792		1557.99	-0.00801074		2087.98	-0.00037102		2617.98	-0.01958899		3147.98	0.04015145		3677.98	0.00273068		4207.98	-0.01561518
498.19	-0.01355653		1028.19	-0.00237281		1558.19	-0.00818394		2088.18	-0.00037128		2618.18	-0.01976105		3148.18	0.04159565		3678.18	0.00360115		4208.18	-0.01541708
498.39	-0.01379645		1028.39	-0.00223427		1558.39	-0.00896924		2088.38	-0.00018235		2618.38	-0.01948157		3148.38	0.04150325		3678.38	0.0029459		4208.38	-0.01462309
498.59	-0.01446545		1028.59	-0.00222771		1558.59	-0.00975134		2088.58	-0.00058293		2618.58	-0.02021924		3148.58	0.04108236		3678.58	0.00419929		4208.58	-0.01506298
498.79	-0.01437029		1028.79	-0.00259373		1558.79	-0.01012369		2088.78	-0.000345		2618.78	-0.02145448		3148.78	0.04067511		3678.78	0.00440329		4208.78	-0.01534073
498.99	-0.01403515		1028.99	-0.00166474		1558.99	-0.01034954		2088.98	-0.00092126		2618.98	-0.02227108		3148.98	0.04089604		3678.98	0.00405508		4208.98	-0.01537505
499.19	-0.01385766		1029.19	-0.00227522		1559.19	-0.01115287		2089.18	-0.00106543		2619.18	-0.02221848		3149.18	0.04184151		3679.18	0.00373707		4209.18	-0.01597517
499.39	-0.01302985		1029.39	-0.0023287		1559.39	-0.0110657		2089.38	-0.00094532		2619.38	-0.02243183		3149.38	0.04221112		3679.38	0.00237118		4209.38	-0.01700919
499.59	-0.01308041		1029.59	-0.00193033		1559.59	-0.01207941		2089.58	-0.00146014		2619.58	-0.02302457		3149.58	0.04243044		3679.58	0.00167338		4209.58	-0.01718289
499.79	-0.01267045		1029.79	-0.00236715		1559.79	-0.01236682		2089.78	-0.00215107		2619.78	-0.02404866		3149.78	0.04222316		3679.78	0.00046723		4209.78	-0.01787054
499.99	-0.01167268		1029.99	-0.00310637		1559.99	-0.01282853		2089.98	-0.00195346		2619.98	-0.02438844		3149.98	0.04243877		3679.98	0.00011345		4209.98	-0.01718498
500.19	-0.0112411		1030.19	-0.00339837		1560.19	-0.01198919		2090.18	-0.00259683		2620.18	-0.02541491		3150.18	0.04209324		3680.18	-0.00043016		4210.18	-0.01653247
500.39	-0.010981		1030.39	-0.0033486		1560.39	-0.01142694		2090.38	-0.00185244		2620.38	-0.02434288		3150.38	0.04116781		3680.38	-0.00022598		4210.38	-0.01651873
500.59	-0.01001219		1030.59	-0.00405622		1560.59	-0.01092733		2090.58	-0.00257597		2620.58	-0.02422691		3150.58	0.04146163		3680.58	-0.00014301		4210.58	-0.01607024
500.79	-0.00925496		1030.79	-0.00439518		1560.79	-0.01098007		2090.78	-0.00219588		2620.78	-0.02363701		3150.78	0.04070714		3680.78	-0.00116546		4210.78	-0.01660337
500.99	-0.00957397		1030.99	-0.00418708		1560.99	-0.01100534		2090.98	-0.00227997		2620.98	-0.02286798		3150.98	0.04039928		3680.98	-0.00092349		4210.98	-0.01595417
501.19	-0.00983234		1031.19	-0.00402357		1561.19	-0.01069552		2091.18	-0.00262948		2621.18	-0.02248727		3151.18	0.03978945		3681.18	-0.0018144		4211.18	-0.01768619
501.39	-0.01041145		1031.39	-0.00467242		1561.39	-0.01079806		2091.38	-0.00241877		2621.38	-0.02130964		3151.38	0.03903891		3681.38	-0.0010453		4211.38	-0.01737647
501.59	-0.01053116		1031.59	-0.00397028		1561.59	-0.01088502		2091.58	-0.00235409		2621.58	-0.02114252		3151.58	0.03809974		3681.58	-0.00195237		4211.58	-0.01695557
501.79	-0.01077662		1031.79	-0.00375788		1561.79	-0.0115902		2091.78	-0.00299166		2621.78	-0.02097089		3151.78	0.0380495		3681.78	-0.00213346		4211.78	-0.01769159
501.99	-0.01052981		1031.99	-0.00371825		1561.99	-0.01219336		2091.98	-0.00253951		2621.98	-0.0210933		3151.98	0.03810013		3681.98	-0.00135573		4211.98	-0.01766996
502.19	-0.01037725		1032.19	-0.00395848		1562.19	-0.01161779		2092.18	-0.00190592		2622.18	-0.02056474		3152.18	0.03882023		3682.18	-0.00056902		4212.18	-0.01826746
502.39	-0.01032796		1032.39	-0.00382438		1562.39	-0.01196207		2092.38	-0.00162247		2622.38	-0.02131361		3152.38	0.03838229		3682.38	-0.0007518		4212.38	-0.0197758
502.59	-0.01080414		1032.59	-0.00343334		1562.59	-0.01121894		2092.58	-0.00158319		2622.58	-0.02204254		3152.58	0.03921914		3682.58	0.00021929		4212.58	-0.02039981
502.79	-0.0106188		1032.79	-0.00334146		1562.79	-0.0105996		2092.78	-0.00054836		2622.78	-0.02244181		3152.78	0.03925379		3682.78	0.00001376		4212.78	-0.02059596
502.99	-0.01051581		1032.99	-0.00160565		1562.99	-0.01132954		2092.98	0.00015972		2622.98	-0.02233929		3152.98	0.03984058		3682.98	0.00052264		4212.98	-0.02179298
503.19	-0.00996608		1033.19	-0.00141138		1563.19	-0.01206795		2093.18	0.00034174		2623.18	-0.02299671		3153.18	0.03977607		3683.18	0.00077198		4213.18	-0.02323446
503.39	-0.00970371		1033.39	-0.00095503		1563.39	-0.01144609		2093.38	0.00033404		2623.38	-0.02417854		3153.38	0.03917665		3683.38	0.00043316		4213.38	-0.02410388
503.59	-0.01026573		1033.59	-0.00044204		1563.59	-0.01166303		2093.58	-0.00082571		2623.58	-0.02457798		3153.58	0.03955444		3683.58	0.00038292		4213.58	-0.02400995
503.79	-0.00983162		1033.79	-0.00081938		1563.79	-0.01212884		2093.78	-0.00037643		2623.78	-0.02518287		3153.78	0.03876471		3683.78	-0.00038706		4213.78	-0.02326575
503.99	-0.00991399		1033.99	-0.00108176		1563.99	-0.0121935		2093.98	0.00014792		2623.98	-0.02541089		3153.98	0.0381167		3683.98	-0.00070813		4213.98	-0.02139948
504.19	-0.01092206		1034.19	-0.0009319		1564.19	-0.01247973		2094.18	-0.00043488		2624.18	-0.02575758		3154.18	0.0378017		3684.18	-0.00056278		4214.18	-0.0205156
504.39	-0.01063443		1034.39	-0.00124116		1564.39	-0.0124545		2094.38	0.00032471		2624.38	-0.02600938		3154.38	0.03815209		3684.38	-0.00041522		4214.38	-0.0194764
504.59	-0.01024967		1034.59	-0.00130526		1564.59	-0.01298688		2094.58	-0.0008193		2624.58	-0.02575047		3154.58	0.03806606		3684.58	-0.00105506		4214.58	-0.01810097
504.79	-0.01033929		1034.79	-0.00134491		1564.79	-0.0138447		2094.78	-0.00131189		2624.78	-0.02586652		3154.78	0.0366758		3684.78	-0.00208446		4214.78	-0.01798854
504.99	-0.01100285		1034.99	-0.00161965		1564.99	-0.01440095		2094.98	-0.00101728		2624.98	-0.02559157		3154.98	0.03591067		3684.98	-0.00189846		4214.98	-0.01613821
505.19	-0.01060336		1035.19	-0.0018542		1565.19	-0.01451882		2095.18	-0.0020796		2625.18	-0.02473409		3155.18	0.03523831		3685.18	-0.00226999		4215.18	-0.01679942
505.39	-0.0111424		1035.39	-0.00230651		1565.39	-0.01414693		2095.38	-0.00294021		2625.38	-0.02442287		3155.38	0.03584709		3685.38	-0.00094019		4215.38	-0.01648413
505.59	-0.01132652		1035.59	-0.00231943		1565.59	-0.0141961		2095.58	-0.00307426		2625.58	-0.02484244		3155.58	0.03631488		3685.58	-0.00032801		4215.58	-0.01659202
505.79	-0.01165133		1035.79	-0.00275226		1565.79	-0.01433465		2095.78	-0.00414556		2625.78	-0.02389448		3155.78	0.03632396		3685.78	-0.00014032		4215.78	-0.01620553
505.99	-0.01151325		1035.99	-0.00352308		1565.99	-0.0142075		2095.98	-0.00270687		2625.98	-0.02341813		3155.98	0.03761374		3685.98	-0.00033307		4215.98	-0.01668838
506.19	-0.01091792		1036.19	-0.00363758		1566.19	-0.01372301		2096.18	-0.00213416		2626.18	-0.02261813		3156.18	0.03877366		3686.18	-0.0000441		4216.18	-0.01696798
506.39	-0.01061002		1036.39	-0.0036158		1566.39	-0.01265948		2096.38	-0.00144354		2626.38	-0.02246089		3156.38	0.03886074		3686.38	-0.00026826		4216.38	-0.01743781
506.59	-0.01077318		1036.59	-0.00368973		1566.59	-0.01109404		2096.58	-0.000969		2626.58	-0.02201611		3156.58	0.03943313		3686.58	0.00088823		4216.58	-0.01716671
506.79	-0.01012592		1036.79	-0.00393423		1566.79	-0.01187767		2096.78	-0.00049113		2626.78	-0.02100947		3156.78	0.03929085		3686.78	0.00142058		4216.78	-0.01792803
506.99	-0.00988719		1036.99	-0.00341237		1566.99	-0.01218304		2096.98	-0.00001716		2626.98	-0.02082258		3156.98	0.03932057		3686.98	0.00203501		4216.98	-0.01915569
507.19	-0.00918194		1037.19	-0.00390565		1567.19	-0.01206286		2097.18	-0.00009255		2627.18	-0.02109857		3157.18	0.03936834		3687.18	0.00135933		4217.18	-0.01991629
507.39	-0.00945277		1037.39	-0.00352445		1567.39	-0.01144327		2097.38	-0.0001043		2627.38	-0.0212426		3157.38	0.03969299		3687.38	0.00088944		4217.38	-0.01974066
507.59	-0.00990008		1037.59	-0.00356812		1567.59	-0.01183944		2097.58	-0.00032292		2627.58	-0.02204734		3157.58	0.04062096		3687.58	0.00094081		4217.58	-0.02002757
507.79	-0.00983198		1037.79	-0.00429129		1567.79	-0.01229556		2097.78	0.00002958		2627.78	-0.02252714		3157.78	0.03976262		3687.78	0.00072855		4217.78	-0.02056758
507.99	-0.01033317		1037.99	-0.00398484		1567.99	-0.01328503		2097.98	-0.0004352		2627.98	-0.02258504		3157.98	0.03989951		3687.98	0.00021754		4217.98	-0.02107259
508.19	-0.01024802		1038.19	-0.00364497		1568.19	-0.0140844		2098.18	-0.00109819		2628.18	-0.02298463		3158.18	0.0402404		3688.18	0.00000487		4218.18	-0.02083493
508.39	-0.01073977		1038.39	-0.00322482		1568.39	-0.01363101		2098.38	-0.00109164		2628.38	-0.02284312		3158.38	0.03966338		3688.38	-0.00100716		4218.38	-0.02086917
508.59	-0.01090343		1038.59	-0.00323132		1568.59	-0.01426956		2098.58	-0.00152168		2628.58	-0.02228467		3158.58	0.03844906		3688.58	-0.00218247		4218.58	-0.02111021
508.79	-0.01116703		1038.79	-0.00381627		1568.79	-0.01494657		2098.78	-0.00164619		2628.78	-0.02277354		3158.78	0.03726841		3688.78	-0.00248499		4218.78	-0.02146646
508.99	-0.01124649		1038.99	-0.00368047		1568.99	-0.01518569		2098.98	-0.00060395		2628.98	-0.02237612		3158.98	0.03681724		3688.98	-0.00270254		4218.98	-0.02055784
509.19	-0.01218446		1039.19	-0.00297342		1569.19	-0.01467207		2099.18	-0.00108512		2629.18	-0.02211721		3159.18	0.03650047		3689.18	-0.00280205		4219.18	-0.02171728
509.39	-0.01347207		1039.39	-0.00266911		1569.39	-0.01428612		2099.38	-0.00115339		2629.38	-0.02280013		3159.38	0.03719395		3689.38	-0.00246457		4219.38	-0.02197556
509.59	-0.01428083		1039.59	-0.00301921		1569.59	-0.01378354		2099.58	0.00004461		2629.58	-0.0228217		3159.58	0.03720086		3689.58	-0.0024176		4219.58	-0.02189008
509.79	-0.01458688		1039.79	-0.00412046		1569.79	-0.0133498		2099.78	0.0000507		2629.78	-0.02346691		3159.78	0.03641366		3689.78	-0.00324461		4219.78	-0.02219155
509.99	-0.01426247		1039.99	-0.00409064		1569.99	-0.01257104		2099.98	0.00110578		2629.98	-0.02346648		3159.98	0.03787491		3689.98	-0.00273763		4219.98	-0.02301553
510.19	-0.01388116		1040.19	-0.00456403		1570.19	-0.01136352		2100.18	0.00176342		2630.18	-0.02388488		3160.18	0.03764908		3690.18	-0.0020852		4220.18	-0.02327579
510.39	-0.01447431		1040.39	-0.00538479		1570.39	-0.00971159		2100.38	0.00255989		2630.38	-0.02369486		3160.38	0.0373294		3690.38	-0.00123729		4220.38	-0.0232009
510.59	-0.01406902		1040.59	-0.00575772		1570.59	-0.00919592		2100.58	0.00307949		2630.58	-0.02435141		3160.58	0.03786345		3690.58	-0.00075124		4220.58	-0.02313872
510.79	-0.01373937		1040.79	-0.00606872		1570.79	-0.00974826		2100.78	0.00422029		2630.78	-0.02418625		3160.78	0.03820473		3690.78	-0.00029593		4220.78	-0.02272319
510.99	-0.01326637		1040.99	-0.00686948		1570.99	-0.00885388		2100.98	0.00504951		2630.98	-0.02507444		3160.98	0.03845476		3690.98	-0.00115467		4220.98	-0.02270603
511.19	-0.01202424		1041.19	-0.00720503		1571.19	-0.00893199		2101.18	0.00574893		2631.18	-0.02520723		3161.18	0.03906288		3691.18	-0.00164594		4221.18	-0.02231531
511.39	-0.01207888		1041.39	-0.00713046		1571.39	-0.00891254		2101.38	0.00647558		2631.38	-0.02585506		3161.38	0.03906906		3691.38	-0.00097582		4221.38	-0.02259189
511.59	-0.0116994		1041.59	-0.00751995		1571.59	-0.00891589		2101.58	0.00672254		2631.58	-0.02691367		3161.58	0.03853557		3691.58	-0.00085135		4221.58	-0.02292049
511.79	-0.01160037		1041.79	-0.00809938		1571.79	-0.00910666		2101.78	0.00578641		2631.78	-0.0265725		3161.78	0.03824029		3691.78	-0.00048227		4221.78	-0.02305895
511.99	-0.01183493		1041.99	-0.00675241		1571.99	-0.01022069		2101.98	0.00527433		2631.98	-0.02626856		3161.98	0.03796153		3691.98	-0.00063091		4221.98	-0.02247837
512.19	-0.0120312		1042.19	-0.0064696		1572.19	-0.01075507		2102.18	0.00452368		2632.18	-0.02654592		3162.18	0.03844635		3692.18	0.00003084		4222.18	-0.02196222
512.39	-0.01224309		1042.39	-0.00583399		1572.39	-0.01121631		2102.38	0.00440466		2632.38	-0.02707629		3162.38	0.03833697		3692.38	0.00030866		4222.38	-0.02092531
512.59	-0.01170898		1042.59	-0.00552124		1572.59	-0.01290231		2102.58	0.00312519		2632.58	-0.02679145		3162.58	0.03825948		3692.58	0.00039707		4222.58	-0.02084434
512.79	-0.01185581		1042.79	-0.00422745		1572.79	-0.01451128		2102.78	0.00317777		2632.78	-0.02735099		3162.78	0.03760995		3692.78	0.00086968		4222.78	-0.01982948
512.99	-0.01259421		1042.99	-0.00360785		1572.99	-0.01493011		2102.98	0.00235865		2632.98	-0.0270653		3162.98	0.03698159		3692.98	0.00059167		4222.98	-0.01935364
513.19	-0.01345687		1043.19	-0.00242566		1573.19	-0.01600913		2103.18	0.00014473		2633.18	-0.02629942		3163.18	0.03735		3693.18	0.00133436		4223.18	-0.01946233
513.39	-0.01377725		1043.39	-0.00202514		1573.39	-0.01648529		2103.38	0.00011683		2633.38	-0.02503322		3163.38	0.03806341		3693.38	0.00099998		4223.38	-0.01912817
513.59	-0.01344801		1043.59	-0.00185975		1573.59	-0.01644858		2103.58	-0.00056706		2633.58	-0.02410952		3163.58	0.03756487		3693.58	0.00143216		4223.58	-0.01867859
513.79	-0.01286899		1043.79	-0.00195324		1573.79	-0.01599963		2103.78	-0.0017303		2633.78	-0.02383658		3163.78	0.03717231		3693.78	0.00122117		4223.78	-0.01942655
513.99	-0.01292639		1043.99	-0.00182208		1573.99	-0.01519066		2103.98	-0.00144334		2633.98	-0.02297153		3163.98	0.03800086		3693.98	0.00190972		4223.98	-0.01945572
514.19	-0.013885		1044.19	-0.00262795		1574.19	-0.01447851		2104.18	-0.00156505		2634.18	-0.02250173		3164.18	0.03818477		3694.18	0.00135472		4224.18	-0.01923872
514.39	-0.01446921		1044.39	-0.00223801		1574.39	-0.01476648		2104.38	-0.00204257		2634.38	-0.02159721		3164.38	0.03856561		3694.38	0.00100256		4224.38	-0.01966677
514.59	-0.01353942		1044.59	-0.00234017		1574.59	-0.01499485		2104.58	-0.00208417		2634.58	-0.02091823		3164.58	0.0383854		3694.58	-0.00011855		4224.58	-0.01976692
514.79	-0.0134807		1044.79	-0.0028598		1574.79	-0.01410567		2104.78	-0.00211034		2634.78	-0.01965933		3164.78	0.03860527		3694.78	-0.00136488		4224.78	-0.01859051
514.99	-0.01286135		1044.99	-0.00314151		1574.99	-0.01388555		2104.98	-0.00190233		2634.98	-0.01892116		3164.98	0.03890548		3694.98	-0.00289034		4224.98	-0.01880274
515.19	-0.01269343		1045.19	-0.0029877		1575.19	-0.01379115		2105.18	-0.00178609		2635.18	-0.01837497		3165.18	0.03851455		3695.18	-0.00325901		4225.18	-0.01843662
515.39	-0.01380784		1045.39	-0.00340787		1575.39	-0.01330633		2105.38	-0.00143568		2635.38	-0.01880063		3165.38	0.03814306		3695.38	-0.00308768		4225.38	-0.01815792
515.59	-0.01366106		1045.59	-0.00296022		1575.59	-0.01269806		2105.58	-0.00187526		2635.58	-0.01792453		3165.58	0.03779091		3695.58	-0.00314009		4225.58	-0.01738368
515.79	-0.01357542		1045.79	-0.0037424		1575.79	-0.01262184		2105.78	-0.00239213		2635.78	-0.01759732		3165.78	0.03818681		3695.78	-0.0036104		4225.78	-0.01760809
515.99	-0.01349176		1045.99	-0.00340742		1575.99	-0.01268662		2105.98	-0.00246496		2635.98	-0.01852578		3165.98	0.03805534		3695.98	-0.0043226		4225.98	-0.01750437
516.19	-0.01369306		1046.19	-0.00312484		1576.19	-0.01179755		2106.18	-0.00279493		2636.18	-0.01945376		3166.18	0.03829545		3696.18	-0.0034138		4226.18	-0.01765302
516.39	-0.0141074		1046.39	-0.00365545		1576.39	-0.01159043		2106.38	-0.00243508		2636.38	-0.02002351		3166.38	0.03807814		3696.38	-0.00360858		4226.38	-0.01737712
516.59	-0.01450772		1046.59	-0.00356486		1576.59	-0.01208255		2106.58	-0.00323333		2636.58	-0.01991654		3166.58	0.03714756		3696.58	-0.00341031		4226.58	-0.01786725
516.79	-0.01491218		1046.79	-0.00289208		1576.79	-0.01240851		2106.78	-0.00209323		2636.78	-0.02137178		3166.78	0.03660029		3696.78	-0.00343541		4226.78	-0.0182933
516.99	-0.01529848		1046.99	-0.00336331		1576.99	-0.01201153		2106.98	-0.002305		2636.98	-0.02229346		3166.98	0.03591237		3696.98	-0.00361865		4226.98	-0.01906053
517.19	-0.01522266		1047.19	-0.00376013		1577.19	-0.01282944		2107.18	-0.00257045		2637.18	-0.02273352		3167.18	0.03633986		3697.18	-0.0035721		4227.18	-0.01954986
517.39	-0.01536551		1047.39	-0.00404292		1577.39	-0.01233229		2107.38	-0.00167175		2637.38	-0.02279773		3167.38	0.03668529		3697.38	-0.00362231		4227.38	-0.01978479
517.59	-0.01507395		1047.59	-0.00423506		1577.59	-0.01205839		2107.58	-0.00211761		2637.58	-0.02418813		3167.58	0.03645612		3697.58	-0.0026953		4227.58	-0.02017803
517.79	-0.01506224		1047.79	-0.00474563		1577.79	-0.01155451		2107.78	-0.00167932		2637.78	-0.02503091		3167.78	0.03677818		3697.78	-0.00228191		4227.78	-0.02124021
517.99	-0.01593148		1047.99	-0.00510733		1577.99	-0.01176705		2107.98	-0.00111572		2637.98	-0.02564726		3167.98	0.03723835		3697.98	-0.00240803		4227.98	-0.02155173
518.19	-0.01674713		1048.19	-0.00498494		1578.19	-0.01168174		2108.18	-0.00178911		2638.18	-0.02624951		3168.18	0.03760124		3698.18	-0.00259755		4228.18	-0.02180901
518.39	-0.01600652		1048.39	-0.00448725		1578.39	-0.01307324		2108.38	-0.00125515		2638.38	-0.02615142		3168.38	0.03743525		3698.38	-0.00279209		4228.38	-0.0228158
518.59	-0.0153352		1048.59	-0.00447898		1578.59	-0.01350669		2108.58	-0.00091256		2638.58	-0.02688498		3168.58	0.0370007		3698.58	-0.00266884		4228.58	-0.02241644
518.79	-0.01521641		1048.79	-0.00431574		1578.79	-0.01389467		2108.78	-0.00073127		2638.78	-0.02696961		3168.78	0.03796195		3698.78	-0.00242728		4228.78	-0.02235831
518.99	-0.01552741		1048.99	-0.00332887		1578.99	-0.01407966		2108.98	-0.00089809		2638.98	-0.02626304		3168.98	0.03836464		3698.98	-0.00162617		4228.98	-0.02296399
519.19	-0.01538924		1049.19	-0.00351868		1579.19	-0.0136763		2109.18	-0.00131361		2639.18	-0.02677752		3169.18	0.03853228		3699.18	-0.00079066		4229.18	-0.02279475
519.39	-0.01520542		1049.39	-0.00381336		1579.39	-0.01351678		2109.38	-0.00075592		2639.38	-0.02628248		3169.38	0.03864867		3699.38	-0.00043602		4229.38	-0.02349426
519.59	-0.01508586		1049.59	-0.00342348		1579.59	-0.01369354		2109.58	-0.00069058		2639.58	-0.02416905		3169.58	0.03804354		3699.58	-0.00057899		4229.58	-0.02407684
519.79	-0.01493978		1049.79	-0.00316909		1579.79	-0.01382874		2109.78	-0.00073416		2639.78	-0.02373618		3169.78	0.03745055		3699.78	-0.00042756		4229.78	-0.02402242
519.99	-0.01495666		1049.99	-0.00317463		1579.99	-0.01376206		2109.98	0.0001445		2639.98	-0.02380667		3169.98	0.03715893		3699.98	0.00007948		4229.98	-0.02405173
520.19	-0.0149887		1050.19	-0.00305094		1580.19	-0.01310614		2110.18	0.00062338		2640.18	-0.02291872		3170.18	0.03696633		3700.18	0.00127302		4230.18	-0.02396887
520.39	-0.01493736		1050.39	-0.00483699		1580.39	-0.01423667		2110.38	0.00098588		2640.38	-0.02257743		3170.38	0.03599322		3700.38	0.00070461		4230.38	-0.02404031
520.59	-0.01401483		1050.59	-0.00488345		1580.59	-0.01450004		2110.58	0.00109509		2640.58	-0.02258007		3170.58	0.03571544		3700.58	0.00034182		4230.58	-0.02375101
520.79	-0.01352941		1050.79	-0.00620134		1580.79	-0.01534142		2110.78	0.00182822		2640.78	-0.02217112		3170.78	0.0362081		3700.78	0.00016489		4230.78	-0.02373977
520.99	-0.01296382		1050.99	-0.00700102		1580.99	-0.01469739		2110.98	0.00151011		2640.98	-0.02299805		3170.98	0.03592503		3700.98	0.00002317		4230.98	-0.02376289
521.19	-0.01320039		1051.19	-0.00815971		1581.19	-0.01501525		2111.18	0.00152442		2641.18	-0.02301347		3171.18	0.03652153		3701.18	0.00006902		4231.18	-0.02432444
521.39	-0.01311903		1051.39	-0.00848325		1581.39	-0.01428077		2111.38	0.00114109		2641.38	-0.02299702		3171.38	0.03684282		3701.38	0.00035009		4231.38	-0.02401004
521.59	-0.0123596		1051.59	-0.00838469		1581.59	-0.01467495		2111.58	0.00050731		2641.58	-0.0235333		3171.58	0.0368654		3701.58	-0.00007404		4231.58	-0.02432423
521.79	-0.01217028		1051.79	-0.00842243		1581.79	-0.01501394		2111.78	0.00013402		2641.78	-0.0236843		3171.78	0.03749651		3701.78	-0.00106619		4231.78	-0.02384145
521.99	-0.0122558		1051.99	-0.00864587		1581.99	-0.01503847		2111.98	-0.00065338		2641.98	-0.02423903		3171.98	0.03686583		3701.98	-0.00205212		4231.98	-0.0236212
522.19	-0.01109229		1052.19	-0.00817185		1582.19	-0.01484777		2112.18	-0.00149487		2642.18	-0.02528767		3172.18	0.03826375		3702.18	-0.00217464		4232.18	-0.02319863
522.39	-0.01027577		1052.39	-0.00748487		1582.39	-0.01558795		2112.38	-0.0011465		2642.38	-0.02517715		3172.38	0.03780592		3702.38	-0.00275232		4232.38	-0.02363376
522.59	-0.00989413		1052.59	-0.00705003		1582.59	-0.01573951		2112.58	-0.0012263		2642.58	-0.02561524		3172.58	0.03889814		3702.58	-0.00273497		4232.58	-0.02315197
522.79	-0.0105344		1052.79	-0.00693513		1582.79	-0.01422456		2112.78	-0.0016632		2642.78	-0.02466197		3172.78	0.0393305		3702.78	-0.00288667		4232.78	-0.02323517
522.99	-0.01108716		1052.99	-0.00643137		1582.99	-0.01309355		2112.98	-0.00219848		2642.98	-0.02473319		3172.98	0.03984607		3702.98	-0.00298626		4232.98	-0.02304591
523.19	-0.01084496		1053.19	-0.00625876		1583.19	-0.01308914		2113.18	-0.00261819		2643.18	-0.02586504		3173.18	0.03945881		3703.18	-0.00306266		4233.18	-0.02355069
523.39	-0.01148654		1053.39	-0.00635416		1583.39	-0.01272231		2113.38	-0.0012325		2643.38	-0.02472744		3173.38	0.0385192		3703.38	-0.00352322		4233.38	-0.02355773
523.59	-0.01218857		1053.59	-0.00555506		1583.59	-0.01283568		2113.58	-0.00198879		2643.58	-0.0240134		3173.58	0.03801054		3703.58	-0.0026428		4233.58	-0.02327162
523.79	-0.01193768		1053.79	-0.00483621		1583.79	-0.01288222		2113.78	-0.00212575		2643.78	-0.02471885		3173.78	0.03783539		3703.78	-0.00185919		4233.78	-0.02330858
523.99	-0.01213243		1053.99	-0.00482988		1583.99	-0.01244126		2113.98	-0.00079132		2643.98	-0.02468635		3173.98	0.03796658		3703.98	-0.00155144		4233.98	-0.02384063
524.19	-0.01159102		1054.19	-0.00496051		1584.19	-0.01201194		2114.18	-0.0004198		2644.18	-0.02418294		3174.18	0.03757425		3704.18	-0.00158808		4234.18	-0.02352041
524.39	-0.01252735		1054.39	-0.00557248		1584.39	-0.01229342		2114.38	-0.00031721		2644.38	-0.02373725		3174.38	0.0370542		3704.38	-0.00175988		4234.38	-0.02305675
524.59	-0.01325077		1054.59	-0.00546095		1584.59	-0.01209073		2114.58	0.00050722		2644.58	-0.02285062		3174.58	0.03768037		3704.58	-0.00194787		4234.58	-0.02259515
524.79	-0.01460121		1054.79	-0.00622682		1584.79	-0.01179982		2114.78	0.00106872		2644.78	-0.02314565		3174.78	0.03801313		3704.78	-0.00107022		4234.78	-0.02244749
524.99	-0.01491445		1054.99	-0.00547448		1584.99	-0.01143136		2114.98	0.00085868		2644.98	-0.02423561		3174.98	0.03786869		3704.98	-0.00119946		4234.98	-0.02284503
525.19	-0.01549539		1055.19	-0.00544735		1585.19	-0.01178455		2115.18	0.00048026		2645.18	-0.0244653		3175.18	0.03748085		3705.18	-0.00088737		4235.18	-0.02235683
525.39	-0.01496411		1055.39	-0.00475117		1585.39	-0.01205272		2115.38	-0.00015678		2645.38	-0.0248787		3175.38	0.03786729		3705.38	-0.00142684		4235.38	-0.02100291
525.59	-0.01404036		1055.59	-0.00416488		1585.59	-0.01308332		2115.58	-0.00030263		2645.58	-0.02481946		3175.58	0.03762483		3705.58	-0.00222607		4235.58	-0.0214315
525.79	-0.01419628		1055.79	-0.0044685		1585.79	-0.01292762		2115.78	-0.0005794		2645.78	-0.02475027		3175.78	0.03784327		3705.78	-0.00289066		4235.78	-0.02042263
525.99	-0.01403368		1055.99	-0.00434102		1585.99	-0.01260172		2115.98	-0.00049009		2645.98	-0.02469214		3175.98	0.03754667		3705.98	-0.00319963		4235.98	-0.02021887
526.19	-0.01377112		1056.19	-0.00394676		1586.19	-0.01274198		2116.18	-0.00019543		2646.18	-0.02488075		3176.18	0.03868562		3706.18	-0.00286665		4236.18	-0.02016494
526.39	-0.01521935		1056.39	-0.00380385		1586.39	-0.01232491		2116.38	-0.00031972		2646.38	-0.02436376		3176.38	0.03755333		3706.38	-0.00340286		4236.38	-0.02044186
526.59	-0.01592644		1056.59	-0.00333635		1586.59	-0.0127557		2116.58	-0.00048064		2646.58	-0.0246536		3176.58	0.03771841		3706.58	-0.00400437		4236.58	-0.02075801
526.79	-0.01588901		1056.79	-0.00358302		1586.79	-0.01274729		2116.78	-0.00155882		2646.78	-0.02450122		3176.78	0.03707902		3706.78	-0.00396124		4236.78	-0.02073597
526.99	-0.01494074		1056.99	-0.00372111		1586.99	-0.01340778		2116.98	-0.00219231		2646.98	-0.02506967		3176.98	0.03707474		3706.98	-0.00422752		4236.98	-0.02100394
527.19	-0.01450815		1057.19	-0.00326945		1587.19	-0.01377672		2117.18	-0.00301032		2647.18	-0.02464556		3177.18	0.03646342		3707.18	-0.00375925		4237.18	-0.02117302
527.39	-0.01443172		1057.39	-0.00344942		1587.39	-0.01385037		2117.38	-0.00275741		2647.38	-0.02559055		3177.38	0.03645038		3707.38	-0.00298695		4237.38	-0.02101748
527.59	-0.01396068		1057.59	-0.00392739		1587.59	-0.01473187		2117.58	-0.00431697		2647.58	-0.0260891		3177.58	0.03598531		3707.58	-0.00162486		4237.58	-0.02165272
527.79	-0.01352205		1057.79	-0.0040025		1587.79	-0.01511719		2117.78	-0.00416521		2647.78	-0.02619049		3177.78	0.03607067		3707.78	-0.00140238		4237.78	-0.02226386
527.99	-0.01369637		1057.99	-0.00352285		1587.99	-0.01510449		2117.98	-0.00347483		2647.98	-0.02585211		3177.98	0.03577381		3707.98	-0.00015069		4237.98	-0.02259781
528.19	-0.01339187		1058.19	-0.00435456		1588.19	-0.01509509		2118.18	-0.00356825		2648.18	-0.02561294		3178.18	0.03554671		3708.18	-0.00003595		4238.18	-0.02287054
528.39	-0.01395592		1058.39	-0.00433393		1588.39	-0.01561062		2118.38	-0.00349439		2648.38	-0.02451886		3178.38	0.0361277		3708.38	0.00022146		4238.38	-0.02293583
528.59	-0.01327874		1058.59	-0.00418981		1588.59	-0.01654836		2118.58	-0.00298951		2648.58	-0.02468242		3178.58	0.03635962		3708.58	0.00019044		4238.58	-0.02281885
528.79	-0.01304438		1058.79	-0.00476023		1588.79	-0.01632128		2118.78	-0.00252723		2648.78	-0.02497542		3178.78	0.03686719		3708.78	0.00046409		4238.78	-0.02258363
528.99	-0.01150588		1058.99	-0.00498981		1588.99	-0.01680499		2118.98	-0.00238435		2648.98	-0.02478661		3178.98	0.03696223		3708.98	-0.00017914		4238.98	-0.02222134
529.19	-0.01098695		1059.19	-0.00498947		1589.19	-0.01702094		2119.18	-0.00165936		2649.18	-0.02487409		3179.18	0.03631733		3709.18	-0.00005025		4239.18	-0.02215809
529.39	-0.01029489		1059.39	-0.00510421		1589.39	-0.01665254		2119.38	-0.00052226		2649.38	-0.02508262		3179.38	0.036674		3709.38	-0.00093649		4239.38	-0.02274608
529.59	-0.01028811		1059.59	-0.00655691		1589.59	-0.01548257		2119.58	0.00016787		2649.58	-0.02460768		3179.58	0.03595		3709.58	-0.00187333		4239.58	-0.02323446
529.79	-0.0111558		1059.79	-0.00662078		1589.79	-0.01475292		2119.78	0.00014931		2649.78	-0.0242617		3179.78	0.03615715		3709.78	-0.00259173		4239.78	-0.02334236
529.99	-0.01211813		1059.99	-0.00631706		1589.99	-0.01411272		2119.98	0.00046546		2649.98	-0.02497824		3179.98	0.03566014		3709.98	-0.0034978		4239.98	-0.02398874
530.19	-0.01218341		1060.19	-0.00611759		1590.19	-0.0136706		2120.18	0.00049959		2650.18	-0.02531127		3180.18	0.03491496		3710.18	-0.00286562		4240.18	-0.02553044
530.39	-0.01314036		1060.39	-0.00540544		1590.39	-0.01352318		2120.38	-0.00005868		2650.38	-0.02539937		3180.38	0.03474096		3710.38	-0.00307406		4240.38	-0.02545387
530.59	-0.01337673		1060.59	-0.00543835		1590.59	-0.01388282		2120.58	-0.0004667		2650.58	-0.02585005		3180.58	0.03490929		3710.58	-0.00310607		4240.58	-0.02562094
530.79	-0.01250324		1060.79	-0.00563506		1590.79	-0.01406122		2120.78	-0.00103751		2650.78	-0.02430274		3180.78	0.03425822		3710.78	-0.00307324		4240.78	-0.02576706
530.99	-0.01260208		1060.99	-0.00588827		1590.99	-0.01358545		2120.98	-0.00121652		2650.98	-0.02464081		3180.98	0.03419565		3710.98	-0.00332807		4240.98	-0.02605901
531.19	-0.01383135		1061.19	-0.00553418		1591.19	-0.0131642		2121.18	-0.00151241		2651.18	-0.02396495		3181.18	0.03462097		3711.18	-0.00261113		4241.18	-0.02566227
531.39	-0.01381211		1061.39	-0.0054753		1591.39	-0.01333152		2121.38	-0.00206036		2651.38	-0.02492237		3181.38	0.03433951		3711.38	-0.00257318		4241.38	-0.02557493
531.59	-0.01432273		1061.59	-0.00545238		1591.59	-0.01427626		2121.58	-0.00251614		2651.58	-0.02385902		3181.58	0.03384413		3711.58	-0.00218086		4241.58	-0.02535621
531.79	-0.01498249		1061.79	-0.00460411		1591.79	-0.01474609		2121.78	-0.00272033		2651.78	-0.02291758		3181.78	0.03427304		3711.78	-0.00253887		4241.78	-0.02541449
531.99	-0.01507553		1061.99	-0.00486012		1591.99	-0.0150119		2121.98	-0.00218163		2651.98	-0.02255048		3181.98	0.03354091		3711.98	-0.00189113		4241.98	-0.02542528
532.19	-0.0144995		1062.19	-0.00517466		1592.19	-0.01439964		2122.18	-0.00178409		2652.18	-0.02169616		3182.18	0.03445802		3712.18	-0.00245734		4242.18	-0.02459156
532.39	-0.01392733		1062.39	-0.00566934		1592.39	-0.01521567		2122.38	-0.001293		2652.38	-0.02114184		3182.38	0.0353944		3712.38	-0.00217987		4242.38	-0.02393059
532.59	-0.01389357		1062.59	-0.00624351		1592.59	-0.01565649		2122.58	-0.00091215		2652.58	-0.02172675		3182.58	0.03605761		3712.58	-0.00242062		4242.58	-0.02295459
532.79	-0.01377489		1062.79	-0.00698793		1592.79	-0.01437285		2122.78	-0.000306		2652.78	-0.02186069		3182.78	0.03656369		3712.78	-0.00330311		4242.78	-0.02267629
532.99	-0.01349355		1062.99	-0.0071909		1592.99	-0.01440647		2122.98	-0.00006008		2652.98	-0.02333988		3182.98	0.03678401		3712.98	-0.00304866		4242.98	-0.02238184
533.19	-0.01268817		1063.19	-0.00661609		1593.19	-0.01416674		2123.18	0.00124133		2653.18	-0.02467193		3183.18	0.03638391		3713.18	-0.00264349		4243.18	-0.02287612
533.39	-0.01256824		1063.39	-0.00698865		1593.39	-0.01376696		2123.38	0.00118533		2653.38	-0.02594347		3183.38	0.03692222		3713.38	-0.00338293		4243.38	-0.02298081
533.59	-0.01245165		1063.59	-0.00715603		1593.59	-0.01354723		2123.58	0.00167558		2653.58	-0.02660343		3183.58	0.03687381		3713.58	-0.00386084		4243.58	-0.022567
533.79	-0.01281806		1063.79	-0.00614661		1593.79	-0.01488173		2123.78	0.00140647		2653.78	-0.02727876		3183.78	0.03737983		3713.78	-0.00347557		4243.78	-0.02292789
533.99	-0.0129675		1063.99	-0.00621063		1593.99	-0.01471555		2123.98	0.0016528		2653.98	-0.02893991		3183.98	0.03698386		3713.98	-0.00281487		4243.98	-0.02274029
534.19	-0.01310827		1064.19	-0.00561631		1594.19	-0.01520199		2124.18	0.00145419		2654.18	-0.02986126		3184.18	0.03709239		3714.18	-0.00159609		4244.18	-0.02256464
534.39	-0.01428432		1064.39	-0.00576759		1594.39	-0.01566749		2124.38	0.00022114		2654.38	-0.03028044		3184.38	0.03746438		3714.38	-0.00088566		4244.38	-0.02084206
534.59	-0.01418932		1064.59	-0.00568343		1594.59	-0.01574374		2124.58	-0.00027468		2654.58	-0.02990974		3184.58	0.037205		3714.58	-0.0004073		4244.58	-0.02164418
534.79	-0.01413807		1064.79	-0.00499627		1594.79	-0.01695154		2124.78	-0.00071438		2654.78	-0.02880958		3184.78	0.03627321		3714.78	-0.0006627		4244.78	-0.02252525
534.99	-0.01447914		1064.99	-0.00518467		1594.99	-0.01749925		2124.98	-0.00142965		2654.98	-0.02964909		3184.98	0.03668983		3714.98	-0.00091582		4244.98	-0.0220541
535.19	-0.01549976		1065.19	-0.00474124		1595.19	-0.01858767		2125.18	-0.0020386		2655.18	-0.02886427		3185.18	0.03668796		3715.18	-0.00107156		4245.18	-0.02197556
535.39	-0.01530774		1065.39	-0.00514085		1595.39	-0.01889965		2125.38	-0.00271446		2655.38	-0.02894176		3185.38	0.03647351		3715.38	-0.00137506		4245.38	-0.0216068
535.59	-0.01526273		1065.59	-0.00601161		1595.59	-0.0194596		2125.58	-0.00313885		2655.58	-0.02776235		3185.58	0.03637457		3715.58	-0.00146227		4245.58	-0.02082563
535.79	-0.015213		1065.79	-0.00682184		1595.79	-0.01927114		2125.78	-0.00319803		2655.78	-0.02672589		3185.78	0.03618117		3715.78	-0.00223082		4245.78	-0.02131888
535.99	-0.01488864		1065.99	-0.00822685		1595.99	-0.01799102		2125.98	-0.00264637		2655.98	-0.02584105		3185.98	0.03529324		3715.98	-0.00235959		4245.98	-0.02138489
536.19	-0.01492708		1066.19	-0.0087532		1596.19	-0.01729849		2126.18	-0.00183415		2656.18	-0.02643055		3186.18	0.03632331		3716.18	-0.00303708		4246.18	-0.02097086
536.39	-0.01531891		1066.39	-0.01074485		1596.39	-0.0178701		2126.38	-0.00164996		2656.38	-0.0267474		3186.38	0.03635493		3716.38	-0.00303724		4246.38	-0.02130206
536.59	-0.01604681		1066.59	-0.01026119		1596.59	-0.01667037		2126.58	-0.00150292		2656.58	-0.02685245		3186.58	0.03686407		3716.58	-0.004138		4246.58	-0.02089105
536.79	-0.01615133		1066.79	-0.00996036		1596.79	-0.01584196		2126.78	-0.00113694		2656.78	-0.02692417		3186.78	0.03567381		3716.78	-0.00406301		4246.78	-0.02120972
536.99	-0.01507365		1066.99	-0.01001381		1596.99	-0.01649496		2126.98	0.00052632		2656.98	-0.027697		3186.98	0.03575667		3716.98	-0.00320665		4246.98	-0.02168011
537.19	-0.01399534		1067.19	-0.00931982		1597.19	-0.01608446		2127.18	0.00168502		2657.18	-0.02770011		3187.18	0.0357908		3717.18	-0.00321189		4247.18	-0.02235199
537.39	-0.01475491		1067.39	-0.00897199		1597.39	-0.01634583		2127.38	0.00117157		2657.38	-0.02694733		3187.38	0.03552767		3717.38	-0.00378175		4247.38	-0.02315093
537.59	-0.01400179		1067.59	-0.0084866		1597.59	-0.01659709		2127.58	0.00187119		2657.58	-0.02585855		3187.58	0.03546748		3717.58	-0.00352741		4247.58	-0.02368276
537.79	-0.01396152		1067.79	-0.00796151		1597.79	-0.01721786		2127.78	0.00139591		2657.78	-0.02570177		3187.78	0.03619782		3717.78	-0.00270379		4247.78	-0.0232868
537.99	-0.01374769		1067.99	-0.0078585		1597.99	-0.01639634		2127.98	0.00096		2657.98	-0.02557726		3187.98	0.03671784		3717.98	-0.00290064		4247.98	-0.02318691
538.19	-0.01361537		1068.19	-0.00708397		1598.19	-0.01712908		2128.18	-0.00033661		2658.18	-0.02598282		3188.18	0.03681931		3718.18	-0.00307221		4248.18	-0.02365671
538.39	-0.01331247		1068.39	-0.00776148		1598.39	-0.01759188		2128.38	-0.00028196		2658.38	-0.02557134		3188.38	0.03626794		3718.38	-0.00292961		4248.38	-0.0241157
538.59	-0.01337651		1068.59	-0.00645878		1598.59	-0.01765219		2128.58	-0.00002791		2658.58	-0.02518862		3188.58	0.03584381		3718.58	-0.00319667		4248.58	-0.0251019
538.79	-0.01338715		1068.79	-0.00686244		1598.79	-0.01834616		2128.78	-0.00072444		2658.78	-0.02548232		3188.78	0.03520448		3718.78	-0.00411816		4248.78	-0.02548654
538.99	-0.01328245		1068.99	-0.00712317		1598.99	-0.0181367		2128.98	-0.00153885		2658.98	-0.02505514		3188.98	0.03549646		3718.98	-0.00427037		4248.98	-0.02514957
539.19	-0.0139272		1069.19	-0.00704564		1599.19	-0.01816997		2129.18	-0.00248265		2659.18	-0.02506842		3189.18	0.03611655		3719.18	-0.00433541		4249.18	-0.02510711
539.39	-0.01317795		1069.39	-0.00761032		1599.39	-0.01639243		2129.38	-0.00350014		2659.38	-0.02517442		3189.38	0.03600675		3719.38	-0.00401409		4249.38	-0.02466916
539.59	-0.01264945		1069.59	-0.00767402		1599.59	-0.01642357		2129.58	-0.00390949		2659.58	-0.02510611		3189.58	0.03580837		3719.58	-0.00339166		4249.58	-0.02517251
539.79	-0.01306947		1069.79	-0.00700643		1599.79	-0.0156991		2129.78	-0.00391696		2659.78	-0.02546012		3189.78	0.0357534		3719.78	-0.0030689		4249.78	-0.02569373
539.99	-0.01329815		1069.99	-0.00666868		1599.99	-0.01503946		2129.98	-0.00313534		2659.98	-0.02559459		3189.98	0.03533325		3719.98	-0.00362041		4249.98	-0.02615024
540.19	-0.01347669		1070.19	-0.00683418		1600.19	-0.01526219		2130.18	-0.00240666		2660.18	-0.02768854		3190.18	0.03607685		3720.18	-0.00373868		4250.18	-0.02599668
540.39	-0.01380529		1070.39	-0.00652003		1600.39	-0.01520853		2130.38	-0.00284166		2660.38	-0.02751628		3190.38	0.03616558		3720.38	-0.00359483		4250.38	-0.02588264
540.59	-0.0148377		1070.59	-0.00555174		1600.59	-0.0146492		2130.58	-0.00191949		2660.58	-0.02822225		3190.58	0.03599956		3720.58	-0.00362762		4250.58	-0.02528351
540.79	-0.01502397		1070.79	-0.00578436		1600.79	-0.01459152		2130.78	-0.0016744		2660.78	-0.02795521		3190.78	0.03568692		3720.78	-0.00308423		4250.78	-0.02445408
540.99	-0.01454085		1070.99	-0.00590991		1600.99	-0.01432903		2130.98	-0.00030994		2660.98	-0.02835747		3190.98	0.03678631		3720.98	-0.00230847		4250.98	-0.02399734
541.19	-0.01587134		1071.19	-0.00565222		1601.19	-0.01363597		2131.18	-0.00044721		2661.18	-0.02730016		3191.18	0.03613078		3721.18	-0.00232383		4251.18	-0.02335659
541.39	-0.01556482		1071.39	-0.00607461		1601.39	-0.01344873		2131.38	-0.00054874		2661.38	-0.02678963		3191.38	0.03540544		3721.38	-0.00207229		4251.38	-0.02373465
541.59	-0.01530477		1071.59	-0.00679318		1601.59	-0.01411884		2131.58	-0.00014706		2661.58	-0.02719072		3191.58	0.03613596		3721.58	-0.0018167		4251.58	-0.02269856
541.79	-0.01469977		1071.79	-0.0063876		1601.79	-0.01324454		2131.78	-0.00059094		2661.78	-0.02765054		3191.78	0.03611881		3721.78	-0.00186634		4251.78	-0.02112943
541.99	-0.01515487		1071.99	-0.00707895		1601.99	-0.01315503		2131.98	-0.00030518		2661.98	-0.02785962		3191.98	0.03511234		3721.98	-0.00311527		4251.98	-0.02099683
542.19	-0.01490857		1072.19	-0.0074483		1602.19	-0.01382188		2132.18	-0.00015788		2662.18	-0.0284108		3192.18	0.03301234		3722.18	-0.00330695		4252.18	-0.02080968
542.39	-0.01543008		1072.39	-0.00829081		1602.39	-0.01365387		2132.38	0.00080247		2662.38	-0.02803192		3192.38	0.03126215		3722.38	-0.00320711		4252.38	-0.02026969
542.59	-0.0157903		1072.59	-0.00826882		1602.59	-0.01319452		2132.58	0.00025421		2662.58	-0.02752769		3192.58	0.03022282		3722.58	-0.00315606		4252.58	-0.02044169
542.79	-0.01519502		1072.79	-0.0097926		1602.79	-0.01316267		2132.78	0.00049305		2662.78	-0.02810055		3192.78	0.03015531		3722.78	-0.00342703		4252.78	-0.02025128
542.99	-0.01529737		1072.99	-0.00962461		1602.99	-0.0129006		2132.98	-0.00014901		2662.98	-0.02811804		3192.98	0.03058965		3722.98	-0.00317889		4252.98	-0.02056805
543.19	-0.01553088		1073.19	-0.00941733		1603.19	-0.01305014		2133.18	-0.00064681		2663.18	-0.02867157		3193.18	0.03092854		3723.18	-0.00294219		4253.18	-0.0206368
543.39	-0.01474952		1073.39	-0.00934645		1603.39	-0.01289092		2133.38	-0.00076779		2663.38	-0.02848119		3193.38	0.03029275		3723.38	-0.00171338		4253.38	-0.02168836
543.59	-0.01454542		1073.59	-0.00837169		1603.59	-0.01343351		2133.58	-0.00067829		2663.58	-0.02829128		3193.58	0.03135498		3723.58	-0.0010677		4253.58	-0.02318993
543.79	-0.01479164		1073.79	-0.00785511		1603.79	-0.01378142		2133.78	-0.00032903		2663.78	-0.02795838		3193.78	0.03200631		3723.78	-0.00220757		4253.78	-0.023982
543.99	-0.0151285		1073.99	-0.00675734		1603.99	-0.01444793		2133.98	0.00058127		2663.98	-0.0276683		3193.98	0.0333695		3723.98	-0.00300549		4253.98	-0.02536169
544.19	-0.01528093		1074.19	-0.00647213		1604.19	-0.01456806		2134.18	0.00030733		2664.18	-0.02856528		3194.18	0.03440281		3724.18	-0.00302934		4254.18	-0.02582473
544.39	-0.01564273		1074.39	-0.00486547		1604.39	-0.01462154		2134.38	-0.00027703		2664.38	-0.0282229		3194.38	0.03551528		3724.38	-0.00345805		4254.38	-0.02697624
544.59	-0.01634453		1074.59	-0.00528738		1604.59	-0.0147774		2134.58	0.00019292		2664.58	-0.02854205		3194.58	0.0366019		3724.58	-0.00377151		4254.58	-0.02706201
544.79	-0.01655938		1074.79	-0.00529212		1604.79	-0.01483928		2134.78	0.00040874		2664.78	-0.02840665		3194.78	0.03755512		3724.78	-0.00426698		4254.78	-0.02735568
544.99	-0.01748857		1074.99	-0.0050948		1604.99	-0.01488067		2134.98	0.00080657		2664.98	-0.02816208		3194.98	0.03789088		3724.98	-0.00377078		4254.98	-0.02835068
545.19	-0.01720541		1075.19	-0.00519755		1605.19	-0.01548023		2135.18	0.00114869		2665.18	-0.02730338		3195.18	0.03724674		3725.18	-0.00501575		4255.18	-0.02818219
545.39	-0.01612676		1075.39	-0.00528404		1605.39	-0.0153719		2135.38	0.00206538		2665.38	-0.02746447		3195.38	0.03715825		3725.38	-0.00538953		4255.38	-0.02793492
545.59	-0.01651616		1075.59	-0.00537626		1605.59	-0.01527461		2135.58	0.00243456		2665.58	-0.02737443		3195.58	0.03698258		3725.58	-0.00548861		4255.58	-0.02666152
545.79	-0.01531404		1075.79	-0.00546429		1605.79	-0.01511688		2135.78	0.002291		2665.78	-0.02688045		3195.78	0.03563814		3725.78	-0.00602836		4255.78	-0.0261786
545.99	-0.01604528		1075.99	-0.00591837		1605.99	-0.01604546		2135.98	0.00293016		2665.98	-0.02726675		3195.98	0.03458105		3725.98	-0.00646453		4255.98	-0.02551964
546.19	-0.01606401		1076.19	-0.00654971		1606.19	-0.01618645		2136.18	0.00247442		2666.18	-0.02736137		3196.18	0.03397793		3726.18	-0.00543813		4256.18	-0.02533006
546.39	-0.01629295		1076.39	-0.00706722		1606.39	-0.01598123		2136.38	0.00310294		2666.38	-0.02713133		3196.38	0.03390111		3726.38	-0.00461265		4256.38	-0.02536631
546.59	-0.01572104		1076.59	-0.00764397		1606.59	-0.01567719		2136.58	0.00288156		2666.58	-0.0272904		3196.58	0.03399966		3726.58	-0.00429615		4256.58	-0.02475193
546.79	-0.01554771		1076.79	-0.00857379		1606.79	-0.01514505		2136.78	0.00291775		2666.78	-0.02758392		3196.78	0.03441026		3726.78	-0.0036046		4256.78	-0.0237393
546.99	-0.01615043		1076.99	-0.00884067		1606.99	-0.014978		2136.98	0.00171902		2666.98	-0.02748327		3196.98	0.03451863		3726.98	-0.00341502		4256.98	-0.02409942
547.19	-0.01584951		1077.19	-0.01011666		1607.19	-0.01520439		2137.18	0.00082923		2667.18	-0.02679718		3197.18	0.03406474		3727.18	-0.00192888		4257.18	-0.0236714
547.39	-0.0154044		1077.39	-0.01019901		1607.39	-0.01495119		2137.38	0.00006773		2667.38	-0.02618825		3197.38	0.03347613		3727.38	-0.00100181		4257.38	-0.02391155
547.59	-0.01578494		1077.59	-0.00974216		1607.59	-0.01413022		2137.58	-0.00097749		2667.58	-0.02601542		3197.58	0.03419326		3727.58	-0.00100679		4257.58	-0.02421215
547.79	-0.01645604		1077.79	-0.01006668		1607.79	-0.0141386		2137.78	-0.00142363		2667.78	-0.02511364		3197.78	0.03492992		3727.78	-0.0012758		4257.78	-0.02449858
547.99	-0.01693453		1077.99	-0.00898832		1607.99	-0.01399534		2137.98	-0.0020041		2667.98	-0.02498098		3197.98	0.03561685		3727.98	-0.00027051		4257.98	-0.02420636
548.19	-0.0163226		1078.19	-0.00898785		1608.19	-0.01352111		2138.18	-0.00308237		2668.18	-0.0261991		3198.18	0.03556062		3728.18	-0.00039103		4258.18	-0.0243421
548.39	-0.01626846		1078.39	-0.00859435		1608.39	-0.01361128		2138.38	-0.00358566		2668.38	-0.02600549		3198.38	0.03636694		3728.38	-0.00116332		4258.38	-0.02510401
548.59	-0.01605396		1078.59	-0.0091366		1608.59	-0.01410502		2138.58	-0.00363154		2668.58	-0.02674814		3198.58	0.03584629		3728.58	-0.00078173		4258.58	-0.0248693
548.79	-0.0159825		1078.79	-0.00868299		1608.79	-0.01428753		2138.78	-0.00305063		2668.78	-0.026902		3198.78	0.0345297		3728.78	-0.00128789		4258.78	-0.02486334
548.99	-0.01608337		1078.99	-0.00849203		1608.99	-0.01393775		2138.98	-0.00309645		2668.98	-0.02660983		3198.98	0.03398682		3728.98	-0.0016992		4258.98	-0.02427029
549.19	-0.01515039		1079.19	-0.00814018		1609.19	-0.01414698		2139.18	-0.00248044		2669.18	-0.02640137		3199.18	0.03318874		3729.18	-0.00268636		4259.18	-0.02291973
549.39	-0.01469448		1079.39	-0.00857931		1609.39	-0.01476322		2139.38	-0.00194051		2669.38	-0.02634357		3199.38	0.03206263		3729.38	-0.00291641		4259.38	-0.02183592
549.59	-0.01538992		1079.59	-0.00802117		1609.59	-0.01605507		2139.58	-0.00202274		2669.58	-0.02682173		3199.58	0.03113137		3729.58	-0.00322534		4259.58	-0.02073274
549.79	-0.01539173		1079.79	-0.00783289		1609.79	-0.01703891		2139.78	-0.00175627		2669.78	-0.02739791		3199.78	0.03072216		3729.78	-0.0042857		4259.78	-0.02046587
549.99	-0.01615029		1079.99	-0.00745551		1609.99	-0.01733264		2139.98	-0.00105889		2669.98	-0.02864611		3199.98	0.03030812		3729.98	-0.00476615		4259.98	-0.02035052
550.19	-0.01623884		1080.19	-0.0072803		1610.19	-0.01770218		2140.18	-0.00094135		2670.18	-0.02824175		3200.18	0.03056587		3730.18	-0.00454984		4260.18	-0.02062389
550.39	-0.01568942		1080.39	-0.00742372		1610.39	-0.01806179		2140.38	-0.00071836		2670.38	-0.02755844		3200.38	0.0298796		3730.38	-0.00513899		4260.38	-0.02042
550.59	-0.01613882		1080.59	-0.00712395		1610.59	-0.01833699		2140.58	-0.00143872		2670.58	-0.02763952		3200.58	0.02991616		3730.58	-0.00617243		4260.58	-0.02058856
550.79	-0.01644978		1080.79	-0.00747254		1610.79	-0.01927733		2140.78	-0.00230779		2670.78	-0.02693814		3200.78	0.0298725		3730.78	-0.00671857		4260.78	-0.0216781
550.99	-0.01631583		1080.99	-0.00780906		1610.99	-0.01907885		2140.98	-0.00208763		2670.98	-0.02663115		3200.98	0.02999388		3730.98	-0.0073807		4260.98	-0.02278782
551.19	-0.01623497		1081.19	-0.00808595		1611.19	-0.01926451		2141.18	-0.00244239		2671.18	-0.02670658		3201.18	0.02997692		3731.18	-0.00662132		4261.18	-0.02388799
551.39	-0.01650737		1081.39	-0.00722311		1611.39	-0.01883633		2141.38	-0.00227544		2671.38	-0.02622845		3201.38	0.03121872		3731.38	-0.00596266		4261.38	-0.0249535
551.59	-0.01632407		1081.59	-0.00667531		1611.59	-0.01761072		2141.58	-0.00261519		2671.58	-0.02661007		3201.58	0.03268956		3731.58	-0.00604278		4261.58	-0.02634077
551.79	-0.01628925		1081.79	-0.00648239		1611.79	-0.01768181		2141.78	-0.00237353		2671.78	-0.02631072		3201.78	0.03375538		3731.78	-0.00671775		4261.78	-0.02695007
551.99	-0.01544077		1081.99	-0.00623899		1611.99	-0.01688071		2141.98	-0.00260556		2671.98	-0.0272358		3201.98	0.03410953		3731.98	-0.00591647		4261.98	-0.02678644
552.19	-0.01480243		1082.19	-0.00670897		1612.19	-0.01585904		2142.18	-0.00251795		2672.18	-0.02768612		3202.18	0.03479681		3732.18	-0.00612388		4262.18	-0.02767225
552.39	-0.01503178		1082.39	-0.00704216		1612.39	-0.01613235		2142.38	-0.00227895		2672.38	-0.02757115		3202.38	0.03458045		3732.38	-0.00570646		4262.38	-0.02846175
552.59	-0.01413856		1082.59	-0.00724905		1612.59	-0.0157343		2142.58	-0.00191269		2672.58	-0.02863725		3202.58	0.03382206		3732.58	-0.00466014		4262.58	-0.02838526
552.79	-0.01379314		1082.79	-0.00676426		1612.79	-0.01508528		2142.78	-0.00174616		2672.78	-0.02883453		3202.78	0.03368058		3732.78	-0.0039405		4262.78	-0.02821578
552.99	-0.01398025		1082.99	-0.00770321		1612.99	-0.01555646		2142.98	-0.00257281		2672.98	-0.02918326		3202.98	0.03353244		3732.98	-0.00431824		4262.98	-0.02720953
553.19	-0.01448741		1083.19	-0.00759396		1613.19	-0.01601132		2143.18	-0.00281979		2673.18	-0.02968483		3203.18	0.03299436		3733.18	-0.00411244		4263.18	-0.02691547
553.39	-0.01416767		1083.39	-0.00809008		1613.39	-0.01646258		2143.38	-0.00260082		2673.38	-0.03060144		3203.38	0.03184486		3733.38	-0.00410405		4263.38	-0.02668769
553.59	-0.01543741		1083.59	-0.00777267		1613.59	-0.01686564		2143.58	-0.00222805		2673.58	-0.03050808		3203.58	0.03135554		3733.58	-0.00341584		4263.58	-0.02667429
553.79	-0.01532951		1083.79	-0.00801315		1613.79	-0.01598424		2143.78	-0.00220784		2673.78	-0.03109698		3203.78	0.0305287		3733.78	-0.00310594		4263.78	-0.0269714
553.99	-0.01516669		1083.99	-0.00846131		1613.99	-0.0152505		2143.98	-0.00268078		2673.98	-0.03060775		3203.98	0.02946692		3733.98	-0.00262221		4263.98	-0.02688003
554.19	-0.01545527		1084.19	-0.00799743		1614.19	-0.0154912		2144.18	-0.0038483		2674.18	-0.02951083		3204.18	0.02935377		3734.18	-0.00270158		4264.18	-0.02659684
554.39	-0.01683664		1084.39	-0.00833929		1614.39	-0.01496534		2144.38	-0.00430076		2674.38	-0.02899424		3204.38	0.0291951		3734.38	-0.00318758		4264.38	-0.02690775
554.59	-0.01785012		1084.59	-0.00745765		1614.59	-0.01517559		2144.58	-0.00497381		2674.58	-0.02827765		3204.58	0.02978901		3734.58	-0.00347366		4264.58	-0.02796711
554.79	-0.01815293		1084.79	-0.00763761		1614.79	-0.01558936		2144.78	-0.00568553		2674.78	-0.02762716		3204.78	0.02971244		3734.78	-0.00340441		4264.78	-0.02803964
554.99	-0.0183678		1084.99	-0.00753398		1614.99	-0.01431478		2144.98	-0.00536388		2674.98	-0.02715451		3204.98	0.03059715		3734.98	-0.00395464		4264.98	-0.02781453
555.19	-0.0184302		1085.19	-0.00689309		1615.19	-0.01475238		2145.18	-0.00611122		2675.18	-0.0268918		3205.18	0.03138216		3735.18	-0.00344785		4265.18	-0.02809484
555.39	-0.01829066		1085.39	-0.00663381		1615.39	-0.0139033		2145.38	-0.00566966		2675.38	-0.02608839		3205.38	0.0329209		3735.38	-0.00362715		4265.38	-0.02798518
555.59	-0.01823613		1085.59	-0.00621073		1615.59	-0.01239796		2145.58	-0.00654892		2675.58	-0.0265377		3205.58	0.03287315		3735.58	-0.00473172		4265.58	-0.02812687
555.79	-0.0181963		1085.79	-0.00696956		1615.79	-0.01252641		2145.78	-0.00611756		2675.78	-0.02607753		3205.78	0.03362631		3735.78	-0.00637746		4265.78	-0.02780478
555.99	-0.01764803		1085.99	-0.00783361		1615.99	-0.01246829		2145.98	-0.00550042		2675.98	-0.0267		3205.98	0.03453971		3735.98	-0.00607755		4265.98	-0.02706721
556.19	-0.01775897		1086.19	-0.00814432		1616.19	-0.01296973		2146.18	-0.00418396		2676.18	-0.02668887		3206.18	0.03506053		3736.18	-0.00625538		4266.18	-0.02616966
556.39	-0.01766403		1086.39	-0.00789529		1616.39	-0.01424769		2146.38	-0.00346452		2676.38	-0.027286		3206.38	0.03521087		3736.38	-0.00661252		4266.38	-0.02555696
556.59	-0.01715459		1086.59	-0.00779469		1616.59	-0.0139925		2146.58	-0.00223491		2676.58	-0.02798007		3206.58	0.03552467		3736.58	-0.00649488		4266.58	-0.02456962
556.79	-0.01765152		1086.79	-0.00830425		1616.79	-0.01532412		2146.78	-0.00264788		2676.78	-0.02832949		3206.78	0.03618484		3736.78	-0.00644334		4266.78	-0.02397043
556.99	-0.0179692		1086.99	-0.00929023		1616.99	-0.01633295		2146.98	-0.00250098		2676.98	-0.02858497		3206.98	0.03535439		3736.98	-0.00810902		4266.98	-0.02400726
557.19	-0.01725756		1087.19	-0.00885259		1617.19	-0.01668072		2147.18	-0.00159757		2677.18	-0.02939411		3207.18	0.03488723		3737.18	-0.00714175		4267.18	-0.02496198
557.39	-0.01572157		1087.39	-0.00950674		1617.39	-0.01619344		2147.38	-0.00180091		2677.38	-0.02947747		3207.38	0.03504521		3737.38	-0.00679789		4267.38	-0.02493872
557.59	-0.01537984		1087.59	-0.00975292		1617.59	-0.016351		2147.58	-0.0019808		2677.58	-0.0293217		3207.58	0.0352393		3737.58	-0.00571904		4267.58	-0.02527867
557.79	-0.01519809		1087.79	-0.01006992		1617.79	-0.01612526		2147.78	-0.00282414		2677.78	-0.02958106		3207.78	0.03449038		3737.78	-0.00504235		4267.78	-0.02545128
557.99	-0.01531486		1087.99	-0.01063544		1617.99	-0.01599274		2147.98	-0.00345321		2677.98	-0.02884969		3207.98	0.03444563		3737.98	-0.00440878		4267.98	-0.02584659
558.19	-0.01587292		1088.19	-0.01074635		1618.19	-0.01636203		2148.18	-0.00368007		2678.18	-0.0289453		3208.18	0.03461851		3738.18	-0.00436725		4268.18	-0.02651682
558.39	-0.01617053		1088.39	-0.01100984		1618.39	-0.0160073		2148.38	-0.0033281		2678.38	-0.02896695		3208.38	0.03455873		3738.38	-0.00398178		4268.38	-0.02697096
558.59	-0.01551615		1088.59	-0.01096183		1618.59	-0.01618807		2148.58	-0.00364814		2678.58	-0.02891739		3208.58	0.0342348		3738.58	-0.00375946		4268.58	-0.02715835
558.79	-0.01527553		1088.79	-0.01127135		1618.79	-0.01580019		2148.78	-0.00370533		2678.78	-0.02929767		3208.78	0.03401758		3738.78	-0.00400534		4268.78	-0.02667339
558.99	-0.01453487		1088.99	-0.01119661		1618.99	-0.01509834		2148.98	-0.0032146		2678.98	-0.02917586		3208.98	0.03416179		3738.98	-0.00436448		4268.98	-0.02651343
559.19	-0.01392045		1089.19	-0.01092013		1619.19	-0.01495189		2149.18	-0.00272009		2679.18	-0.02941517		3209.18	0.03395799		3739.18	-0.00401623		4269.18	-0.02677748
559.39	-0.01400015		1089.39	-0.01096623		1619.39	-0.01348094		2149.38	-0.00175483		2679.38	-0.0300474		3209.38	0.03404193		3739.38	-0.00473282		4269.38	-0.02663946
559.59	-0.01392635		1089.59	-0.01087007		1619.59	-0.01270177		2149.58	-0.0012836		2679.58	-0.03105855		3209.58	0.03364334		3739.58	-0.0053746		4269.58	-0.02652283
559.79	-0.01325144		1089.79	-0.01123379		1619.79	-0.01275805		2149.78	0.00052802		2679.78	-0.03158378		3209.78	0.03438889		3739.78	-0.00656303		4269.78	-0.02569552
