# Supplementary material for: Functional development of a V3/glycan-specific broadly neutralizing antibody isolated from a case of HIV superinfection
Source: eLife journal article supplement (doi:10.7554/elife.68110), 2021-07-15
Supplement: fig2-data2 [file E9.xls]

Vers 3.43 Data Simulation
Conc1	3.125E-08	3.125E-08	3.125E-08	3.125E-08	1.25E-07	1.25E-07	1.25E-07	1.25E-07
Start1	199.99	729.99	1259.98	1789.99	2319.98	2850.01	3380	3910
Stop1	559.79	1089.79	1619.78	2149.79	2679.78	3209.81	3739.8	4269.8
Time1	Data1	Sim1	Time2	Data2	Sim2	Time3	Data3	Sim3	Time4	Data4	Sim4	Time5	Data5	Sim5	Time6	Data6	Sim6	Time7	Data7	Sim7	Time8	Data8	Sim8
199.99	0.00992409		729.99	0.00067558		1259.98	0.00867237		1789.99	-0.00266115		2319.98	0.00381969		2850.01	-0.0021472		3380	0.00479352		3910	-0.00143335
200.19	0.00899782		730.19	0.00011469		1260.18	0.0080027		1790.19	-0.00305943		2320.18	0.0024946		2850.21	-0.0031141		3380.2	0.00519896		3910.2	-0.00098231
200.39	0.00838759		730.39	0.00056242		1260.38	0.00734114		1790.39	-0.00371675		2320.38	0.00184938		2850.41	-0.0041962		3380.4	0.00540678		3910.4	-0.00062399
200.59	0.00718671		730.59	0.00118973		1260.58	0.00739952		1790.59	-0.00422495		2320.58	0.00131365		2850.61	-0.00529758		3380.6	0.00501085		3910.6	0.00007906
200.79	0.00620156		730.79	0.00192371		1260.78	0.00680292		1790.79	-0.0042486		2320.78	0.00074312		2850.81	-0.006174		3380.8	0.00513403		3910.8	0.00004897
200.99	0.00650605		730.99	0.00247891		1260.98	0.00640192		1790.99	-0.00440943		2320.98	0.00016325		2851.01	-0.0065407		3381	0.00503179		3911	0.00053148
201.19	0.00578608		731.19	0.00247085		1261.18	0.00544375		1791.19	-0.00492238		2321.18	0.00005727		2851.21	-0.00723752		3381.2	0.00509802		3911.2	0.00041964
201.39	0.00506838		731.39	0.00225008		1261.38	0.00585089		1791.39	-0.00535697		2321.38	-0.00025059		2851.41	-0.00734887		3381.4	0.00535107		3911.4	0.00013165
201.59	0.00496409		731.59	0.00166425		1261.58	0.0057393		1791.59	-0.00536624		2321.58	-0.00024691		2851.61	-0.00688983		3381.6	0.00496976		3911.6	0.00023555
201.79	0.00473787		731.79	0.00111452		1261.78	0.00578658		1791.79	-0.00551232		2321.78	-0.00008607		2851.81	-0.00716102		3381.8	0.00523083		3911.8	0.00042889
201.99	0.00521551		731.99	0.001289		1261.98	0.0055877		1791.99	-0.00525213		2321.98	0.00024036		2852.01	-0.00701125		3382	0.00534428		3912	0.00119959
202.19	0.00576622		732.19	0.00041434		1262.18	0.00587927		1792.19	-0.005449		2322.18	0.00040657		2852.21	-0.00718429		3382.2	0.00555077		3912.2	0.00144819
202.39	0.00629153		732.39	-0.00015853		1262.38	0.00551222		1792.39	-0.00591982		2322.38	0.00128443		2852.41	-0.00744633		3382.4	0.0057084		3912.4	0.00195418
202.59	0.00636771		732.59	0.000217		1262.58	0.00539825		1792.59	-0.00617814		2322.58	0.00162258		2852.61	-0.00773896		3382.6	0.00655069		3912.6	0.00180021
202.79	0.00650446		732.79	0.00067615		1262.78	0.00539947		1792.79	-0.00680623		2322.78	0.00167845		2852.81	-0.00835888		3382.8	0.00598019		3912.8	0.00089973
202.99	0.00715755		732.99	0.00082176		1262.98	0.00545032		1792.99	-0.00750733		2322.98	0.00201761		2853.01	-0.00779866		3383	0.00751551		3913	0.00086707
203.19	0.00729665		733.19	0.00072166		1263.18	0.00547764		1793.19	-0.00708186		2323.18	0.00279144		2853.21	-0.00800764		3383.2	0.00783504		3913.2	0.00041479
203.39	0.00854883		733.39	0.00082406		1263.38	0.00585779		1793.39	-0.00742364		2323.38	0.00269018		2853.41	-0.00882371		3383.4	0.00733343		3913.4	-0.0007961
203.59	0.00824911		733.59	0.0004275		1263.58	0.0055059		1793.59	-0.00663357		2323.58	0.00226139		2853.61	-0.00881203		3383.6	0.00686789		3913.6	-0.00059603
203.79	0.00808868		733.79	0.00134876		1263.78	0.00649514		1793.79	-0.00728939		2323.78	0.00130436		2853.81	-0.00857025		3383.8	0.00764539		3913.8	-0.00015657
203.99	0.00835679		733.99	0.00041878		1263.98	0.00683776		1793.99	-0.0073725		2323.98	0.00109395		2854.01	-0.00891911		3384	0.00812138		3914	0.00056183
204.19	0.00997568		734.19	0.00060202		1264.18	0.00708289		1794.19	-0.00737369		2324.18	0.00143577		2854.21	-0.00965854		3384.2	0.00887209		3914.2	0.00068146
204.39	0.01080221		734.39	0.00088182		1264.38	0.00768143		1794.39	-0.00784287		2324.38	0.00207384		2854.41	-0.00983429		3384.4	0.00769692		3914.4	0.00097447
204.59	0.01086531		734.59	0.00150365		1264.58	0.00803944		1794.59	-0.00745255		2324.58	0.00238943		2854.61	-0.00939498		3384.6	0.00656102		3914.6	0.00092796
204.79	0.01184868		734.79	0.00177954		1264.78	0.00829721		1794.79	-0.00726889		2324.78	0.0018605		2854.81	-0.00933663		3384.8	0.00568592		3914.8	0.00053028
204.99	0.01277106		734.99	0.00133447		1264.98	0.0090281		1794.99	-0.00703342		2324.98	0.00117023		2855.01	-0.00916836		3385	0.00429275		3915	-0.00020733
205.19	0.01285648		735.19	0.00123645		1265.18	0.00928482		1795.19	-0.00717076		2325.18	0.00109868		2855.21	-0.00943427		3385.2	0.00342349		3915.2	-0.00115804
205.39	0.01289135		735.39	0.00090869		1265.38	0.01043026		1795.39	-0.00699484		2325.38	0.00036783		2855.41	-0.00885413		3385.4	0.00267229		3915.4	-0.00193835
205.59	0.01312619		735.59	-0.00066236		1265.58	0.01000335		1795.59	-0.00774445		2325.58	0.00071308		2855.61	-0.00844609		3385.6	0.00227236		3915.6	-0.00120165
205.79	0.0124517		735.79	-0.00072659		1265.78	0.01048329		1795.79	-0.00753408		2325.78	0.00068294		2855.81	-0.00920771		3385.8	0.0023218		3915.8	-0.0017019
205.99	0.0126106		735.99	-0.00048659		1265.98	0.01075275		1795.99	-0.00652067		2325.98	0.00133623		2856.01	-0.00948117		3386	0.00155293		3916	-0.00150661
206.19	0.01217994		736.19	-0.0010272		1266.18	0.01053793		1796.19	-0.00617565		2326.18	0.00081076		2856.21	-0.00982914		3386.2	0.00141411		3916.2	-0.00257748
206.39	0.01266712		736.39	-0.00126098		1266.38	0.00996451		1796.39	-0.00541455		2326.38	0.00136012		2856.41	-0.00913054		3386.4	0.0012464		3916.4	-0.0034697
206.59	0.01233809		736.59	-0.00129773		1266.58	0.00964975		1796.59	-0.00531015		2326.58	0.00197434		2856.61	-0.00810073		3386.6	0.00133992		3916.6	-0.00368938
206.79	0.01316406		736.79	-0.00059495		1266.78	0.00831417		1796.79	-0.0052967		2326.78	0.00194771		2856.81	-0.00794015		3386.8	0.00137223		3916.8	-0.0034732
206.99	0.01262851		736.99	-0.00125118		1266.98	0.00799298		1796.99	-0.00544132		2326.98	0.0018437		2857.01	-0.00715225		3387	0.00199567		3917	-0.00267077
207.19	0.01177824		737.19	-0.00119152		1267.18	0.0076762		1797.19	-0.0044577		2327.18	0.00154074		2857.21	-0.00784808		3387.2	0.0017374		3917.2	-0.0029141
207.39	0.01135415		737.39	-0.00080404		1267.38	0.007338		1797.39	-0.00415983		2327.38	0.00059088		2857.41	-0.00767803		3387.4	0.00261997		3917.4	-0.00356029
207.59	0.0103786		737.59	-0.0001681		1267.58	0.00727048		1797.59	-0.00428415		2327.58	0.00025622		2857.61	-0.00715414		3387.6	0.00399109		3917.6	-0.00224624
207.79	0.01019817		737.79	0.00129148		1267.78	0.0076482		1797.79	-0.00512154		2327.78	0.0001856		2857.81	-0.00680589		3387.8	0.00534182		3917.8	-0.00208368
207.99	0.01048461		737.99	0.00218212		1267.98	0.00783604		1797.99	-0.00562318		2327.98	0.00099332		2858.01	-0.00698943		3388	0.00564695		3918	-0.00080291
208.19	0.01149243		738.19	0.00281425		1268.18	0.00790423		1798.19	-0.00564701		2328.18	0.00198976		2858.21	-0.00714183		3388.2	0.00547785		3918.2	0.00033373
208.39	0.01144578		738.39	0.00330198		1268.38	0.00770988		1798.39	-0.00621633		2328.38	0.00137986		2858.41	-0.00644534		3388.4	0.00441485		3918.4	0.00115316
208.59	0.01269902		738.59	0.00420333		1268.58	0.00819454		1798.59	-0.00653042		2328.58	0.00090802		2858.61	-0.00581574		3388.6	0.00442339		3918.6	0.00111007
208.79	0.01390023		738.79	0.00466123		1268.78	0.00897953		1798.79	-0.00685472		2328.78	0.0005566		2858.81	-0.00597617		3388.8	0.00472705		3918.8	0.00134404
208.99	0.01539588		738.99	0.00455063		1268.98	0.00928035		1798.99	-0.00620775		2328.98	0.00084055		2859.01	-0.00600639		3389	0.00562907		3919	0.00046912
209.19	0.01693425		739.19	0.00457067		1269.18	0.0093023		1799.19	-0.00669539		2329.18	0.00101416		2859.21	-0.00586406		3389.2	0.00616304		3919.2	0.00063613
209.39	0.01673908		739.39	0.00347568		1269.38	0.01010945		1799.39	-0.00683848		2329.38	0.00068358		2859.41	-0.00571584		3389.4	0.00594944		3919.4	0.0002354
209.59	0.01723729		739.59	0.00199835		1269.58	0.01058312		1799.59	-0.00778105		2329.58	0.00130384		2859.61	-0.00603556		3389.6	0.00585022		3919.6	-0.00002936
209.79	0.01766113		739.79	0.00240111		1269.78	0.01179084		1799.79	-0.00678942		2329.78	0.00174806		2859.81	-0.00650883		3389.8	0.00471439		3919.8	-0.00088275
209.99	0.0189879		739.99	0.00155257		1269.98	0.01203726		1799.99	-0.00584403		2329.98	0.00291323		2860.01	-0.00573363		3390	0.00405528		3920	-0.00060217
210.19	0.01942673		740.19	0.00094926		1270.18	0.01160077		1800.19	-0.00583503		2330.18	0.00282994		2860.21	-0.00488465		3390.2	0.00404533		3920.2	-0.00064916
210.39	0.01955582		740.39	0.00013385		1270.38	0.01135409		1800.39	-0.00594492		2330.38	0.00359649		2860.41	-0.00464906		3390.4	0.00375741		3920.4	-0.00010178
210.59	0.01940099		740.59	-0.00051648		1270.58	0.01059569		1800.59	-0.00626027		2330.58	0.00409337		2860.61	-0.00451696		3390.6	0.00394003		3920.6	0.00043155
210.79	0.0197536		740.79	-0.00027832		1270.78	0.00936433		1800.79	-0.00564281		2330.78	0.00450759		2860.81	-0.00526677		3390.8	0.00379886		3920.8	-0.0002472
210.99	0.01805029		740.99	-0.00138813		1270.98	0.00910634		1800.99	-0.00641599		2330.98	0.00419374		2861.01	-0.0061413		3391	0.00381593		3921	-0.00072058
211.19	0.01789183		741.19	-0.00184975		1271.18	0.00895387		1801.19	-0.00653062		2331.18	0.00466679		2861.21	-0.00713725		3391.2	0.00373855		3921.2	-0.00131819
211.39	0.01722735		741.39	-0.00141317		1271.38	0.00928201		1801.39	-0.00646473		2331.38	0.00408584		2861.41	-0.00688648		3391.4	0.00357989		3921.4	-0.00053722
211.59	0.01714988		741.59	-0.00090226		1271.58	0.00949367		1801.59	-0.00658801		2331.58	0.00418619		2861.61	-0.00733092		3391.6	0.00408156		3921.6	0.00050979
211.79	0.017021		741.79	-0.00009078		1271.78	0.00955679		1801.79	-0.00707433		2331.78	0.00441255		2861.81	-0.00717142		3391.8	0.00298172		3921.8	0.00012201
211.99	0.01742333		741.99	0.00061069		1271.98	0.00880302		1801.99	-0.0072104		2331.98	0.0042402		2862.01	-0.00777019		3392	0.00298434		3922	0.00097415
212.19	0.01855375		742.19	0.00111106		1272.18	0.00853471		1802.19	-0.00671068		2332.18	0.00434825		2862.21	-0.00770043		3392.2	0.00277083		3922.2	0.00096485
212.39	0.01926997		742.39	0.00190971		1272.38	0.00779024		1802.39	-0.00598563		2332.38	0.00421992		2862.41	-0.00799374		3392.4	0.00276863		3922.4	0.0006376
212.59	0.02060378		742.59	0.00206949		1272.58	0.00830803		1802.59	-0.00536543		2332.58	0.00409123		2862.61	-0.00727553		3392.6	0.00444964		3922.6	0.0005418
212.79	0.02068753		742.79	0.00265402		1272.78	0.00779309		1802.79	-0.0051703		2332.78	0.00475334		2862.81	-0.00734378		3392.8	0.00552291		3922.8	0.00019399
212.99	0.02193718		742.99	0.00309165		1272.98	0.00819578		1802.99	-0.00409568		2332.98	0.00413214		2863.01	-0.00716115		3393	0.00591299		3923	-0.0003446
213.19	0.02276882		743.19	0.00297689		1273.18	0.00789051		1803.19	-0.00350035		2333.18	0.00346932		2863.21	-0.00720458		3393.2	0.00517458		3923.2	-0.0005781
213.39	0.02302869		743.39	0.00280395		1273.38	0.0083585		1803.39	-0.00384444		2333.38	0.00319748		2863.41	-0.00703018		3393.4	0.00454639		3923.4	-0.00096856
213.59	0.02367303		743.59	0.00271751		1273.58	0.00765872		1803.59	-0.0049151		2333.58	0.00376883		2863.61	-0.00634627		3393.6	0.00440632		3923.6	-0.00156524
213.79	0.02458882		743.79	0.00314622		1273.78	0.00771855		1803.79	-0.00455694		2333.78	0.0036649		2863.81	-0.00631455		3393.8	0.00390971		3923.8	-0.00093894
213.99	0.02565661		743.99	0.00295525		1273.98	0.00682723		1803.99	-0.00389643		2333.98	0.0037991		2864.01	-0.00509784		3394	0.00404794		3924	-0.00034344
214.19	0.02608612		744.19	0.00344999		1274.18	0.00670498		1804.19	-0.00379939		2334.18	0.00308003		2864.21	-0.00483274		3394.2	0.00432363		3924.2	-0.00028394
214.39	0.02607741		744.39	0.00401983		1274.38	0.00554245		1804.39	-0.00443196		2334.38	0.00279526		2864.41	-0.00464102		3394.4	0.00448454		3924.4	0.00004011
214.59	0.02614265		744.59	0.00387834		1274.58	0.00468415		1804.59	-0.00514823		2334.58	0.00349343		2864.61	-0.00471046		3394.6	0.00461873		3924.6	-0.00002741
214.79	0.02661135		744.79	0.00456999		1274.78	0.00437186		1804.79	-0.00587349		2334.78	0.00402869		2864.81	-0.0049605		3394.8	0.00416207		3924.8	-0.00071633
214.99	0.02707756		744.99	0.00370305		1274.98	0.00425973		1804.99	-0.00714326		2334.98	0.00408962		2865.01	-0.00543496		3395	0.00389302		3925	-0.00065643
215.19	0.027438		745.19	0.0030975		1275.18	0.00489711		1805.19	-0.00723797		2335.18	0.00489248		2865.21	-0.00492042		3395.2	0.00321722		3925.2	-0.00009596
215.39	0.02673982		745.39	0.00375426		1275.38	0.00578721		1805.39	-0.00768472		2335.38	0.0052625		2865.41	-0.00478599		3395.4	0.00284959		3925.4	0.00096865
215.59	0.02722163		745.59	0.00338017		1275.58	0.0060491		1805.59	-0.00851557		2335.58	0.00569362		2865.61	-0.0050261		3395.6	0.00368061		3925.6	-0.00012594
215.79	0.02651873		745.79	0.00355832		1275.78	0.00637321		1805.79	-0.0094238		2335.78	0.00601518		2865.81	-0.00529383		3395.8	0.0030669		3925.8	-0.00065797
215.99	0.02676426		745.99	0.00376789		1275.98	0.00622114		1805.99	-0.00929815		2335.98	0.00612223		2866.01	-0.00634701		3396	0.00302324		3926	-0.00138233
216.19	0.02716026		746.19	0.00397402		1276.18	0.00671618		1806.19	-0.00864101		2336.18	0.00746858		2866.21	-0.00651332		3396.2	0.00297143		3926.2	-0.00139517
216.39	0.02669457		746.39	0.00309599		1276.38	0.00669499		1806.39	-0.00816537		2336.38	0.00765651		2866.41	-0.00651165		3396.4	0.00352383		3926.4	-0.0009177
216.59	0.02651112		746.59	0.0035982		1276.58	0.00811308		1806.59	-0.0079447		2336.58	0.00718712		2866.61	-0.00597085		3396.6	0.00399774		3926.6	-0.00102456
216.79	0.02563886		746.79	0.00369464		1276.78	0.00854508		1806.79	-0.00868026		2336.78	0.00657419		2866.81	-0.00585262		3396.8	0.00334131		3926.8	-0.0015683
216.99	0.02603328		746.99	0.00376018		1276.98	0.0086874		1806.99	-0.00842017		2336.98	0.0058188		2867.01	-0.00579869		3397	0.00361175		3927	-0.00069648
217.19	0.02574004		747.19	0.00327783		1277.18	0.00808688		1807.19	-0.00887837		2337.18	0.00572905		2867.21	-0.00577579		3397.2	0.00349152		3927.2	-0.00097416
217.39	0.0250753		747.39	0.00406988		1277.38	0.00888629		1807.39	-0.00941634		2337.38	0.00576181		2867.41	-0.00562271		3397.4	0.00326455		3927.4	-0.00175834
217.59	0.02459542		747.59	0.00379104		1277.58	0.00859686		1807.59	-0.00950707		2337.58	0.005379		2867.61	-0.0050043		3397.6	0.00245941		3927.6	-0.00264186
217.79	0.02539068		747.79	0.00421122		1277.78	0.00830212		1807.79	-0.00888695		2337.78	0.00465859		2867.81	-0.00548524		3397.8	0.00141625		3927.8	-0.00230245
217.99	0.02687671		747.99	0.00374359		1277.98	0.00795077		1807.99	-0.00839858		2337.98	0.00444805		2868.01	-0.00470912		3398	0.00152144		3928	-0.00221814
218.19	0.02852186		748.19	0.00398631		1278.18	0.00793002		1808.19	-0.00847796		2338.18	0.00445284		2868.21	-0.00444488		3398.2	0.00161766		3928.2	-0.00276145
218.39	0.02888252		748.39	0.0038369		1278.38	0.00733451		1808.39	-0.00899434		2338.38	0.00407305		2868.41	-0.00442199		3398.4	0.00241621		3928.4	-0.00303427
218.59	0.03004072		748.59	0.0029661		1278.58	0.00750932		1808.59	-0.00881261		2338.58	0.00436062		2868.61	-0.00490082		3398.6	0.002541		3928.6	-0.00332825
218.79	0.03072376		748.79	0.00286134		1278.78	0.00715927		1808.79	-0.00868755		2338.78	0.00409596		2868.81	-0.00493585		3398.8	0.00268819		3928.8	-0.00418899
218.99	0.03084922		748.99	0.00233861		1278.98	0.00751252		1808.99	-0.00895805		2338.98	0.0041499		2869.01	-0.00441427		3399	0.00297608		3929	-0.00412988
219.19	0.03047194		749.19	0.00228149		1279.18	0.0076022		1809.19	-0.00952153		2339.18	0.00435279		2869.21	-0.00467144		3399.2	0.00264529		3929.2	-0.0038301
219.39	0.03023885		749.39	0.00259056		1279.38	0.00816711		1809.39	-0.01055642		2339.38	0.00470312		2869.41	-0.00530347		3399.4	0.00324333		3929.4	-0.00395328
219.59	0.0307289		749.59	0.002598		1279.58	0.00782063		1809.59	-0.01069101		2339.58	0.00453312		2869.61	-0.00572087		3399.6	0.00321723		3929.6	-0.00453101
219.79	0.03158099		749.79	0.00308135		1279.78	0.00834662		1809.79	-0.01075491		2339.78	0.00480922		2869.81	-0.00547803		3399.8	0.00329529		3929.8	-0.00429066
219.99	0.03272832		749.99	0.00336926		1279.98	0.00833876		1809.99	-0.01080392		2339.98	0.00497044		2870.01	-0.00562183		3400	0.00354914		3930	-0.00456339
220.19	0.03267099		750.19	0.00261318		1280.18	0.00885022		1810.19	-0.01073961		2340.18	0.00511036		2870.21	-0.00612313		3400.2	0.00406182		3930.2	-0.00433814
220.39	0.03296256		750.39	0.00296156		1280.38	0.00959299		1810.39	-0.01041836		2340.38	0.00366889		2870.41	-0.00665149		3400.4	0.00385872		3930.4	-0.00403435
220.59	0.0323349		750.59	0.00423422		1280.58	0.01014952		1810.59	-0.01003576		2340.58	0.00306272		2870.61	-0.00721894		3400.6	0.00321783		3930.6	-0.00412088
220.79	0.03184669		750.79	0.00427557		1280.78	0.01027009		1810.79	-0.01034868		2340.78	0.00242229		2870.81	-0.00764847		3400.8	0.00398882		3930.8	-0.00361587
220.99	0.03228579		750.99	0.00425966		1280.98	0.0115796		1810.99	-0.01021066		2340.98	0.00237105		2871.01	-0.00863105		3401	0.00432867		3931	-0.00280239
221.19	0.03283108		751.19	0.00456401		1281.18	0.01227104		1811.19	-0.00904201		2341.18	0.00239983		2871.21	-0.00888901		3401.2	0.00406616		3931.2	-0.00377902
221.39	0.03314546		751.39	0.00491267		1281.38	0.01342593		1811.39	-0.00809687		2341.38	0.00220685		2871.41	-0.0088588		3401.4	0.00347885		3931.4	-0.00388152
221.59	0.03402687		751.59	0.00394613		1281.58	0.01340366		1811.59	-0.00817056		2341.58	0.00209939		2871.61	-0.00859661		3401.6	0.00312953		3931.6	-0.0034889
221.79	0.03526563		751.79	0.0037984		1281.78	0.01377211		1811.79	-0.00768339		2341.78	0.00242939		2871.81	-0.00881252		3401.8	0.00324242		3931.8	-0.00279899
221.99	0.03605353		751.99	0.00264409		1281.98	0.01446882		1811.99	-0.00673107		2341.98	0.00258445		2872.01	-0.00917999		3402	0.00358323		3932	-0.00301285
222.19	0.03625967		752.19	0.00274804		1282.18	0.01472585		1812.19	-0.00579982		2342.18	0.002714		2872.21	-0.00910692		3402.2	0.00339389		3932.2	-0.0030011
222.39	0.03557327		752.39	0.00184232		1282.38	0.01413708		1812.39	-0.00461131		2342.38	0.00285501		2872.41	-0.00925997		3402.4	0.00368551		3932.4	-0.00284408
222.59	0.03597585		752.59	0.00166569		1282.58	0.01324914		1812.59	-0.00386461		2342.58	0.00368698		2872.61	-0.00857352		3402.6	0.00287063		3932.6	-0.00218611
222.79	0.03613506		752.79	0.00158437		1282.78	0.01244327		1812.79	-0.00372687		2342.78	0.00423336		2872.81	-0.00834096		3402.8	0.00298542		3932.8	-0.00167219
222.99	0.03629014		752.99	0.00201611		1282.98	0.01160955		1812.99	-0.00349942		2342.98	0.00489989		2873.01	-0.00731599		3403	0.00275579		3933	-0.00096185
223.19	0.03619217		753.19	0.00206019		1283.18	0.01047764		1813.19	-0.00377688		2343.18	0.00557134		2873.21	-0.00702705		3403.2	0.00198142		3933.2	-0.00126062
223.39	0.0364717		753.39	0.00207297		1283.38	0.00950594		1813.39	-0.00365564		2343.38	0.0066571		2873.41	-0.00623243		3403.4	0.00261984		3933.4	-0.00102765
223.59	0.03730046		753.59	0.00221795		1283.58	0.00833876		1813.59	-0.00423532		2343.58	0.00740189		2873.61	-0.00529829		3403.6	0.00217251		3933.6	-0.00083341
223.79	0.0380463		753.79	0.00263643		1283.78	0.008101		1813.79	-0.00538101		2343.78	0.00705843		2873.81	-0.00511139		3403.8	0.00264226		3933.8	-0.0012561
223.99	0.03810105		753.99	0.00225845		1283.98	0.00774791		1813.99	-0.0060031		2343.98	0.0068449		2874.01	-0.00533851		3404	0.00283434		3934	-0.00066952
224.19	0.03808768		754.19	0.00166074		1284.18	0.00844938		1814.19	-0.00704026		2344.18	0.00619952		2874.21	-0.00555543		3404.2	0.00246134		3934.2	-0.00124021
224.39	0.0375992		754.39	0.00199993		1284.38	0.00798834		1814.39	-0.00687282		2344.38	0.00554409		2874.41	-0.0052857		3404.4	0.00266933		3934.4	-0.00009057
224.59	0.03757853		754.59	0.0014862		1284.58	0.00721964		1814.59	-0.00796879		2344.58	0.00575274		2874.61	-0.00545976		3404.6	0.00286982		3934.6	-0.0005299
224.79	0.03820802		754.79	0.0020848		1284.78	0.00804812		1814.79	-0.00953698		2344.78	0.00559158		2874.81	-0.00553743		3404.8	0.00387734		3934.8	-0.0002963
224.99	0.03829283		754.99	0.00182657		1284.98	0.00972729		1814.99	-0.00952311		2344.98	0.00501753		2875.01	-0.00601579		3405	0.0040641		3935	0.00035749
225.19	0.03863059		755.19	0.0017116		1285.18	0.00985143		1815.19	-0.0098062		2345.18	0.00516138		2875.21	-0.0070801		3405.2	0.00435748		3935.2	0.00013539
225.39	0.03867894		755.39	0.00112109		1285.38	0.01108713		1815.39	-0.01099522		2345.38	0.00397523		2875.41	-0.00673901		3405.4	0.00526582		3935.4	0.0010787
225.59	0.0391723		755.59	0.00085833		1285.58	0.01205684		1815.59	-0.01138002		2345.58	0.00347799		2875.61	-0.00660387		3405.6	0.0056627		3935.6	0.00106767
225.79	0.03861838		755.79	0.00109966		1285.78	0.01304524		1815.79	-0.0114946		2345.78	0.00294465		2875.81	-0.00724163		3405.8	0.00642522		3935.8	0.001387
225.99	0.03843183		755.99	0.00054808		1285.98	0.01294145		1815.99	-0.01183844		2345.98	0.00344006		2876.01	-0.0079319		3406	0.0063915		3936	0.00101023
226.19	0.03824831		756.19	0.00044977		1286.18	0.01279683		1816.19	-0.01152808		2346.18	0.00401611		2876.21	-0.00755845		3406.2	0.00645888		3936.2	0.00169323
226.39	0.03796333		756.39	0.00040784		1286.38	0.01179898		1816.39	-0.01113723		2346.38	0.00513694		2876.41	-0.00758046		3406.4	0.00675198		3936.4	0.00175912
226.59	0.03808309		756.59	-0.00019306		1286.58	0.01160079		1816.59	-0.01033074		2346.58	0.00491738		2876.61	-0.00801669		3406.6	0.00664158		3936.6	0.00162635
226.79	0.03865636		756.79	-0.0001216		1286.78	0.01219893		1816.79	-0.00971794		2346.78	0.00525233		2876.81	-0.00869583		3406.8	0.00695741		3936.8	0.00122677
226.99	0.03867617		756.99	0.00119116		1286.98	0.0116489		1816.99	-0.00906737		2346.98	0.00599429		2877.01	-0.00841637		3407	0.00648157		3937	0.00059055
227.19	0.03913388		757.19	0.00062077		1287.18	0.0118711		1817.19	-0.0094998		2347.18	0.00591842		2877.21	-0.00706543		3407.2	0.00528448		3937.2	-0.00052767
227.39	0.03932829		757.39	0.00101418		1287.38	0.0118147		1817.39	-0.00915507		2347.38	0.00541832		2877.41	-0.00681443		3407.4	0.00540157		3937.4	-0.00084427
227.59	0.03914896		757.59	0.00117371		1287.58	0.01172668		1817.59	-0.0089152		2347.58	0.00481761		2877.61	-0.00594557		3407.6	0.00538831		3937.6	-0.00120552
227.79	0.03974201		757.79	0.0020267		1287.78	0.0119994		1817.79	-0.00886019		2347.78	0.0040185		2877.81	-0.00578621		3407.8	0.00546805		3937.8	-0.00194081
227.99	0.04076776		757.99	0.00213834		1287.98	0.01255068		1817.99	-0.00860198		2347.98	0.00420847		2878.01	-0.00423812		3408	0.00562397		3938	-0.00214182
228.19	0.04156358		758.19	0.00258801		1288.18	0.0125922		1818.19	-0.00850484		2348.18	0.00375503		2878.21	-0.0027861		3408.2	0.00577875		3938.2	-0.00189524
228.39	0.04131764		758.39	0.00321948		1288.38	0.01195663		1818.39	-0.00829544		2348.38	0.00381227		2878.41	-0.00197189		3408.4	0.00571926		3938.4	-0.00168922
228.59	0.04251647		758.59	0.00379804		1288.58	0.01158762		1818.59	-0.00911277		2348.58	0.00399045		2878.61	-0.00239071		3408.6	0.00617522		3938.6	-0.00248236
228.79	0.043604		758.79	0.00458613		1288.78	0.01229023		1818.79	-0.0092928		2348.78	0.004016		2878.81	-0.00350936		3408.8	0.00651718		3938.8	-0.00183491
228.99	0.04412686		758.99	0.00394688		1288.98	0.01307612		1818.99	-0.00854294		2348.98	0.003872		2879.01	-0.00370194		3409	0.00646237		3939	-0.00173034
229.19	0.04545105		759.19	0.00372651		1289.18	0.01354669		1819.19	-0.00890362		2349.18	0.00419037		2879.21	-0.00476644		3409.2	0.00633395		3939.2	-0.00159773
229.39	0.04682448		759.39	0.0034215		1289.38	0.01445515		1819.39	-0.00924811		2349.38	0.00338776		2879.41	-0.00369376		3409.4	0.00642314		3939.4	-0.00095162
229.59	0.04744772		759.59	0.00354024		1289.58	0.01483807		1819.59	-0.00891232		2349.58	0.00341338		2879.61	-0.00397805		3409.6	0.00591428		3939.6	-0.00105683
229.79	0.04787232		759.79	0.00337494		1289.78	0.01482153		1819.79	-0.00852252		2349.78	0.00394165		2879.81	-0.00527688		3409.8	0.0055377		3939.8	-0.00104438
229.99	0.0485791		759.99	0.00233929		1289.98	0.01500754		1819.99	-0.00815574		2349.98	0.0042362		2880.01	-0.00547278		3410	0.00471008		3940	-0.00114696
230.19	0.04923528		760.19	0.00186884		1290.18	0.01564338		1820.19	-0.00787779		2350.18	0.00404656		2880.21	-0.0054415		3410.2	0.00470118		3940.2	-0.00111608
230.39	0.04882489		760.39	0.00214078		1290.38	0.01562936		1820.39	-0.00788422		2350.38	0.0038552		2880.41	-0.00608958		3410.4	0.0046712		3940.4	-0.0011977
230.59	0.04883142		760.59	0.00176766		1290.58	0.01635399		1820.59	-0.00736417		2350.58	0.00442358		2880.61	-0.00674839		3410.6	0.0032187		3940.6	-0.00193393
230.79	0.04934044		760.79	0.0021104		1290.78	0.0169944		1820.79	-0.00773095		2350.78	0.00520601		2880.81	-0.00706942		3410.8	0.00299736		3940.8	-0.00209666
230.99	0.04909488		760.99	0.00239464		1290.98	0.01584937		1820.99	-0.00762033		2350.98	0.00543708		2881.01	-0.00689635		3411	0.00235234		3941	-0.00209045
231.19	0.04859672		761.19	0.0016363		1291.18	0.01550374		1821.19	-0.00648181		2351.18	0.00504424		2881.21	-0.00551448		3411.2	0.00267503		3941.2	-0.00238322
231.39	0.04835648		761.39	0.00208031		1291.38	0.01454862		1821.39	-0.0061547		2351.38	0.00496139		2881.41	-0.00626759		3411.4	0.00407647		3941.4	-0.00272637
231.59	0.04834743		761.59	0.00237187		1291.58	0.01370397		1821.59	-0.00560432		2351.58	0.00580829		2881.61	-0.00639323		3411.6	0.00454086		3941.6	-0.00306784
231.79	0.04886944		761.79	0.00246376		1291.78	0.01322663		1821.79	-0.00581148		2351.78	0.0058899		2881.81	-0.0061694		3411.8	0.0046889		3941.8	-0.00395576
231.99	0.04860314		761.99	0.00236308		1291.98	0.01281952		1821.99	-0.0054817		2351.98	0.00604202		2882.01	-0.0050279		3412	0.00604397		3942	-0.00358281
232.19	0.0489997		762.19	0.00272953		1292.18	0.0117759		1822.19	-0.00535529		2352.18	0.00571499		2882.21	-0.00427351		3412.2	0.00698353		3942.2	-0.00323957
232.39	0.04836657		762.39	0.00183715		1292.38	0.01031915		1822.39	-0.0059841		2352.38	0.00577525		2882.41	-0.00400944		3412.4	0.00778144		3942.4	-0.00344313
232.59	0.0483949		762.59	0.00064711		1292.58	0.00920769		1822.59	-0.00668836		2352.58	0.0050504		2882.61	-0.0048078		3412.6	0.00917399		3942.6	-0.0025423
232.79	0.04911897		762.79	0.00000562		1292.78	0.00871111		1822.79	-0.00736516		2352.78	0.00438674		2882.81	-0.00495132		3412.8	0.0091171		3942.8	-0.00208088
232.99	0.04953948		762.99	0.0002717		1292.98	0.00793511		1822.99	-0.00759552		2352.98	0.00462357		2883.01	-0.00397422		3413	0.00940404		3943	-0.00172078
233.19	0.05015592		763.19	0.00112529		1293.18	0.00715896		1823.19	-0.007099		2353.18	0.00486027		2883.21	-0.00412338		3413.2	0.00931072		3943.2	-0.00153226
233.39	0.05036644		763.39	0.0009444		1293.38	0.00777444		1823.39	-0.00724976		2353.38	0.00453482		2883.41	-0.00415146		3413.4	0.00911733		3943.4	-0.00193996
233.59	0.05036841		763.59	0.00090309		1293.58	0.00728957		1823.59	-0.00714382		2353.58	0.00420884		2883.61	-0.00445576		3413.6	0.00817923		3943.6	-0.00093971
233.79	0.0509171		763.79	0.00154751		1293.78	0.00702899		1823.79	-0.00640524		2353.78	0.00414664		2883.81	-0.00498664		3413.8	0.00780813		3943.8	-0.0013295
233.99	0.05107563		763.99	0.00160149		1293.98	0.00856612		1823.99	-0.00721072		2353.98	0.00297312		2884.01	-0.0042143		3414	0.00775252		3944	-0.00107954
234.19	0.05121382		764.19	0.00190256		1294.18	0.0093472		1824.19	-0.00780549		2354.18	0.00363225		2884.21	-0.0036924		3414.2	0.00711355		3944.2	-0.00155062
234.39	0.05040059		764.39	0.00268855		1294.38	0.0098254		1824.39	-0.00851388		2354.38	0.00401358		2884.41	-0.0036779		3414.4	0.00590243		3944.4	-0.00143868
234.59	0.05030483		764.59	0.00340979		1294.58	0.01141444		1824.59	-0.00839618		2354.58	0.00464891		2884.61	-0.00367233		3414.6	0.00443862		3944.6	-0.00189407
234.79	0.05044198		764.79	0.00395501		1294.78	0.01132708		1824.79	-0.00875561		2354.78	0.00447014		2884.81	-0.00444624		3414.8	0.00418219		3944.8	-0.00162322
234.99	0.05003974		764.99	0.00411383		1294.98	0.01161962		1824.99	-0.00832899		2354.98	0.00499833		2885.01	-0.0047842		3415	0.0034465		3945	-0.00189465
235.19	0.04968817		765.19	0.00332362		1295.18	0.01269155		1825.19	-0.0079649		2355.18	0.0057395		2885.21	-0.00462203		3415.2	0.00331789		3945.2	-0.00270679
235.39	0.04973557		765.39	0.00246138		1295.38	0.01285879		1825.39	-0.00951912		2355.38	0.00537592		2885.41	-0.00611297		3415.4	0.00232821		3945.4	-0.00372611
235.59	0.04975133		765.59	0.00267127		1295.58	0.01321511		1825.59	-0.00998329		2355.58	0.00578957		2885.61	-0.00599654		3415.6	0.00075162		3945.6	-0.00484388
235.79	0.04968616		765.79	0.00280939		1295.78	0.01318148		1825.79	-0.01002788		2355.78	0.00549833		2885.81	-0.00601216		3415.8	0.00064018		3945.8	-0.0055306
235.99	0.04974279		765.99	0.0034844		1295.98	0.01342649		1825.99	-0.00953281		2355.98	0.00539126		2886.01	-0.00513313		3416	0.00088027		3946	-0.00587184
236.19	0.05047216		766.19	0.00342882		1296.18	0.01312569		1826.19	-0.01017301		2356.18	0.00511053		2886.21	-0.00477598		3416.2	0.00121822		3946.2	-0.00604666
236.39	0.05051974		766.39	0.00266593		1296.38	0.01230008		1826.39	-0.01080375		2356.38	0.0052299		2886.41	-0.0046033		3416.4	0.00149881		3946.4	-0.00579434
236.59	0.0511298		766.59	0.00209036		1296.58	0.01138556		1826.59	-0.01085167		2356.58	0.0049208		2886.61	-0.00498551		3416.6	0.00117165		3946.6	-0.00560477
236.79	0.05221025		766.79	0.0032706		1296.78	0.01108946		1826.79	-0.01060688		2356.78	0.00468155		2886.81	-0.00410414		3416.8	0.00191216		3946.8	-0.00524417
236.99	0.05323755		766.99	0.00428698		1296.98	0.010504		1826.99	-0.00953455		2356.98	0.00497668		2887.01	-0.00436183		3417	0.00345071		3947	-0.00510541
237.19	0.05296462		767.19	0.00506744		1297.18	0.0108488		1827.19	-0.00913079		2357.18	0.0050574		2887.21	-0.00491042		3417.2	0.00390183		3947.2	-0.00475525
237.39	0.0537848		767.39	0.00477259		1297.38	0.01062944		1827.39	-0.01024428		2357.38	0.00545076		2887.41	-0.00544527		3417.4	0.00457876		3947.4	-0.00395096
237.59	0.05502705		767.59	0.00546009		1297.58	0.00971717		1827.59	-0.01067934		2357.58	0.00604759		2887.61	-0.00498413		3417.6	0.00504836		3947.6	-0.00245057
237.79	0.05631961		767.79	0.00651072		1297.78	0.00985416		1827.79	-0.01020919		2357.78	0.00597057		2887.81	-0.00535868		3417.8	0.00590114		3947.8	-0.00242082
237.99	0.05684513		767.99	0.00576271		1297.98	0.01101177		1827.99	-0.01131933		2357.98	0.0056446		2888.01	-0.00477598		3418	0.00589899		3948	-0.00157527
238.19	0.0583231		768.19	0.00547184		1298.18	0.01097414		1828.19	-0.01130431		2358.18	0.0063122		2888.21	-0.00445181		3418.2	0.00628925		3948.2	-0.00081852
238.39	0.05892403		768.39	0.00542276		1298.38	0.01133515		1828.39	-0.01174752		2358.38	0.00584097		2888.41	-0.00445343		3418.4	0.00653687		3948.4	0.00065554
238.59	0.05950397		768.59	0.00478185		1298.58	0.01179417		1828.59	-0.01205596		2358.58	0.0061104		2888.61	-0.0045316		3418.6	0.00681169		3948.6	0.00081148
238.79	0.06014623		768.79	0.00399138		1298.78	0.01170075		1828.79	-0.01227595		2358.78	0.00652744		2888.81	-0.00461013		3418.8	0.0062916		3948.8	0.00094639
238.99	0.05995284		768.99	0.0018738		1298.98	0.01258662		1828.99	-0.01202073		2358.98	0.00689132		2889.01	-0.0047793		3419	0.005894		3949	0.00104843
239.19	0.05997759		769.19	0.0005339		1299.18	0.01211151		1829.19	-0.01235092		2359.18	0.0072068		2889.21	-0.00424751		3419.2	0.00559315		3949.2	0.00058484
239.39	0.0597142		769.39	0.00094068		1299.38	0.01222839		1829.39	-0.01301402		2359.38	0.00667564		2889.41	-0.00478616		3419.4	0.00497845		3949.4	0.00093788
239.59	0.05973774		769.59	0.00108718		1299.58	0.01317894		1829.59	-0.01299845		2359.58	0.00717925		2889.61	-0.00446231		3419.6	0.00451351		3949.6	0.00074343
239.79	0.05944964		769.79	0.00167794		1299.78	0.01294281		1829.79	-0.01268459		2359.78	0.00639641		2889.81	-0.00491996		3419.8	0.00486623		3949.8	0.0001497
239.99	0.05968553		769.99	0.002237		1299.98	0.0134782		1829.99	-0.01207187		2359.98	0.00706195		2890.01	-0.00385548		3420	0.00449631		3950	0.00036932
240.19	0.06058812		770.19	0.00245751		1300.18	0.01349181		1830.19	-0.0118078		2360.18	0.00720902		2890.21	-0.00451385		3420.2	0.00383195		3950.2	0.00074214
240.39	0.06041858		770.39	0.00243984		1300.38	0.01311937		1830.39	-0.01112366		2360.38	0.00784344		2890.41	-0.00445002		3420.4	0.00305227		3950.4	0.00008242
240.59	0.06048027		770.59	0.00204168		1300.58	0.01315663		1830.59	-0.01023206		2360.58	0.00723249		2890.61	-0.00483516		3420.6	0.00272944		3950.6	0.00020387
240.79	0.0607326		770.79	0.00288922		1300.78	0.01380896		1830.79	-0.00994519		2360.78	0.00594563		2890.81	-0.00488861		3420.8	0.00312584		3950.8	0.00005177
240.99	0.0606924		770.99	0.00348133		1300.98	0.01393866		1830.99	-0.00963427		2360.98	0.00543966		2891.01	-0.00555269		3421	0.00306335		3951	-0.00007635
241.19	0.05972802		771.19	0.00383416		1301.18	0.01415977		1831.19	-0.00977868		2361.18	0.0057741		2891.21	-0.00590632		3421.2	0.00228494		3951.2	-0.00031865
241.39	0.06078342		771.39	0.00420276		1301.38	0.01374605		1831.39	-0.00932744		2361.38	0.00627807		2891.41	-0.00646377		3421.4	0.0024587		3951.4	-0.00055999
241.59	0.06154222		771.59	0.00477242		1301.58	0.01335647		1831.59	-0.00823127		2361.58	0.00567889		2891.61	-0.00667077		3421.6	0.00231634		3951.6	-0.00129349
241.79	0.06092043		771.79	0.00530629		1301.78	0.01314577		1831.79	-0.00747955		2361.78	0.00481319		2891.81	-0.00719283		3421.8	0.00232502		3951.8	-0.00211273
241.99	0.0612808		771.99	0.00489925		1301.98	0.0131264		1831.99	-0.00747721		2361.98	0.00492236		2892.01	-0.00654746		3422	0.00279789		3952	-0.00192295
242.19	0.06217111		772.19	0.00508843		1302.18	0.01294531		1832.19	-0.00676236		2362.18	0.00502719		2892.21	-0.00622271		3422.2	0.00311611		3952.2	-0.00229512
242.39	0.06176783		772.39	0.00465932		1302.38	0.01253853		1832.39	-0.00632974		2362.38	0.00508413		2892.41	-0.00650015		3422.4	0.00300964		3952.4	-0.00200031
242.59	0.06177917		772.59	0.00486662		1302.58	0.01158066		1832.59	-0.00615609		2362.58	0.0056649		2892.61	-0.00590802		3422.6	0.00314035		3952.6	-0.00367342
242.79	0.06232839		772.79	0.004821		1302.78	0.01120359		1832.79	-0.00555202		2362.78	0.00578475		2892.81	-0.00528367		3422.8	0.00355182		3952.8	-0.00356054
242.99	0.06213859		772.99	0.00490834		1302.98	0.01058341		1832.99	-0.00609776		2362.98	0.00660977		2893.01	-0.00484363		3423	0.00408076		3953	-0.0029614
243.19	0.06263425		773.19	0.00528402		1303.18	0.00992425		1833.19	-0.00672189		2363.18	0.00661001		2893.21	-0.00311072		3423.2	0.00483983		3953.2	-0.00279931
243.39	0.06245246		773.39	0.00612256		1303.38	0.01010719		1833.39	-0.00750238		2363.38	0.00665076		2893.41	-0.00271021		3423.4	0.0053844		3953.4	-0.00178022
243.59	0.06268828		773.59	0.0060601		1303.58	0.01012327		1833.59	-0.00804562		2363.58	0.00696445		2893.61	-0.00247761		3423.6	0.00616483		3953.6	-0.00215737
243.79	0.06348076		773.79	0.00733087		1303.78	0.00952177		1833.79	-0.0085508		2363.78	0.00756281		2893.81	-0.00260895		3423.8	0.00671911		3953.8	-0.00228719
243.99	0.06423251		773.99	0.00841916		1303.98	0.01037147		1833.99	-0.00857991		2363.98	0.00894291		2894.01	-0.00249381		3424	0.00674865		3954	-0.00122886
244.19	0.06507401		774.19	0.00852481		1304.18	0.01087382		1834.19	-0.00901894		2364.18	0.00981238		2894.21	-0.00310219		3424.2	0.00690671		3954.2	-0.0012374
244.39	0.06488461		774.39	0.00756107		1304.38	0.011669		1834.39	-0.0101308		2364.38	0.01030227		2894.41	-0.00246351		3424.4	0.00678403		3954.4	-0.00123642
244.59	0.06565226		774.59	0.00682668		1304.58	0.01193238		1834.59	-0.01023761		2364.58	0.00973116		2894.61	-0.00323381		3424.6	0.00665732		3954.6	-0.00133432
244.79	0.06560086		774.79	0.00625947		1304.78	0.01191217		1834.79	-0.01078475		2364.78	0.00900924		2894.81	-0.00282223		3424.8	0.00650031		3954.8	-0.00100082
244.99	0.06644126		774.99	0.00609255		1304.98	0.01312951		1834.99	-0.01050778		2364.98	0.00875707		2895.01	-0.00258804		3425	0.00583534		3955	-0.0002803
245.19	0.06642445		775.19	0.00516373		1305.18	0.0132131		1835.19	-0.01027906		2365.18	0.00942932		2895.21	-0.00313741		3425.2	0.00492828		3955.2	-0.00123016
245.39	0.06698653		775.39	0.00552988		1305.38	0.01343276		1835.39	-0.01013774		2365.38	0.0100563		2895.41	-0.00413162		3425.4	0.00509723		3955.4	-0.00083057
245.59	0.06696418		775.59	0.00558953		1305.58	0.01240116		1835.59	-0.01038606		2365.58	0.00950385		2895.61	-0.0043896		3425.6	0.00400392		3955.6	-0.00209172
245.79	0.06636252		775.79	0.00581474		1305.78	0.01313105		1835.79	-0.01089057		2365.78	0.00934445		2895.81	-0.00470915		3425.8	0.00391998		3955.8	-0.00143524
245.99	0.06680289		775.99	0.00585225		1305.98	0.0136084		1835.99	-0.01044782		2365.98	0.00894595		2896.01	-0.00445939		3426	0.00325241		3956	-0.00050978
246.19	0.06636621		776.19	0.00545556		1306.18	0.01400286		1836.19	-0.01013944		2366.18	0.0090935		2896.21	-0.00488491		3426.2	0.00203931		3956.2	-0.00106758
246.39	0.06631583		776.39	0.00539158		1306.38	0.01379459		1836.39	-0.00988269		2366.38	0.00864019		2896.41	-0.00558558		3426.4	0.00102563		3956.4	-0.00129283
246.59	0.06667173		776.59	0.00623879		1306.58	0.0139183		1836.59	-0.01028039		2366.58	0.00928292		2896.61	-0.00537755		3426.6	0.00101797		3956.6	-0.00242295
246.79	0.06720899		776.79	0.0060463		1306.78	0.01423676		1836.79	-0.00999185		2366.78	0.0087176		2896.81	-0.00550647		3426.8	0.000853		3956.8	-0.00162202
246.99	0.06697864		776.99	0.00627939		1306.98	0.01421703		1836.99	-0.01012828		2366.98	0.00880079		2897.01	-0.00648743		3427	0.00048282		3957	-0.00093061
247.19	0.06750712		777.19	0.00612771		1307.18	0.01372454		1837.19	-0.0094818		2367.18	0.00759316		2897.21	-0.00614222		3427.2	0.00050972		3957.2	-0.00045516
247.39	0.06787311		777.39	0.00565923		1307.38	0.01396417		1837.39	-0.00920861		2367.38	0.00821978		2897.41	-0.00734101		3427.4	0.00126984		3957.4	-0.00081936
247.59	0.06818216		777.59	0.00506622		1307.58	0.01467062		1837.59	-0.00922972		2367.58	0.00847137		2897.61	-0.0079655		3427.6	0.00180249		3957.6	-0.00180732
247.79	0.06928031		777.79	0.00536387		1307.78	0.01528351		1837.79	-0.00916736		2367.78	0.00902566		2897.81	-0.00820287		3427.8	0.00201222		3957.8	-0.00266568
247.99	0.06939078		777.99	0.00563383		1307.98	0.01582806		1837.99	-0.00916093		2367.98	0.00925112		2898.01	-0.00849092		3428	0.00264863		3958	-0.0024876
248.19	0.07043654		778.19	0.00560736		1308.18	0.01618008		1838.19	-0.00952037		2368.18	0.01008143		2898.21	-0.0078883		3428.2	0.00235154		3958.2	-0.0028046
248.39	0.07101166		778.39	0.00506596		1308.38	0.01590301		1838.39	-0.00935706		2368.38	0.00951531		2898.41	-0.00694776		3428.4	0.00318592		3958.4	-0.00252787
248.59	0.07173576		778.59	0.00518259		1308.58	0.01508816		1838.59	-0.0102269		2368.58	0.0086018		2898.61	-0.00619324		3428.6	0.00396012		3958.6	-0.00220686
248.79	0.07249187		778.79	0.00541673		1308.78	0.01472608		1838.79	-0.01066283		2368.78	0.00762332		2898.81	-0.00521563		3428.8	0.0039018		3958.8	-0.00207039
248.99	0.07351952		778.99	0.00562685		1308.98	0.01471805		1838.99	-0.01029419		2368.98	0.00709164		2899.01	-0.00529768		3429	0.00342504		3959	-0.00186596
249.19	0.07288818		779.19	0.00556162		1309.18	0.01372325		1839.19	-0.01073241		2369.18	0.00652232		2899.21	-0.00468468		3429.2	0.00395533		3959.2	-0.00221531
249.39	0.07281894		779.39	0.00542705		1309.38	0.01324493		1839.39	-0.01067795		2369.38	0.0062463		2899.41	-0.0042819		3429.4	0.00458739		3959.4	-0.00134041
249.59	0.07314582		779.59	0.00401162		1309.58	0.01310576		1839.59	-0.0110213		2369.58	0.0050895		2899.61	-0.00417898		3429.6	0.00424161		3959.6	-0.00213012
249.79	0.07252399		779.79	0.00438464		1309.78	0.01335327		1839.79	-0.0104955		2369.78	0.00451571		2899.81	-0.00372091		3429.8	0.00467827		3959.8	-0.0003612
249.99	0.07232581		779.99	0.00475453		1309.98	0.01333474		1839.99	-0.00951007		2369.98	0.00452905		2900.01	-0.00373865		3430	0.00417534		3960	-0.00051
250.19	0.07197386		780.19	0.00408693		1310.18	0.01349316		1840.19	-0.0100282		2370.18	0.00524849		2900.21	-0.00370483		3430.2	0.00415397		3960.2	-0.00047302
250.39	0.07206201		780.39	0.00395766		1310.38	0.01324975		1840.39	-0.01074392		2370.38	0.0044321		2900.41	-0.00408922		3430.4	0.00316777		3960.4	-0.00075674
250.59	0.0717892		780.59	0.00349354		1310.58	0.01304151		1840.59	-0.0106447		2370.58	0.00485433		2900.61	-0.00460782		3430.6	0.00358045		3960.6	-0.0009898
250.79	0.07201097		780.79	0.00283141		1310.78	0.0125511		1840.79	-0.00995997		2370.78	0.00399667		2900.81	-0.005449		3430.8	0.00278175		3960.8	0.0005767
250.99	0.07157274		780.99	0.00206728		1310.98	0.01244249		1840.99	-0.00966516		2370.98	0.00403928		2901.01	-0.00673931		3431	0.0025908		3961	-0.00004269
251.19	0.07120551		781.19	0.00162121		1311.18	0.01222777		1841.19	-0.01027067		2371.18	0.00442991		2901.21	-0.00683379		3431.2	0.00224931		3961.2	-0.00069153
251.39	0.07136027		781.39	0.00110189		1311.38	0.01268447		1841.39	-0.01014002		2371.38	0.00517474		2901.41	-0.00787902		3431.4	0.00264701		3961.4	-0.00216506
251.59	0.07134551		781.59	-0.00045419		1311.58	0.01282124		1841.59	-0.01062479		2371.58	0.00594295		2901.61	-0.00774974		3431.6	0.00229639		3961.6	-0.00325199
251.79	0.07229082		781.79	0.00077406		1311.78	0.01269512		1841.79	-0.01056619		2371.78	0.00634933		2901.81	-0.00757571		3431.8	0.00225738		3961.8	-0.00359723
251.99	0.07274181		781.99	0.00169072		1311.98	0.01222389		1841.99	-0.0106191		2371.98	0.00680329		2902.01	-0.00807591		3432	0.00298089		3962	-0.00334318
252.19	0.07349566		782.19	0.00266985		1312.18	0.01213917		1842.19	-0.01141029		2372.18	0.00742741		2902.21	-0.00751102		3432.2	0.00258839		3962.2	-0.00393664
252.39	0.07352201		782.39	0.00282253		1312.38	0.01224067		1842.39	-0.01191824		2372.38	0.00656156		2902.41	-0.00675379		3432.4	0.00421232		3962.4	-0.00398958
252.59	0.07375839		782.59	0.00358517		1312.58	0.01219575		1842.59	-0.01326541		2372.58	0.00623925		2902.61	-0.00625981		3432.6	0.00465254		3962.6	-0.00423199
252.79	0.07346629		782.79	0.0037216		1312.78	0.01198467		1842.79	-0.01219413		2372.78	0.0060384		2902.81	-0.00657016		3432.8	0.00542771		3962.8	-0.00498107
252.99	0.07321242		782.99	0.00423857		1312.98	0.01203184		1842.99	-0.01207364		2372.98	0.00537138		2903.01	-0.0063321		3433	0.00635937		3963	-0.00554255
253.19	0.07378524		783.19	0.00360831		1313.18	0.01212373		1843.19	-0.01233164		2373.18	0.00459404		2903.21	-0.00544342		3433.2	0.00705179		3963.2	-0.00570161
253.39	0.07400025		783.39	0.00415141		1313.38	0.01248739		1843.39	-0.01234665		2373.38	0.00521929		2903.41	-0.00570153		3433.4	0.00665519		3963.4	-0.00584905
253.59	0.0736602		783.59	0.00422316		1313.58	0.01342394		1843.59	-0.0118947		2373.58	0.00521266		2903.61	-0.00574599		3433.6	0.0067904		3963.6	-0.00530996
253.79	0.07218591		783.79	0.00541363		1313.78	0.01285333		1843.79	-0.01155992		2373.78	0.00628332		2903.81	-0.00434995		3433.8	0.00718096		3963.8	-0.00426178
253.99	0.07196892		783.99	0.00559282		1313.98	0.01352203		1843.99	-0.01154708		2373.98	0.00665537		2904.01	-0.00383618		3434	0.00742062		3964	-0.00464894
254.19	0.07252401		784.19	0.00468249		1314.18	0.01351867		1844.19	-0.01253066		2374.18	0.00646276		2904.21	-0.00339866		3434.2	0.00698474		3964.2	-0.00458614
254.39	0.07273048		784.39	0.00456143		1314.38	0.01426434		1844.39	-0.01288727		2374.38	0.00614389		2904.41	-0.00341597		3434.4	0.00561789		3964.4	-0.0055072
254.59	0.07355887		784.59	0.00436965		1314.58	0.01462575		1844.59	-0.01200962		2374.58	0.00670208		2904.61	-0.00337892		3434.6	0.00661862		3964.6	-0.00537254
254.79	0.07395718		784.79	0.0050954		1314.78	0.01496905		1844.79	-0.0120395		2374.78	0.00624086		2904.81	-0.00351726		3434.8	0.00612609		3964.8	-0.00435862
254.99	0.07345064		784.99	0.00489276		1314.98	0.01460766		1844.99	-0.01181444		2374.98	0.00595165		2905.01	-0.00373995		3435	0.00594137		3965	-0.00548964
255.19	0.07333523		785.19	0.00490753		1315.18	0.01447182		1845.19	-0.01159565		2375.18	0.00607389		2905.21	-0.00417474		3435.2	0.00482258		3965.2	-0.00516522
255.39	0.07409648		785.39	0.00475002		1315.38	0.01460827		1845.39	-0.01084686		2375.38	0.00653744		2905.41	-0.00477319		3435.4	0.00432804		3965.4	-0.00524971
255.59	0.07438262		785.59	0.00404478		1315.58	0.01409688		1845.59	-0.01112214		2375.58	0.00697914		2905.61	-0.00484541		3435.6	0.00416478		3965.6	-0.00533497
255.79	0.07472663		785.79	0.00536308		1315.78	0.01393013		1845.79	-0.01170233		2375.78	0.00716973		2905.81	-0.00496566		3435.8	0.00413846		3965.8	-0.00520821
255.99	0.07501188		785.99	0.00563283		1315.98	0.01370921		1845.99	-0.01178764		2375.98	0.00722577		2906.01	-0.00519626		3436	0.00479574		3966	-0.00520815
256.19	0.07555825		786.19	0.00617701		1316.18	0.01432293		1846.19	-0.01283662		2376.18	0.00732514		2906.21	-0.00531288		3436.2	0.00451933		3966.2	-0.00539022
256.39	0.07566004		786.39	0.00629234		1316.38	0.0146918		1846.39	-0.01309364		2376.38	0.0076151		2906.41	-0.00477174		3436.4	0.0053882		3966.4	-0.0057083
256.59	0.07547774		786.59	0.00644815		1316.58	0.01430801		1846.59	-0.01318419		2376.58	0.00776477		2906.61	-0.00427447		3436.6	0.00593145		3966.6	-0.00630686
256.79	0.07545817		786.79	0.00627077		1316.78	0.01435793		1846.79	-0.01317243		2376.78	0.00748695		2906.81	-0.00485271		3436.8	0.00679946		3966.8	-0.00666895
256.99	0.07597071		786.99	0.00644936		1316.98	0.01392597		1846.99	-0.01321851		2376.98	0.00730474		2907.01	-0.00489664		3437	0.0069985		3967	-0.00738583
257.19	0.07584051		787.19	0.00602101		1317.18	0.01431512		1847.19	-0.01339549		2377.18	0.00734329		2907.21	-0.00432969		3437.2	0.00672821		3967.2	-0.00645857
257.39	0.07506028		787.39	0.00673889		1317.38	0.01439803		1847.39	-0.01377052		2377.38	0.00832635		2907.41	-0.00376229		3437.4	0.00572565		3967.4	-0.00626447
257.59	0.07438122		787.59	0.00624287		1317.58	0.01445482		1847.59	-0.01291558		2377.58	0.00876327		2907.61	-0.00287693		3437.6	0.00576515		3967.6	-0.00527575
257.79	0.07401233		787.79	0.006315		1317.78	0.0149381		1847.79	-0.01308263		2377.78	0.00977753		2907.81	-0.00270303		3437.8	0.0053648		3967.8	-0.00536564
257.99	0.07529237		787.99	0.00711198		1317.98	0.01620044		1847.99	-0.01290099		2377.98	0.00929335		2908.01	-0.00282005		3438	0.00452404		3968	-0.00604086
258.19	0.07731443		788.19	0.00747776		1318.18	0.01675395		1848.19	-0.01345527		2378.18	0.00949731		2908.21	-0.00337892		3438.2	0.00407373		3968.2	-0.00606674
258.39	0.07741064		788.39	0.00767657		1318.38	0.01852343		1848.39	-0.01314144		2378.38	0.00917673		2908.41	-0.00420562		3438.4	0.00399145		3968.4	-0.0056559
258.59	0.07833649		788.59	0.00798696		1318.58	0.01854656		1848.59	-0.01229079		2378.58	0.00845623		2908.61	-0.00368312		3438.6	0.00447373		3968.6	-0.00448817
258.79	0.07768695		788.79	0.00796733		1318.78	0.01910286		1848.79	-0.01113958		2378.78	0.00843563		2908.81	-0.00476201		3438.8	0.00366219		3968.8	-0.00434413
258.99	0.07909192		788.99	0.00736119		1318.98	0.01839848		1848.99	-0.00969043		2378.98	0.00818754		2909.01	-0.00487413		3439	0.00287199		3969	-0.00377496
259.19	0.07928441		789.19	0.00729523		1319.18	0.01879061		1849.19	-0.00854597		2379.18	0.00782473		2909.21	-0.00565156		3439.2	0.0016028		3969.2	-0.00335057
259.39	0.07993941		789.39	0.00686982		1319.38	0.0185935		1849.39	-0.00863262		2379.38	0.0072165		2909.41	-0.00603027		3439.4	0.00106077		3969.4	-0.00290576
259.59	0.07985321		789.59	0.00734172		1319.58	0.01818946		1849.59	-0.00879482		2379.58	0.00705935		2909.61	-0.00619113		3439.6	0.00146393		3969.6	-0.00275771
259.79	0.08043347		789.79	0.00711983		1319.78	0.0177062		1849.79	-0.00977819		2379.78	0.00738686		2909.81	-0.00591151		3439.8	0.00181247		3969.8	-0.00293534
259.99	0.08183861		789.99	0.0075036		1319.98	0.01771336		1849.99	-0.00953205		2379.98	0.00672856		2910.01	-0.00653297		3440	0.00221246		3970	-0.00231117
260.19	0.08175328		790.19	0.00782265		1320.18	0.01832627		1850.19	-0.00955358		2380.18	0.00681127		2910.21	-0.00646183		3440.2	0.00288015		3970.2	-0.00286966
260.39	0.08148171		790.39	0.00754318		1320.38	0.01809008		1850.39	-0.00939621		2380.38	0.00718393		2910.41	-0.0060749		3440.4	0.00325387		3970.4	-0.00317078
260.59	0.08155625		790.59	0.00720149		1320.58	0.01725524		1850.59	-0.00976196		2380.58	0.0065576		2910.61	-0.00546403		3440.6	0.00369106		3970.6	-0.00302795
260.79	0.08218187		790.79	0.00728041		1320.78	0.01636904		1850.79	-0.01046923		2380.78	0.00682089		2910.81	-0.00541572		3440.8	0.0048366		3970.8	-0.00321942
260.99	0.08192425		790.99	0.00702769		1320.98	0.01559514		1850.99	-0.01106432		2380.98	0.00697018		2911.01	-0.00481825		3441	0.00495775		3971	-0.00355729
261.19	0.08144422		791.19	0.00703083		1321.18	0.01531953		1851.19	-0.01218484		2381.18	0.00723564		2911.21	-0.00429116		3441.2	0.0045948		3971.2	-0.00240083
261.39	0.08251877		791.39	0.00763959		1321.38	0.01438257		1851.39	-0.01331209		2381.38	0.00737751		2911.41	-0.00453965		3441.4	0.00412764		3971.4	-0.00216741
261.59	0.08224032		791.59	0.00895935		1321.58	0.01374903		1851.59	-0.01266011		2381.58	0.00737775		2911.61	-0.00505149		3441.6	0.00355891		3971.6	-0.00236995
261.79	0.08230815		791.79	0.00953813		1321.78	0.01436463		1851.79	-0.0128969		2381.78	0.00770361		2911.81	-0.00567514		3441.8	0.00327107		3971.8	-0.00306918
261.99	0.08284658		791.99	0.01043705		1321.98	0.01402765		1851.99	-0.01377822		2381.98	0.00723658		2912.01	-0.00559922		3442	0.00315286		3972	-0.0038052
262.19	0.08297104		792.19	0.01026609		1322.18	0.01391312		1852.19	-0.01415551		2382.18	0.00778319		2912.21	-0.00645651		3442.2	0.0036704		3972.2	-0.00440588
262.39	0.08251188		792.39	0.00981241		1322.38	0.01450732		1852.39	-0.01330304		2382.38	0.00653669		2912.41	-0.00657371		3442.4	0.00288474		3972.4	-0.00497464
262.59	0.08213433		792.59	0.00985388		1322.58	0.01377462		1852.59	-0.01215457		2382.58	0.0062571		2912.61	-0.00557661		3442.6	0.00262745		3972.6	-0.00540238
262.79	0.0821459		792.79	0.00975668		1322.78	0.01348399		1852.79	-0.0104882		2382.78	0.0059931		2912.81	-0.00688808		3442.8	0.00211667		3972.8	-0.00583961
262.99	0.08314365		792.99	0.0097233		1322.98	0.0128129		1852.99	-0.01015223		2382.98	0.00412306		2913.01	-0.00723588		3443	0.0019076		3973	-0.00635829
263.19	0.08200926		793.19	0.00895882		1323.18	0.01324684		1853.19	-0.00979553		2383.18	0.00270879		2913.21	-0.00791819		3443.2	0.00136077		3973.2	-0.00615107
263.39	0.08252348		793.39	0.00789139		1323.38	0.01375316		1853.39	-0.01029609		2383.38	0.00203012		2913.41	-0.00774585		3443.4	0.00071685		3973.4	-0.00705604
263.59	0.08305177		793.59	0.00821098		1323.58	0.01386997		1853.59	-0.01065272		2383.58	0.00334361		2913.61	-0.00758231		3443.6	0.00169185		3973.6	-0.00730535
263.79	0.08320605		793.79	0.00780771		1323.78	0.01294441		1853.79	-0.01039124		2383.78	0.00316052		2913.81	-0.00771769		3443.8	0.00237597		3973.8	-0.00756456
263.99	0.08336209		793.99	0.00772209		1323.98	0.01416018		1853.99	-0.0103879		2383.98	0.00285164		2914.01	-0.0076307		3444	0.0025656		3974	-0.00733767
264.19	0.08280857		794.19	0.00705756		1324.18	0.01470397		1854.19	-0.01012708		2384.18	0.00339511		2914.21	-0.00701569		3444.2	0.00315961		3974.2	-0.00738696
264.39	0.08364581		794.39	0.00761543		1324.38	0.01441253		1854.39	-0.01154826		2384.38	0.00400585		2914.41	-0.00705274		3444.4	0.00352154		3974.4	-0.0070991
264.59	0.08420135		794.59	0.0071949		1324.58	0.01418486		1854.59	-0.01192947		2384.58	0.00422965		2914.61	-0.00678507		3444.6	0.00430217		3974.6	-0.00653612
264.79	0.08479655		794.79	0.00701549		1324.78	0.01445292		1854.79	-0.0126227		2384.78	0.00454105		2914.81	-0.00669608		3444.8	0.00483768		3974.8	-0.00714402
264.99	0.08494908		794.99	0.00718575		1324.98	0.0141058		1854.99	-0.01200173		2384.98	0.00525422		2915.01	-0.00667383		3445	0.00509206		3975	-0.00682983
265.19	0.08557819		795.19	0.00771559		1325.18	0.01344064		1855.19	-0.01228934		2385.18	0.00563871		2915.21	-0.0065119		3445.2	0.0052925		3975.2	-0.00546617
265.39	0.08610972		795.39	0.00817049		1325.38	0.01308398		1855.39	-0.01263731		2385.38	0.00605784		2915.41	-0.00628705		3445.4	0.00510564		3975.4	-0.00530943
265.59	0.08506502		795.59	0.00871647		1325.58	0.01272558		1855.59	-0.011564		2385.58	0.00668096		2915.61	-0.00652074		3445.6	0.0045213		3975.6	-0.00503845
265.79	0.08572292		795.79	0.00864317		1325.78	0.01281635		1855.79	-0.01162774		2385.78	0.00698552		2915.81	-0.00719513		3445.8	0.00434667		3975.8	-0.00436118
265.99	0.08626566		795.99	0.00852392		1325.98	0.01273991		1855.99	-0.0117061		2385.98	0.00738726		2916.01	-0.00794329		3446	0.00482887		3976	-0.00371952
266.19	0.08681405		796.19	0.00838366		1326.18	0.0124891		1856.19	-0.0113962		2386.18	0.00792729		2916.21	-0.00726513		3446.2	0.00422795		3976.2	-0.00356231
266.39	0.08726641		796.39	0.00873642		1326.38	0.01246913		1856.39	-0.01045451		2386.38	0.00667516		2916.41	-0.00642999		3446.4	0.00318719		3976.4	-0.00300756
266.59	0.08721821		796.59	0.00917533		1326.58	0.0123366		1856.59	-0.01012444		2386.58	0.00659923		2916.61	-0.00672243		3446.6	0.00264421		3976.6	-0.00258883
266.79	0.08785797		796.79	0.00965204		1326.78	0.01191351		1856.79	-0.00987859		2386.78	0.00618928		2916.81	-0.00713452		3446.8	0.00281372		3976.8	-0.00254832
266.99	0.08796048		796.99	0.01001042		1326.98	0.01228925		1856.99	-0.00997473		2386.98	0.00631318		2917.01	-0.00752263		3447	0.00263808		3977	-0.00182648
267.19	0.08786628		797.19	0.01007966		1327.18	0.0132267		1857.19	-0.0093527		2387.18	0.00686223		2917.21	-0.00632872		3447.2	0.00219248		3977.2	-0.00130713
267.39	0.08890416		797.39	0.00947872		1327.38	0.01376169		1857.39	-0.01026244		2387.38	0.00679323		2917.41	-0.00485182		3447.4	0.00164669		3977.4	-0.00184912
267.59	0.08882262		797.59	0.00950776		1327.58	0.01314559		1857.59	-0.01048901		2387.58	0.00744346		2917.61	-0.00394667		3447.6	0.00233696		3977.6	-0.00053498
267.79	0.08865768		797.79	0.00907363		1327.78	0.01348117		1857.79	-0.01043836		2387.78	0.00727185		2917.81	-0.00325009		3447.8	0.00251986		3977.8	-0.00084076
267.99	0.08894407		797.99	0.00856266		1327.98	0.01481606		1857.99	-0.01063109		2387.98	0.00733002		2918.01	-0.00201281		3448	0.0023458		3978	-0.00093674
268.19	0.08936944		798.19	0.0090929		1328.18	0.01488391		1858.19	-0.01039767		2388.18	0.00771454		2918.21	-0.00158818		3448.2	0.00291367		3978.2	-0.00152814
268.39	0.09040594		798.39	0.00958611		1328.38	0.01534834		1858.39	-0.01137519		2388.38	0.0078537		2918.41	-0.00110707		3448.4	0.00374219		3978.4	-0.00248615
268.59	0.09028948		798.59	0.00858798		1328.58	0.01577735		1858.59	-0.01000929		2388.58	0.00718969		2918.61	-0.00120719		3448.6	0.0041401		3978.6	-0.00251597
268.79	0.09078876		798.79	0.0092298		1328.78	0.01647164		1858.79	-0.00909802		2388.78	0.00748047		2918.81	-0.00101636		3448.8	0.00450716		3978.8	-0.00377547
268.99	0.09098777		798.99	0.01011824		1328.98	0.01576509		1858.99	-0.00899047		2388.98	0.00799221		2919.01	-0.00138426		3449	0.0054333		3979	-0.00405133
269.19	0.09039464		799.19	0.01004162		1329.18	0.01569205		1859.19	-0.01031561		2389.18	0.00772604		2919.21	-0.00175142		3449.2	0.00528817		3979.2	-0.00470264
269.39	0.09028422		799.39	0.00978599		1329.38	0.01613368		1859.39	-0.01044689		2389.38	0.0079251		2919.41	-0.00245096		3449.4	0.00461737		3979.4	-0.00419501
269.59	0.0908448		799.59	0.01042524		1329.58	0.01591734		1859.59	-0.01073766		2389.58	0.00795106		2919.61	-0.00311767		3449.6	0.00477827		3979.6	-0.00444171
269.79	0.09184107		799.79	0.00982654		1329.78	0.0161031		1859.79	-0.01108459		2389.78	0.0081845		2919.81	-0.00427756		3449.8	0.00399928		3979.8	-0.00481126
269.99	0.09266		799.99	0.00922679		1329.98	0.0162591		1859.99	-0.01131119		2389.98	0.00854964		2920.01	-0.00466501		3450	0.00496321		3980	-0.00508406
270.19	0.09342014		800.19	0.0089996		1330.18	0.01574705		1860.19	-0.01215208		2390.18	0.00825884		2920.21	-0.00383811		3450.2	0.00394526		3980.2	-0.00552859
270.39	0.09378669		800.39	0.009137		1330.38	0.015677		1860.39	-0.01216308		2390.38	0.00776299		2920.41	-0.00435648		3450.4	0.00353345		3980.4	-0.00622646
270.59	0.09408951		800.59	0.00916171		1330.58	0.01569322		1860.59	-0.0129411		2390.58	0.00818623		2920.61	-0.00485437		3450.6	0.00315231		3980.6	-0.00695885
270.79	0.09405576		800.79	0.00960835		1330.78	0.01553803		1860.79	-0.01246494		2390.78	0.0086619		2920.81	-0.00450286		3450.8	0.00350861		3980.8	-0.00665163
270.99	0.09426688		800.99	0.00931426		1330.98	0.0162202		1860.99	-0.01218409		2390.98	0.00907929		2921.01	-0.00434977		3451	0.00291131		3981	-0.00622607
271.19	0.09353101		801.19	0.00850016		1331.18	0.01706697		1861.19	-0.01228645		2391.18	0.00845117		2921.21	-0.00377901		3451.2	0.00281798		3981.2	-0.00683475
271.39	0.09313424		801.39	0.00726414		1331.38	0.01679		1861.39	-0.01209034		2391.38	0.00805139		2921.41	-0.00350689		3451.4	0.00219104		3981.4	-0.00670362
271.59	0.09242656		801.59	0.00719892		1331.58	0.01694078		1861.59	-0.01190448		2391.58	0.00867643		2921.61	-0.00330405		3451.6	0.00242275		3981.6	-0.00672317
271.79	0.09266866		801.79	0.00686833		1331.78	0.0170168		1861.79	-0.01158494		2391.78	0.00890558		2921.81	-0.00340981		3451.8	0.00277019		3981.8	-0.0077824
271.99	0.0929758		801.99	0.00757591		1331.98	0.01761485		1861.99	-0.01111529		2391.98	0.00891016		2922.01	-0.00344711		3452	0.00270623		3982	-0.00757801
272.19	0.09456324		802.19	0.00848935		1332.18	0.01724891		1862.19	-0.01186836		2392.18	0.00865872		2922.21	-0.0028691		3452.2	0.00307964		3982.2	-0.00762
272.39	0.09429947		802.39	0.00835775		1332.38	0.01709428		1862.39	-0.01239215		2392.38	0.00848842		2922.41	-0.00316802		3452.4	0.00317071		3982.4	-0.00724125
272.59	0.09391156		802.59	0.00856048		1332.58	0.01720811		1862.59	-0.0114538		2392.58	0.00875957		2922.61	-0.0041289		3452.6	0.00378728		3982.6	-0.00715547
272.79	0.09406204		802.79	0.00958389		1332.78	0.01792639		1862.79	-0.01127629		2392.78	0.00904966		2922.81	-0.00433168		3452.8	0.00403853		3982.8	-0.00741141
272.99	0.09411017		802.99	0.00988403		1332.98	0.01802709		1862.99	-0.01215875		2392.98	0.00905287		2923.01	-0.00513659		3453	0.00358027		3983	-0.00811618
273.19	0.09444065		803.19	0.00994481		1333.18	0.01791787		1863.19	-0.0114285		2393.18	0.00895271		2923.21	-0.00493005		3453.2	0.00293216		3983.2	-0.00756957
273.39	0.0953445		803.39	0.01030107		1333.38	0.01777897		1863.39	-0.01097583		2393.38	0.00915211		2923.41	-0.00465282		3453.4	0.00237593		3983.4	-0.00659245
273.59	0.09665442		803.59	0.01022945		1333.58	0.01737825		1863.59	-0.01193235		2393.58	0.00913797		2923.61	-0.00508567		3453.6	0.00243893		3983.6	-0.00672496
273.79	0.09681704		803.79	0.00922758		1333.78	0.01767605		1863.79	-0.01196715		2393.78	0.00883669		2923.81	-0.00537563		3453.8	0.00225278		3983.8	-0.00694212
273.99	0.09764208		803.99	0.0091675		1333.98	0.01837896		1863.99	-0.01213056		2393.98	0.00894341		2924.01	-0.00514339		3454	0.00264845		3984	-0.00668808
274.19	0.09784496		804.19	0.0090425		1334.18	0.0174816		1864.19	-0.01265382		2394.18	0.0081863		2924.21	-0.00563766		3454.2	0.00236876		3984.2	-0.00627738
274.39	0.09790704		804.39	0.00815471		1334.38	0.01695177		1864.39	-0.01295522		2394.38	0.00837495		2924.41	-0.00551785		3454.4	0.0025		3984.4	-0.00678025
274.59	0.09758847		804.59	0.0078804		1334.58	0.01645181		1864.59	-0.012658		2394.58	0.00852461		2924.61	-0.00538101		3454.6	0.00226253		3984.6	-0.00577303
274.79	0.09725275		804.79	0.00749261		1334.78	0.01571829		1864.79	-0.01197305		2394.78	0.00910521		2924.81	-0.00534077		3454.8	0.00233412		3984.8	-0.00444161
274.99	0.09714409		804.99	0.00625277		1334.98	0.0151932		1864.99	-0.01196371		2394.98	0.00894713		2925.01	-0.00548743		3455	0.00275593		3985	-0.00429135
275.19	0.09606616		805.19	0.00610618		1335.18	0.01441285		1865.19	-0.01138178		2395.18	0.00889129		2925.21	-0.00558309		3455.2	0.00257386		3985.2	-0.00393901
275.39	0.09598507		805.39	0.00621038		1335.38	0.01406667		1865.39	-0.01016525		2395.38	0.00925008		2925.41	-0.00499312		3455.4	0.0025392		3985.4	-0.00420594
275.59	0.09599555		805.59	0.0062028		1335.58	0.01417923		1865.59	-0.01018126		2395.58	0.00905038		2925.61	-0.0049227		3455.6	0.00362969		3985.6	-0.0038119
275.79	0.0965902		805.79	0.00647945		1335.78	0.01350999		1865.79	-0.01025402		2395.78	0.00890282		2925.81	-0.00531121		3455.8	0.00421417		3985.8	-0.00386447
275.99	0.09702729		805.99	0.00647773		1335.98	0.01424791		1865.99	-0.01086232		2395.98	0.00855782		2926.01	-0.00490057		3456	0.00424647		3986	-0.00323391
276.19	0.09779256		806.19	0.00653491		1336.18	0.0146124		1866.19	-0.01154223		2396.18	0.00827731		2926.21	-0.00349617		3456.2	0.00423459		3986.2	-0.00341296
276.39	0.09719671		806.39	0.0076746		1336.38	0.01532026		1866.39	-0.01113101		2396.38	0.00807199		2926.41	-0.00351117		3456.4	0.00440829		3986.4	-0.00292543
276.59	0.09814239		806.59	0.00792811		1336.58	0.01619485		1866.59	-0.01087475		2396.58	0.00815868		2926.61	-0.00305749		3456.6	0.00490479		3986.6	-0.00330404
276.79	0.09848161		806.79	0.00859226		1336.78	0.01729889		1866.79	-0.01128415		2396.78	0.00797938		2926.81	-0.00209665		3456.8	0.00489268		3986.8	-0.00332514
276.99	0.09941793		806.99	0.00856216		1336.98	0.01744341		1866.99	-0.01126647		2396.98	0.00791107		2927.01	-0.00185036		3457	0.00470313		3987	-0.00415608
277.19	0.10023607		807.19	0.00845181		1337.18	0.01725268		1867.19	-0.01075489		2397.18	0.00764547		2927.21	-0.00053714		3457.2	0.00495517		3987.2	-0.00441903
277.39	0.10045034		807.39	0.00864276		1337.38	0.01819651		1867.39	-0.01108311		2397.38	0.00747682		2927.41	-0.00026006		3457.4	0.00502256		3987.4	-0.00564502
277.59	0.10112862		807.59	0.00849244		1337.58	0.01884116		1867.59	-0.01194432		2397.58	0.00729055		2927.61	-0.00150255		3457.6	0.00528806		3987.6	-0.0058082
277.79	0.10046621		807.79	0.00850378		1337.78	0.01933417		1867.79	-0.011809		2397.78	0.00672631		2927.81	-0.00107693		3457.8	0.00498284		3987.8	-0.00579809
277.99	0.1010991		807.99	0.00848226		1337.98	0.01961434		1867.99	-0.01197206		2397.98	0.00697413		2928.01	-0.00182155		3458	0.00453459		3988	-0.00600866
278.19	0.10058081		808.19	0.00810355		1338.18	0.01854727		1868.19	-0.01194428		2398.18	0.00727122		2928.21	-0.00288125		3458.2	0.00492657		3988.2	-0.006068
278.39	0.100457		808.39	0.00807145		1338.38	0.01859225		1868.39	-0.01170004		2398.38	0.00814808		2928.41	-0.00250126		3458.4	0.00406399		3988.4	-0.00572505
278.59	0.09990437		808.59	0.00904511		1338.58	0.0179169		1868.59	-0.01144632		2398.58	0.00864648		2928.61	-0.00300603		3458.6	0.00359751		3988.6	-0.0052783
278.79	0.09982828		808.79	0.00917258		1338.78	0.01759222		1868.79	-0.0113344		2398.78	0.00995612		2928.81	-0.00396267		3458.8	0.00395992		3988.8	-0.00511323
278.99	0.09972023		808.99	0.00894765		1338.98	0.0177055		1868.99	-0.01066689		2398.98	0.0094407		2929.01	-0.0042945		3459	0.00397462		3989	-0.00547086
279.19	0.0996915		809.19	0.00862907		1339.18	0.01718011		1869.19	-0.01000018		2399.18	0.00922573		2929.21	-0.00429201		3459.2	0.00344636		3989.2	-0.00522974
279.39	0.09957845		809.39	0.00875207		1339.38	0.01809481		1869.39	-0.01018207		2399.38	0.00905318		2929.41	-0.00495599		3459.4	0.00412657		3989.4	-0.00561947
279.59	0.09894459		809.59	0.00868409		1339.58	0.01792098		1869.59	-0.01043918		2399.58	0.00842438		2929.61	-0.00469569		3459.6	0.00493405		3989.6	-0.00595375
279.79	0.09946941		809.79	0.00802209		1339.78	0.01838118		1869.79	-0.01082898		2399.78	0.00861571		2929.81	-0.00481212		3459.8	0.00540393		3989.8	-0.00680783
279.99	0.10048695		809.99	0.00746256		1339.98	0.01898307		1869.99	-0.01140573		2399.98	0.00796105		2930.01	-0.00452596		3460	0.00489498		3990	-0.00693947
280.19	0.10126514		810.19	0.00761393		1340.18	0.01870959		1870.19	-0.01209638		2400.18	0.00755587		2930.21	-0.00383913		3460.2	0.0044371		3990.2	-0.00760514
280.39	0.10196378		810.39	0.00783701		1340.38	0.01788045		1870.39	-0.01250849		2400.38	0.00750739		2930.41	-0.00412717		3460.4	0.004652		3990.4	-0.00700675
280.59	0.10303137		810.59	0.00715177		1340.58	0.01744472		1870.59	-0.01371667		2400.58	0.00773551		2930.61	-0.00394332		3460.6	0.00487524		3990.6	-0.00672357
280.79	0.10283586		810.79	0.00718879		1340.78	0.01718938		1870.79	-0.01420896		2400.78	0.00822612		2930.81	-0.00380404		3460.8	0.00474743		3990.8	-0.00687984
280.99	0.10298309		810.99	0.00707457		1340.98	0.01602774		1870.99	-0.01429555		2400.98	0.00853317		2931.01	-0.0027173		3461	0.00495719		3991	-0.00817054
281.19	0.10389317		811.19	0.00660268		1341.18	0.01626716		1871.19	-0.01480565		2401.18	0.00886786		2931.21	-0.00262316		3461.2	0.00476433		3991.2	-0.00830221
281.39	0.10416094		811.39	0.00650179		1341.38	0.01598799		1871.39	-0.01484102		2401.38	0.00833767		2931.41	-0.00403497		3461.4	0.00450624		3991.4	-0.00761126
281.59	0.10358925		811.59	0.00632416		1341.58	0.01544129		1871.59	-0.01516637		2401.58	0.00900669		2931.61	-0.00390512		3461.6	0.0043151		3991.6	-0.00742202
281.79	0.10327155		811.79	0.00676507		1341.78	0.0160311		1871.79	-0.01524819		2401.78	0.009448		2931.81	-0.00399953		3461.8	0.00337822		3991.8	-0.00566024
281.99	0.10389283		811.99	0.00721597		1341.98	0.01564396		1871.99	-0.01457745		2401.98	0.0100803		2932.01	-0.00400304		3462	0.00314462		3992	-0.00598018
282.19	0.10368801		812.19	0.0076509		1342.18	0.01645685		1872.19	-0.01430429		2402.18	0.01025826		2932.21	-0.00389703		3462.2	0.00340666		3992.2	-0.00524617
282.39	0.10369251		812.39	0.00854406		1342.38	0.01669341		1872.39	-0.01361897		2402.38	0.00964413		2932.41	-0.00361752		3462.4	0.00321541		3992.4	-0.00484022
282.59	0.10352475		812.59	0.00958919		1342.58	0.01693745		1872.59	-0.01315443		2402.58	0.00985261		2932.61	-0.00467095		3462.6	0.00298938		3992.6	-0.00432272
282.79	0.10455928		812.79	0.01012986		1342.78	0.01732019		1872.79	-0.01234596		2402.78	0.0101759		2932.81	-0.00453258		3462.8	0.00268727		3992.8	-0.00322544
282.99	0.10521932		812.99	0.01034405		1342.98	0.01818081		1872.99	-0.0118868		2402.98	0.00873871		2933.01	-0.00400775		3463	0.00231555		3993	-0.00329644
283.19	0.1058658		813.19	0.01022333		1343.18	0.01872739		1873.19	-0.0112912		2403.18	0.00797436		2933.21	-0.00375639		3463.2	0.00304274		3993.2	-0.00228329
283.39	0.10601483		813.39	0.01088984		1343.38	0.01959649		1873.39	-0.0116731		2403.38	0.00843084		2933.41	-0.00356804		3463.4	0.00336489		3993.4	-0.00300161
283.59	0.10688362		813.59	0.01082426		1343.58	0.01979382		1873.59	-0.0115543		2403.58	0.00804791		2933.61	-0.00322363		3463.6	0.00344955		3993.6	-0.0037059
283.79	0.10815726		813.79	0.01047871		1343.78	0.02034815		1873.79	-0.01092519		2403.78	0.00816081		2933.81	-0.00333695		3463.8	0.00338754		3993.8	-0.00363972
283.99	0.10881607		813.99	0.01089268		1343.98	0.02016584		1873.99	-0.01109909		2403.98	0.00722807		2934.01	-0.00332899		3464	0.00232602		3994	-0.00365988
284.19	0.1086966		814.19	0.00996871		1344.18	0.01921221		1874.19	-0.01120241		2404.18	0.00698657		2934.21	-0.00409582		3464.2	0.00265853		3994.2	-0.00420289
284.39	0.10889235		814.39	0.00987664		1344.38	0.01986144		1874.39	-0.01144243		2404.38	0.00598654		2934.41	-0.00386712		3464.4	0.0026768		3994.4	-0.00351455
284.59	0.10820543		814.59	0.01003428		1344.58	0.02036117		1874.59	-0.01124965		2404.58	0.00552399		2934.61	-0.00421831		3464.6	0.00319033		3994.6	-0.00307205
284.79	0.10746348		814.79	0.01049099		1344.78	0.02007287		1874.79	-0.01156073		2404.78	0.00517972		2934.81	-0.00386643		3464.8	0.00298854		3994.8	-0.00377822
284.99	0.10722253		814.99	0.01084462		1344.98	0.01968792		1874.99	-0.01282373		2404.98	0.00574878		2935.01	-0.00341068		3465	0.00396892		3995	-0.00453299
285.19	0.10695577		815.19	0.0093217		1345.18	0.01990103		1875.19	-0.01322733		2405.18	0.00596002		2935.21	-0.00374454		3465.2	0.00447965		3995.2	-0.00426446
285.39	0.10628611		815.39	0.00918757		1345.38	0.01893476		1875.39	-0.01379674		2405.38	0.00589172		2935.41	-0.00475859		3465.4	0.0043855		3995.4	-0.00460822
285.59	0.1048492		815.59	0.00899008		1345.58	0.01967141		1875.59	-0.01419801		2405.58	0.00683305		2935.61	-0.00422816		3465.6	0.00435881		3995.6	-0.00573031
285.79	0.10510637		815.79	0.00868079		1345.78	0.01937686		1875.79	-0.01449657		2405.78	0.00642213		2935.81	-0.00507469		3465.8	0.00421007		3995.8	-0.004982
285.99	0.10439206		815.99	0.00789066		1345.98	0.01910215		1875.99	-0.01434958		2405.98	0.00617958		2936.01	-0.00395938		3466	0.00541935		3996	-0.00670116
286.19	0.1039018		816.19	0.0073863		1346.18	0.02026749		1876.19	-0.01480055		2406.18	0.00554271		2936.21	-0.00415105		3466.2	0.00559114		3996.2	-0.00730148
286.39	0.10398233		816.39	0.00754905		1346.38	0.02008253		1876.39	-0.01444465		2406.38	0.00576226		2936.41	-0.00482411		3466.4	0.00478537		3996.4	-0.00800306
286.59	0.10443036		816.59	0.00754132		1346.58	0.02088231		1876.59	-0.01411253		2406.58	0.0059361		2936.61	-0.00433158		3466.6	0.00403819		3996.6	-0.00741999
286.79	0.10516708		816.79	0.00792563		1346.78	0.02118021		1876.79	-0.01348325		2406.78	0.00657666		2936.81	-0.00378892		3466.8	0.00447954		3996.8	-0.00718507
286.99	0.10592887		816.99	0.00781184		1346.98	0.02181366		1876.99	-0.01327625		2406.98	0.00675853		2937.01	-0.00305342		3467	0.00512444		3997	-0.00796911
287.19	0.10701341		817.19	0.00794038		1347.18	0.02141971		1877.19	-0.01247567		2407.18	0.00742478		2937.21	-0.00243869		3467.2	0.00622525		3997.2	-0.00747439
287.39	0.1082858		817.39	0.00841014		1347.38	0.02119769		1877.39	-0.01278372		2407.38	0.00905866		2937.41	-0.00199293		3467.4	0.00530005		3997.4	-0.00843552
287.59	0.10925598		817.59	0.00791994		1347.58	0.02066943		1877.59	-0.01254781		2407.58	0.00850142		2937.61	-0.00221886		3467.6	0.005933		3997.6	-0.00839832
287.79	0.10955229		817.79	0.00833906		1347.78	0.02050829		1877.79	-0.01186512		2407.78	0.00879173		2937.81	-0.00113387		3467.8	0.00527587		3997.8	-0.00797716
287.99	0.10992594		817.99	0.00819897		1347.98	0.02013391		1877.99	-0.01201359		2407.98	0.00868606		2938.01	-0.00097164		3468	0.00533141		3998	-0.00795928
288.19	0.11049078		818.19	0.00829793		1348.18	0.01937805		1878.19	-0.01260571		2408.18	0.00837579		2938.21	-0.00161347		3468.2	0.00651853		3998.2	-0.00760833
288.39	0.11019748		818.39	0.00923211		1348.38	0.01961747		1878.39	-0.01274589		2408.38	0.00793175		2938.41	-0.00116746		3468.4	0.00593535		3998.4	-0.00676006
288.59	0.11019259		818.59	0.00977927		1348.58	0.01877162		1878.59	-0.01247223		2408.58	0.00814708		2938.61	-0.00210945		3468.6	0.00603961		3998.6	-0.00620023
288.79	0.110671		818.79	0.01152621		1348.78	0.01808581		1878.79	-0.01337423		2408.78	0.00776878		2938.81	-0.00137907		3468.8	0.00579197		3998.8	-0.00555818
288.99	0.1105779		818.99	0.01181889		1348.98	0.01830911		1878.99	-0.01434136		2408.98	0.00825663		2939.01	-0.00130197		3469	0.00566687		3999	-0.00512804
289.19	0.11032583		819.19	0.01099737		1349.18	0.017875		1879.19	-0.01487182		2409.18	0.00809555		2939.21	-0.00129781		3469.2	0.00493635		3999.2	-0.00476222
289.39	0.11055355		819.39	0.01140367		1349.38	0.01739235		1879.39	-0.01514097		2409.38	0.00771703		2939.41	-0.00227048		3469.4	0.00345317		3999.4	-0.00517851
289.59	0.10969217		819.59	0.01071357		1349.58	0.0176313		1879.59	-0.01453468		2409.58	0.00692869		2939.61	-0.00150213		3469.6	0.00277921		3999.6	-0.00551063
289.79	0.10939403		819.79	0.01057794		1349.78	0.01709068		1879.79	-0.0152425		2409.78	0.00666454		2939.81	-0.0013365		3469.8	0.00229438		3999.8	-0.00513089
289.99	0.10913004		819.99	0.0101881		1349.98	0.0177868		1879.99	-0.01488281		2409.98	0.0064317		2940.01	-0.00116354		3470	0.00172202		4000	-0.00486302
290.19	0.10992469		820.19	0.01043798		1350.18	0.01792466		1880.19	-0.01478198		2410.18	0.00595316		2940.21	-0.00243473		3470.2	0.00084597		4000.2	-0.00490575
290.39	0.11037138		820.39	0.01065136		1350.38	0.01771262		1880.39	-0.01427783		2410.38	0.00594474		2940.41	-0.00318803		3470.4	0.00003703		4000.4	-0.00451509
290.59	0.11021393		820.59	0.01013008		1350.58	0.01847458		1880.59	-0.01385895		2410.58	0.00571883		2940.61	-0.00248029		3470.6	0.00026153		4000.6	-0.00401123
290.79	0.11106075		820.79	0.01028321		1350.78	0.01848642		1880.79	-0.01336144		2410.78	0.00600934		2940.81	-0.00304409		3470.8	0.00061692		4000.8	-0.00361857
290.99	0.11221549		820.99	0.01049825		1350.98	0.01871539		1880.99	-0.01423751		2410.98	0.0060563		2941.01	-0.00263793		3471	0.00128477		4001	-0.00510548
291.19	0.11286788		821.19	0.01024546		1351.18	0.01889753		1881.19	-0.01353161		2411.18	0.00677933		2941.21	-0.00294264		3471.2	0.00106886		4001.2	-0.0053184
291.39	0.11379505		821.39	0.00985963		1351.38	0.01962766		1881.39	-0.0137752		2411.38	0.00701713		2941.41	-0.0028153		3471.4	0.00054667		4001.4	-0.00577144
291.59	0.11369874		821.59	0.00952114		1351.58	0.01945833		1881.59	-0.01398593		2411.58	0.00712344		2941.61	-0.0024547		3471.6	0.00142716		4001.6	-0.00570902
291.79	0.11343106		821.79	0.00981074		1351.78	0.01978013		1881.79	-0.01381911		2411.78	0.00775476		2941.81	-0.00148098		3471.8	0.00100836		4001.8	-0.0054238
291.99	0.11383355		821.99	0.00929078		1351.98	0.01978482		1881.99	-0.01406008		2411.98	0.00872817		2942.01	-0.00237811		3472	0.00190406		4002	-0.00528606
292.19	0.11426648		822.19	0.00916945		1352.18	0.01969076		1882.19	-0.01511704		2412.18	0.00919453		2942.21	-0.00264443		3472.2	0.00236837		4002.2	-0.00576466
292.39	0.11412881		822.39	0.00836927		1352.38	0.01909983		1882.39	-0.01440642		2412.38	0.00914397		2942.41	-0.00258624		3472.4	0.001457		4002.4	-0.00605631
292.59	0.11401084		822.59	0.00803287		1352.58	0.01901874		1882.59	-0.01445843		2412.58	0.00906701		2942.61	-0.00322086		3472.6	0.001736		4002.6	-0.00585987
292.79	0.11312356		822.79	0.00832955		1352.78	0.01922434		1882.79	-0.01412702		2412.78	0.0093945		2942.81	-0.00282652		3472.8	0.00269413		4002.8	-0.00544027
292.99	0.1123546		822.99	0.00742656		1352.98	0.01917398		1882.99	-0.01419151		2412.98	0.00924205		2943.01	-0.00363311		3473	0.00243208		4003	-0.00600537
293.19	0.11178193		823.19	0.00727257		1353.18	0.01840202		1883.19	-0.01382629		2413.18	0.00939477		2943.21	-0.00460555		3473.2	0.00298058		4003.2	-0.00634089
293.39	0.11161632		823.39	0.00666274		1353.38	0.01889351		1883.39	-0.01286379		2413.38	0.00934803		2943.41	-0.00430724		3473.4	0.00280709		4003.4	-0.0068945
293.59	0.11036548		823.59	0.00597212		1353.58	0.01844066		1883.59	-0.01175728		2413.58	0.00900256		2943.61	-0.00411934		3473.6	0.00316124		4003.6	-0.00651742
293.79	0.1099618		823.79	0.00638536		1353.78	0.01823493		1883.79	-0.01133526		2413.78	0.00937377		2943.81	-0.0048741		3473.8	0.00323755		4003.8	-0.00525481
293.99	0.10968616		823.99	0.00624538		1353.98	0.01834495		1883.99	-0.01058014		2413.98	0.00897012		2944.01	-0.0052634		3474	0.00332212		4004	-0.004537
294.19	0.10938419		824.19	0.00743622		1354.18	0.01770945		1884.19	-0.01096851		2414.18	0.00893809		2944.21	-0.0062311		3474.2	0.0034667		4004.2	-0.00483766
294.39	0.10940795		824.39	0.00740087		1354.38	0.01785592		1884.39	-0.01003834		2414.38	0.00850117		2944.41	-0.00651826		3474.4	0.00318162		4004.4	-0.00417206
294.59	0.11063634		824.59	0.00708857		1354.58	0.01894623		1884.59	-0.0116778		2414.58	0.00771559		2944.61	-0.00611432		3474.6	0.00382831		4004.6	-0.0046052
294.79	0.11150584		824.79	0.00746676		1354.78	0.01927855		1884.79	-0.0117813		2414.78	0.00790582		2944.81	-0.00571875		3474.8	0.00448268		4004.8	-0.00405506
294.99	0.11240904		824.99	0.00731935		1354.98	0.01971447		1884.99	-0.01215185		2414.98	0.00821311		2945.01	-0.00543591		3475	0.00412511		4005	-0.00535994
295.19	0.11279598		825.19	0.00719871		1355.18	0.02057816		1885.19	-0.01180768		2415.18	0.00867703		2945.21	-0.00496189		3475.2	0.00368946		4005.2	-0.00546695
295.39	0.1131848		825.39	0.00769938		1355.38	0.02117531		1885.39	-0.0129921		2415.38	0.00817435		2945.41	-0.00392061		3475.4	0.00417237		4005.4	-0.00593379
295.59	0.11330108		825.59	0.00731145		1355.58	0.02107253		1885.59	-0.01314069		2415.58	0.00787552		2945.61	-0.00409235		3475.6	0.00515328		4005.6	-0.00551972
295.79	0.11355514		825.79	0.00673328		1355.78	0.02139026		1885.79	-0.01306026		2415.78	0.00746003		2945.81	-0.00372784		3475.8	0.00524079		4005.8	-0.00547637
295.99	0.11434641		825.99	0.00589747		1355.98	0.02168728		1885.99	-0.01371929		2415.98	0.00743101		2946.01	-0.00345364		3476	0.00508888		4006	-0.00565292
296.19	0.11539146		826.19	0.00606117		1356.18	0.02147618		1886.19	-0.01471912		2416.18	0.00714845		2946.21	-0.00265143		3476.2	0.00496463		4006.2	-0.00603882
296.39	0.11509867		826.39	0.00601997		1356.38	0.02107351		1886.39	-0.01501583		2416.38	0.00690673		2946.41	-0.00295658		3476.4	0.00467159		4006.4	-0.00639924
296.59	0.11487816		826.59	0.00610824		1356.58	0.02106716		1886.59	-0.01563449		2416.58	0.00698211		2946.61	-0.0042518		3476.6	0.0044537		4006.6	-0.00565074
296.79	0.11508101		826.79	0.00632674		1356.78	0.02033521		1886.79	-0.01609399		2416.78	0.00684413		2946.81	-0.00449147		3476.8	0.00520791		4006.8	-0.00566223
296.99	0.11455821		826.99	0.0072318		1356.98	0.02029511		1886.99	-0.01683325		2416.98	0.00697797		2947.01	-0.00545873		3477	0.00536033		4007	-0.00604523
297.19	0.114583		827.19	0.00800095		1357.18	0.02055416		1887.19	-0.01735388		2417.18	0.00700252		2947.21	-0.00590115		3477.2	0.00569893		4007.2	-0.00621252
297.39	0.11430582		827.39	0.00854932		1357.38	0.02135108		1887.39	-0.01683251		2417.38	0.00660781		2947.41	-0.00502221		3477.4	0.00518923		4007.4	-0.0056139
297.59	0.1136946		827.59	0.00961432		1357.58	0.02115841		1887.59	-0.01635735		2417.58	0.00689416		2947.61	-0.00524166		3477.6	0.00499928		4007.6	-0.00480288
297.79	0.11464895		827.79	0.01089028		1357.78	0.02084207		1887.79	-0.01664657		2417.78	0.00670036		2947.81	-0.00612695		3477.8	0.00488251		4007.8	-0.00373018
297.99	0.11537422		827.99	0.01183158		1357.98	0.02124661		1887.99	-0.01765436		2417.98	0.00635311		2948.01	-0.00570453		3478	0.00498831		4008	-0.00388688
298.19	0.11624947		828.19	0.01281786		1358.18	0.02128427		1888.19	-0.01745534		2418.18	0.00693531		2948.21	-0.00564529		3478.2	0.00469264		4008.2	-0.00367857
298.39	0.1172948		828.39	0.01259561		1358.38	0.02194256		1888.39	-0.01712537		2418.38	0.00672519		2948.41	-0.00457952		3478.4	0.00498731		4008.4	-0.00318684
298.59	0.11837739		828.59	0.01260959		1358.58	0.02214418		1888.59	-0.0178494		2418.58	0.00706423		2948.61	-0.00388969		3478.6	0.00550776		4008.6	-0.00343515
298.79	0.11916079		828.79	0.0130657		1358.78	0.02220623		1888.79	-0.0163842		2418.78	0.00725387		2948.81	-0.00365054		3478.8	0.00591336		4008.8	-0.00269398
298.99	0.1196561		828.99	0.01248435		1358.98	0.02240879		1888.99	-0.01582827		2418.98	0.00733958		2949.01	-0.00388786		3479	0.00512791		4009	-0.0036017
299.19	0.11931502		829.19	0.01263728		1359.18	0.02241084		1889.19	-0.0156031		2419.18	0.00723902		2949.21	-0.00372239		3479.2	0.00530084		4009.2	-0.0042021
299.39	0.11911782		829.39	0.01150465		1359.38	0.02200784		1889.39	-0.01572577		2419.38	0.00672678		2949.41	-0.00310438		3479.4	0.00527052		4009.4	-0.00473259
299.59	0.11933526		829.59	0.01027138		1359.58	0.02157939		1889.59	-0.014441		2419.58	0.00569895		2949.61	-0.00298071		3479.6	0.00540538		4009.6	-0.0042967
299.79	0.11955031		829.79	0.01035286		1359.78	0.02183094		1889.79	-0.01421419		2419.78	0.00588171		2949.81	-0.00208987		3479.8	0.00469216		4009.8	-0.00484178
299.99	0.12034856		829.99	0.01013506		1359.98	0.02155341		1889.99	-0.01411172		2419.98	0.00522762		2950.01	-0.00147021		3480	0.00324541		4010	-0.00513372
300.19	0.12126561		830.19	0.01050246		1360.18	0.02097926		1890.19	-0.01408304		2420.18	0.00557099		2950.21	-0.00182675		3480.2	0.00282489		4010.2	-0.00556191
300.39	0.12058433		830.39	0.01015655		1360.38	0.01942622		1890.39	-0.01422664		2420.38	0.0055205		2950.41	-0.00227196		3480.4	0.00210542		4010.4	-0.0064325
300.59	0.12125326		830.59	0.00937154		1360.58	0.01896109		1890.59	-0.01449349		2420.58	0.00512886		2950.61	-0.00282497		3480.6	0.00268459		4010.6	-0.00543382
300.79	0.1209083		830.79	0.00990344		1360.78	0.01897858		1890.79	-0.01514099		2420.78	0.00581685		2950.81	-0.00358548		3480.8	0.00370521		4010.8	-0.00662946
300.99	0.11993563		830.99	0.0105766		1360.98	0.01910853		1890.99	-0.01482183		2420.98	0.00716762		2951.01	-0.00408161		3481	0.00422693		4011	-0.00693534
301.19	0.11969314		831.19	0.0107263		1361.18	0.01962909		1891.19	-0.01446391		2421.18	0.00707606		2951.21	-0.00376838		3481.2	0.0047625		4011.2	-0.00737823
301.39	0.11950741		831.39	0.01087424		1361.38	0.02018722		1891.39	-0.01474205		2421.38	0.00725394		2951.41	-0.00344047		3481.4	0.00433375		4011.4	-0.00644087
301.59	0.1199219		831.59	0.01083429		1361.58	0.02099636		1891.59	-0.01542685		2421.58	0.00858647		2951.61	-0.00360789		3481.6	0.00477877		4011.6	-0.00683848
301.79	0.12004236		831.79	0.01052995		1361.78	0.02059186		1891.79	-0.01573269		2421.78	0.00908933		2951.81	-0.00393017		3481.8	0.00514582		4011.8	-0.00675764
301.99	0.11992058		831.99	0.0109581		1361.98	0.02098197		1891.99	-0.01586367		2421.98	0.0098307		2952.01	-0.00330977		3482	0.00506586		4012	-0.0068672
302.19	0.11957352		832.19	0.01154925		1362.18	0.0202477		1892.19	-0.01509996		2422.18	0.01128159		2952.21	-0.00293521		3482.2	0.00428001		4012.2	-0.00605378
302.39	0.11945906		832.39	0.01125231		1362.38	0.02025753		1892.39	-0.01562447		2422.38	0.01086822		2952.41	-0.00268709		3482.4	0.00443246		4012.4	-0.0059717
302.59	0.11946194		832.59	0.01130753		1362.58	0.0204611		1892.59	-0.01542742		2422.58	0.01128316		2952.61	-0.00300502		3482.6	0.00430474		4012.6	-0.00548964
302.79	0.11948994		832.79	0.0111626		1362.78	0.02152542		1892.79	-0.01512505		2422.78	0.01117696		2952.81	-0.00317087		3482.8	0.00405745		4012.8	-0.00489046
302.99	0.1182756		832.99	0.01058851		1362.98	0.02171373		1892.99	-0.01569637		2422.98	0.01183005		2953.01	-0.00250087		3483	0.00360121		4013	-0.00495104
303.19	0.11757176		833.19	0.01079126		1363.18	0.02196473		1893.19	-0.01617982		2423.18	0.01122606		2953.21	-0.00217061		3483.2	0.0030732		4013.2	-0.00497111
303.39	0.11744506		833.39	0.01063944		1363.38	0.02194225		1893.39	-0.01663547		2423.38	0.01062818		2953.41	-0.00156564		3483.4	0.00258189		4013.4	-0.0047862
303.59	0.11766125		833.59	0.01079588		1363.58	0.02212455		1893.59	-0.01654997		2423.58	0.01009261		2953.61	-0.0016124		3483.6	0.00254374		4013.6	-0.00583708
303.79	0.11838029		833.79	0.01115882		1363.78	0.02213182		1893.79	-0.01665538		2423.78	0.01081252		2953.81	-0.0015896		3483.8	0.00262158		4013.8	-0.00600544
303.99	0.11976653		833.99	0.01073875		1363.98	0.02207919		1893.99	-0.01588719		2423.98	0.01067961		2954.01	-0.0011197		3484	0.00221751		4014	-0.00584414
304.19	0.11991879		834.19	0.0104754		1364.18	0.0216031		1894.19	-0.01541183		2424.18	0.01013823		2954.21	-0.00164203		3484.2	0.00300248		4014.2	-0.00624786
304.39	0.12073492		834.39	0.01086217		1364.38	0.02004418		1894.39	-0.01495854		2424.38	0.00969295		2954.41	-0.00254052		3484.4	0.00314713		4014.4	-0.00676569
304.59	0.12140102		834.59	0.01113135		1364.58	0.02071078		1894.59	-0.01441108		2424.58	0.00977105		2954.61	-0.00215182		3484.6	0.0041136		4014.6	-0.00619004
304.79	0.12079302		834.79	0.01133729		1364.78	0.02103579		1894.79	-0.01449326		2424.78	0.01006681		2954.81	-0.00290936		3484.8	0.00449335		4014.8	-0.00711693
304.99	0.1209725		834.99	0.01089966		1364.98	0.02134335		1894.99	-0.01442461		2424.98	0.01012223		2955.01	-0.00214783		3485	0.00462138		4015	-0.00766476
305.19	0.12122917		835.19	0.01013128		1365.18	0.02162682		1895.19	-0.01430666		2425.18	0.00980715		2955.21	-0.00173326		3485.2	0.00449849		4015.2	-0.00779018
305.39	0.12193808		835.39	0.01002297		1365.38	0.02076874		1895.39	-0.01506109		2425.38	0.00933084		2955.41	-0.00194524		3485.4	0.00359863		4015.4	-0.0082798
305.59	0.12250288		835.59	0.01035685		1365.58	0.02064425		1895.59	-0.014591		2425.58	0.00952695		2955.61	-0.00183888		3485.6	0.0044322		4015.6	-0.00879144
305.79	0.12296375		835.79	0.01006355		1365.78	0.01936506		1895.79	-0.01404435		2425.78	0.00859241		2955.81	-0.00178962		3485.8	0.00347069		4015.8	-0.00874664
305.99	0.12372195		835.99	0.00979622		1365.98	0.01833123		1895.99	-0.01420676		2425.98	0.00795505		2956.01	-0.00192928		3486	0.00299912		4016	-0.00888415
306.19	0.12451068		836.19	0.00940116		1366.18	0.01710734		1896.19	-0.0147802		2426.18	0.00731806		2956.21	-0.00156608		3486.2	0.00214993		4016.2	-0.00851395
306.39	0.12473056		836.39	0.00942854		1366.38	0.01734903		1896.39	-0.01531201		2426.38	0.00664707		2956.41	-0.00188237		3486.4	0.00287718		4016.4	-0.00856691
306.59	0.12526439		836.59	0.00903939		1366.58	0.01769491		1896.59	-0.01585202		2426.58	0.00716572		2956.61	-0.00159325		3486.6	0.00315791		4016.6	-0.00823477
306.79	0.12555257		836.79	0.00851258		1366.78	0.01838913		1896.79	-0.01587444		2426.78	0.00786737		2956.81	-0.00136815		3486.8	0.00324509		4016.8	-0.00748264
306.99	0.12527154		836.99	0.00882993		1366.98	0.01853178		1896.99	-0.01638718		2426.98	0.00816667		2957.01	-0.00070243		3487	0.00375612		4017	-0.00717331
307.19	0.12473324		837.19	0.00921369		1367.18	0.01841013		1897.19	-0.01646442		2427.18	0.00791974		2957.21	-0.00060902		3487.2	0.00364355		4017.2	-0.0067213
307.39	0.12516155		837.39	0.00920681		1367.38	0.0182693		1897.39	-0.01757522		2427.38	0.00889317		2957.41	-0.00049933		3487.4	0.00426225		4017.4	-0.0069436
307.59	0.12542848		837.59	0.00918021		1367.58	0.01855699		1897.59	-0.01762873		2427.58	0.00941952		2957.61	-0.00105166		3487.6	0.00500172		4017.6	-0.00737814
307.79	0.1258183		837.79	0.00978452		1367.78	0.01915891		1897.79	-0.01786348		2427.78	0.01027541		2957.81	-0.00115537		3487.8	0.00536615		4017.8	-0.00635477
307.99	0.12632731		837.99	0.01031698		1367.98	0.02019753		1897.99	-0.01723176		2427.98	0.01046332		2958.01	-0.00194704		3488	0.005439		4018	-0.00642393
308.19	0.12607068		838.19	0.01052529		1368.18	0.02056303		1898.19	-0.01713523		2428.18	0.01055389		2958.21	-0.00271922		3488.2	0.00576059		4018.2	-0.00651036
308.39	0.12686709		838.39	0.01135269		1368.38	0.02021854		1898.39	-0.01709366		2428.38	0.01090157		2958.41	-0.00364825		3488.4	0.00614626		4018.4	-0.00652669
308.59	0.12557886		838.59	0.01111936		1368.58	0.02141474		1898.59	-0.01653124		2428.58	0.01155384		2958.61	-0.00377383		3488.6	0.00707492		4018.6	-0.00655458
308.79	0.12500476		838.79	0.01014053		1368.78	0.02183709		1898.79	-0.01642		2428.78	0.0116746		2958.81	-0.00453604		3488.8	0.00718554		4018.8	-0.00684981
308.99	0.12503043		838.99	0.00947772		1368.98	0.02227813		1898.99	-0.01667176		2428.98	0.01151697		2959.01	-0.00456468		3489	0.00633151		4019	-0.00737291
309.19	0.12548928		839.19	0.00975391		1369.18	0.02223868		1899.19	-0.01574289		2429.18	0.01097997		2959.21	-0.00468516		3489.2	0.00589413		4019.2	-0.00699635
309.39	0.12531166		839.39	0.01027178		1369.38	0.02250027		1899.39	-0.01552663		2429.38	0.00992913		2959.41	-0.00471778		3489.4	0.00535922		4019.4	-0.00768947
309.59	0.12551016		839.59	0.01033874		1369.58	0.0229179		1899.59	-0.01499884		2429.58	0.00933161		2959.61	-0.00402913		3489.6	0.00558607		4019.6	-0.00729848
309.79	0.12549004		839.79	0.0096432		1369.78	0.02318426		1899.79	-0.01563758		2429.78	0.00779916		2959.81	-0.00323638		3489.8	0.00462293		4019.8	-0.007665
309.99	0.12571444		839.99	0.01007634		1369.98	0.02255942		1899.99	-0.01606562		2429.98	0.00780949		2960.01	-0.00247345		3490	0.00428369		4020	-0.00754943
310.19	0.12588406		840.19	0.01056011		1370.18	0.02208469		1900.19	-0.01639458		2430.18	0.00725021		2960.21	-0.00170398		3490.2	0.004184		4020.2	-0.00758092
310.39	0.12537627		840.39	0.01130117		1370.38	0.02225075		1900.39	-0.0158468		2430.38	0.00759429		2960.41	-0.00084444		3490.4	0.00480412		4020.4	-0.00765189
310.59	0.12529488		840.59	0.01084921		1370.58	0.02274336		1900.59	-0.0158419		2430.58	0.00834726		2960.61	0.00030185		3490.6	0.00441351		4020.6	-0.00753189
310.79	0.12448016		840.79	0.0109387		1370.78	0.02319002		1900.79	-0.01497533		2430.78	0.00892519		2960.81	0.00081583		3490.8	0.00349052		4020.8	-0.00571726
310.99	0.12388354		840.99	0.01118721		1370.98	0.02332482		1900.99	-0.01567047		2430.98	0.00873323		2961.01	0.00204524		3491	0.00276015		4021	-0.00559007
311.19	0.1235607		841.19	0.01160638		1371.18	0.02352834		1901.19	-0.0165478		2431.18	0.00888584		2961.21	0.00221443		3491.2	0.0023613		4021.2	-0.00522613
311.39	0.12409441		841.39	0.01114419		1371.38	0.02362482		1901.39	-0.01765537		2431.38	0.00973421		2961.41	0.00270548		3491.4	0.00209393		4021.4	-0.00497713
311.59	0.12487208		841.59	0.01176599		1371.58	0.02393276		1901.59	-0.01759968		2431.58	0.00961063		2961.61	0.00236626		3491.6	0.00149539		4021.6	-0.00468833
311.79	0.12449859		841.79	0.01259095		1371.78	0.02366842		1901.79	-0.01887859		2431.78	0.00946746		2961.81	0.00225549		3491.8	0.00090004		4021.8	-0.00401186
311.99	0.12578891		841.99	0.01209862		1371.98	0.02372585		1901.99	-0.01943891		2431.98	0.00964371		2962.01	0.00143033		3492	0.0009233		4022	-0.00402095
312.19	0.12620695		842.19	0.0112251		1372.18	0.02360819		1902.19	-0.01969726		2432.18	0.00937071		2962.21	0.00153799		3492.2	0.00136107		4022.2	-0.00319744
312.39	0.12540316		842.39	0.01155353		1372.38	0.02258586		1902.39	-0.01904447		2432.38	0.00857336		2962.41	0.0002503		3492.4	0.00149231		4022.4	-0.00306847
312.59	0.1250885		842.59	0.0115954		1372.58	0.02263046		1902.59	-0.01809022		2432.58	0.00950519		2962.61	-0.00073262		3492.6	0.00101952		4022.6	-0.00315301
312.79	0.12547944		842.79	0.01078595		1372.78	0.0226167		1902.79	-0.01694322		2432.78	0.00899984		2962.81	-0.00052609		3492.8	0.00071226		4022.8	-0.00314297
312.99	0.12547922		842.99	0.01059913		1372.98	0.02272639		1902.99	-0.01641587		2432.98	0.00856042		2963.01	-0.00029714		3493	0.00046707		4023	-0.00426865
313.19	0.12679486		843.19	0.01168373		1373.18	0.02264011		1903.19	-0.01580988		2433.18	0.00797521		2963.21	-0.00116103		3493.2	0.00073119		4023.2	-0.00447604
313.39	0.12719481		843.39	0.01132671		1373.38	0.02307229		1903.39	-0.01573103		2433.38	0.00769649		2963.41	-0.0020797		3493.4	0.00109897		4023.4	-0.00500181
313.59	0.12836123		843.59	0.01127347		1373.58	0.02289535		1903.59	-0.01547748		2433.58	0.00709368		2963.61	-0.00190399		3493.6	0.00189385		4023.6	-0.00557629
313.79	0.1282332		843.79	0.01091757		1373.78	0.02275183		1903.79	-0.01468119		2433.78	0.00691109		2963.81	-0.00181135		3493.8	0.00208077		4023.8	-0.00616573
313.99	0.12905238		843.99	0.01188883		1373.98	0.02221494		1903.99	-0.0139104		2433.98	0.00691659		2964.01	-0.00226635		3494	0.00290825		4024	-0.00669211
314.19	0.12886982		844.19	0.01167817		1374.18	0.02165801		1904.19	-0.01300521		2434.18	0.00651494		2964.21	-0.00212027		3494.2	0.00368752		4024.2	-0.00796291
314.39	0.12922573		844.39	0.01165297		1374.38	0.0215632		1904.39	-0.01222992		2434.38	0.00641297		2964.41	-0.00237229		3494.4	0.00404645		4024.4	-0.00897407
314.59	0.12922315		844.59	0.01151702		1374.58	0.02178918		1904.59	-0.01186635		2434.58	0.00668513		2964.61	-0.00241488		3494.6	0.00438587		4024.6	-0.00898363
314.79	0.12967547		844.79	0.01120992		1374.78	0.02227723		1904.79	-0.01288803		2434.78	0.00664347		2964.81	-0.00281625		3494.8	0.00388926		4024.8	-0.00873887
314.99	0.12975212		844.99	0.01144991		1374.98	0.02165793		1904.99	-0.01383247		2434.98	0.00600439		2965.01	-0.0025311		3495	0.00382843		4025	-0.00983877
315.19	0.13026651		845.19	0.01087663		1375.18	0.02149986		1905.19	-0.01411278		2435.18	0.00534841		2965.21	-0.00239727		3495.2	0.00480081		4025.2	-0.00968875
315.39	0.13063535		845.39	0.01008854		1375.38	0.02073043		1905.39	-0.01478087		2435.38	0.00564896		2965.41	-0.00183434		3495.4	0.00477419		4025.4	-0.00952579
315.59	0.13168687		845.59	0.0109162		1375.58	0.0200306		1905.59	-0.01506125		2435.58	0.00539782		2965.61	-0.00240033		3495.6	0.00490549		4025.6	-0.00937165
315.79	0.13183056		845.79	0.01104477		1375.78	0.01990959		1905.79	-0.01642474		2435.78	0.00476797		2965.81	-0.00195706		3495.8	0.00493462		4025.8	-0.00858441
315.99	0.13289702		845.99	0.01079985		1375.98	0.0202295		1905.99	-0.01631253		2435.98	0.00516718		2966.01	-0.00226157		3496	0.00509934		4026	-0.00747636
316.19	0.13180707		846.19	0.01090348		1376.18	0.02014961		1906.19	-0.01587394		2436.18	0.00497794		2966.21	-0.00227186		3496.2	0.00469929		4026.2	-0.00593748
316.39	0.13167092		846.39	0.01131523		1376.38	0.02022644		1906.39	-0.01515619		2436.38	0.00569261		2966.41	-0.00181904		3496.4	0.00364706		4026.4	-0.00551304
316.59	0.13248077		846.59	0.01059767		1376.58	0.02038249		1906.59	-0.01533463		2436.58	0.00606483		2966.61	-0.00145662		3496.6	0.00282661		4026.6	-0.00574807
316.79	0.13219893		846.79	0.01027187		1376.78	0.02178507		1906.79	-0.0146153		2436.78	0.00556775		2966.81	-0.00099354		3496.8	0.00304597		4026.8	-0.00615482
316.99	0.13209791		846.99	0.01040922		1376.98	0.02245771		1906.99	-0.0148446		2436.98	0.00594369		2967.01	-0.0010931		3497	0.00222335		4027	-0.00585264
317.19	0.13258255		847.19	0.01131696		1377.18	0.02296177		1907.19	-0.01539049		2437.18	0.00637212		2967.21	-0.002409		3497.2	0.00190992		4027.2	-0.0051184
317.39	0.13241976		847.39	0.01080927		1377.38	0.02351632		1907.39	-0.0153635		2437.38	0.00640584		2967.41	-0.00261953		3497.4	0.0013074		4027.4	-0.00489722
317.59	0.13257839		847.59	0.0104831		1377.58	0.02397421		1907.59	-0.01516798		2437.58	0.00601504		2967.61	-0.00173378		3497.6	0.00088024		4027.6	-0.00496766
317.79	0.131149		847.79	0.01073748		1377.78	0.02381845		1907.79	-0.01429656		2437.78	0.00690116		2967.81	-0.0019087		3497.8	0.00062517		4027.8	-0.00553762
317.99	0.13144492		847.99	0.01148025		1377.98	0.02375649		1907.99	-0.01452634		2437.98	0.00725249		2968.01	-0.00196625		3498	0.000993		4028	-0.00564076
318.19	0.13122404		848.19	0.01127347		1378.18	0.02360978		1908.19	-0.01377117		2438.18	0.00751174		2968.21	-0.00104563		3498.2	0.00098915		4028.2	-0.00643435
318.39	0.1317092		848.39	0.01128026		1378.38	0.02381344		1908.39	-0.01391457		2438.38	0.00775089		2968.41	-0.0019094		3498.4	0.00131476		4028.4	-0.00718122
318.59	0.13180709		848.59	0.01150756		1378.58	0.02336202		1908.59	-0.01441403		2438.58	0.00855775		2968.61	-0.00172688		3498.6	0.0012651		4028.6	-0.00795621
318.79	0.13189981		848.79	0.01155491		1378.78	0.02280242		1908.79	-0.01548996		2438.78	0.00887257		2968.81	-0.00120596		3498.8	0.00084958		4028.8	-0.00855619
318.99	0.13141341		848.99	0.01177167		1378.98	0.02154081		1908.99	-0.01451567		2438.98	0.00865236		2969.01	-0.00117775		3499	0.00177332		4029	-0.00954985
319.19	0.13244447		849.19	0.0112805		1379.18	0.02131027		1909.19	-0.01494849		2439.18	0.00887685		2969.21	-0.00000799		3499.2	0.00211424		4029.2	-0.00962189
319.39	0.13284995		849.39	0.01120937		1379.38	0.02037652		1909.39	-0.01431708		2439.38	0.01034025		2969.41	-0.00054141		3499.4	0.00279573		4029.4	-0.00999045
319.59	0.13367883		849.59	0.01155815		1379.58	0.01973837		1909.59	-0.01398988		2439.58	0.01055025		2969.61	-0.00124234		3499.6	0.00269782		4029.6	-0.00917468
319.79	0.13407011		849.79	0.01081628		1379.78	0.02071095		1909.79	-0.01414706		2439.78	0.0106834		2969.81	-0.00087046		3499.8	0.00253669		4029.8	-0.00855506
319.99	0.1339881		849.99	0.01077924		1379.98	0.0203776		1909.99	-0.0139476		2439.98	0.01064761		2970.01	-0.00154691		3500	0.00255248		4030	-0.00776962
320.19	0.13425611		850.19	0.01049832		1380.18	0.02044781		1910.19	-0.01426543		2440.18	0.01056341		2970.21	-0.00205578		3500.2	0.00283757		4030.2	-0.00732349
320.39	0.13560797		850.39	0.01103122		1380.38	0.02120863		1910.39	-0.01434864		2440.38	0.01043284		2970.41	-0.0011338		3500.4	0.00266553		4030.4	-0.00731493
320.59	0.13590572		850.59	0.01128139		1380.58	0.02104132		1910.59	-0.01494351		2440.58	0.00980646		2970.61	-0.00163261		3500.6	0.00223228		4030.6	-0.00728752
320.79	0.13594532		850.79	0.01233716		1380.78	0.02245561		1910.79	-0.015465		2440.78	0.00958072		2970.81	-0.00206411		3500.8	0.00285795		4030.8	-0.00709579
320.99	0.13575854		850.99	0.01203957		1380.98	0.02243211		1910.99	-0.01601533		2440.98	0.00955861		2971.01	-0.00236919		3501	0.00238389		4031	-0.00633777
321.19	0.13564898		851.19	0.01273165		1381.18	0.0223576		1911.19	-0.01614762		2441.18	0.0099894		2971.21	-0.0023288		3501.2	0.00254699		4031.2	-0.00649183
321.39	0.1359252		851.39	0.01202243		1381.38	0.02216698		1911.39	-0.01650033		2441.38	0.00954754		2971.41	-0.00128468		3501.4	0.00226201		4031.4	-0.00612657
321.59	0.13632372		851.59	0.01194148		1381.58	0.0222261		1911.59	-0.01697134		2441.58	0.00945495		2971.61	-0.000763		3501.6	0.00267154		4031.6	-0.00637598
321.79	0.13544574		851.79	0.01256761		1381.78	0.02217327		1911.79	-0.01670564		2441.78	0.01002161		2971.81	-0.00151915		3501.8	0.00316876		4031.8	-0.00652097
321.99	0.13632137		851.99	0.01200716		1381.98	0.02278012		1911.99	-0.01697981		2441.98	0.00974306		2972.01	-0.00112667		3502	0.00325132		4032	-0.00600311
322.19	0.13712683		852.19	0.01161458		1382.18	0.0234119		1912.19	-0.01691768		2442.18	0.00895049		2972.21	-0.00095882		3502.2	0.00318218		4032.2	-0.00668086
322.39	0.13714405		852.39	0.0113477		1382.38	0.02214472		1912.39	-0.01690922		2442.38	0.00926553		2972.41	-0.00166226		3502.4	0.00253727		4032.4	-0.00670117
322.59	0.13678851		852.59	0.01137329		1382.58	0.02191578		1912.59	-0.01723305		2442.58	0.00928809		2972.61	-0.00130257		3502.6	0.00234255		4032.6	-0.00745797
322.79	0.13648397		852.79	0.01115268		1382.78	0.02170671		1912.79	-0.01652562		2442.78	0.00890452		2972.81	-0.00052613		3502.8	0.0019684		4032.8	-0.00714594
322.99	0.13601237		852.99	0.01011537		1382.98	0.02212187		1912.99	-0.01514232		2442.98	0.00883064		2973.01	-0.00014861		3503	0.00273998		4033	-0.00794156
323.19	0.13599539		853.19	0.00931072		1383.18	0.02217686		1913.19	-0.01490635		2443.18	0.00885049		2973.21	-0.00002258		3503.2	0.00341387		4033.2	-0.00852375
323.39	0.13640661		853.39	0.00884547		1383.38	0.02183942		1913.39	-0.01353563		2443.38	0.00937661		2973.41	-0.00081707		3503.4	0.00326713		4033.4	-0.00815859
323.59	0.13644103		853.59	0.00900207		1383.58	0.02213502		1913.59	-0.01340357		2443.58	0.00902709		2973.61	-0.00150908		3503.6	0.00254703		4033.6	-0.00804772
323.79	0.13679842		853.79	0.0093871		1383.78	0.02302575		1913.79	-0.01295873		2443.78	0.00831256		2973.81	-0.0013037		3503.8	0.00256579		4033.8	-0.00787362
323.99	0.13761141		853.99	0.01016326		1383.98	0.02332819		1913.99	-0.01281463		2443.98	0.00780437		2974.01	-0.00255613		3504	0.00301101		4034	-0.00769845
324.19	0.13789986		854.19	0.01144233		1384.18	0.02374555		1914.19	-0.01270825		2444.18	0.00806595		2974.21	-0.0026284		3504.2	0.00314289		4034.2	-0.00751777
324.39	0.13717636		854.39	0.01276486		1384.38	0.02456424		1914.39	-0.01262235		2444.38	0.00791102		2974.41	-0.0023035		3504.4	0.00288631		4034.4	-0.00755782
324.59	0.13721116		854.59	0.01327399		1384.58	0.02452479		1914.59	-0.0127069		2444.58	0.00814904		2974.61	-0.00302362		3504.6	0.00290527		4034.6	-0.00735755
324.79	0.13724617		854.79	0.01322893		1384.78	0.02586167		1914.79	-0.01369459		2444.78	0.00875163		2974.81	-0.003185		3504.8	0.00370401		4034.8	-0.00777322
324.99	0.13756133		854.99	0.01379221		1384.98	0.02650184		1914.99	-0.01394942		2444.98	0.00962185		2975.01	-0.002989		3505	0.00392289		4035	-0.00864144
325.19	0.13811196		855.19	0.01493139		1385.18	0.02665816		1915.19	-0.0145658		2445.18	0.0093644		2975.21	-0.00340825		3505.2	0.00386085		4035.2	-0.00916575
325.39	0.13807415		855.39	0.01490766		1385.38	0.02660756		1915.39	-0.01550319		2445.38	0.00841919		2975.41	-0.00385254		3505.4	0.00432402		4035.4	-0.0093498
325.59	0.13894197		855.59	0.01518434		1385.58	0.02728811		1915.59	-0.01586434		2445.58	0.00882722		2975.61	-0.00428702		3505.6	0.00491824		4035.6	-0.0092861
325.79	0.13883212		855.79	0.01519323		1385.78	0.02762295		1915.79	-0.01654408		2445.78	0.00895096		2975.81	-0.00515586		3505.8	0.0044518		4035.8	-0.00915417
325.99	0.13872978		855.99	0.01512094		1385.98	0.02687068		1915.99	-0.01646508		2445.98	0.00876211		2976.01	-0.00491369		3506	0.00456941		4036	-0.00855227
326.19	0.13870266		856.19	0.01440983		1386.18	0.02608075		1916.19	-0.01720838		2446.18	0.00904104		2976.21	-0.00525275		3506.2	0.00496671		4036.2	-0.00824171
326.39	0.13766208		856.39	0.01486886		1386.38	0.02481885		1916.39	-0.01747805		2446.38	0.00965417		2976.41	-0.0051388		3506.4	0.00482543		4036.4	-0.00840024
326.59	0.13751354		856.59	0.01400685		1386.58	0.02501636		1916.59	-0.01770902		2446.58	0.00996638		2976.61	-0.00419654		3506.6	0.0051073		4036.6	-0.00842289
326.79	0.13745073		856.79	0.01331283		1386.78	0.02413477		1916.79	-0.01777698		2446.78	0.00968358		2976.81	-0.00327307		3506.8	0.00504891		4036.8	-0.00820329
326.99	0.13707766		856.99	0.01212451		1386.98	0.02410992		1916.99	-0.01733492		2446.98	0.01007087		2977.01	-0.00316099		3507	0.00585203		4037	-0.00852427
327.19	0.1376756		857.19	0.01200831		1387.18	0.02306143		1917.19	-0.0175462		2447.18	0.00974613		2977.21	-0.00312593		3507.2	0.00545203		4037.2	-0.00869292
327.39	0.13859754		857.39	0.01118821		1387.38	0.02229487		1917.39	-0.01736775		2447.38	0.00927101		2977.41	-0.00234628		3507.4	0.00460904		4037.4	-0.00785793
327.59	0.13920182		857.59	0.0117603		1387.58	0.02207845		1917.59	-0.01766967		2447.58	0.00889626		2977.61	-0.00264202		3507.6	0.00454506		4037.6	-0.00798085
327.79	0.1390187		857.79	0.01109653		1387.78	0.02191201		1917.79	-0.01729121		2447.78	0.00799233		2977.81	-0.00265038		3507.8	0.00403058		4037.8	-0.00680257
327.99	0.14035646		857.99	0.0106303		1387.98	0.0218347		1917.99	-0.01652651		2447.98	0.00764066		2978.01	-0.00189671		3508	0.00356067		4038	-0.0067929
328.19	0.13969838		858.19	0.01136677		1388.18	0.0213087		1918.19	-0.01669724		2448.18	0.00735219		2978.21	-0.00112868		3508.2	0.00338259		4038.2	-0.00726576
328.39	0.13974103		858.39	0.01069211		1388.38	0.02177537		1918.39	-0.0161966		2448.38	0.00699949		2978.41	-0.00113521		3508.4	0.00274251		4038.4	-0.00696159
328.59	0.14155568		858.59	0.01055215		1388.58	0.02155606		1918.59	-0.01575606		2448.58	0.00685482		2978.61	-0.00112962		3508.6	0.00191212		4038.6	-0.00694159
328.79	0.14267907		858.79	0.01076922		1388.78	0.02215938		1918.79	-0.01640289		2448.78	0.00713357		2978.81	-0.00139149		3508.8	0.00179529		4038.8	-0.00752367
328.99	0.1429148		858.99	0.01176917		1388.98	0.02255887		1918.99	-0.01550283		2448.98	0.00619696		2979.01	-0.00130119		3509	0.00134671		4039	-0.00814757
329.19	0.14286136		859.19	0.01197434		1389.18	0.02275635		1919.19	-0.01503572		2449.18	0.00537298		2979.21	-0.00148938		3509.2	0.00117593		4039.2	-0.00825483
329.39	0.14269183		859.39	0.01140359		1389.38	0.02272286		1919.39	-0.0145745		2449.38	0.00565185		2979.41	-0.00126297		3509.4	0.001486		4039.4	-0.00729608
329.59	0.14343829		859.59	0.01126435		1389.58	0.02288166		1919.59	-0.01393766		2449.58	0.00702887		2979.61	-0.00114605		3509.6	0.00172725		4039.6	-0.00662971
329.79	0.14337424		859.79	0.01153136		1389.78	0.02272189		1919.79	-0.01380622		2449.78	0.00691537		2979.81	-0.00133056		3509.8	0.00203687		4039.8	-0.00721009
329.99	0.14332078		859.99	0.01181046		1389.98	0.02304596		1919.99	-0.01299933		2449.98	0.00752193		2980.01	-0.00075596		3510	0.00329209		4040	-0.00711138
330.19	0.14366733		860.19	0.0116689		1390.18	0.02351984		1920.19	-0.01383473		2450.18	0.00837071		2980.21	-0.00083197		3510.2	0.00410946		4040.2	-0.00738559
330.39	0.14287575		860.39	0.01244866		1390.38	0.02351545		1920.39	-0.01432498		2450.38	0.00917441		2980.41	-0.00035935		3510.4	0.00429666		4040.4	-0.0078116
330.59	0.14218655		860.59	0.01168185		1390.58	0.02394014		1920.59	-0.01460264		2450.58	0.00995191		2980.61	-0.00078593		3510.6	0.00523836		4040.6	-0.00717731
330.79	0.14169683		860.79	0.01206726		1390.78	0.02465783		1920.79	-0.01468162		2450.78	0.01013767		2980.81	-0.00098429		3510.8	0.00487086		4040.8	-0.00717835
330.99	0.14144348		860.99	0.01242858		1390.98	0.02488913		1920.99	-0.01444058		2450.98	0.01075733		2981.01	-0.00128276		3511	0.0045412		4041	-0.00681903
331.19	0.14155426		861.19	0.01229897		1391.18	0.02462489		1921.19	-0.0148003		2451.18	0.01035775		2981.21	-0.00176025		3511.2	0.00407653		4041.2	-0.0063325
331.39	0.14201551		861.39	0.01234022		1391.38	0.02529837		1921.39	-0.01463654		2451.38	0.00987207		2981.41	-0.00220635		3511.4	0.00394013		4041.4	-0.00621789
331.59	0.14238968		861.59	0.01326428		1391.58	0.02592084		1921.59	-0.01459196		2451.58	0.01009726		2981.61	-0.002685		3511.6	0.00323576		4041.6	-0.0062047
331.79	0.14120105		861.79	0.01289845		1391.78	0.02664465		1921.79	-0.01498939		2451.78	0.00959881		2981.81	-0.00254475		3511.8	0.00190294		4041.8	-0.0053072
331.99	0.14220885		861.99	0.01385757		1391.98	0.02641497		1921.99	-0.01489028		2451.98	0.00882972		2982.01	-0.00183182		3512	0.00116614		4042	-0.00616539
332.19	0.141378		862.19	0.01397107		1392.18	0.02615003		1922.19	-0.01464147		2452.18	0.00832161		2982.21	-0.00230905		3512.2	0.00061603		4042.2	-0.00638737
332.39	0.14172217		862.39	0.01367464		1392.38	0.02661178		1922.39	-0.01408824		2452.38	0.00830276		2982.41	-0.00247118		3512.4	-0.00006113		4042.4	-0.00594417
332.59	0.14209395		862.59	0.01418186		1392.58	0.0258279		1922.59	-0.01390541		2452.58	0.00761156		2982.61	-0.00285346		3512.6	-0.00011228		4042.6	-0.00621307
332.79	0.14169962		862.79	0.01375836		1392.78	0.02582173		1922.79	-0.01421994		2452.78	0.00829268		2982.81	-0.00303962		3512.8	-0.00064949		4042.8	-0.00665998
332.99	0.14058364		862.99	0.01292271		1392.98	0.02569462		1922.99	-0.01396797		2452.98	0.0077604		2983.01	-0.00305281		3513	-0.00088917		4043	-0.00785811
333.19	0.14072143		863.19	0.01221301		1393.18	0.02469009		1923.19	-0.01364117		2453.18	0.00699486		2983.21	-0.00321931		3513.2	-0.00072449		4043.2	-0.00834195
333.39	0.14076502		863.39	0.01163626		1393.38	0.02419756		1923.39	-0.01382406		2453.38	0.00758864		2983.41	-0.00352033		3513.4	-0.00070802		4043.4	-0.00821364
333.59	0.14096648		863.59	0.01173742		1393.58	0.02434878		1923.59	-0.01427892		2453.58	0.0081378		2983.61	-0.00389504		3513.6	-0.00015632		4043.6	-0.00923779
333.79	0.14191203		863.79	0.01128172		1393.78	0.02429071		1923.79	-0.01460983		2453.78	0.00853667		2983.81	-0.00309055		3513.8	0.00031017		4043.8	-0.01002071
333.99	0.14180113		863.99	0.01147632		1393.98	0.02486713		1923.99	-0.01544234		2453.98	0.00963764		2984.01	-0.00316655		3514	0.00102878		4044	-0.01004439
334.19	0.14189707		864.19	0.01148821		1394.18	0.02440136		1924.19	-0.01621533		2454.18	0.00961561		2984.21	-0.00251051		3514.2	0.00106001		4044.2	-0.01015024
334.39	0.14177023		864.39	0.01089014		1394.38	0.02372709		1924.39	-0.01737062		2454.38	0.01023995		2984.41	-0.00241351		3514.4	0.00081726		4044.4	-0.01073666
334.59	0.14162056		864.59	0.0097174		1394.58	0.02422228		1924.59	-0.01663958		2454.58	0.01101199		2984.61	-0.00229296		3514.6	0.00134498		4044.6	-0.01009274
334.79	0.14227281		864.79	0.00928432		1394.78	0.02380711		1924.79	-0.01698834		2454.78	0.01117572		2984.81	-0.00194009		3514.8	0.00033989		4044.8	-0.00988802
334.99	0.1423905		864.99	0.00898144		1394.98	0.02392892		1924.99	-0.01719986		2454.98	0.01161604		2985.01	-0.00303425		3515	0.00005004		4045	-0.01010777
335.19	0.14336386		865.19	0.00877639		1395.18	0.02466384		1925.19	-0.01781932		2455.18	0.01111999		2985.21	-0.00320263		3515.2	0.00025267		4045.2	-0.00938192
335.39	0.14426482		865.39	0.00847756		1395.38	0.02589786		1925.39	-0.01799534		2455.38	0.01091115		2985.41	-0.00230063		3515.4	0.000035		4045.4	-0.00952661
335.59	0.14399087		865.59	0.00881162		1395.58	0.0263624		1925.59	-0.01825721		2455.58	0.01129759		2985.61	-0.00227703		3515.6	-0.00045181		4045.6	-0.00971551
335.79	0.14319253		865.79	0.00905884		1395.78	0.02686756		1925.79	-0.01838201		2455.78	0.01091331		2985.81	-0.00221158		3515.8	-0.00123241		4045.8	-0.00909827
335.99	0.14357383		865.99	0.00900156		1395.98	0.02623631		1925.99	-0.01777724		2455.98	0.01036867		2986.01	-0.00217292		3516	-0.00050833		4046	-0.00946653
336.19	0.14376687		866.19	0.00889991		1396.18	0.02641219		1926.19	-0.01709234		2456.18	0.01057827		2986.21	-0.00175753		3516.2	0.00009811		4046.2	-0.00865406
336.39	0.14411601		866.39	0.00897699		1396.38	0.02671916		1926.39	-0.01707363		2456.38	0.01065579		2986.41	-0.00130722		3516.4	0.00098405		4046.4	-0.00810546
336.59	0.14492115		866.59	0.00878725		1396.58	0.02619409		1926.59	-0.01740553		2456.58	0.01069876		2986.61	-0.00221803		3516.6	0.00074913		4046.6	-0.00825235
336.79	0.1447207		866.79	0.00795108		1396.78	0.02686009		1926.79	-0.01829347		2456.78	0.01121767		2986.81	-0.00287365		3516.8	0.00065901		4046.8	-0.00863619
336.99	0.1451743		866.99	0.00847821		1396.98	0.02666562		1926.99	-0.01810852		2456.98	0.01013009		2987.01	-0.00342773		3517	0.00211671		4047	-0.0094653
337.19	0.14542108		867.19	0.00865901		1397.18	0.0265976		1927.19	-0.01745949		2457.18	0.00951301		2987.21	-0.00319132		3517.2	0.00182405		4047.2	-0.00879767
337.39	0.14511292		867.39	0.00962552		1397.38	0.02654632		1927.39	-0.01802462		2457.38	0.01020663		2987.41	-0.00307597		3517.4	0.00168925		4047.4	-0.00867789
337.59	0.1452934		867.59	0.00983798		1397.58	0.02627307		1927.59	-0.01863244		2457.58	0.00948528		2987.61	-0.00368298		3517.6	0.00106469		4047.6	-0.00844039
337.79	0.14618009		867.79	0.01043943		1397.78	0.02605981		1927.79	-0.0189545		2457.78	0.00952378		2987.81	-0.00361862		3517.8	0.00149456		4047.8	-0.00811923
337.99	0.14656765		867.99	0.01107134		1397.98	0.02630853		1927.99	-0.01868637		2457.98	0.00901378		2988.01	-0.00349269		3518	0.00144498		4048	-0.00773423
338.19	0.14741184		868.19	0.01036087		1398.18	0.02571055		1928.19	-0.01919282		2458.18	0.00788463		2988.21	-0.00279402		3518.2	0.00155781		4048.2	-0.00730107
338.39	0.14813071		868.39	0.00975777		1398.38	0.02584104		1928.39	-0.0186633		2458.38	0.0082781		2988.41	-0.00364949		3518.4	0.00248666		4048.4	-0.007076
338.59	0.14784051		868.59	0.00860002		1398.58	0.02571685		1928.59	-0.01749277		2458.58	0.00841163		2988.61	-0.00321387		3518.6	0.00383537		4048.6	-0.0061787
338.79	0.14849201		868.79	0.00816212		1398.78	0.02629687		1928.79	-0.01723349		2458.78	0.00783567		2988.81	-0.00398584		3518.8	0.00403303		4048.8	-0.00630838
338.99	0.1485587		868.99	0.0079025		1398.98	0.02697969		1928.99	-0.01663328		2458.98	0.00803163		2989.01	-0.00435404		3519	0.00464126		4049	-0.00677373
339.19	0.14911304		869.19	0.0076361		1399.18	0.02657356		1929.19	-0.01621709		2459.18	0.00773839		2989.21	-0.00336553		3519.2	0.00545474		4049.2	-0.00600098
339.39	0.14816884		869.39	0.0073039		1399.38	0.02601403		1929.39	-0.01567475		2459.38	0.00772981		2989.41	-0.00227268		3519.4	0.00496345		4049.4	-0.00614993
339.59	0.14778434		869.59	0.00784366		1399.58	0.02580973		1929.59	-0.01507241		2459.58	0.00730231		2989.61	-0.00225708		3519.6	0.00460239		4049.6	-0.00740147
339.79	0.14761495		869.79	0.00740536		1399.78	0.02548488		1929.79	-0.01474553		2459.78	0.00668119		2989.81	-0.00216567		3519.8	0.00464681		4049.8	-0.00700712
339.99	0.14706962		869.99	0.00794299		1399.98	0.02498013		1929.99	-0.0144473		2459.98	0.00678931		2990.01	-0.00217298		3520	0.00499529		4050	-0.006891
340.19	0.14719801		870.19	0.00874944		1400.18	0.02534468		1930.19	-0.01397913		2460.18	0.00706521		2990.21	-0.00190532		3520.2	0.00510892		4050.2	-0.00711379
340.39	0.14736978		870.39	0.0093687		1400.38	0.02493911		1930.39	-0.01341045		2460.38	0.00720915		2990.41	-0.00225994		3520.4	0.00509847		4050.4	-0.00734975
340.59	0.14787722		870.59	0.01038057		1400.58	0.02476949		1930.59	-0.01314165		2460.58	0.00734254		2990.61	-0.00298175		3520.6	0.00476149		4050.6	-0.00832487
340.79	0.14770928		870.79	0.01115968		1400.78	0.02501304		1930.79	-0.01337714		2460.78	0.00725323		2990.81	-0.00300163		3520.8	0.00477705		4050.8	-0.00862256
340.99	0.14761584		870.99	0.01217888		1400.98	0.02464001		1930.99	-0.0123453		2460.98	0.00717988		2991.01	-0.00367283		3521	0.00428597		4051	-0.00849017
341.19	0.14746053		871.19	0.01227286		1401.18	0.02520426		1931.19	-0.01273064		2461.18	0.00742981		2991.21	-0.00416889		3521.2	0.0018575		4051.2	-0.00767831
341.39	0.14705237		871.39	0.01352177		1401.38	0.02519262		1931.39	-0.01361529		2461.38	0.00793472		2991.41	-0.00467009		3521.4	0.0009476		4051.4	-0.00823911
341.59	0.14797514		871.59	0.01397459		1401.58	0.02498887		1931.59	-0.014566		2461.58	0.00782065		2991.61	-0.00516613		3521.6	0.00016235		4051.6	-0.0082023
341.79	0.14815019		871.79	0.01485227		1401.78	0.02535003		1931.79	-0.01536956		2461.78	0.00839973		2991.81	-0.00485027		3521.8	0.00116512		4051.8	-0.00824465
341.99	0.1486422		871.99	0.01480879		1401.98	0.02532435		1931.99	-0.01627988		2461.98	0.0088498		2992.01	-0.00439062		3522	0.00064598		4052	-0.0084144
342.19	0.14901955		872.19	0.01491082		1402.18	0.02580401		1932.19	-0.01714174		2462.18	0.00862415		2992.21	-0.0049145		3522.2	0.00129447		4052.2	-0.00771445
342.39	0.14915566		872.39	0.01436577		1402.38	0.02651259		1932.39	-0.01644431		2462.38	0.00937845		2992.41	-0.00542754		3522.4	0.00170309		4052.4	-0.00842086
342.59	0.1493775		872.59	0.01364014		1402.58	0.02703747		1932.59	-0.01682936		2462.58	0.00937113		2992.61	-0.0050524		3522.6	0.00172243		4052.6	-0.0084709
342.79	0.15004017		872.79	0.01283635		1402.78	0.02749912		1932.79	-0.01720077		2462.78	0.00955408		2992.81	-0.00463117		3522.8	0.00144977		4052.8	-0.00865544
342.99	0.15044933		872.99	0.01281886		1402.98	0.0274018		1932.99	-0.01821909		2462.98	0.0104557		2993.01	-0.00357397		3523	0.00225344		4053	-0.00957054
343.19	0.15100727		873.19	0.01258759		1403.18	0.02696809		1933.19	-0.01786592		2463.18	0.01112984		2993.21	-0.00300121		3523.2	0.00249668		4053.2	-0.00893175
343.39	0.15087489		873.39	0.01248114		1403.38	0.02656163		1933.39	-0.01922167		2463.38	0.01047208		2993.41	-0.00183738		3523.4	0.00272302		4053.4	-0.00909946
343.59	0.15165356		873.59	0.01243968		1403.58	0.02695364		1933.59	-0.01931028		2463.58	0.01022826		2993.61	-0.00248598		3523.6	0.00275841		4053.6	-0.00965427
343.79	0.15155678		873.79	0.01264972		1403.78	0.02693346		1933.79	-0.01966645		2463.78	0.0102174		2993.81	-0.00218053		3523.8	0.00347168		4053.8	-0.00857894
343.99	0.15129683		873.99	0.01254		1403.98	0.02664502		1933.99	-0.01937368		2463.98	0.0104003		2994.01	-0.00158464		3524	0.00357617		4054	-0.00781869
344.19	0.15180256		874.19	0.01209689		1404.18	0.02675862		1934.19	-0.01954313		2464.18	0.01030961		2994.21	-0.00133688		3524.2	0.00428525		4054.2	-0.00852684
344.39	0.15219645		874.39	0.01097085		1404.38	0.02603255		1934.39	-0.01898995		2464.38	0.00928553		2994.41	-0.00101222		3524.4	0.00459904		4054.4	-0.00784452
344.59	0.15271865		874.59	0.01104158		1404.58	0.02534254		1934.59	-0.01869823		2464.58	0.00934711		2994.61	-0.00131996		3524.6	0.00490664		4054.6	-0.00799958
344.79	0.15253782		874.79	0.01033697		1404.78	0.02488623		1934.79	-0.01922583		2464.78	0.00929258		2994.81	-0.00179662		3524.8	0.00467944		4054.8	-0.00715927
344.99	0.15284721		874.99	0.00965725		1404.98	0.02471925		1934.99	-0.01920072		2464.98	0.0090813		2995.01	-0.00264106		3525	0.00450067		4055	-0.00692498
345.19	0.1534629		875.19	0.0099828		1405.18	0.02539871		1935.19	-0.01945621		2465.18	0.00872367		2995.21	-0.00216249		3525.2	0.00358827		4055.2	-0.00620608
345.39	0.15328073		875.39	0.01052754		1405.38	0.025341		1935.39	-0.01914294		2465.38	0.00830159		2995.41	-0.00164652		3525.4	0.00339103		4055.4	-0.00627581
345.59	0.1536677		875.59	0.01060686		1405.58	0.02515971		1935.59	-0.01885543		2465.58	0.00694126		2995.61	-0.0017314		3525.6	0.00348578		4055.6	-0.00612482
345.79	0.15237619		875.79	0.01092597		1405.78	0.02577527		1935.79	-0.01911235		2465.78	0.00675105		2995.81	-0.00142161		3525.8	0.00369724		4055.8	-0.00674305
345.99	0.15254954		875.99	0.01148826		1405.98	0.02607904		1935.99	-0.01956077		2465.98	0.00615212		2996.01	-0.0013749		3526	0.00290193		4056	-0.00682964
346.19	0.15252121		876.19	0.01207859		1406.18	0.02664469		1936.19	-0.01872975		2466.18	0.00584251		2996.21	-0.00147105		3526.2	0.00289749		4056.2	-0.0063898
346.39	0.15232118		876.39	0.01124499		1406.38	0.02652624		1936.39	-0.01827942		2466.38	0.00679591		2996.41	-0.00176677		3526.4	0.00297431		4056.4	-0.00715572
346.59	0.15277202		876.59	0.01216276		1406.58	0.02677571		1936.59	-0.01833834		2466.58	0.00705559		2996.61	-0.00218322		3526.6	0.00272529		4056.6	-0.00739678
346.79	0.1528244		876.79	0.0132938		1406.78	0.02616857		1936.79	-0.01805089		2466.78	0.00697803		2996.81	-0.0015004		3526.8	0.00286093		4056.8	-0.0077831
346.99	0.15311471		876.99	0.01425591		1406.98	0.02693326		1936.99	-0.01807049		2466.98	0.00712857		2997.01	-0.00157275		3527	0.00294788		4057	-0.00720017
347.19	0.15276811		877.19	0.01473247		1407.18	0.02560432		1937.19	-0.01649956		2467.18	0.00702591		2997.21	-0.00173394		3527.2	0.00287406		4057.2	-0.00655517
347.39	0.15231152		877.39	0.01603924		1407.38	0.02537553		1937.39	-0.01740526		2467.38	0.00668503		2997.41	-0.00156655		3527.4	0.00235418		4057.4	-0.0069927
347.59	0.15167964		877.59	0.01601011		1407.58	0.02589434		1937.59	-0.01652668		2467.58	0.00760143		2997.61	-0.00216189		3527.6	0.00205052		4057.6	-0.00737023
347.79	0.15086258		877.79	0.0156367		1407.78	0.02625617		1937.79	-0.01664751		2467.78	0.00803797		2997.81	-0.00123673		3527.8	0.00257589		4057.8	-0.00754277
347.99	0.15076568		877.99	0.01507633		1407.98	0.02645277		1937.99	-0.01665947		2467.98	0.00831557		2998.01	-0.00147892		3528	0.00223058		4058	-0.00812811
348.19	0.15042185		878.19	0.01418391		1408.18	0.02593846		1938.19	-0.01700493		2468.18	0.00868504		2998.21	-0.00217062		3528.2	0.00308546		4058.2	-0.008888
348.39	0.15059009		878.39	0.01354552		1408.38	0.02545467		1938.39	-0.01651076		2468.38	0.00869878		2998.41	-0.0029647		3528.4	0.00311891		4058.4	-0.00822474
348.59	0.15143472		878.59	0.0137578		1408.58	0.02505397		1938.59	-0.01683268		2468.58	0.01044831		2998.61	-0.00349117		3528.6	0.00358329		4058.6	-0.00862937
348.79	0.1521106		878.79	0.01338363		1408.78	0.0257721		1938.79	-0.01686461		2468.78	0.01034186		2998.81	-0.00359094		3528.8	0.00343086		4058.8	-0.00793057
348.99	0.1535747		878.99	0.01309373		1408.98	0.02635154		1938.99	-0.01687232		2468.98	0.01051792		2999.01	-0.00352207		3529	0.00259503		4059	-0.00706009
349.19	0.15406612		879.19	0.01330025		1409.18	0.02718398		1939.19	-0.01611159		2469.18	0.01048908		2999.21	-0.00286142		3529.2	0.0022006		4059.2	-0.00638928
349.39	0.15450319		879.39	0.01262125		1409.38	0.02782361		1939.39	-0.01537185		2469.38	0.01059529		2999.41	-0.00341386		3529.4	0.002036		4059.4	-0.00688282
349.59	0.15512626		879.59	0.01292728		1409.58	0.02803117		1939.59	-0.01597704		2469.58	0.01046877		2999.61	-0.00322925		3529.6	0.00324848		4059.6	-0.00765809
349.79	0.15551094		879.79	0.01304142		1409.78	0.02846304		1939.79	-0.01725008		2469.78	0.01123824		2999.81	-0.00309209		3529.8	0.00326403		4059.8	-0.00785091
349.99	0.15625308		879.99	0.0135275		1409.98	0.02856371		1939.99	-0.01773842		2469.98	0.01155689		3000.01	-0.00319252		3530	0.00317424		4060	-0.00711322
350.19	0.15662036		880.19	0.01314285		1410.18	0.02836223		1940.19	-0.01757945		2470.18	0.01291967		3000.21	-0.00315458		3530.2	0.00389468		4060.2	-0.0074414
350.39	0.15713653		880.39	0.01263222		1410.38	0.02783943		1940.39	-0.01744047		2470.38	0.01314659		3000.41	-0.00379525		3530.4	0.00455506		4060.4	-0.00751538
350.59	0.15719747		880.59	0.01288951		1410.58	0.02838206		1940.59	-0.0180586		2470.58	0.01251515		3000.61	-0.00358585		3530.6	0.00413345		4060.6	-0.00758772
350.79	0.15778688		880.79	0.01328521		1410.78	0.02833887		1940.79	-0.01768601		2470.78	0.011502		3000.81	-0.00304334		3530.8	0.00454995		4060.8	-0.00834382
350.99	0.15760992		880.99	0.01345775		1410.98	0.02879213		1940.99	-0.01798899		2470.98	0.01109685		3001.01	-0.00281584		3531	0.00462883		4061	-0.00795025
351.19	0.1573417		881.19	0.01447363		1411.18	0.02787644		1941.19	-0.0171921		2471.18	0.01005534		3001.21	-0.0029374		3531.2	0.00536203		4061.2	-0.00805378
351.39	0.15648718		881.39	0.01536857		1411.38	0.02763444		1941.39	-0.01662752		2471.38	0.00955623		3001.41	-0.00364617		3531.4	0.00495018		4061.4	-0.00861043
351.59	0.15536652		881.59	0.01503765		1411.58	0.02802137		1941.59	-0.01668553		2471.58	0.00902208		3001.61	-0.00397262		3531.6	0.00508049		4061.6	-0.00893693
351.79	0.15485322		881.79	0.01581039		1411.78	0.02795458		1941.79	-0.01689668		2471.78	0.00829363		3001.81	-0.00265094		3531.8	0.00478285		4061.8	-0.00908125
351.99	0.15486324		881.99	0.01560613		1411.98	0.02813899		1941.99	-0.01832645		2471.98	0.00789618		3002.01	-0.00261864		3532	0.00451627		4062	-0.00907984
352.19	0.155127		882.19	0.01490523		1412.18	0.02771058		1942.19	-0.01811517		2472.18	0.00719147		3002.21	-0.00263824		3532.2	0.00470532		4062.2	-0.00825682
352.39	0.15550425		882.39	0.01448278		1412.38	0.02785845		1942.39	-0.01745593		2472.38	0.00720801		3002.41	-0.00188909		3532.4	0.00414538		4062.4	-0.00771501
352.59	0.15627419		882.59	0.01388567		1412.58	0.02839395		1942.59	-0.01711247		2472.58	0.00760061		3002.61	-0.00127341		3532.6	0.00413454		4062.6	-0.00736872
352.79	0.15651027		882.79	0.0139809		1412.78	0.02835842		1942.79	-0.01648281		2472.78	0.00676848		3002.81	-0.00143962		3532.8	0.00377236		4062.8	-0.00647717
352.99	0.15644564		882.99	0.01360998		1412.98	0.02835732		1942.99	-0.01662568		2472.98	0.00704944		3003.01	-0.00107749		3533	0.00312067		4063	-0.00550621
353.19	0.15658132		883.19	0.01335501		1413.18	0.02882819		1943.19	-0.01617794		2473.18	0.00786557		3003.21	-0.00086437		3533.2	0.00396674		4063.2	-0.00650268
353.39	0.1568341		883.39	0.01337191		1413.38	0.02807953		1943.39	-0.01695702		2473.38	0.00826559		3003.41	-0.00140272		3533.4	0.00475018		4063.4	-0.00691048
353.59	0.1569476		883.59	0.01366011		1413.58	0.02745358		1943.59	-0.01793411		2473.58	0.00876448		3003.61	-0.00141328		3533.6	0.0054449		4063.6	-0.00731874
353.79	0.15765018		883.79	0.01362902		1413.78	0.02778111		1943.79	-0.01829136		2473.78	0.00978683		3003.81	-0.00201695		3533.8	0.0048098		4063.8	-0.00722998
353.99	0.15716598		883.99	0.01373536		1413.98	0.02787963		1943.99	-0.01825994		2473.98	0.01071076		3004.01	-0.00191637		3534	0.00421301		4064	-0.00742322
354.19	0.15733617		884.19	0.01318409		1414.18	0.02814016		1944.19	-0.01748031		2474.18	0.01126025		3004.21	-0.0024993		3534.2	0.004205		4064.2	-0.00812561
354.39	0.1585531		884.39	0.01383354		1414.38	0.02785112		1944.39	-0.01653413		2474.38	0.01065574		3004.41	-0.00314167		3534.4	0.00378495		4064.4	-0.00875316
354.59	0.15858477		884.59	0.01381884		1414.58	0.02835342		1944.59	-0.01688178		2474.58	0.01052221		3004.61	-0.00368457		3534.6	0.00371476		4064.6	-0.00916422
354.79	0.15966272		884.79	0.0147177		1414.78	0.02798163		1944.79	-0.01623646		2474.78	0.00982451		3004.81	-0.00368612		3534.8	0.00407512		4064.8	-0.01058988
354.99	0.15960631		884.99	0.01563458		1414.98	0.02799413		1944.99	-0.01642551		2474.98	0.00910852		3005.01	-0.00357963		3535	0.00365497		4065	-0.00959324
355.19	0.15989137		885.19	0.01635502		1415.18	0.02744222		1945.19	-0.01650915		2475.18	0.00845185		3005.21	-0.00429429		3535.2	0.00336093		4065.2	-0.00844547
355.39	0.15887218		885.39	0.01619716		1415.38	0.02656568		1945.39	-0.0158427		2475.38	0.00845825		3005.41	-0.00425945		3535.4	0.00298959		4065.4	-0.00885304
355.59	0.15861132		885.59	0.01633762		1415.58	0.02719412		1945.59	-0.01723678		2475.58	0.00855946		3005.61	-0.00406301		3535.6	0.00280246		4065.6	-0.00886727
355.79	0.15819749		885.79	0.0157401		1415.78	0.02732617		1945.79	-0.01786015		2475.78	0.00854391		3005.81	-0.00199767		3535.8	0.00232782		4065.8	-0.00853125
355.99	0.15929044		885.99	0.01441218		1415.98	0.02849074		1945.99	-0.01831882		2475.98	0.00893608		3006.01	-0.00246204		3536	0.0029533		4066	-0.00805921
356.19	0.15951503		886.19	0.01367021		1416.18	0.02855475		1946.19	-0.01732759		2476.18	0.00842497		3006.21	-0.00145899		3536.2	0.00255405		4066.2	-0.00753389
356.39	0.15892154		886.39	0.01286922		1416.38	0.02893945		1946.39	-0.01664879		2476.38	0.00902911		3006.41	-0.0012142		3536.4	0.00186674		4066.4	-0.00777384
356.59	0.15935414		886.59	0.01266288		1416.58	0.02978718		1946.59	-0.01671782		2476.58	0.00903968		3006.61	-0.00142241		3536.6	0.00310338		4066.6	-0.00738908
356.79	0.1588196		886.79	0.01257999		1416.78	0.03007338		1946.79	-0.01691225		2476.78	0.00884616		3006.81	-0.00159817		3536.8	0.00345623		4066.8	-0.00770385
356.99	0.15818471		886.99	0.01223546		1416.98	0.03048353		1946.99	-0.01730726		2476.98	0.00947629		3007.01	-0.00091819		3537	0.00416758		4067	-0.00766665
357.19	0.157768		887.19	0.01206782		1417.18	0.03042949		1947.19	-0.01695544		2477.18	0.00979394		3007.21	-0.00090641		3537.2	0.00501278		4067.2	-0.00741663
357.39	0.15708907		887.39	0.01233006		1417.38	0.02966908		1947.39	-0.01728105		2477.38	0.01008963		3007.41	-0.00103195		3537.4	0.0049653		4067.4	-0.00735527
357.59	0.15644241		887.59	0.01198696		1417.58	0.03075955		1947.59	-0.01562197		2477.58	0.01082186		3007.61	-0.00080805		3537.6	0.00524286		4067.6	-0.00715087
357.79	0.15678871		887.79	0.01259505		1417.78	0.03145751		1947.79	-0.01578862		2477.78	0.01057454		3007.81	-0.00086544		3537.8	0.00404824		4067.8	-0.00710127
357.99	0.15656079		887.99	0.01256795		1417.98	0.03250994		1947.99	-0.01539944		2477.98	0.00959719		3008.01	-0.0018272		3538	0.00340713		4068	-0.00728685
358.19	0.15679258		888.19	0.01314968		1418.18	0.03221744		1948.19	-0.01412631		2478.18	0.00882411		3008.21	-0.00241477		3538.2	0.0032357		4068.2	-0.00751851
358.39	0.15778589		888.39	0.01397921		1418.38	0.03143642		1948.39	-0.0142188		2478.38	0.00823054		3008.41	-0.00239604		3538.4	0.00334146		4068.4	-0.00861302
358.59	0.15792519		888.59	0.01419061		1418.58	0.03090654		1948.59	-0.01462193		2478.58	0.00838811		3008.61	-0.00358096		3538.6	0.00316778		4068.6	-0.00787805
358.79	0.15866909		888.79	0.01451125		1418.78	0.03017819		1948.79	-0.01443341		2478.78	0.00811066		3008.81	-0.00395715		3538.8	0.0028668		4068.8	-0.00848135
358.99	0.15903804		888.99	0.01492863		1418.98	0.02995331		1948.99	-0.01514417		2478.98	0.00788377		3009.01	-0.00394599		3539	0.00257593		4069	-0.0082452
359.19	0.15856292		889.19	0.01549099		1419.18	0.02945585		1949.19	-0.0151664		2479.18	0.00800076		3009.21	-0.00368028		3539.2	0.00236961		4069.2	-0.00802658
359.39	0.15773078		889.39	0.01546046		1419.38	0.02832575		1949.39	-0.0148427		2479.38	0.00799812		3009.41	-0.00348918		3539.4	0.00228201		4069.4	-0.00840577
359.59	0.15780654		889.59	0.01510403		1419.58	0.02899047		1949.59	-0.01545927		2479.58	0.00828174		3009.61	-0.00381842		3539.6	0.00215467		4069.6	-0.00875648
359.79	0.15821448		889.79	0.01472322		1419.78	0.02947235		1949.79	-0.01572492		2479.78	0.0083332		3009.81	-0.00330356		3539.8	0.00290492		4069.8	-0.00829733
359.99	0.15906234		889.99	0.01435523		1419.98	0.02981177		1949.99	-0.01597626		2479.98	0.0087002		3010.01	-0.00358295		3540	0.00292356		4070	-0.00862149
360.19	0.15900533		890.19	0.01441587		1420.18	0.02927709		1950.19	-0.01656715		2480.18	0.00882327		3010.21	-0.00320748		3540.2	0.00203261		4070.2	-0.00915149
360.39	0.15867523		890.39	0.01426914		1420.38	0.02902986		1950.39	-0.01650481		2480.38	0.00831708		3010.41	-0.00359607		3540.4	0.00199492		4070.4	-0.00943681
360.59	0.15983758		890.59	0.0145651		1420.58	0.02899388		1950.59	-0.01630668		2480.58	0.00875444		3010.61	-0.00320222		3540.6	0.00336345		4070.6	-0.01046794
360.79	0.15951759		890.79	0.0143215		1420.78	0.0289651		1950.79	-0.01628634		2480.78	0.00836083		3010.81	-0.00324925		3540.8	0.00352303		4070.8	-0.01106574
360.99	0.15882684		890.99	0.01484598		1420.98	0.02805297		1950.99	-0.01652906		2480.98	0.00816861		3011.01	-0.00281972		3541	0.00439938		4071	-0.01050133
361.19	0.15903053		891.19	0.01497471		1421.18	0.02820278		1951.19	-0.01631204		2481.18	0.00893138		3011.21	-0.00212559		3541.2	0.00423483		4071.2	-0.01024455
361.39	0.15954952		891.39	0.01423987		1421.38	0.02724402		1951.39	-0.01658687		2481.38	0.01000814		3011.41	-0.00152908		3541.4	0.00371849		4071.4	-0.01094002
361.59	0.15982726		891.59	0.01354008		1421.58	0.02732049		1951.59	-0.01649872		2481.58	0.00954007		3011.61	-0.00115562		3541.6	0.0042198		4071.6	-0.0103985
361.79	0.16019402		891.79	0.01336399		1421.78	0.02723421		1951.79	-0.01701281		2481.78	0.00843814		3011.81	-0.00230272		3541.8	0.00280574		4071.8	-0.01118411
361.99	0.16024786		891.99	0.01278729		1421.98	0.02684956		1951.99	-0.01636129		2481.98	0.00821759		3012.01	-0.0022657		3542	0.00322154		4072	-0.01097241
362.19	0.16080962		892.19	0.01252714		1422.18	0.02623358		1952.19	-0.01606557		2482.18	0.00897622		3012.21	-0.00185539		3542.2	0.00332121		4072.2	-0.01145215
362.39	0.16187322		892.39	0.01233617		1422.38	0.02713489		1952.39	-0.01724783		2482.38	0.00940737		3012.41	-0.00196793		3542.4	0.00373583		4072.4	-0.01144226
362.59	0.16156767		892.59	0.01225545		1422.58	0.02719965		1952.59	-0.01734657		2482.58	0.00927784		3012.61	-0.00286891		3542.6	0.00323943		4072.6	-0.01094206
362.79	0.16124136		892.79	0.01221857		1422.78	0.02742932		1952.79	-0.01720571		2482.78	0.00925573		3012.81	-0.00302015		3542.8	0.00268859		4072.8	-0.01138044
362.99	0.16121534		892.99	0.01276069		1422.98	0.0275037		1952.99	-0.01822253		2482.98	0.00898309		3013.01	-0.00144333		3543	0.00275015		4073	-0.01146358
363.19	0.15990392		893.19	0.01301423		1423.18	0.02772166		1953.19	-0.01796241		2483.18	0.00872801		3013.21	-0.00230666		3543.2	0.00273993		4073.2	-0.01064054
363.39	0.15956585		893.39	0.01323925		1423.38	0.02751414		1953.39	-0.01772001		2483.38	0.00823973		3013.41	-0.00234535		3543.4	0.00242167		4073.4	-0.01024164
363.59	0.16020191		893.59	0.0132245		1423.58	0.02876881		1953.59	-0.01762489		2483.58	0.00863945		3013.61	-0.0022833		3543.6	0.00280269		4073.6	-0.01035778
363.79	0.15982649		893.79	0.01406794		1423.78	0.02885633		1953.79	-0.01810019		2483.78	0.00902379		3013.81	-0.00183841		3543.8	0.00286178		4073.8	-0.00993758
363.99	0.1596029		893.99	0.01408008		1423.98	0.03005694		1953.99	-0.01843037		2483.98	0.00855081		3014.01	-0.00201656		3544	0.00189056		4074	-0.00994612
364.19	0.16049455		894.19	0.01440946		1424.18	0.02999341		1954.19	-0.01847598		2484.18	0.00894399		3014.21	-0.00197645		3544.2	0.00194486		4074.2	-0.00930095
364.39	0.1606773		894.39	0.01449565		1424.38	0.03015428		1954.39	-0.01841354		2484.38	0.00923747		3014.41	-0.00171218		3544.4	0.00179045		4074.4	-0.00916872
364.59	0.1616545		894.59	0.01555622		1424.58	0.03074873		1954.59	-0.01765659		2484.58	0.00919016		3014.61	-0.00188487		3544.6	0.00204326		4074.6	-0.00994022
364.79	0.16151574		894.79	0.01601151		1424.78	0.03065376		1954.79	-0.01816191		2484.78	0.008603		3014.81	-0.00135608		3544.8	0.00226612		4074.8	-0.00973268
364.99	0.16180732		894.99	0.01682208		1424.98	0.0297943		1954.99	-0.0179761		2484.98	0.00902959		3015.01	-0.00070962		3545	0.00282816		4075	-0.00982079
365.19	0.16249183		895.19	0.01605481		1425.18	0.03055082		1955.19	-0.01773195		2485.18	0.01020443		3015.21	0.00007742		3545.2	0.00239689		4075.2	-0.01063218
365.39	0.16320197		895.39	0.01551959		1425.38	0.02946626		1955.39	-0.01753847		2485.38	0.00999981		3015.41	-0.00022575		3545.4	0.00154324		4075.4	-0.01107683
365.59	0.16321547		895.59	0.01514566		1425.58	0.02966159		1955.59	-0.01777179		2485.58	0.00963576		3015.61	-0.00037203		3545.6	0.00159509		4075.6	-0.01135091
365.79	0.16312022		895.79	0.01479004		1425.78	0.02997096		1955.79	-0.01712131		2485.78	0.00972865		3015.81	-0.00040868		3545.8	0.00139665		4075.8	-0.01133699
365.99	0.16378909		895.99	0.01492675		1425.98	0.03035569		1955.99	-0.01734732		2485.98	0.01035536		3016.01	0.00031912		3546	0.00183564		4076	-0.0105295
366.19	0.16489939		896.19	0.01481274		1426.18	0.03049559		1956.19	-0.01688469		2486.18	0.01024541		3016.21	-0.00007007		3546.2	0.00165135		4076.2	-0.01043489
366.39	0.16466858		896.39	0.01533827		1426.38	0.03011446		1956.39	-0.01783778		2486.38	0.01008228		3016.41	-0.0001557		3546.4	0.00230116		4076.4	-0.00979654
366.59	0.16459206		896.59	0.01541592		1426.58	0.02950888		1956.59	-0.01734267		2486.58	0.00974628		3016.61	-0.00045955		3546.6	0.00193743		4076.6	-0.00965983
366.79	0.16496088		896.79	0.01587402		1426.78	0.02924267		1956.79	-0.0172708		2486.78	0.00938664		3016.81	-0.00066673		3546.8	0.00239827		4076.8	-0.00994987
366.99	0.16485389		896.99	0.01646544		1426.98	0.02942806		1956.99	-0.01798909		2486.98	0.00906156		3017.01	-0.00061527		3547	0.00261344		4077	-0.01059056
367.19	0.16431749		897.19	0.01760852		1427.18	0.02966554		1957.19	-0.01774314		2487.18	0.00854605		3017.21	-0.00196776		3547.2	0.00238321		4077.2	-0.01032506
367.39	0.16476712		897.39	0.01888077		1427.38	0.02899499		1957.39	-0.0171188		2487.38	0.00783818		3017.41	-0.00125625		3547.4	0.00222775		4077.4	-0.01051257
367.59	0.16513805		897.59	0.01954543		1427.58	0.02880191		1957.59	-0.01773258		2487.58	0.00763932		3017.61	-0.00188975		3547.6	0.00256536		4077.6	-0.0105739
367.79	0.16436731		897.79	0.02030376		1427.78	0.02898089		1957.79	-0.018204		2487.78	0.00793135		3017.81	-0.00222859		3547.8	0.00239593		4077.8	-0.00992845
367.99	0.16519995		897.99	0.02019394		1427.98	0.02875746		1957.99	-0.01790785		2487.98	0.00760619		3018.01	-0.00236512		3548	0.00197081		4078	-0.00894482
368.19	0.16525146		898.19	0.02047846		1428.18	0.02826439		1958.19	-0.01780471		2488.18	0.00781343		3018.21	-0.00177398		3548.2	0.00167635		4078.2	-0.00764925
368.39	0.16448496		898.39	0.0205289		1428.38	0.02781262		1958.39	-0.01732973		2488.38	0.00801878		3018.41	-0.00218042		3548.4	0.00170063		4078.4	-0.00719343
368.59	0.16400409		898.59	0.02082291		1428.58	0.02756722		1958.59	-0.01625053		2488.58	0.00738701		3018.61	-0.00198767		3548.6	0.00127463		4078.6	-0.00717489
368.79	0.1640196		898.79	0.02050625		1428.78	0.02759808		1958.79	-0.01592538		2488.78	0.0077554		3018.81	-0.00192022		3548.8	0.00194479		4078.8	-0.00712761
368.99	0.16355897		898.99	0.01986286		1428.98	0.02719585		1958.99	-0.01508448		2488.98	0.0077804		3019.01	-0.00201358		3549	0.00251912		4079	-0.00743193
369.19	0.16335067		899.19	0.01886657		1429.18	0.02805978		1959.19	-0.01465863		2489.18	0.00785966		3019.21	-0.00220976		3549.2	0.00207421		4079.2	-0.00766595
369.39	0.16275216		899.39	0.01894333		1429.38	0.02694654		1959.39	-0.01446703		2489.38	0.00804134		3019.41	-0.00286558		3549.4	0.00159304		4079.4	-0.00791367
369.59	0.16272835		899.59	0.0187		1429.58	0.02761744		1959.59	-0.01446722		2489.58	0.00787376		3019.61	-0.00310688		3549.6	0.00158932		4079.6	-0.00796984
369.79	0.16229425		899.79	0.01793837		1429.78	0.0272836		1959.79	-0.01411349		2489.78	0.00834507		3019.81	-0.00318487		3549.8	0.00140104		4079.8	-0.00742856
369.99	0.16188893		899.99	0.01732695		1429.98	0.02691459		1959.99	-0.01403496		2489.98	0.00943707		3020.01	-0.003352		3550	0.00126985		4080	-0.00805168
370.19	0.16211074		900.19	0.01645835		1430.18	0.02542609		1960.19	-0.01409677		2490.18	0.00937062		3020.21	-0.00393076		3550.2	0.00144388		4080.2	-0.00896241
370.39	0.16318015		900.39	0.01593124		1430.38	0.02509375		1960.39	-0.0149376		2490.38	0.00976954		3020.41	-0.00405041		3550.4	0.00202752		4080.4	-0.00933953
370.59	0.1632521		900.59	0.01481806		1430.58	0.02572423		1960.59	-0.01546176		2490.58	0.01014834		3020.61	-0.00391559		3550.6	0.00194097		4080.6	-0.01102769
370.79	0.16362965		900.79	0.01477059		1430.78	0.02617923		1960.79	-0.01651223		2490.78	0.01042633		3020.81	-0.0045864		3550.8	0.00168638		4080.8	-0.01301925
370.99	0.16400003		900.99	0.01475989		1430.98	0.0265155		1960.99	-0.01732408		2490.98	0.01042098		3021.01	-0.0053609		3551	0.00093118		4081	-0.01368363
371.19	0.16480542		901.19	0.01463614		1431.18	0.02649002		1961.19	-0.01792806		2491.18	0.01007205		3021.21	-0.00443707		3551.2	0.00135781		4081.2	-0.01360925
371.39	0.16673498		901.39	0.01415148		1431.38	0.02578423		1961.39	-0.0178683		2491.38	0.00843103		3021.41	-0.00402528		3551.4	0.00172374		4081.4	-0.01425587
371.59	0.16721915		901.59	0.01450904		1431.58	0.02611026		1961.59	-0.01847062		2491.58	0.0085154		3021.61	-0.00408042		3551.6	0.00194449		4081.6	-0.01329143
371.79	0.16792363		901.79	0.01434121		1431.78	0.02723191		1961.79	-0.01875451		2491.78	0.00891598		3021.81	-0.00305641		3551.8	0.00115105		4081.8	-0.01183606
371.99	0.16922369		901.99	0.01309844		1431.98	0.02669094		1961.99	-0.01920214		2491.98	0.00904649		3022.01	-0.00206558		3552	0.00059222		4082	-0.01090488
372.19	0.16925552		902.19	0.01342082		1432.18	0.02748802		1962.19	-0.01918248		2492.18	0.00857259		3022.21	-0.00249753		3552.2	0.00077528		4082.2	-0.01034997
372.39	0.16993897		902.39	0.01359616		1432.38	0.02699599		1962.39	-0.0184553		2492.38	0.00793915		3022.41	-0.00286268		3552.4	0.00117325		4082.4	-0.01034856
372.59	0.17030541		902.59	0.01374422		1432.58	0.02755284		1962.59	-0.01841335		2492.58	0.0085427		3022.61	-0.00325986		3552.6	0.00154513		4082.6	-0.01007444
372.79	0.170566		902.79	0.01461934		1432.78	0.02787596		1962.79	-0.01781174		2492.78	0.008223		3022.81	-0.00398957		3552.8	0.00275535		4082.8	-0.00957024
372.99	0.17038855		902.99	0.01524748		1432.98	0.02799228		1962.99	-0.01693631		2492.98	0.00823584		3023.01	-0.00403372		3553	0.00365715		4083	-0.0096061
373.19	0.17114384		903.19	0.01535415		1433.18	0.02876578		1963.19	-0.01628931		2493.18	0.008072		3023.21	-0.0036474		3553.2	0.00311055		4083.2	-0.00893336
373.39	0.17068629		903.39	0.01591269		1433.38	0.02952933		1963.39	-0.01598022		2493.38	0.00826507		3023.41	-0.00440548		3553.4	0.00320214		4083.4	-0.00926795
373.59	0.17083492		903.59	0.01582104		1433.58	0.03080353		1963.59	-0.01591828		2493.58	0.00765334		3023.61	-0.00405209		3553.6	0.00312133		4083.6	-0.00897758
373.79	0.1695967		903.79	0.01619729		1433.78	0.03079895		1963.79	-0.01607394		2493.78	0.00890022		3023.81	-0.00428125		3553.8	0.00321516		4083.8	-0.00843863
373.99	0.16901345		903.99	0.01703527		1433.98	0.03121286		1963.99	-0.01556997		2493.98	0.00967681		3024.01	-0.00399998		3554	0.00298421		4084	-0.00872164
374.19	0.16925714		904.19	0.01731265		1434.18	0.03202085		1964.19	-0.01493158		2494.18	0.00920576		3024.21	-0.00433302		3554.2	0.00324649		4084.2	-0.00856761
374.39	0.16907778		904.39	0.01700907		1434.38	0.03223418		1964.39	-0.01419683		2494.38	0.00979182		3024.41	-0.00473511		3554.4	0.0032889		4084.4	-0.00765409
374.59	0.16773046		904.59	0.01701542		1434.58	0.03272127		1964.59	-0.01509037		2494.58	0.01004966		3024.61	-0.00471097		3554.6	0.00300018		4084.6	-0.00806785
374.79	0.16809765		904.79	0.01728653		1434.78	0.03330561		1964.79	-0.01563215		2494.78	0.00973426		3024.81	-0.00413054		3554.8	0.00273013		4084.8	-0.00798717
374.99	0.16804046		904.99	0.01677426		1434.98	0.03297225		1964.99	-0.0154075		2494.98	0.00919664		3025.01	-0.00381455		3555	0.0024292		4085	-0.00709818
375.19	0.1680361		905.19	0.01502497		1435.18	0.03373309		1965.19	-0.01539993		2495.18	0.00906954		3025.21	-0.0014308		3555.2	0.00280288		4085.2	-0.00718788
375.39	0.16839324		905.39	0.01472676		1435.38	0.0333311		1965.39	-0.01559891		2495.38	0.00793118		3025.41	-0.00148181		3555.4	0.00280547		4085.4	-0.00800801
375.59	0.16791478		905.59	0.01444595		1435.58	0.03382241		1965.59	-0.01625309		2495.58	0.00914312		3025.61	-0.00074127		3555.6	0.00116783		4085.6	-0.00669864
375.79	0.16774976		905.79	0.01349783		1435.78	0.03298204		1965.79	-0.01704528		2495.78	0.01011302		3025.81	-0.00018479		3555.8	-0.00007729		4085.8	-0.00688915
375.99	0.16778094		905.99	0.01364091		1435.98	0.03201669		1965.99	-0.01770502		2495.98	0.01055176		3026.01	0.00007855		3556	-0.00081543		4086	-0.00779661
376.19	0.16809987		906.19	0.01397508		1436.18	0.03192253		1966.19	-0.01803179		2496.18	0.01017477		3026.21	-0.00013606		3556.2	-0.00075996		4086.2	-0.00811161
376.39	0.16857626		906.39	0.01346792		1436.38	0.03134967		1966.39	-0.01816608		2496.38	0.0094788		3026.41	-0.00008306		3556.4	-0.00009186		4086.4	-0.00877024
376.59	0.16896239		906.59	0.01314362		1436.58	0.03139753		1966.59	-0.01905204		2496.58	0.01132277		3026.61	-0.00000365		3556.6	0.00081107		4086.6	-0.00895703
376.79	0.16937448		906.79	0.01347607		1436.78	0.03124361		1966.79	-0.0190886		2496.78	0.01146594		3026.81	-0.00011135		3556.8	0.00081231		4086.8	-0.00993187
376.99	0.17066173		906.99	0.01334456		1436.98	0.03151652		1966.99	-0.01978082		2496.98	0.01171825		3027.01	-0.00001086		3557	0.00077113		4087	-0.01101974
377.19	0.17128868		907.19	0.01296111		1437.18	0.03171217		1967.19	-0.02015447		2497.18	0.01105199		3027.21	-0.00005293		3557.2	0.0011544		4087.2	-0.01101546
377.39	0.17174812		907.39	0.01268961		1437.38	0.03198698		1967.39	-0.0203746		2497.38	0.01092335		3027.41	-0.00076025		3557.4	0.00222582		4087.4	-0.010593
377.59	0.17238838		907.59	0.01354439		1437.58	0.0312911		1967.59	-0.0202119		2497.58	0.01054874		3027.61	-0.00077477		3557.6	0.00204097		4087.6	-0.01037927
377.79	0.17286432		907.79	0.01528618		1437.78	0.03166218		1967.79	-0.02013335		2497.78	0.01067133		3027.81	-0.00114633		3557.8	0.00241196		4087.8	-0.01030109
377.99	0.17351174		907.99	0.01591203		1437.98	0.03194041		1967.99	-0.01955565		2497.98	0.01023208		3028.01	-0.00121516		3558	0.00265973		4088	-0.01035203
378.19	0.17386155		908.19	0.01624089		1438.18	0.03241239		1968.19	-0.01910448		2498.18	0.00965694		3028.21	-0.00181615		3558.2	0.00348461		4088.2	-0.00998853
378.39	0.17400659		908.39	0.01669161		1438.38	0.03189805		1968.39	-0.01905688		2498.38	0.00966053		3028.41	-0.00247856		3558.4	0.00381464		4088.4	-0.00947342
378.59	0.17401313		908.59	0.01740915		1438.58	0.03211413		1968.59	-0.01949399		2498.58	0.00895259		3028.61	-0.00244015		3558.6	0.0040883		4088.6	-0.00950267
378.79	0.17405775		908.79	0.01756449		1438.78	0.03234586		1968.79	-0.01894156		2498.78	0.00849204		3028.81	-0.00228788		3558.8	0.00426723		4088.8	-0.00958607
378.99	0.17372091		908.99	0.0171708		1438.98	0.03212067		1968.99	-0.0179594		2498.98	0.00836797		3029.01	-0.0028447		3559	0.00408787		4089	-0.0093128
379.19	0.17329391		909.19	0.01651179		1439.18	0.03257047		1969.19	-0.01761099		2499.18	0.00808808		3029.21	-0.00221161		3559.2	0.00419208		4089.2	-0.00969563
379.39	0.17304145		909.39	0.01725956		1439.38	0.031872		1969.39	-0.0171583		2499.38	0.00759784		3029.41	-0.00307872		3559.4	0.00354294		4089.4	-0.00974653
379.59	0.17265033		909.59	0.01719377		1439.58	0.03203191		1969.59	-0.01661367		2499.58	0.0081801		3029.61	-0.00310873		3559.6	0.00241909		4089.6	-0.00904008
379.79	0.17182384		909.79	0.01732058		1439.78	0.03165713		1969.79	-0.01594624		2499.78	0.00838396		3029.81	-0.00339742		3559.8	0.0024037		4089.8	-0.00925332
379.99	0.17182384		909.99	0.01732058		1439.98	0.03165713		1969.99	-0.01594624		2499.98	0.00838396		3030.01	-0.00339742		3560	0.0024037		4090	-0.00925332
380.19	0.17209613		910.19	0.01762156		1440.18	0.03075977		1970.19	-0.01548536		2500.18	0.00773544		3030.21	-0.0021679		3560.2	0.00123743		4090.2	-0.0098424
380.39	0.17275911		910.39	0.01742904		1440.38	0.02956091		1970.39	-0.0146238		2500.38	0.0075743		3030.41	-0.00044204		3560.4	0.00109104		4090.4	-0.01026537
380.59	0.17228238		910.59	0.01746348		1440.58	0.02824775		1970.59	-0.01457707		2500.58	0.00764094		3030.61	0.00076574		3560.6	0.00040637		4090.6	-0.01023586
380.79	0.17247283		910.79	0.01698713		1440.78	0.02678763		1970.79	-0.01400041		2500.78	0.00725302		3030.81	0.00129428		3560.8	0.00002369		4090.8	-0.01033273
380.99	0.17202818		910.99	0.01781895		1440.98	0.02588657		1970.99	-0.01354664		2500.98	0.00742793		3031.01	0.00117034		3561	-0.00003215		4091	-0.01015095
381.19	0.17168652		911.19	0.01824474		1441.18	0.02510277		1971.19	-0.01340545		2501.18	0.00708488		3031.21	0.00147754		3561.2	-0.00004172		4091.2	-0.00998625
381.39	0.17144348		911.39	0.01848265		1441.38	0.02468516		1971.39	-0.01332603		2501.38	0.00691833		3031.41	0.00154652		3561.4	-0.00058171		4091.4	-0.01023567
381.59	0.17054463		911.59	0.01923148		1441.58	0.02419817		1971.59	-0.01408596		2501.58	0.00718099		3031.61	0.00168566		3561.6	-0.00108745		4091.6	-0.00951772
381.79	0.1707205		911.79	0.01899953		1441.78	0.02346971		1971.79	-0.01443735		2501.78	0.00756243		3031.81	0.00152033		3561.8	-0.00174632		4091.8	-0.00949013
381.99	0.17002858		911.99	0.01953715		1441.98	0.02372456		1971.99	-0.0143019		2501.98	0.00728548		3032.01	0.00191584		3562	-0.00213841		4092	-0.00923427
382.19	0.16983069		912.19	0.01986232		1442.18	0.0236456		1972.19	-0.0146577		2502.18	0.00696373		3032.21	0.0007153		3562.2	-0.00186758		4092.2	-0.00860893
382.39	0.16951769		912.39	0.01988725		1442.38	0.02330945		1972.39	-0.0152485		2502.38	0.00618052		3032.41	0.00000463		3562.4	-0.00214176		4092.4	-0.00879636
382.59	0.16965143		912.59	0.01947467		1442.58	0.02360978		1972.59	-0.01577805		2502.58	0.00491509		3032.61	-0.00040239		3562.6	-0.00236047		4092.6	-0.00891009
382.79	0.1700145		912.79	0.01921799		1442.78	0.02378959		1972.79	-0.01497238		2502.78	0.00441177		3032.81	-0.00098279		3562.8	-0.00293182		4092.8	-0.00916796
382.99	0.17074658		912.99	0.01910251		1442.98	0.02383653		1972.99	-0.01553679		2502.98	0.0044272		3033.01	-0.00120166		3563	-0.00370468		4093	-0.00909375
383.19	0.17078025		913.19	0.01890235		1443.18	0.02470557		1973.19	-0.01570874		2503.18	0.00442003		3033.21	-0.00211325		3563.2	-0.00341646		4093.2	-0.00917708
383.39	0.17072715		913.39	0.0189762		1443.38	0.02505744		1973.39	-0.01474347		2503.38	0.0047592		3033.41	-0.00145169		3563.4	-0.00356169		4093.4	-0.00911086
383.59	0.17066746		913.59	0.01869167		1443.58	0.02432779		1973.59	-0.01389344		2503.58	0.00540174		3033.61	-0.00080782		3563.6	-0.00378386		4093.6	-0.00964208
383.79	0.16993959		913.79	0.0184562		1443.78	0.02448721		1973.79	-0.01361577		2503.78	0.00495471		3033.81	-0.00068116		3563.8	-0.00327335		4093.8	-0.00962703
383.99	0.16998507		913.99	0.01827329		1443.98	0.02398998		1973.99	-0.01315782		2503.98	0.00452409		3034.01	-0.00021523		3564	-0.0027543		4094	-0.00875755
384.19	0.16986188		914.19	0.01778889		1444.18	0.02407805		1974.19	-0.01312235		2504.18	0.00443126		3034.21	0.00038916		3564.2	-0.00334638		4094.2	-0.0098656
384.39	0.17035297		914.39	0.01680113		1444.38	0.02379909		1974.39	-0.01248199		2504.38	0.00585988		3034.41	0.00013132		3564.4	-0.0031216		4094.4	-0.00975075
384.59	0.16936822		914.59	0.0165939		1444.58	0.02353042		1974.59	-0.01298535		2504.58	0.00634764		3034.61	-0.00055055		3564.6	-0.00269919		4094.6	-0.00987113
384.79	0.16986672		914.79	0.01604151		1444.78	0.02295091		1974.79	-0.01315623		2504.78	0.006021		3034.81	-0.00123244		3564.8	-0.00185277		4094.8	-0.00963887
384.99	0.16944342		914.99	0.01651998		1444.98	0.02320321		1974.99	-0.0135592		2504.98	0.00650523		3035.01	-0.00172331		3565	-0.00100894		4095	-0.00961033
385.19	0.1696168		915.19	0.01627515		1445.18	0.02295425		1975.19	-0.01448305		2505.18	0.00638349		3035.21	-0.00180906		3565.2	-0.00117058		4095.2	-0.00946774
385.39	0.169098		915.39	0.01595512		1445.38	0.02287064		1975.39	-0.01557071		2505.38	0.00678838		3035.41	-0.0015288		3565.4	-0.00194263		4095.4	-0.00971804
385.59	0.16924467		915.59	0.01569771		1445.58	0.02301589		1975.59	-0.01606574		2505.58	0.00793665		3035.61	-0.00127535		3565.6	-0.00266114		4095.6	-0.0094419
385.79	0.16983624		915.79	0.01559906		1445.78	0.02243776		1975.79	-0.01611735		2505.78	0.00775376		3035.81	-0.0010486		3565.8	-0.00266301		4095.8	-0.01017777
385.99	0.17024196		915.99	0.01627942		1445.98	0.02285778		1975.99	-0.01611805		2505.98	0.00695364		3036.01	-0.0006076		3566	-0.00289779		4096	-0.00929185
386.19	0.17080075		916.19	0.01626469		1446.18	0.0218404		1976.19	-0.01756366		2506.18	0.00649148		3036.21	-0.00187497		3566.2	-0.00307794		4096.2	-0.00896996
386.39	0.17117597		916.39	0.01622795		1446.38	0.02222852		1976.39	-0.01827143		2506.38	0.00539659		3036.41	-0.00156502		3566.4	-0.00413783		4096.4	-0.00968111
386.59	0.16999198		916.59	0.01614304		1446.58	0.02263406		1976.59	-0.01845843		2506.58	0.00371093		3036.61	-0.0019986		3566.6	-0.00410936		4096.6	-0.00968242
386.79	0.17027203		916.79	0.01531529		1446.78	0.02359115		1976.79	-0.01864141		2506.78	0.00399206		3036.81	-0.0012442		3566.8	-0.00494353		4096.8	-0.00915835
386.99	0.1705867		916.99	0.01541665		1446.98	0.02387593		1976.99	-0.01882596		2506.98	0.00438946		3037.01	-0.00035519		3567	-0.0059383		4097	-0.00873062
387.19	0.1706448		917.19	0.01519773		1447.18	0.02506566		1977.19	-0.01846694		2507.18	0.00405562		3037.21	-0.0004017		3567.2	-0.00528012		4097.2	-0.00914201
387.39	0.17034259		917.39	0.01538728		1447.38	0.02465082		1977.39	-0.01866047		2507.38	0.00447263		3037.41	0.0004409		3567.4	-0.00513741		4097.4	-0.00921754
387.59	0.17016027		917.59	0.0150467		1447.58	0.02428675		1977.59	-0.01842001		2507.58	0.00493155		3037.61	0.00031458		3567.6	-0.005159		4097.6	-0.00964818
387.79	0.16987898		917.79	0.01471272		1447.78	0.02440293		1977.79	-0.01724259		2507.78	0.00369061		3037.81	0.00041675		3567.8	-0.00428307		4097.8	-0.00976777
387.99	0.17042328		917.99	0.01381307		1447.98	0.02375681		1977.99	-0.01678709		2507.98	0.00302343		3038.01	0.0005929		3568	-0.00449529		4098	-0.00921617
388.19	0.17004923		918.19	0.01411775		1448.18	0.0250121		1978.19	-0.01676379		2508.18	0.00353171		3038.21	0.00062278		3568.2	-0.00517197		4098.2	-0.00966502
388.39	0.17083411		918.39	0.01437644		1448.38	0.02578495		1978.39	-0.01602092		2508.38	0.00393452		3038.41	-0.00024307		3568.4	-0.00541047		4098.4	-0.00995973
388.59	0.17059284		918.59	0.01530713		1448.58	0.02575015		1978.59	-0.0164984		2508.58	0.00366389		3038.61	-0.00083716		3568.6	-0.00348151		4098.6	-0.01030542
388.79	0.17081362		918.79	0.01469743		1448.78	0.02579007		1978.79	-0.01671084		2508.78	0.00325615		3038.81	-0.00090501		3568.8	-0.00324727		4098.8	-0.00999738
388.99	0.17111386		918.99	0.01471156		1448.98	0.02588289		1978.99	-0.01598531		2508.98	0.00347165		3039.01	-0.00057045		3569	-0.00262305		4099	-0.01051214
389.19	0.17088584		919.19	0.01552358		1449.18	0.02625634		1979.19	-0.01516712		2509.18	0.00355783		3039.21	-0.00043489		3569.2	-0.00309235		4099.2	-0.0107562
389.39	0.17001515		919.39	0.01559877		1449.38	0.02667346		1979.39	-0.01494991		2509.38	0.00343608		3039.41	-0.00052708		3569.4	-0.00279132		4099.4	-0.01091133
389.59	0.17042084		919.59	0.0155829		1449.58	0.02681431		1979.59	-0.01317245		2509.58	0.00361524		3039.61	-0.0007693		3569.6	-0.00245244		4099.6	-0.01137455
389.79	0.17003742		919.79	0.01658775		1449.78	0.02573534		1979.79	-0.01263325		2509.78	0.00312972		3039.81	-0.00063349		3569.8	-0.0013624		4099.8	-0.01182477
389.99	0.17052139		919.99	0.01686451		1449.98	0.02562758		1979.99	-0.01271845		2509.98	0.00275796		3040.01	-0.00063111		3570	-0.00173298		4100	-0.01104983
390.19	0.17048146		920.19	0.01750546		1450.18	0.02439224		1980.19	-0.01365169		2510.18	0.0022343		3040.21	-0.00041053		3570.2	-0.00172079		4100.2	-0.01167999
390.39	0.16987855		920.39	0.018029		1450.38	0.02390373		1980.39	-0.01384812		2510.38	0.00178474		3040.41	0.00065112		3570.4	-0.00271133		4100.4	-0.01273298
390.59	0.16854001		920.59	0.01823494		1450.58	0.02369171		1980.59	-0.01477232		2510.58	0.00224262		3040.61	0.00084587		3570.6	-0.00231392		4100.6	-0.01279087
390.79	0.16912786		920.79	0.01756808		1450.78	0.02345567		1980.79	-0.0145505		2510.78	0.00253544		3040.81	0.00164423		3570.8	-0.003207		4100.8	-0.01301942
390.99	0.16916613		920.99	0.01830863		1450.98	0.02250536		1980.99	-0.01470864		2510.98	0.00202561		3041.01	0.00115991		3571	-0.00306207		4101	-0.01327168
391.19	0.16864836		921.19	0.01779069		1451.18	0.02193632		1981.19	-0.01489356		2511.18	0.00170451		3041.21	-0.00006802		3571.2	-0.00314746		4101.2	-0.01286343
391.39	0.16881657		921.39	0.01777693		1451.38	0.02067333		1981.39	-0.01481991		2511.38	0.00070139		3041.41	-0.00040939		3571.4	-0.00307778		4101.4	-0.01222345
391.59	0.16897256		921.59	0.01724138		1451.58	0.02067906		1981.59	-0.0143969		2511.58	0.00058158		3041.61	-0.00031948		3571.6	-0.00347314		4101.6	-0.01257373
391.79	0.16918497		921.79	0.01694945		1451.78	0.01982393		1981.79	-0.01415599		2511.78	-0.00062391		3041.81	0.00007641		3571.8	-0.00346813		4101.8	-0.01144272
391.99	0.16951972		921.99	0.01641005		1451.98	0.01952362		1981.99	-0.01538931		2511.98	-0.00087277		3042.01	-0.00061511		3572	-0.00438711		4102	-0.01022007
392.19	0.16878372		922.19	0.01716269		1452.18	0.02101152		1982.19	-0.01598123		2512.18	-0.00043434		3042.21	-0.00112176		3572.2	-0.00484835		4102.2	-0.01056531
392.39	0.16856012		922.39	0.01744306		1452.38	0.02137262		1982.39	-0.01640655		2512.38	0.00042708		3042.41	-0.00177584		3572.4	-0.00490892		4102.4	-0.01035245
392.59	0.16802342		922.59	0.01748453		1452.58	0.02123806		1982.59	-0.01682819		2512.58	0.00042548		3042.61	-0.00235622		3572.6	-0.00419051		4102.6	-0.00981316
392.79	0.16810972		922.79	0.01657547		1452.78	0.02203344		1982.79	-0.01636997		2512.78	-0.0000486		3042.81	-0.00206451		3572.8	-0.00497899		4102.8	-0.00921607
392.99	0.16842154		922.99	0.01723523		1452.98	0.02255713		1982.99	-0.01583461		2512.98	-0.00065544		3043.01	-0.00210923		3573	-0.005126		4103	-0.00969941
393.19	0.16782661		923.19	0.01789137		1453.18	0.02300274		1983.19	-0.01547796		2513.18	-0.00069937		3043.21	-0.00254859		3573.2	-0.00512219		4103.2	-0.01054001
393.39	0.1678145		923.39	0.01808677		1453.38	0.02309321		1983.39	-0.01586769		2513.38	0.00007054		3043.41	-0.00297166		3573.4	-0.00477465		4103.4	-0.01042166
393.59	0.16781629		923.59	0.01828772		1453.58	0.02295748		1983.59	-0.0152426		2513.58	0.00069749		3043.61	-0.00232386		3573.6	-0.0051604		4103.6	-0.01048741
393.79	0.16802542		923.79	0.01941267		1453.78	0.02342983		1983.79	-0.01649482		2513.78	0.00126623		3043.81	-0.00177858		3573.8	-0.00513134		4103.8	-0.01099302
393.99	0.16830103		923.99	0.01982647		1453.98	0.02407376		1983.99	-0.01715106		2513.98	0.0012053		3044.01	-0.0008073		3574	-0.00562064		4104	-0.01156697
394.19	0.16896805		924.19	0.02041691		1454.18	0.02375113		1984.19	-0.01695627		2514.18	0.00199199		3044.21	-0.00005487		3574.2	-0.00612069		4104.2	-0.01272281
394.39	0.16885881		924.39	0.02054187		1454.38	0.02344498		1984.39	-0.01657729		2514.38	0.00246997		3044.41	0.00048733		3574.4	-0.00690655		4104.4	-0.01316287
394.59	0.16866023		924.59	0.02060851		1454.58	0.0226916		1984.59	-0.01675422		2514.58	0.00218945		3044.61	0.00026981		3574.6	-0.00698006		4104.6	-0.01340826
394.79	0.16921046		924.79	0.02066258		1454.78	0.02200746		1984.79	-0.01674326		2514.78	0.00119815		3044.81	-0.00010627		3574.8	-0.00768339		4104.8	-0.0132773
394.99	0.16913855		924.99	0.02076134		1454.98	0.02059393		1984.99	-0.01648853		2514.98	0.00121369		3045.01	-0.00075777		3575	-0.00708394		4105	-0.01295371
395.19	0.16915186		925.19	0.020149		1455.18	0.0203342		1985.19	-0.01680867		2515.18	0.00090486		3045.21	-0.00061232		3575.2	-0.00733577		4105.2	-0.01323159
395.39	0.16974765		925.39	0.01987574		1455.38	0.02059677		1985.39	-0.01631579		2515.38	0.00081765		3045.41	0.00075457		3575.4	-0.00803477		4105.4	-0.01310283
395.59	0.17009323		925.59	0.01955488		1455.58	0.02076512		1985.59	-0.01622039		2515.58	0.00081699		3045.61	0.00041271		3575.6	-0.0085227		4105.6	-0.01327771
395.79	0.1707425		925.79	0.01991201		1455.78	0.02042889		1985.79	-0.01622844		2515.78	0.00058517		3045.81	0.00044908		3575.8	-0.00810482		4105.8	-0.01222718
395.99	0.17022866		925.99	0.01900423		1455.98	0.0209539		1985.99	-0.01671935		2515.98	0.00065663		3046.01	-0.00073381		3576	-0.00786283		4106	-0.01194761
396.19	0.16860841		926.19	0.01881917		1456.18	0.02154137		1986.19	-0.01604013		2516.18	0.00073666		3046.21	-0.00138317		3576.2	-0.00720167		4106.2	-0.01184198
396.39	0.16882091		926.39	0.0179933		1456.38	0.02197459		1986.39	-0.01575195		2516.38	0.00090893		3046.41	-0.00143614		3576.4	-0.00746733		4106.4	-0.01159745
396.59	0.16923468		926.59	0.01720473		1456.58	0.02236797		1986.59	-0.01534358		2516.58	0.00045425		3046.61	-0.00220389		3576.6	-0.0066066		4106.6	-0.01151015
396.79	0.16993736		926.79	0.01667415		1456.78	0.02340713		1986.79	-0.0147381		2516.78	-0.00068415		3046.81	-0.00258136		3576.8	-0.00630098		4106.8	-0.01112792
396.99	0.17048487		926.99	0.0163166		1456.98	0.02416323		1986.99	-0.01464237		2516.98	-0.00099245		3047.01	-0.00301922		3577	-0.00576513		4107	-0.01119997
397.19	0.17042784		927.19	0.01562556		1457.18	0.02437191		1987.19	-0.01410472		2517.18	-0.00052669		3047.21	-0.00313997		3577.2	-0.00514962		4107.2	-0.01196913
397.39	0.17033026		927.39	0.01535488		1457.38	0.02457355		1987.39	-0.01419654		2517.38	0.0000312		3047.41	-0.00316328		3577.4	-0.00510982		4107.4	-0.01123539
397.59	0.17007524		927.59	0.0147529		1457.58	0.025368		1987.59	-0.01385338		2517.58	-0.00002708		3047.61	-0.00315775		3577.6	-0.00528087		4107.6	-0.01129626
397.79	0.16997825		927.79	0.01389038		1457.78	0.02608178		1987.79	-0.01366564		2517.78	-0.00016397		3047.81	-0.00361336		3577.8	-0.00440708		4107.8	-0.01232037
397.99	0.16909802		927.99	0.01373773		1457.98	0.02607901		1987.99	-0.01348618		2517.98	-0.00069441		3048.01	-0.00372798		3578	-0.00398204		4108	-0.01284682
398.19	0.16880513		928.19	0.01391077		1458.18	0.02569718		1988.19	-0.0135261		2518.18	-0.00062386		3048.21	-0.00396638		3578.2	-0.00405046		4108.2	-0.01260733
398.39	0.16853672		928.39	0.01461186		1458.38	0.02500706		1988.39	-0.01342737		2518.38	-0.00060206		3048.41	-0.00412825		3578.4	-0.00405639		4108.4	-0.0125412
398.59	0.167897		928.59	0.01484039		1458.58	0.02486055		1988.59	-0.01412889		2518.58	-0.00082961		3048.61	-0.00426095		3578.6	-0.00423362		4108.6	-0.0130565
398.79	0.16920712		928.79	0.01520248		1458.78	0.02538561		1988.79	-0.01428428		2518.78	-0.00079892		3048.81	-0.0045885		3578.8	-0.0038822		4108.8	-0.01235504
398.99	0.169762		928.99	0.01545714		1458.98	0.02522858		1988.99	-0.01510858		2518.98	-0.00074437		3049.01	-0.0040056		3579	-0.00347435		4109	-0.01215801
399.19	0.16986432		929.19	0.01547512		1459.18	0.0268514		1989.19	-0.01570233		2519.18	-0.00076246		3049.21	-0.00316225		3579.2	-0.00422225		4109.2	-0.01213529
399.39	0.17008227		929.39	0.01515926		1459.38	0.02730102		1989.39	-0.0153558		2519.38	-0.0005009		3049.41	-0.00292671		3579.4	-0.00534773		4109.4	-0.01159971
399.59	0.17105148		929.59	0.01511799		1459.58	0.02693937		1989.59	-0.01606341		2519.58	-0.00090381		3049.61	-0.0035531		3579.6	-0.00559249		4109.6	-0.01126555
399.79	0.17141039		929.79	0.01508717		1459.78	0.02699651		1989.79	-0.01648212		2519.78	-0.00105769		3049.81	-0.0034909		3579.8	-0.00527821		4109.8	-0.01095072
399.99	0.17094929		929.99	0.01359284		1459.98	0.02674289		1989.99	-0.0165698		2519.98	-0.00071272		3050.01	-0.00407091		3580	-0.00560846		4110	-0.01073016
400.19	0.17069927		930.19	0.01344375		1460.18	0.02599063		1990.19	-0.01672297		2520.18	-0.00053344		3050.21	-0.00420219		3580.2	-0.00550169		4110.2	-0.00977815
400.39	0.1719453		930.39	0.01305592		1460.38	0.0254047		1990.39	-0.0176778		2520.38	-0.00046962		3050.41	-0.00377577		3580.4	-0.00616405		4110.4	-0.01000234
400.59	0.17247978		930.59	0.01374015		1460.58	0.02533235		1990.59	-0.01748838		2520.58	-0.00072248		3050.61	-0.00350728		3580.6	-0.00488271		4110.6	-0.00989323
400.79	0.17334971		930.79	0.01366315		1460.78	0.0254752		1990.79	-0.01836327		2520.78	-0.00073535		3050.81	-0.00294881		3580.8	-0.00464054		4110.8	-0.00921467
400.99	0.17346891		930.99	0.01343602		1460.98	0.02476563		1990.99	-0.01845648		2520.98	0.0000089		3051.01	-0.00206882		3581	-0.00436413		4111	-0.00957451
401.19	0.17265873		931.19	0.0136244		1461.18	0.02456133		1991.19	-0.01824616		2521.18	-0.00027063		3051.21	-0.00151785		3581.2	-0.00463032		4111.2	-0.01100273
401.39	0.17184503		931.39	0.01380167		1461.38	0.0242365		1991.39	-0.01833249		2521.38	-0.00013944		3051.41	-0.00075374		3581.4	-0.00468801		4111.4	-0.01094316
401.59	0.17085482		931.59	0.01391035		1461.58	0.02402444		1991.59	-0.01800355		2521.58	-0.0008056		3051.61	-0.00055126		3581.6	-0.00479012		4111.6	-0.01192824
401.79	0.16929216		931.79	0.0144867		1461.78	0.02349707		1991.79	-0.01817355		2521.78	-0.00093806		3051.81	-0.00077441		3581.8	-0.00500544		4111.8	-0.0130493
401.99	0.16837789		931.99	0.01556278		1461.98	0.02292724		1991.99	-0.01801505		2521.98	-0.00124295		3052.01	-0.00116776		3582	-0.00511291		4112	-0.01384041
402.19	0.1676292		932.19	0.01591774		1462.18	0.02271342		1992.19	-0.01713478		2522.18	-0.00132358		3052.21	-0.00082437		3582.2	-0.00522092		4112.2	-0.01378972
402.39	0.16776745		932.39	0.01650369		1462.38	0.0227214		1992.39	-0.01585882		2522.38	-0.00187392		3052.41	-0.0017473		3582.4	-0.00493526		4112.4	-0.01365556
402.59	0.16795776		932.59	0.01634002		1462.58	0.02409972		1992.59	-0.01604291		2522.58	-0.00304962		3052.61	-0.0016833		3582.6	-0.00475109		4112.6	-0.01354795
402.79	0.16917195		932.79	0.01753476		1462.78	0.02433579		1992.79	-0.01628688		2522.78	-0.00310893		3052.81	-0.00205576		3582.8	-0.00384427		4112.8	-0.01270143
402.99	0.16865841		932.99	0.01715896		1462.98	0.02435145		1992.99	-0.01645252		2522.98	-0.00295669		3053.01	-0.00120988		3583	-0.00364088		4113	-0.01268416
403.19	0.16880165		933.19	0.01644008		1463.18	0.02488214		1993.19	-0.01575909		2523.18	-0.00279829		3053.21	-0.0025664		3583.2	-0.00324867		4113.2	-0.01253419
403.39	0.16938035		933.39	0.01629075		1463.38	0.02427708		1993.39	-0.01590665		2523.38	-0.00259489		3053.41	-0.00362156		3583.4	-0.00392378		4113.4	-0.01191997
403.59	0.17034106		933.59	0.01626603		1463.58	0.02449385		1993.59	-0.01613867		2523.58	-0.00264073		3053.61	-0.00418797		3583.6	-0.00371575		4113.6	-0.01092495
403.79	0.17076125		933.79	0.01655722		1463.78	0.02419431		1993.79	-0.01596419		2523.78	-0.00192318		3053.81	-0.00478519		3583.8	-0.00368279		4113.8	-0.01082732
403.99	0.1706612		933.99	0.01641618		1463.98	0.02334959		1993.99	-0.01595668		2523.98	-0.00055198		3054.01	-0.00550124		3584	-0.00297097		4114	-0.01087703
404.19	0.17144463		934.19	0.01722734		1464.18	0.02280815		1994.19	-0.01610297		2524.18	-0.00107446		3054.21	-0.00569516		3584.2	-0.00228621		4114.2	-0.0100103
404.39	0.17161946		934.39	0.0173852		1464.38	0.02269964		1994.39	-0.0174545		2524.38	-0.000819		3054.41	-0.00603584		3584.4	-0.00240813		4114.4	-0.00982665
404.59	0.17133982		934.59	0.01782573		1464.58	0.02310239		1994.59	-0.01743336		2524.58	-0.00052697		3054.61	-0.00562128		3584.6	-0.00166481		4114.6	-0.0099646
404.79	0.17123055		934.79	0.01739287		1464.78	0.02324012		1994.79	-0.01840889		2524.78	0.00059416		3054.81	-0.005648		3584.8	-0.00145326		4114.8	-0.00961979
404.99	0.17036952		934.99	0.01676958		1464.98	0.02284413		1994.99	-0.01827014		2524.98	-0.00011583		3055.01	-0.00504982		3585	-0.00159767		4115	-0.0102548
405.19	0.16929535		935.19	0.0171983		1465.18	0.02343631		1995.19	-0.01835876		2525.18	-0.00041156		3055.21	-0.00524176		3585.2	-0.0011958		4115.2	-0.0103749
405.39	0.1683703		935.39	0.01678259		1465.38	0.02297182		1995.39	-0.01805953		2525.38	-0.00074246		3055.41	-0.0051627		3585.4	-0.00125779		4115.4	-0.00995829
405.59	0.16680965		935.59	0.01665198		1465.58	0.02263859		1995.59	-0.01746719		2525.58	-0.00094954		3055.61	-0.00537519		3585.6	-0.00225786		4115.6	-0.01012795
405.79	0.16627402		935.79	0.0163984		1465.78	0.02222		1995.79	-0.01716162		2525.78	-0.00132738		3055.81	-0.00568441		3585.8	-0.00295187		4115.8	-0.01036849
405.99	0.1663801		935.99	0.01554645		1465.98	0.02174224		1995.99	-0.01653792		2525.98	-0.00170251		3056.01	-0.00561587		3586	-0.00319508		4116	-0.01114475
406.19	0.16637973		936.19	0.01534254		1466.18	0.02264465		1996.19	-0.01615542		2526.18	-0.00222752		3056.21	-0.00482866		3586.2	-0.00311378		4116.2	-0.01040994
406.39	0.16673825		936.39	0.01572531		1466.38	0.02257708		1996.39	-0.01536818		2526.38	-0.00306111		3056.41	-0.00477718		3586.4	-0.00310529		4116.4	-0.01027022
406.59	0.16722165		936.59	0.01571557		1466.58	0.02271749		1996.59	-0.01569076		2526.58	-0.00261428		3056.61	-0.00383329		3586.6	-0.00340703		4116.6	-0.01097668
406.79	0.1680608		936.79	0.01601551		1466.78	0.02220904		1996.79	-0.01561503		2526.78	-0.00210339		3056.81	-0.00424945		3586.8	-0.00312072		4116.8	-0.01100241
406.99	0.16809905		936.99	0.01534749		1466.98	0.02174672		1996.99	-0.01520297		2526.98	-0.00213466		3057.01	-0.00397266		3587	-0.00364322		4117	-0.01090338
407.19	0.16883056		937.19	0.01551412		1467.18	0.02171777		1997.19	-0.01422636		2527.18	-0.00163865		3057.21	-0.00512242		3587.2	-0.00360314		4117.2	-0.0112046
407.39	0.16918466		937.39	0.01646902		1467.38	0.02204634		1997.39	-0.01404804		2527.38	-0.00109611		3057.41	-0.0047682		3587.4	-0.00437761		4117.4	-0.01088252
407.59	0.16959389		937.59	0.01618924		1467.58	0.02249857		1997.59	-0.01348999		2527.58	-0.00042695		3057.61	-0.00418231		3587.6	-0.00444441		4117.6	-0.01062309
407.79	0.16981879		937.79	0.01649042		1467.78	0.02210574		1997.79	-0.01345588		2527.78	0.00016592		3057.81	-0.00347179		3587.8	-0.0044915		4117.8	-0.01100672
407.99	0.16978004		937.99	0.01632018		1467.98	0.02195742		1997.99	-0.01383572		2527.98	0.00024486		3058.01	-0.00315963		3588	-0.00426298		4118	-0.01151698
408.19	0.16950136		938.19	0.01599291		1468.18	0.02197493		1998.19	-0.0142353		2528.18	-0.00015355		3058.21	-0.00350646		3588.2	-0.00434173		4118.2	-0.01106471
408.39	0.16847389		938.39	0.01573462		1468.38	0.02249411		1998.39	-0.01477519		2528.38	0.00011138		3058.41	-0.00382192		3588.4	-0.00426207		4118.4	-0.01092546
408.59	0.16770502		938.59	0.01509158		1468.58	0.02303142		1998.59	-0.01444582		2528.58	0.00033006		3058.61	-0.00363032		3588.6	-0.00364373		4118.6	-0.01114651
408.79	0.1673747		938.79	0.01546989		1468.78	0.02368998		1998.79	-0.01568717		2528.78	0.0007114		3058.81	-0.00398245		3588.8	-0.00331731		4118.8	-0.01166837
408.99	0.16669879		938.99	0.01597627		1468.98	0.02358862		1998.99	-0.01650205		2528.98	0.00028622		3059.01	-0.00442184		3589	-0.00294952		4119	-0.01175227
409.19	0.16602501		939.19	0.01703872		1469.18	0.02367102		1999.19	-0.0169823		2529.18	0.00020609		3059.21	-0.00474744		3589.2	-0.00204024		4119.2	-0.01089881
409.39	0.1655615		939.39	0.01671222		1469.38	0.02339726		1999.39	-0.01700438		2529.38	0.00011069		3059.41	-0.00473259		3589.4	-0.00288183		4119.4	-0.01022118
409.59	0.16606794		939.59	0.01662825		1469.58	0.02320543		1999.59	-0.01732364		2529.58	-0.00042299		3059.61	-0.00492336		3589.6	-0.00331584		4119.6	-0.01035856
409.79	0.16721783		939.79	0.01677815		1469.78	0.0227141		1999.79	-0.01798851		2529.78	-0.00141156		3059.81	-0.0043583		3589.8	-0.00340217		4119.8	-0.01143678
409.99	0.16799977		939.99	0.01611454		1469.98	0.02285375		1999.99	-0.01904419		2529.98	-0.00090661		3060.01	-0.00429603		3590	-0.00367303		4120	-0.01275541
410.19	0.16866488		940.19	0.01624466		1470.18	0.02309245		2000.19	-0.02008889		2530.18	-0.00130791		3060.21	-0.00436471		3590.2	-0.00362901		4120.2	-0.01188219
410.39	0.16851491		940.39	0.01628074		1470.38	0.02251157		2000.39	-0.02027212		2530.38	-0.00201703		3060.41	-0.00399021		3590.4	-0.00435011		4120.4	-0.01236002
410.59	0.1689828		940.59	0.01545935		1470.58	0.0232115		2000.59	-0.02046111		2530.58	-0.00256283		3060.61	-0.00350907		3590.6	-0.00510136		4120.6	-0.01343785
410.79	0.16854999		940.79	0.0152957		1470.78	0.02390202		2000.79	-0.02043163		2530.78	-0.00327963		3060.81	-0.00333726		3590.8	-0.00503223		4120.8	-0.01339138
410.99	0.16809163		940.99	0.01507933		1470.98	0.02344513		2000.99	-0.02001993		2530.98	-0.00328905		3061.01	-0.0032072		3591	-0.00545857		4121	-0.01281131
411.19	0.16802797		941.19	0.01459478		1471.18	0.02305191		2001.19	-0.01913933		2531.18	-0.00254587		3061.21	-0.00294241		3591.2	-0.00593457		4121.2	-0.01288122
411.39	0.16803221		941.39	0.01445261		1471.38	0.02368752		2001.39	-0.01910762		2531.38	-0.0031375		3061.41	-0.00201692		3591.4	-0.00696782		4121.4	-0.01217499
411.59	0.16755066		941.59	0.01309389		1471.58	0.02388547		2001.59	-0.01825194		2531.58	-0.00268666		3061.61	-0.00226472		3591.6	-0.00700476		4121.6	-0.01138366
411.79	0.16737488		941.79	0.01242554		1471.78	0.02395606		2001.79	-0.01816292		2531.78	-0.00212719		3061.81	-0.00213103		3591.8	-0.00689975		4121.8	-0.01110113
411.99	0.16743767		941.99	0.01241265		1471.98	0.02346864		2001.99	-0.01827631		2531.98	-0.00118237		3062.01	-0.0024617		3592	-0.00674378		4122	-0.01132467
412.19	0.16684566		942.19	0.0124557		1472.18	0.02373522		2002.19	-0.01765653		2532.18	-0.00060875		3062.21	-0.00317309		3592.2	-0.00669744		4122.2	-0.01115768
412.39	0.16657062		942.39	0.01237558		1472.38	0.02444686		2002.39	-0.01748497		2532.38	-0.00035715		3062.41	-0.00331541		3592.4	-0.0064986		4122.4	-0.01064843
412.59	0.1663737		942.59	0.01235964		1472.58	0.02465394		2002.59	-0.01784302		2532.58	0.0005704		3062.61	-0.00384798		3592.6	-0.00574314		4122.6	-0.01111959
412.79	0.16553435		942.79	0.01380245		1472.78	0.02371246		2002.79	-0.01838788		2532.78	0.00042937		3062.81	-0.00409218		3592.8	-0.00570986		4122.8	-0.01157695
412.99	0.16537933		942.99	0.01401981		1472.98	0.02355757		2002.99	-0.01766265		2532.98	0.00000449		3063.01	-0.00416856		3593	-0.0053394		4123	-0.00979031
413.19	0.16597846		943.19	0.01436526		1473.18	0.0235418		2003.19	-0.01770001		2533.18	-0.00008715		3063.21	-0.00421282		3593.2	-0.0047943		4123.2	-0.0094454
413.39	0.1675375		943.39	0.0143324		1473.38	0.02341392		2003.39	-0.01721843		2533.38	0.00004408		3063.41	-0.00463284		3593.4	-0.00482977		4123.4	-0.00972127
413.59	0.16877016		943.59	0.01480618		1473.58	0.02347367		2003.59	-0.01727766		2533.58	-0.00092898		3063.61	-0.00440156		3593.6	-0.00493172		4123.6	-0.01111151
413.79	0.16869682		943.79	0.01510672		1473.78	0.02315177		2003.79	-0.01817471		2533.78	-0.00115357		3063.81	-0.00387669		3593.8	-0.00552786		4123.8	-0.01195725
413.99	0.16858931		943.99	0.01441404		1473.98	0.02289559		2003.99	-0.01910249		2533.98	-0.0008286		3064.01	-0.00450138		3594	-0.00551154		4124	-0.01289416
414.19	0.16795782		944.19	0.01500842		1474.18	0.02215642		2004.19	-0.01955823		2534.18	-0.00147884		3064.21	-0.00482009		3594.2	-0.00637114		4124.2	-0.01293461
414.39	0.16757351		944.39	0.01540298		1474.38	0.02228249		2004.39	-0.01909926		2534.38	-0.00218147		3064.41	-0.00396091		3594.4	-0.00680951		4124.4	-0.01403912
414.59	0.16800308		944.59	0.01576438		1474.58	0.02231323		2004.59	-0.01879631		2534.58	-0.00285002		3064.61	-0.00303686		3594.6	-0.00715457		4124.6	-0.0146589
414.79	0.1673759		944.79	0.01629863		1474.78	0.02216485		2004.79	-0.01829425		2534.78	-0.00380637		3064.81	-0.00265873		3594.8	-0.00693119		4124.8	-0.01501201
414.99	0.16725399		944.99	0.01611653		1474.98	0.02125304		2004.99	-0.01755412		2534.98	-0.0040294		3065.01	-0.00262812		3595	-0.00704643		4125	-0.01536199
415.19	0.16692792		945.19	0.01593098		1475.18	0.0209379		2005.19	-0.01678445		2535.18	-0.00359913		3065.21	-0.00204173		3595.2	-0.00765895		4125.2	-0.01615286
415.39	0.16633272		945.39	0.01560326		1475.38	0.02178798		2005.39	-0.01651394		2535.38	-0.00401932		3065.41	-0.00218349		3595.4	-0.00816733		4125.4	-0.0162318
415.59	0.16647291		945.59	0.01468506		1475.58	0.02215994		2005.59	-0.01581718		2535.58	-0.0031028		3065.61	-0.00244912		3595.6	-0.00725359		4125.6	-0.01647435
415.79	0.16630238		945.79	0.01481106		1475.78	0.02196849		2005.79	-0.01584047		2535.78	-0.00292656		3065.81	-0.0018931		3595.8	-0.00738188		4125.8	-0.01672917
415.99	0.16632361		945.99	0.01532477		1475.98	0.02177667		2005.99	-0.01605487		2535.98	-0.00260426		3066.01	-0.00160463		3596	-0.00673345		4126	-0.01763205
416.19	0.16574365		946.19	0.01464435		1476.18	0.02213506		2006.19	-0.01613418		2536.18	-0.00290077		3066.21	-0.00204506		3596.2	-0.00616989		4126.2	-0.01885029
416.39	0.16567619		946.39	0.01414756		1476.38	0.02261785		2006.39	-0.0160799		2536.38	-0.00292822		3066.41	-0.00188987		3596.4	-0.00588114		4126.4	-0.01846791
416.59	0.16505349		946.59	0.01391038		1476.58	0.02232352		2006.59	-0.01649648		2536.58	-0.00286075		3066.61	-0.0019395		3596.6	-0.00573442		4126.6	-0.01909926
416.79	0.1650751		946.79	0.01416124		1476.78	0.02177609		2006.79	-0.01632253		2536.78	-0.00335599		3066.81	-0.00145235		3596.8	-0.00557587		4126.8	-0.01853201
416.99	0.16594399		946.99	0.01411234		1476.98	0.02251609		2006.99	-0.01556335		2536.98	-0.00392683		3067.01	-0.00174145		3597	-0.0053209		4127	-0.01774527
417.19	0.16752553		947.19	0.01443631		1477.18	0.02273821		2007.19	-0.01610077		2537.18	-0.00358671		3067.21	-0.00186857		3597.2	-0.00484495		4127.2	-0.01756491
417.39	0.16866415		947.39	0.01444914		1477.38	0.02334996		2007.39	-0.01575639		2537.38	-0.0035126		3067.41	-0.00100389		3597.4	-0.00514402		4127.4	-0.01703982
417.59	0.16800011		947.59	0.01422976		1477.58	0.0226037		2007.59	-0.0165951		2537.58	-0.00343457		3067.61	0.00006269		3597.6	-0.00514002		4127.6	-0.01706685
417.79	0.16768572		947.79	0.01433433		1477.78	0.02155379		2007.79	-0.01752986		2537.78	-0.00248071		3067.81	-0.00009563		3597.8	-0.00508568		4127.8	-0.01609515
417.99	0.16752346		947.99	0.01404848		1477.98	0.02181558		2007.99	-0.018234		2537.98	-0.00216417		3068.01	-0.00092668		3598	-0.00536248		4128	-0.01593911
418.19	0.16768302		948.19	0.0146667		1478.18	0.02097106		2008.19	-0.01878551		2538.18	-0.00238264		3068.21	-0.00089436		3598.2	-0.00606638		4128.2	-0.01505542
418.39	0.16832205		948.39	0.01547133		1478.38	0.02153106		2008.39	-0.01930223		2538.38	-0.00158471		3068.41	-0.00099733		3598.4	-0.00584106		4128.4	-0.01521974
418.59	0.16833197		948.59	0.01575736		1478.58	0.0221711		2008.59	-0.01892855		2538.58	-0.00103117		3068.61	-0.00064143		3598.6	-0.00544432		4128.6	-0.01499878
418.79	0.16741315		948.79	0.01541023		1478.78	0.02237415		2008.79	-0.0190728		2538.78	-0.00091395		3068.81	-0.0010431		3598.8	-0.00469685		4128.8	-0.01428026
418.99	0.16624784		948.99	0.01500156		1478.98	0.02248701		2008.99	-0.0191617		2538.98	0.00006017		3069.01	-0.00094772		3599	-0.00462098		4129	-0.01400761
419.19	0.16622601		949.19	0.01441808		1479.18	0.02336285		2009.19	-0.02003369		2539.18	0.00124604		3069.21	-0.00095473		3599.2	-0.00591823		4129.2	-0.01373284
419.39	0.16618049		949.39	0.01393606		1479.38	0.02416619		2009.39	-0.02048005		2539.38	0.00174719		3069.41	-0.00143176		3599.4	-0.00649884		4129.4	-0.01326642
419.59	0.16698565		949.59	0.01287532		1479.58	0.02420584		2009.59	-0.02017365		2539.58	0.00173774		3069.61	-0.00073778		3599.6	-0.00609794		4129.6	-0.01282835
419.79	0.16645263		949.79	0.01234607		1479.78	0.0239091		2009.79	-0.01987172		2539.78	0.00124887		3069.81	-0.00103218		3599.8	-0.00606191		4129.8	-0.01304427
419.99	0.16692904		949.99	0.01224203		1479.98	0.02455732		2009.99	-0.01963448		2539.98	0.00151705		3070.01	-0.0011976		3600	-0.00561423		4130	-0.01440106
420.19	0.16659571		950.19	0.01133695		1480.18	0.0243994		2010.19	-0.01974461		2540.18	0.00105893		3070.21	-0.00134447		3600.2	-0.00621978		4130.2	-0.01488774
420.39	0.16670921		950.39	0.01127817		1480.38	0.02440466		2010.39	-0.01910194		2540.38	0.00108123		3070.41	-0.00114744		3600.4	-0.00660456		4130.4	-0.01411748
420.59	0.16656125		950.59	0.01054421		1480.58	0.02366683		2010.59	-0.01948629		2540.58	0.0007999		3070.61	-0.00126134		3600.6	-0.00652658		4130.6	-0.01510574
420.79	0.16746373		950.79	0.01104576		1480.78	0.0222672		2010.79	-0.01829703		2540.78	0.00013296		3070.81	-0.00191746		3600.8	-0.00654537		4130.8	-0.01478998
420.99	0.16724899		950.99	0.01091134		1480.98	0.0217444		2010.99	-0.01783178		2540.98	-0.00073563		3071.01	-0.00175882		3601	-0.00665053		4131	-0.01456218
421.19	0.16769464		951.19	0.01105465		1481.18	0.02169131		2011.19	-0.01773214		2541.18	-0.00080768		3071.21	-0.00123651		3601.2	-0.006468		4131.2	-0.01341179
421.39	0.1675596		951.39	0.01072403		1481.38	0.0216511		2011.39	-0.01773748		2541.38	-0.00218598		3071.41	-0.00114964		3601.4	-0.00654546		4131.4	-0.01349136
421.59	0.16712509		951.59	0.01084028		1481.58	0.02101552		2011.59	-0.01824834		2541.58	-0.00224292		3071.61	-0.00187082		3601.6	-0.00606538		4131.6	-0.0129525
421.79	0.16755475		951.79	0.0109751		1481.78	0.02127227		2011.79	-0.01877607		2541.78	-0.00306808		3071.81	-0.0024034		3601.8	-0.00596817		4131.8	-0.0124526
421.99	0.16738483		951.99	0.01060834		1481.98	0.02181782		2011.99	-0.01912865		2541.98	-0.00388114		3072.01	-0.00384165		3602	-0.00600853		4132	-0.01281382
422.19	0.16690402		952.19	0.01071154		1482.18	0.02137128		2012.19	-0.01947475		2542.18	-0.00347938		3072.21	-0.00434315		3602.2	-0.00589994		4132.2	-0.01315038
422.39	0.16662598		952.39	0.01061646		1482.38	0.02159197		2012.39	-0.0199404		2542.38	-0.0023681		3072.41	-0.00502649		3602.4	-0.00528776		4132.4	-0.01326991
422.59	0.16490328		952.59	0.01044086		1482.58	0.02212704		2012.59	-0.02003902		2542.58	-0.00225975		3072.61	-0.00546903		3602.6	-0.00529301		4132.6	-0.01300411
422.79	0.16444737		952.79	0.01066371		1482.78	0.02201403		2012.79	-0.02076228		2542.78	-0.00177765		3072.81	-0.00618802		3602.8	-0.00576174		4132.8	-0.01286405
422.99	0.16353906		952.99	0.01028019		1482.98	0.02287565		2012.99	-0.02092747		2542.98	-0.00129306		3073.01	-0.00608148		3603	-0.00641901		4133	-0.01291455
423.19	0.16394905		953.19	0.01029601		1483.18	0.02343513		2013.19	-0.02162054		2543.18	-0.00152816		3073.21	-0.00565335		3603.2	-0.00728046		4133.2	-0.01213697
423.39	0.16379367		953.39	0.0109648		1483.38	0.02283515		2013.39	-0.02114423		2543.38	-0.00152053		3073.41	-0.00518627		3603.4	-0.00720591		4133.4	-0.01126882
423.59	0.16406899		953.59	0.01130824		1483.58	0.02243794		2013.59	-0.020779		2543.58	-0.00196582		3073.61	-0.00491978		3603.6	-0.00719506		4133.6	-0.01090512
423.79	0.16403579		953.79	0.01194363		1483.78	0.02230162		2013.79	-0.02027994		2543.78	-0.00266541		3073.81	-0.00564458		3603.8	-0.0071017		4133.8	-0.01193748
423.99	0.1640521		953.99	0.0123683		1483.98	0.02220723		2013.99	-0.02054434		2543.98	-0.00213383		3074.01	-0.00567338		3604	-0.00713597		4134	-0.01213083
424.19	0.16331484		954.19	0.01252004		1484.18	0.02111095		2014.19	-0.02080389		2544.18	-0.00214513		3074.21	-0.00515812		3604.2	-0.00752223		4134.2	-0.01177893
424.39	0.1631318		954.39	0.0130594		1484.38	0.02100435		2014.39	-0.02092409		2544.38	-0.00232238		3074.41	-0.0043839		3604.4	-0.00712166		4134.4	-0.01225868
424.59	0.16338217		954.59	0.01348249		1484.58	0.02091419		2014.59	-0.02146286		2544.58	-0.00290031		3074.61	-0.00450479		3604.6	-0.00788349		4134.6	-0.01309608
424.79	0.16324208		954.79	0.01471737		1484.78	0.02029045		2014.79	-0.0204361		2544.78	-0.00381232		3074.81	-0.0043613		3604.8	-0.00769039		4134.8	-0.01276301
424.99	0.16339972		954.99	0.01517173		1484.98	0.02114003		2014.99	-0.02023962		2544.98	-0.00527952		3075.01	-0.00347909		3605	-0.00748643		4135	-0.01291791
425.19	0.16376484		955.19	0.01537208		1485.18	0.0211122		2015.19	-0.0204435		2545.18	-0.00559211		3075.21	-0.00332211		3605.2	-0.0078952		4135.2	-0.01245249
425.39	0.1640696		955.39	0.01491348		1485.38	0.02189293		2015.39	-0.02040394		2545.38	-0.0064834		3075.41	-0.00252345		3605.4	-0.00792904		4135.4	-0.01296042
425.59	0.16494928		955.59	0.0146686		1485.58	0.02255836		2015.59	-0.02018946		2545.58	-0.00601421		3075.61	-0.00227204		3605.6	-0.00785907		4135.6	-0.01306896
425.79	0.16567874		955.79	0.01358237		1485.78	0.02268594		2015.79	-0.01974072		2545.78	-0.00613056		3075.81	-0.00163143		3605.8	-0.0071908		4135.8	-0.01387867
425.99	0.16586799		955.99	0.01328035		1485.98	0.02235569		2015.99	-0.01972736		2545.98	-0.0047689		3076.01	-0.0022263		3606	-0.00795598		4136	-0.01441034
426.19	0.16592497		956.19	0.01347483		1486.18	0.02260274		2016.19	-0.02052565		2546.18	-0.00327589		3076.21	-0.00180223		3606.2	-0.00809746		4136.2	-0.01475359
426.39	0.16601665		956.39	0.01257718		1486.38	0.02260906		2016.39	-0.02024943		2546.38	-0.00226753		3076.41	-0.00200613		3606.4	-0.00845372		4136.4	-0.01450043
426.59	0.16569898		956.59	0.01245518		1486.58	0.02214651		2016.59	-0.02034422		2546.58	-0.00102141		3076.61	-0.00304914		3606.6	-0.0088551		4136.6	-0.0151865
426.79	0.16642927		956.79	0.01195252		1486.78	0.02131157		2016.79	-0.0204074		2546.78	-0.00003546		3076.81	-0.00310608		3606.8	-0.00820652		4136.8	-0.01520413
426.99	0.16648405		956.99	0.01128335		1486.98	0.0211728		2016.99	-0.01961094		2546.98	0.00030561		3077.01	-0.0028338		3607	-0.00810615		4137	-0.01455879
427.19	0.16662575		957.19	0.01183397		1487.18	0.02058553		2017.19	-0.02010784		2547.18	0.00038532		3077.21	-0.00276735		3607.2	-0.00752749		4137.2	-0.01384787
427.39	0.16672199		957.39	0.01231084		1487.38	0.02034158		2017.39	-0.01963605		2547.38	0.00148442		3077.41	-0.00313308		3607.4	-0.00749536		4137.4	-0.01397522
427.59	0.16619857		957.59	0.01255132		1487.58	0.0201411		2017.59	-0.01910231		2547.58	0.00164178		3077.61	-0.00442923		3607.6	-0.00751605		4137.6	-0.01414067
427.79	0.16640912		957.79	0.01282483		1487.78	0.02005114		2017.79	-0.01873391		2547.78	0.00138376		3077.81	-0.00513105		3607.8	-0.00662229		4137.8	-0.01493213
427.99	0.16597201		957.99	0.0127236		1487.98	0.02028311		2017.99	-0.01907409		2547.98	0.00181088		3078.01	-0.005125		3608	-0.00652993		4138	-0.01496043
428.19	0.16516024		958.19	0.01277497		1488.18	0.02001671		2018.19	-0.01904442		2548.18	0.00125536		3078.21	-0.00494551		3608.2	-0.00754061		4138.2	-0.01578857
428.39	0.16482471		958.39	0.0132291		1488.38	0.02021464		2018.39	-0.01888326		2548.38	-0.000606		3078.41	-0.00432691		3608.4	-0.00775161		4138.4	-0.01662748
428.59	0.1648371		958.59	0.01413892		1488.58	0.02040496		2018.59	-0.01881368		2548.58	-0.00133564		3078.61	-0.00421458		3608.6	-0.00791474		4138.6	-0.016796
428.79	0.16453774		958.79	0.0148917		1488.78	0.02059877		2018.79	-0.01780051		2548.78	-0.00256737		3078.81	-0.00341207		3608.8	-0.00643216		4138.8	-0.01676991
428.99	0.1642429		958.99	0.01471122		1488.98	0.02153914		2018.99	-0.01816008		2548.98	-0.00335221		3079.01	-0.00380682		3609	-0.00670125		4139	-0.01618748
429.19	0.16425228		959.19	0.0142717		1489.18	0.02115529		2019.19	-0.01858531		2549.18	-0.00373352		3079.21	-0.00331121		3609.2	-0.0064213		4139.2	-0.01565224
429.39	0.16391153		959.39	0.01405792		1489.38	0.02194803		2019.39	-0.01810327		2549.38	-0.00412101		3079.41	-0.00286522		3609.4	-0.00620895		4139.4	-0.0158593
429.59	0.16445563		959.59	0.01354633		1489.58	0.02175682		2019.59	-0.01791491		2549.58	-0.00383011		3079.61	-0.00332408		3609.6	-0.00516859		4139.6	-0.01574069
429.79	0.16457505		959.79	0.01358615		1489.78	0.02142363		2019.79	-0.01729922		2549.78	-0.0034822		3079.81	-0.00291778		3609.8	-0.00507633		4139.8	-0.01587864
429.99	0.16481999		959.99	0.01352623		1489.98	0.02098139		2019.99	-0.01793789		2549.98	-0.00319182		3080.01	-0.00262119		3610	-0.00568601		4140	-0.01551856
430.19	0.16499062		960.19	0.01349773		1490.18	0.02133956		2020.19	-0.01829644		2550.18	-0.00273448		3080.21	-0.00239378		3610.2	-0.00494906		4140.2	-0.01513651
430.39	0.16554372		960.39	0.01223085		1490.38	0.02116657		2020.39	-0.01884029		2550.38	-0.00311461		3080.41	-0.00349366		3610.4	-0.00525411		4140.4	-0.01464851
430.59	0.16700982		960.59	0.01193427		1490.58	0.01998583		2020.59	-0.01905683		2550.58	-0.00247094		3080.61	-0.0031169		3610.6	-0.00525298		4140.6	-0.0143666
430.79	0.16805623		960.79	0.01183356		1490.78	0.01970035		2020.79	-0.01954509		2550.78	-0.00237816		3080.81	-0.0035095		3610.8	-0.0051708		4140.8	-0.01301099
430.99	0.16902516		960.99	0.01215267		1490.98	0.0199039		2020.99	-0.01984936		2550.98	-0.00246838		3081.01	-0.00432997		3611	-0.00505617		4141	-0.01223749
431.19	0.16926829		961.19	0.0120935		1491.18	0.02016804		2021.19	-0.02053488		2551.18	-0.00212257		3081.21	-0.00503561		3611.2	-0.00495008		4141.2	-0.0118264
431.39	0.16949248		961.39	0.01182139		1491.38	0.02026647		2021.39	-0.02068028		2551.38	-0.0022976		3081.41	-0.00493376		3611.4	-0.00601079		4141.4	-0.01180661
431.59	0.16889153		961.59	0.01134004		1491.58	0.0206046		2021.59	-0.02116267		2551.58	-0.00267814		3081.61	-0.00489121		3611.6	-0.00599676		4141.6	-0.01225932
431.79	0.16919755		961.79	0.01087291		1491.78	0.02134203		2021.79	-0.02100405		2551.78	-0.00303198		3081.81	-0.00453968		3611.8	-0.00686223		4141.8	-0.01252138
431.99	0.16886777		961.99	0.0100694		1491.98	0.02141391		2021.99	-0.02111124		2551.98	-0.00322727		3082.01	-0.00421149		3612	-0.00814024		4142	-0.01284061
432.19	0.16825524		962.19	0.00993089		1492.18	0.02155974		2022.19	-0.02099053		2552.18	-0.00392815		3082.21	-0.00365583		3612.2	-0.00922719		4142.2	-0.01397088
432.39	0.16796375		962.39	0.01102337		1492.38	0.02201628		2022.39	-0.02091311		2552.38	-0.00417709		3082.41	-0.00401687		3612.4	-0.00880577		4142.4	-0.01437775
432.59	0.16775381		962.59	0.01101592		1492.58	0.02234709		2022.59	-0.02130161		2552.58	-0.00359702		3082.61	-0.00387349		3612.6	-0.00800743		4142.6	-0.01497378
432.79	0.16664383		962.79	0.01048226		1492.78	0.0225911		2022.79	-0.02092647		2552.78	-0.00406387		3082.81	-0.00434124		3612.8	-0.00685295		4142.8	-0.0158963
432.99	0.16595993		962.99	0.00973566		1492.98	0.02201053		2022.99	-0.02107119		2552.98	-0.00465953		3083.01	-0.00497785		3613	-0.0073058		4143	-0.01590154
433.19	0.16626403		963.19	0.00935243		1493.18	0.02162742		2023.19	-0.02158188		2553.18	-0.005487		3083.21	-0.00461603		3613.2	-0.00764108		4143.2	-0.01691067
433.39	0.16520179		963.39	0.00911828		1493.38	0.02144649		2023.39	-0.0210763		2553.38	-0.00513893		3083.41	-0.00511333		3613.4	-0.00784027		4143.4	-0.0171693
433.59	0.1661354		963.59	0.00867175		1493.58	0.02109959		2023.59	-0.02072685		2553.58	-0.00454303		3083.61	-0.00485543		3613.6	-0.00712325		4143.6	-0.01729173
433.79	0.16576875		963.79	0.0090676		1493.78	0.02083992		2023.79	-0.020636		2553.78	-0.00471751		3083.81	-0.00478758		3613.8	-0.00800754		4143.8	-0.01724848
433.99	0.16600723		963.99	0.0092286		1493.98	0.02141604		2023.99	-0.02077768		2553.98	-0.00449028		3084.01	-0.00451898		3614	-0.00755502		4144	-0.01673567
434.19	0.16639604		964.19	0.00955136		1494.18	0.02153972		2024.19	-0.02072234		2554.18	-0.00396197		3084.21	-0.00493177		3614.2	-0.00727221		4144.2	-0.01602439
434.39	0.16684535		964.39	0.00989379		1494.38	0.02153418		2024.39	-0.02103218		2554.38	-0.00392059		3084.41	-0.00476663		3614.4	-0.00786369		4144.4	-0.01551395
434.59	0.16800193		964.59	0.01142182		1494.58	0.02149173		2024.59	-0.01989064		2554.58	-0.00248432		3084.61	-0.00469844		3614.6	-0.00846819		4144.6	-0.01429044
434.79	0.16818424		964.79	0.0131593		1494.78	0.02092465		2024.79	-0.02021783		2554.78	-0.00295711		3084.81	-0.00615231		3614.8	-0.00816299		4144.8	-0.01325068
434.99	0.16716197		964.99	0.01463232		1494.98	0.02082502		2024.99	-0.0198262		2554.98	-0.00276645		3085.01	-0.00689678		3615	-0.007263		4145	-0.01379721
435.19	0.16618048		965.19	0.01449845		1495.18	0.02068565		2025.19	-0.01970018		2555.18	-0.00256031		3085.21	-0.00718399		3615.2	-0.00739744		4145.2	-0.013477
435.39	0.16552126		965.39	0.01496049		1495.38	0.01985041		2025.39	-0.01973646		2555.38	-0.0023336		3085.41	-0.0064315		3615.4	-0.00731221		4145.4	-0.01288799
435.59	0.16473605		965.59	0.01484102		1495.58	0.0203106		2025.59	-0.02023528		2555.58	-0.00230429		3085.61	-0.00540075		3615.6	-0.00710399		4145.6	-0.01251122
435.79	0.16410598		965.79	0.01458079		1495.78	0.02036238		2025.79	-0.01929251		2555.78	-0.00177518		3085.81	-0.00557574		3615.8	-0.00808264		4145.8	-0.01175613
435.99	0.16401193		965.99	0.01499522		1495.98	0.02026132		2025.99	-0.01961674		2555.98	-0.00142037		3086.01	-0.00608829		3616	-0.00699315		4146	-0.01334633
436.19	0.16323288		966.19	0.01480562		1496.18	0.02104636		2026.19	-0.01974654		2556.18	-0.00149253		3086.21	-0.00637591		3616.2	-0.00617456		4146.2	-0.01403842
436.39	0.16222518		966.39	0.01462294		1496.38	0.02044946		2026.39	-0.01986461		2556.38	-0.00208836		3086.41	-0.00770866		3616.4	-0.00554737		4146.4	-0.01466362
436.59	0.16236624		966.59	0.01344871		1496.58	0.0198679		2026.59	-0.0202821		2556.58	-0.00255803		3086.61	-0.00714247		3616.6	-0.0046858		4146.6	-0.01531
436.79	0.16246421		966.79	0.01237207		1496.78	0.01938097		2026.79	-0.02057658		2556.78	-0.00322771		3086.81	-0.00714694		3616.8	-0.00497181		4146.8	-0.01582774
436.99	0.16374004		966.99	0.01192167		1496.98	0.0194562		2026.99	-0.02083047		2556.98	-0.00341584		3087.01	-0.00669127		3617	-0.00568412		4147	-0.01553811
437.19	0.16450022		967.19	0.0113608		1497.18	0.02093935		2027.19	-0.02106008		2557.18	-0.00367221		3087.21	-0.00632419		3617.2	-0.00648774		4147.2	-0.01553305
437.39	0.16394925		967.39	0.01095736		1497.38	0.02047704		2027.39	-0.02071148		2557.38	-0.00307847		3087.41	-0.00571101		3617.4	-0.00573178		4147.4	-0.01581325
437.59	0.1645363		967.59	0.01046094		1497.58	0.02114816		2027.59	-0.02034127		2557.58	-0.00276091		3087.61	-0.00544173		3617.6	-0.00573053		4147.6	-0.01592806
437.79	0.16406142		967.79	0.01116298		1497.78	0.02078904		2027.79	-0.02021106		2557.78	-0.00280769		3087.81	-0.0056741		3617.8	-0.00610601		4147.8	-0.01650453
437.99	0.16500686		967.99	0.01124377		1497.98	0.02125659		2027.99	-0.01905586		2557.98	-0.00215117		3088.01	-0.00492154		3618	-0.00566391		4148	-0.01668603
438.19	0.16559334		968.19	0.01091698		1498.18	0.02066554		2028.19	-0.01804091		2558.18	-0.00192003		3088.21	-0.00469198		3618.2	-0.00619182		4148.2	-0.01622312
438.39	0.16595843		968.39	0.01161957		1498.38	0.02124104		2028.39	-0.01760291		2558.38	-0.00189571		3088.41	-0.00367311		3618.4	-0.00620237		4148.4	-0.01675813
438.59	0.16687552		968.59	0.0124311		1498.58	0.02176601		2028.59	-0.01645645		2558.58	-0.00264196		3088.61	-0.00408053		3618.6	-0.00655487		4148.6	-0.01679486
438.79	0.16636424		968.79	0.01326745		1498.78	0.02070523		2028.79	-0.01716809		2558.78	-0.00352207		3088.81	-0.00452032		3618.8	-0.00645017		4148.8	-0.01709614
438.99	0.16522188		968.99	0.01334218		1498.98	0.02096639		2028.99	-0.01680516		2558.98	-0.00320228		3089.01	-0.00423135		3619	-0.0060651		4149	-0.0174026
439.19	0.16561933		969.19	0.01281869		1499.18	0.02026716		2029.19	-0.01752732		2559.18	-0.00333803		3089.21	-0.00396383		3619.2	-0.00617703		4149.2	-0.0156613
439.39	0.1653684		969.39	0.01355317		1499.38	0.01999283		2029.39	-0.01756202		2559.38	-0.00342512		3089.41	-0.00330213		3619.4	-0.00701921		4149.4	-0.01544416
439.59	0.16522924		969.59	0.01294934		1499.58	0.02057706		2029.59	-0.01898628		2559.58	-0.00403196		3089.61	-0.00287749		3619.6	-0.00757806		4149.6	-0.01484056
439.79	0.16491393		969.79	0.0134786		1499.78	0.02040392		2029.79	-0.01920818		2559.78	-0.00362248		3089.81	-0.00360312		3619.8	-0.00715502		4149.8	-0.01525087
439.99	0.165482		969.99	0.01414679		1499.98	0.02063425		2029.99	-0.0203917		2559.98	-0.00401092		3090.01	-0.00415666		3620	-0.00587728		4150	-0.0165224
440.19	0.16507809		970.19	0.01331102		1500.18	0.01999898		2030.19	-0.02066542		2560.18	-0.00462373		3090.21	-0.00414028		3620.2	-0.00550221		4150.2	-0.01562281
440.39	0.16477718		970.39	0.01246207		1500.38	0.0192374		2030.39	-0.02158027		2560.38	-0.00543662		3090.41	-0.00474828		3620.4	-0.00543804		4150.4	-0.01474737
440.59	0.16502236		970.59	0.01197232		1500.58	0.01913169		2030.59	-0.02238375		2560.58	-0.0050237		3090.61	-0.00365968		3620.6	-0.00489289		4150.6	-0.01493807
440.79	0.16484931		970.79	0.0119269		1500.78	0.01971045		2030.79	-0.02293103		2560.78	-0.00433593		3090.81	-0.00353958		3620.8	-0.00551885		4150.8	-0.0150182
440.99	0.16458516		970.99	0.01208578		1500.98	0.020501		2030.99	-0.02315198		2560.98	-0.00400551		3091.01	-0.00279304		3621	-0.00533559		4151	-0.01494578
441.19	0.16400779		971.19	0.01210318		1501.18	0.02065778		2031.19	-0.02330734		2561.18	-0.0042861		3091.21	-0.0030377		3621.2	-0.00553552		4151.2	-0.01572625
441.39	0.16331533		971.39	0.01282963		1501.38	0.0190535		2031.39	-0.02270049		2561.38	-0.00358729		3091.41	-0.00299765		3621.4	-0.00518488		4151.4	-0.01637447
441.59	0.16343027		971.59	0.01289154		1501.58	0.01883406		2031.59	-0.02185238		2561.58	-0.00327713		3091.61	-0.00305207		3621.6	-0.00580141		4151.6	-0.01662266
441.79	0.16300378		971.79	0.01290055		1501.78	0.01824849		2031.79	-0.02159134		2561.78	-0.00299291		3091.81	-0.00379324		3621.8	-0.00612259		4151.8	-0.01718874
441.99	0.1635071		971.99	0.01286708		1501.98	0.01823246		2031.99	-0.02061149		2561.98	-0.00337963		3092.01	-0.00408153		3622	-0.00645869		4152	-0.0168473
442.19	0.16380566		972.19	0.01255318		1502.18	0.01854981		2032.19	-0.0199343		2562.18	-0.00389151		3092.21	-0.00459243		3622.2	-0.00734196		4152.2	-0.01700771
442.39	0.16416398		972.39	0.01248923		1502.38	0.01890515		2032.39	-0.01930142		2562.38	-0.00438666		3092.41	-0.00506386		3622.4	-0.00734326		4152.4	-0.01753295
442.59	0.1643443		972.59	0.01245203		1502.58	0.01877347		2032.59	-0.01907855		2562.58	-0.00524744		3092.61	-0.00523813		3622.6	-0.00807368		4152.6	-0.01725704
442.79	0.16433949		972.79	0.01216198		1502.78	0.01911565		2032.79	-0.01944686		2562.78	-0.00484212		3092.81	-0.00657937		3622.8	-0.00891969		4152.8	-0.01668112
442.99	0.16444128		972.99	0.01200112		1502.98	0.01990237		2032.99	-0.01956384		2562.98	-0.00524168		3093.01	-0.00688829		3623	-0.00921913		4153	-0.01701528
443.19	0.16488216		973.19	0.01197593		1503.18	0.01991404		2033.19	-0.02057659		2563.18	-0.00579245		3093.21	-0.00754545		3623.2	-0.00961917		4153.2	-0.01598529
443.39	0.16429734		973.39	0.0123938		1503.38	0.02089267		2033.39	-0.02157032		2563.38	-0.00615312		3093.41	-0.00809671		3623.4	-0.0104551		4153.4	-0.01657093
443.59	0.16498473		973.59	0.01273227		1503.58	0.02125385		2033.59	-0.0224715		2563.58	-0.0060653		3093.61	-0.00831331		3623.6	-0.01049203		4153.6	-0.01638892
443.79	0.1646116		973.79	0.01275408		1503.78	0.02061412		2033.79	-0.0229812		2563.78	-0.00615352		3093.81	-0.008419		3623.8	-0.0094609		4153.8	-0.01698879
443.99	0.16506359		973.99	0.01203856		1503.98	0.02116871		2033.99	-0.02307372		2563.98	-0.00676197		3094.01	-0.00796372		3624	-0.00950798		4154	-0.01716375
444.19	0.16432173		974.19	0.01062817		1504.18	0.02028381		2034.19	-0.0228225		2564.18	-0.00737296		3094.21	-0.00710895		3624.2	-0.00887046		4154.2	-0.01595648
444.39	0.16405966		974.39	0.0093665		1504.38	0.02057292		2034.39	-0.02406353		2564.38	-0.00838547		3094.41	-0.00689516		3624.4	-0.0084052		4154.4	-0.01604153
444.59	0.16409726		974.59	0.00918503		1504.58	0.02033982		2034.59	-0.02457811		2564.58	-0.00812586		3094.61	-0.00569963		3624.6	-0.00874898		4154.6	-0.01791883
444.79	0.16452007		974.79	0.00866236		1504.78	0.02141902		2034.79	-0.02436805		2564.78	-0.00794169		3094.81	-0.00507978		3624.8	-0.00940577		4154.8	-0.01805026
444.99	0.16488182		974.99	0.00822391		1504.98	0.0199794		2034.99	-0.02453283		2564.98	-0.00811433		3095.01	-0.00518373		3625	-0.00900376		4155	-0.01810084
445.19	0.16488021		975.19	0.00904073		1505.18	0.01934059		2035.19	-0.0233651		2565.18	-0.00744411		3095.21	-0.0049424		3625.2	-0.00980781		4155.2	-0.0181188
445.39	0.16613896		975.39	0.00975909		1505.38	0.018545		2035.39	-0.02287992		2565.38	-0.0063077		3095.41	-0.00444366		3625.4	-0.00947541		4155.4	-0.018426
445.59	0.16592203		975.59	0.00940807		1505.58	0.01812326		2035.59	-0.02347884		2565.58	-0.0059874		3095.61	-0.0044113		3625.6	-0.00906666		4155.6	-0.01880049
445.79	0.1661431		975.79	0.00930149		1505.78	0.01800519		2035.79	-0.02296023		2565.78	-0.00543805		3095.81	-0.0054057		3625.8	-0.00889144		4155.8	-0.01842028
445.99	0.16749595		975.99	0.01019668		1505.98	0.01754934		2035.99	-0.02224949		2565.98	-0.00559009		3096.01	-0.00594279		3626	-0.008944		4156	-0.01799341
446.19	0.16782966		976.19	0.00991619		1506.18	0.01716616		2036.19	-0.021159		2566.18	-0.00457656		3096.21	-0.0050636		3626.2	-0.00916586		4156.2	-0.01739648
446.39	0.16830287		976.39	0.01001129		1506.38	0.0163033		2036.39	-0.0209331		2566.38	-0.00359942		3096.41	-0.00527707		3626.4	-0.00870438		4156.4	-0.01669078
446.59	0.16813638		976.59	0.01004752		1506.58	0.01672058		2036.59	-0.02078231		2566.58	-0.00315958		3096.61	-0.00525653		3626.6	-0.00849837		4156.6	-0.01597312
446.79	0.16858605		976.79	0.01003227		1506.78	0.0168666		2036.79	-0.02044202		2566.78	-0.00275308		3096.81	-0.00601405		3626.8	-0.00817725		4156.8	-0.01589199
446.99	0.16801539		976.99	0.01062342		1506.98	0.01670987		2036.99	-0.02105596		2566.98	-0.00261328		3097.01	-0.00579241		3627	-0.00715976		4157	-0.01665715
447.19	0.16726938		977.19	0.01069285		1507.18	0.01669142		2037.19	-0.02120611		2567.18	-0.00242413		3097.21	-0.00565617		3627.2	-0.00679575		4157.2	-0.01580471
447.39	0.16629683		977.39	0.01089092		1507.38	0.01750132		2037.39	-0.02148029		2567.38	-0.00179786		3097.41	-0.00519338		3627.4	-0.00727848		4157.4	-0.01594789
447.59	0.16596066		977.59	0.01158019		1507.58	0.01749823		2037.59	-0.02128305		2567.58	-0.00215839		3097.61	-0.00462874		3627.6	-0.00645917		4157.6	-0.01597793
447.79	0.16436696		977.79	0.01119165		1507.78	0.01793537		2037.79	-0.02139812		2567.78	-0.00359702		3097.81	-0.00412025		3627.8	-0.00642904		4157.8	-0.01663153
447.99	0.16494499		977.99	0.01105392		1507.98	0.01837872		2037.99	-0.02152157		2567.98	-0.00370342		3098.01	-0.00289813		3628	-0.00737993		4158	-0.01645461
448.19	0.16511311		978.19	0.01070538		1508.18	0.01767794		2038.19	-0.02195433		2568.18	-0.00451415		3098.21	-0.00188175		3628.2	-0.00706532		4158.2	-0.01667234
448.39	0.16509676		978.39	0.0099419		1508.38	0.01797969		2038.39	-0.02235301		2568.38	-0.00493312		3098.41	-0.00168788		3628.4	-0.00766811		4158.4	-0.01688457
448.59	0.16586192		978.59	0.01022568		1508.58	0.01787302		2038.59	-0.02144943		2568.58	-0.00534681		3098.61	-0.00117567		3628.6	-0.00829064		4158.6	-0.01739676
448.79	0.16597217		978.79	0.00956986		1508.78	0.01867438		2038.79	-0.02025285		2568.78	-0.00597696		3098.81	-0.00163968		3628.8	-0.00845959		4158.8	-0.01627848
448.99	0.16620888		978.99	0.00975053		1508.98	0.0171932		2038.99	-0.02020247		2568.98	-0.00681247		3099.01	-0.00306616		3629	-0.00837449		4159	-0.0155047
449.19	0.16671209		979.19	0.01061765		1509.18	0.01796644		2039.19	-0.01947223		2569.18	-0.00621782		3099.21	-0.00249202		3629.2	-0.00961993		4159.2	-0.01516802
449.39	0.16821204		979.39	0.01063881		1509.38	0.01779758		2039.39	-0.02090205		2569.38	-0.00649043		3099.41	-0.00350845		3629.4	-0.00861423		4159.4	-0.01552065
449.59	0.16763715		979.59	0.01033674		1509.58	0.01597587		2039.59	-0.02098872		2569.58	-0.00675648		3099.61	-0.0053486		3629.6	-0.00832327		4159.6	-0.01466501
449.79	0.16821434		979.79	0.01127719		1509.78	0.01559804		2039.79	-0.02009679		2569.78	-0.00662432		3099.81	-0.00633274		3629.8	-0.0082655		4159.8	-0.0142495
449.99	0.16843936		979.99	0.01144371		1509.98	0.01532908		2039.99	-0.02048685		2569.98	-0.00715462		3100.01	-0.00710116		3630	-0.00780705		4160	-0.01461048
450.19	0.16749661		980.19	0.01109945		1510.18	0.01482802		2040.19	-0.02071156		2570.18	-0.00634555		3100.21	-0.00700725		3630.2	-0.00683729		4160.2	-0.01385891
450.39	0.16695412		980.39	0.01080085		1510.38	0.01544346		2040.39	-0.02105631		2570.38	-0.00555662		3100.41	-0.00815257		3630.4	-0.00649995		4160.4	-0.01393427
450.59	0.16611283		980.59	0.01048431		1510.58	0.01604209		2040.59	-0.02104033		2570.58	-0.00531172		3100.61	-0.00856127		3630.6	-0.00595694		4160.6	-0.01436014
450.79	0.16500029		980.79	0.01078688		1510.78	0.01569227		2040.79	-0.02122523		2570.78	-0.00502422		3100.81	-0.00828794		3630.8	-0.00537562		4160.8	-0.0158307
450.99	0.16376839		980.99	0.01071005		1510.98	0.01625089		2040.99	-0.02170555		2570.98	-0.00333025		3101.01	-0.00872607		3631	-0.00535817		4161	-0.01631441
451.19	0.16337496		981.19	0.01060988		1511.18	0.01647612		2041.19	-0.02233233		2571.18	-0.00237324		3101.21	-0.00902459		3631.2	-0.00623124		4161.2	-0.01675365
451.39	0.16211225		981.39	0.01063974		1511.38	0.01751122		2041.39	-0.0222498		2571.38	-0.00264041		3101.41	-0.00918066		3631.4	-0.00619192		4161.4	-0.01734586
451.59	0.16051567		981.59	0.01131885		1511.58	0.01764607		2041.59	-0.02252328		2571.58	-0.00302555		3101.61	-0.00812716		3631.6	-0.00579688		4161.6	-0.01856113
451.79	0.16009754		981.79	0.01095265		1511.78	0.0182837		2041.79	-0.02231455		2571.78	-0.00274187		3101.81	-0.00805727		3631.8	-0.00635179		4161.8	-0.02004216
451.99	0.16105204		981.99	0.01108566		1511.98	0.01789882		2041.99	-0.02252269		2571.98	-0.00141801		3102.01	-0.00818325		3632	-0.00686407		4162	-0.01999454
452.19	0.16145709		982.19	0.0114374		1512.18	0.01836967		2042.19	-0.02212347		2572.18	-0.0017053		3102.21	-0.00771096		3632.2	-0.00735057		4162.2	-0.01989353
452.39	0.16184926		982.39	0.01088353		1512.38	0.01931473		2042.39	-0.0210034		2572.38	-0.00156306		3102.41	-0.00714162		3632.4	-0.00807111		4162.4	-0.01888378
452.59	0.16290197		982.59	0.01090416		1512.58	0.01926304		2042.59	-0.02050455		2572.58	-0.00241534		3102.61	-0.00750435		3632.6	-0.00866606		4162.6	-0.01936457
452.79	0.16263212		982.79	0.01041664		1512.78	0.02006274		2042.79	-0.01981686		2572.78	-0.00268057		3102.81	-0.00804048		3632.8	-0.01031965		4162.8	-0.01869419
452.99	0.16361758		982.99	0.01026346		1512.98	0.01970601		2042.99	-0.01978515		2572.98	-0.00324266		3103.01	-0.00785367		3633	-0.01125837		4163	-0.01883895
453.19	0.16470863		983.19	0.01042208		1513.18	0.01995579		2043.19	-0.01906874		2573.18	-0.00245088		3103.21	-0.0075173		3633.2	-0.01167319		4163.2	-0.01947678
453.39	0.16458563		983.39	0.01024837		1513.38	0.01951958		2043.39	-0.02004918		2573.38	-0.00327244		3103.41	-0.00844941		3633.4	-0.01033606		4163.4	-0.01924893
453.59	0.16499388		983.59	0.01046814		1513.58	0.0187967		2043.59	-0.01914655		2573.58	-0.00307107		3103.61	-0.00894193		3633.6	-0.01004837		4163.6	-0.01887058
453.79	0.16543174		983.79	0.01158382		1513.78	0.01844047		2043.79	-0.01987053		2573.78	-0.00350488		3103.81	-0.00908054		3633.8	-0.00943098		4163.8	-0.01835782
453.99	0.16560899		983.99	0.01114458		1513.98	0.01872819		2043.99	-0.02055173		2573.98	-0.00427055		3104.01	-0.00911586		3634	-0.00806723		4164	-0.01855718
454.19	0.1655459		984.19	0.01165836		1514.18	0.01896734		2044.19	-0.02088251		2574.18	-0.00441037		3104.21	-0.00809496		3634.2	-0.00725757		4164.2	-0.01774924
454.39	0.16576316		984.39	0.01122227		1514.38	0.01990051		2044.39	-0.02114888		2574.38	-0.00417335		3104.41	-0.00791194		3634.4	-0.00728259		4164.4	-0.01784417
454.59	0.16559936		984.59	0.01157287		1514.58	0.01995488		2044.59	-0.02142753		2574.58	-0.00409878		3104.61	-0.00792352		3634.6	-0.00644775		4164.6	-0.01758552
454.79	0.16542204		984.79	0.01201508		1514.78	0.0193464		2044.79	-0.02192636		2574.78	-0.00435752		3104.81	-0.00845921		3634.8	-0.0057103		4164.8	-0.01742939
454.99	0.16554874		984.99	0.01177225		1514.98	0.0192571		2044.99	-0.02235423		2574.98	-0.00380152		3105.01	-0.00924126		3635	-0.00613104		4165	-0.01723489
455.19	0.16598919		985.19	0.01202511		1515.18	0.01915828		2045.19	-0.02260883		2575.18	-0.00411908		3105.21	-0.0088023		3635.2	-0.0059527		4165.2	-0.01818068
455.39	0.16576974		985.39	0.01216294		1515.38	0.01918686		2045.39	-0.02274197		2575.38	-0.00459836		3105.41	-0.00841592		3635.4	-0.00519673		4165.4	-0.01860758
455.59	0.16525367		985.59	0.01263638		1515.58	0.01914327		2045.59	-0.02331375		2575.58	-0.00485576		3105.61	-0.00737634		3635.6	-0.00532788		4165.6	-0.01936606
455.79	0.16600099		985.79	0.01186113		1515.78	0.01965797		2045.79	-0.0230815		2575.78	-0.00445886		3105.81	-0.00844841		3635.8	-0.00505728		4165.8	-0.01945994
455.99	0.16547374		985.99	0.01180798		1515.98	0.01970976		2045.99	-0.02295222		2575.98	-0.00501835		3106.01	-0.00908334		3636	-0.00580935		4166	-0.01868166
456.19	0.16594157		986.19	0.01131563		1516.18	0.02072088		2046.19	-0.02312688		2576.18	-0.00488737		3106.21	-0.00735345		3636.2	-0.00659558		4166.2	-0.01811368
456.39	0.16563504		986.39	0.01049901		1516.38	0.02081082		2046.39	-0.02300612		2576.38	-0.00502125		3106.41	-0.00682821		3636.4	-0.00802965		4166.4	-0.01846167
456.59	0.16436393		986.59	0.01016375		1516.58	0.02080634		2046.59	-0.02354094		2576.58	-0.00483562		3106.61	-0.00655671		3636.6	-0.00829953		4166.6	-0.01918405
456.79	0.16357713		986.79	0.00977221		1516.78	0.02124939		2046.79	-0.02334217		2576.78	-0.00515572		3106.81	-0.00604556		3636.8	-0.008744		4166.8	-0.01850924
456.99	0.16363317		986.99	0.00925618		1516.98	0.02042416		2046.99	-0.02323203		2576.98	-0.00477087		3107.01	-0.00554254		3637	-0.00812727		4167	-0.01773593
457.19	0.16334555		987.19	0.00970276		1517.18	0.02046133		2047.19	-0.02281045		2577.18	-0.00406674		3107.21	-0.00507578		3637.2	-0.00794708		4167.2	-0.01708329
457.39	0.16256323		987.39	0.01040971		1517.38	0.01957368		2047.39	-0.02287952		2577.38	-0.00436957		3107.41	-0.00433204		3637.4	-0.00745141		4167.4	-0.01535279
457.59	0.16303514		987.59	0.01171744		1517.58	0.01868468		2047.59	-0.02262616		2577.58	-0.00395256		3107.61	-0.0038499		3637.6	-0.00741495		4167.6	-0.01414941
457.79	0.1626761		987.79	0.01275867		1517.78	0.01820067		2047.79	-0.02301447		2577.78	-0.00448416		3107.81	-0.00406522		3637.8	-0.00660024		4167.8	-0.01336433
457.99	0.16258593		987.99	0.01267712		1517.98	0.0184053		2047.99	-0.02273597		2577.98	-0.00548436		3108.01	-0.00328594		3638	-0.00585687		4168	-0.01356387
458.19	0.16301693		988.19	0.01315106		1518.18	0.01803076		2048.19	-0.02340149		2578.18	-0.00568836		3108.21	-0.00223863		3638.2	-0.00583134		4168.2	-0.01335621
458.39	0.16328124		988.39	0.01267567		1518.38	0.0183499		2048.39	-0.0236431		2578.38	-0.00579448		3108.41	-0.00301744		3638.4	-0.00654115		4168.4	-0.01356852
458.59	0.16359654		988.59	0.01340733		1518.58	0.01823043		2048.59	-0.02300446		2578.58	-0.00681436		3108.61	-0.00334263		3638.6	-0.00678092		4168.6	-0.01381211
458.79	0.16412481		988.79	0.0137626		1518.78	0.01767998		2048.79	-0.02367507		2578.78	-0.00787141		3108.81	-0.00379734		3638.8	-0.00693167		4168.8	-0.01458878
458.99	0.16444098		988.99	0.01336635		1518.98	0.01797247		2048.99	-0.02360283		2578.98	-0.00759541		3109.01	-0.00388952		3639	-0.00674528		4169	-0.01531255
459.19	0.16452328		989.19	0.01334937		1519.18	0.0176638		2049.19	-0.0233463		2579.18	-0.00725984		3109.21	-0.00313647		3639.2	-0.0066745		4169.2	-0.0162314
459.39	0.16537218		989.39	0.01259625		1519.38	0.0176205		2049.39	-0.02380893		2579.38	-0.00730712		3109.41	-0.00397067		3639.4	-0.00750822		4169.4	-0.01689367
459.59	0.16475497		989.59	0.01195029		1519.58	0.01822221		2049.59	-0.02277512		2579.58	-0.00817647		3109.61	-0.00492782		3639.6	-0.00749786		4169.6	-0.0174474
459.79	0.16407159		989.79	0.01086803		1519.78	0.01827573		2049.79	-0.02196711		2579.78	-0.008413		3109.81	-0.00636327		3639.8	-0.00657963		4169.8	-0.01838065
459.99	0.16375165		989.99	0.01053625		1519.98	0.01839789		2049.99	-0.02191173		2579.98	-0.0094279		3110.01	-0.00702442		3640	-0.00673565		4170	-0.01908969
460.19	0.16469239		990.19	0.00992656		1520.18	0.01903374		2050.19	-0.02212517		2580.18	-0.00889282		3110.21	-0.00690754		3640.2	-0.00716117		4170.2	-0.01921905
460.39	0.16341066		990.39	0.0091756		1520.38	0.01892348		2050.39	-0.02139358		2580.38	-0.00878955		3110.41	-0.00739804		3640.4	-0.00723778		4170.4	-0.01994543
460.59	0.16323396		990.59	0.00886606		1520.58	0.01978995		2050.59	-0.02151363		2580.58	-0.00812276		3110.61	-0.00737786		3640.6	-0.00631507		4170.6	-0.01970896
460.79	0.16421229		990.79	0.00880791		1520.78	0.01937126		2050.79	-0.02080599		2580.78	-0.00821896		3110.81	-0.0072265		3640.8	-0.0069394		4170.8	-0.01838084
460.99	0.16459747		990.99	0.00863369		1520.98	0.01855338		2050.99	-0.02016931		2580.98	-0.00726495		3111.01	-0.00748258		3641	-0.00673409		4171	-0.01740174
461.19	0.16482935		991.19	0.00973416		1521.18	0.01868969		2051.19	-0.0202269		2581.18	-0.00657811		3111.21	-0.00729558		3641.2	-0.00696859		4171.2	-0.01703058
461.39	0.16436726		991.39	0.00963141		1521.38	0.01814655		2051.39	-0.02024805		2581.38	-0.00655882		3111.41	-0.00750507		3641.4	-0.00644532		4171.4	-0.0162141
461.59	0.16471983		991.59	0.00978954		1521.58	0.0193639		2051.59	-0.02092593		2581.58	-0.00605826		3111.61	-0.00782982		3641.6	-0.00684114		4171.6	-0.01664344
461.79	0.16420978		991.79	0.00988141		1521.78	0.01974472		2051.79	-0.02037242		2581.78	-0.00616154		3111.81	-0.00808568		3641.8	-0.00675033		4171.8	-0.01754963
461.99	0.1646981		991.99	0.00932301		1521.98	0.01976294		2051.99	-0.0206219		2581.98	-0.00583206		3112.01	-0.00754058		3642	-0.00780304		4172	-0.01796295
462.19	0.16557686		992.19	0.00979606		1522.18	0.02039234		2052.19	-0.02076382		2582.18	-0.00605618		3112.21	-0.00771409		3642.2	-0.00876509		4172.2	-0.01832397
462.39	0.1654744		992.39	0.01032343		1522.38	0.02171649		2052.39	-0.02081073		2582.38	-0.00617257		3112.41	-0.00716323		3642.4	-0.00966533		4172.4	-0.01796005
462.59	0.16494985		992.59	0.01083487		1522.58	0.02301183		2052.59	-0.02051806		2582.58	-0.00642268		3112.61	-0.00659296		3642.6	-0.00947598		4172.6	-0.01785128
462.79	0.16466867		992.79	0.01089947		1522.78	0.02330315		2052.79	-0.02146463		2582.78	-0.00584693		3112.81	-0.00583654		3642.8	-0.00942176		4172.8	-0.01770028
462.99	0.16414536		992.99	0.01063218		1522.98	0.02313879		2052.99	-0.02148826		2582.98	-0.00569448		3113.01	-0.00510304		3643	-0.00997768		4173	-0.01732914
463.19	0.16270345		993.19	0.01058647		1523.18	0.02269847		2053.19	-0.02160552		2583.18	-0.00588702		3113.21	-0.00475191		3643.2	-0.01026081		4173.2	-0.01750843
463.39	0.16331724		993.39	0.01011518		1523.38	0.02203809		2053.39	-0.02222284		2583.38	-0.00578518		3113.41	-0.00570171		3643.4	-0.00976298		4173.4	-0.01757794
463.59	0.16272424		993.59	0.00983767		1523.58	0.02254031		2053.59	-0.02243645		2583.58	-0.00662483		3113.61	-0.00652072		3643.6	-0.0086292		4173.6	-0.01768398
463.79	0.16218163		993.79	0.00932953		1523.78	0.02200203		2053.79	-0.02340143		2583.78	-0.0066311		3113.81	-0.00676443		3643.8	-0.0083546		4173.8	-0.01879285
463.99	0.1624525		993.99	0.00805887		1523.98	0.02230162		2053.99	-0.02375665		2583.98	-0.00688317		3114.01	-0.00703499		3644	-0.00906623		4174	-0.0189628
464.19	0.16279644		994.19	0.00721248		1524.18	0.02285478		2054.19	-0.02344148		2584.18	-0.00702011		3114.21	-0.00707816		3644.2	-0.00965797		4174.2	-0.01860449
464.39	0.16230611		994.39	0.00725054		1524.38	0.02225195		2054.39	-0.02341062		2584.38	-0.00699943		3114.41	-0.00702441		3644.4	-0.00954468		4174.4	-0.01964443
464.59	0.16314531		994.59	0.00670229		1524.58	0.02154337		2054.59	-0.02341855		2584.58	-0.00732589		3114.61	-0.00775942		3644.6	-0.00970249		4174.6	-0.01991788
464.79	0.16360532		994.79	0.00690209		1524.78	0.02026415		2054.79	-0.02270746		2584.78	-0.00714697		3114.81	-0.0075818		3644.8	-0.00987641		4174.8	-0.0194011
464.99	0.16326686		994.99	0.00606905		1524.98	0.02005759		2054.99	-0.02304442		2584.98	-0.00707607		3115.01	-0.00838793		3645	-0.00923877		4175	-0.01984793
465.19	0.16303501		995.19	0.00644844		1525.18	0.01974457		2055.19	-0.02277816		2585.18	-0.00696659		3115.21	-0.00864662		3645.2	-0.008925		4175.2	-0.0204171
465.39	0.16318276		995.39	0.00601733		1525.38	0.02006822		2055.39	-0.0226566		2585.38	-0.00679247		3115.41	-0.00955564		3645.4	-0.00893278		4175.4	-0.02009027
465.59	0.16353262		995.59	0.00622574		1525.58	0.0202308		2055.59	-0.02168959		2585.58	-0.00741915		3115.61	-0.00984976		3645.6	-0.00943515		4175.6	-0.02107275
465.79	0.16425774		995.79	0.0070939		1525.78	0.01922102		2055.79	-0.0209205		2585.78	-0.00710001		3115.81	-0.0104882		3645.8	-0.00920724		4175.8	-0.02154328
465.99	0.16429686		995.99	0.00713808		1525.98	0.01906471		2055.99	-0.02105755		2585.98	-0.00682404		3116.01	-0.01024006		3646	-0.00886276		4176	-0.02071389
466.19	0.16441954		996.19	0.00859127		1526.18	0.01937079		2056.19	-0.02168054		2586.18	-0.00709424		3116.21	-0.01005075		3646.2	-0.00821831		4176.2	-0.0199119
466.39	0.16377171		996.39	0.00976758		1526.38	0.02022661		2056.39	-0.02231888		2586.38	-0.00681382		3116.41	-0.00850463		3646.4	-0.00771217		4176.4	-0.01934046
466.59	0.16369478		996.59	0.01049496		1526.58	0.02003118		2056.59	-0.02262523		2586.58	-0.00660788		3116.61	-0.00839276		3646.6	-0.00837596		4176.6	-0.01947957
466.79	0.16395974		996.79	0.01151126		1526.78	0.02003969		2056.79	-0.02361254		2586.78	-0.0068144		3116.81	-0.00780662		3646.8	-0.00807603		4176.8	-0.01916669
466.99	0.1635514		996.99	0.01194437		1526.98	0.01973992		2056.99	-0.02378569		2586.98	-0.00737436		3117.01	-0.00717404		3647	-0.00857453		4177	-0.01871564
467.19	0.16291097		997.19	0.01232367		1527.18	0.0198649		2057.19	-0.02452791		2587.18	-0.00657083		3117.21	-0.00757923		3647.2	-0.00829695		4177.2	-0.01891599
467.39	0.16363282		997.39	0.01269524		1527.38	0.01996943		2057.39	-0.02475323		2587.38	-0.00650462		3117.41	-0.00718967		3647.4	-0.00789325		4177.4	-0.01887653
467.59	0.16350053		997.59	0.01278336		1527.58	0.02050962		2057.59	-0.02568587		2587.58	-0.00669235		3117.61	-0.00707359		3647.6	-0.00809752		4177.6	-0.01919987
467.79	0.16287696		997.79	0.01285614		1527.78	0.01998944		2057.79	-0.02570556		2587.78	-0.0064878		3117.81	-0.00599076		3647.8	-0.00856395		4177.8	-0.02034223
467.99	0.16272589		997.99	0.01274611		1527.98	0.01939295		2057.99	-0.02486936		2587.98	-0.00655565		3118.01	-0.00658863		3648	-0.00849604		4178	-0.01985426
468.19	0.16250719		998.19	0.0128507		1528.18	0.01890714		2058.19	-0.02482544		2588.18	-0.00712589		3118.21	-0.00703315		3648.2	-0.00900794		4178.2	-0.0199474
468.39	0.16187357		998.39	0.01299653		1528.38	0.01755988		2058.39	-0.02441477		2588.38	-0.00688334		3118.41	-0.00747646		3648.4	-0.00877713		4178.4	-0.02080989
468.59	0.16173631		998.59	0.01156072		1528.58	0.016641		2058.59	-0.02349503		2588.58	-0.00659458		3118.61	-0.00857701		3648.6	-0.00814258		4178.6	-0.0198981
468.79	0.16189218		998.79	0.01116589		1528.78	0.01638178		2058.79	-0.02211333		2588.78	-0.00581195		3118.81	-0.00744405		3648.8	-0.00797266		4178.8	-0.01923828
468.99	0.1619381		998.99	0.01013841		1528.98	0.0166576		2058.99	-0.02219388		2588.98	-0.00577438		3119.01	-0.00759086		3649	-0.00740007		4179	-0.01898893
469.19	0.16205571		999.19	0.00982151		1529.18	0.01673202		2059.19	-0.02091667		2589.18	-0.00595223		3119.21	-0.00823075		3649.2	-0.00665557		4179.2	-0.01798972
469.39	0.16217153		999.39	0.00874768		1529.38	0.01724904		2059.39	-0.02139166		2589.38	-0.00631463		3119.41	-0.00879527		3649.4	-0.00695087		4179.4	-0.01700402
469.59	0.16271748		999.59	0.00849718		1529.58	0.01634828		2059.59	-0.02087436		2589.58	-0.00718184		3119.61	-0.00875137		3649.6	-0.00619207		4179.6	-0.01731687
469.79	0.16339835		999.79	0.008395		1529.78	0.01526559		2059.79	-0.0217872		2589.78	-0.00738143		3119.81	-0.00887402		3649.8	-0.00498605		4179.8	-0.01636961
469.99	0.16277336		999.99	0.00793737		1529.98	0.01554915		2059.99	-0.02201705		2589.98	-0.00827545		3120.01	-0.00848059		3650	-0.00499689		4180	-0.01514122
470.19	0.16366906		1000.19	0.00814653		1530.18	0.01617895		2060.19	-0.02265012		2590.18	-0.00798872		3120.21	-0.00852343		3650.2	-0.0047895		4180.2	-0.01459097
470.39	0.16325456		1000.39	0.00752404		1530.38	0.01614603		2060.39	-0.02287356		2590.38	-0.00765092		3120.41	-0.00802024		3650.4	-0.00506643		4180.4	-0.01439943
470.59	0.16394396		1000.59	0.00787301		1530.58	0.01582083		2060.59	-0.02300839		2590.58	-0.00725071		3120.61	-0.00846671		3650.6	-0.00570914		4180.6	-0.01440393
470.79	0.16355864		1000.79	0.00902576		1530.78	0.0170656		2060.79	-0.02355844		2590.78	-0.00758141		3120.81	-0.00803516		3650.8	-0.00596584		4180.8	-0.01403006
470.99	0.16344484		1000.99	0.00889974		1530.98	0.01789596		2060.99	-0.02363104		2590.98	-0.00755079		3121.01	-0.00817453		3651	-0.00783984		4181	-0.01449775
471.19	0.16292363		1001.19	0.0092209		1531.18	0.01840368		2061.19	-0.0233758		2591.18	-0.00761117		3121.21	-0.00871129		3651.2	-0.00796725		4181.2	-0.01588123
471.39	0.16295847		1001.39	0.00889467		1531.38	0.01850438		2061.39	-0.02297684		2591.38	-0.00794211		3121.41	-0.00774763		3651.4	-0.00780217		4181.4	-0.01528621
471.59	0.16289203		1001.59	0.00912381		1531.58	0.01833888		2061.59	-0.02329699		2591.58	-0.00788473		3121.61	-0.00778871		3651.6	-0.00790082		4181.6	-0.01576864
471.79	0.16227461		1001.79	0.00927427		1531.78	0.01871248		2061.79	-0.02304735		2591.78	-0.0080143		3121.81	-0.00725752		3651.8	-0.00863672		4181.8	-0.01661147
471.99	0.16241548		1001.99	0.00958104		1531.98	0.01828017		2061.99	-0.02260901		2591.98	-0.00792628		3122.01	-0.00817646		3652	-0.00870323		4182	-0.01646908
472.19	0.16226951		1002.19	0.00911941		1532.18	0.01865956		2062.19	-0.0230117		2592.18	-0.00729034		3122.21	-0.00770655		3652.2	-0.00940492		4182.2	-0.01718145
472.39	0.16177666		1002.39	0.00858647		1532.38	0.01873851		2062.39	-0.0225739		2592.38	-0.00657251		3122.41	-0.00728709		3652.4	-0.00833752		4182.4	-0.01685609
472.59	0.16235836		1002.59	0.00778393		1532.58	0.01868021		2062.59	-0.02247933		2592.58	-0.00509289		3122.61	-0.00634995		3652.6	-0.00790604		4182.6	-0.01676037
472.79	0.16242617		1002.79	0.00790893		1532.78	0.01894253		2062.79	-0.0225522		2592.78	-0.0044372		3122.81	-0.00528259		3652.8	-0.00890847		4182.8	-0.01664542
472.99	0.16312779		1002.99	0.00781515		1532.98	0.02015568		2062.99	-0.02343403		2592.98	-0.00428138		3123.01	-0.00570692		3653	-0.00864532		4183	-0.01655933
473.19	0.16385941		1003.19	0.00820356		1533.18	0.0203487		2063.19	-0.02305831		2593.18	-0.00433779		3123.21	-0.00582688		3653.2	-0.00888567		4183.2	-0.01713482
473.39	0.16452807		1003.39	0.00820858		1533.38	0.02033471		2063.39	-0.02365041		2593.38	-0.0050782		3123.41	-0.00550781		3653.4	-0.00954063		4183.4	-0.0180128
473.59	0.16560632		1003.59	0.00916904		1533.58	0.01955802		2063.59	-0.0243538		2593.58	-0.00574057		3123.61	-0.00580928		3653.6	-0.00916454		4183.6	-0.01879984
473.79	0.166329		1003.79	0.00856833		1533.78	0.01848095		2063.79	-0.02480188		2593.78	-0.00665053		3123.81	-0.00620757		3653.8	-0.00932713		4183.8	-0.01880388
473.99	0.16641155		1003.99	0.00898261		1533.98	0.0183052		2063.99	-0.02476933		2593.98	-0.00643159		3124.01	-0.0066013		3654	-0.00965478		4184	-0.01938504
474.19	0.16716062		1004.19	0.00872654		1534.18	0.01740605		2064.19	-0.02504754		2594.18	-0.00591497		3124.21	-0.00683634		3654.2	-0.0089025		4184.2	-0.01948326
474.39	0.16668542		1004.39	0.00835344		1534.38	0.0161012		2064.39	-0.02564893		2594.38	-0.0058325		3124.41	-0.00737729		3654.4	-0.00967108		4184.4	-0.01984608
474.59	0.1669991		1004.59	0.00928257		1534.58	0.01616308		2064.59	-0.02657932		2594.58	-0.00673989		3124.61	-0.00849099		3654.6	-0.01023534		4184.6	-0.01999599
474.79	0.16614701		1004.79	0.00900196		1534.78	0.01636353		2064.79	-0.02692659		2594.78	-0.00719223		3124.81	-0.00885315		3654.8	-0.01063053		4184.8	-0.01927286
474.99	0.16555048		1004.99	0.00786206		1534.98	0.01732357		2064.99	-0.02658719		2594.98	-0.00750503		3125.01	-0.00988897		3655	-0.01131581		4185	-0.02003469
475.19	0.16430463		1005.19	0.00698031		1535.18	0.01648569		2065.19	-0.02629652		2595.18	-0.00801856		3125.21	-0.01055676		3655.2	-0.01119232		4185.2	-0.02057782
475.39	0.16423288		1005.39	0.00664053		1535.38	0.01626803		2065.39	-0.02625086		2595.38	-0.00840781		3125.41	-0.01051506		3655.4	-0.0122005		4185.4	-0.01961333
475.59	0.16387236		1005.59	0.00710371		1535.58	0.01723604		2065.59	-0.02586176		2595.58	-0.00876097		3125.61	-0.01095818		3655.6	-0.01234557		4185.6	-0.02085693
475.79	0.16357333		1005.79	0.00657676		1535.78	0.01677872		2065.79	-0.02614202		2595.78	-0.00884114		3125.81	-0.01093329		3655.8	-0.01308381		4185.8	-0.02121808
475.99	0.16379281		1005.99	0.00702169		1535.98	0.01657251		2065.99	-0.02587451		2595.98	-0.00944628		3126.01	-0.01090378		3656	-0.01292889		4186	-0.02120094
476.19	0.16239166		1006.19	0.00639216		1536.18	0.01686495		2066.19	-0.02567207		2596.18	-0.00871681		3126.21	-0.00990537		3656.2	-0.01197618		4186.2	-0.01973458
476.39	0.16180292		1006.39	0.00720388		1536.38	0.01703		2066.39	-0.02583227		2596.38	-0.00861102		3126.41	-0.00952414		3656.4	-0.01143972		4186.4	-0.01846574
476.59	0.1624117		1006.59	0.00785807		1536.58	0.01694899		2066.59	-0.02589972		2596.58	-0.00886608		3126.61	-0.00850406		3656.6	-0.0119544		4186.6	-0.01837567
476.79	0.16253211		1006.79	0.00826245		1536.78	0.0165247		2066.79	-0.0258529		2596.78	-0.00868184		3126.81	-0.00885432		3656.8	-0.0126842		4186.8	-0.01752632
476.99	0.16314633		1006.99	0.00918567		1536.98	0.0179331		2066.99	-0.0259701		2596.98	-0.00833488		3127.01	-0.00831706		3657	-0.01185829		4187	-0.01778708
477.19	0.16357315		1007.19	0.0104551		1537.18	0.01812254		2067.19	-0.02593309		2597.18	-0.00815129		3127.21	-0.00761886		3657.2	-0.01148881		4187.2	-0.01717141
477.39	0.16334552		1007.39	0.01026557		1537.38	0.01871747		2067.39	-0.02587598		2597.38	-0.00938977		3127.41	-0.00688777		3657.4	-0.01109587		4187.4	-0.01665895
477.59	0.16364339		1007.59	0.01076561		1537.58	0.01868185		2067.59	-0.02626899		2597.58	-0.00972948		3127.61	-0.00700837		3657.6	-0.01002976		4187.6	-0.01660232
477.79	0.16451182		1007.79	0.0103937		1537.78	0.01863859		2067.79	-0.02641449		2597.78	-0.00916298		3127.81	-0.00586248		3657.8	-0.00915982		4187.8	-0.01597664
477.99	0.16461158		1007.99	0.01081854		1537.98	0.0196644		2067.99	-0.02641012		2597.98	-0.00852422		3128.01	-0.00564022		3658	-0.0080416		4188	-0.01531512
478.19	0.16587577		1008.19	0.01076667		1538.18	0.0199319		2068.19	-0.02547589		2598.18	-0.00877026		3128.21	-0.00542533		3658.2	-0.0078905		4188.2	-0.01451202
478.39	0.16625289		1008.39	0.01049573		1538.38	0.02003167		2068.39	-0.02578992		2598.38	-0.00831068		3128.41	-0.00497542		3658.4	-0.00730053		4188.4	-0.01463264
478.59	0.16620427		1008.59	0.01026915		1538.58	0.0204227		2068.59	-0.02594589		2598.58	-0.007743		3128.61	-0.00541395		3658.6	-0.00725944		4188.6	-0.01400595
478.79	0.16618393		1008.79	0.00950847		1538.78	0.02043922		2068.79	-0.02532073		2598.78	-0.00705662		3128.81	-0.00564836		3658.8	-0.00703232		4188.8	-0.01454257
478.99	0.16601838		1008.99	0.00911719		1538.98	0.0208167		2068.99	-0.02445049		2598.98	-0.00751693		3129.01	-0.00633557		3659	-0.00831136		4189	-0.01584706
479.19	0.16590101		1009.19	0.00920146		1539.18	0.02047546		2069.19	-0.02430133		2599.18	-0.00790462		3129.21	-0.00632425		3659.2	-0.00886954		4189.2	-0.017331
479.39	0.16588327		1009.39	0.0091782		1539.38	0.02056162		2069.39	-0.02445387		2599.38	-0.00850537		3129.41	-0.00635442		3659.4	-0.00963638		4189.4	-0.01887038
479.59	0.16594158		1009.59	0.0090746		1539.58	0.02029768		2069.59	-0.02425235		2599.58	-0.00763237		3129.61	-0.00669995		3659.6	-0.00951988		4189.6	-0.01960852
479.79	0.16575283		1009.79	0.00831368		1539.78	0.02011904		2069.79	-0.02528561		2599.78	-0.00782575		3129.81	-0.00739005		3659.8	-0.01046094		4189.8	-0.02002985
479.99	0.16502657		1009.99	0.00808205		1539.98	0.02036913		2069.99	-0.02510073		2599.98	-0.00866453		3130.01	-0.00744474		3660	-0.01078251		4190	-0.02012281
480.19	0.16433517		1010.19	0.00803787		1540.18	0.01958893		2070.19	-0.02525986		2600.18	-0.00811878		3130.21	-0.00724757		3660.2	-0.01053989		4190.2	-0.01903248
480.39	0.16410893		1010.39	0.00874359		1540.38	0.01908084		2070.39	-0.02529554		2600.38	-0.00773136		3130.41	-0.00759395		3660.4	-0.01154841		4190.4	-0.01954099
480.59	0.16381099		1010.59	0.0083171		1540.58	0.01828953		2070.59	-0.02503889		2600.58	-0.00761004		3130.61	-0.00753036		3660.6	-0.01209512		4190.6	-0.0206417
480.79	0.16303855		1010.79	0.00739533		1540.78	0.01735665		2070.79	-0.02491737		2600.78	-0.00658765		3130.81	-0.00790941		3660.8	-0.01238066		4190.8	-0.02107991
480.99	0.16186443		1010.99	0.00833882		1540.98	0.01796521		2070.99	-0.02563622		2600.98	-0.00620393		3131.01	-0.00768787		3661	-0.01253705		4191	-0.02092903
481.19	0.16093754		1011.19	0.00886455		1541.18	0.01706189		2071.19	-0.02622727		2601.18	-0.00630933		3131.21	-0.00814004		3661.2	-0.01257329		4191.2	-0.01978525
481.39	0.15976765		1011.39	0.00846809		1541.38	0.01703747		2071.39	-0.02619169		2601.38	-0.0062392		3131.41	-0.0083172		3661.4	-0.01261479		4191.4	-0.01979579
481.59	0.1594841		1011.59	0.0088994		1541.58	0.01704951		2071.59	-0.0260772		2601.58	-0.00692349		3131.61	-0.00792812		3661.6	-0.01250321		4191.6	-0.01961845
481.79	0.15955402		1011.79	0.00909323		1541.78	0.01644295		2071.79	-0.02636884		2601.78	-0.00635361		3131.81	-0.00797012		3661.8	-0.01215927		4191.8	-0.01826487
481.99	0.15992163		1011.99	0.0089299		1541.98	0.0155748		2071.99	-0.02546616		2601.98	-0.00684651		3132.01	-0.00895002		3662	-0.01175629		4192	-0.01775169
482.19	0.16110499		1012.19	0.00888971		1542.18	0.01477785		2072.19	-0.02483856		2602.18	-0.00722195		3132.21	-0.00908513		3662.2	-0.01092675		4192.2	-0.01760963
482.39	0.16156478		1012.39	0.0082681		1542.38	0.01472724		2072.39	-0.02556727		2602.38	-0.00720348		3132.41	-0.00869196		3662.4	-0.01068087		4192.4	-0.01829345
482.59	0.16182813		1012.59	0.00846412		1542.58	0.01509154		2072.59	-0.02584728		2602.58	-0.00774448		3132.61	-0.00941651		3662.6	-0.01159095		4192.6	-0.01838286
482.79	0.16224243		1012.79	0.00848863		1542.78	0.014138		2072.79	-0.02538235		2602.78	-0.00874684		3132.81	-0.00920453		3662.8	-0.01173457		4192.8	-0.01953502
482.99	0.16217125		1012.99	0.00778361		1542.98	0.01465925		2072.99	-0.02540754		2602.98	-0.01027323		3133.01	-0.00910538		3663	-0.01193165		4193	-0.02095788
483.19	0.16248266		1013.19	0.00770412		1543.18	0.01533286		2073.19	-0.02638377		2603.18	-0.01115326		3133.21	-0.00871941		3663.2	-0.01145651		4193.2	-0.02188185
483.39	0.16210385		1013.39	0.00655936		1543.38	0.01534423		2073.39	-0.0263456		2603.38	-0.01097601		3133.41	-0.0089138		3663.4	-0.01004097		4193.4	-0.02224138
483.59	0.16293323		1013.59	0.00585127		1543.58	0.01599569		2073.59	-0.02645164		2603.58	-0.01017024		3133.61	-0.00929583		3663.6	-0.00980752		4193.6	-0.02145317
483.79	0.16380534		1013.79	0.00454511		1543.78	0.01687473		2073.79	-0.02663296		2603.78	-0.01031985		3133.81	-0.0097146		3663.8	-0.00969774		4193.8	-0.02185381
483.99	0.16362886		1013.99	0.00451625		1543.98	0.01668353		2073.99	-0.02652417		2603.98	-0.01052381		3134.01	-0.00910185		3664	-0.0094356		4194	-0.02149035
484.19	0.1643691		1014.19	0.00438205		1544.18	0.0171166		2074.19	-0.02654888		2604.18	-0.00977972		3134.21	-0.00810791		3664.2	-0.00884997		4194.2	-0.02120014
484.39	0.16403194		1014.39	0.00406413		1544.38	0.01812308		2074.39	-0.02535834		2604.38	-0.00951044		3134.41	-0.00763415		3664.4	-0.00882177		4194.4	-0.02173226
484.59	0.16424252		1014.59	0.00443383		1544.58	0.01825036		2074.59	-0.02546252		2604.58	-0.00881701		3134.61	-0.0070799		3664.6	-0.00841493		4194.6	-0.02206463
484.79	0.16318282		1014.79	0.00462988		1544.78	0.01848513		2074.79	-0.02560056		2604.78	-0.00850485		3134.81	-0.00631421		3664.8	-0.00847653		4194.8	-0.02144431
484.99	0.16276088		1014.99	0.0061634		1544.98	0.01916004		2074.99	-0.02574178		2604.98	-0.00802261		3135.01	-0.00625309		3665	-0.00821002		4195	-0.02118042
485.19	0.16264492		1015.19	0.00661618		1545.18	0.01951419		2075.19	-0.02631218		2605.18	-0.00854099		3135.21	-0.00708819		3665.2	-0.00789466		4195.2	-0.02079703
485.39	0.16263119		1015.39	0.00620554		1545.38	0.01983169		2075.39	-0.02556164		2605.38	-0.00736772		3135.41	-0.00725613		3665.4	-0.00787819		4195.4	-0.02078754
485.59	0.16181151		1015.59	0.00642701		1545.58	0.0194573		2075.59	-0.02519798		2605.58	-0.00818378		3135.61	-0.00630499		3665.6	-0.0079258		4195.6	-0.0201969
485.79	0.16197249		1015.79	0.00644587		1545.78	0.01855525		2075.79	-0.02539949		2605.78	-0.00748803		3135.81	-0.00727734		3665.8	-0.00778392		4195.8	-0.01999095
485.99	0.16306532		1015.99	0.00635889		1545.98	0.01786033		2075.99	-0.02588981		2605.98	-0.007866		3136.01	-0.00715581		3666	-0.00767783		4196	-0.02011062
486.19	0.16256494		1016.19	0.00746158		1546.18	0.0184178		2076.19	-0.0264063		2606.18	-0.00733016		3136.21	-0.00656492		3666.2	-0.00803312		4196.2	-0.02018726
486.39	0.16187776		1016.39	0.00819564		1546.38	0.01862389		2076.39	-0.02752221		2606.38	-0.00682758		3136.41	-0.00694465		3666.4	-0.00843103		4196.4	-0.02009739
486.59	0.16112189		1016.59	0.00964794		1546.58	0.01850485		2076.59	-0.02768824		2606.58	-0.00685121		3136.61	-0.00713692		3666.6	-0.00882282		4196.6	-0.02053664
486.79	0.16020274		1016.79	0.00971631		1546.78	0.01798681		2076.79	-0.02766729		2606.78	-0.00661657		3136.81	-0.00765474		3666.8	-0.0086105		4196.8	-0.02058455
486.99	0.15968245		1016.99	0.0093821		1546.98	0.01903782		2076.99	-0.02849406		2606.98	-0.00745373		3137.01	-0.00762835		3667	-0.00818589		4197	-0.02085359
487.19	0.15938998		1017.19	0.00938714		1547.18	0.01835431		2077.19	-0.02757775		2607.18	-0.00782543		3137.21	-0.00781969		3667.2	-0.00831314		4197.2	-0.02025368
487.39	0.15931703		1017.39	0.0094637		1547.38	0.01865436		2077.39	-0.02721422		2607.38	-0.00717229		3137.41	-0.00809992		3667.4	-0.00825798		4197.4	-0.02083265
487.59	0.16051396		1017.59	0.01009609		1547.58	0.01798681		2077.59	-0.02718689		2607.58	-0.00783511		3137.61	-0.0078191		3667.6	-0.00883555		4197.6	-0.02056237
487.79	0.16072901		1017.79	0.01018708		1547.78	0.01750673		2077.79	-0.02740687		2607.78	-0.0085011		3137.81	-0.00765275		3667.8	-0.00842607		4197.8	-0.02002093
487.99	0.15972278		1017.99	0.01053561		1547.98	0.0184925		2077.99	-0.02764451		2607.98	-0.00965066		3138.01	-0.00722		3668	-0.00874823		4198	-0.01922734
488.19	0.16033842		1018.19	0.0108423		1548.18	0.01915294		2078.19	-0.0271723		2608.18	-0.00960739		3138.21	-0.00618215		3668.2	-0.00843022		4198.2	-0.01912669
488.39	0.15981757		1018.39	0.01156899		1548.38	0.01956474		2078.39	-0.02714027		2608.38	-0.0088515		3138.41	-0.00613982		3668.4	-0.00867866		4198.4	-0.0191759
488.59	0.16000989		1018.59	0.01191719		1548.58	0.019247		2078.59	-0.02641876		2608.58	-0.00869261		3138.61	-0.00587214		3668.6	-0.00855761		4198.6	-0.01920685
488.79	0.15945545		1018.79	0.01161238		1548.78	0.01898977		2078.79	-0.02620243		2608.78	-0.00902794		3138.81	-0.00571049		3668.8	-0.00905095		4198.8	-0.02000669
488.99	0.16013449		1018.99	0.01157133		1548.98	0.01844523		2078.99	-0.02615283		2608.98	-0.00853983		3139.01	-0.00538751		3669	-0.00858379		4199	-0.02041096
489.19	0.16069065		1019.19	0.01137477		1549.18	0.01827012		2079.19	-0.02604334		2609.18	-0.00816078		3139.21	-0.00622986		3669.2	-0.00960346		4199.2	-0.02063752
489.39	0.16096869		1019.39	0.01067342		1549.38	0.01781895		2079.39	-0.02568214		2609.38	-0.00712017		3139.41	-0.00626926		3669.4	-0.01046553		4199.4	-0.02220346
489.59	0.16100638		1019.59	0.01014758		1549.58	0.01724652		2079.59	-0.02608842		2609.58	-0.00763372		3139.61	-0.00584781		3669.6	-0.01066313		4199.6	-0.02283156
489.79	0.16229707		1019.79	0.00998273		1549.78	0.01660492		2079.79	-0.0259317		2609.78	-0.00743699		3139.81	-0.00612142		3669.8	-0.01110378		4199.8	-0.02316209
489.99	0.16242651		1019.99	0.00980388		1549.98	0.01609475		2079.99	-0.0269668		2609.98	-0.00713986		3140.01	-0.00534565		3670	-0.01167624		4200	-0.02337744
490.19	0.16243584		1020.19	0.01068044		1550.18	0.0159478		2080.19	-0.02675178		2610.18	-0.00519063		3140.21	-0.00577887		3670.2	-0.01201408		4200.2	-0.02370923
490.39	0.16311708		1020.39	0.01089434		1550.38	0.01503722		2080.39	-0.02716385		2610.38	-0.00529143		3140.41	-0.00621115		3670.4	-0.0123388		4200.4	-0.02357652
490.59	0.1630317		1020.59	0.01156014		1550.58	0.01526544		2080.59	-0.02694569		2610.58	-0.00475769		3140.61	-0.00639513		3670.6	-0.01290782		4200.6	-0.02400063
490.79	0.16349435		1020.79	0.01057822		1550.78	0.0151231		2080.79	-0.0267712		2610.78	-0.00450441		3140.81	-0.00722776		3670.8	-0.01339732		4200.8	-0.02422182
490.99	0.16338694		1020.99	0.01009698		1550.98	0.01406192		2080.99	-0.02630048		2610.98	-0.00466385		3141.01	-0.00724512		3671	-0.01358957		4201	-0.0238179
491.19	0.16306042		1021.19	0.00974382		1551.18	0.0136114		2081.19	-0.02579276		2611.18	-0.00515914		3141.21	-0.00823584		3671.2	-0.01435838		4201.2	-0.02389795
491.39	0.16356143		1021.39	0.00999661		1551.38	0.01357585		2081.39	-0.02510893		2611.38	-0.00584734		3141.41	-0.00920485		3671.4	-0.01402342		4201.4	-0.0244927
491.59	0.16308804		1021.59	0.01046935		1551.58	0.01281259		2081.59	-0.02446821		2611.58	-0.00658725		3141.61	-0.00907422		3671.6	-0.01334022		4201.6	-0.02386862
491.79	0.162588		1021.79	0.01005138		1551.78	0.01342913		2081.79	-0.02461658		2611.78	-0.00748998		3141.81	-0.01022608		3671.8	-0.0119029		4201.8	-0.02173285
491.99	0.16189377		1021.99	0.01025008		1551.98	0.01413357		2081.99	-0.02449911		2611.98	-0.00805226		3142.01	-0.01152464		3672	-0.01175413		4202	-0.02139567
492.19	0.16135445		1022.19	0.00975176		1552.18	0.01460108		2082.19	-0.02459761		2612.18	-0.00653208		3142.21	-0.01200583		3672.2	-0.0107615		4202.2	-0.02123871
492.39	0.16135872		1022.39	0.00940389		1552.38	0.01444462		2082.39	-0.02492422		2612.38	-0.00622183		3142.41	-0.01186223		3672.4	-0.0105051		4202.4	-0.02032238
492.59	0.16191954		1022.59	0.00844378		1552.58	0.0141042		2082.59	-0.02498109		2612.58	-0.00674757		3142.61	-0.01140134		3672.6	-0.0098019		4202.6	-0.01968878
492.79	0.16170735		1022.79	0.00862386		1552.78	0.01340564		2082.79	-0.02524214		2612.78	-0.00659871		3142.81	-0.01100429		3672.8	-0.00974006		4202.8	-0.0190527
492.99	0.16204048		1022.99	0.00849863		1552.98	0.01339697		2082.99	-0.02509539		2612.98	-0.00578272		3143.01	-0.00991621		3673	-0.00963155		4203	-0.01877164
493.19	0.16222914		1023.19	0.00847765		1553.18	0.01409902		2083.19	-0.02472764		2613.18	-0.00644803		3143.21	-0.01045218		3673.2	-0.00928765		4203.2	-0.01955797
493.39	0.16288164		1023.39	0.0076509		1553.38	0.01495388		2083.39	-0.02489171		2613.38	-0.00706762		3143.41	-0.00933243		3673.4	-0.00919656		4203.4	-0.01967415
493.59	0.16308576		1023.59	0.0067234		1553.58	0.01569537		2083.59	-0.02509472		2613.58	-0.00735677		3143.61	-0.00825636		3673.6	-0.00919494		4203.6	-0.01894224
493.79	0.16393497		1023.79	0.00687818		1553.78	0.01560197		2083.79	-0.02496866		2613.78	-0.00681961		3143.81	-0.00710734		3673.8	-0.00946382		4203.8	-0.01765826
493.99	0.16442476		1023.99	0.00635369		1553.98	0.01587178		2083.99	-0.02561852		2613.98	-0.00638769		3144.01	-0.00687424		3674	-0.00913113		4204	-0.0179963
494.19	0.16540266		1024.19	0.00727139		1554.18	0.01557264		2084.19	-0.02586889		2614.18	-0.00572626		3144.21	-0.00658393		3674.2	-0.00995		4204.2	-0.01883871
494.39	0.16539592		1024.39	0.00727248		1554.38	0.01624527		2084.39	-0.02619913		2614.38	-0.00645816		3144.41	-0.00645518		3674.4	-0.01118043		4204.4	-0.01869865
494.59	0.16551984		1024.59	0.00711609		1554.58	0.01641609		2084.59	-0.0261538		2614.58	-0.00527521		3144.61	-0.00694621		3674.6	-0.01111776		4204.6	-0.01880885
494.79	0.16569089		1024.79	0.00652213		1554.78	0.01504024		2084.79	-0.02537185		2614.78	-0.00643949		3144.81	-0.00802621		3674.8	-0.01124689		4204.8	-0.01836052
494.99	0.1652204		1024.99	0.00698454		1554.98	0.01494781		2084.99	-0.02507202		2614.98	-0.00734733		3145.01	-0.00825302		3675	-0.01179049		4205	-0.01784151
495.19	0.16426079		1025.19	0.00708194		1555.18	0.01490844		2085.19	-0.02472258		2615.18	-0.00875491		3145.21	-0.00909934		3675.2	-0.01234883		4205.2	-0.01845013
495.39	0.16379427		1025.39	0.00711751		1555.38	0.01417425		2085.39	-0.02448002		2615.38	-0.00927283		3145.41	-0.00946406		3675.4	-0.01173149		4205.4	-0.01933294
495.59	0.16351194		1025.59	0.0074836		1555.58	0.01414362		2085.59	-0.02452435		2615.58	-0.00927185		3145.61	-0.00950746		3675.6	-0.01159623		4205.6	-0.0189135
495.79	0.16275723		1025.79	0.00735547		1555.78	0.01365286		2085.79	-0.02465557		2615.78	-0.00962543		3145.81	-0.00999589		3675.8	-0.01142777		4205.8	-0.01890091
495.99	0.16233326		1025.99	0.00668461		1555.98	0.01289151		2085.99	-0.02520365		2615.98	-0.00982925		3146.01	-0.01013505		3676	-0.01169011		4206	-0.01987445
496.19	0.1625451		1026.19	0.00620075		1556.18	0.01288455		2086.19	-0.02534458		2616.18	-0.00871081		3146.21	-0.00978921		3676.2	-0.01138458		4206.2	-0.02073639
496.39	0.16301856		1026.39	0.00600152		1556.38	0.01209946		2086.39	-0.02551854		2616.38	-0.00888891		3146.41	-0.00775622		3676.4	-0.01125531		4206.4	-0.02067508
496.59	0.16287416		1026.59	0.00509152		1556.58	0.01224639		2086.59	-0.02560163		2616.58	-0.00878915		3146.61	-0.00779965		3676.6	-0.01100714		4206.6	-0.0207269
496.79	0.16274427		1026.79	0.0047569		1556.78	0.01224332		2086.79	-0.02453024		2616.78	-0.00903321		3146.81	-0.00792414		3676.8	-0.01096896		4206.8	-0.02140303
496.99	0.16206402		1026.99	0.00442862		1556.98	0.01335951		2086.99	-0.02501255		2616.98	-0.00885188		3147.01	-0.00671301		3677	-0.01133645		4207	-0.02198765
497.19	0.16172102		1027.19	0.00406866		1557.18	0.0142975		2087.19	-0.02560867		2617.18	-0.00921568		3147.21	-0.00591371		3677.2	-0.01080998		4207.2	-0.02174067
497.39	0.16162127		1027.39	0.00348147		1557.38	0.01510148		2087.39	-0.02579946		2617.38	-0.00949054		3147.41	-0.00567378		3677.4	-0.01129666		4207.4	-0.02076377
497.59	0.16109345		1027.59	0.0032388		1557.58	0.01603575		2087.59	-0.02673212		2617.58	-0.00961965		3147.61	-0.00654953		3677.6	-0.01108607		4207.6	-0.0204377
497.79	0.16131833		1027.79	0.00319568		1557.78	0.01646263		2087.79	-0.02699345		2617.78	-0.00897431		3147.81	-0.00762233		3677.8	-0.01028981		4207.8	-0.01994913
497.99	0.16123799		1027.99	0.00277663		1557.98	0.01649649		2087.99	-0.02697022		2617.98	-0.00923964		3148.01	-0.00848259		3678	-0.01062102		4208	-0.02055319
498.19	0.16099816		1028.19	0.00305839		1558.18	0.01669416		2088.19	-0.02772075		2618.18	-0.00893518		3148.21	-0.00881091		3678.2	-0.01176461		4208.2	-0.02070014
498.39	0.161323		1028.39	0.00237911		1558.38	0.01637288		2088.39	-0.02720069		2618.38	-0.00947905		3148.41	-0.0102935		3678.4	-0.01096566		4208.4	-0.01959391
498.59	0.16204245		1028.59	0.00321108		1558.58	0.01571266		2088.59	-0.02694824		2618.58	-0.01016002		3148.61	-0.0107473		3678.6	-0.01054378		4208.6	-0.01964043
498.79	0.1625387		1028.79	0.00456947		1558.78	0.01503785		2088.79	-0.02743685		2618.78	-0.01135442		3148.81	-0.01089364		3678.8	-0.01060222		4208.8	-0.01858813
498.99	0.16277531		1028.99	0.00509159		1558.98	0.0155876		2088.99	-0.02814168		2618.98	-0.01127162		3149.01	-0.01060085		3679	-0.01163278		4209	-0.01961756
499.19	0.16197446		1029.19	0.00569096		1559.18	0.01493808		2089.19	-0.02819478		2619.18	-0.0112766		3149.21	-0.01100724		3679.2	-0.01140687		4209.2	-0.01972546
499.39	0.16200279		1029.39	0.00616893		1559.38	0.01453025		2089.39	-0.02847728		2619.38	-0.01076394		3149.41	-0.01149487		3679.4	-0.01197413		4209.4	-0.0200787
499.59	0.1622258		1029.59	0.00676234		1559.58	0.01403267		2089.59	-0.02784091		2619.58	-0.0115799		3149.61	-0.01127268		3679.6	-0.01316741		4209.6	-0.01990652
499.79	0.16223669		1029.79	0.00685695		1559.78	0.01288455		2089.79	-0.02809286		2619.78	-0.01117463		3149.81	-0.01149814		3679.8	-0.0133701		4209.8	-0.02029653
499.99	0.16268261		1029.99	0.00651249		1559.98	0.01312791		2089.99	-0.0278459		2619.98	-0.01197305		3150.01	-0.01163454		3680	-0.01372865		4210	-0.02029059
500.19	0.16317826		1030.19	0.00663378		1560.18	0.01404551		2090.19	-0.02739586		2620.18	-0.011171		3150.21	-0.01119721		3680.2	-0.01415619		4210.2	-0.02142237
500.39	0.16286731		1030.39	0.00585712		1560.38	0.01372167		2090.39	-0.02736461		2620.38	-0.01147808		3150.41	-0.00998661		3680.4	-0.01469093		4210.4	-0.02040236
500.59	0.16302801		1030.59	0.00569119		1560.58	0.0142201		2090.59	-0.02735607		2620.58	-0.01193315		3150.61	-0.01085337		3680.6	-0.01539793		4210.6	-0.02034461
500.79	0.16346852		1030.79	0.00527579		1560.78	0.01475319		2090.79	-0.02734112		2620.78	-0.01115703		3150.81	-0.01011522		3680.8	-0.01543657		4210.8	-0.021198
500.99	0.16247902		1030.99	0.00512165		1560.98	0.01534052		2090.99	-0.02827354		2620.98	-0.01123948		3151.01	-0.0085717		3681	-0.01613009		4211	-0.0205412
501.19	0.1623621		1031.19	0.00528374		1561.18	0.01550981		2091.19	-0.0289637		2621.18	-0.01077667		3151.21	-0.00793074		3681.2	-0.01578907		4211.2	-0.02102108
501.39	0.16160531		1031.39	0.00479043		1561.38	0.01555679		2091.39	-0.02902528		2621.38	-0.01132167		3151.41	-0.00819585		3681.4	-0.01580723		4211.4	-0.02046046
501.59	0.1611074		1031.59	0.00433507		1561.58	0.0160685		2091.59	-0.02973293		2621.58	-0.01160362		3151.61	-0.00776839		3681.6	-0.01490142		4211.6	-0.02117331
501.79	0.16054342		1031.79	0.00297728		1561.78	0.01591072		2091.79	-0.02983644		2621.78	-0.01176712		3151.81	-0.00719106		3681.8	-0.01497855		4211.8	-0.02098794
501.99	0.16025753		1031.99	0.00333427		1561.98	0.01613607		2091.99	-0.02988521		2621.98	-0.01174495		3152.01	-0.00562959		3682	-0.01504738		4212	-0.02094501
502.19	0.16001875		1032.19	0.00302365		1562.18	0.01639102		2092.19	-0.03129656		2622.18	-0.0114688		3152.21	-0.00541436		3682.2	-0.01429868		4212.2	-0.02115469
502.39	0.1603184		1032.39	0.00351948		1562.38	0.01580402		2092.39	-0.03145221		2622.38	-0.01154273		3152.41	-0.00441338		3682.4	-0.01310089		4212.4	-0.02152311
502.59	0.16084939		1032.59	0.00520615		1562.58	0.01632518		2092.59	-0.03159243		2622.58	-0.01168332		3152.61	-0.0041517		3682.6	-0.01241584		4212.6	-0.02159232
502.79	0.16086424		1032.79	0.00629492		1562.78	0.01654542		2092.79	-0.03253193		2622.78	-0.01172597		3152.81	-0.00365224		3682.8	-0.01228644		4212.8	-0.0212431
502.99	0.16071832		1032.99	0.00601622		1562.98	0.0169623		2092.99	-0.03188103		2622.98	-0.0114553		3153.01	-0.00382498		3683	-0.01233963		4213	-0.02207673
503.19	0.1599964		1033.19	0.00693797		1563.18	0.01730161		2093.19	-0.03143141		2623.18	-0.01100669		3153.21	-0.00485838		3683.2	-0.01154891		4213.2	-0.02169139
503.39	0.15990283		1033.39	0.00775263		1563.38	0.01680102		2093.39	-0.03012168		2623.38	-0.01062126		3153.41	-0.00545688		3683.4	-0.01107559		4213.4	-0.0213984
503.59	0.15993009		1033.59	0.00760606		1563.58	0.01660144		2093.59	-0.02939848		2623.58	-0.01150153		3153.61	-0.00637736		3683.6	-0.01005531		4213.6	-0.02121472
503.79	0.16031699		1033.79	0.00757958		1563.78	0.01615217		2093.79	-0.02870757		2623.78	-0.01110749		3153.81	-0.00750306		3683.8	-0.00968515		4213.8	-0.02003043
503.99	0.16032988		1033.99	0.00839931		1563.98	0.01638225		2093.99	-0.02820797		2623.98	-0.01128681		3154.01	-0.00831107		3684	-0.01046863		4214	-0.01937788
504.19	0.1605011		1034.19	0.00843814		1564.18	0.01556525		2094.19	-0.02783215		2624.18	-0.01084835		3154.21	-0.00987561		3684.2	-0.01034175		4214.2	-0.01863984
504.39	0.16031096		1034.39	0.00841465		1564.38	0.01502083		2094.39	-0.02768622		2624.38	-0.01029353		3154.41	-0.01117753		3684.4	-0.01041742		4214.4	-0.01853248
504.59	0.16057288		1034.59	0.00865838		1564.58	0.01513129		2094.59	-0.02703113		2624.58	-0.00931542		3154.61	-0.01287287		3684.6	-0.01011931		4214.6	-0.01912095
504.79	0.1614064		1034.79	0.00821303		1564.78	0.01444092		2094.79	-0.02693133		2624.78	-0.00819903		3154.81	-0.01338314		3684.8	-0.01040697		4214.8	-0.02001683
504.99	0.16143982		1034.99	0.00784851		1564.98	0.01421857		2094.99	-0.02774898		2624.98	-0.00832847		3155.01	-0.01334234		3685	-0.01075445		4215	-0.01993897
505.19	0.16113998		1035.19	0.00802687		1565.18	0.01389045		2095.19	-0.0275692		2625.18	-0.00768944		3155.21	-0.01350552		3685.2	-0.01084322		4215.2	-0.02127926
505.39	0.16032115		1035.39	0.00651079		1565.38	0.01400135		2095.39	-0.027482		2625.38	-0.0076554		3155.41	-0.01379354		3685.4	-0.011258		4215.4	-0.02135037
505.59	0.16060084		1035.59	0.00527123		1565.58	0.01444262		2095.59	-0.02802956		2625.58	-0.0076443		3155.61	-0.01386755		3685.6	-0.01172946		4215.6	-0.02193596
505.79	0.16028203		1035.79	0.00471221		1565.78	0.01366586		2095.79	-0.02858221		2625.78	-0.00840988		3155.81	-0.01377366		3685.8	-0.01289586		4215.8	-0.02122839
505.99	0.15968091		1035.99	0.00486205		1565.98	0.01397536		2095.99	-0.02900347		2625.98	-0.00860043		3156.01	-0.01350259		3686	-0.0129208		4216	-0.02149127
506.19	0.15900524		1036.19	0.00403017		1566.18	0.01398889		2096.19	-0.0298901		2626.18	-0.00914433		3156.21	-0.01491966		3686.2	-0.01327617		4216.2	-0.02191243
506.39	0.15966776		1036.39	0.00378167		1566.38	0.01462777		2096.39	-0.02905862		2626.38	-0.0096282		3156.41	-0.01385314		3686.4	-0.01354719		4216.4	-0.02213006
506.59	0.16015524		1036.59	0.00344035		1566.58	0.01571709		2096.59	-0.02904045		2626.58	-0.01026241		3156.61	-0.01421525		3686.6	-0.01380753		4216.6	-0.02248954
506.79	0.15899352		1036.79	0.00268123		1566.78	0.01574997		2096.79	-0.02976393		2626.78	-0.01025817		3156.81	-0.01316674		3686.8	-0.01460941		4216.8	-0.0236292
506.99	0.159478		1036.99	0.00256889		1566.98	0.01530402		2096.99	-0.02877203		2626.98	-0.00981669		3157.01	-0.01306322		3687	-0.01405586		4217	-0.02371259
507.19	0.15945016		1037.19	0.00293609		1567.18	0.01607241		2097.19	-0.02782018		2627.18	-0.00954158		3157.21	-0.01279188		3687.2	-0.0137794		4217.2	-0.0237756
507.39	0.15966737		1037.39	0.00276474		1567.38	0.01571251		2097.39	-0.02667147		2627.38	-0.00992021		3157.41	-0.01181965		3687.4	-0.01278476		4217.4	-0.02337579
507.59	0.15989772		1037.59	0.00236852		1567.58	0.01615701		2097.59	-0.02629194		2627.58	-0.00976551		3157.61	-0.01150734		3687.6	-0.01243271		4217.6	-0.02238487
507.79	0.16098134		1037.79	0.00243528		1567.78	0.0163793		2097.79	-0.02669423		2627.78	-0.00987978		3157.81	-0.01090838		3687.8	-0.01319345		4217.8	-0.02134707
507.99	0.16136538		1037.99	0.0038446		1567.98	0.01580679		2097.99	-0.02675601		2627.98	-0.0092218		3158.01	-0.01121447		3688	-0.01345762		4218	-0.02050977
508.19	0.16123873		1038.19	0.00330103		1568.18	0.01555034		2098.19	-0.02714626		2628.18	-0.0098289		3158.21	-0.01085996		3688.2	-0.0127276		4218.2	-0.02010642
508.39	0.16129944		1038.39	0.00353014		1568.38	0.01630008		2098.39	-0.02684776		2628.38	-0.00892091		3158.41	-0.01024543		3688.4	-0.01131807		4218.4	-0.02104268
508.59	0.16172217		1038.59	0.00389482		1568.58	0.01579613		2098.59	-0.02677002		2628.58	-0.00907509		3158.61	-0.00998271		3688.6	-0.0110645		4218.6	-0.02100242
508.79	0.16191963		1038.79	0.00332862		1568.78	0.01561693		2098.79	-0.0278476		2628.78	-0.00892214		3158.81	-0.00974711		3688.8	-0.01105561		4218.8	-0.0211412
508.99	0.16183233		1038.99	0.00356635		1568.98	0.01543958		2098.99	-0.02859966		2628.98	-0.00898349		3159.01	-0.00919013		3689	-0.01026501		4219	-0.0216262
509.19	0.16051994		1039.19	0.00357759		1569.18	0.01585067		2099.19	-0.02829757		2629.18	-0.00879908		3159.21	-0.00882691		3689.2	-0.00911703		4219.2	-0.02217589
509.39	0.16045629		1039.39	0.00327741		1569.38	0.01575726		2099.39	-0.02856736		2629.38	-0.00834871		3159.41	-0.00814939		3689.4	-0.00881964		4219.4	-0.02172643
509.59	0.16044001		1039.59	0.0034649		1569.58	0.01536893		2099.59	-0.02887622		2629.58	-0.00780206		3159.61	-0.00785434		3689.6	-0.00907065		4219.6	-0.02106554
509.79	0.16006766		1039.79	0.00396923		1569.78	0.01474658		2099.79	-0.02955904		2629.78	-0.00861195		3159.81	-0.00822213		3689.8	-0.00879425		4219.8	-0.02049844
509.99	0.15956029		1039.99	0.00352769		1569.98	0.01573473		2099.99	-0.02936827		2629.98	-0.00894464		3160.01	-0.00894682		3690	-0.00855376		4220	-0.02074647
510.19	0.16013488		1040.19	0.00384453		1570.18	0.01651322		2100.19	-0.0295248		2630.18	-0.0082276		3160.21	-0.00999494		3690.2	-0.00902978		4220.2	-0.02130611
510.39	0.16116446		1040.39	0.00282085		1570.38	0.01728259		2100.39	-0.02904837		2630.38	-0.0087352		3160.41	-0.00947018		3690.4	-0.00988498		4220.4	-0.02161597
510.59	0.16178319		1040.59	0.00282732		1570.58	0.01710878		2100.59	-0.02972164		2630.58	-0.00809425		3160.61	-0.00909886		3690.6	-0.01003893		4220.6	-0.02213687
510.79	0.16170719		1040.79	0.00286333		1570.78	0.01631433		2100.79	-0.02951652		2630.78	-0.0075477		3160.81	-0.00886093		3690.8	-0.01009771		4220.8	-0.02277422
510.99	0.16234802		1040.99	0.00336158		1570.98	0.01750124		2100.99	-0.02834766		2630.98	-0.00713163		3161.01	-0.00958601		3691	-0.01078601		4221	-0.02180192
511.19	0.1627115		1041.19	0.00333424		1571.18	0.01826508		2101.19	-0.02768037		2631.18	-0.00641306		3161.21	-0.00989932		3691.2	-0.01183482		4221.2	-0.02238087
511.39	0.16278387		1041.39	0.00353533		1571.38	0.01861463		2101.39	-0.02768452		2631.38	-0.00619221		3161.41	-0.01069793		3691.4	-0.01226165		4221.4	-0.02182071
511.59	0.16273791		1041.59	0.0042497		1571.58	0.01877131		2101.59	-0.02673991		2631.58	-0.0061994		3161.61	-0.0104139		3691.6	-0.01303124		4221.6	-0.02152754
511.79	0.1636408		1041.79	0.00466531		1571.78	0.01882873		2101.79	-0.02657613		2631.78	-0.00716208		3161.81	-0.01122516		3691.8	-0.01386639		4221.8	-0.02138971
511.99	0.1631537		1041.99	0.00522181		1571.98	0.01836252		2101.99	-0.02655402		2631.98	-0.00834594		3162.01	-0.01112331		3692	-0.01437088		4222	-0.02008512
512.19	0.16246857		1042.19	0.00441827		1572.18	0.01799189		2102.19	-0.02733473		2632.18	-0.00896036		3162.21	-0.01136997		3692.2	-0.01362054		4222.2	-0.01984164
512.39	0.16161808		1042.39	0.00500185		1572.38	0.0180034		2102.39	-0.02737049		2632.38	-0.00906249		3162.41	-0.01224382		3692.4	-0.01355882		4222.4	-0.02006278
512.59	0.16094679		1042.59	0.00511891		1572.58	0.01645139		2102.59	-0.02771861		2632.58	-0.00991902		3162.61	-0.01207627		3692.6	-0.01391535		4222.6	-0.02041047
512.79	0.15932803		1042.79	0.00530361		1572.78	0.01605231		2102.79	-0.02841148		2632.78	-0.01050879		3162.81	-0.01251818		3692.8	-0.01315223		4222.8	-0.02030785
512.99	0.15848526		1042.99	0.00620549		1572.98	0.01601294		2102.99	-0.02856011		2632.98	-0.01051413		3163.01	-0.01261609		3693	-0.01225362		4223	-0.02166357
513.19	0.1571937		1043.19	0.00661434		1573.18	0.01634697		2103.19	-0.02859404		2633.18	-0.01019344		3163.21	-0.01159944		3693.2	-0.010971		4223.2	-0.02127045
513.39	0.15713707		1043.39	0.00732791		1573.38	0.01560822		2103.39	-0.02965887		2633.38	-0.00921993		3163.41	-0.01056959		3693.4	-0.01090905		4223.4	-0.02163698
513.59	0.15685372		1043.59	0.00749936		1573.58	0.01493811		2103.59	-0.03009704		2633.58	-0.00919074		3163.61	-0.01093218		3693.6	-0.01051245		4223.6	-0.021768
513.79	0.15671195		1043.79	0.00742108		1573.78	0.01468748		2103.79	-0.03021803		2633.78	-0.0098556		3163.81	-0.01183697		3693.8	-0.01006846		4223.8	-0.02245244
513.99	0.15654498		1043.99	0.00736151		1573.98	0.0139969		2103.99	-0.02981066		2633.98	-0.00965036		3164.01	-0.01112727		3694	-0.0095768		4224	-0.02388304
514.19	0.15709673		1044.19	0.00772524		1574.18	0.01396392		2104.19	-0.02977271		2634.18	-0.00948911		3164.21	-0.01043884		3694.2	-0.0094921		4224.2	-0.02451799
514.39	0.15697641		1044.39	0.00688053		1574.38	0.01390964		2104.39	-0.0296701		2634.38	-0.01047784		3164.41	-0.00901334		3694.4	-0.00901992		4224.4	-0.02488629
514.59	0.15742496		1044.59	0.00648326		1574.58	0.01279702		2104.59	-0.0299448		2634.58	-0.00938145		3164.61	-0.00811461		3694.6	-0.00821296		4224.6	-0.02480177
514.79	0.15775473		1044.79	0.00639724		1574.78	0.01336436		2104.79	-0.02992167		2634.78	-0.00918819		3164.81	-0.00877608		3694.8	-0.00828437		4224.8	-0.02469718
514.99	0.15787354		1044.99	0.00578347		1574.98	0.01369319		2104.99	-0.02983269		2634.98	-0.00902149		3165.01	-0.00959773		3695	-0.00920747		4225	-0.02426396
515.19	0.15824878		1045.19	0.00576197		1575.18	0.01310026		2105.19	-0.02984643		2635.18	-0.00920139		3165.21	-0.01034378		3695.2	-0.00956927		4225.2	-0.02496984
515.39	0.15783581		1045.39	0.00585941		1575.38	0.01365054		2105.39	-0.0302487		2635.38	-0.00927173		3165.41	-0.0110704		3695.4	-0.01016495		4225.4	-0.02389977
515.59	0.15856776		1045.59	0.00604954		1575.58	0.01287468		2105.59	-0.03074123		2635.58	-0.0097371		3165.61	-0.01098425		3695.6	-0.01030439		4225.6	-0.02327446
515.79	0.15925949		1045.79	0.00532042		1575.78	0.01259273		2105.79	-0.03212972		2635.78	-0.00993115		3165.81	-0.01139121		3695.8	-0.01067179		4225.8	-0.02215168
515.99	0.15914832		1045.99	0.00377834		1575.98	0.01319142		2105.99	-0.03298527		2635.98	-0.01084666		3166.01	-0.01185286		3696	-0.01108046		4226	-0.02120478
516.19	0.1596463		1046.19	0.00318181		1576.18	0.01347947		2106.19	-0.0335175		2636.18	-0.01058735		3166.21	-0.01323351		3696.2	-0.01094853		4226.2	-0.01998731
516.39	0.15959116		1046.39	0.002867		1576.38	0.01336637		2106.39	-0.03366701		2636.38	-0.01204922		3166.41	-0.013138		3696.4	-0.01165681		4226.4	-0.01982681
516.59	0.15957794		1046.59	0.0027978		1576.58	0.0131882		2106.59	-0.03371217		2636.58	-0.01222311		3166.61	-0.01306195		3696.6	-0.01160486		4226.6	-0.01912501
516.79	0.15983797		1046.79	0.00246146		1576.78	0.01562171		2106.79	-0.03413294		2636.78	-0.01347733		3166.81	-0.0135667		3696.8	-0.01163759		4226.8	-0.01861871
516.99	0.16031669		1046.99	0.00212787		1576.98	0.0161273		2106.99	-0.03434003		2636.98	-0.0135418		3167.01	-0.01362413		3697	-0.01187412		4227	-0.01945244
517.19	0.16005886		1047.19	0.00229071		1577.18	0.01616316		2107.19	-0.03510848		2637.18	-0.01339847		3167.21	-0.01328332		3697.2	-0.01218338		4227.2	-0.01934548
517.39	0.15974117		1047.39	0.00158935		1577.38	0.01585986		2107.39	-0.0352705		2637.38	-0.01291399		3167.41	-0.01312383		3697.4	-0.01256913		4227.4	-0.02025755
517.59	0.16006817		1047.59	0.00200482		1577.58	0.01529978		2107.59	-0.03444973		2637.58	-0.01311476		3167.61	-0.01401619		3697.6	-0.01343294		4227.6	-0.02086042
517.79	0.16046001		1047.79	0.00079203		1577.78	0.01455821		2107.79	-0.03345926		2637.78	-0.01250169		3167.81	-0.01339145		3697.8	-0.01352163		4227.8	-0.02191595
517.99	0.16075709		1047.99	0.00127662		1577.98	0.01488727		2107.99	-0.03260507		2637.98	-0.01305476		3168.01	-0.0120628		3698	-0.01356647		4228	-0.02292041
518.19	0.16073879		1048.19	0.00171878		1578.18	0.01503959		2108.19	-0.03121218		2638.18	-0.01327428		3168.21	-0.01184897		3698.2	-0.01314221		4228.2	-0.022768
518.39	0.16119121		1048.39	0.00192472		1578.38	0.0144292		2108.39	-0.03040114		2638.38	-0.01244274		3168.41	-0.01153029		3698.4	-0.01233872		4228.4	-0.02314439
518.59	0.16201001		1048.59	0.00127841		1578.58	0.01448704		2108.59	-0.03007358		2638.58	-0.01212616		3168.61	-0.0110595		3698.6	-0.0119327		4228.6	-0.02362503
518.79	0.1619057		1048.79	0.00218477		1578.78	0.01563459		2108.79	-0.02913215		2638.78	-0.01223639		3168.81	-0.01084743		3698.8	-0.01278999		4228.8	-0.02425139
518.99	0.16155597		1048.99	0.00213232		1578.98	0.01583575		2108.99	-0.02881056		2638.98	-0.01160597		3169.01	-0.01118514		3699	-0.01355004		4229	-0.0251545
519.19	0.1610994		1049.19	0.00299881		1579.18	0.01550933		2109.19	-0.02865976		2639.18	-0.01040593		3169.21	-0.01056715		3699.2	-0.01295985		4229.2	-0.02596639
519.39	0.16112798		1049.39	0.00327179		1579.38	0.01500046		2109.39	-0.02969564		2639.38	-0.00982631		3169.41	-0.01046597		3699.4	-0.01270717		4229.4	-0.02566049
519.59	0.16263667		1049.59	0.00386151		1579.58	0.01470026		2109.59	-0.03023641		2639.58	-0.00955193		3169.61	-0.00987786		3699.6	-0.01219362		4229.6	-0.02530133
519.79	0.16259756		1049.79	0.00399595		1579.78	0.01546932		2109.79	-0.03065538		2639.78	-0.00918888		3169.81	-0.00948864		3699.8	-0.01158948		4229.8	-0.02551093
519.99	0.16265265		1049.99	0.00368975		1579.98	0.01634575		2109.99	-0.03022658		2639.98	-0.00914161		3170.01	-0.01046717		3700	-0.0108876		4230	-0.02498711
520.19	0.16271027		1050.19	0.00472231		1580.18	0.01672043		2110.19	-0.03080115		2640.18	-0.00923278		3170.21	-0.01013395		3700.2	-0.01024373		4230.2	-0.02389677
520.39	0.16252774		1050.39	0.00466878		1580.38	0.01639674		2110.39	-0.03172389		2640.38	-0.00927633		3170.41	-0.00869205		3700.4	-0.01011192		4230.4	-0.02353
520.59	0.16204329		1050.59	0.00518852		1580.58	0.01754247		2110.59	-0.03160551		2640.58	-0.00909004		3170.61	-0.00935692		3700.6	-0.01011181		4230.6	-0.02329914
520.79	0.16177584		1050.79	0.00447576		1580.78	0.01795651		2110.79	-0.03239557		2640.78	-0.00994952		3170.81	-0.00939412		3700.8	-0.01039844		4230.8	-0.02357367
520.99	0.16031069		1050.99	0.00461828		1580.98	0.01640444		2110.99	-0.03266226		2640.98	-0.00964914		3171.01	-0.00947258		3701	-0.01032924		4231	-0.02335383
521.19	0.15913286		1051.19	0.00433464		1581.18	0.01559292		2111.19	-0.03301584		2641.18	-0.00973559		3171.21	-0.00978822		3701.2	-0.01113631		4231.2	-0.02353645
521.39	0.15895034		1051.39	0.00431608		1581.38	0.01455083		2111.39	-0.03304575		2641.38	-0.01031245		3171.41	-0.00983582		3701.4	-0.01138475		4231.4	-0.02331283
521.59	0.15950336		1051.59	0.00440329		1581.58	0.01404035		2111.59	-0.0330789		2641.58	-0.01136316		3171.61	-0.01079485		3701.6	-0.01140404		4231.6	-0.02252137
521.79	0.15921226		1051.79	0.00394865		1581.78	0.01377343		2111.79	-0.03272539		2641.78	-0.01201385		3171.81	-0.01115406		3701.8	-0.01087921		4231.8	-0.02137491
521.99	0.15830565		1051.99	0.00501188		1581.98	0.01453169		2111.99	-0.03276316		2641.98	-0.01275551		3172.01	-0.01171375		3702	-0.01139785		4232	-0.02101399
522.19	0.15767964		1052.19	0.00502252		1582.18	0.01356762		2112.19	-0.03184265		2642.18	-0.01228678		3172.21	-0.01237368		3702.2	-0.01110935		4232.2	-0.02093192
522.39	0.15711997		1052.39	0.00486418		1582.38	0.01332026		2112.39	-0.0318182		2642.38	-0.01173525		3172.41	-0.01304464		3702.4	-0.01150745		4232.4	-0.02068642
522.59	0.15694893		1052.59	0.0042978		1582.58	0.01377297		2112.59	-0.03181671		2642.58	-0.01233834		3172.61	-0.01244425		3702.6	-0.01243844		4232.6	-0.02047849
522.79	0.15645688		1052.79	0.0049699		1582.78	0.01436838		2112.79	-0.03126025		2642.78	-0.01276746		3172.81	-0.01214673		3702.8	-0.01274753		4232.8	-0.02000506
522.99	0.1575643		1052.99	0.00476839		1582.98	0.01466883		2112.99	-0.03183252		2642.98	-0.01204675		3173.01	-0.01251235		3703	-0.01283419		4233	-0.02054466
523.19	0.15778752		1053.19	0.00523705		1583.18	0.01409234		2113.19	-0.03158486		2643.18	-0.01118274		3173.21	-0.01202963		3703.2	-0.01174595		4233.2	-0.02095294
523.39	0.15826591		1053.39	0.00445828		1583.38	0.01408275		2113.39	-0.03213021		2643.38	-0.01108349		3173.41	-0.0132966		3703.4	-0.01154498		4233.4	-0.02067969
523.59	0.15956715		1053.59	0.00529988		1583.58	0.01495759		2113.59	-0.03156299		2643.58	-0.00994746		3173.61	-0.01277872		3703.6	-0.01146945		4233.6	-0.02136512
523.79	0.15898942		1053.79	0.00597953		1583.78	0.01509022		2113.79	-0.03187838		2643.78	-0.00969374		3173.81	-0.01307734		3703.8	-0.01086864		4233.8	-0.02223965
523.99	0.15851322		1053.99	0.00588989		1583.98	0.01499308		2113.99	-0.03235713		2643.98	-0.0091434		3174.01	-0.01363671		3704	-0.0111524		4234	-0.02215511
524.19	0.15820513		1054.19	0.00662655		1584.18	0.01527725		2114.19	-0.03284593		2644.18	-0.00829789		3174.21	-0.01315404		3704.2	-0.01117739		4234.2	-0.02264104
524.39	0.15866509		1054.39	0.00691151		1584.38	0.01494373		2114.39	-0.03256534		2644.38	-0.00796892		3174.41	-0.0127385		3704.4	-0.01101433		4234.4	-0.02383124
524.59	0.15803092		1054.59	0.00654556		1584.58	0.01525882		2114.59	-0.03142956		2644.58	-0.00841077		3174.61	-0.01325446		3704.6	-0.01108994		4234.6	-0.02548708
524.79	0.15733025		1054.79	0.00618593		1584.78	0.01456871		2114.79	-0.03170415		2644.78	-0.00852452		3174.81	-0.01315544		3704.8	-0.01087391		4234.8	-0.02517621
524.99	0.15653387		1054.99	0.00636505		1584.98	0.01433112		2114.99	-0.03092438		2644.98	-0.00855769		3175.01	-0.01322498		3705	-0.01063596		4235	-0.02604363
525.19	0.15669262		1055.19	0.0056034		1585.18	0.01392486		2115.19	-0.0306406		2645.18	-0.00931805		3175.21	-0.01313553		3705.2	-0.01044435		4235.2	-0.02692073
525.39	0.15745023		1055.39	0.00577905		1585.38	0.01378312		2115.39	-0.03095325		2645.38	-0.00945684		3175.41	-0.0139705		3705.4	-0.00997317		4235.4	-0.02668222
525.59	0.15764126		1055.59	0.00463535		1585.58	0.01403015		2115.59	-0.03102613		2645.58	-0.00997142		3175.61	-0.01398543		3705.6	-0.00973695		4235.6	-0.0259982
525.79	0.15710667		1055.79	0.00405671		1585.78	0.01417966		2115.79	-0.03086283		2645.78	-0.00973306		3175.81	-0.01408648		3705.8	-0.0101461		4235.8	-0.0259077
525.99	0.15719083		1055.99	0.00291152		1585.98	0.01341444		2115.99	-0.02983952		2645.98	-0.00952041		3176.01	-0.01410014		3706	-0.01057476		4236	-0.02574485
526.19	0.15783823		1056.19	0.00301804		1586.18	0.01277993		2116.19	-0.02912891		2646.18	-0.00938815		3176.21	-0.01424049		3706.2	-0.01065598		4236.2	-0.02584597
526.39	0.15861918		1056.39	0.00267735		1586.38	0.01289767		2116.39	-0.02831936		2646.38	-0.00945946		3176.41	-0.01404335		3706.4	-0.01132453		4236.4	-0.02491036
526.59	0.15928382		1056.59	0.00257278		1586.58	0.01296696		2116.59	-0.02809097		2646.58	-0.01051012		3176.61	-0.01281773		3706.6	-0.01216965		4236.6	-0.02490692
526.79	0.15988801		1056.79	0.00211824		1586.78	0.01318485		2116.79	-0.02835554		2646.78	-0.01055569		3176.81	-0.01262668		3706.8	-0.01199522		4236.8	-0.0242077
526.99	0.16078085		1056.99	0.00208993		1586.98	0.01344103		2116.99	-0.02849196		2646.98	-0.01023531		3177.01	-0.0131029		3707	-0.0123273		4237	-0.02460912
527.19	0.16076306		1057.19	0.00189792		1587.18	0.01359692		2117.19	-0.02853802		2647.18	-0.01042136		3177.21	-0.01269423		3707.2	-0.01261288		4237.2	-0.0238758
527.39	0.16065236		1057.39	0.00182891		1587.38	0.01340372		2117.39	-0.0283813		2647.38	-0.01070413		3177.41	-0.01235836		3707.4	-0.01329579		4237.4	-0.02411381
527.59	0.16083124		1057.59	0.00256463		1587.58	0.01290193		2117.59	-0.02834613		2647.58	-0.01096827		3177.61	-0.01175488		3707.6	-0.01394986		4237.6	-0.02422997
527.79	0.16040506		1057.79	0.00279622		1587.78	0.01185401		2117.79	-0.02927081		2647.78	-0.01166992		3177.81	-0.01251802		3707.8	-0.01476371		4237.8	-0.02402895
527.99	0.15987106		1057.99	0.00274403		1587.98	0.0116422		2117.99	-0.02974085		2647.98	-0.01170212		3178.01	-0.01262414		3708	-0.01547832		4238	-0.02368671
528.19	0.15949435		1058.19	0.0027742		1588.18	0.01123832		2118.19	-0.02950582		2648.18	-0.0116372		3178.21	-0.01258729		3708.2	-0.01452258		4238.2	-0.02310955
528.39	0.15961206		1058.39	0.00255935		1588.38	0.01136329		2118.39	-0.02879358		2648.38	-0.01242896		3178.41	-0.01209103		3708.4	-0.01386092		4238.4	-0.02341665
528.59	0.15896684		1058.59	0.00174625		1588.58	0.01180958		2118.59	-0.02878361		2648.58	-0.01227959		3178.61	-0.012468		3708.6	-0.0135889		4238.6	-0.02346574
528.79	0.15810946		1058.79	0.00269068		1588.78	0.01188386		2118.79	-0.02843373		2648.78	-0.0123325		3178.81	-0.01281153		3708.8	-0.0135869		4238.8	-0.02231914
528.99	0.15867016		1058.99	0.00244305		1588.98	0.01165547		2118.99	-0.02893183		2648.98	-0.01217606		3179.01	-0.0126138		3709	-0.01352583		4239	-0.02257806
529.19	0.15847761		1059.19	0.00215932		1589.18	0.01146359		2119.19	-0.02976802		2649.18	-0.01298926		3179.21	-0.01240269		3709.2	-0.01286667		4239.2	-0.02199586
529.39	0.15908066		1059.39	0.00191645		1589.38	0.012221		2119.39	-0.03038019		2649.38	-0.01354267		3179.41	-0.01253224		3709.4	-0.01233402		4239.4	-0.02124231
529.59	0.15946278		1059.59	0.00212076		1589.58	0.01232773		2119.59	-0.03022112		2649.58	-0.01409196		3179.61	-0.01226418		3709.6	-0.01150734		4239.6	-0.02104321
529.79	0.15947153		1059.79	0.00226844		1589.78	0.01237956		2119.79	-0.02998025		2649.78	-0.01407457		3179.81	-0.01310044		3709.8	-0.01149398		4239.8	-0.02104482
529.99	0.15975887		1059.99	0.00307981		1589.98	0.01132684		2119.99	-0.02863312		2649.98	-0.01359915		3180.01	-0.01295608		3710	-0.01142091		4240	-0.02083574
530.19	0.15979482		1060.19	0.00374621		1590.18	0.0122613		2120.19	-0.02917854		2650.18	-0.01368404		3180.21	-0.01299187		3710.2	-0.01114878		4240.2	-0.02096198
530.39	0.15913716		1060.39	0.00381544		1590.38	0.01255503		2120.39	-0.02907421		2650.38	-0.01299596		3180.41	-0.01298907		3710.4	-0.01195041		4240.4	-0.02131806
530.59	0.15894865		1060.59	0.00381471		1590.58	0.01312905		2120.59	-0.02934135		2650.58	-0.01264208		3180.61	-0.0126642		3710.6	-0.0124696		4240.6	-0.02151953
530.79	0.15910438		1060.79	0.00363442		1590.78	0.01375692		2120.79	-0.03006872		2650.78	-0.01222821		3180.81	-0.01268396		3710.8	-0.0122071		4240.8	-0.02156373
530.99	0.15859359		1060.99	0.00437376		1590.98	0.01548053		2120.99	-0.02996968		2650.98	-0.01202681		3181.01	-0.01312693		3711	-0.01215163		4241	-0.02218016
531.19	0.15775326		1061.19	0.00454592		1591.18	0.01529962		2121.19	-0.02984328		2651.18	-0.01134907		3181.21	-0.0131582		3711.2	-0.01305657		4241.2	-0.02270253
531.39	0.15675194		1061.39	0.0054025		1591.38	0.01453034		2121.39	-0.02958997		2651.38	-0.01149376		3181.41	-0.01362277		3711.4	-0.01308154		4241.4	-0.02402532
531.59	0.15715834		1061.59	0.0055404		1591.58	0.01408155		2121.59	-0.03033996		2651.58	-0.01122063		3181.61	-0.01406043		3711.6	-0.01313417		4241.6	-0.02405643
531.79	0.15703273		1061.79	0.00528345		1591.78	0.01449115		2121.79	-0.03065839		2651.78	-0.01169563		3181.81	-0.01358835		3711.8	-0.01404011		4241.8	-0.02414413
531.99	0.15623544		1061.99	0.00554967		1591.98	0.01466573		2121.99	-0.03067174		2651.98	-0.01166699		3182.01	-0.01357501		3712	-0.01390045		4242	-0.0240793
532.19	0.15571709		1062.19	0.00535541		1592.18	0.01440754		2122.19	-0.03060153		2652.18	-0.01183015		3182.21	-0.01382281		3712.2	-0.01354524		4242.2	-0.02358451
532.39	0.15546744		1062.39	0.00533983		1592.38	0.01535398		2122.39	-0.03034955		2652.38	-0.01178502		3182.41	-0.01295861		3712.4	-0.01445647		4242.4	-0.02466236
532.59	0.15522136		1062.59	0.00534367		1592.58	0.01529003		2122.59	-0.03063128		2652.58	-0.01216602		3182.61	-0.01305163		3712.6	-0.01615471		4242.6	-0.02498032
532.79	0.1551132		1062.79	0.00557092		1592.78	0.01561346		2122.79	-0.03010848		2652.78	-0.01249933		3182.81	-0.01365368		3712.8	-0.01605179		4242.8	-0.02414453
532.99	0.15582094		1062.99	0.00538314		1592.98	0.01513104		2122.99	-0.03094942		2652.98	-0.01287755		3183.01	-0.01405775		3713	-0.01605689		4243	-0.02393036
533.19	0.15562363		1063.19	0.00537231		1593.18	0.01504934		2123.19	-0.03111613		2653.18	-0.01369889		3183.21	-0.01400801		3713.2	-0.01564846		4243.2	-0.0233028
533.39	0.15632187		1063.39	0.00555344		1593.38	0.01476624		2123.39	-0.03116175		2653.38	-0.01334876		3183.41	-0.01422463		3713.4	-0.01477459		4243.4	-0.0224865
533.59	0.15626662		1063.59	0.00554971		1593.58	0.01364871		2123.59	-0.03088587		2653.58	-0.01287697		3183.61	-0.01409908		3713.6	-0.01484125		4243.6	-0.02275335
533.79	0.15622944		1063.79	0.00499205		1593.78	0.01305796		2123.79	-0.03066016		2653.78	-0.01312794		3183.81	-0.01303297		3713.8	-0.01550625		4243.8	-0.02206438
533.99	0.15569023		1063.99	0.00538458		1593.98	0.0122877		2123.99	-0.02949965		2653.98	-0.01287597		3184.01	-0.01166051		3714	-0.01510757		4244	-0.02140792
534.19	0.15544861		1064.19	0.00479682		1594.18	0.01269664		2124.19	-0.02960493		2654.18	-0.01213712		3184.21	-0.0117181		3714.2	-0.01466144		4244.2	-0.02015906
534.39	0.155573		1064.39	0.00414733		1594.38	0.01230277		2124.39	-0.02970516		2654.38	-0.01131927		3184.41	-0.01071713		3714.4	-0.01480995		4244.4	-0.01987102
534.59	0.15669077		1064.59	0.00329495		1594.58	0.01290364		2124.59	-0.02955459		2654.58	-0.01132916		3184.61	-0.0102919		3714.6	-0.01455272		4244.6	-0.01955588
534.79	0.15692158		1064.79	0.0028519		1594.78	0.01273694		2124.79	-0.03014342		2654.78	-0.01105708		3184.81	-0.01053885		3714.8	-0.01416257		4244.8	-0.01960414
534.99	0.15721144		1064.99	0.00311626		1594.98	0.01281182		2124.99	-0.03018083		2654.98	-0.01111421		3185.01	-0.01086799		3715	-0.01352244		4245	-0.01941705
535.19	0.15782925		1065.19	0.00314231		1595.18	0.01192972		2125.19	-0.03080215		2655.18	-0.01109406		3185.21	-0.01019399		3715.2	-0.01328752		4245.2	-0.02013312
535.39	0.1580507		1065.39	0.00330054		1595.38	0.01170314		2125.39	-0.03078963		2655.38	-0.01203849		3185.41	-0.00987891		3715.4	-0.0132363		4245.4	-0.02063287
535.59	0.15907394		1065.59	0.00339358		1595.58	0.01204012		2125.59	-0.03120686		2655.58	-0.01251964		3185.61	-0.01036783		3715.6	-0.01327468		4245.6	-0.02131231
535.79	0.159082		1065.79	0.0035789		1595.78	0.01283862		2125.79	-0.03086801		2655.78	-0.0129722		3185.81	-0.01044692		3715.8	-0.01375343		4245.8	-0.02174878
535.99	0.15857352		1065.99	0.00399544		1595.98	0.01314846		2125.99	-0.03097531		2655.98	-0.01279224		3186.01	-0.01070368		3716	-0.01380923		4246	-0.02277424
536.19	0.15832789		1066.19	0.0043626		1596.18	0.01383755		2126.19	-0.03106932		2656.18	-0.01293118		3186.21	-0.01050018		3716.2	-0.0137903		4246.2	-0.02373617
536.39	0.1586102		1066.39	0.00466585		1596.38	0.01493624		2126.39	-0.03092587		2656.38	-0.01225041		3186.41	-0.01028404		3716.4	-0.01470347		4246.4	-0.02421165
536.59	0.1579769		1066.59	0.00474693		1596.58	0.01486597		2126.59	-0.03174752		2656.58	-0.01305811		3186.61	-0.01128023		3716.6	-0.01455001		4246.6	-0.02469972
536.79	0.15839345		1066.79	0.00453365		1596.78	0.01540394		2126.79	-0.03221984		2656.78	-0.01231798		3186.81	-0.01262014		3716.8	-0.01389613		4246.8	-0.02490999
536.99	0.15882268		1066.99	0.0050333		1596.98	0.01489279		2126.99	-0.03224276		2656.98	-0.0125323		3187.01	-0.01273435		3717	-0.0139246		4247	-0.02496898
537.19	0.15816386		1067.19	0.00406701		1597.18	0.01526546		2127.19	-0.03250513		2657.18	-0.01227375		3187.21	-0.01305817		3717.2	-0.01381901		4247.2	-0.02550488
537.39	0.15755995		1067.39	0.0042633		1597.38	0.01587694		2127.39	-0.03336849		2657.38	-0.01181195		3187.41	-0.01361395		3717.4	-0.01356496		4247.4	-0.02600232
537.59	0.15681786		1067.59	0.00369008		1597.58	0.01627118		2127.59	-0.0335629		2657.58	-0.01149209		3187.61	-0.01320114		3717.6	-0.01476073		4247.6	-0.0262089
537.79	0.1575292		1067.79	0.00360096		1597.78	0.01665977		2127.79	-0.03365282		2657.78	-0.01132811		3187.81	-0.01347376		3717.8	-0.01516513		4247.8	-0.02543632
537.99	0.15733846		1067.99	0.00376161		1597.98	0.01698583		2127.99	-0.03416157		2657.98	-0.01045901		3188.01	-0.01413909		3718	-0.01453655		4248	-0.02532424
538.19	0.15761835		1068.19	0.00283162		1598.18	0.01708375		2128.19	-0.0345926		2658.18	-0.00924864		3188.21	-0.01491616		3718.2	-0.01392224		4248.2	-0.0250353
538.39	0.15764061		1068.39	0.00258177		1598.38	0.01654453		2128.39	-0.03524572		2658.38	-0.00926972		3188.41	-0.01495649		3718.4	-0.01420279		4248.4	-0.02460304
538.59	0.1585026		1068.59	0.00252356		1598.58	0.01684216		2128.59	-0.03536265		2658.58	-0.00920822		3188.61	-0.01562538		3718.6	-0.01378944		4248.6	-0.02484739
538.79	0.15891619		1068.79	0.00229257		1598.78	0.01625853		2128.79	-0.03507036		2658.78	-0.00903849		3188.81	-0.01559849		3718.8	-0.01343018		4248.8	-0.02461137
538.99	0.15893423		1068.99	0.00277295		1598.98	0.01594653		2128.99	-0.03510024		2658.98	-0.00931879		3189.01	-0.01599546		3719	-0.01323849		4249	-0.02483568
539.19	0.15873508		1069.19	0.00283771		1599.18	0.01542134		2129.19	-0.03482046		2659.18	-0.00979645		3189.21	-0.01585294		3719.2	-0.01323943		4249.2	-0.02539791
539.39	0.15843607		1069.39	0.0038778		1599.38	0.01379302		2129.39	-0.03334529		2659.38	-0.01036575		3189.41	-0.01631934		3719.4	-0.01376768		4249.4	-0.02597165
539.59	0.15838		1069.59	0.00383024		1599.58	0.01323395		2129.59	-0.03211057		2659.58	-0.01117459		3189.61	-0.01656323		3719.6	-0.01280482		4249.6	-0.02631294
539.79	0.15794988		1069.79	0.00493554		1599.78	0.01219288		2129.79	-0.03099752		2659.78	-0.01067622		3189.81	-0.0156303		3719.8	-0.01231067		4249.8	-0.02608495
539.99	0.15706974		1069.99	0.00529405		1599.98	0.01100123		2129.99	-0.03006745		2659.98	-0.01148197		3190.01	-0.01491638		3720	-0.0119607		4250	-0.02680709
540.19	0.15627263		1070.19	0.00594313		1600.18	0.00971933		2130.19	-0.02978993		2660.18	-0.01125414		3190.21	-0.01424138		3720.2	-0.01194094		4250.2	-0.02725767
540.39	0.15540051		1070.39	0.00639185		1600.38	0.00867569		2130.39	-0.02899696		2660.38	-0.01097178		3190.41	-0.01341572		3720.4	-0.01151698		4250.4	-0.02663074
540.59	0.15448686		1070.59	0.00557058		1600.58	0.00724692		2130.59	-0.02924788		2660.58	-0.01142278		3190.61	-0.01342865		3720.6	-0.01050798		4250.6	-0.02767225
540.79	0.15428015		1070.79	0.00539235		1600.78	0.00706812		2130.79	-0.02850089		2660.78	-0.0112031		3190.81	-0.01265726		3720.8	-0.01068802		4250.8	-0.02781116
540.99	0.15398286		1070.99	0.00545633		1600.98	0.00694436		2130.99	-0.02774183		2660.98	-0.01180027		3191.01	-0.01206963		3721	-0.01036962		4251	-0.02803367
541.19	0.15358989		1071.19	0.00439742		1601.18	0.00768861		2131.19	-0.02829053		2661.18	-0.01221121		3191.21	-0.01227592		3721.2	-0.01181628		4251.2	-0.02834449
541.39	0.15313872		1071.39	0.00448113		1601.38	0.00844205		2131.39	-0.02850757		2661.38	-0.01216417		3191.41	-0.01203846		3721.4	-0.01220824		4251.4	-0.02746803
541.59	0.15321274		1071.59	0.00421559		1601.58	0.00885573		2131.59	-0.02867295		2661.58	-0.01156342		3191.61	-0.01192673		3721.6	-0.01369772		4251.6	-0.02654066
541.79	0.15436211		1071.79	0.00390699		1601.78	0.01001037		2131.79	-0.02817073		2661.78	-0.01133055		3191.81	-0.012363		3721.8	-0.01387147		4251.8	-0.02650076
541.99	0.1550395		1071.99	0.00408655		1601.98	0.01075335		2131.99	-0.02875749		2661.98	-0.01094902		3192.01	-0.01239638		3722	-0.01388886		4252	-0.02645675
542.19	0.1554947		1072.19	0.00394606		1602.18	0.01146647		2132.19	-0.02853329		2662.18	-0.00963122		3192.21	-0.01251069		3722.2	-0.01382518		4252.2	-0.02584058
542.39	0.15503701		1072.39	0.0041806		1602.38	0.01227791		2132.39	-0.02874678		2662.38	-0.00978005		3192.41	-0.01282117		3722.4	-0.01436863		4252.4	-0.02520753
542.59	0.15660851		1072.59	0.00372332		1602.58	0.01386883		2132.59	-0.02922763		2662.58	-0.00928414		3192.61	-0.01311882		3722.6	-0.0147291		4252.6	-0.02516262
542.79	0.1574941		1072.79	0.00353457		1602.78	0.01452733		2132.79	-0.02995382		2662.78	-0.00919045		3192.81	-0.01338355		3722.8	-0.01499886		4252.8	-0.02454064
542.99	0.15708739		1072.99	0.00397806		1602.98	0.01458431		2132.99	-0.03076494		2662.98	-0.00940254		3193.01	-0.01377093		3723	-0.01524356		4253	-0.02462621
543.19	0.1572138		1073.19	0.00394946		1603.18	0.01456246		2133.19	-0.0310431		2663.18	-0.01059667		3193.21	-0.01359554		3723.2	-0.01538116		4253.2	-0.02344608
543.39	0.15713113		1073.39	0.00468591		1603.38	0.01362221		2133.39	-0.0303068		2663.38	-0.01098192		3193.41	-0.01359502		3723.4	-0.01552569		4253.4	-0.02305903
543.59	0.15783563		1073.59	0.00351719		1603.58	0.01323851		2133.59	-0.03005941		2663.58	-0.01076317		3193.61	-0.01360752		3723.6	-0.01520954		4253.6	-0.02315878
543.79	0.15821949		1073.79	0.00470056		1603.78	0.01260744		2133.79	-0.03067001		2663.78	-0.01036568		3193.81	-0.01393062		3723.8	-0.01494623		4253.8	-0.02275165
543.99	0.15786232		1073.99	0.00442641		1603.98	0.01231741		2133.99	-0.03131116		2663.98	-0.0111207		3194.01	-0.01346667		3724	-0.01482172		4254	-0.02322273
544.19	0.15823638		1074.19	0.00487623		1604.18	0.01181105		2134.19	-0.03150134		2664.18	-0.01046603		3194.21	-0.01361324		3724.2	-0.01439261		4254.2	-0.02302165
544.39	0.15803674		1074.39	0.00503213		1604.38	0.01062307		2134.39	-0.03181325		2664.38	-0.01040734		3194.41	-0.01273624		3724.4	-0.01366342		4254.4	-0.02215514
544.59	0.15755568		1074.59	0.00420093		1604.58	0.00994079		2134.59	-0.03268269		2664.58	-0.01110331		3194.61	-0.01265125		3724.6	-0.01302604		4254.6	-0.02298038
544.79	0.15622353		1074.79	0.0042466		1604.78	0.00999049		2134.79	-0.03224613		2664.78	-0.01158483		3194.81	-0.01178625		3724.8	-0.01290376		4254.8	-0.0229941
544.99	0.15645925		1074.99	0.00379539		1604.98	0.00959973		2134.99	-0.03212835		2664.98	-0.01196203		3195.01	-0.012595		3725	-0.01315733		4255	-0.02309582
545.19	0.15705056		1075.19	0.00344039		1605.18	0.00967731		2135.19	-0.0322581		2665.18	-0.0118885		3195.21	-0.01309309		3725.2	-0.01378512		4255.2	-0.02296092
545.39	0.15682856		1075.39	0.0032729		1605.38	0.00963233		2135.39	-0.03192731		2665.38	-0.0116748		3195.41	-0.01259981		3725.4	-0.01314783		4255.4	-0.02252957
545.59	0.15799545		1075.59	0.00300353		1605.58	0.01020788		2135.59	-0.03219451		2665.58	-0.01198401		3195.61	-0.01399533		3725.6	-0.01304521		4255.6	-0.02298643
545.79	0.15847292		1075.79	0.00326766		1605.78	0.01129442		2135.79	-0.03148339		2665.78	-0.01192816		3195.81	-0.01434764		3725.8	-0.01303738		4255.8	-0.02366708
545.99	0.15888555		1075.99	0.00303984		1605.98	0.01187775		2135.99	-0.03197934		2665.98	-0.011574		3196.01	-0.01426535		3726	-0.01321262		4256	-0.02352463
546.19	0.15875224		1076.19	0.00249842		1606.18	0.01174185		2136.19	-0.03150173		2666.18	-0.01105611		3196.21	-0.01414982		3726.2	-0.01232805		4256.2	-0.02396416
546.39	0.15805809		1076.39	0.00197931		1606.38	0.01290569		2136.39	-0.03190061		2666.38	-0.01207259		3196.41	-0.01411623		3726.4	-0.01242114		4256.4	-0.02432393
546.59	0.15876044		1076.59	0.00184799		1606.58	0.01334409		2136.59	-0.03256336		2666.58	-0.01207604		3196.61	-0.01524514		3726.6	-0.01298223		4256.6	-0.02503918
546.79	0.15813601		1076.79	0.00192846		1606.78	0.01366089		2136.79	-0.03228351		2666.78	-0.01281666		3196.81	-0.01496306		3726.8	-0.01291214		4256.8	-0.02518929
546.99	0.15743676		1076.99	0.00296988		1606.98	0.01338596		2136.99	-0.03210905		2666.98	-0.01286411		3197.01	-0.01510835		3727	-0.01298685		4257	-0.02543853
547.19	0.15785106		1077.19	0.00343449		1607.18	0.01349442		2137.19	-0.03193001		2667.18	-0.01332424		3197.21	-0.01527109		3727.2	-0.01335889		4257.2	-0.02531337
547.39	0.15771832		1077.39	0.00422754		1607.38	0.01276352		2137.39	-0.03141376		2667.38	-0.01274401		3197.41	-0.0152454		3727.4	-0.01380205		4257.4	-0.0259156
547.59	0.1581972		1077.59	0.00426858		1607.58	0.01304778		2137.59	-0.03221331		2667.58	-0.01185961		3197.61	-0.01538507		3727.6	-0.01433604		4257.6	-0.02549858
547.79	0.1580445		1077.79	0.00477338		1607.78	0.01279876		2137.79	-0.03220641		2667.78	-0.0126708		3197.81	-0.01606918		3727.8	-0.01485241		4257.8	-0.02521835
547.99	0.15803107		1077.99	0.00540828		1607.98	0.01325605		2137.99	-0.03242273		2667.98	-0.01327723		3198.01	-0.0160675		3728	-0.01564116		4258	-0.02550717
548.19	0.15875888		1078.19	0.0050504		1608.18	0.01287841		2138.19	-0.03222258		2668.18	-0.01400417		3198.21	-0.01648807		3728.2	-0.01548108		4258.2	-0.02472008
548.39	0.15728854		1078.39	0.00511837		1608.38	0.01166244		2138.39	-0.03270059		2668.38	-0.01432381		3198.41	-0.01517153		3728.4	-0.01558972		4258.4	-0.02460396
548.59	0.1567929		1078.59	0.00459788		1608.58	0.01194365		2138.59	-0.032524		2668.58	-0.0148911		3198.61	-0.01506813		3728.6	-0.01474856		4258.6	-0.02446539
548.79	0.15641432		1078.79	0.00405063		1608.78	0.01156059		2138.79	-0.03193193		2668.78	-0.01473816		3198.81	-0.01513809		3728.8	-0.01468679		4258.8	-0.02481393
548.99	0.15741711		1078.99	0.00368415		1608.98	0.01135478		2138.99	-0.03241168		2668.98	-0.01457298		3199.01	-0.01553232		3729	-0.0140226		4259	-0.02433107
549.19	0.15818894		1079.19	0.0038168		1609.18	0.01119759		2139.19	-0.0332287		2669.18	-0.0143332		3199.21	-0.01521292		3729.2	-0.01399204		4259.2	-0.02419941
549.39	0.15723794		1079.39	0.0036633		1609.38	0.01140357		2139.39	-0.03390229		2669.38	-0.01417732		3199.41	-0.01468958		3729.4	-0.01289201		4259.4	-0.02392726
549.59	0.15743191		1079.59	0.0034274		1609.58	0.01208765		2139.59	-0.03426104		2669.58	-0.01401999		3199.61	-0.01464146		3729.6	-0.01318023		4259.6	-0.02396971
549.79	0.15702		1079.79	0.00367625		1609.78	0.01267192		2139.79	-0.03432308		2669.78	-0.01331769		3199.81	-0.01373436		3729.8	-0.01307694		4259.8	-0.02399642
549.99	0.1567369		1079.99	0.00276735		1609.98	0.01245029		2139.99	-0.03493129		2669.98	-0.01334327		3200.01	-0.01307867		3730	-0.01285187		4260	-0.02369059
550.19	0.15571388		1080.19	0.00232444		1610.18	0.01212726		2140.19	-0.03462232		2670.18	-0.01238042		3200.21	-0.0124963		3730.2	-0.01274972		4260.2	-0.02404004
550.39	0.15491932		1080.39	0.00208921		1610.38	0.01283119		2140.39	-0.03462342		2670.38	-0.01230119		3200.41	-0.01227389		3730.4	-0.01319318		4260.4	-0.02390856
550.59	0.15468482		1080.59	0.00277195		1610.58	0.01256623		2140.59	-0.03417903		2670.58	-0.01243657		3200.61	-0.01255919		3730.6	-0.01412657		4260.6	-0.02454211
550.79	0.15387198		1080.79	0.00340277		1610.78	0.01248283		2140.79	-0.03379393		2670.78	-0.01220698		3200.81	-0.01239371		3730.8	-0.01423395		4260.8	-0.02484069
550.99	0.15444547		1080.99	0.00420597		1610.98	0.01232712		2140.99	-0.03406643		2670.98	-0.01197061		3201.01	-0.01315113		3731	-0.0151208		4261	-0.02436472
551.19	0.15442991		1081.19	0.00367636		1611.18	0.01159359		2141.19	-0.03316186		2671.18	-0.01185135		3201.21	-0.01287585		3731.2	-0.0162325		4261.2	-0.02424188
551.39	0.15394547		1081.39	0.00340345		1611.38	0.01069593		2141.39	-0.03285014		2671.38	-0.01136377		3201.41	-0.0137678		3731.4	-0.01666468		4261.4	-0.02393825
551.59	0.15398411		1081.59	0.00384897		1611.58	0.01053548		2141.59	-0.0324521		2671.58	-0.01205706		3201.61	-0.01406439		3731.6	-0.01701222		4261.6	-0.02424449
551.79	0.1540087		1081.79	0.00264768		1611.78	0.01018014		2141.79	-0.03133405		2671.78	-0.01338596		3201.81	-0.01595705		3731.8	-0.01761788		4261.8	-0.02507263
551.99	0.15422636		1081.99	0.00303716		1611.98	0.01096919		2141.99	-0.03015022		2671.98	-0.01462764		3202.01	-0.01555675		3732	-0.0174579		4262	-0.02527907
552.19	0.15454564		1082.19	0.00233269		1612.18	0.01017931		2142.19	-0.03027721		2672.18	-0.01540245		3202.21	-0.01501023		3732.2	-0.01711018		4262.2	-0.02521883
552.39	0.15375419		1082.39	0.00286535		1612.38	0.00968703		2142.39	-0.03020535		2672.38	-0.01587566		3202.41	-0.01484544		3732.4	-0.01766825		4262.4	-0.02563434
552.59	0.15505968		1082.59	0.00215426		1612.58	0.00997911		2142.59	-0.03074596		2672.58	-0.01657723		3202.61	-0.01545679		3732.6	-0.0176201		4262.6	-0.02530538
552.79	0.15495898		1082.79	0.00177509		1612.78	0.00968539		2142.79	-0.03088392		2672.78	-0.01629372		3202.81	-0.01531292		3732.8	-0.01840178		4262.8	-0.02599424
552.99	0.15539087		1082.99	0.00268314		1612.98	0.00930179		2142.99	-0.03070066		2672.98	-0.01660978		3203.01	-0.01495778		3733	-0.01844852		4263	-0.02482487
553.19	0.15619424		1083.19	0.00298702		1613.18	0.00924144		2143.19	-0.0313117		2673.18	-0.01648171		3203.21	-0.01464634		3733.2	-0.01895194		4263.2	-0.02501721
553.39	0.15611599		1083.39	0.00312926		1613.38	0.00956921		2143.39	-0.03284192		2673.38	-0.01601417		3203.41	-0.01449294		3733.4	-0.0184529		4263.4	-0.02474444
553.59	0.15759649		1083.59	0.00284322		1613.58	0.00918451		2143.59	-0.03326602		2673.58	-0.01547334		3203.61	-0.01479299		3733.6	-0.01874936		4263.6	-0.02445831
553.79	0.15773194		1083.79	0.00301236		1613.78	0.01009801		2143.79	-0.03394373		2673.78	-0.01452712		3203.81	-0.01476714		3733.8	-0.01796795		4263.8	-0.02394295
553.99	0.1572742		1083.99	0.00262856		1613.98	0.01038436		2143.99	-0.03432127		2673.98	-0.0147293		3204.01	-0.01401197		3734	-0.01828796		4264	-0.02371848
554.19	0.15675224		1084.19	0.00251381		1614.18	0.01048705		2144.19	-0.03337391		2674.18	-0.01349354		3204.21	-0.0137733		3734.2	-0.01796775		4264.2	-0.02332763
554.39	0.15740856		1084.39	0.00273643		1614.38	0.01079689		2144.39	-0.03311499		2674.38	-0.01369011		3204.41	-0.0138571		3734.4	-0.01785957		4264.4	-0.02310013
554.59	0.15700218		1084.59	0.00355588		1614.58	0.0107007		2144.59	-0.03330555		2674.58	-0.01388357		3204.61	-0.01322564		3734.6	-0.01809121		4264.6	-0.02399025
554.79	0.15714677		1084.79	0.00345453		1614.78	0.01039948		2144.79	-0.03326199		2674.78	-0.01395469		3204.81	-0.01451112		3734.8	-0.01686663		4264.8	-0.02364985
554.99	0.15779392		1084.99	0.0032929		1614.98	0.01004481		2144.99	-0.03282549		2674.98	-0.01310995		3205.01	-0.01490055		3735	-0.01629498		4265	-0.02324849
555.19	0.15735187		1085.19	0.00281584		1615.18	0.0092651		2145.19	-0.03204992		2675.18	-0.0133774		3205.21	-0.01483523		3735.2	-0.01563695		4265.2	-0.02406063
555.39	0.1566561		1085.39	0.00307736		1615.38	0.00874076		2145.39	-0.03226727		2675.38	-0.0136861		3205.41	-0.01532747		3735.4	-0.01376237		4265.4	-0.02415168
555.59	0.15533072		1085.59	0.00373466		1615.58	0.00942305		2145.59	-0.0323885		2675.58	-0.01465176		3205.61	-0.01491113		3735.6	-0.01250019		4265.6	-0.02418799
555.79	0.15447801		1085.79	0.00270823		1615.78	0.00990064		2145.79	-0.03224792		2675.78	-0.01473758		3205.81	-0.01513021		3735.8	-0.01217497		4265.8	-0.02491936
555.99	0.15451477		1085.99	0.0034312		1615.98	0.01041594		2145.99	-0.03237221		2675.98	-0.01457151		3206.01	-0.01497477		3736	-0.01189986		4266	-0.02539232
556.19	0.15404211		1086.19	0.0038903		1616.18	0.00994869		2146.19	-0.03346186		2676.18	-0.01451583		3206.21	-0.015242		3736.2	-0.01254704		4266.2	-0.02580994
556.39	0.1541444		1086.39	0.00433383		1616.38	0.00928802		2146.39	-0.03383823		2676.38	-0.01426784		3206.41	-0.01569777		3736.4	-0.01315991		4266.4	-0.02578704
556.59	0.1538986		1086.59	0.00401173		1616.58	0.00981421		2146.59	-0.03454436		2676.58	-0.01365517		3206.61	-0.01512378		3736.6	-0.01330603		4266.6	-0.02526865
556.79	0.15331848		1086.79	0.00360371		1616.78	0.00952557		2146.79	-0.03387838		2676.78	-0.01392538		3206.81	-0.01426709		3736.8	-0.01383516		4266.8	-0.02421082
556.99	0.15368537		1086.99	0.00416957		1616.98	0.00932375		2146.99	-0.0342855		2676.98	-0.01402196		3207.01	-0.01452167		3737	-0.01400229		4267	-0.02340186
557.19	0.15411044		1087.19	0.00339389		1617.18	0.00930339		2147.19	-0.03568715		2677.18	-0.0135767		3207.21	-0.01462252		3737.2	-0.01430418		4267.2	-0.02331844
557.39	0.15444483		1087.39	0.00315595		1617.38	0.00946358		2147.39	-0.03683175		2677.38	-0.01281196		3207.41	-0.01446415		3737.4	-0.01414288		4267.4	-0.02235622
557.59	0.15544229		1087.59	0.0024696		1617.58	0.00922333		2147.59	-0.03652344		2677.58	-0.01281709		3207.61	-0.01461544		3737.6	-0.01411405		4267.6	-0.02189633
557.79	0.15445578		1087.79	0.00202488		1617.78	0.01027431		2147.79	-0.03653455		2677.78	-0.01226755		3207.81	-0.01455007		3737.8	-0.01415012		4267.8	-0.02172806
557.99	0.15418594		1087.99	0.00140236		1617.98	0.01040313		2147.99	-0.03634897		2677.98	-0.01235935		3208.01	-0.01477169		3738	-0.01426524		4268	-0.02205209
558.19	0.1540959		1088.19	0.00100962		1618.18	0.01035824		2148.19	-0.03559799		2678.18	-0.01143383		3208.21	-0.01509334		3738.2	-0.01430376		4268.2	-0.02185857
558.39	0.15431611		1088.39	0.00083311		1618.38	0.01047993		2148.39	-0.03553282		2678.38	-0.01124424		3208.41	-0.01488773		3738.4	-0.01472427		4268.4	-0.02238831
558.59	0.15391762		1088.59	0.00057034		1618.58	0.01016313		2148.59	-0.03530457		2678.58	-0.01114587		3208.61	-0.01423713		3738.6	-0.01458949		4268.6	-0.02291409
558.79	0.15434111		1088.79	-0.00005665		1618.78	0.01028361		2148.79	-0.03472439		2678.78	-0.01108493		3208.81	-0.0147376		3738.8	-0.01399833		4268.8	-0.0224252
558.99	0.15444528		1088.99	-0.00032143		1618.98	0.01037536		2148.99	-0.03448909		2678.98	-0.01058036		3209.01	-0.01394434		3739	-0.01421567		4269	-0.02288308
559.19	0.15456359		1089.19	-0.00067728		1619.18	0.01057688		2149.19	-0.03421001		2679.18	-0.01146331		3209.21	-0.01297286		3739.2	-0.01468932		4269.2	-0.02277063
559.39	0.15431043		1089.39	-0.00054447		1619.38	0.01077705		2149.39	-0.03417855		2679.38	-0.01148947		3209.41	-0.01208546		3739.4	-0.01418548		4269.4	-0.02227447
559.59	0.15415716		1089.59	-0.00060009		1619.58	0.01147151		2149.59	-0.03411236		2679.58	-0.01141629		3209.61	-0.01120403		3739.6	-0.01456905		4269.6	-0.02238368
559.79	0.15483331		1089.79	-0.00075157		1619.78	0.01145067		2149.79	-0.03367591		2679.78	-0.01091532		3209.81	-0.0103974		3739.8	-0.01529675		4269.8	-0.02318697
