# Supplementary material for: Functional development of a V3/glycan-specific broadly neutralizing antibody isolated from a case of HIV superinfection
Source: eLife journal article supplement (doi:10.7554/elife.68110), 2021-07-15
Supplement: fig2-data2 [file E9.xls]

Vers 3.43 Data Simulation
Conc1	3.125E-08	3.125E-08	3.125E-08	3.125E-08	3.125E-08	3.125E-08	3.125E-08
Start1	199.99	729.99	1259.98	1789.98	2319.97	2849.97	3380
Stop1	559.79	1089.79	1619.78	2149.78	2679.77	3209.77	3739.8
Time1	Data1	Sim1	Time2	Data2	Sim2	Time3	Data3	Sim3	Time4	Data4	Sim4	Time5	Data5	Sim5	Time6	Data6	Sim6	Time7	Data7	Sim7
199.99	0.00394453		729.99	-0.00508792		1259.98	0.00202778		1789.98	-0.00175198		2319.97	-0.00873975		2849.97	-0.00339778		3380	-0.00590478
200.19	0.00236905		730.19	-0.00525468		1260.18	0.00126499		1790.18	-0.00152364		2320.17	-0.00859566		2850.17	-0.0035276		3380.2	-0.00554982
200.39	0.00141371		730.39	-0.00502502		1260.38	0.00057319		1790.38	-0.00096897		2320.37	-0.00779671		2850.37	-0.0037661		3380.4	-0.00507453
200.59	0.00037219		730.59	-0.00501162		1260.58	-0.0002478		1790.58	0.00044512		2320.57	-0.00652632		2850.57	-0.00392071		3380.6	-0.00532027
200.79	-0.00033028		730.79	-0.00470351		1260.78	-0.00070134		1790.78	0.00111583		2320.77	-0.00560524		2850.77	-0.00421469		3380.8	-0.00506809
200.99	-0.00073773		730.99	-0.00442695		1260.98	-0.00148727		1790.98	0.00148599		2320.97	-0.00483882		2850.97	-0.00437271		3381	-0.00417165
201.19	-0.00126074		731.19	-0.004222		1261.18	-0.00154548		1791.18	0.00149144		2321.17	-0.00498837		2851.17	-0.00479927		3381.2	-0.003434
201.39	-0.00063803		731.39	-0.00359391		1261.38	-0.00160078		1791.38	0.00216579		2321.37	-0.00472851		2851.37	-0.00471072		3381.4	-0.00259075
201.59	-0.00016363		731.59	-0.00338266		1261.58	-0.00190757		1791.58	0.00166064		2321.57	-0.00454545		2851.57	-0.00456189		3381.6	-0.00188554
201.79	0.00058324		731.79	-0.00313915		1261.78	-0.00170499		1791.78	0.00186675		2321.77	-0.00451877		2851.77	-0.00466956		3381.8	-0.00173988
201.99	0.00134887		731.99	-0.00311799		1261.98	-0.00114053		1791.98	0.00249851		2321.97	-0.00403153		2851.97	-0.00412563		3382	-0.00195573
202.19	0.00298825		732.19	-0.00326541		1262.18	-0.00060234		1792.18	0.00235011		2322.17	-0.00366104		2852.17	-0.00353137		3382.2	-0.00218891
202.39	0.00367554		732.39	-0.00305709		1262.38	0.00027321		1792.38	0.00216647		2322.37	-0.00412275		2852.37	-0.00280965		3382.4	-0.0029136
202.59	0.00375147		732.59	-0.00391755		1262.58	0.00099188		1792.58	0.00267038		2322.57	-0.00467123		2852.57	-0.00234113		3382.6	-0.00392225
202.79	0.00329961		732.79	-0.0045146		1262.78	0.00068248		1792.78	0.00204429		2322.77	-0.00396772		2852.77	-0.00254816		3382.8	-0.00474289
202.99	0.00314558		732.99	-0.0049793		1262.98	0.00087025		1792.98	0.00156975		2322.97	-0.00351511		2852.97	-0.00246721		3383	-0.00526567
203.19	0.00271134		733.19	-0.00518648		1263.18	0.00173387		1793.18	0.00143889		2323.17	-0.00415193		2853.17	-0.00265812		3383.2	-0.0058407
203.39	0.00255227		733.39	-0.00519666		1263.38	0.00249339		1793.38	0.00054607		2323.37	-0.00399701		2853.37	-0.00251629		3383.4	-0.00661665
203.59	0.00140718		733.59	-0.00553982		1263.58	0.00313275		1793.58	-0.00010667		2323.57	-0.00402201		2853.57	-0.00258297		3383.6	-0.00614968
203.79	0.00002746		733.79	-0.00483015		1263.78	0.00346951		1793.78	-0.0006324		2323.77	-0.00421416		2853.77	-0.00254451		3383.8	-0.00711383
203.99	-0.00025451		733.99	-0.00474411		1263.98	0.00346832		1793.98	-0.0005355		2323.97	-0.00374315		2853.97	-0.00227124		3384	-0.00725243
204.19	-0.00027165		734.19	-0.00495489		1264.18	0.00281859		1794.18	-0.00110341		2324.17	-0.00361557		2854.17	-0.00244851		3384.2	-0.00782733
204.39	0.00042723		734.39	-0.00504465		1264.38	0.00288436		1794.38	-0.00015082		2324.37	-0.00241424		2854.37	-0.00214303		3384.4	-0.00853891
204.59	0.00120347		734.59	-0.00484091		1264.58	0.00294405		1794.58	0.00031786		2324.57	-0.0018364		2854.57	-0.00174171		3384.6	-0.00795507
204.79	0.00199358		734.79	-0.00439212		1264.78	0.0028435		1794.78	0.00010794		2324.77	-0.00216139		2854.77	-0.00140256		3384.8	-0.00722637
204.99	0.00294475		734.99	-0.00412175		1264.98	0.00165158		1794.98	0.00020353		2324.97	-0.00249187		2854.97	-0.00117675		3385	-0.00622663
205.19	0.00455004		735.19	-0.00372734		1265.18	0.00203209		1795.18	0.00046358		2325.17	-0.00240473		2855.17	-0.00124079		3385.2	-0.005378
205.39	0.00554643		735.39	-0.00337074		1265.38	0.00192468		1795.38	0.00055765		2325.37	-0.00198547		2855.37	-0.00116731		3385.4	-0.00474504
205.59	0.00644169		735.59	-0.00419524		1265.58	0.00145232		1795.58	0.00001482		2325.57	-0.00256666		2855.57	-0.00151893		3385.6	-0.00407122
205.79	0.00710881		735.79	-0.0042794		1265.78	0.00197008		1795.78	0.00047399		2325.77	-0.00227987		2855.77	-0.00168797		3385.8	-0.00392219
205.99	0.00785633		735.99	-0.00510189		1265.98	0.00155972		1795.98	0.00116825		2325.97	-0.00165973		2855.97	-0.00145052		3386	-0.00477604
206.19	0.0088263		736.19	-0.00627197		1266.18	0.00116036		1796.18	0.00127687		2326.17	-0.00225339		2856.17	-0.00128823		3386.2	-0.00459247
206.39	0.00903746		736.39	-0.0068558		1266.38	0.00116426		1796.38	0.00152151		2326.37	-0.00244743		2856.37	-0.00109354		3386.4	-0.00493592
206.59	0.00896838		736.59	-0.00731013		1266.58	0.00169369		1796.58	0.00138224		2326.57	-0.00251695		2856.57	-0.00069087		3386.6	-0.00533549
206.79	0.00998759		736.79	-0.00733088		1266.78	0.00169005		1796.78	0.00022525		2326.77	-0.00205344		2856.77	-0.00122295		3386.8	-0.00525659
206.99	0.010422		736.99	-0.0081973		1266.98	0.00234383		1796.98	0.00007842		2326.97	-0.00222198		2856.97	-0.00112317		3387	-0.00573224
207.19	0.01045871		737.19	-0.00888787		1267.18	0.00344896		1797.18	0.00021328		2327.17	-0.0030087		2857.17	-0.00119206		3387.2	-0.00588718
207.39	0.010363		737.39	-0.00948332		1267.38	0.00432346		1797.38	-0.00050186		2327.37	-0.00332743		2857.37	-0.0016598		3387.4	-0.0057937
207.59	0.01040288		737.59	-0.00884545		1267.58	0.00484012		1797.58	-0.00075559		2327.57	-0.00333162		2857.57	-0.00163574		3387.6	-0.00552425
207.79	0.01045333		737.79	-0.00876499		1267.78	0.00549689		1797.78	-0.00087772		2327.77	-0.00281926		2857.77	-0.00213461		3387.8	-0.00613297
207.99	0.01041699		737.99	-0.00826888		1267.98	0.00572768		1797.98	-0.00078998		2327.97	-0.00196253		2857.97	-0.00186001		3388	-0.00610781
208.19	0.01060642		738.19	-0.00751237		1268.18	0.00594321		1798.18	-0.00006011		2328.17	-0.00164151		2858.17	-0.00153869		3388.2	-0.00705142
208.39	0.01048059		738.39	-0.00707382		1268.38	0.00633219		1798.38	0.00062363		2328.37	-0.00089434		2858.37	-0.00055528		3388.4	-0.00709429
208.59	0.01060949		738.59	-0.00608101		1268.58	0.00678853		1798.58	0.00076201		2328.57	-0.00123241		2858.57	0.00005425		3388.6	-0.00653187
208.79	0.01090939		738.79	-0.00512977		1268.78	0.00664512		1798.78	0.0014691		2328.77	-0.00147687		2858.77	0.00052133		3388.8	-0.00727929
208.99	0.01094514		738.99	-0.00436567		1268.98	0.00629085		1798.98	0.00125508		2328.97	-0.00123721		2858.97	0.00071553		3389	-0.00673163
209.19	0.01073225		739.19	-0.00374236		1269.18	0.00703371		1799.18	0.00115296		2329.17	-0.00110909		2859.17	-0.00017146		3389.2	-0.00640118
209.39	0.00971007		739.39	-0.00279886		1269.38	0.00683981		1799.38	0.00104401		2329.37	-0.00218992		2859.37	-0.00049597		3389.4	-0.00567318
209.59	0.00973761		739.59	-0.00294561		1269.58	0.00645382		1799.58	0.00142733		2329.57	-0.0027252		2859.57	-0.00117802		3389.6	-0.00582067
209.79	0.00909636		739.79	-0.00271087		1269.78	0.00582401		1799.78	0.00131718		2329.77	-0.00254256		2859.77	-0.000649		3389.8	-0.00657741
209.99	0.00943043		739.99	-0.00311339		1269.98	0.00518276		1799.98	0.00176989		2329.97	-0.00318128		2859.97	-0.00120073		3390	-0.00730214
210.19	0.00976153		740.19	-0.00285834		1270.18	0.0051882		1800.18	0.00095248		2330.17	-0.00383743		2860.17	-0.00085767		3390.2	-0.00703816
210.39	0.01079716		740.39	-0.00300812		1270.38	0.00538898		1800.38	0.00086353		2330.37	-0.00364045		2860.37	-0.00078226		3390.4	-0.00769418
210.59	0.01058717		740.59	-0.00265993		1270.58	0.00577534		1800.58	-0.00007048		2330.57	-0.00353768		2860.57	-0.00086518		3390.6	-0.00822525
210.79	0.01156131		740.79	-0.00341742		1270.78	0.00576792		1800.78	-0.00006645		2330.77	-0.00319673		2860.77	-0.00064621		3390.8	-0.00808363
210.99	0.01147315		740.99	-0.00367501		1270.98	0.00566748		1800.98	0.00013206		2330.97	-0.00319		2860.97	-0.00103868		3391	-0.00897836
211.19	0.01122903		741.19	-0.00328736		1271.18	0.00649929		1801.18	0.00044525		2331.17	-0.00340581		2861.17	-0.00129622		3391.2	-0.00876376
211.39	0.01200788		741.39	-0.00424725		1271.38	0.00608789		1801.38	-0.00004971		2331.37	-0.00301767		2861.37	-0.00127348		3391.4	-0.00888483
211.59	0.01281652		741.59	-0.00380929		1271.58	0.00540323		1801.58	0.00021755		2331.57	-0.00148281		2861.57	-0.00198276		3391.6	-0.00861452
211.79	0.01327527		741.79	-0.00469027		1271.78	0.00446032		1801.78	0.00012074		2331.77	-0.00127558		2861.77	-0.00298409		3391.8	-0.00878727
211.99	0.01273288		741.99	-0.00494715		1271.98	0.00359622		1801.98	-0.00049706		2331.97	0.00029495		2861.97	-0.00268911		3392	-0.00902629
212.19	0.0127567		742.19	-0.00535718		1272.18	0.00344485		1802.18	-0.00013334		2332.17	0.0004732		2862.17	-0.0023043		3392.2	-0.00982798
212.39	0.01264195		742.39	-0.00557428		1272.38	0.00272909		1802.38	0.00000794		2332.37	0.00137408		2862.37	-0.00275843		3392.4	-0.00984116
212.59	0.01275927		742.59	-0.00648979		1272.58	0.00343066		1802.58	0.0000036		2332.57	0.00098067		2862.57	-0.00332898		3392.6	-0.00965401
212.79	0.01242248		742.79	-0.00672621		1272.78	0.00310209		1802.78	-0.00007357		2332.77	0.00077308		2862.77	-0.00327771		3392.8	-0.0097633
212.99	0.0123759		742.99	-0.00670344		1272.98	0.00277699		1802.98	0.00008009		2332.97	0.00084261		2862.97	-0.00301815		3393	-0.0091734
213.19	0.01245491		743.19	-0.00684119		1273.18	0.0031604		1803.18	0.00031625		2333.17	0.0004071		2863.17	-0.00341679		3393.2	-0.00935015
213.39	0.01263743		743.39	-0.00705538		1273.38	0.00312026		1803.38	0.00116425		2333.37	0.00015811		2863.37	-0.00326548		3393.4	-0.00841901
213.59	0.01267063		743.59	-0.00711966		1273.58	0.002899		1803.58	0.00125464		2333.57	-0.00037426		2863.57	-0.00341792		3393.6	-0.00896274
213.79	0.01273193		743.79	-0.00677654		1273.78	0.00290637		1803.78	0.00029856		2333.77	-0.00092515		2863.77	-0.00297213		3393.8	-0.00901539
213.99	0.01407196		743.99	-0.0061698		1273.98	0.00397285		1803.98	-0.00023882		2333.97	-0.00119737		2863.97	-0.00292624		3394	-0.00861147
214.19	0.01488816		744.19	-0.00561417		1274.18	0.00481094		1804.18	-0.00059198		2334.17	-0.00142033		2864.17	-0.00303005		3394.2	-0.00937118
214.39	0.0154382		744.39	-0.0058242		1274.38	0.00511531		1804.38	0.0002677		2334.37	-0.00184012		2864.37	-0.00254899		3394.4	-0.00993964
214.59	0.01441191		744.59	-0.00539991		1274.58	0.00598687		1804.58	-0.00004758		2334.57	-0.00144055		2864.57	-0.00217446		3394.6	-0.01022146
214.79	0.01504455		744.79	-0.00497405		1274.78	0.00645127		1804.78	0.00157602		2334.77	-0.00157635		2864.77	-0.00140275		3394.8	-0.0097431
214.99	0.01503966		744.99	-0.00382208		1274.98	0.00663315		1804.98	0.00239374		2334.97	-0.00200037		2864.97	-0.00158781		3395	-0.00935225
215.19	0.01509169		745.19	-0.00422371		1275.18	0.00721932		1805.18	0.00271475		2335.17	-0.00268472		2865.17	-0.00137459		3395.2	-0.00809752
215.39	0.01545542		745.39	-0.00603885		1275.38	0.00612151		1805.38	0.00293148		2335.37	-0.00284023		2865.37	-0.00073121		3395.4	-0.00747494
215.59	0.01558225		745.59	-0.00585596		1275.58	0.00671864		1805.58	0.00351464		2335.57	-0.00241917		2865.57	-0.00170243		3395.6	-0.00715444
215.79	0.01611814		745.79	-0.00606463		1275.78	0.00688578		1805.78	0.00308606		2335.77	-0.00279499		2865.77	-0.00144108		3395.8	-0.00679365
215.99	0.01594929		745.99	-0.00648498		1275.98	0.00721567		1805.98	0.00334566		2335.97	-0.00262207		2865.97	-0.00077555		3396	-0.00715224
216.19	0.01632255		746.19	-0.00662424		1276.18	0.00776702		1806.18	0.00340301		2336.17	-0.00277875		2866.17	-0.0002689		3396.2	-0.00712959
216.39	0.01637177		746.39	-0.00687849		1276.38	0.00725562		1806.38	0.00398022		2336.37	-0.0016069		2866.37	-0.00072591		3396.4	-0.00647121
216.59	0.01635234		746.59	-0.00726323		1276.58	0.0075714		1806.58	0.00317601		2336.57	-0.00173176		2866.57	-0.00089688		3396.6	-0.00644377
216.79	0.01682368		746.79	-0.00640339		1276.78	0.00706287		1806.78	0.00314099		2336.77	-0.00116669		2866.77	-0.00010561		3396.8	-0.00680317
216.99	0.01808683		746.99	-0.00552055		1276.98	0.00638633		1806.98	0.0030547		2336.97	-0.00070931		2866.97	0.00002683		3397	-0.00681696
217.19	0.01865502		747.19	-0.00556271		1277.18	0.00561364		1807.18	0.00270771		2337.17	-0.00043319		2867.17	0.00003403		3397.2	-0.00618731
217.39	0.01822599		747.39	-0.00522289		1277.38	0.00433923		1807.38	0.00311853		2337.37	-0.00007366		2867.37	-0.00033842		3397.4	-0.00530289
217.59	0.01854765		747.59	-0.0036581		1277.58	0.00355972		1807.58	0.00195129		2337.57	-0.00030811		2867.57	0.00023624		3397.6	-0.00491774
217.79	0.01883537		747.79	-0.00399653		1277.78	0.00331065		1807.78	0.00053052		2337.77	0.00061034		2867.77	-0.00033208		3397.8	-0.00498454
217.99	0.02019619		747.99	-0.00404367		1277.98	0.00376567		1807.98	0.00018994		2337.97	0.00064263		2867.97	-0.00024103		3398	-0.00471422
218.19	0.0201969		748.19	-0.00430209		1278.18	0.00347329		1808.18	0.00023581		2338.17	0.00087845		2868.17	-0.0009815		3398.2	-0.00474116
218.39	0.02038861		748.39	-0.00448119		1278.38	0.00233438		1808.38	-0.0004099		2338.37	0.00074312		2868.37	-0.00034299		3398.4	-0.0057358
218.59	0.02071196		748.59	-0.00426915		1278.58	0.00242026		1808.58	0.00042666		2338.57	0.00095057		2868.57	-0.00071507		3398.6	-0.00569355
218.79	0.02099549		748.79	-0.00421729		1278.78	0.00145952		1808.78	0.00164672		2338.77	0.00051149		2868.77	-0.00067823		3398.8	-0.00566165
218.99	0.02151333		748.99	-0.0043804		1278.98	0.00200091		1808.98	0.00108741		2338.97	0.00007815		2868.97	-0.00027789		3399	-0.00600919
219.19	0.02159277		749.19	-0.00491869		1279.18	0.00193327		1809.18	0.00052458		2339.17	-0.00090125		2869.17	0.00049579		3399.2	-0.00559202
219.39	0.02104901		749.39	-0.00558272		1279.38	0.0026529		1809.38	0.00102054		2339.37	-0.00146414		2869.37	0.00039758		3399.4	-0.00622808
219.59	0.02105646		749.59	-0.0052828		1279.58	0.00428323		1809.58	0.00070672		2339.57	-0.00159957		2869.57	-0.00047428		3399.6	-0.0066303
219.79	0.02082532		749.79	-0.00531178		1279.78	0.00463909		1809.78	0.0005415		2339.77	-0.00233764		2869.77	0.00010625		3399.8	-0.00746237
219.99	0.02060148		749.99	-0.00536143		1279.98	0.0052459		1809.98	0.00111751		2339.97	-0.0029352		2869.97	-0.00047069		3400	-0.00824721
220.19	0.02122694		750.19	-0.00539463		1280.18	0.00474884		1810.18	0.00045534		2340.17	-0.00249127		2870.17	-0.00026089		3400.2	-0.0081152
220.39	0.02088177		750.39	-0.0048774		1280.38	0.00460622		1810.38	0.00119227		2340.37	-0.00111586		2870.37	-0.00054899		3400.4	-0.00894997
220.59	0.02144419		750.59	-0.00460544		1280.58	0.00444579		1810.58	0.00064755		2340.57	-0.00136337		2870.57	-0.0013094		3400.6	-0.0096313
220.79	0.02114367		750.79	-0.00427499		1280.78	0.00466041		1810.78	0.00083598		2340.77	-0.00076039		2870.77	-0.00082489		3400.8	-0.01084308
220.99	0.02162941		750.99	-0.00398479		1280.98	0.00370631		1810.98	0.00109887		2340.97	-0.00109795		2870.97	-0.00100265		3401	-0.01133789
221.19	0.02165516		751.19	-0.00385733		1281.18	0.00363625		1811.18	0.00096585		2341.17	-0.00024844		2871.17	-0.00046803		3401.2	-0.0117925
221.39	0.02097791		751.39	-0.00333025		1281.38	0.003326		1811.38	0.00067542		2341.37	-0.00029353		2871.37	-0.00068586		3401.4	-0.0118923
221.59	0.02126921		751.59	-0.0029468		1281.58	0.00389625		1811.58	-0.00008134		2341.57	-0.00058969		2871.57	0.00049852		3401.6	-0.01102864
221.79	0.02182422		751.79	-0.00417008		1281.78	0.00397935		1811.78	-0.00057809		2341.77	-0.00031033		2871.77	-0.00000122		3401.8	-0.01157441
221.99	0.02192035		751.99	-0.00439524		1281.98	0.00422653		1811.98	-0.00081091		2341.97	-0.00127652		2871.97	0.0004105		3402	-0.01066305
222.19	0.02175757		752.19	-0.00406805		1282.18	0.00406097		1812.18	-0.00033297		2342.17	-0.00155078		2872.17	0.00032311		3402.2	-0.01062253
222.39	0.02202819		752.39	-0.00367501		1282.38	0.00403443		1812.38	-0.00029182		2342.37	-0.0024642		2872.37	0.00050714		3402.4	-0.01234815
222.59	0.02263893		752.59	-0.00273905		1282.58	0.00487436		1812.58	0.00100931		2342.57	-0.00268011		2872.57	0.00171743		3402.6	-0.01151947
222.79	0.02284365		752.79	-0.00230726		1282.78	0.0053073		1812.78	0.00093887		2342.77	-0.00254997		2872.77	0.00269176		3402.8	-0.01135569
222.99	0.02282403		752.99	-0.00249941		1282.98	0.00618043		1812.98	0.00039461		2342.97	-0.00240377		2872.97	0.00385622		3403	-0.01105882
223.19	0.0234553		753.19	-0.00264445		1283.18	0.00672354		1813.18	0.00090886		2343.17	-0.00230352		2873.17	0.00348476		3403.2	-0.01014459
223.39	0.02350642		753.39	-0.00408595		1283.38	0.00758354		1813.38	0.00140535		2343.37	-0.00277719		2873.37	0.00235634		3403.4	-0.0093945
223.59	0.02305324		753.59	-0.00459049		1283.58	0.00798929		1813.58	0.00197776		2343.57	-0.00265856		2873.57	0.00176762		3403.6	-0.00878629
223.79	0.02388268		753.79	-0.00463844		1283.78	0.0075582		1813.78	0.00255933		2343.77	-0.00264037		2873.77	0.00222678		3403.8	-0.00844611
223.99	0.02390619		753.99	-0.00527051		1283.98	0.00716824		1813.98	0.00291259		2343.97	-0.00237952		2873.97	0.00173629		3404	-0.00791365
224.19	0.02449566		754.19	-0.00551572		1284.18	0.00655977		1814.18	0.00248571		2344.17	-0.0008984		2874.17	0.00103116		3404.2	-0.0072136
224.39	0.02414304		754.39	-0.00599015		1284.38	0.00642229		1814.38	0.0028992		2344.37	-0.00017268		2874.37	0.00066357		3404.4	-0.00756401
224.59	0.02471739		754.59	-0.00648468		1284.58	0.00574525		1814.58	0.00292497		2344.57	-0.00014121		2874.57	0.00027321		3404.6	-0.00865142
224.79	0.02423782		754.79	-0.0063759		1284.78	0.00551477		1814.78	0.00273668		2344.77	0.0007991		2874.77	0.00071163		3404.8	-0.01000473
224.99	0.02452315		754.99	-0.00577888		1284.98	0.00482915		1814.98	0.00194861		2344.97	0.00183032		2874.97	0.00078237		3405	-0.00980924
225.19	0.02446567		755.19	-0.00525242		1285.18	0.00474364		1815.18	0.00182099		2345.17	0.00266973		2875.17	0.00109958		3405.2	-0.01067473
225.39	0.02473075		755.39	-0.0048743		1285.38	0.0047249		1815.38	0.00274779		2345.37	0.00223558		2875.37	0.00122945		3405.4	-0.01004732
225.59	0.02521947		755.59	-0.00537319		1285.58	0.00478868		1815.58	0.0024213		2345.57	0.00222118		2875.57	0.00190539		3405.6	-0.00930226
225.79	0.02596833		755.79	-0.00476796		1285.78	0.00446446		1815.78	0.00226378		2345.77	0.00169233		2875.77	0.00190483		3405.8	-0.00892472
225.99	0.02612758		755.99	-0.0037869		1285.98	0.00446356		1815.98	0.00249433		2345.97	0.00085109		2875.97	0.0016362		3406	-0.00784735
226.19	0.02631973		756.19	-0.00282028		1286.18	0.00492295		1816.18	0.00314477		2346.17	0.00010802		2876.17	0.00132589		3406.2	-0.0082163
226.39	0.02678927		756.39	-0.00230788		1286.38	0.00587682		1816.38	0.00387315		2346.37	-0.0000671		2876.37	0.0016895		3406.4	-0.00927975
226.59	0.02777189		756.59	-0.00183326		1286.58	0.00655016		1816.58	0.00461426		2346.57	0.00032196		2876.57	0.00221025		3406.6	-0.0085657
226.79	0.0278299		756.79	-0.001777		1286.78	0.00767881		1816.78	0.00582585		2346.77	0.00071134		2876.77	0.00059773		3406.8	-0.00864663
226.99	0.02796806		756.99	-0.00267173		1286.98	0.00790948		1816.98	0.00612807		2346.97	0.0004003		2876.97	0.00024519		3407	-0.00822394
227.19	0.02908535		757.19	-0.00352805		1287.18	0.0088159		1817.18	0.00677518		2347.17	-0.0001147		2877.17	-0.00060425		3407.2	-0.00801405
227.39	0.02903174		757.39	-0.00355061		1287.38	0.0092107		1817.38	0.00708925		2347.37	-0.00115505		2877.37	-0.00056626		3407.4	-0.00743655
227.59	0.02902092		757.59	-0.0038621		1287.58	0.00843184		1817.58	0.00677295		2347.57	-0.00114072		2877.57	-0.0005614		3407.6	-0.0073293
227.79	0.0303284		757.79	-0.00419192		1287.78	0.00765579		1817.78	0.00634354		2347.77	-0.00144115		2877.77	-0.00095343		3407.8	-0.00718671
227.99	0.03002149		757.99	-0.00367447		1287.98	0.0069071		1817.98	0.00558904		2347.97	-0.00158556		2877.97	-0.00158324		3408	-0.0072913
228.19	0.03037986		758.19	-0.00320985		1288.18	0.00726059		1818.18	0.00543074		2348.17	-0.00160411		2878.17	-0.00234593		3408.2	-0.00688063
228.39	0.0299617		758.39	-0.0033944		1288.38	0.00621679		1818.38	0.00464754		2348.37	-0.00136707		2878.37	-0.00223338		3408.4	-0.00778346
228.59	0.03003756		758.59	-0.00282634		1288.58	0.00599278		1818.58	0.00440612		2348.57	-0.00111478		2878.57	-0.00261572		3408.6	-0.00786598
228.79	0.02969299		758.79	-0.00316921		1288.78	0.00551057		1818.78	0.00373793		2348.77	-0.00024113		2878.77	-0.00185526		3408.8	-0.00744841
228.99	0.02927042		758.99	-0.00303607		1288.98	0.00576625		1818.98	0.00365835		2348.97	0.00001614		2878.97	-0.00144918		3409	-0.00715272
229.19	0.03007414		759.19	-0.00347715		1289.18	0.00509791		1819.18	0.00336882		2349.17	-0.0000831		2879.17	-0.00144758		3409.2	-0.00712619
229.39	0.03088001		759.39	-0.00368438		1289.38	0.0050862		1819.38	0.00236534		2349.37	-0.00057364		2879.37	-0.00127714		3409.4	-0.00656747
229.59	0.03233379		759.59	-0.00434722		1289.58	0.00418446		1819.58	0.00148245		2349.57	-0.00090868		2879.57	-0.00087064		3409.6	-0.00558848
229.79	0.03240335		759.79	-0.00334381		1289.78	0.00399029		1819.78	0.00122759		2349.77	-0.00122311		2879.77	-0.00009373		3409.8	-0.00516876
229.99	0.03256967		759.99	-0.0037332		1289.98	0.00347451		1819.98	0.00119956		2349.97	-0.00063882		2879.97	-0.0001633		3410	-0.00580432
230.19	0.03257203		760.19	-0.00518977		1290.18	0.00384325		1820.18	0.00130961		2350.17	-0.00126558		2880.17	0.00083099		3410.2	-0.00603974
230.39	0.03271816		760.39	-0.00563424		1290.38	0.00463588		1820.38	0.00176179		2350.37	-0.00102227		2880.37	0.00143718		3410.4	-0.00700395
230.59	0.03261778		760.59	-0.00583791		1290.58	0.00469215		1820.58	0.00129561		2350.57	-0.00068454		2880.57	0.00157912		3410.6	-0.00656777
230.79	0.0320413		760.79	-0.00569956		1290.78	0.00496216		1820.78	0.0016586		2350.77	-0.00111165		2880.77	0.00131852		3410.8	-0.00689011
230.99	0.03231964		760.99	-0.00562255		1290.98	0.00475458		1820.98	0.00176813		2350.97	-0.0012805		2880.97	0.00185786		3411	-0.00726479
231.19	0.03181818		761.19	-0.00530322		1291.18	0.00541994		1821.18	0.00213253		2351.17	-0.00161278		2881.17	0.00230749		3411.2	-0.00812376
231.39	0.03208439		761.39	-0.00494148		1291.38	0.00520922		1821.38	0.00137439		2351.37	-0.0012443		2881.37	0.00229923		3411.4	-0.00840989
231.59	0.03263131		761.59	-0.00602478		1291.58	0.00475037		1821.58	0.00162506		2351.57	-0.00162805		2881.57	0.0025095		3411.6	-0.00914222
231.79	0.0324883		761.79	-0.0054344		1291.78	0.00527014		1821.78	0.001913		2351.77	-0.00139412		2881.77	0.00232039		3411.8	-0.0095333
231.99	0.03195327		761.99	-0.0050567		1291.98	0.00515341		1821.98	0.0019701		2351.97	0.00000756		2881.97	0.00290845		3412	-0.00910731
232.19	0.03231817		762.19	-0.00507555		1292.18	0.00574794		1822.18	0.00206148		2352.17	-0.00012213		2882.17	0.00237219		3412.2	-0.00872756
232.39	0.03209491		762.39	-0.00483332		1292.38	0.00548196		1822.38	0.00281988		2352.37	0.00075089		2882.37	0.00131913		3412.4	-0.00896919
232.59	0.03229127		762.59	-0.00456143		1292.58	0.00596199		1822.58	0.00352815		2352.57	0.00103902		2882.57	0.00142428		3412.6	-0.00881725
232.79	0.03303509		762.79	-0.00420653		1292.78	0.00524445		1822.78	0.00384582		2352.77	0.00165169		2882.77	0.00144281		3412.8	-0.00868041
232.99	0.03340578		762.99	-0.00421138		1292.98	0.00583169		1822.98	0.00393653		2352.97	0.00148472		2882.97	0.00054655		3413	-0.00847543
233.19	0.03422012		763.19	-0.00464316		1293.18	0.00473356		1823.18	0.00390821		2353.17	0.00217614		2883.17	0.00065606		3413.2	-0.00779042
233.39	0.03509307		763.39	-0.00523404		1293.38	0.00445345		1823.38	0.00403402		2353.37	0.00126076		2883.37	0.00036093		3413.4	-0.00794288
233.59	0.03670639		763.59	-0.00582383		1293.58	0.00487777		1823.58	0.00479505		2353.57	0.0017486		2883.57	0.00034995		3413.6	-0.00825369
233.79	0.03616903		763.79	-0.00497038		1293.78	0.00504959		1823.78	0.00388981		2353.77	0.00221749		2883.77	0.00123303		3413.8	-0.00872498
233.99	0.03631679		763.99	-0.00591036		1293.98	0.00526765		1823.98	0.00398558		2353.97	0.00181379		2883.97	0.00212375		3414	-0.00877752
234.19	0.03697477		764.19	-0.00645269		1294.18	0.00615407		1824.18	0.003604		2354.17	0.00073278		2884.17	0.00268847		3414.2	-0.00901626
234.39	0.03704669		764.39	-0.00571328		1294.38	0.00692088		1824.38	0.00305635		2354.37	0.00090113		2884.37	0.00333074		3414.4	-0.00945876
234.59	0.03704328		764.59	-0.00517572		1294.58	0.00734096		1824.58	0.00220949		2354.57	0.00073579		2884.57	0.00397809		3414.6	-0.00920891
234.79	0.03661524		764.79	-0.00441576		1294.78	0.0078965		1824.78	0.00251961		2354.77	0.00070179		2884.77	0.00441038		3414.8	-0.00989781
234.99	0.03595019		764.99	-0.00372735		1294.98	0.00805025		1824.98	0.00232944		2354.97	0.00027214		2884.97	0.00480784		3415	-0.01043302
235.19	0.03542738		765.19	-0.00397892		1295.18	0.00820071		1825.18	0.00199475		2355.17	-0.00012587		2885.17	0.0054399		3415.2	-0.01112154
235.39	0.03491823		765.39	-0.00419989		1295.38	0.00856602		1825.38	0.0014203		2355.37	0.0003926		2885.37	0.00546004		3415.4	-0.01158121
235.59	0.03445728		765.59	-0.0038237		1295.58	0.00829149		1825.58	0.00168267		2355.57	0.00037192		2885.57	0.00593171		3415.6	-0.01248763
235.79	0.03392845		765.79	-0.00345557		1295.78	0.00870306		1825.78	0.00140101		2355.77	0.00149969		2885.77	0.00634335		3415.8	-0.01209138
235.99	0.03405123		765.99	-0.00288573		1295.98	0.00807879		1825.98	0.0008008		2355.97	0.00244521		2885.97	0.00687797		3416	-0.01150555
236.19	0.0340598		766.19	-0.00240416		1296.18	0.0073531		1826.18	0.00044834		2356.17	0.00149583		2886.17	0.00613919		3416.2	-0.01162323
236.39	0.03376549		766.39	-0.0026642		1296.38	0.00691396		1826.38	0.00158371		2356.37	0.00158007		2886.37	0.00542242		3416.4	-0.01192575
236.59	0.03367528		766.59	-0.00276817		1296.58	0.00640267		1826.58	0.00100135		2356.57	0.00196852		2886.57	0.0052024		3416.6	-0.01180351
236.79	0.03495661		766.79	-0.00298487		1296.78	0.00519447		1826.78	0.00116466		2356.77	0.00161087		2886.77	0.00362686		3416.8	-0.01117173
236.99	0.03452647		766.99	-0.00437959		1296.98	0.00541064		1826.98	0.0012862		2356.97	0.00061609		2886.97	0.00303175		3417	-0.01167785
237.19	0.03553154		767.19	-0.00484553		1297.18	0.00431773		1827.18	0.00163841		2357.17	0.0000518		2887.17	0.00253951		3417.2	-0.01145012
237.39	0.03615377		767.39	-0.00532269		1297.38	0.00379347		1827.38	0.00112478		2357.37	-0.00004642		2887.37	0.0006509		3417.4	-0.01219386
237.59	0.03779646		767.59	-0.00522409		1297.58	0.00423527		1827.58	0.00057583		2357.57	0.00000518		2887.57	0.00043732		3417.6	-0.01295471
237.79	0.03823752		767.79	-0.00514086		1297.78	0.00482008		1827.78	0.00021147		2357.77	-0.00066117		2887.77	0.00124851		3417.8	-0.01213528
237.99	0.03882666		767.99	-0.00656777		1297.98	0.00523266		1827.98	0.00000661		2357.97	-0.00075045		2887.97	0.00179255		3418	-0.01171593
238.19	0.04034317		768.19	-0.00672483		1298.18	0.00636287		1828.18	-0.00019256		2358.17	-0.00120589		2888.17	0.00163502		3418.2	-0.01144462
238.39	0.041286		768.39	-0.00673894		1298.38	0.00655713		1828.38	0.00015918		2358.37	-0.00082546		2888.37	0.0026019		3418.4	-0.01101557
238.59	0.04143062		768.59	-0.00627499		1298.58	0.00664115		1828.58	-0.00056601		2358.57	-0.00150245		2888.57	0.00317517		3418.6	-0.01114808
238.79	0.04118226		768.79	-0.00518139		1298.78	0.0066643		1828.78	-0.00081323		2358.77	-0.00088663		2888.77	0.002923		3418.8	-0.01162393
238.99	0.04125839		768.99	-0.00450616		1298.98	0.00554731		1828.98	-0.00115199		2358.97	-0.00107557		2888.97	0.00241721		3419	-0.01179432
239.19	0.04074808		769.19	-0.0042261		1299.18	0.00529678		1829.18	-0.00106126		2359.17	-0.00081191		2889.17	0.00261804		3419.2	-0.01204033
239.39	0.04039624		769.39	-0.00274306		1299.38	0.00578602		1829.38	-0.0018093		2359.37	-0.00076286		2889.37	0.00218328		3419.4	-0.01208504
239.59	0.04105099		769.59	-0.00184976		1299.58	0.00588217		1829.58	-0.0012966		2359.57	-0.00022187		2889.57	0.00310194		3419.6	-0.01194474
239.79	0.0403633		769.79	-0.00072551		1299.78	0.00561483		1829.78	-0.00115893		2359.77	-0.00003824		2889.77	0.00428667		3419.8	-0.01134868
239.99	0.03924924		769.99	-0.00057999		1299.98	0.00554861		1829.98	-0.00127714		2359.97	-0.00020624		2889.97	0.00520368		3420	-0.01103166
240.19	0.03891218		770.19	-0.00092285		1300.18	0.00422603		1830.18	-0.00071116		2360.17	-0.00042193		2890.17	0.0050686		3420.2	-0.01098976
240.39	0.0383009		770.39	-0.00133892		1300.38	0.00446978		1830.38	0.00026798		2360.37	-0.00016264		2890.37	0.00429488		3420.4	-0.01027444
240.59	0.03797431		770.59	-0.00146056		1300.58	0.00379157		1830.58	0.000627		2360.57	0.00041195		2890.57	0.00430716		3420.6	-0.01013776
240.79	0.03841643		770.79	-0.00207398		1300.78	0.00396053		1830.78	0.00107622		2360.77	0.00048938		2890.77	0.00355473		3420.8	-0.01056769
240.99	0.03841277		770.99	-0.00299652		1300.98	0.00355257		1830.98	0.0017023		2360.97	0.00000954		2890.97	0.00393657		3421	-0.01082923
241.19	0.0388716		771.19	-0.00367421		1301.18	0.00339511		1831.18	0.0026333		2361.17	0.00153345		2891.17	0.00390116		3421.2	-0.01043728
241.39	0.03940082		771.39	-0.00450867		1301.38	0.00382745		1831.38	0.00226639		2361.37	0.00221996		2891.37	0.00393251		3421.4	-0.00961579
241.59	0.04043444		771.59	-0.00503974		1301.58	0.00482567		1831.58	0.00214789		2361.57	0.00250722		2891.57	0.00422598		3421.6	-0.00904976
241.79	0.04065828		771.79	-0.00580801		1301.78	0.00648265		1831.78	0.00203035		2361.77	0.00344611		2891.77	0.00446009		3421.8	-0.00752289
241.99	0.04168577		771.99	-0.00641514		1301.98	0.00628125		1831.98	0.00218215		2361.97	0.00408262		2891.97	0.00442722		3422	-0.00768311
242.19	0.04298421		772.19	-0.00661307		1302.18	0.00647821		1832.18	0.00298601		2362.17	0.00397931		2892.17	0.00393203		3422.2	-0.00760974
242.39	0.04372461		772.39	-0.00613671		1302.38	0.00581638		1832.38	0.00278486		2362.37	0.00463827		2892.37	0.00422343		3422.4	-0.00841966
242.59	0.0438919		772.59	-0.00579439		1302.58	0.00567052		1832.58	0.00144022		2362.57	0.00445237		2892.57	0.00407287		3422.6	-0.00893884
242.79	0.04372897		772.79	-0.00507874		1302.78	0.0047036		1832.78	0.00086559		2362.77	0.00467467		2892.77	0.0029079		3422.8	-0.00959446
242.99	0.04411857		772.99	-0.0041123		1302.98	0.0040212		1832.98	0.00036903		2362.97	0.00469451		2892.97	0.00302611		3423	-0.0103278
243.19	0.04454687		773.19	-0.00406894		1303.18	0.00383241		1833.18	-0.00022312		2363.17	0.00425397		2893.17	0.00460504		3423.2	-0.01084124
243.39	0.04532545		773.39	-0.00313393		1303.38	0.00388358		1833.38	0.00005503		2363.37	0.00389551		2893.37	0.00457483		3423.4	-0.01203025
243.59	0.04528935		773.59	-0.00276146		1303.58	0.0031522		1833.58	0.00087777		2363.57	0.00365401		2893.57	0.00645367		3423.6	-0.01231524
243.79	0.04494331		773.79	-0.00266967		1303.78	0.00224194		1833.78	0.00018935		2363.77	0.00227128		2893.77	0.00622962		3423.8	-0.01335207
243.99	0.04469517		773.99	-0.00237901		1303.98	0.00327893		1833.98	0.00081668		2363.97	0.00149039		2893.97	0.00612205		3424	-0.01278736
244.19	0.04462168		774.19	-0.00287307		1304.18	0.00218425		1834.18	0.00167324		2364.17	0.00113141		2894.17	0.00598503		3424.2	-0.01235132
244.39	0.04436581		774.39	-0.00329681		1304.38	0.00313645		1834.38	0.00227969		2364.37	0.00056365		2894.37	0.00517625		3424.4	-0.01194738
244.59	0.04414121		774.59	-0.00333207		1304.58	0.00337996		1834.58	0.00300134		2364.57	0.00033984		2894.57	0.00607243		3424.6	-0.01233719
244.79	0.04330313		774.79	-0.00388856		1304.78	0.00355788		1834.78	0.00331988		2364.77	0.00012873		2894.77	0.00557341		3424.8	-0.01226025
244.99	0.04328331		774.99	-0.00524561		1304.98	0.00315338		1834.98	0.00288954		2364.97	0.00011861		2894.97	0.00607273		3425	-0.01127024
245.19	0.0433836		775.19	-0.00511435		1305.18	0.00396214		1835.18	0.00253798		2365.17	0.00128514		2895.17	0.0058297		3425.2	-0.00975571
245.39	0.04420053		775.39	-0.00443264		1305.38	0.00496247		1835.38	0.0026812		2365.37	0.00112362		2895.37	0.00490649		3425.4	-0.00821945
245.59	0.04420377		775.59	-0.0046163		1305.58	0.00555012		1835.58	0.00278253		2365.57	0.00113398		2895.57	0.00451781		3425.6	-0.00796832
245.79	0.04486433		775.79	-0.00473436		1305.78	0.00638099		1835.78	0.00162727		2365.77	0.00104434		2895.77	0.00415397		3425.8	-0.00746966
245.99	0.04562876		775.99	-0.00473367		1305.98	0.00610821		1835.98	0.0019431		2365.97	0.00092096		2895.97	0.00388678		3426	-0.00797996
246.19	0.04606664		776.19	-0.00520197		1306.18	0.00630567		1836.18	0.00151643		2366.17	0.00123631		2896.17	0.00406569		3426.2	-0.00757331
246.39	0.04605662		776.39	-0.00441922		1306.38	0.0060581		1836.38	0.00058611		2366.37	0.00099552		2896.37	0.00324664		3426.4	-0.0074856
246.59	0.04546658		776.59	-0.00486205		1306.58	0.0054257		1836.58	0.00008072		2366.57	0.00113977		2896.57	0.00309377		3426.6	-0.00722532
246.79	0.04647966		776.79	-0.00427652		1306.78	0.00548723		1836.78	-0.00033019		2366.77	0.00045003		2896.77	0.00259359		3426.8	-0.00773601
246.99	0.04735231		776.99	-0.00391371		1306.98	0.00611619		1836.98	-0.00027763		2366.97	0.00066996		2896.97	0.00340056		3427	-0.00875688
247.19	0.0485488		777.19	-0.00443982		1307.18	0.00530535		1837.18	-0.00050031		2367.17	0.00036274		2897.17	0.00477343		3427.2	-0.00907687
247.39	0.04870582		777.39	-0.00389679		1307.38	0.00499131		1837.38	-0.00001693		2367.37	0.00077519		2897.37	0.00409548		3427.4	-0.00937093
247.59	0.04897776		777.59	-0.00318474		1307.58	0.00537271		1837.58	-0.00054769		2367.57	-0.00007188		2897.57	0.00460982		3427.6	-0.00916915
247.79	0.04961801		777.79	-0.00305763		1307.78	0.00632262		1837.78	-0.00061399		2367.77	-0.00111139		2897.77	0.00382174		3427.8	-0.00858313
247.99	0.04913958		777.99	-0.00230342		1307.98	0.00702542		1837.98	-0.00001661		2367.97	-0.0013073		2897.97	0.00427047		3428	-0.007757
248.19	0.04845881		778.19	-0.00313714		1308.18	0.00714086		1838.18	-0.00028748		2368.17	-0.00091405		2898.17	0.00473342		3428.2	-0.0084133
248.39	0.0475756		778.39	-0.00305098		1308.38	0.00741641		1838.38	-0.00033562		2368.37	-0.00091317		2898.37	0.00461103		3428.4	-0.00927648
248.59	0.04622108		778.59	-0.00299145		1308.58	0.00774502		1838.58	0.00017771		2368.57	0.00033432		2898.57	0.00506931		3428.6	-0.00900998
248.79	0.04547385		778.79	-0.00296138		1308.78	0.00753697		1838.78	0.00055199		2368.77	0.00072009		2898.77	0.00452154		3428.8	-0.00884766
248.99	0.04492728		778.99	-0.00312185		1308.98	0.00766019		1838.98	0.00013918		2368.97	0.00166545		2898.97	0.00474254		3429	-0.00869367
249.19	0.04460293		779.19	-0.00237926		1309.18	0.00773165		1839.18	0.00087912		2369.17	0.00235813		2899.17	0.00421367		3429.2	-0.00743092
249.39	0.04466951		779.39	-0.00156278		1309.38	0.00803492		1839.38	0.00246963		2369.37	0.00212075		2899.37	0.0039018		3429.4	-0.00715466
249.59	0.04470624		779.59	-0.00199171		1309.58	0.00728331		1839.58	0.00232316		2369.57	0.00198665		2899.57	0.00373879		3429.6	-0.00766577
249.79	0.04487837		779.79	-0.00117849		1309.78	0.0073425		1839.78	0.0016112		2369.77	0.00299303		2899.77	0.0031859		3429.8	-0.0070315
249.99	0.04541487		779.99	-0.00124394		1309.98	0.00733457		1839.98	0.00269341		2369.97	0.00387268		2899.97	0.00284675		3430	-0.00717233
250.19	0.04553112		780.19	-0.00171739		1310.18	0.00659171		1840.18	0.00302832		2370.17	0.00426055		2900.17	0.00211127		3430.2	-0.00771816
250.39	0.04566156		780.39	-0.0017181		1310.38	0.00559828		1840.38	0.00395354		2370.37	0.00418733		2900.37	0.00092626		3430.4	-0.00824569
250.59	0.04651455		780.59	-0.00244045		1310.58	0.00555334		1840.58	0.00486051		2370.57	0.0046204		2900.57	0.00156391		3430.6	-0.00927666
250.79	0.04812278		780.79	-0.00237049		1310.78	0.0060687		1840.78	0.00461155		2370.77	0.00415868		2900.77	0.00093592		3430.8	-0.00957629
250.99	0.04853257		780.99	-0.00294982		1310.98	0.00609693		1840.98	0.0053088		2370.97	0.00499386		2900.97	0.00129307		3431	-0.00977946
251.19	0.04992441		781.19	-0.00332417		1311.18	0.00606057		1841.18	0.00447249		2371.17	0.00492821		2901.17	0.00126555		3431.2	-0.00949127
251.39	0.05061715		781.39	-0.00328992		1311.38	0.00699597		1841.38	0.00439877		2371.37	0.0046244		2901.37	0.0008307		3431.4	-0.00934979
251.59	0.05154369		781.59	-0.00344884		1311.58	0.00743898		1841.58	0.00361993		2371.57	0.00387584		2901.57	0.00134193		3431.6	-0.00951124
251.79	0.0525365		781.79	-0.00339462		1311.78	0.00728839		1841.78	0.0027445		2371.77	0.00374925		2901.77	0.00170369		3431.8	-0.00924404
251.99	0.05236785		781.99	-0.00312003		1311.98	0.00765598		1841.98	0.00155723		2371.97	0.00387466		2901.97	0.00227306		3432	-0.00993521
252.19	0.05193707		782.19	-0.00362177		1312.18	0.007357		1842.18	0.00070667		2372.17	0.00419593		2902.17	0.00318232		3432.2	-0.00967195
252.39	0.05126273		782.39	-0.00441715		1312.38	0.00761344		1842.38	0.00163194		2372.37	0.00392771		2902.37	0.00339932		3432.4	-0.0103617
252.59	0.05155087		782.59	-0.00447506		1312.58	0.00849647		1842.58	0.00173609		2372.57	0.00448148		2902.57	0.0051627		3432.6	-0.00958382
252.79	0.05039384		782.79	-0.00395366		1312.78	0.00833387		1842.78	0.00139741		2372.77	0.00351137		2902.77	0.00622373		3432.8	-0.01007088
252.99	0.04973838		782.99	-0.00373871		1312.98	0.00814864		1842.98	0.00128036		2372.97	0.00320746		2902.97	0.0072298		3433	-0.00930354
253.19	0.05098232		783.19	-0.00368857		1313.18	0.00784483		1843.18	0.00086361		2373.17	0.00296638		2903.17	0.00741887		3433.2	-0.00855764
253.39	0.05191284		783.39	-0.00274452		1313.38	0.00741965		1843.38	0.00134945		2373.37	0.00219925		2903.37	0.00716538		3433.4	-0.00829278
253.59	0.05224844		783.59	-0.00249879		1313.58	0.00722269		1843.58	0.0004865		2373.57	0.00231129		2903.57	0.00724749		3433.6	-0.00813807
253.79	0.05274189		783.79	-0.00175296		1313.78	0.00741964		1843.78	0.00022642		2373.77	0.00249396		2903.77	0.00672907		3433.8	-0.00766578
253.99	0.05350933		783.99	-0.00194936		1313.98	0.00701236		1843.98	0.00133436		2373.97	0.00191902		2903.97	0.00578354		3434	-0.00873658
254.19	0.05347816		784.19	-0.00213135		1314.18	0.0063755		1844.18	0.00193864		2374.17	0.00153583		2904.17	0.00518261		3434.2	-0.00939231
254.39	0.05409596		784.39	-0.00156026		1314.38	0.00673671		1844.38	0.0023814		2374.37	0.00105012		2904.37	0.00524056		3434.4	-0.00900388
254.59	0.05389565		784.59	-0.00134565		1314.58	0.00733338		1844.58	0.0019226		2374.57	0.00080736		2904.57	0.00512562		3434.6	-0.00939247
254.79	0.054172		784.79	-0.00174105		1314.78	0.00780295		1844.78	0.00161165		2374.77	0.0006331		2904.77	0.00409411		3434.8	-0.00920542
254.99	0.05483198		784.99	-0.00278169		1314.98	0.00807159		1844.98	0.00219667		2374.97	0.00080333		2904.97	0.0043356		3435	-0.00972349
255.19	0.05540082		785.19	-0.00249727		1315.18	0.00896757		1845.18	0.00148746		2375.17	0.00088466		2905.17	0.00425049		3435.2	-0.00983858
255.39	0.05557507		785.39	-0.00284574		1315.38	0.00903144		1845.38	0.0017587		2375.37	0.00142874		2905.37	0.00419506		3435.4	-0.00972161
255.59	0.05513694		785.59	-0.00253641		1315.58	0.00821903		1845.58	0.0020952		2375.57	0.00189822		2905.57	0.00473167		3435.6	-0.01010392
255.79	0.05470039		785.79	-0.00252764		1315.78	0.00775245		1845.78	0.00222696		2375.77	0.00256726		2905.77	0.00493876		3435.8	-0.00989851
255.99	0.05437298		785.99	-0.003439		1315.98	0.00786359		1845.98	0.00212794		2375.97	0.0031172		2905.97	0.00549514		3436	-0.009364
256.19	0.0540458		786.19	-0.00393458		1316.18	0.00656472		1846.18	0.00271727		2376.17	0.00400268		2906.17	0.00574138		3436.2	-0.00897802
256.39	0.05337986		786.39	-0.00439973		1316.38	0.00665857		1846.38	0.00374987		2376.37	0.00487856		2906.37	0.00614456		3436.4	-0.00978906
256.59	0.05374026		786.59	-0.00431272		1316.58	0.00620619		1846.58	0.00331739		2376.57	0.00605616		2906.57	0.00758594		3436.6	-0.00934592
256.79	0.05325652		786.79	-0.00417675		1316.78	0.00591647		1846.78	0.00288272		2376.77	0.00600063		2906.77	0.00715521		3436.8	-0.00960877
256.99	0.05343542		786.99	-0.0036203		1316.98	0.00532951		1846.98	0.00235815		2376.97	0.00617613		2906.97	0.00700645		3437	-0.00877649
257.19	0.0545763		787.19	-0.00410946		1317.18	0.00468301		1847.18	0.00180837		2377.17	0.00633703		2907.17	0.00640234		3437.2	-0.00869743
257.39	0.05414519		787.39	-0.00369941		1317.38	0.00479968		1847.38	0.00177702		2377.37	0.00616928		2907.37	0.00560448		3437.4	-0.00842156
257.59	0.05454356		787.59	-0.00319425		1317.58	0.00528063		1847.58	0.00121743		2377.57	0.0063755		2907.57	0.00551564		3437.6	-0.00860661
257.79	0.05457062		787.79	-0.00303542		1317.78	0.00514201		1847.78	0.00090435		2377.77	0.00584934		2907.77	0.00507661		3437.8	-0.0088491
257.99	0.05403923		787.99	-0.00266567		1317.98	0.00593789		1847.98	0.00076719		2377.97	0.00523455		2907.97	0.00476843		3438	-0.00886015
258.19	0.05406685		788.19	-0.00289177		1318.18	0.00694127		1848.18	0.00001146		2378.17	0.00508349		2908.17	0.0050044		3438.2	-0.0090627
258.39	0.05360277		788.39	-0.00315803		1318.38	0.00755112		1848.38	-0.00018758		2378.37	0.00485255		2908.37	0.00493826		3438.4	-0.00929864
258.59	0.05332625		788.59	-0.00286225		1318.58	0.00823934		1848.58	-0.00027823		2378.57	0.00531478		2908.57	0.00517802		3438.6	-0.01008176
258.79	0.05371854		788.79	-0.00282751		1318.78	0.00880591		1848.78	-0.0004496		2378.77	0.00556376		2908.77	0.00472754		3438.8	-0.01089281
258.99	0.05344376		788.99	-0.00236115		1318.98	0.00853239		1848.98	-0.00045088		2378.97	0.0060028		2908.97	0.00502794		3439	-0.01118361
259.19	0.05336967		789.19	-0.00151396		1319.18	0.00995126		1849.18	-0.00005137		2379.17	0.00584036		2909.17	0.00576109		3439.2	-0.0112812
259.39	0.05360299		789.39	-0.00187873		1319.38	0.00973586		1849.38	0.00115351		2379.37	0.00551878		2909.37	0.00606736		3439.4	-0.01235174
259.59	0.05300135		789.59	-0.00108204		1319.58	0.0096797		1849.58	0.00227981		2379.57	0.00542536		2909.57	0.00681682		3439.6	-0.01245171
259.79	0.05378217		789.79	-0.0020916		1319.78	0.00946624		1849.78	0.0022991		2379.77	0.00673014		2909.77	0.00707659		3439.8	-0.01227917
259.99	0.0538284		789.99	-0.00191459		1319.98	0.00938989		1849.98	0.00185873		2379.97	0.00686219		2909.97	0.00787697		3440	-0.01141657
260.19	0.05393027		790.19	-0.00122464		1320.18	0.00861521		1850.18	0.00254152		2380.17	0.00693054		2910.17	0.0078004		3440.2	-0.01109505
260.39	0.05437966		790.39	-0.0005887		1320.38	0.00833356		1850.38	0.00344452		2380.37	0.00660373		2910.37	0.00811696		3440.4	-0.01117165
260.59	0.05511602		790.59	0.00013496		1320.58	0.00775145		1850.58	0.00447378		2380.57	0.00658147		2910.57	0.00833212		3440.6	-0.01014707
260.79	0.05468101		790.79	0.00018462		1320.78	0.00765688		1850.78	0.00431733		2380.77	0.00574938		2910.77	0.00865526		3440.8	-0.0099086
260.99	0.05529946		790.99	0.00056032		1320.98	0.00667241		1850.98	0.00475384		2380.97	0.00586192		2910.97	0.00886909		3441	-0.00937182
261.19	0.0564576		791.19	0.00007429		1321.18	0.00695792		1851.18	0.00511401		2381.17	0.00581516		2911.17	0.00897506		3441.2	-0.00878927
261.39	0.05738708		791.39	0.00051353		1321.38	0.00717223		1851.38	0.00443366		2381.37	0.0058432		2911.37	0.00879808		3441.4	-0.00872613
261.59	0.05886686		791.59	0.00095671		1321.58	0.00684135		1851.58	0.00372017		2381.57	0.00580444		2911.57	0.00866296		3441.6	-0.00874178
261.79	0.05851246		791.79	0.000801		1321.78	0.00657207		1851.78	0.00289737		2381.77	0.00553691		2911.77	0.00914183		3441.8	-0.00903289
261.99	0.05868637		791.99	0.0007213		1321.98	0.00725548		1851.98	0.00282761		2381.97	0.00499124		2911.97	0.00877172		3442	-0.00937723
262.19	0.05966413		792.19	-0.00129176		1322.18	0.00797567		1852.18	0.00256326		2382.17	0.00493603		2912.17	0.00928805		3442.2	-0.00975341
262.39	0.05950486		792.39	-0.00197518		1322.38	0.00729304		1852.38	0.00213497		2382.37	0.00503287		2912.37	0.00871918		3442.4	-0.0104794
262.59	0.06013512		792.59	-0.00110511		1322.58	0.00838056		1852.58	0.00194026		2382.57	0.00510357		2912.57	0.00768986		3442.6	-0.01101627
262.79	0.06008826		792.79	-0.00138395		1322.78	0.00805492		1852.78	0.00115823		2382.77	0.00516745		2912.77	0.00669132		3442.8	-0.0122033
262.99	0.06100905		792.99	-0.00143706		1322.98	0.00723403		1852.98	0.00168418		2382.97	0.00591346		2912.97	0.00688992		3443	-0.01218367
263.19	0.06157176		793.19	-0.00172146		1323.18	0.00864571		1853.18	0.0015694		2383.17	0.00617102		2913.17	0.00725911		3443.2	-0.01252968
263.39	0.061628		793.39	-0.00249781		1323.38	0.00837574		1853.38	0.0015518		2383.37	0.00748609		2913.37	0.00661252		3443.4	-0.01266833
263.59	0.06085506		793.59	-0.00259265		1323.58	0.00914802		1853.58	0.00162368		2383.57	0.00754161		2913.57	0.00615608		3443.6	-0.01238241
263.79	0.06053013		793.79	-0.00358685		1323.78	0.00913955		1853.78	0.00025831		2383.77	0.00856844		2913.77	0.00607097		3443.8	-0.01253779
263.99	0.05990599		793.99	-0.00274761		1323.98	0.00910331		1853.98	-0.00018949		2383.97	0.00822292		2913.97	0.00570648		3444	-0.0121009
264.19	0.0597815		794.19	-0.00297519		1324.18	0.00872514		1854.18	0.00054692		2384.17	0.00779236		2914.17	0.00473866		3444.2	-0.01254454
264.39	0.06073387		794.39	-0.00189269		1324.38	0.00839612		1854.38	0.00109883		2384.37	0.00818615		2914.37	0.00482295		3444.4	-0.01106451
264.59	0.06156681		794.59	-0.00224646		1324.58	0.00835029		1854.58	0.00209198		2384.57	0.00861292		2914.57	0.00515874		3444.6	-0.00991548
264.79	0.06151147		794.79	-0.00280207		1324.78	0.00873453		1854.78	0.00139845		2384.77	0.00830954		2914.77	0.00522877		3444.8	-0.01013833
264.99	0.06307134		794.99	-0.0023305		1324.98	0.00845967		1854.98	0.00240395		2384.97	0.00880291		2914.97	0.00483398		3445	-0.00971449
265.19	0.06363388		795.19	-0.00119475		1325.18	0.00862269		1855.18	0.00285214		2385.17	0.00864055		2915.17	0.00432629		3445.2	-0.00910096
265.39	0.06388512		795.39	-0.00052219		1325.38	0.00859205		1855.38	0.00299518		2385.37	0.00806418		2915.37	0.0042408		3445.4	-0.00924178
265.59	0.06416431		795.59	-0.00001897		1325.58	0.00846329		1855.58	0.00376971		2385.57	0.00763508		2915.57	0.00492947		3445.6	-0.01016826
265.79	0.06391985		795.79	-0.00002082		1325.78	0.00893271		1855.78	0.00366046		2385.77	0.0068664		2915.77	0.00626716		3445.8	-0.01041946
265.99	0.06379787		795.99	-0.00018385		1325.98	0.00967746		1855.98	0.00345716		2385.97	0.0054249		2915.97	0.00627099		3446	-0.01079651
266.19	0.06381079		796.19	-0.00100938		1326.18	0.01020734		1856.18	0.00409098		2386.17	0.00497874		2916.17	0.00698267		3446.2	-0.01069295
266.39	0.06399539		796.39	-0.00071946		1326.38	0.0103076		1856.38	0.00443244		2386.37	0.00424807		2916.37	0.0063593		3446.4	-0.01161863
266.59	0.06378527		796.59	-0.00031473		1326.58	0.01139904		1856.58	0.00467347		2386.57	0.00434366		2916.57	0.00587546		3446.6	-0.01217616
266.79	0.06463568		796.79	-0.00029111		1326.78	0.01016179		1856.78	0.00476626		2386.77	0.00500787		2916.77	0.00643579		3446.8	-0.01304827
266.99	0.06456673		796.99	0.00013636		1326.98	0.01041928		1856.98	0.00477916		2386.97	0.00524637		2916.97	0.00708745		3447	-0.01150558
267.19	0.06400328		797.19	-0.00002944		1327.18	0.01076057		1857.18	0.00433462		2387.17	0.00497449		2917.17	0.00757575		3447.2	-0.01139842
267.39	0.06300328		797.39	-0.00095196		1327.38	0.00900956		1857.38	0.00410166		2387.37	0.00459433		2917.37	0.00757099		3447.4	-0.01114818
267.59	0.06191572		797.59	-0.00068976		1327.58	0.00910313		1857.58	0.00361357		2387.57	0.00394122		2917.57	0.00760351		3447.6	-0.01068595
267.79	0.0607769		797.79	-0.00047055		1327.78	0.00893965		1857.78	0.00299551		2387.77	0.00558509		2917.77	0.00800022		3447.8	-0.01076127
267.99	0.06032162		797.99	-0.00050687		1327.98	0.00866461		1857.98	0.00341844		2387.97	0.00620113		2917.97	0.00748478		3448	-0.01048076
268.19	0.0610161		798.19	-0.00164919		1328.18	0.00874874		1858.18	0.00383504		2388.17	0.0071534		2918.17	0.00754293		3448.2	-0.01098909
268.39	0.06189224		798.39	-0.00177433		1328.38	0.00852321		1858.38	0.00405642		2388.37	0.00802016		2918.37	0.00755778		3448.4	-0.00976124
268.59	0.06242248		798.59	-0.00288894		1328.58	0.00839462		1858.58	0.00460294		2388.57	0.00811633		2918.57	0.00797845		3448.6	-0.01041173
268.79	0.06180363		798.79	-0.00383925		1328.78	0.00895588		1858.78	0.00470726		2388.77	0.00864877		2918.77	0.00793265		3448.8	-0.01099318
268.99	0.06241097		798.99	-0.00360338		1328.98	0.00845912		1858.98	0.00563851		2388.97	0.00956268		2918.97	0.00802009		3449	-0.01109083
269.19	0.06285176		799.19	-0.00329506		1329.18	0.00904622		1859.18	0.00599078		2389.17	0.0095722		2919.17	0.00796469		3449.2	-0.01087021
269.39	0.06319795		799.39	-0.00318988		1329.38	0.00905359		1859.38	0.00590077		2389.37	0.0095037		2919.37	0.00830511		3449.4	-0.01082648
269.59	0.06478815		799.59	-0.00296084		1329.58	0.00873913		1859.58	0.00502943		2389.57	0.01006442		2919.57	0.00860078		3449.6	-0.01150783
269.79	0.0654069		799.79	-0.00232673		1329.78	0.00939746		1859.78	0.00373081		2389.77	0.01047918		2919.77	0.00904666		3449.8	-0.01153485
269.99	0.06617698		799.99	-0.00266154		1329.98	0.01023643		1859.98	0.00341684		2389.97	0.01022976		2919.97	0.0082098		3450	-0.01163775
270.19	0.06742576		800.19	-0.00345217		1330.18	0.01072394		1860.18	0.00386636		2390.17	0.01024194		2920.17	0.0086051		3450.2	-0.01147807
270.39	0.06818246		800.39	-0.00371918		1330.38	0.0114457		1860.38	0.00304752		2390.37	0.00993104		2920.37	0.0089374		3450.4	-0.01269943
270.59	0.06895632		800.59	-0.00334319		1330.58	0.01246715		1860.58	0.00209831		2390.57	0.00990022		2920.57	0.00898946		3450.6	-0.01356399
270.79	0.07018194		800.79	-0.00299047		1330.78	0.01325457		1860.78	0.001772		2390.77	0.00957971		2920.77	0.0088318		3450.8	-0.01324811
270.99	0.06954944		800.99	-0.00284603		1330.98	0.01348699		1860.98	0.00054366		2390.97	0.00883286		2920.97	0.00859507		3451	-0.01201238
271.19	0.06956088		801.19	-0.00222529		1331.18	0.01266926		1861.18	0.00082841		2391.17	0.008041		2921.17	0.00865325		3451.2	-0.01197487
271.39	0.06918849		801.39	-0.00220518		1331.38	0.01146612		1861.38	0.00059567		2391.37	0.00703997		2921.37	0.00820962		3451.4	-0.01174352
271.59	0.06888615		801.59	-0.00169707		1331.58	0.01182058		1861.58	0.00081621		2391.57	0.00689902		2921.57	0.00836376		3451.6	-0.01184078
271.79	0.06822322		801.79	-0.00215239		1331.78	0.0118576		1861.78	0.0013793		2391.77	0.00654312		2921.77	0.00845037		3451.8	-0.01245339
271.99	0.06793788		801.99	-0.00290868		1331.98	0.01137164		1861.98	0.00138322		2391.97	0.00613887		2921.97	0.00771325		3452	-0.01239812
272.19	0.06805072		802.19	-0.00334066		1332.18	0.01107752		1862.18	0.00168855		2392.17	0.00592433		2922.17	0.00786128		3452.2	-0.01222357
272.39	0.06737517		802.39	-0.00396666		1332.38	0.01088403		1862.38	0.00177413		2392.37	0.00509591		2922.37	0.00802832		3452.4	-0.01193511
272.59	0.06695722		802.59	-0.00476754		1332.58	0.01052637		1862.58	0.00245458		2392.57	0.00485473		2922.57	0.00838739		3452.6	-0.01121312
272.79	0.0662392		802.79	-0.00532086		1332.78	0.00975649		1862.78	0.00194645		2392.77	0.00488497		2922.77	0.00821934		3452.8	-0.01121132
272.99	0.06643261		802.99	-0.00468817		1332.98	0.00806031		1862.98	0.00144956		2392.97	0.00392936		2922.97	0.00808587		3453	-0.01060534
273.19	0.06659444		803.19	-0.00414775		1333.18	0.0077656		1863.18	0.00119384		2393.17	0.0042349		2923.17	0.00780487		3453.2	-0.01016692
273.39	0.06664099		803.39	-0.0031013		1333.38	0.00605451		1863.38	-0.00003883		2393.37	0.00428268		2923.37	0.00744705		3453.4	-0.01048596
273.59	0.0674359		803.59	-0.0025641		1333.58	0.00564824		1863.58	-0.00103821		2393.57	0.00543064		2923.57	0.00752925		3453.6	-0.01085208
273.79	0.06755603		803.79	-0.00170738		1333.78	0.00568731		1863.78	-0.00047384		2393.77	0.00631068		2923.77	0.0077654		3453.8	-0.01073092
273.99	0.06883042		803.99	-0.00193431		1333.98	0.00543502		1863.98	-0.00044122		2393.97	0.00672648		2923.97	0.0074816		3454	-0.01062052
274.19	0.06898839		804.19	-0.00161761		1334.18	0.00565975		1864.18	0.00027022		2394.17	0.00683963		2924.17	0.00765295		3454.2	-0.01110735
274.39	0.06882876		804.39	-0.00109838		1334.38	0.00572727		1864.38	0.0000464		2394.37	0.00623503		2924.37	0.00750756		3454.4	-0.01142525
274.59	0.06935714		804.59	-0.00051183		1334.58	0.00675145		1864.58	-0.00022493		2394.57	0.0064745		2924.57	0.00695716		3454.6	-0.01104763
274.79	0.0696244		804.79	0.00037147		1334.78	0.00692237		1864.78	0.00010744		2394.77	0.00681339		2924.77	0.0060114		3454.8	-0.01040547
274.99	0.06994548		804.99	0.00094723		1334.98	0.00676025		1864.98	0.00052489		2394.97	0.00643629		2924.97	0.0057681		3455	-0.01034864
275.19	0.0697649		805.19	0.00190905		1335.18	0.0072796		1865.18	0.00229092		2395.17	0.00673152		2925.17	0.00621172		3455.2	-0.01041629
275.39	0.07073238		805.39	0.00171355		1335.38	0.00783911		1865.38	0.00242352		2395.37	0.00653147		2925.37	0.00694391		3455.4	-0.01111343
275.59	0.07050487		805.59	0.00128386		1335.58	0.00882366		1865.58	0.0031091		2395.57	0.00740209		2925.57	0.00690744		3455.6	-0.01264305
275.79	0.07064897		805.79	0.00106327		1335.78	0.00973444		1865.78	0.00311772		2395.77	0.00762021		2925.77	0.00717731		3455.8	-0.01277855
275.99	0.07068189		805.99	0.00098728		1335.98	0.01103836		1865.98	0.00344209		2395.97	0.00806201		2925.97	0.00735724		3456	-0.012445
276.19	0.0711172		806.19	0.000539		1336.18	0.0118515		1866.18	0.00446552		2396.17	0.00755546		2926.17	0.0087335		3456.2	-0.01191672
276.39	0.07152139		806.39	0.00000741		1336.38	0.01267196		1866.38	0.00425379		2396.37	0.00685097		2926.37	0.00912077		3456.4	-0.01274092
276.59	0.07139447		806.59	-0.00121789		1336.58	0.01175518		1866.58	0.00445877		2396.57	0.00658789		2926.57	0.00919916		3456.6	-0.01174649
276.79	0.07171855		806.79	-0.00170884		1336.78	0.01152906		1866.78	0.00344808		2396.77	0.00557717		2926.77	0.01035731		3456.8	-0.01279068
276.99	0.07153918		806.99	-0.00159804		1336.98	0.01119215		1866.98	0.00252047		2396.97	0.00558093		2926.97	0.0109951		3457	-0.01277293
277.19	0.07171719		807.19	-0.00119505		1337.18	0.01224478		1867.18	0.00245837		2397.17	0.00610071		2927.17	0.01114752		3457.2	-0.01362849
277.39	0.07243993		807.39	-0.00106314		1337.38	0.0121903		1867.38	0.00166914		2397.37	0.0058238		2927.37	0.01060688		3457.4	-0.01307354
277.59	0.07357559		807.59	-0.0014152		1337.58	0.01272094		1867.58	0.00118979		2397.57	0.0060332		2927.57	0.01052277		3457.6	-0.01224534
277.79	0.07434119		807.79	-0.00175291		1337.78	0.01291968		1867.78	0.00146885		2397.77	0.00544934		2927.77	0.01065891		3457.8	-0.01194149
277.99	0.07487722		807.99	-0.00261283		1337.98	0.013286		1867.98	0.00080586		2397.97	0.00466459		2927.97	0.01132658		3458	-0.01144375
278.19	0.07507509		808.19	-0.00247171		1338.18	0.01348816		1868.18	0.00087916		2398.17	0.00320746		2928.17	0.01116479		3458.2	-0.01081978
278.39	0.07442548		808.39	-0.00248494		1338.38	0.01273917		1868.38	0.00063368		2398.37	0.00289354		2928.37	0.01126585		3458.4	-0.01037072
278.59	0.07546246		808.59	-0.00261257		1338.58	0.01318447		1868.58	0.0001843		2398.57	0.00338736		2928.57	0.01122486		3458.6	-0.01094696
278.79	0.07585271		808.79	-0.00237343		1338.78	0.01346857		1868.78	0.00009752		2398.77	0.00331356		2928.77	0.01103902		3458.8	-0.01069174
278.99	0.07567398		808.99	-0.00242402		1338.98	0.01309904		1868.98	0.00001842		2398.97	0.00366179		2928.97	0.01079658		3459	-0.01066974
279.19	0.0754241		809.19	-0.00233796		1339.18	0.01287519		1869.18	0.00017293		2399.17	0.00509679		2929.17	0.00995221		3459.2	-0.01075783
279.39	0.07519844		809.39	-0.00218999		1339.38	0.01302898		1869.38	-0.00042952		2399.37	0.00669926		2929.37	0.01014432		3459.4	-0.01161815
279.59	0.07459846		809.59	-0.00218777		1339.58	0.01260544		1869.58	-0.00000078		2399.57	0.00802767		2929.57	0.0094591		3459.6	-0.01244712
279.79	0.07450095		809.79	-0.00200307		1339.78	0.01256816		1869.78	0.00011747		2399.77	0.00830075		2929.77	0.00976225		3459.8	-0.0120877
279.99	0.07403102		809.99	-0.00268972		1339.98	0.012999		1869.98	0.00079721		2399.97	0.0088419		2929.97	0.01013831		3460	-0.01156144
280.19	0.0742513		810.19	-0.00300899		1340.18	0.0110357		1870.18	0.00167225		2400.17	0.00979314		2930.17	0.01076455		3460.2	-0.01233598
280.39	0.07385328		810.39	-0.00343138		1340.38	0.00954812		1870.38	0.00152801		2400.37	0.01060243		2930.37	0.01017952		3460.4	-0.01226296
280.59	0.07340645		810.59	-0.00371044		1340.58	0.00787957		1870.58	0.00166313		2400.57	0.01148235		2930.57	0.01038049		3460.6	-0.01170499
280.79	0.07442779		810.79	-0.00364521		1340.78	0.00720114		1870.78	0.00181031		2400.77	0.01242763		2930.77	0.01092626		3460.8	-0.01260854
280.99	0.07483547		810.99	-0.00332436		1340.98	0.00652431		1870.98	0.00121665		2400.97	0.01379572		2930.97	0.01023723		3461	-0.01183549
281.19	0.07491657		811.19	-0.00370419		1341.18	0.00724482		1871.18	0.00139521		2401.17	0.01295858		2931.17	0.0086794		3461.2	-0.01160687
281.39	0.0756401		811.39	-0.00380529		1341.38	0.0069808		1871.38	0.0010154		2401.37	0.0130025		2931.37	0.0079725		3461.4	-0.01106419
281.59	0.07630249		811.59	-0.00431028		1341.58	0.00746016		1871.58	0.001115		2401.57	0.01227699		2931.57	0.00790634		3461.6	-0.01119503
281.79	0.07725491		811.79	-0.00483342		1341.78	0.00787243		1871.78	0.00128153		2401.77	0.01181091		2931.77	0.00880942		3461.8	-0.01148273
281.99	0.07718574		811.99	-0.00357569		1341.98	0.00807123		1871.98	0.00166221		2401.97	0.01151433		2931.97	0.00882609		3462	-0.0119684
282.19	0.077884		812.19	-0.00238971		1342.18	0.00854636		1872.18	0.00154737		2402.17	0.01116476		2932.17	0.00837428		3462.2	-0.01263767
282.39	0.07772093		812.39	-0.00275055		1342.38	0.00909203		1872.38	0.00179046		2402.37	0.01055599		2932.37	0.00782226		3462.4	-0.01387715
282.59	0.07866924		812.59	-0.00278804		1342.58	0.01000685		1872.58	0.00087757		2402.57	0.01022745		2932.57	0.00728479		3462.6	-0.01368579
282.79	0.07826142		812.79	-0.00268318		1342.78	0.01029114		1872.78	0.00051999		2402.77	0.00921843		2932.77	0.00639186		3462.8	-0.01314554
282.99	0.07848539		812.99	-0.00241218		1342.98	0.00982756		1872.98	0.00089195		2402.97	0.00862153		2932.97	0.0058718		3463	-0.0137009
283.19	0.07936558		813.19	-0.00240938		1343.18	0.0105986		1873.18	0.00099841		2403.17	0.00886429		2933.17	0.00532349		3463.2	-0.01384853
283.39	0.07804121		813.39	-0.00293738		1343.38	0.01155952		1873.38	0.00090649		2403.37	0.00933934		2933.37	0.0064919		3463.4	-0.01423998
283.59	0.0788409		813.59	-0.00277085		1343.58	0.01209515		1873.58	0.00150226		2403.57	0.0091937		2933.57	0.00716077		3463.6	-0.01412139
283.79	0.07849573		813.79	-0.00288825		1343.78	0.01233471		1873.78	0.00227109		2403.77	0.00949604		2933.77	0.0077762		3463.8	-0.0138819
283.99	0.07825737		813.99	-0.00246857		1343.98	0.01291344		1873.98	0.00283619		2403.97	0.01006907		2933.97	0.00879445		3464	-0.01322655
284.19	0.07850742		814.19	-0.00224207		1344.18	0.01080911		1874.18	0.00322266		2404.17	0.01044249		2934.17	0.00933472		3464.2	-0.01277988
284.39	0.0785836		814.39	-0.00156588		1344.38	0.01103579		1874.38	0.00283852		2404.37	0.01096774		2934.37	0.00922008		3464.4	-0.01148989
284.59	0.07918562		814.59	-0.00074563		1344.58	0.01052787		1874.58	0.00314477		2404.57	0.01116152		2934.57	0.01015806		3464.6	-0.01088045
284.79	0.0801397		814.79	-0.00055574		1344.78	0.01018925		1874.78	0.0037509		2404.77	0.01180366		2934.77	0.01141689		3464.8	-0.01052308
284.99	0.08048005		814.99	-0.00077259		1344.98	0.01012714		1874.98	0.00296327		2404.97	0.01145957		2934.97	0.01105918		3465	-0.01003548
285.19	0.08025266		815.19	-0.00026096		1345.18	0.01085433		1875.18	0.00336842		2405.17	0.01113751		2935.17	0.01139422		3465.2	-0.00970848
285.39	0.08074392		815.39	0.00069058		1345.38	0.01111308		1875.38	0.00340058		2405.37	0.0113108		2935.37	0.01226891		3465.4	-0.00991171
285.59	0.08069232		815.59	0.00041159		1345.58	0.01211884		1875.58	0.00293944		2405.57	0.01098085		2935.57	0.01300027		3465.6	-0.00907088
285.79	0.08011116		815.79	0.00019226		1345.78	0.01196571		1875.78	0.00246066		2405.77	0.01169326		2935.77	0.01322824		3465.8	-0.00971027
285.99	0.07951729		815.99	0.00124043		1345.98	0.01205354		1875.98	0.00265797		2405.97	0.01179905		2935.97	0.01258031		3466	-0.01075857
286.19	0.07932462		816.19	0.00057733		1346.18	0.01222446		1876.18	0.00214626		2406.17	0.01111848		2936.17	0.01258413		3466.2	-0.01089731
286.39	0.07872676		816.39	-0.0001947		1346.38	0.01255581		1876.38	0.00274379		2406.37	0.0102308		2936.37	0.01213543		3466.4	-0.01183836
286.59	0.07894012		816.59	-0.00004383		1346.58	0.01216702		1876.58	0.00185135		2406.57	0.01016092		2936.57	0.01208276		3466.6	-0.01189541
286.79	0.08008717		816.79	-0.00083279		1346.78	0.01128515		1876.78	0.0020214		2406.77	0.00951969		2936.77	0.0117577		3466.8	-0.01275335
286.99	0.08077904		816.99	-0.00084076		1346.98	0.01128768		1876.98	0.00297918		2406.97	0.00915572		2936.97	0.0123182		3467	-0.01323689
287.19	0.08124239		817.19	-0.00187043		1347.18	0.01102373		1877.18	0.0031049		2407.17	0.00955214		2937.17	0.01240136		3467.2	-0.01341015
287.39	0.08000239		817.39	-0.00207097		1347.38	0.01128364		1877.38	0.00285095		2407.37	0.01029963		2937.37	0.01332487		3467.4	-0.01292633
287.59	0.08124813		817.59	-0.00141306		1347.58	0.01085474		1877.58	0.00352395		2407.57	0.01062924		2937.57	0.01328103		3467.6	-0.01228989
287.79	0.08019463		817.79	-0.0015551		1347.78	0.01050923		1877.78	0.00349867		2407.77	0.01015712		2937.77	0.01284511		3467.8	-0.012497
287.99	0.0799149		817.99	-0.00103924		1347.98	0.01051364		1877.98	0.00330913		2407.97	0.00974429		2937.97	0.01187799		3468	-0.01181457
288.19	0.07997862		818.19	-0.00157229		1348.18	0.00970854		1878.18	0.0031698		2408.17	0.00947085		2938.17	0.01109945		3468.2	-0.01181952
288.39	0.08038833		818.39	-0.00146894		1348.38	0.0098736		1878.38	0.00283204		2408.37	0.01009437		2938.37	0.01120263		3468.4	-0.01202657
288.59	0.07949359		818.59	-0.00139648		1348.58	0.00928409		1878.58	0.00356946		2408.57	0.00988092		2938.57	0.0114501		3468.6	-0.01130088
288.79	0.07929341		818.79	-0.00112416		1348.78	0.00880641		1878.78	0.00335303		2408.77	0.010702		2938.77	0.01123302		3468.8	-0.01100221
288.99	0.07987849		818.99	-0.00162587		1348.98	0.00846737		1878.98	0.00312911		2408.97	0.01102407		2938.97	0.01029227		3469	-0.01094254
289.19	0.07930011		819.19	-0.00089018		1349.18	0.009056		1879.18	0.00379523		2409.17	0.01117712		2939.17	0.01041208		3469.2	-0.01051939
289.39	0.07875148		819.39	-0.00087778		1349.38	0.0092838		1879.38	0.0032909		2409.37	0.01056898		2939.37	0.00990851		3469.4	-0.01099495
289.59	0.0784658		819.59	-0.00190999		1349.58	0.00998939		1879.58	0.00291737		2409.57	0.01102276		2939.57	0.0101061		3469.6	-0.01042829
289.79	0.07833827		819.79	-0.0024869		1349.78	0.00977934		1879.78	0.00288952		2409.77	0.01167438		2939.77	0.00954489		3469.8	-0.01112855
289.99	0.0788605		819.99	-0.00219367		1349.98	0.00954111		1879.98	0.0021142		2409.97	0.01122384		2939.97	0.01003582		3470	-0.0115822
290.19	0.07946167		820.19	-0.00219441		1350.18	0.00984339		1880.18	0.00150245		2410.17	0.01103481		2940.17	0.0102857		3470.2	-0.0118593
290.39	0.07963735		820.39	-0.00256526		1350.38	0.01036004		1880.38	0.0013676		2410.37	0.0101816		2940.37	0.01041019		3470.4	-0.01204356
290.59	0.08045365		820.59	-0.00234501		1350.58	0.01031848		1880.58	0.00063563		2410.57	0.00969328		2940.57	0.01124574		3470.6	-0.01110022
290.79	0.08157888		820.79	-0.00233311		1350.78	0.01002137		1880.78	0.00179356		2410.77	0.00953655		2940.77	0.01096577		3470.8	-0.01096268
290.99	0.08141214		820.99	-0.00196884		1350.98	0.01039936		1880.98	0.00199161		2410.97	0.00922977		2940.97	0.0107771		3471	-0.0106932
291.19	0.08146677		821.19	-0.00278735		1351.18	0.01001688		1881.18	0.00203267		2411.17	0.00931828		2941.17	0.01146493		3471.2	-0.01056044
291.39	0.08167037		821.39	-0.0025621		1351.38	0.01036299		1881.38	0.0019563		2411.37	0.00956135		2941.37	0.01163172		3471.4	-0.01060646
291.59	0.08219862		821.59	-0.00266684		1351.58	0.00970207		1881.58	0.00267553		2411.57	0.00843362		2941.57	0.01115737		3471.6	-0.00996887
291.79	0.08189784		821.79	-0.00329591		1351.78	0.01041737		1881.78	0.0030788		2411.77	0.00784727		2941.77	0.0107439		3471.8	-0.01016251
291.99	0.08281623		821.99	-0.0033745		1351.98	0.01029167		1881.98	0.00345227		2411.97	0.00749323		2941.97	0.01065548		3472	-0.00964595
292.19	0.08339502		822.19	-0.00453716		1352.18	0.01123458		1882.18	0.00365893		2412.17	0.00704043		2942.17	0.01099087		3472.2	-0.00927622
292.39	0.08305535		822.39	-0.00466925		1352.38	0.01070838		1882.38	0.00477953		2412.37	0.00728409		2942.37	0.01059858		3472.4	-0.00892033
292.59	0.08303062		822.59	-0.00385033		1352.58	0.01098423		1882.58	0.00568744		2412.57	0.00725002		2942.57	0.0101268		3472.6	-0.00893907
292.79	0.08437342		822.79	-0.00370577		1352.78	0.01074857		1882.78	0.00524052		2412.77	0.00799114		2942.77	0.01090931		3472.8	-0.00950962
292.99	0.08504508		822.99	-0.00389813		1352.98	0.01063365		1882.98	0.00644783		2412.97	0.00769521		2942.97	0.01119937		3473	-0.01049909
293.19	0.08539025		823.19	-0.00372507		1353.18	0.01083744		1883.18	0.00710242		2413.17	0.00768858		2943.17	0.01125958		3473.2	-0.01087937
293.39	0.08593942		823.39	-0.00324431		1353.38	0.01176194		1883.38	0.00668052		2413.37	0.00809699		2943.37	0.01128989		3473.4	-0.01161087
293.59	0.08618845		823.59	-0.00304632		1353.58	0.01227283		1883.58	0.00599368		2413.57	0.00888054		2943.57	0.0119879		3473.6	-0.01162437
293.79	0.08672694		823.79	-0.00238579		1353.78	0.01258045		1883.78	0.00423257		2413.77	0.00948258		2943.77	0.01230259		3473.8	-0.01298861
293.99	0.08678336		823.99	-0.00160228		1353.98	0.0122711		1883.98	0.00366589		2413.97	0.00899175		2943.97	0.01206816		3474	-0.01364644
294.19	0.08669766		824.19	-0.00019452		1354.18	0.01241258		1884.18	0.00333972		2414.17	0.0088758		2944.17	0.01141157		3474.2	-0.01373968
294.39	0.08586813		824.39	-0.00004335		1354.38	0.01292663		1884.38	0.0032169		2414.37	0.00870156		2944.37	0.01138143		3474.4	-0.01296581
294.59	0.08621566		824.59	0.00138577		1354.58	0.01263845		1884.58	0.00299272		2414.57	0.00918495		2944.57	0.01226212		3474.6	-0.01313045
294.79	0.0866012		824.79	0.00135611		1354.78	0.0123961		1884.78	0.00319429		2414.77	0.00971692		2944.77	0.01189029		3474.8	-0.01366645
294.99	0.08607808		824.99	0.00115761		1354.98	0.01251834		1884.98	0.0026635		2414.97	0.01019696		2944.97	0.01240151		3475	-0.01362783
295.19	0.08595875		825.19	0.00037656		1355.18	0.01227242		1885.18	0.00295427		2415.17	0.00984268		2945.17	0.01364933		3475.2	-0.01348553
295.39	0.0859385		825.39	-0.00045438		1355.38	0.01123346		1885.38	0.00309858		2415.37	0.00952736		2945.37	0.01372111		3475.4	-0.01351227
295.59	0.08586971		825.59	-0.00049351		1355.58	0.01170674		1885.58	0.00304553		2415.57	0.00984596		2945.57	0.01315413		3475.6	-0.01240618
295.79	0.08592006		825.79	-0.00116629		1355.78	0.01244751		1885.78	0.00280482		2415.77	0.01026929		2945.77	0.01374896		3475.8	-0.01293645
295.99	0.08681358		825.99	-0.00168455		1355.98	0.01151213		1885.98	0.00261577		2415.97	0.01032203		2945.97	0.01391694		3476	-0.01252786
296.19	0.08583859		826.19	-0.00158412		1356.18	0.01152241		1886.18	0.00267903		2416.17	0.01049356		2946.17	0.0140947		3476.2	-0.01134154
296.39	0.08510279		826.39	-0.00153412		1356.38	0.01056086		1886.38	0.00333849		2416.37	0.01081945		2946.37	0.01321236		3476.4	-0.01136402
296.59	0.08599961		826.59	-0.00089777		1356.58	0.01080052		1886.58	0.00363099		2416.57	0.0111733		2946.57	0.01346912		3476.6	-0.01107558
296.79	0.08604539		826.79	-0.00124777		1356.78	0.01009077		1886.78	0.00377755		2416.77	0.01121673		2946.77	0.01354604		3476.8	-0.00994246
296.99	0.08590073		826.99	0.00002342		1356.98	0.00953123		1886.98	0.00536255		2416.97	0.01125996		2946.97	0.01246795		3477	-0.00947205
297.19	0.08633274		827.19	0.00005357		1357.18	0.00977805		1887.18	0.00475159		2417.17	0.01144014		2947.17	0.01198223		3477.2	-0.00914019
297.39	0.08558276		827.39	0.00108013		1357.38	0.01072282		1887.38	0.00415586		2417.37	0.01089285		2947.37	0.01206004		3477.4	-0.00887101
297.59	0.08563863		827.59	0.00147516		1357.58	0.0102023		1887.58	0.00484042		2417.57	0.0116123		2947.57	0.0120671		3477.6	-0.00888609
297.79	0.08566017		827.79	0.00145022		1357.78	0.00984088		1887.78	0.00401417		2417.77	0.01104978		2947.77	0.01212882		3477.8	-0.00901419
297.99	0.08569313		827.99	0.00177421		1357.98	0.00914859		1887.98	0.00454063		2417.97	0.0105811		2947.97	0.01112059		3478	-0.00810604
298.19	0.08537938		828.19	0.00152939		1358.18	0.00955979		1888.18	0.00456573		2418.17	0.01043661		2948.17	0.01033153		3478.2	-0.00783808
298.39	0.08586625		828.39	0.00122615		1358.38	0.01071715		1888.38	0.0040096		2418.37	0.01061072		2948.37	0.01084024		3478.4	-0.00814229
298.59	0.08695857		828.59	0.00160227		1358.58	0.01050397		1888.58	0.00397925		2418.57	0.01025747		2948.57	0.01202275		3478.6	-0.00877337
298.79	0.08707464		828.79	0.00082711		1358.78	0.01111045		1888.78	0.0030506		2418.77	0.0093771		2948.77	0.01162773		3478.8	-0.00923772
298.99	0.0866773		828.99	0.00038587		1358.98	0.01196494		1888.98	0.00255685		2418.97	0.00871203		2948.97	0.01206688		3479	-0.00926914
299.19	0.08691998		829.19	-0.0001036		1359.18	0.01182003		1889.18	0.00230703		2419.17	0.00780136		2949.17	0.01280213		3479.2	-0.01018221
299.39	0.08696456		829.39	-0.00059149		1359.38	0.01157921		1889.38	0.00160325		2419.37	0.00776538		2949.37	0.01263396		3479.4	-0.01263768
299.59	0.0876335		829.59	-0.00015041		1359.58	0.01271822		1889.58	0.00077075		2419.57	0.00916435		2949.57	0.01184827		3479.6	-0.01344707
299.79	0.08820562		829.79	-0.00097685		1359.78	0.01208514		1889.78	0.00098033		2419.77	0.00951514		2949.77	0.01258575		3479.8	-0.01387972
299.99	0.08872105		829.99	-0.00171432		1359.98	0.01083481		1889.98	0.00106881		2419.97	0.00977066		2949.97	0.01266582		3480	-0.01366715
300.19	0.08850713		830.19	-0.00132027		1360.18	0.00992518		1890.18	0.00169034		2420.17	0.00944585		2950.17	0.01149354		3480.2	-0.01312038
300.39	0.08878503		830.39	-0.0012769		1360.38	0.00975699		1890.38	0.00208578		2420.37	0.00940118		2950.37	0.01091979		3480.4	-0.01359806
300.59	0.08925976		830.59	-0.00034679		1360.58	0.0100488		1890.58	0.00319339		2420.57	0.00914604		2950.57	0.01081226		3480.6	-0.01333435
300.79	0.08959372		830.79	-0.00013388		1360.78	0.00982286		1890.78	0.00408213		2420.77	0.00920258		2950.77	0.01083078		3480.8	-0.01356267
300.99	0.09024536		830.99	0.00126174		1360.98	0.0093245		1890.98	0.00370013		2420.97	0.00915968		2950.97	0.01107895		3481	-0.01440912
301.19	0.08980878		831.19	0.00055551		1361.18	0.00927978		1891.18	0.00340038		2421.17	0.00974497		2951.17	0.01183643		3481.2	-0.01479791
301.39	0.0895386		831.39	0.00163836		1361.38	0.00919854		1891.38	0.00439383		2421.37	0.0102893		2951.37	0.01188642		3481.4	-0.01489739
301.59	0.0908806		831.59	0.0006764		1361.58	0.0086252		1891.58	0.00522118		2421.57	0.01073644		2951.57	0.0112333		3481.6	-0.01519866
301.79	0.09128463		831.79	-0.00043749		1361.78	0.00821282		1891.78	0.00481298		2421.77	0.01070358		2951.77	0.01148639		3481.8	-0.01496732
301.99	0.0923607		831.99	-0.0006474		1361.98	0.00855382		1891.98	0.00565484		2421.97	0.01175993		2951.97	0.01115126		3482	-0.01547692
302.19	0.09151484		832.19	-0.00198591		1362.18	0.00983645		1892.18	0.00608146		2422.17	0.01184138		2952.17	0.01157734		3482.2	-0.01599093
302.39	0.09223025		832.39	-0.00120203		1362.38	0.0104612		1892.38	0.00532722		2422.37	0.01157594		2952.37	0.01284374		3482.4	-0.01573977
302.59	0.09264387		832.59	-0.00126271		1362.58	0.01172362		1892.58	0.00474056		2422.57	0.01163181		2952.57	0.0135574		3482.6	-0.01600712
302.79	0.09197654		832.79	-0.00132566		1362.78	0.01269587		1892.78	0.00393478		2422.77	0.01098363		2952.77	0.01345		3482.8	-0.01632336
302.99	0.09206536		832.99	-0.00086046		1362.98	0.0138462		1892.98	0.00436025		2422.97	0.01179277		2952.97	0.0141032		3483	-0.01634719
303.19	0.09185815		833.19	-0.00077738		1363.18	0.01414783		1893.18	0.00413141		2423.17	0.01210482		2953.17	0.01475707		3483.2	-0.01713095
303.39	0.09212044		833.39	-0.00084444		1363.38	0.01462304		1893.38	0.00333176		2423.37	0.01247113		2953.37	0.01428908		3483.4	-0.01703002
303.59	0.09262381		833.59	-0.00118241		1363.58	0.01501224		1893.58	0.00352127		2423.57	0.01311791		2953.57	0.01397189		3483.6	-0.01553603
303.79	0.09251454		833.79	-0.00164489		1363.78	0.01447206		1893.78	0.00325785		2423.77	0.01288568		2953.77	0.01423029		3483.8	-0.01520231
303.99	0.09282152		833.99	-0.00181445		1363.98	0.01439319		1893.98	0.0031124		2423.97	0.01234723		2953.97	0.01388219		3484	-0.01436919
304.19	0.09312606		834.19	-0.00089358		1364.18	0.01452139		1894.18	0.00303694		2424.17	0.01119062		2954.17	0.01281026		3484.2	-0.01337711
304.39	0.09201064		834.39	-0.00026954		1364.38	0.0149195		1894.38	0.00260143		2424.37	0.01117985		2954.37	0.0141286		3484.4	-0.01267003
304.59	0.09243555		834.59	0.00064547		1364.58	0.01476701		1894.58	0.00199656		2424.57	0.01024029		2954.57	0.01407307		3484.6	-0.01193175
304.79	0.09255738		834.79	0.00055682		1364.78	0.01434448		1894.78	0.0017876		2424.77	0.00953539		2954.77	0.01417836		3484.8	-0.01220781
304.99	0.09241395		834.99	0.00155001		1364.98	0.01272456		1894.98	0.00160322		2424.97	0.00942886		2954.97	0.01385652		3485	-0.01126743
305.19	0.0913075		835.19	0.0015826		1365.18	0.01260776		1895.18	0.0022988		2425.17	0.0098916		2955.17	0.01386737		3485.2	-0.01108074
305.39	0.09193201		835.39	0.0016823		1365.38	0.01207748		1895.38	0.00229878		2425.37	0.00911146		2955.37	0.01292895		3485.4	-0.01093451
305.59	0.09294399		835.59	0.00060401		1365.58	0.01160668		1895.58	0.00223803		2425.57	0.00921767		2955.57	0.01213817		3485.6	-0.01030145
305.79	0.09251919		835.79	0.00100516		1365.78	0.01120906		1895.78	0.00291872		2425.77	0.00993728		2955.77	0.0130868		3485.8	-0.00944391
305.99	0.09253011		835.99	0.00164333		1365.98	0.01157564		1895.98	0.00317112		2425.97	0.01013898		2955.97	0.01405473		3486	-0.00942652
306.19	0.09178478		836.19	0.00159584		1366.18	0.01189282		1896.18	0.00379844		2426.17	0.00931568		2956.17	0.01435003		3486.2	-0.00876376
306.39	0.09236738		836.39	0.00177173		1366.38	0.01259802		1896.38	0.00405041		2426.37	0.00891014		2956.37	0.01499865		3486.4	-0.00857682
306.59	0.09312998		836.59	0.00227671		1366.58	0.01348444		1896.58	0.00432497		2426.57	0.00898056		2956.57	0.01526288		3486.6	-0.00943437
306.79	0.09305027		836.79	0.00251574		1366.78	0.01376354		1896.78	0.00441744		2426.77	0.00834343		2956.77	0.01603277		3486.8	-0.00998932
306.99	0.09435454		836.99	0.00277018		1366.98	0.01427193		1896.98	0.0051216		2426.97	0.00941123		2956.97	0.01636166		3487	-0.0106969
307.19	0.09405509		837.19	0.00237188		1367.18	0.01502532		1897.18	0.00489081		2427.17	0.00951817		2957.17	0.01609681		3487.2	-0.01125156
307.39	0.09448799		837.39	0.00225689		1367.38	0.01563728		1897.38	0.00501701		2427.37	0.00902634		2957.37	0.01532654		3487.4	-0.01177495
307.59	0.09522118		837.59	0.00111502		1367.58	0.0157822		1897.58	0.00571154		2427.57	0.01004184		2957.57	0.01458385		3487.6	-0.0130689
307.79	0.09588473		837.79	0.0006257		1367.78	0.01534642		1897.78	0.00488639		2427.77	0.00997376		2957.77	0.01364284		3487.8	-0.01363497
307.99	0.09634277		837.99	-0.00046084		1367.98	0.0156636		1897.98	0.00487558		2427.97	0.00993943		2957.97	0.01267427		3488	-0.01331535
308.19	0.09612947		838.19	-0.00080379		1368.18	0.01524841		1898.18	0.00428861		2428.17	0.00950493		2958.17	0.01312167		3488.2	-0.01422453
308.39	0.09629998		838.39	-0.00146192		1368.38	0.01465633		1898.38	0.00416026		2428.37	0.00897426		2958.37	0.01379346		3488.4	-0.01460628
308.59	0.09763361		838.59	-0.0020361		1368.58	0.01406487		1898.58	0.0039821		2428.57	0.00923825		2958.57	0.01357052		3488.6	-0.01542811
308.79	0.09782168		838.79	-0.00266885		1368.78	0.01317268		1898.78	0.00453552		2428.77	0.009001		2958.77	0.01311869		3488.8	-0.01583228
308.99	0.09774877		838.99	-0.00287755		1368.98	0.01182168		1898.98	0.00485		2428.97	0.00977688		2958.97	0.01187628		3489	-0.01586282
309.19	0.09788735		839.19	-0.00305092		1369.18	0.01152836		1899.18	0.00472685		2429.17	0.0102038		2959.17	0.01188798		3489.2	-0.01554452
309.39	0.09840848		839.39	-0.00233192		1369.38	0.01034886		1899.38	0.00376264		2429.37	0.01081404		2959.37	0.01076325		3489.4	-0.01533427
309.59	0.09829883		839.59	-0.0019566		1369.58	0.0091729		1899.58	0.00369598		2429.57	0.01145688		2959.57	0.01085636		3489.6	-0.01505959
309.79	0.09730465		839.79	-0.00111797		1369.78	0.00814154		1899.78	0.00391646		2429.77	0.01103824		2959.77	0.01241232		3489.8	-0.01432362
309.99	0.09716735		839.99	-0.00064041		1369.98	0.0075449		1899.98	0.00377632		2429.97	0.01098609		2959.97	0.01305968		3490	-0.01402396
310.19	0.096279		840.19	-0.00001803		1370.18	0.00692211		1900.18	0.00427983		2430.17	0.0108081		2960.17	0.0139793		3490.2	-0.01411227
310.39	0.09586095		840.39	0.0004169		1370.38	0.00745075		1900.38	0.0037148		2430.37	0.01074798		2960.37	0.01524694		3490.4	-0.01304718
310.59	0.09569054		840.59	0.00199912		1370.58	0.00747225		1900.58	0.00303769		2430.57	0.01098765		2960.57	0.01555928		3490.6	-0.01275321
310.79	0.09511205		840.79	0.00278074		1370.78	0.00854945		1900.78	0.00250555		2430.77	0.0117831		2960.77	0.01652492		3490.8	-0.01315509
310.99	0.09461263		840.99	0.0034806		1370.98	0.00910364		1900.98	0.00278008		2430.97	0.01199059		2960.97	0.0162202		3491	-0.01319357
311.19	0.09365009		841.19	0.0038217		1371.18	0.01023325		1901.18	0.00246955		2431.17	0.01174779		2961.17	0.01538954		3491.2	-0.01259173
311.39	0.09360392		841.39	0.00292418		1371.38	0.01098165		1901.38	0.00211817		2431.37	0.01222774		2961.37	0.01528097		3491.4	-0.0123605
311.59	0.09366789		841.59	0.0024668		1371.58	0.01118983		1901.58	0.00196941		2431.57	0.01289336		2961.57	0.01469575		3491.6	-0.01272209
311.79	0.09358381		841.79	0.00291388		1371.78	0.01134513		1901.78	0.00044732		2431.77	0.01258459		2961.77	0.01385826		3491.8	-0.01223237
311.99	0.09283758		841.99	0.00327474		1371.98	0.01215685		1901.98	-0.00026622		2431.97	0.01291882		2961.97	0.01336267		3492	-0.01212042
312.19	0.09373239		842.19	0.0034635		1372.18	0.01285015		1902.18	-0.00070567		2432.17	0.01329568		2962.17	0.01328527		3492.2	-0.01241565
312.39	0.09528151		842.39	0.00364458		1372.38	0.01304876		1902.38	-0.00041698		2432.37	0.01284723		2962.37	0.0127192		3492.4	-0.01209365
312.59	0.09676347		842.59	0.00441412		1372.58	0.01321178		1902.58	0.0001828		2432.57	0.01384487		2962.57	0.01217379		3492.6	-0.01135166
312.79	0.09732476		842.79	0.00506971		1372.78	0.01333874		1902.78	0.00020937		2432.77	0.01346773		2962.77	0.01120096		3492.8	-0.01142719
312.99	0.09832753		842.99	0.00462877		1372.98	0.01356729		1902.98	0.00067115		2432.97	0.01358403		2962.97	0.01066006		3493	-0.01229813
313.19	0.09907342		843.19	0.00491128		1373.18	0.01370028		1903.18	0.00140349		2433.17	0.01381411		2963.17	0.010765		3493.2	-0.01182582
313.39	0.09966646		843.39	0.00572301		1373.38	0.01292992		1903.38	0.00139718		2433.37	0.01360637		2963.37	0.01133561		3493.4	-0.01311379
313.59	0.10013329		843.59	0.00490283		1373.58	0.0126582		1903.58	0.00201663		2433.57	0.01330982		2963.57	0.01202083		3493.6	-0.01274045
313.79	0.10006536		843.79	0.00467689		1373.78	0.01299669		1903.78	0.00234409		2433.77	0.01292249		2963.77	0.01317091		3493.8	-0.01323921
313.99	0.099515		843.99	0.0046547		1373.98	0.01304234		1903.98	0.00276126		2433.97	0.01305866		2963.97	0.01347248		3494	-0.01352535
314.19	0.09941383		844.19	0.00444197		1374.18	0.01275455		1904.18	0.00336878		2434.17	0.01311748		2964.17	0.01410457		3494.2	-0.01400462
314.39	0.09932679		844.39	0.00466362		1374.38	0.01305329		1904.38	0.00403833		2434.37	0.0128328		2964.37	0.01477011		3494.4	-0.01394626
314.59	0.09888753		844.59	0.00415386		1374.58	0.01290782		1904.58	0.00417713		2434.57	0.01262081		2964.57	0.01522186		3494.6	-0.01523386
314.79	0.09869691		844.79	0.00369286		1374.78	0.01283071		1904.78	0.00469692		2434.77	0.01226299		2964.77	0.01552996		3494.8	-0.01673393
314.99	0.09831403		844.99	0.00270963		1374.98	0.01283666		1904.98	0.00466314		2434.97	0.01160711		2964.97	0.01573805		3495	-0.01688355
315.19	0.09814067		845.19	0.00191394		1375.18	0.01307598		1905.18	0.00464683		2435.17	0.01184961		2965.17	0.01491858		3495.2	-0.01629857
315.39	0.0970123		845.39	0.00093167		1375.38	0.01362533		1905.38	0.00484646		2435.37	0.01210238		2965.37	0.01467233		3495.4	-0.01609012
315.59	0.09637729		845.59	0.00127492		1375.58	0.01345838		1905.58	0.0048774		2435.57	0.01200997		2965.57	0.0134125		3495.6	-0.01629177
315.79	0.09654929		845.79	0.00144078		1375.78	0.01276676		1905.78	0.00464102		2435.77	0.01220231		2965.77	0.01290009		3495.8	-0.01558678
315.99	0.0959103		845.99	0.00206203		1375.98	0.01245161		1905.98	0.00444313		2435.97	0.01273903		2965.97	0.01236148		3496	-0.01536309
316.19	0.09690816		846.19	0.00108668		1376.18	0.01255722		1906.18	0.00457487		2436.17	0.01340846		2966.17	0.0126034		3496.2	-0.01489337
316.39	0.09663086		846.39	0.00096642		1376.38	0.01196299		1906.38	0.00489447		2436.37	0.0136059		2966.37	0.01270323		3496.4	-0.01471037
316.59	0.0967547		846.59	0.00120559		1376.58	0.01223409		1906.58	0.00527107		2436.57	0.01422249		2966.57	0.01311375		3496.6	-0.0148663
316.79	0.09674124		846.79	0.00125823		1376.78	0.01209714		1906.78	0.00582716		2436.77	0.01512104		2966.77	0.0139063		3496.8	-0.01519576
316.99	0.09732656		846.99	0.00087463		1376.98	0.01179119		1906.98	0.00653536		2436.97	0.01489274		2966.97	0.01485887		3497	-0.01470168
317.19	0.09786976		847.19	0.00118739		1377.18	0.0119825		1907.18	0.00642197		2437.17	0.01533937		2967.17	0.01521449		3497.2	-0.01373783
317.39	0.09910801		847.39	0.00167892		1377.38	0.0116259		1907.38	0.00613371		2437.37	0.01542425		2967.37	0.01559207		3497.4	-0.01331854
317.59	0.09987459		847.59	0.00171957		1377.58	0.01191978		1907.58	0.00615909		2437.57	0.01478275		2967.57	0.01577337		3497.6	-0.01384138
317.79	0.1003823		847.79	0.00161359		1377.78	0.01219388		1907.78	0.00614807		2437.77	0.01504775		2967.77	0.01618145		3497.8	-0.01521302
317.99	0.10023524		847.99	0.0026272		1377.98	0.01187709		1907.98	0.00555494		2437.97	0.01490785		2967.97	0.01613087		3498	-0.01520351
318.19	0.1006769		848.19	0.00159423		1378.18	0.01163844		1908.18	0.00531895		2438.17	0.01451761		2968.17	0.01665926		3498.2	-0.01602411
318.39	0.10048695		848.39	0.00176166		1378.38	0.01225274		1908.38	0.00478367		2438.37	0.01351693		2968.37	0.01660706		3498.4	-0.01680492
318.59	0.10025722		848.59	0.00088139		1378.58	0.01130897		1908.58	0.00471742		2438.57	0.01212782		2968.57	0.01686538		3498.6	-0.01686438
318.79	0.10032035		848.79	0.001219		1378.78	0.0118963		1908.78	0.00416306		2438.77	0.01173075		2968.77	0.01690824		3498.8	-0.01761904
318.99	0.099819		848.99	0.00082928		1378.98	0.01233328		1908.98	0.0036873		2438.97	0.01165211		2968.97	0.01700926		3499	-0.01664628
319.19	0.09852		849.19	0.00108113		1379.18	0.01295868		1909.18	0.00295744		2439.17	0.01104654		2969.17	0.0159635		3499.2	-0.01563955
319.39	0.09804253		849.39	0.00184672		1379.38	0.01313932		1909.38	0.00292858		2439.37	0.01096048		2969.37	0.01553273		3499.4	-0.01491175
319.59	0.09836408		849.59	0.00253114		1379.58	0.01225086		1909.58	0.0027083		2439.57	0.01100057		2969.57	0.01533899		3499.6	-0.01481173
319.79	0.09825108		849.79	0.0022022		1379.78	0.01212346		1909.78	0.00274442		2439.77	0.01040844		2969.77	0.01563617		3499.8	-0.01363332
319.99	0.09796106		849.99	0.00273386		1379.98	0.01250071		1909.98	0.00214601		2439.97	0.01103756		2969.97	0.01568814		3500	-0.01329971
320.19	0.0986447		850.19	0.00186974		1380.18	0.01310554		1910.18	0.00227619		2440.17	0.01093886		2970.17	0.01563328		3500.2	-0.01269568
320.39	0.09874593		850.39	0.00198105		1380.38	0.01267512		1910.38	0.0028593		2440.37	0.01049048		2970.37	0.01509723		3500.4	-0.0121242
320.59	0.09966225		850.59	0.0023941		1380.58	0.01286728		1910.58	0.00355743		2440.57	0.01077987		2970.57	0.01602719		3500.6	-0.01182449
320.79	0.10116914		850.79	0.00301663		1380.78	0.01198047		1910.78	0.00380047		2440.77	0.01147339		2970.77	0.01599961		3500.8	-0.01115883
320.99	0.10208008		850.99	0.00287196		1380.98	0.01190582		1910.98	0.00407477		2440.97	0.01113729		2970.97	0.01596857		3501	-0.01066393
321.19	0.10310662		851.19	0.00305335		1381.18	0.01198978		1911.18	0.00356222		2441.17	0.01162516		2971.17	0.01585767		3501.2	-0.01029414
321.39	0.10429483		851.39	0.00415843		1381.38	0.0120165		1911.38	0.00334773		2441.37	0.01162541		2971.37	0.01495727		3501.4	-0.01045034
321.59	0.10471242		851.59	0.0050221		1381.58	0.01194968		1911.58	0.00374091		2441.57	0.01125505		2971.57	0.01492117		3501.6	-0.01216105
321.79	0.10564559		851.79	0.00482045		1381.78	0.01232384		1911.78	0.00308905		2441.77	0.01280248		2971.77	0.01423906		3501.8	-0.01251117
321.99	0.1059753		851.99	0.00557399		1381.98	0.01190483		1911.98	0.00262322		2441.97	0.01300604		2971.97	0.0141225		3502	-0.0129765
322.19	0.10657934		852.19	0.00390151		1382.18	0.01241201		1912.18	0.00279318		2442.17	0.01298773		2972.17	0.01375116		3502.2	-0.01355468
322.39	0.10665488		852.39	0.003776		1382.38	0.01296939		1912.38	0.00369034		2442.37	0.01304146		2972.37	0.01345003		3502.4	-0.01372197
322.59	0.10564425		852.59	0.00287278		1382.58	0.0121115		1912.58	0.0038587		2442.57	0.0132277		2972.57	0.0147685		3502.6	-0.01429358
322.79	0.10632783		852.79	0.00221775		1382.78	0.0124523		1912.78	0.00378157		2442.77	0.0133621		2972.77	0.01526927		3502.8	-0.01493035
322.99	0.10613286		852.99	0.00226473		1382.98	0.01153985		1912.98	0.00433458		2442.97	0.01366084		2972.97	0.01574947		3503	-0.01440259
323.19	0.10521545		853.19	0.00235017		1383.18	0.01184455		1913.18	0.00462596		2443.17	0.0134559		2973.17	0.01612013		3503.2	-0.01478831
323.39	0.10530111		853.39	0.00261421		1383.38	0.01103171		1913.38	0.00454114		2443.37	0.01364586		2973.37	0.01664314		3503.4	-0.01484762
323.59	0.1055238		853.59	0.00206986		1383.58	0.01065919		1913.58	0.00558265		2443.57	0.01354533		2973.57	0.01734789		3503.6	-0.01450715
323.79	0.1050053		853.79	0.00148589		1383.78	0.01131846		1913.78	0.00550967		2443.77	0.01279174		2973.77	0.01737563		3503.8	-0.01381422
323.99	0.10565919		853.99	0.00222165		1383.98	0.01156293		1913.98	0.0050775		2443.97	0.01310656		2973.97	0.01752409		3504	-0.01417864
324.19	0.10599547		854.19	0.00181148		1384.18	0.01075945		1914.18	0.00504888		2444.17	0.01180913		2974.17	0.01687834		3504.2	-0.01437166
324.39	0.10628752		854.39	0.00131128		1384.38	0.01062818		1914.38	0.00564272		2444.37	0.01116913		2974.37	0.01690373		3504.4	-0.01397745
324.59	0.10633849		854.59	0.00094815		1384.58	0.01090978		1914.58	0.00575797		2444.57	0.01194413		2974.57	0.01663325		3504.6	-0.01467236
324.79	0.10671771		854.79	0.00055318		1384.78	0.0102538		1914.78	0.00493967		2444.77	0.0129183		2974.77	0.01612845		3504.8	-0.01535029
324.99	0.10636518		854.99	0.00024608		1384.98	0.01091456		1914.98	0.00549079		2444.97	0.01289314		2974.97	0.01566767		3505	-0.01518613
325.19	0.10611946		855.19	0.00108996		1385.18	0.01150804		1915.18	0.00445043		2445.17	0.01290331		2975.17	0.01614638		3505.2	-0.01424462
325.39	0.10672101		855.39	0.00236652		1385.38	0.01217152		1915.38	0.00413577		2445.37	0.0130934		2975.37	0.01536071		3505.4	-0.01427321
325.59	0.10665822		855.59	0.00236565		1385.58	0.01261513		1915.58	0.00324232		2445.57	0.01341024		2975.57	0.01458567		3505.6	-0.0146173
325.79	0.10651063		855.79	0.00183454		1385.78	0.01378405		1915.78	0.00284563		2445.77	0.01467989		2975.77	0.01447982		3505.8	-0.01396604
325.99	0.10616464		855.99	0.00224448		1385.98	0.01504799		1915.98	0.00260796		2445.97	0.01472487		2975.97	0.01420228		3506	-0.01411084
326.19	0.10577209		856.19	0.00120693		1386.18	0.01629076		1916.18	0.00240521		2446.17	0.01520945		2976.17	0.01352426		3506.2	-0.01388065
326.39	0.10542128		856.39	0.00063679		1386.38	0.01730172		1916.38	0.00254317		2446.37	0.01550955		2976.37	0.01412504		3506.4	-0.01362647
326.59	0.10458896		856.59	0.00076233		1386.58	0.01730141		1916.58	0.00207444		2446.57	0.01496729		2976.57	0.01502811		3506.6	-0.01296294
326.79	0.10485138		856.79	0.00040166		1386.78	0.01758533		1916.78	0.002444		2446.77	0.0139704		2976.77	0.0147307		3506.8	-0.01219542
326.99	0.10375657		856.99	0.00053551		1386.98	0.01761563		1916.98	0.00246755		2446.97	0.01310737		2976.97	0.01480244		3507	-0.01212748
327.19	0.10242134		857.19	0.00003448		1387.18	0.01820139		1917.18	0.00139203		2447.17	0.01287645		2977.17	0.01483096		3507.2	-0.01233335
327.39	0.10240176		857.39	-0.00035196		1387.38	0.0170571		1917.38	0.00059853		2447.37	0.01302303		2977.37	0.01471359		3507.4	-0.0120876
327.59	0.10346837		857.59	-0.00056313		1387.58	0.01740803		1917.58	0.00124861		2447.57	0.01286304		2977.57	0.01448958		3507.6	-0.01155793
327.79	0.10315977		857.79	-0.00002142		1387.78	0.01671211		1917.78	0.00005799		2447.77	0.01216226		2977.77	0.01442499		3507.8	-0.01286931
327.99	0.1048017		857.99	0.00165412		1387.98	0.0150138		1917.98	-0.00034423		2447.97	0.01233168		2977.97	0.01436997		3508	-0.01427119
328.19	0.10509357		858.19	0.00202515		1388.18	0.0134445		1918.18	-0.00070585		2448.17	0.01145795		2978.17	0.01376924		3508.2	-0.01535652
328.39	0.10573705		858.39	0.00138747		1388.38	0.0131829		1918.38	0.00051569		2448.37	0.01232581		2978.37	0.01343455		3508.4	-0.01543234
328.59	0.10637572		858.59	0.00175163		1388.58	0.01253289		1918.58	0.00000303		2448.57	0.01330318		2978.57	0.01371714		3508.6	-0.01724795
328.79	0.10751823		858.79	0.00224416		1388.78	0.01234496		1918.78	0.00035478		2448.77	0.01397549		2978.77	0.01408292		3508.8	-0.01754015
328.99	0.10834659		858.99	0.00247605		1388.98	0.01271438		1918.98	0.00141962		2448.97	0.01405454		2978.97	0.01451386		3509	-0.01784127
329.19	0.10892193		859.19	0.00319931		1389.18	0.01169607		1919.18	0.00107801		2449.17	0.01389738		2979.17	0.01605841		3509.2	-0.01698431
329.39	0.10988663		859.39	0.00327232		1389.38	0.0112598		1919.38	0.00137654		2449.37	0.01455678		2979.37	0.01573059		3509.4	-0.01706905
329.59	0.10968126		859.59	0.00334486		1389.58	0.01142382		1919.58	0.00142107		2449.57	0.01522206		2979.57	0.01616416		3509.6	-0.01741476
329.79	0.10905322		859.79	0.00360956		1389.78	0.01125844		1919.78	0.0023515		2449.77	0.01574356		2979.77	0.01658026		3509.8	-0.01747813
329.99	0.10952631		859.99	0.00366476		1389.98	0.01151019		1919.98	0.00221159		2449.97	0.01548094		2979.97	0.01590453		3510	-0.01691842
330.19	0.10980492		860.19	0.00343602		1390.18	0.01078944		1920.18	0.00229426		2450.17	0.01580807		2980.17	0.01556854		3510.2	-0.01583872
330.39	0.11010018		860.39	0.00393376		1390.38	0.01117574		1920.38	0.00279011		2450.37	0.01532218		2980.37	0.01655292		3510.4	-0.01480778
330.59	0.10953663		860.59	0.00398144		1390.58	0.01157789		1920.58	0.00315274		2450.57	0.01468446		2980.57	0.01651119		3510.6	-0.01369907
330.79	0.10875189		860.79	0.00333635		1390.78	0.01202158		1920.78	0.0025568		2450.77	0.01415011		2980.77	0.0159827		3510.8	-0.01336055
330.99	0.10812813		860.99	0.00274151		1390.98	0.01155638		1920.98	0.00293349		2450.97	0.01343763		2980.97	0.0160781		3511	-0.01276717
331.19	0.1076255		861.19	0.00273248		1391.18	0.01131823		1921.18	0.0025465		2451.17	0.01330632		2981.17	0.01635011		3511.2	-0.01214387
331.39	0.10815886		861.39	0.00237694		1391.38	0.01126366		1921.38	0.00357886		2451.37	0.01349019		2981.37	0.01584493		3511.4	-0.01172494
331.59	0.10817527		861.59	0.00263609		1391.58	0.01196241		1921.58	0.00401729		2451.57	0.01307682		2981.57	0.01613933		3511.6	-0.01120952
331.79	0.10823659		861.79	0.00384963		1391.78	0.0114745		1921.78	0.00331126		2451.77	0.01255879		2981.77	0.01624555		3511.8	-0.01203252
331.99	0.10900992		861.99	0.00495192		1391.98	0.01188413		1921.98	0.00338302		2451.97	0.01257627		2981.97	0.01530664		3512	-0.01241806
332.19	0.1086593		862.19	0.00505789		1392.18	0.01260761		1922.18	0.00310673		2452.17	0.01213887		2982.17	0.01503239		3512.2	-0.01253899
332.39	0.10856889		862.39	0.00405477		1392.38	0.01370548		1922.38	0.00403025		2452.37	0.01241996		2982.37	0.01526212		3512.4	-0.01247983
332.59	0.10925023		862.59	0.00388334		1392.58	0.0144386		1922.58	0.00328701		2452.57	0.01254357		2982.57	0.01484958		3512.6	-0.01374501
332.79	0.11020988		862.79	0.00314881		1392.78	0.01418607		1922.78	0.00404773		2452.77	0.01248829		2982.77	0.01412744		3512.8	-0.01323906
332.99	0.11140507		862.99	0.00254399		1392.98	0.01414861		1922.98	0.00374073		2452.97	0.0127048		2982.97	0.01422761		3513	-0.01422418
333.19	0.11208874		863.19	0.0021985		1393.18	0.0131443		1923.18	0.0026797		2453.17	0.01268355		2983.17	0.01333265		3513.2	-0.0141326
333.39	0.11261301		863.39	0.00212106		1393.38	0.01287876		1923.38	0.00318339		2453.37	0.01349402		2983.37	0.01331808		3513.4	-0.0156213
333.59	0.11211282		863.59	0.00214434		1393.58	0.01195331		1923.58	0.00371333		2453.57	0.01334464		2983.57	0.01359499		3513.6	-0.0161266
333.79	0.11115168		863.79	0.00240124		1393.78	0.01141982		1923.78	0.00280798		2453.77	0.01273851		2983.77	0.01295909		3513.8	-0.01610625
333.99	0.11253969		863.99	0.00208794		1393.98	0.01093186		1923.98	0.0020443		2453.97	0.01304228		2983.97	0.01312149		3514	-0.01421256
334.19	0.1125521		864.19	0.00143807		1394.18	0.01016804		1924.18	0.00183421		2454.17	0.01334428		2984.17	0.01377195		3514.2	-0.01375651
334.39	0.11294308		864.39	0.00095011		1394.38	0.0108928		1924.38	0.00172305		2454.37	0.01359407		2984.37	0.01504931		3514.4	-0.01395114
334.59	0.11240184		864.59	0.00047418		1394.58	0.01137375		1924.58	0.00100887		2454.57	0.01366408		2984.57	0.01533127		3514.6	-0.01343075
334.79	0.11186411		864.79	0.00088366		1394.78	0.01119583		1924.78	0.00020308		2454.77	0.01383595		2984.77	0.01605286		3514.8	-0.01294035
334.99	0.11174757		864.99	0.00004077		1394.98	0.0107903		1924.98	0.000516		2454.97	0.01301491		2984.97	0.01640919		3515	-0.01255645
335.19	0.11171125		865.19	0.00009565		1395.18	0.01118402		1925.18	0.00012381		2455.17	0.01339645		2985.17	0.01684508		3515.2	-0.01259268
335.39	0.11138846		865.39	0.00009925		1395.38	0.01229922		1925.38	0.00055359		2455.37	0.01407343		2985.37	0.0174739		3515.4	-0.01256641
335.59	0.11070908		865.59	0.00028084		1395.58	0.01366083		1925.58	0.00046285		2455.57	0.01387345		2985.57	0.0190029		3515.6	-0.0126625
335.79	0.11119496		865.79	0.00109235		1395.78	0.01440802		1925.78	0.00026962		2455.77	0.01346142		2985.77	0.01928931		3515.8	-0.0125864
335.99	0.11044847		865.99	0.00182099		1395.98	0.01484409		1925.98	0.00045406		2455.97	0.01326361		2985.97	0.01998475		3516	-0.01340203
336.19	0.11001828		866.19	0.00158293		1396.18	0.01537455		1926.18	0.00046377		2456.17	0.01364222		2986.17	0.02033341		3516.2	-0.01294957
336.39	0.11008996		866.39	0.00135944		1396.38	0.0153635		1926.38	0.00075897		2456.37	0.01367411		2986.37	0.01970398		3516.4	-0.01332912
336.59	0.11132463		866.59	0.00140276		1396.58	0.01438233		1926.58	0.00145508		2456.57	0.01439401		2986.57	0.01934699		3516.6	-0.01371922
336.79	0.11175429		866.79	0.00153521		1396.78	0.01486954		1926.78	0.00238554		2456.77	0.01480175		2986.77	0.01843028		3516.8	-0.01431594
336.99	0.11181384		866.99	0.0014957		1396.98	0.01508623		1926.98	0.00128912		2456.97	0.01483958		2986.97	0.01776817		3517	-0.01555207
337.19	0.11177821		867.19	0.00165172		1397.18	0.01506219		1927.18	0.00195199		2457.17	0.01500686		2987.17	0.01723196		3517.2	-0.01579449
337.39	0.1113393		867.39	0.00173865		1397.38	0.01486698		1927.38	0.00276006		2457.37	0.01487253		2987.37	0.0170125		3517.4	-0.01644831
337.59	0.11052244		867.59	0.00150524		1397.58	0.01494179		1927.58	0.00324605		2457.57	0.01433393		2987.57	0.01631652		3517.6	-0.01635204
337.79	0.11075226		867.79	0.00201279		1397.78	0.01580309		1927.78	0.00199953		2457.77	0.01413381		2987.77	0.01586223		3517.8	-0.01631406
337.99	0.11183297		867.99	0.0012499		1397.98	0.01558881		1927.98	0.00252561		2457.97	0.01499997		2987.97	0.01547324		3518	-0.01483255
338.19	0.11108241		868.19	0.00006675		1398.18	0.01546248		1928.18	0.00275713		2458.17	0.01478532		2988.17	0.01499199		3518.2	-0.0150594
338.39	0.11185143		868.39	0.00031126		1398.38	0.01631028		1928.38	0.00238983		2458.37	0.01500492		2988.37	0.0150182		3518.4	-0.01515948
338.59	0.1121423		868.59	-0.00014601		1398.58	0.01573935		1928.58	0.00184166		2458.57	0.0150649		2988.57	0.01418775		3518.6	-0.01490534
338.79	0.1126108		868.79	-0.00069871		1398.78	0.01570284		1928.78	0.00175353		2458.77	0.01583538		2988.77	0.0137466		3518.8	-0.01415265
338.99	0.11344623		868.99	-0.00214279		1398.98	0.01604915		1928.98	0.00244194		2458.97	0.01590194		2988.97	0.01377818		3519	-0.01413315
339.19	0.11401661		869.19	-0.00188097		1399.18	0.01572388		1929.18	0.00273004		2459.17	0.01663433		2989.17	0.01401344		3519.2	-0.01436195
339.39	0.1142926		869.39	-0.00179549		1399.38	0.01546398		1929.38	0.00373892		2459.37	0.01662837		2989.37	0.0143176		3519.4	-0.01388717
339.59	0.1147615		869.59	-0.00126384		1399.58	0.01525022		1929.58	0.00450048		2459.57	0.01616639		2989.57	0.01505498		3519.6	-0.01329732
339.79	0.11450283		869.79	-0.00059821		1399.78	0.01417095		1929.78	0.00472516		2459.77	0.0160556		2989.77	0.01547117		3519.8	-0.01310304
339.99	0.11461771		869.99	0.00008321		1399.98	0.01349755		1929.98	0.00462688		2459.97	0.01588595		2989.97	0.01647842		3520	-0.01383002
340.19	0.11561328		870.19	0.00032433		1400.18	0.01267251		1930.18	0.00483323		2460.17	0.01591835		2990.17	0.01647849		3520.2	-0.01329519
340.39	0.11523709		870.39	0.00019584		1400.38	0.01171317		1930.38	0.00458014		2460.37	0.01541628		2990.37	0.01620876		3520.4	-0.01377147
340.59	0.11560993		870.59	0.00005316		1400.58	0.0109692		1930.58	0.00534495		2460.57	0.01622374		2990.57	0.0162509		3520.6	-0.01412273
340.79	0.11477391		870.79	0.00024033		1400.78	0.01200208		1930.78	0.0046133		2460.77	0.0168678		2990.77	0.01581948		3520.8	-0.01560493
340.99	0.11452181		870.99	-0.00029769		1400.98	0.01143583		1930.98	0.00422737		2460.97	0.01649586		2990.97	0.01603652		3521	-0.01544866
341.19	0.11494689		871.19	0.0002251		1401.18	0.01231341		1931.18	0.00503349		2461.17	0.0169951		2991.17	0.01708672		3521.2	-0.01412775
341.39	0.1141986		871.39	0.00091788		1401.38	0.01266681		1931.38	0.0047582		2461.37	0.01742613		2991.37	0.01697928		3521.4	-0.01433878
341.59	0.11347939		871.59	0.00132729		1401.58	0.01279175		1931.58	0.00506495		2461.57	0.01773766		2991.57	0.01727906		3521.6	-0.01454665
341.79	0.11383849		871.79	0.00172161		1401.78	0.01365235		1931.78	0.00365444		2461.77	0.01818566		2991.77	0.01767848		3521.8	-0.01392951
341.99	0.11338925		871.99	0.00074021		1401.98	0.01288079		1931.98	0.00410612		2461.97	0.01759691		2991.97	0.01832392		3522	-0.01360009
342.19	0.11290982		872.19	0.00055652		1402.18	0.01298687		1932.18	0.00365537		2462.17	0.01740133		2992.17	0.01876275		3522.2	-0.01315564
342.39	0.11372024		872.39	0.00048549		1402.38	0.01347883		1932.38	0.00248203		2462.37	0.01737701		2992.37	0.01846606		3522.4	-0.01252383
342.59	0.11388828		872.59	-0.00080001		1402.58	0.0135002		1932.58	0.00209197		2462.57	0.01744405		2992.57	0.01688109		3522.6	-0.01195491
342.79	0.11515194		872.79	-0.00129767		1402.78	0.01417511		1932.78	0.00253979		2462.77	0.01893573		2992.77	0.01723928		3522.8	-0.01143981
342.99	0.11569168		872.99	-0.00138414		1402.98	0.01373855		1932.98	0.00250468		2462.97	0.01892211		2992.97	0.01666575		3523	-0.01180775
343.19	0.11592012		873.19	-0.00167267		1403.18	0.01316253		1933.18	0.00225764		2463.17	0.01837759		2993.17	0.01641235		3523.2	-0.01194144
343.39	0.11589768		873.39	-0.00227959		1403.38	0.01294549		1933.38	0.00241153		2463.37	0.01771385		2993.37	0.01618173		3523.4	-0.01170991
343.59	0.11507003		873.59	-0.0015906		1403.58	0.0131575		1933.58	0.00252211		2463.57	0.017328		2993.57	0.01631821		3523.6	-0.01142538
343.79	0.11420135		873.79	-0.00152735		1403.78	0.01379444		1933.78	0.00215908		2463.77	0.01667662		2993.77	0.01610842		3523.8	-0.01187678
343.99	0.1152603		873.99	-0.00124189		1403.98	0.0133823		1933.98	0.00211583		2463.97	0.01546358		2993.97	0.01722754		3524	-0.01223621
344.19	0.11566817		874.19	-0.00142902		1404.18	0.0136291		1934.18	0.00274398		2464.17	0.01489225		2994.17	0.01741694		3524.2	-0.01169759
344.39	0.11532552		874.39	-0.00211736		1404.38	0.01419658		1934.38	0.00279508		2464.37	0.01595131		2994.37	0.01715214		3524.4	-0.01177765
344.59	0.11607587		874.59	-0.00153349		1404.58	0.01523859		1934.58	0.00297979		2464.57	0.01799765		2994.57	0.01719884		3524.6	-0.01306278
344.79	0.11638806		874.79	-0.0004872		1404.78	0.01590961		1934.78	0.00406503		2464.77	0.0192104		2994.77	0.01806347		3524.8	-0.01365176
344.99	0.11663987		874.99	0.00037842		1404.98	0.01661242		1934.98	0.00463867		2464.97	0.01873637		2994.97	0.01876093		3525	-0.01258872
345.19	0.11700868		875.19	0.00178417		1405.18	0.01775773		1935.18	0.00419678		2465.17	0.01925976		2995.17	0.01922838		3525.2	-0.01252282
345.39	0.11688565		875.39	0.00236076		1405.38	0.01810021		1935.38	0.00470245		2465.37	0.01975716		2995.37	0.01868377		3525.4	-0.0135407
345.59	0.11738299		875.59	0.00280353		1405.58	0.01729549		1935.58	0.00502594		2465.57	0.01936619		2995.57	0.01877848		3525.6	-0.01344047
345.79	0.11786054		875.79	0.00250302		1405.78	0.0180184		1935.78	0.00443418		2465.77	0.01951371		2995.77	0.01876531		3525.8	-0.01317909
345.99	0.11748682		875.99	0.00241433		1405.98	0.01706621		1935.98	0.00468885		2465.97	0.01896801		2995.97	0.01930019		3526	-0.01364887
346.19	0.11840986		876.19	0.00235224		1406.18	0.0174466		1936.18	0.00459525		2466.17	0.01944469		2996.17	0.01874863		3526.2	-0.01297013
346.39	0.11923865		876.39	0.00166206		1406.38	0.016529		1936.38	0.00457395		2466.37	0.01938127		2996.37	0.01769061		3526.4	-0.01286589
346.59	0.12021583		876.59	0.00109213		1406.58	0.01654102		1936.58	0.00482088		2466.57	0.01921458		2996.57	0.01715774		3526.6	-0.01341454
346.79	0.12137523		876.79	0.00104815		1406.78	0.01581432		1936.78	0.00481061		2466.77	0.0195071		2996.77	0.01783861		3526.8	-0.01366912
346.99	0.12061403		876.99	0.00056414		1406.98	0.01499373		1936.98	0.0035971		2466.97	0.01839996		2996.97	0.01680851		3527	-0.01381772
347.19	0.12075676		877.19	-0.00006339		1407.18	0.01503274		1937.18	0.00324997		2467.17	0.0179022		2997.17	0.01714719		3527.2	-0.01414304
347.39	0.1201046		877.39	-0.00035047		1407.38	0.01523219		1937.38	0.00273061		2467.37	0.0181355		2997.37	0.01761153		3527.4	-0.01385748
347.59	0.11876143		877.59	-0.00023871		1407.58	0.01545768		1937.58	0.00325336		2467.57	0.01797962		2997.57	0.01805972		3527.6	-0.01338961
347.79	0.11849632		877.79	0.00007331		1407.78	0.01490053		1937.78	0.00283414		2467.77	0.01751322		2997.77	0.01926306		3527.8	-0.01314406
347.99	0.11977901		877.99	0.00062102		1407.98	0.01448419		1937.98	0.00328693		2467.97	0.01726118		2997.97	0.02042757		3528	-0.01365055
348.19	0.11996955		878.19	0.00145315		1408.18	0.01560401		1938.18	0.00382138		2468.17	0.01804089		2998.17	0.02088682		3528.2	-0.01313403
348.39	0.12016567		878.39	0.00133		1408.38	0.01584582		1938.38	0.0041808		2468.37	0.01949931		2998.37	0.02086531		3528.4	-0.01374697
348.59	0.11981117		878.59	0.00181416		1408.58	0.01683924		1938.58	0.00413373		2468.57	0.01923142		2998.57	0.02040127		3528.6	-0.01492433
348.79	0.12000568		878.79	0.0033444		1408.78	0.01642267		1938.78	0.00490922		2468.77	0.01789268		2998.77	0.02063558		3528.8	-0.01385141
348.99	0.11980087		878.99	0.00330586		1408.98	0.01722122		1938.98	0.00417643		2468.97	0.01697474		2998.97	0.02022851		3529	-0.01407637
349.19	0.11998401		879.19	0.00341182		1409.18	0.01694174		1939.18	0.00414734		2469.17	0.01693804		2999.17	0.01871472		3529.2	-0.01491478
349.39	0.11998235		879.39	0.00359759		1409.38	0.01540732		1939.38	0.00452461		2469.37	0.01746299		2999.37	0.0184672		3529.4	-0.01410366
349.59	0.12003883		879.59	0.00387954		1409.58	0.01456075		1939.58	0.00394543		2469.57	0.01738151		2999.57	0.01844183		3529.6	-0.01368084
349.79	0.11979292		879.79	0.00346837		1409.78	0.01479269		1939.78	0.00372294		2469.77	0.01810509		2999.77	0.01816373		3529.8	-0.01353806
349.99	0.12079829		879.99	0.00303245		1409.98	0.01390019		1939.98	0.0043643		2469.97	0.01811088		2999.97	0.01809341		3530	-0.01432994
350.19	0.12126815		880.19	0.00228372		1410.18	0.01308804		1940.18	0.00448646		2470.17	0.01779841		3000.17	0.01790935		3530.2	-0.01438955
350.39	0.12111977		880.39	0.00203364		1410.38	0.01192237		1940.38	0.00465336		2470.37	0.01808322		3000.37	0.01696867		3530.4	-0.01419598
350.59	0.12161726		880.59	0.0021127		1410.58	0.0126107		1940.58	0.00354256		2470.57	0.01790328		3000.57	0.01740876		3530.6	-0.01405384
350.79	0.12122733		880.79	0.00192243		1410.78	0.01255424		1940.78	0.00378256		2470.77	0.01821091		3000.77	0.01775661		3530.8	-0.01383755
350.99	0.1203818		880.99	0.00147651		1410.98	0.01258326		1940.98	0.00326267		2470.97	0.0186411		3000.97	0.01746814		3531	-0.01370472
351.19	0.1206386		881.19	0.0010399		1411.18	0.01233668		1941.18	0.00328274		2471.17	0.01905677		3001.17	0.01798262		3531.2	-0.01437019
351.39	0.11978304		881.39	0.00100362		1411.38	0.01217097		1941.38	0.00317138		2471.37	0.01933502		3001.37	0.01889792		3531.4	-0.01432243
351.59	0.11946532		881.59	0.00062677		1411.58	0.01155249		1941.58	0.00402172		2471.57	0.01874188		3001.57	0.01955295		3531.6	-0.01430175
351.79	0.12030498		881.79	0.00193824		1411.78	0.01166053		1941.78	0.00383038		2471.77	0.01861604		3001.77	0.0197211		3531.8	-0.01411124
351.99	0.12042806		881.99	0.00230579		1411.98	0.01231825		1941.98	0.00435402		2471.97	0.01829468		3001.97	0.01928995		3532	-0.01574237
352.19	0.12060228		882.19	0.00218121		1412.18	0.01268641		1942.18	0.00425857		2472.17	0.01855232		3002.17	0.01909263		3532.2	-0.01577271
352.39	0.12076958		882.39	0.00193305		1412.38	0.01279282		1942.38	0.00381981		2472.37	0.01838474		3002.37	0.01758834		3532.4	-0.01595462
352.59	0.12108927		882.59	0.0019931		1412.58	0.01384725		1942.58	0.00265229		2472.57	0.01799797		3002.57	0.01672879		3532.6	-0.0162054
352.79	0.12212773		882.79	0.0021889		1412.78	0.01332421		1942.78	0.00266475		2472.77	0.01857248		3002.77	0.01653733		3532.8	-0.01550365
352.99	0.12297451		882.99	0.00201516		1412.98	0.01311255		1942.98	0.00221177		2472.97	0.01970798		3002.97	0.0163083		3533	-0.01663106
353.19	0.12348825		883.19	0.00277644		1413.18	0.01296639		1943.18	0.00227146		2473.17	0.01958813		3003.17	0.01569285		3533.2	-0.01575592
353.39	0.12395957		883.39	0.0034655		1413.38	0.01251991		1943.38	0.00254765		2473.37	0.020254		3003.37	0.01630704		3533.4	-0.01489927
353.59	0.12464622		883.59	0.00386257		1413.58	0.01290705		1943.58	0.00256361		2473.57	0.01984878		3003.57	0.01658709		3533.6	-0.01478124
353.79	0.12548313		883.79	0.00386571		1413.78	0.01306071		1943.78	0.00354988		2473.77	0.02036266		3003.77	0.01694441		3533.8	-0.01455785
353.99	0.12617965		883.99	0.00326682		1413.98	0.01213885		1943.98	0.00320749		2473.97	0.02068832		3003.97	0.01725779		3534	-0.01440905
354.19	0.12596746		884.19	0.00365258		1414.18	0.01193641		1944.18	0.00230739		2474.17	0.0206438		3004.17	0.01760261		3534.2	-0.01435905
354.39	0.12588543		884.39	0.00412039		1414.38	0.01213285		1944.38	0.00207385		2474.37	0.02077581		3004.37	0.01790329		3534.4	-0.01333674
354.59	0.12607106		884.59	0.00398151		1414.58	0.01349907		1944.58	0.00107319		2474.57	0.02048304		3004.57	0.01908526		3534.6	-0.01285193
354.79	0.12671525		884.79	0.00252223		1414.78	0.01374877		1944.78	0.00169969		2474.77	0.02026044		3004.77	0.01952584		3534.8	-0.01305001
354.99	0.12652341		884.99	0.00162012		1414.98	0.012983		1944.98	0.00213204		2474.97	0.01964535		3004.97	0.02001916		3535	-0.01277272
355.19	0.12714083		885.19	0.00044316		1415.18	0.01315715		1945.18	0.00282026		2475.17	0.01820598		3005.17	0.02106575		3535.2	-0.0133609
355.39	0.12638112		885.39	-0.00030893		1415.38	0.01375971		1945.38	0.00236583		2475.37	0.01826623		3005.37	0.02215462		3535.4	-0.01307808
355.59	0.12669364		885.59	-0.00112924		1415.58	0.01458262		1945.58	0.00249643		2475.57	0.01787875		3005.57	0.02276974		3535.6	-0.01305234
355.79	0.12595912		885.79	-0.00100845		1415.78	0.01634498		1945.78	0.00181134		2475.77	0.01774309		3005.77	0.02218994		3535.8	-0.01308118
355.99	0.12546103		885.99	-0.00136748		1415.98	0.01678494		1945.98	0.00070108		2475.97	0.01748371		3005.97	0.02219693		3536	-0.01364592
356.19	0.12574098		886.19	-0.00195404		1416.18	0.0174711		1946.18	-0.00079584		2476.17	0.0176602		3006.17	0.02140288		3536.2	-0.01359194
356.39	0.12517613		886.39	-0.00107448		1416.38	0.01825366		1946.38	-0.00235619		2476.37	0.0173533		3006.37	0.02066137		3536.4	-0.01359411
356.59	0.12468836		886.59	-0.00110952		1416.58	0.01850719		1946.58	-0.00250532		2476.57	0.01817617		3006.57	0.02091061		3536.6	-0.01398641
356.79	0.12468135		886.79	-0.00076779		1416.78	0.0181398		1946.78	-0.0017681		2476.77	0.01824742		3006.77	0.0204362		3536.8	-0.01449441
356.99	0.1238992		886.99	-0.00012876		1416.98	0.01783555		1946.98	-0.00178084		2476.97	0.01848742		3006.97	0.02006117		3537	-0.01513607
357.19	0.12317947		887.19	0.00026467		1417.18	0.01806106		1947.18	-0.00112035		2477.17	0.01773417		3007.17	0.01915523		3537.2	-0.01456298
357.39	0.12288838		887.39	0.00131947		1417.38	0.01778058		1947.38	0.00006868		2477.37	0.01817696		3007.37	0.0192375		3537.4	-0.01438965
357.59	0.1231334		887.59	0.00096746		1417.58	0.01752581		1947.58	0.00033796		2477.57	0.01882655		3007.57	0.01897464		3537.6	-0.01478111
357.79	0.12272436		887.79	0.00060697		1417.78	0.01753436		1947.78	0.00023097		2477.77	0.01889709		3007.77	0.01897323		3537.8	-0.01487552
357.99	0.12205941		887.99	0.00117053		1417.98	0.0174568		1947.98	-0.00001245		2477.97	0.01826058		3007.97	0.01880886		3538	-0.01507825
358.19	0.12232867		888.19	0.00153594		1418.18	0.01801294		1948.18	-0.00009073		2478.17	0.01839647		3008.17	0.01846009		3538.2	-0.01615819
358.39	0.12238978		888.39	0.0005633		1418.38	0.01766916		1948.38	0.00095255		2478.37	0.01811905		3008.37	0.01794438		3538.4	-0.01596159
358.59	0.12356303		888.59	-0.00060226		1418.58	0.01700999		1948.58	0.00123063		2478.57	0.01827938		3008.57	0.01783812		3538.6	-0.01653734
358.79	0.12430981		888.79	-0.00182598		1418.78	0.01586317		1948.78	0.00203194		2478.77	0.01806953		3008.77	0.01863216		3538.8	-0.01674215
358.99	0.12484497		888.99	-0.00183864		1418.98	0.01521223		1948.98	0.00320268		2478.97	0.01801669		3008.97	0.01906959		3539	-0.01701505
359.19	0.12602592		889.19	-0.00323632		1419.18	0.01587275		1949.18	0.00459347		2479.17	0.01763021		3009.17	0.0199282		3539.2	-0.01635626
359.39	0.12556386		889.39	-0.00356229		1419.38	0.01544586		1949.38	0.00421147		2479.37	0.01829894		3009.37	0.01996604		3539.4	-0.01611262
359.59	0.12659632		889.59	-0.00293809		1419.58	0.01584526		1949.58	0.0047516		2479.57	0.0181693		3009.57	0.01995603		3539.6	-0.01703735
359.79	0.12649155		889.79	-0.00326206		1419.78	0.01672046		1949.78	0.00471093		2479.77	0.01768716		3009.77	0.01939296		3539.8	-0.01646418
359.99	0.12719942		889.99	-0.00265287		1419.98	0.01582656		1949.98	0.00456431		2479.97	0.01781473		3009.97	0.0193868		3540	-0.0163032
360.19	0.1275194		890.19	-0.00115682		1420.18	0.01565702		1950.18	0.00481265		2480.17	0.01745166		3010.17	0.01830808		3540.2	-0.01635596
360.39	0.12706383		890.39	0.00007124		1420.38	0.01660695		1950.38	0.00544456		2480.37	0.01809664		3010.37	0.01812054		3540.4	-0.01640794
360.59	0.12644715		890.59	0.00022394		1420.58	0.01663452		1950.58	0.00613713		2480.57	0.01897472		3010.57	0.01762346		3540.6	-0.01637218
360.79	0.12675388		890.79	0.00066157		1420.78	0.01729834		1950.78	0.00541456		2480.77	0.01935294		3010.77	0.01640836		3540.8	-0.01644762
360.99	0.12648266		890.99	0.00114849		1420.98	0.01677045		1950.98	0.00552519		2480.97	0.02058397		3010.97	0.01607179		3541	-0.01571594
361.19	0.12632517		891.19	0.00207696		1421.18	0.0170112		1951.18	0.00517616		2481.17	0.02030394		3011.17	0.01555199		3541.2	-0.0153161
361.39	0.12601466		891.39	0.00308403		1421.38	0.0166534		1951.38	0.00519785		2481.37	0.02100762		3011.37	0.01522849		3541.4	-0.01518156
361.59	0.12541559		891.59	0.00267737		1421.58	0.01655053		1951.58	0.00381083		2481.57	0.02097349		3011.57	0.01487186		3541.6	-0.01582844
361.79	0.12508333		891.79	0.00348681		1421.78	0.01681139		1951.78	0.00315612		2481.77	0.01969569		3011.77	0.01506675		3541.8	-0.01563722
361.99	0.12511446		891.99	0.00411488		1421.98	0.01602676		1951.98	0.00323452		2481.97	0.01967269		3011.97	0.01484876		3542	-0.01630274
362.19	0.12562901		892.19	0.00388443		1422.18	0.01560272		1952.18	0.00339156		2482.17	0.02039408		3012.17	0.01515933		3542.2	-0.01623443
362.39	0.12589253		892.39	0.00390408		1422.38	0.01478116		1952.38	0.00322373		2482.37	0.02019684		3012.37	0.01530781		3542.4	-0.01663167
362.59	0.12670372		892.59	0.00419986		1422.58	0.01349798		1952.58	0.00254927		2482.57	0.01973957		3012.57	0.01636081		3542.6	-0.01658837
362.79	0.12750818		892.79	0.00446431		1422.78	0.0140112		1952.78	0.0027708		2482.77	0.01936181		3012.77	0.01713731		3542.8	-0.01626439
362.99	0.12823015		892.99	0.00334463		1422.98	0.0142284		1952.98	0.00359693		2482.97	0.01957184		3012.97	0.01751563		3543	-0.01639122
363.19	0.12821606		893.19	0.00308818		1423.18	0.01393702		1953.18	0.0039999		2483.17	0.01927844		3013.17	0.01869477		3543.2	-0.01553007
363.39	0.12813094		893.39	0.00363107		1423.38	0.01343359		1953.38	0.00351715		2483.37	0.0191709		3013.37	0.01878941		3543.4	-0.01598599
363.59	0.12843906		893.59	0.0033884		1423.58	0.01406781		1953.58	0.003656		2483.57	0.01905008		3013.57	0.01953842		3543.6	-0.01652133
363.79	0.12799977		893.79	0.003037		1423.78	0.01373978		1953.78	0.00412122		2483.77	0.01898568		3013.77	0.02009871		3543.8	-0.01497742
363.99	0.12792173		893.99	0.00341348		1423.98	0.01410728		1953.98	0.00518448		2483.97	0.01987485		3013.97	0.02051973		3544	-0.0145878
364.19	0.128427		894.19	0.00396444		1424.18	0.01532354		1954.18	0.00658337		2484.17	0.02027934		3014.17	0.02020011		3544.2	-0.01446406
364.39	0.12762059		894.39	0.00274746		1424.38	0.01647123		1954.38	0.00648387		2484.37	0.02060501		3014.37	0.02035159		3544.4	-0.01380068
364.59	0.12751278		894.59	0.00179518		1424.58	0.01579087		1954.58	0.00613661		2484.57	0.02041416		3014.57	0.01986273		3544.6	-0.01323129
364.79	0.12719741		894.79	0.00196216		1424.78	0.01568439		1954.78	0.00523165		2484.77	0.02086033		3014.77	0.01991326		3544.8	-0.01283823
364.99	0.12675513		894.99	0.00182783		1424.98	0.01554564		1954.98	0.00567771		2484.97	0.02028961		3014.97	0.01963463		3545	-0.01243269
365.19	0.12608949		895.19	0.00154025		1425.18	0.01509149		1955.18	0.00453009		2485.17	0.01943759		3015.17	0.01981671		3545.2	-0.01259401
365.39	0.12555137		895.39	0.00134042		1425.38	0.01420482		1955.38	0.00371281		2485.37	0.01983589		3015.37	0.02014732		3545.4	-0.01241928
365.59	0.12625051		895.59	0.00055388		1425.58	0.01466881		1955.58	0.00387115		2485.57	0.01906704		3015.57	0.02005909		3545.6	-0.01297244
365.79	0.12676494		895.79	0.00090353		1425.78	0.0148107		1955.78	0.00299049		2485.77	0.01836073		3015.77	0.02018582		3545.8	-0.01289926
365.99	0.12667516		895.99	0.00116478		1425.98	0.01424513		1955.98	0.00259898		2485.97	0.01879879		3015.97	0.02022773		3546	-0.01369084
366.19	0.12660234		896.19	0.00083522		1426.18	0.01575974		1956.18	0.00309691		2486.17	0.01918333		3016.17	0.02001251		3546.2	-0.01366888
366.39	0.12629655		896.39	0.00100254		1426.38	0.01648002		1956.38	0.00301461		2486.37	0.01830831		3016.37	0.01914109		3546.4	-0.01501443
366.59	0.12681323		896.59	0.0007429		1426.58	0.01653589		1956.58	0.00325415		2486.57	0.01775809		3016.57	0.01939799		3546.6	-0.01516126
366.79	0.12688358		896.79	0.0007961		1426.78	0.01723024		1956.78	0.00337242		2486.77	0.01799285		3016.77	0.01920398		3546.8	-0.01563148
366.99	0.12652904		896.99	0.00044301		1426.98	0.01697777		1956.98	0.00329392		2486.97	0.0175882		3016.97	0.01866937		3547	-0.01550972
367.19	0.12686171		897.19	0.00099003		1427.18	0.01736559		1957.18	0.00303594		2487.17	0.0178374		3017.17	0.01907725		3547.2	-0.01577033
367.39	0.1267757		897.39	0.0002144		1427.38	0.01716913		1957.38	0.00225197		2487.37	0.01775687		3017.37	0.01927663		3547.4	-0.01575115
367.59	0.12652919		897.59	-0.00010713		1427.58	0.01824756		1957.58	0.00223907		2487.57	0.01791642		3017.57	0.01974638		3547.6	-0.01592292
367.79	0.12723581		897.79	-0.00094594		1427.78	0.01773725		1957.78	0.00215568		2487.77	0.01835638		3017.77	0.02064624		3547.8	-0.01545842
367.99	0.1282964		897.99	-0.00105106		1427.98	0.01804762		1957.98	0.00207823		2487.97	0.01917042		3017.97	0.02029346		3548	-0.0156014
368.19	0.12948519		898.19	-0.00092844		1428.18	0.01724508		1958.18	0.00238322		2488.17	0.01996468		3018.17	0.01943395		3548.2	-0.01482648
368.39	0.12903598		898.39	-0.00107701		1428.38	0.01666276		1958.38	0.00200729		2488.37	0.01964247		3018.37	0.01995736		3548.4	-0.01277209
368.59	0.12927942		898.59	-0.00080397		1428.58	0.01618569		1958.58	0.00232032		2488.57	0.02028465		3018.57	0.02037243		3548.6	-0.01226218
368.79	0.12878666		898.79	0.00024223		1428.78	0.0157492		1958.78	0.00192505		2488.77	0.02020146		3018.77	0.02087552		3548.8	-0.01157694
368.99	0.12913772		898.99	0.00023463		1428.98	0.01531993		1958.98	0.00227039		2488.97	0.02049279		3018.97	0.02133163		3549	-0.01129478
369.19	0.12927365		899.19	0.00055018		1429.18	0.01447233		1959.18	0.00244092		2489.17	0.02157263		3019.17	0.02247738		3549.2	-0.01045875
369.39	0.12912334		899.39	0.00105718		1429.38	0.01390915		1959.38	0.00274716		2489.37	0.02252912		3019.37	0.02362121		3549.4	-0.01006236
369.59	0.12937798		899.59	-0.0001172		1429.58	0.01476639		1959.58	0.00327364		2489.57	0.02231188		3019.57	0.02289249		3549.6	-0.01042833
369.79	0.12862784		899.79	0.00089949		1429.78	0.01406377		1959.78	0.00227992		2489.77	0.02226912		3019.77	0.02257802		3549.8	-0.0109718
369.99	0.12875968		899.99	0.00155697		1429.98	0.01453498		1959.98	0.00351479		2489.97	0.02239155		3019.97	0.02187335		3550	-0.01122679
370.19	0.12911253		900.19	0.00224146		1430.18	0.01540243		1960.18	0.00502351		2490.17	0.02202085		3020.17	0.02096721		3550.2	-0.01243729
370.39	0.12911532		900.39	0.00325922		1430.38	0.01498997		1960.38	0.00554648		2490.37	0.02142991		3020.37	0.02096724		3550.4	-0.01319723
370.59	0.12964765		900.59	0.00267787		1430.58	0.01590472		1960.58	0.00595698		2490.57	0.0216571		3020.57	0.02128826		3550.6	-0.01387428
370.79	0.12883059		900.79	0.00255393		1430.78	0.01583158		1960.78	0.00649125		2490.77	0.02170312		3020.77	0.02036058		3550.8	-0.01425767
370.99	0.12870753		900.99	0.00233222		1430.98	0.01614183		1960.98	0.00710212		2490.97	0.02202565		3020.97	0.01981145		3551	-0.01359666
371.19	0.12933408		901.19	0.00135164		1431.18	0.01681999		1961.18	0.00715452		2491.17	0.02275522		3021.17	0.02024441		3551.2	-0.01371288
371.39	0.12982574		901.39	0.00004774		1431.38	0.01682035		1961.38	0.00703966		2491.37	0.02309125		3021.37	0.01975593		3551.4	-0.0135826
371.59	0.13087392		901.59	-0.00056891		1431.58	0.01780624		1961.58	0.00755807		2491.57	0.02266179		3021.57	0.0194699		3551.6	-0.0138584
371.79	0.13203356		901.79	-0.00115328		1431.78	0.01671854		1961.78	0.00704282		2491.77	0.02257083		3021.77	0.01952922		3551.8	-0.01374085
371.99	0.13281709		901.99	-0.00030482		1431.98	0.01648408		1961.98	0.00670116		2491.97	0.02216196		3021.97	0.01863616		3552	-0.01300957
372.19	0.13201397		902.19	-0.00023341		1432.18	0.01595725		1962.18	0.00686052		2492.17	0.02166475		3022.17	0.01910347		3552.2	-0.01183188
372.39	0.13175927		902.39	0.00020706		1432.38	0.01634694		1962.38	0.00582992		2492.37	0.02093746		3022.37	0.02001457		3552.4	-0.01092017
372.59	0.13100911		902.59	-0.00014567		1432.58	0.01629077		1962.58	0.00536925		2492.57	0.02101819		3022.57	0.02010698		3552.6	-0.01201084
372.79	0.13070125		902.79	-0.0005022		1432.78	0.01637808		1962.78	0.00482002		2492.77	0.02105198		3022.77	0.02044789		3552.8	-0.01176301
372.99	0.13121422		902.99	-0.00139062		1432.98	0.01615805		1962.98	0.00452972		2492.97	0.02127768		3022.97	0.02035203		3553	-0.01228411
373.19	0.13103484		903.19	-0.00189779		1433.18	0.01600663		1963.18	0.00294826		2493.17	0.02118787		3023.17	0.02027593		3553.2	-0.01202623
373.39	0.13142782		903.39	-0.00255784		1433.38	0.01569833		1963.38	0.00202218		2493.37	0.02130236		3023.37	0.02123423		3553.4	-0.0126659
373.59	0.13101261		903.59	-0.00262247		1433.58	0.01636473		1963.58	0.00156803		2493.57	0.01991308		3023.57	0.02077568		3553.6	-0.012717
373.79	0.13113013		903.79	-0.00121734		1433.78	0.01647189		1963.78	0.00131475		2493.77	0.01995489		3023.77	0.02032222		3553.8	-0.01294135
373.99	0.1311996		903.99	-0.00072674		1433.98	0.01726626		1963.98	0.00102598		2493.97	0.02005989		3023.97	0.01994835		3554	-0.01223122
374.19	0.13120524		904.19	-0.00049549		1434.18	0.01633458		1964.18	0.00115212		2494.17	0.02043822		3024.17	0.02050188		3554.2	-0.01209307
374.39	0.13069114		904.39	-0.00037352		1434.38	0.01605745		1964.38	0.00098354		2494.37	0.0213262		3024.37	0.02047602		3554.4	-0.01136279
374.59	0.13063407		904.59	-0.00083879		1434.58	0.01602796		1964.58	0.00125531		2494.57	0.02099051		3024.57	0.02044448		3554.6	-0.01195102
374.79	0.13055055		904.79	-0.00008358		1434.78	0.01426905		1964.78	0.0010968		2494.77	0.02141929		3024.77	0.02021613		3554.8	-0.01127324
374.99	0.13133519		904.99	-0.00010537		1434.98	0.01454986		1964.98	0.00228878		2494.97	0.02153581		3024.97	0.02037013		3555	-0.01016353
375.19	0.13225012		905.19	-0.00011305		1435.18	0.01456744		1965.18	0.00291041		2495.17	0.02096773		3025.17	0.01998974		3555.2	-0.01069773
375.39	0.13246437		905.39	-0.00051265		1435.38	0.01415798		1965.38	0.00295788		2495.37	0.02097214		3025.37	0.01984787		3555.4	-0.01135359
375.59	0.13304675		905.59	-0.00006355		1435.58	0.01362683		1965.58	0.00365115		2495.57	0.02082424		3025.57	0.02016674		3555.6	-0.01218182
375.79	0.13360077		905.79	0.00058459		1435.78	0.01345028		1965.78	0.00352933		2495.77	0.02102473		3025.77	0.02105891		3555.8	-0.01238902
375.99	0.1333649		905.99	0.00025282		1435.98	0.01352197		1965.98	0.00375634		2495.97	0.021121		3025.97	0.02170168		3556	-0.01246215
376.19	0.13344198		906.19	0.00102107		1436.18	0.01355584		1966.18	0.00341597		2496.17	0.02107627		3026.17	0.02205289		3556.2	-0.01298727
376.39	0.1337538		906.39	0.00084709		1436.38	0.01361658		1966.38	0.00365034		2496.37	0.02151349		3026.37	0.02226566		3556.4	-0.01328636
376.59	0.13377986		906.59	-0.00007141		1436.58	0.01461449		1966.58	0.00408357		2496.57	0.02202709		3026.57	0.02172966		3556.6	-0.01423761
376.79	0.1347508		906.79	0.00017901		1436.78	0.01486887		1966.78	0.00449403		2496.77	0.02165207		3026.77	0.02155653		3556.8	-0.01447071
376.99	0.13539922		906.99	-0.00043536		1436.98	0.01482108		1966.98	0.00376344		2496.97	0.02166839		3026.97	0.02180391		3557	-0.01567072
377.19	0.13498348		907.19	-0.00064411		1437.18	0.01575484		1967.18	0.00332194		2497.17	0.02195621		3027.17	0.02208266		3557.2	-0.01592101
377.39	0.13504857		907.39	0.00038357		1437.38	0.01649567		1967.38	0.00406683		2497.37	0.02210619		3027.37	0.02247522		3557.4	-0.01531064
377.59	0.13375319		907.59	0.00033548		1437.58	0.01781682		1967.58	0.00430971		2497.57	0.02222235		3027.57	0.02250014		3557.6	-0.01434844
377.79	0.13379208		907.79	-0.00002275		1437.78	0.0181737		1967.78	0.00437292		2497.77	0.02369244		3027.77	0.02240202		3557.8	-0.01458478
377.99	0.13341116		907.99	-0.00022412		1437.98	0.01786449		1967.98	0.00401445		2497.97	0.02421947		3027.97	0.02264512		3558	-0.01443793
378.19	0.13342976		908.19	-0.0002536		1438.18	0.01719474		1968.18	0.00425182		2498.17	0.02446253		3028.17	0.02291898		3558.2	-0.01400449
378.39	0.13327041		908.39	0.00030757		1438.38	0.01707877		1968.38	0.00402141		2498.37	0.02457884		3028.37	0.02246156		3558.4	-0.01432743
378.59	0.1333638		908.59	0.00043384		1438.58	0.01667333		1968.58	0.00386011		2498.57	0.0239606		3028.57	0.02251272		3558.6	-0.01439257
378.79	0.13322707		908.79	0.00081475		1438.78	0.01678225		1968.78	0.0036147		2498.77	0.02437006		3028.77	0.02227377		3558.8	-0.01335456
378.99	0.13297933		908.99	0.00092277		1438.98	0.01725681		1968.98	0.00399301		2498.97	0.02438176		3028.97	0.02205016		3559	-0.01283945
379.19	0.13278972		909.19	0.00135159		1439.18	0.01682594		1969.18	0.00333642		2499.17	0.02454351		3029.17	0.0216767		3559.2	-0.0128303
379.39	0.13233185		909.39	0.0013636		1439.38	0.01632908		1969.38	0.00289413		2499.37	0.02544544		3029.37	0.02168834		3559.4	-0.01226458
379.59	0.13260238		909.59	0.00183834		1439.58	0.01614174		1969.58	0.00329147		2499.57	0.02622093		3029.57	0.02153305		3559.6	-0.01167877
379.79	0.13241318		909.79	0.00228854		1439.78	0.0162449		1969.78	0.00273179		2499.77	0.02617344		3029.77	0.02151811		3559.8	-0.01056005
379.99	0.13241318		909.99	0.00228854		1439.98	0.0162449		1969.98	0.00273179		2499.97	0.02617344		3029.97	0.02151811		3560	-0.01056005
380.19	0.13218811		910.19	0.00220134		1440.18	0.01537815		1970.18	0.00261235		2500.17	0.02707515		3030.17	0.02121068		3560.2	-0.01030312
380.39	0.13242794		910.39	0.00296124		1440.38	0.01475594		1970.38	0.00290221		2500.37	0.0281509		3030.37	0.02131435		3560.4	-0.01059863
380.59	0.13223205		910.59	0.00420053		1440.58	0.01441366		1970.58	0.00253497		2500.57	0.02883372		3030.57	0.02095484		3560.6	-0.01117298
380.79	0.1321377		910.79	0.00460994		1440.78	0.01414386		1970.78	0.00252004		2500.77	0.02979688		3030.77	0.02113602		3560.8	-0.01183242
380.99	0.13179609		910.99	0.00481502		1440.98	0.01254406		1970.98	0.00293972		2500.97	0.03117016		3030.97	0.0209595		3561	-0.01247297
381.19	0.13135813		911.19	0.00458227		1441.18	0.01213117		1971.18	0.00291914		2501.17	0.03158244		3031.17	0.02099877		3561.2	-0.01234068
381.39	0.13139836		911.39	0.0047701		1441.38	0.01192942		1971.38	0.00278635		2501.37	0.03104623		3031.37	0.02080758		3561.4	-0.01268656
381.59	0.13103516		911.59	0.00512413		1441.58	0.01196746		1971.58	0.00309396		2501.57	0.0310295		3031.57	0.02061968		3561.6	-0.01339925
381.79	0.1303857		911.79	0.00593121		1441.78	0.01194636		1971.78	0.00291379		2501.77	0.03157995		3031.77	0.02050303		3561.8	-0.01449992
381.99	0.1302065		911.99	0.00474656		1441.98	0.01260087		1971.98	0.00287967		2501.97	0.03129299		3031.97	0.02058355		3562	-0.01531337
382.19	0.12963365		912.19	0.00424947		1442.18	0.01288547		1972.18	0.00254561		2502.17	0.03092342		3032.17	0.02159039		3562.2	-0.01551362
382.39	0.1292553		912.39	0.00441305		1442.38	0.01241897		1972.38	0.00199442		2502.37	0.0319046		3032.37	0.02200536		3562.4	-0.01399061
382.59	0.1293967		912.59	0.00507206		1442.58	0.01276432		1972.58	0.00224297		2502.57	0.03202728		3032.57	0.02277013		3562.6	-0.01368686
382.79	0.12917368		912.79	0.00464735		1442.78	0.01376836		1972.78	0.00254553		2502.77	0.0314074		3032.77	0.02357691		3562.8	-0.01332528
382.99	0.12981593		912.99	0.00479117		1442.98	0.0152142		1972.98	0.00358921		2502.97	0.03095454		3032.97	0.02408736		3563	-0.01328748
383.19	0.13075046		913.19	0.00435385		1443.18	0.01617159		1973.18	0.00431924		2503.17	0.03057522		3033.17	0.02356584		3563.2	-0.01333119
383.39	0.13026272		913.39	0.00424006		1443.38	0.0162031		1973.38	0.00411172		2503.37	0.0304741		3033.37	0.02401108		3563.4	-0.01236298
383.59	0.1301041		913.59	0.00396829		1443.58	0.01613804		1973.58	0.0053077		2503.57	0.03036645		3033.57	0.02435476		3563.6	-0.01207965
383.79	0.13090117		913.79	0.00365619		1443.78	0.01547149		1973.78	0.00592215		2503.77	0.03035915		3033.77	0.02568569		3563.8	-0.01125145
383.99	0.13120279		913.99	0.00369503		1443.98	0.01404792		1973.98	0.00576627		2503.97	0.03034673		3033.97	0.02608707		3564	-0.0095505
384.19	0.13201656		914.19	0.003382		1444.18	0.01377752		1974.18	0.00597866		2504.17	0.03027792		3034.17	0.02622622		3564.2	-0.00943443
384.39	0.13237327		914.39	0.00407569		1444.38	0.01345195		1974.38	0.00626414		2504.37	0.03053087		3034.37	0.02657688		3564.4	-0.00970078
384.59	0.13271574		914.59	0.00472703		1444.58	0.01324696		1974.58	0.00682775		2504.57	0.03087903		3034.57	0.02666614		3564.6	-0.00966372
384.79	0.13313001		914.79	0.00377939		1444.78	0.01182065		1974.78	0.00717703		2504.77	0.03157319		3034.77	0.02680199		3564.8	-0.00989234
384.99	0.13376183		914.99	0.0038113		1444.98	0.01028212		1974.98	0.00738344		2504.97	0.03194892		3034.97	0.02651731		3565	-0.00959838
385.19	0.13473558		915.19	0.00409669		1445.18	0.0104128		1975.18	0.00751353		2505.17	0.0309472		3035.17	0.02524806		3565.2	-0.010067
385.39	0.13508351		915.39	0.00362554		1445.38	0.01038112		1975.38	0.00751485		2505.37	0.03110248		3035.37	0.02385624		3565.4	-0.01103405
385.59	0.13461846		915.59	0.00407244		1445.58	0.01002778		1975.58	0.00768338		2505.57	0.03244832		3035.57	0.02330387		3565.6	-0.01200716
385.79	0.13440436		915.79	0.00392129		1445.78	0.01011444		1975.78	0.00719875		2505.77	0.03356748		3035.77	0.02322044		3565.8	-0.01282647
385.99	0.1346619		915.99	0.00357994		1445.98	0.01124576		1975.98	0.0066565		2505.97	0.03322401		3035.97	0.02321645		3566	-0.01258255
386.19	0.13315411		916.19	0.00374232		1446.18	0.0113462		1976.18	0.00653916		2506.17	0.03398904		3036.17	0.02409292		3566.2	-0.01211944
386.39	0.13272155		916.39	0.00434044		1446.38	0.01198107		1976.38	0.00652215		2506.37	0.03329375		3036.37	0.02327097		3566.4	-0.01184543
386.59	0.13267263		916.59	0.00460995		1446.58	0.01279242		1976.58	0.0069244		2506.57	0.0314568		3036.57	0.02238347		3566.6	-0.01227233
386.79	0.13305639		916.79	0.0041536		1446.78	0.01429602		1976.78	0.00679045		2506.77	0.03015931		3036.77	0.02206575		3566.8	-0.01281158
386.99	0.13357437		916.99	0.00361488		1446.98	0.01478823		1976.98	0.00738376		2506.97	0.02986852		3036.97	0.02206902		3567	-0.01395941
387.19	0.13301212		917.19	0.00455799		1447.18	0.01360689		1977.18	0.00721593		2507.17	0.03023438		3037.17	0.02203777		3567.2	-0.01382223
387.39	0.13311025		917.39	0.00527712		1447.38	0.01395412		1977.38	0.0079245		2507.37	0.03021321		3037.37	0.02244346		3567.4	-0.01251285
387.59	0.13288873		917.59	0.00479046		1447.58	0.01417278		1977.58	0.0088398		2507.57	0.02996693		3037.57	0.02303923		3567.6	-0.01228473
387.79	0.13320617		917.79	0.00580309		1447.78	0.01374653		1977.78	0.0094014		2507.77	0.02941111		3037.77	0.02338296		3567.8	-0.01165126
387.99	0.13241347		917.99	0.00622896		1447.98	0.01398768		1977.98	0.00946284		2507.97	0.02924942		3037.97	0.02333821		3568	-0.0111166
388.19	0.13332765		918.19	0.0062054		1448.18	0.01365067		1978.18	0.00980191		2508.17	0.02938596		3038.17	0.02274376		3568.2	-0.01121397
388.39	0.13317363		918.39	0.00632365		1448.38	0.01366775		1978.38	0.01087809		2508.37	0.02981797		3038.37	0.02344346		3568.4	-0.01123528
388.59	0.13342406		918.59	0.00628125		1448.58	0.01320062		1978.58	0.01197428		2508.57	0.02991362		3038.57	0.02364725		3568.6	-0.01126649
388.79	0.13380471		918.79	0.00563878		1448.78	0.01217161		1978.78	0.01150474		2508.77	0.03012261		3038.77	0.02322249		3568.8	-0.01118517
388.99	0.13453859		918.99	0.00571774		1448.98	0.01208269		1978.98	0.01172363		2508.97	0.02953919		3038.97	0.02305422		3569	-0.01123651
389.19	0.134748		919.19	0.00494907		1449.18	0.01182018		1979.18	0.01185643		2509.17	0.02933997		3039.17	0.02245495		3569.2	-0.01161576
389.39	0.13385153		919.39	0.00421416		1449.38	0.01170682		1979.38	0.01105949		2509.37	0.02971894		3039.37	0.02348287		3569.4	-0.01183963
389.59	0.13407787		919.59	0.00499495		1449.58	0.01203153		1979.58	0.01101874		2509.57	0.02994172		3039.57	0.02413851		3569.6	-0.01208467
389.79	0.13381202		919.79	0.00431523		1449.78	0.01356964		1979.78	0.01109184		2509.77	0.0299348		3039.77	0.02478012		3569.8	-0.01180442
389.99	0.13359966		919.99	0.00523032		1449.98	0.01431678		1979.98	0.01066786		2509.97	0.02980703		3039.97	0.02547225		3570	-0.01158993
390.19	0.13312101		920.19	0.00472699		1450.18	0.0142201		1980.18	0.01054135		2510.17	0.02980123		3040.17	0.02521806		3570.2	-0.01176343
390.39	0.13438482		920.39	0.0052582		1450.38	0.01471918		1980.38	0.00939351		2510.37	0.02867021		3040.37	0.02501077		3570.4	-0.01211654
390.59	0.13505741		920.59	0.00481851		1450.58	0.01451118		1980.58	0.00889197		2510.57	0.02854609		3040.57	0.02531404		3570.6	-0.01189634
390.79	0.13490607		920.79	0.00467132		1450.78	0.01507		1980.78	0.00845799		2510.77	0.02895334		3040.77	0.02536723		3570.8	-0.01203252
390.99	0.13445768		920.99	0.00489863		1450.98	0.01454154		1980.98	0.00830223		2510.97	0.02996569		3040.97	0.02467496		3571	-0.01264367
391.19	0.13333058		921.19	0.00617279		1451.18	0.01397984		1981.18	0.0083025		2511.17	0.03004133		3041.17	0.02416556		3571.2	-0.01155323
391.39	0.1335288		921.39	0.00542455		1451.38	0.0137062		1981.38	0.00850098		2511.37	0.02993906		3041.37	0.02393383		3571.4	-0.01099761
391.59	0.13329213		921.59	0.00465041		1451.58	0.01441936		1981.58	0.00865112		2511.57	0.02968081		3041.57	0.0240531		3571.6	-0.01085757
391.79	0.13353564		921.79	0.00564378		1451.78	0.01392664		1981.78	0.00943303		2511.77	0.02952528		3041.77	0.02380668		3571.8	-0.01040915
391.99	0.133488		921.99	0.00578511		1451.98	0.01262344		1981.98	0.01022669		2511.97	0.03006846		3041.97	0.02301321		3572	-0.01089489
392.19	0.13422003		922.19	0.00551905		1452.18	0.01149862		1982.18	0.01102877		2512.17	0.02984017		3042.17	0.0226586		3572.2	-0.01107212
392.39	0.13366548		922.39	0.00621614		1452.38	0.01133071		1982.38	0.01117906		2512.37	0.02965412		3042.37	0.02290674		3572.4	-0.01093349
392.59	0.13330693		922.59	0.00634788		1452.58	0.00995113		1982.58	0.01204054		2512.57	0.0295274		3042.57	0.02273581		3572.6	-0.01109067
392.79	0.13340891		922.79	0.00640477		1452.78	0.00909454		1982.78	0.01195891		2512.77	0.02863683		3042.77	0.02256301		3572.8	-0.01147778
392.99	0.1333141		922.99	0.00649552		1452.98	0.00909806		1982.98	0.0118739		2512.97	0.02786742		3042.97	0.02313168		3573	-0.01301165
393.19	0.13310011		923.19	0.00665814		1453.18	0.00905222		1983.18	0.01194613		2513.17	0.02778581		3043.17	0.02344408		3573.2	-0.01273408
393.39	0.13281379		923.39	0.00643317		1453.38	0.00914786		1983.38	0.01220568		2513.37	0.0272896		3043.37	0.02431246		3573.4	-0.01282963
393.59	0.13348526		923.59	0.00571803		1453.58	0.0097279		1983.58	0.01268578		2513.57	0.02751099		3043.57	0.02389161		3573.6	-0.01238486
393.79	0.13360358		923.79	0.0051111		1453.78	0.01033819		1983.78	0.01246432		2513.77	0.02762967		3043.77	0.02381342		3573.8	-0.01115215
393.99	0.13344901		923.99	0.00543914		1453.98	0.01018669		1983.98	0.01194682		2513.97	0.0276122		3043.97	0.02312831		3574	-0.01196037
394.19	0.13388675		924.19	0.00528507		1454.18	0.01085269		1984.18	0.0112392		2514.17	0.02770124		3044.17	0.02216933		3574.2	-0.01211012
394.39	0.13438656		924.39	0.00457884		1454.38	0.01144023		1984.38	0.01041727		2514.37	0.02732615		3044.37	0.02215584		3574.4	-0.01225635
394.59	0.13457878		924.59	0.00458167		1454.58	0.01103603		1984.58	0.01052359		2514.57	0.02732206		3044.57	0.02114113		3574.6	-0.01227655
394.79	0.13361446		924.79	0.00422219		1454.78	0.01149317		1984.78	0.01038395		2514.77	0.02717218		3044.77	0.01981182		3574.8	-0.01297204
394.99	0.13335267		924.99	0.00384255		1454.98	0.01152156		1984.98	0.01051717		2514.97	0.02692356		3044.97	0.01960756		3575	-0.01278147
395.19	0.13406298		925.19	0.0030766		1455.18	0.01110136		1985.18	0.00979121		2515.17	0.02710286		3045.17	0.01958129		3575.2	-0.01273422
395.39	0.13497932		925.39	0.00205648		1455.38	0.01151534		1985.38	0.00990758		2515.37	0.02735404		3045.37	0.01942532		3575.4	-0.01274687
395.59	0.13547624		925.59	0.00215188		1455.58	0.0127062		1985.58	0.0109615		2515.57	0.02722137		3045.57	0.02007632		3575.6	-0.01242416
395.79	0.13543709		925.79	0.0024685		1455.78	0.01109965		1985.78	0.01182994		2515.77	0.02787348		3045.77	0.01999704		3575.8	-0.01253223
395.99	0.13486159		925.99	0.00320747		1455.98	0.01032971		1985.98	0.01365251		2515.97	0.02860146		3045.97	0.01991015		3576	-0.01287394
396.19	0.13404098		926.19	0.00437286		1456.18	0.01040158		1986.18	0.01402502		2516.17	0.02880658		3046.17	0.0207857		3576.2	-0.01256138
396.39	0.13419338		926.39	0.0053389		1456.38	0.01040113		1986.38	0.01465975		2516.37	0.02929637		3046.37	0.02117614		3576.4	-0.01232075
396.59	0.13409298		926.59	0.00507276		1456.58	0.00947477		1986.58	0.01660568		2516.57	0.02946864		3046.57	0.02171086		3576.6	-0.01309666
396.79	0.13405955		926.79	0.00493883		1456.78	0.00939366		1986.78	0.01710033		2516.77	0.02979683		3046.77	0.02164347		3576.8	-0.01283108
396.99	0.13383349		926.99	0.00524378		1456.98	0.01003737		1986.98	0.01776569		2516.97	0.0306562		3046.97	0.02204542		3577	-0.0127204
397.19	0.1337576		927.19	0.0053565		1457.18	0.01031245		1987.18	0.01848926		2517.17	0.03088798		3047.17	0.02274669		3577.2	-0.01132827
397.39	0.13284699		927.39	0.00469063		1457.38	0.00990696		1987.38	0.01813795		2517.37	0.0307086		3047.37	0.02367391		3577.4	-0.01139008
397.59	0.13315483		927.59	0.00494874		1457.58	0.01037718		1987.58	0.01799513		2517.57	0.03105773		3047.57	0.02365668		3577.6	-0.01139147
397.79	0.13277571		927.79	0.00458144		1457.78	0.01126359		1987.78	0.01771338		2517.77	0.03049044		3047.77	0.02348121		3577.8	-0.01100795
397.99	0.13245195		927.99	0.00366262		1457.98	0.01155959		1987.98	0.01704492		2517.97	0.03034777		3047.97	0.02350692		3578	-0.01214632
398.19	0.13330473		928.19	0.00380287		1458.18	0.01141116		1988.18	0.01587186		2518.17	0.02969555		3048.17	0.02339875		3578.2	-0.0118227
398.39	0.132652		928.39	0.0030219		1458.38	0.01097935		1988.38	0.01506504		2518.37	0.02863784		3048.37	0.02297029		3578.4	-0.01184071
398.59	0.13260722		928.59	0.00313441		1458.58	0.01083699		1988.58	0.01387188		2518.57	0.02866965		3048.57	0.02317024		3578.6	-0.0123935
398.79	0.13208054		928.79	0.00322612		1458.78	0.01076841		1988.78	0.01259474		2518.77	0.02830224		3048.77	0.02357967		3578.8	-0.01237072
398.99	0.13137288		928.99	0.00288385		1458.98	0.01113174		1988.98	0.01152256		2518.97	0.02775656		3048.97	0.02346773		3579	-0.01243797
399.19	0.13087787		929.19	0.00270881		1459.18	0.01072624		1989.18	0.00973542		2519.17	0.02717791		3049.17	0.02282464		3579.2	-0.01276382
399.39	0.1301086		929.39	0.00325855		1459.38	0.01092655		1989.38	0.00985234		2519.37	0.02687206		3049.37	0.02302389		3579.4	-0.01282436
399.59	0.13027444		929.59	0.00374047		1459.58	0.01056693		1989.58	0.01095617		2519.57	0.02608932		3049.57	0.02284116		3579.6	-0.01263237
399.79	0.13019215		929.79	0.00451442		1459.78	0.01065103		1989.78	0.01179689		2519.77	0.02626633		3049.77	0.0219086		3579.8	-0.01286253
399.99	0.13038393		929.99	0.00600641		1459.98	0.0105776		1989.98	0.01285526		2519.97	0.02645041		3049.97	0.02116665		3580	-0.01268943
400.19	0.13025918		930.19	0.00640326		1460.18	0.01079724		1990.18	0.01372578		2520.17	0.02685011		3050.17	0.02037985		3580.2	-0.01347674
400.39	0.13115371		930.39	0.00630531		1460.38	0.01019151		1990.38	0.01574412		2520.37	0.02649308		3050.37	0.01972374		3580.4	-0.01444823
400.59	0.13080912		930.59	0.0066908		1460.58	0.01003283		1990.58	0.01708096		2520.57	0.02732939		3050.57	0.01840359		3580.6	-0.01530862
400.79	0.13101597		930.79	0.00742186		1460.78	0.01020036		1990.78	0.01812744		2520.77	0.0278633		3050.77	0.01810114		3580.8	-0.01494249
400.99	0.13098021		930.99	0.0080602		1460.98	0.01089701		1990.98	0.01864956		2520.97	0.02765548		3050.97	0.01848737		3581	-0.01566511
401.19	0.13129745		931.19	0.00795259		1461.18	0.010423		1991.18	0.01900513		2521.17	0.02760821		3051.17	0.01871663		3581.2	-0.01560133
401.39	0.13085		931.39	0.00713135		1461.38	0.01055092		1991.38	0.01886596		2521.37	0.02769147		3051.37	0.01873139		3581.4	-0.01641339
401.59	0.13228282		931.59	0.00596079		1461.58	0.01184814		1991.58	0.01927058		2521.57	0.02778558		3051.57	0.01913425		3581.6	-0.01570295
401.79	0.13264131		931.79	0.0044394		1461.78	0.0124358		1991.78	0.01867564		2521.77	0.02739649		3051.77	0.01965795		3581.8	-0.01440153
401.99	0.13240059		931.99	0.0038746		1461.98	0.01228619		1991.98	0.01811791		2521.97	0.02818386		3051.97	0.020299		3582	-0.01366464
402.19	0.13192065		932.19	0.00322078		1462.18	0.01219189		1992.18	0.01736527		2522.17	0.02788081		3052.17	0.02025589		3582.2	-0.01256199
402.39	0.13083973		932.39	0.00184657		1462.38	0.01220928		1992.38	0.0151853		2522.37	0.02848822		3052.37	0.0208118		3582.4	-0.01201948
402.59	0.1317631		932.59	0.002142		1462.58	0.01191807		1992.58	0.01307591		2522.57	0.02921113		3052.57	0.02200427		3582.6	-0.01200496
402.79	0.13161497		932.79	0.00197098		1462.78	0.0114033		1992.78	0.01180621		2522.77	0.0289503		3052.77	0.02377564		3582.8	-0.01120302
402.99	0.13097794		932.99	0.00151565		1462.98	0.01110274		1992.98	0.01009457		2522.97	0.02926481		3052.97	0.02424272		3583	-0.01101703
403.19	0.13134302		933.19	0.00121138		1463.18	0.01095396		1993.18	0.0089838		2523.17	0.02918774		3053.17	0.02474586		3583.2	-0.01074574
403.39	0.13229966		933.39	0.0014781		1463.38	0.01078806		1993.38	0.01015168		2523.37	0.02968996		3053.37	0.02541299		3583.4	-0.010497
403.59	0.13287332		933.59	0.00135384		1463.58	0.01101954		1993.58	0.01094254		2523.57	0.02906815		3053.57	0.02469351		3583.6	-0.0101114
403.79	0.13348875		933.79	0.00192152		1463.78	0.01126539		1993.78	0.01131792		2523.77	0.02929563		3053.77	0.0241954		3583.8	-0.01090956
403.99	0.13387		933.99	0.00254361		1463.98	0.0109927		1993.98	0.01197752		2523.97	0.02976516		3053.97	0.0238974		3584	-0.01138246
404.19	0.13336763		934.19	0.00230999		1464.18	0.01057305		1994.18	0.0139076		2524.17	0.02990714		3054.17	0.02338764		3584.2	-0.01331218
404.39	0.13330607		934.39	0.00276557		1464.38	0.00931384		1994.38	0.01564854		2524.37	0.03010581		3054.37	0.02305011		3584.4	-0.0147886
404.59	0.13363212		934.59	0.00316954		1464.58	0.01014464		1994.58	0.01717961		2524.57	0.0310286		3054.57	0.02214854		3584.6	-0.01628634
404.79	0.13351327		934.79	0.0035295		1464.78	0.01015664		1994.78	0.0178734		2524.77	0.03154338		3054.77	0.02194081		3584.8	-0.01652988
404.99	0.13384175		934.99	0.00387495		1464.98	0.00985418		1994.98	0.01913385		2524.97	0.03133819		3054.97	0.02065521		3585	-0.01728412
405.19	0.1337045		935.19	0.00340916		1465.18	0.00914934		1995.18	0.02047805		2525.17	0.03178124		3055.17	0.01906855		3585.2	-0.01717992
405.39	0.13386859		935.39	0.00352958		1465.38	0.00951961		1995.38	0.02096694		2525.37	0.03131776		3055.37	0.01834318		3585.4	-0.01772121
405.59	0.13346793		935.59	0.00360001		1465.58	0.00966651		1995.58	0.02089271		2525.57	0.03081858		3055.57	0.01752975		3585.6	-0.01709563
405.79	0.13200299		935.79	0.00514231		1465.78	0.00940496		1995.78	0.02098392		2525.77	0.03136379		3055.77	0.01715073		3585.8	-0.01617195
405.99	0.13126899		935.99	0.00508974		1465.98	0.00875156		1995.98	0.02021958		2525.97	0.03095342		3055.97	0.01657166		3586	-0.01527741
406.19	0.1309053		936.19	0.00422825		1466.18	0.00899044		1996.18	0.01809657		2526.17	0.03022488		3056.17	0.01685703		3586.2	-0.01445589
406.39	0.1317228		936.39	0.00445071		1466.38	0.00844639		1996.38	0.01601529		2526.37	0.03008283		3056.37	0.01754055		3586.4	-0.01429603
406.59	0.1329376		936.59	0.00555788		1466.58	0.00799674		1996.58	0.01495386		2526.57	0.02982502		3056.57	0.01815129		3586.6	-0.01469914
406.79	0.13315815		936.79	0.00592199		1466.78	0.00858611		1996.78	0.01468622		2526.77	0.02852453		3056.77	0.01993462		3586.8	-0.01482859
406.99	0.13356005		936.99	0.0063124		1466.98	0.00832701		1996.98	0.01374179		2526.97	0.02801204		3056.97	0.02007828		3587	-0.01461626
407.19	0.1335584		937.19	0.00640358		1467.18	0.00915036		1997.18	0.01340287		2527.17	0.02670568		3057.17	0.02064076		3587.2	-0.01413424
407.39	0.13296129		937.39	0.00622154		1467.38	0.00956954		1997.38	0.01387917		2527.37	0.02628991		3057.37	0.021719		3587.4	-0.01378944
407.59	0.1329645		937.59	0.00635774		1467.58	0.00921434		1997.58	0.0136672		2527.57	0.02534871		3057.57	0.0217065		3587.6	-0.01446281
407.79	0.13251035		937.79	0.00613854		1467.78	0.00885807		1997.78	0.01359145		2527.77	0.02565236		3057.77	0.02158904		3587.8	-0.01412268
407.99	0.13231122		937.99	0.00528977		1467.98	0.00885817		1997.98	0.01357851		2527.97	0.02528918		3057.97	0.02250641		3588	-0.01431832
408.19	0.13177606		938.19	0.00440606		1468.18	0.00821589		1998.18	0.01471326		2528.17	0.02540134		3058.17	0.02233867		3588.2	-0.01550977
408.39	0.13120577		938.39	0.00414726		1468.38	0.0084702		1998.38	0.0150893		2528.37	0.02609121		3058.37	0.02275892		3588.4	-0.01581106
408.59	0.13091511		938.59	0.00368597		1468.58	0.00921905		1998.58	0.01642507		2528.57	0.02658563		3058.57	0.02275826		3588.6	-0.0158113
408.79	0.1304217		938.79	0.0038102		1468.78	0.00868276		1998.78	0.01689539		2528.77	0.02705698		3058.77	0.02253151		3588.8	-0.01618483
408.99	0.13032118		938.99	0.00391625		1468.98	0.00775099		1998.98	0.01838825		2528.97	0.02680035		3058.97	0.02231928		3589	-0.01628295
409.19	0.13032228		939.19	0.00356925		1469.18	0.00746915		1999.18	0.01920056		2529.17	0.02689648		3059.17	0.02213851		3589.2	-0.01581884
409.39	0.13013513		939.39	0.00415886		1469.38	0.00731161		1999.38	0.01938848		2529.37	0.02686995		3059.37	0.02196205		3589.4	-0.01613235
409.59	0.12905146		939.59	0.00452195		1469.58	0.00696575		1999.58	0.01917631		2529.57	0.02694325		3059.57	0.0214823		3589.6	-0.01525878
409.79	0.12905332		939.79	0.00498861		1469.78	0.0068877		1999.78	0.0190308		2529.77	0.02719263		3059.77	0.02240657		3589.8	-0.01372132
409.99	0.12963827		939.99	0.00360123		1469.98	0.00655727		1999.98	0.01772932		2529.97	0.02704064		3059.97	0.02221058		3590	-0.01275993
410.19	0.13028104		940.19	0.00338172		1470.18	0.00704344		2000.18	0.01720818		2530.17	0.02693985		3060.17	0.02241176		3590.2	-0.01288977
410.39	0.13145975		940.39	0.00387108		1470.38	0.00661197		2000.38	0.01652643		2530.37	0.02683282		3060.37	0.02218021		3590.4	-0.0132051
410.59	0.13248399		940.59	0.00478074		1470.58	0.00706317		2000.58	0.01661368		2530.57	0.02635435		3060.57	0.02215594		3590.6	-0.01368494
410.79	0.13225473		940.79	0.00506751		1470.78	0.00709672		2000.78	0.01685295		2530.77	0.02562657		3060.77	0.02276811		3590.8	-0.01365802
410.99	0.13138681		940.99	0.00470802		1470.98	0.00683384		2000.98	0.01644662		2530.97	0.02573067		3060.97	0.02280702		3591	-0.01355532
411.19	0.13107768		941.19	0.00545186		1471.18	0.00628613		2001.18	0.01614425		2531.17	0.02574395		3061.17	0.02236404		3591.2	-0.01410315
411.39	0.13069017		941.39	0.00478105		1471.38	0.00603061		2001.38	0.01621964		2531.37	0.02599493		3061.37	0.02228497		3591.4	-0.01513729
411.59	0.12973662		941.59	0.00538051		1471.58	0.0056704		2001.58	0.01605653		2531.57	0.02543107		3061.57	0.02165477		3591.6	-0.01599369
411.79	0.12878074		941.79	0.00561692		1471.78	0.005536		2001.78	0.01553039		2531.77	0.02587222		3061.77	0.02203427		3591.8	-0.01556023
411.99	0.12920249		941.99	0.00558953		1471.98	0.00518706		2001.98	0.01564298		2531.97	0.02559337		3061.97	0.0233866		3592	-0.01623889
412.19	0.1288298		942.19	0.00648137		1472.18	0.00508173		2002.18	0.01587374		2532.17	0.02675932		3062.17	0.02296461		3592.2	-0.0169952
412.39	0.1285015		942.39	0.0068034		1472.38	0.00510552		2002.38	0.01582558		2532.37	0.02719802		3062.37	0.02308008		3592.4	-0.01723781
412.59	0.12831523		942.59	0.00679627		1472.58	0.00507803		2002.58	0.01668759		2532.57	0.02734711		3062.57	0.02310908		3592.6	-0.01875409
412.79	0.12962996		942.79	0.00697701		1472.78	0.00509864		2002.78	0.015939		2532.77	0.02678374		3062.77	0.02345876		3592.8	-0.01937044
412.99	0.13035037		942.99	0.00673916		1472.98	0.00541713		2002.98	0.01565039		2532.97	0.0264034		3062.97	0.02381217		3593	-0.0189933
413.19	0.13070718		943.19	0.00595419		1473.18	0.00618702		2003.18	0.01504401		2533.17	0.02549911		3063.17	0.02392604		3593.2	-0.01847545
413.39	0.1301715		943.39	0.00538718		1473.38	0.00695453		2003.38	0.01485438		2533.37	0.02575465		3063.37	0.024123		3593.4	-0.01812124
413.59	0.13076424		943.59	0.00488973		1473.58	0.00766723		2003.58	0.01378977		2533.57	0.02537542		3063.57	0.02419552		3593.6	-0.01778096
413.79	0.13070236		943.79	0.00413165		1473.78	0.00882126		2003.78	0.01229296		2533.77	0.02562126		3063.77	0.02526751		3593.8	-0.01727989
413.99	0.13076205		943.99	0.00279927		1473.98	0.00989537		2003.98	0.01109742		2533.97	0.02565229		3063.97	0.02497003		3594	-0.01654084
414.19	0.13141442		944.19	0.00207442		1474.18	0.01029807		2004.18	0.01060634		2534.17	0.02479014		3064.17	0.02429035		3594.2	-0.01675825
414.39	0.13138614		944.39	0.00158958		1474.38	0.01030376		2004.38	0.00940578		2534.37	0.02489762		3064.37	0.02405665		3594.4	-0.01597929
414.59	0.13173958		944.59	0.00131796		1474.58	0.01041588		2004.58	0.0092118		2534.57	0.02529462		3064.57	0.02437199		3594.6	-0.01453553
414.79	0.13124567		944.79	0.00108458		1474.78	0.01022538		2004.78	0.0086541		2534.77	0.02529246		3064.77	0.02302066		3594.8	-0.01344163
414.99	0.13122039		944.99	0.00131296		1474.98	0.01024935		2004.98	0.00871092		2534.97	0.02505159		3064.97	0.02238636		3595	-0.01311539
415.19	0.13065173		945.19	0.00221183		1475.18	0.01012487		2005.18	0.00816917		2535.17	0.02531458		3065.17	0.0217335		3595.2	-0.01226616
415.39	0.12930238		945.39	0.00205965		1475.38	0.01015363		2005.38	0.00793543		2535.37	0.02563992		3065.37	0.02215447		3595.4	-0.01219377
415.59	0.12835715		945.59	0.00352988		1475.58	0.01022659		2005.58	0.00790426		2535.57	0.02650213		3065.57	0.02170579		3595.6	-0.0119665
415.79	0.12783945		945.79	0.00414958		1475.78	0.00926572		2005.78	0.00828774		2535.77	0.02813388		3065.77	0.02213518		3595.8	-0.01167275
415.99	0.12848269		945.99	0.00504251		1475.98	0.00864526		2005.98	0.00847111		2535.97	0.028614		3065.97	0.02175082		3596	-0.01281026
416.19	0.12768637		946.19	0.00525051		1476.18	0.00808853		2006.18	0.0085959		2536.17	0.0296281		3066.17	0.02027308		3596.2	-0.01377808
416.39	0.12813609		946.39	0.00521991		1476.38	0.00828978		2006.38	0.0083739		2536.37	0.02956198		3066.37	0.01975681		3596.4	-0.01515036
416.59	0.12890428		946.59	0.00513082		1476.58	0.00782294		2006.58	0.00883573		2536.57	0.02933066		3066.57	0.01966472		3596.6	-0.01613487
416.79	0.13023831		946.79	0.00497751		1476.78	0.00761203		2006.78	0.00856574		2536.77	0.02883217		3066.77	0.01918171		3596.8	-0.0162862
416.99	0.13087782		946.99	0.00438319		1476.98	0.00719458		2006.98	0.00911132		2536.97	0.02815635		3066.97	0.0182507		3597	-0.0176028
417.19	0.13042085		947.19	0.00407029		1477.18	0.00736235		2007.18	0.00888455		2537.17	0.02748785		3067.17	0.01811736		3597.2	-0.01809246
417.39	0.12995141		947.39	0.00408775		1477.38	0.00763529		2007.38	0.00918743		2537.37	0.02727978		3067.37	0.01861882		3597.4	-0.01866884
417.59	0.1301982		947.59	0.00327489		1477.58	0.00846792		2007.58	0.00862394		2537.57	0.02719243		3067.57	0.019256		3597.6	-0.01981418
417.79	0.12975646		947.79	0.00293201		1477.78	0.00833466		2007.78	0.00919314		2537.77	0.02650286		3067.77	0.02045391		3597.8	-0.01932959
417.99	0.13070218		947.99	0.00202101		1477.98	0.00823009		2007.98	0.0100084		2537.97	0.02573441		3067.97	0.02008231		3598	-0.01897539
418.19	0.13122075		948.19	0.00225583		1478.18	0.0072176		2008.18	0.01045981		2538.17	0.0248792		3068.17	0.01929395		3598.2	-0.01946253
418.39	0.13208303		948.39	0.00209011		1478.38	0.00748007		2008.38	0.00974836		2538.37	0.02440899		3068.37	0.01964569		3598.4	-0.01888544
418.59	0.1329304		948.59	0.00208473		1478.58	0.00772542		2008.58	0.01021581		2538.57	0.02522161		3068.57	0.019731		3598.6	-0.01764621
418.79	0.13341634		948.79	0.0016786		1478.78	0.00731482		2008.78	0.01039305		2538.77	0.02480743		3068.77	0.01903211		3598.8	-0.01650758
418.99	0.13306035		948.99	0.00207019		1478.98	0.00690692		2008.98	0.01012864		2538.97	0.02482812		3068.97	0.01932952		3599	-0.01526838
419.19	0.13194213		949.19	0.00239417		1479.18	0.006814		2009.18	0.01023901		2539.17	0.02506399		3069.17	0.02019041		3599.2	-0.01404726
419.39	0.13182928		949.39	0.00224103		1479.38	0.00639911		2009.38	0.01034372		2539.37	0.02515712		3069.37	0.02149161		3599.4	-0.01402154
419.59	0.13214911		949.59	0.00239369		1479.58	0.00600709		2009.58	0.01032879		2539.57	0.02566641		3069.57	0.02217634		3599.6	-0.01404097
419.79	0.13112417		949.79	0.00273323		1479.78	0.00580974		2009.78	0.01076016		2539.77	0.0259799		3069.77	0.02296753		3599.8	-0.01444801
419.99	0.13111111		949.99	0.00298118		1479.98	0.00611519		2009.98	0.01058114		2539.97	0.02563654		3069.97	0.02333785		3600	-0.01544912
420.19	0.13118099		950.19	0.00188155		1480.18	0.0056206		2010.18	0.00931786		2540.17	0.02573723		3070.17	0.02345113		3600.2	-0.0154941
420.39	0.13201477		950.39	0.00183482		1480.38	0.00641992		2010.38	0.00879212		2540.37	0.02613235		3070.37	0.02464474		3600.4	-0.01598641
420.59	0.13273388		950.59	0.00225082		1480.58	0.00579656		2010.58	0.00938182		2540.57	0.0257776		3070.57	0.02441221		3600.6	-0.01616299
420.79	0.13233435		950.79	0.00245102		1480.78	0.00566552		2010.78	0.00874237		2540.77	0.02518523		3070.77	0.02358442		3600.8	-0.01608287
420.99	0.13230907		950.99	0.00220743		1480.98	0.00582679		2010.98	0.00864305		2540.97	0.02528959		3070.97	0.02351421		3601	-0.01608605
421.19	0.13127122		951.19	0.00212224		1481.18	0.00615924		2011.18	0.00775848		2541.17	0.02484906		3071.17	0.02462379		3601.2	-0.01597476
421.39	0.12995983		951.39	0.00218682		1481.38	0.00623704		2011.38	0.00784572		2541.37	0.02473781		3071.37	0.02524504		3601.4	-0.01663806
421.59	0.13054284		951.59	0.00117715		1481.58	0.00723406		2011.58	0.00779452		2541.57	0.02457523		3071.57	0.02475029		3601.6	-0.01642949
421.79	0.13043722		951.79	0.00164577		1481.78	0.00661471		2011.78	0.00899215		2541.77	0.02375885		3071.77	0.02391646		3601.8	-0.01624176
421.99	0.13095058		951.99	0.00132847		1481.98	0.00679261		2011.98	0.00875511		2541.97	0.02344204		3071.97	0.02269159		3602	-0.01723717
422.19	0.13022844		952.19	0.00152893		1482.18	0.00774979		2012.18	0.00811204		2542.17	0.02316505		3072.17	0.02126584		3602.2	-0.01809397
422.39	0.13000461		952.39	0.00133925		1482.38	0.00842648		2012.38	0.00713807		2542.37	0.02354731		3072.37	0.02104532		3602.4	-0.01816817
422.59	0.13066147		952.59	0.00086384		1482.58	0.00823487		2012.58	0.00717178		2542.57	0.02463922		3072.57	0.02121821		3602.6	-0.01715512
422.79	0.12998755		952.79	0.00042689		1482.78	0.00807509		2012.78	0.00646763		2542.77	0.02416923		3072.77	0.02120506		3602.8	-0.01567033
422.99	0.1293122		952.99	0.00144443		1482.98	0.00861748		2012.98	0.00625065		2542.97	0.02332234		3072.97	0.02118688		3603	-0.01526454
423.19	0.12917142		953.19	0.0017294		1483.18	0.00817424		2013.18	0.00740295		2543.17	0.0234203		3073.17	0.02127152		3603.2	-0.01543148
423.39	0.1299779		953.39	0.00194287		1483.38	0.0080792		2013.38	0.00754323		2543.37	0.02357466		3073.37	0.02147494		3603.4	-0.01596665
423.59	0.13017433		953.59	0.00246432		1483.58	0.00843772		2013.58	0.00765899		2543.57	0.02385166		3073.57	0.02140842		3603.6	-0.01642397
423.79	0.12972294		953.79	0.00295762		1483.78	0.00893269		2013.78	0.00802144		2543.77	0.02361279		3073.77	0.02172247		3603.8	-0.01673755
423.99	0.12994214		953.99	0.00273825		1483.98	0.00945159		2013.98	0.00764594		2543.97	0.02354562		3073.97	0.02207866		3604	-0.01685357
424.19	0.13060507		954.19	0.00274591		1484.18	0.00981427		2014.18	0.0067518		2544.17	0.02400856		3074.17	0.02232189		3604.2	-0.01602737
424.39	0.13063198		954.39	0.00275151		1484.38	0.00993665		2014.38	0.00769638		2544.37	0.02428174		3074.37	0.02286167		3604.4	-0.01519771
424.59	0.13105327		954.59	0.0027558		1484.58	0.00903267		2014.58	0.00716598		2544.57	0.02456397		3074.57	0.02265758		3604.6	-0.01451254
424.79	0.13022306		954.79	0.00286215		1484.78	0.00831995		2014.78	0.00745551		2544.77	0.02476102		3074.77	0.02218076		3604.8	-0.01334802
424.99	0.13072084		954.99	0.00341158		1484.98	0.00752342		2014.98	0.00747441		2544.97	0.02479584		3074.97	0.02252514		3605	-0.0130647
425.19	0.13071322		955.19	0.00380593		1485.18	0.00607241		2015.18	0.00713929		2545.17	0.0235824		3075.17	0.0227475		3605.2	-0.01378554
425.39	0.13049701		955.39	0.00364825		1485.38	0.00530877		2015.38	0.00699055		2545.37	0.02349361		3075.37	0.02287036		3605.4	-0.01372402
425.59	0.13104007		955.59	0.00370651		1485.58	0.00550398		2015.58	0.00698193		2545.57	0.02350467		3075.57	0.02285693		3605.6	-0.01298821
425.79	0.13030414		955.79	0.00442481		1485.78	0.00490496		2015.78	0.00730506		2545.77	0.02379437		3075.77	0.0219948		3605.8	-0.01362271
425.99	0.13049833		955.99	0.00413973		1485.98	0.00551809		2015.98	0.00651177		2545.97	0.0245642		3075.97	0.02131289		3606	-0.01403675
426.19	0.12986025		956.19	0.00432956		1486.18	0.0055585		2016.18	0.00546416		2546.17	0.02488037		3076.17	0.02075754		3606.2	-0.01446062
426.39	0.12919055		956.39	0.00388949		1486.38	0.0050354		2016.38	0.00465307		2546.37	0.02529027		3076.37	0.0210242		3606.4	-0.0147599
426.59	0.12972602		956.59	0.0036962		1486.58	0.00492798		2016.58	0.00431655		2546.57	0.02590254		3076.57	0.0211619		3606.6	-0.01530952
426.79	0.12831428		956.79	0.0036108		1486.78	0.00486338		2016.78	0.00461866		2546.77	0.02596069		3076.77	0.02006627		3606.8	-0.01636705
426.99	0.12824302		956.99	0.00445436		1486.98	0.0050658		2016.98	0.00506868		2546.97	0.02607533		3076.97	0.01925714		3607	-0.0176734
427.19	0.12871785		957.19	0.00395958		1487.18	0.00472812		2017.18	0.00559228		2547.17	0.02609164		3077.17	0.01782117		3607.2	-0.01850326
427.39	0.12839198		957.39	0.00343759		1487.38	0.00520632		2017.38	0.00510199		2547.37	0.02596049		3077.37	0.01748669		3607.4	-0.01966998
427.59	0.12788426		957.59	0.00277544		1487.58	0.0058449		2017.58	0.00446635		2547.57	0.02610442		3077.57	0.01697537		3607.6	-0.02020089
427.79	0.12799277		957.79	0.0021134		1487.78	0.00606424		2017.78	0.00473844		2547.77	0.02604366		3077.77	0.01661033		3607.8	-0.02069956
427.99	0.12796747		957.99	0.00079601		1487.98	0.00633545		2017.98	0.00474216		2547.97	0.02637934		3077.97	0.01572687		3608	-0.02028686
428.19	0.12796877		958.19	0.0002065		1488.18	0.00762488		2018.18	0.00465014		2548.17	0.0268161		3078.17	0.01524409		3608.2	-0.01986744
428.39	0.12818164		958.39	-0.00176099		1488.38	0.00697498		2018.38	0.00506237		2548.37	0.02677594		3078.37	0.01457543		3608.4	-0.02017905
428.59	0.12808739		958.59	-0.00181751		1488.58	0.00756447		2018.58	0.00440014		2548.57	0.02746992		3078.57	0.01431106		3608.6	-0.01980827
428.79	0.12822455		958.79	-0.00155		1488.78	0.00701967		2018.78	0.00573899		2548.77	0.02736178		3078.77	0.01434864		3608.8	-0.01856936
428.99	0.12772373		958.99	-0.00056932		1488.98	0.00596893		2018.98	0.00574564		2548.97	0.02666356		3078.97	0.01510355		3609	-0.01809317
429.19	0.12781303		959.19	-0.00058956		1489.18	0.00531127		2019.18	0.00526725		2549.17	0.02739063		3079.17	0.01597201		3609.2	-0.01788012
429.39	0.12899719		959.39	-0.00100394		1489.38	0.00526439		2019.38	0.00508373		2549.37	0.02743704		3079.37	0.01748367		3609.4	-0.01698664
429.59	0.12970775		959.59	-0.00003383		1489.58	0.00557342		2019.58	0.00580542		2549.57	0.02836186		3079.57	0.01766945		3609.6	-0.01671628
429.79	0.1303543		959.79	0.00001072		1489.78	0.0055609		2019.78	0.00561019		2549.77	0.02786685		3079.77	0.0174116		3609.8	-0.01617737
429.99	0.13127065		959.99	0.00069294		1489.98	0.00577386		2019.98	0.00555715		2549.97	0.0285845		3079.97	0.01726621		3610	-0.0158581
430.19	0.13175056		960.19	0.00075938		1490.18	0.00538002		2020.18	0.00513542		2550.17	0.02835158		3080.17	0.0185582		3610.2	-0.01592697
430.39	0.13214873		960.39	0.00087463		1490.38	0.00561468		2020.38	0.00556044		2550.37	0.02882786		3080.37	0.01854256		3610.4	-0.01602772
430.59	0.13259127		960.59	0.00142621		1490.58	0.00541694		2020.58	0.00586681		2550.57	0.0287635		3080.57	0.01960046		3610.6	-0.01620194
430.79	0.13231825		960.79	0.00150312		1490.78	0.00548307		2020.78	0.005885		2550.77	0.02830793		3080.77	0.01935477		3610.8	-0.01683555
430.99	0.13278751		960.99	0.00222178		1490.98	0.00561814		2020.98	0.00568038		2550.97	0.02748611		3080.97	0.01948158		3611	-0.01667997
431.19	0.13341545		961.19	0.00170178		1491.18	0.00484956		2021.18	0.00535562		2551.17	0.0265115		3081.17	0.01959177		3611.2	-0.01703114
431.39	0.13279514		961.39	0.00247232		1491.38	0.00499914		2021.38	0.00495623		2551.37	0.02651168		3081.37	0.01974825		3611.4	-0.01774325
431.59	0.13301876		961.59	0.00255934		1491.58	0.00465958		2021.58	0.00502772		2551.57	0.02635313		3081.57	0.0197539		3611.6	-0.01789945
431.79	0.13276543		961.79	0.00225365		1491.78	0.00558684		2021.78	0.00622091		2551.77	0.02574594		3081.77	0.01950694		3611.8	-0.01825474
431.99	0.13168212		961.99	0.00195126		1491.98	0.00548311		2021.98	0.00673949		2551.97	0.02550177		3081.97	0.01969921		3612	-0.01799979
432.19	0.1301003		962.19	0.00252907		1492.18	0.00644159		2022.18	0.00647158		2552.17	0.02513412		3082.17	0.01933227		3612.2	-0.01848416
432.39	0.1295889		962.39	0.00173649		1492.38	0.00570551		2022.38	0.00664836		2552.37	0.02522826		3082.37	0.01913094		3612.4	-0.01845943
432.59	0.12893838		962.59	0.00304788		1492.58	0.00603426		2022.58	0.00597954		2552.57	0.02524727		3082.57	0.01893094		3612.6	-0.01792235
432.79	0.12827798		962.79	0.00294141		1492.78	0.00492685		2022.78	0.00714436		2552.77	0.0248882		3082.77	0.01896444		3612.8	-0.01802317
432.99	0.12728829		962.99	0.00443365		1492.98	0.00453892		2022.98	0.00729603		2552.97	0.02457962		3082.97	0.01881719		3613	-0.0183693
433.19	0.12814414		963.19	0.00362757		1493.18	0.00452081		2023.18	0.00678656		2553.17	0.02506016		3083.17	0.01990538		3613.2	-0.01897545
433.39	0.12898145		963.39	0.00330189		1493.38	0.0042516		2023.38	0.0072373		2553.37	0.02395112		3083.37	0.02040576		3613.4	-0.01932087
433.59	0.1284799		963.59	0.00277943		1493.58	0.00455153		2023.58	0.00710775		2553.57	0.02510776		3083.57	0.02033849		3613.6	-0.0191291
433.79	0.1285391		963.79	0.00235315		1493.78	0.00438832		2023.78	0.00714405		2553.77	0.0249413		3083.77	0.02007978		3613.8	-0.01841573
433.99	0.12806457		963.99	0.0017998		1493.98	0.00393659		2023.98	0.00715245		2553.97	0.02589735		3083.97	0.01962838		3614	-0.01895841
434.19	0.12919129		964.19	0.00056242		1494.18	0.00391527		2024.18	0.0062271		2554.17	0.02576112		3084.17	0.02059943		3614.2	-0.01956722
434.39	0.12937468		964.39	0.00031903		1494.38	0.00365307		2024.38	0.00655582		2554.37	0.02608678		3084.37	0.02047326		3614.4	-0.01968044
434.59	0.12906802		964.59	-0.00032641		1494.58	0.00369765		2024.58	0.00479276		2554.57	0.02566947		3084.57	0.02069955		3614.6	-0.02034337
434.79	0.13018376		964.79	-0.00005719		1494.78	0.0036435		2024.78	0.00447405		2554.77	0.02577417		3084.77	0.01952617		3614.8	-0.02046786
434.99	0.13064899		964.99	0.00015511		1494.98	0.00339887		2024.98	0.00424112		2554.97	0.02590154		3084.97	0.01986123		3615	-0.01997955
435.19	0.13102187		965.19	0.00011554		1495.18	0.00423433		2025.18	0.00353181		2555.17	0.02643164		3085.17	0.0203098		3615.2	-0.02078734
435.39	0.13025853		965.39	0.00029724		1495.38	0.00424267		2025.38	0.00322553		2555.37	0.0269321		3085.37	0.02046952		3615.4	-0.02144734
435.59	0.12945474		965.59	-0.00008907		1495.58	0.00441832		2025.58	0.00301211		2555.57	0.02763211		3085.57	0.02048814		3615.6	-0.02033778
435.79	0.12959502		965.79	-0.00012023		1495.78	0.00518365		2025.78	0.00310323		2555.77	0.02740913		3085.77	0.02077247		3615.8	-0.02053197
435.99	0.12832746		965.99	-0.00000698		1495.98	0.00467504		2025.98	0.00273745		2555.97	0.02731829		3085.97	0.02116538		3616	-0.01986377
436.19	0.12790999		966.19	-0.00007186		1496.18	0.00485301		2026.18	0.00239935		2556.17	0.02683437		3086.17	0.02102472		3616.2	-0.01979021
436.39	0.128192		966.39	-0.00076129		1496.38	0.00528175		2026.38	0.00253004		2556.37	0.02691097		3086.37	0.02110667		3616.4	-0.01967889
436.59	0.12779377		966.59	-0.00031875		1496.58	0.00567818		2026.58	0.00252235		2556.57	0.02579449		3086.57	0.02080813		3616.6	-0.01998867
436.79	0.12749812		966.79	-0.00129177		1496.78	0.00545455		2026.78	0.00306284		2556.77	0.02520779		3086.77	0.02088997		3616.8	-0.0202423
436.99	0.12749485		966.99	-0.00039		1496.98	0.00611659		2026.98	0.00281888		2556.97	0.02509324		3086.97	0.02130476		3617	-0.01966907
437.19	0.12786625		967.19	-0.00187157		1497.18	0.00640489		2027.18	0.00208209		2557.17	0.02491242		3087.17	0.02159234		3617.2	-0.01900277
437.39	0.12773756		967.39	-0.0019927		1497.38	0.00623569		2027.38	0.00223355		2557.37	0.02488349		3087.37	0.02061973		3617.4	-0.01843498
437.59	0.12736761		967.59	-0.00326181		1497.58	0.00594545		2027.58	0.00201179		2557.57	0.02553176		3087.57	0.0197636		3617.6	-0.01759924
437.79	0.12680549		967.79	-0.00290742		1497.78	0.00527822		2027.78	0.00296268		2557.77	0.02564631		3087.77	0.01817491		3617.8	-0.0178127
437.99	0.12716973		967.99	-0.00275841		1497.98	0.00497942		2027.98	0.00306977		2557.97	0.02622878		3087.97	0.01800118		3618	-0.01834775
438.19	0.12890418		968.19	-0.00233321		1498.18	0.00458697		2028.18	0.002742		2558.17	0.02626924		3088.17	0.01831378		3618.2	-0.01834005
438.39	0.1294368		968.39	-0.00099192		1498.38	0.00457145		2028.38	0.00331712		2558.37	0.0259117		3088.37	0.01717289		3618.4	-0.0179742
438.59	0.1292247		968.59	-0.00122275		1498.58	0.0051045		2028.58	0.00264486		2558.57	0.02579935		3088.57	0.01615565		3618.6	-0.01862446
438.79	0.12924443		968.79	-0.00060446		1498.78	0.00527045		2028.78	0.00297401		2558.77	0.02606485		3088.77	0.0155157		3618.8	-0.01887869
438.99	0.12847507		968.99	-0.00033744		1498.98	0.00544824		2028.98	0.00300038		2558.97	0.02641576		3088.97	0.01587413		3619	-0.01940451
439.19	0.12898635		969.19	0.00040823		1499.18	0.00576762		2029.18	0.00241337		2559.17	0.02685024		3089.17	0.01592395		3619.2	-0.02055493
439.39	0.1288852		969.39	0.00124416		1499.38	0.00502516		2029.38	0.00308803		2559.37	0.02746795		3089.37	0.01499825		3619.4	-0.02029962
439.59	0.12838348		969.59	0.00263928		1499.58	0.00557989		2029.58	0.00295281		2559.57	0.02718268		3089.57	0.01478801		3619.6	-0.01914261
439.79	0.1281156		969.79	0.00230478		1499.78	0.00503034		2029.78	0.00400064		2559.77	0.0263177		3089.77	0.01555085		3619.8	-0.01933207
439.99	0.12623115		969.99	0.00191616		1499.98	0.00432765		2029.98	0.004102		2559.97	0.02552079		3089.97	0.0158997		3620	-0.01923347
440.19	0.1261141		970.19	0.00208257		1500.18	0.00444087		2030.18	0.00414786		2560.17	0.02519041		3090.17	0.01678946		3620.2	-0.0201933
440.39	0.12547631		970.39	0.00176478		1500.38	0.00467219		2030.38	0.00298473		2560.37	0.02505263		3090.37	0.01712517		3620.4	-0.02136089
440.59	0.12525966		970.59	0.00129867		1500.58	0.00463151		2030.58	0.00314094		2560.57	0.0236888		3090.57	0.01810552		3620.6	-0.02158888
440.79	0.12576046		970.79	0.00059364		1500.78	0.00444346		2030.78	0.00319709		2560.77	0.02386995		3090.77	0.01840041		3620.8	-0.02120293
440.99	0.12574071		970.99	0.00078946		1500.98	0.00418086		2030.98	0.00329851		2560.97	0.02338645		3090.97	0.01883171		3621	-0.02081925
441.19	0.12648217		971.19	-0.00045348		1501.18	0.0043849		2031.18	0.00339204		2561.17	0.02342054		3091.17	0.01868917		3621.2	-0.02045061
441.39	0.12627816		971.39	-0.00164817		1501.38	0.00400629		2031.38	0.00358959		2561.37	0.02327092		3091.37	0.01814209		3621.4	-0.02059035
441.59	0.12640172		971.59	-0.00290785		1501.58	0.00394475		2031.58	0.00288305		2561.57	0.02384023		3091.57	0.01868309		3621.6	-0.0204787
441.79	0.1267687		971.79	-0.00332373		1501.78	0.00385545		2031.78	0.00347073		2561.77	0.02530981		3091.77	0.01816986		3621.8	-0.02195311
441.99	0.12761008		971.99	-0.00345678		1501.98	0.00479876		2031.98	0.00369431		2561.97	0.02564056		3091.97	0.01897464		3622	-0.02183491
442.19	0.12809915		972.19	-0.00394785		1502.18	0.0044332		2032.18	0.00413317		2562.17	0.02554732		3092.17	0.01922703		3622.2	-0.02196081
442.39	0.12773537		972.39	-0.00369075		1502.38	0.00601635		2032.38	0.00416023		2562.37	0.02512445		3092.37	0.01876652		3622.4	-0.02179539
442.59	0.12723142		972.59	-0.00481478		1502.58	0.00670778		2032.58	0.00366714		2562.57	0.02573267		3092.57	0.01968618		3622.6	-0.02175611
442.79	0.12701219		972.79	-0.0037901		1502.78	0.00711798		2032.78	0.00306964		2562.77	0.0256526		3092.77	0.02010127		3622.8	-0.02207857
442.99	0.12722827		972.99	-0.00379005		1502.98	0.00747879		2032.98	0.00317447		2562.97	0.02557745		3092.97	0.02008413		3623	-0.02145465
443.19	0.12760599		973.19	-0.00285046		1503.18	0.00679317		2033.18	0.00309759		2563.17	0.02573594		3093.17	0.0199926		3623.2	-0.02111056
443.39	0.12704096		973.39	-0.00187424		1503.38	0.00743929		2033.38	0.00322031		2563.37	0.02543163		3093.37	0.01879292		3623.4	-0.02079507
443.59	0.12624283		973.59	-0.00132269		1503.58	0.00746382		2033.58	0.00262604		2563.57	0.02492237		3093.57	0.01901053		3623.6	-0.02010036
443.79	0.12568774		973.79	-0.00201353		1503.78	0.00666706		2033.78	0.00246115		2563.77	0.02408464		3093.77	0.01905864		3623.8	-0.01973432
443.99	0.12541752		973.99	-0.00194385		1503.98	0.00669074		2033.98	0.00138053		2563.97	0.02424743		3093.97	0.01959284		3624	-0.02041085
444.19	0.12543374		974.19	-0.00119839		1504.18	0.00684857		2034.18	0.00151192		2564.17	0.02468089		3094.17	0.02044499		3624.2	-0.02037967
444.39	0.12569205		974.39	-0.00138003		1504.38	0.00635644		2034.38	0.00103378		2564.37	0.02480172		3094.37	0.02048901		3624.4	-0.02062962
444.59	0.12560944		974.59	-0.00168225		1504.58	0.00539112		2034.58	0.00122538		2564.57	0.0242416		3094.57	0.02040175		3624.6	-0.02007731
444.79	0.12577308		974.79	-0.00199626		1504.78	0.00459502		2034.78	0.00125869		2564.77	0.02494414		3094.77	0.02063321		3624.8	-0.01957881
444.99	0.12504557		974.99	-0.00144533		1504.98	0.00433204		2034.98	0.00168633		2564.97	0.02409173		3094.97	0.01989657		3625	-0.01974198
445.19	0.12517731		975.19	-0.00125459		1505.18	0.00478396		2035.18	0.00147646		2565.17	0.02472219		3095.17	0.01910164		3625.2	-0.01973243
445.39	0.12537219		975.39	-0.00159412		1505.38	0.00432108		2035.38	0.00087054		2565.37	0.02514211		3095.37	0.01821055		3625.4	-0.01950104
445.59	0.12556237		975.59	-0.0016424		1505.58	0.00392564		2035.58	0.0012302		2565.57	0.02622793		3095.57	0.01841977		3625.6	-0.01956159
445.79	0.12621253		975.79	-0.00200762		1505.78	0.00422704		2035.78	0.0020418		2565.77	0.02628363		3095.77	0.01721428		3625.8	-0.01996713
445.99	0.12646154		975.99	-0.00129375		1505.98	0.0046679		2035.98	0.00243292		2565.97	0.02650384		3095.97	0.01754507		3626	-0.01904428
446.19	0.12667439		976.19	-0.0016571		1506.18	0.00402145		2036.18	0.00266357		2566.17	0.02734726		3096.17	0.01833885		3626.2	-0.01898222
446.39	0.12694294		976.39	-0.00116955		1506.38	0.00404496		2036.38	0.00155711		2566.37	0.02753942		3096.37	0.0181972		3626.4	-0.01893075
446.59	0.12720303		976.59	-0.00132301		1506.58	0.0037407		2036.58	0.00098155		2566.57	0.02813285		3096.57	0.01823842		3626.6	-0.0188453
446.79	0.12737617		976.79	-0.00083136		1506.78	0.00334507		2036.78	0.00122517		2566.77	0.0273699		3096.77	0.01763388		3626.8	-0.01919029
446.99	0.12762413		976.99	-0.00188655		1506.98	0.00193418		2036.98	0.00187955		2566.97	0.02685578		3096.97	0.01751737		3627	-0.01887075
447.19	0.12751181		977.19	-0.0002183		1507.18	0.00097951		2037.18	0.00216354		2567.17	0.02651389		3097.17	0.01738556		3627.2	-0.02024235
447.39	0.12798094		977.39	-0.00009434		1507.38	0.00167466		2037.38	0.00161733		2567.37	0.025345		3097.37	0.01702604		3627.4	-0.02085931
447.59	0.12785615		977.59	-0.00101679		1507.58	0.00138366		2037.58	0.00163205		2567.57	0.02489263		3097.57	0.01747294		3627.6	-0.02044713
447.79	0.12770291		977.79	-0.00177717		1507.78	0.00094255		2037.78	0.00240208		2567.77	0.02391797		3097.77	0.01829823		3627.8	-0.02075169
447.99	0.12825033		977.99	-0.00237597		1507.98	0.00124075		2037.98	0.00225258		2567.97	0.02437913		3097.97	0.01904318		3628	-0.02109268
448.19	0.1277465		978.19	-0.00209201		1508.18	0.00076331		2038.18	0.0030712		2568.17	0.0239531		3098.17	0.0191038		3628.2	-0.02094695
448.39	0.12773919		978.39	-0.00245136		1508.38	0.0004673		2038.38	0.0029338		2568.37	0.02404515		3098.37	0.01885554		3628.4	-0.02175523
448.59	0.12697013		978.59	-0.00294282		1508.58	0.00035118		2038.58	0.00286805		2568.57	0.02423889		3098.57	0.01894985		3628.6	-0.02159089
448.79	0.12705304		978.79	-0.00286593		1508.78	0.00105525		2038.78	0.00375275		2568.77	0.02353318		3098.77	0.01860185		3628.8	-0.02245763
448.99	0.12691066		978.99	-0.00179847		1508.98	0.00218061		2038.98	0.00351819		2568.97	0.02359567		3098.97	0.01747305		3629	-0.02257205
449.19	0.12700218		979.19	-0.00206707		1509.18	0.00316559		2039.18	0.0026846		2569.17	0.024116		3099.17	0.01643878		3629.2	-0.02338375
449.39	0.1273811		979.39	-0.00266861		1509.38	0.00440182		2039.38	0.00230675		2569.37	0.02423525		3099.37	0.01585556		3629.4	-0.02316441
449.59	0.12776591		979.59	-0.00297757		1509.58	0.00537708		2039.58	0.00209631		2569.57	0.02478876		3099.57	0.0158426		3629.6	-0.02311486
449.79	0.12862145		979.79	-0.00315183		1509.78	0.00604432		2039.78	0.00144632		2569.77	0.02499017		3099.77	0.01567065		3629.8	-0.02308304
449.99	0.12749494		979.99	-0.00303123		1509.98	0.00593924		2039.98	0.00089319		2569.97	0.02609113		3099.97	0.01636962		3630	-0.02386059
450.19	0.12721135		980.19	-0.00343977		1510.18	0.00593683		2040.18	-0.0001243		2570.17	0.02666439		3100.17	0.01574386		3630.2	-0.02417774
450.39	0.12745363		980.39	-0.00272009		1510.38	0.00518863		2040.38	-0.00122316		2570.37	0.02616142		3100.37	0.01516927		3630.4	-0.02352427
450.59	0.12683419		980.59	-0.00293263		1510.58	0.00550164		2040.58	-0.00086445		2570.57	0.02564904		3100.57	0.01508669		3630.6	-0.02343881
450.79	0.12711155		980.79	-0.0027434		1510.78	0.00464128		2040.78	0.00010448		2570.77	0.02492694		3100.77	0.0157566		3630.8	-0.02338687
450.99	0.12721077		980.99	-0.00264674		1510.98	0.00380935		2040.98	0.0002704		2570.97	0.02442131		3100.97	0.01657207		3631	-0.02284905
451.19	0.12592204		981.19	-0.00218419		1511.18	0.00448248		2041.18	-0.0002409		2571.17	0.02416237		3101.17	0.01722008		3631.2	-0.02310143
451.39	0.1257072		981.39	-0.0029503		1511.38	0.00374166		2041.38	0.0003446		2571.37	0.02377412		3101.37	0.01767546		3631.4	-0.02264196
451.59	0.1248287		981.59	-0.0035208		1511.58	0.00329944		2041.58	0.00068659		2571.57	0.02355435		3101.57	0.01862335		3631.6	-0.02215583
451.79	0.12502332		981.79	-0.00305336		1511.78	0.00362862		2041.78	0.00102036		2571.77	0.0227798		3101.77	0.01884756		3631.8	-0.02244857
451.99	0.12536874		981.99	-0.00261674		1511.98	0.00379864		2041.98	0.00065276		2571.97	0.02325898		3101.97	0.01866064		3632	-0.02161976
452.19	0.12444695		982.19	-0.00208976		1512.18	0.00350109		2042.18	0.00100411		2572.17	0.02332564		3102.17	0.01787659		3632.2	-0.02165031
452.39	0.12488814		982.39	-0.0022096		1512.38	0.0036406		2042.38	0.00069353		2572.37	0.02303925		3102.37	0.01842968		3632.4	-0.02130842
452.59	0.12468718		982.59	-0.00253322		1512.58	0.00367049		2042.58	0.0002906		2572.57	0.02246628		3102.57	0.017526		3632.6	-0.02208198
452.79	0.12481175		982.79	-0.00157766		1512.78	0.00411453		2042.78	-0.00041499		2572.77	0.02187453		3102.77	0.01689182		3632.8	-0.02322803
452.99	0.12499137		982.99	-0.00091649		1512.98	0.00425997		2042.98	-0.00112103		2572.97	0.02205034		3102.97	0.01719138		3633	-0.02325509
453.19	0.12479343		983.19	-0.00095963		1513.18	0.00449808		2043.18	-0.00148142		2573.17	0.02159528		3103.17	0.01674786		3633.2	-0.02364148
453.39	0.12488159		983.39	-0.00028398		1513.38	0.00520323		2043.38	-0.00215662		2573.37	0.02070237		3103.37	0.01698084		3633.4	-0.02315462
453.59	0.12518541		983.59	-0.00031974		1513.58	0.00446357		2043.58	-0.00204479		2573.57	0.02101589		3103.57	0.01730039		3633.6	-0.02307909
453.79	0.12468686		983.79	0.00021328		1513.78	0.0039826		2043.78	-0.00126548		2573.77	0.02135949		3103.77	0.01699701		3633.8	-0.0237949
453.99	0.12359634		983.99	-0.0003759		1513.98	0.00370545		2043.98	-0.00137693		2573.97	0.02100581		3103.97	0.01693632		3634	-0.02373871
454.19	0.12408926		984.19	-0.0006198		1514.18	0.00343502		2044.18	-0.00099751		2574.17	0.02077266		3104.17	0.01659744		3634.2	-0.02341533
454.39	0.12399911		984.39	0.00036618		1514.38	0.0032755		2044.38	-0.00082534		2574.37	0.01987533		3104.37	0.01723622		3634.4	-0.02332895
454.59	0.12431307		984.59	0.00025209		1514.58	0.00397931		2044.58	0.00003944		2574.57	0.01955803		3104.57	0.01753957		3634.6	-0.0231567
454.79	0.12506924		984.79	0.00018049		1514.78	0.00414371		2044.78	0.00093711		2574.77	0.0202995		3104.77	0.01820318		3634.8	-0.02291926
454.99	0.1255205		984.99	0.00013453		1514.98	0.00445213		2044.98	0.00111595		2574.97	0.02088647		3104.97	0.01835812		3635	-0.02172478
455.19	0.12429675		985.19	-0.00095859		1515.18	0.00454369		2045.18	0.00148905		2575.17	0.02157192		3105.17	0.01953607		3635.2	-0.02123483
455.39	0.12402288		985.39	-0.00093572		1515.38	0.00403884		2045.38	0.00216398		2575.37	0.0211417		3105.37	0.019376		3635.4	-0.021306
455.59	0.12409089		985.59	-0.00056326		1515.58	0.00437176		2045.58	0.00217487		2575.57	0.02107738		3105.57	0.01961355		3635.6	-0.02043666
455.79	0.12446029		985.79	-0.00086008		1515.78	0.00479645		2045.78	0.00136193		2575.77	0.02186247		3105.77	0.01888795		3635.8	-0.02083035
455.99	0.12465187		985.99	-0.00182934		1515.98	0.00526716		2045.98	0.00235106		2575.97	0.02241381		3105.97	0.0185541		3636	-0.02054061
456.19	0.12484357		986.19	-0.002338		1516.18	0.00545238		2046.18	0.00222206		2576.17	0.02274662		3106.17	0.01772553		3636.2	-0.02198369
456.39	0.12470627		986.39	-0.00311804		1516.38	0.00583445		2046.38	0.00163835		2576.37	0.02274417		3106.37	0.018043		3636.4	-0.02265406
456.59	0.12354925		986.59	-0.00342786		1516.58	0.00546161		2046.58	0.00129432		2576.57	0.02377928		3106.57	0.01714403		3636.6	-0.02434318
456.79	0.12376072		986.79	-0.00395754		1516.78	0.00510386		2046.78	0.00054092		2576.77	0.02429848		3106.77	0.01797585		3636.8	-0.02486317
456.99	0.12365889		986.99	-0.00451539		1516.98	0.00441899		2046.98	0.00077481		2576.97	0.02382302		3106.97	0.01816942		3637	-0.0248003
457.19	0.12312084		987.19	-0.00471816		1517.18	0.00339847		2047.18	-0.00001978		2577.17	0.02387656		3107.17	0.01783829		3637.2	-0.02475806
457.39	0.12264385		987.39	-0.0046286		1517.38	0.00336404		2047.38	-0.00081432		2577.37	0.02358529		3107.37	0.01744462		3637.4	-0.02524979
457.59	0.12205775		987.59	-0.00505094		1517.58	0.00185199		2047.58	-0.00046416		2577.57	0.02429087		3107.57	0.01771019		3637.6	-0.02482327
457.79	0.12226948		987.79	-0.00475298		1517.78	0.00138747		2047.78	-0.00060072		2577.77	0.02461622		3107.77	0.01738592		3637.8	-0.02510871
457.99	0.12154329		987.99	-0.0054573		1517.98	0.00075063		2047.98	-0.00128428		2577.97	0.02404739		3107.97	0.01729786		3638	-0.02468041
458.19	0.12178283		988.19	-0.0055226		1518.18	0.00131137		2048.18	-0.00142322		2578.17	0.02361601		3108.17	0.01604673		3638.2	-0.02453133
458.39	0.1229024		988.39	-0.00537353		1518.38	0.00130039		2048.38	-0.00255462		2578.37	0.02298473		3108.37	0.01538539		3638.4	-0.02388332
458.59	0.12334116		988.59	-0.00575864		1518.58	0.00081511		2048.58	-0.00155126		2578.57	0.02354552		3108.57	0.01578793		3638.6	-0.02352522
458.79	0.12339422		988.79	-0.00549062		1518.78	0.00112282		2048.78	-0.00034395		2578.77	0.02361568		3108.77	0.01586162		3638.8	-0.02316785
458.99	0.12283075		988.99	-0.00553722		1518.98	0.00064614		2048.98	-0.00074582		2578.97	0.02368391		3108.97	0.01514446		3639	-0.02242652
459.19	0.12209214		989.19	-0.0065176		1519.18	0.00002743		2049.18	-0.00109143		2579.17	0.02327167		3109.17	0.01539578		3639.2	-0.02225146
459.39	0.12199629		989.39	-0.00554993		1519.38	-0.00018246		2049.38	-0.00020186		2579.37	0.022096		3109.37	0.01508952		3639.4	-0.02213299
459.59	0.12238979		989.59	-0.00553665		1519.58	-0.00051464		2049.58	0.00036698		2579.57	0.02275165		3109.57	0.01478304		3639.6	-0.02164678
459.79	0.12280996		989.79	-0.00616621		1519.78	0.00042704		2049.78	0.00043047		2579.77	0.02299592		3109.77	0.01336333		3639.8	-0.02200848
459.99	0.12287222		989.99	-0.00591115		1519.98	0.00147964		2049.98	0.00179686		2579.97	0.02265579		3109.97	0.0131717		3640	-0.02189238
460.19	0.12283534		990.19	-0.00612256		1520.18	0.00153236		2050.18	0.00174921		2580.17	0.02298813		3110.17	0.01320951		3640.2	-0.02221036
460.39	0.12268502		990.39	-0.0058803		1520.38	0.00149605		2050.38	0.00120856		2580.37	0.02348529		3110.37	0.01290337		3640.4	-0.02289555
460.59	0.12248161		990.59	-0.0056491		1520.58	0.00109008		2050.58	0.00026649		2580.57	0.02356417		3110.57	0.01300449		3640.6	-0.02341622
460.79	0.12311824		990.79	-0.00513956		1520.78	0.00076403		2050.78	0.0002377		2580.77	0.02307933		3110.77	0.01365697		3640.8	-0.02370099
460.99	0.12264708		990.99	-0.00389179		1520.98	0.00049984		2050.98	-0.00084323		2580.97	0.02303211		3110.97	0.01418815		3641	-0.02339093
461.19	0.1227267		991.19	-0.0029269		1521.18	-0.00013681		2051.18	-0.00177269		2581.17	0.02338857		3111.17	0.01482631		3641.2	-0.02399945
461.39	0.12295828		991.39	-0.00302247		1521.38	0.00044447		2051.38	-0.00265996		2581.37	0.02401561		3111.37	0.01518235		3641.4	-0.02401179
461.59	0.12325739		991.59	-0.00363373		1521.58	0.00005856		2051.58	-0.00267644		2581.57	0.0239778		3111.57	0.01620012		3641.6	-0.02471739
461.79	0.124422		991.79	-0.00317901		1521.78	0.00025222		2051.78	-0.00321863		2581.77	0.02374533		3111.77	0.01620088		3641.8	-0.02560671
461.99	0.12381948		991.99	-0.00316165		1521.98	0.00054808		2051.98	-0.00376404		2581.97	0.02399314		3111.97	0.01632234		3642	-0.02574873
462.19	0.12453971		992.19	-0.00352895		1522.18	0.00153089		2052.18	-0.00395403		2582.17	0.02361148		3112.17	0.01552451		3642.2	-0.02578264
462.39	0.12566201		992.39	-0.00383953		1522.38	0.00135979		2052.38	-0.00367947		2582.37	0.02299187		3112.37	0.01644728		3642.4	-0.02641406
462.59	0.12493889		992.59	-0.00328721		1522.58	0.00157185		2052.58	-0.00244167		2582.57	0.02384509		3112.57	0.01677		3642.6	-0.0267421
462.79	0.12413823		992.79	-0.0030617		1522.78	0.00271487		2052.78	-0.00195882		2582.77	0.02328501		3112.77	0.0164971		3642.8	-0.02701778
462.99	0.12328547		992.99	-0.00350684		1522.98	0.00277162		2052.98	-0.00268462		2582.97	0.02296586		3112.97	0.01669198		3643	-0.02761683
463.19	0.12337582		993.19	-0.00419554		1523.18	0.00348841		2053.18	-0.0026544		2583.17	0.0227164		3113.17	0.01691987		3643.2	-0.02743598
463.39	0.12344221		993.39	-0.00358056		1523.38	0.0041901		2053.38	-0.00156422		2583.37	0.02196941		3113.37	0.01759466		3643.4	-0.02596254
463.59	0.12276213		993.59	-0.00406933		1523.58	0.00406354		2053.58	-0.00081047		2583.57	0.02211171		3113.57	0.01728914		3643.6	-0.02488477
463.79	0.12277366		993.79	-0.00382028		1523.78	0.00493503		2053.78	0.00006254		2583.77	0.02223187		3113.77	0.01597709		3643.8	-0.02363462
463.99	0.12299221		993.99	-0.00415631		1523.98	0.00454638		2053.98	0.00131046		2583.97	0.02247366		3113.97	0.01585707		3644	-0.02330515
464.19	0.12389455		994.19	-0.0045779		1524.18	0.00384451		2054.18	0.00154049		2584.17	0.02198832		3114.17	0.01535346		3644.2	-0.02304784
464.39	0.12438212		994.39	-0.00396283		1524.38	0.00330776		2054.38	0.00090877		2584.37	0.02212366		3114.37	0.01440819		3644.4	-0.02378332
464.59	0.1237239		994.59	-0.00418468		1524.58	0.00283464		2054.58	0.00060899		2584.57	0.02268917		3114.57	0.01392689		3644.6	-0.02290757
464.79	0.12353564		994.79	-0.00404139		1524.78	0.00244861		2054.78	0.0011962		2584.77	0.0236156		3114.77	0.01442362		3644.8	-0.02274362
464.99	0.12362712		994.99	-0.00426479		1524.98	0.00202718		2054.98	0.00029399		2584.97	0.02374773		3114.97	0.01522824		3645	-0.02235196
465.19	0.1239329		995.19	-0.00428283		1525.18	0.00133273		2055.18	0.00079474		2585.17	0.02360142		3115.17	0.0144407		3645.2	-0.02299772
465.39	0.12419812		995.39	-0.00449211		1525.38	0.00062471		2055.38	0.00084458		2585.37	0.02359413		3115.37	0.01447852		3645.4	-0.02343305
465.59	0.12453507		995.59	-0.00412646		1525.58	-0.00034472		2055.58	0.00078747		2585.57	0.02359359		3115.57	0.01490588		3645.6	-0.02472195
465.79	0.12500521		995.79	-0.00297826		1525.78	-0.00093237		2055.78	0.0009634		2585.77	0.02348672		3115.77	0.01480482		3645.8	-0.02486694
465.99	0.1250247		995.99	-0.00284699		1525.98	-0.00126848		2055.98	0.00062806		2585.97	0.02371225		3115.97	0.01553122		3646	-0.02618477
466.19	0.12552176		996.19	-0.00284623		1526.18	-0.00156743		2056.18	-0.00004806		2586.17	0.0229277		3116.17	0.01534114		3646.2	-0.02649366
466.39	0.12593483		996.39	-0.00276638		1526.38	-0.00247243		2056.38	-0.00007396		2586.37	0.02303024		3116.37	0.01648288		3646.4	-0.02690923
466.59	0.1260161		996.59	-0.00241146		1526.58	-0.002801		2056.58	-0.00070242		2586.57	0.02398557		3116.57	0.017298		3646.6	-0.02700906
466.79	0.12511618		996.79	-0.00303909		1526.78	-0.00260863		2056.78	-0.00153025		2586.77	0.02330899		3116.77	0.0175646		3646.8	-0.02786019
466.99	0.12398098		996.99	-0.00352311		1526.98	-0.00229856		2056.98	-0.00165577		2586.97	0.02383378		3116.97	0.01810245		3647	-0.02772115
467.19	0.12413826		997.19	-0.00426631		1527.18	-0.00162691		2057.18	-0.00204939		2587.17	0.02355814		3117.17	0.01738023		3647.2	-0.02736577
467.39	0.12352108		997.39	-0.00468584		1527.38	-0.00266535		2057.38	-0.00168451		2587.37	0.0233242		3117.37	0.01762671		3647.4	-0.02574682
467.59	0.12284968		997.59	-0.00527371		1527.58	-0.00295475		2057.58	-0.00101712		2587.57	0.02313752		3117.57	0.01674978		3647.6	-0.02590337
467.79	0.12375206		997.79	-0.00570896		1527.78	-0.00263946		2057.78	-0.00057644		2587.77	0.02404685		3117.77	0.01515045		3647.8	-0.0250054
467.99	0.1248003		997.99	-0.00626264		1527.98	-0.00232348		2057.98	-0.00087664		2587.97	0.02417395		3117.97	0.01473153		3648	-0.02500069
468.19	0.12485916		998.19	-0.00691248		1528.18	-0.00167351		2058.18	-0.00187386		2588.17	0.023411		3118.17	0.01473389		3648.2	-0.02426123
468.39	0.12415629		998.39	-0.00787319		1528.38	-0.00060834		2058.38	-0.00192978		2588.37	0.02461599		3118.37	0.01415605		3648.4	-0.02392699
468.59	0.12334816		998.59	-0.00912392		1528.58	-0.00026172		2058.58	-0.00102668		2588.57	0.02565227		3118.57	0.01413564		3648.6	-0.02272508
468.79	0.12318258		998.79	-0.00893781		1528.78	0.00023585		2058.78	-0.00143404		2588.77	0.02487381		3118.77	0.01477549		3648.8	-0.02241254
468.99	0.12343579		998.99	-0.00915232		1528.98	0.0004189		2058.98	-0.00154241		2588.97	0.02403218		3118.97	0.01480657		3649	-0.02243878
469.19	0.12306378		999.19	-0.00915536		1529.18	0.00028977		2059.18	-0.00073371		2589.17	0.02390915		3119.17	0.01354573		3649.2	-0.02303736
469.39	0.12330659		999.39	-0.0095375		1529.38	0.00064686		2059.38	-0.00061773		2589.37	0.02416896		3119.37	0.0145498		3649.4	-0.02313616
469.59	0.12365493		999.59	-0.00912399		1529.58	0.00074367		2059.58	-0.00173343		2589.57	0.02388726		3119.57	0.01411645		3649.6	-0.02435985
469.79	0.12372775		999.79	-0.00959392		1529.78	0.00061387		2059.78	-0.00127141		2589.77	0.0224305		3119.77	0.01432397		3649.8	-0.0251308
469.99	0.12348811		999.99	-0.00875988		1529.98	0.00066537		2059.98	-0.00179995		2589.97	0.02122594		3119.97	0.01508519		3650	-0.02571672
470.19	0.12337139		1000.19	-0.00878962		1530.18	-0.00013535		2060.18	-0.00298547		2590.17	0.02088742		3120.17	0.01584673		3650.2	-0.02504352
470.39	0.12386377		1000.39	-0.00849159		1530.38	-0.00046378		2060.38	-0.00271856		2590.37	0.02100413		3120.37	0.01624669		3650.4	-0.02504762
470.59	0.12417266		1000.59	-0.00839525		1530.58	-0.00049524		2060.58	-0.00258646		2590.57	0.02058833		3120.57	0.01638086		3650.6	-0.02496071
470.79	0.12332329		1000.79	-0.00807273		1530.78	-0.00005582		2060.78	-0.00250559		2590.77	0.02039122		3120.77	0.01578316		3650.8	-0.0248953
470.99	0.12253265		1000.99	-0.00708605		1530.98	0.00056655		2060.98	-0.00274215		2590.97	0.02106305		3120.97	0.01505029		3651	-0.02433688
471.19	0.12389595		1001.19	-0.00650554		1531.18	-0.0001056		2061.18	-0.00357996		2591.17	0.01998458		3121.17	0.01426207		3651.2	-0.02436507
471.39	0.12354921		1001.39	-0.00610063		1531.38	-0.00081599		2061.38	-0.00375796		2591.37	0.02051193		3121.37	0.01413648		3651.4	-0.02448168
471.59	0.12428124		1001.59	-0.00471117		1531.58	-0.00042628		2061.58	-0.00420373		2591.57	0.02040438		3121.57	0.01443117		3651.6	-0.02458682
471.79	0.12517065		1001.79	-0.00413193		1531.78	-0.00128867		2061.78	-0.00346592		2591.77	0.02116653		3121.77	0.01418265		3651.8	-0.02358013
471.99	0.125737		1001.99	-0.0034148		1531.98	-0.00090421		2061.98	-0.00363927		2591.97	0.02101033		3121.97	0.01463952		3652	-0.02375232
472.19	0.12500706		1002.19	-0.00360064		1532.18	-0.00076635		2062.18	-0.00337615		2592.17	0.02056584		3122.17	0.01459133		3652.2	-0.0234786
472.39	0.12450853		1002.39	-0.0036518		1532.38	-0.00104762		2062.38	-0.00241802		2592.37	0.02136634		3122.37	0.0138898		3652.4	-0.02299961
472.59	0.12414377		1002.59	-0.00390149		1532.58	-0.00104345		2062.58	-0.0016018		2592.57	0.02153406		3122.57	0.01377891		3652.6	-0.023106
472.79	0.12405365		1002.79	-0.0032715		1532.78	-0.0009918		2062.78	-0.00158473		2592.77	0.02162573		3122.77	0.01352229		3652.8	-0.02346894
472.99	0.12407618		1002.99	-0.00413654		1532.98	-0.00095294		2062.98	-0.00100762		2592.97	0.0222269		3122.97	0.01416969		3653	-0.02505524
473.19	0.12414448		1003.19	-0.0048609		1533.18	-0.00085486		2063.18	-0.00020476		2593.17	0.02288346		3123.17	0.01422421		3653.2	-0.02483535
473.39	0.12382089		1003.39	-0.00504915		1533.38	-0.00024106		2063.38	-0.0003497		2593.37	0.02312899		3123.37	0.01476694		3653.4	-0.02444667
473.59	0.12315747		1003.59	-0.0050978		1533.58	-0.00051469		2063.58	0.00003549		2593.57	0.02223685		3123.57	0.01443404		3653.6	-0.02500105
473.79	0.12339		1003.79	-0.00646032		1533.78	-0.00085191		2063.78	0.00152446		2593.77	0.02108266		3123.77	0.01564316		3653.8	-0.02481048
473.99	0.12297922		1003.99	-0.00622322		1533.98	-0.00014774		2063.98	0.00158555		2593.97	0.02084133		3123.97	0.01615184		3654	-0.02443868
474.19	0.12330852		1004.19	-0.00634111		1534.18	-0.00065108		2064.18	0.00092187		2594.17	0.02026404		3124.17	0.01619687		3654.2	-0.02431327
474.39	0.12359782		1004.39	-0.00643921		1534.38	-0.00031954		2064.38	0.00167516		2594.37	0.0206023		3124.37	0.01622111		3654.4	-0.0244287
474.59	0.12376301		1004.59	-0.00605272		1534.58	-0.00032829		2064.58	0.00173315		2594.57	0.02001282		3124.57	0.01660121		3654.6	-0.0238715
474.79	0.12351311		1004.79	-0.00523795		1534.78	0.00008803		2064.78	0.00090809		2594.77	0.02017718		3124.77	0.01560893		3654.8	-0.02339955
474.99	0.12392264		1004.99	-0.00488062		1534.98	0.00055125		2064.98	-0.0005447		2594.97	0.02036257		3124.97	0.01540107		3655	-0.02327039
475.19	0.12437495		1005.19	-0.00489847		1535.18	-0.00008491		2065.18	-0.00072004		2595.17	0.0190501		3125.17	0.01595773		3655.2	-0.02331679
475.39	0.12384774		1005.39	-0.00527898		1535.38	0.0002942		2065.38	-0.00140768		2595.37	0.01926526		3125.37	0.01629222		3655.4	-0.02375043
475.59	0.12368407		1005.59	-0.00464339		1535.58	-0.00041397		2065.58	-0.00174498		2595.57	0.01826204		3125.57	0.0168006		3655.6	-0.02317389
475.79	0.1238555		1005.79	-0.00494202		1535.78	-0.0004701		2065.78	-0.00109831		2595.77	0.01733965		3125.77	0.01653528		3655.8	-0.02342706
475.99	0.12327768		1005.99	-0.00486501		1535.98	0.00045111		2065.98	-0.0020122		2595.97	0.0171656		3125.97	0.01615974		3656	-0.0237878
476.19	0.12217475		1006.19	-0.00531767		1536.18	0.00035566		2066.18	-0.00249927		2596.17	0.01723448		3126.17	0.01537088		3656.2	-0.02393371
476.39	0.12170135		1006.39	-0.00543619		1536.38	0.00121009		2066.38	-0.00199665		2596.37	0.01752856		3126.37	0.01465109		3656.4	-0.02408326
476.59	0.12145525		1006.59	-0.00553613		1536.58	0.00211699		2066.58	-0.00226006		2596.57	0.01894805		3126.57	0.01507195		3656.6	-0.02511604
476.79	0.12189513		1006.79	-0.00541413		1536.78	0.00161347		2066.78	-0.00316768		2596.77	0.02033035		3126.77	0.01496204		3656.8	-0.02513305
476.99	0.12140457		1006.99	-0.00597552		1536.98	0.00173403		2066.98	-0.00413254		2596.97	0.02074323		3126.97	0.01520255		3657	-0.02572932
477.19	0.12121881		1007.19	-0.00618598		1537.18	0.00273688		2067.18	-0.00403252		2597.17	0.02145198		3127.17	0.01481352		3657.2	-0.02405168
477.39	0.12060099		1007.39	-0.00583472		1537.38	0.00269999		2067.38	-0.00316515		2597.37	0.02224038		3127.37	0.0152159		3657.4	-0.02396857
477.59	0.12054124		1007.59	-0.00562633		1537.58	0.00270814		2067.58	-0.00241518		2597.57	0.02176725		3127.57	0.01505282		3657.6	-0.02375213
477.79	0.12154647		1007.79	-0.0060062		1537.78	0.00187442		2067.78	-0.0030334		2597.77	0.02174967		3127.77	0.0156915		3657.8	-0.02387501
477.99	0.12162721		1007.99	-0.00499111		1537.98	0.00142307		2067.98	-0.00333762		2597.97	0.0222174		3127.97	0.01585951		3658	-0.02479603
478.19	0.1220558		1008.19	-0.00415422		1538.18	0.00055416		2068.18	-0.00349656		2598.17	0.02169418		3128.17	0.01546546		3658.2	-0.02503087
478.39	0.1217391		1008.39	-0.00436642		1538.38	-0.00040854		2068.38	-0.00286488		2598.37	0.02226449		3128.37	0.01603287		3658.4	-0.0250051
478.59	0.12201277		1008.59	-0.00397362		1538.58	-0.00055189		2068.58	-0.00245888		2598.57	0.02188937		3128.57	0.01542707		3658.6	-0.0243989
478.79	0.1213124		1008.79	-0.00390179		1538.78	-0.00098655		2068.78	-0.00271571		2598.77	0.0219823		3128.77	0.01500838		3658.8	-0.02459009
478.99	0.12134394		1008.99	-0.00472443		1538.98	-0.00136068		2068.98	-0.00345958		2598.97	0.02116282		3128.97	0.01553486		3659	-0.02463563
479.19	0.12086974		1009.19	-0.00492522		1539.18	-0.00227725		2069.18	-0.00243264		2599.17	0.01985088		3129.17	0.01489422		3659.2	-0.02439573
479.39	0.12068897		1009.39	-0.00539544		1539.38	-0.00245925		2069.38	-0.00263476		2599.37	0.019662		3129.37	0.01433731		3659.4	-0.02469674
479.59	0.11981685		1009.59	-0.00472656		1539.58	-0.00245829		2069.58	-0.00260248		2599.57	0.01888151		3129.57	0.01472999		3659.6	-0.02479745
479.79	0.12042055		1009.79	-0.00495915		1539.78	-0.00153542		2069.78	-0.00185289		2599.77	0.01910049		3129.77	0.01430023		3659.8	-0.02556438
479.99	0.11991035		1009.99	-0.00491871		1539.98	-0.0014314		2069.98	-0.00216956		2599.97	0.01970363		3129.97	0.01323512		3660	-0.02574439
480.19	0.12059721		1010.19	-0.00559355		1540.18	-0.00092007		2070.18	-0.0018996		2600.17	0.02054263		3130.17	0.01272177		3660.2	-0.02623776
480.39	0.1213344		1010.39	-0.00611464		1540.38	0.00045046		2070.38	-0.00248791		2600.37	0.02006408		3130.37	0.01134147		3660.4	-0.02623196
480.59	0.12153425		1010.59	-0.00675731		1540.58	0.00089216		2070.58	-0.00397932		2600.57	0.02117743		3130.57	0.01095213		3660.6	-0.02649423
480.79	0.12154363		1010.79	-0.00699873		1540.78	0.00120661		2070.78	-0.00472802		2600.77	0.02137034		3130.77	0.00992384		3660.8	-0.02559807
480.99	0.12111525		1010.99	-0.00707578		1540.98	0.00225784		2070.98	-0.00474868		2600.97	0.0209528		3130.97	0.00976323		3661	-0.02531352
481.19	0.1216524		1011.19	-0.00704738		1541.18	0.00323447		2071.18	-0.00405191		2601.17	0.02157328		3131.17	0.00940383		3661.2	-0.02405972
481.39	0.12164156		1011.39	-0.00697617		1541.38	0.00289259		2071.38	-0.00350438		2601.37	0.02198315		3131.37	0.00925511		3661.4	-0.02416703
481.59	0.12173672		1011.59	-0.00702004		1541.58	0.00313372		2071.58	-0.00431867		2601.57	0.02155358		3131.57	0.00843072		3661.6	-0.02418044
481.79	0.12209672		1011.79	-0.00760244		1541.78	0.00282426		2071.78	-0.00527448		2601.77	0.0219329		3131.77	0.00890279		3661.8	-0.02430749
481.99	0.12176147		1011.99	-0.00705424		1541.98	0.0024893		2071.98	-0.00493163		2601.97	0.02204611		3131.97	0.00943566		3662	-0.02472263
482.19	0.12127884		1012.19	-0.00735198		1542.18	0.00296091		2072.18	-0.00527575		2602.17	0.02156864		3132.17	0.00938755		3662.2	-0.02401459
482.39	0.12019197		1012.39	-0.00686702		1542.38	0.00337961		2072.38	-0.00476275		2602.37	0.02195698		3132.37	0.01002925		3662.4	-0.02380833
482.59	0.11984568		1012.59	-0.00656654		1542.58	0.0037011		2072.58	-0.00447174		2602.57	0.02178151		3132.57	0.00963904		3662.6	-0.02386845
482.79	0.1189876		1012.79	-0.00633489		1542.78	0.00276853		2072.78	-0.00437772		2602.77	0.0209524		3132.77	0.01046363		3662.8	-0.02422797
482.99	0.11876414		1012.99	-0.00604369		1542.98	0.00187822		2072.98	-0.00427777		2602.97	0.01951101		3132.97	0.01084867		3663	-0.02414641
483.19	0.11846837		1013.19	-0.00548975		1543.18	0.00110086		2073.18	-0.00342537		2603.17	0.01859958		3133.17	0.01099602		3663.2	-0.02441546
483.39	0.11852925		1013.39	-0.00451398		1543.38	0.00108488		2073.38	-0.00279349		2603.37	0.01860227		3133.37	0.01127268		3663.4	-0.02476693
483.59	0.11863442		1013.59	-0.00281842		1543.58	0.00053624		2073.58	-0.00248536		2603.57	0.0190342		3133.57	0.01238418		3663.6	-0.02541609
483.79	0.11975202		1013.79	-0.00321164		1543.78	0.00060981		2073.78	-0.00168119		2603.77	0.01953824		3133.77	0.01275887		3663.8	-0.0258821
483.99	0.12087783		1013.99	-0.00306518		1543.98	0.00014794		2073.98	-0.00201747		2603.97	0.02036325		3133.97	0.01273011		3664	-0.0263921
484.19	0.12250246		1014.19	-0.00302771		1544.18	0.00017944		2074.18	-0.00158726		2604.17	0.02112451		3134.17	0.01266045		3664.2	-0.02674554
484.39	0.12269071		1014.39	-0.00253949		1544.38	-0.00059284		2074.38	-0.00235507		2604.37	0.02026938		3134.37	0.01211666		3664.4	-0.02711383
484.59	0.12271957		1014.59	-0.00197244		1544.58	-0.00019359		2074.58	-0.00307605		2604.57	0.02111593		3134.57	0.01286659		3664.6	-0.0270749
484.79	0.12290706		1014.79	-0.00098474		1544.78	-0.00038429		2074.78	-0.00253738		2604.77	0.02146552		3134.77	0.01264304		3664.8	-0.0267444
484.99	0.12382387		1014.99	-0.00103868		1544.98	-0.00097543		2074.98	-0.00227601		2604.97	0.0215061		3134.97	0.01283185		3665	-0.02669999
485.19	0.12524607		1015.19	-0.00182319		1545.18	-0.0013675		2075.18	-0.00224391		2605.17	0.02182034		3135.17	0.01227341		3665.2	-0.026542
485.39	0.12521808		1015.39	-0.00272536		1545.38	-0.00158642		2075.38	-0.00377337		2605.37	0.02198813		3135.37	0.0120438		3665.4	-0.02792888
485.59	0.12493251		1015.59	-0.0029647		1545.58	-0.00112733		2075.58	-0.00438088		2605.57	0.02169717		3135.57	0.01234749		3665.6	-0.02767654
485.79	0.12499454		1015.79	-0.00367513		1545.78	-0.00111222		2075.78	-0.0048741		2605.77	0.02168998		3135.77	0.01349937		3665.8	-0.02662555
485.99	0.12430171		1015.99	-0.00384155		1545.98	-0.00121747		2075.98	-0.00504892		2605.97	0.02168687		3135.97	0.01406346		3666	-0.02615891
486.19	0.12403616		1016.19	-0.00464356		1546.18	-0.00091084		2076.18	-0.00569091		2606.17	0.02117234		3136.17	0.01430672		3666.2	-0.02549486
486.39	0.12279145		1016.39	-0.00551858		1546.38	-0.00103367		2076.38	-0.00588182		2606.37	0.02076074		3136.37	0.01523442		3666.4	-0.02624633
486.59	0.1225462		1016.59	-0.00604901		1546.58	-0.00121899		2076.58	-0.00633249		2606.57	0.02016972		3136.57	0.01458039		3666.6	-0.02679816
486.79	0.12225314		1016.79	-0.00683611		1546.78	-0.0012807		2076.78	-0.0066151		2606.77	0.01942618		3136.77	0.01536587		3666.8	-0.02697175
486.99	0.12122846		1016.99	-0.00760409		1546.98	-0.00125656		2076.98	-0.00710935		2606.97	0.01824532		3136.97	0.01589754		3667	-0.02734785
487.19	0.12034695		1017.19	-0.00780081		1547.18	-0.0008706		2077.18	-0.00733466		2607.17	0.01818041		3137.17	0.01663086		3667.2	-0.02696537
487.39	0.12008649		1017.39	-0.00738535		1547.38	-0.00096158		2077.38	-0.0066988		2607.37	0.01859455		3137.37	0.01666061		3667.4	-0.02714325
487.59	0.11993173		1017.59	-0.00786577		1547.58	-0.00102849		2077.58	-0.00655334		2607.57	0.02006792		3137.57	0.01684125		3667.6	-0.02691465
487.79	0.11992797		1017.79	-0.00902468		1547.78	-0.00039521		2077.78	-0.00554473		2607.77	0.02026235		3137.77	0.01654094		3667.8	-0.02688249
487.99	0.12034574		1017.99	-0.00874111		1547.98	-0.00004762		2077.98	-0.00429531		2607.97	0.02103911		3137.97	0.01593891		3668	-0.02734341
488.19	0.11972728		1018.19	-0.00840204		1548.18	0.0003688		2078.18	-0.00378188		2608.17	0.02099207		3138.17	0.01563641		3668.2	-0.02668963
488.39	0.11923228		1018.39	-0.00878114		1548.38	0.00106807		2078.38	-0.00413346		2608.37	0.02077659		3138.37	0.01521141		3668.4	-0.02688581
488.59	0.11967494		1018.59	-0.00775821		1548.58	0.00164097		2078.58	-0.00422779		2608.57	0.02154565		3138.57	0.01537071		3668.6	-0.02636113
488.79	0.11965259		1018.79	-0.00741892		1548.78	0.00114822		2078.78	-0.00433951		2608.77	0.02194888		3138.77	0.01421907		3668.8	-0.02689862
488.99	0.12058817		1018.99	-0.00730781		1548.98	0.00053267		2078.98	-0.00386796		2608.97	0.02256706		3138.97	0.014242		3669	-0.02649297
489.19	0.12095943		1019.19	-0.00783219		1549.18	0.0004576		2079.18	-0.00412507		2609.17	0.02316789		3139.17	0.01358024		3669.2	-0.02735902
489.39	0.12091081		1019.39	-0.00752108		1549.38	0.00041197		2079.38	-0.00467508		2609.37	0.02374145		3139.37	0.01297518		3669.4	-0.02731402
489.59	0.12069465		1019.59	-0.00700175		1549.58	-0.0004617		2079.58	-0.00415937		2609.57	0.02416111		3139.57	0.01312666		3669.6	-0.02608875
489.79	0.12071403		1019.79	-0.00725524		1549.78	-0.0009284		2079.78	-0.00414507		2609.77	0.02431139		3139.77	0.01342557		3669.8	-0.02627265
489.99	0.12021598		1019.99	-0.00658549		1549.98	-0.00103768		2079.98	-0.0043743		2609.97	0.02322547		3139.97	0.01315839		3670	-0.02612605
490.19	0.12064205		1020.19	-0.00719701		1550.18	-0.00137287		2080.18	-0.00469834		2610.17	0.02276924		3140.17	0.01288479		3670.2	-0.0265933
490.39	0.12052394		1020.39	-0.00731727		1550.38	-0.00129138		2080.38	-0.00566307		2610.37	0.02194942		3140.37	0.01329341		3670.4	-0.02714843
490.59	0.12108848		1020.59	-0.00643714		1550.58	-0.00120281		2080.58	-0.00516844		2610.57	0.02107889		3140.57	0.0130843		3670.6	-0.02737619
490.79	0.12166731		1020.79	-0.0068474		1550.78	-0.00140959		2080.78	-0.00532416		2610.77	0.01958663		3140.77	0.01372126		3670.8	-0.02756283
490.99	0.12169427		1020.99	-0.00704242		1550.98	-0.00184469		2080.98	-0.0053748		2610.97	0.01925647		3140.97	0.01480244		3671	-0.02769201
491.19	0.12157169		1021.19	-0.00723858		1551.18	-0.00118651		2081.18	-0.0055268		2611.17	0.01817633		3141.17	0.01494062		3671.2	-0.02721614
491.39	0.12258134		1021.39	-0.00816837		1551.38	-0.00056659		2081.38	-0.00480578		2611.37	0.01797835		3141.37	0.01453208		3671.4	-0.02722559
491.59	0.12265663		1021.59	-0.00904359		1551.58	-0.00043902		2081.58	-0.00415599		2611.57	0.01836983		3141.57	0.01421322		3671.6	-0.02710359
491.79	0.12232814		1021.79	-0.00854636		1551.78	-0.00059784		2081.78	-0.00372728		2611.77	0.0164563		3141.77	0.01435608		3671.8	-0.02776428
491.99	0.1220912		1021.99	-0.00859031		1551.98	-0.0006913		2081.98	-0.00375056		2611.97	0.01633564		3141.97	0.01475563		3672	-0.02789562
492.19	0.12118219		1022.19	-0.00864063		1552.18	0.00024464		2082.18	-0.00474709		2612.17	0.01587374		3142.17	0.01470342		3672.2	-0.02774639
492.39	0.12167127		1022.39	-0.00916237		1552.38	0.00058578		2082.38	-0.00503296		2612.37	0.0164442		3142.37	0.014669		3672.4	-0.0281098
492.59	0.1214638		1022.59	-0.00841289		1552.58	-0.00079246		2082.58	-0.00585111		2612.57	0.01750687		3142.57	0.01468945		3672.6	-0.02781801
492.79	0.12088996		1022.79	-0.00914811		1552.78	-0.00039239		2082.78	-0.00672811		2612.77	0.01778375		3142.77	0.01424215		3672.8	-0.02765216
492.99	0.11996084		1022.99	-0.01007549		1552.98	-0.00037638		2082.98	-0.00610822		2612.97	0.0184234		3142.97	0.01469568		3673	-0.02664737
493.19	0.11959209		1023.19	-0.01129394		1553.18	-0.00039404		2083.18	-0.00666178		2613.17	0.01893756		3143.17	0.01398919		3673.2	-0.02699645
493.39	0.11944724		1023.39	-0.0112024		1553.38	-0.00021087		2083.38	-0.00697611		2613.37	0.02008799		3143.37	0.01324443		3673.4	-0.02590689
493.59	0.11841993		1023.59	-0.01125905		1553.58	-0.00051319		2083.58	-0.00743242		2613.57	0.02064472		3143.57	0.01362664		3673.6	-0.02657401
493.79	0.11763841		1023.79	-0.0114048		1553.78	0.00003473		2083.78	-0.00667287		2613.77	0.02080344		3143.77	0.01349052		3673.8	-0.02698664
493.99	0.11849127		1023.99	-0.01103303		1553.98	0.00040478		2083.98	-0.0070608		2613.97	0.02088802		3143.97	0.01326411		3674	-0.02659372
494.19	0.11900562		1024.19	-0.01184281		1554.18	0.00080362		2084.18	-0.00697366		2614.17	0.02177755		3144.17	0.01273676		3674.2	-0.02596085
494.39	0.11861556		1024.39	-0.01127648		1554.38	0.00142465		2084.38	-0.00664234		2614.37	0.02168853		3144.37	0.01242439		3674.4	-0.02567907
494.59	0.11786965		1024.59	-0.01086525		1554.58	0.00147612		2084.58	-0.00586853		2614.57	0.02149236		3144.57	0.01218726		3674.6	-0.02635283
494.79	0.11842295		1024.79	-0.01107365		1554.78	0.00171356		2084.78	-0.00587132		2614.77	0.02141706		3144.77	0.0110832		3674.8	-0.0257555
494.99	0.11785892		1024.99	-0.01054126		1554.98	0.00170479		2084.98	-0.00531958		2614.97	0.02196677		3144.97	0.01162859		3675	-0.02515185
495.19	0.11802225		1025.19	-0.01045619		1555.18	0.00190922		2085.18	-0.0044284		2615.17	0.02087587		3145.17	0.01084151		3675.2	-0.0252991
495.39	0.1190629		1025.39	-0.00993717		1555.38	0.00187837		2085.38	-0.00441544		2615.37	0.02136134		3145.37	0.01083698		3675.4	-0.02567366
495.59	0.11891691		1025.59	-0.00958151		1555.58	0.00029534		2085.58	-0.00444247		2615.57	0.0220813		3145.57	0.01052946		3675.6	-0.02606003
495.79	0.11803817		1025.79	-0.00833525		1555.78	-0.00056046		2085.78	-0.00379099		2615.77	0.02095601		3145.77	0.00980202		3675.8	-0.02667172
495.99	0.11770896		1025.99	-0.00852301		1555.98	-0.00132942		2085.98	-0.0040106		2615.97	0.02108848		3145.97	0.00970875		3676	-0.02627538
496.19	0.11758752		1026.19	-0.00826781		1556.18	-0.00042254		2086.18	-0.00438888		2616.17	0.02085546		3146.17	0.00934944		3676.2	-0.02636947
496.39	0.11826629		1026.39	-0.00841		1556.38	-0.00138682		2086.38	-0.0039404		2616.37	0.02028277		3146.37	0.00928482		3676.4	-0.02618932
496.59	0.11917915		1026.59	-0.00801353		1556.58	-0.00246675		2086.58	-0.00420323		2616.57	0.01896067		3146.57	0.0090293		3676.6	-0.0263134
496.79	0.11952368		1026.79	-0.00885232		1556.78	-0.00209725		2086.78	-0.0039457		2616.77	0.01835337		3146.77	0.00936491		3676.8	-0.02685912
496.99	0.11942799		1026.99	-0.00942478		1556.98	-0.00265183		2086.98	-0.00359857		2616.97	0.01855197		3146.97	0.0094793		3677	-0.02644958
497.19	0.12066915		1027.19	-0.00977575		1557.18	-0.00401281		2087.18	-0.00358632		2617.17	0.01895937		3147.17	0.0095319		3677.2	-0.02708134
497.39	0.12057405		1027.39	-0.00946556		1557.38	-0.00444405		2087.38	-0.00343073		2617.37	0.01886825		3147.37	0.00999778		3677.4	-0.02767078
497.59	0.12129277		1027.59	-0.01010703		1557.58	-0.00504967		2087.58	-0.00383658		2617.57	0.0185567		3147.57	0.01118753		3677.6	-0.02812641
497.79	0.12129409		1027.79	-0.01059341		1557.78	-0.00546613		2087.78	-0.00395764		2617.77	0.0186115		3147.77	0.01141286		3677.8	-0.02825047
497.99	0.12205565		1027.99	-0.01064027		1557.98	-0.00479736		2087.98	-0.00396073		2617.97	0.01822268		3147.97	0.01136299		3678	-0.02788031
498.19	0.12140574		1028.19	-0.01062597		1558.18	-0.00453823		2088.18	-0.0040003		2618.17	0.0172017		3148.17	0.01080333		3678.2	-0.02710093
498.39	0.12032475		1028.39	-0.01000813		1558.38	-0.00349907		2088.38	-0.00356218		2618.37	0.016785		3148.37	0.01075738		3678.4	-0.02744604
498.59	0.12028179		1028.59	-0.01009334		1558.58	-0.0037641		2088.58	-0.00387158		2618.57	0.0164203		3148.57	0.01094211		3678.6	-0.02797355
498.79	0.12048257		1028.79	-0.01000549		1558.78	-0.00457131		2088.78	-0.00367929		2618.77	0.01634507		3148.77	0.01078903		3678.8	-0.02712642
498.99	0.12009526		1028.99	-0.01046774		1558.98	-0.00505692		2088.98	-0.00371436		2618.97	0.0170864		3148.97	0.01187892		3679	-0.02730416
499.19	0.11989744		1029.19	-0.01091312		1559.18	-0.00596704		2089.18	-0.00325884		2619.17	0.01720981		3149.17	0.01202324		3679.2	-0.0285096
499.39	0.11952609		1029.39	-0.01105021		1559.38	-0.00536228		2089.38	-0.00311592		2619.37	0.01706632		3149.37	0.01215392		3679.4	-0.0284025
499.59	0.11884864		1029.59	-0.01060645		1559.58	-0.00518258		2089.58	-0.00220877		2619.57	0.01792406		3149.57	0.01208804		3679.6	-0.02818129
499.79	0.1178135		1029.79	-0.01009144		1559.78	-0.00399178		2089.78	-0.00228556		2619.77	0.01706586		3149.77	0.01234283		3679.8	-0.02815556
499.99	0.11815898		1029.99	-0.00923551		1559.98	-0.00306644		2089.98	-0.00301223		2619.97	0.01676206		3149.97	0.012444		3680	-0.02769106
500.19	0.11850164		1030.19	-0.00849096		1560.18	-0.00173054		2090.18	-0.00346534		2620.17	0.01660528		3150.17	0.01161079		3680.2	-0.02834043
500.39	0.11902504		1030.39	-0.00758735		1560.38	-0.00139646		2090.38	-0.00287169		2620.37	0.01612007		3150.37	0.01075695		3680.4	-0.02918727
500.59	0.1203424		1030.59	-0.00709222		1560.58	-0.00081162		2090.58	-0.00278083		2620.57	0.01613055		3150.57	0.01021902		3680.6	-0.03000169
500.79	0.11960942		1030.79	-0.00707283		1560.78	0.0000055		2090.78	-0.00333959		2620.77	0.01679073		3150.77	0.01051576		3680.8	-0.02941951
500.99	0.11903776		1030.99	-0.00713228		1560.98	-0.00017594		2090.98	-0.00386056		2620.97	0.01746774		3150.97	0.01058787		3681	-0.02813693
501.19	0.11934643		1031.19	-0.00737595		1561.18	-0.00063113		2091.18	-0.00413384		2621.17	0.0182655		3151.17	0.01019004		3681.2	-0.02860206
501.39	0.11952128		1031.39	-0.00754246		1561.38	0.00060297		2091.38	-0.00430003		2621.37	0.01855626		3151.37	0.01051191		3681.4	-0.02944524
501.59	0.12038655		1031.59	-0.00864085		1561.58	0.00122133		2091.58	-0.0045493		2621.57	0.01865636		3151.57	0.0116679		3681.6	-0.0288316
501.79	0.1197768		1031.79	-0.00850549		1561.78	0.00180399		2091.78	-0.00515914		2621.77	0.01864919		3151.77	0.01174375		3681.8	-0.0292899
501.99	0.11968036		1031.99	-0.00803228		1561.98	0.00205524		2091.98	-0.00500348		2621.97	0.01902819		3151.97	0.01172052		3682	-0.02896809
502.19	0.12006526		1032.19	-0.00783707		1562.18	0.00083728		2092.18	-0.00558277		2622.17	0.01900572		3152.17	0.01184801		3682.2	-0.0289179
502.39	0.12031226		1032.39	-0.00880404		1562.38	0.00033428		2092.38	-0.00547819		2622.37	0.01953593		3152.37	0.01227703		3682.4	-0.02878816
502.59	0.11969479		1032.59	-0.00918049		1562.58	-0.00067914		2092.58	-0.00596618		2622.57	0.01967284		3152.57	0.0127442		3682.6	-0.02920838
502.79	0.11870281		1032.79	-0.00929861		1562.78	-0.00206231		2092.78	-0.00592294		2622.77	0.02000617		3152.77	0.01250299		3682.8	-0.02852208
502.99	0.11825332		1032.99	-0.00984989		1562.98	-0.00259927		2092.98	-0.00598461		2622.97	0.01997183		3152.97	0.0123512		3683	-0.02885826
503.19	0.11764293		1033.19	-0.01038089		1563.18	-0.00285928		2093.18	-0.00543088		2623.17	0.01943305		3153.17	0.01303242		3683.2	-0.02832747
503.39	0.11731581		1033.39	-0.0098372		1563.38	-0.00280239		2093.38	-0.00491583		2623.37	0.01873124		3153.37	0.01373817		3683.4	-0.02720128
503.59	0.11616129		1033.59	-0.00960323		1563.58	-0.00270369		2093.58	-0.00542684		2623.57	0.01937294		3153.57	0.01401451		3683.6	-0.02711046
503.79	0.11607988		1033.79	-0.01027307		1563.78	-0.00276141		2093.78	-0.00608554		2623.77	0.01945192		3153.77	0.01375507		3683.8	-0.0271305
503.99	0.11633665		1033.99	-0.00949387		1563.98	-0.0032359		2093.98	-0.00669303		2623.97	0.01938647		3153.97	0.01353997		3684	-0.02708501
504.19	0.11659259		1034.19	-0.01000591		1564.18	-0.00332584		2094.18	-0.00629314		2624.17	0.01978968		3154.17	0.01282846		3684.2	-0.0273855
504.39	0.11643623		1034.39	-0.00937298		1564.38	-0.00331675		2094.38	-0.00625026		2624.37	0.01950437		3154.37	0.01337815		3684.4	-0.02794019
504.59	0.11630962		1034.59	-0.01002819		1564.58	-0.00401691		2094.58	-0.00640561		2624.57	0.01957593		3154.57	0.01307954		3684.6	-0.02720296
504.79	0.11525288		1034.79	-0.00989162		1564.78	-0.00345229		2094.78	-0.00663131		2624.77	0.01954675		3154.77	0.01336842		3684.8	-0.02687265
504.99	0.11490635		1034.99	-0.01093725		1564.98	-0.00406283		2094.98	-0.00684417		2624.97	0.02037354		3154.97	0.0128976		3685	-0.02750808
505.19	0.11622013		1035.19	-0.01069765		1565.18	-0.00326916		2095.18	-0.00644302		2625.17	0.02091786		3155.17	0.0128083		3685.2	-0.02751122
505.39	0.11627291		1035.39	-0.01104016		1565.38	-0.00226818		2095.38	-0.00600776		2625.37	0.02025436		3155.37	0.01304302		3685.4	-0.02813759
505.59	0.11676013		1035.59	-0.01018333		1565.58	-0.00258782		2095.58	-0.00598879		2625.57	0.02013037		3155.57	0.01410566		3685.6	-0.0285704
505.79	0.11654914		1035.79	-0.01029398		1565.78	-0.00297938		2095.78	-0.00609268		2625.77	0.02101556		3155.77	0.01366781		3685.8	-0.02901186
505.99	0.11698888		1035.99	-0.0101716		1565.98	-0.00339927		2095.98	-0.006566		2625.97	0.02121546		3155.97	0.01367399		3686	-0.02923498
506.19	0.11755518		1036.19	-0.01023403		1566.18	-0.00352592		2096.18	-0.00638905		2626.17	0.02061629		3156.17	0.01285544		3686.2	-0.02937847
506.39	0.1173987		1036.39	-0.01077125		1566.38	-0.00318867		2096.38	-0.00607491		2626.37	0.02042865		3156.37	0.01228177		3686.4	-0.02860114
506.59	0.11741208		1036.59	-0.00973033		1566.58	-0.00228338		2096.58	-0.00598769		2626.57	0.01951855		3156.57	0.01147811		3686.6	-0.028873
506.79	0.11799351		1036.79	-0.0092246		1566.78	-0.00244896		2096.78	-0.00534078		2626.77	0.01857979		3156.77	0.00968498		3686.8	-0.02842953
506.99	0.11868896		1036.99	-0.00885966		1566.98	-0.00301637		2096.98	-0.00434523		2626.97	0.01803638		3156.97	0.00963322		3687	-0.02761338
507.19	0.11772072		1037.19	-0.00839547		1567.18	-0.00335492		2097.18	-0.00423992		2627.17	0.01872239		3157.17	0.01033841		3687.2	-0.02730269
507.39	0.11697448		1037.39	-0.00821822		1567.38	-0.00343557		2097.38	-0.00393438		2627.37	0.01926879		3157.37	0.00997745		3687.4	-0.02759769
507.59	0.11670584		1037.59	-0.008618		1567.58	-0.00354602		2097.58	-0.00470288		2627.57	0.01977419		3157.57	0.00923125		3687.6	-0.02831714
507.79	0.11702112		1037.79	-0.00906364		1567.78	-0.00386899		2097.78	-0.0049066		2627.77	0.01986869		3157.77	0.0098863		3687.8	-0.02883051
507.99	0.11746314		1037.99	-0.00846872		1567.98	-0.0036219		2097.98	-0.00550442		2627.97	0.01926864		3157.97	0.01061341		3688	-0.02911417
508.19	0.11707741		1038.19	-0.00858593		1568.18	-0.00390695		2098.18	-0.00471389		2628.17	0.01963215		3158.17	0.01091315		3688.2	-0.02928026
508.39	0.11633894		1038.39	-0.00759793		1568.38	-0.00471424		2098.38	-0.00466989		2628.37	0.01955882		3158.37	0.01194042		3688.4	-0.02942593
508.59	0.11633396		1038.59	-0.00859504		1568.58	-0.00534829		2098.58	-0.00463534		2628.57	0.01983102		3158.57	0.0117875		3688.6	-0.02936431
508.79	0.11588415		1038.79	-0.00775705		1568.78	-0.00438023		2098.78	-0.00509435		2628.77	0.01955423		3158.77	0.01259663		3688.8	-0.0298722
508.99	0.11586315		1038.99	-0.00868578		1568.98	-0.00440218		2098.98	-0.0052894		2628.97	0.02000863		3158.97	0.01304458		3689	-0.02917371
509.19	0.11670026		1039.19	-0.00803121		1569.18	-0.00435994		2099.18	-0.00505095		2629.17	0.01984763		3159.17	0.0133051		3689.2	-0.02858236
509.39	0.11584346		1039.39	-0.00798463		1569.38	-0.004219		2099.38	-0.00540737		2629.37	0.01930099		3159.37	0.01311183		3689.4	-0.02942764
509.59	0.1158096		1039.59	-0.00768484		1569.58	-0.0039993		2099.58	-0.00609053		2629.57	0.0194202		3159.57	0.01363057		3689.6	-0.02870528
509.79	0.11560613		1039.79	-0.00900845		1569.78	-0.00336662		2099.78	-0.00640199		2629.77	0.01981961		3159.77	0.01228002		3689.8	-0.02881444
509.99	0.11608339		1039.99	-0.00861763		1569.98	-0.00227019		2099.98	-0.00707058		2629.97	0.01884684		3159.97	0.01266949		3690	-0.02846419
510.19	0.1157426		1040.19	-0.00853873		1570.18	-0.00143515		2100.18	-0.00642502		2630.17	0.01894153		3160.17	0.01182984		3690.2	-0.02851794
510.39	0.11595574		1040.39	-0.00789995		1570.38	-0.00118235		2100.38	-0.0064329		2630.37	0.01889869		3160.37	0.01130694		3690.4	-0.02757593
510.59	0.11619468		1040.59	-0.00758489		1570.58	-0.00071682		2100.58	-0.0059985		2630.57	0.01738539		3160.57	0.01103353		3690.6	-0.02788475
510.79	0.1166392		1040.79	-0.00779896		1570.78	-0.0006537		2100.78	-0.00534686		2630.77	0.01676763		3160.77	0.01070785		3690.8	-0.02659702
510.99	0.11657741		1040.99	-0.00793082		1570.98	-0.00066821		2100.98	-0.0047706		2630.97	0.01739089		3160.97	0.01011175		3691	-0.02615408
511.19	0.11586009		1041.19	-0.00869159		1571.18	-0.00065517		2101.18	-0.00509348		2631.17	0.01713551		3161.17	0.0094143		3691.2	-0.02646618
511.39	0.11618466		1041.39	-0.01031797		1571.38	-0.00053979		2101.38	-0.00496557		2631.37	0.01667902		3161.37	0.00850003		3691.4	-0.02670586
511.59	0.11615381		1041.59	-0.01023008		1571.58	-0.00151337		2101.58	-0.00500264		2631.57	0.01568083		3161.57	0.00834657		3691.6	-0.0269762
511.79	0.11605221		1041.79	-0.01065309		1571.78	-0.00182544		2101.78	-0.00507517		2631.77	0.01486292		3161.77	0.0082266		3691.8	-0.02727565
511.99	0.1170553		1041.99	-0.01044588		1571.98	-0.00169152		2101.98	-0.00484719		2631.97	0.01418153		3161.97	0.00829385		3692	-0.02703454
512.19	0.11660964		1042.19	-0.01097391		1572.18	-0.002683		2102.18	-0.00448016		2632.17	0.01490976		3162.17	0.00883592		3692.2	-0.02615237
512.39	0.11699093		1042.39	-0.01071715		1572.38	-0.00394612		2102.38	-0.00499709		2632.37	0.01494249		3162.37	0.00929069		3692.4	-0.02576461
512.59	0.11701664		1042.59	-0.01113709		1572.58	-0.00436273		2102.58	-0.00574415		2632.57	0.01584835		3162.57	0.00916377		3692.6	-0.02566931
512.79	0.11716663		1042.79	-0.01119503		1572.78	-0.0047426		2102.78	-0.0059479		2632.77	0.01623641		3162.77	0.00961335		3692.8	-0.02528032
512.99	0.1172039		1042.99	-0.01169116		1572.98	-0.00526072		2102.98	-0.00604638		2632.97	0.01679277		3162.97	0.01009976		3693	-0.02465554
513.19	0.11779966		1043.19	-0.01104065		1573.18	-0.00568431		2103.18	-0.00644766		2633.17	0.01700861		3163.17	0.01054447		3693.2	-0.02516351
513.39	0.11729526		1043.39	-0.01023578		1573.38	-0.0055589		2103.38	-0.00706171		2633.37	0.01730762		3163.37	0.0113917		3693.4	-0.0256655
513.59	0.11767308		1043.59	-0.01084504		1573.58	-0.00517388		2103.58	-0.00736975		2633.57	0.01803241		3163.57	0.01188194		3693.6	-0.0242999
513.79	0.11738595		1043.79	-0.01145037		1573.78	-0.00476459		2103.78	-0.00721489		2633.77	0.01911075		3163.77	0.01282477		3693.8	-0.02549981
513.99	0.11840894		1043.99	-0.01092705		1573.98	-0.0040055		2103.98	-0.00786032		2633.97	0.01947388		3163.97	0.01530945		3694	-0.02584592
514.19	0.11827989		1044.19	-0.01122261		1574.18	-0.00358862		2104.18	-0.00775742		2634.17	0.02049214		3164.17	0.01596571		3694.2	-0.02616627
514.39	0.11915197		1044.39	-0.01167199		1574.38	-0.0033971		2104.38	-0.00834646		2634.37	0.02010054		3164.37	0.01605182		3694.4	-0.02583354
514.59	0.11914695		1044.59	-0.01288963		1574.58	-0.00361585		2104.58	-0.00813345		2634.57	0.01890177		3164.57	0.01637003		3694.6	-0.02630297
514.79	0.11923847		1044.79	-0.01272215		1574.78	-0.00327291		2104.78	-0.00896607		2634.77	0.01908459		3164.77	0.01580003		3694.8	-0.02650481
514.99	0.11883893		1044.99	-0.01250017		1574.98	-0.00378632		2104.98	-0.00882058		2634.97	0.01814696		3164.97	0.01499323		3695	-0.02724999
515.19	0.11828736		1045.19	-0.01328964		1575.18	-0.00467291		2105.18	-0.00795648		2635.17	0.01686043		3165.17	0.01452637		3695.2	-0.02799386
515.39	0.11801272		1045.39	-0.01302936		1575.38	-0.00470413		2105.38	-0.00852873		2635.37	0.01620173		3165.37	0.01411295		3695.4	-0.02813497
515.59	0.11816272		1045.59	-0.01275355		1575.58	-0.00536619		2105.58	-0.00797279		2635.57	0.01478829		3165.57	0.01437773		3695.6	-0.02893883
515.79	0.11879472		1045.79	-0.01278586		1575.78	-0.00475435		2105.78	-0.0089176		2635.77	0.01380096		3165.77	0.013968		3695.8	-0.02932263
515.99	0.11965276		1045.99	-0.01339194		1575.98	-0.00554132		2105.98	-0.00932506		2635.97	0.01401602		3165.97	0.01419324		3696	-0.02868656
516.19	0.11990365		1046.19	-0.01335391		1576.18	-0.00564122		2106.18	-0.00980218		2636.17	0.01411146		3166.17	0.0139429		3696.2	-0.02878759
516.39	0.11956339		1046.39	-0.01273075		1576.38	-0.00544275		2106.38	-0.00995042		2636.37	0.01461545		3166.37	0.01379964		3696.4	-0.02866655
516.59	0.11880601		1046.59	-0.01282021		1576.58	-0.00519972		2106.58	-0.00971496		2636.57	0.01559649		3166.57	0.01295359		3696.6	-0.02826511
516.79	0.11912354		1046.79	-0.01260314		1576.78	-0.00502626		2106.78	-0.00949089		2636.77	0.01503547		3166.77	0.01317359		3696.8	-0.02840374
516.99	0.11798565		1046.99	-0.01185972		1576.98	-0.00470359		2106.98	-0.00948447		2636.97	0.01505651		3166.97	0.01304806		3697	-0.02803205
517.19	0.1182038		1047.19	-0.01134713		1577.18	-0.00461411		2107.18	-0.00917669		2637.17	0.01638864		3167.17	0.01305973		3697.2	-0.02859133
517.39	0.11758703		1047.39	-0.01122957		1577.38	-0.00554329		2107.38	-0.00894081		2637.37	0.01700262		3167.37	0.01242492		3697.4	-0.02827023
517.59	0.11670994		1047.59	-0.01096476		1577.58	-0.00558215		2107.58	-0.00888738		2637.57	0.01868576		3167.57	0.01211556		3697.6	-0.02677001
517.79	0.11595974		1047.79	-0.01043829		1577.78	-0.0061613		2107.78	-0.00837781		2637.77	0.01953487		3167.77	0.01222273		3697.8	-0.02710372
517.99	0.11602923		1047.99	-0.00937218		1577.98	-0.00626335		2107.98	-0.00824585		2637.97	0.02008394		3167.97	0.01215864		3698	-0.02728989
518.19	0.11424414		1048.19	-0.00966799		1578.18	-0.00705117		2108.18	-0.00788848		2638.17	0.02050876		3168.17	0.01053961		3698.2	-0.02644987
518.39	0.11392382		1048.39	-0.00970822		1578.38	-0.00750313		2108.38	-0.00812309		2638.37	0.02012046		3168.37	0.00941379		3698.4	-0.02709345
518.59	0.11300117		1048.59	-0.00905732		1578.58	-0.00809133		2108.58	-0.0073984		2638.57	0.02107417		3168.57	0.00904029		3698.6	-0.02656712
518.79	0.11275058		1048.79	-0.00848323		1578.78	-0.00796527		2108.78	-0.00749208		2638.77	0.02187793		3168.77	0.0084606		3698.8	-0.02713426
518.99	0.11264809		1048.99	-0.00817985		1578.98	-0.00871587		2108.98	-0.00682315		2638.97	0.0205805		3168.97	0.0081882		3699	-0.02691083
519.19	0.11189665		1049.19	-0.00799829		1579.18	-0.00858678		2109.18	-0.00571491		2639.17	0.02085598		3169.17	0.0079446		3699.2	-0.02760933
519.39	0.11231488		1049.39	-0.00684691		1579.38	-0.00804257		2109.38	-0.00666217		2639.37	0.02018949		3169.37	0.00826322		3699.4	-0.02756779
519.59	0.11318726		1049.59	-0.00769702		1579.58	-0.00776158		2109.58	-0.00621471		2639.57	0.01922213		3169.57	0.00786553		3699.6	-0.02825422
519.79	0.11436608		1049.79	-0.00840265		1579.78	-0.00660656		2109.78	-0.00663947		2639.77	0.01904056		3169.77	0.00832851		3699.8	-0.02707937
519.99	0.11518235		1049.99	-0.00929838		1579.98	-0.0061697		2109.98	-0.00663571		2639.97	0.01911309		3169.97	0.00836677		3700	-0.02714528
520.19	0.11521234		1050.19	-0.01031699		1580.18	-0.00495615		2110.18	-0.0063703		2640.17	0.01840891		3170.17	0.00964576		3700.2	-0.02724012
520.39	0.11390496		1050.39	-0.01115754		1580.38	-0.00425062		2110.38	-0.00574335		2640.37	0.01793767		3170.37	0.01003158		3700.4	-0.02717523
520.59	0.11431295		1050.59	-0.01141327		1580.58	-0.00443915		2110.58	-0.00601681		2640.57	0.0172576		3170.57	0.01043057		3700.6	-0.0272019
520.79	0.11479362		1050.79	-0.01173803		1580.78	-0.00441275		2110.78	-0.00671529		2640.77	0.01625988		3170.77	0.01123981		3700.8	-0.02747188
520.99	0.11407803		1050.99	-0.01300984		1580.98	-0.00446708		2110.98	-0.00719495		2640.97	0.01613125		3170.97	0.01019567		3701	-0.02757005
521.19	0.11394402		1051.19	-0.01322904		1581.18	-0.00486636		2111.18	-0.00781946		2641.17	0.01618724		3171.17	0.0102773		3701.2	-0.0276009
521.39	0.11373047		1051.39	-0.01338345		1581.38	-0.00557254		2111.38	-0.00781804		2641.37	0.01598019		3171.37	0.00960994		3701.4	-0.02704242
521.59	0.11272803		1051.59	-0.01262723		1581.58	-0.0056423		2111.58	-0.00838577		2641.57	0.01550435		3171.57	0.00922652		3701.6	-0.02659067
521.79	0.11200736		1051.79	-0.01278217		1581.78	-0.00598227		2111.78	-0.00841281		2641.77	0.01497859		3171.77	0.00948416		3701.8	-0.02723585
521.99	0.11064375		1051.99	-0.01295294		1581.98	-0.00567119		2111.98	-0.00909616		2641.97	0.0153642		3171.97	0.00890758		3702	-0.02711171
522.19	0.1109096		1052.19	-0.01304284		1582.18	-0.00570803		2112.18	-0.00956924		2642.17	0.01477567		3172.17	0.00861136		3702.2	-0.02688686
522.39	0.11171677		1052.39	-0.01345588		1582.38	-0.00552611		2112.38	-0.00937913		2642.37	0.01453922		3172.37	0.00861978		3702.4	-0.02716923
522.59	0.11137429		1052.59	-0.0140191		1582.58	-0.00605722		2112.58	-0.00915086		2642.57	0.01476658		3172.57	0.00847206		3702.6	-0.02665455
522.79	0.1110804		1052.79	-0.01401986		1582.78	-0.00561743		2112.78	-0.00927471		2642.77	0.01468521		3172.77	0.00790814		3702.8	-0.02767147
522.99	0.11128114		1052.99	-0.01218093		1582.98	-0.0063898		2112.98	-0.00937029		2642.97	0.01446798		3172.97	0.00758823		3703	-0.02704598
523.19	0.11180233		1053.19	-0.01126187		1583.18	-0.00647406		2113.18	-0.00826686		2643.17	0.0149998		3173.17	0.00765994		3703.2	-0.02759154
523.39	0.11203418		1053.39	-0.01151557		1583.38	-0.00575223		2113.38	-0.00909477		2643.37	0.01450164		3173.37	0.00708305		3703.4	-0.02724212
523.59	0.11277126		1053.59	-0.01243348		1583.58	-0.00461052		2113.58	-0.00844878		2643.57	0.01398736		3173.57	0.00613812		3703.6	-0.02703887
523.79	0.11437645		1053.79	-0.0124275		1583.78	-0.00465009		2113.78	-0.00799763		2643.77	0.01344078		3173.77	0.00699765		3703.8	-0.02678307
523.99	0.11490486		1053.99	-0.01242663		1583.98	-0.00463371		2113.98	-0.00799537		2643.97	0.01407895		3173.97	0.00689974		3704	-0.02722992
524.19	0.11515238		1054.19	-0.0133304		1584.18	-0.00454632		2114.18	-0.00679438		2644.17	0.01450211		3174.17	0.00871899		3704.2	-0.02691356
524.39	0.11523126		1054.39	-0.012583		1584.38	-0.00441805		2114.38	-0.00583747		2644.37	0.0137308		3174.37	0.00828501		3704.4	-0.02674124
524.59	0.11625355		1054.59	-0.01242489		1584.58	-0.00425933		2114.58	-0.00565243		2644.57	0.01389287		3174.57	0.00879937		3704.6	-0.02688768
524.79	0.1166468		1054.79	-0.01279014		1584.78	-0.00421177		2114.78	-0.00584574		2644.77	0.01371644		3174.77	0.00919045		3704.8	-0.0262509
524.99	0.11689204		1054.99	-0.01378363		1584.98	-0.00372995		2114.98	-0.00562812		2644.97	0.01405466		3174.97	0.00926318		3705	-0.02642712
525.19	0.11685113		1055.19	-0.01306082		1585.18	-0.00349568		2115.18	-0.0056638		2645.17	0.01363908		3175.17	0.01065592		3705.2	-0.02637286
525.39	0.11679301		1055.39	-0.01265058		1585.38	-0.00323297		2115.38	-0.00515936		2645.37	0.01462791		3175.37	0.01024265		3705.4	-0.02627229
525.59	0.11641878		1055.59	-0.01205369		1585.58	-0.00265172		2115.58	-0.00476517		2645.57	0.0140627		3175.57	0.00972139		3705.6	-0.02581766
525.79	0.1162243		1055.79	-0.01180687		1585.78	-0.00253941		2115.78	-0.00459183		2645.77	0.01522089		3175.77	0.009231		3705.8	-0.02666167
525.99	0.11653213		1055.99	-0.01137415		1585.98	-0.0023912		2115.98	-0.00491062		2645.97	0.01495336		3175.97	0.00827448		3706	-0.0258467
526.19	0.11727787		1056.19	-0.01030131		1586.18	-0.00232261		2116.18	-0.00473127		2646.17	0.01366914		3176.17	0.00889786		3706.2	-0.02589412
526.39	0.11707157		1056.39	-0.01076383		1586.38	-0.00308851		2116.38	-0.00522992		2646.37	0.01361208		3176.37	0.00802155		3706.4	-0.02598085
526.59	0.11659582		1056.59	-0.01098724		1586.58	-0.00370858		2116.58	-0.0058131		2646.57	0.01381321		3176.57	0.00804282		3706.6	-0.02619558
526.79	0.11631856		1056.79	-0.01077536		1586.78	-0.00413127		2116.78	-0.00591097		2646.77	0.01422453		3176.77	0.00711882		3706.8	-0.027137
526.99	0.11670532		1056.99	-0.00961516		1586.98	-0.00504288		2116.98	-0.00706062		2646.97	0.01471142		3176.97	0.00658102		3707	-0.02753685
527.19	0.11634723		1057.19	-0.01064798		1587.18	-0.0045407		2117.18	-0.00703205		2647.17	0.01435935		3177.17	0.00711736		3707.2	-0.02881501
527.39	0.11557493		1057.39	-0.01065937		1587.38	-0.00418657		2117.38	-0.00816864		2647.37	0.01407022		3177.37	0.0060793		3707.4	-0.02957129
527.59	0.11587818		1057.59	-0.01049621		1587.58	-0.0041949		2117.58	-0.00820509		2647.57	0.01401646		3177.57	0.00532187		3707.6	-0.03030586
527.79	0.11658809		1057.79	-0.01116491		1587.78	-0.00588161		2117.78	-0.00844929		2647.77	0.01433798		3177.77	0.00547272		3707.8	-0.03084884
527.99	0.11499695		1057.99	-0.01134213		1587.98	-0.00630067		2117.98	-0.00800211		2647.97	0.01506508		3177.97	0.0054538		3708	-0.0304146
528.19	0.11379405		1058.19	-0.01175105		1588.18	-0.00545458		2118.18	-0.00722522		2648.17	0.01398924		3178.17	0.00616456		3708.2	-0.03068668
528.39	0.11340508		1058.39	-0.01189286		1588.38	-0.0060472		2118.38	-0.00716831		2648.37	0.01310506		3178.37	0.00642842		3708.4	-0.03101891
528.59	0.11364455		1058.59	-0.01242488		1588.58	-0.00563852		2118.58	-0.00761153		2648.57	0.01358863		3178.57	0.00668575		3708.6	-0.03141466
528.79	0.11335993		1058.79	-0.01181307		1588.78	-0.00530391		2118.78	-0.0076603		2648.77	0.0134771		3178.77	0.0071502		3708.8	-0.03104111
528.99	0.11323849		1058.99	-0.01179805		1588.98	-0.00397842		2118.98	-0.00867149		2648.97	0.01350493		3178.97	0.00722674		3709	-0.03115658
529.19	0.11283751		1059.19	-0.01059526		1589.18	-0.0045032		2119.18	-0.00772856		2649.17	0.01360201		3179.17	0.00684844		3709.2	-0.03010101
529.39	0.11340435		1059.39	-0.00995245		1589.38	-0.00485892		2119.38	-0.00767128		2649.37	0.01402871		3179.37	0.00586661		3709.4	-0.02941544
529.59	0.11466548		1059.59	-0.00999146		1589.58	-0.0047771		2119.58	-0.0073631		2649.57	0.01336963		3179.57	0.00525332		3709.6	-0.02883543
529.79	0.11466713		1059.79	-0.00942548		1589.78	-0.00443568		2119.78	-0.00835831		2649.77	0.01342103		3179.77	0.00516601		3709.8	-0.02961207
529.99	0.11477499		1059.99	-0.00905332		1589.98	-0.00440651		2119.98	-0.00885738		2649.97	0.0122586		3179.97	0.00541754		3710	-0.02839787
530.19	0.11460435		1060.19	-0.00850559		1590.18	-0.00434114		2120.18	-0.0092377		2650.17	0.01148943		3180.17	0.00565987		3710.2	-0.02804427
530.39	0.11489431		1060.39	-0.00866728		1590.38	-0.00469839		2120.38	-0.00973579		2650.37	0.01257929		3180.37	0.00534792		3710.4	-0.02802244
530.59	0.1147009		1060.59	-0.00893288		1590.58	-0.00523017		2120.58	-0.00937929		2650.57	0.01214184		3180.57	0.00621748		3710.6	-0.02792259
530.79	0.11461989		1060.79	-0.0092176		1590.78	-0.00524483		2120.78	-0.00897388		2650.77	0.01210251		3180.77	0.0067725		3710.8	-0.02837163
530.99	0.11499587		1060.99	-0.00936835		1590.98	-0.00422042		2120.98	-0.00946677		2650.97	0.0124051		3180.97	0.00738202		3711	-0.02881551
531.19	0.11442891		1061.19	-0.00926374		1591.18	-0.0041169		2121.18	-0.00877798		2651.17	0.0122368		3181.17	0.00830747		3711.2	-0.02927791
531.39	0.11472388		1061.39	-0.0093111		1591.38	-0.00477955		2121.38	-0.00916231		2651.37	0.0123484		3181.37	0.00786875		3711.4	-0.03060227
531.59	0.11385148		1061.59	-0.01027795		1591.58	-0.00499892		2121.58	-0.0092114		2651.57	0.01314365		3181.57	0.0081368		3711.6	-0.03115246
531.79	0.11312865		1061.79	-0.01193672		1591.78	-0.00622918		2121.78	-0.00889784		2651.77	0.01266935		3181.77	0.00871951		3711.8	-0.03132357
531.99	0.11195837		1061.99	-0.01180523		1591.98	-0.00523713		2121.98	-0.00818665		2651.97	0.0119149		3181.97	0.00946066		3712	-0.03148696
532.19	0.11266856		1062.19	-0.01275308		1592.18	-0.00414437		2122.18	-0.00807469		2652.17	0.01116484		3182.17	0.00968892		3712.2	-0.03187874
532.39	0.11294164		1062.39	-0.01360989		1592.38	-0.00445657		2122.38	-0.00767253		2652.37	0.01109679		3182.37	0.00919739		3712.4	-0.03196218
532.59	0.11307679		1062.59	-0.01388871		1592.58	-0.00348256		2122.58	-0.00719922		2652.57	0.01103917		3182.57	0.00861906		3712.6	-0.03216682
532.79	0.11216141		1062.79	-0.0135285		1592.78	-0.00325545		2122.78	-0.00677647		2652.77	0.01076364		3182.77	0.00855077		3712.8	-0.03167716
532.99	0.11257109		1062.99	-0.01414255		1592.98	-0.00345071		2122.98	-0.00760726		2652.97	0.0109028		3182.97	0.00889125		3713	-0.03077455
533.19	0.11312893		1063.19	-0.01374062		1593.18	-0.00439623		2123.18	-0.00666183		2653.17	0.01186073		3183.17	0.00871157		3713.2	-0.03012347
533.39	0.11373959		1063.39	-0.01414308		1593.38	-0.0041976		2123.38	-0.00776904		2653.37	0.01185948		3183.37	0.00802323		3713.4	-0.03074523
533.59	0.11394732		1063.59	-0.01433721		1593.58	-0.00390163		2123.58	-0.00858455		2653.57	0.01218261		3183.57	0.00783461		3713.6	-0.03031443
533.79	0.11373639		1063.79	-0.01380851		1593.78	-0.00397826		2123.78	-0.00958533		2653.77	0.01287053		3183.77	0.00805568		3713.8	-0.03027443
533.99	0.11392141		1063.99	-0.0136381		1593.98	-0.00407343		2123.98	-0.0101027		2653.97	0.01235677		3183.97	0.00648768		3714	-0.02979047
534.19	0.11444207		1064.19	-0.01314666		1594.18	-0.00413889		2124.18	-0.01007374		2654.17	0.01305131		3184.17	0.00630325		3714.2	-0.02930277
534.39	0.11521477		1064.39	-0.01318356		1594.38	-0.00417056		2124.38	-0.01039843		2654.37	0.01408911		3184.37	0.00650939		3714.4	-0.02893496
534.59	0.11557256		1064.59	-0.01353862		1594.58	-0.00379389		2124.58	-0.0098513		2654.57	0.01394693		3184.57	0.00695514		3714.6	-0.02795919
534.79	0.11572015		1064.79	-0.01398278		1594.78	-0.0034057		2124.78	-0.00995089		2654.77	0.01444593		3184.77	0.00677405		3714.8	-0.02770205
534.99	0.11609197		1064.99	-0.01435059		1594.98	-0.00302556		2124.98	-0.01011172		2654.97	0.01465696		3184.97	0.00634719		3715	-0.02723959
535.19	0.11610576		1065.19	-0.01343412		1595.18	-0.00348091		2125.18	-0.00966289		2655.17	0.01535531		3185.17	0.00640274		3715.2	-0.02637248
535.39	0.11649834		1065.39	-0.01401215		1595.38	-0.00333914		2125.38	-0.00933831		2655.37	0.01463269		3185.37	0.00689596		3715.4	-0.02692021
535.59	0.11544101		1065.59	-0.0146759		1595.58	-0.00333508		2125.58	-0.00914794		2655.57	0.01483498		3185.57	0.00707946		3715.6	-0.02663597
535.79	0.11532523		1065.79	-0.01510442		1595.78	-0.00365952		2125.78	-0.00862829		2655.77	0.01437191		3185.77	0.00746615		3715.8	-0.02646255
535.99	0.11526273		1065.99	-0.01407813		1595.98	-0.00294137		2125.98	-0.00765066		2655.97	0.01445903		3185.97	0.00752167		3716	-0.02682364
536.19	0.11532162		1066.19	-0.01487468		1596.18	-0.00341422		2126.18	-0.00742035		2656.17	0.01280989		3186.17	0.00655864		3716.2	-0.02706647
536.39	0.11480892		1066.39	-0.01463484		1596.38	-0.00458499		2126.38	-0.00652044		2656.37	0.01214945		3186.37	0.00698248		3716.4	-0.0281837
536.59	0.1150303		1066.59	-0.01429963		1596.58	-0.00567549		2126.58	-0.0056218		2656.57	0.01271079		3186.57	0.00754469		3716.6	-0.02948845
536.79	0.11439119		1066.79	-0.01428361		1596.78	-0.00672243		2126.78	-0.00640174		2656.77	0.01287312		3186.77	0.00759049		3716.8	-0.02943078
536.99	0.11453285		1066.99	-0.01419961		1596.98	-0.00735735		2126.98	-0.006616		2656.97	0.01339156		3186.97	0.00862502		3717	-0.0300884
537.19	0.11407677		1067.19	-0.01399194		1597.18	-0.00684217		2127.18	-0.00723172		2657.17	0.01363996		3187.17	0.00901486		3717.2	-0.03062028
537.39	0.11406247		1067.39	-0.01396511		1597.38	-0.00742743		2127.38	-0.00762198		2657.37	0.01435499		3187.37	0.00923832		3717.4	-0.03081417
537.59	0.11460278		1067.59	-0.01398342		1597.58	-0.00785813		2127.58	-0.00810532		2657.57	0.01477919		3187.57	0.00914836		3717.6	-0.03129604
537.79	0.11436314		1067.79	-0.01397117		1597.78	-0.00801773		2127.78	-0.00898382		2657.77	0.01497179		3187.77	0.00969306		3717.8	-0.03150162
537.99	0.11385792		1067.99	-0.01455663		1597.98	-0.00799903		2127.98	-0.00980965		2657.97	0.01512732		3187.97	0.00964818		3718	-0.03153587
538.19	0.11392482		1068.19	-0.01463688		1598.18	-0.00849023		2128.18	-0.00991		2658.17	0.01569664		3188.17	0.0102865		3718.2	-0.03148574
538.39	0.11313628		1068.39	-0.01472012		1598.38	-0.00838602		2128.38	-0.01068346		2658.37	0.01546682		3188.37	0.01054906		3718.4	-0.03110618
538.59	0.11240191		1068.59	-0.01418035		1598.58	-0.00820472		2128.58	-0.00968558		2658.57	0.01602806		3188.57	0.0104137		3718.6	-0.03069217
538.79	0.11233635		1068.79	-0.01474125		1598.78	-0.00884401		2128.78	-0.01009325		2658.77	0.01551405		3188.77	0.01047082		3718.8	-0.02919587
538.99	0.11271317		1068.99	-0.01503524		1598.98	-0.00867276		2128.98	-0.00985329		2658.97	0.01579875		3188.97	0.00986728		3719	-0.02901027
539.19	0.11244872		1069.19	-0.01421398		1599.18	-0.00856151		2129.18	-0.00917984		2659.17	0.01563187		3189.17	0.00977284		3719.2	-0.0288337
539.39	0.11238897		1069.39	-0.01418629		1599.38	-0.00842783		2129.38	-0.00865343		2659.37	0.01469216		3189.37	0.01011494		3719.4	-0.02898228
539.59	0.11212718		1069.59	-0.01380289		1599.58	-0.00884515		2129.58	-0.00885425		2659.57	0.01496851		3189.57	0.00953376		3719.6	-0.02840874
539.79	0.11173934		1069.79	-0.01302081		1599.78	-0.00907327		2129.78	-0.00914693		2659.77	0.0151542		3189.77	0.00972299		3719.8	-0.02827159
539.99	0.11133161		1069.99	-0.01250517		1599.98	-0.00836848		2129.98	-0.00802647		2659.97	0.01373509		3189.97	0.0095325		3720	-0.0290149
540.19	0.1117092		1070.19	-0.01277728		1600.18	-0.00797444		2130.18	-0.00851655		2660.17	0.0121909		3190.17	0.0091632		3720.2	-0.03047216
540.39	0.11225987		1070.39	-0.01255961		1600.38	-0.00812496		2130.38	-0.00868813		2660.37	0.0123185		3190.37	0.00994877		3720.4	-0.03091318
540.59	0.11255487		1070.59	-0.01247833		1600.58	-0.00795012		2130.58	-0.00843121		2660.57	0.01332736		3190.57	0.00927846		3720.6	-0.03072701
540.79	0.11233328		1070.79	-0.01289418		1600.78	-0.00772347		2130.78	-0.00902037		2660.77	0.01311329		3190.77	0.00906237		3720.8	-0.03054042
540.99	0.11195337		1070.99	-0.01407969		1600.98	-0.00678779		2130.98	-0.00901773		2660.97	0.01315758		3190.97	0.00970921		3721	-0.03024515
541.19	0.11214032		1071.19	-0.01454257		1601.18	-0.00610785		2131.18	-0.00913513		2661.17	0.01273656		3191.17	0.01022718		3721.2	-0.02916284
541.39	0.11252196		1071.39	-0.01463978		1601.38	-0.0059975		2131.38	-0.00915096		2661.37	0.01415843		3191.37	0.0091102		3721.4	-0.02852874
541.59	0.11196092		1071.59	-0.01510791		1601.58	-0.00634703		2131.58	-0.0097532		2661.57	0.01439007		3191.57	0.00820132		3721.6	-0.02869546
541.79	0.11148451		1071.79	-0.01528788		1601.78	-0.00681954		2131.78	-0.01148572		2661.77	0.01437625		3191.77	0.00834331		3721.8	-0.0278345
541.99	0.11125878		1071.99	-0.01530762		1601.98	-0.00723622		2131.98	-0.01181305		2661.97	0.0141557		3191.97	0.00847039		3722	-0.02807822
542.19	0.11135836		1072.19	-0.01475492		1602.18	-0.00683886		2132.18	-0.01166273		2662.17	0.01402997		3192.17	0.00780297		3722.2	-0.02862599
542.39	0.11224864		1072.39	-0.01421389		1602.38	-0.00638742		2132.38	-0.01181693		2662.37	0.014099		3192.37	0.00732852		3722.4	-0.0285769
542.59	0.11336251		1072.59	-0.01403292		1602.58	-0.006914		2132.58	-0.01171326		2662.57	0.01356976		3192.57	0.00673966		3722.6	-0.0291515
542.79	0.1141752		1072.79	-0.01485052		1602.78	-0.00755806		2132.78	-0.01269618		2662.77	0.01378421		3192.77	0.00664283		3722.8	-0.02861048
542.99	0.11470055		1072.99	-0.01432458		1602.98	-0.00844419		2132.98	-0.01251406		2662.97	0.01362679		3192.97	0.00521145		3723	-0.02964389
543.19	0.11497925		1073.19	-0.01372422		1603.18	-0.00953996		2133.18	-0.01173156		2663.17	0.01307332		3193.17	0.00501275		3723.2	-0.02904332
543.39	0.1153776		1073.39	-0.01385368		1603.38	-0.00961525		2133.38	-0.01148778		2663.37	0.01262096		3193.37	0.00474813		3723.4	-0.02932171
543.59	0.11582293		1073.59	-0.01383092		1603.58	-0.01038292		2133.58	-0.01130464		2663.57	0.01255445		3193.57	0.00443821		3723.6	-0.0300296
543.79	0.11552692		1073.79	-0.01435491		1603.78	-0.00966563		2133.78	-0.01072379		2663.77	0.01273556		3193.77	0.00477017		3723.8	-0.03142824
543.99	0.11490704		1073.99	-0.01516204		1603.98	-0.00821477		2133.98	-0.00986076		2663.97	0.01171594		3193.97	0.00392318		3724	-0.0323411
544.19	0.11503125		1074.19	-0.01595401		1604.18	-0.00766977		2134.18	-0.00974082		2664.17	0.01235235		3194.17	0.00362122		3724.2	-0.0332297
544.39	0.1150941		1074.39	-0.01653771		1604.38	-0.00791824		2134.38	-0.00950728		2664.37	0.01288621		3194.37	0.00317623		3724.4	-0.03254036
544.59	0.11510439		1074.59	-0.01755896		1604.58	-0.00729727		2134.58	-0.00885998		2664.57	0.01392997		3194.57	0.00269077		3724.6	-0.03252705
544.79	0.11489217		1074.79	-0.01828409		1604.78	-0.00657255		2134.78	-0.00921976		2664.77	0.01391698		3194.77	0.00250876		3724.8	-0.03250877
544.99	0.11526947		1074.99	-0.01951723		1604.98	-0.00560984		2134.98	-0.00859907		2664.97	0.01362748		3194.97	0.00308503		3725	-0.03170115
545.19	0.11576492		1075.19	-0.01984297		1605.18	-0.00513417		2135.18	-0.00840468		2665.17	0.01388217		3195.17	0.00344972		3725.2	-0.03127499
545.39	0.11586203		1075.39	-0.01954052		1605.38	-0.00508543		2135.38	-0.00909085		2665.37	0.01437432		3195.37	0.00300812		3725.4	-0.03134607
545.59	0.11537256		1075.59	-0.01876662		1605.58	-0.00563042		2135.58	-0.00959422		2665.57	0.01426859		3195.57	0.00314145		3725.6	-0.03089074
545.79	0.1159093		1075.79	-0.01777454		1605.78	-0.00569206		2135.78	-0.00966391		2665.77	0.01440269		3195.77	0.00386353		3725.8	-0.03009787
545.99	0.11556023		1075.99	-0.01674687		1605.98	-0.0055355		2135.98	-0.00874641		2665.97	0.0139051		3195.97	0.00456481		3726	-0.03036753
546.19	0.11615846		1076.19	-0.01674692		1606.18	-0.00506575		2136.18	-0.00904902		2666.17	0.0147748		3196.17	0.00479501		3726.2	-0.02971256
546.39	0.11723025		1076.39	-0.01640382		1606.38	-0.00560588		2136.38	-0.00933515		2666.37	0.01459399		3196.37	0.00589485		3726.4	-0.02867509
546.59	0.11688067		1076.59	-0.01581242		1606.58	-0.00663295		2136.58	-0.00921476		2666.57	0.01458513		3196.57	0.00701508		3726.6	-0.02872465
546.79	0.11616523		1076.79	-0.01467722		1606.78	-0.00689305		2136.78	-0.00876921		2666.77	0.01472347		3196.77	0.00744312		3726.8	-0.02853166
546.99	0.1155558		1076.99	-0.01395826		1606.98	-0.00758677		2136.98	-0.00890344		2666.97	0.0132985		3196.97	0.00652797		3727	-0.02833257
547.19	0.11484942		1077.19	-0.01442949		1607.18	-0.00851486		2137.18	-0.0087238		2667.17	0.01248104		3197.17	0.00634399		3727.2	-0.02800329
547.39	0.11431492		1077.39	-0.01322169		1607.38	-0.00839975		2137.38	-0.00872933		2667.37	0.01228519		3197.37	0.00633001		3727.4	-0.02903956
547.59	0.11413288		1077.59	-0.01281607		1607.58	-0.0096298		2137.58	-0.00842501		2667.57	0.01271281		3197.57	0.00596912		3727.6	-0.02915116
547.79	0.11276532		1077.79	-0.01233766		1607.78	-0.00885821		2137.78	-0.00800247		2667.77	0.0126128		3197.77	0.00630322		3727.8	-0.02967549
547.99	0.11135054		1077.99	-0.01278922		1607.98	-0.0084024		2137.98	-0.00839811		2667.97	0.01177523		3197.97	0.00581692		3728	-0.03005017
548.19	0.11131665		1078.19	-0.01257154		1608.18	-0.00814488		2138.18	-0.00780617		2668.17	0.01193414		3198.17	0.00602053		3728.2	-0.03007487
548.39	0.11079973		1078.39	-0.0127903		1608.38	-0.00780732		2138.38	-0.00804811		2668.37	0.01139474		3198.37	0.00557843		3728.4	-0.0304513
548.59	0.1108253		1078.59	-0.01342138		1608.58	-0.00686081		2138.58	-0.00781305		2668.57	0.01156702		3198.57	0.00539604		3728.6	-0.03106234
548.79	0.11099299		1078.79	-0.01309155		1608.78	-0.00644772		2138.78	-0.0080261		2668.77	0.01104711		3198.77	0.00547375		3728.8	-0.03226799
548.99	0.11199965		1078.99	-0.01346448		1608.98	-0.00708247		2138.98	-0.00786724		2668.97	0.01072644		3198.97	0.00650211		3729	-0.03299443
549.19	0.11248641		1079.19	-0.01320141		1609.18	-0.00680211		2139.18	-0.00757191		2669.17	0.01124153		3199.17	0.00730962		3729.2	-0.03358362
549.39	0.11320277		1079.39	-0.01262661		1609.38	-0.00831986		2139.38	-0.00763945		2669.37	0.01131393		3199.37	0.00728682		3729.4	-0.03409532
549.59	0.11292696		1079.59	-0.01250603		1609.58	-0.0088466		2139.58	-0.00816488		2669.57	0.01172797		3199.57	0.00777666		3729.6	-0.03291862
549.79	0.11336674		1079.79	-0.01300828		1609.78	-0.00929733		2139.78	-0.00778933		2669.77	0.01193689		3199.77	0.00770259		3729.8	-0.03268505
549.99	0.11273087		1079.99	-0.01415053		1609.98	-0.0103013		2139.98	-0.00769841		2669.97	0.01213446		3199.97	0.00740101		3730	-0.03278699
550.19	0.11216365		1080.19	-0.01533558		1610.18	-0.01021877		2140.18	-0.00879644		2670.17	0.01263863		3200.17	0.00771978		3730.2	-0.03278419
550.39	0.11148699		1080.39	-0.01584048		1610.38	-0.01019178		2140.38	-0.00812123		2670.37	0.01287916		3200.37	0.00815766		3730.4	-0.03233656
550.59	0.11125369		1080.59	-0.01664745		1610.58	-0.01037631		2140.58	-0.0077389		2670.57	0.01318329		3200.57	0.00678277		3730.6	-0.03323624
550.79	0.11206425		1080.79	-0.01704478		1610.78	-0.01011665		2140.78	-0.00856407		2670.77	0.01227994		3200.77	0.00566092		3730.8	-0.03310668
550.99	0.1121717		1080.99	-0.01829148		1610.98	-0.01031726		2140.98	-0.00979892		2670.97	0.0116971		3200.97	0.00416141		3731	-0.03258364
551.19	0.11208865		1081.19	-0.01851433		1611.18	-0.01111273		2141.18	-0.00992176		2671.17	0.01122584		3201.17	0.00438304		3731.2	-0.0324003
551.39	0.11192214		1081.39	-0.01777985		1611.38	-0.01001865		2141.38	-0.00962236		2671.37	0.01214878		3201.37	0.00454282		3731.4	-0.03257921
551.59	0.11164908		1081.59	-0.01828297		1611.58	-0.00934972		2141.58	-0.00932234		2671.57	0.01262874		3201.57	0.00503402		3731.6	-0.03182362
551.79	0.11129129		1081.79	-0.01782982		1611.78	-0.00833603		2141.78	-0.00941423		2671.77	0.01209495		3201.77	0.00571582		3731.8	-0.03186601
551.99	0.11147703		1081.99	-0.01785729		1611.98	-0.00767018		2141.98	-0.01021321		2671.97	0.0115792		3201.97	0.00565665		3732	-0.0324616
552.19	0.11146199		1082.19	-0.01791622		1612.18	-0.00691096		2142.18	-0.00982417		2672.17	0.01190728		3202.17	0.00592324		3732.2	-0.03191658
552.39	0.11169062		1082.39	-0.01762598		1612.38	-0.0060381		2142.38	-0.00961734		2672.37	0.01183908		3202.37	0.00622112		3732.4	-0.03261341
552.59	0.11251858		1082.59	-0.01744237		1612.58	-0.00606028		2142.58	-0.00953091		2672.57	0.01230213		3202.57	0.00647021		3732.6	-0.03261709
552.79	0.11257999		1082.79	-0.01727884		1612.78	-0.00651002		2142.78	-0.00958948		2672.77	0.01184849		3202.77	0.00735518		3732.8	-0.0321092
552.99	0.11302624		1082.99	-0.0169461		1612.98	-0.00673438		2142.98	-0.00966756		2672.97	0.01169644		3202.97	0.00799446		3733	-0.03204647
553.19	0.11263876		1083.19	-0.01665522		1613.18	-0.00646103		2143.18	-0.00977318		2673.17	0.01139463		3203.17	0.00828479		3733.2	-0.03181305
553.39	0.11253362		1083.39	-0.01661016		1613.38	-0.00734202		2143.38	-0.01037348		2673.37	0.0106971		3203.37	0.00839467		3733.4	-0.03213791
553.59	0.11107055		1083.59	-0.01650568		1613.58	-0.00777084		2143.58	-0.01127641		2673.57	0.01023669		3203.57	0.00923679		3733.6	-0.03190319
553.79	0.1106327		1083.79	-0.01690388		1613.78	-0.00892767		2143.78	-0.0112992		2673.77	0.0095349		3203.77	0.00833139		3733.8	-0.03210979
553.99	0.10985416		1083.99	-0.01730579		1613.98	-0.00996838		2143.98	-0.01125125		2673.97	0.00951262		3203.97	0.00835395		3734	-0.03248284
554.19	0.109293		1084.19	-0.01761253		1614.18	-0.00962712		2144.18	-0.0116141		2674.17	0.00899803		3204.17	0.00806205		3734.2	-0.03255157
554.39	0.10979579		1084.39	-0.01804775		1614.38	-0.01011393		2144.38	-0.01123941		2674.37	0.0088551		3204.37	0.00664581		3734.4	-0.03210824
554.59	0.11055848		1084.59	-0.01828661		1614.58	-0.01045129		2144.58	-0.01169998		2674.57	0.00910136		3204.57	0.00465868		3734.6	-0.03222016
554.79	0.11106337		1084.79	-0.01880633		1614.78	-0.01044133		2144.78	-0.01203199		2674.77	0.00835473		3204.77	0.00470476		3734.8	-0.03255213
554.99	0.11008803		1084.99	-0.01929229		1614.98	-0.01123055		2144.98	-0.0114196		2674.97	0.00898534		3204.97	0.00405636		3735	-0.03296452
555.19	0.10993103		1085.19	-0.0194185		1615.18	-0.0113236		2145.18	-0.01112724		2675.17	0.00932424		3205.17	0.00473748		3735.2	-0.03272047
555.39	0.10975561		1085.39	-0.01835355		1615.38	-0.01065191		2145.38	-0.01004212		2675.37	0.00990343		3205.37	0.00414082		3735.4	-0.03271735
555.59	0.11016388		1085.59	-0.01757332		1615.58	-0.01003731		2145.58	-0.00916256		2675.57	0.00984891		3205.57	0.00372487		3735.6	-0.03239257
555.79	0.11053324		1085.79	-0.01648452		1615.78	-0.00943484		2145.78	-0.00913995		2675.77	0.01027106		3205.77	0.00352687		3735.8	-0.03240981
555.99	0.11055539		1085.99	-0.01713892		1615.98	-0.00866427		2145.98	-0.00914354		2675.97	0.00996558		3205.97	0.00383142		3736	-0.03298273
556.19	0.11001988		1086.19	-0.01736089		1616.18	-0.00798821		2146.18	-0.00846518		2676.17	0.01113104		3206.17	0.00358403		3736.2	-0.03276581
556.39	0.11096172		1086.39	-0.01709841		1616.38	-0.00751065		2146.38	-0.00846993		2676.37	0.01125678		3206.37	0.00287346		3736.4	-0.03321802
556.59	0.11153697		1086.59	-0.01747832		1616.58	-0.00765543		2146.58	-0.00814748		2676.57	0.01230539		3206.57	0.0020594		3736.6	-0.03299745
556.79	0.1106369		1086.79	-0.01718303		1616.78	-0.00663386		2146.78	-0.00811292		2676.77	0.01214254		3206.77	0.00179491		3736.8	-0.03288423
556.99	0.11055024		1086.99	-0.01659109		1616.98	-0.00549691		2146.98	-0.00842476		2676.97	0.01124872		3206.97	0.00155597		3737	-0.03382232
557.19	0.11014963		1087.19	-0.01635182		1617.18	-0.00534863		2147.18	-0.00883728		2677.17	0.01090282		3207.17	0.00200342		3737.2	-0.03486464
557.39	0.11061078		1087.39	-0.01561455		1617.38	-0.00602621		2147.38	-0.00887243		2677.37	0.01118753		3207.37	0.00200342		3737.4	-0.03585881
557.59	0.11014037		1087.59	-0.01579244		1617.58	-0.00723088		2147.58	-0.01048389		2677.57	0.01096449		3207.57	0.00241808		3737.6	-0.03647608
557.79	0.1112248		1087.79	-0.01613398		1617.78	-0.00851062		2147.78	-0.01113385		2677.77	0.01071533		3207.77	0.00207226		3737.8	-0.03571424
557.99	0.11189558		1087.99	-0.01644824		1617.98	-0.00877901		2147.98	-0.01163832		2677.97	0.01106745		3207.97	0.00240057		3738	-0.03569174
558.19	0.11231345		1088.19	-0.016533		1618.18	-0.00908429		2148.18	-0.012341		2678.17	0.01115834		3208.17	0.00228331		3738.2	-0.03538121
558.39	0.11289989		1088.39	-0.01656812		1618.38	-0.00948276		2148.38	-0.01303205		2678.37	0.01145083		3208.37	0.00200502		3738.4	-0.03581402
558.59	0.11302141		1088.59	-0.01671526		1618.58	-0.00930665		2148.58	-0.01358702		2678.57	0.01215842		3208.57	0.00235222		3738.6	-0.03621883
558.79	0.11325978		1088.79	-0.01735915		1618.78	-0.0094143		2148.78	-0.01371666		2678.77	0.01218172		3208.77	0.00329849		3738.8	-0.03725448
558.99	0.11349542		1088.99	-0.01696503		1618.98	-0.00935171		2148.98	-0.01387934		2678.97	0.01308401		3208.97	0.00345359		3739	-0.03741325
559.19	0.11414075		1089.19	-0.01655616		1619.18	-0.00828442		2149.18	-0.01420271		2679.17	0.01292239		3209.17	0.00401996		3739.2	-0.03749758
559.39	0.11417084		1089.39	-0.01529641		1619.38	-0.00728951		2149.38	-0.01360355		2679.37	0.01299348		3209.37	0.00384754		3739.4	-0.03811814
559.59	0.11442812		1089.59	-0.01546975		1619.58	-0.00549174		2149.58	-0.01357802		2679.57	0.01355086		3209.57	0.0041739		3739.6	-0.03829402
559.79	0.11416264		1089.79	-0.01545935		1619.78	-0.00420508		2149.78	-0.01397245		2679.77	0.01415898		3209.77	0.00475883		3739.8	-0.0387952
