# Supplementary material for: Functional development of a V3/glycan-specific broadly neutralizing antibody isolated from a case of HIV superinfection
Source: eLife journal article supplement (doi:10.7554/elife.68110), 2021-07-15
Supplement: fig2-data2 [file ExcelReport.xls]

## Sheet: Experiment Summary
C:\Users\Labuser\Desktop\Overbaugh_lab\Mackenzie Shipley\QA013.2 Lineage\QA013.2 mutated ints_2020.08.06\BG505 SOSIP v3
ExpDescription: Unassigned
ExperimentType: KINETICS
StartDateTime: 8/6/2020 3:48:03 PM
MachineName: 886RGX1
UserName: Labuser
PlateName: 200806
PlateName2: Unassigned
Instrument Type: OctetRED96
200806_001.frd (A9)
200806_002.frd (B9)
200806_003.frd (C9)
200806_004.frd (D9)
200806_005.frd (E9)
200806_006.frd (F9)
200806_007.frd (G9)
200806_008.frd (H9)
200806_009.frd (A10)
200806_010.frd (B10)
200806_011.frd (C10)
200806_012.frd (D10)
200806_013.frd (E10)
200806_014.frd (F10)
200806_015.frd (G10)
200806_016.frd (H10)
200806_ExpMethod.fmf
N	Data Name	Assay Time	Flow Rate	Step Type Name	Step Type		Assay Step Number	Step Data Name	Sensor Column	Sample Column	Step Type	Assay Time
1	Baseline	30	1000	Baseline	2		1	Baseline	1	1	Baseline	30
2	Regeneration	5	1000	Regeneration	6		2	Regeneration	1	11	Regeneration	5
3	Association	180	600	Association	0		3	Baseline	1	1	Baseline	30
4	Dissociation	180	600	Dissociation	1		4	Loading	1	2	Loading	80
5	Loading	80	1000	Loading	3		5	Baseline	1	1	Baseline	30
							6	Association	1	10	Association	180
							7	Dissociation	1	1	Dissociation	180
							8	Regeneration	1	11	Regeneration	5
							9	Baseline	1	1	Baseline	30
							10	Loading	1	3	Loading	80
							11	Baseline	1	1	Baseline	30
							12	Association	1	10	Association	180
							13	Dissociation	1	1	Dissociation	180
							14	Regeneration	1	11	Regeneration	5
							15	Baseline	1	1	Baseline	30
							16	Loading	1	4	Loading	80
							17	Baseline	1	1	Baseline	30
							18	Association	1	10	Association	180
							19	Dissociation	1	1	Dissociation	180
							20	Regeneration	1	11	Regeneration	5
							21	Baseline	1	1	Baseline	30
							22	Loading	1	5	Loading	80
							23	Baseline	1	1	Baseline	30
							24	Association	1	10	Association	180
							25	Dissociation	1	1	Dissociation	180
							26	Regeneration	1	11	Regeneration	5
							27	Baseline	1	1	Baseline	30
							28	Loading	1	6	Loading	80
							29	Baseline	1	1	Baseline	30
							30	Association	1	10	Association	180
							31	Dissociation	1	1	Dissociation	180
							32	Regeneration	1	11	Regeneration	5
							33	Baseline	1	1	Baseline	30
							34	Loading	1	7	Loading	80
							35	Baseline	1	1	Baseline	30
							36	Association	1	10	Association	180
							37	Dissociation	1	1	Dissociation	180
							38	Regeneration	1	11	Regeneration	5
							39	Baseline	1	1	Baseline	30
							40	Loading	1	8	Loading	80
							41	Baseline	1	1	Baseline	30
							42	Association	1	10	Association	180
							43	Dissociation	1	1	Dissociation	180
							44	Regeneration	1	11	Regeneration	5
							45	Baseline	2	1	Baseline	30
							46	Regeneration	2	11	Regeneration	5
							47	Baseline	2	1	Baseline	30
							48	Loading	2	1	Loading	80
							49	Baseline	2	1	Baseline	30
							50	Association	2	10	Association	180
							51	Dissociation	2	1	Dissociation	180
							52	Regeneration	2	11	Regeneration	5
							53	Baseline	2	1	Baseline	30
							54	Loading	2	1	Loading	80
							55	Baseline	2	1	Baseline	30
							56	Association	2	10	Association	180
							57	Dissociation	2	1	Dissociation	180
							58	Regeneration	2	11	Regeneration	5
							59	Baseline	2	1	Baseline	30
							60	Loading	2	1	Loading	80
							61	Baseline	2	1	Baseline	30
							62	Association	2	10	Association	180
							63	Dissociation	2	1	Dissociation	180
							64	Regeneration	2	11	Regeneration	5
							65	Baseline	2	1	Baseline	30
							66	Loading	2	1	Loading	80
							67	Baseline	2	1	Baseline	30
							68	Association	2	10	Association	180
							69	Dissociation	2	1	Dissociation	180
							70	Regeneration	2	11	Regeneration	5
							71	Baseline	2	1	Baseline	30
							72	Loading	2	1	Loading	80
							73	Baseline	2	1	Baseline	30
							74	Association	2	10	Association	180
							75	Dissociation	2	1	Dissociation	180
							76	Regeneration	2	11	Regeneration	5
							77	Baseline	2	1	Baseline	30
							78	Loading	2	1	Loading	80
							79	Baseline	2	1	Baseline	30
							80	Association	2	10	Association	180
							81	Dissociation	2	1	Dissociation	180
							82	Regeneration	2	11	Regeneration	5
							83	Baseline	2	1	Baseline	30
							84	Loading	2	1	Loading	80
							85	Baseline	2	1	Baseline	30
							86	Association	2	10	Association	180
							87	Dissociation	2	1	Dissociation	180
							88	Regeneration	2	11	Regeneration	5
Report Info
SW Name: Octet DataAnalysis
SW Version: 11.1.2.9
Date/Time: 8/6/2020 6:37:41 PM

## Sheet: Sensor Tray
Assay Table					Sensor Location and File Name
Step	Step Name	Step Type	Step Time		Number	Sensor Location	Sensor Type	Sensor Info	File Name
1	Baseline	BASELINE	30		1	A9	AHC (Anti-hIgG Fc Capture)		C:\Users\Labuser\Desktop\Overbaugh_lab\Mackenzie Shipley\QA013.2 Lineage\QA013.2 mutated ints_2020.08.06\BG505 SOSIP v3\200806_001.frd
2	Regeneration	KREGENERATION	5		2	B9	AHC (Anti-hIgG Fc Capture)		C:\Users\Labuser\Desktop\Overbaugh_lab\Mackenzie Shipley\QA013.2 Lineage\QA013.2 mutated ints_2020.08.06\BG505 SOSIP v3\200806_002.frd
3	Regeneration	KREGENERATION	5		3	C9	AHC (Anti-hIgG Fc Capture)		C:\Users\Labuser\Desktop\Overbaugh_lab\Mackenzie Shipley\QA013.2 Lineage\QA013.2 mutated ints_2020.08.06\BG505 SOSIP v3\200806_003.frd
4	Regeneration	KREGENERATION	5		4	D9	AHC (Anti-hIgG Fc Capture)		C:\Users\Labuser\Desktop\Overbaugh_lab\Mackenzie Shipley\QA013.2 Lineage\QA013.2 mutated ints_2020.08.06\BG505 SOSIP v3\200806_004.frd
5	Regeneration	KREGENERATION	5		5	E9	AHC (Anti-hIgG Fc Capture)		C:\Users\Labuser\Desktop\Overbaugh_lab\Mackenzie Shipley\QA013.2 Lineage\QA013.2 mutated ints_2020.08.06\BG505 SOSIP v3\200806_005.frd
6	Regeneration	KREGENERATION	5		6	F9	AHC (Anti-hIgG Fc Capture)		C:\Users\Labuser\Desktop\Overbaugh_lab\Mackenzie Shipley\QA013.2 Lineage\QA013.2 mutated ints_2020.08.06\BG505 SOSIP v3\200806_006.frd
7	Regeneration	KREGENERATION	5		7	G9	AHC (Anti-hIgG Fc Capture)		C:\Users\Labuser\Desktop\Overbaugh_lab\Mackenzie Shipley\QA013.2 Lineage\QA013.2 mutated ints_2020.08.06\BG505 SOSIP v3\200806_007.frd
8	Baseline	BASELINE	30		8	H9	AHC (Anti-hIgG Fc Capture)		C:\Users\Labuser\Desktop\Overbaugh_lab\Mackenzie Shipley\QA013.2 Lineage\QA013.2 mutated ints_2020.08.06\BG505 SOSIP v3\200806_008.frd
9	Loading	LOADING	80		9	A10	AHC (Anti-hIgG Fc Capture)		C:\Users\Labuser\Desktop\Overbaugh_lab\Mackenzie Shipley\QA013.2 Lineage\QA013.2 mutated ints_2020.08.06\BG505 SOSIP v3\200806_009.frd
10	Baseline	BASELINE	30		10	B10	AHC (Anti-hIgG Fc Capture)		C:\Users\Labuser\Desktop\Overbaugh_lab\Mackenzie Shipley\QA013.2 Lineage\QA013.2 mutated ints_2020.08.06\BG505 SOSIP v3\200806_010.frd
11	Association	ASSOC	180		11	C10	AHC (Anti-hIgG Fc Capture)		C:\Users\Labuser\Desktop\Overbaugh_lab\Mackenzie Shipley\QA013.2 Lineage\QA013.2 mutated ints_2020.08.06\BG505 SOSIP v3\200806_011.frd
12	Dissociation	DISASSOC	180		12	D10	AHC (Anti-hIgG Fc Capture)		C:\Users\Labuser\Desktop\Overbaugh_lab\Mackenzie Shipley\QA013.2 Lineage\QA013.2 mutated ints_2020.08.06\BG505 SOSIP v3\200806_012.frd
13	Regeneration	KREGENERATION	5		13	E10	AHC (Anti-hIgG Fc Capture)		C:\Users\Labuser\Desktop\Overbaugh_lab\Mackenzie Shipley\QA013.2 Lineage\QA013.2 mutated ints_2020.08.06\BG505 SOSIP v3\200806_013.frd
14	Regeneration	KREGENERATION	5		14	F10	AHC (Anti-hIgG Fc Capture)		C:\Users\Labuser\Desktop\Overbaugh_lab\Mackenzie Shipley\QA013.2 Lineage\QA013.2 mutated ints_2020.08.06\BG505 SOSIP v3\200806_014.frd
15	Regeneration	KREGENERATION	5		15	G10	AHC (Anti-hIgG Fc Capture)		C:\Users\Labuser\Desktop\Overbaugh_lab\Mackenzie Shipley\QA013.2 Lineage\QA013.2 mutated ints_2020.08.06\BG505 SOSIP v3\200806_015.frd
16	Regeneration	KREGENERATION	5		16	H10	AHC (Anti-hIgG Fc Capture)		C:\Users\Labuser\Desktop\Overbaugh_lab\Mackenzie Shipley\QA013.2 Lineage\QA013.2 mutated ints_2020.08.06\BG505 SOSIP v3\200806_016.frd
17	Regeneration	KREGENERATION	5
18	Regeneration	KREGENERATION	5
19	Baseline	BASELINE	30
20	Loading	LOADING	80
21	Baseline	BASELINE	30
22	Association	ASSOC	180
23	Dissociation	DISASSOC	180
24	Regeneration	KREGENERATION	5
25	Regeneration	KREGENERATION	5
26	Regeneration	KREGENERATION	5
27	Regeneration	KREGENERATION	5
28	Regeneration	KREGENERATION	5
29	Regeneration	KREGENERATION	5
30	Baseline	BASELINE	30
31	Loading	LOADING	80
32	Baseline	BASELINE	30
33	Association	ASSOC	180
34	Dissociation	DISASSOC	180
35	Regeneration	KREGENERATION	5
36	Regeneration	KREGENERATION	5
37	Regeneration	KREGENERATION	5
38	Regeneration	KREGENERATION	5
39	Regeneration	KREGENERATION	5
40	Regeneration	KREGENERATION	5
41	Baseline	BASELINE	30
42	Loading	LOADING	80
43	Baseline	BASELINE	30
44	Association	ASSOC	180
45	Dissociation	DISASSOC	180
46	Regeneration	KREGENERATION	5
47	Regeneration	KREGENERATION	5
48	Regeneration	KREGENERATION	5
49	Regeneration	KREGENERATION	5
50	Regeneration	KREGENERATION	5
51	Regeneration	KREGENERATION	5
52	Baseline	BASELINE	30
53	Loading	LOADING	80
54	Baseline	BASELINE	30
55	Association	ASSOC	180
56	Dissociation	DISASSOC	180
57	Regeneration	KREGENERATION	5
58	Regeneration	KREGENERATION	5
59	Regeneration	KREGENERATION	5
60	Regeneration	KREGENERATION	5
61	Regeneration	KREGENERATION	5
62	Regeneration	KREGENERATION	5
63	Baseline	BASELINE	30
64	Loading	LOADING	80
65	Baseline	BASELINE	30
66	Association	ASSOC	180
67	Dissociation	DISASSOC	180
68	Regeneration	KREGENERATION	5.03
69	Regeneration	KREGENERATION	5
70	Regeneration	KREGENERATION	5
71	Regeneration	KREGENERATION	5
72	Regeneration	KREGENERATION	5.01
73	Regeneration	KREGENERATION	5
74	Baseline	BASELINE	30
75	Loading	LOADING	80
76	Baseline	BASELINE	30
77	Association	ASSOC	180
78	Dissociation	DISASSOC	180
79	Regeneration	KREGENERATION	5
80	Regeneration	KREGENERATION	5
81	Regeneration	KREGENERATION	5
82	Regeneration	KREGENERATION	5
83	Regeneration	KREGENERATION	5
84	Regeneration	KREGENERATION	5

## Sheet: Processing Parameters
Processing Parameters
Subtraction Type:	Double Reference
Align Y:	Yes
	Step to Align:	Association
	Time (seconds):	0	0
Inter-step Correction:	Dissociation
S-G Filtering	ON
Analysis Parameters
Step to Analyze	Association & Dissociation
Model:	1 to 1
Fitting	Global
	Group By:
		Color
	Rmax
		Unlinked by Sensor
Window of Interest:	Association (secs):	0	180
	Dissociation (secs):	0	180
Steady State Analysis
	Fit using Data	Req
Sensors Analyzed
	(A9-A10)-(H9-H10)
	(B9-B10)-(H9-H10)
	(C9-C10)-(H9-H10)
	(D9-D10)-(H9-H10)
	(E9-E10)-(H9-H10)
	(F9-F10)-(H9-H10)
	(G9-G10)-(H9-H10)

## Sheet: Sensor Data
Well Number	Well Location	Sensor	Sensor Type	Sensor Info	File Name
1	A1	Empty
2	B1	Empty
3	C1	Empty
4	D1	Empty
5	E1	Empty
6	F1	Empty
7	G1	Empty
8	H1	Empty
9	A2	Empty
10	B2	Empty
11	C2	Empty
12	D2	Empty
13	E2	Empty
14	F2	Empty
15	G2	Empty
16	H2	Empty
17	A3	Empty
18	B3	Empty
19	C3	Empty
20	D3	Empty
21	E3	Empty
22	F3	Empty
23	G3	Empty
24	H3	Empty
25	A4	Empty
26	B4	Empty
27	C4	Empty
28	D4	Empty
29	E4	Empty
30	F4	Empty
31	G4	Empty
32	H4	Empty
33	A5	Empty
34	B5	Empty
35	C5	Empty
36	D5	Empty
37	E5	Empty
38	F5	Empty
39	G5	Empty
40	H5	Empty
41	A6	Empty
42	B6	Empty
43	C6	Empty
44	D6	Empty
45	E6	Empty
46	F6	Empty
47	G6	Empty
48	H6	Empty
49	A7	Empty
50	B7	Empty
51	C7	Empty
52	D7	Empty
53	E7	Empty
54	F7	Empty
55	G7	Empty
56	H7	Empty
57	A8	Empty
58	B8	Empty
59	C8	Empty
60	D8	Empty
61	E8	Empty
62	F8	Empty
63	G8	Empty
64	H8	Empty
65	A9	Ligand Sensor	AHC (Anti-hIgG Fc Capture)		C:\Users\Labuser\Desktop\Overbaugh_lab\Mackenzie Shipley\QA013.2 Lineage\QA013.2 mutated ints_2020.08.06\BG505 SOSIP v3\200806_001.frd
66	B9	Ligand Sensor	AHC (Anti-hIgG Fc Capture)		C:\Users\Labuser\Desktop\Overbaugh_lab\Mackenzie Shipley\QA013.2 Lineage\QA013.2 mutated ints_2020.08.06\BG505 SOSIP v3\200806_002.frd
67	C9	Ligand Sensor	AHC (Anti-hIgG Fc Capture)		C:\Users\Labuser\Desktop\Overbaugh_lab\Mackenzie Shipley\QA013.2 Lineage\QA013.2 mutated ints_2020.08.06\BG505 SOSIP v3\200806_003.frd
68	D9	Ligand Sensor	AHC (Anti-hIgG Fc Capture)		C:\Users\Labuser\Desktop\Overbaugh_lab\Mackenzie Shipley\QA013.2 Lineage\QA013.2 mutated ints_2020.08.06\BG505 SOSIP v3\200806_004.frd
69	E9	Ligand Sensor	AHC (Anti-hIgG Fc Capture)		C:\Users\Labuser\Desktop\Overbaugh_lab\Mackenzie Shipley\QA013.2 Lineage\QA013.2 mutated ints_2020.08.06\BG505 SOSIP v3\200806_005.frd
70	F9	Ligand Sensor	AHC (Anti-hIgG Fc Capture)		C:\Users\Labuser\Desktop\Overbaugh_lab\Mackenzie Shipley\QA013.2 Lineage\QA013.2 mutated ints_2020.08.06\BG505 SOSIP v3\200806_006.frd
71	G9	Ligand Sensor	AHC (Anti-hIgG Fc Capture)		C:\Users\Labuser\Desktop\Overbaugh_lab\Mackenzie Shipley\QA013.2 Lineage\QA013.2 mutated ints_2020.08.06\BG505 SOSIP v3\200806_007.frd
72	H9	Ligand Sensor	AHC (Anti-hIgG Fc Capture)		C:\Users\Labuser\Desktop\Overbaugh_lab\Mackenzie Shipley\QA013.2 Lineage\QA013.2 mutated ints_2020.08.06\BG505 SOSIP v3\200806_008.frd
73	A10	Reference Sensor	AHC (Anti-hIgG Fc Capture)		C:\Users\Labuser\Desktop\Overbaugh_lab\Mackenzie Shipley\QA013.2 Lineage\QA013.2 mutated ints_2020.08.06\BG505 SOSIP v3\200806_009.frd
74	B10	Reference Sensor	AHC (Anti-hIgG Fc Capture)		C:\Users\Labuser\Desktop\Overbaugh_lab\Mackenzie Shipley\QA013.2 Lineage\QA013.2 mutated ints_2020.08.06\BG505 SOSIP v3\200806_010.frd
75	C10	Reference Sensor	AHC (Anti-hIgG Fc Capture)		C:\Users\Labuser\Desktop\Overbaugh_lab\Mackenzie Shipley\QA013.2 Lineage\QA013.2 mutated ints_2020.08.06\BG505 SOSIP v3\200806_011.frd
76	D10	Reference Sensor	AHC (Anti-hIgG Fc Capture)		C:\Users\Labuser\Desktop\Overbaugh_lab\Mackenzie Shipley\QA013.2 Lineage\QA013.2 mutated ints_2020.08.06\BG505 SOSIP v3\200806_012.frd
77	E10	Reference Sensor	AHC (Anti-hIgG Fc Capture)		C:\Users\Labuser\Desktop\Overbaugh_lab\Mackenzie Shipley\QA013.2 Lineage\QA013.2 mutated ints_2020.08.06\BG505 SOSIP v3\200806_013.frd
78	F10	Reference Sensor	AHC (Anti-hIgG Fc Capture)		C:\Users\Labuser\Desktop\Overbaugh_lab\Mackenzie Shipley\QA013.2 Lineage\QA013.2 mutated ints_2020.08.06\BG505 SOSIP v3\200806_014.frd
79	G10	Reference Sensor	AHC (Anti-hIgG Fc Capture)		C:\Users\Labuser\Desktop\Overbaugh_lab\Mackenzie Shipley\QA013.2 Lineage\QA013.2 mutated ints_2020.08.06\BG505 SOSIP v3\200806_015.frd
80	H10	Reference Sensor	AHC (Anti-hIgG Fc Capture)		C:\Users\Labuser\Desktop\Overbaugh_lab\Mackenzie Shipley\QA013.2 Lineage\QA013.2 mutated ints_2020.08.06\BG505 SOSIP v3\200806_016.frd
81	A11	Empty
82	B11	Empty
83	C11	Empty
84	D11	Empty
85	E11	Empty
86	F11	Empty
87	G11	Empty
88	H11	Empty
89	A12	Empty
90	B12	Empty
91	C12	Empty
92	D12	Empty
93	E12	Empty
94	F12	Empty
95	G12	Empty
96	H12	Empty

## Sheet: Sample Data
Well Number	Well Location	Well Type	Sample ID	Description	Molar Conc.
1	A1	Buffer			65535
2	B1	Buffer			65535
3	C1	Buffer			65535
4	D1	Buffer			65535
5	E1	Buffer			65535
6	F1	Buffer			65535
7	G1	Buffer			65535
8	H1	Reference Well			65535
9	A2	Load	QA013.2 EVQ mature		65535
10	B2	Load	QA013.2 EVQ mature		65535
11	C2	Load	QA013.2 EVQ mature		65535
12	D2	Load	QA013.2 EVQ mature		65535
13	E2	Load	QA013.2 EVQ mature		65535
14	F2	Load	QA013.2 EVQ mature		65535
15	G2	Load	QA013.2 EVQ mature		65535
16	H2	Reference Well			65535
17	A3	Load	QA013.2 EVQ mat/-CDRL2		65535
18	B3	Load	QA013.2 EVQ mat/-CDRL2		65535
19	C3	Load	QA013.2 EVQ mat/-CDRL2		65535
20	D3	Load	QA013.2 EVQ mat/-CDRL2		65535
21	E3	Load	QA013.2 EVQ mat/-CDRL2		65535
22	F3	Load	QA013.2 EVQ mat/-CDRL2		65535
23	G3	Load	QA013.2 EVQ mat/-CDRL2		65535
24	H3	Reference Well			65535
25	A4	Load	QA013.2 EVQ mat/-CDRL3		65535
26	B4	Load	QA013.2 EVQ mat/-CDRL3		65535
27	C4	Load	QA013.2 EVQ mat/-CDRL3		65535
28	D4	Load	QA013.2 EVQ mat/-CDRL3		65535
29	E4	Load	QA013.2 EVQ mat/-CDRL3		65535
30	F4	Load	QA013.2 EVQ mat/-CDRL3		65535
31	G4	Load	QA013.2 EVQ mat/-CDRL3		65535
32	H4	Reference Well			65535
33	A5	Load	QA013.2 G0/Lmat		65535
34	B5	Load	QA013.2 G0/Lmat		65535
35	C5	Load	QA013.2 G0/Lmat		65535
36	D5	Load	QA013.2 G0/Lmat		65535
37	E5	Load	QA013.2 G0/Lmat		65535
38	F5	Load	QA013.2 G0/Lmat		65535
39	G5	Load	QA013.2 G0/Lmat		65535
40	H5	Reference Well			65535
41	A6	Load	QA013.2 EVQ D106V/Lmat		65535
42	B6	Load	QA013.2 EVQ D106V/Lmat		65535
43	C6	Load	QA013.2 EVQ D106V/Lmat		65535
44	D6	Load	QA013.2 EVQ D106V/Lmat		65535
45	E6	Load	QA013.2 EVQ D106V/Lmat		65535
46	F6	Load	QA013.2 EVQ D106V/Lmat		65535
47	G6	Load	QA013.2 EVQ D106V/Lmat		65535
48	H6	Reference Well			65535
49	A7	Load	QA013.2 EVQ -CDRH3/Lmat		65535
50	B7	Load	QA013.2 EVQ -CDRH3/Lmat		65535
51	C7	Load	QA013.2 EVQ -CDRH3/Lmat		65535
52	D7	Load	QA013.2 EVQ -CDRH3/Lmat		65535
53	E7	Load	QA013.2 EVQ -CDRH3/Lmat		65535
54	F7	Load	QA013.2 EVQ -CDRH3/Lmat		65535
55	G7	Load	QA013.2 EVQ -CDRH3/Lmat		65535
56	H7	Reference Well			65535
57	A8	Load	1000000000		65535
58	B8	Load	1000000000		65535
59	C8	Load	1000000000		65535
60	D8	Load	1000000000		65535
61	E8	Load	1000000000		65535
62	F8	Load	1000000000		65535
63	G8	Load	1000000000		65535
64	H8	Reference Well			65535
65	A9	unset			65535
66	B9	unset			65535
67	C9	unset			65535
68	D9	unset			65535
69	E9	unset			65535
70	F9	unset			65535
71	G9	unset			65535
72	H9	Reference Well			65535
73	A10	Sample	BG505 SOSIP v3		500
74	B10	Sample	BG505 SOSIP v3		250
75	C10	Sample	BG505 SOSIP v3		125
76	D10	Sample	BG505 SOSIP v3		62.5
77	E10	Sample	BG505 SOSIP v3		31.25
78	F10	Sample	BG505 SOSIP v3		15.63
79	G10	Sample	BG505 SOSIP v3		7.813
80	H10	Reference Well			65535
81	A11	Regeneration			65535
82	B11	Regeneration			65535
83	C11	Regeneration			65535
84	D11	Regeneration			65535
85	E11	Regeneration			65535
86	F11	Regeneration			65535
87	G11	Regeneration			65535
88	H11	Reference Well			65535
89	A12	Neutralization			65535
90	B12	Neutralization			65535
91	C12	Neutralization			65535
92	D12	Neutralization			65535
93	E12	Neutralization			65535
94	F12	Neutralization			65535
95	G12	Neutralization			65535
96	H12	Reference Well			65535

## Sheet: Raw and Aligned Data
Sensor Location	Color	Sensor	Sensor Type	Sensor Info
A9		Ligand Sensor	AHC (Anti-hIgG Fc Capture)
B9		Ligand Sensor	AHC (Anti-hIgG Fc Capture)
C9		Ligand Sensor	AHC (Anti-hIgG Fc Capture)
D9		Ligand Sensor	AHC (Anti-hIgG Fc Capture)
E9		Ligand Sensor	AHC (Anti-hIgG Fc Capture)
F9		Ligand Sensor	AHC (Anti-hIgG Fc Capture)
G9		Ligand Sensor	AHC (Anti-hIgG Fc Capture)
H9		Ligand Sensor	AHC (Anti-hIgG Fc Capture)
A10		Reference Sensor	AHC (Anti-hIgG Fc Capture)
B10		Reference Sensor	AHC (Anti-hIgG Fc Capture)
C10		Reference Sensor	AHC (Anti-hIgG Fc Capture)
D10		Reference Sensor	AHC (Anti-hIgG Fc Capture)
E10		Reference Sensor	AHC (Anti-hIgG Fc Capture)
F10		Reference Sensor	AHC (Anti-hIgG Fc Capture)
G10		Reference Sensor	AHC (Anti-hIgG Fc Capture)
H10		Reference Sensor	AHC (Anti-hIgG Fc Capture)

## Sheet: Result Table
Selected	Include	Index	Color	Sensor Location	Sensor Type	Sensor Info	Replicate Group	Baseline Loc.	Assoc. (Sample) Loc.	Sample ID	Dissoc. Loc.	Loading Well Location	Loading Sample ID	Cycle	Conc. (nM)	Response	KD (M)	KD Error	kon(1/Ms)	kon Error	kdis(1/s)	kdis Error	RMax	RMax Error	kobs(1/s)	Req	Req/Rmax(%)	Full X^2	Full R^2	SSG KD	SSG Rmax	SSG R^2
x	x	24	-14513767	D9	AHC (Anti-hIgG Fc Capture)		N/A	D1	D10	BG505 SOSIP v3	D1	D5	QA013.2 G0/Lmat	4	62.5	0.0003	3.188e-09	8.216e-08	20000	20930	6.377e-05	0.001642	0.0035	0.0045	0.001314	0.0033	95.1	0.123	0	<1.0E-12	0	0
x	x	45	-14513767	G9	AHC (Anti-hIgG Fc Capture)		N/A	G1	G10	BG505 SOSIP v3	G1	G5	QA013.2 G0/Lmat	4	7.81	-0.0009	3.188e-09	8.216e-08	20000	20930	6.377e-05	0.001642	0.0035	0.0169	0.00022	0.0025	71	0.123	0	<1.0E-12	0	0
x	x	3	-14513767	A9	AHC (Anti-hIgG Fc Capture)		N/A	A1	A10	BG505 SOSIP v3	A1	A5	QA013.2 G0/Lmat	4	500	0.0061	3.188e-09	8.216e-08	20000	20930	6.377e-05	0.001642	0.006	0.0034	0.01006	0.0059	99.4	0.123	0	<1.0E-12	0	0
x	x	38	-14513767	F9	AHC (Anti-hIgG Fc Capture)		N/A	F1	F10	BG505 SOSIP v3	F1	F5	QA013.2 G0/Lmat	4	15.6	0.0098	3.188e-09	8.216e-08	20000	20930	6.377e-05	0.001642	0.0083	0.0128	0.0003764	0.0069	83.1	0.123	0	<1.0E-12	0	0
x	x	31	-14513767	E9	AHC (Anti-hIgG Fc Capture)		N/A	E1	E10	BG505 SOSIP v3	E1	E5	QA013.2 G0/Lmat	4	31.3	0.0043	3.188e-09	8.216e-08	20000	20930	6.377e-05	0.001642	0.0027	0.0053	0.0006888	0.0025	90.7	0.123	0	<1.0E-12	0	0
x	x	17	-14513767	C9	AHC (Anti-hIgG Fc Capture)		N/A	C1	C10	BG505 SOSIP v3	C1	C5	QA013.2 G0/Lmat	4	125	-0.0031	3.188e-09	8.216e-08	20000	20930	6.377e-05	0.001642	0		0.002564	0		0.123	0	<1.0E-12	0	0
x	x	10	-14513767	B9	AHC (Anti-hIgG Fc Capture)		N/A	B1	B10	BG505 SOSIP v3	B1	B5	QA013.2 G0/Lmat	4	250	-0.0052	3.188e-09	8.216e-08	20000	20930	6.377e-05	0.001642	0		0.005064	0		0.123	0	<1.0E-12	0	0
x	x	42	-5143054	G9	AHC (Anti-hIgG Fc Capture)		N/A	G1	G10	BG505 SOSIP v3	G1	G2	QA013.2 EVQ mature	1	7.81	0.0457	8.725e-09	2.766e-10	64230	660.6	0.0005604	1.681e-05	0.4935	0.0082	0.001062	0.2331	47.2	0.1167	0.995	4.3e-09	0.3817	0.9193
x	x	35	-5143054	F9	AHC (Anti-hIgG Fc Capture)		N/A	F1	F10	BG505 SOSIP v3	F1	F2	QA013.2 EVQ mature	1	15.6	0.0784	8.725e-09	2.766e-10	64230	660.6	0.0005604	1.681e-05	0.4709	0.006	0.001564	0.3022	64.2	0.1167	0.995	4.3e-09	0.3817	0.9193
x	x	28	-5143054	E9	AHC (Anti-hIgG Fc Capture)		N/A	E1	E10	BG505 SOSIP v3	E1	E2	QA013.2 EVQ mature	1	31.3	0.1306	8.725e-09	2.766e-10	64230	660.6	0.0005604	1.681e-05	0.459	0.005	0.002568	0.3588	78.2	0.1167	0.995	4.3e-09	0.3817	0.9193
x	x	21	-5143054	D9	AHC (Anti-hIgG Fc Capture)		N/A	D1	D10	BG505 SOSIP v3	D1	D2	QA013.2 EVQ mature	1	62.5	0.1906	8.725e-09	2.766e-10	64230	660.6	0.0005604	1.681e-05	0.4017	0.0037	0.004575	0.3525	87.8	0.1167	0.995	4.3e-09	0.3817	0.9193
x	x	14	-5143054	C9	AHC (Anti-hIgG Fc Capture)		N/A	C1	C10	BG505 SOSIP v3	C1	C2	QA013.2 EVQ mature	1	125	0.2801	8.725e-09	2.766e-10	64230	660.6	0.0005604	1.681e-05	0.4023	0.0027	0.008589	0.376	93.5	0.1167	0.995	4.3e-09	0.3817	0.9193
x		0	-5143054	A9	AHC (Anti-hIgG Fc Capture)		N/A	A1	A10	BG505 SOSIP v3	A1	A2	QA013.2 EVQ mature	1	500	0.4266
x	x	7	-5143054	B9	AHC (Anti-hIgG Fc Capture)		N/A	B1	B10	BG505 SOSIP v3	B1	B2	QA013.2 EVQ mature	1	250	0.3328	8.725e-09	2.766e-10	64230	660.6	0.0005604	1.681e-05	0.3686	0.0015	0.01662	0.3562	96.6	0.1167	0.995	4.3e-09	0.3817	0.9193
x		30	-24008	E9	AHC (Anti-hIgG Fc Capture)		N/A	E1	E10	BG505 SOSIP v3	E1	E4	QA013.2 EVQ mat/-CDRL3	3	31.3	0.016
x		37	-24008	F9	AHC (Anti-hIgG Fc Capture)		N/A	F1	F10	BG505 SOSIP v3	F1	F4	QA013.2 EVQ mat/-CDRL3	3	15.6	0.006
x		44	-24008	G9	AHC (Anti-hIgG Fc Capture)		N/A	G1	G10	BG505 SOSIP v3	G1	G4	QA013.2 EVQ mat/-CDRL3	3	7.81	0.0062
x	x	23	-24008	D9	AHC (Anti-hIgG Fc Capture)		N/A	D1	D10	BG505 SOSIP v3	D1	D4	QA013.2 EVQ mat/-CDRL3	3	62.5	0.0236	1.316e-07	9.054e-09	6772	391	0.0008914	3.331e-05	0.3022	0.0184	0.001315	0.0973	32.2	0.0335	0.9882	1.5e-07	0.3771	0.9712
x	x	2	-24008	A9	AHC (Anti-hIgG Fc Capture)		N/A	A1	A10	BG505 SOSIP v3	A1	A4	QA013.2 EVQ mat/-CDRL3	3	500	0.1481	1.316e-07	9.054e-09	6772	391	0.0008914	3.331e-05	0.367	0.017	0.004277	0.2905	79.2	0.0335	0.9882	1.5e-07	0.3771	0.9712
x	x	9	-24008	B9	AHC (Anti-hIgG Fc Capture)		N/A	B1	B10	BG505 SOSIP v3	B1	B4	QA013.2 EVQ mat/-CDRL3	3	250	0.0845	1.316e-07	9.054e-09	6772	391	0.0008914	3.331e-05	0.3551	0.0189	0.002584	0.2326	65.5	0.0335	0.9882	1.5e-07	0.3771	0.9712
x	x	16	-24008	C9	AHC (Anti-hIgG Fc Capture)		N/A	C1	C10	BG505 SOSIP v3	C1	C4	QA013.2 EVQ mat/-CDRL3	3	125	0.054	1.316e-07	9.054e-09	6772	391	0.0008914	3.331e-05	0.3923	0.0224	0.001738	0.1911	48.7	0.0335	0.9882	1.5e-07	0.3771	0.9712
x	x	1	-12859347	A9	AHC (Anti-hIgG Fc Capture)		N/A	A1	A10	BG505 SOSIP v3	A1	A3	QA013.2 EVQ mat/-CDRL2	2	500	0.071	<1.0E-12	2.013e-08	5184	1177	<1.0E-07		0.2148	0.0411	0.002592	0.2148	100	0.0409	0.9372	1.6e-07	0.2824	1
x	x	8	-12859347	B9	AHC (Anti-hIgG Fc Capture)		N/A	B1	B10	BG505 SOSIP v3	B1	B3	QA013.2 EVQ mat/-CDRL2	2	250	0.0357	<1.0E-12	2.013e-08	5184	1177	<1.0E-07		0.1733	0.037	0.001296	0.1733	100	0.0409	0.9372	1.6e-07	0.2824	1
x		22	-12859347	D9	AHC (Anti-hIgG Fc Capture)		N/A	D1	D10	BG505 SOSIP v3	D1	D3	QA013.2 EVQ mat/-CDRL2	2	62.5	-0.0009
x		29	-12859347	E9	AHC (Anti-hIgG Fc Capture)		N/A	E1	E10	BG505 SOSIP v3	E1	E3	QA013.2 EVQ mat/-CDRL2	2	31.3	0.0001
x		15	-12859347	C9	AHC (Anti-hIgG Fc Capture)		N/A	C1	C10	BG505 SOSIP v3	C1	C3	QA013.2 EVQ mat/-CDRL2	2	125	0.0064
x		36	-12859347	F9	AHC (Anti-hIgG Fc Capture)		N/A	F1	F10	BG505 SOSIP v3	F1	F3	QA013.2 EVQ mat/-CDRL2	2	15.6	-0.0108
x		43	-12859347	G9	AHC (Anti-hIgG Fc Capture)		N/A	G1	G10	BG505 SOSIP v3	G1	G3	QA013.2 EVQ mat/-CDRL2	2	7.81	-0.0135
x		46	-12144190	G9	AHC (Anti-hIgG Fc Capture)		N/A	G1	G10	BG505 SOSIP v3	G1	G6	QA013.2 EVQ D106V/Lmat	5	7.81	0.0063
x		39	-12144190	F9	AHC (Anti-hIgG Fc Capture)		N/A	F1	F10	BG505 SOSIP v3	F1	F6	QA013.2 EVQ D106V/Lmat	5	15.6	0.0107
x	x	25	-12144190	D9	AHC (Anti-hIgG Fc Capture)		N/A	D1	D10	BG505 SOSIP v3	D1	D6	QA013.2 EVQ D106V/Lmat	5	62.5	0.028	8.546e-08	3.028e-09	10520	272.8	0.0008995	2.172e-05	0.3097	0.0087	0.001557	0.1308	42.2	0.0341	0.9947	7.2e-08	0.3456	0.9023
x	x	4	-12144190	A9	AHC (Anti-hIgG Fc Capture)		N/A	A1	A10	BG505 SOSIP v3	A1	A6	QA013.2 EVQ D106V/Lmat	5	500	0.1937	8.546e-08	3.028e-09	10520	272.8	0.0008995	2.172e-05	0.3566	0.0066	0.006162	0.3045	85.4	0.0341	0.9947	7.2e-08	0.3456	0.9023
x	x	11	-12144190	B9	AHC (Anti-hIgG Fc Capture)		N/A	B1	B10	BG505 SOSIP v3	B1	B6	QA013.2 EVQ D106V/Lmat	5	250	0.1103	8.546e-08	3.028e-09	10520	272.8	0.0008995	2.172e-05	0.3348	0.0076	0.003531	0.2495	74.5	0.0341	0.9947	7.2e-08	0.3456	0.9023
x	x	18	-12144190	C9	AHC (Anti-hIgG Fc Capture)		N/A	C1	C10	BG505 SOSIP v3	C1	C6	QA013.2 EVQ D106V/Lmat	5	125	0.0779	8.546e-08	3.028e-09	10520	272.8	0.0008995	2.172e-05	0.4339	0.011	0.002215	0.2577	59.4	0.0341	0.9947	7.2e-08	0.3456	0.9023
x	x	32	-12144190	E9	AHC (Anti-hIgG Fc Capture)		N/A	E1	E10	BG505 SOSIP v3	E1	E6	QA013.2 EVQ D106V/Lmat	5	31.3	0.0215	8.546e-08	3.028e-09	10520	272.8	0.0008995	2.172e-05	0.4203	0.0127	0.001228	0.1125	26.8	0.0341	0.9947	7.2e-08	0.3456	0.9023
x	x	12	-3721216	B9	AHC (Anti-hIgG Fc Capture)		N/A	B1	B10	BG505 SOSIP v3	B1	B7	QA013.2 EVQ -CDRH3/Lmat	6	250	0.114	6.339e-08	2.722e-09	9301	248	0.0005896	1.984e-05	0.3626	0.0086	0.002915	0.2892	79.8	0.0203	0.9957	7.3e-08	0.3665	0.9525
x		33	-3721216	E9	AHC (Anti-hIgG Fc Capture)		N/A	E1	E10	BG505 SOSIP v3	E1	E7	QA013.2 EVQ -CDRH3/Lmat	6	31.3	0.0203
x		40	-3721216	F9	AHC (Anti-hIgG Fc Capture)		N/A	F1	F10	BG505 SOSIP v3	F1	F7	QA013.2 EVQ -CDRH3/Lmat	6	15.6	0.0086
x	x	26	-3721216	D9	AHC (Anti-hIgG Fc Capture)		N/A	D1	D10	BG505 SOSIP v3	D1	D7	QA013.2 EVQ -CDRH3/Lmat	6	62.5	0.03	6.339e-08	2.722e-09	9301	248	0.0005896	1.984e-05	0.3068	0.0088	0.001171	0.1523	49.6	0.0203	0.9957	7.3e-08	0.3665	0.9525
x		47	-3721216	G9	AHC (Anti-hIgG Fc Capture)		N/A	G1	G10	BG505 SOSIP v3	G1	G7	QA013.2 EVQ -CDRH3/Lmat	6	7.81	0.0045
x	x	5	-3721216	A9	AHC (Anti-hIgG Fc Capture)		N/A	A1	A10	BG505 SOSIP v3	A1	A7	QA013.2 EVQ -CDRH3/Lmat	6	500	0.1777	6.339e-08	2.722e-09	9301	248	0.0005896	1.984e-05	0.3499	0.0069	0.00524	0.3105	88.7	0.0203	0.9957	7.3e-08	0.3665	0.9525
x	x	19	-3721216	C9	AHC (Anti-hIgG Fc Capture)		N/A	C1	C10	BG505 SOSIP v3	C1	C7	QA013.2 EVQ -CDRH3/Lmat	6	125	0.0631	6.339e-08	2.722e-09	9301	248	0.0005896	1.984e-05	0.375	0.0098	0.001752	0.2488	66.4	0.0203	0.9957	7.3e-08	0.3665	0.9525
x	x	13	-14261055	B9	AHC (Anti-hIgG Fc Capture)		N/A	B1	B10	BG505 SOSIP v3	B1	B8	1000000000	7	250	-0.0137	3.469e-09		20000	0	6.938e-05	<1.0E-07	0		0.005069	0		0.7229	0
x	x	34	-14261055	E9	AHC (Anti-hIgG Fc Capture)		N/A	E1	E10	BG505 SOSIP v3	E1	E8	1000000000	7	31.3	-0.0125	3.469e-09		20000	0	6.938e-05	<1.0E-07	0		0.0006944	0		0.7229	0
x	x	6	-14261055	A9	AHC (Anti-hIgG Fc Capture)		N/A	A1	A10	BG505 SOSIP v3	A1	A8	1000000000	7	500	-0.0087	3.469e-09		20000	0	6.938e-05	<1.0E-07	0		0.01007	0		0.7229	0
x	x	27	-14261055	D9	AHC (Anti-hIgG Fc Capture)		N/A	D1	D10	BG505 SOSIP v3	D1	D8	1000000000	7	62.5	-0.0172	3.469e-09		20000	0	6.938e-05	<1.0E-07	0		0.001319	0		0.7229	0
x	x	20	-14261055	C9	AHC (Anti-hIgG Fc Capture)		N/A	C1	C10	BG505 SOSIP v3	C1	C8	1000000000	7	125	-0.0081	3.469e-09		20000	0	6.938e-05	<1.0E-07	0		0.002569	0		0.7229	0
x	x	41	-14261055	F9	AHC (Anti-hIgG Fc Capture)		N/A	F1	F10	BG505 SOSIP v3	F1	F8	1000000000	7	15.6	-0.0063	3.469e-09		20000	0	6.938e-05	<1.0E-07	0		0.000382	0		0.7229	0
x	x	48	-14261055	G9	AHC (Anti-hIgG Fc Capture)		N/A	G1	G10	BG505 SOSIP v3	G1	G8	1000000000	7	7.81	-0.0097	3.469e-09		20000	0	6.938e-05	<1.0E-07	0		0.0002256	0		0.7229	0

## Sheet: Steady State
							Results
								Data Used	Reqs
								Y Weighting
								Chi^2/DoF	0.0184569
								R^2	0.0699693
								RMax	0.192866	0.040454
								KD	1.8e-08	±2.0E-08M

## Sheet: Analysis Parameters
2;0:Association; 1: Dissociation; 2: both
1;1: 1:1 model; 2: 2:1; 3: Mass Transport
1;0:local; 1:global
0;0:Full; 1: partial
1;0:Sensor; 1: color; 2:...
0;
1;0:linked; 1: unlinked by sensor; 2: unlinked by compound; 3: ...
1;0: use entire step, 1:use WOI
0;secs, Assoication starts
179.999987792969;Association step ends
0;Dissociation step starts
179.999987792969;Dissociation step ends
0;0: use Req; 1:Response;
