# Supplementary material for: Functional development of a V3/glycan-specific broadly neutralizing antibody isolated from a case of HIV superinfection
Source: eLife journal article supplement (doi:10.7554/elife.68110), 2021-07-15
Supplement: fig2-data2 [file ExcelReport_fixed.xls]

## Sheet: Experiment Summary
C:\Users\Labuser\Desktop\Overbaugh_lab\Mackenzie Shipley\QA013.2 Lineage\QA013.2 Lineage Replicates_21.02.04
ExpDescription: Unassigned
ExperimentType: KINETICS
StartDateTime: 2/4/2021 1:30:33 PM
MachineName: 886RGX1
UserName: Labuser
PlateName: 210204
PlateName2: Unassigned
Instrument Type: OctetRED96
210204_001.frd (A5)
210204_002.frd (B5)
210204_003.frd (C5)
210204_004.frd (D5)
210204_005.frd (E5)
210204_006.frd (F5)
210204_007.frd (G5)
210204_008.frd (H5)
210204_009.frd (A6)
210204_010.frd (B6)
210204_011.frd (C6)
210204_012.frd (D6)
210204_013.frd (E6)
210204_014.frd (F6)
210204_015.frd (G6)
210204_016.frd (H6)
210204_ExpMethod.fmf
N	Data Name	Assay Time	Flow Rate	Step Type Name	Step Type		Assay Step Number	Step Data Name	Sensor Column	Sample Column	Step Type	Assay Time
1	Baseline	60	1000	Baseline	2		1	Baseline	1	1	Baseline	60
2	Association	180	600	Association	0		2	Regeneration	1	11	Regeneration	5
3	Dissociation	180	600	Dissociation	1		3	Baseline	1	1	Baseline	60
4	Loading	80	600	Loading	3		4	Loading	1	2	Loading	80
5	Regeneration	5	1000	Regeneration	6		5	Baseline	1	1	Baseline	60
							6	Association	1	8	Association	180
							7	Dissociation	1	1	Dissociation	180
							8	Regeneration	1	11	Regeneration	5
							9	Baseline	1	1	Baseline	60
							10	Loading	1	3	Loading	80
							11	Baseline	1	1	Baseline	60
							12	Association	1	8	Association	180
							13	Dissociation	1	1	Dissociation	180
							14	Regeneration	1	11	Regeneration	5
							15	Baseline	1	1	Baseline	60
							16	Loading	1	4	Loading	80
							17	Baseline	1	1	Baseline	60
							18	Association	1	8	Association	180
							19	Dissociation	1	1	Dissociation	180
							20	Regeneration	1	11	Regeneration	5
							21	Baseline	1	1	Baseline	60
							22	Loading	1	5	Loading	80
							23	Baseline	1	1	Baseline	60
							24	Association	1	9	Association	180
							25	Dissociation	1	1	Dissociation	180
							26	Regeneration	1	11	Regeneration	5
							27	Baseline	1	1	Baseline	60
							28	Loading	1	6	Loading	80
							29	Baseline	1	1	Baseline	60
							30	Association	1	10	Association	180
							31	Dissociation	1	1	Dissociation	180
							32	Regeneration	1	11	Regeneration	5
							33	Baseline	2	1	Baseline	60
							34	Regeneration	2	11	Regeneration	5
							35	Baseline	2	1	Baseline	60
							36	Loading	2	1	Loading	80
							37	Baseline	2	1	Baseline	60
							38	Association	2	8	Association	180
							39	Dissociation	2	1	Dissociation	180
							40	Regeneration	2	11	Regeneration	5
							41	Baseline	2	1	Baseline	60
							42	Loading	2	1	Loading	80
							43	Baseline	2	1	Baseline	60
							44	Association	2	8	Association	180
							45	Dissociation	2	1	Dissociation	180
							46	Regeneration	2	11	Regeneration	5
							47	Baseline	2	1	Baseline	60
							48	Loading	2	1	Loading	80
							49	Baseline	2	1	Baseline	60
							50	Association	2	8	Association	180
							51	Dissociation	2	1	Dissociation	180
							52	Regeneration	2	11	Regeneration	5
							53	Baseline	2	1	Baseline	60
							54	Loading	2	1	Loading	80
							55	Baseline	2	1	Baseline	60
							56	Association	2	9	Association	180
							57	Dissociation	2	1	Dissociation	180
							58	Regeneration	2	11	Regeneration	5
							59	Baseline	2	1	Baseline	60
							60	Loading	2	1	Loading	80
							61	Baseline	2	1	Baseline	60
							62	Association	2	10	Association	180
							63	Dissociation	2	1	Dissociation	180
							64	Regeneration	2	11	Regeneration	5
Report Info
SW Name: Octet DataAnalysis
SW Version: 11.1.2.9
Date/Time: 2/4/2021 4:07:42 PM

## Sheet: Sensor Tray
Assay Table					Sensor Location and File Name
Step	Step Name	Step Type	Step Time		Number	Sensor Location	Sensor Type	Sensor Info	File Name
1	Baseline	BASELINE	60		1	A5	AHC (Anti-hIgG Fc Capture)		C:\Users\Labuser\Desktop\Overbaugh_lab\Mackenzie Shipley\QA013.2 Lineage\QA013.2 Lineage Replicates_21.02.04\210204_001.frd
2	Regeneration	KREGENERATION	5.01		2	B5	AHC (Anti-hIgG Fc Capture)		C:\Users\Labuser\Desktop\Overbaugh_lab\Mackenzie Shipley\QA013.2 Lineage\QA013.2 Lineage Replicates_21.02.04\210204_002.frd
3	Regeneration	KREGENERATION	5		3	C5	AHC (Anti-hIgG Fc Capture)		C:\Users\Labuser\Desktop\Overbaugh_lab\Mackenzie Shipley\QA013.2 Lineage\QA013.2 Lineage Replicates_21.02.04\210204_003.frd
4	Regeneration	KREGENERATION	5		4	D5	AHC (Anti-hIgG Fc Capture)		C:\Users\Labuser\Desktop\Overbaugh_lab\Mackenzie Shipley\QA013.2 Lineage\QA013.2 Lineage Replicates_21.02.04\210204_004.frd
5	Regeneration	KREGENERATION	5		5	E5	AHC (Anti-hIgG Fc Capture)		C:\Users\Labuser\Desktop\Overbaugh_lab\Mackenzie Shipley\QA013.2 Lineage\QA013.2 Lineage Replicates_21.02.04\210204_005.frd
6	Regeneration	KREGENERATION	5		6	F5	AHC (Anti-hIgG Fc Capture)		C:\Users\Labuser\Desktop\Overbaugh_lab\Mackenzie Shipley\QA013.2 Lineage\QA013.2 Lineage Replicates_21.02.04\210204_006.frd
7	Regeneration	KREGENERATION	5		7	G5	AHC (Anti-hIgG Fc Capture)		C:\Users\Labuser\Desktop\Overbaugh_lab\Mackenzie Shipley\QA013.2 Lineage\QA013.2 Lineage Replicates_21.02.04\210204_007.frd
8	Baseline	BASELINE	60		8	H5	AHC (Anti-hIgG Fc Capture)		C:\Users\Labuser\Desktop\Overbaugh_lab\Mackenzie Shipley\QA013.2 Lineage\QA013.2 Lineage Replicates_21.02.04\210204_008.frd
9	Loading	LOADING	80		9	A6	AHC (Anti-hIgG Fc Capture)		C:\Users\Labuser\Desktop\Overbaugh_lab\Mackenzie Shipley\QA013.2 Lineage\QA013.2 Lineage Replicates_21.02.04\210204_009.frd
10	Baseline	BASELINE	60		10	B6	AHC (Anti-hIgG Fc Capture)		C:\Users\Labuser\Desktop\Overbaugh_lab\Mackenzie Shipley\QA013.2 Lineage\QA013.2 Lineage Replicates_21.02.04\210204_010.frd
11	Association	ASSOC	180		11	C6	AHC (Anti-hIgG Fc Capture)		C:\Users\Labuser\Desktop\Overbaugh_lab\Mackenzie Shipley\QA013.2 Lineage\QA013.2 Lineage Replicates_21.02.04\210204_011.frd
12	Dissociation	DISASSOC	180		12	D6	AHC (Anti-hIgG Fc Capture)		C:\Users\Labuser\Desktop\Overbaugh_lab\Mackenzie Shipley\QA013.2 Lineage\QA013.2 Lineage Replicates_21.02.04\210204_012.frd
13	Regeneration	KREGENERATION	5		13	E6	AHC (Anti-hIgG Fc Capture)		C:\Users\Labuser\Desktop\Overbaugh_lab\Mackenzie Shipley\QA013.2 Lineage\QA013.2 Lineage Replicates_21.02.04\210204_013.frd
14	Regeneration	KREGENERATION	5		14	F6	AHC (Anti-hIgG Fc Capture)		C:\Users\Labuser\Desktop\Overbaugh_lab\Mackenzie Shipley\QA013.2 Lineage\QA013.2 Lineage Replicates_21.02.04\210204_014.frd
15	Regeneration	KREGENERATION	5		15	G6	AHC (Anti-hIgG Fc Capture)		C:\Users\Labuser\Desktop\Overbaugh_lab\Mackenzie Shipley\QA013.2 Lineage\QA013.2 Lineage Replicates_21.02.04\210204_015.frd
16	Regeneration	KREGENERATION	5		16	H6	AHC (Anti-hIgG Fc Capture)		C:\Users\Labuser\Desktop\Overbaugh_lab\Mackenzie Shipley\QA013.2 Lineage\QA013.2 Lineage Replicates_21.02.04\210204_016.frd
17	Regeneration	KREGENERATION	5
18	Regeneration	KREGENERATION	5
19	Baseline	BASELINE	60
20	Loading	LOADING	80
21	Baseline	BASELINE	60
22	Association	ASSOC	180
23	Dissociation	DISASSOC	180
24	Regeneration	KREGENERATION	5
25	Regeneration	KREGENERATION	5
26	Regeneration	KREGENERATION	5
27	Regeneration	KREGENERATION	5
28	Regeneration	KREGENERATION	5
29	Regeneration	KREGENERATION	5
30	Baseline	BASELINE	60
31	Loading	LOADING	80
32	Baseline	BASELINE	60
33	Association	ASSOC	180
34	Dissociation	DISASSOC	180
35	Regeneration	KREGENERATION	5
36	Regeneration	KREGENERATION	5
37	Regeneration	KREGENERATION	5
38	Regeneration	KREGENERATION	5
39	Regeneration	KREGENERATION	5.01
40	Regeneration	KREGENERATION	5
41	Baseline	BASELINE	60
42	Loading	LOADING	80
43	Baseline	BASELINE	60
44	Association	ASSOC	180
45	Dissociation	DISASSOC	180
46	Regeneration	KREGENERATION	5
47	Regeneration	KREGENERATION	5
48	Regeneration	KREGENERATION	5
49	Regeneration	KREGENERATION	5
50	Regeneration	KREGENERATION	5
51	Regeneration	KREGENERATION	5
52	Baseline	BASELINE	60
53	Loading	LOADING	80
54	Baseline	BASELINE	60
55	Association	ASSOC	180
56	Dissociation	DISASSOC	180
57	Regeneration	KREGENERATION	5
58	Regeneration	KREGENERATION	5
59	Regeneration	KREGENERATION	5
60	Regeneration	KREGENERATION	5
61	Regeneration	KREGENERATION	5
62	Regeneration	KREGENERATION	5

## Sheet: Processing Parameters
Processing Parameters
Subtraction Type:	Double Reference
Align Y:	Yes
	Step to Align:	Baseline
	Time (seconds):	0.1	59.8
Inter-step Correction:	Dissociation
S-G Filtering	ON
Analysis Parameters
Step to Analyze	Association & Dissociation
Model:	1 to 1
Fitting	Global
	Group By:
		Color
	Rmax
		Unlinked by Sensor
Window of Interest:	Association (secs):	0	180
	Dissociation (secs):	0	180
Steady State Analysis
	Fit using Data	Req
Sensors Analyzed
	(A5-A6)-(H5-H6)
	(B5-B6)-(H5-H6)
	(C5-C6)-(H5-H6)
	(D5-D6)-(H5-H6)
	(E5-E6)-(H5-H6)
	(F5-F6)-(H5-H6)
	(G5-G6)-(H5-H6)

## Sheet: Sensor Data
Well Number	Well Location	Sensor	Sensor Type	Sensor Info	File Name
1	A1	Empty
2	B1	Empty
3	C1	Empty
4	D1	Empty
5	E1	Empty
6	F1	Empty
7	G1	Empty
8	H1	Empty
9	A2	Empty
10	B2	Empty
11	C2	Empty
12	D2	Empty
13	E2	Empty
14	F2	Empty
15	G2	Empty
16	H2	Empty
17	A3	Empty
18	B3	Empty
19	C3	Empty
20	D3	Empty
21	E3	Empty
22	F3	Empty
23	G3	Empty
24	H3	Empty
25	A4	Empty
26	B4	Empty
27	C4	Empty
28	D4	Empty
29	E4	Empty
30	F4	Empty
31	G4	Empty
32	H4	Empty
33	A5	Ligand Sensor	AHC (Anti-hIgG Fc Capture)		C:\Users\Labuser\Desktop\Overbaugh_lab\Mackenzie Shipley\QA013.2 Lineage\QA013.2 Lineage Replicates_21.02.04\210204_001.frd
34	B5	Ligand Sensor	AHC (Anti-hIgG Fc Capture)		C:\Users\Labuser\Desktop\Overbaugh_lab\Mackenzie Shipley\QA013.2 Lineage\QA013.2 Lineage Replicates_21.02.04\210204_002.frd
35	C5	Ligand Sensor	AHC (Anti-hIgG Fc Capture)		C:\Users\Labuser\Desktop\Overbaugh_lab\Mackenzie Shipley\QA013.2 Lineage\QA013.2 Lineage Replicates_21.02.04\210204_003.frd
36	D5	Ligand Sensor	AHC (Anti-hIgG Fc Capture)		C:\Users\Labuser\Desktop\Overbaugh_lab\Mackenzie Shipley\QA013.2 Lineage\QA013.2 Lineage Replicates_21.02.04\210204_004.frd
37	E5	Ligand Sensor	AHC (Anti-hIgG Fc Capture)		C:\Users\Labuser\Desktop\Overbaugh_lab\Mackenzie Shipley\QA013.2 Lineage\QA013.2 Lineage Replicates_21.02.04\210204_005.frd
38	F5	Ligand Sensor	AHC (Anti-hIgG Fc Capture)		C:\Users\Labuser\Desktop\Overbaugh_lab\Mackenzie Shipley\QA013.2 Lineage\QA013.2 Lineage Replicates_21.02.04\210204_006.frd
39	G5	Ligand Sensor	AHC (Anti-hIgG Fc Capture)		C:\Users\Labuser\Desktop\Overbaugh_lab\Mackenzie Shipley\QA013.2 Lineage\QA013.2 Lineage Replicates_21.02.04\210204_007.frd
40	H5	Ligand Sensor	AHC (Anti-hIgG Fc Capture)		C:\Users\Labuser\Desktop\Overbaugh_lab\Mackenzie Shipley\QA013.2 Lineage\QA013.2 Lineage Replicates_21.02.04\210204_008.frd
41	A6	Reference Sensor	AHC (Anti-hIgG Fc Capture)		C:\Users\Labuser\Desktop\Overbaugh_lab\Mackenzie Shipley\QA013.2 Lineage\QA013.2 Lineage Replicates_21.02.04\210204_009.frd
42	B6	Reference Sensor	AHC (Anti-hIgG Fc Capture)		C:\Users\Labuser\Desktop\Overbaugh_lab\Mackenzie Shipley\QA013.2 Lineage\QA013.2 Lineage Replicates_21.02.04\210204_010.frd
43	C6	Reference Sensor	AHC (Anti-hIgG Fc Capture)		C:\Users\Labuser\Desktop\Overbaugh_lab\Mackenzie Shipley\QA013.2 Lineage\QA013.2 Lineage Replicates_21.02.04\210204_011.frd
44	D6	Reference Sensor	AHC (Anti-hIgG Fc Capture)		C:\Users\Labuser\Desktop\Overbaugh_lab\Mackenzie Shipley\QA013.2 Lineage\QA013.2 Lineage Replicates_21.02.04\210204_012.frd
45	E6	Reference Sensor	AHC (Anti-hIgG Fc Capture)		C:\Users\Labuser\Desktop\Overbaugh_lab\Mackenzie Shipley\QA013.2 Lineage\QA013.2 Lineage Replicates_21.02.04\210204_013.frd
46	F6	Reference Sensor	AHC (Anti-hIgG Fc Capture)		C:\Users\Labuser\Desktop\Overbaugh_lab\Mackenzie Shipley\QA013.2 Lineage\QA013.2 Lineage Replicates_21.02.04\210204_014.frd
47	G6	Reference Sensor	AHC (Anti-hIgG Fc Capture)		C:\Users\Labuser\Desktop\Overbaugh_lab\Mackenzie Shipley\QA013.2 Lineage\QA013.2 Lineage Replicates_21.02.04\210204_015.frd
48	H6	Reference Sensor	AHC (Anti-hIgG Fc Capture)		C:\Users\Labuser\Desktop\Overbaugh_lab\Mackenzie Shipley\QA013.2 Lineage\QA013.2 Lineage Replicates_21.02.04\210204_016.frd
49	A7	Empty
50	B7	Empty
51	C7	Empty
52	D7	Empty
53	E7	Empty
54	F7	Empty
55	G7	Empty
56	H7	Empty
57	A8	Empty
58	B8	Empty
59	C8	Empty
60	D8	Empty
61	E8	Empty
62	F8	Empty
63	G8	Empty
64	H8	Empty
65	A9	Empty
66	B9	Empty
67	C9	Empty
68	D9	Empty
69	E9	Empty
70	F9	Empty
71	G9	Empty
72	H9	Empty
73	A10	Empty
74	B10	Empty
75	C10	Empty
76	D10	Empty
77	E10	Empty
78	F10	Empty
79	G10	Empty
80	H10	Empty
81	A11	Empty
82	B11	Empty
83	C11	Empty
84	D11	Empty
85	E11	Empty
86	F11	Empty
87	G11	Empty
88	H11	Empty
89	A12	Empty
90	B12	Empty
91	C12	Empty
92	D12	Empty
93	E12	Empty
94	F12	Empty
95	G12	Empty
96	H12	Empty

## Sheet: Sample Data
Well Number	Well Location	Well Type	Sample ID	Description	Molar Conc.
1	A1	Buffer			65535
2	B1	Buffer			65535
3	C1	Buffer			65535
4	D1	Buffer			65535
5	E1	Buffer			65535
6	F1	Buffer			65535
7	G1	Buffer			65535
8	H1	Reference Well			65535
9	A2	Load	QA013.2 G0/Lmat		65535
10	B2	Load	QA013.2 G0/Lmat		65535
11	C2	Load	QA013.2 G0/Lmat		65535
12	D2	Load	QA013.2 G0/Lmat		65535
13	E2	Load	QA013.2 G0/Lmat		65535
14	F2	Load	QA013.2 G0/Lmat		65535
15	G2	Load	QA013.2 G0/Lmat		65535
16	H2	Reference Well			65535
17	A3	Load	QA013.2 G7/L4		65535
18	B3	Load	QA013.2 G7/L4		65535
19	C3	Load	QA013.2 G7/L4		65535
20	D3	Load	QA013.2 G7/L4		65535
21	E3	Load	QA013.2 G7/L4		65535
22	F3	Load	QA013.2 G7/L4		65535
23	G3	Load	QA013.2 G7/L4		65535
24	H3	Reference Well			65535
25	A4	Load	QA013.2 Gmat/L0		65535
26	B4	Load	QA013.2 Gmat/L0		65535
27	C4	Load	QA013.2 Gmat/L0		65535
28	D4	Load	QA013.2 Gmat/L0		65535
29	E4	Load	QA013.2 Gmat/L0		65535
30	F4	Load	QA013.2 Gmat/L0		65535
31	G4	Load	QA013.2 Gmat/L0		65535
32	H4	Reference Well			65535
33	A5	Load	QA013.2 Naive		65535
34	B5	Load	QA013.2 Naive		65535
35	C5	Load	QA013.2 Naive		65535
36	D5	Load	QA013.2 Naive		65535
37	E5	Load	QA013.2 Naive		65535
38	F5	Load	QA013.2 Naive		65535
39	G5	Load	QA013.2 Naive		65535
40	H5	Reference Well			65535
41	A6	Load	QA013.2 mature		65535
42	B6	Load	QA013.2 mature		65535
43	C6	Load	QA013.2 mature		65535
44	D6	Load	QA013.2 mature		65535
45	E6	Load	QA013.2 mature		65535
46	F6	Load	QA013.2 mature		65535
47	G6	Load	QA013.2 mature		65535
48	H6	Reference Well			65535
49	A7	unset			65535
50	B7	unset			65535
51	C7	unset			65535
52	D7	unset			65535
53	E7	unset			65535
54	F7	unset			65535
55	G7	unset			65535
56	H7	Reference Well			65535
57	A8	Sample	QA013.765M.C1 gp120		2000
58	B8	Sample	QA013.765M.C1 gp120		1000
59	C8	Sample	QA013.765M.C1 gp120		500
60	D8	Sample	QA013.765M.C1 gp120		250
61	E8	Sample	QA013.765M.C1 gp120		125
62	F8	Sample	QA013.765M.C1 gp120		62.5
63	G8	Sample	QA013.765M.C1 gp120		31.25
64	H8	Reference Well			65535
65	A9	Sample	QA013.70 dpi gp120		2000
66	B9	Sample	QA013.70 dpi gp120		1000
67	C9	Sample	QA013.70 dpi gp120		500
68	D9	Sample	QA013.70 dpi gp120		250
69	E9	Sample	QA013.70 dpi gp120		125
70	F9	Sample	QA013.70 dpi gp120		62.5
71	G9	Sample	QA013.70 dpi gp120		31.25
72	H9	Reference Well			65535
73	A10	Sample	BG505.W6.C2 gp120		2000
74	B10	Sample	BG505.W6.C2 gp120		1000
75	C10	Sample	BG505.W6.C2 gp120		500
76	D10	Sample	BG505.W6.C2 gp120		250
77	E10	Sample	BG505.W6.C2 gp120		125
78	F10	Sample	BG505.W6.C2 gp120		62.5
79	G10	Sample	BG505.W6.C2 gp120		31.25
80	H10	Reference Well			65535
81	A11	Regeneration			65535
82	B11	Regeneration			65535
83	C11	Regeneration			65535
84	D11	Regeneration			65535
85	E11	Regeneration			65535
86	F11	Regeneration			65535
87	G11	Regeneration			65535
88	H11	Reference Well			65535
89	A12	Neutralization			65535
90	B12	Neutralization			65535
91	C12	Neutralization			65535
92	D12	Neutralization			65535
93	E12	Neutralization			65535
94	F12	Neutralization			65535
95	G12	Neutralization			65535
96	H12	Reference Well			65535

## Sheet: Raw and Aligned Data
Sensor Location	Color	Sensor	Sensor Type	Sensor Info
A5		Ligand Sensor	AHC (Anti-hIgG Fc Capture)
B5		Ligand Sensor	AHC (Anti-hIgG Fc Capture)
C5		Ligand Sensor	AHC (Anti-hIgG Fc Capture)
D5		Ligand Sensor	AHC (Anti-hIgG Fc Capture)
E5		Ligand Sensor	AHC (Anti-hIgG Fc Capture)
F5		Ligand Sensor	AHC (Anti-hIgG Fc Capture)
G5		Ligand Sensor	AHC (Anti-hIgG Fc Capture)
H5		Ligand Sensor	AHC (Anti-hIgG Fc Capture)
A6		Reference Sensor	AHC (Anti-hIgG Fc Capture)
B6		Reference Sensor	AHC (Anti-hIgG Fc Capture)
C6		Reference Sensor	AHC (Anti-hIgG Fc Capture)
D6		Reference Sensor	AHC (Anti-hIgG Fc Capture)
E6		Reference Sensor	AHC (Anti-hIgG Fc Capture)
F6		Reference Sensor	AHC (Anti-hIgG Fc Capture)
G6		Reference Sensor	AHC (Anti-hIgG Fc Capture)
H6		Reference Sensor	AHC (Anti-hIgG Fc Capture)

## Sheet: Result Table
Selected	Include	Index	Color	Sensor Location	Sensor Type	Sensor Info	Replicate Group	Baseline Loc.	Assoc. (Sample) Loc.	Sample ID	Dissoc. Loc.	Loading Well Location	Loading Sample ID	Cycle	Conc. (nM)	Response	KD (M)	KD Error	kon(1/Ms)	kon Error	kdis(1/s)	kdis Error	RMax	RMax Error	kobs(1/s)	Req	Req/Rmax(%)	Full X^2	Full R^2	SSG KD	SSG Rmax	SSG R^2
x	x	3	-24008	A5	AHC (Anti-hIgG Fc Capture)		N/A	A1	A9	QA013.70 dpi gp120	A1	A5	QA013.2 Naive	1	2000	0.0106	9.944e-06	2.323e-05	69680	162500	0.6929	0.09137	0.0671	0.1341	0.8322	0.0112	16.7	0.0153	0.8214	1.4e-08	0.0122	0.1509
x	x	8	-24008	B5	AHC (Anti-hIgG Fc Capture)		N/A	B1	B9	QA013.70 dpi gp120	B1	B5	QA013.2 Naive	1	1000	0.0174	9.944e-06	2.323e-05	69680	162500	0.6929	0.09137	0.1591	0.3468	0.7625	0.0145	9.1	0.0153	0.8214	1.4e-08	0.0122	0.1509
x	x	13	-24008	C5	AHC (Anti-hIgG Fc Capture)		N/A	C1	C9	QA013.70 dpi gp120	C1	C5	QA013.2 Naive	1	500	0.0084	9.944e-06	2.323e-05	69680	162500	0.6929	0.09137	0.2039	0.4655	0.7277	0.0098	4.8	0.0153	0.8214	1.4e-08	0.0122	0.1509
x	x	18	-24008	D5	AHC (Anti-hIgG Fc Capture)		N/A	D1	D9	QA013.70 dpi gp120	D1	D5	QA013.2 Naive	1	250	0.0109	9.944e-06	2.323e-05	69680	162500	0.6929	0.09137	0.4329	1.0126	0.7103	0.0106	2.5	0.0153	0.8214	1.4e-08	0.0122	0.1509
x	x	23	-24008	E5	AHC (Anti-hIgG Fc Capture)		N/A	E1	E9	QA013.70 dpi gp120	E1	E5	QA013.2 Naive	1	125	0.0127	9.944e-06	2.323e-05	69680	162500	0.6929	0.09137	1.1008	2.6066	0.7016	0.0137	1.2	0.0153	0.8214	1.4e-08	0.0122	0.1509
x	x	28	-24008	F5	AHC (Anti-hIgG Fc Capture)		N/A	F1	F9	QA013.70 dpi gp120	F1	F5	QA013.2 Naive	1	62.5	0.0107	9.944e-06	2.323e-05	69680	162500	0.6929	0.09137	1.4302	3.4077	0.6972	0.0089	0.6	0.0153	0.8214	1.4e-08	0.0122	0.1509
x		33	-24008	G5	AHC (Anti-hIgG Fc Capture)		N/A	G1	G9	QA013.70 dpi gp120	G1	G5	QA013.2 Naive	1	31.3	0.0093
x	x	4	-12859347	A5	AHC (Anti-hIgG Fc Capture)		N/A	A1	A10	BG505.W6.C2 gp120	A1	A6	QA013.2 mature	1	2000	0.0735	3.032e-05	4.478e-05	9451	13950	0.2865	0.01301	1.1106	1.5669	0.3054	0.0687	6.2	0.0528	0.9598	3.2e-07	0.0722	0.773
x	x	9	-12859347	B5	AHC (Anti-hIgG Fc Capture)		N/A	B1	B10	BG505.W6.C2 gp120	B1	B6	QA013.2 mature	1	1000	0.0501	3.032e-05	4.478e-05	9451	13950	0.2865	0.01301	1.5186	2.2099	0.296	0.0485	3.2	0.0528	0.9598	3.2e-07	0.0722	0.773
x	x	14	-12859347	C5	AHC (Anti-hIgG Fc Capture)		N/A	C1	C10	BG505.W6.C2 gp120	C1	C6	QA013.2 mature	1	500	0.0413	3.032e-05	4.478e-05	9451	13950	0.2865	0.01301	2.6178	3.8705	0.2913	0.0425	1.6	0.0528	0.9598	3.2e-07	0.0722	0.773
x	x	19	-12859347	D5	AHC (Anti-hIgG Fc Capture)		N/A	D1	D10	BG505.W6.C2 gp120	D1	D6	QA013.2 mature	1	250	0.0177	3.032e-05	4.478e-05	9451	13950	0.2865	0.01301	2.4511	3.6533	0.2889	0.02	0.8	0.0528	0.9598	3.2e-07	0.0722	0.773
x	x	24	-12859347	E5	AHC (Anti-hIgG Fc Capture)		N/A	E1	E10	BG505.W6.C2 gp120	E1	E6	QA013.2 mature	1	125	0.0297	3.032e-05	4.478e-05	9451	13950	0.2865	0.01301	8.1183	12.1488	0.2877	0.0333	0.4	0.0528	0.9598	3.2e-07	0.0722	0.773
x	x	29	-12859347	F5	AHC (Anti-hIgG Fc Capture)		N/A	F1	F10	BG505.W6.C2 gp120	F1	F6	QA013.2 mature	1	62.5	0.016	3.032e-05	4.478e-05	9451	13950	0.2865	0.01301	8.4222	12.6299	0.2871	0.0173	0.2	0.0528	0.9598	3.2e-07	0.0722	0.773
x		34	-12859347	G5	AHC (Anti-hIgG Fc Capture)		N/A	G1	G10	BG505.W6.C2 gp120	G1	G6	QA013.2 mature	1	31.3	0.0186
x	x	2	-12144190	A5	AHC (Anti-hIgG Fc Capture)		N/A	A1	A8	QA013.765M.C1 gp120	A1	A4	QA013.2 Gmat/L0	3	2000	0.0196	1.941e-10	3.181e-10	5769000	9397000	0.00112	0.000205	0.0185	0.0003	11.54	0.0185	100	0.0429	0.6248	4.1e-06	0.0545	0.9094
x	x	7	-12144190	B5	AHC (Anti-hIgG Fc Capture)		N/A	B1	B8	QA013.765M.C1 gp120	B1	B4	QA013.2 Gmat/L0	3	1000	0.0111	1.941e-10	3.181e-10	5769000	9397000	0.00112	0.000205	0.0078	0.0003	5.77	0.0078	100	0.0429	0.6248	4.1e-06	0.0545	0.9094
x	x	12	-12144190	C5	AHC (Anti-hIgG Fc Capture)		N/A	C1	C8	QA013.765M.C1 gp120	C1	C4	QA013.2 Gmat/L0	3	500	0.0098	1.941e-10	3.181e-10	5769000	9397000	0.00112	0.000205	0.0072	0.0003	2.886	0.0072	100	0.0429	0.6248	4.1e-06	0.0545	0.9094
x	x	17	-12144190	D5	AHC (Anti-hIgG Fc Capture)		N/A	D1	D8	QA013.765M.C1 gp120	D1	D4	QA013.2 Gmat/L0	3	250	0.0094	1.941e-10	3.181e-10	5769000	9397000	0.00112	0.000205	0.0059	0.0003	1.443	0.0059	99.9	0.0429	0.6248	4.1e-06	0.0545	0.9094
x	x	22	-12144190	E5	AHC (Anti-hIgG Fc Capture)		N/A	E1	E8	QA013.765M.C1 gp120	E1	E4	QA013.2 Gmat/L0	3	125	0.0032	1.941e-10	3.181e-10	5769000	9397000	0.00112	0.000205	0.0012	0.0002	0.7223	0.0012	99.8	0.0429	0.6248	4.1e-06	0.0545	0.9094
x	x	27	-12144190	F5	AHC (Anti-hIgG Fc Capture)		N/A	F1	F8	QA013.765M.C1 gp120	F1	F4	QA013.2 Gmat/L0	3	62.5	0.002	1.941e-10	3.181e-10	5769000	9397000	0.00112	0.000205	0.0009	0.0002	0.3617	0.0009	99.7	0.0429	0.6248	4.1e-06	0.0545	0.9094
x		32	-12144190	G5	AHC (Anti-hIgG Fc Capture)		N/A	G1	G8	QA013.765M.C1 gp120	G1	G4	QA013.2 Gmat/L0	3	31.3	-0.0345
x	x	1	-3721216	A5	AHC (Anti-hIgG Fc Capture)		N/A	A1	A8	QA013.765M.C1 gp120	A1	A3	QA013.2 G7/L4	2	2000	-0.0069	1.068e-08		5000	0	5.341e-05	<1.0E-07	0		0.01005	0		0.3855	0
x	x	6	-3721216	B5	AHC (Anti-hIgG Fc Capture)		N/A	B1	B8	QA013.765M.C1 gp120	B1	B3	QA013.2 G7/L4	2	1000	-0.0069	1.068e-08		5000	0	5.341e-05	<1.0E-07	0		0.005053	0		0.3855	0
x	x	11	-3721216	C5	AHC (Anti-hIgG Fc Capture)		N/A	C1	C8	QA013.765M.C1 gp120	C1	C3	QA013.2 G7/L4	2	500	-0.0073	1.068e-08		5000	0	5.341e-05	<1.0E-07	0		0.002553	0		0.3855	0
x	x	16	-3721216	D5	AHC (Anti-hIgG Fc Capture)		N/A	D1	D8	QA013.765M.C1 gp120	D1	D3	QA013.2 G7/L4	2	250	-0.0052	1.068e-08		5000	0	5.341e-05	<1.0E-07	0		0.001303	0		0.3855	0
x	x	21	-3721216	E5	AHC (Anti-hIgG Fc Capture)		N/A	E1	E8	QA013.765M.C1 gp120	E1	E3	QA013.2 G7/L4	2	125	-0.0083	1.068e-08		5000	0	5.341e-05	<1.0E-07	0		0.0006784	0		0.3855	0
x	x	26	-3721216	F5	AHC (Anti-hIgG Fc Capture)		N/A	F1	F8	QA013.765M.C1 gp120	F1	F3	QA013.2 G7/L4	2	62.5	-0.0057	1.068e-08		5000	0	5.341e-05	<1.0E-07	0		0.0003659	0		0.3855	0
x		31	-3721216	G5	AHC (Anti-hIgG Fc Capture)		N/A	G1	G8	QA013.765M.C1 gp120	G1	G3	QA013.2 G7/L4	2	31.3	-0.0617
x	x	0	-14261055	A5	AHC (Anti-hIgG Fc Capture)		N/A	A1	A8	QA013.765M.C1 gp120	A1	A2	QA013.2 G0/Lmat	1	2000	-0.0236	1.174e-08		5000	0	5.871e-05	<1.0E-07	0		0.01006	0		0.4651	0
x	x	5	-14261055	B5	AHC (Anti-hIgG Fc Capture)		N/A	B1	B8	QA013.765M.C1 gp120	B1	B2	QA013.2 G0/Lmat	1	1000	-0.0091	1.174e-08		5000	0	5.871e-05	<1.0E-07	0		0.005059	0		0.4651	0
x	x	10	-14261055	C5	AHC (Anti-hIgG Fc Capture)		N/A	C1	C8	QA013.765M.C1 gp120	C1	C2	QA013.2 G0/Lmat	1	500	-0.0131	1.174e-08		5000	0	5.871e-05	<1.0E-07	0		0.002559	0		0.4651	0
x	x	15	-14261055	D5	AHC (Anti-hIgG Fc Capture)		N/A	D1	D8	QA013.765M.C1 gp120	D1	D2	QA013.2 G0/Lmat	1	250	-0.0043	1.174e-08		5000	0	5.871e-05	<1.0E-07	0		0.001309	0		0.4651	0
x	x	20	-14261055	E5	AHC (Anti-hIgG Fc Capture)		N/A	E1	E8	QA013.765M.C1 gp120	E1	E2	QA013.2 G0/Lmat	1	125	0.0003	1.174e-08		5000	0	5.871e-05	<1.0E-07	0		0.0006837	0		0.4651	0
x	x	25	-14261055	F5	AHC (Anti-hIgG Fc Capture)		N/A	F1	F8	QA013.765M.C1 gp120	F1	F2	QA013.2 G0/Lmat	1	62.5	-0.0083	1.174e-08		5000	0	5.871e-05	<1.0E-07	0		0.0003712	0		0.4651	0
x		30	-14261055	G5	AHC (Anti-hIgG Fc Capture)		N/A	G1	G8	QA013.765M.C1 gp120	G1	G2	QA013.2 G0/Lmat	1	31.3	-0.0517

## Sheet: Steady State
							Results
								Data Used	Reqs
								Y Weighting
								Chi^2/DoF	0.000271507
								R^2	0.0645814
								RMax	0.019637	0.0086077
								KD	2.5e-07	±3.5E-07M

## Sheet: Analysis Parameters
2;0:Association; 1: Dissociation; 2: both
1;1: 1:1 model; 2: 2:1; 3: Mass Transport
1;0:local; 1:global
0;0:Full; 1: partial
1;0:Sensor; 1: color; 2:...
0;
1;0:linked; 1: unlinked by sensor; 2: unlinked by compound; 3: ...
1;0: use entire step, 1:use WOI
0;secs, Assoication starts
179.998980712891;Association step ends
0;Dissociation step starts
179.999987792969;Dissociation step ends
0;0: use Req; 1:Response;
