# Supplementary material for: Functional development of a V3/glycan-specific broadly neutralizing antibody isolated from a case of HIV superinfection
Source: eLife journal article supplement (doi:10.7554/elife.68110), 2021-07-15
Supplement: fig2-data2 [file F1.xls]

Vers 3.43 Data Simulation
Conc1	1.563E-08	1.563E-08	1.563E-08	1.563E-08
Start1	200.03	730.02	1260.02	1790.01
Stop1	559.82	1089.82	1619.82	2149.81
Time1	Data1	Sim1	Time2	Data2	Sim2	Time3	Data3	Sim3	Time4	Data4	Sim4
200.03	0.00521563		730.02	-0.000387		1260.02	0.00666043		1790.01	-0.00065825
200.23	0.00549458		730.22	-0.00051646		1260.22	0.00677105		1790.21	-0.00037326
200.43	0.00520965		730.42	-0.00083973		1260.42	0.00645625		1790.41	-0.00033604
200.63	0.00506305		730.62	-0.00031968		1260.62	0.00684499		1790.61	0.00062652
200.83	0.00486816		730.82	-0.00057486		1260.82	0.00656517		1790.81	0.00143559
201.03	0.0046668		731.02	0.00017168		1261.02	0.0065535		1791.01	0.00188268
201.23	0.00497574		731.22	0.00050635		1261.22	0.00680799		1791.21	0.0018768
201.43	0.00460674		731.42	0.00076397		1261.42	0.00677501		1791.41	0.00156567
201.63	0.00478223		731.62	0.00160464		1261.62	0.00602403		1791.61	0.00126098
201.83	0.00490204		731.82	0.00236529		1261.82	0.00538321		1791.81	0.00159351
202.03	0.00534001		732.02	0.00276617		1262.02	0.00493668		1792.01	0.00174188
202.23	0.00496873		732.22	0.00275384		1262.22	0.00412232		1792.21	0.00136356
202.43	0.0053388		732.42	0.00195299		1262.42	0.00477407		1792.41	0.00108598
202.63	0.00575203		732.62	0.00172884		1262.62	0.00387133		1792.61	0.00081843
202.83	0.00668616		732.82	0.00171072		1262.82	0.00392836		1792.81	0.00054983
203.03	0.00707397		733.02	0.00144991		1263.02	0.00368307		1793.01	0.00074337
203.23	0.00680441		733.22	0.00124348		1263.22	0.0031443		1793.21	0.00007033
203.43	0.00654024		733.42	0.00118853		1263.42	0.00247734		1793.41	-0.00037922
203.63	0.00594124		733.62	0.00192374		1263.62	0.00205091		1793.61	-0.00012277
203.83	0.00633589		733.82	0.00204341		1263.82	0.00313851		1793.81	-0.00017659
204.03	0.00724553		734.02	0.00130817		1264.02	0.00393591		1794.01	0.00011111
204.23	0.00728885		734.22	0.00153736		1264.22	0.00267637		1794.21	0.00018415
204.43	0.0070071		734.42	0.00178716		1264.42	0.00200879		1794.41	0.00058772
204.63	0.00738123		734.62	0.00303413		1264.62	0.00251508		1794.61	0.0014654
204.83	0.00765696		734.82	0.00278935		1264.82	0.00243297		1794.81	0.00059811
205.03	0.00787844		735.02	0.00368235		1265.02	0.00331465		1795.01	0.00037947
205.23	0.00800629		735.22	0.00391205		1265.22	0.00401099		1795.21	-0.00015949
205.43	0.00860037		735.42	0.00375651		1265.42	0.00351634		1795.41	0.00046926
205.63	0.00933696		735.62	0.00387203		1265.62	0.00361209		1795.61	0.00094562
205.83	0.0097946		735.82	0.00283763		1265.82	0.00416672		1795.81	0.00078039
206.03	0.0103648		736.02	0.00256159		1266.02	0.00458236		1796.01	0.00063212
206.23	0.01067214		736.22	0.00183708		1266.22	0.00436411		1796.21	0.00034347
206.43	0.01188897		736.42	0.00083447		1266.42	0.00405305		1796.41	0.00075967
206.63	0.01249669		736.62	0.00071247		1266.62	0.00347272		1796.61	0.00070661
206.83	0.01275142		736.82	0.00068125		1266.82	0.00362787		1796.81	0.00095887
207.03	0.01280876		737.02	0.00066834		1267.02	0.00329858		1797.01	0.00092446
207.23	0.01282725		737.22	0.00144169		1267.22	0.00418339		1797.21	0.00058648
207.43	0.01322648		737.42	0.0012619		1267.42	0.00426885		1797.41	0.00090323
207.63	0.01316456		737.62	0.00167934		1267.62	0.00539726		1797.61	0.00166057
207.83	0.01263764		737.82	0.00128636		1267.82	0.00662634		1797.81	0.00188416
208.03	0.01333521		738.02	0.00122983		1268.02	0.0064007		1798.01	0.00127477
208.23	0.01244935		738.22	0.001344		1268.22	0.00561639		1798.21	0.00070751
208.43	0.01181969		738.42	0.00151292		1268.42	0.00550516		1798.41	0.00068034
208.63	0.01119954		738.62	0.0018885		1268.62	0.00614942		1798.61	0.0005591
208.83	0.01199335		738.82	0.00184491		1268.82	0.00599965		1798.81	0.00003192
209.03	0.01206521		739.02	0.00303547		1269.02	0.00612104		1799.01	0.00114121
209.23	0.01231001		739.22	0.00330122		1269.22	0.00575986		1799.21	0.00128308
209.43	0.01296516		739.42	0.00207631		1269.42	0.0053009		1799.41	0.00218275
209.63	0.01257518		739.62	0.00246723		1269.62	0.00598897		1799.61	0.001201
209.83	0.01338566		739.82	0.00294653		1269.82	0.00548286		1799.81	0.00110043
210.03	0.01348156		740.02	0.00346392		1270.02	0.00548819		1800.01	0.00162159
210.23	0.01398579		740.22	0.0029329		1270.22	0.00473786		1800.21	0.00167229
210.43	0.01389944		740.42	0.0019956		1270.42	0.0050593		1800.41	0.00201141
210.63	0.01391695		740.62	0.00155473		1270.62	0.00510652		1800.61	0.001863
210.83	0.01450945		740.82	0.00145625		1270.82	0.0044019		1800.81	0.00223323
211.03	0.0140388		741.02	0.00171858		1271.02	0.00418331		1801.01	0.00255737
211.23	0.01466861		741.22	0.00133897		1271.22	0.00461657		1801.21	0.00368055
211.43	0.01397988		741.42	0.00012512		1271.42	0.00418377		1801.41	0.00396282
211.63	0.01382004		741.62	0.00011013		1271.62	0.0056832		1801.61	0.00363202
211.83	0.01335022		741.82	-0.00019451		1271.82	0.00638279		1801.81	0.00362109
212.03	0.01481491		742.02	-0.00020062		1272.02	0.00658367		1802.01	0.00254488
212.23	0.01443159		742.22	-0.00081518		1272.22	0.00600345		1802.21	0.00223558
212.43	0.01488245		742.42	0.00026719		1272.42	0.00544705		1802.41	0.00186772
212.63	0.01532189		742.62	0.00092434		1272.62	0.00528282		1802.61	0.00108921
212.83	0.01646463		742.82	0.0021483		1272.82	0.00468546		1802.81	0.00039461
213.03	0.01631424		743.02	0.00384074		1273.02	0.00454384		1803.01	0.00019405
213.23	0.01634073		743.22	0.00448298		1273.22	0.00408769		1803.21	0.00063098
213.43	0.01620355		743.42	0.00512453		1273.42	0.00446848		1803.41	0.00072446
213.63	0.0155926		743.62	0.00606976		1273.62	0.00434339		1803.61	0.00101739
213.83	0.01667928		743.82	0.00560118		1273.82	0.00384579		1803.81	0.00122304
214.03	0.01608128		744.02	0.00493281		1274.02	0.00412659		1804.01	0.00143599
214.23	0.01643988		744.22	0.0049143		1274.22	0.00349276		1804.21	0.00166186
214.43	0.01626723		744.42	0.00376362		1274.42	0.00396564		1804.41	0.0017134
214.63	0.0166781		744.62	0.00339291		1274.62	0.002669		1804.61	0.00209307
214.83	0.01742999		744.82	0.00309543		1274.82	0.00241834		1804.81	0.00291834
215.03	0.01729234		745.02	0.00303822		1275.02	0.00238553		1805.01	0.00323279
215.23	0.01794694		745.22	0.00220739		1275.22	0.00278946		1805.21	0.00413021
215.43	0.01782115		745.42	0.00254908		1275.42	0.00377283		1805.41	0.0041188
215.63	0.01809632		745.62	0.00255831		1275.62	0.00430154		1805.61	0.0040224
215.83	0.01825517		745.82	0.00237169		1275.82	0.00453022		1805.81	0.00420842
216.03	0.01960495		746.02	0.00171172		1276.02	0.00430383		1806.01	0.00364654
216.23	0.01960116		746.22	0.00130143		1276.22	0.00328775		1806.21	0.00305938
216.43	0.01909805		746.42	0.00117414		1276.42	0.0028698		1806.41	0.00245817
216.63	0.01827139		746.62	0.00115787		1276.62	0.00329983		1806.61	0.00242016
216.83	0.01817185		746.82	0.00129995		1276.82	0.00406186		1806.81	0.003281
217.03	0.01816648		747.02	0.00194527		1277.02	0.00429958		1807.01	0.00330937
217.23	0.01743081		747.22	0.00185835		1277.22	0.00384042		1807.21	0.00402394
217.43	0.01716809		747.42	0.00184447		1277.42	0.00411121		1807.41	0.00352328
217.63	0.01709084		747.62	0.00228748		1277.62	0.00340345		1807.61	0.00386902
217.83	0.0185187		747.82	0.00263618		1277.82	0.00432528		1807.81	0.00284199
218.03	0.01837194		748.02	0.00293131		1278.02	0.00406349		1808.01	0.00249744
218.23	0.01858189		748.22	0.00324392		1278.22	0.00333192		1808.21	0.00246271
218.43	0.01914311		748.42	0.00301671		1278.42	0.00421372		1808.41	0.00195324
218.63	0.02014976		748.62	0.00250009		1278.62	0.00421724		1808.61	0.00205351
218.83	0.02089839		748.82	0.0025371		1278.82	0.00512038		1808.81	0.00210583
219.03	0.02090457		749.02	0.00276304		1279.02	0.00523356		1809.01	0.00085042
219.23	0.02123412		749.22	0.00250044		1279.22	0.00570068		1809.21	0.00102127
219.43	0.0211299		749.42	0.00268039		1279.42	0.00593631		1809.41	0.00095473
219.63	0.02122634		749.62	0.00199323		1279.62	0.00563763		1809.61	0.00103692
219.83	0.02168813		749.82	0.00233523		1279.82	0.00567101		1809.81	0.00169777
220.03	0.02252611		750.02	0.00127196		1280.02	0.00545606		1810.01	0.00225384
220.23	0.02181048		750.22	0.00054569		1280.22	0.00531956		1810.21	0.00168425
220.43	0.02091565		750.42	0.00005081		1280.42	0.00548756		1810.41	0.00203911
220.63	0.02110581		750.62	0.00002005		1280.62	0.00528936		1810.61	0.0029545
220.83	0.02167768		750.82	-0.00035906		1280.82	0.00497672		1810.81	0.00260825
221.03	0.02195482		751.02	-0.00033447		1281.02	0.00357738		1811.01	0.00255627
221.23	0.02185373		751.22	-0.00016487		1281.22	0.00237214		1811.21	0.002896
221.43	0.02238965		751.42	0.00061581		1281.42	0.00199601		1811.41	0.00341885
221.63	0.02172811		751.62	0.00076231		1281.62	0.00183108		1811.61	0.00368412
221.83	0.02233641		751.82	-0.0000671		1281.82	0.00198039		1811.81	0.00359032
222.03	0.0220435		752.02	-0.00034128		1282.02	0.00076068		1812.01	0.00344441
222.23	0.02194783		752.22	-0.00064789		1282.22	0.00133496		1812.21	0.00369818
222.43	0.02221359		752.42	-0.00066784		1282.42	0.00176378		1812.41	0.00330095
222.63	0.02210735		752.62	-0.00119359		1282.62	0.00199146		1812.61	0.00264641
222.83	0.02179937		752.82	-0.00033487		1282.82	0.00234654		1812.81	0.00198348
223.03	0.02133199		753.02	-0.00050148		1283.02	0.00220538		1813.01	0.00170581
223.23	0.02137382		753.22	0.00020274		1283.22	0.00262027		1813.21	0.00199609
223.43	0.0209073		753.42	0.00115512		1283.42	0.00383728		1813.41	0.00220188
223.63	0.02106381		753.62	0.0014779		1283.62	0.00468609		1813.61	0.00274649
223.83	0.02124093		753.82	0.0017737		1283.82	0.00484931		1813.81	0.00307551
224.03	0.02139511		754.02	0.00178134		1284.02	0.00470452		1814.01	0.00343927
224.23	0.02105876		754.22	0.00179551		1284.22	0.00404855		1814.21	0.00374208
224.43	0.02159709		754.42	0.0017635		1284.42	0.0032895		1814.41	0.00417964
224.63	0.02329136		754.62	0.00182245		1284.62	0.00204048		1814.61	0.00425167
224.83	0.02491989		754.82	0.00217512		1284.82	0.00169186		1814.81	0.00443145
225.03	0.02615001		755.02	0.00182816		1285.02	0.00166993		1815.01	0.00596088
225.23	0.02717028		755.22	0.00169129		1285.22	0.0018499		1815.21	0.00562743
225.43	0.02781891		755.42	0.00138382		1285.42	0.00169554		1815.41	0.00537609
225.63	0.02844408		755.62	0.0004475		1285.62	0.00130705		1815.61	0.00495417
225.83	0.02998984		755.82	0.0011258		1285.82	0.00077448		1815.81	0.00451814
226.03	0.03025965		756.02	0.00130334		1286.02	0.00092901		1816.01	0.00388941
226.23	0.03139131		756.22	0.00136055		1286.22	0.00167451		1816.21	0.00283766
226.43	0.03124737		756.42	0.00146202		1286.42	0.00193034		1816.41	0.00112276
226.63	0.03138307		756.62	0.00140239		1286.62	0.0025351		1816.61	-0.00074656
226.83	0.03146055		756.82	0.00142475		1286.82	0.00267341		1816.81	-0.00114927
227.03	0.03028941		757.02	0.00079323		1287.02	0.00279302		1817.01	-0.00096266
227.23	0.02920617		757.22	0.00188477		1287.22	0.00402831		1817.21	-0.0014329
227.43	0.02873056		757.42	0.00174169		1287.42	0.00481518		1817.41	-0.00090258
227.63	0.02803873		757.62	0.00186199		1287.62	0.00405024		1817.61	-0.00096745
227.83	0.02794995		757.82	0.00161389		1287.82	0.00324858		1817.81	-0.00010127
228.03	0.02716172		758.02	0.00240069		1288.02	0.00345841		1818.01	0.00043188
228.23	0.02636814		758.22	0.00103478		1288.22	0.00256891		1818.21	0.00018327
228.43	0.02658448		758.42	0.00070348		1288.42	0.00165442		1818.41	0.00025968
228.63	0.02690224		758.62	0.00101189		1288.62	0.00204991		1818.61	0.00067836
228.83	0.02708337		758.82	0.001223		1288.82	0.00211751		1818.81	0.00131249
229.03	0.02696258		759.02	0.00109083		1289.02	0.00258362		1819.01	0.00218749
229.23	0.02730011		759.22	0.00090798		1289.22	0.00196734		1819.21	0.00215464
229.43	0.02722994		759.42	0.00145766		1289.42	0.00093999		1819.41	0.00271609
229.63	0.02806724		759.62	0.00113807		1289.62	0.00042842		1819.61	0.00306686
229.83	0.02888262		759.82	0.00093972		1289.82	0.00083173		1819.81	0.00324471
230.03	0.02904971		760.02	0.00094263		1290.02	0.00158873		1820.01	0.00352694
230.23	0.03045103		760.22	0.00095081		1290.22	0.00173752		1820.21	0.00311004
230.43	0.03124998		760.42	0.00031386		1290.42	0.00182085		1820.41	0.00312779
230.63	0.03188584		760.62	0.00016823		1290.62	0.00193143		1820.61	0.00340725
230.83	0.03186005		760.82	0.00003626		1290.82	0.00153673		1820.81	0.00428936
231.03	0.0311894		761.02	0.00025917		1291.02	0.00171258		1821.01	0.00450884
231.23	0.03065215		761.22	0.00105689		1291.22	0.00190014		1821.21	0.00427014
231.43	0.03114903		761.42	0.00033016		1291.42	0.00152863		1821.41	0.00386632
231.63	0.03087031		761.62	0.00004254		1291.62	0.00048497		1821.61	0.00312889
231.83	0.03034534		761.82	-0.00102518		1291.82	0.00062614		1821.81	0.00328214
232.03	0.02945234		762.02	-0.00057329		1292.02	0.00105257		1822.01	0.00248868
232.23	0.02809389		762.22	-0.001705		1292.22	0.00082166		1822.21	0.00204338
232.43	0.02824382		762.42	-0.00166885		1292.42	0.00097404		1822.41	0.00238619
232.63	0.02781737		762.62	-0.00143208		1292.62	0.0011372		1822.61	0.0022927
232.83	0.02821378		762.82	-0.00093994		1292.82	0.00093664		1822.81	0.00242248
233.03	0.0277749		763.02	-0.00090058		1293.02	0.00114966		1823.01	0.00275501
233.23	0.02888366		763.22	-0.00143648		1293.22	0.00177509		1823.21	0.00272557
233.43	0.02934457		763.42	-0.00130291		1293.42	0.00182233		1823.41	0.00242652
233.63	0.03026711		763.62	-0.00143086		1293.62	0.00252711		1823.61	0.0023112
233.83	0.03108105		763.82	-0.00061819		1293.82	0.00347576		1823.81	0.00310276
234.03	0.03145606		764.02	0.00041739		1294.02	0.00378637		1824.01	0.00300692
234.23	0.03253538		764.22	0.00040888		1294.22	0.00340014		1824.21	0.00290455
234.43	0.0338172		764.42	0.00030955		1294.42	0.00353683		1824.41	0.00276192
234.63	0.03409325		764.62	0.00055395		1294.62	0.00375274		1824.61	0.00208888
234.83	0.03453956		764.82	0.00098969		1294.82	0.0032204		1824.81	0.00185074
235.03	0.03504632		765.02	0.00073493		1295.02	0.00277664		1825.01	0.00107577
235.23	0.03528577		765.22	0.00061363		1295.22	0.00150496		1825.21	0.00017448
235.43	0.03605164		765.42	-0.00025626		1295.42	0.00057265		1825.41	-0.00038533
235.63	0.03556263		765.62	-0.00055755		1295.62	-0.00065495		1825.61	-0.00097885
235.83	0.03607997		765.82	-0.00121213		1295.82	0.00000432		1825.81	-0.00152947
236.03	0.03608479		766.02	-0.00094792		1296.02	0.00005576		1826.01	-0.00160026
236.23	0.03595443		766.22	-0.00159273		1296.22	-0.00050909		1826.21	-0.0011999
236.43	0.03681708		766.42	-0.00224113		1296.42	-0.00061187		1826.41	-0.00091838
236.63	0.03716796		766.62	-0.00262714		1296.62	-0.00084671		1826.61	-0.00079845
236.83	0.03724001		766.82	-0.00360916		1296.82	-0.00100713		1826.81	0.00002058
237.03	0.03681845		767.02	-0.0035413		1297.02	-0.00073653		1827.01	-0.00020474
237.23	0.03704863		767.22	-0.00393791		1297.22	0.00044056		1827.21	0.00017841
237.43	0.03653304		767.42	-0.00312097		1297.42	0.00078322		1827.41	-0.00035806
237.63	0.03575394		767.62	-0.00220617		1297.62	0.00202815		1827.61	-0.00019971
237.83	0.03527655		767.82	-0.00097963		1297.82	0.00282138		1827.81	0.00034221
238.03	0.034741		768.02	-0.0010977		1298.02	0.00331352		1828.01	0.00079444
238.23	0.03430345		768.22	-0.00086295		1298.22	0.00279833		1828.21	0.00128148
238.43	0.03392743		768.42	-0.00012751		1298.42	0.00310939		1828.41	0.00215306
238.63	0.03311953		768.62	0.00007526		1298.62	0.00368416		1828.61	0.00246753
238.83	0.03241092		768.82	0.00050995		1298.82	0.00417331		1828.81	0.00306432
239.03	0.03259371		769.02	0.0014916		1299.02	0.0035101		1829.01	0.00305511
239.23	0.03277086		769.22	0.00215105		1299.22	0.0032661		1829.21	0.00257491
239.43	0.0334994		769.42	0.00190103		1299.42	0.00202599		1829.41	0.00308583
239.63	0.03358232		769.62	0.00189006		1299.62	0.00145242		1829.61	0.0020436
239.83	0.03463737		769.82	0.00168264		1299.82	0.00208944		1829.81	0.00200873
240.03	0.03459426		770.02	0.00139938		1300.02	0.00192674		1830.01	0.00251819
240.23	0.0345022		770.22	0.00054162		1300.22	0.00180049		1830.21	0.00250584
240.43	0.03465615		770.42	-0.00034178		1300.42	0.0021281		1830.41	0.00285785
240.63	0.03469976		770.62	-0.00159647		1300.62	0.00150023		1830.61	0.00306212
240.83	0.03473895		770.82	-0.0023341		1300.82	0.00032573		1830.81	0.00287524
241.03	0.03537409		771.02	-0.00124634		1301.02	0.00140448		1831.01	0.00175439
241.23	0.03574817		771.22	-0.0019957		1301.22	0.00175222		1831.21	0.00102714
241.43	0.03600108		771.42	-0.00128676		1301.42	0.0020792		1831.41	0.00006381
241.63	0.03581241		771.62	-0.00104657		1301.62	0.00237399		1831.61	0.00013042
241.83	0.03594646		771.82	-0.00040302		1301.82	0.00198326		1831.81	0.00104124
242.03	0.03534909		772.02	-0.00104965		1302.02	0.00182775		1832.01	0.00209056
242.23	0.03482788		772.22	-0.00086233		1302.22	0.00199069		1832.21	0.0015962
242.43	0.03481967		772.42	-0.0004462		1302.42	0.00266172		1832.41	0.00148112
242.63	0.03529585		772.62	-0.00003586		1302.62	0.00363547		1832.61	0.00091341
242.83	0.03564225		772.82	0.00125821		1302.82	0.00432645		1832.81	0.00152968
243.03	0.03652837		773.02	0.00283202		1303.02	0.00388552		1833.01	0.00113866
243.23	0.03711993		773.22	0.00259623		1303.22	0.00337901		1833.21	0.00139778
243.43	0.03800717		773.42	0.0028062		1303.42	0.00266608		1833.41	0.00114811
243.63	0.03878887		773.62	0.00305256		1303.62	0.0034046		1833.61	0.00013212
243.83	0.03913378		773.82	0.00241027		1303.82	0.00351607		1833.81	0.00093994
244.03	0.03874014		774.02	0.00193989		1304.02	0.00315268		1834.01	0.00128688
244.23	0.03826745		774.22	0.00191351		1304.22	0.00269351		1834.21	0.00106471
244.43	0.03847068		774.42	0.00180272		1304.42	0.00271458		1834.41	0.00172914
244.63	0.03933875		774.62	0.00143777		1304.62	0.00287085		1834.61	0.00159724
244.83	0.04007322		774.82	0.00158057		1304.82	0.00208931		1834.81	0.00123869
245.03	0.04023637		775.02	0.0015415		1305.02	0.00256569		1835.01	0.00222206
245.23	0.04030317		775.22	0.00081555		1305.22	0.0026391		1835.21	0.00284317
245.43	0.04000253		775.42	0.00109239		1305.42	0.00275678		1835.41	0.00349707
245.63	0.04082337		775.62	0.00142955		1305.62	0.00330949		1835.61	0.00358615
245.83	0.04057297		775.82	0.00082116		1305.82	0.00285869		1835.81	0.00448221
246.03	0.04020034		776.02	-0.00044666		1306.02	0.00280558		1836.01	0.00534572
246.23	0.04003776		776.22	0.0000683		1306.22	0.00325373		1836.21	0.00513263
246.43	0.04073208		776.42	-0.00046366		1306.42	0.00304192		1836.41	0.00559367
246.63	0.04039537		776.62	0.00120608		1306.62	0.00311646		1836.61	0.00565373
246.83	0.04085427		776.82	0.00149618		1306.82	0.00226075		1836.81	0.0061576
247.03	0.04210872		777.02	0.00213328		1307.02	0.00157571		1837.01	0.00540867
247.23	0.04338451		777.22	0.00158395		1307.22	0.00115807		1837.21	0.00623905
247.43	0.04392002		777.42	0.00157421		1307.42	0.00117282		1837.41	0.00596895
247.63	0.04466426		777.62	0.00122922		1307.62	0.0003993		1837.61	0.00613097
247.83	0.04447178		777.82	0.00141171		1307.82	-0.00013071		1837.81	0.00621411
248.03	0.04407739		778.02	0.00236822		1308.02	-0.00111228		1838.01	0.00514955
248.23	0.0442605		778.22	0.0020179		1308.22	-0.00059125		1838.21	0.00461461
248.43	0.04432144		778.42	0.00209752		1308.42	-0.00021944		1838.41	0.00400361
248.63	0.04441774		778.62	0.00180242		1308.62	-0.00015134		1838.61	0.00334798
248.83	0.04358363		778.82	0.00167813		1308.82	0.00006198		1838.81	0.00307005
249.03	0.04306296		779.02	0.00090103		1309.02	0.00124888		1839.01	0.00366185
249.23	0.04354431		779.22	0.00143502		1309.22	0.00236368		1839.21	0.00337054
249.43	0.04277457		779.42	0.00171331		1309.42	0.00231176		1839.41	0.00248304
249.63	0.04308874		779.62	0.00149334		1309.62	0.00262534		1839.61	0.00196612
249.83	0.04162961		779.82	0.00024984		1309.82	0.00211841		1839.81	0.00253426
250.03	0.04058116		780.02	-0.00021954		1310.02	0.00191284		1840.01	0.00279837
250.23	0.04010521		780.22	0.00035982		1310.22	0.00231278		1840.21	0.00304154
250.43	0.04004575		780.42	0.00005438		1310.42	0.00164129		1840.41	0.00320089
250.63	0.03982338		780.62	0.00049467		1310.62	0.00083581		1840.61	0.002777
250.83	0.04078424		780.82	-0.00019579		1310.82	0.00065418		1840.81	0.0030253
251.03	0.04169747		781.02	-0.00011348		1311.02	0.00120013		1841.01	0.00272362
251.23	0.04180647		781.22	-0.00033338		1311.22	0.00056287		1841.21	0.00360342
251.43	0.0416775		781.42	0.00010915		1311.42	0.00019707		1841.41	0.00293957
251.63	0.04241768		781.62	0.00094362		1311.62	-0.00056561		1841.61	0.00299297
251.83	0.04293236		781.82	0.00115504		1311.82	-0.00041919		1841.81	0.00241702
252.03	0.04289625		782.02	0.00102158		1312.02	-0.00090704		1842.01	0.00194389
252.23	0.04250913		782.22	0.00058154		1312.22	0.00019598		1842.21	0.00152848
252.43	0.04321814		782.42	0.00065003		1312.42	0.00007275		1842.41	0.00129209
252.63	0.04403357		782.62	0.00050988		1312.62	0.00082712		1842.61	0.0009481
252.83	0.04483575		782.82	0.00113281		1312.82	0.0015664		1842.81	0.00093449
253.03	0.04507072		783.02	0.0013368		1313.02	0.00232214		1843.01	0.00130758
253.23	0.04611761		783.22	0.00232654		1313.22	0.00219106		1843.21	0.0015315
253.43	0.04518457		783.42	0.00212141		1313.42	0.00193239		1843.41	0.00091535
253.63	0.04526098		783.62	0.00201738		1313.62	0.00251703		1843.61	0.00186452
253.83	0.04406049		783.82	0.00141328		1313.82	0.0031049		1843.81	0.00207343
254.03	0.04354492		784.02	0.00117742		1314.02	0.00243878		1844.01	0.0020935
254.23	0.04412097		784.22	0.00035072		1314.22	0.0024175		1844.21	0.00253267
254.43	0.04370458		784.42	-0.00088942		1314.42	0.00226283		1844.41	0.00284128
254.63	0.04436829		784.62	-0.00237981		1314.62	0.00233308		1844.61	0.00250751
254.83	0.04498283		784.82	-0.00254631		1314.82	0.00245075		1844.81	0.00272617
255.03	0.04520099		785.02	-0.00288864		1315.02	0.00121264		1845.01	0.00285188
255.23	0.04479418		785.22	-0.00268863		1315.22	-0.00011301		1845.21	0.00418311
255.43	0.0450481		785.42	-0.00293631		1315.42	-0.0008834		1845.41	0.00386902
255.63	0.04527882		785.62	-0.00339102		1315.62	-0.00220358		1845.61	0.00464554
255.83	0.04574844		785.82	-0.0040536		1315.82	-0.00169716		1845.81	0.00391916
256.03	0.04532697		786.02	-0.00436546		1316.02	-0.00154388		1846.01	0.00429028
256.23	0.04547944		786.22	-0.00417089		1316.22	-0.0012178		1846.21	0.00457307
256.43	0.04661429		786.42	-0.00436428		1316.42	-0.00094429		1846.41	0.00462433
256.63	0.04710689		786.62	-0.00372539		1316.62	-0.00045157		1846.61	0.00453974
256.83	0.04681209		786.82	-0.00227903		1316.82	-0.00049455		1846.81	0.00474355
257.03	0.04691359		787.02	-0.00148052		1317.02	0.00014997		1847.01	0.00505988
257.23	0.04757759		787.22	-0.00049739		1317.22	-0.00011622		1847.21	0.004304
257.43	0.04749495		787.42	-0.00010284		1317.42	0.00060244		1847.41	0.00372689
257.63	0.04732002		787.62	0.0005035		1317.62	0.00157595		1847.61	0.00356934
257.83	0.04717625		787.82	0.00057233		1317.82	0.00188475		1847.81	0.00232101
258.03	0.04807633		788.02	0.00081765		1318.02	0.00230572		1848.01	0.00176808
258.23	0.04872239		788.22	0.00086359		1318.22	0.0042869		1848.21	0.00128485
258.43	0.04888906		788.42	0.00127661		1318.42	0.00527727		1848.41	0.00114892
258.63	0.04939798		788.62	0.0017172		1318.62	0.00463207		1848.61	0.00062543
258.83	0.05026805		788.82	0.00253413		1318.82	0.00362117		1848.81	0.0010206
259.03	0.05019338		789.02	0.00251246		1319.02	0.00260343		1849.01	0.00158423
259.23	0.04989511		789.22	0.00318981		1319.22	0.00188095		1849.21	0.00239975
259.43	0.04977791		789.42	0.00236848		1319.42	0.00173331		1849.41	0.00166519
259.63	0.04971204		789.62	0.00210578		1319.62	0.00173767		1849.61	0.00145625
259.83	0.04954299		789.82	0.00214389		1319.82	0.00305268		1849.81	0.00094204
260.03	0.05015795		790.02	0.0012701		1320.02	0.00294822		1850.01	0.0017524
260.23	0.05070912		790.22	0.00151709		1320.22	0.00181403		1850.21	0.00201919
260.43	0.05106431		790.42	0.00144448		1320.42	0.00162508		1850.41	0.00147168
260.63	0.05144951		790.62	0.00116753		1320.62	0.00152516		1850.61	0.00211425
260.83	0.05122401		790.82	0.00166128		1320.82	0.00124807		1850.81	0.00219652
261.03	0.05215274		791.02	0.00112026		1321.02	0.00167897		1851.01	0.00301251
261.23	0.05264169		791.22	0.00082407		1321.22	0.00081371		1851.21	0.00256908
261.43	0.05270008		791.42	0.00065111		1321.42	0.0012506		1851.41	0.00277562
261.63	0.05289168		791.62	0.00123122		1321.62	0.00079669		1851.61	0.00306691
261.83	0.0529463		791.82	0.00149457		1321.82	-0.00003961		1851.81	0.00238754
262.03	0.05342083		792.02	0.00246365		1322.02	0.0003522		1852.01	0.00280924
262.23	0.05257313		792.22	0.00336019		1322.22	0.00075177		1852.21	0.00302316
262.43	0.05253822		792.42	0.00355994		1322.42	-0.00027118		1852.41	0.00295716
262.63	0.05223547		792.62	0.00399298		1322.62	-0.00170197		1852.61	0.00240963
262.83	0.05299783		792.82	0.00487013		1322.82	-0.00229018		1852.81	0.00274595
263.03	0.05172933		793.02	0.00458788		1323.02	-0.00279861		1853.01	0.00295149
263.23	0.05122162		793.22	0.00441162		1323.22	-0.00192914		1853.21	0.0030972
263.43	0.05163045		793.42	0.00409582		1323.42	-0.00053929		1853.41	0.00206009
263.63	0.05161146		793.62	0.00432765		1323.62	-0.00072506		1853.61	0.00058838
263.83	0.05143707		793.82	0.00354437		1323.82	-0.00076185		1853.81	0.00075841
264.03	0.05236596		794.02	0.00309672		1324.02	-0.00089368		1854.01	0.00116592
264.23	0.05217072		794.22	0.00238332		1324.22	-0.00069645		1854.21	0.00054025
264.43	0.05306351		794.42	0.00212672		1324.42	0.00043796		1854.41	0.00060907
264.63	0.05252752		794.62	0.00175785		1324.62	0.00105033		1854.61	0.00130746
264.83	0.05202773		794.82	0.00092724		1324.82	0.00158278		1854.81	0.00151775
265.03	0.05161222		795.02	-0.0004428		1325.02	0.00204405		1855.01	0.00155355
265.23	0.05219181		795.22	-0.00111246		1325.22	0.00148524		1855.21	0.00122899
265.43	0.05283928		795.42	-0.00086248		1325.42	0.00200596		1855.41	0.00136705
265.63	0.05315592		795.62	-0.00043837		1325.62	0.00149741		1855.61	0.00158022
265.83	0.05251816		795.82	-0.00017042		1325.82	0.00154657		1855.81	0.00075638
266.03	0.05274484		796.02	0.00049081		1326.02	0.00165084		1856.01	0.00180994
266.23	0.05177326		796.22	0.00057164		1326.22	0.00171018		1856.21	0.00201698
266.43	0.05210289		796.42	0.00053239		1326.42	0.00118458		1856.41	0.00234101
266.63	0.05101751		796.62	0.00075238		1326.62	0.0007468		1856.61	0.0030492
266.83	0.05138463		796.82	0.00094963		1326.82	0.00126194		1856.81	0.00456241
267.03	0.05175192		797.02	0.00044624		1327.02	0.00188161		1857.01	0.0043436
267.23	0.05308037		797.22	-0.00028433		1327.22	0.00285078		1857.21	0.00338959
267.43	0.05411323		797.42	-0.00004465		1327.42	0.00318563		1857.41	0.00268724
267.63	0.05361229		797.62	-0.000629		1327.62	0.00255158		1857.61	0.003079
267.83	0.05373755		797.82	-0.00051256		1327.82	0.00308348		1857.81	0.00461992
268.03	0.05419746		798.02	0.00012117		1328.02	0.00313531		1858.01	0.00482871
268.23	0.05427597		798.22	-0.00041105		1328.22	0.00224048		1858.21	0.00508481
268.43	0.05517484		798.42	-0.00018251		1328.42	0.00184577		1858.41	0.00490299
268.63	0.05441825		798.62	-0.00093679		1328.62	0.00146126		1858.61	0.00418437
268.83	0.05405821		798.82	-0.00093949		1328.82	0.00170505		1858.81	0.00349973
269.03	0.05412177		799.02	-0.00083508		1329.02	0.0012748		1859.01	0.00229225
269.23	0.0554618		799.22	-0.00048165		1329.22	0.0008596		1859.21	0.00179004
269.43	0.05484881		799.42	0.00032595		1329.42	0.00072555		1859.41	0.001263
269.63	0.05383538		799.62	0.00059341		1329.62	0.0001503		1859.61	0.00113588
269.83	0.05366314		799.82	0.00113871		1329.82	-0.00034309		1859.81	0.00164362
270.03	0.05371136		800.02	0.00171829		1330.02	-0.00176519		1860.01	0.00256622
270.23	0.05316176		800.22	0.00203541		1330.22	-0.00219687		1860.21	0.00251493
270.43	0.05330621		800.42	0.00220136		1330.42	-0.00262532		1860.41	0.00353456
270.63	0.05262319		800.62	0.0015964		1330.62	-0.00281703		1860.61	0.00400267
270.83	0.05392528		800.82	0.00186287		1330.82	-0.00249139		1860.81	0.00347532
271.03	0.05469424		801.02	0.00165794		1331.02	-0.00324684		1861.01	0.00255058
271.23	0.0551875		801.22	0.0006157		1331.22	-0.00357647		1861.21	0.00205222
271.43	0.05536165		801.42	0.00052812		1331.42	-0.00275216		1861.41	0.00340416
271.63	0.05509177		801.62	0.00048428		1331.62	-0.00349349		1861.61	0.00465214
271.83	0.05523377		801.82	0.001089		1331.82	-0.00287214		1861.81	0.00498874
272.03	0.05517663		802.02	0.00008015		1332.02	-0.00334691		1862.01	0.004459
272.23	0.05547529		802.22	-0.00070616		1332.22	-0.00320148		1862.21	0.00433643
272.43	0.05604341		802.42	-0.00123906		1332.42	-0.00222811		1862.41	0.00352624
272.63	0.05571962		802.62	-0.0012842		1332.62	-0.00097594		1862.61	0.00340712
272.83	0.05552608		802.82	-0.00056872		1332.82	-0.00073873		1862.81	0.00323125
273.03	0.05600446		803.02	-0.00063689		1333.02	-0.00078179		1863.01	0.00232668
273.23	0.05624668		803.22	-0.00099767		1333.22	0.00002804		1863.21	0.00177775
273.43	0.05563573		803.42	-0.00097335		1333.42	0.00070298		1863.41	0.00151326
273.63	0.05629142		803.62	-0.00103726		1333.62	0.00149896		1863.61	0.00184971
273.83	0.05700115		803.82	-0.00059219		1333.82	0.00134789		1863.81	0.00059705
274.03	0.05664626		804.02	-0.00025319		1334.02	0.00094126		1864.01	0.00009771
274.23	0.05720567		804.22	-0.00006741		1334.22	0.00087332		1864.21	-0.00021666
274.43	0.05737441		804.42	-0.00030545		1334.42	0.00097683		1864.41	-0.00011099
274.63	0.05673893		804.62	-0.00037917		1334.62	0.00117744		1864.61	-0.00009335
274.83	0.05748599		804.82	0.00023291		1334.82	0.0005672		1864.81	-0.00052799
275.03	0.05740207		805.02	0.00014942		1335.02	-0.00060839		1865.01	-0.00000236
275.23	0.05791617		805.22	-0.00034155		1335.22	-0.00038783		1865.21	0.00021396
275.43	0.05823135		805.42	-0.00043098		1335.42	-0.00084995		1865.41	0.00101002
275.63	0.05854113		805.62	-0.00022907		1335.62	-0.00159222		1865.61	0.0017775
275.83	0.05899707		805.82	-0.00011972		1335.82	-0.00138066		1865.81	0.00207065
276.03	0.05938075		806.02	-0.00019485		1336.02	-0.001608		1866.01	0.00281704
276.23	0.06010509		806.22	0.00026251		1336.22	-0.00130178		1866.21	0.00398273
276.43	0.05997487		806.42	0.00018077		1336.42	-0.00149997		1866.41	0.00510876
276.63	0.05954765		806.62	0.00070833		1336.62	-0.00161224		1866.61	0.00613311
276.83	0.06024969		806.82	0.00052776		1336.82	-0.00256766		1866.81	0.0062227
277.03	0.05970594		807.02	0.00096085		1337.02	-0.00285401		1867.01	0.00641514
277.23	0.05972254		807.22	0.00059153		1337.22	-0.00235536		1867.21	0.00681145
277.43	0.05959396		807.42	0.00085046		1337.42	-0.00224042		1867.41	0.00713507
277.63	0.06000495		807.62	0.00105788		1337.62	-0.00107796		1867.61	0.00764091
277.83	0.05921172		807.82	0.00061506		1337.82	-0.00149005		1867.81	0.00653305
278.03	0.05852869		808.02	0.00087972		1338.02	-0.00131846		1868.01	0.00702838
278.23	0.0590605		808.22	0.00014423		1338.22	-0.00090032		1868.21	0.00723006
278.43	0.05851906		808.42	0.00000615		1338.42	-0.00044461		1868.41	0.00649725
278.63	0.05779134		808.62	0.0000104		1338.62	-0.00003635		1868.61	0.0067445
278.83	0.05833908		808.82	-0.00003306		1338.82	0.00025866		1868.81	0.00525971
279.03	0.05798316		809.02	-0.00015776		1339.02	0.00020023		1869.01	0.00385701
279.23	0.05875884		809.22	-0.00015106		1339.22	0.00009052		1869.21	0.0031657
279.43	0.05947015		809.42	0.00036754		1339.42	-0.00022442		1869.41	0.00244497
279.63	0.05956381		809.62	0.00086866		1339.62	-0.00024833		1869.61	0.00281105
279.83	0.05917784		809.82	0.00134686		1339.82	-0.0000678		1869.81	0.00154746
280.03	0.05888492		810.02	0.00184326		1340.02	-0.00053325		1870.01	0.00099396
280.23	0.05907355		810.22	0.00185003		1340.22	-0.00074562		1870.21	0.00130549
280.43	0.0586308		810.42	0.00221905		1340.42	-0.00191858		1870.41	0.00140106
280.63	0.05769945		810.62	0.00248522		1340.62	-0.00223558		1870.61	0.00081808
280.83	0.05815521		810.82	0.0026581		1340.82	-0.00273738		1870.81	0.0003053
281.03	0.05799299		811.02	0.00275875		1341.02	-0.00392705		1871.01	0.00061834
281.23	0.05883518		811.22	0.00261998		1341.22	-0.00397839		1871.21	0.00119009
281.43	0.05958682		811.42	0.00310896		1341.42	-0.00393068		1871.41	0.00105531
281.63	0.06000263		811.62	0.00271527		1341.62	-0.00418872		1871.61	0.00123973
281.83	0.06076144		811.82	0.00138386		1341.82	-0.00501278		1871.81	0.00068633
282.03	0.06116299		812.02	0.00089302		1342.02	-0.00474879		1872.01	0.00093432
282.23	0.06193112		812.22	0.0000292		1342.22	-0.00454672		1872.21	0.00117175
282.43	0.06212518		812.42	-0.00027195		1342.42	-0.00366669		1872.41	0.00080394
282.63	0.06236604		812.62	-0.00107822		1342.62	-0.00282022		1872.61	0.00033998
282.83	0.0626677		812.82	-0.00155371		1342.82	-0.00167382		1872.81	-0.00036151
283.03	0.06313924		813.02	-0.00133285		1343.02	-0.00130136		1873.01	0.0005092
283.23	0.06336441		813.22	-0.001114		1343.22	-0.00072324		1873.21	0.00163476
283.43	0.06281278		813.42	-0.00108709		1343.42	0.00029966		1873.41	0.00115061
283.63	0.0622323		813.62	-0.00192999		1343.62	0.00068615		1873.61	0.00205922
283.83	0.06162867		813.82	-0.00194948		1343.82	0.00060831		1873.81	0.00162045
284.03	0.06187688		814.02	-0.00189194		1344.02	-0.00006085		1874.01	0.0010879
284.23	0.06202809		814.22	-0.00105953		1344.22	0.00004062		1874.21	0.00163353
284.43	0.06148341		814.42	-0.00086019		1344.42	-0.00036178		1874.41	0.00147198
284.63	0.06089825		814.62	-0.00078355		1344.62	-0.00034385		1874.61	0.00114992
284.83	0.06187697		814.82	-0.00056214		1344.82	-0.00135258		1874.81	0.00188474
285.03	0.06274104		815.02	-0.00043362		1345.02	-0.00194293		1875.01	0.0026136
285.23	0.0629045		815.22	0.00110282		1345.22	-0.0020927		1875.21	0.00320813
285.43	0.06319999		815.42	0.00185074		1345.42	-0.00258419		1875.41	0.00311525
285.63	0.06291229		815.62	0.00165952		1345.62	-0.00277098		1875.61	0.00339887
285.83	0.06381789		815.82	0.00129231		1345.82	-0.00235081		1875.81	0.00311787
286.03	0.06321168		816.02	0.0017094		1346.02	-0.00286981		1876.01	0.00361273
286.23	0.06363953		816.22	0.00238492		1346.22	-0.00286862		1876.21	0.0038992
286.43	0.06500185		816.42	0.00221654		1346.42	-0.00222076		1876.41	0.00452465
286.63	0.06468895		816.62	0.00182646		1346.62	-0.00259988		1876.61	0.00522721
286.83	0.06544091		816.82	0.00200029		1346.82	-0.00239637		1876.81	0.00651314
287.03	0.06585227		817.02	0.00229893		1347.02	-0.00174709		1877.01	0.00662783
287.23	0.06670485		817.22	0.0014755		1347.22	-0.00186216		1877.21	0.00623412
287.43	0.06698323		817.42	0.00161629		1347.42	-0.00232264		1877.41	0.00503893
287.63	0.06749667		817.62	0.00120288		1347.62	-0.00298973		1877.61	0.00452257
287.83	0.06742113		817.82	0.0012084		1347.82	-0.00453363		1877.81	0.00359769
288.03	0.06774349		818.02	0.00066957		1348.02	-0.00477276		1878.01	0.00284633
288.23	0.06703626		818.22	0.00042498		1348.22	-0.00472779		1878.21	0.00334003
288.43	0.06653883		818.42	-0.00048983		1348.42	-0.00478178		1878.41	0.00234406
288.63	0.06615384		818.62	0.00020904		1348.62	-0.00501496		1878.61	0.00234312
288.83	0.06605671		818.82	-0.00005216		1348.82	-0.00531567		1878.81	0.0021296
289.03	0.06548543		819.02	0.00059794		1349.02	-0.00498062		1879.01	0.00115987
289.23	0.06476503		819.22	0.00116567		1349.22	-0.00468727		1879.21	0.00036651
289.43	0.06377848		819.42	0.00057222		1349.42	-0.00485679		1879.41	-0.00053689
289.63	0.0632145		819.62	0.0003519		1349.62	-0.0044814		1879.61	-0.00040765
289.83	0.06312486		819.82	0.00031778		1349.82	-0.00460838		1879.81	-0.00044777
290.03	0.06369089		820.02	0.00102681		1350.02	-0.00443636		1880.01	0.00107946
290.23	0.06495432		820.22	0.00130723		1350.22	-0.00405627		1880.21	0.00091084
290.43	0.0657375		820.42	0.00069483		1350.42	-0.00344759		1880.41	0.00135906
290.63	0.06546047		820.62	0.00054349		1350.62	-0.00371225		1880.61	0.00185922
290.83	0.0672814		820.82	0.00127853		1350.82	-0.00298068		1880.81	0.00113012
291.03	0.06780201		821.02	0.00169231		1351.02	-0.00160341		1881.01	-0.00014729
291.23	0.0686901		821.22	0.00166222		1351.22	-0.00114905		1881.21	-0.00002541
291.43	0.06900702		821.42	0.00200378		1351.42	-0.00162875		1881.41	-0.0005909
291.63	0.06949105		821.62	0.00109684		1351.62	-0.00173701		1881.61	-0.00039231
291.83	0.06890508		821.82	0.00066688		1351.82	-0.00162909		1881.81	0.00030238
292.03	0.06887745		822.02	0.00028388		1352.02	-0.0013346		1882.01	-0.00005694
292.23	0.06867789		822.22	0.00025185		1352.22	-0.00079575		1882.21	-0.00031276
292.43	0.0688726		822.42	0.00135219		1352.42	-0.00069933		1882.41	0.00010164
292.63	0.0681348		822.62	0.00198991		1352.62	-0.00082254		1882.61	0.00159669
292.83	0.06815534		822.82	0.00108355		1352.82	-0.00057127		1882.81	0.00166465
293.03	0.06780639		823.02	0.0009341		1353.02	-0.00046134		1883.01	0.00168617
293.23	0.06739735		823.22	0.00033839		1353.22	-0.00125129		1883.21	0.00203423
293.43	0.06660006		823.42	-0.00055464		1353.42	-0.00240632		1883.41	0.00219369
293.63	0.06598965		823.62	-0.00062804		1353.62	-0.00196402		1883.61	0.00314015
293.83	0.06630802		823.82	-0.00018736		1353.82	-0.00254242		1883.81	0.00293063
294.03	0.06700047		824.02	-0.00048581		1354.02	-0.00345414		1884.01	0.00353131
294.23	0.06745385		824.22	-0.00079772		1354.22	-0.00373611		1884.21	0.00299687
294.43	0.06632477		824.42	-0.00094542		1354.42	-0.0035301		1884.41	0.00308395
294.63	0.06691177		824.62	-0.00098526		1354.62	-0.00369005		1884.61	0.00270311
294.83	0.06697528		824.82	-0.00013193		1354.82	-0.00307939		1884.81	0.00128187
295.03	0.06649092		825.02	0.00043297		1355.02	-0.00315694		1885.01	0.00082588
295.23	0.06687499		825.22	0.00053301		1355.22	-0.00367828		1885.21	0.00134957
295.43	0.06695391		825.42	0.00101362		1355.42	-0.00370218		1885.41	0.00131884
295.63	0.0670844		825.62	0.00140269		1355.62	-0.00279043		1885.61	0.00133782
295.83	0.0669155		825.82	0.00212178		1355.82	-0.00201315		1885.81	0.00091633
296.03	0.06702336		826.02	0.0022613		1356.02	-0.00162402		1886.01	0.00038509
296.23	0.0672405		826.22	0.00276113		1356.22	-0.00126563		1886.21	0.00115405
296.43	0.06703191		826.42	0.00289293		1356.42	-0.00079381		1886.41	0.00125212
296.63	0.06697161		826.62	0.00249735		1356.62	-0.00060868		1886.61	0.00165479
296.83	0.06856347		826.82	0.00144697		1356.82	-0.00071284		1886.81	0.00156895
297.03	0.06955091		827.02	0.00131496		1357.02	-0.00091258		1887.01	0.0015242
297.23	0.07018239		827.22	0.00167604		1357.22	-0.00100972		1887.21	0.00087374
297.43	0.07036819		827.42	0.00114502		1357.42	-0.00173186		1887.41	0.00067485
297.63	0.07063628		827.62	0.001206		1357.62	-0.0013606		1887.61	0.00019852
297.83	0.0717919		827.82	0.00139688		1357.82	-0.00187427		1887.81	0.00005284
298.03	0.07288259		828.02	0.00052072		1358.02	-0.00225037		1888.01	0.00042992
298.23	0.07273996		828.22	0.00119255		1358.22	-0.00205889		1888.21	0.00001519
298.43	0.07186204		828.42	0.00140603		1358.42	-0.00176314		1888.41	-0.00024588
298.63	0.07273324		828.62	0.00211809		1358.62	-0.00209898		1888.61	-0.00105036
298.83	0.07174173		828.82	0.00280745		1358.82	-0.00273473		1888.81	-0.00070039
299.03	0.07176552		829.02	0.00267335		1359.02	-0.00358338		1889.01	0.0006511
299.23	0.07241958		829.22	0.00262384		1359.22	-0.00314255		1889.21	0.00100366
299.43	0.07148552		829.42	0.0027474		1359.42	-0.00259151		1889.41	0.00176805
299.63	0.07143538		829.62	0.00268502		1359.62	-0.00228978		1889.61	0.0021512
299.83	0.07154634		829.82	0.0013467		1359.82	-0.00282569		1889.81	0.00228186
300.03	0.07114908		830.02	0.00021762		1360.02	-0.00299256		1890.01	0.00230355
300.23	0.07174367		830.22	0.0004039		1360.22	-0.00363837		1890.21	0.0024831
300.43	0.07201531		830.42	-0.00004147		1360.42	-0.00359794		1890.41	0.00289322
300.63	0.07268758		830.62	0.0002616		1360.62	-0.00412611		1890.61	0.00433678
300.83	0.07379617		830.82	0.00047198		1360.82	-0.00423109		1890.81	0.00499525
301.03	0.07402044		831.02	0.0014139		1361.02	-0.00424036		1891.01	0.00515103
301.23	0.07426627		831.22	0.00219216		1361.22	-0.00523379		1891.21	0.00476397
301.43	0.07450684		831.42	0.00119077		1361.42	-0.00571746		1891.41	0.00524097
301.63	0.07455991		831.62	0.00115752		1361.62	-0.0050548		1891.61	0.00467831
301.83	0.07457531		831.82	0.00115748		1361.82	-0.00391034		1891.81	0.00426615
302.03	0.07466957		832.02	0.0009179		1362.02	-0.00343856		1892.01	0.00433087
302.23	0.07320487		832.22	0.00141214		1362.22	-0.00395726		1892.21	0.00306972
302.43	0.07251455		832.42	0.00155883		1362.42	-0.00407684		1892.41	0.00252173
302.63	0.07231125		832.62	0.00187245		1362.62	-0.00474968		1892.61	0.00231224
302.83	0.07180171		832.82	0.00073583		1362.82	-0.00496422		1892.81	0.00235663
303.03	0.07267291		833.02	-0.00044088		1363.02	-0.00450435		1893.01	0.00261877
303.23	0.07295217		833.22	-0.0005084		1363.22	-0.00389211		1893.21	0.00184305
303.43	0.07288902		833.42	-0.00085829		1363.42	-0.00441527		1893.41	0.00170323
303.63	0.07316676		833.62	-0.0011164		1363.62	-0.00467864		1893.61	0.00046278
303.83	0.07350646		833.82	-0.00236575		1363.82	-0.00466674		1893.81	-0.00005636
304.03	0.07359558		834.02	-0.00144521		1364.02	-0.00491458		1894.01	-0.00046955
304.23	0.073822		834.22	-0.00018323		1364.22	-0.00552678		1894.21	-0.00071459
304.43	0.07313493		834.42	-0.0000314		1364.42	-0.00612103		1894.41	0.00004889
304.63	0.07352222		834.62	0.00060001		1364.62	-0.00603437		1894.61	0.00093904
304.83	0.07396047		834.82	0.00098825		1364.82	-0.00616099		1894.81	0.00051891
305.03	0.07468447		835.02	0.00097895		1365.02	-0.0073364		1895.01	0.00106373
305.23	0.07642752		835.22	0.00131653		1365.22	-0.00754082		1895.21	0.00097812
305.43	0.07700361		835.42	0.00087592		1365.42	-0.00698728		1895.41	0.00086745
305.63	0.07755153		835.62	0.00006601		1365.62	-0.00665329		1895.61	0.00109725
305.83	0.07784704		835.82	0.00001843		1365.82	-0.00595277		1895.81	0.00141987
306.03	0.07815577		836.02	0.00050407		1366.02	-0.00680798		1896.01	0.00186278
306.23	0.07814107		836.22	0.00088097		1366.22	-0.00805439		1896.21	0.00089047
306.43	0.07877233		836.42	0.00121213		1366.42	-0.00872575		1896.41	0.00183679
306.63	0.07971353		836.62	0.00143534		1366.62	-0.00722082		1896.61	0.00223888
306.83	0.07990679		836.82	0.00093492		1366.82	-0.00644125		1896.81	0.00166239
307.03	0.07990791		837.02	0.00064466		1367.02	-0.00610515		1897.01	0.00179783
307.23	0.07973671		837.22	0.00193861		1367.22	-0.0061053		1897.21	0.00106534
307.43	0.07976235		837.42	0.00194221		1367.42	-0.00693315		1897.41	0.00024531
307.63	0.07899668		837.62	0.00180723		1367.62	-0.00588997		1897.61	0.00007118
307.83	0.07806859		837.82	0.00135067		1367.82	-0.00548942		1897.81	-0.00016073
308.03	0.07766677		838.02	0.00141618		1368.02	-0.00610567		1898.01	-0.00023779
308.23	0.07732812		838.22	0.00063213		1368.22	-0.00576083		1898.21	-0.00031456
308.43	0.0769489		838.42	-0.00010182		1368.42	-0.00544339		1898.41	0.00071746
308.63	0.07754513		838.62	-0.00086976		1368.62	-0.00505856		1898.61	0.00080627
308.83	0.07707201		838.82	-0.00171652		1368.82	-0.00442041		1898.81	0.00001629
309.03	0.07737381		839.02	-0.00227972		1369.02	-0.00523488		1899.01	0.00003158
309.23	0.07783537		839.22	-0.00244409		1369.22	-0.0053347		1899.21	-0.00014115
309.43	0.0777867		839.42	-0.00287197		1369.42	-0.00586225		1899.41	0.00011501
309.63	0.07774461		839.62	-0.00249048		1369.62	-0.005653		1899.61	0.00061934
309.83	0.07746494		839.82	-0.00173688		1369.82	-0.00593228		1899.81	-0.0002674
310.03	0.0772792		840.02	-0.00089508		1370.02	-0.0067675		1900.01	0.00025503
310.23	0.07806866		840.22	-0.00071411		1370.22	-0.0076576		1900.21	0.00030764
310.43	0.07862148		840.42	-0.00096501		1370.42	-0.00803525		1900.41	0.00062599
310.63	0.07844529		840.62	-0.00038566		1370.62	-0.00697591		1900.61	0.00001039
310.83	0.0782971		840.82	0.00090531		1370.82	-0.00710682		1900.81	-0.0003237
311.03	0.07828225		841.02	0.00101913		1371.02	-0.00732627		1901.01	-0.00007596
311.23	0.07826526		841.22	0.00268263		1371.22	-0.00661624		1901.21	0.00027415
311.43	0.07875444		841.42	0.00230124		1371.42	-0.00604976		1901.41	0.00091512
311.63	0.0790666		841.62	0.00225235		1371.62	-0.00441202		1901.61	0.00141442
311.83	0.07897461		841.82	0.00181112		1371.82	-0.00395115		1901.81	0.00080373
312.03	0.07972648		842.02	0.001356		1372.02	-0.00363223		1902.01	0.00199753
312.23	0.07989552		842.22	0.00078403		1372.22	-0.00305187		1902.21	0.00202755
312.43	0.07982582		842.42	0.00075024		1372.42	-0.00206742		1902.41	0.00247401
312.63	0.08026646		842.62	0.00070284		1372.62	-0.00179075		1902.61	0.00214269
312.83	0.08036585		842.82	0.00012876		1372.82	-0.00152012		1902.81	0.00195918
313.03	0.08075534		843.02	-0.00054123		1373.02	-0.0022113		1903.01	0.00160381
313.23	0.08132488		843.22	0.00030517		1373.22	-0.0020974		1903.21	0.00196141
313.43	0.08126069		843.42	0.00104388		1373.42	-0.00197048		1903.41	0.00205189
313.63	0.08027027		843.62	0.00173744		1373.62	-0.00189031		1903.61	0.00229454
313.83	0.07998191		843.82	0.00147083		1373.82	-0.00268967		1903.81	0.00220151
314.03	0.08019848		844.02	0.00152686		1374.02	-0.00319778		1904.01	0.00249004
314.23	0.08112791		844.22	0.00111583		1374.22	-0.00357925		1904.21	0.00184857
314.43	0.08153485		844.42	0.00105593		1374.42	-0.00407592		1904.41	0.0012624
314.63	0.08111407		844.62	0.00163401		1374.62	-0.00453638		1904.61	0.00069772
314.83	0.08134721		844.82	0.00173037		1374.82	-0.0045031		1904.81	0.0001169
315.03	0.08167325		845.02	0.00136026		1375.02	-0.0038873		1905.01	0.00037359
315.23	0.08202578		845.22	0.00225447		1375.22	-0.00393937		1905.21	0.00089855
315.43	0.08254597		845.42	0.0014976		1375.42	-0.0036523		1905.41	0.0016374
315.63	0.08274203		845.62	0.00070564		1375.62	-0.00310211		1905.61	0.00206539
315.83	0.08177091		845.82	0.00011228		1375.82	-0.00357737		1905.81	0.00209242
316.03	0.0812665		846.02	0.00020445		1376.02	-0.00418223		1906.01	0.00307391
316.23	0.08077754		846.22	0.00025146		1376.22	-0.00480157		1906.21	0.00217864
316.43	0.0806298		846.42	0.00101893		1376.42	-0.00474465		1906.41	0.00274521
316.63	0.08154779		846.62	0.00119531		1376.62	-0.00491847		1906.61	0.00226844
316.83	0.08125301		846.82	0.00086549		1376.82	-0.00608792		1906.81	0.00218697
317.03	0.08097035		847.02	0.00143016		1377.02	-0.00667589		1907.01	0.00233243
317.23	0.08137813		847.22	0.00265411		1377.22	-0.00721854		1907.21	0.00318461
317.43	0.08112818		847.42	0.00318802		1377.42	-0.00742161		1907.41	0.00301152
317.63	0.08116175		847.62	0.00396513		1377.62	-0.00762792		1907.61	0.00275649
317.83	0.08181825		847.82	0.00444433		1377.82	-0.00738059		1907.81	0.00202995
318.03	0.08253103		848.02	0.00476983		1378.02	-0.00689944		1908.01	0.00178105
318.23	0.08364936		848.22	0.00525751		1378.22	-0.00674697		1908.21	0.00126371
318.43	0.08367088		848.42	0.00627451		1378.42	-0.00692312		1908.41	0.00028699
318.63	0.08378611		848.62	0.00566237		1378.62	-0.00662434		1908.61	-0.00038853
318.83	0.08430369		848.82	0.00460212		1378.82	-0.00566299		1908.81	-0.00086972
319.03	0.08509121		849.02	0.00483132		1379.02	-0.00472472		1909.01	-0.00123687
319.23	0.0852395		849.22	0.00471117		1379.22	-0.00525222		1909.21	-0.00150516
319.43	0.08537286		849.42	0.00358631		1379.42	-0.00381484		1909.41	-0.00159198
319.63	0.08466998		849.62	0.00326397		1379.62	-0.00355589		1909.61	-0.00177412
319.83	0.08383831		849.82	0.00345134		1379.82	-0.00346852		1909.81	-0.00270367
320.03	0.08317878		850.02	0.00318617		1380.02	-0.0030033		1910.01	-0.00245004
320.23	0.08292624		850.22	0.00253512		1380.22	-0.00301791		1910.21	-0.00196634
320.43	0.08243609		850.42	0.00335037		1380.42	-0.00245988		1910.41	-0.00116879
320.63	0.08299543		850.62	0.00299327		1380.62	-0.00300425		1910.61	-0.00137284
320.83	0.08255378		850.82	0.0030883		1380.82	-0.00479291		1910.81	-0.00070726
321.03	0.08290226		851.02	0.00261414		1381.02	-0.00424957		1911.01	-0.00015882
321.23	0.08298743		851.22	0.00288921		1381.22	-0.00456378		1911.21	0.0003062
321.43	0.08334247		851.42	0.00341588		1381.42	-0.00388331		1911.41	-0.00014144
321.63	0.08321709		851.62	0.00296677		1381.62	-0.00467389		1911.61	-0.00030457
321.83	0.08290417		851.82	0.00298105		1381.82	-0.00450235		1911.81	-0.00032246
322.03	0.08262476		852.02	0.00296706		1382.02	-0.00515985		1912.01	0.00039475
322.23	0.08351113		852.22	0.00249653		1382.22	-0.0055177		1912.21	0.00092844
322.43	0.0819663		852.42	0.00267734		1382.42	-0.00666377		1912.41	0.00043594
322.63	0.08227906		852.62	0.00142092		1382.62	-0.00677467		1912.61	0.00105159
322.83	0.08229748		852.82	0.00156129		1382.82	-0.00706858		1912.81	0.0002981
323.03	0.08248492		853.02	0.00178332		1383.02	-0.00726317		1913.01	-0.00059233
323.23	0.08202904		853.22	0.00181439		1383.22	-0.0072039		1913.21	-0.00102734
323.43	0.08191206		853.42	0.0014476		1383.42	-0.00643948		1913.41	-0.00054369
323.63	0.08156832		853.62	0.00186806		1383.62	-0.00676367		1913.61	-0.00043262
323.83	0.08175965		853.82	0.0018637		1383.82	-0.00670163		1913.81	-0.00055322
324.03	0.08192637		854.02	0.00107335		1384.02	-0.00618837		1914.01	0.0001654
324.23	0.08316495		854.22	0.00121558		1384.22	-0.00542159		1914.21	0.0004444
324.43	0.08434453		854.42	0.00174271		1384.42	-0.00504858		1914.41	0.00040309
324.63	0.08445482		854.62	0.00140983		1384.62	-0.00648692		1914.61	0.00155346
324.83	0.08488299		854.82	0.00187682		1384.82	-0.00575625		1914.81	0.00182893
325.03	0.08568986		855.02	0.00187628		1385.02	-0.00527709		1915.01	0.0021467
325.23	0.08573352		855.22	0.00253384		1385.22	-0.00564706		1915.21	0.00258682
325.43	0.08610263		855.42	0.00290946		1385.42	-0.00521187		1915.41	0.00304693
325.63	0.08619088		855.62	0.00239843		1385.62	-0.00606532		1915.61	0.00294109
325.83	0.08578924		855.82	0.00188129		1385.82	-0.00630641		1915.81	0.00385219
326.03	0.08647429		856.02	0.00189176		1386.02	-0.00657959		1916.01	0.00444094
326.23	0.08622429		856.22	0.00233648		1386.22	-0.00644367		1916.21	0.00439485
326.43	0.08552489		856.42	0.00216323		1386.42	-0.00686293		1916.41	0.00270895
326.63	0.08717732		856.62	0.00200743		1386.62	-0.00638098		1916.61	0.00314177
326.83	0.08623338		856.82	0.00257865		1386.82	-0.00596296		1916.81	0.00153088
327.03	0.08633022		857.02	0.00264088		1387.02	-0.00581551		1917.01	0.00068668
327.23	0.08648507		857.22	0.00279242		1387.22	-0.00556789		1917.21	0.00014727
327.43	0.08670453		857.42	0.00321597		1387.42	-0.00515757		1917.41	0.00044094
327.63	0.08663285		857.62	0.00267886		1387.62	-0.00502311		1917.61	-0.00001257
327.83	0.08729885		857.82	0.00236832		1387.82	-0.00507776		1917.81	-0.00038294
328.03	0.0878059		858.02	0.00226412		1388.02	-0.00434274		1918.01	0.00040623
328.23	0.08800572		858.22	0.00314882		1388.22	-0.00443886		1918.21	0.00085723
328.43	0.0886524		858.42	0.00296522		1388.42	-0.00500629		1918.41	0.0014932
328.63	0.0874097		858.62	0.00323791		1388.62	-0.00558071		1918.61	0.00219797
328.83	0.08784567		858.82	0.00342516		1388.82	-0.00428059		1918.81	0.0023883
329.03	0.08805371		859.02	0.00324667		1389.02	-0.00426976		1919.01	0.00317913
329.23	0.08768653		859.22	0.00328208		1389.22	-0.0040906		1919.21	0.00382433
329.43	0.08789684		859.42	0.00374587		1389.42	-0.00407392		1919.41	0.00509068
329.63	0.08787057		859.62	0.00260064		1389.62	-0.00436149		1919.61	0.00502996
329.83	0.08718428		859.82	0.00133539		1389.82	-0.00419116		1919.81	0.0052274
330.03	0.08767042		860.02	0.00159461		1390.02	-0.00359839		1920.01	0.00452725
330.23	0.08730235		860.22	0.00059501		1390.22	-0.00426449		1920.21	0.00409553
330.43	0.08828199		860.42	-0.00004675		1390.42	-0.00468261		1920.41	0.00427959
330.63	0.08879259		860.62	0.00076302		1390.62	-0.00445637		1920.61	0.00386051
330.83	0.08895554		860.82	0.00146		1390.82	-0.00394793		1920.81	0.00299171
331.03	0.09063239		861.02	0.00124216		1391.02	-0.00448983		1921.01	0.00242625
331.23	0.09129171		861.22	0.0004419		1391.22	-0.00511078		1921.21	0.00232025
331.43	0.09110938		861.42	0.0009361		1391.42	-0.00566006		1921.41	0.00224211
331.63	0.09174641		861.62	-0.00058521		1391.62	-0.00685303		1921.61	0.00181868
331.83	0.09240854		861.82	-0.00036736		1391.82	-0.00796027		1921.81	0.00209817
332.03	0.09282569		862.02	0.00047342		1392.02	-0.00908601		1922.01	0.00157974
332.23	0.09235584		862.22	0.00109561		1392.22	-0.00990554		1922.21	0.00062308
332.43	0.09260985		862.42	0.00097931		1392.42	-0.00927459		1922.41	-0.00006908
332.63	0.09265271		862.62	0.00086564		1392.62	-0.00839647		1922.61	-0.00019727
332.83	0.09296991		862.82	0.00135484		1392.82	-0.00752815		1922.81	0.00024801
333.03	0.09327672		863.02	0.00195346		1393.02	-0.00732126		1923.01	-0.00029804
333.23	0.0934579		863.22	0.00235011		1393.22	-0.00750402		1923.21	0.00012444
333.43	0.09313032		863.42	0.00283386		1393.42	-0.00726741		1923.41	0.00122565
333.63	0.09257487		863.62	0.00243162		1393.62	-0.00700778		1923.61	0.00099472
333.83	0.09302179		863.82	0.00217442		1393.82	-0.00607541		1923.81	0.00168022
334.03	0.0929601		864.02	0.00305441		1394.02	-0.00569872		1924.01	0.00187181
334.23	0.09225628		864.22	0.0037472		1394.22	-0.00511815		1924.21	0.00243859
334.43	0.09264007		864.42	0.00522239		1394.42	-0.00499269		1924.41	0.0029524
334.63	0.09266866		864.62	0.00646989		1394.62	-0.00510783		1924.61	0.00207775
334.83	0.09292062		864.82	0.0067967		1394.82	-0.00469478		1924.81	0.00237575
335.03	0.09357242		865.02	0.0062884		1395.02	-0.00490312		1925.01	0.00213543
335.23	0.09353554		865.22	0.00576889		1395.22	-0.00550927		1925.21	0.00331693
335.43	0.09295009		865.42	0.00626584		1395.42	-0.0063717		1925.41	0.00291149
335.63	0.09358807		865.62	0.00495779		1395.62	-0.00700799		1925.61	0.00298996
335.83	0.09312781		865.82	0.00533838		1395.82	-0.0069032		1925.81	0.00288053
336.03	0.0926714		866.02	0.00543782		1396.02	-0.00728843		1926.01	0.00294128
336.23	0.09201847		866.22	0.00457929		1396.22	-0.00696013		1926.21	0.00332602
336.43	0.09235358		866.42	0.00339806		1396.42	-0.00573098		1926.41	0.00369223
336.63	0.09302743		866.62	0.00237921		1396.62	-0.00520312		1926.61	0.00462036
336.83	0.09243975		866.82	0.00184612		1396.82	-0.00444695		1926.81	0.00508548
337.03	0.09289522		867.02	0.00102195		1397.02	-0.00479358		1927.01	0.0048393
337.23	0.09214416		867.22	0.00036864		1397.22	-0.00468599		1927.21	0.00572301
337.43	0.09171834		867.42	-0.00029302		1397.42	-0.00422119		1927.41	0.00599171
337.63	0.09227995		867.62	-0.00124618		1397.62	-0.00367134		1927.61	0.00587251
337.83	0.09270491		867.82	-0.00188424		1397.82	-0.00378		1927.81	0.00545819
338.03	0.09207806		868.02	-0.0019034		1398.02	-0.00417174		1928.01	0.00507838
338.23	0.09241688		868.22	-0.00180014		1398.22	-0.00425263		1928.21	0.00472393
338.43	0.09264788		868.42	-0.00080927		1398.42	-0.00450654		1928.41	0.00522118
338.63	0.09347788		868.62	-0.00022462		1398.62	-0.00443839		1928.61	0.00452676
338.83	0.09293135		868.82	-0.00006079		1398.82	-0.00370113		1928.81	0.00423123
339.03	0.09363789		869.02	0.0010476		1399.02	-0.00485088		1929.01	0.00368024
339.23	0.09356666		869.22	0.00211983		1399.22	-0.00499628		1929.21	0.00414958
339.43	0.09369674		869.42	0.00261786		1399.42	-0.00565845		1929.41	0.00266444
339.63	0.09426185		869.62	0.00290571		1399.62	-0.00580684		1929.61	0.00241197
339.83	0.09372086		869.82	0.00372314		1399.82	-0.00582627		1929.81	0.00236617
340.03	0.09351199		870.02	0.00441249		1400.02	-0.00609342		1930.01	0.00249485
340.23	0.0943558		870.22	0.00400862		1400.22	-0.00671003		1930.21	0.00290032
340.43	0.09414391		870.42	0.00449049		1400.42	-0.0064		1930.41	0.00471517
340.63	0.09478369		870.62	0.00429713		1400.62	-0.00628994		1930.61	0.00519784
340.83	0.09515982		870.82	0.00477112		1400.82	-0.00628463		1930.81	0.0055056
341.03	0.09529172		871.02	0.00485878		1401.02	-0.00643209		1931.01	0.00529862
341.23	0.09426146		871.22	0.00489625		1401.22	-0.00600481		1931.21	0.00526813
341.43	0.09504587		871.42	0.00347777		1401.42	-0.00536938		1931.41	0.00499564
341.63	0.09529159		871.62	0.00291706		1401.62	-0.00528818		1931.61	0.00358698
341.83	0.09589468		871.82	0.00220516		1401.82	-0.00564165		1931.81	0.00382679
342.03	0.09641166		872.02	0.00142062		1402.02	-0.0047201		1932.01	0.00396227
342.23	0.09690655		872.22	0.00127441		1402.22	-0.00375947		1932.21	0.00325898
342.43	0.096863		872.42	0.00168558		1402.42	-0.00347251		1932.41	0.00281269
342.63	0.09752661		872.62	0.00112196		1402.62	-0.00383697		1932.61	0.00068263
342.83	0.09608382		872.82	0.00098894		1402.82	-0.00387345		1932.81	-0.00035313
343.03	0.09670891		873.02	0.00163747		1403.02	-0.00451376		1933.01	-0.0011115
343.23	0.09707211		873.22	0.00131311		1403.22	-0.00458297		1933.21	-0.00158878
343.43	0.09667546		873.42	0.00112405		1403.42	-0.00505199		1933.41	-0.00341846
343.63	0.09710636		873.62	0.00164972		1403.62	-0.00517514		1933.61	-0.00342286
343.83	0.09656017		873.82	0.00236325		1403.82	-0.0053693		1933.81	-0.00289894
344.03	0.09654518		874.02	0.00309692		1404.02	-0.00543277		1934.01	-0.00287415
344.23	0.09702543		874.22	0.00274448		1404.22	-0.00626093		1934.21	-0.00152669
344.43	0.09659378		874.42	0.00211798		1404.42	-0.00609789		1934.41	-0.00063312
344.63	0.09663531		874.62	0.00211117		1404.62	-0.00639143		1934.61	-0.00074624
344.83	0.09677926		874.82	0.00249457		1404.82	-0.00639461		1934.81	0.00073057
345.03	0.09635267		875.02	0.00175869		1405.02	-0.00568141		1935.01	0.00058778
345.23	0.09608542		875.22	0.0017541		1405.22	-0.00565111		1935.21	0.00019872
345.43	0.09672681		875.42	0.00094566		1405.42	-0.00455578		1935.41	0.00010332
345.63	0.09639547		875.62	0.00095716		1405.62	-0.0053437		1935.61	0.0001038
345.83	0.09759091		875.82	0.0008195		1405.82	-0.00492109		1935.81	0.00179132
346.03	0.09738155		876.02	0.0012377		1406.02	-0.00401677		1936.01	0.0009629
346.23	0.09768534		876.22	0.0008503		1406.22	-0.0041982		1936.21	0.00009734
346.43	0.09757858		876.42	0.00159377		1406.42	-0.00426435		1936.41	0.00064775
346.63	0.09748451		876.62	0.00122266		1406.62	-0.00505266		1936.61	0.00060223
346.83	0.09743533		876.82	0.00159992		1406.82	-0.00541572		1936.81	0.00099284
347.03	0.09790088		877.02	0.00152988		1407.02	-0.00532432		1937.01	0.00053936
347.23	0.09838302		877.22	0.00154594		1407.22	-0.00621252		1937.21	0.00047127
347.43	0.09811723		877.42	0.00146152		1407.42	-0.00593792		1937.41	0.00078924
347.63	0.09847732		877.62	0.00150394		1407.62	-0.0057114		1937.61	0.00249698
347.83	0.09840776		877.82	0.00205986		1407.82	-0.00593156		1937.81	0.00323401
348.03	0.09928532		878.02	0.00162461		1408.02	-0.00646087		1938.01	0.00296025
348.23	0.09889456		878.22	0.00024689		1408.22	-0.00611618		1938.21	0.00316295
348.43	0.09913205		878.42	-0.00026136		1408.42	-0.00598319		1938.41	0.0030523
348.63	0.09865707		878.62	0.00020792		1408.62	-0.00621491		1938.61	0.00370227
348.83	0.09913546		878.82	0.00021804		1408.82	-0.00514924		1938.81	0.0040589
349.03	0.09921529		879.02	0.00038428		1409.02	-0.00433284		1939.01	0.00339092
349.23	0.09937		879.22	0.00142813		1409.22	-0.00368952		1939.21	0.00312479
349.43	0.10018185		879.42	0.00148995		1409.42	-0.00313392		1939.41	0.00382513
349.63	0.09978426		879.62	0.00202374		1409.62	-0.00449712		1939.61	0.00413677
349.83	0.10053803		879.82	0.00319669		1409.82	-0.00396011		1939.81	0.0037834
350.03	0.09996862		880.02	0.00340015		1410.02	-0.00357907		1940.01	0.00363461
350.23	0.10039733		880.22	0.00340437		1410.22	-0.00405308		1940.21	0.003654
350.43	0.10028304		880.42	0.0039162		1410.42	-0.0042699		1940.41	0.00424682
350.63	0.10081954		880.62	0.00282597		1410.62	-0.0044158		1940.61	0.00441659
350.83	0.10054939		880.82	0.00295984		1410.82	-0.00434821		1940.81	0.00440461
351.03	0.10065879		881.02	0.00248447		1411.02	-0.0040357		1941.01	0.00424098
351.23	0.10152165		881.22	0.00270493		1411.22	-0.00415855		1941.21	0.00514564
351.43	0.10159566		881.42	0.00251355		1411.42	-0.00327436		1941.41	0.00510499
351.63	0.10152138		881.62	0.00230592		1411.62	-0.00283315		1941.61	0.00490473
351.83	0.10156476		881.82	0.00251056		1411.82	-0.00364492		1941.81	0.00429771
352.03	0.10225048		882.02	0.00181116		1412.02	-0.0038398		1942.01	0.00383314
352.23	0.10121562		882.22	0.00126227		1412.22	-0.00292434		1942.21	0.00348904
352.43	0.10104965		882.42	0.0022201		1412.42	-0.00378045		1942.41	0.00312249
352.63	0.09980589		882.62	0.00221732		1412.62	-0.00440049		1942.61	0.00364623
352.83	0.09949086		882.82	0.0016879		1412.82	-0.00416259		1942.81	0.00380179
353.03	0.10011008		883.02	0.00135556		1413.02	-0.00480864		1943.01	0.0042652
353.23	0.09999416		883.22	0.00096611		1413.22	-0.00568151		1943.21	0.00490243
353.43	0.10022834		883.42	0.0006773		1413.42	-0.00662663		1943.41	0.00493202
353.63	0.09971176		883.62	0.00074117		1413.62	-0.00803756		1943.61	0.00461155
353.83	0.10049885		883.82	0.00091095		1413.82	-0.00833038		1943.81	0.00440147
354.03	0.10025434		884.02	-0.00019021		1414.02	-0.00866975		1944.01	0.00470331
354.23	0.1012828		884.22	-0.00050757		1414.22	-0.00938332		1944.21	0.00407926
354.43	0.10160366		884.42	-0.00057483		1414.42	-0.00985992		1944.41	0.00413155
354.63	0.10204237		884.62	-0.00131807		1414.62	-0.00978272		1944.61	0.00459292
354.83	0.10209987		884.82	-0.00038263		1414.82	-0.00941075		1944.81	0.00392157
355.03	0.10239964		885.02	0.0002063		1415.02	-0.00822146		1945.01	0.00370132
355.23	0.1026506		885.22	0.00077726		1415.22	-0.00715188		1945.21	0.00334623
355.43	0.10243019		885.42	0.00112049		1415.42	-0.00638669		1945.41	0.00286453
355.63	0.10197068		885.62	0.00095159		1415.62	-0.00567603		1945.61	0.00298645
355.83	0.10300917		885.82	0.00211258		1415.82	-0.00534355		1945.81	0.00362275
356.03	0.10331208		886.02	0.00307518		1416.02	-0.00458088		1946.01	0.00419033
356.23	0.10253797		886.22	0.00383998		1416.22	-0.00394411		1946.21	0.00398658
356.43	0.10257501		886.42	0.00499629		1416.42	-0.00418935		1946.41	0.00346647
356.63	0.10279536		886.62	0.00518476		1416.62	-0.00416092		1946.61	0.00370236
356.83	0.10356261		886.82	0.00493719		1416.82	-0.0042459		1946.81	0.00466309
357.03	0.1046757		887.02	0.00478678		1417.02	-0.00458269		1947.01	0.00499628
357.23	0.10456076		887.22	0.0045262		1417.22	-0.0043965		1947.21	0.00536837
357.43	0.10502764		887.42	0.00518149		1417.42	-0.00492361		1947.41	0.00424382
357.63	0.10598829		887.62	0.00469107		1417.62	-0.00510414		1947.61	0.00432928
357.83	0.10642815		887.82	0.00451779		1417.82	-0.00532726		1947.81	0.00479372
358.03	0.10622383		888.02	0.00361825		1418.02	-0.00562532		1948.01	0.00391615
358.23	0.10691084		888.22	0.00378412		1418.22	-0.00532151		1948.21	0.00328305
358.43	0.1062079		888.42	0.00297595		1418.42	-0.00568032		1948.41	0.00331081
358.63	0.10594472		888.62	0.00327044		1418.62	-0.00591278		1948.61	0.00266095
358.83	0.10572899		888.82	0.00375943		1418.82	-0.00550376		1948.81	0.0023861
359.03	0.10466613		889.02	0.00370396		1419.02	-0.0058255		1949.01	0.00252198
359.23	0.10475823		889.22	0.00348897		1419.22	-0.00560966		1949.21	0.00203314
359.43	0.10481187		889.42	0.00332969		1419.42	-0.00507872		1949.41	0.00187717
359.63	0.1051434		889.62	0.00257598		1419.62	-0.00463804		1949.61	0.00211754
359.83	0.10518365		889.82	0.00303995		1419.82	-0.00449568		1949.81	0.00247135
360.03	0.10363245		890.02	0.00339341		1420.02	-0.00404482		1950.01	0.00162906
360.23	0.10351392		890.22	0.00162955		1420.22	-0.00418535		1950.21	0.00122573
360.43	0.10333776		890.42	0.00133062		1420.42	-0.00424722		1950.41	0.00063336
360.63	0.10329073		890.62	0.00083501		1420.62	-0.00453337		1950.61	0.00091
360.83	0.10371806		890.82	0.00037564		1420.82	-0.00500055		1950.81	0.00217987
361.03	0.10374281		891.02	-0.00065596		1421.02	-0.00535061		1951.01	0.00186292
361.23	0.10342601		891.22	-0.00077412		1421.22	-0.00571046		1951.21	0.00203762
361.43	0.10345408		891.42	-0.00061684		1421.42	-0.00610428		1951.41	0.00197281
361.63	0.10358072		891.62	-0.00079981		1421.62	-0.00558549		1951.61	0.0030731
361.83	0.10373505		891.82	-0.00075227		1421.82	-0.00469241		1951.81	0.00353967
362.03	0.10325118		892.02	-0.0017537		1422.02	-0.00436494		1952.01	0.00352418
362.23	0.10352125		892.22	-0.00164645		1422.22	-0.00405083		1952.21	0.0042763
362.43	0.10235728		892.42	-0.001222		1422.42	-0.00451251		1952.41	0.00441104
362.63	0.10332968		892.62	0.00008745		1422.62	-0.00523661		1952.61	0.00431112
362.83	0.10471432		892.82	-0.0000722		1422.82	-0.0051427		1952.81	0.00426053
363.03	0.10471379		893.02	0.00014259		1423.02	-0.00533531		1953.01	0.00423744
363.23	0.105244		893.22	0.00100317		1423.22	-0.00496525		1953.21	0.00409742
363.43	0.10488805		893.42	0.0013167		1423.42	-0.00454919		1953.41	0.00454982
363.63	0.10473755		893.62	0.00131471		1423.62	-0.00516673		1953.61	0.00539305
363.83	0.10437147		893.82	0.00202497		1423.82	-0.00515283		1953.81	0.00450483
364.03	0.10377139		894.02	0.00257882		1424.02	-0.00525418		1954.01	0.00351827
364.23	0.10432513		894.22	0.00153211		1424.22	-0.00542588		1954.21	0.00338601
364.43	0.10461461		894.42	0.00162953		1424.42	-0.00555752		1954.41	0.00303426
364.63	0.10553847		894.62	0.0019998		1424.62	-0.005303		1954.61	0.00311251
364.83	0.1064768		894.82	0.00187041		1424.82	-0.00583048		1954.81	0.00326242
365.03	0.10705679		895.02	0.00208042		1425.02	-0.00676644		1955.01	0.0025288
365.23	0.10700262		895.22	0.00219598		1425.22	-0.00672517		1955.21	0.00235114
365.43	0.10812631		895.42	0.00248501		1425.42	-0.00641136		1955.41	0.00255408
365.63	0.10852215		895.62	0.00213504		1425.62	-0.0068522		1955.61	0.00296198
365.83	0.10920196		895.82	0.00176509		1425.82	-0.00556542		1955.81	0.00196197
366.03	0.10917578		896.02	0.00105849		1426.02	-0.00655582		1956.01	0.00252527
366.23	0.10950034		896.22	0.00137343		1426.22	-0.00668582		1956.21	0.0023295
366.43	0.1092481		896.42	0.0015722		1426.42	-0.00686979		1956.41	0.00276695
366.63	0.11043653		896.62	0.00125268		1426.62	-0.00733851		1956.61	0.00301765
366.83	0.11045064		896.82	0.00161716		1426.82	-0.00664891		1956.81	0.00350074
367.03	0.10920444		897.02	0.00222401		1427.02	-0.00694385		1957.01	0.00483505
367.23	0.10875885		897.22	0.00314487		1427.22	-0.00640376		1957.21	0.0054869
367.43	0.10845769		897.42	0.00349543		1427.42	-0.00578061		1957.41	0.00618402
367.63	0.10799934		897.62	0.00389303		1427.62	-0.00582376		1957.61	0.00621758
367.83	0.10819568		897.82	0.0038395		1427.82	-0.0048128		1957.81	0.00549531
368.03	0.10803288		898.02	0.00330021		1428.02	-0.00427609		1958.01	0.00538159
368.23	0.10848946		898.22	0.00330229		1428.22	-0.00364518		1958.21	0.00529764
368.43	0.10963897		898.42	0.00202176		1428.42	-0.00361443		1958.41	0.00508483
368.63	0.11013942		898.62	0.00260388		1428.62	-0.00315878		1958.61	0.00489856
368.83	0.11057598		898.82	0.00227742		1428.82	-0.00368065		1958.81	0.0044762
369.03	0.11077946		899.02	0.00309044		1429.02	-0.00393932		1959.01	0.00377886
369.23	0.10997111		899.22	0.00320873		1429.22	-0.00383233		1959.21	0.00325214
369.43	0.11061642		899.42	0.00371468		1429.42	-0.00411194		1959.41	0.00263331
369.63	0.10994493		899.62	0.00356131		1429.62	-0.00422542		1959.61	0.00165043
369.83	0.11012123		899.82	0.0038391		1429.82	-0.00443845		1959.81	0.00098388
370.03	0.11008019		900.02	0.0042691		1430.02	-0.00574252		1960.01	0.00173927
370.23	0.10967348		900.22	0.00446771		1430.22	-0.00576946		1960.21	0.00179822
370.43	0.10873743		900.42	0.00509035		1430.42	-0.00600811		1960.41	0.00275952
370.63	0.10817305		900.62	0.0055087		1430.62	-0.00637294		1960.61	0.00179606
370.83	0.10877785		900.82	0.00572681		1430.82	-0.00707585		1960.81	0.00238727
371.03	0.10853306		901.02	0.00641249		1431.02	-0.00779136		1961.01	0.00243608
371.23	0.1088477		901.22	0.00682944		1431.22	-0.00739391		1961.21	0.00280507
371.43	0.10918486		901.42	0.00714642		1431.42	-0.00722817		1961.41	0.00344941
371.63	0.11000038		901.62	0.00615225		1431.62	-0.00726091		1961.61	0.00388922
371.83	0.11018301		901.82	0.00508106		1431.82	-0.00708863		1961.81	0.00426646
372.03	0.11053022		902.02	0.00434774		1432.02	-0.00684531		1962.01	0.00400441
372.23	0.11113471		902.22	0.00417824		1432.22	-0.00630251		1962.21	0.00371063
372.43	0.11135446		902.42	0.0027416		1432.42	-0.00638531		1962.41	0.00414224
372.63	0.11150965		902.62	0.00314802		1432.62	-0.00609629		1962.61	0.00499403
372.83	0.11216781		902.82	0.00238994		1432.82	-0.00582524		1962.81	0.00475415
373.03	0.11170854		903.02	0.00255791		1433.02	-0.00579333		1963.01	0.0048133
373.23	0.11091916		903.22	0.00293652		1433.22	-0.00521477		1963.21	0.004487
373.43	0.11160341		903.42	0.00230906		1433.42	-0.00497129		1963.41	0.00473361
373.63	0.11104118		903.62	0.00199879		1433.62	-0.00449904		1963.61	0.00445324
373.83	0.11175918		903.82	0.00159627		1433.82	-0.00480407		1963.81	0.0048803
374.03	0.1111063		904.02	0.00211001		1434.02	-0.00462861		1964.01	0.00375038
374.23	0.11150039		904.22	0.00124553		1434.22	-0.00421991		1964.21	0.00359631
374.43	0.11090089		904.42	0.00143797		1434.42	-0.00417032		1964.41	0.00319187
374.63	0.11126443		904.62	0.00157047		1434.62	-0.00474327		1964.61	0.0017548
374.83	0.11213238		904.82	0.0015525		1434.82	-0.00466586		1964.81	0.00272184
375.03	0.11197019		905.02	0.00194709		1435.02	-0.00436314		1965.01	0.00326044
375.23	0.11263278		905.22	0.00207947		1435.22	-0.00489777		1965.21	0.00478567
375.43	0.1122308		905.42	0.002109		1435.42	-0.00495685		1965.41	0.00502329
375.63	0.11198225		905.62	0.00216649		1435.62	-0.00451552		1965.61	0.00390718
375.83	0.11126408		905.82	0.00171187		1435.82	-0.00355165		1965.81	0.00329755
376.03	0.11144411		906.02	0.0017838		1436.02	-0.00377047		1966.01	0.00205452
376.23	0.1110037		906.22	0.00136537		1436.22	-0.00358093		1966.21	0.00198453
376.43	0.11023576		906.42	0.001367		1436.42	-0.00403147		1966.41	0.00251034
376.63	0.1111621		906.62	0.0015653		1436.62	-0.00408172		1966.61	0.002471
376.83	0.11097811		906.82	0.00104161		1436.82	-0.00364255		1966.81	0.00233437
377.03	0.11100306		907.02	0.00147666		1437.02	-0.00352497		1967.01	0.00280817
377.23	0.11155083		907.22	0.00194146		1437.22	-0.00328414		1967.21	0.00201776
377.43	0.11204467		907.42	0.00154626		1437.42	-0.0036815		1967.41	0.00251722
377.63	0.1123575		907.62	0.00118978		1437.62	-0.00390417		1967.61	0.00210084
377.83	0.11284025		907.82	0.00068007		1437.82	-0.00444268		1967.81	0.00140844
378.03	0.11252783		908.02	0.00062594		1438.02	-0.00497445		1968.01	0.00061774
378.23	0.11345639		908.22	0.00011753		1438.22	-0.00557496		1968.21	0.00114276
378.43	0.11332098		908.42	0.00057974		1438.42	-0.0063447		1968.41	0.00125983
378.63	0.1138373		908.62	0.00074447		1438.62	-0.00746333		1968.61	0.00174316
378.83	0.11456423		908.82	0.00069437		1438.82	-0.0083157		1968.81	0.00313247
379.03	0.11495596		909.02	0.00099619		1439.02	-0.00970196		1969.01	0.00398799
379.23	0.11517762		909.22	0.00163012		1439.22	-0.01110151		1969.21	0.00458212
379.43	0.11466958		909.42	0.00226365		1439.42	-0.01159351		1969.41	0.00407971
379.63	0.11519359		909.62	0.00282194		1439.62	-0.01205845		1969.61	0.00370628
379.83	0.11558544		909.82	0.00242705		1439.82	-0.01284247		1969.81	0.00448278
380.02	0.11558544		910.02	0.00242705		1440.02	-0.01284247		1970.01	0.00448278
380.22	0.116412		910.22	0.00308389		1440.22	-0.01235065		1970.21	0.00383402
380.42	0.11677114		910.42	0.00372896		1440.42	-0.01185258		1970.41	0.00357069
380.62	0.11658186		910.62	0.00388084		1440.62	-0.01154724		1970.61	0.00309167
380.82	0.11677685		910.82	0.00487685		1440.82	-0.01069718		1970.81	0.00325498
381.02	0.11712309		911.02	0.00611215		1441.02	-0.00995391		1971.01	0.00336624
381.22	0.11665306		911.22	0.00652861		1441.22	-0.00987503		1971.21	0.00396332
381.42	0.11700128		911.42	0.00671954		1441.42	-0.00971729		1971.41	0.00406566
381.62	0.11676941		911.62	0.00648311		1441.62	-0.00907668		1971.61	0.00355507
381.82	0.11634625		911.82	0.00654679		1441.82	-0.00899127		1971.81	0.00383361
382.02	0.11612581		912.02	0.00619296		1442.02	-0.0097755		1972.01	0.00407517
382.22	0.11496467		912.22	0.00603667		1442.22	-0.00994383		1972.21	0.00474666
382.42	0.11487538		912.42	0.0052019		1442.42	-0.00993628		1972.41	0.00529199
382.62	0.11568139		912.62	0.00482422		1442.62	-0.01090368		1972.61	0.00536047
382.82	0.11565237		912.82	0.00410979		1442.82	-0.01095255		1972.81	0.00568193
383.02	0.11687239		913.02	0.00303463		1443.02	-0.01052992		1973.01	0.00567113
383.22	0.11679053		913.22	0.00160321		1443.22	-0.01124092		1973.21	0.00597165
383.42	0.11636687		913.42	0.00175809		1443.42	-0.01201424		1973.41	0.00532299
383.62	0.11660003		913.62	0.00140036		1443.62	-0.0116595		1973.61	0.00519538
383.82	0.11699869		913.82	0.00182578		1443.82	-0.01230672		1973.81	0.00510338
384.02	0.11716483		914.02	0.00175096		1444.02	-0.01264105		1974.01	0.00456243
384.22	0.11782565		914.22	0.00328829		1444.22	-0.01216752		1974.21	0.00361044
384.42	0.11734207		914.42	0.00366666		1444.42	-0.01181291		1974.41	0.00315057
384.62	0.11696446		914.62	0.00405311		1444.62	-0.01111144		1974.61	0.0025086
384.82	0.1176782		914.82	0.00497886		1444.82	-0.01099088		1974.81	0.00291181
385.02	0.11824337		915.02	0.00618565		1445.02	-0.01099521		1975.01	0.00333585
385.22	0.1186306		915.22	0.00568361		1445.22	-0.01174893		1975.21	0.00401678
385.42	0.11964341		915.42	0.00618231		1445.42	-0.01170571		1975.41	0.00281286
385.62	0.11974782		915.62	0.00671321		1445.62	-0.01201507		1975.61	0.00271622
385.82	0.11999266		915.82	0.00709349		1445.82	-0.01284543		1975.81	0.0040242
386.02	0.12047855		916.02	0.00668329		1446.02	-0.01363701		1976.01	0.00476852
386.22	0.12035264		916.22	0.006237		1446.22	-0.01316914		1976.21	0.00567626
386.42	0.11996255		916.42	0.00540106		1446.42	-0.01405119		1976.41	0.00568842
386.62	0.12049759		916.62	0.0051566		1446.62	-0.01493774		1976.61	0.00557944
386.82	0.11933975		916.82	0.00479787		1446.82	-0.01426117		1976.81	0.00482036
387.02	0.11884529		917.02	0.00413289		1447.02	-0.01462505		1977.01	0.00476643
387.22	0.11785093		917.22	0.00417828		1447.22	-0.01525158		1977.21	0.00522518
387.42	0.11676612		917.42	0.00451899		1447.42	-0.01500658		1977.41	0.00436108
387.62	0.1165377		917.62	0.00409841		1447.62	-0.01383387		1977.61	0.00354487
387.82	0.11616975		917.82	0.00425972		1447.82	-0.0128196		1977.81	0.00361239
388.02	0.11557666		918.02	0.00495938		1448.02	-0.01192889		1978.01	0.00285694
388.22	0.11500162		918.22	0.00552076		1448.22	-0.01018079		1978.21	0.00216989
388.42	0.11410485		918.42	0.0053721		1448.42	-0.00920274		1978.41	0.00125082
388.62	0.11404221		918.62	0.00525642		1448.62	-0.00817037		1978.61	0.00126895
388.82	0.11422385		918.82	0.00508198		1448.82	-0.00810105		1978.81	0.00109756
389.02	0.11425247		919.02	0.00592636		1449.02	-0.0074424		1979.01	0.00163768
389.22	0.1141762		919.22	0.00585573		1449.22	-0.00771439		1979.21	0.00082307
389.42	0.11470059		919.42	0.00718163		1449.42	-0.00797685		1979.41	0.00058714
389.62	0.11437568		919.62	0.00794693		1449.62	-0.00801735		1979.61	0.00150897
389.82	0.11555409		919.82	0.0070849		1449.82	-0.007833		1979.81	0.00201437
390.02	0.11582524		920.02	0.00608611		1450.02	-0.00840179		1980.01	0.00183372
390.22	0.11549311		920.22	0.00498775		1450.22	-0.00933004		1980.21	0.00210882
390.42	0.1152255		920.42	0.0042948		1450.42	-0.01073098		1980.41	0.00225944
390.62	0.11544956		920.62	0.00354783		1450.62	-0.011422		1980.61	0.00207332
390.82	0.11572904		920.82	0.00295553		1450.82	-0.01158019		1980.81	0.00241912
391.02	0.11625678		921.02	0.00175389		1451.02	-0.01251915		1981.01	0.00313176
391.22	0.11664502		921.22	0.00211079		1451.22	-0.0136784		1981.21	0.00355385
391.42	0.11662187		921.42	0.0023553		1451.42	-0.01359854		1981.41	0.00343597
391.62	0.11707559		921.62	0.0021416		1451.62	-0.01355386		1981.61	0.00298451
391.82	0.1173333		921.82	0.00196053		1451.82	-0.01355129		1981.81	0.00313096
392.02	0.11714325		922.02	0.00260832		1452.02	-0.01320253		1982.01	0.00226053
392.22	0.11663466		922.22	0.00229821		1452.22	-0.01253997		1982.21	0.0020167
392.42	0.11636311		922.42	0.0018864		1452.42	-0.01267092		1982.41	0.00166343
392.62	0.11612216		922.62	0.00074153		1452.62	-0.01225212		1982.61	0.00176047
392.82	0.11541554		922.82	0.00036126		1452.82	-0.01257771		1982.81	0.00076484
393.02	0.11565237		923.02	0.00120811		1453.02	-0.0124942		1983.01	0.00121085
393.22	0.11554786		923.22	0.0016804		1453.22	-0.01261336		1983.21	0.00119081
393.42	0.1150878		923.42	0.00258099		1453.42	-0.01340536		1983.41	0.00168516
393.62	0.11414262		923.62	0.00300664		1453.62	-0.01304147		1983.61	0.0016319
393.82	0.1147703		923.82	0.00248711		1453.82	-0.0134965		1983.81	0.00201258
394.02	0.11396279		924.02	0.00237939		1454.02	-0.01453418		1984.01	0.00165202
394.22	0.11333552		924.22	0.00182861		1454.22	-0.01562402		1984.21	0.00196533
394.42	0.11356631		924.42	0.00186147		1454.42	-0.01633123		1984.41	0.0020086
394.62	0.11319942		924.62	0.00185239		1454.62	-0.01689581		1984.61	0.00161698
394.82	0.11406662		924.82	0.00145204		1454.82	-0.01670304		1984.81	0.00240512
395.02	0.11417284		925.02	0.00116004		1455.02	-0.01676434		1985.01	0.00224194
395.22	0.11349417		925.22	0.00216184		1455.22	-0.01733601		1985.21	0.00232796
395.42	0.11370908		925.42	0.00296932		1455.42	-0.01699597		1985.41	0.00227082
395.62	0.11387334		925.62	0.00301357		1455.62	-0.01686619		1985.61	0.00216795
395.82	0.11461477		925.82	0.00352068		1455.82	-0.01524214		1985.81	0.00230365
396.02	0.11478371		926.02	0.00381517		1456.02	-0.01443099		1986.01	0.00201392
396.22	0.11511851		926.22	0.00373545		1456.22	-0.01371693		1986.21	0.00309492
396.42	0.11486276		926.42	0.00273537		1456.42	-0.01312831		1986.41	0.00349068
396.62	0.1151457		926.62	0.00266175		1456.62	-0.0117567		1986.61	0.00385619
396.82	0.11531075		926.82	0.0027493		1456.82	-0.01170601		1986.81	0.00351757
397.02	0.11559899		927.02	0.00391831		1457.02	-0.01159771		1987.01	0.00492988
397.22	0.11595401		927.22	0.00394724		1457.22	-0.01218495		1987.21	0.0054071
397.42	0.11570663		927.42	0.00461402		1457.42	-0.01323533		1987.41	0.00535548
397.62	0.11597648		927.62	0.0042965		1457.62	-0.01257341		1987.61	0.00491564
397.82	0.11618048		927.82	0.00374899		1457.82	-0.01314551		1987.81	0.00487616
398.02	0.1168561		928.02	0.00352756		1458.02	-0.01332806		1988.01	0.00430261
398.22	0.11756026		928.22	0.00252091		1458.22	-0.0140357		1988.21	0.00476915
398.42	0.11766364		928.42	0.00212781		1458.42	-0.01422049		1988.41	0.00469258
398.62	0.11851641		928.62	0.00202357		1458.62	-0.0142031		1988.61	0.00412929
398.82	0.11848266		928.82	0.00194393		1458.82	-0.01337719		1988.81	0.00324463
399.02	0.11818952		929.02	0.00160113		1459.02	-0.01236911		1989.01	0.00275043
399.22	0.11782733		929.22	0.00296842		1459.22	-0.01205466		1989.21	0.00246139
399.42	0.11816769		929.42	0.00362615		1459.42	-0.01111327		1989.41	0.00229999
399.62	0.11898393		929.62	0.00369975		1459.62	-0.01000079		1989.61	0.00274371
399.82	0.12016917		929.82	0.00468758		1459.82	-0.0090307		1989.81	0.00272943
400.02	0.11892613		930.02	0.00535853		1460.02	-0.00953788		1990.01	0.0026624
400.22	0.1182778		930.22	0.00576338		1460.22	-0.00905347		1990.21	0.00327009
400.42	0.11654386		930.42	0.00601991		1460.42	-0.0093072		1990.41	0.00293297
400.62	0.11642609		930.62	0.00664478		1460.62	-0.00868469		1990.61	0.00237375
400.82	0.11497055		930.82	0.00631702		1460.82	-0.00964813		1990.81	0.0019921
401.02	0.11384165		931.02	0.00666465		1461.02	-0.01054123		1991.01	0.00203777
401.22	0.11392199		931.22	0.00670069		1461.22	-0.01172395		1991.21	0.00176413
401.42	0.11349006		931.42	0.00583091		1461.42	-0.01272711		1991.41	0.00199306
401.62	0.11364326		931.62	0.00466742		1461.62	-0.01312605		1991.61	0.00211372
401.82	0.11470601		931.82	0.00492187		1461.82	-0.01473562		1991.81	0.00259236
402.02	0.11552384		932.02	0.00457647		1462.02	-0.01551434		1992.01	0.0035557
402.22	0.11531644		932.22	0.00419518		1462.22	-0.01656975		1992.21	0.00479569
402.42	0.11505909		932.42	0.00501919		1462.42	-0.01621655		1992.41	0.00491111
402.62	0.11523508		932.62	0.00502291		1462.62	-0.016181		1992.61	0.00479129
402.82	0.114531		932.82	0.00547919		1462.82	-0.01506823		1992.81	0.00388092
403.02	0.11522736		933.02	0.00451741		1463.02	-0.0139056		1993.01	0.0046193
403.22	0.11566062		933.22	0.00563054		1463.22	-0.01328025		1993.21	0.00481669
403.42	0.11636047		933.42	0.00496523		1463.42	-0.01243166		1993.41	0.00488159
403.62	0.1166952		933.62	0.00459497		1463.62	-0.01102167		1993.61	0.00380377
403.82	0.11697111		933.82	0.00501742		1463.82	-0.01034866		1993.81	0.00271805
404.02	0.11600443		934.02	0.00512948		1464.02	-0.01022885		1994.01	0.00105931
404.22	0.11614244		934.22	0.00596343		1464.22	-0.00976129		1994.21	0.00033001
404.42	0.11481547		934.42	0.0054777		1464.42	-0.00984837		1994.41	-0.00048551
404.62	0.1148122		934.62	0.00450516		1464.62	-0.0094505		1994.61	-0.00083584
404.82	0.11363728		934.82	0.00447072		1464.82	-0.00962423		1994.81	-0.00118479
405.02	0.11369438		935.02	0.00416055		1465.02	-0.01098674		1995.01	-0.00094028
405.22	0.1144265		935.22	0.00389642		1465.22	-0.01178769		1995.21	-0.00072909
405.42	0.11570502		935.42	0.00254999		1465.42	-0.01280426		1995.41	-0.00053311
405.62	0.11677222		935.62	0.00306205		1465.62	-0.01373452		1995.61	0.0002077
405.82	0.11756553		935.82	0.00269804		1465.82	-0.01456132		1995.81	0.00101282
406.02	0.1167386		936.02	0.00209213		1466.02	-0.01484945		1996.01	0.00270527
406.22	0.1170056		936.22	0.00241612		1466.22	-0.01573337		1996.21	0.00350823
406.42	0.11654558		936.42	0.00233541		1466.42	-0.01553447		1996.41	0.00315166
406.62	0.11673097		936.62	0.00155003		1466.62	-0.01618798		1996.61	0.00339865
406.82	0.11736873		936.82	0.00169032		1466.82	-0.01621271		1996.81	0.00395399
407.02	0.11712669		937.02	0.00165237		1467.02	-0.01565888		1997.01	0.00437213
407.22	0.11682156		937.22	0.00259705		1467.22	-0.01502408		1997.21	0.00378796
407.42	0.11728164		937.42	0.00218573		1467.42	-0.01385135		1997.41	0.00261723
407.62	0.1166724		937.62	0.00226192		1467.62	-0.0121618		1997.61	0.00124957
407.82	0.11675736		937.82	0.00293356		1467.82	-0.0123023		1997.81	0.00086114
408.02	0.11649077		938.02	0.00286951		1468.02	-0.01198461		1998.01	0.00021507
408.22	0.11666525		938.22	0.00354297		1468.22	-0.01258077		1998.21	0.00035781
408.42	0.11587297		938.42	0.00339284		1468.42	-0.0130754		1998.41	0.00046063
408.62	0.11565717		938.62	0.00396239		1468.62	-0.01261189		1998.61	0.00059713
408.82	0.11503013		938.82	0.00424184		1468.82	-0.01261864		1998.81	0.00087643
409.02	0.11466104		939.02	0.00393928		1469.02	-0.01394397		1999.01	0.00099905
409.22	0.11487877		939.22	0.00446869		1469.22	-0.014561		1999.21	0.00068092
409.42	0.1152623		939.42	0.00511323		1469.42	-0.01581623		1999.41	0.00114065
409.62	0.11526206		939.62	0.00634133		1469.62	-0.01554362		1999.61	0.00238363
409.82	0.11540234		939.82	0.00556763		1469.82	-0.01572945		1999.81	0.0027181
410.02	0.11416808		940.02	0.00556207		1470.02	-0.01579152		2000.01	0.00284543
410.22	0.11450663		940.22	0.00568969		1470.22	-0.01631416		2000.21	0.00237094
410.42	0.11389341		940.42	0.00579404		1470.42	-0.01600499		2000.41	0.00240109
410.62	0.11484123		940.62	0.00579434		1470.62	-0.0155533		2000.61	0.00270575
410.82	0.11532158		940.82	0.00573128		1470.82	-0.01448314		2000.81	0.00292403
411.02	0.1146082		941.02	0.00604435		1471.02	-0.01355222		2001.01	0.00218211
411.22	0.1145231		941.22	0.00598082		1471.22	-0.01283002		2001.21	0.00170295
411.42	0.11552302		941.42	0.00509793		1471.42	-0.01204578		2001.41	0.00212216
411.62	0.11483745		941.62	0.00503765		1471.62	-0.01146713		2001.61	0.0021522
411.82	0.11565082		941.82	0.00506816		1471.82	-0.01241782		2001.81	0.00298859
412.02	0.11602697		942.02	0.00420099		1472.02	-0.01174236		2002.01	0.00236659
412.22	0.11600796		942.22	0.00451527		1472.22	-0.01341949		2002.21	0.00253077
412.42	0.1149345		942.42	0.00478837		1472.42	-0.01344009		2002.41	0.00282492
412.62	0.11398301		942.62	0.00427451		1472.62	-0.0138139		2002.61	0.00292092
412.82	0.1138086		942.82	0.00400219		1472.82	-0.01558853		2002.81	0.00297839
413.02	0.11323804		943.02	0.00440328		1473.02	-0.01661485		2003.01	0.0028734
413.22	0.11305241		943.22	0.00470215		1473.22	-0.017018		2003.21	0.00267492
413.42	0.11242364		943.42	0.00505628		1473.42	-0.01698942		2003.41	0.00358786
413.62	0.11311186		943.62	0.00518608		1473.62	-0.01678946		2003.61	0.00424251
413.82	0.1127539		943.82	0.00453278		1473.82	-0.01684294		2003.81	0.00402319
414.02	0.11280741		944.02	0.00413914		1474.02	-0.01656373		2004.01	0.00413197
414.22	0.11369431		944.22	0.0041529		1474.22	-0.01683044		2004.21	0.00393843
414.42	0.11346347		944.42	0.00414711		1474.42	-0.01588706		2004.41	0.0040457
414.62	0.11412283		944.62	0.00375368		1474.62	-0.01498988		2004.61	0.00351696
414.82	0.11465646		944.82	0.00414644		1474.82	-0.01431387		2004.81	0.00350115
415.02	0.11379403		945.02	0.00434746		1475.02	-0.01416758		2005.01	0.00322225
415.22	0.1145521		945.22	0.00392689		1475.22	-0.01427097		2005.21	0.00287273
415.42	0.11580992		945.42	0.00362797		1475.42	-0.01411523		2005.41	0.00329584
415.62	0.115102		945.62	0.00400152		1475.62	-0.01477401		2005.61	0.00221618
415.82	0.1154549		945.82	0.0036655		1475.82	-0.01473178		2005.81	0.00223602
416.02	0.11513065		946.02	0.00291651		1476.02	-0.01449019		2006.01	0.00163763
416.22	0.11493967		946.22	0.00282237		1476.22	-0.01495886		2006.21	0.00196271
416.42	0.1143669		946.42	0.0028513		1476.42	-0.01485697		2006.41	0.00172924
416.62	0.11452724		946.62	0.00241141		1476.62	-0.01531573		2006.61	0.00200406
416.82	0.11424568		946.82	0.00242604		1476.82	-0.01617308		2006.81	0.00167458
417.02	0.11383241		947.02	0.00214871		1477.02	-0.01585643		2007.01	0.00253405
417.22	0.11298101		947.22	0.00254609		1477.22	-0.01591601		2007.21	0.00223143
417.42	0.11287014		947.42	0.00279389		1477.42	-0.01559041		2007.41	0.00301136
417.62	0.11382939		947.62	0.0031337		1477.62	-0.01511269		2007.61	0.00315392
417.82	0.11294216		947.82	0.00307589		1477.82	-0.01468012		2007.81	0.00259852
418.02	0.11264011		948.02	0.00312403		1478.02	-0.01458303		2008.01	0.00319621
418.22	0.11178843		948.22	0.00342432		1478.22	-0.01512058		2008.21	0.00269644
418.42	0.11092435		948.42	0.00380701		1478.42	-0.01439143		2008.41	0.00249673
418.62	0.11072445		948.62	0.00422254		1478.62	-0.01430612		2008.61	0.00244535
418.82	0.1109144		948.82	0.00533112		1478.82	-0.01371334		2008.81	0.00185967
419.02	0.10998017		949.02	0.00525383		1479.02	-0.01409716		2009.01	0.00163222
419.22	0.11108073		949.22	0.00528369		1479.22	-0.01417432		2009.21	0.00156985
419.42	0.11154253		949.42	0.00556615		1479.42	-0.01428923		2009.41	0.00166371
419.62	0.11118075		949.62	0.00565451		1479.62	-0.01499875		2009.61	0.0011914
419.82	0.11186076		949.82	0.00606974		1479.82	-0.01415796		2009.81	0.00247783
420.02	0.11176332		950.02	0.00576407		1480.02	-0.01477333		2010.01	0.00256998
420.22	0.11241876		950.22	0.00643629		1480.22	-0.01421592		2010.21	0.00326539
420.42	0.11339158		950.42	0.00663372		1480.42	-0.01476912		2010.41	0.00406318
420.62	0.11388977		950.62	0.00623044		1480.62	-0.01544879		2010.61	0.00412576
420.82	0.11394472		950.82	0.00583689		1480.82	-0.01642412		2010.81	0.00391149
421.02	0.1139028		951.02	0.005815		1481.02	-0.01637267		2011.01	0.00416021
421.22	0.11376321		951.22	0.00617808		1481.22	-0.01605556		2011.21	0.00363655
421.42	0.11468774		951.42	0.0061467		1481.42	-0.01591073		2011.41	0.00324079
421.62	0.11477969		951.62	0.0056242		1481.62	-0.01604848		2011.61	0.0027304
421.82	0.11443786		951.82	0.00497868		1481.82	-0.0166387		2011.81	0.00242936
422.02	0.11420325		952.02	0.00460816		1482.02	-0.0173498		2012.01	0.00230328
422.22	0.1145883		952.22	0.00399998		1482.22	-0.01803223		2012.21	0.00125064
422.42	0.11480635		952.42	0.00373132		1482.42	-0.01749834		2012.41	0.00103144
422.62	0.11490962		952.62	0.00326185		1482.62	-0.01710015		2012.61	0.00064702
422.82	0.11532027		952.82	0.00274773		1482.82	-0.01752846		2012.81	0.00005828
423.02	0.11469997		953.02	0.00184535		1483.02	-0.01746783		2013.01	-0.00017092
423.22	0.11556423		953.22	0.00132172		1483.22	-0.01697268		2013.21	-0.00007657
423.42	0.11483553		953.42	0.00142198		1483.42	-0.01722886		2013.41	-0.00088193
423.62	0.11409705		953.62	0.00139712		1483.62	-0.01687338		2013.61	-0.00107394
423.82	0.11361669		953.82	0.00102311		1483.82	-0.01630557		2013.81	-0.00091256
424.02	0.11306421		954.02	0.00175131		1484.02	-0.01664209		2014.01	-0.00092541
424.22	0.1129108		954.22	0.00187359		1484.22	-0.01585893		2014.21	-0.00050387
424.42	0.11228506		954.42	0.00189325		1484.42	-0.01609789		2014.41	-0.00075621
424.62	0.11105222		954.62	0.00267154		1484.62	-0.0163502		2014.61	-0.00080578
424.82	0.11066947		954.82	0.00321861		1484.82	-0.01647411		2014.81	-0.00041278
425.02	0.11049172		955.02	0.00372013		1485.02	-0.01603704		2015.01	0.00081164
425.22	0.11090589		955.22	0.00421744		1485.22	-0.01530469		2015.21	0.00154149
425.42	0.11145677		955.42	0.00463563		1485.42	-0.01569829		2015.41	0.00070167
425.62	0.11251794		955.62	0.00484805		1485.62	-0.01569916		2015.61	0.00090574
425.82	0.11416943		955.82	0.0049686		1485.82	-0.01559658		2015.81	0.00107754
426.02	0.11462249		956.02	0.00469567		1486.02	-0.01575309		2016.01	0.00097571
426.22	0.11474394		956.22	0.00467392		1486.22	-0.01564461		2016.21	0.00153963
426.42	0.11550305		956.42	0.00483474		1486.42	-0.01562589		2016.41	0.00193327
426.62	0.11551533		956.62	0.0046896		1486.62	-0.01569098		2016.61	0.00252915
426.82	0.11490385		956.82	0.00490845		1486.82	-0.01500689		2016.81	0.00266239
427.02	0.11462684		957.02	0.00558241		1487.02	-0.01398828		2017.01	0.00198817
427.22	0.1147433		957.22	0.00554654		1487.22	-0.01365387		2017.21	0.00199218
427.42	0.11436464		957.42	0.00674763		1487.42	-0.01332996		2017.41	0.00072976
427.62	0.11418908		957.62	0.00599332		1487.62	-0.01239967		2017.61	0.00063759
427.82	0.1138992		957.82	0.00562284		1487.82	-0.01316173		2017.81	-0.00043033
428.02	0.11394067		958.02	0.00572317		1488.02	-0.01368413		2018.01	-0.00003026
428.22	0.11305351		958.22	0.00462065		1488.22	-0.01313555		2018.21	-0.00090666
428.42	0.11220328		958.42	0.00482129		1488.42	-0.01338945		2018.41	-0.00021316
428.62	0.11174336		958.62	0.00498502		1488.62	-0.01425545		2018.61	0.00139693
428.82	0.11147498		958.82	0.00385729		1488.82	-0.01465136		2018.81	0.00226675
429.02	0.11142496		959.02	0.0029003		1489.02	-0.0149417		2019.01	0.00344765
429.22	0.11173633		959.22	0.00237491		1489.22	-0.01609024		2019.21	0.00256631
429.42	0.11310344		959.42	0.00203006		1489.42	-0.01675531		2019.41	0.00165224
429.62	0.11371101		959.62	0.00199144		1489.62	-0.01658371		2019.61	0.00199753
429.82	0.11459269		959.82	0.00035646		1489.82	-0.01651061		2019.81	0.00165858
430.02	0.11425637		960.02	0.00063687		1490.02	-0.01738793		2020.01	0.00179096
430.22	0.1143835		960.22	0.00086793		1490.22	-0.01754769		2020.21	0.00218447
430.42	0.11492152		960.42	0.00183115		1490.42	-0.01751125		2020.41	0.00252871
430.62	0.11432832		960.62	0.00298915		1490.62	-0.01676056		2020.61	0.00312762
430.82	0.11431306		960.82	0.00368005		1490.82	-0.01613617		2020.81	0.00274467
431.02	0.114941		961.02	0.00418751		1491.02	-0.01571086		2021.01	0.00224829
431.22	0.11450899		961.22	0.00493039		1491.22	-0.01543482		2021.21	0.00214255
431.42	0.11445166		961.42	0.00626844		1491.42	-0.01461913		2021.41	0.00118189
431.62	0.11413632		961.62	0.00570643		1491.62	-0.01410482		2021.61	0.00100107
431.82	0.11469915		961.82	0.0053275		1491.82	-0.01485535		2021.81	0.00036172
432.02	0.11492805		962.02	0.00451424		1492.02	-0.01494915		2022.01	0.00117579
432.22	0.11418866		962.22	0.00418819		1492.22	-0.01498382		2022.21	-0.00007618
432.42	0.11343767		962.42	0.00393968		1492.42	-0.01546549		2022.41	0.00139127
432.62	0.11309219		962.62	0.00412734		1492.62	-0.01664808		2022.61	0.00220576
432.82	0.11291741		962.82	0.00386166		1492.82	-0.01688286		2022.81	0.00236586
433.02	0.11246051		963.02	0.00329719		1493.02	-0.01758257		2023.01	0.00240759
433.22	0.11318384		963.22	0.00334963		1493.22	-0.01885591		2023.21	0.00199007
433.42	0.11394021		963.42	0.00288912		1493.42	-0.0185979		2023.41	0.0019869
433.62	0.11371645		963.62	0.00299431		1493.62	-0.01861809		2023.61	0.00235514
433.82	0.11381112		963.82	0.00254236		1493.82	-0.01891699		2023.81	0.00165012
434.02	0.11383138		964.02	0.00319537		1494.02	-0.01922581		2024.01	0.00197658
434.22	0.11446004		964.22	0.00307438		1494.22	-0.01905038		2024.21	0.00220197
434.42	0.11441659		964.42	0.00302708		1494.42	-0.01878007		2024.41	0.00254262
434.62	0.11466616		964.62	0.00284426		1494.62	-0.01893648		2024.61	0.00263731
434.82	0.11495787		964.82	0.00241778		1494.82	-0.01874447		2024.81	0.00219757
435.02	0.11363824		965.02	0.00282579		1495.02	-0.01755163		2025.01	0.00228474
435.22	0.11316236		965.22	0.00345952		1495.22	-0.01731169		2025.21	0.00223771
435.42	0.11350882		965.42	0.00348844		1495.42	-0.0161967		2025.41	0.00209795
435.62	0.11255811		965.62	0.00353557		1495.62	-0.01594427		2025.61	0.00231228
435.82	0.11296153		965.82	0.00284888		1495.82	-0.01525228		2025.81	0.00137201
436.02	0.11274763		966.02	0.00293157		1496.02	-0.01553418		2026.01	0.00073939
436.22	0.11137064		966.22	0.00395528		1496.22	-0.01556319		2026.21	-0.00009708
436.42	0.11091184		966.42	0.00477276		1496.42	-0.01516853		2026.41	0.00146658
436.62	0.11119781		966.62	0.00568244		1496.62	-0.01591429		2026.61	0.00179262
436.82	0.11070487		966.82	0.00551142		1496.82	-0.01667586		2026.81	0.00267146
437.02	0.11056865		967.02	0.00473756		1497.02	-0.01719545		2027.01	0.00299272
437.22	0.11155863		967.22	0.00536379		1497.22	-0.0182949		2027.21	0.00346352
437.42	0.1120614		967.42	0.00525632		1497.42	-0.01817694		2027.41	0.00363882
437.62	0.1119018		967.62	0.00514939		1497.62	-0.01803033		2027.61	0.0049151
437.82	0.11188526		967.82	0.00532315		1497.82	-0.01797345		2027.81	0.00465215
438.02	0.11348659		968.02	0.00484906		1498.02	-0.01839925		2028.01	0.0048147
438.22	0.11402244		968.22	0.00449046		1498.22	-0.01866581		2028.21	0.00390771
438.42	0.11492945		968.42	0.00415826		1498.42	-0.01818764		2028.41	0.00390552
438.62	0.11569153		968.62	0.00392073		1498.62	-0.01786368		2028.61	0.0032443
438.82	0.11550505		968.82	0.00392084		1498.82	-0.01676791		2028.81	0.00316594
439.02	0.11518946		969.02	0.00430614		1499.02	-0.01660052		2029.01	0.00316508
439.22	0.11595576		969.22	0.00359681		1499.22	-0.01544441		2029.21	0.00203998
439.42	0.1154501		969.42	0.00348286		1499.42	-0.01459471		2029.41	0.00169169
439.62	0.11527424		969.62	0.00387863		1499.62	-0.01363111		2029.61	0.00073811
439.82	0.11559267		969.82	0.00351772		1499.82	-0.0138541		2029.81	-0.00065398
440.02	0.1148852		970.02	0.00427411		1500.02	-0.01471871		2030.01	-0.00075159
440.22	0.11301866		970.22	0.00483386		1500.22	-0.01471415		2030.21	-0.00148456
440.42	0.11367339		970.42	0.00499263		1500.42	-0.01541002		2030.41	-0.00137405
440.62	0.11369791		970.62	0.00535351		1500.62	-0.01701352		2030.61	-0.0011205
440.82	0.11292828		970.82	0.00458827		1500.82	-0.01771259		2030.81	-0.00044719
441.02	0.11289561		971.02	0.00534625		1501.02	-0.01784201		2031.01	-0.00054537
441.22	0.11288398		971.22	0.00570693		1501.22	-0.0186128		2031.21	0.00155498
441.42	0.11292587		971.42	0.00458479		1501.42	-0.0186207		2031.41	0.00221804
441.62	0.11297985		971.62	0.00453551		1501.62	-0.01922099		2031.61	0.00265947
441.82	0.11331985		971.82	0.00432243		1501.82	-0.01956372		2031.81	0.00212226
442.02	0.11302065		972.02	0.00349564		1502.02	-0.02058941		2032.01	0.00200792
442.22	0.1128136		972.22	0.00291829		1502.22	-0.02054682		2032.21	0.00209027
442.42	0.11317705		972.42	0.00330876		1502.42	-0.02048764		2032.41	0.00265121
442.62	0.11304338		972.62	0.00294667		1502.62	-0.02092836		2032.61	0.00265661
442.82	0.11301182		972.82	0.00407666		1502.82	-0.02153299		2032.81	0.00230493
443.02	0.11346535		973.02	0.00398343		1503.02	-0.02189218		2033.01	0.00190637
443.22	0.11382253		973.22	0.00367121		1503.22	-0.0211014		2033.21	0.00110813
443.42	0.11399019		973.42	0.00402849		1503.42	-0.02152221		2033.41	0.00056432
443.62	0.11468095		973.62	0.0039598		1503.62	-0.02128614		2033.61	0.00054394
443.82	0.11406283		973.82	0.00385633		1503.82	-0.0221785		2033.81	0.00083219
444.02	0.11360645		974.02	0.00379033		1504.02	-0.02224061		2034.01	0.00115302
444.22	0.11312828		974.22	0.00388349		1504.22	-0.0225592		2034.21	0.00137261
444.42	0.11456196		974.42	0.00371188		1504.42	-0.02259183		2034.41	0.00183215
444.62	0.11458553		974.62	0.00357787		1504.62	-0.02227083		2034.61	0.00253908
444.82	0.114363		974.82	0.00305505		1504.82	-0.02073838		2034.81	0.00268658
445.02	0.11434097		975.02	0.00359548		1505.02	-0.01974305		2035.01	0.00238978
445.22	0.11428291		975.22	0.00226435		1505.22	-0.01974617		2035.21	0.00366947
445.42	0.1146359		975.42	0.00061222		1505.42	-0.01946155		2035.41	0.00267075
445.62	0.11481674		975.62	0.00054712		1505.62	-0.01880316		2035.61	0.0024564
445.82	0.11391251		975.82	-0.00043069		1505.82	-0.01768487		2035.81	0.00213278
446.02	0.11404591		976.02	-0.00029638		1506.02	-0.01837055		2036.01	0.00236687
446.22	0.11467563		976.22	-0.00021729		1506.22	-0.01865825		2036.21	0.00166715
446.42	0.1145625		976.42	0.00048185		1506.42	-0.01885469		2036.41	0.00103775
446.62	0.11403891		976.62	0.00155059		1506.62	-0.01991988		2036.61	-0.00068104
446.82	0.11333196		976.82	0.00361157		1506.82	-0.02012605		2036.81	-0.00145214
447.02	0.11235291		977.02	0.00332263		1507.02	-0.02007058		2037.01	-0.00158649
447.22	0.11176647		977.22	0.00366974		1507.22	-0.01972475		2037.21	-0.00284848
447.42	0.11136276		977.42	0.00339688		1507.42	-0.02004131		2037.41	-0.00245168
447.62	0.11127288		977.62	0.0035351		1507.62	-0.01925129		2037.61	-0.00190932
447.82	0.11078625		977.82	0.00341603		1507.82	-0.01885569		2037.81	-0.00176799
448.02	0.11023763		978.02	0.00321974		1508.02	-0.0187965		2038.01	-0.00189369
448.22	0.10984736		978.22	0.00305366		1508.22	-0.01858579		2038.21	-0.0013231
448.42	0.11023827		978.42	0.00311169		1508.42	-0.01792882		2038.41	-0.00147793
448.62	0.110024		978.62	0.00245205		1508.62	-0.01718891		2038.61	-0.0006691
448.82	0.11018204		978.82	0.00206139		1508.82	-0.01722184		2038.81	-0.00063294
449.02	0.11056023		979.02	0.00144976		1509.02	-0.01771765		2039.01	0.00073108
449.22	0.11096215		979.22	0.00038061		1509.22	-0.01872376		2039.21	0.00198709
449.42	0.11077794		979.42	0.00073742		1509.42	-0.01773875		2039.41	0.00244362
449.62	0.11112861		979.62	0.00114483		1509.62	-0.01745949		2039.61	0.00288013
449.82	0.11157273		979.82	0.00154972		1509.82	-0.01801685		2039.81	0.00285629
450.02	0.11253433		980.02	0.00229648		1510.02	-0.01936935		2040.01	0.00310913
450.22	0.11302604		980.22	0.00287866		1510.22	-0.01967274		2040.21	0.00200361
450.42	0.11283326		980.42	0.0032139		1510.42	-0.01979466		2040.41	0.00228064
450.62	0.11236395		980.62	0.00413842		1510.62	-0.01985042		2040.61	0.00166938
450.82	0.11272405		980.82	0.00400244		1510.82	-0.0192926		2040.81	0.00202208
451.02	0.11273274		981.02	0.0030841		1511.02	-0.01864168		2041.01	0.00091713
451.22	0.11228327		981.22	0.00322621		1511.22	-0.01796355		2041.21	0.00013827
451.42	0.11218165		981.42	0.00308317		1511.42	-0.01701259		2041.41	0.00048043
451.62	0.11258186		981.62	0.0027061		1511.62	-0.0156099		2041.61	-0.00136409
451.82	0.11235136		981.82	0.00211019		1511.82	-0.01552414		2041.81	-0.00189546
452.02	0.11100556		982.02	0.00204743		1512.02	-0.01549736		2042.01	-0.00268019
452.22	0.11083304		982.22	0.00154384		1512.22	-0.01562435		2042.21	-0.00226983
452.42	0.11086622		982.42	0.00137888		1512.42	-0.01668124		2042.41	-0.00240051
452.62	0.11127951		982.62	0.00079791		1512.62	-0.01688841		2042.61	-0.00183565
452.82	0.11150825		982.82	0.00072371		1512.82	-0.01848118		2042.81	-0.00262893
453.02	0.11147536		983.02	0.00017809		1513.02	-0.0190622		2043.01	-0.00222784
453.22	0.1117465		983.22	0.00080754		1513.22	-0.01986843		2043.21	-0.00291439
453.42	0.11108367		983.42	0.00178633		1513.42	-0.01952327		2043.41	-0.00304641
453.62	0.11160302		983.62	0.00144474		1513.62	-0.02105597		2043.61	-0.00275828
453.82	0.11190281		983.82	0.00196412		1513.82	-0.02183422		2043.81	-0.00250855
454.02	0.11267381		984.02	0.00280835		1514.02	-0.02193905		2044.01	-0.00220651
454.22	0.11346654		984.22	0.0027284		1514.22	-0.02091135		2044.21	-0.00228455
454.42	0.11312474		984.42	0.00251805		1514.42	-0.02107454		2044.41	-0.00119783
454.62	0.11419839		984.62	0.00208777		1514.62	-0.02016118		2044.61	-0.00109441
454.82	0.11428461		984.82	0.00222381		1514.82	-0.02006343		2044.81	-0.0012293
455.02	0.11431243		985.02	0.00213718		1515.02	-0.0193706		2045.01	-0.00052636
455.22	0.11397508		985.22	0.00155281		1515.22	-0.0181381		2045.21	-0.00004023
455.42	0.11438777		985.42	0.00081378		1515.42	-0.0171583		2045.41	-0.0001958
455.62	0.1142362		985.62	0.00032523		1515.62	-0.01786986		2045.61	-0.00078194
455.82	0.11294703		985.82	0.00032193		1515.82	-0.01777226		2045.81	-0.00034383
456.02	0.1118908		986.02	0.0000201		1516.02	-0.01805		2046.01	0.00025348
456.22	0.11162538		986.22	0.00042169		1516.22	-0.01708791		2046.21	0.00119425
456.42	0.11165898		986.42	0.00104312		1516.42	-0.01686358		2046.41	0.00104963
456.62	0.11149174		986.62	0.00198954		1516.62	-0.01583262		2046.61	0.00082301
456.82	0.1109371		986.82	0.00262119		1516.82	-0.0158143		2046.81	0.00016111
457.02	0.11119665		987.02	0.00287215		1517.02	-0.01496757		2047.01	0.00024372
457.22	0.11215872		987.22	0.00342266		1517.22	-0.01509856		2047.21	0.00018024
457.42	0.11155907		987.42	0.00423086		1517.42	-0.01433061		2047.41	0.00063819
457.62	0.11127761		987.62	0.00430407		1517.62	-0.01487889		2047.61	0.00104184
457.82	0.11060881		987.82	0.00465003		1517.82	-0.01429099		2047.81	0.00133405
458.02	0.11163996		988.02	0.00490407		1518.02	-0.01402699		2048.01	0.0011085
458.22	0.11157458		988.22	0.00455461		1518.22	-0.01394535		2048.21	0.00068079
458.42	0.11178629		988.42	0.00401847		1518.42	-0.01506661		2048.41	0.00086392
458.62	0.11233502		988.62	0.00328422		1518.62	-0.01519902		2048.61	0.00159441
458.82	0.11160198		988.82	0.0031072		1518.82	-0.0159852		2048.81	0.00178846
459.02	0.11183721		989.02	0.00175076		1519.02	-0.01674695		2049.01	0.00232721
459.22	0.11159074		989.22	0.00089766		1519.22	-0.01743963		2049.21	0.00240368
459.42	0.11141615		989.42	-0.00021773		1519.42	-0.01915081		2049.41	0.00236033
459.62	0.11127071		989.62	-0.00108043		1519.62	-0.02110235		2049.61	0.00221217
459.82	0.11135544		989.82	-0.00091994		1519.82	-0.02067849		2049.81	0.00209613
460.02	0.11185598		990.02	-0.00150478		1520.02	-0.02126116		2050.01	0.00236774
460.22	0.11172353		990.22	-0.0010588		1520.22	-0.02041273		2050.21	0.00151729
460.42	0.11255545		990.42	-0.00085438		1520.42	-0.02033452		2050.41	0.00046056
460.62	0.11308597		990.62	-0.00002887		1520.62	-0.02037486		2050.61	0.00015997
460.82	0.11390811		990.82	-0.00007873		1520.82	-0.02068539		2050.81	0.00034554
461.02	0.11493623		991.02	0.00046885		1521.02	-0.0211252		2051.01	0.00059734
461.22	0.11527632		991.22	0.00111984		1521.22	-0.02121256		2051.21	0.00052191
461.42	0.11414962		991.42	0.0021184		1521.42	-0.02005058		2051.41	0.00038528
461.62	0.11458963		991.62	0.00207029		1521.62	-0.01976587		2051.61	-0.00003745
461.82	0.11455066		991.82	0.00264912		1521.82	-0.01874527		2051.81	-0.00127456
462.02	0.1154819		992.02	0.00240395		1522.02	-0.01885457		2052.01	-0.00266248
462.22	0.11478456		992.22	0.00259959		1522.22	-0.01853247		2052.21	-0.00380999
462.42	0.11413374		992.42	0.00276851		1522.42	-0.01839112		2052.41	-0.00416593
462.62	0.11282516		992.62	0.00335735		1522.62	-0.01848848		2052.61	-0.00350172
462.82	0.11186102		992.82	0.00389394		1522.82	-0.01859666		2052.81	-0.00397881
463.02	0.11119456		993.02	0.00369128		1523.02	-0.01830035		2053.01	-0.00392926
463.22	0.11039832		993.22	0.00279283		1523.22	-0.01860878		2053.21	-0.00364066
463.42	0.11000785		993.42	0.00221108		1523.42	-0.01884267		2053.41	-0.00294621
463.62	0.10983247		993.62	0.00285873		1523.62	-0.01920066		2053.61	-0.00277265
463.82	0.10950107		993.82	0.0037824		1523.82	-0.01822252		2053.81	-0.002762
464.02	0.10929031		994.02	0.00253605		1524.02	-0.01831791		2054.01	-0.00268583
464.22	0.1089563		994.22	0.00210008		1524.22	-0.01821938		2054.21	-0.00248836
464.42	0.10993585		994.42	0.00141932		1524.42	-0.01784981		2054.41	-0.00114406
464.62	0.11102352		994.62	0.00115168		1524.62	-0.01848657		2054.61	-0.00005105
464.82	0.11109225		994.82	0.00057831		1524.82	-0.01889705		2054.81	0.00079234
465.02	0.11107136		995.02	0.00007306		1525.02	-0.01906799		2055.01	0.001888
465.22	0.1109602		995.22	-0.00017447		1525.22	-0.01834293		2055.21	0.00201756
465.42	0.11149465		995.42	0.00012499		1525.42	-0.01836955		2055.41	0.00183886
465.62	0.11257667		995.62	-0.00020867		1525.62	-0.0180831		2055.61	0.0011066
465.82	0.11247024		995.82	-0.00004729		1525.82	-0.01792328		2055.81	0.00058408
466.02	0.11209517		996.02	0.00002108		1526.02	-0.01782136		2056.01	0.00015114
466.22	0.11242029		996.22	0.00070708		1526.22	-0.017654		2056.21	-0.0002345
466.42	0.11239554		996.42	0.00129636		1526.42	-0.01800726		2056.41	-0.00027724
466.62	0.11209842		996.62	0.00182877		1526.62	-0.01819188		2056.61	0.00009573
466.82	0.11185907		996.82	0.0024413		1526.82	-0.01795739		2056.81	-0.00031623
467.02	0.11179237		997.02	0.00137759		1527.02	-0.01853668		2057.01	-0.00088859
467.22	0.11132814		997.22	0.00206178		1527.22	-0.02036834		2057.21	-0.00059574
467.42	0.11119438		997.42	0.00292413		1527.42	-0.02065207		2057.41	0.00002797
467.62	0.11151007		997.62	0.00337214		1527.62	-0.02151106		2057.61	-0.00091677
467.82	0.11131312		997.82	0.00307254		1527.82	-0.02163855		2057.81	-0.00142179
468.02	0.11131689		998.02	0.00264655		1528.02	-0.02109167		2058.01	-0.00111949
468.22	0.11144598		998.22	0.00291171		1528.22	-0.02150681		2058.21	-0.00029878
468.42	0.11224452		998.42	0.00181506		1528.42	-0.02129455		2058.41	0.00003234
468.62	0.11225019		998.62	0.00193385		1528.62	-0.02120308		2058.61	-0.00020262
468.82	0.11222987		998.82	0.00097157		1528.82	-0.02091927		2058.81	0.00003796
469.02	0.11214936		999.02	0.00108407		1529.02	-0.02029888		2059.01	0.00116998
469.22	0.11163526		999.22	0.00169204		1529.22	-0.01963713		2059.21	0.00162695
469.42	0.11270327		999.42	0.0017721		1529.42	-0.01921401		2059.41	0.00188287
469.62	0.11335428		999.62	0.00216178		1529.62	-0.01808524		2059.61	0.00135752
469.82	0.11340917		999.82	0.00240808		1529.82	-0.0175904		2059.81	0.00170467
470.02	0.11336963		1000.02	0.00210553		1530.02	-0.01702337		2060.01	0.00207444
470.22	0.11309096		1000.22	0.00164367		1530.22	-0.01783532		2060.21	0.00191425
470.42	0.11272659		1000.42	0.00134579		1530.42	-0.01776829		2060.41	0.0016764
470.62	0.11188113		1000.62	0.0024674		1530.62	-0.01778053		2060.61	0.00123473
470.82	0.1125722		1000.82	0.00259926		1530.82	-0.01821653		2060.81	0.00065201
471.02	0.11267462		1001.02	0.00136638		1531.02	-0.0197841		2061.01	0.00129806
471.22	0.11217688		1001.22	0.00240759		1531.22	-0.0208997		2061.21	0.00132531
471.42	0.11245519		1001.42	0.00159217		1531.42	-0.02179421		2061.41	0.0005348
471.62	0.11196773		1001.62	0.00188367		1531.62	-0.02234239		2061.61	-0.0002605
471.82	0.11156871		1001.82	0.00232628		1531.82	-0.02153169		2061.81	-0.00062512
472.02	0.11208312		1002.02	0.0024238		1532.02	-0.02079198		2062.01	-0.00080835
472.22	0.11262763		1002.22	0.00172253		1532.22	-0.02184207		2062.21	-0.00134681
472.42	0.11260098		1002.42	0.00000335		1532.42	-0.02141396		2062.41	-0.00174366
472.62	0.11235097		1002.62	0.00081662		1532.62	-0.02080922		2062.61	-0.00245876
472.82	0.11336811		1002.82	0.00113375		1532.82	-0.01946498		2062.81	-0.00246889
473.02	0.11288237		1003.02	0.00250075		1533.02	-0.01840315		2063.01	-0.00223686
473.22	0.1126308		1003.22	0.00204983		1533.22	-0.01771595		2063.21	-0.00262151
473.42	0.1127052		1003.42	0.00240664		1533.42	-0.01733708		2063.41	-0.00350399
473.62	0.11198458		1003.62	0.00327325		1533.62	-0.01761951		2063.61	-0.00398869
473.82	0.11098577		1003.82	0.002705		1533.82	-0.01841458		2063.81	-0.00332711
474.02	0.11049684		1004.02	0.00237905		1534.02	-0.01837844		2064.01	-0.00284197
474.22	0.10932365		1004.22	0.00271729		1534.22	-0.01906949		2064.21	-0.00310228
474.42	0.10933518		1004.42	0.00308622		1534.42	-0.01811296		2064.41	-0.00311818
474.62	0.109098		1004.62	0.00415242		1534.62	-0.01857628		2064.61	-0.0024734
474.82	0.10939237		1004.82	0.0040487		1534.82	-0.01863376		2064.81	-0.00145093
475.02	0.10885135		1005.02	0.00389122		1535.02	-0.01903306		2065.01	-0.00017993
475.22	0.10836977		1005.22	0.00390605		1535.22	-0.01847078		2065.21	0.0000335
475.42	0.10765802		1005.42	0.00262448		1535.42	-0.01870931		2065.41	0.0001255
475.62	0.10774117		1005.62	0.00288961		1535.62	-0.01898923		2065.61	0.00054779
475.82	0.10937601		1005.82	0.00190819		1535.82	-0.01929957		2065.81	0.00082375
476.02	0.11045705		1006.02	0.00029368		1536.02	-0.02030001		2066.01	0.00138802
476.22	0.11029282		1006.22	-0.00116258		1536.22	-0.02073651		2066.21	0.00084662
476.42	0.11124073		1006.42	-0.00180883		1536.42	-0.02055433		2066.41	0.0010948
476.62	0.11286719		1006.62	-0.00076693		1536.62	-0.0202582		2066.61	0.00025338
476.82	0.11396108		1006.82	-0.00028771		1536.82	-0.0198927		2066.81	0.00043377
477.02	0.1128024		1007.02	-0.00036575		1537.02	-0.01991724		2067.01	0.00017044
477.22	0.1122849		1007.22	-0.00116807		1537.22	-0.01966516		2067.21	-0.00041694
477.42	0.11199773		1007.42	-0.0010701		1537.42	-0.01993981		2067.41	-0.00042857
477.62	0.11251097		1007.62	-0.00025257		1537.62	-0.0197792		2067.61	-0.00035158
477.82	0.11184495		1007.82	-0.00003874		1537.82	-0.01952636		2067.81	-0.00026516
478.02	0.11151583		1008.02	-0.00008093		1538.02	-0.01802416		2068.01	0.00026877
478.22	0.11098137		1008.22	0.00052854		1538.22	-0.01756895		2068.21	0.00020013
478.42	0.11062377		1008.42	0.00098584		1538.42	-0.01745603		2068.41	0.00050624
478.62	0.10965465		1008.62	0.0013244		1538.62	-0.01717942		2068.61	0.00109655
478.82	0.10889465		1008.82	0.00189734		1538.82	-0.01597974		2068.81	0.00106126
479.02	0.10894496		1009.02	0.00268215		1539.02	-0.01539294		2069.01	0.00112643
479.22	0.10820177		1009.22	0.00253626		1539.22	-0.01476181		2069.21	0.00187448
479.42	0.10841125		1009.42	0.00299663		1539.42	-0.01567603		2069.41	0.00080785
479.62	0.10951347		1009.62	0.00310863		1539.62	-0.01711452		2069.61	0.00111167
479.82	0.10984893		1009.82	0.00285514		1539.82	-0.01789905		2069.81	0.00114927
480.02	0.1104163		1010.02	0.00219918		1540.02	-0.01876541		2070.01	0.00088124
480.22	0.11025144		1010.22	0.00157125		1540.22	-0.01942993		2070.21	-0.00055373
480.42	0.11106298		1010.42	0.00126721		1540.42	-0.02036217		2070.41	-0.00031573
480.62	0.11145785		1010.62	0.00234472		1540.62	-0.02060596		2070.61	-0.00101987
480.82	0.11099891		1010.82	0.00294878		1540.82	-0.02046959		2070.81	-0.0015978
481.02	0.1101802		1011.02	0.00254861		1541.02	-0.02050292		2071.01	-0.00213183
481.22	0.11059157		1011.22	0.00246734		1541.22	-0.02055244		2071.21	-0.0027148
481.42	0.11116288		1011.42	0.00313507		1541.42	-0.02048322		2071.41	-0.00210589
481.62	0.11069093		1011.62	0.00323628		1541.62	-0.02037575		2071.61	-0.00235566
481.82	0.10960694		1011.82	0.0030492		1541.82	-0.02034958		2071.81	-0.00154224
482.02	0.10961437		1012.02	0.00245179		1542.02	-0.01947429		2072.01	-0.00115832
482.22	0.10922206		1012.22	0.00308711		1542.22	-0.0199436		2072.21	-0.00128374
482.42	0.10807516		1012.42	0.00292027		1542.42	-0.02047792		2072.41	-0.00119165
482.62	0.10794095		1012.62	0.00307519		1542.62	-0.01941854		2072.61	-0.0014869
482.82	0.10899223		1012.82	0.00329565		1542.82	-0.0190103		2072.81	-0.00142025
483.02	0.10990811		1013.02	0.0033995		1543.02	-0.02001269		2073.01	-0.00135925
483.22	0.11020567		1013.22	0.00262368		1543.22	-0.01999052		2073.21	-0.00121124
483.42	0.1110212		1013.42	0.00172809		1543.42	-0.02090138		2073.41	-0.00209232
483.62	0.11028448		1013.62	0.00044758		1543.62	-0.02245392		2073.61	-0.00174379
483.82	0.11106065		1013.82	0.00003322		1543.82	-0.02272138		2073.81	-0.00174521
484.02	0.11192248		1014.02	-0.00117278		1544.02	-0.02273899		2074.01	-0.00206601
484.22	0.11139694		1014.22	-0.00122823		1544.22	-0.02243528		2074.21	-0.00204082
484.42	0.11215363		1014.42	-0.00122135		1544.42	-0.02215733		2074.41	-0.00205171
484.62	0.11243297		1014.62	-0.00087822		1544.62	-0.02198362		2074.61	-0.00193463
484.82	0.11283525		1014.82	-0.00142431		1544.82	-0.02129514		2074.81	-0.0028077
485.02	0.1127111		1015.02	-0.0020907		1545.02	-0.02142978		2075.01	-0.00270507
485.22	0.11255821		1015.22	-0.00175781		1545.22	-0.0206832		2075.21	-0.00215577
485.42	0.11233006		1015.42	-0.00116276		1545.42	-0.01987735		2075.41	-0.00201875
485.62	0.11065138		1015.62	-0.00197615		1545.62	-0.01910351		2075.61	-0.00231296
485.82	0.11005087		1015.82	-0.00164748		1545.82	-0.01785742		2075.81	-0.0021313
486.02	0.10946645		1016.02	-0.0014622		1546.02	-0.01769375		2076.01	-0.0021609
486.22	0.10900838		1016.22	-0.00077848		1546.22	-0.01784088		2076.21	-0.00233642
486.42	0.10859761		1016.42	-0.00081014		1546.42	-0.0174715		2076.41	-0.00228552
486.62	0.10912724		1016.62	-0.00106729		1546.62	-0.01722526		2076.61	-0.00193569
486.82	0.10900619		1016.82	-0.00150311		1546.82	-0.0175758		2076.81	-0.00141322
487.02	0.10866311		1017.02	-0.00183241		1547.02	-0.01893421		2077.01	-0.00135697
487.22	0.10791847		1017.22	-0.00200236		1547.22	-0.01864021		2077.21	-0.00123324
487.42	0.10746108		1017.42	-0.00192203		1547.42	-0.01949945		2077.41	-0.00173959
487.62	0.10721414		1017.62	-0.00192202		1547.62	-0.02019052		2077.61	-0.00155247
487.82	0.10823443		1017.82	-0.00151378		1547.82	-0.01973031		2077.81	-0.000841
488.02	0.10844212		1018.02	-0.00145916		1548.02	-0.01992509		2078.01	-0.00053911
488.22	0.10869326		1018.22	-0.00055413		1548.22	-0.02007179		2078.21	-0.00129764
488.42	0.10965823		1018.42	-0.00066587		1548.42	-0.02091622		2078.41	-0.00200891
488.62	0.10918674		1018.62	-0.00048251		1548.62	-0.02159321		2078.61	-0.00234808
488.82	0.10900012		1018.82	0.00081333		1548.82	-0.02173913		2078.81	-0.00259826
489.02	0.1086805		1019.02	0.0018743		1549.02	-0.021518		2079.01	-0.00230189
489.22	0.10870752		1019.22	0.0024332		1549.22	-0.02092785		2079.21	-0.00195286
489.42	0.10846841		1019.42	0.00366302		1549.42	-0.02142686		2079.41	-0.00287748
489.62	0.107871		1019.62	0.00393644		1549.62	-0.02169144		2079.61	-0.00297798
489.82	0.10887007		1019.82	0.00435205		1549.82	-0.02214511		2079.81	-0.00241436
490.02	0.10935445		1020.02	0.00485884		1550.02	-0.02278546		2080.01	-0.00218523
490.22	0.11019715		1020.22	0.00456365		1550.22	-0.02241467		2080.21	-0.00238445
490.42	0.1101177		1020.42	0.00476281		1550.42	-0.02239521		2080.41	-0.00266839
490.62	0.10957383		1020.62	0.00398523		1550.62	-0.02298569		2080.61	-0.0031939
490.82	0.10907019		1020.82	0.00409779		1550.82	-0.02328607		2080.81	-0.00342239
491.02	0.10966978		1021.02	0.00296481		1551.02	-0.02412899		2081.01	-0.00366885
491.22	0.10983137		1021.22	0.00171389		1551.22	-0.0242748		2081.21	-0.0026747
491.42	0.1106879		1021.42	0.00090496		1551.42	-0.02449026		2081.41	-0.001966
491.62	0.11111331		1021.62	-0.00030493		1551.62	-0.0244551		2081.61	-0.00199528
491.82	0.11141248		1021.82	-0.00082799		1551.82	-0.02449992		2081.81	-0.00217902
492.02	0.11247549		1022.02	-0.00122424		1552.02	-0.02420176		2082.01	-0.00255168
492.22	0.11269831		1022.22	-0.00164569		1552.22	-0.02477196		2082.21	-0.00341907
492.42	0.11331528		1022.42	-0.00195001		1552.42	-0.02496115		2082.41	-0.00346749
492.62	0.11269872		1022.62	-0.00243824		1552.62	-0.02548934		2082.61	-0.00247801
492.82	0.11269373		1022.82	-0.00188707		1552.82	-0.02526433		2082.81	-0.00245991
493.02	0.11299575		1023.02	-0.0024316		1553.02	-0.02452504		2083.01	-0.00284802
493.22	0.11231541		1023.22	-0.00212449		1553.22	-0.02440486		2083.21	-0.00288699
493.42	0.11135428		1023.42	-0.00111386		1553.42	-0.02426279		2083.41	-0.00210143
493.62	0.1114632		1023.62	-0.00165889		1553.62	-0.02352291		2083.61	-0.00129958
493.82	0.11163762		1023.82	-0.00243143		1553.82	-0.02246215		2083.81	-0.00091729
494.02	0.1113825		1024.02	-0.0018227		1554.02	-0.02197888		2084.01	-0.00076549
494.22	0.11118563		1024.22	-0.00198365		1554.22	-0.02112882		2084.21	-0.00128832
494.42	0.11059625		1024.42	-0.00190037		1554.42	-0.0205095		2084.41	-0.0014454
494.62	0.10938842		1024.62	-0.00197702		1554.62	-0.02019505		2084.61	-0.00137632
494.82	0.11021181		1024.82	-0.00152822		1554.82	-0.0196502		2084.81	-0.00108899
495.02	0.11128541		1025.02	-0.00215437		1555.02	-0.01963337		2085.01	-0.0003597
495.22	0.11149161		1025.22	-0.00254829		1555.22	-0.01989878		2085.21	0.00026118
495.42	0.11107378		1025.42	-0.00193666		1555.42	-0.01963048		2085.41	0.00044002
495.62	0.11075905		1025.62	-0.00172599		1555.62	-0.01936254		2085.61	-0.00088172
495.82	0.11084985		1025.82	-0.00143838		1555.82	-0.01881106		2085.81	-0.00172858
496.02	0.11129901		1026.02	-0.00126556		1556.02	-0.0194384		2086.01	-0.00071361
496.22	0.11068834		1026.22	-0.00063068		1556.22	-0.01972176		2086.21	-0.00136534
496.42	0.11060604		1026.42	0.00026951		1556.42	-0.01911512		2086.41	-0.00143425
496.62	0.10971741		1026.62	0.00080566		1556.62	-0.01986387		2086.61	-0.00139158
496.82	0.10910001		1026.82	0.00210639		1556.82	-0.01968029		2086.81	-0.00325889
497.02	0.10730444		1027.02	0.00180408		1557.02	-0.01997355		2087.01	-0.00301829
497.22	0.10565133		1027.22	0.00251809		1557.22	-0.02012243		2087.21	-0.00246258
497.42	0.10513176		1027.42	0.00250664		1557.42	-0.02002749		2087.41	-0.00188304
497.62	0.10509336		1027.62	0.00092449		1557.62	-0.02083962		2087.61	-0.00244795
497.82	0.10442069		1027.82	0.0000202		1557.82	-0.02151751		2087.81	-0.0025804
498.02	0.1039325		1028.02	-0.00056373		1558.02	-0.02210188		2088.01	-0.00195609
498.22	0.10418922		1028.22	-0.00169212		1558.22	-0.02204624		2088.21	-0.00174741
498.42	0.10467638		1028.42	-0.00325876		1558.42	-0.02170885		2088.41	-0.00128288
498.62	0.10486053		1028.62	-0.00322523		1558.62	-0.02145798		2088.61	-0.00103412
498.82	0.10668311		1028.82	-0.00386158		1558.82	-0.02193208		2088.81	-0.0005463
499.02	0.10715231		1029.02	-0.00515007		1559.02	-0.02281347		2089.01	-0.0002454
499.22	0.10734646		1029.22	-0.00538524		1559.22	-0.02292626		2089.21	-0.00046622
499.42	0.10751984		1029.42	-0.00510541		1559.42	-0.02207942		2089.41	-0.000621
499.62	0.10835753		1029.62	-0.00536527		1559.62	-0.02113839		2089.61	-0.00026432
499.82	0.10842125		1029.82	-0.00465003		1559.82	-0.02078577		2089.81	-0.00008274
500.02	0.1090666		1030.02	-0.00316156		1560.02	-0.02141064		2090.01	0.00045583
500.22	0.10925726		1030.22	-0.00069358		1560.22	-0.0207028		2090.21	-0.00098278
500.42	0.10959708		1030.42	0.00059055		1560.42	-0.02031324		2090.41	-0.00062554
500.62	0.1093785		1030.62	0.00177602		1560.62	-0.02030792		2090.61	-0.00116813
500.82	0.10912858		1030.82	0.00281552		1560.82	-0.02055944		2090.81	-0.00110969
501.02	0.10819615		1031.02	0.00309516		1561.02	-0.02039759		2091.01	-0.00079906
501.22	0.1081074		1031.22	0.00335642		1561.22	-0.02026223		2091.21	-0.00088554
501.42	0.10865904		1031.42	0.00356148		1561.42	-0.02077435		2091.41	-0.00104923
501.62	0.10835741		1031.62	0.00233642		1561.62	-0.02191204		2091.61	-0.00080491
501.82	0.10762608		1031.82	0.00158121		1561.82	-0.02204083		2091.81	-0.00043562
502.02	0.10676173		1032.02	0.00122426		1562.02	-0.02157508		2092.01	-0.00008616
502.22	0.10671544		1032.22	0.00070938		1562.22	-0.02099423		2092.21	-0.00013205
502.42	0.10634197		1032.42	-0.00032249		1562.42	-0.02003985		2092.41	0.00033267
502.62	0.10690591		1032.62	-0.00071145		1562.62	-0.02046476		2092.61	0.00161526
502.82	0.10808093		1032.82	-0.00238398		1562.82	-0.02137473		2092.81	0.00162132
503.02	0.10924335		1033.02	-0.00341666		1563.02	-0.02209303		2093.01	0.00119973
503.22	0.11016272		1033.22	-0.00384158		1563.22	-0.02147795		2093.21	0.00149483
503.42	0.11037976		1033.42	-0.00423948		1563.42	-0.02139934		2093.41	0.00208749
503.62	0.11115831		1033.62	-0.00455503		1563.62	-0.02120915		2093.61	0.00302204
503.82	0.11158479		1033.82	-0.00379128		1563.82	-0.02141645		2093.81	0.00285096
504.02	0.11137125		1034.02	-0.00306088		1564.02	-0.02117108		2094.01	0.0024367
504.22	0.11129191		1034.22	-0.00222698		1564.22	-0.02095466		2094.21	0.00179065
504.42	0.11091879		1034.42	-0.00183215		1564.42	-0.02069132		2094.41	0.00277321
504.62	0.1104684		1034.62	-0.00154757		1564.62	-0.02088101		2094.61	0.00309855
504.82	0.11005053		1034.82	-0.00121157		1564.82	-0.02157083		2094.81	0.00271351
505.02	0.10890436		1035.02	-0.00140545		1565.02	-0.02124809		2095.01	0.00164094
505.22	0.10794869		1035.22	-0.0008477		1565.22	-0.0209914		2095.21	0.00187386
505.42	0.10778669		1035.42	-0.00038399		1565.42	-0.02098108		2095.41	0.00216972
505.62	0.10617067		1035.62	-0.00111479		1565.62	-0.02090908		2095.61	0.00170006
505.82	0.10515118		1035.82	-0.00069607		1565.82	-0.02023612		2095.81	0.00182589
506.02	0.10445797		1036.02	0.00073745		1566.02	-0.02040594		2096.01	0.00255475
506.22	0.10433152		1036.22	0.00050231		1566.22	-0.01935589		2096.21	0.00231053
506.42	0.10409402		1036.42	-0.000209		1566.42	-0.01921403		2096.41	0.00313528
506.62	0.10524113		1036.62	-0.00070572		1566.62	-0.02031645		2096.61	0.00301899
506.82	0.1061859		1036.82	-0.00039289		1566.82	-0.02091618		2096.81	0.00189717
507.02	0.10745685		1037.02	0.00023094		1567.02	-0.02198573		2097.01	0.00200997
507.22	0.10765478		1037.22	-0.00024038		1567.22	-0.02162925		2097.21	0.00309532
507.42	0.10802256		1037.42	-0.0009171		1567.42	-0.02210223		2097.41	0.002525
507.62	0.10954299		1037.62	-0.00164549		1567.62	-0.02096901		2097.61	0.00215951
507.82	0.10940774		1037.82	-0.00210759		1567.82	-0.02149637		2097.81	0.00233304
508.02	0.10927038		1038.02	-0.00294152		1568.02	-0.02156097		2098.01	0.00172954
508.22	0.11014192		1038.22	-0.0029544		1568.22	-0.02184691		2098.21	0.0011148
508.42	0.11004733		1038.42	-0.00319197		1568.42	-0.02200616		2098.41	0.00063979
508.62	0.11025141		1038.62	-0.00370389		1568.62	-0.02233001		2098.61	0.00007381
508.82	0.10980473		1038.82	-0.00359708		1568.82	-0.02196017		2098.81	-0.00151765
509.02	0.10906902		1039.02	-0.00338025		1569.02	-0.0217668		2099.01	-0.00135271
509.22	0.1093286		1039.22	-0.00266857		1569.22	-0.02161957		2099.21	-0.00148932
509.42	0.10951039		1039.42	-0.00317239		1569.42	-0.02146725		2099.41	-0.0014746
509.62	0.10914202		1039.62	-0.00273439		1569.62	-0.02167696		2099.61	-0.00158506
509.82	0.10929903		1039.82	-0.00194669		1569.82	-0.02235307		2099.81	-0.00153371
510.02	0.10915219		1040.02	-0.0014517		1570.02	-0.02294402		2100.01	-0.00086186
510.22	0.10863521		1040.22	-0.00129002		1570.22	-0.02250002		2100.21	-0.00145657
510.42	0.10799192		1040.42	-0.00165437		1570.42	-0.02279416		2100.41	-0.00122677
510.62	0.10800743		1040.62	-0.00184432		1570.62	-0.02399708		2100.61	-0.0009668
510.82	0.10797157		1040.82	-0.0006967		1570.82	-0.02465739		2100.81	-0.0006328
511.02	0.10753367		1041.02	-0.00110992		1571.02	-0.02430254		2101.01	0.00030253
511.22	0.10683489		1041.22	-0.00151398		1571.22	-0.02370006		2101.21	0.00126218
511.42	0.10757291		1041.42	-0.00239027		1571.42	-0.02306552		2101.41	0.00138887
511.62	0.10817302		1041.62	-0.00297999		1571.62	-0.02220338		2101.61	0.00245028
511.82	0.10792764		1041.82	-0.00300054		1571.82	-0.02283013		2101.81	0.00258596
512.02	0.10815996		1042.02	-0.00326288		1572.02	-0.02187488		2102.01	0.00166989
512.22	0.10841387		1042.22	-0.00294521		1572.22	-0.02095017		2102.21	0.00080131
512.42	0.10716237		1042.42	-0.00308407		1572.42	-0.01971633		2102.41	-0.00030364
512.62	0.10684282		1042.62	-0.00259995		1572.62	-0.01963416		2102.61	-0.00040045
512.82	0.10614563		1042.82	-0.00202103		1572.82	-0.01912869		2102.81	-0.00101988
513.02	0.10617987		1043.02	-0.00165125		1573.02	-0.01992107		2103.01	-0.00114063
513.22	0.10616016		1043.22	-0.00151595		1573.22	-0.02049168		2103.21	-0.002487
513.42	0.10515564		1043.42	-0.00189771		1573.42	-0.02018159		2103.41	-0.00235674
513.62	0.1046925		1043.62	-0.00158522		1573.62	-0.02123728		2103.61	-0.00348727
513.82	0.10445259		1043.82	-0.00133012		1573.82	-0.02195485		2103.81	-0.0048945
514.02	0.10407464		1044.02	-0.00142406		1574.02	-0.02227771		2104.01	-0.00398156
514.22	0.10422053		1044.22	-0.00161457		1574.22	-0.02304876		2104.21	-0.00383289
514.42	0.10442573		1044.42	-0.00236489		1574.42	-0.02308845		2104.41	-0.00320405
514.62	0.10450016		1044.62	-0.00264835		1574.62	-0.02364795		2104.61	-0.00203672
514.82	0.1048385		1044.82	-0.00215626		1574.82	-0.02403723		2104.81	-0.00188374
515.02	0.10549789		1045.02	-0.00188851		1575.02	-0.02381443		2105.01	-0.00157073
515.22	0.1064684		1045.22	-0.00111303		1575.22	-0.02426628		2105.21	-0.00101195
515.42	0.10746419		1045.42	-0.00124132		1575.42	-0.02411734		2105.41	-0.00061912
515.62	0.10764981		1045.62	-0.00147388		1575.62	-0.02397343		2105.61	-0.00131382
515.82	0.10740041		1045.82	-0.00060974		1575.82	-0.02410906		2105.81	-0.00235956
516.02	0.10762863		1046.02	-0.00059599		1576.02	-0.0237156		2106.01	-0.00302729
516.22	0.1070624		1046.22	-0.00005579		1576.22	-0.02375738		2106.21	-0.00320826
516.42	0.10741865		1046.42	-0.00054378		1576.42	-0.02287646		2106.41	-0.00407097
516.62	0.10862225		1046.62	-0.00069224		1576.62	-0.02273273		2106.61	-0.00413569
516.82	0.10850013		1046.82	-0.00119267		1576.82	-0.02248549		2106.81	-0.00449463
517.02	0.10847069		1047.02	-0.00132247		1577.02	-0.02252833		2107.01	-0.00427984
517.22	0.10819186		1047.22	-0.00197186		1577.22	-0.02251932		2107.21	-0.00424621
517.42	0.10678599		1047.42	-0.00276326		1577.42	-0.02176133		2107.41	-0.00401056
517.62	0.10620792		1047.62	-0.00320847		1577.62	-0.02244444		2107.61	-0.00454256
517.82	0.10613825		1047.82	-0.00339456		1577.82	-0.02185321		2107.81	-0.00304613
518.02	0.10634837		1048.02	-0.00456195		1578.02	-0.02168046		2108.01	-0.00163561
518.22	0.1075783		1048.22	-0.00442989		1578.22	-0.0213291		2108.21	-0.00036419
518.42	0.10782077		1048.42	-0.0050712		1578.42	-0.0208805		2108.41	0.00041914
518.62	0.10789261		1048.62	-0.00463572		1578.62	-0.02066809		2108.61	0.00072256
518.82	0.10817092		1048.82	-0.00480786		1578.82	-0.02009333		2108.81	0.00107317
519.02	0.10909963		1049.02	-0.00357498		1579.02	-0.01960289		2109.01	0.00057037
519.22	0.10947983		1049.22	-0.00244411		1579.22	-0.01978537		2109.21	0.00105025
519.42	0.10815716		1049.42	-0.00181127		1579.42	-0.01972202		2109.41	0.00032545
519.62	0.10838013		1049.62	-0.00104556		1579.62	-0.01967992		2109.61	-0.00021333
519.82	0.10847074		1049.82	-0.00005981		1579.82	-0.01993507		2109.81	-0.0006899
520.02	0.10884293		1050.02	0.00122327		1580.02	-0.01957954		2110.01	-0.00139448
520.22	0.10885342		1050.22	0.00169087		1580.22	-0.01975682		2110.21	-0.00224906
520.42	0.10981375		1050.42	0.0009301		1580.42	-0.0197182		2110.41	-0.00389871
520.62	0.11004304		1050.62	0.00107498		1580.62	-0.0196913		2110.61	-0.00361374
520.82	0.10903514		1050.82	0.00105507		1580.82	-0.02023852		2110.81	-0.00383307
521.02	0.1083967		1051.02	0.00175227		1581.02	-0.02039916		2111.01	-0.00322186
521.22	0.10801342		1051.22	0.00181077		1581.22	-0.02136968		2111.21	-0.00325728
521.42	0.10604287		1051.42	0.00139932		1581.42	-0.02159761		2111.41	-0.00227121
521.62	0.10577018		1051.62	0.00194936		1581.62	-0.02252407		2111.61	-0.00107523
521.82	0.10642378		1051.82	0.00207908		1581.82	-0.02268871		2111.81	0.00007136
522.02	0.10588097		1052.02	0.00058309		1582.02	-0.02288544		2112.01	0.00028933
522.22	0.10592337		1052.22	0.00040297		1582.22	-0.02275051		2112.21	0.00063663
522.42	0.10519035		1052.42	0.00009776		1582.42	-0.02330969		2112.41	0.00026288
522.62	0.10538316		1052.62	0.00131928		1582.62	-0.02242558		2112.61	-0.00008712
522.82	0.10551067		1052.82	0.00049973		1582.82	-0.02191897		2112.81	-0.00022663
523.02	0.10628241		1053.02	0.00093684		1583.02	-0.02254644		2113.01	-0.00150977
523.22	0.10684752		1053.22	0.00102684		1583.22	-0.02276507		2113.21	-0.0011069
523.42	0.10652373		1053.42	0.00107006		1583.42	-0.02180079		2113.41	-0.00217508
523.62	0.10759997		1053.62	0.00077247		1583.62	-0.02158372		2113.61	-0.00255042
523.82	0.10765619		1053.82	0.00057394		1583.82	-0.02143617		2113.81	-0.00308633
524.02	0.10767254		1054.02	0.00127187		1584.02	-0.02131958		2114.01	-0.00404629
524.22	0.10791779		1054.22	0.00103104		1584.22	-0.02143385		2114.21	-0.0051502
524.42	0.10775507		1054.42	0.00059435		1584.42	-0.02256664		2114.41	-0.00611801
524.62	0.10716699		1054.62	0.00058957		1584.62	-0.02209351		2114.61	-0.00557539
524.82	0.10695743		1054.82	0.00096762		1584.82	-0.02266205		2114.81	-0.00588519
525.02	0.10674425		1055.02	0.00185821		1585.02	-0.02366729		2115.01	-0.00491988
525.22	0.10675137		1055.22	0.00199243		1585.22	-0.02434275		2115.21	-0.00361065
525.42	0.10653825		1055.42	0.00134873		1585.42	-0.02402692		2115.41	-0.00224711
525.62	0.10651973		1055.62	0.0015023		1585.62	-0.02469802		2115.61	-0.00129069
525.82	0.10636595		1055.82	0.00082555		1585.82	-0.02495376		2115.81	-0.00112922
526.02	0.10482508		1056.02	-0.00121828		1586.02	-0.02468267		2116.01	0.00013126
526.22	0.10528352		1056.22	-0.00152016		1586.22	-0.02434227		2116.21	0.00023405
526.42	0.10523725		1056.42	-0.00103134		1586.42	-0.02450817		2116.41	0.00030565
526.62	0.10575236		1056.62	-0.00037501		1586.62	-0.0231427		2116.61	0.00045062
526.82	0.10560138		1056.82	-0.00095592		1586.82	-0.02366091		2116.81	-0.00012475
527.02	0.1066438		1057.02	-0.00085133		1587.02	-0.02287143		2117.01	-0.00040841
527.22	0.10666862		1057.22	-0.00056661		1587.22	-0.02245411		2117.21	-0.00055951
527.42	0.10625602		1057.42	-0.00029852		1587.42	-0.0223371		2117.41	-0.00119143
527.62	0.105759		1057.62	0.00024567		1587.62	-0.0229207		2117.61	-0.00214932
527.82	0.10474755		1057.82	0.00078225		1587.82	-0.02320851		2117.81	-0.00233804
528.02	0.10476628		1058.02	0.00211229		1588.02	-0.02319781		2118.01	-0.00363545
528.22	0.1041788		1058.22	0.00247465		1588.22	-0.02266751		2118.21	-0.00469594
528.42	0.10289614		1058.42	0.00229522		1588.42	-0.02390843		2118.41	-0.00469478
528.62	0.10219535		1058.62	0.00247017		1588.62	-0.02376068		2118.61	-0.00468298
528.82	0.10246757		1058.82	0.0024928		1588.82	-0.02427149		2118.81	-0.00512341
529.02	0.1018643		1059.02	0.00152338		1589.02	-0.02478493		2119.01	-0.00431974
529.22	0.10173553		1059.22	0.00077519		1589.22	-0.02406111		2119.21	-0.00400743
529.42	0.10153019		1059.42	-0.00017401		1589.42	-0.02413352		2119.41	-0.00368964
529.62	0.10115904		1059.62	-0.00042026		1589.62	-0.0241931		2119.61	-0.0038578
529.82	0.10157604		1059.82	-0.00148804		1589.82	-0.02374897		2119.81	-0.00333912
530.02	0.10214582		1060.02	-0.00334497		1590.02	-0.02282993		2120.01	-0.00297616
530.22	0.10336895		1060.22	-0.0033182		1590.22	-0.0224633		2120.21	-0.00345441
530.42	0.10425485		1060.42	-0.00217785		1590.42	-0.0221819		2120.41	-0.00394577
530.62	0.10457619		1060.62	-0.00132153		1590.62	-0.02141072		2120.61	-0.00396327
530.82	0.10482739		1060.82	-0.00192359		1590.82	-0.02211356		2120.81	-0.00451523
531.02	0.10589475		1061.02	-0.00120012		1591.02	-0.02136349		2121.01	-0.0043568
531.22	0.10641158		1061.22	-0.00115683		1591.22	-0.02225473		2121.21	-0.00425857
531.42	0.10749951		1061.42	-0.00055347		1591.42	-0.02312404		2121.41	-0.00440664
531.62	0.10780039		1061.62	0.00068477		1591.62	-0.02345915		2121.61	-0.00513168
531.82	0.10681225		1061.82	0.00073149		1591.82	-0.02391204		2121.81	-0.004545
532.02	0.1068771		1062.02	0.00189082		1592.02	-0.02395167		2122.01	-0.00483464
532.22	0.10641643		1062.22	0.0023786		1592.22	-0.02416875		2122.21	-0.00403701
532.42	0.10557195		1062.42	0.00232257		1592.42	-0.02441471		2122.41	-0.00351726
532.62	0.10479327		1062.62	0.00235715		1592.62	-0.02385626		2122.61	-0.00397485
532.82	0.10455092		1062.82	0.00225281		1592.82	-0.02443644		2122.81	-0.00504523
533.02	0.1045146		1063.02	0.00164538		1593.02	-0.02422587		2123.01	-0.00491832
533.22	0.10483035		1063.22	0.00149339		1593.22	-0.02396641		2123.21	-0.00545814
533.42	0.10569471		1063.42	0.00120767		1593.42	-0.02446947		2123.41	-0.00575094
533.62	0.10546416		1063.62	0.00065387		1593.62	-0.02362887		2123.61	-0.00681402
533.82	0.10582783		1063.82	0.0000916		1593.82	-0.0230941		2123.81	-0.00617493
534.02	0.10597376		1064.02	-0.00035789		1594.02	-0.02259183		2124.01	-0.00698423
534.22	0.10651581		1064.22	-0.00000945		1594.22	-0.02220757		2124.21	-0.00675386
534.42	0.10667805		1064.42	-0.00024592		1594.42	-0.02222166		2124.41	-0.00617395
534.62	0.10612686		1064.62	-0.00083048		1594.62	-0.02219715		2124.61	-0.00601851
534.82	0.10584791		1064.82	-0.00192264		1594.82	-0.02199755		2124.81	-0.00658344
535.02	0.10529302		1065.02	-0.00213805		1595.02	-0.02194071		2125.01	-0.0063162
535.22	0.105812		1065.22	-0.00293124		1595.22	-0.02282995		2125.21	-0.00605976
535.42	0.10489003		1065.42	-0.00244345		1595.42	-0.02287003		2125.41	-0.00596369
535.62	0.10435334		1065.62	-0.00217175		1595.62	-0.022585		2125.61	-0.00494353
535.82	0.10300374		1065.82	-0.00277473		1595.82	-0.02305027		2125.81	-0.00381783
536.02	0.10279376		1066.02	-0.00229652		1596.02	-0.02277989		2126.01	-0.00311242
536.22	0.10269006		1066.22	-0.00176468		1596.22	-0.0235119		2126.21	-0.00187369
536.42	0.10187685		1066.42	-0.00226407		1596.42	-0.02293051		2126.41	-0.00198098
536.62	0.10252908		1066.62	-0.00245419		1596.62	-0.02331959		2126.61	-0.00224822
536.82	0.10336024		1066.82	-0.0030598		1596.82	-0.02345334		2126.81	-0.00155144
537.02	0.10377527		1067.02	-0.00419344		1597.02	-0.02305975		2127.01	-0.00133624
537.22	0.10419043		1067.22	-0.00467438		1597.22	-0.02379757		2127.21	-0.00129856
537.42	0.10488781		1067.42	-0.00463184		1597.42	-0.0244734		2127.41	-0.00106342
537.62	0.10481041		1067.62	-0.00476062		1597.62	-0.02407031		2127.61	-0.00135974
537.82	0.10611766		1067.82	-0.00433596		1597.82	-0.02316236		2127.81	-0.00089368
538.02	0.1067485		1068.02	-0.00480012		1598.02	-0.0233429		2128.01	-0.00085298
538.22	0.10743862		1068.22	-0.00363723		1598.22	-0.02351405		2128.21	-0.00088593
538.42	0.10820186		1068.42	-0.00385977		1598.42	-0.02395855		2128.41	-0.00091853
538.62	0.1082225		1068.62	-0.00391694		1598.62	-0.02343722		2128.61	-0.00214266
538.82	0.10796486		1068.82	-0.00398466		1598.82	-0.02290419		2128.81	-0.00256644
539.02	0.10705941		1069.02	-0.00360144		1599.02	-0.02296991		2129.01	-0.00280782
539.22	0.10759975		1069.22	-0.00270982		1599.22	-0.02236764		2129.21	-0.00285233
539.42	0.106665		1069.42	-0.00116127		1599.42	-0.021646		2129.41	-0.00250756
539.62	0.10712214		1069.62	-0.00013681		1599.62	-0.02141188		2129.61	-0.00277184
539.82	0.1067945		1069.82	-0.0000746		1599.82	-0.02224936		2129.81	-0.0027643
540.02	0.10701133		1070.02	0.00023628		1600.02	-0.02256633		2130.01	-0.00280184
540.22	0.10653076		1070.22	0.00003303		1600.22	-0.0231843		2130.21	-0.00198513
540.42	0.1059911		1070.42	-0.00116374		1600.42	-0.02337772		2130.41	-0.00215125
540.62	0.10591014		1070.62	-0.00184175		1600.62	-0.02367		2130.61	-0.00184912
540.82	0.10474206		1070.82	-0.00271633		1600.82	-0.02400174		2130.81	-0.00140519
541.02	0.10454083		1071.02	-0.00336451		1601.02	-0.02490128		2131.01	-0.0024344
541.22	0.10441065		1071.22	-0.00300508		1601.22	-0.02596064		2131.21	-0.00310638
541.42	0.10514282		1071.42	-0.00318412		1601.42	-0.02708841		2131.41	-0.00306206
541.62	0.10497695		1071.62	-0.00238035		1601.62	-0.02690968		2131.61	-0.00296349
541.82	0.10538729		1071.82	-0.0016032		1601.82	-0.0266416		2131.81	-0.00262014
542.02	0.10502282		1072.02	-0.00194275		1602.02	-0.02780606		2132.01	-0.00273443
542.22	0.10535656		1072.22	-0.00077464		1602.22	-0.02795466		2132.21	-0.00328261
542.42	0.10653345		1072.42	-0.0013423		1602.42	-0.02855761		2132.41	-0.00288101
542.62	0.1060007		1072.62	-0.00207906		1602.62	-0.02849267		2132.61	-0.00385901
542.82	0.10539759		1072.82	-0.00164048		1602.82	-0.02858223		2132.81	-0.00424562
543.02	0.10514348		1073.02	-0.00067287		1603.02	-0.02762398		2133.01	-0.00473499
543.22	0.10507706		1073.22	0.00006405		1603.22	-0.02650048		2133.21	-0.00532816
543.42	0.10417759		1073.42	0.00051053		1603.42	-0.02574537		2133.41	-0.0064143
543.62	0.10531071		1073.62	0.00068176		1603.62	-0.02523565		2133.61	-0.00786943
543.82	0.10539712		1073.82	0.00055961		1603.82	-0.02450579		2133.81	-0.00773333
544.02	0.10492698		1074.02	-0.00008345		1604.02	-0.02380095		2134.01	-0.00738675
544.22	0.10434336		1074.22	-0.00143213		1604.22	-0.02328215		2134.21	-0.00620285
544.42	0.10463907		1074.42	-0.00164633		1604.42	-0.02323938		2134.41	-0.00584745
544.62	0.10516094		1074.62	-0.00182616		1604.62	-0.02289665		2134.61	-0.00540403
544.82	0.10563803		1074.82	-0.0025416		1604.82	-0.02339826		2134.81	-0.00502332
545.02	0.10664784		1075.02	-0.00279949		1605.02	-0.02306808		2135.01	-0.00433396
545.22	0.10655581		1075.22	-0.00223157		1605.22	-0.02370291		2135.21	-0.00375863
545.42	0.10651628		1075.42	-0.00174919		1605.42	-0.02392418		2135.41	-0.00207134
545.62	0.10588742		1075.62	-0.00086319		1605.62	-0.02358555		2135.61	-0.00144702
545.82	0.10637604		1075.82	-0.00153592		1605.82	-0.02355244		2135.81	-0.00106989
546.02	0.10723196		1076.02	-0.00178859		1606.02	-0.02410367		2136.01	-0.00064517
546.22	0.1077554		1076.22	-0.00149758		1606.22	-0.02505673		2136.21	-0.00023855
546.42	0.10718336		1076.42	-0.00173309		1606.42	-0.0257024		2136.41	0.00087169
546.62	0.106183		1076.62	-0.00167089		1606.62	-0.02589116		2136.61	-0.000035
546.82	0.10599405		1076.82	-0.00128088		1606.82	-0.02578491		2136.81	-0.00030761
547.02	0.10562188		1077.02	-0.00167551		1607.02	-0.02510257		2137.01	-0.00019647
547.22	0.10456108		1077.22	-0.00176882		1607.22	-0.02473079		2137.21	-0.0015332
547.42	0.10343959		1077.42	-0.0021813		1607.42	-0.02399528		2137.41	-0.00286153
547.62	0.1038983		1077.62	-0.00172477		1607.62	-0.02337384		2137.61	-0.00354271
547.82	0.10319797		1077.82	-0.00283285		1607.82	-0.02301039		2137.81	-0.00322346
548.02	0.10201197		1078.02	-0.00385411		1608.02	-0.02311526		2138.01	-0.00317923
548.22	0.10169961		1078.22	-0.00461233		1608.22	-0.02334712		2138.21	-0.00349361
548.42	0.10225711		1078.42	-0.00339164		1608.42	-0.02336745		2138.41	-0.00303691
548.62	0.10236164		1078.62	-0.00384945		1608.62	-0.0225435		2138.61	-0.00370504
548.82	0.1023244		1078.82	-0.00379352		1608.82	-0.02335423		2138.81	-0.0036909
549.02	0.10183923		1079.02	-0.00305974		1609.02	-0.02284843		2139.01	-0.00385291
549.22	0.10165979		1079.22	-0.00289421		1609.22	-0.02319459		2139.21	-0.00389823
549.42	0.10282225		1079.42	-0.00334759		1609.42	-0.02319566		2139.41	-0.00378826
549.62	0.10369083		1079.62	-0.00416632		1609.62	-0.02279594		2139.61	-0.00403691
549.82	0.1046424		1079.82	-0.00429178		1609.82	-0.02323483		2139.81	-0.00412165
550.02	0.10545116		1080.02	-0.00413127		1610.02	-0.02287429		2140.01	-0.00396051
550.22	0.10482505		1080.22	-0.00414816		1610.22	-0.02314949		2140.21	-0.00402828
550.42	0.10490912		1080.42	-0.00367674		1610.42	-0.02319215		2140.41	-0.00369579
550.62	0.10597431		1080.62	-0.00322635		1610.62	-0.0229995		2140.61	-0.0042547
550.82	0.10636207		1080.82	-0.00318512		1610.82	-0.02277231		2140.81	-0.00377872
551.02	0.10572728		1081.02	-0.00328447		1611.02	-0.02220147		2141.01	-0.0036147
551.22	0.10580922		1081.22	-0.00319924		1611.22	-0.02194793		2141.21	-0.00432851
551.42	0.10512054		1081.42	-0.0035241		1611.42	-0.02193392		2141.41	-0.00456857
551.62	0.10600208		1081.62	-0.00346025		1611.62	-0.02269057		2141.61	-0.00410215
551.82	0.10585968		1081.82	-0.00482156		1611.82	-0.02355072		2141.81	-0.00342777
552.02	0.10450095		1082.02	-0.00414029		1612.02	-0.02364173		2142.01	-0.00369015
552.22	0.10439503		1082.22	-0.0033316		1612.22	-0.02456012		2142.21	-0.00296815
552.42	0.10492456		1082.42	-0.00203901		1612.42	-0.02505819		2142.41	-0.00249443
552.62	0.1048609		1082.62	-0.00222939		1612.62	-0.02468041		2142.61	-0.00273596
552.82	0.10559459		1082.82	-0.00176985		1612.82	-0.02633322		2142.81	-0.00303387
553.02	0.10538499		1083.02	-0.00209407		1613.02	-0.02616385		2143.01	-0.00257225
553.22	0.1057797		1083.22	-0.00316972		1613.22	-0.02657231		2143.21	-0.00123708
553.42	0.10690892		1083.42	-0.00406739		1613.42	-0.0265911		2143.41	-0.00007116
553.62	0.10650704		1083.62	-0.0050553		1613.62	-0.0262272		2143.61	-0.00025505
553.82	0.10645323		1083.82	-0.00470707		1613.82	-0.02619466		2143.81	0.00027983
554.02	0.10683977		1084.02	-0.00588371		1614.02	-0.0248261		2144.01	0.0002238
554.22	0.10607054		1084.22	-0.00566513		1614.22	-0.02441		2144.21	0.00026517
554.42	0.10622283		1084.42	-0.00514777		1614.42	-0.02346347		2144.41	0.0008857
554.62	0.10639613		1084.62	-0.00496265		1614.62	-0.02239549		2144.61	0.00088584
554.82	0.10611633		1084.82	-0.0053024		1614.82	-0.02197171		2144.81	0.00055147
555.02	0.10496013		1085.02	-0.00572755		1615.02	-0.02099807		2145.01	0.00034868
555.22	0.10459412		1085.22	-0.00562139		1615.22	-0.02128978		2145.21	0.00053946
555.42	0.10408389		1085.42	-0.00571374		1615.42	-0.02133027		2145.41	-0.00033853
555.62	0.10428772		1085.62	-0.00562026		1615.62	-0.0208411		2145.61	-0.00095665
555.82	0.103679		1085.82	-0.00625283		1615.82	-0.02102952		2145.81	-0.00103204
556.02	0.10218267		1086.02	-0.00584475		1616.02	-0.02124247		2146.01	-0.00176623
556.22	0.10293674		1086.22	-0.00520937		1616.22	-0.02167252		2146.21	-0.00127635
556.42	0.10331425		1086.42	-0.00506138		1616.42	-0.02304043		2146.41	-0.00168414
556.62	0.10395918		1086.62	-0.00518216		1616.62	-0.0228714		2146.61	-0.00171694
556.82	0.10424367		1086.82	-0.00453666		1616.82	-0.0241686		2146.81	-0.00251603
557.02	0.10416239		1087.02	-0.00483423		1617.02	-0.0251178		2147.01	-0.00102268
557.22	0.10467028		1087.22	-0.00436744		1617.22	-0.02618653		2147.21	-0.00046219
557.42	0.1058318		1087.42	-0.00502857		1617.42	-0.0266793		2147.41	-0.00059477
557.62	0.10629721		1087.62	-0.00517786		1617.62	-0.02681507		2147.61	-0.00153808
557.82	0.10689311		1087.82	-0.00463719		1617.82	-0.02656229		2147.81	-0.00148928
558.02	0.10721168		1088.02	-0.00493207		1618.02	-0.0260936		2148.01	-0.00227957
558.22	0.10672515		1088.22	-0.00392871		1618.22	-0.02556822		2148.21	-0.00235719
558.42	0.10711674		1088.42	-0.00330826		1618.42	-0.02497845		2148.41	-0.00252344
558.62	0.10724524		1088.62	-0.0029956		1618.62	-0.0245812		2148.61	-0.00312723
558.82	0.1067553		1088.82	-0.00274495		1618.82	-0.02357697		2148.81	-0.00337081
559.02	0.10564989		1089.02	-0.00182115		1619.02	-0.02248666		2149.01	-0.00357526
559.22	0.10531431		1089.22	-0.0012152		1619.22	-0.02184874		2149.21	-0.00433023
559.42	0.10502406		1089.42	-0.00107919		1619.42	-0.02054634		2149.41	-0.0057269
559.62	0.1044329		1089.62	-0.00055572		1619.62	-0.01940814		2149.61	-0.00574045
559.82	0.10382069		1089.82	-0.00078092		1619.82	-0.01932862		2149.81	-0.0053167
