# Supplementary material for: Functional development of a V3/glycan-specific broadly neutralizing antibody isolated from a case of HIV superinfection
Source: eLife journal article supplement (doi:10.7554/elife.68110), 2021-07-15
Supplement: fig2-data2 [file F1.xls]

Vers 3.43 Data Simulation
Conc1	1.56E-08	1.56E-08	1.56E-08	1.56E-08	1.56E-08
Start1	200	729.99	1260	1790	2320
Stop1	559.8	1089.79	1619.8	2149.8	2679.8
Time1	Data1	Sim1	Time2	Data2	Sim2	Time3	Data3	Sim3	Time4	Data4	Sim4	Time5	Data5	Sim5
200	0.00535413		729.99	-0.0018211		1260	0.00298079		1790	-0.00008774		2320	0.00214316
200.2	0.00408401		730.19	-0.00185533		1260.2	0.00214946		1790.2	0.00077446		2320.2	0.00229099
200.4	0.00249142		730.39	-0.00155523		1260.4	0.00141618		1790.4	0.00129793		2320.4	0.00268108
200.6	0.00209744		730.59	-0.00175667		1260.6	0.00110727		1790.6	0.00160347		2320.6	0.00355723
200.8	0.00123647		730.79	-0.00171257		1260.8	-0.00002791		1790.8	0.0015825		2320.8	0.00426593
201	0.00019353		730.99	-0.00249614		1261	-0.00099776		1791	0.00138894		2321	0.00480666
201.2	-0.00090177		731.19	-0.00262346		1261.2	-0.00109709		1791.2	0.00157968		2321.2	0.00506533
201.4	-0.00138182		731.39	-0.00293466		1261.4	-0.0017128		1791.4	0.0016039		2321.4	0.00535937
201.6	-0.00150135		731.59	-0.00339001		1261.6	-0.00190281		1791.6	0.00166688		2321.6	0.00597525
201.8	-0.00173012		731.79	-0.00345894		1261.8	-0.00183176		1791.8	0.00113812		2321.8	0.00671666
202	-0.00165746		731.99	-0.00278591		1262	-0.00155915		1792	0.00087219		2322	0.00714376
202.2	-0.00080411		732.19	-0.00247808		1262.2	-0.00071261		1792.2	0.000634		2322.2	0.0079179
202.4	-0.00123577		732.39	-0.00241362		1262.4	0.00062563		1792.4	0.0004		2322.4	0.0082156
202.6	-0.00047969		732.59	-0.00214573		1262.6	0.00035585		1792.6	0.00002638		2322.6	0.00816316
202.8	-0.00005548		732.79	-0.0020066		1262.8	0.00041969		1792.8	0.00035571		2322.8	0.00749968
203	0.00051222		732.99	-0.00238698		1263	-0.0004924		1793	0.00032352		2323	0.00834968
203.2	0.00123643		733.19	-0.00263383		1263.2	-0.00049507		1793.2	0.00068898		2323.2	0.00767499
203.4	0.00169637		733.39	-0.00248342		1263.4	0.00029511		1793.4	0.00112335		2323.4	0.0068865
203.6	0.00210406		733.59	-0.00272315		1263.6	-0.00012958		1793.6	0.00154896		2323.6	0.00660624
203.8	0.00315726		733.79	-0.00311872		1263.8	-0.00049531		1793.8	0.00255395		2323.8	0.00608828
204	0.00329567		733.99	-0.00335985		1264	-0.0005843		1794	0.00333365		2324	0.00519671
204.2	0.00203641		734.19	-0.00363148		1264.2	0.00014376		1794.2	0.00356966		2324.2	0.00526314
204.4	0.00207518		734.39	-0.00411789		1264.4	0.00121246		1794.4	0.00296224		2324.4	0.00521754
204.6	0.00275766		734.59	-0.00496273		1264.6	0.00277854		1794.6	0.00332224		2324.6	0.00538968
204.8	0.00241134		734.79	-0.00585829		1264.8	0.00291713		1794.8	0.00276166		2324.8	0.00500133
205	0.00212392		734.99	-0.00664804		1265	0.00315857		1795	0.00328143		2325	0.00521689
205.2	0.00170121		735.19	-0.00714159		1265.2	0.00414464		1795.2	0.003633		2325.2	0.00517336
205.4	0.00203132		735.39	-0.0073941		1265.4	0.00373514		1795.4	0.00405642		2325.4	0.00500549
205.6	0.00231269		735.59	-0.00735008		1265.6	0.00341633		1795.6	0.00389541		2325.6	0.00577882
205.8	0.00206566		735.79	-0.00633278		1265.8	0.00348245		1795.8	0.00379447		2325.8	0.00676917
206	0.00217178		735.99	-0.00531194		1266	0.00324952		1796	0.00370307		2326	0.00748578
206.2	0.00197469		736.19	-0.00436201		1266.2	0.00306989		1796.2	0.00325194		2326.2	0.00857185
206.4	0.00157772		736.39	-0.00373922		1266.4	0.00280281		1796.4	0.00306153		2326.4	0.00788073
206.6	0.00210536		736.59	-0.00244715		1266.6	0.00221086		1796.6	0.00278505		2326.6	0.00736375
206.8	0.00236438		736.79	-0.00201825		1266.8	0.00116176		1796.8	0.00224826		2326.8	0.0074883
207	0.00260675		736.99	-0.00241331		1267	0.00072172		1797	0.00143186		2327	0.00755356
207.2	0.00269429		737.19	-0.00166294		1267.2	0.00067871		1797.2	0.00101688		2327.2	0.0071671
207.4	0.00302966		737.39	-0.00164671		1267.4	-0.00005337		1797.4	0.00098035		2327.4	0.00709291
207.6	0.00313505		737.59	-0.00149629		1267.6	-0.00146783		1797.6	0.00174535		2327.6	0.00714878
207.8	0.00294625		737.79	-0.00098757		1267.8	-0.00159696		1797.8	0.00244592		2327.8	0.00631636
208	0.00352655		737.99	-0.0013369		1268	-0.0009362		1798	0.002849		2328	0.00596875
208.2	0.00319392		738.19	-0.00194425		1268.2	-0.00029954		1798.2	0.0030649		2328.2	0.00621012
208.4	0.00367211		738.39	-0.00233235		1268.4	0.00051864		1798.4	0.00290496		2328.4	0.00562081
208.6	0.00444925		738.59	-0.00207721		1268.6	0.00128478		1798.6	0.00286165		2328.6	0.00521805
208.8	0.00445		738.79	-0.0023514		1268.8	0.00083664		1798.8	0.00296996		2328.8	0.00506199
209	0.00478447		738.99	-0.00218282		1269	0.00069248		1799	0.00399746		2329	0.0053295
209.2	0.0044081		739.19	-0.00288674		1269.2	0.00121979		1799.2	0.0038536		2329.2	0.00483188
209.4	0.00444132		739.39	-0.0029271		1269.4	0.00043753		1799.4	0.00474262		2329.4	0.00483234
209.6	0.0043582		739.59	-0.00280726		1269.6	-0.00027531		1799.6	0.0050079		2329.6	0.00566722
209.8	0.00362016		739.79	-0.00231175		1269.8	-0.00023718		1799.8	0.00532716		2329.8	0.00636336
210	0.00351735		739.99	-0.001728		1270	-0.00001672		1800	0.00507763		2330	0.00691262
210.2	0.00381409		740.19	-0.00059533		1270.2	0.00013805		1800.2	0.00488279		2330.2	0.00763762
210.4	0.00427513		740.39	-0.00095471		1270.4	0.00059526		1800.4	0.00469835		2330.4	0.00723079
210.6	0.00428758		740.59	-0.00049233		1270.6	0.0010868		1800.6	0.00379071		2330.6	0.00752819
210.8	0.00380745		740.79	-0.00092931		1270.8	0.00034489		1800.8	0.0027065		2330.8	0.00785893
211	0.00365097		740.99	-0.00082798		1271	0.0006161		1801	0.00305707		2331	0.00753619
211.2	0.00401903		741.19	0.00010427		1271.2	-0.00039847		1801.2	0.00373553		2331.2	0.0073013
211.4	0.00441502		741.39	0.00031989		1271.4	-0.00019631		1801.4	0.00429185		2331.4	0.00617101
211.6	0.00426081		741.59	0.00032224		1271.6	-0.0005419		1801.6	0.0047519		2331.6	0.00600629
211.8	0.00490554		741.79	0.00014586		1271.8	-0.00027411		1801.8	0.004633		2331.8	0.0062875
212	0.00633391		741.99	-0.00018783		1272	0.00042605		1802	0.00465402		2332	0.00702428
212.2	0.00548781		742.19	0.00015395		1272.2	0.00139195		1802.2	0.00402637		2332.2	0.00712276
212.4	0.00581738		742.39	-0.00017245		1272.4	0.00141915		1802.4	0.00374272		2332.4	0.0057851
212.6	0.00666525		742.59	-0.00033518		1272.6	0.00207733		1802.6	0.0036489		2332.6	0.00549389
212.8	0.00673531		742.79	-0.00184458		1272.8	0.0019851		1802.8	0.00431622		2332.8	0.00584015
213	0.00720002		742.99	-0.00264839		1273	0.00219483		1803	0.00484181		2333	0.00534796
213.2	0.00600287		743.19	-0.00369986		1273.2	0.00204677		1803.2	0.00536721		2333.2	0.00514783
213.4	0.00573002		743.39	-0.00421982		1273.4	0.00163837		1803.4	0.00617991		2333.4	0.00574317
213.6	0.00572438		743.59	-0.00387259		1273.6	0.00166683		1803.6	0.00566611		2333.6	0.00580808
213.8	0.00594683		743.79	-0.00389973		1273.8	0.00188323		1803.8	0.00533776		2333.8	0.0065208
214	0.00598493		743.99	-0.00388084		1274	0.00225235		1804	0.00552934		2334	0.00697895
214.2	0.00630582		744.19	-0.00392431		1274.2	0.00204235		1804.2	0.00556132		2334.2	0.00738198
214.4	0.00591244		744.39	-0.00411447		1274.4	0.00166331		1804.4	0.00602895		2334.4	0.00709294
214.6	0.00566221		744.59	-0.00355518		1274.6	0.00129047		1804.6	0.00640618		2334.6	0.00709336
214.8	0.00571968		744.79	-0.00289626		1274.8	0.00021916		1804.8	0.00616703		2334.8	0.00629278
215	0.00588825		744.99	-0.00237053		1275	0.00025906		1805	0.00656665		2335	0.00542132
215.2	0.00585494		745.19	-0.00266188		1275.2	-0.00113718		1805.2	0.00678889		2335.2	0.00531175
215.4	0.00602088		745.39	-0.00232303		1275.4	-0.000836		1805.4	0.00565782		2335.4	0.00496817
215.6	0.00676443		745.59	-0.00211618		1275.6	-0.00196147		1805.6	0.00510471		2335.6	0.00537179
215.8	0.00694589		745.79	-0.00193249		1275.8	-0.00203036		1805.8	0.00473167		2335.8	0.0049778
216	0.00701894		745.99	-0.00136795		1276	-0.00202756		1806	0.00447657		2336	0.00434809
216.2	0.00670701		746.19	-0.0016324		1276.2	-0.00136149		1806.2	0.00387386		2336.2	0.00413703
216.4	0.00791675		746.39	-0.00227547		1276.4	-0.00139882		1806.4	0.00343213		2336.4	0.00366015
216.6	0.00840081		746.59	-0.00306884		1276.6	-0.00106938		1806.6	0.00359962		2336.6	0.00361149
216.8	0.00919529		746.79	-0.00312872		1276.8	-0.00158767		1806.8	0.00354597		2336.8	0.00371709
217	0.00882492		746.99	-0.00267643		1277	-0.00176514		1807	0.00426386		2337	0.00367588
217.2	0.00784365		747.19	-0.00207596		1277.2	-0.00130679		1807.2	0.00392291		2337.2	0.00431879
217.4	0.00733783		747.39	-0.00191448		1277.4	-0.00098757		1807.4	0.00355758		2337.4	0.00503934
217.6	0.0072828		747.59	-0.00147886		1277.6	-0.00055442		1807.6	0.00308924		2337.6	0.00531902
217.8	0.0073464		747.79	-0.00189545		1277.8	-0.00026014		1807.8	0.00337374		2337.8	0.00625768
218	0.00699184		747.99	-0.00124461		1278	0.00013293		1808	0.00440726		2338	0.00614899
218.2	0.00710578		748.19	-0.00066136		1278.2	0.00049054		1808.2	0.00498166		2338.2	0.00648289
218.4	0.00694551		748.39	-0.0001318		1278.4	0.00079148		1808.4	0.00546287		2338.4	0.00679523
218.6	0.00740161		748.59	-0.0000013		1278.6	0.0019103		1808.6	0.00585777		2338.6	0.00771878
218.8	0.00727212		748.79	-0.0000144		1278.8	0.00175298		1808.8	0.00628723		2338.8	0.007427
219	0.00718741		748.99	-0.00093679		1279	0.00163625		1809	0.00635659		2339	0.00723655
219.2	0.00778733		749.19	-0.00194546		1279.2	0.00109607		1809.2	0.00686927		2339.2	0.00761856
219.4	0.00905802		749.39	-0.00152127		1279.4	0.0016667		1809.4	0.00637668		2339.4	0.00666309
219.6	0.00926504		749.59	-0.00212486		1279.6	0.00151129		1809.6	0.00670341		2339.6	0.00577542
219.8	0.00826093		749.79	-0.00224202		1279.8	0.00208855		1809.8	0.00653704		2339.8	0.0052423
220	0.00820706		749.99	-0.00184596		1280	0.00219905		1810	0.00663784		2340	0.0048982
220.2	0.00828137		750.19	-0.0021212		1280.2	0.00242952		1810.2	0.00564684		2340.2	0.00498866
220.4	0.00904743		750.39	-0.00268189		1280.4	0.00193899		1810.4	0.00458988		2340.4	0.00493843
220.6	0.00836576		750.59	-0.00348477		1280.6	0.0015615		1810.6	0.00477644		2340.6	0.00444946
220.8	0.0075877		750.79	-0.00307168		1280.8	0.00054183		1810.8	0.00444066		2340.8	0.00476088
221	0.00683042		750.99	-0.00359284		1281	0.00085244		1811	0.00427404		2341	0.00555318
221.2	0.00643161		751.19	-0.00314862		1281.2	0.00098316		1811.2	0.00371077		2341.2	0.00579779
221.4	0.00564714		751.39	-0.00324035		1281.4	0.00037322		1811.4	0.00376601		2341.4	0.00526776
221.6	0.00585077		751.59	-0.00273279		1281.6	0.0006971		1811.6	0.00332407		2341.6	0.00488744
221.8	0.00620306		751.79	-0.00249896		1281.8	0.00083318		1811.8	0.00356598		2341.8	0.0046863
222	0.00608316		751.99	-0.00205705		1282	0.00028814		1812	0.00377446		2342	0.00461873
222.2	0.00595591		752.19	-0.00194755		1282.2	0.00000434		1812.2	0.00421179		2342.2	0.00481904
222.4	0.00612632		752.39	-0.00189522		1282.4	-0.00007968		1812.4	0.00412875		2342.4	0.00516228
222.6	0.00654566		752.59	-0.00165845		1282.6	0.00003065		1812.6	0.0045257		2342.6	0.00513526
222.8	0.00667071		752.79	-0.00217475		1282.8	-0.0006691		1812.8	0.00509245		2342.8	0.00499603
223	0.00736098		752.99	-0.00298764		1283	-0.00122555		1813	0.00454582		2343	0.00435189
223.2	0.00743745		753.19	-0.00335025		1283.2	-0.00100941		1813.2	0.00476077		2343.2	0.00437539
223.4	0.00749604		753.39	-0.00298959		1283.4	-0.00088663		1813.4	0.00556064		2343.4	0.00384028
223.6	0.00727485		753.59	-0.00316334		1283.6	-0.00038557		1813.6	0.0064997		2343.6	0.00394934
223.8	0.00706241		753.79	-0.00276311		1283.8	0.00035028		1813.8	0.00585643		2343.8	0.00432317
224	0.00727744		753.99	-0.00316142		1284	0.00016618		1814	0.00632862		2344	0.00418339
224.2	0.00694276		754.19	-0.00357047		1284.2	-0.00004741		1814.2	0.00584429		2344.2	0.00455257
224.4	0.00756766		754.39	-0.00421206		1284.4	-0.0008812		1814.4	0.00566675		2344.4	0.00451921
224.6	0.00806437		754.59	-0.00489422		1284.6	-0.00046197		1814.6	0.00570569		2344.6	0.00511409
224.8	0.00832587		754.79	-0.00445152		1284.8	-0.00023794		1814.8	0.00556585		2344.8	0.00621017
225	0.00951771		754.99	-0.00378813		1285	0.00002707		1815	0.00518693		2345	0.00712488
225.2	0.00911924		755.19	-0.00239968		1285.2	-0.0000002		1815.2	0.0051764		2345.2	0.00661645
225.4	0.00781367		755.39	-0.00212701		1285.4	0.00000856		1815.4	0.00433787		2345.4	0.00612362
225.6	0.00750626		755.59	-0.00136963		1285.6	0.00003858		1815.6	0.00372576		2345.6	0.00578831
225.8	0.00813105		755.79	-0.00149199		1285.8	0.00023124		1815.8	0.00364528		2345.8	0.0054335
226	0.00780472		755.99	-0.00205378		1286	-0.00041971		1816	0.00257889		2346	0.00564749
226.2	0.00787241		756.19	-0.00179153		1286.2	-0.00087057		1816.2	0.00334497		2346.2	0.00563223
226.4	0.00816279		756.39	-0.00171629		1286.4	-0.00037283		1816.4	0.00281864		2346.4	0.00605137
226.6	0.00828188		756.59	-0.00117259		1286.6	-0.00035889		1816.6	0.00277778		2346.6	0.00683079
226.8	0.00841681		756.79	-0.00124525		1286.8	-0.0003959		1816.8	0.00281537		2346.8	0.00698361
227	0.00774112		756.99	-0.00042414		1287	-0.00072256		1817	0.00263809		2347	0.00653058
227.2	0.00771739		757.19	-0.00004306		1287.2	0.00002244		1817.2	0.00347656		2347.2	0.00640239
227.4	0.00860782		757.39	0.00008325		1287.4	0.00032968		1817.4	0.00456423		2347.4	0.00700472
227.6	0.00851206		757.59	-0.00006497		1287.6	0.00041268		1817.6	0.00532188		2347.6	0.0071613
227.8	0.00866112		757.79	0.00002256		1287.8	0.00045262		1817.8	0.00544607		2347.8	0.00730274
228	0.00872235		757.99	0.00006432		1288	0.00041013		1818	0.00728761		2348	0.0065061
228.2	0.00917422		758.19	0.00035265		1288.2	0.00070701		1818.2	0.00810514		2348.2	0.00606164
228.4	0.01017984		758.39	0.00000449		1288.4	0.00109327		1818.4	0.00866165		2348.4	0.00612607
228.6	0.01075779		758.59	-0.00075907		1288.6	0.00185058		1818.6	0.00927542		2348.6	0.00596355
228.8	0.01048354		758.79	0.00002897		1288.8	0.00157938		1818.8	0.00976937		2348.8	0.00561919
229	0.01035916		758.99	-0.00007862		1289	0.00102819		1819	0.00951501		2349	0.00573624
229.2	0.00932752		759.19	0.0001921		1289.2	0.00101165		1819.2	0.00904898		2349.2	0.00462392
229.4	0.00848237		759.39	-0.00013294		1289.4	0.00057235		1819.4	0.00828707		2349.4	0.00484179
229.6	0.00864105		759.59	-0.00092181		1289.6	0.00016793		1819.6	0.008373		2349.6	0.00402299
229.8	0.00880073		759.79	-0.00193311		1289.8	0.00080132		1819.8	0.00806845		2349.8	0.00383357
230	0.00862893		759.99	-0.00252623		1290	-0.00013048		1820	0.00727411		2350	0.00401937
230.2	0.00875511		760.19	-0.00336095		1290.2	-0.00052021		1820.2	0.00774449		2350.2	0.00461227
230.4	0.0089149		760.39	-0.00311483		1290.4	-0.00005877		1820.4	0.00666741		2350.4	0.00487842
230.6	0.00942019		760.59	-0.00281635		1290.6	-0.00066219		1820.6	0.00594784		2350.6	0.00503076
230.8	0.00969579		760.79	-0.00246693		1290.8	-0.0005281		1820.8	0.00567943		2350.8	0.00414374
231	0.010003		760.99	-0.00130985		1291	-0.00052661		1821	0.00566483		2351	0.0044403
231.2	0.01106999		761.19	-0.00103565		1291.2	-0.00011996		1821.2	0.00479531		2351.2	0.00375293
231.4	0.01234687		761.39	-0.0008688		1291.4	-0.00112515		1821.4	0.00467797		2351.4	0.00418528
231.6	0.01197339		761.59	-0.00046155		1291.6	-0.00118021		1821.6	0.00420145		2351.6	0.00395658
231.8	0.01266569		761.79	-0.00017738		1291.8	-0.00018721		1821.8	0.003833		2351.8	0.00360077
232	0.01362119		761.99	-0.00054216		1292	0.00092291		1822	0.00380149		2352	0.00347558
232.2	0.01391519		762.19	-0.00098955		1292.2	0.00184833		1822.2	0.00357755		2352.2	0.00262444
232.4	0.01381968		762.39	-0.00100923		1292.4	0.00180863		1822.4	0.00333007		2352.4	0.0024325
232.6	0.01448811		762.59	-0.00123074		1292.6	0.00168181		1822.6	0.00331377		2352.6	0.00172526
232.8	0.01409217		762.79	-0.00057277		1292.8	0.00209385		1822.8	0.00320406		2352.8	0.00245019
233	0.01362056		762.99	-0.0012185		1293	0.00241409		1823	0.0028095		2353	0.00394316
233.2	0.01255771		763.19	-0.00056069		1293.2	0.00240994		1823.2	0.00306649		2353.2	0.00364754
233.4	0.01199409		763.39	-0.00087303		1293.4	0.00257941		1823.4	0.00417294		2353.4	0.00373926
233.6	0.01137997		763.59	-0.00151381		1293.6	0.00229929		1823.6	0.00482375		2353.6	0.00361313
233.8	0.01049506		763.79	-0.00135396		1293.8	0.00239874		1823.8	0.00539463		2353.8	0.00447889
234	0.01048433		763.99	-0.00203632		1294	0.00177529		1824	0.00609885		2354	0.00480764
234.2	0.00970233		764.19	-0.0027768		1294.2	0.00239957		1824.2	0.00683444		2354.2	0.00551033
234.4	0.0099011		764.39	-0.00211402		1294.4	0.00265572		1824.4	0.00660308		2354.4	0.00527922
234.6	0.0104372		764.59	-0.00263935		1294.6	0.00268975		1824.6	0.00673438		2354.6	0.005105
234.8	0.01057723		764.79	-0.00232655		1294.8	0.00254117		1824.8	0.00695571		2354.8	0.0044327
235	0.01058798		764.99	-0.00241044		1295	0.00333681		1825	0.00738757		2355	0.00423424
235.2	0.00985174		765.19	-0.00251535		1295.2	0.00351319		1825.2	0.00707059		2355.2	0.00348346
235.4	0.00944944		765.39	-0.00334774		1295.4	0.0028571		1825.4	0.00718019		2355.4	0.00345438
235.6	0.00821118		765.59	-0.0036808		1295.6	0.00339729		1825.6	0.00677983		2355.6	0.00399326
235.8	0.00829605		765.79	-0.00387747		1295.8	0.0039638		1825.8	0.00700406		2355.8	0.00377396
236	0.00863684		765.99	-0.004722		1296	0.00374773		1826	0.00679065		2356	0.0039564
236.2	0.00789273		766.19	-0.00513194		1296.2	0.003637		1826.2	0.00674751		2356.2	0.00323492
236.4	0.00793223		766.39	-0.00461223		1296.4	0.00287064		1826.4	0.00653475		2356.4	0.00352234
236.6	0.00799341		766.59	-0.00433673		1296.6	0.00290192		1826.6	0.00683298		2356.6	0.00381811
236.8	0.00768755		766.79	-0.00391639		1296.8	0.0031818		1826.8	0.00730993		2356.8	0.00439048
237	0.00787244		766.99	-0.00417802		1297	0.00216816		1827	0.00770004		2357	0.00432625
237.2	0.00780282		767.19	-0.00256431		1297.2	0.00123902		1827.2	0.00811882		2357.2	0.00325536
237.4	0.00784587		767.39	-0.00205472		1297.4	0.00119959		1827.4	0.00884687		2357.4	0.00271629
237.6	0.00786514		767.59	-0.00086448		1297.6	0.00036266		1827.6	0.00894871		2357.6	0.00306844
237.8	0.00801066		767.79	-0.00020737		1297.8	0.0005906		1827.8	0.00923787		2357.8	0.00338371
238	0.00872552		767.99	-0.0001157		1298	0.00062218		1828	0.00905574		2358	0.00331788
238.2	0.00866949		768.19	-0.00025027		1298.2	0.00094356		1828.2	0.00879688		2358.2	0.00299799
238.4	0.00977372		768.39	-0.00021123		1298.4	0.00099355		1828.4	0.00786243		2358.4	0.00231339
238.6	0.00991311		768.59	-0.00018288		1298.6	0.00102528		1828.6	0.00741327		2358.6	0.00156415
238.8	0.00968325		768.79	0.00024135		1298.8	0.00125059		1828.8	0.00768551		2358.8	0.00045959
239	0.00911197		768.99	-0.00029539		1299	0.00217103		1829	0.00755538		2359	0.0007761
239.2	0.00842783		769.19	0.00041025		1299.2	0.0015626		1829.2	0.00758732		2359.2	0.00151238
239.4	0.00890149		769.39	-0.00019496		1299.4	0.00143522		1829.4	0.00737779		2359.4	0.00228763
239.6	0.00882004		769.59	-0.00027597		1299.6	0.00103155		1829.6	0.00733425		2359.6	0.00305196
239.8	0.00882442		769.79	-0.00086375		1299.8	0.00136709		1829.8	0.00712749		2359.8	0.00326007
240	0.00987961		769.99	-0.00154278		1300	0.00066903		1830	0.00702356		2360	0.00420996
240.2	0.00916731		770.19	-0.00234205		1300.2	0.00032213		1830.2	0.00685381		2360.2	0.00481515
240.4	0.00955093		770.39	-0.00202019		1300.4	0.00018261		1830.4	0.00644027		2360.4	0.00512395
240.6	0.0101665		770.59	-0.00270668		1300.6	-0.00046196		1830.6	0.00653092		2360.6	0.00561509
240.8	0.0104074		770.79	-0.00297408		1300.8	-0.00049703		1830.8	0.0067517		2360.8	0.00610147
241	0.01024397		770.99	-0.00286081		1301	-0.00189525		1831	0.00659247		2361	0.00609174
241.2	0.00992261		771.19	-0.00181628		1301.2	-0.00176435		1831.2	0.00667759		2361.2	0.00605347
241.4	0.01008294		771.39	-0.00191486		1301.4	-0.00126944		1831.4	0.00713536		2361.4	0.00603015
241.6	0.01067614		771.59	-0.00156356		1301.6	-0.0019225		1831.6	0.00703246		2361.6	0.00590836
241.8	0.00991517		771.79	-0.0012899		1301.8	-0.00128294		1831.8	0.00746991		2361.8	0.0058468
242	0.01023265		771.99	-0.0019118		1302	-0.00090078		1832	0.00740003		2362	0.00523232
242.2	0.01041169		772.19	-0.00158181		1302.2	-0.00020979		1832.2	0.00818331		2362.2	0.00424836
242.4	0.01086825		772.39	-0.0010363		1302.4	0.00058613		1832.4	0.00837633		2362.4	0.00343211
242.6	0.01037066		772.59	-0.00089633		1302.6	0.00095378		1832.6	0.0085301		2362.6	0.00297632
242.8	0.00969819		772.79	-0.00098957		1302.8	0.00148931		1832.8	0.00919873		2362.8	0.0024895
243	0.00908164		772.99	-0.0010181		1303	0.00177774		1833	0.00959358		2363	0.00262514
243.2	0.00897231		773.19	-0.00050129		1303.2	0.00190016		1833.2	0.01020955		2363.2	0.00323476
243.4	0.00930734		773.39	-0.00034012		1303.4	0.00250059		1833.4	0.01001333		2363.4	0.00294994
243.6	0.00889366		773.59	-0.00066642		1303.6	0.00268072		1833.6	0.00940629		2363.6	0.00252455
243.8	0.00950374		773.79	-0.00099053		1303.8	0.00317604		1833.8	0.00911819		2363.8	0.00224903
244	0.0099734		773.99	-0.00078369		1304	0.00316031		1834	0.00927714		2364	0.00265737
244.2	0.00895709		774.19	-0.00061852		1304.2	0.00329297		1834.2	0.00893533		2364.2	0.00252055
244.4	0.00957743		774.39	-0.00061203		1304.4	0.00355438		1834.4	0.00843507		2364.4	0.00163758
244.6	0.00933877		774.59	-0.00110755		1304.6	0.0028847		1834.6	0.00832875		2364.6	0.00180092
244.8	0.00910704		774.79	-0.00080601		1304.8	0.00262749		1834.8	0.00883901		2364.8	0.00203111
245	0.0100412		774.99	-0.00031036		1305	0.00236346		1835	0.00893068		2365	0.00187499
245.2	0.01082822		775.19	-0.00043841		1305.2	0.00312679		1835.2	0.00850275		2365.2	0.001707
245.4	0.01182109		775.39	0.00003433		1305.4	0.00349248		1835.4	0.00868727		2365.4	0.00170327
245.6	0.01201826		775.59	-0.00013086		1305.6	0.00319917		1835.6	0.00822319		2365.6	0.00186967
245.8	0.01187212		775.79	0.00042289		1305.8	0.00426651		1835.8	0.00894944		2365.8	0.00171919
246	0.01318086		775.99	0.00013165		1306	0.00470945		1836	0.00874971		2366	0.00110404
246.2	0.01378448		776.19	0.00002607		1306.2	0.00432475		1836.2	0.00920109		2366.2	0.00176434
246.4	0.01293392		776.39	-0.00083334		1306.4	0.00414006		1836.4	0.00929665		2366.4	0.00253133
246.6	0.01244998		776.59	-0.0022404		1306.6	0.00428038		1836.6	0.00901323		2366.6	0.00275812
246.8	0.01154641		776.79	-0.00223921		1306.8	0.00489411		1836.8	0.00966891		2366.8	0.00280245
247	0.01160153		776.99	-0.00236738		1307	0.00491725		1837	0.0101113		2367	0.00289757
247.2	0.0122937		777.19	-0.00226778		1307.2	0.00414978		1837.2	0.00974294		2367.2	0.00355745
247.4	0.01232559		777.39	-0.00214194		1307.4	0.00361089		1837.4	0.0093208		2367.4	0.00307361
247.6	0.01228226		777.59	-0.00294398		1307.6	0.00334198		1837.6	0.00913234		2367.6	0.00302388
247.8	0.01291599		777.79	-0.0032385		1307.8	0.00262297		1837.8	0.00965646		2367.8	0.00350944
248	0.01287439		777.99	-0.00298972		1308	0.00191911		1838	0.01022779		2368	0.00411952
248.2	0.01223349		778.19	-0.00270487		1308.2	0.00148946		1838.2	0.01007388		2368.2	0.00361639
248.4	0.01243524		778.39	-0.00303957		1308.4	0.00109667		1838.4	0.01061057		2368.4	0.003054
248.6	0.01191054		778.59	-0.00310507		1308.6	0.00016489		1838.6	0.01041746		2368.6	0.00359176
248.8	0.01222953		778.79	-0.00344766		1308.8	-0.00081688		1838.8	0.0106063		2368.8	0.00313119
249	0.01224002		778.99	-0.00375929		1309	-0.00061509		1839	0.00998929		2369	0.00304211
249.2	0.01184857		779.19	-0.00391755		1309.2	-0.00125923		1839.2	0.0083803		2369.2	0.00310614
249.4	0.01173123		779.39	-0.00372328		1309.4	-0.00146306		1839.4	0.00823042		2369.4	0.0033805
249.6	0.01173275		779.59	-0.00474819		1309.6	-0.00149252		1839.6	0.00696413		2369.6	0.00351106
249.8	0.01144597		779.79	-0.00421417		1309.8	-0.00133509		1839.8	0.00733195		2369.8	0.00250787
250	0.01142207		779.99	-0.00461331		1310	-0.00125523		1840	0.00658068		2370	0.00218779
250.2	0.01139887		780.19	-0.00551934		1310.2	-0.00124603		1840.2	0.00589966		2370.2	0.00291237
250.4	0.01086042		780.39	-0.00634663		1310.4	-0.00036196		1840.4	0.00572985		2370.4	0.00328301
250.6	0.01093145		780.59	-0.006374		1310.6	-0.00004328		1840.6	0.00525424		2370.6	0.00257597
250.8	0.01050032		780.79	-0.00583085		1310.8	0.0003254		1840.8	0.00523647		2370.8	0.0027953
251	0.01050847		780.99	-0.00540884		1311	0.00008752		1841	0.00546779		2371	0.00263178
251.2	0.00984262		781.19	-0.00495995		1311.2	-0.00054911		1841.2	0.00495269		2371.2	0.00309028
251.4	0.00936217		781.39	-0.00479018		1311.4	-0.00015985		1841.4	0.00503272		2371.4	0.0029973
251.6	0.0094879		781.59	-0.00415918		1311.6	0.00042443		1841.6	0.00593137		2371.6	0.00334614
251.8	0.00992159		781.79	-0.0037335		1311.8	0.00062965		1841.8	0.00668241		2371.8	0.00397952
252	0.0096527		781.99	-0.00290016		1312	0.00084947		1842	0.00722668		2372	0.00435353
252.2	0.00982297		782.19	-0.00203202		1312.2	0.00186203		1842.2	0.00772263		2372.2	0.00366926
252.4	0.01102228		782.39	-0.00134794		1312.4	0.00167039		1842.4	0.00843432		2372.4	0.00386041
252.6	0.01131518		782.59	-0.00140116		1312.6	0.0020645		1842.6	0.00852076		2372.6	0.00290298
252.8	0.01111177		782.79	-0.00111471		1312.8	0.00153764		1842.8	0.00885243		2372.8	0.00255553
253	0.01051816		782.99	-0.0009048		1313	0.00229077		1843	0.00894989		2373	0.00317655
253.2	0.01150701		783.19	-0.00064004		1313.2	0.00192416		1843.2	0.00840904		2373.2	0.00362101
253.4	0.01159242		783.39	-0.00030646		1313.4	0.00256658		1843.4	0.0087468		2373.4	0.00299692
253.6	0.0118655		783.59	-0.00056308		1313.6	0.0030879		1843.6	0.00883899		2373.6	0.00252695
253.8	0.01193398		783.79	-0.00066587		1313.8	0.00367898		1843.8	0.00919689		2373.8	0.00228578
254	0.01234718		783.99	-0.00119078		1314	0.00382329		1844	0.00850946		2374	0.00266339
254.2	0.01299068		784.19	-0.00191422		1314.2	0.00407355		1844.2	0.00868238		2374.2	0.00336275
254.4	0.01297006		784.39	-0.00263873		1314.4	0.00387184		1844.4	0.0086811		2374.4	0.00333995
254.6	0.01215011		784.59	-0.00137233		1314.6	0.00338597		1844.6	0.00838998		2374.6	0.00274528
254.8	0.01210284		784.79	-0.00208368		1314.8	0.00267		1844.8	0.00859316		2374.8	0.00311008
255	0.01193023		784.99	-0.00202531		1315	0.00190217		1845	0.00908702		2375	0.00325531
255.2	0.01183326		785.19	-0.00214394		1315.2	0.0009578		1845.2	0.00875916		2375.2	0.00283004
255.4	0.01236781		785.39	-0.00226351		1315.4	0.00079813		1845.4	0.00933982		2375.4	0.00270141
255.6	0.0127702		785.59	-0.00203113		1315.6	0.00199672		1845.6	0.01034788		2375.6	0.00304261
255.8	0.0127777		785.79	-0.00228666		1315.8	0.00189453		1845.8	0.01053217		2375.8	0.00418919
256	0.01305346		785.99	-0.00268433		1316	0.00170629		1846	0.01101068		2376	0.0045636
256.2	0.01468996		786.19	-0.00156424		1316.2	0.00258545		1846.2	0.01137416		2376.2	0.00443079
256.4	0.01523622		786.39	-0.00109727		1316.4	0.0026469		1846.4	0.01174399		2376.4	0.00470447
256.6	0.01453125		786.59	-0.00089628		1316.6	0.00227461		1846.6	0.01222652		2376.6	0.00356859
256.8	0.01335146		786.79	-0.00103402		1316.8	0.00108554		1846.8	0.01264227		2376.8	0.00407263
257	0.01319711		786.99	-0.00153632		1317	0.0013853		1847	0.01257316		2377	0.00531235
257.2	0.01329306		787.19	-0.00198101		1317.2	0.00062764		1847.2	0.01179723		2377.2	0.00508492
257.4	0.01176065		787.39	-0.00245332		1317.4	0.00126813		1847.4	0.01188578		2377.4	0.00395839
257.6	0.01169905		787.59	-0.00315923		1317.6	0.0008821		1847.6	0.01157887		2377.6	0.00423607
257.8	0.0112549		787.79	-0.00397863		1317.8	0.00086611		1847.8	0.01118821		2377.8	0.00450047
258	0.01065175		787.99	-0.00384604		1318	0.00056777		1848	0.01102235		2378	0.00438002
258.2	0.01006702		788.19	-0.00346192		1318.2	0.00061366		1848.2	0.01092432		2378.2	0.00322375
258.4	0.00933164		788.39	-0.00322481		1318.4	0.00046479		1848.4	0.01076934		2378.4	0.00230754
258.6	0.00894806		788.59	-0.00261203		1318.6	0.0000658		1848.6	0.01077625		2378.6	0.00178995
258.8	0.00935345		788.79	-0.00329189		1318.8	-0.00043668		1848.8	0.01094192		2378.8	0.00147574
259	0.00915958		788.99	-0.00309139		1319	-0.00043902		1849	0.01075773		2379	0.00079662
259.2	0.00941844		789.19	-0.00340577		1319.2	-0.00002642		1849.2	0.01072696		2379.2	-0.00035201
259.4	0.00962413		789.39	-0.00327451		1319.4	0.00117364		1849.4	0.01092194		2379.4	0.00047283
259.6	0.00952889		789.59	-0.00286471		1319.6	0.00262231		1849.6	0.01098112		2379.6	0.00033608
259.8	0.01042227		789.79	-0.00299889		1319.8	0.00277201		1849.8	0.01076175		2379.8	0.00016829
260	0.01164515		789.99	-0.00260613		1320	0.00396382		1850	0.01089755		2380	-0.00066015
260.2	0.01327594		790.19	-0.00175137		1320.2	0.00445057		1850.2	0.01083891		2380.2	-0.00065205
260.4	0.013499		790.39	-0.0022024		1320.4	0.00475071		1850.4	0.01086343		2380.4	-0.00079543
260.6	0.01358437		790.59	-0.00239718		1320.6	0.00370943		1850.6	0.01029991		2380.6	-0.00114015
260.8	0.01295293		790.79	-0.00292188		1320.8	0.00402317		1850.8	0.00998028		2380.8	-0.000354
261	0.01364876		790.99	-0.00251285		1321	0.00454215		1851	0.00924728		2381	0.00049881
261.2	0.01358537		791.19	-0.00242091		1321.2	0.00415062		1851.2	0.00823269		2381.2	0.00022714
261.4	0.01315417		791.39	-0.00255922		1321.4	0.00449676		1851.4	0.00821943		2381.4	-0.00014744
261.6	0.01373689		791.59	-0.00200837		1321.6	0.0038902		1851.6	0.00777316		2381.6	0.00101801
261.8	0.0137567		791.79	-0.00250156		1321.8	0.00409988		1851.8	0.00756185		2381.8	0.00114152
262	0.0140037		791.99	-0.00219224		1322	0.0037566		1852	0.00780499		2382	0.00142316
262.2	0.013989		792.19	-0.00192795		1322.2	0.00327801		1852.2	0.00740705		2382.2	0.00154514
262.4	0.01418239		792.39	-0.00270942		1322.4	0.00282282		1852.4	0.00794242		2382.4	0.00226543
262.6	0.01443912		792.59	-0.00246695		1322.6	0.00216256		1852.6	0.00840942		2382.6	0.0026197
262.8	0.01360632		792.79	-0.00274649		1322.8	0.0016752		1852.8	0.00910673		2382.8	0.00290475
263	0.0134887		792.99	-0.00336863		1323	0.00122655		1853	0.008344		2383	0.002761
263.2	0.01349784		793.19	-0.00374469		1323.2	0.00121317		1853.2	0.00916703		2383.2	0.0026811
263.4	0.01332575		793.39	-0.00376396		1323.4	0.00160259		1853.4	0.00908864		2383.4	0.0031703
263.6	0.01333381		793.59	-0.00396		1323.6	0.00170115		1853.6	0.00966978		2383.6	0.00283864
263.8	0.01420072		793.79	-0.00415003		1323.8	0.00209312		1853.8	0.01016569		2383.8	0.00222564
264	0.01491244		793.99	-0.00440371		1324	0.00235707		1854	0.01039704		2384	0.00279101
264.2	0.0155094		794.19	-0.00437206		1324.2	0.00203593		1854.2	0.01060229		2384.2	0.00314834
264.4	0.01525717		794.39	-0.00415429		1324.4	0.00263552		1854.4	0.01017298		2384.4	0.00238195
264.6	0.0149842		794.59	-0.00358298		1324.6	0.00204085		1854.6	0.0103377		2384.6	0.00160528
264.8	0.01376644		794.79	-0.00368913		1324.8	0.00255994		1854.8	0.00999759		2384.8	0.00129575
265	0.01434126		794.99	-0.00319889		1325	0.00275779		1855	0.0096161		2385	0.00064562
265.2	0.01353225		795.19	-0.00323628		1325.2	0.002301		1855.2	0.00886551		2385.2	0.00126646
265.4	0.01348539		795.39	-0.00275611		1325.4	0.00245317		1855.4	0.00963651		2385.4	0.0006263
265.6	0.01362502		795.59	-0.00200121		1325.6	0.00205288		1855.6	0.00979519		2385.6	0.00135164
265.8	0.01394529		795.79	-0.00216582		1325.8	0.00175039		1855.8	0.00959375		2385.8	0.00084987
266	0.01388653		795.99	-0.00239172		1326	0.00180626		1856	0.00914888		2386	0.00091409
266.2	0.01467603		796.19	-0.00190839		1326.2	0.00231105		1856.2	0.00859741		2386.2	0.00101698
266.4	0.01479356		796.39	-0.00165093		1326.4	0.00212965		1856.4	0.00918952		2386.4	0.00123348
266.6	0.01514214		796.59	-0.00074787		1326.6	0.00184175		1856.6	0.00965827		2386.6	0.00086627
266.8	0.01479432		796.79	-0.00124078		1326.8	0.00144091		1856.8	0.00946845		2386.8	0.00197209
267	0.01536288		796.99	-0.00117855		1327	0.00262904		1857	0.0096199		2387	0.00185674
267.2	0.0158702		797.19	-0.00102469		1327.2	0.00264835		1857.2	0.01078636		2387.2	0.00222458
267.4	0.01559566		797.39	-0.00115073		1327.4	0.00278347		1857.4	0.01071292		2387.4	0.00243657
267.6	0.01464492		797.59	-0.00106487		1327.6	0.00252704		1857.6	0.01088328		2387.6	0.00217158
267.8	0.01471473		797.79	-0.00135877		1327.8	0.00230999		1857.8	0.01155932		2387.8	0.00197679
268	0.01494077		797.99	-0.00147258		1328	0.0027557		1858	0.01124762		2388	0.00264241
268.2	0.01474835		798.19	-0.00097832		1328.2	0.00193985		1858.2	0.01127554		2388.2	0.00174836
268.4	0.01420191		798.39	-0.00090853		1328.4	0.00156691		1858.4	0.01126732		2388.4	0.00083583
268.6	0.01392564		798.59	-0.00166037		1328.6	0.00091792		1858.6	0.01182839		2388.6	0.00120171
268.8	0.01343044		798.79	-0.00221128		1328.8	0.00025576		1858.8	0.0112311		2388.8	0.00141897
269	0.01448217		798.99	-0.00252189		1329	-0.00002459		1859	0.0109613		2389	0.00150595
269.2	0.01366316		799.19	-0.00273915		1329.2	-0.00066907		1859.2	0.01027824		2389.2	0.00326135
269.4	0.01338284		799.39	-0.00255355		1329.4	-0.00044093		1859.4	0.01084997		2389.4	0.00259023
269.6	0.01297382		799.59	-0.003264		1329.6	-0.00096382		1859.6	0.00998756		2389.6	0.00247884
269.8	0.0127714		799.79	-0.00343628		1329.8	-0.00028625		1859.8	0.00844195		2389.8	0.00190484
270	0.01218333		799.99	-0.00327379		1330	-0.00011059		1860	0.00751656		2390	0.00169995
270.2	0.01308861		800.19	-0.00327291		1330.2	-0.00024069		1860.2	0.00770846		2390.2	0.00225339
270.4	0.01272951		800.39	-0.00288632		1330.4	-0.00026773		1860.4	0.0081616		2390.4	0.00246413
270.6	0.01344957		800.59	-0.00273921		1330.6	-0.00070636		1860.6	0.00787562		2390.6	0.00236108
270.8	0.01308468		800.79	-0.00326479		1330.8	-0.00041406		1860.8	0.00817257		2390.8	0.003374
271	0.01317513		800.99	-0.00292624		1331	0.00047996		1861	0.00900316		2391	0.0026102
271.2	0.01334901		801.19	-0.00326876		1331.2	-0.00040236		1861.2	0.0090945		2391.2	0.00237697
271.4	0.01205491		801.39	-0.0033657		1331.4	-0.00045006		1861.4	0.00940709		2391.4	0.00235791
271.6	0.01203625		801.59	-0.00346227		1331.6	-0.00040781		1861.6	0.00967612		2391.6	0.00214821
271.8	0.01227724		801.79	-0.00363164		1331.8	-0.00016437		1861.8	0.01086538		2391.8	0.002753
272	0.01246692		801.99	-0.00296445		1332	-0.00006762		1862	0.01068117		2392	0.00280333
272.2	0.01252934		802.19	-0.00247171		1332.2	-0.0002908		1862.2	0.01101159		2392.2	0.00213586
272.4	0.0133003		802.39	-0.00197223		1332.4	-0.00003052		1862.4	0.01160369		2392.4	0.00166204
272.6	0.01455644		802.59	-0.00202857		1332.6	0.00023068		1862.6	0.01151612		2392.6	0.00195917
272.8	0.01572786		802.79	-0.00103511		1332.8	0.00070391		1862.8	0.01136559		2392.8	0.00163948
273	0.01662448		802.99	-0.00076213		1333	0.00144344		1863	0.01081006		2393	0.00149712
273.2	0.01590317		803.19	-0.00054048		1333.2	0.00231842		1863.2	0.01092139		2393.2	0.00204657
273.4	0.01601787		803.39	-0.00038163		1333.4	0.00205179		1863.4	0.01190486		2393.4	0.00033771
273.6	0.01631955		803.59	-0.00057642		1333.6	0.00147444		1863.6	0.01160257		2393.6	-0.00047612
273.8	0.01564942		803.79	-0.00022758		1333.8	0.00227034		1863.8	0.01106348		2393.8	-0.00089695
274	0.01532109		803.99	-0.00008892		1334	0.00201232		1864	0.01135629		2394	-0.00135053
274.2	0.01576063		804.19	0.00020968		1334.2	0.00203956		1864.2	0.01133407		2394.2	-0.00125563
274.4	0.01540837		804.39	0.00102219		1334.4	0.00197182		1864.4	0.01080703		2394.4	-0.0011779
274.6	0.01613779		804.59	0.00112277		1334.6	0.00135656		1864.6	0.01044248		2394.6	-0.00093133
274.8	0.01531067		804.79	0.00080047		1334.8	0.00141265		1864.8	0.01031171		2394.8	-0.00169498
275	0.01454715		804.99	0.00089584		1335	0.00184144		1865	0.01015346		2395	-0.00119642
275.2	0.01425305		805.19	-0.00020454		1335.2	0.00141642		1865.2	0.01047561		2395.2	-0.000984
275.4	0.01307699		805.39	-0.00055446		1335.4	0.00122871		1865.4	0.01041929		2395.4	-0.00093116
275.6	0.01350819		805.59	-0.00039629		1335.6	0.00095895		1865.6	0.00987413		2395.6	-0.00045378
275.8	0.01266748		805.79	-0.0002345		1335.8	0.00094118		1865.8	0.00937805		2395.8	-0.00012557
276	0.01300672		805.99	0.0001841		1336	0.00038473		1866	0.00918426		2396	-0.00042182
276.2	0.01256173		806.19	0.00024333		1336.2	0.00097191		1866.2	0.00911119		2396.2	-0.00060349
276.4	0.0130443		806.39	0.00052289		1336.4	0.00109554		1866.4	0.00977413		2396.4	-0.00096484
276.6	0.01299211		806.59	0.00052546		1336.6	0.00151868		1866.6	0.00953667		2396.6	-0.00048742
276.8	0.01340393		806.79	0.00015879		1336.8	0.00212839		1866.8	0.00958844		2396.8	-0.00092455
277	0.01353572		806.99	-0.00007209		1337	0.00133651		1867	0.01013494		2397	-0.0006223
277.2	0.01424891		807.19	-0.00059785		1337.2	0.00124974		1867.2	0.01049668		2397.2	-0.0009093
277.4	0.01442119		807.39	-0.00120954		1337.4	0.00047666		1867.4	0.01096624		2397.4	-0.00173835
277.6	0.014249		807.59	-0.00139156		1337.6	0.00166463		1867.6	0.01100611		2397.6	-0.001676
277.8	0.01351138		807.79	-0.0010796		1337.8	0.00266817		1867.8	0.01099591		2397.8	-0.00125582
278	0.01435619		807.99	-0.0012021		1338	0.00275823		1868	0.0106422		2398	-0.00104231
278.2	0.0148178		808.19	-0.00108852		1338.2	0.00306126		1868.2	0.01020805		2398.2	-0.00078383
278.4	0.01466559		808.39	-0.00164375		1338.4	0.00348099		1868.4	0.00973817		2398.4	-0.00029886
278.6	0.01457171		808.59	-0.0015907		1338.6	0.00333635		1868.6	0.00967077		2398.6	-0.00061494
278.8	0.01321151		808.79	-0.00208442		1338.8	0.00388105		1868.8	0.00888465		2398.8	-0.00048302
279	0.01316416		808.99	-0.00232261		1339	0.0047744		1869	0.00899244		2399	0.00023487
279.2	0.01356432		809.19	-0.00304324		1339.2	0.00497985		1869.2	0.00875732		2399.2	0.00047027
279.4	0.01325153		809.39	-0.00301949		1339.4	0.00489605		1869.4	0.00800553		2399.4	0.0003791
279.6	0.01353176		809.59	-0.00260276		1339.6	0.00486107		1869.6	0.0075359		2399.6	0.00132022
279.8	0.01312179		809.79	-0.00317653		1339.8	0.00465388		1869.8	0.00701994		2399.8	0.00141126
280	0.01300434		809.99	-0.00280884		1340	0.00455792		1870	0.00705023		2400	0.00123813
280.2	0.01270319		810.19	-0.00276095		1340.2	0.00426979		1870.2	0.00720009		2400.2	0.00125634
280.4	0.01327049		810.39	-0.0027022		1340.4	0.00404242		1870.4	0.00734085		2400.4	0.00115168
280.6	0.01320865		810.59	-0.00348979		1340.6	0.00401856		1870.6	0.0070917		2400.6	0.0007036
280.8	0.01377832		810.79	-0.00395691		1340.8	0.00372324		1870.8	0.00689965		2400.8	-0.0002033
281	0.01423322		810.99	-0.00275245		1341	0.00253432		1871	0.00629485		2401	-0.00040906
281.2	0.01485481		811.19	-0.0025901		1341.2	0.00253278		1871.2	0.00601606		2401.2	-0.00098863
281.4	0.01482346		811.39	-0.0021552		1341.4	0.00224603		1871.4	0.00627246		2401.4	-0.00145536
281.6	0.01450478		811.59	-0.00131962		1341.6	0.00262495		1871.6	0.00665044		2401.6	-0.0011715
281.8	0.01401261		811.79	-0.00130628		1341.8	0.00183228		1871.8	0.00683133		2401.8	-0.00176424
282	0.01443134		811.99	-0.00177374		1342	0.00164623		1872	0.00676738		2402	-0.00263679
282.2	0.01411993		812.19	-0.00214601		1342.2	0.0017673		1872.2	0.00701755		2402.2	-0.00355777
282.4	0.01366775		812.39	-0.00258798		1342.4	0.00154932		1872.4	0.0077221		2402.4	-0.00366952
282.6	0.01353902		812.59	-0.00205719		1342.6	0.00134419		1872.6	0.00821786		2402.6	-0.00423162
282.8	0.01300077		812.79	-0.00194366		1342.8	0.00196632		1872.8	0.00875317		2402.8	-0.00436175
283	0.01319401		812.99	-0.00190692		1343	0.00249043		1873	0.00930194		2403	-0.00383142
283.2	0.01256984		813.19	-0.00207941		1343.2	0.00252618		1873.2	0.0091701		2403.2	-0.00305893
283.4	0.01147505		813.39	-0.00213785		1343.4	0.00244865		1873.4	0.00984495		2403.4	-0.00326521
283.6	0.01092987		813.59	-0.00185575		1343.6	0.00233377		1873.6	0.00989885		2403.6	-0.00220877
283.8	0.01132551		813.79	-0.0016662		1343.8	0.0027349		1873.8	0.00956207		2403.8	-0.00218133
284	0.01065312		813.99	-0.00126436		1344	0.00322597		1874	0.00988696		2404	-0.00250164
284.2	0.01142142		814.19	-0.00151999		1344.2	0.00297407		1874.2	0.01083612		2404.2	-0.00172929
284.4	0.01187542		814.39	-0.00154638		1344.4	0.00368939		1874.4	0.01155703		2404.4	-0.00167936
284.6	0.01225354		814.59	-0.00149082		1344.6	0.00381111		1874.6	0.01137182		2404.6	-0.00180037
284.8	0.01277594		814.79	-0.00121461		1344.8	0.00387767		1874.8	0.01125421		2404.8	-0.00122924
285	0.01323699		814.99	-0.00073291		1345	0.00378058		1875	0.0103267		2405	-0.00065825
285.2	0.01396537		815.19	-0.0009748		1345.2	0.00443917		1875.2	0.01064125		2405.2	-0.00049001
285.4	0.01453553		815.39	-0.0012709		1345.4	0.00402506		1875.4	0.00993061		2405.4	-0.00087497
285.6	0.01427026		815.59	-0.00115483		1345.6	0.00369253		1875.6	0.00999975		2405.6	-0.00123731
285.8	0.01436381		815.79	-0.00204898		1345.8	0.00412998		1875.8	0.00983778		2405.8	-0.00180148
286	0.0153824		815.99	-0.00300394		1346	0.00468549		1876	0.00989686		2406	-0.00242587
286.2	0.01612091		816.19	-0.00358461		1346.2	0.00420944		1876.2	0.01022442		2406.2	-0.00296962
286.4	0.01554151		816.39	-0.00383594		1346.4	0.00325273		1876.4	0.01017229		2406.4	-0.00226771
286.6	0.01572832		816.59	-0.00262295		1346.6	0.0025174		1876.6	0.00936195		2406.6	-0.00216123
286.8	0.01549543		816.79	-0.00272278		1346.8	0.00201		1876.8	0.00917341		2406.8	-0.00123689
287	0.01603414		816.99	-0.00287807		1347	0.00183183		1877	0.00849389		2407	-0.000005
287.2	0.01542443		817.19	-0.00289249		1347.2	0.00153012		1877.2	0.00825851		2407.2	-0.00016084
287.4	0.015474		817.39	-0.00314659		1347.4	0.00133231		1877.4	0.00868041		2407.4	0.00017754
287.6	0.01521219		817.59	-0.00334488		1347.6	0.00087793		1877.6	0.00819346		2407.6	0.00054478
287.8	0.01543606		817.79	-0.00323267		1347.8	0.00063512		1877.8	0.00796656		2407.8	-0.00011634
288	0.01409383		817.99	-0.00352984		1348	0.00048545		1878	0.0086368		2408	0.00000238
288.2	0.01504764		818.19	-0.00357607		1348.2	0.00067005		1878.2	0.0094059		2408.2	0.00074688
288.4	0.01486911		818.39	-0.0030223		1348.4	0.00089208		1878.4	0.01003103		2408.4	0.00038416
288.6	0.01482344		818.59	-0.00345797		1348.6	0.00150705		1878.6	0.00971661		2408.6	0.00066028
288.8	0.01494277		818.79	-0.00352923		1348.8	0.00182519		1878.8	0.0101243		2408.8	0.0002707
289	0.01493288		818.99	-0.00346234		1349	0.0018939		1879	0.01010645		2409	-0.00002405
289.2	0.01511834		819.19	-0.00334535		1349.2	0.00286773		1879.2	0.01118025		2409.2	-0.00045017
289.4	0.01487137		819.39	-0.00330471		1349.4	0.00259231		1879.4	0.01116804		2409.4	-0.00080637
289.6	0.01428312		819.59	-0.00284286		1349.6	0.00301474		1879.6	0.01143413		2409.6	-0.00079675
289.8	0.01432059		819.79	-0.00277462		1349.8	0.00374719		1879.8	0.01165003		2409.8	-0.00039871
290	0.01503193		819.99	-0.00285617		1350	0.00357132		1880	0.01241218		2410	-0.00104858
290.2	0.0147013		820.19	-0.00278736		1350.2	0.0028998		1880.2	0.01268806		2410.2	-0.00062788
290.4	0.01441404		820.39	-0.00225945		1350.4	0.00361172		1880.4	0.01221455		2410.4	-0.00032433
290.6	0.01533579		820.59	-0.00100204		1350.6	0.00386553		1880.6	0.01142883		2410.6	-0.00017499
290.8	0.01543791		820.79	-0.00120992		1350.8	0.00409048		1880.8	0.01162814		2410.8	0.00018856
291	0.01575122		820.99	-0.0007101		1351	0.00382714		1881	0.01207664		2411	0.00016738
291.2	0.01492222		821.19	-0.00043476		1351.2	0.00384942		1881.2	0.01270934		2411.2	-0.00004229
291.4	0.01504637		821.39	-0.00083556		1351.4	0.00336992		1881.4	0.01278265		2411.4	0.00015947
291.6	0.01479263		821.59	-0.00143602		1351.6	0.0024619		1881.6	0.01147793		2411.6	-0.00083115
291.8	0.01517815		821.79	-0.00099406		1351.8	0.00099		1881.8	0.01137125		2411.8	-0.00084112
292	0.01522471		821.99	-0.00131244		1352	0.00128846		1882	0.01166396		2412	-0.00056465
292.2	0.01525391		822.19	-0.00175101		1352.2	0.00057688		1882.2	0.01086589		2412.2	-0.00092277
292.4	0.01445354		822.39	-0.00173857		1352.4	-0.00010739		1882.4	0.01068511		2412.4	-0.00102886
292.6	0.01432317		822.59	-0.00234949		1352.6	-0.00001709		1882.6	0.01080891		2412.6	-0.0010032
292.8	0.01466941		822.79	-0.00164608		1352.8	-0.0007311		1882.8	0.0107641		2412.8	-0.00169015
293	0.01441706		822.99	-0.00200725		1353	-0.00048801		1883	0.01094232		2413	-0.00085103
293.2	0.01353427		823.19	-0.00269805		1353.2	0.00035038		1883.2	0.01053854		2413.2	-0.00069552
293.4	0.01318951		823.39	-0.00286398		1353.4	0.0006978		1883.4	0.00977638		2413.4	-0.00047192
293.6	0.01302557		823.59	-0.00302003		1353.6	0.00141593		1883.6	0.00955687		2413.6	-0.00028792
293.8	0.01325214		823.79	-0.00309074		1353.8	0.00112489		1883.8	0.00988816		2413.8	-0.0003471
294	0.01383769		823.99	-0.00376807		1354	0.00178489		1884	0.01102411		2414	-0.00040778
294.2	0.01380879		824.19	-0.00362789		1354.2	0.00201511		1884.2	0.01091904		2414.2	-0.00088861
294.4	0.01385958		824.39	-0.00274581		1354.4	0.00289908		1884.4	0.01104146		2414.4	-0.00181065
294.6	0.01386579		824.59	-0.002135		1354.6	0.00189874		1884.6	0.01136129		2414.6	-0.00103969
294.8	0.01319678		824.79	-0.00199744		1354.8	0.0024142		1884.8	0.012541		2414.8	-0.00156639
295	0.01355119		824.99	-0.00203547		1355	0.00306899		1885	0.01376706		2415	-0.00164034
295.2	0.01390815		825.19	-0.00136117		1355.2	0.00307319		1885.2	0.01314638		2415.2	-0.00197397
295.4	0.01408024		825.39	-0.00122631		1355.4	0.00261611		1885.4	0.01285578		2415.4	-0.00233744
295.6	0.01476431		825.59	-0.00159179		1355.6	0.00203638		1885.6	0.01275039		2415.6	-0.003032
295.8	0.01516572		825.79	-0.00088997		1355.8	0.0021302		1885.8	0.01362314		2415.8	-0.00252226
296	0.01553154		825.99	-0.00094358		1356	0.00266338		1886	0.01294		2416	-0.00236798
296.2	0.01454784		826.19	-0.00102368		1356.2	0.00199366		1886.2	0.01251978		2416.2	-0.00293988
296.4	0.01467752		826.39	-0.0012276		1356.4	0.00181753		1886.4	0.01297227		2416.4	-0.00255937
296.6	0.01561123		826.59	-0.00128908		1356.6	0.00206668		1886.6	0.01295422		2416.6	-0.00309023
296.8	0.01580447		826.79	-0.00088146		1356.8	0.00181794		1886.8	0.01211061		2416.8	-0.00326319
297	0.01617788		826.99	-0.00166903		1357	0.0014664		1887	0.01150229		2417	-0.00209284
297.2	0.0154992		827.19	-0.00140435		1357.2	0.00158621		1887.2	0.01113564		2417.2	-0.0030074
297.4	0.01570094		827.39	-0.00136335		1357.4	0.00109863		1887.4	0.01136529		2417.4	-0.00311413
297.6	0.0161416		827.59	-0.00172051		1357.6	-0.00009917		1887.6	0.01122542		2417.6	-0.00273812
297.8	0.01641802		827.79	-0.00172996		1357.8	-0.00138667		1887.8	0.01047907		2417.8	-0.00271356
298	0.01617309		827.99	-0.00253942		1358	-0.00087366		1888	0.01035657		2418	-0.00272714
298.2	0.01632638		828.19	-0.00245953		1358.2	-0.00106056		1888.2	0.00999455		2418.2	-0.00274392
298.4	0.01586923		828.39	-0.00287412		1358.4	-0.00071515		1888.4	0.01029781		2418.4	-0.00242389
298.6	0.01637321		828.59	-0.0029161		1358.6	-0.00107674		1888.6	0.01072027		2418.6	-0.00116797
298.8	0.01577375		828.79	-0.00370476		1358.8	-0.00027669		1888.8	0.01056087		2418.8	-0.00087166
299	0.01556895		828.99	-0.00369911		1359	-0.00013461		1889	0.01105831		2419	-0.00073055
299.2	0.01578894		829.19	-0.00223224		1359.2	-0.00038595		1889.2	0.01099877		2419.2	-0.00076204
299.4	0.01571087		829.39	-0.00233917		1359.4	-0.00014923		1889.4	0.01185473		2419.4	-0.00109919
299.6	0.01597136		829.59	-0.00308747		1359.6	-0.00018687		1889.6	0.01170889		2419.6	-0.00103688
299.8	0.01572365		829.79	-0.00290743		1359.8	0.00127851		1889.8	0.01203618		2419.8	-0.00083814
300	0.01516207		829.99	-0.00205215		1360	0.00132091		1890	0.01207582		2420	-0.00117002
300.2	0.01475006		830.19	-0.0015266		1360.2	0.00130056		1890.2	0.01264955		2420.2	-0.00137886
300.4	0.01494224		830.39	-0.00216649		1360.4	0.00100615		1890.4	0.01288695		2420.4	-0.00010319
300.6	0.01538864		830.59	-0.00177586		1360.6	0.00129884		1890.6	0.01233425		2420.6	-0.00046004
300.8	0.01441021		830.79	-0.00169702		1360.8	0.00114982		1890.8	0.01148499		2420.8	-0.00067769
301	0.01472735		830.99	-0.0019774		1361	0.00025462		1891	0.01165705		2421	-0.00078463
301.2	0.01445		831.19	-0.00090963		1361.2	0.00049389		1891.2	0.01152783		2421.2	-0.00169943
301.4	0.0146415		831.39	-0.00162464		1361.4	0.00031213		1891.4	0.01101231		2421.4	-0.00134112
301.6	0.01497592		831.59	-0.00122403		1361.6	0.00032884		1891.6	0.0105282		2421.6	-0.00090553
301.8	0.01487276		831.79	-0.00129528		1361.8	0.00147547		1891.8	0.00996556		2421.8	-0.00058177
302	0.01497541		831.99	-0.00178102		1362	0.00181533		1892	0.0102149		2422	-0.00013111
302.2	0.01541024		832.19	-0.00169607		1362.2	0.00112869		1892.2	0.01095249		2422.2	0.00015496
302.4	0.0152287		832.39	-0.00203999		1362.4	0.00106415		1892.4	0.01106999		2422.4	0.00042722
302.6	0.01657339		832.59	-0.00182166		1362.6	0.00071483		1892.6	0.01114658		2422.6	0.00108145
302.8	0.01628803		832.79	-0.0026254		1362.8	0.00016117		1892.8	0.01130404		2422.8	0.0007709
303	0.01603977		832.99	-0.00262919		1363	0.00022523		1893	0.01202916		2423	0.00003881
303.2	0.0166625		833.19	-0.00201221		1363.2	0.00067609		1893.2	0.01207546		2423.2	0.00000938
303.4	0.01702739		833.39	-0.00237795		1363.4	0.00108762		1893.4	0.01242881		2423.4	-0.00024024
303.6	0.01639972		833.59	-0.00276573		1363.6	0.00135973		1893.6	0.01255936		2423.6	0.00008398
303.8	0.01610868		833.79	-0.00218704		1363.8	0.00232799		1893.8	0.01288127		2423.8	-0.0001334
304	0.01607883		833.99	-0.00231334		1364	0.00248256		1894	0.0122562		2424	-0.00061207
304.2	0.01650296		834.19	-0.00225499		1364.2	0.00262421		1894.2	0.01254273		2424.2	-0.00033611
304.4	0.01667359		834.39	-0.00307848		1364.4	0.00314337		1894.4	0.01199344		2424.4	-0.00073424
304.6	0.01720105		834.59	-0.00278616		1364.6	0.00351913		1894.6	0.01137371		2424.6	-0.00291722
304.8	0.01754525		834.79	-0.00276435		1364.8	0.00419368		1894.8	0.01023868		2424.8	-0.00349975
305	0.01809282		834.99	-0.00217723		1365	0.00366642		1895	0.01003818		2425	-0.00337151
305.2	0.01841687		835.19	-0.00148899		1365.2	0.00405895		1895.2	0.00970909		2425.2	-0.00358767
305.4	0.01905244		835.39	-0.00202178		1365.4	0.00376245		1895.4	0.0096024		2425.4	-0.00384654
305.6	0.01897091		835.59	-0.00141228		1365.6	0.0033577		1895.6	0.00947126		2425.6	-0.00337843
305.8	0.01926672		835.79	-0.00169527		1365.8	0.0035213		1895.8	0.00932583		2425.8	-0.00338489
306	0.01864823		835.99	-0.00161892		1366	0.00256905		1896	0.00924011		2426	-0.00304101
306.2	0.01799065		836.19	-0.00149877		1366.2	0.00219578		1896.2	0.00880961		2426.2	-0.00277
306.4	0.01780786		836.39	-0.00137907		1366.4	0.00250218		1896.4	0.00826852		2426.4	-0.00238897
306.6	0.01838699		836.59	-0.00193908		1366.6	0.0021171		1896.6	0.00754995		2426.6	-0.00217875
306.8	0.01765572		836.79	-0.00235092		1366.8	0.00174524		1896.8	0.00740327		2426.8	-0.00208972
307	0.01634184		836.99	-0.00247938		1367	0.00232545		1897	0.00764952		2427	-0.00163095
307.2	0.01514358		837.19	-0.00228593		1367.2	0.00271549		1897.2	0.00865273		2427.2	-0.00167797
307.4	0.0144693		837.39	-0.00238531		1367.4	0.00255662		1897.4	0.00887335		2427.4	-0.00177605
307.6	0.01320844		837.59	-0.00305538		1367.6	0.00241807		1897.6	0.0089515		2427.6	-0.00134051
307.8	0.01328333		837.79	-0.00265157		1367.8	0.00196079		1897.8	0.0086796		2427.8	-0.00134489
308	0.01322688		837.99	-0.00281101		1368	0.0017978		1898	0.0092029		2428	-0.00175258
308.2	0.01300239		838.19	-0.00084593		1368.2	0.00198558		1898.2	0.01009358		2428.2	-0.0022222
308.4	0.01299505		838.39	-0.00091536		1368.4	0.00292636		1898.4	0.00946396		2428.4	-0.00253562
308.6	0.01324265		838.59	-0.00089761		1368.6	0.00226883		1898.6	0.00964728		2428.6	-0.00245959
308.8	0.01347168		838.79	-0.00111032		1368.8	0.00215345		1898.8	0.00957377		2428.8	-0.00190394
309	0.01310483		838.99	-0.00170565		1369	0.00126645		1899	0.01066314		2429	-0.00162754
309.2	0.01444651		839.19	-0.00176308		1369.2	0.00136901		1899.2	0.01137887		2429.2	-0.00222803
309.4	0.01523554		839.39	-0.00168608		1369.4	0.00121557		1899.4	0.01146014		2429.4	-0.00246117
309.6	0.01487048		839.59	-0.00146419		1369.6	0.00158321		1899.6	0.01101674		2429.6	-0.00217335
309.8	0.01537535		839.79	-0.00229205		1369.8	0.00255711		1899.8	0.01008764		2429.8	-0.00277485
310	0.01516235		839.99	-0.0024633		1370	0.00209246		1900	0.01001119		2430	-0.00196096
310.2	0.01563043		840.19	-0.00270551		1370.2	0.00137532		1900.2	0.00844187		2430.2	-0.00170458
310.4	0.01666693		840.39	-0.00326694		1370.4	0.0009321		1900.4	0.00876292		2430.4	-0.00241064
310.6	0.01688365		840.59	-0.00282971		1370.6	0.00106108		1900.6	0.00833502		2430.6	-0.00252449
310.8	0.01700512		840.79	-0.00236915		1370.8	0.00097252		1900.8	0.00905069		2430.8	-0.00276623
311	0.01662912		840.99	-0.0025906		1371	0.0011602		1901	0.00997613		2431	-0.00317071
311.2	0.01697759		841.19	-0.0032248		1371.2	0.0016576		1901.2	0.01100215		2431.2	-0.00397754
311.4	0.01750734		841.39	-0.00312268		1371.4	0.00233334		1901.4	0.01041375		2431.4	-0.0039466
311.6	0.01700466		841.59	-0.00334513		1371.6	0.0026463		1901.6	0.01036911		2431.6	-0.00353862
311.8	0.01742784		841.79	-0.00307801		1371.8	0.00238181		1901.8	0.01047377		2431.8	-0.00366187
312	0.01697594		841.99	-0.00325363		1372	0.00304214		1902	0.01058516		2432	-0.00428139
312.2	0.01671824		842.19	-0.00283852		1372.2	0.00371411		1902.2	0.01023584		2432.2	-0.00449233
312.4	0.01693113		842.39	-0.00414213		1372.4	0.00367678		1902.4	0.01017265		2432.4	-0.00388166
312.6	0.01625876		842.59	-0.0048234		1372.6	0.00287672		1902.6	0.01030787		2432.6	-0.00392905
312.8	0.01609649		842.79	-0.00523023		1372.8	0.00325386		1902.8	0.01032105		2432.8	-0.00407279
313	0.01561511		842.99	-0.00530598		1373	0.00263135		1903	0.01055074		2433	-0.00342988
313.2	0.01583929		843.19	-0.00462021		1373.2	0.0019878		1903.2	0.01001097		2433.2	-0.00317346
313.4	0.01542925		843.39	-0.00478107		1373.4	0.0025231		1903.4	0.00956623		2433.4	-0.00236462
313.6	0.01473484		843.59	-0.00416846		1373.6	0.00214629		1903.6	0.00880882		2433.6	-0.00180501
313.8	0.01472258		843.79	-0.00407448		1373.8	0.00126519		1903.8	0.00830713		2433.8	-0.00120267
314	0.01423478		843.99	-0.00328428		1374	0.0006314		1904	0.00910819		2434	-0.00047478
314.2	0.0147072		844.19	-0.00308844		1374.2	0.00014917		1904.2	0.00794952		2434.2	-0.00034631
314.4	0.01491411		844.39	-0.00224589		1374.4	0.00111494		1904.4	0.00913196		2434.4	-0.00114464
314.6	0.01518969		844.59	-0.00096476		1374.6	0.00166448		1904.6	0.00907534		2434.6	-0.00083473
314.8	0.01549778		844.79	-0.00063702		1374.8	0.0017378		1904.8	0.01005825		2434.8	-0.00099832
315	0.01594595		844.99	-0.00065686		1375	0.00238867		1905	0.01041788		2435	-0.00146388
315.2	0.01691594		845.19	-0.00071769		1375.2	0.00311655		1905.2	0.01131295		2435.2	-0.00163522
315.4	0.01716603		845.39	-0.00041689		1375.4	0.00332068		1905.4	0.01170483		2435.4	-0.00126183
315.6	0.01687965		845.59	-0.00098793		1375.6	0.00311786		1905.6	0.0119506		2435.6	-0.00160839
315.8	0.01771809		845.79	-0.00145449		1375.8	0.002806		1905.8	0.01276379		2435.8	-0.00301383
316	0.01864701		845.99	-0.00128558		1376	0.00277044		1906	0.01329049		2436	-0.00444562
316.2	0.01847665		846.19	-0.00136444		1376.2	0.00285822		1906.2	0.01351537		2436.2	-0.00469524
316.4	0.01848011		846.39	-0.0011872		1376.4	0.0030233		1906.4	0.01357941		2436.4	-0.00412221
316.6	0.01750276		846.59	-0.0005554		1376.6	0.003616		1906.6	0.01408407		2436.6	-0.00389049
316.8	0.01795221		846.79	-0.00084837		1376.8	0.00304883		1906.8	0.01394964		2436.8	-0.00359178
317	0.01741791		846.99	-0.00047566		1377	0.00186225		1907	0.01471559		2437	-0.00294512
317.2	0.01729998		847.19	-0.00007133		1377.2	0.00193755		1907.2	0.01498023		2437.2	-0.00270945
317.4	0.01749863		847.39	-0.00015847		1377.4	0.00181643		1907.4	0.01503149		2437.4	-0.00292789
317.6	0.0165956		847.59	0.00087811		1377.6	0.00087896		1907.6	0.01439923		2437.6	-0.0029911
317.8	0.01658082		847.79	0.00086385		1377.8	0.00037799		1907.8	0.01395257		2437.8	-0.00304385
318	0.01663259		847.99	0.00071267		1378	0.00077046		1908	0.0141538		2438	-0.00309764
318.2	0.01681541		848.19	0.00108032		1378.2	0.00058139		1908.2	0.01297388		2438.2	-0.00268069
318.4	0.01698644		848.39	0.00070799		1378.4	0.00055144		1908.4	0.01332524		2438.4	-0.0026139
318.6	0.01741434		848.59	0.00095234		1378.6	0.00108574		1908.6	0.01236666		2438.6	-0.00229337
318.8	0.01719732		848.79	0.00084856		1378.8	0.00136219		1908.8	0.0119224		2438.8	-0.00300139
319	0.01785374		848.99	0.00062388		1379	0.00119388		1909	0.0119507		2439	-0.00312524
319.2	0.01818937		849.19	0.0001799		1379.2	0.00101918		1909.2	0.01227889		2439.2	-0.00262047
319.4	0.01800398		849.39	-0.00037394		1379.4	0.00127396		1909.4	0.01151194		2439.4	-0.00284875
319.6	0.0175909		849.59	-0.00093411		1379.6	0.00145262		1909.6	0.01062264		2439.6	-0.00406264
319.8	0.01855211		849.79	-0.00146502		1379.8	0.00181871		1909.8	0.01056602		2439.8	-0.00501709
320	0.0188597		849.99	-0.00159832		1380	0.0020325		1910	0.01034679		2440	-0.00457658
320.2	0.01840578		850.19	-0.00139618		1380.2	0.0030567		1910.2	0.0104678		2440.2	-0.00381672
320.4	0.01895312		850.39	-0.00098089		1380.4	0.00412169		1910.4	0.01040235		2440.4	-0.00290582
320.6	0.01856233		850.59	-0.00086906		1380.6	0.00470721		1910.6	0.01100213		2440.6	-0.00263338
320.8	0.01901902		850.79	-0.00068922		1380.8	0.00369288		1910.8	0.01050408		2440.8	-0.002886
321	0.01872985		850.99	-0.00112282		1381	0.00372826		1911	0.01119459		2441	-0.00251488
321.2	0.01832056		851.19	-0.00186927		1381.2	0.00285453		1911.2	0.01144386		2441.2	-0.00259221
321.4	0.01824245		851.39	-0.00236953		1381.4	0.00234199		1911.4	0.01150581		2441.4	-0.0022584
321.6	0.01783496		851.59	-0.0018083		1381.6	0.00194351		1911.6	0.01107098		2441.6	-0.00151288
321.8	0.01759986		851.79	-0.00179883		1381.8	0.00087292		1911.8	0.01108387		2441.8	-0.00097461
322	0.01768225		851.99	-0.00205947		1382	0.00017216		1912	0.01157856		2442	0.00003861
322.2	0.01697032		852.19	-0.00219514		1382.2	-0.00059102		1912.2	0.01118312		2442.2	0.00043301
322.4	0.01701248		852.39	-0.00281874		1382.4	-0.00118591		1912.4	0.01121367		2442.4	0.00023484
322.6	0.01681089		852.59	-0.00141837		1382.6	-0.00068508		1912.6	0.01067367		2442.6	-0.00030293
322.8	0.01664032		852.79	-0.00102481		1382.8	-0.00154658		1912.8	0.01127197		2442.8	-0.00112645
323	0.01662599		852.99	-0.00146546		1383	-0.00247732		1913	0.01229653		2443	-0.00016087
323.2	0.01633832		853.19	-0.00203567		1383.2	-0.00222248		1913.2	0.01159332		2443.2	-0.00027258
323.4	0.01630797		853.39	-0.00233622		1383.4	-0.00201085		1913.4	0.01108347		2443.4	-0.00091814
323.6	0.01667365		853.59	-0.0027151		1383.6	-0.00216541		1913.6	0.01139211		2443.6	-0.00113371
323.8	0.01770188		853.79	-0.00332024		1383.8	-0.00197876		1913.8	0.01196183		2443.8	-0.00061565
324	0.01754724		853.99	-0.00259459		1384	-0.0013699		1914	0.01162301		2444	-0.00083545
324.2	0.01771914		854.19	-0.00140153		1384.2	0.00047122		1914.2	0.01213884		2444.2	-0.00117803
324.4	0.01844397		854.39	-0.00055094		1384.4	0.00186143		1914.4	0.01207305		2444.4	-0.00081406
324.6	0.01867744		854.59	-0.00043538		1384.6	0.00173429		1914.6	0.01258768		2444.6	-0.00148789
324.8	0.01933884		854.79	-0.00062648		1384.8	0.00168571		1914.8	0.01296487		2444.8	-0.00165262
325	0.01936689		854.99	-0.00255512		1385	0.00236716		1915	0.01331847		2445	-0.00184519
325.2	0.01935591		855.19	-0.00296736		1385.2	0.00243511		1915.2	0.01360905		2445.2	-0.00225789
325.4	0.01949697		855.39	-0.00308176		1385.4	0.00321148		1915.4	0.0134356		2445.4	-0.00295331
325.6	0.01949087		855.59	-0.00351407		1385.6	0.00348305		1915.6	0.01239009		2445.6	-0.00365724
325.8	0.01966364		855.79	-0.00388594		1385.8	0.00391323		1915.8	0.01215909		2445.8	-0.004122
326	0.01996757		855.99	-0.00419085		1386	0.00392066		1916	0.01175625		2446	-0.00360677
326.2	0.01943373		856.19	-0.00425358		1386.2	0.00436738		1916.2	0.01133751		2446.2	-0.00404928
326.4	0.01957566		856.39	-0.00323751		1386.4	0.00444546		1916.4	0.01091865		2446.4	-0.00395501
326.6	0.01912862		856.59	-0.00338827		1386.6	0.00425424		1916.6	0.01144216		2446.6	-0.00415137
326.8	0.0190694		856.79	-0.00353845		1386.8	0.00406816		1916.8	0.01086533		2446.8	-0.00404647
327	0.01872448		856.99	-0.00373475		1387	0.00316389		1917	0.01047619		2447	-0.00362199
327.2	0.0186921		857.19	-0.00266824		1387.2	0.00340022		1917.2	0.01002977		2447.2	-0.00356845
327.4	0.01878739		857.39	-0.00238865		1387.4	0.00260805		1917.4	0.00999086		2447.4	-0.00296516
327.6	0.0186207		857.59	-0.00132843		1387.6	0.00297709		1917.6	0.01019527		2447.6	-0.00191881
327.8	0.01879766		857.79	-0.00097386		1387.8	0.00264584		1917.8	0.01042141		2447.8	-0.00105624
328	0.01846252		857.99	-0.00013857		1388	0.00280337		1918	0.00989428		2448	-0.00142133
328.2	0.01860603		858.19	0.00114149		1388.2	0.00305521		1918.2	0.01079641		2448.2	-0.00087517
328.4	0.01893478		858.39	0.00089266		1388.4	0.0025903		1918.4	0.01097574		2448.4	-0.00106696
328.6	0.01924012		858.59	0.00048176		1388.6	0.001892		1918.6	0.01183172		2448.6	-0.00192802
328.8	0.01890185		858.79	0.00032342		1388.8	0.00186571		1918.8	0.01221249		2448.8	-0.00184826
329	0.01889126		858.99	-0.00023936		1389	0.00217917		1919	0.01254703		2449	-0.00207227
329.2	0.01961768		859.19	-0.00045445		1389.2	0.00169391		1919.2	0.01174997		2449.2	-0.00270697
329.4	0.0197762		859.39	-0.0007606		1389.4	0.00149561		1919.4	0.010692		2449.4	-0.00382828
329.6	0.0201772		859.59	-0.00143958		1389.6	0.0018175		1919.6	0.01017374		2449.6	-0.0038961
329.8	0.02083817		859.79	-0.00122195		1389.8	0.00210994		1919.8	0.01004987		2449.8	-0.00349297
330	0.02127299		859.99	-0.00157079		1390	0.00154899		1920	0.00911976		2450	-0.00310033
330.2	0.02139235		860.19	-0.00160715		1390.2	0.00182298		1920.2	0.00879949		2450.2	-0.00396239
330.4	0.02173746		860.39	-0.00158184		1390.4	0.00173019		1920.4	0.00821733		2450.4	-0.00402364
330.6	0.02143809		860.59	-0.00279239		1390.6	0.00164244		1920.6	0.00826782		2450.6	-0.00461195
330.8	0.02233882		860.79	-0.00163921		1390.8	0.00177753		1920.8	0.00727376		2450.8	-0.00484969
331	0.02146692		860.99	-0.00160087		1391	0.00083281		1921	0.00799433		2451	-0.00484176
331.2	0.02153225		861.19	-0.00167177		1391.2	0.00125577		1921.2	0.00837034		2451.2	-0.00374917
331.4	0.02101221		861.39	-0.00228938		1391.4	0.00082324		1921.4	0.00852274		2451.4	-0.00372373
331.6	0.01991781		861.59	-0.00183972		1391.6	0.00151658		1921.6	0.00921873		2451.6	-0.00362891
331.8	0.01890529		861.79	-0.00231029		1391.8	0.00200688		1921.8	0.01019713		2451.8	-0.00354271
332	0.01794883		861.99	-0.00258059		1392	0.0017564		1922	0.01104529		2452	-0.00423882
332.2	0.01672396		862.19	-0.00248012		1392.2	0.00277984		1922.2	0.0115504		2452.2	-0.00417204
332.4	0.01601161		862.39	-0.00307326		1392.4	0.00307501		1922.4	0.01216108		2452.4	-0.00417783
332.6	0.01596963		862.59	-0.00219587		1392.6	0.00340209		1922.6	0.01378255		2452.6	-0.00426703
332.8	0.01509763		862.79	-0.00172672		1392.8	0.00395244		1922.8	0.01384264		2452.8	-0.00423146
333	0.01542558		862.99	-0.00158811		1393	0.00385845		1923	0.01383708		2453	-0.00432696
333.2	0.01618836		863.19	-0.00162354		1393.2	0.00308325		1923.2	0.01323452		2453.2	-0.00382795
333.4	0.01628457		863.39	-0.00090692		1393.4	0.00317298		1923.4	0.01359115		2453.4	-0.00347903
333.6	0.01699283		863.59	-0.00073584		1393.6	0.00269765		1923.6	0.0142189		2453.6	-0.00290557
333.8	0.01760663		863.79	-0.00058761		1393.8	0.00187011		1923.8	0.01420573		2453.8	-0.00240735
334	0.01788147		863.99	-0.00028032		1394	0.00138247		1924	0.01344173		2454	-0.00278217
334.2	0.01872286		864.19	0.0000281		1394.2	0.00091912		1924.2	0.013548		2454.2	-0.00295852
334.4	0.01963614		864.39	0.00022587		1394.4	0.00074945		1924.4	0.0133544		2454.4	-0.00304922
334.6	0.01947115		864.59	0.00020914		1394.6	0.0002608		1924.6	0.01313357		2454.6	-0.00273891
334.8	0.01903226		864.79	0.00030353		1394.8	-0.00034113		1924.8	0.01248738		2454.8	-0.00187013
335	0.0186515		864.99	-0.00027916		1395	-0.00101901		1925	0.01238585		2455	-0.00172574
335.2	0.01920248		865.19	-0.000681		1395.2	-0.00076502		1925.2	0.01151236		2455.2	-0.00191413
335.4	0.01810251		865.39	-0.00068136		1395.4	-0.0006294		1925.4	0.01108852		2455.4	-0.00221565
335.6	0.01787681		865.59	-0.00047272		1395.6	0.00049852		1925.6	0.01123844		2455.6	-0.00187083
335.8	0.01842459		865.79	-0.00095223		1395.8	0.001509		1925.8	0.01105822		2455.8	-0.00121785
336	0.01875596		865.99	-0.00130046		1396	0.00054204		1926	0.01075428		2456	-0.00172619
336.2	0.01833831		866.19	-0.00151236		1396.2	0.0021476		1926.2	0.01017209		2456.2	-0.00165642
336.4	0.01791728		866.39	-0.00168126		1396.4	0.00244239		1926.4	0.00953721		2456.4	-0.00178336
336.6	0.01814926		866.59	-0.00095978		1396.6	0.00305532		1926.6	0.00992096		2456.6	-0.00221647
336.8	0.01768424		866.79	-0.00153305		1396.8	0.00345808		1926.8	0.00883948		2456.8	-0.00260605
337	0.01804976		866.99	-0.00246415		1397	0.00340549		1927	0.00932127		2457	-0.00228199
337.2	0.01809014		867.19	-0.00237773		1397.2	0.00308508		1927.2	0.00960398		2457.2	-0.00053716
337.4	0.01730135		867.39	-0.00188386		1397.4	0.00405477		1927.4	0.01016944		2457.4	-0.00066087
337.6	0.01658502		867.59	-0.00271956		1397.6	0.00377548		1927.6	0.01093714		2457.6	-0.00096951
337.8	0.01614892		867.79	-0.00224369		1397.8	0.0035		1927.8	0.01058187		2457.8	-0.00079321
338	0.0157427		867.99	-0.00173734		1398	0.00399818		1928	0.01085462		2458	-0.00108211
338.2	0.01619669		868.19	-0.00164155		1398.2	0.00306622		1928.2	0.01162916		2458.2	-0.00166081
338.4	0.01555582		868.39	-0.00137795		1398.4	0.00358394		1928.4	0.01140533		2458.4	-0.00148844
338.6	0.01553325		868.59	-0.0021878		1398.6	0.00322206		1928.6	0.01138369		2458.6	-0.00084141
338.8	0.01538124		868.79	-0.00283318		1398.8	0.00236602		1928.8	0.01196201		2458.8	-0.00112781
339	0.01625414		868.99	-0.00214877		1399	0.00152705		1929	0.01252841		2459	-0.00238761
339.2	0.01700957		869.19	-0.00172542		1399.2	0.00108653		1929.2	0.01252712		2459.2	-0.00257719
339.4	0.01734616		869.39	-0.0008761		1399.4	0.00107719		1929.4	0.01277836		2459.4	-0.00170946
339.6	0.01902405		869.59	0.00031447		1399.6	0.00077756		1929.6	0.01321794		2459.6	-0.00109719
339.8	0.01986332		869.79	0.0005875		1399.8	0.00043663		1929.8	0.01252168		2459.8	-0.00149008
340	0.0196115		869.99	0.00058134		1400	-0.00049494		1930	0.01266952		2460	-0.00216023
340.2	0.01933232		870.19	0.00017923		1400.2	0.00019447		1930.2	0.01261655		2460.2	-0.00198973
340.4	0.01915948		870.39	0.0000106		1400.4	-0.00060068		1930.4	0.01162427		2460.4	-0.00195316
340.6	0.01891204		870.59	0.00008528		1400.6	-0.00119398		1930.6	0.01178077		2460.6	-0.00204183
340.8	0.01801942		870.79	-0.00037407		1400.8	-0.00170351		1930.8	0.01111986		2460.8	-0.00241547
341	0.01762214		870.99	-0.00085098		1401	-0.00095184		1931	0.01150651		2461	-0.0020025
341.2	0.01640021		871.19	-0.00011798		1401.2	-0.00056721		1931.2	0.01118759		2461.2	-0.0014641
341.4	0.01582842		871.39	-0.00015814		1401.4	0.00053453		1931.4	0.01076768		2461.4	-0.00263199
341.6	0.01522553		871.59	-0.00031016		1401.6	0.00015572		1931.6	0.01038558		2461.6	-0.00322457
341.8	0.01536894		871.79	-0.00022341		1401.8	0.00027916		1931.8	0.00993871		2461.8	-0.00386764
342	0.01516811		871.99	-0.00153533		1402	0.00109446		1932	0.01086229		2462	-0.00457746
342.2	0.01556833		872.19	-0.00158289		1402.2	0.00128256		1932.2	0.01089413		2462.2	-0.00496853
342.4	0.01596528		872.39	-0.00261582		1402.4	0.00151992		1932.4	0.0112439		2462.4	-0.00498308
342.6	0.01699622		872.59	-0.00308305		1402.6	0.00081191		1932.6	0.01177604		2462.6	-0.00518724
342.8	0.01730838		872.79	-0.0029888		1402.8	0.0006366		1932.8	0.01267507		2462.8	-0.00546148
343	0.01810109		872.99	-0.00259134		1403	-0.00005468		1933	0.01271297		2463	-0.00585064
343.2	0.01947366		873.19	-0.00229803		1403.2	-0.00047309		1933.2	0.01293459		2463.2	-0.00460291
343.4	0.01955885		873.39	-0.00186874		1403.4	-0.0008138		1933.4	0.01322896		2463.4	-0.00354502
343.6	0.01947895		873.59	-0.00125623		1403.6	-0.00106812		1933.6	0.01283062		2463.6	-0.00234881
343.8	0.01927494		873.79	-0.00175158		1403.8	-0.00129323		1933.8	0.01257663		2463.8	-0.00255216
344	0.01928205		873.99	-0.00261448		1404	-0.00124391		1934	0.01257445		2464	-0.00155832
344.2	0.01904002		874.19	-0.00241905		1404.2	-0.00060834		1934.2	0.01242699		2464.2	-0.00079636
344.4	0.01878149		874.39	-0.00278119		1404.4	-0.00150315		1934.4	0.01173801		2464.4	0.00002496
344.6	0.01857213		874.59	-0.00325837		1404.6	-0.00161403		1934.6	0.0114222		2464.6	0.00038706
344.8	0.01825326		874.79	-0.00334526		1404.8	-0.00142422		1934.8	0.01091339		2464.8	0.00026594
345	0.01809522		874.99	-0.00346053		1405	-0.00121223		1935	0.01042268		2465	-0.00000133
345.2	0.01708627		875.19	-0.00261874		1405.2	-0.00086445		1935.2	0.00957993		2465.2	-0.00019102
345.4	0.01739608		875.39	-0.00352859		1405.4	-0.00067642		1935.4	0.00931639		2465.4	-0.00159155
345.6	0.01691995		875.59	-0.00402833		1405.6	0.00009774		1935.6	0.00971905		2465.6	-0.00275649
345.8	0.01692088		875.79	-0.00514487		1405.8	0.00099874		1935.8	0.01014928		2465.8	-0.00393674
346	0.01688058		875.99	-0.00548955		1406	0.00170076		1936	0.01140463		2466	-0.0041327
346.2	0.01696447		876.19	-0.00548539		1406.2	0.00179211		1936.2	0.01143965		2466.2	-0.00546895
346.4	0.01671968		876.39	-0.00604944		1406.4	0.00202728		1936.4	0.01180646		2466.4	-0.00664974
346.6	0.01703704		876.59	-0.00563307		1406.6	0.00208419		1936.6	0.01192193		2466.6	-0.00747639
346.8	0.017379		876.79	-0.00612707		1406.8	0.00185244		1936.8	0.01196935		2466.8	-0.00864132
347	0.01730424		876.99	-0.00669795		1407	0.00081067		1937	0.01212921		2467	-0.00885376
347.2	0.01754223		877.19	-0.00633623		1407.2	0.00063626		1937.2	0.01214752		2467.2	-0.00799696
347.4	0.01695018		877.39	-0.00607383		1407.4	0.00044174		1937.4	0.01141651		2467.4	-0.00821957
347.6	0.01771347		877.59	-0.00589072		1407.6	0.00018987		1937.6	0.01124204		2467.6	-0.0073939
347.8	0.01806196		877.79	-0.00562558		1407.8	0.00018523		1937.8	0.01105345		2467.8	-0.00696349
348	0.01843648		877.99	-0.00538207		1408	0.0006274		1938	0.0110503		2468	-0.00539304
348.2	0.0188165		878.19	-0.00391772		1408.2	0.00152535		1938.2	0.01115663		2468.2	-0.00450987
348.4	0.01928123		878.39	-0.00348609		1408.4	0.00085331		1938.4	0.01128176		2468.4	-0.00342208
348.6	0.01961899		878.59	-0.00222032		1408.6	0.0011759		1938.6	0.01135012		2468.6	-0.00264336
348.8	0.0189713		878.79	-0.00077042		1408.8	0.00122429		1938.8	0.01199584		2468.8	-0.00225285
349	0.01830765		878.99	0.00063027		1409	0.00123709		1939	0.01153159		2469	-0.00181455
349.2	0.01765172		879.19	0.0010906		1409.2	0.00211818		1939.2	0.01176682		2469.2	-0.00115323
349.4	0.01838271		879.39	0.0006004		1409.4	0.00235914		1939.4	0.01249187		2469.4	-0.00100977
349.6	0.01882798		879.59	0.00108948		1409.6	0.00299937		1939.6	0.01299113		2469.6	-0.00095983
349.8	0.01851868		879.79	0.00133124		1409.8	0.00333642		1939.8	0.01352791		2469.8	-0.00033286
350	0.01766464		879.99	0.00132961		1410	0.003064		1940	0.01426096		2470	-0.00020452
350.2	0.01749871		880.19	0.00027015		1410.2	0.00331261		1940.2	0.01401215		2470.2	-0.00120639
350.4	0.01763891		880.39	-0.00058406		1410.4	0.00361032		1940.4	0.01384859		2470.4	-0.0014681
350.6	0.01778507		880.59	-0.00148729		1410.6	0.00280791		1940.6	0.01349071		2470.6	-0.00259468
350.8	0.01744315		880.79	-0.00260973		1410.8	0.00206885		1940.8	0.01266602		2470.8	-0.0033472
351	0.01728973		880.99	-0.00301767		1411	0.00130163		1941	0.01279369		2471	-0.00362634
351.2	0.01757514		881.19	-0.00359938		1411.2	0.00130631		1941.2	0.01146129		2471.2	-0.00429621
351.4	0.01728042		881.39	-0.00419577		1411.4	0.00107121		1941.4	0.01085673		2471.4	-0.00482916
351.6	0.01804103		881.59	-0.00512528		1411.6	0.00092263		1941.6	0.01093703		2471.6	-0.00436218
351.8	0.0174204		881.79	-0.00479931		1411.8	0.00122033		1941.8	0.01003189		2471.8	-0.0044705
352	0.01758798		881.99	-0.00411218		1412	0.00186884		1942	0.01033188		2472	-0.00466735
352.2	0.0186478		882.19	-0.00353016		1412.2	0.00227308		1942.2	0.01056454		2472.2	-0.00547243
352.4	0.01886095		882.39	-0.00329423		1412.4	0.00191734		1942.4	0.01099733		2472.4	-0.00590152
352.6	0.01881021		882.59	-0.00274567		1412.6	0.00176107		1942.6	0.01111529		2472.6	-0.00649125
352.8	0.01925898		882.79	-0.00231014		1412.8	0.00129431		1942.8	0.01127669		2472.8	-0.00740323
353	0.0185064		882.99	-0.00138005		1413	0.00126602		1943	0.01078772		2473	-0.00706252
353.2	0.01877667		883.19	-0.00136461		1413.2	0.00127972		1943.2	0.01193081		2473.2	-0.0067589
353.4	0.0195905		883.39	-0.00194346		1413.4	0.00127937		1943.4	0.01238127		2473.4	-0.00599031
353.6	0.02001908		883.59	-0.00201939		1413.6	0.00143622		1943.6	0.01365863		2473.6	-0.00636509
353.8	0.01892849		883.79	-0.00232881		1413.8	0.00121566		1943.8	0.01421015		2473.8	-0.00579867
354	0.01909967		883.99	-0.0029893		1414	0.00089993		1944	0.01466704		2474	-0.00545616
354.2	0.01957945		884.19	-0.00348398		1414.2	0.0012617		1944.2	0.01511305		2474.2	-0.00519908
354.4	0.01965213		884.39	-0.00395141		1414.4	0.0011523		1944.4	0.01526554		2474.4	-0.00569781
354.6	0.01847292		884.59	-0.00365911		1414.6	0.00094331		1944.6	0.01514159		2474.6	-0.00589819
354.8	0.01822539		884.79	-0.00321641		1414.8	0.00142234		1944.8	0.01501917		2474.8	-0.00569962
355	0.0180366		884.99	-0.00321857		1415	0.00095598		1945	0.01491468		2475	-0.00566291
355.2	0.01827008		885.19	-0.00391034		1415.2	0.00185987		1945.2	0.01430563		2475.2	-0.00489486
355.4	0.01837988		885.39	-0.0043703		1415.4	0.00232714		1945.4	0.01415506		2475.4	-0.00520553
355.6	0.01869883		885.59	-0.00491952		1415.6	0.0026658		1945.6	0.01366431		2475.6	-0.00536446
355.8	0.01900767		885.79	-0.00441005		1415.8	0.0024575		1945.8	0.01332558		2475.8	-0.00478452
356	0.02045027		885.99	-0.00426878		1416	0.00249756		1946	0.01344912		2476	-0.00426866
356.2	0.02126487		886.19	-0.00455583		1416.2	0.00207465		1946.2	0.01374709		2476.2	-0.00444888
356.4	0.02098784		886.39	-0.00444765		1416.4	0.00154405		1946.4	0.01249455		2476.4	-0.00460231
356.6	0.02097045		886.59	-0.00438737		1416.6	0.00074689		1946.6	0.01158096		2476.6	-0.00449547
356.8	0.02072966		886.79	-0.00408445		1416.8	0.00129122		1946.8	0.01120289		2476.8	-0.00448793
357	0.01943241		886.99	-0.00357932		1417	0.00158614		1947	0.01111576		2477	-0.00377964
357.2	0.01963075		887.19	-0.00420645		1417.2	0.0014162		1947.2	0.01096145		2477.2	-0.00350219
357.4	0.02006106		887.39	-0.00443299		1417.4	0.00143218		1947.4	0.01096507		2477.4	-0.00390926
357.6	0.02064964		887.59	-0.00422024		1417.6	0.00095841		1947.6	0.01211801		2477.6	-0.0040298
357.8	0.02067038		887.79	-0.0041033		1417.8	0.00101855		1947.8	0.01230511		2477.8	-0.00346565
358	0.02054785		887.99	-0.00378098		1418	0.00100509		1948	0.01306145		2478	-0.00322697
358.2	0.01987554		888.19	-0.0037188		1418.2	0.00140589		1948.2	0.0134437		2478.2	-0.00270695
358.4	0.01973672		888.39	-0.00342755		1418.4	0.00133516		1948.4	0.01398215		2478.4	-0.00351344
358.6	0.01928359		888.59	-0.00280674		1418.6	0.00210421		1948.6	0.01442681		2478.6	-0.00358016
358.8	0.01900452		888.79	-0.00239766		1418.8	0.00277215		1948.8	0.01441379		2478.8	-0.00415072
359	0.01902583		888.99	-0.00307642		1419	0.00196821		1949	0.01499406		2479	-0.0050678
359.2	0.01851123		889.19	-0.00252772		1419.2	0.00227514		1949.2	0.0157694		2479.2	-0.00516906
359.4	0.01786841		889.39	-0.00229901		1419.4	0.00215313		1949.4	0.01587217		2479.4	-0.00624211
359.6	0.0178154		889.59	-0.00171868		1419.6	0.00163493		1949.6	0.01537666		2479.6	-0.00596394
359.8	0.01808877		889.79	-0.00101305		1419.8	0.00142611		1949.8	0.01529709		2479.8	-0.00548547
360	0.01728309		889.99	-0.00171025		1420	0.00111694		1950	0.01539712		2480	-0.00526929
360.2	0.01706446		890.19	-0.00182082		1420.2	0.00096289		1950.2	0.01535969		2480.2	-0.00570516
360.4	0.01703655		890.39	-0.00185921		1420.4	0.0009648		1950.4	0.01451369		2480.4	-0.00581951
360.6	0.01666159		890.59	-0.00201972		1420.6	0.00128491		1950.6	0.0142007		2480.6	-0.00585682
360.8	0.01651491		890.79	-0.00216323		1420.8	0.0019794		1950.8	0.01419412		2480.8	-0.00629956
361	0.01722143		890.99	-0.00266676		1421	0.00188374		1951	0.0136685		2481	-0.00672986
361.2	0.01782415		891.19	-0.00290158		1421.2	0.00184378		1951.2	0.01356918		2481.2	-0.00649402
361.4	0.01877859		891.39	-0.00358544		1421.4	0.00113871		1951.4	0.0136672		2481.4	-0.00667289
361.6	0.01900091		891.59	-0.00388225		1421.6	0.00041312		1951.6	0.01372626		2481.6	-0.00618259
361.8	0.01834668		891.79	-0.0039995		1421.8	0.00011974		1951.8	0.0136124		2481.8	-0.00627394
362	0.01818699		891.99	-0.00395433		1422	-0.00030157		1952	0.01409107		2482	-0.00625991
362.2	0.01916404		892.19	-0.00471163		1422.2	-0.00034063		1952.2	0.01353327		2482.2	-0.00595732
362.4	0.01911917		892.39	-0.00434253		1422.4	-0.00050032		1952.4	0.01341928		2482.4	-0.0062555
362.6	0.01836078		892.59	-0.00406378		1422.6	-0.00045562		1952.6	0.01309756		2482.6	-0.00603263
362.8	0.01865594		892.79	-0.00414346		1422.8	-0.00001168		1952.8	0.01341839		2482.8	-0.0056787
363	0.01850555		892.99	-0.00392826		1423	-0.00058531		1953	0.01392016		2483	-0.00524391
363.2	0.01775796		893.19	-0.00292361		1423.2	-0.00030511		1953.2	0.01295666		2483.2	-0.00451572
363.4	0.01763118		893.39	-0.00183921		1423.4	0.00042981		1953.4	0.01197505		2483.4	-0.00399608
363.6	0.01808069		893.59	-0.00129742		1423.6	0.00104152		1953.6	0.01083694		2483.6	-0.00372382
363.8	0.01774197		893.79	-0.00113336		1423.8	0.00216382		1953.8	0.01107295		2483.8	-0.00300069
364	0.01782848		893.99	-0.00127661		1424	0.00194189		1954	0.01165839		2484	-0.00192405
364.2	0.01895905		894.19	-0.00099009		1424.2	0.0025384		1954.2	0.01123358		2484.2	-0.00204966
364.4	0.01904287		894.39	-0.00070721		1424.4	0.00314026		1954.4	0.01073976		2484.4	-0.00203432
364.6	0.01860178		894.59	-0.00058767		1424.6	0.00340182		1954.6	0.01067143		2484.6	-0.00170802
364.8	0.01912003		894.79	-0.0011137		1424.8	0.00367168		1954.8	0.01105351		2484.8	-0.00247887
365	0.01888913		894.99	-0.00120102		1425	0.00392306		1955	0.01100891		2485	-0.0028499
365.2	0.01843907		895.19	-0.00094075		1425.2	0.0036539		1955.2	0.0116908		2485.2	-0.00266425
365.4	0.01838494		895.39	-0.00121335		1425.4	0.00267867		1955.4	0.01187017		2485.4	-0.00315356
365.6	0.01707782		895.59	-0.00086217		1425.6	0.0016943		1955.6	0.01269846		2485.6	-0.0034201
365.8	0.01684993		895.79	-0.00130797		1425.8	0.00149535		1955.8	0.01350953		2485.8	-0.00341607
366	0.01679672		895.99	-0.00207454		1426	0.00068265		1956	0.01425062		2486	-0.0040414
366.2	0.01656775		896.19	-0.00344157		1426.2	0.0005084		1956.2	0.01411266		2486.2	-0.0041926
366.4	0.01561441		896.39	-0.00361039		1426.4	0.00094224		1956.4	0.01465305		2486.4	-0.00388642
366.6	0.01564476		896.59	-0.00391762		1426.6	0.00030598		1956.6	0.01569266		2486.6	-0.00475561
366.8	0.01689272		896.79	-0.00440398		1426.8	0.00081059		1956.8	0.01595316		2486.8	-0.00472551
367	0.01716205		896.99	-0.00387147		1427	0.0009377		1957	0.01543701		2487	-0.00465119
367.2	0.01764773		897.19	-0.00389181		1427.2	0.00009608		1957.2	0.01495246		2487.2	-0.0045041
367.4	0.0180197		897.39	-0.00370034		1427.4	0.00059649		1957.4	0.01572086		2487.4	-0.00448949
367.6	0.01882776		897.59	-0.0045659		1427.6	0.00058776		1957.6	0.01601483		2487.6	-0.00458724
367.8	0.01923127		897.79	-0.00444122		1427.8	0.00010085		1957.8	0.0162322		2487.8	-0.00364422
368	0.01976881		897.99	-0.00471887		1428	0.0002227		1958	0.01566283		2488	-0.00312859
368.2	0.01983657		898.19	-0.00514989		1428.2	0.00074503		1958.2	0.01491875		2488.2	-0.00331393
368.4	0.02029903		898.39	-0.00469467		1428.4	0.00075376		1958.4	0.01474787		2488.4	-0.00295893
368.6	0.02010196		898.59	-0.00444606		1428.6	0.00112		1958.6	0.01567011		2488.6	-0.00218616
368.8	0.0201185		898.79	-0.00421792		1428.8	0.00165326		1958.8	0.0155262		2488.8	-0.00285087
369	0.02020644		898.99	-0.00345461		1429	0.00203152		1959	0.01550137		2489	-0.00298281
369.2	0.02033833		899.19	-0.00328844		1429.2	0.0023		1959.2	0.01578894		2489.2	-0.00282321
369.4	0.02003748		899.39	-0.00271275		1429.4	0.00153727		1959.4	0.01517307		2489.4	-0.00344385
369.6	0.0190989		899.59	-0.00257868		1429.6	0.00165454		1959.6	0.01499661		2489.6	-0.0029631
369.8	0.01941376		899.79	-0.0030906		1429.8	0.00215896		1959.8	0.01406542		2489.8	-0.00345258
370	0.01907858		899.99	-0.00330188		1430	0.00190585		1960	0.01369479		2490	-0.00417883
370.2	0.01928731		900.19	-0.00371447		1430.2	0.00255389		1960.2	0.01306724		2490.2	-0.00434763
370.4	0.01923353		900.39	-0.00351412		1430.4	0.0025262		1960.4	0.01278452		2490.4	-0.00455115
370.6	0.0196713		900.59	-0.00340798		1430.6	0.00160772		1960.6	0.01314021		2490.6	-0.00520073
370.8	0.02049987		900.79	-0.00323617		1430.8	0.00187141		1960.8	0.0115232		2490.8	-0.00462898
371	0.02076222		900.99	-0.00198729		1431	0.00154314		1961	0.01112024		2491	-0.00460225
371.2	0.02068726		901.19	-0.00237467		1431.2	0.00026409		1961.2	0.01048264		2491.2	-0.00488547
371.4	0.02072869		901.39	-0.00232036		1431.4	0.00134363		1961.4	0.01057985		2491.4	-0.00466093
371.6	0.0212641		901.59	-0.00285047		1431.6	0.00069593		1961.6	0.01044524		2491.6	-0.00436448
371.8	0.02126519		901.79	-0.00243403		1431.8	0.00126776		1961.8	0.01107546		2491.8	-0.00393232
372	0.02127244		901.99	-0.00249687		1432	0.00190731		1962	0.01119685		2492	-0.00412856
372.2	0.02195923		902.19	-0.00211678		1432.2	0.00205695		1962.2	0.01188463		2492.2	-0.00387541
372.4	0.02228935		902.39	-0.00113638		1432.4	0.0018267		1962.4	0.0124086		2492.4	-0.00376256
372.6	0.02147277		902.59	-0.00112436		1432.6	0.00205055		1962.6	0.01310069		2492.6	-0.00349454
372.8	0.02063686		902.79	-0.00058504		1432.8	0.0025829		1962.8	0.01311173		2492.8	-0.00448201
373	0.01990734		902.99	-0.00047655		1433	0.00292782		1963	0.01359865		2493	-0.00506172
373.2	0.0193737		903.19	-0.00104778		1433.2	0.00330597		1963.2	0.01391182		2493.2	-0.00471472
373.4	0.01935926		903.39	-0.00056088		1433.4	0.00313914		1963.4	0.01423613		2493.4	-0.00510262
373.6	0.01913784		903.59	-0.00173002		1433.6	0.00419518		1963.6	0.01373288		2493.6	-0.00441322
373.8	0.01930222		903.79	-0.00222075		1433.8	0.00446812		1963.8	0.0136287		2493.8	-0.00500295
374	0.01895446		903.99	-0.0023876		1434	0.00463542		1964	0.01377328		2494	-0.00447976
374.2	0.01927993		904.19	-0.00294411		1434.2	0.0048176		1964.2	0.01417707		2494.2	-0.00423793
374.4	0.0192971		904.39	-0.00382288		1434.4	0.00444787		1964.4	0.01461554		2494.4	-0.00372385
374.6	0.01979575		904.59	-0.00436365		1434.6	0.0040578		1964.6	0.01479581		2494.6	-0.00276177
374.8	0.01961045		904.79	-0.00426608		1434.8	0.00392127		1964.8	0.0135577		2494.8	-0.00318829
375	0.01871878		904.99	-0.00364621		1435	0.00304714		1965	0.01324721		2495	-0.00326363
375.2	0.01896856		905.19	-0.00412029		1435.2	0.00350803		1965.2	0.01299268		2495.2	-0.00407191
375.4	0.01894172		905.39	-0.00429398		1435.4	0.00382862		1965.4	0.01359788		2495.4	-0.0036193
375.6	0.01985666		905.59	-0.00444749		1435.6	0.00378278		1965.6	0.01448616		2495.6	-0.00399609
375.8	0.01988532		905.79	-0.00416054		1435.8	0.00433735		1965.8	0.01504458		2495.8	-0.00462735
376	0.01976952		905.99	-0.00391553		1436	0.00369948		1966	0.01454856		2496	-0.00472039
376.2	0.01988643		906.19	-0.0035283		1436.2	0.00302009		1966.2	0.01499296		2496.2	-0.0043465
376.4	0.01950692		906.39	-0.00269755		1436.4	0.00220944		1966.4	0.01510626		2496.4	-0.00465931
376.6	0.01983747		906.59	-0.00315302		1436.6	0.0021765		1966.6	0.01526229		2496.6	-0.00440625
376.8	0.02000648		906.79	-0.00280167		1436.8	0.0023172		1966.8	0.01523706		2496.8	-0.00471917
377	0.02024163		906.99	-0.00323156		1437	0.002348		1967	0.01560626		2497	-0.00457564
377.2	0.0209294		907.19	-0.00343321		1437.2	0.00302049		1967.2	0.01581248		2497.2	-0.00415018
377.4	0.02162833		907.39	-0.00217391		1437.4	0.0032629		1967.4	0.01538507		2497.4	-0.00479857
377.6	0.02212616		907.59	-0.00273061		1437.6	0.00364657		1967.6	0.01434405		2497.6	-0.0051449
377.8	0.02246977		907.79	-0.00228928		1437.8	0.00360229		1967.8	0.01476924		2497.8	-0.00624283
378	0.02274153		907.99	-0.00249855		1438	0.00354832		1968	0.0147652		2498	-0.00644495
378.2	0.02327273		908.19	-0.00269067		1438.2	0.00312708		1968.2	0.01498071		2498.2	-0.00697787
378.4	0.02309611		908.39	-0.00317544		1438.4	0.0022473		1968.4	0.01453614		2498.4	-0.00718794
378.6	0.02282444		908.59	-0.00296646		1438.6	0.0015873		1968.6	0.01365547		2498.6	-0.00745098
378.8	0.02186177		908.79	-0.0027037		1438.8	0.00108719		1968.8	0.01272653		2498.8	-0.00857908
379	0.02108498		908.99	-0.00259138		1439	0.00054834		1969	0.01198324		2499	-0.00857577
379.2	0.02115457		909.19	-0.00266773		1439.2	0.00070198		1969.2	0.01131944		2499.2	-0.00902979
379.4	0.02071004		909.39	-0.00301621		1439.4	-0.00013416		1969.4	0.01075551		2499.4	-0.0084121
379.6	0.020573		909.59	-0.00297299		1439.6	-0.00060188		1969.6	0.01010799		2499.6	-0.00836667
379.8	0.01987808		909.79	-0.00317972		1439.8	-0.00155548		1969.8	0.00921897		2499.8	-0.0080974
380	0.01987808		909.99	-0.00317972		1440	-0.00155548		1970	0.00921897		2500	-0.0080974
380.2	0.01858899		910.19	-0.00380179		1440.2	-0.00172409		1970.2	0.010556		2500.2	-0.00834991
380.4	0.01840369		910.39	-0.00381284		1440.4	-0.0019002		1970.4	0.01164297		2500.4	-0.00934426
380.6	0.01776865		910.59	-0.00464463		1440.6	-0.00245271		1970.6	0.01234239		2500.6	-0.00986874
380.8	0.01766261		910.79	-0.00577812		1440.8	-0.00167325		1970.8	0.01339262		2500.8	-0.0096453
381	0.0165769		910.99	-0.00613003		1441	-0.00141325		1971	0.01429511		2501	-0.00950853
381.2	0.01638913		911.19	-0.00582471		1441.2	-0.00096586		1971.2	0.01495184		2501.2	-0.00898092
381.4	0.01604775		911.39	-0.00553237		1441.4	-0.00079186		1971.4	0.01501501		2501.4	-0.00836595
381.6	0.01558116		911.59	-0.00588789		1441.6	-0.00088156		1971.6	0.01479416		2501.6	-0.00784061
381.8	0.01572426		911.79	-0.0058301		1441.8	0.00004597		1971.8	0.01435727		2501.8	-0.00804248
382	0.01558604		911.99	-0.005427		1442	0.0000177		1972	0.01380065		2502	-0.00839633
382.2	0.01603628		912.19	-0.0052118		1442.2	-0.00063322		1972.2	0.01324871		2502.2	-0.00903761
382.4	0.01676101		912.39	-0.00492572		1442.4	-0.00167356		1972.4	0.01221067		2502.4	-0.00838555
382.6	0.01725477		912.59	-0.00297381		1442.6	-0.00184064		1972.6	0.01074561		2502.6	-0.00871301
382.8	0.01792492		912.79	-0.00256589		1442.8	-0.002577		1972.8	0.0098371		2502.8	-0.00860086
383	0.01846878		912.99	-0.00224055		1443	-0.00282322		1973	0.00934642		2503	-0.00874651
383.2	0.01979851		913.19	-0.00135445		1443.2	-0.00306416		1973.2	0.00903569		2503.2	-0.00902491
383.4	0.01951737		913.39	-0.00056853		1443.4	-0.00207704		1973.4	0.00931856		2503.4	-0.00918801
383.6	0.0184614		913.59	-0.00022736		1443.6	-0.00233251		1973.6	0.01037148		2503.6	-0.0092818
383.8	0.01841095		913.79	0.00001068		1443.8	-0.0029675		1973.8	0.01029062		2503.8	-0.00966235
384	0.01791337		913.99	0.00077461		1444	-0.00298482		1974	0.01008908		2504	-0.0091584
384.2	0.01710058		914.19	0.00012049		1444.2	-0.00341763		1974.2	0.0111957		2504.2	-0.00967148
384.4	0.01769047		914.39	-0.0002437		1444.4	-0.00325208		1974.4	0.01210112		2504.4	-0.00938963
384.6	0.01712224		914.59	-0.00151535		1444.6	-0.00248239		1974.6	0.0127461		2504.6	-0.00874638
384.8	0.01689977		914.79	-0.00167005		1444.8	-0.00182196		1974.8	0.01401029		2504.8	-0.00756052
385	0.01572622		914.99	-0.00126242		1445	-0.00136186		1975	0.01404744		2505	-0.00742443
385.2	0.01557682		915.19	-0.00061046		1445.2	-0.00161028		1975.2	0.01409364		2505.2	-0.00679425
385.4	0.01498966		915.39	-0.00120503		1445.4	-0.00191291		1975.4	0.01392535		2505.4	-0.00658277
385.6	0.01482194		915.59	-0.00092604		1445.6	-0.00270889		1975.6	0.01359479		2505.6	-0.00685303
385.8	0.01410294		915.79	-0.00118723		1445.8	-0.00209077		1975.8	0.01374407		2505.8	-0.00730261
386	0.01312897		915.99	-0.00089248		1446	-0.00366179		1976	0.0131664		2506	-0.00772245
386.2	0.01323219		916.19	-0.00163222		1446.2	-0.00492798		1976.2	0.01252137		2506.2	-0.0074256
386.4	0.01275648		916.39	-0.00211052		1446.4	-0.0061044		1976.4	0.01130412		2506.4	-0.0059204
386.6	0.01341824		916.59	-0.00129919		1446.6	-0.00626251		1976.6	0.01063208		2506.6	-0.00656862
386.8	0.01403092		916.79	-0.00236768		1446.8	-0.00576083		1976.8	0.0104162		2506.8	-0.00612912
387	0.01428102		916.99	-0.00271142		1447	-0.00612469		1977	0.01056123		2507	-0.00696059
387.2	0.01369496		917.19	-0.00277428		1447.2	-0.00577984		1977.2	0.01067958		2507.2	-0.00718401
387.4	0.01326258		917.39	-0.0021596		1447.4	-0.00571983		1977.4	0.01117571		2507.4	-0.00718622
387.6	0.01273166		917.59	-0.00252585		1447.6	-0.00562499		1977.6	0.01067105		2507.6	-0.00631569
387.8	0.01256139		917.79	-0.00259879		1447.8	-0.0059633		1977.8	0.01087513		2507.8	-0.00599777
388	0.0128052		917.99	-0.00254279		1448	-0.00532494		1978	0.01042417		2508	-0.00586456
388.2	0.01371838		918.19	-0.0035412		1448.2	-0.00622538		1978.2	0.01126629		2508.2	-0.00558448
388.4	0.01381737		918.39	-0.0038243		1448.4	-0.00537152		1978.4	0.01203273		2508.4	-0.00605108
388.6	0.01378891		918.59	-0.00338067		1448.6	-0.00503235		1978.6	0.01225701		2508.6	-0.00578134
388.8	0.01449779		918.79	-0.00269028		1448.8	-0.00539815		1978.8	0.01215636		2508.8	-0.00570346
389	0.01464762		918.99	-0.00251326		1449	-0.00503899		1979	0.01210145		2509	-0.00602978
389.2	0.014908		919.19	-0.00198207		1449.2	-0.00566199		1979.2	0.0125407		2509.2	-0.00581644
389.4	0.01538434		919.39	-0.00143931		1449.4	-0.00593172		1979.4	0.01193554		2509.4	-0.00700196
389.6	0.014942		919.59	-0.00031087		1449.6	-0.00597149		1979.6	0.01207555		2509.6	-0.00750271
389.8	0.01411857		919.79	-0.00019664		1449.8	-0.00550427		1979.8	0.01251253		2509.8	-0.00802615
390	0.01469385		919.99	0.00045458		1450	-0.00562057		1980	0.01176598		2510	-0.00926581
390.2	0.01491005		920.19	-0.00045242		1450.2	-0.00632086		1980.2	0.01150498		2510.2	-0.0098302
390.4	0.01522986		920.39	-0.00062716		1450.4	-0.00605333		1980.4	0.01075891		2510.4	-0.01077517
390.6	0.01628588		920.59	-0.00019236		1450.6	-0.00519837		1980.6	0.01102348		2510.6	-0.0119454
390.8	0.01520871		920.79	-0.00105498		1450.8	-0.00450608		1980.8	0.01052648		2510.8	-0.01157097
391	0.01495471		920.99	-0.00178301		1451	-0.00477967		1981	0.01040387		2511	-0.01160156
391.2	0.01457418		921.19	-0.0019449		1451.2	-0.00392409		1981.2	0.01078758		2511.2	-0.01080311
391.4	0.01430534		921.39	-0.00178557		1451.4	-0.00421615		1981.4	0.01056216		2511.4	-0.01010223
391.6	0.01450877		921.59	-0.00223206		1451.6	-0.00381854		1981.6	0.01060395		2511.6	-0.00961649
391.8	0.01406928		921.79	-0.00197934		1451.8	-0.00412808		1981.8	0.01073085		2511.8	-0.00948596
392	0.01454439		921.99	-0.00237398		1452	-0.00441068		1982	0.01111479		2512	-0.01007848
392.2	0.0150993		922.19	-0.00350037		1452.2	-0.00496811		1982.2	0.012337		2512.2	-0.01021189
392.4	0.01404896		922.39	-0.00348983		1452.4	-0.00431871		1982.4	0.01236545		2512.4	-0.01029184
392.6	0.01407135		922.59	-0.00376524		1452.6	-0.00448543		1982.6	0.01200306		2512.6	-0.00920697
392.8	0.0142591		922.79	-0.0042135		1452.8	-0.00534535		1982.8	0.0119855		2512.8	-0.00909042
393	0.01390172		922.99	-0.00441014		1453	-0.00596936		1983	0.01248889		2513	-0.0093662
393.2	0.01337134		923.19	-0.00435649		1453.2	-0.00618358		1983.2	0.01242199		2513.2	-0.00929544
393.4	0.0129485		923.39	-0.00415059		1453.4	-0.00688042		1983.4	0.01177306		2513.4	-0.01027396
393.6	0.01242132		923.59	-0.00400063		1453.6	-0.00705472		1983.6	0.0125592		2513.6	-0.00980333
393.8	0.0130629		923.79	-0.0034443		1453.8	-0.00726906		1983.8	0.01257274		2513.8	-0.0104823
394	0.01342101		923.99	-0.0036278		1454	-0.00719547		1984	0.0120483		2514	-0.01155504
394.2	0.01298629		924.19	-0.00399796		1454.2	-0.00808756		1984.2	0.01117361		2514.2	-0.01170227
394.4	0.01333472		924.39	-0.00343221		1454.4	-0.00715825		1984.4	0.01035522		2514.4	-0.01208236
394.6	0.01324216		924.59	-0.00300931		1454.6	-0.00708164		1984.6	0.01030609		2514.6	-0.01129752
394.8	0.01276745		924.79	-0.00407344		1454.8	-0.00708865		1984.8	0.00973317		2514.8	-0.01091977
395	0.01306173		924.99	-0.00469775		1455	-0.00715558		1985	0.00945795		2515	-0.01082249
395.2	0.01230087		925.19	-0.00420584		1455.2	-0.00728092		1985.2	0.01022838		2515.2	-0.01051891
395.4	0.01209531		925.39	-0.00467747		1455.4	-0.00745119		1985.4	0.00949823		2515.4	-0.010459
395.6	0.01230275		925.59	-0.00466976		1455.6	-0.00660266		1985.6	0.00970266		2515.6	-0.01049138
395.8	0.0123668		925.79	-0.00482992		1455.8	-0.00618121		1985.8	0.01000921		2515.8	-0.01052878
396	0.01310709		925.99	-0.00535513		1456	-0.00633891		1986	0.01047366		2516	-0.01022578
396.2	0.01346191		926.19	-0.00538343		1456.2	-0.00595773		1986.2	0.00970473		2516.2	-0.00963693
396.4	0.0124632		926.39	-0.00534489		1456.4	-0.00600211		1986.4	0.00882379		2516.4	-0.00960458
396.6	0.01249909		926.59	-0.00595571		1456.6	-0.00626596		1986.6	0.00849462		2516.6	-0.00960174
396.8	0.01216101		926.79	-0.00577777		1456.8	-0.00642897		1986.8	0.00906495		2516.8	-0.00946249
397	0.01257134		926.99	-0.0061844		1457	-0.00669744		1987	0.00909587		2517	-0.00968483
397.2	0.01251444		927.19	-0.00632647		1457.2	-0.00630753		1987.2	0.00920819		2517.2	-0.00948595
397.4	0.01281599		927.39	-0.00671402		1457.4	-0.00620958		1987.4	0.00871217		2517.4	-0.00989586
397.6	0.01361119		927.59	-0.00615683		1457.6	-0.00635427		1987.6	0.00912213		2517.6	-0.0101334
397.8	0.01383866		927.79	-0.0059439		1457.8	-0.00534111		1987.8	0.00876592		2517.8	-0.01123708
398	0.01342449		927.99	-0.00587674		1458	-0.00486311		1988	0.00864677		2518	-0.01212915
398.2	0.01365215		928.19	-0.00580546		1458.2	-0.00482708		1988.2	0.00868805		2518.2	-0.01258988
398.4	0.01356812		928.39	-0.00517309		1458.4	-0.00449797		1988.4	0.00936084		2518.4	-0.01309663
398.6	0.01330523		928.59	-0.00457076		1458.6	-0.00510279		1988.6	0.00928508		2518.6	-0.01311746
398.8	0.01291494		928.79	-0.00516798		1458.8	-0.00498754		1988.8	0.009673		2518.8	-0.0139017
399	0.01273819		928.99	-0.00482832		1459	-0.00497742		1989	0.00959403		2519	-0.01397361
399.2	0.01179618		929.19	-0.0044898		1459.2	-0.00446037		1989.2	0.01012501		2519.2	-0.01404098
399.4	0.01176224		929.39	-0.00531604		1459.4	-0.00473812		1989.4	0.0094815		2519.4	-0.01370805
399.6	0.01158661		929.59	-0.00460952		1459.6	-0.00453814		1989.6	0.00925824		2519.6	-0.01354998
399.8	0.01143087		929.79	-0.00437726		1459.8	-0.00553562		1989.8	0.00940419		2519.8	-0.01321444
400	0.01087461		929.99	-0.00366592		1460	-0.00641468		1990	0.00864325		2520	-0.0120258
400.2	0.01064737		930.19	-0.0034209		1460.2	-0.00716293		1990.2	0.00794984		2520.2	-0.01187081
400.4	0.0093985		930.39	-0.00358713		1460.4	-0.00772815		1990.4	0.00741292		2520.4	-0.01216226
400.6	0.00989612		930.59	-0.00396555		1460.6	-0.00850916		1990.6	0.00812203		2520.6	-0.01219572
400.8	0.00912492		930.79	-0.00397791		1460.8	-0.0088423		1990.8	0.00817278		2520.8	-0.01184104
401	0.00964394		930.99	-0.00494417		1461	-0.00948595		1991	0.00865226		2521	-0.01161974
401.2	0.01029509		931.19	-0.00443991		1461.2	-0.00920484		1991.2	0.0086704		2521.2	-0.01176366
401.4	0.01082148		931.39	-0.00542089		1461.4	-0.00865302		1991.4	0.00827977		2521.4	-0.01214981
401.6	0.01139746		931.59	-0.0051713		1461.6	-0.00910355		1991.6	0.00849953		2521.6	-0.01228111
401.8	0.010927		931.79	-0.00625291		1461.8	-0.00843081		1991.8	0.00887108		2521.8	-0.01263097
402	0.01106462		931.99	-0.00668592		1462	-0.00804788		1992	0.00943927		2522	-0.01253682
402.2	0.01159907		932.19	-0.00723174		1462.2	-0.00858368		1992.2	0.01002078		2522.2	-0.01247544
402.4	0.0121148		932.39	-0.00689322		1462.4	-0.00876776		1992.4	0.01047694		2522.4	-0.01260798
402.6	0.01247931		932.59	-0.00625385		1462.6	-0.00863873		1992.6	0.00921413		2522.6	-0.01302803
402.8	0.01252913		932.79	-0.0067033		1462.8	-0.00754996		1992.8	0.01004013		2522.8	-0.01314457
403	0.01263784		932.99	-0.00668317		1463	-0.00752889		1993	0.01002561		2523	-0.01303219
403.2	0.01180717		933.19	-0.00723918		1463.2	-0.00689651		1993.2	0.01011152		2523.2	-0.01346
403.4	0.01093396		933.39	-0.00788719		1463.4	-0.00753591		1993.4	0.01078964		2523.4	-0.01337333
403.6	0.01024615		933.59	-0.00815922		1463.6	-0.00777783		1993.6	0.0108368		2523.6	-0.01331849
403.8	0.00972455		933.79	-0.00792032		1463.8	-0.00767211		1993.8	0.01112367		2523.8	-0.01289631
404	0.00935219		933.99	-0.00788185		1464	-0.00800886		1994	0.01126998		2524	-0.01275347
404.2	0.00974904		934.19	-0.0072609		1464.2	-0.00821869		1994.2	0.01122454		2524.2	-0.01294518
404.4	0.00941185		934.39	-0.00755006		1464.4	-0.00779457		1994.4	0.01191864		2524.4	-0.01280891
404.6	0.00978907		934.59	-0.0073867		1464.6	-0.00802758		1994.6	0.01193708		2524.6	-0.01278351
404.8	0.00963968		934.79	-0.0068139		1464.8	-0.00800955		1994.8	0.01185916		2524.8	-0.01277302
405	0.01087436		934.99	-0.00660212		1465	-0.00795201		1995	0.01121415		2525	-0.01331666
405.2	0.01159799		935.19	-0.0059105		1465.2	-0.00781001		1995.2	0.00989901		2525.2	-0.01377982
405.4	0.01199157		935.39	-0.00612324		1465.4	-0.00719811		1995.4	0.00871381		2525.4	-0.0140836
405.6	0.01189095		935.59	-0.00538307		1465.6	-0.00823382		1995.6	0.00776522		2525.6	-0.01414198
405.8	0.0121885		935.79	-0.0052439		1465.8	-0.00824886		1995.8	0.00754554		2525.8	-0.01410084
406	0.01253705		935.99	-0.00447539		1466	-0.00814886		1996	0.00667089		2526	-0.01392923
406.2	0.01293188		936.19	-0.00426352		1466.2	-0.00900898		1996.2	0.00618939		2526.2	-0.01472589
406.4	0.01329104		936.39	-0.00406675		1466.4	-0.00928188		1996.4	0.00541086		2526.4	-0.01415971
406.6	0.0126156		936.59	-0.00389233		1466.6	-0.00928462		1996.6	0.00459938		2526.6	-0.01437378
406.8	0.01229171		936.79	-0.00452869		1466.8	-0.0094665		1996.8	0.00557082		2526.8	-0.01455626
407	0.01150582		936.99	-0.00550038		1467	-0.01000785		1997	0.00585402		2527	-0.0150718
407.2	0.0104875		937.19	-0.00636853		1467.2	-0.0093838		1997.2	0.00636469		2527.2	-0.01506976
407.4	0.00878336		937.39	-0.00727965		1467.4	-0.00917252		1997.4	0.00707791		2527.4	-0.01487952
407.6	0.00836668		937.59	-0.00755819		1467.6	-0.00858199		1997.6	0.00754235		2527.6	-0.0142798
407.8	0.00816012		937.79	-0.00763228		1467.8	-0.00763478		1997.8	0.00847876		2527.8	-0.01336715
408	0.00794203		937.99	-0.0077429		1468	-0.00771505		1998	0.00913598		2528	-0.01227951
408.2	0.00850357		938.19	-0.00786492		1468.2	-0.00739411		1998.2	0.00974866		2528.2	-0.01253234
408.4	0.00814588		938.39	-0.00821833		1468.4	-0.00678838		1998.4	0.00994125		2528.4	-0.01293567
408.6	0.00807758		938.59	-0.00740764		1468.6	-0.00760374		1998.6	0.0099597		2528.6	-0.01262293
408.8	0.00849749		938.79	-0.00732118		1468.8	-0.00733097		1998.8	0.00991059		2528.8	-0.01268946
409	0.00911054		938.99	-0.00735298		1469	-0.00731863		1999	0.00941195		2529	-0.01331752
409.2	0.01012671		939.19	-0.00746577		1469.2	-0.00761143		1999.2	0.00936244		2529.2	-0.01286415
409.4	0.01055928		939.39	-0.007171		1469.4	-0.00758898		1999.4	0.00932624		2529.4	-0.01248164
409.6	0.01127303		939.59	-0.00709443		1469.6	-0.00834998		1999.6	0.00895637		2529.6	-0.01342908
409.8	0.01182872		939.79	-0.00667515		1469.8	-0.00864252		1999.8	0.00969916		2529.8	-0.01322276
410	0.01128612		939.99	-0.0068844		1470	-0.00924153		2000	0.00976942		2530	-0.01358481
410.2	0.01088278		940.19	-0.00705817		1470.2	-0.00990558		2000.2	0.00904218		2530.2	-0.01388351
410.4	0.01071906		940.39	-0.00755945		1470.4	-0.01048309		2000.4	0.00863778		2530.4	-0.01308416
410.6	0.01022417		940.59	-0.00775574		1470.6	-0.01015356		2000.6	0.00860767		2530.6	-0.01395845
410.8	0.01030767		940.79	-0.00817148		1470.8	-0.01009002		2000.8	0.008031		2530.8	-0.01423779
411	0.00932291		940.99	-0.00894118		1471	-0.00988976		2001	0.00758099		2531	-0.01435535
411.2	0.00843082		941.19	-0.00906627		1471.2	-0.00910042		2001.2	0.006648		2531.2	-0.01383681
411.4	0.00697644		941.39	-0.0088953		1471.4	-0.00876834		2001.4	0.00607732		2531.4	-0.01406965
411.6	0.00704898		941.59	-0.00927866		1471.6	-0.00880625		2001.6	0.0057299		2531.6	-0.01457191
411.8	0.00692613		941.79	-0.01005188		1471.8	-0.00787565		2001.8	0.00549022		2531.8	-0.01446288
412	0.00692513		941.99	-0.00981288		1472	-0.00781518		2002	0.00492591		2532	-0.01497589
412.2	0.00744819		942.19	-0.00961001		1472.2	-0.00755863		2002.2	0.00494338		2532.2	-0.01590879
412.4	0.00701533		942.39	-0.00917362		1472.4	-0.00756822		2002.4	0.00488821		2532.4	-0.01688756
412.6	0.00762112		942.59	-0.00913704		1472.6	-0.00822085		2002.6	0.00562031		2532.6	-0.01653749
412.8	0.00913061		942.79	-0.00965814		1472.8	-0.00774355		2002.8	0.00518122		2532.8	-0.01700041
413	0.01033442		942.99	-0.00937845		1473	-0.00822348		2003	0.00616143		2533	-0.01732053
413.2	0.01091051		943.19	-0.00879613		1473.2	-0.00878477		2003.2	0.00628253		2533.2	-0.01692852
413.4	0.01047988		943.39	-0.00838045		1473.4	-0.00936907		2003.4	0.00741679		2533.4	-0.01673057
413.6	0.01184648		943.59	-0.0083527		1473.6	-0.0093423		2003.6	0.00718117		2533.6	-0.01754426
413.8	0.01137396		943.79	-0.00820818		1473.8	-0.00942647		2003.8	0.00847859		2533.8	-0.01711002
414	0.01094119		943.99	-0.00778181		1474	-0.01005483		2004	0.00881379		2534	-0.01724595
414.2	0.01048722		944.19	-0.00694495		1474.2	-0.01011006		2004.2	0.0088658		2534.2	-0.01662839
414.4	0.00982132		944.39	-0.00706664		1474.4	-0.01055102		2004.4	0.00908943		2534.4	-0.01611651
414.6	0.00907388		944.59	-0.00686759		1474.6	-0.00948451		2004.6	0.00929078		2534.6	-0.01557983
414.8	0.00883981		944.79	-0.00614457		1474.8	-0.00979942		2004.8	0.00899313		2534.8	-0.01548268
415	0.00754592		944.99	-0.00554114		1475	-0.01033603		2005	0.00957865		2535	-0.01459482
415.2	0.00602424		945.19	-0.0054178		1475.2	-0.0101469		2005.2	0.0094962		2535.2	-0.01424331
415.4	0.00549752		945.39	-0.00619367		1475.4	-0.00985948		2005.4	0.01050779		2535.4	-0.01436171
415.6	0.0053686		945.59	-0.00747474		1475.6	-0.00961655		2005.6	0.01003238		2535.6	-0.01452613
415.8	0.00497397		945.79	-0.00792516		1475.8	-0.00889938		2005.8	0.00997797		2535.8	-0.01407791
416	0.00524794		945.99	-0.00750457		1476	-0.00872726		2006	0.00974312		2536	-0.01395402
416.2	0.00551187		946.19	-0.00783068		1476.2	-0.00837473		2006.2	0.01001138		2536.2	-0.01330082
416.4	0.00614385		946.39	-0.0085619		1476.4	-0.00829168		2006.4	0.01020123		2536.4	-0.01367559
416.6	0.00750102		946.59	-0.00885727		1476.6	-0.00851697		2006.6	0.01007143		2536.6	-0.01376663
416.8	0.00885802		946.79	-0.00898416		1476.8	-0.00805277		2006.8	0.00939891		2536.8	-0.01383843
417	0.00862868		946.99	-0.00858373		1477	-0.00849254		2007	0.00923737		2537	-0.01393931
417.2	0.00886641		947.19	-0.0083237		1477.2	-0.00872453		2007.2	0.00871622		2537.2	-0.01454737
417.4	0.00963639		947.39	-0.00881611		1477.4	-0.00897973		2007.4	0.00866519		2537.4	-0.01459527
417.6	0.01089957		947.59	-0.00873539		1477.6	-0.00794553		2007.6	0.00809999		2537.6	-0.0158146
417.8	0.01043102		947.79	-0.00826009		1477.8	-0.00807639		2007.8	0.00879186		2537.8	-0.01565822
418	0.01121775		947.99	-0.00694423		1478	-0.00825133		2008	0.00849571		2538	-0.01595619
418.2	0.01062627		948.19	-0.00600208		1478.2	-0.00764354		2008.2	0.00842289		2538.2	-0.01604225
418.4	0.01002368		948.39	-0.00631439		1478.4	-0.00742169		2008.4	0.00767494		2538.4	-0.01654101
418.6	0.01056025		948.59	-0.00643955		1478.6	-0.00663011		2008.6	0.00829485		2538.6	-0.01663178
418.8	0.01064392		948.79	-0.00599895		1478.8	-0.00714371		2008.8	0.00839387		2538.8	-0.01682156
419	0.00910853		948.99	-0.00643994		1479	-0.00752028		2009	0.00940443		2539	-0.01639759
419.2	0.00757838		949.19	-0.0071415		1479.2	-0.00778194		2009.2	0.00928194		2539.2	-0.01648938
419.4	0.0077943		949.39	-0.00746534		1479.4	-0.00748415		2009.4	0.00910499		2539.4	-0.01656622
419.6	0.00685471		949.59	-0.00775566		1479.6	-0.00862409		2009.6	0.00838467		2539.6	-0.01585962
419.8	0.00672216		949.79	-0.00762066		1479.8	-0.00908271		2009.8	0.00887716		2539.8	-0.01590134
420	0.00693138		949.99	-0.00749445		1480	-0.00901437		2010	0.00915124		2540	-0.01570961
420.2	0.00673887		950.19	-0.00774846		1480.2	-0.00905639		2010.2	0.00958274		2540.2	-0.01509058
420.4	0.00762703		950.39	-0.00784818		1480.4	-0.00927167		2010.4	0.00970327		2540.4	-0.01568861
420.6	0.00739808		950.59	-0.00761557		1480.6	-0.00977199		2010.6	0.00909939		2540.6	-0.01624097
420.8	0.00755884		950.79	-0.00791626		1480.8	-0.01014524		2010.8	0.00760676		2540.8	-0.01604181
421	0.00724341		950.99	-0.00778301		1481	-0.01079507		2011	0.00766291		2541	-0.01627307
421.2	0.00794286		951.19	-0.00778033		1481.2	-0.01087705		2011.2	0.0072569		2541.2	-0.01733371
421.4	0.00847542		951.39	-0.00774426		1481.4	-0.01068938		2011.4	0.00716576		2541.4	-0.01752592
421.6	0.00839473		951.59	-0.00764543		1481.6	-0.01133908		2011.6	0.00776976		2541.6	-0.01797667
421.8	0.00784185		951.79	-0.00707833		1481.8	-0.01080872		2011.8	0.00703996		2541.8	-0.01660992
422	0.00809876		951.99	-0.00712621		1482	-0.01011202		2012	0.00620696		2542	-0.01778051
422.2	0.00725629		952.19	-0.00684496		1482.2	-0.01003028		2012.2	0.0062477		2542.2	-0.01803168
422.4	0.00741411		952.39	-0.00758746		1482.4	-0.009832		2012.4	0.00622137		2542.4	-0.01717483
422.6	0.00841264		952.59	-0.00759273		1482.6	-0.0097237		2012.6	0.00726272		2542.6	-0.01607514
422.8	0.00731692		952.79	-0.00747843		1482.8	-0.00928495		2012.8	0.00780872		2542.8	-0.01593069
423	0.00602669		952.99	-0.0076358		1483	-0.00906054		2013	0.0088587		2543	-0.01568429
423.2	0.00563623		953.19	-0.00743828		1483.2	-0.00947855		2013.2	0.00873895		2543.2	-0.01531141
423.4	0.00594114		953.39	-0.00747279		1483.4	-0.00927632		2013.4	0.00981056		2543.4	-0.01573616
423.6	0.004632		953.59	-0.00825866		1483.6	-0.01013693		2013.6	0.01064142		2543.6	-0.015338
423.8	0.00505877		953.79	-0.00861373		1483.8	-0.00980177		2013.8	0.01087894		2543.8	-0.01605951
424	0.00511478		953.99	-0.0086012		1484	-0.00921738		2014	0.01085588		2544	-0.01631388
424.2	0.00521438		954.19	-0.00874396		1484.2	-0.00917881		2014.2	0.01097358		2544.2	-0.01625273
424.4	0.00547134		954.39	-0.00889365		1484.4	-0.00919155		2014.4	0.01046997		2544.4	-0.01668533
424.6	0.00456399		954.59	-0.00906424		1484.6	-0.00973587		2014.6	0.00981856		2544.6	-0.01706494
424.8	0.00499229		954.79	-0.00936037		1484.8	-0.00972157		2014.8	0.00902799		2544.8	-0.01795638
425	0.00479351		954.99	-0.00942265		1485	-0.00930937		2015	0.00930275		2545	-0.01890924
425.2	0.00533288		955.19	-0.01025407		1485.2	-0.00935655		2015.2	0.00831108		2545.2	-0.0203839
425.4	0.00561584		955.39	-0.00981936		1485.4	-0.00990748		2015.4	0.00822216		2545.4	-0.02081504
425.6	0.00542695		955.59	-0.01003054		1485.6	-0.01081732		2015.6	0.00719691		2545.6	-0.0208489
425.8	0.00550484		955.79	-0.00981045		1485.8	-0.00992189		2015.8	0.0057686		2545.8	-0.02042681
426	0.00598483		955.99	-0.01024316		1486	-0.01002202		2016	0.00518984		2546	-0.0209245
426.2	0.00609557		956.19	-0.01030389		1486.2	-0.01054499		2016.2	0.00481777		2546.2	-0.01967118
426.4	0.00603387		956.39	-0.01043047		1486.4	-0.0098781		2016.4	0.00473163		2546.4	-0.01828515
426.6	0.00680925		956.59	-0.01060947		1486.6	-0.00978416		2016.6	0.00534772		2546.6	-0.01799098
426.8	0.00559612		956.79	-0.01072833		1486.8	-0.00875766		2016.8	0.00620252		2546.8	-0.0183241
427	0.00540702		956.99	-0.01076345		1487	-0.00932039		2017	0.00653089		2547	-0.01799824
427.2	0.00499099		957.19	-0.01136353		1487.2	-0.00937909		2017.2	0.00630415		2547.2	-0.01799484
427.4	0.00464457		957.39	-0.0115601		1487.4	-0.00958718		2017.4	0.00669896		2547.4	-0.01816941
427.6	0.00438942		957.59	-0.01199243		1487.6	-0.00991464		2017.6	0.00638412		2547.6	-0.01777078
427.8	0.00498659		957.79	-0.01149387		1487.8	-0.00991577		2017.8	0.00677132		2547.8	-0.0173663
428	0.00456699		957.99	-0.01059722		1488	-0.01009393		2018	0.00672382		2548	-0.01726845
428.2	0.00533679		958.19	-0.0108315		1488.2	-0.01005488		2018.2	0.0074588		2548.2	-0.01676323
428.4	0.00544604		958.39	-0.01024152		1488.4	-0.00977032		2018.4	0.00715325		2548.4	-0.0172941
428.6	0.00536565		958.59	-0.00949344		1488.6	-0.00974468		2018.6	0.00763166		2548.6	-0.01802499
428.8	0.00523326		958.79	-0.00883377		1488.8	-0.00941094		2018.8	0.0074453		2548.8	-0.01818847
429	0.00575333		958.99	-0.0091502		1489	-0.00922733		2019	0.00753152		2549	-0.01814026
429.2	0.00736128		959.19	-0.00869866		1489.2	-0.01031957		2019.2	0.00758869		2549.2	-0.01820644
429.4	0.00807454		959.39	-0.00782056		1489.4	-0.01103757		2019.4	0.0079372		2549.4	-0.01851496
429.6	0.00800178		959.59	-0.00816107		1489.6	-0.01102762		2019.6	0.00711912		2549.6	-0.01834317
429.8	0.00785327		959.79	-0.00857512		1489.8	-0.01086569		2019.8	0.00712296		2549.8	-0.01782162
430	0.00869257		959.99	-0.00870942		1490	-0.01116276		2020	0.00681454		2550	-0.01701582
430.2	0.00841864		960.19	-0.00901705		1490.2	-0.01092543		2020.2	0.00727412		2550.2	-0.01706455
430.4	0.00789782		960.39	-0.00866598		1490.4	-0.01069858		2020.4	0.00743619		2550.4	-0.01685443
430.6	0.00790647		960.59	-0.00858049		1490.6	-0.01070067		2020.6	0.00726118		2550.6	-0.01668477
430.8	0.00684246		960.79	-0.00965639		1490.8	-0.01042819		2020.8	0.00777948		2550.8	-0.01674
431	0.00681182		960.99	-0.00984508		1491	-0.01060989		2021	0.00740551		2551	-0.01658314
431.2	0.00643618		961.19	-0.0107619		1491.2	-0.01032142		2021.2	0.00755428		2551.2	-0.01627664
431.4	0.0065502		961.39	-0.01029392		1491.4	-0.01091046		2021.4	0.00759167		2551.4	-0.01573521
431.6	0.00570083		961.59	-0.01047852		1491.6	-0.01042948		2021.6	0.00859737		2551.6	-0.01529546
431.8	0.00557545		961.79	-0.01029242		1491.8	-0.01008475		2021.8	0.00830569		2551.8	-0.01564345
432	0.00535367		961.99	-0.01039036		1492	-0.01027674		2022	0.00789503		2552	-0.0162923
432.2	0.00595728		962.19	-0.01058303		1492.2	-0.01013445		2022.2	0.00751496		2552.2	-0.01697626
432.4	0.0056364		962.39	-0.01036315		1492.4	-0.01005366		2022.4	0.00623812		2552.4	-0.01768985
432.6	0.00515449		962.59	-0.00935171		1492.6	-0.01004751		2022.6	0.00575263		2552.6	-0.01774261
432.8	0.00494132		962.79	-0.00924604		1492.8	-0.01029113		2022.8	0.00451344		2552.8	-0.01724026
433	0.00597198		962.99	-0.00931053		1493	-0.01086112		2023	0.00455143		2553	-0.01743741
433.2	0.00604189		963.19	-0.00899348		1493.2	-0.01180513		2023.2	0.00439765		2553.2	-0.01812257
433.4	0.00540123		963.39	-0.0081925		1493.4	-0.01212072		2023.4	0.00403587		2553.4	-0.01860435
433.6	0.00476557		963.59	-0.0086598		1493.6	-0.01212155		2023.6	0.00437827		2553.6	-0.01818994
433.8	0.00492051		963.79	-0.00838291		1493.8	-0.01175751		2023.8	0.00460674		2553.8	-0.01798112
434	0.0053974		963.99	-0.00777507		1494	-0.01181839		2024	0.00441303		2554	-0.01864024
434.2	0.00528128		964.19	-0.0082439		1494.2	-0.01213571		2024.2	0.00477207		2554.2	-0.01895159
434.4	0.00550305		964.39	-0.00771157		1494.4	-0.01283545		2024.4	0.00398276		2554.4	-0.01879208
434.6	0.00619588		964.59	-0.00828494		1494.6	-0.01226284		2024.6	0.00435989		2554.6	-0.01857085
434.8	0.00617703		964.79	-0.00927226		1494.8	-0.01198576		2024.8	0.00602797		2554.8	-0.01792678
435	0.00623504		964.99	-0.00878338		1495	-0.01101887		2025	0.00704697		2555	-0.01747849
435.2	0.0064585		965.19	-0.0096343		1495.2	-0.01134139		2025.2	0.00768695		2555.2	-0.01731783
435.4	0.00619095		965.39	-0.00930607		1495.4	-0.01091892		2025.4	0.00857496		2555.4	-0.01689093
435.6	0.00661455		965.59	-0.0098542		1495.6	-0.01067327		2025.6	0.0091644		2555.6	-0.0176313
435.8	0.00752305		965.79	-0.00992111		1495.8	-0.01050156		2025.8	0.00857786		2555.8	-0.01787229
436	0.00724061		965.99	-0.01027748		1496	-0.01119435		2026	0.00819943		2556	-0.01735903
436.2	0.00739878		966.19	-0.01081757		1496.2	-0.01105694		2026.2	0.00741644		2556.2	-0.01790376
436.4	0.00730018		966.39	-0.01148857		1496.4	-0.01071868		2026.4	0.0069646		2556.4	-0.01720609
436.6	0.00671877		966.59	-0.01138806		1496.6	-0.01082059		2026.6	0.00627944		2556.6	-0.01719014
436.8	0.00641564		966.79	-0.01169546		1496.8	-0.01125087		2026.8	0.00631343		2556.8	-0.01707292
437	0.00606355		966.99	-0.01189367		1497	-0.01243261		2027	0.00633975		2557	-0.01760386
437.2	0.00518634		967.19	-0.01237228		1497.2	-0.01255976		2027.2	0.00677602		2557.2	-0.01762361
437.4	0.00463875		967.39	-0.01205367		1497.4	-0.01224766		2027.4	0.00686868		2557.4	-0.01749632
437.6	0.00318917		967.59	-0.01307461		1497.6	-0.01195156		2027.6	0.00781377		2557.6	-0.01757311
437.8	0.00264201		967.79	-0.01308546		1497.8	-0.01162781		2027.8	0.00737074		2557.8	-0.0178717
438	0.00304166		967.99	-0.01290596		1498	-0.01199381		2028	0.00721824		2558	-0.01821674
438.2	0.00313526		968.19	-0.01305695		1498.2	-0.01301193		2028.2	0.00859025		2558.2	-0.01779895
438.4	0.00270441		968.39	-0.01265161		1498.4	-0.0124254		2028.4	0.00871779		2558.4	-0.01788505
438.6	0.00230811		968.59	-0.01354518		1498.6	-0.01155822		2028.6	0.00964031		2558.6	-0.01687673
438.8	0.00160059		968.79	-0.01347971		1498.8	-0.01118155		2028.8	0.01046483		2558.8	-0.01664679
439	0.00181768		968.99	-0.01384484		1499	-0.01058931		2029	0.01105915		2559	-0.01719223
439.2	0.00320588		969.19	-0.0136434		1499.2	-0.01073443		2029.2	0.01118736		2559.2	-0.01736912
439.4	0.00362794		969.39	-0.01312894		1499.4	-0.01077008		2029.4	0.01130298		2559.4	-0.01709259
439.6	0.00543522		969.59	-0.01336385		1499.6	-0.01093728		2029.6	0.01017291		2559.6	-0.01693938
439.8	0.00560427		969.79	-0.01394911		1499.8	-0.0112249		2029.8	0.00985912		2559.8	-0.0162379
440	0.00639924		969.99	-0.0143536		1500	-0.011238		2030	0.00915169		2560	-0.01649836
440.2	0.00672851		970.19	-0.01427489		1500.2	-0.01066182		2030.2	0.00872516		2560.2	-0.01670602
440.4	0.00696362		970.39	-0.01371108		1500.4	-0.01126326		2030.4	0.00767881		2560.4	-0.01694417
440.6	0.00721927		970.59	-0.01317364		1500.6	-0.01123192		2030.6	0.00714324		2560.6	-0.01767379
440.8	0.00711333		970.79	-0.01250108		1500.8	-0.01165094		2030.8	0.00717158		2560.8	-0.01802513
441	0.00672786		970.99	-0.01315636		1501	-0.01196244		2031	0.00680711		2561	-0.01815287
441.2	0.00677281		971.19	-0.01404038		1501.2	-0.0111867		2031.2	0.00686896		2561.2	-0.01835985
441.4	0.00629363		971.39	-0.01443449		1501.4	-0.01041761		2031.4	0.00666179		2561.4	-0.01944649
441.6	0.0046349		971.59	-0.01426112		1501.6	-0.01045359		2031.6	0.00619158		2561.6	-0.02039155
441.8	0.0041118		971.79	-0.01375964		1501.8	-0.0103873		2031.8	0.0063731		2561.8	-0.02013137
442	0.00433307		971.99	-0.01258323		1502	-0.01040818		2032	0.0067082		2562	-0.02039633
442.2	0.00411769		972.19	-0.01221277		1502.2	-0.01067284		2032.2	0.00721453		2562.2	-0.02024653
442.4	0.00327011		972.39	-0.01195649		1502.4	-0.01006602		2032.4	0.00681463		2562.4	-0.02023663
442.6	0.00291686		972.59	-0.01173802		1502.6	-0.01009983		2032.6	0.00757911		2562.6	-0.02067534
442.8	0.00289045		972.79	-0.01250015		1502.8	-0.01010585		2032.8	0.00706016		2562.8	-0.02147586
443	0.00257668		972.99	-0.01221515		1503	-0.01055008		2033	0.00700823		2563	-0.02218469
443.2	0.00283362		973.19	-0.01192293		1503.2	-0.01087428		2033.2	0.00691876		2563.2	-0.02165829
443.4	0.00189283		973.39	-0.01234393		1503.4	-0.01164482		2033.4	0.00593194		2563.4	-0.02103796
443.6	0.00212356		973.59	-0.01239531		1503.6	-0.01246233		2033.6	0.00607481		2563.6	-0.02045139
443.8	0.00278535		973.79	-0.01290512		1503.8	-0.01374415		2033.8	0.00643874		2563.8	-0.02044109
444	0.00351076		973.99	-0.01259722		1504	-0.01309804		2034	0.00604942		2564	-0.02038141
444.2	0.00366522		974.19	-0.0122648		1504.2	-0.01427274		2034.2	0.00597858		2564.2	-0.02000239
444.4	0.00439625		974.39	-0.0120036		1504.4	-0.01502666		2034.4	0.00557636		2564.4	-0.02020041
444.6	0.00473168		974.59	-0.01255126		1504.6	-0.01473973		2034.6	0.00583819		2564.6	-0.01985174
444.8	0.00529171		974.79	-0.01304431		1504.8	-0.01525316		2034.8	0.00559191		2564.8	-0.02042206
445	0.00565073		974.99	-0.01432463		1505	-0.01515779		2035	0.00554018		2565	-0.02103384
445.2	0.00674189		975.19	-0.01485959		1505.2	-0.01490662		2035.2	0.00513913		2565.2	-0.02158125
445.4	0.00652659		975.39	-0.01431308		1505.4	-0.01383294		2035.4	0.00578954		2565.4	-0.02088487
445.6	0.00606325		975.59	-0.01368039		1505.6	-0.0132499		2035.6	0.0059085		2565.6	-0.02030702
445.8	0.00607593		975.79	-0.01332685		1505.8	-0.01304508		2035.8	0.00720425		2565.8	-0.01890883
446	0.00721519		975.99	-0.01297729		1506	-0.01263347		2036	0.00731972		2566	-0.01856666
446.2	0.00765918		976.19	-0.01289443		1506.2	-0.0115304		2036.2	0.00722191		2566.2	-0.01797263
446.4	0.00687579		976.39	-0.01304245		1506.4	-0.01105043		2036.4	0.00750007		2566.4	-0.01772655
446.6	0.00721783		976.59	-0.01284371		1506.6	-0.01072032		2036.6	0.00776208		2566.6	-0.01836688
446.8	0.00720918		976.79	-0.01304464		1506.8	-0.01119186		2036.8	0.0076792		2566.8	-0.018186
447	0.00632574		976.99	-0.01249		1507	-0.01179034		2037	0.00790317		2567	-0.01851895
447.2	0.00602929		977.19	-0.01248565		1507.2	-0.01184113		2037.2	0.00808702		2567.2	-0.01724603
447.4	0.00525796		977.39	-0.01226422		1507.4	-0.01236579		2037.4	0.00755885		2567.4	-0.017354
447.6	0.00573218		977.59	-0.01156696		1507.6	-0.01269753		2037.6	0.00746505		2567.6	-0.01731328
447.8	0.00625524		977.79	-0.01213755		1507.8	-0.01313445		2037.8	0.0070668		2567.8	-0.01761579
448	0.00536269		977.99	-0.01124006		1508	-0.01215459		2038	0.00633438		2568	-0.0182664
448.2	0.00474286		978.19	-0.01132345		1508.2	-0.01302632		2038.2	0.00580519		2568.2	-0.01877992
448.4	0.00427562		978.39	-0.01136384		1508.4	-0.01327024		2038.4	0.00572966		2568.4	-0.01878722
448.6	0.00405487		978.59	-0.0107822		1508.6	-0.01374443		2038.6	0.00532918		2568.6	-0.01948838
448.8	0.00422329		978.79	-0.00985912		1508.8	-0.01440259		2038.8	0.00516187		2568.8	-0.02111045
449	0.00392868		978.99	-0.01045561		1509	-0.01440575		2039	0.0049041		2569	-0.02070254
449.2	0.00366456		979.19	-0.01116007		1509.2	-0.01444645		2039.2	0.00507185		2569.2	-0.02044074
449.4	0.00329717		979.39	-0.01126664		1509.4	-0.01387427		2039.4	0.00526476		2569.4	-0.01949946
449.6	0.0028634		979.59	-0.01122074		1509.6	-0.01357918		2039.6	0.00563322		2569.6	-0.02045812
449.8	0.00308869		979.79	-0.01146439		1509.8	-0.01305105		2039.8	0.00566709		2569.8	-0.01991904
450	0.00370807		979.99	-0.01145609		1510	-0.01229809		2040	0.00530049		2570	-0.01982204
450.2	0.00384875		980.19	-0.01172529		1510.2	-0.01201058		2040.2	0.00462207		2570.2	-0.01990216
450.4	0.00412327		980.39	-0.01231191		1510.4	-0.01160695		2040.4	0.00561903		2570.4	-0.0198573
450.6	0.00481292		980.59	-0.01118008		1510.6	-0.011067		2040.6	0.00545667		2570.6	-0.02015606
450.8	0.00498253		980.79	-0.0113602		1510.8	-0.01154465		2040.8	0.00663884		2570.8	-0.02052872
451	0.00433099		980.99	-0.01145732		1511	-0.0118952		2041	0.00581007		2571	-0.02031015
451.2	0.00458139		981.19	-0.0115166		1511.2	-0.01173449		2041.2	0.00561517		2571.2	-0.01974266
451.4	0.00494055		981.39	-0.01210904		1511.4	-0.01159526		2041.4	0.00491894		2571.4	-0.01962743
451.6	0.00572464		981.59	-0.01228066		1511.6	-0.01072011		2041.6	0.00486948		2571.6	-0.01894583
451.8	0.00600983		981.79	-0.0130986		1511.8	-0.0113611		2041.8	0.0049615		2571.8	-0.019332
452	0.0057086		981.99	-0.01236837		1512	-0.01047692		2042	0.00490642		2572	-0.01937431
452.2	0.00537434		982.19	-0.01258229		1512.2	-0.01119724		2042.2	0.00551846		2572.2	-0.01969824
452.4	0.00514048		982.39	-0.01231512		1512.4	-0.01129609		2042.4	0.00591038		2572.4	-0.0191278
452.6	0.0046247		982.59	-0.01222697		1512.6	-0.01174983		2042.6	0.00600693		2572.6	-0.01964348
452.8	0.00362261		982.79	-0.01202105		1512.8	-0.01207047		2042.8	0.00620873		2572.8	-0.01990549
453	0.0029697		982.99	-0.01336692		1513	-0.01153157		2043	0.00652505		2573	-0.01935459
453.2	0.00130802		983.19	-0.01346935		1513.2	-0.01181795		2043.2	0.00730467		2573.2	-0.01939036
453.4	0.00077224		983.39	-0.01328252		1513.4	-0.01166314		2043.4	0.00707686		2573.4	-0.01905706
453.6	0.00064348		983.59	-0.01334657		1513.6	-0.0115489		2043.6	0.0071348		2573.6	-0.01900187
453.8	-0.00014018		983.79	-0.01350299		1513.8	-0.01112101		2043.8	0.00693379		2573.8	-0.01881127
454	-0.00056899		983.99	-0.01349476		1514	-0.01084854		2044	0.00656836		2574	-0.01850866
454.2	-0.00051616		984.19	-0.01399616		1514.2	-0.0107967		2044.2	0.00643731		2574.2	-0.01884217
454.4	-0.00055429		984.39	-0.01430064		1514.4	-0.01023436		2044.4	0.00709246		2574.4	-0.01849856
454.6	-0.00014726		984.59	-0.01339918		1514.6	-0.01040645		2044.6	0.00643708		2574.6	-0.01821821
454.8	0.00066758		984.79	-0.0141747		1514.8	-0.01134626		2044.8	0.00712921		2574.8	-0.01837808
455	0.00153994		984.99	-0.0138317		1515	-0.01182681		2045	0.00640336		2575	-0.01825074
455.2	0.00307867		985.19	-0.01454489		1515.2	-0.01230151		2045.2	0.00600178		2575.2	-0.0187026
455.4	0.00426059		985.39	-0.01478216		1515.4	-0.01228869		2045.4	0.0055288		2575.4	-0.01880961
455.6	0.0055919		985.59	-0.0146497		1515.6	-0.01228033		2045.6	0.00550498		2575.6	-0.01923407
455.8	0.006033		985.79	-0.01432936		1515.8	-0.01315973		2045.8	0.00515811		2575.8	-0.0204863
456	0.00633695		985.99	-0.01375599		1516	-0.01286787		2046	0.00613811		2576	-0.02126741
456.2	0.0060067		986.19	-0.01339048		1516.2	-0.01358189		2046.2	0.00651042		2576.2	-0.02167005
456.4	0.00623355		986.39	-0.01338849		1516.4	-0.01330979		2046.4	0.00642178		2576.4	-0.02148102
456.6	0.00631056		986.59	-0.0135791		1516.6	-0.01329513		2046.6	0.00730266		2576.6	-0.02194651
456.8	0.00595221		986.79	-0.01324905		1516.8	-0.01303726		2046.8	0.00773974		2576.8	-0.02154298
457	0.00497981		986.99	-0.01402304		1517	-0.01265237		2047	0.00839549		2577	-0.02114778
457.2	0.00385159		987.19	-0.01401939		1517.2	-0.01241969		2047.2	0.00778294		2577.2	-0.02080822
457.4	0.00405814		987.39	-0.01421367		1517.4	-0.01245466		2047.4	0.00753052		2577.4	-0.02025628
457.6	0.00342996		987.59	-0.01419132		1517.6	-0.01242457		2047.6	0.00770497		2577.6	-0.01986633
457.8	0.00251207		987.79	-0.01439905		1517.8	-0.01189887		2047.8	0.00828341		2577.8	-0.01987659
458	0.00304225		987.99	-0.01485174		1518	-0.01132533		2048	0.00731901		2578	-0.01918772
458.2	0.00293079		988.19	-0.01461671		1518.2	-0.01186859		2048.2	0.00657969		2578.2	-0.01953857
458.4	0.00258272		988.39	-0.01477881		1518.4	-0.01180558		2048.4	0.00647869		2578.4	-0.01921714
458.6	0.00233719		988.59	-0.01425862		1518.6	-0.0114957		2048.6	0.00597378		2578.6	-0.01911539
458.8	0.00238576		988.79	-0.01390492		1518.8	-0.01173166		2048.8	0.00567884		2578.8	-0.01854628
459	0.0023162		988.99	-0.01401189		1519	-0.01183566		2049	0.0054106		2579	-0.01865107
459.2	0.00178783		989.19	-0.01428675		1519.2	-0.01268949		2049.2	0.00492523		2579.2	-0.01860579
459.4	0.00220588		989.39	-0.01380043		1519.4	-0.01268891		2049.4	0.00488479		2579.4	-0.01815065
459.6	0.00271367		989.59	-0.01371175		1519.6	-0.01337521		2049.6	0.0049191		2579.6	-0.01830302
459.8	0.00240672		989.79	-0.01300831		1519.8	-0.01330529		2049.8	0.00592723		2579.8	-0.01887178
460	0.00266045		989.99	-0.0130607		1520	-0.01356898		2050	0.00688864		2580	-0.01906681
460.2	0.00231657		990.19	-0.01309947		1520.2	-0.01407314		2050.2	0.00687575		2580.2	-0.01865741
460.4	0.00270537		990.39	-0.0135658		1520.4	-0.01341393		2050.4	0.00801225		2580.4	-0.01884461
460.6	0.00257114		990.59	-0.01407736		1520.6	-0.01337668		2050.6	0.00851889		2580.6	-0.01865673
460.8	0.00197975		990.79	-0.0146615		1520.8	-0.01328491		2050.8	0.00850512		2580.8	-0.01870979
461	0.00090864		990.99	-0.01464852		1521	-0.01247236		2051	0.00912735		2581	-0.01864774
461.2	0.000515		991.19	-0.01471708		1521.2	-0.01152356		2051.2	0.00897117		2581.2	-0.01853847
461.4	0.00012806		991.39	-0.01494883		1521.4	-0.01168929		2051.4	0.00926596		2581.4	-0.01848906
461.6	-0.00038834		991.59	-0.01511238		1521.6	-0.01089165		2051.6	0.0093804		2581.6	-0.01897812
461.8	-0.00002097		991.79	-0.01591856		1521.8	-0.01068555		2051.8	0.00820681		2581.8	-0.01937327
462	0.00014529		991.99	-0.01569007		1522	-0.00987421		2052	0.00666395		2582	-0.01991947
462.2	-0.00043431		992.19	-0.01502903		1522.2	-0.01015129		2052.2	0.00636939		2582.2	-0.02034371
462.4	-0.00083113		992.39	-0.01480936		1522.4	-0.00997884		2052.4	0.00569835		2582.4	-0.02114562
462.6	-0.00036589		992.59	-0.01389221		1522.6	-0.01013279		2052.6	0.00495852		2582.6	-0.02103243
462.8	-0.00003899		992.79	-0.01395212		1522.8	-0.01089881		2052.8	0.00392372		2582.8	-0.02108575
463	0.00067597		992.99	-0.01380406		1523	-0.01163886		2053	0.00303491		2583	-0.02131331
463.2	0.00212071		993.19	-0.01328844		1523.2	-0.01217583		2053.2	0.0023503		2583.2	-0.02161752
463.4	0.00347053		993.39	-0.01257873		1523.4	-0.01336297		2053.4	0.00222954		2583.4	-0.02133495
463.6	0.00353375		993.59	-0.01208436		1523.6	-0.01418564		2053.6	0.0019578		2583.6	-0.02157444
463.8	0.00325504		993.79	-0.01116765		1523.8	-0.01404127		2053.8	0.00294349		2583.8	-0.02176659
464	0.0031458		993.99	-0.01112905		1524	-0.0149303		2054	0.00291343		2584	-0.0217242
464.2	0.00262006		994.19	-0.01133495		1524.2	-0.01626161		2054.2	0.00310809		2584.2	-0.02150848
464.4	0.00265534		994.39	-0.0110049		1524.4	-0.01577367		2054.4	0.00459997		2584.4	-0.02106417
464.6	0.00207249		994.59	-0.01126498		1524.6	-0.01652486		2054.6	0.00490131		2584.6	-0.02065324
464.8	0.00134236		994.79	-0.01155246		1524.8	-0.01563413		2054.8	0.0060678		2584.8	-0.02047185
465	0.00002384		994.99	-0.0115812		1525	-0.01507052		2055	0.00629513		2585	-0.01991903
465.2	-0.00070429		995.19	-0.01230488		1525.2	-0.01448327		2055.2	0.00590423		2585.2	-0.02010592
465.4	-0.00130921		995.39	-0.01262712		1525.4	-0.01359502		2055.4	0.00649013		2585.4	-0.02029793
465.6	-0.00143783		995.59	-0.01284478		1525.6	-0.01265568		2055.6	0.00690393		2585.6	-0.02003726
465.8	-0.00184429		995.79	-0.01304184		1525.8	-0.01226705		2055.8	0.00652642		2585.8	-0.01956831
466	-0.00214005		995.99	-0.01328847		1526	-0.01164803		2056	0.00685807		2586	-0.01966123
466.2	-0.00129004		996.19	-0.01342867		1526.2	-0.01122447		2056.2	0.00716455		2586.2	-0.02052122
466.4	-0.0006907		996.39	-0.01283761		1526.4	-0.01193132		2056.4	0.00606073		2586.4	-0.02126111
466.6	-0.00053119		996.59	-0.01240292		1526.6	-0.01098715		2056.6	0.00548072		2586.6	-0.02107712
466.8	-0.00003871		996.79	-0.0125067		1526.8	-0.01175838		2056.8	0.00407171		2586.8	-0.02165458
467	0.00066052		996.99	-0.01162812		1527	-0.0116212		2057	0.00391218		2587	-0.02148672
467.2	0.00175447		997.19	-0.01199885		1527.2	-0.01151124		2057.2	0.00379626		2587.2	-0.02143128
467.4	0.00133601		997.39	-0.01163956		1527.4	-0.01175979		2057.4	0.00399025		2587.4	-0.02128227
467.6	0.00097428		997.59	-0.01085254		1527.6	-0.01191816		2057.6	0.00416359		2587.6	-0.02159061
467.8	0.0015533		997.79	-0.01051606		1527.8	-0.01217886		2057.8	0.00424467		2587.8	-0.02218141
468	0.00199444		997.99	-0.01016899		1528	-0.01281196		2058	0.00405443		2588	-0.02236332
468.2	0.00121963		998.19	-0.01000214		1528.2	-0.01348858		2058.2	0.00464222		2588.2	-0.02200435
468.4	0.00140981		998.39	-0.00980052		1528.4	-0.01317642		2058.4	0.00545235		2588.4	-0.02153706
468.6	0.00090855		998.59	-0.01044397		1528.6	-0.01400249		2058.6	0.00533078		2588.6	-0.0209784
468.8	0.00066664		998.79	-0.01031553		1528.8	-0.01363042		2058.8	0.00584566		2588.8	-0.02065949
469	0.00035897		998.99	-0.01048375		1529	-0.01311367		2059	0.00503985		2589	-0.02035463
469.2	0.00045528		999.19	-0.01063937		1529.2	-0.01269923		2059.2	0.00519713		2589.2	-0.02026898
469.4	-0.0000441		999.39	-0.01059517		1529.4	-0.01256807		2059.4	0.00557056		2589.4	-0.01970277
469.6	0.00001023		999.59	-0.01109071		1529.6	-0.01275291		2059.6	0.0049523		2589.6	-0.01908906
469.8	-0.00009023		999.79	-0.01154893		1529.8	-0.01304356		2059.8	0.00481644		2589.8	-0.01916801
470	0.00079058		999.99	-0.01190528		1530	-0.0132933		2060	0.00471861		2590	-0.01956711
470.2	0.00223015		1000.19	-0.01228068		1530.2	-0.0133291		2060.2	0.00430263		2590.2	-0.02052677
470.4	0.00193213		1000.39	-0.01210026		1530.4	-0.01389022		2060.4	0.00371706		2590.4	-0.02098009
470.6	0.00223901		1000.59	-0.01242571		1530.6	-0.01287024		2060.6	0.00371276		2590.6	-0.02170018
470.8	0.00217987		1000.79	-0.01239373		1530.8	-0.01344877		2060.8	0.00318342		2590.8	-0.02275594
471	0.00216558		1000.99	-0.01252917		1531	-0.01306035		2061	0.0041472		2591	-0.02247051
471.2	0.00258594		1001.19	-0.01350494		1531.2	-0.01309983		2061.2	0.00428051		2591.2	-0.0226798
471.4	0.00265465		1001.39	-0.01312592		1531.4	-0.01295106		2061.4	0.00425516		2591.4	-0.02334045
471.6	0.00268048		1001.59	-0.01229611		1531.6	-0.0136658		2061.6	0.00372982		2591.6	-0.02330561
471.8	0.00244329		1001.79	-0.01146531		1531.8	-0.0137861		2061.8	0.00281776		2591.8	-0.02355561
472	0.00223051		1001.99	-0.01113141		1532	-0.01394932		2062	0.00349745		2592	-0.02329436
472.2	0.00133315		1002.19	-0.01119902		1532.2	-0.01441519		2062.2	0.00419008		2592.2	-0.02271003
472.4	0.00121189		1002.39	-0.01113976		1532.4	-0.01397658		2062.4	0.00429384		2592.4	-0.02278514
472.6	0.00108429		1002.59	-0.01147775		1532.6	-0.01400276		2062.6	0.00467904		2592.6	-0.021793
472.8	0.00188428		1002.79	-0.01158603		1532.8	-0.01323103		2062.8	0.00539571		2592.8	-0.02141081
473	0.00203311		1002.99	-0.01217197		1533	-0.01252977		2063	0.00529563		2593	-0.0208137
473.2	0.00238827		1003.19	-0.01219506		1533.2	-0.01321632		2063.2	0.0052842		2593.2	-0.020228
473.4	0.00224347		1003.39	-0.01195583		1533.4	-0.01381883		2063.4	0.00607101		2593.4	-0.0205656
473.6	0.00254732		1003.59	-0.01264961		1533.6	-0.01371601		2063.6	0.00597778		2593.6	-0.02062634
473.8	0.00287427		1003.79	-0.01270957		1533.8	-0.01426709		2063.8	0.00605262		2593.8	-0.02090243
474	0.00384251		1003.99	-0.0132416		1534	-0.01399814		2064	0.00633952		2594	-0.0213954
474.2	0.00525442		1004.19	-0.01382371		1534.2	-0.01417945		2064.2	0.00612095		2594.2	-0.02213581
474.4	0.00483458		1004.39	-0.0140407		1534.4	-0.01436927		2064.4	0.00669662		2594.4	-0.02242113
474.6	0.00541391		1004.59	-0.01345427		1534.6	-0.01497525		2064.6	0.00664448		2594.6	-0.02299747
474.8	0.00478526		1004.79	-0.01308431		1534.8	-0.01563478		2064.8	0.00633196		2594.8	-0.02310734
475	0.00464063		1004.99	-0.01282431		1535	-0.01563817		2065	0.00661457		2595	-0.0231998
475.2	0.00386955		1005.19	-0.01238952		1535.2	-0.01574783		2065.2	0.00604757		2595.2	-0.02386993
475.4	0.00299048		1005.39	-0.01173496		1535.4	-0.01592557		2065.4	0.00458026		2595.4	-0.02358729
475.6	0.00208597		1005.59	-0.01157224		1535.6	-0.01569773		2065.6	0.00350829		2595.6	-0.0234085
475.8	0.00136913		1005.79	-0.01191919		1535.8	-0.01617871		2065.8	0.0030316		2595.8	-0.02389309
476	0.00082659		1005.99	-0.01195743		1536	-0.01555049		2066	0.00301573		2596	-0.02392453
476.2	-0.00053752		1006.19	-0.01231076		1536.2	-0.01561742		2066.2	0.00253213		2596.2	-0.02352113
476.4	-0.00084832		1006.39	-0.01271897		1536.4	-0.0144112		2066.4	0.00222741		2596.4	-0.02324618
476.6	-0.00086572		1006.59	-0.01301242		1536.6	-0.01415579		2066.6	0.00184018		2596.6	-0.02231677
476.8	-0.00049018		1006.79	-0.01328645		1536.8	-0.01372406		2066.8	0.00202861		2596.8	-0.02183072
477	0.00000936		1006.99	-0.01400266		1537	-0.01290655		2067	0.00197871		2597	-0.02065095
477.2	0.00013877		1007.19	-0.01385488		1537.2	-0.0135414		2067.2	0.00233		2597.2	-0.02005441
477.4	-0.00018626		1007.39	-0.0134489		1537.4	-0.01338711		2067.4	0.0036719		2597.4	-0.01936372
477.6	0.00071749		1007.59	-0.01385183		1537.6	-0.01309271		2067.6	0.00366845		2597.6	-0.01856175
477.8	0.001434		1007.79	-0.01391883		1537.8	-0.01381488		2067.8	0.00407089		2597.8	-0.01813659
478	0.00284214		1007.99	-0.01343406		1538	-0.01375071		2068	0.00483315		2598	-0.01801403
478.2	0.00330808		1008.19	-0.0130305		1538.2	-0.01484674		2068.2	0.00526745		2598.2	-0.0183777
478.4	0.00357011		1008.39	-0.01287241		1538.4	-0.01583061		2068.4	0.00568637		2598.4	-0.01919129
478.6	0.00445468		1008.59	-0.01279035		1538.6	-0.01668185		2068.6	0.00537166		2598.6	-0.02024296
478.8	0.00345118		1008.79	-0.01336101		1538.8	-0.01635659		2068.8	0.00516716		2598.8	-0.02089072
479	0.00278687		1008.99	-0.01290366		1539	-0.01615931		2069	0.0049756		2599	-0.02148361
479.2	0.00241624		1009.19	-0.01342302		1539.2	-0.01626094		2069.2	0.00518853		2599.2	-0.02145249
479.4	0.00245211		1009.39	-0.014042		1539.4	-0.01542599		2069.4	0.00436678		2599.4	-0.02134123
479.6	0.00293773		1009.59	-0.01462732		1539.6	-0.0150941		2069.6	0.00501461		2599.6	-0.02176602
479.8	0.00240912		1009.79	-0.01502691		1539.8	-0.01556825		2069.8	0.00472294		2599.8	-0.02187421
480	0.00211368		1009.99	-0.01534029		1540	-0.01484921		2070	0.00479686		2600	-0.02197892
480.2	0.00174495		1010.19	-0.01673475		1540.2	-0.01489504		2070.2	0.00461591		2600.2	-0.02166157
480.4	0.00191287		1010.39	-0.016921		1540.4	-0.01465131		2070.4	0.00473658		2600.4	-0.02202902
480.6	0.00193249		1010.59	-0.01695912		1540.6	-0.01399481		2070.6	0.00468424		2600.6	-0.0221187
480.8	0.00194247		1010.79	-0.01735289		1540.8	-0.01342805		2070.8	0.00475433		2600.8	-0.02172018
481	0.00253748		1010.99	-0.01750773		1541	-0.01269228		2071	0.0047687		2601	-0.02059859
481.2	0.00172804		1011.19	-0.01710501		1541.2	-0.01321004		2071.2	0.00486421		2601.2	-0.02083531
481.4	0.00141404		1011.39	-0.01663581		1541.4	-0.012767		2071.4	0.00460713		2601.4	-0.02003696
481.6	0.00248623		1011.59	-0.01666468		1541.6	-0.01277901		2071.6	0.00431607		2601.6	-0.02039179
481.8	0.0018993		1011.79	-0.01678295		1541.8	-0.01347468		2071.8	0.00421785		2601.8	-0.02094185
482	0.00227474		1011.99	-0.01681983		1542	-0.01333818		2072	0.00425308		2602	-0.02109712
482.2	0.00139793		1012.19	-0.0173721		1542.2	-0.0142746		2072.2	0.00398018		2602.2	-0.02201255
482.4	0.00181436		1012.39	-0.0172083		1542.4	-0.01457036		2072.4	0.00355184		2602.4	-0.02265466
482.6	0.00128508		1012.59	-0.01750188		1542.6	-0.01503589		2072.6	0.0027384		2602.6	-0.02241163
482.8	0.00024147		1012.79	-0.01680846		1542.8	-0.01555801		2072.8	0.00221365		2602.8	-0.02239665
483	0.00031561		1012.99	-0.0162232		1543	-0.01645699		2073	0.00295293		2603	-0.02128494
483.2	-0.0000531		1013.19	-0.01626694		1543.2	-0.01673956		2073.2	0.00372415		2603.2	-0.02094337
483.4	-0.00011956		1013.39	-0.01558917		1543.4	-0.01715494		2073.4	0.00439597		2603.4	-0.02104337
483.6	0.00021513		1013.59	-0.01560202		1543.6	-0.01769122		2073.6	0.00584868		2603.6	-0.02080057
483.8	0.00019685		1013.79	-0.015958		1543.8	-0.01803582		2073.8	0.0063543		2603.8	-0.01995594
484	-0.00021133		1013.99	-0.01604311		1544	-0.01824449		2074	0.00707664		2604	-0.020313
484.2	-0.00043984		1014.19	-0.01478607		1544.2	-0.01809006		2074.2	0.00793378		2604.2	-0.02038441
484.4	-0.00047082		1014.39	-0.01437215		1544.4	-0.0179503		2074.4	0.00857992		2604.4	-0.02156679
484.6	-0.0000649		1014.59	-0.01395347		1544.6	-0.01683787		2074.6	0.00923439		2604.6	-0.02204924
484.8	-0.00064679		1014.79	-0.01402283		1544.8	-0.01581704		2074.8	0.00963403		2604.8	-0.02223676
485	-0.00042367		1014.99	-0.01401467		1545	-0.01450152		2075	0.01011345		2605	-0.02234678
485.2	-0.00138744		1015.19	-0.01526517		1545.2	-0.01443854		2075.2	0.00916956		2605.2	-0.02300319
485.4	-0.00114815		1015.39	-0.01470113		1545.4	-0.01410649		2075.4	0.00874825		2605.4	-0.02291376
485.6	-0.00054892		1015.59	-0.01540268		1545.6	-0.01344171		2075.6	0.00793568		2605.6	-0.02269701
485.8	-0.00114941		1015.79	-0.01627029		1545.8	-0.01320896		2075.8	0.00752803		2605.8	-0.02303387
486	-0.0003312		1015.99	-0.01613787		1546	-0.01299509		2076	0.00678275		2606	-0.023054
486.2	0.00048651		1016.19	-0.01576817		1546.2	-0.01330654		2076.2	0.00628861		2606.2	-0.0238052
486.4	0.00133039		1016.39	-0.0152451		1546.4	-0.01347818		2076.4	0.00480358		2606.4	-0.0236675
486.6	0.00145143		1016.59	-0.01513891		1546.6	-0.01433386		2076.6	0.00359809		2606.6	-0.02380099
486.8	0.00218886		1016.79	-0.01493194		1546.8	-0.01555969		2076.8	0.00278218		2606.8	-0.02361199
487	0.00228985		1016.99	-0.01511929		1547	-0.01611277		2077	0.00288081		2607	-0.02229622
487.2	0.00227314		1017.19	-0.01506551		1547.2	-0.01615265		2077.2	0.00275903		2607.2	-0.02270716
487.4	0.00213311		1017.39	-0.01460994		1547.4	-0.01663783		2077.4	0.00182589		2607.4	-0.02274502
487.6	0.00212876		1017.59	-0.01501658		1547.6	-0.01662779		2077.6	0.00080407		2607.6	-0.02252407
487.8	0.00192256		1017.79	-0.01513247		1547.8	-0.01709322		2077.8	0.00130145		2607.8	-0.02161313
488	0.00047018		1017.99	-0.01406154		1548	-0.01699008		2078	0.00155493		2608	-0.02219934
488.2	0.00046761		1018.19	-0.01328684		1548.2	-0.01643911		2078.2	0.00244892		2608.2	-0.02220454
488.4	0.00024337		1018.39	-0.01414702		1548.4	-0.01654623		2078.4	0.00256563		2608.4	-0.02202693
488.6	0.00056012		1018.59	-0.01384248		1548.6	-0.01600526		2078.6	0.00330857		2608.6	-0.0210825
488.8	-0.00047881		1018.79	-0.01406477		1548.8	-0.01588601		2078.8	0.00421852		2608.8	-0.0203696
489	-0.00072336		1018.99	-0.01468001		1549	-0.01567758		2079	0.00444971		2609	-0.01936072
489.2	-0.00129832		1019.19	-0.01547552		1549.2	-0.01611327		2079.2	0.00345405		2609.2	-0.01868148
489.4	-0.00063033		1019.39	-0.01471861		1549.4	-0.01557557		2079.4	0.00340373		2609.4	-0.0185565
489.6	-0.00087426		1019.59	-0.01592709		1549.6	-0.01494143		2079.6	0.00230751		2609.6	-0.01891732
489.8	-0.00061034		1019.79	-0.01602829		1549.8	-0.01537243		2079.8	0.00334419		2609.8	-0.01978739
490	0.00048841		1019.99	-0.01547897		1550	-0.01514317		2080	0.00290258		2610	-0.0203193
490.2	0.00042558		1020.19	-0.0155746		1550.2	-0.0152868		2080.2	0.00314939		2610.2	-0.02159124
490.4	0.0004036		1020.39	-0.01531976		1550.4	-0.01511736		2080.4	0.00280345		2610.4	-0.02205243
490.6	0.00044163		1020.59	-0.0154612		1550.6	-0.01605345		2080.6	0.00308411		2610.6	-0.02318141
490.8	0.00029195		1020.79	-0.01552568		1550.8	-0.01605402		2080.8	0.00317254		2610.8	-0.02313133
491	-0.00030464		1020.99	-0.0155221		1551	-0.01565651		2081	0.00288695		2611	-0.02332025
491.2	-0.00088474		1021.19	-0.01535332		1551.2	-0.01480154		2081.2	0.00329109		2611.2	-0.02433855
491.4	-0.0011776		1021.39	-0.0151987		1551.4	-0.01452924		2081.4	0.00329577		2611.4	-0.02476802
491.6	-0.00127285		1021.59	-0.01556897		1551.6	-0.01365973		2081.6	0.00348246		2611.6	-0.02430768
491.8	-0.00195885		1021.79	-0.01490867		1551.8	-0.01314733		2081.8	0.004855		2611.8	-0.02366463
492	-0.00235909		1021.99	-0.01481482		1552	-0.01295213		2082	0.00492453		2612	-0.02427334
492.2	-0.00192535		1022.19	-0.01468427		1552.2	-0.0129033		2082.2	0.00572904		2612.2	-0.02404046
492.4	-0.00165008		1022.39	-0.0143772		1552.4	-0.01290585		2082.4	0.00601113		2612.4	-0.02298715
492.6	-0.00094537		1022.59	-0.01411352		1552.6	-0.01235064		2082.6	0.0054512		2612.6	-0.02226478
492.8	-0.00042313		1022.79	-0.01496778		1552.8	-0.01252528		2082.8	0.00537854		2612.8	-0.02231171
493	0.00040446		1022.99	-0.01583373		1553	-0.01283849		2083	0.0048055		2613	-0.02191665
493.2	0.00034898		1023.19	-0.01563426		1553.2	-0.01286579		2083.2	0.00371744		2613.2	-0.0232734
493.4	0.00105384		1023.39	-0.01497645		1553.4	-0.01320736		2083.4	0.00279684		2613.4	-0.02392284
493.6	0.00109378		1023.59	-0.01477968		1553.6	-0.01381424		2083.6	0.00275925		2613.6	-0.02451357
493.8	0.00156165		1023.79	-0.01502712		1553.8	-0.01451174		2083.8	0.00293941		2613.8	-0.0248365
494	0.00171554		1023.99	-0.01537087		1554	-0.01405995		2084	0.00204636		2614	-0.025526
494.2	0.00127573		1024.19	-0.01554598		1554.2	-0.01469019		2084.2	0.00141113		2614.2	-0.02643851
494.4	0.00118121		1024.39	-0.01581252		1554.4	-0.01506011		2084.4	0.00191017		2614.4	-0.02701379
494.6	-0.00005223		1024.59	-0.01548987		1554.6	-0.01613278		2084.6	0.00213662		2614.6	-0.02705934
494.8	-0.00122629		1024.79	-0.01516961		1554.8	-0.01581446		2084.8	0.00196281		2614.8	-0.02671817
495	-0.00179571		1024.99	-0.01567062		1555	-0.015292		2085	0.00228008		2615	-0.02647046
495.2	-0.00268066		1025.19	-0.01541631		1555.2	-0.01380205		2085.2	0.00354422		2615.2	-0.02578119
495.4	-0.0027594		1025.39	-0.0163497		1555.4	-0.01381763		2085.4	0.00390785		2615.4	-0.02557475
495.6	-0.00281011		1025.59	-0.01729114		1555.6	-0.01302855		2085.6	0.00412015		2615.6	-0.02475525
495.8	-0.00403586		1025.79	-0.01760154		1555.8	-0.01281371		2085.8	0.00518119		2615.8	-0.02470565
496	-0.00380313		1025.99	-0.01844956		1556	-0.01302475		2086	0.00569261		2616	-0.02464783
496.2	-0.00382022		1026.19	-0.01818213		1556.2	-0.01264424		2086.2	0.00623734		2616.2	-0.02400517
496.4	-0.00400225		1026.39	-0.01785548		1556.4	-0.01189875		2086.4	0.00577105		2616.4	-0.02264238
496.6	-0.00314239		1026.59	-0.01781566		1556.6	-0.01178452		2086.6	0.00465628		2616.6	-0.02259559
496.8	-0.0019397		1026.79	-0.01801261		1556.8	-0.01175587		2086.8	0.0052228		2616.8	-0.02285088
497	-0.00171532		1026.99	-0.01703367		1557	-0.01237134		2087	0.00541222		2617	-0.02337592
497.2	-0.00042496		1027.19	-0.01562619		1557.2	-0.01158937		2087.2	0.00491197		2617.2	-0.0247788
497.4	0.0003334		1027.39	-0.01465903		1557.4	-0.01218292		2087.4	0.00496448		2617.4	-0.02403304
497.6	0.00089782		1027.59	-0.01444481		1557.6	-0.01361767		2087.6	0.00558112		2617.6	-0.02344053
497.8	0.00187485		1027.79	-0.01431235		1557.8	-0.01349586		2087.8	0.00484948		2617.8	-0.02365774
498	0.00212053		1027.99	-0.01400391		1558	-0.01423884		2088	0.00461788		2618	-0.02396374
498.2	0.00219452		1028.19	-0.01311824		1558.2	-0.01519964		2088.2	0.00436992		2618.2	-0.02499047
498.4	0.00188879		1028.39	-0.01284562		1558.4	-0.01580322		2088.4	0.00467167		2618.4	-0.02583868
498.6	0.00085453		1028.59	-0.01253639		1558.6	-0.01618386		2088.6	0.00398625		2618.6	-0.02507553
498.8	0.00027558		1028.79	-0.01218724		1558.8	-0.01564042		2088.8	0.00269606		2618.8	-0.02401669
499	-0.00004364		1028.99	-0.01321971		1559	-0.01559311		2089	0.00339776		2619	-0.02379524
499.2	-0.00014591		1029.19	-0.01396431		1559.2	-0.01541996		2089.2	0.00269718		2619.2	-0.02395605
499.4	0.00004254		1029.39	-0.01531452		1559.4	-0.01583854		2089.4	0.00265933		2619.4	-0.02456293
499.6	-0.00086808		1029.59	-0.01632948		1559.6	-0.01582886		2089.6	0.00275807		2619.6	-0.02397989
499.8	-0.00137598		1029.79	-0.01677366		1559.8	-0.01545516		2089.8	0.00269494		2619.8	-0.02264356
500	-0.00118817		1029.99	-0.01768858		1560	-0.01539414		2090	0.00226788		2620	-0.02126766
500.2	-0.00126926		1030.19	-0.01750053		1560.2	-0.01471272		2090.2	0.00234009		2620.2	-0.02065591
500.4	-0.00061183		1030.39	-0.01756844		1560.4	-0.01354423		2090.4	0.00241596		2620.4	-0.01925083
500.6	0.00038943		1030.59	-0.01722929		1560.6	-0.01393364		2090.6	0.00217523		2620.6	-0.01975644
500.8	0.00096451		1030.79	-0.01801931		1560.8	-0.01353152		2090.8	0.00227033		2620.8	-0.02038109
501	0.0009307		1030.99	-0.01747593		1561	-0.01402288		2091	0.0028273		2621	-0.02058347
501.2	0.00236839		1031.19	-0.01678183		1561.2	-0.0140557		2091.2	0.00218157		2621.2	-0.02054935
501.4	0.00195192		1031.39	-0.01603886		1561.4	-0.0149271		2091.4	0.00178207		2621.4	-0.02049381
501.6	0.00181647		1031.59	-0.01538481		1561.6	-0.01578554		2091.6	0.00170392		2621.6	-0.0209099
501.8	0.0017163		1031.79	-0.01481898		1561.8	-0.01472574		2091.8	0.00166207		2621.8	-0.02321156
502	0.00062692		1031.99	-0.01526827		1562	-0.01551994		2092	0.00183385		2622	-0.0242108
502.2	0.00075051		1032.19	-0.01491505		1562.2	-0.01540554		2092.2	0.00134799		2622.2	-0.02548424
502.4	0.0001961		1032.39	-0.0154227		1562.4	-0.01520471		2092.4	0.00101808		2622.4	-0.02601986
502.6	-0.00058234		1032.59	-0.01512583		1562.6	-0.01535949		2092.6	0.00057783		2622.6	-0.02619418
502.8	-0.00057173		1032.79	-0.01462446		1562.8	-0.01467114		2092.8	0.00030596		2622.8	-0.02721521
503	-0.00138049		1032.99	-0.01549693		1563	-0.01539676		2093	0.0012333		2623	-0.02867956
503.2	-0.00174871		1033.19	-0.01509805		1563.2	-0.01537171		2093.2	0.00049026		2623.2	-0.02975607
503.4	-0.00244624		1033.39	-0.01497106		1563.4	-0.0151246		2093.4	0.00163066		2623.4	-0.02959628
503.6	-0.00303057		1033.59	-0.01521525		1563.6	-0.01554864		2093.6	0.00240005		2623.6	-0.02892296
503.8	-0.00288401		1033.79	-0.01546392		1563.8	-0.01462639		2093.8	0.00310908		2623.8	-0.02758904
504	-0.00342031		1033.99	-0.01629762		1564	-0.0148617		2094	0.00349081		2624	-0.02742757
504.2	-0.0036939		1034.19	-0.01658152		1564.2	-0.01474112		2094.2	0.00500653		2624.2	-0.0272565
504.4	-0.00373931		1034.39	-0.01645978		1564.4	-0.01434467		2094.4	0.00528874		2624.4	-0.02662153
504.6	-0.00347254		1034.59	-0.01720867		1564.6	-0.01561236		2094.6	0.00493097		2624.6	-0.02641765
504.8	-0.00405253		1034.79	-0.01756253		1564.8	-0.01563761		2094.8	0.00529498		2624.8	-0.02613319
505	-0.00424893		1034.99	-0.01617821		1565	-0.01587977		2095	0.00582999		2625	-0.02522467
505.2	-0.00301879		1035.19	-0.01566896		1565.2	-0.01655651		2095.2	0.00466378		2625.2	-0.02542625
505.4	-0.00337966		1035.39	-0.01513129		1565.4	-0.01724322		2095.4	0.00489258		2625.4	-0.02493288
505.6	-0.00372956		1035.59	-0.01529398		1565.6	-0.01736092		2095.6	0.00441102		2625.6	-0.02480606
505.8	-0.00368919		1035.79	-0.01533957		1565.8	-0.01735943		2095.8	0.00365706		2625.8	-0.02489887
506	-0.00318745		1035.99	-0.01506513		1566	-0.01781439		2096	0.00310886		2626	-0.02385132
506.2	-0.00228072		1036.19	-0.01415409		1566.2	-0.01769201		2096.2	0.00198779		2626.2	-0.02393987
506.4	-0.00212656		1036.39	-0.01479527		1566.4	-0.01775187		2096.4	0.00138054		2626.4	-0.02414544
506.6	-0.00163685		1036.59	-0.01372643		1566.6	-0.01730128		2096.6	0.00075719		2626.6	-0.02401746
506.8	-0.00140945		1036.79	-0.01418913		1566.8	-0.01721696		2096.8	0.00073092		2626.8	-0.02431332
507	-0.00116266		1036.99	-0.01465255		1567	-0.01727382		2097	0.00082381		2627	-0.02463083
507.2	-0.00083462		1037.19	-0.01475135		1567.2	-0.01729073		2097.2	0.00065398		2627.2	-0.02416057
507.4	-0.00098084		1037.39	-0.01550119		1567.4	-0.01673582		2097.4	0.00075771		2627.4	-0.02356137
507.6	-0.00046385		1037.59	-0.01606813		1567.6	-0.01671392		2097.6	0.00125543		2627.6	-0.02375977
507.8	-0.00084848		1037.79	-0.01688952		1567.8	-0.01613179		2097.8	0.00153977		2627.8	-0.02373952
508	-0.00055478		1037.99	-0.01699829		1568	-0.01642451		2098	0.00198031		2628	-0.0242905
508.2	0.00022629		1038.19	-0.01798764		1568.2	-0.01609489		2098.2	0.00315562		2628.2	-0.02439902
508.4	0.00064411		1038.39	-0.01754418		1568.4	-0.01628686		2098.4	0.00345416		2628.4	-0.02447087
508.6	0.00143688		1038.59	-0.017855		1568.6	-0.01700303		2098.6	0.00365427		2628.6	-0.02487894
508.8	0.0013711		1038.79	-0.01671806		1568.8	-0.01653653		2098.8	0.00496219		2628.8	-0.02502981
509	0.00160421		1038.99	-0.01568314		1569	-0.01633074		2099	0.00527289		2629	-0.02519269
509.2	0.00236554		1039.19	-0.01543646		1569.2	-0.01604217		2099.2	0.00510948		2629.2	-0.02478198
509.4	0.00187046		1039.39	-0.01522277		1569.4	-0.01562929		2099.4	0.00461847		2629.4	-0.02470111
509.6	0.00096306		1039.59	-0.01486575		1569.6	-0.01519611		2099.6	0.00337771		2629.6	-0.02560315
509.8	0.00063915		1039.79	-0.01430596		1569.8	-0.01509869		2099.8	0.00303003		2629.8	-0.02539305
510	-0.00020473		1039.99	-0.01383441		1570	-0.0143946		2100	0.00311512		2630	-0.02576465
510.2	-0.00114734		1040.19	-0.01337562		1570.2	-0.01397052		2100.2	0.00282973		2630.2	-0.02556564
510.4	-0.00219483		1040.39	-0.01375086		1570.4	-0.01425164		2100.4	0.00259441		2630.4	-0.02536025
510.6	-0.00248275		1040.59	-0.01333294		1570.6	-0.01354963		2100.6	0.00274568		2630.6	-0.02486243
510.8	-0.00318888		1040.79	-0.01442173		1570.8	-0.01359184		2100.8	0.00312548		2630.8	-0.02486604
511	-0.00341568		1040.99	-0.01529576		1571	-0.01286505		2101	0.00309444		2631	-0.02370456
511.2	-0.00410269		1041.19	-0.01659093		1571.2	-0.01357025		2101.2	0.0031385		2631.2	-0.02228594
511.4	-0.00373684		1041.39	-0.01763462		1571.4	-0.01370499		2101.4	0.00255887		2631.4	-0.02211744
511.6	-0.00330748		1041.59	-0.01840879		1571.6	-0.014515		2101.6	0.00301675		2631.6	-0.02239914
511.8	-0.00247919		1041.79	-0.01835865		1571.8	-0.0151014		2101.8	0.00348413		2631.8	-0.02183265
512	-0.00229639		1041.99	-0.01851016		1572	-0.01559876		2102	0.00359725		2632	-0.02243551
512.2	-0.00087009		1042.19	-0.01919194		1572.2	-0.01658816		2102.2	0.00496222		2632.2	-0.02286482
512.4	-0.00053022		1042.39	-0.01896331		1572.4	-0.01786361		2102.4	0.00561227		2632.4	-0.02296578
512.6	-0.00011872		1042.59	-0.01837119		1572.6	-0.01853803		2102.6	0.00585415		2632.6	-0.02348443
512.8	0.00097436		1042.79	-0.01839631		1572.8	-0.01905387		2102.8	0.00608888		2632.8	-0.02381877
513	0.00103037		1042.99	-0.01840694		1573	-0.01893878		2103	0.00575101		2633	-0.02440539
513.2	0.00105296		1043.19	-0.0176497		1573.2	-0.01883934		2103.2	0.00491164		2633.2	-0.02493952
513.4	0.00099046		1043.39	-0.01777866		1573.4	-0.01974179		2103.4	0.0031967		2633.4	-0.02624403
513.6	0.00030429		1043.59	-0.01717683		1573.6	-0.01985267		2103.6	0.00293463		2633.6	-0.02731544
513.8	-0.00018165		1043.79	-0.01675377		1573.8	-0.02079904		2103.8	0.00245023		2633.8	-0.02717488
514	-0.00106814		1043.99	-0.0157214		1574	-0.02050962		2104	0.0017767		2634	-0.02767463
514.2	-0.00172678		1044.19	-0.01484259		1574.2	-0.02025289		2104.2	0.00107982		2634.2	-0.02762495
514.4	-0.00252865		1044.39	-0.01481302		1574.4	-0.02042384		2104.4	0.00083686		2634.4	-0.02762524
514.6	-0.00255917		1044.59	-0.01517395		1574.6	-0.01951967		2104.6	0.00084487		2634.6	-0.0274231
514.8	-0.00308082		1044.79	-0.01593845		1574.8	-0.01964667		2104.8	0.00052239		2634.8	-0.02706592
515	-0.0029146		1044.99	-0.01664576		1575	-0.01876806		2105	0.00083209		2635	-0.02605078
515.2	-0.00304751		1045.19	-0.01744305		1575.2	-0.01902292		2105.2	0.0000907		2635.2	-0.02601018
515.4	-0.0023401		1045.39	-0.01724667		1575.4	-0.01855419		2105.4	-0.00061471		2635.4	-0.02554315
515.6	-0.00277386		1045.59	-0.0168879		1575.6	-0.01828494		2105.6	-0.00073498		2635.6	-0.02567402
515.8	-0.0027545		1045.79	-0.01691019		1575.8	-0.01785398		2105.8	0.00025117		2635.8	-0.02541093
516	-0.00351082		1045.99	-0.01726031		1576	-0.01739431		2106	0.00055629		2636	-0.02559134
516.2	-0.0030741		1046.19	-0.01692518		1576.2	-0.01690043		2106.2	0.00141534		2636.2	-0.02500733
516.4	-0.00325596		1046.39	-0.0171366		1576.4	-0.01661532		2106.4	0.00156814		2636.4	-0.02557359
516.6	-0.00352506		1046.59	-0.01621759		1576.6	-0.01628887		2106.6	0.00167937		2636.6	-0.02600588
516.8	-0.00273735		1046.79	-0.01647158		1576.8	-0.01643176		2106.8	0.00197923		2636.8	-0.02640234
517	-0.0026446		1046.99	-0.01674256		1577	-0.0161323		2107	0.00243235		2637	-0.02630438
517.2	-0.00276012		1047.19	-0.01549772		1577.2	-0.01725013		2107.2	0.00208589		2637.2	-0.02683999
517.4	-0.00248571		1047.39	-0.01554105		1577.4	-0.01789194		2107.4	0.0016064		2637.4	-0.02716839
517.6	-0.00277914		1047.59	-0.01502203		1577.6	-0.01798043		2107.6	0.00265106		2637.6	-0.02725457
517.8	-0.00254419		1047.79	-0.01447397		1577.8	-0.01820438		2107.8	0.00321268		2637.8	-0.02678606
518	-0.00217799		1047.99	-0.01463696		1578	-0.01755099		2108	0.00373415		2638	-0.02667594
518.2	-0.00183121		1048.19	-0.01541779		1578.2	-0.01744905		2108.2	0.00477402		2638.2	-0.0263059
518.4	-0.00081741		1048.39	-0.01641799		1578.4	-0.0173726		2108.4	0.00534956		2638.4	-0.02647183
518.6	0.00001106		1048.59	-0.01713197		1578.6	-0.01741863		2108.6	0.00553024		2638.6	-0.02591106
518.8	0.00041998		1048.79	-0.01753355		1578.8	-0.01758168		2108.8	0.00612316		2638.8	-0.02498325
519	0.00108837		1048.99	-0.01814964		1579	-0.01733843		2109	0.00729364		2639	-0.02486827
519.2	0.00078012		1049.19	-0.01800822		1579.2	-0.01789844		2109.2	0.00661303		2639.2	-0.02451587
519.4	0.00094645		1049.39	-0.01834675		1579.4	-0.01819486		2109.4	0.00719276		2639.4	-0.02423875
519.6	0.00049934		1049.59	-0.01920688		1579.6	-0.01790263		2109.6	0.00708622		2639.6	-0.0242708
519.8	0.00092183		1049.79	-0.01991032		1579.8	-0.01741011		2109.8	0.00758047		2639.8	-0.02397633
520	0.00118306		1049.99	-0.01997703		1580	-0.01642343		2110	0.00704417		2640	-0.02377581
520.2	0.00100805		1050.19	-0.01923332		1580.2	-0.01570125		2110.2	0.00611956		2640.2	-0.02439928
520.4	0.00077625		1050.39	-0.01905763		1580.4	-0.01551106		2110.4	0.00594197		2640.4	-0.02571662
520.6	0.00007237		1050.59	-0.01864201		1580.6	-0.01554709		2110.6	0.00514169		2640.6	-0.02550771
520.8	-0.00023725		1050.79	-0.0190324		1580.8	-0.01558857		2110.8	0.00549749		2640.8	-0.02564866
521	-0.00133149		1050.99	-0.01904422		1581	-0.01578137		2111	0.00489823		2641	-0.02584042
521.2	-0.00225386		1051.19	-0.01787061		1581.2	-0.01633071		2111.2	0.00498035		2641.2	-0.02594581
521.4	-0.00264706		1051.39	-0.01816359		1581.4	-0.01643588		2111.4	0.00441469		2641.4	-0.02613056
521.6	-0.00373767		1051.59	-0.01779477		1581.6	-0.01597059		2111.6	0.00463491		2641.6	-0.02589893
521.8	-0.00385985		1051.79	-0.01728297		1581.8	-0.01604577		2111.8	0.00463533		2641.8	-0.02624179
522	-0.00418267		1051.99	-0.01763917		1582	-0.01681481		2112	0.00457384		2642	-0.02596416
522.2	-0.00395588		1052.19	-0.01792005		1582.2	-0.01609014		2112.2	0.00476597		2642.2	-0.02591522
522.4	-0.00381166		1052.39	-0.01880948		1582.4	-0.01597851		2112.4	0.00471033		2642.4	-0.02629772
522.6	-0.00435648		1052.59	-0.01844001		1582.6	-0.01580659		2112.6	0.00497598		2642.6	-0.02534972
522.8	-0.0042434		1052.79	-0.0190716		1582.8	-0.01570759		2112.8	0.00536471		2642.8	-0.02513193
523	-0.00418245		1052.99	-0.02001263		1583	-0.01636766		2113	0.0055751		2643	-0.02558217
523.2	-0.00435376		1053.19	-0.01974968		1583.2	-0.01694397		2113.2	0.00566115		2643.2	-0.02530575
523.4	-0.00364271		1053.39	-0.02115592		1583.4	-0.01702197		2113.4	0.0061982		2643.4	-0.02493247
523.6	-0.00205732		1053.59	-0.02092139		1583.6	-0.01673568		2113.6	0.0061571		2643.6	-0.02571908
523.8	-0.00129365		1053.79	-0.02058347		1583.8	-0.01709686		2113.8	0.00602574		2643.8	-0.02537934
524	-0.0010838		1053.99	-0.02009946		1584	-0.01711706		2114	0.00544602		2644	-0.02563208
524.2	-0.00115636		1054.19	-0.01872923		1584.2	-0.01773752		2114.2	0.00457134		2644.2	-0.0261228
524.4	-0.00106058		1054.39	-0.01808997		1584.4	-0.01758694		2114.4	0.00511045		2644.4	-0.02617123
524.6	-0.00088225		1054.59	-0.01744668		1584.6	-0.01781947		2114.6	0.00490035		2644.6	-0.02628707
524.8	-0.00136879		1054.79	-0.01736359		1584.8	-0.01759793		2114.8	0.00513065		2644.8	-0.0270445
525	-0.00186576		1054.99	-0.01604554		1585	-0.0178389		2115	0.00496573		2645	-0.02714723
525.2	-0.001725		1055.19	-0.0146122		1585.2	-0.01780691		2115.2	0.00477924		2645.2	-0.02732817
525.4	-0.00242559		1055.39	-0.01410529		1585.4	-0.01820339		2115.4	0.00365573		2645.4	-0.02677003
525.6	-0.0036273		1055.59	-0.01273587		1585.6	-0.01769433		2115.6	0.00319461		2645.6	-0.02644162
525.8	-0.00345429		1055.79	-0.01179533		1585.8	-0.01821651		2115.8	0.00267304		2645.8	-0.02656776
526	-0.00377587		1055.99	-0.011896		1586	-0.01768418		2116	0.00301044		2646	-0.0261178
526.2	-0.00392543		1056.19	-0.01191596		1586.2	-0.01705731		2116.2	0.00301803		2646.2	-0.02549151
526.4	-0.00391652		1056.39	-0.01275633		1586.4	-0.01670204		2116.4	0.00188928		2646.4	-0.02459621
526.6	-0.003958		1056.59	-0.01300243		1586.6	-0.01650586		2116.6	0.00128458		2646.6	-0.02380468
526.8	-0.00393617		1056.79	-0.01467109		1586.8	-0.01639096		2116.8	0.00097114		2646.8	-0.02318309
527	-0.00432934		1056.99	-0.01607554		1587	-0.0169717		2117	0.00091069		2647	-0.02315774
527.2	-0.00489439		1057.19	-0.01681024		1587.2	-0.0171581		2117.2	0.0008299		2647.2	-0.02348613
527.4	-0.00495386		1057.39	-0.01778263		1587.4	-0.01599457		2117.4	0.00163959		2647.4	-0.02323505
527.6	-0.00448682		1057.59	-0.01766047		1587.6	-0.01611936		2117.6	0.00157966		2647.6	-0.02369757
527.8	-0.00499182		1057.79	-0.01845846		1587.8	-0.01646859		2117.8	0.00110337		2647.8	-0.02297362
528	-0.00524511		1057.99	-0.01932144		1588	-0.01624862		2118	0.00101211		2648	-0.02338778
528.2	-0.0058752		1058.19	-0.01887201		1588.2	-0.01670433		2118.2	0.00117229		2648.2	-0.02403726
528.4	-0.00592666		1058.39	-0.01916823		1588.4	-0.01647051		2118.4	0.00230381		2648.4	-0.02492755
528.6	-0.00639028		1058.59	-0.01913164		1588.6	-0.01641814		2118.6	0.00243621		2648.6	-0.02571718
528.8	-0.00633872		1058.79	-0.01880809		1588.8	-0.01627429		2118.8	0.00200021		2648.8	-0.02643187
529	-0.0066245		1058.99	-0.01764729		1589	-0.01648911		2119	0.00256936		2649	-0.02559266
529.2	-0.00738568		1059.19	-0.01675692		1589.2	-0.01664011		2119.2	0.00254068		2649.2	-0.02563461
529.4	-0.00783707		1059.39	-0.01659166		1589.4	-0.01728156		2119.4	0.00283793		2649.4	-0.02463982
529.6	-0.00756355		1059.59	-0.01619914		1589.6	-0.01782997		2119.6	0.00282611		2649.6	-0.02465977
529.8	-0.00666403		1059.79	-0.01633569		1589.8	-0.01833204		2119.8	0.00232609		2649.8	-0.02404676
530	-0.00628246		1059.99	-0.0163812		1590	-0.01783106		2120	0.00222623		2650	-0.02372409
530.2	-0.00614839		1060.19	-0.016694		1590.2	-0.01873813		2120.2	0.00112609		2650.2	-0.02246035
530.4	-0.00533983		1060.39	-0.01744504		1590.4	-0.01867505		2120.4	-0.00019289		2650.4	-0.02237468
530.6	-0.00479097		1060.59	-0.01773096		1590.6	-0.01884709		2120.6	0.00070221		2650.6	-0.02228452
530.8	-0.00462902		1060.79	-0.01794578		1590.8	-0.01900593		2120.8	0.00098257		2650.8	-0.02165899
531	-0.00463256		1060.99	-0.01821777		1591	-0.01907669		2121	0.00134231		2651	-0.0219667
531.2	-0.0043049		1061.19	-0.01823769		1591.2	-0.01872721		2121.2	0.00171479		2651.2	-0.02106518
531.4	-0.00353336		1061.39	-0.01857252		1591.4	-0.0182127		2121.4	0.00318343		2651.4	-0.02026196
531.6	-0.00362688		1061.59	-0.01910063		1591.6	-0.01896671		2121.6	0.0032798		2651.6	-0.02074974
531.8	-0.00408108		1061.79	-0.01947649		1591.8	-0.01960643		2121.8	0.00409901		2651.8	-0.02170164
532	-0.00482866		1061.99	-0.01925932		1592	-0.01978295		2122	0.00414995		2652	-0.02286722
532.2	-0.00567429		1062.19	-0.01863358		1592.2	-0.02026259		2122.2	0.00483722		2652.2	-0.02397626
532.4	-0.00532714		1062.39	-0.01875898		1592.4	-0.02071238		2122.4	0.00508133		2652.4	-0.02524131
532.6	-0.00526063		1062.59	-0.01768637		1592.6	-0.02075559		2122.6	0.00497786		2652.6	-0.02579246
532.8	-0.00516123		1062.79	-0.01708442		1592.8	-0.02107877		2122.8	0.00462178		2652.8	-0.02620675
533	-0.00585496		1062.99	-0.0169766		1593	-0.0210394		2123	0.00520608		2653	-0.025848
533.2	-0.00598665		1063.19	-0.01641227		1593.2	-0.02045289		2123.2	0.00488805		2653.2	-0.02597294
533.4	-0.0057698		1063.39	-0.01707419		1593.4	-0.02054709		2123.4	0.00462241		2653.4	-0.0256736
533.6	-0.00555059		1063.59	-0.01708169		1593.6	-0.02047979		2123.6	0.00304726		2653.6	-0.02569552
533.8	-0.00645852		1063.79	-0.0176411		1593.8	-0.01994016		2123.8	0.00129795		2653.8	-0.02562086
534	-0.00648692		1063.99	-0.01745698		1594	-0.01934201		2124	-0.00012671		2654	-0.02598633
534.2	-0.00658717		1064.19	-0.01779129		1594.2	-0.02023747		2124.2	-0.00049827		2654.2	-0.02559959
534.4	-0.00636385		1064.39	-0.01747806		1594.4	-0.01979799		2124.4	-0.00078918		2654.4	-0.0266422
534.6	-0.00585349		1064.59	-0.01749323		1594.6	-0.01975119		2124.6	-0.0003204		2654.6	-0.02578205
534.8	-0.00493143		1064.79	-0.01746904		1594.8	-0.01962967		2124.8	-0.0001426		2654.8	-0.0252506
535	-0.00530889		1064.99	-0.01734237		1595	-0.01877059		2125	0.00069651		2655	-0.02517176
535.2	-0.00498064		1065.19	-0.01743371		1595.2	-0.01856542		2125.2	0.0016364		2655.2	-0.02494484
535.4	-0.00506244		1065.39	-0.01755637		1595.4	-0.01885514		2125.4	0.00256327		2655.4	-0.02530362
535.6	-0.00561134		1065.59	-0.01717677		1595.6	-0.01903219		2125.6	0.00294906		2655.6	-0.02658106
535.8	-0.00477358		1065.79	-0.01621051		1595.8	-0.01872449		2125.8	0.00269601		2655.8	-0.02757586
536	-0.00422457		1065.99	-0.01554316		1596	-0.01853129		2126	0.00239363		2656	-0.02891119
536.2	-0.00333695		1066.19	-0.01502163		1596.2	-0.01842866		2126.2	0.00270071		2656.2	-0.02960822
536.4	-0.00246133		1066.39	-0.01426616		1596.4	-0.01899373		2126.4	0.00252304		2656.4	-0.03075707
536.6	-0.00170393		1066.59	-0.01397006		1596.6	-0.01906285		2126.6	0.00232427		2656.6	-0.03078059
536.8	-0.00128059		1066.79	-0.01400544		1596.8	-0.01859559		2126.8	0.00196186		2656.8	-0.03019858
537	-0.00052107		1066.99	-0.01403381		1597	-0.01814102		2127	0.00215017		2657	-0.03040546
537.2	-0.00082534		1067.19	-0.01443206		1597.2	-0.01787597		2127.2	0.0021905		2657.2	-0.03002351
537.4	-0.00083449		1067.39	-0.01465085		1597.4	-0.0186072		2127.4	0.00226368		2657.4	-0.02985567
537.6	-0.00080404		1067.59	-0.01446354		1597.6	-0.01890712		2127.6	0.00164004		2657.6	-0.02946736
537.8	-0.00226264		1067.79	-0.01516924		1597.8	-0.0193195		2127.8	0.00148911		2657.8	-0.02959705
538	-0.00189499		1067.99	-0.01529348		1598	-0.01969779		2128	0.00107614		2658	-0.02937817
538.2	-0.00269187		1068.19	-0.01596939		1598.2	-0.02019531		2128.2	0.00221463		2658.2	-0.02857869
538.4	-0.00312169		1068.39	-0.01710322		1598.4	-0.0198326		2128.4	0.00224544		2658.4	-0.02859555
538.6	-0.00310427		1068.59	-0.01740323		1598.6	-0.0193982		2128.6	0.00244971		2658.6	-0.02786423
538.8	-0.00288432		1068.79	-0.01788697		1598.8	-0.01844004		2128.8	0.00309718		2658.8	-0.0279616
539	-0.00353161		1068.99	-0.01823398		1599	-0.01788563		2129	0.00407251		2659	-0.02743818
539.2	-0.00372806		1069.19	-0.01839732		1599.2	-0.01800392		2129.2	0.00440842		2659.2	-0.02697911
539.4	-0.00374599		1069.39	-0.01814839		1599.4	-0.01726546		2129.4	0.00435497		2659.4	-0.02626577
539.6	-0.00409354		1069.59	-0.01789961		1599.6	-0.01649885		2129.6	0.00402211		2659.6	-0.02699059
539.8	-0.00353038		1069.79	-0.01781222		1599.8	-0.01637026		2129.8	0.00354674		2659.8	-0.02739559
540	-0.0036791		1069.99	-0.01767628		1600	-0.01650657		2130	0.00373445		2660	-0.02845027
540.2	-0.00315566		1070.19	-0.01728936		1600.2	-0.01700828		2130.2	0.0039967		2660.2	-0.0290772
540.4	-0.00317489		1070.39	-0.01741089		1600.4	-0.01759043		2130.4	0.00346444		2660.4	-0.02892402
540.6	-0.00328281		1070.59	-0.01774717		1600.6	-0.01833756		2130.6	0.00341746		2660.6	-0.0285752
540.8	-0.00305814		1070.79	-0.01744762		1600.8	-0.01771388		2130.8	0.00343345		2660.8	-0.02857197
541	-0.00347408		1070.99	-0.01649217		1601	-0.01778029		2131	0.00424406		2661	-0.02876798
541.2	-0.00390484		1071.19	-0.01638764		1601.2	-0.0178112		2131.2	0.00480194		2661.2	-0.02812268
541.4	-0.00405276		1071.39	-0.01546047		1601.4	-0.01859489		2131.4	0.00455304		2661.4	-0.02784779
541.6	-0.00431948		1071.59	-0.01519752		1601.6	-0.01826735		2131.6	0.0042998		2661.6	-0.02758786
541.8	-0.00540387		1071.79	-0.01508714		1601.8	-0.01814511		2131.8	0.00440256		2661.8	-0.02703618
542	-0.00515017		1071.99	-0.01533628		1602	-0.01821801		2132	0.00436317		2662	-0.02671706
542.2	-0.00587463		1072.19	-0.01538774		1602.2	-0.01772182		2132.2	0.00453722		2662.2	-0.02585546
542.4	-0.00562178		1072.39	-0.01583309		1602.4	-0.01763562		2132.4	0.00402161		2662.4	-0.02617564
542.6	-0.00501539		1072.59	-0.01573159		1602.6	-0.01746338		2132.6	0.00283434		2662.6	-0.02571041
542.8	-0.00445674		1072.79	-0.01623237		1602.8	-0.01751168		2132.8	0.00285979		2662.8	-0.02612853
543	-0.00435167		1072.99	-0.01660176		1603	-0.01726631		2133	0.00190709		2663	-0.02563342
543.2	-0.00410836		1073.19	-0.01623046		1603.2	-0.01778098		2133.2	0.00141292		2663.2	-0.02617976
543.4	-0.00328646		1073.39	-0.01663307		1603.4	-0.01678357		2133.4	0.00066199		2663.4	-0.0267791
543.6	-0.00339345		1073.59	-0.01697151		1603.6	-0.01779575		2133.6	0.00043826		2663.6	-0.0272769
543.8	-0.00282958		1073.79	-0.01777332		1603.8	-0.01889941		2133.8	0.00037959		2663.8	-0.02756766
544	-0.00295745		1073.99	-0.01756586		1604	-0.01881425		2134	-0.00011869		2664	-0.02893289
544.2	-0.00285495		1074.19	-0.01791812		1604.2	-0.01936575		2134.2	0.00011669		2664.2	-0.02830423
544.4	-0.00335606		1074.39	-0.01779554		1604.4	-0.01931598		2134.4	-0.00032566		2664.4	-0.0277464
544.6	-0.00406174		1074.59	-0.01784471		1604.6	-0.01955506		2134.6	0.00085362		2664.6	-0.02855294
544.8	-0.00381229		1074.79	-0.01786363		1604.8	-0.01913308		2134.8	0.00170995		2664.8	-0.02835445
545	-0.00467165		1074.99	-0.0173041		1605	-0.01920871		2135	0.00213254		2665	-0.02823078
545.2	-0.00488509		1075.19	-0.01757619		1605.2	-0.0187666		2135.2	0.00205513		2665.2	-0.02806513
545.4	-0.0051957		1075.39	-0.01722388		1605.4	-0.01858852		2135.4	0.00267534		2665.4	-0.0283247
545.6	-0.00489811		1075.59	-0.01666669		1605.6	-0.01753646		2135.6	0.00359086		2665.6	-0.02840411
545.8	-0.00569561		1075.79	-0.01663211		1605.8	-0.01708443		2135.8	0.00431324		2665.8	-0.02768739
546	-0.00607828		1075.99	-0.01655047		1606	-0.01642852		2136	0.00453791		2666	-0.02782946
546.2	-0.00681858		1076.19	-0.015795		1606.2	-0.01539539		2136.2	0.00480815		2666.2	-0.02735882
546.4	-0.00672414		1076.39	-0.016069		1606.4	-0.01511313		2136.4	0.00442124		2666.4	-0.02756592
546.6	-0.00599712		1076.59	-0.01660905		1606.6	-0.01495048		2136.6	0.00296461		2666.6	-0.02744522
546.8	-0.00635097		1076.79	-0.01680798		1606.8	-0.01497333		2136.8	0.00297496		2666.8	-0.02781842
547	-0.00562424		1076.99	-0.01729569		1607	-0.01487519		2137	0.00147609		2667	-0.02713061
547.2	-0.0050063		1077.19	-0.01669957		1607.2	-0.0155891		2137.2	0.00116932		2667.2	-0.02821014
547.4	-0.0038986		1077.39	-0.01720327		1607.4	-0.01555019		2137.4	0.00058619		2667.4	-0.0281572
547.6	-0.00405688		1077.59	-0.01689925		1607.6	-0.01703674		2137.6	0.0007478		2667.6	-0.02759338
547.8	-0.00423179		1077.79	-0.01710096		1607.8	-0.01660377		2137.8	-0.0004413		2667.8	-0.02837079
548	-0.00425174		1077.99	-0.01642436		1608	-0.01608081		2138	-0.00091691		2668	-0.02898488
548.2	-0.00493854		1078.19	-0.01709259		1608.2	-0.01559059		2138.2	-0.00153727		2668.2	-0.02808776
548.4	-0.00537879		1078.39	-0.01684117		1608.4	-0.01630426		2138.4	-0.0020396		2668.4	-0.02814073
548.6	-0.00550735		1078.59	-0.01677411		1608.6	-0.01644439		2138.6	-0.00178304		2668.6	-0.02823809
548.8	-0.00477532		1078.79	-0.0165751		1608.8	-0.01714827		2138.8	-0.00202397		2668.8	-0.02748384
549	-0.00498804		1078.99	-0.01613534		1609	-0.01714084		2139	-0.0022121		2669	-0.02714476
549.2	-0.00542996		1079.19	-0.0157331		1609.2	-0.01676788		2139.2	-0.00178991		2669.2	-0.02699377
549.4	-0.00571106		1079.39	-0.01525853		1609.4	-0.0173075		2139.4	-0.0003107		2669.4	-0.02717191
549.6	-0.00597856		1079.59	-0.01561918		1609.6	-0.01711793		2139.6	0.00018827		2669.6	-0.02647687
549.8	-0.00717075		1079.79	-0.01609579		1609.8	-0.01710779		2139.8	0.00158332		2669.8	-0.02515926
550	-0.0072995		1079.99	-0.01651542		1610	-0.01630026		2140	0.00289808		2670	-0.02516553
550.2	-0.00752887		1080.19	-0.01583275		1610.2	-0.0163604		2140.2	0.00390451		2670.2	-0.02513028
550.4	-0.00772281		1080.39	-0.01691231		1610.4	-0.01724408		2140.4	0.00383935		2670.4	-0.02451715
550.6	-0.00694351		1080.59	-0.01780896		1610.6	-0.01785609		2140.6	0.00407838		2670.6	-0.02365089
550.8	-0.00787906		1080.79	-0.01880706		1610.8	-0.01812786		2140.8	0.00437508		2670.8	-0.02317276
551	-0.00715027		1080.99	-0.01919326		1611	-0.01867496		2141	0.00447244		2671	-0.02382288
551.2	-0.00643269		1081.19	-0.0189232		1611.2	-0.01957351		2141.2	0.00461775		2671.2	-0.02518228
551.4	-0.00587581		1081.39	-0.01975296		1611.4	-0.02018346		2141.4	0.00510557		2671.4	-0.02522155
551.6	-0.00542572		1081.59	-0.01963276		1611.6	-0.02089623		2141.6	0.00451075		2671.6	-0.02553061
551.8	-0.00567334		1081.79	-0.01982488		1611.8	-0.02034543		2141.8	0.0037665		2671.8	-0.0268912
552	-0.00545607		1081.99	-0.02007273		1612	-0.02015247		2142	0.0029601		2672	-0.02672901
552.2	-0.00572316		1082.19	-0.0203962		1612.2	-0.02012897		2142.2	0.00237182		2672.2	-0.02662067
552.4	-0.00606444		1082.39	-0.01966342		1612.4	-0.02009948		2142.4	0.00164054		2672.4	-0.02655576
552.6	-0.00606586		1082.59	-0.01902304		1612.6	-0.01969428		2142.6	0.0013256		2672.6	-0.02672138
552.8	-0.00638483		1082.79	-0.01964385		1612.8	-0.02036124		2142.8	0.00108712		2672.8	-0.02644305
553	-0.00723367		1082.99	-0.01969791		1613	-0.01990165		2143	0.00135612		2673	-0.02655056
553.2	-0.0087618		1083.19	-0.01964362		1613.2	-0.01945337		2143.2	0.00117674		2673.2	-0.02671681
553.4	-0.00925913		1083.39	-0.01939786		1613.4	-0.01900848		2143.4	0.00113182		2673.4	-0.02677428
553.6	-0.00990774		1083.59	-0.02001036		1613.6	-0.01850125		2143.6	0.00144858		2673.6	-0.02691625
553.8	-0.01088296		1083.79	-0.01970342		1613.8	-0.01757774		2143.8	0.00173283		2673.8	-0.02735117
554	-0.01072818		1083.99	-0.01992626		1614	-0.01626977		2144	0.00229074		2674	-0.02796006
554.2	-0.01081428		1084.19	-0.01933014		1614.2	-0.01663647		2144.2	0.00256368		2674.2	-0.02868731
554.4	-0.0105997		1084.39	-0.02058647		1614.4	-0.01695555		2144.4	0.00255143		2674.4	-0.02847814
554.6	-0.01029352		1084.59	-0.02054411		1614.6	-0.0165712		2144.6	0.0030691		2674.6	-0.02836104
554.8	-0.01052138		1084.79	-0.02120062		1614.8	-0.01643358		2144.8	0.0031609		2674.8	-0.02925072
555	-0.0098305		1084.99	-0.02081305		1615	-0.01737422		2145	0.00370199		2675	-0.0297799
555.2	-0.00886108		1085.19	-0.02057985		1615.2	-0.01824502		2145.2	0.00320503		2675.2	-0.03003746
555.4	-0.00851793		1085.39	-0.02052844		1615.4	-0.01814885		2145.4	0.00311246		2675.4	-0.03055145
555.6	-0.00807735		1085.59	-0.01964952		1615.6	-0.01830894		2145.6	0.00296367		2675.6	-0.02999695
555.8	-0.00841098		1085.79	-0.01967709		1615.8	-0.01869811		2145.8	0.0032476		2675.8	-0.02954888
556	-0.00817332		1085.99	-0.01948149		1616	-0.01883301		2146	0.0028476		2676	-0.02924218
556.2	-0.007566		1086.19	-0.01932601		1616.2	-0.01914862		2146.2	0.00292434		2676.2	-0.02926058
556.4	-0.00772802		1086.39	-0.01904982		1616.4	-0.01881684		2146.4	0.00276355		2676.4	-0.02882699
556.6	-0.00724254		1086.59	-0.01934021		1616.6	-0.0204515		2146.6	0.00236283		2676.6	-0.02828203
556.8	-0.00657901		1086.79	-0.01985782		1616.8	-0.02082036		2146.8	0.00264886		2676.8	-0.02781365
557	-0.00619522		1086.99	-0.01905774		1617	-0.02033702		2147	0.00252266		2677	-0.02811112
557.2	-0.00649927		1087.19	-0.01896403		1617.2	-0.02044429		2147.2	0.00219492		2677.2	-0.0271444
557.4	-0.00569378		1087.39	-0.01897932		1617.4	-0.02062424		2147.4	0.00151386		2677.4	-0.02714501
557.6	-0.00583526		1087.59	-0.01959272		1617.6	-0.02065719		2147.6	0.00140786		2677.6	-0.02643777
557.8	-0.00506362		1087.79	-0.01953825		1617.8	-0.01990167		2147.8	0.00070837		2677.8	-0.02727025
558	-0.0041575		1087.99	-0.01956497		1618	-0.01975191		2148	0.00112587		2678	-0.02790827
558.2	-0.00346609		1088.19	-0.01917251		1618.2	-0.02002006		2148.2	0.00088826		2678.2	-0.02865877
558.4	-0.0031874		1088.39	-0.01889976		1618.4	-0.01989879		2148.4	0.00082131		2678.4	-0.02848978
558.6	-0.00344508		1088.59	-0.0181146		1618.6	-0.01964236		2148.6	0.00115505		2678.6	-0.02851351
558.8	-0.00361647		1088.79	-0.0177681		1618.8	-0.01965497		2148.8	0.00113175		2678.8	-0.02869422
559	-0.00410063		1088.99	-0.01677466		1619	-0.01990695		2149	0.00114417		2679	-0.02816489
559.2	-0.00434113		1089.19	-0.01582875		1619.2	-0.01990254		2149.2	0.00114388		2679.2	-0.02811825
559.4	-0.00519969		1089.39	-0.01486756		1619.4	-0.01954638		2149.4	0.00178941		2679.4	-0.0277103
559.6	-0.00627486		1089.59	-0.01402264		1619.6	-0.01998642		2149.6	0.00235711		2679.6	-0.02638058
559.8	-0.00675884		1089.79	-0.01373389		1619.8	-0.02048709		2149.8	0.00260429		2679.8	-0.02591355
