# Supplementary material for: Functional development of a V3/glycan-specific broadly neutralizing antibody isolated from a case of HIV superinfection
Source: eLife journal article supplement (doi:10.7554/elife.68110), 2021-07-15
Supplement: fig2-data2 [file F1.xls]

Vers 3.43 Data Simulation
Conc1	6.25E-08	6.25E-08	6.25E-08	6.25E-08	6.25E-08
Start1	199.99	730	1259.99	1790	2320
Stop1	559.79	1089.8	1619.79	2149.8	2679.8
Time1	Data1	Sim1	Time2	Data2	Sim2	Time3	Data3	Sim3	Time4	Data4	Sim4	Time5	Data5	Sim5
199.99	-0.00628001		730	-0.00093664		1259.99	-0.0081154		1790	0.00273212		2320	-0.00488773
200.19	-0.0068319		730.2	-0.00094073		1260.19	-0.0085056		1790.2	0.00146604		2320.2	-0.00498525
200.39	-0.00724805		730.4	-0.00111507		1260.39	-0.00874761		1790.4	0.00093209		2320.4	-0.00492394
200.59	-0.00777628		730.6	-0.00080898		1260.59	-0.00926891		1790.6	0.00017329		2320.6	-0.0045402
200.79	-0.0082006		730.8	-0.00071533		1260.79	-0.00953418		1790.8	-0.00038521		2320.8	-0.00522792
200.99	-0.00833342		731	0.00006069		1260.99	-0.00971651		1791	-0.00159773		2321	-0.00515977
201.19	-0.00797218		731.2	0.00044465		1261.19	-0.01000017		1791.2	-0.00166899		2321.2	-0.00484452
201.39	-0.00779167		731.4	0.00058334		1261.39	-0.01016644		1791.4	-0.00124047		2321.4	-0.00453824
201.59	-0.00738538		731.6	0.00083658		1261.59	-0.0108036		1791.6	-0.00132179		2321.6	-0.00449148
201.79	-0.00759642		731.8	0.001197		1261.79	-0.0110266		1791.8	-0.00065324		2321.8	-0.00456258
201.99	-0.00755886		732	0.00091744		1261.99	-0.01081044		1792	-0.00031964		2322	-0.00460563
202.19	-0.00747356		732.2	0.00090954		1262.19	-0.01102582		1792.2	0.00033517		2322.2	-0.00444801
202.39	-0.00779476		732.4	0.00161688		1262.39	-0.01183657		1792.4	0.00052857		2322.4	-0.0052715
202.59	-0.00752751		732.6	0.00153522		1262.59	-0.01179956		1792.6	0.00133646		2322.6	-0.00604757
202.79	-0.0068296		732.8	0.00101206		1262.79	-0.01194913		1792.8	0.00222068		2322.8	-0.00642885
202.99	-0.0062782		733	0.00130041		1262.99	-0.01260489		1793	0.00212257		2323	-0.00662686
203.19	-0.00544527		733.2	0.0011242		1263.19	-0.01307275		1793.2	0.00324955		2323.2	-0.00632461
203.39	-0.00463633		733.4	0.001377		1263.39	-0.01287538		1793.4	0.00374665		2323.4	-0.00646035
203.59	-0.00475539		733.6	0.00057354		1263.59	-0.013242		1793.6	0.00425997		2323.6	-0.00641634
203.79	-0.00431058		733.8	-0.00006867		1263.79	-0.01357321		1793.8	0.00364432		2323.8	-0.00662636
203.99	-0.00439951		734	0.00025374		1263.99	-0.01382813		1794	0.00389564		2324	-0.00662906
204.19	-0.00438344		734.2	0.00058584		1264.19	-0.01447013		1794.2	0.00373848		2324.2	-0.00682262
204.39	-0.00427304		734.4	0.00096689		1264.39	-0.01473443		1794.4	0.00422195		2324.4	-0.0064303
204.59	-0.0047458		734.6	0.0018781		1264.59	-0.01447931		1794.6	0.0042048		2324.6	-0.00666094
204.79	-0.00447739		734.8	0.00186419		1264.79	-0.01416385		1794.8	0.00427606		2324.8	-0.00711415
204.99	-0.00465775		735	0.00246		1264.99	-0.01377852		1795	0.00447674		2325	-0.00616604
205.19	-0.00432974		735.2	0.00229873		1265.19	-0.01267236		1795.2	0.00580262		2325.2	-0.00562333
205.39	-0.00511014		735.4	0.0021326		1265.39	-0.0120885		1795.4	0.00654365		2325.4	-0.00508382
205.59	-0.00582929		735.6	0.00217292		1265.59	-0.01187001		1795.6	0.00659908		2325.6	-0.00449591
205.79	-0.00735263		735.8	0.00215339		1265.79	-0.01056052		1795.8	0.00755734		2325.8	-0.00401476
205.99	-0.0078618		736	0.00229875		1265.99	-0.00989307		1796	0.00736347		2326	-0.0038628
206.19	-0.0081807		736.2	0.00254926		1266.19	-0.01020544		1796.2	0.0074729		2326.2	-0.00328877
206.39	-0.0072982		736.4	0.00245215		1266.39	-0.01060415		1796.4	0.00746336		2326.4	-0.00342307
206.59	-0.00650956		736.6	0.00197296		1266.59	-0.00925089		1796.6	0.00822208		2326.6	-0.0035678
206.79	-0.00640492		736.8	0.00229622		1266.79	-0.00859098		1796.8	0.00864171		2326.8	-0.00382635
206.99	-0.00480778		737	0.00228492		1266.99	-0.00920467		1797	0.00803091		2327	-0.00355903
207.19	-0.0044045		737.2	0.00195919		1267.19	-0.01002934		1797.2	0.00877818		2327.2	-0.00282395
207.39	-0.00357871		737.4	0.00174681		1267.39	-0.00980492		1797.4	0.00791667		2327.4	-0.00279818
207.59	-0.00311806		737.6	0.00140958		1267.59	-0.0100022		1797.6	0.00759591		2327.6	-0.00345219
207.79	-0.00234092		737.8	0.00118787		1267.79	-0.01069371		1797.8	0.00617211		2327.8	-0.00544018
207.99	-0.00181565		738	0.00178823		1267.99	-0.0111482		1798	0.00651975		2328	-0.00587068
208.19	-0.00238811		738.2	0.00162697		1268.19	-0.01106838		1798.2	0.00508368		2328.2	-0.00595337
208.39	-0.00259331		738.4	0.00146824		1268.39	-0.01100552		1798.4	0.0045584		2328.4	-0.00596744
208.59	-0.00342089		738.6	0.00161792		1268.59	-0.0104048		1798.6	0.00450832		2328.6	-0.00670098
208.79	-0.00357197		738.8	0.00088463		1268.79	-0.01021071		1798.8	0.00416		2328.8	-0.0066462
208.99	-0.00414925		739	0.00037781		1268.99	-0.01002647		1799	0.00399873		2329	-0.00673878
209.19	-0.00497724		739.2	-0.00051557		1269.19	-0.00938993		1799.2	0.00475893		2329.2	-0.00664571
209.39	-0.00572943		739.4	-0.00134672		1269.39	-0.00952978		1799.4	0.00493513		2329.4	-0.00579515
209.59	-0.0067478		739.6	-0.00085891		1269.59	-0.00935552		1799.6	0.00535999		2329.6	-0.00513212
209.79	-0.00725171		739.8	-0.00075685		1269.79	-0.00932421		1799.8	0.00636425		2329.8	-0.00584162
209.99	-0.00664347		740	-0.00072747		1269.99	-0.00961122		1800	0.00695656		2330	-0.00651007
210.19	-0.00664297		740.2	-0.0008489		1270.19	-0.00967832		1800.2	0.00759886		2330.2	-0.00651455
210.39	-0.00619763		740.4	-0.00074188		1270.39	-0.0097136		1800.4	0.00805049		2330.4	-0.00723054
210.59	-0.00570405		740.6	0.00070553		1270.59	-0.00940064		1800.6	0.00832934		2330.6	-0.00807272
210.79	-0.00536941		740.8	0.00182445		1270.79	-0.00990538		1800.8	0.00805542		2330.8	-0.0080503
210.99	-0.00437112		741	0.00224073		1270.99	-0.01132573		1801	0.00789563		2331	-0.00702679
211.19	-0.00358376		741.2	0.00342695		1271.19	-0.01218992		1801.2	0.00806302		2331.2	-0.00668201
211.39	-0.00239324		741.4	0.00425314		1271.39	-0.01166778		1801.4	0.00751933		2331.4	-0.00742976
211.59	-0.00232242		741.6	0.00522758		1271.59	-0.01193752		1801.6	0.00676892		2331.6	-0.00795037
211.79	-0.00143934		741.8	0.00452988		1271.79	-0.0119855		1801.8	0.00577228		2331.8	-0.00874113
211.99	-0.0013169		742	0.00473533		1271.99	-0.01221428		1802	0.00559506		2332	-0.00761202
212.19	-0.00211655		742.2	0.00425396		1272.19	-0.01178907		1802.2	0.0041225		2332.2	-0.00685172
212.39	-0.00212578		742.4	0.00325163		1272.39	-0.01202047		1802.4	0.00403662		2332.4	-0.00611813
212.59	-0.0017794		742.6	0.00304101		1272.59	-0.01082513		1802.6	0.00391747		2332.6	-0.0063717
212.79	-0.00149962		742.8	0.00237657		1272.79	-0.01063033		1802.8	0.00355555		2332.8	-0.0054328
212.99	-0.00161545		743	0.00173786		1272.99	-0.01034735		1803	0.00409472		2333	-0.0057757
213.19	-0.00185498		743.2	0.00054868		1273.19	-0.0099222		1803.2	0.00498987		2333.2	-0.00603542
213.39	-0.00120374		743.4	-0.00037223		1273.39	-0.00913144		1803.4	0.00460537		2333.4	-0.005386
213.59	-0.0013451		743.6	-0.00011288		1273.59	-0.00914921		1803.6	0.00466248		2333.6	-0.00552431
213.79	-0.00050989		743.8	-0.00096876		1273.79	-0.00902931		1803.8	0.00523601		2333.8	-0.00665924
213.99	-0.000075		744	-0.00067593		1273.99	-0.00892019		1804	0.00581512		2334	-0.00667026
214.19	0.00033135		744.2	-0.00009876		1274.19	-0.00934836		1804.2	0.00634659		2334.2	-0.00612705
214.39	0.00051722		744.4	0.00010075		1274.39	-0.00974047		1804.4	0.00627571		2334.4	-0.006168
214.59	0.00092509		744.6	0.00089149		1274.59	-0.01012549		1804.6	0.00630396		2334.6	-0.00620807
214.79	0.00082255		744.8	0.00104528		1274.79	-0.00997848		1804.8	0.00617689		2334.8	-0.00612716
214.99	0.00065282		745	0.00104895		1274.99	-0.01049558		1805	0.00654065		2335	-0.00573417
215.19	0.00085475		745.2	0.00118714		1275.19	-0.01044811		1805.2	0.00625382		2335.2	-0.00556435
215.39	0.00072354		745.4	0.00183068		1275.39	-0.00917439		1805.4	0.0058042		2335.4	-0.00567072
215.59	0.00027179		745.6	0.00174554		1275.59	-0.00899109		1805.6	0.00566398		2335.6	-0.00514019
215.79	0.00051197		745.8	0.00076527		1275.79	-0.0086194		1805.8	0.00533683		2335.8	-0.00495106
215.99	0.00002757		746	0.0006732		1275.99	-0.00866818		1806	0.00612938		2336	-0.0046235
216.19	0.00008547		746.2	0.00049337		1276.19	-0.00778467		1806.2	0.00642836		2336.2	-0.00512497
216.39	0.00011684		746.4	-0.00014005		1276.39	-0.00727588		1806.4	0.00702136		2336.4	-0.00507479
216.59	0.00003751		746.6	0.00045183		1276.59	-0.0062063		1806.6	0.00727535		2336.6	-0.005837
216.79	-0.00050958		746.8	0.00053203		1276.79	-0.00587524		1806.8	0.00777237		2336.8	-0.00584695
216.99	-0.00006782		747	-0.00047976		1276.99	-0.00568866		1807	0.00817792		2337	-0.00733318
217.19	0.00049209		747.2	-0.00100078		1277.19	-0.00608592		1807.2	0.00763849		2337.2	-0.00788525
217.39	0.00133231		747.4	-0.00127674		1277.39	-0.00570893		1807.4	0.00746725		2337.4	-0.00770446
217.59	0.00141983		747.6	-0.00153169		1277.59	-0.00605069		1807.6	0.00748194		2337.6	-0.00819542
217.79	0.00130086		747.8	-0.00174105		1277.79	-0.00676064		1807.8	0.00803936		2337.8	-0.00906878
217.99	0.00105392		748	-0.00139686		1277.99	-0.00780367		1808	0.00798006		2338	-0.00850882
218.19	0.00170774		748.2	-0.00116129		1278.19	-0.00819591		1808.2	0.00801519		2338.2	-0.00805327
218.39	0.00132086		748.4	-0.00100329		1278.39	-0.0087184		1808.4	0.00738043		2338.4	-0.00758164
218.59	0.00124161		748.6	-0.00044896		1278.59	-0.00902788		1808.6	0.00695312		2338.6	-0.00730974
218.79	0.00181363		748.8	-0.00027433		1278.79	-0.0094038		1808.8	0.0060416		2338.8	-0.00784779
218.99	0.00163957		749	0.00015202		1278.99	-0.00973852		1809	0.00605517		2339	-0.00701671
219.19	0.00197646		749.2	0.00095642		1279.19	-0.00933925		1809.2	0.00581524		2339.2	-0.00589299
219.39	0.0018504		749.4	0.00206883		1279.39	-0.0086903		1809.4	0.00533189		2339.4	-0.00521644
219.59	0.00222292		749.6	0.00180249		1279.59	-0.00809881		1809.6	0.00548662		2339.6	-0.00474117
219.79	0.00211243		749.8	0.00151925		1279.79	-0.00853301		1809.8	0.00508186		2339.8	-0.00441654
219.99	0.00180858		750	0.00230664		1279.99	-0.0082605		1810	0.00598513		2340	-0.00454129
220.19	0.00150503		750.2	0.00291381		1280.19	-0.00861217		1810.2	0.00632533		2340.2	-0.00392827
220.39	0.00069781		750.4	0.00264694		1280.39	-0.00874221		1810.4	0.00684334		2340.4	-0.00305004
220.59	0.00030464		750.6	0.00278547		1280.59	-0.00928619		1810.6	0.00754732		2340.6	-0.00387923
220.79	0.00027607		750.8	0.00257737		1280.79	-0.00920492		1810.8	0.00778385		2340.8	-0.00377625
220.99	0.00011597		751	0.00204679		1280.99	-0.00987961		1811	0.00918225		2341	-0.00418238
221.19	-0.00060518		751.2	0.00173477		1281.19	-0.0097639		1811.2	0.00985044		2341.2	-0.00481058
221.39	-0.00079777		751.4	0.00046869		1281.39	-0.00912209		1811.4	0.0108395		2341.4	-0.0052054
221.59	-0.00184845		751.6	-0.00030409		1281.59	-0.00860562		1811.6	0.0111361		2341.6	-0.00508977
221.79	-0.00231763		751.8	-0.00024386		1281.79	-0.00925852		1811.8	0.01139223		2341.8	-0.00563032
221.99	-0.00190249		752	0.00042028		1281.99	-0.00956501		1812	0.01188829		2342	-0.00568526
222.19	-0.00073669		752.2	0.00158601		1282.19	-0.00918251		1812.2	0.0111901		2342.2	-0.006342
222.39	0.00052186		752.4	0.00207716		1282.39	-0.00940564		1812.4	0.01088702		2342.4	-0.00689434
222.59	0.00169304		752.6	0.00237273		1282.59	-0.00872758		1812.6	0.0102225		2342.6	-0.00773791
222.79	0.00306278		752.8	0.00239995		1282.79	-0.00854741		1812.8	0.00935177		2342.8	-0.00867712
222.99	0.00375465		753	0.00235205		1282.99	-0.00814455		1813	0.01014673		2343	-0.00862629
223.19	0.00365327		753.2	0.00274987		1283.19	-0.00806532		1813.2	0.00996557		2343.2	-0.00773083
223.39	0.00379806		753.4	0.00254117		1283.39	-0.0076426		1813.4	0.00926426		2343.4	-0.00791512
223.59	0.00367396		753.6	0.00228165		1283.59	-0.00764137		1813.6	0.00898658		2343.6	-0.00812242
223.79	0.00297121		753.8	0.00225688		1283.79	-0.00808198		1813.8	0.00900534		2343.8	-0.00800485
223.99	0.0029869		754	0.00242137		1283.99	-0.00809714		1814	0.00871599		2344	-0.00748695
224.19	0.00321827		754.2	0.00294819		1284.19	-0.00842694		1814.2	0.00888006		2344.2	-0.00675188
224.39	0.00295797		754.4	0.00242057		1284.39	-0.00830888		1814.4	0.0096851		2344.4	-0.00673739
224.59	0.00301846		754.6	0.00241378		1284.59	-0.00808773		1814.6	0.01006766		2344.6	-0.00674406
224.79	0.00223327		754.8	0.00241447		1284.79	-0.008129		1814.8	0.00966141		2344.8	-0.00582215
224.99	0.00216767		755	0.0022824		1284.99	-0.00800173		1815	0.0104202		2345	-0.00564109
225.19	0.00150497		755.2	0.00149321		1285.19	-0.00775452		1815.2	0.00934213		2345.2	-0.00581525
225.39	0.00216099		755.4	0.00032805		1285.39	-0.00723781		1815.4	0.00926282		2345.4	-0.00586248
225.59	0.00227062		755.6	0.00015608		1285.59	-0.00714749		1815.6	0.00903042		2345.6	-0.00574486
225.79	0.00275255		755.8	0.00029787		1285.79	-0.00757575		1815.8	0.0094308		2345.8	-0.00661299
225.99	0.00313156		756	0.00055135		1285.99	-0.00808077		1816	0.00988098		2346	-0.00661115
226.19	0.00362861		756.2	0.00102424		1286.19	-0.0079488		1816.2	0.00909355		2346.2	-0.00691569
226.39	0.00447769		756.4	0.00083963		1286.39	-0.0081309		1816.4	0.01005227		2346.4	-0.00682682
226.59	0.00466243		756.6	0.00029092		1286.59	-0.00771326		1816.6	0.0102141		2346.6	-0.00676325
226.79	0.00459332		756.8	0.00062575		1286.79	-0.0079094		1816.8	0.0105579		2346.8	-0.00685288
226.99	0.00462493		757	0.00073633		1286.99	-0.00839757		1817	0.01149134		2347	-0.00647418
227.19	0.00311561		757.2	0.00034649		1287.19	-0.0079693		1817.2	0.01064098		2347.2	-0.00650122
227.39	0.00274289		757.4	0.00006353		1287.39	-0.00805111		1817.4	0.01016011		2347.4	-0.00692917
227.59	0.0020823		757.6	-0.00007147		1287.59	-0.00811562		1817.6	0.01048309		2347.6	-0.0070977
227.79	0.00200943		757.8	0.00030576		1287.79	-0.0078091		1817.8	0.01021779		2347.8	-0.00736502
227.99	0.00191741		758	0.00124491		1287.99	-0.00811844		1818	0.00982754		2348	-0.00671826
228.19	0.00243017		758.2	0.00158049		1288.19	-0.00834466		1818.2	0.01037486		2348.2	-0.00672406
228.39	0.00226274		758.4	0.00171167		1288.39	-0.00844424		1818.4	0.0106502		2348.4	-0.00681314
228.59	0.00306331		758.6	0.00211339		1288.59	-0.00845111		1818.6	0.01093757		2348.6	-0.00596101
228.79	0.00392497		758.8	0.00272113		1288.79	-0.00860787		1818.8	0.01006657		2348.8	-0.00628457
228.99	0.00506128		759	0.00198023		1288.99	-0.00885347		1819	0.00992445		2349	-0.00616327
229.19	0.00523063		759.2	0.00145153		1289.19	-0.00842657		1819.2	0.00961162		2349.2	-0.00567042
229.39	0.00675684		759.4	0.00095802		1289.39	-0.00775873		1819.4	0.00979095		2349.4	-0.00588641
229.59	0.0070718		759.6	0.00191535		1289.59	-0.0083628		1819.6	0.00976929		2349.6	-0.00471202
229.79	0.00662832		759.8	0.00214832		1289.79	-0.00776936		1819.8	0.01059827		2349.8	-0.00447515
229.99	0.00651863		760	0.00216792		1289.99	-0.00813219		1820	0.01070914		2350	-0.00349528
230.19	0.0066318		760.2	0.00253492		1290.19	-0.00799232		1820.2	0.01087288		2350.2	-0.00372093
230.39	0.00677565		760.4	0.00242762		1290.39	-0.00698591		1820.4	0.01053778		2350.4	-0.00364688
230.59	0.00648883		760.6	0.00238558		1290.59	-0.00607782		1820.6	0.01054178		2350.6	-0.00359291
230.79	0.0058974		760.8	0.00258406		1290.79	-0.00603585		1820.8	0.00997487		2350.8	-0.00336409
230.99	0.00559656		761	0.00292875		1290.99	-0.00534135		1821	0.01008414		2351	-0.00343248
231.19	0.00494559		761.2	0.00207751		1291.19	-0.0054773		1821.2	0.01009274		2351.2	-0.00359425
231.39	0.00491529		761.4	0.00312989		1291.39	-0.00541162		1821.4	0.01063139		2351.4	-0.00381342
231.59	0.00523949		761.6	0.0035113		1291.59	-0.00569276		1821.6	0.01102276		2351.6	-0.00419816
231.79	0.00495097		761.8	0.00436321		1291.79	-0.00587068		1821.8	0.01125469		2351.8	-0.00447591
231.99	0.00503777		762	0.00444364		1291.99	-0.00691842		1822	0.01141146		2352	-0.00438997
232.19	0.0059805		762.2	0.00321388		1292.19	-0.0065495		1822.2	0.01177461		2352.2	-0.00550423
232.39	0.00629268		762.4	0.00323594		1292.39	-0.00648924		1822.4	0.01211094		2352.4	-0.00578443
232.59	0.00754367		762.6	0.00290009		1292.59	-0.0063054		1822.6	0.01265986		2352.6	-0.005377
232.79	0.00731335		762.8	0.00301851		1292.79	-0.00578752		1822.8	0.01162127		2352.8	-0.00610179
232.99	0.00776377		763	0.0019087		1292.99	-0.00609749		1823	0.01112523		2353	-0.00563723
233.19	0.00834965		763.2	0.00248091		1293.19	-0.00564154		1823.2	0.01068856		2353.2	-0.00547649
233.39	0.00875403		763.4	0.0025163		1293.39	-0.00534831		1823.4	0.01050089		2353.4	-0.00541767
233.59	0.00760368		763.6	0.00262539		1293.59	-0.005902		1823.6	0.01007432		2353.6	-0.00462108
233.79	0.00707073		763.8	0.00140096		1293.79	-0.0051162		1823.8	0.00965864		2353.8	-0.00518445
233.99	0.0064654		764	0.001339		1293.99	-0.00573221		1824	0.00868612		2354	-0.00484482
234.19	0.00547844		764.2	0.00152661		1294.19	-0.00552471		1824.2	0.00797074		2354.2	-0.00523929
234.39	0.00520607		764.4	0.00131201		1294.39	-0.00459256		1824.4	0.00746189		2354.4	-0.0047463
234.59	0.00469613		764.6	0.00124929		1294.59	-0.00515586		1824.6	0.00737869		2354.6	-0.00467459
234.79	0.00366177		764.8	0.00131182		1294.79	-0.00559006		1824.8	0.00781418		2354.8	-0.00493963
234.99	0.00288562		765	0.00200222		1294.99	-0.00583814		1825	0.00868294		2355	-0.00525843
235.19	0.00247783		765.2	0.00171774		1295.19	-0.00691145		1825.2	0.00922319		2355.2	-0.00516586
235.39	0.00268676		765.4	0.00263254		1295.39	-0.00639797		1825.4	0.00919683		2355.4	-0.00499292
235.59	0.00335052		765.6	0.0028409		1295.59	-0.0068175		1825.6	0.00966098		2355.6	-0.0051888
235.79	0.00338239		765.8	0.00300601		1295.79	-0.00653309		1825.8	0.01023919		2355.8	-0.00566414
235.99	0.00372612		766	0.00279464		1295.99	-0.00682213		1826	0.01128794		2356	-0.00659481
236.19	0.00359446		766.2	0.00271482		1296.19	-0.00595926		1826.2	0.01171975		2356.2	-0.00697319
236.39	0.00358709		766.4	0.00170526		1296.39	-0.00584411		1826.4	0.01160598		2356.4	-0.00662228
236.59	0.00344847		766.6	0.00183657		1296.59	-0.00590231		1826.6	0.01175927		2356.6	-0.00679711
236.79	0.00328003		766.8	0.00267714		1296.79	-0.00605191		1826.8	0.01149932		2356.8	-0.00696616
236.99	0.00467587		767	0.00252945		1296.99	-0.00652895		1827	0.01158627		2357	-0.00598369
237.19	0.00526326		767.2	0.00283573		1297.19	-0.00616708		1827.2	0.0117391		2357.2	-0.00545707
237.39	0.00552932		767.4	0.00214016		1297.39	-0.00573586		1827.4	0.01171112		2357.4	-0.00503765
237.59	0.0062447		767.6	0.00210302		1297.59	-0.006386		1827.6	0.01054576		2357.6	-0.0048027
237.79	0.00671433		767.8	0.00122316		1297.79	-0.00567886		1827.8	0.01026937		2357.8	-0.00492935
237.99	0.00630935		768	0.00124576		1297.99	-0.00638193		1828	0.0093872		2358	-0.00480144
238.19	0.00608076		768.2	0.00095985		1298.19	-0.00605266		1828.2	0.00860318		2358.2	-0.00482464
238.39	0.00658466		768.4	0.00055277		1298.39	-0.00556561		1828.4	0.00851624		2358.4	-0.00492113
238.59	0.00563431		768.6	0.00136361		1298.59	-0.00626467		1828.6	0.00833695		2358.6	-0.00568308
238.79	0.00507655		768.8	0.00162635		1298.79	-0.00644637		1828.8	0.00829437		2358.8	-0.00593804
238.99	0.00481486		769	0.00224591		1298.99	-0.00700302		1829	0.00778309		2359	-0.00636624
239.19	0.00574039		769.2	0.00286424		1299.19	-0.00692224		1829.2	0.00773128		2359.2	-0.00692383
239.39	0.00677698		769.4	0.00373088		1299.39	-0.00724		1829.4	0.00752489		2359.4	-0.00690611
239.59	0.00701511		769.6	0.00417755		1299.59	-0.00708248		1829.6	0.0076341		2359.6	-0.00834848
239.79	0.00645678		769.8	0.00392853		1299.79	-0.00682568		1829.8	0.00815856		2359.8	-0.00855688
239.99	0.00554515		770	0.00481681		1299.99	-0.00743058		1830	0.0090285		2360	-0.00915236
240.19	0.00475922		770.2	0.00449266		1300.19	-0.00756793		1830.2	0.00863016		2360.2	-0.00878401
240.39	0.00485454		770.4	0.00435765		1300.39	-0.007679		1830.4	0.00858011		2360.4	-0.00863351
240.59	0.00414547		770.6	0.00532814		1300.59	-0.00832884		1830.6	0.00929772		2360.6	-0.00806949
240.79	0.00436342		770.8	0.00610845		1300.79	-0.00828978		1830.8	0.00862488		2360.8	-0.00760796
240.99	0.00421423		771	0.0059502		1300.99	-0.00815702		1831	0.00818538		2361	-0.00663106
241.19	0.00533201		771.2	0.005463		1301.19	-0.00779296		1831.2	0.00762063		2361.2	-0.00692405
241.39	0.00558794		771.4	0.00504412		1301.39	-0.00819252		1831.4	0.00729938		2361.4	-0.00729065
241.59	0.00596317		771.6	0.00507074		1301.59	-0.00875569		1831.6	0.00640975		2361.6	-0.00688331
241.79	0.00557536		771.8	0.00413884		1301.79	-0.00854989		1831.8	0.00655481		2361.8	-0.00748862
241.99	0.00587278		772	0.0041012		1301.99	-0.00930447		1832	0.00562037		2362	-0.00767709
242.19	0.00576237		772.2	0.00342637		1302.19	-0.00814686		1832.2	0.00582364		2362.2	-0.00756019
242.39	0.00580844		772.4	0.00357433		1302.39	-0.00769295		1832.4	0.00619872		2362.4	-0.0069829
242.59	0.0049767		772.6	0.0032528		1302.59	-0.00827506		1832.6	0.00643008		2362.6	-0.00698387
242.79	0.00524815		772.8	0.00243656		1302.79	-0.00801866		1832.8	0.00675565		2362.8	-0.00664665
242.99	0.00481698		773	0.00239902		1302.99	-0.00809925		1833	0.00719776		2363	-0.00658352
243.19	0.00503238		773.2	0.00257344		1303.19	-0.0066002		1833.2	0.00791957		2363.2	-0.00641741
243.39	0.00526029		773.4	0.00170448		1303.39	-0.00662328		1833.4	0.00895011		2363.4	-0.00628255
243.59	0.00542641		773.6	0.00136039		1303.59	-0.00527599		1833.6	0.00946983		2363.6	-0.00649984
243.79	0.00486389		773.8	0.00220616		1303.79	-0.00385315		1833.8	0.00990912		2363.8	-0.00595804
243.99	0.00484183		774	0.00286791		1303.99	-0.00359894		1834	0.01106042		2364	-0.00555926
244.19	0.00576832		774.2	0.00316896		1304.19	-0.00241128		1834.2	0.0113873		2364.2	-0.00522536
244.39	0.0053227		774.4	0.00332331		1304.39	-0.00200327		1834.4	0.01174157		2364.4	-0.00461573
244.59	0.00491191		774.6	0.00321287		1304.59	-0.00153263		1834.6	0.01186463		2364.6	-0.0042619
244.79	0.00532884		774.8	0.00358012		1304.79	-0.002192		1834.8	0.01084943		2364.8	-0.00490249
244.99	0.00551666		775	0.00354117		1304.99	-0.00267437		1835	0.01069902		2365	-0.00546652
245.19	0.00628343		775.2	0.00394034		1305.19	-0.00314391		1835.2	0.01118813		2365.2	-0.00607872
245.39	0.00647154		775.4	0.00391474		1305.39	-0.00483148		1835.4	0.01121566		2365.4	-0.00661284
245.59	0.0071248		775.6	0.00476308		1305.59	-0.00591182		1835.6	0.01100969		2365.6	-0.00661244
245.79	0.0083115		775.8	0.00544806		1305.79	-0.00651426		1835.8	0.01158373		2365.8	-0.00784448
245.99	0.00820286		776	0.00540146		1305.99	-0.00715204		1836	0.01208837		2366	-0.00806331
246.19	0.00770882		776.2	0.00497337		1306.19	-0.00726998		1836.2	0.01229634		2366.2	-0.00783225
246.39	0.00760156		776.4	0.00514226		1306.39	-0.00900346		1836.4	0.01209976		2366.4	-0.00803941
246.59	0.00751246		776.6	0.00395001		1306.59	-0.00954801		1836.6	0.01282744		2366.6	-0.00823852
246.79	0.00747892		776.8	0.00329299		1306.79	-0.00923555		1836.8	0.01246886		2366.8	-0.0076956
246.99	0.00740894		777	0.0033143		1306.99	-0.00905958		1837	0.01148647		2367	-0.00734226
247.19	0.00729435		777.2	0.00267177		1307.19	-0.00782745		1837.2	0.01121322		2367.2	-0.00733462
247.39	0.00816124		777.4	0.00206888		1307.39	-0.00828537		1837.4	0.01104962		2367.4	-0.00818416
247.59	0.00787311		777.6	0.00221999		1307.59	-0.00711768		1837.6	0.01054096		2367.6	-0.00812886
247.79	0.00812051		777.8	0.00257719		1307.79	-0.00571221		1837.8	0.01019864		2367.8	-0.00807612
247.99	0.00852026		778	0.00176469		1307.99	-0.00551578		1838	0.0099222		2368	-0.00759949
248.19	0.00877284		778.2	0.00239008		1308.19	-0.00543058		1838.2	0.00942419		2368.2	-0.00728723
248.39	0.00744631		778.4	0.00183097		1308.39	-0.0049273		1838.4	0.00900511		2368.4	-0.00668156
248.59	0.00788249		778.6	0.00193344		1308.59	-0.00469292		1838.6	0.00861275		2368.6	-0.00597189
248.79	0.00820465		778.8	0.00238944		1308.79	-0.00478574		1838.8	0.00865463		2368.8	-0.00610748
248.99	0.00886356		779	0.00222443		1308.99	-0.00377041		1839	0.00949453		2369	-0.00581557
249.19	0.00893404		779.2	0.0021882		1309.19	-0.00378431		1839.2	0.00984848		2369.2	-0.00457876
249.39	0.00947885		779.4	0.00272159		1309.39	-0.00424226		1839.4	0.00984534		2369.4	-0.00389153
249.59	0.00943172		779.6	0.00358291		1309.59	-0.00376571		1839.6	0.00993799		2369.6	-0.00344466
249.79	0.00938671		779.8	0.00398439		1309.79	-0.0033368		1839.8	0.01115543		2369.8	-0.00333229
249.99	0.00829804		780	0.00415586		1309.99	-0.00352159		1840	0.011476		2370	-0.00291664
250.19	0.00864114		780.2	0.00475828		1310.19	-0.0031661		1840.2	0.01118195		2370.2	-0.00231649
250.39	0.00939533		780.4	0.00478163		1310.39	-0.00379771		1840.4	0.01154884		2370.4	-0.00230241
250.59	0.00906812		780.6	0.00404785		1310.59	-0.00279756		1840.6	0.01134544		2370.6	-0.00114054
250.79	0.00870075		780.8	0.00374319		1310.79	-0.00252337		1840.8	0.00979111		2370.8	-0.00149184
250.99	0.0092492		781	0.0039942		1310.99	-0.00263518		1841	0.01019346		2371	-0.00245644
251.19	0.00921172		781.2	0.00429147		1311.19	-0.00239791		1841.2	0.01045767		2371.2	-0.00383062
251.39	0.00990485		781.4	0.00488463		1311.39	-0.00181883		1841.4	0.01114255		2371.4	-0.00456877
251.59	0.0091072		781.6	0.0050896		1311.59	-0.00135655		1841.6	0.01096354		2371.6	-0.00535383
251.79	0.00964288		781.8	0.00508965		1311.79	-0.001203		1841.8	0.01066379		2371.8	-0.00640947
251.99	0.009799		782	0.00475105		1311.99	-0.00235892		1842	0.0103617		2372	-0.00703209
252.19	0.00971549		782.2	0.00483826		1312.19	-0.00296164		1842.2	0.01082224		2372.2	-0.00669714
252.39	0.00838199		782.4	0.00420701		1312.39	-0.00316493		1842.4	0.01097545		2372.4	-0.00642843
252.59	0.00862131		782.6	0.00346141		1312.59	-0.00396352		1842.6	0.01103397		2372.6	-0.00611028
252.79	0.00893321		782.8	0.00352926		1312.79	-0.00392417		1842.8	0.01107648		2372.8	-0.00632257
252.99	0.00894751		783	0.00299074		1312.99	-0.00427201		1843	0.0108635		2373	-0.00535621
253.19	0.00832392		783.2	0.00258982		1313.19	-0.00573285		1843.2	0.01012211		2373.2	-0.00430077
253.39	0.00817361		783.4	0.00362759		1313.39	-0.00582387		1843.4	0.0095528		2373.4	-0.00445299
253.59	0.00764782		783.6	0.00324997		1313.59	-0.00634465		1843.6	0.00946407		2373.6	-0.00421688
253.79	0.00724459		783.8	0.00313773		1313.79	-0.00604568		1843.8	0.01020557		2373.8	-0.00392862
253.99	0.00671249		784	0.00344555		1313.99	-0.00602558		1844	0.00989436		2374	-0.0036598
254.19	0.00806771		784.2	0.00336645		1314.19	-0.00575976		1844.2	0.0094468		2374.2	-0.00330081
254.39	0.00870596		784.4	0.00417404		1314.39	-0.00523166		1844.4	0.00934825		2374.4	-0.00267212
254.59	0.00883245		784.6	0.00416405		1314.59	-0.00459732		1844.6	0.00891774		2374.6	-0.00216765
254.79	0.00918813		784.8	0.00535994		1314.79	-0.00482207		1844.8	0.00899145		2374.8	-0.00270806
254.99	0.01020875		785	0.00675614		1314.99	-0.00463194		1845	0.00983736		2375	-0.00274886
255.19	0.00984166		785.2	0.00818288		1315.19	-0.00345967		1845.2	0.00973033		2375.2	-0.00324858
255.39	0.01087351		785.4	0.00870483		1315.39	-0.00300881		1845.4	0.01032253		2375.4	-0.00325007
255.59	0.01087695		785.6	0.00861872		1315.59	-0.0026606		1845.6	0.01013928		2375.6	-0.00406771
255.79	0.01166265		785.8	0.00801148		1315.79	-0.0022686		1845.8	0.01096127		2375.8	-0.00495107
255.99	0.01164739		786	0.00751336		1315.99	-0.00242049		1846	0.01153626		2376	-0.0051839
256.19	0.01007112		786.2	0.00713178		1316.19	-0.00188419		1846.2	0.01220732		2376.2	-0.00470588
256.39	0.00945264		786.4	0.00665031		1316.39	-0.00231453		1846.4	0.01203175		2376.4	-0.00487193
256.59	0.01071254		786.6	0.00545774		1316.59	-0.00273448		1846.6	0.01162076		2376.6	-0.00538515
256.79	0.01039124		786.8	0.00609691		1316.79	-0.00292428		1846.8	0.01193118		2376.8	-0.00494824
256.99	0.01059809		787	0.00516875		1316.99	-0.00328221		1847	0.01230945		2377	-0.00492852
257.19	0.01034228		787.2	0.00402692		1317.19	-0.00422098		1847.2	0.01160023		2377.2	-0.00572007
257.39	0.00994493		787.4	0.0035492		1317.39	-0.00375476		1847.4	0.01189148		2377.4	-0.00609083
257.59	0.00952984		787.6	0.00242648		1317.59	-0.00457383		1847.6	0.01207682		2377.6	-0.00609736
257.79	0.00984754		787.8	0.00232809		1317.79	-0.00433122		1847.8	0.01158112		2377.8	-0.00592748
257.99	0.01019046		788	0.00235573		1317.99	-0.00456476		1848	0.01172842		2378	-0.0048869
258.19	0.01140444		788.2	0.00166479		1318.19	-0.00450734		1848.2	0.01163331		2378.2	-0.00448596
258.39	0.0112287		788.4	0.00224106		1318.39	-0.00461229		1848.4	0.01191403		2378.4	-0.00360277
258.59	0.01207092		788.6	0.00197714		1318.59	-0.00557022		1848.6	0.0111673		2378.6	-0.00350875
258.79	0.01224599		788.8	0.00282116		1318.79	-0.00592799		1848.8	0.01081553		2378.8	-0.00388697
258.99	0.01273365		789	0.00322093		1318.99	-0.00503984		1849	0.01138555		2379	-0.00340912
259.19	0.01258381		789.2	0.00348263		1319.19	-0.00463411		1849.2	0.01172455		2379.2	-0.00401007
259.39	0.01325788		789.4	0.00406115		1319.39	-0.0042091		1849.4	0.01177019		2379.4	-0.00363758
259.59	0.01296296		789.6	0.00391204		1319.59	-0.00263288		1849.6	0.01108417		2379.6	-0.00276904
259.79	0.01301421		789.8	0.00466688		1319.79	-0.00195376		1849.8	0.01017436		2379.8	-0.00333992
259.99	0.01272148		790	0.00477785		1319.99	-0.00171825		1850	0.0098151		2380	-0.0033051
260.19	0.01231601		790.2	0.00574309		1320.19	-0.00151826		1850.2	0.00976827		2380.2	-0.00283822
260.39	0.01267373		790.4	0.00601541		1320.39	-0.00121719		1850.4	0.00926355		2380.4	-0.00173378
260.59	0.01303184		790.6	0.00627649		1320.59	-0.00158011		1850.6	0.00866349		2380.6	-0.00205251
260.79	0.01197133		790.8	0.0068326		1320.79	-0.00113643		1850.8	0.00868742		2380.8	-0.00178128
260.99	0.01192084		791	0.00578158		1320.99	-0.00133206		1851	0.00814427		2381	-0.00254703
261.19	0.01051288		791.2	0.00615093		1321.19	-0.00162897		1851.2	0.00689872		2381.2	-0.00303404
261.39	0.01049889		791.4	0.00630724		1321.39	-0.00138142		1851.4	0.00727349		2381.4	-0.00263686
261.59	0.00986869		791.6	0.00581037		1321.59	-0.00179573		1851.6	0.00662899		2381.6	-0.00300854
261.79	0.00944488		791.8	0.00576552		1321.79	-0.00224421		1851.8	0.00646391		2381.8	-0.00286463
261.99	0.00828797		792	0.00512728		1321.99	-0.00258123		1852	0.00708709		2382	-0.00286014
262.19	0.00793816		792.2	0.00441593		1322.19	-0.00244414		1852.2	0.00733863		2382.2	-0.00372969
262.39	0.00764325		792.4	0.00431228		1322.39	-0.00307615		1852.4	0.00706482		2382.4	-0.00466581
262.59	0.00747254		792.6	0.00423613		1322.59	-0.00347567		1852.6	0.00754868		2382.6	-0.00594681
262.79	0.00680705		792.8	0.00384493		1322.79	-0.00315046		1852.8	0.00842617		2382.8	-0.00638914
262.99	0.00646577		793	0.00361503		1322.99	-0.00253974		1853	0.00953311		2383	-0.00594046
263.19	0.00656776		793.2	0.00393281		1323.19	-0.00176302		1853.2	0.00938609		2383.2	-0.00654115
263.39	0.00707959		793.4	0.00496205		1323.39	-0.00102076		1853.4	0.00969201		2383.4	-0.00523639
263.59	0.00854129		793.6	0.00450891		1323.59	-0.00114102		1853.6	0.01016775		2383.6	-0.0046305
263.79	0.00949395		793.8	0.00535136		1323.79	-0.00204839		1853.8	0.00990116		2383.8	-0.00510092
263.99	0.0098189		794	0.00613604		1323.99	-0.0019578		1854	0.01054439		2384	-0.00444293
264.19	0.01006609		794.2	0.00648007		1324.19	-0.00228496		1854.2	0.011444		2384.2	-0.00378649
264.39	0.01075706		794.4	0.00604213		1324.39	-0.00229577		1854.4	0.01091528		2384.4	-0.00289525
264.59	0.01158808		794.6	0.00540892		1324.59	-0.00308128		1854.6	0.01012134		2384.6	-0.00334446
264.79	0.01200956		794.8	0.00472936		1324.79	-0.00325039		1854.8	0.0102592		2384.8	-0.00290474
264.99	0.01204311		795	0.00388804		1324.99	-0.00419563		1855	0.01059876		2385	-0.00267652
265.19	0.01220835		795.2	0.00358941		1325.19	-0.0042114		1855.2	0.01082899		2385.2	-0.00219153
265.39	0.01308336		795.4	0.00308917		1325.39	-0.00423974		1855.4	0.0114302		2385.4	-0.00138947
265.59	0.01269161		795.6	0.00263657		1325.59	-0.00397429		1855.6	0.01229288		2385.6	-0.00141361
265.79	0.01203361		795.8	0.00307367		1325.79	-0.00467054		1855.8	0.01318228		2385.8	-0.0011254
265.99	0.01185986		796	0.00358809		1325.99	-0.00500897		1856	0.01355918		2386	-0.00119936
266.19	0.01152148		796.2	0.0032423		1326.19	-0.00477245		1856.2	0.01342621		2386.2	-0.00098349
266.39	0.01130596		796.4	0.00338803		1326.39	-0.00561556		1856.4	0.01359161		2386.4	-0.00069658
266.59	0.01064316		796.6	0.00389688		1326.59	-0.00577647		1856.6	0.01457972		2386.6	-0.0009076
266.79	0.01074075		796.8	0.00334202		1326.79	-0.00478263		1856.8	0.0147275		2386.8	0.00026016
266.99	0.01034123		797	0.00368978		1326.99	-0.0044092		1857	0.01498293		2387	-0.00007345
267.19	0.01092152		797.2	0.00414072		1327.19	-0.00402999		1857.2	0.01453722		2387.2	-0.00025517
267.39	0.01116337		797.4	0.00476125		1327.39	-0.0039705		1857.4	0.01568732		2387.4	-0.00018289
267.59	0.01135265		797.6	0.0043042		1327.59	-0.00516054		1857.6	0.01512873		2387.6	-0.00172395
267.79	0.01078453		797.8	0.00496997		1327.79	-0.00518931		1857.8	0.01423303		2387.8	-0.00213362
267.99	0.01032703		798	0.00547883		1327.99	-0.00495158		1858	0.01382773		2388	-0.00206157
268.19	0.01112309		798.2	0.0046425		1328.19	-0.00542263		1858.2	0.012825		2388.2	-0.00261933
268.39	0.01164932		798.4	0.00470591		1328.39	-0.00528856		1858.4	0.0113217		2388.4	-0.00246925
268.59	0.01128528		798.6	0.00404418		1328.59	-0.00488035		1858.6	0.01069959		2388.6	-0.00289687
268.79	0.01157078		798.8	0.00359008		1328.79	-0.00493393		1858.8	0.00994543		2388.8	-0.00275985
268.99	0.01199777		799	0.00311615		1328.99	-0.00432417		1859	0.00970425		2389	-0.00253067
269.19	0.01274501		799.2	0.00351836		1329.19	-0.00301552		1859.2	0.00965693		2389.2	-0.00238715
269.39	0.01245006		799.4	0.0036925		1329.39	-0.00225241		1859.4	0.01006227		2389.4	-0.00211118
269.59	0.01202578		799.6	0.00438351		1329.59	-0.00260011		1859.6	0.01116382		2389.6	-0.0023945
269.79	0.0111486		799.8	0.00502859		1329.79	-0.00278496		1859.8	0.01135888		2389.8	-0.00281096
269.99	0.01119204		800	0.00485954		1329.99	-0.00332331		1860	0.011412		2390	-0.00257508
270.19	0.01062832		800.2	0.00364821		1330.19	-0.00366152		1860.2	0.0111739		2390.2	-0.002542
270.39	0.01094192		800.4	0.00401117		1330.39	-0.00385783		1860.4	0.01210783		2390.4	-0.00238158
270.59	0.01077131		800.6	0.00393881		1330.59	-0.0040083		1860.6	0.01300705		2390.6	-0.00319883
270.79	0.01049874		800.8	0.00342349		1330.79	-0.00346242		1860.8	0.01314818		2390.8	-0.00302927
270.99	0.01029483		801	0.0030414		1330.99	-0.00352385		1861	0.01316127		2391	-0.00441659
271.19	0.01125718		801.2	0.00254927		1331.19	-0.00412646		1861.2	0.01324755		2391.2	-0.00513963
271.39	0.01135351		801.4	0.0021678		1331.39	-0.00414172		1861.4	0.01293105		2391.4	-0.00584979
271.59	0.01144376		801.6	0.00179744		1331.59	-0.00473952		1861.6	0.0118642		2391.6	-0.00568047
271.79	0.01175028		801.8	0.00206661		1331.79	-0.00424043		1861.8	0.01102657		2391.8	-0.00461686
271.99	0.01252696		802	0.0023163		1331.99	-0.00420493		1862	0.01002533		2392	-0.00380936
272.19	0.01305225		802.2	0.00214225		1332.19	-0.0041628		1862.2	0.0093752		2392.2	-0.00382624
272.39	0.01356857		802.4	0.00291665		1332.39	-0.00400104		1862.4	0.00925567		2392.4	-0.00338898
272.59	0.01348604		802.6	0.00298081		1332.59	-0.00404474		1862.6	0.00864337		2392.6	-0.00308971
272.79	0.01416366		802.8	0.0027433		1332.79	-0.00403264		1862.8	0.00849226		2392.8	-0.00274502
272.99	0.01467343		803	0.00319877		1332.99	-0.0039162		1863	0.00927243		2393	-0.00222332
273.19	0.01442421		803.2	0.00436571		1333.19	-0.00381509		1863.2	0.01000665		2393.2	-0.00174414
273.39	0.01362949		803.4	0.00520672		1333.39	-0.00487328		1863.4	0.011099		2393.4	-0.00177898
273.59	0.01311207		803.6	0.00659104		1333.59	-0.00490411		1863.6	0.01187965		2393.6	-0.00185355
273.79	0.01268423		803.8	0.00649943		1333.79	-0.00457449		1863.8	0.01232077		2393.8	-0.00261666
273.99	0.01258017		804	0.00612296		1333.99	-0.00583065		1864	0.01241791		2394	-0.00173378
274.19	0.01205843		804.2	0.00687578		1334.19	-0.00625053		1864.2	0.01328394		2394.2	-0.00251477
274.39	0.01151766		804.4	0.00810506		1334.39	-0.00594706		1864.4	0.01414971		2394.4	-0.00260454
274.59	0.0106903		804.6	0.0087759		1334.59	-0.00637858		1864.6	0.01443906		2394.6	-0.00322138
274.79	0.00983318		804.8	0.00891425		1334.79	-0.00556911		1864.8	0.01434821		2394.8	-0.00348889
274.99	0.01040546		805	0.00831148		1334.99	-0.00553392		1865	0.01386357		2395	-0.00436712
275.19	0.01076767		805.2	0.0084886		1335.19	-0.00572704		1865.2	0.01312426		2395.2	-0.0046852
275.39	0.01042095		805.4	0.00863992		1335.39	-0.00502287		1865.4	0.01241781		2395.4	-0.00412526
275.59	0.01074623		805.6	0.00866507		1335.59	-0.00457929		1865.6	0.01241799		2395.6	-0.00342915
275.79	0.01087265		805.8	0.00868513		1335.79	-0.0038391		1865.8	0.01202113		2395.8	-0.00334097
275.99	0.01104663		806	0.00781945		1335.99	-0.00327088		1866	0.01246623		2396	-0.00299107
276.19	0.01147939		806.2	0.00772928		1336.19	-0.00356459		1866.2	0.01194434		2396.2	-0.00225831
276.39	0.01184287		806.4	0.00726602		1336.39	-0.00347635		1866.4	0.01146132		2396.4	-0.00179364
276.59	0.01162028		806.6	0.00645103		1336.59	-0.00422292		1866.6	0.01192243		2396.6	-0.00149458
276.79	0.01295721		806.8	0.00604604		1336.79	-0.00391275		1866.8	0.01334445		2396.8	-0.00128652
276.99	0.01340189		807	0.00590535		1336.99	-0.00401529		1867	0.01421281		2397	-0.00092186
277.19	0.01478936		807.2	0.00560123		1337.19	-0.00363884		1867.2	0.01438506		2397.2	-0.00142857
277.39	0.0150698		807.4	0.00461071		1337.39	-0.00358943		1867.4	0.01444383		2397.4	-0.00264235
277.59	0.01521822		807.6	0.0042531		1337.59	-0.00325571		1867.6	0.01476798		2397.6	-0.00268166
277.79	0.01590803		807.8	0.00301985		1337.79	-0.0042597		1867.8	0.01454835		2397.8	-0.00352347
277.99	0.01587355		808	0.00310409		1337.99	-0.00502946		1868	0.01463834		2398	-0.00360992
278.19	0.01562049		808.2	0.00357762		1338.19	-0.00500803		1868.2	0.01516446		2398.2	-0.0048565
278.39	0.01510809		808.4	0.00335155		1338.39	-0.00431329		1868.4	0.01432662		2398.4	-0.00526995
278.59	0.01477343		808.6	0.00325984		1338.59	-0.00393623		1868.6	0.01300798		2398.6	-0.00560881
278.79	0.01546197		808.8	0.00244381		1338.79	-0.00303074		1868.8	0.01239624		2398.8	-0.0057852
278.99	0.01679838		809	0.00250512		1338.99	-0.00199975		1869	0.01193866		2399	-0.00600765
279.19	0.01669729		809.2	0.00255069		1339.19	-0.00088139		1869.2	0.01167582		2399.2	-0.0059316
279.39	0.01680701		809.4	0.00254415		1339.39	-0.00097332		1869.4	0.011813		2399.4	-0.00534598
279.59	0.01617999		809.6	0.00176903		1339.59	-0.00070892		1869.6	0.01139386		2399.6	-0.00500752
279.79	0.01511196		809.8	0.00194488		1339.79	-0.00028295		1869.8	0.01188266		2399.8	-0.0045129
279.99	0.01503503		810	0.00174845		1339.99	-0.00048671		1870	0.01165209		2400	-0.00343581
280.19	0.01490124		810.2	0.00168742		1340.19	-0.00092046		1870.2	0.01130079		2400.2	-0.00217111
280.39	0.01395565		810.4	0.0019032		1340.39	-0.00094901		1870.4	0.01237037		2400.4	-0.00181994
280.59	0.01413937		810.6	0.00279592		1340.59	-0.00086165		1870.6	0.01298874		2400.6	-0.00106775
280.79	0.01473099		810.8	0.00396731		1340.79	-0.00089026		1870.8	0.01397571		2400.8	-0.00087017
280.99	0.01467082		811	0.00419867		1340.99	-0.00130768		1871	0.01428812		2401	-0.00121396
281.19	0.01468308		811.2	0.00431403		1341.19	-0.00196116		1871.2	0.01371481		2401.2	-0.00159935
281.39	0.01386852		811.4	0.00460579		1341.39	-0.00289808		1871.4	0.01393384		2401.4	-0.00242192
281.59	0.01351543		811.6	0.00572108		1341.59	-0.00360422		1871.6	0.01371869		2401.6	-0.00213442
281.79	0.01335753		811.8	0.0058952		1341.79	-0.00402266		1871.8	0.01333163		2401.8	-0.00271163
281.99	0.01343983		812	0.00655876		1341.99	-0.00410992		1872	0.01366408		2402	-0.00362929
282.19	0.01382496		812.2	0.0068928		1342.19	-0.00429859		1872.2	0.01325003		2402.2	-0.00365546
282.39	0.01417066		812.4	0.00744118		1342.39	-0.00480307		1872.4	0.01292847		2402.4	-0.00378509
282.59	0.01548928		812.6	0.00687341		1342.59	-0.00455767		1872.6	0.01180982		2402.6	-0.00374213
282.79	0.01668465		812.8	0.00677572		1342.79	-0.0041686		1872.8	0.01178849		2402.8	-0.0034288
282.99	0.01688219		813	0.00659355		1342.99	-0.003805		1873	0.01176082		2403	-0.00378457
283.19	0.01747375		813.2	0.00592153		1343.19	-0.00441641		1873.2	0.01187554		2403.2	-0.00358134
283.39	0.01790065		813.4	0.00550966		1343.39	-0.00576448		1873.4	0.01149533		2403.4	-0.00347203
283.59	0.0174599		813.6	0.0053825		1343.59	-0.00514373		1873.6	0.01145919		2403.6	-0.00444172
283.79	0.01748775		813.8	0.00570094		1343.79	-0.00598089		1873.8	0.01211473		2403.8	-0.00434333
283.99	0.01815293		814	0.00551805		1343.99	-0.00598631		1874	0.0122135		2404	-0.00424508
284.19	0.01789178		814.2	0.00499767		1344.19	-0.00579658		1874.2	0.01241083		2404.2	-0.0036432
284.39	0.01763194		814.4	0.0059723		1344.39	-0.00535372		1874.4	0.01302049		2404.4	-0.00256868
284.59	0.01737269		814.6	0.00721753		1344.59	-0.00531302		1874.6	0.01300438		2404.6	-0.00217828
284.79	0.01748144		814.8	0.00826506		1344.79	-0.00518883		1874.8	0.01376235		2404.8	-0.00290266
284.99	0.01740044		815	0.00839511		1344.99	-0.00479383		1875	0.01397749		2405	-0.00400953
285.19	0.01745505		815.2	0.00803145		1345.19	-0.00424381		1875.2	0.01400276		2405.2	-0.00361575
285.39	0.01745277		815.4	0.00820969		1345.39	-0.00388674		1875.4	0.01395501		2405.4	-0.00399538
285.59	0.01722045		815.6	0.00773063		1345.59	-0.0031982		1875.6	0.01401671		2405.6	-0.0038744
285.79	0.01713503		815.8	0.00712246		1345.79	-0.00349455		1875.8	0.01464345		2405.8	-0.00371174
285.99	0.01752319		816	0.0064876		1345.99	-0.00355278		1876	0.01447801		2406	-0.00439345
286.19	0.01756244		816.2	0.00567409		1346.19	-0.00418331		1876.2	0.0145573		2406.2	-0.00422752
286.39	0.01763767		816.4	0.00609411		1346.39	-0.00429121		1876.4	0.01481376		2406.4	-0.00422049
286.59	0.01743384		816.6	0.00514426		1346.59	-0.00328491		1876.6	0.0147381		2406.6	-0.00432718
286.79	0.01676481		816.8	0.00483262		1346.79	-0.00352416		1876.8	0.01474394		2406.8	-0.00427112
286.99	0.01644259		817	0.00376577		1346.99	-0.00378866		1877	0.014467		2407	-0.00545339
287.19	0.01669267		817.2	0.00419843		1347.19	-0.00459827		1877.2	0.01414883		2407.2	-0.00551513
287.39	0.01663345		817.4	0.00395159		1347.39	-0.00461664		1877.4	0.01318188		2407.4	-0.00617743
287.59	0.01598478		817.6	0.00398255		1347.59	-0.0039542		1877.6	0.01277561		2407.6	-0.00658633
287.79	0.01586594		817.8	0.00390673		1347.79	-0.00448299		1877.8	0.01237042		2407.8	-0.00551131
287.99	0.01570321		818	0.00407986		1347.99	-0.00423908		1878	0.01245245		2408	-0.00524607
288.19	0.01512237		818.2	0.00457432		1348.19	-0.00378928		1878.2	0.01198993		2408.2	-0.0040528
288.39	0.0144045		818.4	0.0053271		1348.39	-0.00376527		1878.4	0.01237226		2408.4	-0.00391108
288.59	0.01438729		818.6	0.00569921		1348.59	-0.00329257		1878.6	0.012455		2408.6	-0.00421958
288.79	0.01474579		818.8	0.00603041		1348.79	-0.00290287		1878.8	0.0119935		2408.8	-0.00530777
288.99	0.01471748		819	0.00558106		1348.99	-0.00363608		1879	0.01243446		2409	-0.00525154
289.19	0.01554828		819.2	0.0054557		1349.19	-0.0038615		1879.2	0.01198991		2409.2	-0.00396677
289.39	0.0149052		819.4	0.00660889		1349.39	-0.00450462		1879.4	0.01151752		2409.4	-0.00388664
289.59	0.01487751		819.6	0.00645911		1349.59	-0.00484083		1879.6	0.01172147		2409.6	-0.0037371
289.79	0.01462555		819.8	0.0072906		1349.79	-0.0052144		1879.8	0.01144501		2409.8	-0.00343068
289.99	0.01539754		820	0.00719764		1349.99	-0.00538033		1880	0.01064758		2410	-0.00362535
290.19	0.01552432		820.2	0.00657431		1350.19	-0.00473264		1880.2	0.01163024		2410.2	-0.00388067
290.39	0.01538526		820.4	0.00774747		1350.39	-0.00468451		1880.4	0.01206915		2410.4	-0.004253
290.59	0.01470708		820.6	0.00703562		1350.59	-0.00489526		1880.6	0.01293492		2410.6	-0.00491644
290.79	0.01522329		820.8	0.0070609		1350.79	-0.00471643		1880.8	0.01254508		2410.8	-0.0049449
290.99	0.01517321		821	0.00751375		1350.99	-0.00486904		1881	0.01330677		2411	-0.00574315
291.19	0.01486164		821.2	0.00773987		1351.19	-0.0057487		1881.2	0.01412142		2411.2	-0.00556216
291.39	0.01556233		821.4	0.00770926		1351.39	-0.00514974		1881.4	0.01428502		2411.4	-0.00478727
291.59	0.01597174		821.6	0.00845329		1351.59	-0.00491233		1881.6	0.01365946		2411.6	-0.00470511
291.79	0.01639623		821.8	0.0086576		1351.79	-0.00383917		1881.8	0.0143274		2411.8	-0.00456348
291.99	0.01659626		822	0.00819239		1351.99	-0.00330436		1882	0.01573031		2412	-0.00422436
292.19	0.01655533		822.2	0.00739314		1352.19	-0.00314263		1882.2	0.01597776		2412.2	-0.00412078
292.39	0.01659144		822.4	0.00701072		1352.39	-0.00365561		1882.4	0.01653676		2412.4	-0.00434519
292.59	0.0169019		822.6	0.00711051		1352.59	-0.00365621		1882.6	0.01679299		2412.6	-0.00473411
292.79	0.01648573		822.8	0.00663858		1352.79	-0.00420064		1882.8	0.01622749		2412.8	-0.00552749
292.99	0.01690184		823	0.00627023		1352.99	-0.00451883		1883	0.01667052		2413	-0.00534653
293.19	0.01754921		823.2	0.00613628		1353.19	-0.00432234		1883.2	0.01577085		2413.2	-0.00594424
293.39	0.01771861		823.4	0.00624869		1353.39	-0.00375696		1883.4	0.01577741		2413.4	-0.00620159
293.59	0.01796011		823.6	0.00567803		1353.59	-0.00421722		1883.6	0.01525782		2413.6	-0.00656166
293.79	0.01769614		823.8	0.00509824		1353.79	-0.00432611		1883.8	0.01491179		2413.8	-0.00578975
293.99	0.01802006		824	0.00483223		1353.99	-0.00453514		1884	0.01439516		2414	-0.00538364
294.19	0.0176782		824.2	0.00479376		1354.19	-0.00406255		1884.2	0.01551188		2414.2	-0.00549589
294.39	0.01709706		824.4	0.00575365		1354.39	-0.00437274		1884.4	0.0155656		2414.4	-0.00567508
294.59	0.01703046		824.6	0.00573096		1354.59	-0.00404009		1884.6	0.01615548		2414.6	-0.00468613
294.79	0.01783415		824.8	0.00637535		1354.79	-0.00334733		1884.8	0.01687808		2414.8	-0.00380009
294.99	0.01743619		825	0.00688667		1354.99	-0.00335801		1885	0.01729741		2415	-0.00396655
295.19	0.01656985		825.2	0.00667215		1355.19	-0.00356996		1885.2	0.01691811		2415.2	-0.00364375
295.39	0.01763546		825.4	0.00793375		1355.39	-0.00302972		1885.4	0.01612311		2415.4	-0.00196743
295.59	0.01709201		825.6	0.00871344		1355.59	-0.00273538		1885.6	0.0158595		2415.6	-0.00260054
295.79	0.0164814		825.8	0.00779062		1355.79	-0.00171707		1885.8	0.01663305		2415.8	-0.00209132
295.99	0.01641691		826	0.0079132		1355.99	-0.00156086		1886	0.01653458		2416	-0.00140264
296.19	0.01678184		826.2	0.00854943		1356.19	-0.00211637		1886.2	0.0155375		2416.2	-0.00216155
296.39	0.01731478		826.4	0.00896067		1356.39	-0.00212184		1886.4	0.01542578		2416.4	-0.00244152
296.59	0.01746778		826.6	0.00913568		1356.59	-0.00201154		1886.6	0.01448555		2416.6	-0.00353791
296.79	0.01770269		826.8	0.00797933		1356.79	-0.00154899		1886.8	0.01317622		2416.8	-0.0043801
296.99	0.01820687		827	0.00834933		1356.99	-0.00132337		1887	0.01262563		2417	-0.0054322
297.19	0.01824941		827.2	0.00712401		1357.19	-0.00136571		1887.2	0.01171528		2417.2	-0.0055054
297.39	0.01757154		827.4	0.00660134		1357.39	-0.00166903		1887.4	0.01191098		2417.4	-0.00531147
297.59	0.01747532		827.6	0.00689076		1357.59	-0.00167331		1887.6	0.01123699		2417.6	-0.00522502
297.79	0.01738914		827.8	0.00755731		1357.79	-0.00140887		1887.8	0.01119266		2417.8	-0.00485455
297.99	0.01721024		828	0.00807302		1357.99	-0.00171465		1888	0.01163198		2418	-0.00522015
298.19	0.01827622		828.2	0.00780398		1358.19	-0.00159987		1888.2	0.01221829		2418.2	-0.00473274
298.39	0.01804765		828.4	0.00742667		1358.39	-0.00110113		1888.4	0.01233284		2418.4	-0.00524108
298.59	0.01808036		828.6	0.00710392		1358.59	-0.0011357		1888.6	0.01306706		2418.6	-0.00486323
298.79	0.01758681		828.8	0.00690107		1358.79	-0.00125095		1888.8	0.01367644		2418.8	-0.0055247
298.99	0.0166384		829	0.0060523		1358.99	-0.00241417		1889	0.01283551		2419	-0.00588934
299.19	0.01555793		829.2	0.00528984		1359.19	-0.00375543		1889.2	0.01265339		2419.2	-0.0056291
299.39	0.01644066		829.4	0.005698		1359.39	-0.00435195		1889.4	0.01283987		2419.4	-0.0049249
299.59	0.01523138		829.6	0.00593956		1359.59	-0.0048122		1889.6	0.01341796		2419.6	-0.00537755
299.79	0.01558853		829.8	0.00531165		1359.79	-0.00544541		1889.8	0.0133131		2419.8	-0.00457066
299.99	0.01610823		830	0.00612392		1359.99	-0.00590738		1890	0.01339876		2420	-0.00400271
300.19	0.01624767		830.2	0.00597722		1360.19	-0.00643363		1890.2	0.01438135		2420.2	-0.00500724
300.39	0.01704634		830.4	0.00566278		1360.39	-0.0062075		1890.4	0.01583702		2420.4	-0.00490714
300.59	0.01702805		830.6	0.00532926		1360.59	-0.00635058		1890.6	0.01554881		2420.6	-0.00575722
300.79	0.0168874		830.8	0.00472756		1360.79	-0.0055614		1890.8	0.01547956		2420.8	-0.00586484
300.99	0.01683554		831	0.00469079		1360.99	-0.0049968		1891	0.01602043		2421	-0.0057511
301.19	0.01625468		831.2	0.0039629		1361.19	-0.00470793		1891.2	0.0156964		2421.2	-0.00565897
301.39	0.01571127		831.4	0.00478109		1361.39	-0.00453747		1891.4	0.01664032		2421.4	-0.0065133
301.59	0.01646463		831.6	0.00676553		1361.59	-0.00303384		1891.6	0.01642729		2421.6	-0.00658877
301.79	0.01646005		831.8	0.00712323		1361.79	-0.00255461		1891.8	0.01719957		2421.8	-0.00637765
301.99	0.0174052		832	0.00688588		1361.99	-0.00283551		1892	0.01776354		2422	-0.00637368
302.19	0.01804719		832.2	0.00718461		1362.19	-0.00204148		1892.2	0.01835218		2422.2	-0.00572219
302.39	0.01757466		832.4	0.00748608		1362.39	-0.00135004		1892.4	0.01877192		2422.4	-0.00616527
302.59	0.01642379		832.6	0.00843743		1362.59	-0.00130582		1892.6	0.01874311		2422.6	-0.00647353
302.79	0.0162265		832.8	0.00799109		1362.79	-0.00099153		1892.8	0.01763948		2422.8	-0.00658893
302.99	0.01617689		833	0.00821091		1362.99	-0.00102114		1893	0.01720561		2423	-0.00597814
303.19	0.01603524		833.2	0.00851232		1363.19	-0.0013091		1893.2	0.01720456		2423.2	-0.00543081
303.39	0.01663265		833.4	0.00925961		1363.39	-0.00114191		1893.4	0.01667399		2423.4	-0.00448292
303.59	0.01627442		833.6	0.0100117		1363.59	-0.00086078		1893.6	0.01692519		2423.6	-0.00364948
303.79	0.01667892		833.8	0.00935569		1363.79	-0.00097666		1893.8	0.01579437		2423.8	-0.00308183
303.99	0.01624065		834	0.00930297		1363.99	-0.00088677		1894	0.01599138		2424	-0.00283349
304.19	0.01685207		834.2	0.00885655		1364.19	-0.00063825		1894.2	0.01558158		2424.2	-0.00367026
304.39	0.01885113		834.4	0.00835754		1364.39	-0.00069418		1894.4	0.0146971		2424.4	-0.00400534
304.59	0.01825905		834.6	0.00675337		1364.59	-0.00085556		1894.6	0.01303804		2424.6	-0.00492226
304.79	0.01870732		834.8	0.0063485		1364.79	-0.00077854		1894.8	0.01285253		2424.8	-0.00556572
304.99	0.01879291		835	0.00617551		1364.99	-0.00070559		1895	0.01248782		2425	-0.00658973
305.19	0.01983425		835.2	0.00696845		1365.19	-0.00103967		1895.2	0.01236791		2425.2	-0.00805766
305.39	0.01995642		835.4	0.0076651		1365.39	-0.00142884		1895.4	0.01273279		2425.4	-0.00802356
305.59	0.01996748		835.6	0.00811916		1365.59	-0.0018446		1895.6	0.01241268		2425.6	-0.0076589
305.79	0.02033911		835.8	0.00792268		1365.79	-0.00208998		1895.8	0.01239088		2425.8	-0.00762743
305.99	0.02093816		836	0.00935991		1365.99	-0.00270772		1896	0.01283739		2426	-0.00810032
306.19	0.01949503		836.2	0.00984829		1366.19	-0.00218279		1896.2	0.01348326		2426.2	-0.00789345
306.39	0.01929374		836.4	0.00991825		1366.39	-0.00216679		1896.4	0.01335774		2426.4	-0.00800106
306.59	0.01798608		836.6	0.01049952		1366.59	-0.0017846		1896.6	0.01247963		2426.6	-0.00824812
306.79	0.01781056		836.8	0.01032846		1366.79	-0.0022015		1896.8	0.01186567		2426.8	-0.00736479
306.99	0.01677414		837	0.01042638		1366.99	-0.00258846		1897	0.01271679		2427	-0.00676956
307.19	0.01569424		837.2	0.0094739		1367.19	-0.00352068		1897.2	0.01265145		2427.2	-0.00622719
307.39	0.01581846		837.4	0.00949569		1367.39	-0.00340137		1897.4	0.01232483		2427.4	-0.00554064
307.59	0.01555039		837.6	0.00927981		1367.59	-0.00289603		1897.6	0.01173077		2427.6	-0.00515007
307.79	0.01484433		837.8	0.0075819		1367.79	-0.00285964		1897.8	0.01091162		2427.8	-0.00503061
307.99	0.01487248		838	0.00749447		1367.99	-0.00257202		1898	0.01113315		2428	-0.00480187
308.19	0.01533127		838.2	0.00670087		1368.19	-0.00226063		1898.2	0.00923293		2428.2	-0.00530736
308.39	0.01616087		838.4	0.00596158		1368.39	-0.0022692		1898.4	0.00894431		2428.4	-0.00621378
308.59	0.01661182		838.6	0.00541352		1368.59	-0.00193087		1898.6	0.00839749		2428.6	-0.0061723
308.79	0.01717756		838.8	0.00579975		1368.79	-0.00161703		1898.8	0.00875554		2428.8	-0.00709521
308.99	0.01708466		839	0.00530634		1368.99	-0.00141457		1899	0.0092355		2429	-0.00747789
309.19	0.01783978		839.2	0.00575803		1369.19	-0.00139041		1899.2	0.00983787		2429.2	-0.00839335
309.39	0.01729831		839.4	0.00579722		1369.39	-0.00193026		1899.4	0.00937743		2429.4	-0.00775792
309.59	0.01803473		839.6	0.00651539		1369.59	-0.00194518		1899.6	0.00954609		2429.6	-0.00812466
309.79	0.01784672		839.8	0.00764398		1369.79	-0.00195524		1899.8	0.00987568		2429.8	-0.00844187
309.99	0.01767816		840	0.00842867		1369.99	-0.00215987		1900	0.01112235		2430	-0.00893191
310.19	0.01733637		840.2	0.0083687		1370.19	-0.00245227		1900.2	0.0115407		2430.2	-0.00855554
310.39	0.01774566		840.4	0.00900571		1370.39	-0.00296451		1900.4	0.01119222		2430.4	-0.00767502
310.59	0.01729686		840.6	0.00960833		1370.59	-0.00363457		1900.6	0.01169662		2430.6	-0.00697943
310.79	0.01715636		840.8	0.009976		1370.79	-0.00478772		1900.8	0.0128751		2430.8	-0.00648678
310.99	0.01707902		841	0.00966659		1370.99	-0.0040995		1901	0.01383913		2431	-0.00675582
311.19	0.01743227		841.2	0.01044897		1371.19	-0.00405826		1901.2	0.01410363		2431.2	-0.00637189
311.39	0.01877049		841.4	0.01062384		1371.39	-0.00358288		1901.4	0.01455627		2431.4	-0.00571285
311.59	0.01888432		841.6	0.01092464		1371.59	-0.00302487		1901.6	0.0144687		2431.6	-0.00627627
311.79	0.01857393		841.8	0.01084841		1371.79	-0.00349615		1901.8	0.01488459		2431.8	-0.00607061
311.99	0.01991878		842	0.0116469		1371.99	-0.0031513		1902	0.01452413		2432	-0.00592887
312.19	0.02022674		842.2	0.01125283		1372.19	-0.00299678		1902.2	0.01345058		2432.2	-0.00625908
312.39	0.02079114		842.4	0.01176132		1372.39	-0.00275059		1902.4	0.01328929		2432.4	-0.00585983
312.59	0.0212409		842.6	0.01168778		1372.59	-0.00243893		1902.6	0.01253832		2432.6	-0.00566718
312.79	0.020801		842.8	0.01156961		1372.79	-0.00182896		1902.8	0.01253021		2432.8	-0.00643747
312.99	0.02037196		843	0.01029457		1372.99	-0.00126067		1903	0.01229703		2433	-0.00713888
313.19	0.02083415		843.2	0.01057991		1373.19	-0.0011384		1903.2	0.01105512		2433.2	-0.00768085
313.39	0.02152179		843.4	0.01038944		1373.39	-0.00178549		1903.4	0.0104212		2433.4	-0.00706511
313.59	0.02130814		843.6	0.01074937		1373.59	-0.00169798		1903.6	0.01053727		2433.6	-0.00705329
313.79	0.02022303		843.8	0.01092187		1373.79	-0.00205577		1903.8	0.01110411		2433.8	-0.00710077
313.99	0.01951978		844	0.010095		1373.99	-0.00193631		1904	0.01143669		2434	-0.00717145
314.19	0.01931748		844.2	0.00981258		1374.19	-0.0015044		1904.2	0.01095824		2434.2	-0.00596729
314.39	0.01891028		844.4	0.01017809		1374.39	-0.00191622		1904.4	0.01124883		2434.4	-0.00515934
314.59	0.01874622		844.6	0.01005647		1374.59	-0.00226058		1904.6	0.01162673		2434.6	-0.00481174
314.79	0.01834264		844.8	0.00991195		1374.79	-0.00226989		1904.8	0.01201692		2434.8	-0.00491172
314.99	0.01819051		845	0.00963704		1374.99	-0.00195029		1905	0.01192904		2435	-0.00492012
315.19	0.01773614		845.2	0.00937727		1375.19	-0.00268249		1905.2	0.01259754		2435.2	-0.0047035
315.39	0.01818118		845.4	0.00871691		1375.39	-0.00311564		1905.4	0.01334769		2435.4	-0.00452423
315.59	0.01834828		845.6	0.00867574		1375.59	-0.00402434		1905.6	0.01359567		2435.6	-0.00523222
315.79	0.01829761		845.8	0.00836157		1375.79	-0.00494286		1905.8	0.01380972		2435.8	-0.00443938
315.99	0.01930212		846	0.00871884		1375.99	-0.00481074		1906	0.01440735		2436	-0.00431656
316.19	0.01889351		846.2	0.00825528		1376.19	-0.00459665		1906.2	0.01461098		2436.2	-0.00437289
316.39	0.01813196		846.4	0.00846838		1376.39	-0.00386635		1906.4	0.01450446		2436.4	-0.00497522
316.59	0.01838043		846.6	0.00877112		1376.59	-0.00351583		1906.6	0.01421637		2436.6	-0.00647103
316.79	0.01817011		846.8	0.00871385		1376.79	-0.00254691		1906.8	0.01395289		2436.8	-0.00679981
316.99	0.01771881		847	0.00857849		1376.99	-0.00130343		1907	0.01362162		2437	-0.00699542
317.19	0.01757651		847.2	0.00826466		1377.19	-0.00133689		1907.2	0.01446272		2437.2	-0.00770433
317.39	0.01727862		847.4	0.00815113		1377.39	-0.00115192		1907.4	0.01498038		2437.4	-0.00809888
317.59	0.01720879		847.6	0.00893862		1377.59	-0.00004688		1907.6	0.01513659		2437.6	-0.00793023
317.79	0.01760434		847.8	0.00880447		1377.79	0.00058492		1907.8	0.01480857		2437.8	-0.00870846
317.99	0.01741739		848	0.00866792		1377.99	0.00053996		1908	0.01420939		2438	-0.00811741
318.19	0.01773529		848.2	0.00911348		1378.19	0.00092923		1908.2	0.01336419		2438.2	-0.00734414
318.39	0.01861612		848.4	0.00935742		1378.39	0.00063981		1908.4	0.01307684		2438.4	-0.00654507
318.59	0.01872732		848.6	0.00924471		1378.59	0.00013987		1908.6	0.01195714		2438.6	-0.00630487
318.79	0.01838802		848.8	0.0093466		1378.79	-0.00014823		1908.8	0.01206418		2438.8	-0.00656132
318.99	0.01861856		849	0.0096218		1378.99	0.00004125		1909	0.01220321		2439	-0.00582458
319.19	0.01934424		849.2	0.00964575		1379.19	-0.0003039		1909.2	0.01190853		2439.2	-0.00480055
319.39	0.02073427		849.4	0.00969571		1379.39	-0.00083953		1909.4	0.01181573		2439.4	-0.00446389
319.59	0.02188795		849.6	0.00973941		1379.59	-0.00136259		1909.6	0.01108945		2439.6	-0.00427621
319.79	0.02230854		849.8	0.01040914		1379.79	-0.00137715		1909.8	0.01071682		2439.8	-0.00304322
319.99	0.02250974		850	0.01069411		1379.99	-0.00197125		1910	0.01117865		2440	-0.00351599
320.19	0.02226816		850.2	0.01029709		1380.19	-0.00198555		1910.2	0.01101456		2440.2	-0.00349704
320.39	0.02155546		850.4	0.01074481		1380.39	-0.00189321		1910.4	0.01112725		2440.4	-0.00381753
320.59	0.02101396		850.6	0.01062871		1380.59	-0.00238618		1910.6	0.01066391		2440.6	-0.00429047
320.79	0.02058912		850.8	0.01005053		1380.79	-0.00163785		1910.8	0.01111933		2440.8	-0.00426932
320.99	0.02026675		851	0.00952637		1380.99	-0.00179257		1911	0.01070222		2441	-0.00444644
321.19	0.0197781		851.2	0.00829188		1381.19	-0.00226062		1911.2	0.01158139		2441.2	-0.00537745
321.39	0.01976372		851.4	0.00818579		1381.39	-0.00256162		1911.4	0.01097622		2441.4	-0.0048503
321.59	0.01935729		851.6	0.00829133		1381.59	-0.00249252		1911.6	0.01040211		2441.6	-0.00510368
321.79	0.01827632		851.8	0.00843503		1381.79	-0.00245295		1911.8	0.010507		2441.8	-0.00575679
321.99	0.01799443		852	0.00829085		1381.99	-0.00198055		1912	0.01113763		2442	-0.00530684
322.19	0.01762989		852.2	0.00808698		1382.19	-0.00093087		1912.2	0.0108263		2442.2	-0.00527404
322.39	0.01774667		852.4	0.00828689		1382.39	0.00008687		1912.4	0.01148107		2442.4	-0.00564456
322.59	0.01772048		852.6	0.0082938		1382.59	0.00063959		1912.6	0.01183634		2442.6	-0.00592017
322.79	0.01794091		852.8	0.00833354		1382.79	0.00148043		1912.8	0.01224032		2442.8	-0.00601
322.99	0.01892991		853	0.00778968		1382.99	0.0022614		1913	0.01187836		2443	-0.00555542
323.19	0.01947763		853.2	0.00789934		1383.19	0.00248611		1913.2	0.01089461		2443.2	-0.00560948
323.39	0.02009607		853.4	0.00779484		1383.39	0.00279233		1913.4	0.01052785		2443.4	-0.00539525
323.59	0.02033542		853.6	0.00876263		1383.59	0.00290641		1913.6	0.01022094		2443.6	-0.00440878
323.79	0.01998054		853.8	0.00918891		1383.79	0.00253448		1913.8	0.00969567		2443.8	-0.00376654
323.99	0.02021219		854	0.00938307		1383.99	0.00119885		1914	0.00946607		2444	-0.00468376
324.19	0.02017775		854.2	0.0094801		1384.19	0.00092138		1914.2	0.00861283		2444.2	-0.00407218
324.39	0.02028874		854.4	0.00948332		1384.39	0.00018162		1914.4	0.00906423		2444.4	-0.00351901
324.59	0.02034217		854.6	0.00914683		1384.59	0.00006876		1914.6	0.0083202		2444.6	-0.00392579
324.79	0.0204645		854.8	0.00964798		1384.79	-0.00050658		1914.8	0.00896813		2444.8	-0.00313988
324.99	0.01999502		855	0.00905467		1384.99	-0.00130192		1915	0.00850342		2445	-0.00277511
325.19	0.01969062		855.2	0.00958628		1385.19	-0.00106696		1915.2	0.00957183		2445.2	-0.00291121
325.39	0.01893747		855.4	0.00961992		1385.39	-0.00052761		1915.4	0.0088824		2445.4	-0.00272447
325.59	0.01783467		855.6	0.00930158		1385.59	-0.00067662		1915.6	0.00927627		2445.6	-0.00316624
325.79	0.01695309		855.8	0.00944905		1385.79	-0.00025878		1915.8	0.01052286		2445.8	-0.0027273
325.99	0.0172224		856	0.00905095		1385.99	-0.00029418		1916	0.01060925		2446	-0.00294219
326.19	0.01688958		856.2	0.0089691		1386.19	0.00001762		1916.2	0.01071403		2446.2	-0.00384355
326.39	0.01718805		856.4	0.00881087		1386.39	0.0000172		1916.4	0.01154544		2446.4	-0.00516966
326.59	0.01777937		856.6	0.00826468		1386.59	0.00034804		1916.6	0.01151598		2446.6	-0.00508025
326.79	0.01790951		856.8	0.00866831		1386.79	0.00025993		1916.8	0.0116055		2446.8	-0.00576324
326.99	0.01831748		857	0.00911019		1386.99	0.00078247		1917	0.01170342		2447	-0.00572828
327.19	0.01752017		857.2	0.00964057		1387.19	0.00072106		1917.2	0.01135864		2447.2	-0.00609663
327.39	0.01750128		857.4	0.00967824		1387.39	0.00095646		1917.4	0.01135161		2447.4	-0.00519951
327.59	0.01737259		857.6	0.01029051		1387.59	0.000637		1917.6	0.01162717		2447.6	-0.00530809
327.79	0.01735814		857.8	0.01027141		1387.79	0.00049444		1917.8	0.01120429		2447.8	-0.00574738
327.99	0.01731403		858	0.01166208		1387.99	0.00051863		1918	0.01118002		2448	-0.00625678
328.19	0.01727577		858.2	0.01137552		1388.19	0.00081405		1918.2	0.01120885		2448.2	-0.0053342
328.39	0.01780258		858.4	0.01106508		1388.39	0.00072297		1918.4	0.01226785		2448.4	-0.00452194
328.59	0.01736605		858.6	0.01129137		1388.59	0.00080786		1918.6	0.0122011		2448.6	-0.00486187
328.79	0.01693671		858.8	0.01170727		1388.79	0.00038077		1918.8	0.01257713		2448.8	-0.00350832
328.99	0.01683921		859	0.01100084		1388.99	0.00177034		1919	0.01272363		2449	-0.00370212
329.19	0.01733386		859.2	0.01165152		1389.19	0.00204906		1919.2	0.01237576		2449.2	-0.00363384
329.39	0.01694081		859.4	0.01024118		1389.39	0.00240391		1919.4	0.01176095		2449.4	-0.00306179
329.59	0.01674526		859.6	0.0088909		1389.59	0.00168686		1919.6	0.01236938		2449.6	-0.00281369
329.79	0.01654996		859.8	0.0087338		1389.79	0.00187697		1919.8	0.01177075		2449.8	-0.00332225
329.99	0.01783821		860	0.00852697		1389.99	0.00217621		1920	0.01111122		2450	-0.00314622
330.19	0.01834418		860.2	0.00792851		1390.19	0.0021288		1920.2	0.01127289		2450.2	-0.00384807
330.39	0.01905173		860.4	0.00830931		1390.39	0.00274524		1920.4	0.01150823		2450.4	-0.00357904
330.59	0.01961634		860.6	0.00842369		1390.59	0.00313735		1920.6	0.01129026		2450.6	-0.00289155
330.79	0.02034285		860.8	0.00839984		1390.79	0.00229861		1920.8	0.01145995		2450.8	-0.00250908
330.99	0.02034672		861	0.00824929		1390.99	0.00324818		1921	0.01170131		2451	-0.00182224
331.19	0.02055196		861.2	0.00807198		1391.19	0.00306498		1921.2	0.01166331		2451.2	-0.00142537
331.39	0.02066565		861.4	0.0074415		1391.39	0.00395615		1921.4	0.01210689		2451.4	-0.0011466
331.59	0.02096474		861.6	0.00832621		1391.59	0.00425696		1921.6	0.01272945		2451.6	-0.00135277
331.79	0.0207809		861.8	0.00862547		1391.79	0.00396935		1921.8	0.01317579		2451.8	-0.00135646
331.99	0.02012086		862	0.0095727		1391.99	0.00447141		1922	0.0132206		2452	-0.00064007
332.19	0.0205597		862.2	0.00890797		1392.19	0.00400441		1922.2	0.01461157		2452.2	0.00129395
332.39	0.02054137		862.4	0.00915578		1392.39	0.00362118		1922.4	0.01573969		2452.4	0.00127008
332.59	0.02081577		862.6	0.0099827		1392.59	0.00307565		1922.6	0.01553962		2452.6	0.00104779
332.79	0.0209319		862.8	0.01086337		1392.79	0.00332437		1922.8	0.01558752		2452.8	0.00158507
332.99	0.02051706		863	0.01059352		1392.99	0.00263987		1923	0.01605111		2453	0.00025853
333.19	0.02069935		863.2	0.01068636		1393.19	0.00175809		1923.2	0.01556271		2453.2	0.00013349
333.39	0.02052505		863.4	0.01001165		1393.39	0.00126299		1923.4	0.01566894		2453.4	-0.00021202
333.59	0.02057085		863.6	0.00952185		1393.59	0.00155285		1923.6	0.01561211		2453.6	-0.00063402
333.79	0.0212739		863.8	0.00986479		1393.79	0.00148449		1923.8	0.01543149		2453.8	-0.00123181
333.99	0.02176975		864	0.00979397		1393.99	0.00102414		1924	0.01510826		2454	-0.00138527
334.19	0.02136283		864.2	0.01002804		1394.19	0.00054428		1924.2	0.01419423		2454.2	-0.00208982
334.39	0.02166475		864.4	0.00997219		1394.39	0.00009474		1924.4	0.01340757		2454.4	-0.00204208
334.59	0.02175336		864.6	0.00951561		1394.59	-0.00093865		1924.6	0.01203		2454.6	-0.00221193
334.79	0.02123228		864.8	0.00979263		1394.79	-0.00152788		1924.8	0.01163015		2454.8	-0.00286501
334.99	0.02144359		865	0.01020175		1394.99	-0.00065068		1925	0.01097445		2455	-0.0026111
335.19	0.02090315		865.2	0.00981049		1395.19	-0.00093241		1925.2	0.01155645		2455.2	-0.00237151
335.39	0.02053915		865.4	0.00933992		1395.39	-0.00062772		1925.4	0.01090875		2455.4	-0.00334851
335.59	0.01981185		865.6	0.0094512		1395.59	-0.00091338		1925.6	0.01139178		2455.6	-0.00281413
335.79	0.01920257		865.8	0.00910454		1395.79	-0.00087531		1925.8	0.01174966		2455.8	-0.00157402
335.99	0.01869225		866	0.00967672		1395.99	-0.00066238		1926	0.01207127		2456	-0.00078884
336.19	0.01845168		866.2	0.00973139		1396.19	-0.00057793		1926.2	0.01268599		2456.2	0.00039267
336.39	0.01839184		866.4	0.00951267		1396.39	-0.00123265		1926.4	0.0117398		2456.4	-0.00031094
336.59	0.01886072		866.6	0.00961243		1396.59	-0.00135102		1926.6	0.01086761		2456.6	0.00030243
336.79	0.01860944		866.8	0.00967542		1396.79	-0.00195671		1926.8	0.01042038		2456.8	0.00019918
336.99	0.01846207		867	0.00902936		1396.99	-0.00194185		1927	0.0111554		2457	-0.00059505
337.19	0.01883601		867.2	0.00951311		1397.19	-0.00123427		1927.2	0.01127455		2457.2	-0.00016336
337.39	0.01859018		867.4	0.00922954		1397.39	-0.00097755		1927.4	0.01172641		2457.4	-0.00125827
337.59	0.01916561		867.6	0.00981083		1397.59	-0.00029281		1927.6	0.01242387		2457.6	-0.00179163
337.79	0.0199715		867.8	0.01040223		1397.79	-0.00037363		1927.8	0.01242014		2457.8	-0.00258216
337.99	0.02040481		868	0.01035049		1397.99	-0.00090405		1928	0.01186279		2458	-0.00326084
338.19	0.02000495		868.2	0.01093007		1398.19	-0.00110013		1928.2	0.01115044		2458.2	-0.00336823
338.39	0.02021446		868.4	0.01074524		1398.39	-0.00194705		1928.4	0.01123489		2458.4	-0.00318127
338.59	0.0198842		868.6	0.01118291		1398.59	-0.00199486		1928.6	0.01099876		2458.6	-0.00358879
338.79	0.01953388		868.8	0.011828		1398.79	-0.00188642		1928.8	0.01140731		2458.8	-0.00410108
338.99	0.01937586		869	0.01193421		1398.99	-0.0022308		1929	0.01198384		2459	-0.00416032
339.19	0.01792962		869.2	0.01195253		1399.19	-0.00194334		1929.2	0.01280609		2459.2	-0.00444511
339.39	0.01854565		869.4	0.01194091		1399.39	-0.0017017		1929.4	0.01221744		2459.4	-0.00432104
339.59	0.01767967		869.6	0.01168978		1399.59	-0.00131595		1929.6	0.01276013		2459.6	-0.0035969
339.79	0.01770362		869.8	0.01116936		1399.79	0.00019079		1929.8	0.01258843		2459.8	-0.00256277
339.99	0.01676829		870	0.01072582		1399.99	0.0010661		1930	0.01251699		2460	-0.00257894
340.19	0.01649459		870.2	0.01001425		1400.19	0.0013617		1930.2	0.0127697		2460.2	-0.00189448
340.39	0.01720159		870.4	0.00876407		1400.39	0.00065584		1930.4	0.01243462		2460.4	-0.00233375
340.59	0.0176401		870.6	0.00801389		1400.59	0.00142851		1930.6	0.01206796		2460.6	-0.00243776
340.79	0.01728883		870.8	0.00751441		1400.79	0.00205829		1930.8	0.01251769		2460.8	-0.0030529
340.99	0.0180635		871	0.00707957		1400.99	0.0031666		1931	0.01390186		2461	-0.00325986
341.19	0.01843207		871.2	0.00732942		1401.19	0.00336411		1931.2	0.01356837		2461.2	-0.00345244
341.39	0.01948867		871.4	0.00706529		1401.39	0.00395366		1931.4	0.01405845		2461.4	-0.004402
341.59	0.02060546		871.6	0.00733212		1401.59	0.0037732		1931.6	0.01372958		2461.6	-0.00429058
341.79	0.02071185		871.8	0.00706886		1401.79	0.00432056		1931.8	0.0131871		2461.8	-0.00462658
341.99	0.02082509		872	0.00684621		1401.99	0.00335008		1932	0.01254607		2462	-0.00549014
342.19	0.02058371		872.2	0.0076502		1402.19	0.00244497		1932.2	0.01228875		2462.2	-0.00511193
342.39	0.02151856		872.4	0.00761076		1402.39	0.00210491		1932.4	0.01296019		2462.4	-0.00430243
342.59	0.02154752		872.6	0.0082981		1402.59	0.00155895		1932.6	0.01317172		2462.6	-0.00423279
342.79	0.02139528		872.8	0.00982982		1402.79	0.0015239		1932.8	0.01331927		2462.8	-0.00459954
342.99	0.02146313		873	0.01064447		1402.99	0.00090603		1933	0.01345639		2463	-0.00487201
343.19	0.02115723		873.2	0.01162393		1403.19	0.00104781		1933.2	0.01295973		2463.2	-0.00410656
343.39	0.02116939		873.4	0.01190084		1403.39	0.00058577		1933.4	0.01288907		2463.4	-0.00342193
343.59	0.02119811		873.6	0.01249749		1403.59	0.0008282		1933.6	0.01340283		2463.6	-0.00341172
343.79	0.02110657		873.8	0.01142474		1403.79	0.00075736		1933.8	0.01324999		2463.8	-0.00231431
343.99	0.02064695		874	0.01102259		1403.99	0.00008789		1934	0.01364063		2464	-0.00313604
344.19	0.02098089		874.2	0.01057269		1404.19	-0.00100566		1934.2	0.01430881		2464.2	-0.00278989
344.39	0.02097351		874.4	0.00988082		1404.39	-0.00063558		1934.4	0.01382155		2464.4	-0.00243614
344.59	0.02034668		874.6	0.00951523		1404.59	-0.00066074		1934.6	0.01380979		2464.6	-0.0023984
344.79	0.0203403		874.8	0.00907741		1404.79	-0.00100874		1934.8	0.01420214		2464.8	-0.00159289
344.99	0.0219333		875	0.00910168		1404.99	-0.00061266		1935	0.01419426		2465	-0.00130426
345.19	0.02209661		875.2	0.00919598		1405.19	-0.00016736		1935.2	0.01342357		2465.2	-0.00215781
345.39	0.02192054		875.4	0.0088127		1405.39	-0.00031264		1935.4	0.01306647		2465.4	-0.00231625
345.59	0.02146863		875.6	0.00861656		1405.59	-0.00079507		1935.6	0.01236188		2465.6	-0.00278276
345.79	0.02106255		875.8	0.0086363		1405.79	-0.00135231		1935.8	0.01256552		2465.8	-0.00331639
345.99	0.02094191		876	0.00852479		1405.99	-0.00143419		1936	0.01227329		2466	-0.00378024
346.19	0.02071116		876.2	0.00833422		1406.19	-0.00143111		1936.2	0.0130017		2466.2	-0.00277827
346.39	0.02069		876.4	0.00766007		1406.39	-0.00123863		1936.4	0.01344911		2466.4	-0.00254725
346.59	0.0205248		876.6	0.0076864		1406.59	-0.00112363		1936.6	0.01371131		2466.6	-0.00327923
346.79	0.02013329		876.8	0.00796199		1406.79	-0.00069076		1936.8	0.01397107		2466.8	-0.00431082
346.99	0.01969996		877	0.00717841		1406.99	-0.00132712		1937	0.01444979		2467	-0.00391317
347.19	0.0192866		877.2	0.0073791		1407.19	-0.00150693		1937.2	0.01462202		2467.2	-0.00414577
347.39	0.01929328		877.4	0.00763085		1407.39	-0.00227371		1937.4	0.01452853		2467.4	-0.00431578
347.59	0.02047857		877.6	0.00797475		1407.59	-0.00156168		1937.6	0.01446865		2467.6	-0.00488993
347.79	0.0200956		877.8	0.00727877		1407.79	-0.00138911		1937.8	0.01347241		2467.8	-0.00453973
347.99	0.02026037		878	0.00800778		1407.99	-0.00084015		1938	0.01363261		2468	-0.00536804
348.19	0.02022862		878.2	0.00821212		1408.19	-0.00041796		1938.2	0.01343956		2468.2	-0.00447249
348.39	0.01991173		878.4	0.00847558		1408.39	0.00010489		1938.4	0.01263284		2468.4	-0.00373527
348.59	0.02018651		878.6	0.00820079		1408.59	-0.0003373		1938.6	0.01191525		2468.6	-0.0037033
348.79	0.02123557		878.8	0.00915468		1408.79	-0.00010331		1938.8	0.01120792		2468.8	-0.0034252
348.99	0.02210891		879	0.00967128		1408.99	0.00068298		1939	0.01014671		2469	-0.00361212
349.19	0.02251435		879.2	0.01047434		1409.19	0.00068781		1939.2	0.00943922		2469.2	-0.00413958
349.39	0.02154494		879.4	0.01080375		1409.39	0.00039175		1939.4	0.00901119		2469.4	-0.00379403
349.59	0.0218129		879.6	0.01161618		1409.59	0.00022337		1939.6	0.00893181		2469.6	-0.0034475
349.79	0.02128622		879.8	0.01177293		1409.79	-0.00036854		1939.8	0.00872891		2469.8	-0.00329426
349.99	0.02052163		880	0.01154977		1409.99	0.00068353		1940	0.00895855		2470	-0.00312826
350.19	0.01992728		880.2	0.0109034		1410.19	0.00021987		1940.2	0.00958126		2470.2	-0.0026915
350.39	0.02008824		880.4	0.01068042		1410.39	-0.00050036		1940.4	0.0101266		2470.4	-0.00211329
350.59	0.02016692		880.6	0.01063898		1410.59	-0.00044224		1940.6	0.01047568		2470.6	-0.00188326
350.79	0.01940128		880.8	0.01090307		1410.79	-0.00035997		1940.8	0.01078888		2470.8	-0.00130696
350.99	0.01884896		881	0.01043803		1410.99	-0.00028504		1941	0.01159163		2471	-0.00026486
351.19	0.01937705		881.2	0.01097222		1411.19	-0.00020751		1941.2	0.01215625		2471.2	-0.00071253
351.39	0.01906431		881.4	0.01141913		1411.39	-0.00079419		1941.4	0.01240015		2471.4	-0.00042341
351.59	0.01956719		881.6	0.01176558		1411.59	0.00100484		1941.6	0.01293211		2471.6	-0.0006786
351.79	0.01932824		881.8	0.01143582		1411.79	0.00199296		1941.8	0.01249098		2471.8	-0.00055452
351.99	0.02036058		882	0.01206781		1411.99	0.00184458		1942	0.01243105		2472	-0.00086456
352.19	0.02024005		882.2	0.01131348		1412.19	0.00206622		1942.2	0.01197377		2472.2	-0.00084567
352.39	0.02084478		882.4	0.01116001		1412.39	0.00287734		1942.4	0.01137051		2472.4	-0.00069472
352.59	0.02253132		882.6	0.01076336		1412.59	0.00357098		1942.6	0.01145189		2472.6	-0.00078641
352.79	0.02312056		882.8	0.01153813		1412.79	0.00417868		1942.8	0.01189818		2472.8	-0.00143307
352.99	0.02408739		883	0.01112615		1412.99	0.00486011		1943	0.01178131		2473	-0.00195052
353.19	0.02487366		883.2	0.01096051		1413.19	0.00491287		1943.2	0.01222727		2473.2	-0.00368815
353.39	0.02427878		883.4	0.01150443		1413.39	0.00462365		1943.4	0.01258805		2473.4	-0.00419915
353.59	0.02517441		883.6	0.01153466		1413.59	0.00412233		1943.6	0.01324074		2473.6	-0.00571774
353.79	0.02469668		883.8	0.01112782		1413.79	0.00393751		1943.8	0.01377011		2473.8	-0.00711983
353.99	0.02462694		884	0.01060557		1413.99	0.00467119		1944	0.01459371		2474	-0.00662991
354.19	0.02463683		884.2	0.0105949		1414.19	0.00408267		1944.2	0.01484719		2474.2	-0.00717923
354.39	0.02424927		884.4	0.01059601		1414.39	0.00374327		1944.4	0.01502903		2474.4	-0.00669127
354.59	0.02409988		884.6	0.0103966		1414.59	0.00384469		1944.6	0.01471768		2474.6	-0.00639791
354.79	0.02267092		884.8	0.01024362		1414.79	0.00429777		1944.8	0.01588681		2474.8	-0.00670965
354.99	0.02216985		885	0.00953384		1414.99	0.00393908		1945	0.01667197		2475	-0.00573154
355.19	0.0218736		885.2	0.01020275		1415.19	0.0024716		1945.2	0.0164022		2475.2	-0.00575167
355.39	0.02113683		885.4	0.01025212		1415.39	0.0017142		1945.4	0.01557972		2475.4	-0.00580924
355.59	0.0212405		885.6	0.01036938		1415.59	0.00297575		1945.6	0.01463454		2475.6	-0.00615814
355.79	0.0207613		885.8	0.01112616		1415.79	0.00264174		1945.8	0.01357573		2475.8	-0.0064878
355.99	0.02069366		886	0.01232969		1415.99	0.00158194		1946	0.01348858		2476	-0.00643336
356.19	0.02016299		886.2	0.01227968		1416.19	0.00192953		1946.2	0.01293131		2476.2	-0.00553437
356.39	0.02080362		886.4	0.01297581		1416.39	0.00122856		1946.4	0.01239688		2476.4	-0.00469484
356.59	0.02067972		886.6	0.01244341		1416.59	0.00057082		1946.6	0.01229633		2476.6	-0.00447322
356.79	0.02001334		886.8	0.01346712		1416.79	0.00112599		1946.8	0.01154336		2476.8	-0.00514694
356.99	0.02039134		887	0.01285257		1416.99	0.00045638		1947	0.01096893		2477	-0.00621369
357.19	0.02008639		887.2	0.01301593		1417.19	-0.00057043		1947.2	0.0113859		2477.2	-0.00697293
357.39	0.01956868		887.4	0.01374954		1417.39	-0.0012572		1947.4	0.01219361		2477.4	-0.00734126
357.59	0.0195334		887.6	0.01287102		1417.59	-0.00106852		1947.6	0.01233029		2477.6	-0.00805987
357.79	0.01973501		887.8	0.01278284		1417.79	0.00004973		1947.8	0.01250598		2477.8	-0.00694051
357.99	0.01979809		888	0.01211549		1417.99	0.00051109		1948	0.0135689		2478	-0.00628849
358.19	0.02021289		888.2	0.01169967		1418.19	0.00087133		1948.2	0.01442623		2478.2	-0.00667363
358.39	0.0199378		888.4	0.01150692		1418.39	0.00214372		1948.4	0.01447561		2478.4	-0.00531505
358.59	0.0209625		888.6	0.01099163		1418.59	0.00291512		1948.6	0.01458289		2478.6	-0.0047517
358.79	0.02007779		888.8	0.01087816		1418.79	0.00401142		1948.8	0.01539093		2478.8	-0.00415657
358.99	0.02116365		889	0.01026817		1418.99	0.00358991		1949	0.01526236		2479	-0.00287637
359.19	0.02143292		889.2	0.01018585		1419.19	0.00347217		1949.2	0.01533676		2479.2	-0.00317624
359.39	0.02127186		889.4	0.00974677		1419.39	0.00437317		1949.4	0.01565539		2479.4	-0.00257208
359.59	0.02149645		889.6	0.00996516		1419.59	0.00518639		1949.6	0.01522071		2479.6	-0.00214414
359.79	0.02177533		889.8	0.01102118		1419.79	0.00470368		1949.8	0.0154031		2479.8	-0.00217353
359.99	0.02267852		890	0.01124388		1419.99	0.00421247		1950	0.01473404		2480	-0.0013271
360.19	0.02304828		890.2	0.01136521		1420.19	0.00401041		1950.2	0.0139031		2480.2	-0.00064571
360.39	0.02332275		890.4	0.01153718		1420.39	0.0029903		1950.4	0.01329182		2480.4	-0.00114271
360.59	0.02308728		890.6	0.01103868		1420.59	0.00295451		1950.6	0.01272273		2480.6	-0.00163376
360.79	0.02335555		890.8	0.01189165		1420.79	0.00293108		1950.8	0.012929		2480.8	-0.00182646
360.99	0.02339878		891	0.01160281		1420.99	0.00146293		1951	0.01306636		2481	-0.00274192
361.19	0.02362965		891.2	0.01212465		1421.19	0.00100269		1951.2	0.01364785		2481.2	-0.00308836
361.39	0.02336833		891.4	0.01214438		1421.39	0.00051128		1951.4	0.01402015		2481.4	-0.00346439
361.59	0.0238618		891.6	0.01181815		1421.59	0.00043059		1951.6	0.01437863		2481.6	-0.00307575
361.79	0.02451879		891.8	0.01151718		1421.79	0.00009762		1951.8	0.01481408		2481.8	-0.00338212
361.99	0.02328534		892	0.01159567		1421.99	0.00045759		1952	0.0154893		2482	-0.00360508
362.19	0.02339094		892.2	0.01149709		1422.19	0.00125324		1952.2	0.01568517		2482.2	-0.00331351
362.39	0.0228443		892.4	0.01131657		1422.39	0.00249606		1952.4	0.01451731		2482.4	-0.00309447
362.59	0.02336039		892.6	0.01109465		1422.59	0.00244011		1952.6	0.01455984		2482.6	-0.0032958
362.79	0.02276055		892.8	0.01089226		1422.79	0.0035277		1952.8	0.0142802		2482.8	-0.00297622
362.99	0.0234092		893	0.01068415		1422.99	0.00339597		1953	0.01402747		2483	-0.00280324
363.19	0.02289332		893.2	0.01087377		1423.19	0.00343332		1953.2	0.01444618		2483.2	-0.00247201
363.39	0.02247042		893.4	0.01141682		1423.39	0.00367423		1953.4	0.01372677		2483.4	-0.0023797
363.59	0.02327065		893.6	0.01164641		1423.59	0.00300005		1953.6	0.0125633		2483.6	-0.00254706
363.79	0.02384988		893.8	0.01193246		1423.79	0.00255029		1953.8	0.01225639		2483.8	-0.00242116
363.99	0.02471443		894	0.01198244		1423.99	0.00268362		1954	0.01211127		2484	-0.00174076
364.19	0.02449677		894.2	0.01194132		1424.19	0.00251473		1954.2	0.01278188		2484.2	-0.0024139
364.39	0.02460709		894.4	0.01194644		1424.39	0.00236008		1954.4	0.01244281		2484.4	-0.00234514
364.59	0.02443774		894.6	0.01236477		1424.59	0.00116766		1954.6	0.01250993		2484.6	-0.00221714
364.79	0.02423274		894.8	0.01263483		1424.79	0.00067174		1954.8	0.01259623		2484.8	-0.00222046
364.99	0.02480139		895	0.01220504		1424.99	0.00033398		1955	0.01297519		2485	-0.00238454
365.19	0.02481202		895.2	0.01228987		1425.19	-0.0000748		1955.2	0.01309166		2485.2	-0.00264959
365.39	0.02423985		895.4	0.01233401		1425.39	-0.00008944		1955.4	0.01359994		2485.4	-0.00283622
365.59	0.02469416		895.6	0.01185818		1425.59	0.00003205		1955.6	0.01386548		2485.6	-0.00283604
365.79	0.02437574		895.8	0.01208091		1425.79	0.00099804		1955.8	0.01391062		2485.8	-0.00309937
365.99	0.02311935		896	0.01232748		1425.99	0.00150127		1956	0.01407922		2486	-0.00219818
366.19	0.02231162		896.2	0.01177373		1426.19	0.00211768		1956.2	0.01362476		2486.2	-0.00239541
366.39	0.02246274		896.4	0.0110974		1426.39	0.00280524		1956.4	0.01257727		2486.4	-0.00257388
366.59	0.02258466		896.6	0.01112788		1426.59	0.00264502		1956.6	0.01296456		2486.6	-0.00235202
366.79	0.02238791		896.8	0.01117784		1426.79	0.00318642		1956.8	0.01232519		2486.8	-0.00284992
366.99	0.02287857		897	0.01147897		1426.99	0.00301481		1957	0.01267523		2487	-0.00228177
367.19	0.02239277		897.2	0.01181311		1427.19	0.00304091		1957.2	0.01314455		2487.2	-0.00292182
367.39	0.02206906		897.4	0.01121277		1427.39	0.00298035		1957.4	0.01249767		2487.4	-0.00334912
367.59	0.02286852		897.6	0.0114599		1427.59	0.00277855		1957.6	0.01270193		2487.6	-0.00254222
367.79	0.02346819		897.8	0.01134789		1427.79	0.00301953		1957.8	0.01292282		2487.8	-0.00210417
367.99	0.02408031		898	0.01153782		1427.99	0.00336715		1958	0.01328665		2488	-0.00254027
368.19	0.02382058		898.2	0.01147778		1428.19	0.00288122		1958.2	0.01382273		2488.2	-0.00280183
368.39	0.02430188		898.4	0.01161737		1428.39	0.00301974		1958.4	0.01340121		2488.4	-0.00247578
368.59	0.02436677		898.6	0.0123293		1428.59	0.00203222		1958.6	0.01373819		2488.6	-0.00310841
368.79	0.02443472		898.8	0.01233546		1428.79	0.00243591		1958.8	0.01430513		2488.8	-0.00365848
368.99	0.02497482		899	0.01228704		1428.99	0.00269625		1959	0.01476212		2489	-0.00389331
369.19	0.02402398		899.2	0.01251514		1429.19	0.0032363		1959.2	0.01373127		2489.2	-0.00454477
369.39	0.02450824		899.4	0.01244344		1429.39	0.00417072		1959.4	0.0140755		2489.4	-0.00433032
369.59	0.02508799		899.6	0.01187487		1429.59	0.0042086		1959.6	0.01388752		2489.6	-0.00399036
369.79	0.02531154		899.8	0.0124975		1429.79	0.00461729		1959.8	0.01391337		2489.8	-0.0038593
369.99	0.02512242		900	0.01213703		1429.99	0.00463341		1960	0.01285319		2490	-0.00325742
370.19	0.02510234		900.2	0.01132383		1430.19	0.0053743		1960.2	0.01293867		2490.2	-0.00337424
370.39	0.02606534		900.4	0.01035942		1430.39	0.00538115		1960.4	0.01311864		2490.4	-0.00325096
370.59	0.02589513		900.6	0.0106731		1430.59	0.00536048		1960.6	0.0130152		2490.6	-0.00285701
370.79	0.02594952		900.8	0.0104558		1430.79	0.00507383		1960.8	0.01275546		2490.8	-0.00333105
370.99	0.02587616		901	0.01031368		1430.99	0.00569538		1961	0.01280023		2491	-0.00249943
371.19	0.02490945		901.2	0.0098		1431.19	0.00442831		1961.2	0.01254523		2491.2	-0.0025167
371.39	0.02506608		901.4	0.00920439		1431.39	0.00303691		1961.4	0.01226581		2491.4	-0.00202504
371.59	0.02498061		901.6	0.01001984		1431.59	0.00201444		1961.6	0.01205854		2491.6	-0.00159908
371.79	0.0244531		901.8	0.01002053		1431.79	0.00159694		1961.8	0.01170308		2491.8	-0.00158328
371.99	0.02312142		902	0.01010831		1431.99	0.00073187		1962	0.01199887		2492	-0.00191815
372.19	0.02242295		902.2	0.00996678		1432.19	0.0000155		1962.2	0.01195521		2492.2	-0.00142593
372.39	0.02232456		902.4	0.01019601		1432.39	-0.00080949		1962.4	0.01247344		2492.4	-0.00115767
372.59	0.02066446		902.6	0.01127859		1432.59	-0.00195008		1962.6	0.01194507		2492.6	-0.00114873
372.79	0.01984366		902.8	0.01159439		1432.79	-0.00253844		1962.8	0.01255355		2492.8	-0.00090516
372.99	0.01885931		903	0.01175845		1432.99	-0.00298059		1963	0.01247554		2493	-0.00067911
373.19	0.01859003		903.2	0.01142796		1433.19	-0.00292136		1963.2	0.01266169		2493.2	-0.00095692
373.39	0.01969145		903.4	0.01228017		1433.39	-0.0024941		1963.4	0.01283206		2493.4	-0.00109905
373.59	0.01980307		903.6	0.01269525		1433.59	-0.0014279		1963.6	0.01354891		2493.6	-0.00097184
373.79	0.02106373		903.8	0.01379903		1433.79	-0.00076611		1963.8	0.0135457		2493.8	-0.00131013
373.99	0.02132515		904	0.0135232		1433.99	-0.00012343		1964	0.0141597		2494	-0.00172827
374.19	0.0215257		904.2	0.01299003		1434.19	0.00046009		1964.2	0.01538112		2494.2	-0.00239062
374.39	0.02259957		904.4	0.01280871		1434.39	0.00097083		1964.4	0.01468599		2494.4	-0.0030511
374.59	0.02304171		904.6	0.01328782		1434.59	0.00145621		1964.6	0.01492842		2494.6	-0.0029493
374.79	0.02337282		904.8	0.01326657		1434.79	0.00236503		1964.8	0.01519379		2494.8	-0.00279495
374.99	0.02423996		905	0.01388293		1434.99	0.0024631		1965	0.01473704		2495	-0.0027464
375.19	0.02364375		905.2	0.01335688		1435.19	0.00137401		1965.2	0.01469238		2495.2	-0.00259312
375.39	0.02367214		905.4	0.01306515		1435.39	0.00154907		1965.4	0.01452327		2495.4	-0.0032631
375.59	0.02341562		905.6	0.01312331		1435.59	0.0022575		1965.6	0.01394459		2495.6	-0.00298465
375.79	0.02328817		905.8	0.01174158		1435.79	0.00262278		1965.8	0.01424255		2495.8	-0.00275885
375.99	0.02301558		906	0.01125403		1435.99	0.00249052		1966	0.01416041		2496	-0.00196965
376.19	0.02268058		906.2	0.01144247		1436.19	0.00219551		1966.2	0.01436159		2496.2	-0.00137106
376.39	0.02214316		906.4	0.01188973		1436.39	0.00123469		1966.4	0.01537921		2496.4	-0.0016512
376.59	0.02133882		906.6	0.0116648		1436.59	0.00065984		1966.6	0.01522136		2496.6	-0.00164297
376.79	0.02176535		906.8	0.01210798		1436.79	0.00074461		1966.8	0.01675063		2496.8	-0.00157598
376.99	0.02173216		907	0.01250517		1436.99	0.00073167		1967	0.01714183		2497	-0.00291896
377.19	0.02282294		907.2	0.01244071		1437.19	0.00066996		1967.2	0.0174202		2497.2	-0.00257232
377.39	0.02323873		907.4	0.01314042		1437.39	0.00056826		1967.4	0.01720077		2497.4	-0.00278799
377.59	0.02326123		907.6	0.01285797		1437.59	0.00063954		1967.6	0.01820861		2497.6	-0.00287789
377.79	0.02417641		907.8	0.01239061		1437.79	-0.00074336		1967.8	0.0180129		2497.8	-0.0037541
377.99	0.02397684		908	0.01180994		1437.99	-0.00110954		1968	0.01839977		2498	-0.00410432
378.19	0.02437463		908.2	0.01142765		1438.19	-0.00110756		1968.2	0.01794172		2498.2	-0.00424824
378.39	0.02514925		908.4	0.01138624		1438.39	-0.00126507		1968.4	0.01702365		2498.4	-0.00408097
378.59	0.02494707		908.6	0.01178403		1438.59	-0.00099007		1968.6	0.01681788		2498.6	-0.00341692
378.79	0.02495759		908.8	0.01201982		1438.79	-0.00049605		1968.8	0.01585852		2498.8	-0.00297747
378.99	0.02500606		909	0.01211036		1438.99	-0.00063109		1969	0.01494758		2499	-0.0029561
379.19	0.02387207		909.2	0.0115342		1439.19	0.00007592		1969.2	0.01434517		2499.2	-0.00232606
379.39	0.0241223		909.4	0.01132759		1439.39	0.0010772		1969.4	0.01354461		2499.4	-0.00207191
379.59	0.02411384		909.6	0.01136511		1439.59	0.00214837		1969.6	0.01267083		2499.6	-0.00120002
379.79	0.02363717		909.8	0.01102067		1439.79	0.00255956		1969.8	0.01234458		2499.8	-0.00076869
379.99	0.02363717		910	0.01102067		1439.99	0.00255956		1970	0.01234458		2500	-0.00076869
380.19	0.02339442		910.2	0.01149639		1440.19	0.00327544		1970.2	0.01199785		2500.2	-0.00112348
380.39	0.02294116		910.4	0.01152869		1440.39	0.00475021		1970.4	0.01144198		2500.4	-0.0021858
380.59	0.02294553		910.6	0.01128554		1440.59	0.00620689		1970.6	0.01087753		2500.6	-0.00278276
380.79	0.02250892		910.8	0.01146703		1440.79	0.00743248		1970.8	0.01047315		2500.8	-0.00312098
380.99	0.02259485		911	0.01125663		1440.99	0.00843452		1971	0.01051917		2501	-0.00314335
381.19	0.02299357		911.2	0.01145822		1441.19	0.00949279		1971.2	0.0107065		2501.2	-0.00379364
381.39	0.02299921		911.4	0.01249048		1441.39	0.01011714		1971.4	0.01131681		2501.4	-0.00378418
381.59	0.02322912		911.6	0.0131234		1441.59	0.01045912		1971.6	0.01129047		2501.6	-0.00330994
381.79	0.02358316		911.8	0.01338274		1441.79	0.01066536		1971.8	0.01167309		2501.8	-0.00370359
381.99	0.02360903		912	0.01431353		1441.99	0.01004131		1972	0.01168933		2502	-0.00409572
382.19	0.02374111		912.2	0.01362782		1442.19	0.00936944		1972.2	0.01205459		2502.2	-0.00371218
382.39	0.02320218		912.4	0.01327006		1442.39	0.00957996		1972.4	0.0131593		2502.4	-0.00508217
382.59	0.02330632		912.6	0.01361327		1442.59	0.00954102		1972.6	0.01363721		2502.6	-0.00498706
382.79	0.02364081		912.8	0.01347165		1442.79	0.01028032		1972.8	0.01307085		2502.8	-0.00614459
382.99	0.02335091		913	0.01401849		1442.99	0.01055573		1973	0.012435		2503	-0.00634358
383.19	0.02319987		913.2	0.01296503		1443.19	0.01131428		1973.2	0.01257553		2503.2	-0.00603013
383.39	0.02283033		913.4	0.01335821		1443.39	0.01164565		1973.4	0.01190777		2503.4	-0.00616528
383.59	0.02273939		913.6	0.01339628		1443.59	0.01221377		1973.6	0.01229067		2503.6	-0.00528382
383.79	0.02220661		913.8	0.01377016		1443.79	0.01220856		1973.8	0.01144965		2503.8	-0.00403237
383.99	0.02169826		914	0.01346054		1443.99	0.01179399		1974	0.01085308		2504	-0.00469116
384.19	0.02085267		914.2	0.01326868		1444.19	0.01136299		1974.2	0.01114726		2504.2	-0.00422198
384.39	0.02058482		914.4	0.01274028		1444.39	0.01181822		1974.4	0.01008023		2504.4	-0.00425647
384.59	0.0199661		914.6	0.0125893		1444.59	0.01196393		1974.6	0.00993357		2504.6	-0.00352786
384.79	0.01909434		914.8	0.01266833		1444.79	0.01200758		1974.8	0.00976204		2504.8	-0.00295065
384.99	0.0189125		915	0.01226257		1444.99	0.01205321		1975	0.00974564		2505	-0.00313698
385.19	0.01956755		915.2	0.01326858		1445.19	0.01177855		1975.2	0.00993144		2505.2	-0.00326589
385.39	0.01903087		915.4	0.01367651		1445.39	0.01155372		1975.4	0.00977922		2505.4	-0.00233969
385.59	0.01968633		915.6	0.01390759		1445.59	0.01149051		1975.6	0.00924882		2505.6	-0.00212638
385.79	0.02019998		915.8	0.01342923		1445.79	0.01151618		1975.8	0.00963579		2505.8	-0.00311275
385.99	0.02016257		916	0.0124994		1445.99	0.01114489		1976	0.00922965		2506	-0.00375686
386.19	0.02046531		916.2	0.01078921		1446.19	0.01166279		1976.2	0.00997711		2506.2	-0.00364324
386.39	0.02141157		916.4	0.01072879		1446.39	0.01103395		1976.4	0.01038516		2506.4	-0.00425962
386.59	0.02185792		916.6	0.0107245		1446.59	0.01110109		1976.6	0.01083253		2506.6	-0.00341924
386.79	0.02143995		916.8	0.01077776		1446.79	0.01126747		1976.8	0.01035807		2506.8	-0.00320161
386.99	0.02106657		917	0.01092289		1446.99	0.01076473		1977	0.01036619		2507	-0.00306968
387.19	0.02118373		917.2	0.01052622		1447.19	0.01107103		1977.2	0.00977349		2507.2	-0.00303122
387.39	0.02099378		917.4	0.01108944		1447.39	0.01062005		1977.4	0.01023755		2507.4	-0.00280738
387.59	0.02053037		917.6	0.01155391		1447.59	0.01040703		1977.6	0.01057978		2507.6	-0.00203724
387.79	0.02090913		917.8	0.0119617		1447.79	0.0098421		1977.8	0.01023837		2507.8	-0.00219176
387.99	0.02130879		918	0.01069604		1447.99	0.00994879		1978	0.00988714		2508	-0.00265702
388.19	0.02081785		918.2	0.01106046		1448.19	0.00956718		1978.2	0.00961687		2508.2	-0.00272892
388.39	0.01992209		918.4	0.01127103		1448.39	0.0096468		1978.4	0.00899493		2508.4	-0.00217019
388.59	0.01855106		918.6	0.01186989		1448.59	0.00975994		1978.6	0.00986082		2508.6	-0.00203378
388.79	0.01852912		918.8	0.01248446		1448.79	0.01008175		1978.8	0.00934277		2508.8	-0.00212024
388.99	0.01890039		919	0.01288335		1448.99	0.01005315		1979	0.00888508		2509	-0.00218422
389.19	0.01947008		919.2	0.01418325		1449.19	0.00973898		1979.2	0.00892135		2509.2	-0.0016684
389.39	0.01867595		919.4	0.01509494		1449.39	0.00999298		1979.4	0.00863969		2509.4	-0.00127173
389.59	0.01969154		919.6	0.01580539		1449.59	0.01053154		1979.6	0.00915166		2509.6	-0.00129856
389.79	0.01982745		919.8	0.0146772		1449.79	0.01126238		1979.8	0.01014877		2509.8	-0.0014757
389.99	0.01999962		920	0.01447559		1449.99	0.01270804		1980	0.01020922		2510	-0.00214716
390.19	0.02021249		920.2	0.01488906		1450.19	0.01350211		1980.2	0.01056111		2510.2	-0.00142231
390.39	0.02089549		920.4	0.01482669		1450.39	0.01324857		1980.4	0.01065768		2510.4	-0.00107081
390.59	0.02019792		920.6	0.01515084		1450.59	0.0131114		1980.6	0.01129213		2510.6	-0.00025418
390.79	0.0204554		920.8	0.01419749		1450.79	0.01312554		1980.8	0.0115612		2510.8	-0.0008311
390.99	0.01944688		921	0.01408954		1450.99	0.01257285		1981	0.01231203		2511	-0.00188065
391.19	0.01945705		921.2	0.01441204		1451.19	0.01262764		1981.2	0.01219377		2511.2	-0.00221668
391.39	0.01993831		921.4	0.01503706		1451.39	0.01229663		1981.4	0.01292933		2511.4	-0.00257434
391.59	0.02008719		921.6	0.01486239		1451.59	0.01178735		1981.6	0.01269422		2511.6	-0.00234542
391.79	0.02057474		921.8	0.01482681		1451.79	0.01136128		1981.8	0.01241371		2511.8	-0.00368171
391.99	0.01928101		922	0.01395922		1451.99	0.01138942		1982	0.01330851		2512	-0.00421196
392.19	0.01846647		922.2	0.01417033		1452.19	0.01117169		1982.2	0.01281819		2512.2	-0.00432985
392.39	0.01837588		922.4	0.01314541		1452.39	0.01101815		1982.4	0.01275296		2512.4	-0.00419081
392.59	0.01873017		922.6	0.0136145		1452.59	0.01095679		1982.6	0.01329428		2512.6	-0.00454968
392.79	0.01944152		922.8	0.01381007		1452.79	0.01105229		1982.8	0.01275845		2512.8	-0.00443546
392.99	0.01962805		923	0.01407892		1452.99	0.01016157		1983	0.01253026		2513	-0.00448478
393.19	0.01933553		923.2	0.01386371		1453.19	0.0090135		1983.2	0.01275315		2513.2	-0.00462745
393.39	0.01894255		923.4	0.01455482		1453.39	0.00899274		1983.4	0.01276593		2513.4	-0.00480987
393.59	0.01978317		923.6	0.01406414		1453.59	0.00898954		1983.6	0.01307025		2513.6	-0.00471424
393.79	0.01964521		923.8	0.01440476		1453.79	0.01024436		1983.8	0.0132076		2513.8	-0.00479115
393.99	0.01945986		924	0.01490833		1453.99	0.01173755		1984	0.01270519		2514	-0.00413941
394.19	0.01897747		924.2	0.01488288		1454.19	0.0108861		1984.2	0.01285135		2514.2	-0.00314432
394.39	0.01888569		924.4	0.01445694		1454.39	0.01160021		1984.4	0.0134236		2514.4	-0.0023611
394.59	0.01813977		924.6	0.01473767		1454.59	0.01149448		1984.6	0.01396362		2514.6	-0.00227177
394.79	0.01780094		924.8	0.0142706		1454.79	0.0121522		1984.8	0.01392329		2514.8	-0.00228545
394.99	0.01683769		925	0.01525002		1454.99	0.01154328		1985	0.01430056		2515	-0.00234141
395.19	0.0175219		925.2	0.01581577		1455.19	0.01125264		1985.2	0.0136146		2515.2	-0.00154259
395.39	0.01830117		925.4	0.01614981		1455.39	0.01142611		1985.4	0.01307382		2515.4	-0.00102337
395.59	0.01894319		925.6	0.01673687		1455.59	0.01109634		1985.6	0.01250951		2515.6	-0.00093823
395.79	0.01838626		925.8	0.01686245		1455.79	0.01076099		1985.8	0.01234092		2515.8	-0.00169002
395.99	0.0174113		926	0.01608429		1455.99	0.01097751		1986	0.01301891		2516	-0.00111261
396.19	0.01899292		926.2	0.01600101		1456.19	0.0112338		1986.2	0.01164431		2516.2	-0.00161836
396.39	0.01984565		926.4	0.01489098		1456.39	0.01108833		1986.4	0.0115751		2516.4	-0.00200143
396.59	0.02095253		926.6	0.01473161		1456.59	0.01070987		1986.6	0.01198902		2516.6	-0.00210095
396.79	0.02076182		926.8	0.01382936		1456.79	0.01059179		1986.8	0.01151687		2516.8	-0.00299348
396.99	0.02038003		927	0.01340194		1456.99	0.00953878		1987	0.01136522		2517	-0.00398014
397.19	0.02021352		927.2	0.01183016		1457.19	0.00996403		1987.2	0.01171718		2517.2	-0.00382375
397.39	0.01974088		927.4	0.01231664		1457.39	0.01005892		1987.4	0.01203595		2517.4	-0.00441617
397.59	0.01957678		927.6	0.01206869		1457.59	0.00976906		1987.6	0.01201995		2517.6	-0.0044561
397.79	0.01918048		927.8	0.01223987		1457.79	0.01073334		1987.8	0.01174925		2517.8	-0.00497026
397.99	0.01911428		928	0.010894		1457.99	0.01059006		1988	0.01191263		2518	-0.00461737
398.19	0.01897746		928.2	0.01111188		1458.19	0.0101755		1988.2	0.01270802		2518.2	-0.00453527
398.39	0.01900833		928.4	0.01081508		1458.39	0.01128804		1988.4	0.01378		2518.4	-0.00399243
398.59	0.01874156		928.6	0.01094274		1458.59	0.01115437		1988.6	0.01307611		2518.6	-0.00386694
398.79	0.01846032		928.8	0.01112386		1458.79	0.01145927		1988.8	0.01294908		2518.8	-0.00357814
398.99	0.01848632		929	0.0123976		1458.99	0.01036973		1989	0.01331252		2519	-0.00368026
399.19	0.01834726		929.2	0.01254581		1459.19	0.00995865		1989.2	0.01282495		2519.2	-0.00373938
399.39	0.01861703		929.4	0.01292215		1459.39	0.00998278		1989.4	0.01250254		2519.4	-0.00355009
399.59	0.01833637		929.6	0.01280357		1459.59	0.01006709		1989.6	0.01318664		2519.6	-0.0035208
399.79	0.01732837		929.8	0.01295649		1459.79	0.0105715		1989.8	0.01293404		2519.8	-0.00405324
399.99	0.01730878		930	0.0132854		1459.99	0.01127024		1990	0.01313384		2520	-0.00482177
400.19	0.01883479		930.2	0.01403146		1460.19	0.01168902		1990.2	0.01217983		2520.2	-0.0051794
400.39	0.01897043		930.4	0.01410445		1460.39	0.01256309		1990.4	0.01240726		2520.4	-0.00496582
400.59	0.01917966		930.6	0.01405495		1460.59	0.01215619		1990.6	0.01188416		2520.6	-0.00529342
400.79	0.01760711		930.8	0.01420978		1460.79	0.01230787		1990.8	0.01166598		2520.8	-0.00630406
400.99	0.01673115		931	0.01411061		1460.99	0.0121251		1991	0.01185225		2521	-0.00512091
401.19	0.01613344		931.2	0.01394681		1461.19	0.01233276		1991.2	0.01168103		2521.2	-0.00449095
401.39	0.01501702		931.4	0.01442098		1461.39	0.010643		1991.4	0.01167212		2521.4	-0.00442829
401.59	0.01424187		931.6	0.01469748		1461.59	0.01012665		1991.6	0.01087079		2521.6	-0.0044732
401.79	0.01453666		931.8	0.01455808		1461.79	0.00945701		1991.8	0.01007548		2521.8	-0.00398843
401.99	0.01518187		932	0.0136841		1461.99	0.00967953		1992	0.01026904		2522	-0.00319455
402.19	0.01511679		932.2	0.01394947		1462.19	0.01013656		1992.2	0.01055303		2522.2	-0.00277924
402.39	0.01511586		932.4	0.0128989		1462.39	0.01025583		1992.4	0.01027592		2522.4	-0.00207693
402.59	0.01503858		932.6	0.01249241		1462.59	0.01044014		1992.6	0.00852423		2522.6	-0.00155885
402.79	0.01394043		932.8	0.01275803		1462.79	0.01011053		1992.8	0.00908932		2522.8	-0.002189
402.99	0.01377558		933	0.01302256		1462.99	0.00967786		1993	0.00946496		2523	-0.00263607
403.19	0.01363713		933.2	0.01149816		1463.19	0.00975545		1993.2	0.01002536		2523.2	-0.00240873
403.39	0.0138498		933.4	0.01085706		1463.39	0.00941971		1993.4	0.00989297		2523.4	-0.00250796
403.59	0.01405391		933.6	0.01039226		1463.59	0.00992247		1993.6	0.01028352		2523.6	-0.00308244
403.79	0.01485328		933.8	0.01135402		1463.79	0.01020584		1993.8	0.00932431		2523.8	-0.00315294
403.99	0.01593129		934	0.01158522		1463.99	0.01043984		1994	0.00985314		2524	-0.00352263
404.19	0.01699077		934.2	0.0127729		1464.19	0.01053085		1994.2	0.00987039		2524.2	-0.00280282
404.39	0.01758246		934.4	0.01305569		1464.39	0.01152106		1994.4	0.01069079		2524.4	-0.0030753
404.59	0.01723638		934.6	0.01278843		1464.59	0.01126862		1994.6	0.01094802		2524.6	-0.00452941
404.79	0.01662497		934.8	0.01312483		1464.79	0.01179334		1994.8	0.01103908		2524.8	-0.00479453
404.99	0.01668842		935	0.01327938		1464.99	0.01241112		1995	0.01115367		2525	-0.00428936
405.19	0.01634454		935.2	0.01327681		1465.19	0.01233609		1995.2	0.01123818		2525.2	-0.00452768
405.39	0.0158869		935.4	0.01384498		1465.39	0.01232263		1995.4	0.01173979		2525.4	-0.00426762
405.59	0.01569727		935.6	0.01370148		1465.59	0.01235345		1995.6	0.01181724		2525.6	-0.00406779
405.79	0.01600969		935.8	0.01403783		1465.79	0.01273895		1995.8	0.01219056		2525.8	-0.0040121
405.99	0.01622675		936	0.01374629		1465.99	0.01333712		1996	0.01222243		2526	-0.00466203
406.19	0.0158995		936.2	0.01379013		1466.19	0.01322943		1996.2	0.01198423		2526.2	-0.00465312
406.39	0.01588439		936.4	0.01256195		1466.39	0.01350253		1996.4	0.01172453		2526.4	-0.00424763
406.59	0.01577435		936.6	0.01209637		1466.59	0.01334167		1996.6	0.01128583		2526.6	-0.0044062
406.79	0.01548549		936.8	0.01148544		1466.79	0.01319355		1996.8	0.0117405		2526.8	-0.00440902
406.99	0.01604517		937	0.01062023		1466.99	0.01251623		1997	0.01230418		2527	-0.00442876
407.19	0.01646865		937.2	0.00973861		1467.19	0.01101878		1997.2	0.01281694		2527.2	-0.00371936
407.39	0.01634646		937.4	0.0094987		1467.39	0.00948699		1997.4	0.01231175		2527.4	-0.00364057
407.59	0.01682348		937.6	0.00927199		1467.59	0.00905577		1997.6	0.0129218		2527.6	-0.00344105
407.79	0.01739772		937.8	0.00994534		1467.79	0.00891869		1997.8	0.01232117		2527.8	-0.00235783
407.99	0.01782054		938	0.0105874		1467.99	0.00938516		1998	0.01241579		2528	-0.00330213
408.19	0.01781386		938.2	0.01204517		1468.19	0.01015559		1998.2	0.01248872		2528.2	-0.00342661
408.39	0.01821792		938.4	0.01239839		1468.39	0.01169736		1998.4	0.0125836		2528.4	-0.00330341
408.59	0.01748378		938.6	0.01297271		1468.59	0.01289863		1998.6	0.01210931		2528.6	-0.0042989
408.79	0.01835393		938.8	0.01355166		1468.79	0.01336993		1998.8	0.01133026		2528.8	-0.00397215
408.99	0.01833986		939	0.01359719		1468.99	0.01416212		1999	0.01106604		2529	-0.00362122
409.19	0.01821988		939.2	0.01332709		1469.19	0.01408625		1999.2	0.01088077		2529.2	-0.00342356
409.39	0.01778134		939.4	0.0145278		1469.39	0.01454747		1999.4	0.01055785		2529.4	-0.00335359
409.59	0.01721737		939.6	0.01444142		1469.59	0.01458717		1999.6	0.01039359		2529.6	-0.00327735
409.79	0.01716407		939.8	0.01495208		1469.79	0.01537833		1999.8	0.0094009		2529.8	-0.00438418
409.99	0.01734652		940	0.01473054		1469.99	0.014862		2000	0.00862745		2530	-0.00474025
410.19	0.01744779		940.2	0.01486543		1470.19	0.0145061		2000.2	0.00783542		2530.2	-0.00405526
410.39	0.01830253		940.4	0.01371248		1470.39	0.01469328		2000.4	0.00795762		2530.4	-0.00378941
410.59	0.01846188		940.6	0.0135388		1470.59	0.01342114		2000.6	0.00761128		2530.6	-0.00382327
410.79	0.01784505		940.8	0.01333723		1470.79	0.01279991		2000.8	0.0074734		2530.8	-0.00356885
410.99	0.01701647		941	0.01274974		1470.99	0.01110118		2001	0.00823146		2531	-0.00316196
411.19	0.01728261		941.2	0.01269145		1471.19	0.01074413		2001.2	0.00877331		2531.2	-0.00282007
411.39	0.01630648		941.4	0.01218571		1471.39	0.01003304		2001.4	0.00903496		2531.4	-0.00291244
411.59	0.01654741		941.6	0.01249753		1471.59	0.01057747		2001.6	0.00993989		2531.6	-0.00331858
411.79	0.01664909		941.8	0.0129907		1471.79	0.01095763		2001.8	0.00977513		2531.8	-0.00343643
411.99	0.01657707		942	0.01341861		1471.99	0.01116797		2002	0.01063334		2532	-0.00377365
412.19	0.01573935		942.2	0.01397971		1472.19	0.01163884		2002.2	0.01108487		2532.2	-0.00348644
412.39	0.01567116		942.4	0.01358729		1472.39	0.01225272		2002.4	0.01149535		2532.4	-0.0033347
412.59	0.01582888		942.6	0.01306897		1472.59	0.01268033		2002.6	0.01154801		2532.6	-0.00312154
412.79	0.0163436		942.8	0.01274476		1472.79	0.01267268		2002.8	0.01208075		2532.8	-0.00272338
412.99	0.01566384		943	0.01245995		1472.99	0.01280393		2003	0.01140828		2533	-0.00225558
413.19	0.01539135		943.2	0.01198487		1473.19	0.01272985		2003.2	0.01162123		2533.2	-0.00232459
413.39	0.01476717		943.4	0.01261006		1473.39	0.01313127		2003.4	0.01082788		2533.4	-0.00132675
413.59	0.01466899		943.6	0.01215245		1473.59	0.01308266		2003.6	0.01009041		2533.6	-0.00123108
413.79	0.01472568		943.8	0.01303304		1473.79	0.01311923		2003.8	0.00963511		2533.8	-0.00198883
413.99	0.01489049		944	0.01397222		1473.99	0.01315646		2004	0.00998423		2534	-0.00195579
414.19	0.0148249		944.2	0.01398463		1474.19	0.0127764		2004.2	0.0096165		2534.2	-0.00123056
414.39	0.0143767		944.4	0.0131406		1474.39	0.01234062		2004.4	0.01077018		2534.4	-0.00110429
414.59	0.01344419		944.6	0.01344491		1474.59	0.01123403		2004.6	0.01095282		2534.6	-0.00165092
414.79	0.01245417		944.8	0.01410292		1474.79	0.01100706		2004.8	0.0111849		2534.8	-0.00175138
414.99	0.01250865		945	0.01427405		1474.99	0.01116158		2005	0.0109663		2535	-0.00220324
415.19	0.01292288		945.2	0.01480452		1475.19	0.01198916		2005.2	0.01108059		2535.2	-0.00358918
415.39	0.01214773		945.4	0.01476061		1475.39	0.01195343		2005.4	0.01155727		2535.4	-0.00360248
415.59	0.01298099		945.6	0.01505156		1475.59	0.01223374		2005.6	0.01178023		2535.6	-0.00404254
415.79	0.01279349		945.8	0.01431034		1475.79	0.01225865		2005.8	0.01241762		2535.8	-0.00408231
415.99	0.0125328		946	0.01402845		1475.99	0.01234839		2006	0.01287212		2536	-0.00411546
416.19	0.0125637		946.2	0.01405162		1476.19	0.01237117		2006.2	0.01264698		2536.2	-0.00482871
416.39	0.0130268		946.4	0.01304822		1476.39	0.01173325		2006.4	0.01234448		2536.4	-0.00422076
416.59	0.01383361		946.6	0.01295767		1476.59	0.01116702		2006.6	0.01205795		2536.6	-0.0038391
416.79	0.01472737		946.8	0.01287252		1476.79	0.01152163		2006.8	0.01191492		2536.8	-0.0041447
416.99	0.01484737		947	0.0130938		1476.99	0.01174704		2007	0.01092363		2537	-0.00419628
417.19	0.01533353		947.2	0.01320604		1477.19	0.01222525		2007.2	0.01116513		2537.2	-0.00382618
417.39	0.01588186		947.4	0.0138451		1477.39	0.01168348		2007.4	0.00995087		2537.4	-0.00333474
417.59	0.01624615		947.6	0.01404368		1477.59	0.01171785		2007.6	0.00954736		2537.6	-0.00383479
417.79	0.01666622		947.8	0.01440224		1477.79	0.01190756		2007.8	0.00998806		2537.8	-0.00384649
417.99	0.01683599		948	0.01405371		1477.99	0.01245335		2008	0.0096694		2538	-0.00349033
418.19	0.01669356		948.2	0.01413653		1478.19	0.0118768		2008.2	0.00919043		2538.2	-0.00337551
418.39	0.01592297		948.4	0.01452652		1478.39	0.01139656		2008.4	0.01001686		2538.4	-0.00404783
418.59	0.01587429		948.6	0.01566938		1478.59	0.01106924		2008.6	0.00991728		2538.6	-0.00451163
418.79	0.01545043		948.8	0.0155689		1478.79	0.01138564		2008.8	0.00896568		2538.8	-0.00434002
418.99	0.01614871		949	0.01573212		1478.99	0.01144373		2009	0.00910737		2539	-0.00441551
419.19	0.01616363		949.2	0.01523928		1479.19	0.01216916		2009.2	0.01067317		2539.2	-0.0042033
419.39	0.01626007		949.4	0.01537366		1479.39	0.01159315		2009.4	0.01096246		2539.4	-0.00271192
419.59	0.01588272		949.6	0.01442446		1479.59	0.01137158		2009.6	0.01120206		2539.6	-0.00256638
419.79	0.01555706		949.8	0.0140016		1479.79	0.01166991		2009.8	0.01213296		2539.8	-0.00234702
419.99	0.01573275		950	0.01386772		1479.99	0.0110377		2010	0.01171115		2540	-0.00252358
420.19	0.01582931		950.2	0.01322027		1480.19	0.01080692		2010.2	0.01192479		2540.2	-0.00196467
420.39	0.01559423		950.4	0.01207152		1480.39	0.01048867		2010.4	0.01206602		2540.4	-0.00168485
420.59	0.01617529		950.6	0.01245529		1480.59	0.01090063		2010.6	0.01284023		2540.6	-0.00211588
420.79	0.01613918		950.8	0.01209064		1480.79	0.01153461		2010.8	0.01313056		2540.8	-0.00200487
420.99	0.01556463		951	0.01255397		1480.99	0.01139743		2011	0.01378234		2541	-0.00196081
421.19	0.01523026		951.2	0.01206149		1481.19	0.01150055		2011.2	0.01357489		2541.2	-0.0016882
421.39	0.01505775		951.4	0.01184258		1481.39	0.01111874		2011.4	0.01330882		2541.4	-0.00189481
421.59	0.01437445		951.6	0.01118142		1481.59	0.01172492		2011.6	0.01309494		2541.6	-0.00186968
421.79	0.01471088		951.8	0.01114595		1481.79	0.01203616		2011.8	0.01279556		2541.8	-0.00173903
421.99	0.01414071		952	0.01220473		1481.99	0.01294672		2012	0.01220631		2542	-0.00315489
422.19	0.01373859		952.2	0.01324182		1482.19	0.01242637		2012.2	0.0118811		2542.2	-0.00346126
422.39	0.01335736		952.4	0.01361491		1482.39	0.01207456		2012.4	0.01134813		2542.4	-0.00417491
422.59	0.01279881		952.6	0.01361826		1482.59	0.01169775		2012.6	0.01062498		2542.6	-0.00370699
422.79	0.01305379		952.8	0.01388858		1482.79	0.01093069		2012.8	0.01007283		2542.8	-0.00384617
422.99	0.01324125		953	0.01475996		1482.99	0.01054728		2013	0.01012256		2543	-0.00371959
423.19	0.01343171		953.2	0.01527419		1483.19	0.01020534		2013.2	0.01001249		2543.2	-0.00390994
423.39	0.01334279		953.4	0.01597323		1483.39	0.00924414		2013.4	0.00909108		2543.4	-0.00316258
423.59	0.0128693		953.6	0.01616669		1483.59	0.01008971		2013.6	0.00886751		2543.6	-0.00346212
423.79	0.01378237		953.8	0.01696864		1483.79	0.01099078		2013.8	0.00882365		2543.8	-0.00313369
423.99	0.01439762		954	0.01713677		1483.99	0.01091899		2014	0.00904384		2544	-0.00286745
424.19	0.01405311		954.2	0.01654871		1484.19	0.01160362		2014.2	0.00955467		2544.2	-0.00257295
424.39	0.0140801		954.4	0.01653771		1484.39	0.01146176		2014.4	0.01015603		2544.4	-0.00283219
424.59	0.01416135		954.6	0.01620149		1484.59	0.01130493		2014.6	0.0102011		2544.6	-0.00319537
424.79	0.01315913		954.8	0.01576798		1484.79	0.01133985		2014.8	0.01104567		2544.8	-0.00341008
424.99	0.01277773		955	0.01603425		1484.99	0.01197493		2015	0.01154787		2545	-0.00363436
425.19	0.01292942		955.2	0.01493475		1485.19	0.01319009		2015.2	0.01080595		2545.2	-0.00403748
425.39	0.01285717		955.4	0.01506711		1485.39	0.01311935		2015.4	0.01080179		2545.4	-0.00488553
425.59	0.01217588		955.6	0.01408285		1485.59	0.01390836		2015.6	0.01061571		2545.6	-0.00528647
425.79	0.01261538		955.8	0.01419865		1485.79	0.01337568		2015.8	0.01156028		2545.8	-0.00615611
425.99	0.01262354		956	0.01382963		1485.99	0.01335026		2016	0.01110942		2546	-0.00657462
426.19	0.01226455		956.2	0.0142641		1486.19	0.01245588		2016.2	0.01181387		2546.2	-0.00624711
426.39	0.01227369		956.4	0.01413575		1486.39	0.01197997		2016.4	0.01166106		2546.4	-0.00629101
426.59	0.01150825		956.6	0.01358181		1486.59	0.01192583		2016.6	0.01190205		2546.6	-0.00598213
426.79	0.01196452		956.8	0.013369		1486.79	0.01201838		2016.8	0.01163733		2546.8	-0.00611417
426.99	0.01183485		957	0.01325223		1486.99	0.01198869		2017	0.01217749		2547	-0.00551244
427.19	0.01273516		957.2	0.01297132		1487.19	0.01136778		2017.2	0.01208617		2547.2	-0.00562544
427.39	0.01179911		957.4	0.01313788		1487.39	0.01185275		2017.4	0.01170838		2547.4	-0.0045679
427.59	0.01224146		957.6	0.0129268		1487.59	0.01281688		2017.6	0.0115205		2547.6	-0.00395587
427.79	0.01275181		957.8	0.0129256		1487.79	0.01293256		2017.8	0.01194952		2547.8	-0.00309645
427.99	0.01314116		958	0.01251851		1487.99	0.01219091		2018	0.01205587		2548	-0.00299173
428.19	0.01271459		958.2	0.01119567		1488.19	0.01224625		2018.2	0.01162635		2548.2	-0.00358295
428.39	0.01262661		958.4	0.01108267		1488.39	0.01199208		2018.4	0.01180472		2548.4	-0.00324716
428.59	0.01258464		958.6	0.01091114		1488.59	0.01231638		2018.6	0.01168617		2548.6	-0.00451494
428.79	0.01250707		958.8	0.01173766		1488.79	0.01288847		2018.8	0.01250973		2548.8	-0.00446733
428.99	0.01226647		959	0.01158798		1488.99	0.01309198		2019	0.01149559		2549	-0.00424917
429.19	0.01272988		959.2	0.01116987		1489.19	0.01288267		2019.2	0.01073746		2549.2	-0.00477205
429.39	0.01256866		959.4	0.01181276		1489.39	0.01281124		2019.4	0.01045498		2549.4	-0.00518009
429.59	0.01313939		959.6	0.01171473		1489.59	0.0131095		2019.6	0.01114901		2549.6	-0.00478207
429.79	0.01333936		959.8	0.01253386		1489.79	0.01265034		2019.8	0.01164005		2549.8	-0.00486727
429.99	0.01328294		960	0.01319787		1489.99	0.01296974		2020	0.01130462		2550	-0.00420653
430.19	0.0122605		960.2	0.01391728		1490.19	0.01316608		2020.2	0.01302545		2550.2	-0.00406717
430.39	0.01241511		960.4	0.0135887		1490.39	0.01414001		2020.4	0.01304598		2550.4	-0.0034326
430.59	0.01223321		960.6	0.01276325		1490.59	0.01551791		2020.6	0.01295998		2550.6	-0.00282314
430.79	0.01184558		960.8	0.01259835		1490.79	0.01572065		2020.8	0.01312588		2550.8	-0.00319344
430.99	0.01206853		961	0.01315516		1490.99	0.0148075		2021	0.013305		2551	-0.00333077
431.19	0.01171629		961.2	0.01287062		1491.19	0.01429604		2021.2	0.01208717		2551.2	-0.00323817
431.39	0.01135822		961.4	0.01209619		1491.39	0.01517185		2021.4	0.01139838		2551.4	-0.00230282
431.59	0.01153279		961.6	0.01085718		1491.59	0.01451745		2021.6	0.01168425		2551.6	-0.00185749
431.79	0.0116648		961.8	0.01070163		1491.79	0.01382838		2021.8	0.0111091		2551.8	-0.001907
431.99	0.01234614		962	0.01009494		1491.99	0.0134758		2022	0.01105128		2552	-0.00129199
432.19	0.01173347		962.2	0.00937087		1492.19	0.01254776		2022.2	0.01086565		2552.2	-0.00186724
432.39	0.01221598		962.4	0.00948102		1492.39	0.01335467		2022.4	0.01115957		2552.4	-0.00081442
432.59	0.01292426		962.6	0.00918895		1492.59	0.01365555		2022.6	0.01127293		2552.6	-0.00144137
432.79	0.01333726		962.8	0.0091034		1492.79	0.01347168		2022.8	0.01069292		2552.8	-0.00119017
432.99	0.01328414		963	0.00806719		1492.99	0.0130161		2023	0.00949946		2553	-0.00146633
433.19	0.01409828		963.2	0.00831338		1493.19	0.01362772		2023.2	0.00942463		2553.2	-0.00210512
433.39	0.01480507		963.4	0.00962368		1493.39	0.01403319		2023.4	0.00921789		2553.4	-0.00217791
433.59	0.01470876		963.6	0.00995334		1493.59	0.01398052		2023.6	0.00941895		2553.6	-0.00190535
433.79	0.01392165		963.8	0.01048032		1493.79	0.01369394		2023.8	0.00939162		2553.8	-0.00221102
433.99	0.01338489		964	0.01179665		1493.99	0.01336602		2024	0.0092007		2554	-0.00194821
434.19	0.01360898		964.2	0.01232015		1494.19	0.01392694		2024.2	0.01006221		2554.2	-0.00182146
434.39	0.01362247		964.4	0.01295738		1494.39	0.01413691		2024.4	0.00986948		2554.4	-0.00215974
434.59	0.01364279		964.6	0.01304249		1494.59	0.01340155		2024.6	0.0101218		2554.6	-0.00173437
434.79	0.01396386		964.8	0.0136301		1494.79	0.0124426		2024.8	0.00987016		2554.8	-0.00269909
434.99	0.0149437		965	0.01383093		1494.99	0.01139723		2025	0.00970911		2555	-0.00249191
435.19	0.01479636		965.2	0.01373156		1495.19	0.01044251		2025.2	0.00992885		2555.2	-0.00178805
435.39	0.01558442		965.4	0.01306406		1495.39	0.01038299		2025.4	0.00916984		2555.4	-0.00172448
435.59	0.01587277		965.6	0.01291869		1495.59	0.00932667		2025.6	0.01019533		2555.6	-0.00204733
435.79	0.01687812		965.8	0.0135352		1495.79	0.01000222		2025.8	0.00979857		2555.8	-0.00124777
435.99	0.01693994		966	0.01310509		1495.99	0.01017838		2026	0.01046875		2556	-0.00023887
436.19	0.01673133		966.2	0.01295771		1496.19	0.00994747		2026.2	0.01033018		2556.2	-0.00109432
436.39	0.01740109		966.4	0.01269434		1496.39	0.01170743		2026.4	0.01028295		2556.4	-0.00080951
436.59	0.01738153		966.6	0.01233026		1496.59	0.011468		2026.6	0.00989777		2556.6	-0.00065862
436.79	0.01716363		966.8	0.01211612		1496.79	0.01217728		2026.8	0.0090881		2556.8	-0.00161794
436.99	0.01700727		967	0.01158183		1496.99	0.01318366		2027	0.00858927		2557	-0.00202164
437.19	0.01645625		967.2	0.01187233		1497.19	0.01376874		2027.2	0.00918112		2557.2	-0.00219014
437.39	0.01629333		967.4	0.01249567		1497.39	0.01411958		2027.4	0.00958962		2557.4	-0.00273895
437.59	0.01576162		967.6	0.01234905		1497.59	0.01498063		2027.6	0.01016384		2557.6	-0.00277954
437.79	0.01598258		967.8	0.01276526		1497.79	0.0155972		2027.8	0.01100861		2557.8	-0.0032682
437.99	0.01589017		968	0.0132959		1497.99	0.01617578		2028	0.01104759		2558	-0.00339997
438.19	0.01583858		968.2	0.01301023		1498.19	0.01628576		2028.2	0.01139387		2558.2	-0.00395373
438.39	0.01571204		968.4	0.01305825		1498.39	0.01611948		2028.4	0.01123906		2558.4	-0.00401975
438.59	0.01561242		968.6	0.01294159		1498.59	0.01531762		2028.6	0.01230986		2558.6	-0.00330541
438.79	0.01595143		968.8	0.01260899		1498.79	0.01533837		2028.8	0.01235609		2558.8	-0.003521
438.99	0.01563151		969	0.01261641		1498.99	0.01464758		2029	0.01290432		2559	-0.00340561
439.19	0.01565219		969.2	0.01244213		1499.19	0.01391348		2029.2	0.01286946		2559.2	-0.0035445
439.39	0.0157324		969.4	0.01274703		1499.39	0.01412434		2029.4	0.01228637		2559.4	-0.00434693
439.59	0.01588936		969.6	0.01245542		1499.59	0.01422812		2029.6	0.01245622		2559.6	-0.00386165
439.79	0.01565104		969.8	0.01234117		1499.79	0.01498123		2029.8	0.01189633		2559.8	-0.00265143
439.99	0.0147113		970	0.01191022		1499.99	0.01477273		2030	0.01194621		2560	-0.00295379
440.19	0.01434035		970.2	0.01149512		1500.19	0.01429322		2030.2	0.01118633		2560.2	-0.0031111
440.39	0.01347945		970.4	0.0111465		1500.39	0.01470764		2030.4	0.01061759		2560.4	-0.00267151
440.59	0.01307174		970.6	0.01155048		1500.59	0.01459685		2030.6	0.01022353		2560.6	-0.00146698
440.79	0.01275274		970.8	0.01209302		1500.79	0.01488584		2030.8	0.01021726		2560.8	-0.00181629
440.99	0.01247491		971	0.01251508		1500.99	0.0155598		2031	0.01026687		2561	-0.00223893
441.19	0.01219023		971.2	0.01258546		1501.19	0.01558775		2031.2	0.01116136		2561.2	-0.00237084
441.39	0.01268277		971.4	0.01309444		1501.39	0.01586016		2031.4	0.01182072		2561.4	-0.003193
441.59	0.01358237		971.6	0.01326267		1501.59	0.01635445		2031.6	0.0123783		2561.6	-0.00304845
441.79	0.01478301		971.8	0.01320016		1501.79	0.01605205		2031.8	0.01287569		2561.8	-0.0038166
441.99	0.01545096		972	0.0136102		1501.99	0.01589448		2032	0.01299948		2562	-0.00400313
442.19	0.01547383		972.2	0.0146733		1502.19	0.01518459		2032.2	0.01377128		2562.2	-0.00443858
442.39	0.01545905		972.4	0.0152997		1502.39	0.01464493		2032.4	0.01463364		2562.4	-0.00403387
442.59	0.01482155		972.6	0.01531696		1502.59	0.01415259		2032.6	0.0155378		2562.6	-0.00411424
442.79	0.01511454		972.8	0.01513432		1502.79	0.01430434		2032.8	0.01595659		2562.8	-0.00446135
442.99	0.01443814		973	0.01587354		1502.99	0.01375332		2033	0.01601392		2563	-0.00519421
443.19	0.01461002		973.2	0.01646072		1503.19	0.0130219		2033.2	0.01547716		2563.2	-0.00539018
443.39	0.01425176		973.4	0.01684809		1503.39	0.01277554		2033.4	0.01515219		2563.4	-0.00522951
443.59	0.01464668		973.6	0.01666952		1503.59	0.01170193		2033.6	0.01440912		2563.6	-0.00436745
443.79	0.01333149		973.8	0.01617789		1503.79	0.01241941		2033.8	0.01429694		2563.8	-0.0036485
443.99	0.01286554		974	0.01554163		1503.99	0.01152258		2034	0.0139868		2564	-0.00326992
444.19	0.01249572		974.2	0.01407524		1504.19	0.01101429		2034.2	0.01313208		2564.2	-0.00274514
444.39	0.011779		974.4	0.01500735		1504.39	0.01181131		2034.4	0.01305679		2564.4	-0.00155251
444.59	0.01111036		974.6	0.01489742		1504.59	0.01171524		2034.6	0.01248961		2564.6	-0.00036618
444.79	0.01011298		974.8	0.01418352		1504.79	0.01137903		2034.8	0.01218721		2564.8	-0.00063663
444.99	0.00961684		975	0.01363944		1504.99	0.01218248		2035	0.01133454		2565	-0.00072433
445.19	0.00949347		975.2	0.01260774		1505.19	0.01174858		2035.2	0.0114215		2565.2	-0.00080927
445.39	0.01002888		975.4	0.01296027		1505.39	0.01209966		2035.4	0.01197301		2565.4	-0.00103073
445.59	0.011634		975.6	0.01274876		1505.59	0.01237685		2035.6	0.01221128		2565.6	-0.00109573
445.79	0.01205449		975.8	0.01348894		1505.79	0.01309935		2035.8	0.01248681		2565.8	-0.00182356
445.99	0.0118575		976	0.01385155		1505.99	0.01379899		2036	0.01259231		2566	-0.00233368
446.19	0.01133986		976.2	0.01439248		1506.19	0.01421696		2036.2	0.01253849		2566.2	-0.00242906
446.39	0.01060017		976.4	0.01444435		1506.39	0.01414577		2036.4	0.01184228		2566.4	-0.00191257
446.59	0.01034159		976.6	0.01397454		1506.59	0.01477765		2036.6	0.01191592		2566.6	-0.00233982
446.79	0.01018871		976.8	0.01473963		1506.79	0.01550255		2036.8	0.01233814		2566.8	-0.00293
446.99	0.00990242		977	0.01504606		1506.99	0.0149435		2037	0.01182886		2567	-0.0033798
447.19	0.0102268		977.2	0.0151691		1507.19	0.01458232		2037.2	0.01160993		2567.2	-0.0030066
447.39	0.01073922		977.4	0.01549086		1507.39	0.01437357		2037.4	0.01135037		2567.4	-0.00304792
447.59	0.01036516		977.6	0.01597074		1507.59	0.01443233		2037.6	0.01103029		2567.6	-0.00338278
447.79	0.01009276		977.8	0.01545852		1507.79	0.01524396		2037.8	0.01145786		2567.8	-0.00374454
447.99	0.01095844		978	0.01452905		1507.99	0.01451396		2038	0.01158552		2568	-0.00413696
448.19	0.01055194		978.2	0.01409413		1508.19	0.01408167		2038.2	0.01141547		2568.2	-0.00395297
448.39	0.00987963		978.4	0.01361205		1508.39	0.01479798		2038.4	0.01186865		2568.4	-0.003531
448.59	0.00940234		978.6	0.0118945		1508.59	0.01388972		2038.6	0.0121042		2568.6	-0.00383507
448.79	0.00962575		978.8	0.01128272		1508.79	0.01453102		2038.8	0.01236603		2568.8	-0.00388402
448.99	0.00903427		979	0.01091387		1508.99	0.01520888		2039	0.01306746		2569	-0.00384476
449.19	0.00945486		979.2	0.01060644		1509.19	0.01517964		2039.2	0.01296318		2569.2	-0.00402895
449.39	0.01030025		979.4	0.01131655		1509.39	0.01566282		2039.4	0.01355868		2569.4	-0.0042653
449.59	0.01113792		979.6	0.0118314		1509.59	0.01587212		2039.6	0.01320222		2569.6	-0.00527194
449.79	0.0108816		979.8	0.01266798		1509.79	0.01678996		2039.8	0.01281463		2569.8	-0.00497938
449.99	0.01163188		980	0.013419		1509.99	0.01644679		2040	0.01220579		2570	-0.00463336
450.19	0.01250462		980.2	0.0134329		1510.19	0.01627471		2040.2	0.01200527		2570.2	-0.00396932
450.39	0.01310189		980.4	0.01412138		1510.39	0.01572487		2040.4	0.01247573		2570.4	-0.00359932
450.59	0.0141144		980.6	0.01521386		1510.59	0.0167003		2040.6	0.01234084		2570.6	-0.00407553
450.79	0.01487788		980.8	0.01543739		1510.79	0.01603913		2040.8	0.01220151		2570.8	-0.00410758
450.99	0.01523508		981	0.01547692		1510.99	0.01544514		2041	0.01149773		2571	-0.00399047
451.19	0.0153184		981.2	0.01602688		1511.19	0.01552766		2041.2	0.01142307		2571.2	-0.00441804
451.39	0.01578103		981.4	0.01725506		1511.39	0.01513327		2041.4	0.01134742		2571.4	-0.00604648
451.59	0.0151289		981.6	0.01665002		1511.59	0.01486085		2041.6	0.01143064		2571.6	-0.00692179
451.79	0.0146978		981.8	0.01590424		1511.79	0.01370631		2041.8	0.01200897		2571.8	-0.00744332
451.99	0.01382716		982	0.01462265		1511.99	0.01330299		2042	0.01185538		2572	-0.00738206
452.19	0.01305678		982.2	0.01397721		1512.19	0.01276139		2042.2	0.01211915		2572.2	-0.00746532
452.39	0.0120975		982.4	0.01323908		1512.39	0.01349661		2042.4	0.01294076		2572.4	-0.0070752
452.59	0.01215389		982.6	0.0130987		1512.59	0.01331903		2042.6	0.01297446		2572.6	-0.00739128
452.79	0.01198017		982.8	0.01280987		1512.79	0.01394563		2042.8	0.01299813		2572.8	-0.00721987
452.99	0.01084351		983	0.01207209		1512.99	0.01393024		2043	0.01255679		2573	-0.00745035
453.19	0.01141189		983.2	0.01245374		1513.19	0.01388919		2043.2	0.01164735		2573.2	-0.00664521
453.39	0.01177314		983.4	0.0131636		1513.39	0.01416744		2043.4	0.0121777		2573.4	-0.00702263
453.59	0.01188118		983.6	0.01347167		1513.59	0.01441228		2043.6	0.01183551		2573.6	-0.00657382
453.79	0.01169014		983.8	0.01284574		1513.79	0.0145351		2043.8	0.01201957		2573.8	-0.00579366
453.99	0.01264271		984	0.01277835		1513.99	0.01409803		2044	0.01125765		2574	-0.00557923
454.19	0.0136093		984.2	0.01211365		1514.19	0.01488159		2044.2	0.01187921		2574.2	-0.00485722
454.39	0.01333852		984.4	0.01269533		1514.39	0.01546295		2044.4	0.01171137		2574.4	-0.00469913
454.59	0.01352485		984.6	0.01220878		1514.59	0.01514312		2044.6	0.01096301		2574.6	-0.0043721
454.79	0.01312684		984.8	0.01148167		1514.79	0.01440316		2044.8	0.01055394		2574.8	-0.00444421
454.99	0.01231283		985	0.01185432		1514.99	0.01398981		2045	0.00997023		2575	-0.00497144
455.19	0.01211123		985.2	0.01155723		1515.19	0.0138652		2045.2	0.01062126		2575.2	-0.00588743
455.39	0.01258422		985.4	0.01170883		1515.39	0.01357892		2045.4	0.01111179		2575.4	-0.00621278
455.59	0.01199793		985.6	0.01128197		1515.59	0.01284589		2045.6	0.01143979		2575.6	-0.00576438
455.79	0.01126046		985.8	0.0112239		1515.79	0.01283525		2045.8	0.01183173		2575.8	-0.00613142
455.99	0.0100376		986	0.01113748		1515.99	0.01324075		2046	0.01245453		2576	-0.00611735
456.19	0.0103346		986.2	0.01254394		1516.19	0.01262461		2046.2	0.01276505		2576.2	-0.00545446
456.39	0.01030863		986.4	0.01368296		1516.39	0.01234293		2046.4	0.01244709		2576.4	-0.005434
456.59	0.01056778		986.6	0.01412783		1516.59	0.01209958		2046.6	0.01217632		2576.6	-0.00574489
456.79	0.0105398		986.8	0.01458635		1516.79	0.01221877		2046.8	0.01167091		2576.8	-0.00555884
456.99	0.01087671		987	0.01540438		1516.99	0.01213064		2047	0.01103142		2577	-0.00529298
457.19	0.01150652		987.2	0.01600047		1517.19	0.01238977		2047.2	0.01116377		2577.2	-0.00506365
457.39	0.01129093		987.4	0.01586054		1517.39	0.01355592		2047.4	0.01149326		2577.4	-0.00620438
457.59	0.01102724		987.6	0.01519942		1517.59	0.0134808		2047.6	0.01105855		2577.6	-0.00633973
457.79	0.01092892		987.8	0.01488324		1517.79	0.01337719		2047.8	0.0112782		2577.8	-0.00597202
457.99	0.01092414		988	0.01529947		1517.99	0.0136276		2048	0.01010536		2578	-0.00533157
458.19	0.01075482		988.2	0.01586702		1518.19	0.01374897		2048.2	0.01097926		2578.2	-0.00484122
458.39	0.01051218		988.4	0.01590657		1518.39	0.01381197		2048.4	0.00983673		2578.4	-0.00447211
458.59	0.01058367		988.6	0.01560245		1518.59	0.01328361		2048.6	0.00967084		2578.6	-0.00396344
458.79	0.01025132		988.8	0.01527876		1518.79	0.01310177		2048.8	0.00889643		2578.8	-0.0039725
458.99	0.01023041		989	0.01493742		1518.99	0.01271984		2049	0.00924934		2579	-0.00418692
459.19	0.01115535		989.2	0.01469486		1519.19	0.01352929		2049.2	0.00991799		2579.2	-0.00361962
459.39	0.0114395		989.4	0.01446056		1519.39	0.01395461		2049.4	0.0098244		2579.4	-0.00241715
459.59	0.01130322		989.6	0.01453655		1519.59	0.0138314		2049.6	0.01021867		2579.6	-0.00237838
459.79	0.01061068		989.8	0.01429422		1519.79	0.01420452		2049.8	0.00993182		2579.8	-0.00260678
459.99	0.0095316		990	0.01462971		1519.99	0.01379205		2050	0.0103962		2580	-0.00214856
460.19	0.00997474		990.2	0.0149036		1520.19	0.01324287		2050.2	0.00997807		2580.2	-0.00083148
460.39	0.00963946		990.4	0.01429245		1520.39	0.01296677		2050.4	0.01018958		2580.4	-0.00197489
460.59	0.00928972		990.6	0.01382712		1520.59	0.01345409		2050.6	0.01069703		2580.6	-0.00115444
460.79	0.00932903		990.8	0.01390436		1520.79	0.01398029		2050.8	0.01138451		2580.8	-0.00038316
460.99	0.00929497		991	0.01351933		1520.99	0.01379581		2051	0.01230073		2581	-0.00036271
461.19	0.00916639		991.2	0.01276712		1521.19	0.01502978		2051.2	0.01314178		2581.2	-0.00142715
461.39	0.00872665		991.4	0.01285572		1521.39	0.01561187		2051.4	0.01526891		2581.4	-0.00200684
461.59	0.00827765		991.6	0.01321705		1521.59	0.01445405		2051.6	0.01481812		2581.6	-0.00188033
461.79	0.00862087		991.8	0.01372372		1521.79	0.01446342		2051.8	0.01548342		2581.8	-0.00123671
461.99	0.00865172		992	0.01390168		1521.99	0.01471058		2052	0.0149256		2582	-0.00172164
462.19	0.00921102		992.2	0.01486473		1522.19	0.01482814		2052.2	0.01539105		2582.2	-0.00142654
462.39	0.00981341		992.4	0.01542287		1522.39	0.01603042		2052.4	0.01471759		2582.4	-0.00107559
462.59	0.00929252		992.6	0.0152332		1522.59	0.01533856		2052.6	0.01413606		2582.6	-0.00172697
462.79	0.00957747		992.8	0.01529449		1522.79	0.01575427		2052.8	0.01332967		2582.8	-0.00247018
462.99	0.0098833		993	0.01600218		1522.99	0.01618221		2053	0.01342595		2583	-0.00249427
463.19	0.01056148		993.2	0.01598041		1523.19	0.01625408		2053.2	0.01299127		2583.2	-0.00197294
463.39	0.01074214		993.4	0.01585968		1523.39	0.0167601		2053.4	0.01175934		2583.4	-0.00256388
463.59	0.01101242		993.6	0.01554342		1523.59	0.0165251		2053.6	0.01119591		2583.6	-0.00330643
463.79	0.01101716		993.8	0.01497793		1523.79	0.01628001		2053.8	0.009819		2583.8	-0.00409067
463.99	0.01117287		994	0.01434474		1523.99	0.01682609		2054	0.00984756		2584	-0.00390856
464.19	0.01149369		994.2	0.01366461		1524.19	0.01734789		2054.2	0.00955786		2584.2	-0.0041046
464.39	0.01142739		994.4	0.01316448		1524.39	0.01725004		2054.4	0.00931984		2584.4	-0.00432891
464.59	0.01094762		994.6	0.01293607		1524.59	0.01741886		2054.6	0.00974429		2584.6	-0.0031682
464.79	0.01005231		994.8	0.01288994		1524.79	0.01717773		2054.8	0.01028537		2584.8	-0.0032347
464.99	0.01049466		995	0.01174439		1524.99	0.01685284		2055	0.01045645		2585	-0.00444666
465.19	0.01053779		995.2	0.01122282		1525.19	0.01708365		2055.2	0.01105232		2585.2	-0.00520017
465.39	0.01050015		995.4	0.01119098		1525.39	0.01627825		2055.4	0.01167088		2585.4	-0.00495113
465.59	0.01038417		995.6	0.01135381		1525.59	0.01519305		2055.6	0.01109883		2585.6	-0.00482082
465.79	0.01034984		995.8	0.01137855		1525.79	0.01467059		2055.8	0.01210845		2585.8	-0.00447897
465.99	0.01016189		996	0.01208593		1525.99	0.01351216		2056	0.01209085		2586	-0.00511834
466.19	0.00890745		996.2	0.01322164		1526.19	0.013824		2056.2	0.01243473		2586.2	-0.00469777
466.39	0.00836277		996.4	0.01414988		1526.39	0.01348329		2056.4	0.01211807		2586.4	-0.00520166
466.59	0.00796942		996.6	0.013564		1526.59	0.01246753		2056.6	0.01111662		2586.6	-0.00484254
466.79	0.00742813		996.8	0.01399982		1526.79	0.01288835		2056.8	0.01088711		2586.8	-0.00406503
466.99	0.00767441		997	0.01345944		1526.99	0.01229843		2057	0.01109532		2587	-0.00388579
467.19	0.00822237		997.2	0.01251781		1527.19	0.01204146		2057.2	0.01042247		2587.2	-0.00389788
467.39	0.00828923		997.4	0.0120464		1527.39	0.01269062		2057.4	0.01010888		2587.4	-0.00424455
467.59	0.00977214		997.6	0.01143382		1527.59	0.01327189		2057.6	0.0096357		2587.6	-0.00335125
467.79	0.01142144		997.8	0.0114298		1527.79	0.01358683		2057.8	0.00965965		2587.8	-0.0035209
467.99	0.01164913		998	0.01164718		1527.99	0.01452913		2058	0.01040372		2588	-0.00328855
468.19	0.01153044		998.2	0.01089081		1528.19	0.01507014		2058.2	0.01105555		2588.2	-0.00283329
468.39	0.01088049		998.4	0.01050325		1528.39	0.01508177		2058.4	0.01089662		2588.4	-0.00228141
468.59	0.01052214		998.6	0.00977969		1528.59	0.01558423		2058.6	0.01145006		2588.6	-0.00247577
468.79	0.01095751		998.8	0.00991469		1528.79	0.01534553		2058.8	0.01155222		2588.8	-0.00361793
468.99	0.01167384		999	0.00906647		1528.99	0.01588891		2059	0.01139513		2589	-0.00422431
469.19	0.01145253		999.2	0.00890755		1529.19	0.01665557		2059.2	0.01163187		2589.2	-0.00454793
469.39	0.01137053		999.4	0.01014414		1529.39	0.01660168		2059.4	0.01175942		2589.4	-0.00464052
469.59	0.01044232		999.6	0.01148073		1529.59	0.01590617		2059.6	0.01190006		2589.6	-0.00543805
469.79	0.01005277		999.8	0.01226355		1529.79	0.01556218		2059.8	0.01237397		2589.8	-0.00594869
469.99	0.00982423		1000	0.01237737		1529.99	0.01594384		2060	0.01209148		2590	-0.00681977
470.19	0.00917676		1000.2	0.01222432		1530.19	0.01692395		2060.2	0.01193745		2590.2	-0.00658165
470.39	0.00939053		1000.4	0.0124569		1530.39	0.01641302		2060.4	0.01137414		2590.4	-0.00670512
470.59	0.0094548		1000.6	0.0111636		1530.59	0.01631701		2060.6	0.01111195		2590.6	-0.00665563
470.79	0.00917121		1000.8	0.01176751		1530.79	0.01629833		2060.8	0.01078073		2590.8	-0.00648842
470.99	0.00959742		1001	0.01118907		1530.99	0.0160279		2061	0.01140673		2591	-0.0061643
471.19	0.00989395		1001.2	0.01093087		1531.19	0.0156773		2061.2	0.01125712		2591.2	-0.0050105
471.39	0.01108442		1001.4	0.01147899		1531.39	0.01616636		2061.4	0.01192677		2591.4	-0.00527658
471.59	0.01226157		1001.6	0.01162698		1531.59	0.01601911		2061.6	0.01189001		2591.6	-0.00512172
471.79	0.01218125		1001.8	0.01232864		1531.79	0.01527681		2061.8	0.01307619		2591.8	-0.00574185
471.99	0.01112642		1002	0.01293651		1531.99	0.01549444		2062	0.01376179		2592	-0.00486105
472.19	0.01075196		1002.2	0.01306103		1532.19	0.01613215		2062.2	0.01428305		2592.2	-0.00356132
472.39	0.0101804		1002.4	0.01433498		1532.39	0.0159509		2062.4	0.01306955		2592.4	-0.00327262
472.59	0.01058401		1002.6	0.01449226		1532.59	0.01611101		2062.6	0.01351819		2592.6	-0.00383465
472.79	0.01094294		1002.8	0.01576601		1532.79	0.01549588		2062.8	0.01291639		2592.8	-0.00410609
472.99	0.01121828		1003	0.0152793		1532.99	0.0167992		2063	0.01217049		2593	-0.00435068
473.19	0.01130848		1003.2	0.01616287		1533.19	0.0170822		2063.2	0.01237474		2593.2	-0.00450597
473.39	0.01126245		1003.4	0.0174136		1533.39	0.01577064		2063.4	0.01196577		2593.4	-0.00494609
473.59	0.01095502		1003.6	0.01718413		1533.59	0.01562282		2063.6	0.0114643		2593.6	-0.00546077
473.79	0.01170246		1003.8	0.01681028		1533.79	0.01521066		2063.8	0.01217978		2593.8	-0.00518361
473.99	0.01200995		1004	0.01598605		1533.99	0.01527259		2064	0.01174641		2594	-0.00540955
474.19	0.01265962		1004.2	0.01618789		1534.19	0.01473662		2064.2	0.01156576		2594.2	-0.00550933
474.39	0.01340851		1004.4	0.01600448		1534.39	0.01373386		2064.4	0.01134851		2594.4	-0.0054752
474.59	0.01354302		1004.6	0.01479939		1534.59	0.01298182		2064.6	0.01128047		2594.6	-0.00550372
474.79	0.01403452		1004.8	0.01526657		1534.79	0.01220418		2064.8	0.01177996		2594.8	-0.00477748
474.99	0.01450843		1005	0.01418611		1534.99	0.01219024		2065	0.01175551		2595	-0.00473434
475.19	0.01502626		1005.2	0.01332557		1535.19	0.01194739		2065.2	0.01092116		2595.2	-0.00548996
475.39	0.01505751		1005.4	0.01375381		1535.39	0.01230542		2065.4	0.01111845		2595.4	-0.00602373
475.59	0.01440809		1005.6	0.01367848		1535.59	0.012522		2065.6	0.01147747		2595.6	-0.0062096
475.79	0.01434781		1005.8	0.01374562		1535.79	0.01359372		2065.8	0.01150059		2595.8	-0.00629964
475.99	0.01412653		1006	0.01365863		1535.99	0.01460964		2066	0.01144763		2596	-0.00518898
476.19	0.01453111		1006.2	0.01378817		1536.19	0.01535265		2066.2	0.01084134		2596.2	-0.00487521
476.39	0.01458512		1006.4	0.01441855		1536.39	0.01507358		2066.4	0.00999767		2596.4	-0.00499294
476.59	0.01519854		1006.6	0.01379135		1536.59	0.0157065		2066.6	0.01036958		2596.6	-0.0057306
476.79	0.01498836		1006.8	0.01366856		1536.79	0.01562665		2066.8	0.00980322		2596.8	-0.00486607
476.99	0.01487401		1007	0.01317908		1536.99	0.015911		2067	0.0095575		2597	-0.00552562
477.19	0.01410983		1007.2	0.01335695		1537.19	0.01594979		2067.2	0.01005121		2597.2	-0.00502021
477.39	0.01405549		1007.4	0.01276446		1537.39	0.01550606		2067.4	0.00997704		2597.4	-0.00542852
477.59	0.01386863		1007.6	0.012339		1537.59	0.0152557		2067.6	0.0100199		2597.6	-0.00530294
477.79	0.01366863		1007.8	0.01207319		1537.79	0.01411056		2067.8	0.01088579		2597.8	-0.00508603
477.99	0.01423202		1008	0.0118598		1537.99	0.0140645		2068	0.0109317		2598	-0.00457186
478.19	0.01414397		1008.2	0.01254169		1538.19	0.01381425		2068.2	0.0112725		2598.2	-0.00443392
478.39	0.01417728		1008.4	0.01228705		1538.39	0.01317352		2068.4	0.01035408		2598.4	-0.00409406
478.59	0.01280029		1008.6	0.01199513		1538.59	0.01259311		2068.6	0.01036355		2598.6	-0.00401982
478.79	0.01262805		1008.8	0.01253257		1538.79	0.01197108		2068.8	0.01127696		2598.8	-0.00435982
478.99	0.01178545		1009	0.01272628		1538.99	0.012463		2069	0.0108944		2599	-0.00448595
479.19	0.01084379		1009.2	0.01281651		1539.19	0.0124937		2069.2	0.01208236		2599.2	-0.00427636
479.39	0.00919401		1009.4	0.01366206		1539.39	0.01308574		2069.4	0.01266865		2599.4	-0.0041999
479.59	0.00895154		1009.6	0.01366058		1539.59	0.01393632		2069.6	0.01324919		2599.6	-0.005049
479.79	0.00830943		1009.8	0.01390124		1539.79	0.01473369		2069.8	0.01401796		2599.8	-0.0042783
479.99	0.00837104		1010	0.01403303		1539.99	0.01446926		2070	0.01411812		2600	-0.00361284
480.19	0.00882449		1010.2	0.01421666		1540.19	0.01414779		2070.2	0.01410354		2600.2	-0.00397911
480.39	0.0082045		1010.4	0.0139962		1540.39	0.01448549		2070.4	0.01419963		2600.4	-0.00332659
480.59	0.00816731		1010.6	0.01341586		1540.59	0.01462228		2070.6	0.0142853		2600.6	-0.00342562
480.79	0.0079269		1010.8	0.01299892		1540.79	0.0146313		2070.8	0.0140506		2600.8	-0.00282973
480.99	0.00804908		1011	0.01322492		1540.99	0.01456743		2071	0.0130716		2601	-0.00400773
481.19	0.00811231		1011.2	0.01277155		1541.19	0.01546491		2071.2	0.0126376		2601.2	-0.00358144
481.39	0.00816356		1011.4	0.01249483		1541.39	0.01482021		2071.4	0.01216309		2601.4	-0.00458763
481.59	0.00850405		1011.6	0.01194809		1541.59	0.01445252		2071.6	0.01179617		2601.6	-0.0045961
481.79	0.00937266		1011.8	0.01124753		1541.79	0.01416269		2071.8	0.01179954		2601.8	-0.00467542
481.99	0.00974738		1012	0.01174667		1541.99	0.01391574		2072	0.01143024		2602	-0.00508803
482.19	0.00952511		1012.2	0.01222191		1542.19	0.01356897		2072.2	0.01069155		2602.2	-0.00583626
482.39	0.00892385		1012.4	0.01141878		1542.39	0.01364956		2072.4	0.00933381		2602.4	-0.0058748
482.59	0.00852559		1012.6	0.01157254		1542.59	0.0131086		2072.6	0.01018792		2602.6	-0.00610152
482.79	0.00907241		1012.8	0.01199032		1542.79	0.01227077		2072.8	0.01076442		2602.8	-0.00650568
482.99	0.00865395		1013	0.01167936		1542.99	0.01285802		2073	0.01161095		2603	-0.00693917
483.19	0.00932431		1013.2	0.0114538		1543.19	0.01250249		2073.2	0.01229545		2603.2	-0.00720725
483.39	0.00944826		1013.4	0.01201922		1543.39	0.01272334		2073.4	0.01192828		2603.4	-0.00683405
483.59	0.00945101		1013.6	0.01205734		1543.59	0.01318565		2073.6	0.01238176		2603.6	-0.00635689
483.79	0.00937843		1013.8	0.01247252		1543.79	0.0131492		2073.8	0.01220066		2603.8	-0.00532484
483.99	0.01021228		1014	0.01204027		1543.99	0.01306064		2074	0.01200918		2604	-0.0056065
484.19	0.01055453		1014.2	0.01182205		1544.19	0.01336138		2074.2	0.01274054		2604.2	-0.00460363
484.39	0.01083697		1014.4	0.01140553		1544.39	0.01424546		2074.4	0.01234613		2604.4	-0.00319509
484.59	0.01126214		1014.6	0.01141649		1544.59	0.01433314		2074.6	0.01226925		2604.6	-0.00305328
484.79	0.01126063		1014.8	0.01141818		1544.79	0.01542457		2074.8	0.01159352		2604.8	-0.00319018
484.99	0.01192634		1015	0.01129929		1544.99	0.01647834		2075	0.01141845		2605	-0.00395143
485.19	0.01115131		1015.2	0.01092622		1545.19	0.01719993		2075.2	0.01139919		2605.2	-0.003635
485.39	0.01061577		1015.4	0.01064443		1545.39	0.01701212		2075.4	0.01098461		2605.4	-0.00380628
485.59	0.01102917		1015.6	0.01105071		1545.59	0.01791652		2075.6	0.01099899		2605.6	-0.00376319
485.79	0.01071913		1015.8	0.01175691		1545.79	0.01805816		2075.8	0.0114429		2605.8	-0.00396039
485.99	0.00967923		1016	0.01248723		1545.99	0.01812796		2076	0.01158561		2606	-0.00442347
486.19	0.01022408		1016.2	0.01301076		1546.19	0.01859089		2076.2	0.01082028		2606.2	-0.00330338
486.39	0.01005435		1016.4	0.01343652		1546.39	0.0185102		2076.4	0.01104637		2606.4	-0.0034056
486.59	0.01028833		1016.6	0.01428107		1546.59	0.01776434		2076.6	0.01191635		2606.6	-0.00401984
486.79	0.00982381		1016.8	0.0142401		1546.79	0.01740225		2076.8	0.01240778		2606.8	-0.00448911
486.99	0.00962728		1017	0.0141096		1546.99	0.01666506		2077	0.01304117		2607	-0.00490752
487.19	0.01008745		1017.2	0.01474838		1547.19	0.01608294		2077.2	0.01304957		2607.2	-0.00459872
487.39	0.00961006		1017.4	0.01534778		1547.39	0.01543425		2077.4	0.01313792		2607.4	-0.00383911
487.59	0.00921006		1017.6	0.01540228		1547.59	0.01534248		2077.6	0.012912		2607.6	-0.00411818
487.79	0.00902541		1017.8	0.01581935		1547.79	0.01469252		2077.8	0.01260937		2607.8	-0.00425996
487.99	0.0098948		1018	0.01560919		1547.99	0.01426626		2078	0.01403651		2608	-0.00370929
488.19	0.01047453		1018.2	0.01588769		1548.19	0.01383948		2078.2	0.01420071		2608.2	-0.00272147
488.39	0.01122044		1018.4	0.01533197		1548.39	0.0138594		2078.4	0.01362734		2608.4	-0.00291496
488.59	0.01164834		1018.6	0.01535991		1548.59	0.0139856		2078.6	0.01333576		2608.6	-0.00389329
488.79	0.0120008		1018.8	0.01527923		1548.79	0.01373922		2078.8	0.0131214		2608.8	-0.00405136
488.99	0.01245711		1019	0.0151519		1548.99	0.01333967		2079	0.01335526		2609	-0.00364863
489.19	0.01191673		1019.2	0.01502486		1549.19	0.01293374		2079.2	0.01220651		2609.2	-0.00417572
489.39	0.01231983		1019.4	0.01525204		1549.39	0.01318208		2079.4	0.01140718		2609.4	-0.0039244
489.59	0.01326216		1019.6	0.01664712		1549.59	0.01335404		2079.6	0.01217394		2609.6	-0.00445843
489.79	0.01298498		1019.8	0.01695037		1549.79	0.01301821		2079.8	0.01236275		2609.8	-0.00428706
489.99	0.01338433		1020	0.01646812		1549.99	0.01357459		2080	0.01145737		2610	-0.00445165
490.19	0.01414063		1020.2	0.01580438		1550.19	0.01388027		2080.2	0.01085989		2610.2	-0.00430553
490.39	0.0134019		1020.4	0.01531826		1550.39	0.01334941		2080.4	0.01132561		2610.4	-0.00542944
490.59	0.01286302		1020.6	0.01495095		1550.59	0.01379566		2080.6	0.01209933		2610.6	-0.00553996
490.79	0.01224496		1020.8	0.01348866		1550.79	0.01445009		2080.8	0.01224209		2610.8	-0.0055584
490.99	0.01178261		1021	0.01322177		1550.99	0.01435771		2081	0.01260869		2611	-0.00479396
491.19	0.01092871		1021.2	0.01287731		1551.19	0.01508478		2081.2	0.01295884		2611.2	-0.00479661
491.39	0.01025024		1021.4	0.01255244		1551.39	0.01493058		2081.4	0.01273462		2611.4	-0.00456402
491.59	0.0097217		1021.6	0.0129859		1551.59	0.01582158		2081.6	0.01233965		2611.6	-0.00525221
491.79	0.00881861		1021.8	0.01261416		1551.79	0.0151037		2081.8	0.01232797		2611.8	-0.00519553
491.99	0.00901074		1022	0.01309292		1551.99	0.01501562		2082	0.01359004		2612	-0.00464558
492.19	0.00847037		1022.2	0.01279725		1552.19	0.01488882		2082.2	0.0129871		2612.2	-0.00499093
492.39	0.00799616		1022.4	0.01262666		1552.39	0.01521373		2082.4	0.01272587		2612.4	-0.00437585
492.59	0.00723403		1022.6	0.01320343		1552.59	0.01438352		2082.6	0.01262366		2612.6	-0.0044251
492.79	0.00652149		1022.8	0.01378339		1552.79	0.01371467		2082.8	0.01298843		2612.8	-0.00308038
492.99	0.00589255		1023	0.01423966		1552.99	0.0130556		2083	0.01333862		2613	-0.00276105
493.19	0.00623009		1023.2	0.01380527		1553.19	0.01321162		2083.2	0.0135195		2613.2	-0.00284567
493.39	0.00693638		1023.4	0.01399968		1553.39	0.01249884		2083.4	0.01384662		2613.4	-0.002801
493.59	0.00781081		1023.6	0.01452653		1553.59	0.01185943		2083.6	0.01430637		2613.6	-0.00279487
493.79	0.00733332		1023.8	0.01463694		1553.79	0.01264735		2083.8	0.01380229		2613.8	-0.00206504
493.99	0.0081957		1024	0.01344742		1553.99	0.01339055		2084	0.01333787		2614	-0.00233051
494.19	0.00881696		1024.2	0.01240353		1554.19	0.01266657		2084.2	0.01346141		2614.2	-0.00246986
494.39	0.0084835		1024.4	0.01278551		1554.39	0.0124956		2084.4	0.01334253		2614.4	-0.00242915
494.59	0.00914088		1024.6	0.01241867		1554.59	0.01326004		2084.6	0.0133488		2614.6	-0.00237617
494.79	0.00932421		1024.8	0.01172355		1554.79	0.013617		2084.8	0.01245691		2614.8	-0.0026246
494.99	0.00936756		1025	0.01224082		1554.99	0.01375449		2085	0.01254625		2615	-0.00299809
495.19	0.01042839		1025.2	0.01197655		1555.19	0.01400004		2085.2	0.01201494		2615.2	-0.00408577
495.39	0.01175514		1025.4	0.0117664		1555.39	0.01434888		2085.4	0.01135457		2615.4	-0.00430375
495.59	0.01195385		1025.6	0.01189242		1555.59	0.01397734		2085.6	0.01154739		2615.6	-0.00570622
495.79	0.01182638		1025.8	0.01154117		1555.79	0.01318822		2085.8	0.01178217		2615.8	-0.00587927
495.99	0.01153719		1026	0.01100125		1555.99	0.01341285		2086	0.01196683		2616	-0.00603264
496.19	0.01072445		1026.2	0.01069976		1556.19	0.01335457		2086.2	0.01092129		2616.2	-0.0062414
496.39	0.01018996		1026.4	0.01137016		1556.39	0.01284175		2086.4	0.01076685		2616.4	-0.00580018
496.59	0.00956275		1026.6	0.01203786		1556.59	0.01329112		2086.6	0.01020313		2616.6	-0.00665949
496.79	0.00884063		1026.8	0.01292124		1556.79	0.01300899		2086.8	0.01034445		2616.8	-0.00689659
496.99	0.00827094		1027	0.01247479		1556.99	0.01279104		2087	0.01038445		2617	-0.00669774
497.19	0.00903334		1027.2	0.01242586		1557.19	0.01254963		2087.2	0.01014656		2617.2	-0.00772528
497.39	0.00965164		1027.4	0.01263616		1557.39	0.01246992		2087.4	0.0089672		2617.4	-0.00783461
497.59	0.0092102		1027.6	0.01373576		1557.59	0.01223438		2087.6	0.00898949		2617.6	-0.00720309
497.79	0.00938767		1027.8	0.01349992		1557.79	0.01224261		2087.8	0.00896147		2617.8	-0.0062163
497.99	0.00990626		1028	0.01334286		1557.99	0.01199994		2088	0.00910108		2618	-0.00670816
498.19	0.00963446		1028.2	0.01387848		1558.19	0.01182282		2088.2	0.00859362		2618.2	-0.00634063
498.39	0.00922558		1028.4	0.01514822		1558.39	0.01280593		2088.4	0.00844894		2618.4	-0.00589696
498.59	0.00941513		1028.6	0.01587775		1558.59	0.01351662		2088.6	0.00872972		2618.6	-0.00552695
498.79	0.00936916		1028.8	0.01632705		1558.79	0.01385452		2088.8	0.00901698		2618.8	-0.00538434
498.99	0.00970572		1029	0.01610654		1558.99	0.01441564		2089	0.00984291		2619	-0.00454474
499.19	0.01082132		1029.2	0.01642237		1559.19	0.01513314		2089.2	0.01017923		2619.2	-0.00441654
499.39	0.01066471		1029.4	0.01653418		1559.39	0.01522474		2089.4	0.01045992		2619.4	-0.00382555
499.59	0.00938588		1029.6	0.01612717		1559.59	0.01506832		2089.6	0.01140688		2619.6	-0.00382551
499.79	0.00938359		1029.8	0.01658033		1559.79	0.01592802		2089.8	0.0114338		2619.8	-0.00295023
499.99	0.00960948		1030	0.01552905		1559.99	0.01596897		2090	0.01110673		2620	-0.00243714
500.19	0.00919196		1030.2	0.01540632		1560.19	0.01643606		2090.2	0.01113982		2620.2	-0.00282703
500.39	0.00939816		1030.4	0.01520963		1560.39	0.01650884		2090.4	0.01153464		2620.4	-0.00308851
500.59	0.00907029		1030.6	0.01488912		1560.59	0.0176732		2090.6	0.0112616		2620.6	-0.00456335
500.79	0.00887125		1030.8	0.01463901		1560.79	0.01651806		2090.8	0.01229065		2620.8	-0.00493302
500.99	0.00870814		1031	0.01305646		1560.99	0.01622176		2091	0.01292883		2621	-0.00506279
501.19	0.0088361		1031.2	0.01232549		1561.19	0.01489678		2091.2	0.01316455		2621.2	-0.00617202
501.39	0.00973312		1031.4	0.01234884		1561.39	0.01432137		2091.4	0.01239837		2621.4	-0.00610901
501.59	0.01014622		1031.6	0.01224756		1561.59	0.01278354		2091.6	0.01264486		2621.6	-0.00652072
501.79	0.01104599		1031.8	0.01134599		1561.79	0.01254113		2091.8	0.01275068		2621.8	-0.00601645
501.99	0.01081381		1032	0.01271371		1561.99	0.01258332		2092	0.01263087		2622	-0.0071145
502.19	0.0112753		1032.2	0.01276873		1562.19	0.01275726		2092.2	0.01166277		2622.2	-0.00677676
502.39	0.01046215		1032.4	0.01311777		1562.39	0.01380574		2092.4	0.01135139		2622.4	-0.00655236
502.59	0.01028996		1032.6	0.01303277		1562.59	0.01297006		2092.6	0.01045173		2622.6	-0.00682229
502.79	0.00965745		1032.8	0.01317734		1562.79	0.01282492		2092.8	0.01000492		2622.8	-0.00668167
502.99	0.00896446		1033	0.01244872		1562.99	0.01270787		2093	0.00884752		2623	-0.00600045
503.19	0.00957068		1033.2	0.01311471		1563.19	0.01316503		2093.2	0.00853523		2623.2	-0.00619862
503.39	0.00906916		1033.4	0.01326698		1563.39	0.01345552		2093.4	0.00779165		2623.4	-0.00499077
503.59	0.00919517		1033.6	0.01306925		1563.59	0.01385211		2093.6	0.00783784		2623.6	-0.00482443
503.79	0.00999381		1033.8	0.01366786		1563.79	0.0146219		2093.8	0.0071495		2623.8	-0.00443553
503.99	0.00961922		1034	0.01370891		1563.99	0.0141169		2094	0.00716095		2624	-0.00399006
504.19	0.00890442		1034.2	0.01324036		1564.19	0.01522329		2094.2	0.0083029		2624.2	-0.00413646
504.39	0.00816146		1034.4	0.01360522		1564.39	0.01563352		2094.4	0.00923373		2624.4	-0.00440439
504.59	0.007244		1034.6	0.01340304		1564.59	0.01638744		2094.6	0.00985689		2624.6	-0.00473792
504.79	0.0065716		1034.8	0.01342277		1564.79	0.01583608		2094.8	0.01060075		2624.8	-0.00410518
504.99	0.00588449		1035	0.0131789		1564.99	0.01600156		2095	0.01199688		2625	-0.00467737
505.19	0.00599623		1035.2	0.01298505		1565.19	0.01522059		2095.2	0.01264716		2625.2	-0.00542885
505.39	0.00631393		1035.4	0.01404367		1565.39	0.0148728		2095.4	0.0126172		2625.4	-0.00514657
505.59	0.00592435		1035.6	0.01344389		1565.59	0.01521492		2095.6	0.0126718		2625.6	-0.00519188
505.79	0.00604403		1035.8	0.01381985		1565.79	0.01550552		2095.8	0.01363474		2625.8	-0.00504879
505.99	0.00652978		1036	0.01439809		1565.99	0.01559593		2096	0.01346965		2626	-0.00550884
506.19	0.00717829		1036.2	0.01420709		1566.19	0.01544257		2096.2	0.01349336		2626.2	-0.00471636
506.39	0.00575962		1036.4	0.01416946		1566.39	0.01568185		2096.4	0.0128048		2626.4	-0.00543565
506.59	0.00572685		1036.6	0.01449178		1566.59	0.01503753		2096.6	0.01232777		2626.6	-0.00620086
506.79	0.00575977		1036.8	0.01463737		1566.79	0.01429586		2096.8	0.01192399		2626.8	-0.0055453
506.99	0.00645412		1037	0.0142636		1566.99	0.0137547		2097	0.01182821		2627	-0.00581249
507.19	0.00790099		1037.2	0.01475244		1567.19	0.01345474		2097.2	0.01185819		2627.2	-0.0060113
507.39	0.00805764		1037.4	0.01471991		1567.39	0.01374357		2097.4	0.01073722		2627.4	-0.005651
507.59	0.0090626		1037.6	0.01443272		1567.59	0.01260962		2097.6	0.01037767		2627.6	-0.00522534
507.79	0.00972238		1037.8	0.01364985		1567.79	0.0126233		2097.8	0.00984271		2627.8	-0.00541479
507.99	0.00922214		1038	0.0137753		1567.99	0.01245631		2098	0.00983022		2628	-0.00512683
508.19	0.00898347		1038.2	0.01334546		1568.19	0.01304859		2098.2	0.01017416		2628.2	-0.00512854
508.39	0.00908404		1038.4	0.01391712		1568.39	0.01265773		2098.4	0.00967942		2628.4	-0.00553227
508.59	0.00943504		1038.6	0.01343674		1568.59	0.01330893		2098.6	0.00958578		2628.6	-0.00529298
508.79	0.0095497		1038.8	0.01372098		1568.79	0.01322221		2098.8	0.01025472		2628.8	-0.00575572
508.99	0.0098284		1039	0.01324076		1568.99	0.01396998		2099	0.01122694		2629	-0.00633857
509.19	0.00982576		1039.2	0.01348013		1569.19	0.01369505		2099.2	0.01120867		2629.2	-0.00660401
509.39	0.0094138		1039.4	0.01389772		1569.39	0.01354514		2099.4	0.01100839		2629.4	-0.00669954
509.59	0.00948211		1039.6	0.01352249		1569.59	0.01416093		2099.6	0.01152485		2629.6	-0.00748204
509.79	0.00962618		1039.8	0.01337975		1569.79	0.01398594		2099.8	0.01257245		2629.8	-0.00702389
509.99	0.00966096		1040	0.01363511		1569.99	0.01433566		2100	0.0125202		2630	-0.00702042
510.19	0.00968666		1040.2	0.0137713		1570.19	0.01358781		2100.2	0.01324089		2630.2	-0.00778602
510.39	0.00937719		1040.4	0.01341549		1570.39	0.01337089		2100.4	0.0128213		2630.4	-0.0091768
510.59	0.00964775		1040.6	0.0134297		1570.59	0.01343583		2100.6	0.01353293		2630.6	-0.00896899
510.79	0.01008801		1040.8	0.01222115		1570.79	0.01245285		2100.8	0.01378517		2630.8	-0.00844332
510.99	0.01001514		1041	0.01231656		1570.99	0.01340218		2101	0.01366483		2631	-0.00848175
511.19	0.010032		1041.2	0.01199797		1571.19	0.0129725		2101.2	0.01307904		2631.2	-0.00759299
511.39	0.0102291		1041.4	0.01124804		1571.39	0.01290046		2101.4	0.01255299		2631.4	-0.0073612
511.59	0.01140529		1041.6	0.01111624		1571.59	0.01236226		2101.6	0.01288035		2631.6	-0.00673146
511.79	0.01076898		1041.8	0.01064923		1571.79	0.01282808		2101.8	0.01242646		2631.8	-0.00639291
511.99	0.00961911		1042	0.01156494		1571.99	0.01395303		2102	0.01199212		2632	-0.00513536
512.19	0.00942444		1042.2	0.01172629		1572.19	0.0144002		2102.2	0.01259274		2632.2	-0.00455138
512.39	0.00893485		1042.4	0.01152692		1572.39	0.01419526		2102.4	0.01285331		2632.4	-0.00422623
512.59	0.00806414		1042.6	0.01206449		1572.59	0.01492195		2102.6	0.0130159		2632.6	-0.00392327
512.79	0.00738597		1042.8	0.01254262		1572.79	0.014983		2102.8	0.01349138		2632.8	-0.00351325
512.99	0.00674143		1043	0.01277947		1572.99	0.0154275		2103	0.01365379		2633	-0.00297078
513.19	0.00601541		1043.2	0.01383384		1573.19	0.01532343		2103.2	0.01380137		2633.2	-0.00361851
513.39	0.00528006		1043.4	0.01393082		1573.39	0.01542416		2103.4	0.01366793		2633.4	-0.0037141
513.59	0.0054643		1043.6	0.01426976		1573.59	0.01556432		2103.6	0.01442031		2633.6	-0.00329661
513.79	0.0054713		1043.8	0.01439699		1573.79	0.0151525		2103.8	0.01365494		2633.8	-0.00396267
513.99	0.00568033		1044	0.0152061		1573.99	0.01467483		2104	0.01368443		2634	-0.00433168
514.19	0.00620456		1044.2	0.01526757		1574.19	0.01322815		2104.2	0.014094		2634.2	-0.00591663
514.39	0.0069411		1044.4	0.01479039		1574.39	0.01327474		2104.4	0.01361084		2634.4	-0.0060424
514.59	0.00683005		1044.6	0.01435781		1574.59	0.01336311		2104.6	0.0131142		2634.6	-0.00594088
514.79	0.00726159		1044.8	0.01449336		1574.79	0.0128041		2104.8	0.01237687		2634.8	-0.00565264
514.99	0.00737921		1045	0.01505563		1574.99	0.01284523		2105	0.01112992		2635	-0.00541899
515.19	0.00779342		1045.2	0.0152983		1575.19	0.01167757		2105.2	0.01132698		2635.2	-0.0050921
515.39	0.00813099		1045.4	0.01541146		1575.39	0.01191743		2105.4	0.01102069		2635.4	-0.00542949
515.59	0.00855894		1045.6	0.01543528		1575.59	0.01215315		2105.6	0.01025591		2635.6	-0.00543726
515.79	0.00839818		1045.8	0.01533055		1575.79	0.0123846		2105.8	0.00946936		2635.8	-0.00513566
515.99	0.00790071		1046	0.01553544		1575.99	0.01330673		2106	0.00957746		2636	-0.0057898
516.19	0.00799869		1046.2	0.01500937		1576.19	0.01350657		2106.2	0.01012412		2636.2	-0.00619113
516.39	0.00781036		1046.4	0.01527424		1576.39	0.01347173		2106.4	0.00954822		2636.4	-0.00576367
516.59	0.0078727		1046.6	0.01558184		1576.59	0.01432413		2106.6	0.00982495		2636.6	-0.00566291
516.79	0.00794496		1046.8	0.01515348		1576.79	0.0145562		2106.8	0.01077404		2636.8	-0.00513939
516.99	0.00779543		1047	0.01538011		1576.99	0.01464182		2107	0.01086413		2637	-0.00476394
517.19	0.00728675		1047.2	0.0152021		1577.19	0.01503541		2107.2	0.01089472		2637.2	-0.00511604
517.39	0.00758255		1047.4	0.01455487		1577.39	0.01536198		2107.4	0.01056695		2637.4	-0.0042609
517.59	0.00786196		1047.6	0.0148733		1577.59	0.01572022		2107.6	0.01049274		2637.6	-0.00402423
517.79	0.00784187		1047.8	0.01482232		1577.79	0.01570482		2107.8	0.0094113		2637.8	-0.00453715
517.99	0.00813132		1048	0.01431608		1577.99	0.01612828		2108	0.00986145		2638	-0.00498577
518.19	0.008716		1048.2	0.01395932		1578.19	0.01577282		2108.2	0.00908149		2638.2	-0.00620509
518.39	0.00874006		1048.4	0.01233372		1578.39	0.01629457		2108.4	0.00820494		2638.4	-0.00631327
518.59	0.00869913		1048.6	0.01247221		1578.59	0.01563368		2108.6	0.00794651		2638.6	-0.00672086
518.79	0.00893194		1048.8	0.01251973		1578.79	0.01573232		2108.8	0.00771792		2638.8	-0.00629405
518.99	0.00885692		1049	0.01236054		1578.99	0.01539479		2109	0.00804958		2639	-0.00604434
519.19	0.0087406		1049.2	0.01267732		1579.19	0.01509079		2109.2	0.00879743		2639.2	-0.00557994
519.39	0.008568		1049.4	0.01213147		1579.39	0.01529493		2109.4	0.00892179		2639.4	-0.00625599
519.59	0.00905272		1049.6	0.01105126		1579.59	0.01540919		2109.6	0.00898617		2639.6	-0.00584649
519.79	0.00914625		1049.8	0.01051941		1579.79	0.01507008		2109.8	0.0098349		2639.8	-0.00609935
519.99	0.0086422		1050	0.01076883		1579.99	0.0157493		2110	0.00961755		2640	-0.0068254
520.19	0.00964793		1050.2	0.01096935		1580.19	0.01561167		2110.2	0.00974282		2640.2	-0.00695775
520.39	0.01047489		1050.4	0.01100751		1580.39	0.01419759		2110.4	0.00970939		2640.4	-0.00586196
520.59	0.01068854		1050.6	0.01026811		1580.59	0.01409607		2110.6	0.01041886		2640.6	-0.00529773
520.79	0.01090533		1050.8	0.0102992		1580.79	0.01333972		2110.8	0.01123871		2640.8	-0.00426253
520.99	0.01034762		1051	0.01084093		1580.99	0.01295421		2111	0.01112988		2641	-0.00326881
521.19	0.00994784		1051.2	0.01071758		1581.19	0.0130464		2111.2	0.01141265		2641.2	-0.00272676
521.39	0.01026202		1051.4	0.01125491		1581.39	0.01406149		2111.4	0.01140495		2641.4	-0.00186175
521.59	0.00980749		1051.6	0.01205487		1581.59	0.01415301		2111.6	0.01054784		2641.6	-0.0022075
521.79	0.0100049		1051.8	0.01190389		1581.79	0.01417669		2111.8	0.00974552		2641.8	-0.00286894
521.99	0.00989224		1052	0.01177195		1581.99	0.01461204		2112	0.00970537		2642	-0.00380799
522.19	0.01007509		1052.2	0.01204692		1582.19	0.01448057		2112.2	0.00984372		2642.2	-0.00326925
522.39	0.01016856		1052.4	0.01192196		1582.39	0.0153947		2112.4	0.01023869		2642.4	-0.00305285
522.59	0.0101264		1052.6	0.01297701		1582.59	0.01599263		2112.6	0.01139896		2642.6	-0.00269481
522.79	0.01022204		1052.8	0.01308665		1582.79	0.01604461		2112.8	0.01236579		2642.8	-0.00182416
522.99	0.00971228		1053	0.01271221		1582.99	0.01509171		2113	0.01348844		2643	-0.00153862
523.19	0.00924543		1053.2	0.01189693		1583.19	0.0152403		2113.2	0.01439754		2643.2	-0.00130893
523.39	0.00900803		1053.4	0.01156765		1583.39	0.0144873		2113.4	0.01425573		2643.4	-0.00127783
523.59	0.00961066		1053.6	0.0107254		1583.59	0.01432297		2113.6	0.01433793		2643.6	-0.00046402
523.79	0.00906992		1053.8	0.01018708		1583.79	0.01374599		2113.8	0.01447617		2643.8	-0.00222955
523.99	0.00873118		1054	0.01055028		1583.99	0.01324074		2114	0.01340096		2644	-0.00310656
524.19	0.00897401		1054.2	0.01095401		1584.19	0.01238209		2114.2	0.0136736		2644.2	-0.00348404
524.39	0.00864097		1054.4	0.01045326		1584.39	0.01194289		2114.4	0.01338736		2644.4	-0.0041647
524.59	0.00817191		1054.6	0.00971062		1584.59	0.01266889		2114.6	0.01346749		2644.6	-0.00387404
524.79	0.00790241		1054.8	0.0093193		1584.79	0.01288541		2114.8	0.01367507		2644.8	-0.00463414
524.99	0.00708708		1055	0.00969662		1584.99	0.01340972		2115	0.01273009		2645	-0.00461703
525.19	0.00764436		1055.2	0.00969057		1585.19	0.01410488		2115.2	0.0126697		2645.2	-0.00502102
525.39	0.0077348		1055.4	0.0100578		1585.39	0.01453741		2115.4	0.01160666		2645.4	-0.0057761
525.59	0.00671458		1055.6	0.0094451		1585.59	0.01363622		2115.6	0.01082966		2645.6	-0.00644657
525.79	0.00649805		1055.8	0.00976039		1585.79	0.01427181		2115.8	0.01041879		2645.8	-0.00667182
525.99	0.00626857		1056	0.00997679		1585.99	0.01497893		2116	0.01060685		2646	-0.00644321
526.19	0.00672836		1056.2	0.01090755		1586.19	0.01551886		2116.2	0.01074705		2646.2	-0.00655709
526.39	0.00645748		1056.4	0.01205271		1586.39	0.01630133		2116.4	0.01075646		2646.4	-0.00719962
526.59	0.00686393		1056.6	0.01259758		1586.59	0.01636289		2116.6	0.0116801		2646.6	-0.00742856
526.79	0.00720964		1056.8	0.01268333		1586.79	0.01551935		2116.8	0.01154732		2646.8	-0.00828922
526.99	0.00707764		1057	0.01201421		1586.99	0.01524499		2117	0.01118432		2647	-0.00847008
527.19	0.00763596		1057.2	0.01276077		1587.19	0.01508654		2117.2	0.01101011		2647.2	-0.00845016
527.39	0.00789355		1057.4	0.0137161		1587.39	0.01488251		2117.4	0.01034428		2647.4	-0.00783535
527.59	0.00768945		1057.6	0.01370018		1587.59	0.01428141		2117.6	0.01022598		2647.6	-0.00741552
527.79	0.00665761		1057.8	0.01409147		1587.79	0.01402445		2117.8	0.01015967		2647.8	-0.00806645
527.99	0.00624692		1058	0.0149288		1587.99	0.01376213		2118	0.0099067		2648	-0.00855185
528.19	0.00701342		1058.2	0.01536621		1588.19	0.01372603		2118.2	0.01024912		2648.2	-0.00903777
528.39	0.00716746		1058.4	0.01498897		1588.39	0.01398681		2118.4	0.010021		2648.4	-0.00892135
528.59	0.00814555		1058.6	0.01423366		1588.59	0.01365032		2118.6	0.00966717		2648.6	-0.00771598
528.79	0.00833455		1058.8	0.01445894		1588.79	0.01423867		2118.8	0.00959073		2648.8	-0.00752525
528.99	0.00866566		1059	0.01451327		1588.99	0.01363606		2119	0.00992115		2649	-0.00568731
529.19	0.00895385		1059.2	0.01468857		1589.19	0.01317518		2119.2	0.01073652		2649.2	-0.00567405
529.39	0.00863144		1059.4	0.01393954		1589.39	0.01308529		2119.4	0.01095077		2649.4	-0.00488768
529.59	0.00777518		1059.6	0.01376857		1589.59	0.0132763		2119.6	0.01204688		2649.6	-0.0043711
529.79	0.00778262		1059.8	0.01425324		1589.79	0.01448318		2119.8	0.01240295		2649.8	-0.00445773
529.99	0.00793186		1060	0.0140949		1589.99	0.01462304		2120	0.01232081		2650	-0.00458055
530.19	0.00874321		1060.2	0.0141662		1590.19	0.01442965		2120.2	0.01153759		2650.2	-0.00576364
530.39	0.00803752		1060.4	0.01404345		1590.39	0.01461483		2120.4	0.01209884		2650.4	-0.00611747
530.59	0.00768147		1060.6	0.01376277		1590.59	0.0147635		2120.6	0.01269231		2650.6	-0.00555883
530.79	0.00664992		1060.8	0.0134952		1590.79	0.01463954		2120.8	0.01267347		2650.8	-0.00593296
530.99	0.00610089		1061	0.01356829		1590.99	0.01476298		2121	0.01245403		2651	-0.00541855
531.19	0.00507265		1061.2	0.01470196		1591.19	0.01473686		2121.2	0.01186307		2651.2	-0.00527904
531.39	0.0048015		1061.4	0.01483454		1591.39	0.01509201		2121.4	0.01161111		2651.4	-0.00557685
531.59	0.00399136		1061.6	0.01460156		1591.59	0.01466399		2121.6	0.0114292		2651.6	-0.00595856
531.79	0.0035006		1061.8	0.01508439		1591.79	0.01474498		2121.8	0.01115267		2651.8	-0.00689714
531.99	0.00408501		1062	0.01466892		1591.99	0.01451806		2122	0.01138012		2652	-0.00724983
532.19	0.0043079		1062.2	0.01375495		1592.19	0.01403001		2122.2	0.01068421		2652.2	-0.00682048
532.39	0.00498453		1062.4	0.01321347		1592.39	0.0151981		2122.4	0.01039914		2652.4	-0.00597662
532.59	0.00585738		1062.6	0.01257805		1592.59	0.01449583		2122.6	0.01071221		2652.6	-0.00527297
532.79	0.00657311		1062.8	0.01236887		1592.79	0.01487861		2122.8	0.01154873		2652.8	-0.00466744
532.99	0.00688746		1063	0.01157658		1592.99	0.01416874		2123	0.01243197		2653	-0.00487843
533.19	0.0063561		1063.2	0.01166326		1593.19	0.01473517		2123.2	0.01280549		2653.2	-0.00543669
533.39	0.00689561		1063.4	0.01070561		1593.39	0.0154404		2123.4	0.01284496		2653.4	-0.00492955
533.59	0.00750713		1063.6	0.0109778		1593.59	0.01579367		2123.6	0.01297617		2653.6	-0.00555282
533.79	0.0072862		1063.8	0.01111781		1593.79	0.01616193		2123.8	0.01249172		2653.8	-0.00535236
533.99	0.00801618		1064	0.01109128		1593.99	0.01527036		2124	0.01199727		2654	-0.00478133
534.19	0.00801889		1064.2	0.01074899		1594.19	0.01508548		2124.2	0.01183835		2654.2	-0.00451724
534.39	0.00725877		1064.4	0.01111968		1594.39	0.01524547		2124.4	0.0130344		2654.4	-0.00434162
534.59	0.00687969		1064.6	0.01265815		1594.59	0.01458972		2124.6	0.01366962		2654.6	-0.00389517
534.79	0.00686123		1064.8	0.01404781		1594.79	0.01434162		2124.8	0.01367269		2654.8	-0.00490701
534.99	0.00643974		1065	0.01477545		1594.99	0.01475729		2125	0.01350383		2655	-0.00518516
535.19	0.00628729		1065.2	0.01531964		1595.19	0.01451157		2125.2	0.01288893		2655.2	-0.00539722
535.39	0.00655542		1065.4	0.01470145		1595.39	0.01424303		2125.4	0.01317636		2655.4	-0.00553158
535.59	0.00553511		1065.6	0.01518781		1595.59	0.01447896		2125.6	0.01261864		2655.6	-0.00528591
535.79	0.00523791		1065.8	0.0147215		1595.79	0.01412796		2125.8	0.01208252		2655.8	-0.00451341
535.99	0.00536765		1066	0.0132533		1595.99	0.01479837		2126	0.01196702		2656	-0.00422495
536.19	0.00443794		1066.2	0.01309257		1596.19	0.01512505		2126.2	0.01185427		2656.2	-0.00401383
536.39	0.00534571		1066.4	0.01296948		1596.39	0.01509372		2126.4	0.01160156		2656.4	-0.00367522
536.59	0.00521177		1066.6	0.01290632		1596.59	0.014184		2126.6	0.01196957		2656.6	-0.00339249
536.79	0.00526526		1066.8	0.01229952		1596.79	0.01481562		2126.8	0.01175008		2656.8	-0.00425642
536.99	0.00457604		1067	0.01154599		1596.99	0.01457222		2127	0.01200907		2657	-0.00421874
537.19	0.00444848		1067.2	0.01223353		1597.19	0.01496066		2127.2	0.01127944		2657.2	-0.00439224
537.39	0.00494695		1067.4	0.01170965		1597.39	0.0153224		2127.4	0.01161622		2657.4	-0.00484797
537.59	0.00482595		1067.6	0.01203941		1597.59	0.01493058		2127.6	0.01128134		2657.6	-0.00498174
537.79	0.00427728		1067.8	0.01160416		1597.79	0.01509891		2127.8	0.01089652		2657.8	-0.00421738
537.99	0.00544312		1068	0.01099579		1597.99	0.01471334		2128	0.01144303		2658	-0.00378757
538.19	0.00621355		1068.2	0.01095991		1598.19	0.01514399		2128.2	0.01189697		2658.2	-0.00424233
538.39	0.00652531		1068.4	0.01203921		1598.39	0.01560096		2128.4	0.01155218		2658.4	-0.00502353
538.59	0.00628661		1068.6	0.01318166		1598.59	0.01505192		2128.6	0.01175413		2658.6	-0.00516868
538.79	0.00651401		1068.8	0.01321641		1598.79	0.01609167		2128.8	0.01199676		2658.8	-0.00573811
538.99	0.00625201		1069	0.01321033		1598.99	0.01702123		2129	0.01164441		2659	-0.00573888
539.19	0.00599676		1069.2	0.01361101		1599.19	0.0167151		2129.2	0.01153315		2659.2	-0.00565817
539.39	0.00555594		1069.4	0.01408487		1599.39	0.01691156		2129.4	0.01149804		2659.4	-0.00522579
539.59	0.00523414		1069.6	0.01386594		1599.59	0.0179793		2129.6	0.01024901		2659.6	-0.00547382
539.79	0.00494864		1069.8	0.01293931		1599.79	0.01786297		2129.8	0.01072958		2659.8	-0.00516116
539.99	0.00500012		1070	0.01369816		1599.99	0.01792002		2130	0.01100843		2660	-0.00564781
540.19	0.00531064		1070.2	0.01446212		1600.19	0.01777095		2130.2	0.01120091		2660.2	-0.00461009
540.39	0.00633156		1070.4	0.01456811		1600.39	0.01694584		2130.4	0.01040515		2660.4	-0.00488639
540.59	0.0067181		1070.6	0.01435725		1600.59	0.01707736		2130.6	0.01079839		2660.6	-0.00456146
540.79	0.0069217		1070.8	0.01376455		1600.79	0.01685028		2130.8	0.01068782		2660.8	-0.00469669
540.99	0.00750848		1071	0.01387844		1600.99	0.01655281		2131	0.01139582		2661	-0.00483186
541.19	0.00774763		1071.2	0.01491692		1601.19	0.01558288		2131.2	0.01159927		2661.2	-0.00508102
541.39	0.00805204		1071.4	0.0145046		1601.39	0.01453591		2131.4	0.01207096		2661.4	-0.00482845
541.59	0.00793809		1071.6	0.01412911		1601.59	0.01271397		2131.6	0.01133334		2661.6	-0.00467271
541.79	0.00792164		1071.8	0.01348951		1601.79	0.01252128		2131.8	0.01164691		2661.8	-0.00425617
541.99	0.00812067		1072	0.01356797		1601.99	0.01204893		2132	0.0116745		2662	-0.00440299
542.19	0.0080801		1072.2	0.01380956		1602.19	0.01201042		2132.2	0.01127773		2662.2	-0.00420067
542.39	0.00704371		1072.4	0.01354981		1602.39	0.01267579		2132.4	0.01100432		2662.4	-0.00496055
542.59	0.00616407		1072.6	0.01353405		1602.59	0.01246374		2132.6	0.01134145		2662.6	-0.00436016
542.79	0.00531376		1072.8	0.01336524		1602.79	0.01321688		2132.8	0.0112586		2662.8	-0.0046976
542.99	0.00475251		1073	0.01345517		1602.99	0.01307962		2133	0.01084428		2663	-0.00491615
543.19	0.00486072		1073.2	0.01357694		1603.19	0.01219209		2133.2	0.0108369		2663.2	-0.00491641
543.39	0.00432314		1073.4	0.01362068		1603.39	0.01252203		2133.4	0.01062102		2663.4	-0.00414759
543.59	0.00435913		1073.6	0.01328304		1603.59	0.01317121		2133.6	0.01083108		2663.6	-0.00348107
543.79	0.00388738		1073.8	0.01337192		1603.79	0.01296784		2133.8	0.01193371		2663.8	-0.00377484
543.99	0.003759		1074	0.01338889		1603.99	0.01385505		2134	0.01124853		2664	-0.00389948
544.19	0.00363134		1074.2	0.01328758		1604.19	0.01472055		2134.2	0.01233032		2664.2	-0.00403678
544.39	0.00338399		1074.4	0.01282259		1604.39	0.01503436		2134.4	0.01128455		2664.4	-0.004531
544.59	0.0032851		1074.6	0.01198209		1604.59	0.0155355		2134.6	0.01153785		2664.6	-0.00350276
544.79	0.00309772		1074.8	0.01202038		1604.79	0.01557597		2134.8	0.01094811		2664.8	-0.00361327
544.99	0.00357294		1075	0.01221081		1604.99	0.0160681		2135	0.01137894		2665	-0.00387251
545.19	0.0034051		1075.2	0.01331879		1605.19	0.01564719		2135.2	0.01124547		2665.2	-0.00386574
545.39	0.00263995		1075.4	0.01258393		1605.39	0.01636324		2135.4	0.01123122		2665.4	-0.00407714
545.59	0.00305273		1075.6	0.01248765		1605.59	0.01641404		2135.6	0.01133115		2665.6	-0.00491104
545.79	0.00297195		1075.8	0.01206534		1605.79	0.01740355		2135.8	0.01178515		2665.8	-0.00421585
545.99	0.00335879		1076	0.01191391		1605.99	0.0176263		2136	0.01130572		2666	-0.0045139
546.19	0.00367844		1076.2	0.0114408		1606.19	0.01785995		2136.2	0.01113201		2666.2	-0.00458045
546.39	0.00376788		1076.4	0.01154051		1606.39	0.01730162		2136.4	0.01120356		2666.4	-0.00468056
546.59	0.00407135		1076.6	0.01106377		1606.59	0.01624234		2136.6	0.0105596		2666.6	-0.00390431
546.79	0.00483186		1076.8	0.01063376		1606.79	0.01594909		2136.8	0.01027248		2666.8	-0.00377578
546.99	0.00545461		1077	0.01054112		1606.99	0.01502009		2137	0.01041711		2667	-0.00380241
547.19	0.00647043		1077.2	0.01087974		1607.19	0.01405413		2137.2	0.01050202		2667.2	-0.00356079
547.39	0.0065224		1077.4	0.01096509		1607.39	0.01373525		2137.4	0.01134696		2667.4	-0.00323211
547.59	0.00746492		1077.6	0.01148625		1607.59	0.01411038		2137.6	0.0115083		2667.6	-0.00362651
547.79	0.00738175		1077.8	0.01111719		1607.79	0.01320541		2137.8	0.0113025		2667.8	-0.00464487
547.99	0.00735746		1078	0.01140378		1607.99	0.01317518		2138	0.01151491		2668	-0.00506205
548.19	0.0070239		1078.2	0.01199021		1608.19	0.01276019		2138.2	0.0120637		2668.2	-0.00544825
548.39	0.0068584		1078.4	0.0122817		1608.39	0.01247841		2138.4	0.01066984		2668.4	-0.00541255
548.59	0.0066726		1078.6	0.01297795		1608.59	0.01201628		2138.6	0.01182824		2668.6	-0.00499814
548.79	0.00633664		1078.8	0.01350001		1608.79	0.01272191		2138.8	0.01188626		2668.8	-0.00592532
548.99	0.00596263		1079	0.01429628		1608.99	0.01325231		2139	0.01232502		2669	-0.00628962
549.19	0.0054567		1079.2	0.01534103		1609.19	0.01431175		2139.2	0.01279139		2669.2	-0.00690096
549.39	0.00511503		1079.4	0.01468518		1609.39	0.01531812		2139.4	0.01324856		2669.4	-0.0067899
549.59	0.00582566		1079.6	0.01591119		1609.59	0.01634667		2139.6	0.0134206		2669.6	-0.00727976
549.79	0.00487515		1079.8	0.01587615		1609.79	0.01622302		2139.8	0.01360851		2669.8	-0.00711325
549.99	0.00511257		1080	0.01593466		1609.99	0.01651324		2140	0.01291711		2670	-0.00710935
550.19	0.00453916		1080.2	0.01642887		1610.19	0.01608355		2140.2	0.01239772		2670.2	-0.00678766
550.39	0.00466642		1080.4	0.01604699		1610.39	0.01518805		2140.4	0.01190606		2670.4	-0.00619968
550.59	0.00543647		1080.6	0.01532659		1610.59	0.01531415		2140.6	0.01139682		2670.6	-0.00552527
550.79	0.00595361		1080.8	0.01492281		1610.79	0.01475965		2140.8	0.01072998		2670.8	-0.00439242
550.99	0.00582132		1081	0.014411		1610.99	0.01378252		2141	0.01065273		2671	-0.00447605
551.19	0.00667327		1081.2	0.01391828		1611.19	0.01347444		2141.2	0.01016662		2671.2	-0.00429553
551.39	0.0063975		1081.4	0.01394941		1611.39	0.01349924		2141.4	0.00960066		2671.4	-0.00407579
551.59	0.00653079		1081.6	0.01301385		1611.59	0.0133165		2141.6	0.00907685		2671.6	-0.00389756
551.79	0.00660358		1081.8	0.01173231		1611.79	0.01212652		2141.8	0.00914148		2671.8	-0.0037223
551.99	0.00651233		1082	0.01188292		1611.99	0.01226173		2142	0.00942575		2672	-0.00371736
552.19	0.00604136		1082.2	0.01260759		1612.19	0.01217397		2142.2	0.00925563		2672.2	-0.00412672
552.39	0.00625415		1082.4	0.01245124		1612.39	0.01220704		2142.4	0.00977407		2672.4	-0.00367137
552.59	0.00669967		1082.6	0.01205353		1612.59	0.01311097		2142.6	0.01058766		2672.6	-0.00327381
552.79	0.00666229		1082.8	0.01172204		1612.79	0.01326209		2142.8	0.01050429		2672.8	-0.00357083
552.99	0.0063144		1083	0.01267682		1612.99	0.01382158		2143	0.01012245		2673	-0.00310758
553.19	0.00598548		1083.2	0.01310032		1613.19	0.01506886		2143.2	0.01033096		2673.2	-0.00260797
553.39	0.00566983		1083.4	0.0129849		1613.39	0.01570869		2143.4	0.0101414		2673.4	-0.00160505
553.59	0.00587751		1083.6	0.01398691		1613.59	0.01677967		2143.6	0.01014732		2673.6	-0.00159809
553.79	0.00642931		1083.8	0.01285755		1613.79	0.01554277		2143.8	0.00980696		2673.8	-0.00059983
553.99	0.00629882		1084	0.01335298		1613.99	0.01623332		2144	0.00934348		2674	0.0002021
554.19	0.0065198		1084.2	0.0141075		1614.19	0.01534546		2144.2	0.00940424		2674.2	-0.0001307
554.39	0.00724491		1084.4	0.01341693		1614.39	0.01525805		2144.4	0.00917097		2674.4	-0.00036571
554.59	0.00711269		1084.6	0.01313817		1614.59	0.0147234		2144.6	0.00905622		2674.6	0.00079159
554.79	0.00697415		1084.8	0.0126092		1614.79	0.01477435		2144.8	0.00878705		2674.8	0.00020061
554.99	0.00643503		1085	0.01330384		1614.99	0.01453646		2145	0.00908834		2675	-0.00025837
555.19	0.00579494		1085.2	0.01339194		1615.19	0.0144645		2145.2	0.00919338		2675.2	-0.00060934
555.39	0.0053997		1085.4	0.01338377		1615.39	0.01469467		2145.4	0.01007384		2675.4	-0.00148303
555.59	0.00606086		1085.6	0.01293284		1615.59	0.01428782		2145.6	0.01070507		2675.6	-0.00257334
555.79	0.00622245		1085.8	0.01306389		1615.79	0.01420253		2145.8	0.01118203		2675.8	-0.00443838
555.99	0.00629287		1086	0.0136111		1615.99	0.01402709		2146	0.01173458		2676	-0.00563509
556.19	0.00637153		1086.2	0.01335959		1616.19	0.01447768		2146.2	0.01179788		2676.2	-0.00688026
556.39	0.00605602		1086.4	0.0132711		1616.39	0.01440697		2146.4	0.0118237		2676.4	-0.00724749
556.59	0.00614358		1086.6	0.0135938		1616.59	0.01471373		2146.6	0.01151959		2676.6	-0.00784718
556.79	0.00592124		1086.8	0.01432527		1616.79	0.01390701		2146.8	0.01117919		2676.8	-0.00816464
556.99	0.00517389		1087	0.01460146		1616.99	0.01480999		2147	0.01093619		2677	-0.00811164
557.19	0.00516027		1087.2	0.01422385		1617.19	0.01509674		2147.2	0.0103422		2677.2	-0.00794833
557.39	0.00449164		1087.4	0.01466315		1617.39	0.01543057		2147.4	0.00972803		2677.4	-0.00788679
557.59	0.00466899		1087.6	0.01513356		1617.59	0.01572199		2147.6	0.00935091		2677.6	-0.00847115
557.79	0.00471121		1087.8	0.01447325		1617.79	0.01520023		2147.8	0.00870059		2677.8	-0.00812454
557.99	0.00421294		1088	0.0153515		1617.99	0.01558484		2148	0.00851435		2678	-0.00839369
558.19	0.00500682		1088.2	0.01509679		1618.19	0.01527289		2148.2	0.00841444		2678.2	-0.00816883
558.39	0.0049379		1088.4	0.01464848		1618.39	0.01530054		2148.4	0.00822251		2678.4	-0.00755663
558.59	0.00477202		1088.6	0.01473554		1618.59	0.01491699		2148.6	0.00862352		2678.6	-0.00645504
558.79	0.00542406		1088.8	0.01517268		1618.79	0.01507329		2148.8	0.00908434		2678.8	-0.00646432
558.99	0.00553913		1089	0.01590141		1618.99	0.01419966		2149	0.00983053		2679	-0.0054756
559.19	0.00582797		1089.2	0.01588072		1619.19	0.01376317		2149.2	0.01077372		2679.2	-0.00517652
559.39	0.00690512		1089.4	0.01602712		1619.39	0.0135658		2149.4	0.01188943		2679.4	-0.00525637
559.59	0.00767612		1089.6	0.01608367		1619.59	0.01270174		2149.6	0.01218712		2679.6	-0.00482215
559.79	0.0081142		1089.8	0.01549404		1619.79	0.01215307		2149.8	0.01294377		2679.8	-0.00478289
