# Supplementary material for: Functional development of a V3/glycan-specific broadly neutralizing antibody isolated from a case of HIV superinfection
Source: eLife journal article supplement (doi:10.7554/elife.68110), 2021-07-15
Supplement: fig2-data2 [file F3.xls]

Vers 3.43 Data Simulation
Conc1	3.125E-08	3.125E-08	3.125E-08	3.125E-08	3.125E-08	3.125E-08
Start1	290	879.99	1469.99	2059.98	2649.98	3239.98
Stop1	649.8	1239.79	1829.79	2419.78	3009.78	3599.78
Time1	Data1	Sim1	Time2	Data2	Sim2	Time3	Data3	Sim3	Time4	Data4	Sim4	Time5	Data5	Sim5	Time6	Data6	Sim6
290	-0.00508961		879.99	0.00042782		1469.99	-0.0044855		2059.98	-0.00628071		2649.98	0.00471529		3239.98	-0.00780446
290.2	-0.00397166		880.19	0.00012476		1470.19	-0.00393476		2060.18	-0.0057819		2650.18	0.00482895		3240.18	-0.00692022
290.4	-0.00345912		880.39	-0.00033398		1470.39	-0.00322371		2060.38	-0.00571051		2650.38	0.00447765		3240.38	-0.00651542
290.6	-0.00214545		880.59	-0.00078673		1470.59	-0.00278751		2060.58	-0.0068274		2650.58	0.0038285		3240.58	-0.0063502
290.8	-0.00117253		880.79	-0.00142999		1470.79	-0.00214239		2060.78	-0.00716848		2650.78	0.00436838		3240.78	-0.00615513
291	-0.00076441		880.99	-0.00150332		1470.99	-0.0018882		2060.98	-0.00762885		2650.98	0.00453693		3240.98	-0.00675625
291.2	-0.00044504		881.19	-0.00121612		1471.19	-0.0017252		2061.18	-0.0084807		2651.18	0.00456767		3241.18	-0.00645833
291.4	0.00037155		881.39	-0.00095386		1471.39	-0.00123251		2061.38	-0.00887865		2651.38	0.00454406		3241.38	-0.00722472
291.6	0.0002101		881.59	-0.00027682		1471.59	-0.00057428		2061.58	-0.00926942		2651.58	0.00439037		3241.58	-0.00717467
291.8	-0.00007258		881.79	0.00064608		1471.79	-0.00105608		2061.78	-0.0092954		2651.78	0.00473516		3241.78	-0.00759929
292	-0.00055655		881.99	0.00143979		1471.99	-0.00088557		2061.98	-0.00941087		2651.98	0.00503959		3241.98	-0.007337
292.2	-0.00182705		882.19	0.00210988		1472.19	-0.00132185		2062.18	-0.00950247		2652.18	0.00481032		3242.18	-0.00728366
292.4	-0.00159037		882.39	0.0023422		1472.39	-0.00210304		2062.38	-0.00909638		2652.38	0.00472593		3242.38	-0.00798168
292.6	-0.00195328		882.59	0.0025655		1472.59	-0.00127554		2062.58	-0.00851369		2652.58	0.0042456		3242.58	-0.00796372
292.8	-0.00167757		882.79	0.00238933		1472.79	-0.00178982		2062.78	-0.00723494		2652.78	0.00432594		3242.78	-0.0077728
293	-0.00279625		882.99	0.00201689		1472.99	-0.00208171		2062.98	-0.00733175		2652.98	0.00436875		3242.98	-0.00779475
293.2	-0.00254805		883.19	0.00126036		1473.19	-0.00317379		2063.18	-0.00614716		2653.18	0.0047251		3243.18	-0.00753282
293.4	-0.00222648		883.39	0.00043633		1473.39	-0.00304631		2063.38	-0.00559056		2653.38	0.00426659		3243.38	-0.00724511
293.6	-0.00227047		883.59	-0.00039342		1473.59	-0.00371893		2063.58	-0.00502096		2653.58	0.00482674		3243.58	-0.00694293
293.8	-0.00257491		883.79	-0.00059954		1473.79	-0.00314764		2063.78	-0.00341526		2653.78	0.00521554		3243.78	-0.00623966
294	-0.00145398		883.99	-0.00083591		1473.99	-0.0035121		2063.98	-0.00372792		2653.98	0.00585213		3243.98	-0.00500956
294.2	-0.00124578		884.19	-0.00089089		1474.19	-0.00312441		2064.18	-0.00409686		2654.18	0.00649913		3244.18	-0.00449213
294.4	-0.00124484		884.39	-0.00045474		1474.39	-0.0027878		2064.38	-0.00438209		2654.38	0.00617877		3244.38	-0.00504905
294.6	-0.00023051		884.59	-0.00024332		1474.59	-0.00234658		2064.58	-0.00484866		2654.58	0.00689975		3244.58	-0.00496674
294.8	-0.00039258		884.79	-0.00030908		1474.79	-0.00233434		2064.78	-0.00462746		2654.78	0.00787683		3244.78	-0.00569178
295	-0.00002337		884.99	0.00042491		1474.99	-0.0018943		2064.98	-0.00486588		2654.98	0.00740357		3244.98	-0.00678823
295.2	0.00037446		885.19	0.00131339		1475.19	-0.00147054		2065.18	-0.00541704		2655.18	0.00717641		3245.18	-0.00673905
295.4	0.0005772		885.39	0.00245683		1475.39	-0.00053823		2065.38	-0.00543511		2655.38	0.00684381		3245.38	-0.00793138
295.6	-0.00056155		885.59	0.00405495		1475.59	0.0001773		2065.58	-0.005948		2655.58	0.00637706		3245.58	-0.00723164
295.8	-0.00097469		885.79	0.0046726		1475.79	0.00001649		2065.78	-0.0063517		2655.78	0.00559125		3245.78	-0.00702384
296	-0.0011811		885.99	0.00485839		1475.99	0.00165624		2065.98	-0.00686961		2655.98	0.00510015		3245.98	-0.00703035
296.2	-0.0020768		886.19	0.00487479		1476.19	0.00160957		2066.18	-0.00685013		2656.18	0.00443091		3246.18	-0.00714862
296.4	-0.00093967		886.39	0.00411249		1476.39	0.00175606		2066.38	-0.00601449		2656.38	0.00361891		3246.38	-0.00770213
296.6	-0.00101355		886.59	0.00410358		1476.59	0.00247862		2066.58	-0.00579262		2656.58	0.00367249		3246.58	-0.00746863
296.8	-0.00075217		886.79	0.0040861		1476.79	0.00231844		2066.78	-0.00557173		2656.78	0.00434269		3246.78	-0.00706464
297	-0.00144978		886.99	0.0032881		1476.99	0.0020393		2066.98	-0.00561097		2656.98	0.00423717		3246.98	-0.00716136
297.2	-0.00155473		887.19	0.0023748		1477.19	0.00171619		2067.18	-0.0056656		2657.18	0.00520109		3247.18	-0.00701111
297.4	-0.00141635		887.39	0.0020011		1477.39	0.00142919		2067.38	-0.00629907		2657.38	0.00578383		3247.38	-0.00705749
297.6	-0.00225276		887.59	0.00197292		1477.59	0.00142573		2067.58	-0.0059553		2657.58	0.00633414		3247.58	-0.00694746
297.8	-0.00184997		887.79	0.00163562		1477.79	0.00168492		2067.78	-0.00651654		2657.78	0.00648547		3247.78	-0.0063655
298	-0.00116854		887.99	0.00049693		1477.99	0.00126543		2067.98	-0.00683684		2657.98	0.00648137		3247.98	-0.00652083
298.2	-0.00081168		888.19	0.00040587		1478.19	0.00140539		2068.18	-0.0077082		2658.18	0.00694698		3248.18	-0.0070308
298.4	-0.0010013		888.39	0.00079409		1478.39	0.00074159		2068.38	-0.00700318		2658.38	0.00750191		3248.38	-0.00728663
298.6	-0.00041844		888.59	0.00038838		1478.59	0.00029657		2068.58	-0.00658745		2658.58	0.00855541		3248.58	-0.00694819
298.8	-0.00008187		888.79	0.00022523		1478.79	-0.00082462		2068.78	-0.00610402		2658.78	0.00822934		3248.78	-0.00736399
299	0.00039383		888.99	0.00117327		1478.99	-0.00101961		2068.98	-0.00522925		2658.98	0.00813122		3248.98	-0.0072687
299.2	-0.00008458		889.19	0.00207351		1479.19	-0.00227726		2069.18	-0.00501919		2659.18	0.00773347		3249.18	-0.00643026
299.4	-0.00062694		889.39	0.00247793		1479.39	-0.00239869		2069.38	-0.00523847		2659.38	0.00769274		3249.38	-0.00671175
299.6	-0.00083919		889.59	0.0026848		1479.59	-0.0018851		2069.58	-0.00585509		2659.58	0.0075138		3249.58	-0.00591747
299.8	-0.00090007		889.79	0.0026399		1479.79	-0.00210236		2069.78	-0.00568829		2659.78	0.00693128		3249.78	-0.00586705
300	-0.00081591		889.99	0.00259166		1479.99	-0.00143656		2069.98	-0.00497701		2659.98	0.00729098		3249.98	-0.00622816
300.2	-0.00078924		890.19	0.00277535		1480.19	-0.00250034		2070.18	-0.0041383		2660.18	0.00707855		3250.18	-0.00597367
300.4	0.00011147		890.39	0.00226188		1480.39	-0.00226168		2070.38	-0.00325303		2660.38	0.00689736		3250.38	-0.00647207
300.6	0.00068073		890.59	0.00262413		1480.59	-0.00122509		2070.58	-0.00299805		2660.58	0.00724264		3250.58	-0.00622517
300.8	0.00006413		890.79	0.00277199		1480.79	-0.00118432		2070.78	-0.00224382		2660.78	0.00669857		3250.78	-0.00686765
301	0.00043563		890.99	0.00165865		1480.99	-0.00132738		2070.98	-0.00238555		2660.98	0.00613765		3250.98	-0.00783372
301.2	0.00097708		891.19	0.00148422		1481.19	-0.00081264		2071.18	-0.00312477		2661.18	0.00603813		3251.18	-0.00857275
301.4	0.00133849		891.39	0.00139503		1481.39	-0.00113091		2071.38	-0.00393449		2661.38	0.00567769		3251.38	-0.00905995
301.6	0.00106167		891.59	0.00105513		1481.59	-0.00019371		2071.58	-0.00430516		2661.58	0.00517804		3251.58	-0.00881184
301.8	0.00209478		891.79	0.00062187		1481.79	-0.00012266		2071.78	-0.00541788		2661.78	0.00576793		3251.78	-0.00815404
302	0.0022777		891.99	0.00027487		1481.99	-0.00031187		2071.98	-0.00580501		2661.98	0.00600062		3251.98	-0.00841185
302.2	0.00257881		892.19	0.00070356		1482.19	-0.00015787		2072.18	-0.00696461		2662.18	0.00660443		3252.18	-0.00793598
302.4	0.00250282		892.39	0.0014536		1482.39	-0.0005905		2072.38	-0.006643		2662.38	0.00735417		3252.38	-0.00775012
302.6	0.00330328		892.59	0.00158827		1482.59	-0.00055919		2072.58	-0.00704729		2662.58	0.0074205		3252.58	-0.00668427
302.8	0.00278943		892.79	0.00214742		1482.79	-0.00087126		2072.78	-0.00681386		2662.78	0.00720385		3252.78	-0.00610527
303	0.00285375		892.99	0.0029277		1482.99	-0.00092477		2072.98	-0.00716288		2662.98	0.00716452		3252.98	-0.00601107
303.2	0.00154579		893.19	0.00302115		1483.19	-0.00129129		2073.18	-0.00790956		2663.18	0.00725743		3253.18	-0.00536707
303.4	0.00118616		893.39	0.00272473		1483.39	-0.00037023		2073.38	-0.00784936		2663.38	0.00789559		3253.38	-0.00608159
303.6	0.00075748		893.59	0.00342195		1483.59	0.00016656		2073.58	-0.00800069		2663.58	0.00791687		3253.58	-0.0061445
303.8	0.00023268		893.79	0.00411784		1483.79	-0.00027421		2073.78	-0.00756921		2663.78	0.00751792		3253.78	-0.00573268
304	0.00093286		893.99	0.00374337		1483.99	-0.00000763		2073.98	-0.0075383		2663.98	0.00711964		3253.98	-0.00574773
304.2	0.00138114		894.19	0.00408593		1484.19	-0.00040609		2074.18	-0.00722835		2664.18	0.00707709		3254.18	-0.00679545
304.4	0.00191161		894.39	0.0034822		1484.39	0.00047148		2074.38	-0.00647974		2664.38	0.0074774		3254.38	-0.00685452
304.6	0.00221		894.59	0.00257658		1484.59	0.0003418		2074.58	-0.00574873		2664.58	0.00716707		3254.58	-0.00692384
304.8	0.00160981		894.79	0.00237159		1484.79	-0.00002484		2074.78	-0.00539619		2664.78	0.00725784		3254.78	-0.00759244
305	0.0018229		894.99	0.0017499		1484.99	-0.00055176		2074.98	-0.00579364		2664.98	0.0078007		3254.98	-0.00788203
305.2	0.0013281		895.19	0.0015541		1485.19	-0.00073187		2075.18	-0.00593245		2665.18	0.00820343		3255.18	-0.00789613
305.4	0.00078773		895.39	0.000541		1485.39	-0.00126683		2075.38	-0.00602371		2665.38	0.00898078		3255.38	-0.00754479
305.6	0.0009821		895.59	-0.00011999		1485.59	-0.00107552		2075.58	-0.00599512		2665.58	0.00961063		3255.58	-0.00720215
305.8	0.0009694		895.79	0.00021272		1485.79	-0.00192904		2075.78	-0.00631594		2665.78	0.01035005		3255.78	-0.00701567
306	0.00096842		895.99	0.00049013		1485.99	-0.0016115		2075.98	-0.00698264		2665.98	0.0104652		3255.98	-0.00663886
306.2	0.00129224		896.19	0.00092223		1486.19	-0.00183049		2076.18	-0.00769652		2666.18	0.0099973		3256.18	-0.00669585
306.4	0.00080854		896.39	0.00105158		1486.39	-0.00183119		2076.38	-0.00787136		2666.38	0.00962489		3256.38	-0.00603102
306.6	0.00079137		896.59	0.00109804		1486.59	-0.00161125		2076.58	-0.00834659		2666.58	0.00903066		3256.58	-0.00530594
306.8	0.0000976		896.79	0.0011901		1486.79	-0.0014076		2076.78	-0.00683705		2666.78	0.00898629		3256.78	-0.00595166
307	0.00006978		896.99	0.00058115		1486.99	-0.0009735		2076.98	-0.0063023		2666.98	0.00793569		3256.98	-0.0058135
307.2	-0.00108924		897.19	0.00139908		1487.19	-0.00045075		2077.18	-0.00609198		2667.18	0.0072473		3257.18	-0.00523714
307.4	-0.00073669		897.39	0.00128942		1487.39	-0.00000514		2077.38	-0.00543801		2667.38	0.00701777		3257.38	-0.00547365
307.6	-0.00062064		897.59	0.00177108		1487.59	0.0010474		2077.58	-0.00555716		2667.58	0.00655287		3257.58	-0.00584495
307.8	-0.00034181		897.79	0.00199511		1487.79	0.00142669		2077.78	-0.00532022		2667.78	0.00566215		3257.78	-0.00492183
308	0.00147037		897.99	0.00162261		1487.99	0.00180046		2077.98	-0.00493198		2667.98	0.00574889		3257.98	-0.00495024
308.2	0.00131475		898.19	0.00185357		1488.19	0.00147338		2078.18	-0.00443477		2668.18	0.00636333		3258.18	-0.00556666
308.4	0.00195781		898.39	0.00088391		1488.39	0.00184871		2078.38	-0.00446763		2668.38	0.0071638		3258.38	-0.0046227
308.6	0.00250885		898.59	0.00059116		1488.59	0.00153865		2078.58	-0.00403747		2668.58	0.00763906		3258.58	-0.00464439
308.8	0.00286521		898.79	0.00055991		1488.79	0.0024699		2078.78	-0.00354042		2668.78	0.0082303		3258.78	-0.00487407
309	0.00292667		898.99	0.00133063		1488.99	0.00211824		2078.98	-0.00370885		2668.98	0.0089657		3258.98	-0.00507569
309.2	0.00275273		899.19	0.00051446		1489.19	0.00163228		2079.18	-0.0035463		2669.18	0.00933105		3259.18	-0.00490533
309.4	0.00332726		899.39	0.00010694		1489.39	0.00155702		2079.38	-0.0045508		2669.38	0.00938596		3259.38	-0.00478478
309.6	0.0038698		899.59	0.00146359		1489.59	0.00160303		2079.58	-0.00430145		2669.58	0.01014727		3259.58	-0.00538188
309.8	0.00317091		899.79	0.00255235		1489.79	0.00138213		2079.78	-0.00575827		2669.78	0.01055317		3259.78	-0.00550444
310	0.00332342		899.99	0.00296941		1489.99	0.00171903		2079.98	-0.00628256		2669.98	0.01093604		3259.98	-0.00621821
310.2	0.00302385		900.19	0.00340606		1490.19	0.00083727		2080.18	-0.00620048		2670.18	0.01063313		3260.18	-0.00676354
310.4	0.00247062		900.39	0.00321214		1490.39	0.00073853		2080.38	-0.00584626		2670.38	0.01081622		3260.38	-0.00642432
310.6	0.00251712		900.59	0.00392746		1490.59	0.00150551		2080.58	-0.00572545		2670.58	0.01049323		3260.58	-0.00732367
310.8	0.00156609		900.79	0.0036538		1490.79	0.00186		2080.78	-0.00466553		2670.78	0.0092661		3260.78	-0.00687863
311	0.00161599		900.99	0.0030843		1490.99	0.00157242		2080.98	-0.00538923		2670.98	0.00785771		3260.98	-0.00583566
311.2	0.00114192		901.19	0.00388228		1491.19	0.00197368		2081.18	-0.00572755		2671.18	0.00786845		3261.18	-0.00618067
311.4	0.00092934		901.39	0.00311694		1491.39	0.00157448		2081.38	-0.00525121		2671.38	0.00760967		3261.38	-0.00645137
311.6	0.00088181		901.59	0.00308396		1491.59	0.00174381		2081.58	-0.0042395		2671.58	0.00659026		3261.58	-0.0071173
311.8	0.00079035		901.79	0.00257624		1491.79	0.00082792		2081.78	-0.0036961		2671.78	0.00636937		3261.78	-0.00631468
312	0.00137099		901.99	0.00210155		1491.99	0.00001346		2081.98	-0.0037683		2671.98	0.00671074		3261.98	-0.00645895
312.2	0.00072016		902.19	0.00202017		1492.19	-0.00119552		2082.18	-0.0038434		2672.18	0.00631352		3262.18	-0.0069149
312.4	0.00188541		902.39	0.00041208		1492.39	-0.00127361		2082.38	-0.00447544		2672.38	0.00618401		3262.38	-0.00654076
312.6	0.0018477		902.59	0.00058064		1492.59	-0.00171822		2082.58	-0.00393937		2672.58	0.00564161		3262.58	-0.00699542
312.8	0.00155507		902.79	-0.00037068		1492.79	-0.00191229		2082.78	-0.00332233		2672.78	0.00545292		3262.78	-0.00786657
313	0.00201451		902.99	0.00033216		1492.99	-0.00259229		2082.98	-0.00361957		2672.98	0.00549891		3262.98	-0.0082437
313.2	0.00275126		903.19	-0.00105992		1493.19	-0.00254908		2083.18	-0.00277425		2673.18	0.00513291		3263.18	-0.00855377
313.4	0.00306527		903.39	-0.00077456		1493.39	-0.00182974		2083.38	-0.00305753		2673.38	0.00532446		3263.38	-0.00883849
313.6	0.00330632		903.59	0.00028817		1493.59	-0.00140649		2083.58	-0.00216269		2673.58	0.00607847		3263.58	-0.00957337
313.8	0.00230998		903.79	0.00098095		1493.79	-0.0014297		2083.78	-0.00279368		2673.78	0.00660362		3263.78	-0.00942626
314	0.00232516		903.99	0.001903		1493.99	-0.00095849		2083.98	-0.00186252		2673.98	0.00719435		3263.98	-0.00944427
314.2	0.00257088		904.19	0.00252587		1494.19	-0.00104463		2084.18	-0.00203037		2674.18	0.00702587		3264.18	-0.00852016
314.4	0.00219994		904.39	0.00221121		1494.39	-0.00024058		2084.38	-0.00256004		2674.38	0.00690038		3264.38	-0.00854171
314.6	0.00134323		904.59	0.00330761		1494.59	0.00081091		2084.58	-0.00269012		2674.58	0.00629561		3264.58	-0.00836155
314.8	0.00067673		904.79	0.0036094		1494.79	0.00035661		2084.78	-0.00263224		2674.78	0.0055866		3264.78	-0.00726855
315	0.0008476		904.99	0.0033249		1494.99	0.00023981		2084.98	-0.00279736		2674.98	0.00638273		3264.98	-0.00720208
315.2	0.00046836		905.19	0.00432681		1495.19	0.00072754		2085.18	-0.00208456		2675.18	0.00657253		3265.18	-0.00671445
315.4	0.00021185		905.39	0.00436082		1495.39	0.00001319		2085.38	-0.00156198		2675.38	0.00583594		3265.38	-0.00628132
315.6	0.00048283		905.59	0.00464313		1495.59	-0.00000887		2085.58	-0.00139625		2675.58	0.00620875		3265.58	-0.00578844
315.8	0.000633		905.79	0.00434551		1495.79	-0.00030695		2085.78	-0.00234578		2675.78	0.00647848		3265.78	-0.00492203
316	0.00050997		905.99	0.00469098		1495.99	-0.00092682		2085.98	-0.00268729		2675.98	0.00692725		3265.98	-0.00543507
316.2	0.0010529		906.19	0.00431127		1496.19	-0.00086395		2086.18	-0.00322535		2676.18	0.00687798		3266.18	-0.00568389
316.4	0.00205018		906.39	0.00273288		1496.39	-0.00086772		2086.38	-0.00433412		2676.38	0.00721625		3266.38	-0.00589732
316.6	0.00217088		906.59	0.00229628		1496.59	-0.00078716		2086.58	-0.00494916		2676.58	0.0078058		3266.58	-0.00631109
316.8	0.00344454		906.79	0.00137079		1496.79	-0.00037895		2086.78	-0.00506773		2676.78	0.00790273		3266.78	-0.00645024
317	0.00476721		906.99	0.00150207		1496.99	0.00080217		2086.98	-0.00573922		2676.98	0.00842307		3266.98	-0.00597197
317.2	0.00498981		907.19	0.00099801		1497.19	0.00166634		2087.18	-0.0053674		2677.18	0.00803537		3267.18	-0.00636934
317.4	0.00389979		907.39	0.00091072		1497.39	0.0017996		2087.38	-0.00617328		2677.38	0.00826779		3267.38	-0.00659554
317.6	0.0037785		907.59	0.00102946		1497.59	0.00223833		2087.58	-0.00655122		2677.58	0.00816193		3267.58	-0.00700476
317.8	0.00411678		907.79	0.00152223		1497.79	0.00252947		2087.78	-0.00730994		2677.78	0.00815625		3267.78	-0.0065857
318	0.0036737		907.99	0.00141977		1497.99	0.00260274		2087.98	-0.00675059		2677.98	0.00810531		3267.98	-0.00667643
318.2	0.00353735		908.19	0.00117073		1498.19	0.00247125		2088.18	-0.00661997		2678.18	0.00777721		3268.18	-0.00770957
318.4	0.00240658		908.39	0.00107907		1498.39	0.00308354		2088.38	-0.00655112		2678.38	0.00798586		3268.38	-0.00781645
318.6	0.00205715		908.59	0.00227372		1498.59	0.00330761		2088.58	-0.00610432		2678.58	0.00826121		3268.58	-0.00809266
318.8	0.00138467		908.79	0.00203224		1498.79	0.00287097		2088.78	-0.00572965		2678.78	0.00872382		3268.78	-0.00757291
319	0.00088281		908.99	0.00231842		1498.99	0.00364834		2088.98	-0.00475614		2678.98	0.00913484		3268.98	-0.00741757
319.2	0.00057796		909.19	0.00280042		1499.19	0.00350267		2089.18	-0.00389518		2679.18	0.00885468		3269.18	-0.00807892
319.4	-0.00042068		909.39	0.00276674		1499.39	0.00243363		2089.38	-0.00393139		2679.38	0.0086682		3269.38	-0.00825321
319.6	-0.00131546		909.59	0.00350509		1499.59	0.00240916		2089.58	-0.0043284		2679.58	0.00954872		3269.58	-0.00824186
319.8	-0.00087064		909.79	0.00347529		1499.79	0.00167719		2089.78	-0.00404551		2679.78	0.00985433		3269.78	-0.00900913
320	-0.00066403		909.99	0.00397074		1499.99	0.00053723		2089.98	-0.00344764		2679.98	0.0096458		3269.98	-0.00951055
320.2	-0.00049867		910.19	0.00372004		1500.19	0.00086525		2090.18	-0.00385474		2680.18	0.00920177		3270.18	-0.00930477
320.4	-0.00020081		910.39	0.00343926		1500.39	0.0004803		2090.38	-0.00398353		2680.38	0.00962782		3270.38	-0.0090949
320.6	-0.0002071		910.59	0.00357099		1500.59	0.00088318		2090.58	-0.0039577		2680.58	0.00905722		3270.58	-0.00849633
320.8	-0.00036796		910.79	0.00396976		1500.79	0.00194057		2090.78	-0.00287489		2680.78	0.00816716		3270.78	-0.00834766
321	0.00019493		910.99	0.00436407		1500.99	0.00222393		2090.98	-0.00270508		2680.98	0.00891132		3270.98	-0.00772838
321.2	-0.00078812		911.19	0.00464224		1501.19	0.00244635		2091.18	-0.00231974		2681.18	0.00844825		3271.18	-0.0084151
321.4	-0.00069092		911.39	0.0044025		1501.39	0.00318669		2091.38	-0.00200782		2681.38	0.00832355		3271.38	-0.009199
321.6	0.00056699		911.59	0.0041856		1501.59	0.00310474		2091.58	-0.00244952		2681.58	0.00792468		3271.58	-0.0092806
321.8	0.00151878		911.79	0.00434137		1501.79	0.00265989		2091.78	-0.00304478		2681.78	0.00777856		3271.78	-0.00901186
322	0.00079303		911.99	0.00381809		1501.99	0.00209351		2091.98	-0.00246531		2681.98	0.00814498		3271.98	-0.00933505
322.2	0.00137778		912.19	0.00334696		1502.19	0.0029055		2092.18	-0.00247113		2682.18	0.0089609		3272.18	-0.00917365
322.4	0.00147742		912.39	0.00372548		1502.39	0.00321666		2092.38	-0.00259047		2682.38	0.01006182		3272.38	-0.00850031
322.6	0.00166234		912.59	0.00258476		1502.59	0.00264114		2092.58	-0.0027861		2682.58	0.01082332		3272.58	-0.0091471
322.8	0.00188459		912.79	0.00138556		1502.79	0.00281187		2092.78	-0.00274168		2682.78	0.01152422		3272.78	-0.00902204
323	0.00141296		912.99	0.00129199		1502.99	0.0030191		2092.98	-0.00203218		2682.98	0.01118073		3272.98	-0.00933484
323.2	0.00186895		913.19	0.00126658		1503.19	0.00238804		2093.18	-0.00287499		2683.18	0.01072672		3273.18	-0.00984501
323.4	0.00139119		913.39	0.00100617		1503.39	0.00189656		2093.38	-0.00335655		2683.38	0.01092957		3273.38	-0.00843489
323.6	0.00164172		913.59	0.00060581		1503.59	0.00270315		2093.58	-0.00353798		2683.58	0.01100332		3273.58	-0.00862134
323.8	0.00247323		913.79	0.00012692		1503.79	0.00171893		2093.78	-0.00418999		2683.78	0.01035566		3273.78	-0.00833782
324	0.00201501		913.99	-0.00008249		1503.99	0.00047319		2093.98	-0.00490664		2683.98	0.00863935		3273.98	-0.00718089
324.2	0.00164523		914.19	-0.00005064		1504.19	0.0006791		2094.18	-0.00499115		2684.18	0.00853942		3274.18	-0.00681892
324.4	0.00179657		914.39	-0.00029612		1504.39	0.00030995		2094.38	-0.00497564		2684.38	0.00821875		3274.38	-0.00602845
324.6	0.00104559		914.59	-0.00072921		1504.59	0.00072113		2094.58	-0.00465878		2684.58	0.00760369		3274.58	-0.00564528
324.8	0.00084242		914.79	-0.00058835		1504.79	0.00159149		2094.78	-0.00517763		2684.78	0.00758513		3274.78	-0.00519377
325	0.00193977		914.99	0.00020636		1504.99	0.00225146		2094.98	-0.00521296		2684.98	0.00810477		3274.98	-0.00479775
325.2	0.00130663		915.19	0.00118874		1505.19	0.00315566		2095.18	-0.00546306		2685.18	0.00811588		3275.18	-0.00488029
325.4	0.00168233		915.39	0.00158679		1505.39	0.00370348		2095.38	-0.00552463		2685.38	0.00763027		3275.38	-0.00527866
325.6	0.00246254		915.59	0.00189227		1505.59	0.00306552		2095.58	-0.0055294		2685.58	0.00779044		3275.58	-0.00547921
325.8	0.00348569		915.79	0.00247131		1505.79	0.00284214		2095.78	-0.00520991		2685.78	0.00836939		3275.78	-0.00637259
326	0.00301573		915.99	0.00281839		1505.99	0.00244908		2095.98	-0.0045225		2685.98	0.00914272		3275.98	-0.00653702
326.2	0.00306987		916.19	0.00359225		1506.19	0.00318107		2096.18	-0.00394612		2686.18	0.00954713		3276.18	-0.00616731
326.4	0.00257143		916.39	0.00408467		1506.39	0.00307101		2096.38	-0.00307986		2686.38	0.00966882		3276.38	-0.0065153
326.6	0.00256796		916.59	0.00334369		1506.59	0.00326365		2096.58	-0.00324399		2686.58	0.00970911		3276.58	-0.00699721
326.8	0.00265867		916.79	0.00356078		1506.79	0.0035365		2096.78	-0.00237097		2686.78	0.01025295		3276.78	-0.00760926
327	0.00225946		916.99	0.00437406		1506.99	0.00340735		2096.98	-0.00223733		2686.98	0.00978518		3276.98	-0.00748958
327.2	0.00264718		917.19	0.00356553		1507.19	0.00322601		2097.18	-0.00218525		2687.18	0.0096263		3277.18	-0.0080899
327.4	0.0031687		917.39	0.00294321		1507.39	0.00334061		2097.38	-0.00137484		2687.38	0.00987307		3277.38	-0.00842197
327.6	0.00336717		917.59	0.0029769		1507.59	0.00429408		2097.58	-0.00176939		2687.58	0.00858385		3277.58	-0.00902211
327.8	0.00386196		917.79	0.00256021		1507.79	0.00306143		2097.78	-0.00264841		2687.78	0.00843508		3277.78	-0.00875498
328	0.0044753		917.99	0.00241799		1507.99	0.00213214		2097.98	-0.00356199		2687.98	0.00737923		3277.98	-0.00939323
328.2	0.00515979		918.19	0.00210354		1508.19	0.00145869		2098.18	-0.00412555		2688.18	0.00778497		3278.18	-0.00947542
328.4	0.00464214		918.39	0.00091834		1508.39	0.0013314		2098.38	-0.00452722		2688.38	0.00770326		3278.38	-0.00961999
328.6	0.00408805		918.59	-0.00021607		1508.59	0.00202608		2098.58	-0.00483147		2688.58	0.00798942		3278.58	-0.00997245
328.8	0.00416001		918.79	0.00014507		1508.79	0.00143433		2098.78	-0.00547834		2688.78	0.00787712		3278.78	-0.00982165
329	0.00434644		918.99	0.00036753		1508.99	0.00164849		2098.98	-0.00535236		2688.98	0.00790629		3278.98	-0.00971437
329.2	0.00407138		919.19	0.00048015		1509.19	0.00138045		2099.18	-0.00507919		2689.18	0.00786474		3279.18	-0.00852985
329.4	0.00403978		919.39	0.00003169		1509.39	0.00141372		2099.38	-0.00463616		2689.38	0.0076562		3279.38	-0.00851801
329.6	0.00452164		919.59	0.00071348		1509.59	0.00036693		2099.58	-0.00385584		2689.58	0.00790252		3279.58	-0.00854658
329.8	0.00426599		919.79	0.00118506		1509.79	-0.00033807		2099.78	-0.00369405		2689.78	0.00751806		3279.78	-0.00804722
330	0.00283535		919.99	0.00122224		1509.99	-0.00016138		2099.98	-0.00392241		2689.98	0.0072504		3279.98	-0.00669531
330.2	0.00230799		920.19	0.00193473		1510.19	0.00009352		2100.18	-0.00368994		2690.18	0.00662955		3280.18	-0.00640884
330.4	0.00171324		920.39	0.0022453		1510.39	0.00016906		2100.38	-0.00373855		2690.38	0.0063616		3280.38	-0.00629768
330.6	0.0013602		920.59	0.00284685		1510.59	0.00002758		2100.58	-0.00415339		2690.58	0.00671058		3280.58	-0.00619001
330.8	0.00093116		920.79	0.00402881		1510.79	-0.00059002		2100.78	-0.00374912		2690.78	0.00694878		3280.78	-0.00627625
331	0.00138953		920.99	0.00503593		1510.99	-0.00012502		2100.98	-0.00343343		2690.98	0.00741377		3280.98	-0.00571974
331.2	0.00192648		921.19	0.00481834		1511.19	-0.0003282		2101.18	-0.00299897		2691.18	0.00737891		3281.18	-0.00586526
331.4	0.00266001		921.39	0.00530039		1511.39	-0.00008032		2101.38	-0.0032		2691.38	0.0073672		3281.38	-0.00634097
331.6	0.00302946		921.59	0.00588196		1511.59	0.0006864		2101.58	-0.00374684		2691.58	0.00681694		3281.58	-0.00668114
331.8	0.00359182		921.79	0.00581684		1511.79	-0.00004507		2101.78	-0.00461275		2691.78	0.0070263		3281.78	-0.00684706
332	0.00366024		921.99	0.00576496		1511.99	-0.00040173		2101.98	-0.00511663		2691.98	0.00685937		3281.98	-0.00757544
332.2	0.0042134		922.19	0.00529486		1512.19	-0.00062781		2102.18	-0.0047311		2692.18	0.00759269		3282.18	-0.00685342
332.4	0.00418867		922.39	0.00464365		1512.39	0.00022493		2102.38	-0.00380229		2692.38	0.00836349		3282.38	-0.00758003
332.6	0.00406239		922.59	0.00440671		1512.59	0.00097484		2102.58	-0.00390521		2692.58	0.00809933		3282.58	-0.00737832
332.8	0.00345147		922.79	0.00502217		1512.79	0.00133848		2102.78	-0.00347946		2692.78	0.0084641		3282.78	-0.00684009
333	0.00327969		922.99	0.00473471		1512.99	0.00251042		2102.98	-0.00284115		2692.98	0.00829337		3282.98	-0.00632257
333.2	0.00360046		923.19	0.00383093		1513.19	0.00359873		2103.18	-0.00230399		2693.18	0.00867067		3283.18	-0.00574607
333.4	0.00328392		923.39	0.00337188		1513.39	0.00419734		2103.38	-0.00215288		2693.38	0.00911739		3283.38	-0.00544801
333.6	0.0032743		923.59	0.00339999		1513.59	0.0046097		2103.58	-0.00250276		2693.58	0.00882971		3283.58	-0.00522122
333.8	0.00329555		923.79	0.00352388		1513.79	0.00569458		2103.78	-0.00237995		2693.78	0.00857572		3283.78	-0.00498864
334	0.0027751		923.99	0.0027479		1513.99	0.00634519		2103.98	-0.00277447		2693.98	0.00839962		3283.98	-0.00481873
334.2	0.00243076		924.19	0.00367305		1514.19	0.00549055		2104.18	-0.00296779		2694.18	0.00735917		3284.18	-0.00541065
334.4	0.0021744		924.39	0.00388546		1514.39	0.00590889		2104.38	-0.00319277		2694.38	0.00687144		3284.38	-0.00503878
334.6	0.00213271		924.59	0.00414478		1514.59	0.00522437		2104.58	-0.00306552		2694.58	0.00727991		3284.58	-0.00582573
334.8	0.00208226		924.79	0.00464398		1514.79	0.00454677		2104.78	-0.00322488		2694.78	0.00659375		3284.78	-0.00532755
335	0.00248712		924.99	0.00433077		1514.99	0.00435235		2104.98	-0.00332822		2694.98	0.00755341		3284.98	-0.00524402
335.2	0.00269328		925.19	0.00319168		1515.19	0.00382043		2105.18	-0.00330334		2695.18	0.00742973		3285.18	-0.0055071
335.4	0.00306572		925.39	0.00299534		1515.39	0.00303204		2105.38	-0.00386181		2695.38	0.00779673		3285.38	-0.00668332
335.6	0.00372597		925.59	0.00283115		1515.59	0.0028085		2105.58	-0.00402113		2695.58	0.00770363		3285.58	-0.00723578
335.8	0.00406553		925.79	0.00232685		1515.79	0.00199456		2105.78	-0.00409874		2695.78	0.00845467		3285.78	-0.0073487
336	0.00472498		925.99	0.00146495		1515.99	0.00098643		2105.98	-0.00384844		2695.98	0.00908048		3285.98	-0.00763439
336.2	0.00540506		926.19	0.00231932		1516.19	0.00173257		2106.18	-0.00371329		2696.18	0.01036164		3286.18	-0.00784831
336.4	0.00566392		926.39	0.00219831		1516.39	0.00191099		2106.38	-0.00369452		2696.38	0.01127744		3286.38	-0.00792464
336.6	0.00547819		926.59	0.00208623		1516.59	0.00159312		2106.58	-0.00411526		2696.58	0.01095266		3286.58	-0.00825586
336.8	0.00467342		926.79	0.00290659		1516.79	0.00165554		2106.78	-0.00354751		2696.78	0.01232711		3286.78	-0.00866514
337	0.00424753		926.99	0.00308438		1516.99	0.0018725		2106.98	-0.00374815		2696.98	0.01255448		3286.98	-0.00837274
337.2	0.00428778		927.19	0.00306813		1517.19	0.00206029		2107.18	-0.00403656		2697.18	0.01306771		3287.18	-0.00789163
337.4	0.00361905		927.39	0.00447864		1517.39	0.0021749		2107.38	-0.00343204		2697.38	0.01286878		3287.38	-0.00647921
337.6	0.00456544		927.59	0.00507879		1517.59	0.00213695		2107.58	-0.0040211		2697.58	0.011885		3287.58	-0.00643205
337.8	0.00384973		927.79	0.00621931		1517.79	0.00247371		2107.78	-0.003606		2697.78	0.01107309		3287.78	-0.00575021
338	0.00353728		927.99	0.00595315		1517.99	0.00185688		2107.98	-0.00355458		2697.98	0.00962548		3287.98	-0.00587576
338.2	0.00253497		928.19	0.00711905		1518.19	0.00131117		2108.18	-0.00369372		2698.18	0.0083333		3288.18	-0.00565715
338.4	0.00232204		928.39	0.00709966		1518.39	0.00119517		2108.38	-0.0033531		2698.38	0.00731428		3288.38	-0.00540559
338.6	0.00210531		928.59	0.00736848		1518.59	0.00052259		2108.58	-0.002448		2698.58	0.00731514		3288.58	-0.00584216
338.8	0.00190851		928.79	0.00774838		1518.79	0.0004805		2108.78	-0.00255187		2698.78	0.00666726		3288.78	-0.00535955
339	0.0016169		928.99	0.0079672		1518.99	0.00076032		2108.98	-0.00247784		2698.98	0.00660193		3288.98	-0.0058979
339.2	0.00230596		929.19	0.00760857		1519.19	0.00085647		2109.18	-0.00173354		2699.18	0.00619393		3289.18	-0.00681311
339.4	0.002501		929.39	0.00753483		1519.39	0.00143422		2109.38	-0.00231319		2699.38	0.00586446		3289.38	-0.00720517
339.6	0.00258727		929.59	0.00607834		1519.59	0.00230759		2109.58	-0.00181965		2699.58	0.0063346		3289.58	-0.00795299
339.8	0.00269136		929.79	0.00429184		1519.79	0.00288495		2109.78	-0.00173767		2699.78	0.00684987		3289.78	-0.00828997
340	0.00253937		929.99	0.00352228		1519.99	0.0037923		2109.98	-0.00180061		2699.98	0.00679141		3289.98	-0.00837253
340.2	0.00296798		930.19	0.00368315		1520.19	0.00467385		2110.18	-0.00256835		2700.18	0.00799015		3290.18	-0.00849672
340.4	0.00333027		930.39	0.0018234		1520.39	0.00436751		2110.38	-0.00270753		2700.38	0.00893342		3290.38	-0.00892486
340.6	0.0032368		930.59	0.00140282		1520.59	0.00444345		2110.58	-0.00338182		2700.58	0.00934651		3290.58	-0.00981783
340.8	0.00313974		930.79	0.00178882		1520.79	0.00511487		2110.78	-0.00357787		2700.78	0.00980433		3290.78	-0.00877297
341	0.00307083		930.99	0.00197185		1520.99	0.00561005		2110.98	-0.00364171		2700.98	0.01058739		3290.98	-0.00764011
341.2	0.00373605		931.19	0.00256446		1521.19	0.00596468		2111.18	-0.00297501		2701.18	0.01130099		3291.18	-0.00730916
341.4	0.00404839		931.39	0.00262926		1521.39	0.00617122		2111.38	-0.00317042		2701.38	0.01115726		3291.38	-0.00680802
341.6	0.00494743		931.59	0.0026546		1521.59	0.00582057		2111.58	-0.00365372		2701.58	0.01117778		3291.58	-0.00696024
341.8	0.00381191		931.79	0.00274602		1521.79	0.00602068		2111.78	-0.00425437		2701.78	0.01073584		3291.78	-0.00617488
342	0.00364578		931.99	0.00257885		1521.99	0.00471674		2111.98	-0.00389636		2701.98	0.00982875		3291.98	-0.00675156
342.2	0.00276878		932.19	0.00319504		1522.19	0.00420469		2112.18	-0.00419152		2702.18	0.01031351		3292.18	-0.00583103
342.4	0.00370526		932.39	0.00399051		1522.39	0.0029005		2112.38	-0.00363982		2702.38	0.00952947		3292.38	-0.00597791
342.6	0.00370672		932.59	0.00452654		1522.59	0.0025345		2112.58	-0.00295462		2702.58	0.00935394		3292.58	-0.0064631
342.8	0.00325021		932.79	0.00501001		1522.79	0.00158662		2112.78	-0.0037034		2702.78	0.00869064		3292.78	-0.00693374
343	0.00276636		932.99	0.00571032		1522.99	0.00086565		2112.98	-0.00287374		2702.98	0.0078762		3292.98	-0.00673135
343.2	0.00234266		933.19	0.00627124		1523.19	0.00159141		2113.18	-0.00187822		2703.18	0.00844104		3293.18	-0.00674771
343.4	0.00173615		933.39	0.00583927		1523.39	0.00185321		2113.38	-0.00121593		2703.38	0.00868971		3293.38	-0.00661118
343.6	0.00202538		933.59	0.0047525		1523.59	0.00155805		2113.58	-0.0004859		2703.58	0.00974199		3293.58	-0.00721003
343.8	0.00254853		933.79	0.00423979		1523.79	0.0014079		2113.78	-0.00098156		2703.78	0.01016677		3293.78	-0.00733523
344	0.00361912		933.99	0.00498626		1523.99	0.00149398		2113.98	-0.00131961		2703.98	0.01071384		3293.98	-0.00734818
344.2	0.00449196		934.19	0.00402498		1524.19	0.00119913		2114.18	-0.0024034		2704.18	0.01120251		3294.18	-0.00804575
344.4	0.0047256		934.39	0.00332462		1524.39	0.00181368		2114.38	-0.0022574		2704.38	0.01156511		3294.38	-0.00857654
344.6	0.00513174		934.59	0.00438642		1524.59	0.00190909		2114.58	-0.0026613		2704.58	0.01106581		3294.58	-0.00787483
344.8	0.00560632		934.79	0.00485226		1524.79	0.0029503		2114.78	-0.00290058		2704.78	0.01134425		3294.78	-0.00591123
345	0.00521014		934.99	0.00483375		1524.99	0.00352218		2114.98	-0.00333053		2704.98	0.01227014		3294.98	-0.00545878
345.2	0.00607262		935.19	0.00415546		1525.19	0.00486993		2115.18	-0.00347575		2705.18	0.01179355		3295.18	-0.00531316
345.4	0.00639162		935.39	0.0031343		1525.39	0.00550823		2115.38	-0.00466455		2705.38	0.01106151		3295.38	-0.00478065
345.6	0.00572368		935.59	0.0035398		1525.59	0.00519954		2115.58	-0.00524497		2705.58	0.010389		3295.58	-0.00401604
345.8	0.00551379		935.79	0.00392179		1525.79	0.00560482		2115.78	-0.00558627		2705.78	0.00939885		3295.78	-0.00404848
346	0.00579671		935.99	0.00442918		1525.99	0.00509864		2115.98	-0.00521738		2705.98	0.00855347		3295.98	-0.00359779
346.2	0.00642959		936.19	0.00464814		1526.19	0.00558873		2116.18	-0.00528365		2706.18	0.00813064		3296.18	-0.00236706
346.4	0.00709073		936.39	0.00447468		1526.39	0.00517896		2116.38	-0.00469316		2706.38	0.00674382		3296.38	-0.00298142
346.6	0.0066578		936.59	0.00435733		1526.59	0.00524618		2116.58	-0.00445385		2706.58	0.00631833		3296.58	-0.00393355
346.8	0.00527143		936.79	0.00510352		1526.79	0.00484171		2116.78	-0.0048443		2706.78	0.00730888		3296.78	-0.00400597
347	0.00547562		936.99	0.00515745		1526.99	0.00527278		2116.98	-0.00319534		2706.98	0.00787952		3296.98	-0.00456593
347.2	0.00503726		937.19	0.00555633		1527.19	0.00562477		2117.18	-0.00274531		2707.18	0.00835568		3297.18	-0.00508644
347.4	0.00506575		937.39	0.00516782		1527.39	0.00423782		2117.38	-0.00276891		2707.38	0.00955144		3297.38	-0.00572146
347.6	0.00596168		937.59	0.00556842		1527.59	0.00439021		2117.58	-0.00344224		2707.58	0.01030459		3297.58	-0.00685479
347.8	0.00660085		937.79	0.00567685		1527.79	0.00484647		2117.78	-0.00488701		2707.78	0.0102554		3297.78	-0.00762844
348	0.0063196		937.99	0.00596032		1527.99	0.0042229		2117.98	-0.00538449		2707.98	0.01039952		3297.98	-0.00831995
348.2	0.00646937		938.19	0.00491422		1528.19	0.00406257		2118.18	-0.00503796		2708.18	0.01078887		3298.18	-0.00897451
348.4	0.00620215		938.39	0.00511225		1528.39	0.00420729		2118.38	-0.00486111		2708.38	0.01151041		3298.38	-0.00933556
348.6	0.00609644		938.59	0.0058216		1528.59	0.00393342		2118.58	-0.00558868		2708.58	0.01199592		3298.58	-0.00854638
348.8	0.0056208		938.79	0.00589076		1528.79	0.00459164		2118.78	-0.00664842		2708.78	0.01208138		3298.78	-0.00792076
349	0.00531946		938.99	0.00517335		1528.99	0.00456108		2118.98	-0.00688611		2708.98	0.011663		3298.98	-0.00798861
349.2	0.0056659		939.19	0.00457847		1529.19	0.00536483		2119.18	-0.00686313		2709.18	0.01137187		3299.18	-0.0080404
349.4	0.00537364		939.39	0.00455542		1529.39	0.00473186		2119.38	-0.0071493		2709.38	0.0117464		3299.38	-0.0077629
349.6	0.0047413		939.59	0.00498167		1529.59	0.00399381		2119.58	-0.00668758		2709.58	0.01209635		3299.58	-0.00679344
349.8	0.00603821		939.79	0.00580711		1529.79	0.00348699		2119.78	-0.00628529		2709.78	0.01224618		3299.78	-0.00705697
350	0.00651677		939.99	0.00526687		1529.99	0.00297913		2119.98	-0.00589954		2709.98	0.01254192		3299.98	-0.00650951
350.2	0.006334		940.19	0.00493539		1530.19	0.00228235		2120.18	-0.00511174		2710.18	0.01226824		3300.18	-0.00716907
350.4	0.00587786		940.39	0.00498195		1530.39	0.00189047		2120.38	-0.0044947		2710.38	0.0128217		3300.38	-0.00842557
350.6	0.00486979		940.59	0.00567104		1530.59	0.0016138		2120.58	-0.00356587		2710.58	0.01183608		3300.58	-0.00846731
350.8	0.0043893		940.79	0.00566807		1530.79	0.00052669		2120.78	-0.00325164		2710.78	0.01234541		3300.78	-0.00872366
351	0.00474303		940.99	0.00606933		1530.99	0.00002753		2120.98	-0.00310094		2710.98	0.01154824		3300.98	-0.00912931
351.2	0.00415959		941.19	0.00633934		1531.19	-0.00025172		2121.18	-0.00293301		2711.18	0.01159755		3301.18	-0.00854503
351.4	0.00429477		941.39	0.0056745		1531.39	0.00007377		2121.38	-0.00282702		2711.38	0.01120947		3301.38	-0.00860119
351.6	0.00460228		941.59	0.00692719		1531.59	0.00117549		2121.58	-0.00286601		2711.58	0.01057972		3301.58	-0.00912438
351.8	0.00483929		941.79	0.00631535		1531.79	0.00162669		2121.78	-0.0029121		2711.78	0.01008716		3301.78	-0.00887096
352	0.00468358		941.99	0.00666988		1531.99	0.00054995		2121.98	-0.00279003		2711.98	0.01083771		3301.98	-0.00920019
352.2	0.00514118		942.19	0.00560475		1532.19	0.00136781		2122.18	-0.00241999		2712.18	0.01136077		3302.18	-0.00932236
352.4	0.00405953		942.39	0.0052899		1532.39	0.00163722		2122.38	-0.00333389		2712.38	0.0117952		3302.38	-0.00951926
352.6	0.00402878		942.59	0.00517735		1532.59	0.00213385		2122.58	-0.0035758		2712.58	0.01181815		3302.58	-0.00844749
352.8	0.00351374		942.79	0.00433184		1532.79	0.00198958		2122.78	-0.00327515		2712.78	0.01174		3302.78	-0.00849945
353	0.00362087		942.99	0.00407639		1532.99	0.00200112		2122.98	-0.00242538		2712.98	0.01224438		3302.98	-0.00820034
353.2	0.00325751		943.19	0.00399957		1533.19	0.00164265		2123.18	-0.00254762		2713.18	0.01326852		3303.18	-0.00798576
353.4	0.00310782		943.39	0.0047454		1533.39	0.00068659		2123.38	-0.00185909		2713.38	0.01385128		3303.38	-0.00788157
353.6	0.00275888		943.59	0.00495803		1533.59	0.00111947		2123.58	-0.00165523		2713.58	0.01390768		3303.58	-0.00752471
353.8	0.00333898		943.79	0.00528532		1533.79	0.00032592		2123.78	-0.0010069		2713.78	0.01384818		3303.78	-0.00838397
354	0.00358428		943.99	0.0048317		1533.99	-0.00004868		2123.98	-0.00084558		2713.98	0.01418096		3303.98	-0.00855136
354.2	0.00347894		944.19	0.00465382		1534.19	-0.00058603		2124.18	-0.00052505		2714.18	0.01338427		3304.18	-0.00890529
354.4	0.00317518		944.39	0.00472919		1534.39	-0.00054072		2124.38	0.00019218		2714.38	0.01292795		3304.38	-0.00934442
354.6	0.0036373		944.59	0.00502122		1534.59	-0.00037157		2124.58	0.00043344		2714.58	0.01120029		3304.58	-0.0094948
354.8	0.00446037		944.79	0.00444918		1534.79	-0.00075579		2124.78	-0.00013143		2714.78	0.01167723		3304.78	-0.009559
355	0.00446506		944.99	0.00492151		1534.99	0.00012371		2124.98	-0.00133702		2714.98	0.01116271		3304.98	-0.00927341
355.2	0.0047615		945.19	0.00456146		1535.19	0.00157978		2125.18	-0.00111196		2715.18	0.01088123		3305.18	-0.00901394
355.4	0.00559928		945.39	0.00454866		1535.39	0.00267681		2125.38	-0.0017142		2715.38	0.01027881		3305.38	-0.00887777
355.6	0.00588117		945.59	0.00564512		1535.59	0.00296925		2125.58	-0.00238378		2715.58	0.01085891		3305.58	-0.00811114
355.8	0.00667527		945.79	0.00550616		1535.79	0.00280294		2125.78	-0.0031835		2715.78	0.01124201		3305.78	-0.00805956
356	0.00701705		945.99	0.00524811		1535.99	0.0023479		2125.98	-0.00437327		2715.98	0.01175095		3305.98	-0.00781808
356.2	0.00690753		946.19	0.0042896		1536.19	0.00288216		2126.18	-0.00531085		2716.18	0.01147061		3306.18	-0.00717087
356.4	0.00650297		946.39	0.0047027		1536.39	0.00273391		2126.38	-0.00570773		2716.38	0.01242096		3306.38	-0.0063419
356.6	0.00612399		946.59	0.00487879		1536.59	0.00305145		2126.58	-0.00532143		2716.58	0.01279513		3306.58	-0.00513139
356.8	0.00524269		946.79	0.00571291		1536.79	0.00233047		2126.78	-0.00459787		2716.78	0.01337779		3306.78	-0.00520711
357	0.00512614		946.99	0.00659046		1536.99	0.00182547		2126.98	-0.00371085		2716.98	0.01426485		3306.98	-0.00502991
357.2	0.00433744		947.19	0.00649754		1537.19	0.00120206		2127.18	-0.00437009		2717.18	0.01421131		3307.18	-0.00492472
357.4	0.00434123		947.39	0.0062655		1537.39	0.00110029		2127.38	-0.00349024		2717.38	0.01348967		3307.38	-0.00523297
357.6	0.00373022		947.59	0.00591572		1537.59	0.00058517		2127.58	-0.00368553		2717.58	0.01298124		3307.58	-0.0066232
357.8	0.00418873		947.79	0.00510204		1537.79	-0.00046116		2127.78	-0.00334906		2717.78	0.01298631		3307.78	-0.00749919
358	0.00423423		947.99	0.00458866		1537.99	-0.00058892		2127.98	-0.00402141		2717.98	0.01317545		3307.98	-0.00831064
358.2	0.00373248		948.19	0.00390682		1538.19	-0.00083703		2128.18	-0.00352075		2718.18	0.01257654		3308.18	-0.00884872
358.4	0.00320098		948.39	0.00359472		1538.39	-0.00095906		2128.38	-0.00344974		2718.38	0.01209635		3308.38	-0.00991824
358.6	0.00322665		948.59	0.00352354		1538.59	-0.00138242		2128.58	-0.00359903		2718.58	0.01070266		3308.58	-0.0104078
358.8	0.00307222		948.79	0.00309152		1538.79	-0.00128716		2128.78	-0.003888		2718.78	0.01050744		3308.78	-0.01071525
359	0.00240447		948.99	0.00353668		1538.99	-0.00060822		2128.98	-0.00468401		2718.98	0.01050424		3308.98	-0.0112078
359.2	0.00277395		949.19	0.00367577		1539.19	-0.00042345		2129.18	-0.00528925		2719.18	0.01085675		3309.18	-0.01121368
359.4	0.00375111		949.39	0.00353808		1539.39	-0.00051879		2129.38	-0.00578206		2719.38	0.01218032		3309.38	-0.01079514
359.6	0.00391412		949.59	0.00383927		1539.59	-0.00065965		2129.58	-0.00567593		2719.58	0.01282331		3309.58	-0.01036269
359.8	0.00432339		949.79	0.00479586		1539.79	0.00007081		2129.78	-0.00584814		2719.78	0.01283611		3309.78	-0.01022474
360	0.00456602		949.99	0.00490305		1539.99	0.00069441		2129.98	-0.0058317		2719.98	0.01218741		3309.98	-0.00919435
360.2	0.00424146		950.19	0.00572374		1540.19	0.00157241		2130.18	-0.00588966		2720.18	0.0123237		3310.18	-0.00859614
360.4	0.00448329		950.39	0.00730585		1540.39	0.00195268		2130.38	-0.00562288		2720.38	0.01318972		3310.38	-0.00746017
360.6	0.00485025		950.59	0.00715765		1540.59	0.00288299		2130.58	-0.00461429		2720.58	0.01336946		3310.58	-0.00691858
360.8	0.00517357		950.79	0.00809828		1540.79	0.00298447		2130.78	-0.00421287		2720.78	0.01335439		3310.78	-0.00673049
361	0.00506432		950.99	0.00672479		1540.99	0.00310333		2130.98	-0.00435679		2720.98	0.01327032		3310.98	-0.00651672
361.2	0.00527161		951.19	0.0064751		1541.19	0.00268253		2131.18	-0.00477744		2721.18	0.01299185		3311.18	-0.00665536
361.4	0.00522046		951.39	0.00673995		1541.39	0.00255326		2131.38	-0.00447475		2721.38	0.01211132		3311.38	-0.0065479
361.6	0.0053288		951.59	0.00697029		1541.59	0.00240208		2131.58	-0.00468612		2721.58	0.01237162		3311.58	-0.00687246
361.8	0.006212		951.79	0.00629364		1541.79	0.00157931		2131.78	-0.00472593		2721.78	0.01192124		3311.78	-0.00617863
362	0.00626275		951.99	0.00667153		1541.99	0.00126267		2131.98	-0.00446864		2721.98	0.01191265		3311.98	-0.00592023
362.2	0.00652241		952.19	0.00612875		1542.19	0.00055348		2132.18	-0.00431747		2722.18	0.01147037		3312.18	-0.00563069
362.4	0.00680984		952.39	0.00552032		1542.39	0.00039116		2132.38	-0.00476856		2722.38	0.01110736		3312.38	-0.00607996
362.6	0.00642105		952.59	0.0056543		1542.59	-0.00065017		2132.58	-0.00467771		2722.58	0.01076406		3312.58	-0.00633514
362.8	0.00629292		952.79	0.00468772		1542.79	-0.00025445		2132.78	-0.00521808		2722.78	0.01084053		3312.78	-0.00717432
363	0.00676202		952.99	0.00424507		1542.99	-0.00027452		2132.98	-0.00555159		2722.98	0.01188943		3312.98	-0.00807295
363.2	0.00727006		953.19	0.00334846		1543.19	-0.00131669		2133.18	-0.00633955		2723.18	0.01219596		3313.18	-0.00850194
363.4	0.00684317		953.39	0.00363541		1543.39	-0.00193457		2133.38	-0.00568457		2723.38	0.01253907		3313.38	-0.00835967
363.6	0.00601289		953.59	0.00372342		1543.59	-0.00081588		2133.58	-0.00558274		2723.58	0.01176364		3313.58	-0.00834077
363.8	0.00559591		953.79	0.004723		1543.79	-0.00003749		2133.78	-0.00564155		2723.78	0.01120986		3313.78	-0.00837911
364	0.0049145		953.99	0.0053293		1543.99	0.00104244		2133.98	-0.0058126		2723.98	0.01085796		3313.98	-0.00821383
364.2	0.00471766		954.19	0.00589619		1544.19	0.00162666		2134.18	-0.00647661		2724.18	0.01180072		3314.18	-0.00892818
364.4	0.0044492		954.39	0.00691697		1544.39	0.00206843		2134.38	-0.00598733		2724.38	0.0115826		3314.38	-0.00920202
364.6	0.00360425		954.59	0.00666348		1544.59	0.00310864		2134.58	-0.0059367		2724.58	0.01165343		3314.58	-0.00966002
364.8	0.00288291		954.79	0.00719601		1544.79	0.00285676		2134.78	-0.00628741		2724.78	0.01093496		3314.78	-0.01014133
365	0.00227909		954.99	0.00704288		1544.99	0.00288038		2134.98	-0.00580505		2724.98	0.01076613		3314.98	-0.01056265
365.2	0.00192899		955.19	0.00795797		1545.19	0.00220473		2135.18	-0.00512937		2725.18	0.01102654		3315.18	-0.01065919
365.4	0.00159397		955.39	0.00788823		1545.39	0.00234571		2135.38	-0.00426079		2725.38	0.01035303		3315.38	-0.01075166
365.6	0.0025367		955.59	0.00755195		1545.59	0.00268753		2135.58	-0.00269379		2725.58	0.01043737		3315.58	-0.00959669
365.8	0.00282802		955.79	0.00735486		1545.79	0.00190383		2135.78	-0.00199489		2725.78	0.01073759		3315.78	-0.00985053
366	0.00256832		955.99	0.00719845		1545.99	0.00202926		2135.98	-0.00213241		2725.98	0.01172335		3315.98	-0.00969829
366.2	0.00309634		956.19	0.00617881		1546.19	0.0018611		2136.18	-0.00241372		2726.18	0.01263177		3316.18	-0.00985082
366.4	0.00279505		956.39	0.00514885		1546.39	0.00144937		2136.38	-0.00210955		2726.38	0.01357497		3316.38	-0.00975647
366.6	0.00270485		956.59	0.00483164		1546.59	0.00087076		2136.58	-0.00230341		2726.58	0.01385354		3316.58	-0.01019301
366.8	0.0027426		956.79	0.00367752		1546.79	0.00060729		2136.78	-0.00284831		2726.78	0.01370719		3316.78	-0.01074721
367	0.00356598		956.99	0.00318112		1546.99	0.00059155		2136.98	-0.00316823		2726.98	0.01406742		3316.98	-0.01063644
367.2	0.00363547		957.19	0.00297648		1547.19	-0.00053654		2137.18	-0.00356025		2727.18	0.01343485		3317.18	-0.01006387
367.4	0.00306969		957.39	0.00301123		1547.39	0.00012506		2137.38	-0.0032345		2727.38	0.01305432		3317.38	-0.00955017
367.6	0.00365886		957.59	0.00213492		1547.59	0.00160309		2137.58	-0.00392079		2727.58	0.01323726		3317.58	-0.0094232
367.8	0.00471589		957.79	0.00278471		1547.79	0.00107291		2137.78	-0.00466873		2727.78	0.01364741		3317.78	-0.00885749
368	0.00459906		957.99	0.00338968		1547.99	0.00189178		2137.98	-0.00567721		2727.98	0.01380605		3317.98	-0.00854522
368.2	0.00526538		958.19	0.00367272		1548.19	0.00153932		2138.18	-0.00588617		2728.18	0.01434509		3318.18	-0.00877335
368.4	0.0051662		958.39	0.00451138		1548.39	0.0022499		2138.38	-0.00501753		2728.38	0.01332206		3318.38	-0.00880541
368.6	0.00579888		958.59	0.00412783		1548.59	0.0023318		2138.58	-0.00589193		2728.58	0.01315428		3318.58	-0.00894741
368.8	0.00595989		958.79	0.00454952		1548.79	0.00215128		2138.78	-0.00574271		2728.78	0.01266599		3318.78	-0.00914257
369	0.00566975		958.99	0.00526494		1548.99	0.00307374		2138.98	-0.00570006		2728.98	0.0126965		3318.98	-0.00925078
369.2	0.0052659		959.19	0.00512899		1549.19	0.00282575		2139.18	-0.00546333		2729.18	0.01278462		3319.18	-0.00937904
369.4	0.00581729		959.39	0.00530857		1549.39	0.00279952		2139.38	-0.00549438		2729.38	0.0126115		3319.38	-0.00894768
369.6	0.00667815		959.59	0.00610447		1549.59	0.00283345		2139.58	-0.00525961		2729.58	0.01202395		3319.58	-0.00838492
369.8	0.00563373		959.79	0.00594369		1549.79	0.00218217		2139.78	-0.00589534		2729.78	0.01310885		3319.78	-0.00920784
370	0.00539654		959.99	0.0065899		1549.99	0.00229471		2139.98	-0.00630453		2729.98	0.01320315		3319.98	-0.00947769
370.2	0.00481608		960.19	0.00705817		1550.19	0.0028589		2140.18	-0.00622193		2730.18	0.01373235		3320.18	-0.00930357
370.4	0.00372127		960.39	0.00721358		1550.39	0.0030066		2140.38	-0.00703583		2730.38	0.01405111		3320.38	-0.00881484
370.6	0.00321526		960.59	0.00680262		1550.59	0.00282242		2140.58	-0.0077703		2730.58	0.0134565		3320.58	-0.00912446
370.8	0.0030662		960.79	0.00715168		1550.79	0.00243694		2140.78	-0.00831817		2730.78	0.01366292		3320.78	-0.00841271
371	0.00329419		960.99	0.00741114		1550.99	0.00208084		2140.98	-0.00911908		2730.98	0.01362248		3320.98	-0.00812271
371.2	0.00352741		961.19	0.00714584		1551.19	0.001165		2141.18	-0.00813523		2731.18	0.01313945		3321.18	-0.00798788
371.4	0.00291534		961.39	0.00614014		1551.39	0.00145086		2141.38	-0.00776552		2731.38	0.01274266		3321.38	-0.00837871
371.6	0.00340007		961.59	0.00552205		1551.59	0.00074314		2141.58	-0.00748546		2731.58	0.01377762		3321.58	-0.00828492
371.8	0.00363719		961.79	0.0065931		1551.79	0.00074245		2141.78	-0.00738865		2731.78	0.01371481		3321.78	-0.00779485
372	0.00314484		961.99	0.00674445		1551.99	0.00155715		2141.98	-0.00607653		2731.98	0.01375495		3321.98	-0.00786545
372.2	0.0035464		962.19	0.00654404		1552.19	0.00207945		2142.18	-0.00490436		2732.18	0.01298673		3322.18	-0.00812203
372.4	0.00360378		962.39	0.00703529		1552.39	0.00262275		2142.38	-0.00390209		2732.38	0.01349991		3322.38	-0.00824059
372.6	0.00460433		962.59	0.00607911		1552.59	0.00317684		2142.58	-0.00414583		2732.58	0.01340287		3322.58	-0.00894476
372.8	0.00499716		962.79	0.00576751		1552.79	0.00309833		2142.78	-0.00303994		2732.78	0.01368891		3322.78	-0.00946921
373	0.00629347		962.99	0.00586552		1552.99	0.00348965		2142.98	-0.00312178		2732.98	0.01381296		3322.98	-0.01007969
373.2	0.00683226		963.19	0.00649497		1553.19	0.00244525		2143.18	-0.00218202		2733.18	0.01382479		3323.18	-0.01070561
373.4	0.00788796		963.39	0.00625716		1553.39	0.00235927		2143.38	-0.00239576		2733.38	0.0134117		3323.38	-0.0108489
373.6	0.00900122		963.59	0.00553198		1553.59	0.00281633		2143.58	-0.00127757		2733.58	0.01297454		3323.58	-0.01154456
373.8	0.00844365		963.79	0.00522685		1553.79	0.00271385		2143.78	-0.00123504		2733.78	0.01399205		3323.78	-0.01153475
374	0.0095069		963.99	0.00595662		1553.99	0.00363121		2143.98	-0.00187144		2733.98	0.01308904		3323.98	-0.01153011
374.2	0.00970144		964.19	0.00567988		1554.19	0.00311913		2144.18	-0.00212666		2734.18	0.01262273		3324.18	-0.01098619
374.4	0.00998908		964.39	0.00571035		1554.39	0.00248088		2144.38	-0.00257385		2734.38	0.01267136		3324.38	-0.01061522
374.6	0.01015722		964.59	0.00576458		1554.59	0.00165771		2144.58	-0.00305232		2734.58	0.01289053		3324.58	-0.01072626
374.8	0.01047557		964.79	0.00612546		1554.79	0.00080165		2144.78	-0.00354995		2734.78	0.01367087		3324.78	-0.00986408
375	0.00929568		964.99	0.00616021		1554.99	-0.00008291		2144.98	-0.00384544		2734.98	0.01293545		3324.98	-0.00970812
375.2	0.00868771		965.19	0.00598491		1555.19	-0.0003714		2145.18	-0.0031918		2735.18	0.0126642		3325.18	-0.0093923
375.4	0.00794428		965.39	0.00539576		1555.39	0.00072937		2145.38	-0.00356646		2735.38	0.01306768		3325.38	-0.00949763
375.6	0.00713845		965.59	0.00577		1555.59	0.00060548		2145.58	-0.00345732		2735.58	0.01387222		3325.58	-0.00901347
375.8	0.00593642		965.79	0.00585606		1555.79	0.00088257		2145.78	-0.00334501		2735.78	0.01285639		3325.78	-0.00828725
376	0.00452849		965.99	0.0054766		1555.99	0.00055485		2145.98	-0.00325811		2735.98	0.01242594		3325.98	-0.00842719
376.2	0.00404427		966.19	0.00526289		1556.19	0.00082907		2146.18	-0.00311638		2736.18	0.01187485		3326.18	-0.00828806
376.4	0.00456936		966.39	0.00501552		1556.39	0.00071434		2146.38	-0.00248522		2736.38	0.01312923		3326.38	-0.00724095
376.6	0.00443768		966.59	0.00483884		1556.59	0.00128859		2146.58	-0.00184272		2736.58	0.01178043		3326.58	-0.00722407
376.8	0.00446167		966.79	0.00495542		1556.79	0.00182074		2146.78	-0.00132987		2736.78	0.01193388		3326.78	-0.00795625
377	0.00401866		966.99	0.00547428		1556.99	0.00225728		2146.98	-0.00184517		2736.98	0.01112345		3326.98	-0.00819651
377.2	0.00379701		967.19	0.00588984		1557.19	0.00258813		2147.18	-0.00108823		2737.18	0.01053354		3327.18	-0.00863274
377.4	0.00410681		967.39	0.0054471		1557.39	0.00250357		2147.38	-0.00159892		2737.38	0.01024215		3327.38	-0.00822804
377.6	0.00433449		967.59	0.00588664		1557.59	0.00209389		2147.58	-0.00042656		2737.58	0.00962959		3327.58	-0.00833516
377.8	0.00447236		967.79	0.00676683		1557.79	0.00165134		2147.78	-0.00066493		2737.78	0.00852814		3327.78	-0.00887488
378	0.00499356		967.99	0.00739551		1557.99	0.00210766		2147.98	-0.0006646		2737.98	0.00767162		3327.98	-0.00893755
378.2	0.00487655		968.19	0.00767986		1558.19	0.00167563		2148.18	0.00029356		2738.18	0.00800466		3328.18	-0.00966617
378.4	0.00469065		968.39	0.00839525		1558.39	0.00134824		2148.38	-0.00002633		2738.38	0.00851931		3328.38	-0.0101905
378.6	0.00480597		968.59	0.00839438		1558.59	0.00091742		2148.58	-0.00099322		2738.58	0.00932087		3328.58	-0.01057318
378.8	0.00414733		968.79	0.0086471		1558.79	0.00038452		2148.78	-0.00117385		2738.78	0.00875674		3328.78	-0.01041277
379	0.00359193		968.99	0.0092586		1558.99	-0.00002647		2148.98	-0.00150953		2738.98	0.0087258		3328.98	-0.01068529
379.2	0.00391662		969.19	0.00888885		1559.19	-0.00020532		2149.18	-0.0016355		2739.18	0.00972438		3329.18	-0.01051986
379.4	0.00462282		969.39	0.00786244		1559.39	-0.00002857		2149.38	-0.00250151		2739.38	0.01033811		3329.38	-0.01104691
379.6	0.00442085		969.59	0.0072484		1559.59	-0.00119059		2149.58	-0.00304983		2739.58	0.01053062		3329.58	-0.01071087
379.8	0.00408183		969.79	0.00631995		1559.79	-0.0008851		2149.78	-0.00308739		2739.78	0.01059629		3329.78	-0.01007129
380	0.00491863		969.99	0.00621755		1559.99	-0.00118766		2149.98	-0.00310945		2739.98	0.01083248		3329.98	-0.0107208
380.2	0.00594379		970.19	0.00643608		1560.19	-0.00043881		2150.18	-0.0035585		2740.18	0.01183324		3330.18	-0.01027042
380.4	0.00599038		970.39	0.0060894		1560.39	0.00013506		2150.38	-0.00428384		2740.38	0.01304473		3330.38	-0.01013112
380.6	0.00580172		970.59	0.00664412		1560.59	0.00110701		2150.58	-0.00497584		2740.58	0.01258784		3330.58	-0.01024241
380.8	0.00610551		970.79	0.00626181		1560.79	0.00218476		2150.78	-0.00553692		2740.78	0.01365678		3330.78	-0.01043636
381	0.00593675		970.99	0.00682286		1560.99	0.00150508		2150.98	-0.00548033		2740.98	0.01317409		3330.98	-0.0099846
381.2	0.00660215		971.19	0.00738113		1561.19	0.00092517		2151.18	-0.00455226		2741.18	0.01347294		3331.18	-0.0096934
381.4	0.00714061		971.39	0.00689333		1561.39	-0.00001005		2151.38	-0.00459376		2741.38	0.01342885		3331.38	-0.00928865
381.6	0.00628984		971.59	0.0068208		1561.59	-0.00014987		2151.58	-0.00331792		2741.58	0.01319931		3331.58	-0.00958266
381.8	0.00619141		971.79	0.00631766		1561.79	0.00055632		2151.78	-0.00304311		2741.78	0.01306158		3331.78	-0.00944966
382	0.00553989		971.99	0.00572105		1561.99	0.00077677		2151.98	-0.00236089		2741.98	0.01354566		3331.98	-0.00897386
382.2	0.00514742		972.19	0.00483215		1562.19	0.00059562		2152.18	-0.00175941		2742.18	0.01268657		3332.18	-0.00871186
382.4	0.00493435		972.39	0.00440814		1562.39	0.00025562		2152.38	-0.00271634		2742.38	0.01314726		3332.38	-0.00886288
382.6	0.00415453		972.59	0.0041497		1562.59	0.00040142		2152.58	-0.00296308		2742.58	0.01297352		3332.58	-0.0092777
382.8	0.00360481		972.79	0.00433123		1562.79	-0.00008327		2152.78	-0.00232342		2742.78	0.01199966		3332.78	-0.00954045
383	0.00427305		972.99	0.00390391		1562.99	-0.00008684		2152.98	-0.00224673		2742.98	0.01272152		3332.98	-0.00888608
383.2	0.00435102		973.19	0.00381118		1563.19	-0.00040454		2153.18	-0.00226477		2743.18	0.01248109		3333.18	-0.00867253
383.4	0.00484697		973.39	0.00408635		1563.39	-0.00018331		2153.38	-0.00229668		2743.38	0.01247311		3333.38	-0.00902001
383.6	0.00473292		973.59	0.00397835		1563.59	0.0000392		2153.58	-0.00281949		2743.58	0.01252029		3333.58	-0.00851998
383.8	0.00455315		973.79	0.00566252		1563.79	0.00049436		2153.78	-0.00289334		2743.78	0.01248101		3333.78	-0.00908145
384	0.00486071		973.99	0.00628805		1563.99	0.00085089		2153.98	-0.00351334		2743.98	0.01282727		3333.98	-0.00999066
384.2	0.00441728		974.19	0.00742497		1564.19	0.00191993		2154.18	-0.00491897		2744.18	0.01385973		3334.18	-0.00984146
384.4	0.00488098		974.39	0.00800992		1564.39	0.00188949		2154.38	-0.00544052		2744.38	0.0142385		3334.38	-0.01027797
384.6	0.00556761		974.59	0.0096496		1564.59	0.00222877		2154.58	-0.00538805		2744.58	0.01419943		3334.58	-0.01034732
384.8	0.00604091		974.79	0.01031136		1564.79	0.00185622		2154.78	-0.00496445		2744.78	0.01424621		3334.78	-0.01018498
385	0.00644224		974.99	0.01071686		1564.99	0.0003383		2154.98	-0.00486451		2744.98	0.01340407		3334.98	-0.01066309
385.2	0.0071857		975.19	0.0104362		1565.19	-0.00020357		2155.18	-0.00405118		2745.18	0.01365525		3335.18	-0.0105032
385.4	0.00720152		975.39	0.00969363		1565.39	-0.00075173		2155.38	-0.00413954		2745.38	0.01367705		3335.38	-0.01024921
385.6	0.00587698		975.59	0.00941561		1565.59	0.00006265		2155.58	-0.00323792		2745.58	0.01340452		3335.58	-0.0095037
385.8	0.00627517		975.79	0.00856369		1565.79	0.00045271		2155.78	-0.00352121		2745.78	0.01235478		3335.78	-0.00890542
386	0.00521388		975.99	0.00750898		1565.99	0.00047448		2155.98	-0.00311644		2745.98	0.01232645		3335.98	-0.0082009
386.2	0.00512174		976.19	0.00656583		1566.19	0.00013664		2156.18	-0.00214939		2746.18	0.01232312		3336.18	-0.0076535
386.4	0.00444824		976.39	0.00588078		1566.39	0.00049024		2156.38	-0.00191863		2746.38	0.0132037		3336.38	-0.00754961
386.6	0.00382605		976.59	0.0058219		1566.59	0.00050524		2156.58	-0.00108853		2746.58	0.01252266		3336.58	-0.00793936
386.8	0.0039968		976.79	0.00579602		1566.79	0.00015203		2156.78	-0.00057266		2746.78	0.01305627		3336.78	-0.00737695
387	0.0039217		976.99	0.00556057		1566.99	0.00019888		2156.98	-0.00069969		2746.98	0.01359736		3336.98	-0.00651434
387.2	0.00369903		977.19	0.00556145		1567.19	0.00009887		2157.18	-0.00045336		2747.18	0.0137688		3337.18	-0.00703997
387.4	0.00395235		977.39	0.00588566		1567.39	0.00081909		2157.38	0.00028775		2747.38	0.01402765		3337.38	-0.0080486
387.6	0.00374928		977.59	0.00643395		1567.59	0.00108009		2157.58	-0.00103811		2747.58	0.01457621		3337.58	-0.00822185
387.8	0.00334262		977.79	0.00768458		1567.79	0.001331		2157.78	-0.00102843		2747.78	0.01488106		3337.78	-0.0092357
388	0.00353896		977.99	0.00751159		1567.99	0.00179479		2157.98	-0.00139711		2747.98	0.01519356		3337.98	-0.00925258
388.2	0.00423024		978.19	0.00858121		1568.19	0.00179825		2158.18	-0.00145929		2748.18	0.01549714		3338.18	-0.0093403
388.4	0.00511901		978.39	0.00921108		1568.39	0.00162273		2158.38	-0.00170287		2748.38	0.01599273		3338.38	-0.01078311
388.6	0.00511208		978.59	0.00966668		1568.59	0.00213029		2158.58	-0.00168822		2748.58	0.01583666		3338.58	-0.01124811
388.8	0.00517676		978.79	0.00934883		1568.79	0.0022433		2158.78	-0.00133094		2748.78	0.01576746		3338.78	-0.01114857
389	0.00530669		978.99	0.00933786		1568.99	0.00164235		2158.98	-0.0014444		2748.98	0.01476237		3338.98	-0.01093807
389.2	0.00536465		979.19	0.00920165		1569.19	0.00061677		2159.18	-0.0012939		2749.18	0.01434906		3339.18	-0.0106713
389.4	0.00464673		979.39	0.00881952		1569.39	0.00054588		2159.38	-0.00159647		2749.38	0.01318232		3339.38	-0.01061617
389.6	0.00424523		979.59	0.0087407		1569.59	0.00133039		2159.58	-0.00204848		2749.58	0.01205456		3339.58	-0.00933221
389.8	0.00505408		979.79	0.00871734		1569.79	0.00141431		2159.78	-0.00289716		2749.78	0.0119068		3339.78	-0.00844764
390	0.00527987		979.99	0.00872703		1569.99	0.00100721		2159.98	-0.00215058		2749.98	0.01222527		3339.98	-0.00763814
390.2	0.00606476		980.19	0.00804149		1570.19	0.00025426		2160.18	-0.00130241		2750.18	0.01117248		3340.18	-0.00727779
390.4	0.00608727		980.39	0.00726931		1570.39	-0.00004085		2160.38	-0.00171916		2750.38	0.01091048		3340.38	-0.006776
390.6	0.00620432		980.59	0.00715742		1570.59	-0.00089003		2160.58	-0.00250919		2750.58	0.01132292		3340.58	-0.0065873
390.8	0.00631856		980.79	0.00652505		1570.79	-0.00195054		2160.78	-0.00268225		2750.78	0.01190987		3340.78	-0.00649177
391	0.00739788		980.99	0.006015		1570.99	-0.00187288		2160.98	-0.00246151		2750.98	0.01150744		3340.98	-0.00605767
391.2	0.00776229		981.19	0.00592543		1571.19	-0.00212908		2161.18	-0.00276929		2751.18	0.01157649		3341.18	-0.0063753
391.4	0.00787355		981.39	0.00550745		1571.39	-0.00208567		2161.38	-0.00338459		2751.38	0.01148601		3341.38	-0.00683102
391.6	0.00772163		981.59	0.00556712		1571.59	-0.0022235		2161.58	-0.00474521		2751.58	0.012068		3341.58	-0.00587925
391.8	0.00788884		981.79	0.00468327		1571.79	-0.00206623		2161.78	-0.00444229		2751.78	0.01226257		3341.78	-0.00542546
392	0.00767625		981.99	0.00422955		1571.99	-0.00193337		2161.98	-0.0043015		2751.98	0.01268003		3341.98	-0.00532349
392.2	0.00771731		982.19	0.00393584		1572.19	-0.00147849		2162.18	-0.0040785		2752.18	0.01394068		3342.18	-0.00599786
392.4	0.00670966		982.39	0.00348069		1572.39	-0.00035012		2162.38	-0.00473187		2752.38	0.01456621		3342.38	-0.00618299
392.6	0.00574158		982.59	0.00378135		1572.59	0.0007474		2162.58	-0.00400051		2752.58	0.01437105		3342.58	-0.00614587
392.8	0.00484997		982.79	0.004762		1572.79	0.00100575		2162.78	-0.00346032		2752.78	0.01425602		3342.78	-0.00602789
393	0.00496486		982.99	0.00515024		1572.99	0.00045038		2162.98	-0.00360556		2752.98	0.01319138		3342.98	-0.00583045
393.2	0.0051391		983.19	0.00504291		1573.19	0.00058132		2163.18	-0.00395949		2753.18	0.01346907		3343.18	-0.00581699
393.4	0.00488502		983.39	0.00481162		1573.39	0.00098329		2163.38	-0.004571		2753.38	0.01305083		3343.38	-0.0056581
393.6	0.00512639		983.59	0.00536135		1573.59	0.00151245		2163.58	-0.00463903		2753.58	0.01324965		3343.58	-0.00482738
393.8	0.00602248		983.79	0.00609027		1573.79	0.00182932		2163.78	-0.00472943		2753.78	0.01411625		3343.78	-0.00551575
394	0.00649975		983.99	0.00614744		1573.99	0.00100392		2163.98	-0.00386823		2753.98	0.01413632		3343.98	-0.00614926
394.2	0.00596246		984.19	0.00619424		1574.19	-0.00020299		2164.18	-0.00354839		2754.18	0.01322652		3344.18	-0.0066764
394.4	0.00535575		984.39	0.0062127		1574.39	-0.00022283		2164.38	-0.00374184		2754.38	0.01362251		3344.38	-0.00729587
394.6	0.00407235		984.59	0.00715737		1574.59	-0.00087285		2164.58	-0.00342565		2754.58	0.01426057		3344.58	-0.00732144
394.8	0.00419924		984.79	0.00727768		1574.79	-0.00086088		2164.78	-0.00267336		2754.78	0.01493851		3344.78	-0.00809101
395	0.00507379		984.99	0.00768614		1574.99	-0.00102433		2164.98	-0.00138276		2754.98	0.01565241		3344.98	-0.00770797
395.2	0.00455663		985.19	0.00732896		1575.19	-0.0012157		2165.18	-0.00159269		2755.18	0.01660162		3345.18	-0.00856288
395.4	0.00451235		985.39	0.00765151		1575.39	-0.00143204		2165.38	-0.00126135		2755.38	0.01689946		3345.38	-0.00907374
395.6	0.00480952		985.59	0.00755868		1575.59	-0.00173245		2165.58	-0.00114662		2755.58	0.01734196		3345.58	-0.00917438
395.8	0.00564116		985.79	0.00710154		1575.79	-0.00263285		2165.78	-0.0007376		2755.78	0.01691783		3345.78	-0.00947249
396	0.00554994		985.99	0.00685994		1575.99	-0.00263497		2165.98	-0.00031923		2755.98	0.01681773		3345.98	-0.01085485
396.2	0.00542614		986.19	0.00755051		1576.19	-0.00224856		2166.18	-0.00033446		2756.18	0.01699983		3346.18	-0.01104007
396.4	0.00536995		986.39	0.0079729		1576.39	-0.00176028		2166.38	-0.00127797		2756.38	0.01613416		3346.38	-0.0108425
396.6	0.00549658		986.59	0.00801119		1576.59	-0.00154134		2166.58	-0.00043847		2756.58	0.01602601		3346.58	-0.01102169
396.8	0.00665512		986.79	0.00830527		1576.79	-0.00121687		2166.78	-0.00026298		2756.78	0.01519972		3346.78	-0.01116668
397	0.00780053		986.99	0.00733205		1576.99	-0.00070325		2166.98	-0.00104761		2756.98	0.01567091		3346.98	-0.01081056
397.2	0.00783364		987.19	0.00646101		1577.19	-0.00039888		2167.18	-0.00191405		2757.18	0.01527941		3347.18	-0.01065284
397.4	0.00726496		987.39	0.00584587		1577.39	-0.00026099		2167.38	-0.00257785		2757.38	0.01534722		3347.38	-0.01053319
397.6	0.0075527		987.59	0.00551699		1577.59	0.00028155		2167.58	-0.00220195		2757.58	0.01534755		3347.58	-0.00954161
397.8	0.00763606		987.79	0.00485079		1577.79	0.00066347		2167.78	-0.00263547		2757.78	0.01496078		3347.78	-0.00980509
398	0.0072627		987.99	0.00367879		1577.99	0.00062746		2167.98	-0.00221104		2757.98	0.01454517		3347.98	-0.00948234
398.2	0.00604578		988.19	0.00307968		1578.19	0.00108627		2168.18	-0.00269648		2758.18	0.01300246		3348.18	-0.00896177
398.4	0.00487953		988.39	0.00256717		1578.39	0.00161148		2168.38	-0.00276397		2758.38	0.01348347		3348.38	-0.00847568
398.6	0.00383822		988.59	0.00286169		1578.59	0.00097439		2168.58	-0.00261203		2758.58	0.01400784		3348.58	-0.00784758
398.8	0.00374142		988.79	0.00173956		1578.79	0.00155433		2168.78	-0.00222871		2758.78	0.014103		3348.78	-0.00768386
399	0.00366163		988.99	0.00160034		1578.99	0.00160882		2168.98	-0.00152995		2758.98	0.01369169		3348.98	-0.00698065
399.2	0.00309012		989.19	0.00159327		1579.19	0.00137968		2169.18	-0.00233767		2759.18	0.0132525		3349.18	-0.00747434
399.4	0.00285237		989.39	0.00291707		1579.39	0.00088532		2169.38	-0.00271635		2759.38	0.013184		3349.38	-0.00692544
399.6	0.00334801		989.59	0.00283779		1579.59	0.00063513		2169.58	-0.00290147		2759.58	0.01337664		3349.58	-0.0065541
399.8	0.00374327		989.79	0.00384893		1579.79	-0.00031254		2169.78	-0.00268536		2759.78	0.01282582		3349.78	-0.0061027
400	0.00336148		989.99	0.00468845		1579.99	-0.00016032		2169.98	-0.00228076		2759.98	0.01347046		3349.98	-0.00622243
400.2	0.00344024		990.19	0.00657263		1580.19	-0.00020521		2170.18	-0.00284013		2760.18	0.01361245		3350.18	-0.00607616
400.4	0.00421957		990.39	0.00691051		1580.39	0.00012504		2170.38	-0.00311845		2760.38	0.01423774		3350.38	-0.00695695
400.6	0.00364855		990.59	0.00727567		1580.59	0.0004595		2170.58	-0.00187042		2760.58	0.01496572		3350.58	-0.00745626
400.8	0.00489024		990.79	0.00733666		1580.79	0.00046682		2170.78	-0.00281231		2760.78	0.01511357		3350.78	-0.00816763
401	0.00531357		990.99	0.0076292		1580.99	0.00142675		2170.98	-0.00370573		2760.98	0.01596186		3350.98	-0.00815377
401.2	0.00523046		991.19	0.00768708		1581.19	0.00206051		2171.18	-0.00392619		2761.18	0.01558155		3351.18	-0.00877294
401.4	0.00585423		991.39	0.00778658		1581.39	0.00255389		2171.38	-0.00422906		2761.38	0.0158009		3351.38	-0.00889721
401.6	0.00627637		991.59	0.00781289		1581.59	0.00266169		2171.58	-0.0034436		2761.58	0.01572808		3351.58	-0.00964575
401.8	0.00626941		991.79	0.0071188		1581.79	0.00277676		2171.78	-0.00294542		2761.78	0.01504559		3351.78	-0.01072696
402	0.0057129		991.99	0.00701736		1581.99	0.00208295		2171.98	-0.00280812		2761.98	0.01490819		3351.98	-0.01041603
402.2	0.00627021		992.19	0.00642158		1582.19	0.00181321		2172.18	-0.00365168		2762.18	0.01414618		3352.18	-0.01072249
402.4	0.00635899		992.39	0.00593304		1582.39	0.00145655		2172.38	-0.00348445		2762.38	0.01364642		3352.38	-0.01035566
402.6	0.00590064		992.59	0.00583008		1582.59	0.00076714		2172.58	-0.003117		2762.58	0.01295626		3352.58	-0.01053441
402.8	0.0057179		992.79	0.00501413		1582.79	0.00123141		2172.78	-0.0032764		2762.78	0.01201296		3352.78	-0.0104923
403	0.00555696		992.99	0.00583898		1582.99	0.00170084		2172.98	-0.0038558		2762.98	0.01133477		3352.98	-0.01000306
403.2	0.00592645		993.19	0.00692781		1583.19	0.00153082		2173.18	-0.00430781		2763.18	0.01137846		3353.18	-0.00992135
403.4	0.00617451		993.39	0.00748061		1583.39	0.00161823		2173.38	-0.00381434		2763.38	0.01146383		3353.38	-0.00870895
403.6	0.00628441		993.59	0.00741529		1583.59	0.00074802		2173.58	-0.00327722		2763.58	0.01145029		3353.58	-0.00855103
403.8	0.00625266		993.79	0.00776386		1583.79	0.00069234		2173.78	-0.00309936		2763.78	0.01146961		3353.78	-0.00811343
404	0.00652712		993.99	0.00751968		1583.99	0.00099229		2173.98	-0.0028561		2763.98	0.01204249		3353.98	-0.00838244
404.2	0.00679014		994.19	0.00753946		1584.19	0.00142552		2174.18	-0.00291678		2764.18	0.01199185		3354.18	-0.00836238
404.4	0.00649029		994.39	0.0074225		1584.39	0.00122966		2174.38	-0.00251272		2764.38	0.01270296		3354.38	-0.00824062
404.6	0.00638539		994.59	0.00625578		1584.59	0.00183347		2174.58	-0.00274017		2764.58	0.01256363		3354.58	-0.00818434
404.8	0.00752396		994.79	0.00529722		1584.79	0.00188646		2174.78	-0.00354967		2764.78	0.01287078		3354.78	-0.00899217
405	0.00879564		994.99	0.00549936		1584.99	0.00250498		2174.98	-0.00273431		2764.98	0.01281519		3354.98	-0.00874711
405.2	0.00908072		995.19	0.00499601		1585.19	0.00218531		2175.18	-0.00307075		2765.18	0.01292798		3355.18	-0.00933563
405.4	0.00949182		995.39	0.00446015		1585.39	0.00217831		2175.38	-0.00261629		2765.38	0.01298551		3355.38	-0.00921173
405.6	0.00892432		995.59	0.00429175		1585.59	0.00178289		2175.58	-0.00213179		2765.58	0.01348968		3355.58	-0.01005388
405.8	0.00931214		995.79	0.00416843		1585.79	0.00092454		2175.78	-0.00241901		2765.78	0.01328632		3355.78	-0.01000535
406	0.00936765		995.99	0.00366995		1585.99	0.00065661		2175.98	-0.00320266		2765.98	0.01331846		3355.98	-0.00934722
406.2	0.01035532		996.19	0.00297955		1586.19	0.00091228		2176.18	-0.00349461		2766.18	0.01302353		3356.18	-0.00944399
406.4	0.00968732		996.39	0.00299013		1586.39	0.0010951		2176.38	-0.00325969		2766.38	0.01283274		3356.38	-0.00865319
406.6	0.00868643		996.59	0.0048156		1586.59	0.00032255		2176.58	-0.00313945		2766.58	0.01354459		3356.58	-0.00879484
406.8	0.00892416		996.79	0.00532067		1586.79	0.0008241		2176.78	-0.00383022		2766.78	0.01293927		3356.78	-0.00837717
407	0.00848793		996.99	0.00626341		1586.99	0.00140978		2176.98	-0.0038047		2766.98	0.01234001		3356.98	-0.00809201
407.2	0.00868077		997.19	0.00738594		1587.19	0.00107551		2177.18	-0.00390416		2767.18	0.01256886		3357.18	-0.00804999
407.4	0.00810363		997.39	0.00812241		1587.39	0.00092939		2177.38	-0.00355719		2767.38	0.01194425		3357.38	-0.00789685
407.6	0.00707766		997.59	0.00840095		1587.59	0.00092622		2177.58	-0.00389833		2767.58	0.01130257		3357.58	-0.00851771
407.8	0.00658154		997.79	0.00943991		1587.79	0.00152232		2177.78	-0.00363483		2767.78	0.01138609		3357.78	-0.00782378
408	0.00564565		997.99	0.0098341		1587.99	0.00163034		2177.98	-0.00362426		2767.98	0.01183991		3357.98	-0.00807193
408.2	0.00467666		998.19	0.0102438		1588.19	0.00191491		2178.18	-0.00339883		2768.18	0.01137916		3358.18	-0.00821755
408.4	0.00393422		998.39	0.01044764		1588.39	0.00169265		2178.38	-0.00285038		2768.38	0.0109039		3358.38	-0.00802971
408.6	0.00318078		998.59	0.00978024		1588.59	0.0026028		2178.58	-0.00210786		2768.58	0.01103036		3358.58	-0.00893496
408.8	0.00290753		998.79	0.00951701		1588.79	0.00174217		2178.78	-0.00129701		2768.78	0.01193455		3358.78	-0.01002153
409	0.00349422		998.99	0.00900807		1588.99	0.00152841		2178.98	-0.00051276		2768.98	0.01210536		3358.98	-0.01003811
409.2	0.00292328		999.19	0.00846055		1589.19	0.00134677		2179.18	-0.0008265		2769.18	0.01218324		3359.18	-0.01012419
409.4	0.00251648		999.39	0.00843391		1589.39	0.00135965		2179.38	-0.00095148		2769.38	0.01268426		3359.38	-0.00978305
409.6	0.0026132		999.59	0.0082925		1589.59	0.00094649		2179.58	-0.00107218		2769.58	0.0131681		3359.58	-0.01007472
409.8	0.00348633		999.79	0.00820822		1589.79	0.00039934		2179.78	-0.00139432		2769.78	0.0142031		3359.78	-0.01025224
410	0.0044132		999.99	0.00660768		1589.99	0.00061801		2179.98	-0.00123381		2769.98	0.01456353		3359.98	-0.01013397
410.2	0.00440772		1000.19	0.00670991		1590.19	0.00045127		2180.18	-0.00066086		2770.18	0.01476679		3360.18	-0.01019159
410.4	0.00436738		1000.39	0.00774684		1590.39	-0.00026695		2180.38	-0.00018819		2770.38	0.01578493		3360.38	-0.01018781
410.6	0.00525777		1000.59	0.00822975		1590.59	-0.00043664		2180.58	0.000096		2770.58	0.01513996		3360.58	-0.01013598
410.8	0.00572605		1000.79	0.00725682		1590.79	-0.00005918		2180.78	-0.00033446		2770.78	0.01525137		3360.78	-0.00969843
411	0.00596663		1000.99	0.00662366		1590.99	-0.00028912		2180.98	-0.00023362		2770.98	0.01522312		3360.98	-0.01039979
411.2	0.00661202		1001.19	0.00636845		1591.19	-0.00028639		2181.18	-0.00059632		2771.18	0.01529845		3361.18	-0.0110515
411.4	0.00682274		1001.39	0.0061661		1591.39	0.00018587		2181.38	-0.00028372		2771.38	0.01444545		3361.38	-0.01058178
411.6	0.00660786		1001.59	0.00617468		1591.59	0.0001573		2181.58	-0.00002569		2771.58	0.01436969		3361.58	-0.01034137
411.8	0.00666633		1001.79	0.00669318		1591.79	0.00043875		2181.78	0.00104905		2771.78	0.01483527		3361.78	-0.00974804
412	0.00593152		1001.99	0.00656069		1591.99	0.0006781		2181.98	0.00083533		2771.98	0.01484092		3361.98	-0.0103041
412.2	0.00605805		1002.19	0.00603818		1592.19	0.00114207		2182.18	0.00095323		2772.18	0.0137201		3362.18	-0.01028336
412.4	0.00600236		1002.39	0.00547533		1592.39	0.00078073		2182.38	0.00081477		2772.38	0.01253704		3362.38	-0.01012528
412.6	0.00566403		1002.59	0.00560043		1592.59	0.00113465		2182.58	0.00065449		2772.58	0.0132505		3362.58	-0.01049827
412.8	0.00619499		1002.79	0.00532513		1592.79	0.00126469		2182.78	0.00066272		2772.78	0.01345578		3362.78	-0.01068441
413	0.00638806		1002.99	0.00510334		1592.99	0.00127039		2182.98	0.00018275		2772.98	0.0131776		3362.98	-0.01059942
413.2	0.00628767		1003.19	0.00437553		1593.19	0.00090033		2183.18	-0.00054602		2773.18	0.01341491		3363.18	-0.01009971
413.4	0.00631136		1003.39	0.0045227		1593.39	0.00180281		2183.38	-0.00163224		2773.38	0.01398663		3363.38	-0.0097017
413.6	0.00658904		1003.59	0.00427438		1593.59	0.0018759		2183.58	-0.00172622		2773.58	0.01430345		3363.58	-0.00960347
413.8	0.00576658		1003.79	0.00466187		1593.79	0.0015723		2183.78	-0.00254423		2773.78	0.01574621		3363.78	-0.00964455
414	0.00628782		1003.99	0.00518061		1593.99	0.00156149		2183.98	-0.00266988		2773.98	0.01573086		3363.98	-0.0094584
414.2	0.0058384		1004.19	0.00619625		1594.19	0.00165145		2184.18	-0.00220725		2774.18	0.01581541		3364.18	-0.00829725
414.4	0.00577892		1004.39	0.00665783		1594.39	0.00129908		2184.38	-0.00251761		2774.38	0.01638208		3364.38	-0.00792361
414.6	0.00544228		1004.59	0.00646688		1594.59	0.00148281		2184.58	-0.00261436		2774.58	0.01626224		3364.58	-0.00732019
414.8	0.00488869		1004.79	0.00583767		1594.79	0.00083569		2184.78	-0.00223086		2774.78	0.01684926		3364.78	-0.00691717
415	0.00500918		1004.99	0.00566132		1594.99	0.00132701		2184.98	-0.00100229		2774.98	0.01661191		3364.98	-0.00738286
415.2	0.00493645		1005.19	0.00694849		1595.19	0.00213103		2185.18	-0.00079529		2775.18	0.01690031		3365.18	-0.00766855
415.4	0.00463844		1005.39	0.00750069		1595.39	0.00226889		2185.38	-0.00111286		2775.38	0.01709931		3365.38	-0.00750307
415.6	0.00467023		1005.59	0.00810997		1595.59	0.00234798		2185.58	-0.00084616		2775.58	0.01717532		3365.58	-0.00779622
415.8	0.00492259		1005.79	0.00903428		1595.79	0.00242681		2185.78	-0.00099814		2775.78	0.01673435		3365.78	-0.00780311
416	0.00499152		1005.99	0.00860621		1595.99	0.00251781		2185.98	-0.001478		2775.98	0.01659636		3365.98	-0.0083033
416.2	0.00557286		1006.19	0.00834973		1596.19	0.00263098		2186.18	-0.00122333		2776.18	0.016321		3366.18	-0.00837603
416.4	0.00608434		1006.39	0.00877523		1596.39	0.00188161		2186.38	-0.00082647		2776.38	0.01542188		3366.38	-0.00897526
416.6	0.00640879		1006.59	0.00910244		1596.59	0.00288202		2186.58	-0.00073397		2776.58	0.01552858		3366.58	-0.00900377
416.8	0.00684378		1006.79	0.00811353		1596.79	0.00382721		2186.78	-0.00009117		2776.78	0.01562381		3366.78	-0.00852068
417	0.00691632		1006.99	0.00715809		1596.99	0.00380747		2186.98	-0.00051045		2776.98	0.01601404		3366.98	-0.00849655
417.2	0.00703167		1007.19	0.00653987		1597.19	0.00388087		2187.18	-0.00031581		2777.18	0.01595417		3367.18	-0.00979305
417.4	0.00683148		1007.39	0.00699762		1597.39	0.00357223		2187.38	-0.00168905		2777.38	0.01580738		3367.38	-0.00968387
417.6	0.00659044		1007.59	0.00719603		1597.59	0.00239822		2187.58	-0.00198603		2777.58	0.01592177		3367.58	-0.00983143
417.8	0.0057377		1007.79	0.00741713		1597.79	0.00170521		2187.78	-0.00303377		2777.78	0.01612129		3367.78	-0.00941248
418	0.00660618		1007.99	0.00762851		1597.99	0.00136305		2187.98	-0.00349485		2777.98	0.01509693		3367.98	-0.00990853
418.2	0.0055124		1008.19	0.00767188		1598.19	0.00040009		2188.18	-0.00290995		2778.18	0.01458778		3368.18	-0.0091189
418.4	0.00506374		1008.39	0.00718803		1598.39	-0.00048337		2188.38	-0.00317622		2778.38	0.01441772		3368.38	-0.00906502
418.6	0.00459744		1008.59	0.0074294		1598.59	-0.00105802		2188.58	-0.00321304		2778.58	0.01381632		3368.58	-0.00879014
418.8	0.00520731		1008.79	0.00606608		1598.79	-0.0021884		2188.78	-0.00251661		2778.78	0.01347463		3368.78	-0.00910068
419	0.00508904		1008.99	0.0065349		1598.99	-0.00107271		2188.98	-0.00250272		2778.98	0.01362381		3368.98	-0.00992543
419.2	0.00508078		1009.19	0.00704112		1599.19	-0.0010884		2189.18	-0.00327379		2779.18	0.01389023		3369.18	-0.01080627
419.4	0.00497819		1009.39	0.00641893		1599.39	-0.00084576		2189.38	-0.00421601		2779.38	0.01364722		3369.38	-0.01047071
419.6	0.00535934		1009.59	0.00696605		1599.59	-0.00102951		2189.58	-0.00369329		2779.58	0.01310791		3369.58	-0.00999792
419.8	0.00467484		1009.79	0.00781923		1599.79	-0.00089908		2189.78	-0.00349436		2779.78	0.01297118		3369.78	-0.0104325
420	0.00482097		1009.99	0.00695212		1599.99	-0.00032992		2189.98	-0.00292939		2779.98	0.01393978		3369.98	-0.00999559
420.2	0.00471257		1010.19	0.00693433		1600.19	0.00040396		2190.18	-0.00271333		2780.18	0.01423388		3370.18	-0.01014619
420.4	0.0049784		1010.39	0.00688754		1600.39	0.00059628		2190.38	-0.00186106		2780.38	0.01412416		3370.38	-0.00988576
420.6	0.00540603		1010.59	0.00587956		1600.59	0.00179842		2190.58	-0.0019543		2780.58	0.01424333		3370.58	-0.00904664
420.8	0.00636366		1010.79	0.00539013		1600.79	0.00218014		2190.78	-0.00153081		2780.78	0.01508175		3370.78	-0.00818584
421	0.00707448		1010.99	0.00541312		1600.99	0.00232087		2190.98	-0.00187526		2780.98	0.01523976		3370.98	-0.00834092
421.2	0.00727798		1011.19	0.00585961		1601.19	0.00192826		2191.18	-0.0023713		2781.18	0.01510564		3371.18	-0.00906464
421.4	0.00713296		1011.39	0.00586035		1601.39	0.00189273		2191.38	-0.00308016		2781.38	0.01481224		3371.38	-0.00934411
421.6	0.0071928		1011.59	0.00569191		1601.59	0.00271097		2191.58	-0.00261248		2781.58	0.01537316		3371.58	-0.00963136
421.8	0.00716285		1011.79	0.0063462		1601.79	0.00287915		2191.78	-0.00296489		2781.78	0.01446151		3371.78	-0.01036145
422	0.00732138		1011.99	0.00616087		1601.99	0.00300364		2191.98	-0.00284855		2781.98	0.01453301		3371.98	-0.01132203
422.2	0.00730663		1012.19	0.00554973		1602.19	0.00167232		2192.18	-0.00220319		2782.18	0.01543711		3372.18	-0.01130851
422.4	0.00826658		1012.39	0.00476654		1602.39	0.00117924		2192.38	-0.0021395		2782.38	0.01579596		3372.38	-0.01145443
422.6	0.00839257		1012.59	0.00427438		1602.59	0.00096251		2192.58	-0.00196268		2782.58	0.0161019		3372.58	-0.01159925
422.8	0.00938904		1012.79	0.00378011		1602.79	0.0001921		2192.78	-0.00112794		2782.78	0.01691529		3372.78	-0.01208241
423	0.00912673		1012.99	0.00447183		1602.99	0.00038527		2192.98	-0.00092534		2782.98	0.01680295		3372.98	-0.01282802
423.2	0.00866227		1013.19	0.00477141		1603.19	0.00003573		2193.18	-0.00119535		2783.18	0.0168425		3373.18	-0.01239008
423.4	0.00788544		1013.39	0.00548232		1603.39	-0.00004591		2193.38	-0.00110148		2783.38	0.01640919		3373.38	-0.01135592
423.6	0.00746505		1013.59	0.00562732		1603.59	-0.00018479		2193.58	-0.0006929		2783.58	0.01676908		3373.58	-0.01130122
423.8	0.00643383		1013.79	0.00575072		1603.79	-0.00018188		2193.78	-0.00118131		2783.78	0.01651199		3373.78	-0.01121453
424	0.00687189		1013.99	0.0054818		1603.99	-0.00080379		2193.98	-0.00098978		2783.98	0.01690527		3373.98	-0.01014307
424.2	0.00692854		1014.19	0.00456697		1604.19	-0.00133229		2194.18	-0.00084103		2784.18	0.01645685		3374.18	-0.00979891
424.4	0.00638473		1014.39	0.00403356		1604.39	-0.00175126		2194.38	-0.00066773		2784.38	0.0160447		3374.38	-0.0085978
424.6	0.00645243		1014.59	0.00420321		1604.59	-0.00130348		2194.58	-0.00044863		2784.58	0.01570713		3374.58	-0.00835614
424.8	0.00648743		1014.79	0.00446367		1604.79	-0.00135504		2194.78	-0.00073555		2784.78	0.01590453		3374.78	-0.00821359
425	0.00687669		1014.99	0.00468229		1604.99	-0.00097913		2194.98	-0.0012216		2784.98	0.01551916		3374.98	-0.00776861
425.2	0.00629125		1015.19	0.00529506		1605.19	-0.00127944		2195.18	-0.00086915		2785.18	0.01495344		3375.18	-0.00767353
425.4	0.00549931		1015.39	0.0058781		1605.39	0.00001758		2195.38	-0.00040656		2785.38	0.01493344		3375.38	-0.00825676
425.6	0.00567134		1015.59	0.0063365		1605.59	0.00014153		2195.58	-0.00015299		2785.58	0.01544139		3375.58	-0.0082708
425.8	0.00551928		1015.79	0.00717863		1605.79	0.00017276		2195.78	-0.00041593		2785.78	0.01457737		3375.78	-0.00903247
426	0.00536241		1015.99	0.00657592		1605.99	0.00060721		2195.98	-0.00101419		2785.98	0.0147995		3375.98	-0.00950506
426.2	0.00640403		1016.19	0.00674652		1606.19	0.00027066		2196.18	-0.00129621		2786.18	0.01493618		3376.18	-0.00999715
426.4	0.00646738		1016.39	0.0076366		1606.39	0.00057059		2196.38	-0.00190994		2786.38	0.01463052		3376.38	-0.01056367
426.6	0.00705458		1016.59	0.00808333		1606.59	0.00131254		2196.58	-0.0024245		2786.58	0.01446499		3376.58	-0.01035889
426.8	0.00797777		1016.79	0.00855538		1606.79	0.00164173		2196.78	-0.00288005		2786.78	0.01487713		3376.78	-0.01049572
427	0.00711301		1016.99	0.00863314		1606.99	0.00129256		2196.98	-0.00329053		2786.98	0.0144997		3376.98	-0.01022957
427.2	0.00740376		1017.19	0.00895166		1607.19	0.00122679		2197.18	-0.00321698		2787.18	0.01408994		3377.18	-0.01030566
427.4	0.00681333		1017.39	0.00888032		1607.39	0.00180767		2197.38	-0.00334472		2787.38	0.01351462		3377.38	-0.00978462
427.6	0.00698021		1017.59	0.0085388		1607.59	0.00180078		2197.58	-0.00419834		2787.58	0.01330757		3377.58	-0.01040308
427.8	0.0071698		1017.79	0.00881564		1607.79	0.0012838		2197.78	-0.00514829		2787.78	0.01291375		3377.78	-0.01087508
428	0.00817798		1017.99	0.00857092		1607.99	0.00105607		2197.98	-0.00467048		2787.98	0.01352823		3377.98	-0.01069822
428.2	0.00755012		1018.19	0.00785588		1608.19	0.00075821		2198.18	-0.0044435		2788.18	0.01361918		3378.18	-0.0104562
428.4	0.00642755		1018.39	0.00812899		1608.39	0.00080295		2198.38	-0.0044786		2788.38	0.01373101		3378.38	-0.01012195
428.6	0.00666122		1018.59	0.00860269		1608.59	0.00042705		2198.58	-0.00331401		2788.58	0.01408259		3378.58	-0.01076562
428.8	0.00673711		1018.79	0.00819284		1608.79	0.00055383		2198.78	-0.00402975		2788.78	0.01417533		3378.78	-0.01033455
429	0.00670716		1018.99	0.00800025		1608.99	0.00046243		2198.98	-0.00382013		2788.98	0.01438176		3378.98	-0.01012365
429.2	0.0056411		1019.19	0.00788454		1609.19	-0.00003624		2199.18	-0.00411414		2789.18	0.01477642		3379.18	-0.00988914
429.4	0.00455435		1019.39	0.00759877		1609.39	0.00035306		2199.38	-0.00448163		2789.38	0.0156441		3379.38	-0.00933948
429.6	0.00477807		1019.59	0.00724091		1609.59	0.00079121		2199.58	-0.00477237		2789.58	0.01598604		3379.58	-0.00906268
429.8	0.00457649		1019.79	0.00660155		1609.79	0.0017089		2199.78	-0.00583706		2789.78	0.01605221		3379.78	-0.0092175
430	0.00511463		1019.99	0.00567693		1609.99	0.00188963		2199.98	-0.00628152		2789.98	0.01636287		3379.98	-0.00937867
430.2	0.00560757		1020.19	0.00552716		1610.19	0.00212096		2200.18	-0.00659134		2790.18	0.01614357		3380.18	-0.00992306
430.4	0.0053365		1020.39	0.00594491		1610.39	0.00210437		2200.38	-0.00666519		2790.38	0.01595433		3380.38	-0.00942819
430.6	0.00574845		1020.59	0.0058345		1610.59	0.0023186		2200.58	-0.00660049		2790.58	0.01606107		3380.58	-0.00897883
430.8	0.00527707		1020.79	0.00552695		1610.79	0.00277686		2200.78	-0.00580357		2790.78	0.01552116		3380.78	-0.00835757
431	0.00489514		1020.99	0.0055446		1610.99	0.00228465		2200.98	-0.00485493		2790.98	0.01527229		3380.98	-0.00880252
431.2	0.00527675		1021.19	0.00614492		1611.19	0.00308609		2201.18	-0.00416566		2791.18	0.01465999		3381.18	-0.0095642
431.4	0.00454111		1021.39	0.00639479		1611.39	0.00395665		2201.38	-0.00417311		2791.38	0.01414916		3381.38	-0.00888375
431.6	0.00556063		1021.59	0.0074684		1611.59	0.00314305		2201.58	-0.00368887		2791.58	0.01374954		3381.58	-0.00930037
431.8	0.00645901		1021.79	0.00822866		1611.79	0.00355937		2201.78	-0.00324947		2791.78	0.01445426		3381.78	-0.00937768
432	0.00661824		1021.99	0.00854029		1611.99	0.00304869		2201.98	-0.00237406		2791.98	0.01440591		3381.98	-0.00979855
432.2	0.00608587		1022.19	0.00783468		1612.19	0.00217942		2202.18	-0.00131869		2792.18	0.0138055		3382.18	-0.0098408
432.4	0.00702173		1022.39	0.00833886		1612.39	0.00237504		2202.38	-0.00116051		2792.38	0.01449955		3382.38	-0.00938326
432.6	0.00796686		1022.59	0.00805792		1612.59	0.00224776		2202.58	-0.00072344		2792.58	0.0145263		3382.58	-0.00975291
432.8	0.00858329		1022.79	0.00775952		1612.79	0.00250234		2202.78	-0.00136054		2792.78	0.01409119		3382.78	-0.0100434
433	0.00878407		1022.99	0.00655073		1612.99	0.00131501		2202.98	-0.00205748		2792.98	0.01372158		3382.98	-0.0110218
433.2	0.00808279		1023.19	0.00592928		1613.19	0.00098473		2203.18	-0.00267558		2793.18	0.01441747		3383.18	-0.01054373
433.4	0.00770727		1023.39	0.0060656		1613.39	0.00122138		2203.38	-0.00326289		2793.38	0.01461233		3383.38	-0.00979889
433.6	0.00866287		1023.59	0.00595201		1613.59	0.00181788		2203.58	-0.00414677		2793.58	0.01544514		3383.58	-0.01008318
433.8	0.00925237		1023.79	0.00545474		1613.79	0.00125212		2203.78	-0.00494018		2793.78	0.01584577		3383.78	-0.01010334
434	0.00957577		1023.99	0.00437796		1613.99	0.00057317		2203.98	-0.00429742		2793.98	0.01641004		3383.98	-0.01012661
434.2	0.00920588		1024.19	0.0046708		1614.19	0.00058098		2204.18	-0.00471399		2794.18	0.01635591		3384.18	-0.01075283
434.4	0.00859335		1024.39	0.0048579		1614.39	-0.00044113		2204.38	-0.00457027		2794.38	0.01660389		3384.38	-0.01030243
434.6	0.00810041		1024.59	0.00524456		1614.59	-0.00001318		2204.58	-0.00431043		2794.58	0.01706633		3384.58	-0.01095933
434.8	0.00710449		1024.79	0.00614098		1614.79	0.00036374		2204.78	-0.00355388		2794.78	0.01639007		3384.78	-0.00996454
435	0.00668994		1024.99	0.00713813		1614.99	0.00005397		2204.98	-0.00477755		2794.98	0.01683205		3384.98	-0.01103482
435.2	0.00597358		1025.19	0.00756245		1615.19	0.00010632		2205.18	-0.00531509		2795.18	0.01639987		3385.18	-0.01115723
435.4	0.00619821		1025.39	0.00803127		1615.39	-0.00094291		2205.38	-0.00514271		2795.38	0.01613319		3385.38	-0.01070898
435.6	0.0060784		1025.59	0.0082812		1615.59	-0.00155509		2205.58	-0.00472027		2795.58	0.01639585		3385.58	-0.01084009
435.8	0.00516276		1025.79	0.00762946		1615.79	-0.00074481		2205.78	-0.00517076		2795.78	0.0172404		3385.78	-0.01129274
436	0.00463245		1025.99	0.00740734		1615.99	-0.00166245		2205.98	-0.00482984		2795.98	0.01753329		3385.98	-0.01172814
436.2	0.00496234		1026.19	0.00674296		1616.19	-0.00162098		2206.18	-0.0032		2796.18	0.01759548		3386.18	-0.01169193
436.4	0.00598661		1026.39	0.00789385		1616.39	-0.00152953		2206.38	-0.00322583		2796.38	0.01811837		3386.38	-0.01161646
436.6	0.00546478		1026.59	0.00788586		1616.59	-0.00113173		2206.58	-0.00308406		2796.58	0.01696106		3386.58	-0.01159373
436.8	0.00491335		1026.79	0.0084615		1616.79	-0.0014684		2206.78	-0.00314883		2796.78	0.01612913		3386.78	-0.01230613
437	0.00491302		1026.99	0.00869937		1616.99	-0.00256436		2206.98	-0.0032618		2796.98	0.01599752		3386.98	-0.0125338
437.2	0.00421026		1027.19	0.00823048		1617.19	-0.00148774		2207.18	-0.00283649		2797.18	0.01609127		3387.18	-0.01221495
437.4	0.00429325		1027.39	0.00846203		1617.39	-0.00107526		2207.38	-0.00316588		2797.38	0.01539487		3387.38	-0.01181877
437.6	0.00537109		1027.59	0.00803183		1617.59	-0.00047467		2207.58	-0.00300243		2797.58	0.0162357		3387.58	-0.01136872
437.8	0.00556296		1027.79	0.00776282		1617.79	-0.00061995		2207.78	-0.0026793		2797.78	0.01561172		3387.78	-0.01077753
438	0.00524579		1027.99	0.00738435		1617.99	0.00006141		2207.98	-0.00199927		2797.98	0.01560569		3387.98	-0.01096906
438.2	0.00529582		1028.19	0.00765897		1618.19	0.00085136		2208.18	-0.00227308		2798.18	0.0154024		3388.18	-0.01171522
438.4	0.0049007		1028.39	0.00738955		1618.39	0.00112194		2208.38	-0.00119981		2798.38	0.0148517		3388.38	-0.01146828
438.6	0.00473426		1028.59	0.00819832		1618.59	0.002048		2208.58	-0.0001314		2798.58	0.01522799		3388.58	-0.01146003
438.8	0.0055719		1028.79	0.00809132		1618.79	0.00210199		2208.78	-0.00044806		2798.78	0.01516224		3388.78	-0.01088403
439	0.00513357		1028.99	0.00772183		1618.99	0.00180762		2208.98	-0.00082281		2798.98	0.01469063		3388.98	-0.01135233
439.2	0.00535923		1029.19	0.00722768		1619.19	0.00251549		2209.18	-0.00065871		2799.18	0.01494703		3389.18	-0.01182307
439.4	0.00497631		1029.39	0.00715006		1619.39	0.00268763		2209.38	-0.00100352		2799.38	0.01509892		3389.38	-0.01158869
439.6	0.0046857		1029.59	0.00624606		1619.59	0.00323601		2209.58	-0.0012178		2799.58	0.01545576		3389.58	-0.01169155
439.8	0.00522613		1029.79	0.00586333		1619.79	0.00378581		2209.78	-0.00107258		2799.78	0.01508517		3389.78	-0.01175729
440	0.00557797		1029.99	0.00672189		1619.99	0.00326399		2209.98	-0.00048344		2799.98	0.01475657		3389.98	-0.01207115
440.2	0.00586704		1030.19	0.00654229		1620.19	0.00378178		2210.18	-0.00050779		2800.18	0.01493949		3390.18	-0.01239715
440.4	0.00674488		1030.39	0.00705992		1620.39	0.00441155		2210.38	-0.00134454		2800.38	0.01519968		3390.38	-0.01193218
440.6	0.00567179		1030.59	0.0073792		1620.59	0.00425857		2210.58	-0.00194251		2800.58	0.01590304		3390.58	-0.01127354
440.8	0.00602405		1030.79	0.00842807		1620.79	0.00232304		2210.78	-0.00343954		2800.78	0.01605657		3390.78	-0.01151422
441	0.00551455		1030.99	0.00844792		1620.99	0.00185449		2210.98	-0.00345904		2800.98	0.01651679		3390.98	-0.01120247
441.2	0.0054345		1031.19	0.00826899		1621.19	0.00291606		2211.18	-0.00465954		2801.18	0.01632121		3391.18	-0.01143833
441.4	0.00500942		1031.39	0.00897987		1621.39	0.00220795		2211.38	-0.0055987		2801.38	0.01672977		3391.38	-0.01053524
441.6	0.00618836		1031.59	0.00923558		1621.59	0.0018802		2211.58	-0.00618791		2801.58	0.01690363		3391.58	-0.01003543
441.8	0.00635268		1031.79	0.0091579		1621.79	0.00119952		2211.78	-0.00580307		2801.78	0.01663571		3391.78	-0.01002019
442	0.0068185		1031.99	0.00954242		1621.99	0.00132691		2211.98	-0.0049925		2801.98	0.01708225		3391.98	-0.01058429
442.2	0.00757939		1032.19	0.0099806		1622.19	0.0008514		2212.18	-0.00469472		2802.18	0.01749962		3392.18	-0.01140093
442.4	0.00741305		1032.39	0.00975942		1622.39	-0.00037931		2212.38	-0.00317685		2802.38	0.01705917		3392.38	-0.01139805
442.6	0.00853276		1032.59	0.00977221		1622.59	-0.00075187		2212.58	-0.00321842		2802.58	0.01701746		3392.58	-0.01132879
442.8	0.00924947		1032.79	0.00908854		1622.79	-0.00035972		2212.78	-0.00305198		2802.78	0.01635869		3392.78	-0.01148206
443	0.00894697		1032.99	0.00951321		1622.99	0.0002358		2212.98	-0.00201682		2802.98	0.01573494		3392.98	-0.01181418
443.2	0.0093775		1033.19	0.00980753		1623.19	0.00134692		2213.18	-0.00243505		2803.18	0.01549192		3393.18	-0.01193522
443.4	0.00874209		1033.39	0.0090761		1623.39	0.00092812		2213.38	-0.00198963		2803.38	0.01465433		3393.38	-0.01184126
443.6	0.00970269		1033.59	0.00830359		1623.59	0.00096684		2213.58	-0.00218579		2803.58	0.01487391		3393.58	-0.0117674
443.8	0.00955405		1033.79	0.00783113		1623.79	0.00227188		2213.78	-0.00131585		2803.78	0.01452321		3393.78	-0.01137101
444	0.00911986		1033.99	0.00782002		1623.99	0.00217748		2213.98	-0.0014081		2803.98	0.01379233		3393.98	-0.01110399
444.2	0.00882069		1034.19	0.0075317		1624.19	0.00352284		2214.18	-0.00250562		2804.18	0.01392492		3394.18	-0.01164886
444.4	0.00855865		1034.39	0.00788048		1624.39	0.00458071		2214.38	-0.00314922		2804.38	0.01389828		3394.38	-0.01106707
444.6	0.00716975		1034.59	0.00814		1624.59	0.00503501		2214.58	-0.00348136		2804.58	0.01398697		3394.58	-0.01123557
444.8	0.00646146		1034.79	0.00862899		1624.79	0.00492382		2214.78	-0.00451373		2804.78	0.01327384		3394.78	-0.01154233
445	0.00535357		1034.99	0.00806268		1624.99	0.0057881		2214.98	-0.00393169		2804.98	0.01350668		3394.98	-0.01131765
445.2	0.00584789		1035.19	0.00843211		1625.19	0.0057447		2215.18	-0.00456729		2805.18	0.01362219		3395.18	-0.01128755
445.4	0.00621106		1035.39	0.00795832		1625.39	0.00458059		2215.38	-0.00439127		2805.38	0.01349549		3395.38	-0.01084421
445.6	0.00656494		1035.59	0.00816205		1625.59	0.00457883		2215.58	-0.00403831		2805.58	0.01347585		3395.58	-0.01090459
445.8	0.00569232		1035.79	0.008331		1625.79	0.00389569		2215.78	-0.00332349		2805.78	0.01338334		3395.78	-0.01128174
446	0.00623291		1035.99	0.00914092		1625.99	0.00314974		2215.98	-0.00328544		2805.98	0.01299958		3395.98	-0.01181847
446.2	0.00626218		1036.19	0.00934338		1626.19	0.00163865		2216.18	-0.00305499		2806.18	0.01290416		3396.18	-0.01205093
446.4	0.00649051		1036.39	0.00822637		1626.39	0.00137318		2216.38	-0.00244059		2806.38	0.01257939		3396.38	-0.01189929
446.6	0.00742095		1036.59	0.00818475		1626.59	0.00169775		2216.58	-0.00207822		2806.58	0.01240882		3396.58	-0.01251457
446.8	0.00735715		1036.79	0.00859263		1626.79	0.00087937		2216.78	-0.00105819		2806.78	0.01273048		3396.78	-0.01264487
447	0.00760237		1036.99	0.00865656		1626.99	0.00110803		2216.98	0.00042102		2806.98	0.0130371		3396.98	-0.01237301
447.2	0.00715002		1037.19	0.00840977		1627.19	0.00079872		2217.18	0.00016705		2807.18	0.01281364		3397.18	-0.01203853
447.4	0.0077294		1037.39	0.00725807		1627.39	-0.0000367		2217.38	-0.00068666		2807.38	0.01384845		3397.38	-0.01136304
447.6	0.00819687		1037.59	0.00738057		1627.59	0.00035099		2217.58	-0.00117381		2807.58	0.01461267		3397.58	-0.01118237
447.8	0.00816987		1037.79	0.00622616		1627.79	0.00121771		2217.78	-0.0007109		2807.78	0.01405397		3397.78	-0.01062053
448	0.00797476		1037.99	0.00688388		1627.99	0.00186243		2217.98	-0.00068714		2807.98	0.01446888		3397.98	-0.01033018
448.2	0.00834114		1038.19	0.00768677		1628.19	0.0025869		2218.18	-0.0016326		2808.18	0.01542117		3398.18	-0.01058885
448.4	0.00785281		1038.39	0.00698291		1628.39	0.00297182		2218.38	-0.00144355		2808.38	0.01601803		3398.38	-0.01019272
448.6	0.00759346		1038.59	0.00720218		1628.59	0.0029696		2218.58	-0.00062627		2808.58	0.0153625		3398.58	-0.01008017
448.8	0.00752269		1038.79	0.00707203		1628.79	0.0016235		2218.78	-0.00098754		2808.78	0.01568351		3398.78	-0.00953504
449	0.00751212		1038.99	0.00716806		1628.99	0.00116475		2218.98	-0.00121372		2808.98	0.01633048		3398.98	-0.00903658
449.2	0.00753799		1039.19	0.00836471		1629.19	0.00018509		2219.18	-0.00184176		2809.18	0.01623002		3399.18	-0.00871421
449.4	0.0073358		1039.39	0.00858892		1629.39	0.00019299		2219.38	-0.00155365		2809.38	0.01596069		3399.38	-0.00880132
449.6	0.00642478		1039.59	0.00877552		1629.59	0.00076595		2219.58	-0.001578		2809.58	0.01536006		3399.58	-0.00863854
449.8	0.00630776		1039.79	0.00875817		1629.79	0.00069431		2219.78	-0.00118727		2809.78	0.01510398		3399.78	-0.00886769
450	0.00667116		1039.99	0.00871071		1629.99	0.00095332		2219.98	-0.00116172		2809.98	0.01520944		3399.98	-0.00903
450.2	0.00661827		1040.19	0.0079508		1630.19	0.00090513		2220.18	-0.00029277		2810.18	0.01507355		3400.18	-0.01005148
450.4	0.00776352		1040.39	0.00702391		1630.39	0.00159939		2220.38	-0.00051188		2810.38	0.01513946		3400.38	-0.01004345
450.6	0.00759175		1040.59	0.00702967		1630.59	0.00170003		2220.58	-0.00018039		2810.58	0.01494081		3400.58	-0.0112104
450.8	0.00715316		1040.79	0.00732355		1630.79	0.00155802		2220.78	0.00021484		2810.78	0.01476819		3400.78	-0.01163717
451	0.00692406		1040.99	0.00692401		1630.99	0.0028898		2220.98	0.00104952		2810.98	0.0141969		3400.98	-0.01178049
451.2	0.00690789		1041.19	0.00732622		1631.19	0.00295266		2221.18	0.00018329		2811.18	0.01449546		3401.18	-0.01163427
451.4	0.0074941		1041.39	0.00692012		1631.39	0.0029177		2221.38	-0.00121159		2811.38	0.0147186		3401.38	-0.01132904
451.6	0.00731778		1041.59	0.00693266		1631.59	0.00334127		2221.58	-0.00059098		2811.58	0.01443431		3401.58	-0.01183622
451.8	0.00677358		1041.79	0.00666068		1631.79	0.00340023		2221.78	-0.00039328		2811.78	0.01489259		3401.78	-0.01168166
452	0.00611219		1041.99	0.00735211		1631.99	0.0035197		2221.98	-0.00045947		2811.98	0.01569643		3401.98	-0.01158043
452.2	0.00577804		1042.19	0.00793755		1632.19	0.0025757		2222.18	-0.00107372		2812.18	0.01608367		3402.18	-0.01139029
452.4	0.00516521		1042.39	0.00770521		1632.39	0.00171494		2222.38	-0.0011044		2812.38	0.01566005		3402.38	-0.01151108
452.6	0.00569572		1042.59	0.00832147		1632.59	0.00120632		2222.58	-0.00121348		2812.58	0.0155156		3402.58	-0.01093135
452.8	0.00605464		1042.79	0.0081312		1632.79	0.00021413		2222.78	-0.00142394		2812.78	0.01621517		3402.78	-0.01063391
453	0.00614042		1042.99	0.00803941		1632.99	0.00044627		2222.98	-0.00189917		2812.98	0.01657692		3402.98	-0.01029176
453.2	0.00706137		1043.19	0.00842907		1633.19	0.00012534		2223.18	-0.00222343		2813.18	0.0164865		3403.18	-0.01067619
453.4	0.00778017		1043.39	0.00844455		1633.39	0.00098829		2223.38	-0.00230424		2813.38	0.0171917		3403.38	-0.01044012
453.6	0.00743678		1043.59	0.00841412		1633.59	0.0017088		2223.58	-0.00289664		2813.58	0.01707532		3403.58	-0.01097467
453.8	0.00744182		1043.79	0.00782794		1633.79	0.00209763		2223.78	-0.00275933		2813.78	0.01755156		3403.78	-0.01172892
454	0.00674185		1043.99	0.00786415		1633.99	0.00223704		2223.98	-0.00291171		2813.98	0.01781623		3403.98	-0.01330675
454.2	0.0069943		1044.19	0.00723042		1634.19	0.00176354		2224.18	-0.00263786		2814.18	0.01780355		3404.18	-0.0140913
454.4	0.00676513		1044.39	0.00684518		1634.39	0.00188383		2224.38	-0.00277269		2814.38	0.01834548		3404.38	-0.01298001
454.6	0.00621103		1044.59	0.00663034		1634.59	0.00208335		2224.58	-0.00213676		2814.58	0.01849506		3404.58	-0.0137409
454.8	0.0059771		1044.79	0.00687876		1634.79	0.00225878		2224.78	-0.00170933		2814.78	0.01885407		3404.78	-0.01406303
455	0.00585713		1044.99	0.00637786		1634.99	0.00222346		2224.98	-0.00196112		2814.98	0.01838755		3404.98	-0.01375909
455.2	0.00541204		1045.19	0.00754566		1635.19	0.00179345		2225.18	-0.00225676		2815.18	0.01818854		3405.18	-0.01357957
455.4	0.00491507		1045.39	0.00725169		1635.39	0.00123445		2225.38	-0.0019822		2815.38	0.01804792		3405.38	-0.01320608
455.6	0.00485916		1045.59	0.00748566		1635.59	0.0012755		2225.58	-0.00160047		2815.58	0.01824561		3405.58	-0.01312553
455.8	0.00349735		1045.79	0.00871947		1635.79	0.00063571		2225.78	-0.00029554		2815.78	0.0174057		3405.78	-0.01318133
456	0.00343499		1045.99	0.00869609		1635.99	0.00029101		2225.98	0.00009332		2815.98	0.01669303		3405.98	-0.01234343
456.2	0.0036546		1046.19	0.00912608		1636.19	-0.0001381		2226.18	0.00099356		2816.18	0.01632426		3406.18	-0.01136613
456.4	0.00439242		1046.39	0.00897303		1636.39	-0.00062848		2226.38	0.00097741		2816.38	0.01510101		3406.38	-0.01113416
456.6	0.00512882		1046.59	0.00916236		1636.59	-0.00039793		2226.58	0.00092971		2816.58	0.01488311		3406.58	-0.01078277
456.8	0.00574513		1046.79	0.00917168		1636.79	-0.00029868		2226.78	0.00128894		2816.78	0.01466131		3406.78	-0.01046908
457	0.00654049		1046.99	0.00865844		1636.99	-0.00028003		2226.98	0.00028859		2816.98	0.01429089		3406.98	-0.01120119
457.2	0.00762839		1047.19	0.00868995		1637.19	-0.0004806		2227.18	-0.00124969		2817.18	0.01349228		3407.18	-0.01147888
457.4	0.00775658		1047.39	0.00844976		1637.39	0.00017764		2227.38	-0.00199345		2817.38	0.01333343		3407.38	-0.01101652
457.6	0.00761817		1047.59	0.00773858		1637.59	0.00059968		2227.58	-0.002952		2817.58	0.01303811		3407.58	-0.01160472
457.8	0.00799284		1047.79	0.00669292		1637.79	0.00006797		2227.78	-0.00300168		2817.78	0.01278419		3407.78	-0.01196483
458	0.00798124		1047.99	0.00666795		1637.99	0.00023634		2227.98	-0.00365012		2817.98	0.01286031		3407.98	-0.01220882
458.2	0.00902424		1048.19	0.00538414		1638.19	0.00023201		2228.18	-0.00419125		2818.18	0.01296021		3408.18	-0.01127224
458.4	0.00943199		1048.39	0.00464912		1638.39	0.00087046		2228.38	-0.00509519		2818.38	0.01337199		3408.38	-0.0103651
458.6	0.0104895		1048.59	0.00425306		1638.59	0.00114013		2228.58	-0.0052025		2818.58	0.01362982		3408.58	-0.01129762
458.8	0.01018931		1048.79	0.0044576		1638.79	0.00182419		2228.78	-0.0054075		2818.78	0.01378837		3408.78	-0.01151145
459	0.0096842		1048.99	0.00457452		1638.99	0.00200146		2228.98	-0.00597508		2818.98	0.01372385		3408.98	-0.01126757
459.2	0.00929759		1049.19	0.00558029		1639.19	0.00255996		2229.18	-0.00511899		2819.18	0.01495533		3409.18	-0.01150521
459.4	0.00833466		1049.39	0.00547761		1639.39	0.00306847		2229.38	-0.00454224		2819.38	0.01574458		3409.38	-0.01144477
459.6	0.00821597		1049.59	0.00597921		1639.59	0.00375966		2229.58	-0.00432374		2819.58	0.01567025		3409.58	-0.01080203
459.8	0.0072901		1049.79	0.00668916		1639.79	0.00326604		2229.78	-0.00312961		2819.78	0.01493327		3409.78	-0.01130434
460	0.00690689		1049.99	0.00646024		1639.99	0.00301441		2229.98	-0.00310599		2819.98	0.0147086		3409.98	-0.01138441
460.2	0.0060295		1050.19	0.00704763		1640.19	0.00294178		2230.18	-0.00230322		2820.18	0.01451305		3410.18	-0.01216345
460.4	0.00527481		1050.39	0.0077733		1640.39	0.00264309		2230.38	-0.00253921		2820.38	0.01459799		3410.38	-0.01260512
460.6	0.00528077		1050.59	0.00844788		1640.59	0.00272376		2230.58	-0.00260506		2820.58	0.01506451		3410.58	-0.01349701
460.8	0.00515472		1050.79	0.00856614		1640.79	0.00260869		2230.78	-0.00178695		2820.78	0.01650937		3410.78	-0.0143574
461	0.00562145		1050.99	0.00819542		1640.99	0.0022434		2230.98	-0.00265656		2820.98	0.01608982		3410.98	-0.01495873
461.2	0.00592357		1051.19	0.00829933		1641.19	0.00209231		2231.18	-0.00272491		2821.18	0.01647953		3411.18	-0.014151
461.4	0.00482531		1051.39	0.00848636		1641.39	0.00210934		2231.38	-0.00256881		2821.38	0.01660721		3411.38	-0.01374603
461.6	0.00542914		1051.59	0.00825364		1641.59	0.00223241		2231.58	-0.00290743		2821.58	0.0170878		3411.58	-0.01383284
461.8	0.00648566		1051.79	0.00796627		1641.79	0.001561		2231.78	-0.00250511		2821.78	0.01683552		3411.78	-0.0135781
462	0.00679807		1051.99	0.00768593		1641.99	0.00180443		2231.98	-0.00265798		2821.98	0.01705223		3411.98	-0.01331247
462.2	0.00638716		1052.19	0.00710121		1642.19	0.00170533		2232.18	-0.00222804		2822.18	0.01684792		3412.18	-0.01299705
462.4	0.00672406		1052.39	0.00737222		1642.39	0.00201714		2232.38	-0.00231519		2822.38	0.01666089		3412.38	-0.01199885
462.6	0.0071015		1052.59	0.00702793		1642.59	0.00188091		2232.58	-0.00120427		2822.58	0.01679376		3412.58	-0.01147481
462.8	0.00668687		1052.79	0.00632444		1642.79	0.00195166		2232.78	-0.00126896		2822.78	0.01627327		3412.78	-0.01029045
463	0.00674018		1052.99	0.00624222		1642.99	0.00207063		2232.98	-0.00080137		2822.98	0.01738876		3412.98	-0.00955057
463.2	0.0070175		1053.19	0.00643303		1643.19	0.00254752		2233.18	-0.00029903		2823.18	0.01688594		3413.18	-0.00938265
463.4	0.00648138		1053.39	0.00715872		1643.39	0.00195696		2233.38	-0.00048192		2823.38	0.01658989		3413.38	-0.00860112
463.6	0.00606253		1053.59	0.00694543		1643.59	0.00240534		2233.58	-0.00056181		2823.58	0.01674041		3413.58	-0.0078275
463.8	0.00617002		1053.79	0.0074994		1643.79	0.00231656		2233.78	-0.0005237		2823.78	0.01641964		3413.78	-0.00892857
464	0.00525791		1053.99	0.00789492		1643.99	0.00254986		2233.98	-0.0002046		2823.98	0.01599082		3413.98	-0.00900465
464.2	0.00503284		1054.19	0.0083719		1644.19	0.00268963		2234.18	-0.00011115		2824.18	0.01675287		3414.18	-0.00882151
464.4	0.00541574		1054.39	0.00803637		1644.39	0.0031308		2234.38	-0.0000916		2824.38	0.01739621		3414.38	-0.00917712
464.6	0.0059847		1054.59	0.0080368		1644.59	0.00382208		2234.58	-0.00074922		2824.58	0.01767781		3414.58	-0.009683
464.8	0.00576728		1054.79	0.00790529		1644.79	0.00306415		2234.78	0.00023825		2824.78	0.01802411		3414.78	-0.01017998
465	0.00643445		1054.99	0.00788363		1644.99	0.00282986		2234.98	-0.00095874		2824.98	0.01723576		3414.98	-0.010098
465.2	0.00635452		1055.19	0.00686511		1645.19	0.00236641		2235.18	-0.00192845		2825.18	0.01669736		3415.18	-0.01013386
465.4	0.00528686		1055.39	0.00654945		1645.39	0.00224253		2235.38	-0.00261307		2825.38	0.01549908		3415.38	-0.01060316
465.6	0.00650185		1055.59	0.0056789		1645.59	0.00138889		2235.58	-0.00334052		2825.58	0.01522618		3415.58	-0.01127931
465.8	0.00716638		1055.79	0.00570706		1645.79	0.00036064		2235.78	-0.0035408		2825.78	0.01401296		3415.78	-0.01097946
466	0.00572104		1055.99	0.00594764		1645.99	0.00115119		2235.98	-0.00310558		2825.98	0.01420678		3415.98	-0.01113561
466.2	0.00554294		1056.19	0.00620401		1646.19	0.00156035		2236.18	-0.00298951		2826.18	0.01416051		3416.18	-0.01078152
466.4	0.00661903		1056.39	0.00652871		1646.39	0.00120104		2236.38	-0.003663		2826.38	0.0144058		3416.38	-0.01053217
466.6	0.00699957		1056.59	0.00608174		1646.59	0.00146172		2236.58	-0.00408738		2826.58	0.01465026		3416.58	-0.01061391
466.8	0.00703989		1056.79	0.00672432		1646.79	0.00147012		2236.78	-0.00407513		2826.78	0.01410101		3416.78	-0.01052902
467	0.00787627		1056.99	0.00769611		1646.99	0.00183887		2236.98	-0.00412723		2826.98	0.01491092		3416.98	-0.01109852
467.2	0.00773401		1057.19	0.00815281		1647.19	0.00253248		2237.18	-0.00455939		2827.18	0.01467858		3417.18	-0.01181866
467.4	0.00680992		1057.39	0.00909239		1647.39	0.0029799		2237.38	-0.00483112		2827.38	0.01597166		3417.38	-0.0119856
467.6	0.00705745		1057.59	0.00864559		1647.59	0.00399844		2237.58	-0.004793		2827.58	0.01660332		3417.58	-0.01186311
467.8	0.00773041		1057.79	0.00919163		1647.79	0.00410898		2237.78	-0.00407421		2827.78	0.01721563		3417.78	-0.01249466
468	0.00744646		1057.99	0.00930055		1647.99	0.00426622		2237.98	-0.00357515		2827.98	0.01789891		3417.98	-0.01254802
468.2	0.00785578		1058.19	0.00928488		1648.19	0.00431093		2238.18	-0.00313017		2828.18	0.01883119		3418.18	-0.01235121
468.4	0.00814817		1058.39	0.00908213		1648.39	0.00439681		2238.38	-0.00222544		2828.38	0.0187797		3418.38	-0.01258863
468.6	0.00823546		1058.59	0.0092038		1648.59	0.00398871		2238.58	-0.00192773		2828.58	0.01833199		3418.58	-0.01168973
468.8	0.00817383		1058.79	0.00918074		1648.79	0.00302892		2238.78	-0.00065866		2828.78	0.0179017		3418.78	-0.01113809
469	0.00864252		1058.99	0.00916941		1648.99	0.0028513		2238.98	-0.00118409		2828.98	0.01731555		3418.98	-0.01006922
469.2	0.00828855		1059.19	0.00857872		1649.19	0.00250299		2239.18	-0.00099692		2829.18	0.01596871		3419.18	-0.00921989
469.4	0.00752162		1059.39	0.00948787		1649.39	0.00205332		2239.38	0.00003037		2829.38	0.01510397		3419.38	-0.00832675
469.6	0.00749665		1059.59	0.00995335		1649.59	0.00149057		2239.58	0.0004558		2829.58	0.01448378		3419.58	-0.00718701
469.8	0.00723165		1059.79	0.01118682		1649.79	0.00184127		2239.78	0.00128288		2829.78	0.01381338		3419.78	-0.00590634
470	0.00723165		1059.99	0.01118682		1649.99	0.00184127		2239.98	0.00128288		2829.98	0.01381338		3419.98	-0.00590634
470.2	0.00774453		1060.19	0.01076475		1650.19	0.00236476		2240.18	0.00170004		2830.18	0.01351305		3420.18	-0.00600669
470.4	0.0086094		1060.39	0.00983429		1650.39	0.00343143		2240.38	0.00229642		2830.38	0.01376233		3420.38	-0.00556206
470.6	0.00959772		1060.59	0.00926461		1650.59	0.00359162		2240.58	0.00276591		2830.58	0.01296818		3420.58	-0.00578784
470.8	0.01052974		1060.79	0.00880409		1650.79	0.00330285		2240.78	0.00311401		2830.78	0.01257677		3420.78	-0.00579194
471	0.01153392		1060.99	0.00773862		1650.99	0.00325448		2240.98	0.00270056		2830.98	0.01243352		3420.98	-0.0060015
471.2	0.01239652		1061.19	0.00703018		1651.19	0.00386102		2241.18	0.00282454		2831.18	0.0125489		3421.18	-0.00609304
471.4	0.01282825		1061.39	0.00658409		1651.39	0.00380399		2241.38	0.00273967		2831.38	0.01305482		3421.38	-0.00582692
471.6	0.01294765		1061.59	0.00641502		1651.59	0.0040173		2241.58	0.0030225		2831.58	0.01249835		3421.58	-0.00536801
471.8	0.01281444		1061.79	0.00640416		1651.79	0.00421512		2241.78	0.00273363		2831.78	0.01252166		3421.78	-0.00583583
472	0.0126432		1061.99	0.0063428		1651.99	0.00477157		2241.98	0.00283374		2831.98	0.01271908		3421.98	-0.00649309
472.2	0.01229973		1062.19	0.00636708		1652.19	0.00504628		2242.18	0.00313136		2832.18	0.01342663		3422.18	-0.00610613
472.4	0.01227597		1062.39	0.00540419		1652.39	0.00538027		2242.38	0.00371816		2832.38	0.01290332		3422.38	-0.00587103
472.6	0.01199832		1062.59	0.00555625		1652.59	0.00582871		2242.58	0.00319662		2832.58	0.01227647		3422.58	-0.00534483
472.8	0.01127656		1062.79	0.00580279		1652.79	0.00532772		2242.78	0.00320267		2832.78	0.01221657		3422.78	-0.0045389
473	0.01153136		1062.99	0.00643794		1652.99	0.00479888		2242.98	0.00343268		2832.98	0.01211085		3422.98	-0.00456195
473.2	0.01208944		1063.19	0.00682545		1653.19	0.0039152		2243.18	0.00250462		2833.18	0.01104316		3423.18	-0.00388832
473.4	0.01160328		1063.39	0.00684611		1653.39	0.00409277		2243.38	0.00270617		2833.38	0.01074449		3423.38	-0.00355014
473.6	0.01140988		1063.59	0.00770983		1653.59	0.00308697		2243.58	0.00238684		2833.58	0.01039215		3423.58	-0.00331844
473.8	0.01154752		1063.79	0.00773614		1653.79	0.00278101		2243.78	0.00229519		2833.78	0.00985139		3423.78	-0.00227008
474	0.01211551		1063.99	0.00808093		1653.99	0.00358607		2243.98	0.0021832		2833.98	0.00838672		3423.98	-0.00198193
474.2	0.01289019		1064.19	0.00852931		1654.19	0.00368936		2244.18	0.00292967		2834.18	0.00806778		3424.18	-0.00224013
474.4	0.01299741		1064.39	0.00921348		1654.39	0.00358229		2244.38	0.00245573		2834.38	0.00848633		3424.38	-0.00243522
474.6	0.01336747		1064.59	0.0092789		1654.59	0.00246371		2244.58	0.00185802		2834.58	0.00798249		3424.58	-0.00225349
474.8	0.0134389		1064.79	0.00955306		1654.79	0.00257107		2244.78	0.00136983		2834.78	0.00808841		3424.78	-0.00210495
475	0.01309535		1064.99	0.00923847		1654.99	0.00255213		2244.98	0.0007223		2834.98	0.00850208		3424.98	-0.00263829
475.2	0.01305039		1065.19	0.00898105		1655.19	0.00326574		2245.18	0.00141981		2835.18	0.00859069		3425.18	-0.00272697
475.4	0.01253493		1065.39	0.00865475		1655.39	0.0028703		2245.38	0.00152518		2835.38	0.00867701		3425.38	-0.00292496
475.6	0.01232939		1065.59	0.00750761		1655.59	0.00337675		2245.58	0.00248912		2835.58	0.00823287		3425.58	-0.00331399
475.8	0.01229756		1065.79	0.00683254		1655.79	0.00339525		2245.78	0.0026579		2835.78	0.00917312		3425.78	-0.00477132
476	0.01245097		1065.99	0.00558637		1655.99	0.00441661		2245.98	0.00276946		2835.98	0.00973353		3425.98	-0.00478429
476.2	0.01211813		1066.19	0.00436377		1656.19	0.00472063		2246.18	0.00341521		2836.18	0.01012918		3426.18	-0.00489709
476.4	0.01183369		1066.39	0.00452693		1656.39	0.00514795		2246.38	0.00314279		2836.38	0.00972664		3426.38	-0.00457454
476.6	0.01097321		1066.59	0.00432422		1656.59	0.00481598		2246.58	0.00322836		2836.58	0.00964524		3426.58	-0.00475248
476.8	0.01084859		1066.79	0.0038297		1656.79	0.00400881		2246.78	0.00373478		2836.78	0.00971055		3426.78	-0.00463583
477	0.0103586		1066.99	0.00370676		1656.99	0.00351483		2246.98	0.00262865		2836.98	0.00970801		3426.98	-0.00487684
477.2	0.01028664		1067.19	0.00380755		1657.19	0.00332982		2247.18	0.00242467		2837.18	0.00979598		3427.18	-0.00418859
477.4	0.01091561		1067.39	0.00368125		1657.39	0.0037449		2247.38	0.00231199		2837.38	0.00930531		3427.38	-0.00446973
477.6	0.01162975		1067.59	0.00350742		1657.59	0.00382933		2247.58	0.0020649		2837.58	0.00979678		3427.58	-0.00402469
477.8	0.01176165		1067.79	0.00331314		1657.79	0.00423841		2247.78	0.0022779		2837.78	0.0101288		3427.78	-0.00351339
478	0.01277896		1067.99	0.0039286		1657.99	0.00435735		2247.98	0.00257886		2837.98	0.01031311		3427.98	-0.00411595
478.2	0.01305925		1068.19	0.00398538		1658.19	0.00362034		2248.18	0.00199123		2838.18	0.01108788		3428.18	-0.00501185
478.4	0.01227147		1068.39	0.00442207		1658.39	0.00388399		2248.38	0.00116727		2838.38	0.01200363		3428.38	-0.00494526
478.6	0.01250109		1068.59	0.00416384		1658.59	0.00432362		2248.58	0.00139477		2838.58	0.01217151		3428.58	-0.00462196
478.8	0.01220466		1068.79	0.00512303		1658.79	0.00407437		2248.78	0.00088911		2838.78	0.01214794		3428.78	-0.00565274
479	0.01218967		1068.99	0.00500322		1658.99	0.00387925		2248.98	0.00092991		2838.98	0.011993		3428.98	-0.00594991
479.2	0.01278276		1069.19	0.00496263		1659.19	0.00453389		2249.18	0.00089951		2839.18	0.01170046		3429.18	-0.00565294
479.4	0.01291478		1069.39	0.00541479		1659.39	0.00407562		2249.38	0.00114042		2839.38	0.01174221		3429.38	-0.00612421
479.6	0.01304053		1069.59	0.00534703		1659.59	0.00460147		2249.58	0.00172172		2839.58	0.01175381		3429.58	-0.00605035
479.8	0.01283143		1069.79	0.00601517		1659.79	0.00393957		2249.78	0.00155003		2839.78	0.01141249		3429.78	-0.00595469
480	0.01193831		1069.99	0.00586175		1659.99	0.00374811		2249.98	0.00172432		2839.98	0.01037428		3429.98	-0.00540239
480.2	0.01109542		1070.19	0.00614831		1660.19	0.00328052		2250.18	0.00212169		2840.18	0.00926298		3430.18	-0.0059281
480.4	0.01070552		1070.39	0.0068712		1660.39	0.00296052		2250.38	0.00136623		2840.38	0.00835647		3430.38	-0.0054223
480.6	0.01039393		1070.59	0.00630798		1660.59	0.00283663		2250.58	0.00189992		2840.58	0.00741207		3430.58	-0.00642201
480.8	0.00991311		1070.79	0.00628515		1660.79	0.00240466		2250.78	0.00175068		2840.78	0.00727572		3430.78	-0.00673937
481	0.00934557		1070.99	0.00635019		1660.99	0.00227508		2250.98	0.0012004		2840.98	0.00747367		3430.98	-0.00732677
481.2	0.00942911		1071.19	0.00637466		1661.19	0.00237068		2251.18	0.00169622		2841.18	0.00715641		3431.18	-0.00719416
481.4	0.00960401		1071.39	0.00563702		1661.39	0.00247931		2251.38	0.00234037		2841.38	0.00599882		3431.38	-0.00615532
481.6	0.00961076		1071.59	0.00504618		1661.59	0.00273298		2251.58	0.0027549		2841.58	0.00711654		3431.58	-0.00480019
481.8	0.00895845		1071.79	0.00524043		1661.79	0.00275755		2251.78	0.00310911		2841.78	0.00771539		3431.78	-0.00431143
482	0.00939865		1071.99	0.00488395		1661.99	0.00316941		2251.98	0.00324761		2841.98	0.0077364		3431.98	-0.00407476
482.2	0.0089422		1072.19	0.00420773		1662.19	0.0038626		2252.18	0.00298866		2842.18	0.00815979		3432.18	-0.00427298
482.4	0.00859833		1072.39	0.00423364		1662.39	0.00482652		2252.38	0.00253233		2842.38	0.00918731		3432.38	-0.00362385
482.6	0.00847129		1072.59	0.00470101		1662.59	0.00552706		2252.58	0.00190792		2842.58	0.00946079		3432.58	-0.00350244
482.8	0.00837775		1072.79	0.00505174		1662.79	0.00558934		2252.78	0.00010647		2842.78	0.00974551		3432.78	-0.00301617
483	0.00811156		1072.99	0.00476524		1662.99	0.00623156		2252.98	-0.00058179		2842.98	0.01111109		3432.98	-0.00215556
483.2	0.00861297		1073.19	0.00514639		1663.19	0.00642368		2253.18	-0.00104294		2843.18	0.01144498		3433.18	-0.00220575
483.4	0.0083865		1073.39	0.00482894		1663.39	0.00633803		2253.38	-0.00121165		2843.38	0.01271077		3433.38	-0.00218691
483.6	0.00811607		1073.59	0.00456265		1663.59	0.00702256		2253.58	-0.00188775		2843.58	0.01256624		3433.58	-0.00157753
483.8	0.00774176		1073.79	0.00452967		1663.79	0.00671576		2253.78	-0.00237486		2843.78	0.01213923		3433.78	-0.00167104
484	0.00767776		1073.99	0.0041492		1663.99	0.00663653		2253.98	-0.00309647		2843.98	0.01163663		3433.98	-0.00225164
484.2	0.00842169		1074.19	0.00428772		1664.19	0.00736681		2254.18	-0.00354421		2844.18	0.01193534		3434.18	-0.00282431
484.4	0.0089239		1074.39	0.00450397		1664.39	0.00705064		2254.38	-0.00349028		2844.38	0.01217053		3434.38	-0.00368085
484.6	0.00867594		1074.59	0.00464938		1664.59	0.00701009		2254.58	-0.00228097		2844.58	0.01278973		3434.58	-0.00559421
484.8	0.00778434		1074.79	0.00447772		1664.79	0.00662697		2254.78	-0.00190837		2844.78	0.01276458		3434.78	-0.00662376
485	0.00736118		1074.99	0.0045586		1664.99	0.00703472		2254.98	-0.00118432		2844.98	0.01193533		3434.98	-0.00683393
485.2	0.007383		1075.19	0.00513945		1665.19	0.00693601		2255.18	-0.00026346		2845.18	0.01094274		3435.18	-0.00616232
485.4	0.0075848		1075.39	0.00595816		1665.39	0.00629337		2255.38	0.00015116		2845.38	0.01015699		3435.38	-0.00596584
485.6	0.00785137		1075.59	0.00572844		1665.59	0.00615731		2255.58	0.00053256		2845.58	0.01010699		3435.58	-0.00632732
485.8	0.0078161		1075.79	0.00639851		1665.79	0.00667465		2255.78	0.00090479		2845.78	0.00988693		3435.78	-0.00644342
486	0.00819234		1075.99	0.00610505		1665.99	0.00700173		2255.98	0.00161258		2845.98	0.00932126		3435.98	-0.00648678
486.2	0.00926109		1076.19	0.00613797		1666.19	0.00679638		2256.18	0.00185002		2846.18	0.00927985		3436.18	-0.00691951
486.4	0.00919508		1076.39	0.00637132		1666.39	0.00582249		2256.38	0.00140775		2846.38	0.00897599		3436.38	-0.00683635
486.6	0.00895689		1076.59	0.00681365		1666.59	0.00506339		2256.58	0.00150921		2846.58	0.00842883		3436.58	-0.006827
486.8	0.00876839		1076.79	0.00642406		1666.79	0.00424579		2256.78	0.00049115		2846.78	0.00868634		3436.78	-0.00671311
487	0.00867763		1076.99	0.00616229		1666.99	0.00362479		2256.98	0.00081834		2846.98	0.00911561		3436.98	-0.00676058
487.2	0.00939459		1077.19	0.0062865		1667.19	0.00283921		2257.18	0.00065769		2847.18	0.00829915		3437.18	-0.00708048
487.4	0.00945223		1077.39	0.00594373		1667.39	0.00241174		2257.38	-0.00033765		2847.38	0.00883629		3437.38	-0.00703906
487.6	0.00913798		1077.59	0.00641402		1667.59	0.0026375		2257.58	-0.00071725		2847.58	0.00776163		3437.58	-0.00754207
487.8	0.00875953		1077.79	0.00616793		1667.79	0.0022709		2257.78	-0.00142505		2847.78	0.0081029		3437.78	-0.00823148
488	0.00888587		1077.99	0.00570761		1667.99	0.00242807		2257.98	-0.00192098		2847.98	0.00862558		3437.98	-0.00822785
488.2	0.00894677		1078.19	0.00596676		1668.19	0.0028492		2258.18	-0.00256929		2848.18	0.00989732		3438.18	-0.00824977
488.4	0.00863839		1078.39	0.00604416		1668.39	0.00328811		2258.38	-0.00325703		2848.38	0.01010225		3438.38	-0.00843509
488.6	0.00735932		1078.59	0.00530947		1668.59	0.00423626		2258.58	-0.00347866		2848.58	0.01010349		3438.58	-0.00813812
488.8	0.00642016		1078.79	0.00559171		1668.79	0.00543159		2258.78	-0.00379995		2848.78	0.00987016		3438.78	-0.00748647
489	0.00592723		1078.99	0.00522018		1668.99	0.0060322		2258.98	-0.00375293		2848.98	0.00945348		3438.98	-0.0065902
489.2	0.00567281		1079.19	0.00525936		1669.19	0.00569058		2259.18	-0.00359252		2849.18	0.01070645		3439.18	-0.00680717
489.4	0.00601588		1079.39	0.00463794		1669.39	0.00606421		2259.38	-0.00396375		2849.38	0.0111984		3439.38	-0.00687962
489.6	0.00611098		1079.59	0.00314545		1669.59	0.00674684		2259.58	-0.00375551		2849.58	0.01132482		3439.58	-0.00655597
489.8	0.00551585		1079.79	0.00314154		1669.79	0.00721098		2259.78	-0.00317284		2849.78	0.01187905		3439.78	-0.0065792
490	0.00644452		1079.99	0.00237252		1669.99	0.00700761		2259.98	-0.00194916		2849.98	0.0117129		3439.98	-0.00629153
490.2	0.00626271		1080.19	0.00196206		1670.19	0.0068332		2260.18	-0.00132397		2850.18	0.01189803		3440.18	-0.00655322
490.4	0.00574742		1080.39	0.00217869		1670.39	0.00656314		2260.38	-0.0000952		2850.38	0.01221727		3440.38	-0.00652218
490.6	0.00525701		1080.59	0.00207868		1670.59	0.00619184		2260.58	0.00052811		2850.58	0.01256577		3440.58	-0.00645599
490.8	0.00521328		1080.79	0.00173612		1670.79	0.00654241		2260.78	0.00052487		2850.78	0.01328782		3440.78	-0.00674866
491	0.00535039		1080.99	0.00161632		1670.99	0.00652435		2260.98	0.00070233		2850.98	0.01301773		3440.98	-0.00664375
491.2	0.00617827		1081.19	0.0015951		1671.19	0.00528656		2261.18	0.00053015		2851.18	0.0124025		3441.18	-0.00700051
491.4	0.00648788		1081.39	0.00158403		1671.39	0.00478321		2261.38	0.00078022		2851.38	0.01204355		3441.38	-0.00717973
491.6	0.00679236		1081.59	0.00090988		1671.59	0.00398941		2261.58	0.00090204		2851.58	0.01167488		3441.58	-0.00755026
491.8	0.00671728		1081.79	0.00077514		1671.79	0.00364809		2261.78	0.00021422		2851.78	0.01114043		3441.78	-0.00731267
492	0.00731939		1081.99	0.00103181		1671.99	0.00317997		2261.98	-0.00002337		2851.98	0.01081306		3441.98	-0.00726685
492.2	0.00831006		1082.19	0.00178123		1672.19	0.00263636		2262.18	-0.00099283		2852.18	0.01048229		3442.18	-0.00739526
492.4	0.00787212		1082.39	0.00158468		1672.39	0.00196468		2262.38	-0.0006308		2852.38	0.00996435		3442.38	-0.00754375
492.6	0.00757922		1082.59	0.00083905		1672.59	0.00151851		2262.58	-0.00054906		2852.58	0.00945168		3442.58	-0.00814285
492.8	0.00851752		1082.79	0.0013627		1672.79	0.00064788		2262.78	-0.00037157		2852.78	0.00856661		3442.78	-0.00918775
493	0.00846766		1082.99	0.00081572		1672.99	-0.00057352		2262.98	-0.00047989		2852.98	0.00843514		3442.98	-0.00928538
493.2	0.00865881		1083.19	0.00088518		1673.19	-0.00138893		2263.18	-0.00036097		2853.18	0.00855049		3443.18	-0.01002375
493.4	0.00930043		1083.39	0.00067682		1673.39	-0.00130302		2263.38	-0.00149175		2853.38	0.00805532		3443.38	-0.0096084
493.6	0.0097781		1083.59	0.00098486		1673.59	-0.00170648		2263.58	-0.00093864		2853.58	0.00754636		3443.58	-0.00990387
493.8	0.01011595		1083.79	0.00123056		1673.79	-0.00078975		2263.78	-0.0006116		2853.78	0.00707467		3443.78	-0.00938863
494	0.01011574		1083.99	0.00228176		1673.99	-0.00022201		2263.98	0.00045723		2853.98	0.0063499		3443.98	-0.0086968
494.2	0.00939795		1084.19	0.00296868		1674.19	0.00028197		2264.18	0.00101121		2854.18	0.00619455		3444.18	-0.00960639
494.4	0.00881929		1084.39	0.00416693		1674.39	0.00089838		2264.38	0.00109611		2854.38	0.00643761		3444.38	-0.00916179
494.6	0.00741058		1084.59	0.00395925		1674.59	0.00130793		2264.58	0.00126798		2854.58	0.00635472		3444.58	-0.00751221
494.8	0.00717735		1084.79	0.00392264		1674.79	0.0017032		2264.78	0.00017895		2854.78	0.00623871		3444.78	-0.00648552
495	0.00625571		1084.99	0.00441363		1674.99	0.00178208		2264.98	-0.00018535		2854.98	0.00570225		3444.98	-0.0058291
495.2	0.00650258		1085.19	0.00493906		1675.19	0.00109446		2265.18	0.00044471		2855.18	0.00529999		3445.18	-0.00454705
495.4	0.00604769		1085.39	0.00467954		1675.39	0.00138437		2265.38	0.00048381		2855.38	0.00586855		3445.38	-0.00371259
495.6	0.00537616		1085.59	0.00378104		1675.59	0.00140605		2265.58	-0.00008828		2855.58	0.0059838		3445.58	-0.00269855
495.8	0.00440055		1085.79	0.0044967		1675.79	0.00229705		2265.78	-0.0003922		2855.78	0.00611294		3445.78	-0.00213288
496	0.0040742		1085.99	0.00425876		1675.99	0.00169303		2265.98	0.00005821		2855.98	0.00690221		3445.98	-0.00253516
496.2	0.00459239		1086.19	0.00359999		1676.19	0.00111008		2266.18	-0.00078014		2856.18	0.00788358		3446.18	-0.00304717
496.4	0.0042805		1086.39	0.00315696		1676.39	0.00078516		2266.38	-0.00084397		2856.38	0.00879857		3446.38	-0.00397601
496.6	0.00406649		1086.59	0.00226666		1676.59	0.0005098		2266.58	-0.00085779		2856.58	0.00922348		3446.58	-0.0045247
496.8	0.00497624		1086.79	0.00254847		1676.79	-0.00024061		2266.78	-0.00112601		2856.78	0.00968502		3446.78	-0.00533755
497	0.00408913		1086.99	0.00234599		1676.99	-0.00010109		2266.98	-0.00192887		2856.98	0.01062603		3446.98	-0.00601857
497.2	0.00454215		1087.19	0.00141805		1677.19	0.00021891		2267.18	-0.00213046		2857.18	0.0095216		3447.18	-0.00683429
497.4	0.00532356		1087.39	0.00115274		1677.39	0.00044095		2267.38	-0.00252358		2857.38	0.01038989		3447.38	-0.00700254
497.6	0.00662006		1087.59	0.00144741		1677.59	0.00073962		2267.58	-0.00061038		2857.58	0.00958389		3447.58	-0.00761958
497.8	0.00651417		1087.79	0.00158513		1677.79	0.00111848		2267.78	-0.00077592		2857.78	0.00937421		3447.78	-0.00808874
498	0.0059729		1087.99	0.00280279		1677.99	0.00066513		2267.98	0.00044725		2857.98	0.00881891		3447.98	-0.00824151
498.2	0.00639077		1088.19	0.00286609		1678.19	0.00105103		2268.18	0.00099966		2858.18	0.00799699		3448.18	-0.00884626
498.4	0.00584122		1088.39	0.00339445		1678.39	0.00103816		2268.38	0.00045511		2858.38	0.00814668		3448.38	-0.0081628
498.6	0.00608826		1088.59	0.00241528		1678.59	0.00065583		2268.58	0.00071398		2858.58	0.00746089		3448.58	-0.00672641
498.8	0.00678929		1088.79	0.00286236		1678.79	0.00039753		2268.78	0.00045928		2858.78	0.00614127		3448.78	-0.00687458
499	0.00736058		1088.99	0.00418671		1678.99	0.00096959		2268.98	0.00058902		2858.98	0.00662066		3448.98	-0.00665697
499.2	0.00777423		1089.19	0.00407694		1679.19	0.000902		2269.18	0.00060824		2859.18	0.00613787		3449.18	-0.00593089
499.4	0.00782735		1089.39	0.00371661		1679.39	0.00118075		2269.38	-0.0002869		2859.38	0.0063173		3449.38	-0.00585421
499.6	0.00755637		1089.59	0.0035762		1679.59	0.00098673		2269.58	-0.00070799		2859.58	0.00682751		3449.58	-0.00603296
499.8	0.00779857		1089.79	0.00366654		1679.79	0.00142181		2269.78	-0.00061032		2859.78	0.00730959		3449.78	-0.00692482
500	0.00821615		1089.99	0.00377224		1679.99	0.00085603		2269.98	-0.00034515		2859.98	0.00729875		3449.98	-0.00669617
500.2	0.00950683		1090.19	0.00392245		1680.19	0.00122003		2270.18	-0.00057126		2860.18	0.00792536		3450.18	-0.00689141
500.4	0.00971689		1090.39	0.00466366		1680.39	0.00100277		2270.38	-0.00074483		2860.38	0.00736508		3450.38	-0.00691159
500.6	0.0090021		1090.59	0.00460202		1680.59	0.00086713		2270.58	0.00057311		2860.58	0.00826478		3450.58	-0.0067334
500.8	0.00899421		1090.79	0.00509835		1680.79	0.00038325		2270.78	0.00006213		2860.78	0.00896097		3450.78	-0.00745605
501	0.00843074		1090.99	0.00492977		1680.99	0.00095056		2270.98	-0.00014376		2860.98	0.00866938		3450.98	-0.00818124
501.2	0.00831332		1091.19	0.00504159		1681.19	0.00127597		2271.18	0.00030638		2861.18	0.00796594		3451.18	-0.00804576
501.4	0.00772026		1091.39	0.00542225		1681.39	0.00071316		2271.38	0.00104471		2861.38	0.00842446		3451.38	-0.00827555
501.6	0.00762051		1091.59	0.00484361		1681.59	0.00040632		2271.58	0.00126254		2861.58	0.00773412		3451.58	-0.00782618
501.8	0.00644339		1091.79	0.00518142		1681.79	0.00014205		2271.78	0.00071522		2861.78	0.00818576		3451.78	-0.00792959
502	0.00565296		1091.99	0.00514701		1681.99	0.00005848		2271.98	0.00087076		2861.98	0.00802571		3451.98	-0.00668332
502.2	0.00516925		1092.19	0.00429461		1682.19	0.00061855		2272.18	-0.00010893		2862.18	0.00811363		3452.18	-0.00672843
502.4	0.00459758		1092.39	0.0035224		1682.39	0.0007952		2272.38	-0.00105265		2862.38	0.00835326		3452.38	-0.00584904
502.6	0.00434773		1092.59	0.0027208		1682.59	0.00111402		2272.58	-0.00107243		2862.58	0.00726418		3452.58	-0.00548931
502.8	0.00451139		1092.79	0.0029294		1682.79	0.00111805		2272.78	-0.00132299		2862.78	0.0066758		3452.78	-0.00691132
503	0.00553874		1092.99	0.00259287		1682.99	0.00073881		2272.98	-0.002531		2862.98	0.00740291		3452.98	-0.00697086
503.2	0.00548028		1093.19	0.00168396		1683.19	0.00067005		2273.18	-0.00356378		2863.18	0.0075165		3453.18	-0.00834473
503.4	0.00538864		1093.39	0.00090265		1683.39	0.0004293		2273.38	-0.0041235		2863.38	0.00804897		3453.38	-0.00888732
503.6	0.00548064		1093.59	0.00036441		1683.59	0.00014941		2273.58	-0.00390961		2863.58	0.00790298		3453.58	-0.00994341
503.8	0.00615314		1093.79	0.00065964		1683.79	0.00057205		2273.78	-0.00332412		2863.78	0.00778172		3453.78	-0.0098631
504	0.00672793		1093.99	0.00077153		1683.99	0.00069762		2273.98	-0.00286957		2863.98	0.00757527		3453.98	-0.00943112
504.2	0.00745242		1094.19	0.00089024		1684.19	-0.00002013		2274.18	-0.00199321		2864.18	0.0074994		3454.18	-0.00937321
504.4	0.00767685		1094.39	0.00100839		1684.39	-0.00110575		2274.38	-0.00180602		2864.38	0.00748095		3454.38	-0.00954699
504.6	0.00755318		1094.59	0.00081212		1684.59	-0.00093209		2274.58	-0.00055454		2864.58	0.00864244		3454.58	-0.00968679
504.8	0.007321		1094.79	0.00071589		1684.79	-0.0012837		2274.78	-0.00111668		2864.78	0.00907894		3454.78	-0.01041914
505	0.0073894		1094.99	0.00160999		1684.99	-0.00091315		2274.98	-0.00146002		2864.98	0.0087172		3454.98	-0.01109069
505.2	0.00660722		1095.19	0.00219204		1685.19	-0.00053116		2275.18	-0.00147913		2865.18	0.00808277		3455.18	-0.01112021
505.4	0.00621724		1095.39	0.00217664		1685.39	-0.00066802		2275.38	-0.00204898		2865.38	0.0082486		3455.38	-0.01088875
505.6	0.00590533		1095.59	0.00282126		1685.59	-0.00056698		2275.58	-0.00218759		2865.58	0.00792943		3455.58	-0.01079156
505.8	0.00529262		1095.79	0.00378573		1685.79	-0.00058774		2275.78	-0.00184294		2865.78	0.00784561		3455.78	-0.0113268
506	0.00454984		1095.99	0.0037418		1685.99	-0.00070963		2275.98	-0.00300908		2865.98	0.00800843		3455.98	-0.01066549
506.2	0.00411393		1096.19	0.00376766		1686.19	-0.0003893		2276.18	-0.00342213		2866.18	0.00813215		3456.18	-0.01121622
506.4	0.00414472		1096.39	0.00337863		1686.39	-0.00027361		2276.38	-0.00298238		2866.38	0.00781786		3456.38	-0.01013231
506.6	0.00284844		1096.59	0.00293861		1686.59	0.00004143		2276.58	-0.00324419		2866.58	0.00789975		3456.58	-0.01050462
506.8	0.00328174		1096.79	0.00329537		1686.79	0.0001895		2276.78	-0.00372897		2866.78	0.00787396		3456.78	-0.01036305
507	0.00372965		1096.99	0.00244863		1686.99	0.00050063		2276.98	-0.00436978		2866.98	0.00825215		3456.98	-0.00920896
507.2	0.00363034		1097.19	0.00208411		1687.19	0.00175318		2277.18	-0.00370824		2867.18	0.00781459		3457.18	-0.00904374
507.4	0.00327003		1097.39	0.00191429		1687.39	0.00184438		2277.38	-0.00296588		2867.38	0.00769496		3457.38	-0.0078308
507.6	0.00424716		1097.59	0.0012316		1687.59	0.00213388		2277.58	-0.00232231		2867.58	0.00747306		3457.58	-0.00693167
507.8	0.00507988		1097.79	0.0009136		1687.79	0.00148005		2277.78	-0.00174655		2867.78	0.00801528		3457.78	-0.00620191
508	0.00557286		1097.99	-0.00038622		1687.99	0.0007136		2277.98	-0.00094285		2867.98	0.00849477		3457.98	-0.00504848
508.2	0.00577051		1098.19	-0.00115187		1688.19	-0.00012616		2278.18	0.00066058		2868.18	0.00860897		3458.18	-0.00438333
508.4	0.00635902		1098.39	-0.00082739		1688.39	-0.00019356		2278.38	0.00147895		2868.38	0.00943308		3458.38	-0.00480917
508.6	0.00627844		1098.59	-0.00119099		1688.59	-0.00017013		2278.58	0.00200426		2868.58	0.00978691		3458.58	-0.00510933
508.8	0.00697669		1098.79	-0.00094983		1688.79	0.00024973		2278.78	0.0023396		2868.78	0.00952436		3458.78	-0.00591991
509	0.00770082		1098.99	-0.00004381		1688.99	0.00032677		2278.98	0.00252083		2868.98	0.00950413		3458.98	-0.00594348
509.2	0.00804549		1099.19	0.00002715		1689.19	0.00063938		2279.18	0.00282663		2869.18	0.00916613		3459.18	-0.00547079
509.4	0.00828752		1099.39	0.00056894		1689.39	-0.00009543		2279.38	0.00346245		2869.38	0.00990949		3459.38	-0.00604889
509.6	0.00870823		1099.59	0.00143466		1689.59	-0.00053222		2279.58	0.00378016		2869.58	0.00981246		3459.58	-0.00735572
509.8	0.00875713		1099.79	0.00104143		1689.79	-0.00024395		2279.78	0.00307651		2869.78	0.01089877		3459.78	-0.00796365
510	0.00837833		1099.99	0.00106916		1689.99	-0.00043465		2279.98	0.00220655		2869.98	0.011051		3459.98	-0.00803215
510.2	0.00825697		1100.19	0.00112354		1690.19	-0.00042084		2280.18	0.00219784		2870.18	0.01060115		3460.18	-0.00900495
510.4	0.00768158		1100.39	0.00118315		1690.39	-0.00022669		2280.38	0.00200063		2870.38	0.01012686		3460.38	-0.00790564
510.6	0.00617499		1100.59	0.0022316		1690.59	0.00036243		2280.58	0.00126228		2870.58	0.00991106		3460.58	-0.00824883
510.8	0.00633164		1100.79	0.00285559		1690.79	0.00079126		2280.78	0.00063009		2870.78	0.00872284		3460.78	-0.00799029
511	0.00603029		1100.99	0.00221663		1690.99	0.00123511		2280.98	0.00038528		2870.98	0.00863979		3460.98	-0.00816942
511.2	0.00532769		1101.19	0.00231154		1691.19	0.00230048		2281.18	0.00019822		2871.18	0.00853127		3461.18	-0.00861072
511.4	0.00466659		1101.39	0.00271045		1691.39	0.00231565		2281.38	-0.00145531		2871.38	0.00872971		3461.38	-0.00818399
511.6	0.00540963		1101.59	0.00247426		1691.59	0.00191421		2281.58	-0.00202469		2871.58	0.0084434		3461.58	-0.00889867
511.8	0.0050175		1101.79	0.0025719		1691.79	0.0002089		2281.78	-0.00266799		2871.78	0.0083444		3461.78	-0.00978007
512	0.00404064		1101.99	0.00177731		1691.99	-0.00019231		2281.98	-0.00244247		2871.98	0.00874587		3461.98	-0.00980023
512.2	0.0033404		1102.19	0.00157237		1692.19	-0.00027869		2282.18	-0.00219497		2872.18	0.00861156		3462.18	-0.01062157
512.4	0.0038576		1102.39	0.00298741		1692.39	-0.00036953		2282.38	-0.00221828		2872.38	0.00904269		3462.38	-0.01097712
512.6	0.0039739		1102.59	0.0022502		1692.59	0.00041658		2282.58	-0.0026488		2872.58	0.0083175		3462.58	-0.01103589
512.8	0.00460831		1102.79	0.00256131		1692.79	0.00084766		2282.78	-0.00243116		2872.78	0.00812814		3462.78	-0.00997611
513	0.00481651		1102.99	0.00294342		1692.99	-0.00000527		2282.98	-0.00282418		2872.98	0.0085288		3462.98	-0.0090781
513.2	0.0047015		1103.19	0.00242225		1693.19	-0.00101481		2283.18	-0.00246394		2873.18	0.00738436		3463.18	-0.00902687
513.4	0.00469827		1103.39	0.00169971		1693.39	-0.00170237		2283.38	-0.00180806		2873.38	0.00798764		3463.38	-0.0083903
513.6	0.00571684		1103.59	0.00139051		1693.59	-0.00222945		2283.58	-0.00267951		2873.58	0.00822839		3463.58	-0.00808718
513.8	0.0059513		1103.79	0.00123173		1693.79	-0.00199911		2283.78	-0.00276471		2873.78	0.00795013		3463.78	-0.00807748
514	0.00638594		1103.99	0.00086386		1693.99	-0.00305331		2283.98	-0.00274479		2873.98	0.00659806		3463.98	-0.00815402
514.2	0.00661945		1104.19	0.00064906		1694.19	-0.00390118		2284.18	-0.00302104		2874.18	0.00607921		3464.18	-0.00856188
514.4	0.00700758		1104.39	0.00042463		1694.39	-0.00443414		2284.38	-0.00277749		2874.38	0.00577911		3464.38	-0.00808214
514.6	0.00640972		1104.59	0.0006959		1694.59	-0.00468033		2284.58	-0.00286517		2874.58	0.00562559		3464.58	-0.00840504
514.8	0.00721623		1104.79	0.0002199		1694.79	-0.00494787		2284.78	-0.00325795		2874.78	0.00531294		3464.78	-0.0084159
515	0.00693475		1104.99	0.00030799		1694.99	-0.00415717		2284.98	-0.00302793		2874.98	0.00625236		3464.98	-0.00869695
515.2	0.00664733		1105.19	-0.00047667		1695.19	-0.0032004		2285.18	-0.00338649		2875.18	0.00665137		3465.18	-0.008557
515.4	0.00737636		1105.39	-0.000151		1695.39	-0.00257097		2285.38	-0.00396643		2875.38	0.00727197		3465.38	-0.00816933
515.6	0.00749891		1105.59	0.00047974		1695.59	-0.00176533		2285.58	-0.00327545		2875.58	0.00769794		3465.58	-0.00901344
515.8	0.0069242		1105.79	0.0008306		1695.79	-0.00092033		2285.78	-0.00328014		2875.78	0.00823784		3465.78	-0.00910751
516	0.00721302		1105.99	0.00041363		1695.99	-0.00003616		2285.98	-0.00298549		2875.98	0.00907802		3465.98	-0.00868994
516.2	0.00746045		1106.19	0.00102418		1696.19	0.00152211		2286.18	-0.00252847		2876.18	0.00980364		3466.18	-0.0088154
516.4	0.00726675		1106.39	0.00213571		1696.39	0.00278278		2286.38	-0.00251216		2876.38	0.01042629		3466.38	-0.00867667
516.6	0.00702718		1106.59	0.00246094		1696.59	0.00299024		2286.58	-0.00189529		2876.58	0.01016545		3466.58	-0.00787446
516.8	0.00668766		1106.79	0.0026228		1696.79	0.0030299		2286.78	-0.00088204		2876.78	0.0107888		3466.78	-0.00736302
517	0.00700201		1106.99	0.00289213		1696.99	0.00269565		2286.98	-0.00101171		2876.98	0.01013986		3466.98	-0.00784063
517.2	0.006641		1107.19	0.00226847		1697.19	0.00280002		2287.18	-0.00036243		2877.18	0.00956306		3467.18	-0.00772744
517.4	0.00659982		1107.39	0.0022661		1697.39	0.00234798		2287.38	-0.00037339		2877.38	0.00987377		3467.38	-0.00652376
517.6	0.00675609		1107.59	0.00239428		1697.59	0.00240618		2287.58	-0.00066318		2877.58	0.00961992		3467.58	-0.00712429
517.8	0.00580671		1107.79	0.00206929		1697.79	0.00282395		2287.78	-0.00026521		2877.78	0.00910904		3467.78	-0.00730248
518	0.00550884		1107.99	0.00106581		1697.99	0.00143122		2287.98	-0.00049368		2877.98	0.00921496		3467.98	-0.00756852
518.2	0.00522293		1108.19	0.00012985		1698.19	0.00043174		2288.18	-0.00100794		2878.18	0.0089587		3468.18	-0.00855133
518.4	0.00488489		1108.39	-0.00043414		1698.39	-0.00017816		2288.38	-0.00193985		2878.38	0.00860827		3468.38	-0.00823364
518.6	0.00410499		1108.59	-0.00053262		1698.59	-0.00164533		2288.58	-0.00331734		2878.58	0.00829325		3468.58	-0.00888135
518.8	0.00473654		1108.79	-0.00129721		1698.79	-0.00201192		2288.78	-0.00490017		2878.78	0.00807921		3468.78	-0.00849633
519	0.00438986		1108.99	-0.00218748		1698.99	-0.00205727		2288.98	-0.00533348		2878.98	0.00810666		3468.98	-0.00858925
519.2	0.00464569		1109.19	-0.00280953		1699.19	-0.00209118		2289.18	-0.005597		2879.18	0.00814309		3469.18	-0.0080009
519.4	0.00511374		1109.39	-0.00237656		1699.39	-0.00213859		2289.38	-0.00593886		2879.38	0.00904288		3469.38	-0.00875722
519.6	0.00511584		1109.59	-0.00215034		1699.59	-0.00153315		2289.58	-0.0054232		2879.58	0.00836672		3469.58	-0.00857067
519.8	0.00576146		1109.79	-0.00215134		1699.79	-0.00141837		2289.78	-0.00583692		2879.78	0.00794777		3469.78	-0.00885743
520	0.00567375		1109.99	-0.00259291		1699.99	-0.00138903		2289.98	-0.00574587		2879.98	0.00864648		3469.98	-0.00971292
520.2	0.00496246		1110.19	-0.00275238		1700.19	-0.00131063		2290.18	-0.00526906		2880.18	0.00874576		3470.18	-0.00995712
520.4	0.0051416		1110.39	-0.00225104		1700.39	-0.00161058		2290.38	-0.00462396		2880.38	0.0088421		3470.38	-0.01017649
520.6	0.00535568		1110.59	-0.00146225		1700.59	-0.0015976		2290.58	-0.00377308		2880.58	0.00834659		3470.58	-0.00969805
520.8	0.00498061		1110.79	-0.00110187		1700.79	-0.00081751		2290.78	-0.00302366		2880.78	0.00847748		3470.78	-0.00983186
521	0.00500147		1110.99	-0.00053007		1700.99	-0.00030124		2290.98	-0.00321505		2880.98	0.00794944		3470.98	-0.00989738
521.2	0.0042251		1111.19	0.00009986		1701.19	-0.00001126		2291.18	-0.00245911		2881.18	0.00760865		3471.18	-0.00945629
521.4	0.00353667		1111.39	0.00114963		1701.39	0.00073584		2291.38	-0.00225296		2881.38	0.0072715		3471.38	-0.00877232
521.6	0.00329563		1111.59	0.00158647		1701.59	0.00118655		2291.58	-0.00176403		2881.58	0.00688924		3471.58	-0.00882942
521.8	0.00347068		1111.79	0.00161584		1701.79	0.00136355		2291.78	-0.00165875		2881.78	0.00680148		3471.78	-0.00899496
522	0.00348739		1111.99	0.00194984		1701.99	0.00145418		2291.98	-0.00238244		2881.98	0.00680088		3471.98	-0.00860971
522.2	0.00385166		1112.19	0.00151634		1702.19	0.00123601		2292.18	-0.00342172		2882.18	0.00637968		3472.18	-0.00874441
522.4	0.00378302		1112.39	0.00202286		1702.39	0.00126187		2292.38	-0.00470605		2882.38	0.0062322		3472.38	-0.00765781
522.6	0.00439872		1112.59	0.00308548		1702.59	0.00075676		2292.58	-0.00534577		2882.58	0.00624166		3472.58	-0.00833373
522.8	0.00541207		1112.79	0.00326679		1702.79	0.00092398		2292.78	-0.00546363		2882.78	0.00617345		3472.78	-0.00838667
523	0.00598808		1112.99	0.00382733		1702.99	0.00093975		2292.98	-0.00491039		2882.98	0.00589616		3472.98	-0.00868623
523.2	0.00559772		1113.19	0.00413357		1703.19	0.00044324		2293.18	-0.00492722		2883.18	0.00637578		3473.18	-0.00937448
523.4	0.00526932		1113.39	0.00380026		1703.39	0.00058541		2293.38	-0.00432228		2883.38	0.00620346		3473.38	-0.01023321
523.6	0.00523601		1113.59	0.0037448		1703.59	0.00086861		2293.58	-0.0043447		2883.58	0.00460854		3473.58	-0.00996695
523.8	0.00478269		1113.79	0.00316914		1703.79	0.00095444		2293.78	-0.00429562		2883.78	0.00531466		3473.78	-0.01087142
524	0.00353354		1113.99	0.00274655		1703.99	0.00093283		2293.98	-0.0040083		2883.98	0.00662027		3473.98	-0.01204224
524.2	0.00323702		1114.19	0.00213049		1704.19	0.00045795		2294.18	-0.00362107		2884.18	0.00611581		3474.18	-0.0117069
524.4	0.00308368		1114.39	0.00215291		1704.39	0.00148482		2294.38	-0.00315448		2884.38	0.00676641		3474.38	-0.01181131
524.6	0.00201236		1114.59	0.00174944		1704.59	0.00186152		2294.58	-0.00291926		2884.58	0.00699217		3474.58	-0.01206546
524.8	0.00132882		1114.79	0.00149652		1704.79	0.00175203		2294.78	-0.00190243		2884.78	0.00771534		3474.78	-0.01254743
525	0.00107627		1114.99	0.00053646		1704.99	0.00155565		2294.98	-0.00204934		2884.98	0.00864791		3474.98	-0.01293143
525.2	0.00072856		1115.19	0.00077922		1705.19	0.00086402		2295.18	-0.0017078		2885.18	0.008395		3475.18	-0.01314545
525.4	0.00069868		1115.39	0.00131974		1705.39	0.00155859		2295.38	-0.00151215		2885.38	0.00860529		3475.38	-0.01310267
525.6	0.00126694		1115.59	0.00098333		1705.59	0.00086074		2295.58	-0.00230419		2885.58	0.00856668		3475.58	-0.01247318
525.8	0.00205386		1115.79	0.00093148		1705.79	0.00082227		2295.78	-0.00281079		2885.78	0.00935555		3475.78	-0.01278511
526	0.00268951		1115.99	0.00152061		1705.99	0.00041174		2295.98	-0.00300859		2885.98	0.00909297		3475.98	-0.01206372
526.2	0.00370447		1116.19	0.00203024		1706.19	0.00066039		2296.18	-0.00286705		2886.18	0.00938175		3476.18	-0.01200497
526.4	0.00449192		1116.39	0.00256875		1706.39	0.00173026		2296.38	-0.00282646		2886.38	0.01029074		3476.38	-0.01125436
526.6	0.00558236		1116.59	0.00350284		1706.59	0.00186038		2296.58	-0.00249332		2886.58	0.01097639		3476.58	-0.01115128
526.8	0.00604463		1116.79	0.0032631		1706.79	0.00185329		2296.78	-0.0024699		2886.78	0.01134958		3476.78	-0.01127377
527	0.00572551		1116.99	0.0035235		1706.99	0.00137396		2296.98	-0.00225595		2886.98	0.01044274		3476.98	-0.01093433
527.2	0.00542328		1117.19	0.00314333		1707.19	0.00013906		2297.18	-0.00252538		2887.18	0.00970332		3477.18	-0.01082237
527.4	0.00517441		1117.39	0.00293317		1707.39	0.0009268		2297.38	-0.00162358		2887.38	0.00900294		3477.38	-0.01033575
527.6	0.0057017		1117.59	0.00265617		1707.59	0.00075855		2297.58	-0.00208592		2887.58	0.0081215		3477.58	-0.00962458
527.8	0.00547139		1117.79	0.00242183		1707.79	0.0012026		2297.78	-0.00213831		2887.78	0.00819281		3477.78	-0.00987372
528	0.00460262		1117.99	0.00231111		1707.99	0.00032144		2297.98	-0.00172077		2887.98	0.00762777		3477.98	-0.00980296
528.2	0.0040411		1118.19	0.00194332		1708.19	0.00055183		2298.18	-0.0020526		2888.18	0.00674116		3478.18	-0.00869273
528.4	0.00309445		1118.39	0.00063711		1708.39	0.00081857		2298.38	-0.00253993		2888.38	0.00762135		3478.38	-0.00893044
528.6	0.00269103		1118.59	0.00006572		1708.59	0.00000471		2298.58	-0.00252548		2888.58	0.00736111		3478.58	-0.00944813
528.8	0.00215264		1118.79	-0.00008099		1708.79	-0.000459		2298.78	-0.00197818		2888.78	0.00734105		3478.78	-0.0097723
529	0.00145718		1118.99	-0.00007117		1708.99	-0.00146087		2298.98	-0.00281507		2888.98	0.0072069		3478.98	-0.00996207
529.2	0.00170226		1119.19	0.00086519		1709.19	-0.00199275		2299.18	-0.0038052		2889.18	0.00609037		3479.18	-0.0106222
529.4	0.0019564		1119.39	0.00145002		1709.39	-0.00189243		2299.38	-0.00367986		2889.38	0.00648396		3479.38	-0.01041954
529.6	0.00230716		1119.59	0.00126495		1709.59	-0.00241706		2299.58	-0.00401775		2889.58	0.00617177		3479.58	-0.01097758
529.8	0.00293402		1119.79	0.00207558		1709.79	-0.00207887		2299.78	-0.00399065		2889.78	0.00710311		3479.78	-0.0123923
530	0.00361263		1119.99	0.00241315		1709.99	-0.00160511		2299.98	-0.00393182		2889.98	0.00689399		3479.98	-0.01250443
530.2	0.00389467		1120.19	0.00251825		1710.19	-0.00061026		2300.18	-0.00332124		2890.18	0.00768331		3480.18	-0.0120948
530.4	0.00392511		1120.39	0.00229878		1710.39	0.00005804		2300.38	-0.00277474		2890.38	0.00761603		3480.38	-0.01099574
530.6	0.00330413		1120.59	0.00231953		1710.59	-0.00060497		2300.58	-0.00272216		2890.58	0.0078879		3480.58	-0.01133756
530.8	0.00328507		1120.79	0.00159863		1710.79	-0.00109075		2300.78	-0.00243297		2890.78	0.00745171		3480.78	-0.01173085
531	0.0032422		1120.99	0.00131952		1710.99	-0.0019914		2300.98	-0.00195064		2890.98	0.0064212		3480.98	-0.01167074
531.2	0.0043756		1121.19	0.00084165		1711.19	-0.00190897		2301.18	-0.00181611		2891.18	0.00630916		3481.18	-0.01175296
531.4	0.00382804		1121.39	0.00038309		1711.39	-0.00129174		2301.38	-0.00119721		2891.38	0.0064952		3481.38	-0.01219054
531.6	0.00476099		1121.59	0.00082958		1711.59	-0.0011599		2301.58	-0.00140092		2891.58	0.00550429		3481.58	-0.0117677
531.8	0.00507386		1121.79	0.00134737		1711.79	-0.00186005		2301.78	-0.00109265		2891.78	0.00492566		3481.78	-0.01191459
532	0.0048379		1121.99	0.0012888		1711.99	-0.00246172		2301.98	-0.00094699		2891.98	0.00490349		3481.98	-0.01102398
532.2	0.00456942		1122.19	0.00070211		1712.19	-0.00176479		2302.18	-0.00147168		2892.18	0.00561005		3482.18	-0.01042698
532.4	0.00422567		1122.39	-0.00082978		1712.39	-0.00172038		2302.38	-0.00102581		2892.38	0.00610008		3482.38	-0.0109446
532.6	0.00519594		1122.59	-0.00101945		1712.59	-0.00184376		2302.58	-0.00119783		2892.58	0.00628638		3482.58	-0.0105422
532.8	0.00549594		1122.79	-0.00147305		1712.79	-0.00142261		2302.78	-0.00079186		2892.78	0.00639943		3482.78	-0.0101756
533	0.00597131		1122.99	-0.00180825		1712.99	-0.0018106		2302.98	-0.00213469		2892.98	0.00636232		3482.98	-0.01057407
533.2	0.00755778		1123.19	-0.001871		1713.19	-0.00166889		2303.18	-0.00195938		2893.18	0.00636277		3483.18	-0.0105502
533.4	0.00712583		1123.39	-0.00219453		1713.39	-0.00104546		2303.38	-0.00116418		2893.38	0.00653651		3483.38	-0.01033007
533.6	0.00686715		1123.59	-0.00148814		1713.59	-0.00061975		2303.58	-0.00109508		2893.58	0.00630151		3483.58	-0.01039722
533.8	0.0069515		1123.79	-0.00135533		1713.79	-0.00036722		2303.78	-0.00220915		2893.78	0.00688301		3483.78	-0.01017057
534	0.00688678		1123.99	-0.00089578		1713.99	-0.00030995		2303.98	-0.00145093		2893.98	0.00663917		3483.98	-0.00991134
534.2	0.00616283		1124.19	-0.00122341		1714.19	-0.00071945		2304.18	-0.0011672		2894.18	0.00609706		3484.18	-0.00851022
534.4	0.00488185		1124.39	-0.001187		1714.39	-0.00089727		2304.38	-0.00157636		2894.38	0.00558787		3484.38	-0.00773268
534.6	0.00414033		1124.59	-0.00093344		1714.59	-0.00175484		2304.58	-0.00277449		2894.58	0.0059022		3484.58	-0.0079061
534.8	0.00420216		1124.79	-0.00043849		1714.79	-0.00258664		2304.78	-0.00353207		2894.78	0.00516169		3484.78	-0.00781314
535	0.00361696		1124.99	0.00058617		1714.99	-0.00309967		2304.98	-0.00340382		2894.98	0.00516685		3484.98	-0.00807013
535.2	0.00348026		1125.19	0.00063161		1715.19	-0.00249023		2305.18	-0.00378961		2895.18	0.00541401		3485.18	-0.00853173
535.4	0.00200256		1125.39	0.0001852		1715.39	-0.00300039		2305.38	-0.00407675		2895.38	0.00517885		3485.38	-0.00948144
535.6	0.00210011		1125.59	0.00081007		1715.59	-0.00326636		2305.58	-0.00525082		2895.58	0.00478364		3485.58	-0.00937646
535.8	0.00247606		1125.79	0.00077776		1715.79	-0.00330842		2305.78	-0.004873		2895.78	0.00527442		3485.78	-0.00885495
536	0.00153099		1125.99	0.00074328		1715.99	-0.00319578		2305.98	-0.00460024		2895.98	0.00521658		3485.98	-0.00856231
536.2	0.00121302		1126.19	0.00004414		1716.19	-0.00251168		2306.18	-0.00415606		2896.18	0.0063272		3486.18	-0.00800531
536.4	0.0011523		1126.39	-0.00089981		1716.39	-0.00148217		2306.38	-0.00338575		2896.38	0.00642135		3486.38	-0.00802308
536.6	0.00219742		1126.59	-0.00086513		1716.59	-0.00121731		2306.58	-0.003403		2896.58	0.00637408		3486.58	-0.00729617
536.8	0.0027693		1126.79	-0.0011655		1716.79	-0.00036019		2306.78	-0.00314722		2896.78	0.00622878		3486.78	-0.00748483
537	0.00215291		1126.99	-0.00060804		1716.99	-0.00011733		2306.98	-0.00351294		2896.98	0.00682749		3486.98	-0.00787667
537.2	0.00304551		1127.19	-0.00033747		1717.19	0.00005685		2307.18	-0.00228101		2897.18	0.00682823		3487.18	-0.00755087
537.4	0.00255674		1127.39	-0.00014485		1717.39	0.0005883		2307.38	-0.0018199		2897.38	0.00672169		3487.38	-0.00767277
537.6	0.00297393		1127.59	0.00090903		1717.59	-0.00002066		2307.58	-0.00107663		2897.58	0.00615014		3487.58	-0.00734086
537.8	0.00353758		1127.79	0.00064973		1717.79	-0.00045485		2307.78	-0.00071179		2897.78	0.00633955		3487.78	-0.0073522
538	0.00365239		1127.99	-0.00019109		1717.99	-0.00083105		2307.98	0.00061646		2897.98	0.00642115		3487.98	-0.00740501
538.2	0.00386018		1128.19	-0.00116495		1718.19	-0.00113761		2308.18	0.00041998		2898.18	0.0065213		3488.18	-0.00725989
538.4	0.00364777		1128.39	-0.00022046		1718.39	-0.00188203		2308.38	0.00021507		2898.38	0.00714121		3488.38	-0.00776582
538.6	0.00371943		1128.59	0.00085525		1718.59	-0.00231142		2308.58	0.00057555		2898.58	0.00717898		3488.58	-0.00805898
538.8	0.0037466		1128.79	0.00137684		1718.79	-0.0034151		2308.78	0.00037991		2898.78	0.00746401		3488.78	-0.00897975
539	0.00335167		1128.99	0.00072653		1718.99	-0.00259547		2308.98	0.00149504		2898.98	0.00816566		3488.98	-0.00948447
539.2	0.00304214		1129.19	-0.00057426		1719.19	-0.0020472		2309.18	0.00098931		2899.18	0.00811813		3489.18	-0.01050008
539.4	0.00280233		1129.39	-0.00126117		1719.39	-0.00221428		2309.38	0.00028438		2899.38	0.00816354		3489.38	-0.01102763
539.6	0.00288405		1129.59	-0.00136992		1719.59	-0.0023896		2309.58	-0.00014671		2899.58	0.00835812		3489.58	-0.01067199
539.8	0.00341781		1129.79	-0.00127336		1719.79	-0.00162837		2309.78	-0.00003554		2899.78	0.00887907		3489.78	-0.01073378
540	0.00321539		1129.99	-0.00103405		1719.99	-0.00172197		2309.98	-0.00003521		2899.98	0.00847473		3489.98	-0.01048662
540.2	0.00355507		1130.19	-0.00164008		1720.19	-0.00036602		2310.18	-0.00082479		2900.18	0.00940561		3490.18	-0.01007937
540.4	0.00390196		1130.39	-0.00142772		1720.39	0.00029395		2310.38	-0.0009564		2900.38	0.00893131		3490.38	-0.00953015
540.6	0.00396338		1130.59	-0.00056728		1720.59	0.00002228		2310.58	-0.00199995		2900.58	0.00864483		3490.58	-0.00885059
540.8	0.00352671		1130.79	-0.00041068		1720.79	0.00002178		2310.78	-0.0033467		2900.78	0.00866957		3490.78	-0.0094209
541	0.00276398		1130.99	-0.00052239		1720.99	0.00025239		2310.98	-0.00380449		2900.98	0.00784837		3490.98	-0.00872228
541.2	0.00330973		1131.19	-0.00087424		1721.19	0.00043153		2311.18	-0.00375104		2901.18	0.00712467		3491.18	-0.0086489
541.4	0.0035452		1131.39	-0.00054307		1721.39	0.0005104		2311.38	-0.0043626		2901.38	0.00649727		3491.38	-0.00836084
541.6	0.00316185		1131.59	-0.00111931		1721.59	0.00048545		2311.58	-0.00491455		2901.58	0.00572898		3491.58	-0.00830891
541.8	0.00324087		1131.79	-0.00173076		1721.79	0.00028501		2311.78	-0.00498998		2901.78	0.0063963		3491.78	-0.00843194
542	0.00309799		1131.99	-0.00255452		1721.99	-0.00001391		2311.98	-0.00515716		2901.98	0.00676615		3491.98	-0.00883496
542.2	0.00293759		1132.19	-0.00246424		1722.19	0.000397		2312.18	-0.00628901		2902.18	0.00723678		3492.18	-0.00958633
542.4	0.00237756		1132.39	-0.0020864		1722.39	-0.00057609		2312.38	-0.0065975		2902.38	0.00729842		3492.38	-0.00952823
542.6	0.00217641		1132.59	-0.00214046		1722.59	-0.00052435		2312.58	-0.00588732		2902.58	0.00757773		3492.58	-0.0092207
542.8	0.00163543		1132.79	-0.00255618		1722.79	-0.00034798		2312.78	-0.00604236		2902.78	0.00832033		3492.78	-0.00940229
543	0.0016362		1132.99	-0.00309084		1722.99	0.00059257		2312.98	-0.00455785		2902.98	0.0087922		3492.98	-0.01025723
543.2	0.00181505		1133.19	-0.00317876		1723.19	0.00091222		2313.18	-0.00475239		2903.18	0.00798651		3493.18	-0.01048418
543.4	0.00270304		1133.39	-0.00283487		1723.39	0.00072704		2313.38	-0.00484999		2903.38	0.00762606		3493.38	-0.01052069
543.6	0.00320009		1133.59	-0.00261482		1723.59	-0.00020456		2313.58	-0.00397255		2903.58	0.0073106		3493.58	-0.01053708
543.8	0.00387329		1133.79	-0.00193289		1723.79	0.00053892		2313.78	-0.00370826		2903.78	0.00729545		3493.78	-0.01088829
544	0.00420426		1133.99	-0.00157204		1723.99	-0.00001788		2313.98	-0.00302166		2903.98	0.00765141		3493.98	-0.0102531
544.2	0.00412586		1134.19	-0.00120334		1724.19	-0.00028694		2314.18	-0.0024055		2904.18	0.00746507		3494.18	-0.00971037
544.4	0.00489452		1134.39	-0.00053635		1724.39	-0.00135927		2314.38	-0.00207336		2904.38	0.00722626		3494.38	-0.0084737
544.6	0.00536605		1134.59	-0.00051115		1724.59	-0.00251547		2314.58	-0.00187234		2904.58	0.00720614		3494.58	-0.00843604
544.8	0.0051384		1134.79	-0.00075329		1724.79	-0.00236213		2314.78	-0.0023866		2904.78	0.00664865		3494.78	-0.00846019
545	0.00511057		1134.99	-0.00061263		1724.99	-0.00262284		2314.98	-0.00117908		2904.98	0.00575554		3494.98	-0.0074708
545.2	0.00522207		1135.19	-0.00016736		1725.19	-0.00279413		2315.18	-0.00086066		2905.18	0.00646472		3495.18	-0.00755281
545.4	0.00575461		1135.39	0.00028646		1725.39	-0.00329188		2315.38	-0.00092112		2905.38	0.00627287		3495.38	-0.00817832
545.6	0.00515043		1135.59	-0.00039387		1725.59	-0.00317913		2315.58	-0.00123691		2905.58	0.00655141		3495.58	-0.00839949
545.8	0.00474007		1135.79	0.0002278		1725.79	-0.00457216		2315.78	-0.00080405		2905.78	0.0069166		3495.78	-0.0084458
546	0.00475188		1135.99	-0.00002023		1725.99	-0.0047291		2315.98	-0.00126386		2905.98	0.00787503		3495.98	-0.0090017
546.2	0.00416558		1136.19	-0.00030039		1726.19	-0.00469572		2316.18	-0.00228497		2906.18	0.00799125		3496.18	-0.0093478
546.4	0.00355984		1136.39	-0.00030064		1726.39	-0.00510637		2316.38	-0.00227551		2906.38	0.00891808		3496.38	-0.00946136
546.6	0.00379775		1136.59	-0.00036694		1726.59	-0.00455535		2316.58	-0.00289999		2906.58	0.00975708		3496.58	-0.0101128
546.8	0.00345527		1136.79	-0.00036271		1726.79	-0.0043357		2316.78	-0.00318908		2906.78	0.00966853		3496.78	-0.01060019
547	0.00402303		1136.99	-0.00080279		1726.99	-0.00443437		2316.98	-0.00397604		2906.98	0.00972904		3496.98	-0.01089019
547.2	0.0039278		1137.19	-0.00106452		1727.19	-0.00349387		2317.18	-0.0050606		2907.18	0.00869455		3497.18	-0.01119875
547.4	0.00410331		1137.39	-0.00055428		1727.39	-0.00296761		2317.38	-0.0056008		2907.38	0.00868443		3497.38	-0.01153538
547.6	0.00359489		1137.59	-0.00012351		1727.59	-0.00263358		2317.58	-0.00578497		2907.58	0.00925764		3497.58	-0.01089495
547.8	0.00349613		1137.79	-0.00029329		1727.79	-0.00160792		2317.78	-0.00592319		2907.78	0.00892112		3497.78	-0.01074297
548	0.00307111		1137.99	-0.0013252		1727.99	-0.00171841		2317.98	-0.00589003		2907.98	0.00916686		3497.98	-0.01080039
548.2	0.0034197		1138.19	-0.00194746		1728.19	-0.00126459		2318.18	-0.00544992		2908.18	0.0089067		3498.18	-0.00957774
548.4	0.00428056		1138.39	-0.00284203		1728.39	-0.00129256		2318.38	-0.00587615		2908.38	0.00908756		3498.38	-0.00957602
548.6	0.00461046		1138.59	-0.00316164		1728.59	-0.00157467		2318.58	-0.00611041		2908.58	0.00862403		3498.58	-0.00967185
548.8	0.00395279		1138.79	-0.00354734		1728.79	-0.00119357		2318.78	-0.00650786		2908.78	0.00770649		3498.78	-0.00893032
549	0.00409787		1138.99	-0.00350919		1728.99	-0.00161759		2318.98	-0.00535587		2908.98	0.00657837		3498.98	-0.00864532
549.2	0.00424598		1139.19	-0.00364353		1729.19	-0.00117419		2319.18	-0.00625885		2909.18	0.00649668		3499.18	-0.0088644
549.4	0.00388494		1139.39	-0.00316445		1729.39	-0.00076334		2319.38	-0.00578107		2909.38	0.00542329		3499.38	-0.00955953
549.6	0.00329367		1139.59	-0.00346217		1729.59	-0.00084095		2319.58	-0.00612901		2909.58	0.00549212		3499.58	-0.00925376
549.8	0.00305694		1139.79	-0.00258535		1729.79	-0.00114752		2319.78	-0.00605435		2909.78	0.00577853		3499.78	-0.00925167
550	0.00353354		1139.99	-0.00203132		1729.99	-0.00019899		2319.98	-0.00629118		2909.98	0.00707352		3499.98	-0.00863762
550.2	0.00394807		1140.19	-0.00128487		1730.19	-0.00082602		2320.18	-0.00648411		2910.18	0.00658306		3500.18	-0.00837058
550.4	0.00387921		1140.39	-0.00072569		1730.39	-0.00148938		2320.38	-0.00621616		2910.38	0.00651833		3500.38	-0.00889564
550.6	0.00465878		1140.59	-0.00051343		1730.59	-0.00120089		2320.58	-0.00705332		2910.58	0.00628917		3500.58	-0.00938753
550.8	0.00398855		1140.79	-0.00027444		1730.79	-0.00200233		2320.78	-0.00647685		2910.78	0.00650977		3500.78	-0.00984863
551	0.00408202		1140.99	-0.00091621		1730.99	-0.00189824		2320.98	-0.00661969		2910.98	0.00619068		3500.98	-0.01014708
551.2	0.00394631		1141.19	-0.0004814		1731.19	-0.00143922		2321.18	-0.00622677		2911.18	0.00627925		3501.18	-0.01107795
551.4	0.00358554		1141.39	0.00006862		1731.39	-0.00177246		2321.38	-0.00546666		2911.38	0.00660272		3501.38	-0.01056238
551.6	0.00306535		1141.59	-0.00010415		1731.59	-0.00213199		2321.58	-0.00526575		2911.58	0.00682816		3501.58	-0.01069933
551.8	0.00309587		1141.79	-0.00059651		1731.79	-0.00241599		2321.78	-0.00480159		2911.78	0.00632689		3501.78	-0.01163617
552	0.00244273		1141.99	-0.00085191		1731.99	-0.00304963		2321.98	-0.0043947		2911.98	0.00691354		3501.98	-0.01173693
552.2	0.0026301		1142.19	-0.00118836		1732.19	-0.00340198		2322.18	-0.00389083		2912.18	0.00737615		3502.18	-0.01160724
552.4	0.00240611		1142.39	-0.00119143		1732.39	-0.00369767		2322.38	-0.0034551		2912.38	0.00646554		3502.38	-0.0119914
552.6	0.00198819		1142.59	-0.00061142		1732.59	-0.00367782		2322.58	-0.00401761		2912.58	0.0066963		3502.58	-0.01193401
552.8	0.00171672		1142.79	-0.00097704		1732.79	-0.00343413		2322.78	-0.0038744		2912.78	0.00574891		3502.78	-0.0111902
553	0.0017716		1142.99	-0.00167143		1732.99	-0.00351522		2322.98	-0.00406938		2912.98	0.0055069		3502.98	-0.01154665
553.2	0.00214542		1143.19	-0.00200537		1733.19	-0.00284711		2323.18	-0.00426265		2913.18	0.00556945		3503.18	-0.01086365
553.4	0.00199567		1143.39	-0.0020256		1733.39	-0.00216051		2323.38	-0.00385316		2913.38	0.00546602		3503.38	-0.01005282
553.6	0.00224663		1143.59	-0.00193858		1733.59	-0.00187817		2323.58	-0.00474218		2913.58	0.00583223		3503.58	-0.00917006
553.8	0.00265401		1143.79	-0.00104276		1733.79	-0.00098541		2323.78	-0.0046328		2913.78	0.00627581		3503.78	-0.00822481
554	0.00339942		1143.99	-0.00046556		1733.99	-0.00058326		2323.98	-0.00392218		2913.98	0.00638728		3503.98	-0.00788416
554.2	0.00412978		1144.19	-0.00046948		1734.19	-0.00150917		2324.18	-0.00309015		2914.18	0.00575942		3504.18	-0.00760349
554.4	0.00424536		1144.39	-0.00027405		1734.39	-0.00096108		2324.38	-0.00353197		2914.38	0.00602075		3504.38	-0.0081761
554.6	0.00491358		1144.59	-0.00082234		1734.59	-0.0003254		2324.58	-0.00378128		2914.58	0.00627357		3504.58	-0.00888627
554.8	0.00443668		1144.79	-0.00122234		1734.79	-0.00042653		2324.78	-0.00281985		2914.78	0.00635569		3504.78	-0.008811
555	0.0049944		1144.99	-0.00172481		1734.99	-0.00004919		2324.98	-0.00247724		2914.98	0.00555467		3504.98	-0.00840319
555.2	0.00469781		1145.19	-0.00122426		1735.19	-0.00066579		2325.18	-0.00235827		2915.18	0.00629435		3505.18	-0.00870133
555.4	0.00407513		1145.39	-0.00160389		1735.39	-0.00073855		2325.38	-0.00215187		2915.38	0.00654108		3505.38	-0.00861081
555.6	0.00418712		1145.59	-0.00191455		1735.59	-0.00096438		2325.58	-0.00300485		2915.58	0.00707872		3505.58	-0.00903374
555.8	0.00397393		1145.79	-0.00209863		1735.79	-0.00109279		2325.78	-0.00362891		2915.78	0.00763946		3505.78	-0.00951844
556	0.0029818		1145.99	-0.00177931		1735.99	-0.00108833		2325.98	-0.00386646		2915.98	0.00902953		3505.98	-0.00963446
556.2	0.00279971		1146.19	-0.0021245		1736.19	-0.00097982		2326.18	-0.00376192		2916.18	0.00883542		3506.18	-0.01019814
556.4	0.00198556		1146.39	-0.00222525		1736.39	-0.00038037		2326.38	-0.00423507		2916.38	0.00858652		3506.38	-0.00979178
556.6	0.00186103		1146.59	-0.00207267		1736.59	-0.00044262		2326.58	-0.0050551		2916.58	0.00917869		3506.58	-0.01056219
556.8	0.00216571		1146.79	-0.00315174		1736.79	-0.00082634		2326.78	-0.005556		2916.78	0.00784427		3506.78	-0.01032431
557	0.0027168		1146.99	-0.00350452		1736.99	-0.00048744		2326.98	-0.00649654		2916.98	0.00820725		3506.98	-0.0100719
557.2	0.00319321		1147.19	-0.00252951		1737.19	-0.00045408		2327.18	-0.00648864		2917.18	0.00806503		3507.18	-0.00939142
557.4	0.00281018		1147.39	-0.00238431		1737.39	-0.00087305		2327.38	-0.00662958		2917.38	0.0085201		3507.38	-0.00885239
557.6	0.00282613		1147.59	-0.00160114		1737.59	-0.00121583		2327.58	-0.00666335		2917.58	0.00732529		3507.58	-0.0096189
557.8	0.00323087		1147.79	-0.00122608		1737.79	-0.00123728		2327.78	-0.00670191		2917.78	0.00688739		3507.78	-0.00980581
558	0.00369016		1147.99	-0.00142252		1737.99	-0.00195213		2327.98	-0.00631251		2917.98	0.00550688		3507.98	-0.01011925
558.2	0.00443813		1148.19	-0.00179002		1738.19	-0.00278657		2328.18	-0.00692386		2918.18	0.00517836		3508.18	-0.0094096
558.4	0.00340241		1148.39	-0.00131899		1738.39	-0.00307888		2328.38	-0.00707811		2918.38	0.00515061		3508.38	-0.01038873
558.6	0.00235738		1148.59	-0.00101412		1738.59	-0.00321092		2328.58	-0.00649116		2918.58	0.0047358		3508.58	-0.01008927
558.8	0.0008123		1148.79	-0.0007309		1738.79	-0.00303117		2328.78	-0.0058146		2918.78	0.00501224		3508.78	-0.00951712
559	0.00049054		1148.99	-0.00031763		1738.99	-0.00333387		2328.98	-0.00501473		2918.98	0.00476663		3508.98	-0.00974647
559.2	-0.00067169		1149.19	-0.00051318		1739.19	-0.00345134		2329.18	-0.00378287		2919.18	0.00550405		3509.18	-0.00954403
559.4	-0.00092046		1149.39	-0.00142841		1739.39	-0.00288881		2329.38	-0.00345794		2919.38	0.00570403		3509.38	-0.00918303
559.6	-0.0009586		1149.59	-0.00170151		1739.59	-0.00264652		2329.58	-0.00398562		2919.58	0.00673431		3509.58	-0.00953348
559.8	-0.00120528		1149.79	-0.00171608		1739.79	-0.00210275		2329.78	-0.00403075		2919.78	0.00717989		3509.78	-0.00939032
560	-0.00078337		1149.99	-0.00080129		1739.99	-0.0016605		2329.98	-0.00354995		2919.98	0.00755011		3509.98	-0.00996893
560.2	-0.0005527		1150.19	-0.00063637		1740.19	-0.00118675		2330.18	-0.00409919		2920.18	0.00689958		3510.18	-0.01003788
560.4	0.00035836		1150.39	-0.00101196		1740.39	-0.00046688		2330.38	-0.00464982		2920.38	0.0073014		3510.38	-0.01005534
560.6	0.00145722		1150.59	0.00043377		1740.59	-0.00049516		2330.58	-0.00462589		2920.58	0.00768019		3510.58	-0.0102525
560.8	0.00308673		1150.79	0.00104042		1740.79	-0.00012947		2330.78	-0.00509525		2920.78	0.00804		3510.78	-0.00933099
561	0.00370218		1150.99	0.00142065		1740.99	-0.00003427		2330.98	-0.00514575		2920.98	0.00921358		3510.98	-0.00880599
561.2	0.00404023		1151.19	0.00204686		1741.19	-0.00071142		2331.18	-0.00465279		2921.18	0.0088944		3511.18	-0.00856701
561.4	0.00414209		1151.39	0.00257242		1741.39	-0.00058548		2331.38	-0.00430634		2921.38	0.00926743		3511.38	-0.00882748
561.6	0.00475417		1151.59	0.00356388		1741.59	-0.00023026		2331.58	-0.00432078		2921.58	0.00796917		3511.58	-0.00904863
561.8	0.00514619		1151.79	0.00353951		1741.79	-0.00018791		2331.78	-0.00519272		2921.78	0.00768481		3511.78	-0.00961931
562	0.00455708		1151.99	0.00300406		1741.99	-0.00020607		2331.98	-0.00608834		2921.98	0.00681625		3511.98	-0.00960271
562.2	0.00444366		1152.19	0.00369665		1742.19	-0.0007539		2332.18	-0.00680865		2922.18	0.00684465		3512.18	-0.00970658
562.4	0.00268806		1152.39	0.00330741		1742.39	-0.00152651		2332.38	-0.00639511		2922.38	0.00712493		3512.38	-0.01063974
562.6	0.0019953		1152.59	0.00298817		1742.59	-0.0014499		2332.58	-0.00647372		2922.58	0.0071082		3512.58	-0.01105927
562.8	0.00097837		1152.79	0.00251513		1742.79	-0.0010057		2332.78	-0.00571398		2922.78	0.00672964		3512.78	-0.01212293
563	0.00123667		1152.99	0.00105276		1742.99	-0.00099549		2332.98	-0.00503059		2922.98	0.00555325		3512.98	-0.01292316
563.2	0.00025489		1153.19	-0.00011902		1743.19	-0.00041843		2333.18	-0.00514347		2923.18	0.00536251		3513.18	-0.01270229
563.4	0.00041355		1153.39	-0.00130899		1743.39	0.00033081		2333.38	-0.005865		2923.38	0.00511627		3513.38	-0.01343946
563.6	0.00071291		1153.59	-0.00139228		1743.59	0.00034547		2333.58	-0.00654596		2923.58	0.00523993		3513.58	-0.01423818
563.8	0.00117624		1153.79	-0.00138664		1743.79	0.00023977		2333.78	-0.00607361		2923.78	0.00440704		3513.78	-0.01416297
564	0.00197911		1153.99	-0.00257503		1743.99	0.00010022		2333.98	-0.00634926		2923.98	0.00441765		3513.98	-0.01512703
564.2	0.00183922		1154.19	-0.00311623		1744.19	-0.00018298		2334.18	-0.00688178		2924.18	0.00446809		3514.18	-0.01447488
564.4	0.00283455		1154.39	-0.00340884		1744.39	-0.0002352		2334.38	-0.00640357		2924.38	0.00545789		3514.38	-0.01393275
564.6	0.0036099		1154.59	-0.00410654		1744.59	-0.0007978		2334.58	-0.00641492		2924.58	0.00680652		3514.58	-0.01345754
564.8	0.00407437		1154.79	-0.00430634		1744.79	-0.00141778		2334.78	-0.00712545		2924.78	0.00770284		3514.78	-0.01259617
565	0.00363028		1154.99	-0.00541107		1744.99	-0.00209665		2334.98	-0.00618283		2924.98	0.00771956		3514.98	-0.01280959
565.2	0.00376159		1155.19	-0.00520718		1745.19	-0.00291779		2335.18	-0.00487984		2925.18	0.00781778		3515.18	-0.01271736
565.4	0.00333514		1155.39	-0.00483433		1745.39	-0.00290642		2335.38	-0.0044409		2925.38	0.00906949		3515.38	-0.01283639
565.6	0.00276395		1155.59	-0.00480712		1745.59	-0.00332039		2335.58	-0.00473275		2925.58	0.00962724		3515.58	-0.01290919
565.8	0.0023274		1155.79	-0.00427669		1745.79	-0.00482982		2335.78	-0.00519851		2925.78	0.00943398		3515.78	-0.01291514
566	0.0012715		1155.99	-0.00368971		1745.99	-0.004678		2335.98	-0.00565504		2925.98	0.00891894		3515.98	-0.01191426
566.2	0.00100093		1156.19	-0.00275499		1746.19	-0.00585713		2336.18	-0.00472744		2926.18	0.00909389		3516.18	-0.01167625
566.4	0.00004805		1156.39	-0.00334563		1746.39	-0.00553045		2336.38	-0.00484839		2926.38	0.00976677		3516.38	-0.0118336
566.6	-0.00052164		1156.59	-0.00252296		1746.59	-0.00537891		2336.58	-0.00438449		2926.58	0.00950359		3516.58	-0.01173006
566.8	-0.00107811		1156.79	-0.00281141		1746.79	-0.00469079		2336.78	-0.00444931		2926.78	0.00893867		3516.78	-0.01117462
567	-0.0004521		1156.99	-0.00288971		1746.99	-0.00443322		2336.98	-0.00441248		2926.98	0.00894333		3516.98	-0.01049613
567.2	-0.00143794		1157.19	-0.00190254		1747.19	-0.00365258		2337.18	-0.00468871		2927.18	0.00889137		3517.18	-0.00990738
567.4	-0.00137609		1157.39	-0.00101509		1747.39	-0.00235535		2337.38	-0.00384326		2927.38	0.00853168		3517.38	-0.01043577
567.6	-0.00125294		1157.59	-0.00042721		1747.59	-0.00197912		2337.58	-0.00341466		2927.58	0.00823656		3517.58	-0.01043636
567.8	-0.00106079		1157.79	-0.00128434		1747.79	-0.00203162		2337.78	-0.00352034		2927.78	0.00799071		3517.78	-0.01030727
568	-0.00088134		1157.99	-0.0019688		1747.99	-0.0018507		2337.98	-0.00403089		2927.98	0.00822		3517.98	-0.00986572
568.2	-0.00102541		1158.19	-0.00195535		1748.19	-0.00173126		2338.18	-0.00386071		2928.18	0.00857438		3518.18	-0.01022399
568.4	0.00100509		1158.39	-0.00251487		1748.39	-0.0016745		2338.38	-0.00402354		2928.38	0.00850085		3518.38	-0.01060279
568.6	0.00231058		1158.59	-0.003536		1748.59	-0.00213042		2338.58	-0.0045638		2928.58	0.00790198		3518.58	-0.01115457
568.8	0.00264811		1158.79	-0.00324003		1748.79	-0.00233573		2338.78	-0.00399695		2928.78	0.00769327		3518.78	-0.01158067
569	0.00255196		1158.99	-0.00509631		1748.99	-0.00304848		2338.98	-0.0027068		2928.98	0.00803061		3518.98	-0.0126222
569.2	0.00346753		1159.19	-0.00562301		1749.19	-0.00371118		2339.18	-0.00368146		2929.18	0.00811899		3519.18	-0.01249589
569.4	0.00398393		1159.39	-0.00595744		1749.39	-0.00353273		2339.38	-0.00446981		2929.38	0.00880199		3519.38	-0.01240578
569.6	0.00384423		1159.59	-0.0055384		1749.59	-0.00466584		2339.58	-0.00428783		2929.58	0.0087539		3519.58	-0.01231555
569.8	0.00427684		1159.79	-0.00497064		1749.79	-0.00502298		2339.78	-0.00416172		2929.78	0.00797173		3519.78	-0.01211815
570	0.00420883		1159.99	-0.00442841		1749.99	-0.00435683		2339.98	-0.00442152		2929.98	0.0078862		3519.98	-0.01201477
570.2	0.00426817		1160.19	-0.00465757		1750.19	-0.00481514		2340.18	-0.00403279		2930.18	0.00852717		3520.18	-0.01243872
570.4	0.00448419		1160.39	-0.00378189		1750.39	-0.00434383		2340.38	-0.00408228		2930.38	0.00901429		3520.38	-0.01224592
570.6	0.00414873		1160.59	-0.0034224		1750.59	-0.00494819		2340.58	-0.00315395		2930.58	0.00899531		3520.58	-0.01178523
570.8	0.00456515		1160.79	-0.00372232		1750.79	-0.00571375		2340.78	-0.00335103		2930.78	0.0089533		3520.78	-0.0118398
571	0.00435212		1160.99	-0.00287241		1750.99	-0.00539732		2340.98	-0.00237064		2930.98	0.00798918		3520.98	-0.01187247
571.2	0.00334344		1161.19	-0.00270422		1751.19	-0.00477669		2341.18	-0.00276575		2931.18	0.00721399		3521.18	-0.0121483
571.4	0.00340918		1161.39	-0.0025177		1751.39	-0.00389566		2341.38	-0.00219068		2931.38	0.00733066		3521.38	-0.01240644
571.6	0.0040449		1161.59	-0.0025842		1751.59	-0.00496275		2341.58	-0.00225468		2931.58	0.00748019		3521.58	-0.01249889
571.8	0.00340844		1161.79	-0.00282994		1751.79	-0.00497721		2341.78	-0.00289858		2931.78	0.00667237		3521.78	-0.01213635
572	0.00272147		1161.99	-0.00236329		1751.99	-0.00468781		2341.98	-0.00275528		2931.98	0.00697122		3521.98	-0.0119179
572.2	0.00235104		1162.19	-0.00228375		1752.19	-0.00469072		2342.18	-0.00286283		2932.18	0.00669322		3522.18	-0.01197808
572.4	0.00271299		1162.39	-0.00203295		1752.39	-0.00488492		2342.38	-0.003514		2932.38	0.0055776		3522.38	-0.01126068
572.6	0.00160619		1162.59	-0.00201896		1752.59	-0.00347032		2342.58	-0.00325598		2932.58	0.00476564		3522.58	-0.0119833
572.8	0.00151671		1162.79	-0.00255914		1752.79	-0.00361263		2342.78	-0.00310923		2932.78	0.00507367		3522.78	-0.01161475
573	0.00139175		1162.99	-0.00318591		1752.99	-0.0031782		2342.98	-0.00423286		2932.98	0.00498246		3522.98	-0.01183166
573.2	0.00195895		1163.19	-0.00352617		1753.19	-0.00226039		2343.18	-0.0050307		2933.18	0.00441772		3523.18	-0.01167586
573.4	0.00147106		1163.39	-0.00333442		1753.39	-0.00169587		2343.38	-0.00453647		2933.38	0.00500108		3523.38	-0.01184989
573.6	0.00073443		1163.59	-0.00295065		1753.59	-0.00104838		2343.58	-0.00416494		2933.58	0.00497877		3523.58	-0.01174188
573.8	0.00064932		1163.79	-0.00303195		1753.79	-0.00057229		2343.78	-0.00429622		2933.78	0.0049939		3523.78	-0.01259615
574	0.00016966		1163.99	-0.00193438		1753.99	-0.00054891		2343.98	-0.00505891		2933.98	0.00528226		3523.98	-0.01169935
574.2	-0.0007336		1164.19	-0.00242641		1754.19	-0.00061918		2344.18	-0.00442649		2934.18	0.00558649		3524.18	-0.01160626
574.4	-0.00026545		1164.39	-0.00157578		1754.39	-0.00053793		2344.38	-0.00415693		2934.38	0.00508342		3524.38	-0.01116643
574.6	0.00016868		1164.59	-0.00204225		1754.59	-0.00188269		2344.58	-0.00395996		2934.58	0.0049709		3524.58	-0.0109441
574.8	0.00070105		1164.79	-0.00242289		1754.79	-0.00257654		2344.78	-0.00493917		2934.78	0.00534406		3524.78	-0.01099316
575	-0.0002603		1164.99	-0.00203692		1754.99	-0.00256831		2344.98	-0.00398698		2934.98	0.00495233		3524.98	-0.01072209
575.2	0.00075002		1165.19	-0.00224909		1755.19	-0.00395543		2345.18	-0.00425716		2935.18	0.00532977		3525.18	-0.01003489
575.4	0.00182087		1165.39	-0.00194224		1755.39	-0.00419178		2345.38	-0.00431143		2935.38	0.0058179		3525.38	-0.01035085
575.6	0.00176623		1165.59	-0.00144002		1755.59	-0.00527319		2345.58	-0.00499457		2935.58	0.00561112		3525.58	-0.0098988
575.8	0.00122703		1165.79	-0.00156766		1755.79	-0.00545469		2345.78	-0.00558313		2935.78	0.00559288		3525.78	-0.00963022
576	0.00073553		1165.99	-0.00126916		1755.99	-0.00610709		2345.98	-0.00603162		2935.98	0.0059793		3525.98	-0.01024584
576.2	0.0005998		1166.19	-0.00170805		1756.19	-0.00727491		2346.18	-0.00608988		2936.18	0.00592093		3526.18	-0.00978279
576.4	0.00077434		1166.39	-0.00218707		1756.39	-0.00785818		2346.38	-0.00684744		2936.38	0.00573536		3526.38	-0.01070069
576.6	0.00117391		1166.59	-0.00226433		1756.59	-0.00699017		2346.58	-0.00628601		2936.58	0.00579923		3526.58	-0.01137682
576.8	0.00154923		1166.79	-0.00283176		1756.79	-0.0079474		2346.78	-0.00709863		2936.78	0.00586209		3526.78	-0.01178134
577	0.00090816		1166.99	-0.00230549		1756.99	-0.00675925		2346.98	-0.00734967		2936.98	0.00621417		3526.98	-0.01298361
577.2	0.00065632		1167.19	-0.00265236		1757.19	-0.00662768		2347.18	-0.00747329		2937.18	0.00635673		3527.18	-0.01368069
577.4	0.00023267		1167.39	-0.00145536		1757.39	-0.00655695		2347.38	-0.00760274		2937.38	0.00740833		3527.38	-0.01421283
577.6	0.00042662		1167.59	-0.00106053		1757.59	-0.00621952		2347.58	-0.00713577		2937.58	0.00770468		3527.58	-0.01482408
577.8	0.0003407		1167.79	-0.00029004		1757.79	-0.0063762		2347.78	-0.00699181		2937.78	0.00758818		3527.78	-0.01565581
578	0.00047194		1167.99	0.00024273		1757.99	-0.00602701		2347.98	-0.0077413		2937.98	0.00729132		3527.98	-0.01505917
578.2	0.00072688		1168.19	0.00022452		1758.19	-0.00611948		2348.18	-0.0064188		2938.18	0.00703088		3528.18	-0.01534501
578.4	0.0012129		1168.39	0.00082133		1758.39	-0.00606957		2348.38	-0.00598437		2938.38	0.00647291		3528.38	-0.01519086
578.6	0.00147787		1168.59	0.00104646		1758.59	-0.00655595		2348.58	-0.00601761		2938.58	0.00671026		3528.58	-0.0145239
578.8	0.00128614		1168.79	0.00161798		1758.79	-0.00588422		2348.78	-0.00572576		2938.78	0.00728294		3528.78	-0.01411013
579	0.00117292		1168.99	0.00237467		1758.99	-0.00648178		2348.98	-0.00438376		2938.98	0.00673786		3528.98	-0.01397308
579.2	0.00190373		1169.19	0.0019151		1759.19	-0.00646085		2349.18	-0.00405039		2939.18	0.00599037		3529.18	-0.01336194
579.4	0.00223603		1169.39	0.00225013		1759.39	-0.00553899		2349.38	-0.0044651		2939.38	0.00579961		3529.38	-0.0135641
579.6	0.00142583		1169.59	0.00205088		1759.59	-0.00613492		2349.58	-0.00429431		2939.58	0.00556001		3529.58	-0.01268813
579.8	0.0019147		1169.79	0.00161345		1759.79	-0.0059571		2349.78	-0.00384088		2939.78	0.00626398		3529.78	-0.01236803
580	0.00141187		1169.99	0.00153228		1759.99	-0.0057286		2349.98	-0.00423751		2939.98	0.00575834		3529.98	-0.01200381
580.2	0.00206855		1170.19	0.00028658		1760.19	-0.00615342		2350.18	-0.00421602		2940.18	0.00627039		3530.18	-0.01183638
580.4	0.00218101		1170.39	0.00069851		1760.39	-0.00646595		2350.38	-0.00468764		2940.38	0.00620688		3530.38	-0.01229861
580.6	0.00138463		1170.59	0.0008537		1760.59	-0.00563323		2350.58	-0.00458621		2940.58	0.00676286		3530.58	-0.01244381
580.8	0.00093064		1170.79	0.00042811		1760.79	-0.00566929		2350.78	-0.00517456		2940.78	0.00603991		3530.78	-0.0130404
581	0.00012833		1170.99	0.00165916		1760.99	-0.00547788		2350.98	-0.00578619		2940.98	0.00685131		3530.98	-0.01361043
581.2	0.00017291		1171.19	0.00123879		1761.19	-0.00546572		2351.18	-0.00584666		2941.18	0.00700662		3531.18	-0.01352809
581.4	0.00010208		1171.39	0.00125678		1761.39	-0.00608546		2351.38	-0.00587853		2941.38	0.00704707		3531.38	-0.01332923
581.6	0.00030265		1171.59	0.00075033		1761.59	-0.00745133		2351.58	-0.00605992		2941.58	0.00687303		3531.58	-0.01318643
581.8	-0.00006195		1171.79	0.00078452		1761.79	-0.0081925		2351.78	-0.00639999		2941.78	0.00587133		3531.78	-0.01368894
582	-0.00029721		1171.99	0.00035685		1761.99	-0.008633		2351.98	-0.00598924		2941.98	0.00558376		3531.98	-0.01314032
582.2	-0.00043942		1172.19	0.00019486		1762.19	-0.00917059		2352.18	-0.00495032		2942.18	0.00556439		3532.18	-0.01324537
582.4	-0.00098817		1172.39	-0.00048367		1762.39	-0.00964423		2352.38	-0.00489088		2942.38	0.00505079		3532.38	-0.01276046
582.6	-0.00053376		1172.59	-0.00092031		1762.59	-0.00998961		2352.58	-0.00409894		2942.58	0.00445838		3532.58	-0.01234483
582.8	-0.00097893		1172.79	-0.00186074		1762.79	-0.00972541		2352.78	-0.00324308		2942.78	0.00459913		3532.78	-0.01190438
583	-0.00107996		1172.99	-0.00258468		1762.99	-0.00949134		2352.98	-0.00292309		2942.98	0.00365454		3532.98	-0.01214155
583.2	-0.00185158		1173.19	-0.00297504		1763.19	-0.00817238		2353.18	-0.00218352		2943.18	0.00454083		3533.18	-0.01134188
583.4	-0.00149415		1173.39	-0.00294763		1763.39	-0.00748619		2353.38	-0.0021465		2943.38	0.00495323		3533.38	-0.01131921
583.6	-0.00170811		1173.59	-0.0035552		1763.59	-0.00718248		2353.58	-0.00244725		2943.58	0.00484801		3533.58	-0.01181763
583.8	-0.00176254		1173.79	-0.00342405		1763.79	-0.00640498		2353.78	-0.00297229		2943.78	0.00612067		3533.78	-0.01231004
584	-0.00192795		1173.99	-0.00355099		1763.99	-0.0051013		2353.98	-0.00370154		2943.98	0.00558981		3533.98	-0.01335749
584.2	-0.00107696		1174.19	-0.00301908		1764.19	-0.00470703		2354.18	-0.00355281		2944.18	0.00671028		3534.18	-0.01458882
584.4	-0.00157921		1174.39	-0.00217152		1764.39	-0.00391255		2354.38	-0.00439027		2944.38	0.00719209		3534.38	-0.01463982
584.6	-0.00271149		1174.59	-0.00215719		1764.59	-0.001937		2354.58	-0.00462764		2944.58	0.0080465		3534.58	-0.01508997
584.8	-0.0018408		1174.79	-0.00108873		1764.79	-0.00186018		2354.78	-0.00461295		2944.78	0.0072856		3534.78	-0.01542598
585	-0.00207526		1174.99	0.00008677		1764.99	-0.00097072		2354.98	-0.00485463		2944.98	0.00777858		3534.98	-0.01560152
585.2	-0.00219009		1175.19	-0.00027666		1765.19	-0.00161814		2355.18	-0.00430287		2945.18	0.0072961		3535.18	-0.01518799
585.4	-0.00174072		1175.39	-0.00038275		1765.39	-0.00294342		2355.38	-0.00497345		2945.38	0.0071139		3535.38	-0.01497292
585.6	-0.00173711		1175.59	-0.00029583		1765.59	-0.00411746		2355.58	-0.00512668		2945.58	0.00753999		3535.58	-0.01564703
585.8	-0.00112498		1175.79	-0.00017819		1765.79	-0.00402853		2355.78	-0.00464108		2945.78	0.00704036		3535.78	-0.01636494
586	-0.00100834		1175.99	0.0001796		1765.99	-0.0046964		2355.98	-0.00402488		2945.98	0.00702717		3535.98	-0.01567801
586.2	-0.00103467		1176.19	-0.00001393		1766.19	-0.00532395		2356.18	-0.00458268		2946.18	0.00690297		3536.18	-0.01484131
586.4	-0.00088152		1176.39	-0.00071558		1766.39	-0.00601925		2356.38	-0.00439827		2946.38	0.00599244		3536.38	-0.01376687
586.6	-0.00087861		1176.59	-0.00089696		1766.59	-0.00639314		2356.58	-0.00371092		2946.58	0.00478575		3536.58	-0.01315081
586.8	-0.00077997		1176.79	-0.00215542		1766.79	-0.00654847		2356.78	-0.00403937		2946.78	0.00476537		3536.78	-0.01320555
587	-0.0010602		1176.99	-0.00177765		1766.99	-0.00631207		2356.98	-0.00359469		2946.98	0.00443632		3536.98	-0.0127087
587.2	-0.00135592		1177.19	-0.0013323		1767.19	-0.00643833		2357.18	-0.00332423		2947.18	0.00536657		3537.18	-0.01216915
587.4	-0.00011442		1177.39	-0.00218886		1767.39	-0.00689034		2357.38	-0.00341465		2947.38	0.0046193		3537.38	-0.01260684
587.6	-0.00020921		1177.59	-0.00245733		1767.59	-0.00697353		2357.58	-0.00437222		2947.58	0.00432377		3537.58	-0.01281973
587.8	0.00034571		1177.79	-0.00257681		1767.79	-0.00622279		2357.78	-0.00456232		2947.78	0.00517008		3537.78	-0.0131158
588	0.00138718		1177.99	-0.00226797		1767.99	-0.00510513		2357.98	-0.00508259		2947.98	0.00411031		3537.98	-0.01227953
588.2	0.00226715		1178.19	-0.0017053		1768.19	-0.0054092		2358.18	-0.00586645		2948.18	0.00470505		3538.18	-0.01225807
588.4	0.00140406		1178.39	-0.00191835		1768.39	-0.00484179		2358.38	-0.00669781		2948.38	0.00501009		3538.38	-0.01221508
588.6	0.00177103		1178.59	-0.00144248		1768.59	-0.00423682		2358.58	-0.00565468		2948.58	0.00457045		3538.58	-0.01234596
588.8	0.00205303		1178.79	-0.00076029		1768.79	-0.00424166		2358.78	-0.00542441		2948.78	0.0042174		3538.78	-0.01189616
589	0.00151063		1178.99	-0.00090132		1768.99	-0.00441313		2358.98	-0.00631563		2948.98	0.00397789		3538.98	-0.01225308
589.2	0.0003472		1179.19	-0.00116895		1769.19	-0.00579522		2359.18	-0.00667233		2949.18	0.00416146		3539.18	-0.01151228
589.4	0.00045188		1179.39	-0.00114947		1769.39	-0.00555812		2359.38	-0.00725309		2949.38	0.00491114		3539.38	-0.01140798
589.6	-0.00043544		1179.59	-0.00098544		1769.59	-0.00491298		2359.58	-0.00691988		2949.58	0.0045974		3539.58	-0.01145815
589.8	-0.00064656		1179.79	-0.00070554		1769.79	-0.00469845		2359.78	-0.00684644		2949.78	0.0043595		3539.78	-0.01097794
590	-0.00143629		1179.99	-0.00041806		1769.99	-0.0051207		2359.98	-0.0073009		2949.98	0.00445089		3539.98	-0.01049399
590.2	-0.00164777		1180.19	0.00004627		1770.19	-0.00513012		2360.18	-0.00763024		2950.18	0.00467503		3540.18	-0.01043218
590.4	-0.00135404		1180.39	0.000211		1770.39	-0.006493		2360.38	-0.00691271		2950.38	0.00466142		3540.38	-0.01046517
590.6	-0.00183102		1180.59	0.00031986		1770.59	-0.00700086		2360.58	-0.00612146		2950.58	0.00451384		3540.58	-0.01026464
590.8	-0.00143632		1180.79	-0.00076588		1770.79	-0.00735232		2360.78	-0.00542104		2950.78	0.00519646		3540.78	-0.01098429
591	-0.00189546		1180.99	-0.00054729		1770.99	-0.00769333		2360.98	-0.00457997		2950.98	0.00519812		3540.98	-0.01167202
591.2	-0.00120934		1181.19	-0.00148464		1771.19	-0.00801448		2361.18	-0.00464737		2951.18	0.00547847		3541.18	-0.01224261
591.4	0.00007139		1181.39	-0.00268829		1771.39	-0.00789861		2361.38	-0.00436359		2951.38	0.00584976		3541.38	-0.01234401
591.6	0.00085529		1181.59	-0.00277675		1771.59	-0.00707797		2361.58	-0.00422794		2951.58	0.00648667		3541.58	-0.01250242
591.8	0.00142677		1181.79	-0.00329854		1771.79	-0.00667526		2361.78	-0.00432996		2951.78	0.00683228		3541.78	-0.01334181
592	0.0010619		1181.99	-0.00415265		1771.99	-0.00655276		2361.98	-0.00502756		2951.98	0.00662561		3541.98	-0.01399495
592.2	0.00010629		1182.19	-0.00491251		1772.19	-0.00712626		2362.18	-0.00519961		2952.18	0.00740494		3542.18	-0.01502706
592.4	-0.00096343		1182.39	-0.0054505		1772.39	-0.0073583		2362.38	-0.0047174		2952.38	0.00764189		3542.38	-0.01517882
592.6	-0.00088982		1182.59	-0.00651732		1772.59	-0.00623268		2362.58	-0.00475146		2952.58	0.00767527		3542.58	-0.01467405
592.8	-0.00237433		1182.79	-0.00568244		1772.79	-0.00618393		2362.78	-0.00496118		2952.78	0.00843736		3542.78	-0.01407296
593	-0.00262758		1182.99	-0.00549288		1772.99	-0.00604135		2362.98	-0.00590482		2952.98	0.0078054		3542.98	-0.01436434
593.2	-0.00382713		1183.19	-0.00506053		1773.19	-0.00521865		2363.18	-0.00556183		2953.18	0.00745955		3543.18	-0.01367481
593.4	-0.00382061		1183.39	-0.00418014		1773.39	-0.00376356		2363.38	-0.00566675		2953.38	0.00707489		3543.38	-0.01404598
593.6	-0.00456557		1183.59	-0.00344656		1773.59	-0.00330016		2363.58	-0.00545087		2953.58	0.00600542		3543.58	-0.01373979
593.8	-0.00401574		1183.79	-0.0029311		1773.79	-0.00392153		2363.78	-0.0050867		2953.78	0.00546603		3543.78	-0.01373812
594	-0.00318389		1183.99	-0.00152779		1773.99	-0.00376597		2363.98	-0.00546882		2953.98	0.00545392		3543.98	-0.0135157
594.2	-0.00292532		1184.19	-0.00044849		1774.19	-0.00445495		2364.18	-0.00544648		2954.18	0.00469159		3544.18	-0.01313767
594.4	-0.00256355		1184.39	-0.00063194		1774.39	-0.00444819		2364.38	-0.00504619		2954.38	0.00466031		3544.38	-0.01256336
594.6	-0.00208735		1184.59	-0.00030427		1774.59	-0.00376867		2364.58	-0.00522207		2954.58	0.00412422		3544.58	-0.01257005
594.8	-0.00132098		1184.79	-0.00046349		1774.79	-0.00369136		2364.78	-0.00584495		2954.78	0.00399575		3544.78	-0.01317669
595	-0.00046239		1184.99	-0.00057379		1774.99	-0.00339353		2364.98	-0.00627974		2954.98	0.00329812		3544.98	-0.01341456
595.2	0.00072149		1185.19	-0.0004905		1775.19	-0.00322439		2365.18	-0.00633159		2955.18	0.00329561		3545.18	-0.01254621
595.4	0.00179952		1185.39	-0.00030699		1775.39	-0.00323117		2365.38	-0.0057602		2955.38	0.00345934		3545.38	-0.01335239
595.6	0.00197308		1185.59	-0.00045156		1775.59	-0.00268962		2365.58	-0.00576312		2955.58	0.00296959		3545.58	-0.01428577
595.8	0.00073262		1185.79	-0.00086198		1775.79	-0.00267939		2365.78	-0.00669708		2955.78	0.00244804		3545.78	-0.01518438
596	0.00000167		1185.99	-0.00151523		1775.99	-0.00346567		2365.98	-0.00698836		2955.98	0.00230775		3545.98	-0.01515237
596.2	-0.0005663		1186.19	-0.00172239		1776.19	-0.00374653		2366.18	-0.00689703		2956.18	0.00272856		3546.18	-0.01477678
596.4	-0.00096565		1186.39	-0.00251161		1776.39	-0.00351233		2366.38	-0.00685361		2956.38	0.00332629		3546.38	-0.01526107
596.6	-0.00131709		1186.59	-0.0031034		1776.59	-0.0031593		2366.58	-0.00703306		2956.58	0.00393975		3546.58	-0.01516101
596.8	-0.00225827		1186.79	-0.00248288		1776.79	-0.00399534		2366.78	-0.00635271		2956.78	0.00413249		3546.78	-0.01441444
597	-0.00263355		1186.99	-0.00300221		1776.99	-0.00399188		2366.98	-0.00650123		2956.98	0.00471021		3546.98	-0.01424573
597.2	-0.00345887		1187.19	-0.00341368		1777.19	-0.00499348		2367.18	-0.00543463		2957.18	0.00452001		3547.18	-0.0141964
597.4	-0.00382242		1187.39	-0.00307767		1777.39	-0.00517155		2367.38	-0.00455904		2957.38	0.00500313		3547.38	-0.01339662
597.6	-0.00445031		1187.59	-0.00314282		1777.59	-0.00671897		2367.58	-0.00414258		2957.58	0.0048959		3547.58	-0.01368453
597.8	-0.00389651		1187.79	-0.00326524		1777.79	-0.00698075		2367.78	-0.00316611		2957.78	0.00483774		3547.78	-0.01318406
598	-0.00455943		1187.99	-0.002733		1777.99	-0.00713664		2367.98	-0.00386743		2957.98	0.00543424		3547.98	-0.01313954
598.2	-0.00449732		1188.19	-0.00322932		1778.19	-0.00703993		2368.18	-0.00348742		2958.18	0.00516188		3548.18	-0.01271631
598.4	-0.00384744		1188.39	-0.00370906		1778.39	-0.00604656		2368.38	-0.00302531		2958.38	0.00545808		3548.38	-0.01316646
598.6	-0.00337574		1188.59	-0.00306112		1778.59	-0.00568827		2368.58	-0.00308049		2958.58	0.00583847		3548.58	-0.01376
598.8	-0.00237558		1188.79	-0.00314561		1778.79	-0.00544927		2368.78	-0.00294496		2958.78	0.00581874		3548.78	-0.01385799
599	-0.00129177		1188.99	-0.00299232		1778.99	-0.00504813		2368.98	-0.00291303		2958.98	0.00540813		3548.98	-0.01399444
599.2	-0.00108566		1189.19	-0.00268613		1779.19	-0.00569753		2369.18	-0.00270984		2959.18	0.00536372		3549.18	-0.01471163
599.4	-0.00121928		1189.39	-0.00243341		1779.39	-0.00611167		2369.38	-0.00298412		2959.38	0.00492159		3549.38	-0.01564245
599.6	-0.00116246		1189.59	-0.00258003		1779.59	-0.00604534		2369.58	-0.00442885		2959.58	0.00517813		3549.58	-0.01575796
599.8	-0.00155766		1189.79	-0.00216196		1779.79	-0.00581352		2369.78	-0.00513452		2959.78	0.00532258		3549.78	-0.0164188
600	-0.00116569		1189.99	-0.00189732		1779.99	-0.00655638		2369.98	-0.00528032		2959.98	0.00541655		3549.98	-0.01655158
600.2	-0.00045662		1190.19	-0.00218555		1780.19	-0.00618565		2370.18	-0.00546648		2960.18	0.00573082		3550.18	-0.01743944
600.4	-0.00085477		1190.39	-0.00287997		1780.39	-0.00585025		2370.38	-0.00564166		2960.38	0.00596861		3550.38	-0.01767845
600.6	-0.00128001		1190.59	-0.00326587		1780.59	-0.00635059		2370.58	-0.00626197		2960.58	0.00566915		3550.58	-0.01758551
600.8	-0.00148034		1190.79	-0.00331511		1780.79	-0.00610369		2370.78	-0.00622073		2960.78	0.00629484		3550.78	-0.01688828
601	-0.0014382		1190.99	-0.00309264		1780.99	-0.00608649		2370.98	-0.00638238		2960.98	0.00628991		3550.98	-0.01674386
601.2	-0.00227029		1191.19	-0.00330171		1781.19	-0.00641175		2371.18	-0.00597448		2961.18	0.00497089		3551.18	-0.01710127
601.4	-0.00338689		1191.39	-0.00243685		1781.39	-0.00622701		2371.38	-0.00622509		2961.38	0.00529405		3551.38	-0.0171847
601.6	-0.00333626		1191.59	-0.00251618		1781.59	-0.0066274		2371.58	-0.00720975		2961.58	0.00555564		3551.58	-0.01748797
601.8	-0.00329161		1191.79	-0.00195868		1781.79	-0.0069557		2371.78	-0.00651997		2961.78	0.00545575		3551.78	-0.01672677
602	-0.0035026		1191.99	-0.00230188		1781.99	-0.00710506		2371.98	-0.00732866		2961.98	0.00523619		3551.98	-0.0168042
602.2	-0.00248822		1192.19	-0.0021087		1782.19	-0.00641981		2372.18	-0.00670943		2962.18	0.00489872		3552.18	-0.01612152
602.4	-0.00285434		1192.39	-0.00177081		1782.39	-0.00621644		2372.38	-0.0066824		2962.38	0.00473219		3552.38	-0.01633562
602.6	-0.00280745		1192.59	-0.00170366		1782.59	-0.00614905		2372.58	-0.00692414		2962.58	0.00531844		3552.58	-0.01658358
602.8	-0.00239037		1192.79	-0.00156817		1782.79	-0.00675184		2372.78	-0.00675094		2962.78	0.00469604		3552.78	-0.01640523
603	-0.00256696		1192.99	-0.00257537		1782.99	-0.00672055		2372.98	-0.00700592		2962.98	0.00442321		3552.98	-0.01615171
603.2	-0.00328331		1193.19	-0.00292389		1783.19	-0.00721406		2373.18	-0.00722734		2963.18	0.00516151		3553.18	-0.01608852
603.4	-0.00397776		1193.39	-0.00266751		1783.39	-0.00772618		2373.38	-0.00808462		2963.38	0.0054036		3553.38	-0.01577993
603.6	-0.0037851		1193.59	-0.0030224		1783.59	-0.00745337		2373.58	-0.00785617		2963.58	0.00548304		3553.58	-0.01564757
603.8	-0.00393657		1193.79	-0.00254672		1783.79	-0.00718795		2373.78	-0.00717646		2963.78	0.00498447		3553.78	-0.01586494
604	-0.00364171		1193.99	-0.00268811		1783.99	-0.00776581		2373.98	-0.00793589		2963.98	0.00477861		3553.98	-0.01520399
604.2	-0.00312596		1194.19	-0.00350876		1784.19	-0.00729142		2374.18	-0.00760251		2964.18	0.00515074		3554.18	-0.01455121
604.4	-0.00314604		1194.39	-0.00394368		1784.39	-0.00656937		2374.38	-0.00769416		2964.38	0.00528188		3554.38	-0.01429915
604.6	-0.00249391		1194.59	-0.00317009		1784.59	-0.00701477		2374.58	-0.007704		2964.58	0.00472419		3554.58	-0.01393949
604.8	-0.00193187		1194.79	-0.00314593		1784.79	-0.00711074		2374.78	-0.00735066		2964.78	0.00496943		3554.78	-0.01262225
605	-0.00153412		1194.99	-0.00364495		1784.99	-0.00753932		2374.98	-0.00679824		2964.98	0.00484044		3554.98	-0.01307458
605.2	-0.00211644		1195.19	-0.00409786		1785.19	-0.00881582		2375.18	-0.00655475		2965.18	0.00531853		3555.18	-0.01338773
605.4	-0.00203782		1195.39	-0.00366056		1785.39	-0.00906894		2375.38	-0.00623651		2965.38	0.00606774		3555.38	-0.01288558
605.6	-0.00042635		1195.59	-0.00385236		1785.59	-0.00924015		2375.58	-0.006628		2965.58	0.0065809		3555.58	-0.01202082
605.8	-0.00078012		1195.79	-0.00366456		1785.79	-0.00985199		2375.78	-0.00606846		2965.78	0.0071622		3555.78	-0.01215785
606	-0.00083549		1195.99	-0.00417246		1785.99	-0.00971529		2375.98	-0.00656714		2965.98	0.00751994		3555.98	-0.01193811
606.2	-0.00063098		1196.19	-0.00326181		1786.19	-0.00951555		2376.18	-0.0063007		2966.18	0.00799716		3556.18	-0.01149003
606.4	-0.00113682		1196.39	-0.00317139		1786.39	-0.00920281		2376.38	-0.00631759		2966.38	0.00798304		3556.38	-0.01178475
606.6	-0.00107911		1196.59	-0.0035811		1786.59	-0.00879069		2376.58	-0.00542434		2966.58	0.00827016		3556.58	-0.01288003
606.8	-0.00101789		1196.79	-0.00359347		1786.79	-0.00851565		2376.78	-0.0043107		2966.78	0.00815266		3556.78	-0.01267928
607	-0.00104296		1196.99	-0.0042041		1786.99	-0.00777469		2376.98	-0.00408049		2966.98	0.00846279		3556.98	-0.01293851
607.2	-0.00173958		1197.19	-0.00408149		1787.19	-0.00673799		2377.18	-0.00448914		2967.18	0.00837755		3557.18	-0.01387585
607.4	-0.002583		1197.39	-0.00326698		1787.39	-0.00630376		2377.38	-0.00489368		2967.38	0.00785716		3557.38	-0.01402122
607.6	-0.00294899		1197.59	-0.00463337		1787.59	-0.00583168		2377.58	-0.00521402		2967.58	0.00730109		3557.58	-0.01384747
607.8	-0.00299447		1197.79	-0.0047826		1787.79	-0.00554187		2377.78	-0.00545069		2967.78	0.00664442		3557.78	-0.0147333
608	-0.00259821		1197.99	-0.00505888		1787.99	-0.00521426		2377.98	-0.0055357		2967.98	0.00622879		3557.98	-0.01526631
608.2	-0.00246043		1198.19	-0.0052302		1788.19	-0.00509017		2378.18	-0.00476573		2968.18	0.00495376		3558.18	-0.0158033
608.4	-0.00254301		1198.39	-0.00560695		1788.39	-0.00431266		2378.38	-0.00460005		2968.38	0.00370657		3558.38	-0.01611499
608.6	-0.00248876		1198.59	-0.00596319		1788.59	-0.00465596		2378.58	-0.00484887		2968.58	0.00265851		3558.58	-0.01600808
608.8	-0.00262029		1198.79	-0.00631612		1788.79	-0.00577246		2378.78	-0.00522641		2968.78	0.00234408		3558.78	-0.01673849
609	-0.00234438		1198.99	-0.00706774		1788.99	-0.0063475		2378.98	-0.00501212		2968.98	0.00173941		3558.98	-0.01771235
609.2	-0.00268347		1199.19	-0.00702004		1789.19	-0.00755814		2379.18	-0.00490504		2969.18	0.00154713		3559.18	-0.0166243
609.4	-0.00300457		1199.39	-0.00651422		1789.39	-0.00680869		2379.38	-0.00482494		2969.38	0.00112282		3559.38	-0.0169431
609.6	-0.00304297		1199.59	-0.0063404		1789.59	-0.00596952		2379.58	-0.00541288		2969.58	0.00102532		3559.58	-0.0171231
609.8	-0.00360456		1199.79	-0.00555427		1789.79	-0.00593665		2379.78	-0.00498279		2969.78	0.00188851		3559.78	-0.01699853
610	-0.00329858		1199.99	-0.00556147		1789.99	-0.00632856		2379.98	-0.00449794		2969.98	0.00148891		3559.98	-0.01592262
610.2	-0.00267808		1200.19	-0.00463621		1790.19	-0.00578792		2380.18	-0.00455257		2970.18	0.00176459		3560.18	-0.01535388
610.4	-0.00325991		1200.39	-0.00430473		1790.39	-0.00578738		2380.38	-0.00423659		2970.38	0.00163413		3560.38	-0.01519397
610.6	-0.00260299		1200.59	-0.0037209		1790.59	-0.00571213		2380.58	-0.00349769		2970.58	0.00258525		3560.58	-0.0148494
610.8	-0.00170209		1200.79	-0.00401267		1790.79	-0.00602036		2380.78	-0.00344893		2970.78	0.00325698		3560.78	-0.01409827
611	-0.00222693		1200.99	-0.00406661		1790.99	-0.00535729		2380.98	-0.00346224		2970.98	0.00373724		3560.98	-0.01411675
611.2	-0.00307986		1201.19	-0.00478664		1791.19	-0.00451965		2381.18	-0.00483125		2971.18	0.00441736		3561.18	-0.01389808
611.4	-0.00361715		1201.39	-0.00475852		1791.39	-0.00526473		2381.38	-0.0057578		2971.38	0.00559761		3561.38	-0.01364264
611.6	-0.00389737		1201.59	-0.00574618		1791.59	-0.004828		2381.58	-0.00653618		2971.58	0.00582646		3561.58	-0.01363494
611.8	-0.00379457		1201.79	-0.00555717		1791.79	-0.00409723		2381.78	-0.0054158		2971.78	0.00585335		3561.78	-0.01396124
612	-0.0035323		1201.99	-0.00554248		1791.99	-0.00443821		2381.98	-0.00485766		2971.98	0.00586095		3561.98	-0.01416723
612.2	-0.00437538		1202.19	-0.00547462		1792.19	-0.00448084		2382.18	-0.00464601		2972.18	0.0045548		3562.18	-0.01462912
612.4	-0.00463805		1202.39	-0.00574228		1792.39	-0.00437149		2382.38	-0.00511483		2972.38	0.00537932		3562.38	-0.01495423
612.6	-0.00445157		1202.59	-0.00576027		1792.59	-0.00526115		2382.58	-0.00553942		2972.58	0.00557873		3562.58	-0.01515265
612.8	-0.00471451		1202.79	-0.00536711		1792.79	-0.0062256		2382.78	-0.00527042		2972.78	0.00585294		3562.78	-0.015456
613	-0.0046421		1202.99	-0.00594302		1792.99	-0.00661256		2382.98	-0.0043995		2972.98	0.00520597		3562.98	-0.01506796
613.2	-0.00495494		1203.19	-0.00545514		1793.19	-0.00714657		2383.18	-0.0037124		2973.18	0.00473059		3563.18	-0.01512099
613.4	-0.00474234		1203.39	-0.0049169		1793.39	-0.00635916		2383.38	-0.0035657		2973.38	0.00419238		3563.38	-0.01642427
613.6	-0.00449241		1203.59	-0.00450237		1793.59	-0.0062996		2383.58	-0.00412995		2973.58	0.00400448		3563.58	-0.0163397
613.8	-0.00409237		1203.79	-0.00444255		1793.79	-0.0072104		2383.78	-0.00371302		2973.78	0.00392318		3563.78	-0.01523373
614	-0.00440845		1203.99	-0.00478759		1793.99	-0.00781173		2383.98	-0.00347729		2973.98	0.00357172		3563.98	-0.01481737
614.2	-0.00408794		1204.19	-0.00500165		1794.19	-0.00705512		2384.18	-0.00403126		2974.18	0.0030414		3564.18	-0.01468246
614.4	-0.00457871		1204.39	-0.00495321		1794.39	-0.00733719		2384.38	-0.00399934		2974.38	0.00233794		3564.38	-0.01488393
614.6	-0.00349131		1204.59	-0.00505164		1794.59	-0.00742367		2384.58	-0.0035328		2974.58	0.00303554		3564.58	-0.01472735
614.8	-0.00351718		1204.79	-0.00557512		1794.79	-0.00749894		2384.78	-0.00449819		2974.78	0.00325372		3564.78	-0.01405688
615	-0.00353547		1204.99	-0.0059548		1794.99	-0.00683218		2384.98	-0.00484759		2974.98	0.00351232		3564.98	-0.01360542
615.2	-0.00298385		1205.19	-0.00613562		1795.19	-0.00660841		2385.18	-0.0061523		2975.18	0.00393997		3565.18	-0.0134769
615.4	-0.00304982		1205.39	-0.0061542		1795.39	-0.00582526		2385.38	-0.00632834		2975.38	0.00355572		3565.38	-0.0129423
615.6	-0.00272235		1205.59	-0.00621242		1795.59	-0.00459748		2385.58	-0.0060158		2975.58	0.00313025		3565.58	-0.01251354
615.8	-0.00289707		1205.79	-0.00693049		1795.79	-0.00440323		2385.78	-0.00532267		2975.78	0.00385266		3565.78	-0.01249988
616	-0.00276811		1205.99	-0.00641114		1795.99	-0.00455757		2385.98	-0.00529948		2975.98	0.00361519		3565.98	-0.01349431
616.2	-0.00358078		1206.19	-0.00603755		1796.19	-0.00475482		2386.18	-0.00557815		2976.18	0.00351197		3566.18	-0.01382396
616.4	-0.00310329		1206.39	-0.00664063		1796.39	-0.00542837		2386.38	-0.00674682		2976.38	0.00437208		3566.38	-0.01375808
616.6	-0.00339871		1206.59	-0.00721836		1796.59	-0.00518979		2386.58	-0.00658275		2976.58	0.00349536		3566.58	-0.0134899
616.8	-0.00317469		1206.79	-0.00700892		1796.79	-0.00550473		2386.78	-0.00647574		2976.78	0.0029075		3566.78	-0.01502069
617	-0.00273161		1206.99	-0.00713456		1796.99	-0.00571815		2386.98	-0.00696175		2976.98	0.00187325		3566.98	-0.01600235
617.2	-0.00275991		1207.19	-0.00699264		1797.19	-0.00562475		2387.18	-0.0077962		2977.18	0.00217108		3567.18	-0.01693388
617.4	-0.00231013		1207.39	-0.00690858		1797.39	-0.00542546		2387.38	-0.00813776		2977.38	0.00257728		3567.38	-0.0173706
617.6	-0.00279037		1207.59	-0.0065521		1797.59	-0.00564484		2387.58	-0.00803609		2977.58	0.00299701		3567.58	-0.01809915
617.8	-0.00369663		1207.79	-0.00699203		1797.79	-0.00559747		2387.78	-0.00770658		2977.78	0.00219724		3567.78	-0.01743726
618	-0.00372459		1207.99	-0.00660465		1797.99	-0.00530541		2387.98	-0.00806016		2977.98	0.00167316		3567.98	-0.01723296
618.2	-0.00368502		1208.19	-0.00655476		1798.19	-0.00517915		2388.18	-0.00824844		2978.18	0.00091701		3568.18	-0.01713608
618.4	-0.00382194		1208.39	-0.00585646		1798.39	-0.00580965		2388.38	-0.00805778		2978.38	0.00128428		3568.38	-0.01659531
618.6	-0.00258351		1208.59	-0.00555627		1798.59	-0.00612105		2388.58	-0.00705868		2978.58	0.00182547		3568.58	-0.01547632
618.8	-0.00288956		1208.79	-0.00451079		1798.79	-0.00600118		2388.78	-0.00689801		2978.78	0.00188493		3568.78	-0.01423266
619	-0.00208803		1208.99	-0.0045271		1798.99	-0.00591694		2388.98	-0.00605418		2978.98	0.00188556		3568.98	-0.01457687
619.2	-0.00218722		1209.19	-0.00379135		1799.19	-0.00609073		2389.18	-0.00569733		2979.18	0.00211086		3569.18	-0.01349655
619.4	-0.0023283		1209.39	-0.0043429		1799.39	-0.00648593		2389.38	-0.0044605		2979.38	0.00181999		3569.38	-0.01258701
619.6	-0.0016665		1209.59	-0.00431901		1799.59	-0.00718619		2389.58	-0.00397662		2979.58	0.00185269		3569.58	-0.0126399
619.8	-0.0022264		1209.79	-0.00476651		1799.79	-0.00773713		2389.78	-0.00333086		2979.78	0.00285226		3569.78	-0.01231853
620	-0.00207684		1209.99	-0.00493021		1799.99	-0.00891496		2389.98	-0.00336732		2979.98	0.00284506		3569.98	-0.01253729
620.2	-0.00264941		1210.19	-0.00521018		1800.19	-0.01024161		2390.18	-0.00242215		2980.18	0.00343357		3570.18	-0.01196546
620.4	-0.00309562		1210.39	-0.00609686		1800.39	-0.00996816		2390.38	-0.00218264		2980.38	0.00386811		3570.38	-0.01212284
620.6	-0.0040562		1210.59	-0.00636882		1800.59	-0.00989759		2390.58	-0.00194428		2980.58	0.00351572		3570.58	-0.01249193
620.8	-0.00401224		1210.79	-0.00688247		1800.79	-0.00937391		2390.78	-0.00233939		2980.78	0.00365531		3570.78	-0.01401706
621	-0.00433952		1210.99	-0.00719578		1800.99	-0.00849291		2390.98	-0.00293329		2980.98	0.00520508		3570.98	-0.01448438
621.2	-0.00475558		1211.19	-0.00722951		1801.19	-0.0084549		2391.18	-0.002679		2981.18	0.0062608		3571.18	-0.0146586
621.4	-0.00425227		1211.39	-0.00711535		1801.39	-0.00802201		2391.38	-0.00348356		2981.38	0.00677513		3571.38	-0.01430657
621.6	-0.00437331		1211.59	-0.00661402		1801.59	-0.00710432		2391.58	-0.00398684		2981.58	0.00783748		3571.58	-0.01532185
621.8	-0.00444533		1211.79	-0.00717618		1801.79	-0.0071155		2391.78	-0.00546739		2981.78	0.00748343		3571.78	-0.01494996
622	-0.00387113		1211.99	-0.00737847		1801.99	-0.00658644		2391.98	-0.00560906		2981.98	0.00821539		3571.98	-0.01521065
622.2	-0.0040936		1212.19	-0.00743516		1802.19	-0.00658737		2392.18	-0.00582136		2982.18	0.00889569		3572.18	-0.01570938
622.4	-0.00404883		1212.39	-0.00698037		1802.39	-0.00648182		2392.38	-0.00622454		2982.38	0.0096408		3572.38	-0.01568876
622.6	-0.00380368		1212.59	-0.00612384		1802.59	-0.00662137		2392.58	-0.00578811		2982.58	0.00921253		3572.58	-0.01584075
622.8	-0.00484101		1212.79	-0.00550318		1802.79	-0.00682635		2392.78	-0.00676753		2982.78	0.00861534		3572.78	-0.01624384
623	-0.00391068		1212.99	-0.00536862		1802.99	-0.00690948		2392.98	-0.0076717		2982.98	0.00808307		3572.98	-0.01646262
623.2	-0.00374162		1213.19	-0.00520087		1803.19	-0.00767626		2393.18	-0.00769315		2983.18	0.00750358		3573.18	-0.01581896
623.4	-0.00302597		1213.39	-0.00543881		1803.39	-0.00829041		2393.38	-0.00702027		2983.38	0.00669288		3573.38	-0.01570752
623.6	-0.00287915		1213.59	-0.00460045		1803.59	-0.00846012		2393.58	-0.00764975		2983.58	0.00555431		3573.58	-0.01612372
623.8	-0.00248838		1213.79	-0.00473695		1803.79	-0.00952386		2393.78	-0.00733827		2983.78	0.00638412		3573.78	-0.01531964
624	-0.00242911		1213.99	-0.00491363		1803.99	-0.01024261		2393.98	-0.0070502		2983.98	0.00502014		3573.98	-0.01550434
624.2	-0.00306172		1214.19	-0.00448616		1804.19	-0.00970564		2394.18	-0.00605661		2984.18	0.00416848		3574.18	-0.01587408
624.4	-0.00271282		1214.39	-0.00488845		1804.39	-0.00937841		2394.38	-0.00590794		2984.38	0.00360918		3574.38	-0.01596097
624.6	-0.00232148		1214.59	-0.00452952		1804.59	-0.00934935		2394.58	-0.00610759		2984.58	0.00309246		3574.58	-0.01580797
624.8	-0.00276432		1214.79	-0.00424568		1804.79	-0.0086781		2394.78	-0.00721054		2984.78	0.00335109		3574.78	-0.01599391
625	-0.00326047		1214.99	-0.0037991		1804.99	-0.00864498		2394.98	-0.00685729		2984.98	0.00422503		3574.98	-0.01633725
625.2	-0.00321125		1215.19	-0.00320257		1805.19	-0.00898763		2395.18	-0.00643252		2985.18	0.00317404		3575.18	-0.01563182
625.4	-0.00258851		1215.39	-0.00328218		1805.39	-0.00818642		2395.38	-0.00738331		2985.38	0.00382773		3575.38	-0.01555786
625.6	-0.00269368		1215.59	-0.00349898		1805.59	-0.00806738		2395.58	-0.00718389		2985.58	0.00312091		3575.58	-0.01651808
625.8	-0.00280234		1215.79	-0.00409892		1805.79	-0.00807799		2395.78	-0.00709054		2985.78	0.00330264		3575.78	-0.01647583
626	-0.00343027		1215.99	-0.00429341		1805.99	-0.00718749		2395.98	-0.00651881		2985.98	0.00356719		3575.98	-0.01676357
626.2	-0.00406618		1216.19	-0.00428819		1806.19	-0.00718189		2396.18	-0.00694944		2986.18	0.00352681		3576.18	-0.01716864
626.4	-0.00448999		1216.39	-0.00470601		1806.39	-0.00747494		2396.38	-0.0070871		2986.38	0.00417122		3576.38	-0.01660027
626.6	-0.00490288		1216.59	-0.00515864		1806.59	-0.00773126		2396.58	-0.00737821		2986.58	0.00423863		3576.58	-0.01615499
626.8	-0.0059371		1216.79	-0.00572015		1806.79	-0.00827187		2396.78	-0.00703351		2986.78	0.00401027		3576.78	-0.01569596
627	-0.00524979		1216.99	-0.00623642		1806.99	-0.00811302		2396.98	-0.00653475		2986.98	0.00436428		3576.98	-0.01523365
627.2	-0.00493438		1217.19	-0.00656309		1807.19	-0.00811623		2397.18	-0.00581253		2987.18	0.0046503		3577.18	-0.01586768
627.4	-0.00435661		1217.39	-0.00612436		1807.39	-0.00764627		2397.38	-0.00513841		2987.38	0.00473345		3577.38	-0.01552802
627.6	-0.0048216		1217.59	-0.00615331		1807.59	-0.00737331		2397.58	-0.00574677		2987.58	0.00370375		3577.58	-0.01600736
627.8	-0.00399461		1217.79	-0.00602259		1807.79	-0.0076506		2397.78	-0.0054806		2987.78	0.00402505		3577.78	-0.01543585
628	-0.00408466		1217.99	-0.00596351		1807.99	-0.00737614		2397.98	-0.00541869		2987.98	0.00236222		3577.98	-0.01605343
628.2	-0.00319485		1218.19	-0.00636721		1808.19	-0.0067743		2398.18	-0.00539888		2988.18	0.00324618		3578.18	-0.01655124
628.4	-0.00236626		1218.39	-0.00619406		1808.39	-0.00621714		2398.38	-0.00553624		2988.38	0.00375875		3578.38	-0.01608778
628.6	-0.00301479		1218.59	-0.00617879		1808.59	-0.00638883		2398.58	-0.00571612		2988.58	0.00367245		3578.58	-0.01606765
628.8	-0.00307391		1218.79	-0.00627732		1808.79	-0.00646179		2398.78	-0.00609133		2988.78	0.00396974		3578.78	-0.0159656
629	-0.00232633		1218.99	-0.00690914		1808.99	-0.00723448		2398.98	-0.00511796		2988.98	0.00334643		3578.98	-0.01684553
629.2	-0.0017824		1219.19	-0.0069817		1809.19	-0.00715661		2399.18	-0.00543489		2989.18	0.00278311		3579.18	-0.01625594
629.4	-0.00196916		1219.39	-0.00769382		1809.39	-0.00718445		2399.38	-0.00651937		2989.38	0.00366199		3579.38	-0.01656591
629.6	-0.00216992		1219.59	-0.00789826		1809.59	-0.00755298		2399.58	-0.00638336		2989.58	0.00295293		3579.58	-0.01663755
629.8	-0.00252415		1219.79	-0.00705083		1809.79	-0.00740333		2399.78	-0.00591385		2989.78	0.00396704		3579.78	-0.01574232
630	-0.00242127		1219.99	-0.0071669		1809.99	-0.00765199		2399.98	-0.00613788		2989.98	0.00365783		3579.98	-0.01555164
630.2	-0.00296357		1220.19	-0.0080563		1810.19	-0.00814869		2400.18	-0.00685019		2990.18	0.00456515		3580.18	-0.01633099
630.4	-0.00350298		1220.39	-0.00840477		1810.39	-0.00884131		2400.38	-0.0070975		2990.38	0.00531498		3580.38	-0.01562937
630.6	-0.00411621		1220.59	-0.00829222		1810.59	-0.00950384		2400.58	-0.00682996		2990.58	0.0053433		3580.58	-0.01560233
630.8	-0.00428379		1220.79	-0.00800965		1810.79	-0.00988996		2400.78	-0.00632422		2990.78	0.00477047		3580.78	-0.0149832
631	-0.00358793		1220.99	-0.00773113		1810.99	-0.00948157		2400.98	-0.00621341		2990.98	0.00526448		3580.98	-0.01492373
631.2	-0.00381254		1221.19	-0.00615665		1811.19	-0.00905524		2401.18	-0.00628027		2991.18	0.0049879		3581.18	-0.01560496
631.4	-0.00471395		1221.39	-0.00573477		1811.39	-0.00868399		2401.38	-0.00646134		2991.38	0.00419811		3581.38	-0.01461498
631.6	-0.00572319		1221.59	-0.00529188		1811.59	-0.00900039		2401.58	-0.00731412		2991.58	0.0040973		3581.58	-0.01511333
631.8	-0.00585549		1221.79	-0.00439173		1811.79	-0.00917566		2401.78	-0.00752132		2991.78	0.0046998		3581.78	-0.01506363
632	-0.00572548		1221.99	-0.00453887		1811.99	-0.00895253		2401.98	-0.00854202		2991.98	0.00399544		3581.98	-0.01544512
632.2	-0.00637629		1222.19	-0.00446925		1812.19	-0.00868445		2402.18	-0.00874194		2992.18	0.00461604		3582.18	-0.01494319
632.4	-0.00691237		1222.39	-0.00398173		1812.39	-0.00896558		2402.38	-0.00854351		2992.38	0.00366799		3582.38	-0.01477586
632.6	-0.00722809		1222.59	-0.00423246		1812.59	-0.0102518		2402.58	-0.00786665		2992.58	0.00359504		3582.58	-0.01480345
632.8	-0.00605995		1222.79	-0.00465164		1812.79	-0.01087566		2402.78	-0.00835416		2992.78	0.00409304		3582.78	-0.01588156
633	-0.00604635		1222.99	-0.00533777		1812.99	-0.01188659		2402.98	-0.00842172		2992.98	0.00327302		3582.98	-0.0160186
633.2	-0.00654275		1223.19	-0.00599477		1813.19	-0.01150081		2403.18	-0.00923924		2993.18	0.00308246		3583.18	-0.01564371
633.4	-0.00599301		1223.39	-0.00641862		1813.39	-0.01162189		2403.38	-0.00896593		2993.38	0.00247983		3583.38	-0.01590591
633.6	-0.00532812		1223.59	-0.00573471		1813.59	-0.01088436		2403.58	-0.007601		2993.58	0.00151229		3583.58	-0.01552762
633.8	-0.00498629		1223.79	-0.00555514		1813.79	-0.01040017		2403.78	-0.00777721		2993.78	0.0004415		3583.78	-0.01528241
634	-0.00420362		1223.99	-0.00619941		1813.99	-0.01065884		2403.98	-0.00791432		2993.98	0.00014514		3583.98	-0.01583353
634.2	-0.00464743		1224.19	-0.00638494		1814.19	-0.00945693		2404.18	-0.00744521		2994.18	0.00095		3584.18	-0.01732144
634.4	-0.00441724		1224.39	-0.00654399		1814.39	-0.00935875		2404.38	-0.00655941		2994.38	0.00084919		3584.38	-0.01706051
634.6	-0.00432196		1224.59	-0.00659201		1814.59	-0.00863668		2404.58	-0.00593308		2994.58	0.00060921		3584.58	-0.01710407
634.8	-0.00401383		1224.79	-0.00657118		1814.79	-0.0080205		2404.78	-0.00530754		2994.78	0.00045301		3584.78	-0.01697833
635	-0.00378878		1224.99	-0.0063832		1814.99	-0.007287		2404.98	-0.00446153		2994.98	0.00062561		3584.98	-0.01697579
635.2	-0.00446675		1225.19	-0.00635136		1815.19	-0.00679363		2405.18	-0.00438242		2995.18	0.00090781		3585.18	-0.01676171
635.4	-0.00498171		1225.39	-0.00647016		1815.39	-0.00698112		2405.38	-0.00484785		2995.38	0.00130117		3585.38	-0.01677157
635.6	-0.0057399		1225.59	-0.00654921		1815.59	-0.0069911		2405.58	-0.00473138		2995.58	0.00248912		3585.58	-0.01698219
635.8	-0.00579506		1225.79	-0.00740217		1815.79	-0.00743143		2405.78	-0.00552245		2995.78	0.00190706		3585.78	-0.01638288
636	-0.00604494		1225.99	-0.0074948		1815.99	-0.00719258		2405.98	-0.00571769		2995.98	0.00140695		3585.98	-0.01617388
636.2	-0.0073383		1226.19	-0.00693818		1816.19	-0.00758414		2406.18	-0.00606183		2996.18	0.00170762		3586.18	-0.01501988
636.4	-0.00694175		1226.39	-0.00695228		1816.39	-0.00744608		2406.38	-0.00648921		2996.38	0.00132512		3586.38	-0.01492065
636.6	-0.00708238		1226.59	-0.00715563		1816.59	-0.00809588		2406.58	-0.00672143		2996.58	0.0016323		3586.58	-0.01508365
636.8	-0.00630716		1226.79	-0.00832276		1816.79	-0.0081917		2406.78	-0.00747376		2996.78	0.00132409		3586.78	-0.01463018
637	-0.0053419		1226.99	-0.00815939		1816.99	-0.00855479		2406.98	-0.00746114		2996.98	0.00045087		3586.98	-0.01336016
637.2	-0.00434823		1227.19	-0.00876248		1817.19	-0.00808801		2407.18	-0.00799829		2997.18	0.00051487		3587.18	-0.01309118
637.4	-0.00264205		1227.39	-0.00862041		1817.39	-0.00732099		2407.38	-0.00760859		2997.38	0.00069071		3587.38	-0.01295368
637.6	-0.00202386		1227.59	-0.0079909		1817.59	-0.00676517		2407.58	-0.00775746		2997.58	0.00137473		3587.58	-0.01284708
637.8	-0.00154552		1227.79	-0.00853549		1817.79	-0.00642873		2407.78	-0.00802999		2997.78	0.0015387		3587.78	-0.01344502
638	-0.0007887		1227.99	-0.00837429		1817.99	-0.00689095		2407.98	-0.00762739		2997.98	0.00298574		3587.98	-0.0139274
638.2	-0.00007198		1228.19	-0.00860699		1818.19	-0.00640505		2408.18	-0.0072618		2998.18	0.00458546		3588.18	-0.01490849
638.4	-0.00030618		1228.39	-0.00857975		1818.39	-0.00721544		2408.38	-0.00712022		2998.38	0.00491451		3588.38	-0.01428378
638.6	-0.00096875		1228.59	-0.00810818		1818.59	-0.00678764		2408.58	-0.00659886		2998.58	0.00493629		3588.58	-0.01505394
638.8	-0.00087195		1228.79	-0.00788622		1818.79	-0.00709772		2408.78	-0.00611138		2998.78	0.00469442		3588.78	-0.01469498
639	-0.0012545		1228.99	-0.00725774		1818.99	-0.0070098		2408.98	-0.00601983		2998.98	0.00465361		3588.98	-0.01468633
639.2	-0.00151574		1229.19	-0.00718566		1819.19	-0.00724412		2409.18	-0.0055729		2999.18	0.00521238		3589.18	-0.01484976
639.4	-0.00210733		1229.39	-0.00606013		1819.39	-0.00713399		2409.38	-0.00542093		2999.38	0.00493654		3589.38	-0.01546109
639.6	-0.00262869		1229.59	-0.00668485		1819.59	-0.00675638		2409.58	-0.00545073		2999.58	0.00466688		3589.58	-0.01502525
639.8	-0.00264661		1229.79	-0.00720745		1819.79	-0.00717704		2409.78	-0.00574404		2999.78	0.00348232		3589.78	-0.01546006
640	-0.00364123		1229.99	-0.00628907		1819.99	-0.00683644		2409.98	-0.00573733		2999.98	0.00287549		3589.98	-0.01612589
640.2	-0.00450008		1230.19	-0.00627286		1820.19	-0.00658636		2410.18	-0.00554601		3000.18	0.00242729		3590.18	-0.015839
640.4	-0.00496525		1230.39	-0.00741507		1820.39	-0.00651283		2410.38	-0.00521661		3000.38	0.00194503		3590.38	-0.01609277
640.6	-0.00560555		1230.59	-0.00815317		1820.59	-0.00755326		2410.58	-0.00513604		3000.58	0.00178755		3590.58	-0.01643092
640.8	-0.00498204		1230.79	-0.00887745		1820.79	-0.00797244		2410.78	-0.00520446		3000.78	0.00181469		3590.78	-0.01615437
641	-0.00436322		1230.99	-0.00861165		1820.99	-0.00807684		2410.98	-0.00497954		3000.98	0.00182029		3590.98	-0.01663695
641.2	-0.00392309		1231.19	-0.00905402		1821.19	-0.00850886		2411.18	-0.00525156		3001.18	0.00223116		3591.18	-0.01670195
641.4	-0.00305106		1231.39	-0.00923695		1821.39	-0.00825078		2411.38	-0.00580925		3001.38	0.00297479		3591.38	-0.01690789
641.6	-0.00307494		1231.59	-0.00891526		1821.59	-0.00845744		2411.58	-0.00655406		3001.58	0.0030905		3591.58	-0.01758728
641.8	-0.00307639		1231.79	-0.00926026		1821.79	-0.00837499		2411.78	-0.00703522		3001.78	0.0035242		3591.78	-0.01801254
642	-0.00312317		1231.99	-0.00893811		1821.99	-0.00922232		2411.98	-0.00702118		3001.98	0.00431779		3591.98	-0.01818332
642.2	-0.00346911		1232.19	-0.00837619		1822.19	-0.00991073		2412.18	-0.00748595		3002.18	0.00459963		3592.18	-0.01821314
642.4	-0.0041868		1232.39	-0.00736404		1822.39	-0.00987735		2412.38	-0.00712158		3002.38	0.00431938		3592.38	-0.01801744
642.6	-0.00525168		1232.59	-0.00690661		1822.59	-0.00956724		2412.58	-0.00658983		3002.58	0.0041477		3592.58	-0.01865398
642.8	-0.00520327		1232.79	-0.00665381		1822.79	-0.00951546		2412.78	-0.00714655		3002.78	0.00317077		3592.78	-0.01780187
643	-0.00558257		1232.99	-0.00672193		1822.99	-0.00974681		2412.98	-0.00673974		3002.98	0.00335961		3592.98	-0.01825309
643.2	-0.00543889		1233.19	-0.00605467		1823.19	-0.00960125		2413.18	-0.00690431		3003.18	0.00390153		3593.18	-0.01845612
643.4	-0.00660094		1233.39	-0.00538367		1823.39	-0.01004605		2413.38	-0.00711109		3003.38	0.00322559		3593.38	-0.01837752
643.6	-0.00701456		1233.59	-0.00601047		1823.59	-0.01072423		2413.58	-0.00801619		3003.58	0.00251325		3593.58	-0.01761375
643.8	-0.00784341		1233.79	-0.00658056		1823.79	-0.01126167		2413.78	-0.00750562		3003.78	0.00222754		3593.78	-0.01796298
644	-0.00802077		1233.99	-0.00587015		1823.99	-0.01055142		2413.98	-0.00770519		3003.98	0.00200177		3593.98	-0.01736463
644.2	-0.00845725		1234.19	-0.00711381		1824.19	-0.01039586		2414.18	-0.00722454		3004.18	0.00253307		3594.18	-0.01690333
644.4	-0.00796961		1234.39	-0.00744356		1824.39	-0.01111057		2414.38	-0.00774315		3004.38	0.00271079		3594.38	-0.01701193
644.6	-0.00762906		1234.59	-0.0075682		1824.59	-0.01168972		2414.58	-0.00861144		3004.58	0.00255261		3594.58	-0.01678738
644.8	-0.00651997		1234.79	-0.00736923		1824.79	-0.01165787		2414.78	-0.00858401		3004.78	0.00305761		3594.78	-0.01651039
645	-0.00580882		1234.99	-0.00684573		1824.99	-0.01135951		2414.98	-0.00926689		3004.98	0.00285441		3594.98	-0.01620954
645.2	-0.00530485		1235.19	-0.00670019		1825.19	-0.0118605		2415.18	-0.00991724		3005.18	0.00312303		3595.18	-0.01533604
645.4	-0.00534635		1235.39	-0.0060773		1825.39	-0.01128395		2415.38	-0.01080938		3005.38	0.00301214		3595.38	-0.01573602
645.6	-0.0056632		1235.59	-0.00609508		1825.59	-0.01160882		2415.58	-0.01103534		3005.58	0.00276842		3595.58	-0.0166476
645.8	-0.00580061		1235.79	-0.0064805		1825.79	-0.01087947		2415.78	-0.01140908		3005.78	0.00296399		3595.78	-0.01647337
646	-0.00603024		1235.99	-0.00560664		1825.99	-0.01129171		2415.98	-0.01094804		3005.98	0.00309415		3595.98	-0.01659811
646.2	-0.0061797		1236.19	-0.00512848		1826.19	-0.01113917		2416.18	-0.01115569		3006.18	0.00363899		3596.18	-0.01662213
646.4	-0.00645294		1236.39	-0.00543405		1826.39	-0.01054151		2416.38	-0.01000453		3006.38	0.0040112		3596.38	-0.01588224
646.6	-0.00628232		1236.59	-0.00518964		1826.59	-0.00985536		2416.58	-0.01031694		3006.58	0.00351404		3596.58	-0.01544416
646.8	-0.0057951		1236.79	-0.00497914		1826.79	-0.00977086		2416.78	-0.01075613		3006.78	0.0026632		3596.78	-0.01568036
647	-0.00565112		1236.99	-0.00508308		1826.99	-0.01060397		2416.98	-0.01012452		3006.98	0.00317		3596.98	-0.01648478
647.2	-0.00599066		1237.19	-0.00386645		1827.19	-0.0106404		2417.18	-0.01017829		3007.18	0.00293963		3597.18	-0.01614311
647.4	-0.00661043		1237.39	-0.00411319		1827.39	-0.0104383		2417.38	-0.00924414		3007.38	0.00208552		3597.38	-0.01683594
647.6	-0.00640412		1237.59	-0.0047841		1827.59	-0.00945988		2417.58	-0.00944031		3007.58	0.00173731		3597.58	-0.01669714
647.8	-0.00612084		1237.79	-0.00517489		1827.79	-0.00824315		2417.78	-0.00840723		3007.78	0.00172503		3597.78	-0.0171875
648	-0.00538063		1237.99	-0.00526599		1827.99	-0.00698031		2417.98	-0.00786187		3007.98	0.00137577		3597.98	-0.01680358
648.2	-0.0051965		1238.19	-0.00646252		1828.19	-0.00712832		2418.18	-0.00715851		3008.18	0.00145421		3598.18	-0.01693123
648.4	-0.00439431		1238.39	-0.00669432		1828.39	-0.00680684		2418.38	-0.00646846		3008.38	0.00114329		3598.38	-0.01678707
648.6	-0.00433264		1238.59	-0.00751646		1828.59	-0.00639711		2418.58	-0.00601993		3008.58	0.00087363		3598.58	-0.01660886
648.8	-0.00393713		1238.79	-0.00781347		1828.79	-0.00606817		2418.78	-0.00506524		3008.78	0.00128816		3598.78	-0.01643587
649	-0.00420776		1238.99	-0.00846644		1828.99	-0.00611556		2418.98	-0.00474176		3008.98	0.00080889		3598.98	-0.01621906
649.2	-0.00468738		1239.19	-0.00910648		1829.19	-0.00636568		2419.18	-0.0039031		3009.18	0.00088051		3599.18	-0.01589347
649.4	-0.00496907		1239.39	-0.0094771		1829.39	-0.00666617		2419.38	-0.00353323		3009.38	0.00068701		3599.38	-0.01638272
649.6	-0.00511564		1239.59	-0.01060858		1829.59	-0.00700729		2419.58	-0.00287456		3009.58	0.00105738		3599.58	-0.01614434
649.8	-0.00534414		1239.79	-0.01093347		1829.79	-0.00684224		2419.78	-0.00264063		3009.78	0.00145851		3599.78	-0.01526376
