# Supplementary material for: Functional development of a V3/glycan-specific broadly neutralizing antibody isolated from a case of HIV superinfection
Source: eLife journal article supplement (doi:10.7554/elife.68110), 2021-07-15
Supplement: fig2-data2 [file F3.xls]

Vers 3.43 Data Simulation
Conc1	1.563E-08	1.563E-08	1.563E-08	1.563E-08	1.563E-08	1.563E-08	1.563E-08
Start1	290	879.99	1469.99	2059.99	2650	3240	3830
Stop1	649.8	1239.79	1829.8	2419.79	3009.8	3599.8	4189.8
Time1	Data1	Sim1	Time2	Data2	Sim2	Time3	Data3	Sim3	Time4	Data4	Sim4	Time5	Data5	Sim5	Time6	Data6	Sim6	Time7	Data7	Sim7
290	-0.002467		879.99	0.0061199		1469.99	-0.00543666		2059.99	-0.00368826		2650	-0.0004486		3240	-0.00079291		3830	-0.00924553
290.2	-0.00301773		880.19	0.00642852		1470.19	-0.0054955		2060.19	-0.00400668		2650.2	-0.00044449		3240.2	-0.00052063		3830.2	-0.00809801
290.4	-0.00344908		880.39	0.00548282		1470.39	-0.00545296		2060.39	-0.00487216		2650.4	0.00016263		3240.4	0.00051865		3830.4	-0.00819328
290.6	-0.00411812		880.59	0.0051598		1470.59	-0.00513296		2060.59	-0.00458009		2650.6	0.00075646		3240.6	0.00104348		3830.6	-0.00797013
290.8	-0.00430151		880.79	0.00482685		1470.79	-0.00574204		2060.79	-0.00449027		2650.8	0.00127504		3240.8	0.00112988		3830.8	-0.00791274
291	-0.00452914		880.99	0.00501672		1470.99	-0.00625959		2060.99	-0.00441254		2651	0.00196359		3241	0.00193238		3831	-0.0077071
291.2	-0.00402577		881.19	0.00431452		1471.19	-0.00555366		2061.19	-0.00458126		2651.2	0.00257028		3241.2	0.00249465		3831.2	-0.00782639
291.4	-0.00372879		881.39	0.0043891		1471.39	-0.00581204		2061.39	-0.00446635		2651.4	0.00279005		3241.4	0.00336218		3831.4	-0.00805438
291.6	-0.00266592		881.59	0.00403525		1471.59	-0.00588764		2061.59	-0.0049459		2651.6	0.00209428		3241.6	0.00353976		3831.6	-0.00813614
291.8	-0.00182416		881.79	0.00354376		1471.79	-0.00515904		2061.79	-0.00449758		2651.8	0.00179041		3241.8	0.00372567		3831.8	-0.0079126
292	-0.00059714		881.99	0.00438047		1471.99	-0.00475541		2061.99	-0.00408944		2652	0.00176384		3242	0.00377206		3832	-0.00823456
292.2	0.00045806		882.19	0.00402016		1472.19	-0.00405835		2062.19	-0.00384092		2652.2	0.00132407		3242.2	0.00405048		3832.2	-0.00895675
292.4	0.00115178		882.39	0.00351208		1472.39	-0.00365488		2062.39	-0.00362376		2652.4	0.00106638		3242.4	0.00493515		3832.4	-0.00872516
292.6	0.00163262		882.59	0.00388647		1472.59	-0.00291989		2062.59	-0.00364024		2652.6	0.00015639		3242.6	0.00509547		3832.6	-0.0090386
292.8	0.00117808		882.79	0.00492671		1472.79	-0.00274954		2062.79	-0.00388522		2652.8	0.00070819		3242.8	0.00457896		3832.8	-0.00857071
293	0.00063501		882.99	0.00571031		1472.99	-0.00172486		2062.99	-0.00412596		2653	0.00049858		3243	0.0050339		3833	-0.00810958
293.2	0.00026713		883.19	0.00687493		1473.19	-0.00111044		2063.19	-0.00403398		2653.2	0.00051304		3243.2	0.00498044		3833.2	-0.00756484
293.4	0.00073695		883.39	0.00714228		1473.39	-0.00143092		2063.39	-0.00465725		2653.4	0.00039581		3243.4	0.00555353		3833.4	-0.00691223
293.6	0.0006362		883.59	0.00739097		1473.59	-0.00048238		2063.59	-0.00470695		2653.6	0.00023928		3243.6	0.00565401		3833.6	-0.00613509
293.8	-0.00004969		883.79	0.00725952		1473.79	-0.00046173		2063.79	-0.00431253		2653.8	0.00078562		3243.8	0.0070277		3833.8	-0.0067594
294	-0.00071741		883.99	0.00838611		1473.99	-0.00006637		2063.99	-0.0052202		2654	0.00128446		3244	0.00838525		3834	-0.00602259
294.2	-0.00037706		884.19	0.00870972		1474.19	0.00031945		2064.19	-0.00522665		2654.2	0.00166457		3244.2	0.00901931		3834.2	-0.00591401
294.4	-0.00030068		884.39	0.0080066		1474.39	0.0003811		2064.39	-0.00546227		2654.4	0.00253323		3244.4	0.00993344		3834.4	-0.00645855
294.6	-0.0007038		884.59	0.00855598		1474.59	0.00002786		2064.59	-0.0049512		2654.6	0.00292821		3244.6	0.00964349		3834.6	-0.00662542
294.8	0.000175		884.79	0.00926712		1474.79	-0.00115737		2064.79	-0.00511308		2654.8	0.00322774		3244.8	0.00979267		3834.8	-0.00724835
295	0.00107001		884.99	0.00943808		1474.99	-0.00187199		2064.99	-0.00532076		2655	0.00393493		3245	0.01073357		3835	-0.00767842
295.2	0.00265872		885.19	0.00893203		1475.19	-0.00150858		2065.19	-0.00521234		2655.2	0.00427016		3245.2	0.01106593		3835.2	-0.00772649
295.4	0.00245897		885.39	0.00968081		1475.39	-0.00250285		2065.39	-0.00378514		2655.4	0.00410763		3245.4	0.01080372		3835.4	-0.00814185
295.6	0.00334986		885.59	0.00908422		1475.59	-0.00212979		2065.59	-0.00413384		2655.6	0.0038012		3245.6	0.00934632		3835.6	-0.00817105
295.8	0.00392607		885.79	0.0094808		1475.79	-0.00170935		2065.79	-0.00309174		2655.8	0.00415705		3245.8	0.0085889		3835.8	-0.00835013
296	0.00497069		885.99	0.01015104		1475.99	-0.00179421		2065.99	-0.00228195		2656	0.00436344		3246	0.00877114		3836	-0.00907019
296.2	0.00569345		886.19	0.00885376		1476.19	-0.0016601		2066.19	-0.00189528		2656.2	0.004585		3246.2	0.00880882		3836.2	-0.00871861
296.4	0.0063374		886.39	0.00885176		1476.39	-0.00151058		2066.39	-0.00107753		2656.4	0.0045625		3246.4	0.00938778		3836.4	-0.00898289
296.6	0.00681903		886.59	0.00870992		1476.59	-0.00169187		2066.59	-0.00129472		2656.6	0.00519199		3246.6	0.00804852		3836.6	-0.00889883
296.8	0.00622781		886.79	0.00842698		1476.79	-0.00224884		2066.79	-0.00135314		2656.8	0.00525746		3246.8	0.00737247		3836.8	-0.00836212
297	0.00599255		886.99	0.00763273		1476.99	-0.00149636		2066.99	-0.0011581		2657	0.00525612		3247	0.00729918		3837	-0.00809561
297.2	0.00623104		887.19	0.00814828		1477.19	-0.00155175		2067.19	-0.00081573		2657.2	0.00534894		3247.2	0.00705913		3837.2	-0.00784988
297.4	0.00630378		887.39	0.00802558		1477.39	-0.0011937		2067.39	-0.00094485		2657.4	0.00536654		3247.4	0.0070083		3837.4	-0.00787346
297.6	0.00613541		887.59	0.00797339		1477.59	-0.00081476		2067.59	-0.00017054		2657.6	0.00602671		3247.6	0.00663593		3837.6	-0.00715588
297.8	0.00604775		887.79	0.00797059		1477.79	-0.00074017		2067.79	0.00076031		2657.8	0.00581948		3247.8	0.00741037		3837.8	-0.00729598
298	0.00691118		887.99	0.0084626		1477.99	-0.00100148		2067.99	0.00007807		2658	0.00625098		3248	0.00699771		3838	-0.00602671
298.2	0.00726083		888.19	0.0080493		1478.19	-0.00020781		2068.19	0.00096798		2658.2	0.00638137		3248.2	0.00685008		3838.2	-0.00483285
298.4	0.00754746		888.39	0.00774549		1478.39	-0.00087729		2068.39	0.00104164		2658.4	0.00573554		3248.4	0.00760429		3838.4	-0.00451784
298.6	0.00763367		888.59	0.00848955		1478.59	-0.0003194		2068.59	0.00123699		2658.6	0.0053233		3248.6	0.00752521		3838.6	-0.0045534
298.8	0.00837584		888.79	0.0085934		1478.79	-0.00099266		2068.79	0.00052746		2658.8	0.00496094		3248.8	0.00868273		3838.8	-0.0044873
299	0.00918748		888.99	0.00822831		1478.99	-0.00055241		2068.99	0.0006359		2659	0.00496084		3249	0.00929338		3839	-0.00450448
299.2	0.00972391		889.19	0.0081647		1479.19	0.00085935		2069.19	-0.00003724		2659.2	0.00559361		3249.2	0.0089473		3839.2	-0.00388385
299.4	0.00880351		889.39	0.00902836		1479.39	0.00097314		2069.39	-0.00013092		2659.4	0.00577478		3249.4	0.00860891		3839.4	-0.00398492
299.6	0.00904649		889.59	0.0088074		1479.59	0.00113352		2069.59	-0.00178972		2659.6	0.00542903		3249.6	0.00816585		3839.6	-0.00389211
299.8	0.00971847		889.79	0.00943991		1479.79	0.00133607		2069.79	-0.00157904		2659.8	0.00538721		3249.8	0.00842996		3839.8	-0.00385785
300	0.01041826		889.99	0.00868884		1479.99	0.00174871		2069.99	-0.00166431		2660	0.00612079		3250	0.00876543		3840	-0.00405084
300.2	0.01023204		890.19	0.0080985		1480.19	0.00156559		2070.19	-0.0018227		2660.2	0.00632499		3250.2	0.00841364		3840.2	-0.00353394
300.4	0.01020342		890.39	0.0091091		1480.39	0.00098062		2070.39	-0.00152435		2660.4	0.00590191		3250.4	0.00895832		3840.4	-0.00507768
300.6	0.00967927		890.59	0.00906042		1480.59	0.00080959		2070.59	-0.00176798		2660.6	0.00546217		3250.6	0.00731466		3840.6	-0.00515005
300.8	0.00895689		890.79	0.00974602		1480.79	0.00050318		2070.79	-0.00125743		2660.8	0.0050467		3250.8	0.00784543		3840.8	-0.00579024
301	0.0084851		890.99	0.00956215		1480.99	0.00071435		2070.99	-0.00104152		2661	0.00610971		3251	0.00788193		3841	-0.00559234
301.2	0.00877215		891.19	0.00983427		1481.19	-0.00053985		2071.19	-0.00084053		2661.2	0.00568826		3251.2	0.00812038		3841.2	-0.00614285
301.4	0.00849501		891.39	0.00983287		1481.39	-0.00183692		2071.39	0.00045655		2661.4	0.00566298		3251.4	0.00864933		3841.4	-0.00628336
301.6	0.00863524		891.59	0.01051952		1481.59	-0.0021078		2071.59	0.0013281		2661.6	0.00635562		3251.6	0.00852023		3841.6	-0.00649535
301.8	0.00906274		891.79	0.01104972		1481.79	-0.00236094		2071.79	0.00187178		2661.8	0.00712908		3251.8	0.00861707		3841.8	-0.00644536
302	0.00900469		891.99	0.01210554		1481.99	-0.00211147		2071.99	0.0010771		2662	0.00739242		3252	0.00796081		3842	-0.005571
302.2	0.00863899		892.19	0.01244078		1482.19	-0.00174774		2072.19	0.00156116		2662.2	0.00736195		3252.2	0.00836654		3842.2	-0.00587207
302.4	0.0093786		892.39	0.01233874		1482.39	-0.00202754		2072.39	0.00153788		2662.4	0.00741699		3252.4	0.00893646		3842.4	-0.00622817
302.6	0.01023331		892.59	0.01217722		1482.59	-0.00117337		2072.59	0.0002299		2662.6	0.00779993		3252.6	0.00858453		3842.6	-0.0063609
302.8	0.01106386		892.79	0.01136196		1482.79	-0.0017337		2072.79	-0.00159621		2662.8	0.00826176		3252.8	0.00872294		3842.8	-0.00677877
303	0.01219226		892.99	0.01085937		1482.99	-0.00090652		2072.99	-0.00204672		2663	0.00833928		3253	0.00837029		3843	-0.00679577
303.2	0.01237316		893.19	0.01080649		1483.19	-0.00009945		2073.19	-0.00368816		2663.2	0.0084783		3253.2	0.00788278		3843.2	-0.0059196
303.4	0.01300075		893.39	0.01107057		1483.39	-0.00089323		2073.39	-0.00413624		2663.4	0.00744296		3253.4	0.00771306		3843.4	-0.00546144
303.6	0.01415902		893.59	0.01023954		1483.59	-0.00077947		2073.59	-0.00463616		2663.6	0.00709393		3253.6	0.00712924		3843.6	-0.00557072
303.8	0.01430184		893.79	0.01058487		1483.79	-0.00043043		2073.79	-0.00429689		2663.8	0.00779348		3253.8	0.00691678		3843.8	-0.00511499
304	0.01500754		893.99	0.01047371		1483.99	-0.00022679		2073.99	-0.00416632		2664	0.00743386		3254	0.00704907		3844	-0.00566555
304.2	0.01539653		894.19	0.01110529		1484.19	-0.00059844		2074.19	-0.00403643		2664.2	0.00626698		3254.2	0.00704776		3844.2	-0.00569259
304.4	0.0159796		894.39	0.01197736		1484.39	-0.00084887		2074.39	-0.00435203		2664.4	0.00560581		3254.4	0.00809598		3844.4	-0.00599547
304.6	0.0156317		894.59	0.01170727		1484.59	-0.00057443		2074.59	-0.0035405		2664.6	0.00525713		3254.6	0.00742884		3844.6	-0.00559678
304.8	0.01524949		894.79	0.0115821		1484.79	-0.00057345		2074.79	-0.00262925		2664.8	0.00537184		3254.8	0.00848419		3844.8	-0.00526799
305	0.01481278		894.99	0.01084859		1484.99	-0.00043333		2074.99	-0.00191403		2665	0.00524391		3255	0.00960132		3845	-0.00546179
305.2	0.01432922		895.19	0.01030824		1485.19	-0.00107973		2075.19	-0.00045124		2665.2	0.00451926		3255.2	0.01023289		3845.2	-0.00564606
305.4	0.01437892		895.39	0.01105888		1485.39	-0.00114616		2075.39	0.00064256		2665.4	0.00519557		3255.4	0.01039022		3845.4	-0.00541205
305.6	0.01483728		895.59	0.01175946		1485.59	-0.00040999		2075.59	0.00089731		2665.6	0.00629568		3255.6	0.01037698		3845.6	-0.00617446
305.8	0.01470473		895.79	0.01254782		1485.79	-0.00079567		2075.79	0.00166254		2665.8	0.00679779		3255.8	0.01133304		3845.8	-0.00470851
306	0.01439434		895.99	0.01343164		1485.99	-0.00046153		2075.99	0.00091479		2666	0.00687604		3256	0.01102119		3846	-0.00506762
306.2	0.01527461		896.19	0.0122239		1486.19	-0.00073159		2076.19	0.00101486		2666.2	0.00811984		3256.2	0.0114597		3846.2	-0.00487688
306.4	0.01545624		896.39	0.01167186		1486.39	-0.00091884		2076.39	-0.00008226		2666.4	0.00889778		3256.4	0.01208122		3846.4	-0.00474452
306.6	0.01675862		896.59	0.01122846		1486.59	-0.00125257		2076.59	-0.00131985		2666.6	0.00925826		3256.6	0.01205716		3846.6	-0.00493466
306.8	0.01693738		896.79	0.01086873		1486.79	-0.00155137		2076.79	-0.0022849		2666.8	0.00928089		3256.8	0.01227766		3846.8	-0.00496792
307	0.01756643		896.99	0.01041707		1486.99	-0.00112308		2076.99	-0.00280541		2667	0.00951348		3257	0.0124502		3847	-0.00456331
307.2	0.01822926		897.19	0.01103528		1487.19	-0.00019398		2077.19	-0.00228732		2667.2	0.01001429		3257.2	0.01276826		3847.2	-0.0045691
307.4	0.01949339		897.39	0.01106645		1487.39	-0.00082966		2077.39	-0.00298728		2667.4	0.00992066		3257.4	0.01277194		3847.4	-0.00524282
307.6	0.01958103		897.59	0.01159364		1487.59	-0.0003467		2077.59	-0.0027485		2667.6	0.01031767		3257.6	0.01247075		3847.6	-0.00617151
307.8	0.01973052		897.79	0.01224545		1487.79	0.0000537		2077.79	-0.00308958		2667.8	0.01013053		3257.8	0.0124957		3847.8	-0.00613707
308	0.0207368		897.99	0.01283622		1487.99	0.00045592		2077.99	-0.00347497		2668	0.00860745		3258	0.01247604		3848	-0.0064985
308.2	0.02037471		898.19	0.01269535		1488.19	0.00050634		2078.19	-0.00337185		2668.2	0.00778589		3258.2	0.01196376		3848.2	-0.00670977
308.4	0.0194688		898.39	0.01269606		1488.39	0.00111567		2078.39	-0.00265802		2668.4	0.00731951		3258.4	0.01156915		3848.4	-0.0068842
308.6	0.01935068		898.59	0.01248462		1488.59	0.00216293		2078.59	-0.00149991		2668.6	0.00678356		3258.6	0.0105265		3848.6	-0.0075994
308.8	0.01904825		898.79	0.01243076		1488.79	0.00296491		2078.79	-0.00110056		2668.8	0.00543362		3258.8	0.01034961		3848.8	-0.00737502
309	0.01894446		898.99	0.01288079		1488.99	0.00398198		2078.99	-0.00074735		2669	0.00531719		3259	0.00988028		3849	-0.00822695
309.2	0.01879829		899.19	0.01254897		1489.19	0.00397808		2079.19	0.00062043		2669.2	0.00557496		3259.2	0.00962161		3849.2	-0.00733167
309.4	0.01957986		899.39	0.01310699		1489.39	0.00383825		2079.39	0.00062697		2669.4	0.00551996		3259.4	0.00986394		3849.4	-0.0085381
309.6	0.01935687		899.59	0.01282222		1489.59	0.00351398		2079.59	0.0013796		2669.6	0.00512799		3259.6	0.00988531		3849.6	-0.00883542
309.8	0.01999222		899.79	0.01249348		1489.79	0.00246708		2079.79	0.00173666		2669.8	0.00484329		3259.8	0.01012914		3849.8	-0.00804776
310	0.02055602		899.99	0.01233818		1489.99	0.00282773		2079.99	0.00154663		2670	0.00454198		3260	0.00965866		3850	-0.00860339
310.2	0.02128721		900.19	0.01149376		1490.19	0.00244827		2080.19	0.00119818		2670.2	0.00516487		3260.2	0.01045827		3850.2	-0.00843726
310.4	0.02203031		900.39	0.0121309		1490.39	0.00290553		2080.39	0.00047179		2670.4	0.00564365		3260.4	0.01130822		3850.4	-0.008613
310.6	0.02299805		900.59	0.01178448		1490.59	0.00254841		2080.59	-0.00103911		2670.6	0.00608613		3260.6	0.01144371		3850.6	-0.00791587
310.8	0.02359399		900.79	0.01082434		1490.79	0.00230289		2080.79	-0.00171801		2670.8	0.00658188		3260.8	0.01169592		3850.8	-0.00851092
311	0.0244764		900.99	0.01091368		1490.99	0.00229068		2080.99	-0.00148154		2671	0.00747488		3261	0.01191647		3851	-0.00849668
311.2	0.02475306		901.19	0.01159845		1491.19	0.00201462		2081.19	-0.00114851		2671.2	0.00768521		3261.2	0.01239594		3851.2	-0.00864925
311.4	0.02498925		901.39	0.01120317		1491.39	0.00128568		2081.39	-0.00244996		2671.4	0.00760707		3261.4	0.01254411		3851.4	-0.0090351
311.6	0.02440432		901.59	0.01151106		1491.59	0.00068678		2081.59	-0.00225144		2671.6	0.00813198		3261.6	0.01141121		3851.6	-0.0079175
311.8	0.02470889		901.79	0.01096266		1491.79	0.00075911		2081.79	-0.0025882		2671.8	0.00749181		3261.8	0.01128592		3851.8	-0.00680234
312	0.02335105		901.99	0.01114759		1491.99	0.00057296		2081.99	-0.00265877		2672	0.00708317		3262	0.011089		3852	-0.0066343
312.2	0.02278749		902.19	0.01148544		1492.19	0.00129284		2082.19	-0.00153313		2672.2	0.00721089		3262.2	0.01102205		3852.2	-0.00676896
312.4	0.02301767		902.39	0.01156655		1492.39	0.00213691		2082.39	-0.00092162		2672.4	0.00743001		3262.4	0.01068229		3852.4	-0.00658934
312.6	0.023549		902.59	0.01176412		1492.59	0.0028247		2082.59	-0.00105516		2672.6	0.00721184		3262.6	0.01039422		3852.6	-0.00567541
312.8	0.02266463		902.79	0.01214511		1492.79	0.00312328		2082.79	-0.00065807		2672.8	0.00721497		3262.8	0.0105693		3852.8	-0.00549006
313	0.02225594		902.99	0.01269874		1492.99	0.00288105		2082.99	-0.00078405		2673	0.00735705		3263	0.01034164		3853	-0.00601653
313.2	0.02241563		903.19	0.01265233		1493.19	0.00232092		2083.19	0.00017716		2673.2	0.00798195		3263.2	0.01117153		3853.2	-0.00579908
313.4	0.02251479		903.39	0.01246187		1493.39	0.00179504		2083.39	0.00008066		2673.4	0.00724584		3263.4	0.01106144		3853.4	-0.00683362
313.6	0.0232579		903.59	0.01173526		1493.59	0.00145756		2083.59	0.00105296		2673.6	0.00754947		3263.6	0.0108077		3853.6	-0.00616625
313.8	0.02440603		903.79	0.01187235		1493.79	0.00154624		2083.79	0.00124694		2673.8	0.00683324		3263.8	0.01141664		3853.8	-0.00643219
314	0.02538593		903.99	0.0126265		1493.99	0.00240696		2083.99	0.00115397		2674	0.00642059		3264	0.01119523		3854	-0.00652462
314.2	0.02667466		904.19	0.01276242		1494.19	0.00196845		2084.19	0.00051907		2674.2	0.00628707		3264.2	0.01175806		3854.2	-0.00733674
314.4	0.02803896		904.39	0.01332891		1494.39	0.00263518		2084.39	-0.00079084		2674.4	0.00607239		3264.4	0.01225852		3854.4	-0.00652974
314.6	0.02806109		904.59	0.01248191		1494.59	0.00179432		2084.59	-0.00200744		2674.6	0.00516001		3264.6	0.01243719		3854.6	-0.00681595
314.8	0.02907758		904.79	0.01227733		1494.79	0.00174556		2084.79	-0.00143063		2674.8	0.00492369		3264.8	0.01274076		3854.8	-0.00793688
315	0.02899656		904.99	0.01250476		1494.99	0.00128076		2084.99	-0.00231668		2675	0.00496543		3265	0.01358899		3855	-0.00825007
315.2	0.02910458		905.19	0.01293892		1495.19	0.00118087		2085.19	-0.00259242		2675.2	0.00475098		3265.2	0.01406997		3855.2	-0.0085241
315.4	0.02840946		905.39	0.0122723		1495.39	0.00099105		2085.39	-0.00260854		2675.4	0.00466351		3265.4	0.01438696		3855.4	-0.0086504
315.6	0.02849573		905.59	0.01238136		1495.59	0.00070305		2085.59	-0.0029605		2675.6	0.004694		3265.6	0.01365913		3855.6	-0.00770117
315.8	0.02915132		905.79	0.01265382		1495.79	0.001939		2085.79	-0.00303413		2675.8	0.00382673		3265.8	0.01464557		3855.8	-0.00746794
316	0.02875083		905.99	0.01340187		1495.99	0.00295922		2085.99	-0.0026433		2676	0.00380202		3266	0.01488321		3856	-0.00760983
316.2	0.02967586		906.19	0.01299787		1496.19	0.00374357		2086.19	-0.00173931		2676.2	0.00431767		3266.2	0.01584814		3856.2	-0.00756862
316.4	0.02953799		906.39	0.01260375		1496.39	0.00374101		2086.39	-0.00175342		2676.4	0.00473652		3266.4	0.01571025		3856.4	-0.00689645
316.6	0.02877664		906.59	0.01236393		1496.59	0.00414337		2086.59	-0.00224467		2676.6	0.00551474		3266.6	0.01562785		3856.6	-0.00669939
316.8	0.02803158		906.79	0.01241803		1496.79	0.00373272		2086.79	-0.00152892		2676.8	0.00622998		3266.8	0.0162162		3856.8	-0.00716248
317	0.02790492		906.99	0.01294339		1496.99	0.00347862		2086.99	-0.00082176		2677	0.00639412		3267	0.01655291		3857	-0.00654416
317.2	0.02800889		907.19	0.01293874		1497.19	0.00394897		2087.19	0.0000828		2677.2	0.00800763		3267.2	0.01679084		3857.2	-0.00690356
317.4	0.02844818		907.39	0.01216581		1497.39	0.00414687		2087.39	0.00050648		2677.4	0.00858613		3267.4	0.01592721		3857.4	-0.0070032
317.6	0.02986135		907.59	0.0116668		1497.59	0.00473903		2087.59	0.00112033		2677.6	0.00951803		3267.6	0.01485212		3857.6	-0.00719934
317.8	0.02992329		907.79	0.01211069		1497.79	0.00525209		2087.79	0.00064836		2677.8	0.00904663		3267.8	0.01441469		3857.8	-0.00717878
318	0.03141738		907.99	0.01158042		1497.99	0.00551798		2087.99	0.00037418		2678	0.0101257		3268	0.01397957		3858	-0.00714368
318.2	0.03159666		908.19	0.0111202		1498.19	0.00581298		2088.19	0.0004452		2678.2	0.01075265		3268.2	0.01453427		3858.2	-0.00750013
318.4	0.03157527		908.39	0.01097492		1498.39	0.0069185		2088.39	0.00032554		2678.4	0.01117436		3268.4	0.01428395		3858.4	-0.00747004
318.6	0.03143508		908.59	0.01037847		1498.59	0.00636344		2088.59	-0.00021896		2678.6	0.01041191		3268.6	0.0146973		3858.6	-0.00814216
318.8	0.03223253		908.79	0.01053178		1498.79	0.00619324		2088.79	-0.00023908		2678.8	0.01028885		3268.8	0.01506859		3858.8	-0.00878396
319	0.03178076		908.99	0.00983623		1498.99	0.00611644		2088.99	-0.00059732		2679	0.01021357		3269	0.01549158		3859	-0.00873605
319.2	0.03225395		909.19	0.01107706		1499.19	0.00582888		2089.19	0.0000223		2679.2	0.01039529		3269.2	0.01551767		3859.2	-0.0083142
319.4	0.0315868		909.39	0.01123308		1499.39	0.00613026		2089.39	0.00064733		2679.4	0.01020426		3269.4	0.01483665		3859.4	-0.0079216
319.6	0.03191927		909.59	0.0121306		1499.59	0.00677363		2089.59	0.00031		2679.6	0.00979588		3269.6	0.01465165		3859.6	-0.00762634
319.8	0.03142671		909.79	0.01295958		1499.79	0.00746389		2089.79	0.00060951		2679.8	0.00851622		3269.8	0.01457535		3859.8	-0.00704592
320	0.03032946		909.99	0.0134899		1499.99	0.0071211		2089.99	0.00227783		2680	0.00853249		3270	0.01421412		3860	-0.00804929
320.2	0.03006394		910.19	0.0138132		1500.19	0.00597084		2090.19	0.00250598		2680.2	0.00922768		3270.2	0.01459468		3860.2	-0.00872975
320.4	0.02964653		910.39	0.01513805		1500.39	0.00494287		2090.39	0.00284893		2680.4	0.00976114		3270.4	0.0139975		3860.4	-0.00898021
320.6	0.03003849		910.59	0.0155772		1500.59	0.00413469		2090.59	0.00337631		2680.6	0.00995519		3270.6	0.01435897		3860.6	-0.00885461
320.8	0.02970698		910.79	0.01584227		1500.79	0.00366155		2090.79	0.0040265		2680.8	0.01047613		3270.8	0.01513676		3860.8	-0.00829006
321	0.0299632		910.99	0.01627791		1500.99	0.00401256		2090.99	0.00386249		2681	0.01131195		3271	0.01527738		3861	-0.00775644
321.2	0.02971915		911.19	0.01657172		1501.19	0.00445197		2091.19	0.00373617		2681.2	0.01178893		3271.2	0.0148256		3861.2	-0.00749304
321.4	0.03059753		911.39	0.01645697		1501.39	0.00447949		2091.39	0.00325613		2681.4	0.01204355		3271.4	0.01410178		3861.4	-0.00740429
321.6	0.03150682		911.59	0.01629091		1501.59	0.00492994		2091.59	0.00200263		2681.6	0.01158372		3271.6	0.01322871		3861.6	-0.00755237
321.8	0.03141032		911.79	0.01713757		1501.79	0.0050829		2091.79	0.00084671		2681.8	0.0112871		3271.8	0.01367818		3861.8	-0.00663908
322	0.03196001		911.99	0.01723233		1501.99	0.00575428		2091.99	-0.00029493		2682	0.01163324		3272	0.0133793		3862	-0.00675831
322.2	0.03215446		912.19	0.01793721		1502.19	0.0053136		2092.19	-0.00093981		2682.2	0.01085589		3272.2	0.01301256		3862.2	-0.00663863
322.4	0.03255831		912.39	0.01745853		1502.39	0.00481712		2092.39	-0.00197116		2682.4	0.00948856		3272.4	0.01288464		3862.4	-0.00600477
322.6	0.03296258		912.59	0.0177296		1502.59	0.00504701		2092.59	-0.00373934		2682.6	0.00772893		3272.6	0.01349596		3862.6	-0.0055463
322.8	0.03320407		912.79	0.01750261		1502.79	0.00525451		2092.79	-0.004463		2682.8	0.00741554		3272.8	0.01385617		3862.8	-0.00491575
323	0.03233992		912.99	0.01735775		1502.99	0.00560307		2092.99	-0.00466092		2683	0.00745437		3273	0.01386797		3863	-0.0047297
323.2	0.03219558		913.19	0.01802387		1503.19	0.00558142		2093.19	-0.00491247		2683.2	0.00768454		3273.2	0.01331213		3863.2	-0.00526727
323.4	0.03069238		913.39	0.01734996		1503.39	0.00654418		2093.39	-0.00405801		2683.4	0.0073723		3273.4	0.01244838		3863.4	-0.00474438
323.6	0.02988543		913.59	0.01698273		1503.59	0.0071026		2093.59	-0.00400678		2683.6	0.00650517		3273.6	0.01234075		3863.6	-0.00506397
323.8	0.0290761		913.79	0.01705147		1503.79	0.00619113		2093.79	-0.0026862		2683.8	0.00577042		3273.8	0.01270132		3863.8	-0.00506977
324	0.02849952		913.99	0.01765728		1503.99	0.00540363		2093.99	-0.00134999		2684	0.00667364		3274	0.01323785		3864	-0.00672724
324.2	0.02929066		914.19	0.01762675		1504.19	0.00553798		2094.19	-0.0014178		2684.2	0.0067439		3274.2	0.01427425		3864.2	-0.00660036
324.4	0.03003354		914.39	0.01725611		1504.39	0.00551117		2094.39	-0.00002572		2684.4	0.00667531		3274.4	0.01490944		3864.4	-0.00605113
324.6	0.0307816		914.59	0.01755048		1504.59	0.00588923		2094.59	0.00058572		2684.6	0.00704445		3274.6	0.0157499		3864.6	-0.00521101
324.8	0.0312189		914.79	0.01690928		1504.79	0.00635781		2094.79	0.00107458		2684.8	0.00812348		3274.8	0.01661711		3864.8	-0.00550149
325	0.03174832		914.99	0.0169911		1504.99	0.00671929		2094.99	0.00185076		2685	0.00849635		3275	0.01656113		3865	-0.0054906
325.2	0.03242949		915.19	0.01656007		1505.19	0.00701122		2095.19	0.00251518		2685.2	0.00788077		3275.2	0.01714834		3865.2	-0.00598174
325.4	0.03424908		915.39	0.01704609		1505.39	0.00710016		2095.39	0.0019673		2685.4	0.00804623		3275.4	0.01655401		3865.4	-0.00692181
325.6	0.03511853		915.59	0.01746441		1505.59	0.00731719		2095.59	0.0012656		2685.6	0.0078612		3275.6	0.01686531		3865.6	-0.00684123
325.8	0.0352984		915.79	0.01844093		1505.79	0.00789823		2095.79	0.00076781		2685.8	0.00822153		3275.8	0.01772408		3865.8	-0.00605737
326	0.03572514		915.99	0.01832386		1505.99	0.00817406		2095.99	0.00018171		2686	0.00831088		3276	0.01714579		3866	-0.00606593
326.2	0.03703656		916.19	0.01825735		1506.19	0.00760642		2096.19	-0.00002132		2686.2	0.00811598		3276.2	0.01749125		3866.2	-0.00587183
326.4	0.03762329		916.39	0.01819089		1506.39	0.00763767		2096.39	-0.00075835		2686.4	0.00848848		3276.4	0.01792977		3866.4	-0.00599269
326.6	0.03718703		916.59	0.01880148		1506.59	0.00844484		2096.59	-0.00210036		2686.6	0.00774901		3276.6	0.01781119		3866.6	-0.00605771
326.8	0.03724805		916.79	0.0184324		1506.79	0.00827176		2096.79	-0.00185293		2686.8	0.00831913		3276.8	0.01780812		3866.8	-0.00626601
327	0.03721352		916.99	0.01935109		1506.99	0.00792673		2096.99	-0.00198491		2687	0.00906773		3277	0.01733575		3867	-0.00706743
327.2	0.03700384		917.19	0.01912306		1507.19	0.00727257		2097.19	-0.00190811		2687.2	0.00948425		3277.2	0.01676923		3867.2	-0.0068341
327.4	0.03620194		917.39	0.01926077		1507.39	0.00714532		2097.39	-0.00183105		2687.4	0.00990669		3277.4	0.0156982		3867.4	-0.00618826
327.6	0.03644188		917.59	0.01996718		1507.59	0.00628324		2097.59	-0.00163452		2687.6	0.00869405		3277.6	0.0159151		3867.6	-0.00676037
327.8	0.03611762		917.79	0.01988024		1507.79	0.00632002		2097.79	-0.00186715		2687.8	0.00939601		3277.8	0.01531749		3867.8	-0.00662942
328	0.03614677		917.99	0.02030591		1507.99	0.00662073		2097.99	-0.00232106		2688	0.00962133		3278	0.01448968		3868	-0.0070209
328.2	0.03657195		918.19	0.02001595		1508.19	0.00746267		2098.19	-0.00166121		2688.2	0.00888517		3278.2	0.01434635		3868.2	-0.00643906
328.4	0.03642003		918.39	0.02065876		1508.39	0.00682105		2098.39	-0.00064469		2688.4	0.00889682		3278.4	0.01356582		3868.4	-0.00609839
328.6	0.03677165		918.59	0.02074617		1508.59	0.00640989		2098.59	-0.00039813		2688.6	0.01046689		3278.6	0.01269789		3868.6	-0.0065376
328.8	0.03715222		918.79	0.01913349		1508.79	0.00620381		2098.79	0.00010766		2688.8	0.01050206		3278.8	0.01214029		3868.8	-0.00725945
329	0.03712558		918.99	0.01870813		1508.99	0.00649307		2098.99	-0.00022394		2689	0.01024332		3279	0.01157557		3869	-0.0072754
329.2	0.03757202		919.19	0.01815465		1509.19	0.00630531		2099.19	-0.00065735		2689.2	0.01032544		3279.2	0.01229735		3869.2	-0.0069506
329.4	0.0376699		919.39	0.01824475		1509.39	0.00684886		2099.39	-0.00136329		2689.4	0.01125299		3279.4	0.01219809		3869.4	-0.00707011
329.6	0.03733302		919.59	0.01748136		1509.59	0.00747783		2099.59	-0.00140775		2689.6	0.01112928		3279.6	0.01358219		3869.6	-0.00661491
329.8	0.03679067		919.79	0.01636945		1509.79	0.00798765		2099.79	-0.00168604		2689.8	0.0118655		3279.8	0.01485651		3869.8	-0.00616662
330	0.03736231		919.99	0.01622076		1509.99	0.00792841		2099.99	-0.00124263		2690	0.01219096		3280	0.01523787		3870	-0.00630135
330.2	0.03783027		920.19	0.0154241		1510.19	0.00774602		2100.19	-0.0005466		2690.2	0.01173259		3280.2	0.01603675		3870.2	-0.00634284
330.4	0.0377291		920.39	0.01603121		1510.39	0.00792864		2100.39	-0.00031101		2690.4	0.01131903		3280.4	0.01638933		3870.4	-0.00571001
330.6	0.03735514		920.59	0.01565771		1510.59	0.00890038		2100.59	-0.00027886		2690.6	0.00988688		3280.6	0.01643265		3870.6	-0.00524981
330.8	0.03701327		920.79	0.01611469		1510.79	0.00974337		2100.79	0.00022677		2690.8	0.00964928		3280.8	0.01646036		3870.8	-0.00558131
331	0.03743098		920.99	0.01664424		1510.99	0.00972684		2100.99	-0.0005394		2691	0.00898486		3281	0.01682551		3871	-0.00524966
331.2	0.03765821		921.19	0.01620543		1511.19	0.00942773		2101.19	-0.00059756		2691.2	0.00840771		3281.2	0.01712883		3871.2	-0.00590708
331.4	0.03771563		921.39	0.01679913		1511.39	0.00932316		2101.39	-0.00063956		2691.4	0.00854936		3281.4	0.01664893		3871.4	-0.00620786
331.6	0.03843235		921.59	0.01733485		1511.59	0.01008987		2101.59	-0.00026945		2691.6	0.0082439		3281.6	0.01680059		3871.6	-0.00548762
331.8	0.03800077		921.79	0.01725442		1511.79	0.0112817		2101.79	-0.00100958		2691.8	0.00911239		3281.8	0.01540925		3871.8	-0.00556009
332	0.03886927		921.99	0.01793734		1511.99	0.01073214		2101.99	-0.00086562		2692	0.00862442		3282	0.01449636		3872	-0.00559847
332.2	0.03864381		922.19	0.01793619		1512.19	0.01101045		2102.19	-0.00013978		2692.2	0.00861727		3282.2	0.01430804		3872.2	-0.00680433
332.4	0.03873844		922.39	0.01857419		1512.39	0.01023399		2102.39	-0.00046293		2692.4	0.00925811		3282.4	0.01356937		3872.4	-0.00762144
332.6	0.03949411		922.59	0.01819066		1512.59	0.01046947		2102.59	-0.00110175		2692.6	0.01005919		3282.6	0.01288931		3872.6	-0.00790832
332.8	0.03966021		922.79	0.01777582		1512.79	0.01068827		2102.79	-0.00190576		2692.8	0.00953418		3282.8	0.01353431		3872.8	-0.00869143
333	0.04057855		922.99	0.01842969		1512.99	0.01056185		2102.99	-0.00306236		2693	0.01035166		3283	0.01444021		3873	-0.00941747
333.2	0.04044742		923.19	0.01842599		1513.19	0.01005256		2103.19	-0.00338233		2693.2	0.01173923		3283.2	0.01596524		3873.2	-0.0099953
333.4	0.04032237		923.39	0.01822185		1513.39	0.00998428		2103.39	-0.00418608		2693.4	0.01253914		3283.4	0.01635515		3873.4	-0.01107754
333.6	0.03982122		923.59	0.01802242		1513.59	0.00900908		2103.59	-0.00343711		2693.6	0.01194288		3283.6	0.01732147		3873.6	-0.01129862
333.8	0.03927254		923.79	0.01789201		1513.79	0.008239		2103.79	-0.00331576		2693.8	0.012691		3283.8	0.01833774		3873.8	-0.01069044
334	0.03983996		923.99	0.01797975		1513.99	0.00843274		2103.99	-0.00275754		2694	0.01210284		3284	0.01774178		3874	-0.00980754
334.2	0.03957117		924.19	0.01692485		1514.19	0.0083882		2104.19	-0.00189016		2694.2	0.01053308		3284.2	0.01844314		3874.2	-0.00917768
334.4	0.03905174		924.39	0.01715178		1514.39	0.00906939		2104.39	-0.00152064		2694.4	0.00938967		3284.4	0.01788981		3874.4	-0.0081157
334.6	0.0381764		924.59	0.01700238		1514.59	0.01026327		2104.59	-0.00119923		2694.6	0.00811846		3284.6	0.01765522		3874.6	-0.00758616
334.8	0.03791595		924.79	0.01822983		1514.79	0.01052777		2104.79	-0.00085356		2694.8	0.00687355		3284.8	0.01801168		3874.8	-0.00641989
335	0.03897094		924.99	0.01791701		1514.99	0.01104222		2104.99	-0.00030981		2695	0.00580664		3285	0.01904679		3875	-0.0052258
335.2	0.03950719		925.19	0.01860946		1515.19	0.01172382		2105.19	0.0004339		2695.2	0.00531427		3285.2	0.01903892		3875.2	-0.00450821
335.4	0.03923989		925.39	0.01930128		1515.39	0.01256427		2105.39	0.00111528		2695.4	0.00603664		3285.4	0.01881049		3875.4	-0.00362399
335.6	0.04031319		925.59	0.01968269		1515.59	0.01420226		2105.59	0.00137123		2695.6	0.00556927		3285.6	0.01859098		3875.6	-0.00244264
335.8	0.04064431		925.79	0.01999538		1515.79	0.0141999		2105.79	0.00143946		2695.8	0.00599342		3285.8	0.0173687		3875.8	-0.00230024
336	0.04182367		925.99	0.02021374		1515.99	0.01447768		2105.99	0.00124049		2696	0.00657818		3286	0.01619676		3876	-0.00235324
336.2	0.04206617		926.19	0.02062753		1516.19	0.01462233		2106.19	0.00198775		2696.2	0.00657683		3286.2	0.01614814		3876.2	-0.00309123
336.4	0.04340091		926.39	0.02130317		1516.39	0.01489505		2106.39	0.00101824		2696.4	0.00683059		3286.4	0.01598614		3876.4	-0.00302511
336.6	0.04486951		926.59	0.0219324		1516.59	0.01480309		2106.59	-0.0000627		2696.6	0.00780763		3286.6	0.01560274		3876.6	-0.00284859
336.8	0.04550604		926.79	0.02188576		1516.79	0.01383595		2106.79	-0.00063196		2696.8	0.0089117		3286.8	0.01593349		3876.8	-0.00403713
337	0.04637879		926.99	0.02193928		1516.99	0.0133406		2106.99	-0.00151636		2697	0.01041901		3287	0.01612651		3877	-0.00490637
337.2	0.0469998		927.19	0.0214692		1517.19	0.01272475		2107.19	-0.00173555		2697.2	0.01089866		3287.2	0.01598022		3877.2	-0.00510632
337.4	0.04806833		927.39	0.02107044		1517.39	0.01191497		2107.39	-0.00225101		2697.4	0.01038091		3287.4	0.01542595		3877.4	-0.00500883
337.6	0.04823824		927.59	0.02137479		1517.59	0.01152628		2107.59	-0.00219771		2697.6	0.01067652		3287.6	0.01526819		3877.6	-0.00523787
337.8	0.04877215		927.79	0.02110823		1517.79	0.01180701		2107.79	-0.00303729		2697.8	0.0106276		3287.8	0.01561677		3877.8	-0.00459808
338	0.04873741		927.99	0.01976124		1517.99	0.01225281		2107.99	-0.00339984		2698	0.01048206		3288	0.01546164		3878	-0.00431232
338.2	0.04797189		928.19	0.01869142		1518.19	0.01225497		2108.19	-0.00313424		2698.2	0.01019473		3288.2	0.01664561		3878.2	-0.00390688
338.4	0.04687191		928.39	0.01801912		1518.39	0.01176357		2108.39	-0.00279889		2698.4	0.00954805		3288.4	0.01628491		3878.4	-0.0039963
338.6	0.04604546		928.59	0.01770608		1518.59	0.01171638		2108.59	-0.00212843		2698.6	0.00907203		3288.6	0.01679677		3878.6	-0.00326706
338.8	0.04566399		928.79	0.01702489		1518.79	0.01288168		2108.79	-0.0009224		2698.8	0.007976		3288.8	0.01868331		3878.8	-0.00257823
339	0.04536853		928.99	0.01598328		1518.99	0.01320377		2108.99	-0.00077479		2699	0.00775207		3289	0.01977724		3879	-0.00218853
339.2	0.04540005		929.19	0.01578288		1519.19	0.01351283		2109.19	0.00003316		2699.2	0.00811293		3289.2	0.02036792		3879.2	-0.00227273
339.4	0.04515523		929.39	0.01558772		1519.39	0.01353955		2109.39	0.00097828		2699.4	0.00854373		3289.4	0.02124327		3879.4	-0.00326321
339.6	0.04585121		929.59	0.0151329		1519.59	0.01360873		2109.59	0.00219795		2699.6	0.00788194		3289.6	0.02132118		3879.6	-0.00280961
339.8	0.0458631		929.79	0.01544415		1519.79	0.01308585		2109.79	0.00246555		2699.8	0.00894985		3289.8	0.02119427		3879.8	-0.00272172
340	0.04639699		929.99	0.01603701		1519.99	0.01270249		2109.99	0.00256102		2700	0.00944782		3290	0.02092935		3880	-0.0034741
340.2	0.04678762		930.19	0.01585282		1520.19	0.01247643		2110.19	0.00397805		2700.2	0.00891064		3290.2	0.02057799		3880.2	-0.00397474
340.4	0.04744489		930.39	0.01708382		1520.39	0.0121595		2110.39	0.00288935		2700.4	0.01007281		3290.4	0.02050489		3880.4	-0.00423702
340.6	0.04861317		930.59	0.01780324		1520.59	0.01053966		2110.59	0.00296799		2700.6	0.01083589		3290.6	0.02030287		3880.6	-0.0053865
340.8	0.0491479		930.79	0.01812275		1520.79	0.00999635		2110.79	0.00283548		2700.8	0.01094419		3290.8	0.02064022		3880.8	-0.00579007
341	0.05005963		930.99	0.0188295		1520.99	0.00993189		2110.99	0.00274298		2701	0.01117522		3291	0.02102874		3881	-0.0062998
341.2	0.05068763		931.19	0.01984389		1521.19	0.00946087		2111.19	0.00235667		2701.2	0.01083906		3291.2	0.02001824		3881.2	-0.00695027
341.4	0.05059265		931.39	0.0201713		1521.39	0.00979054		2111.39	0.00175565		2701.4	0.01097063		3291.4	0.02067441		3881.4	-0.00686353
341.6	0.05028958		931.59	0.02207477		1521.59	0.01074408		2111.59	0.00041496		2701.6	0.01207527		3291.6	0.02015093		3881.6	-0.00671658
341.8	0.05015718		931.79	0.02206205		1521.79	0.01060072		2111.79	-0.00080707		2701.8	0.01158401		3291.8	0.01996165		3881.8	-0.00710529
342	0.04915162		931.99	0.02189516		1521.99	0.01025239		2111.99	-0.00078669		2702	0.01231264		3292	0.02019092		3882	-0.00679411
342.2	0.04821501		932.19	0.02082736		1522.19	0.01046937		2112.19	-0.00115865		2702.2	0.01125111		3292.2	0.02037831		3882.2	-0.00666313
342.4	0.04773881		932.39	0.02071381		1522.39	0.00990103		2112.39	-0.00067858		2702.4	0.01000913		3292.4	0.01973319		3882.4	-0.00733208
342.6	0.04704084		932.59	0.02075398		1522.59	0.01012787		2112.59	-0.00100461		2702.6	0.00932022		3292.6	0.02008959		3882.6	-0.00595395
342.8	0.04698555		932.79	0.02035191		1522.79	0.01125497		2112.79	-0.00162957		2702.8	0.0090012		3292.8	0.02108005		3882.8	-0.00446507
343	0.04749268		932.99	0.02025359		1522.99	0.01114739		2112.99	-0.00187862		2703	0.00848068		3293	0.02058904		3883	-0.00405799
343.2	0.04882856		933.19	0.02015076		1523.19	0.0121268		2113.19	-0.00139193		2703.2	0.00824024		3293.2	0.02042003		3883.2	-0.00423026
343.4	0.04924822		933.39	0.02057379		1523.39	0.01281327		2113.39	-0.00118496		2703.4	0.00801982		3293.4	0.01983299		3883.4	-0.00400639
343.6	0.04946461		933.59	0.01954085		1523.59	0.01361859		2113.59	-0.00103213		2703.6	0.00785176		3293.6	0.0191346		3883.6	-0.00305384
343.8	0.0502925		933.79	0.02024928		1523.79	0.01452801		2113.79	-0.00177675		2703.8	0.0089393		3293.8	0.0186829		3883.8	-0.00335743
344	0.05179856		933.99	0.02041267		1523.99	0.0151586		2113.99	-0.00128978		2704	0.00886512		3294	0.01801347		3884	-0.00379329
344.2	0.05275913		934.19	0.01977668		1524.19	0.01608408		2114.19	-0.00142999		2704.2	0.00952827		3294.2	0.01791648		3884.2	-0.00395832
344.4	0.05417407		934.39	0.02034715		1524.39	0.01553588		2114.39	-0.00171971		2704.4	0.01010434		3294.4	0.01849091		3884.4	-0.00410709
344.6	0.05529781		934.59	0.01945196		1524.59	0.01523671		2114.59	-0.00133771		2704.6	0.01027516		3294.6	0.01906974		3884.6	-0.00454027
344.8	0.05600935		934.79	0.01941122		1524.79	0.01495519		2114.79	-0.00211587		2704.8	0.01085919		3294.8	0.0191526		3884.8	-0.0041102
345	0.05661175		934.99	0.01973817		1524.99	0.01542395		2114.99	-0.0018121		2705	0.01174109		3295	0.02005505		3885	-0.0038427
345.2	0.05592967		935.19	0.01945174		1525.19	0.01534458		2115.19	-0.00232325		2705.2	0.0116737		3295.2	0.01994061		3885.2	-0.00379177
345.4	0.05551436		935.39	0.01879164		1525.39	0.01557339		2115.39	-0.00242071		2705.4	0.01205676		3295.4	0.02081246		3885.4	-0.0033655
345.6	0.05585001		935.59	0.01959374		1525.59	0.01476832		2115.59	-0.00291327		2705.6	0.01189074		3295.6	0.0201309		3885.6	-0.00348077
345.8	0.0557226		935.79	0.01944507		1525.79	0.01359148		2115.79	-0.00237594		2705.8	0.01068434		3295.8	0.02040975		3885.8	-0.00476607
346	0.0558713		935.99	0.01936554		1525.99	0.01344504		2115.99	-0.00171362		2706	0.00950568		3296	0.02129395		3886	-0.00433152
346.2	0.05550965		936.19	0.01880573		1526.19	0.01332798		2116.19	-0.00142331		2706.2	0.0077295		3296.2	0.02116238		3886.2	-0.00483341
346.4	0.05483282		936.39	0.01982034		1526.39	0.01184073		2116.39	-0.00106256		2706.4	0.00676503		3296.4	0.02108134		3886.4	-0.00489423
346.6	0.05448402		936.59	0.02034537		1526.59	0.01157431		2116.59	-0.00125775		2706.6	0.00719986		3296.6	0.02152726		3886.6	-0.00453268
346.8	0.05421291		936.79	0.02020279		1526.79	0.01133337		2116.79	-0.00110719		2706.8	0.00714185		3296.8	0.02137035		3886.8	-0.00455473
347	0.05489349		936.99	0.0204313		1526.99	0.0115058		2116.99	0.00010583		2707	0.0071822		3297	0.01976273		3887	-0.00559088
347.2	0.05572261		937.19	0.02101046		1527.19	0.01163728		2117.19	0.00036441		2707.2	0.0081985		3297.2	0.01911767		3887.2	-0.00589435
347.4	0.05561269		937.39	0.02025187		1527.39	0.0111016		2117.39	0.000607		2707.4	0.00859502		3297.4	0.0186481		3887.4	-0.00609307
347.6	0.05617586		937.59	0.02047867		1527.59	0.01070395		2117.59	0.00103075		2707.6	0.00891234		3297.6	0.01826746		3887.6	-0.00648584
347.8	0.05697706		937.79	0.02111061		1527.79	0.011179		2117.79	0.00149872		2707.8	0.01012793		3297.8	0.01774226		3887.8	-0.00755782
348	0.05690765		937.99	0.02067508		1527.99	0.01166169		2117.99	0.00189627		2708	0.00999864		3298	0.0176155		3888	-0.00776141
348.2	0.05776268		938.19	0.01991968		1528.19	0.01158855		2118.19	0.0014231		2708.2	0.01080986		3298.2	0.01717538		3888.2	-0.00795339
348.4	0.05825829		938.39	0.0193569		1528.39	0.01051598		2118.39	0.00190051		2708.4	0.01009713		3298.4	0.01802048		3888.4	-0.0083707
348.6	0.05875249		938.59	0.01902129		1528.59	0.01075791		2118.59	0.00135354		2708.6	0.0102236		3298.6	0.0193822		3888.6	-0.00752872
348.8	0.05935454		938.79	0.01875964		1528.79	0.01051318		2118.79	0.00072631		2708.8	0.00958322		3298.8	0.01945356		3888.8	-0.00747956
349	0.05916544		938.99	0.01861571		1528.99	0.01125557		2118.99	0.00082838		2709	0.00987092		3299	0.0203239		3889	-0.00721983
349.2	0.05844436		939.19	0.0177935		1529.19	0.01149402		2119.19	0.00040102		2709.2	0.00842936		3299.2	0.01989483		3889.2	-0.00765851
349.4	0.05824266		939.39	0.01738194		1529.39	0.01148201		2119.39	0.00029441		2709.4	0.00787443		3299.4	0.01989326		3889.4	-0.00746122
349.6	0.05866509		939.59	0.01728188		1529.59	0.01165534		2119.59	0.00083604		2709.6	0.00652849		3299.6	0.02045389		3889.6	-0.00810336
349.8	0.0590516		939.79	0.01708925		1529.79	0.01291439		2119.79	0.00152491		2709.8	0.00496875		3299.8	0.02088796		3889.8	-0.00856089
350	0.05936768		939.99	0.01774495		1529.99	0.01398695		2119.99	0.00142705		2710	0.00339975		3300	0.02091228		3890	-0.0092651
350.2	0.05841688		940.19	0.01823105		1530.19	0.01394068		2120.19	0.0023373		2710.2	0.00310437		3300.2	0.02106519		3890.2	-0.00886644
350.4	0.05757963		940.39	0.01880186		1530.39	0.01409721		2120.39	0.00296405		2710.4	0.00358022		3300.4	0.02128701		3890.4	-0.00818489
350.6	0.05777771		940.59	0.01909927		1530.59	0.01392638		2120.59	0.00313572		2710.6	0.00427858		3300.6	0.02103548		3890.6	-0.00749715
350.8	0.05806167		940.79	0.01915368		1530.79	0.01341795		2120.79	0.00318941		2710.8	0.00535175		3300.8	0.02026073		3890.8	-0.00684401
351	0.05899505		940.99	0.0189857		1530.99	0.01306414		2120.99	0.00345452		2711	0.00644237		3301	0.0192232		3891	-0.00571227
351.2	0.05944842		941.19	0.01957398		1531.19	0.01345706		2121.19	0.00315323		2711.2	0.00789164		3301.2	0.0193828		3891.2	-0.00557377
351.4	0.06006198		941.39	0.01957844		1531.39	0.01274315		2121.39	0.00261965		2711.4	0.00806303		3301.4	0.01885356		3891.4	-0.00559089
351.6	0.06044863		941.59	0.0205944		1531.59	0.01230167		2121.59	0.00284634		2711.6	0.00876795		3301.6	0.01834139		3891.6	-0.00520447
351.8	0.05971133		941.79	0.02036857		1531.79	0.01282588		2121.79	0.00275406		2711.8	0.00922707		3301.8	0.01837039		3891.8	-0.00481438
352	0.06026526		941.99	0.02006875		1531.99	0.01220231		2121.99	0.00262877		2712	0.00839456		3302	0.01830827		3892	-0.00405771
352.2	0.06128083		942.19	0.01969354		1532.19	0.0109385		2122.19	0.00212766		2712.2	0.00783251		3302.2	0.01830615		3892.2	-0.00404013
352.4	0.06191046		942.39	0.01937334		1532.39	0.01004546		2122.39	0.00189098		2712.4	0.00717997		3302.4	0.01957985		3892.4	-0.00425154
352.6	0.06258895		942.59	0.01983113		1532.59	0.01015952		2122.59	0.0008804		2712.6	0.00675014		3302.6	0.0196625		3892.6	-0.0043439
352.8	0.06222491		942.79	0.01934149		1532.79	0.00941007		2122.79	0.00010204		2712.8	0.00701362		3302.8	0.01959956		3892.8	-0.00459314
353	0.06205217		942.99	0.01892276		1532.99	0.00912698		2122.99	-0.00025346		2713	0.00663508		3303	0.02017589		3893	-0.00513529
353.2	0.06192005		943.19	0.01827449		1533.19	0.00868882		2123.19	-0.00069097		2713.2	0.00547254		3303.2	0.0201966		3893.2	-0.00569646
353.4	0.06204055		943.39	0.01777371		1533.39	0.00774083		2123.39	-0.0002331		2713.4	0.00479122		3303.4	0.02019839		3893.4	-0.00620088
353.6	0.06208015		943.59	0.0174554		1533.59	0.00815344		2123.59	0.00034959		2713.6	0.00402255		3303.6	0.02068923		3893.6	-0.00760863
353.8	0.06218067		943.79	0.01748202		1533.79	0.0089168		2123.79	0.00106624		2713.8	0.00384375		3303.8	0.02054106		3893.8	-0.00863179
354	0.06151711		943.99	0.01906046		1533.99	0.00858652		2123.99	0.00136832		2714	0.00330659		3304	0.01949659		3894	-0.00916303
354.2	0.06083955		944.19	0.019093		1534.19	0.00845151		2124.19	0.00225774		2714.2	0.00372679		3304.2	0.01976475		3894.2	-0.00846834
354.4	0.06064665		944.39	0.01994475		1534.39	0.00890506		2124.39	0.00276099		2714.4	0.0048347		3304.4	0.01951284		3894.4	-0.00830808
354.6	0.06083974		944.59	0.02000497		1534.59	0.00889089		2124.59	0.00219329		2714.6	0.0060736		3304.6	0.0187905		3894.6	-0.00845367
354.8	0.06087261		944.79	0.02012983		1534.79	0.00947024		2124.79	0.0026523		2714.8	0.00743122		3304.8	0.01793453		3894.8	-0.00789551
355	0.06088333		944.99	0.02068517		1534.99	0.01070393		2124.99	0.00304926		2715	0.00926864		3305	0.01771595		3895	-0.007709
355.2	0.06171232		945.19	0.02160814		1535.19	0.0121738		2125.19	0.00261726		2715.2	0.01071818		3305.2	0.0170303		3895.2	-0.00858292
355.4	0.06261286		945.39	0.02132375		1535.39	0.01204314		2125.39	0.00311274		2715.4	0.01038076		3305.4	0.01648512		3895.4	-0.00802274
355.6	0.06298401		945.59	0.02181281		1535.59	0.01245878		2125.59	0.00345491		2715.6	0.01027304		3305.6	0.01624142		3895.6	-0.00703954
355.8	0.06376117		945.79	0.02234483		1535.79	0.0135553		2125.79	0.0037812		2715.8	0.00934889		3305.8	0.0166509		3895.8	-0.00656773
356	0.06504265		945.99	0.02272136		1535.99	0.01313092		2125.99	0.00411988		2716	0.00790547		3306	0.016379		3896	-0.00612563
356.2	0.06570236		946.19	0.02214041		1536.19	0.01385469		2126.19	0.00356804		2716.2	0.008352		3306.2	0.01632663		3896.2	-0.00622137
356.4	0.06719418		946.39	0.02216699		1536.39	0.01477369		2126.39	0.00366113		2716.4	0.00830453		3306.4	0.01707391		3896.4	-0.00652012
356.6	0.06713738		946.59	0.02181005		1536.59	0.0146077		2126.59	0.00346767		2716.6	0.00734399		3306.6	0.0175391		3896.6	-0.00633059
356.8	0.06640518		946.79	0.02118097		1536.79	0.0143132		2126.79	0.00290372		2716.8	0.00703144		3306.8	0.01986034		3896.8	-0.0062251
357	0.0675503		946.99	0.02093022		1536.99	0.01374584		2126.99	0.00219359		2717	0.00570046		3307	0.02005143		3897	-0.00699304
357.2	0.0681598		947.19	0.0213649		1537.19	0.01331182		2127.19	0.00191219		2717.2	0.00532963		3307.2	0.02072278		3897.2	-0.00713831
357.4	0.06878207		947.39	0.02049649		1537.39	0.01256608		2127.39	0.00167695		2717.4	0.0045209		3307.4	0.02093405		3897.4	-0.00774838
357.6	0.06809209		947.59	0.02029911		1537.59	0.01220846		2127.59	0.00129798		2717.6	0.00401107		3307.6	0.02175989		3897.6	-0.00803019
357.8	0.06778595		947.79	0.0205025		1537.79	0.01154122		2127.79	0.00156463		2717.8	0.0037536		3307.8	0.02192677		3897.8	-0.00840728
358	0.06722946		947.99	0.0218233		1537.99	0.01079945		2127.99	0.00128822		2718	0.00307657		3308	0.02219542		3898	-0.00822065
358.2	0.06744608		948.19	0.02158209		1538.19	0.01156892		2128.19	0.00179931		2718.2	0.00355518		3308.2	0.02212341		3898.2	-0.00819267
358.4	0.06729336		948.39	0.02199591		1538.39	0.0129546		2128.39	0.00111413		2718.4	0.00400099		3308.4	0.02179016		3898.4	-0.00714832
358.6	0.06746021		948.59	0.02097922		1538.59	0.01311308		2128.59	0.00071626		2718.6	0.00486399		3308.6	0.02159389		3898.6	-0.00714676
358.8	0.06701807		948.79	0.0217627		1538.79	0.01302904		2128.79	0.00173949		2718.8	0.00495488		3308.8	0.02106092		3898.8	-0.0057373
359	0.06742953		948.99	0.02233465		1538.99	0.01327594		2128.99	0.00194374		2719	0.00736381		3309	0.02149355		3899	-0.00536026
359.2	0.0680813		949.19	0.02260825		1539.19	0.01337672		2129.19	0.00155092		2719.2	0.00718544		3309.2	0.0203392		3899.2	-0.00509197
359.4	0.06817347		949.39	0.02279865		1539.39	0.0132615		2129.39	0.00219851		2719.4	0.0062515		3309.4	0.01968875		3899.4	-0.00391226
359.6	0.06803329		949.59	0.02385592		1539.59	0.01368486		2129.59	0.00214026		2719.6	0.00596518		3309.6	0.0185109		3899.6	-0.00317101
359.8	0.06835089		949.79	0.02396251		1539.79	0.01426524		2129.79	0.00301537		2719.8	0.00594591		3309.8	0.01877483		3899.8	-0.00210446
360	0.06796338		949.99	0.02389383		1539.99	0.01403992		2129.99	0.00297072		2720	0.00645788		3310	0.01790088		3900	-0.00086712
360.2	0.06814436		950.19	0.02303188		1540.19	0.0151358		2130.19	0.0037671		2720.2	0.00746329		3310.2	0.01746017		3900.2	-0.00022655
360.4	0.06844692		950.39	0.02274401		1540.39	0.01503443		2130.39	0.00370394		2720.4	0.00675531		3310.4	0.01756139		3900.4	-0.00040577
360.6	0.06876456		950.59	0.02234593		1540.59	0.01420137		2130.59	0.00355177		2720.6	0.00677751		3310.6	0.01797003		3900.6	-0.0004752
360.8	0.06821758		950.79	0.02289225		1540.79	0.01434784		2130.79	0.00270877		2720.8	0.00714521		3310.8	0.01927094		3900.8	-0.00153502
361	0.06922206		950.99	0.02316506		1540.99	0.01406326		2130.99	0.00208247		2721	0.00754055		3311	0.01820736		3901	-0.00191114
361.2	0.06893829		951.19	0.02313929		1541.19	0.01300764		2131.19	0.00213591		2721.2	0.00774213		3311.2	0.01852915		3901.2	-0.00248778
361.4	0.06826045		951.39	0.02183176		1541.39	0.01175701		2131.39	0.00194225		2721.4	0.00862197		3311.4	0.01806004		3901.4	-0.00273018
361.6	0.06735759		951.59	0.02320128		1541.59	0.01194224		2131.59	0.00230414		2721.6	0.00821127		3311.6	0.0181297		3901.6	-0.00344229
361.8	0.06749223		951.79	0.02386268		1541.79	0.01220151		2131.79	0.003568		2721.8	0.00919147		3311.8	0.01866209		3901.8	-0.00417132
362	0.06723169		951.99	0.02507287		1541.99	0.01289893		2131.99	0.00351629		2722	0.0094602		3312	0.0196419		3902	-0.0041006
362.2	0.06766957		952.19	0.02501735		1542.19	0.01376632		2132.19	0.00403952		2722.2	0.00968733		3312.2	0.01883742		3902.2	-0.00352646
362.4	0.06775536		952.39	0.02504237		1542.39	0.01421252		2132.39	0.00318134		2722.4	0.0094405		3312.4	0.01978582		3902.4	-0.00402524
362.6	0.06759226		952.59	0.02486924		1542.59	0.01378665		2132.59	0.00273115		2722.6	0.01070396		3312.6	0.02034099		3902.6	-0.00517994
362.8	0.0669546		952.79	0.02561934		1542.79	0.01430811		2132.79	0.00293777		2722.8	0.01082788		3312.8	0.02062444		3902.8	-0.00547398
363	0.06710888		952.99	0.02526228		1542.99	0.01536984		2132.99	0.00307997		2723	0.01173055		3313	0.02178661		3903	-0.00587761
363.2	0.06733813		953.19	0.02551926		1543.19	0.01612717		2133.19	0.00206617		2723.2	0.0113407		3313.2	0.02204279		3903.2	-0.00576523
363.4	0.0677243		953.39	0.02571716		1543.39	0.01687739		2133.39	0.00178544		2723.4	0.01129884		3313.4	0.02261823		3903.4	-0.00544077
363.6	0.06831749		953.59	0.02655117		1543.59	0.01731768		2133.59	0.00133727		2723.6	0.01143432		3313.6	0.02281119		3903.6	-0.00518436
363.8	0.06899483		953.79	0.02653853		1543.79	0.01779221		2133.79	0.00121937		2723.8	0.0114858		3313.8	0.02359539		3903.8	-0.00431998
364	0.06868705		953.99	0.02694624		1543.99	0.01752657		2133.99	0.00129674		2724	0.01087904		3314	0.02319248		3904	-0.00395144
364.2	0.06952816		954.19	0.0261969		1544.19	0.01750469		2134.19	0.00147807		2724.2	0.01076341		3314.2	0.02422829		3904.2	-0.00341136
364.4	0.07035449		954.39	0.02582106		1544.39	0.01629334		2134.39	0.00051432		2724.4	0.00986697		3314.4	0.02406948		3904.4	-0.00385277
364.6	0.07015706		954.59	0.02541346		1544.59	0.01624862		2134.59	0.00087743		2724.6	0.00920286		3314.6	0.02480346		3904.6	-0.00387638
364.8	0.07066241		954.79	0.02538881		1544.79	0.01601256		2134.79	0.00154395		2724.8	0.00809425		3314.8	0.02455071		3904.8	-0.00463865
365	0.07259631		954.99	0.0252659		1544.99	0.01493512		2134.99	0.002038		2725	0.00744069		3315	0.02367844		3905	-0.00444228
365.2	0.07322113		955.19	0.02531446		1545.19	0.01347851		2135.19	0.00318073		2725.2	0.00666991		3315.2	0.02332133		3905.2	-0.00455132
365.4	0.07304092		955.39	0.02564905		1545.39	0.01317735		2135.39	0.00405793		2725.4	0.00659399		3315.4	0.02300216		3905.4	-0.00402551
365.6	0.07308367		955.59	0.02700276		1545.59	0.01249216		2135.59	0.00564301		2725.6	0.00545064		3315.6	0.02263409		3905.6	-0.00438811
365.8	0.07319147		955.79	0.02696298		1545.79	0.01266731		2135.79	0.00626097		2725.8	0.00585884		3315.8	0.02269308		3905.8	-0.00401902
366	0.07313182		955.99	0.0279461		1545.99	0.01246532		2135.99	0.00643481		2726	0.00487516		3316	0.02163142		3906	-0.0030721
366.2	0.07404874		956.19	0.02731243		1546.19	0.01253142		2136.19	0.00787985		2726.2	0.00471583		3316.2	0.0206381		3906.2	-0.0031875
366.4	0.07370814		956.39	0.02765758		1546.39	0.01263199		2136.39	0.00800693		2726.4	0.00430402		3316.4	0.02081264		3906.4	-0.00421616
366.6	0.07224739		956.59	0.02730719		1546.59	0.01344843		2136.59	0.00704951		2726.6	0.00554054		3316.6	0.02016468		3906.6	-0.00498981
366.8	0.07194194		956.79	0.02696792		1546.79	0.01395724		2136.79	0.00772072		2726.8	0.00558609		3316.8	0.01983971		3906.8	-0.00466136
367	0.07228804		956.99	0.02711943		1546.99	0.01437703		2136.99	0.00757512		2727	0.00687734		3317	0.02033008		3907	-0.00494654
367.2	0.07259411		957.19	0.02724322		1547.19	0.01480344		2137.19	0.00600951		2727.2	0.00845964		3317.2	0.02033125		3907.2	-0.00465906
367.4	0.07252107		957.39	0.02839293		1547.39	0.01547113		2137.39	0.00552173		2727.4	0.00920298		3317.4	0.01982313		3907.4	-0.00462968
367.6	0.07240222		957.59	0.02897		1547.59	0.01527576		2137.59	0.0053194		2727.6	0.00994556		3317.6	0.0200801		3907.6	-0.00418715
367.8	0.07176527		957.79	0.0284433		1547.79	0.01556605		2137.79	0.00514075		2727.8	0.010675		3317.8	0.02051345		3907.8	-0.00388356
368	0.07026191		957.99	0.0284787		1547.99	0.01508012		2137.99	0.00502159		2728	0.0105527		3318	0.02096532		3908	-0.00332117
368.2	0.07068023		958.19	0.02744712		1548.19	0.01484665		2138.19	0.00472418		2728.2	0.01077406		3318.2	0.02149967		3908.2	-0.0034724
368.4	0.07060207		958.39	0.02734353		1548.39	0.01362089		2138.39	0.00449236		2728.4	0.01007845		3318.4	0.02152969		3908.4	-0.00431598
368.6	0.07019963		958.59	0.02703322		1548.59	0.01389209		2138.59	0.0045466		2728.6	0.00925427		3318.6	0.02221878		3908.6	-0.00475867
368.8	0.07133616		958.79	0.02686757		1548.79	0.01322627		2138.79	0.0044332		2728.8	0.00919563		3318.8	0.02145264		3908.8	-0.00558441
369	0.07155783		958.99	0.02717521		1548.99	0.01244703		2138.99	0.00363039		2729	0.0092281		3319	0.02232018		3909	-0.00538154
369.2	0.07107666		959.19	0.02744755		1549.19	0.01145835		2139.19	0.00327845		2729.2	0.0090954		3319.2	0.0223747		3909.2	-0.00581722
369.4	0.06997025		959.39	0.02827156		1549.39	0.01037627		2139.39	0.00378974		2729.4	0.00862576		3319.4	0.02273581		3909.4	-0.00609056
369.6	0.07042174		959.59	0.02835054		1549.59	0.00996596		2139.59	0.00410843		2729.6	0.00847998		3319.6	0.02265314		3909.6	-0.00638446
369.8	0.07091154		959.79	0.0286802		1549.79	0.01072315		2139.79	0.00351269		2729.8	0.0082005		3319.8	0.02285527		3909.8	-0.00643243
370	0.07192197		959.99	0.02920455		1549.99	0.01024422		2139.99	0.00499439		2730	0.00827304		3320	0.02225091		3910	-0.00575401
370.2	0.07301619		960.19	0.02849671		1550.19	0.01066064		2140.19	0.00493314		2730.2	0.00852603		3320.2	0.02199343		3910.2	-0.00643784
370.4	0.07277351		960.39	0.02931355		1550.39	0.01044543		2140.39	0.00439285		2730.4	0.00845534		3320.4	0.02157401		3910.4	-0.0069555
370.6	0.07273747		960.59	0.02808325		1550.59	0.0111573		2140.59	0.00455037		2730.6	0.00940787		3320.6	0.02128085		3910.6	-0.00735364
370.8	0.07416569		960.79	0.02789656		1550.79	0.01073254		2140.79	0.00442795		2730.8	0.00977446		3320.8	0.02107998		3910.8	-0.00629083
371	0.07534878		960.99	0.02847474		1550.99	0.01134436		2140.99	0.00351516		2731	0.01036065		3321	0.02103236		3911	-0.00584055
371.2	0.07519521		961.19	0.028251		1551.19	0.01199092		2141.19	0.00296397		2731.2	0.01042784		3321.2	0.02039732		3911.2	-0.00570989
371.4	0.07590615		961.39	0.02896255		1551.39	0.01247923		2141.39	0.00264945		2731.4	0.0102053		3321.4	0.01985289		3911.4	-0.00540031
371.6	0.07633407		961.59	0.02822119		1551.59	0.01272237		2141.59	0.00221498		2731.6	0.01047987		3321.6	0.02002828		3911.6	-0.0052662
371.8	0.07637951		961.79	0.02814142		1551.79	0.01330708		2141.79	0.00159963		2731.8	0.01011822		3321.8	0.01939221		3911.8	-0.0051376
372	0.07631453		961.99	0.02752569		1551.99	0.01276231		2141.99	0.00117394		2732	0.00897418		3322	0.01820135		3912	-0.00454684
372.2	0.0764238		962.19	0.02705138		1552.19	0.01304452		2142.19	0.0006383		2732.2	0.00867762		3322.2	0.01796862		3912.2	-0.00450973
372.4	0.07625059		962.39	0.0267613		1552.39	0.0123688		2142.39	0.00039129		2732.4	0.00847102		3322.4	0.01771921		3912.4	-0.00366035
372.6	0.07668264		962.59	0.02717046		1552.59	0.01251574		2142.59	0.00064352		2732.6	0.00884002		3322.6	0.01730488		3912.6	-0.00357508
372.8	0.07702366		962.79	0.02712787		1552.79	0.01267425		2142.79	0.00051117		2732.8	0.00815023		3322.8	0.01734496		3912.8	-0.00413263
373	0.07658511		962.99	0.02764507		1552.99	0.01230144		2142.99	0.00069787		2733	0.00774548		3323	0.01782009		3913	-0.00343591
373.2	0.07656111		963.19	0.02813641		1553.19	0.01184821		2143.19	0.00099859		2733.2	0.00704184		3323.2	0.01788503		3913.2	-0.00354261
373.4	0.07706688		963.39	0.02849987		1553.39	0.01197386		2143.39	0.00225254		2733.4	0.00668845		3323.4	0.01875314		3913.4	-0.00281786
373.6	0.07831913		963.59	0.02800186		1553.59	0.0129129		2143.59	0.00256951		2733.6	0.00659261		3323.6	0.01986559		3913.6	-0.00281637
373.8	0.07908178		963.79	0.02763829		1553.79	0.01338132		2143.79	0.00276546		2733.8	0.00650031		3323.8	0.02093677		3913.8	-0.00294613
374	0.07978625		963.99	0.02688799		1553.99	0.01349934		2143.99	0.00372635		2734	0.00727725		3324	0.02083778		3914	-0.00342739
374.2	0.08059436		964.19	0.02658197		1554.19	0.01459366		2144.19	0.00326564		2734.2	0.00729461		3324.2	0.02157129		3914.2	-0.00419112
374.4	0.08067283		964.39	0.02613406		1554.39	0.01553866		2144.39	0.00411689		2734.4	0.00833352		3324.4	0.02300789		3914.4	-0.0041206
374.6	0.08111503		964.59	0.02513001		1554.59	0.01639322		2144.59	0.0043928		2734.6	0.00852829		3324.6	0.02339065		3914.6	-0.00387625
374.8	0.08163931		964.79	0.02484829		1554.79	0.01662896		2144.79	0.0037239		2734.8	0.00791209		3324.8	0.02432023		3914.8	-0.00374933
375	0.08136318		964.99	0.02443762		1554.99	0.01738457		2144.99	0.00382822		2735	0.00723955		3325	0.02486572		3915	-0.00479831
375.2	0.08157043		965.19	0.02352566		1555.19	0.01784607		2145.19	0.00306525		2735.2	0.00699964		3325.2	0.02465302		3915.2	-0.00562597
375.4	0.0823964		965.39	0.02406166		1555.39	0.01786142		2145.39	0.00222779		2735.4	0.00705456		3325.4	0.02471334		3915.4	-0.00515717
375.6	0.08168502		965.59	0.02443841		1555.59	0.0177942		2145.59	0.00167045		2735.6	0.00663174		3325.6	0.0240693		3915.6	-0.00530443
375.8	0.08200012		965.79	0.02453331		1555.79	0.01740413		2145.79	0.00102001		2735.8	0.00598524		3325.8	0.02293862		3915.8	-0.00442769
376	0.08243934		965.99	0.02446594		1555.99	0.01604568		2145.99	0.00043252		2736	0.00529363		3326	0.02245135		3916	-0.00374447
376.2	0.08249643		966.19	0.02508811		1556.19	0.01554396		2146.19	-0.00010237		2736.2	0.00553266		3326.2	0.02199684		3916.2	-0.00384305
376.4	0.08287055		966.39	0.02531355		1556.39	0.01458728		2146.39	0.00035707		2736.4	0.00549277		3326.4	0.02145752		3916.4	-0.00309628
376.6	0.08359995		966.59	0.02616537		1556.59	0.01423185		2146.59	0.00096816		2736.6	0.00577916		3326.6	0.02108244		3916.6	-0.00249088
376.8	0.08322548		966.79	0.02689123		1556.79	0.01406839		2146.79	0.00092406		2736.8	0.00481689		3326.8	0.020497		3916.8	-0.00166323
377	0.08309661		966.99	0.02745009		1556.99	0.01269043		2146.99	0.00106484		2737	0.00551754		3327	0.02015688		3917	0.00006991
377.2	0.08450101		967.19	0.02816064		1557.19	0.01213741		2147.19	0.00135294		2737.2	0.00513843		3327.2	0.02075417		3917.2	0.00016646
377.4	0.0847754		967.39	0.02832529		1557.39	0.01266103		2147.39	0.00153656		2737.4	0.00604907		3327.4	0.02095472		3917.4	0.00117975
377.6	0.08512884		967.59	0.02800077		1557.59	0.01274792		2147.59	0.00139188		2737.6	0.00665023		3327.6	0.0214783		3917.6	0.00028924
377.8	0.08509983		967.79	0.02796162		1557.79	0.01331681		2147.79	0.00162978		2737.8	0.00835455		3327.8	0.02149214		3917.8	-0.00026267
378	0.08508314		967.99	0.02794833		1557.99	0.01379029		2147.99	0.00198704		2738	0.00964512		3328	0.02209264		3918	0.00020195
378.2	0.08491793		968.19	0.02769193		1558.19	0.01583843		2148.19	0.00255277		2738.2	0.01015405		3328.2	0.02317991		3918.2	0.00068833
378.4	0.08419223		968.39	0.02644099		1558.39	0.01669987		2148.39	0.00333738		2738.4	0.01101445		3328.4	0.02375563		3918.4	0.00079327
378.6	0.08366272		968.59	0.02573243		1558.59	0.01788956		2148.59	0.00330744		2738.6	0.0107326		3328.6	0.02344594		3918.6	0.00073258
378.8	0.08300495		968.79	0.02463426		1558.79	0.01803906		2148.79	0.00386502		2738.8	0.01083862		3328.8	0.02358961		3918.8	-0.00023277
379	0.08299319		968.99	0.02432164		1558.99	0.01920374		2148.99	0.00331922		2739	0.01138143		3329	0.02307045		3919	-0.00093283
379.2	0.08387012		969.19	0.02467524		1559.19	0.0186445		2149.19	0.00315795		2739.2	0.01188619		3329.2	0.02214204		3919.2	-0.00056133
379.4	0.08418092		969.39	0.02503482		1559.39	0.01810399		2149.39	0.00257637		2739.4	0.01106609		3329.4	0.02207003		3919.4	-0.00152233
379.6	0.08373447		969.59	0.02607076		1559.59	0.01811934		2149.59	0.00292079		2739.6	0.01142381		3329.6	0.02167262		3919.6	-0.002022
379.8	0.08474121		969.79	0.02539348		1559.79	0.01693242		2149.79	0.00273427		2739.8	0.01149771		3329.8	0.02125674		3919.8	-0.00272256
380	0.08553701		969.99	0.02548926		1559.99	0.01683946		2149.99	0.00272943		2740	0.01146437		3330	0.02125357		3920	-0.00292234
380.2	0.08557586		970.19	0.02609054		1560.19	0.01665578		2150.19	0.00171354		2740.2	0.0107882		3330.2	0.02111786		3920.2	-0.00371995
380.4	0.08604512		970.39	0.02686429		1560.39	0.01638508		2150.39	0.00151705		2740.4	0.01033837		3330.4	0.021044		3920.4	-0.00319691
380.6	0.08657869		970.59	0.02749248		1560.59	0.01590226		2150.59	0.00194687		2740.6	0.00973979		3330.6	0.0205265		3920.6	-0.00277662
380.8	0.08745514		970.79	0.02814202		1560.79	0.01531742		2150.79	0.00167886		2740.8	0.00945384		3330.8	0.02009827		3920.8	-0.00273608
381	0.08848759		970.99	0.02913671		1560.99	0.01463183		2150.99	0.00079442		2741	0.00957262		3331	0.02023164		3921	-0.00259227
381.2	0.08964928		971.19	0.02911183		1561.19	0.01468716		2151.19	0.00037216		2741.2	0.0091801		3331.2	0.02036733		3921.2	-0.00272904
381.4	0.08940631		971.39	0.02990052		1561.39	0.0159848		2151.39	0.00014091		2741.4	0.00945573		3331.4	0.0200688		3921.4	-0.00283789
381.6	0.09042877		971.59	0.03057988		1561.59	0.01638734		2151.59	0.0008591		2741.6	0.00944769		3331.6	0.02073423		3921.6	-0.00290276
381.8	0.09023723		971.79	0.03122519		1561.79	0.01687769		2151.79	0.00068568		2741.8	0.00901849		3331.8	0.0211436		3921.8	-0.00280612
382	0.09029781		971.99	0.03099155		1561.99	0.01737515		2151.99	0.00088686		2742	0.00841441		3332	0.02155012		3922	-0.0016519
382.2	0.09012334		972.19	0.03029393		1562.19	0.01805964		2152.19	0.00147611		2742.2	0.00786083		3332.2	0.02138509		3922.2	-0.00162324
382.4	0.09096898		972.39	0.02977932		1562.39	0.01828021		2152.39	0.0011746		2742.4	0.00839935		3332.4	0.02075211		3922.4	-0.00157932
382.6	0.09088969		972.59	0.02943902		1562.59	0.01915611		2152.59	0.000971		2742.6	0.0090222		3332.6	0.01983854		3922.6	-0.00167755
382.8	0.09074098		972.79	0.02885963		1562.79	0.01878242		2152.79	0.00121749		2742.8	0.0096072		3332.8	0.01988359		3922.8	-0.00298057
383	0.09206044		972.99	0.02938806		1562.99	0.01901547		2152.99	0.00107305		2743	0.01025227		3333	0.02032719		3923	-0.00273566
383.2	0.09259554		973.19	0.02933378		1563.19	0.01737747		2153.19	0.00167561		2743.2	0.01051046		3333.2	0.02024935		3923.2	-0.00268686
383.4	0.09341237		973.39	0.02921935		1563.39	0.01719558		2153.39	0.00131553		2743.4	0.01070114		3333.4	0.02120116		3923.4	-0.00268432
383.6	0.09377603		973.59	0.02980009		1563.59	0.01727823		2153.59	0.00211628		2743.6	0.01194271		3333.6	0.02154856		3923.6	-0.00231674
383.8	0.09414944		973.79	0.02918768		1563.79	0.01610713		2153.79	0.00182985		2743.8	0.01157514		3333.8	0.02162486		3923.8	-0.00272589
384	0.0943113		973.99	0.02898776		1563.99	0.01629473		2153.99	0.00127497		2744	0.01120929		3334	0.02203156		3924	-0.00166104
384.2	0.09409463		974.19	0.02910705		1564.19	0.01626809		2154.19	0.00030866		2744.2	0.01047273		3334.2	0.02170306		3924.2	-0.00189393
384.4	0.09383351		974.39	0.02955876		1564.39	0.01665039		2154.39	0.00035973		2744.4	0.01003392		3334.4	0.02104999		3924.4	-0.00147104
384.6	0.09333272		974.59	0.02957807		1564.59	0.0165194		2154.59	0.00034484		2744.6	0.00949963		3334.6	0.02127592		3924.6	-0.00127294
384.8	0.09345395		974.79	0.03004298		1564.79	0.01725184		2154.79	0.00006832		2744.8	0.01046133		3334.8	0.02146311		3924.8	-0.00168446
385	0.0939844		974.99	0.0305901		1564.99	0.01795859		2154.99	0.000076		2745	0.01072894		3335	0.02170325		3925	-0.00086738
385.2	0.09436808		975.19	0.03026244		1565.19	0.01830584		2155.19	0.00056141		2745.2	0.01003225		3335.2	0.02269567		3925.2	-0.00099352
385.4	0.09390691		975.39	0.03160819		1565.39	0.01868866		2155.39	0.00091182		2745.4	0.0090127		3335.4	0.02322716		3925.4	-0.00162359
385.6	0.09438742		975.59	0.03202062		1565.59	0.01851862		2155.59	0.00028782		2745.6	0.00953454		3335.6	0.02337674		3925.6	-0.00260361
385.8	0.09391746		975.79	0.03129395		1565.79	0.01790904		2155.79	-0.00043219		2745.8	0.00887571		3335.8	0.02276483		3925.8	-0.0035679
386	0.09439597		975.99	0.03196122		1565.99	0.01832398		2155.99	-0.00016455		2746	0.00863371		3336	0.02266696		3926	-0.00410228
386.2	0.09487153		976.19	0.0317824		1566.19	0.01788903		2156.19	0.00018447		2746.2	0.00876238		3336.2	0.02266366		3926.2	-0.00447308
386.4	0.09479437		976.39	0.03170723		1566.39	0.01789667		2156.39	-0.00021497		2746.4	0.00918678		3336.4	0.02205824		3926.4	-0.00499552
386.6	0.09425252		976.59	0.03158546		1566.59	0.01850426		2156.59	0.00027168		2746.6	0.00875441		3336.6	0.02192624		3926.6	-0.00542654
386.8	0.09454335		976.79	0.03160022		1566.79	0.01843573		2156.79	0.0002624		2746.8	0.00853525		3336.8	0.02235535		3926.8	-0.00603592
387	0.0952146		976.99	0.03199839		1566.99	0.01720357		2156.99	-0.00002339		2747	0.00881588		3337	0.02169045		3927	-0.00588226
387.2	0.09480204		977.19	0.03195334		1567.19	0.01660363		2157.19	-0.00065841		2747.2	0.00843498		3337.2	0.02125163		3927.2	-0.0059584
387.4	0.09527627		977.39	0.03272092		1567.39	0.01618658		2157.39	-0.00063292		2747.4	0.0085797		3337.4	0.02162763		3927.4	-0.00547556
387.6	0.09489103		977.59	0.03249501		1567.59	0.01605931		2157.59	-0.0003202		2747.6	0.00798913		3337.6	0.02190136		3927.6	-0.00522652
387.8	0.09408123		977.79	0.03123267		1567.79	0.01606121		2157.79	-0.00079358		2747.8	0.00801712		3337.8	0.02230048		3927.8	-0.00516215
388	0.09401024		977.99	0.03108844		1567.99	0.01668551		2157.99	-0.00009765		2748	0.00799454		3338	0.02191411		3928	-0.00476442
388.2	0.09405245		978.19	0.03178809		1568.19	0.01764933		2158.19	-0.00014354		2748.2	0.00752615		3338.2	0.0219567		3928.2	-0.00511973
388.4	0.09406775		978.39	0.0325946		1568.39	0.01810686		2158.39	0.00052739		2748.4	0.00727612		3338.4	0.02252051		3928.4	-0.00472463
388.6	0.09453608		978.59	0.03237507		1568.59	0.01871211		2158.59	0.00067139		2748.6	0.00747075		3338.6	0.02286005		3928.6	-0.0043124
388.8	0.0950418		978.79	0.03267551		1568.79	0.02018573		2158.79	0.00198139		2748.8	0.00740634		3338.8	0.02288505		3928.8	-0.00382171
389	0.09511301		978.99	0.03288482		1568.99	0.01980941		2158.99	0.00330876		2749	0.00721986		3339	0.02253774		3929	-0.00210303
389.2	0.09554715		979.19	0.03325374		1569.19	0.01975463		2159.19	0.00385864		2749.2	0.00744635		3339.2	0.02291854		3929.2	-0.00290668
389.4	0.09516159		979.39	0.03362217		1569.39	0.01956348		2159.39	0.00471691		2749.4	0.00809983		3339.4	0.02362946		3929.4	-0.00334992
389.6	0.09527198		979.59	0.0333849		1569.59	0.0195935		2159.59	0.00495941		2749.6	0.00898655		3339.6	0.0234827		3929.6	-0.00441559
389.8	0.09542164		979.79	0.0326017		1569.79	0.01929975		2159.79	0.00556881		2749.8	0.00916696		3339.8	0.02297551		3929.8	-0.00450817
390	0.09595748		979.99	0.03284921		1569.99	0.01911622		2159.99	0.00605732		2750	0.00946003		3340	0.02284888		3930	-0.00400196
390.2	0.09549782		980.19	0.03188551		1570.19	0.01833816		2160.19	0.00604969		2750.2	0.01033013		3340.2	0.02199359		3930.2	-0.00333204
390.4	0.09568336		980.39	0.03067316		1570.39	0.01840663		2160.39	0.00476564		2750.4	0.01061945		3340.4	0.02129623		3930.4	-0.00385549
390.6	0.0961242		980.59	0.03037786		1570.59	0.01879131		2160.59	0.00461883		2750.6	0.01070669		3340.6	0.02119998		3930.6	-0.00412251
390.8	0.09642525		980.79	0.03032557		1570.79	0.01730325		2160.79	0.00219249		2750.8	0.0108198		3340.8	0.02148441		3930.8	-0.00458189
391	0.09567893		980.99	0.03070134		1570.99	0.01611919		2160.99	0.00133684		2751	0.01120522		3341	0.02103144		3931	-0.00540249
391.2	0.09568142		981.19	0.03090933		1571.19	0.01530599		2161.19	-0.00012778		2751.2	0.01158627		3341.2	0.02155363		3931.2	-0.00541589
391.4	0.09586085		981.39	0.0311551		1571.39	0.01456961		2161.39	-0.00051609		2751.4	0.01200503		3341.4	0.02212498		3931.4	-0.00566515
391.6	0.09588752		981.59	0.03105836		1571.59	0.01421079		2161.59	-0.00145965		2751.6	0.01239021		3341.6	0.02288499		3931.6	-0.00510765
391.8	0.096871		981.79	0.0315567		1571.79	0.01448795		2161.79	-0.00207762		2751.8	0.01299249		3341.8	0.02315197		3931.8	-0.00490184
392	0.09754362		981.99	0.03327679		1571.99	0.01360852		2161.99	-0.00156371		2752	0.01338837		3342	0.02227445		3932	-0.0049725
392.2	0.09851411		982.19	0.03436535		1572.19	0.01325731		2162.19	-0.00218104		2752.2	0.01320151		3342.2	0.02259135		3932.2	-0.00416362
392.4	0.09943159		982.39	0.03521492		1572.39	0.01339233		2162.39	-0.00184347		2752.4	0.01309928		3342.4	0.02238311		3932.4	-0.00308362
392.6	0.09972943		982.59	0.03601814		1572.59	0.01401108		2162.59	-0.00142082		2752.6	0.01287265		3342.6	0.02193643		3932.6	-0.00229349
392.8	0.09980349		982.79	0.0372335		1572.79	0.01462092		2162.79	-0.00015056		2752.8	0.01279542		3342.8	0.02127737		3932.8	-0.00241039
393	0.09889436		982.99	0.03764815		1572.99	0.01491373		2162.99	0.00084865		2753	0.01399279		3343	0.02088995		3933	-0.00208725
393.2	0.09933112		983.19	0.03800156		1573.19	0.0161019		2163.19	0.00233196		2753.2	0.01322273		3343.2	0.02092029		3933.2	-0.00225427
393.4	0.09903217		983.39	0.03818926		1573.39	0.01647913		2163.39	0.00341974		2753.4	0.01357815		3343.4	0.02247354		3933.4	-0.00216631
393.6	0.09914453		983.59	0.03790234		1573.59	0.01757278		2163.59	0.00370891		2753.6	0.01348709		3343.6	0.02193386		3933.6	-0.00241852
393.8	0.09894033		983.79	0.03739752		1573.79	0.0187706		2163.79	0.00338064		2753.8	0.01344168		3343.8	0.02084994		3933.8	-0.00250258
394	0.09852039		983.99	0.03778881		1573.99	0.02045209		2163.99	0.00375733		2754	0.01303783		3344	0.02037513		3934	-0.00236675
394.2	0.09870361		984.19	0.03741075		1574.19	0.02169376		2164.19	0.00294368		2754.2	0.01347864		3344.2	0.01978803		3934.2	-0.00255705
394.4	0.09968508		984.39	0.03687701		1574.39	0.02371849		2164.39	0.00202502		2754.4	0.01238849		3344.4	0.01926313		3934.4	-0.00315453
394.6	0.09948072		984.59	0.03697377		1574.59	0.02370613		2164.59	0.00235906		2754.6	0.01207846		3344.6	0.02039331		3934.6	-0.00344184
394.8	0.09964359		984.79	0.03686157		1574.79	0.02365131		2164.79	0.00170866		2754.8	0.0108086		3344.8	0.02050017		3934.8	-0.00457285
395	0.10004232		984.99	0.03696714		1574.99	0.0237227		2164.99	0.00250502		2755	0.01079292		3345	0.02038962		3935	-0.00508939
395.2	0.09999375		985.19	0.03622086		1575.19	0.02372469		2165.19	0.00226798		2755.2	0.01003303		3345.2	0.02140978		3935.2	-0.00533496
395.4	0.10049983		985.39	0.03564612		1575.39	0.02388837		2165.39	0.00240814		2755.4	0.01031826		3345.4	0.02193236		3935.4	-0.00528404
395.6	0.1012504		985.59	0.03609251		1575.59	0.02372288		2165.59	0.00180657		2755.6	0.01002939		3345.6	0.02285082		3935.6	-0.00528224
395.8	0.10170857		985.79	0.03649087		1575.79	0.02343428		2165.79	0.00205042		2755.8	0.00988449		3345.8	0.02275826		3935.8	-0.0052382
396	0.10190051		985.99	0.03630492		1575.99	0.02252313		2165.99	0.00174769		2756	0.01082871		3346	0.02329868		3936	-0.00507173
396.2	0.10286028		986.19	0.0359221		1576.19	0.02173838		2166.19	0.00208112		2756.2	0.01068345		3346.2	0.02363525		3936.2	-0.00497038
396.4	0.10244723		986.39	0.03601643		1576.39	0.02202606		2166.39	0.00182816		2756.4	0.01181819		3346.4	0.02344379		3936.4	-0.00487165
396.6	0.10287173		986.59	0.0351482		1576.59	0.02168084		2166.59	0.00149582		2756.6	0.0122668		3346.6	0.02352709		3936.6	-0.00541772
396.8	0.10371588		986.79	0.03542793		1576.79	0.02150128		2166.79	0.00160391		2756.8	0.01271125		3346.8	0.02337167		3936.8	-0.00650646
397	0.10322098		986.99	0.0345932		1576.99	0.02138721		2166.99	0.00143751		2757	0.01292825		3347	0.02328831		3937	-0.00636923
397.2	0.10328564		987.19	0.03431254		1577.19	0.02037272		2167.19	0.00071547		2757.2	0.01117824		3347.2	0.0239018		3937.2	-0.00574609
397.4	0.10362607		987.39	0.03449179		1577.39	0.02013681		2167.39	-0.00031118		2757.4	0.01215063		3347.4	0.02465173		3937.4	-0.00570399
397.6	0.10248361		987.59	0.03494457		1577.59	0.02044845		2167.59	-0.00221102		2757.6	0.01162186		3347.6	0.02352266		3937.6	-0.00503816
397.8	0.10187275		987.79	0.03553066		1577.79	0.02055611		2167.79	-0.00342445		2757.8	0.0119155		3347.8	0.02231323		3937.8	-0.00498003
398	0.10080654		987.99	0.03641535		1577.99	0.02075297		2167.99	-0.00376311		2758	0.01238076		3348	0.02220757		3938	-0.00477123
398.2	0.1010082		988.19	0.03671702		1578.19	0.02053554		2168.19	-0.00425699		2758.2	0.01231184		3348.2	0.02151859		3938.2	-0.00371071
398.4	0.10062833		988.39	0.03713105		1578.39	0.02077427		2168.39	-0.00428026		2758.4	0.01164786		3348.4	0.02090815		3938.4	-0.00376101
398.6	0.09993989		988.59	0.03758257		1578.59	0.01988376		2168.59	-0.00356102		2758.6	0.01207276		3348.6	0.02141512		3938.6	-0.00418582
398.8	0.10013274		988.79	0.0380939		1578.79	0.0197918		2168.79	-0.00358279		2758.8	0.01170551		3348.8	0.02066749		3938.8	-0.00523995
399	0.1004207		988.99	0.03925185		1578.99	0.02017952		2168.99	-0.00278628		2759	0.01151223		3349	0.02135864		3939	-0.00456767
399.2	0.09998547		989.19	0.0389122		1579.19	0.02062912		2169.19	-0.00279904		2759.2	0.01162501		3349.2	0.02205377		3939.2	-0.00539713
399.4	0.10081557		989.39	0.03914825		1579.39	0.02067757		2169.39	-0.00214505		2759.4	0.01218674		3349.4	0.02252573		3939.4	-0.0057823
399.6	0.10045248		989.59	0.03923326		1579.59	0.0207156		2169.59	-0.00187536		2759.6	0.01219813		3349.6	0.02321722		3939.6	-0.00618636
399.8	0.10075653		989.79	0.03974439		1579.79	0.01993331		2169.79	-0.00069953		2759.8	0.01242493		3349.8	0.02318119		3939.8	-0.00556142
400	0.10162303		989.99	0.03905809		1579.99	0.01962033		2169.99	-0.00088862		2760	0.01286463		3350	0.0230787		3940	-0.00536851
400.2	0.10248628		990.19	0.03890041		1580.19	0.01995662		2170.19	0.00012893		2760.2	0.01314385		3350.2	0.02225342		3940.2	-0.00587124
400.4	0.102655		990.39	0.03871665		1580.39	0.02049112		2170.39	-0.00046016		2760.4	0.01379699		3350.4	0.02203517		3940.4	-0.00601136
400.6	0.10336896		990.59	0.03836933		1580.59	0.02059498		2170.59	0.00016518		2760.6	0.01352097		3350.6	0.02202813		3940.6	-0.0064196
400.8	0.10377102		990.79	0.03801156		1580.79	0.02114944		2170.79	0.00021602		2760.8	0.01357797		3350.8	0.02200177		3940.8	-0.00680094
401	0.10353618		990.99	0.03691688		1580.99	0.02087693		2170.99	0.00041345		2761	0.01295408		3351	0.02191369		3941	-0.00628128
401.2	0.10349775		991.19	0.03658486		1581.19	0.02086141		2171.19	0.00057153		2761.2	0.01161665		3351.2	0.02269544		3941.2	-0.00500025
401.4	0.10388335		991.39	0.03690309		1581.39	0.0212543		2171.39	0.00014047		2761.4	0.01240295		3351.4	0.02220517		3941.4	-0.00433862
401.6	0.10334391		991.59	0.03667038		1581.59	0.02122722		2171.59	-0.00167707		2761.6	0.01250509		3351.6	0.02164925		3941.6	-0.0043648
401.8	0.10298779		991.79	0.03598882		1581.79	0.02108974		2171.79	-0.00175693		2761.8	0.01238122		3351.8	0.02133126		3941.8	-0.00396533
402	0.10188831		991.99	0.03633616		1581.99	0.02076931		2171.99	-0.00187307		2762	0.01204058		3352	0.02206559		3942	-0.00392674
402.2	0.10266974		992.19	0.03616427		1582.19	0.0209167		2172.19	-0.00256911		2762.2	0.01197312		3352.2	0.02112428		3942.2	-0.00395901
402.4	0.10268274		992.39	0.03624533		1582.39	0.0210906		2172.39	-0.00318464		2762.4	0.01283448		3352.4	0.02074262		3942.4	-0.00413776
402.6	0.10276324		992.59	0.03643226		1582.59	0.02076598		2172.59	-0.00341887		2762.6	0.01301234		3352.6	0.02122017		3942.6	-0.0053471
402.8	0.10331162		992.79	0.03686485		1582.79	0.0210881		2172.79	-0.00389844		2762.8	0.01256915		3352.8	0.02161367		3942.8	-0.00560714
403	0.10365695		992.99	0.0374617		1582.99	0.02228315		2172.99	-0.0027494		2763	0.01310347		3353	0.02294978		3943	-0.00612163
403.2	0.10421769		993.19	0.03745137		1583.19	0.02126256		2173.19	-0.00248217		2763.2	0.01278725		3353.2	0.0237777		3943.2	-0.00695486
403.4	0.10499248		993.39	0.03846531		1583.39	0.02114186		2173.39	-0.00092951		2763.4	0.01214867		3353.4	0.0242257		3943.4	-0.00679247
403.6	0.10459985		993.59	0.03896282		1583.59	0.02064058		2173.59	-0.00077593		2763.6	0.01256837		3353.6	0.0247275		3943.6	-0.0075282
403.8	0.10502445		993.79	0.03946232		1583.79	0.01947744		2173.79	-0.00047154		2763.8	0.01245383		3353.8	0.02443714		3943.8	-0.00773189
404	0.10590419		993.99	0.03994099		1583.99	0.02015523		2173.99	-0.00019058		2764	0.01287878		3354	0.02449406		3944	-0.00804566
404.2	0.10589932		994.19	0.04097993		1584.19	0.02126082		2174.19	0.00073837		2764.2	0.01353136		3354.2	0.02528653		3944.2	-0.00912073
404.4	0.10546029		994.39	0.04093326		1584.39	0.02146548		2174.39	0.00102665		2764.4	0.01387977		3354.4	0.02553726		3944.4	-0.00939392
404.6	0.10553224		994.59	0.04192109		1584.59	0.02204171		2174.59	0.00209325		2764.6	0.01422651		3354.6	0.02504599		3944.6	-0.00903701
404.8	0.10634908		994.79	0.04170858		1584.79	0.02202866		2174.79	0.00157974		2764.8	0.01383024		3354.8	0.02492078		3944.8	-0.00902562
405	0.10712184		994.99	0.04206577		1584.99	0.02214935		2174.99	0.0018368		2765	0.013859		3355	0.02508533		3945	-0.00793
405.2	0.10772415		995.19	0.04210349		1585.19	0.02232042		2175.19	0.00150516		2765.2	0.01322694		3355.2	0.02500002		3945.2	-0.00665998
405.4	0.10848227		995.39	0.0425358		1585.39	0.02210984		2175.39	0.00067901		2765.4	0.01359013		3355.4	0.02446353		3945.4	-0.00637126
405.6	0.10795669		995.59	0.04221537		1585.59	0.02190581		2175.59	-0.00044431		2765.6	0.01354511		3355.6	0.02434191		3945.6	-0.0066923
405.8	0.10775234		995.79	0.04199131		1585.79	0.02226377		2175.79	-0.00057492		2765.8	0.01315858		3355.8	0.02446005		3945.8	-0.00557775
406	0.10798833		995.99	0.04193348		1585.99	0.02194963		2175.99	-0.00116952		2766	0.01413151		3356	0.02438006		3946	-0.00620871
406.2	0.10831972		996.19	0.04093952		1586.19	0.02244427		2176.19	-0.00235172		2766.2	0.0145171		3356.2	0.02403903		3946.2	-0.00648835
406.4	0.10878217		996.39	0.04051844		1586.39	0.02286311		2176.39	-0.00282589		2766.4	0.01468788		3356.4	0.02370855		3946.4	-0.00611851
406.6	0.10919686		996.59	0.04019464		1586.59	0.02261697		2176.59	-0.00209701		2766.6	0.0143387		3356.6	0.02384219		3946.6	-0.00712033
406.8	0.10905446		996.79	0.04070384		1586.79	0.02314146		2176.79	-0.00174124		2766.8	0.01394801		3356.8	0.02420941		3946.8	-0.00673984
407	0.10954353		996.99	0.04099267		1586.99	0.02344295		2176.99	-0.00070249		2767	0.01357697		3357	0.02474095		3947	-0.00697164
407.2	0.11018926		997.19	0.04169188		1587.19	0.02185299		2177.19	-0.00056511		2767.2	0.01299452		3357.2	0.02511907		3947.2	-0.00675066
407.4	0.11013115		997.39	0.04204105		1587.39	0.02196379		2177.39	0.00012624		2767.4	0.01360628		3357.4	0.02521278		3947.4	-0.00702539
407.6	0.10926842		997.59	0.04120628		1587.59	0.02179099		2177.59	0.00014511		2767.6	0.01377138		3357.6	0.02490451		3947.6	-0.00818974
407.8	0.10889806		997.79	0.0403633		1587.79	0.02124582		2177.79	0.00075736		2767.8	0.01432473		3357.8	0.02454005		3947.8	-0.00743069
408	0.1092248		997.99	0.04035373		1587.99	0.02098626		2177.99	0.00111527		2768	0.0143284		3358	0.02512469		3948	-0.0078447
408.2	0.10881837		998.19	0.03928645		1588.19	0.02165565		2178.19	0.00051946		2768.2	0.01436034		3358.2	0.0250954		3948.2	-0.00826875
408.4	0.10923967		998.39	0.03816928		1588.39	0.02122231		2178.39	0.00088285		2768.4	0.01449894		3358.4	0.02481561		3948.4	-0.00803422
408.6	0.10921604		998.59	0.03807965		1588.59	0.02134782		2178.59	0.00067481		2768.6	0.01384521		3358.6	0.02475819		3948.6	-0.00758891
408.8	0.10867837		998.79	0.03680973		1588.79	0.0209139		2178.79	0.00030557		2768.8	0.01392294		3358.8	0.02516135		3948.8	-0.00693011
409	0.10875306		998.99	0.03659237		1588.99	0.02139587		2178.99	0.00069238		2769	0.01432732		3359	0.02520438		3949	-0.00593316
409.2	0.10908225		999.19	0.03650521		1589.19	0.02130141		2179.19	0.00040035		2769.2	0.01414903		3359.2	0.02488038		3949.2	-0.00517545
409.4	0.10905514		999.39	0.03736217		1589.39	0.0220102		2179.39	0.00010085		2769.4	0.01527863		3359.4	0.02519495		3949.4	-0.00493422
409.6	0.10866428		999.59	0.03746255		1589.59	0.02222416		2179.59	-0.00057217		2769.6	0.0149161		3359.6	0.02499277		3949.6	-0.004503
409.8	0.1094086		999.79	0.03713778		1589.79	0.02293133		2179.79	-0.00071401		2769.8	0.01507486		3359.8	0.02438472		3949.8	-0.00429554
410	0.10968765		999.99	0.03690803		1589.99	0.02315739		2179.99	-0.00085522		2770	0.01574887		3360	0.02377005		3950	-0.00518677
410.2	0.11025109		1000.19	0.03680006		1590.19	0.02371067		2180.19	-0.00087302		2770.2	0.01576699		3360.2	0.02412903		3950.2	-0.00544429
410.4	0.11107735		1000.39	0.03733698		1590.39	0.02359466		2180.39	-0.00042983		2770.4	0.01673869		3360.4	0.02311151		3950.4	-0.00559865
410.6	0.11128118		1000.59	0.03798972		1590.59	0.02363312		2180.59	-0.00011567		2770.6	0.01664125		3360.6	0.02355567		3950.6	-0.00608764
410.8	0.11130413		1000.79	0.03887736		1590.79	0.02320978		2180.79	-0.00010285		2770.8	0.0163966		3360.8	0.0241859		3950.8	-0.005904
411	0.11223806		1000.99	0.03978641		1590.99	0.02308791		2180.99	0.00011675		2771	0.0157442		3361	0.02412766		3951	-0.0051541
411.2	0.11236726		1001.19	0.04098033		1591.19	0.02205382		2181.19	0.00101717		2771.2	0.01614154		3361.2	0.02445924		3951.2	-0.00555345
411.4	0.11190908		1001.39	0.04080752		1591.39	0.02152356		2181.39	0.00196604		2771.4	0.01513932		3361.4	0.02442794		3951.4	-0.00676135
411.6	0.11187383		1001.59	0.04099662		1591.59	0.02139137		2181.59	0.0017765		2771.6	0.01498062		3361.6	0.02448686		3951.6	-0.00724569
411.8	0.11122981		1001.79	0.04138155		1591.79	0.02082936		2181.79	0.00203624		2771.8	0.01489524		3361.8	0.0250259		3951.8	-0.00786314
412	0.1119794		1001.99	0.04173607		1591.99	0.02084449		2181.99	0.00136882		2772	0.01440131		3362	0.02559231		3952	-0.00815292
412.2	0.11256464		1002.19	0.04157939		1592.19	0.02092776		2182.19	0.00126818		2772.2	0.01433427		3362.2	0.02555434		3952.2	-0.00846432
412.4	0.11282843		1002.39	0.04129499		1592.39	0.02138247		2182.39	0.00183084		2772.4	0.01422707		3362.4	0.02534773		3952.4	-0.00895881
412.6	0.11258309		1002.59	0.04185613		1592.59	0.02131236		2182.59	0.00116468		2772.6	0.01416583		3362.6	0.0261423		3952.6	-0.00842355
412.8	0.11266595		1002.79	0.04129715		1592.79	0.02103216		2182.79	0.00156196		2772.8	0.01478873		3362.8	0.02544283		3952.8	-0.00808386
413	0.11308661		1002.99	0.04227775		1592.99	0.02083062		2182.99	0.00098775		2773	0.01472202		3363	0.02519444		3953	-0.00788929
413.2	0.1134829		1003.19	0.04172829		1593.19	0.02067334		2183.19	0.00002958		2773.2	0.01469273		3363.2	0.02517016		3953.2	-0.00772979
413.4	0.11367616		1003.39	0.04254944		1593.39	0.02113672		2183.39	-0.0000118		2773.4	0.01440388		3363.4	0.02503231		3953.4	-0.00726991
413.6	0.11409329		1003.59	0.0419994		1593.59	0.02142168		2183.59	0.00081524		2773.6	0.01302497		3363.6	0.02367419		3953.6	-0.00635572
413.8	0.11420612		1003.79	0.04156234		1593.79	0.02199065		2183.79	-0.00023088		2773.8	0.01290622		3363.8	0.02371047		3953.8	-0.00697236
414	0.1138115		1003.99	0.04183795		1593.99	0.02251512		2183.99	0.00019795		2774	0.01269305		3364	0.02445616		3954	-0.00736877
414.2	0.11321254		1004.19	0.04167738		1594.19	0.02253125		2184.19	0.00025929		2774.2	0.0122754		3364.2	0.02564947		3954.2	-0.00627151
414.4	0.11235809		1004.39	0.04137546		1594.39	0.02229494		2184.39	0.00063528		2774.4	0.0118825		3364.4	0.02542222		3954.4	-0.00556719
414.6	0.11200205		1004.59	0.04179487		1594.59	0.02187482		2184.59	0.00019177		2774.6	0.01052245		3364.6	0.02619899		3954.6	-0.00486499
414.8	0.1118776		1004.79	0.04202287		1594.79	0.02135414		2184.79	0.00146314		2774.8	0.01064066		3364.8	0.02651549		3954.8	-0.00401014
415	0.1118261		1004.99	0.04244572		1594.99	0.02156911		2184.99	0.0015218		2775	0.01057193		3365	0.02706584		3955	-0.00361948
415.2	0.111245		1005.19	0.04253067		1595.19	0.02125795		2185.19	0.00257485		2775.2	0.01034446		3365.2	0.02764823		3955.2	-0.0036097
415.4	0.1111643		1005.39	0.04274749		1595.39	0.02120178		2185.39	0.00301772		2775.4	0.01051134		3365.4	0.02807215		3955.4	-0.00383406
415.6	0.11193885		1005.59	0.04391588		1595.59	0.02206283		2185.59	0.0025897		2775.6	0.01120877		3365.6	0.02848639		3955.6	-0.00375496
415.8	0.11151475		1005.79	0.04472418		1595.79	0.02222017		2185.79	0.00290698		2775.8	0.0112228		3365.8	0.02787713		3955.8	-0.00380558
416	0.11249879		1005.99	0.04456142		1595.99	0.02237106		2185.99	0.00285463		2776	0.01157794		3366	0.02769912		3956	-0.00366109
416.2	0.11273566		1006.19	0.04437245		1596.19	0.0220794		2186.19	0.00299272		2776.2	0.01139724		3366.2	0.02744529		3956.2	-0.0041075
416.4	0.11281785		1006.39	0.04352394		1596.39	0.02334076		2186.39	0.00272062		2776.4	0.01150677		3366.4	0.02744167		3956.4	-0.0047278
416.6	0.11335927		1006.59	0.04373978		1596.59	0.02245525		2186.59	0.00165696		2776.6	0.01227846		3366.6	0.02793114		3956.6	-0.00529988
416.8	0.11368276		1006.79	0.04265935		1596.79	0.02256421		2186.79	0.00098273		2776.8	0.01277994		3366.8	0.02737153		3956.8	-0.00575613
417	0.11411607		1006.99	0.04239809		1596.99	0.02222596		2186.99	0.00048125		2777	0.0122795		3367	0.02663855		3957	-0.00641564
417.2	0.11417357		1007.19	0.04195201		1597.19	0.02275577		2187.19	0.00005071		2777.2	0.01237842		3367.2	0.02573305		3957.2	-0.0070222
417.4	0.11420705		1007.39	0.04194565		1597.39	0.0223876		2187.39	-0.00067378		2777.4	0.01165928		3367.4	0.02522208		3957.4	-0.00665668
417.6	0.11458777		1007.59	0.04170555		1597.59	0.02244584		2187.59	-0.00006634		2777.6	0.01026087		3367.6	0.02398911		3957.6	-0.00630275
417.8	0.1141666		1007.79	0.04184973		1597.79	0.02215628		2187.79	-0.00108086		2777.8	0.01008684		3367.8	0.02485184		3957.8	-0.00704097
418	0.11348416		1007.99	0.04215542		1597.99	0.02189632		2187.99	-0.00033861		2778	0.01052439		3368	0.02437073		3958	-0.00711656
418.2	0.11356418		1008.19	0.04195743		1598.19	0.02171655		2188.19	-0.00012118		2778.2	0.01069268		3368.2	0.02410686		3958.2	-0.00643863
418.4	0.11432371		1008.39	0.04240473		1598.39	0.02149813		2188.39	-0.00020404		2778.4	0.01052039		3368.4	0.02355171		3958.4	-0.0065379
418.6	0.11455362		1008.59	0.04234102		1598.59	0.02168251		2188.59	-0.00054892		2778.6	0.01101167		3368.6	0.02313063		3958.6	-0.00689761
418.8	0.11520556		1008.79	0.04146438		1598.79	0.02203956		2188.79	0.00051486		2778.8	0.01253173		3368.8	0.02411321		3958.8	-0.00657022
419	0.11575873		1008.99	0.04192158		1598.99	0.02147933		2188.99	0.00081917		2779	0.01317857		3369	0.02424389		3959	-0.0060403
419.2	0.11615687		1009.19	0.04171289		1599.19	0.02116809		2189.19	0.00186651		2779.2	0.01365965		3369.2	0.02426269		3959.2	-0.00532928
419.4	0.11719758		1009.39	0.04270094		1599.39	0.02132291		2189.39	0.00221082		2779.4	0.01433041		3369.4	0.02430063		3959.4	-0.00457958
419.6	0.117674		1009.59	0.0427984		1599.59	0.02098101		2189.59	0.0026152		2779.6	0.01463576		3369.6	0.02469077		3959.6	-0.00428429
419.8	0.1174229		1009.79	0.04319361		1599.79	0.02120096		2189.79	0.00312994		2779.8	0.01519105		3369.8	0.02541634		3959.8	-0.00420611
420	0.11771531		1009.99	0.04353335		1599.99	0.02115091		2189.99	0.00282909		2780	0.01511918		3370	0.0267506		3960	-0.00472147
420.2	0.11767918		1010.19	0.04412906		1600.19	0.02144628		2190.19	0.0023279		2780.2	0.01472807		3370.2	0.02769221		3960.2	-0.0045458
420.4	0.11776145		1010.39	0.04437028		1600.39	0.02217		2190.39	0.00161177		2780.4	0.01543524		3370.4	0.02874086		3960.4	-0.00479707
420.6	0.11773218		1010.59	0.04404027		1600.59	0.02312767		2190.59	0.00028351		2780.6	0.01638004		3370.6	0.028626		3960.6	-0.00469466
420.8	0.11835377		1010.79	0.04379365		1600.79	0.0237336		2190.79	-0.00051019		2780.8	0.01637828		3370.8	0.02813654		3960.8	-0.00406233
421	0.11805625		1010.99	0.04373781		1600.99	0.02342173		2190.99	-0.00071848		2781	0.0161736		3371	0.02773684		3961	-0.00427989
421.2	0.11757192		1011.19	0.04406501		1601.19	0.02384179		2191.19	-0.00048331		2781.2	0.01590049		3371.2	0.02877568		3961.2	-0.00460924
421.4	0.11705151		1011.39	0.04367904		1601.39	0.02296273		2191.39	-0.00097494		2781.4	0.01484452		3371.4	0.02925		3961.4	-0.00443742
421.6	0.11646782		1011.59	0.04399881		1601.59	0.02314546		2191.59	-0.0009553		2781.6	0.01371957		3371.6	0.0283725		3961.6	-0.00458111
421.8	0.11521678		1011.79	0.04413655		1601.79	0.02343416		2191.79	-0.00059238		2781.8	0.01499014		3371.8	0.02869888		3961.8	-0.00533198
422	0.11491153		1011.99	0.04321961		1601.99	0.0234511		2191.99	-0.00041989		2782	0.01487309		3372	0.02810007		3962	-0.00626599
422.2	0.1151371		1012.19	0.04258186		1602.19	0.024072		2192.19	-0.00020135		2782.2	0.01315367		3372.2	0.02826458		3962.2	-0.00583528
422.4	0.11478783		1012.39	0.04226449		1602.39	0.02404539		2192.39	-0.00037029		2782.4	0.01244615		3372.4	0.02888308		3962.4	-0.00591894
422.6	0.11403311		1012.59	0.04109245		1602.59	0.02454665		2192.59	0.0004394		2782.6	0.01264328		3372.6	0.0287578		3962.6	-0.00616359
422.8	0.11437755		1012.79	0.0409114		1602.79	0.0238615		2192.79	0.00142618		2782.8	0.01314267		3372.8	0.03008802		3962.8	-0.00583183
423	0.11500251		1012.99	0.04119839		1602.99	0.02316514		2192.99	0.00202762		2783	0.01278924		3373	0.02931289		3963	-0.00534524
423.2	0.11528652		1013.19	0.04016623		1603.19	0.0234863		2193.19	0.00178413		2783.2	0.01284494		3373.2	0.03000471		3963.2	-0.00533914
423.4	0.11562386		1013.39	0.04007627		1603.39	0.02381664		2193.39	0.00235536		2783.4	0.01333958		3373.4	0.02974679		3963.4	-0.00403342
423.6	0.11637423		1013.59	0.04038162		1603.59	0.02386287		2193.59	0.00235892		2783.6	0.01367794		3373.6	0.03094212		3963.6	-0.00360082
423.8	0.11730399		1013.79	0.04096593		1603.79	0.02424067		2193.79	0.00136447		2783.8	0.01387248		3373.8	0.03177139		3963.8	-0.00310991
424	0.11879161		1013.99	0.04175526		1603.99	0.02419831		2193.99	0.00050069		2784	0.01335329		3374	0.03184252		3964	-0.00247249
424.2	0.11977544		1014.19	0.04191898		1604.19	0.02417006		2194.19	0.00020096		2784.2	0.01341924		3374.2	0.03111593		3964.2	-0.00120514
424.4	0.12095769		1014.39	0.04157913		1604.39	0.02505791		2194.39	-0.00068292		2784.4	0.01398336		3374.4	0.03006083		3964.4	-0.00056424
424.6	0.12112603		1014.59	0.04132544		1604.59	0.02574801		2194.59	-0.00173986		2784.6	0.01463715		3374.6	0.02952303		3964.6	-0.0005122
424.8	0.12270595		1014.79	0.04186982		1604.79	0.02508885		2194.79	-0.00268245		2784.8	0.01487496		3374.8	0.02889026		3964.8	-0.00055086
425	0.12320355		1014.99	0.04164101		1604.99	0.02497616		2194.99	-0.00280934		2785	0.01504863		3375	0.02879811		3965	-0.000666
425.2	0.12380578		1015.19	0.04278444		1605.19	0.02503882		2195.19	-0.00320647		2785.2	0.01409485		3375.2	0.02863041		3965.2	-0.00091964
425.4	0.12403628		1015.39	0.04273512		1605.39	0.02355374		2195.39	-0.00385963		2785.4	0.01334365		3375.4	0.02829779		3965.4	-0.00053068
425.6	0.12286578		1015.59	0.04358981		1605.59	0.02331448		2195.59	-0.0035086		2785.6	0.01282286		3375.6	0.02664077		3965.6	-0.00078722
425.8	0.12284588		1015.79	0.04444942		1605.79	0.0237162		2195.79	-0.00267921		2785.8	0.0127808		3375.8	0.02695587		3965.8	-0.00137675
426	0.12317012		1015.99	0.04442022		1605.99	0.02240786		2195.99	-0.00278882		2786	0.01113223		3376	0.02719222		3966	-0.00152946
426.2	0.12301759		1016.19	0.04541555		1606.19	0.02252408		2196.19	-0.00308806		2786.2	0.01041772		3376.2	0.02756266		3966.2	-0.0005613
426.4	0.12255		1016.39	0.04609445		1606.39	0.0219985		2196.39	-0.00281889		2786.4	0.01059356		3376.4	0.02818612		3966.4	-0.00075074
426.6	0.12229575		1016.59	0.04611326		1606.59	0.02254122		2196.59	-0.00222636		2786.6	0.01057499		3376.6	0.02723755		3966.6	-0.00048681
426.8	0.12288246		1016.79	0.0462163		1606.79	0.02226422		2196.79	-0.00166611		2786.8	0.01097619		3376.8	0.02781114		3966.8	-0.00043989
427	0.1224602		1016.99	0.04583882		1606.99	0.02217379		2196.99	-0.00104163		2787	0.01013247		3377	0.02804334		3967	-0.0007789
427.2	0.12158853		1017.19	0.04505435		1607.19	0.0228307		2197.19	-0.0007164		2787.2	0.01090351		3377.2	0.02803644		3967.2	-0.00033801
427.4	0.12219866		1017.39	0.04590689		1607.39	0.02357151		2197.39	0.00024274		2787.4	0.01203473		3377.4	0.02769862		3967.4	0.0002964
427.6	0.12270446		1017.59	0.0467753		1607.59	0.02374202		2197.59	-0.00048063		2787.6	0.01202166		3377.6	0.02826275		3967.6	0.0005347
427.8	0.12271184		1017.79	0.04670585		1607.79	0.0241864		2197.79	-0.00118267		2787.8	0.01286769		3377.8	0.02785928		3967.8	0.00029908
428	0.12352294		1017.99	0.04671533		1607.99	0.02436861		2197.99	-0.00125122		2788	0.01434251		3378	0.02697669		3968	-0.00095263
428.2	0.1237758		1018.19	0.04598003		1608.19	0.02449823		2198.19	-0.00225791		2788.2	0.01532518		3378.2	0.02554676		3968.2	-0.00139303
428.4	0.1238693		1018.39	0.04536237		1608.39	0.02451257		2198.39	-0.003282		2788.4	0.0165644		3378.4	0.02519665		3968.4	-0.00175713
428.6	0.12273432		1018.59	0.04554951		1608.59	0.02421518		2198.59	-0.00311583		2788.6	0.01788672		3378.6	0.02577159		3968.6	-0.00252295
428.8	0.12345483		1018.79	0.04501406		1608.79	0.02379658		2198.79	-0.00295536		2788.8	0.01797949		3378.8	0.02475978		3968.8	-0.00253907
429	0.12334026		1018.99	0.04445618		1608.99	0.02411187		2198.99	-0.00296425		2789	0.0182019		3379	0.0243533		3969	-0.00201008
429.2	0.12313305		1019.19	0.04490318		1609.19	0.02358158		2199.19	-0.00305437		2789.2	0.0173099		3379.2	0.02424034		3969.2	-0.0026772
429.4	0.12238152		1019.39	0.0445212		1609.39	0.02308407		2199.39	-0.00240371		2789.4	0.01697999		3379.4	0.02526045		3969.4	-0.00237427
429.6	0.12140208		1019.59	0.04529938		1609.59	0.0231339		2199.59	-0.00169154		2789.6	0.01616506		3379.6	0.02508247		3969.6	-0.00246242
429.8	0.12143114		1019.79	0.04645834		1609.79	0.02323611		2199.79	-0.00152899		2789.8	0.01548513		3379.8	0.02677586		3969.8	-0.00203376
430	0.12095343		1019.99	0.04664683		1609.99	0.02206669		2199.99	-0.00126858		2790	0.01459387		3380	0.027163		3970	-0.00149197
430.2	0.1210524		1020.19	0.04661214		1610.19	0.02314899		2200.19	-0.00135046		2790.2	0.01373578		3380.2	0.02814251		3970.2	-0.00012561
430.4	0.1207038		1020.39	0.04671729		1610.39	0.02321423		2200.39	-0.00102998		2790.4	0.01274858		3380.4	0.02854681		3970.4	0.00043904
430.6	0.12099091		1020.59	0.04600866		1610.59	0.02397436		2200.59	0.00069471		2790.6	0.01265399		3380.6	0.02850147		3970.6	0.00073545
430.8	0.12140831		1020.79	0.04581998		1610.79	0.02418837		2200.79	0.00153937		2790.8	0.0119764		3380.8	0.02897789		3970.8	0.00014609
431	0.12140717		1020.99	0.04540021		1610.99	0.02422656		2200.99	0.00220675		2791	0.01132395		3381	0.0286733		3971	0.00046864
431.2	0.12187431		1021.19	0.04521427		1611.19	0.02504486		2201.19	0.00245412		2791.2	0.01193065		3381.2	0.0279116		3971.2	0.00085372
431.4	0.12320716		1021.39	0.04507325		1611.39	0.02516037		2201.39	0.00193124		2791.4	0.01235454		3381.4	0.02804647		3971.4	0.00088738
431.6	0.12411772		1021.59	0.04403012		1611.59	0.0251878		2201.59	0.00073429		2791.6	0.0124654		3381.6	0.0276528		3971.6	0.00060001
431.8	0.12493029		1021.79	0.04374873		1611.79	0.02463199		2201.79	0.00021738		2791.8	0.01350486		3381.8	0.02713644		3971.8	-0.00026242
432	0.12608732		1021.99	0.04332129		1611.99	0.02376347		2201.99	-0.00061498		2792	0.01391769		3382	0.02677438		3972	-0.00091679
432.2	0.12710984		1022.19	0.04221366		1612.19	0.02329431		2202.19	-0.00233588		2792.2	0.01372475		3382.2	0.02607567		3972.2	-0.00117231
432.4	0.12693938		1022.39	0.04220862		1612.39	0.02259133		2202.39	-0.00180608		2792.4	0.01404604		3382.4	0.02673243		3972.4	-0.00217822
432.6	0.12742127		1022.59	0.04263932		1612.59	0.02245138		2202.59	-0.00106488		2792.6	0.01435413		3382.6	0.02712403		3972.6	-0.00335727
432.8	0.12779749		1022.79	0.04262761		1612.79	0.02155183		2202.79	-0.00136193		2792.8	0.01413224		3382.8	0.02676393		3972.8	-0.00329159
433	0.12779767		1022.99	0.04307401		1612.99	0.02099546		2202.99	-0.00185959		2793	0.01518364		3383	0.02680949		3973	-0.00392391
433.2	0.12830452		1023.19	0.04337547		1613.19	0.01981979		2203.19	-0.00159835		2793.2	0.01481025		3383.2	0.02764662		3973.2	-0.00498217
433.4	0.12852681		1023.39	0.043928		1613.39	0.01990769		2203.39	-0.00113576		2793.4	0.0148942		3383.4	0.027904		3973.4	-0.00451998
433.6	0.12908689		1023.59	0.0448922		1613.59	0.0196485		2203.59	0.00008412		2793.6	0.01399087		3383.6	0.02874293		3973.6	-0.00525069
433.8	0.12899568		1023.79	0.0459091		1613.79	0.01904349		2203.79	-0.00023861		2793.8	0.01363942		3383.8	0.02871562		3973.8	-0.0052313
434	0.12881964		1023.99	0.04603332		1613.99	0.01884377		2203.99	0.00010187		2794	0.01317053		3384	0.02789783		3974	-0.00541181
434.2	0.12935425		1024.19	0.04654357		1614.19	0.01973413		2204.19	-0.00042263		2794.2	0.0134669		3384.2	0.02828274		3974.2	-0.00435323
434.4	0.12874074		1024.39	0.04686092		1614.39	0.01955644		2204.39	0.00015987		2794.4	0.01458538		3384.4	0.02810172		3974.4	-0.00479023
434.6	0.12884653		1024.59	0.04618026		1614.59	0.01997256		2204.59	0.00144382		2794.6	0.01475986		3384.6	0.02707852		3974.6	-0.00472571
434.8	0.12888722		1024.79	0.04569138		1614.79	0.0203234		2204.79	0.00175537		2794.8	0.01462919		3384.8	0.0260927		3974.8	-0.0046931
435	0.12960683		1024.99	0.0454669		1614.99	0.01980851		2204.99	0.00220761		2795	0.01507795		3385	0.0258165		3975	-0.00391717
435.2	0.12934222		1025.19	0.0449198		1615.19	0.020173		2205.19	0.00191188		2795.2	0.01521521		3385.2	0.0261124		3975.2	-0.00346696
435.4	0.12948855		1025.39	0.0438318		1615.39	0.01970399		2205.39	0.00187941		2795.4	0.01522589		3385.4	0.02617422		3975.4	-0.00278639
435.6	0.12936491		1025.59	0.04320872		1615.59	0.01987262		2205.59	0.00161655		2795.6	0.01503293		3385.6	0.02591739		3975.6	-0.00320747
435.8	0.1281428		1025.79	0.04354716		1615.79	0.01940892		2205.79	0.00195785		2795.8	0.01475388		3385.8	0.02638366		3975.8	-0.00327438
436	0.12830781		1025.99	0.04289405		1615.99	0.0201383		2205.99	0.00097726		2796	0.01452512		3386	0.02657992		3976	-0.00362875
436.2	0.12841336		1026.19	0.04300661		1616.19	0.02042563		2206.19	0.00059076		2796.2	0.01486479		3386.2	0.02671342		3976.2	-0.00399649
436.4	0.12801858		1026.39	0.0433854		1616.39	0.02170447		2206.39	0.00202178		2796.4	0.01519241		3386.4	0.02742776		3976.4	-0.00446511
436.6	0.12847833		1026.59	0.04396811		1616.59	0.02214107		2206.59	0.00087558		2796.6	0.01475739		3386.6	0.02825403		3976.6	-0.00459038
436.8	0.12836872		1026.79	0.04331572		1616.79	0.02190114		2206.79	0.00013215		2796.8	0.01563414		3386.8	0.02797291		3976.8	-0.00401054
437	0.12931975		1026.99	0.04344223		1616.99	0.02210516		2206.99	-0.00026461		2797	0.01594698		3387	0.02827739		3977	-0.00476459
437.2	0.13020494		1027.19	0.04311558		1617.19	0.02246677		2207.19	-0.00048657		2797.2	0.01543978		3387.2	0.02815913		3977.2	-0.00493788
437.4	0.1308631		1027.39	0.04329546		1617.39	0.02395655		2207.39	-0.00029462		2797.4	0.01548476		3387.4	0.0282182		3977.4	-0.0047986
437.6	0.13162104		1027.59	0.04420948		1617.59	0.02296933		2207.59	-0.00043944		2797.6	0.01523918		3387.6	0.0292554		3977.6	-0.00478529
437.8	0.13130694		1027.79	0.04403283		1617.79	0.02245715		2207.79	-0.00140001		2797.8	0.01503773		3387.8	0.02877672		3977.8	-0.00372453
438	0.13129065		1027.99	0.04541632		1617.99	0.02233064		2207.99	-0.00093556		2798	0.01558135		3388	0.02790477		3978	-0.00310451
438.2	0.13195351		1028.19	0.04609786		1618.19	0.0214272		2208.19	-0.00188626		2798.2	0.01585278		3388.2	0.02802431		3978.2	-0.00203669
438.4	0.13177878		1028.39	0.04683105		1618.39	0.02082773		2208.39	-0.00130423		2798.4	0.01599021		3388.4	0.02821986		3978.4	-0.00199199
438.6	0.13283646		1028.59	0.04693133		1618.59	0.02076326		2208.59	-0.00035359		2798.6	0.01621763		3388.6	0.02778148		3978.6	-0.00103324
438.8	0.13408168		1028.79	0.04717681		1618.79	0.01976269		2208.79	-0.00002583		2798.8	0.01659971		3388.8	0.02781857		3978.8	-0.0004463
439	0.13533642		1028.99	0.0475132		1618.99	0.01871502		2208.99	0.00038497		2799	0.01740144		3389	0.02845197		3979	0.00037529
439.2	0.13586407		1029.19	0.04727995		1619.19	0.01923986		2209.19	0.00077891		2799.2	0.01730477		3389.2	0.02921043		3979.2	0.00073329
439.4	0.13545056		1029.39	0.04680982		1619.39	0.01943044		2209.39	0.00155608		2799.4	0.01672135		3389.4	0.02902958		3979.4	0.00036721
439.6	0.13547603		1029.59	0.04658581		1619.59	0.02040621		2209.59	0.00223583		2799.6	0.01643822		3389.6	0.02913214		3979.6	0.00020424
439.8	0.1356237		1029.79	0.04645777		1619.79	0.02084779		2209.79	0.00335211		2799.8	0.01669639		3389.8	0.02931575		3979.8	0.00005551
440	0.13617192		1029.99	0.04615973		1619.99	0.02142988		2209.99	0.00319336		2800	0.01686789		3390	0.02920771		3980	-0.00017131
440.2	0.13657728		1030.19	0.04644998		1620.19	0.02254811		2210.19	0.00316502		2800.2	0.01648832		3390.2	0.02935027		3980.2	-0.00041176
440.4	0.13659776		1030.39	0.0459611		1620.39	0.02436731		2210.39	0.00371164		2800.4	0.01592682		3390.4	0.02913665		3980.4	-0.000876
440.6	0.13689703		1030.59	0.04604488		1620.59	0.02441872		2210.59	0.00191452		2800.6	0.01621017		3390.6	0.02889401		3980.6	-0.00127231
440.8	0.13733157		1030.79	0.04578649		1620.79	0.02436901		2210.79	0.00209507		2800.8	0.01712589		3390.8	0.02824197		3980.8	-0.00122206
441	0.13803278		1030.99	0.04602119		1620.99	0.02499188		2210.99	0.00208687		2801	0.01706607		3391	0.02836471		3981	-0.0021912
441.2	0.13729344		1031.19	0.04630458		1621.19	0.02585455		2211.19	0.00148071		2801.2	0.0166372		3391.2	0.02749034		3981.2	-0.00187453
441.4	0.13727567		1031.39	0.04653426		1621.39	0.02566602		2211.39	0.00183047		2801.4	0.01580494		3391.4	0.02751414		3981.4	-0.00300116
441.6	0.13713004		1031.59	0.04718772		1621.59	0.0244945		2211.59	0.00171952		2801.6	0.01505071		3391.6	0.02775399		3981.6	-0.00303054
441.8	0.13628504		1031.79	0.04756368		1621.79	0.02392271		2211.79	0.0018131		2801.8	0.01393882		3391.8	0.02726589		3981.8	-0.00304969
442	0.13599028		1031.99	0.048789		1621.99	0.02422955		2211.99	0.00236783		2802	0.01367044		3392	0.025514		3982	-0.00309043
442.2	0.13577828		1032.19	0.04911022		1622.19	0.02349554		2212.19	0.00169602		2802.2	0.01301501		3392.2	0.02589439		3982.2	-0.00240796
442.4	0.13638707		1032.39	0.04956589		1622.39	0.02299728		2212.39	0.00182014		2802.4	0.01308958		3392.4	0.02656693		3982.4	-0.00236845
442.6	0.13751604		1032.59	0.04987042		1622.59	0.02286339		2212.59	0.00147092		2802.6	0.0136211		3392.6	0.02656671		3982.6	-0.00237973
442.8	0.13882141		1032.79	0.04971947		1622.79	0.02249054		2212.79	0.00079263		2802.8	0.01418759		3392.8	0.02657831		3982.8	-0.00190315
443	0.13859644		1032.99	0.04906644		1622.99	0.02350531		2212.99	0.00134478		2803	0.0146167		3393	0.02683661		3983	-0.00190282
443.2	0.13844205		1033.19	0.04797766		1623.19	0.02416887		2213.19	0.00216285		2803.2	0.01391187		3393.2	0.02633005		3983.2	-0.00247586
443.4	0.13659053		1033.39	0.046556		1623.39	0.02425205		2213.39	0.00167773		2803.4	0.01403203		3393.4	0.02628896		3983.4	-0.00237763
443.6	0.13656452		1033.59	0.04567026		1623.59	0.02515338		2213.59	0.00207302		2803.6	0.01434746		3393.6	0.02656492		3983.6	-0.00274508
443.8	0.1366387		1033.79	0.04488415		1623.79	0.02498701		2213.79	0.00210424		2803.8	0.01510323		3393.8	0.02639509		3983.8	-0.00241945
444	0.13709975		1033.99	0.04484581		1623.99	0.02488703		2213.99	0.00107296		2804	0.01552787		3394	0.02758747		3984	-0.00134094
444.2	0.137654		1034.19	0.04521743		1624.19	0.02522085		2214.19	0.00141518		2804.2	0.01563343		3394.2	0.02800052		3984.2	-0.00082765
444.4	0.13800085		1034.39	0.04515211		1624.39	0.02491128		2214.39	0.00119954		2804.4	0.01674495		3394.4	0.02848684		3984.4	-0.00005056
444.6	0.13870611		1034.59	0.04494302		1624.59	0.02375559		2214.59	0.00063401		2804.6	0.01799986		3394.6	0.02904419		3984.6	0.00062575
444.8	0.13920524		1034.79	0.04507456		1624.79	0.02243864		2214.79	0.00091342		2804.8	0.01794624		3394.8	0.02930374		3984.8	0.00035535
445	0.14032657		1034.99	0.04482785		1624.99	0.02217168		2214.99	0.00031632		2805	0.01780461		3395	0.029773		3985	0.00054021
445.2	0.13970006		1035.19	0.04494135		1625.19	0.02159431		2215.19	-0.00009662		2805.2	0.01737317		3395.2	0.02958456		3985.2	0.00111227
445.4	0.14016768		1035.39	0.04546938		1625.39	0.02051673		2215.39	0.00032694		2805.4	0.01703157		3395.4	0.03044714		3985.4	0.00056435
445.6	0.14027944		1035.59	0.04632719		1625.59	0.02025008		2215.59	-0.00001507		2805.6	0.01735597		3395.6	0.03125594		3985.6	0.00135489
445.8	0.13938416		1035.79	0.04743526		1625.79	0.01971299		2215.79	0.00067628		2805.8	0.01720802		3395.8	0.03095644		3985.8	0.00058695
446	0.13872727		1035.99	0.04739966		1625.99	0.02055843		2215.99	0.00139672		2806	0.01737851		3396	0.03100606		3986	0.00040767
446.2	0.13941105		1036.19	0.04899302		1626.19	0.0201139		2216.19	0.00098578		2806.2	0.01690764		3396.2	0.03118686		3986.2	0.00065853
446.4	0.14073382		1036.39	0.04942791		1626.39	0.02010125		2216.39	0.00102732		2806.4	0.01652726		3396.4	0.03167541		3986.4	-0.0006564
446.6	0.14112342		1036.59	0.05035689		1626.59	0.02119495		2216.59	0.00133799		2806.6	0.01666717		3396.6	0.03057448		3986.6	-0.00176161
446.8	0.14148333		1036.79	0.04992916		1626.79	0.02156305		2216.79	0.00192315		2806.8	0.01741989		3396.8	0.02997046		3986.8	-0.00179353
447	0.14040078		1036.99	0.0500315		1626.99	0.02208194		2216.99	0.00297441		2807	0.01713713		3397	0.02912101		3987	-0.00229851
447.2	0.13990874		1037.19	0.04991233		1627.19	0.02185411		2217.19	0.00408433		2807.2	0.01737715		3397.2	0.02835026		3987.2	-0.00283295
447.4	0.13887498		1037.39	0.04957642		1627.39	0.02151423		2217.39	0.00343632		2807.4	0.01784031		3397.4	0.0284978		3987.4	-0.0023299
447.6	0.13879989		1037.59	0.04959568		1627.59	0.02211192		2217.59	0.00439488		2807.6	0.01722523		3397.6	0.02772226		3987.6	-0.00259259
447.8	0.13911699		1037.79	0.0492028		1627.79	0.0212417		2217.79	0.0043336		2807.8	0.01709417		3397.8	0.02734168		3987.8	-0.00086105
448	0.13938685		1037.99	0.04962935		1627.99	0.0215381		2217.99	0.00435074		2808	0.01750249		3398	0.02784863		3988	-0.00107535
448.2	0.13937808		1038.19	0.04983152		1628.19	0.02136729		2218.19	0.0058386		2808.2	0.01710263		3398.2	0.02680232		3988.2	-0.0012103
448.4	0.14007715		1038.39	0.04958534		1628.39	0.02113748		2218.39	0.0055167		2808.4	0.01728358		3398.4	0.02674621		3988.4	-0.00065051
448.6	0.14047962		1038.59	0.04917945		1628.59	0.02021809		2218.59	0.00633542		2808.6	0.01697864		3398.6	0.02689859		3988.6	-0.00093996
448.8	0.14042934		1038.79	0.04898572		1628.79	0.01959473		2218.79	0.00625626		2808.8	0.01625056		3398.8	0.02770698		3988.8	-0.00062885
449	0.14063998		1038.99	0.04871734		1628.99	0.02058992		2218.99	0.00561369		2809	0.01629664		3399	0.02817353		3989	0.00025517
449.2	0.14025669		1039.19	0.04831955		1629.19	0.02073317		2219.19	0.00589298		2809.2	0.01665471		3399.2	0.02880337		3989.2	0.00022799
449.4	0.14116122		1039.39	0.04815164		1629.39	0.02100136		2219.39	0.00607142		2809.4	0.0161715		3399.4	0.02967366		3989.4	0.00013196
449.6	0.14117755		1039.59	0.04847691		1629.59	0.02127094		2219.59	0.00606578		2809.6	0.01632077		3399.6	0.03028258		3989.6	0.00020182
449.8	0.14136409		1039.79	0.0485149		1629.79	0.0221736		2219.79	0.00625607		2809.8	0.01572926		3399.8	0.03102505		3989.8	0.00003404
450	0.14188634		1039.99	0.0482321		1629.99	0.02334193		2219.99	0.00548319		2810	0.01549732		3400	0.03187194		3990	0.0005099
450.2	0.14289954		1040.19	0.04944214		1630.19	0.02459622		2220.19	0.00484785		2810.2	0.01524061		3400.2	0.03128717		3990.2	0.00075727
450.4	0.14402539		1040.39	0.04882171		1630.39	0.02428708		2220.39	0.00451418		2810.4	0.01503923		3400.4	0.03234471		3990.4	0.00039832
450.6	0.14400118		1040.59	0.04921882		1630.59	0.0250883		2220.59	0.00405718		2810.6	0.01475862		3400.6	0.03222256		3990.6	0.00059511
450.8	0.14416151		1040.79	0.04949771		1630.79	0.02509707		2220.79	0.0033101		2810.8	0.01530787		3400.8	0.03255665		3990.8	0.00062012
451	0.14435411		1040.99	0.05051931		1630.99	0.02550281		2220.99	0.00338428		2811	0.01517569		3401	0.03202359		3991	0.00125712
451.2	0.14407661		1041.19	0.05058285		1631.19	0.02529924		2221.19	0.00336469		2811.2	0.01504061		3401.2	0.03134724		3991.2	0.0016185
451.4	0.1441628		1041.39	0.04970463		1631.39	0.02448152		2221.39	0.00266736		2811.4	0.01556047		3401.4	0.03158857		3991.4	0.00193403
451.6	0.14334088		1041.59	0.04920231		1631.59	0.02465858		2221.59	0.0022386		2811.6	0.01515048		3401.6	0.03058885		3991.6	0.00216403
451.8	0.1431649		1041.79	0.04925793		1631.79	0.02446895		2221.79	0.00147223		2811.8	0.01589358		3401.8	0.02995415		3991.8	0.00226921
452	0.14357939		1041.99	0.04912364		1631.99	0.02438002		2221.99	0.00166034		2812	0.01688064		3402	0.02861895		3992	0.00089291
452.2	0.14333456		1042.19	0.04903207		1632.19	0.0239685		2222.19	0.00163961		2812.2	0.01715659		3402.2	0.02801594		3992.2	0.00145217
452.4	0.14345179		1042.39	0.04878		1632.39	0.02327351		2222.39	0.00140304		2812.4	0.01719976		3402.4	0.02842743		3992.4	0.00130607
452.6	0.14299255		1042.59	0.04744596		1632.59	0.02276708		2222.59	0.00191406		2812.6	0.01782322		3402.6	0.02879368		3992.6	0.00117449
452.8	0.14311599		1042.79	0.04707022		1632.79	0.02299506		2222.79	0.00146321		2812.8	0.01823448		3402.8	0.02815802		3992.8	0.00115527
453	0.14292829		1042.99	0.04681236		1632.99	0.02363891		2222.99	0.00193773		2813	0.01928224		3403	0.02792048		3993	0.0008027
453.2	0.14370153		1043.19	0.04618781		1633.19	0.02296267		2223.19	0.00267792		2813.2	0.01970806		3403.2	0.02849475		3993.2	0.00028744
453.4	0.14372453		1043.39	0.04703166		1633.39	0.02237025		2223.39	0.00253577		2813.4	0.01957454		3403.4	0.0284077		3993.4	0.00045241
453.6	0.14319405		1043.59	0.0483775		1633.59	0.02191594		2223.59	0.00340914		2813.6	0.01923219		3403.6	0.02884585		3993.6	0.00064632
453.8	0.14275562		1043.79	0.04893446		1633.79	0.0216969		2223.79	0.00384034		2813.8	0.01910592		3403.8	0.02933322		3993.8	0.00089712
454	0.14180475		1043.99	0.04968534		1633.99	0.02089097		2223.99	0.00318194		2814	0.01885498		3404	0.0288519		3994	-0.00000823
454.2	0.14189999		1044.19	0.05078634		1634.19	0.02072623		2224.19	0.00382739		2814.2	0.01959915		3404.2	0.02877321		3994.2	-0.00040467
454.4	0.14237855		1044.39	0.05069027		1634.39	0.01971265		2224.39	0.00370306		2814.4	0.01828076		3404.4	0.02914238		3994.4	-0.00120785
454.6	0.14188318		1044.59	0.0521327		1634.59	0.02003722		2224.59	0.00370713		2814.6	0.01785699		3404.6	0.02944039		3994.6	-0.00158358
454.8	0.14243068		1044.79	0.05230862		1634.79	0.02004922		2224.79	0.00422011		2814.8	0.01862373		3404.8	0.02890553		3994.8	-0.00143503
455	0.14269213		1044.99	0.05311907		1634.99	0.0199857		2224.99	0.00468061		2815	0.01834661		3405	0.02876736		3995	-0.00129164
455.2	0.14323957		1045.19	0.05279805		1635.19	0.02036645		2225.19	0.00468453		2815.2	0.01848454		3405.2	0.02893904		3995.2	-0.0007844
455.4	0.14374665		1045.39	0.05272636		1635.39	0.0210055		2225.39	0.00415017		2815.4	0.01913258		3405.4	0.02940038		3995.4	-0.00130513
455.6	0.14370283		1045.59	0.05317808		1635.59	0.0219828		2225.59	0.00382816		2815.6	0.01821505		3405.6	0.02909178		3995.6	-0.00077369
455.8	0.14445476		1045.79	0.05317959		1635.79	0.02227977		2225.79	0.00413715		2815.8	0.01773048		3405.8	0.02966347		3995.8	-0.00104351
456	0.14540841		1045.99	0.05284154		1635.99	0.02289479		2225.99	0.00417811		2816	0.0174365		3406	0.02925098		3996	-0.00048456
456.2	0.14505731		1046.19	0.05266053		1636.19	0.02361093		2226.19	0.00344856		2816.2	0.01718848		3406.2	0.02958818		3996.2	0.00016285
456.4	0.14628233		1046.39	0.05177757		1636.39	0.02386624		2226.39	0.00400643		2816.4	0.01696222		3406.4	0.03019033		3996.4	-0.0000081
456.6	0.14695165		1046.59	0.05071742		1636.59	0.0243405		2226.59	0.00407006		2816.6	0.01713916		3406.6	0.03039953		3996.6	0.00059204
456.8	0.14769311		1046.79	0.05066437		1636.79	0.02548969		2226.79	0.00466739		2816.8	0.01711197		3406.8	0.03043966		3996.8	0.00034468
457	0.14750518		1046.99	0.05075133		1636.99	0.02641775		2226.99	0.00506326		2817	0.01758283		3407	0.03099472		3997	0.00109129
457.2	0.14808437		1047.19	0.05099986		1637.19	0.02641868		2227.19	0.00488126		2817.2	0.0183443		3407.2	0.03077733		3997.2	0.00078219
457.4	0.14722392		1047.39	0.05164586		1637.39	0.02619694		2227.39	0.0053627		2817.4	0.01760435		3407.4	0.03084816		3997.4	0.00085148
457.6	0.14643546		1047.59	0.05166388		1637.59	0.0258468		2227.59	0.00697103		2817.6	0.01769625		3407.6	0.03131204		3997.6	0.00094169
457.8	0.1455197		1047.79	0.05156311		1637.79	0.02529058		2227.79	0.00662579		2817.8	0.01785899		3407.8	0.03162348		3997.8	-0.00021517
458	0.14527335		1047.99	0.0516806		1637.99	0.02441238		2227.99	0.00616603		2818	0.01867337		3408	0.03135447		3998	-0.00141909
458.2	0.14571332		1048.19	0.0511091		1638.19	0.02418367		2228.19	0.00690172		2818.2	0.01941765		3408.2	0.03151693		3998.2	-0.00182004
458.4	0.14523028		1048.39	0.05002884		1638.39	0.02359433		2228.39	0.00688294		2818.4	0.01916496		3408.4	0.03078007		3998.4	-0.00203159
458.6	0.14502739		1048.59	0.05042788		1638.59	0.02349183		2228.59	0.00653436		2818.6	0.02077613		3408.6	0.03106293		3998.6	-0.00191366
458.8	0.14481178		1048.79	0.0495906		1638.79	0.02365958		2228.79	0.00624902		2818.8	0.02158995		3408.8	0.03062728		3998.8	-0.00104455
459	0.14443438		1048.99	0.05000231		1638.99	0.02347797		2228.99	0.00556015		2819	0.02173586		3409	0.03053036		3999	-0.00175846
459.2	0.14467654		1049.19	0.04968214		1639.19	0.02448478		2229.19	0.0049176		2819.2	0.02188613		3409.2	0.03000959		3999.2	-0.0013076
459.4	0.14455719		1049.39	0.04980352		1639.39	0.0239473		2229.39	0.0044177		2819.4	0.02168542		3409.4	0.03019083		3999.4	-0.001996
459.6	0.14533069		1049.59	0.0498866		1639.59	0.02402776		2229.59	0.00419249		2819.6	0.02032874		3409.6	0.02960843		3999.6	-0.0010116
459.8	0.1454631		1049.79	0.04959744		1639.79	0.02465142		2229.79	0.00350823		2819.8	0.01938983		3409.8	0.02955477		3999.8	-0.00066844
460	0.14565061		1049.99	0.04944495		1639.99	0.02495263		2229.99	0.00232724		2820	0.01817556		3410	0.02889067		4000	-0.00024936
460.2	0.14600262		1050.19	0.04935335		1640.19	0.02435177		2230.19	0.00120278		2820.2	0.01788206		3410.2	0.02780349		4000.2	-0.00041581
460.4	0.14758302		1050.39	0.04916565		1640.39	0.02466289		2230.39	0.00129078		2820.4	0.01751134		3410.4	0.02831533		4000.4	-0.00004722
460.6	0.14737934		1050.59	0.04976577		1640.59	0.02540162		2230.59	0.00033412		2820.6	0.01701127		3410.6	0.02804395		4000.6	0.00024068
460.8	0.14792628		1050.79	0.05077739		1640.79	0.02598871		2230.79	0.00019952		2820.8	0.01747361		3410.8	0.02862349		4000.8	0.00042147
461	0.14812246		1050.99	0.05104844		1640.99	0.02625158		2230.99	0.00023935		2821	0.01757787		3411	0.02810046		4001	0.00096423
461.2	0.14853402		1051.19	0.0512214		1641.19	0.02624472		2231.19	-0.00001472		2821.2	0.01701677		3411.2	0.02804523		4001.2	0.00024207
461.4	0.14748805		1051.39	0.05138542		1641.39	0.02604055		2231.39	-0.00031741		2821.4	0.01576169		3411.4	0.02950352		4001.4	0.00022209
461.6	0.14668901		1051.59	0.05202885		1641.59	0.02587022		2231.59	0.00071734		2821.6	0.01561272		3411.6	0.03098235		4001.6	0.00004113
461.8	0.14635521		1051.79	0.05207157		1641.79	0.02661033		2231.79	0.00155692		2821.8	0.01493465		3411.8	0.03082648		4001.8	-0.00081258
462	0.14626064		1051.99	0.05195576		1641.99	0.02607323		2231.99	0.00214073		2822	0.01480113		3412	0.03078871		4002	-0.00052031
462.2	0.14635294		1052.19	0.05240496		1642.19	0.02641302		2232.19	0.00255588		2822.2	0.01451145		3412.2	0.03063014		4002.2	-0.0006769
462.4	0.14550971		1052.39	0.05251187		1642.39	0.02673215		2232.39	0.00327279		2822.4	0.01589713		3412.4	0.03052985		4002.4	-0.00138322
462.6	0.14579064		1052.59	0.05310705		1642.59	0.02726118		2232.59	0.00313652		2822.6	0.01694288		3412.6	0.03012424		4002.6	-0.00142249
462.8	0.14559637		1052.79	0.05284714		1642.79	0.02754482		2232.79	0.0036364		2822.8	0.01726287		3412.8	0.03008576		4002.8	-0.00118178
463	0.14610062		1052.99	0.05233125		1642.99	0.02731751		2232.99	0.00377057		2823	0.01817337		3413	0.02943189		4003	-0.00177895
463.2	0.14663857		1053.19	0.05190328		1643.19	0.02746561		2233.19	0.00398993		2823.2	0.01835007		3413.2	0.03014471		4003.2	-0.00135617
463.4	0.14719474		1053.39	0.0526959		1643.39	0.02669427		2233.39	0.00449074		2823.4	0.0185058		3413.4	0.03005536		4003.4	-0.00181977
463.6	0.14826103		1053.59	0.05345202		1643.59	0.02748569		2233.59	0.00482735		2823.6	0.01768836		3413.6	0.02954052		4003.6	-0.00211804
463.8	0.1484896		1053.79	0.05384469		1643.79	0.02808209		2233.79	0.00428821		2823.8	0.01727619		3413.8	0.02967061		4003.8	-0.00272565
464	0.14890576		1053.99	0.05475289		1643.99	0.0275497		2233.99	0.00414585		2824	0.01689428		3414	0.02929586		4004	-0.00323636
464.2	0.14989078		1054.19	0.05494781		1644.19	0.02659689		2234.19	0.00323103		2824.2	0.01723277		3414.2	0.02892186		4004.2	-0.00385331
464.4	0.15112728		1054.39	0.05543596		1644.39	0.02707489		2234.39	0.00310931		2824.4	0.01749296		3414.4	0.02977019		4004.4	-0.00422452
464.6	0.15122387		1054.59	0.05596585		1644.59	0.02679252		2234.59	0.00279087		2824.6	0.01750819		3414.6	0.03003146		4004.6	-0.00486382
464.8	0.15151974		1054.79	0.05567327		1644.79	0.0266332		2234.79	0.00325081		2824.8	0.01765491		3414.8	0.03107907		4004.8	-0.00506045
465	0.15143373		1054.99	0.05510591		1644.99	0.02723881		2234.99	0.00345398		2825	0.01725543		3415	0.03109599		4005	-0.00515194
465.2	0.15182075		1055.19	0.05571077		1645.19	0.02702689		2235.19	0.00305004		2825.2	0.01784403		3415.2	0.0310575		4005.2	-0.00571196
465.4	0.15075745		1055.39	0.05587365		1645.39	0.02733664		2235.39	0.00373604		2825.4	0.0176364		3415.4	0.03264996		4005.4	-0.0053055
465.6	0.15043898		1055.59	0.05550599		1645.59	0.02750951		2235.59	0.00459452		2825.6	0.01753793		3415.6	0.03288956		4005.6	-0.00479125
465.8	0.15077926		1055.79	0.05507612		1645.79	0.02789943		2235.79	0.00475629		2825.8	0.01762652		3415.8	0.03189449		4005.8	-0.00488459
466	0.15072606		1055.99	0.05444506		1645.99	0.02656946		2235.99	0.00406056		2826	0.01797556		3416	0.03243038		4006	-0.0052219
466.2	0.1505357		1056.19	0.05473221		1646.19	0.02672915		2236.19	0.0043386		2826.2	0.01861285		3416.2	0.03216573		4006.2	-0.00459501
466.4	0.1504939		1056.39	0.05415509		1646.39	0.02652243		2236.39	0.00460389		2826.4	0.0198603		3416.4	0.03183799		4006.4	-0.00464859
466.6	0.15077367		1056.59	0.05344307		1646.59	0.02731395		2236.59	0.00397278		2826.6	0.01986196		3416.6	0.03195485		4006.6	-0.00353104
466.8	0.15129542		1056.79	0.05272419		1646.79	0.02673742		2236.79	0.00421404		2826.8	0.02097159		3416.8	0.0322759		4006.8	-0.00285501
467	0.15149596		1056.99	0.05238672		1646.99	0.02734898		2236.99	0.00421458		2827	0.0221642		3417	0.03201897		4007	-0.00282315
467.2	0.15176282		1057.19	0.05278618		1647.19	0.02799242		2237.19	0.00464478		2827.2	0.02225885		3417.2	0.03293186		4007.2	-0.00238424
467.4	0.15188749		1057.39	0.05467108		1647.39	0.02868333		2237.39	0.0047534		2827.4	0.02205833		3417.4	0.03212173		4007.4	-0.00276454
467.6	0.1522336		1057.59	0.05487779		1647.59	0.02939222		2237.59	0.00459049		2827.6	0.02207614		3417.6	0.03233049		4007.6	-0.00246374
467.8	0.15277905		1057.79	0.05523134		1647.79	0.03023186		2237.79	0.00395749		2827.8	0.02120393		3417.8	0.03204878		4007.8	-0.00264921
468	0.15324555		1057.99	0.05542387		1647.99	0.03049007		2237.99	0.00389006		2828	0.02047603		3418	0.03182028		4008	-0.00308362
468.2	0.15391627		1058.19	0.05472081		1648.19	0.03095926		2238.19	0.0034261		2828.2	0.01991979		3418.2	0.03164548		4008.2	-0.00362459
468.4	0.15392327		1058.39	0.05479643		1648.39	0.03218797		2238.39	0.00396173		2828.4	0.01965987		3418.4	0.03131273		4008.4	-0.00397575
468.6	0.15338172		1058.59	0.05425977		1648.59	0.03268409		2238.59	0.00442391		2828.6	0.01910906		3418.6	0.03096197		4008.6	-0.00438705
468.8	0.15268991		1058.79	0.053726		1648.79	0.03373785		2238.79	0.00475514		2828.8	0.01890048		3418.8	0.03059873		4008.8	-0.00459071
469	0.15258579		1058.99	0.05350536		1648.99	0.03394568		2238.99	0.00494422		2829	0.01897389		3419	0.02970202		4009	-0.00471393
469.2	0.15208661		1059.19	0.05306917		1649.19	0.03370368		2239.19	0.00571476		2829.2	0.01920259		3419.2	0.02855203		4009.2	-0.00478749
469.4	0.15087241		1059.39	0.05212594		1649.39	0.03396341		2239.39	0.00601682		2829.4	0.01823482		3419.4	0.02836419		4009.4	-0.00469026
469.6	0.15026773		1059.59	0.05109116		1649.59	0.03356918		2239.59	0.00575529		2829.6	0.0180671		3419.6	0.0276624		4009.6	-0.00487802
469.8	0.14958209		1059.79	0.05052909		1649.79	0.03305886		2239.79	0.00618794		2829.8	0.01812966		3419.8	0.02702901		4009.8	-0.00510305
470	0.14958209		1059.99	0.05052909		1650	0.03305886		2239.99	0.00618794		2830	0.01812966		3420	0.02702901		4010	-0.00510305
470.2	0.15007739		1060.19	0.05071199		1650.2	0.03341144		2240.19	0.00619854		2830.2	0.0181948		3420.2	0.02666111		4010.2	-0.00434074
470.4	0.15067829		1060.39	0.04976473		1650.4	0.0334323		2240.39	0.00626182		2830.4	0.01887142		3420.4	0.0256899		4010.4	-0.00354466
470.6	0.15065271		1060.59	0.04929967		1650.6	0.03334999		2240.59	0.0061831		2830.6	0.0191042		3420.6	0.02479968		4010.6	-0.00339524
470.8	0.15070447		1060.79	0.04879746		1650.8	0.0330272		2240.79	0.00672367		2830.8	0.01866196		3420.8	0.02417765		4010.8	-0.00261042
471	0.15096678		1060.99	0.04867217		1651	0.03305742		2240.99	0.00736487		2831	0.01825652		3421	0.02346866		4011	-0.00196892
471.2	0.15186671		1061.19	0.04879578		1651.2	0.03266415		2241.19	0.00758726		2831.2	0.01851497		3421.2	0.02313439		4011.2	-0.00153141
471.4	0.15240912		1061.39	0.04904422		1651.4	0.03222288		2241.39	0.00822005		2831.4	0.01815722		3421.4	0.02385895		4011.4	-0.00134568
471.6	0.15252162		1061.59	0.04878832		1651.6	0.03221852		2241.59	0.00793648		2831.6	0.01829305		3421.6	0.02320956		4011.6	-0.00111554
471.8	0.15306537		1061.79	0.04915686		1651.8	0.03188136		2241.79	0.00731515		2831.8	0.01792275		3421.8	0.02333717		4011.8	-0.00091982
472	0.15397249		1061.99	0.04944716		1652	0.03189388		2241.99	0.00648604		2832	0.01702771		3422	0.02405964		4012	-0.00180244
472.2	0.15339467		1062.19	0.04935223		1652.2	0.03177774		2242.19	0.00595785		2832.2	0.0170426		3422.2	0.0248096		4012.2	-0.00278851
472.4	0.15358453		1062.39	0.04897191		1652.4	0.03090662		2242.39	0.00615487		2832.4	0.01740772		3422.4	0.02498853		4012.4	-0.00161486
472.6	0.15322253		1062.59	0.04851844		1652.6	0.03105226		2242.59	0.00564493		2832.6	0.01743085		3422.6	0.02554566		4012.6	-0.00156517
472.8	0.1534191		1062.79	0.04949735		1652.8	0.03159078		2242.79	0.00485727		2832.8	0.01798513		3422.8	0.025467		4012.8	-0.00098219
473	0.15339262		1062.99	0.0490558		1653	0.0309355		2242.99	0.00419439		2833	0.01773796		3423	0.02577975		4013	-0.00011372
473.2	0.15276436		1063.19	0.04855191		1653.2	0.03033116		2243.19	0.00417964		2833.2	0.01692591		3423.2	0.02566129		4013.2	0.00031257
473.4	0.1526551		1063.39	0.04919277		1653.4	0.02989296		2243.39	0.00469367		2833.4	0.01709079		3423.4	0.02575864		4013.4	0.00065472
473.6	0.1527401		1063.59	0.04890692		1653.6	0.03082284		2243.59	0.00479153		2833.6	0.01698307		3423.6	0.02497772		4013.6	0.00082666
473.8	0.15177357		1063.79	0.04864584		1653.8	0.0313537		2243.79	0.0045819		2833.8	0.01753515		3423.8	0.02413016		4013.8	0.0004878
474	0.15253209		1063.99	0.04908386		1654	0.0320465		2243.99	0.00369907		2834	0.01753496		3424	0.02306615		4014	-0.00036615
474.2	0.15199272		1064.19	0.04883297		1654.2	0.03213561		2244.19	0.0033081		2834.2	0.01751846		3424.2	0.02311991		4014.2	-0.00085509
474.4	0.15185418		1064.39	0.04788058		1654.4	0.03233212		2244.39	0.00309431		2834.4	0.01843737		3424.4	0.02199621		4014.4	-0.00077828
474.6	0.1510123		1064.59	0.04807931		1654.6	0.03214005		2244.59	0.00418496		2834.6	0.01784781		3424.6	0.0221084		4014.6	-0.00095306
474.8	0.15136088		1064.79	0.0484666		1654.8	0.0319278		2244.79	0.00484556		2834.8	0.01763548		3424.8	0.02182944		4014.8	-0.00050654
475	0.15174345		1064.99	0.04882828		1655	0.03142715		2244.99	0.00521797		2835	0.01749146		3425	0.02176685		4015	-0.00065848
475.2	0.152349		1065.19	0.04806342		1655.2	0.0306699		2245.19	0.00509491		2835.2	0.01873888		3425.2	0.02204014		4015.2	0.00001073
475.4	0.15229344		1065.39	0.04808461		1655.4	0.02968324		2245.39	0.00496104		2835.4	0.01837779		3425.4	0.02263143		4015.4	-0.00060849
475.6	0.15278449		1065.59	0.04708529		1655.6	0.0297507		2245.59	0.00374094		2835.6	0.01900343		3425.6	0.02188513		4015.6	-0.00051172
475.8	0.15406272		1065.79	0.04715706		1655.8	0.02939237		2245.79	0.00312516		2835.8	0.01895566		3425.8	0.02334906		4015.8	-0.00073042
476	0.15489183		1065.99	0.04679003		1656	0.02932278		2245.99	0.00271986		2836	0.01876239		3426	0.0239717		4016	-0.00175983
476.2	0.15414875		1066.19	0.04631778		1656.2	0.0289089		2246.19	0.00245438		2836.2	0.02012215		3426.2	0.02412342		4016.2	-0.00220998
476.4	0.15481719		1066.39	0.0468903		1656.4	0.02833335		2246.39	0.0019665		2836.4	0.01971535		3426.4	0.02367305		4016.4	-0.0023057
476.6	0.15506502		1066.59	0.04687895		1656.6	0.02838691		2246.59	0.00094585		2836.6	0.01909327		3426.6	0.02355886		4016.6	-0.00184464
476.8	0.15506741		1066.79	0.04719061		1656.8	0.02860668		2246.79	0.00013451		2836.8	0.01938731		3426.8	0.02279613		4016.8	-0.00175439
477	0.15455695		1066.99	0.04653286		1657	0.0280982		2246.99	0.0010843		2837	0.01890388		3427	0.02332927		4017	-0.00219804
477.2	0.1537023		1067.19	0.04560802		1657.2	0.0280988		2247.19	0.00139982		2837.2	0.017848		3427.2	0.02310012		4017.2	-0.00266389
477.4	0.15324776		1067.39	0.04580926		1657.4	0.02819969		2247.39	0.00192297		2837.4	0.01747173		3427.4	0.02337873		4017.4	-0.00310645
477.6	0.15241499		1067.59	0.04577572		1657.6	0.02912838		2247.59	0.00229789		2837.6	0.01630436		3427.6	0.02264995		4017.6	-0.00271
477.8	0.15224336		1067.79	0.04528627		1657.8	0.0298191		2247.79	0.00264051		2837.8	0.01645064		3427.8	0.02283476		4017.8	-0.00360659
478	0.152087		1067.99	0.04576315		1658	0.03038376		2247.99	0.00281978		2838	0.01455104		3428	0.02173622		4018	-0.00341793
478.2	0.15161815		1068.19	0.04517234		1658.2	0.02998067		2248.19	0.00448175		2838.2	0.01388236		3428.2	0.02189811		4018.2	-0.00307402
478.4	0.15179839		1068.39	0.04523846		1658.4	0.03058716		2248.39	0.00470648		2838.4	0.01405753		3428.4	0.0219046		4018.4	-0.0017128
478.6	0.15161157		1068.59	0.04488551		1658.6	0.03021111		2248.59	0.00551379		2838.6	0.01461597		3428.6	0.02207802		4018.6	-0.00105802
478.8	0.15172182		1068.79	0.04507497		1658.8	0.02932881		2248.79	0.00517623		2838.8	0.01503865		3428.8	0.02194658		4018.8	-0.00062259
479	0.15193323		1068.99	0.04407828		1659	0.02879298		2248.99	0.00470547		2839	0.01425903		3429	0.02245141		4019	-0.00011514
479.2	0.15262072		1069.19	0.04286074		1659.2	0.02867619		2249.19	0.00455453		2839.2	0.01485166		3429.2	0.02331875		4019.2	0.00058813
479.4	0.1525326		1069.39	0.0437018		1659.4	0.02825793		2249.39	0.00412412		2839.4	0.01502864		3429.4	0.02410183		4019.4	0.00072167
479.6	0.15294627		1069.59	0.04370769		1659.6	0.02875236		2249.59	0.00392854		2839.6	0.01595559		3429.6	0.02447197		4019.6	0.00090743
479.8	0.15306264		1069.79	0.04395848		1659.8	0.02809896		2249.79	0.00338658		2839.8	0.0168415		3429.8	0.02435329		4019.8	0.00067992
480	0.1532685		1069.99	0.04498164		1660	0.0276832		2249.99	0.00239725		2840	0.01753265		3430	0.02375344		4020	-0.00026204
480.2	0.15244627		1070.19	0.04632573		1660.2	0.02756485		2250.19	0.00233278		2840.2	0.01843772		3430.2	0.02305116		4020.2	-0.00056826
480.4	0.15197206		1070.39	0.04714891		1660.4	0.02762623		2250.39	0.00192894		2840.4	0.01866237		3430.4	0.02214918		4020.4	-0.00007595
480.6	0.15171066		1070.59	0.04678488		1660.6	0.02795837		2250.59	0.00143017		2840.6	0.01914222		3430.6	0.02214004		4020.6	-0.00019552
480.8	0.15145582		1070.79	0.04762573		1660.8	0.02839194		2250.79	0.00167359		2840.8	0.01978024		3430.8	0.02168253		4020.8	-0.00094436
481	0.15071889		1070.99	0.04746511		1661	0.02813238		2250.99	0.00183906		2841	0.02008014		3431	0.02212124		4021	-0.00165208
481.2	0.15060989		1071.19	0.04687271		1661.2	0.0288522		2251.19	0.00123364		2841.2	0.01965086		3431.2	0.02216794		4021.2	-0.00119742
481.4	0.15145845		1071.39	0.0470285		1661.4	0.02910726		2251.39	0.00152356		2841.4	0.01916615		3431.4	0.02191285		4021.4	-0.00065797
481.6	0.15118922		1071.59	0.04658856		1661.6	0.03048218		2251.59	0.00208723		2841.6	0.01817812		3431.6	0.02103157		4021.6	-0.00024079
481.8	0.15189562		1071.79	0.04646264		1661.8	0.03100781		2251.79	0.00222159		2841.8	0.01837494		3431.8	0.02068368		4021.8	-0.00057422
482	0.15140066		1071.99	0.04671508		1662	0.03058696		2251.99	0.00269287		2842	0.01671822		3432	0.01930809		4022	-0.00114964
482.2	0.15175643		1072.19	0.04594377		1662.2	0.03044842		2252.19	0.00277003		2842.2	0.01613681		3432.2	0.01886007		4022.2	-0.00116752
482.4	0.15182071		1072.39	0.04570529		1662.4	0.03102673		2252.39	0.00235627		2842.4	0.01648862		3432.4	0.01821817		4022.4	-0.00054274
482.6	0.15197707		1072.59	0.04492779		1662.6	0.0307527		2252.59	0.00197589		2842.6	0.01641706		3432.6	0.01792334		4022.6	-0.00069439
482.8	0.15182726		1072.79	0.0450114		1662.8	0.03024589		2252.79	0.00127934		2842.8	0.01449601		3432.8	0.0176454		4022.8	-0.00155444
483	0.15141354		1072.99	0.04353275		1663	0.03018355		2252.99	0.00079539		2843	0.01318281		3433	0.01856825		4023	-0.00176988
483.2	0.15119446		1073.19	0.04294439		1663.2	0.02928077		2253.19	0.00113714		2843.2	0.01340968		3433.2	0.01915907		4023.2	-0.00189707
483.4	0.15054457		1073.39	0.04370022		1663.4	0.02847405		2253.39	0.00062538		2843.4	0.01281249		3433.4	0.01848946		4023.4	-0.0019308
483.6	0.1508624		1073.59	0.04374103		1663.6	0.02730806		2253.59	0.00108982		2843.6	0.01318588		3433.6	0.0182612		4023.6	-0.00269658
483.8	0.15061323		1073.79	0.04443489		1663.8	0.02602308		2253.79	0.00103113		2843.8	0.01396361		3433.8	0.01790912		4023.8	-0.00385714
484	0.15079602		1073.99	0.04519384		1664	0.02625752		2253.99	0.00060898		2844	0.01408793		3434	0.01822507		4024	-0.0041395
484.2	0.15065363		1074.19	0.04526514		1664.2	0.02608553		2254.19	0.00168584		2844.2	0.0143389		3434.2	0.01795291		4024.2	-0.00406262
484.4	0.15023804		1074.39	0.04392924		1664.4	0.02605439		2254.39	0.00120272		2844.4	0.01481425		3434.4	0.01783972		4024.4	-0.00405415
484.6	0.15061422		1074.59	0.04331384		1664.6	0.02581888		2254.59	0.00171126		2844.6	0.01537299		3434.6	0.0181111		4024.6	-0.00469817
484.8	0.15073354		1074.79	0.04390965		1664.8	0.02605238		2254.79	0.00221342		2844.8	0.01606187		3434.8	0.01828725		4024.8	-0.00400305
485	0.14999604		1074.99	0.0428975		1665	0.02618249		2254.99	0.00180369		2845	0.01687477		3435	0.01890008		4025	-0.00479553
485.2	0.15077292		1075.19	0.04216898		1665.2	0.02610928		2255.19	0.00184699		2845.2	0.01627292		3435.2	0.01873986		4025.2	-0.00417145
485.4	0.15054921		1075.39	0.04245965		1665.4	0.02639158		2255.39	0.00212005		2845.4	0.01633568		3435.4	0.01881234		4025.4	-0.00453976
485.6	0.14965237		1075.59	0.04325816		1665.6	0.02705028		2255.59	0.00244289		2845.6	0.01697893		3435.6	0.01885423		4025.6	-0.00498323
485.8	0.1498822		1075.79	0.04420243		1665.8	0.02730108		2255.79	0.00218351		2845.8	0.01719637		3435.8	0.01838769		4025.8	-0.00567191
486	0.14960629		1075.99	0.04466636		1666	0.02780811		2255.99	0.00165484		2846	0.0171504		3436	0.01890852		4026	-0.00594359
486.2	0.15041791		1076.19	0.04544549		1666.2	0.02846063		2256.19	0.00136284		2846.2	0.01668662		3436.2	0.01900586		4026.2	-0.00593588
486.4	0.1505704		1076.39	0.04617156		1666.4	0.02901106		2256.39	0.00117721		2846.4	0.01662721		3436.4	0.01921983		4026.4	-0.00572277
486.6	0.15015706		1076.59	0.04629231		1666.6	0.02945328		2256.59	0.000313		2846.6	0.01610483		3436.6	0.01963471		4026.6	-0.00662608
486.8	0.15008389		1076.79	0.04667454		1666.8	0.02869434		2256.79	-0.00078593		2846.8	0.01567529		3436.8	0.01989729		4026.8	-0.00700819
487	0.1499113		1076.99	0.04669022		1667	0.02871271		2256.99	-0.00035722		2847	0.01609899		3437	0.02123562		4027	-0.00656859
487.2	0.15068041		1077.19	0.04799827		1667.2	0.02811724		2257.19	-0.00083786		2847.2	0.01541944		3437.2	0.02217027		4027.2	-0.00726928
487.4	0.15094646		1077.39	0.04858498		1667.4	0.02763237		2257.39	-0.00090509		2847.4	0.01489035		3437.4	0.02231029		4027.4	-0.00699453
487.6	0.15132223		1077.59	0.04893239		1667.6	0.02670552		2257.59	-0.00059611		2847.6	0.01565182		3437.6	0.02357537		4027.6	-0.00682781
487.8	0.15104523		1077.79	0.04959059		1667.8	0.02709648		2257.79	-0.00090497		2847.8	0.01522603		3437.8	0.0241531		4027.8	-0.00676206
488	0.1514618		1077.99	0.0487709		1668	0.02753207		2257.99	-0.00126513		2848	0.0145004		3438	0.02449798		4028	-0.00547228
488.2	0.15139132		1078.19	0.04806506		1668.2	0.02685729		2258.19	-0.00050693		2848.2	0.01458071		3438.2	0.02447766		4028.2	-0.00576407
488.4	0.15072697		1078.39	0.04803405		1668.4	0.02653129		2258.39	-0.001479		2848.4	0.01476619		3438.4	0.02402939		4028.4	-0.00548565
488.6	0.15103009		1078.59	0.04800869		1668.6	0.02632638		2258.59	-0.00151525		2848.6	0.01510377		3438.6	0.02311592		4028.6	-0.0046677
488.8	0.15045026		1078.79	0.04718857		1668.8	0.02549488		2258.79	-0.00152455		2848.8	0.01533368		3438.8	0.02278977		4028.8	-0.00418907
489	0.14953106		1078.99	0.04604275		1669	0.02466759		2258.99	-0.0019924		2849	0.01534488		3439	0.02186797		4029	-0.00456509
489.2	0.14886378		1079.19	0.04590732		1669.2	0.02363901		2259.19	-0.00210687		2849.2	0.01551503		3439.2	0.02169089		4029.2	-0.00341355
489.4	0.14802942		1079.39	0.04578744		1669.4	0.0246872		2259.39	-0.00206512		2849.4	0.01620318		3439.4	0.02119479		4029.4	-0.00361334
489.6	0.14824668		1079.59	0.04553453		1669.6	0.02493552		2259.59	-0.00184491		2849.6	0.0161295		3439.6	0.02038116		4029.6	-0.00320454
489.8	0.14843077		1079.79	0.04476012		1669.8	0.0249439		2259.79	-0.00117355		2849.8	0.01582543		3439.8	0.01942261		4029.8	-0.00368831
490	0.14803678		1079.99	0.0447989		1670	0.02421621		2259.99	-0.00094285		2850	0.01503758		3440	0.01997624		4030	-0.00379531
490.2	0.14784214		1080.19	0.04445005		1670.2	0.0242343		2260.19	-0.00009968		2850.2	0.01421143		3440.2	0.02016957		4030.2	-0.00340757
490.4	0.14737051		1080.39	0.04391421		1670.4	0.02580778		2260.39	-0.00012717		2850.4	0.01394338		3440.4	0.01946039		4030.4	-0.00374225
490.6	0.14701203		1080.59	0.04379837		1670.6	0.0259633		2260.59	0.00071433		2850.6	0.01337543		3440.6	0.01963607		4030.6	-0.00441041
490.8	0.14766035		1080.79	0.04401198		1670.8	0.02546445		2260.79	0.00033726		2850.8	0.01293343		3440.8	0.01988958		4030.8	-0.00455353
491	0.14782554		1080.99	0.04405577		1671	0.0265077		2260.99	0.00127256		2851	0.01280764		3441	0.01988534		4031	-0.00487302
491.2	0.1476978		1081.19	0.04439015		1671.2	0.02637161		2261.19	0.00082808		2851.2	0.01270447		3441.2	0.02108183		4031.2	-0.00561411
491.4	0.14711722		1081.39	0.04401318		1671.4	0.0270087		2261.39	0.00077011		2851.4	0.01237224		3441.4	0.02062743		4031.4	-0.00469894
491.6	0.14715587		1081.59	0.04410304		1671.6	0.02777065		2261.59	0.00016324		2851.6	0.01250845		3441.6	0.02145852		4031.6	-0.00475916
491.8	0.14698903		1081.79	0.04436891		1671.8	0.02902316		2261.79	-0.00041774		2851.8	0.01248805		3441.8	0.0216953		4031.8	-0.00445038
492	0.14732311		1081.99	0.04455217		1672	0.02874222		2261.99	-0.00046741		2852	0.01282332		3442	0.0222436		4032	-0.00360502
492.2	0.14672478		1082.19	0.04497351		1672.2	0.02950269		2262.19	-0.00090002		2852.2	0.01319833		3442.2	0.02185584		4032.2	-0.00401878
492.4	0.14699207		1082.39	0.04633946		1672.4	0.02967983		2262.39	-0.00186791		2852.4	0.01364805		3442.4	0.02215405		4032.4	-0.0042024
492.6	0.14681991		1082.59	0.04584576		1672.6	0.02991501		2262.59	-0.00290438		2852.6	0.01371245		3442.6	0.02166406		4032.6	-0.0039991
492.8	0.14601359		1082.79	0.04511498		1672.8	0.02934061		2262.79	-0.00353758		2852.8	0.01343393		3442.8	0.02175766		4032.8	-0.00358815
493	0.145475		1082.99	0.04520572		1673	0.02947949		2262.99	-0.00437218		2853	0.01383971		3443	0.02195118		4033	-0.00337013
493.2	0.14648607		1083.19	0.04498589		1673.2	0.02951147		2263.19	-0.00485119		2853.2	0.01403115		3443.2	0.02291803		4033.2	-0.00306522
493.4	0.14768365		1083.39	0.04432709		1673.4	0.03044369		2263.39	-0.00465399		2853.4	0.01470265		3443.4	0.02239724		4033.4	-0.0029822
493.6	0.14860653		1083.59	0.04423583		1673.6	0.03016821		2263.59	-0.00408211		2853.6	0.01353949		3443.6	0.0225287		4033.6	-0.00307492
493.8	0.14861863		1083.79	0.04407756		1673.8	0.02946364		2263.79	-0.00325635		2853.8	0.01289267		3443.8	0.02241325		4033.8	-0.00425251
494	0.14872897		1083.99	0.0440264		1674	0.02860165		2263.99	-0.00279187		2854	0.0118184		3444	0.02261289		4034	-0.00436138
494.2	0.1494102		1084.19	0.04375747		1674.2	0.02889324		2264.19	-0.00214758		2854.2	0.0120383		3444.2	0.02326377		4034.2	-0.00444756
494.4	0.15015818		1084.39	0.04365633		1674.4	0.02921675		2264.39	-0.00147307		2854.4	0.01187258		3444.4	0.02211348		4034.4	-0.00508797
494.6	0.1500629		1084.59	0.04394018		1674.6	0.02772261		2264.59	-0.00094893		2854.6	0.01200015		3444.6	0.02153912		4034.6	-0.00538809
494.8	0.15065913		1084.79	0.04354442		1674.8	0.02661164		2264.79	-0.00051705		2854.8	0.01221998		3444.8	0.02050364		4034.8	-0.00466405
495	0.15072682		1084.99	0.043003		1675	0.02641862		2264.99	0.00066261		2855	0.01208708		3445	0.02023599		4035	-0.00428911
495.2	0.14911198		1085.19	0.04298097		1675.2	0.02632104		2265.19	0.00013736		2855.2	0.01239695		3445.2	0.02074868		4035.2	-0.00459039
495.4	0.14838422		1085.39	0.04275337		1675.4	0.02594549		2265.39	0.00044393		2855.4	0.0123046		3445.4	0.01981296		4035.4	-0.0044411
495.6	0.14854696		1085.59	0.04213341		1675.6	0.02542635		2265.59	-0.00011026		2855.6	0.01273332		3445.6	0.01974743		4035.6	-0.00442613
495.8	0.14843217		1085.79	0.04212771		1675.8	0.0250842		2265.79	-0.00021384		2855.8	0.01259183		3445.8	0.01957793		4035.8	-0.00400272
496	0.14828784		1085.99	0.04243082		1676	0.02447881		2265.99	-0.00038975		2856	0.01313086		3446	0.01946562		4036	-0.00458372
496.2	0.14789508		1086.19	0.04320226		1676.2	0.02594458		2266.19	-0.00056435		2856.2	0.01322663		3446.2	0.01957702		4036.2	-0.00608136
496.4	0.14784736		1086.39	0.04404369		1676.4	0.02612062		2266.39	-0.00148179		2856.4	0.01327569		3446.4	0.02024929		4036.4	-0.00702438
496.6	0.1471467		1086.59	0.04448916		1676.6	0.02629651		2266.59	-0.00296481		2856.6	0.01300328		3446.6	0.01971596		4036.6	-0.00710916
496.8	0.14710344		1086.79	0.0439398		1676.8	0.02601634		2266.79	-0.00289883		2856.8	0.01291052		3446.8	0.02027482		4036.8	-0.00730632
497	0.14827473		1086.99	0.04376683		1677	0.026175		2266.99	-0.00266893		2857	0.01381833		3447	0.02093835		4037	-0.00839933
497.2	0.14926648		1087.19	0.04356815		1677.2	0.02677926		2267.19	-0.00267008		2857.2	0.01448521		3447.2	0.0214803		4037.2	-0.00840687
497.4	0.15013964		1087.39	0.04324011		1677.4	0.02688129		2267.39	-0.00268001		2857.4	0.01433038		3447.4	0.02200691		4037.4	-0.00825939
497.6	0.14996319		1087.59	0.04435379		1677.6	0.02716835		2267.59	-0.00255305		2857.6	0.01327677		3447.6	0.0217901		4037.6	-0.00859016
497.8	0.14967518		1087.79	0.04496455		1677.8	0.02680131		2267.79	-0.0019526		2857.8	0.01410414		3447.8	0.0216273		4037.8	-0.00901091
498	0.15014121		1087.99	0.04478576		1678	0.02618728		2267.99	-0.00159565		2858	0.01412217		3448	0.02186109		4038	-0.0089094
498.2	0.15025383		1088.19	0.04476311		1678.2	0.02606918		2268.19	-0.00087691		2858.2	0.01410177		3448.2	0.02217523		4038.2	-0.00841929
498.4	0.15008168		1088.39	0.04477146		1678.4	0.02621516		2268.39	-0.00027688		2858.4	0.01378489		3448.4	0.02115459		4038.4	-0.00736895
498.6	0.14942834		1088.59	0.04450699		1678.6	0.0259914		2268.59	0.0001434		2858.6	0.01325575		3448.6	0.02120675		4038.6	-0.00632194
498.8	0.14938221		1088.79	0.04385229		1678.8	0.02641011		2268.79	0.00083257		2858.8	0.01293169		3448.8	0.02040772		4038.8	-0.00578186
499	0.14886396		1088.99	0.0441381		1679	0.02684763		2268.99	0.00069954		2859	0.01232257		3449	0.02043915		4039	-0.0050942
499.2	0.14691823		1089.19	0.04391491		1679.2	0.02751833		2269.19	0.00070016		2859.2	0.01289559		3449.2	0.0197882		4039.2	-0.00471801
499.4	0.14707934		1089.39	0.04435068		1679.4	0.02682544		2269.39	0.00109216		2859.4	0.0130688		3449.4	0.01888023		4039.4	-0.00441932
499.6	0.14765953		1089.59	0.04302769		1679.6	0.0265322		2269.59	0.00038263		2859.6	0.01189866		3449.6	0.01801095		4039.6	-0.00450909
499.8	0.14742126		1089.79	0.04389002		1679.8	0.02653541		2269.79	0.00028259		2859.8	0.0118916		3449.8	0.01738591		4039.8	-0.00455894
500	0.14736298		1089.99	0.04432251		1680	0.02652202		2269.99	-0.00039767		2860	0.01250414		3450	0.01694545		4040	-0.00511159
500.2	0.14789103		1090.19	0.04492679		1680.2	0.02783127		2270.19	-0.00085178		2860.2	0.01203502		3450.2	0.01690743		4040.2	-0.00537167
500.4	0.14735707		1090.39	0.04453134		1680.4	0.02785233		2270.39	-0.00202325		2860.4	0.01233586		3450.4	0.01668099		4040.4	-0.00561112
500.6	0.14669124		1090.59	0.04433636		1680.6	0.02718		2270.59	-0.00264179		2860.6	0.01201125		3450.6	0.01679091		4040.6	-0.00626925
500.8	0.14700182		1090.79	0.04373076		1680.8	0.02627571		2270.79	-0.0032344		2860.8	0.01202848		3450.8	0.01700722		4040.8	-0.00680503
501	0.14681288		1090.99	0.04397884		1681	0.02650769		2270.99	-0.00416158		2861	0.0121594		3451	0.01776016		4041	-0.00719407
501.2	0.14643606		1091.19	0.04444989		1681.2	0.02690229		2271.19	-0.00526929		2861.2	0.01292077		3451.2	0.01793761		4041.2	-0.00729306
501.4	0.14563205		1091.39	0.04416607		1681.4	0.02644538		2271.39	-0.00530886		2861.4	0.01276312		3451.4	0.01786924		4041.4	-0.00718372
501.6	0.14436433		1091.59	0.04524845		1681.6	0.02684017		2271.59	-0.00581128		2861.6	0.01372278		3451.6	0.01766016		4041.6	-0.0069703
501.8	0.1442734		1091.79	0.04497596		1681.8	0.02688018		2271.79	-0.00574144		2861.8	0.01423086		3451.8	0.01841975		4041.8	-0.0072886
502	0.14407553		1091.99	0.04516261		1682	0.026195		2271.99	-0.00538603		2862	0.01431849		3452	0.01901371		4042	-0.00764067
502.2	0.14406606		1092.19	0.0447088		1682.2	0.02612396		2272.19	-0.00563102		2862.2	0.01363093		3452.2	0.01915842		4042.2	-0.00746367
502.4	0.14469724		1092.39	0.04547238		1682.4	0.02655928		2272.39	-0.00511646		2862.4	0.01296979		3452.4	0.0192106		4042.4	-0.00738993
502.6	0.14510535		1092.59	0.0448215		1682.6	0.02717838		2272.59	-0.0049674		2862.6	0.01382026		3452.6	0.0196548		4042.6	-0.00719509
502.8	0.14527427		1092.79	0.04481953		1682.8	0.02744739		2272.79	-0.00462518		2862.8	0.01418964		3452.8	0.01967077		4042.8	-0.00656662
503	0.14539926		1092.99	0.0452451		1683	0.02693384		2272.99	-0.00392842		2863	0.01412615		3453	0.02101646		4043	-0.00566124
503.2	0.14598126		1093.19	0.04501207		1683.2	0.02671621		2273.19	-0.00290419		2863.2	0.01360871		3453.2	0.02145821		4043.2	-0.00570717
503.4	0.14688665		1093.39	0.04591345		1683.4	0.02600163		2273.39	-0.0022545		2863.4	0.01233524		3453.4	0.02180476		4043.4	-0.0069324
503.6	0.14833643		1093.59	0.04551373		1683.6	0.02569228		2273.59	-0.00194312		2863.6	0.01134149		3453.6	0.02246224		4043.6	-0.00667135
503.8	0.1482659		1093.79	0.04629657		1683.8	0.02572997		2273.79	-0.00172426		2863.8	0.01108719		3453.8	0.02229845		4043.8	-0.00613606
504	0.14946799		1093.99	0.04639854		1684	0.02576087		2273.99	-0.001464		2864	0.01040777		3454	0.02206689		4044	-0.00590886
504.2	0.14930595		1094.19	0.04611788		1684.2	0.02601869		2274.19	-0.00119074		2864.2	0.0095885		3454.2	0.02244412		4044.2	-0.00596924
504.4	0.14820044		1094.39	0.04494959		1684.4	0.0254757		2274.39	-0.00118028		2864.4	0.00894211		3454.4	0.02145328		4044.4	-0.00580025
504.6	0.14822043		1094.59	0.04479866		1684.6	0.02556026		2274.59	-0.00071145		2864.6	0.00669406		3454.6	0.02096628		4044.6	-0.00631806
504.8	0.14820172		1094.79	0.0455357		1684.8	0.02568732		2274.79	-0.00073662		2864.8	0.00643545		3454.8	0.02075861		4044.8	-0.00548594
505	0.14766888		1094.99	0.04592252		1685	0.02673382		2274.99	-0.00079676		2865	0.00615138		3455	0.02045149		4045	-0.0054853
505.2	0.14785267		1095.19	0.04607139		1685.2	0.02732417		2275.19	-0.00049578		2865.2	0.00693753		3455.2	0.01948019		4045.2	-0.00589696
505.4	0.14657818		1095.39	0.04635017		1685.4	0.02766666		2275.39	-0.00054758		2865.4	0.00757994		3455.4	0.01919691		4045.4	-0.00516981
505.6	0.14611797		1095.59	0.04671105		1685.6	0.02857406		2275.59	-0.000859		2865.6	0.00767802		3455.6	0.01887089		4045.6	-0.00493314
505.8	0.14634066		1095.79	0.04679403		1685.8	0.02898362		2275.79	-0.00062743		2865.8	0.00870212		3455.8	0.01868936		4045.8	-0.00581091
506	0.14579145		1095.99	0.0466985		1686	0.02853608		2275.99	-0.00070767		2866	0.00849683		3456	0.01852693		4046	-0.00636447
506.2	0.14561141		1096.19	0.04592329		1686.2	0.02890651		2276.19	-0.00195519		2866.2	0.00835249		3456.2	0.01850009		4046.2	-0.00593451
506.4	0.14455944		1096.39	0.0453884		1686.4	0.02900068		2276.39	-0.00196067		2866.4	0.00919334		3456.4	0.01846132		4046.4	-0.00544765
506.6	0.14468862		1096.59	0.0436849		1686.6	0.02881083		2276.59	-0.00245821		2866.6	0.01051186		3456.6	0.01880459		4046.6	-0.00484346
506.8	0.1450501		1096.79	0.04283591		1686.8	0.0282588		2276.79	-0.00229357		2866.8	0.01027138		3456.8	0.0194276		4046.8	-0.00459252
507	0.14488269		1096.99	0.04228772		1687	0.02799301		2276.99	-0.00240397		2867	0.01050356		3457	0.01974971		4047	-0.00528087
507.2	0.14481459		1097.19	0.04251219		1687.2	0.02835838		2277.19	-0.00258757		2867.2	0.00949582		3457.2	0.02037612		4047.2	-0.0065805
507.4	0.14445387		1097.39	0.04295683		1687.4	0.02825649		2277.39	-0.00216636		2867.4	0.00940079		3457.4	0.02054056		4047.4	-0.00798052
507.6	0.1443463		1097.59	0.04191779		1687.6	0.02837681		2277.59	-0.00180677		2867.6	0.01020633		3457.6	0.02103422		4047.6	-0.00815471
507.8	0.14435142		1097.79	0.04124558		1687.8	0.02787213		2277.79	-0.00197526		2867.8	0.00978089		3457.8	0.02106995		4047.8	-0.00817344
508	0.14459806		1097.99	0.04178434		1688	0.02793391		2277.99	-0.00118755		2868	0.00906236		3458	0.02120126		4048	-0.00851386
508.2	0.14325437		1098.19	0.04161168		1688.2	0.02731093		2278.19	-0.00090716		2868.2	0.00844848		3458.2	0.02135003		4048.2	-0.00835447
508.4	0.14347524		1098.39	0.04134293		1688.4	0.02732849		2278.39	-0.00078333		2868.4	0.0076328		3458.4	0.02082536		4048.4	-0.0090317
508.6	0.14404756		1098.59	0.041781		1688.6	0.02769428		2278.59	-0.00075298		2868.6	0.00666521		3458.6	0.02105381		4048.6	-0.00936455
508.8	0.14384533		1098.79	0.04307611		1688.8	0.02712333		2278.79	-0.00117613		2868.8	0.00720521		3458.8	0.02082046		4048.8	-0.00891195
509	0.14447122		1098.99	0.04370471		1689	0.02748111		2278.99	-0.00137472		2869	0.00758877		3459	0.0202755		4049	-0.00895585
509.2	0.14506119		1099.19	0.04469844		1689.2	0.02693732		2279.19	-0.0013538		2869.2	0.00811538		3459.2	0.02022655		4049.2	-0.0094099
509.4	0.14500189		1099.39	0.0454585		1689.4	0.02679844		2279.39	-0.00191074		2869.4	0.00891985		3459.4	0.02009725		4049.4	-0.00891739
509.6	0.14527478		1099.59	0.0450516		1689.6	0.02755681		2279.59	-0.00177908		2869.6	0.00890007		3459.6	0.01921467		4049.6	-0.0091364
509.8	0.14517249		1099.79	0.04533057		1689.8	0.02699005		2279.79	-0.00201535		2869.8	0.01030982		3459.8	0.01917254		4049.8	-0.00892757
510	0.14486251		1099.99	0.04445615		1690	0.02614074		2279.99	-0.00216178		2870	0.01065042		3460	0.01914007		4050	-0.00791959
510.2	0.14458091		1100.19	0.04304764		1690.2	0.02586374		2280.19	-0.0023309		2870.2	0.01127386		3460.2	0.01847295		4050.2	-0.00660737
510.4	0.14447234		1100.39	0.04196768		1690.4	0.02557807		2280.39	-0.00299232		2870.4	0.0116112		3460.4	0.01750278		4050.4	-0.00710204
510.6	0.14633747		1100.59	0.04181367		1690.6	0.02536912		2280.59	-0.00304981		2870.6	0.01156966		3460.6	0.01675428		4050.6	-0.00742488
510.8	0.14593922		1100.79	0.04133655		1690.8	0.02519683		2280.79	-0.00294585		2870.8	0.0112211		3460.8	0.01665201		4050.8	-0.00736935
511	0.14560888		1100.99	0.04104135		1691	0.02577675		2280.99	-0.00341453		2871	0.0113532		3461	0.01660326		4051	-0.0074351
511.2	0.14537568		1101.19	0.04198879		1691.2	0.0261673		2281.19	-0.00350828		2871.2	0.01090103		3461.2	0.01622432		4051.2	-0.00827628
511.4	0.14569417		1101.39	0.04132568		1691.4	0.02538747		2281.39	-0.00289856		2871.4	0.01193077		3461.4	0.01608772		4051.4	-0.00799869
511.6	0.14586718		1101.59	0.04056785		1691.6	0.02622873		2281.59	-0.00284047		2871.6	0.01244273		3461.6	0.01615488		4051.6	-0.0075922
511.8	0.1461362		1101.79	0.04139405		1691.8	0.02640496		2281.79	-0.00301028		2871.8	0.01189583		3461.8	0.01608585		4051.8	-0.0071802
512	0.14604431		1101.99	0.04191729		1692	0.02678243		2281.99	-0.00292829		2872	0.01134302		3462	0.01585324		4052	-0.00742397
512.2	0.14608652		1102.19	0.04218808		1692.2	0.02698235		2282.19	-0.00331323		2872.2	0.01032391		3462.2	0.01638667		4052.2	-0.00770802
512.4	0.14698769		1102.39	0.04219357		1692.4	0.02712864		2282.39	-0.00330197		2872.4	0.01038851		3462.4	0.01707184		4052.4	-0.00906125
512.6	0.14752387		1102.59	0.04308301		1692.6	0.02698412		2282.59	-0.00433778		2872.6	0.01042473		3462.6	0.01666549		4052.6	-0.01000922
512.8	0.14774516		1102.79	0.04403905		1692.8	0.02725871		2282.79	-0.00473373		2872.8	0.0105865		3462.8	0.01664973		4052.8	-0.01010241
513	0.14802329		1102.99	0.04425044		1693	0.02783096		2282.99	-0.00452666		2873	0.01074922		3463	0.01669375		4053	-0.0103852
513.2	0.14836385		1103.19	0.04450757		1693.2	0.0270596		2283.19	-0.00562014		2873.2	0.0110278		3463.2	0.01685419		4053.2	-0.01145704
513.4	0.14779367		1103.39	0.04424919		1693.4	0.02693139		2283.39	-0.00630375		2873.4	0.01144351		3463.4	0.01687148		4053.4	-0.0110363
513.6	0.14770248		1103.59	0.04405268		1693.6	0.02755924		2283.59	-0.0064743		2873.6	0.01161072		3463.6	0.0169343		4053.6	-0.01010011
513.8	0.14718879		1103.79	0.0446952		1693.8	0.02710426		2283.79	-0.00593906		2873.8	0.01185238		3463.8	0.01681557		4053.8	-0.00958983
514	0.14748184		1103.99	0.04360199		1694	0.02690361		2283.99	-0.0062146		2874	0.0112653		3464	0.0175315		4054	-0.00910195
514.2	0.14714808		1104.19	0.04265471		1694.2	0.02668226		2284.19	-0.0061536		2874.2	0.01089075		3464.2	0.01763679		4054.2	-0.00927018
514.4	0.1471359		1104.39	0.04266217		1694.4	0.02645895		2284.39	-0.00707418		2874.4	0.01047739		3464.4	0.01708761		4054.4	-0.00977032
514.6	0.14683988		1104.59	0.04295332		1694.6	0.02571689		2284.59	-0.00666311		2874.6	0.00942433		3464.6	0.01740069		4054.6	-0.00949442
514.8	0.14589542		1104.79	0.04246454		1694.8	0.02572905		2284.79	-0.00656045		2874.8	0.00881336		3464.8	0.01767334		4054.8	-0.00805833
515	0.14507216		1104.99	0.04235803		1695	0.02633985		2284.99	-0.00654851		2875	0.0085577		3465	0.01720749		4055	-0.00772475
515.2	0.1446437		1105.19	0.04265105		1695.2	0.0262906		2285.19	-0.00593799		2875.2	0.00880812		3465.2	0.01806671		4055.2	-0.00739244
515.4	0.14456946		1105.39	0.04239865		1695.4	0.02549597		2285.39	-0.00615287		2875.4	0.0086022		3465.4	0.01938982		4055.4	-0.00649113
515.6	0.14419657		1105.59	0.04200463		1695.6	0.02600709		2285.59	-0.00548213		2875.6	0.0072457		3465.6	0.01884526		4055.6	-0.00628043
515.8	0.14406926		1105.79	0.04172386		1695.8	0.02556214		2285.79	-0.00564905		2875.8	0.00653274		3465.8	0.01878318		4055.8	-0.00635988
516	0.14416176		1105.99	0.04113171		1696	0.02555867		2285.99	-0.00613707		2876	0.00595981		3466	0.01901559		4056	-0.00639553
516.2	0.14413367		1106.19	0.04149289		1696.2	0.02534637		2286.19	-0.00547234		2876.2	0.00667878		3466.2	0.01895684		4056.2	-0.00686795
516.4	0.14458755		1106.39	0.04196995		1696.4	0.02496406		2286.39	-0.00475324		2876.4	0.00700048		3466.4	0.01851449		4056.4	-0.00728314
516.6	0.14428932		1106.59	0.04192631		1696.6	0.0254429		2286.59	-0.00590248		2876.6	0.00737981		3466.6	0.01805882		4056.6	-0.00761842
516.8	0.14358516		1106.79	0.04096178		1696.8	0.02572088		2286.79	-0.0058462		2876.8	0.00791823		3466.8	0.01734937		4056.8	-0.00721385
517	0.14343115		1106.99	0.04061799		1697	0.02586177		2286.99	-0.00596822		2877	0.00825838		3467	0.0163131		4057	-0.00784338
517.2	0.14421262		1107.19	0.04037732		1697.2	0.02544148		2287.19	-0.00673001		2877.2	0.0080615		3467.2	0.01638349		4057.2	-0.00814407
517.4	0.1438736		1107.39	0.04023362		1697.4	0.02626183		2287.39	-0.0061671		2877.4	0.00809765		3467.4	0.0161933		4057.4	-0.0074762
517.6	0.14480642		1107.59	0.03937645		1697.6	0.02711778		2287.59	-0.00552819		2877.6	0.00861303		3467.6	0.01615623		4057.6	-0.0070142
517.8	0.1453048		1107.79	0.03939937		1697.8	0.02720663		2287.79	-0.00487429		2877.8	0.00896155		3467.8	0.01556916		4057.8	-0.00763978
518	0.14588536		1107.99	0.03866051		1698	0.02671268		2287.99	-0.00574606		2878	0.00987198		3468	0.01658172		4058	-0.00776045
518.2	0.14579177		1108.19	0.03779259		1698.2	0.02638924		2288.19	-0.00601944		2878.2	0.01100053		3468.2	0.01638764		4058.2	-0.00754527
518.4	0.14542088		1108.39	0.03790371		1698.4	0.02634186		2288.39	-0.00615853		2878.4	0.01080845		3468.4	0.01584722		4058.4	-0.00776879
518.6	0.14481922		1108.59	0.03804519		1698.6	0.02677983		2288.59	-0.00617408		2878.6	0.01092744		3468.6	0.01634813		4058.6	-0.00791944
518.8	0.14518949		1108.79	0.03847826		1698.8	0.02758737		2288.79	-0.00652345		2878.8	0.01095242		3468.8	0.01613664		4058.8	-0.00796726
519	0.1441585		1108.99	0.0392642		1699	0.02760399		2288.99	-0.00637554		2879	0.01053553		3469	0.01611419		4059	-0.00885826
519.2	0.14441649		1109.19	0.04001195		1699.2	0.0271651		2289.19	-0.0072082		2879.2	0.01070578		3469.2	0.01786962		4059.2	-0.00941216
519.4	0.14468296		1109.39	0.04009324		1699.4	0.02637998		2289.39	-0.00697512		2879.4	0.0099805		3469.4	0.01845987		4059.4	-0.00935913
519.6	0.14431754		1109.59	0.03903857		1699.6	0.02585303		2289.59	-0.00663688		2879.6	0.00951852		3469.6	0.01878935		4059.6	-0.00935412
519.8	0.14445536		1109.79	0.03964117		1699.8	0.02517471		2289.79	-0.00810902		2879.8	0.00931238		3469.8	0.01847231		4059.8	-0.00916698
520	0.14412327		1109.99	0.04015782		1700	0.02535674		2289.99	-0.00762046		2880	0.00868238		3470	0.01799428		4060	-0.00962066
520.2	0.14397513		1110.19	0.04179294		1700.2	0.02480004		2290.19	-0.00683346		2880.2	0.00844401		3470.2	0.01809972		4060.2	-0.0095846
520.4	0.14414102		1110.39	0.04236923		1700.4	0.02567337		2290.39	-0.00719063		2880.4	0.00746696		3470.4	0.01825516		4060.4	-0.00932381
520.6	0.14376308		1110.59	0.04193884		1700.6	0.02609878		2290.59	-0.00755624		2880.6	0.00741071		3470.6	0.01842758		4060.6	-0.00909671
520.8	0.1444454		1110.79	0.04233741		1700.8	0.02601004		2290.79	-0.00677752		2880.8	0.00653526		3470.8	0.0177292		4060.8	-0.00869718
521	0.14533308		1110.99	0.04263739		1701	0.026831		2290.99	-0.0059972		2881	0.00638646		3471	0.01750619		4061	-0.00888275
521.2	0.14560628		1111.19	0.04255143		1701.2	0.02768927		2291.19	-0.0050506		2881.2	0.00553934		3471.2	0.01737943		4061.2	-0.00835815
521.4	0.14555774		1111.39	0.04213585		1701.4	0.02806388		2291.39	-0.00392793		2881.4	0.0061975		3471.4	0.01721386		4061.4	-0.0085675
521.6	0.14616157		1111.59	0.0414914		1701.6	0.02821172		2291.59	-0.00319723		2881.6	0.0053498		3471.6	0.01690531		4061.6	-0.0084665
521.8	0.14643019		1111.79	0.04144204		1701.8	0.02799729		2291.79	-0.00328027		2881.8	0.00589877		3471.8	0.01679447		4061.8	-0.0091158
522	0.14595846		1111.99	0.04111452		1702	0.0281022		2291.99	-0.00411583		2882	0.00593299		3472	0.01687803		4062	-0.00853871
522.2	0.14542674		1112.19	0.04014871		1702.2	0.02846187		2292.19	-0.00496289		2882.2	0.00665799		3472.2	0.0167821		4062.2	-0.00820196
522.4	0.14507732		1112.39	0.04067514		1702.4	0.02885918		2292.39	-0.00481496		2882.4	0.00650741		3472.4	0.01604632		4062.4	-0.00867982
522.6	0.14528449		1112.59	0.04079437		1702.6	0.02952839		2292.59	-0.00565555		2882.6	0.00640414		3472.6	0.016638		4062.6	-0.00871937
522.8	0.14500296		1112.79	0.04112363		1702.8	0.02973977		2292.79	-0.00615874		2882.8	0.00608813		3472.8	0.01650519		4062.8	-0.00834821
523	0.144399		1112.99	0.04064707		1703	0.02868693		2292.99	-0.00642567		2883	0.00633173		3473	0.01692887		4063	-0.00817005
523.2	0.14484825		1113.19	0.0399411		1703.2	0.02792657		2293.19	-0.0071222		2883.2	0.00698737		3473.2	0.01809972		4063.2	-0.00821685
523.4	0.14497946		1113.39	0.03949807		1703.4	0.02661545		2293.39	-0.0066595		2883.4	0.00734353		3473.4	0.01894684		4063.4	-0.00807362
523.6	0.14475406		1113.59	0.03941212		1703.6	0.02558476		2293.59	-0.00725021		2883.6	0.00733135		3473.6	0.0187898		4063.6	-0.00844366
523.8	0.14479681		1113.79	0.03993389		1703.8	0.02500952		2293.79	-0.00832654		2883.8	0.00687475		3473.8	0.01814249		4063.8	-0.00928718
524	0.14426567		1113.99	0.04018306		1704	0.02533015		2293.99	-0.00822945		2884	0.00695006		3474	0.01849228		4064	-0.00923505
524.2	0.14361478		1114.19	0.04093139		1704.2	0.02515106		2294.19	-0.00854441		2884.2	0.00716183		3474.2	0.01828459		4064.2	-0.00833722
524.4	0.14316436		1114.39	0.04084341		1704.4	0.02568246		2294.39	-0.00934063		2884.4	0.00811266		3474.4	0.01796598		4064.4	-0.0084802
524.6	0.14260445		1114.59	0.04076577		1704.6	0.02564795		2294.59	-0.00901552		2884.6	0.00745106		3474.6	0.01746893		4064.6	-0.00887761
524.8	0.14319042		1114.79	0.04122556		1704.8	0.02572906		2294.79	-0.00867995		2884.8	0.00692068		3474.8	0.01705297		4064.8	-0.00848042
525	0.14328945		1114.99	0.04101459		1705	0.02582299		2294.99	-0.00849986		2885	0.00770812		3475	0.01759591		4065	-0.00964489
525.2	0.14277698		1115.19	0.04130298		1705.2	0.02656247		2295.19	-0.00814718		2885.2	0.0074153		3475.2	0.01701074		4065.2	-0.00994322
525.4	0.14312862		1115.39	0.04125293		1705.4	0.02596992		2295.39	-0.00792304		2885.4	0.00785165		3475.4	0.01734135		4065.4	-0.01114207
525.6	0.14343496		1115.59	0.04048149		1705.6	0.0260282		2295.59	-0.00769964		2885.6	0.0069769		3475.6	0.01684384		4065.6	-0.01193112
525.8	0.14385339		1115.79	0.04009549		1705.8	0.02558135		2295.79	-0.00798726		2885.8	0.00755129		3475.8	0.01764803		4065.8	-0.01252598
526	0.14345558		1115.99	0.03951188		1706	0.02569291		2295.99	-0.00825621		2886	0.00747865		3476	0.0182892		4066	-0.011879
526.2	0.14391775		1116.19	0.03957831		1706.2	0.02558296		2296.19	-0.00911142		2886.2	0.00796571		3476.2	0.01812416		4066.2	-0.01215464
526.4	0.14494869		1116.39	0.03984067		1706.4	0.02598587		2296.39	-0.00913786		2886.4	0.00683204		3476.4	0.01866032		4066.4	-0.01189098
526.6	0.14505309		1116.59	0.03970586		1706.6	0.02564383		2296.59	-0.00929473		2886.6	0.00691571		3476.6	0.01917652		4066.6	-0.0113915
526.8	0.1446088		1116.79	0.03919258		1706.8	0.02475879		2296.79	-0.00936038		2886.8	0.00676653		3476.8	0.0191019		4066.8	-0.01137788
527	0.14504716		1116.99	0.03925792		1707	0.02453495		2296.99	-0.00902379		2887	0.00681139		3477	0.0193506		4067	-0.01142885
527.2	0.14543366		1117.19	0.03896552		1707.2	0.02465717		2297.19	-0.0086565		2887.2	0.0069564		3477.2	0.01899989		4067.2	-0.01130679
527.4	0.14571542		1117.39	0.03912687		1707.4	0.02413212		2297.39	-0.00811981		2887.4	0.00716274		3477.4	0.01853981		4067.4	-0.01129737
527.6	0.14570667		1117.59	0.03865007		1707.6	0.02449388		2297.59	-0.00713376		2887.6	0.00710753		3477.6	0.01765305		4067.6	-0.01154479
527.8	0.14472882		1117.79	0.03882129		1707.8	0.02472914		2297.79	-0.00787409		2887.8	0.00703499		3477.8	0.01698202		4067.8	-0.01125614
528	0.14414928		1117.99	0.0388138		1708	0.02598751		2297.99	-0.0067682		2888	0.00757835		3478	0.01668873		4068	-0.01063709
528.2	0.1430946		1118.19	0.03899868		1708.2	0.02645754		2298.19	-0.00631918		2888.2	0.00766054		3478.2	0.01534582		4068.2	-0.01033388
528.4	0.14218232		1118.39	0.04025831		1708.4	0.0275379		2298.39	-0.00614074		2888.4	0.00781414		3478.4	0.01470826		4068.4	-0.01039979
528.6	0.14227525		1118.59	0.04019484		1708.6	0.02734742		2298.59	-0.00624859		2888.6	0.00709343		3478.6	0.0142079		4068.6	-0.00962659
528.8	0.14243336		1118.79	0.04056652		1708.8	0.02781319		2298.79	-0.00542269		2888.8	0.00711978		3478.8	0.01404133		4068.8	-0.00932523
529	0.14297633		1118.99	0.04077531		1709	0.02791593		2298.99	-0.00559418		2889	0.00798024		3479	0.01428567		4069	-0.00979425
529.2	0.14256074		1119.19	0.04053168		1709.2	0.02766114		2299.19	-0.00500369		2889.2	0.00911771		3479.2	0.01337936		4069.2	-0.00994121
529.4	0.14376854		1119.39	0.04006935		1709.4	0.02641256		2299.39	-0.00468919		2889.4	0.00928198		3479.4	0.01294818		4069.4	-0.00956119
529.6	0.14399992		1119.59	0.03934995		1709.6	0.02587992		2299.59	-0.00407268		2889.6	0.00933115		3479.6	0.0128646		4069.6	-0.00923346
529.8	0.14452871		1119.79	0.03885		1709.8	0.02534521		2299.79	-0.00424212		2889.8	0.00885252		3479.8	0.01317523		4069.8	-0.00834355
530	0.14482644		1119.99	0.03816314		1710	0.02473055		2299.99	-0.00497974		2890	0.00869533		3480	0.01323948		4070	-0.00811754
530.2	0.14492456		1120.19	0.03815103		1710.2	0.02415298		2300.19	-0.00544431		2890.2	0.00834105		3480.2	0.01299843		4070.2	-0.00826368
530.4	0.14581919		1120.39	0.03805866		1710.4	0.02365713		2300.39	-0.00563778		2890.4	0.00716903		3480.4	0.01362504		4070.4	-0.00833835
530.6	0.14591221		1120.59	0.0384766		1710.6	0.02224539		2300.59	-0.00661647		2890.6	0.00754664		3480.6	0.01335506		4070.6	-0.00907744
530.8	0.14618694		1120.79	0.03832117		1710.8	0.02191331		2300.79	-0.00776071		2890.8	0.00670232		3480.8	0.0140223		4070.8	-0.00910142
531	0.14589573		1120.99	0.03806702		1711	0.02260946		2300.99	-0.00813861		2891	0.00654219		3481	0.01446572		4071	-0.00904246
531.2	0.14542378		1121.19	0.03754614		1711.2	0.02200916		2301.19	-0.00796532		2891.2	0.00568397		3481.2	0.01430211		4071.2	-0.00946041
531.4	0.14529105		1121.39	0.03739291		1711.4	0.02100305		2301.39	-0.00839337		2891.4	0.00542408		3481.4	0.01478799		4071.4	-0.01051728
531.6	0.14382246		1121.59	0.03731784		1711.6	0.02180905		2301.59	-0.00857841		2891.6	0.00489224		3481.6	0.0148429		4071.6	-0.0121367
531.8	0.14345851		1121.79	0.0381905		1711.8	0.02313511		2301.79	-0.00925701		2891.8	0.005111		3481.8	0.01509016		4071.8	-0.0126444
532	0.1426954		1121.99	0.03868507		1712	0.02428186		2301.99	-0.00772299		2892	0.00536051		3482	0.0154462		4072	-0.01362021
532.2	0.14137946		1122.19	0.03916078		1712.2	0.02484862		2302.19	-0.00809996		2892.2	0.00582961		3482.2	0.0150675		4072.2	-0.01372995
532.4	0.14213274		1122.39	0.04001569		1712.4	0.02525232		2302.39	-0.00861017		2892.4	0.0061869		3482.4	0.01474064		4072.4	-0.01359742
532.6	0.14294041		1122.59	0.03964579		1712.6	0.02509315		2302.59	-0.00888626		2892.6	0.00571918		3482.6	0.01390979		4072.6	-0.01376119
532.8	0.14311918		1122.79	0.04073381		1712.8	0.02618		2302.79	-0.00860152		2892.8	0.0062682		3482.8	0.01431644		4072.8	-0.01406675
533	0.14376524		1122.99	0.04058237		1713	0.02605467		2302.99	-0.0091066		2893	0.00716676		3483	0.01425074		4073	-0.0149661
533.2	0.1437699		1123.19	0.04084743		1713.2	0.02557252		2303.19	-0.00856317		2893.2	0.00773912		3483.2	0.01315083		4073.2	-0.01542417
533.4	0.14460623		1123.39	0.04067973		1713.4	0.02586147		2303.39	-0.0085424		2893.4	0.00632243		3483.4	0.012803		4073.4	-0.01443206
533.6	0.14472818		1123.59	0.04108148		1713.6	0.02573398		2303.59	-0.00709746		2893.6	0.00624122		3483.6	0.01253486		4073.6	-0.01437418
533.8	0.14534456		1123.79	0.04028784		1713.8	0.02585541		2303.79	-0.00697551		2893.8	0.00559443		3483.8	0.012881		4073.8	-0.01388178
534	0.14502173		1123.99	0.03974681		1714	0.02577229		2303.99	-0.00631454		2894	0.00541701		3484	0.01345823		4074	-0.01342625
534.2	0.14489353		1124.19	0.03927842		1714.2	0.02504022		2304.19	-0.00639824		2894.2	0.00501269		3484.2	0.01379245		4074.2	-0.0128427
534.4	0.14545146		1124.39	0.03887442		1714.4	0.02464906		2304.39	-0.00672351		2894.4	0.00496926		3484.4	0.01428969		4074.4	-0.01251762
534.6	0.14556113		1124.59	0.03928313		1714.6	0.0244079		2304.59	-0.00762384		2894.6	0.00486639		3484.6	0.01497147		4074.6	-0.01207337
534.8	0.14548242		1124.79	0.03859329		1714.8	0.02515856		2304.79	-0.00810662		2894.8	0.00480518		3484.8	0.0165067		4074.8	-0.01152381
535	0.14441169		1124.99	0.0383172		1715	0.02414845		2304.99	-0.00783631		2895	0.00450646		3485	0.01646609		4075	-0.01255793
535.2	0.14422501		1125.19	0.03846272		1715.2	0.02396341		2305.19	-0.0081693		2895.2	0.00372501		3485.2	0.01660069		4075.2	-0.01255827
535.4	0.14465246		1125.39	0.03860497		1715.4	0.02428671		2305.39	-0.00887926		2895.4	0.00428367		3485.4	0.01687181		4075.4	-0.01325329
535.6	0.14476999		1125.59	0.03852642		1715.6	0.02486731		2305.59	-0.00916569		2895.6	0.00483226		3485.6	0.01710902		4075.6	-0.01373349
535.8	0.14478051		1125.79	0.03866751		1715.8	0.02552249		2305.79	-0.00845583		2895.8	0.00531454		3485.8	0.01682462		4075.8	-0.01366874
536	0.14315605		1125.99	0.03815963		1716	0.02477999		2305.99	-0.00804412		2896	0.00589264		3486	0.01613815		4076	-0.01385192
536.2	0.14378996		1126.19	0.03775424		1716.2	0.02472329		2306.19	-0.00858173		2896.2	0.00578162		3486.2	0.01638053		4076.2	-0.01360091
536.4	0.1447914		1126.39	0.03762242		1716.4	0.02379121		2306.39	-0.00920654		2896.4	0.00563745		3486.4	0.01557637		4076.4	-0.0138731
536.6	0.14457298		1126.59	0.03813717		1716.6	0.02478195		2306.59	-0.00876458		2896.6	0.0055634		3486.6	0.0148634		4076.6	-0.01361191
536.8	0.14476196		1126.79	0.03880477		1716.8	0.02524496		2306.79	-0.00943004		2896.8	0.00629759		3486.8	0.01507263		4076.8	-0.0142216
537	0.1454007		1126.99	0.03843625		1717	0.02522759		2306.99	-0.00946353		2897	0.00635577		3487	0.01436822		4077	-0.01516088
537.2	0.14533004		1127.19	0.03815411		1717.2	0.024901		2307.19	-0.00916687		2897.2	0.00633464		3487.2	0.01377664		4077.2	-0.01462316
537.4	0.14542573		1127.39	0.03719357		1717.4	0.02470653		2307.39	-0.00873528		2897.4	0.00522443		3487.4	0.01330596		4077.4	-0.01397987
537.6	0.14528842		1127.59	0.03759987		1717.6	0.02488622		2307.59	-0.00811258		2897.6	0.00568904		3487.6	0.01320512		4077.6	-0.01326443
537.8	0.14487203		1127.79	0.03672625		1717.8	0.02595026		2307.79	-0.00836972		2897.8	0.00501954		3487.8	0.01339033		4077.8	-0.01254003
538	0.14467424		1127.99	0.03614825		1718	0.025478		2307.99	-0.00819872		2898	0.00517958		3488	0.01256541		4078	-0.01198431
538.2	0.14458796		1128.19	0.03576194		1718.2	0.02504911		2308.19	-0.00923229		2898.2	0.00532692		3488.2	0.01284983		4078.2	-0.01176638
538.4	0.14414537		1128.39	0.03573777		1718.4	0.02545113		2308.39	-0.00866274		2898.4	0.0055306		3488.4	0.01258621		4078.4	-0.01208606
538.6	0.1439685		1128.59	0.03601233		1718.6	0.02576745		2308.59	-0.00955662		2898.6	0.00538212		3488.6	0.01239047		4078.6	-0.01247726
538.8	0.14443257		1128.79	0.03562913		1718.8	0.02587903		2308.79	-0.01016597		2898.8	0.00564153		3488.8	0.01283094		4078.8	-0.01334728
539	0.14413307		1128.99	0.03610549		1719	0.02512224		2308.99	-0.01019455		2899	0.00517885		3489	0.01172746		4079	-0.01370063
539.2	0.14367661		1129.19	0.03569122		1719.2	0.02586035		2309.19	-0.01050959		2899.2	0.00604192		3489.2	0.0111655		4079.2	-0.01384575
539.4	0.14413676		1129.39	0.03505487		1719.4	0.0259089		2309.39	-0.01036541		2899.4	0.00691045		3489.4	0.01179633		4079.4	-0.01395877
539.6	0.14400871		1129.59	0.03456786		1719.6	0.02597459		2309.59	-0.01095005		2899.6	0.00710594		3489.6	0.01179016		4079.6	-0.0136179
539.8	0.14308439		1129.79	0.03466959		1719.8	0.02565915		2309.79	-0.01049737		2899.8	0.00712381		3489.8	0.01190434		4079.8	-0.01354528
540	0.14200627		1129.99	0.03500094		1720	0.02474322		2309.99	-0.01042988		2900	0.00689493		3490	0.01257886		4080	-0.01303755
540.2	0.14239165		1130.19	0.03501967		1720.2	0.02459255		2310.19	-0.01021614		2900.2	0.00563533		3490.2	0.01298972		4080.2	-0.01321903
540.4	0.14184671		1130.39	0.035406		1720.4	0.02485533		2310.39	-0.01024105		2900.4	0.00598545		3490.4	0.01287013		4080.4	-0.01303432
540.6	0.14215708		1130.59	0.03585604		1720.6	0.0263041		2310.59	-0.00956619		2900.6	0.00640148		3490.6	0.01300398		4080.6	-0.01226587
540.8	0.14227123		1130.79	0.0352746		1720.8	0.02578981		2310.79	-0.01030847		2900.8	0.00645506		3490.8	0.01317861		4080.8	-0.0122636
541	0.14251056		1130.99	0.03555806		1721	0.02575226		2310.99	-0.00998003		2901	0.00594962		3491	0.01417158		4081	-0.01161935
541.2	0.14163524		1131.19	0.03488755		1721.2	0.02482972		2311.19	-0.0091431		2901.2	0.00550209		3491.2	0.01316802		4081.2	-0.010342
541.4	0.14115524		1131.39	0.03572595		1721.4	0.02540617		2311.39	-0.00903871		2901.4	0.00505665		3491.4	0.01293915		4081.4	-0.00957205
541.6	0.14095347		1131.59	0.03687869		1721.6	0.02575126		2311.59	-0.00930483		2901.6	0.00505967		3491.6	0.01232291		4081.6	-0.00887655
541.8	0.14152955		1131.79	0.03684054		1721.8	0.02548124		2311.79	-0.0094771		2901.8	0.00499059		3491.8	0.01161175		4081.8	-0.00940825
542	0.14149335		1131.99	0.03674947		1722	0.0246819		2311.99	-0.00981488		2902	0.00532688		3492	0.01087648		4082	-0.01008555
542.2	0.14112835		1132.19	0.03671008		1722.2	0.02357571		2312.19	-0.00986605		2902.2	0.00532563		3492.2	0.01076254		4082.2	-0.01028918
542.4	0.1409602		1132.39	0.03687535		1722.4	0.02302179		2312.39	-0.01008497		2902.4	0.00501384		3492.4	0.01009056		4082.4	-0.01134116
542.6	0.14082408		1132.59	0.03622805		1722.6	0.02247902		2312.59	-0.00985614		2902.6	0.00485516		3492.6	0.01005293		4082.6	-0.01224153
542.8	0.14135028		1132.79	0.03587777		1722.8	0.02198168		2312.79	-0.00967751		2902.8	0.0043541		3492.8	0.01034128		4082.8	-0.01291262
543	0.14078601		1132.99	0.03538408		1723	0.02149157		2312.99	-0.00912145		2903	0.00435851		3493	0.00987524		4083	-0.01314784
543.2	0.14042524		1133.19	0.03447673		1723.2	0.02113076		2313.19	-0.00857523		2903.2	0.00482851		3493.2	0.00985425		4083.2	-0.01353777
543.4	0.14037502		1133.39	0.03389269		1723.4	0.02089712		2313.39	-0.00900959		2903.4	0.00466974		3493.4	0.01158218		4083.4	-0.01286049
543.6	0.14024077		1133.59	0.03380286		1723.6	0.01996423		2313.59	-0.00907651		2903.6	0.00454954		3493.6	0.01242516		4083.6	-0.01311549
543.8	0.13978033		1133.79	0.03433571		1723.8	0.01890173		2313.79	-0.0088577		2903.8	0.00459235		3493.8	0.013981		4083.8	-0.01381181
544	0.13945347		1133.99	0.03446384		1724	0.01871559		2313.99	-0.00900618		2904	0.00478928		3494	0.01419642		4084	-0.01479707
544.2	0.13986476		1134.19	0.03303609		1724.2	0.01871467		2314.19	-0.00906768		2904.2	0.00434056		3494.2	0.01459385		4084.2	-0.01519277
544.4	0.13957977		1134.39	0.03245477		1724.4	0.01889117		2314.39	-0.00865297		2904.4	0.0050482		3494.4	0.01505047		4084.4	-0.0149879
544.6	0.13984628		1134.59	0.03246382		1724.6	0.01905682		2314.59	-0.00809625		2904.6	0.004891		3494.6	0.01505584		4084.6	-0.01471338
544.8	0.14027845		1134.79	0.03221065		1724.8	0.01900516		2314.79	-0.00757756		2904.8	0.00506019		3494.8	0.01463173		4084.8	-0.01444594
545	0.14068079		1134.99	0.03303354		1725	0.01873741		2314.99	-0.00694734		2905	0.00479178		3495	0.01445133		4085	-0.01357291
545.2	0.14053747		1135.19	0.03298284		1725.2	0.01913299		2315.19	-0.00666181		2905.2	0.00523655		3495.2	0.01300003		4085.2	-0.01305435
545.4	0.14013016		1135.39	0.03442122		1725.4	0.02063676		2315.39	-0.00679472		2905.4	0.00536393		3495.4	0.01257229		4085.4	-0.01336442
545.6	0.1413032		1135.59	0.03431877		1725.6	0.02133108		2315.59	-0.00705077		2905.6	0.00538171		3495.6	0.01191539		4085.6	-0.01406198
545.8	0.14153479		1135.79	0.03437103		1725.8	0.02103978		2315.79	-0.0072655		2905.8	0.00607023		3495.8	0.01222516		4085.8	-0.01437794
546	0.14154698		1135.99	0.03514789		1726	0.020923		2315.99	-0.00777005		2906	0.00642185		3496	0.012416		4086	-0.01507733
546.2	0.14171858		1136.19	0.0353692		1726.2	0.0210095		2316.19	-0.00834497		2906.2	0.00656847		3496.2	0.01199207		4086.2	-0.01447763
546.4	0.14147313		1136.39	0.03618912		1726.4	0.02155305		2316.39	-0.00907963		2906.4	0.00623144		3496.4	0.01210653		4086.4	-0.01530892
546.6	0.14102035		1136.59	0.03643413		1726.6	0.02194374		2316.59	-0.00856192		2906.6	0.00529722		3496.6	0.01229285		4086.6	-0.01592311
546.8	0.14104208		1136.79	0.03660773		1726.8	0.02193804		2316.79	-0.00902512		2906.8	0.00492548		3496.8	0.0124735		4086.8	-0.01583405
547	0.14032069		1136.99	0.0369012		1727	0.0221373		2316.99	-0.00897516		2907	0.00465184		3497	0.01261623		4087	-0.0152215
547.2	0.13986222		1137.19	0.03637132		1727.2	0.021887		2317.19	-0.00933359		2907.2	0.00442606		3497.2	0.01369521		4087.2	-0.01501773
547.4	0.13898246		1137.39	0.03596932		1727.4	0.02140666		2317.39	-0.01021776		2907.4	0.0044588		3497.4	0.01485517		4087.4	-0.01436781
547.6	0.13967032		1137.59	0.03661483		1727.6	0.02084613		2317.59	-0.01045718		2907.6	0.00505872		3497.6	0.01532126		4087.6	-0.01468666
547.8	0.13944247		1137.79	0.0375983		1727.8	0.02177472		2317.79	-0.01081107		2907.8	0.00447315		3497.8	0.01538649		4087.8	-0.0154759
548	0.14017371		1137.99	0.03670748		1728	0.02195545		2317.99	-0.01071334		2908	0.0044126		3498	0.01514402		4088	-0.0154802
548.2	0.14082513		1138.19	0.03605792		1728.2	0.02191556		2318.19	-0.01058834		2908.2	0.00358522		3498.2	0.01512113		4088.2	-0.01475049
548.4	0.14079209		1138.39	0.03651865		1728.4	0.02135545		2318.39	-0.00964729		2908.4	0.0029134		3498.4	0.01457203		4088.4	-0.01483665
548.6	0.14144945		1138.59	0.03660807		1728.6	0.02164043		2318.59	-0.00974227		2908.6	0.00210391		3498.6	0.0135718		4088.6	-0.01351385
548.8	0.14147948		1138.79	0.0359994		1728.8	0.02163383		2318.79	-0.00964816		2908.8	0.00211099		3498.8	0.01267025		4088.8	-0.01326014
549	0.14118201		1138.99	0.03583153		1729	0.0219199		2318.99	-0.00967308		2909	0.0019827		3499	0.01243119		4089	-0.01276986
549.2	0.1412764		1139.19	0.03508255		1729.2	0.02357132		2319.19	-0.0095461		2909.2	0.00108548		3499.2	0.01177947		4089.2	-0.01310391
549.4	0.14094892		1139.39	0.0346376		1729.4	0.02369253		2319.39	-0.00952904		2909.4	0.00032333		3499.4	0.01225609		4089.4	-0.01337641
549.6	0.14092718		1139.59	0.03400586		1729.6	0.02331791		2319.59	-0.00911936		2909.6	0.0009729		3499.6	0.01278636		4089.6	-0.01335102
549.8	0.14031331		1139.79	0.03488169		1729.8	0.02305874		2319.79	-0.00954774		2909.8	0.00148425		3499.8	0.01174184		4089.8	-0.0134737
550	0.13996284		1139.99	0.03516514		1730	0.02341262		2319.99	-0.00991641		2910	0.00182928		3500	0.01200615		4090	-0.01418775
550.2	0.13904955		1140.19	0.03534785		1730.2	0.02432601		2320.19	-0.00936228		2910.2	0.00206355		3500.2	0.01149949		4090.2	-0.01461442
550.4	0.13911198		1140.39	0.0362201		1730.4	0.02378336		2320.39	-0.0092847		2910.4	0.00222606		3500.4	0.0120107		4090.4	-0.01570493
550.6	0.13865385		1140.59	0.03572897		1730.6	0.02305087		2320.59	-0.00873054		2910.6	0.00255576		3500.6	0.01185687		4090.6	-0.01590917
550.8	0.13890434		1140.79	0.03560092		1730.8	0.02233081		2320.79	-0.00850274		2910.8	0.00360298		3500.8	0.01191835		4090.8	-0.01564626
551	0.13858646		1140.99	0.0348439		1731	0.02171792		2320.99	-0.00875724		2911	0.00361416		3501	0.0124495		4091	-0.01563851
551.2	0.13834179		1141.19	0.03437215		1731.2	0.02124208		2321.19	-0.00827666		2911.2	0.00452906		3501.2	0.01280626		4091.2	-0.01600292
551.4	0.1378073		1141.39	0.03447493		1731.4	0.02115838		2321.39	-0.00801475		2911.4	0.00501037		3501.4	0.01239116		4091.4	-0.01625279
551.6	0.13860214		1141.59	0.0347965		1731.6	0.02135066		2321.59	-0.00768949		2911.6	0.00535201		3501.6	0.0120832		4091.6	-0.01659447
551.8	0.13875471		1141.79	0.03479596		1731.8	0.02223042		2321.79	-0.008253		2911.8	0.00504208		3501.8	0.01217072		4091.8	-0.01681436
552	0.14011476		1141.99	0.03380488		1732	0.0222647		2321.99	-0.00766346		2912	0.00564056		3502	0.01110671		4092	-0.01626321
552.2	0.14075259		1142.19	0.03449722		1732.2	0.02173543		2322.19	-0.00801954		2912.2	0.00537577		3502.2	0.01050718		4092.2	-0.01641186
552.4	0.14037905		1142.39	0.03426174		1732.4	0.02137713		2322.39	-0.00816095		2912.4	0.00528844		3502.4	0.01062332		4092.4	-0.0163731
552.6	0.14075747		1142.59	0.03301652		1732.6	0.02145076		2322.59	-0.00887625		2912.6	0.00559501		3502.6	0.01000358		4092.6	-0.01524196
552.8	0.14057326		1142.79	0.03352897		1732.8	0.02223992		2322.79	-0.00900323		2912.8	0.00520708		3502.8	0.00994024		4092.8	-0.01570797
553	0.14048975		1142.99	0.03324328		1733	0.02288983		2322.99	-0.00916442		2913	0.00507573		3503	0.01008313		4093	-0.0151898
553.2	0.14012755		1143.19	0.03255312		1733.2	0.02347509		2323.19	-0.00952142		2913.2	0.00410634		3503.2	0.01067246		4093.2	-0.01512611
553.4	0.1404058		1143.39	0.03282124		1733.4	0.02257264		2323.39	-0.0095278		2913.4	0.00388549		3503.4	0.01197964		4093.4	-0.01473467
553.6	0.14018397		1143.59	0.03382945		1733.6	0.02264963		2323.59	-0.00891251		2913.6	0.00368438		3503.6	0.01077958		4093.6	-0.01453462
553.8	0.1408033		1143.79	0.03464041		1733.8	0.02345657		2323.79	-0.00919533		2913.8	0.00349991		3503.8	0.01005017		4093.8	-0.01574853
554	0.14133475		1143.99	0.03500565		1734	0.02365186		2323.99	-0.00856149		2914	0.00297968		3504	0.01059051		4094	-0.01604951
554.2	0.14166125		1144.19	0.03593396		1734.2	0.02360381		2324.19	-0.00787582		2914.2	0.0032478		3504.2	0.01086485		4094.2	-0.01671184
554.4	0.14254901		1144.39	0.03601013		1734.4	0.02237198		2324.39	-0.00821268		2914.4	0.00366082		3504.4	0.01106294		4094.4	-0.01671717
554.6	0.14198816		1144.59	0.0353698		1734.6	0.02136935		2324.59	-0.00841004		2914.6	0.00356465		3504.6	0.01086928		4094.6	-0.01661906
554.8	0.14197927		1144.79	0.03556405		1734.8	0.02118233		2324.79	-0.00752908		2914.8	0.00327335		3504.8	0.01137398		4094.8	-0.0171127
555	0.14167757		1144.99	0.03479128		1735	0.02074616		2324.99	-0.00705512		2915	0.0023131		3505	0.01118212		4095	-0.0175221
555.2	0.14093039		1145.19	0.03454678		1735.2	0.02155249		2325.19	-0.00667004		2915.2	0.00308298		3505.2	0.01051829		4095.2	-0.01771673
555.4	0.14018715		1145.39	0.03415492		1735.4	0.0215611		2325.39	-0.00692936		2915.4	0.00338162		3505.4	0.01013666		4095.4	-0.01816307
555.6	0.14030618		1145.59	0.03357492		1735.6	0.021399		2325.59	-0.00773953		2915.6	0.00355366		3505.6	0.01038291		4095.6	-0.01695599
555.8	0.13972328		1145.79	0.03317694		1735.8	0.02177892		2325.79	-0.00821539		2915.8	0.00394487		3505.8	0.00959633		4095.8	-0.01636603
556	0.13906226		1145.99	0.03277083		1736	0.02141111		2325.99	-0.00738993		2916	0.00462549		3506	0.00932376		4096	-0.01581892
556.2	0.13798102		1146.19	0.03365734		1736.2	0.02103674		2326.19	-0.00868279		2916.2	0.00458478		3506.2	0.00988176		4096.2	-0.01499985
556.4	0.13807912		1146.39	0.03289168		1736.4	0.02066192		2326.39	-0.00952075		2916.4	0.00490266		3506.4	0.01024249		4096.4	-0.0142575
556.6	0.13818573		1146.59	0.03248635		1736.6	0.02088643		2326.59	-0.0092732		2916.6	0.00479146		3506.6	0.00958519		4096.6	-0.01279236
556.8	0.13749157		1146.79	0.03273708		1736.8	0.02111106		2326.79	-0.0096385		2916.8	0.00433381		3506.8	0.00998196		4096.8	-0.01230662
557	0.1372146		1146.99	0.03232898		1737	0.02080051		2326.99	-0.00954362		2917	0.00491248		3507	0.00971991		4097	-0.0119333
557.2	0.13741153		1147.19	0.03258509		1737.2	0.02115414		2327.19	-0.00990762		2917.2	0.0046776		3507.2	0.01024758		4097.2	-0.01239999
557.4	0.13845173		1147.39	0.03369697		1737.4	0.02061021		2327.39	-0.00991026		2917.4	0.00399481		3507.4	0.01014588		4097.4	-0.01249116
557.6	0.13856387		1147.59	0.0345047		1737.6	0.02192683		2327.59	-0.01005194		2917.6	0.00406752		3507.6	0.00985985		4097.6	-0.01288992
557.8	0.13882507		1147.79	0.03462975		1737.8	0.02227883		2327.79	-0.00970126		2917.8	0.00405779		3507.8	0.0102133		4097.8	-0.01380175
558	0.13934581		1147.99	0.03400745		1738	0.02173787		2327.99	-0.01002085		2918	0.00351513		3508	0.01056086		4098	-0.01374718
558.2	0.13977603		1148.19	0.03296975		1738.2	0.02112691		2328.19	-0.00979478		2918.2	0.00370122		3508.2	0.01099837		4098.2	-0.0147085
558.4	0.1403255		1148.39	0.03199791		1738.4	0.02114297		2328.39	-0.01032624		2918.4	0.00345327		3508.4	0.01105699		4098.4	-0.01544753
558.6	0.1409147		1148.59	0.03149297		1738.6	0.0212606		2328.59	-0.01107038		2918.6	0.00221548		3508.6	0.01145038		4098.6	-0.01593198
558.8	0.14064654		1148.79	0.03128325		1738.8	0.02211147		2328.79	-0.01047148		2918.8	0.00238337		3508.8	0.01148438		4098.8	-0.01600857
559	0.14077047		1148.99	0.03071854		1739	0.02241205		2328.99	-0.01141982		2919	0.00249419		3509	0.01187597		4099	-0.01619507
559.2	0.14058677		1149.19	0.02980726		1739.2	0.02311093		2329.19	-0.01224774		2919.2	0.00378972		3509.2	0.01175747		4099.2	-0.01640893
559.4	0.13985387		1149.39	0.03072108		1739.4	0.02335768		2329.39	-0.01312431		2919.4	0.00364168		3509.4	0.011663		4099.4	-0.01647705
559.6	0.14018204		1149.59	0.03035743		1739.6	0.0231726		2329.59	-0.01419663		2919.6	0.0029387		3509.6	0.01152944		4099.6	-0.0157392
559.8	0.13905613		1149.79	0.03007797		1739.8	0.02219048		2329.79	-0.0146699		2919.8	0.00347501		3509.8	0.01209483		4099.8	-0.01481535
560	0.13870857		1149.99	0.03072974		1740	0.02170501		2329.99	-0.01509976		2920	0.00424495		3510	0.0124517		4100	-0.01382004
560.2	0.13966966		1150.19	0.03150394		1740.2	0.02137117		2330.19	-0.0157573		2920.2	0.00393825		3510.2	0.01145183		4100.2	-0.0127271
560.4	0.14061201		1150.39	0.03123778		1740.4	0.02022971		2330.39	-0.01574768		2920.4	0.00382855		3510.4	0.01055328		4100.4	-0.01300519
560.6	0.14112238		1150.59	0.03217466		1740.6	0.02068936		2330.59	-0.01489045		2920.6	0.00387659		3510.6	0.01004668		4100.6	-0.01222838
560.8	0.14070493		1150.79	0.03280261		1740.8	0.02006633		2330.79	-0.01473919		2920.8	0.00402616		3510.8	0.01005224		4100.8	-0.01250124
561	0.14014667		1150.99	0.03413665		1741	0.02033986		2330.99	-0.01431166		2921	0.00396167		3511	0.00958228		4101	-0.01263083
561.2	0.1407836		1151.19	0.03561739		1741.2	0.02026999		2331.19	-0.0143525		2921.2	0.00389346		3511.2	0.00954296		4101.2	-0.01271081
561.4	0.14159057		1151.39	0.03629633		1741.4	0.02031544		2331.39	-0.01292032		2921.4	0.00320019		3511.4	0.00933709		4101.4	-0.01216489
561.6	0.14118737		1151.59	0.03551813		1741.6	0.02022137		2331.59	-0.01211115		2921.6	0.00399049		3511.6	0.00957647		4101.6	-0.01206777
561.8	0.14022481		1151.79	0.03449296		1741.8	0.01900226		2331.79	-0.01094213		2921.8	0.00397481		3511.8	0.00923025		4101.8	-0.01278805
562	0.14095454		1151.99	0.03342849		1742	0.01806044		2331.99	-0.01068865		2922	0.00398901		3512	0.00901013		4102	-0.0132722
562.2	0.14134352		1152.19	0.03333525		1742.2	0.01793556		2332.19	-0.00938278		2922.2	0.00357428		3512.2	0.00953059		4102.2	-0.01412024
562.4	0.14117015		1152.39	0.03342086		1742.4	0.0185327		2332.39	-0.00882937		2922.4	0.00402293		3512.4	0.00921388		4102.4	-0.01427525
562.6	0.14059951		1152.59	0.03335451		1742.6	0.01870406		2332.59	-0.00808188		2922.6	0.0037556		3512.6	0.00918011		4102.6	-0.01394039
562.8	0.13995858		1152.79	0.03296054		1742.8	0.01856606		2332.79	-0.00772209		2922.8	0.00507248		3512.8	0.00948645		4102.8	-0.01376058
563	0.13950071		1152.99	0.03237413		1743	0.01799308		2332.99	-0.00811702		2923	0.00539531		3513	0.01003858		4103	-0.01387503
563.2	0.13901899		1153.19	0.03149073		1743.2	0.01844355		2333.19	-0.00787567		2923.2	0.00518622		3513.2	0.01024432		4103.2	-0.0133123
563.4	0.13863421		1153.39	0.03137885		1743.4	0.01840664		2333.39	-0.00811032		2923.4	0.00460766		3513.4	0.01077589		4103.4	-0.01317677
563.6	0.13873526		1153.59	0.03027113		1743.6	0.0172483		2333.59	-0.00907316		2923.6	0.00434883		3513.6	0.01095101		4103.6	-0.01256518
563.8	0.13790705		1153.79	0.02939136		1743.8	0.01697716		2333.79	-0.00992126		2923.8	0.00487858		3513.8	0.01190615		4103.8	-0.01192943
564	0.1383308		1153.99	0.02938752		1744	0.01773707		2333.99	-0.009925		2924	0.0037897		3514	0.01115912		4104	-0.01153838
564.2	0.13898415		1154.19	0.029651		1744.2	0.01793071		2334.19	-0.01057439		2924.2	0.00232422		3514.2	0.01161117		4104.2	-0.01244245
564.4	0.13871093		1154.39	0.02955116		1744.4	0.01873827		2334.39	-0.01156916		2924.4	0.00108714		3514.4	0.01201497		4104.4	-0.0129913
564.6	0.13878804		1154.59	0.03047437		1744.6	0.02048284		2334.59	-0.01276125		2924.6	0.00025147		3514.6	0.01260502		4104.6	-0.01191158
564.8	0.13805597		1154.79	0.03095057		1744.8	0.02052991		2334.79	-0.01423229		2924.8	-0.00084306		3514.8	0.01210435		4104.8	-0.01184996
565	0.13878964		1154.99	0.03119283		1745	0.02094004		2334.99	-0.01484568		2925	-0.00190668		3515	0.01259345		4105	-0.01222763
565.2	0.14022323		1155.19	0.03165002		1745.2	0.02089989		2335.19	-0.01532509		2925.2	-0.00235143		3515.2	0.01233343		4105.2	-0.01290579
565.4	0.14071404		1155.39	0.03107588		1745.4	0.02126739		2335.39	-0.01523263		2925.4	-0.00327838		3515.4	0.01247003		4105.4	-0.01296508
565.6	0.14007127		1155.59	0.03075469		1745.6	0.02016386		2335.59	-0.01525737		2925.6	-0.00304523		3515.6	0.0120952		4105.6	-0.01407759
565.8	0.13977998		1155.79	0.03127139		1745.8	0.01975985		2335.79	-0.01494518		2925.8	-0.00350296		3515.8	0.01235019		4105.8	-0.01478935
566	0.14049445		1155.99	0.0323391		1746	0.01951241		2335.99	-0.01397943		2926	-0.00329426		3516	0.01208268		4106	-0.01452586
566.2	0.14082547		1156.19	0.03300091		1746.2	0.01947054		2336.19	-0.01263463		2926.2	-0.00354582		3516.2	0.0127628		4106.2	-0.01434386
566.4	0.14205101		1156.39	0.03259392		1746.4	0.01953274		2336.39	-0.01162044		2926.4	-0.00313014		3516.4	0.01115488		4106.4	-0.01401776
566.6	0.1410729		1156.59	0.0322017		1746.6	0.01918146		2336.59	-0.01129351		2926.6	-0.00264414		3516.6	0.01135132		4106.6	-0.01341986
566.8	0.14118663		1156.79	0.03192825		1746.8	0.01830646		2336.79	-0.01130455		2926.8	-0.00133793		3516.8	0.01113656		4106.8	-0.01312169
567	0.13995274		1156.99	0.03178102		1747	0.01806445		2336.99	-0.01089785		2927	-0.00141091		3517	0.01027086		4107	-0.01296589
567.2	0.14039386		1157.19	0.03142995		1747.2	0.01721233		2337.19	-0.00994239		2927.2	-0.00046907		3517.2	0.01071476		4107.2	-0.01261548
567.4	0.14054333		1157.39	0.03097744		1747.4	0.0167258		2337.39	-0.00980294		2927.4	0.00133733		3517.4	0.00963209		4107.4	-0.01276712
567.6	0.14044076		1157.59	0.03141427		1747.6	0.01599184		2337.59	-0.01073005		2927.6	0.00176368		3517.6	0.00902243		4107.6	-0.0128158
567.8	0.14082415		1157.79	0.03102553		1747.8	0.01650143		2337.79	-0.01087366		2927.8	0.00234837		3517.8	0.00966348		4107.8	-0.0133196
568	0.14099245		1157.99	0.03181344		1748	0.0166264		2337.99	-0.0106975		2928	0.00185656		3518	0.00960444		4108	-0.01330592
568.2	0.14129634		1158.19	0.03207529		1748.2	0.01716098		2338.19	-0.01150727		2928.2	0.00141275		3518.2	0.01042246		4108.2	-0.01503825
568.4	0.1401928		1158.39	0.03168146		1748.4	0.0178313		2338.39	-0.01346428		2928.4	0.00145555		3518.4	0.01049666		4108.4	-0.01445059
568.6	0.13912776		1158.59	0.0323289		1748.6	0.01786105		2338.59	-0.0143946		2928.6	0.00160304		3518.6	0.01116822		4108.6	-0.01369769
568.8	0.1393924		1158.79	0.03192947		1748.8	0.01760104		2338.79	-0.0148316		2928.8	0.00084558		3518.8	0.01046345		4108.8	-0.01391799
569	0.13930238		1158.99	0.03127238		1749	0.01883504		2338.99	-0.01538205		2929	0.00044685		3519	0.01120857		4109	-0.0138845
569.2	0.13935241		1159.19	0.03075831		1749.2	0.01836069		2339.19	-0.01554848		2929.2	-0.00048706		3519.2	0.01146642		4109.2	-0.01382251
569.4	0.13886893		1159.39	0.03033995		1749.4	0.01837023		2339.39	-0.01529611		2929.4	-0.00114192		3519.4	0.01172275		4109.4	-0.0132136
569.6	0.13770172		1159.59	0.03045689		1749.6	0.01795369		2339.59	-0.01482949		2929.6	-0.00102427		3519.6	0.01190379		4109.6	-0.01376549
569.8	0.137128		1159.79	0.03081374		1749.8	0.01834424		2339.79	-0.01376305		2929.8	-0.00087221		3519.8	0.01243129		4109.8	-0.0138248
570	0.13697037		1159.99	0.0307879		1750	0.01914162		2339.99	-0.01219		2930	-0.00057806		3520	0.01215692		4110	-0.012992
570.2	0.13742355		1160.19	0.03065694		1750.2	0.01936852		2340.19	-0.0120732		2930.2	-0.00079803		3520.2	0.01192732		4110.2	-0.01282447
570.4	0.1380634		1160.39	0.02952187		1750.4	0.01928204		2340.39	-0.01182292		2930.4	-0.00001753		3520.4	0.01081974		4110.4	-0.0125566
570.6	0.13720587		1160.59	0.02948572		1750.6	0.01947465		2340.59	-0.01147364		2930.6	0.00038918		3520.6	0.01024267		4110.6	-0.01292534
570.8	0.13706582		1160.79	0.02944534		1750.8	0.01975844		2340.79	-0.01011474		2930.8	0.00131929		3520.8	0.0088255		4110.8	-0.01320076
571	0.13713569		1160.99	0.02910166		1751	0.01913907		2340.99	-0.00938419		2931	0.00216274		3521	0.00778187		4111	-0.01366339
571.2	0.13822099		1161.19	0.02919093		1751.2	0.01848733		2341.19	-0.00818813		2931.2	0.00333439		3521.2	0.00863632		4111.2	-0.01369531
571.4	0.13873811		1161.39	0.02867626		1751.4	0.01939249		2341.39	-0.00795331		2931.4	0.00384144		3521.4	0.00782212		4111.4	-0.01389844
571.6	0.13902737		1161.59	0.02884947		1751.6	0.01936409		2341.59	-0.00726973		2931.6	0.00365606		3521.6	0.00814625		4111.6	-0.01524346
571.8	0.13937928		1161.79	0.02887089		1751.8	0.02004031		2341.79	-0.00756695		2931.8	0.00393527		3521.8	0.00846985		4111.8	-0.0157824
572	0.13887671		1161.99	0.02905306		1752	0.02060594		2341.99	-0.00781431		2932	0.00442223		3522	0.00817933		4112	-0.01609154
572.2	0.13871166		1162.19	0.02769913		1752.2	0.02038709		2342.19	-0.00920909		2932.2	0.00429934		3522.2	0.00843154		4112.2	-0.01665934
572.4	0.13747991		1162.39	0.0273787		1752.4	0.02039673		2342.39	-0.01096945		2932.4	0.00481001		3522.4	0.008045		4112.4	-0.01580632
572.6	0.1374556		1162.59	0.02727284		1752.6	0.02069225		2342.59	-0.01116465		2932.6	0.00451286		3522.6	0.00848163		4112.6	-0.01555204
572.8	0.13845705		1162.79	0.02711605		1752.8	0.02150181		2342.79	-0.01197974		2932.8	0.00320379		3522.8	0.00793162		4112.8	-0.01516362
573	0.13825284		1162.99	0.0266195		1753	0.02263188		2342.99	-0.01256302		2933	0.00265633		3523	0.00853752		4113	-0.0145896
573.2	0.1380581		1163.19	0.02690567		1753.2	0.02130857		2343.19	-0.01201684		2933.2	0.00181877		3523.2	0.00949501		4113.2	-0.01480937
573.4	0.13639689		1163.39	0.02812718		1753.4	0.02155896		2343.39	-0.01289532		2933.4	0.00126133		3523.4	0.00990774		4113.4	-0.01490962
573.6	0.13577668		1163.59	0.02832742		1753.6	0.02172474		2343.59	-0.0130724		2933.6	0.00179133		3523.6	0.00995442		4113.6	-0.01577427
573.8	0.13609727		1163.79	0.02935176		1753.8	0.02094237		2343.79	-0.0134695		2933.8	0.00123657		3523.8	0.00942336		4113.8	-0.01621034
574	0.13579736		1163.99	0.02991314		1754	0.0208312		2343.99	-0.01451655		2934	0.00065608		3524	0.00880774		4114	-0.01552762
574.2	0.1366958		1164.19	0.03059667		1754.2	0.01977883		2344.19	-0.01566131		2934.2	0.00048557		3524.2	0.00906046		4114.2	-0.0152724
574.4	0.13694059		1164.39	0.03068272		1754.4	0.01908029		2344.39	-0.01577651		2934.4	0.00112783		3524.4	0.00880621		4114.4	-0.01531679
574.6	0.13647856		1164.59	0.03133733		1754.6	0.0189994		2344.59	-0.01449048		2934.6	0.0011358		3524.6	0.00857666		4114.6	-0.01570039
574.8	0.13641326		1164.79	0.03165229		1754.8	0.01905062		2344.79	-0.013694		2934.8	0.00124295		3524.8	0.00874324		4114.8	-0.0150627
575	0.1372157		1164.99	0.0322897		1755	0.01829991		2344.99	-0.01325745		2935	0.00050632		3525	0.00904958		4115	-0.01427307
575.2	0.13731631		1165.19	0.03261637		1755.2	0.01853849		2345.19	-0.01283396		2935.2	0.00051679		3525.2	0.00939973		4115.2	-0.01345967
575.4	0.13708112		1165.39	0.03234562		1755.4	0.01899665		2345.39	-0.01254388		2935.4	0.00096868		3525.4	0.00890541		4115.4	-0.01331453
575.6	0.13659194		1165.59	0.03242002		1755.6	0.01841361		2345.59	-0.01184823		2935.6	0.00181757		3525.6	0.00935822		4115.6	-0.01298111
575.8	0.13663784		1165.79	0.03235082		1755.8	0.01813699		2345.79	-0.01315901		2935.8	0.00241265		3525.8	0.00889345		4115.8	-0.01211998
576	0.13648227		1165.99	0.03208836		1756	0.01814937		2345.99	-0.01297877		2936	0.00380131		3526	0.00856943		4116	-0.0125074
576.2	0.13597339		1166.19	0.03093695		1756.2	0.01768719		2346.19	-0.01363043		2936.2	0.00384258		3526.2	0.00897111		4116.2	-0.01332732
576.4	0.13571892		1166.39	0.03075458		1756.4	0.01789299		2346.39	-0.01389999		2936.4	0.00338677		3526.4	0.00894184		4116.4	-0.01313521
576.6	0.13622969		1166.59	0.03081487		1756.6	0.01781386		2346.59	-0.01403275		2936.6	0.00240122		3526.6	0.00895943		4116.6	-0.01410202
576.8	0.13666267		1166.79	0.03060076		1756.8	0.01759813		2346.79	-0.01326326		2936.8	0.00157174		3526.8	0.00890695		4116.8	-0.01485634
577	0.1361675		1166.99	0.02994553		1757	0.01742977		2346.99	-0.01346057		2937	0.00117123		3527	0.00858337		4117	-0.01598835
577.2	0.13527011		1167.19	0.03001881		1757.2	0.01669116		2347.19	-0.01425939		2937.2	0.00061105		3527.2	0.00851538		4117.2	-0.01711868
577.4	0.13483315		1167.39	0.03001935		1757.4	0.01629677		2347.39	-0.01524535		2937.4	-0.00024314		3527.4	0.00781626		4117.4	-0.01783719
577.6	0.13553482		1167.59	0.0293751		1757.6	0.01571565		2347.59	-0.01512277		2937.6	-0.00061125		3527.6	0.0069064		4117.6	-0.01924217
577.8	0.1359123		1167.79	0.03015012		1757.8	0.01516148		2347.79	-0.01588765		2937.8	-0.00129385		3527.8	0.00599076		4117.8	-0.02031491
578	0.13553186		1167.99	0.02982828		1758	0.01474753		2347.99	-0.0160762		2938	-0.00186288		3528	0.00570615		4118	-0.0197414
578.2	0.13567626		1168.19	0.02966962		1758.2	0.01461365		2348.19	-0.01510434		2938.2	-0.00217631		3528.2	0.00542762		4118.2	-0.02035147
578.4	0.13607005		1168.39	0.02989885		1758.4	0.01451474		2348.39	-0.01397935		2938.4	-0.00157774		3528.4	0.00503075		4118.4	-0.02024561
578.6	0.13644254		1168.59	0.02979974		1758.6	0.01485356		2348.59	-0.01319126		2938.6	-0.00176337		3528.6	0.00548169		4118.6	-0.01974729
578.8	0.13716975		1168.79	0.02950396		1758.8	0.01523745		2348.79	-0.01350179		2938.8	-0.00183353		3528.8	0.00589789		4118.8	-0.01831097
579	0.13752634		1168.99	0.03007401		1759	0.01555628		2348.99	-0.01383882		2939	-0.00096394		3529	0.00718757		4119	-0.0174578
579.2	0.13772914		1169.19	0.02984359		1759.2	0.01582002		2349.19	-0.01377388		2939.2	-0.00050987		3529.2	0.00730096		4119.2	-0.0158477
579.4	0.13751586		1169.39	0.03052772		1759.4	0.01583548		2349.39	-0.01398527		2939.4	-0.00048243		3529.4	0.00884098		4119.4	-0.01520889
579.6	0.13736729		1169.59	0.03075421		1759.6	0.01548713		2349.59	-0.01328011		2939.6	-0.00037094		3529.6	0.00977593		4119.6	-0.01374911
579.8	0.13690933		1169.79	0.02984812		1759.8	0.01616761		2349.79	-0.01280909		2939.8	-0.00038694		3529.8	0.0100676		4119.8	-0.01327306
580	0.13575476		1169.99	0.03041807		1760	0.01612765		2349.99	-0.01183426		2940	0.00017589		3530	0.01079404		4120	-0.01344494
580.2	0.13449576		1170.19	0.02962165		1760.2	0.0163675		2350.19	-0.01204829		2940.2	-0.00000608		3530.2	0.01092142		4120.2	-0.0127964
580.4	0.13468305		1170.39	0.02979624		1760.4	0.01546502		2350.39	-0.01209692		2940.4	0.00032831		3530.4	0.00995148		4120.4	-0.01266528
580.6	0.13453791		1170.59	0.02890659		1760.6	0.01491852		2350.59	-0.0122556		2940.6	0.00086885		3530.6	0.009921		4120.6	-0.01307099
580.8	0.13460759		1170.79	0.0280591		1760.8	0.014639		2350.79	-0.01210084		2940.8	0.00085082		3530.8	0.00946429		4120.8	-0.01387637
581	0.13388372		1170.99	0.0276326		1761	0.01525804		2350.99	-0.01206909		2941	0.00029662		3531	0.00838255		4121	-0.01447168
581.2	0.13389982		1171.19	0.02717377		1761.2	0.0158748		2351.19	-0.01240031		2941.2	0.00058176		3531.2	0.00830905		4121.2	-0.01450638
581.4	0.13359027		1171.39	0.02680764		1761.4	0.01582901		2351.39	-0.01177269		2941.4	0.00086567		3531.4	0.00819536		4121.4	-0.01458054
581.6	0.13352089		1171.59	0.0267645		1761.6	0.01613886		2351.59	-0.01129508		2941.6	0.00081693		3531.6	0.00841291		4121.6	-0.01624849
581.8	0.13389203		1171.79	0.02624707		1761.8	0.01682725		2351.79	-0.01143387		2941.8	0.00035703		3531.8	0.00835334		4121.8	-0.01641982
582	0.13388785		1171.99	0.02570419		1762	0.01629158		2351.99	-0.01100503		2942	-0.00037396		3532	0.00818811		4122	-0.01559038
582.2	0.13470479		1172.19	0.02554382		1762.2	0.01671479		2352.19	-0.01045965		2942.2	-0.00003493		3532.2	0.00739484		4122.2	-0.01594868
582.4	0.13509443		1172.39	0.02556178		1762.4	0.01639469		2352.39	-0.01069325		2942.4	0.00053713		3532.4	0.00700492		4122.4	-0.01524287
582.6	0.13486424		1172.59	0.02486386		1762.6	0.0173853		2352.59	-0.01150014		2942.6	0.00030067		3532.6	0.00772331		4122.6	-0.01516286
582.8	0.13476114		1172.79	0.02451043		1762.8	0.01798655		2352.79	-0.01259528		2942.8	0.000231		3532.8	0.00752914		4122.8	-0.01455894
583	0.13506548		1172.99	0.02510723		1763	0.01841501		2352.99	-0.01292793		2943	0.00035467		3533	0.00806548		4123	-0.01411653
583.2	0.13477423		1173.19	0.02579675		1763.2	0.01835155		2353.19	-0.01296645		2943.2	-0.00052295		3533.2	0.0074208		4123.2	-0.01311477
583.4	0.13403701		1173.39	0.02650827		1763.4	0.01874758		2353.39	-0.0128291		2943.4	-0.00120495		3533.4	0.00909511		4123.4	-0.01264931
583.6	0.13269509		1173.59	0.02568171		1763.6	0.01816419		2353.59	-0.01166981		2943.6	-0.00135374		3533.6	0.00926582		4123.6	-0.01178222
583.8	0.13199438		1173.79	0.02508677		1763.8	0.01900667		2353.79	-0.01175229		2943.8	-0.00071273		3533.8	0.00911567		4123.8	-0.01078289
584	0.1312816		1173.99	0.02629405		1764	0.01856451		2353.99	-0.01260196		2944	-0.00015649		3534	0.00889677		4124	-0.01079776
584.2	0.13133916		1174.19	0.02556456		1764.2	0.01945327		2354.19	-0.0138779		2944.2	0.00040925		3534.2	0.00856851		4124.2	-0.01053599
584.4	0.13131952		1174.39	0.02574903		1764.4	0.01903498		2354.39	-0.01425995		2944.4	0.00109119		3534.4	0.00827879		4124.4	-0.01126319
584.6	0.13152422		1174.59	0.02425964		1764.6	0.01921858		2354.59	-0.01470398		2944.6	0.0016368		3534.6	0.00811852		4124.6	-0.01128766
584.8	0.1321962		1174.79	0.02435518		1764.8	0.02000131		2354.79	-0.01439119		2944.8	0.00150731		3534.8	0.00734775		4124.8	-0.01323032
585	0.13216312		1174.99	0.02421059		1765	0.02099255		2354.99	-0.01441182		2945	0.00098329		3535	0.00750636		4125	-0.01369222
585.2	0.13279745		1175.19	0.02405775		1765.2	0.02122488		2355.19	-0.01515369		2945.2	0.00111919		3535.2	0.00796971		4125.2	-0.01412099
585.4	0.13304908		1175.39	0.02335404		1765.4	0.02083407		2355.39	-0.01489164		2945.4	0.0015314		3535.4	0.00805126		4125.4	-0.01451317
585.6	0.133949		1175.59	0.02339762		1765.6	0.02121529		2355.59	-0.01483397		2945.6	0.00152118		3535.6	0.008684		4125.6	-0.01568789
585.8	0.13469456		1175.79	0.02330623		1765.8	0.02063457		2355.79	-0.01439525		2945.8	0.00131156		3535.8	0.00893545		4125.8	-0.01487685
586	0.13508237		1175.99	0.02352002		1766	0.0202747		2355.99	-0.01432047		2946	0.00118302		3536	0.00863541		4126	-0.01478376
586.2	0.13531501		1176.19	0.024193		1766.2	0.02034131		2356.19	-0.01360734		2946.2	0.00154854		3536.2	0.00831228		4126.2	-0.01443214
586.4	0.1346142		1176.39	0.02420252		1766.4	0.02062704		2356.39	-0.0128918		2946.4	0.00083041		3536.4	0.00736969		4126.4	-0.01432331
586.6	0.13412866		1176.59	0.02465355		1766.6	0.02058183		2356.59	-0.01266588		2946.6	-0.00000149		3536.6	0.00733125		4126.6	-0.01455077
586.8	0.13380368		1176.79	0.0256852		1766.8	0.02059066		2356.79	-0.012981		2946.8	-0.00029226		3536.8	0.00607116		4126.8	-0.01424377
587	0.13406877		1176.99	0.02725553		1767	0.02025385		2356.99	-0.01256006		2947	-0.00023333		3537	0.00587033		4127	-0.01399724
587.2	0.13309796		1177.19	0.02860963		1767.2	0.01910618		2357.19	-0.01149042		2947.2	-0.00086891		3537.2	0.00678447		4127.2	-0.01387813
587.4	0.13231912		1177.39	0.02889945		1767.4	0.01889814		2357.39	-0.01121933		2947.4	-0.00167852		3537.4	0.00794878		4127.4	-0.01394157
587.6	0.13202793		1177.59	0.02908816		1767.6	0.01824719		2357.59	-0.01171272		2947.6	-0.00211236		3537.6	0.00795291		4127.6	-0.01349404
587.8	0.13195931		1177.79	0.03011887		1767.8	0.01797459		2357.79	-0.01221398		2947.8	-0.00207671		3537.8	0.0079037		4127.8	-0.01428462
588	0.13231143		1177.99	0.03130957		1768	0.0173721		2357.99	-0.01279112		2948	-0.00221613		3538	0.00839463		4128	-0.01487747
588.2	0.13241955		1178.19	0.03087618		1768.2	0.01683817		2358.19	-0.01266963		2948.2	-0.00224402		3538.2	0.0088234		4128.2	-0.01548097
588.4	0.13296862		1178.39	0.030544		1768.4	0.01582821		2358.39	-0.01304311		2948.4	-0.00213469		3538.4	0.00904358		4128.4	-0.01705478
588.6	0.13428373		1178.59	0.02997528		1768.6	0.01542654		2358.59	-0.01257179		2948.6	-0.00162618		3538.6	0.00907041		4128.6	-0.01819636
588.8	0.13439875		1178.79	0.03021692		1768.8	0.01556519		2358.79	-0.01232647		2948.8	-0.00223216		3538.8	0.00893887		4128.8	-0.02001507
589	0.13485173		1178.99	0.02956477		1769	0.01545312		2358.99	-0.01229038		2949	-0.00313472		3539	0.00893193		4129	-0.01989213
589.2	0.13543866		1179.19	0.02861454		1769.2	0.01535362		2359.19	-0.0121715		2949.2	-0.00199486		3539.2	0.00896952		4129.2	-0.01919179
589.4	0.13564481		1179.39	0.02749218		1769.4	0.01498997		2359.39	-0.01180141		2949.4	-0.00095458		3539.4	0.00893904		4129.4	-0.01947785
589.6	0.13554913		1179.59	0.02681019		1769.6	0.01526877		2359.59	-0.01113257		2949.6	-0.00010824		3539.6	0.00968443		4129.6	-0.01891021
589.8	0.13528107		1179.79	0.02685666		1769.8	0.01547587		2359.79	-0.01062394		2949.8	0.00036801		3539.8	0.00952239		4129.8	-0.01814042
590	0.13524343		1179.99	0.02643926		1770	0.01669615		2359.99	-0.01095677		2950	0.00099129		3540	0.00947492		4130	-0.01802987
590.2	0.13492907		1180.19	0.02654223		1770.2	0.01653302		2360.19	-0.01021704		2950.2	0.00082106		3540.2	0.00981952		4130.2	-0.01731192
590.4	0.13566157		1180.39	0.02586143		1770.4	0.0171582		2360.39	-0.01052758		2950.4	0.00078781		3540.4	0.00906238		4130.4	-0.01717661
590.6	0.13478873		1180.59	0.02667095		1770.6	0.01701883		2360.59	-0.01096638		2950.6	0.00062691		3540.6	0.00898148		4130.6	-0.01730038
590.8	0.13541973		1180.79	0.02637167		1770.8	0.01811525		2360.79	-0.01200316		2950.8	0.00083689		3540.8	0.00844687		4130.8	-0.01655299
591	0.13540656		1180.99	0.02653572		1771	0.0175389		2360.99	-0.01269075		2951	0.00017358		3541	0.00802114		4131	-0.01646405
591.2	0.13502444		1181.19	0.02626088		1771.2	0.01718981		2361.19	-0.01264334		2951.2	-0.00008322		3541.2	0.00813819		4131.2	-0.01604611
591.4	0.13500813		1181.39	0.02590055		1771.4	0.01773169		2361.39	-0.01436134		2951.4	-0.00062698		3541.4	0.00711006		4131.4	-0.01513914
591.6	0.13540965		1181.59	0.02577438		1771.6	0.01750762		2361.59	-0.01496468		2951.6	-0.00045588		3541.6	0.00709495		4131.6	-0.01413659
591.8	0.13492511		1181.79	0.02596162		1771.8	0.01612991		2361.79	-0.01450399		2951.8	-0.00085798		3541.8	0.00643711		4131.8	-0.01439385
592	0.13563592		1181.99	0.02578033		1772	0.01614881		2361.99	-0.01433628		2952	-0.00137141		3542	0.00612465		4132	-0.01454808
592.2	0.13534443		1182.19	0.02563154		1772.2	0.01553317		2362.19	-0.01473677		2952.2	-0.00232995		3542.2	0.00643627		4132.2	-0.01547635
592.4	0.13605759		1182.39	0.02642633		1772.4	0.01478665		2362.39	-0.0155721		2952.4	-0.00268497		3542.4	0.00690049		4132.4	-0.01656203
592.6	0.13588619		1182.59	0.02736666		1772.6	0.01424844		2362.59	-0.01416437		2952.6	-0.00245047		3542.6	0.00748334		4132.6	-0.01697869
592.8	0.13580129		1182.79	0.02730735		1772.8	0.01398022		2362.79	-0.01377269		2952.8	-0.00323043		3542.8	0.00792326		4132.8	-0.01729867
593	0.13643436		1182.99	0.02686988		1773	0.01409606		2362.99	-0.01384196		2953	-0.00323673		3543	0.00885208		4133	-0.01647388
593.2	0.13564756		1183.19	0.02692132		1773.2	0.01388681		2363.19	-0.01334917		2953.2	-0.00208576		3543.2	0.00884694		4133.2	-0.01658238
593.4	0.13495278		1183.39	0.02607501		1773.4	0.01367844		2363.39	-0.01278639		2953.4	-0.00175874		3543.4	0.00941035		4133.4	-0.01676751
593.6	0.13424902		1183.59	0.0263982		1773.6	0.01398252		2363.59	-0.01273343		2953.6	-0.00140529		3543.6	0.00939778		4133.6	-0.01571388
593.8	0.13504344		1183.79	0.02653516		1773.8	0.01510686		2363.79	-0.01253074		2953.8	-0.00145088		3543.8	0.00908981		4133.8	-0.01599145
594	0.13467088		1183.99	0.02601031		1774	0.01473309		2363.99	-0.01296518		2954	-0.00108102		3544	0.01008519		4134	-0.01622246
594.2	0.1349441		1184.19	0.02556453		1774.2	0.01381576		2364.19	-0.01231581		2954.2	-0.00119891		3544.2	0.01045246		4134.2	-0.01559204
594.4	0.13496264		1184.39	0.02530084		1774.4	0.01454538		2364.39	-0.01289151		2954.4	-0.00111126		3544.4	0.01046887		4134.4	-0.01559719
594.6	0.13389657		1184.59	0.02478802		1774.6	0.01474531		2364.59	-0.0129696		2954.6	-0.00106262		3544.6	0.0107034		4134.6	-0.01592019
594.8	0.13390772		1184.79	0.02419501		1774.8	0.01458921		2364.79	-0.01353347		2954.8	-0.00048844		3544.8	0.0101184		4134.8	-0.01572446
595	0.13428606		1184.99	0.0238677		1775	0.01449352		2364.99	-0.01366663		2955	-0.00088678		3545	0.00995858		4135	-0.01510961
595.2	0.13406631		1185.19	0.02430074		1775.2	0.01493077		2365.19	-0.01450611		2955.2	0.00057041		3545.2	0.01015234		4135.2	-0.01382064
595.4	0.13436279		1185.39	0.02416266		1775.4	0.01508378		2365.39	-0.01529848		2955.4	0.00123423		3545.4	0.00983009		4135.4	-0.01328735
595.6	0.13448355		1185.59	0.02382101		1775.6	0.01524488		2365.59	-0.015038		2955.6	0.00099967		3545.6	0.00973955		4135.6	-0.01327597
595.8	0.13461971		1185.79	0.02344318		1775.8	0.01516606		2365.79	-0.01482304		2955.8	-0.00007228		3545.8	0.00881539		4135.8	-0.01358844
596	0.13439528		1185.99	0.02403758		1776	0.01572816		2365.99	-0.01556323		2956	0.00020536		3546	0.00844588		4136	-0.01511503
596.2	0.13467001		1186.19	0.02453684		1776.2	0.01576247		2366.19	-0.01665191		2956.2	0.00057323		3546.2	0.00905732		4136.2	-0.01525698
596.4	0.13466813		1186.39	0.02504231		1776.4	0.01593833		2366.39	-0.01676038		2956.4	0.00137225		3546.4	0.00915939		4136.4	-0.01625984
596.6	0.13439693		1186.59	0.02498718		1776.6	0.01621934		2366.59	-0.01627196		2956.6	0.00152928		3546.6	0.00940769		4136.6	-0.01695554
596.8	0.13510473		1186.79	0.0248355		1776.8	0.01660259		2366.79	-0.01572725		2956.8	0.00082381		3546.8	0.00901176		4136.8	-0.01660232
597	0.13432374		1186.99	0.02506012		1777	0.0172831		2366.99	-0.01583389		2957	0.0011659		3547	0.00889977		4137	-0.01678633
597.2	0.13309768		1187.19	0.02512869		1777.2	0.01721798		2367.19	-0.01483201		2957.2	0.00117725		3547.2	0.00830519		4137.2	-0.01601425
597.4	0.13313956		1187.39	0.02545791		1777.4	0.01721939		2367.39	-0.0147963		2957.4	0.00070381		3547.4	0.00800901		4137.4	-0.01551167
597.6	0.133579		1187.59	0.02580605		1777.6	0.01709336		2367.59	-0.01504399		2957.6	-0.00054463		3547.6	0.00680301		4137.6	-0.0154123
597.8	0.13404173		1187.79	0.02513174		1777.8	0.01690421		2367.79	-0.01465063		2957.8	-0.00118254		3547.8	0.00611487		4137.8	-0.01532828
598	0.13275594		1187.99	0.02446345		1778	0.01614888		2367.99	-0.01415495		2958	-0.00100304		3548	0.00568113		4138	-0.0147669
598.2	0.13299349		1188.19	0.02457781		1778.2	0.01534972		2368.19	-0.01353813		2958.2	-0.00091939		3548.2	0.00501859		4138.2	-0.01475251
598.4	0.13283615		1188.39	0.02442296		1778.4	0.01598607		2368.39	-0.0133453		2958.4	-0.00082146		3548.4	0.0049173		4138.4	-0.01459574
598.6	0.13348934		1188.59	0.02481349		1778.6	0.01541952		2368.59	-0.01276471		2958.6	-0.00034199		3548.6	0.00554932		4138.6	-0.01493019
598.8	0.13397677		1188.79	0.02501864		1778.8	0.0146018		2368.79	-0.01236253		2958.8	-0.00065031		3548.8	0.0057564		4138.8	-0.01500054
599	0.1349323		1188.99	0.0250951		1779	0.01520365		2368.99	-0.0121212		2959	-0.00087121		3549	0.00583823		4139	-0.0145941
599.2	0.13522156		1189.19	0.02553556		1779.2	0.01502615		2369.19	-0.01221058		2959.2	-0.00023265		3549.2	0.00585864		4139.2	-0.01480435
599.4	0.13657719		1189.39	0.02523574		1779.4	0.01535445		2369.39	-0.01185717		2959.4	-0.00054133		3549.4	0.00610492		4139.4	-0.01555038
599.6	0.1366858		1189.59	0.02450816		1779.6	0.01534467		2369.59	-0.01193783		2959.6	-0.00110484		3549.6	0.00594424		4139.6	-0.01622114
599.8	0.13663781		1189.79	0.02446629		1779.8	0.01588667		2369.79	-0.01253312		2959.8	-0.00133223		3549.8	0.00570445		4139.8	-0.01743253
600	0.13585596		1189.99	0.02463808		1780	0.01616203		2369.99	-0.01324958		2960	-0.00066894		3550	0.00620958		4140	-0.01893985
600.2	0.13620782		1190.19	0.02347576		1780.2	0.01616619		2370.19	-0.01398269		2960.2	0.00022041		3550.2	0.00644802		4140.2	-0.01899371
600.4	0.13542802		1190.39	0.02394713		1780.4	0.01653327		2370.39	-0.01434392		2960.4	0.0007709		3550.4	0.00702098		4140.4	-0.01959645
600.6	0.13520514		1190.59	0.02392417		1780.6	0.01615481		2370.59	-0.01414286		2960.6	0.00083261		3550.6	0.00715269		4140.6	-0.01977332
600.8	0.13478857		1190.79	0.02434449		1780.8	0.01565246		2370.79	-0.01364511		2960.8	0.00147105		3550.8	0.00785909		4140.8	-0.01949002
601	0.13434362		1190.99	0.0247153		1781	0.0155501		2370.99	-0.0145092		2961	0.00161579		3551	0.00832574		4141	-0.02001977
601.2	0.13397575		1191.19	0.02512325		1781.2	0.01508612		2371.19	-0.01470309		2961.2	0.00115532		3551.2	0.00968388		4141.2	-0.01983461
601.4	0.13381158		1191.39	0.02481042		1781.4	0.01447089		2371.39	-0.01494575		2961.4	0.00059236		3551.4	0.00954977		4141.4	-0.02036945
601.6	0.13296417		1191.59	0.02327609		1781.6	0.01498133		2371.59	-0.01556993		2961.6	0.00009063		3551.6	0.00962655		4141.6	-0.01988741
601.8	0.13252128		1191.79	0.02284511		1781.8	0.01461354		2371.79	-0.01542725		2961.8	0.00017079		3551.8	0.00936184		4141.8	-0.0187937
602	0.13201733		1191.99	0.02305247		1782	0.01424502		2371.99	-0.01583381		2962	0.00017025		3552	0.00950712		4142	-0.0175758
602.2	0.13208735		1192.19	0.0230139		1782.2	0.01394548		2372.19	-0.01698199		2962.2	0.00000019		3552.2	0.01014921		4142.2	-0.01684437
602.4	0.13143956		1192.39	0.02228262		1782.4	0.01473981		2372.39	-0.0170801		2962.4	0.00000127		3552.4	0.00967584		4142.4	-0.01628269
602.6	0.13230454		1192.59	0.02289394		1782.6	0.01442455		2372.59	-0.01755643		2962.6	-0.00045431		3552.6	0.01032694		4142.6	-0.01659421
602.8	0.13284458		1192.79	0.02258811		1782.8	0.01486127		2372.79	-0.01735409		2962.8	-0.00180419		3552.8	0.00921318		4142.8	-0.01601447
603	0.13346612		1192.99	0.02286394		1783	0.01584479		2372.99	-0.0179825		2963	-0.00190567		3553	0.00820696		4143	-0.01532579
603.2	0.13476024		1193.19	0.0228436		1783.2	0.01517983		2373.19	-0.01836716		2963.2	-0.00181271		3553.2	0.00773919		4143.2	-0.01499774
603.4	0.13584282		1193.39	0.02352123		1783.4	0.01481273		2373.39	-0.01842061		2963.4	-0.00208693		3553.4	0.0073162		4143.4	-0.01515056
603.6	0.1362815		1193.59	0.02361211		1783.6	0.01466327		2373.59	-0.01909713		2963.6	-0.00254369		3553.6	0.00625666		4143.6	-0.01549402
603.8	0.13608098		1193.79	0.02389883		1783.8	0.01501928		2373.79	-0.01903971		2963.8	-0.00347396		3553.8	0.00591718		4143.8	-0.01581708
604	0.13579111		1193.99	0.02385387		1784	0.01439875		2373.99	-0.01827921		2964	-0.00327623		3554	0.00586089		4144	-0.01558604
604.2	0.13648478		1194.19	0.0237199		1784.2	0.0135895		2374.19	-0.01835916		2964.2	-0.00310339		3554.2	0.00565368		4144.2	-0.01502806
604.4	0.13659886		1194.39	0.02461199		1784.4	0.01313928		2374.39	-0.01765136		2964.4	-0.00311444		3554.4	0.00550374		4144.4	-0.015203
604.6	0.13631737		1194.59	0.02456464		1784.6	0.01293928		2374.59	-0.01646235		2964.6	-0.00279322		3554.6	0.005722		4144.6	-0.0155567
604.8	0.13560532		1194.79	0.02429155		1784.8	0.01202329		2374.79	-0.01512442		2964.8	-0.00190813		3554.8	0.00644959		4144.8	-0.01612386
605	0.1357425		1194.99	0.02395284		1785	0.01186161		2374.99	-0.01517222		2965	-0.00158935		3555	0.00653334		4145	-0.0167205
605.2	0.13468216		1195.19	0.02378149		1785.2	0.0125928		2375.19	-0.01415307		2965.2	-0.00156852		3555.2	0.00731652		4145.2	-0.01688808
605.4	0.13345786		1195.39	0.02264925		1785.4	0.01291603		2375.39	-0.0136635		2965.4	-0.00177304		3555.4	0.0064999		4145.4	-0.01635603
605.6	0.13230103		1195.59	0.02235561		1785.6	0.01336523		2375.59	-0.01329525		2965.6	-0.00125263		3555.6	0.00716075		4145.6	-0.01601591
605.8	0.13238075		1195.79	0.02290668		1785.8	0.01310429		2375.79	-0.01310306		2965.8	-0.00112658		3555.8	0.00760598		4145.8	-0.01552779
606	0.13206248		1195.99	0.02298412		1786	0.01361482		2375.99	-0.01368222		2966	-0.00108631		3556	0.00816409		4146	-0.01514492
606.2	0.13225724		1196.19	0.02344301		1786.2	0.01491128		2376.19	-0.01391146		2966.2	-0.00142893		3556.2	0.00830439		4146.2	-0.01563136
606.4	0.13241721		1196.39	0.02422357		1786.4	0.01583516		2376.39	-0.0144164		2966.4	-0.00125088		3556.4	0.00878869		4146.4	-0.01636809
606.6	0.1336792		1196.59	0.02512323		1786.6	0.01638768		2376.59	-0.01534431		2966.6	-0.00091274		3556.6	0.00952591		4146.6	-0.01606048
606.8	0.13285169		1196.79	0.02511226		1786.8	0.01655638		2376.79	-0.0170674		2966.8	-0.00182688		3556.8	0.008443		4146.8	-0.01574513
607	0.13391958		1196.99	0.02499442		1787	0.01636198		2376.99	-0.01807592		2967	-0.00110875		3557	0.0088459		4147	-0.01631621
607.2	0.13497474		1197.19	0.02520463		1787.2	0.01563316		2377.19	-0.01882624		2967.2	-0.00176308		3557.2	0.00849318		4147.2	-0.01656859
607.4	0.1363723		1197.39	0.02502999		1787.4	0.01520683		2377.39	-0.01836243		2967.4	-0.00195161		3557.4	0.00846084		4147.4	-0.01672866
607.6	0.13641403		1197.59	0.0248988		1787.6	0.0156254		2377.59	-0.01881408		2967.6	-0.00250441		3557.6	0.00796363		4147.6	-0.01678836
607.8	0.13666974		1197.79	0.02455255		1787.8	0.01484639		2377.79	-0.01824118		2967.8	-0.00307624		3557.8	0.00779376		4147.8	-0.01690225
608	0.13646253		1197.99	0.02428518		1788	0.01369683		2377.99	-0.01776859		2968	-0.00363956		3558	0.00771164		4148	-0.01643108
608.2	0.1363541		1198.19	0.02394931		1788.2	0.01276229		2378.19	-0.01711479		2968.2	-0.0044247		3558.2	0.0067974		4148.2	-0.01704657
608.4	0.13565239		1198.39	0.02348167		1788.4	0.01243741		2378.39	-0.01634083		2968.4	-0.00387892		3558.4	0.00583962		4148.4	-0.01733346
608.6	0.13440853		1198.59	0.02289594		1788.6	0.01258532		2378.59	-0.01436355		2968.6	-0.00331047		3558.6	0.00607699		4148.6	-0.0174855
608.8	0.13395817		1198.79	0.02196152		1788.8	0.01195898		2378.79	-0.01302533		2968.8	-0.00242169		3558.8	0.00488945		4148.8	-0.01824698
609	0.13397986		1198.99	0.02191167		1789	0.01243832		2378.99	-0.0127205		2969	-0.00210801		3559	0.00465847		4149	-0.01821667
609.2	0.13294982		1199.19	0.02164144		1789.2	0.01336677		2379.19	-0.01270583		2969.2	-0.00172138		3559.2	0.00439847		4149.2	-0.01847119
609.4	0.13258875		1199.39	0.02097791		1789.4	0.01331427		2379.39	-0.01330667		2969.4	-0.00183443		3559.4	0.0046251		4149.4	-0.01821419
609.6	0.13271733		1199.59	0.02174162		1789.6	0.01314609		2379.59	-0.01348749		2969.6	-0.00160817		3559.6	0.00518529		4149.6	-0.01842707
609.8	0.13293411		1199.79	0.02212203		1789.8	0.01425727		2379.79	-0.0140664		2969.8	-0.00097437		3559.8	0.00529171		4149.8	-0.01848677
610	0.13217411		1199.99	0.02253021		1790	0.01485801		2379.99	-0.01476055		2970	-0.00017043		3560	0.00560549		4150	-0.01869244
610.2	0.13241888		1200.19	0.02448493		1790.2	0.015896		2380.19	-0.01586407		2970.2	-0.00078902		3560.2	0.00689079		4150.2	-0.01900129
610.4	0.13146841		1200.39	0.02505909		1790.4	0.01595178		2380.39	-0.01705562		2970.4	-0.00085008		3560.4	0.00799221		4150.4	-0.01925427
610.6	0.13024756		1200.59	0.02525535		1790.6	0.01548202		2380.59	-0.01816992		2970.6	-0.00147614		3560.6	0.00812541		4150.6	-0.01914128
610.8	0.13044906		1200.79	0.02537501		1790.8	0.01483366		2380.79	-0.01897262		2970.8	-0.00234658		3560.8	0.00836606		4150.8	-0.01971833
611	0.13177373		1200.99	0.02513447		1791	0.01472462		2380.99	-0.01889151		2971	-0.00235271		3561	0.00943737		4151	-0.02012444
611.2	0.13229305		1201.19	0.02485407		1791.2	0.0149746		2381.19	-0.01954556		2971.2	-0.0027423		3561.2	0.00992548		4151.2	-0.01945835
611.4	0.1330335		1201.39	0.02351068		1791.4	0.01443899		2381.39	-0.01863253		2971.4	-0.00255499		3561.4	0.01015479		4151.4	-0.01858639
611.6	0.13290237		1201.59	0.0231549		1791.6	0.01424971		2381.59	-0.01815486		2971.6	-0.00301646		3561.6	0.010394		4151.6	-0.01895645
611.8	0.13341157		1201.79	0.02229344		1791.8	0.01270095		2381.79	-0.01778649		2971.8	-0.00309667		3561.8	0.01088772		4151.8	-0.01894187
612	0.13421878		1201.99	0.02094639		1792	0.01320574		2381.99	-0.01734943		2972	-0.00286524		3562	0.01107289		4152	-0.01906631
612.2	0.13425655		1202.19	0.02036503		1792.2	0.01322459		2382.19	-0.01650568		2972.2	-0.00363667		3562.2	0.01004783		4152.2	-0.01902554
612.4	0.13458429		1202.39	0.01899752		1792.4	0.01358998		2382.39	-0.01590578		2972.4	-0.003036		3562.4	0.00988133		4152.4	-0.01916933
612.6	0.13468044		1202.59	0.01903884		1792.6	0.01326109		2382.59	-0.01415513		2972.6	-0.00339515		3562.6	0.00979053		4152.6	-0.01851489
612.8	0.13441033		1202.79	0.01836414		1792.8	0.01320656		2382.79	-0.01387214		2972.8	-0.00355237		3562.8	0.00930153		4152.8	-0.018673
613	0.13500142		1202.99	0.01829324		1793	0.0136857		2382.99	-0.01439808		2973	-0.00337687		3563	0.0091237		4153	-0.01839267
613.2	0.13470407		1203.19	0.01813849		1793.2	0.01336905		2383.19	-0.01531949		2973.2	-0.00251343		3563.2	0.00887879		4153.2	-0.01781935
613.4	0.1346853		1203.39	0.01801256		1793.4	0.01347234		2383.39	-0.01581128		2973.4	-0.00284166		3563.4	0.00864825		4153.4	-0.0169483
613.6	0.13431291		1203.59	0.01896912		1793.6	0.01274255		2383.59	-0.01610606		2973.6	-0.00247975		3563.6	0.00825703		4153.6	-0.01703014
613.8	0.13429796		1203.79	0.01932477		1793.8	0.0128109		2383.79	-0.01693097		2973.8	-0.00170877		3563.8	0.00775929		4153.8	-0.01651568
614	0.13298728		1203.99	0.02151642		1794	0.0116394		2383.99	-0.01743337		2974	-0.00210034		3564	0.00794759		4154	-0.01615207
614.2	0.13269911		1204.19	0.0233607		1794.2	0.01151863		2384.19	-0.01868403		2974.2	-0.00316587		3564.2	0.00849461		4154.2	-0.01554969
614.4	0.13169395		1204.39	0.02453745		1794.4	0.01093491		2384.39	-0.01897294		2974.4	-0.00366305		3564.4	0.00811285		4154.4	-0.01592374
614.6	0.13214914		1204.59	0.02525559		1794.6	0.01083099		2384.59	-0.01965597		2974.6	-0.00388044		3564.6	0.00815041		4154.6	-0.01644653
614.8	0.13309845		1204.79	0.02623715		1794.8	0.01069765		2384.79	-0.01961208		2974.8	-0.00400169		3564.8	0.00748574		4154.8	-0.01668026
615	0.13256683		1204.99	0.02673231		1795	0.01120298		2384.99	-0.01956225		2975	-0.00395403		3565	0.00739413		4155	-0.01646557
615.2	0.13301996		1205.19	0.02683128		1795.2	0.0111229		2385.19	-0.01924155		2975.2	-0.003789		3565.2	0.0084174		4155.2	-0.0162743
615.4	0.13258982		1205.39	0.02635245		1795.4	0.01123173		2385.39	-0.01876142		2975.4	-0.00403766		3565.4	0.00861306		4155.4	-0.0162092
615.6	0.13194908		1205.59	0.02702735		1795.6	0.01086033		2385.59	-0.01818733		2975.6	-0.00445778		3565.6	0.00905348		4155.6	-0.0171566
615.8	0.13232245		1205.79	0.02565105		1795.8	0.01161875		2385.79	-0.01840773		2975.8	-0.00413729		3565.8	0.00959244		4155.8	-0.01705953
616	0.13244303		1205.99	0.02395607		1796	0.01298189		2385.99	-0.01759757		2976	-0.00384303		3566	0.00935384		4156	-0.01717175
616.2	0.13125938		1206.19	0.02349982		1796.2	0.01297468		2386.19	-0.01653111		2976.2	-0.004865		3566.2	0.00816706		4156.2	-0.01727961
616.4	0.13014242		1206.39	0.02291558		1796.4	0.0131011		2386.39	-0.01573553		2976.4	-0.00384284		3566.4	0.0076787		4156.4	-0.01821035
616.6	0.12895449		1206.59	0.02371145		1796.6	0.01322551		2386.59	-0.01464787		2976.6	-0.00424079		3566.6	0.00664768		4156.6	-0.01731942
616.8	0.12800809		1206.79	0.02358879		1796.8	0.01392801		2386.79	-0.0145604		2976.8	-0.00370496		3566.8	0.0054064		4156.8	-0.01636151
617	0.12907999		1206.99	0.02360553		1797	0.01354397		2386.99	-0.01408058		2977	-0.00347327		3567	0.00519258		4157	-0.01526217
617.2	0.12890134		1207.19	0.0232413		1797.2	0.01350426		2387.19	-0.01374421		2977.2	-0.00234431		3567.2	0.00567441		4157.2	-0.01449158
617.4	0.12926452		1207.39	0.02299683		1797.4	0.01378135		2387.39	-0.01429703		2977.4	-0.00271138		3567.4	0.0053871		4157.4	-0.01389011
617.6	0.13039457		1207.59	0.02324829		1797.6	0.01242379		2387.59	-0.0151509		2977.6	-0.00204238		3567.6	0.00504264		4157.6	-0.01387994
617.8	0.13109661		1207.79	0.02405124		1797.8	0.01261741		2387.79	-0.01672323		2977.8	-0.00230309		3567.8	0.00528569		4157.8	-0.01321114
618	0.13100518		1207.99	0.02454639		1798	0.01239047		2387.99	-0.01723507		2978	-0.00224786		3568	0.00547114		4158	-0.0130832
618.2	0.13077495		1208.19	0.02396022		1798.2	0.01267966		2388.19	-0.01835835		2978.2	-0.00157582		3568.2	0.00567415		4158.2	-0.01328601
618.4	0.13113568		1208.39	0.02425366		1798.4	0.01209063		2388.39	-0.01835291		2978.4	-0.00075171		3568.4	0.00594396		4158.4	-0.01406569
618.6	0.13157763		1208.59	0.02449765		1798.6	0.01188784		2388.59	-0.01868125		2978.6	-0.0003492		3568.6	0.00639829		4158.6	-0.01469421
618.8	0.13156183		1208.79	0.02479087		1798.8	0.01165107		2388.79	-0.01824054		2978.8	-0.00055101		3568.8	0.00620918		4158.8	-0.01493501
619	0.13129407		1208.99	0.02458036		1799	0.01137597		2388.99	-0.01836233		2979	-0.00103539		3569	0.00655009		4159	-0.01521134
619.2	0.13117814		1209.19	0.02498985		1799.2	0.01147304		2389.19	-0.0183777		2979.2	-0.00143364		3569.2	0.00744693		4159.2	-0.01614058
619.4	0.13022658		1209.39	0.02450886		1799.4	0.01226695		2389.39	-0.01904473		2979.4	-0.00144316		3569.4	0.00696351		4159.4	-0.01600009
619.6	0.13044873		1209.59	0.0239504		1799.6	0.01242106		2389.59	-0.01862251		2979.6	-0.00182598		3569.6	0.00714462		4159.6	-0.01678266
619.8	0.13032094		1209.79	0.02315044		1799.8	0.01296042		2389.79	-0.01795409		2979.8	-0.00054585		3569.8	0.00774256		4159.8	-0.01715939
620	0.12968824		1209.99	0.02202505		1800	0.01263398		2389.99	-0.01669692		2980	-0.00054748		3570	0.00733439		4160	-0.01723151
620.2	0.12935207		1210.19	0.02215471		1800.2	0.01294559		2390.19	-0.01640758		2980.2	-0.00130254		3570.2	0.00647771		4160.2	-0.01798776
620.4	0.12916935		1210.39	0.022035		1800.4	0.01324424		2390.39	-0.01584575		2980.4	-0.0011075		3570.4	0.00571721		4160.4	-0.01770219
620.6	0.12954303		1210.59	0.02251807		1800.6	0.01362866		2390.59	-0.01558141		2980.6	-0.00168819		3570.6	0.00524382		4160.6	-0.01703835
620.8	0.13005535		1210.79	0.02207395		1800.8	0.01402416		2390.79	-0.01576897		2980.8	-0.00170253		3570.8	0.00484238		4160.8	-0.01651778
621	0.13094085		1210.99	0.02171767		1801	0.01396285		2390.99	-0.01547945		2981	-0.00258514		3571	0.00510816		4161	-0.01728396
621.2	0.13187941		1211.19	0.02096612		1801.2	0.01407305		2391.19	-0.01582338		2981.2	-0.00260611		3571.2	0.00519046		4161.2	-0.01748971
621.4	0.13234998		1211.39	0.02097899		1801.4	0.01406555		2391.39	-0.01696108		2981.4	-0.00318069		3571.4	0.00464262		4161.4	-0.01760283
621.6	0.13246997		1211.59	0.02050116		1801.6	0.0134993		2391.59	-0.01834002		2981.6	-0.0025659		3571.6	0.00468291		4161.6	-0.01819972
621.8	0.13194616		1211.79	0.02104331		1801.8	0.01314787		2391.79	-0.0192172		2981.8	-0.00316549		3571.8	0.0041913		4161.8	-0.01833833
622	0.13105746		1211.99	0.02012287		1802	0.01214782		2391.99	-0.01895829		2982	-0.00279874		3572	0.00448805		4162	-0.0182094
622.2	0.12945516		1212.19	0.02017266		1802.2	0.01090539		2392.19	-0.01965722		2982.2	-0.00255375		3572.2	0.0048127		4162.2	-0.01889689
622.4	0.12917483		1212.39	0.02058848		1802.4	0.0098385		2392.39	-0.01961511		2982.4	-0.00271853		3572.4	0.00587		4162.4	-0.01883717
622.6	0.12957086		1212.59	0.02004769		1802.6	0.01045446		2392.59	-0.02033464		2982.6	-0.00324406		3572.6	0.00594812		4162.6	-0.0195967
622.8	0.13054465		1212.79	0.0193911		1802.8	0.01002933		2392.79	-0.02080967		2982.8	-0.00357027		3572.8	0.00520442		4162.8	-0.02008002
623	0.13041158		1212.99	0.01954445		1803	0.01035637		2392.99	-0.02086249		2983	-0.00451671		3573	0.00451031		4163	-0.02065997
623.2	0.13095838		1213.19	0.01977265		1803.2	0.01090981		2393.19	-0.02141667		2983.2	-0.00393433		3573.2	0.00404088		4163.2	-0.02096941
623.4	0.13106987		1213.39	0.01962835		1803.4	0.01095792		2393.39	-0.02170869		2983.4	-0.00366289		3573.4	0.00365127		4163.4	-0.02112267
623.6	0.1310161		1213.59	0.01949522		1803.6	0.01073627		2393.59	-0.02129718		2983.6	-0.00369695		3573.6	0.0039951		4163.6	-0.02162758
623.8	0.13013841		1213.79	0.01996886		1803.8	0.01038872		2393.79	-0.02003563		2983.8	-0.00355317		3573.8	0.00449808		4163.8	-0.02085275
624	0.12972955		1213.99	0.018435		1804	0.0107658		2393.99	-0.0193499		2984	-0.0042041		3574	0.00478131		4164	-0.02076653
624.2	0.13058698		1214.19	0.01893463		1804.2	0.01150039		2394.19	-0.01900469		2984.2	-0.00446234		3574.2	0.00485381		4164.2	-0.01995542
624.4	0.13096424		1214.39	0.01872281		1804.4	0.01227253		2394.39	-0.0180675		2984.4	-0.00399171		3574.4	0.00539451		4164.4	-0.01913691
624.6	0.13100047		1214.59	0.01998919		1804.6	0.01254524		2394.59	-0.01834136		2984.6	-0.0042005		3574.6	0.00632817		4164.6	-0.01953485
624.8	0.1316013		1214.79	0.01997795		1804.8	0.01295795		2394.79	-0.01838216		2984.8	-0.00497364		3574.8	0.00550662		4164.8	-0.01883939
625	0.13162985		1214.99	0.02034596		1805	0.01311369		2394.99	-0.01846357		2985	-0.00528758		3575	0.00533227		4165	-0.01859618
625.2	0.1320986		1215.19	0.01992694		1805.2	0.0130215		2395.19	-0.01825771		2985.2	-0.00549718		3575.2	0.00615335		4165.2	-0.01802715
625.4	0.13121898		1215.39	0.0202634		1805.4	0.01293979		2395.39	-0.01894636		2985.4	-0.0056303		3575.4	0.00545417		4165.4	-0.01743598
625.6	0.13111395		1215.59	0.02160084		1805.6	0.01279999		2395.59	-0.01854215		2985.6	-0.00547639		3575.6	0.00542868		4165.6	-0.01685552
625.8	0.13099058		1215.79	0.02273352		1805.8	0.01159872		2395.79	-0.01842099		2985.8	-0.00513071		3575.8	0.00483703		4165.8	-0.01638631
626	0.13097803		1215.99	0.02262153		1806	0.01099275		2395.99	-0.01790142		2986	-0.00519525		3576	0.00601604		4166	-0.01575079
626.2	0.1325816		1216.19	0.02263826		1806.2	0.01108162		2396.19	-0.01757854		2986.2	-0.00507743		3576.2	0.0058761		4166.2	-0.01630045
626.4	0.13259825		1216.39	0.02282295		1806.4	0.01133178		2396.39	-0.01747906		2986.4	-0.00510485		3576.4	0.00583756		4166.4	-0.0162123
626.6	0.13340142		1216.59	0.02198996		1806.6	0.01145237		2396.59	-0.01735458		2986.6	-0.00415903		3576.6	0.00483439		4166.6	-0.01803865
626.8	0.1334513		1216.79	0.02230386		1806.8	0.01089608		2396.79	-0.01642644		2986.8	-0.00393164		3576.8	0.00465876		4166.8	-0.01838341
627	0.13264909		1216.99	0.02256439		1807	0.01101721		2396.99	-0.01540139		2987	-0.00357757		3577	0.00435864		4167	-0.01897696
627.2	0.13254684		1217.19	0.02235718		1807.2	0.01065221		2397.19	-0.01554803		2987.2	-0.00294715		3577.2	0.00409253		4167.2	-0.01909717
627.4	0.13164324		1217.39	0.02164443		1807.4	0.01055003		2397.39	-0.01470239		2987.4	-0.00331008		3577.4	0.00421009		4167.4	-0.02008735
627.6	0.13081514		1217.59	0.02126326		1807.6	0.01061828		2397.59	-0.01376919		2987.6	-0.00238263		3577.6	0.00452575		4167.6	-0.01953347
627.8	0.13118902		1217.79	0.02059468		1807.8	0.01094329		2397.79	-0.01327915		2987.8	-0.00195963		3577.8	0.00550258		4167.8	-0.01920719
628	0.13083038		1217.99	0.01964179		1808	0.0112502		2397.99	-0.01393876		2988	-0.00228977		3578	0.00615623		4168	-0.01948198
628.2	0.13099341		1218.19	0.0197841		1808.2	0.0120488		2398.19	-0.01424215		2988.2	-0.00209976		3578.2	0.00659373		4168.2	-0.0189676
628.4	0.13046024		1218.39	0.01965978		1808.4	0.01173192		2398.39	-0.01447541		2988.4	-0.00250823		3578.4	0.007191		4168.4	-0.01894319
628.6	0.13036715		1218.59	0.01968952		1808.6	0.01091024		2398.59	-0.01607262		2988.6	-0.00325779		3578.6	0.00736016		4168.6	-0.01894421
628.8	0.13092242		1218.79	0.019251		1808.8	0.01110661		2398.79	-0.0167618		2988.8	-0.00388417		3578.8	0.00682822		4168.8	-0.0177585
629	0.12993723		1218.99	0.01963749		1809	0.01114071		2398.99	-0.0176373		2989	-0.0042098		3579	0.0072652		4169	-0.01859196
629.2	0.13028081		1219.19	0.01986536		1809.2	0.01072487		2399.19	-0.01889432		2989.2	-0.00498711		3579.2	0.00767215		4169.2	-0.01842897
629.4	0.12973384		1219.39	0.02118199		1809.4	0.01061655		2399.39	-0.01967948		2989.4	-0.00554458		3579.4	0.00710856		4169.4	-0.01822523
629.6	0.13039352		1219.59	0.0222001		1809.6	0.01010116		2399.59	-0.02031308		2989.6	-0.0052767		3579.6	0.00689191		4169.6	-0.01767902
629.8	0.1306246		1219.79	0.02160524		1809.8	0.00922439		2399.79	-0.02104588		2989.8	-0.00596153		3579.8	0.00621153		4169.8	-0.01779734
630	0.1312129		1219.99	0.02141568		1810	0.0092984		2399.99	-0.02111929		2990	-0.00695999		3580	0.00597538		4170	-0.01714692
630.2	0.13170181		1220.19	0.02136143		1810.2	0.00956872		2400.19	-0.02164682		2990.2	-0.00718417		3580.2	0.00550901		4170.2	-0.01752916
630.4	0.13089676		1220.39	0.0216373		1810.4	0.00910534		2400.39	-0.02209575		2990.4	-0.00683417		3580.4	0.00521234		4170.4	-0.01692571
630.6	0.13092207		1220.59	0.0215808		1810.6	0.00820536		2400.59	-0.02194003		2990.6	-0.00613204		3580.6	0.0050811		4170.6	-0.01727706
630.8	0.12996811		1220.79	0.02166067		1810.8	0.00887662		2400.79	-0.02105569		2990.8	-0.00589565		3580.8	0.00599044		4170.8	-0.0164212
631	0.13017626		1220.99	0.02110881		1811	0.0091621		2400.99	-0.02121101		2991	-0.00530169		3581	0.00613868		4171	-0.01611342
631.2	0.13028262		1221.19	0.0203209		1811.2	0.00953879		2401.19	-0.02075435		2991.2	-0.00454891		3581.2	0.0059375		4171.2	-0.01650912
631.4	0.13023227		1221.39	0.01964756		1811.4	0.00983626		2401.39	-0.01962566		2991.4	-0.00518456		3581.4	0.00631704		4171.4	-0.01680092
631.6	0.13059375		1221.59	0.01994424		1811.6	0.01086709		2401.59	-0.01899185		2991.6	-0.00415965		3581.6	0.00692201		4171.6	-0.01609262
631.8	0.13059892		1221.79	0.01932315		1811.8	0.01154951		2401.79	-0.01897621		2991.8	-0.00437622		3581.8	0.00786919		4171.8	-0.01652146
632	0.12992834		1221.99	0.01955983		1812	0.01113552		2401.99	-0.01873908		2992	-0.00431189		3582	0.00791931		4172	-0.01678678
632.2	0.12928341		1222.19	0.01885414		1812.2	0.01192021		2402.19	-0.01802202		2992.2	-0.00387109		3582.2	0.00799297		4172.2	-0.01677509
632.4	0.12975136		1222.39	0.01858417		1812.4	0.01099353		2402.39	-0.01784722		2992.4	-0.00412001		3582.4	0.00817362		4172.4	-0.01560452
632.6	0.1294913		1222.59	0.01888237		1812.6	0.01035		2402.59	-0.01753148		2992.6	-0.00465395		3582.6	0.00834703		4172.6	-0.01609621
632.8	0.12970822		1222.79	0.01951473		1812.8	0.01089773		2402.79	-0.01740878		2992.8	-0.00508858		3582.8	0.00838144		4172.8	-0.01709621
633	0.13042684		1222.99	0.02026841		1813	0.01015987		2402.99	-0.01726949		2993	-0.00513284		3583	0.00935626		4173	-0.01855896
633.2	0.13109826		1223.19	0.01963136		1813.2	0.01011535		2403.19	-0.01740029		2993.2	-0.00471134		3583.2	0.00849489		4173.2	-0.01847568
633.4	0.13081824		1223.39	0.01994374		1813.4	0.0096168		2403.39	-0.01752337		2993.4	-0.00509958		3583.4	0.00819184		4173.4	-0.01865691
633.6	0.13097988		1223.59	0.02020082		1813.6	0.00930279		2403.59	-0.01786818		2993.6	-0.00474095		3583.6	0.0071242		4173.6	-0.01801637
633.8	0.13118668		1223.79	0.02074992		1813.8	0.00929216		2403.79	-0.01727683		2993.8	-0.00503553		3583.8	0.00704949		4173.8	-0.01841243
634	0.1309525		1223.99	0.02129838		1814	0.00926102		2403.99	-0.01759209		2994	-0.00518765		3584	0.00640605		4174	-0.01819161
634.2	0.13032915		1224.19	0.0216201		1814.2	0.00942175		2404.19	-0.01744842		2994.2	-0.00500286		3584.2	0.00596666		4174.2	-0.01849095
634.4	0.13081823		1224.39	0.0208046		1814.4	0.00879166		2404.39	-0.01739157		2994.4	-0.00458673		3584.4	0.00503223		4174.4	-0.01813631
634.6	0.12982564		1224.59	0.02026044		1814.6	0.00875151		2404.59	-0.01818769		2994.6	-0.00435608		3584.6	0.00502667		4174.6	-0.01880718
634.8	0.12935849		1224.79	0.01929919		1814.8	0.00971668		2404.79	-0.01805281		2994.8	-0.00416757		3584.8	0.00508275		4174.8	-0.01814612
635	0.12956338		1224.99	0.01895241		1815	0.00983186		2404.99	-0.01840498		2995	-0.00483521		3585	0.00471304		4175	-0.01868303
635.2	0.12965984		1225.19	0.01850368		1815.2	0.0101719		2405.19	-0.01743166		2995.2	-0.00435294		3585.2	0.00401026		4175.2	-0.01886953
635.4	0.12914626		1225.39	0.01868225		1815.4	0.01109457		2405.39	-0.01690526		2995.4	-0.00517928		3585.4	0.00416955		4175.4	-0.01854655
635.6	0.12927789		1225.59	0.01856726		1815.6	0.01204016		2405.59	-0.016898		2995.6	-0.00383174		3585.6	0.00373608		4175.6	-0.01799239
635.8	0.12886385		1225.79	0.01802412		1815.8	0.01178896		2405.79	-0.01724191		2995.8	-0.00368044		3585.8	0.00421167		4175.8	-0.01810209
636	0.12907668		1225.99	0.01843779		1816	0.01151693		2405.99	-0.01706366		2996	-0.00309604		3586	0.00353968		4176	-0.01781108
636.2	0.12885307		1226.19	0.01675478		1816.2	0.01250453		2406.19	-0.01699624		2996.2	-0.00372651		3586.2	0.00349029		4176.2	-0.01755195
636.4	0.1296295		1226.39	0.01756177		1816.4	0.01276686		2406.39	-0.01691159		2996.4	-0.00372773		3586.4	0.00333859		4176.4	-0.01720811
636.6	0.12979741		1226.59	0.01848757		1816.6	0.01268018		2406.59	-0.01639543		2996.6	-0.00391024		3586.6	0.003882		4176.6	-0.01846426
636.8	0.13135095		1226.79	0.01912961		1816.8	0.01271646		2406.79	-0.01766129		2996.8	-0.00337288		3586.8	0.00441732		4176.8	-0.01889228
637	0.13275321		1226.99	0.01906534		1817	0.01210796		2406.99	-0.01788984		2997	-0.002417		3587	0.00509937		4177	-0.01876394
637.2	0.13284072		1227.19	0.01971832		1817.2	0.01155191		2407.19	-0.01855893		2997.2	-0.00202458		3587.2	0.00433319		4177.2	-0.01841875
637.4	0.13250911		1227.39	0.02131895		1817.4	0.01096759		2407.39	-0.01947019		2997.4	-0.00199852		3587.4	0.00501056		4177.4	-0.0187126
637.6	0.13235442		1227.59	0.02276501		1817.6	0.01084063		2407.59	-0.01980856		2997.6	-0.00157525		3587.6	0.00531562		4177.6	-0.01944539
637.8	0.13306172		1227.79	0.02311187		1817.8	0.01002801		2407.79	-0.02029544		2997.8	-0.00216481		3587.8	0.00524447		4177.8	-0.02055953
638	0.13248309		1227.99	0.02307683		1818	0.01070301		2407.99	-0.02032337		2998	-0.00334958		3588	0.00417585		4178	-0.02119182
638.2	0.13189532		1228.19	0.02309105		1818.2	0.01072095		2408.19	-0.01982309		2998.2	-0.00401983		3588.2	0.00437951		4178.2	-0.02133481
638.4	0.13249161		1228.39	0.02195449		1818.4	0.01025668		2408.39	-0.02067956		2998.4	-0.0044378		3588.4	0.00416362		4178.4	-0.02181504
638.6	0.13147499		1228.59	0.0218547		1818.6	0.01012258		2408.59	-0.02065861		2998.6	-0.00478779		3588.6	0.00474178		4178.6	-0.02171189
638.8	0.13094192		1228.79	0.02125932		1818.8	0.00972644		2408.79	-0.02009901		2998.8	-0.00534904		3588.8	0.00450986		4178.8	-0.02031485
639	0.1304455		1228.99	0.02146228		1819	0.00850373		2408.99	-0.01978771		2999	-0.00569223		3589	0.00421511		4179	-0.021155
639.2	0.13091773		1229.19	0.02083327		1819.2	0.00866973		2409.19	-0.01905114		2999.2	-0.00535653		3589.2	0.00378773		4179.2	-0.01983313
639.4	0.13043555		1229.39	0.0196472		1819.4	0.00907293		2409.39	-0.01785411		2999.4	-0.00500878		3589.4	0.00465496		4179.4	-0.02021898
639.6	0.13023812		1229.59	0.01822882		1819.6	0.00871048		2409.59	-0.01766909		2999.6	-0.00461117		3589.6	0.00427334		4179.6	-0.01900816
639.8	0.12948145		1229.79	0.01778489		1819.8	0.00921557		2409.79	-0.01742403		2999.8	-0.00474475		3589.8	0.00518671		4179.8	-0.01857124
640	0.12906126		1229.99	0.01834792		1820	0.00979238		2409.99	-0.01615161		3000	-0.00413287		3590	0.00474278		4180	-0.01831546
640.2	0.12869184		1230.19	0.01816072		1820.2	0.01097896		2410.19	-0.01600677		3000.2	-0.0049639		3590.2	0.00620409		4180.2	-0.0180676
640.4	0.12864228		1230.39	0.01985812		1820.4	0.01099011		2410.39	-0.01624273		3000.4	-0.00510151		3590.4	0.00671393		4180.4	-0.01811932
640.6	0.12863626		1230.59	0.02032735		1820.6	0.01029151		2410.59	-0.01656164		3000.6	-0.00499991		3590.6	0.00809633		4180.6	-0.01771653
640.8	0.12918876		1230.79	0.02066205		1820.8	0.00942942		2410.79	-0.0178728		3000.8	-0.00415118		3590.8	0.00893936		4180.8	-0.01716107
641	0.12958983		1230.99	0.02065909		1821	0.00879622		2410.99	-0.01836929		3001	-0.00331656		3591	0.00909868		4181	-0.01733412
641.2	0.12986298		1231.19	0.02248033		1821.2	0.00840311		2411.19	-0.01882998		3001.2	-0.00325223		3591.2	0.00867471		4181.2	-0.01751533
641.4	0.12900475		1231.39	0.02287035		1821.4	0.00851784		2411.39	-0.01989189		3001.4	-0.00316709		3591.4	0.00905158		4181.4	-0.01753561
641.6	0.12905406		1231.59	0.02331489		1821.6	0.00834025		2411.59	-0.02062238		3001.6	-0.0038914		3591.6	0.00919938		4181.6	-0.01861017
641.8	0.12952005		1231.79	0.02306889		1821.8	0.00881006		2411.79	-0.02026459		3001.8	-0.00419345		3591.8	0.00897416		4181.8	-0.01934932
642	0.12899207		1231.99	0.02291941		1822	0.00992532		2411.99	-0.01954647		3002	-0.00515638		3592	0.00889801		4182	-0.01960897
642.2	0.12880286		1232.19	0.02263374		1822.2	0.00990777		2412.19	-0.01935513		3002.2	-0.00561911		3592.2	0.00838931		4182.2	-0.02028013
642.4	0.12941631		1232.39	0.02276301		1822.4	0.01010025		2412.39	-0.01949728		3002.4	-0.00586092		3592.4	0.0074884		4182.4	-0.02065158
642.6	0.12884066		1232.59	0.02303318		1822.6	0.00935541		2412.59	-0.01886882		3002.6	-0.0058935		3592.6	0.00728911		4182.6	-0.0203631
642.8	0.12932613		1232.79	0.02169161		1822.8	0.00822128		2412.79	-0.01863922		3002.8	-0.00579241		3592.8	0.00676653		4182.8	-0.01979948
643	0.12892772		1232.99	0.02098419		1823	0.00714028		2412.99	-0.01836158		3003	-0.00510821		3593	0.0055955		4183	-0.02074607
643.2	0.12897794		1233.19	0.01965973		1823.2	0.00768046		2413.19	-0.0172294		3003.2	-0.0050848		3593.2	0.00495061		4183.2	-0.01970385
643.4	0.12816184		1233.39	0.0187967		1823.4	0.00799061		2413.39	-0.01695574		3003.4	-0.00499818		3593.4	0.00518139		4183.4	-0.02074997
643.6	0.12772504		1233.59	0.01856647		1823.6	0.00810902		2413.59	-0.01765844		3003.6	-0.00537927		3593.6	0.00432265		4183.6	-0.01998643
643.8	0.12791824		1233.79	0.01915384		1823.8	0.00898835		2413.79	-0.01709191		3003.8	-0.00505731		3593.8	0.00457585		4183.8	-0.0200851
644	0.12805184		1233.99	0.02079699		1824	0.00903768		2413.99	-0.01744853		3004	-0.00465468		3594	0.00420639		4184	-0.01974649
644.2	0.12810299		1234.19	0.02096583		1824.2	0.00981596		2414.19	-0.01856844		3004.2	-0.0057936		3594.2	0.00507293		4184.2	-0.01987052
644.4	0.12732557		1234.39	0.02031689		1824.4	0.00937452		2414.39	-0.01918832		3004.4	-0.00590927		3594.4	0.0047369		4184.4	-0.02035914
644.6	0.12785753		1234.59	0.02055485		1824.6	0.00946466		2414.59	-0.02001264		3004.6	-0.00590085		3594.6	0.0056339		4184.6	-0.01922396
644.8	0.12809442		1234.79	0.02081832		1824.8	0.00945297		2414.79	-0.0205612		3004.8	-0.0055096		3594.8	0.00496993		4184.8	-0.01876903
645	0.12839637		1234.99	0.02080324		1825	0.00958162		2414.99	-0.02058927		3005	-0.00596746		3595	0.0043486		4185	-0.01877123
645.2	0.12770591		1235.19	0.02136173		1825.2	0.00962442		2415.19	-0.02085123		3005.2	-0.0064972		3595.2	0.00421903		4185.2	-0.01855524
645.4	0.12712725		1235.39	0.02106829		1825.4	0.00938241		2415.39	-0.02083747		3005.4	-0.00639184		3595.4	0.00470447		4185.4	-0.01905759
645.6	0.12730678		1235.59	0.02121249		1825.6	0.00960957		2415.59	-0.02097636		3005.6	-0.00703837		3595.6	0.00479808		4185.6	-0.01948964
645.8	0.12730956		1235.79	0.02131532		1825.8	0.01021935		2415.79	-0.02003055		3005.8	-0.00699677		3595.8	0.00508049		4185.8	-0.02017876
646	0.12683917		1235.99	0.02120693		1826	0.01075635		2415.99	-0.01944911		3006	-0.00811239		3596	0.00480131		4186	-0.0205498
646.2	0.1271312		1236.19	0.02108592		1826.2	0.01117751		2416.19	-0.01921314		3006.2	-0.00792677		3596.2	0.00430014		4186.2	-0.02078079
646.4	0.12775475		1236.39	0.02084816		1826.4	0.01147216		2416.39	-0.01909417		3006.4	-0.00815629		3596.4	0.00428153		4186.4	-0.02011067
646.6	0.12789588		1236.59	0.02016144		1826.6	0.01108798		2416.59	-0.01860804		3006.6	-0.00776006		3596.6	0.00462443		4186.6	-0.01994627
646.8	0.12789469		1236.79	0.01893279		1826.8	0.01019288		2416.79	-0.01865743		3006.8	-0.00745083		3596.8	0.00454882		4186.8	-0.01946478
647	0.12740473		1236.99	0.01922152		1827	0.00938498		2416.99	-0.01875711		3007	-0.00611084		3597	0.00442589		4187	-0.01929662
647.2	0.12715284		1237.19	0.01975099		1827.2	0.00975549		2417.19	-0.01912198		3007.2	-0.00578481		3597.2	0.00508333		4187.2	-0.01850852
647.4	0.12805544		1237.39	0.02083529		1827.4	0.01014455		2417.39	-0.0197947		3007.4	-0.00546861		3597.4	0.00582661		4187.4	-0.0190926
647.6	0.12877105		1237.59	0.02101631		1827.6	0.01097443		2417.59	-0.02007143		3007.6	-0.00398535		3597.6	0.00577936		4187.6	-0.01864589
647.8	0.12946202		1237.79	0.02138995		1827.8	0.01134276		2417.79	-0.02017958		3007.8	-0.00325092		3597.8	0.00563794		4187.8	-0.01758349
648	0.12951833		1237.99	0.0219331		1828	0.01176205		2417.99	-0.02097997		3008	-0.00303597		3598	0.00518199		4188	-0.01703016
648.2	0.12943072		1238.19	0.0208661		1828.2	0.01209827		2418.19	-0.02116279		3008.2	-0.00331469		3598.2	0.0050214		4188.2	-0.01702011
648.4	0.12921038		1238.39	0.02048055		1828.4	0.01180902		2418.39	-0.02085321		3008.4	-0.00318492		3598.4	0.00451998		4188.4	-0.01693784
648.6	0.12983367		1238.59	0.02106834		1828.6	0.01153985		2418.59	-0.02091856		3008.6	-0.00320094		3598.6	0.0039349		4188.6	-0.01646782
648.8	0.12947255		1238.79	0.02067643		1828.8	0.01118628		2418.79	-0.02014414		3008.8	-0.00301113		3598.8	0.00247135		4188.8	-0.01702594
649	0.12909184		1238.99	0.02025943		1829	0.01049936		2418.99	-0.01961165		3009	-0.00303765		3599	0.0016229		4189	-0.01802778
649.2	0.12841627		1239.19	0.02041205		1829.2	0.0098232		2419.19	-0.01938725		3009.2	-0.00251748		3599.2	0.00074922		4189.2	-0.01923367
649.4	0.12805683		1239.39	0.02043959		1829.4	0.00930093		2419.39	-0.01879585		3009.4	-0.00211094		3599.4	-0.00014334		4189.4	-0.02053325
649.6	0.12727238		1239.59	0.0205432		1829.6	0.00913277		2419.59	-0.01840479		3009.6	-0.00257213		3599.6	-0.00094038		4189.6	-0.02110569
649.8	0.12662411		1239.79	0.0204248		1829.8	0.00896564		2419.79	-0.01715735		3009.8	-0.00252679		3599.8	-0.0016081		4189.8	-0.02288245
