# Supplementary material for: Functional development of a V3/glycan-specific broadly neutralizing antibody isolated from a case of HIV superinfection
Source: eLife journal article supplement (doi:10.7554/elife.68110), 2021-07-15
Supplement: fig2-data2 [file F3.xls]

Vers 3.43 Data Simulation
Conc1	1.56E-08	1.56E-08	1.56E-08	1.56E-08	1.56E-08
Start1	200	729.99	1259.99	1789.98	2320.01
Stop1	559.8	1089.79	1619.78	2149.78	2679.81
Time1	Data1	Sim1	Time2	Data2	Sim2	Time3	Data3	Sim3	Time4	Data4	Sim4	Time5	Data5	Sim5
200	0.00831772		729.99	0.00774288		1259.99	-0.00504249		1789.98	0.0066135		2320.01	-0.00193847
200.2	0.00781117		730.19	0.00849369		1260.19	-0.00467809		1790.18	0.00617028		2320.21	-0.00139539
200.4	0.00793164		730.39	0.00959043		1260.39	-0.00471587		1790.38	0.00584738		2320.41	-0.00030945
200.6	0.00770351		730.59	0.01070966		1260.59	-0.00498341		1790.58	0.00500531		2320.61	-0.00021493
200.8	0.00742216		730.79	0.01232383		1260.79	-0.00518092		1790.78	0.00425457		2320.81	0.00029259
201	0.00736834		730.99	0.01281677		1260.99	-0.0049353		1790.98	0.00449777		2321.01	0.00026861
201.2	0.00734071		731.19	0.01326178		1261.19	-0.00479292		1791.18	0.00450486		2321.21	0.00023527
201.4	0.00734611		731.39	0.0143029		1261.39	-0.00489647		1791.38	0.00454714		2321.41	0.00017216
201.6	0.00626887		731.59	0.01459248		1261.59	-0.00479646		1791.58	0.00487019		2321.61	0.00048792
201.8	0.00619592		731.79	0.01437758		1261.79	-0.00463095		1791.78	0.00501024		2321.81	0.00017875
202	0.00643355		731.99	0.01489099		1261.99	-0.00410875		1791.98	0.00538594		2322.01	0.00028363
202.2	0.0068164		732.19	0.01409713		1262.19	-0.00359788		1792.18	0.00608989		2322.21	-0.00026066
202.4	0.00714187		732.39	0.01437446		1262.39	-0.00415375		1792.38	0.00565079		2322.41	-0.00084176
202.6	0.00634389		732.59	0.01422893		1262.59	-0.00421914		1792.58	0.0049469		2322.61	-0.00070423
202.8	0.00615132		732.79	0.01523919		1262.79	-0.00333707		1792.78	0.00460399		2322.81	-0.00154461
203	0.00463374		732.99	0.01576317		1262.99	-0.003121		1792.98	0.00478977		2323.01	-0.00199376
203.2	0.00491209		733.19	0.01607516		1263.19	-0.00237704		1793.18	0.004735		2323.21	-0.00158061
203.4	0.00581052		733.39	0.01542477		1263.39	-0.00180918		1793.38	0.00393582		2323.41	-0.00135878
203.6	0.00675858		733.59	0.01581585		1263.59	-0.00201274		1793.58	0.00403273		2323.61	-0.00032389
203.8	0.00731218		733.79	0.01528252		1263.79	-0.00128201		1793.78	0.00353784		2323.81	-0.0004282
204	0.00730609		733.99	0.01529139		1263.99	-0.00090068		1793.98	0.00316351		2324.01	0.00020959
204.2	0.00790002		734.19	0.01625654		1264.19	-0.00117593		1794.18	0.00344554		2324.21	0.0007011
204.4	0.00930543		734.39	0.01678807		1264.39	-0.00182714		1794.38	0.00295586		2324.41	0.00091255
204.6	0.0092039		734.59	0.01659608		1264.59	-0.00235789		1794.58	0.00197483		2324.61	-0.00005524
204.8	0.0095804		734.79	0.0163115		1264.79	-0.00280875		1794.78	0.00145111		2324.81	0.00126137
205	0.00992978		734.99	0.01527626		1264.99	-0.00348381		1794.98	0.00179714		2325.01	0.00044233
205.2	0.0099156		735.19	0.01572901		1265.19	-0.00416088		1795.18	0.00139941		2325.21	0.0008856
205.4	0.00931299		735.39	0.01664445		1265.39	-0.00526524		1795.38	0.00184272		2325.41	0.00161654
205.6	0.00905972		735.59	0.01635989		1265.59	-0.00556937		1795.58	0.00179704		2325.61	0.00144308
205.8	0.00990938		735.79	0.01593025		1265.79	-0.0058092		1795.78	0.00177177		2325.81	0.0015179
206	0.00913635		735.99	0.01615087		1265.99	-0.00662297		1795.98	0.00204397		2326.01	0.00211037
206.2	0.00806746		736.19	0.01480384		1266.19	-0.00677953		1796.18	0.00239998		2326.21	0.00149384
206.4	0.00746509		736.39	0.01519669		1266.39	-0.0077263		1796.38	0.00169182		2326.41	0.00119238
206.6	0.00731356		736.59	0.0162525		1266.59	-0.00724278		1796.58	0.00236007		2326.61	0.00108184
206.8	0.00661685		736.79	0.01666359		1266.79	-0.00721986		1796.78	0.0034814		2326.81	0.0002505
207	0.00616622		736.99	0.01572174		1266.99	-0.0075184		1796.98	0.00365103		2327.01	0.00005239
207.2	0.00669906		737.19	0.01493802		1267.19	-0.00648568		1797.18	0.00362713		2327.21	0.00041621
207.4	0.00733064		737.39	0.01422638		1267.39	-0.00593806		1797.38	0.00283244		2327.41	-0.00010802
207.6	0.0073018		737.59	0.01385998		1267.59	-0.0051317		1797.58	0.00386722		2327.61	-0.0008337
207.8	0.00788467		737.79	0.01360272		1267.79	-0.00368833		1797.78	0.00267129		2327.81	-0.00083093
208	0.00792668		737.99	0.0142223		1267.99	-0.00342714		1797.98	0.00236591		2328.01	-0.000097
208.2	0.00815266		738.19	0.01408523		1268.19	-0.00356495		1798.18	0.0026279		2328.21	-0.00035348
208.4	0.00850342		738.39	0.01329144		1268.39	-0.00301048		1798.38	0.00207993		2328.41	-0.00020766
208.6	0.00763725		738.59	0.01287167		1268.59	-0.00372406		1798.58	0.00129561		2328.61	0.00007964
208.8	0.00827964		738.79	0.01278239		1268.79	-0.00421872		1798.78	0.00050602		2328.81	0.00152296
209	0.00904661		738.99	0.01350541		1268.99	-0.00428243		1798.98	0.00080473		2329.01	0.00133846
209.2	0.00938333		739.19	0.01371856		1269.19	-0.00460363		1799.18	0.00054119		2329.21	0.00230165
209.4	0.01018396		739.39	0.01365331		1269.39	-0.00432867		1799.38	0.00052519		2329.41	0.00260699
209.6	0.01092042		739.59	0.01303744		1269.59	-0.00420729		1799.58	-0.00021444		2329.61	0.00281352
209.8	0.01012438		739.79	0.01237423		1269.79	-0.00482367		1799.78	-0.00033114		2329.81	0.00307035
210	0.00952433		739.99	0.0124775		1269.99	-0.00558964		1799.98	0.00010537		2330.01	0.00300289
210.2	0.00967751		740.19	0.01258363		1270.19	-0.00558414		1800.18	0.00003678		2330.21	0.00219755
210.4	0.01031237		740.39	0.01358007		1270.39	-0.00538766		1800.38	0.00060661		2330.41	0.00100973
210.6	0.00989848		740.59	0.01415541		1270.59	-0.00434002		1800.58	0.00115319		2330.61	0.00023364
210.8	0.00987921		740.79	0.01403206		1270.79	-0.00481075		1800.78	0.00112501		2330.81	-0.00028403
211	0.00998326		740.99	0.01377266		1270.99	-0.0041402		1800.98	0.00099992		2331.01	-0.00058986
211.2	0.01081978		741.19	0.01379137		1271.19	-0.00428644		1801.18	0.00070241		2331.21	-0.00144603
211.4	0.01158712		741.39	0.0135216		1271.39	-0.00407996		1801.38	0.00054493		2331.41	-0.00297175
211.6	0.01184011		741.59	0.01338616		1271.59	-0.00404722		1801.58	0.00108608		2331.61	-0.003492
211.8	0.01186284		741.79	0.01339025		1271.79	-0.00431782		1801.78	0.00120835		2331.81	-0.00342399
212	0.01145397		741.99	0.01333599		1271.99	-0.0044793		1801.98	0.0020401		2332.01	-0.0032961
212.2	0.0114777		742.19	0.01306563		1272.19	-0.0048056		1802.18	0.00412198		2332.21	-0.00407238
212.4	0.01223882		742.39	0.0126447		1272.39	-0.00604842		1802.38	0.00482294		2332.41	-0.00465146
212.6	0.01294808		742.59	0.01242825		1272.59	-0.00680787		1802.58	0.00489251		2332.61	-0.00437029
212.8	0.01459948		742.79	0.01234121		1272.79	-0.00740546		1802.78	0.00498065		2332.81	-0.00403045
213	0.01603338		742.99	0.01250879		1272.99	-0.00745055		1802.98	0.00532581		2333.01	-0.00391232
213.2	0.01641797		743.19	0.01202933		1273.19	-0.00807372		1803.18	0.00544269		2333.21	-0.00350834
213.4	0.01694242		743.39	0.01188389		1273.39	-0.00763998		1803.38	0.00511442		2333.41	-0.00344261
213.6	0.01652705		743.59	0.01184598		1273.59	-0.00874045		1803.58	0.00489368		2333.61	-0.00277599
213.8	0.01645707		743.79	0.0116762		1273.79	-0.00868684		1803.78	0.00487992		2333.81	-0.00323109
214	0.01636011		743.99	0.01231318		1273.99	-0.00919374		1803.98	0.0051319		2334.01	-0.00335333
214.2	0.01547572		744.19	0.01291419		1274.19	-0.00850805		1804.18	0.00496855		2334.21	-0.00315628
214.4	0.01540433		744.39	0.01348209		1274.39	-0.00702088		1804.38	0.00490776		2334.41	-0.0031838
214.6	0.01435505		744.59	0.01468395		1274.59	-0.00729365		1804.58	0.00455239		2334.61	-0.00249376
214.8	0.01396589		744.79	0.01584533		1274.79	-0.00708694		1804.78	0.00432219		2334.81	-0.00260519
215	0.01351753		744.99	0.01635393		1274.99	-0.00705247		1804.98	0.00381378		2335.01	-0.0026538
215.2	0.01385763		745.19	0.01670326		1275.19	-0.00758669		1805.18	0.00243334		2335.21	-0.00301598
215.4	0.0137119		745.39	0.01688461		1275.39	-0.0066162		1805.38	0.00219632		2335.41	-0.00361353
215.6	0.01288133		745.59	0.01729903		1275.59	-0.00638451		1805.58	0.00119087		2335.61	-0.00339251
215.8	0.01293128		745.79	0.01655616		1275.79	-0.0061537		1805.78	0.00124298		2335.81	-0.00332149
216	0.01317252		745.99	0.01701813		1275.99	-0.0059907		1805.98	0.00065039		2336.01	-0.00305716
216.2	0.01431012		746.19	0.01650348		1276.19	-0.0072046		1806.18	0.00072195		2336.21	-0.00329004
216.4	0.01533275		746.39	0.01557585		1276.39	-0.00672464		1806.38	0.00027883		2336.41	-0.00427716
216.6	0.01646929		746.59	0.01548325		1276.59	-0.00580419		1806.58	-0.00028807		2336.61	-0.00352074
216.8	0.01789134		746.79	0.01574334		1276.79	-0.0068401		1806.78	-0.00115216		2336.81	-0.00353086
217	0.01892047		746.99	0.01530513		1276.99	-0.00669117		1806.98	-0.00167166		2337.01	-0.00297063
217.2	0.01918077		747.19	0.0151103		1277.19	-0.00707951		1807.18	-0.00212868		2337.21	-0.00221605
217.4	0.02017049		747.39	0.0146941		1277.39	-0.00667189		1807.38	-0.00251391		2337.41	-0.00233154
217.6	0.02121753		747.59	0.01379086		1277.59	-0.00759547		1807.58	-0.00199725		2337.61	-0.00200719
217.8	0.02182877		747.79	0.01401024		1277.79	-0.00705214		1807.78	-0.00187322		2337.81	-0.00245658
218	0.02184475		747.99	0.01348685		1277.99	-0.00701045		1807.98	-0.00123636		2338.01	-0.00323415
218.2	0.0217573		748.19	0.01287175		1278.19	-0.00643637		1808.18	-0.00126494		2338.21	-0.00262594
218.4	0.02195855		748.39	0.01289489		1278.39	-0.006747		1808.38	-0.00078897		2338.41	-0.00242528
218.6	0.02118155		748.59	0.01325861		1278.59	-0.00776662		1808.58	0.00074408		2338.61	-0.00277568
218.8	0.02093091		748.79	0.0131044		1278.79	-0.00813716		1808.78	0.0009586		2338.81	-0.00320483
219	0.02103569		748.99	0.01221805		1278.99	-0.00901163		1808.98	0.000499		2339.01	-0.00277278
219.2	0.02028657		749.19	0.0120479		1279.19	-0.00918441		1809.18	0.00060204		2339.21	-0.00343817
219.4	0.02031934		749.39	0.01152523		1279.39	-0.00927149		1809.38	0.00068542		2339.41	-0.00336181
219.6	0.02001607		749.59	0.01195363		1279.59	-0.00963025		1809.58	0.00044318		2339.61	-0.00342231
219.8	0.01954495		749.79	0.01144103		1279.79	-0.0097353		1809.78	0.00093609		2339.81	-0.00397176
220	0.01901391		749.99	0.01249292		1279.99	-0.01052082		1809.98	0.00077597		2340.01	-0.00371839
220.2	0.0191106		750.19	0.01234847		1280.19	-0.01075485		1810.18	0.00114579		2340.21	-0.00447608
220.4	0.01919591		750.39	0.01277773		1280.39	-0.00980534		1810.38	0.00136676		2340.41	-0.00459629
220.6	0.01943623		750.59	0.01290322		1280.59	-0.01066104		1810.58	0.00097096		2340.61	-0.00363918
220.8	0.02002671		750.79	0.0132868		1280.79	-0.01124622		1810.78	0.00074731		2340.81	-0.00294072
221	0.02043177		750.99	0.01448127		1280.99	-0.01073149		1810.98	0.00074809		2341.01	-0.00272765
221.2	0.02136258		751.19	0.01495332		1281.19	-0.01069007		1811.18	0.00064519		2341.21	-0.00246593
221.4	0.02178456		751.39	0.01567094		1281.39	-0.01050917		1811.38	0.00110055		2341.41	-0.00254074
221.6	0.02177302		751.59	0.01558602		1281.59	-0.01017487		1811.58	0.0018452		2341.61	-0.00240639
221.8	0.02149829		751.79	0.0168583		1281.79	-0.00786241		1811.78	0.00177808		2341.81	-0.00263201
222	0.02141619		751.99	0.01567387		1281.99	-0.00702439		1811.98	0.00232057		2342.01	-0.00320617
222.2	0.02121949		752.19	0.01528134		1282.19	-0.00638055		1812.18	0.00202872		2342.21	-0.00302968
222.4	0.02100347		752.39	0.01495921		1282.39	-0.00602987		1812.38	0.00251273		2342.41	-0.0029991
222.6	0.02067852		752.59	0.01375056		1282.59	-0.00521653		1812.58	0.00253827		2342.61	-0.0035962
222.8	0.02068042		752.79	0.01234004		1282.79	-0.00431287		1812.78	0.002493		2342.81	-0.00354121
223	0.02053164		752.99	0.01103022		1282.99	-0.00402638		1812.98	0.00305767		2343.01	-0.00339865
223.2	0.02052117		753.19	0.01062718		1283.19	-0.00358231		1813.18	0.00349829		2343.21	-0.0041558
223.4	0.02122622		753.39	0.00980367		1283.39	-0.00406756		1813.38	0.00345482		2343.41	-0.00453732
223.6	0.02098015		753.59	0.01010068		1283.59	-0.00400617		1813.58	0.00389095		2343.61	-0.00544754
223.8	0.0208685		753.79	0.00972892		1283.79	-0.00413169		1813.78	0.00309492		2343.81	-0.00597818
224	0.02137498		753.99	0.01046366		1283.99	-0.00522692		1813.98	0.00262279		2344.01	-0.00586525
224.2	0.02177349		754.19	0.01013539		1284.19	-0.00533381		1814.18	0.00178611		2344.21	-0.00580342
224.4	0.02180083		754.39	0.01073893		1284.39	-0.00658983		1814.38	0.00078576		2344.41	-0.00452941
224.6	0.02213908		754.59	0.01060376		1284.59	-0.00742063		1814.58	-0.00000047		2344.61	-0.00351692
224.8	0.02213071		754.79	0.01208965		1284.79	-0.00677819		1814.78	0.0004249		2344.81	-0.00315222
225	0.0228924		754.99	0.01333406		1284.99	-0.00712602		1814.98	-0.0000239		2345.01	-0.00287006
225.2	0.0225297		755.19	0.0142287		1285.19	-0.00691296		1815.18	-0.0008251		2345.21	-0.00250037
225.4	0.02153542		755.39	0.01530237		1285.39	-0.00709731		1815.38	-0.00034941		2345.41	-0.00213783
225.6	0.02054821		755.59	0.01568816		1285.59	-0.006181		1815.58	-0.00089763		2345.61	-0.00141213
225.8	0.02066032		755.79	0.01644503		1285.79	-0.00584448		1815.78	-0.00146007		2345.81	-0.00136852
226	0.02019849		755.99	0.01617635		1285.99	-0.00670986		1815.98	-0.00115618		2346.01	-0.00159982
226.2	0.01940191		756.19	0.01622234		1286.19	-0.00639478		1816.18	-0.00156529		2346.21	-0.00157356
226.4	0.01855764		756.39	0.01632042		1286.39	-0.00677277		1816.38	-0.00146913		2346.41	-0.00118521
226.6	0.01839684		756.59	0.01571235		1286.59	-0.00611509		1816.58	-0.00065427		2346.61	-0.00186116
226.8	0.01853909		756.79	0.01553658		1286.79	-0.00625605		1816.78	-0.00012426		2346.81	-0.00179126
227	0.01836653		756.99	0.01498544		1286.99	-0.00640157		1816.98	0.000695		2347.01	-0.0019809
227.2	0.01853913		757.19	0.0147781		1287.19	-0.00622452		1817.18	0.00151204		2347.21	-0.0028582
227.4	0.01890757		757.39	0.01477553		1287.39	-0.00671053		1817.38	0.00148397		2347.41	-0.00358807
227.6	0.01935653		757.59	0.01465348		1287.59	-0.00686527		1817.58	0.00160452		2347.61	-0.00351126
227.8	0.02016491		757.79	0.01437151		1287.79	-0.00715848		1817.78	0.00111784		2347.81	-0.0037217
228	0.02094197		757.99	0.0137985		1287.99	-0.0064566		1817.98	0.00072015		2348.01	-0.00407289
228.2	0.02146806		758.19	0.01306522		1288.19	-0.00677019		1818.18	0.00059537		2348.21	-0.0033558
228.4	0.0221263		758.39	0.0135429		1288.39	-0.00645381		1818.38	0.00056138		2348.41	-0.00342722
228.6	0.02336881		758.59	0.01265716		1288.59	-0.00541582		1818.58	0.00094225		2348.61	-0.00348988
228.8	0.02431859		758.79	0.01314068		1288.79	-0.00439368		1818.78	0.00170023		2348.81	-0.00398247
229	0.02607495		758.99	0.01240782		1288.99	-0.00461228		1818.98	0.00145902		2349.01	-0.00434538
229.2	0.02676708		759.19	0.0119346		1289.19	-0.0046356		1819.18	0.00091199		2349.21	-0.00588288
229.4	0.02730468		759.39	0.01129807		1289.39	-0.00604016		1819.38	0.00088785		2349.41	-0.00683816
229.6	0.02758877		759.59	0.01148488		1289.59	-0.00687462		1819.58	0.00003543		2349.61	-0.00696187
229.8	0.02809372		759.79	0.01134956		1289.79	-0.00777143		1819.78	0.00049472		2349.81	-0.00736007
230	0.02793777		759.99	0.01148555		1289.99	-0.00833235		1819.98	0.00013373		2350.01	-0.00768655
230.2	0.02776235		760.19	0.01146928		1290.19	-0.00803614		1820.18	-0.00108028		2350.21	-0.00748817
230.4	0.02833918		760.39	0.01172711		1290.39	-0.00833453		1820.38	-0.00096079		2350.41	-0.00805036
230.6	0.0290545		760.59	0.01117209		1290.59	-0.0088498		1820.58	-0.0009045		2350.61	-0.00865227
230.8	0.02917135		760.79	0.01194011		1290.79	-0.00885675		1820.78	-0.00157202		2350.81	-0.00844561
231	0.02854485		760.99	0.01161477		1290.99	-0.00844541		1820.98	-0.00105867		2351.01	-0.00892701
231.2	0.02847426		761.19	0.01201915		1291.19	-0.00818441		1821.18	-0.00099108		2351.21	-0.00932715
231.4	0.02830078		761.39	0.01334146		1291.39	-0.00798458		1821.38	-0.0016319		2351.41	-0.00853576
231.6	0.02864064		761.59	0.01300375		1291.59	-0.00806518		1821.58	-0.00199872		2351.61	-0.00771651
231.8	0.02846857		761.79	0.01385428		1291.79	-0.00790725		1821.78	-0.00234827		2351.81	-0.00770883
232	0.02848567		761.99	0.01342531		1291.99	-0.00693228		1821.98	-0.00261049		2352.01	-0.00781311
232.2	0.0288544		762.19	0.01347909		1292.19	-0.00703516		1822.18	-0.00215954		2352.21	-0.00701047
232.4	0.02855519		762.39	0.01445154		1292.39	-0.00663662		1822.38	-0.0022503		2352.41	-0.00653084
232.6	0.02861749		762.59	0.01529784		1292.59	-0.00633719		1822.58	-0.00288952		2352.61	-0.00600297
232.8	0.02907453		762.79	0.01495594		1292.79	-0.00556527		1822.78	-0.00288541		2352.81	-0.00615901
233	0.02966172		762.99	0.01408427		1292.99	-0.00579339		1822.98	-0.00305062		2353.01	-0.00627822
233.2	0.02905962		763.19	0.01411587		1293.19	-0.00612938		1823.18	-0.00324641		2353.21	-0.00667999
233.4	0.02857639		763.39	0.0146757		1293.39	-0.00680046		1823.38	-0.00247392		2353.41	-0.0058048
233.6	0.02893142		763.59	0.01448309		1293.59	-0.00627611		1823.58	-0.00244234		2353.61	-0.00495601
233.8	0.02816589		763.79	0.0144139		1293.79	-0.00591433		1823.78	-0.00297546		2353.81	-0.00392428
234	0.02861551		763.99	0.01490559		1293.99	-0.00583184		1823.98	-0.00348607		2354.01	-0.00368843
234.2	0.02872884		764.19	0.01544791		1294.19	-0.00470149		1824.18	-0.00371936		2354.21	-0.00328474
234.4	0.02894954		764.39	0.0159939		1294.39	-0.00514712		1824.38	-0.00234321		2354.41	-0.00405826
234.6	0.02952852		764.59	0.01557468		1294.59	-0.00591396		1824.58	-0.00160545		2354.61	-0.00409962
234.8	0.03030802		764.79	0.01583056		1294.79	-0.00516079		1824.78	-0.00087644		2354.81	-0.00466597
235	0.03002307		764.99	0.01532576		1294.99	-0.00510709		1824.98	-0.00001183		2355.01	-0.00566523
235.2	0.03096948		765.19	0.01537428		1295.19	-0.00427406		1825.18	-0.00022007		2355.21	-0.00560938
235.4	0.03067162		765.39	0.01629473		1295.39	-0.00417072		1825.38	-0.00095691		2355.41	-0.00501564
235.6	0.0309519		765.59	0.01543154		1295.59	-0.00565024		1825.58	-0.00153078		2355.61	-0.00575702
235.8	0.03103364		765.79	0.01563433		1295.79	-0.00579186		1825.78	-0.00090428		2355.81	-0.00597361
236	0.03103516		765.99	0.0155083		1295.99	-0.00545582		1825.98	-0.00108084		2356.01	-0.00659858
236.2	0.03115753		766.19	0.01578488		1296.19	-0.0055355		1826.18	-0.00152655		2356.21	-0.00647692
236.4	0.03043346		766.39	0.0168923		1296.39	-0.00582678		1826.38	-0.00166033		2356.41	-0.00603822
236.6	0.03063778		766.59	0.01715517		1296.59	-0.00546122		1826.58	-0.00156168		2356.61	-0.00615269
236.8	0.0306554		766.79	0.01605299		1296.79	-0.00459029		1826.78	-0.0010281		2356.81	-0.00689886
237	0.03170299		766.99	0.01598756		1296.99	-0.00499539		1826.98	-0.00083373		2357.01	-0.00672668
237.2	0.03118006		767.19	0.01601173		1297.19	-0.00544752		1827.18	-0.00048557		2357.21	-0.00602098
237.4	0.03178214		767.39	0.01540083		1297.39	-0.00612197		1827.38	-0.00015305		2357.41	-0.00525062
237.6	0.03227182		767.59	0.01506227		1297.59	-0.00605726		1827.58	-0.00068202		2357.61	-0.00504284
237.8	0.03131827		767.79	0.01503482		1297.79	-0.00719649		1827.78	-0.00053583		2357.81	-0.00478448
238	0.03191703		767.99	0.01470872		1297.99	-0.00718502		1827.98	-0.00016233		2358.01	-0.00513085
238.2	0.03245674		768.19	0.01518694		1298.19	-0.00629646		1828.18	0.00090252		2358.21	-0.00486704
238.4	0.03315134		768.39	0.01500971		1298.39	-0.00655742		1828.38	0.00272568		2358.41	-0.00564882
238.6	0.03466232		768.59	0.01407864		1298.59	-0.00658884		1828.58	0.00302729		2358.61	-0.00503279
238.8	0.03499907		768.79	0.01444053		1298.79	-0.00667539		1828.78	0.00309389		2358.81	-0.00548753
239	0.03468032		768.99	0.01472306		1298.99	-0.00667585		1828.98	0.00289126		2359.01	-0.00568892
239.2	0.03424865		769.19	0.01478416		1299.19	-0.00622067		1829.18	0.00203851		2359.21	-0.00544861
239.4	0.03291555		769.39	0.01575014		1299.39	-0.00662466		1829.38	0.00157834		2359.41	-0.00585603
239.6	0.0326165		769.59	0.01578872		1299.59	-0.00718108		1829.58	0.00191648		2359.61	-0.00668544
239.8	0.03182611		769.79	0.01703714		1299.79	-0.00605041		1829.78	0.00163759		2359.81	-0.00664066
240	0.0313291		769.99	0.01825442		1299.99	-0.00613594		1829.98	0.00049339		2360.01	-0.00788682
240.2	0.0315042		770.19	0.01909415		1300.19	-0.00624278		1830.18	-0.00063688		2360.21	-0.00768648
240.4	0.03088078		770.39	0.0197084		1300.39	-0.00628228		1830.38	-0.00038343		2360.41	-0.00745511
240.6	0.03074873		770.59	0.01880011		1300.59	-0.00626534		1830.58	-0.00069919		2360.61	-0.00858893
240.8	0.03130907		770.79	0.01847529		1300.79	-0.00644025		1830.78	-0.00074459		2360.81	-0.00914733
241	0.03287988		770.99	0.0178085		1300.99	-0.00754397		1830.98	-0.00078176		2361.01	-0.00887221
241.2	0.03356841		771.19	0.01738625		1301.19	-0.00803185		1831.18	-0.00033843		2361.21	-0.00798808
241.4	0.03337803		771.39	0.01658387		1301.39	-0.00841737		1831.38	-0.00014455		2361.41	-0.00801955
241.6	0.03346078		771.59	0.01627566		1301.59	-0.00863231		1831.58	0.00017562		2361.61	-0.00841364
241.8	0.03337251		771.79	0.01549835		1301.79	-0.00862543		1831.78	0.00093206		2361.81	-0.00841362
242	0.03407181		771.99	0.01549038		1301.99	-0.00739846		1831.98	0.00129735		2362.01	-0.00796428
242.2	0.03419868		772.19	0.01511566		1302.19	-0.00700685		1832.18	0.00210187		2362.21	-0.00756817
242.4	0.03465868		772.39	0.01466602		1302.39	-0.00743247		1832.38	0.00288134		2362.41	-0.00729024
242.6	0.03486781		772.59	0.01391145		1302.59	-0.00793853		1832.58	0.00166059		2362.61	-0.0061255
242.8	0.03468122		772.79	0.01382614		1302.79	-0.00783284		1832.78	0.00217757		2362.81	-0.00626325
243	0.03437663		772.99	0.01424565		1302.99	-0.00777281		1832.98	0.00233066		2363.01	-0.00650544
243.2	0.03272018		773.19	0.01464686		1303.19	-0.0069563		1833.18	0.0017969		2363.21	-0.00736361
243.4	0.03205647		773.39	0.01507207		1303.39	-0.00647994		1833.38	0.00138577		2363.41	-0.00755666
243.6	0.03221583		773.59	0.0148136		1303.59	-0.00647197		1833.58	0.00093881		2363.61	-0.00743375
243.8	0.0320616		773.79	0.01435098		1303.79	-0.00657128		1833.78	-0.00000692		2363.81	-0.00772553
244	0.03283884		773.99	0.01423891		1303.99	-0.00659195		1833.98	-0.00081572		2364.01	-0.00828905
244.2	0.03322778		774.19	0.01382802		1304.19	-0.006345		1834.18	-0.00164415		2364.21	-0.00876212
244.4	0.03280483		774.39	0.01321205		1304.39	-0.00658574		1834.38	-0.00111252		2364.41	-0.00899444
244.6	0.03343107		774.59	0.01239403		1304.59	-0.00678747		1834.58	-0.00083969		2364.61	-0.00900972
244.8	0.03472954		774.79	0.01274118		1304.79	-0.00734087		1834.78	-0.00063877		2364.81	-0.0086768
245	0.03527489		774.99	0.0126707		1304.99	-0.00752848		1834.98	-0.00060179		2365.01	-0.00884902
245.2	0.03465472		775.19	0.01350552		1305.19	-0.00725806		1835.18	-0.00072099		2365.21	-0.00957946
245.4	0.03366161		775.39	0.01414643		1305.39	-0.00671223		1835.38	-0.0006263		2365.41	-0.00986693
245.6	0.03405291		775.59	0.01465731		1305.59	-0.00707836		1835.58	-0.0007693		2365.61	-0.00961079
245.8	0.03431986		775.79	0.01491489		1305.79	-0.00622792		1835.78	-0.00087202		2365.81	-0.00918371
246	0.0341745		775.99	0.01566382		1305.99	-0.00594423		1835.98	-0.00104518		2366.01	-0.00886603
246.2	0.03461305		776.19	0.01576261		1306.19	-0.00687867		1836.18	-0.00129597		2366.21	-0.00886726
246.4	0.03478576		776.39	0.016333		1306.39	-0.00726191		1836.38	-0.00109303		2366.41	-0.00775325
246.6	0.03441258		776.59	0.01620957		1306.59	-0.00645931		1836.58	-0.00133434		2366.61	-0.00793164
246.8	0.03489526		776.79	0.01686712		1306.79	-0.00637104		1836.78	-0.00139911		2366.81	-0.00802166
247	0.03422564		776.99	0.01750545		1306.99	-0.00687777		1836.98	-0.00101355		2367.01	-0.00870538
247.2	0.03422897		777.19	0.01770001		1307.19	-0.00638923		1837.18	-0.0017691		2367.21	-0.00874114
247.4	0.03480099		777.39	0.01717093		1307.39	-0.00665486		1837.38	-0.00169423		2367.41	-0.00870601
247.6	0.03583749		777.59	0.01691854		1307.59	-0.00698485		1837.58	-0.00164375		2367.61	-0.00897502
247.8	0.03612922		777.79	0.01666312		1307.79	-0.00682684		1837.78	-0.001907		2367.81	-0.00949843
248	0.03654849		777.99	0.01740149		1307.99	-0.0063211		1837.98	-0.00244596		2368.01	-0.0091687
248.2	0.03731012		778.19	0.01763399		1308.19	-0.00614511		1838.18	-0.00310635		2368.21	-0.00938201
248.4	0.03780654		778.39	0.01741968		1308.39	-0.00590602		1838.38	-0.0039108		2368.41	-0.00893061
248.6	0.03852386		778.59	0.01719237		1308.59	-0.0066447		1838.58	-0.00403086		2368.61	-0.00849668
248.8	0.03838041		778.79	0.01744153		1308.79	-0.00656448		1838.78	-0.00415831		2368.81	-0.00972914
249	0.03814983		778.99	0.01710763		1308.99	-0.00653061		1838.98	-0.0042564		2369.01	-0.01061647
249.2	0.03833288		779.19	0.01778534		1309.19	-0.00693865		1839.18	-0.00389463		2369.21	-0.01149459
249.4	0.03821505		779.39	0.01770761		1309.39	-0.00688956		1839.38	-0.00322938		2369.41	-0.01098914
249.6	0.03797256		779.59	0.0177006		1309.59	-0.00705795		1839.58	-0.00383907		2369.61	-0.01082313
249.8	0.0378026		779.79	0.01716376		1309.79	-0.00669978		1839.78	-0.00370948		2369.81	-0.01085248
250	0.03761887		779.99	0.01735823		1309.99	-0.00705551		1839.98	-0.00313341		2370.01	-0.01085769
250.2	0.03666618		780.19	0.0168718		1310.19	-0.00692012		1840.18	-0.00268384		2370.21	-0.01077371
250.4	0.03570248		780.39	0.01636065		1310.39	-0.00659799		1840.38	-0.00222753		2370.41	-0.01016941
250.6	0.03514325		780.59	0.01581951		1310.59	-0.00619265		1840.58	-0.00185472		2370.61	-0.01024403
250.8	0.03507183		780.79	0.01540545		1310.79	-0.00726445		1840.78	-0.0018052		2370.81	-0.00970771
251	0.0339929		780.99	0.01490615		1310.99	-0.00731778		1840.98	-0.00056355		2371.01	-0.00953511
251.2	0.0344413		781.19	0.01494294		1311.19	-0.0071635		1841.18	-0.00070157		2371.21	-0.0093186
251.4	0.03448445		781.39	0.01507257		1311.39	-0.00721305		1841.38	0.00027462		2371.41	-0.01016983
251.6	0.03529422		781.59	0.01515549		1311.59	-0.0074784		1841.58	0.00039972		2371.61	-0.00943402
251.8	0.03560913		781.79	0.01524405		1311.79	-0.00739251		1841.78	-0.00028253		2371.81	-0.00932052
252	0.0363539		781.99	0.01495791		1311.99	-0.00757854		1841.98	-0.00033096		2372.01	-0.00902656
252.2	0.03725369		782.19	0.0151916		1312.19	-0.00800901		1842.18	-0.00143092		2372.21	-0.00880126
252.4	0.0385829		782.39	0.01462927		1312.39	-0.00773302		1842.38	-0.00126839		2372.41	-0.00877818
252.6	0.03959185		782.59	0.01486929		1312.59	-0.00866309		1842.58	-0.0006605		2372.61	-0.00941719
252.8	0.04046588		782.79	0.01467096		1312.79	-0.00807362		1842.78	-0.00069118		2372.81	-0.0102949
253	0.04197102		782.99	0.01470657		1312.99	-0.00827256		1842.98	-0.00110529		2373.01	-0.01076079
253.2	0.04218237		783.19	0.01537041		1313.19	-0.00862442		1843.18	-0.00087322		2373.21	-0.01080567
253.4	0.04246405		783.39	0.01586826		1313.39	-0.00865939		1843.38	-0.00092563		2373.41	-0.01039144
253.6	0.04300842		783.59	0.01622935		1313.59	-0.00835931		1843.58	-0.00114613		2373.61	-0.01004361
253.8	0.04336685		783.79	0.01609329		1313.79	-0.00804138		1843.78	-0.00097933		2373.81	-0.00997353
254	0.0429938		783.99	0.01702077		1313.99	-0.00789196		1843.98	-0.00088431		2374.01	-0.01037173
254.2	0.0423118		784.19	0.01680976		1314.19	-0.00764304		1844.18	-0.00150852		2374.21	-0.01006402
254.4	0.04264949		784.39	0.01752266		1314.39	-0.00805822		1844.38	-0.00166421		2374.41	-0.00967322
254.6	0.04160662		784.59	0.01765382		1314.59	-0.00830059		1844.58	-0.00062989		2374.61	-0.00918386
254.8	0.04116126		784.79	0.01764443		1314.79	-0.00836804		1844.78	-0.00068452		2374.81	-0.00884236
255	0.04056762		784.99	0.0175669		1314.99	-0.00819792		1844.98	-0.00057364		2375.01	-0.00896034
255.2	0.04063768		785.19	0.01785281		1315.19	-0.00832638		1845.18	-0.00017865		2375.21	-0.01001999
255.4	0.04055077		785.39	0.01805196		1315.39	-0.00852111		1845.38	0.00005507		2375.41	-0.01024372
255.6	0.04044237		785.59	0.01687567		1315.59	-0.00872496		1845.58	0.00033346		2375.61	-0.00986569
255.8	0.04047426		785.79	0.0166748		1315.79	-0.00911988		1845.78	-0.00042668		2375.81	-0.01073565
256	0.04035257		785.99	0.01625273		1315.99	-0.00935241		1845.98	0.00017735		2376.01	-0.01198827
256.2	0.04093022		786.19	0.0164965		1316.19	-0.00963542		1846.18	-0.00040563		2376.21	-0.0121425
256.4	0.04139017		786.39	0.01579368		1316.39	-0.00921798		1846.38	0.00047147		2376.41	-0.01283558
256.6	0.04138075		786.59	0.01578147		1316.59	-0.00955258		1846.58	-0.00092717		2376.61	-0.01351906
256.8	0.04174911		786.79	0.01547143		1316.79	-0.0087104		1846.78	-0.00224183		2376.81	-0.01283384
257	0.04161918		786.99	0.01577326		1316.99	-0.00870541		1846.98	-0.00266304		2377.01	-0.01288576
257.2	0.04219073		787.19	0.01654865		1317.19	-0.0087039		1847.18	-0.00270571		2377.21	-0.01174016
257.4	0.04288614		787.39	0.01724179		1317.39	-0.00847278		1847.38	-0.00249911		2377.41	-0.01082277
257.6	0.04330905		787.59	0.01754648		1317.59	-0.00756404		1847.58	-0.00272338		2377.61	-0.01012205
257.8	0.043344		787.79	0.01780673		1317.79	-0.00792799		1847.78	-0.00318778		2377.81	-0.00990277
258	0.04363422		787.99	0.01818169		1317.99	-0.00777556		1847.98	-0.00361966		2378.01	-0.00963265
258.2	0.04417214		788.19	0.01796808		1318.19	-0.00846004		1848.18	-0.00361078		2378.21	-0.00920608
258.4	0.04433921		788.39	0.018239		1318.39	-0.00859901		1848.38	-0.00266409		2378.41	-0.00882448
258.6	0.04454014		788.59	0.01828139		1318.59	-0.00803049		1848.58	-0.00229999		2378.61	-0.00883913
258.8	0.04452489		788.79	0.01836617		1318.79	-0.00742267		1848.78	-0.00307601		2378.81	-0.00852875
259	0.04484438		788.99	0.01841035		1318.99	-0.00759605		1848.98	-0.00277711		2379.01	-0.00932776
259.2	0.04514131		789.19	0.01877977		1319.19	-0.00720008		1849.18	-0.00219863		2379.21	-0.01026279
259.4	0.04585639		789.39	0.01828274		1319.39	-0.00627526		1849.38	-0.00183218		2379.41	-0.00945245
259.6	0.04598848		789.59	0.01705928		1319.59	-0.00649742		1849.58	-0.00122372		2379.61	-0.00998309
259.8	0.04618417		789.79	0.01788908		1319.79	-0.00699437		1849.78	-0.00193454		2379.81	-0.01103375
260	0.04657471		789.99	0.01778638		1319.99	-0.00699412		1849.98	-0.00175231		2380.01	-0.01229879
260.2	0.04684291		790.19	0.01780836		1320.19	-0.00688898		1850.18	-0.00199219		2380.21	-0.01214024
260.4	0.0463685		790.39	0.0178627		1320.39	-0.0072857		1850.38	-0.00169005		2380.41	-0.01281
260.6	0.04621313		790.59	0.01829996		1320.59	-0.00705782		1850.58	-0.00234923		2380.61	-0.0129599
260.8	0.04687541		790.79	0.01816865		1320.79	-0.0069214		1850.78	-0.00306294		2380.81	-0.01301026
261	0.04704333		790.99	0.01826104		1320.99	-0.00720829		1850.98	-0.00248002		2381.01	-0.01297559
261.2	0.04723137		791.19	0.01907781		1321.19	-0.00718099		1851.18	-0.00281302		2381.21	-0.01239993
261.4	0.04769893		791.39	0.01874292		1321.39	-0.00711525		1851.38	-0.00273474		2381.41	-0.01236841
261.6	0.04816976		791.59	0.01866419		1321.59	-0.00758225		1851.58	-0.00255067		2381.61	-0.01172644
261.8	0.04733105		791.79	0.01874548		1321.79	-0.00860014		1851.78	-0.00310494		2381.81	-0.01164553
262	0.04747065		791.99	0.01886945		1321.99	-0.00902296		1851.98	-0.00273857		2382.01	-0.01162968
262.2	0.04710852		792.19	0.01842272		1322.19	-0.01009246		1852.18	-0.00229649		2382.21	-0.01131041
262.4	0.04720811		792.39	0.01915796		1322.39	-0.00976668		1852.38	-0.00233705		2382.41	-0.01144603
262.6	0.04693836		792.59	0.02015929		1322.59	-0.00892351		1852.58	-0.00262136		2382.61	-0.01147762
262.8	0.04597267		792.79	0.02014637		1322.79	-0.00887033		1852.78	-0.00281722		2382.81	-0.01115007
263	0.04566654		792.99	0.0205234		1322.99	-0.00858283		1852.98	-0.00309858		2383.01	-0.01090082
263.2	0.04563968		793.19	0.02097014		1323.19	-0.00833039		1853.18	-0.00284673		2383.21	-0.01051352
263.4	0.04527367		793.39	0.02043869		1323.39	-0.00846528		1853.38	-0.00305482		2383.41	-0.00992075
263.6	0.04503367		793.59	0.01945443		1323.59	-0.00874182		1853.58	-0.00361314		2383.61	-0.01085078
263.8	0.0454476		793.79	0.01986695		1323.79	-0.00785814		1853.78	-0.00423013		2383.81	-0.01103053
264	0.04617263		793.99	0.01857575		1323.99	-0.00732832		1853.98	-0.00460866		2384.01	-0.01189626
264.2	0.04566483		794.19	0.01840275		1324.19	-0.0061295		1854.18	-0.00430476		2384.21	-0.01226592
264.4	0.04613442		794.39	0.01799596		1324.39	-0.00588258		1854.38	-0.00435993		2384.41	-0.01244898
264.6	0.04614726		794.59	0.01789466		1324.59	-0.00567641		1854.58	-0.00357956		2384.61	-0.0125115
264.8	0.0472354		794.79	0.01651538		1324.79	-0.00632634		1854.78	-0.00405493		2384.81	-0.01295632
265	0.04705358		794.99	0.01596759		1324.99	-0.00668391		1854.98	-0.00273266		2385.01	-0.01267893
265.2	0.04748235		795.19	0.01626671		1325.19	-0.00716691		1855.18	-0.00308401		2385.21	-0.01267613
265.4	0.04841267		795.39	0.01620391		1325.39	-0.00725419		1855.38	-0.00335441		2385.41	-0.01273398
265.6	0.04877531		795.59	0.01573135		1325.59	-0.00779779		1855.58	-0.00319776		2385.61	-0.01201688
265.8	0.0487458		795.79	0.01597152		1325.79	-0.00847753		1855.78	-0.00292498		2385.81	-0.01116275
266	0.04924431		795.99	0.01660923		1325.99	-0.00918266		1855.98	-0.00274842		2386.01	-0.01091003
266.2	0.0489928		796.19	0.01769042		1326.19	-0.00933788		1856.18	-0.00292978		2386.21	-0.01073383
266.4	0.04921625		796.39	0.01859703		1326.39	-0.00993298		1856.38	-0.00262647		2386.41	-0.0102495
266.6	0.04914289		796.59	0.01942145		1326.59	-0.00930897		1856.58	-0.00239856		2386.61	-0.01030358
266.8	0.04903745		796.79	0.01988721		1326.79	-0.00966881		1856.78	-0.00261549		2386.81	-0.01044256
267	0.04942301		796.99	0.02121047		1326.99	-0.01004749		1856.98	-0.00255543		2387.01	-0.00986799
267.2	0.04985985		797.19	0.02158608		1327.19	-0.01121715		1857.18	-0.00219856		2387.21	-0.01031272
267.4	0.05073375		797.39	0.02095221		1327.39	-0.01114775		1857.38	-0.00218088		2387.41	-0.01158622
267.6	0.05197643		797.59	0.02104806		1327.59	-0.01009214		1857.58	-0.002563		2387.61	-0.01212371
267.8	0.0528952		797.79	0.02100647		1327.79	-0.00870729		1857.78	-0.0027361		2387.81	-0.01247591
268	0.05302779		797.99	0.02013821		1327.99	-0.00881392		1857.98	-0.00246175		2388.01	-0.013492
268.2	0.05269449		798.19	0.02039817		1328.19	-0.0083481		1858.18	-0.00202016		2388.21	-0.01308073
268.4	0.05322449		798.39	0.01986154		1328.39	-0.00893667		1858.38	-0.00166369		2388.41	-0.01313882
268.6	0.05321018		798.59	0.01987038		1328.59	-0.00988258		1858.58	-0.00070666		2388.61	-0.013772
268.8	0.05284283		798.79	0.01961814		1328.79	-0.00981563		1858.78	-0.00156735		2388.81	-0.01434441
269	0.05237898		798.99	0.02056485		1328.99	-0.00934825		1858.98	-0.00177865		2389.01	-0.01362448
269.2	0.05282351		799.19	0.02109898		1329.19	-0.00902367		1859.18	-0.00270076		2389.21	-0.013839
269.4	0.05227977		799.39	0.02036291		1329.39	-0.00861582		1859.38	-0.00436168		2389.41	-0.01377084
269.6	0.05227385		799.59	0.01944486		1329.59	-0.00923014		1859.58	-0.0049529		2389.61	-0.01354683
269.8	0.05170226		799.79	0.01956799		1329.79	-0.00936015		1859.78	-0.00509597		2389.81	-0.01292668
270	0.05113679		799.99	0.02005046		1329.99	-0.00916403		1859.98	-0.00628963		2390.01	-0.01300452
270.2	0.05049727		800.19	0.02082831		1330.19	-0.00942849		1860.18	-0.00567575		2390.21	-0.01230848
270.4	0.05081362		800.39	0.0211255		1330.39	-0.00921478		1860.38	-0.00460744		2390.41	-0.0116621
270.6	0.05106287		800.59	0.0220973		1330.59	-0.00834923		1860.58	-0.00450335		2390.61	-0.01181608
270.8	0.05135862		800.79	0.02175159		1330.79	-0.00825933		1860.78	-0.0041646		2390.81	-0.01145536
271	0.05140945		800.99	0.02208563		1330.99	-0.00807599		1860.98	-0.00371275		2391.01	-0.01038587
271.2	0.05220344		801.19	0.02145008		1331.19	-0.00773378		1861.18	-0.00337291		2391.21	-0.01011893
271.4	0.05384483		801.39	0.02114877		1331.39	-0.0067731		1861.38	-0.00303063		2391.41	-0.01051759
271.6	0.05468875		801.59	0.02171375		1331.59	-0.00650176		1861.58	-0.00288036		2391.61	-0.01036015
271.8	0.05623142		801.79	0.02132912		1331.79	-0.00678941		1861.78	-0.00195677		2391.81	-0.01113024
272	0.05653041		801.99	0.02147343		1331.99	-0.00791026		1861.98	-0.00157539		2392.01	-0.01093057
272.2	0.05719391		802.19	0.02241745		1332.19	-0.00875382		1862.18	-0.00221512		2392.21	-0.01138965
272.4	0.05820396		802.39	0.02220489		1332.39	-0.00964785		1862.38	-0.00187124		2392.41	-0.01202073
272.6	0.05784187		802.59	0.02272471		1332.59	-0.00991052		1862.58	-0.0017603		2392.61	-0.01224197
272.8	0.05717219		802.79	0.0228497		1332.79	-0.01032047		1862.78	-0.00229385		2392.81	-0.01338892
273	0.05731786		802.99	0.02191624		1332.99	-0.01061512		1862.98	-0.00260237		2393.01	-0.01389938
273.2	0.05713285		803.19	0.02157902		1333.19	-0.01101583		1863.18	-0.00372949		2393.21	-0.01499107
273.4	0.0566711		803.39	0.02068418		1333.39	-0.01154978		1863.38	-0.00559972		2393.41	-0.01552084
273.6	0.05633247		803.59	0.01972395		1333.59	-0.01204518		1863.58	-0.00560965		2393.61	-0.01670775
273.8	0.05581625		803.79	0.01883251		1333.79	-0.01120121		1863.78	-0.0049047		2393.81	-0.01658348
274	0.05468355		803.99	0.0188077		1333.99	-0.01079235		1863.98	-0.00506406		2394.01	-0.01608899
274.2	0.05420737		804.19	0.01922259		1334.19	-0.0100682		1864.18	-0.00421396		2394.21	-0.01521131
274.4	0.05438414		804.39	0.01916349		1334.39	-0.00948917		1864.38	-0.00546846		2394.41	-0.01478693
274.6	0.05402313		804.59	0.01892215		1334.59	-0.00870672		1864.58	-0.00554049		2394.61	-0.01437156
274.8	0.05371465		804.79	0.01866201		1334.79	-0.00804183		1864.78	-0.00562355		2394.81	-0.01399779
275	0.05365825		804.99	0.01952715		1334.99	-0.00690793		1864.98	-0.00557344		2395.01	-0.01325111
275.2	0.05413336		805.19	0.01969248		1335.19	-0.00632682		1865.18	-0.00551629		2395.21	-0.01232632
275.4	0.05429147		805.39	0.02083662		1335.39	-0.00614551		1865.38	-0.00593886		2395.41	-0.01299936
275.6	0.05561671		805.59	0.02121615		1335.59	-0.00599188		1865.58	-0.0061291		2395.61	-0.01305074
275.8	0.05623045		805.79	0.02164943		1335.79	-0.00596259		1865.78	-0.00616408		2395.81	-0.01305687
276	0.05525072		805.99	0.02267079		1335.99	-0.00619615		1865.98	-0.00633036		2396.01	-0.01247016
276.2	0.05555069		806.19	0.02373429		1336.19	-0.00696935		1866.18	-0.00581454		2396.21	-0.01304873
276.4	0.05533255		806.39	0.02337598		1336.39	-0.0074233		1866.38	-0.00451151		2396.41	-0.01293791
276.6	0.05426616		806.59	0.02443724		1336.59	-0.00707083		1866.58	-0.00456918		2396.61	-0.01272844
276.8	0.05414478		806.79	0.02322611		1336.79	-0.00752933		1866.78	-0.00487095		2396.81	-0.01314947
277	0.05443177		806.99	0.02197174		1336.99	-0.00777326		1866.98	-0.00469694		2397.01	-0.0124868
277.2	0.05432986		807.19	0.02187625		1337.19	-0.00802707		1867.18	-0.00517673		2397.21	-0.01206877
277.4	0.05410235		807.39	0.0207867		1337.39	-0.00830201		1867.38	-0.00505634		2397.41	-0.01176932
277.6	0.05415118		807.59	0.01964518		1337.59	-0.00916173		1867.58	-0.00418895		2397.61	-0.01165488
277.8	0.05407346		807.79	0.01911938		1337.79	-0.00875429		1867.78	-0.00474569		2397.81	-0.01080687
278	0.05402724		807.99	0.01911976		1337.99	-0.00920126		1867.98	-0.00548742		2398.01	-0.01002638
278.2	0.05478608		808.19	0.01958371		1338.19	-0.00857612		1868.18	-0.005818		2398.21	-0.00970477
278.4	0.05638152		808.39	0.01923654		1338.39	-0.00905594		1868.38	-0.00672395		2398.41	-0.00968813
278.6	0.05697422		808.59	0.01883238		1338.59	-0.00885487		1868.58	-0.00553952		2398.61	-0.00992015
278.8	0.05763466		808.79	0.01908251		1338.79	-0.0082283		1868.78	-0.00570955		2398.81	-0.01000587
279	0.05889134		808.99	0.01986702		1338.99	-0.00755505		1868.98	-0.00530375		2399.01	-0.010607
279.2	0.05944954		809.19	0.01929829		1339.19	-0.00794606		1869.18	-0.0054833		2399.21	-0.01077027
279.4	0.06024974		809.39	0.0201642		1339.39	-0.00729128		1869.38	-0.00505291		2399.41	-0.01158832
279.6	0.06130116		809.59	0.02010047		1339.59	-0.00681568		1869.58	-0.00433773		2399.61	-0.01216494
279.8	0.06063488		809.79	0.02090852		1339.79	-0.00713113		1869.78	-0.00389549		2399.81	-0.01273738
280	0.06063541		809.99	0.02195862		1339.99	-0.00784136		1869.98	-0.0028495		2400.01	-0.01359916
280.2	0.06070084		810.19	0.02251724		1340.19	-0.00828319		1870.18	-0.0016558		2400.21	-0.01424246
280.4	0.06022839		810.39	0.02282163		1340.39	-0.00795647		1870.38	-0.00128894		2400.41	-0.01515786
280.6	0.05943619		810.59	0.02323921		1340.59	-0.00821607		1870.58	-0.00127059		2400.61	-0.01579902
280.8	0.05919027		810.79	0.02155619		1340.79	-0.00892161		1870.78	-0.00082056		2400.81	-0.01623211
281	0.05876873		810.99	0.02130036		1340.99	-0.00925602		1870.98	-0.00075724		2401.01	-0.01619812
281.2	0.05839233		811.19	0.02176293		1341.19	-0.0096674		1871.18	-0.00109556		2401.21	-0.01638865
281.4	0.05811722		811.39	0.02143935		1341.39	-0.01016334		1871.38	-0.00114912		2401.41	-0.01568934
281.6	0.0582829		811.59	0.02173598		1341.59	-0.01104466		1871.58	-0.00148534		2401.61	-0.01480745
281.8	0.05762796		811.79	0.021753		1341.79	-0.01145951		1871.78	-0.00226981		2401.81	-0.01469811
282	0.0575162		811.99	0.02193355		1341.99	-0.01157587		1871.98	-0.00243435		2402.01	-0.01319016
282.2	0.05786763		812.19	0.02193072		1342.19	-0.01019487		1872.18	-0.00293978		2402.21	-0.01211063
282.4	0.0584711		812.39	0.02104894		1342.39	-0.0104967		1872.38	-0.00268907		2402.41	-0.01113054
282.6	0.05842421		812.59	0.02028166		1342.59	-0.01006507		1872.58	-0.00287227		2402.61	-0.00956293
282.8	0.05927806		812.79	0.02087574		1342.79	-0.0093441		1872.78	-0.00244184		2402.81	-0.0091829
283	0.06037091		812.99	0.02148827		1342.99	-0.00914448		1872.98	-0.00206649		2403.01	-0.00892196
283.2	0.0606198		813.19	0.02108727		1343.19	-0.00895546		1873.18	-0.00224084		2403.21	-0.0088501
283.4	0.06153209		813.39	0.02230038		1343.39	-0.00863568		1873.38	-0.0020016		2403.41	-0.00830087
283.6	0.06167668		813.59	0.02210645		1343.59	-0.00891676		1873.58	-0.00257273		2403.61	-0.0090867
283.8	0.06167657		813.79	0.02250502		1343.79	-0.00954653		1873.78	-0.00227058		2403.81	-0.00925097
284	0.06179559		813.99	0.02277477		1343.99	-0.00957158		1873.98	-0.00214563		2404.01	-0.00982864
284.2	0.06113294		814.19	0.022788		1344.19	-0.00937166		1874.18	-0.00205863		2404.21	-0.01026356
284.4	0.06092363		814.39	0.02253699		1344.39	-0.00955408		1874.38	-0.00266327		2404.41	-0.01221916
284.6	0.06065135		814.59	0.02270781		1344.59	-0.00997288		1874.58	-0.00310572		2404.61	-0.01326035
284.8	0.06047188		814.79	0.02212874		1344.79	-0.00917532		1874.78	-0.00358509		2404.81	-0.01368445
285	0.06020052		814.99	0.02292585		1344.99	-0.00913182		1874.98	-0.00358189		2405.01	-0.01440913
285.2	0.06045976		815.19	0.02299663		1345.19	-0.00973468		1875.18	-0.00315664		2405.21	-0.01437284
285.4	0.06020859		815.39	0.02206715		1345.39	-0.0099476		1875.38	-0.0037938		2405.41	-0.01414462
285.6	0.0600441		815.59	0.02182823		1345.59	-0.0104625		1875.58	-0.00428265		2405.61	-0.01325
285.8	0.05969749		815.79	0.02140228		1345.79	-0.01019717		1875.78	-0.00402233		2405.81	-0.0131437
286	0.06035761		815.99	0.02101979		1345.99	-0.00946542		1875.98	-0.00447363		2406.01	-0.01230044
286.2	0.06018374		816.19	0.02066659		1346.19	-0.00885335		1876.18	-0.00423609		2406.21	-0.01227267
286.4	0.0599816		816.39	0.02048011		1346.39	-0.00939213		1876.38	-0.00373437		2406.41	-0.01159349
286.6	0.06016838		816.59	0.0202595		1346.59	-0.00933575		1876.58	-0.00323958		2406.61	-0.01091325
286.8	0.06046967		816.79	0.02099281		1346.79	-0.00908212		1876.78	-0.00198779		2406.81	-0.01127052
287	0.06035957		816.99	0.02103885		1346.99	-0.00921279		1876.98	-0.00235765		2407.01	-0.01138772
287.2	0.06017693		817.19	0.02054848		1347.19	-0.00976644		1877.18	-0.00267119		2407.21	-0.01136644
287.4	0.06048513		817.39	0.02059388		1347.39	-0.01026237		1877.38	-0.00297534		2407.41	-0.01135936
287.6	0.06057017		817.59	0.02048082		1347.59	-0.01085054		1877.58	-0.00346297		2407.61	-0.01170478
287.8	0.06067738		817.79	0.02173544		1347.79	-0.01107158		1877.78	-0.00375805		2407.81	-0.01204323
288	0.06052508		817.99	0.02183511		1347.99	-0.01077051		1877.98	-0.00433527		2408.01	-0.01260165
288.2	0.06073419		818.19	0.0218093		1348.19	-0.01022304		1878.18	-0.00506301		2408.21	-0.01312782
288.4	0.06136608		818.39	0.02153817		1348.39	-0.01033215		1878.38	-0.00503891		2408.41	-0.01347687
288.6	0.06130799		818.59	0.02214931		1348.59	-0.01007793		1878.58	-0.00490207		2408.61	-0.01367813
288.8	0.06137847		818.79	0.02260532		1348.79	-0.00966881		1878.78	-0.00490263		2408.81	-0.01365153
289	0.06175904		818.99	0.02358911		1348.99	-0.00970325		1878.98	-0.00465913		2409.01	-0.01421583
289.2	0.06261594		819.19	0.0229669		1349.19	-0.01005628		1879.18	-0.00434678		2409.21	-0.01424239
289.4	0.06299734		819.39	0.02285975		1349.39	-0.0104542		1879.38	-0.00478916		2409.41	-0.01414054
289.6	0.0637935		819.59	0.02324564		1349.59	-0.0101652		1879.58	-0.00477916		2409.61	-0.01344918
289.8	0.06413526		819.79	0.02345185		1349.79	-0.00993526		1879.78	-0.00424736		2409.81	-0.01459883
290	0.06507344		819.99	0.02330075		1349.99	-0.01038229		1879.98	-0.00467685		2410.01	-0.01550342
290.2	0.06347797		820.19	0.02352534		1350.19	-0.01063059		1880.18	-0.00453204		2410.21	-0.01564564
290.4	0.06398576		820.39	0.02322255		1350.39	-0.01179423		1880.38	-0.00374978		2410.41	-0.01530294
290.6	0.06418114		820.59	0.02341256		1350.59	-0.01175633		1880.58	-0.00309653		2410.61	-0.01534779
290.8	0.06407411		820.79	0.02351224		1350.79	-0.01129342		1880.78	-0.00238789		2410.81	-0.01543844
291	0.06421847		820.99	0.02279919		1350.99	-0.01128452		1880.98	-0.0032017		2411.01	-0.01500406
291.2	0.06488678		821.19	0.02187734		1351.19	-0.01090525		1881.18	-0.00307409		2411.21	-0.01483262
291.4	0.06452883		821.39	0.02211464		1351.39	-0.01066608		1881.38	-0.00304366		2411.41	-0.01517757
291.6	0.06457448		821.59	0.02184671		1351.59	-0.01074609		1881.58	-0.0032966		2411.61	-0.01414433
291.8	0.06392203		821.79	0.02231928		1351.79	-0.01003328		1881.78	-0.00365096		2411.81	-0.01466295
292	0.06381614		821.99	0.02139517		1351.99	-0.00909495		1881.98	-0.00378639		2412.01	-0.01401521
292.2	0.06376109		822.19	0.02183991		1352.19	-0.00816085		1882.18	-0.00388566		2412.21	-0.01344325
292.4	0.06345735		822.39	0.02232892		1352.39	-0.00833246		1882.38	-0.00323648		2412.41	-0.01259711
292.6	0.06322478		822.59	0.022664		1352.59	-0.0080144		1882.58	-0.00336067		2412.61	-0.01281715
292.8	0.06306086		822.79	0.02306957		1352.79	-0.00843034		1882.78	-0.00314049		2412.81	-0.01269988
293	0.06317137		822.99	0.02366619		1352.99	-0.00853616		1882.98	-0.00273073		2413.01	-0.01379881
293.2	0.06338173		823.19	0.02363763		1353.19	-0.0091646		1883.18	-0.00307567		2413.21	-0.01364287
293.4	0.0635147		823.39	0.02407657		1353.39	-0.00888488		1883.38	-0.00360078		2413.41	-0.0130598
293.6	0.06447194		823.59	0.02454813		1353.59	-0.00856873		1883.58	-0.00384917		2413.61	-0.0134206
293.8	0.06527299		823.79	0.02440005		1353.79	-0.00862068		1883.78	-0.00340129		2413.81	-0.0140518
294	0.06530304		823.99	0.02478913		1353.99	-0.00888764		1883.98	-0.00393029		2414.01	-0.0146242
294.2	0.06581864		824.19	0.02562469		1354.19	-0.00922189		1884.18	-0.00398305		2414.21	-0.01383419
294.4	0.06774575		824.39	0.02590696		1354.39	-0.00967886		1884.38	-0.00296361		2414.41	-0.01371935
294.6	0.06872548		824.59	0.02700836		1354.59	-0.00824352		1884.58	-0.00359576		2414.61	-0.0137862
294.8	0.06956939		824.79	0.0269572		1354.79	-0.00777765		1884.78	-0.00272311		2414.81	-0.01449456
295	0.07061495		824.99	0.02657286		1354.99	-0.00726915		1884.98	-0.00323124		2415.01	-0.01501434
295.2	0.07156503		825.19	0.026081		1355.19	-0.00714797		1885.18	-0.00251458		2415.21	-0.01621162
295.4	0.0710943		825.39	0.02638851		1355.39	-0.00743201		1885.38	-0.00286751		2415.41	-0.01627282
295.6	0.07076604		825.59	0.02519991		1355.59	-0.00684445		1885.58	-0.00311741		2415.61	-0.01620217
295.8	0.07087512		825.79	0.02499544		1355.79	-0.00576605		1885.78	-0.00350355		2415.81	-0.01712006
296	0.07067181		825.99	0.02472227		1355.99	-0.00531124		1885.98	-0.00330928		2416.01	-0.01677407
296.2	0.06971937		826.19	0.02531455		1356.19	-0.00531265		1886.18	-0.00282344		2416.21	-0.01613958
296.4	0.0687971		826.39	0.02396754		1356.39	-0.00542266		1886.38	-0.00291261		2416.41	-0.01601452
296.6	0.06882976		826.59	0.0234413		1356.59	-0.00574482		1886.58	-0.00306527		2416.61	-0.01684443
296.8	0.06797423		826.79	0.0233012		1356.79	-0.00632871		1886.78	-0.00224738		2416.81	-0.01686882
297	0.06704701		826.99	0.02297075		1356.99	-0.0061024		1886.98	-0.00294959		2417.01	-0.01649888
297.2	0.0666643		827.19	0.02168924		1357.19	-0.00685449		1887.18	-0.00362562		2417.21	-0.01516004
297.4	0.06644632		827.39	0.02182261		1357.39	-0.00700566		1887.38	-0.00379354		2417.41	-0.01463194
297.6	0.06654719		827.59	0.02211058		1357.59	-0.00789467		1887.58	-0.00322341		2417.61	-0.01444928
297.8	0.0657038		827.79	0.02185121		1357.79	-0.00877944		1887.78	-0.00273803		2417.81	-0.01438481
298	0.06467604		827.99	0.02199418		1357.99	-0.00945265		1887.98	-0.003281		2418.01	-0.01369624
298.2	0.06548206		828.19	0.02233455		1358.19	-0.01005388		1888.18	-0.00342286		2418.21	-0.01279449
298.4	0.06568609		828.39	0.0221754		1358.39	-0.01050625		1888.38	-0.00251746		2418.41	-0.01333173
298.6	0.06526715		828.59	0.02288744		1358.59	-0.01019421		1888.58	-0.00251459		2418.61	-0.01379747
298.8	0.06558422		828.79	0.02301518		1358.79	-0.01082159		1888.78	-0.00169662		2418.81	-0.01514045
299	0.06585712		828.99	0.02289763		1358.99	-0.01052835		1888.98	-0.00170429		2419.01	-0.01596019
299.2	0.06601448		829.19	0.02345925		1359.19	-0.01172377		1889.18	-0.00179878		2419.21	-0.01597498
299.4	0.0665341		829.39	0.02370858		1359.39	-0.01180563		1889.38	-0.00241103		2419.41	-0.01539482
299.6	0.06692674		829.59	0.02381981		1359.59	-0.01048917		1889.58	-0.00232393		2419.61	-0.01583991
299.8	0.0680907		829.79	0.02428288		1359.79	-0.01003174		1889.78	-0.00301291		2419.81	-0.01526745
300	0.06901568		829.99	0.02521099		1359.99	-0.01017743		1889.98	-0.00278699		2420.01	-0.01419914
300.2	0.06942278		830.19	0.02531955		1360.19	-0.00930223		1890.18	-0.00356724		2420.21	-0.01331703
300.4	0.07083462		830.39	0.02479813		1360.39	-0.00827849		1890.38	-0.00443757		2420.41	-0.01339046
300.6	0.07255		830.59	0.02592622		1360.59	-0.00823818		1890.58	-0.00464759		2420.61	-0.01313014
300.8	0.07232443		830.79	0.02645211		1360.79	-0.00875377		1890.78	-0.0047876		2420.81	-0.01229877
301	0.07269189		830.99	0.02664781		1360.99	-0.00896019		1890.98	-0.00566659		2421.01	-0.01135357
301.2	0.07357001		831.19	0.02653934		1361.19	-0.00917736		1891.18	-0.00568149		2421.21	-0.0107859
301.4	0.07313424		831.39	0.02705358		1361.39	-0.0088978		1891.38	-0.00577126		2421.41	-0.01064139
301.6	0.07306827		831.59	0.02659974		1361.59	-0.00867586		1891.58	-0.00515007		2421.61	-0.00978069
301.8	0.0721783		831.79	0.02547917		1361.79	-0.00935677		1891.78	-0.00467801		2421.81	-0.00939107
302	0.07179334		831.99	0.02495414		1361.99	-0.00849866		1891.98	-0.0046089		2422.01	-0.00967016
302.2	0.07163249		832.19	0.02443547		1362.19	-0.00817922		1892.18	-0.00391811		2422.21	-0.01025192
302.4	0.07114656		832.39	0.0235392		1362.39	-0.0078545		1892.38	-0.00250217		2422.41	-0.01102413
302.6	0.06995308		832.59	0.02406408		1362.59	-0.00751709		1892.58	-0.00243145		2422.61	-0.0123117
302.8	0.07045561		832.79	0.02314566		1362.79	-0.00819557		1892.78	-0.00175454		2422.81	-0.01358294
303	0.07039512		832.99	0.02222136		1362.99	-0.00865976		1892.98	-0.00119251		2423.01	-0.01434462
303.2	0.07066625		833.19	0.02304986		1363.19	-0.01005515		1893.18	-0.00062212		2423.21	-0.01420074
303.4	0.07069903		833.39	0.02350646		1363.39	-0.0098688		1893.38	-0.00094288		2423.41	-0.01510402
303.6	0.07099685		833.59	0.02346925		1363.59	-0.00975847		1893.58	-0.00113288		2423.61	-0.01600108
303.8	0.07141466		833.79	0.02285251		1363.79	-0.00992641		1893.78	-0.00136191		2423.81	-0.01605727
304	0.07193007		833.99	0.02312674		1363.99	-0.01051092		1893.98	-0.00131407		2424.01	-0.01589477
304.2	0.07159143		834.19	0.02221731		1364.19	-0.01081527		1894.18	-0.00179287		2424.21	-0.01636118
304.4	0.07166281		834.39	0.02266663		1364.39	-0.01132221		1894.38	-0.00231525		2424.41	-0.01621999
304.6	0.0707025		834.59	0.02307759		1364.59	-0.01151639		1894.58	-0.00260082		2424.61	-0.01602848
304.8	0.07062969		834.79	0.02373034		1364.79	-0.01205082		1894.78	-0.00313446		2424.81	-0.01540424
305	0.07047629		834.99	0.0238197		1364.99	-0.01091318		1894.98	-0.00399751		2425.01	-0.01475076
305.2	0.070098		835.19	0.02352179		1365.19	-0.01020663		1895.18	-0.00439433		2425.21	-0.01416214
305.4	0.06940904		835.39	0.02359779		1365.39	-0.0097435		1895.38	-0.00475466		2425.41	-0.01419863
305.6	0.06990009		835.59	0.02394462		1365.59	-0.00935323		1895.58	-0.00549279		2425.61	-0.01331657
305.8	0.06974924		835.79	0.02405223		1365.79	-0.00904891		1895.78	-0.00561846		2425.81	-0.01351638
306	0.06926172		835.99	0.02376185		1365.99	-0.00859353		1895.98	-0.00563385		2426.01	-0.01455507
306.2	0.07009878		836.19	0.0234155		1366.19	-0.00879485		1896.18	-0.00511975		2426.21	-0.01391904
306.4	0.07098664		836.39	0.02412733		1366.39	-0.00887039		1896.38	-0.00511371		2426.41	-0.01423321
306.6	0.07165114		836.59	0.02459774		1366.59	-0.00897108		1896.58	-0.00499415		2426.61	-0.01548616
306.8	0.07225759		836.79	0.02389597		1366.79	-0.00936274		1896.78	-0.00481481		2426.81	-0.01553522
307	0.07340182		836.99	0.02438232		1366.99	-0.00919604		1896.98	-0.00437449		2427.01	-0.01567292
307.2	0.07371697		837.19	0.02532312		1367.19	-0.00944916		1897.18	-0.00403384		2427.21	-0.01635639
307.4	0.0735296		837.39	0.02576856		1367.39	-0.00892888		1897.38	-0.00489275		2427.41	-0.01762385
307.6	0.07428949		837.59	0.02549532		1367.59	-0.00928464		1897.58	-0.00536105		2427.61	-0.01800554
307.8	0.07489325		837.79	0.02577688		1367.79	-0.00874484		1897.78	-0.00534825		2427.81	-0.01818864
308	0.07539686		837.99	0.02673554		1367.99	-0.00928486		1897.98	-0.0052765		2428.01	-0.01850626
308.2	0.07493768		838.19	0.02714143		1368.19	-0.0093444		1898.18	-0.00550442		2428.21	-0.01898287
308.4	0.07482748		838.39	0.02752826		1368.39	-0.00869887		1898.38	-0.00672688		2428.41	-0.01854205
308.6	0.07387764		838.59	0.02732352		1368.59	-0.00827499		1898.58	-0.00700311		2428.61	-0.01833099
308.8	0.07427015		838.79	0.02733585		1368.79	-0.00857241		1898.78	-0.00719363		2428.81	-0.01817279
309	0.07370319		838.99	0.02758584		1368.99	-0.00727363		1898.98	-0.00728356		2429.01	-0.01825342
309.2	0.07370948		839.19	0.02822561		1369.19	-0.00750584		1899.18	-0.00721457		2429.21	-0.01815643
309.4	0.07327368		839.39	0.02899493		1369.39	-0.00705379		1899.38	-0.00744037		2429.41	-0.01792003
309.6	0.07344063		839.59	0.02955209		1369.59	-0.00702114		1899.58	-0.00807242		2429.61	-0.01701192
309.8	0.0733838		839.79	0.0284401		1369.79	-0.00734547		1899.78	-0.00746735		2429.81	-0.01613257
310	0.07303013		839.99	0.02751564		1369.99	-0.0085494		1899.98	-0.0064475		2430.01	-0.01605414
310.2	0.07402749		840.19	0.02759796		1370.19	-0.00802836		1900.18	-0.00657229		2430.21	-0.01540615
310.4	0.07441002		840.39	0.02796542		1370.39	-0.00805986		1900.38	-0.00685557		2430.41	-0.01537418
310.6	0.07453921		840.59	0.02737791		1370.59	-0.00791534		1900.58	-0.00611372		2430.61	-0.01551154
310.8	0.07476464		840.79	0.02677088		1370.79	-0.00820485		1900.78	-0.00562074		2430.81	-0.01454792
311	0.07487799		840.99	0.02609318		1370.99	-0.0083874		1900.98	-0.00479965		2431.01	-0.01452225
311.2	0.07517201		841.19	0.02616971		1371.19	-0.00856491		1901.18	-0.00471182		2431.21	-0.01407572
311.4	0.07591746		841.39	0.02613363		1371.39	-0.00806961		1901.38	-0.00481295		2431.41	-0.013132
311.6	0.07633314		841.59	0.02634882		1371.59	-0.00814697		1901.58	-0.00464333		2431.61	-0.012543
311.8	0.07748654		841.79	0.02677869		1371.79	-0.00786118		1901.78	-0.00427424		2431.81	-0.01217006
312	0.07825234		841.99	0.0265453		1371.99	-0.00914939		1901.98	-0.00441614		2432.01	-0.01325469
312.2	0.07825113		842.19	0.02584036		1372.19	-0.00893445		1902.18	-0.00471721		2432.21	-0.01293221
312.4	0.07895405		842.39	0.02511355		1372.39	-0.00836302		1902.38	-0.00512599		2432.41	-0.0125229
312.6	0.07770384		842.59	0.02509127		1372.59	-0.00871417		1902.58	-0.00492215		2432.61	-0.01258731
312.8	0.07825866		842.79	0.02527583		1372.79	-0.00816754		1902.78	-0.00504538		2432.81	-0.01281308
313	0.07820284		842.99	0.02590732		1372.99	-0.00736277		1902.98	-0.00574652		2433.01	-0.01287651
313.2	0.07806808		843.19	0.02670191		1373.19	-0.00753898		1903.18	-0.00649865		2433.21	-0.01316102
313.4	0.07857299		843.39	0.02650125		1373.39	-0.00759671		1903.38	-0.00650886		2433.41	-0.01280716
313.6	0.07902636		843.59	0.02570951		1373.59	-0.00783257		1903.58	-0.00770448		2433.61	-0.01380687
313.8	0.07966075		843.79	0.02472142		1373.79	-0.00853516		1903.78	-0.00739539		2433.81	-0.01482647
314	0.07912233		843.99	0.02446901		1373.99	-0.0089322		1903.98	-0.0071276		2434.01	-0.01664288
314.2	0.07956385		844.19	0.0249077		1374.19	-0.00868936		1904.18	-0.00858538		2434.21	-0.01739173
314.4	0.07929318		844.39	0.02490524		1374.39	-0.00935589		1904.38	-0.00804788		2434.41	-0.01779683
314.6	0.07851177		844.59	0.0250765		1374.59	-0.01000711		1904.58	-0.00754061		2434.61	-0.01847243
314.8	0.07732871		844.79	0.02491081		1374.79	-0.01079173		1904.78	-0.00685996		2434.81	-0.01934209
315	0.07657867		844.99	0.02467661		1374.99	-0.01092329		1904.98	-0.00640999		2435.01	-0.01969855
315.2	0.07692273		845.19	0.02496015		1375.19	-0.0106274		1905.18	-0.00619246		2435.21	-0.01929964
315.4	0.07659898		845.39	0.02511703		1375.39	-0.01077329		1905.38	-0.00514697		2435.41	-0.0192107
315.6	0.07648266		845.59	0.02634777		1375.59	-0.01081947		1905.58	-0.004801		2435.61	-0.01917763
315.8	0.07735753		845.79	0.0259707		1375.79	-0.01057135		1905.78	-0.00476704		2435.81	-0.0196756
316	0.07806885		845.99	0.02564691		1375.99	-0.01030785		1905.98	-0.00469913		2436.01	-0.01951682
316.2	0.07802259		846.19	0.02572867		1376.19	-0.00808465		1906.18	-0.00490485		2436.21	-0.0183478
316.4	0.0786353		846.39	0.02587935		1376.39	-0.00697093		1906.38	-0.00513658		2436.41	-0.01793825
316.6	0.07838845		846.59	0.0262454		1376.59	-0.00613867		1906.58	-0.00555489		2436.61	-0.01742968
316.8	0.07908735		846.79	0.02614726		1376.79	-0.00481079		1906.78	-0.0060424		2436.81	-0.01679795
317	0.07995684		846.99	0.02599967		1376.99	-0.00478948		1906.98	-0.00634624		2437.01	-0.016149
317.2	0.08129161		847.19	0.0265457		1377.19	-0.00509787		1907.18	-0.00616493		2437.21	-0.01563827
317.4	0.08240281		847.39	0.02564298		1377.39	-0.00539907		1907.38	-0.00682166		2437.41	-0.01552977
317.6	0.08194613		847.59	0.02562717		1377.59	-0.00549893		1907.58	-0.00770064		2437.61	-0.01655693
317.8	0.0819221		847.79	0.02496844		1377.79	-0.00634157		1907.78	-0.00700241		2437.81	-0.01680911
318	0.08136582		847.99	0.02476264		1377.99	-0.00738316		1907.98	-0.00718378		2438.01	-0.01751318
318.2	0.08074768		848.19	0.02498331		1378.19	-0.00814721		1908.18	-0.00772645		2438.21	-0.01719816
318.4	0.08009575		848.39	0.02482071		1378.39	-0.00958674		1908.38	-0.00633042		2438.41	-0.01736909
318.6	0.07999004		848.59	0.02526885		1378.59	-0.01115838		1908.58	-0.00647735		2438.61	-0.01775561
318.8	0.07898588		848.79	0.02523094		1378.79	-0.01179029		1908.78	-0.00557411		2438.81	-0.01789583
319	0.07913788		848.99	0.02453636		1378.99	-0.01229214		1908.98	-0.00520969		2439.01	-0.01700361
319.2	0.07946561		849.19	0.02456005		1379.19	-0.01305967		1909.18	-0.00526275		2439.21	-0.01652497
319.4	0.07975486		849.39	0.02480402		1379.39	-0.013729		1909.38	-0.00452178		2439.41	-0.0156351
319.6	0.08026581		849.59	0.02571192		1379.59	-0.01363291		1909.58	-0.00420374		2439.61	-0.01570008
319.8	0.08097896		849.79	0.02583719		1379.79	-0.01275065		1909.78	-0.00410162		2439.81	-0.01565436
320	0.08157192		849.99	0.0265004		1379.99	-0.01246056		1909.98	-0.00357605		2440.01	-0.01538615
320.2	0.08164821		850.19	0.02688567		1380.19	-0.01140456		1910.18	-0.0032085		2440.21	-0.01599091
320.4	0.08230957		850.39	0.02763274		1380.39	-0.01130101		1910.38	-0.00332231		2440.41	-0.01540133
320.6	0.08240128		850.59	0.02809752		1380.59	-0.01033505		1910.58	-0.00319905		2440.61	-0.01503732
320.8	0.08220333		850.79	0.02827135		1380.79	-0.01029251		1910.78	-0.00340927		2440.81	-0.01524926
321	0.08274603		850.99	0.02945268		1380.99	-0.00965697		1910.98	-0.00431697		2441.01	-0.01598627
321.2	0.0824355		851.19	0.03052873		1381.19	-0.00936435		1911.18	-0.00477004		2441.21	-0.01640548
321.4	0.08183317		851.39	0.03018846		1381.39	-0.00893738		1911.38	-0.00491167		2441.41	-0.01751326
321.6	0.08092597		851.59	0.03028926		1381.59	-0.00919261		1911.58	-0.0046221		2441.61	-0.01829342
321.8	0.08130529		851.79	0.03007889		1381.79	-0.00929728		1911.78	-0.00490231		2441.81	-0.019303
322	0.08164429		851.99	0.03033953		1381.99	-0.00929576		1911.98	-0.005516		2442.01	-0.02023547
322.2	0.08126327		852.19	0.03007301		1382.19	-0.00956457		1912.18	-0.00500495		2442.21	-0.02000397
322.4	0.08231565		852.39	0.03000332		1382.39	-0.01017391		1912.38	-0.00516475		2442.41	-0.0198161
322.6	0.08249817		852.59	0.02959695		1382.59	-0.0103475		1912.58	-0.00561732		2442.61	-0.01969948
322.8	0.08210263		852.79	0.02870824		1382.79	-0.01072839		1912.78	-0.00506362		2442.81	-0.01999852
323	0.08291942		852.99	0.02789918		1382.99	-0.01112556		1912.98	-0.00473314		2443.01	-0.01966634
323.2	0.08272111		853.19	0.02805203		1383.19	-0.01099924		1913.18	-0.00449497		2443.21	-0.0191821
323.4	0.08284506		853.39	0.02828609		1383.39	-0.0107778		1913.38	-0.00403964		2443.41	-0.0187175
323.6	0.08352075		853.59	0.02894053		1383.59	-0.01122557		1913.58	-0.00400185		2443.61	-0.01911994
323.8	0.08417089		853.79	0.02866835		1383.79	-0.01066709		1913.78	-0.00412874		2443.81	-0.01900943
324	0.08423831		853.99	0.02843294		1383.99	-0.01083124		1913.98	-0.00315033		2444.01	-0.01893053
324.2	0.08394555		854.19	0.02861063		1384.19	-0.01069869		1914.18	-0.003536		2444.21	-0.01803876
324.4	0.08380928		854.39	0.028918		1384.39	-0.0106275		1914.38	-0.00419555		2444.41	-0.01650854
324.6	0.08313264		854.59	0.02781996		1384.59	-0.00941993		1914.58	-0.00505777		2444.61	-0.01665292
324.8	0.08320815		854.79	0.02680775		1384.79	-0.00915394		1914.78	-0.00648575		2444.81	-0.01646877
325	0.08292177		854.99	0.0266714		1384.99	-0.00823732		1914.98	-0.0073048		2445.01	-0.01627179
325.2	0.08272706		855.19	0.02597756		1385.19	-0.00877501		1915.18	-0.00709387		2445.21	-0.01558513
325.4	0.08255063		855.39	0.02533379		1385.39	-0.00860159		1915.38	-0.00776146		2445.41	-0.01617845
325.6	0.08242185		855.59	0.02591302		1385.59	-0.00832055		1915.58	-0.00850388		2445.61	-0.01664888
325.8	0.08247034		855.79	0.02589889		1385.79	-0.00838385		1915.78	-0.00866936		2445.81	-0.01706277
326	0.08193758		855.99	0.02580794		1385.99	-0.00902652		1915.98	-0.00893731		2446.01	-0.01663778
326.2	0.08131414		856.19	0.02566467		1386.19	-0.0098098		1916.18	-0.00876533		2446.21	-0.01598454
326.4	0.08092767		856.39	0.02578787		1386.39	-0.01018566		1916.38	-0.00823176		2446.41	-0.01616944
326.6	0.08061475		856.59	0.02569527		1386.59	-0.01056162		1916.58	-0.00793394		2446.61	-0.01657682
326.8	0.08079003		856.79	0.02580466		1386.79	-0.01121243		1916.78	-0.00761511		2446.81	-0.01687459
327	0.08057229		856.99	0.02618151		1386.99	-0.01078184		1916.98	-0.00698334		2447.01	-0.01651784
327.2	0.08026735		857.19	0.0268224		1387.19	-0.01074275		1917.18	-0.00672198		2447.21	-0.01609965
327.4	0.08153737		857.39	0.027701		1387.39	-0.01092582		1917.38	-0.00658102		2447.41	-0.01598707
327.6	0.08246169		857.59	0.02781522		1387.59	-0.01157261		1917.58	-0.00520846		2447.61	-0.01610017
327.8	0.0827237		857.79	0.02818642		1387.79	-0.01020309		1917.78	-0.00467614		2447.81	-0.01618263
328	0.08254752		857.99	0.02949104		1387.99	-0.010272		1917.98	-0.00344887		2448.01	-0.01578133
328.2	0.08288709		858.19	0.02958164		1388.19	-0.01043513		1918.18	-0.00354388		2448.21	-0.01539205
328.4	0.08313912		858.39	0.02957576		1388.39	-0.01031596		1918.38	-0.00301103		2448.41	-0.01475513
328.6	0.08376277		858.59	0.02866714		1388.59	-0.00888924		1918.58	-0.00340724		2448.61	-0.01518725
328.8	0.08505331		858.79	0.02764127		1388.79	-0.00912721		1918.78	-0.0034257		2448.81	-0.01548213
329	0.08536218		858.99	0.02743814		1388.99	-0.0092321		1918.98	-0.00321428		2449.01	-0.01509747
329.2	0.08549567		859.19	0.02749068		1389.19	-0.00998077		1919.18	-0.0036372		2449.21	-0.01497823
329.4	0.08473287		859.39	0.02796681		1389.39	-0.00948602		1919.38	-0.00380747		2449.41	-0.01547082
329.6	0.08454493		859.59	0.02856668		1389.59	-0.00927224		1919.58	-0.00316467		2449.61	-0.01592717
329.8	0.08357864		859.79	0.02817001		1389.79	-0.01035881		1919.78	-0.0031308		2449.81	-0.0154377
330	0.08341712		859.99	0.02814578		1389.99	-0.01071309		1919.98	-0.00393372		2450.01	-0.01507624
330.2	0.0831664		860.19	0.02756864		1390.19	-0.01020406		1920.18	-0.00395569		2450.21	-0.01493395
330.4	0.08296653		860.39	0.02748409		1390.39	-0.01019986		1920.38	-0.00406406		2450.41	-0.01536616
330.6	0.08386833		860.59	0.02790545		1390.59	-0.0101433		1920.58	-0.00517177		2450.61	-0.01488875
330.8	0.08400214		860.79	0.02818297		1390.79	-0.00972097		1920.78	-0.00523368		2450.81	-0.01527826
331	0.08394709		860.99	0.028675		1390.99	-0.0096245		1920.98	-0.00516236		2451.01	-0.01557816
331.2	0.08440813		861.19	0.02855039		1391.19	-0.00958134		1921.18	-0.00472337		2451.21	-0.01595618
331.4	0.08500562		861.39	0.02910578		1391.39	-0.00997244		1921.38	-0.00430464		2451.41	-0.01607508
331.6	0.08549173		861.59	0.02849577		1391.59	-0.00948194		1921.58	-0.00334377		2451.61	-0.01568998
331.8	0.08540591		861.79	0.02949006		1391.79	-0.00869996		1921.78	-0.00378214		2451.81	-0.01561542
332	0.08507553		861.99	0.03037084		1391.99	-0.01019364		1921.98	-0.00370882		2452.01	-0.01599756
332.2	0.08569626		862.19	0.02968417		1392.19	-0.00988004		1922.18	-0.00424598		2452.21	-0.01609167
332.4	0.08600438		862.39	0.02929681		1392.39	-0.00963145		1922.38	-0.00487574		2452.41	-0.01622446
332.6	0.08708267		862.59	0.02898445		1392.59	-0.0092532		1922.58	-0.00588512		2452.61	-0.01674147
332.8	0.08780492		862.79	0.02825358		1392.79	-0.0096982		1922.78	-0.00633101		2452.81	-0.0169837
333	0.08794262		862.99	0.02822741		1392.99	-0.01017681		1922.98	-0.00650676		2453.01	-0.01595152
333.2	0.08738581		863.19	0.02878719		1393.19	-0.00991783		1923.18	-0.00710015		2453.21	-0.01547663
333.4	0.08657024		863.39	0.02886119		1393.39	-0.00889806		1923.38	-0.00683158		2453.41	-0.01569844
333.6	0.08679319		863.59	0.02959525		1393.59	-0.00896103		1923.58	-0.00680931		2453.61	-0.01615378
333.8	0.08663222		863.79	0.03039467		1393.79	-0.0094548		1923.78	-0.0070369		2453.81	-0.0149695
334	0.08698742		863.99	0.02989224		1393.99	-0.00908593		1923.98	-0.00667027		2454.01	-0.01480466
334.2	0.08592897		864.19	0.02978691		1394.19	-0.00879098		1924.18	-0.0063451		2454.21	-0.01453846
334.4	0.08613836		864.39	0.03004833		1394.39	-0.00928616		1924.38	-0.00698114		2454.41	-0.01462081
334.6	0.08650546		864.59	0.03002203		1394.59	-0.00835508		1924.58	-0.00641928		2454.61	-0.01494887
334.8	0.08576222		864.79	0.02959305		1394.79	-0.00891201		1924.78	-0.00631987		2454.81	-0.015591
335	0.0856585		864.99	0.02978698		1394.99	-0.00975785		1924.98	-0.00582456		2455.01	-0.01549192
335.2	0.08541147		865.19	0.02935548		1395.19	-0.0091522		1925.18	-0.00469432		2455.21	-0.01579956
335.4	0.08536188		865.39	0.02996585		1395.39	-0.01010043		1925.38	-0.00407166		2455.41	-0.01486704
335.6	0.08533816		865.59	0.0299245		1395.59	-0.0095128		1925.58	-0.00413052		2455.61	-0.01461325
335.8	0.08484712		865.79	0.03098223		1395.79	-0.00998417		1925.78	-0.00393902		2455.81	-0.01534653
336	0.08445679		865.99	0.03084771		1395.99	-0.01036974		1925.98	-0.00437185		2456.01	-0.01624116
336.2	0.08466049		866.19	0.03018262		1396.19	-0.00941606		1926.18	-0.00444698		2456.21	-0.01639836
336.4	0.08484401		866.39	0.03010972		1396.39	-0.01032398		1926.38	-0.00424834		2456.41	-0.01619279
336.6	0.08575849		866.59	0.03047691		1396.59	-0.01032403		1926.58	-0.00439132		2456.61	-0.01622394
336.8	0.08579148		866.79	0.03067243		1396.79	-0.00979588		1926.78	-0.00384007		2456.81	-0.016138
337	0.08525595		866.99	0.03086561		1396.99	-0.0095334		1926.98	-0.00378409		2457.01	-0.01578626
337.2	0.08590042		867.19	0.03068168		1397.19	-0.00861913		1927.18	-0.00418119		2457.21	-0.01571119
337.4	0.08565547		867.39	0.03088988		1397.39	-0.00859372		1927.38	-0.00363038		2457.41	-0.01553547
337.6	0.08632705		867.59	0.03187373		1397.59	-0.00838516		1927.58	-0.00367916		2457.61	-0.01506683
337.8	0.08643087		867.79	0.03107755		1397.79	-0.00847876		1927.78	-0.00341231		2457.81	-0.01373003
338	0.08637279		867.99	0.03031322		1397.99	-0.00930407		1927.98	-0.00353515		2458.01	-0.01447959
338.2	0.08690047		868.19	0.02986504		1398.19	-0.00933357		1928.18	-0.00439649		2458.21	-0.01489574
338.4	0.08773949		868.39	0.03006466		1398.39	-0.00916649		1928.38	-0.00559482		2458.41	-0.01506563
338.6	0.0879783		868.59	0.02971258		1398.59	-0.00808516		1928.58	-0.00591006		2458.61	-0.01549072
338.8	0.08854513		868.79	0.03024137		1398.79	-0.00890428		1928.78	-0.0062772		2458.81	-0.01563768
339	0.08875492		868.99	0.03063041		1398.99	-0.00899341		1928.98	-0.00598237		2459.01	-0.01574564
339.2	0.08889861		869.19	0.03101051		1399.19	-0.00955674		1929.18	-0.00628317		2459.21	-0.01647143
339.4	0.08875273		869.39	0.03167155		1399.39	-0.01035407		1929.38	-0.00666947		2459.41	-0.01676058
339.6	0.08868002		869.59	0.03170419		1399.59	-0.01044453		1929.58	-0.00762323		2459.61	-0.01790323
339.8	0.08817399		869.79	0.0324207		1399.79	-0.01041635		1929.78	-0.00728665		2459.81	-0.01842318
340	0.08733414		869.99	0.03243781		1399.99	-0.01094868		1929.98	-0.00746273		2460.01	-0.01827509
340.2	0.08746811		870.19	0.0324416		1400.19	-0.01089514		1930.18	-0.00728542		2460.21	-0.01788215
340.4	0.08846945		870.39	0.0317551		1400.39	-0.01133326		1930.38	-0.0069578		2460.41	-0.01801487
340.6	0.08835465		870.59	0.03165023		1400.59	-0.01021464		1930.58	-0.00787243		2460.61	-0.01853577
340.8	0.08804829		870.79	0.03280167		1400.79	-0.00965714		1930.78	-0.00772574		2460.81	-0.01797647
341	0.08803761		870.99	0.03136514		1400.99	-0.00919966		1930.98	-0.00801183		2461.01	-0.01806648
341.2	0.08861168		871.19	0.03074108		1401.19	-0.00878964		1931.18	-0.00813665		2461.21	-0.01738831
341.4	0.08739351		871.39	0.03069349		1401.39	-0.0081428		1931.38	-0.00754678		2461.41	-0.01726991
341.6	0.08800098		871.59	0.02927273		1401.59	-0.00799431		1931.58	-0.00700234		2461.61	-0.01738932
341.8	0.08843535		871.79	0.02866075		1401.79	-0.00792915		1931.78	-0.006965		2461.81	-0.01745949
342	0.08948919		871.99	0.02889153		1401.99	-0.00779287		1931.98	-0.00749178		2462.01	-0.0183889
342.2	0.09082849		872.19	0.02856187		1402.19	-0.00714618		1932.18	-0.00754748		2462.21	-0.01842254
342.4	0.09169277		872.39	0.02886425		1402.39	-0.0065813		1932.38	-0.00757873		2462.41	-0.01819238
342.6	0.09239243		872.59	0.02827716		1402.59	-0.0059775		1932.58	-0.00727811		2462.61	-0.01882712
342.8	0.09253356		872.79	0.02856431		1402.79	-0.00631971		1932.78	-0.00662119		2462.81	-0.01842754
343	0.09200159		872.99	0.0278493		1402.99	-0.0065642		1932.98	-0.00618814		2463.01	-0.0184641
343.2	0.09294765		873.19	0.02808315		1403.19	-0.00744578		1933.18	-0.00695731		2463.21	-0.01835743
343.4	0.09273922		873.39	0.02845622		1403.39	-0.00736093		1933.38	-0.00730266		2463.41	-0.01868706
343.6	0.09319807		873.59	0.0280308		1403.59	-0.00799193		1933.58	-0.00685074		2463.61	-0.01842254
343.8	0.09275284		873.79	0.02823047		1403.79	-0.00811874		1933.78	-0.0066894		2463.81	-0.01761827
344	0.0932144		873.99	0.02823507		1403.99	-0.00835321		1933.98	-0.00666815		2464.01	-0.01699404
344.2	0.09363728		874.19	0.02757521		1404.19	-0.00800445		1934.18	-0.00614373		2464.21	-0.01754184
344.4	0.0940662		874.39	0.02699141		1404.39	-0.00839021		1934.38	-0.00623524		2464.41	-0.01793911
344.6	0.09250672		874.59	0.02777543		1404.59	-0.008116		1934.58	-0.00642858		2464.61	-0.01785813
344.8	0.09264787		874.79	0.02877307		1404.79	-0.00918935		1934.78	-0.0059224		2464.81	-0.01699364
345	0.09239183		874.99	0.02746504		1404.99	-0.00897753		1934.98	-0.00603183		2465.01	-0.01762544
345.2	0.0918314		875.19	0.02807856		1405.19	-0.00881976		1935.18	-0.00479298		2465.21	-0.01701351
345.4	0.09205522		875.39	0.02794214		1405.39	-0.0087011		1935.38	-0.00355965		2465.41	-0.01743365
345.6	0.09367915		875.59	0.02723095		1405.59	-0.00990784		1935.58	-0.00343162		2465.61	-0.01793874
345.8	0.09458728		875.79	0.02771728		1405.79	-0.00964314		1935.78	-0.00271035		2465.81	-0.01822273
346	0.09497629		875.99	0.0277652		1405.99	-0.0094664		1935.98	-0.00281401		2466.01	-0.01847837
346.2	0.09578258		876.19	0.02756104		1406.19	-0.00943459		1936.18	-0.00298112		2466.21	-0.01796777
346.4	0.09617635		876.39	0.02843306		1406.39	-0.00890879		1936.38	-0.00324378		2466.41	-0.01791167
346.6	0.09597655		876.59	0.02882924		1406.59	-0.00820471		1936.58	-0.00428718		2466.61	-0.01821834
346.8	0.095794		876.79	0.0291823		1406.79	-0.00818369		1936.78	-0.00423853		2466.81	-0.01771432
347	0.096157		876.99	0.0290115		1406.99	-0.00741129		1936.98	-0.00472362		2467.01	-0.01801624
347.2	0.09626166		877.19	0.02954284		1407.19	-0.007616		1937.18	-0.00541673		2467.21	-0.0172529
347.4	0.09569884		877.39	0.03010938		1407.39	-0.00759036		1937.38	-0.00606529		2467.41	-0.01749751
347.6	0.09532535		877.59	0.02959728		1407.59	-0.00776708		1937.58	-0.00566952		2467.61	-0.01697074
347.8	0.09454376		877.79	0.02991838		1407.79	-0.00844099		1937.78	-0.0065277		2467.81	-0.01739786
348	0.09419031		877.99	0.03015647		1407.99	-0.00812548		1937.98	-0.00585564		2468.01	-0.01820116
348.2	0.09215848		878.19	0.02948734		1408.19	-0.00844545		1938.18	-0.00631107		2468.21	-0.01812953
348.4	0.09157836		878.39	0.02998781		1408.39	-0.00880998		1938.38	-0.00676168		2468.41	-0.01764999
348.6	0.09038844		878.59	0.03048814		1408.59	-0.00850276		1938.58	-0.00631058		2468.61	-0.01740478
348.8	0.09091109		878.79	0.03076014		1408.79	-0.00924474		1938.78	-0.00628211		2468.81	-0.01632316
349	0.09133235		878.99	0.03070349		1408.99	-0.00838113		1938.98	-0.00533546		2469.01	-0.0163962
349.2	0.09129975		879.19	0.03066915		1409.19	-0.00840581		1939.18	-0.0039478		2469.21	-0.01554495
349.4	0.09150843		879.39	0.03026552		1409.39	-0.00892577		1939.38	-0.00401422		2469.41	-0.01598541
349.6	0.09178085		879.59	0.02985226		1409.59	-0.00947682		1939.58	-0.00449662		2469.61	-0.01668896
349.8	0.09254995		879.79	0.03003968		1409.79	-0.00953151		1939.78	-0.00385825		2469.81	-0.01631788
350	0.09237462		879.99	0.03091146		1409.99	-0.0087437		1939.98	-0.0048998		2470.01	-0.01606517
350.2	0.09287499		880.19	0.03163668		1410.19	-0.00840457		1940.18	-0.00531905		2470.21	-0.01611786
350.4	0.09372655		880.39	0.03249293		1410.39	-0.00867454		1940.38	-0.00578108		2470.41	-0.01691537
350.6	0.09425205		880.59	0.03207191		1410.59	-0.00862076		1940.58	-0.00630259		2470.61	-0.01753058
350.8	0.09456718		880.79	0.03224972		1410.79	-0.00854951		1940.78	-0.00536687		2470.81	-0.01816195
351	0.09477154		880.99	0.03237516		1410.99	-0.0083605		1940.98	-0.00557113		2471.01	-0.01789288
351.2	0.09503749		881.19	0.03236394		1411.19	-0.00821411		1941.18	-0.00548359		2471.21	-0.01766649
351.4	0.09568674		881.39	0.03187597		1411.39	-0.00859046		1941.38	-0.00550184		2471.41	-0.01861498
351.6	0.0961057		881.59	0.03214757		1411.59	-0.00837704		1941.58	-0.00514522		2471.61	-0.01904628
351.8	0.09664924		881.79	0.03265205		1411.79	-0.0082721		1941.78	-0.00407057		2471.81	-0.0195566
352	0.09651948		881.99	0.03266735		1411.99	-0.0071078		1941.98	-0.00424794		2472.01	-0.01991578
352.2	0.09586659		882.19	0.0321548		1412.19	-0.00748162		1942.18	-0.00595137		2472.21	-0.01987093
352.4	0.09607488		882.39	0.03189589		1412.39	-0.00727941		1942.38	-0.00564216		2472.41	-0.01953451
352.6	0.09603471		882.59	0.03108444		1412.59	-0.0068479		1942.58	-0.00548465		2472.61	-0.01892493
352.8	0.09631403		882.79	0.03111919		1412.79	-0.00663857		1942.78	-0.00614722		2472.81	-0.01880263
353	0.09596219		882.99	0.03034362		1412.99	-0.00587331		1942.98	-0.00507609		2473.01	-0.01884221
353.2	0.09505387		883.19	0.02966081		1413.19	-0.00669053		1943.18	-0.00563729		2473.21	-0.01922668
353.4	0.09496918		883.39	0.02898034		1413.39	-0.00714111		1943.38	-0.00637063		2473.41	-0.01990004
353.6	0.09508362		883.59	0.02875724		1413.59	-0.00768266		1943.58	-0.00634767		2473.61	-0.02014772
353.8	0.09539421		883.79	0.02884754		1413.79	-0.00759726		1943.78	-0.00637666		2473.81	-0.01949578
354	0.09498306		883.99	0.02856603		1413.99	-0.00775691		1943.98	-0.00659272		2474.01	-0.01962301
354.2	0.09504824		884.19	0.02827179		1414.19	-0.00797838		1944.18	-0.00657915		2474.21	-0.01952459
354.4	0.09517949		884.39	0.02756038		1414.39	-0.0083679		1944.38	-0.00664952		2474.41	-0.01942107
354.6	0.09543469		884.59	0.02734258		1414.59	-0.00788724		1944.58	-0.0060631		2474.61	-0.01887747
354.8	0.09615831		884.79	0.02764092		1414.79	-0.00801009		1944.78	-0.00491926		2474.81	-0.01912378
355	0.09613225		884.99	0.02733623		1414.99	-0.00721043		1944.98	-0.00487932		2475.01	-0.01863756
355.2	0.09708356		885.19	0.0274497		1415.19	-0.00609421		1945.18	-0.00436998		2475.21	-0.01823455
355.4	0.09794529		885.39	0.02770437		1415.39	-0.00641955		1945.38	-0.00404602		2475.41	-0.01860569
355.6	0.0992361		885.59	0.02860539		1415.59	-0.00580904		1945.58	-0.00376529		2475.61	-0.01770477
355.8	0.09959587		885.79	0.02844067		1415.79	-0.0055027		1945.78	-0.00365441		2475.81	-0.01751044
356	0.09923357		885.99	0.02839829		1415.99	-0.00534119		1945.98	-0.00515207		2476.01	-0.01771669
356.2	0.09927006		886.19	0.02831826		1416.19	-0.00624082		1946.18	-0.00573227		2476.21	-0.01743623
356.4	0.09878221		886.39	0.02905506		1416.39	-0.00627092		1946.38	-0.00567839		2476.41	-0.01747302
356.6	0.09902702		886.59	0.02927346		1416.59	-0.00656797		1946.58	-0.00550924		2476.61	-0.01736426
356.8	0.09850457		886.79	0.0306114		1416.79	-0.00666514		1946.78	-0.00516671		2476.81	-0.01775378
357	0.09835949		886.99	0.02979996		1416.99	-0.00804196		1946.98	-0.00515157		2477.01	-0.01801687
357.2	0.09801384		887.19	0.02997828		1417.19	-0.00949694		1947.18	-0.00578399		2477.21	-0.01833396
357.4	0.09793213		887.39	0.02968046		1417.39	-0.00994528		1947.38	-0.00613457		2477.41	-0.01832305
357.6	0.09772145		887.59	0.03046532		1417.59	-0.01094724		1947.58	-0.00660339		2477.61	-0.01779075
357.8	0.09704992		887.79	0.03085248		1417.79	-0.01111147		1947.78	-0.00734182		2477.81	-0.01702595
358	0.09719863		887.99	0.03104203		1417.99	-0.01168936		1947.98	-0.00711316		2478.01	-0.01692295
358.2	0.09575053		888.19	0.03180325		1418.19	-0.0109935		1948.18	-0.00650652		2478.21	-0.01612184
358.4	0.09562172		888.39	0.0319662		1418.39	-0.01093408		1948.38	-0.00624346		2478.41	-0.01592394
358.6	0.0959779		888.59	0.03269449		1418.59	-0.01052218		1948.58	-0.00549318		2478.61	-0.01524663
358.8	0.09612422		888.79	0.03328386		1418.79	-0.01074608		1948.78	-0.00511826		2478.81	-0.01605266
359	0.09632164		888.99	0.0330417		1418.99	-0.00911609		1948.98	-0.00500138		2479.01	-0.01559693
359.2	0.09708001		889.19	0.03312794		1419.19	-0.00875152		1949.18	-0.00486913		2479.21	-0.01534003
359.4	0.0980561		889.39	0.03257482		1419.39	-0.00826248		1949.38	-0.0046527		2479.41	-0.01613915
359.6	0.09831848		889.59	0.03188197		1419.59	-0.00698665		1949.58	-0.00421712		2479.61	-0.01603308
359.8	0.09828493		889.79	0.03181268		1419.79	-0.00637056		1949.78	-0.00465963		2479.81	-0.01602013
360	0.09844725		889.99	0.03164433		1419.99	-0.00615373		1949.98	-0.00400776		2480.01	-0.0159277
360.2	0.09921449		890.19	0.03183916		1420.19	-0.00670044		1950.18	-0.00361472		2480.21	-0.01694483
360.4	0.09927987		890.39	0.03216951		1420.39	-0.00691041		1950.38	-0.00318515		2480.41	-0.01716802
360.6	0.09932342		890.59	0.03157502		1420.59	-0.0071987		1950.58	-0.00275993		2480.61	-0.01759193
360.8	0.09935833		890.79	0.03137124		1420.79	-0.00759964		1950.78	-0.00297204		2480.81	-0.01837251
361	0.09980064		890.99	0.03044247		1420.99	-0.00861492		1950.98	-0.00392276		2481.01	-0.01874088
361.2	0.09940621		891.19	0.03064315		1421.19	-0.00904272		1951.18	-0.00414358		2481.21	-0.01857062
361.4	0.09987244		891.39	0.03030191		1421.39	-0.01010673		1951.38	-0.00450474		2481.41	-0.01875761
361.6	0.10080615		891.59	0.03033958		1421.59	-0.010189		1951.58	-0.00561362		2481.61	-0.01827437
361.8	0.10047784		891.79	0.03029946		1421.79	-0.01067453		1951.78	-0.00646641		2481.81	-0.01848606
362	0.10089059		891.99	0.03081035		1421.99	-0.01035492		1951.98	-0.00680334		2482.01	-0.01822456
362.2	0.10018479		892.19	0.03099685		1422.19	-0.01064189		1952.18	-0.00745134		2482.21	-0.01845503
362.4	0.10139095		892.39	0.03077687		1422.39	-0.01068205		1952.38	-0.00782876		2482.41	-0.01795412
362.6	0.10144505		892.59	0.03185108		1422.59	-0.00992533		1952.58	-0.00820862		2482.61	-0.01726988
362.8	0.10301662		892.79	0.03139877		1422.79	-0.00962204		1952.78	-0.0091163		2482.81	-0.01785951
363	0.10387049		892.99	0.03097057		1422.99	-0.00893185		1952.98	-0.00910132		2483.01	-0.01760973
363.2	0.10391013		893.19	0.03096187		1423.19	-0.00895955		1953.18	-0.00939574		2483.21	-0.01759063
363.4	0.10456233		893.39	0.03073267		1423.39	-0.00817161		1953.38	-0.0089978		2483.41	-0.01769645
363.6	0.10401313		893.59	0.03106016		1423.59	-0.00735942		1953.58	-0.00844299		2483.61	-0.01692104
363.8	0.10440282		893.79	0.03193771		1423.79	-0.00740404		1953.78	-0.00781086		2483.81	-0.01626804
364	0.10435266		893.99	0.03204348		1423.99	-0.00712938		1953.98	-0.00608252		2484.01	-0.01699533
364.2	0.10411113		894.19	0.03244181		1424.19	-0.00754461		1954.18	-0.00564693		2484.21	-0.01749874
364.4	0.10348341		894.39	0.03238275		1424.39	-0.00749552		1954.38	-0.00463785		2484.41	-0.01735359
364.6	0.10273398		894.59	0.03211739		1424.59	-0.0067247		1954.58	-0.00352238		2484.61	-0.0178883
364.8	0.10272166		894.79	0.03274219		1424.79	-0.00657255		1954.78	-0.00282517		2484.81	-0.01725386
365	0.10228747		894.99	0.03307256		1424.99	-0.00704112		1954.98	-0.00261575		2485.01	-0.01625624
365.2	0.10212301		895.19	0.03365931		1425.19	-0.00742943		1955.18	-0.00302566		2485.21	-0.01562209
365.4	0.10223988		895.39	0.03303963		1425.39	-0.00810541		1955.38	-0.0023196		2485.41	-0.01521566
365.6	0.10306763		895.59	0.03274252		1425.59	-0.00850047		1955.58	-0.00223055		2485.61	-0.01523848
365.8	0.10218798		895.79	0.0329619		1425.79	-0.00905028		1955.78	-0.00297572		2485.81	-0.01548588
366	0.10228016		895.99	0.03317014		1425.99	-0.00904682		1955.98	-0.00266208		2486.01	-0.01548601
366.2	0.10229229		896.19	0.03222065		1426.19	-0.00975019		1956.18	-0.00280788		2486.21	-0.01604875
366.4	0.10294025		896.39	0.03161983		1426.39	-0.0096636		1956.38	-0.00293716		2486.41	-0.01612333
366.6	0.10209975		896.59	0.03120949		1426.59	-0.00961577		1956.58	-0.0038533		2486.61	-0.01627742
366.8	0.10320267		896.79	0.03095137		1426.79	-0.0101609		1956.78	-0.00463431		2486.81	-0.01682417
367	0.10351119		896.99	0.03112454		1426.99	-0.01057652		1956.98	-0.00413443		2487.01	-0.01727569
367.2	0.10270659		897.19	0.03112126		1427.19	-0.01050045		1957.18	-0.00385764		2487.21	-0.01722365
367.4	0.10232433		897.39	0.03107377		1427.39	-0.01021521		1957.38	-0.00363334		2487.41	-0.01794973
367.6	0.1019385		897.59	0.03162896		1427.59	-0.00993051		1957.58	-0.00362623		2487.61	-0.01849489
367.8	0.10275094		897.79	0.03146593		1427.79	-0.00995697		1957.78	-0.00459228		2487.81	-0.01880542
368	0.10342798		897.99	0.03120722		1427.99	-0.00970319		1957.98	-0.00484758		2488.01	-0.01933047
368.2	0.1035725		898.19	0.0311856		1428.19	-0.00947736		1958.18	-0.00550229		2488.21	-0.01895467
368.4	0.10372994		898.39	0.03121268		1428.39	-0.00876591		1958.38	-0.00519928		2488.41	-0.0195037
368.6	0.1036521		898.59	0.03148176		1428.59	-0.0079816		1958.58	-0.00599811		2488.61	-0.019435
368.8	0.10445414		898.79	0.03223903		1428.79	-0.00797172		1958.78	-0.00700852		2488.81	-0.01939655
369	0.10463618		898.99	0.03165692		1428.99	-0.007622		1958.98	-0.00688688		2489.01	-0.01844265
369.2	0.10464863		899.19	0.03184261		1429.19	-0.00734207		1959.18	-0.00689824		2489.21	-0.01773407
369.4	0.10461642		899.39	0.03159824		1429.39	-0.00711639		1959.38	-0.00608817		2489.41	-0.01747246
369.6	0.10508368		899.59	0.03153904		1429.59	-0.00721677		1959.58	-0.00649245		2489.61	-0.01715615
369.8	0.1041437		899.79	0.03119179		1429.79	-0.00634588		1959.78	-0.00781786		2489.81	-0.01605549
370	0.10458168		899.99	0.03044657		1429.99	-0.00630725		1959.98	-0.00773248		2490.01	-0.015978
370.2	0.10458811		900.19	0.03020982		1430.19	-0.00658951		1960.18	-0.00876844		2490.21	-0.01624897
370.4	0.10458819		900.39	0.0301685		1430.39	-0.00582506		1960.38	-0.009898		2490.41	-0.01663446
370.6	0.10438325		900.59	0.03009618		1430.59	-0.00531319		1960.58	-0.00947668		2490.61	-0.01609309
370.8	0.10517386		900.79	0.0309848		1430.79	-0.00503359		1960.78	-0.00929563		2490.81	-0.01664481
371	0.10557576		900.99	0.0307232		1430.99	-0.00575967		1960.98	-0.0081002		2491.01	-0.01690451
371.2	0.10431011		901.19	0.03084884		1431.19	-0.0065553		1961.18	-0.0074249		2491.21	-0.017156
371.4	0.10477369		901.39	0.03113666		1431.39	-0.00675698		1961.38	-0.00761646		2491.41	-0.01796008
371.6	0.10576103		901.59	0.03112625		1431.59	-0.00695395		1961.58	-0.00803947		2491.61	-0.01764398
371.8	0.10632397		901.79	0.03143871		1431.79	-0.00715554		1961.78	-0.00781577		2491.81	-0.01778433
372	0.10558681		901.99	0.03233556		1431.99	-0.00778987		1961.98	-0.00707829		2492.01	-0.01892016
372.2	0.10502785		902.19	0.03331078		1432.19	-0.00774101		1962.18	-0.00627971		2492.21	-0.02027698
372.4	0.10515482		902.39	0.03415747		1432.39	-0.00820112		1962.38	-0.00544523		2492.41	-0.02132941
372.6	0.1047595		902.59	0.0346574		1432.59	-0.0087678		1962.58	-0.00477276		2492.61	-0.02209063
372.8	0.10485634		902.79	0.03581202		1432.79	-0.00914116		1962.78	-0.00363238		2492.81	-0.02292642
373	0.10449851		902.99	0.03621496		1432.99	-0.00899058		1962.98	-0.00285389		2493.01	-0.02238493
373.2	0.10395734		903.19	0.03696226		1433.19	-0.00915989		1963.18	-0.00289016		2493.21	-0.02240091
373.4	0.10381072		903.39	0.0364049		1433.39	-0.00898953		1963.38	-0.00255383		2493.41	-0.02223576
373.6	0.10333777		903.59	0.0356722		1433.59	-0.00919614		1963.58	-0.00314348		2493.61	-0.02146576
373.8	0.10323373		903.79	0.03512963		1433.79	-0.0084455		1963.78	-0.00373905		2493.81	-0.020797
374	0.1036861		903.99	0.03506387		1433.99	-0.00902329		1963.98	-0.00379025		2494.01	-0.02043407
374.2	0.10332266		904.19	0.03558295		1434.19	-0.00866697		1964.18	-0.00433963		2494.21	-0.02084319
374.4	0.10351617		904.39	0.03432434		1434.39	-0.0078737		1964.38	-0.00425975		2494.41	-0.02057055
374.6	0.10432068		904.59	0.03348791		1434.59	-0.0074649		1964.58	-0.00375397		2494.61	-0.02026723
374.8	0.1044777		904.79	0.03263828		1434.79	-0.00725754		1964.78	-0.00430326		2494.81	-0.01996801
375	0.1045671		904.99	0.03199652		1434.99	-0.00744095		1964.98	-0.00446279		2495.01	-0.01969275
375.2	0.1040175		905.19	0.03169253		1435.19	-0.00707824		1965.18	-0.00483909		2495.21	-0.01959972
375.4	0.1042537		905.39	0.03146182		1435.39	-0.00638294		1965.38	-0.0057571		2495.41	-0.01985748
375.6	0.10421083		905.59	0.03065561		1435.59	-0.00662432		1965.58	-0.00574422		2495.61	-0.01954827
375.8	0.10369298		905.79	0.03118906		1435.79	-0.00641616		1965.78	-0.00489238		2495.81	-0.01972074
376	0.1042999		905.99	0.03129431		1435.99	-0.00654287		1965.98	-0.00534966		2496.01	-0.02004515
376.2	0.10526896		906.19	0.03159545		1436.19	-0.00610752		1966.18	-0.00484374		2496.21	-0.02034283
376.4	0.10528559		906.39	0.03206203		1436.39	-0.00700892		1966.38	-0.00527901		2496.41	-0.02008971
376.6	0.10577059		906.59	0.03251066		1436.59	-0.00749949		1966.58	-0.0055276		2496.61	-0.02069142
376.8	0.10706293		906.79	0.03302723		1436.79	-0.00763604		1966.78	-0.00614492		2496.81	-0.02127883
377	0.10670563		906.99	0.03310535		1436.99	-0.00843795		1966.98	-0.00669558		2497.01	-0.021219
377.2	0.10616299		907.19	0.03244266		1437.19	-0.00860775		1967.18	-0.00646383		2497.21	-0.0211007
377.4	0.10604269		907.39	0.03266376		1437.39	-0.00857151		1967.38	-0.00634147		2497.41	-0.02120503
377.6	0.1063857		907.59	0.033744		1437.59	-0.00927023		1967.58	-0.00662552		2497.61	-0.02036123
377.8	0.10702561		907.79	0.03416975		1437.79	-0.00947889		1967.78	-0.0066937		2497.81	-0.0203603
378	0.10727169		907.99	0.03443095		1437.99	-0.01020662		1967.98	-0.00662284		2498.01	-0.02028571
378.2	0.10729731		908.19	0.03429245		1438.19	-0.00966205		1968.18	-0.00672058		2498.21	-0.02078611
378.4	0.10796014		908.39	0.03360231		1438.39	-0.00952822		1968.38	-0.00695131		2498.41	-0.02047278
378.6	0.10844802		908.59	0.0336335		1438.59	-0.0090204		1968.58	-0.00749211		2498.61	-0.02031968
378.8	0.10791572		908.79	0.03357224		1438.79	-0.00852838		1968.78	-0.0076888		2498.81	-0.01998687
379	0.10732802		908.99	0.03387445		1438.99	-0.00827773		1968.98	-0.00785871		2499.01	-0.02023762
379.2	0.10684492		909.19	0.03371799		1439.19	-0.00806918		1969.18	-0.00766187		2499.21	-0.02005601
379.4	0.10662905		909.39	0.03345654		1439.39	-0.00774005		1969.38	-0.00748777		2499.41	-0.0201528
379.6	0.10667901		909.59	0.03296201		1439.59	-0.00761667		1969.58	-0.006742		2499.61	-0.01942122
379.8	0.10666192		909.79	0.03313112		1439.79	-0.00694276		1969.78	-0.00643879		2499.81	-0.01883445
380	0.10666192		909.99	0.03313112		1439.98	-0.00694276		1969.98	-0.00643879		2500.01	-0.01883445
380.2	0.10645098		910.19	0.03199618		1440.18	-0.00680928		1970.18	-0.00743629		2500.21	-0.01844478
380.4	0.10607506		910.39	0.03140132		1440.38	-0.00669483		1970.38	-0.00878967		2500.41	-0.0189461
380.6	0.10598565		910.59	0.02987934		1440.58	-0.00692518		1970.58	-0.01072701		2500.61	-0.01930295
380.8	0.10646138		910.79	0.02940334		1440.78	-0.00667772		1970.78	-0.01165263		2500.81	-0.01928854
381	0.10656813		910.99	0.02857468		1440.98	-0.00571748		1970.98	-0.01279701		2501.01	-0.01899115
381.2	0.10585858		911.19	0.02856244		1441.18	-0.00557835		1971.18	-0.01395143		2501.21	-0.01912029
381.4	0.10623007		911.39	0.02862651		1441.38	-0.00509369		1971.38	-0.01478028		2501.41	-0.01912471
381.6	0.10582881		911.59	0.02830958		1441.58	-0.00429741		1971.58	-0.01522721		2501.61	-0.01950408
381.8	0.1054044		911.79	0.02826524		1441.78	-0.00434202		1971.78	-0.01555807		2501.81	-0.019492
382	0.1050962		911.99	0.02839731		1441.98	-0.00319878		1971.98	-0.01545285		2502.01	-0.01883911
382.2	0.10520039		912.19	0.02913518		1442.18	-0.00322773		1972.18	-0.015837		2502.21	-0.01911019
382.4	0.1053245		912.39	0.02832987		1442.38	-0.00311756		1972.38	-0.01625045		2502.41	-0.01909299
382.6	0.10508184		912.59	0.02829766		1442.58	-0.00322099		1972.58	-0.01597467		2502.61	-0.01829269
382.8	0.10582747		912.79	0.02844562		1442.78	-0.0021355		1972.78	-0.015793		2502.81	-0.01799533
383	0.10707067		912.99	0.0286241		1442.98	-0.00170393		1972.98	-0.01591897		2503.01	-0.01759969
383.2	0.1070718		913.19	0.02816571		1443.18	-0.00188843		1973.18	-0.01535988		2503.21	-0.01695975
383.4	0.10659061		913.39	0.02782296		1443.38	-0.00211033		1973.38	-0.01484193		2503.41	-0.0163049
383.6	0.10701795		913.59	0.0271028		1443.58	-0.00287737		1973.58	-0.01401497		2503.61	-0.01562571
383.8	0.10697405		913.79	0.0263786		1443.78	-0.00344867		1973.78	-0.01249463		2503.81	-0.01575522
384	0.1065774		913.99	0.0270447		1443.98	-0.0037126		1973.98	-0.01218104		2504.01	-0.01600489
384.2	0.10701398		914.19	0.02723466		1444.18	-0.00450705		1974.18	-0.0117569		2504.21	-0.0158514
384.4	0.10719648		914.39	0.02755114		1444.38	-0.00523602		1974.38	-0.01191908		2504.41	-0.016975
384.6	0.10803131		914.59	0.02696801		1444.58	-0.00540935		1974.58	-0.01143403		2504.61	-0.01761658
384.8	0.10850809		914.79	0.02780708		1444.78	-0.00548427		1974.78	-0.010367		2504.81	-0.01786412
385	0.10741564		914.99	0.02766803		1444.98	-0.00548622		1974.98	-0.00953454		2505.01	-0.01827903
385.2	0.10711954		915.19	0.02856063		1445.18	-0.00630804		1975.18	-0.00977137		2505.21	-0.01853434
385.4	0.10762431		915.39	0.02843606		1445.38	-0.00556429		1975.38	-0.0096251		2505.41	-0.0182831
385.6	0.10660922		915.59	0.02781836		1445.58	-0.00505264		1975.58	-0.00951368		2505.61	-0.01829093
385.8	0.10678678		915.79	0.02822816		1445.78	-0.00540921		1975.78	-0.00943367		2505.81	-0.01781938
386	0.10670106		915.99	0.0287493		1445.98	-0.0045435		1975.98	-0.01033639		2506.01	-0.01765
386.2	0.10749604		916.19	0.0296946		1446.18	-0.00449327		1976.18	-0.01147568		2506.21	-0.01799671
386.4	0.10727281		916.39	0.03013402		1446.38	-0.00461747		1976.38	-0.011566		2506.41	-0.01755583
386.6	0.10742325		916.59	0.03030359		1446.58	-0.00424232		1976.58	-0.0116501		2506.61	-0.01726731
386.8	0.1071715		916.79	0.03066436		1446.78	-0.00368246		1976.78	-0.01270362		2506.81	-0.01760838
387	0.10770901		916.99	0.03055885		1446.98	-0.00366873		1976.98	-0.01395935		2507.01	-0.01775292
387.2	0.10688413		917.19	0.03016708		1447.18	-0.00379369		1977.18	-0.0141822		2507.21	-0.01716947
387.4	0.106301		917.39	0.03082913		1447.38	-0.00399426		1977.38	-0.01456081		2507.41	-0.01795681
387.6	0.10659606		917.59	0.03086565		1447.58	-0.00443317		1977.58	-0.01475554		2507.61	-0.01732929
387.8	0.10742791		917.79	0.03197061		1447.78	-0.00434178		1977.78	-0.0139129		2507.81	-0.01712228
388	0.10769656		917.99	0.03327366		1447.98	-0.00502246		1977.98	-0.01460251		2508.01	-0.01718803
388.2	0.10830085		918.19	0.03330574		1448.18	-0.00553783		1978.18	-0.01460491		2508.21	-0.01841044
388.4	0.10879487		918.39	0.03309611		1448.38	-0.00555379		1978.38	-0.01412435		2508.41	-0.01872429
388.6	0.10863569		918.59	0.03321326		1448.58	-0.00500717		1978.58	-0.01351614		2508.61	-0.01923141
388.8	0.10830982		918.79	0.03324038		1448.78	-0.00508872		1978.78	-0.01300626		2508.81	-0.01909977
389	0.10811901		918.99	0.03334344		1448.98	-0.00462906		1978.98	-0.01273085		2509.01	-0.01949043
389.2	0.1084008		919.19	0.03355688		1449.18	-0.00369761		1979.18	-0.01339932		2509.21	-0.01926735
389.4	0.10831055		919.39	0.03248863		1449.38	-0.00213233		1979.38	-0.01306633		2509.41	-0.01967582
389.6	0.10845069		919.59	0.03219173		1449.58	-0.00185819		1979.58	-0.01243852		2509.61	-0.01950015
389.8	0.10880624		919.79	0.03212661		1449.78	-0.00133725		1979.78	-0.011786		2509.81	-0.0200221
390	0.1086712		919.99	0.03153405		1449.98	-0.00062303		1979.98	-0.01190474		2510.01	-0.02017885
390.2	0.10980481		920.19	0.03116906		1450.18	-0.00042724		1980.18	-0.01171752		2510.21	-0.01974031
390.4	0.10917727		920.39	0.03043914		1450.38	-0.00149675		1980.38	-0.01122665		2510.41	-0.01939163
390.6	0.10876217		920.59	0.02985026		1450.58	-0.00077253		1980.58	-0.01090486		2510.61	-0.02001864
390.8	0.10788908		920.79	0.02940656		1450.78	-0.00047812		1980.78	-0.01141212		2510.81	-0.02024915
391	0.10831034		920.99	0.02881175		1450.98	-0.00109336		1980.98	-0.0111851		2511.01	-0.02022278
391.2	0.10835475		921.19	0.02836023		1451.18	-0.00206628		1981.18	-0.01130539		2511.21	-0.01985535
391.4	0.10800459		921.39	0.0287432		1451.38	-0.00303758		1981.38	-0.01165068		2511.41	-0.02004545
391.6	0.10901763		921.59	0.02894748		1451.58	-0.00471503		1981.58	-0.01160874		2511.61	-0.01896575
391.8	0.10980081		921.79	0.02986458		1451.78	-0.00560786		1981.78	-0.01136265		2511.81	-0.01887042
392	0.10905077		921.99	0.03013543		1451.98	-0.00663806		1981.98	-0.01195056		2512.01	-0.01891083
392.2	0.10863414		922.19	0.0294296		1452.18	-0.00600757		1982.18	-0.01276546		2512.21	-0.01905587
392.4	0.10880776		922.39	0.02930293		1452.38	-0.00614225		1982.38	-0.01282651		2512.41	-0.01836638
392.6	0.1084645		922.59	0.03001378		1452.58	-0.00570113		1982.58	-0.01350354		2512.61	-0.01822937
392.8	0.1086565		922.79	0.03050314		1452.78	-0.00520377		1982.78	-0.01471802		2512.81	-0.01822744
393	0.10882374		922.99	0.03090597		1452.98	-0.0046132		1982.98	-0.01575634		2513.01	-0.01806599
393.2	0.10816945		923.19	0.03041674		1453.18	-0.00333236		1983.18	-0.01638408		2513.21	-0.01809402
393.4	0.10771348		923.39	0.03023078		1453.38	-0.00269168		1983.38	-0.01714098		2513.41	-0.01854296
393.6	0.10776139		923.59	0.03049981		1453.58	-0.00254718		1983.58	-0.01697532		2513.61	-0.01819963
393.8	0.10809822		923.79	0.03063687		1453.78	-0.00208748		1983.78	-0.01696577		2513.81	-0.01820717
394	0.10896117		923.99	0.03031402		1453.98	-0.00216631		1983.98	-0.0166592		2514.01	-0.01771855
394.2	0.10902388		924.19	0.03068569		1454.18	-0.00157335		1984.18	-0.01682853		2514.21	-0.0171965
394.4	0.1082856		924.39	0.03129916		1454.38	-0.00136661		1984.38	-0.01582879		2514.41	-0.01717325
394.6	0.10759864		924.59	0.03107257		1454.58	-0.00023455		1984.58	-0.01572901		2514.61	-0.01752193
394.8	0.1088744		924.79	0.03140672		1454.78	0.00003961		1984.78	-0.0151272		2514.81	-0.0171959
395	0.10962732		924.99	0.03145913		1454.98	-0.00038967		1984.98	-0.01398574		2515.01	-0.01703919
395.2	0.10899212		925.19	0.03147132		1455.18	-0.00097542		1985.18	-0.01420376		2515.21	-0.01566198
395.4	0.10796987		925.39	0.03256122		1455.38	-0.00037511		1985.38	-0.01421681		2515.41	-0.01544556
395.6	0.10869785		925.59	0.03286589		1455.58	-0.00105196		1985.58	-0.01367172		2515.61	-0.0162259
395.8	0.10867428		925.79	0.03275679		1455.78	-0.00093067		1985.78	-0.01332721		2515.81	-0.01691831
396	0.10896213		925.99	0.0326595		1455.98	-0.0008326		1985.98	-0.01327524		2516.01	-0.01683352
396.2	0.1095538		926.19	0.03226572		1456.18	0.00018275		1986.18	-0.01358175		2516.21	-0.01690285
396.4	0.1095997		926.39	0.03326364		1456.38	-0.00047344		1986.38	-0.01328357		2516.41	-0.01683182
396.6	0.10948602		926.59	0.0332899		1456.58	-0.00004466		1986.58	-0.01343028		2516.61	-0.01626142
396.8	0.10906128		926.79	0.03376812		1456.78	-0.00029876		1986.78	-0.01404097		2516.81	-0.01609161
397	0.10868461		926.99	0.03378476		1456.98	-0.00020427		1986.98	-0.013952		2517.01	-0.01594889
397.2	0.10821271		927.19	0.0332995		1457.18	-0.00007975		1987.18	-0.01434968		2517.21	-0.01661206
397.4	0.10791872		927.39	0.03307603		1457.38	-0.00084944		1987.38	-0.01525717		2517.41	-0.01652472
397.6	0.1086889		927.59	0.03250961		1457.58	-0.00120372		1987.58	-0.01499656		2517.61	-0.0165477
397.8	0.10907024		927.79	0.03214259		1457.78	-0.00206536		1987.78	-0.01460116		2517.81	-0.01645149
398	0.10869361		927.99	0.03123548		1457.98	-0.00227811		1987.98	-0.01319554		2518.01	-0.01580786
398.2	0.10793329		928.19	0.03164516		1458.18	-0.00295886		1988.18	-0.01334599		2518.21	-0.01565204
398.4	0.10826174		928.39	0.03116968		1458.38	-0.0038724		1988.38	-0.01272257		2518.41	-0.01532567
398.6	0.10799734		928.59	0.03084665		1458.58	-0.00361616		1988.58	-0.01317834		2518.61	-0.01530304
398.8	0.10926707		928.79	0.03116639		1458.78	-0.00325397		1988.78	-0.01237888		2518.81	-0.01523978
399	0.10847199		928.99	0.03092552		1458.98	-0.00331981		1988.98	-0.01262442		2519.01	-0.01484327
399.2	0.10793007		929.19	0.03106851		1459.18	-0.0039811		1989.18	-0.01262235		2519.21	-0.0148386
399.4	0.10780933		929.39	0.03132177		1459.38	-0.00271718		1989.38	-0.01262283		2519.41	-0.0160921
399.6	0.10863629		929.59	0.03094499		1459.58	-0.00349729		1989.58	-0.01224944		2519.61	-0.01689577
399.8	0.10903546		929.79	0.03079058		1459.78	-0.00398885		1989.78	-0.01216199		2519.81	-0.01697665
400	0.10895586		929.99	0.03121804		1459.98	-0.00343384		1989.98	-0.01211256		2520.01	-0.01633475
400.2	0.10902231		930.19	0.03104935		1460.18	-0.00298591		1990.18	-0.01207585		2520.21	-0.01608737
400.4	0.10790543		930.39	0.03180497		1460.38	-0.00336743		1990.38	-0.01157755		2520.41	-0.01646432
400.6	0.1072212		930.59	0.03100793		1460.58	-0.00315359		1990.58	-0.01131898		2520.61	-0.01640647
400.8	0.10719708		930.79	0.03095927		1460.78	-0.00329205		1990.78	-0.01081749		2520.81	-0.01704599
401	0.10644026		930.99	0.03018716		1460.98	-0.00269735		1990.98	-0.01076152		2521.01	-0.01781932
401.2	0.10691961		931.19	0.02912666		1461.18	-0.00301033		1991.18	-0.01133185		2521.21	-0.01801913
401.4	0.10664736		931.39	0.0283051		1461.38	-0.00314888		1991.38	-0.01187406		2521.41	-0.01812173
401.6	0.10743655		931.59	0.02794805		1461.58	-0.00314227		1991.58	-0.01131715		2521.61	-0.01873594
401.8	0.10712769		931.79	0.02772201		1461.78	-0.00295506		1991.78	-0.01079642		2521.81	-0.01887464
402	0.10622725		931.99	0.02854676		1461.98	-0.00266645		1991.98	-0.01020185		2522.01	-0.01788241
402.2	0.10643855		932.19	0.02924038		1462.18	-0.00313301		1992.18	-0.01118674		2522.21	-0.0183323
402.4	0.10717597		932.39	0.0291848		1462.38	-0.00353179		1992.38	-0.01135634		2522.41	-0.01865157
402.6	0.10756493		932.59	0.03047452		1462.58	-0.00293668		1992.58	-0.01164079		2522.61	-0.01944652
402.8	0.10902057		932.79	0.03079015		1462.78	-0.00197642		1992.78	-0.01084736		2522.81	-0.01969863
403	0.10886969		932.99	0.03166366		1462.98	-0.00182983		1992.98	-0.01134118		2523.01	-0.0199945
403.2	0.10948824		933.19	0.03152046		1463.18	-0.00204933		1993.18	-0.01159816		2523.21	-0.0194424
403.4	0.10948112		933.39	0.03107115		1463.38	-0.00152691		1993.38	-0.01239116		2523.41	-0.01931188
403.6	0.11042774		933.59	0.03211006		1463.58	-0.00209033		1993.58	-0.0122499		2523.61	-0.01831856
403.8	0.11036608		933.79	0.0318315		1463.78	-0.00204714		1993.78	-0.01173315		2523.81	-0.01774752
404	0.11096214		933.99	0.03166057		1463.98	-0.00166863		1993.98	-0.0113414		2524.01	-0.01655529
404.2	0.11149358		934.19	0.03074169		1464.18	-0.0019797		1994.18	-0.01092164		2524.21	-0.01683703
404.4	0.11088182		934.39	0.02986672		1464.38	-0.00195933		1994.38	-0.01070719		2524.41	-0.01694644
404.6	0.11081831		934.59	0.0282549		1464.58	-0.00209408		1994.58	-0.01003253		2524.61	-0.01690452
404.8	0.11057072		934.79	0.02765059		1464.78	-0.00241022		1994.78	-0.0094635		2524.81	-0.01670483
405	0.10935307		934.99	0.02770114		1464.98	-0.00274455		1994.98	-0.00951356		2525.01	-0.01691442
405.2	0.10983304		935.19	0.02800398		1465.18	-0.00339118		1995.18	-0.00959457		2525.21	-0.01692476
405.4	0.1090967		935.39	0.02811099		1465.38	-0.0043129		1995.38	-0.00898915		2525.41	-0.01808248
405.6	0.1088937		935.59	0.02850188		1465.58	-0.00453087		1995.58	-0.00926477		2525.61	-0.01859844
405.8	0.10786651		935.79	0.02881103		1465.78	-0.00477414		1995.78	-0.00921915		2525.81	-0.0187346
406	0.10687629		935.99	0.02961402		1465.98	-0.00469469		1995.98	-0.00882977		2526.01	-0.01820348
406.2	0.10719884		936.19	0.03008127		1466.18	-0.00573528		1996.18	-0.00852507		2526.21	-0.01863625
406.4	0.10793634		936.39	0.03097273		1466.38	-0.00593089		1996.38	-0.00835486		2526.41	-0.0201838
406.6	0.10907467		936.59	0.03209973		1466.58	-0.00488452		1996.58	-0.00808504		2526.61	-0.02092485
406.8	0.10916696		936.79	0.032645		1466.78	-0.00477854		1996.78	-0.00848172		2526.81	-0.02119287
407	0.10962191		936.99	0.03364638		1466.98	-0.00531369		1996.98	-0.00971662		2527.01	-0.02094741
407.2	0.10992386		937.19	0.03329058		1467.18	-0.00529414		1997.18	-0.01058329		2527.21	-0.0202177
407.4	0.11107179		937.39	0.03350118		1467.38	-0.0046473		1997.38	-0.01125369		2527.41	-0.02003063
407.6	0.11167185		937.59	0.03392087		1467.58	-0.00349244		1997.58	-0.0106053		2527.61	-0.01965281
407.8	0.11121237		937.79	0.03292874		1467.78	-0.00208897		1997.78	-0.01072283		2527.81	-0.01937439
408	0.11190721		937.99	0.03228877		1467.98	-0.00137266		1997.98	-0.01073098		2528.01	-0.01823408
408.2	0.11223161		938.19	0.03149472		1468.18	-0.00114025		1998.18	-0.01099118		2528.21	-0.01804434
408.4	0.11170959		938.39	0.03124048		1468.38	-0.00064087		1998.38	-0.01112121		2528.41	-0.01711231
408.6	0.11092106		938.59	0.03131468		1468.58	0.00033589		1998.58	-0.01088568		2528.61	-0.01687589
408.8	0.11013674		938.79	0.03126337		1468.78	0.00030961		1998.78	-0.0107084		2528.81	-0.01669231
409	0.10953441		938.99	0.03163606		1468.98	0.00013347		1998.98	-0.01054149		2529.01	-0.01724441
409.2	0.10962468		939.19	0.03187263		1469.18	-0.00107867		1999.18	-0.00995246		2529.21	-0.01706161
409.4	0.10955705		939.39	0.03211319		1469.38	-0.00208969		1999.38	-0.01062483		2529.41	-0.01713988
409.6	0.10936192		939.59	0.03189915		1469.58	-0.00192454		1999.58	-0.0112494		2529.61	-0.01667102
409.8	0.10969334		939.79	0.03229842		1469.78	-0.00166744		1999.78	-0.01058663		2529.81	-0.0163534
410	0.10958911		939.99	0.03262888		1469.98	-0.00132461		1999.98	-0.01015909		2530.01	-0.0165131
410.2	0.10987798		940.19	0.03330013		1470.18	-0.0020565		2000.18	-0.00995721		2530.21	-0.01710519
410.4	0.11015655		940.39	0.03405563		1470.38	-0.00130286		2000.38	-0.01022937		2530.41	-0.0179695
410.6	0.11010948		940.59	0.03483973		1470.58	-0.00160966		2000.58	-0.01040516		2530.61	-0.01860419
410.8	0.10961448		940.79	0.03541895		1470.78	-0.00273278		2000.78	-0.01152299		2530.81	-0.01932235
411	0.11044942		940.99	0.03598039		1470.98	-0.00239337		2000.98	-0.01208247		2531.01	-0.01971576
411.2	0.10994912		941.19	0.03524092		1471.18	-0.00246881		2001.18	-0.01246586		2531.21	-0.02003351
411.4	0.11068203		941.39	0.03507824		1471.38	-0.0016009		2001.38	-0.01247746		2531.41	-0.02071396
411.6	0.11005329		941.59	0.03438191		1471.58	-0.00068166		2001.58	-0.01154088		2531.61	-0.02105455
411.8	0.11015278		941.79	0.03380859		1471.78	-0.00021087		2001.78	-0.01115656		2531.81	-0.02027652
412	0.11037769		941.99	0.03307888		1471.98	0.00025221		2001.98	-0.0105254		2532.01	-0.01985584
412.2	0.11036594		942.19	0.0331959		1472.18	-0.00014329		2002.18	-0.01024101		2532.21	-0.02023317
412.4	0.11093872		942.39	0.03228608		1472.38	0.00060818		2002.38	-0.01023806		2532.41	-0.02020951
412.6	0.11036638		942.59	0.03152369		1472.58	0.00070581		2002.58	-0.01014811		2532.61	-0.02030114
412.8	0.11089573		942.79	0.03103798		1472.78	-0.00012662		2002.78	-0.00924653		2532.81	-0.01988623
413	0.11062796		942.99	0.03116547		1472.98	-0.00060103		2002.98	-0.00859699		2533.01	-0.01960061
413.2	0.11124934		943.19	0.03091367		1473.18	-0.00149041		2003.18	-0.0080411		2533.21	-0.01898488
413.4	0.11185981		943.39	0.0310226		1473.38	-0.00192778		2003.38	-0.00847356		2533.41	-0.01830058
413.6	0.11231943		943.59	0.0308308		1473.58	-0.0021525		2003.58	-0.00883556		2533.61	-0.01820877
413.8	0.11325028		943.79	0.03091558		1473.78	-0.00200549		2003.78	-0.00890544		2533.81	-0.01799263
414	0.11270122		943.99	0.03072885		1473.98	-0.00197435		2003.98	-0.00898565		2534.01	-0.01777189
414.2	0.11189949		944.19	0.03112634		1474.18	-0.00246864		2004.18	-0.00860125		2534.21	-0.01738185
414.4	0.11133619		944.39	0.03136239		1474.38	-0.00237587		2004.38	-0.00834631		2534.41	-0.01709409
414.6	0.11045415		944.59	0.03159295		1474.58	-0.00293488		2004.58	-0.00894927		2534.61	-0.01764724
414.8	0.11002487		944.79	0.03176256		1474.78	-0.00396766		2004.78	-0.00997585		2534.81	-0.01760103
415	0.10982832		944.99	0.032381		1474.98	-0.00275223		2004.98	-0.00989577		2535.01	-0.01748761
415.2	0.10863638		945.19	0.03224972		1475.18	-0.00241528		2005.18	-0.00999207		2535.21	-0.01765605
415.4	0.10894626		945.39	0.03284077		1475.38	-0.00152041		2005.38	-0.00986841		2535.41	-0.01739244
415.6	0.10835617		945.59	0.03303596		1475.58	-0.00082302		2005.58	-0.01030098		2535.61	-0.01738585
415.8	0.10820291		945.79	0.03302286		1475.78	-0.00051168		2005.78	-0.01011073		2535.81	-0.01753931
416	0.10806554		945.99	0.03243879		1475.98	-0.0003841		2005.98	-0.01087068		2536.01	-0.01714648
416.2	0.10881319		946.19	0.03251524		1476.18	-0.00035403		2006.18	-0.01120972		2536.21	-0.01779276
416.4	0.1089217		946.39	0.03142091		1476.38	0.00052265		2006.38	-0.01188511		2536.41	-0.01772036
416.6	0.10893403		946.59	0.0320309		1476.58	-0.00018263		2006.58	-0.01148495		2536.61	-0.01711008
416.8	0.10990298		946.79	0.03265647		1476.78	0.00050449		2006.78	-0.01070772		2536.81	-0.01651308
417	0.11039753		946.99	0.03218762		1476.98	0.00027798		2006.98	-0.01069157		2537.01	-0.01635252
417.2	0.11168077		947.19	0.03164212		1477.18	0.0003175		2007.18	-0.01050995		2537.21	-0.01589168
417.4	0.11210085		947.39	0.03136987		1477.38	0.00007061		2007.38	-0.01111978		2537.41	-0.01501374
417.6	0.11219918		947.59	0.03140937		1477.58	0.00028907		2007.58	-0.0122763		2537.61	-0.01533191
417.8	0.1120564		947.79	0.03105313		1477.78	0.00090841		2007.78	-0.01184604		2537.81	-0.01580597
418	0.11135708		947.99	0.03112552		1477.98	0.00073293		2007.98	-0.01187079		2538.01	-0.01563755
418.2	0.11132605		948.19	0.03116425		1478.18	0.00054269		2008.18	-0.01140716		2538.21	-0.01582321
418.4	0.11090605		948.39	0.03114529		1478.38	0.00075427		2008.38	-0.01198115		2538.41	-0.01588068
418.6	0.11033516		948.59	0.03170904		1478.58	0.00085052		2008.58	-0.01215202		2538.61	-0.01629025
418.8	0.10993129		948.79	0.03200559		1478.78	0.00112978		2008.78	-0.01179577		2538.81	-0.01631237
419	0.10958175		948.99	0.0334109		1478.98	0.00177561		2008.98	-0.01141414		2539.01	-0.01725136
419.2	0.10908557		949.19	0.03360966		1479.18	0.00112784		2009.18	-0.01164133		2539.21	-0.0178758
419.4	0.10900396		949.39	0.03369711		1479.38	-0.00001798		2009.38	-0.01094828		2539.41	-0.01783868
419.6	0.10828392		949.59	0.03331835		1479.58	0.0003763		2009.58	-0.01064646		2539.61	-0.01816469
419.8	0.10852868		949.79	0.03279721		1479.78	-0.00010921		2009.78	-0.00969269		2539.81	-0.01833927
420	0.1083967		949.99	0.03187132		1479.98	0.0003632		2009.98	-0.00910645		2540.01	-0.01843039
420.2	0.10817678		950.19	0.03164863		1480.18	0.00044488		2010.18	-0.00807773		2540.21	-0.01881456
420.4	0.10733694		950.39	0.03181388		1480.38	0.00023226		2010.38	-0.00811378		2540.41	-0.0183231
420.6	0.10834097		950.59	0.03248986		1480.58	0.00034627		2010.58	-0.00769553		2540.61	-0.01738793
420.8	0.10855868		950.79	0.03191855		1480.78	0.00051003		2010.78	-0.00791445		2540.81	-0.01607074
421	0.10874823		950.99	0.03076499		1480.98	0.00022617		2010.98	-0.00856642		2541.01	-0.01670226
421.2	0.10805656		951.19	0.030685		1481.18	0.00084841		2011.18	-0.00876156		2541.21	-0.01576041
421.4	0.10756206		951.39	0.03041328		1481.38	0.00073661		2011.38	-0.00960697		2541.41	-0.01516297
421.6	0.10673675		951.59	0.03137411		1481.58	0.00073313		2011.58	-0.01036241		2541.61	-0.01563787
421.8	0.10725247		951.79	0.03120662		1481.78	-0.00001056		2011.78	-0.01061196		2541.81	-0.01557901
422	0.10761198		951.99	0.0318601		1481.98	-0.00081296		2011.98	-0.01065347		2542.01	-0.01535823
422.2	0.10799969		952.19	0.03191229		1482.18	-0.00089617		2012.18	-0.0103019		2542.21	-0.0153076
422.4	0.10796668		952.39	0.03136299		1482.38	-0.00119498		2012.38	-0.01058689		2542.41	-0.01519134
422.6	0.1081739		952.59	0.03086131		1482.58	-0.00110108		2012.58	-0.00969652		2542.61	-0.01548977
422.8	0.10827267		952.79	0.03115317		1482.78	-0.00186452		2012.78	-0.01000555		2542.81	-0.01512765
423	0.10799258		952.99	0.03180831		1482.98	-0.00278112		2012.98	-0.01034331		2543.01	-0.01570652
423.2	0.10697992		953.19	0.03134651		1483.18	-0.00250663		2013.18	-0.01063042		2543.21	-0.01577001
423.4	0.10687044		953.39	0.03144606		1483.38	-0.00262459		2013.38	-0.01040648		2543.41	-0.01576397
423.6	0.10707847		953.59	0.03164281		1483.58	-0.00124777		2013.58	-0.01057513		2543.61	-0.01540382
423.8	0.10669471		953.79	0.03176742		1483.78	-0.00064482		2013.78	-0.01014362		2543.81	-0.0165347
424	0.10619106		953.99	0.03157369		1483.98	-0.00009951		2013.98	-0.01025117		2544.01	-0.01694594
424.2	0.1056246		954.19	0.03179566		1484.18	-0.000192		2014.18	-0.01111991		2544.21	-0.01683366
424.4	0.1055214		954.39	0.0322103		1484.38	0.00067906		2014.38	-0.01183032		2544.41	-0.01686002
424.6	0.1061298		954.59	0.03242726		1484.58	0.00149804		2014.58	-0.01230691		2544.61	-0.01652639
424.8	0.10649329		954.79	0.03237753		1484.78	0.00188603		2014.78	-0.01314047		2544.81	-0.01684685
425	0.1067429		954.99	0.03293727		1484.98	0.00270748		2014.98	-0.01344802		2545.01	-0.01894084
425.2	0.10676608		955.19	0.03334576		1485.18	0.00322797		2015.18	-0.01342901		2545.21	-0.01788601
425.4	0.10791607		955.39	0.03233846		1485.38	0.00292409		2015.38	-0.01345178		2545.41	-0.01818321
425.6	0.10920053		955.59	0.03282096		1485.58	0.00211148		2015.58	-0.01304241		2545.61	-0.01899231
425.8	0.11043977		955.79	0.0327304		1485.78	0.0010971		2015.78	-0.01254679		2545.81	-0.01838296
426	0.11117248		955.99	0.03209988		1485.98	0.00045955		2015.98	-0.01195374		2546.01	-0.01810777
426.2	0.11218297		956.19	0.03114789		1486.18	0.0002373		2016.18	-0.01113001		2546.21	-0.01790248
426.4	0.11233272		956.39	0.03081099		1486.38	-0.00016102		2016.38	-0.01065116		2546.41	-0.01770576
426.6	0.11236643		956.59	0.03044041		1486.58	-0.0007109		2016.58	-0.01053853		2546.61	-0.01812524
426.8	0.11236839		956.79	0.03118234		1486.78	-0.00245503		2016.78	-0.01072637		2546.81	-0.0169971
427	0.11184125		956.99	0.03089356		1486.98	-0.00344898		2016.98	-0.01101277		2547.01	-0.01799422
427.2	0.11158297		957.19	0.03095559		1487.18	-0.00303652		2017.18	-0.01070089		2547.21	-0.01781411
427.4	0.11256171		957.39	0.03047576		1487.38	-0.00295955		2017.38	-0.00986026		2547.41	-0.01779195
427.6	0.11278133		957.59	0.03069928		1487.58	-0.00206851		2017.58	-0.00944703		2547.61	-0.01763445
427.8	0.11224526		957.79	0.03092342		1487.78	-0.00237708		2017.78	-0.00904547		2547.81	-0.01822727
428	0.11211137		957.99	0.03114283		1487.98	-0.00277044		2017.98	-0.00861545		2548.01	-0.01837707
428.2	0.11136837		958.19	0.03171519		1488.18	-0.00246687		2018.18	-0.00830435		2548.21	-0.01794587
428.4	0.11104114		958.39	0.03222753		1488.38	-0.00218056		2018.38	-0.00802327		2548.41	-0.01743746
428.6	0.11034114		958.59	0.03336838		1488.58	-0.00115987		2018.58	-0.00814962		2548.61	-0.01757878
428.8	0.1096104		958.79	0.03338458		1488.78	0.00002536		2018.78	-0.00861046		2548.81	-0.01791309
429	0.10926107		958.99	0.03387097		1488.98	0.00013898		2018.98	-0.00778507		2549.01	-0.01861418
429.2	0.10941378		959.19	0.03287858		1489.18	0.00015941		2019.18	-0.00767471		2549.21	-0.01782296
429.4	0.10939313		959.39	0.03263841		1489.38	0.00008339		2019.38	-0.00801266		2549.41	-0.01760385
429.6	0.10941956		959.59	0.03332191		1489.58	0.00011344		2019.58	-0.00838033		2549.61	-0.01786725
429.8	0.10823429		959.79	0.03353055		1489.78	0.00039509		2019.78	-0.00877186		2549.81	-0.01716461
430	0.10800245		959.99	0.03200034		1489.98	-0.00013839		2019.98	-0.00939183		2550.01	-0.0169614
430.2	0.10770888		960.19	0.03144138		1490.18	0.0004065		2020.18	-0.00937951		2550.21	-0.01684995
430.4	0.10772184		960.39	0.03132351		1490.38	0.00076811		2020.38	-0.00992976		2550.41	-0.01625552
430.6	0.10742883		960.59	0.03068349		1490.58	-0.00014251		2020.58	-0.01083099		2550.61	-0.01669332
430.8	0.10736296		960.79	0.03116222		1490.78	-0.00113641		2020.78	-0.01058969		2550.81	-0.01624884
431	0.10702259		960.99	0.02985066		1490.98	-0.00074596		2020.98	-0.01129783		2551.01	-0.01672889
431.2	0.10729919		961.19	0.02905998		1491.18	0.00008619		2021.18	-0.01096073		2551.21	-0.01630719
431.4	0.10782572		961.39	0.02872058		1491.38	0.00004523		2021.38	-0.01063763		2551.41	-0.0158849
431.6	0.10826945		961.59	0.02937629		1491.58	-0.00042596		2021.58	-0.01136828		2551.61	-0.01549313
431.8	0.10757995		961.79	0.02986881		1491.78	-0.00111086		2021.78	-0.01083611		2551.81	-0.01583567
432	0.1078613		961.99	0.03062642		1491.98	-0.00149764		2021.98	-0.01000216		2552.01	-0.0160982
432.2	0.10812711		962.19	0.03027042		1492.18	-0.00109797		2022.18	-0.01007882		2552.21	-0.01602866
432.4	0.1080606		962.39	0.03046203		1492.38	-0.00145973		2022.38	-0.00982198		2552.41	-0.01585874
432.6	0.10782322		962.59	0.03150369		1492.58	-0.00093832		2022.58	-0.00897186		2552.61	-0.01641363
432.8	0.10807914		962.79	0.03203184		1492.78	-0.00034401		2022.78	-0.00950003		2552.81	-0.01616665
433	0.10817429		962.99	0.03268629		1492.98	-0.0002455		2022.98	-0.00878139		2553.01	-0.01665446
433.2	0.10951768		963.19	0.0328761		1493.18	0.00008216		2023.18	-0.00942407		2553.21	-0.01678884
433.4	0.10954819		963.39	0.03345027		1493.38	0.00056394		2023.38	-0.00999442		2553.41	-0.01696014
433.6	0.11017973		963.59	0.03342223		1493.58	0.00044831		2023.58	-0.00954209		2553.61	-0.01725263
433.8	0.11053316		963.79	0.03327839		1493.78	0.00039297		2023.78	-0.00944658		2553.81	-0.0166874
434	0.11091586		963.99	0.0323401		1493.98	0.00029987		2023.98	-0.01007503		2554.01	-0.01630707
434.2	0.11152137		964.19	0.03233725		1494.18	0.00113219		2024.18	-0.00993927		2554.21	-0.01632794
434.4	0.11217145		964.39	0.03282555		1494.38	0.0013076		2024.38	-0.01035015		2554.41	-0.01635143
434.6	0.11063103		964.59	0.03327522		1494.58	-0.00001202		2024.58	-0.01059988		2554.61	-0.01626685
434.8	0.11036834		964.79	0.03287892		1494.78	0.0005243		2024.78	-0.01110043		2554.81	-0.01653209
435	0.11033747		964.99	0.03145262		1494.98	0.00072648		2024.98	-0.01163754		2555.01	-0.01656032
435.2	0.11048245		965.19	0.03121648		1495.18	0.00012394		2025.18	-0.01210786		2555.21	-0.01654455
435.4	0.10993008		965.39	0.03099136		1495.38	-0.00039252		2025.38	-0.01289763		2555.41	-0.01594392
435.6	0.1095236		965.59	0.03084403		1495.58	-0.00118824		2025.58	-0.01309616		2555.61	-0.0159385
435.8	0.10878144		965.79	0.03073755		1495.78	-0.00047998		2025.78	-0.01304932		2555.81	-0.01701428
436	0.10876078		965.99	0.03021899		1495.98	-0.00057361		2025.98	-0.01299136		2556.01	-0.01771131
436.2	0.10840751		966.19	0.03027657		1496.18	-0.00024532		2026.18	-0.01351927		2556.21	-0.0177692
436.4	0.10805225		966.39	0.031734		1496.38	-0.00033958		2026.38	-0.01319923		2556.41	-0.01753988
436.6	0.10813896		966.59	0.03276785		1496.58	0.00017144		2026.58	-0.01315287		2556.61	-0.01768182
436.8	0.10809649		966.79	0.0331814		1496.78	0.00063494		2026.78	-0.01314385		2556.81	-0.01754244
437	0.10837142		966.99	0.03342866		1496.98	0.0012949		2026.98	-0.01206018		2557.01	-0.01775488
437.2	0.10864326		967.19	0.03397964		1497.18	0.001254		2027.18	-0.01165149		2557.21	-0.01769806
437.4	0.10774674		967.39	0.03433896		1497.38	0.00049661		2027.38	-0.01111555		2557.41	-0.0168725
437.6	0.1074568		967.59	0.0344994		1497.58	-0.00066335		2027.58	-0.00999537		2557.61	-0.01573545
437.8	0.10744353		967.79	0.03491188		1497.78	-0.0005655		2027.78	-0.00960297		2557.81	-0.01545781
438	0.10750824		967.99	0.03469268		1497.98	-0.00055488		2027.98	-0.00949673		2558.01	-0.01507141
438.2	0.10816677		968.19	0.03472941		1498.18	-0.00157493		2028.18	-0.0094186		2558.21	-0.01451145
438.4	0.10822923		968.39	0.03430591		1498.38	-0.00197027		2028.38	-0.00948004		2558.41	-0.01461354
438.6	0.10804767		968.59	0.03339257		1498.58	-0.00240366		2028.58	-0.0095554		2558.61	-0.01458218
438.8	0.10868922		968.79	0.03232345		1498.78	-0.00216603		2028.78	-0.00975308		2558.81	-0.01477749
439	0.10916845		968.99	0.03179992		1498.98	-0.00214052		2028.98	-0.00955647		2559.01	-0.01478463
439.2	0.10811881		969.19	0.03115539		1499.18	-0.00250967		2029.18	-0.01096518		2559.21	-0.01432043
439.4	0.10730722		969.39	0.03095416		1499.38	-0.00222114		2029.38	-0.01126901		2559.41	-0.01494255
439.6	0.10786471		969.59	0.03135296		1499.58	-0.00255232		2029.58	-0.01116538		2559.61	-0.01528834
439.8	0.107828		969.79	0.03174281		1499.78	-0.00188681		2029.78	-0.01131269		2559.81	-0.01611098
440	0.10789253		969.99	0.03240427		1499.98	-0.00263237		2029.98	-0.01138615		2560.01	-0.01637048
440.2	0.10768542		970.19	0.0328897		1500.18	-0.00279453		2030.18	-0.01194727		2560.21	-0.01678391
440.4	0.10814754		970.39	0.03301073		1500.38	-0.0026904		2030.38	-0.01146992		2560.41	-0.01775706
440.6	0.10850937		970.59	0.03339113		1500.58	-0.0025868		2030.58	-0.01081869		2560.61	-0.01841201
440.8	0.1083384		970.79	0.0335782		1500.78	-0.00289253		2030.78	-0.01024234		2560.81	-0.01786694
441	0.10878094		970.99	0.03336848		1500.98	-0.00273879		2030.98	-0.00969804		2561.01	-0.01723045
441.2	0.10795684		971.19	0.03289678		1501.18	-0.00284003		2031.18	-0.01013543		2561.21	-0.01716118
441.4	0.10777539		971.39	0.03332681		1501.38	-0.00272526		2031.38	-0.01081034		2561.41	-0.01670832
441.6	0.10840622		971.59	0.03344327		1501.58	-0.00230625		2031.58	-0.01104094		2561.61	-0.01691859
441.8	0.10854737		971.79	0.03389318		1501.78	-0.00108093		2031.78	-0.01136131		2561.81	-0.01719495
442	0.10900627		971.99	0.03336731		1501.98	-0.00122625		2031.98	-0.01160388		2562.01	-0.01757356
442.2	0.10919709		972.19	0.03314167		1502.18	-0.00108268		2032.18	-0.01218625		2562.21	-0.01696485
442.4	0.10974792		972.39	0.03225424		1502.38	0.00010308		2032.38	-0.01197281		2562.41	-0.01784696
442.6	0.11001477		972.59	0.03156625		1502.58	0.00079788		2032.58	-0.01236115		2562.61	-0.01791626
442.8	0.10942848		972.79	0.03200177		1502.78	0.00097007		2032.78	-0.01214224		2562.81	-0.01782044
443	0.10919535		972.99	0.03157874		1502.98	0.00188259		2032.98	-0.01231436		2563.01	-0.01803302
443.2	0.1085137		973.19	0.03179901		1503.18	0.00243395		2033.18	-0.01235797		2563.21	-0.01764144
443.4	0.10904547		973.39	0.03162577		1503.38	0.00269438		2033.38	-0.011486		2563.41	-0.01844942
443.6	0.10940304		973.59	0.03187536		1503.58	0.00249234		2033.58	-0.01059159		2563.61	-0.01860546
443.8	0.10895288		973.79	0.03310435		1503.78	0.00306982		2033.78	-0.01010736		2563.81	-0.01830132
444	0.10910436		973.99	0.03286078		1503.98	0.00312484		2033.98	-0.01111856		2564.01	-0.01821769
444.2	0.1090103		974.19	0.03284619		1504.18	0.00324576		2034.18	-0.01154154		2564.21	-0.01878159
444.4	0.10873084		974.39	0.03339641		1504.38	0.00247294		2034.38	-0.01132693		2564.41	-0.01857716
444.6	0.10853632		974.59	0.03318442		1504.58	0.001298		2034.58	-0.01115511		2564.61	-0.01737822
444.8	0.1079256		974.79	0.0328322		1504.78	0.00002578		2034.78	-0.01134263		2564.81	-0.01649607
445	0.1081969		974.99	0.03265554		1504.98	0.00052396		2034.98	-0.01123855		2565.01	-0.01647385
445.2	0.10747317		975.19	0.03216335		1505.18	0.00079658		2035.18	-0.01167362		2565.21	-0.0161734
445.4	0.10723388		975.39	0.03312354		1505.38	0.00073997		2035.38	-0.0119717		2565.41	-0.01625876
445.6	0.1065597		975.59	0.03330356		1505.58	0.00020078		2035.58	-0.01122982		2565.61	-0.01670963
445.8	0.10572018		975.79	0.03329908		1505.78	-0.00012228		2035.78	-0.0119624		2565.81	-0.01631266
446	0.10550819		975.99	0.03295726		1505.98	-0.00064157		2035.98	-0.01208901		2566.01	-0.0167955
446.2	0.1059725		976.19	0.03283839		1506.18	-0.00040282		2036.18	-0.01198108		2566.21	-0.01600151
446.4	0.10581059		976.39	0.03232206		1506.38	-0.00020167		2036.38	-0.01193241		2566.41	-0.01699061
446.6	0.10503244		976.59	0.03194636		1506.58	-0.00040492		2036.58	-0.01151368		2566.61	-0.0176728
446.8	0.10513098		976.79	0.03124044		1506.78	-0.00094727		2036.78	-0.01081162		2566.81	-0.01824215
447	0.10539784		976.99	0.03109597		1506.98	-0.00040407		2036.98	-0.01030179		2567.01	-0.01815607
447.2	0.10630101		977.19	0.03108947		1507.18	-0.00133938		2037.18	-0.01006602		2567.21	-0.01835753
447.4	0.10702682		977.39	0.03080236		1507.38	-0.00151826		2037.38	-0.0100013		2567.41	-0.01925665
447.6	0.10735794		977.59	0.03115685		1507.58	-0.0016858		2037.58	-0.01017747		2567.61	-0.01938284
447.8	0.10828743		977.79	0.0322789		1507.78	-0.00197436		2037.78	-0.01076847		2567.81	-0.01929673
448	0.10874928		977.99	0.03209228		1507.98	-0.00228758		2037.98	-0.01167134		2568.01	-0.01919593
448.2	0.10859849		978.19	0.03338124		1508.18	-0.00281367		2038.18	-0.01147647		2568.21	-0.01857366
448.4	0.1091002		978.39	0.03328611		1508.38	-0.00347862		2038.38	-0.01135511		2568.41	-0.0183066
448.6	0.10941909		978.59	0.0327513		1508.58	-0.00308417		2038.58	-0.01144502		2568.61	-0.01758579
448.8	0.1100277		978.79	0.03325876		1508.78	-0.002637		2038.78	-0.01133684		2568.81	-0.0175036
449	0.11111278		978.99	0.0326379		1508.98	-0.00166146		2038.98	-0.01161669		2569.01	-0.01713807
449.2	0.11086561		979.19	0.03203723		1509.18	-0.00163219		2039.18	-0.01152118		2569.21	-0.01621902
449.4	0.11043807		979.39	0.03211738		1509.38	-0.00070252		2039.38	-0.01196564		2569.41	-0.01630249
449.6	0.11034908		979.59	0.03157459		1509.58	0.00041932		2039.58	-0.01238865		2569.61	-0.01563247
449.8	0.11059974		979.79	0.03067931		1509.78	0.00126627		2039.78	-0.01277557		2569.81	-0.01457904
450	0.11037303		979.99	0.03013762		1509.98	0.00217034		2039.98	-0.01176394		2570.01	-0.01471054
450.2	0.11057674		980.19	0.03019003		1510.18	0.00368872		2040.18	-0.01157004		2570.21	-0.01457154
450.4	0.10954057		980.39	0.02929258		1510.38	0.00424621		2040.38	-0.01167732		2570.41	-0.01482431
450.6	0.1093819		980.59	0.02947341		1510.58	0.0041158		2040.58	-0.01069762		2570.61	-0.01522025
450.8	0.10976733		980.79	0.02960089		1510.78	0.00401269		2040.78	-0.01061546		2570.81	-0.01560149
451	0.10927077		980.99	0.03052975		1510.98	0.00373626		2040.98	-0.01068599		2571.01	-0.01595512
451.2	0.10936109		981.19	0.0302688		1511.18	0.00283279		2041.18	-0.01141445		2571.21	-0.01676969
451.4	0.1090303		981.39	0.03000325		1511.38	0.00260811		2041.38	-0.01099051		2571.41	-0.01765748
451.6	0.10884749		981.59	0.02994874		1511.58	0.00205049		2041.58	-0.01051816		2571.61	-0.01824724
451.8	0.10862481		981.79	0.03103098		1511.78	0.00121758		2041.78	-0.00972713		2571.81	-0.01834261
452	0.10847388		981.99	0.03212302		1511.98	0.00131789		2041.98	-0.00920223		2572.01	-0.01831174
452.2	0.10838631		982.19	0.03303425		1512.18	0.00129686		2042.18	-0.00863466		2572.21	-0.01814096
452.4	0.10953388		982.39	0.03290115		1512.38	0.00112877		2042.38	-0.00863648		2572.41	-0.01821384
452.6	0.10956859		982.59	0.03266168		1512.58	0.00066006		2042.58	-0.00824927		2572.61	-0.01782725
452.8	0.10967742		982.79	0.03285562		1512.78	0.00068614		2042.78	-0.00863415		2572.81	-0.0179622
453	0.10936906		982.99	0.03220424		1512.98	0.00137985		2042.98	-0.00876341		2573.01	-0.01681515
453.2	0.10894632		983.19	0.03246081		1513.18	0.00072727		2043.18	-0.00898549		2573.21	-0.01629489
453.4	0.10883462		983.39	0.03249236		1513.38	0.00168589		2043.38	-0.00984402		2573.41	-0.0162603
453.6	0.10903672		983.59	0.03204906		1513.58	0.0015028		2043.58	-0.00982068		2573.61	-0.01501452
453.8	0.10895427		983.79	0.03136562		1513.78	0.0011147		2043.78	-0.00935818		2573.81	-0.01461655
454	0.10837829		983.99	0.03141668		1513.98	0.00154252		2043.98	-0.00986796		2574.01	-0.01471502
454.2	0.1084912		984.19	0.03203121		1514.18	0.00254919		2044.18	-0.0104198		2574.21	-0.01479833
454.4	0.10814589		984.39	0.03162536		1514.38	0.00126058		2044.38	-0.01055463		2574.41	-0.01538538
454.6	0.10761518		984.59	0.0328703		1514.58	0.00092641		2044.58	-0.0096586		2574.61	-0.01546337
454.8	0.10703181		984.79	0.03288745		1514.78	0.00038027		2044.78	-0.01024908		2574.81	-0.01609706
455	0.1068766		984.99	0.03233765		1514.98	0.00006519		2044.98	-0.01103133		2575.01	-0.01649244
455.2	0.10654016		985.19	0.03177588		1515.18	-0.00036721		2045.18	-0.01150711		2575.21	-0.01741034
455.4	0.10778004		985.39	0.03113862		1515.38	-0.00086664		2045.38	-0.01137815		2575.41	-0.01772942
455.6	0.10804353		985.59	0.03120633		1515.58	-0.00123146		2045.58	-0.01145257		2575.61	-0.0180664
455.8	0.10832692		985.79	0.0308382		1515.78	-0.00237698		2045.78	-0.01127911		2575.81	-0.01752437
456	0.10882625		985.99	0.03123467		1515.98	-0.00261967		2045.98	-0.01084306		2576.01	-0.01755564
456.2	0.1084917		986.19	0.03085832		1516.18	-0.00296142		2046.18	-0.01158767		2576.21	-0.01669563
456.4	0.10906064		986.39	0.03056203		1516.38	-0.00398318		2046.38	-0.01189188		2576.41	-0.01645706
456.6	0.10904588		986.59	0.03049551		1516.58	-0.00405596		2046.58	-0.01167786		2576.61	-0.01719055
456.8	0.10873531		986.79	0.03079479		1516.78	-0.00286956		2046.78	-0.01212741		2576.81	-0.01685255
457	0.10857885		986.99	0.03131567		1516.98	-0.00287112		2046.98	-0.01236884		2577.01	-0.01586311
457.2	0.10832921		987.19	0.03156123		1517.18	-0.00351587		2047.18	-0.01335109		2577.21	-0.01579746
457.4	0.10856312		987.39	0.03134707		1517.38	-0.0027366		2047.38	-0.01380854		2577.41	-0.01578148
457.6	0.1085409		987.59	0.03098436		1517.58	-0.00267081		2047.58	-0.01383096		2577.61	-0.01584899
457.8	0.10831058		987.79	0.03082882		1517.78	-0.00240181		2047.78	-0.01357969		2577.81	-0.01616223
458	0.1074687		987.99	0.03171617		1517.98	-0.00209544		2047.98	-0.01290347		2578.01	-0.01678354
458.2	0.10739838		988.19	0.03236221		1518.18	-0.00203276		2048.18	-0.01198725		2578.21	-0.01736257
458.4	0.10710546		988.39	0.03272285		1518.38	-0.00192261		2048.38	-0.01190004		2578.41	-0.01739497
458.6	0.10607842		988.59	0.03373553		1518.58	-0.00120274		2048.58	-0.01072658		2578.61	-0.01752833
458.8	0.10585705		988.79	0.03329514		1518.78	-0.00065992		2048.78	-0.01108618		2578.81	-0.01729475
459	0.1057382		988.99	0.0334174		1518.98	-0.00039302		2048.98	-0.0105974		2579.01	-0.01746599
459.2	0.10577724		989.19	0.03425536		1519.18	-0.00108162		2049.18	-0.00967417		2579.21	-0.01793997
459.4	0.10651155		989.39	0.03410588		1519.38	-0.00087368		2049.38	-0.00918188		2579.41	-0.01756893
459.6	0.10548203		989.59	0.03409874		1519.58	-0.00179004		2049.58	-0.00803989		2579.61	-0.01673696
459.8	0.10590468		989.79	0.03397485		1519.78	-0.00224417		2049.78	-0.00775011		2579.81	-0.01672172
460	0.1057977		989.99	0.03389005		1519.98	-0.00286446		2049.98	-0.0072121		2580.01	-0.01701148
460.2	0.10518582		990.19	0.03331911		1520.18	-0.00274662		2050.18	-0.00750333		2580.21	-0.01658397
460.4	0.10557965		990.39	0.03355273		1520.38	-0.00279286		2050.38	-0.0080068		2580.41	-0.01660678
460.6	0.10629718		990.59	0.0335977		1520.58	-0.00218747		2050.58	-0.00781677		2580.61	-0.01617099
460.8	0.10641668		990.79	0.03328183		1520.78	-0.00167324		2050.78	-0.00908325		2580.81	-0.01510255
461	0.1063256		990.99	0.03256063		1520.98	-0.00159086		2050.98	-0.01071325		2581.01	-0.01438328
461.2	0.1069124		991.19	0.03072985		1521.18	-0.00182307		2051.18	-0.01191084		2581.21	-0.01361362
461.4	0.10763395		991.39	0.02999607		1521.38	-0.00148851		2051.38	-0.01256704		2581.41	-0.01423106
461.6	0.1080059		991.59	0.03001217		1521.58	-0.00126108		2051.58	-0.01266322		2581.61	-0.01436022
461.8	0.10764611		991.79	0.02984701		1521.78	-0.00197653		2051.78	-0.01283729		2581.81	-0.01419307
462	0.10717304		991.99	0.02987896		1521.98	-0.0015544		2051.98	-0.01339147		2582.01	-0.01503007
462.2	0.1073602		992.19	0.02955447		1522.18	-0.0014361		2052.18	-0.01357964		2582.21	-0.01505824
462.4	0.10749335		992.39	0.02997642		1522.38	-0.00110681		2052.38	-0.01393489		2582.41	-0.0148757
462.6	0.10682581		992.59	0.02987636		1522.58	-0.00122441		2052.58	-0.01295256		2582.61	-0.01506281
462.8	0.10662163		992.79	0.03007535		1522.78	-0.00153661		2052.78	-0.01213121		2582.81	-0.01472886
463	0.10650951		992.99	0.0309659		1522.98	-0.00171492		2052.98	-0.01101091		2583.01	-0.01513056
463.2	0.1060129		993.19	0.03188798		1523.18	-0.00182965		2053.18	-0.01005836		2583.21	-0.01563456
463.4	0.10586021		993.39	0.03212224		1523.38	-0.00157732		2053.38	-0.00893396		2583.41	-0.01628777
463.6	0.10608274		993.59	0.03237112		1523.58	-0.00183657		2053.58	-0.00756726		2583.61	-0.01632919
463.8	0.10624259		993.79	0.03254047		1523.78	-0.00196467		2053.78	-0.00770152		2583.81	-0.01698287
464	0.10567657		993.99	0.03235895		1523.98	-0.00196818		2053.98	-0.00703688		2584.01	-0.01686121
464.2	0.10558173		994.19	0.03234247		1524.18	-0.00150302		2054.18	-0.00743785		2584.21	-0.01722157
464.4	0.10660469		994.39	0.03223558		1524.38	-0.00173779		2054.38	-0.00801944		2584.41	-0.01713622
464.6	0.10715336		994.59	0.03178498		1524.58	-0.00161889		2054.58	-0.00753052		2584.61	-0.01739122
464.8	0.10722248		994.79	0.03117657		1524.78	-0.00167889		2054.78	-0.00880731		2584.81	-0.01709628
465	0.10767993		994.99	0.03138131		1524.98	-0.00133067		2054.98	-0.00944317		2585.01	-0.01707641
465.2	0.10789434		995.19	0.0308794		1525.18	-0.0014101		2055.18	-0.00973259		2585.21	-0.01705627
465.4	0.1075872		995.39	0.03113716		1525.38	-0.00091471		2055.38	-0.01025912		2585.41	-0.01785611
465.6	0.10757053		995.59	0.03199608		1525.58	-0.00135056		2055.58	-0.01019137		2585.61	-0.01853067
465.8	0.10749107		995.79	0.03225654		1525.78	-0.00131255		2055.78	-0.01058625		2585.81	-0.01868475
466	0.10724135		995.99	0.03212956		1525.98	-0.00096426		2055.98	-0.01122044		2586.01	-0.01923519
466.2	0.10716908		996.19	0.03274799		1526.18	-0.00133423		2056.18	-0.01131031		2586.21	-0.01901152
466.4	0.10785096		996.39	0.0330098		1526.38	-0.0010197		2056.38	-0.01114932		2586.41	-0.01933249
466.6	0.10772787		996.59	0.03370452		1526.58	-0.0008508		2056.58	-0.01004064		2586.61	-0.01949808
466.8	0.10754548		996.79	0.03390811		1526.78	-0.00021574		2056.78	-0.00977408		2586.81	-0.01967
467	0.10797984		996.99	0.03435877		1526.98	0.0006371		2056.98	-0.01009381		2587.01	-0.01968315
467.2	0.10711294		997.19	0.03408148		1527.18	0.00099819		2057.18	-0.00948586		2587.21	-0.01958868
467.4	0.10727141		997.39	0.03341674		1527.38	0.00071433		2057.38	-0.00946958		2587.41	-0.01891595
467.6	0.10653342		997.59	0.03332527		1527.58	0.00128689		2057.58	-0.00971119		2587.61	-0.01717519
467.8	0.10627035		997.79	0.03316823		1527.78	0.00127703		2057.78	-0.01108314		2587.81	-0.0164633
468	0.10640123		997.99	0.03235509		1527.98	0.00184343		2057.98	-0.01053026		2588.01	-0.01659947
468.2	0.10663567		998.19	0.03138331		1528.18	0.00112096		2058.18	-0.01060521		2588.21	-0.01659741
468.4	0.10662796		998.39	0.03159537		1528.38	0.00111052		2058.38	-0.01061497		2588.41	-0.01627908
468.6	0.1062387		998.59	0.03100005		1528.58	0.00070687		2058.58	-0.01077278		2588.61	-0.01557715
468.8	0.10657769		998.79	0.03184891		1528.78	-0.00011648		2058.78	-0.01201809		2588.81	-0.01479576
469	0.10666369		998.99	0.03205175		1528.98	-0.00048448		2058.98	-0.01249733		2589.01	-0.01560303
469.2	0.1064149		999.19	0.03210492		1529.18	-0.0007695		2059.18	-0.01299954		2589.21	-0.01536301
469.4	0.10685868		999.39	0.0320929		1529.38	-0.00093729		2059.38	-0.01343949		2589.41	-0.0164261
469.6	0.10721302		999.59	0.03240202		1529.58	-0.00116735		2059.58	-0.01337023		2589.61	-0.01741985
469.8	0.10779368		999.79	0.03247775		1529.78	-0.00039563		2059.78	-0.01323821		2589.81	-0.01806258
470	0.10817317		999.99	0.03248769		1529.98	-0.00070345		2059.98	-0.01387825		2590.01	-0.01937083
470.2	0.10875124		1000.19	0.03241626		1530.18	-0.00104817		2060.18	-0.01368646		2590.21	-0.01984821
470.4	0.10940559		1000.39	0.03226865		1530.38	-0.0006806		2060.38	-0.01218449		2590.41	-0.02119765
470.6	0.10965578		1000.59	0.03283848		1530.58	-0.00128475		2060.58	-0.01099314		2590.61	-0.02112357
470.8	0.10994367		1000.79	0.03169758		1530.78	-0.00084521		2060.78	-0.01106824		2590.81	-0.02043132
471	0.10997261		1000.99	0.03134333		1530.98	-0.00183891		2060.98	-0.01048436		2591.01	-0.01998306
471.2	0.10901061		1001.19	0.03063505		1531.18	-0.00222876		2061.18	-0.00953042		2591.21	-0.01910008
471.4	0.10790392		1001.39	0.03013224		1531.38	-0.00314667		2061.38	-0.00945145		2591.41	-0.01861294
471.6	0.1070518		1001.59	0.03037425		1531.58	-0.00279406		2061.58	-0.00943962		2591.61	-0.01783243
471.8	0.10728802		1001.79	0.03022087		1531.78	-0.00219218		2061.78	-0.00929604		2591.81	-0.01804646
472	0.10670619		1001.99	0.03043635		1531.98	-0.0023218		2061.98	-0.00787265		2592.01	-0.01820251
472.2	0.10545122		1002.19	0.03088944		1532.18	-0.00251328		2062.18	-0.00825494		2592.21	-0.01797037
472.4	0.10424471		1002.39	0.03156178		1532.38	-0.0021283		2062.38	-0.00854397		2592.41	-0.01854251
472.6	0.10429337		1002.59	0.03077035		1532.58	-0.00264886		2062.58	-0.00851627		2592.61	-0.01842567
472.8	0.10415692		1002.79	0.03137958		1532.78	-0.00237766		2062.78	-0.00933372		2592.81	-0.01840122
473	0.10383165		1002.99	0.03111859		1532.98	-0.0012138		2062.98	-0.00998424		2593.01	-0.01882144
473.2	0.10399791		1003.19	0.03132703		1533.18	-0.00035949		2063.18	-0.01012949		2593.21	-0.01927632
473.4	0.10442926		1003.39	0.03088129		1533.38	0.00002519		2063.38	-0.01112884		2593.41	-0.02063443
473.6	0.10450864		1003.59	0.03061227		1533.58	0.00009279		2063.58	-0.01114411		2593.61	-0.0217851
473.8	0.10547263		1003.79	0.03096977		1533.78	0.00059136		2063.78	-0.01190422		2593.81	-0.02237669
474	0.10596251		1003.99	0.03114998		1533.98	0.00052149		2063.98	-0.01161984		2594.01	-0.02285356
474.2	0.10605697		1004.19	0.0312519		1534.18	0.00035771		2064.18	-0.01091357		2594.21	-0.02299078
474.4	0.10603853		1004.39	0.0322541		1534.38	0.0003015		2064.38	-0.01018187		2594.41	-0.0230157
474.6	0.10674892		1004.59	0.03274829		1534.58	-0.00053275		2064.58	-0.00933175		2594.61	-0.02223752
474.8	0.10681857		1004.79	0.03325123		1534.78	-0.00040086		2064.78	-0.00910324		2594.81	-0.02181565
475	0.10624885		1004.99	0.03339466		1534.98	-0.00094735		2064.98	-0.00935125		2595.01	-0.02161522
475.2	0.10645405		1005.19	0.0338362		1535.18	-0.00106429		2065.18	-0.00914257		2595.21	-0.02108306
475.4	0.10634003		1005.39	0.03401887		1535.38	-0.00114109		2065.38	-0.00926333		2595.41	-0.02094825
475.6	0.10664392		1005.59	0.03346349		1535.58	-0.00127555		2065.58	-0.00974599		2595.61	-0.0207045
475.8	0.10664356		1005.79	0.03378774		1535.78	-0.00065942		2065.78	-0.00880805		2595.81	-0.01990624
476	0.10627908		1005.99	0.03363193		1535.98	-0.00140779		2065.98	-0.00891338		2596.01	-0.01933857
476.2	0.10509896		1006.19	0.03293515		1536.18	-0.00112141		2066.18	-0.00953386		2596.21	-0.01937816
476.4	0.10572662		1006.39	0.0323875		1536.38	-0.00085347		2066.38	-0.00987705		2596.41	-0.01956779
476.6	0.10594801		1006.59	0.03180852		1536.58	-0.00026189		2066.58	-0.00952552		2596.61	-0.01928582
476.8	0.10539681		1006.79	0.03187798		1536.78	0.0007382		2066.78	-0.01021979		2596.81	-0.01858641
477	0.10560465		1006.99	0.03092002		1536.98	0.00196676		2066.98	-0.0104261		2597.01	-0.01864338
477.2	0.1061089		1007.19	0.03000682		1537.18	0.00165331		2067.18	-0.01046015		2597.21	-0.01879898
477.4	0.10617607		1007.39	0.02938407		1537.38	0.0022013		2067.38	-0.01071653		2597.41	-0.01899506
477.6	0.10658124		1007.59	0.02889449		1537.58	0.00222958		2067.58	-0.0105886		2597.61	-0.01979295
477.8	0.10721885		1007.79	0.02916539		1537.78	0.00232352		2067.78	-0.01121088		2597.81	-0.02006755
478	0.10670246		1007.99	0.03013211		1537.98	0.00164666		2067.98	-0.01037702		2598.01	-0.02038769
478.2	0.10698929		1008.19	0.03025898		1538.18	0.00110786		2068.18	-0.01073405		2598.21	-0.02045636
478.4	0.10774411		1008.39	0.03076843		1538.38	0.00094802		2068.38	-0.01018281		2598.41	-0.01987895
478.6	0.1079886		1008.59	0.03069926		1538.58	0.00098943		2068.58	-0.00925978		2598.61	-0.01978416
478.8	0.10725927		1008.79	0.03135395		1538.78	0.00122179		2068.78	-0.009264		2598.81	-0.01987868
479	0.10687796		1008.99	0.03040771		1538.98	0.00093711		2068.98	-0.00959937		2599.01	-0.01979454
479.2	0.10714625		1009.19	0.03039512		1539.18	0.00035476		2069.18	-0.00871537		2599.21	-0.02015328
479.4	0.10748439		1009.39	0.03069381		1539.38	-0.00101844		2069.38	-0.00862658		2599.41	-0.02125939
479.6	0.10705071		1009.59	0.02953132		1539.58	-0.00199567		2069.58	-0.00929542		2599.61	-0.02132566
479.8	0.10791593		1009.79	0.03026784		1539.78	-0.00212172		2069.78	-0.00932815		2599.81	-0.02041457
480	0.10787108		1009.99	0.02986474		1539.98	-0.00263187		2069.98	-0.01067965		2600.01	-0.02039002
480.2	0.10765885		1010.19	0.03005609		1540.18	-0.00297945		2070.18	-0.0106321		2600.21	-0.02051177
480.4	0.10706753		1010.39	0.03024862		1540.38	-0.00202052		2070.38	-0.01020632		2600.41	-0.02089865
480.6	0.10598273		1010.59	0.03135974		1540.58	-0.0019085		2070.58	-0.01007201		2600.61	-0.02136586
480.8	0.1052303		1010.79	0.03140403		1540.78	-0.00149496		2070.78	-0.01036474		2600.81	-0.02019453
481	0.10543362		1010.99	0.03068044		1540.98	-0.00057371		2070.98	-0.010587		2601.01	-0.01964496
481.2	0.10535592		1011.19	0.03084947		1541.18	-0.00033872		2071.18	-0.01067332		2601.21	-0.01918881
481.4	0.1042658		1011.39	0.03095399		1541.38	0.00109734		2071.38	-0.01063188		2601.41	-0.01958443
481.6	0.10449763		1011.59	0.03172046		1541.58	0.00142184		2071.58	-0.01070514		2601.61	-0.0189765
481.8	0.10387517		1011.79	0.03287802		1541.78	0.00160978		2071.78	-0.01008677		2601.81	-0.01845179
482	0.10337514		1011.99	0.03353272		1541.98	0.00154866		2071.98	-0.00941323		2602.01	-0.0179384
482.2	0.10360626		1012.19	0.03290566		1542.18	0.00247204		2072.18	-0.00930839		2602.21	-0.01717307
482.4	0.10360856		1012.39	0.03261448		1542.38	0.00266614		2072.38	-0.00757534		2602.41	-0.01577503
482.6	0.10298493		1012.59	0.03250782		1542.58	0.00235027		2072.58	-0.00739633		2602.61	-0.01559204
482.8	0.10235513		1012.79	0.03264783		1542.78	0.00286145		2072.78	-0.00681991		2602.81	-0.01620892
483	0.10370135		1012.99	0.03199941		1542.98	0.00281945		2072.98	-0.0065826		2603.01	-0.01669683
483.2	0.10410709		1013.19	0.03183306		1543.18	0.00242063		2073.18	-0.00683008		2603.21	-0.01676407
483.4	0.10512854		1013.39	0.03223426		1543.38	0.00136398		2073.38	-0.00748365		2603.41	-0.01666279
483.6	0.10526191		1013.59	0.03117871		1543.58	0.00130481		2073.58	-0.00866273		2603.61	-0.01700263
483.8	0.1061365		1013.79	0.03080426		1543.78	0.00134663		2073.78	-0.00918977		2603.81	-0.01707917
484	0.10549647		1013.99	0.03039112		1543.98	0.00067612		2073.98	-0.01002458		2604.01	-0.01655765
484.2	0.10552274		1014.19	0.03062214		1544.18	0.00007774		2074.18	-0.01104766		2604.21	-0.01737649
484.4	0.10536183		1014.39	0.03022681		1544.38	0.00110285		2074.38	-0.01183131		2604.41	-0.0183835
484.6	0.10567838		1014.59	0.02991076		1544.58	-0.00022956		2074.58	-0.01354848		2604.61	-0.01881373
484.8	0.10555466		1014.79	0.02919027		1544.78	-0.00031187		2074.78	-0.01473738		2604.81	-0.01933542
485	0.10610182		1014.99	0.0288852		1544.98	-0.00026109		2074.98	-0.01592475		2605.01	-0.02043863
485.2	0.10584053		1015.19	0.02893007		1545.18	-0.00069851		2075.18	-0.01648499		2605.21	-0.02091944
485.4	0.10597843		1015.39	0.02930616		1545.38	-0.00026		2075.38	-0.01640827		2605.41	-0.02175614
485.6	0.10646989		1015.59	0.02922402		1545.58	-0.00062714		2075.58	-0.01601147		2605.61	-0.02204594
485.8	0.10650395		1015.79	0.03053835		1545.78	-0.00125054		2075.78	-0.01568942		2605.81	-0.02279045
486	0.10695717		1015.99	0.03069795		1545.98	-0.00145928		2075.98	-0.01529471		2606.01	-0.02275471
486.2	0.10691778		1016.19	0.03000563		1546.18	-0.00178118		2076.18	-0.01478525		2606.21	-0.02150779
486.4	0.10689436		1016.39	0.02975688		1546.38	-0.00329971		2076.38	-0.01290041		2606.41	-0.02109837
486.6	0.10714327		1016.59	0.02995824		1546.58	-0.00342944		2076.58	-0.01269245		2606.61	-0.02120533
486.8	0.10693481		1016.79	0.03008155		1546.78	-0.00319042		2076.78	-0.01100803		2606.81	-0.02015845
487	0.10658832		1016.99	0.03095577		1546.98	-0.00329631		2076.98	-0.01005716		2607.01	-0.01857363
487.2	0.10547953		1017.19	0.03098163		1547.18	-0.00308282		2077.18	-0.01020407		2607.21	-0.01721683
487.4	0.10484509		1017.39	0.03159976		1547.38	-0.00327064		2077.38	-0.00944895		2607.41	-0.01615659
487.6	0.10401206		1017.59	0.03117998		1547.58	-0.00300417		2077.58	-0.00899381		2607.61	-0.01635462
487.8	0.10325693		1017.79	0.03083414		1547.78	-0.00272807		2077.78	-0.00867849		2607.81	-0.01537943
488	0.10289765		1017.99	0.03064752		1547.98	-0.00287762		2077.98	-0.00891676		2608.01	-0.01525079
488.2	0.10267785		1018.19	0.03044717		1548.18	-0.00213157		2078.18	-0.00993728		2608.21	-0.01580241
488.4	0.10238448		1018.39	0.03058403		1548.38	-0.00175142		2078.38	-0.00997212		2608.41	-0.01565818
488.6	0.10165143		1018.59	0.0307595		1548.58	-0.00198852		2078.58	-0.01149484		2608.61	-0.01681338
488.8	0.10099775		1018.79	0.03193779		1548.78	-0.00189434		2078.78	-0.01204094		2608.81	-0.01791493
489	0.10142781		1018.99	0.03167131		1548.98	-0.00168347		2078.98	-0.01268326		2609.01	-0.01824237
489.2	0.10171591		1019.19	0.03107711		1549.18	-0.00201333		2079.18	-0.01206638		2609.21	-0.01903291
489.4	0.10196482		1019.39	0.03031169		1549.38	-0.00186959		2079.38	-0.01206172		2609.41	-0.02000909
489.6	0.10225356		1019.59	0.02981412		1549.58	-0.00205907		2079.58	-0.01203832		2609.61	-0.02074065
489.8	0.10356588		1019.79	0.0304232		1549.78	-0.00197975		2079.78	-0.01123769		2609.81	-0.02132514
490	0.10372187		1019.99	0.02908691		1549.98	-0.00129571		2079.98	-0.01050082		2610.01	-0.02116297
490.2	0.10418384		1020.19	0.02855532		1550.18	-0.00224599		2080.18	-0.00980282		2610.21	-0.02089933
490.4	0.10398148		1020.39	0.02840951		1550.38	-0.00274873		2080.38	-0.0093673		2610.41	-0.02080652
490.6	0.10425325		1020.59	0.02765599		1550.58	-0.00255846		2080.58	-0.00967716		2610.61	-0.02022295
490.8	0.10342585		1020.79	0.02846502		1550.78	-0.00269274		2080.78	-0.0094265		2610.81	-0.01853402
491	0.10328167		1020.99	0.02907374		1550.98	-0.00170066		2080.98	-0.00985552		2611.01	-0.01818022
491.2	0.10413407		1021.19	0.02845218		1551.18	-0.00170182		2081.18	-0.01032055		2611.21	-0.0171072
491.4	0.10419887		1021.39	0.02838672		1551.38	-0.00148488		2081.38	-0.00973672		2611.41	-0.01668371
491.6	0.10527446		1021.59	0.02792032		1551.58	-0.00083429		2081.58	-0.0099097		2611.61	-0.01680231
491.8	0.10476536		1021.79	0.02740465		1551.78	-0.00119329		2081.78	-0.01058723		2611.81	-0.01710374
492	0.10487352		1021.99	0.02794623		1551.98	-0.00024358		2081.98	-0.010637		2612.01	-0.01718665
492.2	0.10560832		1022.19	0.02909949		1552.18	-0.0002517		2082.18	-0.01141307		2612.21	-0.01629993
492.4	0.10543616		1022.39	0.03094889		1552.38	-0.00048914		2082.38	-0.01191135		2612.41	-0.0161751
492.6	0.1058568		1022.59	0.03193651		1552.58	-0.00062154		2082.58	-0.0133899		2612.61	-0.01664784
492.8	0.10607731		1022.79	0.03195002		1552.78	-0.00121483		2082.78	-0.01305788		2612.81	-0.01693554
493	0.10596684		1022.99	0.03095609		1552.98	-0.00158007		2082.98	-0.01281996		2613.01	-0.01788623
493.2	0.10576852		1023.19	0.03059556		1553.18	-0.00174262		2083.18	-0.0126644		2613.21	-0.01817337
493.4	0.1054802		1023.39	0.03083038		1553.38	-0.00184528		2083.38	-0.01260586		2613.41	-0.01871051
493.6	0.10535936		1023.59	0.03123265		1553.58	-0.00184542		2083.58	-0.01184804		2613.61	-0.01917604
493.8	0.10558084		1023.79	0.03104495		1553.78	-0.00147736		2083.78	-0.01077555		2613.81	-0.01955784
494	0.10466653		1023.99	0.03103975		1553.98	-0.00101391		2083.98	-0.01097045		2614.01	-0.01970062
494.2	0.1045797		1024.19	0.03135008		1554.18	-0.00153632		2084.18	-0.01106846		2614.21	-0.01922717
494.4	0.10440945		1024.39	0.03137432		1554.38	-0.00140194		2084.38	-0.0107325		2614.41	-0.01819232
494.6	0.10508996		1024.59	0.03142365		1554.58	-0.00109984		2084.58	-0.01076508		2614.61	-0.0183547
494.8	0.10509665		1024.79	0.03222532		1554.78	-0.00071444		2084.78	-0.01025227		2614.81	-0.01735352
495	0.10554922		1024.99	0.03113653		1554.98	0.00011067		2084.98	-0.00960083		2615.01	-0.01696082
495.2	0.10588972		1025.19	0.03065508		1555.18	-0.00010716		2085.18	-0.00898271		2615.21	-0.01664513
495.4	0.10540817		1025.39	0.02976186		1555.38	0.00008554		2085.38	-0.0089958		2615.41	-0.01737088
495.6	0.10583752		1025.59	0.02975356		1555.58	0.00026586		2085.58	-0.00883515		2615.61	-0.01773166
495.8	0.10545879		1025.79	0.02953962		1555.78	-0.00048596		2085.78	-0.00876966		2615.81	-0.01844559
496	0.1063217		1025.99	0.02953996		1555.98	-0.00000331		2085.98	-0.00872129		2616.01	-0.0182566
496.2	0.1077392		1026.19	0.02902218		1556.18	-0.0011197		2086.18	-0.00981658		2616.21	-0.01789047
496.4	0.10754987		1026.39	0.0293305		1556.38	-0.00079036		2086.38	-0.01106884		2616.41	-0.01785828
496.6	0.10759391		1026.59	0.02889565		1556.58	-0.00164242		2086.58	-0.01174604		2616.61	-0.01884717
496.8	0.10780222		1026.79	0.02786945		1556.78	-0.00216219		2086.78	-0.01157275		2616.81	-0.01996956
497	0.10634084		1026.99	0.0277549		1556.98	-0.00329417		2086.98	-0.01220366		2617.01	-0.02015313
497.2	0.10563857		1027.19	0.02818276		1557.18	-0.00356364		2087.18	-0.0135996		2617.21	-0.01974475
497.4	0.10490241		1027.39	0.02773454		1557.38	-0.0049188		2087.38	-0.01333919		2617.41	-0.01963282
497.6	0.10375617		1027.59	0.02789926		1557.58	-0.00485668		2087.58	-0.01350846		2617.61	-0.01926785
497.8	0.10405887		1027.79	0.02744		1557.78	-0.0043115		2087.78	-0.01375566		2617.81	-0.01970427
498	0.10408005		1027.99	0.02839319		1557.98	-0.00393274		2087.98	-0.0135569		2618.01	-0.01939907
498.2	0.10491504		1028.19	0.02890922		1558.18	-0.00350609		2088.18	-0.0130432		2618.21	-0.01869243
498.4	0.10617793		1028.39	0.03027244		1558.38	-0.00259548		2088.38	-0.01163519		2618.41	-0.01810459
498.6	0.10637946		1028.59	0.03027955		1558.58	-0.00215811		2088.58	-0.01081009		2618.61	-0.01812193
498.8	0.10603664		1028.79	0.03075623		1558.78	-0.00199466		2088.78	-0.00932321		2618.81	-0.0173903
499	0.10574344		1028.99	0.03108807		1558.98	-0.00138115		2088.98	-0.00910622		2619.01	-0.01720412
499.2	0.10574796		1029.19	0.03195855		1559.18	-0.0015573		2089.18	-0.00814822		2619.21	-0.01756781
499.4	0.10517839		1029.39	0.0323369		1559.38	-0.00120299		2089.38	-0.00818336		2619.41	-0.01780878
499.6	0.10590436		1029.59	0.03346516		1559.58	-0.00076228		2089.58	-0.00750895		2619.61	-0.0175676
499.8	0.10560485		1029.79	0.03338586		1559.78	-0.00139358		2089.78	-0.00768309		2619.81	-0.01736915
500	0.1048004		1029.99	0.03342952		1559.98	-0.00130131		2089.98	-0.00846048		2620.01	-0.01713706
500.2	0.10433987		1030.19	0.03352668		1560.18	-0.00160211		2090.18	-0.00905127		2620.21	-0.01681611
500.4	0.10350996		1030.39	0.03308629		1560.38	-0.00068121		2090.38	-0.01020936		2620.41	-0.01764885
500.6	0.10299431		1030.59	0.03281343		1560.58	-0.00117356		2090.58	-0.01028494		2620.61	-0.01913818
500.8	0.10232891		1030.79	0.032291		1560.78	-0.0009933		2090.78	-0.01038377		2620.81	-0.01914472
501	0.10075228		1030.99	0.03230407		1560.98	-0.00237262		2090.98	-0.01098364		2621.01	-0.0182561
501.2	0.10042245		1031.19	0.03190376		1561.18	-0.00261324		2091.18	-0.01175759		2621.21	-0.01766534
501.4	0.10010131		1031.39	0.03114232		1561.38	-0.00289031		2091.38	-0.01156358		2621.41	-0.01729658
501.6	0.09999735		1031.59	0.03108146		1561.58	-0.00188175		2091.58	-0.01212352		2621.61	-0.01695376
501.8	0.10092097		1031.79	0.03111331		1561.78	-0.00162025		2091.78	-0.01221592		2621.81	-0.01787675
502	0.10165313		1031.99	0.03157468		1561.98	-0.00081313		2091.98	-0.01171168		2622.01	-0.01782862
502.2	0.10283213		1032.19	0.03148436		1562.18	-0.00073821		2092.18	-0.01138419		2622.21	-0.0180611
502.4	0.10355449		1032.39	0.0318093		1562.38	-0.00059996		2092.38	-0.01110649		2622.41	-0.01845617
502.6	0.10390835		1032.59	0.03075665		1562.58	-0.00105681		2092.58	-0.01118112		2622.61	-0.01823452
502.8	0.10441546		1032.79	0.03138883		1562.78	-0.00008492		2092.78	-0.01157273		2622.81	-0.0182303
503	0.10448068		1032.99	0.03136225		1562.98	0.00030028		2092.98	-0.0120925		2623.01	-0.01836836
503.2	0.1045038		1033.19	0.03145979		1563.18	0.00051422		2093.18	-0.01143597		2623.21	-0.01823619
503.4	0.10478153		1033.39	0.03104402		1563.38	0.00066172		2093.38	-0.01173668		2623.41	-0.01799814
503.6	0.10451212		1033.59	0.0315705		1563.58	0.00058072		2093.58	-0.0109985		2623.61	-0.01820219
503.8	0.10336632		1033.79	0.03169953		1563.78	-0.00011325		2093.78	-0.01082202		2623.81	-0.01846935
504	0.10298207		1033.99	0.03129009		1563.98	0.00076255		2093.98	-0.01055298		2624.01	-0.01890824
504.2	0.10262829		1034.19	0.0308581		1564.18	0.00080597		2094.18	-0.01054824		2624.21	-0.01938731
504.4	0.102331		1034.39	0.03041145		1564.38	0.00089759		2094.38	-0.00991738		2624.41	-0.01959111
504.6	0.10218981		1034.59	0.03077809		1564.58	0.00067674		2094.58	-0.0093249		2624.61	-0.0199411
504.8	0.10166075		1034.79	0.03081116		1564.78	0.00025277		2094.78	-0.00835681		2624.81	-0.01950122
505	0.101525		1034.99	0.03126166		1564.98	-0.00062993		2094.98	-0.00836257		2625.01	-0.0191618
505.2	0.10190569		1035.19	0.03140104		1565.18	-0.00022755		2095.18	-0.00854659		2625.21	-0.01898427
505.4	0.10184451		1035.39	0.03191101		1565.38	-0.00062701		2095.38	-0.00808141		2625.41	-0.01867604
505.6	0.10239997		1035.59	0.03205208		1565.58	-0.00044476		2095.58	-0.00869295		2625.61	-0.01801799
505.8	0.10366744		1035.79	0.03315004		1565.78	-0.00124934		2095.78	-0.00805487		2625.81	-0.01894631
506	0.10347391		1035.99	0.03284791		1565.98	-0.00092422		2095.98	-0.00811174		2626.01	-0.01919065
506.2	0.10448916		1036.19	0.03256393		1566.18	-0.00218434		2096.18	-0.00822593		2626.21	-0.01940506
506.4	0.10485884		1036.39	0.03213093		1566.38	-0.00157436		2096.38	-0.00937049		2626.41	-0.01934035
506.6	0.10545447		1036.59	0.03109899		1566.58	-0.00071854		2096.58	-0.00996257		2626.61	-0.01917776
506.8	0.10561261		1036.79	0.03121261		1566.78	-0.00016054		2096.78	-0.01067663		2626.81	-0.01963777
507	0.10543218		1036.99	0.03046685		1566.98	0.00025772		2096.98	-0.0109153		2627.01	-0.01971147
507.2	0.10603162		1037.19	0.03025393		1567.18	0.00014874		2097.18	-0.01147679		2627.21	-0.01972114
507.4	0.10662239		1037.39	0.02973627		1567.38	0.00068813		2097.38	-0.012131		2627.41	-0.01922503
507.6	0.10636415		1037.59	0.03034484		1567.58	0.00075808		2097.58	-0.01225836		2627.61	-0.01901667
507.8	0.10605105		1037.79	0.02979213		1567.78	0.00071583		2097.78	-0.01290253		2627.81	-0.0189787
508	0.10639885		1037.99	0.02948636		1567.98	0.00123398		2097.98	-0.01284879		2628.01	-0.01906548
508.2	0.10583722		1038.19	0.02982094		1568.18	0.00043416		2098.18	-0.01310443		2628.21	-0.01851339
508.4	0.10538919		1038.39	0.02934939		1568.38	-0.00037235		2098.38	-0.01278468		2628.41	-0.01802316
508.6	0.10505938		1038.59	0.02933786		1568.58	-0.00053752		2098.58	-0.01370061		2628.61	-0.01793978
508.8	0.1041595		1038.79	0.02901933		1568.78	-0.00082377		2098.78	-0.01316003		2628.81	-0.01795816
509	0.10362149		1038.99	0.03007378		1568.98	-0.00097609		2098.98	-0.0129407		2629.01	-0.01794937
509.2	0.1033256		1039.19	0.02981038		1569.18	-0.00116481		2099.18	-0.01267627		2629.21	-0.01863333
509.4	0.103176		1039.39	0.03005017		1569.38	-0.00143732		2099.38	-0.0122186		2629.41	-0.01839008
509.6	0.10254149		1039.59	0.03009298		1569.58	-0.00164242		2099.58	-0.01193557		2629.61	-0.01843079
509.8	0.10256528		1039.79	0.03117468		1569.78	-0.00295832		2099.78	-0.01155229		2629.81	-0.01956517
510	0.1012501		1039.99	0.03085892		1569.98	-0.00315943		2099.98	-0.0118766		2630.01	-0.0202146
510.2	0.10166187		1040.19	0.03091567		1570.18	-0.00398099		2100.18	-0.01162625		2630.21	-0.02068015
510.4	0.10134361		1040.39	0.03135135		1570.38	-0.00250185		2100.38	-0.0123166		2630.41	-0.02134959
510.6	0.10156939		1040.59	0.03211576		1570.58	-0.00224219		2100.58	-0.0118314		2630.61	-0.02228415
510.8	0.10148923		1040.79	0.03256437		1570.78	-0.00206164		2100.78	-0.01235208		2630.81	-0.02314055
511	0.10147952		1040.99	0.03296187		1570.98	-0.00034317		2100.98	-0.01260347		2631.01	-0.02339254
511.2	0.10079928		1041.19	0.03276071		1571.18	-0.00069707		2101.18	-0.01254596		2631.21	-0.02336277
511.4	0.10118142		1041.39	0.03274117		1571.38	0.00001707		2101.38	-0.01269214		2631.41	-0.02267485
511.6	0.10145417		1041.59	0.03303423		1571.58	-0.00064796		2101.58	-0.01189821		2631.61	-0.02268464
511.8	0.10207076		1041.79	0.0328984		1571.78	-0.00013219		2101.78	-0.01201611		2631.81	-0.02260268
512	0.10271743		1041.99	0.03251493		1571.98	0.00020913		2101.98	-0.0111733		2632.01	-0.02157816
512.2	0.10170545		1042.19	0.03229308		1572.18	-0.00047048		2102.18	-0.0105851		2632.21	-0.02019916
512.4	0.10098016		1042.39	0.0317567		1572.38	-0.00072778		2102.38	-0.01036639		2632.41	-0.01894796
512.6	0.10056523		1042.59	0.03218595		1572.58	-0.00051789		2102.58	-0.01001828		2632.61	-0.01775089
512.8	0.10037069		1042.79	0.03128668		1572.78	-0.00029783		2102.78	-0.00947384		2632.81	-0.01756956
513	0.0999399		1042.99	0.03158539		1572.98	-0.00090252		2102.98	-0.00890756		2633.01	-0.01688012
513.2	0.09889506		1043.19	0.03008245		1573.18	-0.00129389		2103.18	-0.00974684		2633.21	-0.01698816
513.4	0.09913129		1043.39	0.02968488		1573.38	-0.00201302		2103.38	-0.01063594		2633.41	-0.01618974
513.6	0.09866444		1043.59	0.02951174		1573.58	-0.00319974		2103.58	-0.01082648		2633.61	-0.01601097
513.8	0.0989879		1043.79	0.03060434		1573.78	-0.0038696		2103.78	-0.01135827		2633.81	-0.0158813
514	0.09896151		1043.99	0.03037477		1573.98	-0.00379509		2103.98	-0.01189318		2634.01	-0.01623977
514.2	0.09919596		1044.19	0.03069237		1574.18	-0.00285253		2104.18	-0.01209154		2634.21	-0.0168234
514.4	0.0996297		1044.39	0.0305125		1574.38	-0.00194768		2104.38	-0.01262258		2634.41	-0.01726999
514.6	0.09991817		1044.59	0.03099336		1574.58	-0.00167093		2104.58	-0.01287576		2634.61	-0.0184375
514.8	0.09973962		1044.79	0.03129219		1574.78	-0.00116916		2104.78	-0.01356382		2634.81	-0.01881456
515	0.09960509		1044.99	0.03068528		1574.98	-0.00071675		2104.98	-0.01342968		2635.01	-0.01981806
515.2	0.09937622		1045.19	0.02960452		1575.18	-0.00155124		2105.18	-0.01294384		2635.21	-0.02068882
515.4	0.1018552		1045.39	0.02934345		1575.38	-0.00141453		2105.38	-0.01227365		2635.41	-0.02114523
515.6	0.10205713		1045.59	0.02912934		1575.58	-0.00188992		2105.58	-0.01175343		2635.61	-0.02089832
515.8	0.10341089		1045.79	0.02860022		1575.78	-0.00149124		2105.78	-0.0124939		2635.81	-0.02076506
516	0.10330206		1045.99	0.02755795		1575.98	-0.00140765		2105.98	-0.0114682		2636.01	-0.02071023
516.2	0.10276777		1046.19	0.02785279		1576.18	-0.00234369		2106.18	-0.01120447		2636.21	-0.02034334
516.4	0.10293899		1046.39	0.02725832		1576.38	-0.00269871		2106.38	-0.01098576		2636.41	-0.02025524
516.6	0.10279943		1046.59	0.0271649		1576.58	-0.00336001		2106.58	-0.01049839		2636.61	-0.01966966
516.8	0.10270378		1046.79	0.02687683		1576.78	-0.00352017		2106.78	-0.01002122		2636.81	-0.01898055
517	0.10117526		1046.99	0.02704321		1576.98	-0.0048883		2106.98	-0.01000295		2637.01	-0.01803716
517.2	0.10051744		1047.19	0.02683927		1577.18	-0.00554879		2107.18	-0.01065251		2637.21	-0.01784399
517.4	0.10138585		1047.39	0.02714474		1577.38	-0.00513115		2107.38	-0.01016988		2637.41	-0.01812717
517.6	0.10071857		1047.59	0.02836908		1577.58	-0.00469383		2107.58	-0.00937337		2637.61	-0.0175888
517.8	0.10106586		1047.79	0.03010648		1577.78	-0.00370872		2107.78	-0.00898295		2637.81	-0.01798064
518	0.10129088		1047.99	0.03048125		1577.98	-0.00253028		2107.98	-0.00893144		2638.01	-0.01908478
518.2	0.10113147		1048.19	0.03089317		1578.18	-0.0015443		2108.18	-0.00815456		2638.21	-0.01940827
518.4	0.10066287		1048.39	0.03084633		1578.38	-0.00169553		2108.38	-0.00849629		2638.41	-0.02037033
518.6	0.10064926		1048.59	0.03108833		1578.58	-0.00083273		2108.58	-0.00885162		2638.61	-0.02123505
518.8	0.10038904		1048.79	0.03120458		1578.78	-0.00062946		2108.78	-0.00940195		2638.81	-0.02092377
519	0.10027062		1048.99	0.02998588		1578.98	-0.00056989		2108.98	-0.00950258		2639.01	-0.02195079
519.2	0.10078329		1049.19	0.0295214		1579.18	-0.0003704		2109.18	-0.01046373		2639.21	-0.02185378
519.4	0.10132359		1049.39	0.0289254		1579.38	-0.00016742		2109.38	-0.01090502		2639.41	-0.02130503
519.6	0.10006841		1049.59	0.02806981		1579.58	0.00030544		2109.58	-0.01173922		2639.61	-0.02131681
519.8	0.10105292		1049.79	0.02698166		1579.78	0.00033015		2109.78	-0.01234374		2639.81	-0.02153134
520	0.10086788		1049.99	0.02655246		1579.98	0.00010086		2109.98	-0.01197591		2640.01	-0.02146732
520.2	0.10024626		1050.19	0.02661922		1580.18	-0.00098373		2110.18	-0.01235787		2640.21	-0.0213099
520.4	0.10014942		1050.39	0.02682284		1580.38	-0.00089222		2110.38	-0.01223624		2640.41	-0.02081206
520.6	0.09965369		1050.59	0.02710047		1580.58	-0.0010407		2110.58	-0.01289925		2640.61	-0.01935387
520.8	0.09920513		1050.79	0.02806413		1580.78	-0.00112244		2110.78	-0.01293486		2640.81	-0.01866554
521	0.09812569		1050.99	0.02832802		1580.98	-0.00174532		2110.98	-0.01340489		2641.01	-0.01849156
521.2	0.09827134		1051.19	0.02885347		1581.18	-0.00147245		2111.18	-0.01369228		2641.21	-0.01922824
521.4	0.09854479		1051.39	0.0301183		1581.38	-0.00021645		2111.38	-0.01347825		2641.41	-0.0195194
521.6	0.0981587		1051.59	0.03112747		1581.58	0.00034113		2111.58	-0.0137089		2641.61	-0.0193734
521.8	0.09930409		1051.79	0.0316351		1581.78	0.00083303		2111.78	-0.01320759		2641.81	-0.02035519
522	0.09943796		1051.99	0.03225593		1581.98	0.00061305		2111.98	-0.01334911		2642.01	-0.02083754
522.2	0.09992367		1052.19	0.03163313		1582.18	-0.0002053		2112.18	-0.01350798		2642.21	-0.02158901
522.4	0.09984894		1052.39	0.03159693		1582.38	0.00024891		2112.38	-0.0136778		2642.41	-0.02191371
522.6	0.10061824		1052.59	0.03075314		1582.58	0.00058433		2112.58	-0.01407788		2642.61	-0.02244876
522.8	0.10132118		1052.79	0.03105804		1582.78	-0.00035437		2112.78	-0.01444726		2642.81	-0.02323546
523	0.10237041		1052.99	0.03010991		1582.98	-0.00063906		2112.98	-0.01386424		2643.01	-0.02348791
523.2	0.10298151		1053.19	0.02964177		1583.18	-0.0008514		2113.18	-0.01338743		2643.21	-0.02238759
523.4	0.10301027		1053.39	0.02884945		1583.38	-0.00074357		2113.38	-0.0122754		2643.41	-0.02192809
523.6	0.10327932		1053.59	0.02797075		1583.58	-0.00138178		2113.58	-0.01094541		2643.61	-0.02169929
523.8	0.10408243		1053.79	0.02774244		1583.78	-0.00239294		2113.78	-0.01051439		2643.81	-0.02045449
524	0.10366136		1053.99	0.02826532		1583.98	-0.00184839		2113.98	-0.01017942		2644.01	-0.0198535
524.2	0.10296171		1054.19	0.02804149		1584.18	-0.00179298		2114.18	-0.01025377		2644.21	-0.01840225
524.4	0.10359057		1054.39	0.02888185		1584.38	-0.00128986		2114.38	-0.01007126		2644.41	-0.01714198
524.6	0.10350751		1054.59	0.02845707		1584.58	-0.0022362		2114.58	-0.01062209		2644.61	-0.01626368
524.8	0.10313243		1054.79	0.02954454		1584.78	-0.00242014		2114.78	-0.01050812		2644.81	-0.01659076
525	0.10274846		1054.99	0.02920848		1584.98	-0.00202086		2114.98	-0.01062386		2645.01	-0.01638269
525.2	0.10325944		1055.19	0.02983094		1585.18	-0.00158152		2115.18	-0.01153286		2645.21	-0.01649749
525.4	0.10310129		1055.39	0.03011431		1585.38	-0.00078484		2115.38	-0.01243113		2645.41	-0.01674156
525.6	0.1035681		1055.59	0.02992011		1585.58	-0.00057966		2115.58	-0.01313757		2645.61	-0.01704398
525.8	0.10392427		1055.79	0.03041583		1585.78	-0.00070978		2115.78	-0.01334495		2645.81	-0.01819392
526	0.10390978		1055.99	0.03097203		1585.98	-0.00091634		2115.98	-0.01424995		2646.01	-0.01939058
526.2	0.10420297		1056.19	0.03076866		1586.18	-0.00084356		2116.18	-0.01505244		2646.21	-0.02044865
526.4	0.10333007		1056.39	0.03104659		1586.38	0.00004824		2116.38	-0.01482763		2646.41	-0.02145098
526.6	0.10399372		1056.59	0.0302153		1586.58	-0.00019257		2116.58	-0.015353		2646.61	-0.02298594
526.8	0.10450781		1056.79	0.02980583		1586.78	-0.00054297		2116.78	-0.01535954		2646.81	-0.02353611
527	0.10540412		1056.99	0.02914618		1586.98	-0.00101946		2116.98	-0.01452588		2647.01	-0.02309162
527.2	0.10459694		1057.19	0.02936455		1587.18	-0.00099057		2117.18	-0.01320866		2647.21	-0.02244892
527.4	0.10430608		1057.39	0.02930343		1587.38	-0.00119074		2117.38	-0.01345411		2647.41	-0.02249905
527.6	0.1037784		1057.59	0.02899923		1587.58	-0.00234619		2117.58	-0.01219136		2647.61	-0.02222047
527.8	0.10297202		1057.79	0.02893205		1587.78	-0.0024682		2117.78	-0.01120927		2647.81	-0.02121293
528	0.10202168		1057.99	0.02907706		1587.98	-0.00155746		2117.98	-0.01055309		2648.01	-0.02052992
528.2	0.10164313		1058.19	0.02907617		1588.18	-0.00217572		2118.18	-0.01016912		2648.21	-0.01957293
528.4	0.1025177		1058.39	0.03065621		1588.38	-0.00325327		2118.38	-0.00885243		2648.41	-0.01925543
528.6	0.10163573		1058.59	0.03044059		1588.58	-0.00448903		2118.58	-0.00838969		2648.61	-0.01887573
528.8	0.10091557		1058.79	0.03124552		1588.78	-0.00404823		2118.78	-0.00810323		2648.81	-0.01888207
529	0.10036494		1058.99	0.03148504		1588.98	-0.00375673		2118.98	-0.00858134		2649.01	-0.01885344
529.2	0.10050159		1059.19	0.03199111		1589.18	-0.00383807		2119.18	-0.00929376		2649.21	-0.01890748
529.4	0.09971743		1059.39	0.03148071		1589.38	-0.0034615		2119.38	-0.00936896		2649.41	-0.01936423
529.6	0.10042707		1059.59	0.0313041		1589.58	-0.00348166		2119.58	-0.00909547		2649.61	-0.01955284
529.8	0.10059633		1059.79	0.03182057		1589.78	-0.00295789		2119.78	-0.01020402		2649.81	-0.02049177
530	0.10095165		1059.99	0.03114669		1589.98	-0.00285581		2119.98	-0.01091447		2650.01	-0.02066435
530.2	0.10164501		1060.19	0.03103159		1590.18	-0.00299902		2120.18	-0.01171217		2650.21	-0.02144779
530.4	0.10216298		1060.39	0.03027659		1590.38	-0.00295532		2120.38	-0.01199056		2650.41	-0.02156168
530.6	0.10328199		1060.59	0.02989388		1590.58	-0.00238866		2120.58	-0.01255194		2650.61	-0.02129163
530.8	0.10312772		1060.79	0.02898691		1590.78	-0.00256136		2120.78	-0.01324954		2650.81	-0.0213867
531	0.1039433		1060.99	0.02898078		1590.98	-0.00340632		2120.98	-0.01225889		2651.01	-0.02094371
531.2	0.10409176		1061.19	0.02868399		1591.18	-0.00295347		2121.18	-0.01290925		2651.21	-0.02100865
531.4	0.10360704		1061.39	0.0289569		1591.38	-0.00384831		2121.38	-0.01323707		2651.41	-0.02100311
531.6	0.10320005		1061.59	0.02927814		1591.58	-0.00396659		2121.58	-0.01243795		2651.61	-0.02118022
531.8	0.10290548		1061.79	0.02989318		1591.78	-0.00312649		2121.78	-0.01262074		2651.81	-0.02133461
532	0.10285791		1061.99	0.03032771		1591.98	-0.00292714		2121.98	-0.01249445		2652.01	-0.02082242
532.2	0.10257782		1062.19	0.03096292		1592.18	-0.00338884		2122.18	-0.01288176		2652.21	-0.02048618
532.4	0.10276264		1062.39	0.03192583		1592.38	-0.00334244		2122.38	-0.01202556		2652.41	-0.01983216
532.6	0.10175445		1062.59	0.03187044		1592.58	-0.00314129		2122.58	-0.01202591		2652.61	-0.01999879
532.8	0.10126245		1062.79	0.0317614		1592.78	-0.00256609		2122.78	-0.01180168		2652.81	-0.01997543
533	0.10193373		1062.99	0.03198015		1592.98	-0.00257974		2122.98	-0.01241272		2653.01	-0.02052463
533.2	0.1012255		1063.19	0.03196156		1593.18	-0.0020896		2123.18	-0.01201854		2653.21	-0.01945266
533.4	0.10134793		1063.39	0.03158137		1593.38	-0.00065145		2123.38	-0.01135391		2653.41	-0.01956332
533.6	0.10219372		1063.59	0.03104737		1593.58	-0.00015091		2123.58	-0.01175688		2653.61	-0.02038966
533.8	0.10316319		1063.79	0.03022671		1593.78	0.00039412		2123.78	-0.01233439		2653.81	-0.02047557
534	0.10357969		1063.99	0.02909466		1593.98	0.00071236		2123.98	-0.01238817		2654.01	-0.02020436
534.2	0.10404622		1064.19	0.02848517		1594.18	0.00020383		2124.18	-0.01301139		2654.21	-0.02015634
534.4	0.10405229		1064.39	0.02731213		1594.38	-0.00031427		2124.38	-0.01299875		2654.41	-0.01962523
534.6	0.10363296		1064.59	0.02711131		1594.58	-0.00008542		2124.58	-0.01323296		2654.61	-0.0192237
534.8	0.10284035		1064.79	0.02599699		1594.78	-0.00136366		2124.78	-0.01428691		2654.81	-0.0191194
535	0.10304167		1064.99	0.0256194		1594.98	-0.00233273		2124.98	-0.01396419		2655.01	-0.01950081
535.2	0.10222949		1065.19	0.02615339		1595.18	-0.0026763		2125.18	-0.01469729		2655.21	-0.01931499
535.4	0.10087844		1065.39	0.02747973		1595.38	-0.00293272		2125.38	-0.01438104		2655.41	-0.01889646
535.6	0.1010397		1065.59	0.02762679		1595.58	-0.00225946		2125.58	-0.01512952		2655.61	-0.01912832
535.8	0.10131433		1065.79	0.02819023		1595.78	-0.00300433		2125.78	-0.0157417		2655.81	-0.0194442
536	0.10074481		1065.99	0.02783448		1595.98	-0.00417369		2125.98	-0.01547881		2656.01	-0.01866305
536.2	0.09951744		1066.19	0.02888777		1596.18	-0.00427484		2126.18	-0.01612948		2656.21	-0.0184387
536.4	0.10001813		1066.39	0.02924218		1596.38	-0.00492126		2126.38	-0.01538644		2656.41	-0.01882443
536.6	0.09972336		1066.59	0.02943691		1596.58	-0.0054057		2126.58	-0.01455639		2656.61	-0.01921997
536.8	0.09997463		1066.79	0.02978848		1596.78	-0.00497443		2126.78	-0.01340029		2656.81	-0.01896114
537	0.10004833		1066.99	0.0305712		1596.98	-0.00475657		2126.98	-0.01388931		2657.01	-0.01992694
537.2	0.09931608		1067.19	0.03100581		1597.18	-0.00362433		2127.18	-0.01320496		2657.21	-0.01990857
537.4	0.09886415		1067.39	0.03094295		1597.38	-0.00340865		2127.38	-0.01236623		2657.41	-0.02085896
537.6	0.09958462		1067.59	0.0302152		1597.58	-0.00379077		2127.58	-0.01221259		2657.61	-0.02159141
537.8	0.10087504		1067.79	0.02955582		1597.78	-0.00371868		2127.78	-0.01213407		2657.81	-0.02158759
538	0.10091256		1067.99	0.03014454		1597.98	-0.0035148		2127.98	-0.01204659		2658.01	-0.02084152
538.2	0.10034995		1068.19	0.03041732		1598.18	-0.00307438		2128.18	-0.0122033		2658.21	-0.021202
538.4	0.10015279		1068.39	0.03046123		1598.38	-0.00325423		2128.38	-0.01182194		2658.41	-0.02161406
538.6	0.10092024		1068.59	0.03082165		1598.58	-0.00334326		2128.58	-0.0117422		2658.61	-0.02139342
538.8	0.10051289		1068.79	0.03016874		1598.78	-0.00456729		2128.78	-0.01148745		2658.81	-0.0211491
539	0.10046347		1068.99	0.02986631		1598.98	-0.00466398		2128.98	-0.01110121		2659.01	-0.02076557
539.2	0.10043616		1069.19	0.03058585		1599.18	-0.00390844		2129.18	-0.01207256		2659.21	-0.01953432
539.4	0.10133085		1069.39	0.03079607		1599.38	-0.00322762		2129.38	-0.01241715		2659.41	-0.01967354
539.6	0.10125742		1069.59	0.0308685		1599.58	-0.00327203		2129.58	-0.01292559		2659.61	-0.0198317
539.8	0.1010362		1069.79	0.03138901		1599.78	-0.00459662		2129.78	-0.01319253		2659.81	-0.02019424
540	0.10038514		1069.99	0.03066895		1599.98	-0.00383095		2129.98	-0.013456		2660.01	-0.01986227
540.2	0.10022082		1070.19	0.0307516		1600.18	-0.00309954		2130.18	-0.01418348		2660.21	-0.01967886
540.4	0.10060813		1070.39	0.02918252		1600.38	-0.00366453		2130.38	-0.01388852		2660.41	-0.01967866
540.6	0.10059643		1070.59	0.02881512		1600.58	-0.00330995		2130.58	-0.01381346		2660.61	-0.01960445
540.8	0.10145712		1070.79	0.0281974		1600.78	-0.00234033		2130.78	-0.01365558		2660.81	-0.02050242
541	0.10099164		1070.99	0.02715825		1600.98	-0.00294781		2130.98	-0.01514692		2661.01	-0.02147843
541.2	0.10100017		1071.19	0.02720738		1601.18	-0.0029406		2131.18	-0.01421063		2661.21	-0.02109653
541.4	0.10025089		1071.39	0.02583424		1601.38	-0.00359265		2131.38	-0.01321389		2661.41	-0.02159115
541.6	0.10116147		1071.59	0.02464899		1601.58	-0.00339237		2131.58	-0.01288089		2661.61	-0.02100169
541.8	0.10048375		1071.79	0.0235084		1601.78	-0.00328663		2131.78	-0.01299451		2661.81	-0.02131835
542	0.09970756		1071.99	0.02330256		1601.98	-0.00334763		2131.98	-0.01216118		2662.01	-0.02078786
542.2	0.099833		1072.19	0.02273107		1602.18	-0.00310922		2132.18	-0.01252692		2662.21	-0.02145912
542.4	0.10052976		1072.39	0.02225577		1602.38	-0.00308707		2132.38	-0.0121054		2662.41	-0.02152729
542.6	0.10104156		1072.59	0.02237442		1602.58	-0.00296152		2132.58	-0.01184033		2662.61	-0.02106789
542.8	0.10088099		1072.79	0.02261634		1602.78	-0.00274988		2132.78	-0.0125301		2662.81	-0.02096397
543	0.10158378		1072.99	0.02355505		1602.98	-0.00200707		2132.98	-0.01301656		2663.01	-0.02159305
543.2	0.10170067		1073.19	0.02530021		1603.18	-0.00114302		2133.18	-0.01294543		2663.21	-0.02164331
543.4	0.10180486		1073.39	0.02639108		1603.38	-0.00096681		2133.38	-0.0125231		2663.41	-0.02227759
543.6	0.10139535		1073.59	0.02752645		1603.58	-0.00125669		2133.58	-0.01309322		2663.61	-0.02195222
543.8	0.10189436		1073.79	0.02859315		1603.78	-0.00080488		2133.78	-0.01356263		2663.81	-0.02233508
544	0.10208706		1073.99	0.02865381		1603.98	-0.00019435		2133.98	-0.01403214		2664.01	-0.02188632
544.2	0.10243042		1074.19	0.02922529		1604.18	-0.00015586		2134.18	-0.01449231		2664.21	-0.02168122
544.4	0.10229465		1074.39	0.02957317		1604.38	-0.00029283		2134.38	-0.01418821		2664.41	-0.02179411
544.6	0.10281781		1074.59	0.02992134		1604.58	0.00084318		2134.58	-0.01366125		2664.61	-0.02197756
544.8	0.10297405		1074.79	0.02996106		1604.78	0.00114466		2134.78	-0.01346589		2664.81	-0.02245141
545	0.10193718		1074.99	0.030308		1604.98	0.00063451		2134.98	-0.01413339		2665.01	-0.02154723
545.2	0.10154326		1075.19	0.03007758		1605.18	0.00077765		2135.18	-0.01334522		2665.21	-0.02120436
545.4	0.1017327		1075.39	0.02826169		1605.38	0.00074184		2135.38	-0.01319026		2665.41	-0.02107923
545.6	0.1015158		1075.59	0.02765562		1605.58	0.00033241		2135.58	-0.01322563		2665.61	-0.02017455
545.8	0.10126514		1075.79	0.02643386		1605.78	-0.00045287		2135.78	-0.01335525		2665.81	-0.02070645
546	0.10213234		1075.99	0.02613844		1605.98	-0.00111982		2135.98	-0.0128593		2666.01	-0.02057799
546.2	0.10248073		1076.19	0.02567914		1606.18	-0.00080273		2136.18	-0.01280233		2666.21	-0.02116193
546.4	0.10246853		1076.39	0.02587926		1606.38	-0.00069985		2136.38	-0.01219692		2666.41	-0.02151562
546.6	0.10245464		1076.59	0.02569562		1606.58	-0.00133336		2136.58	-0.01168904		2666.61	-0.0214719
546.8	0.10228741		1076.79	0.02594299		1606.78	-0.00199871		2136.78	-0.011409		2666.81	-0.02153885
547	0.10122753		1076.99	0.02636432		1606.98	-0.0029386		2136.98	-0.01075258		2667.01	-0.02157438
547.2	0.10083552		1077.19	0.02714053		1607.18	-0.0033374		2137.18	-0.0104494		2667.21	-0.02131694
547.4	0.10050351		1077.39	0.02768725		1607.38	-0.00388581		2137.38	-0.01082992		2667.41	-0.02176345
547.6	0.10012014		1077.59	0.02895882		1607.58	-0.00453203		2137.58	-0.01096008		2667.61	-0.02234128
547.8	0.09986177		1077.79	0.02915832		1607.78	-0.00483488		2137.78	-0.01094143		2667.81	-0.02257461
548	0.09927313		1077.99	0.02832338		1607.98	-0.00534581		2137.98	-0.0109124		2668.01	-0.02288691
548.2	0.09966994		1078.19	0.02917192		1608.18	-0.0051624		2138.18	-0.01086154		2668.21	-0.02295558
548.4	0.09917778		1078.39	0.02903229		1608.38	-0.00455321		2138.38	-0.01045768		2668.41	-0.02272185
548.6	0.09918838		1078.59	0.02867948		1608.58	-0.00358576		2138.58	-0.01036211		2668.61	-0.02262598
548.8	0.09880438		1078.79	0.02917702		1608.78	-0.00387754		2138.78	-0.01107384		2668.81	-0.02232723
549	0.09837024		1078.99	0.02915713		1608.98	-0.00356525		2138.98	-0.0117118		2669.01	-0.0217361
549.2	0.09907117		1079.19	0.02819664		1609.18	-0.00351168		2139.18	-0.01249148		2669.21	-0.02243807
549.4	0.09963693		1079.39	0.02834084		1609.38	-0.00347374		2139.38	-0.0130671		2669.41	-0.02217035
549.6	0.09901592		1079.59	0.02844884		1609.58	-0.00348801		2139.58	-0.0137258		2669.61	-0.02257377
549.8	0.09907261		1079.79	0.02829995		1609.78	-0.00328702		2139.78	-0.01416225		2669.81	-0.02269086
550	0.09955542		1079.99	0.02796848		1609.98	-0.00371957		2139.98	-0.01367935		2670.01	-0.02290012
550.2	0.09957436		1080.19	0.02757566		1610.18	-0.00419431		2140.18	-0.01386366		2670.21	-0.02303168
550.4	0.09969954		1080.39	0.02759133		1610.38	-0.00538378		2140.38	-0.01362976		2670.41	-0.02339832
550.6	0.09860854		1080.59	0.02697537		1610.58	-0.00575107		2140.58	-0.01374232		2670.61	-0.02362613
550.8	0.0969477		1080.79	0.02731043		1610.78	-0.00619701		2140.78	-0.01423409		2670.81	-0.0228912
551	0.09659633		1080.99	0.02745492		1610.98	-0.00651956		2140.98	-0.01402543		2671.01	-0.02323766
551.2	0.09665412		1081.19	0.02740914		1611.18	-0.00650673		2141.18	-0.01484814		2671.21	-0.02357033
551.4	0.09633709		1081.39	0.02801371		1611.38	-0.00660531		2141.38	-0.01443525		2671.41	-0.02392025
551.6	0.09603393		1081.59	0.02815154		1611.58	-0.00715135		2141.58	-0.01430671		2671.61	-0.02420324
551.8	0.09618887		1081.79	0.02742809		1611.78	-0.00740799		2141.78	-0.01398836		2671.81	-0.0237605
552	0.09661072		1081.99	0.02748555		1611.98	-0.00667284		2141.98	-0.01415287		2672.01	-0.02399105
552.2	0.09705995		1082.19	0.02824855		1612.18	-0.00660077		2142.18	-0.01440576		2672.21	-0.02349925
552.4	0.09772769		1082.39	0.02782593		1612.38	-0.00543482		2142.38	-0.01462983		2672.41	-0.02262026
552.6	0.09877476		1082.59	0.02805473		1612.58	-0.00466408		2142.58	-0.01505796		2672.61	-0.02250174
552.8	0.09880479		1082.79	0.02842717		1612.78	-0.00479012		2142.78	-0.01526878		2672.81	-0.022399
553	0.09902511		1082.99	0.02830665		1612.98	-0.00477567		2142.98	-0.01594089		2673.01	-0.02261525
553.2	0.09943832		1083.19	0.02854381		1613.18	-0.00482274		2143.18	-0.01671202		2673.21	-0.02199441
553.4	0.09927952		1083.39	0.02892402		1613.38	-0.00425408		2143.38	-0.0172003		2673.41	-0.02178838
553.6	0.09938048		1083.59	0.02879846		1613.58	-0.00374979		2143.58	-0.01688086		2673.61	-0.02137959
553.8	0.10059256		1083.79	0.02868375		1613.78	-0.0032971		2143.78	-0.01645022		2673.81	-0.0206651
554	0.10130255		1083.99	0.02774944		1613.98	-0.0036575		2143.98	-0.01590707		2674.01	-0.02082995
554.2	0.10199029		1084.19	0.02703013		1614.18	-0.00366778		2144.18	-0.01550532		2674.21	-0.02078446
554.4	0.10160014		1084.39	0.02705045		1614.38	-0.00409561		2144.38	-0.01521815		2674.41	-0.02116887
554.6	0.10112941		1084.59	0.02637065		1614.58	-0.0043368		2144.58	-0.01485173		2674.61	-0.02066151
554.8	0.10059328		1084.79	0.02676045		1614.78	-0.00460463		2144.78	-0.01471638		2674.81	-0.019878
555	0.10052405		1084.99	0.02654421		1614.98	-0.00400816		2144.98	-0.01394743		2675.01	-0.02020581
555.2	0.09997416		1085.19	0.02662742		1615.18	-0.00304876		2145.18	-0.01366149		2675.21	-0.01993336
555.4	0.09928176		1085.39	0.0271206		1615.38	-0.00206278		2145.38	-0.01174351		2675.41	-0.02028289
555.6	0.09894116		1085.59	0.02715214		1615.58	-0.0021246		2145.58	-0.01193529		2675.61	-0.02026918
555.8	0.09895412		1085.79	0.02674181		1615.78	-0.00151847		2145.78	-0.01135624		2675.81	-0.02112266
556	0.09852972		1085.99	0.02685691		1615.98	-0.00096251		2145.98	-0.01187391		2676.01	-0.02126369
556.2	0.09847248		1086.19	0.02683122		1616.18	-0.00130246		2146.18	-0.01132119		2676.21	-0.0209383
556.4	0.09942838		1086.39	0.02658104		1616.38	-0.00140827		2146.38	-0.01106086		2676.41	-0.02071741
556.6	0.09972601		1086.59	0.02629549		1616.58	-0.0015552		2146.58	-0.01104808		2676.61	-0.02145707
556.8	0.09879875		1086.79	0.02639315		1616.78	-0.00189376		2146.78	-0.01115406		2676.81	-0.02224062
557	0.09913891		1086.99	0.02571194		1616.98	-0.00264738		2146.98	-0.01116273		2677.01	-0.022165
557.2	0.09927331		1087.19	0.02508714		1617.18	-0.00345028		2147.18	-0.0108089		2677.21	-0.02127242
557.4	0.09964219		1087.39	0.0246339		1617.38	-0.00300135		2147.38	-0.01104352		2677.41	-0.0214226
557.6	0.10047188		1087.59	0.02486007		1617.58	-0.00339555		2147.58	-0.01078483		2677.61	-0.02116775
557.8	0.10096587		1087.79	0.02497306		1617.78	-0.00383742		2147.78	-0.01138422		2677.81	-0.02087938
558	0.101116		1087.99	0.02508084		1617.98	-0.00464774		2147.98	-0.01173446		2678.01	-0.02072012
558.2	0.10141959		1088.19	0.02562738		1618.18	-0.00540413		2148.18	-0.01210136		2678.21	-0.02019408
558.4	0.10094438		1088.39	0.02646757		1618.38	-0.00636759		2148.38	-0.01328054		2678.41	-0.01994423
558.6	0.10085378		1088.59	0.02679132		1618.58	-0.00693707		2148.58	-0.01367699		2678.61	-0.01948679
558.8	0.1005951		1088.79	0.0276155		1618.78	-0.00671155		2148.78	-0.0146549		2678.81	-0.01933737
559	0.1005093		1088.99	0.0278519		1618.98	-0.00582968		2148.98	-0.0150103		2679.01	-0.01924637
559.2	0.10042161		1089.19	0.02816645		1619.18	-0.00536601		2149.18	-0.01526145		2679.21	-0.01901576
559.4	0.09990604		1089.39	0.02799663		1619.38	-0.00514348		2149.38	-0.01563708		2679.41	-0.01939169
559.6	0.10024509		1089.59	0.02806762		1619.58	-0.00545806		2149.58	-0.01649288		2679.61	-0.0192955
559.8	0.10007278		1089.79	0.02768614		1619.78	-0.00519631		2149.78	-0.01633651		2679.81	-0.01975142
