# Supplementary material for: Functional development of a V3/glycan-specific broadly neutralizing antibody isolated from a case of HIV superinfection
Source: eLife journal article supplement (doi:10.7554/elife.68110), 2021-07-15
Supplement: fig2-data2 [file F5.xls]

Vers 3.43 Data Simulation
Conc1	6.25E-08	6.25E-08	6.25E-08	6.25E-08	6.25E-08
Start1	290.01	880.01	1470	2060	2650
Stop1	649.81	1239.81	1829.8	2419.8	3009.8
Time1	Data1	Sim1	Time2	Data2	Sim2	Time3	Data3	Sim3	Time4	Data4	Sim4	Time5	Data5	Sim5
290.01	-0.00325196		880.01	0.00347749		1470	-0.01090708		2060	-0.00156662		2650	0.00824145
290.21	-0.00318159		880.21	0.00378019		1470.2	-0.01037788		2060.2	-0.00025149		2650.2	0.00833218
290.41	-0.0030203		880.41	0.00438639		1470.4	-0.00961761		2060.4	0.00026746		2650.4	0.00884884
290.61	-0.00311478		880.61	0.00490338		1470.6	-0.00817744		2060.6	0.00023692		2650.6	0.00891424
290.81	-0.00298631		880.81	0.00477375		1470.8	-0.00711291		2060.8	0.00116387		2650.8	0.00920323
291.01	-0.00259604		881.01	0.00504829		1471	-0.00560108		2061	0.00228056		2651	0.0092927
291.21	-0.00247457		881.21	0.00563327		1471.2	-0.00436199		2061.2	0.00299004		2651.2	0.00969358
291.41	-0.00168292		881.41	0.00591498		1471.4	-0.00332023		2061.4	0.00348261		2651.4	0.00997204
291.61	-0.00147964		881.61	0.00622103		1471.6	-0.00181451		2061.6	0.00406124		2651.6	0.01047982
291.81	-0.00071918		881.81	0.00711008		1471.8	-0.0008492		2061.8	0.00459879		2651.8	0.0108044
292.01	-0.00020509		882.01	0.00708013		1472	-0.00020442		2062	0.0045447		2652	0.01204749
292.21	0.00057013		882.21	0.00703565		1472.2	0.00053916		2062.2	0.00422196		2652.2	0.01297472
292.41	0.00063142		882.41	0.00710356		1472.4	0.00142212		2062.4	0.00324303		2652.4	0.01340222
292.61	0.00129777		882.61	0.00683348		1472.6	0.00190097		2062.6	0.00360181		2652.6	0.01466819
292.81	0.00209774		882.81	0.0069801		1472.8	0.00150367		2062.8	0.00421891		2652.8	0.01497406
293.01	0.00274036		883.01	0.00693401		1473	0.00199095		2063	0.00443138		2653	0.01515589
293.21	0.0036984		883.21	0.00621819		1473.2	0.00229148		2063.2	0.00494412		2653.2	0.01585612
293.41	0.0041843		883.41	0.00682492		1473.4	0.00217379		2063.4	0.00500203		2653.4	0.01632474
293.61	0.00453935		883.61	0.00675099		1473.6	0.00262932		2063.6	0.00508292		2653.6	0.0176338
293.81	0.00461989		883.81	0.00643666		1473.8	0.00318553		2063.8	0.00528475		2653.8	0.01849562
294.01	0.00355956		884.01	0.00631218		1474	0.00312441		2064	0.00588113		2654	0.01895857
294.21	0.00350285		884.21	0.00681219		1474.2	0.00297493		2064.2	0.00551772		2654.2	0.0182513
294.41	0.00306698		884.41	0.0065807		1474.4	0.00376997		2064.4	0.00503555		2654.4	0.01828589
294.61	0.00287641		884.61	0.00642045		1474.6	0.00353844		2064.6	0.00543633		2654.6	0.01756953
294.81	0.0030769		884.81	0.00597309		1474.8	0.00304542		2064.8	0.00645708		2654.8	0.01739526
295.01	0.00311081		885.01	0.00619601		1475	0.00254639		2065	0.00664246		2655	0.01733169
295.21	0.00313236		885.21	0.00662967		1475.2	0.00200002		2065.2	0.00674699		2655.2	0.01637789
295.41	0.00323501		885.41	0.00598137		1475.4	0.00120297		2065.4	0.00675098		2655.4	0.0158164
295.61	0.00318281		885.61	0.00678212		1475.6	0.00165976		2065.6	0.00723012		2655.6	0.01572016
295.81	0.00358413		885.81	0.0074101		1475.8	0.00113632		2065.8	0.0074148		2655.8	0.015473
296.01	0.00342675		886.01	0.00709778		1476	0.00101222		2066	0.00744429		2656	0.01545677
296.21	0.00357683		886.21	0.00757934		1476.2	0.00135234		2066.2	0.00710904		2656.2	0.01499752
296.41	0.00364154		886.41	0.00826466		1476.4	0.00051743		2066.4	0.00703156		2656.4	0.01447732
296.61	0.00336226		886.61	0.00795162		1476.6	0.00050946		2066.6	0.00727644		2656.6	0.01429835
296.81	0.00384119		886.81	0.00847335		1476.8	0.00024313		2066.8	0.00797414		2656.8	0.01353005
297.01	0.00349282		887.01	0.00823993		1477	0.0007137		2067	0.00734797		2657	0.0133009
297.21	0.00390992		887.21	0.0065329		1477.2	0.0005659		2067.2	0.00817215		2657.2	0.01371667
297.41	0.00377782		887.41	0.00652191		1477.4	0.00100354		2067.4	0.00809757		2657.4	0.0140965
297.61	0.00421844		887.61	0.00691039		1477.6	0.00143451		2067.6	0.00799762		2657.6	0.01510138
297.81	0.00325033		887.81	0.0074434		1477.8	0.00274451		2067.8	0.00862516		2657.8	0.01568612
298.01	0.00280889		888.01	0.00753942		1478	0.0031503		2068	0.00846521		2658	0.01522111
298.21	0.00290132		888.21	0.00800252		1478.2	0.00309368		2068.2	0.00798199		2658.2	0.01422337
298.41	0.00304811		888.41	0.00742863		1478.4	0.00318574		2068.4	0.00829757		2658.4	0.01494515
298.61	0.00323326		888.61	0.00788393		1478.6	0.00190832		2068.6	0.00811717		2658.6	0.01499848
298.81	0.00320053		888.81	0.00813442		1478.8	0.00284874		2068.8	0.0079953		2658.8	0.01525393
299.01	0.003327		889.01	0.00847965		1479	0.00280591		2069	0.00810168		2659	0.01604191
299.21	0.00260649		889.21	0.00799159		1479.2	0.00347748		2069.2	0.00846283		2659.2	0.01522634
299.41	0.00314582		889.41	0.00766159		1479.4	0.00390371		2069.4	0.00797224		2659.4	0.01564076
299.61	0.00326209		889.61	0.00906367		1479.6	0.00534665		2069.6	0.00790856		2659.6	0.01537134
299.81	0.00266123		889.81	0.00916837		1479.8	0.00611616		2069.8	0.00641348		2659.8	0.01499951
300.01	0.0022062		890.01	0.00910867		1480	0.00632054		2070	0.00638223		2660	0.01447899
300.21	0.00169007		890.21	0.00872843		1480.2	0.00649538		2070.2	0.00578312		2660.2	0.01462416
300.41	0.00182671		890.41	0.00844943		1480.4	0.0059224		2070.4	0.00532313		2660.4	0.01505018
300.61	0.0019386		890.61	0.00789418		1480.6	0.00652038		2070.6	0.00527182		2660.6	0.01519332
300.81	0.00171308		890.81	0.00801086		1480.8	0.00696174		2070.8	0.00558153		2660.8	0.0156172
301.01	0.00238971		891.01	0.00698312		1481	0.00620923		2071	0.00539735		2661	0.01611746
301.21	0.00316078		891.21	0.00646977		1481.2	0.00491852		2071.2	0.00590803		2661.2	0.01688886
301.41	0.00297822		891.41	0.00654978		1481.4	0.00497112		2071.4	0.00561824		2661.4	0.01730666
301.61	0.00331245		891.61	0.00778595		1481.6	0.00525636		2071.6	0.00535934		2661.6	0.01702819
301.81	0.00330674		891.81	0.00823552		1481.8	0.00497675		2071.8	0.00593535		2661.8	0.01686132
302.01	0.00397746		892.01	0.0076575		1482	0.00391725		2072	0.00572487		2662	0.01634894
302.21	0.00381447		892.21	0.00777207		1482.2	0.00273195		2072.2	0.00590446		2662.2	0.0160489
302.41	0.00367148		892.41	0.00735051		1482.4	0.00242416		2072.4	0.00722915		2662.4	0.01629066
302.61	0.00373667		892.61	0.00789355		1482.6	0.00212773		2072.6	0.00743701		2662.6	0.01613898
302.81	0.00404866		892.81	0.00768574		1482.8	0.00253626		2072.8	0.00844286		2662.8	0.01608836
303.01	0.00371884		893.01	0.00687495		1483	0.00203648		2073	0.00922607		2663	0.01582656
303.21	0.00360788		893.21	0.00602518		1483.2	0.00235621		2073.2	0.00922124		2663.2	0.0153834
303.41	0.0040617		893.41	0.0061556		1483.4	0.00208781		2073.4	0.00856472		2663.4	0.01547402
303.61	0.00259362		893.61	0.00587431		1483.6	0.00229646		2073.6	0.00823025		2663.6	0.01552485
303.81	0.00158305		893.81	0.00518203		1483.8	0.00205897		2073.8	0.00643196		2663.8	0.01588895
304.01	0.00031231		894.01	0.00582779		1484	0.00178059		2074	0.00632589		2664	0.01638753
304.21	-0.00027582		894.21	0.00543256		1484.2	0.00204521		2074.2	0.00503943		2664.2	0.01678279
304.41	-0.00038809		894.41	0.00578612		1484.4	0.00236783		2074.4	0.00480514		2664.4	0.01692167
304.61	-0.00071351		894.61	0.00601986		1484.6	0.0032104		2074.6	0.00441072		2664.6	0.0165053
304.81	-0.00121208		894.81	0.00653404		1484.8	0.00359983		2074.8	0.00416259		2664.8	0.0171055
305.01	-0.00048835		895.01	0.00645925		1485	0.0027659		2075	0.00391775		2665	0.01733018
305.21	-0.00110771		895.21	0.00643176		1485.2	0.0027666		2075.2	0.00330537		2665.2	0.01769113
305.41	-0.00138485		895.41	0.00630309		1485.4	0.00411068		2075.4	0.00404172		2665.4	0.01765597
305.61	-0.00118549		895.61	0.00606842		1485.6	0.00402796		2075.6	0.00442117		2665.6	0.01726909
305.81	-0.00167208		895.81	0.00580279		1485.8	0.00360682		2075.8	0.00519254		2665.8	0.01705397
306.01	-0.00181234		896.01	0.00543339		1486	0.00452308		2076	0.00564747		2666	0.01830282
306.21	-0.00169056		896.21	0.00547626		1486.2	0.00520504		2076.2	0.00610732		2666.2	0.0190607
306.41	-0.00099153		896.41	0.00525492		1486.4	0.00542766		2076.4	0.00662796		2666.4	0.02015926
306.61	-0.00090812		896.61	0.00511366		1486.6	0.00574848		2076.6	0.00654486		2666.6	0.02032972
306.81	-0.00028739		896.81	0.00500473		1486.8	0.00556618		2076.8	0.00703539		2666.8	0.02050052
307.01	0.00013408		897.01	0.00525387		1487	0.00569117		2077	0.00760478		2667	0.02038446
307.21	0.00066259		897.21	0.00522538		1487.2	0.00605736		2077.2	0.00784325		2667.2	0.02056721
307.41	0.00116767		897.41	0.00531869		1487.4	0.00619971		2077.4	0.00798482		2667.4	0.01992696
307.61	0.00065813		897.61	0.00587484		1487.6	0.00674287		2077.6	0.00744558		2667.6	0.02004175
307.81	0.00081845		897.81	0.00685051		1487.8	0.00609771		2077.8	0.00682118		2667.8	0.01896809
308.01	0.00087833		898.01	0.00784056		1488	0.00545123		2078	0.00643163		2668	0.01863655
308.21	0.00166082		898.21	0.00833618		1488.2	0.00496235		2078.2	0.00663289		2668.2	0.01791208
308.41	0.00182807		898.41	0.00944882		1488.4	0.00504434		2078.4	0.00717709		2668.4	0.01698566
308.61	0.00167461		898.61	0.00986923		1488.6	0.00545619		2078.6	0.00633387		2668.6	0.01613334
308.81	0.00179631		898.81	0.00960842		1488.8	0.00419414		2078.8	0.0071573		2668.8	0.01581052
309.01	0.0024383		899.01	0.00903772		1489	0.00370109		2079	0.00794247		2669	0.01524901
309.21	0.00203477		899.21	0.0081947		1489.2	0.00297697		2079.2	0.00794274		2669.2	0.01500313
309.41	0.00231921		899.41	0.00777782		1489.4	0.00256624		2079.4	0.0082846		2669.4	0.01464663
309.61	0.00265169		899.61	0.00740802		1489.6	0.00216173		2079.6	0.00802421		2669.6	0.0138553
309.81	0.00175792		899.81	0.00867629		1489.8	0.00206809		2079.8	0.00776155		2669.8	0.01430069
310.01	0.00178907		900.01	0.00808016		1490	0.00334596		2080	0.00718222		2670	0.01522599
310.21	0.00240646		900.21	0.00771905		1490.2	0.00380445		2080.2	0.00728563		2670.2	0.01535634
310.41	0.00239179		900.41	0.00686559		1490.4	0.00412304		2080.4	0.00620124		2670.4	0.01610373
310.61	0.00210809		900.61	0.00672166		1490.6	0.00476991		2080.6	0.00583109		2670.6	0.01637815
310.81	0.00313279		900.81	0.00687592		1490.8	0.00512265		2080.8	0.00531512		2670.8	0.01710427
311.01	0.00309345		901.01	0.00662133		1491	0.00579642		2081	0.00556002		2671	0.01715666
311.21	0.00253492		901.21	0.00664731		1491.2	0.00704621		2081.2	0.00531874		2671.2	0.01740587
311.41	0.00250961		901.41	0.0060685		1491.4	0.00765793		2081.4	0.00554167		2671.4	0.01821833
311.61	0.00134871		901.61	0.00580805		1491.6	0.00732703		2081.6	0.005532		2671.6	0.0189655
311.81	0.00173186		901.81	0.00581578		1491.8	0.00667		2081.8	0.00615255		2671.8	0.01873796
312.01	0.00204443		902.01	0.00607336		1492	0.00604102		2082	0.00614909		2672	0.01924151
312.21	0.00221358		902.21	0.00705619		1492.2	0.0065965		2082.2	0.00686836		2672.2	0.01913787
312.41	0.002015		902.41	0.00675879		1492.4	0.00674241		2082.4	0.00681734		2672.4	0.01912492
312.61	0.00210244		902.61	0.00605339		1492.6	0.00651238		2082.6	0.00702076		2672.6	0.01910363
312.81	0.00372046		902.81	0.0057016		1492.8	0.00540757		2082.8	0.00798744		2672.8	0.01939903
313.01	0.00415197		903.01	0.00587453		1493	0.00530446		2083	0.00791461		2673	0.01893458
313.21	0.00344565		903.21	0.00618512		1493.2	0.00496259		2083.2	0.00763148		2673.2	0.01877619
313.41	0.00341905		903.41	0.00641962		1493.4	0.00535911		2083.4	0.00817714		2673.4	0.01845988
313.61	0.00401395		903.61	0.00638036		1493.6	0.0053603		2083.6	0.00851412		2673.6	0.01767311
313.81	0.00288205		903.81	0.00656769		1493.8	0.00530722		2083.8	0.00881014		2673.8	0.0179298
314.01	0.00298864		904.01	0.00567351		1494	0.00587783		2084	0.0086242		2674	0.01730138
314.21	0.00351353		904.21	0.00513174		1494.2	0.00604141		2084.2	0.0090586		2674.2	0.01711828
314.41	0.00336494		904.41	0.00488119		1494.4	0.00556297		2084.4	0.00798397		2674.4	0.01770084
314.61	0.00264845		904.61	0.00500729		1494.6	0.00509636		2084.6	0.00854134		2674.6	0.01820593
314.81	0.0025391		904.81	0.00464327		1494.8	0.00545323		2084.8	0.0080817		2674.8	0.01825233
315.01	0.00149873		905.01	0.00459503		1495	0.00531855		2085	0.00843402		2675	0.01820809
315.21	0.00077225		905.21	0.00442287		1495.2	0.00536728		2085.2	0.0079875		2675.2	0.01837335
315.41	0.00009331		905.41	0.00270609		1495.4	0.00541883		2085.4	0.00900954		2675.4	0.01852021
315.61	-0.0004318		905.61	0.00311886		1495.6	0.00477789		2085.6	0.00890788		2675.6	0.01841656
315.81	-0.00041026		905.81	0.00459455		1495.8	0.00396078		2085.8	0.00882046		2675.8	0.0185379
316.01	-0.00083081		906.01	0.00509163		1496	0.00367547		2086	0.00862672		2676	0.01831056
316.21	-0.00026131		906.21	0.00550561		1496.2	0.00370907		2086.2	0.00801164		2676.2	0.01814492
316.41	0.00042258		906.41	0.00527547		1496.4	0.0035398		2086.4	0.00695511		2676.4	0.01784696
316.61	0.00174005		906.61	0.00564451		1496.6	0.00340132		2086.6	0.00633418		2676.6	0.01804595
316.81	0.00234867		906.81	0.00609957		1496.8	0.00370863		2086.8	0.00604605		2676.8	0.01834539
317.01	0.00198157		907.01	0.00637798		1497	0.00343174		2087	0.006107		2677	0.01835036
317.21	0.00147714		907.21	0.00615609		1497.2	0.00331281		2087.2	0.00646609		2677.2	0.01825254
317.41	0.000964		907.41	0.00606777		1497.4	0.00315582		2087.4	0.00686546		2677.4	0.01855113
317.61	0.00012202		907.61	0.00677089		1497.6	0.00324878		2087.6	0.00688504		2677.6	0.01840511
317.81	-0.00061291		907.81	0.00680333		1497.8	0.00251276		2087.8	0.00752153		2677.8	0.01963825
318.01	-0.0004673		908.01	0.00681912		1498	0.00236985		2088	0.00794556		2678	0.01962622
318.21	-0.00034043		908.21	0.00635061		1498.2	0.00250836		2088.2	0.00856479		2678.2	0.02034528
318.41	-0.00068458		908.41	0.00627289		1498.4	0.00255007		2088.4	0.0090086		2678.4	0.02156343
318.61	-0.0013535		908.61	0.00614757		1498.6	0.00347224		2088.6	0.00944052		2678.6	0.0224386
318.81	-0.00076416		908.81	0.00657118		1498.8	0.0039175		2088.8	0.00938965		2678.8	0.02247703
319.01	-0.00047519		909.01	0.00679999		1499	0.00433692		2089	0.00933912		2679	0.02203855
319.21	-0.00090119		909.21	0.00683309		1499.2	0.00450797		2089.2	0.01005363		2679.2	0.02171241
319.41	-0.00135891		909.41	0.00659442		1499.4	0.00483223		2089.4	0.01094744		2679.4	0.02153687
319.61	-0.00114951		909.61	0.00740809		1499.6	0.00425632		2089.6	0.01072087		2679.6	0.0212225
319.81	-0.00076992		909.81	0.00793835		1499.8	0.00384052		2089.8	0.00996889		2679.8	0.02113834
320.01	0.00016303		910.01	0.0080593		1500	0.00431576		2090	0.00945344		2680	0.01966911
320.21	0.0013516		910.21	0.00785206		1500.2	0.00436813		2090.2	0.00878193		2680.2	0.01879224
320.41	0.00267474		910.41	0.00696412		1500.4	0.00465009		2090.4	0.00807306		2680.4	0.01864151
320.61	0.0036		910.61	0.00754353		1500.6	0.00475964		2090.6	0.00849166		2680.6	0.018864
320.81	0.00347723		910.81	0.00668436		1500.8	0.00503542		2090.8	0.00969009		2680.8	0.01733197
321.01	0.00367368		911.01	0.00638552		1501	0.00456676		2091	0.01065326		2681	0.01721248
321.21	0.00291792		911.21	0.00652366		1501.2	0.00366853		2091.2	0.0106928		2681.2	0.01711264
321.41	0.00221008		911.41	0.00689847		1501.4	0.00314451		2091.4	0.01071178		2681.4	0.01650104
321.61	0.00157443		911.61	0.00726664		1501.6	0.00321537		2091.6	0.01051809		2681.6	0.01623475
321.81	0.00237634		911.81	0.00626171		1501.8	0.00304728		2091.8	0.01107138		2681.8	0.01694378
322.01	0.00188495		912.01	0.00593324		1502	0.00453643		2092	0.01104481		2682	0.01694238
322.21	0.00241699		912.21	0.00497307		1502.2	0.00442093		2092.2	0.01091293		2682.2	0.01765659
322.41	0.00293874		912.41	0.00396208		1502.4	0.00503031		2092.4	0.01091438		2682.4	0.01827285
322.61	0.00278708		912.61	0.00431896		1502.6	0.00537952		2092.6	0.01099401		2682.6	0.01838847
322.81	0.00368086		912.81	0.00522606		1502.8	0.00559977		2092.8	0.01060965		2682.8	0.01826469
323.01	0.00295919		913.01	0.00543749		1503	0.00623819		2093	0.01028449		2683	0.01773947
323.21	0.00246365		913.21	0.00557417		1503.2	0.00631335		2093.2	0.01100266		2683.2	0.01828233
323.41	0.00215514		913.41	0.00555842		1503.4	0.0068456		2093.4	0.01007936		2683.4	0.01851392
323.61	0.00210721		913.61	0.00591905		1503.6	0.00654944		2093.6	0.00873972		2683.6	0.01849876
323.81	0.00243086		913.81	0.00605085		1503.8	0.00625597		2093.8	0.00758223		2683.8	0.01805477
324.01	0.00298826		914.01	0.00618545		1504	0.00655683		2094	0.0070272		2684	0.01802135
324.21	0.00312803		914.21	0.00575269		1504.2	0.00688128		2094.2	0.00731179		2684.2	0.01846926
324.41	0.00291988		914.41	0.00621568		1504.4	0.00739089		2094.4	0.00763352		2684.4	0.01774863
324.61	0.00302699		914.61	0.00667377		1504.6	0.0072873		2094.6	0.00895574		2684.6	0.01704314
324.81	0.0031766		914.81	0.00565384		1504.8	0.0066462		2094.8	0.00877023		2684.8	0.01687452
325.01	0.00289488		915.01	0.00566295		1505	0.00584474		2095	0.00810798		2685	0.01741782
325.21	0.0030675		915.21	0.00582474		1505.2	0.00428424		2095.2	0.00692759		2685.2	0.01727096
325.41	0.0029319		915.41	0.00515356		1505.4	0.00406711		2095.4	0.00657632		2685.4	0.01710551
325.61	0.00266488		915.61	0.00482972		1505.6	0.00399173		2095.6	0.00604784		2685.6	0.0169835
325.81	0.00328648		915.81	0.0040412		1505.8	0.00468361		2095.8	0.00598669		2685.8	0.01738901
326.01	0.00376833		916.01	0.00335735		1506	0.0044956		2096	0.00527462		2686	0.01773663
326.21	0.00490654		916.21	0.0025177		1506.2	0.00355087		2096.2	0.00513216		2686.2	0.01824949
326.41	0.00555243		916.41	0.00229102		1506.4	0.00321296		2096.4	0.0051647		2686.4	0.01810978
326.61	0.00575636		916.61	0.00314176		1506.6	0.00266887		2096.6	0.00556123		2686.6	0.01807027
326.81	0.0060742		916.81	0.00365188		1506.8	0.00354055		2096.8	0.00514532		2686.8	0.01935375
327.01	0.00535299		917.01	0.00360753		1507	0.00360491		2097	0.00534679		2687	0.01911498
327.21	0.00511885		917.21	0.00352991		1507.2	0.0036492		2097.2	0.00499082		2687.2	0.01984088
327.41	0.00509026		917.41	0.00402714		1507.4	0.00387128		2097.4	0.00459464		2687.4	0.0199693
327.61	0.00489455		917.61	0.00403603		1507.6	0.00357797		2097.6	0.00477969		2687.6	0.0202357
327.81	0.00503414		917.81	0.00328872		1507.8	0.00375708		2097.8	0.00571495		2687.8	0.02024576
328.01	0.00408512		918.01	0.00340982		1508	0.00446363		2098	0.00619386		2688	0.02037329
328.21	0.00316648		918.21	0.00427495		1508.2	0.00516591		2098.2	0.00803318		2688.2	0.02009435
328.41	0.00230348		918.41	0.00496036		1508.4	0.00591778		2098.4	0.0081825		2688.4	0.01987314
328.61	0.00236447		918.61	0.00455708		1508.6	0.00585094		2098.6	0.00816473		2688.6	0.02067562
328.81	0.00222295		918.81	0.00429432		1508.8	0.00584166		2098.8	0.00756302		2688.8	0.02191437
329.01	0.0012513		919.01	0.00434682		1509	0.00554872		2099	0.00706839		2689	0.02162158
329.21	0.00144726		919.21	0.00406351		1509.2	0.00503086		2099.2	0.00622856		2689.2	0.02213291
329.41	0.00092038		919.41	0.00423953		1509.4	0.00541339		2099.4	0.00639868		2689.4	0.02249281
329.61	-0.00009411		919.61	0.00461593		1509.6	0.00471299		2099.6	0.00583464		2689.6	0.02150338
329.81	0.00061429		919.81	0.00475883		1509.8	0.00573231		2099.8	0.00633235		2689.8	0.02179592
330.01	0.00081754		920.01	0.00543325		1510	0.00555385		2100	0.00603592		2690	0.02078513
330.21	0.00167979		920.21	0.00560352		1510.2	0.0051763		2100.2	0.00634425		2690.2	0.0202145
330.41	0.00137164		920.41	0.00517673		1510.4	0.00491742		2100.4	0.00684006		2690.4	0.01989142
330.61	0.0013601		920.61	0.00507075		1510.6	0.0046506		2100.6	0.00703154		2690.6	0.01962239
330.81	0.00038772		920.81	0.00491967		1510.8	0.00463343		2100.8	0.00627931		2690.8	0.02024538
331.01	0.00070967		921.01	0.0038059		1511	0.00456431		2101	0.00717061		2691	0.01894938
331.21	0.00049291		921.21	0.00313302		1511.2	0.00406738		2101.2	0.00761862		2691.2	0.01856042
331.41	0.00055436		921.41	0.00348606		1511.4	0.00459734		2101.4	0.00813182		2691.4	0.01793813
331.61	0.00018541		921.61	0.00326914		1511.6	0.00492265		2101.6	0.0079654		2691.6	0.01721248
331.81	0.00017804		921.81	0.00294207		1511.8	0.00531451		2101.8	0.00795548		2691.8	0.01632759
332.01	-0.00027855		922.01	0.0033832		1512	0.00623673		2102	0.00837615		2692	0.01524464
332.21	-0.00018209		922.21	0.00405616		1512.2	0.00665239		2102.2	0.00879943		2692.2	0.01554546
332.41	-0.0007846		922.41	0.00465566		1512.4	0.00696614		2102.4	0.00801942		2692.4	0.01563157
332.61	-0.00068384		922.61	0.00548967		1512.6	0.00632784		2102.6	0.00811367		2692.6	0.01564608
332.81	0.00013719		922.81	0.00558978		1512.8	0.00608784		2102.8	0.00784928		2692.8	0.01564121
333.01	0.00016785		923.01	0.00569419		1513	0.0062149		2103	0.00763719		2693	0.01526415
333.21	0.0003466		923.21	0.00592649		1513.2	0.00587249		2103.2	0.00752351		2693.2	0.01546804
333.41	-0.0004632		923.41	0.00664761		1513.4	0.00561721		2103.4	0.00856827		2693.4	0.01631382
333.61	-0.000906		923.61	0.00641313		1513.6	0.00509373		2103.6	0.00844618		2693.6	0.0158874
333.81	0.00012535		923.81	0.00717396		1513.8	0.0066128		2103.8	0.00930547		2693.8	0.01695013
334.01	0.00016648		924.01	0.00766045		1514	0.00603179		2104	0.00931703		2694	0.01742764
334.21	0.00083746		924.21	0.00666237		1514.2	0.00549396		2104.2	0.01048489		2694.2	0.01806159
334.41	0.0001037		924.41	0.00604157		1514.4	0.00477735		2104.4	0.01047405		2694.4	0.01913387
334.61	0.00021864		924.61	0.00638103		1514.6	0.00306448		2104.6	0.01040661		2694.6	0.01967933
334.81	0.0001613		924.81	0.0060717		1514.8	0.00237326		2104.8	0.01030663		2694.8	0.01976473
335.01	0.00033355		925.01	0.00536422		1515	0.00284887		2105	0.01139436		2695	0.0196719
335.21	-0.0006597		925.21	0.00656004		1515.2	0.00237256		2105.2	0.01083287		2695.2	0.01996067
335.41	-0.00064804		925.41	0.0072727		1515.4	0.00326002		2105.4	0.00984053		2695.4	0.02031038
335.61	-0.00108434		925.61	0.0065452		1515.6	0.0029043		2105.6	0.00911742		2695.6	0.01985431
335.81	-0.00129631		925.81	0.0066031		1515.8	0.00297977		2105.8	0.00889557		2695.8	0.01914618
336.01	-0.00143328		926.01	0.00625743		1516	0.00346735		2106	0.00824157		2696	0.01863201
336.21	-0.00163472		926.21	0.00676223		1516.2	0.00308523		2106.2	0.00721533		2696.2	0.01862027
336.41	-0.00150103		926.41	0.00678785		1516.4	0.00317036		2106.4	0.00700867		2696.4	0.01781028
336.61	-0.00059051		926.61	0.00652134		1516.6	0.00310067		2106.6	0.0070339		2696.6	0.01709214
336.81	-0.00011683		926.81	0.00585972		1516.8	0.00372686		2106.8	0.00683394		2696.8	0.01616933
337.01	0.00051608		927.01	0.00617853		1517	0.0042338		2107	0.00682759		2697	0.01651274
337.21	0.00019356		927.21	0.00672901		1517.2	0.00416231		2107.2	0.00702122		2697.2	0.01654348
337.41	-0.00067593		927.41	0.00617238		1517.4	0.00455917		2107.4	0.00659787		2697.4	0.01716927
337.61	-0.0001603		927.61	0.00590265		1517.6	0.00542954		2107.6	0.00700817		2697.6	0.01669876
337.81	0.00034748		927.81	0.00680567		1517.8	0.00629792		2107.8	0.0071846		2697.8	0.01695362
338.01	-0.00009984		928.01	0.00675875		1518	0.00576586		2108	0.00812739		2698	0.01711513
338.21	0.00026063		928.21	0.00702138		1518.2	0.00526602		2108.2	0.00823807		2698.2	0.01776578
338.41	-0.00016052		928.41	0.00684057		1518.4	0.00512026		2108.4	0.00740884		2698.4	0.01837075
338.61	-0.00001398		928.61	0.0068049		1518.6	0.00473445		2108.6	0.00734823		2698.6	0.01853993
338.81	-0.00078307		928.81	0.00792907		1518.8	0.0043816		2108.8	0.00683526		2698.8	0.01814554
339.01	-0.00155086		929.01	0.00826192		1519	0.00504903		2109	0.00671745		2699	0.01971453
339.21	-0.00153171		929.21	0.00867619		1519.2	0.0047269		2109.2	0.00605275		2699.2	0.0200677
339.41	-0.00150731		929.41	0.00751252		1519.4	0.00511625		2109.4	0.00618077		2699.4	0.01972889
339.61	-0.00287868		929.61	0.00624812		1519.6	0.00464527		2109.6	0.0065704		2699.6	0.01896866
339.81	-0.00278451		929.81	0.00617139		1519.8	0.00441017		2109.8	0.00643061		2699.8	0.01899717
340.01	-0.00243334		930.01	0.00532384		1520	0.00463447		2110	0.00640703		2700	0.01917153
340.21	-0.00219299		930.21	0.00590955		1520.2	0.00444508		2110.2	0.00697048		2700.2	0.01898023
340.41	-0.00173667		930.41	0.00565426		1520.4	0.00413473		2110.4	0.00772402		2700.4	0.01844486
340.61	-0.00118728		930.61	0.00534809		1520.6	0.00376409		2110.6	0.00828992		2700.6	0.0185562
340.81	-0.0003091		930.81	0.00558299		1520.8	0.00278841		2110.8	0.00864883		2700.8	0.01830768
341.01	0.00014884		931.01	0.00570803		1521	0.00344018		2111	0.00890541		2701	0.01933573
341.21	-0.00059453		931.21	0.00511923		1521.2	0.00374655		2111.2	0.00961423		2701.2	0.01925446
341.41	-0.0008748		931.41	0.00445568		1521.4	0.00391087		2111.4	0.00901005		2701.4	0.01989784
341.61	-0.00067481		931.61	0.00495099		1521.6	0.00477586		2111.6	0.00999977		2701.6	0.02003077
341.81	-0.00043851		931.81	0.00548843		1521.8	0.00506167		2111.8	0.00989164		2701.8	0.02080969
342.01	-0.00067657		932.01	0.00543017		1522	0.00518467		2112	0.01030471		2702	0.02199062
342.21	0.0002285		932.21	0.00482429		1522.2	0.00483271		2112.2	0.00982239		2702.2	0.02281981
342.41	-0.00007552		932.41	0.00431373		1522.4	0.00566015		2112.4	0.00992083		2702.4	0.02309859
342.61	0.00035272		932.61	0.00457422		1522.6	0.00460383		2112.6	0.00948953		2702.6	0.02288571
342.81	-0.0000166		932.81	0.0043152		1522.8	0.00413522		2112.8	0.00953007		2702.8	0.02328551
343.01	-0.0001584		933.01	0.00380349		1523	0.00453291		2113	0.00887262		2703	0.02335746
343.21	-0.00020534		933.21	0.00274589		1523.2	0.00494167		2113.2	0.0087056		2703.2	0.02291222
343.41	0.00001247		933.41	0.00181059		1523.4	0.00517532		2113.4	0.00904458		2703.4	0.02215219
343.61	-0.0005819		933.61	0.00165082		1523.6	0.00554492		2113.6	0.00890713		2703.6	0.02141754
343.81	-0.00057067		933.81	0.00183153		1523.8	0.00586287		2113.8	0.00873461		2703.8	0.0207623
344.01	-0.00064051		934.01	0.00237024		1524	0.00696139		2114	0.00842747		2704	0.01980466
344.21	-0.00065669		934.21	0.00334245		1524.2	0.0069157		2114.2	0.00837616		2704.2	0.01890612
344.41	-0.00061475		934.41	0.00297587		1524.4	0.0064031		2114.4	0.00768392		2704.4	0.01815657
344.61	-0.00032056		934.61	0.00301325		1524.6	0.00655736		2114.6	0.00769218		2704.6	0.0176131
344.81	-0.00037463		934.81	0.00362453		1524.8	0.00667686		2114.8	0.00780277		2704.8	0.01780314
345.01	-0.00118503		935.01	0.00337245		1525	0.00746532		2115	0.00720394		2705	0.01810917
345.21	-0.00161521		935.21	0.00334766		1525.2	0.00731547		2115.2	0.0068501		2705.2	0.01832586
345.41	-0.00172163		935.41	0.00327925		1525.4	0.00773953		2115.4	0.00615563		2705.4	0.01866308
345.61	-0.00203486		935.61	0.00400547		1525.6	0.00775869		2115.6	0.00637972		2705.6	0.01917081
345.81	-0.00203659		935.81	0.00432252		1525.8	0.0070956		2115.8	0.00760845		2705.8	0.01968324
346.01	-0.00232789		936.01	0.00426648		1526	0.00688276		2116	0.00769565		2706	0.0198763
346.21	-0.00221224		936.21	0.00383771		1526.2	0.00644187		2116.2	0.00815299		2706.2	0.02148978
346.41	-0.00232704		936.41	0.00493972		1526.4	0.00562956		2116.4	0.00865826		2706.4	0.02170167
346.61	-0.00080069		936.61	0.00450589		1526.6	0.00465868		2116.6	0.00847571		2706.6	0.0219726
346.81	-0.00013603		936.81	0.00406135		1526.8	0.0041448		2116.8	0.00817739		2706.8	0.02281422
347.01	0.00090586		937.01	0.00439179		1527	0.00412691		2117	0.00735907		2707	0.02263438
347.21	0.00125874		937.21	0.00383853		1527.2	0.00459366		2117.2	0.00804246		2707.2	0.02287782
347.41	0.00195639		937.41	0.00403421		1527.4	0.00412672		2117.4	0.00711344		2707.4	0.02161708
347.61	0.00172089		937.61	0.0039291		1527.6	0.00437773		2117.6	0.0068134		2707.6	0.02068623
347.81	0.00162834		937.81	0.00400769		1527.8	0.00457821		2117.8	0.00634456		2707.8	0.02022059
348.01	0.00150557		938.01	0.00447987		1528	0.00547751		2118	0.00614677		2708	0.01960944
348.21	0.00191785		938.21	0.00421452		1528.2	0.00556386		2118.2	0.00619196		2708.2	0.01886587
348.41	0.0019258		938.41	0.00352134		1528.4	0.00601379		2118.4	0.00469925		2708.4	0.01914887
348.61	0.00291809		938.61	0.00383595		1528.6	0.00621586		2118.6	0.00566671		2708.6	0.0191738
348.81	0.00309712		938.81	0.00330226		1528.8	0.00649639		2118.8	0.00519411		2708.8	0.0197109
349.01	0.00260554		939.01	0.0020349		1529	0.00623104		2119	0.00393711		2709	0.01956234
349.21	0.00300115		939.21	0.00183127		1529.2	0.00656291		2119.2	0.00433746		2709.2	0.01848135
349.41	0.00271742		939.41	0.00193942		1529.4	0.0068136		2119.4	0.00446497		2709.4	0.01816375
349.61	0.002253		939.61	0.00248269		1529.6	0.00654365		2119.6	0.00508068		2709.6	0.01879381
349.81	0.00168305		939.81	0.00234717		1529.8	0.00630376		2119.8	0.00623769		2709.8	0.01857032
350.01	0.00152128		940.01	0.00208876		1530	0.00635606		2120	0.00591749		2710	0.01847935
350.21	0.00184476		940.21	0.00202817		1530.2	0.00585631		2120.2	0.00562561		2710.2	0.0191355
350.41	0.00176746		940.41	0.00264181		1530.4	0.00553339		2120.4	0.00570018		2710.4	0.01837922
350.61	0.0021966		940.61	0.00218111		1530.6	0.00534958		2120.6	0.00569259		2710.6	0.01888819
350.81	0.0015066		940.81	0.00288344		1530.8	0.00465617		2120.8	0.00634401		2710.8	0.01897107
351.01	0.00094175		941.01	0.00374312		1531	0.00505286		2121	0.00695088		2711	0.01812219
351.21	-0.00093285		941.21	0.00414523		1531.2	0.00553605		2121.2	0.00759712		2711.2	0.01777005
351.41	-0.0013766		941.41	0.00507251		1531.4	0.00541878		2121.4	0.00754422		2711.4	0.01733213
351.61	-0.00212821		941.61	0.00567426		1531.6	0.00520329		2121.6	0.00832544		2711.6	0.01706345
351.81	-0.00232464		941.81	0.00683309		1531.8	0.00575666		2121.8	0.00892404		2711.8	0.01706442
352.01	-0.0025021		942.01	0.00679285		1532	0.00607053		2122	0.00989064		2712	0.01674004
352.21	-0.00257573		942.21	0.00720153		1532.2	0.00644728		2122.2	0.00982172		2712.2	0.01699509
352.41	-0.00171373		942.41	0.00791536		1532.4	0.0061111		2122.4	0.00948319		2712.4	0.017547
352.61	-0.00053914		942.61	0.00802464		1532.6	0.00583008		2122.6	0.0111523		2712.6	0.01757103
352.81	-0.00035797		942.81	0.00767189		1532.8	0.00554888		2122.8	0.01011945		2712.8	0.01792843
353.01	0.00005637		943.01	0.00805255		1533	0.00513258		2123	0.0100763		2713	0.01787483
353.21	0.00032561		943.21	0.00800254		1533.2	0.00487913		2123.2	0.01015606		2713.2	0.01710232
353.41	0.00020051		943.41	0.00758345		1533.4	0.00497581		2123.4	0.00972473		2713.4	0.01815556
353.61	0.00004178		943.61	0.00634312		1533.6	0.00421888		2123.6	0.00934062		2713.6	0.01830639
353.81	0.00111246		943.81	0.0052214		1533.8	0.00373553		2123.8	0.00945277		2713.8	0.01785175
354.01	0.00159953		944.01	0.00434988		1534	0.00345673		2124	0.00877253		2714	0.01769927
354.21	0.00195746		944.21	0.00356828		1534.2	0.00414503		2124.2	0.00880196		2714.2	0.01729834
354.41	0.00126506		944.41	0.00363142		1534.4	0.00408085		2124.4	0.0093479		2714.4	0.0172394
354.61	0.00119717		944.61	0.00387894		1534.6	0.00415825		2124.6	0.01006785		2714.6	0.01728732
354.81	0.00158201		944.81	0.00459729		1534.8	0.00475299		2124.8	0.01054183		2714.8	0.01805998
355.01	0.00247578		945.01	0.00505868		1535	0.00538391		2125	0.0104535		2715	0.01788417
355.21	0.00176265		945.21	0.00449596		1535.2	0.00577979		2125.2	0.01111649		2715.2	0.01803872
355.41	0.00156625		945.41	0.0048457		1535.4	0.00520285		2125.4	0.01080874		2715.4	0.01773423
355.61	0.00139945		945.61	0.00519071		1535.6	0.00498687		2125.6	0.0108409		2715.6	0.01762528
355.81	0.00164082		945.81	0.00573945		1535.8	0.00458476		2125.8	0.01030393		2715.8	0.01808891
356.01	0.00076588		946.01	0.00642108		1536	0.00451643		2126	0.00966198		2716	0.01873091
356.21	0.00049174		946.21	0.00692349		1536.2	0.00468772		2126.2	0.00916493		2716.2	0.01877596
356.41	0.00077428		946.41	0.00799936		1536.4	0.00421369		2126.4	0.00849895		2716.4	0.01885581
356.61	0.00042321		946.61	0.0081005		1536.6	0.0044317		2126.6	0.00854109		2716.6	0.01917103
356.81	0.00067259		946.81	0.00774241		1536.8	0.00398449		2126.8	0.00688184		2716.8	0.01889695
357.01	0.00115242		947.01	0.00762902		1537	0.00400778		2127	0.00624356		2717	0.01881624
357.21	0.00096422		947.21	0.00677241		1537.2	0.00366196		2127.2	0.00556151		2717.2	0.01873563
357.41	0.00116368		947.41	0.00643221		1537.4	0.00357171		2127.4	0.00528053		2717.4	0.01927439
357.61	0.00215567		947.61	0.00536122		1537.6	0.0023512		2127.6	0.00491349		2717.6	0.01858971
357.81	0.00296304		947.81	0.00442676		1537.8	0.00258298		2127.8	0.00529815		2717.8	0.01795646
358.01	0.00259543		948.01	0.00331636		1538	0.00287514		2128	0.00629526		2718	0.0175773
358.21	0.00263831		948.21	0.00320737		1538.2	0.00335104		2128.2	0.00766569		2718.2	0.01724759
358.41	0.00212683		948.41	0.00314323		1538.4	0.00268348		2128.4	0.00853492		2718.4	0.01746114
358.61	0.0027454		948.61	0.00288701		1538.6	0.00274866		2128.6	0.00944734		2718.6	0.01702511
358.81	0.00343643		948.81	0.00217386		1538.8	0.0026288		2128.8	0.00993718		2718.8	0.01733092
359.01	0.00392538		949.01	0.00129109		1539	0.00319156		2129	0.01081717		2719	0.01680233
359.21	0.00268516		949.21	0.00033972		1539.2	0.0031526		2129.2	0.01109288		2719.2	0.01630729
359.41	0.0022792		949.41	0.0000923		1539.4	0.00302833		2129.4	0.01074788		2719.4	0.01581905
359.61	0.0025445		949.61	0.00117852		1539.6	0.00226701		2129.6	0.01124727		2719.6	0.01586651
359.81	0.00217934		949.81	0.00218367		1539.8	0.00218942		2129.8	0.01056456		2719.8	0.01610779
360.01	0.00161682		950.01	0.0025732		1540	0.00226554		2130	0.01051621		2720	0.01652042
360.21	0.0013647		950.21	0.00238861		1540.2	0.00248228		2130.2	0.0114226		2720.2	0.01672279
360.41	0.00140063		950.41	0.00354159		1540.4	0.00298243		2130.4	0.01083361		2720.4	0.01711299
360.61	0.00135583		950.61	0.00364503		1540.6	0.00236055		2130.6	0.01181803		2720.6	0.01694114
360.81	0.00211407		950.81	0.00333474		1540.8	0.00198195		2130.8	0.01140028		2720.8	0.01705393
361.01	0.0018977		951.01	0.00341394		1541	0.00218614		2131	0.0114214		2721	0.01760406
361.21	0.00115741		951.21	0.00394282		1541.2	0.00232999		2131.2	0.01141168		2721.2	0.0179078
361.41	0.00023643		951.41	0.00357738		1541.4	0.00228153		2131.4	0.01070564		2721.4	0.0183517
361.61	0.00004012		951.61	0.00357263		1541.6	0.00279716		2131.6	0.01017197		2721.6	0.01829441
361.81	-0.00092169		951.81	0.00353513		1541.8	0.00364024		2131.8	0.01070785		2721.8	0.01893701
362.01	-0.00039354		952.01	0.00314066		1542	0.00443585		2132	0.01133791		2722	0.01894562
362.21	-0.00057448		952.21	0.00383381		1542.2	0.00499222		2132.2	0.0111181		2722.2	0.01932196
362.41	-0.00156823		952.41	0.0037877		1542.4	0.00541765		2132.4	0.01114423		2722.4	0.01904269
362.61	-0.00171315		952.61	0.00317168		1542.6	0.00578089		2132.6	0.01084047		2722.6	0.01850367
362.81	-0.00214733		952.81	0.00232045		1542.8	0.006363		2132.8	0.01028468		2722.8	0.01920531
363.01	-0.00243747		953.01	0.00223905		1543	0.00659126		2133	0.00973179		2723	0.01937555
363.21	-0.00314358		953.21	0.00180885		1543.2	0.0066491		2133.2	0.00987866		2723.2	0.01900802
363.41	-0.00308703		953.41	0.00252542		1543.4	0.00664713		2133.4	0.01038197		2723.4	0.01920194
363.61	-0.00322808		953.61	0.00364906		1543.6	0.00583701		2133.6	0.01018794		2723.6	0.01897407
363.81	-0.0035124		953.81	0.00388957		1543.8	0.00603894		2133.8	0.01030064		2723.8	0.0198958
364.01	-0.0037101		954.01	0.0035091		1544	0.00548199		2134	0.0114805		2724	0.02051975
364.21	-0.00398062		954.21	0.00401028		1544.2	0.00556716		2134.2	0.01194402		2724.2	0.02109865
364.41	-0.00348024		954.41	0.0044343		1544.4	0.00508487		2134.4	0.01212344		2724.4	0.02031817
364.61	-0.00383797		954.61	0.0048556		1544.6	0.0027017		2134.6	0.01248185		2724.6	0.01995297
364.81	-0.00422156		954.81	0.00479207		1544.8	0.00254621		2134.8	0.01213161		2724.8	0.01964427
365.01	-0.00503926		955.01	0.00467529		1545	0.00262047		2135	0.01252832		2725	0.01872667
365.21	-0.00508603		955.21	0.00485819		1545.2	0.00260735		2135.2	0.01214151		2725.2	0.01900993
365.41	-0.00517573		955.41	0.00436119		1545.4	0.00210119		2135.4	0.01108861		2725.4	0.01889979
365.61	-0.00453071		955.61	0.0048483		1545.6	0.00247813		2135.6	0.01089519		2725.6	0.01859073
365.81	-0.00333942		955.81	0.00435746		1545.8	0.00250003		2135.8	0.01024686		2725.8	0.01813257
366.01	-0.00239032		956.01	0.00442554		1546	0.00299473		2136	0.00958381		2726	0.01758872
366.21	-0.00247531		956.21	0.00478129		1546.2	0.00295545		2136.2	0.0087109		2726.2	0.01708211
366.41	-0.00249052		956.41	0.00446101		1546.4	0.00254089		2136.4	0.00827074		2726.4	0.01733335
366.61	-0.00194742		956.61	0.00422084		1546.6	0.00300319		2136.6	0.00816193		2726.6	0.01785379
366.81	-0.0013616		956.81	0.00368851		1546.8	0.00370322		2136.8	0.0082		2726.8	0.017843
367.01	-0.00147976		957.01	0.00402691		1547	0.00465766		2137	0.00855488		2727	0.01846393
367.21	-0.00059028		957.21	0.00408192		1547.2	0.0058092		2137.2	0.00912012		2727.2	0.01838343
367.41	-0.00050978		957.41	0.00497191		1547.4	0.00603777		2137.4	0.00961499		2727.4	0.01922346
367.61	0.00007424		957.61	0.00492187		1547.6	0.00554763		2137.6	0.00918844		2727.6	0.01842725
367.81	0.00040904		957.81	0.00495482		1547.8	0.00558599		2137.8	0.00992145		2727.8	0.0196085
368.01	0.00091688		958.01	0.00451474		1548	0.00611692		2138	0.01045629		2728	0.01927532
368.21	0.00123873		958.21	0.00446616		1548.2	0.00630012		2138.2	0.00996061		2728.2	0.01859537
368.41	0.00155026		958.41	0.00447392		1548.4	0.00572155		2138.4	0.01050272		2728.4	0.01850444
368.61	0.00105342		958.61	0.0039163		1548.6	0.0044301		2138.6	0.01053187		2728.6	0.01844171
368.81	0.00038546		958.81	0.00285095		1548.8	0.00506565		2138.8	0.01019121		2728.8	0.01782702
369.01	-0.00007165		959.01	0.0018546		1549	0.00528283		2139	0.00986964		2729	0.01746501
369.21	-0.00056864		959.21	0.00147968		1549.2	0.00487523		2139.2	0.00852659		2729.2	0.01856088
369.41	-0.00019205		959.41	0.00154771		1549.4	0.00435283		2139.4	0.00772704		2729.4	0.01774543
369.61	-0.0006186		959.61	0.0029458		1549.6	0.00462457		2139.6	0.00784893		2729.6	0.0173271
369.81	-0.00079196		959.81	0.00314964		1549.8	0.00475029		2139.8	0.00737646		2729.8	0.01743268
370.01	-0.00188549		960.01	0.00436575		1550	0.0051566		2140	0.00793931		2730	0.01653465
370.21	-0.00228842		960.21	0.0042908		1550.2	0.00534841		2140.2	0.00772677		2730.2	0.01596995
370.41	-0.00303618		960.41	0.00519727		1550.4	0.00611726		2140.4	0.00758702		2730.4	0.01704714
370.61	-0.00329284		960.61	0.00570691		1550.6	0.00731545		2140.6	0.00811487		2730.6	0.01739894
370.81	-0.00316346		960.81	0.00558033		1550.8	0.00829155		2140.8	0.00831302		2730.8	0.01705686
371.01	-0.00345099		961.01	0.00705786		1551	0.00822417		2141	0.00779471		2731	0.01728306
371.21	-0.00291486		961.21	0.00733466		1551.2	0.00856216		2141.2	0.00776292		2731.2	0.01728377
371.41	-0.00301068		961.41	0.00707078		1551.4	0.00855662		2141.4	0.00841919		2731.4	0.01745367
371.61	-0.00183113		961.61	0.00656174		1551.6	0.00804838		2141.6	0.00815589		2731.6	0.01654842
371.81	-0.0011922		961.81	0.00634696		1551.8	0.00793605		2141.8	0.00878574		2731.8	0.01758104
372.01	-0.00070336		962.01	0.00594262		1552	0.00801115		2142	0.00874971		2732	0.01778481
372.21	-0.00123143		962.21	0.00576375		1552.2	0.00685174		2142.2	0.00850717		2732.2	0.01729396
372.41	-0.00112249		962.41	0.00472131		1552.4	0.0060623		2142.4	0.00858285		2732.4	0.018258
372.61	-0.00089392		962.61	0.00316293		1552.6	0.00535209		2142.6	0.00808042		2732.6	0.01806008
372.81	-0.00145767		962.81	0.00163942		1552.8	0.0048372		2142.8	0.00713789		2732.8	0.01800471
373.01	-0.00147821		963.01	0.00076882		1553	0.00420635		2143	0.00760858		2733	0.01864821
373.21	-0.00131693		963.21	0.00066276		1553.2	0.00352927		2143.2	0.00810964		2733.2	0.01881271
373.41	-0.00068206		963.41	0.00085282		1553.4	0.00266598		2143.4	0.00862864		2733.4	0.01774108
373.61	-0.00189578		963.61	0.00123521		1553.6	0.00318127		2143.6	0.00902569		2733.6	0.01706567
373.81	-0.00158493		963.81	0.00048878		1553.8	0.00317397		2143.8	0.0098592		2733.8	0.01694388
374.01	-0.00162699		964.01	0.00116668		1554	0.00316018		2144	0.01022465		2734	0.01658696
374.21	-0.00180651		964.21	0.00120671		1554.2	0.00335905		2144.2	0.00927019		2734.2	0.01718182
374.41	-0.00176754		964.41	0.001469		1554.4	0.00396157		2144.4	0.00887517		2734.4	0.01744086
374.61	-0.00155735		964.61	0.00075264		1554.6	0.00362468		2144.6	0.00988836		2734.6	0.01713966
374.81	-0.00142273		964.81	0.00124938		1554.8	0.00390249		2144.8	0.01065639		2734.8	0.01701738
375.01	-0.00083749		965.01	0.00121172		1555	0.00378261		2145	0.01077456		2735	0.01610156
375.21	-0.00064243		965.21	0.00095498		1555.2	0.00477113		2145.2	0.01116927		2735.2	0.01657076
375.41	-0.00044611		965.41	0.00100081		1555.4	0.0040666		2145.4	0.01186837		2735.4	0.01616235
375.61	-0.00051182		965.61	0.00134736		1555.6	0.0039364		2145.6	0.0121228		2735.6	0.0172763
375.81	-0.00065673		965.81	0.00206976		1555.8	0.00326371		2145.8	0.01228704		2735.8	0.01879915
376.01	-0.00152589		966.01	0.00295523		1556	0.00299014		2146	0.01128678		2736	0.01905129
376.21	-0.0021436		966.21	0.00297631		1556.2	0.00263609		2146.2	0.01105776		2736.2	0.01849905
376.41	-0.00163325		966.41	0.00306125		1556.4	0.0036414		2146.4	0.0106079		2736.4	0.01950892
376.61	-0.00201861		966.61	0.00315022		1556.6	0.00346717		2146.6	0.01008152		2736.6	0.01952529
376.81	-0.00259116		966.81	0.0035638		1556.8	0.00385133		2146.8	0.00997179		2736.8	0.02046464
377.01	-0.00280112		967.01	0.00411702		1557	0.00383816		2147	0.01072147		2737	0.02088892
377.21	-0.00362007		967.21	0.00445962		1557.2	0.00358613		2147.2	0.00986087		2737.2	0.02087757
377.41	-0.0027564		967.41	0.00542773		1557.4	0.00392393		2147.4	0.00943358		2737.4	0.02042299
377.61	-0.00320281		967.61	0.00561285		1557.6	0.00476639		2147.6	0.0085943		2737.6	0.0199079
377.81	-0.00297606		967.81	0.00568625		1557.8	0.00512452		2147.8	0.00845259		2737.8	0.01969544
378.01	-0.00229332		968.01	0.00603551		1558	0.0055353		2148	0.00831988		2738	0.01954663
378.21	-0.00257771		968.21	0.00542586		1558.2	0.00602374		2148.2	0.00715898		2738.2	0.01822596
378.41	-0.00228289		968.41	0.00381703		1558.4	0.00595869		2148.4	0.00803316		2738.4	0.01772245
378.61	-0.0023177		968.61	0.0032339		1558.6	0.00555621		2148.6	0.00920534		2738.6	0.01714152
378.81	-0.00244323		968.81	0.00317985		1558.8	0.00574295		2148.8	0.00959678		2738.8	0.0165154
379.01	-0.00239921		969.01	0.00293656		1559	0.00515311		2149	0.00887228		2739	0.01579986
379.21	-0.00209053		969.21	0.00314515		1559.2	0.00468729		2149.2	0.00877871		2739.2	0.01564534
379.41	-0.00216519		969.41	0.00338152		1559.4	0.00397247		2149.4	0.00934502		2739.4	0.01520901
379.61	-0.00185451		969.61	0.00338548		1559.6	0.00344889		2149.6	0.00956809		2739.6	0.01587607
379.81	-0.0008681		969.81	0.0036628		1559.8	0.00267684		2149.8	0.00907341		2739.8	0.01530585
380.01	-0.00118477		970.01	0.00439161		1560	0.00296391		2150	0.00836416		2740	0.01509271
380.21	-0.00144512		970.21	0.00364264		1560.2	0.00311777		2150.2	0.00813376		2740.2	0.01533666
380.41	-0.00088664		970.41	0.00336457		1560.4	0.00352395		2150.4	0.00828334		2740.4	0.01575331
380.61	-0.00138219		970.61	0.00344314		1560.6	0.00300271		2150.6	0.0075369		2740.6	0.01677166
380.81	-0.00096953		970.81	0.00384333		1560.8	0.00325156		2150.8	0.00802813		2740.8	0.01742909
381.01	-0.00115649		971.01	0.00363074		1561	0.00311409		2151	0.00858944		2741	0.01769222
381.21	-0.00070479		971.21	0.0035577		1561.2	0.0033944		2151.2	0.0084276		2741.2	0.01745033
381.41	0.00004759		971.41	0.00338854		1561.4	0.00343036		2151.4	0.00923971		2741.4	0.0163158
381.61	-0.00039568		971.61	0.00272776		1561.6	0.00313707		2151.6	0.00965144		2741.6	0.01598372
381.81	0.00011163		971.81	0.00226285		1561.8	0.00404654		2151.8	0.0103221		2741.8	0.0155931
382.01	0.00132378		972.01	0.00187669		1562	0.00408914		2152	0.01149637		2742	0.01568795
382.21	0.00040761		972.21	0.00116011		1562.2	0.0039731		2152.2	0.01117313		2742.2	0.01513044
382.41	-0.00009858		972.41	0.00082168		1562.4	0.00428478		2152.4	0.01176303		2742.4	0.01551697
382.61	-0.00050543		972.61	0.00098648		1562.6	0.00463397		2152.6	0.01146944		2742.6	0.01511819
382.81	-0.00086116		972.81	0.00087054		1562.8	0.00421972		2152.8	0.01116883		2742.8	0.01505573
383.01	-0.00095988		973.01	0.00182647		1563	0.00362187		2153	0.01044583		2743	0.01500329
383.21	0.00010353		973.21	0.00161595		1563.2	0.00298217		2153.2	0.01116089		2743.2	0.01456683
383.41	0.00045511		973.41	0.00233357		1563.4	0.00290173		2153.4	0.01144686		2743.4	0.0145908
383.61	0.00068102		973.61	0.00147993		1563.6	0.00304207		2153.6	0.01137342		2743.6	0.01492179
383.81	0.00059835		973.81	0.00126769		1563.8	0.0027069		2153.8	0.01085661		2743.8	0.015153
384.01	0.00047935		974.01	0.00032373		1564	0.00316683		2154	0.01024153		2744	0.0158676
384.21	0.0007509		974.21	-0.00060212		1564.2	0.00310224		2154.2	0.00993125		2744.2	0.01612425
384.41	0.00111927		974.41	-0.00041464		1564.4	0.003473		2154.4	0.01056599		2744.4	0.01607146
384.61	0.0010059		974.61	-0.00027887		1564.6	0.00410469		2154.6	0.01040812		2744.6	0.016671
384.81	0.00133313		974.81	0.00061655		1564.8	0.00474416		2154.8	0.01075379		2744.8	0.01637837
385.01	0.00152157		975.01	0.00086619		1565	0.00561051		2155	0.01012399		2745	0.01646288
385.21	0.00162495		975.21	0.00134528		1565.2	0.00553603		2155.2	0.00990972		2745.2	0.01566615
385.41	0.00039304		975.41	0.00122731		1565.4	0.00538896		2155.4	0.00946281		2745.4	0.01498395
385.61	0.00015809		975.61	0.00170295		1565.6	0.00531605		2155.6	0.00979794		2745.6	0.0153066
385.81	0.00036183		975.81	0.00156989		1565.8	0.00554232		2155.8	0.00972354		2745.8	0.01513453
386.01	0.00027277		976.01	0.00164059		1566	0.00549427		2156	0.0098398		2746	0.01525521
386.21	-0.00118327		976.21	0.00169062		1566.2	0.00556848		2156.2	0.00936056		2746.2	0.01487524
386.41	-0.00172809		976.41	0.00174651		1566.4	0.00647978		2156.4	0.00919799		2746.4	0.01437968
386.61	-0.00194898		976.61	0.00172617		1566.6	0.00612658		2156.6	0.00892435		2746.6	0.01426455
386.81	-0.00251466		976.81	0.00265006		1566.8	0.00579459		2156.8	0.00950051		2746.8	0.01417392
387.01	-0.00320289		977.01	0.00290839		1567	0.00533561		2157	0.00963191		2747	0.01448578
387.21	-0.00275915		977.21	0.0026526		1567.2	0.00416918		2157.2	0.01105534		2747.2	0.01505274
387.41	-0.00260987		977.41	0.00341248		1567.4	0.00410931		2157.4	0.01075741		2747.4	0.01534586
387.61	-0.00273597		977.61	0.00269232		1567.6	0.00391754		2157.6	0.01071577		2747.6	0.01558395
387.81	-0.00222721		977.81	0.00310982		1567.8	0.00371822		2157.8	0.00984788		2747.8	0.01641716
388.01	-0.00153041		978.01	0.00280872		1568	0.00407468		2158	0.00965206		2748	0.01661775
388.21	-0.00205791		978.21	0.00295009		1568.2	0.00379046		2158.2	0.01023639		2748.2	0.0165645
388.41	-0.00268633		978.41	0.00243198		1568.4	0.00450504		2158.4	0.01031591		2748.4	0.01672579
388.61	-0.0027957		978.61	0.00252322		1568.6	0.00550899		2158.6	0.0097856		2748.6	0.01720466
388.81	-0.00342917		978.81	0.00336474		1568.8	0.00524793		2158.8	0.00850313		2748.8	0.01760737
389.01	-0.00348656		979.01	0.00265207		1569	0.00601265		2159	0.00800703		2749	0.01853666
389.21	-0.00498745		979.21	0.00255417		1569.2	0.00547718		2159.2	0.00810101		2749.2	0.01888809
389.41	-0.00553971		979.41	0.00186208		1569.4	0.00512474		2159.4	0.00826308		2749.4	0.0190908
389.61	-0.00437292		979.61	0.0013761		1569.6	0.00419827		2159.6	0.00920911		2749.6	0.01908669
389.81	-0.00359524		979.81	0.00104452		1569.8	0.00401126		2159.8	0.00957691		2749.8	0.01928753
390.01	-0.00326813		980.01	0.0010662		1570	0.00403238		2160	0.00976882		2750	0.01933826
390.21	-0.00295621		980.21	0.00132955		1570.2	0.00416082		2160.2	0.00986339		2750.2	0.01853039
390.41	-0.00329661		980.41	0.00179833		1570.4	0.00454132		2160.4	0.00959532		2750.4	0.01807188
390.61	-0.00292301		980.61	0.00250526		1570.6	0.00419341		2160.6	0.00971651		2750.6	0.01834546
390.81	-0.00285861		980.81	0.00258821		1570.8	0.00410265		2160.8	0.0109717		2750.8	0.01792372
391.01	-0.00245801		981.01	0.00190107		1571	0.00301232		2161	0.01075794		2751	0.01798336
391.21	-0.00184774		981.21	0.00278813		1571.2	0.00224971		2161.2	0.01115346		2751.2	0.01694012
391.41	-0.00198668		981.41	0.00321653		1571.4	0.00231061		2161.4	0.01035908		2751.4	0.0166618
391.61	-0.00214145		981.61	0.00233987		1571.6	0.00235488		2161.6	0.01003296		2751.6	0.01630017
391.81	-0.00204358		981.81	0.00239456		1571.8	0.0023299		2161.8	0.00978674		2751.8	0.01595639
392.01	-0.00216056		982.01	0.0021985		1572	0.00161713		2162	0.00965008		2752	0.0153744
392.21	-0.00357495		982.21	0.00206742		1572.2	0.00174815		2162.2	0.0094716		2752.2	0.01454483
392.41	-0.00413628		982.41	0.00173563		1572.4	0.00223023		2162.4	0.00909578		2752.4	0.01467389
392.61	-0.0043708		982.61	0.0024855		1572.6	0.00260514		2162.6	0.00824865		2752.6	0.01473277
392.81	-0.00490841		982.81	0.00224466		1572.8	0.00290796		2162.8	0.00771955		2752.8	0.0154022
393.01	-0.00456457		983.01	0.00220038		1573	0.00387655		2163	0.00795619		2753	0.01609582
393.21	-0.00471262		983.21	0.00207382		1573.2	0.00367313		2163.2	0.00819117		2753.2	0.01595908
393.41	-0.00363412		983.41	0.00179751		1573.4	0.0046294		2163.4	0.00802709		2753.4	0.01598891
393.61	-0.00248011		983.61	0.00121772		1573.6	0.00490076		2163.6	0.00870355		2753.6	0.01533958
393.81	-0.00222819		983.81	0.00124718		1573.8	0.00529062		2163.8	0.00918084		2753.8	0.01636655
394.01	-0.00252213		984.01	0.00126386		1574	0.00616222		2164	0.00919527		2754	0.01655824
394.21	-0.00235094		984.21	0.00127028		1574.2	0.00715413		2164.2	0.00934999		2754.2	0.01661238
394.41	-0.00378918		984.41	0.0010354		1574.4	0.00701611		2164.4	0.00945367		2754.4	0.01748322
394.61	-0.00324338		984.61	0.00076732		1574.6	0.0068319		2164.6	0.01030304		2754.6	0.01782919
394.81	-0.00370341		984.81	0.00029184		1574.8	0.00647551		2164.8	0.01090662		2754.8	0.01814761
395.01	-0.00399084		985.01	-0.00005187		1575	0.00570181		2165	0.01080432		2755	0.01860773
395.21	-0.00399271		985.21	-0.00005406		1575.2	0.00559766		2165.2	0.01202291		2755.2	0.01862599
395.41	-0.00513344		985.41	-0.00132067		1575.4	0.00533687		2165.4	0.01225861		2755.4	0.01896393
395.61	-0.00494255		985.61	-0.00217849		1575.6	0.00523217		2165.6	0.01268873		2755.6	0.01925917
395.81	-0.00531447		985.81	-0.00134999		1575.8	0.00499255		2165.8	0.01263275		2755.8	0.01899883
396.01	-0.00592252		986.01	-0.00093545		1576	0.00415165		2166	0.0120189		2756	0.01960321
396.21	-0.00660224		986.21	-0.00084682		1576.2	0.00383233		2166.2	0.01174068		2756.2	0.01877461
396.41	-0.00588533		986.41	-0.00081388		1576.4	0.00328497		2166.4	0.0113468		2756.4	0.01861463
396.61	-0.00521318		986.61	0.00006007		1576.6	0.00336451		2166.6	0.01049029		2756.6	0.0186324
396.81	-0.00474866		986.81	-0.00029519		1576.8	0.00348519		2166.8	0.00975849		2756.8	0.01950636
397.01	-0.0039503		987.01	0.00026059		1577	0.00365062		2167	0.00945769		2757	0.01929445
397.21	-0.00358969		987.21	0.00005805		1577.2	0.00404075		2167.2	0.00894097		2757.2	0.01928794
397.41	-0.00382449		987.41	-0.00048549		1577.4	0.00469202		2167.4	0.0087185		2757.4	0.01897486
397.61	-0.00316697		987.61	-0.00110069		1577.6	0.00425485		2167.6	0.0088833		2757.6	0.01956452
397.81	-0.00384527		987.81	-0.00017711		1577.8	0.00470918		2167.8	0.00873234		2757.8	0.01925235
398.01	-0.00392381		988.01	0.00027255		1578	0.00490592		2168	0.0088807		2758	0.01940334
398.21	-0.003652		988.21	0.00027161		1578.2	0.00467305		2168.2	0.00872482		2758.2	0.01926218
398.41	-0.00385198		988.41	0.00012655		1578.4	0.00347975		2168.4	0.00805292		2758.4	0.01932904
398.61	-0.00300866		988.61	0.00041739		1578.6	0.00332619		2168.6	0.00812841		2758.6	0.01909097
398.81	-0.00278969		988.81	0.00035313		1578.8	0.00255965		2168.8	0.00857303		2758.8	0.01894253
399.01	-0.00230179		989.01	-0.00005348		1579	0.00264949		2169	0.00940177		2759	0.01862765
399.21	-0.00199257		989.21	-0.00022308		1579.2	0.00203078		2169.2	0.00975362		2759.2	0.01828351
399.41	-0.00233219		989.41	-0.00092185		1579.4	0.0028834		2169.4	0.00926543		2759.4	0.01802418
399.61	-0.00208547		989.61	-0.00085411		1579.6	0.00350943		2169.6	0.00972498		2759.6	0.0177677
399.81	-0.00250236		989.81	0.00002788		1579.8	0.00294045		2169.8	0.00968841		2759.8	0.01768977
400.01	-0.00190123		990.01	-0.00087773		1580	0.00182632		2170	0.009437		2760	0.01744328
400.21	-0.00179308		990.21	-0.00099796		1580.2	0.00221853		2170.2	0.00913598		2760.2	0.01680374
400.41	-0.00157788		990.41	-0.00126709		1580.4	0.00229394		2170.4	0.00906279		2760.4	0.01683632
400.61	-0.00158576		990.61	-0.00107983		1580.6	0.00256626		2170.6	0.00826737		2760.6	0.0167303
400.81	-0.00208593		990.81	-0.00145406		1580.8	0.00237376		2170.8	0.00781103		2760.8	0.01747497
401.01	-0.00261451		991.01	-0.00159524		1581	0.00229659		2171	0.00819821		2761	0.01717432
401.21	-0.00300166		991.21	-0.00167478		1581.2	0.00237269		2171.2	0.00822831		2761.2	0.01774908
401.41	-0.0035253		991.41	-0.00199451		1581.4	0.00259929		2171.4	0.0078276		2761.4	0.01777434
401.61	-0.00348116		991.61	-0.00125698		1581.6	0.00195379		2171.6	0.00791235		2761.6	0.0182087
401.81	-0.00389238		991.81	-0.0006205		1581.8	0.00262878		2171.8	0.00760266		2761.8	0.01734253
402.01	-0.0027356		992.01	-0.00070175		1582	0.00322359		2172	0.00773749		2762	0.01781815
402.21	-0.0030429		992.21	-0.00019574		1582.2	0.00378157		2172.2	0.00728634		2762.2	0.01768077
402.41	-0.0035752		992.41	0.00062783		1582.4	0.00340048		2172.4	0.00671614		2762.4	0.01735014
402.61	-0.00368924		992.61	0.00100794		1582.6	0.00435451		2172.6	0.00671715		2762.6	0.01667543
402.81	-0.00387615		992.81	0.00093712		1582.8	0.00416646		2172.8	0.00726048		2762.8	0.01620907
403.01	-0.00267562		993.01	0.00109544		1583	0.00601084		2173	0.00740697		2763	0.01641749
403.21	-0.00234092		993.21	0.00084565		1583.2	0.0052749		2173.2	0.0074349		2763.2	0.01650576
403.41	-0.0024953		993.41	0.00102231		1583.4	0.00644573		2173.4	0.00772916		2763.4	0.01617615
403.61	-0.00240469		993.61	0.00094228		1583.6	0.00629549		2173.6	0.00765269		2763.6	0.01559032
403.81	-0.0025606		993.81	0.00157407		1583.8	0.00585578		2173.8	0.00739629		2763.8	0.01558643
404.01	-0.00272189		994.01	0.00089572		1584	0.00507538		2174	0.00773676		2764	0.01507685
404.21	-0.00336152		994.21	0.00121233		1584.2	0.00533342		2174.2	0.00788927		2764.2	0.01500773
404.41	-0.0036271		994.41	0.00048721		1584.4	0.00423543		2174.4	0.00816909		2764.4	0.01461104
404.61	-0.00345064		994.61	0.00023447		1584.6	0.00367385		2174.6	0.00818156		2764.6	0.01436182
404.81	-0.00360724		994.81	0.00054151		1584.8	0.00280985		2174.8	0.00930068		2764.8	0.01544023
405.01	-0.00364249		995.01	0.00021679		1585	0.00228712		2175	0.00981424		2765	0.01639367
405.21	-0.00302405		995.21	-0.00030983		1585.2	0.00169748		2175.2	0.00955381		2765.2	0.01730145
405.41	-0.0034898		995.41	-0.00066534		1585.4	0.00096813		2175.4	0.00949987		2765.4	0.01726399
405.61	-0.00348027		995.61	-0.00034745		1585.6	-0.00017284		2175.6	0.0093907		2765.6	0.01782739
405.81	-0.00289755		995.81	-0.0000822		1585.8	0.00068811		2175.8	0.00874974		2765.8	0.01797076
406.01	-0.00206212		996.01	0.00030528		1586	0.00099349		2176	0.00956007		2766	0.01797999
406.21	-0.00251081		996.21	0.00072409		1586.2	0.00112135		2176.2	0.01015852		2766.2	0.01777485
406.41	-0.00328494		996.41	0.000671		1586.4	0.00090924		2176.4	0.00892067		2766.4	0.01738888
406.61	-0.00243823		996.61	-0.00060995		1586.6	0.0018389		2176.6	0.00863257		2766.6	0.01730026
406.81	-0.00171718		996.81	-0.0014291		1586.8	0.00167758		2176.8	0.00900658		2766.8	0.01735481
407.01	-0.00100846		997.01	-0.00182085		1587	0.00277425		2177	0.00809128		2767	0.01678262
407.21	-0.00187339		997.21	-0.00278625		1587.2	0.00155703		2177.2	0.00803066		2767.2	0.01716463
407.41	-0.00156055		997.41	-0.00196835		1587.4	0.00151473		2177.4	0.00742001		2767.4	0.01649634
407.61	-0.0014804		997.61	-0.00238624		1587.6	0.00147932		2177.6	0.00619741		2767.6	0.01629738
407.81	-0.00212418		997.81	-0.00216833		1587.8	0.00110209		2177.8	0.00610782		2767.8	0.01615871
408.01	-0.00186921		998.01	-0.00151763		1588	0.00073496		2178	0.00656397		2768	0.01642056
408.21	-0.00258386		998.21	-0.00100271		1588.2	0.001041		2178.2	0.00572267		2768.2	0.01623488
408.41	-0.00319861		998.41	-0.00152298		1588.4	0.00154812		2178.4	0.00557579		2768.4	0.0157206
408.61	-0.00316087		998.61	-0.00185483		1588.6	0.00242866		2178.6	0.0059441		2768.6	0.01599149
408.81	-0.00407072		998.81	-0.00135511		1588.8	0.00214254		2178.8	0.0068725		2768.8	0.01715712
409.01	-0.00463215		999.01	-0.00162358		1589	0.00256195		2179	0.00656395		2769	0.01749713
409.21	-0.00485306		999.21	-0.0016936		1589.2	0.00375191		2179.2	0.00676614		2769.2	0.01720998
409.41	-0.00596621		999.41	-0.00047657		1589.4	0.00414254		2179.4	0.00715187		2769.4	0.01662036
409.61	-0.00580462		999.61	0.00032373		1589.6	0.00459571		2179.6	0.00726102		2769.6	0.01676918
409.81	-0.00620482		999.81	0.00083314		1589.8	0.00537468		2179.8	0.0081563		2769.8	0.01644282
410.01	-0.00584585		1000.01	0.00077256		1590	0.00554701		2180	0.00862665		2770	0.01677708
410.21	-0.00634827		1000.21	0.00094429		1590.2	0.00560414		2180.2	0.00903789		2770.2	0.01627321
410.41	-0.0066814		1000.41	0.00094204		1590.4	0.00528863		2180.4	0.00848055		2770.4	0.01646018
410.61	-0.00566322		1000.61	0.00027704		1590.6	0.00560055		2180.6	0.00882603		2770.6	0.01575111
410.81	-0.0055261		1000.81	-0.00027953		1590.8	0.00501397		2180.8	0.00854286		2770.8	0.01553097
411.01	-0.00555269		1001.01	0.00001596		1591	0.00419958		2181	0.00781525		2771	0.0152746
411.21	-0.00440953		1001.21	-0.00000424		1591.2	0.00318467		2181.2	0.00754618		2771.2	0.01617999
411.41	-0.0034393		1001.41	0.00084874		1591.4	0.00274863		2181.4	0.00685529		2771.4	0.01574151
411.61	-0.00349005		1001.61	0.00012091		1591.6	0.0017348		2181.6	0.0064738		2771.6	0.01630242
411.81	-0.00335925		1001.81	0.00036025		1591.8	0.00113851		2181.8	0.00629375		2771.8	0.01673221
412.01	-0.00313285		1002.01	0.00092407		1592	0.0010744		2182	0.00684737		2772	0.01616044
412.21	-0.00406452		1002.21	0.00074314		1592.2	0.00122747		2182.2	0.00619835		2772.2	0.01615608
412.41	-0.00400114		1002.41	-0.00086519		1592.4	0.00148971		2182.4	0.00623196		2772.4	0.01603716
412.61	-0.00402213		1002.61	-0.00086202		1592.6	0.00145272		2182.6	0.00787529		2772.6	0.01656364
412.81	-0.00465673		1002.81	-0.00067279		1592.8	0.0023829		2182.8	0.00833373		2772.8	0.01679746
413.01	-0.00481536		1003.01	-0.0010237		1593	0.00332052		2183	0.00911866		2773	0.01624506
413.21	-0.00526537		1003.21	-0.00065584		1593.2	0.00440393		2183.2	0.00996484		2773.2	0.01631351
413.41	-0.00582853		1003.41	-0.00061393		1593.4	0.00437758		2183.4	0.01053638		2773.4	0.0164438
413.61	-0.00588084		1003.61	-0.00060202		1593.6	0.00425999		2183.6	0.01113661		2773.6	0.01621381
413.81	-0.00558216		1003.81	-0.00068686		1593.8	0.00485002		2183.8	0.011887		2773.8	0.01616416
414.01	-0.00424281		1004.01	-0.00122755		1594	0.00486316		2184	0.01143092		2774	0.01661822
414.21	-0.00482037		1004.21	-0.0017007		1594.2	0.0048696		2184.2	0.0117835		2774.2	0.01687533
414.41	-0.00503516		1004.41	-0.0020628		1594.4	0.0044887		2184.4	0.01183374		2774.4	0.01736288
414.61	-0.00446004		1004.61	-0.00255718		1594.6	0.00385581		2184.6	0.01191088		2774.6	0.01665797
414.81	-0.00461341		1004.81	-0.0024746		1594.8	0.002938		2184.8	0.01222354		2774.8	0.01725898
415.01	-0.00473821		1005.01	-0.00212463		1595	0.00265858		2185	0.01203993		2775	0.01715022
415.21	-0.00387871		1005.21	-0.00259546		1595.2	0.00295721		2185.2	0.01094325		2775.2	0.01694464
415.41	-0.00371365		1005.41	-0.00261757		1595.4	0.00223564		2185.4	0.01068814		2775.4	0.01719256
415.61	-0.00384176		1005.61	-0.00229945		1595.6	0.00173943		2185.6	0.01066753		2775.6	0.01829387
415.81	-0.0040575		1005.81	-0.00180874		1595.8	0.00201745		2185.8	0.01012034		2775.8	0.01821187
416.01	-0.00396466		1006.01	-0.00126598		1596	0.00203676		2186	0.00995996		2776	0.01790513
416.21	-0.00388567		1006.21	-0.00138436		1596.2	0.00168029		2186.2	0.00928589		2776.2	0.01840196
416.41	-0.00357673		1006.41	-0.00163855		1596.4	0.00171677		2186.4	0.00928799		2776.4	0.0181757
416.61	-0.00361294		1006.61	-0.00097344		1596.6	0.00206022		2186.6	0.009732		2776.6	0.01806577
416.81	-0.00428759		1006.81	-0.00128258		1596.8	0.00253465		2186.8	0.00909528		2776.8	0.01810745
417.01	-0.00448687		1007.01	-0.00059543		1597	0.00188149		2187	0.00912432		2777	0.0181967
417.21	-0.00474004		1007.21	0.0000644		1597.2	0.00248134		2187.2	0.0089928		2777.2	0.01802125
417.41	-0.00469431		1007.41	0.00014267		1597.4	0.00181794		2187.4	0.00880712		2777.4	0.01751579
417.61	-0.00438742		1007.61	0.0001804		1597.6	0.00167205		2187.6	0.00910127		2777.6	0.01661243
417.81	-0.00428061		1007.81	-0.00030669		1597.8	0.00211074		2187.8	0.00897727		2777.8	0.01706901
418.01	-0.00470603		1008.01	-0.00157069		1598	0.00130392		2188	0.0089783		2778	0.01715474
418.21	-0.00592189		1008.21	-0.00163643		1598.2	0.00107004		2188.2	0.00953655		2778.2	0.01774536
418.41	-0.00552863		1008.41	-0.00128377		1598.4	0.00014579		2188.4	0.01000848		2778.4	0.01722311
418.61	-0.00502766		1008.61	-0.00156507		1598.6	0.00034431		2188.6	0.01068593		2778.6	0.01657651
418.81	-0.00541432		1008.81	-0.00204039		1598.8	0.00082018		2188.8	0.01084679		2778.8	0.01695623
419.01	-0.00562338		1009.01	-0.00251185		1599	0.00153216		2189	0.01028329		2779	0.01696856
419.21	-0.00476176		1009.21	-0.00287588		1599.2	0.00171232		2189.2	0.0092925		2779.2	0.01695259
419.41	-0.00468373		1009.41	-0.00236811		1599.4	0.00127112		2189.4	0.00940816		2779.4	0.01811706
419.61	-0.00500914		1009.61	-0.00193866		1599.6	0.00163321		2189.6	0.0099365		2779.6	0.01831166
419.81	-0.00508818		1009.81	-0.00219733		1599.8	0.00194794		2189.8	0.00927518		2779.8	0.01767368
420.01	-0.00419896		1010.01	-0.00248283		1600	0.00173009		2190	0.00947768		2780	0.01760826
420.21	-0.0039255		1010.21	-0.00316149		1600.2	0.00132032		2190.2	0.00893978		2780.2	0.01801057
420.41	-0.00425166		1010.41	-0.00315219		1600.4	0.00242009		2190.4	0.00880833		2780.4	0.0183743
420.61	-0.00459066		1010.61	-0.00288871		1600.6	0.00293051		2190.6	0.0086102		2780.6	0.01895991
420.81	-0.00507394		1010.81	-0.00232343		1600.8	0.00316209		2190.8	0.00893705		2780.8	0.01938435
421.01	-0.0046615		1011.01	-0.00147441		1601	0.00265717		2191	0.00902016		2781	0.01950314
421.21	-0.00510784		1011.21	-0.00195557		1601.2	0.00297589		2191.2	0.00931095		2781.2	0.01903521
421.41	-0.00578607		1011.41	-0.00187193		1601.4	0.00345914		2191.4	0.00895265		2781.4	0.01795081
421.61	-0.00674385		1011.61	-0.00193525		1601.6	0.00357143		2191.6	0.00975381		2781.6	0.01721942
421.81	-0.00757536		1011.81	-0.00195345		1601.8	0.00367447		2191.8	0.00937832		2781.8	0.01638154
422.01	-0.00800664		1012.01	-0.00205461		1602	0.00405839		2192	0.00932498		2782	0.01571173
422.21	-0.00781207		1012.21	-0.00177254		1602.2	0.004153		2192.2	0.00899565		2782.2	0.01589719
422.41	-0.00797063		1012.41	-0.00106302		1602.4	0.00346838		2192.4	0.00944752		2782.4	0.01517669
422.61	-0.00992788		1012.61	-0.00209183		1602.6	0.00396344		2192.6	0.00990474		2782.6	0.01541205
422.81	-0.01043368		1012.81	-0.00237535		1602.8	0.00405506		2192.8	0.00975022		2782.8	0.01540972
423.01	-0.01039484		1013.01	-0.00287311		1603	0.00397316		2193	0.0091173		2783	0.01499275
423.21	-0.01070749		1013.21	-0.00291139		1603.2	0.0038187		2193.2	0.00864248		2783.2	0.01395117
423.41	-0.01078462		1013.41	-0.00248702		1603.4	0.00343892		2193.4	0.00888393		2783.4	0.01453242
423.61	-0.01023788		1013.61	-0.00246542		1603.6	0.00317948		2193.6	0.00876088		2783.6	0.0144883
423.81	-0.00968279		1013.81	-0.0022339		1603.8	0.0025434		2193.8	0.0079833		2783.8	0.01449445
424.01	-0.00859761		1014.01	-0.00205062		1604	0.00213278		2194	0.009049		2784	0.01459692
424.21	-0.00853843		1014.21	-0.0016783		1604.2	0.00213056		2194.2	0.00898056		2784.2	0.01554756
424.41	-0.00819585		1014.41	-0.00104322		1604.4	0.00205691		2194.4	0.0098045		2784.4	0.0164292
424.61	-0.00797549		1014.61	-0.00064211		1604.6	0.00208475		2194.6	0.0098697		2784.6	0.01797428
424.81	-0.00711419		1014.81	-0.00080278		1604.8	0.00168102		2194.8	0.01023755		2784.8	0.01795737
425.01	-0.00709013		1015.01	-0.00117946		1605	0.00139023		2195	0.00998275		2785	0.0175689
425.21	-0.00692249		1015.21	-0.00132661		1605.2	0.00250522		2195.2	0.01029877		2785.2	0.0176452
425.41	-0.00697032		1015.41	-0.0014006		1605.4	0.00322753		2195.4	0.01049456		2785.4	0.01616615
425.61	-0.00651591		1015.61	-0.00111058		1605.6	0.00330969		2195.6	0.0103514		2785.6	0.01648997
425.81	-0.0059027		1015.81	-0.00138855		1605.8	0.00391294		2195.8	0.01003354		2785.8	0.01622342
426.01	-0.00593098		1016.01	-0.00230092		1606	0.00382295		2196	0.0103612		2786	0.01622617
426.21	-0.00629088		1016.21	-0.00207299		1606.2	0.00306444		2196.2	0.01156115		2786.2	0.0160372
426.41	-0.00649397		1016.41	-0.00171943		1606.4	0.00226263		2196.4	0.01222437		2786.4	0.01608698
426.61	-0.00684374		1016.61	-0.0022889		1606.6	0.00249919		2196.6	0.01226614		2786.6	0.01609277
426.81	-0.00660638		1016.81	-0.00144142		1606.8	0.00208999		2196.8	0.01233945		2786.8	0.01539744
427.01	-0.00634665		1017.01	-0.00183969		1607	0.00125466		2197	0.01201864		2787	0.01469505
427.21	-0.00681559		1017.21	-0.00105955		1607.2	0.00172555		2197.2	0.01134813		2787.2	0.01517142
427.41	-0.00652014		1017.41	-0.00004984		1607.4	0.00181327		2197.4	0.01070937		2787.4	0.0162011
427.61	-0.00657009		1017.61	0.0005146		1607.6	0.00142498		2197.6	0.00994968		2787.6	0.01546542
427.81	-0.00674091		1017.81	0.00105609		1607.8	0.00140784		2197.8	0.00983356		2787.8	0.01511081
428.01	-0.00687718		1018.01	0.00137249		1608	0.002254		2198	0.01020047		2788	0.01585115
428.21	-0.00705668		1018.21	0.00115168		1608.2	0.00186616		2198.2	0.00963357		2788.2	0.01648014
428.41	-0.00749238		1018.41	0.00071275		1608.4	0.00120528		2198.4	0.0087481		2788.4	0.01732168
428.61	-0.00785705		1018.61	-0.00057446		1608.6	0.00180789		2198.6	0.00854764		2788.6	0.01789872
428.81	-0.00739471		1018.81	-0.00124892		1608.8	0.00151006		2198.8	0.00786176		2788.8	0.0170699
429.01	-0.00756015		1019.01	-0.00157312		1609	0.00150355		2199	0.00787244		2789	0.01683143
429.21	-0.006282		1019.21	-0.00222272		1609.2	0.00229499		2199.2	0.00799567		2789.2	0.01694265
429.41	-0.00628886		1019.41	-0.00279519		1609.4	0.00280467		2199.4	0.00720225		2789.4	0.01558541
429.61	-0.00599338		1019.61	-0.00350147		1609.6	0.00319761		2199.6	0.00730091		2789.6	0.01601081
429.81	-0.00632648		1019.81	-0.00411929		1609.8	0.00315476		2199.8	0.00694747		2789.8	0.01522238
430.01	-0.00655389		1020.01	-0.00452823		1610	0.00305147		2200	0.00768898		2790	0.0146442
430.21	-0.00637677		1020.21	-0.00337001		1610.2	0.00288358		2200.2	0.00805284		2790.2	0.01485025
430.41	-0.00554549		1020.41	-0.00317313		1610.4	0.00217027		2200.4	0.00806918		2790.4	0.01491167
430.61	-0.00550976		1020.61	-0.00217988		1610.6	0.00159314		2200.6	0.00820465		2790.6	0.01487579
430.81	-0.00643676		1020.81	-0.00174816		1610.8	0.00113336		2200.8	0.00825594		2790.8	0.01424512
431.01	-0.00651368		1021.01	-0.0020323		1611	0.00167773		2201	0.00822904		2791	0.01415761
431.21	-0.00762824		1021.21	-0.00174082		1611.2	0.00279509		2201.2	0.00770794		2791.2	0.01504269
431.41	-0.00785753		1021.41	-0.00163088		1611.4	0.00299975		2201.4	0.00847165		2791.4	0.01516182
431.61	-0.00836588		1021.61	-0.00182343		1611.6	0.00316462		2201.6	0.00838021		2791.6	0.0144903
431.81	-0.00774036		1021.81	-0.00141405		1611.8	0.00316469		2201.8	0.00920062		2791.8	0.01527012
432.01	-0.00725351		1022.01	-0.00156139		1612	0.00368146		2202	0.00961399		2792	0.01653719
432.21	-0.00701362		1022.21	-0.00170197		1612.2	0.00311921		2202.2	0.01034532		2792.2	0.01692896
432.41	-0.00687012		1022.41	-0.001296		1612.4	0.00259084		2202.4	0.0101677		2792.4	0.01815739
432.61	-0.00676818		1022.61	-0.00156246		1612.6	0.00281595		2202.6	0.01074243		2792.6	0.01864466
432.81	-0.00683791		1022.81	-0.00187215		1612.8	0.00406849		2202.8	0.0102667		2792.8	0.01817035
433.01	-0.0067741		1023.01	-0.00207945		1613	0.00451051		2203	0.0108428		2793	0.01781612
433.21	-0.00726175		1023.21	-0.00265084		1613.2	0.00514403		2203.2	0.01082024		2793.2	0.01707852
433.41	-0.00781196		1023.41	-0.00278277		1613.4	0.00555856		2203.4	0.01113354		2793.4	0.0156695
433.61	-0.00808975		1023.61	-0.00295785		1613.6	0.00504777		2203.6	0.01146179		2793.6	0.01538014
433.81	-0.00898238		1023.81	-0.00296296		1613.8	0.00504423		2203.8	0.01080945		2793.8	0.01491404
434.01	-0.0090261		1024.01	-0.00371706		1614	0.00483228		2204	0.01110103		2794	0.01469548
434.21	-0.0086774		1024.21	-0.00367172		1614.2	0.00433012		2204.2	0.00990596		2794.2	0.01445589
434.41	-0.00943602		1024.41	-0.00363629		1614.4	0.00381943		2204.4	0.00929505		2794.4	0.01448679
434.61	-0.0097013		1024.61	-0.00384425		1614.6	0.0035237		2204.6	0.00917905		2794.6	0.01521611
434.81	-0.01019177		1024.81	-0.00396591		1614.8	0.00409949		2204.8	0.0095667		2794.8	0.01382836
435.01	-0.01064583		1025.01	-0.00455463		1615	0.00429633		2205	0.01003173		2795	0.01386155
435.21	-0.01102105		1025.21	-0.00479186		1615.2	0.00388866		2205.2	0.00990905		2795.2	0.01454257
435.41	-0.0107871		1025.41	-0.00532753		1615.4	0.00331281		2205.4	0.01010461		2795.4	0.01539701
435.61	-0.01097027		1025.61	-0.00520385		1615.6	0.00279804		2205.6	0.00976468		2795.6	0.01479876
435.81	-0.01066377		1025.81	-0.00499536		1615.8	0.00216246		2205.8	0.01062896		2795.8	0.0159738
436.01	-0.01031408		1026.01	-0.00552053		1616	0.00177273		2206	0.0099891		2796	0.01695196
436.21	-0.01024956		1026.21	-0.00582988		1616.2	0.00131888		2206.2	0.01007778		2796.2	0.01739095
436.41	-0.01023302		1026.41	-0.00524347		1616.4	0.001158		2206.4	0.00938912		2796.4	0.01786185
436.61	-0.01022971		1026.61	-0.00576122		1616.6	0.00283288		2206.6	0.00988047		2796.6	0.01747026
436.81	-0.00989375		1026.81	-0.0060884		1616.8	0.00366814		2206.8	0.00944774		2796.8	0.01726124
437.01	-0.00988147		1027.01	-0.00562015		1617	0.00340475		2207	0.00933712		2797	0.0165318
437.21	-0.00959214		1027.21	-0.00562466		1617.2	0.00275527		2207.2	0.00943265		2797.2	0.01517631
437.41	-0.00880051		1027.41	-0.00603395		1617.4	0.00223264		2207.4	0.00983443		2797.4	0.01473693
437.61	-0.00842981		1027.61	-0.00577077		1617.6	0.00202639		2207.6	0.00942512		2797.6	0.01475853
437.81	-0.00819206		1027.81	-0.00597205		1617.8	0.00266572		2207.8	0.00991872		2797.8	0.01474111
438.01	-0.00767908		1028.01	-0.00621539		1618	0.00278729		2208	0.00950551		2798	0.01526042
438.21	-0.0073861		1028.21	-0.00516767		1618.2	0.00213105		2208.2	0.00941385		2798.2	0.01629754
438.41	-0.0076252		1028.41	-0.00452369		1618.4	0.00288328		2208.4	0.00983668		2798.4	0.01694425
438.61	-0.00750754		1028.61	-0.00462466		1618.6	0.0029347		2208.6	0.0100921		2798.6	0.01743362
438.81	-0.00751789		1028.81	-0.00467473		1618.8	0.0034818		2208.8	0.01051161		2798.8	0.01624319
439.01	-0.00737905		1029.01	-0.00520184		1619	0.0032453		2209	0.01079769		2799	0.01654708
439.21	-0.00759664		1029.21	-0.00388733		1619.2	0.00242182		2209.2	0.01114114		2799.2	0.0170909
439.41	-0.00751708		1029.41	-0.00424197		1619.4	0.00194076		2209.4	0.011206		2799.4	0.01725013
439.61	-0.00773913		1029.61	-0.00351425		1619.6	0.00199933		2209.6	0.01108154		2799.6	0.01716134
439.81	-0.00813978		1029.81	-0.00268458		1619.8	0.0012596		2209.8	0.0112391		2799.8	0.01827005
440.01	-0.00798961		1030.01	-0.00209936		1620	0.00047751		2210	0.01068282		2800	0.01856196
440.21	-0.00877355		1030.21	-0.00191517		1620.2	0.00028526		2210.2	0.01081916		2800.2	0.01904942
440.41	-0.00774782		1030.41	-0.00079929		1620.4	0.00064918		2210.4	0.01061901		2800.4	0.01916677
440.61	-0.0074807		1030.61	-0.00101035		1620.6	0.0015493		2210.6	0.01038248		2800.6	0.01915545
440.81	-0.00728157		1030.81	-0.00055193		1620.8	0.00058743		2210.8	0.00938392		2800.8	0.01816765
441.01	-0.00725024		1031.01	-0.00034664		1621	0.00063453		2211	0.00947532		2801	0.01656606
441.21	-0.00680947		1031.21	-0.00042408		1621.2	0.0003889		2211.2	0.0104271		2801.2	0.01567236
441.41	-0.00668166		1031.41	-0.00093795		1621.4	0.00069198		2211.4	0.01062976		2801.4	0.01555382
441.61	-0.00604651		1031.61	-0.00070722		1621.6	0.00206293		2211.6	0.01115864		2801.6	0.0147395
441.81	-0.00638688		1031.81	-0.00099521		1621.8	0.00218873		2211.8	0.01108687		2801.8	0.01468472
442.01	-0.00645283		1032.01	-0.00171765		1622	0.00234428		2212	0.01085271		2802	0.01479066
442.21	-0.00631597		1032.21	-0.00133579		1622.2	0.0028644		2212.2	0.01109893		2802.2	0.014906
442.41	-0.00734033		1032.41	-0.00237118		1622.4	0.00410983		2212.4	0.01060737		2802.4	0.01439169
442.61	-0.00788909		1032.61	-0.00349965		1622.6	0.00322731		2212.6	0.00999513		2802.6	0.01503421
442.81	-0.00820053		1032.81	-0.00444727		1622.8	0.00287992		2212.8	0.01071146		2802.8	0.01517816
443.01	-0.00847288		1033.01	-0.00401201		1623	0.0025055		2213	0.0105662		2803	0.01525109
443.21	-0.00990725		1033.21	-0.00327963		1623.2	0.00196		2213.2	0.00994759		2803.2	0.0156364
443.41	-0.01070001		1033.41	-0.00400534		1623.4	0.00195382		2213.4	0.0090005		2803.4	0.01626022
443.61	-0.01170146		1033.61	-0.0035077		1623.6	0.00231213		2213.6	0.00827699		2803.6	0.01718416
443.81	-0.01269205		1033.81	-0.00317243		1623.8	0.00091499		2213.8	0.00866343		2803.8	0.01751683
444.01	-0.01234485		1034.01	-0.00346995		1624	0.00067042		2214	0.00867401		2804	0.0180326
444.21	-0.01210907		1034.21	-0.00469962		1624.2	0.00111437		2214.2	0.0082953		2804.2	0.01874998
444.41	-0.01087603		1034.41	-0.00537611		1624.4	0.00241117		2214.4	0.00772897		2804.4	0.01858716
444.61	-0.01128081		1034.61	-0.00586467		1624.6	0.0023102		2214.6	0.00708928		2804.6	0.01794762
444.81	-0.01090348		1034.81	-0.00611345		1624.8	0.00246391		2214.8	0.00750931		2804.8	0.01676111
445.01	-0.00995411		1035.01	-0.00564495		1625	0.00299173		2215	0.00819217		2805	0.0168795
445.21	-0.00910566		1035.21	-0.00573072		1625.2	0.00316617		2215.2	0.00869233		2805.2	0.01692446
445.41	-0.00822209		1035.41	-0.00546843		1625.4	0.00337919		2215.4	0.00839795		2805.4	0.01705496
445.61	-0.0077843		1035.61	-0.0052138		1625.6	0.0035709		2215.6	0.0093512		2805.6	0.01655324
445.81	-0.00744037		1035.81	-0.00517617		1625.8	0.00298961		2215.8	0.00983329		2805.8	0.01654327
446.01	-0.00636766		1036.01	-0.00523566		1626	0.002214		2216	0.01088036		2806	0.01642524
446.21	-0.00639681		1036.21	-0.00389173		1626.2	0.00093689		2216.2	0.01116654		2806.2	0.01661079
446.41	-0.00700972		1036.41	-0.00370191		1626.4	0.00014696		2216.4	0.01062482		2806.4	0.01657409
446.61	-0.00709308		1036.61	-0.0031963		1626.6	-0.00150827		2216.6	0.01101922		2806.6	0.01717071
446.81	-0.00789467		1036.81	-0.00360785		1626.8	-0.00126193		2216.8	0.01178425		2806.8	0.01677926
447.01	-0.00847794		1037.01	-0.00280728		1627	-0.00120088		2217	0.0109082		2807	0.01559452
447.21	-0.00885122		1037.21	-0.00288944		1627.2	-0.00127479		2217.2	0.01042313		2807.2	0.01567874
447.41	-0.008664		1037.41	-0.0031222		1627.4	-0.00128646		2217.4	0.01098369		2807.4	0.01535663
447.61	-0.00841351		1037.61	-0.00280029		1627.6	-0.00104848		2217.6	0.01108944		2807.6	0.01492876
447.81	-0.00779025		1037.81	-0.00292265		1627.8	-0.00132137		2217.8	0.01194347		2807.8	0.01477276
448.01	-0.00675784		1038.01	-0.00380098		1628	-0.00086065		2218	0.0120987		2808	0.01495961
448.21	-0.00676461		1038.21	-0.00473448		1628.2	0.00067245		2218.2	0.01142444		2808.2	0.01505146
448.41	-0.00709137		1038.41	-0.00478831		1628.4	0.00119338		2218.4	0.01073437		2808.4	0.01445883
448.61	-0.00696988		1038.61	-0.0045644		1628.6	0.0011217		2218.6	0.01043045		2808.6	0.01392992
448.81	-0.00716943		1038.81	-0.00441801		1628.8	0.00132293		2218.8	0.01099109		2808.8	0.01429105
449.01	-0.00637774		1039.01	-0.00419436		1629	0.00127409		2219	0.01023321		2809	0.01519325
449.21	-0.00602287		1039.21	-0.00475413		1629.2	0.0009109		2219.2	0.0104774		2809.2	0.01536133
449.41	-0.00553111		1039.41	-0.00393418		1629.4	0.00149651		2219.4	0.01146555		2809.4	0.0158714
449.61	-0.00615183		1039.61	-0.00417326		1629.6	0.00144572		2219.6	0.01223243		2809.6	0.01556575
449.81	-0.00559312		1039.81	-0.00400335		1629.8	0.00197852		2219.8	0.01186923		2809.8	0.01629996
450.01	-0.00488475		1040.01	-0.00321469		1630	0.00108452		2220	0.01179637		2810	0.01623578
450.21	-0.00497203		1040.21	-0.00215744		1630.2	0.00115007		2220.2	0.01111329		2810.2	0.0168272
450.41	-0.00557169		1040.41	-0.00272766		1630.4	0.00206614		2220.4	0.01086284		2810.4	0.0172865
450.61	-0.0057765		1040.61	-0.00251751		1630.6	0.00226862		2220.6	0.01054903		2810.6	0.01763004
450.81	-0.0058811		1040.81	-0.00224952		1630.8	0.00272947		2220.8	0.00997507		2810.8	0.01759433
451.01	-0.00571976		1041.01	-0.00216198		1631	0.00253158		2221	0.00950673		2811	0.0179271
451.21	-0.0057256		1041.21	-0.00277658		1631.2	0.00261869		2221.2	0.00912443		2811.2	0.01907873
451.41	-0.00636855		1041.41	-0.00215498		1631.4	0.00225364		2221.4	0.01007198		2811.4	0.0190036
451.61	-0.00647398		1041.61	-0.00169552		1631.6	0.0027596		2221.6	0.00926953		2811.6	0.01870369
451.81	-0.00652165		1041.81	-0.00146565		1631.8	0.00257773		2221.8	0.00999267		2811.8	0.0182266
452.01	-0.00685244		1042.01	-0.00169148		1632	0.00193336		2222	0.00960115		2812	0.01806173
452.21	-0.00830482		1042.21	-0.0016276		1632.2	0.00261303		2222.2	0.00938092		2812.2	0.01720551
452.41	-0.00949451		1042.41	-0.00215854		1632.4	0.00157846		2222.4	0.00916511		2812.4	0.01657743
452.61	-0.00983227		1042.61	-0.00224803		1632.6	0.00149162		2222.6	0.01037385		2812.6	0.01513388
452.81	-0.01019314		1042.81	-0.00272768		1632.8	0.00090962		2222.8	0.01129428		2812.8	0.01502529
453.01	-0.01011803		1043.01	-0.0034529		1633	0.00130546		2223	0.01150142		2813	0.01456023
453.21	-0.01025915		1043.21	-0.00351273		1633.2	0.00094417		2223.2	0.01253081		2813.2	0.01472821
453.41	-0.01074952		1043.41	-0.00381047		1633.4	0.00154512		2223.4	0.01311217		2813.4	0.0145274
453.61	-0.01132267		1043.61	-0.00427814		1633.6	0.00210923		2223.6	0.01316655		2813.6	0.01426949
453.81	-0.0111858		1043.81	-0.00410347		1633.8	0.00267154		2223.8	0.01232396		2813.8	0.01511237
454.01	-0.0105806		1044.01	-0.00356761		1634	0.0024852		2224	0.01263668		2814	0.01457464
454.21	-0.01068625		1044.21	-0.0038031		1634.2	0.0023699		2224.2	0.01178489		2814.2	0.01534838
454.41	-0.01026635		1044.41	-0.00397569		1634.4	0.00258252		2224.4	0.01186069		2814.4	0.01655477
454.61	-0.00963138		1044.61	-0.00344745		1634.6	0.00193937		2224.6	0.01117205		2814.6	0.01809897
454.81	-0.00982478		1044.81	-0.00266513		1634.8	0.00073957		2224.8	0.01150861		2814.8	0.01919653
455.01	-0.00973964		1045.01	-0.00318534		1635	0.00018699		2225	0.01119686		2815	0.01985596
455.21	-0.00950472		1045.21	-0.00265246		1635.2	0.00035729		2225.2	0.00998171		2815.2	0.02071336
455.41	-0.00917891		1045.41	-0.0017309		1635.4	-0.00010979		2225.4	0.00995567		2815.4	0.0205639
455.61	-0.00828456		1045.61	-0.00155231		1635.6	-0.00019378		2225.6	0.00894873		2815.6	0.02046664
455.81	-0.00819003		1045.81	-0.00137709		1635.8	-0.00099179		2225.8	0.00875878		2815.8	0.02075537
456.01	-0.00840733		1046.01	-0.00211037		1636	-0.00081716		2226	0.00826456		2816	0.0204702
456.21	-0.00835367		1046.21	-0.00253553		1636.2	-0.00054572		2226.2	0.00847648		2816.2	0.01970964
456.41	-0.00835604		1046.41	-0.00264171		1636.4	-0.00082933		2226.4	0.00816409		2816.4	0.01969562
456.61	-0.00853637		1046.61	-0.00267196		1636.6	0.00026795		2226.6	0.00892679		2816.6	0.01802976
456.81	-0.00804109		1046.81	-0.00280762		1636.8	-0.0000753		2226.8	0.00852593		2816.8	0.01753453
457.01	-0.00860455		1047.01	-0.00303917		1637	0.00018232		2227	0.00803961		2817	0.01655978
457.21	-0.00871359		1047.21	-0.00306238		1637.2	0.00042111		2227.2	0.00779923		2817.2	0.01652127
457.41	-0.00941904		1047.41	-0.00377881		1637.4	0.00122415		2227.4	0.00826396		2817.4	0.01573584
457.61	-0.00942542		1047.61	-0.00357527		1637.6	0.00189342		2227.6	0.00897825		2817.6	0.01560034
457.81	-0.00978403		1047.81	-0.00311794		1637.8	0.00268533		2227.8	0.00913828		2817.8	0.01497386
458.01	-0.00967322		1048.01	-0.00341739		1638	0.00230436		2228	0.00987498		2818	0.01428981
458.21	-0.00964157		1048.21	-0.00412743		1638.2	0.00267219		2228.2	0.01013075		2818.2	0.01475062
458.41	-0.0095333		1048.41	-0.00437649		1638.4	0.00275052		2228.4	0.01122433		2818.4	0.01531793
458.61	-0.00947483		1048.61	-0.00482348		1638.6	0.00227074		2228.6	0.01241457		2818.6	0.01590856
458.81	-0.01013076		1048.81	-0.00466822		1638.8	0.00190155		2228.8	0.01259781		2818.8	0.01601691
459.01	-0.01014221		1049.01	-0.00506029		1639	0.00155488		2229	0.01244001		2819	0.0174735
459.21	-0.00950411		1049.21	-0.00450861		1639.2	0.0023312		2229.2	0.01273269		2819.2	0.01746625
459.41	-0.01003822		1049.41	-0.0047635		1639.4	0.00174623		2229.4	0.01277466		2819.4	0.01794626
459.61	-0.01002987		1049.61	-0.0049159		1639.6	0.00175205		2229.6	0.01272144		2819.6	0.01848487
459.81	-0.00985727		1049.81	-0.00544777		1639.8	0.00232731		2229.8	0.01236087		2819.8	0.01869577
460.01	-0.01015944		1050.01	-0.00622099		1640	0.0029384		2230	0.01268738		2820	0.01878411
460.21	-0.00914761		1050.21	-0.00584734		1640.2	0.00288662		2230.2	0.0117775		2820.2	0.01880366
460.41	-0.00955817		1050.41	-0.00555678		1640.4	0.00367779		2230.4	0.0114917		2820.4	0.01910342
460.61	-0.00927885		1050.61	-0.00562534		1640.6	0.00395497		2230.6	0.01162977		2820.6	0.01851994
460.81	-0.00907285		1050.81	-0.00559963		1640.8	0.00332025		2230.8	0.01064313		2820.8	0.01893005
461.01	-0.00878673		1051.01	-0.00560042		1641	0.00313161		2231	0.01032055		2821	0.0190359
461.21	-0.00827282		1051.21	-0.00604678		1641.2	0.00367861		2231.2	0.01139399		2821.2	0.01944815
461.41	-0.00851758		1051.41	-0.00665422		1641.4	0.00322015		2231.4	0.01213184		2821.4	0.01877475
461.61	-0.00847882		1051.61	-0.00628969		1641.6	0.0031459		2231.6	0.01198595		2821.6	0.01813938
461.81	-0.00858993		1051.81	-0.00625812		1641.8	0.00333437		2231.8	0.01191093		2821.8	0.01742578
462.01	-0.00795877		1052.01	-0.00693169		1642	0.00269476		2232	0.01093934		2822	0.0169432
462.21	-0.0075957		1052.21	-0.00721663		1642.2	0.00295727		2232.2	0.01081405		2822.2	0.01646039
462.41	-0.00716516		1052.41	-0.00716454		1642.4	0.00195209		2232.4	0.01065784		2822.4	0.01606929
462.61	-0.00697309		1052.61	-0.00679359		1642.6	0.00122532		2232.6	0.01024144		2822.6	0.01524367
462.81	-0.00716859		1052.81	-0.00568145		1642.8	0.00084465		2232.8	0.00963625		2822.8	0.01562746
463.01	-0.00761654		1053.01	-0.00507053		1643	0.00037395		2233	0.00989885		2823	0.01522712
463.21	-0.00792589		1053.21	-0.00509486		1643.2	0.0008233		2233.2	0.00926588		2823.2	0.01388164
463.41	-0.00859728		1053.41	-0.00543952		1643.4	0.00006713		2233.4	0.00894856		2823.4	0.01418429
463.61	-0.00825774		1053.61	-0.00532844		1643.6	0.00025735		2233.6	0.00951366		2823.6	0.01390425
463.81	-0.00839111		1053.81	-0.00514081		1643.8	0.00065293		2233.8	0.00959801		2823.8	0.01311269
464.01	-0.00882774		1054.01	-0.0054688		1644	0.00073871		2234	0.00977524		2824	0.01281726
464.21	-0.00787533		1054.21	-0.00463121		1644.2	0.00084235		2234.2	0.00935825		2824.2	0.01310806
464.41	-0.00813158		1054.41	-0.00409416		1644.4	0.00081679		2234.4	0.01043324		2824.4	0.01352781
464.61	-0.00764434		1054.61	-0.00433557		1644.6	0.00017753		2234.6	0.01081234		2824.6	0.01358536
464.81	-0.00790396		1054.81	-0.00422792		1644.8	0.00090907		2234.8	0.0103869		2824.8	0.01346028
465.01	-0.00780301		1055.01	-0.0036546		1645	0.00051733		2235	0.01083502		2825	0.01314838
465.21	-0.00837639		1055.21	-0.00420622		1645.2	0.00083334		2235.2	0.01222568		2825.2	0.01374102
465.41	-0.00845169		1055.41	-0.00428444		1645.4	0.00043291		2235.4	0.01211341		2825.4	0.01337148
465.61	-0.00875066		1055.61	-0.00371081		1645.6	0.00033202		2235.6	0.01138103		2825.6	0.01452605
465.81	-0.00896913		1055.81	-0.00371022		1645.8	-0.00042329		2235.8	0.01144228		2825.8	0.01503534
466.01	-0.0085824		1056.01	-0.00327434		1646	-0.00073899		2236	0.01092042		2826	0.01500316
466.21	-0.0092567		1056.21	-0.00314746		1646.2	-0.00123471		2236.2	0.0112001		2826.2	0.01543721
466.41	-0.00997481		1056.41	-0.00291284		1646.4	-0.00172254		2236.4	0.01069321		2826.4	0.01532388
466.61	-0.01074402		1056.61	-0.00286679		1646.6	-0.00190319		2236.6	0.00941807		2826.6	0.01437171
466.81	-0.01064247		1056.81	-0.00250977		1646.8	-0.0021764		2236.8	0.00940643		2826.8	0.01525873
467.01	-0.01162621		1057.01	-0.00320981		1647	-0.00299328		2237	0.00923081		2827	0.01501204
467.21	-0.01086903		1057.21	-0.00410632		1647.2	-0.00316521		2237.2	0.00929489		2827.2	0.01534293
467.41	-0.01064792		1057.41	-0.00432803		1647.4	-0.00374317		2237.4	0.01021358		2827.4	0.01531601
467.61	-0.01010779		1057.61	-0.00534466		1647.6	-0.00327204		2237.6	0.01060545		2827.6	0.01464078
467.81	-0.00989618		1057.81	-0.00557964		1647.8	-0.00334505		2237.8	0.01058929		2827.8	0.01405706
468.01	-0.00922881		1058.01	-0.00611018		1648	-0.00344756		2238	0.01055549		2828	0.0141055
468.21	-0.00821511		1058.21	-0.00584406		1648.2	-0.003182		2238.2	0.0104042		2828.2	0.01427272
468.41	-0.00755174		1058.41	-0.00589802		1648.4	-0.0028936		2238.4	0.01050373		2828.4	0.01341934
468.61	-0.006803		1058.61	-0.00657718		1648.6	-0.00209048		2238.6	0.00986563		2828.6	0.01305734
468.81	-0.00669793		1058.81	-0.00659706		1648.8	-0.00081881		2238.8	0.00904584		2828.8	0.01279024
469.01	-0.00626549		1059.01	-0.00701861		1649	-0.00066661		2239	0.00870101		2829	0.01297418
469.21	-0.00550595		1059.21	-0.00776976		1649.2	0.00027144		2239.2	0.00882594		2829.2	0.01341688
469.41	-0.00479095		1059.41	-0.00798348		1649.4	0.00098459		2239.4	0.00801419		2829.4	0.01324632
469.61	-0.00473723		1059.61	-0.0078232		1649.6	0.00165482		2239.6	0.00726978		2829.6	0.01384993
469.81	-0.00474135		1059.81	-0.00793129		1649.8	0.00235304		2239.8	0.00716341		2829.8	0.01350727
470.01	-0.00474135		1060.01	-0.00793129		1650	0.00235304		2240	0.00716341		2830	0.01350727
470.21	-0.00571836		1060.21	-0.00801068		1650.2	0.00199263		2240.2	0.00745968		2830.2	0.01279105
470.41	-0.00692856		1060.41	-0.0089049		1650.4	0.00158247		2240.4	0.00740726		2830.4	0.01150267
470.61	-0.00839681		1060.61	-0.00985478		1650.6	0.00117499		2240.6	0.00745209		2830.6	0.01048988
470.81	-0.00985039		1060.81	-0.01079138		1650.8	-0.00022134		2240.8	0.00669462		2830.8	0.00923024
471.01	-0.01049906		1061.01	-0.01190342		1651	-0.00037478		2241	0.00692786		2831	0.00827443
471.21	-0.01175563		1061.21	-0.01298495		1651.2	-0.00104984		2241.2	0.00665641		2831.2	0.00721758
471.41	-0.01267633		1061.41	-0.01373768		1651.4	-0.00128989		2241.4	0.00646133		2831.4	0.00609767
471.61	-0.0123156		1061.61	-0.01484795		1651.6	-0.00154662		2241.6	0.00573225		2831.6	0.00439483
471.81	-0.01260644		1061.81	-0.01587982		1651.8	-0.00190732		2241.8	0.00555651		2831.8	0.00273531
472.01	-0.01214615		1062.01	-0.01674598		1652	-0.00213358		2242	0.00521723		2832	0.00254864
472.21	-0.01221643		1062.21	-0.01759747		1652.2	-0.00184538		2242.2	0.00437559		2832.2	0.00218474
472.41	-0.01241903		1062.41	-0.01789627		1652.4	-0.00141333		2242.4	0.00447277		2832.4	0.00189539
472.61	-0.01229552		1062.61	-0.01814031		1652.6	-0.00165059		2242.6	0.00437171		2832.6	0.0010135
472.81	-0.01188501		1062.81	-0.0184058		1652.8	-0.00177423		2242.8	0.00439165		2832.8	0.00060857
473.01	-0.01203473		1063.01	-0.01900828		1653	-0.00209189		2243	0.00447341		2833	0.00031606
473.21	-0.01239068		1063.21	-0.01942191		1653.2	-0.00300355		2243.2	0.00421952		2833.2	-0.00012468
473.41	-0.0126858		1063.41	-0.0196573		1653.4	-0.00261438		2243.4	0.00454793		2833.4	0.00014888
473.61	-0.01279017		1063.61	-0.02024537		1653.6	-0.00211294		2243.6	0.00418488		2833.6	0.00020988
473.81	-0.01196966		1063.81	-0.02032268		1653.8	-0.00184964		2243.8	0.00394098		2833.8	0.00004506
474.01	-0.0118023		1064.01	-0.0196799		1654	-0.00215728		2244	0.00378532		2834	-0.00013513
474.21	-0.01206551		1064.21	-0.01901311		1654.2	-0.00202381		2244.2	0.00395343		2834.2	-0.00065089
474.41	-0.01291368		1064.41	-0.01927481		1654.4	-0.00211544		2244.4	0.00361515		2834.4	-0.00026464
474.61	-0.01372469		1064.61	-0.01968123		1654.6	-0.00186752		2244.6	0.00375434		2834.6	0.00016462
474.81	-0.01386945		1064.81	-0.01926039		1654.8	-0.00164295		2244.8	0.00341266		2834.8	0.00086883
475.01	-0.01406943		1065.01	-0.01967039		1655	-0.00078846		2245	0.0038044		2835	0.00130586
475.21	-0.01404931		1065.21	-0.01949568		1655.2	-0.00042876		2245.2	0.00360414		2835.2	0.00101714
475.41	-0.01384448		1065.41	-0.0193559		1655.4	0.00015107		2245.4	0.00308203		2835.4	0.00039079
475.61	-0.0132926		1065.61	-0.01946618		1655.6	0.00015262		2245.6	0.0026916		2835.6	-0.00015674
475.81	-0.01426079		1065.81	-0.01939759		1655.8	0.00031653		2245.8	0.00261885		2835.8	0.00012333
476.01	-0.01433199		1066.01	-0.01865943		1656	0.00046389		2246	0.00272297		2836	0.00070999
476.21	-0.01525356		1066.21	-0.01825161		1656.2	0.0006446		2246.2	0.00319065		2836.2	0.00012322
476.41	-0.01488816		1066.41	-0.01860204		1656.4	0.00004472		2246.4	0.00373699		2836.4	-0.00043645
476.61	-0.01494409		1066.61	-0.01789983		1656.6	-0.00093567		2246.6	0.00402607		2836.6	-0.000393
476.81	-0.01397165		1066.81	-0.01785766		1656.8	-0.00145723		2246.8	0.00434019		2836.8	-0.00030609
477.01	-0.01378303		1067.01	-0.01856718		1657	-0.00224049		2247	0.00423156		2837	-0.00127951
477.21	-0.01428486		1067.21	-0.01948232		1657.2	-0.00195972		2247.2	0.00453462		2837.2	-0.00148002
477.41	-0.01315812		1067.41	-0.0195714		1657.4	-0.00207482		2247.4	0.0048776		2837.4	-0.00175688
477.61	-0.0135257		1067.61	-0.01946434		1657.6	-0.0019213		2247.6	0.00498756		2837.6	-0.00256794
477.81	-0.01328797		1067.81	-0.01872081		1657.8	-0.00195071		2247.8	0.00486362		2837.8	-0.00260308
478.01	-0.01352656		1068.01	-0.01802937		1658	-0.00109843		2248	0.0058241		2838	-0.00337619
478.21	-0.01397231		1068.21	-0.01816684		1658.2	-0.00114377		2248.2	0.00619578		2838.2	-0.00364894
478.41	-0.01309866		1068.41	-0.01846456		1658.4	-0.00087373		2248.4	0.00625399		2838.4	-0.00306647
478.61	-0.01229071		1068.61	-0.01907195		1658.6	0.00037006		2248.6	0.00631622		2838.6	-0.0032837
478.81	-0.01149093		1068.81	-0.0191572		1658.8	0.00051767		2248.8	0.0058679		2838.8	-0.00280413
479.01	-0.01138985		1069.01	-0.02001524		1659	0.0002585		2249	0.00552875		2839	-0.00278231
479.21	-0.01089616		1069.21	-0.01911979		1659.2	0.00060191		2249.2	0.00509896		2839.2	-0.0031351
479.41	-0.01053423		1069.41	-0.01847416		1659.4	0.00039061		2249.4	0.00442636		2839.4	-0.00297639
479.61	-0.01063834		1069.61	-0.01776813		1659.6	0.00069385		2249.6	0.00448464		2839.6	-0.00258492
479.81	-0.01162236		1069.81	-0.01672456		1659.8	0.00058066		2249.8	0.00400832		2839.8	-0.00272385
480.01	-0.01155725		1070.01	-0.01569055		1660	-0.00013657		2250	0.00472074		2840	-0.00233835
480.21	-0.01205938		1070.21	-0.01592265		1660.2	-0.00046218		2250.2	0.00442364		2840.2	-0.00153046
480.41	-0.012032		1070.41	-0.01569117		1660.4	-0.00118253		2250.4	0.00417224		2840.4	-0.0005979
480.61	-0.01235398		1070.61	-0.01510315		1660.6	-0.00089607		2250.6	0.00384469		2840.6	-0.00004551
480.81	-0.01206607		1070.81	-0.01429321		1660.8	-0.00115469		2250.8	0.00393241		2840.8	0.00000091
481.01	-0.01318299		1071.01	-0.0146538		1661	-0.00075137		2251	0.00310699		2841	-0.00005925
481.21	-0.01359116		1071.21	-0.01454548		1661.2	-0.00049681		2251.2	0.00349496		2841.2	0.00049849
481.41	-0.01296222		1071.41	-0.01432559		1661.4	-0.00040545		2251.4	0.00324856		2841.4	0.0004373
481.61	-0.01376021		1071.61	-0.01377022		1661.6	0.00054602		2251.6	0.00365485		2841.6	0.00010838
481.81	-0.01277342		1071.81	-0.01390304		1661.8	0.00055634		2251.8	0.00424166		2841.8	0.00025853
482.01	-0.0125332		1072.01	-0.01401022		1662	0.00097899		2252	0.00537754		2842	-0.00053389
482.21	-0.01147732		1072.21	-0.0145504		1662.2	0.00044398		2252.2	0.00510261		2842.2	-0.00100148
482.41	-0.01106594		1072.41	-0.01544303		1662.4	0.0006214		2252.4	0.00573059		2842.4	-0.0021631
482.61	-0.01125552		1072.61	-0.01617463		1662.6	0.00113528		2252.6	0.00528583		2842.6	-0.00239303
482.81	-0.01134685		1072.81	-0.0166069		1662.8	0.00062139		2252.8	0.00510101		2842.8	-0.0019921
483.01	-0.01180367		1073.01	-0.01646315		1663	0.00095184		2253	0.00544205		2843	-0.00238681
483.21	-0.01126268		1073.21	-0.01571651		1663.2	0.00073728		2253.2	0.00469779		2843.2	-0.00329935
483.41	-0.01089791		1073.41	-0.0165763		1663.4	0.00134401		2253.4	0.00515234		2843.4	-0.00277143
483.61	-0.01201478		1073.61	-0.01662102		1663.6	0.00199288		2253.6	0.00469843		2843.6	-0.0026156
483.81	-0.01233645		1073.81	-0.01589016		1663.8	0.00150417		2253.8	0.00371084		2843.8	-0.00286606
484.01	-0.01169913		1074.01	-0.01653932		1664	0.00159382		2254	0.00414144		2844	-0.00180427
484.21	-0.01145952		1074.21	-0.01677075		1664.2	0.00115453		2254.2	0.00407565		2844.2	-0.00130226
484.41	-0.01259793		1074.41	-0.01640313		1664.4	0.00101671		2254.4	0.00367861		2844.4	-0.00062581
484.61	-0.01300783		1074.61	-0.01622197		1664.6	0.00125318		2254.6	0.00321723		2844.6	-0.00059756
484.81	-0.01341146		1074.81	-0.01543315		1664.8	0.0010726		2254.8	0.00342476		2844.8	-0.00009108
485.01	-0.0140698		1075.01	-0.01602331		1665	0.00082277		2255	0.00349666		2845	0.000508
485.21	-0.0138315		1075.21	-0.016043		1665.2	0.00029382		2255.2	0.0040366		2845.2	0.0010308
485.41	-0.01351927		1075.41	-0.01587716		1665.4	0.00032766		2255.4	0.00460885		2845.4	0.00107016
485.61	-0.01349419		1075.61	-0.01488179		1665.6	0.00011021		2255.6	0.0049849		2845.6	0.000899
485.81	-0.01246652		1075.81	-0.01479144		1665.8	-0.00053754		2255.8	0.00570636		2845.8	0.00099954
486.01	-0.01321087		1076.01	-0.01466617		1666	-0.00093606		2256	0.00624168		2846	0.00051425
486.21	-0.01387661		1076.21	-0.01513189		1666.2	-0.00123937		2256.2	0.00688649		2846.2	-0.00010618
486.41	-0.01477502		1076.41	-0.01510993		1666.4	-0.00133662		2256.4	0.00708478		2846.4	-0.000136
486.61	-0.01457822		1076.61	-0.01468979		1666.6	-0.00158726		2256.6	0.00639396		2846.6	0.00011263
486.81	-0.01448694		1076.81	-0.0145869		1666.8	-0.00161944		2256.8	0.0070203		2846.8	-0.00073062
487.01	-0.01456539		1077.01	-0.01436215		1667	-0.00140943		2257	0.00742067		2847	-0.00134084
487.21	-0.01339256		1077.21	-0.01418868		1667.2	-0.00126217		2257.2	0.00650064		2847.2	-0.00163533
487.41	-0.01324683		1077.41	-0.01418662		1667.4	-0.00044435		2257.4	0.00609327		2847.4	-0.00131916
487.61	-0.01269425		1077.61	-0.01407959		1667.6	-0.00076458		2257.6	0.00511559		2847.6	-0.00127834
487.81	-0.01149898		1077.81	-0.01357671		1667.8	-0.00090222		2257.8	0.00453596		2847.8	-0.00188587
488.01	-0.01088853		1078.01	-0.01400486		1668	-0.00224424		2258	0.00519181		2848	-0.00195883
488.21	-0.01057004		1078.21	-0.01301116		1668.2	-0.00286599		2258.2	0.00465699		2848.2	-0.00239386
488.41	-0.0107705		1078.41	-0.01285712		1668.4	-0.00298329		2258.4	0.00410517		2848.4	-0.00216549
488.61	-0.0100399		1078.61	-0.01245949		1668.6	-0.0024759		2258.6	0.0040415		2848.6	-0.00199244
488.81	-0.01067739		1078.81	-0.01331505		1668.8	-0.00199219		2258.8	0.004205		2848.8	-0.00188336
489.01	-0.01026922		1079.01	-0.01354166		1669	-0.00212675		2259	0.00425789		2849	-0.00200395
489.21	-0.0110129		1079.21	-0.0132235		1669.2	-0.00191324		2259.2	0.00507206		2849.2	-0.00257369
489.41	-0.01071196		1079.41	-0.01360201		1669.4	-0.00146361		2259.4	0.0064468		2849.4	-0.002503
489.61	-0.01056754		1079.61	-0.01396944		1669.6	-0.00109133		2259.6	0.00684929		2849.6	-0.00180727
489.81	-0.01025467		1079.81	-0.01489948		1669.8	-0.00126057		2259.8	0.00753455		2849.8	-0.00120334
490.01	-0.01125047		1080.01	-0.01514588		1670	-0.00120931		2260	0.00796847		2850	-0.00084599
490.21	-0.01165404		1080.21	-0.01539715		1670.2	-0.00076372		2260.2	0.00777534		2850.2	-0.00028756
490.41	-0.01149902		1080.41	-0.01565334		1670.4	-0.00032725		2260.4	0.007828		2850.4	-0.00016657
490.61	-0.01142696		1080.61	-0.01610364		1670.6	-0.00040329		2260.6	0.00774829		2850.6	-0.00066101
490.81	-0.01146249		1080.81	-0.01577042		1670.8	0.00054806		2260.8	0.00853954		2850.8	-0.00038025
491.01	-0.01065303		1081.01	-0.01618641		1671	0.0003854		2261	0.00857434		2851	0.00047232
491.21	-0.0099104		1081.21	-0.01617294		1671.2	0.00004191		2261.2	0.00787704		2851.2	0.00035078
491.41	-0.00941809		1081.41	-0.01680968		1671.4	0.00051426		2261.4	0.00753976		2851.4	-0.00005348
491.61	-0.0096204		1081.61	-0.01774744		1671.6	-0.00120449		2261.6	0.00727827		2851.6	0.00025736
491.81	-0.01021178		1081.81	-0.01678904		1671.8	-0.00069521		2261.8	0.00729871		2851.8	-0.00066565
492.01	-0.01043214		1082.01	-0.01627181		1672	-0.00204815		2262	0.0073444		2852	-0.00092833
492.21	-0.01074025		1082.21	-0.01542505		1672.2	-0.00173222		2262.2	0.0069093		2852.2	-0.00086648
492.41	-0.01117498		1082.41	-0.01516773		1672.4	-0.00143124		2262.4	0.0074892		2852.4	-0.00045841
492.61	-0.0122745		1082.61	-0.0148964		1672.6	-0.00044659		2262.6	0.008253		2852.6	-0.00079019
492.81	-0.0129011		1082.81	-0.01531736		1672.8	-0.00051598		2262.8	0.00851875		2852.8	-0.00136038
493.01	-0.01279325		1083.01	-0.0146139		1673	-0.0007514		2263	0.0092102		2853	-0.00201379
493.21	-0.01418068		1083.21	-0.01448358		1673.2	-0.00003686		2263.2	0.00886853		2853.2	-0.0032405
493.41	-0.01371618		1083.41	-0.01428119		1673.4	-0.00009972		2263.4	0.00929459		2853.4	-0.00278808
493.61	-0.01329529		1083.61	-0.01479001		1673.6	0.00013231		2263.6	0.00833212		2853.6	-0.00315542
493.81	-0.01287798		1083.81	-0.01452521		1673.8	-0.00007845		2263.8	0.00780371		2853.8	-0.00374145
494.01	-0.0132384		1084.01	-0.01405889		1674	-0.00060988		2264	0.00743734		2854	-0.00449633
494.21	-0.01356133		1084.21	-0.01472235		1674.2	-0.00105259		2264.2	0.00682252		2854.2	-0.00453008
494.41	-0.01350996		1084.41	-0.01477888		1674.4	-0.00129844		2264.4	0.00700034		2854.4	-0.00501102
494.61	-0.01302658		1084.61	-0.01558906		1674.6	-0.00195854		2264.6	0.00591339		2854.6	-0.00474191
494.81	-0.01274617		1084.81	-0.01603946		1674.8	-0.00243737		2264.8	0.00668703		2854.8	-0.00354143
495.01	-0.01192208		1085.01	-0.01735163		1675	-0.00294124		2265	0.00610683		2855	-0.00331605
495.21	-0.01240361		1085.21	-0.01770556		1675.2	-0.00236297		2265.2	0.00596592		2855.2	-0.00354189
495.41	-0.01246953		1085.41	-0.01875422		1675.4	-0.00205468		2265.4	0.00568271		2855.4	-0.00327609
495.61	-0.01304586		1085.61	-0.01903805		1675.6	-0.00237198		2265.6	0.0047405		2855.6	-0.00201022
495.81	-0.01400289		1085.81	-0.01923075		1675.8	-0.00137409		2265.8	0.00465953		2855.8	-0.0026288
496.01	-0.01381045		1086.01	-0.01834011		1676	-0.00081508		2266	0.00443021		2856	-0.00150776
496.21	-0.01454777		1086.21	-0.01806893		1676.2	-0.00067881		2266.2	0.00438566		2856.2	-0.00090696
496.41	-0.0153126		1086.41	-0.01762982		1676.4	0.00080514		2266.4	0.0046761		2856.4	-0.00006687
496.61	-0.01585904		1086.61	-0.01829481		1676.6	0.00131973		2266.6	0.00446224		2856.6	0.00019836
496.81	-0.01545676		1086.81	-0.01808273		1676.8	0.00214159		2266.8	0.00318466		2856.8	0.00116295
497.01	-0.01543055		1087.01	-0.01798118		1677	0.0026323		2267	0.00301838		2857	0.00058472
497.21	-0.01626789		1087.21	-0.01764318		1677.2	0.00381487		2267.2	0.00169569		2857.2	0.00012434
497.41	-0.01623306		1087.41	-0.01729463		1677.4	0.00424907		2267.4	0.00274766		2857.4	0.00015147
497.61	-0.01565434		1087.61	-0.01755454		1677.6	0.0040001		2267.6	0.00231037		2857.6	-0.00043098
497.81	-0.01591615		1087.81	-0.0171466		1677.8	0.00348008		2267.8	0.00282624		2857.8	-0.00089628
498.01	-0.01637031		1088.01	-0.01704632		1678	0.00283052		2268	0.00273336		2858	-0.00149903
498.21	-0.01651496		1088.21	-0.01675645		1678.2	0.00215586		2268.2	0.00297508		2858.2	-0.00178895
498.41	-0.01588248		1088.41	-0.01668652		1678.4	0.00167293		2268.4	0.00330728		2858.4	-0.0024934
498.61	-0.01469392		1088.61	-0.01741859		1678.6	0.00051133		2268.6	0.00329415		2858.6	-0.0029008
498.81	-0.01452357		1088.81	-0.01703307		1678.8	0.00035094		2268.8	0.00462244		2858.8	-0.00251436
499.01	-0.01449128		1089.01	-0.01716652		1679	0.000667		2269	0.00375332		2859	-0.00286924
499.21	-0.01417112		1089.21	-0.01729227		1679.2	0.00018797		2269.2	0.00437966		2859.2	-0.00272679
499.41	-0.01390531		1089.41	-0.01774578		1679.4	-0.00080693		2269.4	0.00429102		2859.4	-0.00251632
499.61	-0.01280722		1089.61	-0.0179489		1679.6	-0.00122185		2269.6	0.00365174		2859.6	-0.00193684
499.81	-0.01303482		1089.81	-0.01844555		1679.8	-0.00253185		2269.8	0.00380796		2859.8	-0.00275964
500.01	-0.01222543		1090.01	-0.01794528		1680	-0.00202681		2270	0.00390471		2860	-0.0020578
500.21	-0.01222738		1090.21	-0.01917201		1680.2	-0.00274734		2270.2	0.00388003		2860.2	-0.00190394
500.41	-0.01238648		1090.41	-0.01955052		1680.4	-0.00215635		2270.4	0.00431075		2860.4	-0.00143133
500.61	-0.01250495		1090.61	-0.0197726		1680.6	-0.00190994		2270.6	0.00450059		2860.6	-0.00126083
500.81	-0.01179744		1090.81	-0.01922125		1680.8	-0.00223927		2270.8	0.00441491		2860.8	-0.00089344
501.01	-0.01157851		1091.01	-0.01928397		1681	-0.0020735		2271	0.00485591		2861	-0.00093064
501.21	-0.01234905		1091.21	-0.0186237		1681.2	-0.00169845		2271.2	0.00498681		2861.2	-0.00079866
501.41	-0.01158874		1091.41	-0.01827583		1681.4	-0.00126866		2271.4	0.00628306		2861.4	-0.00081721
501.61	-0.01199231		1091.61	-0.016938		1681.6	-0.00142072		2271.6	0.00588869		2861.6	-0.00120013
501.81	-0.01221813		1091.81	-0.01703737		1681.8	-0.00129966		2271.8	0.0061722		2861.8	-0.00115828
502.01	-0.01193161		1092.01	-0.01712081		1682	-0.00049068		2272	0.00636833		2862	-0.00129313
502.21	-0.01210172		1092.21	-0.01680981		1682.2	-0.00090522		2272.2	0.00654104		2862.2	-0.00135929
502.41	-0.01215269		1092.41	-0.01747428		1682.4	-0.00108166		2272.4	0.00705782		2862.4	-0.00205897
502.61	-0.01213804		1092.61	-0.01698211		1682.6	-0.00057389		2272.6	0.00703674		2862.6	-0.00220416
502.81	-0.01269342		1092.81	-0.0167571		1682.8	0.00035422		2272.8	0.00772685		2862.8	-0.00168696
503.01	-0.01311028		1093.01	-0.01708768		1683	0.00015377		2273	0.00705397		2863	-0.00195396
503.21	-0.01259395		1093.21	-0.01742927		1683.2	-0.00039087		2273.2	0.00730908		2863.2	-0.00097672
503.41	-0.01248681		1093.41	-0.01744999		1683.4	-0.00004325		2273.4	0.00715477		2863.4	-0.00058891
503.61	-0.01225892		1093.61	-0.0181323		1683.6	-0.00048675		2273.6	0.00660016		2863.6	0.00030028
503.81	-0.01297423		1093.81	-0.01851973		1683.8	-0.00047193		2273.8	0.00669263		2863.8	0.00020293
504.01	-0.01282866		1094.01	-0.01883551		1684	0.00046027		2274	0.00653029		2864	0.00026453
504.21	-0.01352071		1094.21	-0.01857328		1684.2	0.00080178		2274.2	0.00705588		2864.2	0.00080826
504.41	-0.01426663		1094.41	-0.01816906		1684.4	0.00039353		2274.4	0.00700972		2864.4	0.0007485
504.61	-0.01438136		1094.61	-0.01715026		1684.6	-0.00049446		2274.6	0.00690781		2864.6	0.00091216
504.81	-0.01449466		1094.81	-0.01707659		1684.8	-0.00129028		2274.8	0.00564523		2864.8	0.00125118
505.01	-0.01482249		1095.01	-0.01675806		1685	-0.00106072		2275	0.00631628		2865	0.0012555
505.21	-0.01519261		1095.21	-0.01621811		1685.2	-0.00094613		2275.2	0.00587557		2865.2	0.00055768
505.41	-0.01409515		1095.41	-0.01549493		1685.4	0.00007288		2275.4	0.00645309		2865.4	0.00055144
505.61	-0.0153808		1095.61	-0.01452964		1685.6	0.00051524		2275.6	0.00588572		2865.6	0.00033242
505.81	-0.01499733		1095.81	-0.01527153		1685.8	0.00023461		2275.8	0.00577914		2865.8	0.00000183
506.01	-0.01468122		1096.01	-0.01543386		1686	0.00025987		2276	0.0053919		2866	-0.00003013
506.21	-0.01434997		1096.21	-0.01506569		1686.2	-0.00005874		2276.2	0.00526429		2866.2	-0.00052475
506.41	-0.0144259		1096.41	-0.01507661		1686.4	-0.00019639		2276.4	0.00576937		2866.4	-0.00126441
506.61	-0.01429979		1096.61	-0.01512079		1686.6	0.00055274		2276.6	0.00559697		2866.6	-0.0015913
506.81	-0.01399625		1096.81	-0.01647045		1686.8	0.00047864		2276.8	0.00650284		2866.8	-0.00276484
507.01	-0.0138142		1097.01	-0.01600956		1687	0.00071631		2277	0.00638172		2867	-0.00334016
507.21	-0.01340865		1097.21	-0.0161928		1687.2	0.0007202		2277.2	0.00564681		2867.2	-0.00294878
507.41	-0.01366204		1097.41	-0.01607174		1687.4	0.00080487		2277.4	0.00589427		2867.4	-0.00365276
507.61	-0.01387599		1097.61	-0.01602862		1687.6	-0.00026453		2277.6	0.00564318		2867.6	-0.00406512
507.81	-0.01349052		1097.81	-0.01594913		1687.8	-0.00058604		2277.8	0.00588197		2867.8	-0.00454172
508.01	-0.0133534		1098.01	-0.01646055		1688	-0.00084825		2278	0.0057647		2868	-0.00486181
508.21	-0.01394218		1098.21	-0.0159138		1688.2	-0.00097918		2278.2	0.00637491		2868.2	-0.0046228
508.41	-0.01370423		1098.41	-0.0163804		1688.4	-0.00248895		2278.4	0.00570023		2868.4	-0.00486042
508.61	-0.01384405		1098.61	-0.01676207		1688.6	-0.00320149		2278.6	0.00582858		2868.6	-0.00458014
508.81	-0.01380608		1098.81	-0.0170219		1688.8	-0.00279416		2278.8	0.00503849		2868.8	-0.00415761
509.01	-0.0141317		1099.01	-0.01680358		1689	-0.00246941		2279	0.00561306		2869	-0.00397507
509.21	-0.01329439		1099.21	-0.01717085		1689.2	-0.00211457		2279.2	0.00493833		2869.2	-0.00403737
509.41	-0.01274575		1099.41	-0.01677278		1689.4	-0.00275769		2279.4	0.0045811		2869.4	-0.00339296
509.61	-0.01333425		1099.61	-0.0164517		1689.6	-0.00346384		2279.6	0.00438964		2869.6	-0.00349617
509.81	-0.01291245		1099.81	-0.01651308		1689.8	-0.00445748		2279.8	0.00407095		2869.8	-0.0032066
510.01	-0.01258845		1100.01	-0.01656415		1690	-0.00468989		2280	0.00406406		2870	-0.0020176
510.21	-0.01250835		1100.21	-0.01652891		1690.2	-0.00424437		2280.2	0.00390591		2870.2	-0.002385
510.41	-0.01324003		1100.41	-0.01732821		1690.4	-0.00431159		2280.4	0.00410787		2870.4	-0.00213954
510.61	-0.01413398		1100.61	-0.01828006		1690.6	-0.00379228		2280.6	0.00461479		2870.6	-0.00254752
510.81	-0.01422852		1100.81	-0.01839946		1690.8	-0.00372841		2280.8	0.00547542		2870.8	-0.00281999
511.01	-0.01467478		1101.01	-0.01791126		1691	-0.00369446		2281	0.00523864		2871	-0.00219973
511.21	-0.01455035		1101.21	-0.01777984		1691.2	-0.00482233		2281.2	0.00457202		2871.2	-0.00291109
511.41	-0.01464488		1101.41	-0.01812788		1691.4	-0.00470931		2281.4	0.00560951		2871.4	-0.00391721
511.61	-0.01393884		1101.61	-0.01902342		1691.6	-0.00396886		2281.6	0.00515054		2871.6	-0.00419251
511.81	-0.0131131		1101.81	-0.01959098		1691.8	-0.00319353		2281.8	0.00537779		2871.8	-0.00427336
512.01	-0.0131507		1102.01	-0.01978144		1692	-0.00206866		2282	0.00530418		2872	-0.00359717
512.21	-0.01301053		1102.21	-0.01901984		1692.2	-0.00125557		2282.2	0.0057532		2872.2	-0.00331449
512.41	-0.01225435		1102.41	-0.01863915		1692.4	-0.00142119		2282.4	0.00534313		2872.4	-0.00338984
512.61	-0.01220833		1102.61	-0.01811793		1692.6	-0.00074931		2282.6	0.00542376		2872.6	-0.00261484
512.81	-0.01176049		1102.81	-0.01714993		1692.8	-0.00034865		2282.8	0.00491661		2872.8	-0.00243351
513.01	-0.01144105		1103.01	-0.01689265		1693	0.00004422		2283	0.0049301		2873	-0.0024407
513.21	-0.01046328		1103.21	-0.0170383		1693.2	0.00005562		2283.2	0.00405327		2873.2	-0.00322568
513.41	-0.01068418		1103.41	-0.01570878		1693.4	-0.00001205		2283.4	0.00349036		2873.4	-0.00316978
513.61	-0.01073478		1103.61	-0.01539017		1693.6	-0.00021598		2283.6	0.00401769		2873.6	-0.00304143
513.81	-0.01063389		1103.81	-0.01578838		1693.8	-0.00045856		2283.8	0.00301136		2873.8	-0.00206336
514.01	-0.01119597		1104.01	-0.01569696		1694	0.0001927		2284	0.00313677		2874	-0.00229611
514.21	-0.01171933		1104.21	-0.01564965		1694.2	0.00020464		2284.2	0.00277306		2874.2	-0.00240841
514.41	-0.01253602		1104.41	-0.01648101		1694.4	-0.00065958		2284.4	0.00349912		2874.4	-0.00238496
514.61	-0.01380267		1104.61	-0.01655771		1694.6	-0.00112259		2284.6	0.00381312		2874.6	-0.00235165
514.81	-0.01386366		1104.81	-0.01676018		1694.8	-0.00135907		2284.8	0.00417379		2874.8	-0.00174
515.01	-0.01427618		1105.01	-0.01780079		1695	-0.0019522		2285	0.00461951		2875	-0.00134284
515.21	-0.01389227		1105.21	-0.01788469		1695.2	-0.00265821		2285.2	0.00456697		2875.2	-0.00090771
515.41	-0.01429787		1105.41	-0.01994001		1695.4	-0.00203643		2285.4	0.00426871		2875.4	-0.00013279
515.61	-0.01418748		1105.61	-0.02022047		1695.6	-0.00182048		2285.6	0.0036926		2875.6	0.00039223
515.81	-0.01395872		1105.81	-0.0195108		1695.8	-0.00188207		2285.8	0.0042963		2875.8	0.00079196
516.01	-0.01366341		1106.01	-0.01960599		1696	-0.0011735		2286	0.00464306		2876	0.00203454
516.21	-0.01373097		1106.21	-0.01929481		1696.2	-0.00165447		2286.2	0.00475845		2876.2	0.00140011
516.41	-0.01354936		1106.41	-0.01838832		1696.4	-0.00154794		2286.4	0.00449556		2876.4	0.00085181
516.61	-0.01351548		1106.61	-0.01764286		1696.6	-0.00108641		2286.6	0.0048189		2876.6	0.00079559
516.81	-0.0136113		1106.81	-0.01718053		1696.8	-0.00073748		2286.8	0.00398575		2876.8	-0.00015439
517.01	-0.01282448		1107.01	-0.01727843		1697	0.00045068		2287	0.00348113		2877	-0.00064346
517.21	-0.0124483		1107.21	-0.01690616		1697.2	0.00137628		2287.2	0.00305446		2877.2	-0.00131571
517.41	-0.012693		1107.41	-0.01612278		1697.4	0.00178326		2287.4	0.00254543		2877.4	-0.00160227
517.61	-0.01247053		1107.61	-0.01682224		1697.6	0.00115557		2287.6	0.00292843		2877.6	-0.00154278
517.81	-0.01288268		1107.81	-0.01701839		1697.8	0.00105797		2287.8	0.00252037		2877.8	-0.00245274
518.01	-0.01355077		1108.01	-0.01685411		1698	0.0010296		2288	0.00317951		2878	-0.003715
518.21	-0.01405053		1108.21	-0.01673566		1698.2	0.00145068		2288.2	0.00316602		2878.2	-0.00393484
518.41	-0.0138485		1108.41	-0.01701375		1698.4	0.00068166		2288.4	0.00359044		2878.4	-0.00427884
518.61	-0.01386916		1108.61	-0.01696474		1698.6	0.00112357		2288.6	0.00341576		2878.6	-0.00380382
518.81	-0.01334366		1108.81	-0.01752535		1698.8	0.00161307		2288.8	0.0034497		2878.8	-0.00355211
519.01	-0.01331985		1109.01	-0.01766078		1699	0.00164548		2289	0.00313272		2879	-0.00233858
519.21	-0.01322191		1109.21	-0.01788117		1699.2	0.0010376		2289.2	0.00199801		2879.2	-0.00106342
519.41	-0.01339444		1109.41	-0.01798059		1699.4	0.00161952		2289.4	0.00175199		2879.4	-0.00110079
519.61	-0.01301716		1109.61	-0.01760385		1699.6	0.00133679		2289.6	0.00236474		2879.6	-0.00140986
519.81	-0.01272316		1109.81	-0.01852348		1699.8	0.00153035		2289.8	0.00319371		2879.8	-0.00132945
520.01	-0.01230987		1110.01	-0.01922806		1700	0.00188714		2290	0.00381431		2880	-0.00145229
520.21	-0.01275956		1110.21	-0.01860132		1700.2	0.00104025		2290.2	0.00354107		2880.2	-0.00252564
520.41	-0.01252479		1110.41	-0.01823092		1700.4	0.00104871		2290.4	0.00322976		2880.4	-0.00292577
520.61	-0.01220363		1110.61	-0.01826521		1700.6	0.00066517		2290.6	0.00368892		2880.6	-0.00270279
520.81	-0.01213352		1110.81	-0.01809008		1700.8	0.00048576		2290.8	0.00279202		2880.8	-0.00299906
521.01	-0.01178082		1111.01	-0.01838073		1701	0.00090463		2291	0.00377979		2881	-0.00362016
521.21	-0.0121514		1111.21	-0.01763294		1701.2	0.0011086		2291.2	0.00443345		2881.2	-0.00394027
521.41	-0.0137752		1111.41	-0.01772207		1701.4	0.00104968		2291.4	0.00347407		2881.4	-0.00434762
521.61	-0.01386673		1111.61	-0.01796561		1701.6	0.00058665		2291.6	0.00430263		2881.6	-0.00430452
521.81	-0.01414643		1111.81	-0.01778807		1701.8	-0.00008975		2291.8	0.00368266		2881.8	-0.00507847
522.01	-0.01467183		1112.01	-0.01828081		1702	-0.00067098		2292	0.0042717		2882	-0.00482516
522.21	-0.01497861		1112.21	-0.01802989		1702.2	0.00012929		2292.2	0.00411412		2882.2	-0.00466569
522.41	-0.01508904		1112.41	-0.01864253		1702.4	-0.00075718		2292.4	0.00417585		2882.4	-0.0051203
522.61	-0.01531133		1112.61	-0.01828418		1702.6	0.00017654		2292.6	0.00381375		2882.6	-0.00515837
522.81	-0.01511118		1112.81	-0.01820035		1702.8	0.00005663		2292.8	0.00306241		2882.8	-0.00491506
523.01	-0.01536367		1113.01	-0.01780381		1703	-0.00001182		2293	0.00189629		2883	-0.0042145
523.21	-0.0154027		1113.21	-0.01795477		1703.2	-0.00049165		2293.2	0.00179016		2883.2	-0.00478273
523.41	-0.01528518		1113.41	-0.01767251		1703.4	-0.00053651		2293.4	0.00232565		2883.4	-0.00463086
523.61	-0.01495455		1113.61	-0.01738248		1703.6	-0.00079536		2293.6	0.00315484		2883.6	-0.00497224
523.81	-0.01507891		1113.81	-0.01742925		1703.8	-0.00078386		2293.8	0.00363672		2883.8	-0.00466319
524.01	-0.01477719		1114.01	-0.01706138		1704	-0.00102185		2294	0.00386969		2884	-0.00459258
524.21	-0.01390101		1114.21	-0.01672518		1704.2	-0.00186315		2294.2	0.0033068		2884.2	-0.00359989
524.41	-0.01259635		1114.41	-0.01678582		1704.4	-0.00240038		2294.4	0.00342149		2884.4	-0.00313665
524.61	-0.0118514		1114.61	-0.01640261		1704.6	-0.00259724		2294.6	0.00424693		2884.6	-0.00273279
524.81	-0.01111321		1114.81	-0.0161302		1704.8	-0.00233953		2294.8	0.00441398		2884.8	-0.00308162
525.01	-0.01123131		1115.01	-0.01642799		1705	-0.00232952		2295	0.00489892		2885	-0.00313049
525.21	-0.01212702		1115.21	-0.01644652		1705.2	-0.0016996		2295.2	0.00470248		2885.2	-0.00220097
525.41	-0.01226997		1115.41	-0.01676574		1705.4	-0.00194277		2295.4	0.00416579		2885.4	-0.00164901
525.61	-0.01175852		1115.61	-0.01712454		1705.6	-0.00181855		2295.6	0.00508349		2885.6	-0.00161329
525.81	-0.01162321		1115.81	-0.01771147		1705.8	-0.00191468		2295.8	0.00494522		2885.8	-0.00172576
526.01	-0.01213268		1116.01	-0.01813868		1706	-0.00209507		2296	0.00591243		2886	-0.00260396
526.21	-0.0129967		1116.21	-0.0184057		1706.2	-0.00091955		2296.2	0.00626574		2886.2	-0.0038982
526.41	-0.01452915		1116.41	-0.01849918		1706.4	-0.00074723		2296.4	0.00715975		2886.4	-0.00513279
526.61	-0.01502227		1116.61	-0.01856745		1706.6	-0.00002698		2296.6	0.0074773		2886.6	-0.00461633
526.81	-0.01522261		1116.81	-0.01844017		1706.8	0.00012314		2296.8	0.0067904		2886.8	-0.00452572
527.01	-0.01533827		1117.01	-0.01877426		1707	0.00006463		2297	0.00673704		2887	-0.00529667
527.21	-0.01561186		1117.21	-0.01858909		1707.2	-0.00062876		2297.2	0.00643311		2887.2	-0.00549809
527.41	-0.01560218		1117.41	-0.01774527		1707.4	-0.00060648		2297.4	0.00666784		2887.4	-0.0056487
527.61	-0.01537759		1117.61	-0.01749065		1707.6	-0.00012578		2297.6	0.00649051		2887.6	-0.00611079
527.81	-0.01569645		1117.81	-0.01790743		1707.8	-0.00043257		2297.8	0.00625953		2887.8	-0.005018
528.01	-0.01543782		1118.01	-0.01783047		1708	-0.00013741		2298	0.00601195		2888	-0.0047485
528.21	-0.01468501		1118.21	-0.01794739		1708.2	0.00038778		2298.2	0.00585015		2888.2	-0.00336923
528.41	-0.01414156		1118.41	-0.01731089		1708.4	0.00074386		2298.4	0.00580232		2888.4	-0.00318023
528.61	-0.01411293		1118.61	-0.0175928		1708.6	0.00051855		2298.6	0.00640036		2888.6	-0.0020547
528.81	-0.01375106		1118.81	-0.01821631		1708.8	0.00015452		2298.8	0.00614575		2888.8	-0.00257272
529.01	-0.01478246		1119.01	-0.01821203		1709	-0.0000795		2299	0.00538505		2889	-0.00191941
529.21	-0.01473205		1119.21	-0.01782652		1709.2	0.00049861		2299.2	0.00521674		2889.2	-0.00129732
529.41	-0.01318757		1119.41	-0.01804489		1709.4	-0.00005641		2299.4	0.00482551		2889.4	-0.00129846
529.61	-0.01256602		1119.61	-0.01881925		1709.6	0.00036724		2299.6	0.00543917		2889.6	-0.00237997
529.81	-0.01243173		1119.81	-0.01852981		1709.8	0.0000759		2299.8	0.00485713		2889.8	-0.0029321
530.01	-0.01311907		1120.01	-0.01877117		1710	-0.00039809		2300	0.00443309		2890	-0.00352819
530.21	-0.0142371		1120.21	-0.01960514		1710.2	-0.00013358		2300.2	0.00491002		2890.2	-0.00394019
530.41	-0.01487119		1120.41	-0.02015058		1710.4	-0.00014172		2300.4	0.00465776		2890.4	-0.00365456
530.61	-0.0147916		1120.61	-0.02110206		1710.6	0.00004861		2300.6	0.00426454		2890.6	-0.00312313
530.81	-0.01385555		1120.81	-0.02093625		1710.8	0.00017371		2300.8	0.00398096		2890.8	-0.00404341
531.01	-0.01380789		1121.01	-0.02111461		1711	-0.00104737		2301	0.00425231		2891	-0.00518933
531.21	-0.0135764		1121.21	-0.02057852		1711.2	-0.00111511		2301.2	0.00444864		2891.2	-0.00567891
531.41	-0.01327648		1121.41	-0.02056752		1711.4	-0.00099262		2301.4	0.00520003		2891.4	-0.00668917
531.61	-0.01273288		1121.61	-0.02047848		1711.6	-0.00067516		2301.6	0.0052747		2891.6	-0.00699742
531.81	-0.01289543		1121.81	-0.01965539		1711.8	-0.00067716		2301.8	0.00547056		2891.8	-0.00726167
532.01	-0.01322307		1122.01	-0.01895767		1712	0.00000441		2302	0.00559562		2892	-0.00792637
532.21	-0.01309944		1122.21	-0.01962855		1712.2	-0.00005098		2302.2	0.00651964		2892.2	-0.00757789
532.41	-0.01291824		1122.41	-0.01904901		1712.4	-0.00096289		2302.4	0.00654269		2892.4	-0.0076891
532.61	-0.01300824		1122.61	-0.01908877		1712.6	-0.00103585		2302.6	0.00697516		2892.6	-0.00726646
532.81	-0.01344888		1122.81	-0.01869924		1712.8	-0.00102267		2302.8	0.00630823		2892.8	-0.00845313
533.01	-0.01410343		1123.01	-0.0172966		1713	-0.00091086		2303	0.00643824		2893	-0.00684065
533.21	-0.01220418		1123.21	-0.01686426		1713.2	-0.00137207		2303.2	0.00584599		2893.2	-0.00648034
533.41	-0.01230524		1123.41	-0.01723231		1713.4	-0.00209595		2303.4	0.0060415		2893.4	-0.00626759
533.61	-0.01239794		1123.61	-0.0177779		1713.6	-0.00230734		2303.6	0.00596452		2893.6	-0.00610563
533.81	-0.01333986		1123.81	-0.01720491		1713.8	-0.002713		2303.8	0.00528953		2893.8	-0.00515831
534.01	-0.0136733		1124.01	-0.01744988		1714	-0.00245266		2304	0.00479793		2894	-0.00454083
534.21	-0.01442286		1124.21	-0.01752078		1714.2	-0.00228543		2304.2	0.00501177		2894.2	-0.00398059
534.41	-0.01367161		1124.41	-0.01749384		1714.4	-0.00190264		2304.4	0.00410618		2894.4	-0.00363262
534.61	-0.01384471		1124.61	-0.01749606		1714.6	-0.00143806		2304.6	0.00390493		2894.6	-0.00355332
534.81	-0.0135197		1124.81	-0.01685257		1714.8	-0.00104278		2304.8	0.00425177		2894.8	-0.00371538
535.01	-0.01315009		1125.01	-0.01597311		1715	-0.00117236		2305	0.00446264		2895	-0.00398197
535.21	-0.01179073		1125.21	-0.01626026		1715.2	-0.00095768		2305.2	0.00410642		2895.2	-0.00410599
535.41	-0.01202071		1125.41	-0.01692667		1715.4	-0.00141618		2305.4	0.0033158		2895.4	-0.00472984
535.61	-0.01164961		1125.61	-0.01702914		1715.6	-0.00164047		2305.6	0.00277761		2895.6	-0.00519861
535.81	-0.01241494		1125.81	-0.01751166		1715.8	-0.00164149		2305.8	0.00321814		2895.8	-0.00495207
536.01	-0.01300718		1126.01	-0.01822065		1716	-0.00167244		2306	0.00357171		2896	-0.00454428
536.21	-0.01250397		1126.21	-0.0195256		1716.2	-0.00229576		2306.2	0.00391424		2896.2	-0.00425372
536.41	-0.01238752		1126.41	-0.01911216		1716.4	-0.00202676		2306.4	0.0036325		2896.4	-0.00433533
536.61	-0.01321595		1126.61	-0.01935163		1716.6	-0.00158027		2306.6	0.00412628		2896.6	-0.00420539
536.81	-0.01382784		1126.81	-0.01912107		1716.8	-0.00217771		2306.8	0.00371864		2896.8	-0.00436571
537.01	-0.01415315		1127.01	-0.01936731		1717	-0.00253055		2307	0.00395208		2897	-0.00353397
537.21	-0.01356788		1127.21	-0.01881034		1717.2	-0.00305409		2307.2	0.00376565		2897.2	-0.0036887
537.41	-0.01516225		1127.41	-0.01893886		1717.4	-0.0024562		2307.4	0.00411091		2897.4	-0.0030714
537.61	-0.01461433		1127.61	-0.01990853		1717.6	-0.00224531		2307.6	0.00393808		2897.6	-0.00263909
537.81	-0.01540346		1127.81	-0.01915425		1717.8	-0.00127434		2307.8	0.00440968		2897.8	-0.00234192
538.01	-0.01612037		1128.01	-0.01926241		1718	-0.00035931		2308	0.00389698		2898	-0.00276999
538.21	-0.01607346		1128.21	-0.01896395		1718.2	-0.0007716		2308.2	0.00369241		2898.2	-0.00289679
538.41	-0.01538694		1128.41	-0.01839697		1718.4	-0.00027401		2308.4	0.00395629		2898.4	-0.00315609
538.61	-0.01631671		1128.61	-0.01770475		1718.6	0.00000134		2308.6	0.00403564		2898.6	-0.00347711
538.81	-0.01561141		1128.81	-0.01733839		1718.8	0.00025114		2308.8	0.00376848		2898.8	-0.00435047
539.01	-0.01495116		1129.01	-0.01734815		1719	0.00037802		2309	0.00353605		2899	-0.0042672
539.21	-0.01500355		1129.21	-0.01865088		1719.2	0.0001414		2309.2	0.00313206		2899.2	-0.00474452
539.41	-0.01566822		1129.41	-0.01903108		1719.4	0.000616		2309.4	0.00356797		2899.4	-0.00455056
539.61	-0.0156874		1129.61	-0.01887213		1719.6	0.00074354		2309.6	0.00341176		2899.6	-0.00455206
539.81	-0.01563058		1129.81	-0.01851398		1719.8	0.0015151		2309.8	0.00389313		2899.8	-0.00387261
540.01	-0.01535157		1130.01	-0.01831633		1720	0.00181256		2310	0.00326111		2900	-0.00373781
540.21	-0.01447599		1130.21	-0.01788397		1720.2	0.00156595		2310.2	0.003025		2900.2	-0.00355982
540.41	-0.01391257		1130.41	-0.01708035		1720.4	0.00182825		2310.4	0.00204549		2900.4	-0.00375536
540.61	-0.01383322		1130.61	-0.01693864		1720.6	0.00149156		2310.6	0.00157246		2900.6	-0.00306848
540.81	-0.01421665		1130.81	-0.01616007		1720.8	0.00094359		2310.8	0.00070151		2900.8	-0.00284814
541.01	-0.01431825		1131.01	-0.01626013		1721	0.00044171		2311	0.00034448		2901	-0.00256487
541.21	-0.01390733		1131.21	-0.01483123		1721.2	0.00063886		2311.2	0.00043077		2901.2	-0.00256756
541.41	-0.01424181		1131.41	-0.01534959		1721.4	0.0003081		2311.4	0.00017528		2901.4	-0.0020349
541.61	-0.01371729		1131.61	-0.01621196		1721.6	-0.00005282		2311.6	0.00052826		2901.6	-0.00198446
541.81	-0.0141691		1131.81	-0.01556849		1721.8	-0.00018951		2311.8	0.00091985		2901.8	-0.00269962
542.01	-0.0149429		1132.01	-0.01520618		1722	-0.00139128		2312	0.0015288		2902	-0.00414437
542.21	-0.01506656		1132.21	-0.01432762		1722.2	-0.00320031		2312.2	0.00146531		2902.2	-0.00466357
542.41	-0.01569203		1132.41	-0.01457307		1722.4	-0.00302028		2312.4	0.00336355		2902.4	-0.00507419
542.61	-0.01657101		1132.61	-0.01507489		1722.6	-0.00402591		2312.6	0.0036391		2902.6	-0.00617644
542.81	-0.0164614		1132.81	-0.01590281		1722.8	-0.00419979		2312.8	0.00370976		2902.8	-0.00694432
543.01	-0.01701671		1133.01	-0.01654133		1723	-0.00453861		2313	0.0045515		2903	-0.00698108
543.21	-0.01719521		1133.21	-0.01774571		1723.2	-0.00424017		2313.2	0.00549655		2903.2	-0.00690433
543.41	-0.01695887		1133.41	-0.01875537		1723.4	-0.00324643		2313.4	0.00632451		2903.4	-0.00634287
543.61	-0.01686602		1133.61	-0.0190442		1723.6	-0.00263657		2313.6	0.00585714		2903.6	-0.00637504
543.81	-0.01637911		1133.81	-0.01983214		1723.8	-0.00233754		2313.8	0.00623821		2903.8	-0.00535997
544.01	-0.01588145		1134.01	-0.01957585		1724	-0.00208143		2314	0.00645502		2904	-0.00429601
544.21	-0.01480696		1134.21	-0.01948339		1724.2	-0.00195642		2314.2	0.00632343		2904.2	-0.00406693
544.41	-0.01378843		1134.41	-0.0200763		1724.4	-0.00126639		2314.4	0.00576948		2904.4	-0.00368597
544.61	-0.01407498		1134.61	-0.02013937		1724.6	-0.0015998		2314.6	0.0057203		2904.6	-0.00309076
544.81	-0.01503762		1134.81	-0.02024341		1724.8	-0.00086381		2314.8	0.00526227		2904.8	-0.00349068
545.01	-0.01476613		1135.01	-0.02088325		1725	-0.00009247		2315	0.00502554		2905	-0.00347703
545.21	-0.01513304		1135.21	-0.02069558		1725.2	-0.00018545		2315.2	0.00470934		2905.2	-0.00330497
545.41	-0.01588933		1135.41	-0.02099409		1725.4	-0.00039113		2315.4	0.00388195		2905.4	-0.00340829
545.61	-0.01641329		1135.61	-0.02187462		1725.6	-0.0000682		2315.6	0.00360117		2905.6	-0.00347991
545.81	-0.01722303		1135.81	-0.02109724		1725.8	0.00006886		2315.8	0.003221		2905.8	-0.00402969
546.01	-0.01842518		1136.01	-0.02079604		1726	-0.00033504		2316	0.00322373		2906	-0.00436368
546.21	-0.01958509		1136.21	-0.02049445		1726.2	-0.00031716		2316.2	0.00255704		2906.2	-0.00482319
546.41	-0.02032277		1136.41	-0.02052569		1726.4	-0.00018973		2316.4	0.00326264		2906.4	-0.00513433
546.61	-0.02040621		1136.61	-0.02000851		1726.6	-0.00090095		2316.6	0.00228173		2906.6	-0.00506196
546.81	-0.02014945		1136.81	-0.01992798		1726.8	-0.00091258		2316.8	0.00241295		2906.8	-0.00528923
547.01	-0.02029159		1137.01	-0.01982994		1727	-0.00134916		2317	0.00290537		2907	-0.00535422
547.21	-0.01984524		1137.21	-0.01958249		1727.2	-0.00059599		2317.2	0.00232745		2907.2	-0.00413908
547.41	-0.01927103		1137.41	-0.01988595		1727.4	-0.00024033		2317.4	0.00233567		2907.4	-0.00378595
547.61	-0.01945058		1137.61	-0.01937469		1727.6	-0.00094477		2317.6	0.00251135		2907.6	-0.00443128
547.81	-0.01848665		1137.81	-0.01863961		1727.8	-0.00172667		2317.8	0.00321638		2907.8	-0.00382031
548.01	-0.0180319		1138.01	-0.01767817		1728	-0.00170358		2318	0.00421084		2908	-0.0034599
548.21	-0.01742171		1138.21	-0.01774122		1728.2	-0.00190885		2318.2	0.00369358		2908.2	-0.00419019
548.41	-0.01715817		1138.41	-0.01831364		1728.4	-0.00162428		2318.4	0.00370291		2908.4	-0.00318094
548.61	-0.01706972		1138.61	-0.01832882		1728.6	-0.00155527		2318.6	0.00409762		2908.6	-0.00427084
548.81	-0.01688472		1138.81	-0.01886371		1728.8	-0.00130871		2318.8	0.00423527		2908.8	-0.00473381
549.01	-0.01710884		1139.01	-0.0198022		1729	-0.00197777		2319	0.00436015		2909	-0.0046473
549.21	-0.01772707		1139.21	-0.02047389		1729.2	-0.00295609		2319.2	0.00439601		2909.2	-0.00444631
549.41	-0.01708279		1139.41	-0.02084133		1729.4	-0.00314995		2319.4	0.00423619		2909.4	-0.00549593
549.61	-0.01673194		1139.61	-0.02122764		1729.6	-0.0026063		2319.6	0.00498778		2909.6	-0.00503089
549.81	-0.01666893		1139.81	-0.02114129		1729.8	-0.00269788		2319.8	0.00497298		2909.8	-0.00577263
550.01	-0.0163009		1140.01	-0.02158363		1730	-0.00286502		2320	0.0056062		2910	-0.00538749
550.21	-0.01587085		1140.21	-0.02129534		1730.2	-0.00261979		2320.2	0.00581586		2910.2	-0.00574964
550.41	-0.01468176		1140.41	-0.02162184		1730.4	-0.0028645		2320.4	0.00560971		2910.4	-0.00569774
550.61	-0.01368054		1140.61	-0.02231503		1730.6	-0.00308507		2320.6	0.00573978		2910.6	-0.00577762
550.81	-0.0140791		1140.81	-0.02228453		1730.8	-0.00333074		2320.8	0.00617818		2910.8	-0.00627753
551.01	-0.0146163		1141.01	-0.02159642		1731	-0.00298035		2321	0.00537257		2911	-0.0065666
551.21	-0.01391216		1141.21	-0.02124506		1731.2	-0.00224571		2321.2	0.00457905		2911.2	-0.0063873
551.41	-0.01384809		1141.41	-0.02112028		1731.4	-0.00235899		2321.4	0.00455972		2911.4	-0.00747545
551.61	-0.01417976		1141.61	-0.0202158		1731.6	-0.00294321		2321.6	0.00448373		2911.6	-0.00758801
551.81	-0.01382745		1141.81	-0.01928419		1731.8	-0.00273858		2321.8	0.00420723		2911.8	-0.00632651
552.01	-0.01482418		1142.01	-0.01883982		1732	-0.00268783		2322	0.00433349		2912	-0.00611101
552.21	-0.01496243		1142.21	-0.01937673		1732.2	-0.00225637		2322.2	0.00299504		2912.2	-0.00565166
552.41	-0.01519786		1142.41	-0.01924853		1732.4	-0.00152996		2322.4	0.00334931		2912.4	-0.00488434
552.61	-0.01496872		1142.61	-0.01874715		1732.6	-0.00116961		2322.6	0.00432342		2912.6	-0.00559137
552.81	-0.01498044		1142.81	-0.01942613		1732.8	-0.00168419		2322.8	0.00399905		2912.8	-0.00504075
553.01	-0.015807		1143.01	-0.01984531		1733	-0.00138956		2323	0.00364975		2913	-0.0049849
553.21	-0.01536915		1143.21	-0.01968618		1733.2	-0.00174961		2323.2	0.00335653		2913.2	-0.00464086
553.41	-0.01525178		1143.41	-0.01938698		1733.4	-0.00154622		2323.4	0.00274371		2913.4	-0.0048673
553.61	-0.01532071		1143.61	-0.01974308		1733.6	-0.00066982		2323.6	0.00354213		2913.6	-0.00407948
553.81	-0.01512816		1143.81	-0.02070876		1733.8	-0.00105158		2323.8	0.00327313		2913.8	-0.00439307
554.01	-0.0148635		1144.01	-0.02137168		1734	-0.00060528		2324	0.00462822		2914	-0.0038602
554.21	-0.01479655		1144.21	-0.02213607		1734.2	-0.00016332		2324.2	0.00445158		2914.2	-0.00469122
554.41	-0.01466828		1144.41	-0.02254039		1734.4	0.00000787		2324.4	0.00425836		2914.4	-0.00509187
554.61	-0.01521247		1144.61	-0.02260411		1734.6	0.0002137		2324.6	0.00463033		2914.6	-0.00557657
554.81	-0.01596713		1144.81	-0.02235732		1734.8	0.00082326		2324.8	0.00478591		2914.8	-0.00629142
555.01	-0.01581183		1145.01	-0.02220357		1735	0.00105202		2325	0.00438931		2915	-0.00673877
555.21	-0.01509938		1145.21	-0.02233231		1735.2	0.00066428		2325.2	0.00433753		2915.2	-0.00731285
555.41	-0.01592726		1145.41	-0.02145307		1735.4	0.00046841		2325.4	0.00399192		2915.4	-0.00729701
555.61	-0.01664188		1145.61	-0.02116942		1735.6	0.0004288		2325.6	0.00499473		2915.6	-0.00643794
555.81	-0.01748855		1145.81	-0.02091895		1735.8	0.00018618		2325.8	0.00527031		2915.8	-0.0067168
556.01	-0.01791584		1146.01	-0.02063578		1736	0.00031998		2326	0.00567459		2916	-0.0071575
556.21	-0.01801999		1146.21	-0.02019042		1736.2	0.00107745		2326.2	0.00559146		2916.2	-0.00613123
556.41	-0.01722663		1146.41	-0.01949416		1736.4	0.00074928		2326.4	0.00605248		2916.4	-0.00568447
556.61	-0.01690574		1146.61	-0.01945391		1736.6	0.00050682		2326.6	0.00686431		2916.6	-0.00563402
556.81	-0.01726715		1146.81	-0.01990955		1736.8	-0.00022055		2326.8	0.00592623		2916.8	-0.00551945
557.01	-0.01810898		1147.01	-0.01973526		1737	-0.00122794		2327	0.0052598		2917	-0.00473424
557.21	-0.01741223		1147.21	-0.01950629		1737.2	-0.00193566		2327.2	0.00481591		2917.2	-0.00361867
557.41	-0.01743816		1147.41	-0.01979283		1737.4	-0.00210106		2327.4	0.0047599		2917.4	-0.0028662
557.61	-0.01723208		1147.61	-0.02099894		1737.6	-0.00193953		2327.6	0.00433243		2917.6	-0.00321814
557.81	-0.01707717		1147.81	-0.02153689		1737.8	-0.00258757		2327.8	0.00408112		2917.8	-0.00346042
558.01	-0.01694377		1148.01	-0.02117813		1738	-0.00316555		2328	0.00456927		2918	-0.00348672
558.21	-0.0165338		1148.21	-0.02111077		1738.2	-0.00333172		2328.2	0.00404787		2918.2	-0.00295546
558.41	-0.01575362		1148.41	-0.02087396		1738.4	-0.00405639		2328.4	0.00411047		2918.4	-0.00294615
558.61	-0.01498661		1148.61	-0.02102212		1738.6	-0.00428644		2328.6	0.00460107		2918.6	-0.00291852
558.81	-0.01407427		1148.81	-0.0211448		1738.8	-0.00411747		2328.8	0.00414892		2918.8	-0.00343142
559.01	-0.01342753		1149.01	-0.02027909		1739	-0.00558245		2329	0.00406328		2919	-0.00402064
559.21	-0.01295925		1149.21	-0.01982668		1739.2	-0.00547542		2329.2	0.00360704		2919.2	-0.00469325
559.41	-0.01373296		1149.41	-0.01922184		1739.4	-0.00490927		2329.4	0.00375031		2919.4	-0.00519312
559.61	-0.01334333		1149.61	-0.01899894		1739.6	-0.00539696		2329.6	0.00449496		2919.6	-0.00538838
559.81	-0.01246163		1149.81	-0.01729421		1739.8	-0.00511474		2329.8	0.00401817		2919.8	-0.00599909
560.01	-0.01256918		1150.01	-0.01670306		1740	-0.00482201		2330	0.00426932		2920	-0.00611525
560.21	-0.0119977		1150.21	-0.01556031		1740.2	-0.00434213		2330.2	0.00454855		2920.2	-0.00548267
560.41	-0.01089801		1150.41	-0.01593136		1740.4	-0.00448189		2330.4	0.0051263		2920.4	-0.00617768
560.61	-0.01143204		1150.61	-0.01615658		1740.6	-0.00455214		2330.6	0.00549729		2920.6	-0.00626409
560.81	-0.01166257		1150.81	-0.0169387		1740.8	-0.0053279		2330.8	0.00501138		2920.8	-0.00591786
561.01	-0.01108137		1151.01	-0.01781591		1741	-0.00521555		2331	0.00507213		2921	-0.00554912
561.21	-0.01093811		1151.21	-0.01880806		1741.2	-0.00445333		2331.2	0.0047845		2921.2	-0.0050631
561.41	-0.01159256		1151.41	-0.01983398		1741.4	-0.00404061		2331.4	0.00500107		2921.4	-0.00481447
561.61	-0.01212219		1151.61	-0.01984466		1741.6	-0.00357847		2331.6	0.00422111		2921.6	-0.00445632
561.81	-0.01204374		1151.81	-0.02013218		1741.8	-0.00475708		2331.8	0.00449126		2921.8	-0.00366232
562.01	-0.01253772		1152.01	-0.02014755		1742	-0.00508804		2332	0.00474392		2922	-0.00308525
562.21	-0.0133746		1152.21	-0.02118493		1742.2	-0.00544426		2332.2	0.00478124		2922.2	-0.002924
562.41	-0.0139701		1152.41	-0.02211267		1742.4	-0.00570111		2332.4	0.00468081		2922.4	-0.00311414
562.61	-0.01429417		1152.61	-0.0221694		1742.6	-0.00496998		2332.6	0.00493626		2922.6	-0.00290641
562.81	-0.01522931		1152.81	-0.02213698		1742.8	-0.00433195		2332.8	0.00419424		2922.8	-0.00341141
563.01	-0.01680963		1153.01	-0.02141795		1743	-0.00423782		2333	0.00436144		2923	-0.0039018
563.21	-0.01780141		1153.21	-0.02175741		1743.2	-0.00297548		2333.2	0.00403269		2923.2	-0.00374095
563.41	-0.01926726		1153.41	-0.02130534		1743.4	-0.00283337		2333.4	0.00401103		2923.4	-0.00323949
563.61	-0.01931395		1153.61	-0.02062395		1743.6	-0.00315331		2333.6	0.00337297		2923.6	-0.00275387
563.81	-0.02000408		1153.81	-0.01943782		1743.8	-0.00199797		2333.8	0.00283053		2923.8	-0.00343312
564.01	-0.02107618		1154.01	-0.01907337		1744	-0.00131946		2334	0.00278705		2924	-0.00327982
564.21	-0.02050589		1154.21	-0.01897484		1744.2	-0.00079362		2334.2	0.00292058		2924.2	-0.00299819
564.41	-0.02053698		1154.41	-0.01914076		1744.4	-0.00132034		2334.4	0.00267704		2924.4	-0.0030635
564.61	-0.02083359		1154.61	-0.01920543		1744.6	-0.00274573		2334.6	0.00244841		2924.6	-0.00244438
564.81	-0.02025288		1154.81	-0.01889496		1744.8	-0.00283579		2334.8	0.00233067		2924.8	-0.00241132
565.01	-0.01973008		1155.01	-0.01986878		1745	-0.00184956		2335	0.00243779		2925	-0.00241387
565.21	-0.01962623		1155.21	-0.02033821		1745.2	-0.00216087		2335.2	0.00242816		2925.2	-0.0022771
565.41	-0.01935452		1155.41	-0.0201622		1745.4	-0.00287118		2335.4	0.00364546		2925.4	-0.00190763
565.61	-0.01814361		1155.61	-0.01952021		1745.6	-0.00305781		2335.6	0.00350701		2925.6	-0.00125158
565.81	-0.01792938		1155.81	-0.01972325		1745.8	-0.00395717		2335.8	0.00411396		2925.8	-0.00139375
566.01	-0.01720281		1156.01	-0.01948599		1746	-0.00380077		2336	0.00430763		2926	-0.00162442
566.21	-0.01649225		1156.21	-0.02046342		1746.2	-0.00336776		2336.2	0.00381155		2926.2	-0.00235482
566.41	-0.01564703		1156.41	-0.02117337		1746.4	-0.00253755		2336.4	0.00415978		2926.4	-0.00253912
566.61	-0.01476188		1156.61	-0.02113909		1746.6	-0.00210145		2336.6	0.00458762		2926.6	-0.00396361
566.81	-0.01414045		1156.81	-0.02079752		1746.8	-0.00125123		2336.8	0.00438695		2926.8	-0.00386262
567.01	-0.01403727		1157.01	-0.02040029		1747	-0.00107648		2337	0.00505062		2927	-0.00473227
567.21	-0.01433332		1157.21	-0.02024346		1747.2	-0.00106292		2337.2	0.00467618		2927.2	-0.0047805
567.41	-0.01405034		1157.41	-0.0193654		1747.4	-0.00108912		2337.4	0.00431007		2927.4	-0.00481448
567.61	-0.01323607		1157.61	-0.01899158		1747.6	-0.00097783		2337.6	0.00283543		2927.6	-0.00511916
567.81	-0.01382911		1157.81	-0.01896988		1747.8	-0.00085678		2337.8	0.00233654		2927.8	-0.00525861
568.01	-0.01241536		1158.01	-0.0188809		1748	-0.00092109		2338	0.00210245		2928	-0.0049465
568.21	-0.01289842		1158.21	-0.01948753		1748.2	-0.00135089		2338.2	0.00192497		2928.2	-0.00469086
568.41	-0.0138634		1158.41	-0.01948576		1748.4	-0.0015864		2338.4	0.00203854		2928.4	-0.00504778
568.61	-0.01399581		1158.61	-0.02008582		1748.6	-0.00204205		2338.6	0.00224576		2928.6	-0.00531235
568.81	-0.01408138		1158.81	-0.02009968		1748.8	-0.00117605		2338.8	0.00143946		2928.8	-0.00586173
569.01	-0.01414333		1159.01	-0.02159948		1749	-0.00118187		2339	0.00238451		2929	-0.00585217
569.21	-0.01452616		1159.21	-0.02212907		1749.2	-0.00109005		2339.2	0.00339433		2929.2	-0.00619361
569.41	-0.01473855		1159.41	-0.02242194		1749.4	-0.00080771		2339.4	0.00421066		2929.4	-0.0053075
569.61	-0.01424732		1159.61	-0.02260545		1749.6	-0.00072668		2339.6	0.00370839		2929.6	-0.00519625
569.81	-0.01485411		1159.81	-0.02274317		1749.8	-0.00069495		2339.8	0.00377156		2929.8	-0.00541472
570.01	-0.015091		1160.01	-0.02291181		1750	-0.00016533		2340	0.00358171		2930	-0.00567696
570.21	-0.01503715		1160.21	-0.02350328		1750.2	0.00005734		2340.2	0.00422577		2930.2	-0.00604979
570.41	-0.01504543		1160.41	-0.02361612		1750.4	-0.00002185		2340.4	0.00510309		2930.4	-0.00589082
570.61	-0.01512264		1160.61	-0.02351164		1750.6	0.00026365		2340.6	0.00460237		2930.6	-0.00604019
570.81	-0.0150901		1160.81	-0.02304852		1750.8	0.00048113		2340.8	0.00461036		2930.8	-0.00514154
571.01	-0.01623137		1161.01	-0.02309455		1751	-0.00008482		2341	0.00470791		2931	-0.00554167
571.21	-0.01664769		1161.21	-0.0226962		1751.2	0.00012691		2341.2	0.00382744		2931.2	-0.00528869
571.41	-0.01628574		1161.41	-0.02218659		1751.4	0.00041225		2341.4	0.00296599		2931.4	-0.00529373
571.61	-0.01557839		1161.61	-0.02252745		1751.6	0.00031859		2341.6	0.00219882		2931.6	-0.0049063
571.81	-0.0157127		1161.81	-0.02260897		1751.8	0.00028884		2341.8	0.00237358		2931.8	-0.00457424
572.01	-0.01501611		1162.01	-0.02263545		1752	0.00041683		2342	0.00280235		2932	-0.00498636
572.21	-0.01649957		1162.21	-0.02248875		1752.2	0.00101931		2342.2	0.00224093		2932.2	-0.00466331
572.41	-0.0167356		1162.41	-0.02257277		1752.4	0.00088986		2342.4	0.00261714		2932.4	-0.00545016
572.61	-0.01605716		1162.61	-0.02169023		1752.6	0.00052099		2342.6	0.00242519		2932.6	-0.00606648
572.81	-0.01598748		1162.81	-0.02116061		1752.8	0.00038031		2342.8	0.00249473		2932.8	-0.00606562
573.01	-0.01616424		1163.01	-0.0210729		1753	0.00015396		2343	0.00381436		2933	-0.00627741
573.21	-0.01578362		1163.21	-0.02075738		1753.2	0.00049979		2343.2	0.00359309		2933.2	-0.00719143
573.41	-0.01579645		1163.41	-0.02036107		1753.4	0.00033749		2343.4	0.00341155		2933.4	-0.00695441
573.61	-0.01613668		1163.61	-0.0198499		1753.6	0.00002085		2343.6	0.00341239		2933.6	-0.00731992
573.81	-0.01657961		1163.81	-0.0190493		1753.8	0.00005544		2343.8	0.00398921		2933.8	-0.00657793
574.01	-0.01723678		1164.01	-0.01806196		1754	-0.00047922		2344	0.0051112		2934	-0.00578051
574.21	-0.0171151		1164.21	-0.0176551		1754.2	-0.00040105		2344.2	0.00530152		2934.2	-0.00514859
574.41	-0.01750601		1164.41	-0.01773327		1754.4	0.00004982		2344.4	0.00466116		2934.4	-0.00473644
574.61	-0.01749658		1164.61	-0.01782871		1754.6	-0.00051591		2344.6	0.00407522		2934.6	-0.00484909
574.81	-0.01826294		1164.81	-0.01822861		1754.8	-0.00123013		2344.8	0.00423212		2934.8	-0.00493613
575.01	-0.01873629		1165.01	-0.01854457		1755	-0.00085669		2345	0.00389525		2935	-0.00482955
575.21	-0.01859968		1165.21	-0.0189156		1755.2	-0.00055775		2345.2	0.00293982		2935.2	-0.00523355
575.41	-0.0186471		1165.41	-0.01992401		1755.4	-0.00014248		2345.4	0.00280375		2935.4	-0.0045432
575.61	-0.01792184		1165.61	-0.02160043		1755.6	-0.0008885		2345.6	0.00344456		2935.6	-0.0046465
575.81	-0.01779038		1165.81	-0.0218892		1755.8	-0.00107174		2345.8	0.00237436		2935.8	-0.00467877
576.01	-0.01749779		1166.01	-0.02283316		1756	-0.00222202		2346	0.0017485		2936	-0.00540358
576.21	-0.01722699		1166.21	-0.02298919		1756.2	-0.00279181		2346.2	0.00107631		2936.2	-0.00467932
576.41	-0.0159671		1166.41	-0.02345138		1756.4	-0.0044097		2346.4	0.00129653		2936.4	-0.00496946
576.61	-0.01525998		1166.61	-0.02306124		1756.6	-0.00523291		2346.6	0.00118179		2936.6	-0.00504736
576.81	-0.01520178		1166.81	-0.02291323		1756.8	-0.00589457		2346.8	0.00103976		2936.8	-0.00520877
577.01	-0.0141567		1167.01	-0.0231077		1757	-0.00583344		2347	0.00159011		2937	-0.005635
577.21	-0.01280658		1167.21	-0.02314865		1757.2	-0.00524003		2347.2	0.00126904		2937.2	-0.00563571
577.41	-0.01212623		1167.41	-0.02230223		1757.4	-0.00486209		2347.4	0.0017656		2937.4	-0.00539038
577.61	-0.01249672		1167.61	-0.02196581		1757.6	-0.00480258		2347.6	0.002844		2937.6	-0.00478025
577.81	-0.01246104		1167.81	-0.02160977		1757.8	-0.00514456		2347.8	0.00369101		2937.8	-0.00440566
578.01	-0.01299639		1168.01	-0.02133759		1758	-0.00476253		2348	0.00441518		2938	-0.00500511
578.21	-0.01279507		1168.21	-0.02147858		1758.2	-0.00420121		2348.2	0.00419614		2938.2	-0.00532184
578.41	-0.01348703		1168.41	-0.02123263		1758.4	-0.00404181		2348.4	0.00445668		2938.4	-0.00528255
578.61	-0.0141222		1168.61	-0.02111468		1758.6	-0.00447366		2348.6	0.0046067		2938.6	-0.00573921
578.81	-0.01576897		1168.81	-0.02104775		1758.8	-0.0033266		2348.8	0.00544791		2938.8	-0.00600627
579.01	-0.01664041		1169.01	-0.02072373		1759	-0.00272336		2349	0.00603816		2939	-0.00567318
579.21	-0.01734922		1169.21	-0.01983174		1759.2	-0.00301703		2349.2	0.00642527		2939.2	-0.006073
579.41	-0.01808825		1169.41	-0.02061306		1759.4	-0.00301819		2349.4	0.0071681		2939.4	-0.00562884
579.61	-0.01921103		1169.61	-0.02066175		1759.6	-0.0039985		2349.6	0.00717449		2939.6	-0.00646254
579.81	-0.0194087		1169.81	-0.02065416		1759.8	-0.00450169		2349.8	0.00595546		2939.8	-0.00607848
580.01	-0.02024263		1170.01	-0.0205418		1760	-0.00524394		2350	0.00566643		2940	-0.0057391
580.21	-0.02040869		1170.21	-0.02015396		1760.2	-0.00622215		2350.2	0.00564907		2940.2	-0.00485658
580.41	-0.01987436		1170.41	-0.02043816		1760.4	-0.00690561		2350.4	0.00566539		2940.4	-0.00456368
580.61	-0.01993134		1170.61	-0.02059113		1760.6	-0.00690693		2350.6	0.00529423		2940.6	-0.00437603
580.81	-0.01959055		1170.81	-0.0202758		1760.8	-0.00661717		2350.8	0.00458021		2940.8	-0.00454874
581.01	-0.01857216		1171.01	-0.02041932		1761	-0.00584118		2351	0.00549209		2941	-0.00442594
581.21	-0.01788404		1171.21	-0.02028474		1761.2	-0.00549483		2351.2	0.0046259		2941.2	-0.00483798
581.41	-0.01736274		1171.41	-0.02012667		1761.4	-0.00433471		2351.4	0.00419101		2941.4	-0.0051378
581.61	-0.01779237		1171.61	-0.02121841		1761.6	-0.00393222		2351.6	0.00455872		2941.6	-0.00520884
581.81	-0.01642447		1171.81	-0.02233348		1761.8	-0.00353928		2351.8	0.00414673		2941.8	-0.00600348
582.01	-0.01603059		1172.01	-0.02285036		1762	-0.00287574		2352	0.00402764		2942	-0.0056942
582.21	-0.01485663		1172.21	-0.02276252		1762.2	-0.00277787		2352.2	0.00350625		2942.2	-0.00518182
582.41	-0.01584486		1172.41	-0.02256249		1762.4	-0.00190899		2352.4	0.00345771		2942.4	-0.00523532
582.61	-0.01573426		1172.61	-0.02237766		1762.6	-0.0010275		2352.6	0.00377049		2942.6	-0.00622327
582.81	-0.01670206		1172.81	-0.02133968		1762.8	-0.00069935		2352.8	0.00404386		2942.8	-0.00658822
583.01	-0.01672961		1173.01	-0.02133394		1763	-0.00115485		2353	0.00425963		2943	-0.006701
583.21	-0.0165911		1173.21	-0.02061703		1763.2	-0.00075584		2353.2	0.00510548		2943.2	-0.007634
583.41	-0.01712683		1173.41	-0.02109802		1763.4	-0.00074174		2353.4	0.00507857		2943.4	-0.00758477
583.61	-0.01834703		1173.61	-0.02132472		1763.6	-0.00137053		2353.6	0.0050168		2943.6	-0.00776209
583.81	-0.01834511		1173.81	-0.02118988		1763.8	-0.00200887		2353.8	0.00532227		2943.8	-0.00777856
584.01	-0.01876334		1174.01	-0.02017025		1764	-0.0018069		2354	0.00572818		2944	-0.00724036
584.21	-0.01784475		1174.21	-0.01994485		1764.2	-0.00250312		2354.2	0.00605086		2944.2	-0.00693332
584.41	-0.01708511		1174.41	-0.02029067		1764.4	-0.00270679		2354.4	0.00588686		2944.4	-0.00607007
584.61	-0.01698907		1174.61	-0.02011899		1764.6	-0.00308666		2354.6	0.00549546		2944.6	-0.00557149
584.81	-0.0167427		1174.81	-0.01925774		1764.8	-0.00293841		2354.8	0.00524109		2944.8	-0.00568851
585.01	-0.01660778		1175.01	-0.01879296		1765	-0.00250395		2355	0.00585788		2945	-0.00561931
585.21	-0.01612413		1175.21	-0.019515		1765.2	-0.00224331		2355.2	0.00515623		2945.2	-0.00530746
585.41	-0.01565395		1175.41	-0.01984676		1765.4	-0.00143941		2355.4	0.00483562		2945.4	-0.00548547
585.61	-0.01583459		1175.61	-0.01990284		1765.6	-0.00158145		2355.6	0.00498495		2945.6	-0.00503505
585.81	-0.01528597		1175.81	-0.02045904		1765.8	-0.00260931		2355.8	0.00461722		2945.8	-0.00459562
586.01	-0.01580099		1176.01	-0.02090272		1766	-0.00295076		2356	0.00457277		2946	-0.00372172
586.21	-0.0156219		1176.21	-0.02129614		1766.2	-0.00319776		2356.2	0.00435298		2946.2	-0.00422454
586.41	-0.0167098		1176.41	-0.02196882		1766.4	-0.00308399		2356.4	0.00451958		2946.4	-0.00509286
586.61	-0.01686709		1176.61	-0.02128554		1766.6	-0.00307116		2356.6	0.00450197		2946.6	-0.00542299
586.81	-0.01792879		1176.81	-0.02122758		1766.8	-0.00426411		2356.8	0.00364683		2946.8	-0.00604348
587.01	-0.01810868		1177.01	-0.02146772		1767	-0.00380177		2357	0.00421184		2947	-0.00631106
587.21	-0.01861175		1177.21	-0.02087385		1767.2	-0.00378253		2357.2	0.00426616		2947.2	-0.0061224
587.41	-0.01906091		1177.41	-0.02132782		1767.4	-0.00434982		2357.4	0.00411493		2947.4	-0.00599153
587.61	-0.01932618		1177.61	-0.02211252		1767.6	-0.00467254		2357.6	0.00448755		2947.6	-0.00614956
587.81	-0.01869134		1177.81	-0.02163444		1767.8	-0.00447027		2357.8	0.00510145		2947.8	-0.00686986
588.01	-0.01871769		1178.01	-0.02172384		1768	-0.0037642		2358	0.00494985		2948	-0.00657735
588.21	-0.0186256		1178.21	-0.02165291		1768.2	-0.00457093		2358.2	0.00496799		2948.2	-0.00587684
588.41	-0.01890832		1178.41	-0.02116084		1768.4	-0.00538234		2358.4	0.00444782		2948.4	-0.00561162
588.61	-0.01884352		1178.61	-0.02063432		1768.6	-0.00498951		2358.6	0.00464947		2948.6	-0.00495208
588.81	-0.01879235		1178.81	-0.02059876		1768.8	-0.00403011		2358.8	0.00417174		2948.8	-0.00515456
589.01	-0.01874644		1179.01	-0.02028716		1769	-0.00281952		2359	0.00420682		2949	-0.00527003
589.21	-0.0190641		1179.21	-0.0203562		1769.2	-0.00233299		2359.2	0.00451399		2949.2	-0.00494908
589.41	-0.01870017		1179.41	-0.0198954		1769.4	-0.00182141		2359.4	0.00406715		2949.4	-0.00498989
589.61	-0.01934667		1179.61	-0.02027674		1769.6	-0.00171508		2359.6	0.00392566		2949.6	-0.00398233
589.81	-0.01820551		1179.81	-0.02116892		1769.8	-0.00219335		2359.8	0.00469443		2949.8	-0.00419612
590.01	-0.01750444		1180.01	-0.02141945		1770	-0.00151795		2360	0.00530649		2950	-0.00406734
590.21	-0.01729125		1180.21	-0.02122838		1770.2	-0.00165447		2360.2	0.00524711		2950.2	-0.00417001
590.41	-0.01688127		1180.41	-0.02082594		1770.4	-0.00235052		2360.4	0.00548376		2950.4	-0.00430804
590.61	-0.01694151		1180.61	-0.02042503		1770.6	-0.00217671		2360.6	0.00567832		2950.6	-0.00456826
590.81	-0.01681557		1180.81	-0.02096622		1770.8	-0.00327763		2360.8	0.00508594		2950.8	-0.00498101
591.01	-0.01643977		1181.01	-0.02102127		1771	-0.00255654		2361	0.00491971		2951	-0.00482363
591.21	-0.01603457		1181.21	-0.02135915		1771.2	-0.00307028		2361.2	0.00432406		2951.2	-0.00491906
591.41	-0.0153279		1181.41	-0.02215135		1771.4	-0.00288696		2361.4	0.00416681		2951.4	-0.00537168
591.61	-0.01488652		1181.61	-0.02181733		1771.6	-0.00318344		2361.6	0.00412152		2951.6	-0.00571467
591.81	-0.01541756		1181.81	-0.02215472		1771.8	-0.00314493		2361.8	0.00457548		2951.8	-0.00624826
592.01	-0.01608208		1182.01	-0.02290785		1772	-0.00316614		2362	0.00409627		2952	-0.00599008
592.21	-0.01623056		1182.21	-0.02237981		1772.2	-0.00402032		2362.2	0.00395758		2952.2	-0.00563702
592.41	-0.01590214		1182.41	-0.02279676		1772.4	-0.00394887		2362.4	0.00329906		2952.4	-0.00612875
592.61	-0.01556176		1182.61	-0.02339728		1772.6	-0.00306431		2362.6	0.00345527		2952.6	-0.00625018
592.81	-0.01552436		1182.81	-0.02394393		1772.8	-0.00228435		2362.8	0.00278728		2952.8	-0.00593784
593.01	-0.01530787		1183.01	-0.02317688		1773	-0.0017378		2363	0.00358395		2953	-0.00654826
593.21	-0.01547578		1183.21	-0.02362185		1773.2	-0.00125625		2363.2	0.00393962		2953.2	-0.00553616
593.41	-0.01431499		1183.41	-0.0232476		1773.4	-0.00075873		2363.4	0.00379999		2953.4	-0.00523609
593.61	-0.01396013		1183.61	-0.02405283		1773.6	-0.00093145		2363.6	0.00436779		2953.6	-0.0049393
593.81	-0.01355436		1183.81	-0.02424087		1773.8	-0.00099631		2363.8	0.00493604		2953.8	-0.00525771
594.01	-0.01396199		1184.01	-0.02349747		1774	-0.0013249		2364	0.00523384		2954	-0.00461698
594.21	-0.01430076		1184.21	-0.02337806		1774.2	-0.00176363		2364.2	0.00453494		2954.2	-0.00408128
594.41	-0.01421375		1184.41	-0.02295861		1774.4	-0.00171657		2364.4	0.00467846		2954.4	-0.00428131
594.61	-0.01454181		1184.61	-0.02327876		1774.6	-0.00222107		2364.6	0.00405516		2954.6	-0.00432539
594.81	-0.01476259		1184.81	-0.02314845		1774.8	-0.00260462		2364.8	0.00316613		2954.8	-0.00360447
595.01	-0.01492663		1185.01	-0.02258401		1775	-0.00218093		2365	0.00251957		2955	-0.0036191
595.21	-0.01571454		1185.21	-0.02144675		1775.2	-0.00312893		2365.2	0.00256268		2955.2	-0.00343083
595.41	-0.01647941		1185.41	-0.02109877		1775.4	-0.00306726		2365.4	0.00274914		2955.4	-0.00301112
595.61	-0.0171116		1185.61	-0.02085565		1775.6	-0.00281245		2365.6	0.00341435		2955.6	-0.00310081
595.81	-0.01781311		1185.81	-0.02224137		1775.8	-0.00302318		2365.8	0.00310922		2955.8	-0.00339752
596.01	-0.0175813		1186.01	-0.02303431		1776	-0.00297237		2366	0.00267766		2956	-0.00399555
596.21	-0.01798093		1186.21	-0.02289104		1776.2	-0.00328573		2366.2	0.00229606		2956.2	-0.00459739
596.41	-0.01725275		1186.41	-0.02390011		1776.4	-0.00321142		2366.4	0.00204157		2956.4	-0.00532356
596.61	-0.0167818		1186.61	-0.02383081		1776.6	-0.00301221		2366.6	0.0019739		2956.6	-0.00611224
596.81	-0.0163926		1186.81	-0.02383308		1776.8	-0.00237856		2366.8	0.00185158		2956.8	-0.00623422
597.01	-0.01594572		1187.01	-0.02338614		1777	-0.00273901		2367	0.00201732		2957	-0.00744481
597.21	-0.01615045		1187.21	-0.02336536		1777.2	-0.00257034		2367.2	0.00213147		2957.2	-0.00724706
597.41	-0.01632141		1187.41	-0.02269399		1777.4	-0.00277315		2367.4	0.00223845		2957.4	-0.00851179
597.61	-0.0167852		1187.61	-0.0224139		1777.6	-0.00351266		2367.6	0.00286344		2957.6	-0.00952794
597.81	-0.0173195		1187.81	-0.02191741		1777.8	-0.00331372		2367.8	0.00254929		2957.8	-0.01024206
598.01	-0.01750793		1188.01	-0.02101916		1778	-0.0036596		2368	0.00266228		2958	-0.01080909
598.21	-0.01678826		1188.21	-0.02104205		1778.2	-0.00350401		2368.2	0.00161126		2958.2	-0.01119113
598.41	-0.01737755		1188.41	-0.02056584		1778.4	-0.00287165		2368.4	0.00189392		2958.4	-0.01140169
598.61	-0.01805494		1188.61	-0.02100708		1778.6	-0.00288675		2368.6	0.00193238		2958.6	-0.01118225
598.81	-0.01916243		1188.81	-0.02054424		1778.8	-0.00255317		2368.8	0.00186607		2958.8	-0.01055864
599.01	-0.01827524		1189.01	-0.01962883		1779	-0.00206801		2369	0.0027052		2959	-0.00979911
599.21	-0.01871952		1189.21	-0.01981415		1779.2	-0.00102196		2369.2	0.00347044		2959.2	-0.00865114
599.41	-0.01902975		1189.41	-0.0202136		1779.4	-0.00066505		2369.4	0.00309656		2959.4	-0.00862327
599.61	-0.01849069		1189.61	-0.0204306		1779.6	-0.00017543		2369.6	0.00427155		2959.6	-0.00889904
599.81	-0.01939978		1189.81	-0.02167464		1779.8	-0.00051953		2369.8	0.00363188		2959.8	-0.00821635
600.01	-0.01892063		1190.01	-0.02205489		1780	-0.00029917		2370	0.00343509		2960	-0.00758169
600.21	-0.01903952		1190.21	-0.02267188		1780.2	-0.00098275		2370.2	0.0035169		2960.2	-0.00735322
600.41	-0.01808577		1190.41	-0.0228473		1780.4	-0.00115888		2370.4	0.00397656		2960.4	-0.00702026
600.61	-0.01808974		1190.61	-0.02221571		1780.6	-0.00152938		2370.6	0.0050367		2960.6	-0.0064927
600.81	-0.01823945		1190.81	-0.02198663		1780.8	-0.00245348		2370.8	0.00522179		2960.8	-0.00598393
601.01	-0.01836768		1191.01	-0.02190258		1781	-0.00388494		2371	0.00521275		2961	-0.00566011
601.21	-0.01876459		1191.21	-0.02139313		1781.2	-0.00358263		2371.2	0.00543663		2961.2	-0.00549734
601.41	-0.01889547		1191.41	-0.02114273		1781.4	-0.00353431		2371.4	0.00534496		2961.4	-0.00594227
601.61	-0.0179518		1191.61	-0.02007468		1781.6	-0.0037016		2371.6	0.00481859		2961.6	-0.00599079
601.81	-0.01750665		1191.81	-0.02029128		1781.8	-0.00415957		2371.8	0.0040531		2961.8	-0.00606989
602.01	-0.01728265		1192.01	-0.02058754		1782	-0.00488509		2372	0.00348794		2962	-0.00676091
602.21	-0.01650169		1192.21	-0.02054557		1782.2	-0.00476149		2372.2	0.0031176		2962.2	-0.0063175
602.41	-0.01692811		1192.41	-0.02070766		1782.4	-0.00391424		2372.4	0.00225899		2962.4	-0.00593247
602.61	-0.01722168		1192.61	-0.02154937		1782.6	-0.00392849		2372.6	0.00253222		2962.6	-0.0053929
602.81	-0.01659384		1192.81	-0.02141699		1782.8	-0.00378953		2372.8	0.00211427		2962.8	-0.00514717
603.01	-0.01504542		1193.01	-0.02090375		1783	-0.00247384		2373	0.00200183		2963	-0.00529082
603.21	-0.01519263		1193.21	-0.02137827		1783.2	-0.00265855		2373.2	0.00075618		2963.2	-0.00511975
603.41	-0.01521839		1193.41	-0.02108683		1783.4	-0.00276475		2373.4	0.00016484		2963.4	-0.00637925
603.61	-0.01554471		1193.61	-0.0216705		1783.6	-0.00229546		2373.6	0.00062806		2963.6	-0.00661156
603.81	-0.01573499		1193.81	-0.02239703		1783.8	-0.00231488		2373.8	-0.00032215		2963.8	-0.00620755
604.01	-0.0156233		1194.01	-0.02212719		1784	-0.00267735		2374	-0.00052744		2964	-0.00640437
604.21	-0.01643841		1194.21	-0.02203926		1784.2	-0.00298929		2374.2	0.00049221		2964.2	-0.00599821
604.41	-0.01722293		1194.41	-0.02163595		1784.4	-0.00304247		2374.4	0.00116338		2964.4	-0.00560531
604.61	-0.01856879		1194.61	-0.02117152		1784.6	-0.0031024		2374.6	0.00247806		2964.6	-0.0051853
604.81	-0.01982988		1194.81	-0.02155613		1784.8	-0.00321911		2374.8	0.00255281		2964.8	-0.00559585
605.01	-0.02088411		1195.01	-0.02150018		1785	-0.00291588		2375	0.00261055		2965	-0.00532881
605.21	-0.02142173		1195.21	-0.02158087		1785.2	-0.00205482		2375.2	0.00290121		2965.2	-0.00635525
605.41	-0.02187133		1195.41	-0.02178704		1785.4	-0.00240984		2375.4	0.0036331		2965.4	-0.00694636
605.61	-0.02127102		1195.61	-0.02162252		1785.6	-0.00278281		2375.6	0.00381184		2965.6	-0.00718296
605.81	-0.02121795		1195.81	-0.02278484		1785.8	-0.00300957		2375.8	0.00365742		2965.8	-0.00731717
606.01	-0.02075405		1196.01	-0.02327789		1786	-0.00229571		2376	0.00362712		2966	-0.0076423
606.21	-0.02049928		1196.21	-0.02385977		1786.2	-0.00181169		2376.2	0.00425838		2966.2	-0.00733842
606.41	-0.02051442		1196.41	-0.02368469		1786.4	-0.00260168		2376.4	0.00357915		2966.4	-0.00663514
606.61	-0.02020044		1196.61	-0.02370259		1786.6	-0.00237466		2376.6	0.00454688		2966.6	-0.00616569
606.81	-0.02007999		1196.81	-0.02375669		1786.8	-0.00236116		2376.8	0.00370765		2966.8	-0.00683997
607.01	-0.01982251		1197.01	-0.02369322		1787	-0.00295902		2377	0.00278077		2967	-0.00682096
607.21	-0.01912261		1197.21	-0.02361511		1787.2	-0.00383089		2377.2	0.0019941		2967.2	-0.00624689
607.41	-0.01862194		1197.41	-0.02399556		1787.4	-0.00274572		2377.4	0.00225331		2967.4	-0.00692528
607.61	-0.01850564		1197.61	-0.02413586		1787.6	-0.00266029		2377.6	0.00230629		2967.6	-0.00648433
607.81	-0.01773018		1197.81	-0.02383337		1787.8	-0.00308032		2377.8	0.00245028		2967.8	-0.00627556
608.01	-0.01871621		1198.01	-0.02392191		1788	-0.00300006		2378	0.00176514		2968	-0.00586431
608.21	-0.01836366		1198.21	-0.02383465		1788.2	-0.00318345		2378.2	0.00233804		2968.2	-0.00463948
608.41	-0.01907738		1198.41	-0.02366651		1788.4	-0.00261895		2378.4	0.00242426		2968.4	-0.00492752
608.61	-0.0199661		1198.61	-0.02282403		1788.6	-0.00247364		2378.6	0.00264405		2968.6	-0.00474854
608.81	-0.02099737		1198.81	-0.02302086		1788.8	-0.00221986		2378.8	0.00224024		2968.8	-0.00533806
609.01	-0.02098938		1199.01	-0.02267023		1789	-0.0021685		2379	0.00212013		2969	-0.00581132
609.21	-0.02059363		1199.21	-0.02254482		1789.2	-0.00235688		2379.2	0.00180652		2969.2	-0.00668757
609.41	-0.01983349		1199.41	-0.0220624		1789.4	-0.00299813		2379.4	0.00159991		2969.4	-0.00649593
609.61	-0.01888693		1199.61	-0.02190444		1789.6	-0.00273808		2379.6	0.00140616		2969.6	-0.00604049
609.81	-0.01797844		1199.81	-0.02216549		1789.8	-0.0024793		2379.8	0.00080756		2969.8	-0.00600851
610.01	-0.01671835		1200.01	-0.02193504		1790	-0.00294815		2380	0.00171072		2970	-0.00619702
610.21	-0.01594232		1200.21	-0.02205122		1790.2	-0.00343825		2380.2	0.00241719		2970.2	-0.00562539
610.41	-0.01548631		1200.41	-0.02189921		1790.4	-0.00392374		2380.4	0.0024577		2970.4	-0.00529499
610.61	-0.01509112		1200.61	-0.022815		1790.6	-0.00349357		2380.6	0.00204196		2970.6	-0.00557071
610.81	-0.01506921		1200.81	-0.02319407		1790.8	-0.00391736		2380.8	0.00221904		2970.8	-0.00683038
611.01	-0.0146598		1201.01	-0.02368068		1791	-0.00397836		2381	0.00282279		2971	-0.0066582
611.21	-0.01415345		1201.21	-0.0240034		1791.2	-0.00342569		2381.2	0.00286342		2971.2	-0.00663934
611.41	-0.01354967		1201.41	-0.02424973		1791.4	-0.00232842		2381.4	0.00342405		2971.4	-0.0067173
611.61	-0.01396616		1201.61	-0.0244958		1791.6	-0.00220732		2381.6	0.0038599		2971.6	-0.00632997
611.81	-0.01401486		1201.81	-0.02461521		1791.8	-0.00243559		2381.8	0.00381161		2971.8	-0.00599416
612.01	-0.01497498		1202.01	-0.02519462		1792	-0.00140251		2382	0.00481219		2972	-0.00559052
612.21	-0.01537752		1202.21	-0.02441613		1792.2	-0.0013533		2382.2	0.00510329		2972.2	-0.00513176
612.41	-0.01666401		1202.41	-0.02485543		1792.4	-0.00085918		2382.4	0.00466363		2972.4	-0.00573705
612.61	-0.01782347		1202.61	-0.0241669		1792.6	-0.00131004		2382.6	0.00449811		2972.6	-0.00537716
612.81	-0.01885501		1202.81	-0.02380505		1792.8	-0.00100769		2382.8	0.00445578		2972.8	-0.00552262
613.01	-0.01870282		1203.01	-0.02268227		1793	-0.00169544		2383	0.00439013		2973	-0.00590689
613.21	-0.01905096		1203.21	-0.02154156		1793.2	-0.00209089		2383.2	0.00414757		2973.2	-0.00597913
613.41	-0.01890496		1203.41	-0.02101689		1793.4	-0.00290738		2383.4	0.00454534		2973.4	-0.0063064
613.61	-0.01851868		1203.61	-0.02075726		1793.6	-0.00272795		2383.6	0.00460262		2973.6	-0.00585531
613.81	-0.01857346		1203.81	-0.02071404		1793.8	-0.00319663		2383.8	0.00412351		2973.8	-0.00608844
614.01	-0.01828765		1204.01	-0.01996559		1794	-0.00354069		2384	0.00372109		2974	-0.00614585
614.21	-0.0187024		1204.21	-0.01972519		1794.2	-0.00309334		2384.2	0.00389828		2974.2	-0.0066072
614.41	-0.01915287		1204.41	-0.01992726		1794.4	-0.00291536		2384.4	0.00316854		2974.4	-0.00797352
614.61	-0.01927234		1204.61	-0.01934302		1794.6	-0.00313444		2384.6	0.00231307		2974.6	-0.00830731
614.81	-0.01900019		1204.81	-0.01931898		1794.8	-0.00288929		2384.8	0.00300759		2974.8	-0.00969811
615.01	-0.01896017		1205.01	-0.01927111		1795	-0.00281136		2385	0.00308628		2975	-0.01004876
615.21	-0.0185099		1205.21	-0.01850488		1795.2	-0.00236376		2385.2	0.00259401		2975.2	-0.01061358
615.41	-0.01842394		1205.41	-0.01848036		1795.4	-0.00163227		2385.4	0.00292167		2975.4	-0.01102858
615.61	-0.01894114		1205.61	-0.01889223		1795.6	-0.00111304		2385.6	0.00308474		2975.6	-0.01087699
615.81	-0.01830151		1205.81	-0.01900031		1795.8	-0.00120055		2385.8	0.00354453		2975.8	-0.01099253
616.01	-0.01870458		1206.01	-0.02032058		1796	-0.00101932		2386	0.00393096		2976	-0.01145363
616.21	-0.01879871		1206.21	-0.02040832		1796.2	-0.00136399		2386.2	0.00196472		2976.2	-0.01085009
616.41	-0.0185062		1206.41	-0.02097973		1796.4	-0.00105934		2386.4	0.00217731		2976.4	-0.01110591
616.61	-0.01874497		1206.61	-0.0208136		1796.6	-0.00034635		2386.6	0.0028257		2976.6	-0.01020542
616.81	-0.01857752		1206.81	-0.02113258		1796.8	0.00002957		2386.8	0.00394863		2976.8	-0.00982779
617.01	-0.01801108		1207.01	-0.02107043		1797	-0.0000016		2387	0.00433542		2977	-0.00961327
617.21	-0.01853336		1207.21	-0.02067233		1797.2	-0.00031859		2387.2	0.004457		2977.2	-0.00900809
617.41	-0.01783758		1207.41	-0.02110552		1797.4	-0.00056135		2387.4	0.00338323		2977.4	-0.00818376
617.61	-0.01778934		1207.61	-0.02134098		1797.6	-0.00044143		2387.6	0.00269174		2977.6	-0.007112
617.81	-0.01825773		1207.81	-0.02138169		1797.8	-0.00091756		2387.8	0.00195382		2977.8	-0.00583506
618.01	-0.01832221		1208.01	-0.02043212		1798	-0.00151103		2388	0.0012109		2978	-0.00582947
618.21	-0.01866055		1208.21	-0.02013178		1798.2	-0.00154372		2388.2	0.0014872		2978.2	-0.00617646
618.41	-0.01827576		1208.41	-0.02057908		1798.4	-0.00195584		2388.4	0.00131653		2978.4	-0.0065556
618.61	-0.01833208		1208.61	-0.02012161		1798.6	-0.00234839		2388.6	0.00175855		2978.6	-0.00631079
618.81	-0.01807848		1208.81	-0.01990492		1798.8	-0.00388152		2388.8	0.00214514		2978.8	-0.00735682
619.01	-0.01773134		1209.01	-0.01935433		1799	-0.004629		2389	0.00199805		2979	-0.00752442
619.21	-0.01801959		1209.21	-0.01881848		1799.2	-0.00530725		2389.2	0.00207299		2979.2	-0.00803646
619.41	-0.01833452		1209.41	-0.0200177		1799.4	-0.00550709		2389.4	0.00210675		2979.4	-0.00769735
619.61	-0.01751317		1209.61	-0.0203938		1799.6	-0.00601982		2389.6	0.00251795		2979.6	-0.00752364
619.81	-0.01711561		1209.81	-0.02044265		1799.8	-0.00656815		2389.8	0.00283429		2979.8	-0.008168
620.01	-0.01757853		1210.01	-0.0213175		1800	-0.00648594		2390	0.00289392		2980	-0.00807633
620.21	-0.01685808		1210.21	-0.02197944		1800.2	-0.00583921		2390.2	0.003334		2980.2	-0.00741974
620.41	-0.01649185		1210.41	-0.02289291		1800.4	-0.00449796		2390.4	0.00455166		2980.4	-0.00738645
620.61	-0.0169197		1210.61	-0.02370925		1800.6	-0.00372433		2390.6	0.00496962		2980.6	-0.00752451
620.81	-0.01680762		1210.81	-0.02319089		1800.8	-0.00393685		2390.8	0.00475964		2980.8	-0.00825893
621.01	-0.01688964		1211.01	-0.02285477		1801	-0.00426483		2391	0.00423259		2981	-0.00784502
621.21	-0.01679225		1211.21	-0.02268165		1801.2	-0.00388069		2391.2	0.00300825		2981.2	-0.00805017
621.41	-0.01622789		1211.41	-0.02288279		1801.4	-0.00332235		2391.4	0.00237475		2981.4	-0.0085067
621.61	-0.01691288		1211.61	-0.02192373		1801.6	-0.00304442		2391.6	0.00231363		2981.6	-0.00842811
621.81	-0.01680531		1211.81	-0.02131584		1801.8	-0.00222903		2391.8	0.00260046		2981.8	-0.00806122
622.01	-0.01695027		1212.01	-0.02043481		1802	-0.00247407		2392	0.00277845		2982	-0.00944631
622.21	-0.01709769		1212.21	-0.01983653		1802.2	-0.00211962		2392.2	0.00291029		2982.2	-0.00963894
622.41	-0.01669714		1212.41	-0.01956791		1802.4	-0.00234682		2392.4	0.00309634		2982.4	-0.00964142
622.61	-0.01713412		1212.61	-0.01882112		1802.6	-0.0026976		2392.6	0.00317219		2982.6	-0.00931622
622.81	-0.01638397		1212.81	-0.01778984		1802.8	-0.00380027		2392.8	0.00344728		2982.8	-0.00982757
623.01	-0.01561206		1213.01	-0.01750596		1803	-0.00448696		2393	0.00375427		2983	-0.00922729
623.21	-0.01578406		1213.21	-0.01716208		1803.2	-0.00474822		2393.2	0.00437036		2983.2	-0.00917625
623.41	-0.01557424		1213.41	-0.01747993		1803.4	-0.00448923		2393.4	0.00450545		2983.4	-0.00822517
623.61	-0.0150954		1213.61	-0.01767015		1803.6	-0.00440452		2393.6	0.00491325		2983.6	-0.00838349
623.81	-0.0153077		1213.81	-0.01820071		1803.8	-0.00451464		2393.8	0.00482126		2983.8	-0.00801075
624.01	-0.01608655		1214.01	-0.01882193		1804	-0.00528369		2394	0.004561		2984	-0.00719034
624.21	-0.01561839		1214.21	-0.01976527		1804.2	-0.00565352		2394.2	0.00448054		2984.2	-0.00646176
624.41	-0.01734475		1214.41	-0.02015504		1804.4	-0.00513853		2394.4	0.0033249		2984.4	-0.00555547
624.61	-0.01895139		1214.61	-0.01965626		1804.6	-0.00586423		2394.6	0.0024207		2984.6	-0.00613715
624.81	-0.01983133		1214.81	-0.01917112		1804.8	-0.00573085		2394.8	0.00188073		2984.8	-0.00578166
625.01	-0.0202643		1215.01	-0.01943866		1805	-0.00539492		2395	0.00175176		2985	-0.00521584
625.21	-0.0199035		1215.21	-0.0196015		1805.2	-0.00511052		2395.2	0.00112069		2985.2	-0.00582128
625.41	-0.020535		1215.41	-0.01891568		1805.4	-0.0051466		2395.4	0.0010233		2985.4	-0.00660328
625.61	-0.02139145		1215.61	-0.0182262		1805.6	-0.00422711		2395.6	0.00032993		2985.6	-0.00622328
625.81	-0.02113614		1215.81	-0.01835823		1805.8	-0.00482805		2395.8	0.00060693		2985.8	-0.00656056
626.01	-0.02080494		1216.01	-0.01787449		1806	-0.00460884		2396	0.0003188		2986	-0.00661538
626.21	-0.02008669		1216.21	-0.01775053		1806.2	-0.00403825		2396.2	-0.00018427		2986.2	-0.00673069
626.41	-0.01952501		1216.41	-0.01781748		1806.4	-0.0039087		2396.4	0.00013749		2986.4	-0.006874
626.61	-0.01913863		1216.61	-0.01823051		1806.6	-0.00356108		2396.6	0.00061245		2986.6	-0.00726567
626.81	-0.01790797		1216.81	-0.01830524		1806.8	-0.00393323		2396.8	0.00133134		2986.8	-0.00755544
627.01	-0.01670668		1217.01	-0.0187484		1807	-0.00380911		2397	0.00150398		2987	-0.00685036
627.21	-0.01686414		1217.21	-0.01921356		1807.2	-0.0031812		2397.2	0.00151618		2987.2	-0.00717333
627.41	-0.0171778		1217.41	-0.01943681		1807.4	-0.00303624		2397.4	0.00102708		2987.4	-0.00723521
627.61	-0.01693423		1217.61	-0.02076515		1807.6	-0.0032378		2397.6	0.00138142		2987.6	-0.00739417
627.81	-0.01719871		1217.81	-0.02131675		1807.8	-0.00419058		2397.8	0.00075147		2987.8	-0.00710758
628.01	-0.01779178		1218.01	-0.02112853		1808	-0.00534914		2398	0.00089182		2988	-0.00702393
628.21	-0.01820475		1218.21	-0.02156387		1808.2	-0.00547334		2398.2	0.00183313		2988.2	-0.0068192
628.41	-0.02000659		1218.41	-0.02226656		1808.4	-0.00491609		2398.4	0.00167615		2988.4	-0.00689593
628.61	-0.02070836		1218.61	-0.02230791		1808.6	-0.00584849		2398.6	0.00271372		2988.6	-0.00722469
628.81	-0.02132111		1218.81	-0.02226689		1808.8	-0.00544089		2398.8	0.00294112		2988.8	-0.00643749
629.01	-0.02127087		1219.01	-0.02257717		1809	-0.00559801		2399	0.00358188		2989	-0.00653145
629.21	-0.02147059		1219.21	-0.02274794		1809.2	-0.00474362		2399.2	0.00339773		2989.2	-0.00636352
629.41	-0.02168016		1219.41	-0.0225247		1809.4	-0.00470682		2399.4	0.00257046		2989.4	-0.00624876
629.61	-0.02170348		1219.61	-0.02237398		1809.6	-0.00456146		2399.6	0.00195177		2989.6	-0.00602695
629.81	-0.02097351		1219.81	-0.02277742		1809.8	-0.00491106		2399.8	0.00161842		2989.8	-0.00592296
630.01	-0.02106055		1220.01	-0.02277633		1810	-0.0035472		2400	0.00125904		2990	-0.0056272
630.21	-0.02124233		1220.21	-0.02333838		1810.2	-0.00448973		2400.2	0.00059246		2990.2	-0.00605036
630.41	-0.02153621		1220.41	-0.02325529		1810.4	-0.00481301		2400.4	0.00036955		2990.4	-0.00561017
630.61	-0.02147819		1220.61	-0.02355772		1810.6	-0.00505959		2400.6	0.00027211		2990.6	-0.00574386
630.81	-0.02105894		1220.81	-0.0236909		1810.8	-0.00543974		2400.8	-0.00013235		2990.8	-0.00604336
631.01	-0.02072572		1221.01	-0.02387704		1811	-0.00511433		2401	0.00012074		2991	-0.0062303
631.21	-0.02165105		1221.21	-0.02412639		1811.2	-0.00542198		2401.2	-0.00018862		2991.2	-0.00606448
631.41	-0.02167879		1221.41	-0.02413675		1811.4	-0.00637092		2401.4	-0.0000188		2991.4	-0.00619552
631.61	-0.02141136		1221.61	-0.02381122		1811.6	-0.00691583		2401.6	0.00036514		2991.6	-0.00654285
631.81	-0.02089232		1221.81	-0.02378319		1811.8	-0.00728573		2401.8	0.00069973		2991.8	-0.00740377
632.01	-0.02036631		1222.01	-0.02364684		1812	-0.0078257		2402	0.00176448		2992	-0.00738166
632.21	-0.02046963		1222.21	-0.02370996		1812.2	-0.00831669		2402.2	0.00245882		2992.2	-0.00738325
632.41	-0.02064332		1222.41	-0.02374852		1812.4	-0.00856121		2402.4	0.00239604		2992.4	-0.00779247
632.61	-0.02035011		1222.61	-0.02311543		1812.6	-0.00883337		2402.6	0.00315278		2992.6	-0.00730261
632.81	-0.02053485		1222.81	-0.02300242		1812.8	-0.00750877		2402.8	0.00336409		2992.8	-0.00753034
633.01	-0.02037215		1223.01	-0.02271775		1813	-0.0066245		2403	0.00361795		2993	-0.0078786
633.21	-0.01965582		1223.21	-0.02270416		1813.2	-0.00643632		2403.2	0.00356818		2993.2	-0.00787644
633.41	-0.01937322		1223.41	-0.02170202		1813.4	-0.00656858		2403.4	0.00309093		2993.4	-0.00844044
633.61	-0.01971685		1223.61	-0.02171863		1813.6	-0.00516697		2403.6	0.00334702		2993.6	-0.00835435
633.81	-0.02010089		1223.81	-0.02141815		1813.8	-0.00370255		2403.8	0.00255028		2993.8	-0.00780162
634.01	-0.02036724		1224.01	-0.02083609		1814	-0.00311315		2404	0.00208243		2994	-0.00823138
634.21	-0.02023076		1224.21	-0.02086354		1814.2	-0.00361695		2404.2	0.00204319		2994.2	-0.00860504
634.41	-0.02048414		1224.41	-0.02036712		1814.4	-0.00286583		2404.4	0.00165594		2994.4	-0.00799323
634.61	-0.02099042		1224.61	-0.02058625		1814.6	-0.00265254		2404.6	0.00140745		2994.6	-0.00858562
634.81	-0.02112032		1224.81	-0.02070496		1814.8	-0.00229371		2404.8	0.00141857		2994.8	-0.00931648
635.01	-0.02103478		1225.01	-0.02087482		1815	-0.00250627		2405	0.00150913		2995	-0.00831665
635.21	-0.02073952		1225.21	-0.02041249		1815.2	-0.00314958		2405.2	0.00160637		2995.2	-0.0073414
635.41	-0.02040904		1225.41	-0.02069801		1815.4	-0.00405924		2405.4	0.00144567		2995.4	-0.00687025
635.61	-0.02015637		1225.61	-0.02074395		1815.6	-0.00399948		2405.6	0.00152245		2995.6	-0.00653594
635.81	-0.01928972		1225.81	-0.02189772		1815.8	-0.00404464		2405.8	0.0015844		2995.8	-0.00615068
636.01	-0.01950906		1226.01	-0.0228582		1816	-0.00462236		2406	0.00167397		2996	-0.00526851
636.21	-0.01997243		1226.21	-0.02293023		1816.2	-0.00477598		2406.2	0.00183958		2996.2	-0.00505562
636.41	-0.02019397		1226.41	-0.02339303		1816.4	-0.00507491		2406.4	0.00225576		2996.4	-0.0054938
636.61	-0.0197546		1226.61	-0.02378097		1816.6	-0.00592031		2406.6	0.00259169		2996.6	-0.00514668
636.81	-0.01981722		1226.81	-0.02415814		1816.8	-0.00630073		2406.8	0.00290505		2996.8	-0.00526307
637.01	-0.01962609		1227.01	-0.02345049		1817	-0.00668297		2407	0.00307902		2997	-0.00535838
637.21	-0.01909522		1227.21	-0.02331797		1817.2	-0.00670218		2407.2	0.00444212		2997.2	-0.0057311
637.41	-0.01907171		1227.41	-0.02298167		1817.4	-0.00639077		2407.4	0.00451769		2997.4	-0.00699677
637.61	-0.01895567		1227.61	-0.02414244		1817.6	-0.00631439		2407.6	0.00476277		2997.6	-0.00752883
637.81	-0.01884244		1227.81	-0.02314442		1817.8	-0.00574249		2407.8	0.00366584		2997.8	-0.00768013
638.01	-0.01825652		1228.01	-0.02265371		1818	-0.00651054		2408	0.00394647		2998	-0.00874547
638.21	-0.01847065		1228.21	-0.02285731		1818.2	-0.00703215		2408.2	0.00411697		2998.2	-0.00943553
638.41	-0.01878315		1228.41	-0.02284651		1818.4	-0.00692752		2408.4	0.00363344		2998.4	-0.00998692
638.61	-0.01902941		1228.61	-0.02269092		1818.6	-0.00639882		2408.6	0.00343778		2998.6	-0.01042434
638.81	-0.01882179		1228.81	-0.02279137		1818.8	-0.00654702		2408.8	0.00360206		2998.8	-0.01106875
639.01	-0.01880174		1229.01	-0.02269332		1819	-0.00574307		2409	0.00272557		2999	-0.0110615
639.21	-0.01852962		1229.21	-0.02220443		1819.2	-0.00489364		2409.2	0.00212577		2999.2	-0.01081798
639.41	-0.01866029		1229.41	-0.02303121		1819.4	-0.0041227		2409.4	0.00106793		2999.4	-0.01051851
639.61	-0.01886897		1229.61	-0.02240187		1819.6	-0.00385919		2409.6	0.00126117		2999.6	-0.01062039
639.81	-0.01949864		1229.81	-0.02317174		1819.8	-0.00310035		2409.8	0.00087318		2999.8	-0.01059493
640.01	-0.02016078		1230.01	-0.02384543		1820	-0.00278453		2410	0.00122692		3000	-0.01082507
640.21	-0.02012096		1230.21	-0.02291232		1820.2	-0.00368833		2410.2	0.00128281		3000.2	-0.00981987
640.41	-0.02056228		1230.41	-0.02322343		1820.4	-0.0037815		2410.4	0.00050409		3000.4	-0.00942317
640.61	-0.02050109		1230.61	-0.02332026		1820.6	-0.00387458		2410.6	-0.00003531		3000.6	-0.0082221
640.81	-0.02052142		1230.81	-0.02299124		1820.8	-0.00309518		2410.8	0.00100884		3000.8	-0.00765591
641.01	-0.02026095		1231.01	-0.02291553		1821	-0.00272105		2411	0.00134244		3001	-0.00790281
641.21	-0.02008221		1231.21	-0.02318255		1821.2	-0.00219316		2411.2	0.002562		3001.2	-0.00784744
641.41	-0.01992967		1231.41	-0.02342916		1821.4	-0.00358015		2411.4	0.00233049		3001.4	-0.00711686
641.61	-0.0202517		1231.61	-0.02398626		1821.6	-0.00387843		2411.6	0.00245172		3001.6	-0.00635119
641.81	-0.01963733		1231.81	-0.02382986		1821.8	-0.00382216		2411.8	0.00219977		3001.8	-0.0052313
642.01	-0.01917567		1232.01	-0.02449976		1822	-0.00485432		2412	0.00270594		3002	-0.00585632
642.21	-0.01900662		1232.21	-0.0256188		1822.2	-0.00541659		2412.2	0.00373355		3002.2	-0.00589231
642.41	-0.01908547		1232.41	-0.02563317		1822.4	-0.00476637		2412.4	0.00457082		3002.4	-0.00606624
642.61	-0.01980462		1232.61	-0.02635555		1822.6	-0.00400524		2412.6	0.00474966		3002.6	-0.00565907
642.81	-0.0200626		1232.81	-0.0269525		1822.8	-0.00414535		2412.8	0.00555238		3002.8	-0.00714578
643.01	-0.02037965		1233.01	-0.02664342		1823	-0.00360568		2413	0.00550631		3003	-0.00758107
643.21	-0.01986295		1233.21	-0.02665257		1823.2	-0.00339819		2413.2	0.0053829		3003.2	-0.00728396
643.41	-0.01991935		1233.41	-0.02664979		1823.4	-0.00372763		2413.4	0.00592453		3003.4	-0.00738501
643.61	-0.02029577		1233.61	-0.02628285		1823.6	-0.00445944		2413.6	0.00615755		3003.6	-0.00794456
643.81	-0.02010985		1233.81	-0.02703442		1823.8	-0.0045362		2413.8	0.00546457		3003.8	-0.00926787
644.01	-0.02007851		1234.01	-0.02599487		1824	-0.00494093		2414	0.00526035		3004	-0.01018115
644.21	-0.02038649		1234.21	-0.02520348		1824.2	-0.00504533		2414.2	0.00506925		3004.2	-0.01019937
644.41	-0.02138292		1234.41	-0.02498734		1824.4	-0.00410039		2414.4	0.00433686		3004.4	-0.0106889
644.61	-0.02170711		1234.61	-0.02384324		1824.6	-0.00416977		2414.6	0.00439272		3004.6	-0.01084248
644.81	-0.02136963		1234.81	-0.02217974		1824.8	-0.00447132		2414.8	0.00440744		3004.8	-0.01065512
645.01	-0.0211747		1235.01	-0.02132006		1825	-0.0043063		2415	0.00403055		3005	-0.01046273
645.21	-0.02145968		1235.21	-0.02076068		1825.2	-0.00364856		2415.2	0.00453991		3005.2	-0.00998186
645.41	-0.0214099		1235.41	-0.02044158		1825.4	-0.00449494		2415.4	0.00434581		3005.4	-0.00934309
645.61	-0.02104989		1235.61	-0.02005493		1825.6	-0.00427336		2415.6	0.00431149		3005.6	-0.00906782
645.81	-0.02021735		1235.81	-0.01981664		1825.8	-0.00378285		2415.8	0.00408651		3005.8	-0.00913507
646.01	-0.01967026		1236.01	-0.01969725		1826	-0.00401551		2416	0.00460976		3006	-0.00859324
646.21	-0.01991306		1236.21	-0.01992662		1826.2	-0.00458145		2416.2	0.00559324		3006.2	-0.00750436
646.41	-0.02081571		1236.41	-0.02009262		1826.4	-0.00480244		2416.4	0.0052124		3006.4	-0.00733395
646.61	-0.02135072		1236.61	-0.02173647		1826.6	-0.00570367		2416.6	0.00543735		3006.6	-0.00753428
646.81	-0.02136798		1236.81	-0.02146616		1826.8	-0.00642002		2416.8	0.00509061		3006.8	-0.00740996
647.01	-0.02127497		1237.01	-0.02175077		1827	-0.00616764		2417	0.00502928		3007	-0.00668813
647.21	-0.02123573		1237.21	-0.02262156		1827.2	-0.00559626		2417.2	0.00470454		3007.2	-0.00609099
647.41	-0.0215777		1237.41	-0.02296256		1827.4	-0.00688307		2417.4	0.0046957		3007.4	-0.0067792
647.61	-0.0215107		1237.61	-0.0233556		1827.6	-0.00747602		2417.6	0.0042113		3007.6	-0.00717613
647.81	-0.02152668		1237.81	-0.02316083		1827.8	-0.00783159		2417.8	0.00316533		3007.8	-0.00767582
648.01	-0.02205452		1238.01	-0.0226254		1828	-0.0077266		2418	0.00274828		3008	-0.0075735
648.21	-0.02242521		1238.21	-0.02280376		1828.2	-0.00746825		2418.2	0.00211804		3008.2	-0.00758362
648.41	-0.02265005		1238.41	-0.02251237		1828.4	-0.00749963		2418.4	0.00116313		3008.4	-0.00750293
648.61	-0.02262085		1238.61	-0.02192815		1828.6	-0.00718813		2418.6	0.00038282		3008.6	-0.00751514
648.81	-0.02206714		1238.81	-0.02178556		1828.8	-0.00662977		2418.8	0.00011861		3008.8	-0.00712888
649.01	-0.0222828		1239.01	-0.02211149		1829	-0.00516962		2419	0.00036096		3009	-0.00737979
649.21	-0.02239028		1239.21	-0.02243673		1829.2	-0.00421798		2419.2	0.00052635		3009.2	-0.00764481
649.41	-0.02204312		1239.41	-0.0225047		1829.4	-0.00353673		2419.4	0.00059668		3009.4	-0.00769286
649.61	-0.02170657		1239.61	-0.02244902		1829.6	-0.00247989		2419.6	0.00050464		3009.6	-0.00736149
649.81	-0.02130214		1239.81	-0.02327343		1829.8	-0.00156247		2419.8	0.00068557		3009.8	-0.00776067
