# Supplementary material for: Functional development of a V3/glycan-specific broadly neutralizing antibody isolated from a case of HIV superinfection
Source: eLife journal article supplement (doi:10.7554/elife.68110), 2021-07-15
Supplement: fig2-data2 [file F5.xls]

Vers 3.43 Data Simulation
Conc1	6.25E-08	6.25E-08	6.25E-08	6.25E-08	6.25E-08	6.25E-08	6.25E-08
Start1	290	880	1470	2060	2649.99	3239.99	3829.98
Stop1	649.8	1239.79	1829.8	2419.8	3009.79	3599.78	4189.78
Time1	Data1	Sim1	Time2	Data2	Sim2	Time3	Data3	Sim3	Time4	Data4	Sim4	Time5	Data5	Sim5	Time6	Data6	Sim6	Time7	Data7	Sim7
290	0.00267928		880	-0.00617082		1470	0.00291208		2060	-0.00228287		2649.99	0.00294369		3239.99	0.00178801		3829.98	-0.00455573
290.2	0.00288559		880.2	-0.0067171		1470.2	0.00292536		2060.2	-0.00049686		2650.19	0.00264862		3240.19	0.0019124		3830.18	-0.00489136
290.4	0.0032199		880.4	-0.00751385		1470.4	0.0026671		2060.4	0.00126076		2650.39	0.00268193		3240.39	0.00267956		3830.38	-0.00533005
290.6	0.00290126		880.6	-0.00783786		1470.6	0.00276939		2060.6	0.00258603		2650.59	0.0026804		3240.59	0.00298269		3830.58	-0.00492069
290.8	0.00291972		880.8	-0.00719954		1470.8	0.00258306		2060.8	0.00465586		2650.79	0.00230563		3240.79	0.00350221		3830.78	-0.00480086
291	0.00311212		881	-0.0070847		1471	0.00255832		2061	0.00644972		2650.99	0.00265885		3240.99	0.00332798		3830.98	-0.00452209
291.2	0.00368112		881.2	-0.00659062		1471.2	0.0031586		2061.2	0.0079075		2651.19	0.00288455		3241.19	0.00301873		3831.18	-0.00451425
291.4	0.00436539		881.4	-0.00618492		1471.4	0.00358608		2061.4	0.00867704		2651.39	0.00361854		3241.39	0.0029122		3831.38	-0.00436958
291.6	0.00449895		881.6	-0.00590071		1471.6	0.00306135		2061.6	0.00869393		2651.59	0.00348913		3241.59	0.00227081		3831.58	-0.00383771
291.8	0.00444727		881.8	-0.0060236		1471.8	0.00289837		2061.8	0.00888163		2651.79	0.00299585		3241.79	0.00142982		3831.78	-0.00355129
292	0.00486835		882	-0.00541873		1472	0.00273961		2062	0.00942237		2651.99	0.00321345		3241.99	0.00130012		3831.98	-0.00373754
292.2	0.00467313		882.2	-0.00549749		1472.2	0.00247478		2062.2	0.00892442		2652.19	0.00247099		3242.19	0.00090394		3832.18	-0.00399509
292.4	0.00502134		882.4	-0.00559606		1472.4	0.00171082		2062.4	0.00867627		2652.39	0.00300909		3242.39	0.00128789		3832.38	-0.00364953
292.6	0.00458987		882.6	-0.00525652		1472.6	0.00158819		2062.6	0.00810404		2652.59	0.00287938		3242.59	0.00051743		3832.58	-0.00379708
292.8	0.00454999		882.8	-0.00516606		1472.8	0.00205844		2062.8	0.00682462		2652.79	0.00267718		3242.79	0.0002493		3832.78	-0.00415604
293	0.00520702		883	-0.00494693		1473	0.00250051		2063	0.00696816		2652.99	0.0030034		3242.99	0.00107829		3832.98	-0.00337934
293.2	0.00479315		883.2	-0.00510479		1473.2	0.0027466		2063.2	0.00663291		2653.19	0.00267996		3243.19	0.00167977		3833.18	-0.00327424
293.4	0.00524809		883.4	-0.00454464		1473.4	0.0027277		2063.4	0.00680036		2653.39	0.00221194		3243.39	0.00181435		3833.38	-0.00321926
293.6	0.00588642		883.6	-0.00367361		1473.6	0.00243027		2063.6	0.00746619		2653.59	0.00266895		3243.59	0.00264907		3833.58	-0.00342216
293.8	0.00653656		883.8	-0.00263056		1473.8	0.00317601		2063.8	0.0081767		2653.79	0.00297297		3243.79	0.00283325		3833.78	-0.00240873
294	0.00704596		884	-0.00285565		1474	0.00336026		2064	0.00845945		2653.99	0.00266953		3243.99	0.00295172		3833.98	-0.00288118
294.2	0.00680204		884.2	-0.00287793		1474.2	0.00379619		2064.2	0.00850687		2654.19	0.00273176		3244.19	0.0037986		3834.18	-0.00267694
294.4	0.00708675		884.4	-0.00330387		1474.4	0.00370452		2064.4	0.00782948		2654.39	0.00284425		3244.39	0.0047469		3834.38	-0.00187554
294.6	0.00699741		884.6	-0.00281129		1474.6	0.00443767		2064.6	0.00746796		2654.59	0.00380543		3244.59	0.00427676		3834.58	-0.00104149
294.8	0.00708505		884.8	-0.00220561		1474.8	0.00508393		2064.8	0.00759087		2654.79	0.00473606		3244.79	0.00485595		3834.78	-0.00094366
295	0.00708813		885	-0.002395		1475	0.00560439		2065	0.00772841		2654.99	0.00515018		3244.99	0.00465782		3834.98	-0.00142641
295.2	0.00848824		885.2	-0.00188213		1475.2	0.00613237		2065.2	0.00707561		2655.19	0.00496088		3245.19	0.00422715		3835.18	-0.00177715
295.4	0.00896604		885.4	-0.00303672		1475.4	0.00629504		2065.4	0.00623796		2655.39	0.0050898		3245.39	0.00514486		3835.38	-0.00145641
295.6	0.00905476		885.6	-0.00360322		1475.6	0.00612515		2065.6	0.00664757		2655.59	0.00376249		3245.59	0.00540133		3835.58	-0.00216656
295.8	0.00898672		885.8	-0.0041163		1475.8	0.0059921		2065.8	0.00641525		2655.79	0.0037245		3245.79	0.00589246		3835.78	-0.00280309
296	0.00952921		886	-0.00416636		1476	0.00616781		2066	0.00667129		2655.99	0.00435568		3245.99	0.00684358		3835.98	-0.00278928
296.2	0.00973815		886.2	-0.0047568		1476.2	0.00552492		2066.2	0.0057694		2656.19	0.00426358		3246.19	0.00744799		3836.18	-0.00237984
296.4	0.01018788		886.4	-0.00425876		1476.4	0.00549361		2066.4	0.00507804		2656.39	0.00541995		3246.39	0.00776449		3836.38	-0.00185695
296.6	0.0104294		886.6	-0.0046634		1476.6	0.00607537		2066.6	0.00579166		2656.59	0.00548716		3246.59	0.00705577		3836.58	-0.00219268
296.8	0.01097875		886.8	-0.00406906		1476.8	0.00673526		2066.8	0.00674096		2656.79	0.00503909		3246.79	0.00750147		3836.78	-0.00268535
297	0.01108591		887	-0.00404911		1477	0.00659408		2067	0.00809702		2656.99	0.0043951		3246.99	0.00693915		3836.98	-0.00237205
297.2	0.01084251		887.2	-0.00389406		1477.2	0.0062129		2067.2	0.00866447		2657.19	0.00418951		3247.19	0.00738853		3837.18	-0.00211169
297.4	0.01128078		887.4	-0.00302249		1477.4	0.00623253		2067.4	0.00919219		2657.39	0.00470874		3247.39	0.00628885		3837.38	-0.00161161
297.6	0.01138034		887.6	-0.00195566		1477.6	0.00584523		2067.6	0.00970854		2657.59	0.00497225		3247.59	0.00546159		3837.58	-0.0007911
297.8	0.01166756		887.8	-0.00178254		1477.8	0.0059971		2067.8	0.01075181		2657.79	0.00527046		3247.79	0.00483114		3837.78	0.00010612
298	0.01149882		888	-0.00249439		1478	0.00639014		2068	0.01128076		2657.99	0.00530247		3247.99	0.00448001		3837.98	0.00113639
298.2	0.01134274		888.2	-0.00229021		1478.2	0.00601093		2068.2	0.01063872		2658.19	0.00566484		3248.19	0.00428973		3838.18	0.0027252
298.4	0.01124795		888.4	-0.0026482		1478.4	0.00608838		2068.4	0.01041306		2658.39	0.0055666		3248.39	0.00289182		3838.38	0.00352198
298.6	0.01058568		888.6	-0.00209219		1478.6	0.00715252		2068.6	0.01031714		2658.59	0.0059957		3248.59	0.0019412		3838.58	0.00344619
298.8	0.00997747		888.8	-0.00160709		1478.8	0.00765751		2068.8	0.01061291		2658.79	0.00502084		3248.79	0.00286919		3838.78	0.00332773
299	0.00978193		889	-0.00112869		1479	0.00800168		2069	0.01074536		2658.99	0.00343405		3248.99	0.00315201		3838.98	0.00347153
299.2	0.01087722		889.2	-0.00121723		1479.2	0.00790116		2069.2	0.01029477		2659.19	0.00368523		3249.19	0.00338141		3839.18	0.00319604
299.4	0.01041378		889.4	-0.00157738		1479.4	0.00817999		2069.4	0.0097539		2659.39	0.00354102		3249.39	0.00512072		3839.38	0.00284635
299.6	0.01075493		889.6	-0.00103322		1479.6	0.008244		2069.6	0.00925995		2659.59	0.00344231		3249.59	0.00596901		3839.58	0.00206356
299.8	0.01127359		889.8	-0.0007113		1479.8	0.00766592		2069.8	0.0077562		2659.79	0.0045232		3249.79	0.00628034		3839.78	0.002554
300	0.01200623		890	-0.00082863		1480	0.0072277		2070	0.00728189		2659.99	0.00538254		3249.99	0.00694496		3839.98	0.0021434
300.2	0.01205384		890.2	-0.00037481		1480.2	0.00693716		2070.2	0.00750464		2660.19	0.00499436		3250.19	0.00719868		3840.18	0.00170716
300.4	0.01196459		890.4	0.00015289		1480.4	0.00796168		2070.4	0.00731104		2660.39	0.00532427		3250.39	0.00681644		3840.38	0.0001284
300.6	0.01190494		890.6	0.00013606		1480.6	0.00877192		2070.6	0.00768259		2660.59	0.00371376		3250.59	0.00615823		3840.58	-0.00153322
300.8	0.01222181		890.8	-0.00001782		1480.8	0.00884181		2070.8	0.00765191		2660.79	0.00276601		3250.79	0.00563151		3840.78	-0.00269211
301	0.01202819		891	0.00010867		1481	0.00963078		2071	0.0072935		2660.99	0.00312552		3250.99	0.00545364		3840.98	-0.00384157
301.2	0.01210424		891.2	0.00015539		1481.2	0.00923902		2071.2	0.00750183		2661.19	0.004334		3251.19	0.00527286		3841.18	-0.00480115
301.4	0.01239148		891.4	0.00024828		1481.4	0.00898424		2071.4	0.00729134		2661.39	0.00499969		3251.39	0.00396682		3841.38	-0.00489472
301.6	0.01272614		891.6	0.00027296		1481.6	0.00879897		2071.6	0.00738412		2661.59	0.00509229		3251.59	0.0039736		3841.58	-0.00455566
301.8	0.01290053		891.8	0.00019027		1481.8	0.00863488		2071.8	0.0085415		2661.79	0.00555258		3251.79	0.00349453		3841.78	-0.00418427
302	0.01244404		892	-0.00002237		1482	0.00920311		2072	0.00817524		2661.99	0.00608019		3251.99	0.00331871		3841.98	-0.00272528
302.2	0.0131174		892.2	0.00061292		1482.2	0.00920986		2072.2	0.0074793		2662.19	0.00540827		3252.19	0.00284405		3842.18	-0.00240988
302.4	0.01320731		892.4	0.00113714		1482.4	0.0098665		2072.4	0.00805842		2662.39	0.00560483		3252.39	0.00264261		3842.38	-0.00191772
302.6	0.01310903		892.6	0.00117485		1482.6	0.00958308		2072.6	0.00760979		2662.59	0.00552797		3252.59	0.00248005		3842.58	-0.00131033
302.8	0.0132724		892.8	0.00064149		1482.8	0.00973344		2072.8	0.00726119		2662.79	0.00522559		3252.79	0.00345292		3842.78	-0.00037749
303	0.01399391		893	0.00039683		1483	0.00947429		2073	0.00627757		2662.99	0.00649011		3252.99	0.00416611		3842.98	0.00050385
303.2	0.01447429		893.2	-0.00041501		1483.2	0.00849071		2073.2	0.00599126		2663.19	0.00762526		3253.19	0.00407943		3843.18	0.00036861
303.4	0.01508867		893.4	-0.00084903		1483.4	0.00810713		2073.4	0.00597276		2663.39	0.00810768		3253.39	0.00452471		3843.38	0.00159043
303.6	0.01586078		893.6	-0.00125673		1483.6	0.0082502		2073.6	0.00597085		2663.59	0.00919591		3253.59	0.0054879		3843.58	0.00239341
303.8	0.01684818		893.8	-0.00180696		1483.8	0.00813633		2073.8	0.00631695		2663.79	0.00925562		3253.79	0.00480957		3843.78	0.00204475
304	0.01640889		894	-0.00247372		1484	0.00800329		2074	0.00662206		2663.99	0.0092555		3253.99	0.0047289		3843.98	0.00127657
304.2	0.01598891		894.2	-0.00242177		1484.2	0.00885991		2074.2	0.00764698		2664.19	0.00830016		3254.19	0.0045461		3844.18	0.00131355
304.4	0.01593932		894.4	-0.00292172		1484.4	0.00876867		2074.4	0.00798695		2664.39	0.00800519		3254.39	0.00397562		3844.38	0.0011836
304.6	0.01558151		894.6	-0.00311412		1484.6	0.00814858		2074.6	0.00880782		2664.59	0.00630024		3254.59	0.00398029		3844.58	0.00027055
304.8	0.01553337		894.8	-0.0031496		1484.8	0.00841789		2074.8	0.00995601		2664.79	0.00610058		3254.79	0.00479015		3844.78	0.0000049
305	0.01475204		895	-0.0032435		1485	0.00834503		2075	0.01034486		2664.99	0.00655742		3254.99	0.00506828		3844.98	-0.00054008
305.2	0.01382036		895.2	-0.00347216		1485.2	0.00737965		2075.2	0.01100151		2665.19	0.00586066		3255.19	0.00531307		3845.18	-0.00040272
305.4	0.01402301		895.4	-0.00259865		1485.4	0.00767192		2075.4	0.01080764		2665.39	0.00594588		3255.39	0.0048532		3845.38	0.00020114
305.6	0.01359604		895.6	-0.00256298		1485.6	0.00784055		2075.6	0.01145521		2665.59	0.00551372		3255.59	0.00523141		3845.58	0.0010447
305.8	0.01359078		895.8	-0.00224805		1485.8	0.00795495		2075.8	0.01177024		2665.79	0.00442974		3255.79	0.00454074		3845.78	0.00171117
306	0.01357111		896	-0.00176175		1486	0.00854777		2076	0.01157257		2665.99	0.0042064		3255.99	0.00524254		3845.98	0.00188903
306.2	0.01396087		896.2	-0.00184025		1486.2	0.00838352		2076.2	0.01076027		2666.19	0.00394736		3256.19	0.00594393		3846.18	0.00170956
306.4	0.01394569		896.4	-0.00172787		1486.4	0.00804903		2076.4	0.0110323		2666.39	0.00456945		3256.39	0.0060523		3846.38	0.00229145
306.6	0.01347383		896.6	-0.00231149		1486.6	0.00823859		2076.6	0.01063927		2666.59	0.00452006		3256.59	0.00452944		3846.58	0.00188914
306.8	0.01351206		896.8	-0.00184005		1486.8	0.00936571		2076.8	0.01016076		2666.79	0.00503664		3256.79	0.00502116		3846.78	0.00239932
307	0.01402137		897	-0.00122824		1487	0.0083612		2077	0.01065001		2666.99	0.00658378		3256.99	0.00530901		3846.98	0.00258343
307.2	0.01396991		897.2	-0.00105525		1487.2	0.00839082		2077.2	0.01169989		2667.19	0.00595507		3257.19	0.00513853		3847.18	0.00286642
307.4	0.01474461		897.4	-0.00049424		1487.4	0.00838517		2077.4	0.01204035		2667.39	0.00669349		3257.39	0.00495075		3847.38	0.00328659
307.6	0.01578255		897.6	0.00002369		1487.6	0.0087926		2077.6	0.01186519		2667.59	0.00692255		3257.59	0.00556231		3847.58	0.00253902
307.8	0.01674581		897.8	-0.00096002		1487.8	0.00812772		2077.8	0.01136442		2667.79	0.00708175		3257.79	0.00468226		3847.78	0.00199352
308	0.01675702		898	-0.00073902		1488	0.00753362		2078	0.01136057		2667.99	0.00694564		3257.99	0.00498983		3847.98	0.00178954
308.2	0.01785251		898.2	-0.00058707		1488.2	0.00699842		2078.2	0.01185989		2668.19	0.00684162		3258.19	0.00490198		3848.18	0.00251742
308.4	0.01777815		898.4	-0.00085595		1488.4	0.00603869		2078.4	0.01243222		2668.39	0.00650252		3258.39	0.00425452		3848.38	0.00285275
308.6	0.01775996		898.6	-0.00040412		1488.6	0.00563662		2078.6	0.01168185		2668.59	0.00583472		3258.59	0.00448738		3848.58	0.00231615
308.8	0.01832754		898.8	-0.00106433		1488.8	0.00665143		2078.8	0.0114851		2668.79	0.00654118		3258.79	0.0050846		3848.78	0.00236782
309	0.01948507		899	-0.00174153		1489	0.00687019		2079	0.01049526		2668.99	0.00657304		3258.99	0.00463145		3848.98	0.00207544
309.2	0.01992205		899.2	-0.00072716		1489.2	0.00740522		2079.2	0.0098062		2669.19	0.00561595		3259.19	0.00503888		3849.18	0.00292499
309.4	0.02118398		899.4	-0.00116032		1489.4	0.00865647		2079.4	0.00860435		2669.39	0.00638967		3259.39	0.00501855		3849.38	0.00332079
309.6	0.02176658		899.6	-0.00229147		1489.6	0.00940257		2079.6	0.00879729		2669.59	0.00526381		3259.59	0.00583556		3849.58	0.00403946
309.8	0.02213406		899.8	-0.00274877		1489.8	0.00982749		2079.8	0.00863199		2669.79	0.00474364		3259.79	0.00567391		3849.78	0.00397655
310	0.02242731		900	-0.00309797		1490	0.01073343		2080	0.00856239		2669.99	0.00571849		3259.99	0.00659529		3849.98	0.00306311
310.2	0.02300004		900.2	-0.00354911		1490.2	0.0113283		2080.2	0.00835202		2670.19	0.00616385		3260.19	0.00720687		3850.18	0.00274288
310.4	0.02311856		900.4	-0.00301994		1490.4	0.0123903		2080.4	0.00824058		2670.39	0.00630187		3260.39	0.00689965		3850.38	0.00267544
310.6	0.02272891		900.6	-0.00301511		1490.6	0.01302234		2080.6	0.00858178		2670.59	0.0064738		3260.59	0.00678699		3850.58	0.00272019
310.8	0.02224384		900.8	-0.00195919		1490.8	0.01343392		2080.8	0.0093532		2670.79	0.00623432		3260.79	0.00774608		3850.78	0.00346362
311	0.02281153		901	-0.00163558		1491	0.01267529		2081	0.0095129		2670.99	0.00630533		3260.99	0.00839929		3850.98	0.00364566
311.2	0.02304768		901.2	-0.00109661		1491.2	0.01276913		2081.2	0.00978405		2671.19	0.00615102		3261.19	0.00901471		3851.18	0.0038292
311.4	0.02291987		901.4	-0.00034316		1491.4	0.01209138		2081.4	0.00966456		2671.39	0.00677763		3261.39	0.00937401		3851.38	0.00370068
311.6	0.02292287		901.6	-0.00025952		1491.6	0.01081926		2081.6	0.01045413		2671.59	0.00638934		3261.59	0.01010493		3851.58	0.00294903
311.8	0.02297963		901.8	-0.00024548		1491.8	0.00991379		2081.8	0.01053887		2671.79	0.00652791		3261.79	0.00941714		3851.78	0.0026439
312	0.02281988		902	0.00034673		1492	0.00936825		2082	0.01128604		2671.99	0.00514913		3261.99	0.00898349		3851.98	0.00196272
312.2	0.02293657		902.2	0.00052074		1492.2	0.00822567		2082.2	0.01194733		2672.19	0.00501904		3262.19	0.00793085		3852.18	0.00231531
312.4	0.02231449		902.4	0.00042664		1492.4	0.00767897		2082.4	0.01203966		2672.39	0.00476115		3262.39	0.00718063		3852.38	0.00155135
312.6	0.02232855		902.6	-0.00006508		1492.6	0.00741312		2082.6	0.01170943		2672.59	0.00452614		3262.59	0.00660779		3852.58	0.00140311
312.8	0.02297895		902.8	-0.00070801		1492.8	0.00761977		2082.8	0.01240544		2672.79	0.00473618		3262.79	0.00700962		3852.78	0.00151723
313	0.02302001		903	-0.00122893		1493	0.00723206		2083	0.01305609		2672.99	0.00432602		3262.99	0.00595289		3852.98	0.00151775
313.2	0.02246929		903.2	-0.00128617		1493.2	0.00730359		2083.2	0.01353332		2673.19	0.00356752		3263.19	0.00537921		3853.18	0.00250524
313.4	0.02232013		903.4	-0.0016084		1493.4	0.00815754		2083.4	0.01385367		2673.39	0.00459897		3263.39	0.00480614		3853.38	0.00198297
313.6	0.02186849		903.6	-0.00125065		1493.6	0.00730615		2083.6	0.01472845		2673.59	0.00422411		3263.59	0.00423872		3853.58	0.00216292
313.8	0.02140796		903.8	-0.00121225		1493.8	0.006854		2083.8	0.01436342		2673.79	0.00487741		3263.79	0.00415528		3853.78	0.0021005
314	0.02264643		904	-0.00156251		1494	0.00734865		2084	0.01359277		2673.99	0.00498153		3263.99	0.00403819		3853.98	0.00266039
314.2	0.02297108		904.2	-0.00142901		1494.2	0.00668746		2084.2	0.01369652		2674.19	0.00505277		3264.19	0.00405769		3854.18	0.00267576
314.4	0.02263555		904.4	-0.00139736		1494.4	0.00778695		2084.4	0.01244496		2674.39	0.00602863		3264.39	0.004344		3854.38	0.00340199
314.6	0.02260812		904.6	-0.00156327		1494.6	0.00805714		2084.6	0.0125638		2674.59	0.00616008		3264.59	0.00425464		3854.58	0.00415121
314.8	0.02221661		904.8	-0.00128201		1494.8	0.00867284		2084.8	0.01262995		2674.79	0.00623316		3264.79	0.00441051		3854.78	0.00384041
315	0.0220092		905	-0.00058176		1495	0.00882624		2085	0.01226437		2674.99	0.00634818		3264.99	0.00473994		3854.98	0.00439777
315.2	0.02142529		905.2	0.00012347		1495.2	0.00891822		2085.2	0.01199362		2675.19	0.00739715		3265.19	0.00591954		3855.18	0.00383381
315.4	0.02153397		905.4	0.00140976		1495.4	0.00975554		2085.4	0.01237732		2675.39	0.00729059		3265.39	0.00661566		3855.38	0.00340487
315.6	0.0218623		905.6	0.00166246		1495.6	0.00918272		2085.6	0.01240192		2675.59	0.00686056		3265.59	0.00728488		3855.58	0.00414016
315.8	0.02258619		905.8	0.00185991		1495.8	0.00967339		2085.8	0.01180701		2675.79	0.00722233		3265.79	0.00698033		3855.78	0.00410882
316	0.02328808		906	0.00214725		1496	0.00875989		2086	0.01198209		2675.99	0.00603383		3265.99	0.00732942		3855.98	0.00378869
316.2	0.02315302		906.2	0.0017653		1496.2	0.00870127		2086.2	0.01197481		2676.19	0.00606886		3266.19	0.00719564		3856.18	0.00387412
316.4	0.0231809		906.4	0.00087465		1496.4	0.00897897		2086.4	0.01152536		2676.39	0.00659432		3266.39	0.00728543		3856.38	0.00321976
316.6	0.02339397		906.6	-0.00016535		1496.6	0.0087369		2086.6	0.01139733		2676.59	0.0062242		3266.59	0.00711156		3856.58	0.00311005
316.8	0.02319828		906.8	-0.00011864		1496.8	0.00864375		2086.8	0.01133244		2676.79	0.00644383		3266.79	0.00719175		3856.78	0.00285621
317	0.02322098		907	-0.00064286		1497	0.00831019		2087	0.01181598		2676.99	0.00693326		3266.99	0.00709298		3856.98	0.0018017
317.2	0.02366894		907.2	-0.00014862		1497.2	0.00852814		2087.2	0.01125055		2677.19	0.00659964		3267.19	0.00727503		3857.18	0.00174741
317.4	0.02362121		907.4	0.00065763		1497.4	0.00887222		2087.4	0.01170033		2677.39	0.0073725		3267.39	0.00705123		3857.38	0.00127505
317.6	0.02348777		907.6	0.00012047		1497.6	0.00720541		2087.6	0.01158804		2677.59	0.00666392		3267.59	0.00700848		3857.58	0.00158713
317.8	0.02350357		907.8	-0.00117688		1497.8	0.00709368		2087.8	0.01103596		2677.79	0.00697284		3267.79	0.00685194		3857.78	0.00219598
318	0.02492342		908	-0.00186414		1498	0.00690892		2088	0.01115222		2677.99	0.0062301		3267.99	0.00615242		3857.98	0.00224757
318.2	0.02557692		908.2	-0.00199142		1498.2	0.00642307		2088.2	0.01174796		2678.19	0.00624801		3268.19	0.00598845		3858.18	0.00226714
318.4	0.02538792		908.4	-0.00225978		1498.4	0.00798576		2088.4	0.01131097		2678.39	0.00683289		3268.39	0.00574409		3858.38	0.00277145
318.6	0.02596241		908.6	-0.00286584		1498.6	0.00784912		2088.6	0.01112738		2678.59	0.00712812		3268.59	0.0050326		3858.58	0.00236957
318.8	0.02564064		908.8	-0.00199914		1498.8	0.00777567		2088.8	0.01164536		2678.79	0.00739609		3268.79	0.0051064		3858.78	0.00240923
319	0.0254519		909	-0.00095349		1499	0.0084238		2089	0.01059119		2678.99	0.00727116		3268.99	0.00524236		3858.98	0.00321093
319.2	0.02619741		909.2	0.00022256		1499.2	0.00859215		2089.2	0.01032313		2679.19	0.00827521		3269.19	0.00654358		3859.18	0.00417565
319.4	0.02623337		909.4	0.00121667		1499.4	0.00913299		2089.4	0.01107229		2679.39	0.00825628		3269.39	0.00653936		3859.38	0.00616139
319.6	0.02648552		909.6	0.00150983		1499.6	0.00887727		2089.6	0.01127606		2679.59	0.00862987		3269.59	0.00707812		3859.58	0.00762644
319.8	0.02584671		909.8	0.00234628		1499.8	0.00959417		2089.8	0.01101099		2679.79	0.00921513		3269.79	0.00544292		3859.78	0.00709382
320	0.02694235		910	0.00305708		1500	0.01011367		2090	0.01195341		2679.99	0.0090064		3269.99	0.00499758		3859.98	0.00719865
320.2	0.0265138		910.2	0.00211738		1500.2	0.0108646		2090.2	0.01201226		2680.19	0.00875619		3270.19	0.00458673		3860.18	0.00683078
320.4	0.02670153		910.4	0.00290052		1500.4	0.01059574		2090.4	0.01237229		2680.39	0.00892727		3270.39	0.00418647		3860.38	0.00670292
320.6	0.0270251		910.6	0.00356477		1500.6	0.01080567		2090.6	0.01266251		2680.59	0.00795812		3270.59	0.00453729		3860.58	0.00589644
320.8	0.02684482		910.8	0.00352453		1500.8	0.01049459		2090.8	0.01213329		2680.79	0.00759601		3270.79	0.00503644		3860.78	0.00511206
321	0.02702185		911	0.00325122		1501	0.0101988		2091	0.01343927		2680.99	0.00766525		3270.99	0.00563877		3860.98	0.00398754
321.2	0.02602737		911.2	0.00350518		1501.2	0.010706		2091.2	0.01408202		2681.19	0.00638354		3271.19	0.00549572		3861.18	0.00380354
321.4	0.02616875		911.4	0.00275134		1501.4	0.01099857		2091.4	0.01554657		2681.39	0.00607258		3271.39	0.00517282		3861.38	0.00347429
321.6	0.02504827		911.6	0.00210959		1501.6	0.01083038		2091.6	0.01644753		2681.59	0.00638346		3271.59	0.00585788		3861.58	0.0035902
321.8	0.02499647		911.8	0.00144042		1501.8	0.01028569		2091.8	0.01755401		2681.79	0.00638045		3271.79	0.0053735		3861.78	0.00333835
322	0.02569194		912	0.00070262		1502	0.01094174		2092	0.01785878		2681.99	0.00579626		3271.99	0.00535419		3861.98	0.00361896
322.2	0.02573669		912.2	-0.00010242		1502.2	0.01148746		2092.2	0.01729008		2682.19	0.0065261		3272.19	0.00565788		3862.18	0.00476919
322.4	0.02526043		912.4	-0.0000296		1502.4	0.01178178		2092.4	0.01647794		2682.39	0.00664822		3272.39	0.00468868		3862.38	0.00410776
322.6	0.02561449		912.6	-0.00046828		1502.6	0.01063405		2092.6	0.01562423		2682.59	0.00711403		3272.59	0.00497273		3862.58	0.00329428
322.8	0.02554686		912.8	-0.00035375		1502.8	0.01030781		2092.8	0.01449592		2682.79	0.00683473		3272.79	0.00602367		3862.78	0.00388607
323	0.0252606		913	0.00011304		1503	0.01098774		2093	0.01304848		2682.99	0.00713738		3272.99	0.00658252		3862.98	0.00398345
323.2	0.02554734		913.2	0.00069812		1503.2	0.01080434		2093.2	0.01242068		2683.19	0.00794693		3273.19	0.00706763		3863.18	0.00441865
323.4	0.02454769		913.4	0.00068947		1503.4	0.01144728		2093.4	0.01219026		2683.39	0.00824312		3273.39	0.00693547		3863.38	0.00476947
323.6	0.02485068		913.6	0.0002975		1503.6	0.01160328		2093.6	0.01141363		2683.59	0.00942647		3273.59	0.00739477		3863.58	0.00460006
323.8	0.02455408		913.8	0.00042713		1503.8	0.01173459		2093.8	0.0107		2683.79	0.00963197		3273.79	0.00627577		3863.78	0.0049555
324	0.02605324		914	0.00053037		1504	0.01188734		2094	0.01071461		2683.99	0.00994587		3273.99	0.00698057		3863.98	0.00480097
324.2	0.02653517		914.2	0.0004151		1504.2	0.01147167		2094.2	0.00965856		2684.19	0.00980175		3274.19	0.00697562		3864.18	0.00394219
324.4	0.027462		914.4	0.00064468		1504.4	0.01151436		2094.4	0.00930235		2684.39	0.01136982		3274.39	0.00699583		3864.38	0.00399982
324.6	0.0285441		914.6	0.00019509		1504.6	0.01163193		2094.6	0.00939213		2684.59	0.01097127		3274.59	0.0080371		3864.58	0.00248828
324.8	0.02850905		914.8	-0.00019149		1504.8	0.01184798		2094.8	0.00940426		2684.79	0.01101488		3274.79	0.00888621		3864.78	0.00211131
325	0.02827723		915	0.00043923		1505	0.01213548		2095	0.01087044		2684.99	0.01174428		3274.99	0.00928884		3864.98	0.0015386
325.2	0.02763453		915.2	0.00043019		1505.2	0.01301695		2095.2	0.01107883		2685.19	0.01145793		3275.19	0.00952399		3865.18	0.00153735
325.4	0.02837286		915.4	-0.00003366		1505.4	0.01303527		2095.4	0.0122873		2685.39	0.01177932		3275.39	0.01011514		3865.38	0.00169625
325.6	0.0278322		915.6	0.00028567		1505.6	0.01259291		2095.6	0.01323554		2685.59	0.01200606		3275.59	0.01047106		3865.58	0.00191838
325.8	0.02809992		915.8	-0.00025614		1505.8	0.0122016		2095.8	0.01381954		2685.79	0.01113771		3275.79	0.00919315		3865.78	0.00210548
326	0.02863892		916	-0.00085175		1506	0.01267179		2096	0.01435368		2685.99	0.01135357		3275.99	0.00906696		3865.98	0.00296018
326.2	0.02886929		916.2	-0.00039683		1506.2	0.01209628		2096.2	0.01467879		2686.19	0.01052813		3276.19	0.00814691		3866.18	0.00274372
326.4	0.02921412		916.4	-0.00005693		1506.4	0.01162686		2096.4	0.01557484		2686.39	0.00952485		3276.39	0.0075008		3866.38	0.00190456
326.6	0.02937347		916.6	-0.00085544		1506.6	0.01071577		2096.6	0.01575007		2686.59	0.00908397		3276.59	0.0079864		3866.58	0.00214939
326.8	0.02991049		916.8	-0.00088288		1506.8	0.01060865		2096.8	0.01539229		2686.79	0.00846592		3276.79	0.008669		3866.78	0.00292473
327	0.02976231		917	-0.00013651		1507	0.01097162		2097	0.01552827		2686.99	0.00799596		3276.99	0.00824074		3866.98	0.00304136
327.2	0.02889442		917.2	-0.00020439		1507.2	0.01052834		2097.2	0.01518211		2687.19	0.00718258		3277.19	0.00771912		3867.18	0.0032497
327.4	0.02834651		917.4	-0.00029665		1507.4	0.00992476		2097.4	0.01538019		2687.39	0.00637696		3277.39	0.00734336		3867.38	0.00425329
327.6	0.02889089		917.6	-0.00064921		1507.6	0.00909245		2097.6	0.01494066		2687.59	0.0064394		3277.59	0.00738482		3867.58	0.00502827
327.8	0.0289282		917.8	-0.000385		1507.8	0.00916345		2097.8	0.01499526		2687.79	0.00574744		3277.79	0.0062512		3867.78	0.00551623
328	0.02879132		918	-0.00011576		1508	0.00923671		2098	0.01453496		2687.99	0.00587225		3277.99	0.00619953		3867.98	0.00548643
328.2	0.02901951		918.2	-0.00055396		1508.2	0.00966103		2098.2	0.01399835		2688.19	0.00573853		3278.19	0.00586784		3868.18	0.00588848
328.4	0.02927122		918.4	-0.00141464		1508.4	0.01021219		2098.4	0.01377688		2688.39	0.00638645		3278.39	0.00583132		3868.38	0.00707992
328.6	0.02889953		918.6	-0.00080777		1508.6	0.01105947		2098.6	0.01357266		2688.59	0.00526008		3278.59	0.00633349		3868.58	0.00725837
328.8	0.02841237		918.8	-0.00043195		1508.8	0.01178613		2098.8	0.01328359		2688.79	0.00529672		3278.79	0.00616175		3868.78	0.00702441
329	0.02786824		919	-0.00063031		1509	0.01176636		2099	0.01329334		2688.99	0.00615335		3278.99	0.00543937		3868.98	0.00598272
329.2	0.02775317		919.2	-0.0013626		1509.2	0.01234078		2099.2	0.01320743		2689.19	0.00626656		3279.19	0.00537503		3869.18	0.00583738
329.4	0.02872879		919.4	-0.00153068		1509.4	0.01198956		2099.4	0.01322105		2689.39	0.00578863		3279.39	0.00470228		3869.38	0.00582365
329.6	0.02947044		919.6	-0.00122823		1509.6	0.01223556		2099.6	0.0127847		2689.59	0.00575444		3279.59	0.00470556		3869.58	0.00467122
329.8	0.02953986		919.8	-0.00097187		1509.8	0.01251617		2099.8	0.0137848		2689.79	0.00654121		3279.79	0.0045022		3869.78	0.00405469
330	0.03034989		920	-0.00067462		1510	0.0130837		2100	0.01366673		2689.99	0.00733773		3279.99	0.00389092		3869.98	0.00337019
330.2	0.03020761		920.2	-0.00019485		1510.2	0.01294497		2100.2	0.01366499		2690.19	0.00742643		3280.19	0.00352031		3870.18	0.00270998
330.4	0.0305619		920.4	0.00012181		1510.4	0.01310473		2100.4	0.01379087		2690.39	0.00815216		3280.39	0.00415395		3870.38	0.00248939
330.6	0.03052118		920.6	0.00085606		1510.6	0.01280552		2100.6	0.01382371		2690.59	0.00898642		3280.59	0.00467041		3870.58	0.00266181
330.8	0.03064528		920.8	0.0003996		1510.8	0.0129471		2100.8	0.01424976		2690.79	0.01010169		3280.79	0.00463024		3870.78	0.00212772
331	0.02951586		921	0.0000787		1511	0.01288976		2101	0.01377586		2690.99	0.01107112		3280.99	0.00410901		3870.98	0.00136812
331.2	0.02957366		921.2	0.0002164		1511.2	0.01246043		2101.2	0.0131756		2691.19	0.01159988		3281.19	0.00288312		3871.18	0.00116403
331.4	0.03059432		921.4	0.00085152		1511.4	0.01218377		2101.4	0.01399018		2691.39	0.0116836		3281.39	0.00299697		3871.38	0.0014292
331.6	0.03034806		921.6	0.00094362		1511.6	0.01207829		2101.6	0.01479019		2691.59	0.012158		3281.59	0.00496326		3871.58	0.00185481
331.8	0.02993683		921.8	0.00084576		1511.8	0.01233942		2101.8	0.01521712		2691.79	0.0116532		3281.79	0.00531386		3871.78	0.00265297
332	0.03020823		922	0.00086646		1512	0.01194993		2102	0.01513022		2691.99	0.01098044		3281.99	0.00635653		3871.98	0.00443909
332.2	0.0307183		922.2	0.0002376		1512.2	0.01202068		2102.2	0.01544354		2692.19	0.01065467		3282.19	0.00674743		3872.18	0.00509625
332.4	0.0309328		922.4	-0.00040911		1512.4	0.01198234		2102.4	0.01494761		2692.39	0.01040614		3282.39	0.00673358		3872.38	0.00612729
332.6	0.03125332		922.6	0.00028544		1512.6	0.0124248		2102.6	0.01510903		2692.59	0.00983601		3282.59	0.00734346		3872.58	0.00557465
332.8	0.03154943		922.8	0.00003355		1512.8	0.01241965		2102.8	0.01615593		2692.79	0.00897707		3282.79	0.00687049		3872.78	0.00482189
333	0.03155265		923	-0.00043155		1513	0.01257275		2103	0.01659413		2692.99	0.00851276		3282.99	0.00698209		3872.98	0.00524078
333.2	0.03268561		923.2	0.00005688		1513.2	0.0122859		2103.2	0.01613711		2693.19	0.00809032		3283.19	0.00721691		3873.18	0.00566137
333.4	0.03361568		923.4	0.00041226		1513.4	0.01236402		2103.4	0.0153096		2693.39	0.00760269		3283.39	0.00602887		3873.38	0.00555888
333.6	0.03466101		923.6	0.00104954		1513.6	0.01282505		2103.6	0.01530351		2693.59	0.00770186		3283.59	0.00591927		3873.58	0.00520739
333.8	0.03494981		923.8	0.00148409		1513.8	0.01292179		2103.8	0.01554693		2693.79	0.00824821		3283.79	0.00516747		3873.78	0.00462051
334	0.03524008		924	0.00203861		1514	0.0127808		2104	0.01412883		2693.99	0.00902659		3283.99	0.00382889		3873.98	0.0046651
334.2	0.03523458		924.2	0.00231741		1514.2	0.01160569		2104.2	0.01392349		2694.19	0.00943577		3284.19	0.00360564		3874.18	0.00407599
334.4	0.03593906		924.4	0.0027122		1514.4	0.01175815		2104.4	0.01369083		2694.39	0.00983719		3284.39	0.00342374		3874.38	0.00366334
334.6	0.03581589		924.6	0.00289457		1514.6	0.01157627		2104.6	0.01344231		2694.59	0.0108781		3284.59	0.00309906		3874.58	0.00320484
334.8	0.03579191		924.8	0.00151327		1514.8	0.01172581		2104.8	0.01304844		2694.79	0.01190607		3284.79	0.00182369		3874.78	0.00219417
335	0.03623248		925	0.00219694		1515	0.0108216		2105	0.01338739		2694.99	0.01220545		3284.99	0.0018176		3874.98	0.00235456
335.2	0.0361582		925.2	0.00247002		1515.2	0.01092378		2105.2	0.01339132		2695.19	0.01181844		3285.19	0.00160022		3875.18	0.00305956
335.4	0.03602709		925.4	0.00295646		1515.4	0.01078588		2105.4	0.01466658		2695.39	0.01199152		3285.39	0.00359845		3875.38	0.00319279
335.6	0.03548124		925.6	0.00352721		1515.6	0.00977291		2105.6	0.0147499		2695.59	0.01243053		3285.59	0.00498599		3875.58	0.00397548
335.8	0.03536386		925.8	0.00389806		1515.8	0.01019714		2105.8	0.01465276		2695.79	0.01114703		3285.79	0.00498704		3875.78	0.005291
336	0.03412701		926	0.00406962		1516	0.00960628		2106	0.01493094		2695.99	0.01083301		3285.99	0.00619041		3875.98	0.00590376
336.2	0.03303171		926.2	0.00377557		1516.2	0.00966837		2106.2	0.01562624		2696.19	0.0104767		3286.19	0.00605264		3876.18	0.00593579
336.4	0.03282245		926.4	0.00322724		1516.4	0.010203		2106.4	0.01584597		2696.39	0.01061219		3286.39	0.00683883		3876.38	0.00619435
336.6	0.03287824		926.6	0.00352555		1516.6	0.01038299		2106.6	0.01637916		2696.59	0.00964253		3286.59	0.00752242		3876.58	0.00653574
336.8	0.03276887		926.8	0.00298311		1516.8	0.01045446		2106.8	0.01663711		2696.79	0.00834126		3286.79	0.00746249		3876.78	0.00818325
337	0.03307971		927	0.00212289		1517	0.01089428		2107	0.01577431		2696.99	0.00729514		3286.99	0.00819972		3876.98	0.00900539
337.2	0.03297373		927.2	0.00207855		1517.2	0.0110754		2107.2	0.01529566		2697.19	0.00785408		3287.19	0.00790195		3877.18	0.00883437
337.4	0.03384087		927.4	0.00176817		1517.4	0.0124023		2107.4	0.01516849		2697.39	0.00723296		3287.39	0.00703187		3877.38	0.00868818
337.6	0.03461962		927.6	0.00099382		1517.6	0.01320252		2107.6	0.01505452		2697.59	0.00760028		3287.59	0.00638461		3877.58	0.00832881
337.8	0.03443779		927.8	0.00127727		1517.8	0.0137278		2107.8	0.01455356		2697.79	0.00755519		3287.79	0.00605283		3877.78	0.00730316
338	0.03457405		928	0.00147109		1518	0.01437751		2108	0.01383827		2697.99	0.00744409		3287.99	0.00665639		3877.98	0.00776477
338.2	0.03554		928.2	0.00172987		1518.2	0.01445935		2108.2	0.01313507		2698.19	0.00670075		3288.19	0.0057864		3878.18	0.00756339
338.4	0.03654282		928.4	0.0025747		1518.4	0.01496306		2108.4	0.01276231		2698.39	0.00702766		3288.39	0.005415		3878.38	0.00777155
338.6	0.03690541		928.6	0.00322401		1518.6	0.01441211		2108.6	0.01237361		2698.59	0.00728778		3288.59	0.00553507		3878.58	0.00802033
338.8	0.03679508		928.8	0.0031856		1518.8	0.01473272		2108.8	0.01297229		2698.79	0.00762681		3288.79	0.00564227		3878.78	0.0074448
339	0.03694737		929	0.00452673		1519	0.01445016		2109	0.01369745		2698.99	0.00738489		3288.99	0.00605912		3878.98	0.00779989
339.2	0.03559399		929.2	0.00461788		1519.2	0.01488135		2109.2	0.01297451		2699.19	0.00747193		3289.19	0.00591953		3879.18	0.00814869
339.4	0.03651615		929.4	0.00569138		1519.4	0.01414395		2109.4	0.01331117		2699.39	0.00802437		3289.39	0.0069752		3879.38	0.00748513
339.6	0.03619172		929.6	0.0064204		1519.6	0.01377927		2109.6	0.01373731		2699.59	0.00815372		3289.59	0.00676898		3879.58	0.00794816
339.8	0.03593982		929.8	0.00572614		1519.8	0.01477447		2109.8	0.01419304		2699.79	0.0075981		3289.79	0.00697973		3879.78	0.00830259
340	0.03553631		930	0.00539964		1520	0.01413075		2110	0.01533102		2699.99	0.00896794		3289.99	0.00726027		3879.98	0.00762482
340.2	0.03657097		930.2	0.00496829		1520.2	0.01325431		2110.2	0.01514749		2700.19	0.00902746		3290.19	0.00688732		3880.18	0.00745677
340.4	0.03763428		930.4	0.00353696		1520.4	0.01326137		2110.4	0.01497083		2700.39	0.00970946		3290.39	0.00648596		3880.38	0.00674518
340.6	0.03860723		930.6	0.0027199		1520.6	0.01202687		2110.6	0.01526594		2700.59	0.0092127		3290.59	0.00594396		3880.58	0.00719398
340.8	0.03814243		930.8	0.00198385		1520.8	0.01206085		2110.8	0.01549339		2700.79	0.00947933		3290.79	0.00598402		3880.78	0.00767591
341	0.03818684		931	0.00058988		1521	0.01227999		2111	0.01503812		2700.99	0.00940029		3290.99	0.0057921		3880.98	0.00634932
341.2	0.03825338		931.2	0.00031936		1521.2	0.01209622		2111.2	0.01505161		2701.19	0.01033467		3291.19	0.00506222		3881.18	0.00525524
341.4	0.03928479		931.4	0.00019059		1521.4	0.01265093		2111.4	0.01513952		2701.39	0.01037937		3291.39	0.00442452		3881.38	0.00483048
341.6	0.03946221		931.6	-0.00079311		1521.6	0.0123925		2111.6	0.01525889		2701.59	0.01062558		3291.59	0.00376152		3881.58	0.00486933
341.8	0.03967432		931.8	0.00061411		1521.8	0.01263139		2111.8	0.01510392		2701.79	0.01036538		3291.79	0.00369217		3881.78	0.0044904
342	0.04037264		932	0.00113801		1522	0.01236981		2112	0.01487463		2701.99	0.01002384		3291.99	0.00430782		3881.98	0.00538427
342.2	0.04039974		932.2	0.00168309		1522.2	0.01110765		2112.2	0.01457335		2702.19	0.01076682		3292.19	0.00422468		3882.18	0.00525617
342.4	0.04091873		932.4	0.00245493		1522.4	0.01060741		2112.4	0.01460035		2702.39	0.01140891		3292.39	0.00490974		3882.38	0.00482992
342.6	0.04022265		932.6	0.00319265		1522.6	0.01063017		2112.6	0.01457988		2702.59	0.0118557		3292.59	0.00587239		3882.58	0.00490965
342.8	0.04021347		932.8	0.00388463		1522.8	0.01053827		2112.8	0.01537787		2702.79	0.01183869		3292.79	0.00578764		3882.78	0.00397567
343	0.0396956		933	0.00421683		1523	0.01094565		2113	0.01500602		2702.99	0.01147409		3292.99	0.00579332		3882.98	0.00334108
343.2	0.03917328		933.2	0.00424896		1523.2	0.01132339		2113.2	0.01453546		2703.19	0.01182135		3293.19	0.00617015		3883.18	0.00284675
343.4	0.03982154		933.4	0.00422906		1523.4	0.01127268		2113.4	0.015368		2703.39	0.01174211		3293.39	0.00725008		3883.38	0.00232219
343.6	0.03976859		933.6	0.00434042		1523.6	0.01141835		2113.6	0.01585029		2703.59	0.01155436		3293.59	0.00661238		3883.58	0.00215275
343.8	0.0395481		933.8	0.00487429		1523.8	0.01219159		2113.8	0.01589002		2703.79	0.01116804		3293.79	0.00646964		3883.78	0.00205642
344	0.03960725		934	0.00515096		1524	0.01150448		2114	0.01607505		2703.99	0.01218633		3293.99	0.0071847		3883.98	0.00156088
344.2	0.03988071		934.2	0.00504838		1524.2	0.01184945		2114.2	0.01578609		2704.19	0.01149379		3294.19	0.00702993		3884.18	0.00204703
344.4	0.03940451		934.4	0.00480291		1524.4	0.0132336		2114.4	0.01649837		2704.39	0.01158099		3294.39	0.0058783		3884.38	0.00190354
344.6	0.03909035		934.6	0.00482812		1524.6	0.01292934		2114.6	0.01738681		2704.59	0.01210716		3294.59	0.00531058		3884.58	0.00231356
344.8	0.03773978		934.8	0.00510209		1524.8	0.01374918		2114.8	0.01695995		2704.79	0.012236		3294.79	0.00502826		3884.78	0.00345758
345	0.03849943		935	0.00427718		1525	0.01417896		2115	0.01636744		2704.99	0.01155175		3294.99	0.00427482		3884.98	0.00406016
345.2	0.03834604		935.2	0.00463275		1525.2	0.014464		2115.2	0.01686755		2705.19	0.01158416		3295.19	0.00362349		3885.18	0.00497787
345.4	0.0382423		935.4	0.00455179		1525.4	0.01395195		2115.4	0.01710433		2705.39	0.01089687		3295.39	0.00347056		3885.38	0.00598708
345.6	0.03840546		935.6	0.00435609		1525.6	0.01295931		2115.6	0.017564		2705.59	0.01052882		3295.59	0.00393954		3885.58	0.00668186
345.8	0.03850639		935.8	0.00538175		1525.8	0.01324906		2115.8	0.01714878		2705.79	0.01065979		3295.79	0.00392929		3885.78	0.00681544
346	0.03827233		936	0.00485895		1526	0.01290604		2116	0.01699716		2705.99	0.01104314		3295.99	0.00406815		3885.98	0.00686902
346.2	0.03771635		936.2	0.0045045		1526.2	0.0124077		2116.2	0.0169018		2706.19	0.01165278		3296.19	0.00423589		3886.18	0.00665528
346.4	0.03838389		936.4	0.00480664		1526.4	0.01256507		2116.4	0.01683279		2706.39	0.01119162		3296.39	0.00398682		3886.38	0.00673066
346.6	0.03845537		936.6	0.00586755		1526.6	0.01236839		2116.6	0.01647624		2706.59	0.01150703		3296.59	0.00429676		3886.58	0.00655039
346.8	0.0392345		936.8	0.00617031		1526.8	0.01211096		2116.8	0.01709323		2706.79	0.01128894		3296.79	0.00411264		3886.78	0.00566634
347	0.0386547		937	0.00571979		1527	0.01296365		2117	0.01685085		2706.99	0.01136206		3296.99	0.004988		3886.98	0.00453659
347.2	0.03846757		937.2	0.00571573		1527.2	0.01238631		2117.2	0.01710321		2707.19	0.01182637		3297.19	0.00562421		3887.18	0.00400474
347.4	0.03926909		937.4	0.00454443		1527.4	0.01195465		2117.4	0.01761077		2707.39	0.01192179		3297.39	0.00620453		3887.38	0.0036871
347.6	0.0398666		937.6	0.00489722		1527.6	0.01146333		2117.6	0.01717331		2707.59	0.01187169		3297.59	0.0058738		3887.58	0.00269141
347.8	0.04093048		937.8	0.00510954		1527.8	0.01113313		2117.8	0.01680157		2707.79	0.0122534		3297.79	0.00679537		3887.78	0.00208387
348	0.04108678		938	0.00358281		1528	0.01130616		2118	0.01681162		2707.99	0.01247666		3297.99	0.00733275		3887.98	0.00217663
348.2	0.04140595		938.2	0.00255142		1528.2	0.01235202		2118.2	0.01656789		2708.19	0.01187978		3298.19	0.00763154		3888.18	0.00301855
348.4	0.04149849		938.4	0.00159647		1528.4	0.01249471		2118.4	0.01594426		2708.39	0.01266102		3298.39	0.00733535		3888.38	0.00319345
348.6	0.04194872		938.6	0.00094763		1528.6	0.01218146		2118.6	0.01558567		2708.59	0.013099		3298.59	0.00687278		3888.58	0.00403393
348.8	0.04147245		938.8	0.00015912		1528.8	0.01236629		2118.8	0.01460663		2708.79	0.01362708		3298.79	0.00681522		3888.78	0.00489856
349	0.04159664		939	-0.0004184		1529	0.01219356		2119	0.01498204		2708.99	0.01362705		3298.99	0.00677464		3888.98	0.00571974
349.2	0.04095342		939.2	0.00017623		1529.2	0.01189607		2119.2	0.01523164		2709.19	0.01367107		3299.19	0.00719121		3889.18	0.00525706
349.4	0.04117403		939.4	-0.00011543		1529.4	0.01116972		2119.4	0.01460785		2709.39	0.01329022		3299.39	0.00712937		3889.38	0.00488949
349.6	0.0411598		939.6	-0.00002376		1529.6	0.01180347		2119.6	0.01555626		2709.59	0.01370954		3299.59	0.00670476		3889.58	0.00509957
349.8	0.04168364		939.8	-0.00013131		1529.8	0.0127111		2119.8	0.01517135		2709.79	0.01297243		3299.79	0.00613085		3889.78	0.0052258
350	0.04088377		940	-0.00045441		1530	0.0126465		2120	0.01545452		2709.99	0.01241721		3299.99	0.00527049		3889.98	0.00526358
350.2	0.04083434		940.2	0.00008521		1530.2	0.01354015		2120.2	0.01558866		2710.19	0.01118247		3300.19	0.00542568		3890.18	0.00497715
350.4	0.04084926		940.4	0.00136828		1530.4	0.01315387		2120.4	0.01649737		2710.39	0.010681		3300.39	0.00572394		3890.38	0.00490344
350.6	0.04086406		940.6	0.00232116		1530.6	0.0127886		2120.6	0.01702416		2710.59	0.01140233		3300.59	0.00585841		3890.58	0.00387058
350.8	0.03979879		940.8	0.00298153		1530.8	0.01314399		2120.8	0.01768597		2710.79	0.01184461		3300.79	0.0061309		3890.78	0.00391966
351	0.03868534		941	0.00294704		1531	0.0128926		2121	0.01759448		2710.99	0.01140842		3300.99	0.00620661		3890.98	0.00230986
351.2	0.03787137		941.2	0.00317524		1531.2	0.01225084		2121.2	0.01783326		2711.19	0.011453		3301.19	0.00570343		3891.18	0.00195637
351.4	0.03784186		941.4	0.00300622		1531.4	0.01333718		2121.4	0.01688966		2711.39	0.01135582		3301.39	0.00581887		3891.38	0.00210806
351.6	0.03837893		941.6	0.00424329		1531.6	0.01316842		2121.6	0.0168489		2711.59	0.01130746		3301.59	0.00594574		3891.58	0.00129475
351.8	0.03856373		941.8	0.00465683		1531.8	0.01309628		2121.8	0.01639992		2711.79	0.01165406		3301.79	0.00579619		3891.78	0.0015139
352	0.03793693		942	0.00384532		1532	0.01379598		2122	0.01660986		2711.99	0.01110175		3301.99	0.00696753		3891.98	0.00269344
352.2	0.03836768		942.2	0.00393307		1532.2	0.01374217		2122.2	0.01642274		2712.19	0.01091537		3302.19	0.00751333		3892.18	0.00305364
352.4	0.03895016		942.4	0.00407111		1532.4	0.0135618		2122.4	0.016172		2712.39	0.01112341		3302.39	0.00698383		3892.38	0.00296461
352.6	0.03955072		942.6	0.00458237		1532.6	0.01321869		2122.6	0.01561691		2712.59	0.01072869		3302.59	0.00706769		3892.58	0.00398156
352.8	0.03995226		942.8	0.00439272		1532.8	0.01367528		2122.8	0.01539623		2712.79	0.01202152		3302.79	0.00802955		3892.78	0.004356
353	0.04146459		943	0.00451032		1533	0.01384971		2123	0.01655923		2712.99	0.01141086		3302.99	0.00839183		3892.98	0.00553593
353.2	0.04228926		943.2	0.00511136		1533.2	0.0141422		2123.2	0.01708773		2713.19	0.01108188		3303.19	0.00862059		3893.18	0.00572217
353.4	0.04301021		943.4	0.0041544		1533.4	0.01496566		2123.4	0.01772313		2713.39	0.01172056		3303.39	0.00768644		3893.38	0.00636853
353.6	0.04394077		943.6	0.00340429		1533.6	0.01540353		2123.6	0.01853734		2713.59	0.01158959		3303.59	0.00773986		3893.58	0.00768677
353.8	0.04494756		943.8	0.00307997		1533.8	0.01576694		2123.8	0.01872129		2713.79	0.01075718		3303.79	0.00805987		3893.78	0.00830675
354	0.04487529		944	0.00270659		1534	0.01513461		2124	0.01925226		2713.99	0.01126117		3303.99	0.00703868		3893.98	0.00873499
354.2	0.04564863		944.2	0.00271852		1534.2	0.01566807		2124.2	0.01877711		2714.19	0.01044531		3304.19	0.00724372		3894.18	0.00769123
354.4	0.04499745		944.4	0.00314187		1534.4	0.01503631		2124.4	0.01907727		2714.39	0.01127469		3304.39	0.00728419		3894.38	0.00817676
354.6	0.04521676		944.6	0.00281822		1534.6	0.01479517		2124.6	0.01805559		2714.59	0.0113727		3304.59	0.00784657		3894.58	0.00845941
354.8	0.04484938		944.8	0.00262837		1534.8	0.01524459		2124.8	0.01712247		2714.79	0.01181668		3304.79	0.0072225		3894.78	0.00847658
355	0.04473587		945	0.00223783		1535	0.01539637		2125	0.01637644		2714.99	0.01116628		3304.99	0.0056183		3894.98	0.00757169
355.2	0.04434618		945.2	0.00225844		1535.2	0.01539134		2125.2	0.01619621		2715.19	0.01159992		3305.19	0.00506477		3895.18	0.00848648
355.4	0.04402724		945.4	0.00238724		1535.4	0.01602863		2125.4	0.0157713		2715.39	0.01190393		3305.39	0.00483544		3895.38	0.00877017
355.6	0.044525		945.6	0.00200756		1535.6	0.01586411		2125.6	0.01712349		2715.59	0.01262047		3305.59	0.00486874		3895.58	0.0084937
355.8	0.04443102		945.8	0.00260446		1535.8	0.01513318		2125.8	0.01695011		2715.79	0.01283552		3305.79	0.00502536		3895.78	0.00906092
356	0.04437207		946	0.0025497		1536	0.01448759		2126	0.01661016		2715.99	0.01174569		3305.99	0.00592382		3895.98	0.00797949
356.2	0.04457735		946.2	0.0029615		1536.2	0.01482691		2126.2	0.0171156		2716.19	0.01121902		3306.19	0.00461705		3896.18	0.00666367
356.4	0.04503872		946.4	0.00251451		1536.4	0.0155647		2126.4	0.01706786		2716.39	0.01130736		3306.39	0.00494488		3896.38	0.00580677
356.6	0.04579832		946.6	0.00185363		1536.6	0.01608436		2126.6	0.01707252		2716.59	0.01162892		3306.59	0.0054828		3896.58	0.00567577
356.8	0.04500942		946.8	0.00145123		1536.8	0.01660289		2126.8	0.0180274		2716.79	0.01249494		3306.79	0.00649547		3896.78	0.00522004
357	0.04556036		947	0.00141946		1537	0.01665793		2127	0.01857615		2716.99	0.01188152		3306.99	0.00616228		3896.98	0.00506198
357.2	0.04515409		947.2	0.00194287		1537.2	0.01613833		2127.2	0.01925341		2717.19	0.01248626		3307.19	0.00634265		3897.18	0.00531977
357.4	0.04467208		947.4	0.00130427		1537.4	0.01664696		2127.4	0.01907346		2717.39	0.01261253		3307.39	0.00586077		3897.38	0.00511823
357.6	0.04543019		947.6	0.00112637		1537.6	0.01618783		2127.6	0.01933924		2717.59	0.01203822		3307.59	0.00610098		3897.58	0.00614809
357.8	0.04575787		947.8	0.0008089		1537.8	0.01589316		2127.8	0.01919501		2717.79	0.01197994		3307.79	0.00574845		3897.78	0.0064598
358	0.045998		948	0.0011653		1538	0.01467719		2128	0.01899533		2717.99	0.01256161		3307.99	0.00556051		3897.98	0.0071362
358.2	0.04666767		948.2	0.00126939		1538.2	0.01548975		2128.2	0.01813082		2718.19	0.01197739		3308.19	0.0055983		3898.18	0.00769798
358.4	0.04690499		948.4	0.00147093		1538.4	0.01535915		2128.4	0.01703166		2718.39	0.0127191		3308.39	0.00609361		3898.38	0.00867048
358.6	0.04710212		948.6	0.00094427		1538.6	0.01449974		2128.6	0.01514838		2718.59	0.01224595		3308.59	0.00607749		3898.58	0.00939484
358.8	0.04690274		948.8	0.00026017		1538.8	0.01462334		2128.8	0.01403305		2718.79	0.0124077		3308.79	0.00550086		3898.78	0.00951087
359	0.04684243		949	0.00070722		1539	0.01391104		2129	0.01352911		2718.99	0.01179267		3308.99	0.00518776		3898.98	0.01025745
359.2	0.04670034		949.2	0.00040554		1539.2	0.01315378		2129.2	0.01358025		2719.19	0.01168705		3309.19	0.00579283		3899.18	0.01020996
359.4	0.04646106		949.4	0.0008678		1539.4	0.01276955		2129.4	0.01293879		2719.39	0.01219155		3309.39	0.00592417		3899.38	0.01036658
359.6	0.04638174		949.6	0.00047962		1539.6	0.01220661		2129.6	0.01340204		2719.59	0.01192761		3309.59	0.00631979		3899.58	0.01024395
359.8	0.046417		949.8	0.00152193		1539.8	0.01191155		2129.8	0.01307315		2719.79	0.0114952		3309.79	0.00680688		3899.78	0.01024639
360	0.04575535		950	0.00168525		1540	0.01211573		2130	0.01362744		2719.99	0.0115584		3309.99	0.00610299		3899.98	0.0088619
360.2	0.04557929		950.2	0.00218751		1540.2	0.01321923		2130.2	0.01492902		2720.19	0.01117811		3310.19	0.00526697		3900.18	0.00903625
360.4	0.04529867		950.4	0.00245302		1540.4	0.01348303		2130.4	0.01495231		2720.39	0.01197703		3310.39	0.00589019		3900.38	0.00854064
360.6	0.04492456		950.6	0.00268802		1540.6	0.01388042		2130.6	0.01436207		2720.59	0.0122741		3310.59	0.00607793		3900.58	0.00765939
360.8	0.04454292		950.8	0.00321153		1540.8	0.01367433		2130.8	0.01465516		2720.79	0.01300154		3310.79	0.00674028		3900.78	0.00696715
361	0.04517183		951	0.00459647		1541	0.01480153		2131	0.0157936		2720.99	0.01194963		3310.99	0.00635073		3900.98	0.00660292
361.2	0.04553706		951.2	0.0046862		1541.2	0.01453712		2131.2	0.0161792		2721.19	0.01242805		3311.19	0.00615439		3901.18	0.00666627
361.4	0.04649501		951.4	0.00465331		1541.4	0.01490925		2131.4	0.01638704		2721.39	0.01196011		3311.39	0.00625902		3901.38	0.00581666
361.6	0.04695463		951.6	0.00432183		1541.6	0.01542706		2131.6	0.01647291		2721.59	0.01216283		3311.59	0.00677103		3901.58	0.00684892
361.8	0.04716322		951.8	0.00400656		1541.8	0.01519318		2131.8	0.016232		2721.79	0.01261603		3311.79	0.00757282		3901.78	0.00698285
362	0.04721138		952	0.00444264		1542	0.01522066		2132	0.01702245		2721.99	0.01288151		3311.99	0.00806617		3901.98	0.00717191
362.2	0.04819826		952.2	0.00355682		1542.2	0.01600092		2132.2	0.01678079		2722.19	0.01302478		3312.19	0.00809252		3902.18	0.00732403
362.4	0.04830976		952.4	0.0030065		1542.4	0.01528492		2132.4	0.0159371		2722.39	0.01320079		3312.39	0.00880289		3902.38	0.0070938
362.6	0.04746639		952.6	0.00264591		1542.6	0.0151373		2132.6	0.01633531		2722.59	0.01240656		3312.59	0.00932121		3902.58	0.00724805
362.8	0.04785545		952.8	0.00213069		1542.8	0.01497225		2132.8	0.01643686		2722.79	0.01196423		3312.79	0.01037247		3902.78	0.00747997
363	0.04812775		953	0.00207391		1543	0.01440495		2133	0.01648767		2722.99	0.0120739		3312.99	0.01007461		3902.98	0.00671256
363.2	0.04752141		953.2	0.00177832		1543.2	0.0139425		2133.2	0.01765953		2723.19	0.01183937		3313.19	0.00969457		3903.18	0.0056426
363.4	0.04774794		953.4	0.00215404		1543.4	0.01377218		2133.4	0.01769176		2723.39	0.01180246		3313.39	0.0098505		3903.38	0.00613223
363.6	0.04737564		953.6	0.0019647		1543.6	0.01355121		2133.6	0.0181742		2723.59	0.01134724		3313.59	0.00978899		3903.58	0.00681377
363.8	0.04752642		953.8	0.00225533		1543.8	0.01344093		2133.8	0.01878027		2723.79	0.01079676		3313.79	0.00976004		3903.78	0.0072046
364	0.04661725		954	0.0023917		1544	0.01308734		2134	0.01901353		2723.99	0.01138145		3313.99	0.00878444		3903.98	0.00791543
364.2	0.04619808		954.2	0.00303642		1544.2	0.01325924		2134.2	0.01849826		2724.19	0.01091478		3314.19	0.00837147		3904.18	0.00851259
364.4	0.0461115		954.4	0.00321685		1544.4	0.01365871		2134.4	0.01790894		2724.39	0.01101552		3314.39	0.00875315		3904.38	0.007329
364.6	0.04563754		954.6	0.00342811		1544.6	0.01387841		2134.6	0.01782586		2724.59	0.01138333		3314.59	0.00831417		3904.58	0.00632861
364.8	0.04636071		954.8	0.00318961		1544.8	0.01324243		2134.8	0.01823575		2724.79	0.01176334		3314.79	0.00820534		3904.78	0.00673996
365	0.04610785		955	0.00358557		1545	0.01331899		2135	0.01920478		2724.99	0.01103875		3314.99	0.00792199		3904.98	0.00725231
365.2	0.04657016		955.2	0.00249165		1545.2	0.01341289		2135.2	0.0187687		2725.19	0.01185164		3315.19	0.00873554		3905.18	0.00724179
365.4	0.04650407		955.4	0.00232236		1545.4	0.01397599		2135.4	0.01914344		2725.39	0.01033309		3315.39	0.00947431		3905.38	0.00709447
365.6	0.04549079		955.6	0.0016458		1545.6	0.0150521		2135.6	0.01864214		2725.59	0.01019981		3315.59	0.00955155		3905.58	0.00762702
365.8	0.04564794		955.8	0.00158852		1545.8	0.01536276		2135.8	0.0192534		2725.79	0.01151257		3315.79	0.00997227		3905.78	0.00690745
366	0.04548149		956	0.00205739		1546	0.01541235		2136	0.02012351		2725.99	0.01213416		3315.99	0.00932871		3905.98	0.00692645
366.2	0.04616473		956.2	0.00124054		1546.2	0.01587207		2136.2	0.01980662		2726.19	0.01275661		3316.19	0.00879405		3906.18	0.00755716
366.4	0.0466164		956.4	0.00127591		1546.4	0.01567673		2136.4	0.02008435		2726.39	0.01342529		3316.39	0.00817852		3906.38	0.00795644
366.6	0.04714076		956.6	0.00164903		1546.6	0.01621395		2136.6	0.02036621		2726.59	0.01358685		3316.59	0.00807037		3906.58	0.00803323
366.8	0.04731368		956.8	0.00187943		1546.8	0.01623755		2136.8	0.01987463		2726.79	0.01429017		3316.79	0.00768805		3906.78	0.00838898
367	0.04775812		957	0.00218196		1547	0.01653115		2137	0.01921883		2726.99	0.01523417		3316.99	0.00687339		3906.98	0.00796549
367.2	0.04802217		957.2	0.00273778		1547.2	0.01693504		2137.2	0.01919784		2727.19	0.01519224		3317.19	0.00713986		3907.18	0.00862179
367.4	0.04932647		957.4	0.00342085		1547.4	0.01720813		2137.4	0.01817057		2727.39	0.01513256		3317.39	0.00738977		3907.38	0.00905003
367.6	0.04953358		957.6	0.00335062		1547.6	0.01674184		2137.6	0.01736355		2727.59	0.01495458		3317.59	0.00675107		3907.58	0.00890487
367.8	0.05001293		957.8	0.00337735		1547.8	0.01720479		2137.8	0.01756684		2727.79	0.01441389		3317.79	0.00691366		3907.78	0.00806855
368	0.05009008		958	0.00441492		1548	0.01739157		2138	0.01657832		2727.99	0.01445069		3317.99	0.0069258		3907.98	0.00869218
368.2	0.05028364		958.2	0.00461169		1548.2	0.01707951		2138.2	0.01606895		2728.19	0.01348423		3318.19	0.00723545		3908.18	0.00822049
368.4	0.04995891		958.4	0.00493383		1548.4	0.0171781		2138.4	0.01578191		2728.39	0.0127032		3318.39	0.00810238		3908.38	0.00714422
368.6	0.04998994		958.6	0.00472386		1548.6	0.01591614		2138.6	0.0163614		2728.59	0.01302904		3318.59	0.00783647		3908.58	0.00780651
368.8	0.05088005		958.8	0.00518486		1548.8	0.01590492		2138.8	0.01597806		2728.79	0.01230949		3318.79	0.00865736		3908.78	0.00865566
369	0.05129399		959	0.00543911		1549	0.01626522		2139	0.01712586		2728.99	0.01182333		3318.99	0.00884445		3908.98	0.00836388
369.2	0.05112029		959.2	0.00507298		1549.2	0.01685475		2139.2	0.01746946		2729.19	0.01101245		3319.19	0.00936274		3909.18	0.00796221
369.4	0.05170914		959.4	0.00597894		1549.4	0.01680021		2139.4	0.01788477		2729.39	0.01032251		3319.39	0.00865638		3909.38	0.00704476
369.6	0.05197484		959.6	0.00608821		1549.6	0.01673596		2139.6	0.01780383		2729.59	0.01091619		3319.59	0.00815565		3909.58	0.00627085
369.8	0.05200246		959.8	0.00661288		1549.8	0.01697592		2139.8	0.01807714		2729.79	0.01172986		3319.79	0.00786067		3909.78	0.00629177
370	0.05198529		960	0.00676848		1550	0.01669025		2140	0.01810848		2729.99	0.01082151		3319.99	0.00705835		3909.98	0.00672901
370.2	0.05229991		960.2	0.00599845		1550.2	0.01780688		2140.2	0.01797879		2730.19	0.01074067		3320.19	0.00646158		3910.18	0.00695342
370.4	0.05226666		960.4	0.00605889		1550.4	0.01813027		2140.4	0.01807451		2730.39	0.01069463		3320.39	0.0065264		3910.38	0.00661609
370.6	0.05212466		960.6	0.00500704		1550.6	0.01827033		2140.6	0.01751885		2730.59	0.01055429		3320.59	0.00617239		3910.58	0.00732996
370.8	0.05125652		960.8	0.00492431		1550.8	0.01813304		2140.8	0.01755143		2730.79	0.0105967		3320.79	0.00583767		3910.78	0.00775051
371	0.05106435		961	0.00456203		1551	0.01786646		2141	0.01734385		2730.99	0.01093501		3320.99	0.00590914		3910.98	0.00762845
371.2	0.05069299		961.2	0.00442043		1551.2	0.01764501		2141.2	0.01706132		2731.19	0.01153477		3321.19	0.00554107		3911.18	0.00782314
371.4	0.05088961		961.4	0.00372677		1551.4	0.0174673		2141.4	0.01738166		2731.39	0.01128282		3321.39	0.00544539		3911.38	0.00802699
371.6	0.0512391		961.6	0.00362497		1551.6	0.01688068		2141.6	0.01666555		2731.59	0.01080314		3321.59	0.00526743		3911.58	0.00743546
371.8	0.05094972		961.8	0.00484758		1551.8	0.01709727		2141.8	0.0168125		2731.79	0.01075035		3321.79	0.00680099		3911.78	0.00682321
372	0.050687		962	0.00566098		1552	0.01609927		2142	0.01684615		2731.99	0.01021344		3321.99	0.00733709		3911.98	0.00766034
372.2	0.05005482		962.2	0.0051191		1552.2	0.01567053		2142.2	0.01696534		2732.19	0.01034485		3322.19	0.00834395		3912.18	0.00740845
372.4	0.04973071		962.4	0.00583258		1552.4	0.01557384		2142.4	0.01711464		2732.39	0.01110027		3322.39	0.00875263		3912.38	0.00682089
372.6	0.05016603		962.6	0.00489298		1552.6	0.01512285		2142.6	0.01750871		2732.59	0.01081122		3322.59	0.00816756		3912.58	0.00775698
372.8	0.05044639		962.8	0.00568234		1552.8	0.01554749		2142.8	0.01643165		2732.79	0.01194989		3322.79	0.00848045		3912.78	0.00813057
373	0.05047701		963	0.00547752		1553	0.01518553		2143	0.01641413		2732.99	0.01245747		3322.99	0.00768442		3912.98	0.0077211
373.2	0.05041655		963.2	0.00579954		1553.2	0.01519237		2143.2	0.01645049		2733.19	0.01299892		3323.19	0.00771107		3913.18	0.00801193
373.4	0.05182552		963.4	0.00692765		1553.4	0.01578997		2143.4	0.0166445		2733.39	0.01304438		3323.39	0.00642121		3913.38	0.00735126
373.6	0.05210908		963.6	0.00632709		1553.6	0.01600034		2143.6	0.01593791		2733.59	0.01257828		3323.59	0.00603514		3913.58	0.00740928
373.8	0.05286038		963.8	0.00588415		1553.8	0.01666487		2143.8	0.01587664		2733.79	0.01277839		3323.79	0.00500315		3913.78	0.007994
374	0.053068		964	0.00560501		1554	0.01734999		2144	0.01588839		2733.99	0.01240919		3323.99	0.00419311		3913.98	0.00812849
374.2	0.0531018		964.2	0.00531816		1554.2	0.01829751		2144.2	0.01595833		2734.19	0.01205616		3324.19	0.00415928		3914.18	0.00834228
374.4	0.05324185		964.4	0.0049016		1554.4	0.01770593		2144.4	0.01541557		2734.39	0.01147601		3324.39	0.00391079		3914.38	0.00869202
374.6	0.05360893		964.6	0.00449239		1554.6	0.01734928		2144.6	0.01486291		2734.59	0.01116345		3324.59	0.00291182		3914.58	0.00961523
374.8	0.05310484		964.8	0.00525474		1554.8	0.01707713		2144.8	0.01469332		2734.79	0.01163655		3324.79	0.00285434		3914.78	0.00940129
375	0.05346297		965	0.00560642		1555	0.01687625		2145	0.01554221		2734.99	0.01152178		3324.99	0.00255632		3914.98	0.00955662
375.2	0.05381614		965.2	0.00592972		1555.2	0.01677317		2145.2	0.01504448		2735.19	0.01174007		3325.19	0.0024289		3915.18	0.01011331
375.4	0.05385472		965.4	0.00560761		1555.4	0.01623144		2145.4	0.0157896		2735.39	0.01134332		3325.39	0.00289777		3915.38	0.01078136
375.6	0.05441121		965.6	0.00669833		1555.6	0.01485018		2145.6	0.0163309		2735.59	0.0118288		3325.59	0.00326347		3915.58	0.00998455
375.8	0.05375149		965.8	0.00700418		1555.8	0.01419279		2145.8	0.01680215		2735.79	0.01177321		3325.79	0.004234		3915.78	0.00972358
376	0.05356832		966	0.00648718		1556	0.01347324		2146	0.01772952		2735.99	0.01093215		3325.99	0.00411515		3915.98	0.01013017
376.2	0.05353473		966.2	0.00561473		1556.2	0.01300425		2146.2	0.0183501		2736.19	0.01072473		3326.19	0.00446561		3916.18	0.0097796
376.4	0.05321074		966.4	0.00548773		1556.4	0.01288227		2146.4	0.01868179		2736.39	0.01053484		3326.39	0.00415828		3916.38	0.01000542
376.6	0.05299775		966.6	0.00459691		1556.6	0.01308991		2146.6	0.01887393		2736.59	0.00987552		3326.59	0.00504202		3916.58	0.01027597
376.8	0.05274319		966.8	0.00513728		1556.8	0.01373868		2146.8	0.01868285		2736.79	0.01138981		3326.79	0.00551407		3916.78	0.00984728
377	0.05237693		967	0.00522459		1557	0.01444164		2147	0.02001317		2736.99	0.01124344		3326.99	0.00586981		3916.98	0.00901965
377.2	0.05252485		967.2	0.00563989		1557.2	0.01482546		2147.2	0.02072354		2737.19	0.01202118		3327.19	0.00689141		3917.18	0.00840659
377.4	0.05290498		967.4	0.00516962		1557.4	0.01489821		2147.4	0.02150055		2737.39	0.01191015		3327.39	0.00610222		3917.38	0.00873425
377.6	0.05227723		967.6	0.00525541		1557.6	0.01441741		2147.6	0.02191482		2737.59	0.01258455		3327.59	0.00656782		3917.58	0.00910108
377.8	0.0519962		967.8	0.00499784		1557.8	0.01504458		2147.8	0.02227808		2737.79	0.01281556		3327.79	0.00615489		3917.78	0.00959742
378	0.05152567		968	0.00571155		1558	0.01576239		2148	0.02215976		2737.99	0.01247567		3327.99	0.00638149		3917.98	0.00981398
378.2	0.05168878		968.2	0.00589353		1558.2	0.01563821		2148.2	0.02161873		2738.19	0.01238529		3328.19	0.00662469		3918.18	0.00982289
378.4	0.05148358		968.4	0.0060395		1558.4	0.0157273		2148.4	0.02105895		2738.39	0.01227552		3328.39	0.00642699		3918.38	0.01009937
378.6	0.05104306		968.6	0.00629167		1558.6	0.01698641		2148.6	0.020283		2738.59	0.01248387		3328.59	0.00641562		3918.58	0.00997446
378.8	0.05022537		968.8	0.00691287		1558.8	0.01755722		2148.8	0.0203958		2738.79	0.0124507		3328.79	0.00623441		3918.78	0.00984143
379	0.05039981		969	0.00642019		1559	0.0183344		2149	0.02037994		2738.99	0.01223228		3328.99	0.00621685		3918.98	0.00989192
379.2	0.05065327		969.2	0.0054788		1559.2	0.01798112		2149.2	0.01953689		2739.19	0.01211036		3329.19	0.0062241		3919.18	0.01012229
379.4	0.05117921		969.4	0.00474663		1559.4	0.01818563		2149.4	0.01915645		2739.39	0.01193359		3329.39	0.00665242		3919.38	0.01007275
379.6	0.05241926		969.6	0.00495481		1559.6	0.01793984		2149.6	0.01914417		2739.59	0.01110133		3329.59	0.00648681		3919.58	0.00912056
379.8	0.05259619		969.8	0.00465327		1559.8	0.01812339		2149.8	0.01795645		2739.79	0.00971045		3329.79	0.00606748		3919.78	0.00894282
380	0.0537303		970	0.0041559		1560	0.0178738		2150	0.01783943		2739.99	0.00882012		3329.99	0.00611		3919.98	0.00920355
380.2	0.05468941		970.2	0.0035776		1560.2	0.01779767		2150.2	0.01745918		2740.19	0.00882098		3330.19	0.00586171		3920.18	0.00877767
380.4	0.05493333		970.4	0.00429456		1560.4	0.01885951		2150.4	0.01699427		2740.39	0.00907763		3330.39	0.00543478		3920.38	0.00898882
380.6	0.05506803		970.6	0.00410444		1560.6	0.01917386		2150.6	0.01683771		2740.59	0.00888513		3330.59	0.00515491		3920.58	0.00828314
380.8	0.05517321		970.8	0.00474549		1560.8	0.01949233		2150.8	0.0170641		2740.79	0.00926204		3330.79	0.00468085		3920.78	0.00776372
381	0.05493623		971	0.00546191		1561	0.01957619		2151	0.01721272		2740.99	0.00917244		3330.99	0.00485367		3920.98	0.00714277
381.2	0.05494158		971.2	0.0059534		1561.2	0.01896407		2151.2	0.01709944		2741.19	0.00964686		3331.19	0.00485464		3921.18	0.0077527
381.4	0.05543158		971.4	0.00611158		1561.4	0.01870378		2151.4	0.01770583		2741.39	0.01030334		3331.39	0.00393803		3921.38	0.00850075
381.6	0.05485448		971.6	0.0070069		1561.6	0.01781246		2151.6	0.01822103		2741.59	0.01052876		3331.59	0.00402681		3921.58	0.0083446
381.8	0.05441789		971.8	0.00647041		1561.8	0.01795358		2151.8	0.01766534		2741.79	0.01090816		3331.79	0.00386777		3921.78	0.0083706
382	0.0537752		972	0.00620286		1562	0.01741064		2152	0.01827961		2741.99	0.01125905		3331.99	0.00384729		3921.98	0.00817585
382.2	0.05363003		972.2	0.00515596		1562.2	0.01718328		2152.2	0.01784343		2742.19	0.0116908		3332.19	0.00394494		3922.18	0.00840349
382.4	0.05338587		972.4	0.0042897		1562.4	0.0173152		2152.4	0.01757853		2742.39	0.01226232		3332.39	0.00483691		3922.38	0.00843645
382.6	0.05317267		972.6	0.00440082		1562.6	0.01754548		2152.6	0.01729195		2742.59	0.01272142		3332.59	0.00498129		3922.58	0.00720019
382.8	0.05277697		972.8	0.00403164		1562.8	0.01702045		2152.8	0.01710198		2742.79	0.01212689		3332.79	0.00473865		3922.78	0.00694933
383	0.05407022		973	0.00308257		1563	0.01660921		2153	0.01671797		2742.99	0.01155207		3332.99	0.00623273		3922.98	0.00724941
383.2	0.05565475		973.2	0.0026601		1563.2	0.01591262		2153.2	0.01740367		2743.19	0.01165575		3333.19	0.00728204		3923.18	0.00759723
383.4	0.05610945		973.4	0.0024		1563.4	0.01648005		2153.4	0.01717747		2743.39	0.012404		3333.39	0.00766631		3923.38	0.00811159
383.6	0.05688662		973.6	0.0025736		1563.6	0.01609669		2153.6	0.01714048		2743.59	0.01314412		3333.59	0.00792562		3923.58	0.00768574
383.8	0.05694942		973.8	0.0027798		1563.8	0.01569644		2153.8	0.01668742		2743.79	0.0134177		3333.79	0.00883807		3923.78	0.00755333
384	0.05701151		974	0.00252702		1564	0.01542265		2154	0.01700866		2743.99	0.01324895		3333.99	0.00891439		3923.98	0.00809927
384.2	0.05643812		974.2	0.00260952		1564.2	0.01618144		2154.2	0.01703253		2744.19	0.0136008		3334.19	0.00853904		3924.18	0.00783328
384.4	0.056159		974.4	0.00325823		1564.4	0.01720537		2154.4	0.01678186		2744.39	0.01338467		3334.39	0.00816017		3924.38	0.00841317
384.6	0.05522399		974.6	0.00408929		1564.6	0.01670093		2154.6	0.01694556		2744.59	0.0127423		3334.59	0.00725562		3924.58	0.00801831
384.8	0.05575544		974.8	0.00566572		1564.8	0.01757041		2154.8	0.01673339		2744.79	0.01273168		3334.79	0.00703363		3924.78	0.00838741
385	0.05584298		975	0.00653315		1565	0.01765235		2155	0.01634175		2744.99	0.01271591		3334.99	0.00638049		3924.98	0.00811529
385.2	0.0554106		975.2	0.00679306		1565.2	0.01790539		2155.2	0.01698846		2745.19	0.01325324		3335.19	0.00590919		3925.18	0.00883036
385.4	0.05566863		975.4	0.00705548		1565.4	0.01831627		2155.4	0.01711951		2745.39	0.01347441		3335.39	0.00613183		3925.38	0.00886676
385.6	0.0549095		975.6	0.00682915		1565.6	0.0181318		2155.6	0.01754778		2745.59	0.01296775		3335.59	0.00590467		3925.58	0.00931122
385.8	0.05362099		975.8	0.00611156		1565.8	0.01794243		2155.8	0.01716842		2745.79	0.01368289		3335.79	0.0053795		3925.78	0.009586
386	0.05307005		976	0.00559779		1566	0.01814904		2156	0.01768355		2745.99	0.01429874		3335.99	0.00565477		3925.98	0.00990253
386.2	0.05357781		976.2	0.00560182		1566.2	0.01902617		2156.2	0.01675836		2746.19	0.01419474		3336.19	0.00569481		3926.18	0.01042889
386.4	0.05378301		976.4	0.00557558		1566.4	0.01862664		2156.4	0.01681181		2746.39	0.01463411		3336.39	0.00549377		3926.38	0.01026282
386.6	0.05306989		976.6	0.00628183		1566.6	0.01870895		2156.6	0.01690669		2746.59	0.01444803		3336.59	0.00479546		3926.58	0.00943317
386.8	0.05320549		976.8	0.00633912		1566.8	0.01839427		2156.8	0.0166693		2746.79	0.01422498		3336.79	0.00460033		3926.78	0.0099083
387	0.05466909		977	0.00609165		1567	0.01751116		2157	0.01696401		2746.99	0.01479138		3336.99	0.00520251		3926.98	0.01052305
387.2	0.0552385		977.2	0.00604048		1567.2	0.01746071		2157.2	0.01708648		2747.19	0.01597808		3337.19	0.00511018		3927.18	0.01050614
387.4	0.05484198		977.4	0.00605419		1567.4	0.01725312		2157.4	0.01645157		2747.39	0.01604102		3337.39	0.00493473		3927.38	0.00985048
387.6	0.05555641		977.6	0.00600019		1567.6	0.01664244		2157.6	0.01677634		2747.59	0.01586567		3337.59	0.00602866		3927.58	0.00839561
387.8	0.05526753		977.8	0.00544628		1567.8	0.01612784		2157.8	0.01693899		2747.79	0.01457888		3337.79	0.00611005		3927.78	0.00711604
388	0.05519154		978	0.00459517		1568	0.01520061		2158	0.01717577		2747.99	0.0142868		3337.99	0.00640191		3927.98	0.00671774
388.2	0.05531496		978.2	0.00428491		1568.2	0.0150065		2158.2	0.01686136		2748.19	0.01447948		3338.19	0.00636164		3928.18	0.00604863
388.4	0.05606537		978.4	0.00433755		1568.4	0.0143738		2158.4	0.01647427		2748.39	0.01384267		3338.39	0.00633023		3928.38	0.00569056
388.6	0.05635213		978.6	0.00503544		1568.6	0.01391734		2158.6	0.01632784		2748.59	0.01338585		3338.59	0.00636609		3928.58	0.00541905
388.8	0.05742941		978.8	0.00601774		1568.8	0.0139891		2158.8	0.01605805		2748.79	0.013132		3338.79	0.00694347		3928.78	0.00615975
389	0.05830138		979	0.00590277		1569	0.01365805		2159	0.01640463		2748.99	0.01175652		3338.99	0.00676444		3928.98	0.00561079
389.2	0.05811823		979.2	0.0063974		1569.2	0.01384969		2159.2	0.01761078		2749.19	0.01176088		3339.19	0.00746584		3929.18	0.00622171
389.4	0.05783795		979.4	0.00701713		1569.4	0.01370401		2159.4	0.01763269		2749.39	0.01192046		3339.39	0.00803681		3929.38	0.00611476
389.6	0.05786772		979.6	0.00681065		1569.6	0.01338771		2159.6	0.01808341		2749.59	0.01177902		3339.59	0.00785801		3929.58	0.00627363
389.8	0.05731575		979.8	0.00712423		1569.8	0.0134979		2159.8	0.01850986		2749.79	0.01226879		3339.79	0.00837868		3929.78	0.00705651
390	0.05779572		980	0.00753337		1570	0.0142388		2160	0.01868492		2749.99	0.01287285		3339.99	0.00829741		3929.98	0.00747194
390.2	0.05772169		980.2	0.00783328		1570.2	0.01559		2160.2	0.01829324		2750.19	0.01213751		3340.19	0.00823911		3930.18	0.00871128
390.4	0.05766182		980.4	0.00767506		1570.4	0.01574836		2160.4	0.01923697		2750.39	0.01310531		3340.39	0.00836649		3930.38	0.00914212
390.6	0.05795455		980.6	0.0080355		1570.6	0.01546335		2160.6	0.01959014		2750.59	0.01372124		3340.59	0.00794105		3930.58	0.00955547
390.8	0.05858345		980.8	0.00753096		1570.8	0.01575757		2160.8	0.01949313		2750.79	0.01459281		3340.79	0.00770493		3930.78	0.00964264
391	0.05928757		981	0.00721096		1571	0.01540075		2161	0.0193165		2750.99	0.01499316		3340.99	0.00639826		3930.98	0.01058815
391.2	0.0595776		981.2	0.00647279		1571.2	0.01580343		2161.2	0.01926375		2751.19	0.01473893		3341.19	0.00581976		3931.18	0.00990072
391.4	0.05928953		981.4	0.00544468		1571.4	0.01572653		2161.4	0.01918479		2751.39	0.01505947		3341.39	0.00657664		3931.38	0.00955301
391.6	0.05960235		981.6	0.00426446		1571.6	0.01558627		2161.6	0.01973141		2751.59	0.01494958		3341.59	0.00586302		3931.58	0.00943848
391.8	0.0597167		981.8	0.00357632		1571.8	0.01546661		2161.8	0.01875037		2751.79	0.01447191		3341.79	0.00512834		3931.78	0.00908059
392	0.05933596		982	0.00300545		1572	0.01538925		2162	0.01890337		2751.99	0.01435036		3341.99	0.00487387		3931.98	0.00879257
392.2	0.05970597		982.2	0.0019038		1572.2	0.01618791		2162.2	0.01838468		2752.19	0.01397574		3342.19	0.00436166		3932.18	0.00854164
392.4	0.05965384		982.4	0.00152382		1572.4	0.01662447		2162.4	0.01770376		2752.39	0.01430941		3342.39	0.00503364		3932.38	0.00792786
392.6	0.05886324		982.6	0.00102181		1572.6	0.01715566		2162.6	0.01767376		2752.59	0.01459903		3342.59	0.00514971		3932.58	0.00828271
392.8	0.05932249		982.8	0.00025992		1572.8	0.01716893		2162.8	0.01772804		2752.79	0.01415309		3342.79	0.00509005		3932.78	0.0085748
393	0.05957656		983	-0.00027668		1573	0.01800328		2163	0.01758143		2752.99	0.0133285		3342.99	0.00547768		3932.98	0.00841474
393.2	0.05870627		983.2	0.00031934		1573.2	0.01810857		2163.2	0.01773641		2753.19	0.01403743		3343.19	0.00609483		3933.18	0.00868358
393.4	0.05845589		983.4	0.00068307		1573.4	0.01786489		2163.4	0.0167613		2753.39	0.01459121		3343.39	0.006047		3933.38	0.00878804
393.6	0.05923796		983.6	0.0012086		1573.6	0.0188326		2163.6	0.01680454		2753.59	0.01342693		3343.59	0.00593195		3933.58	0.00922007
393.8	0.05888314		983.8	0.002248		1573.8	0.01976591		2163.8	0.01651609		2753.79	0.01307384		3343.79	0.00577115		3933.78	0.00964693
394	0.05866603		984	0.00229862		1574	0.02007712		2164	0.01612909		2753.99	0.0129786		3343.99	0.00567754		3933.98	0.01000945
394.2	0.05867996		984.2	0.00297117		1574.2	0.02158894		2164.2	0.01622545		2754.19	0.01265114		3344.19	0.0072838		3934.18	0.01131241
394.4	0.05857734		984.4	0.0025097		1574.4	0.02111199		2164.4	0.01680361		2754.39	0.01327044		3344.39	0.0071297		3934.38	0.01102729
394.6	0.05925976		984.6	0.0030337		1574.6	0.02073434		2164.6	0.0164094		2754.59	0.01344608		3344.59	0.00702729		3934.58	0.01078636
394.8	0.05901132		984.8	0.00328734		1574.8	0.02083252		2164.8	0.0164763		2754.79	0.01391196		3344.79	0.00711985		3934.78	0.01042088
395	0.05832867		985	0.00415503		1575	0.02046978		2165	0.01631886		2754.99	0.01310549		3344.99	0.00633684		3934.98	0.01039064
395.2	0.05838234		985.2	0.00389597		1575.2	0.02033709		2165.2	0.01626218		2755.19	0.01266515		3345.19	0.00624602		3935.18	0.01047348
395.4	0.05774222		985.4	0.00473161		1575.4	0.02008859		2165.4	0.01623229		2755.39	0.0126322		3345.39	0.00638063		3935.38	0.01102676
395.6	0.0572118		985.6	0.00582804		1575.6	0.01933489		2165.6	0.01675803		2755.59	0.01195609		3345.59	0.00469413		3935.58	0.01091662
395.8	0.05772326		985.8	0.0064305		1575.8	0.01914404		2165.8	0.01669046		2755.79	0.01174045		3345.79	0.00455608		3935.78	0.01049157
396	0.0572972		986	0.00616679		1576	0.01912657		2166	0.01754307		2755.99	0.01181464		3345.99	0.00443566		3935.98	0.00960735
396.2	0.05800328		986.2	0.00509338		1576.2	0.01848048		2166.2	0.01771533		2756.19	0.01188735		3346.19	0.0046724		3936.18	0.00910483
396.4	0.05786503		986.4	0.00549333		1576.4	0.01744233		2166.4	0.01828562		2756.39	0.01342763		3346.39	0.00530321		3936.38	0.00940166
396.6	0.05788616		986.6	0.00522824		1576.6	0.01636919		2166.6	0.01850553		2756.59	0.01374612		3346.59	0.00535947		3936.58	0.01001653
396.8	0.05899204		986.8	0.00436167		1576.8	0.01532183		2166.8	0.0187918		2756.79	0.01374196		3346.79	0.00630215		3936.78	0.01007374
397	0.05919621		987	0.00460893		1577	0.01549235		2167	0.01878328		2756.99	0.01392816		3346.99	0.00727803		3936.98	0.01069842
397.2	0.05987666		987.2	0.00471027		1577.2	0.01519607		2167.2	0.01988369		2757.19	0.01367626		3347.19	0.00703892		3937.18	0.01101596
397.4	0.0605318		987.4	0.00449602		1577.4	0.01488894		2167.4	0.01976045		2757.39	0.01312874		3347.39	0.00713666		3937.38	0.01171341
397.6	0.0606087		987.6	0.00482578		1577.6	0.01547148		2167.6	0.02005856		2757.59	0.01210354		3347.59	0.0069813		3937.58	0.01136471
397.8	0.06054624		987.8	0.00452624		1577.8	0.01539576		2167.8	0.02010073		2757.79	0.01232241		3347.79	0.00805594		3937.78	0.01114332
398	0.06080577		988	0.00422248		1578	0.01540836		2168	0.01997336		2757.99	0.01300048		3347.99	0.00912107		3937.98	0.01056989
398.2	0.06158555		988.2	0.00406274		1578.2	0.01580638		2168.2	0.01970166		2758.19	0.01383602		3348.19	0.00976207		3938.18	0.01058936
398.4	0.06155903		988.4	0.00350109		1578.4	0.01544164		2168.4	0.01875076		2758.39	0.01430854		3348.39	0.00948378		3938.38	0.00906841
398.6	0.06168015		988.6	0.00456835		1578.6	0.01501791		2168.6	0.01874053		2758.59	0.01459515		3348.59	0.01009301		3938.58	0.00834268
398.8	0.06107085		988.8	0.00499562		1578.8	0.01481923		2168.8	0.01902284		2758.79	0.0151146		3348.79	0.00989405		3938.78	0.00868349
399	0.06022945		989	0.00489307		1579	0.01579855		2169	0.01852408		2758.99	0.01429741		3348.99	0.00971239		3938.98	0.00924477
399.2	0.06059821		989.2	0.00475637		1579.2	0.0150107		2169.2	0.01794863		2759.19	0.01412672		3349.19	0.00860925		3939.18	0.01048648
399.4	0.06027796		989.4	0.00532398		1579.4	0.0156798		2169.4	0.01753314		2759.39	0.01378274		3349.39	0.00786434		3939.38	0.01020974
399.6	0.06056345		989.6	0.00631935		1579.6	0.01557852		2169.6	0.01806473		2759.59	0.01402476		3349.59	0.007119		3939.58	0.00999223
399.8	0.06140236		989.8	0.00640792		1579.8	0.01630376		2169.8	0.017285		2759.79	0.01455175		3349.79	0.00703416		3939.78	0.01085089
400	0.06159848		990	0.00643918		1580	0.01678526		2170	0.01714775		2759.99	0.01456877		3349.99	0.00743178		3939.98	0.01112152
400.2	0.06211384		990.2	0.00671852		1580.2	0.01634663		2170.2	0.01721458		2760.19	0.0139178		3350.19	0.00670473		3940.18	0.01128424
400.4	0.06199143		990.4	0.00740523		1580.4	0.01600939		2170.4	0.01765542		2760.39	0.01467612		3350.39	0.0070275		3940.38	0.01149814
400.6	0.06176671		990.6	0.00725364		1580.6	0.01609062		2170.6	0.01747687		2760.59	0.01434944		3350.59	0.00645816		3940.58	0.01103031
400.8	0.06122463		990.8	0.00694555		1580.8	0.01655266		2170.8	0.01755259		2760.79	0.01386502		3350.79	0.0065174		3940.78	0.01145688
401	0.06078382		991	0.00703582		1581	0.0167957		2171	0.01777061		2760.99	0.01330728		3350.99	0.00671892		3940.98	0.01096885
401.2	0.06073333		991.2	0.00744702		1581.2	0.01700411		2171.2	0.01853304		2761.19	0.012435		3351.19	0.00600016		3941.18	0.01017154
401.4	0.06061956		991.4	0.00749261		1581.4	0.01670138		2171.4	0.01813916		2761.39	0.01178105		3351.39	0.00638842		3941.38	0.00979593
401.6	0.06044829		991.6	0.00780852		1581.6	0.01643809		2171.6	0.01867801		2761.59	0.01131796		3351.59	0.00715456		3941.58	0.00893502
401.8	0.06081235		991.8	0.00731666		1581.8	0.01670055		2171.8	0.01882182		2761.79	0.0117867		3351.79	0.00779328		3941.78	0.00775261
402	0.06070071		992	0.00756133		1582	0.01669071		2172	0.01839067		2761.99	0.01187902		3351.99	0.0079237		3941.98	0.00724624
402.2	0.06040842		992.2	0.0069402		1582.2	0.01649257		2172.2	0.01864696		2762.19	0.01183702		3352.19	0.00869296		3942.18	0.0069904
402.4	0.06014194		992.4	0.00696767		1582.4	0.01547801		2172.4	0.01857251		2762.39	0.01215902		3352.39	0.0084994		3942.38	0.00615926
402.6	0.05929125		992.6	0.00655802		1582.6	0.01479194		2172.6	0.01933528		2762.59	0.01183129		3352.59	0.0085364		3942.58	0.00637382
402.8	0.0598204		992.8	0.00584639		1582.8	0.01459472		2172.8	0.01909216		2762.79	0.01229473		3352.79	0.00815628		3942.78	0.00685299
403	0.05947267		993	0.00582243		1583	0.01377643		2173	0.01892541		2762.99	0.01192846		3352.99	0.00783693		3942.98	0.00744166
403.2	0.06024796		993.2	0.00521752		1583.2	0.01270766		2173.2	0.01820713		2763.19	0.01211539		3353.19	0.00818795		3943.18	0.00740383
403.4	0.06100469		993.4	0.00495527		1583.4	0.01371815		2173.4	0.01824386		2763.39	0.0126501		3353.39	0.00771248		3943.38	0.00718517
403.6	0.06112375		993.6	0.00526575		1583.6	0.01416224		2173.6	0.01778768		2763.59	0.01398857		3353.59	0.00746853		3943.58	0.00743364
403.8	0.06159225		993.8	0.00516553		1583.8	0.01489443		2173.8	0.01711953		2763.79	0.01455182		3353.79	0.00735479		3943.78	0.00915805
404	0.06205076		994	0.00517133		1584	0.01518015		2174	0.01761812		2763.99	0.01440304		3353.99	0.0067194		3943.98	0.0092649
404.2	0.06250196		994.2	0.00543111		1584.2	0.0156511		2174.2	0.01752792		2764.19	0.01457397		3354.19	0.0058106		3944.18	0.00894804
404.4	0.0629082		994.4	0.00512229		1584.4	0.01606993		2174.4	0.01729669		2764.39	0.01484033		3354.39	0.00584597		3944.38	0.00819999
404.6	0.06307602		994.6	0.00591034		1584.6	0.01634377		2174.6	0.01728611		2764.59	0.015421		3354.59	0.00474121		3944.58	0.00777872
404.8	0.06295034		994.8	0.0065423		1584.8	0.01669223		2174.8	0.01708227		2764.79	0.01580751		3354.79	0.00468298		3944.78	0.00856566
405	0.06372588		995	0.00695017		1585	0.0169934		2175	0.01729925		2764.99	0.01502946		3354.99	0.00436776		3944.98	0.00800674
405.2	0.0649137		995.2	0.00705578		1585.2	0.01817966		2175.2	0.01797868		2765.19	0.01410168		3355.19	0.00330179		3945.18	0.0083167
405.4	0.06558182		995.4	0.00653573		1585.4	0.0188296		2175.4	0.01836539		2765.39	0.01309469		3355.39	0.00373882		3945.38	0.00766722
405.6	0.06535573		995.6	0.00588453		1585.6	0.01977419		2175.6	0.01819265		2765.59	0.01244076		3355.59	0.00378354		3945.58	0.00697954
405.8	0.06591267		995.8	0.00565157		1585.8	0.02075458		2175.8	0.01740943		2765.79	0.0120276		3355.79	0.00326057		3945.78	0.00625411
406	0.0656233		996	0.00550348		1586	0.02070046		2176	0.01698255		2765.99	0.01178327		3355.99	0.0033364		3945.98	0.00669743
406.2	0.06569585		996.2	0.00519619		1586.2	0.01994607		2176.2	0.01695267		2766.19	0.01133795		3356.19	0.00349327		3946.18	0.00665099
406.4	0.06528412		996.4	0.00572332		1586.4	0.01987711		2176.4	0.01693053		2766.39	0.0108411		3356.39	0.00315009		3946.38	0.0068301
406.6	0.06525812		996.6	0.00557516		1586.6	0.01943858		2176.6	0.016821		2766.59	0.01102839		3356.59	0.00243802		3946.58	0.00701827
406.8	0.06481276		996.8	0.00497756		1586.8	0.01906206		2176.8	0.01680615		2766.79	0.01114405		3356.79	0.00196625		3946.78	0.00678706
407	0.06410648		997	0.00501502		1587	0.01712757		2177	0.01673286		2766.99	0.01114375		3356.99	0.00241166		3946.98	0.0073749
407.2	0.06459753		997.2	0.00424723		1587.2	0.01747779		2177.2	0.01701102		2767.19	0.01152372		3357.19	0.00347339		3947.18	0.00698958
407.4	0.06431398		997.4	0.00511728		1587.4	0.01695562		2177.4	0.01755162		2767.39	0.01153429		3357.39	0.00238585		3947.38	0.00649333
407.6	0.06398257		997.6	0.00595366		1587.6	0.01708196		2177.6	0.01714421		2767.59	0.01221217		3357.59	0.00314676		3947.58	0.00684779
407.8	0.06500374		997.8	0.00660524		1587.8	0.01671473		2177.8	0.01861614		2767.79	0.01296886		3357.79	0.00355622		3947.78	0.00715825
408	0.06448871		998	0.0070466		1588	0.01660525		2178	0.01963195		2767.99	0.01333717		3357.99	0.00426766		3947.98	0.00648953
408.2	0.06470124		998.2	0.00760446		1588.2	0.01670559		2178.2	0.01943373		2768.19	0.01504743		3358.19	0.00503569		3948.18	0.00632605
408.4	0.06515126		998.4	0.00771903		1588.4	0.01533791		2178.4	0.01978593		2768.39	0.01518664		3358.39	0.00522928		3948.38	0.00600317
408.6	0.06502879		998.6	0.00814598		1588.6	0.01518919		2178.6	0.02054088		2768.59	0.01623794		3358.59	0.0053101		3948.58	0.00656677
408.8	0.06488596		998.8	0.00789882		1588.8	0.01534154		2178.8	0.01995924		2768.79	0.01688086		3358.79	0.00544611		3948.78	0.00733353
409	0.06575398		999	0.00770404		1589	0.01602812		2179	0.02047857		2768.99	0.01603324		3358.99	0.00601764		3948.98	0.00785959
409.2	0.06618596		999.2	0.00717824		1589.2	0.01722275		2179.2	0.02069467		2769.19	0.01610224		3359.19	0.00638098		3949.18	0.00791293
409.4	0.06698187		999.4	0.00697635		1589.4	0.01741782		2179.4	0.02077611		2769.39	0.01607745		3359.39	0.00722915		3949.38	0.00740026
409.6	0.06719911		999.6	0.00749221		1589.6	0.01817923		2179.6	0.02036996		2769.59	0.01600847		3359.59	0.0070436		3949.58	0.00710508
409.8	0.0677174		999.8	0.00769891		1589.8	0.01737159		2179.8	0.01953847		2769.79	0.0158535		3359.79	0.00733933		3949.78	0.00791544
410	0.06741009		1000	0.00872331		1590	0.01717188		2180	0.01948235		2769.99	0.01588411		3359.99	0.00691672		3949.98	0.00918799
410.2	0.06723531		1000.2	0.00952377		1590.2	0.01655982		2180.2	0.01964243		2770.19	0.01488861		3360.19	0.00685346		3950.18	0.00948535
410.4	0.06621775		1000.4	0.00933282		1590.4	0.01737559		2180.4	0.01921241		2770.39	0.01467872		3360.39	0.00665469		3950.38	0.00970048
410.6	0.06583169		1000.6	0.00831146		1590.6	0.01679554		2180.6	0.01830626		2770.59	0.01496061		3360.59	0.00544487		3950.58	0.00990994
410.8	0.06476431		1000.8	0.00780667		1590.8	0.01743423		2180.8	0.01755494		2770.79	0.01381655		3360.79	0.00493391		3950.78	0.0102987
411	0.06486553		1001	0.00786849		1591	0.01703369		2181	0.01654955		2770.99	0.0136537		3360.99	0.00531977		3950.98	0.01096439
411.2	0.06506362		1001.2	0.00881184		1591.2	0.01765873		2181.2	0.01694312		2771.19	0.01354602		3361.19	0.00580085		3951.18	0.01109108
411.4	0.06561877		1001.4	0.00923552		1591.4	0.01754007		2181.4	0.01708716		2771.39	0.0132527		3361.39	0.00599418		3951.38	0.01087381
411.6	0.06497385		1001.6	0.00906958		1591.6	0.0179962		2181.6	0.01705206		2771.59	0.01357425		3361.59	0.00637659		3951.58	0.01072656
411.8	0.06453217		1001.8	0.00879612		1591.8	0.01805561		2181.8	0.01803461		2771.79	0.01355798		3361.79	0.0058536		3951.78	0.010602
412	0.0623212		1002	0.00818294		1592	0.01865441		2182	0.01787641		2771.99	0.01301479		3361.99	0.00602338		3951.98	0.01067072
412.2	0.0620473		1002.2	0.00770091		1592.2	0.01812691		2182.2	0.01716115		2772.19	0.01413376		3362.19	0.00570068		3952.18	0.01085351
412.4	0.06176796		1002.4	0.00683519		1592.4	0.01848778		2182.4	0.01709383		2772.39	0.01350518		3362.39	0.00618977		3952.38	0.01090849
412.6	0.06137071		1002.6	0.00566239		1592.6	0.01910072		2182.6	0.01654288		2772.59	0.01419128		3362.59	0.00602028		3952.58	0.01116002
412.8	0.06154423		1002.8	0.00504785		1592.8	0.01887051		2182.8	0.01667256		2772.79	0.01432149		3362.79	0.00645314		3952.78	0.01064654
413	0.06280788		1003	0.00480006		1593	0.01925335		2183	0.0177168		2772.99	0.01459745		3362.99	0.00720436		3952.98	0.01087839
413.2	0.06321327		1003.2	0.00465857		1593.2	0.01946843		2183.2	0.01764348		2773.19	0.01493017		3363.19	0.00666389		3953.18	0.01038358
413.4	0.06385059		1003.4	0.00490731		1593.4	0.01900977		2183.4	0.01873866		2773.39	0.01455686		3363.39	0.00659172		3953.38	0.0100641
413.6	0.06386681		1003.6	0.00518333		1593.6	0.01815581		2183.6	0.01844151		2773.59	0.01482561		3363.59	0.00601965		3953.58	0.00938245
413.8	0.06421858		1003.8	0.00514527		1593.8	0.01656028		2183.8	0.01828503		2773.79	0.01509797		3363.79	0.00562378		3953.78	0.01053085
414	0.06461415		1004	0.00577098		1594	0.01638865		2184	0.01880753		2773.99	0.01476039		3363.99	0.00516066		3953.98	0.01019506
414.2	0.06497118		1004.2	0.00488116		1594.2	0.0153671		2184.2	0.01885358		2774.19	0.01497413		3364.19	0.00605632		3954.18	0.00985287
414.4	0.06571647		1004.4	0.00501013		1594.4	0.01482104		2184.4	0.01873713		2774.39	0.01518055		3364.39	0.0061804		3954.38	0.01036548
414.6	0.06688054		1004.6	0.00566893		1594.6	0.01423561		2184.6	0.0188397		2774.59	0.01448941		3364.59	0.00567306		3954.58	0.01089767
414.8	0.06758402		1004.8	0.00665451		1594.8	0.01496715		2184.8	0.01785561		2774.79	0.01375115		3364.79	0.00628714		3954.78	0.01121638
415	0.06769385		1005	0.00711993		1595	0.01468854		2185	0.01829715		2774.99	0.01419563		3364.99	0.00718554		3954.98	0.01119668
415.2	0.06817413		1005.2	0.00777045		1595.2	0.01393869		2185.2	0.01897259		2775.19	0.01431458		3365.19	0.00755151		3955.18	0.01133207
415.4	0.06828611		1005.4	0.00716834		1595.4	0.01490707		2185.4	0.01995924		2775.39	0.01385388		3365.39	0.00749966		3955.38	0.01123591
415.6	0.06668763		1005.6	0.00691454		1595.6	0.01483526		2185.6	0.02068568		2775.59	0.01342563		3365.59	0.00714936		3955.58	0.01095429
415.8	0.06629864		1005.8	0.00676854		1595.8	0.01479529		2185.8	0.02159903		2775.79	0.01260923		3365.79	0.00711857		3955.78	0.01139106
416	0.06573114		1006	0.00695874		1596	0.01533532		2186	0.02237789		2775.99	0.01239475		3365.99	0.00768796		3955.98	0.01165101
416.2	0.06600637		1006.2	0.00664289		1596.2	0.01502038		2186.2	0.02236387		2776.19	0.01316338		3366.19	0.00759183		3956.18	0.01216534
416.4	0.06595283		1006.4	0.00584905		1596.4	0.01530578		2186.4	0.02178709		2776.39	0.01357092		3366.39	0.00807289		3956.38	0.01314865
416.6	0.06580987		1006.6	0.00550523		1596.6	0.01412891		2186.6	0.02115831		2776.59	0.01450425		3366.59	0.00780295		3956.58	0.01254968
416.8	0.0660739		1006.8	0.00593794		1596.8	0.01394362		2186.8	0.02115831		2776.79	0.01424423		3366.79	0.00764949		3956.78	0.01179817
417	0.06627379		1007	0.00648561		1597	0.01438279		2187	0.02081632		2776.99	0.01490105		3366.99	0.00778708		3956.98	0.01141603
417.2	0.06611353		1007.2	0.00645678		1597.2	0.01446557		2187.2	0.02088768		2777.19	0.014547		3367.19	0.00731243		3957.18	0.01165259
417.4	0.06668915		1007.4	0.0059159		1597.4	0.01493417		2187.4	0.02069172		2777.39	0.01381217		3367.39	0.00706456		3957.38	0.01164845
417.6	0.06700122		1007.6	0.00540587		1597.6	0.01466039		2187.6	0.02001771		2777.59	0.01486234		3367.59	0.00631891		3957.58	0.01160802
417.8	0.06730938		1007.8	0.00504001		1597.8	0.01531562		2187.8	0.01969258		2777.79	0.01446274		3367.79	0.00593398		3957.78	0.0116603
418	0.06781542		1008	0.00501876		1598	0.01590382		2188	0.01935799		2777.99	0.01428939		3367.99	0.00617745		3957.98	0.01028851
418.2	0.06836339		1008.2	0.00531947		1598.2	0.01636866		2188.2	0.01886966		2778.19	0.01513489		3368.19	0.00685246		3958.18	0.01002835
418.4	0.06910626		1008.4	0.00562197		1598.4	0.01636561		2188.4	0.01852804		2778.39	0.0147091		3368.39	0.00654846		3958.38	0.00994166
418.6	0.06977301		1008.6	0.00593463		1598.6	0.01767124		2188.6	0.01728787		2778.59	0.01473271		3368.59	0.00625645		3958.58	0.00991878
418.8	0.06894831		1008.8	0.00608223		1598.8	0.01783992		2188.8	0.01590186		2778.79	0.01555389		3368.79	0.00699782		3958.78	0.00909905
419	0.06919906		1009	0.00572745		1599	0.01850396		2189	0.01667906		2778.99	0.01666428		3368.99	0.00693504		3958.98	0.00887301
419.2	0.06882989		1009.2	0.00552104		1599.2	0.01876266		2189.2	0.01693106		2779.19	0.01644026		3369.19	0.00661255		3959.18	0.00863986
419.4	0.0690675		1009.4	0.00488914		1599.4	0.02047287		2189.4	0.0176994		2779.39	0.0166281		3369.39	0.00679115		3959.38	0.0086756
419.6	0.06879634		1009.6	0.00508435		1599.6	0.01990061		2189.6	0.01766422		2779.59	0.01707655		3369.59	0.00697246		3959.58	0.00835555
419.8	0.06826382		1009.8	0.00511379		1599.8	0.01937117		2189.8	0.01807888		2779.79	0.01574152		3369.79	0.00661911		3959.78	0.00843485
420	0.06825664		1010	0.00460074		1600	0.01953514		2190	0.01860171		2779.99	0.01548452		3369.99	0.00744025		3959.98	0.00891371
420.2	0.06784165		1010.2	0.00504771		1600.2	0.01927047		2190.2	0.01780316		2780.19	0.0154158		3370.19	0.00733415		3960.18	0.00988461
420.4	0.06884828		1010.4	0.0056348		1600.4	0.01747096		2190.4	0.01713182		2780.39	0.01511399		3370.39	0.00714079		3960.38	0.00983251
420.6	0.06925365		1010.6	0.00682878		1600.6	0.0167948		2190.6	0.01773167		2780.59	0.01461138		3370.59	0.00709607		3960.58	0.00969619
420.8	0.06949562		1010.8	0.00751987		1600.8	0.01667468		2190.8	0.01940937		2780.79	0.01367944		3370.79	0.0062689		3960.78	0.00925717
421	0.06901909		1011	0.0077522		1601	0.0162115		2191	0.0203849		2780.99	0.01327721		3370.99	0.00640152		3960.98	0.00957622
421.2	0.06922101		1011.2	0.00760355		1601.2	0.0159548		2191.2	0.02240251		2781.19	0.01278741		3371.19	0.00595195		3961.18	0.0101165
421.4	0.069859		1011.4	0.00735663		1601.4	0.01599871		2191.4	0.02219493		2781.39	0.01231844		3371.39	0.00549446		3961.38	0.01015701
421.6	0.06989174		1011.6	0.00746448		1601.6	0.01595836		2191.6	0.02247094		2781.59	0.01228518		3371.59	0.00578285		3961.58	0.01100931
421.8	0.07031356		1011.8	0.00753614		1601.8	0.01614228		2191.8	0.02245579		2781.79	0.01179505		3371.79	0.006313		3961.78	0.01091921
422	0.07020996		1012	0.00786076		1602	0.0166735		2192	0.02223545		2781.99	0.01237949		3371.99	0.00642947		3961.98	0.01146217
422.2	0.07002648		1012.2	0.0072823		1602.2	0.01704507		2192.2	0.02201922		2782.19	0.01295937		3372.19	0.00687332		3962.18	0.01181071
422.4	0.07052569		1012.4	0.00705978		1602.4	0.01697385		2192.4	0.02179217		2782.39	0.01358751		3372.39	0.00661772		3962.38	0.0122176
422.6	0.07132964		1012.6	0.00761616		1602.6	0.0175041		2192.6	0.02107355		2782.59	0.01467738		3372.59	0.00623242		3962.58	0.01256849
422.8	0.07106179		1012.8	0.00814424		1602.8	0.01718453		2192.8	0.0203784		2782.79	0.01593226		3372.79	0.00672791		3962.78	0.01185033
423	0.07188998		1013	0.00773923		1603	0.0181153		2193	0.02011948		2782.99	0.01631687		3372.99	0.00678285		3962.98	0.01254077
423.2	0.07092435		1013.2	0.00850612		1603.2	0.01833612		2193.2	0.02014274		2783.19	0.01630145		3373.19	0.00703459		3963.18	0.01257655
423.4	0.07186793		1013.4	0.00814572		1603.4	0.01924636		2193.4	0.01933755		2783.39	0.01722626		3373.39	0.00744174		3963.38	0.0126671
423.6	0.07186724		1013.6	0.00807143		1603.6	0.01810299		2193.6	0.01869126		2783.59	0.01745508		3373.59	0.00694844		3963.58	0.01246456
423.8	0.07152834		1013.8	0.00750827		1603.8	0.01781152		2193.8	0.01849784		2783.79	0.01701321		3373.79	0.00741552		3963.78	0.01239258
424	0.07238059		1014	0.00737103		1604	0.01830115		2194	0.0180816		2783.99	0.01711521		3373.99	0.00810439		3963.98	0.01242088
424.2	0.07266624		1014.2	0.00843847		1604.2	0.01737082		2194.2	0.01781714		2784.19	0.01657344		3374.19	0.00716669		3964.18	0.01220733
424.4	0.07388664		1014.4	0.00807679		1604.4	0.01604353		2194.4	0.01761116		2784.39	0.01619464		3374.39	0.0059854		3964.38	0.01138811
424.6	0.07340843		1014.6	0.00779639		1604.6	0.01608902		2194.6	0.01808541		2784.59	0.01630292		3374.59	0.00567623		3964.58	0.01181989
424.8	0.07293445		1014.8	0.00706111		1604.8	0.01594135		2194.8	0.01839394		2784.79	0.01573861		3374.79	0.00466467		3964.78	0.01162178
425	0.07252601		1015	0.00608045		1605	0.01560331		2195	0.01796819		2784.99	0.01526408		3374.99	0.00480981		3964.98	0.01194191
425.2	0.0719775		1015.2	0.00571436		1605.2	0.01578604		2195.2	0.01793641		2785.19	0.01521953		3375.19	0.00552383		3965.18	0.01152431
425.4	0.07182302		1015.4	0.00508267		1605.4	0.01551092		2195.4	0.01677918		2785.39	0.01461057		3375.39	0.00528419		3965.38	0.01200229
425.6	0.0714349		1015.6	0.00440161		1605.6	0.01629727		2195.6	0.0170291		2785.59	0.01409675		3375.59	0.00563987		3965.58	0.01290516
425.8	0.07061884		1015.8	0.00494426		1605.8	0.0163395		2195.8	0.01733784		2785.79	0.01367969		3375.79	0.0054034		3965.78	0.01280542
426	0.07032246		1016	0.00446948		1606	0.01781759		2196	0.0173619		2785.99	0.01364182		3375.99	0.00472157		3965.98	0.01269686
426.2	0.07038759		1016.2	0.00446997		1606.2	0.01827856		2196.2	0.0172983		2786.19	0.01288644		3376.19	0.00414211		3966.18	0.01198498
426.4	0.07048935		1016.4	0.00477766		1606.4	0.01913811		2196.4	0.01720423		2786.39	0.01257723		3376.39	0.00341461		3966.38	0.01213961
426.6	0.07098113		1016.6	0.00522687		1606.6	0.01874496		2196.6	0.01761955		2786.59	0.01214883		3376.59	0.00356225		3966.58	0.01218864
426.8	0.07115829		1016.8	0.00618766		1606.8	0.01912183		2196.8	0.0176756		2786.79	0.01278173		3376.79	0.00365484		3966.78	0.01208064
427	0.07129017		1017	0.00667673		1607	0.01975658		2197	0.01819455		2786.99	0.0126644		3376.99	0.00368448		3966.98	0.01257496
427.2	0.07134493		1017.2	0.00783604		1607.2	0.02010805		2197.2	0.01770587		2787.19	0.01324608		3377.19	0.00390822		3967.18	0.01187299
427.4	0.07210984		1017.4	0.00839563		1607.4	0.02028308		2197.4	0.0168899		2787.39	0.01414876		3377.39	0.00395097		3967.38	0.0116492
427.6	0.07209999		1017.6	0.00840631		1607.6	0.02001552		2197.6	0.01747521		2787.59	0.01441286		3377.59	0.00379499		3967.58	0.01146323
427.8	0.07151316		1017.8	0.00822897		1607.8	0.02019788		2197.8	0.01778813		2787.79	0.01491392		3377.79	0.00475367		3967.78	0.0114997
428	0.07195239		1018	0.00849742		1608	0.02046212		2198	0.01901402		2787.99	0.01437052		3377.99	0.0044901		3967.98	0.01142179
428.2	0.07155344		1018.2	0.0085542		1608.2	0.01929004		2198.2	0.01938669		2788.19	0.01438597		3378.19	0.00449556		3968.18	0.01184281
428.4	0.07250213		1018.4	0.00842295		1608.4	0.01916618		2198.4	0.01987637		2788.39	0.01480554		3378.39	0.0044352		3968.38	0.01096109
428.6	0.07249152		1018.6	0.00828159		1608.6	0.01878852		2198.6	0.02078922		2788.59	0.01443649		3378.59	0.00541124		3968.58	0.01108779
428.8	0.07217895		1018.8	0.00805363		1608.8	0.0187755		2198.8	0.02119778		2788.79	0.0146189		3378.79	0.0060598		3968.78	0.01070112
429	0.07148068		1019	0.00773425		1609	0.01798719		2199	0.02169928		2788.99	0.01454746		3378.99	0.00656444		3968.98	0.00988786
429.2	0.07032396		1019.2	0.00800126		1609.2	0.01765028		2199.2	0.02175582		2789.19	0.01436191		3379.19	0.0076612		3969.18	0.00965631
429.4	0.07043458		1019.4	0.00817592		1609.4	0.01682517		2199.4	0.02248491		2789.39	0.01414337		3379.39	0.00710439		3969.38	0.00963922
429.6	0.07027365		1019.6	0.0080566		1609.6	0.01752893		2199.6	0.02331729		2789.59	0.01402167		3379.59	0.00664741		3969.58	0.0094539
429.8	0.07012639		1019.8	0.00867905		1609.8	0.01686454		2199.8	0.02357691		2789.79	0.01348375		3379.79	0.00679799		3969.78	0.00890442
430	0.07103702		1020	0.00766028		1610	0.016993		2200	0.0231627		2789.99	0.01365236		3379.99	0.00665521		3969.98	0.00870175
430.2	0.07086099		1020.2	0.0074204		1610.2	0.01635675		2200.2	0.0224405		2790.19	0.01336298		3380.19	0.0068514		3970.18	0.00924722
430.4	0.0715381		1020.4	0.00719264		1610.4	0.01629558		2200.4	0.02225051		2790.39	0.01387819		3380.39	0.00729974		3970.38	0.00948559
430.6	0.07308211		1020.6	0.00774739		1610.6	0.01556746		2200.6	0.0222174		2790.59	0.01394278		3380.59	0.00799721		3970.58	0.00974118
430.8	0.0736373		1020.8	0.00826415		1610.8	0.01562244		2200.8	0.02110485		2790.79	0.01487063		3380.79	0.00746077		3970.78	0.0097288
431	0.07365614		1021	0.00785644		1611	0.01574007		2201	0.0204105		2790.99	0.01542377		3380.99	0.00722485		3970.98	0.0098236
431.2	0.07422355		1021.2	0.00731488		1611.2	0.01519318		2201.2	0.01886241		2791.19	0.0162509		3381.19	0.0062598		3971.18	0.00943022
431.4	0.07395795		1021.4	0.0075796		1611.4	0.01588564		2201.4	0.01800561		2791.39	0.01619716		3381.39	0.00596717		3971.38	0.01004746
431.6	0.07402215		1021.6	0.00713379		1611.6	0.01705913		2201.6	0.01769523		2791.59	0.0165203		3381.59	0.00538451		3971.58	0.0105011
431.8	0.07334107		1021.8	0.00688382		1611.8	0.01795303		2201.8	0.01790969		2791.79	0.01709771		3381.79	0.00527186		3971.78	0.01108381
432	0.07364573		1022	0.00651904		1612	0.01885301		2202	0.0184132		2791.99	0.01652173		3381.99	0.00487493		3971.98	0.01195522
432.2	0.07266136		1022.2	0.00624681		1612.2	0.01865216		2202.2	0.01888839		2792.19	0.0164154		3382.19	0.00499652		3972.18	0.01172267
432.4	0.07243285		1022.4	0.00649025		1612.4	0.01888283		2202.4	0.01958525		2792.39	0.01579615		3382.39	0.00474026		3972.38	0.01106223
432.6	0.07212222		1022.6	0.00620234		1612.6	0.01871598		2202.6	0.01971696		2792.59	0.0153523		3382.59	0.0046628		3972.58	0.01195265
432.8	0.07168154		1022.8	0.00633305		1612.8	0.01927358		2202.8	0.01995388		2792.79	0.01603346		3382.79	0.00479751		3972.78	0.01135331
433	0.07077109		1023	0.00593535		1613	0.0189363		2203	0.0204154		2792.99	0.01554166		3382.99	0.00456289		3972.98	0.01114152
433.2	0.07018934		1023.2	0.00549534		1613.2	0.01860489		2203.2	0.02089847		2793.19	0.0154374		3383.19	0.00455488		3973.18	0.01108776
433.4	0.07034464		1023.4	0.00555831		1613.4	0.01864903		2203.4	0.02080256		2793.39	0.01554931		3383.39	0.00374598		3973.38	0.01067704
433.6	0.0700632		1023.6	0.00482925		1613.6	0.01942703		2203.6	0.02062924		2793.59	0.01563913		3383.59	0.00359373		3973.58	0.01018814
433.8	0.07053432		1023.8	0.00516341		1613.8	0.01850999		2203.8	0.02030306		2793.79	0.01593628		3383.79	0.00452451		3973.78	0.0098442
434	0.07131168		1024	0.00499124		1614	0.01791956		2204	0.0196593		2793.99	0.01606394		3383.99	0.00493017		3973.98	0.01032467
434.2	0.07130049		1024.2	0.00564366		1614.2	0.01734399		2204.2	0.01948915		2794.19	0.01589077		3384.19	0.00516347		3974.18	0.01019909
434.4	0.07232382		1024.4	0.00590288		1614.4	0.01711819		2204.4	0.02047021		2794.39	0.01602103		3384.39	0.00558107		3974.38	0.01015361
434.6	0.07370282		1024.6	0.00586121		1614.6	0.01669186		2204.6	0.02059012		2794.59	0.01543486		3384.59	0.00587273		3974.58	0.01058392
434.8	0.07385527		1024.8	0.00509991		1614.8	0.01598284		2204.8	0.02161485		2794.79	0.01521333		3384.79	0.00531283		3974.78	0.01001094
435	0.07483416		1025	0.00436389		1615	0.01565785		2205	0.02143654		2794.99	0.01581191		3384.99	0.00480174		3974.98	0.00979614
435.2	0.07536101		1025.2	0.0048273		1615.2	0.01545047		2205.2	0.02154865		2795.19	0.01588729		3385.19	0.00479283		3975.18	0.00901717
435.4	0.07515139		1025.4	0.00576376		1615.4	0.01633461		2205.4	0.02077704		2795.39	0.01589049		3385.39	0.00542091		3975.38	0.00949836
435.6	0.0750732		1025.6	0.00639198		1615.6	0.01672559		2205.6	0.02105226		2795.59	0.01635088		3385.59	0.00572641		3975.58	0.01009902
435.8	0.07411399		1025.8	0.00674284		1615.8	0.01726254		2205.8	0.02141872		2795.79	0.0153521		3385.79	0.00601721		3975.78	0.01134694
436	0.07435157		1026	0.00643748		1616	0.01716649		2206	0.02104538		2795.99	0.01525346		3385.99	0.0055631		3975.98	0.01248305
436.2	0.07309528		1026.2	0.00711925		1616.2	0.01647983		2206.2	0.02131558		2796.19	0.01476326		3386.19	0.00569075		3976.18	0.01266392
436.4	0.07333963		1026.4	0.00747262		1616.4	0.01646171		2206.4	0.02039025		2796.39	0.01421486		3386.39	0.00609801		3976.38	0.01369395
436.6	0.07396722		1026.6	0.00759573		1616.6	0.01694256		2206.6	0.02111276		2796.59	0.01520207		3386.59	0.00613672		3976.58	0.01359661
436.8	0.07349548		1026.8	0.00782552		1616.8	0.01698422		2206.8	0.02154379		2796.79	0.01501628		3386.79	0.00727998		3976.78	0.01351876
437	0.07354399		1027	0.00766666		1617	0.01548051		2207	0.02072125		2796.99	0.01496162		3386.99	0.00746262		3976.98	0.01309592
437.2	0.07377255		1027.2	0.00735253		1617.2	0.01542303		2207.2	0.02067349		2797.19	0.01489074		3387.19	0.0076617		3977.18	0.01283811
437.4	0.07386608		1027.4	0.00757834		1617.4	0.0160951		2207.4	0.02009684		2797.39	0.01544207		3387.39	0.00790271		3977.38	0.01267775
437.6	0.07362281		1027.6	0.0078779		1617.6	0.01601993		2207.6	0.01964513		2797.59	0.01541339		3387.59	0.00842586		3977.58	0.01217915
437.8	0.07405627		1027.8	0.00838399		1617.8	0.01599029		2207.8	0.01917338		2797.79	0.0152985		3387.79	0.00855104		3977.78	0.01187457
438	0.07421121		1028	0.00804724		1618	0.01662372		2208	0.01958648		2797.99	0.01510618		3387.99	0.00879786		3977.98	0.01165668
438.2	0.07399454		1028.2	0.00839398		1618.2	0.01671426		2208.2	0.01970014		2798.19	0.01482696		3388.19	0.00872093		3978.18	0.01100358
438.4	0.07391806		1028.4	0.00843118		1618.4	0.01783631		2208.4	0.02054661		2798.39	0.01499873		3388.39	0.0086949		3978.38	0.01046533
438.6	0.07437515		1028.6	0.00875619		1618.6	0.01866715		2208.6	0.02036355		2798.59	0.01437951		3388.59	0.00885435		3978.58	0.00950874
438.8	0.07418946		1028.8	0.00848411		1618.8	0.01957523		2208.8	0.02125501		2798.79	0.01418801		3388.79	0.00873334		3978.78	0.00903932
439	0.07420541		1029	0.00873512		1619	0.01930819		2209	0.02113974		2798.99	0.01492137		3388.99	0.0083611		3978.98	0.00829066
439.2	0.07320194		1029.2	0.00917242		1619.2	0.01948369		2209.2	0.02123559		2799.19	0.01548575		3389.19	0.00841096		3979.18	0.00787377
439.4	0.07354769		1029.4	0.00912649		1619.4	0.01980137		2209.4	0.02052878		2799.39	0.01548657		3389.39	0.00882393		3979.38	0.00861363
439.6	0.07284702		1029.6	0.00946916		1619.6	0.01974257		2209.6	0.02048544		2799.59	0.01574233		3389.59	0.00858602		3979.58	0.00912313
439.8	0.07276816		1029.8	0.00964326		1619.8	0.02005794		2209.8	0.02032661		2799.79	0.01522193		3389.79	0.00849437		3979.78	0.01059223
440	0.07307911		1030	0.0093527		1620	0.01956743		2210	0.01979729		2799.99	0.01551409		3389.99	0.0077933		3979.98	0.01105901
440.2	0.07241849		1030.2	0.00956583		1620.2	0.01828931		2210.2	0.0200873		2800.19	0.01413617		3390.19	0.00745136		3980.18	0.01156538
440.4	0.07271432		1030.4	0.00990304		1620.4	0.01782027		2210.4	0.02020619		2800.39	0.01382892		3390.39	0.0072176		3980.38	0.01203683
440.6	0.07282596		1030.6	0.00972694		1620.6	0.0171962		2210.6	0.02113373		2800.59	0.01405016		3390.59	0.00741071		3980.58	0.01221416
440.8	0.07281703		1030.8	0.00969674		1620.8	0.01539223		2210.8	0.02135643		2800.79	0.01326736		3390.79	0.00692931		3980.78	0.01265254
441	0.07337316		1031	0.00980704		1621	0.01446667		2211	0.02127942		2800.99	0.0135537		3390.99	0.00604426		3980.98	0.01212033
441.2	0.07333099		1031.2	0.00950421		1621.2	0.0149085		2211.2	0.0219826		2801.19	0.01353616		3391.19	0.00551479		3981.18	0.01238841
441.4	0.072755		1031.4	0.00951176		1621.4	0.01479766		2211.4	0.02233786		2801.39	0.01390166		3391.39	0.00488553		3981.38	0.0126268
441.6	0.0726986		1031.6	0.00945144		1621.6	0.01472409		2211.6	0.02222913		2801.59	0.01357513		3391.59	0.00493379		3981.58	0.01288396
441.8	0.07261886		1031.8	0.00854953		1621.8	0.01590986		2211.8	0.02209045		2801.79	0.01409356		3391.79	0.00453651		3981.78	0.01298671
442	0.07233575		1032	0.00858998		1622	0.016927		2212	0.02271365		2801.99	0.01420028		3391.99	0.00456186		3981.98	0.01240131
442.2	0.07274278		1032.2	0.00951749		1622.2	0.0169994		2212.2	0.02270531		2802.19	0.01422922		3392.19	0.00427742		3982.18	0.01196314
442.4	0.07323638		1032.4	0.00988706		1622.4	0.0178964		2212.4	0.02282348		2802.39	0.01486416		3392.39	0.00414817		3982.38	0.01137406
442.6	0.07345482		1032.6	0.00976677		1622.6	0.01860983		2212.6	0.02272212		2802.59	0.0147716		3392.59	0.00398672		3982.58	0.0113518
442.8	0.07347901		1032.8	0.00900898		1622.8	0.01919085		2212.8	0.02258914		2802.79	0.01501599		3392.79	0.00369868		3982.78	0.01150898
443	0.074211		1033	0.00974532		1623	0.01929963		2213	0.0224879		2802.99	0.01624744		3392.99	0.00379554		3982.98	0.01127748
443.2	0.07427737		1033.2	0.00904117		1623.2	0.01992408		2213.2	0.02103789		2803.19	0.01635153		3393.19	0.00447605		3983.18	0.01108221
443.4	0.07538107		1033.4	0.00982455		1623.4	0.02035964		2213.4	0.02056209		2803.39	0.01629413		3393.39	0.00603319		3983.38	0.01075381
443.6	0.07522898		1033.6	0.01035737		1623.6	0.02044477		2213.6	0.02050961		2803.59	0.01680427		3393.59	0.00634021		3983.58	0.01124168
443.8	0.07545051		1033.8	0.01075574		1623.8	0.02041008		2213.8	0.01961569		2803.79	0.01623932		3393.79	0.00756882		3983.78	0.01192276
444	0.07556152		1034	0.01064806		1624	0.02011877		2214	0.01875335		2803.99	0.01497951		3393.99	0.00727733		3983.98	0.01153065
444.2	0.07491557		1034.2	0.010287		1624.2	0.01917879		2214.2	0.01858413		2804.19	0.0140816		3394.19	0.00777093		3984.18	0.01150895
444.4	0.07501016		1034.4	0.01048359		1624.4	0.01947766		2214.4	0.0183182		2804.39	0.01401002		3394.39	0.0081996		3984.38	0.01134281
444.6	0.07525291		1034.6	0.00981325		1624.6	0.01947306		2214.6	0.01771201		2804.59	0.01356106		3394.59	0.00815785		3984.58	0.01129758
444.8	0.07491681		1034.8	0.00937541		1624.8	0.01944421		2214.8	0.01836563		2804.79	0.01295531		3394.79	0.00721702		3984.78	0.01088438
445	0.07519518		1035	0.00845969		1625	0.01962398		2215	0.01823363		2804.99	0.01277118		3394.99	0.00747939		3984.98	0.01051125
445.2	0.07428957		1035.2	0.00780415		1625.2	0.01983691		2215.2	0.01818395		2805.19	0.01199998		3395.19	0.00737621		3985.18	0.00964746
445.4	0.07318822		1035.4	0.00691025		1625.4	0.01931697		2215.4	0.01907195		2805.39	0.01228928		3395.39	0.00769045		3985.38	0.01014836
445.6	0.07314844		1035.6	0.00659739		1625.6	0.01916328		2215.6	0.01933794		2805.59	0.01239144		3395.59	0.00819234		3985.58	0.01083842
445.8	0.07326069		1035.8	0.00617959		1625.8	0.01894999		2215.8	0.01955657		2805.79	0.01286152		3395.79	0.00753377		3985.78	0.00998089
446	0.07334389		1036	0.00620779		1626	0.01857941		2216	0.01990991		2805.99	0.01273627		3395.99	0.00658171		3985.98	0.01015343
446.2	0.07393257		1036.2	0.00626743		1626.2	0.01753485		2216.2	0.02061496		2806.19	0.01344016		3396.19	0.00587104		3986.18	0.00989382
446.4	0.0745804		1036.4	0.00600071		1626.4	0.01769282		2216.4	0.02074409		2806.39	0.01400886		3396.39	0.00580992		3986.38	0.00989968
446.6	0.07415808		1036.6	0.00557419		1626.6	0.01799531		2216.6	0.0214317		2806.59	0.01421083		3396.59	0.00515411		3986.58	0.0095271
446.8	0.07465631		1036.8	0.00574082		1626.8	0.01810504		2216.8	0.02113784		2806.79	0.01482775		3396.79	0.00542844		3986.78	0.00933462
447	0.07554281		1037	0.00736285		1627	0.01798781		2217	0.02148726		2806.99	0.01570013		3396.99	0.00604042		3986.98	0.00914681
447.2	0.07551642		1037.2	0.00714317		1627.2	0.01754695		2217.2	0.02026637		2807.19	0.01556934		3397.19	0.00631855		3987.18	0.00886726
447.4	0.07546634		1037.4	0.00795299		1627.4	0.01722484		2217.4	0.0204882		2807.39	0.01689579		3397.39	0.00694779		3987.38	0.00963303
447.6	0.07479887		1037.6	0.00812826		1627.6	0.01693894		2217.6	0.02008741		2807.59	0.01680442		3397.59	0.00687992		3987.58	0.01019335
447.8	0.0745454		1037.8	0.00779603		1627.8	0.016238		2217.8	0.01885406		2807.79	0.01643615		3397.79	0.0067168		3987.78	0.01071344
448	0.0741591		1038	0.0076128		1628	0.01618179		2218	0.01862151		2807.99	0.01599664		3397.99	0.00614492		3987.98	0.01032991
448.2	0.0734336		1038.2	0.00728804		1628.2	0.0160022		2218.2	0.01800492		2808.19	0.0165023		3398.19	0.00637564		3988.18	0.01097683
448.4	0.07365588		1038.4	0.00699906		1628.4	0.01622583		2218.4	0.01776717		2808.39	0.01634893		3398.39	0.00540287		3988.38	0.01166724
448.6	0.07357318		1038.6	0.00599657		1628.6	0.01652489		2218.6	0.01760397		2808.59	0.01572063		3398.59	0.00472413		3988.58	0.01190855
448.8	0.07395041		1038.8	0.00525775		1628.8	0.01620299		2218.8	0.01819027		2808.79	0.01506971		3398.79	0.00496075		3988.78	0.01153374
449	0.07431245		1039	0.00471259		1629	0.01688458		2219	0.01793245		2808.99	0.01511066		3398.99	0.00450725		3988.98	0.0116055
449.2	0.0735378		1039.2	0.00467121		1629.2	0.01721364		2219.2	0.01795085		2809.19	0.01413011		3399.19	0.00465148		3989.18	0.01199923
449.4	0.07362623		1039.4	0.00462004		1629.4	0.01734951		2219.4	0.0181439		2809.39	0.01404744		3399.39	0.0043961		3989.38	0.01355223
449.6	0.07426932		1039.6	0.00529201		1629.6	0.01844077		2219.6	0.01782459		2809.59	0.01340327		3399.59	0.00397121		3989.58	0.01354906
449.8	0.07490197		1039.8	0.00523045		1629.8	0.01915674		2219.8	0.01770012		2809.79	0.01422235		3399.79	0.0033847		3989.78	0.01351116
450	0.07560421		1040	0.00588796		1630	0.01970693		2220	0.01813646		2809.99	0.01396786		3399.99	0.00284394		3989.98	0.01379372
450.2	0.07637226		1040.2	0.00646943		1630.2	0.02012301		2220.2	0.01860751		2810.19	0.01409236		3400.19	0.00321902		3990.18	0.01266722
450.4	0.07767894		1040.4	0.00646415		1630.4	0.02056723		2220.4	0.01944114		2810.39	0.0142459		3400.39	0.00405812		3990.38	0.01239349
450.6	0.07781021		1040.6	0.00756361		1630.6	0.0204261		2220.6	0.02022207		2810.59	0.01471753		3400.59	0.00437324		3990.58	0.01215773
450.8	0.07883025		1040.8	0.00855804		1630.8	0.01988467		2220.8	0.02010466		2810.79	0.01569357		3400.79	0.00494428		3990.78	0.01276496
451	0.0786384		1041	0.01011777		1631	0.02006189		2221	0.02061976		2810.99	0.0160439		3400.99	0.00507364		3990.98	0.01332119
451.2	0.07881281		1041.2	0.00950167		1631.2	0.01963741		2221.2	0.01976875		2811.19	0.01716084		3401.19	0.0051802		3991.18	0.01357646
451.4	0.0782159		1041.4	0.00975948		1631.4	0.01940948		2221.4	0.02023921		2811.39	0.01749271		3401.39	0.00573833		3991.38	0.01375049
451.6	0.07823998		1041.6	0.010169		1631.6	0.01862491		2221.6	0.01972344		2811.59	0.01654383		3401.59	0.00549767		3991.58	0.01338401
451.8	0.07815418		1041.8	0.01006557		1631.8	0.01759208		2221.8	0.01955206		2811.79	0.01640527		3401.79	0.0054953		3991.78	0.01321062
452	0.07752866		1042	0.01063827		1632	0.01781494		2222	0.01974689		2811.99	0.01700506		3401.99	0.00565009		3991.98	0.01295371
452.2	0.076884		1042.2	0.01010563		1632.2	0.01754872		2222.2	0.02018338		2812.19	0.01697568		3402.19	0.00531323		3992.18	0.01347365
452.4	0.0766056		1042.4	0.00964622		1632.4	0.01722884		2222.4	0.02138367		2812.39	0.01650139		3402.39	0.00422336		3992.38	0.01404613
452.6	0.07709778		1042.6	0.01005221		1632.6	0.01708895		2222.6	0.02172858		2812.59	0.01641135		3402.59	0.00380333		3992.58	0.01354636
452.8	0.07662265		1042.8	0.00986692		1632.8	0.01655181		2222.8	0.02243781		2812.79	0.0157271		3402.79	0.00342212		3992.78	0.01370486
453	0.07598344		1043	0.00952752		1633	0.01781262		2223	0.02268881		2812.99	0.01503863		3402.99	0.00309156		3992.98	0.01340954
453.2	0.07540264		1043.2	0.0092839		1633.2	0.01809655		2223.2	0.02372065		2813.19	0.01362033		3403.19	0.00411101		3993.18	0.01356484
453.4	0.07563936		1043.4	0.00907268		1633.4	0.01890597		2223.4	0.0229541		2813.39	0.01354454		3403.39	0.00421195		3993.38	0.01380722
453.6	0.07640877		1043.6	0.00961434		1633.6	0.01925884		2223.6	0.02294449		2813.59	0.01334843		3403.59	0.00414757		3993.58	0.01224969
453.8	0.0767704		1043.8	0.00948697		1633.8	0.01893329		2223.8	0.02315915		2813.79	0.0141948		3403.79	0.00429181		3993.78	0.01245957
454	0.07713275		1044	0.00973486		1634	0.01844672		2224	0.02287238		2813.99	0.01375456		3403.99	0.00469068		3993.98	0.01137891
454.2	0.07686951		1044.2	0.01008486		1634.2	0.01883675		2224.2	0.02320815		2814.19	0.01356982		3404.19	0.00509768		3994.18	0.01129056
454.4	0.07657686		1044.4	0.01050746		1634.4	0.01830373		2224.4	0.02370801		2814.39	0.01382547		3404.39	0.00565111		3994.38	0.01165722
454.6	0.07646601		1044.6	0.01126622		1634.6	0.01861514		2224.6	0.0237708		2814.59	0.01444451		3404.59	0.00575218		3994.58	0.01240594
454.8	0.07618132		1044.8	0.01105604		1634.8	0.01849114		2224.8	0.02282394		2814.79	0.01488351		3404.79	0.00542509		3994.78	0.01265717
455	0.07568912		1045	0.01113939		1635	0.01894285		2225	0.02211267		2814.99	0.01484999		3404.99	0.00590707		3994.98	0.01275508
455.2	0.07655131		1045.2	0.01071666		1635.2	0.01832022		2225.2	0.02084438		2815.19	0.01558109		3405.19	0.00615941		3995.18	0.01212804
455.4	0.07768863		1045.4	0.01097386		1635.4	0.01852351		2225.4	0.02022249		2815.39	0.01507638		3405.39	0.00647984		3995.38	0.01213225
455.6	0.07785197		1045.6	0.01052904		1635.6	0.01884128		2225.6	0.01962234		2815.59	0.01545315		3405.59	0.00681484		3995.58	0.01191083
455.8	0.07819824		1045.8	0.01068246		1635.8	0.01909292		2225.8	0.01962437		2815.79	0.01568398		3405.79	0.00744968		3995.78	0.01178169
456	0.07775926		1046	0.01025003		1636	0.0195013		2226	0.01993933		2815.99	0.01602837		3405.99	0.00734613		3995.98	0.01158063
456.2	0.0776002		1046.2	0.01023815		1636.2	0.01852154		2226.2	0.02052536		2816.19	0.01532311		3406.19	0.00682198		3996.18	0.0114467
456.4	0.07769335		1046.4	0.01065091		1636.4	0.01767177		2226.4	0.02114883		2816.39	0.01523617		3406.39	0.00640033		3996.38	0.01112132
456.6	0.07842632		1046.6	0.01015196		1636.6	0.01714403		2226.6	0.02122969		2816.59	0.01490538		3406.59	0.00675024		3996.58	0.01090377
456.8	0.07874595		1046.8	0.00926293		1636.8	0.01835552		2226.8	0.02208468		2816.79	0.01455434		3406.79	0.00695503		3996.78	0.01147555
457	0.07891866		1047	0.00920762		1637	0.01911633		2227	0.02294143		2816.99	0.01419549		3406.99	0.0074602		3996.98	0.01069724
457.2	0.07965077		1047.2	0.00827987		1637.2	0.01891198		2227.2	0.02300488		2817.19	0.01414567		3407.19	0.00745933		3997.18	0.01072178
457.4	0.08081902		1047.4	0.00822021		1637.4	0.01900632		2227.4	0.02170948		2817.39	0.01499192		3407.39	0.00680094		3997.38	0.01084211
457.6	0.08144328		1047.6	0.00867066		1637.6	0.01822408		2227.6	0.02198838		2817.59	0.01494065		3407.59	0.00602579		3997.58	0.0094444
457.8	0.0810704		1047.8	0.00842821		1637.8	0.01849531		2227.8	0.02233803		2817.79	0.01563198		3407.79	0.00599264		3997.78	0.00971155
458	0.08149865		1048	0.00804876		1638	0.01856861		2228	0.02198712		2817.99	0.01571349		3407.99	0.00563403		3997.98	0.00955651
458.2	0.08105207		1048.2	0.00861427		1638.2	0.01861156		2228.2	0.02272024		2818.19	0.01551979		3408.19	0.00502781		3998.18	0.00967039
458.4	0.0808581		1048.4	0.00822942		1638.4	0.01796306		2228.4	0.02257391		2818.39	0.01598648		3408.39	0.00475518		3998.38	0.01000078
458.6	0.08042		1048.6	0.00732756		1638.6	0.01816659		2228.6	0.02249851		2818.59	0.01603126		3408.59	0.00435519		3998.58	0.01001035
458.8	0.07971003		1048.8	0.00716259		1638.8	0.01860981		2228.8	0.02198059		2818.79	0.01671488		3408.79	0.00483084		3998.78	0.00868831
459	0.07965856		1049	0.00644982		1639	0.01892595		2229	0.02177983		2818.99	0.01716478		3408.99	0.00563618		3998.98	0.0092272
459.2	0.07947242		1049.2	0.00638003		1639.2	0.01941659		2229.2	0.02154941		2819.19	0.01764022		3409.19	0.00480015		3999.18	0.00921345
459.4	0.07959292		1049.4	0.00625028		1639.4	0.01930974		2229.4	0.02147322		2819.39	0.0178033		3409.39	0.00487691		3999.38	0.0099916
459.6	0.07750138		1049.6	0.00579951		1639.6	0.01975815		2229.6	0.02144307		2819.59	0.01789662		3409.59	0.00430466		3999.58	0.01078556
459.8	0.07725663		1049.8	0.00587966		1639.8	0.01945129		2229.8	0.02175		2819.79	0.01739015		3409.79	0.00443078		3999.78	0.0110819
460	0.07583924		1050	0.00624773		1640	0.01915532		2230	0.02177187		2819.99	0.01768767		3409.99	0.0044459		3999.98	0.01095194
460.2	0.07582941		1050.2	0.00627022		1640.2	0.01928387		2230.2	0.02209011		2820.19	0.01726006		3410.19	0.00486045		4000.18	0.01105371
460.4	0.07597197		1050.4	0.00663787		1640.4	0.01959547		2230.4	0.02162621		2820.39	0.01685541		3410.39	0.00566529		4000.38	0.01159945
460.6	0.0765882		1050.6	0.00630184		1640.6	0.02150121		2230.6	0.02180555		2820.59	0.01686178		3410.59	0.00590801		4000.58	0.01310352
460.8	0.07704458		1050.8	0.00669996		1640.8	0.02291359		2230.8	0.02160489		2820.79	0.01708403		3410.79	0.00639982		4000.78	0.01361638
461	0.07682285		1051	0.00723279		1641	0.02271576		2231	0.02158642		2820.99	0.01726783		3410.99	0.00683582		4000.98	0.01356121
461.2	0.07725373		1051.2	0.00728645		1641.2	0.02287177		2231.2	0.02099868		2821.19	0.01747938		3411.19	0.00634438		4001.18	0.01313769
461.4	0.07794244		1051.4	0.00811921		1641.4	0.02222592		2231.4	0.02068691		2821.39	0.01788857		3411.39	0.00631324		4001.38	0.01260527
461.6	0.07834529		1051.6	0.00831483		1641.6	0.02189916		2231.6	0.0211229		2821.59	0.01802038		3411.59	0.00698401		4001.58	0.01227503
461.8	0.07856949		1051.8	0.00835183		1641.8	0.02232861		2231.8	0.02115411		2821.79	0.01848737		3411.79	0.00736241		4001.78	0.01267593
462	0.07971018		1052	0.00876104		1642	0.02161733		2232	0.02058741		2821.99	0.0180328		3411.99	0.00732592		4001.98	0.0130218
462.2	0.07946103		1052.2	0.00933749		1642.2	0.02133612		2232.2	0.02139335		2822.19	0.01800976		3412.19	0.00816521		4002.18	0.01180898
462.4	0.07889537		1052.4	0.00917037		1642.4	0.02074053		2232.4	0.02209449		2822.39	0.0178895		3412.39	0.00787593		4002.38	0.01162517
462.6	0.07739001		1052.6	0.00908222		1642.6	0.02069562		2232.6	0.02201606		2822.59	0.01766395		3412.59	0.00876958		4002.58	0.01119041
462.8	0.07684825		1052.8	0.00967474		1642.8	0.0201057		2232.8	0.02239569		2822.79	0.01767559		3412.79	0.00957591		4002.78	0.01049379
463	0.07660506		1053	0.00929614		1643	0.01919544		2233	0.02232936		2822.99	0.01701499		3412.99	0.00928446		4002.98	0.01141862
463.2	0.07563644		1053.2	0.00946914		1643.2	0.01841793		2233.2	0.02195826		2823.19	0.01684811		3413.19	0.00827067		4003.18	0.0114495
463.4	0.07561489		1053.4	0.0095216		1643.4	0.01760455		2233.4	0.0219493		2823.39	0.01601456		3413.39	0.00745306		4003.38	0.01271348
463.6	0.07532746		1053.6	0.0088242		1643.6	0.01743509		2233.6	0.02125313		2823.59	0.01611237		3413.59	0.00661412		4003.58	0.01278834
463.8	0.07631271		1053.8	0.00984215		1643.8	0.0177975		2233.8	0.0210971		2823.79	0.01633118		3413.79	0.00750503		4003.78	0.0125807
464	0.07613367		1054	0.00973327		1644	0.01817491		2234	0.02119045		2823.99	0.01646275		3413.99	0.00677631		4003.98	0.01264076
464.2	0.07721341		1054.2	0.00874181		1644.2	0.01831288		2234.2	0.02147711		2824.19	0.01549335		3414.19	0.00638719		4004.18	0.01214485
464.4	0.07816358		1054.4	0.00962178		1644.4	0.01825469		2234.4	0.02102791		2824.39	0.01526416		3414.39	0.00585938		4004.38	0.01268642
464.6	0.07855193		1054.6	0.00932617		1644.6	0.01966757		2234.6	0.02131529		2824.59	0.01516568		3414.59	0.00587211		4004.58	0.01252253
464.8	0.07921089		1054.8	0.00901666		1644.8	0.01964772		2234.8	0.02077979		2824.79	0.01483947		3414.79	0.00605431		4004.78	0.01212188
465	0.07915632		1055	0.00896648		1645	0.01965787		2235	0.02048658		2824.99	0.01492101		3414.99	0.00605754		4004.98	0.01187086
465.2	0.07883652		1055.2	0.00890934		1645.2	0.01894322		2235.2	0.02056759		2825.19	0.01474321		3415.19	0.00584483		4005.18	0.0115334
465.4	0.08004578		1055.4	0.00847158		1645.4	0.01897298		2235.4	0.01998072		2825.39	0.01532983		3415.39	0.00696513		4005.38	0.0116944
465.6	0.08009072		1055.6	0.00867146		1645.6	0.0199724		2235.6	0.02092198		2825.59	0.01584371		3415.59	0.00728541		4005.58	0.0125707
465.8	0.08014899		1055.8	0.00920274		1645.8	0.02051389		2235.8	0.02109484		2825.79	0.01558179		3415.79	0.0065604		4005.78	0.01292711
466	0.08014653		1056	0.00927136		1646	0.02047325		2236	0.02072005		2825.99	0.01602381		3415.99	0.00585701		4005.98	0.01351023
466.2	0.07949775		1056.2	0.00942852		1646.2	0.02120172		2236.2	0.02155475		2826.19	0.01611559		3416.19	0.00563259		4006.18	0.01305896
466.4	0.07905396		1056.4	0.01001681		1646.4	0.02072892		2236.4	0.02138482		2826.39	0.01713113		3416.39	0.00471725		4006.38	0.01358982
466.6	0.07945974		1056.6	0.01070039		1646.6	0.02032994		2236.6	0.02078346		2826.59	0.01768244		3416.59	0.00471199		4006.58	0.01377472
466.8	0.08016406		1056.8	0.01034743		1646.8	0.01948168		2236.8	0.02031		2826.79	0.0188138		3416.79	0.0046266		4006.78	0.01385712
467	0.08077856		1057	0.01032359		1647	0.01886584		2237	0.01994544		2826.99	0.01931189		3416.99	0.00449329		4006.98	0.0140842
467.2	0.08090318		1057.2	0.00978218		1647.2	0.01908359		2237.2	0.01927805		2827.19	0.01964965		3417.19	0.00420343		4007.18	0.01459632
467.4	0.08128205		1057.4	0.00916134		1647.4	0.01882057		2237.4	0.01903902		2827.39	0.01894057		3417.39	0.00408465		4007.38	0.01476602
467.6	0.08183413		1057.6	0.00917968		1647.6	0.01817835		2237.6	0.01891427		2827.59	0.01928281		3417.59	0.00395891		4007.58	0.01420495
467.8	0.08215475		1057.8	0.00936829		1647.8	0.01855743		2237.8	0.01966788		2827.79	0.01909714		3417.79	0.00395028		4007.78	0.01347517
468	0.08225521		1058	0.00834601		1648	0.01799829		2238	0.02053529		2827.99	0.01877484		3417.99	0.00309375		4007.98	0.01287485
468.2	0.08261312		1058.2	0.00815183		1648.2	0.01757804		2238.2	0.02116569		2828.19	0.01797442		3418.19	0.00310948		4008.18	0.01212878
468.4	0.08243917		1058.4	0.00862759		1648.4	0.01755065		2238.4	0.02124024		2828.39	0.01753499		3418.39	0.00323555		4008.38	0.01208367
468.6	0.08206944		1058.6	0.00842181		1648.6	0.01760232		2238.6	0.021409		2828.59	0.0165634		3418.59	0.00372182		4008.58	0.01184498
468.8	0.0816417		1058.8	0.00816387		1648.8	0.01720592		2238.8	0.0214278		2828.79	0.01589169		3418.79	0.00374088		4008.78	0.01216475
469	0.08082966		1059	0.00815735		1649	0.01647496		2239	0.02165556		2828.99	0.01554161		3418.99	0.00430096		4008.98	0.01257084
469.2	0.08023826		1059.2	0.00842446		1649.2	0.01623125		2239.2	0.02234058		2829.19	0.0149982		3419.19	0.00457711		4009.18	0.01320682
469.4	0.08010642		1059.4	0.00867689		1649.4	0.01681072		2239.4	0.02272896		2829.39	0.01470517		3419.39	0.00463821		4009.38	0.01379544
469.6	0.07906535		1059.6	0.00938617		1649.6	0.01670763		2239.6	0.02338938		2829.59	0.01415323		3419.59	0.00365204		4009.58	0.01461953
469.8	0.07852267		1059.8	0.00973851		1649.8	0.01681698		2239.8	0.02310354		2829.79	0.01364334		3419.79	0.00289074		4009.78	0.01557859
470	0.07852267		1059.99	0.00973851		1650	0.01681698		2240	0.02310354		2829.99	0.01364334		3419.98	0.00289074		4009.98	0.01557859
470.2	0.07857057		1060.19	0.01000204		1650.2	0.01640282		2240.2	0.0227925		2830.19	0.01317603		3420.18	0.00239212		4010.18	0.01651966
470.4	0.07889419		1060.39	0.00965121		1650.4	0.01636013		2240.4	0.02278879		2830.39	0.01338225		3420.38	0.00209492		4010.38	0.01655774
470.6	0.07911888		1060.59	0.00974231		1650.6	0.0159266		2240.6	0.02264329		2830.59	0.01278703		3420.58	0.00145321		4010.58	0.01586702
470.8	0.07938092		1060.79	0.0097133		1650.8	0.01561971		2240.8	0.02251433		2830.79	0.01274264		3420.78	0.00105211		4010.78	0.01577803
471	0.07931986		1060.99	0.00956466		1651	0.01533436		2241	0.02234256		2830.99	0.01256554		3420.98	-0.00007652		4010.98	0.01598546
471.2	0.07886593		1061.19	0.00885046		1651.2	0.01478743		2241.2	0.02154356		2831.19	0.01193256		3421.18	-0.00037452		4011.18	0.01574965
471.4	0.0782166		1061.39	0.00855078		1651.4	0.01406603		2241.4	0.0214087		2831.39	0.01139174		3421.38	-0.00108001		4011.38	0.01527938
471.6	0.07795715		1061.59	0.00852606		1651.6	0.01432484		2241.6	0.02071051		2831.59	0.01169492		3421.58	-0.00121802		4011.58	0.01577878
471.8	0.07837411		1061.79	0.00814958		1651.8	0.01373179		2241.8	0.0205646		2831.79	0.01176366		3421.78	-0.00109		4011.78	0.01497828
472	0.0781739		1061.99	0.00771496		1652	0.01241982		2242	0.02041373		2831.99	0.01143772		3421.98	-0.00100609		4011.98	0.01535285
472.2	0.07787238		1062.19	0.00769062		1652.2	0.01144577		2242.2	0.0197675		2832.19	0.0110909		3422.18	-0.00116632		4012.18	0.01494867
472.4	0.07725708		1062.39	0.00707484		1652.4	0.0108514		2242.4	0.01907275		2832.39	0.01058167		3422.38	-0.00069834		4012.38	0.01490065
472.6	0.07738313		1062.59	0.00755352		1652.6	0.0100756		2242.6	0.01855728		2832.59	0.01079072		3422.58	-0.0001799		4012.58	0.0143278
472.8	0.07695065		1062.79	0.00751464		1652.8	0.0099696		2242.8	0.01908237		2832.79	0.01095734		3422.78	-0.000527		4012.78	0.01423791
473	0.07715045		1062.99	0.00695505		1653	0.00959564		2243	0.01851695		2832.99	0.01006697		3422.98	0.00003619		4012.98	0.01443728
473.2	0.07730313		1063.19	0.00731924		1653.2	0.00938989		2243.2	0.01918722		2833.19	0.0093272		3423.18	-0.00042738		4013.18	0.01512922
473.4	0.07677124		1063.39	0.00704519		1653.4	0.00901713		2243.4	0.01983278		2833.39	0.00816479		3423.38	-0.00016746		4013.38	0.01513888
473.6	0.07701818		1063.59	0.00765268		1653.6	0.00838087		2243.6	0.01977935		2833.59	0.00794891		3423.58	-0.00013807		4013.58	0.01560001
473.8	0.07728759		1063.79	0.0083109		1653.8	0.00882685		2243.8	0.01952831		2833.79	0.00786479		3423.78	-0.00012425		4013.78	0.01513645
474	0.07673435		1063.99	0.00883366		1654	0.00855987		2244	0.01946786		2833.99	0.00752119		3423.98	0.00115124		4013.98	0.01473403
474.2	0.07763674		1064.19	0.00936687		1654.2	0.00794505		2244.2	0.01962916		2834.19	0.0085998		3424.18	0.00105047		4014.18	0.01550358
474.4	0.07781874		1064.39	0.00997427		1654.4	0.00783609		2244.4	0.01981034		2834.39	0.00862338		3424.38	0.00126694		4014.38	0.01507618
474.6	0.07699254		1064.59	0.00949002		1654.6	0.00788532		2244.6	0.01854242		2834.59	0.00854731		3424.58	0.00117646		4014.58	0.01519043
474.8	0.07681209		1064.79	0.00950117		1654.8	0.00840617		2244.8	0.01838343		2834.79	0.0095799		3424.78	0.00136696		4014.78	0.01543766
475	0.07588769		1064.99	0.00899219		1655	0.00868178		2245	0.01825267		2834.99	0.0098159		3424.98	0.00124979		4014.98	0.01551739
475.2	0.07511996		1065.19	0.00951691		1655.2	0.00844832		2245.2	0.01786784		2835.19	0.00961159		3425.18	0.00197126		4015.18	0.01507486
475.4	0.07522478		1065.39	0.00916941		1655.4	0.00865511		2245.4	0.01822228		2835.39	0.01011606		3425.38	0.00166744		4015.38	0.01491647
475.6	0.07591921		1065.59	0.00887514		1655.6	0.00905774		2245.6	0.01779961		2835.59	0.0106859		3425.58	0.00231572		4015.58	0.015235
475.8	0.07667337		1065.79	0.00826978		1655.8	0.00814919		2245.8	0.01862592		2835.79	0.00980764		3425.78	0.0025992		4015.78	0.0149185
476	0.0766983		1065.99	0.00731075		1656	0.00719205		2246	0.01865662		2835.99	0.0088787		3425.98	0.00230103		4015.98	0.01556925
476.2	0.07628716		1066.19	0.00719908		1656.2	0.00716646		2246.2	0.01826237		2836.19	0.00855302		3426.18	0.00184277		4016.18	0.01538317
476.4	0.07672094		1066.39	0.00638253		1656.4	0.00715158		2246.4	0.01741767		2836.39	0.00797984		3426.38	0.00192974		4016.38	0.01546236
476.6	0.07674449		1066.59	0.00714974		1656.6	0.00768161		2246.6	0.01778817		2836.59	0.00821162		3426.58	0.00130028		4016.58	0.01584063
476.8	0.07650244		1066.79	0.00651715		1656.8	0.00881062		2246.8	0.01767483		2836.79	0.00810626		3426.78	0.00098501		4016.78	0.01568467
477	0.07643293		1066.99	0.00607203		1657	0.00895102		2247	0.01857062		2836.99	0.00747702		3426.98	0.00132302		4016.98	0.01478269
477.2	0.07689143		1067.19	0.00663668		1657.2	0.008743		2247.2	0.01876874		2837.19	0.00741213		3427.18	0.00068786		4017.18	0.01481575
477.4	0.07693751		1067.39	0.00737185		1657.4	0.00855313		2247.4	0.01894982		2837.39	0.00688663		3427.38	0.00025923		4017.38	0.01438984
477.6	0.0766544		1067.59	0.00779412		1657.6	0.00747426		2247.6	0.01856049		2837.59	0.00661261		3427.58	-0.00111396		4017.58	0.01471158
477.8	0.07557121		1067.79	0.00806036		1657.8	0.0079241		2247.8	0.01849109		2837.79	0.00729111		3427.78	-0.00156275		4017.78	0.01377924
478	0.0752667		1067.99	0.00758291		1658	0.00819467		2248	0.01852085		2837.99	0.00697795		3427.98	-0.00176113		4017.98	0.0141361
478.2	0.07489008		1068.19	0.00759481		1658.2	0.00817164		2248.2	0.01800041		2838.19	0.0074409		3428.18	-0.00226243		4018.18	0.01521771
478.4	0.07434452		1068.39	0.00868372		1658.4	0.00828014		2248.4	0.01710626		2838.39	0.00734432		3428.38	-0.00219		4018.38	0.01556177
478.6	0.07444633		1068.59	0.00816378		1658.6	0.00893355		2248.6	0.01679317		2838.59	0.00865398		3428.58	-0.00162384		4018.58	0.01519753
478.8	0.07480885		1068.79	0.00914924		1658.8	0.00926621		2248.8	0.01740057		2838.79	0.0096671		3428.78	-0.00171003		4018.78	0.01334904
479	0.07387984		1068.99	0.00952444		1659	0.00889178		2249	0.01700956		2838.99	0.00939583		3428.98	-0.00143846		4018.98	0.01271709
479.2	0.07429846		1069.19	0.00962254		1659.2	0.00917187		2249.2	0.01752169		2839.19	0.00970203		3429.18	-0.00087767		4019.18	0.01223647
479.4	0.0745667		1069.39	0.00890489		1659.4	0.0096833		2249.4	0.01797882		2839.39	0.01000313		3429.38	-0.00066153		4019.38	0.01215523
479.6	0.07412281		1069.59	0.00854553		1659.6	0.0096714		2249.6	0.01831268		2839.59	0.0103404		3429.58	-0.00041222		4019.58	0.01257675
479.8	0.0740991		1069.79	0.00835059		1659.8	0.00951541		2249.8	0.01937908		2839.79	0.01117002		3429.78	-0.00063236		4019.78	0.01340068
480	0.07382781		1069.99	0.00791172		1660	0.00955021		2250	0.01911908		2839.99	0.01169124		3429.98	-0.00037152		4019.98	0.01372127
480.2	0.07279252		1070.19	0.00790458		1660.2	0.01053213		2250.2	0.01862712		2840.19	0.01178955		3430.18	-0.00051972		4020.18	0.01434955
480.4	0.0722695		1070.39	0.00795745		1660.4	0.01094742		2250.4	0.01829507		2840.39	0.01139942		3430.38	-0.00024269		4020.38	0.01359915
480.6	0.07292053		1070.59	0.00805714		1660.6	0.01196942		2250.6	0.01903541		2840.59	0.01164355		3430.58	0.0010695		4020.58	0.01392288
480.8	0.0734645		1070.79	0.00780749		1660.8	0.01325391		2250.8	0.01881092		2840.79	0.01184084		3430.78	0.00129293		4020.78	0.01284409
481	0.0737438		1070.99	0.00757341		1661	0.0130177		2251	0.01831133		2840.99	0.01196408		3430.98	0.00043155		4020.98	0.01212481
481.2	0.07341663		1071.19	0.00772185		1661.2	0.01346546		2251.2	0.01778885		2841.19	0.01159121		3431.18	0.00015773		4021.18	0.01251121
481.4	0.07284701		1071.39	0.00834814		1661.4	0.01267027		2251.4	0.01811515		2841.39	0.01194544		3431.38	-0.00081519		4021.38	0.01239788
481.6	0.07264431		1071.59	0.00807125		1661.6	0.01249589		2251.6	0.01751757		2841.59	0.01239984		3431.58	-0.00137013		4021.58	0.01283005
481.8	0.07226501		1071.79	0.00823556		1661.8	0.01264553		2251.8	0.01728623		2841.79	0.01261727		3431.78	-0.001226		4021.78	0.01303861
482	0.07240012		1071.99	0.00822147		1662	0.01313248		2252	0.01651238		2841.99	0.01077716		3431.98	-0.00153468		4021.98	0.01327968
482.2	0.07295944		1072.19	0.00872399		1662.2	0.01309887		2252.2	0.01586699		2842.19	0.01031871		3432.18	-0.00150107		4022.18	0.01314186
482.4	0.07336504		1072.39	0.00950577		1662.4	0.012717		2252.4	0.01508974		2842.39	0.01006729		3432.38	-0.0014698		4022.38	0.01148215
482.6	0.07402285		1072.59	0.00983843		1662.6	0.01197162		2252.6	0.01539237		2842.59	0.00981696		3432.58	-0.0015817		4022.58	0.0106655
482.8	0.07373325		1072.79	0.00948972		1662.8	0.01093431		2252.8	0.01611031		2842.79	0.00880905		3432.78	-0.00239588		4022.78	0.00974422
483	0.07327378		1072.99	0.00953597		1663	0.00969993		2253	0.01659225		2842.99	0.0067452		3432.98	-0.00165221		4022.98	0.01046736
483.2	0.07362387		1073.19	0.00904404		1663.2	0.00926996		2253.2	0.01707012		2843.19	0.00548263		3433.18	-0.00179019		4023.18	0.01155603
483.4	0.07352781		1073.39	0.00943693		1663.4	0.00852466		2253.4	0.01705295		2843.39	0.00523056		3433.38	-0.00160136		4023.38	0.01267192
483.6	0.07262733		1073.59	0.00867719		1663.6	0.00789021		2253.6	0.01759497		2843.59	0.00488542		3433.58	-0.00185265		4023.58	0.01352254
483.8	0.07210868		1073.79	0.00860258		1663.8	0.00729524		2253.8	0.01741379		2843.79	0.0048177		3433.78	-0.00148313		4023.78	0.01413847
484	0.07164304		1073.99	0.00826289		1664	0.00675877		2254	0.0168541		2843.99	0.00357077		3433.98	-0.00088767		4023.98	0.01563298
484.2	0.07171859		1074.19	0.00774339		1664.2	0.00667828		2254.2	0.01729216		2844.19	0.00320419		3434.18	-0.00117809		4024.18	0.01692404
484.4	0.07242352		1074.39	0.00841429		1664.4	0.00636708		2254.4	0.01822037		2844.39	0.00259495		3434.38	0.0000496		4024.38	0.01692535
484.6	0.07381939		1074.59	0.0074802		1664.6	0.00640332		2254.6	0.01737548		2844.59	0.00264884		3434.58	0.00086316		4024.58	0.01762856
484.8	0.07301557		1074.79	0.00688059		1664.8	0.0060995		2254.8	0.01681769		2844.79	0.00354781		3434.78	0.00051698		4024.78	0.01724744
485	0.07248871		1074.99	0.00752918		1665	0.00555493		2255	0.01588702		2844.99	0.00476256		3434.98	0.00027682		4024.98	0.01784654
485.2	0.07164397		1075.19	0.00854182		1665.2	0.00547752		2255.2	0.0170429		2845.19	0.00582567		3435.18	0.00112877		4025.18	0.01783566
485.4	0.07199072		1075.39	0.00958585		1665.4	0.00481615		2255.4	0.01713863		2845.39	0.00765901		3435.38	0.00041231		4025.38	0.01754411
485.6	0.07147161		1075.59	0.00946582		1665.6	0.00599737		2255.6	0.01668912		2845.59	0.00811937		3435.58	0.00080666		4025.58	0.01730384
485.8	0.07152104		1075.79	0.00986012		1665.8	0.00614313		2255.8	0.01540063		2845.79	0.00884171		3435.78	0.00049369		4025.78	0.01677776
486	0.07170556		1075.99	0.00994869		1666	0.00691969		2256	0.01409616		2845.99	0.00882518		3435.98	-0.00039092		4025.98	0.01526098
486.2	0.07140936		1076.19	0.01047966		1666.2	0.00721856		2256.2	0.01412456		2846.19	0.00993109		3436.18	-0.00064693		4026.18	0.01343874
486.4	0.07106834		1076.39	0.00978323		1666.4	0.00720181		2256.4	0.01413808		2846.39	0.0105472		3436.38	-0.00142618		4026.38	0.01269677
486.6	0.07131936		1076.59	0.01024032		1666.6	0.00724617		2256.6	0.01454552		2846.59	0.01096475		3436.58	-0.00142189		4026.58	0.01283926
486.8	0.07163996		1076.79	0.00903468		1666.8	0.00769882		2256.8	0.01568459		2846.79	0.01080649		3436.78	-0.00123173		4026.78	0.01148345
487	0.07150019		1076.99	0.0092756		1667	0.00763238		2257	0.01522789		2846.99	0.01009029		3436.98	-0.00137916		4026.98	0.01105435
487.2	0.07180071		1077.19	0.00867638		1667.2	0.00825859		2257.2	0.01456333		2847.19	0.00975517		3437.18	-0.00243486		4027.18	0.01060641
487.4	0.07189375		1077.39	0.00819974		1667.4	0.008579		2257.4	0.01402758		2847.39	0.00962834		3437.38	-0.00206703		4027.38	0.01068995
487.6	0.07029323		1077.59	0.00801037		1667.6	0.00894375		2257.6	0.01411791		2847.59	0.00914438		3437.58	-0.0022761		4027.58	0.01069713
487.8	0.07034228		1077.79	0.00731773		1667.8	0.00903157		2257.8	0.01312774		2847.79	0.00849674		3437.78	-0.00278388		4027.78	0.01095099
488	0.07105366		1077.99	0.0070435		1668	0.00862648		2258	0.01313933		2847.99	0.00811801		3437.98	-0.00328628		4027.98	0.01243887
488.2	0.07149819		1078.19	0.00648019		1668.2	0.00840067		2258.2	0.01361226		2848.19	0.00801396		3438.18	-0.00322201		4028.18	0.01289414
488.4	0.07189853		1078.39	0.00630581		1668.4	0.00865869		2258.4	0.01335505		2848.39	0.00704576		3438.38	-0.00260481		4028.38	0.0125279
488.6	0.07207895		1078.59	0.00529658		1668.6	0.00760287		2258.6	0.01206876		2848.59	0.00676316		3438.58	-0.00340119		4028.58	0.0127838
488.8	0.07177351		1078.79	0.00473502		1668.8	0.00636362		2258.8	0.01273064		2848.79	0.00658728		3438.78	-0.00296692		4028.78	0.01348565
489	0.07179939		1078.99	0.00593255		1669	0.00613903		2259	0.01339494		2848.99	0.00583538		3438.98	-0.00306221		4028.98	0.01332805
489.2	0.0720149		1079.19	0.00656605		1669.2	0.00578433		2259.2	0.01424328		2849.19	0.00569845		3439.18	-0.00250513		4029.18	0.01291258
489.4	0.07143986		1079.39	0.00633075		1669.4	0.00624701		2259.4	0.01382237		2849.39	0.00548107		3439.38	-0.00329945		4029.38	0.01180448
489.6	0.07106536		1079.59	0.0059494		1669.6	0.00659596		2259.6	0.01349477		2849.59	0.00503882		3439.58	-0.00349769		4029.58	0.0114255
489.8	0.07172988		1079.79	0.00565162		1669.8	0.00637837		2259.8	0.0132689		2849.79	0.00549216		3439.78	-0.003522		4029.78	0.01081179
490	0.07125417		1079.99	0.00544642		1670	0.00621986		2260	0.01334637		2849.99	0.00516386		3439.98	-0.00462282		4029.98	0.01117204
490.2	0.07024772		1080.19	0.00507458		1670.2	0.00596929		2260.2	0.01455867		2850.19	0.00567871		3440.18	-0.00449612		4030.18	0.01103535
490.4	0.07122866		1080.39	0.00354545		1670.4	0.00636149		2260.4	0.01407331		2850.39	0.00588517		3440.38	-0.0046526		4030.38	0.01197619
490.6	0.07088202		1080.59	0.00358838		1670.6	0.00683358		2260.6	0.01374454		2850.59	0.00614926		3440.58	-0.00342022		4030.58	0.011105
490.8	0.07068661		1080.79	0.00311582		1670.8	0.00674821		2260.8	0.01388579		2850.79	0.00557607		3440.78	-0.00318962		4030.78	0.01060876
491	0.06948172		1080.99	0.00342127		1671	0.00666885		2261	0.01349807		2850.99	0.00524958		3440.98	-0.00326701		4030.98	0.01127641
491.2	0.06909325		1081.19	0.00316331		1671.2	0.00739382		2261.2	0.01380601		2851.19	0.0044287		3441.18	-0.00272846		4031.18	0.01122807
491.4	0.0685687		1081.39	0.00368451		1671.4	0.00701071		2261.4	0.0137		2851.39	0.00366991		3441.38	-0.00233576		4031.38	0.01170642
491.6	0.06676559		1081.59	0.00435246		1671.6	0.00729812		2261.6	0.01328075		2851.59	0.00425705		3441.58	-0.00154695		4031.58	0.01154623
491.8	0.06670003		1081.79	0.00419777		1671.8	0.0076378		2261.8	0.01242408		2851.79	0.00422591		3441.78	-0.00136105		4031.78	0.01166112
492	0.06689789		1081.99	0.00506582		1672	0.00784941		2262	0.01222515		2851.99	0.00510825		3441.98	-0.0010611		4031.98	0.01181314
492.2	0.06645085		1082.19	0.00577017		1672.2	0.00776627		2262.2	0.01279167		2852.19	0.00491386		3442.18	-0.00085778		4032.18	0.01247127
492.4	0.06714252		1082.39	0.00632887		1672.4	0.00806375		2262.4	0.01295979		2852.39	0.00491225		3442.38	-0.00156118		4032.38	0.0128045
492.6	0.06748748		1082.59	0.00708049		1672.6	0.00752622		2262.6	0.01336929		2852.59	0.00467795		3442.58	-0.00202198		4032.58	0.01212083
492.8	0.0680072		1082.79	0.00685404		1672.8	0.00707876		2262.8	0.01389767		2852.79	0.00524861		3442.78	-0.00198686		4032.78	0.01215851
493	0.06831567		1082.99	0.00778688		1673	0.00689797		2263	0.01455655		2852.99	0.00553558		3442.98	-0.0021286		4032.98	0.01088236
493.2	0.06886702		1083.19	0.00822203		1673.2	0.00755189		2263.2	0.01414577		2853.19	0.00688417		3443.18	-0.00198871		4033.18	0.01110898
493.4	0.06926951		1083.39	0.00835279		1673.4	0.00809098		2263.4	0.01446443		2853.39	0.00679874		3443.38	-0.00326814		4033.38	0.01067399
493.6	0.07042258		1083.59	0.00869122		1673.6	0.00805456		2263.6	0.01409964		2853.59	0.00765268		3443.58	-0.00298098		4033.58	0.01127223
493.8	0.07103316		1083.79	0.00912589		1673.8	0.00804578		2263.8	0.01420651		2853.79	0.00751831		3443.78	-0.00330118		4033.78	0.01160919
494	0.07110002		1083.99	0.00894392		1674	0.00737449		2264	0.01425176		2853.99	0.00797082		3443.98	-0.00467574		4033.98	0.0127156
494.2	0.07146951		1084.19	0.0083871		1674.2	0.00751074		2264.2	0.01433966		2854.19	0.00867599		3444.18	-0.00378772		4034.18	0.01290382
494.4	0.07199527		1084.39	0.00782101		1674.4	0.00706829		2264.4	0.01374625		2854.39	0.00801377		3444.38	-0.0039762		4034.38	0.01314598
494.6	0.07147953		1084.59	0.00756072		1674.6	0.00682006		2264.6	0.01371405		2854.59	0.00734776		3444.58	-0.00289749		4034.58	0.01289998
494.8	0.07028849		1084.79	0.00692373		1674.8	0.00717214		2264.8	0.01449038		2854.79	0.00659181		3444.78	-0.00275877		4034.78	0.0140376
495	0.06912865		1084.99	0.00618444		1675	0.00734659		2265	0.01500698		2854.99	0.00702932		3444.98	-0.00226707		4034.98	0.01412925
495.2	0.06855439		1085.19	0.00571197		1675.2	0.0075812		2265.2	0.01522083		2855.19	0.0061615		3445.18	-0.00214121		4035.18	0.01277397
495.4	0.06827886		1085.39	0.00519828		1675.4	0.00715946		2265.4	0.01467278		2855.39	0.00614913		3445.38	-0.00183536		4035.38	0.01307572
495.6	0.06749406		1085.59	0.00466886		1675.6	0.00792733		2265.6	0.01473532		2855.59	0.00646316		3445.58	-0.00065557		4035.58	0.01302992
495.8	0.06745555		1085.79	0.0045735		1675.8	0.00840571		2265.8	0.0147231		2855.79	0.00646945		3445.78	-0.00067923		4035.78	0.01254497
496	0.06813162		1085.99	0.00427415		1676	0.00830351		2266	0.01456035		2855.99	0.00681962		3445.98	-0.00144177		4035.98	0.0125383
496.2	0.06801413		1086.19	0.00338897		1676.2	0.00786021		2266.2	0.01514643		2856.19	0.00672159		3446.18	-0.00174796		4036.18	0.01272569
496.4	0.06829995		1086.39	0.00313441		1676.4	0.00748689		2266.4	0.01439872		2856.39	0.00689943		3446.38	-0.001808		4036.38	0.01226271
496.6	0.06868844		1086.59	0.00234352		1676.6	0.00715333		2266.6	0.01451272		2856.59	0.00770345		3446.58	-0.00171201		4036.58	0.0109333
496.8	0.06937882		1086.79	0.00213533		1676.8	0.00660756		2266.8	0.01386164		2856.79	0.00789919		3446.78	-0.00297169		4036.78	0.01166768
497	0.06879926		1086.99	0.0026756		1677	0.00653781		2267	0.01335121		2856.99	0.00757694		3446.98	-0.00224842		4036.98	0.0112615
497.2	0.06901705		1087.19	0.00293763		1677.2	0.00667754		2267.2	0.0128183		2857.19	0.00797246		3447.18	-0.00268951		4037.18	0.01148865
497.4	0.06901065		1087.39	0.00309934		1677.4	0.00651932		2267.4	0.01241493		2857.39	0.00826165		3447.38	-0.00381588		4037.38	0.01189344
497.6	0.06912622		1087.59	0.00342428		1677.6	0.00672828		2267.6	0.01211802		2857.59	0.00875776		3447.58	-0.00381958		4037.58	0.01200025
497.8	0.06823142		1087.79	0.00419969		1677.8	0.00621739		2267.8	0.01260352		2857.79	0.00757707		3447.78	-0.00400007		4037.78	0.01149499
498	0.06833367		1087.99	0.0041697		1678	0.00638403		2268	0.01274475		2857.99	0.00783297		3447.98	-0.00403701		4037.98	0.0113009
498.2	0.06833694		1088.19	0.00471287		1678.2	0.00648586		2268.2	0.01263438		2858.19	0.00687474		3448.18	-0.0033048		4038.18	0.01114487
498.4	0.06778594		1088.39	0.00519441		1678.4	0.00676273		2268.4	0.01245012		2858.39	0.00559601		3448.38	-0.00417163		4038.38	0.01146329
498.6	0.06752786		1088.59	0.00496419		1678.6	0.00799954		2268.6	0.01302314		2858.59	0.00520059		3448.58	-0.00419692		4038.58	0.01226929
498.8	0.06680679		1088.79	0.00472835		1678.8	0.00841763		2268.8	0.01327985		2858.79	0.00448747		3448.78	-0.00492099		4038.78	0.01227793
499	0.06666276		1088.99	0.00491497		1679	0.00817677		2269	0.01286912		2858.99	0.00432602		3448.98	-0.00528657		4038.98	0.0110476
499.2	0.0669056		1089.19	0.0046169		1679.2	0.00819992		2269.2	0.01325494		2859.19	0.00301326		3449.18	-0.00579501		4039.18	0.01007898
499.4	0.06767933		1089.39	0.00409052		1679.4	0.00786412		2269.4	0.0137975		2859.39	0.00243159		3449.38	-0.00571351		4039.38	0.01065367
499.6	0.06762504		1089.59	0.00423252		1679.6	0.0082795		2269.6	0.01475049		2859.59	0.00191032		3449.58	-0.00648084		4039.58	0.00985783
499.8	0.06740905		1089.79	0.00385979		1679.8	0.00709753		2269.8	0.01438049		2859.79	0.0022573		3449.78	-0.00710729		4039.78	0.00952006
500	0.06802324		1089.99	0.00288563		1680	0.00627754		2270	0.01464979		2859.99	0.00190823		3449.98	-0.00745223		4039.98	0.00946198
500.2	0.06692944		1090.19	0.00200302		1680.2	0.00606508		2270.2	0.01496253		2860.19	0.00211167		3450.18	-0.00794793		4040.18	0.00955122
500.4	0.06615227		1090.39	0.00194277		1680.4	0.00568937		2270.4	0.01423457		2860.39	0.00153128		3450.38	-0.00807565		4040.38	0.01015878
500.6	0.06542891		1090.59	0.00155579		1680.6	0.00521131		2270.6	0.01482668		2860.59	0.00254683		3450.58	-0.00823218		4040.58	0.00961981
500.8	0.0648466		1090.79	0.00174735		1680.8	0.00468028		2270.8	0.01442746		2860.79	0.00304673		3450.78	-0.0086243		4040.78	0.00988512
501	0.06413752		1090.99	0.00123812		1681	0.00429692		2271	0.01407239		2860.99	0.00389262		3450.98	-0.00815642		4040.98	0.00959677
501.2	0.06387076		1091.19	0.00086556		1681.2	0.00386234		2271.2	0.01510481		2861.19	0.00460633		3451.18	-0.00811742		4041.18	0.00909084
501.4	0.06352111		1091.39	0.00023739		1681.4	0.00428049		2271.4	0.01495341		2861.39	0.00488154		3451.38	-0.00779344		4041.38	0.00991981
501.6	0.0635036		1091.59	0.00062684		1681.6	0.00447107		2271.6	0.01484927		2861.59	0.00500134		3451.58	-0.00707104		4041.58	0.00975491
501.8	0.0627559		1091.79	0.00103186		1681.8	0.00436657		2271.8	0.01461776		2861.79	0.00462028		3451.78	-0.0064356		4041.78	0.00945722
502	0.06342721		1091.99	0.00154363		1682	0.00502048		2272	0.01357745		2861.99	0.00564659		3451.98	-0.00640363		4041.98	0.01065535
502.2	0.06270547		1092.19	0.00269278		1682.2	0.00516235		2272.2	0.01330665		2862.19	0.00534981		3452.18	-0.00657266		4042.18	0.01132401
502.4	0.06239877		1092.39	0.00188294		1682.4	0.00559159		2272.4	0.01241226		2862.39	0.00518831		3452.38	-0.0063953		4042.38	0.01178457
502.6	0.06253194		1092.59	0.00247544		1682.6	0.00608569		2272.6	0.0119294		2862.59	0.00456068		3452.58	-0.00696913		4042.58	0.0118431
502.8	0.06305161		1092.79	0.00247567		1682.8	0.00598982		2272.8	0.01085508		2862.79	0.00391721		3452.78	-0.00701141		4042.78	0.01094386
503	0.06339273		1092.99	0.00325051		1683	0.00610628		2273	0.01068044		2862.99	0.0039615		3452.98	-0.00631645		4042.98	0.01083327
503.2	0.06407401		1093.19	0.00414056		1683.2	0.00594908		2273.2	0.0102883		2863.19	0.00273076		3453.18	-0.00574572		4043.18	0.01096882
503.4	0.06554101		1093.39	0.00457237		1683.4	0.00562002		2273.4	0.01030174		2863.39	0.00223519		3453.38	-0.00555712		4043.38	0.01139981
503.6	0.06597667		1093.59	0.00492474		1683.6	0.00512093		2273.6	0.00975471		2863.59	0.00208521		3453.58	-0.006455		4043.58	0.01112014
503.8	0.0666299		1093.79	0.00516754		1683.8	0.00468062		2273.8	0.00974246		2863.79	0.00190141		3453.78	-0.00663366		4043.78	0.0116137
504	0.0670675		1093.99	0.00526104		1684	0.00478723		2274	0.00994929		2863.99	0.00205861		3453.98	-0.00662709		4043.98	0.01152901
504.2	0.0669073		1094.19	0.00545919		1684.2	0.00528072		2274.2	0.01012812		2864.19	0.00288029		3454.18	-0.00756662		4044.18	0.01250105
504.4	0.06705331		1094.39	0.00551842		1684.4	0.00504987		2274.4	0.00969009		2864.39	0.00225101		3454.38	-0.0069288		4044.38	0.01296205
504.6	0.0672737		1094.59	0.00572978		1684.6	0.00473123		2274.6	0.01078777		2864.59	0.00311869		3454.58	-0.00680752		4044.58	0.01187042
504.8	0.06841829		1094.79	0.00518162		1684.8	0.00500825		2274.8	0.01108169		2864.79	0.00338918		3454.78	-0.00711624		4044.78	0.01157169
505	0.06845492		1094.99	0.0053225		1685	0.00470115		2275	0.01193653		2864.99	0.00303163		3454.98	-0.00760345		4044.98	0.01195017
505.2	0.06840947		1095.19	0.0047267		1685.2	0.0042892		2275.2	0.01289708		2865.19	0.00376771		3455.18	-0.0069687		4045.18	0.0120479
505.4	0.06807349		1095.39	0.00405896		1685.4	0.00419823		2275.4	0.01267143		2865.39	0.00366851		3455.38	-0.0060603		4045.38	0.01234943
505.6	0.06699024		1095.59	0.00454425		1685.6	0.00473689		2275.6	0.01261359		2865.59	0.0037063		3455.58	-0.00634477		4045.58	0.01250384
505.8	0.06567728		1095.79	0.00487865		1685.8	0.00454863		2275.8	0.01267086		2865.79	0.00312439		3455.78	-0.00680374		4045.78	0.01224548
506	0.06506384		1095.99	0.00397423		1686	0.00451775		2276	0.01170427		2865.99	0.00348782		3455.98	-0.00635676		4045.98	0.01279647
506.2	0.06352784		1096.19	0.00314569		1686.2	0.00403306		2276.2	0.01210995		2866.19	0.00275917		3456.18	-0.00672579		4046.18	0.01220268
506.4	0.06298306		1096.39	0.00196917		1686.4	0.00383531		2276.4	0.01155832		2866.39	0.00188456		3456.38	-0.00580625		4046.38	0.01140298
506.6	0.06291962		1096.59	0.00240418		1686.6	0.00449981		2276.6	0.01043928		2866.59	0.00200491		3456.58	-0.00588904		4046.58	0.01142488
506.8	0.06237418		1096.79	0.00180664		1686.8	0.00394914		2276.8	0.01015335		2866.79	0.00184194		3456.78	-0.00545378		4046.78	0.01139601
507	0.06228244		1096.99	0.00214063		1687	0.00401819		2277	0.00957706		2866.99	0.00203171		3456.98	-0.00560786		4046.98	0.01173657
507.2	0.06178131		1097.19	0.00159844		1687.2	0.00318283		2277.2	0.00836176		2867.19	0.00179251		3457.18	-0.00526333		4047.18	0.01229473
507.4	0.06230801		1097.39	0.00110264		1687.4	0.00265454		2277.4	0.00844809		2867.39	0.0017143		3457.38	-0.00555144		4047.38	0.01238041
507.6	0.06171976		1097.59	0.00110774		1687.6	0.00250277		2277.6	0.00806744		2867.59	0.00228417		3457.58	-0.00655328		4047.58	0.0125173
507.8	0.06215625		1097.79	0.00172554		1687.8	0.0025399		2277.8	0.00899262		2867.79	0.00313784		3457.78	-0.00722683		4047.78	0.01231498
508	0.06290249		1097.99	0.00133555		1688	0.00201191		2278	0.00914315		2867.99	0.00447438		3457.98	-0.00681288		4047.98	0.01229199
508.2	0.06380533		1098.19	0.00084675		1688.2	0.00210629		2278.2	0.00922989		2868.19	0.00389347		3458.18	-0.00720068		4048.18	0.01218892
508.4	0.06488461		1098.39	0.0002893		1688.4	0.00210708		2278.4	0.00948815		2868.39	0.00432352		3458.38	-0.00636813		4048.38	0.01169591
508.6	0.06519036		1098.59	0.00101264		1688.6	0.00228643		2278.6	0.0110012		2868.59	0.00526964		3458.58	-0.00654838		4048.58	0.01032586
508.8	0.06613287		1098.79	0.00120286		1688.8	0.00230851		2278.8	0.0122714		2868.79	0.00641598		3458.78	-0.00610539		4048.78	0.01064561
509	0.06581142		1098.99	0.00183066		1689	0.00209864		2279	0.01304711		2868.99	0.00715966		3458.98	-0.00611443		4048.98	0.0110268
509.2	0.06614461		1099.19	0.00142011		1689.2	0.00195993		2279.2	0.01403111		2869.19	0.00693007		3459.18	-0.00535441		4049.18	0.01057897
509.4	0.06526617		1099.39	0.00212534		1689.4	0.00286527		2279.4	0.01434156		2869.39	0.00569374		3459.38	-0.00451583		4049.38	0.01027751
509.6	0.06472223		1099.59	0.00273948		1689.6	0.00326098		2279.6	0.0143708		2869.59	0.00508638		3459.58	-0.00457785		4049.58	0.01030017
509.8	0.06503074		1099.79	0.00324441		1689.8	0.00347548		2279.8	0.01378143		2869.79	0.00452652		3459.78	-0.00443099		4049.78	0.01035409
510	0.06492697		1099.99	0.00288525		1690	0.00349649		2280	0.01426984		2869.99	0.00462306		3459.98	-0.00395931		4049.98	0.01022341
510.2	0.06418267		1100.19	0.00316098		1690.2	0.00398985		2280.2	0.0149988		2870.19	0.00464422		3460.18	-0.00376763		4050.18	0.01038683
510.4	0.06366056		1100.39	0.00403244		1690.4	0.00402392		2280.4	0.01448748		2870.39	0.00399772		3460.38	-0.00260897		4050.38	0.01032504
510.6	0.06372488		1100.59	0.00336792		1690.6	0.00522471		2280.6	0.01428555		2870.59	0.00367471		3460.58	-0.00269438		4050.58	0.01104275
510.8	0.06295224		1100.79	0.00316085		1690.8	0.00554283		2280.8	0.01408331		2870.79	0.00309555		3460.78	-0.00385841		4050.78	0.01078437
511	0.06236682		1100.99	0.00331935		1691	0.00536358		2281	0.01329824		2870.99	0.00274852		3460.98	-0.00425152		4050.98	0.01097125
511.2	0.06240541		1101.19	0.00321889		1691.2	0.00560756		2281.2	0.0130289		2871.19	0.00290652		3461.18	-0.00482548		4051.18	0.0115835
511.4	0.06284134		1101.39	0.0043558		1691.4	0.00620589		2281.4	0.01314115		2871.39	0.00245065		3461.38	-0.00577043		4051.38	0.01157307
511.6	0.06257658		1101.59	0.00430042		1691.6	0.00663419		2281.6	0.0132189		2871.59	0.00305443		3461.58	-0.0068844		4051.58	0.01103544
511.8	0.06335207		1101.79	0.00467714		1691.8	0.0061675		2281.8	0.01228976		2871.79	0.00296882		3461.78	-0.00727674		4051.78	0.01053275
512	0.06366501		1101.99	0.00437163		1692	0.00606503		2282	0.01124512		2871.99	0.00281972		3461.98	-0.00661359		4051.98	0.01027795
512.2	0.06419538		1102.19	0.00435488		1692.2	0.00685252		2282.2	0.01036702		2872.19	0.00250247		3462.18	-0.00693229		4052.18	0.00979023
512.4	0.06460781		1102.39	0.00500452		1692.4	0.00686296		2282.4	0.01111275		2872.39	0.00367534		3462.38	-0.00674049		4052.38	0.00943743
512.6	0.06299614		1102.59	0.00534974		1692.6	0.00641536		2282.6	0.01202625		2872.59	0.00418345		3462.58	-0.0070036		4052.58	0.0082225
512.8	0.06342564		1102.79	0.0047822		1692.8	0.00585293		2282.8	0.01282352		2872.79	0.00415231		3462.78	-0.00722207		4052.78	0.00888159
513	0.06280948		1102.99	0.00529887		1693	0.00640946		2283	0.0129526		2872.99	0.00370168		3462.98	-0.00716296		4052.98	0.00883942
513.2	0.06336796		1103.19	0.00496475		1693.2	0.00591285		2283.2	0.01240371		2873.19	0.00318234		3463.18	-0.00726212		4053.18	0.00844022
513.4	0.06292607		1103.39	0.00535266		1693.4	0.00609986		2283.4	0.01156105		2873.39	0.00373244		3463.38	-0.00652424		4053.38	0.00825928
513.6	0.06322997		1103.59	0.0051107		1693.6	0.00526349		2283.6	0.01170663		2873.59	0.00379939		3463.58	-0.00605862		4053.58	0.00799976
513.8	0.06297069		1103.79	0.0050079		1693.8	0.00515604		2283.8	0.01125412		2873.79	0.00426349		3463.78	-0.00596768		4053.78	0.00743595
514	0.06369624		1103.99	0.00453413		1694	0.00429529		2284	0.01157109		2873.99	0.00379577		3463.98	-0.00558055		4053.98	0.00697543
514.2	0.06308039		1104.19	0.00342011		1694.2	0.00424252		2284.2	0.01167415		2874.19	0.00373655		3464.18	-0.0050894		4054.18	0.00766188
514.4	0.06329412		1104.39	0.00342882		1694.4	0.00371466		2284.4	0.01095022		2874.39	0.00337452		3464.38	-0.00503997		4054.38	0.00750401
514.6	0.06336035		1104.59	0.0022826		1694.6	0.00436719		2284.6	0.01107501		2874.59	0.00384674		3464.58	-0.00565016		4054.58	0.00800573
514.8	0.06356317		1104.79	0.00214582		1694.8	0.00396197		2284.8	0.01042095		2874.79	0.0041424		3464.78	-0.00609479		4054.78	0.00810581
515	0.06351551		1104.99	0.00196873		1695	0.00372538		2285	0.01064532		2874.99	0.00438737		3464.98	-0.00647722		4054.98	0.00874179
515.2	0.06416051		1105.19	0.00082094		1695.2	0.00429859		2285.2	0.01124779		2875.19	0.00492586		3465.18	-0.00740322		4055.18	0.00920195
515.4	0.06457755		1105.39	0.0008803		1695.4	0.0041788		2285.4	0.01156153		2875.39	0.00545463		3465.38	-0.00745953		4055.38	0.00908347
515.6	0.06433637		1105.59	0.00003556		1695.6	0.00467664		2285.6	0.010996		2875.59	0.00566004		3465.58	-0.00738822		4055.58	0.00893851
515.8	0.06448798		1105.79	-0.0001348		1695.8	0.00437957		2285.8	0.00996489		2875.79	0.00523533		3465.78	-0.00690217		4055.78	0.00914205
516	0.06445575		1105.99	-0.00091702		1696	0.00503024		2286	0.0104971		2875.99	0.0060366		3465.98	-0.00658517		4055.98	0.00914588
516.2	0.06430516		1106.19	-0.00031045		1696.2	0.00621323		2286.2	0.01120348		2876.19	0.00622203		3466.18	-0.00701581		4056.18	0.00924574
516.4	0.06345463		1106.39	-0.00015706		1696.4	0.00655744		2286.4	0.0121062		2876.39	0.00624739		3466.38	-0.00697681		4056.38	0.00931057
516.6	0.0624023		1106.59	-0.00022582		1696.6	0.00701188		2286.6	0.01253362		2876.59	0.00599571		3466.58	-0.00694155		4056.58	0.00836426
516.8	0.06274128		1106.79	0.00063957		1696.8	0.00738332		2286.8	0.01266247		2876.79	0.00510177		3466.78	-0.00765108		4056.78	0.00911826
517	0.0623248		1106.99	0.00178979		1697	0.00808497		2287	0.01220837		2876.99	0.00583846		3466.98	-0.00773393		4056.98	0.0087642
517.2	0.06226856		1107.19	0.00267244		1697.2	0.00782604		2287.2	0.010743		2877.19	0.005607		3467.18	-0.00806876		4057.18	0.00885695
517.4	0.0621233		1107.39	0.0033206		1697.4	0.00685553		2287.4	0.01181329		2877.39	0.00554068		3467.38	-0.00732483		4057.38	0.00880132
517.6	0.06232436		1107.59	0.00405862		1697.6	0.00550118		2287.6	0.01159294		2877.59	0.00545464		3467.58	-0.00708986		4057.58	0.00900521
517.8	0.06249328		1107.79	0.00448307		1697.8	0.00481071		2287.8	0.01026457		2877.79	0.00551134		3467.78	-0.0077862		4057.78	0.008835
518	0.06326035		1107.99	0.00451152		1698	0.00385864		2288	0.00968374		2877.99	0.00535928		3467.98	-0.00839222		4057.98	0.00904847
518.2	0.06187963		1108.19	0.00449		1698.2	0.00358447		2288.2	0.00936299		2878.19	0.00641024		3468.18	-0.00824288		4058.18	0.00929981
518.4	0.06215893		1108.39	0.00524313		1698.4	0.00326608		2288.4	0.00893449		2878.39	0.00700466		3468.38	-0.00839682		4058.38	0.00965767
518.6	0.06249263		1108.59	0.00544403		1698.6	0.00168257		2288.6	0.00866586		2878.59	0.00722333		3468.58	-0.00850661		4058.58	0.00968213
518.8	0.06303914		1108.79	0.00509737		1698.8	0.00066023		2288.8	0.00843326		2878.79	0.00626227		3468.78	-0.00872785		4058.78	0.00890201
519	0.06373153		1108.99	0.00432573		1699	-0.00076638		2289	0.00938565		2878.99	0.00628957		3468.98	-0.00904441		4058.98	0.00793961
519.2	0.06449643		1109.19	0.00358678		1699.2	-0.00118073		2289.2	0.01014843		2879.19	0.00617484		3469.18	-0.00850006		4059.18	0.0072233
519.4	0.06553622		1109.39	0.00377164		1699.4	-0.00087344		2289.4	0.0105616		2879.39	0.00576913		3469.38	-0.00882976		4059.38	0.00646506
519.6	0.06575654		1109.59	0.00342034		1699.6	-0.00033188		2289.6	0.01078755		2879.59	0.00493564		3469.58	-0.00879683		4059.58	0.00635742
519.8	0.06617356		1109.79	0.00318957		1699.8	-0.00073081		2289.8	0.01185739		2879.79	0.00390324		3469.78	-0.00879437		4059.78	0.00596681
520	0.06628443		1109.99	0.00264903		1700	0.00026112		2290	0.01320723		2879.99	0.00361647		3469.98	-0.00929953		4059.98	0.00574074
520.2	0.06582373		1110.19	0.00310138		1700.2	0.00111071		2290.2	0.01384654		2880.19	0.00261388		3470.18	-0.01006338		4060.18	0.00579284
520.4	0.06533084		1110.39	0.00319874		1700.4	0.00174971		2290.4	0.01308605		2880.39	0.00148325		3470.38	-0.01019741		4060.38	0.006152
520.6	0.06524101		1110.59	0.00331125		1700.6	0.00203806		2290.6	0.01362504		2880.59	0.00093943		3470.58	-0.0108593		4060.58	0.00561773
520.8	0.06571316		1110.79	0.00383133		1700.8	0.00263762		2290.8	0.01355096		2880.79	0.00068336		3470.78	-0.01074766		4060.78	0.00670952
521	0.06607607		1110.99	0.00371744		1701	0.00325639		2291	0.01302172		2880.99	0.00131484		3470.98	-0.01020911		4060.98	0.0069885
521.2	0.06612062		1111.19	0.00406663		1701.2	0.00312955		2291.2	0.01259731		2881.19	0.00049405		3471.18	-0.00972275		4061.18	0.0084355
521.4	0.06615358		1111.39	0.00367441		1701.4	0.00249721		2291.4	0.01260219		2881.39	0.00153705		3471.38	-0.00937578		4061.38	0.00927979
521.6	0.06575408		1111.59	0.00385175		1701.6	0.00365504		2291.6	0.01165955		2881.59	0.00260078		3471.58	-0.00935061		4061.58	0.00999392
521.8	0.06572468		1111.79	0.00240224		1701.8	0.00506886		2291.8	0.0114021		2881.79	0.00295594		3471.78	-0.00950723		4061.78	0.00983933
522	0.06536007		1111.99	0.00220071		1702	0.006242		2292	0.01093117		2881.99	0.00370119		3471.98	-0.00815295		4061.98	0.01037948
522.2	0.06456631		1112.19	0.002154		1702.2	0.00634468		2292.2	0.01051409		2882.19	0.00446865		3472.18	-0.00742532		4062.18	0.01065394
522.4	0.06500729		1112.39	0.0021382		1702.4	0.00592343		2292.4	0.01017732		2882.39	0.00476841		3472.38	-0.00663786		4062.38	0.01078975
522.6	0.06553585		1112.59	0.00136301		1702.6	0.0049898		2292.6	0.01022273		2882.59	0.00461566		3472.58	-0.00615581		4062.58	0.01039514
522.8	0.06516681		1112.79	0.00074528		1702.8	0.00486059		2292.8	0.01011177		2882.79	0.00440998		3472.78	-0.00606398		4062.78	0.00891266
523	0.06563888		1112.99	0.00098099		1703	0.00449744		2293	0.01088069		2882.99	0.00502955		3472.98	-0.00631982		4062.98	0.0080495
523.2	0.06503703		1113.19	0.00085248		1703.2	0.00457289		2293.2	0.01087935		2883.19	0.00418474		3473.18	-0.00608184		4063.18	0.00686766
523.4	0.06544331		1113.39	0.00109118		1703.4	0.00473664		2293.4	0.01118097		2883.39	0.002825		3473.38	-0.00646316		4063.38	0.00676487
523.6	0.06462194		1113.59	0.00148533		1703.6	0.0039697		2293.6	0.01160701		2883.59	0.00228542		3473.58	-0.00720485		4063.58	0.00723902
523.8	0.06394314		1113.79	0.00178014		1703.8	0.00407859		2293.8	0.01205793		2883.79	0.00085392		3473.78	-0.00681858		4063.78	0.00658223
524	0.06365423		1113.99	0.00192844		1704	0.00401601		2294	0.01188765		2883.99	0.00049672		3473.98	-0.00687659		4063.98	0.00714809
524.2	0.06321609		1114.19	0.0025099		1704.2	0.00366136		2294.2	0.012022		2884.19	-0.00026768		3474.18	-0.00746615		4064.18	0.00745766
524.4	0.06282266		1114.39	0.00358215		1704.4	0.00478744		2294.4	0.01137924		2884.39	-0.00066033		3474.38	-0.00753544		4064.38	0.00788248
524.6	0.06263359		1114.59	0.00300249		1704.6	0.00493045		2294.6	0.01165487		2884.59	-0.00040454		3474.58	-0.00759603		4064.58	0.0075056
524.8	0.06296705		1114.79	0.00323338		1704.8	0.00547724		2294.8	0.01120365		2884.79	-0.00008019		3474.78	-0.00680281		4064.78	0.00751594
525	0.06313995		1114.99	0.00362264		1705	0.00529581		2295	0.01073093		2884.99	0.00033541		3474.98	-0.00717618		4064.98	0.00746018
525.2	0.06217194		1115.19	0.0043054		1705.2	0.00436125		2295.2	0.01017777		2885.19	0.00098968		3475.18	-0.00679916		4065.18	0.00836437
525.4	0.06184234		1115.39	0.00413207		1705.4	0.00512426		2295.4	0.0099675		2885.39	0.00240103		3475.38	-0.00754349		4065.38	0.00868969
525.6	0.06183939		1115.59	0.00369182		1705.6	0.00563437		2295.6	0.0101656		2885.59	0.00255434		3475.58	-0.00808256		4065.58	0.00853903
525.8	0.06122643		1115.79	0.00289648		1705.8	0.0058043		2295.8	0.01023229		2885.79	0.00255355		3475.78	-0.00816457		4065.78	0.00883538
526	0.06113974		1115.99	0.00259407		1706	0.00512199		2296	0.00961083		2885.99	0.00357731		3475.98	-0.00796534		4065.98	0.00955726
526.2	0.06074151		1116.19	0.00167939		1706.2	0.00459899		2296.2	0.01004386		2886.19	0.00440818		3476.18	-0.00828724		4066.18	0.00937627
526.4	0.06089894		1116.39	0.00108805		1706.4	0.00416289		2296.4	0.01086555		2886.39	0.00469598		3476.38	-0.008478		4066.38	0.00944751
526.6	0.06000089		1116.59	-0.00043715		1706.6	0.00319544		2296.6	0.01198664		2886.59	0.0046351		3476.58	-0.00967804		4066.58	0.00955496
526.8	0.05965617		1116.79	-0.00114508		1706.8	0.00236001		2296.8	0.0119678		2886.79	0.00489806		3476.78	-0.0109462		4066.78	0.00882992
527	0.05935584		1116.99	-0.00145038		1707	0.00188154		2297	0.01173476		2886.99	0.00475376		3476.98	-0.0110577		4066.98	0.00810985
527.2	0.05884843		1117.19	-0.00185503		1707.2	0.00151081		2297.2	0.01129579		2887.19	0.00373677		3477.18	-0.01108293		4067.18	0.00745066
527.4	0.05909888		1117.39	-0.00167083		1707.4	0.00165451		2297.4	0.01145282		2887.39	0.00254192		3477.38	-0.01129598		4067.38	0.00798596
527.6	0.05842579		1117.59	-0.00187142		1707.6	0.00118941		2297.6	0.01125562		2887.59	0.00251822		3477.58	-0.01112994		4067.58	0.0085517
527.8	0.05880894		1117.79	-0.00169669		1707.8	0.00136205		2297.8	0.01149239		2887.79	0.00139632		3477.78	-0.01038854		4067.78	0.00844006
528	0.05977398		1117.99	-0.00149167		1708	0.00175015		2298	0.01137034		2887.99	0.00136806		3477.98	-0.01060828		4067.98	0.00902581
528.2	0.05977327		1118.19	-0.00069672		1708.2	0.00260416		2298.2	0.01101387		2888.19	0.00113879		3478.18	-0.01009973		4068.18	0.00900191
528.4	0.06013146		1118.39	-0.00023089		1708.4	0.0034825		2298.4	0.01108044		2888.39	0.00138382		3478.38	-0.00931917		4068.38	0.00873945
528.6	0.05982887		1118.59	-0.00015259		1708.6	0.00319652		2298.6	0.01102365		2888.59	0.00158819		3478.58	-0.0090724		4068.58	0.00785332
528.8	0.06059246		1118.79	0.00096942		1708.8	0.00333153		2298.8	0.01114837		2888.79	0.00145794		3478.78	-0.00888672		4068.78	0.00776239
529	0.06109662		1118.99	0.00133754		1709	0.00276818		2299	0.01088344		2888.99	0.0021694		3478.98	-0.0089244		4068.98	0.0084351
529.2	0.0614371		1119.19	0.00187329		1709.2	0.00277358		2299.2	0.01044533		2889.19	0.00202367		3479.18	-0.00855533		4069.18	0.00896261
529.4	0.06239976		1119.39	0.00180286		1709.4	0.00320755		2299.4	0.01044601		2889.39	0.00193843		3479.38	-0.00899686		4069.38	0.00903279
529.6	0.06253059		1119.59	0.00189289		1709.6	0.00316626		2299.6	0.01006963		2889.59	0.00121624		3479.58	-0.00929073		4069.58	0.00913708
529.8	0.06251842		1119.79	0.00205905		1709.8	0.00332329		2299.8	0.00973545		2889.79	0.00188559		3479.78	-0.00949347		4069.78	0.00974529
530	0.06258415		1119.99	0.00149648		1710	0.00338902		2300	0.00961789		2889.99	0.00235177		3479.98	-0.00970568		4069.98	0.00908165
530.2	0.06180806		1120.19	0.00168926		1710.2	0.00348626		2300.2	0.00961863		2890.19	0.00325005		3480.18	-0.009566		4070.18	0.00941009
530.4	0.06041497		1120.39	0.00192364		1710.4	0.00317466		2300.4	0.00958189		2890.39	0.00272559		3480.38	-0.01021373		4070.38	0.00959937
530.6	0.0595605		1120.59	0.00196143		1710.6	0.00271799		2300.6	0.00971908		2890.59	0.00266768		3480.58	-0.01096511		4070.58	0.0094588
530.8	0.05970318		1120.79	0.00233034		1710.8	0.00261122		2300.8	0.0084821		2890.79	0.00300068		3480.78	-0.01103588		4070.78	0.00852045
531	0.05936766		1120.99	0.00266594		1711	0.00209405		2301	0.0075572		2890.99	0.00205398		3480.98	-0.01100461		4070.98	0.00813612
531.2	0.05939356		1121.19	0.00297096		1711.2	0.00149554		2301.2	0.00746662		2891.19	0.0019554		3481.18	-0.01187175		4071.18	0.00834451
531.4	0.05940072		1121.39	0.00314984		1711.4	0.00047656		2301.4	0.00776986		2891.39	0.00212205		3481.38	-0.01142619		4071.38	0.00905266
531.6	0.05974531		1121.59	0.00294229		1711.6	0.00007834		2301.6	0.00823631		2891.59	0.00198407		3481.58	-0.01036732		4071.58	0.00955467
531.8	0.06042621		1121.79	0.0027514		1711.8	0.00001199		2301.8	0.00919434		2891.79	0.00122567		3481.78	-0.01063284		4071.78	0.00954059
532	0.06074096		1121.99	0.00342881		1712	0.00012195		2302	0.01008044		2891.99	0.00176918		3481.98	-0.01029939		4071.98	0.00889426
532.2	0.06073147		1122.19	0.00323785		1712.2	-0.00001373		2302.2	0.01100644		2892.19	0.00240921		3482.18	-0.0098273		4072.18	0.00898308
532.4	0.06112345		1122.39	0.00156627		1712.4	-0.00008695		2302.4	0.01212858		2892.39	0.00267721		3482.38	-0.0099001		4072.38	0.00831766
532.6	0.06134817		1122.59	0.0008791		1712.6	0.00058442		2302.6	0.01290032		2892.59	0.00319115		3482.58	-0.01041387		4072.58	0.00898026
532.8	0.06139092		1122.79	0.0000989		1712.8	0.0013778		2302.8	0.01323337		2892.79	0.00290357		3482.78	-0.0100318		4072.78	0.00934827
533	0.06104367		1122.99	-0.00108994		1713	0.00144664		2303	0.01347873		2892.99	0.00329811		3482.98	-0.00951337		4072.98	0.01012089
533.2	0.0606428		1123.19	-0.00113446		1713.2	0.00230507		2303.2	0.01298279		2893.19	0.00263383		3483.18	-0.0087454		4073.18	0.01064778
533.4	0.06026852		1123.39	-0.00244441		1713.4	0.00209938		2303.4	0.01363713		2893.39	0.00254436		3483.38	-0.00897501		4073.38	0.01071161
533.6	0.05893668		1123.59	-0.00268606		1713.6	0.00226422		2303.6	0.01336397		2893.59	0.00248979		3483.58	-0.00922655		4073.58	0.01069208
533.8	0.05764904		1123.79	-0.00320834		1713.8	0.00241245		2303.8	0.01377566		2893.79	0.00314074		3483.78	-0.00851181		4073.78	0.0107224
534	0.05671461		1123.99	-0.002748		1714	0.00214421		2304	0.01383503		2893.99	0.00286952		3483.98	-0.00900887		4073.98	0.01015496
534.2	0.05638624		1124.19	-0.00230936		1714.2	0.00164477		2304.2	0.01330584		2894.19	0.00369226		3484.18	-0.00801655		4074.18	0.01100277
534.4	0.05601075		1124.39	-0.00173987		1714.4	0.00149063		2304.4	0.01317116		2894.39	0.00252276		3484.38	-0.00831778		4074.38	0.01109794
534.6	0.0566157		1124.59	-0.00095917		1714.6	0.00068089		2304.6	0.01285678		2894.59	0.00363506		3484.58	-0.00904465		4074.58	0.01088088
534.8	0.05661506		1124.79	-0.00032182		1714.8	0.00010579		2304.8	0.01227784		2894.79	0.00333779		3484.78	-0.0092584		4074.78	0.01009148
535	0.05725214		1124.99	-0.00037911		1715	-0.00035769		2305	0.01293125		2894.99	0.00225197		3484.98	-0.00976309		4074.98	0.01057951
535.2	0.05748283		1125.19	-0.00051345		1715.2	-0.00079505		2305.2	0.01313622		2895.19	0.00294322		3485.18	-0.00944743		4075.18	0.01017701
535.4	0.05763679		1125.39	-0.0000392		1715.4	-0.00149706		2305.4	0.01437509		2895.39	0.00243632		3485.38	-0.0090482		4075.38	0.01017164
535.6	0.05859077		1125.59	-0.00025405		1715.6	-0.00161019		2305.6	0.01508811		2895.59	0.00165547		3485.58	-0.00795302		4075.58	0.00964855
535.8	0.05919688		1125.79	-0.0000155		1715.8	-0.00124576		2305.8	0.01588823		2895.79	0.00208663		3485.78	-0.00817675		4075.78	0.00961289
536	0.05995029		1125.99	0.00027125		1716	-0.0016747		2306	0.01587234		2895.99	0.00214335		3485.98	-0.00841006		4075.98	0.00848144
536.2	0.06022788		1126.19	-0.00045232		1716.2	-0.00093872		2306.2	0.01582746		2896.19	0.00259641		3486.18	-0.0077029		4076.18	0.00841846
536.4	0.06056635		1126.39	-0.00132341		1716.4	-0.00025948		2306.4	0.01507227		2896.39	0.00228002		3486.38	-0.00715251		4076.38	0.00861654
536.6	0.0609567		1126.59	-0.00092962		1716.6	0.00035713		2306.6	0.01411662		2896.59	0.00174866		3486.58	-0.00749837		4076.58	0.00881311
536.8	0.06021655		1126.79	-0.00074295		1716.8	0.00093973		2306.8	0.01282895		2896.79	0.00116456		3486.78	-0.0067631		4076.78	0.0083268
537	0.06033242		1126.99	-0.00109884		1717	0.00140442		2307	0.01199574		2896.99	0.00076823		3486.98	-0.00690559		4076.98	0.00899533
537.2	0.05925933		1127.19	-0.00074248		1717.2	0.00201328		2307.2	0.01112385		2897.19	-0.00006744		3487.18	-0.00673161		4077.18	0.0091827
537.4	0.05974986		1127.39	-0.0004935		1717.4	0.00200363		2307.4	0.01110053		2897.39	-0.00110442		3487.38	-0.00707509		4077.38	0.00894551
537.6	0.05845478		1127.59	0.00008706		1717.6	0.00179649		2307.6	0.01011337		2897.59	-0.00157411		3487.58	-0.00709619		4077.58	0.007555
537.8	0.05816545		1127.79	-0.00037263		1717.8	0.00259075		2307.8	0.00907387		2897.79	-0.00179683		3487.78	-0.00762894		4077.78	0.00806688
538	0.05913538		1127.99	0.00021374		1718	0.00153481		2308	0.00821442		2897.99	-0.0019192		3487.98	-0.00872704		4077.98	0.00840866
538.2	0.05909956		1128.19	-0.00041579		1718.2	0.00132228		2308.2	0.00773186		2898.19	-0.00174941		3488.18	-0.00885851		4078.18	0.00913088
538.4	0.05859597		1128.39	0.00002117		1718.4	0.00123138		2308.4	0.00762467		2898.39	-0.0014794		3488.38	-0.01008347		4078.38	0.00894325
538.6	0.05805931		1128.59	-0.00000279		1718.6	0.00091343		2308.6	0.00734347		2898.59	-0.00018541		3488.58	-0.01045052		4078.58	0.00874646
538.8	0.0581964		1128.79	0.00042975		1718.8	0.00058666		2308.8	0.00769054		2898.79	-0.00018549		3488.78	-0.00999469		4078.78	0.00796917
539	0.05921361		1128.99	-0.00011791		1719	0.00037526		2309	0.00806167		2898.99	0.00031422		3488.98	-0.01056862		4078.98	0.00820737
539.2	0.05934258		1129.19	-0.00093466		1719.2	0.00024375		2309.2	0.00810066		2899.19	0.00107346		3489.18	-0.01092928		4079.18	0.00804795
539.4	0.05967663		1129.39	0.00001927		1719.4	-0.00017382		2309.4	0.00807192		2899.39	0.00173723		3489.38	-0.01092212		4079.38	0.00843719
539.6	0.06074731		1129.59	-0.00039012		1719.6	-0.00033496		2309.6	0.00807128		2899.59	0.00208139		3489.58	-0.01043598		4079.58	0.00938588
539.8	0.06130139		1129.79	0.00007097		1719.8	-0.0000742		2309.8	0.00890935		2899.79	0.00261791		3489.78	-0.01088989		4079.78	0.01002951
540	0.06130249		1129.99	0.00014588		1720	-0.00024222		2310	0.00897639		2899.99	0.00291055		3489.98	-0.01109021		4079.98	0.00991167
540.2	0.06132981		1130.19	0.00033728		1720.2	-0.00031169		2310.2	0.00959282		2900.19	0.00318249		3490.18	-0.01001754		4080.18	0.00997379
540.4	0.06190821		1130.39	0.00054009		1720.4	0.00051091		2310.4	0.00922111		2900.39	0.00258347		3490.38	-0.01051135		4080.38	0.01007068
540.6	0.06155718		1130.59	0.00075037		1720.6	0.00074632		2310.6	0.00876314		2900.59	0.0018179		3490.58	-0.01114106		4080.58	0.00942597
540.8	0.06068757		1130.79	0.00077215		1720.8	0.00233207		2310.8	0.0093416		2900.79	0.0017283		3490.78	-0.01046742		4080.78	0.00919114
541	0.06043611		1130.99	0.00063039		1721	0.00356052		2311	0.00917013		2900.99	0.00115416		3490.98	-0.01016886		4080.98	0.0095824
541.2	0.05905404		1131.19	0.00120308		1721.2	0.00359506		2311.2	0.009211		2901.19	0.00056151		3491.18	-0.00952827		4081.18	0.00903151
541.4	0.059307		1131.39	0.00102569		1721.4	0.0039254		2311.4	0.00872407		2901.39	0.00100986		3491.38	-0.01013013		4081.38	0.00884428
541.6	0.05826561		1131.59	0.00006037		1721.6	0.00363524		2311.6	0.00857816		2901.59	0.00064307		3491.58	-0.01028644		4081.58	0.0080912
541.8	0.05752546		1131.79	-0.00059176		1721.8	0.00396165		2311.8	0.00869531		2901.79	0.00017217		3491.78	-0.01035212		4081.78	0.00867965
542	0.05682086		1131.99	-0.00043649		1722	0.00360188		2312	0.00939331		2901.99	0.00020919		3491.98	-0.01029876		4081.98	0.00896803
542.2	0.05618329		1132.19	-0.0004577		1722.2	0.0035084		2312.2	0.01014485		2902.19	0.00009914		3492.18	-0.01065387		4082.18	0.00837034
542.4	0.05597766		1132.39	0.00070471		1722.4	0.00371465		2312.4	0.01025363		2902.39	0.00047639		3492.38	-0.0098497		4082.38	0.00825214
542.6	0.05616183		1132.59	0.0004267		1722.6	0.00312144		2312.6	0.01027233		2902.59	0.00058312		3492.58	-0.00998624		4082.58	0.00876673
542.8	0.05601543		1132.79	0.00121261		1722.8	0.00254756		2312.8	0.00980155		2902.79	0.0004146		3492.78	-0.00962167		4082.78	0.00850809
543	0.05657287		1132.99	0.0005159		1723	0.00224969		2313	0.01010002		2902.99	-0.00018238		3492.98	-0.01019933		4082.98	0.00843713
543.2	0.05715974		1133.19	0.00014503		1723.2	0.00261658		2313.2	0.00946954		2903.19	0.00056723		3493.18	-0.01026355		4083.18	0.00878332
543.4	0.05785954		1133.39	0.00127982		1723.4	0.00288362		2313.4	0.00923797		2903.39	0.00017827		3493.38	-0.01032545		4083.38	0.00946605
543.6	0.05810905		1133.59	0.0004835		1723.6	0.00238238		2313.6	0.01020117		2903.59	0.00054196		3493.58	-0.0103694		4083.58	0.00995601
543.8	0.05829		1133.79	0.00134591		1723.8	0.00301302		2313.8	0.01046152		2903.79	0.00072421		3493.78	-0.0103858		4083.78	0.00980612
544	0.05887042		1133.99	0.00150251		1724	0.00325266		2314	0.0104697		2903.99	0.00086803		3493.98	-0.01098502		4083.98	0.00967574
544.2	0.05987225		1134.19	0.00125382		1724.2	0.00272066		2314.2	0.01040028		2904.19	0.00053349		3494.18	-0.01147542		4084.18	0.0093095
544.4	0.06005435		1134.39	0.00082752		1724.4	0.00266272		2314.4	0.00991081		2904.39	0.00077648		3494.38	-0.01231704		4084.38	0.00913564
544.6	0.05951711		1134.59	-0.00035352		1724.6	0.00187175		2314.6	0.00993033		2904.59	0.00075847		3494.58	-0.01230049		4084.58	0.00887077
544.8	0.0591841		1134.79	-0.00140039		1724.8	0.00236191		2314.8	0.01004226		2904.79	0.00109607		3494.78	-0.01194708		4084.78	0.00889052
545	0.05895078		1134.99	-0.00213277		1725	0.00220821		2315	0.00963742		2904.99	0.00097385		3494.98	-0.01200858		4084.98	0.00907361
545.2	0.05808243		1135.19	-0.00245691		1725.2	0.00169156		2315.2	0.00943526		2905.19	0.00132806		3495.18	-0.01232186		4085.18	0.00882852
545.4	0.05775441		1135.39	-0.00331147		1725.4	0.00102287		2315.4	0.01004865		2905.39	0.00210616		3495.38	-0.01304314		4085.38	0.00882036
545.6	0.056921		1135.59	-0.00432824		1725.6	0.0005901		2315.6	0.01074081		2905.59	0.00156652		3495.58	-0.01255775		4085.58	0.0089643
545.8	0.05584216		1135.79	-0.00437503		1725.8	0.00076525		2315.8	0.01122545		2905.79	0.00132989		3495.78	-0.01213405		4085.78	0.00822976
546	0.05563443		1135.99	-0.00415325		1726	0.00098551		2316	0.0111094		2905.99	0.00116533		3495.98	-0.011568		4085.98	0.00941162
546.2	0.05577252		1136.19	-0.004792		1726.2	0.00024753		2316.2	0.01148111		2906.19	0.00064868		3496.18	-0.01158036		4086.18	0.00855004
546.4	0.05502357		1136.39	-0.0045484		1726.4	0.00040112		2316.4	0.01159619		2906.39	-0.00016309		3496.38	-0.01122148		4086.38	0.0094318
546.6	0.05475779		1136.59	-0.00574929		1726.6	-0.00020008		2316.6	0.01187341		2906.59	-0.00044788		3496.58	-0.01155695		4086.58	0.00970638
546.8	0.05428607		1136.79	-0.00572689		1726.8	-0.00044068		2316.8	0.01191915		2906.79	-0.00071644		3496.78	-0.01069517		4086.78	0.00933568
547	0.05492235		1136.99	-0.00561598		1727	-0.000049		2317	0.01331182		2906.99	-0.00050783		3496.98	-0.00999192		4086.98	0.00856523
547.2	0.05565324		1137.19	-0.00474442		1727.2	0.00074963		2317.2	0.01249744		2907.19	0.00006547		3497.18	-0.00984534		4087.18	0.00831427
547.4	0.05571743		1137.39	-0.00378119		1727.4	0.00057236		2317.4	0.01279251		2907.39	-0.00020632		3497.38	-0.00945661		4087.38	0.00804114
547.6	0.05608681		1137.59	-0.00388458		1727.6	0.00015235		2317.6	0.0127683		2907.59	0.00125822		3497.58	-0.00955491		4087.58	0.00851538
547.8	0.05630181		1137.79	-0.00273425		1727.8	0.00097177		2317.8	0.01227887		2907.79	0.00048648		3497.78	-0.00945457		4087.78	0.00886161
548	0.05776677		1137.99	-0.00253843		1728	-0.00031216		2318	0.0125152		2907.99	0.00081837		3497.98	-0.0102122		4087.98	0.00819593
548.2	0.05831065		1138.19	-0.00266836		1728.2	-0.00118974		2318.2	0.01179421		2908.19	0.00087469		3498.18	-0.00985667		4088.18	0.00777362
548.4	0.05939944		1138.39	-0.00249561		1728.4	-0.00201544		2318.4	0.01055884		2908.39	0.00091754		3498.38	-0.00939911		4088.38	0.00788328
548.6	0.05949152		1138.59	-0.00305968		1728.6	-0.00131862		2318.6	0.00977653		2908.59	0.0011988		3498.58	-0.00943736		4088.58	0.00800489
548.8	0.05943896		1138.79	-0.00266313		1728.8	-0.00134481		2318.8	0.00886074		2908.79	0.00113874		3498.78	-0.01027773		4088.78	0.00812252
549	0.05900058		1138.99	-0.00237788		1729	-0.00099121		2319	0.00861042		2908.99	0.00140012		3498.98	-0.01079495		4088.98	0.00785678
549.2	0.05852045		1139.19	-0.00151143		1729.2	-0.00149714		2319.2	0.00774568		2909.19	0.00204724		3499.18	-0.01092381		4089.18	0.00716366
549.4	0.05830081		1139.39	-0.00157234		1729.4	-0.00165384		2319.4	0.00828513		2909.39	0.00272044		3499.38	-0.01045904		4089.38	0.00714045
549.6	0.05812483		1139.59	-0.00203086		1729.6	-0.00139767		2319.6	0.00687266		2909.59	0.00258959		3499.58	-0.01031816		4089.58	0.00720002
549.8	0.05861438		1139.79	-0.00111922		1729.8	-0.00138423		2319.8	0.00668662		2909.79	0.00241553		3499.78	-0.00993355		4089.78	0.00590732
550	0.05851028		1139.99	-0.00112826		1730	-0.00081214		2320	0.0058202		2909.99	0.00197864		3499.98	-0.01040354		4089.98	0.00630354
550.2	0.05857705		1140.19	-0.00194585		1730.2	-0.00017626		2320.2	0.00653874		2910.19	0.00200474		3500.18	-0.01152945		4090.18	0.00555051
550.4	0.05859461		1140.39	-0.00194701		1730.4	0.00086578		2320.4	0.00644452		2910.39	0.00144214		3500.38	-0.0117196		4090.38	0.00581999
550.6	0.0590276		1140.59	-0.00284128		1730.6	0.00138269		2320.6	0.00654935		2910.59	0.00151606		3500.58	-0.01126711		4090.58	0.00569452
550.8	0.05888297		1140.79	-0.00259687		1730.8	0.0015538		2320.8	0.00665974		2910.79	0.00158419		3500.78	-0.01113509		4090.78	0.00539758
551	0.05904432		1140.99	-0.00237453		1731	0.00201156		2321	0.00716106		2910.99	0.0023759		3500.98	-0.0110031		4090.98	0.00507386
551.2	0.05906464		1141.19	-0.00227435		1731.2	0.00187735		2321.2	0.00746789		2911.19	0.00285382		3501.18	-0.01111784		4091.18	0.00517523
551.4	0.0588244		1141.39	-0.00208399		1731.4	0.00094408		2321.4	0.00825062		2911.39	0.00426161		3501.38	-0.01179732		4091.38	0.00577783
551.6	0.05845984		1141.59	-0.00167517		1731.6	0.00143172		2321.6	0.00817523		2911.59	0.00452926		3501.58	-0.01231203		4091.58	0.00572502
551.8	0.05780566		1141.79	-0.0017912		1731.8	0.00167994		2321.8	0.00854637		2911.79	0.00357503		3501.78	-0.01197977		4091.78	0.00555252
552	0.0585258		1141.99	-0.00210515		1732	0.00123914		2322	0.00918314		2911.99	0.00344965		3501.98	-0.01220572		4091.98	0.00605889
552.2	0.05732439		1142.19	-0.00200354		1732.2	0.00123234		2322.2	0.00875511		2912.19	0.00295126		3502.18	-0.01165423		4092.18	0.00693521
552.4	0.05727153		1142.39	-0.0020147		1732.4	0.00147677		2322.4	0.00888675		2912.39	0.00322269		3502.38	-0.01161784		4092.38	0.00767372
552.6	0.0564398		1142.59	-0.00230092		1732.6	0.00158461		2322.6	0.00947181		2912.59	0.0039185		3502.58	-0.01115409		4092.58	0.00855951
552.8	0.05553946		1142.79	-0.00223809		1732.8	0.00042699		2322.8	0.01051869		2912.79	0.0031292		3502.78	-0.01084863		4092.78	0.00923088
553	0.0547685		1142.99	-0.00227466		1733	0.00053823		2323	0.01160665		2912.99	0.0033848		3502.98	-0.01053097		4092.98	0.00889287
553.2	0.05386746		1143.19	-0.00196051		1733.2	0.00067735		2323.2	0.01164945		2913.19	0.00364514		3503.18	-0.01070877		4093.18	0.00818171
553.4	0.05384747		1143.39	-0.00161077		1733.4	0.00115566		2323.4	0.01161596		2913.39	0.00320008		3503.38	-0.00933494		4093.38	0.00828391
553.6	0.05349462		1143.59	-0.00117942		1733.6	0.00092009		2323.6	0.01058201		2913.59	0.00233621		3503.58	-0.01011461		4093.58	0.00777257
553.8	0.05417568		1143.79	-0.00037916		1733.8	0.00117873		2323.8	0.01121691		2913.79	0.00201106		3503.78	-0.01011988		4093.78	0.00691656
554	0.05436101		1143.99	-0.00071027		1734	0.00185005		2324	0.01053303		2913.99	0.00138906		3503.98	-0.01076332		4093.98	0.00747804
554.2	0.05492645		1144.19	-0.00172702		1734.2	0.00210698		2324.2	0.01034858		2914.19	0.00081302		3504.18	-0.01082297		4094.18	0.00749348
554.4	0.05506029		1144.39	-0.0017152		1734.4	0.00214104		2324.4	0.00981165		2914.39	0.00071905		3504.38	-0.01065054		4094.38	0.00761518
554.6	0.05557719		1144.59	-0.00114301		1734.6	0.00201208		2324.6	0.01007362		2914.59	0.00002019		3504.58	-0.01072471		4094.58	0.00762111
554.8	0.05524414		1144.79	-0.00114774		1734.8	0.00122085		2324.8	0.00949709		2914.79	0.00001708		3504.78	-0.01129472		4094.78	0.00711925
555	0.05602864		1144.99	-0.00113131		1735	0.00122011		2325	0.00948602		2914.99	-0.00080509		3504.98	-0.01316579		4094.98	0.00728183
555.2	0.0562116		1145.19	-0.0012588		1735.2	0.00055763		2325.2	0.00947732		2915.19	-0.00030758		3505.18	-0.01357113		4095.18	0.00709039
555.4	0.05637475		1145.39	-0.00139411		1735.4	0.00027645		2325.4	0.00848156		2915.39	0.00036491		3505.38	-0.01414378		4095.38	0.00665501
555.6	0.05596262		1145.59	-0.0015214		1735.6	-0.00003071		2325.6	0.00768979		2915.59	-0.00060697		3505.58	-0.0141913		4095.58	0.00598176
555.8	0.05650147		1145.79	-0.00238014		1735.8	-0.00078771		2325.8	0.00754295		2915.79	-0.00152913		3505.78	-0.01469824		4095.78	0.00661565
556	0.05634065		1145.99	-0.00260233		1736	-0.00141404		2326	0.00719653		2915.99	-0.0022623		3505.98	-0.01434135		4095.98	0.00695305
556.2	0.0554338		1146.19	-0.00259999		1736.2	-0.00231352		2326.2	0.00734084		2916.19	-0.00226554		3506.18	-0.01437709		4096.18	0.00730189
556.4	0.05579958		1146.39	-0.00288498		1736.4	-0.00234589		2326.4	0.00749901		2916.39	-0.00227715		3506.38	-0.01380165		4096.38	0.00770803
556.6	0.05484887		1146.59	-0.00278412		1736.6	-0.00300367		2326.6	0.0080336		2916.59	-0.0024005		3506.58	-0.01297748		4096.58	0.00871053
556.8	0.05452356		1146.79	-0.00265682		1736.8	-0.00328934		2326.8	0.00859959		2916.79	-0.00237701		3506.78	-0.01245016		4096.78	0.00938521
557	0.05439641		1146.99	-0.0027815		1737	-0.00317649		2327	0.00862265		2916.99	-0.00174155		3506.98	-0.01223886		4096.98	0.00875777
557.2	0.05396889		1147.19	-0.00303854		1737.2	-0.00262933		2327.2	0.00809023		2917.19	-0.00156452		3507.18	-0.0122476		4097.18	0.00918243
557.4	0.05454976		1147.39	-0.00217407		1737.4	-0.00340213		2327.4	0.00755074		2917.39	-0.00190654		3507.38	-0.0110668		4097.38	0.00985665
557.6	0.05379209		1147.59	-0.00273743		1737.6	-0.00342689		2327.6	0.00786596		2917.59	-0.00191575		3507.58	-0.01139479		4097.58	0.01014294
557.8	0.0547113		1147.79	-0.00285587		1737.8	-0.00343783		2327.8	0.0084182		2917.79	-0.00206284		3507.78	-0.01065993		4097.78	0.01070177
558	0.05436178		1147.99	-0.00324033		1738	-0.00300813		2328	0.00813998		2917.99	-0.00142313		3507.98	-0.01044385		4097.98	0.01144941
558.2	0.05477961		1148.19	-0.00364609		1738.2	-0.00277689		2328.2	0.00777754		2918.19	-0.00079416		3508.18	-0.01069549		4098.18	0.01126558
558.4	0.05499941		1148.39	-0.00271282		1738.4	-0.00225635		2328.4	0.00829089		2918.39	-0.0000107		3508.38	-0.01054946		4098.38	0.01168955
558.6	0.05537911		1148.59	-0.00149408		1738.6	-0.00136367		2328.6	0.00851791		2918.59	-0.00031097		3508.58	-0.01082898		4098.58	0.01152081
558.8	0.05570804		1148.79	-0.00240738		1738.8	-0.00116603		2328.8	0.00795859		2918.79	-0.00044182		3508.78	-0.01089872		4098.78	0.01174552
559	0.05615268		1148.99	-0.00311314		1739	-0.00083964		2329	0.00753972		2918.99	0.00001134		3508.98	-0.01187615		4098.98	0.01215361
559.2	0.0565047		1149.19	-0.00342408		1739.2	-0.00050693		2329.2	0.00706893		2919.19	0.00131893		3509.18	-0.01058379		4099.18	0.01167123
559.4	0.05675		1149.39	-0.00350718		1739.4	0.00004313		2329.4	0.00690069		2919.39	0.00184141		3509.38	-0.0098957		4099.38	0.01077474
559.6	0.05690966		1149.59	-0.00381078		1739.6	0.00020263		2329.6	0.00628858		2919.59	0.0013134		3509.58	-0.00993796		4099.58	0.01014817
559.8	0.05720971		1149.79	-0.00421023		1739.8	0.00059466		2329.8	0.00635594		2919.79	0.00171718		3509.78	-0.00976206		4099.78	0.00937768
560	0.05685375		1149.99	-0.00449299		1740	0.00124025		2330	0.00657273		2919.99	0.00249006		3509.98	-0.00947414		4099.98	0.00833629
560.2	0.05694808		1150.19	-0.00464919		1740.2	0.0014688		2330.2	0.00639821		2920.19	0.00269037		3510.18	-0.0096935		4100.18	0.00810093
560.4	0.05735289		1150.39	-0.00480646		1740.4	0.0016635		2330.4	0.00632408		2920.39	0.00255253		3510.38	-0.00900225		4100.38	0.00692966
560.6	0.05649599		1150.59	-0.00468294		1740.6	0.00211556		2330.6	0.00627699		2920.59	0.00256583		3510.58	-0.00937373		4100.58	0.00612375
560.8	0.05661505		1150.79	-0.0046035		1740.8	0.00179416		2330.8	0.00646775		2920.79	0.00287431		3510.78	-0.0090065		4100.78	0.00620711
561	0.05699356		1150.99	-0.00454342		1741	0.00112477		2331	0.00689865		2920.99	0.00307642		3510.98	-0.00912763		4100.98	0.00547263
561.2	0.05676901		1151.19	-0.00386221		1741.2	0.00098655		2331.2	0.00634922		2921.19	0.00239066		3511.18	-0.00993178		4101.18	0.00518818
561.4	0.05579652		1151.39	-0.00328623		1741.4	0.00067026		2331.4	0.00609478		2921.39	0.00196935		3511.38	-0.00989426		4101.38	0.00451298
561.6	0.05442433		1151.59	-0.00319905		1741.6	0.00075305		2331.6	0.00692742		2921.59	0.00154849		3511.58	-0.00980804		4101.58	0.00460408
561.8	0.05426215		1151.79	-0.00273641		1741.8	0.00015069		2331.8	0.00727435		2921.79	0.00161478		3511.78	-0.01023007		4101.78	0.00516843
562	0.05330491		1151.99	-0.0026137		1742	0.00066805		2332	0.00829997		2921.99	0.00242139		3511.98	-0.01081526		4101.98	0.00521197
562.2	0.0532679		1152.19	-0.002633		1742.2	-0.00027671		2332.2	0.00858525		2922.19	0.0023697		3512.18	-0.01097803		4102.18	0.00624892
562.4	0.05226205		1152.39	-0.0024433		1742.4	-0.00099652		2332.4	0.00867861		2922.39	0.00212067		3512.38	-0.01047538		4102.38	0.00718423
562.6	0.05207374		1152.59	-0.00146705		1742.6	-0.00139093		2332.6	0.00810864		2922.59	0.00196047		3512.58	-0.01108913		4102.58	0.00816364
562.8	0.05178137		1152.79	-0.00195516		1742.8	-0.00254531		2332.8	0.00697674		2922.79	0.00179651		3512.78	-0.01051048		4102.78	0.0091036
563	0.05119045		1152.99	-0.00235747		1743	-0.00277918		2333	0.00609609		2922.99	0.00228516		3512.98	-0.01075114		4102.98	0.00916075
563.2	0.05176904		1153.19	-0.0018891		1743.2	-0.0026798		2333.2	0.00473334		2923.19	0.00263721		3513.18	-0.01036822		4103.18	0.00880163
563.4	0.05144266		1153.39	-0.00201183		1743.4	-0.00171155		2333.4	0.00457268		2923.39	0.00288078		3513.38	-0.00966431		4103.38	0.00814969
563.6	0.0512339		1153.59	-0.00241702		1743.6	-0.00185098		2333.6	0.00383908		2923.59	0.00278543		3513.58	-0.00908077		4103.58	0.00778352
563.8	0.05145971		1153.79	-0.00314875		1743.8	-0.00145251		2333.8	0.00363107		2923.79	0.0030753		3513.78	-0.00873459		4103.78	0.00749531
564	0.05178455		1153.99	-0.0042608		1744	-0.00091842		2334	0.00374504		2923.99	0.00251815		3513.98	-0.00826603		4103.98	0.00730585
564.2	0.05268764		1154.19	-0.00469065		1744.2	-0.00121895		2334.2	0.00349399		2924.19	0.00173913		3514.18	-0.00853691		4104.18	0.0073029
564.4	0.05383511		1154.39	-0.00556728		1744.4	-0.00047526		2334.4	0.0034944		2924.39	0.00133726		3514.38	-0.00855286		4104.38	0.00683349
564.6	0.05340399		1154.59	-0.00529307		1744.6	0.00035129		2334.6	0.00359975		2924.59	0.00084271		3514.58	-0.00957275		4104.58	0.00645063
564.8	0.05341858		1154.79	-0.00543805		1744.8	0.00015884		2334.8	0.00346696		2924.79	0.00124595		3514.78	-0.00945146		4104.78	0.00653583
565	0.05390821		1154.99	-0.00543728		1745	-0.00052193		2335	0.00252689		2924.99	0.00120676		3514.98	-0.00948404		4104.98	0.00573161
565.2	0.05462961		1155.19	-0.00531688		1745.2	-0.00037852		2335.2	0.00229156		2925.19	0.00116199		3515.18	-0.00932689		4105.18	0.0053665
565.4	0.05536849		1155.39	-0.00619996		1745.4	0.00016397		2335.4	0.00324565		2925.39	0.00105812		3515.38	-0.00923584		4105.38	0.00603675
565.6	0.05600054		1155.59	-0.00558845		1745.6	-0.00004978		2335.6	0.00434625		2925.59	0.00118965		3515.58	-0.0096776		4105.58	0.00676116
565.8	0.05623713		1155.79	-0.00585088		1745.8	0.00111101		2335.8	0.00518157		2925.79	0.00097869		3515.78	-0.00979709		4105.78	0.00695102
566	0.05689743		1155.99	-0.00590783		1746	0.00065478		2336	0.00661921		2925.99	0.00067765		3515.98	-0.00900383		4105.98	0.00648895
566.2	0.05744423		1156.19	-0.00601816		1746.2	-0.00091074		2336.2	0.00650726		2926.19	0.00062455		3516.18	-0.0087142		4106.18	0.00718264
566.4	0.05787936		1156.39	-0.00646625		1746.4	-0.00140621		2336.4	0.00651314		2926.39	0.00073404		3516.38	-0.00907855		4106.38	0.00699912
566.6	0.05826483		1156.59	-0.00567257		1746.6	-0.00179389		2336.6	0.00703466		2926.59	0.0009023		3516.58	-0.00946224		4106.58	0.00686045
566.8	0.05787953		1156.79	-0.00540596		1746.8	-0.0020123		2336.8	0.00718266		2926.79	0.00124944		3516.78	-0.00965592		4106.78	0.00627825
567	0.05733667		1156.99	-0.00502668		1747	-0.00180639		2337	0.00699068		2926.99	0.00206832		3516.98	-0.0105059		4106.98	0.00515151
567.2	0.0572304		1157.19	-0.00423439		1747.2	-0.00282272		2337.2	0.00625227		2927.19	0.00285858		3517.18	-0.01087726		4107.18	0.00487341
567.4	0.0560789		1157.39	-0.00404981		1747.4	-0.0024491		2337.4	0.00689712		2927.39	0.0025519		3517.38	-0.01104005		4107.38	0.00465306
567.6	0.05569721		1157.59	-0.00475887		1747.6	-0.00249313		2337.6	0.00667176		2927.59	0.00173747		3517.58	-0.01065773		4107.58	0.00432917
567.8	0.05551467		1157.79	-0.00487655		1747.8	-0.00223506		2337.8	0.0067921		2927.79	0.00134793		3517.78	-0.01064847		4107.78	0.00504215
568	0.05513358		1157.99	-0.00509894		1748	-0.00265056		2338	0.00776645		2927.99	0.00084166		3517.98	-0.01172385		4107.98	0.00484817
568.2	0.0547374		1158.19	-0.00534054		1748.2	-0.00300214		2338.2	0.00723244		2928.19	0.00070916		3518.18	-0.01279774		4108.18	0.00494451
568.4	0.05359407		1158.39	-0.00564282		1748.4	-0.00263873		2338.4	0.00729341		2928.39	0.00056967		3518.38	-0.01375221		4108.38	0.00533296
568.6	0.05211817		1158.59	-0.00527968		1748.6	-0.00260839		2338.6	0.00742199		2928.59	0.00039165		3518.58	-0.01518821		4108.58	0.00476348
568.8	0.05150485		1158.79	-0.00547218		1748.8	-0.00325532		2338.8	0.00673016		2928.79	0.00111578		3518.78	-0.01630994		4108.78	0.00561479
569	0.05271941		1158.99	-0.00608656		1749	-0.00369708		2339	0.00698604		2928.99	0.0003311		3518.98	-0.01666976		4108.98	0.00612926
569.2	0.05394188		1159.19	-0.00537651		1749.2	-0.00312903		2339.2	0.00788388		2929.19	0.00055827		3519.18	-0.01667074		4109.18	0.00729404
569.4	0.05408996		1159.39	-0.00533648		1749.4	-0.00184556		2339.4	0.00836753		2929.39	0.00010538		3519.38	-0.01748444		4109.38	0.0085101
569.6	0.0532918		1159.59	-0.00410344		1749.6	-0.0015985		2339.6	0.00844433		2929.59	0.00001589		3519.58	-0.01684477		4109.58	0.00856157
569.8	0.05309645		1159.79	-0.00341733		1749.8	-0.00083129		2339.8	0.00871269		2929.79	-0.00100865		3519.78	-0.0160835		4109.78	0.00841182
570	0.05406034		1159.99	-0.00262265		1750	-0.00162073		2340	0.00930834		2929.99	-0.00097091		3519.98	-0.01557475		4109.98	0.00790748
570.2	0.0542998		1160.19	-0.00198044		1750.2	-0.00126836		2340.2	0.00944052		2930.19	-0.00037752		3520.18	-0.0147066		4110.18	0.00872708
570.4	0.05466932		1160.39	-0.00160006		1750.4	-0.00069326		2340.4	0.00946099		2930.39	0.00011502		3520.38	-0.01409571		4110.38	0.00893274
570.6	0.05464049		1160.59	-0.00004723		1750.6	-0.00138805		2340.6	0.00905685		2930.59	0.00127861		3520.58	-0.01390351		4110.58	0.0095497
570.8	0.0542418		1160.79	0.0006322		1750.8	-0.0015014		2340.8	0.00803573		2930.79	0.00208228		3520.78	-0.01392294		4110.78	0.00933275
571	0.05476625		1160.99	0.00116019		1751	-0.00188306		2341	0.0071318		2930.99	0.00296721		3520.98	-0.01373626		4110.98	0.00893519
571.2	0.05506111		1161.19	0.0016377		1751.2	-0.00223843		2341.2	0.00693461		2931.19	0.00388157		3521.18	-0.01299079		4111.18	0.00875499
571.4	0.05494332		1161.39	0.00137332		1751.4	-0.00141726		2341.4	0.00654403		2931.39	0.00308937		3521.38	-0.01199834		4111.38	0.008259
571.6	0.05537664		1161.59	0.00080299		1751.6	-0.00102499		2341.6	0.00684243		2931.59	0.0029047		3521.58	-0.01026951		4111.58	0.00731769
571.8	0.05550963		1161.79	0.00090162		1751.8	-0.00107004		2341.8	0.00686006		2931.79	0.00288689		3521.78	-0.00985672		4111.78	0.00695753
572	0.05591191		1161.99	0.00026264		1752	-0.00154107		2342	0.00686847		2931.99	0.0026002		3521.98	-0.01034879		4111.98	0.00588829
572.2	0.05500157		1162.19	-0.00058403		1752.2	-0.00062627		2342.2	0.00640451		2932.19	0.00227978		3522.18	-0.01011568		4112.18	0.00540757
572.4	0.0540713		1162.39	0.00008661		1752.4	0.00011151		2342.4	0.00640125		2932.39	0.00165505		3522.38	-0.01022487		4112.38	0.00492272
572.6	0.0543712		1162.59	-0.00020615		1752.6	0.0002392		2342.6	0.00621337		2932.59	0.00081427		3522.58	-0.01042328		4112.58	0.00466261
572.8	0.05453642		1162.79	-0.00144191		1752.8	0.00000548		2342.8	0.00660169		2932.79	0.00068839		3522.78	-0.01035716		4112.78	0.00549137
573	0.05477488		1162.99	-0.00285949		1753	0.00039058		2343	0.0072322		2932.99	-0.00093476		3522.98	-0.00984286		4112.98	0.00505749
573.2	0.05399164		1163.19	-0.00295814		1753.2	0.00123037		2343.2	0.00742991		2933.19	-0.00108015		3523.18	-0.0095042		4113.18	0.00595265
573.4	0.05284811		1163.39	-0.00306084		1753.4	0.00111562		2343.4	0.00727923		2933.39	-0.00151521		3523.38	-0.01013115		4113.38	0.00686399
573.6	0.05249271		1163.59	-0.00330208		1753.6	0.00103792		2343.6	0.00738279		2933.59	-0.00268416		3523.58	-0.00955196		4113.58	0.00669397
573.8	0.05196715		1163.79	-0.00303544		1753.8	0.00078357		2343.8	0.00770162		2933.79	-0.00348898		3523.78	-0.0103292		4113.78	0.00666582
574	0.05194992		1163.99	-0.00216843		1754	-0.00018735		2344	0.00802607		2933.99	-0.00276975		3523.98	-0.01040081		4113.98	0.00686382
574.2	0.05133229		1164.19	-0.00217573		1754.2	-0.00063331		2344.2	0.00817817		2934.19	-0.00191855		3524.18	-0.01030205		4114.18	0.00780292
574.4	0.05085468		1164.39	-0.00310901		1754.4	-0.00121257		2344.4	0.00829767		2934.39	-0.00127062		3524.38	-0.01084632		4114.38	0.00842153
574.6	0.05072505		1164.59	-0.00307698		1754.6	-0.00239256		2344.6	0.00834295		2934.59	-0.00056536		3524.58	-0.0122828		4114.58	0.00881379
574.8	0.05049308		1164.79	-0.00334159		1754.8	-0.00273986		2344.8	0.00862724		2934.79	-0.00012939		3524.78	-0.01273559		4114.78	0.00845514
575	0.05126432		1164.99	-0.0032827		1755	-0.00285293		2345	0.00876186		2934.99	0.00104014		3524.98	-0.01264833		4114.98	0.00788381
575.2	0.05125087		1165.19	-0.00319388		1755.2	-0.00283958		2345.2	0.00862989		2935.19	0.00132093		3525.18	-0.01258042		4115.18	0.00700835
575.4	0.05136818		1165.39	-0.0042056		1755.4	-0.00240169		2345.4	0.00890585		2935.39	0.00038925		3525.38	-0.01261109		4115.38	0.00628613
575.6	0.05152033		1165.59	-0.00405468		1755.6	-0.00264305		2345.6	0.00923393		2935.59	0.00077103		3525.58	-0.01236925		4115.58	0.00531508
575.8	0.05187313		1165.79	-0.00409022		1755.8	-0.00268665		2345.8	0.00864942		2935.79	0.00098935		3525.78	-0.0123272		4115.78	0.00460547
576	0.05275847		1165.99	-0.00437852		1756	-0.00311967		2346	0.00842598		2935.99	0.00110531		3525.98	-0.01226494		4115.98	0.00390276
576.2	0.05158408		1166.19	-0.00449782		1756.2	-0.00192276		2346.2	0.00748699		2936.19	0.00138554		3526.18	-0.01180707		4116.18	0.0033804
576.4	0.0521986		1166.39	-0.00406168		1756.4	-0.001913		2346.4	0.00626036		2936.39	0.00177104		3526.38	-0.01082809		4116.38	0.00303752
576.6	0.0528413		1166.59	-0.00413296		1756.6	-0.00180419		2346.6	0.00592658		2936.59	0.00117005		3526.58	-0.01069114		4116.58	0.0032145
576.8	0.05293596		1166.79	-0.00452462		1756.8	-0.00125063		2346.8	0.00513922		2936.79	0.00043981		3526.78	-0.01059311		4116.78	0.00285931
577	0.05307145		1166.99	-0.00465541		1757	-0.0006677		2347	0.004666		2936.99	-0.00011982		3526.98	-0.0105668		4116.98	0.00278783
577.2	0.05330629		1167.19	-0.00394284		1757.2	-0.00030654		2347.2	0.00425446		2937.19	-0.00025965		3527.18	-0.01044812		4117.18	0.00361913
577.4	0.05312507		1167.39	-0.00334098		1757.4	-0.00062555		2347.4	0.00337838		2937.39	-0.00042447		3527.38	-0.01156834		4117.38	0.00419471
577.6	0.0537265		1167.59	-0.00334692		1757.6	-0.00003045		2347.6	0.00373732		2937.59	-0.00020738		3527.58	-0.01155205		4117.58	0.00426071
577.8	0.05365088		1167.79	-0.00308289		1757.8	-0.00034952		2347.8	0.00399283		2937.79	0.0004636		3527.78	-0.01217163		4117.78	0.00510643
578	0.05372703		1167.99	-0.00283317		1758	-0.00071679		2348	0.00414731		2937.99	0.00139523		3527.98	-0.01187624		4117.98	0.00621006
578.2	0.05306726		1168.19	-0.00347737		1758.2	-0.00021398		2348.2	0.00435687		2938.19	0.0020485		3528.18	-0.01209077		4118.18	0.00663746
578.4	0.05270902		1168.39	-0.00399166		1758.4	0.00020689		2348.4	0.00457987		2938.39	0.00165608		3528.38	-0.01206721		4118.38	0.00680594
578.6	0.05365553		1168.59	-0.00371279		1758.6	0.00010825		2348.6	0.00459631		2938.59	0.00156496		3528.58	-0.01259138		4118.58	0.007018
578.8	0.05376948		1168.79	-0.00343195		1758.8	0.00068221		2348.8	0.00434071		2938.79	0.0016712		3528.78	-0.01219277		4118.78	0.00713888
579	0.05338907		1168.99	-0.00380175		1759	0.00118509		2349	0.00417155		2938.99	0.00133108		3528.98	-0.01214827		4118.98	0.00688818
579.2	0.05349235		1169.19	-0.00369502		1759.2	0.00185473		2349.2	0.00383171		2939.19	0.00022527		3529.18	-0.01302067		4119.18	0.00763979
579.4	0.05318921		1169.39	-0.00452871		1759.4	0.00226243		2349.4	0.00472904		2939.39	-0.00015282		3529.38	-0.01318847		4119.38	0.00820726
579.6	0.05310063		1169.59	-0.00451043		1759.6	0.00162945		2349.6	0.00478022		2939.59	0.00000753		3529.58	-0.01266821		4119.58	0.00896258
579.8	0.051989		1169.79	-0.00536151		1759.8	0.00175669		2349.8	0.00482297		2939.79	0.00045313		3529.78	-0.01224335		4119.78	0.00895905
580	0.05133058		1169.99	-0.00577852		1760	0.00215423		2350	0.00527084		2939.99	-0.00053947		3529.98	-0.01213915		4119.98	0.00807968
580.2	0.05011993		1170.19	-0.00547674		1760.2	0.00278655		2350.2	0.00439494		2940.19	-0.00104151		3530.18	-0.01097897		4120.18	0.00820764
580.4	0.05118134		1170.39	-0.00551121		1760.4	0.00314957		2350.4	0.00441258		2940.39	-0.0018913		3530.38	-0.0104097		4120.38	0.00732695
580.6	0.05090669		1170.59	-0.0048856		1760.6	0.00284824		2350.6	0.00425702		2940.59	-0.0028185		3530.58	-0.01001117		4120.58	0.00779787
580.8	0.05085417		1170.79	-0.00478235		1760.8	0.0017468		2350.8	0.00374364		2940.79	-0.00330656		3530.78	-0.0096932		4120.78	0.00685199
581	0.05109085		1170.99	-0.00479815		1761	0.00114168		2351	0.00375824		2940.99	-0.00321025		3530.98	-0.01008097		4120.98	0.00634219
581.2	0.05104884		1171.19	-0.00403006		1761.2	0.00064893		2351.2	0.00370403		2941.19	-0.00309476		3531.18	-0.01040939		4121.18	0.00604238
581.4	0.05110262		1171.39	-0.00403536		1761.4	0.00064915		2351.4	0.00359939		2941.39	-0.00301823		3531.38	-0.01127893		4121.38	0.00541999
581.6	0.05174313		1171.59	-0.00359313		1761.6	0.00003152		2351.6	0.00421717		2941.59	-0.00205421		3531.58	-0.01098971		4121.58	0.00509893
581.8	0.05212401		1171.79	-0.00310428		1761.8	-0.00076627		2351.8	0.00351236		2941.79	-0.00131027		3531.78	-0.01078914		4121.78	0.00515698
582	0.05221262		1171.99	-0.00301031		1762	-0.00151329		2352	0.00385631		2941.99	-0.00053925		3531.98	-0.01071716		4121.98	0.0051892
582.2	0.05155732		1172.19	-0.00290815		1762.2	-0.00154111		2352.2	0.00351019		2942.19	-0.00029237		3532.18	-0.01095436		4122.18	0.00455185
582.4	0.0516761		1172.39	-0.00338287		1762.4	-0.00150665		2352.4	0.00327398		2942.39	-0.00125787		3532.38	-0.01102615		4122.38	0.00460193
582.6	0.05197124		1172.59	-0.00332908		1762.6	-0.00129615		2352.6	0.00313445		2942.59	-0.00062895		3532.58	-0.01089536		4122.58	0.00388314
582.8	0.05122931		1172.79	-0.00343144		1762.8	-0.00065698		2352.8	0.00360251		2942.79	0.00018991		3532.78	-0.01096097		4122.78	0.00420874
583	0.0508604		1172.99	-0.00350359		1763	-0.00030736		2353	0.00396781		2942.99	0.00004263		3532.98	-0.01188454		4122.98	0.00490515
583.2	0.05119725		1173.19	-0.00299829		1763.2	-0.0001993		2353.2	0.00448572		2943.19	0.0006339		3533.18	-0.01190961		4123.18	0.00557638
583.4	0.05106139		1173.39	-0.00321657		1763.4	-0.0000742		2353.4	0.00543125		2943.39	0.00118472		3533.38	-0.01144701		4123.38	0.00568906
583.6	0.05023038		1173.59	-0.00288254		1763.6	-0.00039958		2353.6	0.00589012		2943.59	0.00077203		3533.58	-0.01150467		4123.58	0.00564392
583.8	0.04896349		1173.79	-0.00334418		1763.8	-0.00011337		2353.8	0.00598368		2943.79	0.00041058		3533.78	-0.01193176		4123.78	0.00476244
584	0.04911411		1173.99	-0.00327766		1764	0.00021396		2354	0.00677749		2943.99	-0.00054872		3533.98	-0.01223646		4123.98	0.00350488
584.2	0.04987092		1174.19	-0.00306906		1764.2	-0.00044137		2354.2	0.00700687		2944.19	-0.00057894		3534.18	-0.01179599		4124.18	0.00398656
584.4	0.0507137		1174.39	-0.00250953		1764.4	-0.00043064		2354.4	0.00753069		2944.39	-0.00152242		3534.38	-0.0124066		4124.38	0.00362289
584.6	0.05032848		1174.59	-0.00189702		1764.6	-0.00083947		2354.6	0.00769281		2944.59	-0.00191839		3534.58	-0.01296659		4124.58	0.00369544
584.8	0.05008315		1174.79	-0.00159625		1764.8	-0.00157996		2354.8	0.00741318		2944.79	-0.00222674		3534.78	-0.01278647		4124.78	0.00337045
585	0.04953771		1174.99	-0.00189464		1765	-0.00217223		2355	0.00728		2944.99	-0.00196749		3534.98	-0.01335369		4124.98	0.00368342
585.2	0.04901944		1175.19	-0.00219831		1765.2	-0.00279428		2355.2	0.00724234		2945.19	-0.00206178		3535.18	-0.01238753		4125.18	0.00370389
585.4	0.04932126		1175.39	-0.00235717		1765.4	-0.00288977		2355.4	0.00755754		2945.39	-0.00191877		3535.38	-0.01205301		4125.38	0.003758
585.6	0.0495266		1175.59	-0.00159642		1765.6	-0.00333088		2355.6	0.00731552		2945.59	-0.00155856		3535.58	-0.01156265		4125.58	0.00393597
585.8	0.05006502		1175.79	-0.00251795		1765.8	-0.00320365		2355.8	0.00662176		2945.79	-0.00142353		3535.78	-0.01131542		4125.78	0.00475025
586	0.05046405		1175.99	-0.00300451		1766	-0.00322477		2356	0.00721271		2945.99	-0.00160557		3535.98	-0.01145336		4125.98	0.00555221
586.2	0.0494257		1176.19	-0.00416081		1766.2	-0.00274062		2356.2	0.00612714		2946.19	-0.00128098		3536.18	-0.01106021		4126.18	0.00566337
586.4	0.04914905		1176.39	-0.00431291		1766.4	-0.00199477		2356.4	0.00579752		2946.39	-0.00165263		3536.38	-0.0107757		4126.38	0.00613461
586.6	0.04813912		1176.59	-0.00483738		1766.6	-0.00135129		2356.6	0.00564222		2946.59	-0.00097515		3536.58	-0.01082303		4126.58	0.00601433
586.8	0.04797006		1176.79	-0.00562066		1766.8	-0.00075916		2356.8	0.0056311		2946.79	-0.00104985		3536.78	-0.01120294		4126.78	0.00646509
587	0.04815386		1176.99	-0.00567442		1767	-0.00092226		2357	0.00488035		2946.99	-0.00100924		3536.98	-0.01108326		4126.98	0.00607542
587.2	0.04749472		1177.19	-0.0055483		1767.2	-0.00160466		2357.2	0.0051824		2947.19	-0.00098936		3537.18	-0.01039867		4127.18	0.00592057
587.4	0.04784425		1177.39	-0.00552449		1767.4	-0.00194805		2357.4	0.00465656		2947.39	-0.00136508		3537.38	-0.01050312		4127.38	0.00521694
587.6	0.04708761		1177.59	-0.00650802		1767.6	-0.00230585		2357.6	0.00404573		2947.59	-0.00230983		3537.58	-0.01099811		4127.58	0.00534646
587.8	0.04711356		1177.79	-0.00776484		1767.8	-0.00194236		2357.8	0.00476542		2947.79	-0.00215573		3537.78	-0.01128675		4127.78	0.00482723
588	0.04753228		1177.99	-0.00755659		1768	-0.00142848		2358	0.0055125		2947.99	-0.00265955		3537.98	-0.01135866		4127.98	0.00426678
588.2	0.04823131		1178.19	-0.00752601		1768.2	-0.00127127		2358.2	0.005825		2948.19	-0.00259525		3538.18	-0.01171257		4128.18	0.00493228
588.4	0.04880568		1178.39	-0.00771257		1768.4	-0.00017976		2358.4	0.00497958		2948.39	-0.00258293		3538.38	-0.01251992		4128.38	0.0047722
588.6	0.04949097		1178.59	-0.00769869		1768.6	-0.00045966		2358.6	0.00504086		2948.59	-0.00185284		3538.58	-0.01333378		4128.58	0.00495156
588.8	0.0491125		1178.79	-0.00767017		1768.8	-0.00178066		2358.8	0.0045507		2948.79	-0.00116878		3538.78	-0.01282389		4128.78	0.00618831
589	0.04994281		1178.99	-0.00752521		1769	-0.00223042		2359	0.0051104		2948.99	-0.0007027		3538.98	-0.01287368		4128.98	0.00607207
589.2	0.05100172		1179.19	-0.00782693		1769.2	-0.00219489		2359.2	0.00537577		2949.19	-0.00067214		3539.18	-0.0127019		4129.18	0.00528505
589.4	0.05165061		1179.39	-0.00658849		1769.4	-0.00177206		2359.4	0.00587528		2949.39	0.0001725		3539.38	-0.01279007		4129.38	0.00547641
589.6	0.05185003		1179.59	-0.00626881		1769.6	-0.00152573		2359.6	0.00600015		2949.59	0.00031672		3539.58	-0.01264501		4129.58	0.00522179
589.8	0.05232282		1179.79	-0.00676598		1769.8	-0.00143772		2359.8	0.00540782		2949.79	0.00047705		3539.78	-0.01253624		4129.78	0.00514941
590	0.05281547		1179.99	-0.00527827		1770	-0.00188654		2360	0.00550867		2949.99	0.00065133		3539.98	-0.0120213		4129.98	0.00587746
590.2	0.05219636		1180.19	-0.00508656		1770.2	-0.00189826		2360.2	0.00533221		2950.19	0.00031335		3540.18	-0.01243398		4130.18	0.00597602
590.4	0.05227666		1180.39	-0.00338323		1770.4	-0.0018716		2360.4	0.00594743		2950.39	0.00026316		3540.38	-0.01304078		4130.38	0.00576247
590.6	0.05255615		1180.59	-0.00380439		1770.6	-0.00218867		2360.6	0.00559078		2950.59	0.0006146		3540.58	-0.01322739		4130.58	0.00489174
590.8	0.05303886		1180.79	-0.00436368		1770.8	-0.0021424		2360.8	0.00548003		2950.79	0.00027775		3540.78	-0.01399281		4130.78	0.00320702
591	0.05266319		1180.99	-0.00389238		1771	-0.00311019		2361	0.00541449		2950.99	0.00011811		3540.98	-0.01391727		4130.98	0.00248651
591.2	0.05150763		1181.19	-0.00369551		1771.2	-0.00350924		2361.2	0.00573386		2951.19	-0.001234		3541.18	-0.01339137		4131.18	0.00280557
591.4	0.05125675		1181.39	-0.00460734		1771.4	-0.00384843		2361.4	0.00569396		2951.39	-0.00167906		3541.38	-0.01295652		4131.38	0.00262801
591.6	0.04987346		1181.59	-0.00572984		1771.6	-0.00385696		2361.6	0.00527202		2951.59	-0.00167574		3541.58	-0.01270829		4131.58	0.00337504
591.8	0.04908057		1181.79	-0.0054735		1771.8	-0.00335603		2361.8	0.0053224		2951.79	-0.00185998		3541.78	-0.01278503		4131.78	0.00326042
592	0.04894732		1181.99	-0.00512476		1772	-0.00328456		2362	0.00479715		2951.99	-0.00133762		3541.98	-0.01228753		4131.98	0.00372022
592.2	0.04902301		1182.19	-0.00497416		1772.2	-0.00398046		2362.2	0.00426813		2952.19	-0.00123272		3542.18	-0.01247099		4132.18	0.00430719
592.4	0.04854848		1182.39	-0.00472703		1772.4	-0.00463662		2362.4	0.00341289		2952.39	-0.0009934		3542.38	-0.01341761		4132.38	0.00432868
592.6	0.04881512		1182.59	-0.00435968		1772.6	-0.00546381		2362.6	0.00355941		2952.59	-0.00215223		3542.58	-0.01362661		4132.58	0.00501864
592.8	0.04832677		1182.79	-0.00444989		1772.8	-0.00520102		2362.8	0.00355293		2952.79	-0.00218474		3542.78	-0.013249		4132.78	0.00623389
593	0.04854584		1182.99	-0.00469492		1773	-0.00412919		2363	0.00314813		2952.99	-0.00134836		3542.98	-0.01293711		4132.98	0.00632533
593.2	0.04709851		1183.19	-0.00504495		1773.2	-0.00430743		2363.2	0.00211104		2953.19	-0.00073495		3543.18	-0.0122519		4133.18	0.00625358
593.4	0.04638133		1183.39	-0.00476358		1773.4	-0.0043098		2363.4	0.00236721		2953.39	-0.00052384		3543.38	-0.01075131		4133.38	0.00706602
593.6	0.04650905		1183.59	-0.00611517		1773.6	-0.00464638		2363.6	0.00200599		2953.59	-0.0011753		3543.58	-0.01066068		4133.58	0.00708819
593.8	0.04739152		1183.79	-0.00534567		1773.8	-0.00515338		2363.8	0.0015499		2953.79	-0.00156495		3543.78	-0.01002659		4133.78	0.00771019
594	0.04868354		1183.99	-0.00478709		1774	-0.00516554		2364	0.00258186		2953.99	-0.00192376		3543.98	-0.00935176		4133.98	0.00888533
594.2	0.04942536		1184.19	-0.00516246		1774.2	-0.00468144		2364.2	0.00347898		2954.19	-0.00212825		3544.18	-0.01010396		4134.18	0.00849397
594.4	0.05032937		1184.39	-0.00531925		1774.4	-0.00366274		2364.4	0.00370767		2954.39	-0.00165294		3544.38	-0.01057449		4134.38	0.00756342
594.6	0.05145893		1184.59	-0.00643678		1774.6	-0.00331244		2364.6	0.00400449		2954.59	-0.00150461		3544.58	-0.01064963		4134.58	0.0070161
594.8	0.05149664		1184.79	-0.00725152		1774.8	-0.0033369		2364.8	0.00385175		2954.79	-0.00176158		3544.78	-0.01141937		4134.78	0.00626839
595	0.05146875		1184.99	-0.00715065		1775	-0.00320604		2365	0.00423999		2954.99	-0.00223957		3544.98	-0.01131184		4134.98	0.00598379
595.2	0.05119223		1185.19	-0.00840988		1775.2	-0.00221539		2365.2	0.00471863		2955.19	-0.00205581		3545.18	-0.01056181		4135.18	0.0062981
595.4	0.05203081		1185.39	-0.00862702		1775.4	-0.00272927		2365.4	0.00521677		2955.39	-0.00191469		3545.38	-0.01077972		4135.38	0.00612804
595.6	0.05203859		1185.59	-0.00735162		1775.6	-0.00310739		2365.6	0.00478199		2955.59	-0.00116531		3545.58	-0.01024087		4135.58	0.00602044
595.8	0.05179464		1185.79	-0.00722927		1775.8	-0.00267209		2365.8	0.00451441		2955.79	-0.00183859		3545.78	-0.01094244		4135.78	0.00657897
596	0.05172471		1185.99	-0.0071075		1776	-0.00322712		2366	0.00412533		2955.99	-0.00085097		3545.98	-0.01100866		4135.98	0.00619805
596.2	0.05151412		1186.19	-0.00699405		1776.2	-0.00304593		2366.2	0.00391574		2956.19	-0.0012139		3546.18	-0.01159978		4136.18	0.00591143
596.4	0.05134401		1186.39	-0.00731813		1776.4	-0.00275872		2366.4	0.00344529		2956.39	-0.00094025		3546.38	-0.01186434		4136.38	0.00565681
596.6	0.05219501		1186.59	-0.00767687		1776.6	-0.00187913		2366.6	0.0031685		2956.59	-0.00050445		3546.58	-0.01147003		4136.58	0.00527684
596.8	0.05198543		1186.79	-0.00713659		1776.8	-0.00116049		2366.8	0.00220245		2956.79	0.00080264		3546.78	-0.01145762		4136.78	0.00583331
597	0.05156976		1186.99	-0.00669737		1777	-0.00118353		2367	0.00190608		2956.99	0.00112074		3546.98	-0.01153882		4136.98	0.0051665
597.2	0.05105674		1187.19	-0.0059522		1777.2	-0.00197531		2367.2	0.00219364		2957.19	0.00041414		3547.18	-0.01099101		4137.18	0.00434247
597.4	0.05168182		1187.39	-0.00617701		1777.4	-0.00264578		2367.4	0.00248198		2957.39	0.00039301		3547.38	-0.01080908		4137.38	0.00432568
597.6	0.05192515		1187.59	-0.00552105		1777.6	-0.00294117		2367.6	0.00294845		2957.59	0.00043808		3547.58	-0.01185665		4137.58	0.00454466
597.8	0.05226454		1187.79	-0.00370338		1777.8	-0.00281837		2367.8	0.0030207		2957.79	0.00046149		3547.78	-0.01191355		4137.78	0.00504067
598	0.05225885		1187.99	-0.00250275		1778	-0.00155586		2368	0.00393		2957.99	-0.00032062		3547.98	-0.01145642		4137.98	0.00457802
598.2	0.05193136		1188.19	-0.00173734		1778.2	-0.00146283		2368.2	0.00420987		2958.19	-0.0002814		3548.18	-0.01204794		4138.18	0.00434711
598.4	0.05177706		1188.39	-0.00160957		1778.4	-0.001643		2368.4	0.00447924		2958.39	-0.00049724		3548.38	-0.01277303		4138.38	0.00435462
598.6	0.05176638		1188.59	-0.00063695		1778.6	-0.00229047		2368.6	0.00455286		2958.59	0.0002107		3548.58	-0.01342349		4138.58	0.00429983
598.8	0.05140891		1188.79	-0.00101635		1778.8	-0.00219441		2368.8	0.00432293		2958.79	-0.00020425		3548.78	-0.0132302		4138.78	0.00408227
599	0.05182682		1188.99	-0.00045346		1779	-0.00140499		2369	0.00498458		2958.99	-0.000807		3548.98	-0.01362902		4138.98	0.00455395
599.2	0.05163432		1189.19	-0.0008757		1779.2	-0.00056897		2369.2	0.00491088		2959.19	-0.00048113		3549.18	-0.01339374		4139.18	0.00525464
599.4	0.05239727		1189.39	-0.00137643		1779.4	-0.00164928		2369.4	0.00527978		2959.39	-0.00146618		3549.38	-0.01282741		4139.38	0.0058241
599.6	0.05175165		1189.59	-0.00134624		1779.6	-0.00189852		2369.6	0.00469269		2959.59	-0.00226199		3549.58	-0.01297432		4139.58	0.00698352
599.8	0.05117068		1189.79	-0.0029308		1779.8	-0.00231072		2369.8	0.00385471		2959.79	-0.003091		3549.78	-0.01355716		4139.78	0.0071512
600	0.05159309		1189.99	-0.00320485		1780	-0.00217115		2370	0.0036554		2959.99	-0.00262893		3549.98	-0.01341075		4139.98	0.00691187
600.2	0.05206668		1190.19	-0.00387016		1780.2	-0.00210476		2370.2	0.00424261		2960.19	-0.00220808		3550.18	-0.01351949		4140.18	0.00672665
600.4	0.05270757		1190.39	-0.00493381		1780.4	-0.00219373		2370.4	0.00450789		2960.39	-0.00174308		3550.38	-0.01320618		4140.38	0.00626392
600.6	0.05273198		1190.59	-0.00519854		1780.6	-0.00279928		2370.6	0.00393348		2960.59	-0.00063628		3550.58	-0.01343631		4140.58	0.00635001
600.8	0.05318908		1190.79	-0.00531119		1780.8	-0.00318252		2370.8	0.00410601		2960.79	-0.00055944		3550.78	-0.01394167		4140.78	0.00689779
601	0.0535833		1190.99	-0.00590456		1781	-0.00407644		2371	0.00481028		2960.99	-0.00106048		3550.98	-0.01409432		4140.98	0.00630823
601.2	0.05356347		1191.19	-0.00627788		1781.2	-0.00454162		2371.2	0.00531499		2961.19	-0.00093944		3551.18	-0.01377116		4141.18	0.00666709
601.4	0.05312487		1191.39	-0.00624323		1781.4	-0.00526026		2371.4	0.00553469		2961.39	0.00023632		3551.38	-0.01426001		4141.38	0.00691771
601.6	0.05270269		1191.59	-0.00615203		1781.6	-0.00458601		2371.6	0.00649694		2961.59	0.0000556		3551.58	-0.01522983		4141.58	0.00719818
601.8	0.05288782		1191.79	-0.0057675		1781.8	-0.0039895		2371.8	0.00553478		2961.79	-0.00016675		3551.78	-0.01559599		4141.78	0.00712819
602	0.05326954		1191.99	-0.005663		1782	-0.00363289		2372	0.00560714		2961.99	-0.00129738		3551.98	-0.01531366		4141.98	0.00676373
602.2	0.05260341		1192.19	-0.00575758		1782.2	-0.00441753		2372.2	0.00554001		2962.19	-0.00180477		3552.18	-0.01630995		4142.18	0.00611416
602.4	0.05210153		1192.39	-0.0055909		1782.4	-0.00407336		2372.4	0.00568589		2962.39	-0.00225582		3552.38	-0.01707546		4142.38	0.00522516
602.6	0.0504053		1192.59	-0.00501517		1782.6	-0.00352266		2372.6	0.00560221		2962.59	-0.00192249		3552.58	-0.01702057		4142.58	0.00449965
602.8	0.04945852		1192.79	-0.00519213		1782.8	-0.00256482		2372.8	0.00564513		2962.79	-0.00229256		3552.78	-0.01624252		4142.78	0.00483488
603	0.04954442		1192.99	-0.00452753		1783	-0.00195905		2373	0.00474495		2962.99	-0.00182727		3552.98	-0.01592887		4142.98	0.00479941
603.2	0.04878826		1193.19	-0.00478552		1783.2	-0.00184365		2373.2	0.003881		2963.19	-0.00191521		3553.18	-0.01497141		4143.18	0.00457661
603.4	0.04858748		1193.39	-0.00467604		1783.4	-0.00221895		2373.4	0.0038325		2963.39	-0.0037274		3553.38	-0.01463988		4143.38	0.00469296
603.6	0.04752613		1193.59	-0.00385842		1783.6	-0.001988		2373.6	0.0037171		2963.59	-0.00310834		3553.58	-0.01441503		4143.58	0.00479489
603.8	0.04738013		1193.79	-0.00433123		1783.8	-0.00123271		2373.8	0.00378335		2963.79	-0.00280595		3553.78	-0.01469219		4143.78	0.0033596
604	0.04706274		1193.99	-0.00402483		1784	-0.000227		2374	0.00358345		2963.99	-0.00202865		3553.98	-0.01473747		4143.98	0.00315312
604.2	0.04678839		1194.19	-0.00468237		1784.2	-0.00020295		2374.2	0.00340165		2964.19	-0.00101148		3554.18	-0.01423303		4144.18	0.00366123
604.4	0.04658671		1194.39	-0.00446728		1784.4	-0.00003975		2374.4	0.00366109		2964.39	-0.00013079		3554.38	-0.01360899		4144.38	0.00408931
604.6	0.04671162		1194.59	-0.00394368		1784.6	-0.00192191		2374.6	0.00333358		2964.59	0.00062522		3554.58	-0.01308839		4144.58	0.00435762
604.8	0.04745358		1194.79	-0.00468398		1784.8	-0.0025007		2374.8	0.0041636		2964.79	0.00073793		3554.78	-0.01254563		4144.78	0.00485142
605	0.04817805		1194.99	-0.00484548		1785	-0.00415366		2375	0.00462835		2964.99	0.00081832		3554.98	-0.01214983		4144.98	0.0056151
605.2	0.04844284		1195.19	-0.0050791		1785.2	-0.00520488		2375.2	0.0044535		2965.19	0.00099335		3555.18	-0.0117098		4145.18	0.00662669
605.4	0.04920825		1195.39	-0.00563346		1785.4	-0.00528317		2375.4	0.00440953		2965.39	0.0009687		3555.38	-0.01129963		4145.38	0.00645022
605.6	0.04975091		1195.59	-0.00545901		1785.6	-0.0055207		2375.6	0.00453581		2965.59	0.00094987		3555.58	-0.01197622		4145.58	0.00663619
605.8	0.05149972		1195.79	-0.00588834		1785.8	-0.00543271		2375.8	0.0030896		2965.79	0.00122321		3555.78	-0.01180003		4145.78	0.00648922
606	0.05164739		1195.99	-0.00550312		1786	-0.00598296		2376	0.00399213		2965.99	0.00039404		3555.98	-0.01173491		4145.98	0.00609467
606.2	0.05120502		1196.19	-0.0059071		1786.2	-0.00534759		2376.2	0.00430227		2966.19	0.00035364		3556.18	-0.0120991		4146.18	0.00509624
606.4	0.05084683		1196.39	-0.00613638		1786.4	-0.00468154		2376.4	0.00449775		2966.39	0.00034041		3556.38	-0.01201825		4146.38	0.00466299
606.6	0.05046337		1196.59	-0.00746772		1786.6	-0.0050673		2376.6	0.0048285		2966.59	0.00064995		3556.58	-0.01195737		4146.58	0.00536451
606.8	0.05126004		1196.79	-0.00758464		1786.8	-0.00420411		2376.8	0.00418562		2966.79	-0.00032555		3556.78	-0.01239359		4146.78	0.00562505
607	0.05194523		1196.99	-0.00789271		1787	-0.00477356		2377	0.00372642		2966.99	-0.00050337		3556.98	-0.01241547		4146.98	0.00525598
607.2	0.05137349		1197.19	-0.00817187		1787.2	-0.00490218		2377.2	0.00387803		2967.19	-0.00137258		3557.18	-0.01284897		4147.18	0.00530731
607.4	0.05060978		1197.39	-0.00840917		1787.4	-0.00459583		2377.4	0.00464954		2967.39	-0.00193449		3557.38	-0.01412078		4147.38	0.00559621
607.6	0.05031696		1197.59	-0.00870369		1787.6	-0.00405751		2377.6	0.00460889		2967.59	-0.00098441		3557.58	-0.01425546		4147.58	0.00547702
607.8	0.05031255		1197.79	-0.00961747		1787.8	-0.00381052		2377.8	0.00359943		2967.79	-0.0011037		3557.78	-0.01505542		4147.78	0.00544194
608	0.05029127		1197.99	-0.00961307		1788	-0.0036832		2378	0.00324137		2967.99	-0.00133403		3557.98	-0.01402877		4147.98	0.00548411
608.2	0.05067177		1198.19	-0.00981096		1788.2	-0.00403321		2378.2	0.00226943		2968.19	-0.00133028		3558.18	-0.01334118		4148.18	0.00609051
608.4	0.05040896		1198.39	-0.00944463		1788.4	-0.00439181		2378.4	0.00278628		2968.39	-0.00135258		3558.38	-0.01281987		4148.38	0.00548379
608.6	0.05083079		1198.59	-0.00964019		1788.6	-0.00565119		2378.6	0.00243859		2968.59	-0.00125036		3558.58	-0.0122747		4148.58	0.00631578
608.8	0.05045034		1198.79	-0.00955505		1788.8	-0.00610483		2378.8	0.00373872		2968.79	-0.0018164		3558.78	-0.01269799		4148.78	0.00757298
609	0.05035172		1198.99	-0.00882935		1789	-0.00669742		2379	0.0039931		2968.99	-0.00234151		3558.98	-0.0119897		4148.98	0.00737906
609.2	0.05010644		1199.19	-0.00906196		1789.2	-0.00650828		2379.2	0.00364618		2969.19	-0.0024183		3559.18	-0.01164135		4149.18	0.00725919
609.4	0.04971566		1199.39	-0.00916899		1789.4	-0.00547126		2379.4	0.00424683		2969.39	-0.00216476		3559.38	-0.01148294		4149.38	0.00667642
609.6	0.04920032		1199.59	-0.00833297		1789.6	-0.0045896		2379.6	0.00410556		2969.59	-0.00131729		3559.58	-0.01254794		4149.58	0.00603397
609.8	0.04931172		1199.79	-0.00862315		1789.8	-0.00298227		2379.8	0.00408981		2969.79	-0.00164636		3559.78	-0.01270831		4149.78	0.00603788
610	0.04871131		1199.99	-0.00776509		1790	-0.00218839		2380	0.00471843		2969.99	-0.00230811		3559.98	-0.01305484		4149.98	0.00613107
610.2	0.04892916		1200.19	-0.00863392		1790.2	-0.00123291		2380.2	0.00436457		2970.19	-0.0025638		3560.18	-0.0131372		4150.18	0.00561451
610.4	0.04816595		1200.39	-0.00814723		1790.4	-0.00065798		2380.4	0.00528413		2970.39	-0.0033788		3560.38	-0.01281504		4150.38	0.00571457
610.6	0.04833332		1200.59	-0.00855502		1790.6	-0.00041921		2380.6	0.00559541		2970.59	-0.00303338		3560.58	-0.01320314		4150.58	0.00577354
610.8	0.04880288		1200.79	-0.00862672		1790.8	-0.00010249		2380.8	0.00527125		2970.79	-0.00280984		3560.78	-0.01363072		4150.78	0.00536306
611	0.04863418		1200.99	-0.00863393		1791	-0.00099219		2381	0.00551028		2970.99	-0.00261647		3560.98	-0.01412877		4150.98	0.00527738
611.2	0.04788798		1201.19	-0.00767971		1791.2	-0.00172301		2381.2	0.00510834		2971.19	-0.00129467		3561.18	-0.014068		4151.18	0.00509396
611.4	0.04816916		1201.39	-0.00706254		1791.4	-0.00269327		2381.4	0.00480168		2971.39	-0.00068794		3561.38	-0.01443972		4151.38	0.00501043
611.6	0.04837739		1201.59	-0.00692278		1791.6	-0.0029154		2381.6	0.00355965		2971.59	0.00007585		3561.58	-0.01374708		4151.58	0.00488647
611.8	0.04886861		1201.79	-0.00732623		1791.8	-0.00331541		2381.8	0.00283948		2971.79	0.0012634		3561.78	-0.01316096		4151.78	0.00509398
612	0.0499511		1201.99	-0.00600757		1792	-0.00259617		2382	0.00245208		2971.99	0.00125052		3561.98	-0.01253639		4151.98	0.00423658
612.2	0.04997308		1202.19	-0.00569		1792.2	-0.00325764		2382.2	0.00151025		2972.19	0.00148602		3562.18	-0.01230236		4152.18	0.00494083
612.4	0.05029805		1202.39	-0.005385		1792.4	-0.00372341		2382.4	0.00189383		2972.39	0.00180598		3562.38	-0.01168549		4152.38	0.00565215
612.6	0.05013034		1202.59	-0.00547057		1792.6	-0.00410653		2382.6	0.00191016		2972.59	0.00208639		3562.58	-0.0118121		4152.58	0.0066745
612.8	0.04988495		1202.79	-0.00471306		1792.8	-0.00465696		2382.8	0.00323918		2972.79	0.00161466		3562.78	-0.0122124		4152.78	0.00659612
613	0.05011975		1202.99	-0.00537398		1793	-0.00359652		2383	0.00264561		2972.99	0.00208188		3562.98	-0.01323415		4152.98	0.00622879
613.2	0.05019335		1203.19	-0.00670754		1793.2	-0.00294905		2383.2	0.00301805		2973.19	0.00109671		3563.18	-0.0140581		4153.18	0.00672363
613.4	0.04991727		1203.39	-0.00738613		1793.4	-0.00209067		2383.4	0.00358663		2973.39	0.00032165		3563.38	-0.01445364		4153.38	0.00571736
613.6	0.0506298		1203.59	-0.00744377		1793.6	-0.00169837		2383.6	0.00423464		2973.59	-0.00027247		3563.58	-0.01499459		4153.58	0.00531011
613.8	0.0494886		1203.79	-0.00741116		1793.8	-0.00175723		2383.8	0.00497367		2973.79	-0.00093073		3563.78	-0.01438056		4153.78	0.00612264
614	0.04948441		1203.99	-0.00804418		1794	-0.00238076		2384	0.00408171		2973.99	-0.00099185		3563.98	-0.01417993		4153.98	0.00610478
614.2	0.04878811		1204.19	-0.00823775		1794.2	-0.002589		2384.2	0.00425213		2974.19	-0.00078427		3564.18	-0.01386718		4154.18	0.00580532
614.4	0.04790392		1204.39	-0.00761133		1794.4	-0.00185699		2384.4	0.00519062		2974.39	-0.00089765		3564.38	-0.01322582		4154.38	0.00532403
614.6	0.04823933		1204.59	-0.00855943		1794.6	-0.0020521		2384.6	0.00459852		2974.59	-0.00008357		3564.58	-0.01370479		4154.58	0.00435873
614.8	0.04759893		1204.79	-0.00940407		1794.8	-0.00292944		2384.8	0.00419581		2974.79	-0.00021699		3564.78	-0.01295405		4154.78	0.00361658
615	0.04688789		1204.99	-0.00899387		1795	-0.00328126		2385	0.00446144		2974.99	-0.00023994		3564.98	-0.01321739		4154.98	0.00296789
615.2	0.04585536		1205.19	-0.00849578		1795.2	-0.00428638		2385.2	0.00475062		2975.19	0.00042743		3565.18	-0.01335792		4155.18	0.00318479
615.4	0.04612309		1205.39	-0.00868201		1795.4	-0.00470473		2385.4	0.00442856		2975.39	-0.0001205		3565.38	-0.01359185		4155.38	0.00318937
615.6	0.04573667		1205.59	-0.00851084		1795.6	-0.00521459		2385.6	0.0039984		2975.59	-0.00005057		3565.58	-0.01354989		4155.58	0.0034117
615.8	0.04527512		1205.79	-0.00853476		1795.8	-0.00545515		2385.8	0.00385506		2975.79	-0.00005305		3565.78	-0.01317069		4155.78	0.00310983
616	0.04574097		1205.99	-0.00733242		1796	-0.00639857		2386	0.00373949		2975.99	-0.00015754		3565.98	-0.01323293		4155.98	0.00257418
616.2	0.04600233		1206.19	-0.00772362		1796.2	-0.007418		2386.2	0.00406295		2976.19	-0.00028672		3566.18	-0.0127961		4156.18	0.00334454
616.4	0.0456839		1206.39	-0.00742994		1796.4	-0.00744295		2386.4	0.0036847		2976.39	-0.00036819		3566.38	-0.01237695		4156.38	0.00348601
616.6	0.04502397		1206.59	-0.00829347		1796.6	-0.0072143		2386.6	0.00369723		2976.59	-0.00020001		3566.58	-0.01279901		4156.58	0.00318049
616.8	0.04599818		1206.79	-0.00811195		1796.8	-0.00726804		2386.8	0.00388491		2976.79	-0.00032661		3566.78	-0.01349823		4156.78	0.00333896
617	0.04641883		1206.99	-0.00935631		1797	-0.00663986		2387	0.00338264		2976.99	-0.00054129		3566.98	-0.01358317		4156.98	0.00372479
617.2	0.0463064		1207.19	-0.00962932		1797.2	-0.00611666		2387.2	0.00381185		2977.19	-0.00160099		3567.18	-0.01267291		4157.18	0.00332216
617.4	0.04680971		1207.39	-0.0100771		1797.4	-0.00647076		2387.4	0.00394589		2977.39	-0.0020222		3567.38	-0.01269787		4157.38	0.00286738
617.6	0.04781478		1207.59	-0.01001421		1797.6	-0.00597348		2387.6	0.00364382		2977.59	-0.00146049		3567.58	-0.01253051		4157.58	0.00375616
617.8	0.04794748		1207.79	-0.0106184		1797.8	-0.00545225		2387.8	0.00260973		2977.79	-0.00169218		3567.78	-0.01178618		4157.78	0.00460421
618	0.04818503		1207.99	-0.0107092		1798	-0.00520635		2388	0.00188809		2977.99	-0.00183758		3567.98	-0.01260911		4157.98	0.00478747
618.2	0.0490098		1208.19	-0.00960962		1798.2	-0.00449034		2388.2	0.00214481		2978.19	-0.00136415		3568.18	-0.01268409		4158.18	0.00494463
618.4	0.04901112		1208.39	-0.00926637		1798.4	-0.00375575		2388.4	0.00314389		2978.39	-0.00167409		3568.38	-0.01235297		4158.38	0.00549211
618.6	0.04953327		1208.59	-0.01019328		1798.6	-0.00358057		2388.6	0.0027778		2978.59	-0.00113201		3568.58	-0.01282499		4158.58	0.00584512
618.8	0.04957701		1208.79	-0.01066719		1798.8	-0.00292296		2388.8	0.00236544		2978.79	-0.00138261		3568.78	-0.01302838		4158.78	0.00568163
619	0.05067922		1208.99	-0.01124168		1799	-0.00184246		2389	0.00294294		2978.99	-0.00134965		3568.98	-0.01401962		4158.98	0.00656955
619.2	0.05043882		1209.19	-0.01125852		1799.2	-0.00141235		2389.2	0.00274295		2979.19	-0.00230177		3569.18	-0.01510377		4159.18	0.00722974
619.4	0.04983441		1209.39	-0.01109578		1799.4	-0.00092395		2389.4	0.00290583		2979.39	-0.00265426		3569.38	-0.01512659		4159.38	0.00694974
619.6	0.04928265		1209.59	-0.01145515		1799.6	-0.00092219		2389.6	0.00301354		2979.59	-0.00299537		3569.58	-0.01528187		4159.58	0.00647474
619.8	0.0492461		1209.79	-0.01103453		1799.8	-0.00120544		2389.8	0.00305637		2979.79	-0.00267043		3569.78	-0.01483995		4159.78	0.00597259
620	0.04947738		1209.99	-0.01065426		1800	-0.00154487		2390	0.00361363		2979.99	-0.0017871		3569.98	-0.01475446		4159.98	0.00583088
620.2	0.04899107		1210.19	-0.011095		1800.2	-0.00062768		2390.2	0.00352239		2980.19	-0.00149208		3570.18	-0.01467587		4160.18	0.00576776
620.4	0.0474037		1210.39	-0.01055169		1800.4	-0.00101422		2390.4	0.00259162		2980.39	-0.0009957		3570.38	-0.01447946		4160.38	0.00527205
620.6	0.04726398		1210.59	-0.01146184		1800.6	-0.00144498		2390.6	0.00275303		2980.59	-0.00087713		3570.58	-0.01371399		4160.58	0.00509711
620.8	0.04791469		1210.79	-0.01058798		1800.8	-0.00204399		2390.8	0.00319094		2980.79	-0.00014133		3570.78	-0.01340956		4160.78	0.00556137
621	0.04749632		1210.99	-0.01028069		1801	-0.00186687		2391	0.00326444		2980.99	-0.00051421		3570.98	-0.01307034		4160.98	0.00540139
621.2	0.04672094		1211.19	-0.00994553		1801.2	-0.001582		2391.2	0.00310959		2981.19	-0.00063642		3571.18	-0.01371791		4161.18	0.0051422
621.4	0.04711974		1211.39	-0.01048499		1801.4	-0.00201824		2391.4	0.00361932		2981.39	-0.00093481		3571.38	-0.01386021		4161.38	0.00485825
621.6	0.04704407		1211.59	-0.00924418		1801.6	-0.00265359		2391.6	0.00376629		2981.59	-0.0002764		3571.58	-0.01523106		4161.58	0.00518261
621.8	0.04742484		1211.79	-0.0088109		1801.8	-0.00310803		2391.8	0.0038589		2981.79	-0.00101583		3571.78	-0.0158017		4161.78	0.00554281
622	0.04575344		1211.99	-0.00767547		1802	-0.00366258		2392	0.00426296		2981.99	-0.00055803		3571.98	-0.0160881		4161.98	0.00628844
622.2	0.04590116		1212.19	-0.00676933		1802.2	-0.00450497		2392.2	0.00465648		2982.19	0.00027651		3572.18	-0.0162817		4162.18	0.00698138
622.4	0.04520165		1212.39	-0.00650364		1802.4	-0.00471493		2392.4	0.00534162		2982.39	0.00001517		3572.38	-0.01698254		4162.38	0.00743012
622.6	0.04566005		1212.59	-0.00693332		1802.6	-0.00469242		2392.6	0.00482725		2982.59	0.00037008		3572.58	-0.01732722		4162.58	0.00723515
622.8	0.04579713		1212.79	-0.00731995		1802.8	-0.00420636		2392.8	0.00446571		2982.79	-0.00061156		3572.78	-0.01722417		4162.78	0.00654534
623	0.04544487		1212.99	-0.00801851		1803	-0.00330645		2393	0.0053868		2982.99	-0.00142386		3572.98	-0.01694343		4162.98	0.00707474
623.2	0.0443835		1213.19	-0.00763143		1803.2	-0.00283588		2393.2	0.0054614		2983.19	-0.00248508		3573.18	-0.01716952		4163.18	0.0061622
623.4	0.04436102		1213.39	-0.00716704		1803.4	-0.00302644		2393.4	0.00552835		2983.39	-0.00275872		3573.38	-0.01668336		4163.38	0.00585789
623.6	0.04521455		1213.59	-0.0076363		1803.6	-0.00288984		2393.6	0.00543228		2983.59	-0.00268521		3573.58	-0.0164644		4163.58	0.00543611
623.8	0.04536892		1213.79	-0.00684594		1803.8	-0.0031616		2393.8	0.00577841		2983.79	-0.00281751		3573.78	-0.01635951		4163.78	0.00510831
624	0.04499369		1213.99	-0.00704032		1804	-0.00283084		2394	0.00620699		2983.99	-0.00297644		3573.98	-0.01648121		4163.98	0.00439171
624.2	0.04546719		1214.19	-0.00715269		1804.2	-0.00275357		2394.2	0.00589533		2984.19	-0.00366475		3574.18	-0.01653475		4164.18	0.00469014
624.4	0.04501375		1214.39	-0.006835		1804.4	-0.00384049		2394.4	0.00608618		2984.39	-0.00400159		3574.38	-0.01549682		4164.38	0.00414809
624.6	0.04578686		1214.59	-0.00735084		1804.6	-0.00397921		2394.6	0.00631049		2984.59	-0.0047917		3574.58	-0.01511448		4164.58	0.00489919
624.8	0.04574389		1214.79	-0.0063434		1804.8	-0.00446012		2394.8	0.0061194		2984.79	-0.0041965		3574.78	-0.01564822		4164.78	0.0049301
625	0.04558936		1214.99	-0.00689451		1805	-0.00346961		2395	0.00597946		2984.99	-0.00500785		3574.98	-0.01624898		4164.98	0.00438739
625.2	0.04458928		1215.19	-0.0067982		1805.2	-0.00444472		2395.2	0.00543059		2985.19	-0.00401601		3575.18	-0.01652064		4165.18	0.00447271
625.4	0.04485292		1215.39	-0.00705166		1805.4	-0.00483849		2395.4	0.00586177		2985.39	-0.00388291		3575.38	-0.01719962		4165.38	0.00372658
625.6	0.04432089		1215.59	-0.00701911		1805.6	-0.00540011		2395.6	0.00555287		2985.59	-0.00450099		3575.58	-0.01826009		4165.58	0.00450387
625.8	0.04412458		1215.79	-0.00716708		1805.8	-0.00529434		2395.8	0.00534056		2985.79	-0.004492		3575.78	-0.01819842		4165.78	0.00523794
626	0.04245575		1215.99	-0.00819999		1806	-0.00530919		2396	0.00501748		2985.99	-0.00372412		3575.98	-0.01761787		4165.98	0.00587555
626.2	0.04265087		1216.19	-0.0084721		1806.2	-0.00578082		2396.2	0.00436918		2986.19	-0.00346763		3576.18	-0.01762687		4166.18	0.00602202
626.4	0.0428243		1216.39	-0.00911152		1806.4	-0.00546771		2396.4	0.00389413		2986.39	-0.00361296		3576.38	-0.01723889		4166.38	0.00594603
626.6	0.04251885		1216.59	-0.00990418		1806.6	-0.00537326		2396.6	0.00345421		2986.59	-0.0033412		3576.58	-0.01630328		4166.58	0.00576015
626.8	0.04222477		1216.79	-0.01021372		1806.8	-0.00564502		2396.8	0.00294187		2986.79	-0.00373678		3576.78	-0.01557612		4166.78	0.00600075
627	0.04267864		1216.99	-0.01055362		1807	-0.0051116		2397	0.00265223		2986.99	-0.00311826		3576.98	-0.0144914		4166.98	0.00659792
627.2	0.04302959		1217.19	-0.0101022		1807.2	-0.00582954		2397.2	0.00255086		2987.19	-0.0025833		3577.18	-0.01349947		4167.18	0.00640193
627.4	0.04350605		1217.39	-0.0095625		1807.4	-0.00582736		2397.4	0.00266888		2987.39	-0.00224626		3577.38	-0.01265835		4167.38	0.00671868
627.6	0.04370677		1217.59	-0.00979981		1807.6	-0.00541376		2397.6	0.00309352		2987.59	-0.00159338		3577.58	-0.01207195		4167.58	0.00670719
627.8	0.04403653		1217.79	-0.00865329		1807.8	-0.0055971		2397.8	0.00317856		2987.79	-0.00160468		3577.78	-0.01128463		4167.78	0.00647585
628	0.04498215		1217.99	-0.00791388		1808	-0.00609502		2398	0.00278124		2987.99	-0.00158548		3577.98	-0.0104419		4167.98	0.0064761
628.2	0.04594806		1218.19	-0.00725765		1808.2	-0.0067592		2398.2	0.00236719		2988.19	-0.00206573		3578.18	-0.0098724		4168.18	0.00713718
628.4	0.04559869		1218.39	-0.00662788		1808.4	-0.00756499		2398.4	0.00197054		2988.39	-0.00188041		3578.38	-0.00977877		4168.38	0.00688862
628.6	0.04653862		1218.59	-0.0062864		1808.6	-0.00790492		2398.6	0.00192266		2988.59	-0.00174032		3578.58	-0.01039109		4168.58	0.00719946
628.8	0.0468734		1218.79	-0.00532449		1808.8	-0.00790576		2398.8	0.00180257		2988.79	-0.00143906		3578.78	-0.01099623		4168.78	0.00662321
629	0.04821708		1218.99	-0.00473204		1809	-0.00777664		2399	0.00235849		2988.99	-0.00139921		3578.98	-0.01168572		4168.98	0.00595863
629.2	0.04799794		1219.19	-0.00445729		1809.2	-0.0094073		2399.2	0.00231442		2989.19	-0.00122912		3579.18	-0.01249391		4169.18	0.00575759
629.4	0.04818995		1219.39	-0.0053096		1809.4	-0.00876794		2399.4	0.00245763		2989.39	-0.00143371		3579.38	-0.01274079		4169.38	0.00454114
629.6	0.04835634		1219.59	-0.00570015		1809.6	-0.00841028		2399.6	0.00189191		2989.59	-0.00216818		3579.58	-0.01354879		4169.58	0.00470487
629.8	0.04808051		1219.79	-0.00560331		1809.8	-0.00839983		2399.8	0.00145188		2989.79	-0.00119885		3579.78	-0.01361591		4169.78	0.00397092
630	0.04722485		1219.99	-0.00630289		1810	-0.00768413		2400	0.00052154		2989.99	-0.00065052		3579.98	-0.01410203		4169.98	0.00389795
630.2	0.04699153		1220.19	-0.00692718		1810.2	-0.00748743		2400.2	-0.00086867		2990.19	-0.00086391		3580.18	-0.01467241		4170.18	0.00406529
630.4	0.04684174		1220.39	-0.00776798		1810.4	-0.00694117		2400.4	-0.00056413		2990.39	-0.0008066		3580.38	-0.01515114		4170.38	0.00310497
630.6	0.04682453		1220.59	-0.00753998		1810.6	-0.00684847		2400.6	0.00003358		2990.59	-0.00128316		3580.58	-0.01561674		4170.58	0.00263565
630.8	0.0469551		1220.79	-0.00864544		1810.8	-0.00631993		2400.8	-0.00044863		2990.79	-0.00117131		3580.78	-0.015361		4170.78	0.00274931
631	0.04701802		1220.99	-0.00949781		1811	-0.00538923		2401	0.00056274		2990.99	-0.00060909		3580.98	-0.01469462		4170.98	0.00232784
631.2	0.04596832		1221.19	-0.00992392		1811.2	-0.00544855		2401.2	0.00091547		2991.19	-0.00039454		3581.18	-0.01458485		4171.18	0.0027809
631.4	0.04508505		1221.39	-0.01073784		1811.4	-0.00480885		2401.4	0.00083564		2991.39	-0.00095148		3581.38	-0.01445468		4171.38	0.0028943
631.6	0.04533526		1221.59	-0.01127396		1811.6	-0.00400953		2401.6	0.00079669		2991.59	-0.00093815		3581.58	-0.01436826		4171.58	0.00274762
631.8	0.04544122		1221.79	-0.01093325		1811.8	-0.00380923		2401.8	0.00092647		2991.79	-0.00089434		3581.78	-0.014041		4171.78	0.00371538
632	0.04571939		1221.99	-0.0112801		1812	-0.00402337		2402	0.00021656		2991.99	-0.0007773		3581.98	-0.01409887		4171.98	0.00436898
632.2	0.04572063		1222.19	-0.01096461		1812.2	-0.00406492		2402.2	0.00060004		2992.19	-0.00088885		3582.18	-0.01426034		4172.18	0.00373624
632.4	0.04553294		1222.39	-0.01138079		1812.4	-0.00439787		2402.4	0.00140312		2992.39	-0.00054461		3582.38	-0.01451812		4172.38	0.00406086
632.6	0.04597815		1222.59	-0.01153299		1812.6	-0.00455069		2402.6	0.00221666		2992.59	-0.00063946		3582.58	-0.01431894		4172.58	0.00374844
632.8	0.04540499		1222.79	-0.01047248		1812.8	-0.00428092		2402.8	0.00161788		2992.79	-0.0005468		3582.78	-0.0143382		4172.78	0.00373962
633	0.04556788		1222.99	-0.00970008		1813	-0.00494895		2403	0.0022174		2992.99	-0.00010917		3582.98	-0.01494128		4172.98	0.00373966
633.2	0.04522805		1223.19	-0.00924136		1813.2	-0.00506506		2403.2	0.00270362		2993.19	0.00003703		3583.18	-0.01462044		4173.18	0.00380516
633.4	0.04521862		1223.39	-0.00890515		1813.4	-0.00402365		2403.4	0.00216944		2993.39	0.00038707		3583.38	-0.01423541		4173.38	0.00321921
633.6	0.04512746		1223.59	-0.00877356		1813.6	-0.00330668		2403.6	0.00203121		2993.59	-0.00031874		3583.58	-0.0145497		4173.58	0.00327347
633.8	0.04406521		1223.79	-0.00840928		1813.8	-0.00349207		2403.8	0.00254293		2993.79	-0.00082639		3583.78	-0.01407842		4173.78	0.0022976
634	0.04357144		1223.99	-0.00821879		1814	-0.00310799		2404	0.00296135		2993.99	-0.0013423		3583.98	-0.01561195		4173.98	0.00265981
634.2	0.04360172		1224.19	-0.00868563		1814.2	-0.00297893		2404.2	0.0026099		2994.19	-0.0024299		3584.18	-0.01597787		4174.18	0.00171513
634.4	0.04399616		1224.39	-0.00811007		1814.4	-0.00323789		2404.4	0.00252937		2994.39	-0.00298946		3584.38	-0.01617492		4174.38	0.00100327
634.6	0.04379461		1224.59	-0.00769887		1814.6	-0.00323242		2404.6	0.0023701		2994.59	-0.00314976		3584.58	-0.01650151		4174.58	0.00120021
634.8	0.04351859		1224.79	-0.00836359		1814.8	-0.0032795		2404.8	0.0014884		2994.79	-0.00312345		3584.78	-0.0168142		4174.78	0.00103512
635	0.04347611		1224.99	-0.00779011		1815	-0.00375313		2405	0.00125996		2994.99	-0.00416065		3584.98	-0.01735481		4174.98	0.00164405
635.2	0.04271805		1225.19	-0.00767122		1815.2	-0.00452139		2405.2	0.00028058		2995.19	-0.00455891		3585.18	-0.01807562		4175.18	0.00274445
635.4	0.04311489		1225.39	-0.00774443		1815.4	-0.00426661		2405.4	0.00103536		2995.39	-0.00504275		3585.38	-0.01804285		4175.38	0.00316563
635.6	0.04372252		1225.59	-0.0078137		1815.6	-0.0039081		2405.6	0.00087154		2995.59	-0.005277		3585.58	-0.01824197		4175.58	0.0035534
635.8	0.04327095		1225.79	-0.00759901		1815.8	-0.00466643		2405.8	0.00042685		2995.79	-0.00522016		3585.78	-0.01782813		4175.78	0.00404358
636	0.04331525		1225.99	-0.00800196		1816	-0.00469819		2406	0.00020838		2995.99	-0.0046086		3585.98	-0.0177955		4175.98	0.00407959
636.2	0.04368876		1226.19	-0.00781824		1816.2	-0.0050912		2406.2	0.00087759		2996.19	-0.00437704		3586.18	-0.01680232		4176.18	0.00436463
636.4	0.04430856		1226.39	-0.00862457		1816.4	-0.00535869		2406.4	0.00081595		2996.39	-0.00336018		3586.38	-0.01654047		4176.38	0.00558743
636.6	0.04444329		1226.59	-0.00828248		1816.6	-0.00520405		2406.6	0.00066395		2996.59	-0.00252377		3586.58	-0.01572409		4176.58	0.00587666
636.8	0.04488204		1226.79	-0.00716651		1816.8	-0.00538172		2406.8	0.0002077		2996.79	-0.00208726		3586.78	-0.01544205		4176.78	0.00748392
637	0.04653399		1226.99	-0.00634999		1817	-0.00589654		2407	0.00202127		2996.99	-0.00193157		3586.98	-0.01495109		4176.98	0.00803403
637.2	0.04717248		1227.19	-0.00688918		1817.2	-0.00486663		2407.2	0.00290287		2997.19	-0.00223084		3587.18	-0.01382277		4177.18	0.0077973
637.4	0.04730031		1227.39	-0.0082129		1817.4	-0.00446747		2407.4	0.00316706		2997.39	-0.00247774		3587.38	-0.01431146		4177.38	0.00693685
637.6	0.04730456		1227.59	-0.0089536		1817.6	-0.00354578		2407.6	0.00407817		2997.59	-0.00325105		3587.58	-0.01447288		4177.58	0.00714167
637.8	0.04791417		1227.79	-0.00922474		1817.8	-0.00382672		2407.8	0.00417817		2997.79	-0.00362032		3587.78	-0.01445378		4177.78	0.00664411
638	0.04805087		1227.99	-0.00946742		1818	-0.00351085		2408	0.00418494		2997.99	-0.00271843		3587.98	-0.0151926		4177.98	0.00599925
638.2	0.04752878		1228.19	-0.00950005		1818.2	-0.00437758		2408.2	0.00322175		2998.19	-0.00277565		3588.18	-0.01531601		4178.18	0.00601081
638.4	0.04758352		1228.39	-0.00931943		1818.4	-0.00430788		2408.4	0.00236718		2998.39	-0.00275884		3588.38	-0.01543421		4178.38	0.00562193
638.6	0.0471929		1228.59	-0.0089797		1818.6	-0.00420686		2408.6	0.00231077		2998.59	-0.00263459		3588.58	-0.01522311		4178.58	0.00469811
638.8	0.0473539		1228.79	-0.00838976		1818.8	-0.0051705		2408.8	0.00231949		2998.79	-0.00320916		3588.78	-0.01499021		4178.78	0.00394189
639	0.04689321		1228.99	-0.00799773		1819	-0.00542711		2409	0.00206591		2998.99	-0.00386824		3588.98	-0.01516004		4178.98	0.00429435
639.2	0.04595093		1229.19	-0.00823432		1819.2	-0.00562146		2409.2	0.00217712		2999.19	-0.00357833		3589.18	-0.01519273		4179.18	0.00438083
639.4	0.04573032		1229.39	-0.00794971		1819.4	-0.00607297		2409.4	0.00227675		2999.39	-0.0041643		3589.38	-0.01436166		4179.38	0.00399906
639.6	0.04542365		1229.59	-0.00768612		1819.6	-0.00705811		2409.6	0.00210946		2999.59	-0.00452749		3589.58	-0.01417737		4179.58	0.00355564
639.8	0.04413522		1229.79	-0.00761305		1819.8	-0.00767096		2409.8	0.00233463		2999.79	-0.00385968		3589.78	-0.0141309		4179.78	0.00323754
640	0.04379497		1229.99	-0.00781261		1820	-0.00741683		2410	0.00254137		2999.99	-0.00313253		3589.98	-0.01474434		4179.98	0.0036264
640.2	0.04381261		1230.19	-0.00792446		1820.2	-0.00824009		2410.2	0.00162589		3000.19	-0.00311979		3590.18	-0.01478124		4180.18	0.0042251
640.4	0.04349718		1230.39	-0.0074368		1820.4	-0.00799919		2410.4	0.00164164		3000.39	-0.00314381		3590.38	-0.01609012		4180.38	0.00468093
640.6	0.0434458		1230.59	-0.00759923		1820.6	-0.00792725		2410.6	0.00219364		3000.59	-0.00433986		3590.58	-0.01682939		4180.58	0.00525018
640.8	0.04315657		1230.79	-0.00743949		1820.8	-0.00723914		2410.8	0.00117051		3000.79	-0.00552094		3590.78	-0.0172599		4180.78	0.00691201
641	0.0431892		1230.99	-0.00765677		1821	-0.00726772		2411	0.00217963		3000.99	-0.00569918		3590.98	-0.01758711		4180.98	0.00691024
641.2	0.04294634		1231.19	-0.0085753		1821.2	-0.00678067		2411.2	0.00129642		3001.19	-0.00567253		3591.18	-0.01875188		4181.18	0.00732023
641.4	0.04272609		1231.39	-0.00925375		1821.4	-0.00639631		2411.4	0.00048411		3001.39	-0.00621776		3591.38	-0.01919686		4181.38	0.00753015
641.6	0.04230478		1231.59	-0.01015803		1821.6	-0.00633592		2411.6	-0.00024835		3001.59	-0.00624774		3591.58	-0.01959423		4181.58	0.00828815
641.8	0.04209823		1231.79	-0.0109903		1821.8	-0.00669161		2411.8	-0.00085469		3001.79	-0.00574958		3591.78	-0.01962915		4181.78	0.00721193
642	0.04122027		1231.99	-0.01106004		1822	-0.00642181		2412	-0.00090155		3001.99	-0.00534491		3591.98	-0.02030043		4181.98	0.00653723
642.2	0.04073745		1232.19	-0.01179566		1822.2	-0.00555694		2412.2	-0.00187486		3002.19	-0.00541772		3592.18	-0.02001081		4182.18	0.00637226
642.4	0.04052455		1232.39	-0.01197641		1822.4	-0.00504159		2412.4	-0.00168019		3002.39	-0.00498858		3592.38	-0.01912041		4182.38	0.00554453
642.6	0.03985856		1232.59	-0.01199525		1822.6	-0.00545221		2412.6	-0.0015114		3002.59	-0.00418312		3592.58	-0.01821168		4182.58	0.00479273
642.8	0.03991282		1232.79	-0.01196366		1822.8	-0.00631539		2412.8	-0.00098001		3002.79	-0.00358029		3592.78	-0.01752069		4182.78	0.00438354
643	0.04004221		1232.99	-0.01176421		1823	-0.00575195		2413	-0.00134898		3002.99	-0.00278133		3592.98	-0.01628575		4182.98	0.00483929
643.2	0.0399003		1233.19	-0.01153226		1823.2	-0.00629123		2413.2	-0.00099089		3003.19	-0.00186093		3593.18	-0.01539596		4183.18	0.00490306
643.4	0.04041211		1233.39	-0.01078752		1823.4	-0.00671438		2413.4	-0.0002986		3003.39	-0.00155283		3593.38	-0.01415808		4183.38	0.00436232
643.6	0.04110939		1233.59	-0.01023973		1823.6	-0.00687184		2413.6	0.00016117		3003.59	-0.00045081		3593.58	-0.01377995		4183.58	0.00376407
643.8	0.04107312		1233.79	-0.01030315		1823.8	-0.00650038		2413.8	0.00045827		3003.79	-0.00010309		3593.78	-0.01435093		4183.78	0.00387614
644	0.04212894		1233.99	-0.00991114		1824	-0.00608343		2414	0.00024259		3003.99	-0.00053478		3593.98	-0.01461024		4183.98	0.00418943
644.2	0.04212344		1234.19	-0.01009325		1824.2	-0.00603426		2414.2	-0.00017806		3004.19	-0.00098515		3594.18	-0.01517858		4184.18	0.00401639
644.4	0.04334292		1234.39	-0.00929018		1824.4	-0.00551592		2414.4	0.00042073		3004.39	-0.00108808		3594.38	-0.01685542		4184.38	0.00484078
644.6	0.04476603		1234.59	-0.00902612		1824.6	-0.00540054		2414.6	0.00105988		3004.59	-0.00224388		3594.58	-0.01689959		4184.58	0.00532446
644.8	0.04585422		1234.79	-0.00855987		1824.8	-0.0052247		2414.8	0.00079936		3004.79	-0.00247566		3594.78	-0.01665894		4184.78	0.00590371
645	0.04637673		1234.99	-0.00786584		1825	-0.00642204		2415	0.0014047		3004.99	-0.00282594		3594.98	-0.01707191		4184.98	0.00607195
645.2	0.04670977		1235.19	-0.00806231		1825.2	-0.0060668		2415.2	0.00116816		3005.19	-0.00310843		3595.18	-0.01714648		4185.18	0.00561712
645.4	0.04626066		1235.39	-0.00870135		1825.4	-0.00535778		2415.4	0.00124827		3005.39	-0.0036879		3595.38	-0.01761511		4185.38	0.0049736
645.6	0.04618359		1235.59	-0.00897548		1825.6	-0.00568661		2415.6	0.00106836		3005.59	-0.00366856		3595.58	-0.01843181		4185.58	0.00432265
645.8	0.04613527		1235.79	-0.00884832		1825.8	-0.00522498		2415.8	0.00128817		3005.79	-0.0032513		3595.78	-0.01906285		4185.78	0.00325378
646	0.04560733		1235.99	-0.00928585		1826	-0.00466175		2416	0.00119025		3005.99	-0.0036864		3595.98	-0.01953452		4185.98	0.00365417
646.2	0.04478945		1236.19	-0.01013979		1826.2	-0.00461524		2416.2	0.00136839		3006.19	-0.00268188		3596.18	-0.01960694		4186.18	0.00318607
646.4	0.04397763		1236.39	-0.0099294		1826.4	-0.00552328		2416.4	0.0023444		3006.39	-0.00255269		3596.38	-0.01908727		4186.38	0.00256134
646.6	0.04309926		1236.59	-0.01053722		1826.6	-0.0057712		2416.6	0.00210309		3006.59	-0.00223397		3596.58	-0.01883961		4186.58	0.00216959
646.8	0.04288095		1236.79	-0.01062322		1826.8	-0.0066032		2416.8	0.0028297		3006.79	-0.00242138		3596.78	-0.01764627		4186.78	0.00204499
647	0.04261688		1236.99	-0.01073872		1827	-0.00705157		2417	0.00350559		3006.99	-0.00247242		3596.98	-0.01709619		4186.98	0.00228369
647.2	0.04209602		1237.19	-0.01075171		1827.2	-0.00761848		2417.2	0.00411715		3007.19	-0.00275235		3597.18	-0.01676248		4187.18	0.00235305
647.4	0.04225996		1237.39	-0.01002973		1827.4	-0.00761922		2417.4	0.00417079		3007.39	-0.0033479		3597.38	-0.01649581		4187.38	0.00250294
647.6	0.04254409		1237.59	-0.01002444		1827.6	-0.00731878		2417.6	0.00342871		3007.59	-0.0034308		3597.58	-0.01578311		4187.58	0.00244867
647.8	0.04257291		1237.79	-0.00986029		1827.8	-0.00709229		2417.8	0.00316944		3007.79	-0.00360404		3597.78	-0.01545502		4187.78	0.00244276
648	0.04232891		1237.99	-0.0096719		1828	-0.0071639		2418	0.00229744		3007.99	-0.00377606		3597.98	-0.01508998		4187.98	0.00191353
648.2	0.04183158		1238.19	-0.00962168		1828.2	-0.00721331		2418.2	0.0016416		3008.19	-0.00432709		3598.18	-0.01517245		4188.18	0.00132588
648.4	0.04260981		1238.39	-0.00886193		1828.4	-0.0075818		2418.4	0.00101301		3008.39	-0.00501527		3598.38	-0.01532887		4188.38	0.00202028
648.6	0.04261438		1238.59	-0.00854707		1828.6	-0.00763741		2418.6	0.00066455		3008.59	-0.00654284		3598.58	-0.01426996		4188.58	0.00188194
648.8	0.04227795		1238.79	-0.00879001		1828.8	-0.00774493		2418.8	-0.00049627		3008.79	-0.00741688		3598.78	-0.01404487		4188.78	0.00196148
649	0.04130528		1238.99	-0.00839216		1829	-0.00798119		2419	-0.00176039		3008.99	-0.00845517		3598.98	-0.01405936		4188.98	0.00237728
649.2	0.0412053		1239.19	-0.00878087		1829.2	-0.00756958		2419.2	-0.00254282		3009.19	-0.00901038		3599.18	-0.01398129		4189.18	0.00230179
649.4	0.04092538		1239.39	-0.00864053		1829.4	-0.00750754		2419.4	-0.00376261		3009.39	-0.00994286		3599.38	-0.0145184		4189.38	0.00273001
649.6	0.04093934		1239.59	-0.00865543		1829.6	-0.00803669		2419.6	-0.00497193		3009.59	-0.0107801		3599.58	-0.01435914		4189.58	0.00321799
649.8	0.04058718		1239.79	-0.00913559		1829.8	-0.00822009		2419.8	-0.00556863		3009.79	-0.01120647		3599.78	-0.0148462		4189.78	0.003798
