# Supplementary material for: Functional development of a V3/glycan-specific broadly neutralizing antibody isolated from a case of HIV superinfection
Source: eLife journal article supplement (doi:10.7554/elife.68110), 2021-07-15
Supplement: fig2-data2 [file F5.xls]

Vers 3.43 Data Simulation
Conc1	1.563E-08	1.563E-08	1.563E-08	1.563E-08	1.563E-08	1.563E-08
Start1	290	879.99	1470.01	2060	2650	3240
Stop1	649.8	1239.79	1829.81	2419.8	3009.8	3599.79
Time1	Data1	Sim1	Time2	Data2	Sim2	Time3	Data3	Sim3	Time4	Data4	Sim4	Time5	Data5	Sim5	Time6	Data6	Sim6
290	0.00296344		879.99	-0.0006546		1470.01	-0.00086254		2060	0.00217597		2650	-0.00102538		3240	0.00945662
290.2	0.00408273		880.19	-0.00067705		1470.21	-0.00105715		2060.2	0.00121116		2650.2	-0.00173002		3240.2	0.00947424
290.4	0.00464073		880.39	-0.00024001		1470.41	-0.00143677		2060.4	0.00054027		2650.4	-0.00200787		3240.4	0.00934788
290.6	0.00468209		880.59	-0.00019984		1470.61	-0.00123356		2060.6	-0.00016404		2650.6	-0.00274264		3240.6	0.0093316
290.8	0.0049903		880.79	-0.00089749		1470.81	-0.00061268		2060.8	-0.00070351		2650.8	-0.00326076		3240.8	0.00907884
291	0.00529015		880.99	-0.0011463		1471.01	0.00038508		2061	-0.00195097		2651	-0.00384489		3241	0.00899828
291.2	0.00539759		881.19	-0.00154916		1471.21	0.00111952		2061.2	-0.00203047		2651.2	-0.00376208		3241.2	0.00903006
291.4	0.00488147		881.39	-0.00134213		1471.41	0.00095364		2061.4	-0.00238034		2651.4	-0.00369922		3241.4	0.00914852
291.6	0.00526954		881.59	-0.00076092		1471.61	0.0012125		2061.6	-0.00274179		2651.6	-0.00400077		3241.6	0.00903536
291.8	0.00448991		881.79	-0.00061082		1471.81	0.00123976		2061.8	-0.00284036		2651.8	-0.00445994		3241.8	0.00864506
292	0.00486501		881.99	-0.0006423		1472.01	0.00138255		2062	-0.0032614		2652	-0.00471542		3242	0.00823087
292.2	0.00513052		882.19	-0.00034312		1472.21	0.00119441		2062.2	-0.00291013		2652.2	-0.00468628		3242.2	0.00812289
292.4	0.00496523		882.39	-0.00062517		1472.41	0.00140397		2062.4	-0.00269336		2652.4	-0.00441307		3242.4	0.00714206
292.6	0.00500944		882.59	-0.00126		1472.61	0.00125829		2062.6	-0.0029312		2652.6	-0.00474235		3242.6	0.0065827
292.8	0.00439116		882.79	-0.00212878		1472.81	0.00151854		2062.8	-0.00244011		2652.8	-0.00479906		3242.8	0.00629098
293	0.00441888		882.99	-0.0015447		1473.01	0.00120265		2063	-0.00211991		2653	-0.00414086		3243	0.00621883
293.2	0.00357746		883.19	-0.00217655		1473.21	0.00027575		2063.2	-0.00107426		2653.2	-0.00377363		3243.2	0.00730828
293.4	0.00471182		883.39	-0.00227964		1473.41	0.00043521		2063.4	-0.00063924		2653.4	-0.00303385		3243.4	0.00824435
293.6	0.00497267		883.59	-0.00238839		1473.61	-0.00055248		2063.6	-0.00007669		2653.6	-0.00226467		3243.6	0.00937112
293.8	0.00519085		883.79	-0.00297473		1473.81	-0.0008092		2063.8	0.00011127		2653.8	-0.00210556		3243.8	0.00964274
294	0.00564094		883.99	-0.0027754		1474.01	-0.00074444		2064	0.00000865		2654	-0.00256696		3244	0.0096618
294.2	0.00629287		884.19	-0.00315033		1474.21	-0.00171415		2064.2	-0.00018653		2654.2	-0.00235376		3244.2	0.00848691
294.4	0.00571842		884.39	-0.00309633		1474.41	-0.00173832		2064.4	0.000014		2654.4	-0.00186438		3244.4	0.00837894
294.6	0.00490405		884.59	-0.00335815		1474.61	-0.00151516		2064.6	-0.00044546		2654.6	-0.00305288		3244.6	0.00839634
294.8	0.00529667		884.79	-0.00389155		1474.81	-0.00122426		2064.8	-0.00033224		2654.8	-0.0033162		3244.8	0.00777386
295	0.00605252		884.99	-0.00392533		1475.01	-0.0011158		2065	-0.00036254		2655	-0.00302419		3245	0.00754295
295.2	0.0058771		885.19	-0.00375243		1475.21	-0.00166783		2065.2	0.00088994		2655.2	-0.00207089		3245.2	0.00736986
295.4	0.00577927		885.39	-0.00288358		1475.41	-0.00220513		2065.4	0.00006019		2655.4	-0.00254525		3245.4	0.00674403
295.6	0.00587206		885.59	-0.00254543		1475.61	-0.00263077		2065.6	0.00037404		2655.6	-0.00298611		3245.6	0.00627326
295.8	0.00539921		885.79	-0.00198309		1475.81	-0.00280928		2065.8	0.00012346		2655.8	-0.00436989		3245.8	0.00607439
296	0.00602771		885.99	-0.00169727		1476.01	-0.00288608		2066	-0.00045804		2656	-0.00569637		3246	0.0059206
296.2	0.00593757		886.19	-0.0009938		1476.21	-0.00302027		2066.2	-0.00092801		2656.2	-0.00601027		3246.2	0.00595683
296.4	0.00582531		886.39	-0.0012069		1476.41	-0.0023901		2066.4	-0.00090251		2656.4	-0.00608015		3246.4	0.00592397
296.6	0.00610005		886.59	-0.00160993		1476.61	-0.00263017		2066.6	-0.001103		2656.6	-0.00619176		3246.6	0.00584335
296.8	0.00580041		886.79	-0.0010414		1476.81	-0.00233713		2066.8	-0.00173721		2656.8	-0.00560657		3246.8	0.00630919
297	0.00611855		886.99	-0.00101396		1477.01	-0.00271402		2067	-0.00272631		2657	-0.00451437		3247	0.00706742
297.2	0.00671089		887.19	-0.00195931		1477.21	-0.00242148		2067.2	-0.00278808		2657.2	-0.00387153		3247.2	0.00762885
297.4	0.00684521		887.39	-0.00244661		1477.41	-0.00163343		2067.4	-0.00313211		2657.4	-0.00373328		3247.4	0.00791175
297.6	0.00663685		887.59	-0.00254985		1477.61	-0.00181691		2067.6	-0.00378254		2657.6	-0.00308681		3247.6	0.0068635
297.8	0.00655748		887.79	-0.00380965		1477.81	-0.0010227		2067.8	-0.00372732		2657.8	-0.00364054		3247.8	0.00619828
298	0.00659544		887.99	-0.00275532		1478.01	0.00000797		2068	-0.00363378		2658	-0.00372745		3248	0.00540092
298.2	0.00624262		888.19	-0.00227756		1478.21	-0.00012247		2068.2	-0.00269216		2658.2	-0.0039988		3248.2	0.0044638
298.4	0.00546594		888.39	-0.00203072		1478.41	-0.00030672		2068.4	-0.0027461		2658.4	-0.00442298		3248.4	0.00424487
298.6	0.00544658		888.59	-0.00126601		1478.61	-0.00038823		2068.6	-0.00253149		2658.6	-0.0050728		3248.6	0.00376938
298.8	0.00575151		888.79	-0.00144263		1478.81	0.00007952		2068.8	-0.0012391		2658.8	-0.00448256		3248.8	0.00333182
299	0.00586553		888.99	-0.00233116		1479.01	-0.00028057		2069	-0.00067129		2659	-0.00412923		3249	0.00338234
299.2	0.00476635		889.19	-0.00208415		1479.21	-0.00049677		2069.2	-0.00084922		2659.2	-0.00458571		3249.2	0.00330374
299.4	0.00442587		889.39	-0.00230802		1479.41	-0.00068844		2069.4	-0.00063459		2659.4	-0.00478166		3249.4	0.00301365
299.6	0.00419353		889.59	-0.00219199		1479.61	-0.00138738		2069.6	0.00010071		2659.6	-0.00564871		3249.6	0.00416905
299.8	0.00374871		889.79	-0.00192559		1479.81	-0.00125803		2069.8	0.00018124		2659.8	-0.00698409		3249.8	0.0040658
300	0.00353305		889.99	-0.00193949		1480.01	-0.00130021		2070	0.0002504		2660	-0.00717327		3250	0.0036911
300.2	0.00373115		890.19	-0.00188722		1480.21	-0.0015641		2070.2	-0.00072785		2660.2	-0.00609211		3250.2	0.00409404
300.4	0.00393689		890.39	-0.00273589		1480.41	-0.00161525		2070.4	-0.00036962		2660.4	-0.0060912		3250.4	0.00420705
300.6	0.00359194		890.59	-0.0034756		1480.61	-0.00177009		2070.6	-0.00119881		2660.6	-0.00518699		3250.6	0.00392111
300.8	0.00379312		890.79	-0.00357949		1480.81	-0.00159693		2070.8	-0.00229786		2660.8	-0.00450813		3250.8	0.00386321
301	0.00473947		890.99	-0.00394947		1481.01	-0.00186341		2071	-0.00255535		2661	-0.00365325		3251	0.00374276
301.2	0.00615824		891.19	-0.00430245		1481.21	-0.0019051		2071.2	-0.00236392		2661.2	-0.00367241		3251.2	0.00326364
301.4	0.00528857		891.39	-0.00467492		1481.41	-0.00228655		2071.4	-0.00338877		2661.4	-0.00332964		3251.4	0.0033335
301.6	0.00635596		891.59	-0.00383971		1481.61	-0.00251493		2071.6	-0.00373029		2661.6	-0.00307333		3251.6	0.00250208
301.8	0.00691612		891.79	-0.00317086		1481.81	-0.00280778		2071.8	-0.00284597		2661.8	-0.00343294		3251.8	0.00276809
302	0.00773056		891.99	-0.00157139		1482.01	-0.00246256		2072	-0.00343819		2662	-0.00350848		3252	0.00282808
302.2	0.00799333		892.19	-0.00126922		1482.21	-0.00316088		2072.2	-0.00325061		2662.2	-0.00323014		3252.2	0.00252995
302.4	0.00777254		892.39	-0.00140264		1482.41	-0.00335205		2072.4	-0.00401744		2662.4	-0.00269251		3252.4	0.00281249
302.6	0.00832943		892.59	-0.00106751		1482.61	-0.00279489		2072.6	-0.00377069		2662.6	-0.00281284		3252.6	0.003816
302.8	0.00831573		892.79	-0.00122848		1482.81	-0.00240689		2072.8	-0.00389251		2662.8	-0.00312865		3252.8	0.00460332
303	0.0087113		892.99	-0.00164658		1483.01	-0.00293521		2073	-0.00380302		2663	-0.00309509		3253	0.00476897
303.2	0.00875037		893.19	-0.00145872		1483.21	-0.00258302		2073.2	-0.00418394		2663.2	-0.00309192		3253.2	0.00506121
303.4	0.00864868		893.39	-0.00126677		1483.41	-0.00164337		2073.4	-0.0034032		2663.4	-0.00272317		3253.4	0.00550359
303.6	0.00906704		893.59	-0.00077008		1483.61	-0.00067213		2073.6	-0.00321849		2663.6	-0.00341742		3253.6	0.00688683
303.8	0.00858308		893.79	-0.00090735		1483.81	-0.00063988		2073.8	-0.00268319		2663.8	-0.00326896		3253.8	0.00597946
304	0.00808619		893.99	-0.00151142		1484.01	-0.00033186		2074	-0.00294768		2664	-0.00260357		3254	0.00591724
304.2	0.00771063		894.19	-0.00200526		1484.21	-0.00120449		2074.2	-0.00279269		2664.2	-0.00275154		3254.2	0.00539058
304.4	0.00775749		894.39	-0.00329554		1484.41	-0.00138128		2074.4	-0.00273955		2664.4	-0.0034259		3254.4	0.00523371
304.6	0.0067617		894.59	-0.0034205		1484.61	-0.00143506		2074.6	-0.0023158		2664.6	-0.00297582		3254.6	0.0051392
304.8	0.00626996		894.79	-0.00298598		1484.81	-0.0011818		2074.8	-0.00282476		2664.8	-0.00322672		3254.8	0.00501685
305	0.00596585		894.99	-0.00231107		1485.01	-0.00171221		2075	-0.00209996		2665	-0.00381562		3255	0.00488045
305.2	0.00588762		895.19	-0.00228455		1485.21	-0.00196231		2075.2	-0.00165125		2665.2	-0.0046319		3255.2	0.00489599
305.4	0.00443564		895.39	-0.00243696		1485.41	-0.00237886		2075.4	-0.00187021		2665.4	-0.00450331		3255.4	0.00464227
305.6	0.00523398		895.59	-0.00212614		1485.61	-0.00263689		2075.6	-0.00108523		2665.6	-0.0048469		3255.6	0.00397384
305.8	0.00552153		895.79	-0.00238226		1485.81	-0.00270398		2075.8	-0.00042115		2665.8	-0.00420145		3255.8	0.00415593
306	0.00599477		895.99	-0.00217482		1486.01	-0.00202444		2076	-0.0001564		2666	-0.00413445		3256	0.00455535
306.2	0.00576889		896.19	-0.00270808		1486.21	-0.00168156		2076.2	0.00053363		2666.2	-0.00443613		3256.2	0.00486542
306.4	0.00614886		896.39	-0.00326368		1486.41	-0.00130416		2076.4	0.00046918		2666.4	-0.00486893		3256.4	0.00467424
306.6	0.0072939		896.59	-0.00265814		1486.61	-0.00081523		2076.6	0.00072152		2666.6	-0.00522091		3256.6	0.00425622
306.8	0.00716768		896.79	-0.00239726		1486.81	-0.0009349		2076.8	-0.00000879		2666.8	-0.00544331		3256.8	0.00437319
307	0.00810653		896.99	-0.00195764		1487.01	-0.00094238		2077	0.00035209		2667	-0.00506099		3257	0.00460902
307.2	0.00838523		897.19	-0.002142		1487.21	0.00005748		2077.2	-0.00046409		2667.2	-0.00531952		3257.2	0.00376207
307.4	0.00881187		897.39	-0.00223298		1487.41	0.00075861		2077.4	-0.00073485		2667.4	-0.00624822		3257.4	0.00447714
307.6	0.0088342		897.59	-0.00239139		1487.61	0.00113804		2077.6	-0.00052056		2667.6	-0.00634184		3257.6	0.00423502
307.8	0.00855851		897.79	-0.00300329		1487.81	-0.0002511		2077.8	-0.0008517		2667.8	-0.00665718		3257.8	0.00368554
308	0.00805376		897.99	-0.00335234		1488.01	0.00020876		2078	-0.00126257		2668	-0.00602641		3258	0.00349289
308.2	0.00843167		898.19	-0.00386337		1488.21	-0.0003466		2078.2	-0.00167716		2668.2	-0.00618231		3258.2	0.00269351
308.4	0.00794346		898.39	-0.00400641		1488.41	-0.00033198		2078.4	-0.00268303		2668.4	-0.00568312		3258.4	0.00404617
308.6	0.00710389		898.59	-0.00266916		1488.61	-0.00014254		2078.6	-0.00275494		2668.6	-0.00560177		3258.6	0.0034501
308.8	0.00671176		898.79	-0.00212534		1488.81	-0.0001528		2078.8	-0.00377682		2668.8	-0.0056391		3258.8	0.00328628
309	0.00655355		898.99	-0.00109713		1489.01	-0.00028637		2079	-0.00337659		2669	-0.0056114		3259	0.00327755
309.2	0.00649152		899.19	-0.00086539		1489.21	-0.00057549		2079.2	-0.00295343		2669.2	-0.00552036		3259.2	0.00247201
309.4	0.00611777		899.39	-0.00034018		1489.41	-0.00139137		2079.4	-0.00294343		2669.4	-0.00440574		3259.4	0.00158067
309.6	0.00694175		899.59	-0.00038785		1489.61	-0.00086791		2079.6	-0.00334216		2669.6	-0.00403602		3259.6	0.00187371
309.8	0.00764709		899.79	-0.00004038		1489.81	-0.00103035		2079.8	-0.00248489		2669.8	-0.00414851		3259.8	0.00224885
310	0.00780584		899.99	0.0004731		1490.01	-0.00087491		2080	-0.00225646		2670	-0.00488156		3260	0.00239314
310.2	0.00869169		900.19	0.00040355		1490.21	-0.00100056		2080.2	-0.0021558		2670.2	-0.00521877		3260.2	0.00214535
310.4	0.00960219		900.39	0.00014035		1490.41	-0.00164619		2080.4	-0.00261117		2670.4	-0.00524674		3260.4	0.00199189
310.6	0.00958384		900.59	0.00047155		1490.61	-0.00220266		2080.6	-0.00283694		2670.6	-0.00579442		3260.6	0.00217899
310.8	0.00857859		900.79	-0.00006357		1490.81	-0.00278969		2080.8	-0.00278709		2670.8	-0.00644269		3260.8	0.00307466
311	0.00932489		900.99	-0.0008731		1491.01	-0.0024646		2081	-0.00265533		2671	-0.00624634		3261	0.00313228
311.2	0.00964161		901.19	-0.00211534		1491.21	-0.00242107		2081.2	-0.00262911		2671.2	-0.00709574		3261.2	0.00252635
311.4	0.00947209		901.39	-0.00269825		1491.41	-0.00208997		2081.4	-0.00162292		2671.4	-0.00738535		3261.4	0.00342289
311.6	0.00894991		901.59	-0.00322376		1491.61	-0.0023503		2081.6	-0.0010654		2671.6	-0.00715948		3261.6	0.00310506
311.8	0.00903991		901.79	-0.00425626		1491.81	-0.00258155		2081.8	-0.00085928		2671.8	-0.00646137		3261.8	0.00406063
312	0.00855312		901.99	-0.00432575		1492.01	-0.00194994		2082	-0.00168496		2672	-0.00545891		3262	0.00486369
312.2	0.00869319		902.19	-0.00470013		1492.21	-0.00180561		2082.2	-0.00185691		2672.2	-0.00599197		3262.2	0.00435838
312.4	0.00875002		902.39	-0.00384831		1492.41	-0.00149814		2082.4	-0.00168385		2672.4	-0.00576841		3262.4	0.00483005
312.6	0.00943932		902.59	-0.00421442		1492.61	-0.00128308		2082.6	-0.00218346		2672.6	-0.00607679		3262.6	0.00389143
312.8	0.00968085		902.79	-0.00443148		1492.81	-0.00171503		2082.8	-0.00307694		2672.8	-0.00573416		3262.8	0.00351709
313	0.00983372		902.99	-0.00368466		1493.01	-0.00222412		2083	-0.00290529		2673	-0.00535142		3263	0.00279186
313.2	0.00999516		903.19	-0.00330183		1493.21	-0.0026158		2083.2	-0.00241224		2673.2	-0.00501458		3263.2	0.00231114
313.4	0.01045201		903.39	-0.00299546		1493.41	-0.003113		2083.4	-0.00303676		2673.4	-0.00472655		3263.4	0.00227597
313.6	0.01136352		903.59	-0.00295229		1493.61	-0.00238889		2083.6	-0.00354412		2673.6	-0.0052077		3263.6	0.00178443
313.8	0.01139665		903.79	-0.00254975		1493.81	-0.00296906		2083.8	-0.0034513		2673.8	-0.00548204		3263.8	0.00223753
314	0.01217298		903.99	-0.00258671		1494.01	-0.00304283		2084	-0.0045413		2674	-0.00533489		3264	0.00288741
314.2	0.01221633		904.19	-0.00264243		1494.21	-0.00355846		2084.2	-0.00432166		2674.2	-0.00536437		3264.2	0.00355147
314.4	0.01124135		904.39	-0.00304629		1494.41	-0.00350509		2084.4	-0.00547639		2674.4	-0.00572469		3264.4	0.00400613
314.6	0.0106452		904.59	-0.00370363		1494.61	-0.00382656		2084.6	-0.00553752		2674.6	-0.00604087		3264.6	0.00405246
314.8	0.01043508		904.79	-0.004442		1494.81	-0.00359819		2084.8	-0.00521711		2674.8	-0.00539944		3264.8	0.00437558
315	0.01134538		904.99	-0.00434256		1495.01	-0.0033843		2085	-0.0050272		2675	-0.00443532		3265	0.00433225
315.2	0.01161627		905.19	-0.00453649		1495.21	-0.00360799		2085.2	-0.00430565		2675.2	-0.00380772		3265.2	0.00406985
315.4	0.01112588		905.39	-0.00443475		1495.41	-0.00398301		2085.4	-0.00296906		2675.4	-0.00376052		3265.4	0.00355921
315.6	0.01038483		905.59	-0.00493539		1495.61	-0.00407001		2085.6	-0.00322416		2675.6	-0.00340409		3265.6	0.0038432
315.8	0.00992024		905.79	-0.00500451		1495.81	-0.00377468		2085.8	-0.00291266		2675.8	-0.00344766		3265.8	0.00374209
316	0.00953325		905.99	-0.00449454		1496.01	-0.0034402		2086	-0.00302772		2676	-0.00408788		3266	0.00354089
316.2	0.01043845		906.19	-0.00455668		1496.21	-0.00333556		2086.2	-0.002291		2676.2	-0.0042948		3266.2	0.00168717
316.4	0.01067034		906.39	-0.00439022		1496.41	-0.00323902		2086.4	-0.00269537		2676.4	-0.00331532		3266.4	0.00137877
316.6	0.01148463		906.59	-0.00506516		1496.61	-0.00319475		2086.6	-0.00298091		2676.6	-0.00393171		3266.6	0.00109951
316.8	0.01170889		906.79	-0.00474335		1496.81	-0.00352393		2086.8	-0.00307862		2676.8	-0.00439037		3266.8	0.0003375
317	0.01134544		906.99	-0.00434761		1497.01	-0.00376905		2087	-0.00235616		2677	-0.00433496		3267	-0.0000513
317.2	0.01153927		907.19	-0.00384391		1497.21	-0.003131		2087.2	-0.00176692		2677.2	-0.00447344		3267.2	0.00048291
317.4	0.01034343		907.39	-0.00319419		1497.41	-0.00288937		2087.4	-0.00196959		2677.4	-0.00536998		3267.4	-0.00011979
317.6	0.01074795		907.59	-0.00211018		1497.61	-0.00234706		2087.6	-0.00228466		2677.6	-0.00598647		3267.6	-0.00039613
317.8	0.00963877		907.79	-0.00160884		1497.81	-0.00224743		2087.8	-0.00262828		2677.8	-0.00650741		3267.8	-0.00032368
318	0.0103943		907.99	-0.00141144		1498.01	-0.00247286		2088	-0.00258148		2678	-0.00659908		3268	-0.00042214
318.2	0.00918705		908.19	-0.0013868		1498.21	-0.0031422		2088.2	-0.00223968		2678.2	-0.00643966		3268.2	-0.00087141
318.4	0.00893175		908.39	-0.00205413		1498.41	-0.0029865		2088.4	-0.00309943		2678.4	-0.00646758		3268.4	-0.00066301
318.6	0.00933774		908.59	-0.00220627		1498.61	-0.0030648		2088.6	-0.00219459		2678.6	-0.00631957		3268.6	-0.00089292
318.8	0.01012796		908.79	-0.00141647		1498.81	-0.00244391		2088.8	-0.00209223		2678.8	-0.0053869		3268.8	-0.00068312
319	0.01026816		908.99	-0.0006493		1499.01	-0.00177423		2089	-0.00142969		2679	-0.00579586		3269	-0.0006648
319.2	0.01032788		909.19	-0.00099612		1499.21	-0.0020201		2089.2	-0.00090657		2679.2	-0.00572059		3269.2	-0.00014379
319.4	0.01063825		909.39	-0.00074068		1499.41	-0.00270482		2089.4	0.00007482		2679.4	-0.00625923		3269.4	0.00018933
319.6	0.01030392		909.59	-0.00085573		1499.61	-0.00228072		2089.6	-0.00059765		2679.6	-0.00592481		3269.6	0.00074434
319.8	0.01031903		909.79	-0.00086301		1499.81	-0.00230168		2089.8	0.00052692		2679.8	-0.00622739		3269.8	0.00089566
320	0.01061317		909.99	-0.0011502		1500.01	-0.0019763		2090	0.00038408		2680	-0.0056083		3270	0.00084147
320.2	0.01172436		910.19	-0.00142433		1500.21	-0.00261864		2090.2	0.00009368		2680.2	-0.00521647		3270.2	0.00064331
320.4	0.01185182		910.39	-0.00128499		1500.41	-0.00207621		2090.4	-0.00100492		2680.4	-0.00541822		3270.4	0.00185812
320.6	0.01284441		910.59	-0.00195731		1500.61	-0.00179904		2090.6	-0.00133254		2680.6	-0.00621137		3270.6	0.00177833
320.8	0.01263011		910.79	-0.0014104		1500.81	-0.0014351		2090.8	-0.00120686		2680.8	-0.00616157		3270.8	0.00137811
321	0.01245935		910.99	-0.00098865		1501.01	-0.00065926		2091	-0.00140881		2681	-0.00612494		3271	0.00160284
321.2	0.01207385		911.19	-0.00072553		1501.21	-0.00008426		2091.2	-0.00052112		2681.2	-0.00580468		3271.2	0.00264934
321.4	0.01187915		911.39	-0.00024145		1501.41	-0.00030066		2091.4	-0.00113412		2681.4	-0.00611049		3271.4	0.00194554
321.6	0.01280502		911.59	0.00087471		1501.61	-0.00074636		2091.6	-0.00168006		2681.6	-0.00604283		3271.6	0.00155665
321.8	0.01196918		911.79	0.00099798		1501.81	-0.00074887		2091.8	-0.0022743		2681.8	-0.00569824		3271.8	0.0009013
322	0.01266326		911.99	0.00064666		1502.01	-0.00104916		2092	-0.00232257		2682	-0.00473854		3272	0.00095171
322.2	0.01204483		912.19	0.00041033		1502.21	-0.00105965		2092.2	-0.00335453		2682.2	-0.0043695		3272.2	0.00147446
322.4	0.0128829		912.39	-0.00043327		1502.41	-0.00033586		2092.4	-0.00395413		2682.4	-0.00475366		3272.4	0.00114945
322.6	0.01341211		912.59	-0.00041545		1502.61	0.00032687		2092.6	-0.00443612		2682.6	-0.00406606		3272.6	0.00054132
322.8	0.01399333		912.79	-0.00062138		1502.81	0.0010197		2092.8	-0.00456931		2682.8	-0.0035481		3272.8	0.00102854
323	0.01331164		912.99	-0.00131594		1503.01	0.00098001		2093	-0.00475234		2683	-0.00352177		3273	0.00099298
323.2	0.01372103		913.19	-0.00176486		1503.21	-0.00041875		2093.2	-0.00468929		2683.2	-0.00306391		3273.2	0.00025337
323.4	0.01371049		913.39	-0.00136293		1503.41	-0.00112292		2093.4	-0.00471247		2683.4	-0.00330951		3273.4	0.00012948
323.6	0.01355606		913.59	-0.00179676		1503.61	-0.0016247		2093.6	-0.00498131		2683.6	-0.00371012		3273.6	-0.00020169
323.8	0.01406581		913.79	-0.00276278		1503.81	-0.00202305		2093.8	-0.00424869		2683.8	-0.0038926		3273.8	-0.00046057
324	0.01413191		913.99	-0.00324186		1504.01	-0.00270507		2094	-0.00499347		2684	-0.00411184		3274	-0.0011709
324.2	0.01465814		914.19	-0.00352398		1504.21	-0.00235109		2094.2	-0.00514734		2684.2	-0.00448709		3274.2	-0.00072811
324.4	0.01496719		914.39	-0.00290804		1504.41	-0.00216123		2094.4	-0.00538355		2684.4	-0.00488777		3274.4	-0.00040365
324.6	0.0152653		914.59	-0.00270553		1504.61	-0.00216598		2094.6	-0.00488488		2684.6	-0.00554076		3274.6	-0.00015548
324.8	0.01528844		914.79	-0.00251975		1504.81	-0.00201189		2094.8	-0.00394328		2684.8	-0.0052798		3274.8	0.00031874
325	0.01514234		914.99	-0.00293802		1505.01	-0.00235345		2095	-0.00315054		2685	-0.00530722		3275	0.00086597
325.2	0.01470307		915.19	-0.00298626		1505.21	-0.00332207		2095.2	-0.00227278		2685.2	-0.00459711		3275.2	0.0019678
325.4	0.01522142		915.39	-0.00226604		1505.41	-0.004032		2095.4	-0.00272772		2685.4	-0.00476403		3275.4	0.00142045
325.6	0.01496085		915.59	-0.00142935		1505.61	-0.00380701		2095.6	-0.00235891		2685.6	-0.00487877		3275.6	0.0023039
325.8	0.01488346		915.79	-0.00184915		1505.81	-0.00269623		2095.8	-0.00274796		2685.8	-0.00542439		3275.8	0.00204242
326	0.01526852		915.99	-0.00173495		1506.01	-0.00242849		2096	-0.00299397		2686	-0.00570142		3276	0.00272588
326.2	0.01535758		916.19	-0.00179711		1506.21	-0.00199789		2096.2	-0.00362914		2686.2	-0.00623262		3276.2	0.00297072
326.4	0.01622247		916.39	-0.00205604		1506.41	-0.00241278		2096.4	-0.00356438		2686.4	-0.00555817		3276.4	0.00103524
326.6	0.01692315		916.59	-0.00265181		1506.61	-0.00240814		2096.6	-0.00419114		2686.6	-0.00488763		3276.6	0.00100492
326.8	0.01629048		916.79	-0.00240722		1506.81	-0.00278632		2096.8	-0.0039166		2686.8	-0.00501779		3276.8	0.00010829
327	0.01590676		916.99	-0.0020921		1507.01	-0.00341919		2097	-0.0042815		2687	-0.00463661		3277	-0.00087881
327.2	0.0160337		917.19	-0.00233519		1507.21	-0.0041265		2097.2	-0.00515956		2687.2	-0.00475754		3277.2	-0.0014894
327.4	0.01609182		917.39	-0.00217589		1507.41	-0.0039266		2097.4	-0.00566637		2687.4	-0.00504713		3277.4	-0.00135169
327.6	0.0164531		917.59	-0.00424308		1507.61	-0.00423367		2097.6	-0.00557143		2687.6	-0.00496969		3277.6	-0.00204905
327.8	0.01595926		917.79	-0.00450771		1507.81	-0.00381729		2097.8	-0.00566722		2687.8	-0.00451131		3277.8	-0.00232236
328	0.01496783		917.99	-0.00417057		1508.01	-0.00394729		2098	-0.00584641		2688	-0.00483491		3278	-0.00232587
328.2	0.01507696		918.19	-0.00403667		1508.21	-0.00340915		2098.2	-0.00637918		2688.2	-0.00449703		3278.2	-0.00184208
328.4	0.01480812		918.39	-0.00300931		1508.41	-0.00413643		2098.4	-0.00539655		2688.4	-0.0043536		3278.4	-0.00211779
328.6	0.01407173		918.59	-0.00372599		1508.61	-0.00395541		2098.6	-0.00513033		2688.6	-0.00458605		3278.6	-0.00195883
328.8	0.01397541		918.79	-0.00411526		1508.81	-0.00415218		2098.8	-0.00446468		2688.8	-0.00390836		3278.8	-0.00264881
329	0.01345137		918.99	-0.00442198		1509.01	-0.00380118		2099	-0.00318611		2689	-0.0034084		3279	-0.0029623
329.2	0.01363894		919.19	-0.00427478		1509.21	-0.00365375		2099.2	-0.00330149		2689.2	-0.00380093		3279.2	-0.00217338
329.4	0.01457384		919.39	-0.00400838		1509.41	-0.00304787		2099.4	-0.00260035		2689.4	-0.00447024		3279.4	-0.00227162
329.6	0.01510302		919.59	-0.00392758		1509.61	-0.00238213		2099.6	-0.00197615		2689.6	-0.00538288		3279.6	-0.00145391
329.8	0.01530776		919.79	-0.00436779		1509.81	-0.00172688		2099.8	-0.00252953		2689.8	-0.00592085		3279.8	-0.00191431
330	0.01607738		919.99	-0.00457027		1510.01	-0.00135942		2100	-0.00223255		2690	-0.00552137		3280	-0.00155827
330.2	0.01682043		920.19	-0.00497216		1510.21	-0.00116766		2100.2	-0.00203191		2690.2	-0.00620285		3280.2	-0.00189044
330.4	0.01773662		920.39	-0.00483586		1510.41	-0.00147308		2100.4	-0.00152061		2690.4	-0.00635048		3280.4	-0.00225572
330.6	0.01780426		920.59	-0.0050433		1510.61	-0.00129552		2100.6	-0.00201649		2690.6	-0.00730158		3280.6	-0.0021412
330.8	0.01704647		920.79	-0.00478704		1510.81	-0.00170758		2100.8	-0.00126573		2690.8	-0.00716537		3280.8	-0.00222333
331	0.01748171		920.99	-0.00489026		1511.01	-0.00160037		2101	-0.00123708		2691	-0.00710871		3281	-0.00113347
331.2	0.01715053		921.19	-0.00549686		1511.21	-0.00113516		2101.2	-0.00208243		2691.2	-0.00781775		3281.2	-0.00063618
331.4	0.01658157		921.39	-0.00510078		1511.41	-0.00093934		2101.4	-0.00230857		2691.4	-0.00842477		3281.4	-0.00073772
331.6	0.0169294		921.59	-0.00521744		1511.61	-0.00090495		2101.6	-0.00198942		2691.6	-0.00783605		3281.6	-0.00094725
331.8	0.01603959		921.79	-0.00424124		1511.81	-0.00147183		2101.8	-0.0021325		2691.8	-0.00755554		3281.8	-0.00053182
332	0.01557154		921.99	-0.00414997		1512.01	-0.00218788		2102	-0.00282152		2692	-0.00735456		3282	-0.00030794
332.2	0.01530191		922.19	-0.00332141		1512.21	-0.00100267		2102.2	-0.00286334		2692.2	-0.00683401		3282.2	-0.00079891
332.4	0.01511403		922.39	-0.00205352		1512.41	-0.00087095		2102.4	-0.00245488		2692.4	-0.0068122		3282.4	-0.00090268
332.6	0.01443944		922.59	-0.00241209		1512.61	-0.00034645		2102.6	-0.00328797		2692.6	-0.00657407		3282.6	-0.00045399
332.8	0.01463203		922.79	-0.00176927		1512.81	-0.00076777		2102.8	-0.00339572		2692.8	-0.00553522		3282.8	-0.00016606
333	0.01449987		922.99	-0.00168718		1513.01	-0.00037559		2103	-0.00350092		2693	-0.00512273		3283	-0.00063593
333.2	0.01522715		923.19	-0.00200457		1513.21	-0.00020008		2103.2	-0.0037479		2693.2	-0.00533339		3283.2	0.00013115
333.4	0.01635687		923.39	-0.00243692		1513.41	-0.00084751		2103.4	-0.00408928		2693.4	-0.00505476		3283.4	0.00014344
333.6	0.01671169		923.59	-0.00221662		1513.61	-0.0010763		2103.6	-0.0043851		2693.6	-0.00450217		3283.6	-0.00016662
333.8	0.01720306		923.79	-0.00219828		1513.81	-0.0012818		2103.8	-0.00506578		2693.8	-0.00380023		3283.8	-0.00125832
334	0.01851626		923.99	-0.00178078		1514.01	-0.0012647		2104	-0.00495764		2694	-0.00366592		3284	-0.00171177
334.2	0.01873477		924.19	-0.00194496		1514.21	-0.00157193		2104.2	-0.00494244		2694.2	-0.0041672		3284.2	-0.00130769
334.4	0.01907361		924.39	-0.00154679		1514.41	-0.00147905		2104.4	-0.00411865		2694.4	-0.00456775		3284.4	-0.00102095
334.6	0.01944527		924.59	-0.00153182		1514.61	-0.00169216		2104.6	-0.00376503		2694.6	-0.00438357		3284.6	-0.00049686
334.8	0.0194855		924.79	-0.00177284		1514.81	-0.00231074		2104.8	-0.00294825		2694.8	-0.00454586		3284.8	0.00022496
335	0.01960653		924.99	-0.00189732		1515.01	-0.0019646		2105	-0.0024353		2695	-0.00485776		3285	0.00053699
335.2	0.01950719		925.19	-0.00170004		1515.21	-0.00159623		2105.2	-0.00293438		2695.2	-0.00436613		3285.2	0.00021213
335.4	0.01903889		925.39	-0.00157932		1515.41	-0.00198698		2105.4	-0.00316494		2695.4	-0.0043048		3285.4	-0.00072274
335.6	0.01907104		925.59	-0.00241849		1515.61	-0.00253182		2105.6	-0.00245241		2695.6	-0.0033192		3285.6	-0.00015365
335.8	0.01808155		925.79	-0.00319836		1515.81	-0.00341195		2105.8	-0.00248942		2695.8	-0.0037334		3285.8	-0.00025096
336	0.01727426		925.99	-0.00325306		1516.01	-0.0027852		2106	-0.00284405		2696	-0.00407427		3286	-0.00056346
336.2	0.01701974		926.19	-0.00354965		1516.21	-0.00182141		2106.2	-0.00242207		2696.2	-0.00465134		3286.2	-0.000585
336.4	0.01639001		926.39	-0.00309094		1516.41	-0.00192603		2106.4	-0.00230432		2696.4	-0.00576182		3286.4	-0.00013857
336.6	0.01566189		926.59	-0.0036011		1516.61	-0.00128273		2106.6	-0.00304783		2696.6	-0.00581545		3286.6	0.00028357
336.8	0.01606305		926.79	-0.00360936		1516.81	-0.00124588		2106.8	-0.0028197		2696.8	-0.00606077		3286.8	-0.00024743
337	0.01608831		926.99	-0.00364001		1517.01	-0.00125372		2107	-0.00323274		2697	-0.00713655		3287	-0.00082593
337.2	0.01609129		927.19	-0.00417694		1517.21	-0.00109558		2107.2	-0.00352472		2697.2	-0.00699778		3287.2	-0.00059007
337.4	0.01610387		927.39	-0.00405099		1517.41	-0.00204332		2107.4	-0.00405949		2697.4	-0.00739616		3287.4	-0.00129553
337.6	0.0162116		927.59	-0.00347071		1517.61	-0.00167124		2107.6	-0.00404994		2697.6	-0.00766088		3287.6	-0.00200935
337.8	0.01668874		927.79	-0.00302671		1517.81	-0.00180843		2107.8	-0.00489909		2697.8	-0.00755303		3287.8	-0.00260396
338	0.01729657		927.99	-0.00343976		1518.01	-0.00193255		2108	-0.00465245		2698	-0.00694387		3288	-0.003082
338.2	0.01712567		928.19	-0.00341772		1518.21	-0.00229693		2108.2	-0.00534144		2698.2	-0.00659963		3288.2	-0.00322935
338.4	0.01764804		928.39	-0.00336675		1518.41	-0.00245897		2108.4	-0.00493884		2698.4	-0.00698448		3288.4	-0.00357958
338.6	0.0178615		928.59	-0.00337896		1518.61	-0.00405149		2108.6	-0.00541717		2698.6	-0.0066872		3288.6	-0.00295054
338.8	0.01786085		928.79	-0.00343726		1518.81	-0.00416644		2108.8	-0.00566028		2698.8	-0.00581524		3288.8	-0.00413839
339	0.01840418		928.99	-0.00383997		1519.01	-0.00424612		2109	-0.00647823		2699	-0.00481874		3289	-0.00423906
339.2	0.01831379		929.19	-0.00412122		1519.21	-0.00402856		2109.2	-0.00684722		2699.2	-0.00339006		3289.2	-0.00468656
339.4	0.01806697		929.39	-0.00392782		1519.41	-0.00419867		2109.4	-0.00615274		2699.4	-0.00409482		3289.4	-0.00544227
339.6	0.0192058		929.59	-0.00494472		1519.61	-0.00469171		2109.6	-0.00584018		2699.6	-0.00395428		3289.6	-0.00528156
339.8	0.02038097		929.79	-0.00471192		1519.81	-0.0045211		2109.8	-0.00605797		2699.8	-0.004586		3289.8	-0.00610935
340	0.02046552		929.99	-0.0041687		1520.01	-0.00433413		2110	-0.00517526		2700	-0.00504325		3290	-0.00671507
340.2	0.02125866		930.19	-0.00492099		1520.21	-0.00414764		2110.2	-0.00399494		2700.2	-0.00505533		3290.2	-0.00670635
340.4	0.02142883		930.39	-0.00455556		1520.41	-0.00374143		2110.4	-0.00351988		2700.4	-0.00610498		3290.4	-0.00670963
340.6	0.02107609		930.59	-0.00493831		1520.61	-0.00343259		2110.6	-0.00356893		2700.6	-0.00569065		3290.6	-0.00583523
340.8	0.0214089		930.79	-0.00460729		1520.81	-0.00334035		2110.8	-0.0023729		2700.8	-0.0058883		3290.8	-0.00559712
341	0.02094018		930.99	-0.00415276		1521.01	-0.0033724		2111	-0.00257149		2701	-0.00627508		3291	-0.00423325
341.2	0.02033477		931.19	-0.00424449		1521.21	-0.00292993		2111.2	-0.00194755		2701.2	-0.00546881		3291.2	-0.00381452
341.4	0.02066127		931.39	-0.00476007		1521.41	-0.00280537		2111.4	-0.00175085		2701.4	-0.00560514		3291.4	-0.00326671
341.6	0.02038012		931.59	-0.00453325		1521.61	-0.00245842		2111.6	-0.00216191		2701.6	-0.00528285		3291.6	-0.00261758
341.8	0.02052772		931.79	-0.00425557		1521.81	-0.00294814		2111.8	-0.00241008		2701.8	-0.00504824		3291.8	-0.00304944
342	0.01955682		931.99	-0.00436643		1522.01	-0.00344906		2112	-0.00179996		2702	-0.00558365		3292	-0.00283274
342.2	0.01918531		932.19	-0.0030435		1522.21	-0.00383684		2112.2	-0.00232637		2702.2	-0.00539805		3292.2	-0.00332109
342.4	0.01840125		932.39	-0.0027058		1522.41	-0.00388427		2112.4	-0.00169159		2702.4	-0.00582944		3292.4	-0.00226043
342.6	0.01756853		932.59	-0.00285237		1522.61	-0.00473886		2112.6	-0.00221784		2702.6	-0.00601442		3292.6	-0.00128745
342.8	0.01759001		932.79	-0.00238833		1522.81	-0.00378935		2112.8	-0.00229143		2702.8	-0.00574564		3292.8	-0.00127345
343	0.01767236		932.99	-0.00287491		1523.01	-0.00401033		2113	-0.00255992		2703	-0.00603693		3293	-0.00071056
343.2	0.01756761		933.19	-0.00287636		1523.21	-0.00346937		2113.2	-0.00217095		2703.2	-0.00573677		3293.2	-0.00059271
343.4	0.01849484		933.39	-0.00155892		1523.41	-0.00340241		2113.4	-0.00230345		2703.4	-0.00676136		3293.4	-0.00140063
343.6	0.01926777		933.59	-0.00209015		1523.61	-0.00400531		2113.6	-0.00321176		2703.6	-0.00685462		3293.6	-0.00145544
343.8	0.01960681		933.79	-0.00196872		1523.81	-0.00378521		2113.8	-0.00315675		2703.8	-0.00662144		3293.8	-0.00180273
344	0.01967999		933.99	-0.00239824		1524.01	-0.00440117		2114	-0.00293297		2704	-0.00707812		3294	-0.001914
344.2	0.02060407		934.19	-0.00326511		1524.21	-0.0047292		2114.2	-0.00298788		2704.2	-0.006639		3294.2	-0.00151122
344.4	0.02065541		934.39	-0.00264433		1524.41	-0.0050883		2114.4	-0.00378095		2704.4	-0.00684626		3294.4	-0.00134167
344.6	0.02072927		934.59	-0.00276759		1524.61	-0.00457463		2114.6	-0.00424156		2704.6	-0.00629345		3294.6	-0.00116572
344.8	0.02231973		934.79	-0.00255207		1524.81	-0.00453159		2114.8	-0.00396837		2704.8	-0.00629017		3294.8	-0.00119987
345	0.02265882		934.99	-0.00287089		1525.01	-0.0042862		2115	-0.00482694		2705	-0.00577946		3295	-0.00117041
345.2	0.0230674		935.19	-0.00324161		1525.21	-0.00405824		2115.2	-0.00507085		2705.2	-0.00443169		3295.2	-0.00224829
345.4	0.02312016		935.39	-0.00421793		1525.41	-0.00368366		2115.4	-0.00553958		2705.4	-0.00466049		3295.4	-0.00223695
345.6	0.02197387		935.59	-0.00476838		1525.61	-0.0038748		2115.6	-0.00542831		2705.6	-0.00446234		3295.6	-0.00219216
345.8	0.0221214		935.79	-0.00485832		1525.81	-0.00363794		2115.8	-0.00540003		2705.8	-0.00507762		3295.8	-0.00284114
346	0.02125147		935.99	-0.00503112		1526.01	-0.00337729		2116	-0.00458608		2706	-0.00516105		3296	-0.00249198
346.2	0.02140031		936.19	-0.00482707		1526.21	-0.00289765		2116.2	-0.00438892		2706.2	-0.00396473		3296.2	-0.00244181
346.4	0.02067551		936.39	-0.00467901		1526.41	-0.00209994		2116.4	-0.00397101		2706.4	-0.0042058		3296.4	-0.00138557
346.6	0.02056594		936.59	-0.00545169		1526.61	-0.00231412		2116.6	-0.0041324		2706.6	-0.00414097		3296.6	-0.00138682
346.8	0.02050829		936.79	-0.00459991		1526.81	-0.00217668		2116.8	-0.00367939		2706.8	-0.00413951		3296.8	-0.00122814
347	0.02042894		936.99	-0.00422024		1527.01	-0.00200151		2117	-0.00410517		2707	-0.00439594		3297	-0.00169957
347.2	0.01963137		937.19	-0.00353705		1527.21	-0.00237763		2117.2	-0.00336261		2707.2	-0.00506443		3297.2	-0.0017505
347.4	0.01999777		937.39	-0.0031447		1527.41	-0.00288247		2117.4	-0.00340328		2707.4	-0.0051247		3297.4	-0.00245281
347.6	0.01959659		937.59	-0.00339294		1527.61	-0.00315551		2117.6	-0.00381397		2707.6	-0.00507225		3297.6	-0.00138969
347.8	0.01910827		937.79	-0.00335267		1527.81	-0.00356456		2117.8	-0.00311055		2707.8	-0.00532456		3297.8	-0.00171668
348	0.01963149		937.99	-0.0025417		1528.01	-0.00402561		2118	-0.00379086		2708	-0.006054		3298	-0.00132317
348.2	0.02001369		938.19	-0.0014932		1528.21	-0.00534619		2118.2	-0.00446738		2708.2	-0.00639239		3298.2	-0.00158661
348.4	0.02038677		938.39	-0.00081498		1528.41	-0.00464653		2118.4	-0.00530547		2708.4	-0.00672801		3298.4	-0.00204996
348.6	0.02040196		938.59	-0.00138958		1528.61	-0.0044146		2118.6	-0.00532303		2708.6	-0.00688991		3298.6	-0.0025371
348.8	0.020413		938.79	-0.00064382		1528.81	-0.00516614		2118.8	-0.00537034		2708.8	-0.00712454		3298.8	-0.00331701
349	0.01974606		938.99	-0.00074938		1529.01	-0.0050803		2119	-0.00591786		2709	-0.00629103		3299	-0.00437392
349.2	0.02033557		939.19	-0.00146408		1529.21	-0.00509245		2119.2	-0.00618122		2709.2	-0.00560641		3299.2	-0.00524405
349.4	0.02000968		939.39	-0.00237007		1529.41	-0.00484882		2119.4	-0.00609974		2709.4	-0.00613596		3299.4	-0.00468336
349.6	0.02030632		939.59	-0.0030126		1529.61	-0.00503945		2119.6	-0.00601624		2709.6	-0.00581274		3299.6	-0.00443803
349.8	0.02163618		939.79	-0.00403117		1529.81	-0.00522167		2119.8	-0.00569268		2709.8	-0.00603356		3299.8	-0.00519691
350	0.0221033		939.99	-0.00518198		1530.01	-0.00507649		2120	-0.00489968		2710	-0.00576697		3300	-0.00506105
350.2	0.02252804		940.19	-0.00511442		1530.21	-0.00405855		2120.2	-0.00540162		2710.2	-0.00533332		3300.2	-0.0052116
350.4	0.02277461		940.39	-0.00428893		1530.41	-0.00434964		2120.4	-0.0055848		2710.4	-0.00565661		3300.4	-0.00587294
350.6	0.02357309		940.59	-0.00418753		1530.61	-0.00420678		2120.6	-0.0050446		2710.6	-0.00507373		3300.6	-0.00578614
350.8	0.02354154		940.79	-0.00359191		1530.81	-0.0036391		2120.8	-0.00416028		2710.8	-0.00501965		3300.8	-0.00575032
351	0.02382151		940.99	-0.00365649		1531.01	-0.00354233		2121	-0.00349716		2711	-0.00407151		3301	-0.00651966
351.2	0.02337793		941.19	-0.0041733		1531.21	-0.00279152		2121.2	-0.00293971		2711.2	-0.0034571		3301.2	-0.00610529
351.4	0.02441249		941.39	-0.00441115		1531.41	-0.00292248		2121.4	-0.0032222		2711.4	-0.00350352		3301.4	-0.00529552
351.6	0.02382838		941.59	-0.00365364		1531.61	-0.00221231		2121.6	-0.00284642		2711.6	-0.00366388		3301.6	-0.00389652
351.8	0.02226795		941.79	-0.00350452		1531.81	-0.00195476		2121.8	-0.0027438		2711.8	-0.00475034		3301.8	-0.00368169
352	0.02276857		941.99	-0.00236299		1532.01	-0.0010989		2122	-0.0044497		2712	-0.00593815		3302	-0.00329484
352.2	0.02290744		942.19	-0.00249929		1532.21	-0.00143842		2122.2	-0.00416151		2712.2	-0.00624899		3302.2	-0.00302117
352.4	0.02249121		942.39	-0.00248226		1532.41	-0.00057274		2122.4	-0.00437895		2712.4	-0.00641593		3302.4	-0.0031073
352.6	0.02173556		942.59	-0.0019985		1532.61	-0.00178038		2122.6	-0.00351508		2712.6	-0.00617447		3302.6	-0.00325586
352.8	0.02178153		942.79	-0.00155421		1532.81	-0.00236044		2122.8	-0.00367325		2712.8	-0.00623333		3302.8	-0.00324495
353	0.02203762		942.99	-0.00226203		1533.01	-0.00244919		2123	-0.00273763		2713	-0.0059323		3303	-0.00292078
353.2	0.02303016		943.19	-0.00288933		1533.21	-0.00264063		2123.2	-0.00258264		2713.2	-0.00602138		3303.2	-0.00310942
353.4	0.02166799		943.39	-0.00246614		1533.41	-0.00301589		2123.4	-0.00207642		2713.4	-0.00657462		3303.4	-0.00285119
353.6	0.02197781		943.59	-0.00254923		1533.61	-0.00320549		2123.6	-0.00184636		2713.6	-0.0066322		3303.6	-0.0035844
353.8	0.02173769		943.79	-0.00299445		1533.81	-0.00405787		2123.8	-0.00193935		2713.8	-0.00656068		3303.8	-0.00490287
354	0.02175113		943.99	-0.00307564		1534.01	-0.00391954		2124	-0.00231701		2714	-0.00648813		3304	-0.00550104
354.2	0.02092248		944.19	-0.00164053		1534.21	-0.00431882		2124.2	-0.00349783		2714.2	-0.0065951		3304.2	-0.00582819
354.4	0.02111823		944.39	-0.00109531		1534.41	-0.00504917		2124.4	-0.00421212		2714.4	-0.00621185		3304.4	-0.00646976
354.6	0.02152898		944.59	-0.00172239		1534.61	-0.00438795		2124.6	-0.00443868		2714.6	-0.00557217		3304.6	-0.00677964
354.8	0.02148639		944.79	-0.00231847		1534.81	-0.0049225		2124.8	-0.00538288		2714.8	-0.00507277		3304.8	-0.0067161
355	0.02199844		944.99	-0.00256027		1535.01	-0.00444084		2125	-0.00614962		2715	-0.00434916		3305	-0.00684427
355.2	0.02176456		945.19	-0.00228119		1535.21	-0.00400023		2125.2	-0.00712807		2715.2	-0.00431335		3305.2	-0.00658923
355.4	0.02238915		945.39	-0.00207355		1535.41	-0.00398381		2125.4	-0.00703123		2715.4	-0.00464469		3305.4	-0.00552015
355.6	0.02178442		945.59	-0.00156165		1535.61	-0.00333065		2125.6	-0.00739494		2715.6	-0.00471414		3305.6	-0.00475038
355.8	0.02136973		945.79	-0.0016616		1535.81	-0.00262039		2125.8	-0.00887442		2715.8	-0.00473994		3305.8	-0.00496897
356	0.02230161		945.99	-0.00108136		1536.01	-0.00258185		2126	-0.00894978		2716	-0.00478893		3306	-0.00541484
356.2	0.02314946		946.19	-0.00061004		1536.21	-0.00266576		2126.2	-0.00817496		2716.2	-0.00375241		3306.2	-0.00487715
356.4	0.02348672		946.39	-0.00051237		1536.41	-0.00263165		2126.4	-0.00758154		2716.4	-0.0035863		3306.4	-0.00477432
356.6	0.02432506		946.59	-0.0000786		1536.61	-0.00307965		2126.6	-0.00647055		2716.6	-0.00374959		3306.6	-0.00433348
356.8	0.0248239		946.79	-0.00037237		1536.81	-0.00291004		2126.8	-0.00656489		2716.8	-0.00423684		3306.8	-0.00414453
357	0.02479441		946.99	-0.00064261		1537.01	-0.00278906		2127	-0.00532486		2717	-0.00377247		3307	-0.00382629
357.2	0.0243591		947.19	-0.00004161		1537.21	-0.00273451		2127.2	-0.00526813		2717.2	-0.00396849		3307.2	-0.00425838
357.4	0.02380817		947.39	0.00021096		1537.41	-0.00246042		2127.4	-0.00458293		2717.4	-0.00453415		3307.4	-0.00387372
357.6	0.02461922		947.59	0.00022521		1537.61	-0.00243594		2127.6	-0.0041138		2717.6	-0.0040038		3307.6	-0.00336744
357.8	0.02552449		947.79	0.00024197		1537.81	-0.00294629		2127.8	-0.00415812		2717.8	-0.00347633		3307.8	-0.00332222
358	0.02600201		947.99	-0.00032592		1538.01	-0.0030768		2128	-0.00410895		2718	-0.00397281		3308	-0.00270131
358.2	0.0257022		948.19	0.00036136		1538.21	-0.00314763		2128.2	-0.00440795		2718.2	-0.00476986		3308.2	-0.00252878
358.4	0.02666943		948.39	-0.0006305		1538.41	-0.0031498		2128.4	-0.00429595		2718.4	-0.00568649		3308.4	-0.00302417
358.6	0.02699295		948.59	-0.00109609		1538.61	-0.00340153		2128.6	-0.00363231		2718.6	-0.00632591		3308.6	-0.00294261
358.8	0.02713771		948.79	-0.00164568		1538.81	-0.00363831		2128.8	-0.00329301		2718.8	-0.0062303		3308.8	-0.00198091
359	0.02677386		948.99	-0.00216488		1539.01	-0.00366195		2129	-0.00307391		2719	-0.00587467		3309	-0.00236697
359.2	0.02623656		949.19	-0.00212223		1539.21	-0.00416024		2129.2	-0.00274614		2719.2	-0.00592167		3309.2	-0.00227803
359.4	0.02627845		949.39	-0.00302089		1539.41	-0.00383374		2129.4	-0.00283745		2719.4	-0.00560214		3309.4	-0.00143322
359.6	0.02573602		949.59	-0.00345856		1539.61	-0.00400428		2129.6	-0.00301877		2719.6	-0.00574605		3309.6	-0.00180058
359.8	0.02566315		949.79	-0.00327193		1539.81	-0.00333412		2129.8	-0.00363451		2719.8	-0.00457949		3309.8	-0.00196778
360	0.0248018		949.99	-0.0030546		1540.01	-0.00308444		2130	-0.0030937		2720	-0.00447664		3310	-0.00237579
360.2	0.02453647		950.19	-0.00270923		1540.21	-0.00333146		2130.2	-0.00319822		2720.2	-0.0039368		3310.2	-0.00336802
360.4	0.02370605		950.39	-0.00341026		1540.41	-0.00295805		2130.4	-0.0030411		2720.4	-0.00390188		3310.4	-0.00412916
360.6	0.02302079		950.59	-0.00368897		1540.61	-0.00328706		2130.6	-0.00316239		2720.6	-0.00402006		3310.6	-0.00388424
360.8	0.0218824		950.79	-0.00311499		1540.81	-0.00252632		2130.8	-0.00452336		2720.8	-0.00343237		3310.8	-0.00444645
361	0.02138337		950.99	-0.00255086		1541.01	-0.00245873		2131	-0.00422046		2721	-0.00336694		3311	-0.00368861
361.2	0.02127875		951.19	-0.0021607		1541.21	-0.00263508		2131.2	-0.00418184		2721.2	-0.00345918		3311.2	-0.00373081
361.4	0.02219473		951.39	-0.00257783		1541.41	-0.00252213		2131.4	-0.00382399		2721.4	-0.00343522		3311.4	-0.00365327
361.6	0.02323071		951.59	-0.00192488		1541.61	-0.00296354		2131.6	-0.00431582		2721.6	-0.00262614		3311.6	-0.00318364
361.8	0.0240352		951.79	-0.00167662		1541.81	-0.00276797		2131.8	-0.00446893		2721.8	-0.00316681		3311.8	-0.0023738
362	0.02371016		951.99	-0.00168034		1542.01	-0.00224558		2132	-0.00386911		2722	-0.00389336		3312	-0.00204677
362.2	0.02360678		952.19	-0.00130548		1542.21	-0.00237006		2132.2	-0.00291232		2722.2	-0.00447476		3312.2	-0.00209256
362.4	0.02406786		952.39	-0.00187585		1542.41	-0.00256128		2132.4	-0.0027164		2722.4	-0.00479743		3312.4	-0.0020068
362.6	0.02451594		952.59	-0.00165461		1542.61	-0.00279737		2132.6	-0.00212272		2722.6	-0.00504738		3312.6	-0.00158384
362.8	0.02485502		952.79	-0.00212011		1542.81	-0.0028719		2132.8	-0.00194975		2722.8	-0.00542686		3312.8	-0.00150468
363	0.02531843		952.99	-0.00240347		1543.01	-0.00297408		2133	-0.00203706		2723	-0.00539188		3313	-0.00151011
363.2	0.02505037		953.19	-0.00243978		1543.21	-0.0029424		2133.2	-0.00227401		2723.2	-0.00544375		3313.2	-0.00041728
363.4	0.02557886		953.39	-0.0032199		1543.41	-0.00336246		2133.4	-0.00250136		2723.4	-0.00520492		3313.4	-0.00110425
363.6	0.02536946		953.59	-0.00314716		1543.61	-0.00349505		2133.6	-0.00188948		2723.6	-0.00507717		3313.6	-0.00123175
363.8	0.0252908		953.79	-0.00311806		1543.81	-0.0032194		2133.8	-0.00148253		2723.8	-0.00417998		3313.8	-0.00129649
364	0.02509969		953.99	-0.00339301		1544.01	-0.00361897		2134	-0.00099691		2724	-0.00418181		3314	-0.00287838
364.2	0.02579206		954.19	-0.00437679		1544.21	-0.00484563		2134.2	-0.00110336		2724.2	-0.00422054		3314.2	-0.00367672
364.4	0.02446562		954.39	-0.00463965		1544.41	-0.00450525		2134.4	-0.00161303		2724.4	-0.00446318		3314.4	-0.00328298
364.6	0.02462309		954.59	-0.00467572		1544.61	-0.00468934		2134.6	-0.00098067		2724.6	-0.00459181		3314.6	-0.00290134
364.8	0.02458653		954.79	-0.00364498		1544.81	-0.00445618		2134.8	-0.0019465		2724.8	-0.00455858		3314.8	-0.00322698
365	0.02575642		954.99	-0.00375628		1545.01	-0.00472077		2135	-0.00164086		2725	-0.00465463		3315	-0.00314311
365.2	0.02631813		955.19	-0.00431148		1545.21	-0.00432425		2135.2	-0.00158264		2725.2	-0.00391183		3315.2	-0.00356514
365.4	0.02672471		955.39	-0.0039543		1545.41	-0.00451531		2135.4	-0.00142743		2725.4	-0.00408366		3315.4	-0.00359317
365.6	0.02702256		955.59	-0.0032524		1545.61	-0.00453671		2135.6	-0.00195829		2725.6	-0.00446605		3315.6	-0.00267799
365.8	0.02662146		955.79	-0.00319066		1545.81	-0.00445129		2135.8	-0.0018562		2725.8	-0.00483673		3315.8	-0.00280828
366	0.02666564		955.99	-0.00259049		1546.01	-0.00424756		2136	-0.00194664		2726	-0.00416265		3316	-0.00303351
366.2	0.02734565		956.19	-0.00175118		1546.21	-0.00465944		2136.2	-0.00204202		2726.2	-0.00438702		3316.2	-0.00288007
366.4	0.02817034		956.39	-0.00182367		1546.41	-0.00446475		2136.4	-0.00288208		2726.4	-0.00493125		3316.4	-0.00307887
366.6	0.0288384		956.59	-0.00114038		1546.61	-0.00403283		2136.6	-0.0028382		2726.6	-0.00550036		3316.6	-0.0036332
366.8	0.02853321		956.79	-0.00110561		1546.81	-0.00365953		2136.8	-0.00250539		2726.8	-0.00579425		3316.8	-0.00421559
367	0.02834395		956.99	-0.00056543		1547.01	-0.00317955		2137	-0.00327611		2727	-0.00545526		3317	-0.00389342
367.2	0.02782934		957.19	-0.00083333		1547.21	-0.00315122		2137.2	-0.00311612		2727.2	-0.00558183		3317.2	-0.00394686
367.4	0.02825843		957.39	-0.00053773		1547.41	-0.00325067		2137.4	-0.00295259		2727.4	-0.00567114		3317.4	-0.00464168
367.6	0.02783412		957.59	-0.00065803		1547.61	-0.00298964		2137.6	-0.00215565		2727.6	-0.00507953		3317.6	-0.00434726
367.8	0.02825676		957.79	-0.0017249		1547.81	-0.00266061		2137.8	-0.00254697		2727.8	-0.00472118		3317.8	-0.00403971
368	0.02830707		957.99	-0.00248233		1548.01	-0.00268188		2138	-0.00263779		2728	-0.00518799		3318	-0.00453668
368.2	0.02838717		958.19	-0.00355691		1548.21	-0.00230663		2138.2	-0.00344363		2728.2	-0.00508387		3318.2	-0.00395075
368.4	0.02707909		958.39	-0.00353772		1548.41	-0.00158113		2138.4	-0.00283244		2728.4	-0.00602518		3318.4	-0.00352532
368.6	0.02761513		958.59	-0.002616		1548.61	-0.00114419		2138.6	-0.00246327		2728.6	-0.00573642		3318.6	-0.00310427
368.8	0.02772347		958.79	-0.00272191		1548.81	-0.00003927		2138.8	-0.00270228		2728.8	-0.00558743		3318.8	-0.00256273
369	0.02846614		958.99	-0.00305421		1549.01	0.00043725		2139	-0.00298363		2729	-0.00504133		3319	-0.00301229
369.2	0.02814883		959.19	-0.00336333		1549.21	0.00060573		2139.2	-0.00269408		2729.2	-0.00423788		3319.2	-0.00231511
369.4	0.02821194		959.39	-0.00294461		1549.41	-0.0008028		2139.4	-0.00234709		2729.4	-0.00465027		3319.4	-0.00186596
369.6	0.02870487		959.59	-0.0026411		1549.61	-0.00057717		2139.6	-0.00350414		2729.6	-0.00496913		3319.6	-0.0013163
369.8	0.02980079		959.79	-0.00228292		1549.81	-0.00121882		2139.8	-0.00379096		2729.8	-0.00440061		3319.8	-0.00158258
370	0.0299295		959.99	-0.00238789		1550.01	-0.00137889		2140	-0.00339104		2730	-0.00349854		3320	-0.00103987
370.2	0.03022975		960.19	-0.0025454		1550.21	-0.00173599		2140.2	-0.00347031		2730.2	-0.00306171		3320.2	-0.0011117
370.4	0.03013578		960.39	-0.00305137		1550.41	-0.00233534		2140.4	-0.00385702		2730.4	-0.00236261		3320.4	-0.00124656
370.6	0.02990442		960.59	-0.00252994		1550.61	-0.0028985		2140.6	-0.00421846		2730.6	-0.00170181		3320.6	-0.00192137
370.8	0.02938948		960.79	-0.00228988		1550.81	-0.0035419		2140.8	-0.00439646		2730.8	-0.00123919		3320.8	-0.00257681
371	0.02915597		960.99	-0.00268685		1551.01	-0.00371652		2141	-0.00514409		2731	-0.00124248		3321	-0.00335818
371.2	0.02940262		961.19	-0.00335613		1551.21	-0.00378521		2141.2	-0.00461586		2731.2	-0.00113212		3321.2	-0.00344917
371.4	0.02929421		961.39	-0.00377017		1551.41	-0.004931		2141.4	-0.00468872		2731.4	-0.00145743		3321.4	-0.00327196
371.6	0.02900721		961.59	-0.00454399		1551.61	-0.00544487		2141.6	-0.00512274		2731.6	-0.00172944		3321.6	-0.0030871
371.8	0.02942876		961.79	-0.00495271		1551.81	-0.00549451		2141.8	-0.00548528		2731.8	-0.00171231		3321.8	-0.00244142
372	0.02862307		961.99	-0.00476924		1552.01	-0.0054593		2142	-0.00560796		2732	-0.0028423		3322	-0.00215652
372.2	0.028728		962.19	-0.0051489		1552.21	-0.00538227		2142.2	-0.00619243		2732.2	-0.00305475		3322.2	-0.00206101
372.4	0.02820002		962.39	-0.00483976		1552.41	-0.00511267		2142.4	-0.00558538		2732.4	-0.00483979		3322.4	-0.00273258
372.6	0.02922374		962.59	-0.00426572		1552.61	-0.00507283		2142.6	-0.005727		2732.6	-0.00546078		3322.6	-0.00246585
372.8	0.02921331		962.79	-0.00445001		1552.81	-0.00473056		2142.8	-0.00547994		2732.8	-0.00538544		3322.8	-0.00305422
373	0.02941373		962.99	-0.00335943		1553.01	-0.00520324		2143	-0.005116		2733	-0.00564028		3323	-0.00319163
373.2	0.02937896		963.19	-0.00216559		1553.21	-0.00485831		2143.2	-0.00488776		2733.2	-0.00595337		3323.2	-0.00295857
373.4	0.02928222		963.39	-0.00124389		1553.41	-0.00537758		2143.4	-0.00473407		2733.4	-0.00701228		3323.4	-0.00302308
373.6	0.02959945		963.59	-0.00072712		1553.61	-0.00507383		2143.6	-0.00579577		2733.6	-0.00670338		3323.6	-0.00262302
373.8	0.02912541		963.79	-0.00021968		1553.81	-0.00501647		2143.8	-0.00562003		2733.8	-0.00571128		3323.8	-0.00309925
374	0.02818124		963.99	-0.00059917		1554.01	-0.00506207		2144	-0.00451197		2734	-0.00489378		3324	-0.00333746
374.2	0.02851914		964.19	0.00030903		1554.21	-0.00519913		2144.2	-0.00468464		2734.2	-0.00476333		3324.2	-0.00379131
374.4	0.02858533		964.39	0.00067238		1554.41	-0.0055539		2144.4	-0.00472303		2734.4	-0.00439429		3324.4	-0.00439286
374.6	0.02784478		964.59	0.00134278		1554.61	-0.00533438		2144.6	-0.00472662		2734.6	-0.00402197		3324.6	-0.00533901
374.8	0.02780418		964.79	0.00115225		1554.81	-0.00559037		2144.8	-0.0048826		2734.8	-0.00372772		3324.8	-0.00562108
375	0.02773328		964.99	0.00020411		1555.01	-0.00457242		2145	-0.00500236		2735	-0.00453775		3325	-0.00579924
375.2	0.02780349		965.19	0.00036941		1555.21	-0.00444677		2145.2	-0.00444215		2735.2	-0.004231		3325.2	-0.00581651
375.4	0.02764759		965.39	0.00016169		1555.41	-0.00493563		2145.4	-0.00410261		2735.4	-0.00422912		3325.4	-0.00579558
375.6	0.02783481		965.59	0.00012093		1555.61	-0.00469216		2145.6	-0.00462446		2735.6	-0.00333767		3325.6	-0.00537626
375.8	0.0285454		965.79	0.0001599		1555.81	-0.00439009		2145.8	-0.0043507		2735.8	-0.00328695		3325.8	-0.0050555
376	0.02844552		965.99	-0.00071338		1556.01	-0.00420578		2146	-0.00528035		2736	-0.00418884		3326	-0.00521394
376.2	0.02874337		966.19	-0.00196505		1556.21	-0.00421628		2146.2	-0.00456148		2736.2	-0.00422026		3326.2	-0.00610829
376.4	0.02905227		966.39	-0.00250392		1556.41	-0.00444397		2146.4	-0.00430521		2736.4	-0.00478446		3326.4	-0.00587601
376.6	0.02961987		966.59	-0.00240077		1556.61	-0.00451247		2146.6	-0.00394191		2736.6	-0.00461822		3326.6	-0.00523067
376.8	0.02869295		966.79	-0.00238037		1556.81	-0.0037221		2146.8	-0.00388027		2736.8	-0.00397108		3326.8	-0.00537228
377	0.02857875		966.99	-0.00192902		1557.01	-0.00329642		2147	-0.0037152		2737	-0.00435915		3327	-0.00495492
377.2	0.02816243		967.19	-0.00121639		1557.21	-0.00308161		2147.2	-0.00371201		2737.2	-0.0036879		3327.2	-0.00535973
377.4	0.02752972		967.39	-0.00147794		1557.41	-0.00399666		2147.4	-0.00474865		2737.4	-0.00384694		3327.4	-0.00465662
377.6	0.02751147		967.59	-0.00111315		1557.61	-0.00377916		2147.6	-0.00579758		2737.6	-0.0032469		3327.6	-0.00401433
377.8	0.02709919		967.79	-0.00062633		1557.81	-0.00376026		2147.8	-0.00541726		2737.8	-0.00315522		3327.8	-0.00418585
378	0.02755957		967.99	-0.00085963		1558.01	-0.00444647		2148	-0.00478255		2738	-0.00377005		3328	-0.00349639
378.2	0.02783587		968.19	-0.00062746		1558.21	-0.00456139		2148.2	-0.00497974		2738.2	-0.00385592		3328.2	-0.00344558
378.4	0.02842485		968.39	-0.00093133		1558.41	-0.00452722		2148.4	-0.00487465		2738.4	-0.00409638		3328.4	-0.00343593
378.6	0.02890166		968.59	-0.00037052		1558.61	-0.00399858		2148.6	-0.00462875		2738.6	-0.00371347		3328.6	-0.00350747
378.8	0.02968045		968.79	-0.00009386		1558.81	-0.00442969		2148.8	-0.00526861		2738.8	-0.00375983		3328.8	-0.00236717
379	0.03026675		968.99	-0.00060475		1559.01	-0.00398144		2149	-0.0050299		2739	-0.0042432		3329	-0.00285541
379.2	0.03083967		969.19	0.00004416		1559.21	-0.00441573		2149.2	-0.00376881		2739.2	-0.00420375		3329.2	-0.0034183
379.4	0.03137875		969.39	-0.00014202		1559.41	-0.00428474		2149.4	-0.00422674		2739.4	-0.00420124		3329.4	-0.00282071
379.6	0.03282793		969.59	-0.0002935		1559.61	-0.00411446		2149.6	-0.00477627		2739.6	-0.00449475		3329.6	-0.00199881
379.8	0.03337202		969.79	-0.00054203		1559.81	-0.00367946		2149.8	-0.00478567		2739.8	-0.00553474		3329.8	-0.00227558
380	0.03346769		969.99	-0.00194142		1560.01	-0.00394976		2150	-0.00493342		2740	-0.00585625		3330	-0.00267193
380.2	0.03293044		970.19	-0.00270004		1560.21	-0.00489501		2150.2	-0.00406029		2740.2	-0.00536789		3330.2	-0.00244909
380.4	0.03257196		970.39	-0.00366667		1560.41	-0.00563715		2150.4	-0.00396508		2740.4	-0.00495597		3330.4	-0.00264647
380.6	0.03265593		970.59	-0.00463865		1560.61	-0.00468637		2150.6	-0.00396468		2740.6	-0.00403114		3330.6	-0.00254227
380.8	0.03236635		970.79	-0.00492652		1560.81	-0.00441556		2150.8	-0.00410352		2740.8	-0.00417235		3330.8	-0.00313397
381	0.03207012		970.99	-0.00432959		1561.01	-0.00489623		2151	-0.00399566		2741	-0.00319958		3331	-0.00333529
381.2	0.03190138		971.19	-0.00329435		1561.21	-0.00512665		2151.2	-0.0039055		2741.2	-0.00263018		3331.2	-0.00384296
381.4	0.03134141		971.39	-0.00311037		1561.41	-0.00568062		2151.4	-0.00505804		2741.4	-0.00199193		3331.4	-0.00345153
381.6	0.03099027		971.59	-0.0024783		1561.61	-0.00531252		2151.6	-0.00488809		2741.6	-0.00155823		3331.6	-0.00419462
381.8	0.03060933		971.79	-0.00275741		1561.81	-0.00635406		2151.8	-0.00490856		2741.8	-0.00109701		3331.8	-0.00432072
382	0.03065049		971.99	-0.00343835		1562.01	-0.0066388		2152	-0.00475514		2742	-0.00088778		3332	-0.00439305
382.2	0.03045299		972.19	-0.00311046		1562.21	-0.00643299		2152.2	-0.00335275		2742.2	-0.0002459		3332.2	-0.00518283
382.4	0.03111786		972.39	-0.00241024		1562.41	-0.00621901		2152.4	-0.00339894		2742.4	-0.00029454		3332.4	-0.0062518
382.6	0.03034809		972.59	-0.00181009		1562.61	-0.00645138		2152.6	-0.00386186		2742.6	0.00015316		3332.6	-0.00602
382.8	0.02983798		972.79	-0.00158742		1562.81	-0.00688176		2152.8	-0.00481581		2742.8	-0.0000761		3332.8	-0.00554444
383	0.02988081		972.99	-0.00129617		1563.01	-0.00703482		2153	-0.0037954		2743	-0.00112081		3333	-0.00620624
383.2	0.0303018		973.19	-0.00044825		1563.21	-0.00725336		2153.2	-0.00365431		2743.2	-0.00172801		3333.2	-0.00554492
383.4	0.02991619		973.39	-0.00042965		1563.41	-0.0063479		2153.4	-0.00385565		2743.4	-0.00250547		3333.4	-0.00470977
383.6	0.03025767		973.59	0.00011007		1563.61	-0.00564129		2153.6	-0.0031899		2743.6	-0.00238894		3333.6	-0.00407048
383.8	0.0302299		973.79	-0.00051191		1563.81	-0.00508567		2153.8	-0.00326746		2743.8	-0.00309522		3333.8	-0.00411748
384	0.03030542		973.99	-0.00140926		1564.01	-0.00480898		2154	-0.00341703		2744	-0.00280365		3334	-0.00359841
384.2	0.03024496		974.19	-0.00171623		1564.21	-0.00496756		2154.2	-0.00304725		2744.2	-0.00333984		3334.2	-0.00355962
384.4	0.03144869		974.39	-0.00250783		1564.41	-0.00387722		2154.4	-0.00259252		2744.4	-0.00381728		3334.4	-0.0039834
384.6	0.03236914		974.59	-0.00321741		1564.61	-0.00345316		2154.6	-0.00332439		2744.6	-0.00409316		3334.6	-0.00323472
384.8	0.03269973		974.79	-0.00226504		1564.81	-0.00368691		2154.8	-0.00296375		2744.8	-0.00544164		3334.8	-0.00415377
385	0.03358471		974.99	-0.00221463		1565.01	-0.00335678		2155	-0.00331624		2745	-0.00463484		3335	-0.00361648
385.2	0.0336578		975.19	-0.0018133		1565.21	-0.00289571		2155.2	-0.00322917		2745.2	-0.00476212		3335.2	-0.00419572
385.4	0.03360194		975.39	-0.00194311		1565.41	-0.0022843		2155.4	-0.00419163		2745.4	-0.00460714		3335.4	-0.00406217
385.6	0.03404383		975.59	-0.00181016		1565.61	-0.00166614		2155.6	-0.00392639		2745.6	-0.00481621		3335.6	-0.00458482
385.8	0.03465373		975.79	-0.00240075		1565.81	-0.00161351		2155.8	-0.00386804		2745.8	-0.00377292		3335.8	-0.00377547
386	0.03409729		975.99	-0.00238705		1566.01	-0.00054451		2156	-0.0034168		2746	-0.00382572		3336	-0.00399429
386.2	0.03363171		976.19	-0.00118458		1566.21	-0.00094336		2156.2	-0.00290258		2746.2	-0.00373118		3336.2	-0.00455826
386.4	0.03317252		976.39	-0.00118434		1566.41	-0.00123883		2156.4	-0.00389614		2746.4	-0.00344332		3336.4	-0.00477043
386.6	0.03266982		976.59	-0.00050338		1566.61	-0.00227999		2156.6	-0.00361419		2746.6	-0.00271917		3336.6	-0.00379931
386.8	0.03247538		976.79	-0.00005216		1566.81	-0.00282372		2156.8	-0.00293392		2746.8	-0.00232781		3336.8	-0.00376173
387	0.03293203		976.99	0.00064786		1567.01	-0.003302		2157	-0.00150193		2747	-0.0019958		3337	-0.00336626
387.2	0.03255981		977.19	0.00065641		1567.21	-0.00418556		2157.2	-0.00111969		2747.2	-0.00127458		3337.2	-0.00341445
387.4	0.03164805		977.39	0.00051378		1567.41	-0.00366092		2157.4	-0.00021702		2747.4	-0.00153005		3337.4	-0.00323724
387.6	0.03174042		977.59	0.00101746		1567.61	-0.00374143		2157.6	-0.00062648		2747.6	-0.00159804		3337.6	-0.00243539
387.8	0.03216613		977.79	-0.00020011		1567.81	-0.00442792		2157.8	-0.00074705		2747.8	-0.00274529		3337.8	-0.00196278
388	0.032776		977.99	-0.00044303		1568.01	-0.00460999		2158	-0.00054742		2748	-0.0032642		3338	-0.0016391
388.2	0.03317682		978.19	-0.0005952		1568.21	-0.00469032		2158.2	-0.00074568		2748.2	-0.00374343		3338.2	-0.00245086
388.4	0.03458048		978.39	-0.00063986		1568.41	-0.0046914		2158.4	-0.00044194		2748.4	-0.00431226		3338.4	-0.00236314
388.6	0.03470545		978.59	-0.00061546		1568.61	-0.00527358		2158.6	-0.00092162		2748.6	-0.00576873		3338.6	-0.00308041
388.8	0.03493659		978.79	-0.00045078		1568.81	-0.00488312		2158.8	-0.00067248		2748.8	-0.00661815		3338.8	-0.00344007
389	0.03500339		978.99	-0.00114315		1569.01	-0.00382891		2159	-0.00238819		2749	-0.00621715		3339	-0.00355819
389.2	0.03443848		979.19	-0.00078469		1569.21	-0.003196		2159.2	-0.00245421		2749.2	-0.00636887		3339.2	-0.00411417
389.4	0.03377896		979.39	-0.00070128		1569.41	-0.00249406		2159.4	-0.00289164		2749.4	-0.0068967		3339.4	-0.0044932
389.6	0.03393312		979.59	-0.0002545		1569.61	-0.00158869		2159.6	-0.00309849		2749.6	-0.00683584		3339.6	-0.00463936
389.8	0.03333008		979.79	-0.00048378		1569.81	-0.00092389		2159.8	-0.00381421		2749.8	-0.00647377		3339.8	-0.00447216
390	0.03159993		979.99	-0.00013979		1570.01	-0.00086655		2160	-0.00422815		2750	-0.00726567		3340	-0.00461557
390.2	0.03146008		980.19	0.0007236		1570.21	-0.00123608		2160.2	-0.00443436		2750.2	-0.00661958		3340.2	-0.00450555
390.4	0.03099201		980.39	0.00114787		1570.41	-0.0003516		2160.4	-0.00452282		2750.4	-0.00602959		3340.4	-0.00424273
390.6	0.03135405		980.59	0.00174662		1570.61	-0.0006574		2160.6	-0.00363287		2750.6	-0.00495564		3340.6	-0.00414595
390.8	0.03098819		980.79	0.00158236		1570.81	-0.00080046		2160.8	-0.00451561		2750.8	-0.00420181		3340.8	-0.0044931
391	0.03119888		980.99	0.00183615		1571.01	-0.00068086		2161	-0.00525564		2751	-0.00426094		3341	-0.00533604
391.2	0.03106594		981.19	0.00129914		1571.21	-0.00097788		2161.2	-0.00543261		2751.2	-0.00396545		3341.2	-0.00530802
391.4	0.03146938		981.39	0.00115489		1571.41	-0.00094304		2161.4	-0.00634793		2751.4	-0.00477992		3341.4	-0.00441905
391.6	0.03239614		981.59	0.00129829		1571.61	-0.00151891		2161.6	-0.00748398		2751.6	-0.00498511		3341.6	-0.00400359
391.8	0.03288079		981.79	0.00000738		1571.81	-0.0022608		2161.8	-0.00725911		2751.8	-0.00472492		3341.8	-0.00335239
392	0.03344682		981.99	0.00058569		1572.01	-0.00237388		2162	-0.00805098		2752	-0.00463876		3342	-0.00292959
392.2	0.03326639		982.19	0.00008895		1572.21	-0.00250424		2162.2	-0.00810337		2752.2	-0.00465716		3342.2	-0.00294461
392.4	0.03446809		982.39	-0.00043823		1572.41	-0.00300107		2162.4	-0.00706525		2752.4	-0.0059663		3342.4	-0.00279087
392.6	0.03434535		982.59	-0.00091063		1572.61	-0.00289698		2162.6	-0.00718685		2752.6	-0.00686133		3342.6	-0.00352662
392.8	0.03430879		982.79	-0.00188184		1572.81	-0.00407568		2162.8	-0.00711489		2752.8	-0.00712834		3342.8	-0.0036375
393	0.03425874		982.99	-0.00203246		1573.01	-0.00434132		2163	-0.0070618		2753	-0.00783267		3343	-0.00379687
393.2	0.03463832		983.19	-0.00220032		1573.21	-0.00508468		2163.2	-0.00578934		2753.2	-0.00782559		3343.2	-0.00433107
393.4	0.0343625		983.39	-0.00283233		1573.41	-0.00556433		2163.4	-0.00507321		2753.4	-0.00923187		3343.4	-0.00424268
393.6	0.03480881		983.59	-0.00251042		1573.61	-0.00573103		2163.6	-0.00545402		2753.6	-0.00989732		3343.6	-0.00411602
393.8	0.03458125		983.79	-0.00259431		1573.81	-0.00550515		2163.8	-0.00497852		2753.8	-0.00930344		3343.8	-0.00436681
394	0.03409138		983.99	-0.00161346		1574.01	-0.00624808		2164	-0.00388128		2754	-0.00963509		3344	-0.0046725
394.2	0.03446012		984.19	-0.0007093		1574.21	-0.00551009		2164.2	-0.00271719		2754.2	-0.0095767		3344.2	-0.00385141
394.4	0.03434322		984.39	-0.00153105		1574.41	-0.00485668		2164.4	-0.00265401		2754.4	-0.00921102		3344.4	-0.00368775
394.6	0.03431112		984.59	-0.00143853		1574.61	-0.00537919		2164.6	-0.00255316		2754.6	-0.00833399		3344.6	-0.00388366
394.8	0.03473013		984.79	-0.00081698		1574.81	-0.00541567		2164.8	-0.00319601		2754.8	-0.00768054		3344.8	-0.00377146
395	0.03532279		984.99	0.00004904		1575.01	-0.00493967		2165	-0.00342271		2755	-0.00806102		3345	-0.00383257
395.2	0.03613126		985.19	0.00018161		1575.21	-0.00497063		2165.2	-0.00362715		2755.2	-0.00704762		3345.2	-0.00275185
395.4	0.03762461		985.39	0.0001777		1575.41	-0.00562345		2165.4	-0.00371059		2755.4	-0.00750451		3345.4	-0.00350887
395.6	0.03799865		985.59	0.00067221		1575.61	-0.00594195		2165.6	-0.00356571		2755.6	-0.00640205		3345.6	-0.00360447
395.8	0.03810894		985.79	0.00062136		1575.81	-0.00585054		2165.8	-0.00322354		2755.8	-0.00584947		3345.8	-0.00306755
396	0.0383431		985.99	0.00129505		1576.01	-0.00566568		2166	-0.00346865		2756	-0.00622724		3346	-0.00326105
396.2	0.03759047		986.19	0.00116962		1576.21	-0.00560121		2166.2	-0.00283971		2756.2	-0.00568581		3346.2	-0.00375367
396.4	0.03714767		986.39	0.00082945		1576.41	-0.00534929		2166.4	-0.00268315		2756.4	-0.0050924		3346.4	-0.00396314
396.6	0.036934		986.59	0.00090258		1576.61	-0.00586318		2166.6	-0.00263653		2756.6	-0.00501575		3346.6	-0.00449053
396.8	0.03733681		986.79	0.00049407		1576.81	-0.00664609		2166.8	-0.00239707		2756.8	-0.00507492		3346.8	-0.00444324
397	0.03740485		986.99	0.00064644		1577.01	-0.00619132		2167	-0.00201874		2757	-0.00553124		3347	-0.00420987
397.2	0.03722048		987.19	-0.00007361		1577.21	-0.00608861		2167.2	-0.00206031		2757.2	-0.00511831		3347.2	-0.00484883
397.4	0.03690746		987.39	0.00052105		1577.41	-0.00559482		2167.4	-0.0021339		2757.4	-0.00516851		3347.4	-0.00476992
397.6	0.03648364		987.59	0.00041762		1577.61	-0.0049515		2167.6	-0.00252408		2757.6	-0.00507485		3347.6	-0.00547559
397.8	0.03664427		987.79	-0.0001909		1577.81	-0.00459776		2167.8	-0.00234121		2757.8	-0.00436318		3347.8	-0.00607099
398	0.03603381		987.99	-0.00035533		1578.01	-0.00474836		2168	-0.0022215		2758	-0.00477535		3348	-0.00572042
398.2	0.03587021		988.19	-0.00116314		1578.21	-0.0035342		2168.2	-0.00298142		2758.2	-0.00509084		3348.2	-0.00504411
398.4	0.03542471		988.39	-0.00159915		1578.41	-0.00272295		2168.4	-0.00430384		2758.4	-0.00449218		3348.4	-0.00514652
398.6	0.03517917		988.59	-0.00060539		1578.61	-0.00273077		2168.6	-0.00501643		2758.6	-0.00452689		3348.6	-0.00594316
398.8	0.03496224		988.79	-0.00021687		1578.81	-0.00313401		2168.8	-0.00545343		2758.8	-0.00433875		3348.8	-0.0059248
399	0.0351979		988.99	-0.00009933		1579.01	-0.00313295		2169	-0.00646424		2759	-0.00459409		3349	-0.00612915
399.2	0.03553325		989.19	-0.00074478		1579.21	-0.00322152		2169.2	-0.00690607		2759.2	-0.00519717		3349.2	-0.00641591
399.4	0.03611687		989.39	-0.00096614		1579.41	-0.00410518		2169.4	-0.0067743		2759.4	-0.00533033		3349.4	-0.00761061
399.6	0.03560351		989.59	-0.00058007		1579.61	-0.00329968		2169.6	-0.00692048		2759.6	-0.00507819		3349.6	-0.00750289
399.8	0.0360187		989.79	-0.00096263		1579.81	-0.00286445		2169.8	-0.0071197		2759.8	-0.00554566		3349.8	-0.00707217
400	0.03501952		989.99	-0.00087689		1580.01	-0.00252184		2170	-0.00665367		2760	-0.0056555		3350	-0.00699665
400.2	0.03437569		990.19	-0.00096896		1580.21	-0.00246277		2170.2	-0.00629086		2760.2	-0.00463967		3350.2	-0.00660366
400.4	0.0352018		990.39	-0.00131866		1580.41	-0.00239284		2170.4	-0.00550832		2760.4	-0.00514062		3350.4	-0.00541605
400.6	0.03603804		990.59	-0.00094069		1580.61	-0.0027749		2170.6	-0.00503106		2760.6	-0.00535152		3350.6	-0.0047988
400.8	0.03649232		990.79	-0.00154083		1580.81	-0.00263331		2170.8	-0.00445298		2760.8	-0.00495123		3350.8	-0.0035301
401	0.03670136		990.99	-0.00150238		1581.01	-0.00231779		2171	-0.0036774		2761	-0.0051478		3351	-0.00286901
401.2	0.03700939		991.19	-0.00156325		1581.21	-0.00229691		2171.2	-0.00346523		2761.2	-0.00489789		3351.2	-0.00216727
401.4	0.03809858		991.39	-0.00202235		1581.41	-0.00294202		2171.4	-0.00258658		2761.4	-0.00428387		3351.4	-0.00088708
401.6	0.03832598		991.59	-0.00345031		1581.61	-0.0031093		2171.6	-0.00179368		2761.6	-0.00411305		3351.6	-0.00038865
401.8	0.03935496		991.79	-0.00357569		1581.81	-0.00397508		2171.8	-0.00185808		2761.8	-0.00430992		3351.8	0.00019181
402	0.03919792		991.99	-0.00316638		1582.01	-0.00418843		2172	-0.00163569		2762	-0.00445832		3352	0.00124504
402.2	0.03901966		992.19	-0.00323551		1582.21	-0.00416831		2172.2	-0.00139243		2762.2	-0.00482841		3352.2	0.00072229
402.4	0.03887207		992.39	-0.00244972		1582.41	-0.00548322		2172.4	-0.00098794		2762.4	-0.00397485		3352.4	0.00058469
402.6	0.0382501		992.59	-0.00223425		1582.61	-0.00645364		2172.6	-0.00150318		2762.6	-0.00360863		3352.6	-0.0003998
402.8	0.03758795		992.79	-0.00227547		1582.81	-0.00691925		2172.8	-0.00182027		2762.8	-0.00353636		3352.8	-0.00087307
403	0.03769659		992.99	-0.00196516		1583.01	-0.00643781		2173	-0.00264923		2763	-0.00358913		3353	-0.00149462
403.2	0.03702563		993.19	-0.00206152		1583.21	-0.00659223		2173.2	-0.00310153		2763.2	-0.00365705		3353.2	-0.00167627
403.4	0.03629703		993.39	-0.00063409		1583.41	-0.0068727		2173.4	-0.00315448		2763.4	-0.00340381		3353.4	-0.00267026
403.6	0.03607105		993.59	-0.00002865		1583.61	-0.00638569		2173.6	-0.00272443		2763.6	-0.00427249		3353.6	-0.00298536
403.8	0.03659874		993.79	-0.00008599		1583.81	-0.00593465		2173.8	-0.00253708		2763.8	-0.00479258		3353.8	-0.00399618
404	0.03599586		993.99	-0.00032226		1584.01	-0.00491502		2174	-0.00241312		2764	-0.00539386		3354	-0.0049398
404.2	0.03654152		994.19	-0.00011308		1584.21	-0.0038205		2174.2	-0.0029512		2764.2	-0.00544804		3354.2	-0.00541158
404.4	0.03677037		994.39	-0.00064195		1584.41	-0.00369858		2174.4	-0.00301519		2764.4	-0.00629808		3354.4	-0.00514102
404.6	0.03657669		994.59	-0.00053085		1584.61	-0.00320158		2174.6	-0.0034813		2764.6	-0.00592409		3354.6	-0.00549296
404.8	0.03645877		994.79	-0.00137566		1584.81	-0.00159369		2174.8	-0.00348475		2764.8	-0.00582462		3354.8	-0.00553123
405	0.03720229		994.99	-0.00144833		1585.01	-0.00123805		2175	-0.00414442		2765	-0.0062777		3355	-0.00623304
405.2	0.03827133		995.19	-0.00263754		1585.21	-0.00140287		2175.2	-0.00460885		2765.2	-0.00597984		3355.2	-0.0055155
405.4	0.03881126		995.39	-0.00376089		1585.41	-0.00167886		2175.4	-0.00464754		2765.4	-0.00565493		3355.4	-0.00584379
405.6	0.03903476		995.59	-0.00435707		1585.61	-0.00185634		2175.6	-0.00490136		2765.6	-0.00588539		3355.6	-0.00653831
405.8	0.04068314		995.79	-0.00452146		1585.81	-0.00234159		2175.8	-0.00630746		2765.8	-0.00595079		3355.8	-0.00581439
406	0.04107663		995.99	-0.00469594		1586.01	-0.00244556		2176	-0.00552318		2766	-0.00516644		3356	-0.0059066
406.2	0.04136302		996.19	-0.00577652		1586.21	-0.0031555		2176.2	-0.00538442		2766.2	-0.0048974		3356.2	-0.00658984
406.4	0.04193373		996.39	-0.00569333		1586.41	-0.00340062		2176.4	-0.00534165		2766.4	-0.00356891		3356.4	-0.00605242
406.6	0.04227096		996.59	-0.00575383		1586.61	-0.0032178		2176.6	-0.00607494		2766.6	-0.00299065		3356.6	-0.00556851
406.8	0.04217698		996.79	-0.00495141		1586.81	-0.00345844		2176.8	-0.00633259		2766.8	-0.00288824		3356.8	-0.00551988
407	0.04208957		996.99	-0.00461573		1587.01	-0.00379314		2177	-0.00648393		2767	-0.00211684		3357	-0.00443363
407.2	0.04099808		997.19	-0.00474594		1587.21	-0.00447785		2177.2	-0.00563719		2767.2	-0.00165049		3357.2	-0.0039674
407.4	0.04075305		997.39	-0.00347293		1587.41	-0.00540705		2177.4	-0.00556109		2767.4	-0.00140831		3357.4	-0.0045666
407.6	0.0397028		997.59	-0.00353915		1587.61	-0.00563986		2177.6	-0.00522154		2767.6	-0.00186655		3357.6	-0.00484826
407.8	0.04020153		997.79	-0.00328988		1587.81	-0.00517855		2177.8	-0.00518849		2767.8	-0.00195193		3357.8	-0.00551657
408	0.03874924		997.99	-0.00278594		1588.01	-0.00513476		2178	-0.00483871		2768	-0.0022033		3358	-0.00522877
408.2	0.03792746		998.19	-0.00146728		1588.21	-0.0051776		2178.2	-0.00425739		2768.2	-0.00200732		3358.2	-0.00434288
408.4	0.03691122		998.39	-0.00121459		1588.41	-0.00573667		2178.4	-0.00361181		2768.4	-0.00269069		3358.4	-0.00383398
408.6	0.0363725		998.59	-0.00024074		1588.61	-0.00483426		2178.6	-0.00336207		2768.6	-0.00373236		3358.6	-0.00408484
408.8	0.03529408		998.79	-0.0001229		1588.81	-0.00345177		2178.8	-0.00296424		2768.8	-0.00391259		3358.8	-0.00413104
409	0.03558908		998.99	0.00057731		1589.01	-0.00397067		2179	-0.00364412		2769	-0.00445735		3359	-0.00430924
409.2	0.03574159		999.19	0.00013429		1589.21	-0.00393114		2179.2	-0.00344422		2769.2	-0.00505218		3359.2	-0.00357382
409.4	0.03563625		999.39	0.00060105		1589.41	-0.00399221		2179.4	-0.00334259		2769.4	-0.00547508		3359.4	-0.00418149
409.6	0.0358597		999.59	-0.00022202		1589.61	-0.00393967		2179.6	-0.00404943		2769.6	-0.00558726		3359.6	-0.00373381
409.8	0.03622361		999.79	-0.00031697		1589.81	-0.00381196		2179.8	-0.00408556		2769.8	-0.00532659		3359.8	-0.0031008
410	0.03565028		999.99	0.00015621		1590.01	-0.00362561		2180	-0.00399307		2770	-0.00563477		3360	-0.00409579
410.2	0.03575711		1000.19	-0.00003279		1590.21	-0.00412002		2180.2	-0.00385244		2770.2	-0.00569321		3360.2	-0.00406392
410.4	0.03697571		1000.39	0.00040707		1590.41	-0.0039602		2180.4	-0.00411342		2770.4	-0.00536521		3360.4	-0.00414702
410.6	0.03776914		1000.59	0.00068299		1590.61	-0.00451581		2180.6	-0.00456783		2770.6	-0.00556922		3360.6	-0.00484669
410.8	0.03719912		1000.79	0.00125425		1590.81	-0.00472877		2180.8	-0.00398944		2770.8	-0.00611271		3360.8	-0.00505986
411	0.03821479		1000.99	0.00024645		1591.01	-0.00534521		2181	-0.00399274		2771	-0.00557895		3361	-0.00450402
411.2	0.03874773		1001.19	0.00012397		1591.21	-0.00563447		2181.2	-0.00340726		2771.2	-0.00538346		3361.2	-0.0057918
411.4	0.03894227		1001.39	0.00022315		1591.41	-0.00575197		2181.4	-0.00393533		2771.4	-0.00464746		3361.4	-0.00642345
411.6	0.03908494		1001.59	0.00060241		1591.61	-0.00550379		2181.6	-0.0042312		2771.6	-0.00514131		3361.6	-0.00715946
411.8	0.0402968		1001.79	0.001039		1591.81	-0.0047844		2181.8	-0.00421608		2771.8	-0.00496502		3361.8	-0.00741677
412	0.03993053		1001.99	0.00087173		1592.01	-0.00398245		2182	-0.0041779		2772	-0.00530063		3362	-0.00704378
412.2	0.04011459		1002.19	0.00056541		1592.21	-0.00361812		2182.2	-0.00486312		2772.2	-0.00518144		3362.2	-0.00631398
412.4	0.03995829		1002.39	0.0005698		1592.41	-0.00246078		2182.4	-0.0053445		2772.4	-0.00566278		3362.4	-0.00641439
412.6	0.04016168		1002.59	0.00075069		1592.61	-0.00150238		2182.6	-0.00597566		2772.6	-0.00555657		3362.6	-0.00627868
412.8	0.03986872		1002.79	0.0011533		1592.81	-0.00066902		2182.8	-0.00592761		2772.8	-0.00457071		3362.8	-0.00579736
413	0.04082763		1002.99	0.00181222		1593.01	-0.00082139		2183	-0.0066219		2773	-0.00500633		3363	-0.00570533
413.2	0.04120351		1003.19	0.00081114		1593.21	-0.00158441		2183.2	-0.0066151		2773.2	-0.00456316		3363.2	-0.00536796
413.4	0.04089396		1003.39	0.00013132		1593.41	-0.00158452		2183.4	-0.00722401		2773.4	-0.00323056		3363.4	-0.00509501
413.6	0.03991032		1003.59	-0.00095259		1593.61	-0.00182084		2183.6	-0.0086916		2773.6	-0.00261456		3363.6	-0.00463162
413.8	0.03964142		1003.79	0.00012263		1593.81	-0.0021769		2183.8	-0.00829792		2773.8	-0.00211305		3363.8	-0.00454011
414	0.03895292		1003.99	0.00080198		1594.01	-0.00278501		2184	-0.00915744		2774	-0.0016991		3364	-0.00538482
414.2	0.03932667		1004.19	0.00040059		1594.21	-0.00421778		2184.2	-0.00815923		2774.2	-0.00171239		3364.2	-0.00581554
414.4	0.03969385		1004.39	0.00010685		1594.41	-0.00465078		2184.4	-0.00796094		2774.4	-0.00198428		3364.4	-0.00626106
414.6	0.03889439		1004.59	0.00060883		1594.61	-0.00504492		2184.6	-0.00694686		2774.6	-0.00179869		3364.6	-0.00536198
414.8	0.03868022		1004.79	0.00021956		1594.81	-0.00607144		2184.8	-0.00554008		2774.8	-0.00220151		3364.8	-0.00492621
415	0.03936535		1004.99	-0.00049565		1595.01	-0.00682931		2185	-0.00476547		2775	-0.00209652		3365	-0.00518397
415.2	0.03937897		1005.19	-0.00102501		1595.21	-0.00756887		2185.2	-0.00457848		2775.2	-0.00213166		3365.2	-0.00520548
415.4	0.03831923		1005.39	-0.00158425		1595.41	-0.00734951		2185.4	-0.00492054		2775.4	-0.00215209		3365.4	-0.0051177
415.6	0.03864857		1005.59	-0.00169419		1595.61	-0.00753199		2185.6	-0.00528884		2775.6	-0.00250795		3365.6	-0.00607524
415.8	0.03788814		1005.79	-0.0021262		1595.81	-0.00706032		2185.8	-0.0049074		2775.8	-0.00325879		3365.8	-0.00575674
416	0.03847754		1005.99	-0.00181289		1596.01	-0.00678974		2186	-0.00539584		2776	-0.00395802		3366	-0.00498103
416.2	0.03831017		1006.19	-0.0017697		1596.21	-0.00662334		2186.2	-0.00577779		2776.2	-0.00507156		3366.2	-0.00537878
416.4	0.03817665		1006.39	-0.00099474		1596.41	-0.00572228		2186.4	-0.00547723		2776.4	-0.0056667		3366.4	-0.00618884
416.6	0.03880099		1006.59	-0.00054043		1596.61	-0.00627714		2186.6	-0.00562405		2776.6	-0.00625683		3366.6	-0.00682584
416.8	0.03976296		1006.79	-0.00012356		1596.81	-0.00624167		2186.8	-0.0053356		2776.8	-0.00712862		3366.8	-0.00763828
417	0.04072317		1006.99	-0.00052973		1597.01	-0.00672517		2187	-0.00547039		2777	-0.0072781		3367	-0.00840119
417.2	0.04087777		1007.19	-0.00134888		1597.21	-0.00599319		2187.2	-0.00519753		2777.2	-0.00646702		3367.2	-0.00845896
417.4	0.04144008		1007.39	-0.00140695		1597.41	-0.00438004		2187.4	-0.00504568		2777.4	-0.00559638		3367.4	-0.00779098
417.6	0.04155162		1007.59	-0.00145215		1597.61	-0.00496511		2187.6	-0.00512282		2777.6	-0.00531723		3367.6	-0.00781464
417.8	0.04176866		1007.79	-0.00114948		1597.81	-0.00439461		2187.8	-0.00386954		2777.8	-0.00653011		3367.8	-0.00755448
418	0.0412883		1007.99	-0.00090744		1598.01	-0.0047215		2188	-0.00369268		2778	-0.00674186		3368	-0.00761802
418.2	0.04248221		1008.19	-0.0017417		1598.21	-0.00429514		2188.2	-0.00308707		2778.2	-0.0071769		3368.2	-0.00715992
418.4	0.0430294		1008.39	-0.00193457		1598.41	-0.0041401		2188.4	-0.00249543		2778.4	-0.00621366		3368.4	-0.00636498
418.6	0.04306819		1008.59	-0.00212457		1598.61	-0.00463834		2188.6	-0.00156374		2778.6	-0.00554019		3368.6	-0.00559017
418.8	0.04345807		1008.79	-0.00296553		1598.81	-0.00522578		2188.8	-0.00116825		2778.8	-0.00544905		3368.8	-0.00549536
419	0.0429256		1008.99	-0.00327713		1599.01	-0.00520393		2189	-0.00122889		2779	-0.00456456		3369	-0.005086
419.2	0.04307474		1009.19	-0.00374054		1599.21	-0.0054339		2189.2	-0.00254767		2779.2	-0.00333438		3369.2	-0.00370246
419.4	0.04245899		1009.39	-0.00370732		1599.41	-0.00481075		2189.4	-0.00278249		2779.4	-0.00272517		3369.4	-0.00404828
419.6	0.04246116		1009.59	-0.00363776		1599.61	-0.0051759		2189.6	-0.0031163		2779.6	-0.00249828		3369.6	-0.00463008
419.8	0.0416608		1009.79	-0.00301825		1599.81	-0.00474711		2189.8	-0.00391814		2779.8	-0.00301068		3369.8	-0.00379063
420	0.04272217		1009.99	-0.00222225		1600.01	-0.00416343		2190	-0.00495553		2780	-0.00258368		3370	-0.00358632
420.2	0.04197961		1010.19	-0.00248055		1600.21	-0.0037158		2190.2	-0.0054884		2780.2	-0.00269057		3370.2	-0.0041009
420.4	0.04186681		1010.39	-0.00189723		1600.41	-0.00380875		2190.4	-0.00584534		2780.4	-0.00251933		3370.4	-0.00406565
420.6	0.04219438		1010.59	-0.00188319		1600.61	-0.00395553		2190.6	-0.00624226		2780.6	-0.003002		3370.6	-0.00538642
420.8	0.04155971		1010.79	-0.00164801		1600.81	-0.00335837		2190.8	-0.00698833		2780.8	-0.00287087		3370.8	-0.00527841
421	0.04156712		1010.99	-0.00216364		1601.01	-0.00231254		2191	-0.00733811		2781	-0.00199308		3371	-0.00503595
421.2	0.04116393		1011.19	-0.00154086		1601.21	-0.00127228		2191.2	-0.0070414		2781.2	-0.00258536		3371.2	-0.00457361
421.4	0.04065934		1011.39	-0.00078554		1601.41	-0.00160993		2191.4	-0.00695754		2781.4	-0.00230245		3371.4	-0.00392282
421.6	0.0399258		1011.59	-0.0008396		1601.61	-0.00187057		2191.6	-0.00717303		2781.6	-0.00253145		3371.6	-0.00407972
421.8	0.03983851		1011.79	-0.00035954		1601.81	-0.00098721		2191.8	-0.00648902		2781.8	-0.00407276		3371.8	-0.00360651
422	0.03996034		1011.99	0.00012558		1602.01	-0.00114665		2192	-0.00653852		2782	-0.00365446		3372	-0.00336566
422.2	0.04112442		1012.19	0.0002162		1602.21	-0.00152255		2192.2	-0.00611667		2782.2	-0.00356996		3372.2	-0.00334457
422.4	0.04138084		1012.39	0.00021723		1602.41	-0.00348914		2192.4	-0.00485164		2782.4	-0.00304224		3372.4	-0.00347917
422.6	0.0406245		1012.59	0.00007756		1602.61	-0.00398572		2192.6	-0.00441205		2782.6	-0.00387235		3372.6	-0.00378521
422.8	0.04071489		1012.79	0.00069864		1602.81	-0.00499725		2192.8	-0.00410751		2782.8	-0.00392021		3372.8	-0.00398463
423	0.04110784		1012.99	0.00038779		1603.01	-0.00476894		2193	-0.00416854		2783	-0.00391067		3373	-0.00421016
423.2	0.04196		1013.19	0.00014755		1603.21	-0.00561221		2193.2	-0.00402463		2783.2	-0.00424616		3373.2	-0.00414098
423.4	0.04284261		1013.39	-0.00032348		1603.41	-0.00708585		2193.4	-0.00312608		2783.4	-0.00460159		3373.4	-0.00485235
423.6	0.04286039		1013.59	-0.00065682		1603.61	-0.00776085		2193.6	-0.00272002		2783.6	-0.00457108		3373.6	-0.00539489
423.8	0.04316517		1013.79	-0.00021897		1603.81	-0.00802836		2193.8	-0.00289176		2783.8	-0.00431312		3373.8	-0.00459507
424	0.04390029		1013.99	-0.00005101		1604.01	-0.00853301		2194	-0.00313495		2784	-0.00356551		3374	-0.00418866
424.2	0.04308288		1014.19	-0.00066248		1604.21	-0.00855517		2194.2	-0.00373532		2784.2	-0.0038481		3374.2	-0.00346244
424.4	0.04350891		1014.39	-0.00020987		1604.41	-0.00890172		2194.4	-0.00372914		2784.4	-0.0048941		3374.4	-0.00327182
424.6	0.04353038		1014.59	-0.00095037		1604.61	-0.00788828		2194.6	-0.00391737		2784.6	-0.00520778		3374.6	-0.00355483
424.8	0.04318534		1014.79	-0.00097727		1604.81	-0.0072714		2194.8	-0.0045341		2784.8	-0.0048564		3374.8	-0.00309817
425	0.04331552		1014.99	-0.00156424		1605.01	-0.00709824		2195	-0.00487973		2785	-0.00477069		3375	-0.00322374
425.2	0.0423913		1015.19	-0.00130921		1605.21	-0.00671089		2195.2	-0.00494925		2785.2	-0.00552465		3375.2	-0.00322978
425.4	0.04268045		1015.39	-0.00124775		1605.41	-0.00665298		2195.4	-0.00487365		2785.4	-0.00495824		3375.4	-0.00386165
425.6	0.04290323		1015.59	-0.00125467		1605.61	-0.00584387		2195.6	-0.00439935		2785.6	-0.00474838		3375.6	-0.00394852
425.8	0.04237275		1015.79	-0.00087943		1605.81	-0.00523334		2195.8	-0.0039427		2785.8	-0.0052661		3375.8	-0.00412085
426	0.0419462		1015.99	-0.00121318		1606.01	-0.00496775		2196	-0.00391031		2786	-0.00446529		3376	-0.00374453
426.2	0.04136788		1016.19	-0.00088985		1606.21	-0.00499047		2196.2	-0.00402149		2786.2	-0.00440435		3376.2	-0.00466207
426.4	0.0413599		1016.39	-0.00138828		1606.41	-0.00527729		2196.4	-0.00379564		2786.4	-0.00490397		3376.4	-0.00552263
426.6	0.04110678		1016.59	-0.00080382		1606.61	-0.00495997		2196.6	-0.00450805		2786.6	-0.00574113		3376.6	-0.00675645
426.8	0.04144848		1016.79	-0.00061016		1606.81	-0.00457026		2196.8	-0.00444714		2786.8	-0.00549379		3376.8	-0.00719509
427	0.04188768		1016.99	-0.00110765		1607.01	-0.00397094		2197	-0.00490464		2787	-0.0062773		3377	-0.00767628
427.2	0.04219042		1017.19	-0.00179577		1607.21	-0.00480993		2197.2	-0.00424235		2787.2	-0.0061463		3377.2	-0.00789671
427.4	0.042161		1017.39	-0.00194932		1607.41	-0.00542061		2197.4	-0.00385102		2787.4	-0.00591889		3377.4	-0.00815293
427.6	0.04152684		1017.59	-0.00159146		1607.61	-0.00467545		2197.6	-0.00453321		2787.6	-0.00567999		3377.6	-0.00789916
427.8	0.0417168		1017.79	-0.00091255		1607.81	-0.00479781		2197.8	-0.00527108		2787.8	-0.00532712		3377.8	-0.00694098
428	0.04112522		1017.99	-0.00069091		1608.01	-0.00479354		2198	-0.00628082		2788	-0.00486116		3378	-0.00683582
428.2	0.04123229		1018.19	-0.0009918		1608.21	-0.00413755		2198.2	-0.00571367		2788.2	-0.0051326		3378.2	-0.00605875
428.4	0.04194104		1018.39	-0.0007307		1608.41	-0.00383526		2198.4	-0.00493216		2788.4	-0.00541489		3378.4	-0.00548199
428.6	0.04163548		1018.59	-0.00166319		1608.61	-0.00307364		2198.6	-0.00442458		2788.6	-0.00444631		3378.6	-0.005402
428.8	0.0415523		1018.79	-0.00142142		1608.81	-0.00337718		2198.8	-0.0045271		2788.8	-0.00361447		3378.8	-0.00559387
429	0.04139595		1018.99	-0.00073864		1609.01	-0.00378856		2199	-0.00405738		2789	-0.0038202		3379	-0.00520898
429.2	0.04216497		1019.19	-0.00083076		1609.21	-0.00431068		2199.2	-0.00315049		2789.2	-0.00403805		3379.2	-0.00597571
429.4	0.04322365		1019.39	-0.00027716		1609.41	-0.00516615		2199.4	-0.00201476		2789.4	-0.00258658		3379.4	-0.00595417
429.6	0.04320823		1019.59	0.00002254		1609.61	-0.00521305		2199.6	-0.00125667		2789.6	-0.00221838		3379.6	-0.0059196
429.8	0.04379549		1019.79	-0.00051433		1609.81	-0.0044495		2199.8	-0.00088141		2789.8	-0.00220418		3379.8	-0.00657961
430	0.0442825		1019.99	-0.00120327		1610.01	-0.00515562		2200	-0.001763		2790	-0.00199311		3380	-0.00649412
430.2	0.04471297		1020.19	-0.00145276		1610.21	-0.00519662		2200.2	-0.00196263		2790.2	-0.00280964		3380.2	-0.00839244
430.4	0.0461722		1020.39	-0.00158831		1610.41	-0.00534639		2200.4	-0.00238295		2790.4	-0.00335413		3380.4	-0.00921167
430.6	0.04599792		1020.59	-0.00135612		1610.61	-0.00604722		2200.6	-0.00269203		2790.6	-0.00341361		3380.6	-0.00952211
430.8	0.04647969		1020.79	-0.00208855		1610.81	-0.00615265		2200.8	-0.00284731		2790.8	-0.00365987		3380.8	-0.00895458
431	0.04680272		1020.99	-0.00205087		1611.01	-0.00674628		2201	-0.00267419		2791	-0.00506409		3381	-0.00917202
431.2	0.04690895		1021.19	-0.00174771		1611.21	-0.00727806		2201.2	-0.00237349		2791.2	-0.00438653		3381.2	-0.00861582
431.4	0.0468186		1021.39	-0.00205663		1611.41	-0.00801642		2201.4	-0.00312655		2791.4	-0.00484796		3381.4	-0.00784731
431.6	0.04672114		1021.59	-0.00128562		1611.61	-0.00827734		2201.6	-0.00308179		2791.6	-0.00551648		3381.6	-0.00662537
431.8	0.04682328		1021.79	-0.00148077		1611.81	-0.00827486		2201.8	-0.0034925		2791.8	-0.00551613		3381.8	-0.00601206
432	0.04624368		1021.99	-0.00129201		1612.01	-0.00752721		2202	-0.00288489		2792	-0.00552178		3382	-0.00548974
432.2	0.04599119		1022.19	-0.0007173		1612.21	-0.00723388		2202.2	-0.00250949		2792.2	-0.0064445		3382.2	-0.00453509
432.4	0.04558677		1022.39	-0.0010493		1612.41	-0.00729642		2202.4	-0.00229044		2792.4	-0.00663841		3382.4	-0.00408048
432.6	0.04480225		1022.59	-0.00142436		1612.61	-0.00828835		2202.6	-0.00235424		2792.6	-0.00712813		3382.6	-0.00422306
432.8	0.04472392		1022.79	-0.0006746		1612.81	-0.00853206		2202.8	-0.00236428		2792.8	-0.00767339		3382.8	-0.00448346
433	0.04436154		1022.99	-0.00087437		1613.01	-0.00884024		2203	-0.00173045		2793	-0.00811657		3383	-0.00482013
433.2	0.04571468		1023.19	-0.00138132		1613.21	-0.00878849		2203.2	-0.00151563		2793.2	-0.00827914		3383.2	-0.00498966
433.4	0.04612698		1023.39	-0.00089215		1613.41	-0.00819538		2203.4	-0.0018057		2793.4	-0.00727301		3383.4	-0.00470497
433.6	0.04573537		1023.59	-0.00071498		1613.61	-0.00815171		2203.6	-0.00204218		2793.6	-0.0070174		3383.6	-0.00493653
433.8	0.04600748		1023.79	-0.00115222		1613.81	-0.00692207		2203.8	-0.00158525		2793.8	-0.00691926		3383.8	-0.00539553
434	0.0461715		1023.99	-0.00082108		1614.01	-0.00678563		2204	-0.0019804		2794	-0.0067825		3384	-0.00527871
434.2	0.04650629		1024.19	-0.00076297		1614.21	-0.00574052		2204.2	-0.00148592		2794.2	-0.00641686		3384.2	-0.00586969
434.4	0.04773649		1024.39	-0.00072074		1614.41	-0.00586849		2204.4	-0.00211304		2794.4	-0.00573389		3384.4	-0.00573011
434.6	0.04767839		1024.59	-0.00059265		1614.61	-0.00608156		2204.6	-0.00172179		2794.6	-0.00433195		3384.6	-0.005467
434.8	0.04812373		1024.79	-0.00097912		1614.81	-0.0062915		2204.8	-0.00235562		2794.8	-0.00400053		3384.8	-0.00551075
435	0.04839284		1024.99	-0.00052245		1615.01	-0.00534809		2205	-0.00233669		2795	-0.00301455		3385	-0.00615281
435.2	0.0486352		1025.19	-0.00056368		1615.21	-0.00513295		2205.2	-0.00225954		2795.2	-0.00116589		3385.2	-0.00518423
435.4	0.04907694		1025.39	-0.00099333		1615.41	-0.00617107		2205.4	-0.00264014		2795.4	-0.00085634		3385.4	-0.00455048
435.6	0.04981854		1025.59	-0.00033644		1615.61	-0.00605729		2205.6	-0.0021652		2795.6	-0.00090345		3385.6	-0.00416061
435.8	0.04998813		1025.79	-0.00041337		1615.81	-0.00620749		2205.8	-0.00239449		2795.8	-0.00031258		3385.8	-0.00438351
436	0.04968715		1025.99	-0.00011146		1616.01	-0.00641651		2206	-0.00142707		2796	-0.00075698		3386	-0.0049941
436.2	0.04995711		1026.19	0.00015886		1616.21	-0.00649644		2206.2	-0.00226988		2796.2	-0.00186857		3386.2	-0.00561277
436.4	0.04975653		1026.39	-0.00066709		1616.41	-0.00664162		2206.4	-0.00234737		2796.4	-0.00162767		3386.4	-0.0056719
436.6	0.04951506		1026.59	-0.00032104		1616.61	-0.00707256		2206.6	-0.00238939		2796.6	-0.00244439		3386.6	-0.00594647
436.8	0.04936378		1026.79	-0.00082625		1616.81	-0.00657542		2206.8	-0.00207274		2796.8	-0.00276615		3386.8	-0.00649167
437	0.04868303		1026.99	-0.00167706		1617.01	-0.00621113		2207	-0.00157747		2797	-0.00339705		3387	-0.00675927
437.2	0.04874546		1027.19	-0.00130633		1617.21	-0.00669255		2207.2	-0.00168267		2797.2	-0.00358153		3387.2	-0.00675363
437.4	0.04768525		1027.39	-0.00080578		1617.41	-0.00671262		2207.4	-0.00199549		2797.4	-0.00375863		3387.4	-0.00636475
437.6	0.04660234		1027.59	-0.00055229		1617.61	-0.00629945		2207.6	-0.00136679		2797.6	-0.00390142		3387.6	-0.00584181
437.8	0.04638832		1027.79	-0.00050929		1617.81	-0.00544979		2207.8	-0.00100797		2797.8	-0.00475685		3387.8	-0.00585777
438	0.04683959		1027.99	0.00022864		1618.01	-0.0055813		2208	-0.00148917		2798	-0.00556074		3388	-0.00596922
438.2	0.04659268		1028.19	-0.00014345		1618.21	-0.00541425		2208.2	-0.00240955		2798.2	-0.00485631		3388.2	-0.00580777
438.4	0.04717584		1028.39	-0.00053409		1618.41	-0.00539663		2208.4	-0.00287318		2798.4	-0.00456908		3388.4	-0.00643115
438.6	0.04696376		1028.59	-0.00071161		1618.61	-0.00532335		2208.6	-0.00299237		2798.6	-0.00389047		3388.6	-0.00707633
438.8	0.04801009		1028.79	-0.0013487		1618.81	-0.00519967		2208.8	-0.00323012		2798.8	-0.00342611		3388.8	-0.00735218
439	0.0489304		1028.99	-0.0019149		1619.01	-0.00494182		2209	-0.00304776		2799	-0.00228405		3389	-0.00771974
439.2	0.04932324		1029.19	-0.00204031		1619.21	-0.00497685		2209.2	-0.00259603		2799.2	-0.00115197		3389.2	-0.00707159
439.4	0.05058992		1029.39	-0.00220361		1619.41	-0.00575881		2209.4	-0.00336077		2799.4	-0.00095905		3389.4	-0.00754721
439.6	0.05185614		1029.59	-0.00196003		1619.61	-0.00547156		2209.6	-0.00381339		2799.6	-0.00158385		3389.6	-0.00793716
439.8	0.05234298		1029.79	-0.00118657		1619.81	-0.0054712		2209.8	-0.0034478		2799.8	-0.0013803		3389.8	-0.0087616
440	0.05308024		1029.99	-0.00118938		1620.01	-0.00494137		2210	-0.00363569		2800	-0.00091531		3390	-0.00918138
440.2	0.05274865		1030.19	0.00015446		1620.21	-0.00487071		2210.2	-0.00403575		2800.2	-0.00070266		3390.2	-0.0087376
440.4	0.05313963		1030.39	0.00078213		1620.41	-0.0054023		2210.4	-0.00454603		2800.4	-0.00019297		3390.4	-0.00865016
440.6	0.05321041		1030.59	0.00091145		1620.61	-0.00574481		2210.6	-0.00504618		2800.6	-0.00173388		3390.6	-0.00856767
440.8	0.0525914		1030.79	0.00063645		1620.81	-0.00680927		2210.8	-0.00537194		2800.8	-0.00251613		3390.8	-0.00792275
441	0.05171387		1030.99	0.00118717		1621.01	-0.00711825		2211	-0.00533327		2801	-0.00301731		3391	-0.00723076
441.2	0.05105714		1031.19	0.0011383		1621.21	-0.00786398		2211.2	-0.0065441		2801.2	-0.00304991		3391.2	-0.00635412
441.4	0.05035762		1031.39	0.00099456		1621.41	-0.008144		2211.4	-0.00726548		2801.4	-0.00413841		3391.4	-0.00518062
441.6	0.04897548		1031.59	0.0010172		1621.61	-0.00876052		2211.6	-0.00744457		2801.6	-0.00475083		3391.6	-0.00383978
441.8	0.04830347		1031.79	0.00096989		1621.81	-0.00921059		2211.8	-0.00781982		2801.8	-0.0054188		3391.8	-0.0030136
442	0.04797342		1031.99	0.00034449		1622.01	-0.00959245		2212	-0.00797338		2802	-0.00607093		3392	-0.00306152
442.2	0.04731359		1032.19	-0.00065349		1622.21	-0.0090246		2212.2	-0.00807889		2802.2	-0.0056332		3392.2	-0.0026269
442.4	0.04759685		1032.39	-0.00105625		1622.41	-0.00884622		2212.4	-0.00756099		2802.4	-0.00529599		3392.4	-0.00275424
442.6	0.04815069		1032.59	-0.00158514		1622.61	-0.00891439		2212.6	-0.00703109		2802.6	-0.00491856		3392.6	-0.00281285
442.8	0.04823479		1032.79	-0.00279426		1622.81	-0.00821453		2212.8	-0.00634792		2802.8	-0.00450443		3392.8	-0.00296392
443	0.04806957		1032.99	-0.00307043		1623.01	-0.00818889		2213	-0.00582418		2803	-0.00401827		3393	-0.00277333
443.2	0.0485444		1033.19	-0.0027003		1623.21	-0.00659157		2213.2	-0.00512371		2803.2	-0.00432547		3393.2	-0.0024708
443.4	0.04901674		1033.39	-0.00337705		1623.41	-0.0062648		2213.4	-0.0050322		2803.4	-0.00482701		3393.4	-0.00300054
443.6	0.04936073		1033.59	-0.00306582		1623.61	-0.00542302		2213.6	-0.00403657		2803.6	-0.00535724		3393.6	-0.00388229
443.8	0.04942614		1033.79	-0.00284325		1623.81	-0.00485578		2213.8	-0.0029416		2803.8	-0.00484671		3393.8	-0.00456899
444	0.04949688		1033.99	-0.00271594		1624.01	-0.005359		2214	-0.00299837		2804	-0.00528668		3394	-0.00470921
444.2	0.04895524		1034.19	-0.00148431		1624.21	-0.00464726		2214.2	-0.00291212		2804.2	-0.00588128		3394.2	-0.00494838
444.4	0.04922073		1034.39	-0.00096974		1624.41	-0.00426975		2214.4	-0.002707		2804.4	-0.00659327		3394.4	-0.00572007
444.6	0.0485339		1034.59	-0.00068478		1624.61	-0.0040192		2214.6	-0.00190231		2804.6	-0.00763175		3394.6	-0.00588847
444.8	0.0481486		1034.79	0.00010953		1624.81	-0.00435		2214.8	-0.00184172		2804.8	-0.0069866		3394.8	-0.00606475
445	0.04823284		1034.99	-0.0006911		1625.01	-0.003664		2215	-0.00212192		2805	-0.00681056		3395	-0.00645413
445.2	0.04775374		1035.19	-0.00108577		1625.21	-0.00435056		2215.2	-0.00272979		2805.2	-0.00658694		3395.2	-0.00708847
445.4	0.0486904		1035.39	-0.00056123		1625.41	-0.00530042		2215.4	-0.00347587		2805.4	-0.006466		3395.4	-0.006878
445.6	0.04847938		1035.59	-0.00049296		1625.61	-0.00568845		2215.6	-0.00351963		2805.6	-0.00616726		3395.6	-0.00634851
445.8	0.04906015		1035.79	-0.00140655		1625.81	-0.00534961		2215.8	-0.00371233		2805.8	-0.00561574		3395.8	-0.00714217
446	0.04928854		1035.99	-0.00175917		1626.01	-0.00504345		2216	-0.00493534		2806	-0.0046044		3396	-0.00764398
446.2	0.0494945		1036.19	-0.00180667		1626.21	-0.0049105		2216.2	-0.0057044		2806.2	-0.0037962		3396.2	-0.00824618
446.4	0.04946594		1036.39	-0.0017179		1626.41	-0.00540175		2216.4	-0.00597569		2806.4	-0.00247559		3396.4	-0.00831646
446.6	0.04952156		1036.59	-0.0024062		1626.61	-0.00613141		2216.6	-0.00642096		2806.6	-0.00213116		3396.6	-0.00898181
446.8	0.04944857		1036.79	-0.0021004		1626.81	-0.00627546		2216.8	-0.00697365		2806.8	-0.00142138		3396.8	-0.00900151
447	0.04988305		1036.99	-0.00148391		1627.01	-0.0071963		2217	-0.00671234		2807	-0.00073927		3397	-0.00827496
447.2	0.05071909		1037.19	-0.00082112		1627.21	-0.00752656		2217.2	-0.00697897		2807.2	-0.00122576		3397.2	-0.008487
447.4	0.05059382		1037.39	-0.00116964		1627.41	-0.00811531		2217.4	-0.00716489		2807.4	-0.00094789		3397.4	-0.00831548
447.6	0.05059199		1037.59	-0.00043257		1627.61	-0.00784498		2217.6	-0.0070023		2807.6	-0.0008893		3397.6	-0.00848076
447.8	0.05005139		1037.79	-0.00025872		1627.81	-0.00825892		2217.8	-0.00707297		2807.8	-0.00100525		3397.8	-0.00744839
448	0.04905966		1037.99	0.00050994		1628.01	-0.00837776		2218	-0.0062786		2808	-0.00267514		3398	-0.00694695
448.2	0.04791874		1038.19	0.00162921		1628.21	-0.00754866		2218.2	-0.00493526		2808.2	-0.00299518		3398.2	-0.0066618
448.4	0.04748127		1038.39	0.00166553		1628.41	-0.0076939		2218.4	-0.00362289		2808.4	-0.00333022		3398.4	-0.00630553
448.6	0.04812677		1038.59	0.00148079		1628.61	-0.0075903		2218.6	-0.00345747		2808.6	-0.00347929		3398.6	-0.00573158
448.8	0.04822847		1038.79	0.00107069		1628.81	-0.00739212		2218.8	-0.00379196		2808.8	-0.00316253		3398.8	-0.0050786
449	0.04931424		1038.99	0.00023254		1629.01	-0.00760744		2219	-0.00363694		2809	-0.0037321		3399	-0.00483727
449.2	0.04953693		1039.19	0.00041383		1629.21	-0.0086981		2219.2	-0.00377025		2809.2	-0.00408753		3399.2	-0.00487576
449.4	0.05072595		1039.39	0.00002578		1629.41	-0.00829042		2219.4	-0.00402237		2809.4	-0.00465796		3399.4	-0.00411353
449.6	0.05066093		1039.59	-0.00101462		1629.61	-0.00803529		2219.6	-0.00348388		2809.6	-0.00511431		3399.6	-0.00382961
449.8	0.05143194		1039.79	-0.00147738		1629.81	-0.00712508		2219.8	-0.00364319		2809.8	-0.00604229		3399.8	-0.00454403
450	0.0516923		1039.99	-0.00138376		1630.01	-0.0060595		2220	-0.00427098		2810	-0.00594809		3400	-0.00452409
450.2	0.05198012		1040.19	-0.0021638		1630.21	-0.00582565		2220.2	-0.00395755		2810.2	-0.00576189		3400.2	-0.00527061
450.4	0.05164635		1040.39	-0.00272847		1630.41	-0.00496054		2220.4	-0.00396276		2810.4	-0.00512923		3400.4	-0.00526654
450.6	0.05189673		1040.59	-0.00289529		1630.61	-0.00509586		2220.6	-0.00459068		2810.6	-0.004364		3400.6	-0.00595135
450.8	0.05229776		1040.79	-0.00211068		1630.81	-0.00548316		2220.8	-0.00489585		2810.8	-0.0038501		3400.8	-0.00602881
451	0.05233457		1040.99	-0.00221416		1631.01	-0.00581889		2221	-0.00515226		2811	-0.00328294		3401	-0.00610647
451.2	0.05325484		1041.19	-0.00185651		1631.21	-0.00528219		2221.2	-0.00520787		2811.2	-0.00323742		3401.2	-0.0066199
451.4	0.05307565		1041.39	-0.00234178		1631.41	-0.00437579		2221.4	-0.0057016		2811.4	-0.00250103		3401.4	-0.00689073
451.6	0.05339478		1041.59	-0.00219925		1631.61	-0.00387231		2221.6	-0.00519002		2811.6	-0.00200884		3401.6	-0.00745353
451.8	0.05261411		1041.79	-0.00213365		1631.81	-0.00423457		2221.8	-0.00513188		2811.8	-0.00231162		3401.8	-0.00741235
452	0.0519358		1041.99	-0.00178985		1632.01	-0.00377861		2222	-0.00388957		2812	-0.00296511		3402	-0.00758461
452.2	0.05217719		1042.19	-0.00147437		1632.21	-0.00394587		2222.2	-0.00396082		2812.2	-0.00292943		3402.2	-0.00778409
452.4	0.0523155		1042.39	-0.00145569		1632.41	-0.00458783		2222.4	-0.00417632		2812.4	-0.00189245		3402.4	-0.00772314
452.6	0.05203258		1042.59	-0.00169442		1632.61	-0.00550335		2222.6	-0.00437141		2812.6	-0.00229436		3402.6	-0.00750473
452.8	0.05171465		1042.79	-0.0015185		1632.81	-0.00647881		2222.8	-0.00411006		2812.8	-0.00201964		3402.8	-0.0081596
453	0.0518742		1042.99	-0.00166441		1633.01	-0.00776302		2223	-0.00479796		2813	-0.00291275		3403	-0.00931211
453.2	0.05146514		1043.19	-0.00197953		1633.21	-0.00787306		2223.2	-0.00524564		2813.2	-0.00376221		3403.2	-0.00914226
453.4	0.05051102		1043.39	-0.00175175		1633.41	-0.00717795		2223.4	-0.00452438		2813.4	-0.00427429		3403.4	-0.00883084
453.6	0.05063245		1043.59	-0.00243069		1633.61	-0.0072916		2223.6	-0.00402775		2813.6	-0.0049783		3403.6	-0.00870333
453.8	0.05049735		1043.79	-0.00159936		1633.81	-0.0074008		2223.8	-0.00442872		2813.8	-0.00529594		3403.8	-0.00875579
454	0.04957483		1043.99	-0.00219497		1634.01	-0.00676746		2224	-0.00443423		2814	-0.00479042		3404	-0.00803968
454.2	0.05010344		1044.19	-0.00210541		1634.21	-0.00734602		2224.2	-0.00438411		2814.2	-0.00445456		3404.2	-0.0074146
454.4	0.04953146		1044.39	-0.00165607		1634.41	-0.00797295		2224.4	-0.00480028		2814.4	-0.00444088		3404.4	-0.00675
454.6	0.04961015		1044.59	-0.00165956		1634.61	-0.00822163		2224.6	-0.00481351		2814.6	-0.00504686		3404.6	-0.00652883
454.8	0.0494744		1044.79	-0.00180044		1634.81	-0.00849111		2224.8	-0.00476962		2814.8	-0.00542848		3404.8	-0.00615395
455	0.04997055		1044.99	-0.00187952		1635.01	-0.00799081		2225	-0.00425991		2815	-0.00525232		3405	-0.00586918
455.2	0.05098145		1045.19	-0.00268583		1635.21	-0.00745126		2225.2	-0.00401801		2815.2	-0.00565656		3405.2	-0.00615094
455.4	0.05181913		1045.39	-0.00229831		1635.41	-0.00691322		2225.4	-0.00413527		2815.4	-0.00626031		3405.4	-0.00695502
455.6	0.05298308		1045.59	-0.002621		1635.61	-0.0062576		2225.6	-0.0034967		2815.6	-0.00628997		3405.6	-0.00676603
455.8	0.05303854		1045.79	-0.00196375		1635.81	-0.00576417		2225.8	-0.00411729		2815.8	-0.00655894		3405.8	-0.00658201
456	0.05313968		1045.99	-0.00156706		1636.01	-0.00584822		2226	-0.00338484		2816	-0.00682468		3406	-0.00604854
456.2	0.05321303		1046.19	-0.00099808		1636.21	-0.00663236		2226.2	-0.00319238		2816.2	-0.00728619		3406.2	-0.0067814
456.4	0.05312386		1046.39	-0.00049902		1636.41	-0.00651358		2226.4	-0.0027127		2816.4	-0.00695646		3406.4	-0.00684693
456.6	0.05275793		1046.59	-0.0007407		1636.61	-0.00710659		2226.6	-0.00226087		2816.6	-0.00667737		3406.6	-0.00746282
456.8	0.05301729		1046.79	0.00013121		1636.81	-0.00724747		2226.8	-0.00179082		2816.8	-0.00597682		3406.8	-0.00805922
457	0.05227232		1046.99	0.00006709		1637.01	-0.00662662		2227	-0.00227658		2817	-0.00613989		3407	-0.00877045
457.2	0.05141177		1047.19	0.00079368		1637.21	-0.00610642		2227.2	-0.00195123		2817.2	-0.00583578		3407.2	-0.00859575
457.4	0.05105773		1047.39	0.00051042		1637.41	-0.00606877		2227.4	-0.00184882		2817.4	-0.00459707		3407.4	-0.00918024
457.6	0.0507771		1047.59	-0.00017017		1637.61	-0.00666766		2227.6	-0.00206315		2817.6	-0.00373832		3407.6	-0.00851968
457.8	0.05053693		1047.79	0.00031424		1637.81	-0.00683279		2227.8	-0.00297612		2817.8	-0.00226017		3407.8	-0.00802502
458	0.05032242		1047.99	0.00045397		1638.01	-0.0071033		2228	-0.00335484		2818	-0.001237		3408	-0.00756925
458.2	0.0506552		1048.19	0.0006471		1638.21	-0.00786037		2228.2	-0.00381853		2818.2	-0.00046927		3408.2	-0.00666988
458.4	0.04961688		1048.39	0.00029566		1638.41	-0.00826064		2228.4	-0.00424997		2818.4	-0.00028886		3408.4	-0.00622331
458.6	0.04946368		1048.59	-0.00046777		1638.61	-0.007497		2228.6	-0.00427536		2818.6	-0.00062778		3408.6	-0.00558629
458.8	0.04894842		1048.79	-0.00129959		1638.81	-0.00770786		2228.8	-0.00376031		2818.8	-0.00101339		3408.8	-0.0047575
459	0.04947885		1048.99	-0.00101595		1639.01	-0.00757498		2229	-0.00420036		2819	-0.00136432		3409	-0.0042233
459.2	0.04997328		1049.19	-0.00086766		1639.21	-0.00688711		2229.2	-0.00489467		2819.2	-0.00258355		3409.2	-0.0047012
459.4	0.05037722		1049.39	0.00024174		1639.41	-0.00605244		2229.4	-0.00563306		2819.4	-0.00324414		3409.4	-0.00552835
459.6	0.05062333		1049.59	-0.00031606		1639.61	-0.00571477		2229.6	-0.00587057		2819.6	-0.0027477		3409.6	-0.00459831
459.8	0.05112199		1049.79	-0.00024038		1639.81	-0.00657927		2229.8	-0.00587695		2819.8	-0.00420033		3409.8	-0.00466553
460	0.05107903		1049.99	-0.00053065		1640.01	-0.00807578		2230	-0.00515265		2820	-0.00479269		3410	-0.00496284
460.2	0.05055762		1050.19	-0.00080488		1640.21	-0.00814029		2230.2	-0.00485673		2820.2	-0.00491693		3410.2	-0.00555482
460.4	0.05087699		1050.39	-0.00000383		1640.41	-0.0082324		2230.4	-0.00457772		2820.4	-0.00557736		3410.4	-0.00515743
460.6	0.05037634		1050.59	-0.00045337		1640.61	-0.00893662		2230.6	-0.00391881		2820.6	-0.00532585		3410.6	-0.00533805
460.8	0.04990666		1050.79	-0.00004607		1640.81	-0.00879643		2230.8	-0.00376765		2820.8	-0.00564085		3410.8	-0.00570716
461	0.04968543		1050.99	-0.00015408		1641.01	-0.00895358		2231	-0.00399282		2821	-0.00532447		3411	-0.00608821
461.2	0.05058365		1051.19	0.00030036		1641.21	-0.00910377		2231.2	-0.00448785		2821.2	-0.00423267		3411.2	-0.00610079
461.4	0.05067425		1051.39	-0.00054377		1641.41	-0.00920282		2231.4	-0.00543976		2821.4	-0.00338006		3411.4	-0.00561871
461.6	0.05074205		1051.59	-0.00042444		1641.61	-0.00959777		2231.6	-0.00544652		2821.6	-0.00228046		3411.6	-0.0042433
461.8	0.0512926		1051.79	-0.00042023		1641.81	-0.00911162		2231.8	-0.00577197		2821.8	-0.00174034		3411.8	-0.00492509
462	0.05104485		1051.99	-0.00022971		1642.01	-0.00904978		2232	-0.00593116		2822	-0.00164372		3412	-0.00532972
462.2	0.05097415		1052.19	-0.00094618		1642.21	-0.00847418		2232.2	-0.00609436		2822.2	-0.00137308		3412.2	-0.00477104
462.4	0.05130321		1052.39	-0.00083542		1642.41	-0.00860436		2232.4	-0.00570796		2822.4	-0.00149408		3412.4	-0.00393274
462.6	0.05175006		1052.59	-0.0010641		1642.61	-0.00806659		2232.6	-0.00572432		2822.6	-0.0027125		3412.6	-0.00385919
462.8	0.05180867		1052.79	-0.00075517		1642.81	-0.00729749		2232.8	-0.00533424		2822.8	-0.00338452		3412.8	-0.00403226
463	0.05317137		1052.99	0.00004487		1643.01	-0.00637398		2233	-0.00562162		2823	-0.00314596		3413	-0.00453744
463.2	0.05356906		1053.19	0.00087519		1643.21	-0.00558091		2233.2	-0.00537794		2823.2	-0.00413074		3413.2	-0.00559451
463.4	0.05366305		1053.39	0.00105026		1643.41	-0.00506157		2233.4	-0.00612549		2823.4	-0.00402847		3413.4	-0.00606046
463.6	0.05410432		1053.59	0.0004285		1643.61	-0.00503204		2233.6	-0.00499481		2823.6	-0.00464878		3413.6	-0.00551105
463.8	0.05523889		1053.79	-0.00012907		1643.81	-0.00528336		2233.8	-0.00464219		2823.8	-0.00569532		3413.8	-0.00635099
464	0.05499322		1053.99	0.00021168		1644.01	-0.0048069		2234	-0.00479505		2824	-0.00517773		3414	-0.0065434
464.2	0.05542444		1054.19	0.00029557		1644.21	-0.00392481		2234.2	-0.005003		2824.2	-0.0050331		3414.2	-0.00667137
464.4	0.05595637		1054.39	0.0012311		1644.41	-0.00430661		2234.4	-0.00408288		2824.4	-0.00628775		3414.4	-0.00680109
464.6	0.0552707		1054.59	0.00016783		1644.61	-0.00412428		2234.6	-0.00353221		2824.6	-0.00549498		3414.6	-0.00746538
464.8	0.05558466		1054.79	0.00014699		1644.81	-0.00362124		2234.8	-0.00327775		2824.8	-0.00455307		3414.8	-0.00791544
465	0.05544152		1054.99	0.0005345		1645.01	-0.00355027		2235	-0.00389383		2825	-0.00374553		3415	-0.00754973
465.2	0.0554588		1055.19	0.00034486		1645.21	-0.00299207		2235.2	-0.00438919		2825.2	-0.00304669		3415.2	-0.00767439
465.4	0.0539741		1055.39	-0.00023208		1645.41	-0.0031573		2235.4	-0.00382383		2825.4	-0.00317166		3415.4	-0.00727855
465.6	0.05423418		1055.59	0.00019167		1645.61	-0.00387035		2235.6	-0.00305533		2825.6	-0.00266384		3415.6	-0.00819164
465.8	0.05302852		1055.79	0.00037033		1645.81	-0.00423427		2235.8	-0.00307302		2825.8	-0.00306652		3415.8	-0.00900409
466	0.05284061		1055.99	0.00017219		1646.01	-0.00415271		2236	-0.00294738		2826	-0.00292349		3416	-0.00849058
466.2	0.05293378		1056.19	0.00012811		1646.21	-0.0045001		2236.2	-0.00307464		2826.2	-0.00306155		3416.2	-0.00734294
466.4	0.05245441		1056.39	0.00047086		1646.41	-0.00461542		2236.4	-0.0029897		2826.4	-0.00419309		3416.4	-0.00627098
466.6	0.05198725		1056.59	-0.00007009		1646.61	-0.00404224		2236.6	-0.00282411		2826.6	-0.005238		3416.6	-0.00638105
466.8	0.05225673		1056.79	0.00021151		1646.81	-0.0039522		2236.8	-0.00325635		2826.8	-0.00464504		3416.8	-0.00588524
467	0.05270931		1056.99	-0.00045869		1647.01	-0.0043897		2237	-0.00340043		2827	-0.00477047		3417	-0.0056621
467.2	0.05262535		1057.19	0.00012085		1647.21	-0.00416195		2237.2	-0.00412422		2827.2	-0.00505007		3417.2	-0.00528444
467.4	0.05315495		1057.39	-0.00016954		1647.41	-0.0037492		2237.4	-0.00492911		2827.4	-0.00478625		3417.4	-0.00496868
467.6	0.05397342		1057.59	-0.00056597		1647.61	-0.00324292		2237.6	-0.00485048		2827.6	-0.00565202		3417.6	-0.0045893
467.8	0.05531213		1057.79	0.00017584		1647.81	-0.00381759		2237.8	-0.00507213		2827.8	-0.00546102		3417.8	-0.00532817
468	0.05601404		1057.99	0.00113022		1648.01	-0.00420028		2238	-0.00511707		2828	-0.0053477		3418	-0.00567096
468.2	0.05677915		1058.19	0.00155436		1648.21	-0.00476884		2238.2	-0.00504342		2828.2	-0.00542778		3418.2	-0.00662213
468.4	0.05661586		1058.39	0.00205182		1648.41	-0.00547702		2238.4	-0.00458871		2828.4	-0.00567167		3418.4	-0.00750205
468.6	0.05626102		1058.59	0.00164063		1648.61	-0.00546218		2238.6	-0.00496075		2828.6	-0.00489803		3418.6	-0.00836296
468.8	0.05614157		1058.79	0.00181405		1648.81	-0.005332		2238.8	-0.00525302		2828.8	-0.00481402		3418.8	-0.00926291
469	0.05510277		1058.99	0.0019478		1649.01	-0.00579858		2239	-0.00591745		2829	-0.00500724		3419	-0.01011454
469.2	0.05457299		1059.19	0.00142397		1649.21	-0.00605175		2239.2	-0.00568801		2829.2	-0.00509298		3419.2	-0.01102508
469.4	0.05358639		1059.39	0.00141506		1649.41	-0.00669965		2239.4	-0.00548653		2829.4	-0.0054054		3419.4	-0.01178087
469.6	0.05307584		1059.59	0.00174941		1649.61	-0.00730665		2239.6	-0.00597105		2829.6	-0.00552127		3419.6	-0.01303005
469.8	0.05201354		1059.79	0.00122136		1649.81	-0.00731309		2239.8	-0.00672836		2829.8	-0.0058759		3419.8	-0.01299386
470	0.05201354		1059.99	0.00122136		1650.01	-0.00731309		2240	-0.00672836		2830	-0.0058759		3419.99	-0.01299386
470.2	0.05300547		1060.19	0.00141881		1650.21	-0.00703531		2240.2	-0.00616057		2830.2	-0.00522485		3420.19	-0.01405419
470.4	0.05375467		1060.39	0.00149339		1650.41	-0.00706275		2240.4	-0.00542015		2830.4	-0.00468964		3420.39	-0.01488613
470.6	0.05513649		1060.59	0.0011811		1650.61	-0.00714064		2240.6	-0.00488314		2830.6	-0.00429928		3420.59	-0.01631285
470.8	0.05567655		1060.79	0.00083579		1650.81	-0.0075517		2240.8	-0.00455692		2830.8	-0.00352305		3420.79	-0.01593685
471	0.05582906		1060.99	0.00072625		1651.01	-0.00704762		2241	-0.00409771		2831	-0.00316585		3420.99	-0.01701681
471.2	0.05621818		1061.19	0.0006619		1651.21	-0.00725543		2241.2	-0.00394204		2831.2	-0.0025555		3421.19	-0.01720721
471.4	0.05599713		1061.39	0.00072651		1651.41	-0.00670901		2241.4	-0.00437844		2831.4	-0.0016322		3421.39	-0.01765196
471.6	0.05577287		1061.59	0.00118734		1651.61	-0.00589579		2241.6	-0.00475907		2831.6	-0.00137265		3421.59	-0.01774106
471.8	0.05633052		1061.79	0.00093554		1651.81	-0.00592649		2241.8	-0.0046482		2831.8	-0.00099691		3421.79	-0.01740584
472	0.0559849		1061.99	0.00049866		1652.01	-0.00546865		2242	-0.00526219		2832	-0.00087113		3421.99	-0.01724406
472.2	0.05616382		1062.19	0.00119496		1652.21	-0.00488243		2242.2	-0.00582038		2832.2	-0.00098067		3422.19	-0.01717208
472.4	0.05621713		1062.39	0.00061448		1652.41	-0.00436013		2242.4	-0.0059206		2832.4	-0.00110061		3422.39	-0.01734231
472.6	0.05643887		1062.59	-0.00029981		1652.61	-0.00414472		2242.6	-0.00627049		2832.6	-0.00080181		3422.59	-0.01707248
472.8	0.05644154		1062.79	0.00034638		1652.81	-0.00493053		2242.8	-0.00710035		2832.8	-0.00145779		3422.79	-0.01679446
473	0.05547059		1062.99	-0.00011006		1653.01	-0.00458513		2243	-0.00792633		2833	-0.00204807		3422.99	-0.01752018
473.2	0.0550165		1063.19	0.00042615		1653.21	-0.00419045		2243.2	-0.00769377		2833.2	-0.0015594		3423.19	-0.01707297
473.4	0.05550012		1063.39	0.0000343		1653.41	-0.00406992		2243.4	-0.00801357		2833.4	-0.00194936		3423.39	-0.01709333
473.6	0.05475988		1063.59	0.00027057		1653.61	-0.005174		2243.6	-0.00806562		2833.6	-0.00211151		3423.59	-0.01723869
473.8	0.05497547		1063.79	0.00068483		1653.81	-0.00491655		2243.8	-0.00794416		2833.8	-0.00229831		3423.79	-0.01739936
474	0.0557083		1063.99	0.00097742		1654.01	-0.00418503		2244	-0.00810144		2834	-0.00227184		3423.99	-0.01778717
474.2	0.05605824		1064.19	0.00105039		1654.21	-0.00380504		2244.2	-0.00792272		2834.2	-0.00215986		3424.19	-0.01726148
474.4	0.05568718		1064.39	0.00077683		1654.41	-0.00445347		2244.4	-0.00757102		2834.4	-0.00237048		3424.39	-0.01728913
474.6	0.05626719		1064.59	0.0005581		1654.61	-0.00471905		2244.6	-0.00794563		2834.6	-0.00244601		3424.59	-0.01663346
474.8	0.05592211		1064.79	0.00030906		1654.81	-0.00471958		2244.8	-0.00740138		2834.8	-0.00293722		3424.79	-0.01563231
475	0.05594119		1064.99	0.00081462		1655.01	-0.00444844		2245	-0.0074686		2835	-0.002791		3424.99	-0.01623619
475.2	0.05626928		1065.19	0.00084468		1655.21	-0.00462127		2245.2	-0.00740433		2835.2	-0.00249354		3425.19	-0.01564115
475.4	0.05609699		1065.39	0.00143748		1655.41	-0.00386442		2245.4	-0.00794882		2835.4	-0.0020396		3425.39	-0.01566546
475.6	0.05692436		1065.59	0.00168162		1655.61	-0.00337295		2245.6	-0.00806572		2835.6	-0.00182924		3425.59	-0.01463112
475.8	0.05746818		1065.79	0.00097665		1655.81	-0.004643		2245.8	-0.0078579		2835.8	-0.00137988		3425.79	-0.01460142
476	0.05694816		1065.99	0.00097218		1656.01	-0.00437303		2246	-0.00821936		2836	-0.00111351		3425.99	-0.01418156
476.2	0.05752872		1066.19	0.00142642		1656.21	-0.00410273		2246.2	-0.00751211		2836.2	-0.00070517		3426.19	-0.01396899
476.4	0.05704102		1066.39	0.00090743		1656.41	-0.00427871		2246.4	-0.0074702		2836.4	0.00003219		3426.39	-0.01388946
476.6	0.05786768		1066.59	0.00105521		1656.61	-0.00443338		2246.6	-0.00715529		2836.6	0.00004965		3426.59	-0.01344709
476.8	0.05775621		1066.79	0.00190346		1656.81	-0.00531472		2246.8	-0.00781344		2836.8	-0.00038403		3426.79	-0.01447637
477	0.05695881		1066.99	0.00121787		1657.01	-0.00483592		2247	-0.00757829		2837	-0.00014528		3426.99	-0.01414472
477.2	0.05700982		1067.19	0.00215094		1657.21	-0.00420382		2247.2	-0.00750652		2837.2	-0.00018846		3427.19	-0.01361871
477.4	0.05751024		1067.39	0.00211801		1657.41	-0.00431886		2247.4	-0.0077141		2837.4	-0.00027356		3427.39	-0.01421137
477.6	0.0575253		1067.59	0.00246123		1657.61	-0.0040559		2247.6	-0.00788582		2837.6	0.00008109		3427.59	-0.0141497
477.8	0.05787654		1067.79	0.00166059		1657.81	-0.00301768		2247.8	-0.00726483		2837.8	0.00015897		3427.79	-0.01421913
478	0.05818421		1067.99	0.00204402		1658.01	-0.00212172		2248	-0.00738902		2838	-0.00010762		3427.99	-0.01408832
478.2	0.05721681		1068.19	0.00220867		1658.21	-0.00121373		2248.2	-0.00700382		2838.2	-0.00072982		3428.19	-0.01495138
478.4	0.05678729		1068.39	0.00229921		1658.41	-0.0016052		2248.4	-0.00674798		2838.4	-0.00132779		3428.39	-0.0147959
478.6	0.05713911		1068.59	0.00235496		1658.61	-0.00130948		2248.6	-0.00653063		2838.6	-0.00171065		3428.59	-0.01444377
478.8	0.05733557		1068.79	0.00220353		1658.81	-0.00088991		2248.8	-0.00593822		2838.8	-0.00226565		3428.79	-0.01423596
479	0.0579125		1068.99	0.00336479		1659.01	-0.00110926		2249	-0.00678653		2839	-0.00145358		3428.99	-0.0151418
479.2	0.05767465		1069.19	0.00366475		1659.21	-0.00113045		2249.2	-0.00680513		2839.2	-0.00176286		3429.19	-0.01514767
479.4	0.05709182		1069.39	0.00335646		1659.41	-0.00114322		2249.4	-0.00792899		2839.4	-0.00091096		3429.39	-0.01530694
479.6	0.05741643		1069.59	0.00346691		1659.61	-0.00110596		2249.6	-0.00865403		2839.6	-0.00073548		3429.59	-0.0147993
479.8	0.05736189		1069.79	0.0029008		1659.81	-0.00188422		2249.8	-0.00848039		2839.8	-0.00056377		3429.79	-0.0149305
480	0.05704399		1069.99	0.00303412		1660.01	-0.00138279		2250	-0.00870378		2840	-0.00007597		3429.99	-0.01486586
480.2	0.05679414		1070.19	0.00236014		1660.21	-0.00174583		2250.2	-0.0089007		2840.2	-0.00006781		3430.19	-0.01530683
480.4	0.05620922		1070.39	0.0023016		1660.41	-0.00253395		2250.4	-0.01005051		2840.4	-0.00023332		3430.39	-0.01581977
480.6	0.05594963		1070.59	0.00315463		1660.61	-0.00327599		2250.6	-0.00985993		2840.6	-0.00070107		3430.59	-0.01521086
480.8	0.05474819		1070.79	0.00297208		1660.81	-0.00421133		2250.8	-0.009829		2840.8	-0.00134166		3430.79	-0.01565606
481	0.05446248		1070.99	0.00289111		1661.01	-0.00380725		2251	-0.00928721		2841	-0.00186723		3430.99	-0.01528983
481.2	0.05477645		1071.19	0.00331141		1661.21	-0.00339355		2251.2	-0.00933383		2841.2	-0.0011641		3431.19	-0.01631368
481.4	0.05526401		1071.39	0.00282153		1661.41	-0.00296237		2251.4	-0.00895396		2841.4	-0.00076372		3431.39	-0.01638832
481.6	0.05556908		1071.59	0.00306479		1661.61	-0.00264028		2251.6	-0.00821828		2841.6	-0.0007232		3431.59	-0.01611635
481.8	0.05496245		1071.79	0.00285879		1661.81	-0.00265712		2251.8	-0.00735942		2841.8	-0.00140719		3431.79	-0.01666069
482	0.0543172		1071.99	0.00356948		1662.01	-0.0023219		2252	-0.0076507		2842	-0.00166995		3431.99	-0.01653749
482.2	0.05363891		1072.19	0.00362232		1662.21	-0.00226506		2252.2	-0.00688343		2842.2	-0.00207022		3432.19	-0.01699545
482.4	0.05364196		1072.39	0.00373245		1662.41	-0.00226257		2252.4	-0.00642016		2842.4	-0.00223067		3432.39	-0.01574038
482.6	0.05393664		1072.59	0.00407491		1662.61	-0.0017973		2252.6	-0.00599637		2842.6	-0.00286839		3432.59	-0.01568319
482.8	0.05486744		1072.79	0.0039468		1662.81	-0.00225911		2252.8	-0.00555893		2842.8	-0.00334179		3432.79	-0.01557511
483	0.05498663		1072.99	0.00471112		1663.01	-0.00303201		2253	-0.00573339		2843	-0.00317607		3432.99	-0.01628878
483.2	0.05495342		1073.19	0.00453965		1663.21	-0.00283068		2253.2	-0.00536426		2843.2	-0.00360504		3433.19	-0.01530763
483.4	0.05641975		1073.39	0.00391308		1663.41	-0.00308668		2253.4	-0.00516625		2843.4	-0.00255993		3433.39	-0.01567309
483.6	0.05783936		1073.59	0.0035552		1663.61	-0.00290467		2253.6	-0.00523539		2843.6	-0.00212823		3433.59	-0.01559115
483.8	0.05884075		1073.79	0.00251727		1663.81	-0.00307946		2253.8	-0.0048092		2843.8	-0.00181949		3433.79	-0.01573675
484	0.05977937		1073.99	0.00169776		1664.01	-0.00353092		2254	-0.00502859		2844	-0.00147353		3433.99	-0.01633266
484.2	0.05997287		1074.19	0.00086715		1664.21	-0.00451602		2254.2	-0.00501403		2844.2	-0.00180105		3434.19	-0.01621312
484.4	0.06005108		1074.39	0.00128027		1664.41	-0.00489736		2254.4	-0.00476382		2844.4	-0.00259204		3434.39	-0.01614623
484.6	0.06115976		1074.59	0.00087189		1664.61	-0.005457		2254.6	-0.00449338		2844.6	-0.00335131		3434.59	-0.01638264
484.8	0.06116723		1074.79	0.00023698		1664.81	-0.00456174		2254.8	-0.0044876		2844.8	-0.00380832		3434.79	-0.01715934
485	0.06156621		1074.99	0.0005185		1665.01	-0.00404969		2255	-0.00537751		2845	-0.00331881		3434.99	-0.01746635
485.2	0.06093446		1075.19	0.00016608		1665.21	-0.00384489		2255.2	-0.0054145		2845.2	-0.00273566		3435.19	-0.01786621
485.4	0.06038032		1075.39	-0.00035419		1665.41	-0.00297406		2255.4	-0.00570758		2845.4	-0.00229123		3435.39	-0.01778712
485.6	0.05938608		1075.59	-0.00069192		1665.61	-0.00291726		2255.6	-0.0056767		2845.6	-0.0013317		3435.59	-0.01807118
485.8	0.05764661		1075.79	-0.00149948		1665.81	-0.0026285		2255.8	-0.00583979		2845.8	-0.00046326		3435.79	-0.0186586
486	0.05687859		1075.99	-0.00141195		1666.01	-0.00266622		2256	-0.00657313		2846	0.00060281		3435.99	-0.01854375
486.2	0.05641329		1076.19	-0.00124259		1666.21	-0.00279082		2256.2	-0.0062446		2846.2	0.0013039		3436.19	-0.0186791
486.4	0.05564101		1076.39	-0.00023549		1666.41	-0.00262906		2256.4	-0.00717464		2846.4	0.00149946		3436.39	-0.0187871
486.6	0.05498905		1076.59	0.00042107		1666.61	-0.00290263		2256.6	-0.0084498		2846.6	0.00144848		3436.59	-0.01902215
486.8	0.05448347		1076.79	0.0012561		1666.81	-0.00398926		2256.8	-0.00851921		2846.8	0.00217009		3436.79	-0.01924165
487	0.05421299		1076.99	0.00267003		1667.01	-0.00398868		2257	-0.0087502		2847	0.00309127		3436.99	-0.01853446
487.2	0.05459274		1077.19	0.0039871		1667.21	-0.00356094		2257.2	-0.00930943		2847.2	0.00298417		3437.19	-0.01800746
487.4	0.0545682		1077.39	0.00393725		1667.41	-0.00399794		2257.4	-0.00938709		2847.4	0.00362858		3437.39	-0.01790246
487.6	0.05459495		1077.59	0.00357311		1667.61	-0.00354548		2257.6	-0.00958692		2847.6	0.00304913		3437.59	-0.0176876
487.8	0.05534399		1077.79	0.00311958		1667.81	-0.00387969		2257.8	-0.00906546		2847.8	0.00318956		3437.79	-0.01688961
488	0.0559044		1077.99	0.00339645		1668.01	-0.00462128		2258	-0.00945231		2848	0.00273065		3437.99	-0.01709618
488.2	0.05620594		1078.19	0.00394998		1668.21	-0.00485261		2258.2	-0.00870866		2848.2	0.00145801		3438.19	-0.01673968
488.4	0.05682309		1078.39	0.00367053		1668.41	-0.00515681		2258.4	-0.00922984		2848.4	-0.00016406		3438.39	-0.01670634
488.6	0.05764405		1078.59	0.00353678		1668.61	-0.00500074		2258.6	-0.0094566		2848.6	-0.00088568		3438.59	-0.01625908
488.8	0.05731686		1078.79	0.00418742		1668.81	-0.00420097		2258.8	-0.00929229		2848.8	-0.0012021		3438.79	-0.01618385
489	0.05742654		1078.99	0.00393798		1669.01	-0.00403475		2259	-0.00915654		2849	-0.00176029		3438.99	-0.01576966
489.2	0.05779825		1079.19	0.00359629		1669.21	-0.00349153		2259.2	-0.00837643		2849.2	-0.00217395		3439.19	-0.01546743
489.4	0.05795398		1079.39	0.00313228		1669.41	-0.00310111		2259.4	-0.00700374		2849.4	-0.00216209		3439.39	-0.01593474
489.6	0.05820301		1079.59	0.00217788		1669.61	-0.00344498		2259.6	-0.00633876		2849.6	-0.00113218		3439.59	-0.01626158
489.8	0.05776073		1079.79	0.00132729		1669.81	-0.00430818		2259.8	-0.00504622		2849.8	-0.00031417		3439.79	-0.01630478
490	0.0577357		1079.99	0.00126565		1670.01	-0.00465166		2260	-0.00506401		2850	-0.00023791		3439.99	-0.01641469
490.2	0.0581468		1080.19	0.00196385		1670.21	-0.00462485		2260.2	-0.00468315		2850.2	0.00033284		3440.19	-0.0169297
490.4	0.05812184		1080.39	0.00268892		1670.41	-0.00395091		2260.4	-0.00500285		2850.4	0.00051091		3440.39	-0.01756957
490.6	0.05758393		1080.59	0.00358791		1670.61	-0.00377139		2260.6	-0.00584317		2850.6	0.00029801		3440.59	-0.01794259
490.8	0.05863735		1080.79	0.00453621		1670.81	-0.00348626		2260.8	-0.00535696		2850.8	0.00059108		3440.79	-0.01846585
491	0.05901745		1080.99	0.00447269		1671.01	-0.00323566		2261	-0.00518251		2851	0.00026193		3440.99	-0.01829328
491.2	0.05855386		1081.19	0.00485305		1671.21	-0.00282196		2261.2	-0.0057943		2851.2	-0.00122766		3441.19	-0.01805409
491.4	0.05804008		1081.39	0.00393193		1671.41	-0.00306873		2261.4	-0.00522968		2851.4	-0.00087943		3441.39	-0.01752715
491.6	0.05869807		1081.59	0.00360216		1671.61	-0.00301644		2261.6	-0.00508829		2851.6	-0.00110684		3441.59	-0.0169451
491.8	0.05856398		1081.79	0.00331846		1671.81	-0.00266982		2261.8	-0.0051294		2851.8	-0.00043471		3441.79	-0.01665751
492	0.05747424		1081.99	0.00464302		1672.01	-0.00254068		2262	-0.00501506		2852	-0.00206303		3441.99	-0.01711828
492.2	0.05734588		1082.19	0.00468272		1672.21	-0.00187688		2262.2	-0.00445435		2852.2	-0.00274777		3442.19	-0.01656679
492.4	0.05632749		1082.39	0.00461689		1672.41	-0.00226684		2262.4	-0.00478767		2852.4	-0.00338747		3442.39	-0.01656624
492.6	0.0565406		1082.59	0.0053101		1672.61	-0.00163755		2262.6	-0.00405872		2852.6	-0.00315396		3442.59	-0.01644645
492.8	0.05690514		1082.79	0.0051428		1672.81	-0.00190349		2262.8	-0.00424134		2852.8	-0.00338427		3442.79	-0.01706814
493	0.05733358		1082.99	0.00486325		1673.01	-0.00208927		2263	-0.00368577		2853	-0.00348719		3442.99	-0.01670513
493.2	0.05794917		1083.19	0.00433642		1673.21	-0.00262369		2263.2	-0.00334921		2853.2	-0.00368842		3443.19	-0.01672915
493.4	0.05786117		1083.39	0.0039472		1673.41	-0.00377664		2263.4	-0.00302094		2853.4	-0.00311056		3443.39	-0.01680488
493.6	0.05803894		1083.59	0.00329403		1673.61	-0.00447312		2263.6	-0.00306785		2853.6	-0.00207636		3443.59	-0.01700924
493.8	0.0572355		1083.79	0.00280939		1673.81	-0.005138		2263.8	-0.0020902		2853.8	-0.00250649		3443.79	-0.01707301
494	0.05708279		1083.99	0.00309186		1674.01	-0.00488175		2264	-0.00326518		2854	-0.00242268		3443.99	-0.01692858
494.2	0.05769966		1084.19	0.00328397		1674.21	-0.00467016		2264.2	-0.00310375		2854.2	-0.00101769		3444.19	-0.01729069
494.4	0.05832381		1084.39	0.00280986		1674.41	-0.00507051		2264.4	-0.00427038		2854.4	0.00007318		3444.39	-0.0176755
494.6	0.05823625		1084.59	0.00218914		1674.61	-0.00502271		2264.6	-0.0055376		2854.6	0.00002774		3444.59	-0.01746892
494.8	0.05855778		1084.79	0.00213297		1674.81	-0.00482068		2264.8	-0.00541178		2854.8	0.00113491		3444.79	-0.01714163
495	0.05764161		1084.99	0.00137055		1675.01	-0.00446554		2265	-0.00550105		2855	0.00065821		3444.99	-0.01594463
495.2	0.05712898		1085.19	0.00108749		1675.21	-0.00326772		2265.2	-0.00589102		2855.2	0.00093247		3445.19	-0.01482899
495.4	0.05623519		1085.39	0.00069565		1675.41	-0.0034453		2265.4	-0.00625291		2855.4	0.00102077		3445.39	-0.01387493
495.6	0.05600878		1085.59	0.00100108		1675.61	-0.00300561		2265.6	-0.00706076		2855.6	0.00133146		3445.59	-0.01339152
495.8	0.05466177		1085.79	0.0008781		1675.81	-0.00210138		2265.8	-0.00672585		2855.8	0.00151341		3445.79	-0.01357232
496	0.05376785		1085.99	0.0014388		1676.01	-0.00172035		2266	-0.0068014		2856	0.00054518		3445.99	-0.01342281
496.2	0.05392993		1086.19	0.00141883		1676.21	-0.00113472		2266.2	-0.00725538		2856.2	0.00094835		3446.19	-0.01328316
496.4	0.05343245		1086.39	0.00105651		1676.41	-0.00045196		2266.4	-0.00675363		2856.4	0.00097215		3446.39	-0.01383843
496.6	0.05442513		1086.59	0.00109394		1676.61	-0.00028737		2266.6	-0.00705441		2856.6	0.00120813		3446.59	-0.01417588
496.8	0.05392688		1086.79	0.00056101		1676.81	-0.00048726		2266.8	-0.00749922		2856.8	0.00048813		3446.79	-0.01399035
497	0.05426912		1086.99	0.00114189		1677.01	-0.00060504		2267	-0.00735197		2857	0.00003675		3446.99	-0.01399667
497.2	0.05377845		1087.19	0.0018801		1677.21	-0.00114319		2267.2	-0.00802716		2857.2	-0.00059172		3447.19	-0.01429269
497.4	0.05359379		1087.39	0.00283858		1677.41	-0.00228937		2267.4	-0.00798394		2857.4	0.00036662		3447.39	-0.01462731
497.6	0.05335222		1087.59	0.00251935		1677.61	-0.00239135		2267.6	-0.00760981		2857.6	-0.0003501		3447.59	-0.01506951
497.8	0.05329865		1087.79	0.00256524		1677.81	-0.00291435		2267.8	-0.00723479		2857.8	-0.00049778		3447.79	-0.01604333
498	0.05389744		1087.99	0.00284162		1678.01	-0.00354609		2268	-0.00774634		2858	0.00075814		3447.99	-0.01606898
498.2	0.05482235		1088.19	0.00247899		1678.21	-0.00407398		2268.2	-0.00739727		2858.2	0.00111902		3448.19	-0.01656457
498.4	0.05542967		1088.39	0.00269216		1678.41	-0.00532099		2268.4	-0.00758256		2858.4	0.00099183		3448.39	-0.01722524
498.6	0.05564547		1088.59	0.00258033		1678.61	-0.00513414		2268.6	-0.00663828		2858.6	-0.00031682		3448.59	-0.01678136
498.8	0.05557634		1088.79	0.00216271		1678.81	-0.00481602		2268.8	-0.00568539		2858.8	-0.00006347		3448.79	-0.01655732
499	0.05621858		1088.99	0.00164684		1679.01	-0.00456868		2269	-0.00579115		2859	-0.00016349		3448.99	-0.01653862
499.2	0.05616081		1089.19	0.00106241		1679.21	-0.00463868		2269.2	-0.00520447		2859.2	0.00097719		3449.19	-0.01722438
499.4	0.05648277		1089.39	0.00112538		1679.41	-0.00509558		2269.4	-0.00533339		2859.4	0.00093587		3449.39	-0.01678449
499.6	0.05656706		1089.59	0.00164696		1679.61	-0.00496601		2269.6	-0.00541656		2859.6	0.00095928		3449.59	-0.01700188
499.8	0.05649952		1089.79	0.00124673		1679.81	-0.00459098		2269.8	-0.00506531		2859.8	0.00015701		3449.79	-0.01649599
500	0.05670377		1089.99	0.00180202		1680.01	-0.0037622		2270	-0.00542153		2860	-0.00034594		3449.99	-0.01654311
500.2	0.05734961		1090.19	0.00155194		1680.21	-0.00371669		2270.2	-0.00528848		2860.2	-0.00031324		3450.19	-0.01632571
500.4	0.0572338		1090.39	0.00059353		1680.41	-0.00376959		2270.4	-0.0053671		2860.4	-0.0007952		3450.39	-0.01616122
500.6	0.05700545		1090.59	0.00009003		1680.61	-0.00440714		2270.6	-0.00589711		2860.6	-0.00096273		3450.59	-0.01566158
500.8	0.05611133		1090.79	-0.00023589		1680.81	-0.00407641		2270.8	-0.00582733		2860.8	-0.00213231		3450.79	-0.01586422
501	0.05584606		1090.99	0.00038795		1681.01	-0.0042082		2271	-0.0057885		2861	-0.00258053		3450.99	-0.0164248
501.2	0.05537494		1091.19	0.00048671		1681.21	-0.00451618		2271.2	-0.00677434		2861.2	-0.00199938		3451.19	-0.01572884
501.4	0.05465396		1091.39	-0.00037274		1681.41	-0.00508975		2271.4	-0.00750046		2861.4	-0.00162782		3451.39	-0.01549834
501.6	0.05438561		1091.59	-0.00015544		1681.61	-0.00544553		2271.6	-0.00727996		2861.6	-0.00269945		3451.59	-0.01502462
501.8	0.05437413		1091.79	0.00046927		1681.81	-0.00546799		2271.8	-0.00676059		2861.8	-0.00238245		3451.79	-0.01533573
502	0.05434623		1091.99	0.00082468		1682.01	-0.00549781		2272	-0.00768973		2862	-0.00237792		3451.99	-0.01561903
502.2	0.05436529		1092.19	0.00039528		1682.21	-0.00581162		2272.2	-0.00786301		2862.2	-0.0033833		3452.19	-0.0163338
502.4	0.05450956		1092.39	0.00082464		1682.41	-0.00627187		2272.4	-0.0073824		2862.4	-0.00316143		3452.39	-0.01683546
502.6	0.05412526		1092.59	0.00018119		1682.61	-0.00609608		2272.6	-0.00733172		2862.6	-0.00346394		3452.59	-0.01638909
502.8	0.05348459		1092.79	0.00010762		1682.81	-0.00578867		2272.8	-0.00809437		2862.8	-0.0019698		3452.79	-0.01685993
503	0.05366828		1092.99	0.00130586		1683.01	-0.00565674		2273	-0.00863842		2863	-0.00112641		3452.99	-0.01671629
503.2	0.05348147		1093.19	0.00193108		1683.21	-0.00569726		2273.2	-0.00812684		2863.2	-0.00050805		3453.19	-0.01676276
503.4	0.0544615		1093.39	0.00290869		1683.41	-0.0053688		2273.4	-0.00879776		2863.4	-0.00146792		3453.39	-0.01620554
503.6	0.05432773		1093.59	0.00368664		1683.61	-0.00533079		2273.6	-0.00892982		2863.6	-0.00269682		3453.59	-0.01654593
503.8	0.05477484		1093.79	0.0036004		1683.81	-0.00543181		2273.8	-0.00903266		2863.8	-0.00271647		3453.79	-0.01675722
504	0.05490508		1093.99	0.00392045		1684.01	-0.00566931		2274	-0.00841317		2864	-0.00282154		3453.99	-0.01747084
504.2	0.05508227		1094.19	0.00329156		1684.21	-0.00596998		2274.2	-0.00773419		2864.2	-0.00262121		3454.19	-0.01754674
504.4	0.0550357		1094.39	0.00244528		1684.41	-0.00570393		2274.4	-0.00791476		2864.4	-0.00273562		3454.39	-0.01739727
504.6	0.05488562		1094.59	0.00220147		1684.61	-0.00547755		2274.6	-0.00709616		2864.6	-0.00219644		3454.59	-0.01694291
504.8	0.05521198		1094.79	0.00263131		1684.81	-0.00554302		2274.8	-0.00664977		2864.8	-0.00310552		3454.79	-0.01710273
505	0.05485702		1094.99	0.00254675		1685.01	-0.00561894		2275	-0.0074371		2865	-0.00326118		3454.99	-0.01664758
505.2	0.05550899		1095.19	0.00212896		1685.21	-0.00583509		2275.2	-0.00834147		2865.2	-0.00286167		3455.19	-0.01558099
505.4	0.05471163		1095.39	0.00134396		1685.41	-0.00587961		2275.4	-0.00834927		2865.4	-0.00393405		3455.39	-0.01579909
505.6	0.05487152		1095.59	0.00136089		1685.61	-0.00579163		2275.6	-0.00671655		2865.6	-0.00361064		3455.59	-0.01564446
505.8	0.05461011		1095.79	0.00081454		1685.81	-0.00521477		2275.8	-0.00639249		2865.8	-0.0026818		3455.79	-0.01602791
506	0.05450913		1095.99	0.00010025		1686.01	-0.00476385		2276	-0.00739872		2866	-0.0022758		3455.99	-0.01684794
506.2	0.05429413		1096.19	-0.00014706		1686.21	-0.00519216		2276.2	-0.00677852		2866.2	-0.0014144		3456.19	-0.01698115
506.4	0.05459392		1096.39	0.00073018		1686.41	-0.00547456		2276.4	-0.00623986		2866.4	-0.00140574		3456.39	-0.01668778
506.6	0.05419912		1096.59	0.00076266		1686.61	-0.0054007		2276.6	-0.00620787		2866.6	-0.00146706		3456.59	-0.01702453
506.8	0.05543156		1096.79	0.00106127		1686.81	-0.0057227		2276.8	-0.00630433		2866.8	-0.00110896		3456.79	-0.01726455
507	0.05601772		1096.99	0.00129576		1687.01	-0.00571889		2277	-0.00621615		2867	-0.00038339		3456.99	-0.01711459
507.2	0.0566719		1097.19	0.00178773		1687.21	-0.00571204		2277.2	-0.00554813		2867.2	0.00020547		3457.19	-0.01792832
507.4	0.05703037		1097.39	0.00248688		1687.41	-0.0057426		2277.4	-0.00565301		2867.4	-0.00010588		3457.39	-0.01838531
507.6	0.05745545		1097.59	0.00311654		1687.61	-0.005719		2277.6	-0.00502063		2867.6	-0.0006093		3457.59	-0.0189623
507.8	0.05765898		1097.79	0.00362608		1687.81	-0.00555229		2277.8	-0.00421737		2867.8	-0.00027961		3457.79	-0.01958554
508	0.05818119		1097.99	0.00401523		1688.01	-0.00575103		2278	-0.00331398		2868	-0.00013597		3457.99	-0.01918865
508.2	0.05804058		1098.19	0.00400866		1688.21	-0.00479303		2278.2	-0.00342835		2868.2	-0.00004668		3458.19	-0.01862823
508.4	0.0586983		1098.39	0.00432439		1688.41	-0.00435986		2278.4	-0.0038684		2868.4	0.00001913		3458.39	-0.01787728
508.6	0.05861751		1098.59	0.00410236		1688.61	-0.00438218		2278.6	-0.00370877		2868.6	0.00017826		3458.59	-0.01753835
508.8	0.05830572		1098.79	0.00386745		1688.81	-0.00467564		2278.8	-0.0045102		2868.8	-0.0008848		3458.79	-0.01771954
509	0.0577635		1098.99	0.00358267		1689.01	-0.00401612		2279	-0.00499468		2869	-0.00078934		3458.99	-0.0180262
509.2	0.05802417		1099.19	0.00302345		1689.21	-0.00436533		2279.2	-0.00497907		2869.2	0.00027145		3459.19	-0.01784406
509.4	0.05650601		1099.39	0.0025185		1689.41	-0.00437333		2279.4	-0.00487262		2869.4	-0.00005684		3459.39	-0.01722106
509.6	0.05625346		1099.59	0.00195764		1689.61	-0.00427624		2279.6	-0.00413101		2869.6	0.00107524		3459.59	-0.0170799
509.8	0.05597913		1099.79	0.00186886		1689.81	-0.00360266		2279.8	-0.00416236		2869.8	0.00103395		3459.79	-0.01685586
510	0.05677824		1099.99	0.00147016		1690.01	-0.00373813		2280	-0.00443494		2870	0.00126818		3459.99	-0.01686157
510.2	0.05664592		1100.19	0.00160856		1690.21	-0.00406319		2280.2	-0.00437908		2870.2	0.0008299		3460.19	-0.0167677
510.4	0.05646423		1100.39	0.00099918		1690.41	-0.00510863		2280.4	-0.00448463		2870.4	-0.00015797		3460.39	-0.01677094
510.6	0.05698193		1100.59	-0.00016831		1690.61	-0.00469264		2280.6	-0.00457312		2870.6	-0.00000652		3460.59	-0.01709825
510.8	0.05747084		1100.79	-0.00044151		1690.81	-0.00473937		2280.8	-0.00511056		2870.8	-0.00024554		3460.79	-0.01665247
511	0.05667044		1100.99	0.00059536		1691.01	-0.00484071		2281	-0.00590243		2871	-0.00028687		3460.99	-0.01697458
511.2	0.05639341		1101.19	0.00149297		1691.21	-0.00524886		2281.2	-0.00551304		2871.2	-0.00069785		3461.19	-0.01684589
511.4	0.05654567		1101.39	0.00266312		1691.41	-0.00553342		2281.4	-0.00593346		2871.4	-0.00184029		3461.39	-0.01647072
511.6	0.05722774		1101.59	0.00360515		1691.61	-0.00526517		2281.6	-0.00578998		2871.6	-0.00292617		3461.59	-0.0168207
511.8	0.05629235		1101.79	0.00367136		1691.81	-0.00469512		2281.8	-0.00612133		2871.8	-0.00308726		3461.79	-0.01704758
512	0.05637105		1101.99	0.00364568		1692.01	-0.00458967		2282	-0.00757295		2872	-0.00344757		3461.99	-0.01667487
512.2	0.05517495		1102.19	0.00407459		1692.21	-0.00450653		2282.2	-0.00860393		2872.2	-0.00422239		3462.19	-0.01613917
512.4	0.05474566		1102.39	0.00424015		1692.41	-0.00495934		2282.4	-0.00927027		2872.4	-0.00422442		3462.39	-0.01706599
512.6	0.05453747		1102.59	0.00409911		1692.61	-0.00515641		2282.6	-0.00956517		2872.6	-0.00398912		3462.59	-0.01728846
512.8	0.05368829		1102.79	0.0044754		1692.81	-0.00530361		2282.8	-0.01035254		2872.8	-0.00311616		3462.79	-0.01720781
513	0.05350071		1102.99	0.0043117		1693.01	-0.00490333		2283	-0.01016361		2873	-0.00255273		3462.99	-0.01699074
513.2	0.05361611		1103.19	0.00293044		1693.21	-0.00584524		2283.2	-0.00981954		2873.2	-0.00198845		3463.19	-0.01679643
513.4	0.0527711		1103.39	0.00289283		1693.41	-0.00526232		2283.4	-0.00927515		2873.4	-0.00248645		3463.39	-0.01673522
513.6	0.05348827		1103.59	0.00169243		1693.61	-0.00497969		2283.6	-0.00861952		2873.6	-0.00247202		3463.59	-0.01764995
513.8	0.05413636		1103.79	0.00094467		1693.81	-0.00558396		2283.8	-0.00847794		2873.8	-0.00252822		3463.79	-0.01768434
514	0.05524302		1103.99	0.00044073		1694.01	-0.00691814		2284	-0.00787703		2874	-0.00284218		3463.99	-0.01747682
514.2	0.05486499		1104.19	0.00013418		1694.21	-0.00762484		2284.2	-0.00863963		2874.2	-0.00325186		3464.19	-0.01736397
514.4	0.05549876		1104.39	-0.00099899		1694.41	-0.00813293		2284.4	-0.00807822		2874.4	-0.00215216		3464.39	-0.017571
514.6	0.05630798		1104.59	-0.00117827		1694.61	-0.00775935		2284.6	-0.00753548		2874.6	-0.00133065		3464.59	-0.01709229
514.8	0.05650985		1104.79	-0.00060106		1694.81	-0.0079085		2284.8	-0.00713534		2874.8	-0.00172689		3464.79	-0.01614016
515	0.05704918		1104.99	-0.00017283		1695.01	-0.00803118		2285	-0.00694644		2875	-0.0021427		3464.99	-0.01567189
515.2	0.05721995		1105.19	0.00055905		1695.21	-0.00775326		2285.2	-0.00590208		2875.2	-0.00188782		3465.19	-0.0147716
515.4	0.05712978		1105.39	0.00099233		1695.41	-0.00735026		2285.4	-0.00546656		2875.4	-0.00183037		3465.39	-0.01496095
515.6	0.0572223		1105.59	0.00108257		1695.61	-0.00718516		2285.6	-0.00460696		2875.6	-0.00186218		3465.59	-0.01518337
515.8	0.05684717		1105.79	0.00071145		1695.81	-0.00639058		2285.8	-0.00419775		2875.8	-0.0012358		3465.79	-0.01495236
516	0.05646713		1105.99	0.00086504		1696.01	-0.00654648		2286	-0.00502646		2876	-0.00059771		3465.99	-0.01436597
516.2	0.05588383		1106.19	0.00150441		1696.21	-0.00683088		2286.2	-0.00518657		2876.2	-0.00131211		3466.19	-0.0143445
516.4	0.05599002		1106.39	0.00196265		1696.41	-0.00592056		2286.4	-0.00562911		2876.4	-0.00052405		3466.39	-0.01528734
516.6	0.05625988		1106.59	0.00265727		1696.61	-0.00514225		2286.6	-0.00589567		2876.6	-0.00030417		3466.59	-0.01525781
516.8	0.05535134		1106.79	0.0027351		1696.81	-0.00430248		2286.8	-0.00702375		2876.8	-0.0002361		3466.79	-0.01549994
517	0.0557707		1106.99	0.00216014		1697.01	-0.00448592		2287	-0.0066103		2877	-0.00162413		3466.99	-0.01554072
517.2	0.05536983		1107.19	0.00148722		1697.21	-0.00491392		2287.2	-0.00659833		2877.2	-0.00114255		3467.19	-0.01591493
517.4	0.05410898		1107.39	0.00251526		1697.41	-0.00483588		2287.4	-0.00682325		2877.4	-0.0015846		3467.39	-0.01715199
517.6	0.05420501		1107.59	0.00130131		1697.61	-0.005017		2287.6	-0.00732104		2877.6	-0.00242203		3467.59	-0.01809257
517.8	0.0548176		1107.79	0.00226937		1697.81	-0.00546001		2287.8	-0.00779982		2877.8	-0.00231638		3467.79	-0.01812037
518	0.05481754		1107.99	0.0027766		1698.01	-0.00577556		2288	-0.0078945		2878	-0.00221628		3467.99	-0.01806956
518.2	0.054488		1108.19	0.00273519		1698.21	-0.0060739		2288.2	-0.00906904		2878.2	-0.00146088		3468.19	-0.01872117
518.4	0.0538725		1108.39	0.00227214		1698.41	-0.0060072		2288.4	-0.00806221		2878.4	-0.00063042		3468.39	-0.01924543
518.6	0.05370177		1108.59	0.00225406		1698.61	-0.00577655		2288.6	-0.00748996		2878.6	-0.00127489		3468.59	-0.01909785
518.8	0.05391204		1108.79	0.00246917		1698.81	-0.00555093		2288.8	-0.00712303		2878.8	-0.00191451		3468.79	-0.01896067
519	0.05392886		1108.99	0.00223081		1699.01	-0.00579297		2289	-0.00719469		2879	-0.0021267		3468.99	-0.01871257
519.2	0.05372867		1109.19	0.00276052		1699.21	-0.00643521		2289.2	-0.0060866		2879.2	-0.00198974		3469.19	-0.01873871
519.4	0.05369603		1109.39	0.00220413		1699.41	-0.00684351		2289.4	-0.00587859		2879.4	-0.00248292		3469.39	-0.01868729
519.6	0.05400881		1109.59	0.00118036		1699.61	-0.00667809		2289.6	-0.005299		2879.6	-0.00234513		3469.59	-0.01776028
519.8	0.05387306		1109.79	0.00034782		1699.81	-0.00597788		2289.8	-0.0056745		2879.8	-0.00178753		3469.79	-0.01762551
520	0.05402295		1109.99	0.00035873		1700.01	-0.00560161		2290	-0.00593752		2880	-0.00203323		3469.99	-0.01706696
520.2	0.05494163		1110.19	-0.00048513		1700.21	-0.00495464		2290.2	-0.00623322		2880.2	-0.0026192		3470.19	-0.01726624
520.4	0.05566504		1110.39	-0.00016964		1700.41	-0.00472183		2290.4	-0.0061278		2880.4	-0.00267419		3470.39	-0.01724187
520.6	0.05614757		1110.59	-0.00043987		1700.61	-0.00445082		2290.6	-0.00631281		2880.6	-0.00329596		3470.59	-0.01745507
520.8	0.05583834		1110.79	-0.00026505		1700.81	-0.00417681		2290.8	-0.00659613		2880.8	-0.0035301		3470.79	-0.01723733
521	0.05702605		1110.99	-0.00072503		1701.01	-0.00472703		2291	-0.00623116		2881	-0.00367827		3470.99	-0.01739231
521.2	0.05567283		1111.19	-0.0007135		1701.21	-0.00521797		2291.2	-0.00666559		2881.2	-0.00274289		3471.19	-0.01791112
521.4	0.05566385		1111.39	0.00012284		1701.41	-0.00559913		2291.4	-0.00691472		2881.4	-0.00354241		3471.39	-0.0191105
521.6	0.05627318		1111.59	0.00003372		1701.61	-0.00438104		2291.6	-0.00724657		2881.6	-0.00298573		3471.59	-0.01890485
521.8	0.05745182		1111.79	0.0014908		1701.81	-0.00483231		2291.8	-0.00741602		2881.8	-0.00192349		3471.79	-0.01863323
522	0.05764876		1111.99	0.00136883		1702.01	-0.00532564		2292	-0.00776877		2882	-0.00186803		3471.99	-0.01924823
522.2	0.05789842		1112.19	0.00136655		1702.21	-0.00564587		2292.2	-0.0074734		2882.2	-0.00209964		3472.19	-0.0205779
522.4	0.05735468		1112.39	0.001625		1702.41	-0.00502476		2292.4	-0.00691127		2882.4	-0.00222125		3472.39	-0.02058431
522.6	0.05725309		1112.59	0.00222227		1702.61	-0.00457932		2292.6	-0.00661404		2882.6	-0.00292107		3472.59	-0.02099732
522.8	0.05676152		1112.79	0.00345451		1702.81	-0.00537481		2292.8	-0.00650383		2882.8	-0.00316209		3472.79	-0.02051862
523	0.05609161		1112.99	0.00365465		1703.01	-0.00565132		2293	-0.00674027		2883	-0.00291866		3472.99	-0.02078513
523.2	0.05578681		1113.19	0.00381946		1703.21	-0.00623696		2293.2	-0.00646362		2883.2	-0.00333307		3473.19	-0.02014508
523.4	0.05459476		1113.39	0.00368973		1703.41	-0.0063565		2293.4	-0.00657117		2883.4	-0.00420156		3473.39	-0.0187891
523.6	0.05373626		1113.59	0.00284077		1703.61	-0.0060734		2293.6	-0.00681739		2883.6	-0.00387645		3473.59	-0.01834565
523.8	0.05365339		1113.79	0.00326019		1703.81	-0.00555146		2293.8	-0.00666871		2883.8	-0.00430846		3473.79	-0.01847113
524	0.05412811		1113.99	0.00294224		1704.01	-0.00436847		2294	-0.00562884		2884	-0.00471999		3473.99	-0.01761105
524.2	0.05398266		1114.19	0.00151512		1704.21	-0.00375129		2294.2	-0.00559938		2884.2	-0.0048536		3474.19	-0.01692187
524.4	0.05372795		1114.39	0.00159033		1704.41	-0.00382107		2294.4	-0.00554059		2884.4	-0.00482312		3474.39	-0.01683324
524.6	0.05285328		1114.59	0.00099282		1704.61	-0.00312372		2294.6	-0.00557628		2884.6	-0.0035871		3474.59	-0.01651415
524.8	0.05232789		1114.79	0.00145627		1704.81	-0.00333832		2294.8	-0.00647281		2884.8	-0.00295134		3474.79	-0.01727979
525	0.05297104		1114.99	0.00117451		1705.01	-0.00280383		2295	-0.00684477		2885	-0.00172492		3474.99	-0.01754762
525.2	0.05213112		1115.19	0.00151893		1705.21	-0.00334075		2295.2	-0.00666982		2885.2	-0.00055502		3475.19	-0.01716211
525.4	0.05281757		1115.39	0.00204545		1705.41	-0.00327639		2295.4	-0.00680929		2885.4	-0.00052185		3475.39	-0.01749494
525.6	0.05393689		1115.59	0.0017891		1705.61	-0.00347886		2295.6	-0.00675105		2885.6	0.00054952		3475.59	-0.01698057
525.8	0.05549525		1115.79	0.00121956		1705.81	-0.00501089		2295.8	-0.00682384		2885.8	0.00036962		3475.79	-0.01702067
526	0.05626638		1115.99	0.00079646		1706.01	-0.00548735		2296	-0.00703889		2886	0.00031062		3475.99	-0.0171981
526.2	0.05684198		1116.19	0.00062688		1706.21	-0.0053532		2296.2	-0.0065542		2886.2	0.00092227		3476.19	-0.01753047
526.4	0.056523		1116.39	0.00056276		1706.41	-0.00518713		2296.4	-0.00616249		2886.4	0.00094804		3476.39	-0.01761216
526.6	0.05664599		1116.59	0.00125876		1706.61	-0.00539728		2296.6	-0.00607993		2886.6	0.00081448		3476.59	-0.01821718
526.8	0.05746073		1116.79	0.00129047		1706.81	-0.00634627		2296.8	-0.0058445		2886.8	0.00008343		3476.79	-0.01792623
527	0.05746942		1116.99	0.00094509		1707.01	-0.00667509		2297	-0.00593758		2887	0.00018277		3476.99	-0.01811583
527.2	0.05789249		1117.19	0.00091007		1707.21	-0.00740205		2297.2	-0.00610509		2887.2	-0.00110159		3477.19	-0.01744031
527.4	0.05718294		1117.39	0.00110613		1707.41	-0.00727394		2297.4	-0.00611342		2887.4	-0.00286475		3477.39	-0.01700286
527.6	0.05769113		1117.59	0.00135004		1707.61	-0.00679285		2297.6	-0.00711838		2887.6	-0.0035736		3477.59	-0.01701639
527.8	0.05801599		1117.79	0.00152259		1707.81	-0.00646922		2297.8	-0.00654729		2887.8	-0.00387063		3477.79	-0.01700509
528	0.05785611		1117.99	0.00031754		1708.01	-0.0056005		2298	-0.00577169		2888	-0.0036136		3477.99	-0.01609961
528.2	0.05782068		1118.19	0.00057145		1708.21	-0.00612292		2298.2	-0.00632638		2888.2	-0.00330417		3478.19	-0.01562526
528.4	0.05675588		1118.39	0.00013448		1708.41	-0.00608771		2298.4	-0.00667939		2888.4	-0.00406753		3478.39	-0.0156331
528.6	0.05625005		1118.59	-0.00005959		1708.61	-0.00545728		2298.6	-0.00659632		2888.6	-0.00387639		3478.59	-0.01515725
528.8	0.05611816		1118.79	0.00099453		1708.81	-0.00442281		2298.8	-0.007576		2888.8	-0.00396031		3478.79	-0.01500054
529	0.05644023		1118.99	0.00162208		1709.01	-0.00342343		2299	-0.00733122		2889	-0.00398686		3478.99	-0.01421397
529.2	0.05616927		1119.19	0.00262785		1709.21	-0.00424158		2299.2	-0.0067952		2889.2	-0.0032966		3479.19	-0.01411647
529.4	0.05560849		1119.39	0.00309923		1709.41	-0.00479138		2299.4	-0.00714759		2889.4	-0.00369667		3479.39	-0.01499784
529.6	0.05660329		1119.59	0.00214541		1709.61	-0.00553365		2299.6	-0.00644446		2889.6	-0.00351491		3479.59	-0.01447066
529.8	0.05609208		1119.79	0.00148485		1709.81	-0.0052647		2299.8	-0.0069188		2889.8	-0.00334731		3479.79	-0.01448713
530	0.05614595		1119.99	0.00158316		1710.01	-0.00556917		2300	-0.00703639		2890	-0.00324793		3479.99	-0.01531357
530.2	0.05639846		1120.19	0.00173565		1710.21	-0.00550508		2300.2	-0.00731593		2890.2	-0.00291102		3480.19	-0.01655883
530.4	0.05602816		1120.39	0.00195381		1710.41	-0.00598777		2300.4	-0.00629737		2890.4	-0.00292419		3480.39	-0.01757243
530.6	0.05651968		1120.59	0.00247936		1710.61	-0.00587226		2300.6	-0.00658269		2890.6	-0.00277231		3480.59	-0.01784534
530.8	0.05618164		1120.79	0.00180143		1710.81	-0.00655005		2300.8	-0.00673812		2890.8	-0.00322905		3480.79	-0.01783906
531	0.05582113		1120.99	0.00183669		1711.01	-0.00621871		2301	-0.00745332		2891	-0.00298553		3480.99	-0.01828687
531.2	0.05595072		1121.19	0.00146096		1711.21	-0.00578597		2301.2	-0.00766853		2891.2	-0.00391432		3481.19	-0.01888296
531.4	0.05515248		1121.39	0.00104236		1711.41	-0.00584054		2301.4	-0.00787174		2891.4	-0.00417844		3481.39	-0.01904661
531.6	0.05518811		1121.59	0.00108166		1711.61	-0.00616047		2301.6	-0.00819519		2891.6	-0.00377333		3481.59	-0.01889084
531.8	0.05556629		1121.79	0.00003312		1711.81	-0.00680476		2301.8	-0.0074426		2891.8	-0.00362352		3481.79	-0.01841246
532	0.05561067		1121.99	-0.00055982		1712.01	-0.0070911		2302	-0.007081		2892	-0.00414373		3481.99	-0.01802938
532.2	0.05537062		1122.19	0.00012368		1712.21	-0.00761382		2302.2	-0.00833484		2892.2	-0.00505755		3482.19	-0.01824484
532.4	0.05451023		1122.39	-0.00108709		1712.41	-0.00697541		2302.4	-0.007835		2892.4	-0.00590743		3482.39	-0.01760085
532.6	0.05508574		1122.59	-0.0007895		1712.61	-0.00707919		2302.6	-0.0080339		2892.6	-0.00502392		3482.59	-0.01679546
532.8	0.05545046		1122.79	0.00045227		1712.81	-0.00685356		2302.8	-0.00833678		2892.8	-0.00467011		3482.79	-0.01629195
533	0.0558991		1122.99	0.00081634		1713.01	-0.0071954		2303	-0.00824273		2893	-0.0046059		3482.99	-0.01682898
533.2	0.05636776		1123.19	0.0003696		1713.21	-0.00831502		2303.2	-0.00803313		2893.2	-0.00409852		3483.19	-0.01642652
533.4	0.05609025		1123.39	-0.00042691		1713.41	-0.00749183		2303.4	-0.00765685		2893.4	-0.00409766		3483.39	-0.01676702
533.6	0.05697666		1123.59	-0.00121844		1713.61	-0.00718071		2303.6	-0.00722245		2893.6	-0.00358465		3483.59	-0.01589007
533.8	0.05755809		1123.79	-0.00038334		1713.81	-0.00666399		2303.8	-0.00798643		2893.8	-0.00320156		3483.79	-0.01609213
534	0.05755088		1123.99	0.00023826		1714.01	-0.00681242		2304	-0.00804746		2894	-0.00268455		3483.99	-0.01655476
534.2	0.05736272		1124.19	0.00115202		1714.21	-0.00640836		2304.2	-0.00781046		2894.2	-0.00147005		3484.19	-0.01731217
534.4	0.05677122		1124.39	0.00113387		1714.41	-0.00615033		2304.4	-0.00753727		2894.4	-0.0006502		3484.39	-0.0174463
534.6	0.05666096		1124.59	0.00149176		1714.61	-0.0062163		2304.6	-0.00835432		2894.6	-0.00026713		3484.59	-0.01817056
534.8	0.05590624		1124.79	0.00082287		1714.81	-0.00562537		2304.8	-0.00982469		2894.8	-0.00089885		3484.79	-0.0186966
535	0.05600832		1124.99	0.00104684		1715.01	-0.00556803		2305	-0.00915905		2895	-0.00072766		3484.99	-0.01945601
535.2	0.05583576		1125.19	0.00114191		1715.21	-0.0060098		2305.2	-0.0093667		2895.2	-0.00049204		3485.19	-0.01990691
535.4	0.05483951		1125.39	0.00142471		1715.41	-0.0069802		2305.4	-0.00976987		2895.4	0.00006169		3485.39	-0.01994839
535.6	0.05465136		1125.59	0.00162064		1715.61	-0.00764339		2305.6	-0.01007145		2895.6	0.00009077		3485.59	-0.01921176
535.8	0.05508562		1125.79	0.00115502		1715.81	-0.00759931		2305.8	-0.01024297		2895.8	-0.00020384		3485.79	-0.01935009
536	0.05411555		1125.99	0.00143653		1716.01	-0.00782255		2306	-0.01019391		2896	-0.00022877		3485.99	-0.02050254
536.2	0.05363663		1126.19	0.00171688		1716.21	-0.00803865		2306.2	-0.01045733		2896.2	-0.00022319		3486.19	-0.02049935
536.4	0.05388247		1126.39	0.00126558		1716.41	-0.00916101		2306.4	-0.0099244		2896.4	-0.00073048		3486.39	-0.0197844
536.6	0.05481212		1126.59	0.00111443		1716.61	-0.00958836		2306.6	-0.01004964		2896.6	-0.00058478		3486.59	-0.01979808
536.8	0.05506273		1126.79	0.00156951		1716.81	-0.00914602		2306.8	-0.0093619		2896.8	-0.00054803		3486.79	-0.0199243
537	0.05498329		1126.99	0.00148108		1717.01	-0.00954305		2307	-0.00899714		2897	-0.00089177		3486.99	-0.01892934
537.2	0.05469354		1127.19	0.00074305		1717.21	-0.00925998		2307.2	-0.00793479		2897.2	0.00002229		3487.19	-0.01772554
537.4	0.05503838		1127.39	0.00153486		1717.41	-0.00796044		2307.4	-0.00686097		2897.4	0.00065801		3487.39	-0.01743779
537.6	0.05576212		1127.59	0.0025189		1717.61	-0.00796388		2307.6	-0.00664001		2897.6	0.00081199		3487.59	-0.01706026
537.8	0.05523871		1127.79	0.00355408		1717.81	-0.00695108		2307.8	-0.00653832		2897.8	0.00011722		3487.79	-0.0167449
538	0.05449131		1127.99	0.00377923		1718.01	-0.00645921		2308	-0.00647369		2898	0.00027326		3487.99	-0.01643352
538.2	0.05412526		1128.19	0.00354891		1718.21	-0.00583035		2308.2	-0.00648758		2898.2	0.00021952		3488.19	-0.01677717
538.4	0.05355474		1128.39	0.00332189		1718.41	-0.00550229		2308.4	-0.00678593		2898.4	-0.00019408		3488.39	-0.01694756
538.6	0.05385456		1128.59	0.00350037		1718.61	-0.00602791		2308.6	-0.00675105		2898.6	-0.00136132		3488.59	-0.01767034
538.8	0.05307619		1128.79	0.00219073		1718.81	-0.00550436		2308.8	-0.00728475		2898.8	-0.00235102		3488.79	-0.01791202
539	0.05333669		1128.99	0.00259845		1719.01	-0.00640432		2309	-0.00639133		2899	-0.0016817		3488.99	-0.01865047
539.2	0.05362259		1129.19	0.00252424		1719.21	-0.00697501		2309.2	-0.00678419		2899.2	-0.00128658		3489.19	-0.01882669
539.4	0.05347695		1129.39	0.00277073		1719.41	-0.00679924		2309.4	-0.00774641		2899.4	-0.00160374		3489.39	-0.01832215
539.6	0.05371274		1129.59	0.00286309		1719.61	-0.00671076		2309.6	-0.00811041		2899.6	-0.00208503		3489.59	-0.01814739
539.8	0.05367609		1129.79	0.00254025		1719.81	-0.00597448		2309.8	-0.00807469		2899.8	-0.00235889		3489.79	-0.0188846
540	0.05426828		1129.99	0.00239575		1720.01	-0.00647029		2310	-0.00783158		2900	-0.00241076		3489.99	-0.01983856
540.2	0.055264		1130.19	0.00228988		1720.21	-0.00733391		2310.2	-0.00798207		2900.2	-0.0021496		3490.19	-0.01928357
540.4	0.05564511		1130.39	0.00253904		1720.41	-0.00800249		2310.4	-0.00892323		2900.4	-0.0020411		3490.39	-0.01895086
540.6	0.05662981		1130.59	0.00188343		1720.61	-0.00707819		2310.6	-0.0079425		2900.6	-0.00116557		3490.59	-0.0196677
540.8	0.05616596		1130.79	0.00230308		1720.81	-0.00795415		2310.8	-0.00721477		2900.8	-0.00090952		3490.79	-0.01857551
541	0.05645353		1130.99	0.00268228		1721.01	-0.00794688		2311	-0.0068846		2901	-0.00109341		3490.99	-0.01737341
541.2	0.05572769		1131.19	0.00231461		1721.21	-0.00670294		2311.2	-0.00684419		2901.2	-0.00037209		3491.19	-0.01811548
541.4	0.05533396		1131.39	0.00312922		1721.41	-0.00634403		2311.4	-0.00661153		2901.4	-0.00115308		3491.39	-0.01815812
541.6	0.05492555		1131.59	0.00270668		1721.61	-0.00623581		2311.6	-0.00673296		2901.6	-0.0017838		3491.59	-0.01835398
541.8	0.05438264		1131.79	0.00271113		1721.81	-0.00546963		2311.8	-0.00687998		2901.8	-0.00222329		3491.79	-0.01771512
542	0.05518744		1131.99	0.00267451		1722.01	-0.00601227		2312	-0.00650659		2902	-0.00211289		3491.99	-0.01786925
542.2	0.05462515		1132.19	0.002586		1722.21	-0.00582654		2312.2	-0.00716118		2902.2	-0.0024529		3492.19	-0.01788736
542.4	0.05469864		1132.39	0.00289512		1722.41	-0.00589486		2312.4	-0.0064948		2902.4	-0.00335234		3492.39	-0.01833714
542.6	0.05493836		1132.59	0.0026232		1722.61	-0.00647313		2312.6	-0.00666621		2902.6	-0.00423061		3492.59	-0.01779269
542.8	0.05516763		1132.79	0.0018291		1722.81	-0.00643614		2312.8	-0.00624156		2902.8	-0.00461641		3492.79	-0.01802861
543	0.05658142		1132.99	0.00288941		1723.01	-0.00650014		2313	-0.00597734		2903	-0.00449065		3492.99	-0.01853781
543.2	0.0575537		1133.19	0.00264456		1723.21	-0.00660619		2313.2	-0.0068621		2903.2	-0.00400505		3493.19	-0.01789649
543.4	0.0582029		1133.39	0.00236957		1723.41	-0.00636577		2313.4	-0.00880948		2903.4	-0.00481257		3493.39	-0.01733932
543.6	0.05855657		1133.59	0.00256312		1723.61	-0.00632659		2313.6	-0.00993611		2903.6	-0.00512414		3493.59	-0.01763943
543.8	0.05907549		1133.79	0.00191128		1723.81	-0.00595196		2313.8	-0.00982534		2903.8	-0.00500217		3493.79	-0.01759579
544	0.05983178		1133.99	0.00223952		1724.01	-0.00674807		2314	-0.00983769		2904	-0.00449178		3493.99	-0.01742661
544.2	0.06010586		1134.19	0.00217816		1724.21	-0.00686857		2314.2	-0.009663		2904.2	-0.00400039		3494.19	-0.01627554
544.4	0.05978474		1134.39	0.00188792		1724.41	-0.00624061		2314.4	-0.01023099		2904.4	-0.00422086		3494.39	-0.01622629
544.6	0.05994077		1134.59	0.00104052		1724.61	-0.00583195		2314.6	-0.00922817		2904.6	-0.0042575		3494.59	-0.01615089
544.8	0.05893061		1134.79	0.00101648		1724.81	-0.00626206		2314.8	-0.00988132		2904.8	-0.00295536		3494.79	-0.01471262
545	0.0577203		1134.99	0.00097801		1725.01	-0.00470305		2315	-0.00970076		2905	-0.00344667		3494.99	-0.0145246
545.2	0.05626374		1135.19	-0.00044081		1725.21	-0.00413717		2315.2	-0.00997592		2905.2	-0.00369261		3495.19	-0.01525964
545.4	0.05505357		1135.39	0.00010737		1725.41	-0.00420461		2315.4	-0.00879112		2905.4	-0.00462414		3495.39	-0.01452925
545.6	0.05463906		1135.59	-0.00098111		1725.61	-0.00458636		2315.6	-0.00864166		2905.6	-0.00415102		3495.59	-0.01480449
545.8	0.05438481		1135.79	-0.00052683		1725.81	-0.00502978		2315.8	-0.0082771		2905.8	-0.00333561		3495.79	-0.01441399
546	0.05372574		1135.99	-0.000683		1726.01	-0.00588158		2316	-0.00722245		2906	-0.00362941		3495.99	-0.01406839
546.2	0.0534878		1136.19	-0.0005795		1726.21	-0.00529524		2316.2	-0.00717902		2906.2	-0.00421493		3496.19	-0.01328969
546.4	0.05388228		1136.39	-0.00069025		1726.41	-0.00557981		2316.4	-0.00648003		2906.4	-0.00407116		3496.39	-0.01356606
546.6	0.05420379		1136.59	-0.00169823		1726.61	-0.00593045		2316.6	-0.00634672		2906.6	-0.00325894		3496.59	-0.01418457
546.8	0.05562569		1136.79	-0.00219657		1726.81	-0.00601094		2316.8	-0.00594608		2906.8	-0.00267289		3496.79	-0.01502346
547	0.05665223		1136.99	-0.00159723		1727.01	-0.00618181		2317	-0.00663618		2907	-0.0019661		3496.99	-0.01554939
547.2	0.05732977		1137.19	-0.00259975		1727.21	-0.0067584		2317.2	-0.00826901		2907.2	-0.00092073		3497.19	-0.01575513
547.4	0.0575351		1137.39	-0.00271257		1727.41	-0.0067432		2317.4	-0.00978599		2907.4	-0.00109123		3497.39	-0.01575523
547.6	0.05813525		1137.59	-0.00278698		1727.61	-0.00651647		2317.6	-0.01079371		2907.6	-0.00033609		3497.59	-0.01666034
547.8	0.05784697		1137.79	-0.00318832		1727.81	-0.00658155		2317.8	-0.01008849		2907.8	0.00005696		3497.79	-0.01665373
548	0.05792503		1137.99	-0.00265181		1728.01	-0.00680819		2318	-0.01048105		2908	0.00046582		3497.99	-0.0173649
548.2	0.05806637		1138.19	-0.00316213		1728.21	-0.00561461		2318.2	-0.01083197		2908.2	0.00017086		3498.19	-0.017762
548.4	0.05815382		1138.39	-0.00279982		1728.41	-0.00538165		2318.4	-0.01112158		2908.4	0.00068554		3498.39	-0.01890662
548.6	0.05841061		1138.59	-0.0019748		1728.61	-0.00519513		2318.6	-0.01098541		2908.6	0.00087126		3498.59	-0.0187798
548.8	0.05780071		1138.79	-0.00071278		1728.81	-0.00508482		2318.8	-0.01131299		2908.8	0.00094958		3498.79	-0.01872097
549	0.05661923		1138.99	-0.00011394		1729.01	-0.0050152		2319	-0.01072428		2909	-0.00061037		3498.99	-0.01949353
549.2	0.05618238		1139.19	0.0003877		1729.21	-0.00498357		2319.2	-0.01041126		2909.2	0.0000258		3499.19	-0.01968419
549.4	0.05480342		1139.39	0.00185937		1729.41	-0.00519854		2319.4	-0.01004928		2909.4	-0.0000909		3499.39	-0.0191602
549.6	0.05404632		1139.59	0.00141883		1729.61	-0.00524669		2319.6	-0.01035767		2909.6	0.00037188		3499.59	-0.01965148
549.8	0.0533254		1139.79	0.00166994		1729.81	-0.00569597		2319.8	-0.00990522		2909.8	-0.00036687		3499.79	-0.01905794
550	0.0524305		1139.99	0.00204357		1730.01	-0.00527684		2320	-0.00930407		2910	-0.00126967		3499.99	-0.01925883
550.2	0.05280435		1140.19	0.00178919		1730.21	-0.00466049		2320.2	-0.0086057		2910.2	-0.00169653		3500.19	-0.01945619
550.4	0.0531618		1140.39	0.00144101		1730.41	-0.00513339		2320.4	-0.00825205		2910.4	-0.00144539		3500.39	-0.02045655
550.6	0.05338569		1140.59	0.00048162		1730.61	-0.00446868		2320.6	-0.00718799		2910.6	-0.00143875		3500.59	-0.0204294
550.8	0.05432991		1140.79	0.00121546		1730.81	-0.00474044		2320.8	-0.00631699		2910.8	-0.00205941		3500.79	-0.01996111
551	0.05418413		1140.99	0.00131715		1731.01	-0.00507057		2321	-0.00572646		2911	-0.00132453		3500.99	-0.01918179
551.2	0.05381556		1141.19	0.00049121		1731.21	-0.00493389		2321.2	-0.00532059		2911.2	-0.00010274		3501.19	-0.01891353
551.4	0.05382825		1141.39	0.00009262		1731.41	-0.00443545		2321.4	-0.00511853		2911.4	-0.00050087		3501.39	-0.01872561
551.6	0.0537698		1141.59	-0.00048575		1731.61	-0.0052093		2321.6	-0.00476694		2911.6	-0.00056093		3501.59	-0.01932991
551.8	0.05336407		1141.79	-0.00000791		1731.81	-0.00556066		2321.8	-0.00448413		2911.8	-0.00059542		3501.79	-0.01938851
552	0.05360562		1141.99	-0.00022358		1732.01	-0.00537145		2322	-0.00368281		2912	0.000031		3501.99	-0.01962817
552.2	0.05378075		1142.19	-0.00036244		1732.21	-0.00589162		2322.2	-0.00363972		2912.2	0.00001635		3502.19	-0.01953503
552.4	0.0546804		1142.39	0.00000353		1732.41	-0.00618173		2322.4	-0.00320199		2912.4	0.00093895		3502.39	-0.01960453
552.6	0.0546093		1142.59	0.00067032		1732.61	-0.00654055		2322.6	-0.00369814		2912.6	0.00006442		3502.59	-0.01960342
552.8	0.05432671		1142.79	0.00174898		1732.81	-0.00754561		2322.8	-0.00447709		2912.8	0.00007949		3502.79	-0.01944003
553	0.05369703		1142.99	0.00178528		1733.01	-0.00825762		2323	-0.00556341		2913	-0.00014888		3502.99	-0.01926193
553.2	0.05353746		1143.19	0.00267878		1733.21	-0.0075217		2323.2	-0.00684348		2913.2	-0.00054526		3503.19	-0.01919378
553.4	0.05371534		1143.39	0.00304704		1733.41	-0.00737268		2323.4	-0.00885388		2913.4	-0.00158595		3503.39	-0.01879084
553.6	0.05303094		1143.59	0.00253638		1733.61	-0.00738656		2323.6	-0.01033108		2913.6	-0.00236933		3503.59	-0.01969256
553.8	0.05286161		1143.79	0.00259152		1733.81	-0.00781408		2323.8	-0.01132365		2913.8	-0.00338402		3503.79	-0.02030662
554	0.0535239		1143.99	0.00298635		1734.01	-0.00714411		2324	-0.01208277		2914	-0.00406202		3503.99	-0.02059853
554.2	0.05459074		1144.19	0.00226216		1734.21	-0.00698789		2324.2	-0.01190825		2914.2	-0.0047478		3504.19	-0.02051797
554.4	0.05537744		1144.39	0.00196626		1734.41	-0.00736046		2324.4	-0.01208784		2914.4	-0.00564348		3504.39	-0.02082109
554.6	0.05601531		1144.59	0.00270277		1734.61	-0.00629964		2324.6	-0.0113951		2914.6	-0.00633052		3504.59	-0.02033669
554.8	0.05686995		1144.79	0.00293137		1734.81	-0.00639657		2324.8	-0.01076598		2914.8	-0.00615233		3504.79	-0.01994786
555	0.05596961		1144.99	0.00189071		1735.01	-0.00633634		2325	-0.01009201		2915	-0.00520776		3504.99	-0.01914462
555.2	0.05603943		1145.19	0.00240123		1735.21	-0.00581668		2325.2	-0.00988882		2915.2	-0.00524772		3505.19	-0.0187074
555.4	0.05619917		1145.39	0.002726		1735.41	-0.00532877		2325.4	-0.00930627		2915.4	-0.00585654		3505.39	-0.01835683
555.6	0.0558432		1145.59	0.00232807		1735.61	-0.00602646		2325.6	-0.00943136		2915.6	-0.00490087		3505.59	-0.01822126
555.8	0.05626395		1145.79	0.00177969		1735.81	-0.00577117		2325.8	-0.00928663		2915.8	-0.00381745		3505.79	-0.01776113
556	0.05615449		1145.99	0.00103885		1736.01	-0.00673711		2326	-0.00835001		2916	-0.00294018		3505.99	-0.01736367
556.2	0.05593099		1146.19	0.00082171		1736.21	-0.00691459		2326.2	-0.00765741		2916.2	-0.00259165		3506.19	-0.01734842
556.4	0.05540466		1146.39	0.0004731		1736.41	-0.00582983		2326.4	-0.00774448		2916.4	-0.00183889		3506.39	-0.01714246
556.6	0.05471281		1146.59	0.00055578		1736.61	-0.00611805		2326.6	-0.00804989		2916.6	-0.00178073		3506.59	-0.01761279
556.8	0.05413622		1146.79	0.00071424		1736.81	-0.00626863		2326.8	-0.00876484		2916.8	-0.00149646		3506.79	-0.01729097
557	0.05389726		1146.99	0.00033546		1737.01	-0.00589785		2327	-0.00956466		2917	-0.00209971		3506.99	-0.01746844
557.2	0.05283634		1147.19	-0.00002099		1737.21	-0.0049736		2327.2	-0.01011334		2917.2	-0.00238634		3507.19	-0.0180451
557.4	0.05240345		1147.39	-0.00014947		1737.41	-0.0056333		2327.4	-0.01106403		2917.4	-0.00235163		3507.39	-0.01792192
557.6	0.05263952		1147.59	-0.00082893		1737.61	-0.00602657		2327.6	-0.01217403		2917.6	-0.00189515		3507.59	-0.01936201
557.8	0.05328573		1147.79	-0.00110265		1737.81	-0.00619267		2327.8	-0.01232115		2917.8	-0.00271648		3507.79	-0.01999204
558	0.05339709		1147.99	-0.00058201		1738.01	-0.00641468		2328	-0.01249104		2918	-0.00354961		3507.99	-0.020276
558.2	0.05304569		1148.19	-0.00124927		1738.21	-0.00731412		2328.2	-0.01229282		2918.2	-0.00380619		3508.19	-0.02126399
558.4	0.05246952		1148.39	-0.00150941		1738.41	-0.00732575		2328.4	-0.01216406		2918.4	-0.00431106		3508.39	-0.02112482
558.6	0.05314693		1148.59	-0.0006414		1738.61	-0.00743625		2328.6	-0.01183411		2918.6	-0.00418471		3508.59	-0.02077607
558.8	0.05346092		1148.79	-0.00139663		1738.81	-0.00770941		2328.8	-0.01101736		2918.8	-0.00392607		3508.79	-0.02098914
559	0.05340912		1148.99	-0.00240511		1739.01	-0.00802066		2329	-0.01036592		2919	-0.00435747		3508.99	-0.02109665
559.2	0.05435248		1149.19	-0.00182399		1739.21	-0.00801825		2329.2	-0.00996508		2919.2	-0.00450271		3509.19	-0.02128463
559.4	0.0545438		1149.39	-0.00254244		1739.41	-0.00800928		2329.4	-0.00992708		2919.4	-0.00426486		3509.39	-0.02096443
559.6	0.05531609		1149.59	-0.00321852		1739.61	-0.00859432		2329.6	-0.01010738		2919.6	-0.00389987		3509.59	-0.02075359
559.8	0.05590317		1149.79	-0.00300924		1739.81	-0.00842287		2329.8	-0.00945422		2919.8	-0.00366196		3509.79	-0.02128725
560	0.05626968		1149.99	-0.00329435		1740.01	-0.00929675		2330	-0.00860415		2920	-0.00319344		3509.99	-0.02193327
560.2	0.05560341		1150.19	-0.00350716		1740.21	-0.00763407		2330.2	-0.00781102		2920.2	-0.00334141		3510.19	-0.02091169
560.4	0.05595346		1150.39	-0.00402151		1740.41	-0.00691213		2330.4	-0.00811127		2920.4	-0.00327033		3510.39	-0.02060207
560.6	0.05636383		1150.59	-0.00379042		1740.61	-0.00729253		2330.6	-0.0079754		2920.6	-0.00262537		3510.59	-0.02094303
560.8	0.05581597		1150.79	-0.00390115		1740.81	-0.00791388		2330.8	-0.00791167		2920.8	-0.00235928		3510.79	-0.02074627
561	0.05628336		1150.99	-0.00445798		1741.01	-0.00789798		2331	-0.00716092		2921	-0.00286251		3510.99	-0.02037717
561.2	0.05584702		1151.19	-0.00479795		1741.21	-0.00785702		2331.2	-0.00672501		2921.2	-0.00319129		3511.19	-0.02033019
561.4	0.05659044		1151.39	-0.00336122		1741.41	-0.00807026		2331.4	-0.00724325		2921.4	-0.00348408		3511.39	-0.02019268
561.6	0.05704414		1151.59	-0.00371631		1741.61	-0.00768621		2331.6	-0.00760049		2921.6	-0.00329901		3511.59	-0.01980541
561.8	0.05564633		1151.79	-0.0029424		1741.81	-0.00819515		2331.8	-0.00699154		2921.8	-0.0034869		3511.79	-0.02032965
562	0.0551117		1151.99	-0.00207503		1742.01	-0.00863353		2332	-0.00781887		2922	-0.00314175		3511.99	-0.02012643
562.2	0.05432833		1152.19	-0.00190867		1742.21	-0.00862874		2332.2	-0.00771708		2922.2	-0.00267931		3512.19	-0.02034841
562.4	0.05490706		1152.39	-0.00101454		1742.41	-0.0082012		2332.4	-0.00798468		2922.4	-0.00181394		3512.39	-0.01959422
562.6	0.05587822		1152.59	-0.00047352		1742.61	-0.00868421		2332.6	-0.00761902		2922.6	-0.00111511		3512.59	-0.01980455
562.8	0.05559231		1152.79	-0.00096517		1742.81	-0.00831285		2332.8	-0.00709425		2922.8	-0.00054855		3512.79	-0.02049311
563	0.05572386		1152.99	-0.00137891		1743.01	-0.00843958		2333	-0.00758639		2923	-0.00051864		3512.99	-0.02081201
563.2	0.05504575		1153.19	-0.00106198		1743.21	-0.0078316		2333.2	-0.00880153		2923.2	-0.00047703		3513.19	-0.02128139
563.4	0.05421031		1153.39	-0.00111552		1743.41	-0.00689985		2333.4	-0.0100946		2923.4	0.00023031		3513.39	-0.02032084
563.6	0.05492375		1153.59	-0.00152742		1743.61	-0.00672993		2333.6	-0.01016299		2923.6	0.00088554		3513.59	-0.02076496
563.8	0.05466372		1153.79	-0.00181497		1743.81	-0.00623725		2333.8	-0.01033764		2923.8	0.00058713		3513.79	-0.02121074
564	0.0546131		1153.99	-0.00175488		1744.01	-0.00635215		2334	-0.01093408		2924	0.00087409		3513.99	-0.02095516
564.2	0.05437519		1154.19	-0.00117423		1744.21	-0.00528963		2334.2	-0.01146037		2924.2	0.0001689		3514.19	-0.02011388
564.4	0.05482353		1154.39	-0.00145913		1744.41	-0.00645971		2334.4	-0.01146737		2924.4	0.00047824		3514.39	-0.02105125
564.6	0.05461233		1154.59	-0.00080039		1744.61	-0.00739847		2334.6	-0.01200917		2924.6	0.00126539		3514.59	-0.02130507
564.8	0.05410416		1154.79	-0.00135003		1744.81	-0.0067821		2334.8	-0.01138639		2924.8	0.00087789		3514.79	-0.020758
565	0.05425819		1154.99	-0.00156545		1745.01	-0.00684983		2335	-0.00992574		2925	-0.0002463		3514.99	-0.02082266
565.2	0.05391279		1155.19	-0.00141066		1745.21	-0.00726108		2335.2	-0.00999529		2925.2	-0.00094936		3515.19	-0.02105767
565.4	0.0536482		1155.39	-0.00051012		1745.41	-0.00750343		2335.4	-0.01026048		2925.4	-0.00083767		3515.39	-0.0215624
565.6	0.05384033		1155.59	-0.00117775		1745.61	-0.00757344		2335.6	-0.00958179		2925.6	-0.00135791		3515.59	-0.02188654
565.8	0.05365028		1155.79	-0.00052885		1745.81	-0.00812825		2335.8	-0.00960234		2925.8	-0.00119581		3515.79	-0.02259139
566	0.05419422		1155.99	0.00005224		1746.01	-0.00779287		2336	-0.00975809		2926	-0.00188709		3515.99	-0.02217899
566.2	0.05467353		1156.19	-0.00014839		1746.21	-0.00754284		2336.2	-0.00942386		2926.2	-0.00235969		3516.19	-0.02199305
566.4	0.05581461		1156.39	-0.00031569		1746.41	-0.00805279		2336.4	-0.00945439		2926.4	-0.0024486		3516.39	-0.02090367
566.6	0.05616177		1156.59	-0.00066436		1746.61	-0.00768834		2336.6	-0.00870265		2926.6	-0.00241657		3516.59	-0.02014434
566.8	0.05581059		1156.79	-0.00059334		1746.81	-0.00646595		2336.8	-0.00865405		2926.8	-0.00268512		3516.79	-0.01988933
567	0.05571956		1156.99	-0.00085205		1747.01	-0.00603154		2337	-0.00867907		2927	-0.00289427		3516.99	-0.01901034
567.2	0.05507001		1157.19	-0.0011834		1747.21	-0.00585159		2337.2	-0.00898159		2927.2	-0.00279111		3517.19	-0.01839148
567.4	0.05522169		1157.39	-0.00087151		1747.41	-0.00571816		2337.4	-0.00822303		2927.4	-0.00214442		3517.39	-0.01801219
567.6	0.05544316		1157.59	-0.00197285		1747.61	-0.00542554		2337.6	-0.00838011		2927.6	-0.00191828		3517.59	-0.01853364
567.8	0.05511499		1157.79	-0.00179597		1747.81	-0.00515646		2337.8	-0.00891174		2927.8	-0.0025344		3517.79	-0.01775288
568	0.05571534		1157.99	-0.00146993		1748.01	-0.00438159		2338	-0.00896902		2928	-0.00187863		3517.99	-0.01756387
568.2	0.05541586		1158.19	-0.00188197		1748.21	-0.00423311		2338.2	-0.00845665		2928.2	-0.0020403		3518.19	-0.01743884
568.4	0.05563063		1158.39	-0.00210155		1748.41	-0.00496805		2338.4	-0.00842349		2928.4	-0.00159927		3518.39	-0.018063
568.6	0.05508829		1158.59	-0.00167222		1748.61	-0.00431769		2338.6	-0.00783029		2928.6	-0.00167788		3518.59	-0.01729358
568.8	0.05451198		1158.79	-0.00214783		1748.81	-0.00421266		2338.8	-0.00739432		2928.8	-0.00176026		3518.79	-0.01632096
569	0.05445289		1158.99	-0.0023288		1749.01	-0.00482536		2339	-0.00701417		2929	-0.00126955		3518.99	-0.01691488
569.2	0.05394168		1159.19	-0.0024353		1749.21	-0.00536903		2339.2	-0.00725847		2929.2	-0.00065727		3519.19	-0.01783466
569.4	0.05397961		1159.39	-0.00118562		1749.41	-0.00561955		2339.4	-0.00796559		2929.4	-0.00058077		3519.39	-0.01869557
569.6	0.05386769		1159.59	-0.00096285		1749.61	-0.00555221		2339.6	-0.00839038		2929.6	-0.00158225		3519.59	-0.01840465
569.8	0.05282351		1159.79	-0.00093261		1749.81	-0.00572683		2339.8	-0.0092642		2929.8	-0.00142756		3519.79	-0.01820736
570	0.0529411		1159.99	-0.00027132		1750.01	-0.00559804		2340	-0.00908398		2930	-0.00167093		3519.99	-0.01825711
570.2	0.05313352		1160.19	-0.00135651		1750.21	-0.0061427		2340.2	-0.00923941		2930.2	-0.00155264		3520.19	-0.01809684
570.4	0.05298523		1160.39	-0.00034874		1750.41	-0.00656895		2340.4	-0.00962922		2930.4	-0.00177158		3520.39	-0.01816574
570.6	0.05336575		1160.59	-0.00038899		1750.61	-0.00581731		2340.6	-0.00995564		2930.6	-0.00165486		3520.59	-0.01811286
570.8	0.05296435		1160.79	-0.00028049		1750.81	-0.00504965		2340.8	-0.01043541		2930.8	-0.00104885		3520.79	-0.01850971
571	0.05271809		1160.99	-0.00037016		1751.01	-0.00551538		2341	-0.01056819		2931	-0.00121701		3520.99	-0.01793778
571.2	0.05247498		1161.19	-0.00038803		1751.21	-0.00528582		2341.2	-0.01129108		2931.2	-0.0018689		3521.19	-0.01829396
571.4	0.05325925		1161.39	-0.00082985		1751.41	-0.00489728		2341.4	-0.0116004		2931.4	-0.00233068		3521.39	-0.01888935
571.6	0.05302375		1161.59	-0.00249954		1751.61	-0.00465643		2341.6	-0.01243667		2931.6	-0.00227518		3521.59	-0.01933252
571.8	0.05394974		1161.79	-0.00278064		1751.81	-0.00453538		2341.8	-0.01268638		2931.8	-0.00249867		3521.79	-0.01894864
572	0.05454753		1161.99	-0.00323747		1752.01	-0.00378015		2342	-0.01224372		2932	-0.00217707		3521.99	-0.01894312
572.2	0.0545893		1162.19	-0.00346017		1752.21	-0.00434428		2342.2	-0.0118417		2932.2	-0.00229534		3522.19	-0.01951317
572.4	0.05491772		1162.39	-0.00375838		1752.41	-0.00444862		2342.4	-0.01249327		2932.4	-0.00291828		3522.39	-0.01936705
572.6	0.05427323		1162.59	-0.00420807		1752.61	-0.00482536		2342.6	-0.01238054		2932.6	-0.00278367		3522.59	-0.01867056
572.8	0.05410221		1162.79	-0.00469688		1752.81	-0.00483397		2342.8	-0.01265991		2932.8	-0.00251414		3522.79	-0.01837106
573	0.05422412		1162.99	-0.00442698		1753.01	-0.0048101		2343	-0.01247399		2933	-0.002663		3522.99	-0.01903537
573.2	0.05417956		1163.19	-0.00420498		1753.21	-0.00574978		2343.2	-0.01184126		2933.2	-0.00236848		3523.19	-0.01954591
573.4	0.0548454		1163.39	-0.00257443		1753.41	-0.00576569		2343.4	-0.01202205		2933.4	-0.00247595		3523.39	-0.01965803
573.6	0.05474748		1163.59	-0.00265782		1753.61	-0.00633815		2343.6	-0.01096149		2933.6	-0.0020507		3523.59	-0.01904779
573.8	0.05517462		1163.79	-0.00223536		1753.81	-0.0072022		2343.8	-0.00961659		2933.8	-0.00184117		3523.79	-0.01907799
574	0.05569813		1163.99	-0.00139245		1754.01	-0.0084682		2344	-0.00842605		2934	-0.0018189		3523.99	-0.01889394
574.2	0.05545691		1164.19	-0.00128832		1754.21	-0.00939345		2344.2	-0.00835492		2934.2	-0.00209806		3524.19	-0.01942463
574.4	0.05550193		1164.39	-0.00051098		1754.41	-0.00962289		2344.4	-0.00920202		2934.4	-0.00230749		3524.39	-0.019234
574.6	0.05582989		1164.59	-0.00012823		1754.61	-0.00926459		2344.6	-0.00885398		2934.6	-0.00208024		3524.59	-0.01866332
574.8	0.05529357		1164.79	-0.00006945		1754.81	-0.00934725		2344.8	-0.00933203		2934.8	-0.00183232		3524.79	-0.01866948
575	0.05462598		1164.99	0.00012918		1755.01	-0.00906244		2345	-0.00898512		2935	-0.00209621		3524.99	-0.01764942
575.2	0.05459433		1165.19	0.00031572		1755.21	-0.00918708		2345.2	-0.00930704		2935.2	-0.00183097		3525.19	-0.01749049
575.4	0.05369454		1165.39	0.00024761		1755.41	-0.00993185		2345.4	-0.00893043		2935.4	-0.00197949		3525.39	-0.01809672
575.6	0.05274187		1165.59	-0.00009445		1755.61	-0.00996581		2345.6	-0.0087414		2935.6	-0.00192391		3525.59	-0.01882848
575.8	0.05270534		1165.79	-0.00080052		1755.81	-0.00963509		2345.8	-0.00905625		2935.8	-0.0010456		3525.79	-0.01892088
576	0.05250595		1165.99	-0.00049237		1756.01	-0.00949522		2346	-0.00911482		2936	-0.00143963		3525.99	-0.01926072
576.2	0.05181988		1166.19	-0.00058061		1756.21	-0.00990123		2346.2	-0.01028565		2936.2	-0.00212093		3526.19	-0.02029654
576.4	0.05137191		1166.39	-0.00171594		1756.41	-0.00968744		2346.4	-0.01080299		2936.4	-0.00268524		3526.39	-0.02066736
576.6	0.05079368		1166.59	-0.00186469		1756.61	-0.00891145		2346.6	-0.01157558		2936.6	-0.00285028		3526.59	-0.02076729
576.8	0.05110851		1166.79	-0.00306958		1756.81	-0.00833418		2346.8	-0.01187642		2936.8	-0.00366554		3526.79	-0.02150232
577	0.05159545		1166.99	-0.00282198		1757.01	-0.00877534		2347	-0.01219147		2937	-0.00385527		3526.99	-0.02178916
577.2	0.05230438		1167.19	-0.00275723		1757.21	-0.00860907		2347.2	-0.01210253		2937.2	-0.0035894		3527.19	-0.02254557
577.4	0.05288627		1167.39	-0.00205066		1757.41	-0.00818257		2347.4	-0.01190179		2937.4	-0.00385251		3527.39	-0.02209359
577.6	0.05313116		1167.59	-0.00184434		1757.61	-0.00888596		2347.6	-0.01147443		2937.6	-0.00383567		3527.59	-0.02118482
577.8	0.05380955		1167.79	-0.0012949		1757.81	-0.00887857		2347.8	-0.01196119		2937.8	-0.00454847		3527.79	-0.02130898
578	0.0529003		1167.99	-0.00238117		1758.01	-0.00865547		2348	-0.01277961		2938	-0.00466163		3527.99	-0.02113194
578.2	0.05285611		1168.19	-0.0024592		1758.21	-0.0075483		2348.2	-0.01377288		2938.2	-0.00503375		3528.19	-0.02170898
578.4	0.05392744		1168.39	-0.00294087		1758.41	-0.00743823		2348.4	-0.01428181		2938.4	-0.00452249		3528.39	-0.02040492
578.6	0.05380554		1168.59	-0.00277392		1758.61	-0.00735589		2348.6	-0.01357543		2938.6	-0.00455813		3528.59	-0.01980002
578.8	0.05377531		1168.79	-0.00411209		1758.81	-0.00744981		2348.8	-0.0136584		2938.8	-0.00393973		3528.79	-0.01916008
579	0.05400282		1168.99	-0.00385874		1759.01	-0.00731379		2349	-0.01281115		2939	-0.00322104		3528.99	-0.01935553
579.2	0.05399621		1169.19	-0.00322937		1759.21	-0.0074247		2349.2	-0.01295105		2939.2	-0.00326034		3529.19	-0.0193855
579.4	0.05330234		1169.39	-0.00394177		1759.41	-0.00822925		2349.4	-0.01188557		2939.4	-0.00297881		3529.39	-0.01980789
579.6	0.05387334		1169.59	-0.00389585		1759.61	-0.00800095		2349.6	-0.0115024		2939.6	-0.00228456		3529.59	-0.02036993
579.8	0.0543776		1169.79	-0.00459274		1759.81	-0.00804289		2349.8	-0.0109564		2939.8	-0.00141842		3529.79	-0.02086081
580	0.05462782		1169.99	-0.00412331		1760.01	-0.00772167		2350	-0.01068704		2940	-0.0019227		3529.99	-0.02053703
580.2	0.05483644		1170.19	-0.00389704		1760.21	-0.00726132		2350.2	-0.00969628		2940.2	-0.00213898		3530.19	-0.02141228
580.4	0.05519032		1170.39	-0.00440538		1760.41	-0.00630169		2350.4	-0.00899891		2940.4	-0.00215823		3530.39	-0.02171497
580.6	0.05479029		1170.59	-0.00468086		1760.61	-0.00626495		2350.6	-0.00936146		2940.6	-0.00257988		3530.59	-0.02152726
580.8	0.05434301		1170.79	-0.00541897		1760.81	-0.00705364		2350.8	-0.00988382		2940.8	-0.00215433		3530.79	-0.02190303
581	0.05376437		1170.99	-0.00381217		1761.01	-0.00794228		2351	-0.00942593		2941	-0.00244784		3530.99	-0.02231177
581.2	0.05318825		1171.19	-0.00310858		1761.21	-0.00850516		2351.2	-0.00938949		2941.2	-0.00217849		3531.19	-0.02256166
581.4	0.05268949		1171.39	-0.00261579		1761.41	-0.00851394		2351.4	-0.00947482		2941.4	-0.00273889		3531.39	-0.02194289
581.6	0.05210208		1171.59	-0.00229802		1761.61	-0.00887512		2351.6	-0.01054205		2941.6	-0.00322219		3531.59	-0.02197557
581.8	0.0512315		1171.79	-0.0023368		1761.81	-0.0081377		2351.8	-0.01049074		2941.8	-0.00349636		3531.79	-0.02193822
582	0.05059141		1171.99	-0.00322551		1762.01	-0.00834849		2352	-0.01116671		2942	-0.00415834		3531.99	-0.02162303
582.2	0.0505328		1172.19	-0.00258365		1762.21	-0.00861473		2352.2	-0.01130497		2942.2	-0.00445899		3532.19	-0.02100975
582.4	0.05060181		1172.39	-0.00236611		1762.41	-0.00917417		2352.4	-0.01168885		2942.4	-0.00351204		3532.39	-0.01941143
582.6	0.05033384		1172.59	-0.0023163		1762.61	-0.00905361		2352.6	-0.01203733		2942.6	-0.00367499		3532.59	-0.02027793
582.8	0.05076971		1172.79	-0.00195344		1762.81	-0.0095846		2352.8	-0.01300902		2942.8	-0.00298662		3532.79	-0.02007924
583	0.0510515		1172.99	-0.00177371		1763.01	-0.00970205		2353	-0.01330909		2943	-0.00364978		3532.99	-0.02151178
583.2	0.05098986		1173.19	-0.00150199		1763.21	-0.00892258		2353.2	-0.01310264		2943.2	-0.00338179		3533.19	-0.02110961
583.4	0.05093804		1173.39	-0.00168788		1763.41	-0.00947691		2353.4	-0.01223266		2943.4	-0.00316211		3533.39	-0.02123829
583.6	0.05189912		1173.59	-0.00077383		1763.61	-0.00802168		2353.6	-0.01152372		2943.6	-0.00371293		3533.59	-0.02257816
583.8	0.05249365		1173.79	-0.0012014		1763.81	-0.00722896		2353.8	-0.01068964		2943.8	-0.00360716		3533.79	-0.02253455
584	0.05211619		1173.99	-0.00140401		1764.01	-0.00707502		2354	-0.01007636		2944	-0.00382729		3533.99	-0.02251588
584.2	0.05224062		1174.19	-0.00177528		1764.21	-0.00685547		2354.2	-0.00961044		2944.2	-0.00324167		3534.19	-0.02288228
584.4	0.0525929		1174.39	-0.00241392		1764.41	-0.00675261		2354.4	-0.00964413		2944.4	-0.00312		3534.39	-0.02315222
584.6	0.05255543		1174.59	-0.00246705		1764.61	-0.00775468		2354.6	-0.00945254		2944.6	-0.00291165		3534.59	-0.02308445
584.8	0.05315554		1174.79	-0.00213277		1764.81	-0.0080592		2354.8	-0.00963477		2944.8	-0.00200663		3534.79	-0.02331224
585	0.05328127		1174.99	-0.00130326		1765.01	-0.00869694		2355	-0.00894952		2945	-0.00281836		3534.99	-0.02309571
585.2	0.05267881		1175.19	-0.00154603		1765.21	-0.00800248		2355.2	-0.00859547		2945.2	-0.00307573		3535.19	-0.02194021
585.4	0.0521955		1175.39	-0.00175325		1765.41	-0.00720798		2355.4	-0.00845579		2945.4	-0.00369881		3535.39	-0.02199553
585.6	0.05222546		1175.59	-0.00178234		1765.61	-0.00710252		2355.6	-0.00843639		2945.6	-0.00352617		3535.59	-0.02192583
585.8	0.05233502		1175.79	-0.00202906		1765.81	-0.00698938		2355.8	-0.00792258		2945.8	-0.00351508		3535.79	-0.02152869
586	0.05272651		1175.99	-0.00168725		1766.01	-0.00768011		2356	-0.00917517		2946	-0.00446508		3535.99	-0.02120599
586.2	0.05219002		1176.19	-0.00125285		1766.21	-0.00725423		2356.2	-0.00948184		2946.2	-0.00350723		3536.19	-0.02105657
586.4	0.05289711		1176.39	-0.00081533		1766.41	-0.00716233		2356.4	-0.01109541		2946.4	-0.0033355		3536.39	-0.0210068
586.6	0.05250284		1176.59	-0.0011268		1766.61	-0.00723393		2356.6	-0.01159717		2946.6	-0.00354034		3536.59	-0.02124889
586.8	0.05261782		1176.79	-0.00063733		1766.81	-0.00738134		2356.8	-0.01215027		2946.8	-0.00366096		3536.79	-0.02091656
587	0.05195628		1176.99	-0.00124719		1767.01	-0.00710441		2357	-0.01110858		2947	-0.00397285		3536.99	-0.0216716
587.2	0.05227602		1177.19	-0.00068781		1767.21	-0.00688039		2357.2	-0.01119059		2947.2	-0.00315965		3537.19	-0.02128643
587.4	0.0516372		1177.39	-0.00084714		1767.41	-0.00723952		2357.4	-0.01140914		2947.4	-0.00296758		3537.39	-0.02192148
587.6	0.05230985		1177.59	-0.00113045		1767.61	-0.00710002		2357.6	-0.01146082		2947.6	-0.00260736		3537.59	-0.02208632
587.8	0.05224057		1177.79	-0.00127185		1767.81	-0.00776611		2357.8	-0.01196412		2947.8	-0.00162862		3537.79	-0.02137393
588	0.05162391		1177.99	-0.0024697		1768.01	-0.00846907		2358	-0.01231506		2948	-0.00144821		3537.99	-0.02142569
588.2	0.05210722		1178.19	-0.00330031		1768.21	-0.00827186		2358.2	-0.01276887		2948.2	-0.00135316		3538.19	-0.02091562
588.4	0.05325059		1178.39	-0.00259982		1768.41	-0.00840463		2358.4	-0.01126224		2948.4	-0.00197296		3538.39	-0.02110074
588.6	0.05326369		1178.59	-0.00221857		1768.61	-0.00904475		2358.6	-0.0117144		2948.6	-0.00214507		3538.59	-0.02045658
588.8	0.05395482		1178.79	-0.00177638		1768.81	-0.00917604		2358.8	-0.01185879		2948.8	-0.00238723		3538.79	-0.0203089
589	0.05285287		1178.99	-0.00168586		1769.01	-0.00927673		2359	-0.01187986		2949	-0.00396916		3538.99	-0.01981963
589.2	0.05281596		1179.19	-0.00206725		1769.21	-0.00869909		2359.2	-0.01142061		2949.2	-0.00397579		3539.19	-0.0196135
589.4	0.05346055		1179.39	-0.00151318		1769.41	-0.00885663		2359.4	-0.01199174		2949.4	-0.00406036		3539.39	-0.020569
589.6	0.05462114		1179.59	-0.00189566		1769.61	-0.00893208		2359.6	-0.01231938		2949.6	-0.00426909		3539.59	-0.02038585
589.8	0.05494605		1179.79	-0.00210165		1769.81	-0.00929474		2359.8	-0.01213374		2949.8	-0.0051552		3539.79	-0.01978972
590	0.05530069		1179.99	-0.00156833		1770.01	-0.00983251		2360	-0.0122517		2950	-0.00531971		3539.99	-0.01938687
590.2	0.0550033		1180.19	-0.00085337		1770.21	-0.00946891		2360.2	-0.01319973		2950.2	-0.00491231		3540.19	-0.01998324
590.4	0.05524522		1180.39	-0.00071592		1770.41	-0.00928829		2360.4	-0.01302927		2950.4	-0.00604962		3540.39	-0.01929214
590.6	0.0541012		1180.59	-0.00064206		1770.61	-0.00983467		2360.6	-0.0126416		2950.6	-0.00594218		3540.59	-0.01864469
590.8	0.05402021		1180.79	0.00016464		1770.81	-0.0100521		2360.8	-0.01168332		2950.8	-0.00605409		3540.79	-0.01911578
591	0.05300038		1180.99	0.00071516		1771.01	-0.00998327		2361	-0.01104209		2951	-0.00576496		3540.99	-0.0194621
591.2	0.0526203		1181.19	0.00038679		1771.21	-0.00968479		2361.2	-0.01099269		2951.2	-0.00494498		3541.19	-0.01892259
591.4	0.05221795		1181.39	-0.00045346		1771.41	-0.00989284		2361.4	-0.01048701		2951.4	-0.00418955		3541.39	-0.01967808
591.6	0.05223934		1181.59	-0.0007432		1771.61	-0.00976638		2361.6	-0.01020946		2951.6	-0.00344219		3541.59	-0.01967021
591.8	0.05225418		1181.79	-0.00088125		1771.81	-0.00885775		2361.8	-0.01089842		2951.8	-0.00333295		3541.79	-0.02021897
592	0.05164936		1181.99	-0.00137769		1772.01	-0.0082174		2362	-0.01127577		2952	-0.00336866		3541.99	-0.02043328
592.2	0.05162684		1182.19	-0.00237007		1772.21	-0.00855132		2362.2	-0.01132404		2952.2	-0.00391282		3542.19	-0.02034002
592.4	0.05228807		1182.39	-0.0017558		1772.41	-0.00793651		2362.4	-0.0112636		2952.4	-0.00369463		3542.39	-0.0207693
592.6	0.05205825		1182.59	-0.00214079		1772.61	-0.00791657		2362.6	-0.0119628		2952.6	-0.00327021		3542.59	-0.02166916
592.8	0.05256914		1182.79	-0.0026486		1772.81	-0.00771363		2362.8	-0.01222543		2952.8	-0.00287534		3542.79	-0.02233176
593	0.05297752		1182.99	-0.00383486		1773.01	-0.00752304		2363	-0.0125469		2953	-0.0028831		3542.99	-0.02224384
593.2	0.05385554		1183.19	-0.00409411		1773.21	-0.00747731		2363.2	-0.01276137		2953.2	-0.00188894		3543.19	-0.02241191
593.4	0.05410774		1183.39	-0.00490526		1773.41	-0.00768981		2363.4	-0.0131032		2953.4	-0.00181089		3543.39	-0.02324663
593.6	0.05418109		1183.59	-0.00591872		1773.61	-0.00747072		2363.6	-0.01234624		2953.6	-0.00229928		3543.59	-0.02218314
593.8	0.05468545		1183.79	-0.00593398		1773.81	-0.00767642		2363.8	-0.01241379		2953.8	-0.00360357		3543.79	-0.0216491
594	0.05447862		1183.99	-0.00599039		1774.01	-0.00804846		2364	-0.01245215		2954	-0.00385932		3543.99	-0.0218367
594.2	0.05391708		1184.19	-0.00516549		1774.21	-0.00816686		2364.2	-0.01256891		2954.2	-0.00456143		3544.19	-0.02179586
594.4	0.05346501		1184.39	-0.00572854		1774.41	-0.00920646		2364.4	-0.01081243		2954.4	-0.00553899		3544.39	-0.02034871
594.6	0.0523731		1184.59	-0.00496649		1774.61	-0.00977087		2364.6	-0.01045833		2954.6	-0.00500173		3544.59	-0.01969045
594.8	0.05173919		1184.79	-0.00467071		1774.81	-0.00998711		2364.8	-0.00969683		2954.8	-0.00535737		3544.79	-0.02014294
595	0.05091788		1184.99	-0.00459138		1775.01	-0.00986247		2365	-0.0094295		2955	-0.00531913		3544.99	-0.0199643
595.2	0.04999079		1185.19	-0.0044465		1775.21	-0.01045079		2365.2	-0.00862355		2955.2	-0.00559415		3545.19	-0.0205236
595.4	0.04966841		1185.39	-0.00431398		1775.41	-0.01021515		2365.4	-0.00855824		2955.4	-0.00600992		3545.39	-0.02147647
595.6	0.04938501		1185.59	-0.00314728		1775.61	-0.00971112		2365.6	-0.00893669		2955.6	-0.00709018		3545.59	-0.02119029
595.8	0.04965053		1185.79	-0.00260941		1775.81	-0.00950351		2365.8	-0.00960625		2955.8	-0.00795755		3545.79	-0.02135012
596	0.04901412		1185.99	-0.00182995		1776.01	-0.00905773		2366	-0.01001292		2956	-0.00771088		3545.99	-0.02142016
596.2	0.04932872		1186.19	-0.00247787		1776.21	-0.00864478		2366.2	-0.00992104		2956.2	-0.00853952		3546.19	-0.02125625
596.4	0.04990138		1186.39	-0.00194495		1776.41	-0.00771407		2366.4	-0.0104909		2956.4	-0.00786121		3546.39	-0.02083897
596.6	0.05007402		1186.59	-0.00231639		1776.61	-0.00800138		2366.6	-0.01034589		2956.6	-0.00777447		3546.59	-0.02072942
596.8	0.05010986		1186.79	-0.00303712		1776.81	-0.00700403		2366.8	-0.01148539		2956.8	-0.00835415		3546.79	-0.01983541
597	0.05066267		1186.99	-0.00305269		1777.01	-0.00681422		2367	-0.01168236		2957	-0.00815432		3546.99	-0.01969955
597.2	0.05121165		1187.19	-0.00251858		1777.21	-0.00678943		2367.2	-0.01214041		2957.2	-0.00850873		3547.19	-0.01976605
597.4	0.05162599		1187.39	-0.00275408		1777.41	-0.00663906		2367.4	-0.01206348		2957.4	-0.00796456		3547.39	-0.01874895
597.6	0.0523382		1187.59	-0.00297712		1777.61	-0.00536863		2367.6	-0.0118545		2957.6	-0.00817906		3547.59	-0.01723979
597.8	0.05268362		1187.79	-0.00321936		1777.81	-0.00514216		2367.8	-0.01255225		2957.8	-0.00764948		3547.79	-0.01695619
598	0.05220661		1187.99	-0.00246279		1778.01	-0.00558329		2368	-0.01172753		2958	-0.00643478		3547.99	-0.01679467
598.2	0.05200951		1188.19	-0.00160219		1778.21	-0.00582586		2368.2	-0.01141571		2958.2	-0.00544324		3548.19	-0.01621274
598.4	0.05140178		1188.39	-0.0022903		1778.41	-0.00619941		2368.4	-0.01094466		2958.4	-0.00490746		3548.39	-0.01602491
598.6	0.05103421		1188.59	-0.00184858		1778.61	-0.00529095		2368.6	-0.01091778		2958.6	-0.00405157		3548.59	-0.01712304
598.8	0.05159954		1188.79	-0.00142338		1778.81	-0.0059395		2368.8	-0.01110501		2958.8	-0.00465829		3548.79	-0.01787968
599	0.05205719		1188.99	-0.00075217		1779.01	-0.00658076		2369	-0.01064397		2959	-0.00376555		3548.99	-0.01922224
599.2	0.05177477		1189.19	0.00034951		1779.21	-0.00673764		2369.2	-0.01050493		2959.2	-0.0043218		3549.19	-0.02068772
599.4	0.05137018		1189.39	0.000402		1779.41	-0.00698703		2369.4	-0.01013227		2959.4	-0.00377447		3549.39	-0.02140116
599.6	0.05142618		1189.59	-0.00023613		1779.61	-0.00710885		2369.6	-0.01015281		2959.6	-0.00342334		3549.59	-0.02243184
599.8	0.05082918		1189.79	-0.00066293		1779.81	-0.00780226		2369.8	-0.01067191		2959.8	-0.00300874		3549.79	-0.02297701
600	0.04964066		1189.99	-0.00150655		1780.01	-0.00778854		2370	-0.01039351		2960	-0.00268301		3549.99	-0.0233194
600.2	0.0498228		1190.19	-0.00216459		1780.21	-0.00790114		2370.2	-0.01005532		2960.2	-0.00320897		3550.19	-0.02313841
600.4	0.04986212		1190.39	-0.00234741		1780.41	-0.00801956		2370.4	-0.01077471		2960.4	-0.00268557		3550.39	-0.02230782
600.6	0.04888338		1190.59	-0.00310721		1780.61	-0.00778352		2370.6	-0.01119777		2960.6	-0.00278768		3550.59	-0.02176352
600.8	0.04823034		1190.79	-0.0041396		1780.81	-0.00776082		2370.8	-0.01213106		2960.8	-0.00232889		3550.79	-0.02147959
601	0.04897611		1190.99	-0.00463723		1781.01	-0.00777516		2371	-0.01189072		2961	-0.00190619		3550.99	-0.02140704
601.2	0.04900299		1191.19	-0.00451515		1781.21	-0.0082056		2371.2	-0.01193138		2961.2	-0.00227379		3551.19	-0.02036253
601.4	0.04945287		1191.39	-0.00535754		1781.41	-0.0083163		2371.4	-0.01136439		2961.4	-0.00123223		3551.39	-0.01878981
601.6	0.05038412		1191.59	-0.00564227		1781.61	-0.00795327		2371.6	-0.01110612		2961.6	-0.00174145		3551.59	-0.01796464
601.8	0.0506463		1191.79	-0.00460817		1781.81	-0.00900077		2371.8	-0.01118259		2961.8	-0.00231984		3551.79	-0.01840594
602	0.05063234		1191.99	-0.0035009		1782.01	-0.00961066		2372	-0.01034946		2962	-0.00276186		3551.99	-0.01862909
602.2	0.05047963		1192.19	-0.00339717		1782.21	-0.00961712		2372.2	-0.00999023		2962.2	-0.00314276		3552.19	-0.01822004
602.4	0.05098883		1192.39	-0.00366887		1782.41	-0.00946924		2372.4	-0.00925058		2962.4	-0.00386354		3552.39	-0.01879789
602.6	0.05125085		1192.59	-0.00360574		1782.61	-0.00914907		2372.6	-0.00882707		2962.6	-0.00444907		3552.59	-0.01952523
602.8	0.05243165		1192.79	-0.0034288		1782.81	-0.00937538		2372.8	-0.00934229		2962.8	-0.00493299		3552.79	-0.02012856
603	0.05277994		1192.99	-0.00313245		1783.01	-0.01017091		2373	-0.00988186		2963	-0.00405665		3552.99	-0.02142898
603.2	0.05231757		1193.19	-0.00371842		1783.21	-0.00979617		2373.2	-0.01027844		2963.2	-0.00453208		3553.19	-0.02188923
603.4	0.05136083		1193.39	-0.00425223		1783.41	-0.00945777		2373.4	-0.01024907		2963.4	-0.00428983		3553.39	-0.02316119
603.6	0.05116234		1193.59	-0.00489097		1783.61	-0.00860615		2373.6	-0.01129791		2963.6	-0.00383995		3553.59	-0.02308685
603.8	0.05096262		1193.79	-0.00444351		1783.81	-0.00829024		2373.8	-0.01211371		2963.8	-0.00382423		3553.79	-0.02281632
604	0.05030586		1193.99	-0.00429723		1784.01	-0.00757549		2374	-0.01156131		2964	-0.00359109		3553.99	-0.02352965
604.2	0.05031006		1194.19	-0.00328127		1784.21	-0.0069989		2374.2	-0.01228781		2964.2	-0.00290019		3554.19	-0.02337703
604.4	0.05019177		1194.39	-0.00284388		1784.41	-0.00631676		2374.4	-0.01261347		2964.4	-0.00245146		3554.39	-0.02341819
604.6	0.05015223		1194.59	-0.00288242		1784.61	-0.00613935		2374.6	-0.01284334		2964.6	-0.00198857		3554.59	-0.02290226
604.8	0.0506933		1194.79	-0.0030227		1784.81	-0.00626916		2374.8	-0.01299797		2964.8	-0.00161069		3554.79	-0.02315018
605	0.0514247		1194.99	-0.00271675		1785.01	-0.00593993		2375	-0.01213195		2965	-0.00182103		3554.99	-0.02214089
605.2	0.05145586		1195.19	-0.00201834		1785.21	-0.00734265		2375.2	-0.01133757		2965.2	-0.00283821		3555.19	-0.02117974
605.4	0.05277065		1195.39	-0.00225231		1785.41	-0.00813704		2375.4	-0.01118136		2965.4	-0.0029773		3555.39	-0.02090899
605.6	0.05338983		1195.59	-0.00115373		1785.61	-0.00804009		2375.6	-0.01050679		2965.6	-0.00438364		3555.59	-0.02086757
605.8	0.0530346		1195.79	-0.00087948		1785.81	-0.00843659		2375.8	-0.01061407		2965.8	-0.00510576		3555.79	-0.02136548
606	0.05336683		1195.99	-0.00066971		1786.01	-0.00917692		2376	-0.00997953		2966	-0.00614158		3555.99	-0.0214172
606.2	0.0535823		1196.19	-0.00040979		1786.21	-0.00911913		2376.2	-0.00904455		2966.2	-0.00590409		3556.19	-0.0214277
606.4	0.05444805		1196.39	-0.00064528		1786.41	-0.00978922		2376.4	-0.00795895		2966.4	-0.00611117		3556.39	-0.02211418
606.6	0.05461687		1196.59	-0.0014455		1786.61	-0.01034374		2376.6	-0.00850077		2966.6	-0.00614527		3556.59	-0.0218699
606.8	0.05480536		1196.79	-0.00202756		1786.81	-0.01145326		2376.8	-0.00894357		2966.8	-0.00654483		3556.79	-0.02161068
607	0.05461543		1196.99	-0.00190134		1787.01	-0.01207371		2377	-0.00931967		2967	-0.00608715		3556.99	-0.02200741
607.2	0.05472806		1197.19	-0.00287441		1787.21	-0.01157007		2377.2	-0.00930459		2967.2	-0.00590654		3557.19	-0.02210285
607.4	0.05373236		1197.39	-0.00321107		1787.41	-0.01117257		2377.4	-0.0086229		2967.4	-0.00531208		3557.39	-0.02252943
607.6	0.05335445		1197.59	-0.0037349		1787.61	-0.01097823		2377.6	-0.00876735		2967.6	-0.00516061		3557.59	-0.02177273
607.8	0.05243474		1197.79	-0.00362168		1787.81	-0.01085629		2377.8	-0.00893038		2967.8	-0.00437004		3557.79	-0.02258638
608	0.05228065		1197.99	-0.00338005		1788.01	-0.01025184		2378	-0.00914812		2968	-0.00387414		3557.99	-0.02271628
608.2	0.05212746		1198.19	-0.00411297		1788.21	-0.0100509		2378.2	-0.00972968		2968.2	-0.00373467		3558.19	-0.02280312
608.4	0.0528368		1198.39	-0.00419069		1788.41	-0.01009347		2378.4	-0.00955534		2968.4	-0.00390285		3558.39	-0.0234239
608.6	0.05285236		1198.59	-0.00417511		1788.61	-0.00992083		2378.6	-0.00974495		2968.6	-0.00421511		3558.59	-0.02320969
608.8	0.05231415		1198.79	-0.00453001		1788.81	-0.00918406		2378.8	-0.010055		2968.8	-0.00351394		3558.79	-0.02268068
609	0.05140529		1198.99	-0.00417307		1789.01	-0.00890117		2379	-0.00993406		2969	-0.00384312		3558.99	-0.02212495
609.2	0.05142598		1199.19	-0.00471551		1789.21	-0.00900473		2379.2	-0.00997477		2969.2	-0.00438328		3559.19	-0.02262422
609.4	0.05150246		1199.39	-0.00441858		1789.41	-0.0086714		2379.4	-0.01066594		2969.4	-0.00453259		3559.39	-0.02327774
609.6	0.05137995		1199.59	-0.00345518		1789.61	-0.00818369		2379.6	-0.01057489		2969.6	-0.0058134		3559.59	-0.02361631
609.8	0.05085703		1199.79	-0.00385125		1789.81	-0.00837244		2379.8	-0.01098346		2969.8	-0.00643328		3559.79	-0.02505698
610	0.05084075		1199.99	-0.00367594		1790.01	-0.00893216		2380	-0.01107739		2970	-0.00620026		3559.99	-0.02586603
610.2	0.05058911		1200.19	-0.00310709		1790.21	-0.00829222		2380.2	-0.01085474		2970.2	-0.00490914		3560.19	-0.02604683
610.4	0.05073365		1200.39	-0.00348985		1790.41	-0.00899585		2380.4	-0.01076436		2970.4	-0.00431211		3560.39	-0.02627222
610.6	0.05064531		1200.59	-0.00399722		1790.61	-0.00920913		2380.6	-0.01128011		2970.6	-0.00342923		3560.59	-0.02611717
610.8	0.05057902		1200.79	-0.00460667		1790.81	-0.00917884		2380.8	-0.01120131		2970.8	-0.00390658		3560.79	-0.02617979
611	0.05039114		1200.99	-0.00419081		1791.01	-0.00894069		2381	-0.01090841		2971	-0.00296951		3560.99	-0.02619448
611.2	0.05131632		1201.19	-0.0046744		1791.21	-0.0094457		2381.2	-0.01095558		2971.2	-0.00190117		3561.19	-0.02563785
611.4	0.05023073		1201.39	-0.00533501		1791.41	-0.01030757		2381.4	-0.01005814		2971.4	-0.00176008		3561.39	-0.02541774
611.6	0.05002428		1201.59	-0.00528161		1791.61	-0.00998501		2381.6	-0.01066736		2971.6	-0.00184165		3561.59	-0.02414101
611.8	0.05019924		1201.79	-0.0051916		1791.81	-0.01004484		2381.8	-0.01189959		2971.8	-0.00093952		3561.79	-0.02391506
612	0.05090831		1201.99	-0.00515258		1792.01	-0.01071383		2382	-0.01226096		2972	-0.00101715		3561.99	-0.02331933
612.2	0.05078981		1202.19	-0.00524476		1792.21	-0.01134346		2382.2	-0.01178336		2972.2	-0.00175387		3562.19	-0.02323645
612.4	0.05107753		1202.39	-0.00472443		1792.41	-0.01236749		2382.4	-0.01083722		2972.4	-0.00120688		3562.39	-0.02299448
612.6	0.0511114		1202.59	-0.00413403		1792.61	-0.01256037		2382.6	-0.01115829		2972.6	-0.00176612		3562.59	-0.02216284
612.8	0.05152313		1202.79	-0.00469777		1792.81	-0.01216668		2382.8	-0.01169847		2972.8	-0.00065886		3562.79	-0.02153446
613	0.05176474		1202.99	-0.00472268		1793.01	-0.01219081		2383	-0.01177372		2973	-0.00097775		3562.99	-0.02104284
613.2	0.05204636		1203.19	-0.00571247		1793.21	-0.01210134		2383.2	-0.01165642		2973.2	-0.00132972		3563.19	-0.02155415
613.4	0.05187448		1203.39	-0.00566884		1793.41	-0.01296866		2383.4	-0.01155429		2973.4	-0.00257394		3563.39	-0.02159044
613.6	0.05134928		1203.59	-0.00606808		1793.61	-0.0123705		2383.6	-0.01069612		2973.6	-0.00338395		3563.59	-0.0216144
613.8	0.05051221		1203.79	-0.0069889		1793.81	-0.01182571		2383.8	-0.01041863		2973.8	-0.00368875		3563.79	-0.02210573
614	0.05038595		1203.99	-0.00720693		1794.01	-0.01108844		2384	-0.01009247		2974	-0.00330368		3563.99	-0.02213425
614.2	0.05083738		1204.19	-0.00724538		1794.21	-0.01041092		2384.2	-0.00957916		2974.2	-0.00333668		3564.19	-0.02205928
614.4	0.05031735		1204.39	-0.00818727		1794.41	-0.01048564		2384.4	-0.0093713		2974.4	-0.00350354		3564.39	-0.02160579
614.6	0.0510409		1204.59	-0.00824508		1794.61	-0.00941973		2384.6	-0.00903101		2974.6	-0.00366876		3564.59	-0.02155308
614.8	0.05109967		1204.79	-0.00806095		1794.81	-0.00913302		2384.8	-0.00924769		2974.8	-0.00364016		3564.79	-0.02124687
615	0.0508422		1204.99	-0.00755905		1795.01	-0.00891758		2385	-0.00893262		2975	-0.0036397		3564.99	-0.02101918
615.2	0.05172496		1205.19	-0.00780625		1795.21	-0.00943803		2385.2	-0.00886905		2975.2	-0.00342195		3565.19	-0.02187331
615.4	0.05113691		1205.39	-0.00760117		1795.41	-0.00925358		2385.4	-0.00864631		2975.4	-0.00399535		3565.39	-0.02152731
615.6	0.05157034		1205.59	-0.006138		1795.61	-0.00846408		2385.6	-0.00992775		2975.6	-0.00403269		3565.59	-0.02141886
615.8	0.05187629		1205.79	-0.00499068		1795.81	-0.00894419		2385.8	-0.00998623		2975.8	-0.00401383		3565.79	-0.02296721
616	0.05201931		1205.99	-0.00388294		1796.01	-0.00999323		2386	-0.00873679		2976	-0.00431269		3565.99	-0.02343799
616.2	0.05185227		1206.19	-0.00347492		1796.21	-0.00926827		2386.2	-0.0086533		2976.2	-0.00459924		3566.19	-0.02384926
616.4	0.05236584		1206.39	-0.00284573		1796.41	-0.01016926		2386.4	-0.00799097		2976.4	-0.00400136		3566.39	-0.02464547
616.6	0.05288935		1206.59	-0.00239031		1796.61	-0.01016128		2386.6	-0.00883889		2976.6	-0.0046412		3566.59	-0.02493702
616.8	0.05289489		1206.79	-0.00246246		1796.81	-0.01004634		2386.8	-0.0094482		2976.8	-0.00429612		3566.79	-0.02512468
617	0.05241381		1206.99	-0.00209473		1797.01	-0.00927244		2387	-0.00916162		2977	-0.00453953		3566.99	-0.02491135
617.2	0.0515882		1207.19	-0.00258951		1797.21	-0.01026177		2387.2	-0.0086393		2977.2	-0.00529241		3567.19	-0.02605171
617.4	0.05072861		1207.39	-0.00322818		1797.41	-0.01069232		2387.4	-0.00873734		2977.4	-0.00596154		3567.39	-0.02576704
617.6	0.05027096		1207.59	-0.00321853		1797.61	-0.00976464		2387.6	-0.00825732		2977.6	-0.00609978		3567.59	-0.02540403
617.8	0.04968548		1207.79	-0.003639		1797.81	-0.0102539		2387.8	-0.00877529		2977.8	-0.00653154		3567.79	-0.02540129
618	0.04955605		1207.99	-0.00412587		1798.01	-0.01031747		2388	-0.0087872		2978	-0.00712054		3567.99	-0.02483512
618.2	0.04911983		1208.19	-0.00421807		1798.21	-0.00998154		2388.2	-0.00889167		2978.2	-0.00761425		3568.19	-0.02400813
618.4	0.04850247		1208.39	-0.00397462		1798.41	-0.0099972		2388.4	-0.00988787		2978.4	-0.00771584		3568.39	-0.02390643
618.6	0.049019		1208.59	-0.00392137		1798.61	-0.00908883		2388.6	-0.01016929		2978.6	-0.00704541		3568.59	-0.0248076
618.8	0.0489615		1208.79	-0.00397754		1798.81	-0.0093677		2388.8	-0.01104548		2978.8	-0.0061846		3568.79	-0.0251874
619	0.04915879		1208.99	-0.00464086		1799.01	-0.00870617		2389	-0.01128917		2979	-0.00638989		3568.99	-0.02557173
619.2	0.04944112		1209.19	-0.00457915		1799.21	-0.00894511		2389.2	-0.01183158		2979.2	-0.0059184		3569.19	-0.02569745
619.4	0.04944176		1209.39	-0.00405125		1799.41	-0.00812088		2389.4	-0.01274631		2979.4	-0.00616718		3569.39	-0.02483655
619.6	0.04946022		1209.59	-0.00317564		1799.61	-0.00822056		2389.6	-0.01282783		2979.6	-0.00516153		3569.59	-0.02510665
619.8	0.05015414		1209.79	-0.00385116		1799.81	-0.00834171		2389.8	-0.01304729		2979.8	-0.00506509		3569.79	-0.02537467
620	0.05041943		1209.99	-0.00382283		1800.01	-0.0090633		2390	-0.01265527		2980	-0.0053844		3569.99	-0.02486842
620.2	0.05047028		1210.19	-0.00316317		1800.21	-0.00831671		2390.2	-0.012824		2980.2	-0.0046306		3570.19	-0.02488819
620.4	0.05149148		1210.39	-0.00286068		1800.41	-0.00862771		2390.4	-0.01216092		2980.4	-0.00415498		3570.39	-0.02516832
620.6	0.05151839		1210.59	-0.00262053		1800.61	-0.00864019		2390.6	-0.01261674		2980.6	-0.00394632		3570.59	-0.02458063
620.8	0.05170641		1210.79	-0.00218912		1800.81	-0.0090602		2390.8	-0.01314165		2980.8	-0.00427435		3570.79	-0.02479043
621	0.0514524		1210.99	-0.0027363		1801.01	-0.00845432		2391	-0.01231205		2981	-0.004476		3570.99	-0.02459352
621.2	0.05136902		1211.19	-0.0031563		1801.21	-0.00955489		2391.2	-0.01191929		2981.2	-0.00504135		3571.19	-0.02461614
621.4	0.0514648		1211.39	-0.00300467		1801.41	-0.00975963		2391.4	-0.01178683		2981.4	-0.00521543		3571.39	-0.02397803
621.6	0.0520085		1211.59	-0.00306876		1801.61	-0.00968431		2391.6	-0.0115656		2981.6	-0.00487889		3571.59	-0.02315119
621.8	0.05187863		1211.79	-0.00377642		1801.81	-0.0101953		2391.8	-0.01144624		2981.8	-0.00504758		3571.79	-0.0232151
622	0.05209223		1211.99	-0.0028756		1802.01	-0.01035339		2392	-0.01144769		2982	-0.00533908		3571.99	-0.0230097
622.2	0.05069058		1212.19	-0.00286767		1802.21	-0.01058467		2392.2	-0.01141427		2982.2	-0.00533709		3572.19	-0.02319842
622.4	0.05200724		1212.39	-0.00281012		1802.41	-0.01118044		2392.4	-0.01263873		2982.4	-0.00555811		3572.39	-0.02332907
622.6	0.05186119		1212.59	-0.00345853		1802.61	-0.01065611		2392.6	-0.01252925		2982.6	-0.00551664		3572.59	-0.02375915
622.8	0.05160725		1212.79	-0.00362691		1802.81	-0.01070989		2392.8	-0.01278589		2982.8	-0.00490661		3572.79	-0.02327454
623	0.05065775		1212.99	-0.00393853		1803.01	-0.01090387		2393	-0.01313094		2983	-0.00497808		3572.99	-0.02281978
623.2	0.05026279		1213.19	-0.0037516		1803.21	-0.01155068		2393.2	-0.01342374		2983.2	-0.00451327		3573.19	-0.02260625
623.4	0.05002866		1213.39	-0.00418365		1803.41	-0.01134724		2393.4	-0.01378302		2983.4	-0.00473579		3573.39	-0.02192683
623.6	0.04952471		1213.59	-0.00471615		1803.61	-0.01212253		2393.6	-0.01364611		2983.6	-0.00443039		3573.59	-0.02170991
623.8	0.04911216		1213.79	-0.00580283		1803.81	-0.01170998		2393.8	-0.01472838		2983.8	-0.00423845		3573.79	-0.02137879
624	0.04897533		1213.99	-0.00484617		1804.01	-0.01154402		2394	-0.01380488		2984	-0.00398979		3573.99	-0.02095608
624.2	0.04920179		1214.19	-0.00476047		1804.21	-0.01070384		2394.2	-0.0133529		2984.2	-0.00394734		3574.19	-0.02110875
624.4	0.04916317		1214.39	-0.00545674		1804.41	-0.01080123		2394.4	-0.01415751		2984.4	-0.00407355		3574.39	-0.02132138
624.6	0.04875348		1214.59	-0.00489895		1804.61	-0.00995562		2394.6	-0.01406351		2984.6	-0.00433136		3574.59	-0.02117439
624.8	0.04880609		1214.79	-0.00500476		1804.81	-0.00980882		2394.8	-0.01444836		2984.8	-0.00509222		3574.79	-0.02191758
625	0.0483928		1214.99	-0.00497912		1805.01	-0.00881379		2395	-0.01421277		2985	-0.00507059		3574.99	-0.02251772
625.2	0.04877912		1215.19	-0.00469069		1805.21	-0.00908497		2395.2	-0.01369623		2985.2	-0.00507191		3575.19	-0.02271772
625.4	0.04883374		1215.39	-0.00442236		1805.41	-0.00876377		2395.4	-0.01324276		2985.4	-0.00514963		3575.39	-0.02366665
625.6	0.04878293		1215.59	-0.00519857		1805.61	-0.00881934		2395.6	-0.01408774		2985.6	-0.00518868		3575.59	-0.02383917
625.8	0.04864719		1215.79	-0.00537939		1805.81	-0.00945473		2395.8	-0.01367488		2985.8	-0.00576026		3575.79	-0.02434235
626	0.04808691		1215.99	-0.00541237		1806.01	-0.00988145		2396	-0.01482182		2986	-0.00616261		3575.99	-0.02434197
626.2	0.04811844		1216.19	-0.00656504		1806.21	-0.01047372		2396.2	-0.01486595		2986.2	-0.00688643		3576.19	-0.02422144
626.4	0.04999442		1216.39	-0.00663525		1806.41	-0.00985917		2396.4	-0.01497421		2986.4	-0.00757946		3576.39	-0.02411731
626.6	0.04918591		1216.59	-0.00661385		1806.61	-0.00966788		2396.6	-0.0147217		2986.6	-0.00691755		3576.59	-0.02410281
626.8	0.04962552		1216.79	-0.00657649		1806.81	-0.01010531		2396.8	-0.01527335		2986.8	-0.0071018		3576.79	-0.02382625
627	0.0492947		1216.99	-0.00677637		1807.01	-0.01045037		2397	-0.01496759		2987	-0.00634005		3576.99	-0.02375956
627.2	0.0501883		1217.19	-0.00755587		1807.21	-0.01039128		2397.2	-0.01449328		2987.2	-0.00611425		3577.19	-0.02352816
627.4	0.05090429		1217.39	-0.00853737		1807.41	-0.0105618		2397.4	-0.01410057		2987.4	-0.00623609		3577.39	-0.0224699
627.6	0.05098095		1217.59	-0.00847435		1807.61	-0.01107941		2397.6	-0.0137039		2987.6	-0.00590958		3577.59	-0.02197129
627.8	0.05101975		1217.79	-0.00887037		1807.81	-0.01062812		2397.8	-0.01363246		2987.8	-0.00482724		3577.79	-0.02116504
628	0.05174695		1217.99	-0.00891543		1808.01	-0.01084694		2398	-0.01342967		2988	-0.00494851		3577.99	-0.01956506
628.2	0.05241326		1218.19	-0.0096158		1808.21	-0.01084974		2398.2	-0.01362521		2988.2	-0.00524518		3578.19	-0.01967043
628.4	0.05198967		1218.39	-0.00901887		1808.41	-0.01019285		2398.4	-0.01415364		2988.4	-0.00466565		3578.39	-0.01952877
628.6	0.05162401		1218.59	-0.0086096		1808.61	-0.00918427		2398.6	-0.01384261		2988.6	-0.00440087		3578.59	-0.01930637
628.8	0.05141992		1218.79	-0.0086088		1808.81	-0.00946573		2398.8	-0.0140432		2988.8	-0.0047303		3578.79	-0.02032758
629	0.0509374		1218.99	-0.00840845		1809.01	-0.00884761		2399	-0.01463845		2989	-0.00487157		3578.99	-0.0209553
629.2	0.05083678		1219.19	-0.00794383		1809.21	-0.00929465		2399.2	-0.01388586		2989.2	-0.00515231		3579.19	-0.02130987
629.4	0.05037356		1219.39	-0.00768023		1809.41	-0.0093624		2399.4	-0.0139257		2989.4	-0.00485746		3579.39	-0.02163116
629.6	0.05005275		1219.59	-0.00732662		1809.61	-0.01021993		2399.6	-0.01502374		2989.6	-0.00522226		3579.59	-0.02143091
629.8	0.04939232		1219.79	-0.00734401		1809.81	-0.01038269		2399.8	-0.01503212		2989.8	-0.0056351		3579.79	-0.02178509
630	0.04980311		1219.99	-0.00765063		1810.01	-0.01035683		2400	-0.01634883		2990	-0.00578616		3579.99	-0.02187777
630.2	0.05012712		1220.19	-0.00691871		1810.21	-0.01046793		2400.2	-0.01612955		2990.2	-0.00547736		3580.19	-0.02191789
630.4	0.04986079		1220.39	-0.00594402		1810.41	-0.01059907		2400.4	-0.01606489		2990.4	-0.00532313		3580.39	-0.02235381
630.6	0.04925407		1220.59	-0.0050424		1810.61	-0.01107224		2400.6	-0.01549728		2990.6	-0.0054266		3580.59	-0.02212298
630.8	0.04994601		1220.79	-0.00472048		1810.81	-0.01107287		2400.8	-0.01466884		2990.8	-0.00603046		3580.79	-0.02232636
631	0.04996553		1220.99	-0.00423263		1811.01	-0.01095227		2401	-0.0140979		2991	-0.00541231		3580.99	-0.02276582
631.2	0.05052324		1221.19	-0.00369047		1811.21	-0.01121989		2401.2	-0.01466675		2991.2	-0.00594436		3581.19	-0.02309667
631.4	0.05094439		1221.39	-0.00395309		1811.41	-0.01199261		2401.4	-0.01391941		2991.4	-0.00596444		3581.39	-0.02270383
631.6	0.05094306		1221.59	-0.00265668		1811.61	-0.0114726		2401.6	-0.01385354		2991.6	-0.00664097		3581.59	-0.02235057
631.8	0.05056288		1221.79	-0.00315412		1811.81	-0.01126763		2401.8	-0.0132866		2991.8	-0.00633017		3581.79	-0.02179599
632	0.05064027		1221.99	-0.00308032		1812.01	-0.01130181		2402	-0.01365054		2992	-0.00691659		3581.99	-0.02099019
632.2	0.05120448		1222.19	-0.00297556		1812.21	-0.0105451		2402.2	-0.01319414		2992.2	-0.00744668		3582.19	-0.02129291
632.4	0.050626		1222.39	-0.00339162		1812.41	-0.01063217		2402.4	-0.01365705		2992.4	-0.00703563		3582.39	-0.02129274
632.6	0.05067682		1222.59	-0.00405235		1812.61	-0.01037411		2402.6	-0.01359911		2992.6	-0.00680384		3582.59	-0.02109869
632.8	0.05065255		1222.79	-0.00425246		1812.81	-0.01082362		2402.8	-0.01304982		2992.8	-0.00735301		3582.79	-0.02177292
633	0.05046641		1222.99	-0.00453358		1813.01	-0.01120126		2403	-0.01295748		2993	-0.00682353		3582.99	-0.02187352
633.2	0.05021131		1223.19	-0.00477431		1813.21	-0.01143088		2403.2	-0.01204622		2993.2	-0.0064147		3583.19	-0.02157983
633.4	0.04990977		1223.39	-0.00584066		1813.41	-0.0117781		2403.4	-0.01236615		2993.4	-0.00597054		3583.39	-0.02150172
633.6	0.04975863		1223.59	-0.00641687		1813.61	-0.01179605		2403.6	-0.01286586		2993.6	-0.00623373		3583.59	-0.02205433
633.8	0.0496076		1223.79	-0.00790614		1813.81	-0.01210088		2403.8	-0.01336675		2993.8	-0.00598534		3583.79	-0.022475
634	0.0495886		1223.99	-0.0082655		1814.01	-0.0123275		2404	-0.01435512		2994	-0.00595689		3583.99	-0.02245288
634.2	0.04891488		1224.19	-0.00779832		1814.21	-0.01294581		2404.2	-0.01375355		2994.2	-0.00491918		3584.19	-0.02245151
634.4	0.04919448		1224.39	-0.00821725		1814.41	-0.01292342		2404.4	-0.01335793		2994.4	-0.00489838		3584.39	-0.02242146
634.6	0.04937662		1224.59	-0.00803499		1814.61	-0.01309586		2404.6	-0.01242862		2994.6	-0.00487679		3584.59	-0.02183969
634.8	0.0504521		1224.79	-0.00770699		1814.81	-0.01306043		2404.8	-0.01209733		2994.8	-0.00445559		3584.79	-0.02214741
635	0.050457		1224.99	-0.00752122		1815.01	-0.01322156		2405	-0.01274364		2995	-0.00460408		3584.99	-0.02287743
635.2	0.05005705		1225.19	-0.00730981		1815.21	-0.01328511		2405.2	-0.01254158		2995.2	-0.0046909		3585.19	-0.02270601
635.4	0.05008584		1225.39	-0.00756205		1815.41	-0.01258616		2405.4	-0.01203939		2995.4	-0.00521373		3585.39	-0.02250981
635.6	0.0499551		1225.59	-0.0060736		1815.61	-0.01167257		2405.6	-0.0121418		2995.6	-0.0054315		3585.59	-0.02252756
635.8	0.04919905		1225.79	-0.0052747		1815.81	-0.01180971		2405.8	-0.0127399		2995.8	-0.00476806		3585.79	-0.02241848
636	0.04942775		1225.99	-0.00457148		1816.01	-0.01133722		2406	-0.01320696		2996	-0.00501111		3585.99	-0.02253816
636.2	0.04909118		1226.19	-0.00513308		1816.21	-0.01057727		2406.2	-0.01365138		2996.2	-0.00496176		3586.19	-0.02258642
636.4	0.04951249		1226.39	-0.00487203		1816.41	-0.01080814		2406.4	-0.01405252		2996.4	-0.00500098		3586.39	-0.02337575
636.6	0.04963341		1226.59	-0.00340031		1816.61	-0.01025579		2406.6	-0.01366116		2996.6	-0.00493813		3586.59	-0.02419568
636.8	0.04980822		1226.79	-0.00309145		1816.81	-0.0106278		2406.8	-0.01319392		2996.8	-0.00633442		3586.79	-0.0247234
637	0.04979686		1226.99	-0.00259164		1817.01	-0.01084327		2407	-0.01305118		2997	-0.00655418		3586.99	-0.02423849
637.2	0.04929132		1227.19	-0.00232983		1817.21	-0.01046715		2407.2	-0.01371658		2997.2	-0.00680094		3587.19	-0.02485061
637.4	0.04832847		1227.39	-0.00260453		1817.41	-0.01019488		2407.4	-0.01381545		2997.4	-0.00648073		3587.39	-0.02580453
637.6	0.04864054		1227.59	-0.00275587		1817.61	-0.00992647		2407.6	-0.01395358		2997.6	-0.00615049		3587.59	-0.02668988
637.8	0.04771733		1227.79	-0.00423588		1817.81	-0.0096289		2407.8	-0.01423028		2997.8	-0.00611046		3587.79	-0.02767809
638	0.04781955		1227.99	-0.0036462		1818.01	-0.00994676		2408	-0.01370819		2998	-0.00648605		3587.99	-0.02786097
638.2	0.04860148		1228.19	-0.00442541		1818.21	-0.00970681		2408.2	-0.01325851		2998.2	-0.00536797		3588.19	-0.02734895
638.4	0.0491056		1228.39	-0.00564751		1818.41	-0.00942934		2408.4	-0.01240285		2998.4	-0.00520064		3588.39	-0.02682855
638.6	0.04947905		1228.59	-0.00604011		1818.61	-0.00903847		2408.6	-0.0122072		2998.6	-0.00481329		3588.59	-0.02691579
638.8	0.04952552		1228.79	-0.00724945		1818.81	-0.00836237		2408.8	-0.01189079		2998.8	-0.00428023		3588.79	-0.02739297
639	0.0490755		1228.99	-0.00757961		1819.01	-0.00838272		2409	-0.0125066		2999	-0.00436306		3588.99	-0.02762714
639.2	0.04893832		1229.19	-0.00785248		1819.21	-0.00805391		2409.2	-0.01262255		2999.2	-0.00428341		3589.19	-0.0281358
639.4	0.04902933		1229.39	-0.00837716		1819.41	-0.00755944		2409.4	-0.01354236		2999.4	-0.004895		3589.39	-0.02818068
639.6	0.0490427		1229.59	-0.00749693		1819.61	-0.00792817		2409.6	-0.01427561		2999.6	-0.00458464		3589.59	-0.02807911
639.8	0.04826599		1229.79	-0.00730671		1819.81	-0.00793464		2409.8	-0.01491267		2999.8	-0.00447726		3589.79	-0.02792303
640	0.04793373		1229.99	-0.00750893		1820.01	-0.00776726		2410	-0.01475408		3000	-0.00443239		3589.99	-0.02844763
640.2	0.04748809		1230.19	-0.00795156		1820.21	-0.00786636		2410.2	-0.01551628		3000.2	-0.00540731		3590.19	-0.02816681
640.4	0.04818351		1230.39	-0.0074704		1820.41	-0.00817836		2410.4	-0.01543286		3000.4	-0.00635867		3590.39	-0.02824095
640.6	0.04740861		1230.59	-0.00659352		1820.61	-0.00848417		2410.6	-0.01566422		3000.6	-0.00670913		3590.59	-0.02747083
640.8	0.048195		1230.79	-0.00599607		1820.81	-0.00889623		2410.8	-0.01613612		3000.8	-0.00755816		3590.79	-0.02698096
641	0.04811623		1230.99	-0.00538336		1821.01	-0.01002848		2411	-0.01565659		3001	-0.00721929		3590.99	-0.02583895
641.2	0.04747484		1231.19	-0.00463573		1821.21	-0.01014986		2411.2	-0.01538369		3001.2	-0.0069793		3591.19	-0.02659991
641.4	0.04735579		1231.39	-0.00479851		1821.41	-0.01034399		2411.4	-0.0151376		3001.4	-0.00698704		3591.39	-0.0265202
641.6	0.04814016		1231.59	-0.00510624		1821.61	-0.01100901		2411.6	-0.01556611		3001.6	-0.0074509		3591.59	-0.02707349
641.8	0.04828156		1231.79	-0.00599523		1821.81	-0.01082057		2411.8	-0.01560836		3001.8	-0.0081676		3591.79	-0.02619789
642	0.0487907		1231.99	-0.00597891		1822.01	-0.01134041		2412	-0.01532		3002	-0.00831066		3591.99	-0.02528387
642.2	0.04958879		1232.19	-0.00733981		1822.21	-0.01065829		2412.2	-0.01569426		3002.2	-0.0075927		3592.19	-0.02469655
642.4	0.04950572		1232.39	-0.007946		1822.41	-0.01101523		2412.4	-0.01499578		3002.4	-0.00726308		3592.39	-0.02442922
642.6	0.05006332		1232.59	-0.00843278		1822.61	-0.01050903		2412.6	-0.01538164		3002.6	-0.00662799		3592.59	-0.02469246
642.8	0.04981747		1232.79	-0.00901378		1822.81	-0.01103732		2412.8	-0.01563634		3002.8	-0.00666188		3592.79	-0.02512786
643	0.04969433		1232.99	-0.00892179		1823.01	-0.01173389		2413	-0.01633538		3003	-0.00615732		3592.99	-0.02533312
643.2	0.05000847		1233.19	-0.00919594		1823.21	-0.01135902		2413.2	-0.01594411		3003.2	-0.00604951		3593.19	-0.02552001
643.4	0.05083118		1233.39	-0.00892839		1823.41	-0.01151244		2413.4	-0.01616132		3003.4	-0.00606472		3593.39	-0.02576257
643.6	0.05113318		1233.59	-0.00828426		1823.61	-0.0119403		2413.6	-0.01528643		3003.6	-0.00603105		3593.59	-0.02554962
643.8	0.05019765		1233.79	-0.00798982		1823.81	-0.0117044		2413.8	-0.01423278		3003.8	-0.00697413		3593.79	-0.02617937
644	0.0502974		1233.99	-0.00770565		1824.01	-0.01153824		2414	-0.01371434		3004	-0.00691431		3593.99	-0.02567263
644.2	0.05055229		1234.19	-0.00857908		1824.21	-0.0111616		2414.2	-0.01369387		3004.2	-0.00767421		3594.19	-0.02468391
644.4	0.05046329		1234.39	-0.00889637		1824.41	-0.01068551		2414.4	-0.01364964		3004.4	-0.00810436		3594.39	-0.02446438
644.6	0.05033131		1234.59	-0.00836599		1824.61	-0.01071518		2414.6	-0.0132576		3004.6	-0.00760952		3594.59	-0.02383718
644.8	0.05078003		1234.79	-0.00735181		1824.81	-0.01082366		2414.8	-0.01242959		3004.8	-0.00787184		3594.79	-0.02368899
645	0.05022341		1234.99	-0.00668681		1825.01	-0.01222481		2415	-0.01099834		3005	-0.00823442		3594.99	-0.02306535
645.2	0.04959497		1235.19	-0.00660476		1825.21	-0.01241249		2415.2	-0.01103498		3005.2	-0.00808298		3595.19	-0.0229154
645.4	0.04980625		1235.39	-0.00622906		1825.41	-0.01313651		2415.4	-0.0118687		3005.4	-0.00823075		3595.39	-0.02275529
645.6	0.04965877		1235.59	-0.00556592		1825.61	-0.01335204		2415.6	-0.01215539		3005.6	-0.00845571		3595.59	-0.02307529
645.8	0.04962981		1235.79	-0.00547405		1825.81	-0.01319812		2415.8	-0.01247576		3005.8	-0.00831158		3595.79	-0.02316476
646	0.0485465		1235.99	-0.00565451		1826.01	-0.01347352		2416	-0.01237274		3006	-0.00722607		3595.99	-0.02322266
646.2	0.04938495		1236.19	-0.00651281		1826.21	-0.01359199		2416.2	-0.01153231		3006.2	-0.00638447		3596.19	-0.02303633
646.4	0.04910521		1236.39	-0.00723289		1826.41	-0.01455404		2416.4	-0.01144651		3006.4	-0.0052094		3596.39	-0.02312928
646.6	0.04894163		1236.59	-0.00740704		1826.61	-0.01499605		2416.6	-0.01166712		3006.6	-0.00472073		3596.59	-0.02341142
646.8	0.04854795		1236.79	-0.00766226		1826.81	-0.01481565		2416.8	-0.01191989		3006.8	-0.00500018		3596.79	-0.02388309
647	0.04834992		1236.99	-0.0077751		1827.01	-0.01500845		2417	-0.01149217		3007	-0.00436595		3596.99	-0.023978
647.2	0.04804458		1237.19	-0.00778115		1827.21	-0.01430043		2417.2	-0.01129123		3007.2	-0.0051766		3597.19	-0.02422331
647.4	0.04797518		1237.39	-0.00760391		1827.41	-0.01471672		2417.4	-0.01133225		3007.4	-0.00592783		3597.39	-0.02502843
647.6	0.04754172		1237.59	-0.00808133		1827.61	-0.01432328		2417.6	-0.01167475		3007.6	-0.00695701		3597.59	-0.02484646
647.8	0.04721359		1237.79	-0.00852578		1827.81	-0.01367401		2417.8	-0.01198694		3007.8	-0.00808337		3597.79	-0.02496471
648	0.04775634		1237.99	-0.00946925		1828.01	-0.01295006		2418	-0.01232668		3008	-0.00802197		3597.99	-0.02410275
648.2	0.0478648		1238.19	-0.01050123		1828.21	-0.01233356		2418.2	-0.01302879		3008.2	-0.00837552		3598.19	-0.02413005
648.4	0.0478793		1238.39	-0.01054279		1828.41	-0.0117689		2418.4	-0.01351911		3008.4	-0.00843516		3598.39	-0.02433753
648.6	0.04807483		1238.59	-0.00992433		1828.61	-0.01150744		2418.6	-0.01342099		3008.6	-0.00767631		3598.59	-0.02422678
648.8	0.04817858		1238.79	-0.00883457		1828.81	-0.0113548		2418.8	-0.01358806		3008.8	-0.00757547		3598.79	-0.02419345
649	0.04848958		1238.99	-0.00832723		1829.01	-0.0116524		2419	-0.01440953		3009	-0.00659814		3598.99	-0.02458639
649.2	0.04903839		1239.19	-0.0078958		1829.21	-0.01113803		2419.2	-0.01547772		3009.2	-0.00544234		3599.19	-0.02484595
649.4	0.04978465		1239.39	-0.00622244		1829.41	-0.01079222		2419.4	-0.01634942		3009.4	-0.00468914		3599.39	-0.02580288
649.6	0.05027437		1239.59	-0.00508433		1829.61	-0.0100052		2419.6	-0.01686574		3009.6	-0.00355649		3599.59	-0.02671427
649.8	0.05080652		1239.79	-0.00459817		1829.81	-0.00971434		2419.8	-0.01717525		3009.8	-0.0020274		3599.79	-0.02704054
