# Supplementary material for: Functional development of a V3/glycan-specific broadly neutralizing antibody isolated from a case of HIV superinfection
Source: eLife journal article supplement (doi:10.7554/elife.68110), 2021-07-15
Supplement: fig2-data2 [file F7.xls]

Vers 3.43 Data Simulation
Conc1	6.25E-08	6.25E-08	6.25E-08	6.25E-08	6.25E-08	6.25E-08	6.25E-08	6.25E-08
Start1	200	729.99	1259.99	1789.98	2319.98	2849.98	3379.98	3909.98
Stop1	559.79	1089.79	1619.79	2149.78	2679.78	3209.78	3739.78	4269.78
Time1	Data1	Sim1	Time2	Data2	Sim2	Time3	Data3	Sim3	Time4	Data4	Sim4	Time5	Data5	Sim5	Time6	Data6	Sim6	Time7	Data7	Sim7	Time8	Data8	Sim8
200	-0.00543571		729.99	0.00311057		1259.99	0.00322414		1789.98	0.0033093		2319.98	0.00500869		2849.98	0.00265232		3379.98	0.010526		3909.98	0.00336249
200.2	-0.00462677		730.19	0.00241715		1260.19	0.00362229		1790.18	0.00376352		2320.18	0.00488789		2850.18	0.00251081		3380.18	0.0104097		3910.18	0.00264276
200.4	-0.00455799		730.39	0.00154154		1260.39	0.00374869		1790.38	0.00357767		2320.38	0.00532012		2850.38	0.00225787		3380.38	0.00923541		3910.38	0.00148102
200.6	-0.00449702		730.59	0.00168636		1260.59	0.00396019		1790.58	0.00373139		2320.58	0.00573797		2850.58	0.00199221		3380.58	0.00926532		3910.58	0.00022881
200.8	-0.00400351		730.79	0.00180816		1260.79	0.00423657		1790.78	0.00398172		2320.78	0.00539692		2850.78	0.00189894		3380.78	0.00839571		3910.78	-0.0010344
201	-0.00337148		730.99	0.00249716		1260.99	0.00511874		1790.98	0.00373032		2320.98	0.0059764		2850.98	0.00118684		3380.98	0.0081382		3910.98	-0.00193992
201.2	-0.00310807		731.19	0.00281461		1261.19	0.00525143		1791.18	0.00362489		2321.18	0.00545478		2851.18	0.00040606		3381.18	0.00775701		3911.18	-0.0027179
201.4	-0.00251685		731.39	0.00310442		1261.39	0.00579009		1791.38	0.00290103		2321.38	0.00534275		2851.38	0.00011458		3381.38	0.00740697		3911.38	-0.00265607
201.6	-0.00154734		731.59	0.00381281		1261.59	0.00625899		1791.58	0.00231054		2321.58	0.00563586		2851.58	-0.00006887		3381.58	0.005745		3911.58	-0.00283324
201.8	-0.00098944		731.79	0.00438922		1261.79	0.00595063		1791.78	0.00216515		2321.78	0.00616869		2851.78	-0.00017426		3381.78	0.00462438		3911.78	-0.00269326
202	-0.00041679		731.99	0.00477592		1261.99	0.00644915		1791.98	0.00230876		2321.98	0.00663495		2851.98	-0.00026402		3381.98	0.00361091		3911.98	-0.00179849
202.2	-0.00002132		732.19	0.00483905		1262.19	0.00623093		1792.18	0.00208674		2322.18	0.00643316		2852.18	-0.00013812		3382.18	0.0032939		3912.18	-0.00122657
202.4	-0.00006192		732.39	0.00463559		1262.39	0.00580237		1792.38	0.00180397		2322.38	0.00578863		2852.38	-0.00083002		3382.38	0.00300886		3912.38	-0.00079356
202.6	0.00064478		732.59	0.0035619		1262.59	0.00622108		1792.58	0.00102972		2322.58	0.00639911		2852.58	-0.00058947		3382.58	0.00174286		3912.58	-0.00032469
202.8	0.00049536		732.79	0.00407825		1262.79	0.00647594		1792.78	0.00090958		2322.78	0.00596695		2852.78	-0.00093826		3382.78	0.00114397		3912.78	-0.00062345
203	0.00079089		732.99	0.00336412		1262.99	0.00718354		1792.98	0.0008604		2322.98	0.00635605		2852.98	-0.00065293		3382.98	0.00120678		3912.98	0.00005617
203.2	0.00037303		733.19	0.0033487		1263.19	0.00731089		1793.18	0.00047599		2323.18	0.00583239		2853.18	-0.0006207		3383.18	0.00078947		3913.18	-0.00011965
203.4	-0.00002168		733.39	0.00259119		1263.39	0.0086368		1793.38	0.00052211		2323.38	0.00471785		2853.38	-0.00094089		3383.38	0.00111609		3913.38	0.00058381
203.6	-0.00003896		733.59	0.0025727		1263.59	0.00894369		1793.58	0.00026511		2323.58	0.00498411		2853.58	-0.00073882		3383.58	0.00197061		3913.58	0.00022559
203.8	-0.0002417		733.79	0.00265175		1263.79	0.00928452		1793.78	-0.00008564		2323.78	0.00427146		2853.78	-0.00061766		3383.78	0.00359202		3913.78	0.00020153
204	-0.00074662		733.99	0.00233286		1263.99	0.00825091		1793.98	0.00064377		2323.98	0.00418338		2853.98	-0.00040503		3383.98	0.00439314		3913.98	-0.00003011
204.2	-0.0010253		734.19	0.00255487		1264.19	0.00730076		1794.18	0.00152382		2324.18	0.00373771		2854.18	-0.00042423		3384.18	0.00531548		3914.18	-0.00054401
204.4	-0.00147041		734.39	0.00264388		1264.39	0.00650111		1794.38	0.00162786		2324.38	0.00413242		2854.38	-0.00094893		3384.38	0.00585645		3914.38	-0.0012622
204.6	-0.00187866		734.59	0.003732		1264.59	0.00640934		1794.58	0.00152879		2324.58	0.00376616		2854.58	-0.00030568		3384.58	0.00809691		3914.58	-0.00234975
204.8	-0.00128235		734.79	0.00467159		1264.79	0.00597565		1794.78	0.00159959		2324.78	0.00331032		2854.78	-0.00003971		3384.78	0.00858337		3914.78	-0.00329334
205	-0.00159356		734.99	0.00508369		1264.99	0.00550345		1794.98	0.00131325		2324.98	0.00387706		2854.98	-0.00052112		3384.98	0.00971063		3914.98	-0.0042446
205.2	-0.00153587		735.19	0.00540232		1265.19	0.0045711		1795.18	0.00127071		2325.18	0.00355851		2855.18	-0.00051281		3385.18	0.00858591		3915.18	-0.00436599
205.4	-0.00134904		735.39	0.00594453		1265.39	0.00387964		1795.38	0.0010617		2325.38	0.00454265		2855.38	-0.00071501		3385.38	0.00736864		3915.38	-0.00434319
205.6	-0.0008904		735.59	0.00669011		1265.59	0.00308262		1795.58	0.00046482		2325.58	0.00550553		2855.58	-0.00048397		3385.58	0.00612824		3915.58	-0.00503484
205.8	-0.00157185		735.79	0.0066201		1265.79	0.00240874		1795.78	0.00022861		2325.78	0.00587152		2855.78	-0.00109176		3385.78	0.00584143		3915.78	-0.00544506
206	-0.00085563		735.99	0.00631831		1265.99	0.0030878		1795.98	-0.00015877		2325.98	0.00600058		2855.98	-0.00113449		3385.98	0.00587943		3915.98	-0.0052588
206.2	-0.00067154		736.19	0.00544027		1266.19	0.00278833		1796.18	-0.00094924		2326.18	0.00592774		2856.18	-0.00155088		3386.18	0.00566083		3916.18	-0.00512574
206.4	-0.00081324		736.39	0.00507727		1266.39	0.00320524		1796.38	-0.00076678		2326.38	0.00550409		2856.38	-0.00176081		3386.38	0.00525459		3916.38	-0.00538558
206.6	-0.00106508		736.59	0.00361547		1266.59	0.00397892		1796.58	-0.0012845		2326.58	0.00650788		2856.58	-0.00149891		3386.58	0.0049058		3916.58	-0.00568252
206.8	-0.00187071		736.79	0.00412066		1266.79	0.00416539		1796.78	-0.00126666		2326.78	0.00636567		2856.78	-0.0010848		3386.78	0.00465801		3916.78	-0.00579939
207	-0.00178395		736.99	0.00367252		1266.99	0.0055762		1796.98	-0.00081688		2326.98	0.00558905		2856.98	-0.00092723		3386.98	0.00509806		3916.98	-0.00583469
207.2	-0.00219209		737.19	0.00301434		1267.19	0.00649221		1797.18	-0.00169943		2327.18	0.00483303		2857.18	-0.00050752		3387.18	0.0047352		3917.18	-0.00610957
207.4	-0.0023391		737.39	0.00186196		1267.39	0.00760107		1797.38	-0.00176053		2327.38	0.00485094		2857.38	-0.00035281		3387.38	0.00489675		3917.38	-0.00519759
207.6	-0.00222841		737.59	0.00081732		1267.59	0.00801732		1797.58	-0.00293961		2327.58	0.00482032		2857.58	-0.00026772		3387.58	0.00482057		3917.58	-0.00560737
207.8	-0.00250575		737.79	0.00086345		1267.79	0.00804787		1797.78	-0.00297481		2327.78	0.00376618		2857.78	-0.00005084		3387.78	0.00465388		3917.78	-0.00585745
208	-0.00225845		737.99	0.0012946		1267.99	0.00759122		1797.98	-0.00241652		2327.98	0.00346169		2857.98	0.00070994		3387.98	0.00476834		3917.98	-0.00610848
208.2	-0.0019117		738.19	0.00101505		1268.19	0.00675534		1798.18	-0.00232263		2328.18	0.0037794		2858.18	0.00118494		3388.18	0.00406886		3918.18	-0.00613887
208.4	-0.00178486		738.39	0.00078029		1268.39	0.00696243		1798.38	-0.00203875		2328.38	0.00384853		2858.38	0.00170755		3388.38	0.00429851		3918.38	-0.00580389
208.6	-0.00218445		738.59	0.00102855		1268.59	0.00664142		1798.58	-0.00164065		2328.58	0.003625		2858.58	0.00255479		3388.58	0.00387275		3918.58	-0.00600284
208.8	-0.00181016		738.79	0.00144366		1268.79	0.00533841		1798.78	-0.0013329		2328.78	0.00351146		2858.78	0.00197631		3388.78	0.00334592		3918.78	-0.00650521
209	-0.00132158		738.99	0.00110657		1268.99	0.00467361		1798.98	-0.00095685		2328.98	0.0038313		2858.98	0.00209852		3388.98	0.00278058		3918.98	-0.00686907
209.2	-0.00053703		739.19	0.00197941		1269.19	0.0040211		1799.18	-0.00148059		2329.18	0.00459263		2859.18	0.00179669		3389.18	0.00153894		3919.18	-0.00671269
209.4	-0.00053693		739.39	0.0027331		1269.39	0.00362166		1799.38	-0.00104405		2329.38	0.00521989		2859.38	0.00078861		3389.38	0.00158861		3919.38	-0.00624824
209.6	-0.00005941		739.59	0.00315899		1269.59	0.00303193		1799.58	-0.00137298		2329.58	0.00564777		2859.58	0.00076734		3389.58	0.00142308		3919.58	-0.0056498
209.8	0.00008414		739.79	0.00366823		1269.79	0.00267397		1799.78	-0.00144028		2329.78	0.00537872		2859.78	0.00002117		3389.78	0.00138287		3919.78	-0.00541791
210	0.00106225		739.99	0.00404668		1269.99	0.00266664		1799.98	-0.00105679		2329.98	0.00594435		2859.98	-0.00015256		3389.98	0.0013636		3919.98	-0.00483524
210.2	0.0004438		740.19	0.00317905		1270.19	0.00227855		1800.18	-0.00052046		2330.18	0.00557097		2860.18	-0.0005556		3390.18	0.00164932		3920.18	-0.00390293
210.4	0.00049821		740.39	0.00318613		1270.39	0.00237368		1800.38	0.00085942		2330.38	0.00510589		2860.38	-0.00124608		3390.38	0.00199515		3920.38	-0.00451325
210.6	0.00007838		740.59	0.00335776		1270.59	0.00263739		1800.58	0.00110447		2330.58	0.00458039		2860.58	-0.00117523		3390.58	0.00243639		3920.58	-0.0045327
210.8	0.00002196		740.79	0.00328961		1270.79	0.00268969		1800.78	0.00100209		2330.78	0.00400248		2860.78	-0.00153739		3390.78	0.00335464		3920.78	-0.00470512
211	-0.00058176		740.99	0.00331041		1270.99	0.00322086		1800.98	0.00129427		2330.98	0.00308811		2860.98	-0.00236918		3390.98	0.00402707		3920.98	-0.00512261
211.2	-0.00040632		741.19	0.00345266		1271.19	0.00278509		1801.18	0.00028106		2331.18	0.00316536		2861.18	-0.00249201		3391.18	0.00440446		3921.18	-0.00494476
211.4	-0.00072045		741.39	0.00319711		1271.39	0.0029894		1801.38	0.00049958		2331.38	0.00286058		2861.38	-0.00218384		3391.38	0.00488771		3921.38	-0.00545881
211.6	-0.00120457		741.59	0.00325826		1271.59	0.00319402		1801.58	0.0004225		2331.58	0.00301951		2861.58	-0.00237392		3391.58	0.00504118		3921.58	-0.0073089
211.8	-0.00204389		741.79	0.00420289		1271.79	0.00398196		1801.78	0.00117092		2331.78	0.00328847		2861.78	-0.00068267		3391.78	0.00494272		3921.78	-0.00733028
212	-0.00215796		741.99	0.00424235		1271.99	0.00376111		1801.98	0.0018376		2331.98	0.00359382		2861.98	0.00036241		3391.98	0.00550988		3921.98	-0.00805123
212.2	-0.00243052		742.19	0.00371477		1272.19	0.00413238		1802.18	0.00187481		2332.18	0.00391541		2862.18	0.0007409		3392.18	0.00551757		3922.18	-0.00784881
212.4	-0.00334437		742.39	0.00407859		1272.39	0.00471202		1802.38	0.00214831		2332.38	0.00436944		2862.38	0.00079567		3392.38	0.00578488		3922.38	-0.00768761
212.6	-0.00302167		742.59	0.00314291		1272.59	0.00490959		1802.58	0.00198361		2332.58	0.00407467		2862.58	0.00119568		3392.58	0.00595409		3922.58	-0.00816202
212.8	-0.00228301		742.79	0.00263061		1272.79	0.00497087		1802.78	0.00133882		2332.78	0.00425503		2862.78	0.0017444		3392.78	0.00652295		3922.78	-0.00828638
213	-0.00124047		742.99	0.00259823		1272.99	0.00534639		1802.98	0.00155434		2332.98	0.0046671		2862.98	0.00264744		3392.98	0.00584648		3922.98	-0.00715088
213.2	-0.00129993		743.19	0.00326746		1273.19	0.00479046		1803.18	0.00118418		2333.18	0.00500735		2863.18	0.00215956		3393.18	0.00552339		3923.18	-0.00631033
213.4	-0.00171651		743.39	0.00349384		1273.39	0.00527758		1803.38	0.00181025		2333.38	0.00505222		2863.38	0.00207887		3393.38	0.00422112		3923.38	-0.00563332
213.6	-0.00088823		743.59	0.00327185		1273.59	0.00458844		1803.58	0.00140368		2333.58	0.00558767		2863.58	0.00245525		3393.58	0.00329124		3923.58	-0.00517114
213.8	-0.00052134		743.79	0.00312618		1273.79	0.00516158		1803.78	0.00199349		2333.78	0.00499491		2863.78	0.00218977		3393.78	0.00302668		3923.78	-0.00475199
214	-0.00022456		743.99	0.00227843		1273.99	0.00524483		1803.98	0.00184069		2333.98	0.00473788		2863.98	0.00114898		3393.98	0.0016035		3923.98	-0.00384416
214.2	0.00044668		744.19	0.00112468		1274.19	0.00556207		1804.18	0.00212347		2334.18	0.00369731		2864.18	0.00111885		3394.18	0.00098314		3924.18	-0.00287636
214.4	0.00121365		744.39	0.00152858		1274.39	0.00587565		1804.38	0.00223971		2334.38	0.00327896		2864.38	0.00004191		3394.38	0.00072992		3924.38	-0.00285708
214.6	0.00030054		744.59	0.00142436		1274.59	0.00653131		1804.58	0.00135748		2334.58	0.00227212		2864.58	-0.00028225		3394.58	0.00078408		3924.58	-0.0024239
214.8	-0.00001233		744.79	0.00153452		1274.79	0.00645865		1804.78	0.00102602		2334.78	0.00201738		2864.78	-0.00134009		3394.78	0.00099853		3924.78	-0.00288228
215	-0.00044369		744.99	0.00200591		1274.99	0.00591175		1804.98	0.00118432		2334.98	0.00065026		2864.98	-0.00134193		3394.98	0.00080546		3924.98	-0.00302507
215.2	-0.00050517		745.19	0.00263283		1275.19	0.00587845		1805.18	0.00071441		2335.18	0.00073928		2865.18	-0.00172805		3395.18	0.00056551		3925.18	-0.00378903
215.4	-0.00131487		745.39	0.0029164		1275.39	0.00570155		1805.38	0.00070763		2335.38	0.00147653		2865.38	-0.00136943		3395.38	0.00057444		3925.38	-0.00570817
215.6	-0.00218005		745.59	0.00339839		1275.59	0.00559571		1805.58	0.0000122		2335.58	0.00207731		2865.58	-0.00038718		3395.58	-0.00035635		3925.58	-0.00647853
215.8	-0.00273141		745.79	0.00358866		1275.79	0.00598438		1805.78	-0.00023661		2335.78	0.00218493		2865.78	-0.00011056		3395.78	-0.00081619		3925.78	-0.00681947
216	-0.00150559		745.99	0.00338004		1275.99	0.00517307		1805.98	-0.00025697		2335.98	0.0015689		2865.98	-0.00004376		3395.98	0.00020157		3925.98	-0.00787905
216.2	-0.00110058		746.19	0.0027999		1276.19	0.00481473		1806.18	-0.0006901		2336.18	0.00150974		2866.18	0.00081594		3396.18	0.00001701		3926.18	-0.00803033
216.4	-0.00063905		746.39	0.00233679		1276.39	0.0042916		1806.38	-0.00052569		2336.38	0.00185952		2866.38	0.00113846		3396.38	-0.00025518		3926.38	-0.00844082
216.6	-0.00035596		746.59	0.0016748		1276.59	0.00346117		1806.58	-0.00057948		2336.58	0.00129001		2866.58	0.00142583		3396.58	0.00062833		3926.58	-0.00949191
216.8	0.00004953		746.79	0.00191344		1276.79	0.00280857		1806.78	-0.00062562		2336.78	0.00150791		2866.78	0.00194428		3396.78	0.00102825		3926.78	-0.00930763
217	0.00008341		746.99	0.00240743		1276.99	0.00210853		1806.98	-0.00124916		2336.98	0.00168648		2866.98	0.00191977		3396.98	0.00054878		3926.98	-0.00883539
217.2	-0.00028258		747.19	0.0024916		1277.19	0.00184774		1807.18	-0.00158159		2337.18	0.00241449		2867.18	0.00186789		3397.18	0.00032951		3927.18	-0.00859551
217.4	-0.00006382		747.39	0.00193342		1277.39	0.00272535		1807.38	-0.00143832		2337.38	0.00399539		2867.38	0.00187322		3397.38	-0.00041013		3927.38	-0.00875173
217.6	0.00084921		747.59	0.00137643		1277.59	0.00275139		1807.58	-0.0008693		2337.58	0.00490352		2867.58	0.00142884		3397.58	-0.00083138		3927.58	-0.00778982
217.8	0.00009953		747.79	0.00113707		1277.79	0.00369627		1807.78	-0.00040448		2337.78	0.00466849		2867.78	0.00115765		3397.78	-0.00162795		3927.78	-0.00780716
218	-0.00007007		747.99	0.00092724		1277.99	0.00321316		1807.98	-0.00094009		2337.98	0.00533352		2867.98	0.0008215		3397.98	-0.0017162		3927.98	-0.00725244
218.2	-0.00016132		748.19	0.00035005		1278.19	0.00355926		1808.18	-0.00068397		2338.18	0.00515784		2868.18	0.00172795		3398.18	-0.00147056		3928.18	-0.00705601
218.4	-0.00081058		748.39	0.00018504		1278.39	0.00361409		1808.38	-0.00066864		2338.38	0.00520955		2868.38	0.00124678		3398.38	-0.00116862		3928.38	-0.00639573
218.6	-0.0024694		748.59	-0.00097829		1278.59	0.00504063		1808.58	0.0004867		2338.58	0.00460282		2868.58	0.00118801		3398.58	-0.00146231		3928.58	-0.00594327
218.8	-0.00243593		748.79	0.00013053		1278.79	0.00526652		1808.78	0.00127897		2338.78	0.00474395		2868.78	0.00176931		3398.78	-0.00128362		3928.78	-0.0064473
219	-0.00273074		748.99	0.00020295		1278.99	0.00522428		1808.98	0.0012002		2338.98	0.00416672		2868.98	0.00222754		3398.98	-0.00095229		3928.98	-0.00611667
219.2	-0.00312578		749.19	0.00064901		1279.19	0.00589075		1809.18	0.00119119		2339.18	0.00425759		2869.18	0.00224497		3399.18	-0.00052938		3929.18	-0.00701363
219.4	-0.00280924		749.39	0.00061192		1279.39	0.00553207		1809.38	0.00121408		2339.38	0.0047712		2869.38	0.00286105		3399.38	0.00032953		3929.38	-0.00678865
219.6	-0.00309909		749.59	0.00102815		1279.59	0.0057351		1809.58	0.00097947		2339.58	0.00365198		2869.58	0.00303481		3399.58	-0.00054007		3929.58	-0.00687626
219.8	-0.00165545		749.79	0.00150236		1279.79	0.00570607		1809.78	0.00166273		2339.78	0.00272793		2869.78	0.00254849		3399.78	-0.00011938		3929.78	-0.00697248
220	-0.00056923		749.99	0.00174126		1279.99	0.00573491		1809.98	0.00117852		2339.98	0.00239381		2869.98	0.00268797		3399.98	0.00089307		3929.98	-0.00738322
220.2	-0.00063504		750.19	0.00235259		1280.19	0.00507218		1810.18	0.00107787		2340.18	0.00169831		2870.18	0.00282691		3400.18	0.00014424		3930.18	-0.00882347
220.4	-0.0009449		750.39	0.00237575		1280.39	0.00476589		1810.38	0.00036743		2340.38	0.00180631		2870.38	0.00198588		3400.38	0.00045178		3930.38	-0.00943168
220.6	-0.00071602		750.59	0.00357779		1280.59	0.00386111		1810.58	-0.00024882		2340.58	0.00163763		2870.58	0.0016177		3400.58	0.00127203		3930.58	-0.01054522
220.8	-0.0002466		750.79	0.00367703		1280.79	0.00408206		1810.78	-0.00141521		2340.78	0.00196988		2870.78	0.00158226		3400.78	0.00199948		3930.78	-0.0103859
221	-0.00020468		750.99	0.00375786		1280.99	0.00390185		1810.98	-0.00214118		2340.98	0.00200003		2870.98	0.00069092		3400.98	0.00121787		3930.98	-0.01049368
221.2	-0.0004498		751.19	0.00368075		1281.19	0.00432654		1811.18	-0.00215631		2341.18	0.00207704		2871.18	0.00006982		3401.18	0.00045436		3931.18	-0.01059507
221.4	0.00005779		751.39	0.00331051		1281.39	0.00445		1811.38	-0.00205607		2341.38	0.00262338		2871.38	-0.00059075		3401.38	0.00029384		3931.38	-0.01054799
221.6	0.00047672		751.59	0.00277648		1281.59	0.00385542		1811.58	-0.00214644		2341.58	0.00236681		2871.58	-0.00012328		3401.58	0.00027534		3931.58	-0.01014328
221.8	-0.00023339		751.79	0.00264408		1281.79	0.00298673		1811.78	-0.00186317		2341.78	0.0025819		2871.78	-0.00010709		3401.78	0.00052739		3931.78	-0.01013309
222	0.00002513		751.99	0.00198484		1281.99	0.00231057		1811.98	-0.00193855		2341.98	0.00241288		2871.98	0.00004311		3401.98	0.00154965		3931.98	-0.00959793
222.2	-0.00021356		752.19	0.00106546		1282.19	0.00193706		1812.18	-0.00189004		2342.18	0.00237587		2872.18	0.00048059		3402.18	0.00108191		3932.18	-0.00945067
222.4	-0.00011086		752.39	0.00083644		1282.39	0.00205115		1812.38	-0.00115127		2342.38	0.00251193		2872.38	0.00071962		3402.38	0.00057967		3932.38	-0.00931073
222.6	-0.00052339		752.59	0.00013866		1282.59	0.00195578		1812.58	0.00013977		2342.58	0.00266256		2872.58	0.00083203		3402.58	0.00046937		3932.58	-0.00982945
222.8	0.0002738		752.79	0.00104598		1282.79	0.00125541		1812.78	-0.00040328		2342.78	0.00323901		2872.78	0.00146297		3402.78	0.00089918		3932.78	-0.01007864
223	0.00061947		752.99	0.00094894		1282.99	0.00065642		1812.98	-0.00178892		2342.98	0.0026942		2872.98	0.00207637		3402.98	0.00144476		3932.98	-0.01038445
223.2	0.00069734		753.19	0.0002139		1283.19	0.00064119		1813.18	-0.00102245		2343.18	0.00203237		2873.18	0.00246553		3403.18	0.00214597		3933.18	-0.01098846
223.4	0.00030399		753.39	-0.00026131		1283.39	0.00026778		1813.38	-0.00098011		2343.38	0.00146021		2873.38	0.00326794		3403.38	0.00237066		3933.38	-0.01101528
223.6	0.00004403		753.59	-0.00012042		1283.59	0.00128571		1813.58	-0.00058441		2343.58	0.00094572		2873.58	0.00362594		3403.58	0.00228802		3933.58	-0.01130293
223.8	0.00026512		753.79	0.00010872		1283.79	0.00100569		1813.78	-0.00026052		2343.78	0.00050009		2873.78	0.00378429		3403.78	0.00299664		3933.78	-0.0118159
224	-0.00061299		753.99	0.00040628		1283.99	0.00163552		1813.98	-0.00103791		2343.98	0.00118514		2873.98	0.0036879		3403.98	0.00269982		3933.98	-0.01306832
224.2	-0.00139534		754.19	0.00056735		1284.19	0.00112411		1814.18	-0.00134752		2344.18	0.00106787		2874.18	0.00396609		3404.18	0.00209773		3934.18	-0.01412372
224.4	-0.00145313		754.39	0.00078069		1284.39	0.00123133		1814.38	-0.00213501		2344.38	0.00174203		2874.38	0.00353514		3404.38	0.00197306		3934.38	-0.01408395
224.6	-0.00159606		754.59	0.00182567		1284.59	0.00172882		1814.58	-0.00167263		2344.58	0.00162912		2874.58	0.00346404		3404.58	0.00213478		3934.58	-0.01557822
224.8	-0.00173769		754.79	0.0015143		1284.79	0.00233979		1814.78	-0.00112495		2344.78	0.00193325		2874.78	0.00316137		3404.78	0.00260859		3934.78	-0.01457146
225	-0.00135863		754.99	0.00168695		1284.99	0.00285845		1814.98	-0.0007698		2344.98	0.0015531		2874.98	0.00233113		3404.98	0.00197193		3934.98	-0.01482826
225.2	-0.00138896		755.19	0.00184299		1285.19	0.00385285		1815.18	-0.00001829		2345.18	0.0017043		2875.18	0.00255573		3405.18	0.00137192		3935.18	-0.01376086
225.4	-0.00153569		755.39	0.00220204		1285.39	0.0040525		1815.38	0.00173845		2345.38	0.00212582		2875.38	0.00266199		3405.38	0.00085671		3935.38	-0.01250143
225.6	-0.00143065		755.59	0.0020769		1285.59	0.00391312		1815.58	0.00138782		2345.58	0.00270115		2875.58	0.00247305		3405.58	0.00048934		3935.58	-0.0120194
225.8	-0.00232494		755.79	0.00245479		1285.79	0.00360248		1815.78	0.00206488		2345.78	0.0023405		2875.78	0.00185232		3405.78	0.00026179		3935.78	-0.011615
226	-0.00218433		755.99	0.0023423		1285.99	0.00399043		1815.98	0.00219285		2345.98	0.00139798		2875.98	0.0029517		3405.98	-0.00015189		3935.98	-0.01119586
226.2	-0.00202155		756.19	0.00251244		1286.19	0.00392326		1816.18	0.00261685		2346.18	0.00174292		2876.18	0.00339361		3406.18	-0.00154485		3936.18	-0.01032167
226.4	-0.00099871		756.39	0.00232212		1286.39	0.00430959		1816.38	0.00296475		2346.38	0.00065877		2876.38	0.00303584		3406.38	-0.00276542		3936.38	-0.01059262
226.6	-0.00074549		756.59	0.00281008		1286.59	0.00344179		1816.58	0.00296426		2346.58	0.0008947		2876.58	0.00269438		3406.58	-0.00325879		3936.58	-0.00997987
226.8	-0.0002349		756.79	0.00358457		1286.79	0.00376446		1816.78	0.00222964		2346.78	0.00033089		2876.78	0.00306339		3406.78	-0.00311576		3936.78	-0.00891704
227	-0.0000885		756.99	0.00412646		1286.99	0.00359311		1816.98	0.00184227		2346.98	0.0000085		2876.98	0.00276188		3406.98	-0.00321388		3936.98	-0.00968632
227.2	-0.00076671		757.19	0.00334493		1287.19	0.00360159		1817.18	0.00244362		2347.18	-0.00028585		2877.18	0.00301061		3407.18	-0.00335694		3937.18	-0.00966098
227.4	-0.00036721		757.39	0.00267966		1287.39	0.0032898		1817.38	0.00219109		2347.38	-0.00120317		2877.38	0.00350648		3407.38	-0.00231216		3937.38	-0.0089554
227.6	-0.00006918		757.59	0.00235954		1287.59	0.00343135		1817.58	0.00195647		2347.58	-0.00056611		2877.58	0.00303554		3407.58	-0.00196508		3937.58	-0.00833496
227.8	-0.00019206		757.79	0.00231273		1287.79	0.00237913		1817.78	0.00125694		2347.78	-0.00072942		2877.78	0.00310025		3407.78	-0.00218584		3937.78	-0.00969301
228	-0.00035391		757.99	0.00292113		1287.99	0.00197595		1817.98	0.0007552		2347.98	0.00075909		2877.98	0.00288721		3407.98	-0.0022109		3937.98	-0.01032799
228.2	-0.00075033		758.19	0.00307262		1288.19	0.00175737		1818.18	-0.00052713		2348.18	0.00111513		2878.18	0.00145717		3408.18	-0.0017756		3938.18	-0.0106448
228.4	-0.00094338		758.39	0.00348413		1288.39	0.00163963		1818.38	-0.0001979		2348.38	0.00161913		2878.38	0.00097477		3408.38	-0.00142577		3938.38	-0.01073946
228.6	-0.00215104		758.59	0.00310025		1288.59	0.00114596		1818.58	0.00047782		2348.58	0.00198622		2878.58	0.00061446		3408.58	-0.00068976		3938.58	-0.01139227
228.8	-0.0019372		758.79	0.00333886		1288.79	0.00074376		1818.78	0.00130053		2348.78	0.00266605		2878.78	0.0000926		3408.78	-0.00082031		3938.78	-0.01083223
229	-0.00210622		758.99	0.00263412		1288.99	0.00132368		1818.98	0.00103481		2348.98	0.0030539		2878.98	-0.00013404		3408.98	-0.00097029		3938.98	-0.01181545
229.2	-0.00296412		759.19	0.00326252		1289.19	0.00211026		1819.18	0.0014582		2349.18	0.00349901		2879.18	-0.00028978		3409.18	-0.00140484		3939.18	-0.01155566
229.4	-0.00406764		759.39	0.00319397		1289.39	0.00172959		1819.38	0.0010327		2349.38	0.00386564		2879.38	-0.0005569		3409.38	-0.00232083		3939.38	-0.01134765
229.6	-0.00473152		759.59	0.00285802		1289.59	0.00136353		1819.58	-0.00045963		2349.58	0.00378959		2879.58	-0.0005492		3409.58	-0.00281674		3939.58	-0.01048685
229.8	-0.0053385		759.79	0.00270989		1289.79	0.00201032		1819.78	0.00029545		2349.78	0.003334		2879.78	-0.00003156		3409.78	-0.0025939		3939.78	-0.010504
230	-0.00498055		759.99	0.00298512		1289.99	0.0027837		1819.98	0.00031691		2349.98	0.00264292		2879.98	0.00002215		3409.98	-0.00256815		3939.98	-0.01009362
230.2	-0.00466381		760.19	0.00364795		1290.19	0.00320022		1820.18	-0.00033667		2350.18	0.0027089		2880.18	0.00002282		3410.18	-0.00292309		3940.18	-0.01006217
230.4	-0.00378252		760.39	0.00384263		1290.39	0.00327178		1820.38	-0.00080256		2350.38	0.0023936		2880.38	-0.00085129		3410.38	-0.00261048		3940.38	-0.01024147
230.6	-0.00359266		760.59	0.00449674		1290.59	0.00327471		1820.58	-0.0004427		2350.58	0.00248238		2880.58	-0.00073853		3410.58	-0.00185451		3940.58	-0.00990883
230.8	-0.00310855		760.79	0.00486566		1290.79	0.00399689		1820.78	-0.00025348		2350.78	0.00193675		2880.78	-0.00041767		3410.78	-0.00077553		3940.78	-0.0101081
231	-0.00349319		760.99	0.00498472		1290.99	0.0046934		1820.98	0.00007113		2350.98	0.00253275		2880.98	-0.00088495		3410.98	-0.00087455		3940.98	-0.01159641
231.2	-0.00348429		761.19	0.0045073		1291.19	0.00404002		1821.18	-0.0003938		2351.18	0.00173628		2881.18	-0.00059191		3411.18	-0.0006847		3941.18	-0.01238216
231.4	-0.00339328		761.39	0.0040884		1291.39	0.00318998		1821.38	-0.0005595		2351.38	0.00077978		2881.38	0.00010509		3411.38	0.001181		3941.38	-0.0126132
231.6	-0.00303715		761.59	0.00435712		1291.59	0.00284609		1821.58	-0.00005922		2351.58	0.00130119		2881.58	0.00032935		3411.58	0.00143643		3941.58	-0.01363077
231.8	-0.00302595		761.79	0.0045866		1291.79	0.00266196		1821.78	0.00050504		2351.78	0.00084536		2881.78	0.00074823		3411.78	0.00174205		3941.78	-0.01396962
232	-0.00356049		761.99	0.00410051		1291.99	0.00161373		1821.98	0.00089869		2351.98	0.00075122		2881.98	0.00077513		3411.98	0.00280796		3941.98	-0.01386826
232.2	-0.00325787		762.19	0.00299773		1292.19	0.0010943		1822.18	0.00098047		2352.18	0.00016137		2882.18	0.00074722		3412.18	0.00293674		3942.18	-0.0136932
232.4	-0.00362267		762.39	0.00270277		1292.39	-0.00018822		1822.38	0.00194461		2352.38	-0.00029655		2882.38	0.00145574		3412.38	0.00269496		3942.38	-0.01368095
232.6	-0.00388698		762.59	0.00139163		1292.59	-0.00105624		1822.58	0.00208219		2352.58	-0.00014017		2882.58	0.00118079		3412.58	0.00271618		3942.58	-0.01373266
232.8	-0.00372101		762.79	0.00121277		1292.79	-0.0008174		1822.78	0.00199987		2352.78	-0.00042226		2882.78	0.00195256		3412.78	0.00183066		3942.78	-0.01336699
233	-0.00354485		762.99	0.00080535		1292.99	-0.00036086		1822.98	0.00157714		2352.98	0.00007468		2882.98	0.00252589		3412.98	0.00149955		3942.98	-0.01257509
233.2	-0.00294672		763.19	0.00178865		1293.19	-0.00086331		1823.18	0.00142597		2353.18	-0.00009289		2883.18	0.00264026		3413.18	0.00054392		3943.18	-0.01131954
233.4	-0.00386418		763.39	0.00173721		1293.39	-0.00133537		1823.38	0.00014484		2353.38	-0.00020967		2883.38	0.00341801		3413.38	0.00004024		3943.38	-0.01012266
233.6	-0.00431209		763.59	0.00230943		1293.59	-0.00101749		1823.58	0.00005324		2353.58	-0.00041041		2883.58	0.00358563		3413.58	-0.00032385		3943.58	-0.00911298
233.8	-0.00391287		763.79	0.00275321		1293.79	-0.00060975		1823.78	-0.00075453		2353.78	-0.00017551		2883.78	0.00330209		3413.78	0.00040954		3943.78	-0.00944283
234	-0.00369242		763.99	0.00324737		1293.99	-0.0008776		1823.98	-0.00158232		2353.98	-0.00021609		2883.98	0.00289697		3413.98	0.000316		3943.98	-0.00852602
234.2	-0.00339002		764.19	0.00396991		1294.19	-0.0015601		1824.18	-0.00236242		2354.18	0.00063544		2884.18	0.00336654		3414.18	-0.0008118		3944.18	-0.00836409
234.4	-0.00266907		764.39	0.003985		1294.39	-0.00108699		1824.38	-0.00221667		2354.38	0.00083443		2884.38	0.00202287		3414.38	-0.00040512		3944.38	-0.00892586
234.6	-0.00206743		764.59	0.00446159		1294.59	-0.0000187		1824.58	-0.0023063		2354.58	0.00105184		2884.58	0.00206651		3414.58	0.00027216		3944.58	-0.0095082
234.8	-0.00130806		764.79	0.00517161		1294.79	0.00062764		1824.78	-0.00338598		2354.78	0.0021596		2884.78	0.00155655		3414.78	0.0000827		3944.78	-0.01047128
235	-0.00187405		764.99	0.00494561		1294.99	0.00097284		1824.98	-0.00332991		2354.98	0.00305371		2884.98	0.00042544		3414.98	-0.00041946		3944.98	-0.01150414
235.2	-0.00116632		765.19	0.00486129		1295.19	0.00086288		1825.18	-0.00321624		2355.18	0.00234687		2885.18	0.00054791		3415.18	0.00018128		3945.18	-0.01282902
235.4	-0.00186682		765.39	0.00505357		1295.39	0.00191092		1825.38	-0.00238378		2355.38	0.00248496		2885.38	0.00038064		3415.38	0.0010323		3945.38	-0.01389734
235.6	-0.00005325		765.59	0.00496356		1295.59	0.00263202		1825.58	-0.00136983		2355.58	0.00280218		2885.58	0.00018		3415.58	0.00014709		3945.58	-0.01440183
235.8	0.00000898		765.79	0.00377308		1295.79	0.00271043		1825.78	-0.00178633		2355.78	0.00209106		2885.78	0.00035206		3415.78	0.00064337		3945.78	-0.01455984
236	0.00075979		765.99	0.00272926		1295.99	0.00230273		1825.98	-0.00210764		2355.98	0.00126203		2885.98	0.00064341		3415.98	0.00099473		3945.98	-0.01465677
236.2	0.00122853		766.19	0.00230781		1296.19	0.00199699		1826.18	-0.00205101		2356.18	0.00158021		2886.18	0.00071669		3416.18	-0.00007937		3946.18	-0.01432248
236.4	0.0013418		766.39	0.00188457		1296.39	0.00226981		1826.38	-0.00155357		2356.38	0.00123229		2886.38	0.00085207		3416.38	-0.00014456		3946.38	-0.01455189
236.6	0.00131521		766.59	0.00067047		1296.59	0.00286345		1826.58	-0.00123944		2356.58	0.00118134		2886.58	0.00090358		3416.58	0.00015831		3946.58	-0.01437605
236.8	0.00115203		766.79	0.00110012		1296.79	0.0032779		1826.78	-0.00140039		2356.78	0.00039867		2886.78	0.00218463		3416.78	-0.00061246		3946.78	-0.01390564
237	0.00131775		766.99	0.00172489		1296.99	0.0032925		1826.98	-0.00050227		2356.98	0.00098959		2886.98	0.00286664		3416.98	-0.00057965		3946.98	-0.01309687
237.2	0.00026645		767.19	0.00150257		1297.19	0.00259423		1827.18	-0.00035208		2357.18	0.00016261		2887.18	0.00299466		3417.18	-0.00036392		3947.18	-0.01195591
237.4	-0.00151452		767.39	0.00134213		1297.39	0.00282551		1827.38	-0.00073613		2357.38	-0.00017142		2887.38	0.0033011		3417.38	0.00077579		3947.38	-0.01121221
237.6	-0.00245168		767.59	0.0007778		1297.59	0.00280538		1827.58	-0.00082701		2357.58	-0.00069859		2887.58	0.00287148		3417.58	-0.00003395		3947.58	-0.01005775
237.8	-0.00268161		767.79	0.00033274		1297.79	0.00224825		1827.78	-0.00130974		2357.78	-0.00083438		2887.78	0.00225094		3417.78	0.00026359		3947.78	-0.00972108
238	-0.00352968		767.99	0.00047792		1297.99	0.00226904		1827.98	-0.00044928		2357.98	-0.00061352		2887.98	0.00213675		3417.98	0.00018296		3947.98	-0.00871113
238.2	-0.00375116		768.19	0.0005629		1298.19	0.00164225		1828.18	-0.00021235		2358.18	-0.00061382		2888.18	0.00181208		3418.18	0.0007643		3948.18	-0.00826394
238.4	-0.00401196		768.39	0.00024967		1298.39	0.00118926		1828.38	0.00021302		2358.38	-0.00116958		2888.38	0.00158281		3418.38	0.0019771		3948.38	-0.00858194
238.6	-0.00394001		768.59	0.00027567		1298.59	0.00105191		1828.58	-0.00020218		2358.58	-0.0012105		2888.58	0.00220757		3418.58	0.00265372		3948.58	-0.00882739
238.8	-0.00446471		768.79	-0.00064195		1298.79	0.00044083		1828.78	0.00043364		2358.78	-0.00067398		2888.78	0.00155234		3418.78	0.00290752		3948.78	-0.01021276
239	-0.00545705		768.99	-0.00081957		1298.99	0.00061543		1828.98	0.00159931		2358.98	-0.00127933		2888.98	0.00180074		3418.98	0.00358854		3948.98	-0.01047715
239.2	-0.00566848		769.19	-0.00041788		1299.19	0.00170782		1829.18	0.00187511		2359.18	-0.00184456		2889.18	0.00179223		3419.18	0.00400708		3949.18	-0.010815
239.4	-0.00542115		769.39	0.00063883		1299.39	0.00249107		1829.38	0.00153276		2359.38	-0.0020143		2889.38	0.00195741		3419.38	0.00405346		3949.38	-0.01160441
239.6	-0.00434245		769.59	0.00048415		1299.59	0.00231966		1829.58	0.0008497		2359.58	-0.00208271		2889.58	0.00252975		3419.58	0.00350317		3949.58	-0.01184838
239.8	-0.00480973		769.79	0.00012321		1299.79	0.00208642		1829.78	0.00016419		2359.78	-0.00260532		2889.78	0.00388633		3419.78	0.00432671		3949.78	-0.01222265
240	-0.00368335		769.99	0.00006137		1299.99	0.00235804		1829.98	0.00029315		2359.98	-0.00357824		2889.98	0.00497002		3419.98	0.00279015		3949.98	-0.01201094
240.2	-0.00354596		770.19	0.00045897		1300.19	0.00141353		1830.18	0.00060822		2360.18	-0.00322823		2890.18	0.00560957		3420.18	0.00157232		3950.18	-0.01281786
240.4	-0.0024521		770.39	0.00017595		1300.39	0.00169985		1830.38	0.00116319		2360.38	-0.00358755		2890.38	0.00562894		3420.38	0.00116405		3950.38	-0.01358144
240.6	-0.0021233		770.59	0.00016904		1300.59	0.00167426		1830.58	0.00103972		2360.58	-0.00327246		2890.58	0.00532958		3420.58	0.00011406		3950.58	-0.01366911
240.8	-0.00269273		770.79	0.00093228		1300.79	0.00128568		1830.78	0.00107543		2360.78	-0.00334236		2890.78	0.00592434		3420.78	-0.000352		3950.78	-0.0131766
241	-0.00301909		770.99	0.00115943		1300.99	0.0011275		1830.98	0.00179595		2360.98	-0.00245727		2890.98	0.00662566		3420.98	-0.0013756		3950.98	-0.01335418
241.2	-0.00271792		771.19	0.0009481		1301.19	0.00083869		1831.18	0.00051084		2361.18	-0.0022911		2891.18	0.00677006		3421.18	-0.00210186		3951.18	-0.01292893
241.4	-0.00263194		771.39	0.00118634		1301.39	0.00076436		1831.38	0.00026931		2361.38	-0.00237091		2891.38	0.0066479		3421.38	-0.00306177		3951.38	-0.01308923
241.6	-0.00207954		771.59	0.0009977		1301.59	0.00017601		1831.58	0.00025324		2361.58	-0.00149713		2891.58	0.00624615		3421.58	-0.0044669		3951.58	-0.01241678
241.8	-0.00173332		771.79	0.00152295		1301.79	-0.00032268		1831.78	0.00073844		2361.78	-0.00048075		2891.78	0.0056564		3421.78	-0.003942		3951.78	-0.01263033
242	-0.00142882		771.99	0.0008657		1301.99	-0.00092256		1831.98	0.00116771		2361.98	-0.00087653		2891.98	0.0059872		3421.98	-0.00369583		3951.98	-0.0122925
242.2	-0.00051579		772.19	0.00017165		1302.19	-0.00206297		1832.18	0.00152758		2362.18	-0.00058435		2892.18	0.00554796		3422.18	-0.00306856		3952.18	-0.01190163
242.4	0.00008224		772.39	-0.0006595		1302.39	-0.00248184		1832.38	0.00090053		2362.38	-0.00059083		2892.38	0.00567371		3422.38	-0.00314003		3952.38	-0.01220499
242.6	0.00027079		772.59	-0.00140435		1302.59	-0.00188701		1832.58	0.00055635		2362.58	-0.00002713		2892.58	0.00537744		3422.58	-0.00224477		3952.58	-0.01218391
242.8	-0.00019516		772.79	-0.00191722		1302.79	-0.00173477		1832.78	0.0002602		2362.78	0.00086047		2892.78	0.00542284		3422.78	-0.00174725		3952.78	-0.0122481
243	0.00009492		772.99	-0.00148614		1302.99	-0.00149593		1832.98	-0.00113754		2362.98	0.00075402		2892.98	0.00539176		3422.98	-0.00151676		3952.98	-0.01169012
243.2	-0.00010898		773.19	-0.00041155		1303.19	-0.00061076		1833.18	-0.00170295		2363.18	0.00109608		2893.18	0.00530118		3423.18	-0.00111657		3953.18	-0.01209017
243.4	-0.00021202		773.39	0.00037716		1303.39	-0.00000201		1833.38	-0.00255073		2363.38	0.00106291		2893.38	0.00582013		3423.38	-0.00082768		3953.38	-0.01256937
243.6	-0.00108827		773.59	-0.00020892		1303.59	0.00029343		1833.58	-0.00273233		2363.58	0.00147292		2893.58	0.00547641		3423.58	-0.00121534		3953.58	-0.01278568
243.8	-0.0005192		773.79	-0.00036187		1303.79	0.00097098		1833.78	-0.0020873		2363.78	0.00137837		2893.78	0.00615456		3423.78	-0.00120859		3953.78	-0.01294131
244	-0.00023578		773.99	-0.0007763		1303.99	0.0012074		1833.98	-0.0018739		2363.98	0.00034677		2893.98	0.0056419		3423.98	-0.00230382		3953.98	-0.01342256
244.2	-0.00134928		774.19	0.00030105		1304.19	0.00093095		1834.18	-0.00176839		2364.18	0.00064007		2894.18	0.00510179		3424.18	-0.00262836		3954.18	-0.01411588
244.4	-0.00173043		774.39	0.00027331		1304.39	0.00182369		1834.38	-0.00162418		2364.38	0.00023724		2894.38	0.00501665		3424.38	-0.00293819		3954.38	-0.01411261
244.6	-0.00280052		774.59	0.00069492		1304.59	0.00212408		1834.58	-0.00152685		2364.58	0.00040292		2894.58	0.00523573		3424.58	-0.00298726		3954.58	-0.01432432
244.8	-0.00413579		774.79	0.00082684		1304.79	0.00231186		1834.78	-0.00158937		2364.78	0.00015528		2894.78	0.00664587		3424.78	-0.00328558		3954.78	-0.01451074
245	-0.00454		774.99	0.00207727		1304.99	0.00261799		1834.98	-0.0013019		2364.98	0.0001661		2894.98	0.00733655		3424.98	-0.00468		3954.98	-0.01479798
245.2	-0.00459961		775.19	0.00229452		1305.19	0.00269916		1835.18	-0.00064108		2365.18	0.00002738		2895.18	0.00735874		3425.18	-0.00534452		3955.18	-0.0143532
245.4	-0.00570776		775.39	0.00335451		1305.39	0.00207339		1835.38	0.00030398		2365.38	-0.00049279		2895.38	0.00753209		3425.38	-0.00514379		3955.38	-0.01403156
245.6	-0.00548456		775.59	0.00288453		1305.59	0.00211731		1835.58	0.00096683		2365.58	0.00033036		2895.58	0.00711386		3425.58	-0.00503314		3955.58	-0.013575
245.8	-0.00519914		775.79	0.00274888		1305.79	0.0022419		1835.78	0.00122763		2365.78	-0.00032291		2895.78	0.00661572		3425.78	-0.00443836		3955.78	-0.0147432
246	-0.00514343		775.99	0.0019578		1305.99	0.00216173		1835.98	0.00123853		2365.98	-0.00068275		2895.98	0.00666946		3425.98	-0.00441045		3955.98	-0.01399004
246.2	-0.0041567		776.19	0.00160562		1306.19	0.00150983		1836.18	0.00153029		2366.18	0.00005		2896.18	0.00572305		3426.18	-0.00396565		3956.18	-0.01345807
246.4	-0.0037005		776.39	0.00035398		1306.39	0.00151986		1836.38	-0.00000842		2366.38	0.00002093		2896.38	0.00513606		3426.38	-0.00405541		3956.38	-0.01338677
246.6	-0.00380684		776.59	0.00067818		1306.59	0.00112393		1836.58	-0.00028914		2366.58	-0.00014944		2896.58	0.00453304		3426.58	-0.00357007		3956.58	-0.01387839
246.8	-0.00408786		776.79	0.00061463		1306.79	0.0004121		1836.78	-0.00156964		2366.78	-0.00017503		2896.78	0.00478658		3426.78	-0.00371265		3956.78	-0.0149093
247	-0.00318133		776.99	0.00061362		1306.99	-0.00080353		1836.98	-0.00257458		2366.98	-0.00050163		2896.98	0.00376027		3426.98	-0.00389333		3956.98	-0.01443071
247.2	-0.0039845		777.19	0.00128691		1307.19	-0.00067506		1837.18	-0.00231825		2367.18	-0.00063885		2897.18	0.00302578		3427.18	-0.0044303		3957.18	-0.01500034
247.4	-0.00363261		777.39	0.00066182		1307.39	-0.00024484		1837.38	-0.00211307		2367.38	-0.00081486		2897.38	0.00257199		3427.38	-0.00423912		3957.38	-0.01401803
247.6	-0.00352028		777.59	-0.0002892		1307.59	-0.00006095		1837.58	-0.00213093		2367.58	-0.00055316		2897.58	0.0010326		3427.58	-0.00463291		3957.58	-0.01441542
247.8	-0.00284128		777.79	-0.00074976		1307.79	0.00073117		1837.78	-0.00178451		2367.78	-0.00054922		2897.78	0.00146251		3427.78	-0.00473256		3957.78	-0.01420249
248	-0.00277643		777.99	-0.00121886		1307.99	0.00099349		1837.98	-0.00192074		2367.98	-0.0015945		2897.98	0.00118906		3427.98	-0.0046852		3957.98	-0.01425674
248.2	-0.00279458		778.19	-0.00033303		1308.19	0.00089832		1838.18	-0.00106407		2368.18	-0.00268539		2898.18	0.00164127		3428.18	-0.00440921		3958.18	-0.01450118
248.4	-0.00205668		778.39	-0.00050879		1308.39	0.00127054		1838.38	-0.00094385		2368.38	-0.00335997		2898.38	0.00186931		3428.38	-0.00420751		3958.38	-0.01454949
248.6	-0.00260055		778.59	-0.00023189		1308.59	0.00158472		1838.58	-0.00020113		2368.58	-0.00387889		2898.58	0.00265184		3428.58	-0.0034515		3958.58	-0.01469042
248.8	-0.00267594		778.79	-0.00002682		1308.79	0.00123603		1838.78	0.00080791		2368.78	-0.00415556		2898.78	0.00408007		3428.78	-0.00326351		3958.78	-0.01456397
249	-0.00312393		778.99	0.00088954		1308.99	0.00162621		1838.98	0.00226251		2368.98	-0.00468286		2898.98	0.00389428		3428.98	-0.00322333		3958.98	-0.01334516
249.2	-0.00304148		779.19	0.00009337		1309.19	0.00155414		1839.18	0.00294495		2369.18	-0.00461319		2899.18	0.00455974		3429.18	-0.00270087		3959.18	-0.0129348
249.4	-0.00349525		779.39	0.00133513		1309.39	0.00193286		1839.38	0.00327602		2369.38	-0.00457846		2899.38	0.00479725		3429.38	-0.00140003		3959.38	-0.0122828
249.6	-0.00354389		779.59	0.00177896		1309.59	0.00325374		1839.58	0.00400942		2369.58	-0.00395782		2899.58	0.00429626		3429.58	-0.00146374		3959.58	-0.01275403
249.8	-0.00391697		779.79	0.00219929		1309.79	0.0033636		1839.78	0.00362073		2369.78	-0.0042757		2899.78	0.00450533		3429.78	-0.00025203		3959.78	-0.01316418
250	-0.00487897		779.99	0.00192516		1309.99	0.00362876		1839.98	0.00397954		2369.98	-0.00368579		2899.98	0.00428013		3429.98	-0.00017877		3959.98	-0.0126657
250.2	-0.00452948		780.19	0.00114361		1310.19	0.00290534		1840.18	0.00388179		2370.18	-0.0036967		2900.18	0.00382658		3430.18	0.00040604		3960.18	-0.01317717
250.4	-0.00466578		780.39	0.00156752		1310.39	0.00286514		1840.38	0.00302286		2370.38	-0.0034478		2900.38	0.00380187		3430.38	0.00065659		3960.38	-0.01385482
250.6	-0.00506686		780.59	0.00235743		1310.59	0.00238478		1840.58	0.00263001		2370.58	-0.00356114		2900.58	0.00375521		3430.58	0.00054566		3960.58	-0.0150683
250.8	-0.00526481		780.79	0.00230882		1310.79	0.00221433		1840.78	0.00136831		2370.78	-0.00292439		2900.78	0.00425414		3430.78	0.00011736		3960.78	-0.01487861
251	-0.00438849		780.99	0.00257227		1310.99	0.00201762		1840.98	0.00091709		2370.98	-0.00242693		2900.98	0.00440144		3430.98	0.00004866		3960.98	-0.01396253
251.2	-0.00506806		781.19	0.00332048		1311.19	0.00245755		1841.18	0.0010013		2371.18	-0.00209137		2901.18	0.00444161		3431.18	-0.0001926		3961.18	-0.01406747
251.4	-0.00479446		781.39	0.00326608		1311.39	0.00232619		1841.38	0.00118746		2371.38	-0.00134881		2901.38	0.00545845		3431.38	-0.00062928		3961.38	-0.01282576
251.6	-0.00508369		781.59	0.00263208		1311.59	0.00256199		1841.58	0.00017884		2371.58	-0.00087627		2901.58	0.00532407		3431.58	-0.00223897		3961.58	-0.01308907
251.8	-0.00493191		781.79	0.00280088		1311.79	0.00331133		1841.78	0.00108448		2371.78	-0.00063056		2901.78	0.00626359		3431.78	-0.00331989		3961.78	-0.01245666
252	-0.00447349		781.99	0.00306098		1311.99	0.00271798		1841.98	0.00072458		2371.98	-0.00070228		2901.98	0.00649323		3431.98	-0.00417813		3961.98	-0.01298477
252.2	-0.00479992		782.19	0.00359978		1312.19	0.00136239		1842.18	0.000964		2372.18	-0.00102008		2902.18	0.00734837		3432.18	-0.00450138		3962.18	-0.01415413
252.4	-0.0044918		782.39	0.00355933		1312.39	0.00081905		1842.38	0.00018795		2372.38	-0.00058141		2902.38	0.00813183		3432.38	-0.00493442		3962.38	-0.01433804
252.6	-0.00499737		782.59	0.00289897		1312.59	-0.00022553		1842.58	-0.00010925		2372.58	-0.00055014		2902.58	0.00910526		3432.58	-0.00424708		3962.58	-0.01514331
252.8	-0.00397396		782.79	0.00263204		1312.79	-0.00130502		1842.78	-0.00095753		2372.78	-0.00024301		2902.78	0.00905018		3432.78	-0.00468006		3962.78	-0.01544171
253	-0.00405373		782.99	0.00271487		1312.99	-0.00119296		1842.98	-0.00175642		2372.98	-0.00002112		2902.98	0.00831825		3432.98	-0.00475324		3962.98	-0.01434403
253.2	-0.00379393		783.19	0.00227579		1313.19	-0.00185984		1843.18	-0.00323889		2373.18	0.00027867		2903.18	0.00824101		3433.18	-0.00449781		3963.18	-0.01480665
253.4	-0.00443143		783.39	0.00264991		1313.39	-0.00162068		1843.38	-0.00336396		2373.38	0.00045344		2903.38	0.00766968		3433.38	-0.00377624		3963.38	-0.01484423
253.6	-0.00443988		783.59	0.00164424		1313.59	-0.00154987		1843.58	-0.00421523		2373.58	0.00030867		2903.58	0.00686276		3433.58	-0.00349903		3963.58	-0.01518335
253.8	-0.00503239		783.79	0.00076819		1313.79	-0.00129706		1843.78	-0.00473809		2373.78	-0.00026742		2903.78	0.00557945		3433.78	-0.0026762		3963.78	-0.01482486
254	-0.00523154		783.99	-0.00107673		1313.99	-0.00162321		1843.98	-0.00353427		2373.98	-0.00065622		2903.98	0.00401657		3433.98	-0.00226366		3963.98	-0.01517182
254.2	-0.00507391		784.19	-0.00139537		1314.19	-0.00178329		1844.18	-0.00402117		2374.18	-0.00083967		2904.18	0.00257029		3434.18	-0.00136161		3964.18	-0.01515793
254.4	-0.00462544		784.39	-0.00124892		1314.39	-0.00099883		1844.38	-0.00451788		2374.38	-0.00124899		2904.38	0.00188206		3434.38	-0.00117708		3964.38	-0.01524414
254.6	-0.00426695		784.59	-0.00140921		1314.59	-0.00034921		1844.58	-0.00437128		2374.58	-0.00137233		2904.58	0.00012742		3434.58	-0.00084362		3964.58	-0.01468727
254.8	-0.00394058		784.79	-0.00114944		1314.79	0.00106898		1844.78	-0.00423414		2374.78	-0.00170855		2904.78	0.00078201		3434.78	-0.00009829		3964.78	-0.0138078
255	-0.00328233		784.99	-0.00114379		1314.99	0.00153381		1844.98	-0.00433144		2374.98	-0.00233433		2904.98	0.00119477		3434.98	0.00025608		3964.98	-0.0129688
255.2	-0.00308799		785.19	-0.00020216		1315.19	0.00131526		1845.18	-0.00344736		2375.18	-0.00295836		2905.18	0.0001579		3435.18	-0.00032544		3965.18	-0.01353366
255.4	-0.0021444		785.39	-0.00034467		1315.39	0.00135479		1845.38	-0.00306063		2375.38	-0.00281708		2905.38	0.00032555		3435.38	-0.00173269		3965.38	-0.01370547
255.6	-0.00214774		785.59	-0.0004286		1315.59	0.00208677		1845.58	-0.00282987		2375.58	-0.00239412		2905.58	0.00098574		3435.58	-0.00216397		3965.58	-0.01408461
255.8	-0.00256639		785.79	-0.00022299		1315.79	0.0020037		1845.78	-0.00176316		2375.78	-0.00222291		2905.78	0.00132131		3435.78	-0.0026317		3965.78	-0.01368706
256	-0.00184419		785.99	0.00005248		1315.99	0.00089533		1845.98	-0.00167536		2375.98	-0.00253645		2905.98	0.00193873		3435.98	-0.00252278		3965.98	-0.01437704
256.2	-0.00227288		786.19	-0.00005562		1316.19	0.00070858		1846.18	-0.00096617		2376.18	-0.00285548		2906.18	0.00278235		3436.18	-0.0025564		3966.18	-0.01524162
256.4	-0.0016577		786.39	-0.00052115		1316.39	0.00112422		1846.38	-0.00067062		2376.38	-0.00314866		2906.38	0.00334584		3436.38	-0.00223382		3966.38	-0.01499752
256.6	-0.00110194		786.59	-0.00043923		1316.59	0.0008735		1846.58	-0.00089018		2376.58	-0.00378677		2906.58	0.00418326		3436.58	-0.00171371		3966.58	-0.01596602
256.8	0.00017361		786.79	0.00035934		1316.79	0.00088397		1846.78	-0.00089227		2376.78	-0.00386277		2906.78	0.00481214		3436.78	-0.00186858		3966.78	-0.01576415
257	0.00031374		786.99	-0.000195		1316.99	0.00100214		1846.98	-0.00107385		2376.98	-0.00318377		2906.98	0.00600903		3436.98	-0.0019762		3966.98	-0.01543134
257.2	0.00009051		787.19	-0.00059191		1317.19	0.00146021		1847.18	-0.00176463		2377.18	-0.00315776		2907.18	0.00669959		3437.18	-0.00176168		3967.18	-0.01596606
257.4	-0.00040963		787.39	-0.00091513		1317.39	0.00106162		1847.38	-0.00090501		2377.38	-0.00253699		2907.38	0.00724118		3437.38	-0.00155688		3967.38	-0.01598503
257.6	-0.00093326		787.59	-0.00179806		1317.59	0.00075568		1847.58	-0.00068799		2377.58	-0.00280523		2907.58	0.00677194		3437.58	-0.00180345		3967.58	-0.01606754
257.8	-0.00157283		787.79	-0.00194188		1317.79	0.00143725		1847.78	-0.00017868		2377.78	-0.00324907		2907.78	0.00581992		3437.78	-0.00198052		3967.78	-0.01585025
258	-0.0016945		787.99	-0.00192719		1317.99	0.00070359		1847.98	0.00002562		2377.98	-0.00336345		2907.98	0.00547803		3437.98	-0.00185478		3967.98	-0.01581144
258.2	-0.0016593		788.19	-0.00087662		1318.19	0.00153917		1848.18	-0.00047822		2378.18	-0.00269132		2908.18	0.00526164		3438.18	-0.0017426		3968.18	-0.01533531
258.4	-0.00206683		788.39	-0.0004633		1318.39	0.00228495		1848.38	-0.0007493		2378.38	-0.0027244		2908.38	0.00516771		3438.38	-0.00195058		3968.38	-0.01451122
258.6	-0.00178388		788.59	-0.00021326		1318.59	0.00230293		1848.58	-0.0007702		2378.58	-0.00254005		2908.58	0.00470704		3438.58	-0.00158699		3968.58	-0.01451687
258.8	-0.00187008		788.79	0.00043883		1318.79	0.00287662		1848.78	-0.0012274		2378.78	-0.00262899		2908.78	0.00596403		3438.78	-0.0015309		3968.78	-0.01503652
259	-0.00128056		788.99	0.00019315		1318.99	0.00264652		1848.98	-0.00241361		2378.98	-0.00257829		2908.98	0.0051932		3438.98	-0.00206354		3968.98	-0.01503532
259.2	-0.0010525		789.19	0.00056702		1319.19	0.00188128		1849.18	-0.00232797		2379.18	-0.00250053		2909.18	0.00403376		3439.18	-0.00271145		3969.18	-0.01550914
259.4	-0.00136378		789.39	0.00079257		1319.39	0.0015045		1849.38	-0.00257468		2379.38	-0.00159713		2909.38	0.00433462		3439.38	-0.00334115		3969.38	-0.01490595
259.6	-0.0026931		789.59	0.0005937		1319.59	0.00145397		1849.58	-0.0024982		2379.58	-0.00130395		2909.58	0.00509101		3439.58	-0.00294354		3969.58	-0.0143369
259.8	-0.00245516		789.79	0.00125875		1319.79	0.00135817		1849.78	-0.00215373		2379.78	-0.00174151		2909.78	0.004356		3439.78	-0.00300834		3969.78	-0.01393413
260	-0.00344661		789.99	0.00106825		1319.99	0.00079936		1849.98	-0.00168861		2379.98	-0.00230414		2909.98	0.00403578		3439.98	-0.00221827		3969.98	-0.01397023
260.2	-0.00458464		790.19	0.00029562		1320.19	0.0013038		1850.18	-0.00113783		2380.18	-0.00234892		2910.18	0.00501091		3440.18	-0.00141702		3970.18	-0.01323859
260.4	-0.00447311		790.39	-0.00018106		1320.39	0.00187781		1850.38	-0.00040096		2380.38	-0.00268641		2910.38	0.00570915		3440.38	-0.00039454		3970.38	-0.01284142
260.6	-0.00410522		790.59	-0.00006238		1320.59	0.00274374		1850.58	-0.00058644		2380.58	-0.00214953		2910.58	0.00605702		3440.58	0.00005866		3970.58	-0.01259753
260.8	-0.00335035		790.79	-0.00052075		1320.79	0.00307415		1850.78	-0.00086731		2380.78	-0.00107823		2910.78	0.00691176		3440.78	0.00084328		3970.78	-0.01225112
261	-0.00354437		790.99	-0.00121435		1320.99	0.00337453		1850.98	-0.00101372		2380.98	-0.00015626		2910.98	0.00667052		3440.98	0.00120384		3970.98	-0.01276328
261.2	-0.00407927		791.19	-0.00142679		1321.19	0.00316055		1851.18	-0.00098822		2381.18	-0.00026462		2911.18	0.0064197		3441.18	0.00172031		3971.18	-0.01341235
261.4	-0.00400461		791.39	-0.0022793		1321.39	0.00286277		1851.38	-0.00022327		2381.38	-0.00025171		2911.38	0.0062199		3441.38	0.00166685		3971.38	-0.01453281
261.6	-0.00417075		791.59	-0.00199433		1321.59	0.00292251		1851.58	0.00038494		2381.58	-0.00084266		2911.58	0.00497839		3441.58	0.00195987		3971.58	-0.01506886
261.8	-0.00356993		791.79	-0.00134437		1321.79	0.00345616		1851.78	0.0002867		2381.78	-0.00144176		2911.78	0.00491641		3441.78	0.00136117		3971.78	-0.01572922
262	-0.00307442		791.99	-0.00014514		1321.99	0.00289088		1851.98	0.00093736		2381.98	-0.00164731		2911.98	0.0049179		3441.98	0.00083885		3971.98	-0.01578593
262.2	-0.00237786		792.19	-0.00008204		1322.19	0.00281533		1852.18	0.00099442		2382.18	-0.00141295		2912.18	0.00567719		3442.18	0.00123729		3972.18	-0.01588724
262.4	-0.00197403		792.39	-0.00013551		1322.39	0.00298469		1852.38	0.00129508		2382.38	-0.00218014		2912.38	0.00571408		3442.38	-0.00005624		3972.38	-0.01619292
262.6	-0.00128677		792.59	0.00035039		1322.59	0.00317656		1852.58	0.00102298		2382.58	-0.00233933		2912.58	0.00569454		3442.58	-0.00119508		3972.58	-0.01618887
262.8	-0.00138874		792.79	0.00173053		1322.79	0.00326772		1852.78	0.0017104		2382.78	-0.00317263		2912.78	0.00494609		3442.78	-0.00260649		3972.78	-0.01600832
263	-0.00127619		792.99	0.00167325		1322.99	0.00329385		1852.98	0.00145416		2382.98	-0.0046396		2912.98	0.00519493		3442.98	-0.00457617		3972.98	-0.01504914
263.2	-0.00156727		793.19	0.00274143		1323.19	0.00183984		1853.18	0.00227565		2383.18	-0.00501658		2913.18	0.00547028		3443.18	-0.00594801		3973.18	-0.01469723
263.4	-0.00131151		793.39	0.00371545		1323.39	0.00150613		1853.38	0.00227374		2383.38	-0.00483921		2913.38	0.00626469		3443.38	-0.00663248		3973.38	-0.01450558
263.6	-0.0012315		793.59	0.00388866		1323.59	0.00122861		1853.58	0.00181421		2383.58	-0.00574362		2913.58	0.00688051		3443.58	-0.00700828		3973.58	-0.01374385
263.8	-0.00149079		793.79	0.00403131		1323.79	0.00069596		1853.78	0.00147969		2383.78	-0.00598381		2913.78	0.00694185		3443.78	-0.00722762		3973.78	-0.01272008
264	-0.00300835		793.99	0.00334225		1323.99	-0.00037694		1853.98	0.0017356		2383.98	-0.00581515		2913.98	0.00749727		3443.98	-0.00683484		3973.98	-0.01205487
264.2	-0.0029888		794.19	0.00335624		1324.19	-0.00001075		1854.18	0.00122137		2384.18	-0.00546521		2914.18	0.00779614		3444.18	-0.00667586		3974.18	-0.01087974
264.4	-0.00316372		794.39	0.00305913		1324.39	0.00053349		1854.38	0.00072904		2384.38	-0.00508923		2914.38	0.00733147		3444.38	-0.00692857		3974.38	-0.01090287
264.6	-0.00310534		794.59	0.00324066		1324.59	0.00071263		1854.58	-0.00019088		2384.58	-0.00473163		2914.58	0.00695783		3444.58	-0.00703122		3974.58	-0.01059119
264.8	-0.00353619		794.79	0.00264369		1324.79	0.0004711		1854.78	-0.00063127		2384.78	-0.00466543		2914.78	0.00656775		3444.78	-0.00623919		3974.78	-0.01075791
265	-0.00430905		794.99	0.00262432		1324.99	0.0002265		1854.98	-0.00085615		2384.98	-0.00474105		2914.98	0.00560158		3444.98	-0.00621729		3974.98	-0.01082945
265.2	-0.00480003		795.19	0.00202457		1325.19	0.00022789		1855.18	-0.00125568		2385.18	-0.0039866		2915.18	0.00499188		3445.18	-0.00613199		3975.18	-0.01145196
265.4	-0.00487353		795.39	0.00113684		1325.39	0.00063522		1855.38	-0.00047169		2385.38	-0.00396245		2915.38	0.00339956		3445.38	-0.005362		3975.38	-0.0117063
265.6	-0.00524155		795.59	0.00113761		1325.59	-0.00012556		1855.58	-0.00043267		2385.58	-0.00358521		2915.58	0.0024231		3445.58	-0.0050337		3975.58	-0.01137093
265.8	-0.00512357		795.79	0.0013715		1325.79	0.00039491		1855.78	-0.00093495		2385.78	-0.00382703		2915.78	0.00307722		3445.78	-0.00585369		3975.78	-0.01212806
266	-0.00444749		795.99	0.0017439		1325.99	0.00041189		1855.98	-0.00091776		2385.98	-0.00385949		2915.98	0.00250328		3445.98	-0.00513181		3975.98	-0.01246182
266.2	-0.00412218		796.19	0.00191511		1326.19	0.00093626		1856.18	-0.00158192		2386.18	-0.00320217		2916.18	0.00319213		3446.18	-0.00442834		3976.18	-0.01228567
266.4	-0.00438021		796.39	0.00165054		1326.39	0.00241497		1856.38	-0.00034188		2386.38	-0.00296099		2916.38	0.00250775		3446.38	-0.00510615		3976.38	-0.01229949
266.6	-0.00414069		796.59	0.002503		1326.59	0.00270761		1856.58	-0.00066831		2386.58	-0.00252271		2916.58	0.00232601		3446.58	-0.00445269		3976.58	-0.01213229
266.8	-0.00387005		796.79	0.0034071		1326.79	0.00261288		1856.78	0.00016628		2386.78	-0.00331785		2916.78	0.00270397		3446.78	-0.00403244		3976.78	-0.0125108
267	-0.00326735		796.99	0.00292148		1326.99	0.00260263		1856.98	0.00081274		2386.98	-0.00346889		2916.98	0.00373427		3446.98	-0.00399753		3976.98	-0.01251236
267.2	-0.00226805		797.19	0.00262896		1327.19	0.00176273		1857.18	0.00090736		2387.18	-0.00252822		2917.18	0.00441838		3447.18	-0.00257456		3977.18	-0.01341403
267.4	-0.0005799		797.39	0.00242872		1327.39	0.00187305		1857.38	0.00043672		2387.38	-0.00264215		2917.38	0.00524365		3447.38	-0.00183171		3977.38	-0.0141887
267.6	-0.00031496		797.59	0.00221734		1327.59	0.00203728		1857.58	0.00002545		2387.58	-0.00350929		2917.58	0.00577432		3447.58	-0.00148249		3977.58	-0.01515888
267.8	-0.00074629		797.79	0.00173728		1327.79	0.00185737		1857.78	0.00023148		2387.78	-0.00332673		2917.78	0.00622868		3447.78	-0.00097248		3977.78	-0.01633234
268	-0.00034222		797.99	0.00195095		1327.99	0.0010116		1857.98	0.00041657		2387.98	-0.00336492		2917.98	0.00641645		3447.98	-0.00005074		3977.98	-0.01769139
268.2	0.00000844		798.19	0.00157999		1328.19	0.00127732		1858.18	0.00033767		2388.18	-0.00427796		2918.18	0.00696561		3448.18	-0.00031602		3978.18	-0.01905908
268.4	-0.00090297		798.39	0.00156533		1328.39	0.00121746		1858.38	0.00013086		2388.38	-0.00499866		2918.38	0.00749329		3448.38	-0.00075014		3978.38	-0.01974626
268.6	-0.00161508		798.59	0.00104256		1328.59	0.00105986		1858.58	0.00030286		2388.58	-0.00502094		2918.58	0.008111		3448.58	-0.00124597		3978.58	-0.02028542
268.8	-0.00192632		798.79	0.00001484		1328.79	0.00139582		1858.78	0.00035788		2388.78	-0.00488114		2918.78	0.00787866		3448.78	-0.00093516		3978.78	-0.02079563
269	-0.00168073		798.99	0.00003019		1328.99	0.0014536		1858.98	-0.00029685		2388.98	-0.00521516		2918.98	0.00804766		3448.98	-0.00211384		3978.98	-0.02026099
269.2	-0.00165901		799.19	-0.0014047		1329.19	0.00132474		1859.18	-0.00019141		2389.18	-0.00477139		2919.18	0.0073099		3449.18	-0.00210461		3979.18	-0.0207668
269.4	-0.00065654		799.39	-0.00219291		1329.39	0.00057028		1859.38	0.00035105		2389.38	-0.00510037		2919.38	0.00632629		3449.38	-0.00258522		3979.38	-0.02009725
269.6	-0.001191		799.59	-0.00227897		1329.59	-0.00001906		1859.58	-0.0004055		2389.58	-0.00488417		2919.58	0.0066795		3449.58	-0.00428892		3979.58	-0.01988652
269.8	-0.00116869		799.79	-0.0020682		1329.79	0.00045375		1859.78	-0.00075249		2389.78	-0.00515391		2919.78	0.00748227		3449.78	-0.00512214		3979.78	-0.02046697
270	-0.00066671		799.99	-0.00185182		1329.99	0.00048675		1859.98	-0.00129039		2389.98	-0.00430046		2919.98	0.00753705		3449.98	-0.00456661		3979.98	-0.01974012
270.2	-0.00115342		800.19	-0.00184231		1330.19	0.00103226		1860.18	-0.0009708		2390.18	-0.00370665		2920.18	0.00887494		3450.18	-0.00500141		3980.18	-0.01784008
270.4	-0.00135801		800.39	-0.00174072		1330.39	0.00103844		1860.38	-0.00142102		2390.38	-0.00303688		2920.38	0.00847308		3450.38	-0.00509755		3980.38	-0.01676932
270.6	-0.00069503		800.59	-0.00093175		1330.59	-0.00021199		1860.58	-0.00214441		2390.58	-0.00265194		2920.58	0.00851875		3450.58	-0.00461735		3980.58	-0.01533828
270.8	-0.00037577		800.79	0.00024985		1330.79	-0.00027212		1860.78	-0.00228547		2390.78	-0.00276748		2920.78	0.00890565		3450.78	-0.00532566		3980.78	-0.01421518
271	-0.00048477		800.99	-0.00011241		1330.99	-0.00101201		1860.98	-0.00224884		2390.98	-0.00329794		2920.98	0.00929183		3450.98	-0.00581736		3980.98	-0.01384511
271.2	0.00008257		801.19	-0.00088644		1331.19	-0.00114168		1861.18	-0.00364925		2391.18	-0.0028302		2921.18	0.00989279		3451.18	-0.00527935		3981.18	-0.01284099
271.4	0.00066929		801.39	-0.00029777		1331.39	-0.00071994		1861.38	-0.00368952		2391.38	-0.00323835		2921.38	0.00976409		3451.38	-0.00495541		3981.38	-0.01227022
271.6	0.00048725		801.59	-0.0003609		1331.59	0.00041218		1861.58	-0.00393534		2391.58	-0.00382597		2921.58	0.009584		3451.58	-0.00489477		3981.58	-0.01246025
271.8	0.00003933		801.79	-0.00066208		1331.79	0.000653		1861.78	-0.0030869		2391.78	-0.00431317		2921.78	0.0093878		3451.78	-0.00422724		3981.78	-0.01258243
272	0.00013673		801.99	-0.00101339		1331.99	0.00099662		1861.98	-0.0025462		2391.98	-0.00396502		2921.98	0.0092408		3451.98	-0.00381976		3981.98	-0.01336371
272.2	-0.00023798		802.19	-0.00072138		1332.19	0.00121278		1862.18	-0.00281439		2392.18	-0.0042993		2922.18	0.00901958		3452.18	-0.00353094		3982.18	-0.01445984
272.4	-0.00120773		802.39	-0.000644		1332.39	0.00227651		1862.38	-0.00237774		2392.38	-0.00408496		2922.38	0.00864773		3452.38	-0.00338602		3982.38	-0.01456702
272.6	-0.00116401		802.59	-0.0014254		1332.59	0.00263202		1862.58	-0.00112252		2392.58	-0.00327725		2922.58	0.00838804		3452.58	-0.00322537		3982.58	-0.01503956
272.8	-0.00088288		802.79	-0.00178217		1332.79	0.00349113		1862.78	-0.00088445		2392.78	-0.00281063		2922.78	0.00771129		3452.78	-0.00237986		3982.78	-0.01468487
273	-0.00035431		802.99	-0.00101072		1332.99	0.00352395		1862.98	-0.00028912		2392.98	-0.00265869		2922.98	0.00735298		3452.98	-0.00262673		3982.98	-0.01469321
273.2	-0.0011707		803.19	-0.00152418		1333.19	0.00354907		1863.18	0.00034023		2393.18	-0.00230998		2923.18	0.00764286		3453.18	-0.00139032		3983.18	-0.01530079
273.4	-0.00150207		803.39	-0.00103393		1333.39	0.002838		1863.38	0.00047346		2393.38	-0.00143332		2923.38	0.00798606		3453.38	-0.00128299		3983.38	-0.01593165
273.6	-0.00264722		803.59	-0.00039323		1333.59	0.00217143		1863.58	0.00027027		2393.58	-0.00079062		2923.58	0.00807773		3453.58	-0.00187259		3983.58	-0.01682628
273.8	-0.00297765		803.79	0.00008688		1333.79	0.00183266		1863.78	-0.00034996		2393.78	-0.00047822		2923.78	0.00825272		3453.78	-0.00099968		3983.78	-0.01717341
274	-0.00319022		803.99	0.00044911		1333.99	0.00199768		1863.98	-0.00042437		2393.98	0.00012236		2923.98	0.00853809		3453.98	-0.0005948		3983.98	-0.01676648
274.2	-0.00339191		804.19	0.00140945		1334.19	0.00161755		1864.18	-0.00021624		2394.18	-0.00025772		2924.18	0.00912941		3454.18	-0.00106331		3984.18	-0.01694447
274.4	-0.00335487		804.39	0.00148608		1334.39	0.00051547		1864.38	-0.00184154		2394.38	-0.00017803		2924.38	0.00871507		3454.38	-0.00146061		3984.38	-0.01675561
274.6	-0.0023911		804.59	0.00188653		1334.59	-0.00044987		1864.58	-0.0019016		2394.58	-0.00086915		2924.58	0.00910225		3454.58	-0.00199517		3984.58	-0.01674355
274.8	-0.00300843		804.79	0.00155962		1334.79	-0.00016527		1864.78	-0.00232847		2394.78	-0.0017695		2924.78	0.00954827		3454.78	-0.00302517		3984.78	-0.01722621
275	-0.00347071		804.99	0.00073376		1334.99	-0.00095228		1864.98	-0.00272891		2394.98	-0.00205777		2924.98	0.00946209		3454.98	-0.00321044		3984.98	-0.01783643
275.2	-0.00290895		805.19	0.00017928		1335.19	-0.00101873		1865.18	-0.00348479		2395.18	-0.00181762		2925.18	0.00939681		3455.18	-0.00274177		3985.18	-0.01718796
275.4	-0.00285898		805.39	0.00029577		1335.39	-0.00063653		1865.38	-0.00296257		2395.38	-0.00293053		2925.38	0.00891161		3455.38	-0.00265093		3985.38	-0.01802072
275.6	-0.00274903		805.59	-0.00036431		1335.59	-0.00014356		1865.58	-0.0023883		2395.58	-0.00409859		2925.58	0.00858572		3455.58	-0.00239106		3985.58	-0.01868574
275.8	-0.00280735		805.79	-0.00133886		1335.79	-0.00072932		1865.78	-0.00148329		2395.78	-0.00484526		2925.78	0.00840332		3455.78	-0.00225245		3985.78	-0.01884996
276	-0.00206353		805.99	-0.00216524		1335.99	-0.00120197		1865.98	-0.0013739		2395.98	-0.00522649		2925.98	0.00791826		3455.98	-0.00222992		3985.98	-0.02007812
276.2	-0.00208411		806.19	-0.00139126		1336.19	-0.0016193		1866.18	-0.00138861		2396.18	-0.00608563		2926.18	0.00733207		3456.18	-0.00208204		3986.18	-0.02015149
276.4	-0.00181005		806.39	-0.00178615		1336.39	-0.00139225		1866.38	0.00075149		2396.38	-0.00574913		2926.38	0.00747455		3456.38	-0.00262705		3986.38	-0.02055661
276.6	-0.00152866		806.59	-0.00212681		1336.59	-0.00218093		1866.58	0.00126439		2396.58	-0.00568197		2926.58	0.00717035		3456.58	-0.00246702		3986.58	-0.01984082
276.8	-0.00152892		806.79	-0.00167328		1336.79	-0.00238654		1866.78	0.0021549		2396.78	-0.00583105		2926.78	0.00732971		3456.78	-0.00214265		3986.78	-0.0191458
277	-0.00207735		806.99	-0.00016938		1336.99	-0.00304239		1866.98	0.00284995		2396.98	-0.00653732		2926.98	0.00800771		3456.98	-0.00286523		3986.98	-0.01954244
277.2	-0.0028181		807.19	-0.0003033		1337.19	-0.00306563		1867.18	0.00268611		2397.18	-0.00621602		2927.18	0.00830423		3457.18	-0.00253713		3987.18	-0.01876576
277.4	-0.0029854		807.39	0.00028498		1337.39	-0.00308759		1867.38	0.00247579		2397.38	-0.00541369		2927.38	0.00871399		3457.38	-0.00349527		3987.38	-0.01910748
277.6	-0.00284582		807.59	0.00061658		1337.59	-0.00333918		1867.58	0.00230276		2397.58	-0.00542446		2927.58	0.00823139		3457.58	-0.00485832		3987.58	-0.01870571
277.8	-0.00270922		807.79	0.00119312		1337.79	-0.00323292		1867.78	0.00250681		2397.78	-0.00522103		2927.78	0.00870053		3457.78	-0.00450393		3987.78	-0.01812981
278	-0.00227241		807.99	0.00203733		1337.99	-0.00209356		1867.98	0.00326177		2397.98	-0.00472881		2927.98	0.00924234		3457.98	-0.00453187		3987.98	-0.01807475
278.2	-0.00259143		808.19	0.00228849		1338.19	-0.00179235		1868.18	0.0030677		2398.18	-0.00484739		2928.18	0.0094901		3458.18	-0.00469659		3988.18	-0.01780932
278.4	-0.00222642		808.39	0.00131386		1338.39	-0.00105763		1868.38	0.00195683		2398.38	-0.00476036		2928.38	0.01044921		3458.38	-0.00433916		3988.38	-0.01783484
278.6	-0.00072278		808.59	0.00169295		1338.59	-0.00099724		1868.58	0.00133407		2398.58	-0.00439079		2928.58	0.01039242		3458.58	-0.00437315		3988.58	-0.01797004
278.8	-0.00130653		808.79	0.00114213		1338.79	-0.00032561		1868.78	0.00060878		2398.78	-0.0042257		2928.78	0.01025654		3458.78	-0.00381193		3988.78	-0.01769005
279	-0.00170221		808.99	0.00110961		1338.99	0.00011109		1868.98	0.00009561		2398.98	-0.00372717		2928.98	0.01019126		3458.98	-0.00308502		3988.98	-0.01751111
279.2	-0.00139194		809.19	0.00093421		1339.19	0.00098082		1869.18	-0.00102179		2399.18	-0.00377204		2929.18	0.01073668		3459.18	-0.00281503		3989.18	-0.01667873
279.4	-0.0017314		809.39	0.00074417		1339.39	0.00250519		1869.38	-0.00134083		2399.38	-0.00370836		2929.38	0.00994403		3459.38	-0.00247213		3989.38	-0.01736337
279.6	-0.00111347		809.59	0.00021605		1339.59	0.00257647		1869.58	-0.00117468		2399.58	-0.00396366		2929.58	0.01034108		3459.58	-0.00226252		3989.58	-0.01718187
279.8	-0.00093916		809.79	-0.00058262		1339.79	0.00263279		1869.78	-0.00137604		2399.78	-0.00370146		2929.78	0.00978369		3459.78	-0.00332565		3989.78	-0.01772677
280	-0.00041878		809.99	-0.0007506		1339.99	0.00256144		1869.98	-0.00189082		2399.98	-0.00451762		2929.98	0.00916176		3459.98	-0.00318995		3989.98	-0.01867128
280.2	-0.00078571		810.19	-0.0007041		1340.19	0.00289211		1870.18	-0.00120499		2400.18	-0.00364195		2930.18	0.00910311		3460.18	-0.00351826		3990.18	-0.01853022
280.4	-0.0011569		810.39	-0.00137019		1340.39	0.00304139		1870.38	-0.00041999		2400.38	-0.00348392		2930.38	0.00834115		3460.38	-0.00296698		3990.38	-0.01946753
280.6	-0.00178849		810.59	-0.00221386		1340.59	0.00248281		1870.58	-0.00037475		2400.58	-0.00498581		2930.58	0.00809758		3460.58	-0.00278013		3990.58	-0.01910845
280.8	-0.00300405		810.79	-0.00170906		1340.79	0.001776		1870.78	0.00022606		2400.78	-0.00559867		2930.78	0.00773915		3460.78	-0.00313521		3990.78	-0.01954413
281	-0.00389171		810.99	-0.00146409		1340.99	0.0015041		1870.98	0.00004351		2400.98	-0.0059568		2930.98	0.00800253		3460.98	-0.00392289		3990.98	-0.01898798
281.2	-0.00404549		811.19	-0.00220286		1341.19	0.00171068		1871.18	-0.0001613		2401.18	-0.0055917		2931.18	0.00780088		3461.18	-0.00454523		3991.18	-0.01912912
281.4	-0.00413904		811.39	-0.00178229		1341.39	0.00144282		1871.38	0.00009508		2401.38	-0.00568076		2931.38	0.00832361		3461.38	-0.00538442		3991.38	-0.01951276
281.6	-0.00429698		811.59	-0.00143919		1341.59	0.00104232		1871.58	0.00059852		2401.58	-0.00628821		2931.58	0.00784658		3461.58	-0.00513432		3991.58	-0.0197091
281.8	-0.00436617		811.79	-0.00015147		1341.79	0.00061966		1871.78	0.0010173		2401.78	-0.00628777		2931.78	0.00811763		3461.78	-0.00487858		3991.78	-0.01918063
282	-0.004105		811.99	-0.00004221		1341.99	0.00081197		1871.98	0.00131295		2401.98	-0.00627276		2931.98	0.00875527		3461.98	-0.00457489		3991.98	-0.01972552
282.2	-0.00437793		812.19	-0.00122789		1342.19	0.0006754		1872.18	0.00136179		2402.18	-0.00685502		2932.18	0.00933579		3462.18	-0.00452563		3992.18	-0.01977297
282.4	-0.00326659		812.39	-0.00133223		1342.39	0.00024207		1872.38	0.00038646		2402.38	-0.00661131		2932.38	0.01008429		3462.38	-0.00397943		3992.38	-0.02046017
282.6	-0.00252386		812.59	-0.00080351		1342.59	-0.00032259		1872.58	0.00039038		2402.58	-0.00621932		2932.58	0.00984817		3462.58	-0.00457912		3992.58	-0.02044018
282.8	-0.00203178		812.79	-0.00103668		1342.79	0.00010561		1872.78	0.0007421		2402.78	-0.0070524		2932.78	0.00939531		3462.78	-0.00408889		3992.78	-0.02011899
283	-0.00177264		812.99	-0.00095875		1342.99	0.00015735		1872.98	0.00063864		2402.98	-0.00692608		2932.98	0.00958457		3462.98	-0.00371329		3992.98	-0.02000891
283.2	-0.00150797		813.19	-0.00014113		1343.19	-0.0000007		1873.18	0.00005052		2403.18	-0.00645281		2933.18	0.00942953		3463.18	-0.0042196		3993.18	-0.02032948
283.4	-0.00112776		813.39	0.00086996		1343.39	0.00031877		1873.38	0.00024959		2403.38	-0.00633844		2933.38	0.00910901		3463.38	-0.00419059		3993.38	-0.02111493
283.6	-0.00121599		813.59	0.00129578		1343.59	0.00021987		1873.58	0.00079692		2403.58	-0.00656302		2933.58	0.00974894		3463.58	-0.00401386		3993.58	-0.02082739
283.8	-0.00121944		813.79	0.00115507		1343.79	0.00043602		1873.78	0.0009516		2403.78	-0.00635353		2933.78	0.00947212		3463.78	-0.00433296		3993.78	-0.02088129
284	-0.00073445		813.99	0.00176374		1343.99	0.00013015		1873.98	0.0008199		2403.98	-0.00653664		2933.98	0.00941644		3463.98	-0.00378178		3993.98	-0.02053496
284.2	-0.00087155		814.19	0.00194734		1344.19	0.00057157		1874.18	0.00185052		2404.18	-0.00619892		2934.18	0.00947915		3464.18	-0.00306805		3994.18	-0.02006619
284.4	-0.00103033		814.39	0.00237177		1344.39	0.00063596		1874.38	0.00172189		2404.38	-0.00688202		2934.38	0.00902019		3464.38	-0.00239414		3994.38	-0.01967168
284.6	-0.00077288		814.59	0.0019767		1344.59	-0.00027331		1874.58	0.00161966		2404.58	-0.00712144		2934.58	0.00910123		3464.58	-0.00236969		3994.58	-0.01897998
284.8	-0.00091612		814.79	0.00282059		1344.79	-0.00035075		1874.78	0.00165955		2404.78	-0.00666222		2934.78	0.00870523		3464.78	-0.00238518		3994.78	-0.01891249
285	-0.00117226		814.99	0.00347201		1344.99	-0.00081063		1874.98	0.00079137		2404.98	-0.00603101		2934.98	0.00882612		3464.98	-0.00217534		3994.98	-0.01695323
285.2	-0.00133441		815.19	0.00361305		1345.19	-0.00075315		1875.18	0.00021513		2405.18	-0.00534086		2935.18	0.00907894		3465.18	-0.00229567		3995.18	-0.01658411
285.4	-0.00093514		815.39	0.00408634		1345.39	-0.00102302		1875.38	-0.00057027		2405.38	-0.00460905		2935.38	0.00959788		3465.38	-0.00217862		3995.38	-0.01656084
285.6	-0.00191688		815.59	0.00398486		1345.59	-0.00041317		1875.58	-0.00166448		2405.58	-0.00523574		2935.58	0.00941475		3465.58	-0.00276124		3995.58	-0.01690659
285.8	-0.00232294		815.79	0.00413678		1345.79	0.00007248		1875.78	-0.00255892		2405.78	-0.00518632		2935.78	0.00965683		3465.78	-0.00270287		3995.78	-0.01560571
286	-0.00238391		815.99	0.00346733		1345.99	0.00050014		1875.98	-0.00265927		2405.98	-0.00508202		2935.98	0.00930522		3465.98	-0.00308137		3995.98	-0.01598611
286.2	-0.00341698		816.19	0.00216243		1346.19	0.00050124		1876.18	-0.00324358		2406.18	-0.00490373		2936.18	0.00883423		3466.18	-0.00395612		3996.18	-0.01559039
286.4	-0.00394119		816.39	0.00210777		1346.39	0.00041762		1876.38	-0.00415496		2406.38	-0.00491437		2936.38	0.00843657		3466.38	-0.00473753		3996.38	-0.01605987
286.6	-0.00420076		816.59	0.00144224		1346.59	0.00026447		1876.58	-0.00342171		2406.58	-0.00482097		2936.58	0.00783989		3466.58	-0.00592899		3996.58	-0.01654874
286.8	-0.00397626		816.79	0.00098731		1346.79	0.00053883		1876.78	-0.00409223		2406.78	-0.00514412		2936.78	0.00620287		3466.78	-0.00559869		3996.78	-0.01627495
287	-0.00513736		816.99	0.00071479		1346.99	0.00034396		1876.98	-0.00506647		2406.98	-0.00530376		2936.98	0.00669734		3466.98	-0.00578928		3996.98	-0.01715319
287.2	-0.00681124		817.19	0.00033155		1347.19	0.00023174		1877.18	-0.0049982		2407.18	-0.0048109		2937.18	0.00701467		3467.18	-0.00628075		3997.18	-0.01804791
287.4	-0.00789945		817.39	0.00055692		1347.39	0.00037002		1877.38	-0.00495187		2407.38	-0.00478749		2937.38	0.0075321		3467.38	-0.00635828		3997.38	-0.01827629
287.6	-0.00813516		817.59	0.00021512		1347.59	0.00048061		1877.58	-0.00427143		2407.58	-0.00440132		2937.58	0.00777278		3467.58	-0.0054618		3997.58	-0.01911433
287.8	-0.00759874		817.79	0.00019692		1347.79	0.0003631		1877.78	-0.00340228		2407.78	-0.00368482		2937.78	0.00830218		3467.78	-0.00606486		3997.78	-0.01930305
288	-0.00685946		817.99	0.00073217		1347.99	-0.00037133		1877.98	-0.00258063		2407.98	-0.00332569		2937.98	0.00815215		3467.98	-0.00575657		3997.98	-0.01971939
288.2	-0.0063996		818.19	0.00038825		1348.19	-0.00007389		1878.18	-0.00140737		2408.18	-0.00372625		2938.18	0.00854609		3468.18	-0.00531866		3998.18	-0.02014468
288.4	-0.00573277		818.39	0.00003752		1348.39	-0.00034347		1878.38	-0.00035613		2408.38	-0.00348101		2938.38	0.00786618		3468.38	-0.00590213		3998.38	-0.01967229
288.6	-0.00510816		818.59	-0.00030477		1348.59	-0.00082567		1878.58	0.00026143		2408.58	-0.00311226		2938.58	0.00834974		3468.58	-0.00557053		3998.58	-0.02024291
288.8	-0.00465484		818.79	0.00045955		1348.79	-0.00087304		1878.78	0.00115293		2408.78	-0.00296376		2938.78	0.00793118		3468.78	-0.00541826		3998.78	-0.02050272
289	-0.00446034		818.99	0.00063084		1348.99	-0.00142991		1878.98	0.00048056		2408.98	-0.00198148		2938.98	0.00783394		3468.98	-0.00494214		3998.98	-0.02016217
289.2	-0.00418793		819.19	0.0008801		1349.19	-0.00108351		1879.18	0.00017918		2409.18	-0.00128338		2939.18	0.00863777		3469.18	-0.00501901		3999.18	-0.02072646
289.4	-0.003241		819.39	0.00114964		1349.39	-0.00115649		1879.38	0.00029613		2409.38	-0.00113153		2939.38	0.00810495		3469.38	-0.00522185		3999.38	-0.0206601
289.6	-0.00350609		819.59	0.00124311		1349.59	-0.00037282		1879.58	0.00066862		2409.58	-0.00107979		2939.58	0.00795682		3469.58	-0.00509936		3999.58	-0.01914295
289.8	-0.00337011		819.79	0.0009989		1349.79	0.00003144		1879.78	0.00107816		2409.78	-0.00067189		2939.78	0.00861753		3469.78	-0.00423977		3999.78	-0.01744334
290	-0.00328278		819.99	0.00056336		1349.99	0.00019829		1879.98	0.00126749		2409.98	-0.00110355		2939.98	0.00802449		3469.98	-0.00486308		3999.98	-0.01711643
290.2	-0.00346357		820.19	-0.000509		1350.19	0.00030407		1880.18	0.00128542		2410.18	-0.00096609		2940.18	0.00916868		3470.18	-0.0053377		4000.18	-0.01692058
290.4	-0.00349569		820.39	-0.00005705		1350.39	0.00050392		1880.38	0.00095068		2410.38	-0.00131307		2940.38	0.00903724		3470.38	-0.00553755		4000.38	-0.0166804
290.6	-0.0030798		820.59	-0.00025744		1350.59	0.00056127		1880.58	0.00090869		2410.58	-0.0014031		2940.58	0.00884232		3470.58	-0.00538572		4000.58	-0.0157477
290.8	-0.00296572		820.79	-0.00012941		1350.79	0.00116063		1880.78	0.00053696		2410.78	-0.00198985		2940.78	0.00892601		3470.78	-0.00407191		4000.78	-0.01498655
291	-0.0032755		820.99	0.00032055		1350.99	0.00106565		1880.98	0.00016271		2410.98	-0.00260996		2940.98	0.01054407		3470.98	-0.00369091		4000.98	-0.01493876
291.2	-0.00388549		821.19	0.00001914		1351.19	0.00112096		1881.18	-0.00000773		2411.18	-0.00202183		2941.18	0.01084342		3471.18	-0.00285786		4001.18	-0.01524627
291.4	-0.00394814		821.39	-0.00013169		1351.39	0.00086266		1881.38	0.00012288		2411.38	-0.00250434		2941.38	0.010849		3471.38	-0.0022007		4001.38	-0.016211
291.6	-0.00312566		821.59	0.00012089		1351.59	0.00082183		1881.58	0.00053505		2411.58	-0.00275273		2941.58	0.01102555		3471.58	-0.00105645		4001.58	-0.01646748
291.8	-0.00368116		821.79	0.00028353		1351.79	0.00012254		1881.78	0.00048779		2411.78	-0.00301822		2941.78	0.01110483		3471.78	-0.00072937		4001.78	-0.01678887
292	-0.00311806		821.99	0.00052292		1351.99	-0.00075514		1881.98	0.00088137		2411.98	-0.00390902		2941.98	0.01078391		3471.98	-0.00073058		4001.98	-0.01677998
292.2	-0.00352754		822.19	0.00067462		1352.19	-0.00093565		1882.18	0.00097083		2412.18	-0.00454854		2942.18	0.01046499		3472.18	-0.00055339		4002.18	-0.01749723
292.4	-0.00337045		822.39	0.00066121		1352.39	-0.00084174		1882.38	0.00121031		2412.38	-0.00480013		2942.38	0.01014817		3472.38	-0.0007047		4002.38	-0.01758284
292.6	-0.00375504		822.59	0.00135303		1352.59	-0.00095307		1882.58	0.00012165		2412.58	-0.00536373		2942.58	0.01133684		3472.58	-0.00107984		4002.58	-0.01874686
292.8	-0.00480204		822.79	0.00199548		1352.79	-0.00143734		1882.78	0.00006702		2412.78	-0.00517115		2942.78	0.01071492		3472.78	-0.00134404		4002.78	-0.01941286
293	-0.0056078		822.99	0.00197962		1352.99	-0.00226748		1882.98	-0.00103109		2412.98	-0.0045562		2942.98	0.01148494		3472.98	-0.00176432		4002.98	-0.02000455
293.2	-0.00601015		823.19	0.00237539		1353.19	-0.00266253		1883.18	-0.00053478		2413.18	-0.00456713		2943.18	0.01184527		3473.18	-0.00248478		4003.18	-0.0204538
293.4	-0.00558691		823.39	0.00273766		1353.39	-0.00349585		1883.38	-0.00052122		2413.38	-0.00467543		2943.38	0.01178573		3473.38	-0.00249788		4003.38	-0.01970284
293.6	-0.00599494		823.59	0.00215328		1353.59	-0.00324847		1883.58	-0.00037058		2413.58	-0.00452243		2943.58	0.01241131		3473.58	-0.00293992		4003.58	-0.01991506
293.8	-0.00651008		823.79	0.00138536		1353.79	-0.00332986		1883.78	-0.00047248		2413.78	-0.00512434		2943.78	0.01268844		3473.78	-0.00367351		4003.78	-0.02079778
294	-0.00637922		823.99	0.00091179		1353.99	-0.00248236		1883.98	-0.00080023		2413.98	-0.00514187		2943.98	0.01160044		3473.98	-0.00445155		4003.98	-0.02137347
294.2	-0.00599128		824.19	0.00092232		1354.19	-0.00228225		1884.18	-0.00049996		2414.18	-0.00544654		2944.18	0.01189459		3474.18	-0.00538095		4004.18	-0.02118509
294.4	-0.00583489		824.39	0.00171605		1354.39	-0.00185287		1884.38	-0.00115481		2414.38	-0.00577393		2944.38	0.01089477		3474.38	-0.00609893		4004.38	-0.0199266
294.6	-0.00537008		824.59	0.00132683		1354.59	-0.00080649		1884.58	-0.00090259		2414.58	-0.00644171		2944.58	0.01118814		3474.58	-0.00605193		4004.58	-0.01982073
294.8	-0.00500262		824.79	0.0009551		1354.79	-0.00123373		1884.78	-0.00043667		2414.78	-0.00709749		2944.78	0.0109291		3474.78	-0.00628193		4004.78	-0.01976907
295	-0.0053589		824.99	0.00081244		1354.99	-0.00130956		1884.98	-0.00035907		2414.98	-0.00682694		2944.98	0.01047765		3474.98	-0.00674384		4004.98	-0.01992792
295.2	-0.00646534		825.19	-0.00017603		1355.19	-0.0012014		1885.18	0.00023494		2415.18	-0.00733448		2945.18	0.00983463		3475.18	-0.00604535		4005.18	-0.0209481
295.4	-0.00657		825.39	-0.00023156		1355.39	-0.00155868		1885.38	0.00143566		2415.38	-0.00754977		2945.38	0.00885459		3475.38	-0.00664275		4005.38	-0.02149236
295.6	-0.00713515		825.59	0.00014575		1355.59	-0.00233384		1885.58	0.00091051		2415.58	-0.00781765		2945.58	0.00803968		3475.58	-0.00694568		4005.58	-0.02060581
295.8	-0.00711629		825.79	-0.00027835		1355.79	-0.00268744		1885.78	0.00038004		2415.78	-0.00723828		2945.78	0.00734766		3475.78	-0.00622334		4005.78	-0.02085669
296	-0.00647689		825.99	-0.00012505		1355.99	-0.00218839		1885.98	0.00057398		2415.98	-0.00722067		2945.98	0.00692948		3475.98	-0.00639907		4005.98	-0.0203673
296.2	-0.00643323		826.19	-0.00055207		1356.19	-0.00186142		1886.18	0.00047012		2416.18	-0.00749646		2946.18	0.00689411		3476.18	-0.00596308		4006.18	-0.02001414
296.4	-0.00614883		826.39	-0.00033331		1356.39	-0.00129256		1886.38	0.00037854		2416.38	-0.00752656		2946.38	0.00698791		3476.38	-0.00613053		4006.38	-0.01938341
296.6	-0.0060075		826.59	0.00003928		1356.59	-0.00191028		1886.58	-0.00023313		2416.58	-0.00819322		2946.58	0.00751864		3476.58	-0.00719777		4006.58	-0.01931944
296.8	-0.00577294		826.79	0.0002414		1356.79	-0.00185501		1886.78	0.00051623		2416.78	-0.00810337		2946.78	0.00827241		3476.78	-0.0061267		4006.78	-0.01897356
297	-0.0053011		826.99	0.00030487		1356.99	-0.00225574		1886.98	0.00043209		2416.98	-0.00789882		2946.98	0.00886591		3476.98	-0.0060243		4006.98	-0.01881288
297.2	-0.00425452		827.19	0.00051344		1357.19	-0.00212182		1887.18	0.00090265		2417.18	-0.00751609		2947.18	0.00894269		3477.18	-0.00458244		4007.18	-0.01819009
297.4	-0.00345293		827.39	0.00064444		1357.39	-0.00234105		1887.38	0.00012396		2417.38	-0.00749404		2947.38	0.00890861		3477.38	-0.00371739		4007.38	-0.01751637
297.6	-0.00260835		827.59	-0.00005006		1357.59	-0.00109596		1887.58	0.00094362		2417.58	-0.00690731		2947.58	0.00850115		3477.58	-0.0035769		4007.58	-0.01780378
297.8	-0.00141017		827.79	-0.00038909		1357.79	-0.00020975		1887.78	0.00023225		2417.78	-0.00677492		2947.78	0.00872946		3477.78	-0.00333337		4007.78	-0.01777399
298	-0.00037944		827.99	0.00001977		1357.99	0.00085466		1887.98	0.00019496		2417.98	-0.00601214		2947.98	0.00879028		3477.98	-0.00292249		4007.98	-0.01740498
298.2	0.0002998		828.19	0.00097205		1358.19	0.00122723		1888.18	0.00048639		2418.18	-0.00671223		2948.18	0.00973707		3478.18	-0.00305099		4008.18	-0.01663046
298.4	0.00040012		828.39	0.00074782		1358.39	0.00189376		1888.38	0.0003158		2418.38	-0.00634759		2948.38	0.01017336		3478.38	-0.00309114		4008.38	-0.01720007
298.6	0.00015407		828.59	0.00023172		1358.59	0.0018257		1888.58	0.00033848		2418.58	-0.00676655		2948.58	0.01062492		3478.58	-0.00264761		4008.58	-0.01790304
298.8	-0.00057432		828.79	-0.00004341		1358.79	0.00119619		1888.78	0.00102419		2418.78	-0.0063684		2948.78	0.01028797		3478.78	-0.00288079		4008.78	-0.01773796
299	-0.00162291		828.99	-0.00037924		1358.99	0.00096762		1888.98	0.00172246		2418.98	-0.00584562		2948.98	0.01087859		3478.98	-0.00241769		4008.98	-0.01875535
299.2	-0.00205394		829.19	0.00067017		1359.19	0.00081548		1889.18	0.00176662		2419.18	-0.00646033		2949.18	0.01114896		3479.18	-0.00258902		4009.18	-0.01926186
299.4	-0.00240329		829.39	0.00085254		1359.39	0.0005843		1889.38	0.00143184		2419.38	-0.0056085		2949.38	0.01080567		3479.38	-0.00318779		4009.38	-0.01940435
299.6	-0.00210409		829.59	0.00077326		1359.59	-0.00036375		1889.58	0.00008547		2419.58	-0.00489052		2949.58	0.01122572		3479.58	-0.00283881		4009.58	-0.01908342
299.8	-0.00223766		829.79	0.00072405		1359.79	-0.00031695		1889.78	0.00037209		2419.78	-0.00380307		2949.78	0.01084252		3479.78	-0.00240112		4009.78	-0.01910654
300	-0.00193918		829.99	0.00075251		1359.99	-0.00023787		1889.98	0.00118209		2419.98	-0.00326703		2949.98	0.01058228		3479.98	-0.00343798		4009.98	-0.01904794
300.2	-0.00170398		830.19	0.00061557		1360.19	-0.000659		1890.18	0.00165385		2420.18	-0.00313313		2950.18	0.01080229		3480.18	-0.00366064		4010.18	-0.01956091
300.4	-0.00201859		830.39	0.0011806		1360.39	-0.00105014		1890.38	0.00170255		2420.38	-0.00238656		2950.38	0.01048579		3480.38	-0.00413377		4010.38	-0.01999095
300.6	-0.00135793		830.59	0.0011648		1360.59	-0.00161637		1890.58	0.00217145		2420.58	-0.0024331		2950.58	0.0112618		3480.58	-0.00427961		4010.58	-0.02040911
300.8	-0.00171512		830.79	0.00130305		1360.79	-0.00217706		1890.78	0.00241239		2420.78	-0.00193235		2950.78	0.01218949		3480.78	-0.0028381		4010.78	-0.02022204
301	-0.00227381		830.99	0.00157819		1360.99	-0.00277264		1890.98	0.00216278		2420.98	-0.00183746		2950.98	0.01183818		3480.98	-0.00234208		4010.98	-0.02020491
301.2	-0.00191828		831.19	0.00094608		1361.19	-0.00237448		1891.18	0.00216402		2421.18	-0.00104444		2951.18	0.01150263		3481.18	-0.0020177		4011.18	-0.01983585
301.4	-0.00190475		831.39	0.0004243		1361.39	-0.00192165		1891.38	0.00122266		2421.38	-0.00144797		2951.38	0.01126715		3481.38	-0.00184418		4011.38	-0.01918041
301.6	-0.00199091		831.59	0.00010815		1361.59	-0.0010317		1891.58	0.00137212		2421.58	-0.00219226		2951.58	0.01116138		3481.58	-0.0008418		4011.58	-0.01843872
301.8	-0.00211063		831.79	0.00017153		1361.79	-0.00054444		1891.78	0.00136762		2421.78	-0.00292329		2951.78	0.01174844		3481.78	-0.00059554		4011.78	-0.01880159
302	-0.00259218		831.99	0.0007036		1361.99	-0.00002881		1891.98	0.00121922		2421.98	-0.00416931		2951.98	0.01239133		3481.98	-0.00032414		4011.98	-0.01895932
302.2	-0.00253671		832.19	0.00049072		1362.19	0.00014309		1892.18	0.00061072		2422.18	-0.00422614		2952.18	0.01244189		3482.18	-0.00113865		4012.18	-0.0190154
302.4	-0.0024646		832.39	-0.00005459		1362.39	0.00048137		1892.38	0.00032765		2422.38	-0.00489301		2952.38	0.01265158		3482.38	-0.00046333		4012.38	-0.02010043
302.6	-0.00198078		832.59	-0.000569		1362.59	0.00080419		1892.58	-0.00052698		2422.58	-0.00584872		2952.58	0.01322875		3482.58	-0.00064024		4012.58	-0.02023716
302.8	-0.00243306		832.79	-0.00077403		1362.79	0.00175289		1892.78	-0.00037316		2422.78	-0.00556678		2952.78	0.01324527		3482.78	-0.00180591		4012.78	-0.02024704
303	-0.00240093		832.99	-0.00023245		1362.99	0.00221955		1892.98	-0.00050413		2422.98	-0.00558357		2952.98	0.01342388		3482.98	-0.00259175		4012.98	-0.02092299
303.2	-0.00174846		833.19	0.00026892		1363.19	0.00279521		1893.18	-0.00114567		2423.18	-0.00555315		2953.18	0.01378745		3483.18	-0.00303218		4013.18	-0.02036253
303.4	-0.00151962		833.39	0.00012301		1363.39	0.0035651		1893.38	-0.00141941		2423.38	-0.00493419		2953.38	0.01314119		3483.38	-0.00277388		4013.38	-0.02025037
303.6	0.00014163		833.59	0.00038608		1363.59	0.00307451		1893.58	-0.00103117		2423.58	-0.00458224		2953.58	0.0130598		3483.58	-0.00379734		4013.58	-0.02042702
303.8	0.00003476		833.79	0.00044589		1363.79	0.00270243		1893.78	-0.00026128		2423.78	-0.00489788		2953.78	0.01279241		3483.78	-0.00481167		4013.78	-0.02116244
304	0.00089808		833.99	0.00068925		1363.99	0.00274593		1893.98	-0.00021089		2423.98	-0.00472098		2953.98	0.01249968		3483.98	-0.00659117		4013.98	-0.02234433
304.2	0.00114257		834.19	0.00126256		1364.19	0.00152443		1894.18	-0.00043611		2424.18	-0.00463435		2954.18	0.01245407		3484.18	-0.00659449		4014.18	-0.02317097
304.4	0.00107055		834.39	0.00176625		1364.39	0.00082834		1894.38	0.00010965		2424.38	-0.00435667		2954.38	0.01263107		3484.38	-0.0064216		4014.38	-0.02300028
304.6	0.00143099		834.59	0.00203255		1364.59	-0.00028818		1894.58	-0.00022074		2424.58	-0.00476793		2954.58	0.01235873		3484.58	-0.00558115		4014.58	-0.02339601
304.8	0.00058696		834.79	0.00199802		1364.79	-0.00127702		1894.78	-0.00028563		2424.78	-0.0047773		2954.78	0.01229353		3484.78	-0.00538507		4014.78	-0.02290054
305	0.00028955		834.99	0.00220833		1364.99	-0.00117981		1894.98	-0.00014985		2424.98	-0.00521341		2954.98	0.01196545		3484.98	-0.00547334		4014.98	-0.02228402
305.2	-0.00072234		835.19	0.00148218		1365.19	-0.00053084		1895.18	0.00052472		2425.18	-0.00540944		2955.18	0.01151127		3485.18	-0.00562129		4015.18	-0.02184231
305.4	-0.00090047		835.39	0.00128227		1365.39	0.00004025		1895.38	0.00041286		2425.38	-0.00626095		2955.38	0.01146636		3485.38	-0.00470503		4015.38	-0.0209808
305.6	-0.0020151		835.59	0.00089915		1365.59	-0.00015858		1895.58	0.0011961		2425.58	-0.00777704		2955.58	0.01103672		3485.58	-0.00408098		4015.58	-0.02074952
305.8	-0.0035106		835.79	0.00168861		1365.79	-0.00042793		1895.78	0.0009897		2425.78	-0.00713237		2955.78	0.01113725		3485.78	-0.00373378		4015.78	-0.02115409
306	-0.00352801		835.99	0.00187931		1365.99	-0.00104342		1895.98	0.00035535		2425.98	-0.00792606		2955.98	0.01055266		3485.98	-0.00373276		4015.98	-0.02188726
306.2	-0.00330639		836.19	0.00230763		1366.19	-0.00128904		1896.18	-0.00002251		2426.18	-0.00689306		2956.18	0.01034125		3486.18	-0.00353307		4016.18	-0.02202266
306.4	-0.00292785		836.39	0.00305901		1366.39	-0.00059618		1896.38	0.00032581		2426.38	-0.00714988		2956.38	0.01008418		3486.38	-0.00312275		4016.38	-0.02150099
306.6	-0.00294222		836.59	0.00287345		1366.59	0.00024794		1896.58	0.00022071		2426.58	-0.00685835		2956.58	0.00966958		3486.58	-0.00368475		4016.58	-0.02120993
306.8	-0.00379093		836.79	0.00292161		1366.79	0.00032892		1896.78	0.00038807		2426.78	-0.00671327		2956.78	0.00870171		3486.78	-0.00354068		4016.78	-0.02083555
307	-0.00346332		836.99	0.00321069		1366.99	0.00112975		1896.98	0.00074806		2426.98	-0.00647826		2956.98	0.00852763		3486.98	-0.00295663		4016.98	-0.02110601
307.2	-0.00258117		837.19	0.00319517		1367.19	0.00104011		1897.18	0.00082656		2427.18	-0.00698168		2957.18	0.00845723		3487.18	-0.00274992		4017.18	-0.02058943
307.4	-0.00283193		837.39	0.00354654		1367.39	0.00074989		1897.38	0.00078887		2427.38	-0.00643254		2957.38	0.0083633		3487.38	-0.00339232		4017.38	-0.02081883
307.6	-0.00184875		837.59	0.00298005		1367.59	-0.00107029		1897.58	0.00132174		2427.58	-0.00614553		2957.58	0.00817472		3487.58	-0.00405776		4017.58	-0.02118893
307.8	-0.00206999		837.79	0.00290676		1367.79	-0.00199263		1897.78	0.00131125		2427.78	-0.00583224		2957.78	0.00841089		3487.78	-0.00476728		4017.78	-0.02142871
308	-0.00163998		837.99	0.00347415		1367.99	-0.00207595		1897.98	0.00140397		2427.98	-0.00536106		2957.98	0.00812557		3487.98	-0.00523345		4017.98	-0.02173123
308.2	-0.0015122		838.19	0.00366988		1368.19	-0.00338196		1898.18	0.00147991		2428.18	-0.00491644		2958.18	0.00900371		3488.18	-0.00384669		4018.18	-0.02073163
308.4	-0.00129266		838.39	0.00322817		1368.39	-0.00326541		1898.38	0.00190321		2428.38	-0.00509049		2958.38	0.01003402		3488.38	-0.00361528		4018.38	-0.0199358
308.6	-0.00154144		838.59	0.00265755		1368.59	-0.00338968		1898.58	0.00148436		2428.58	-0.00464629		2958.58	0.00989597		3488.58	-0.00367203		4018.58	-0.01966211
308.8	-0.00233844		838.79	0.00244085		1368.79	-0.00244284		1898.78	0.00188519		2428.78	-0.00441074		2958.78	0.01029782		3488.78	-0.00415287		4018.78	-0.02008968
309	-0.0024842		838.99	0.00188993		1368.99	-0.00149133		1898.98	0.00181625		2428.98	-0.00516681		2958.98	0.0105968		3488.98	-0.00418827		4018.98	-0.01980883
309.2	-0.00344013		839.19	0.00120785		1369.19	-0.00053368		1899.18	0.00227976		2429.18	-0.00467067		2959.18	0.01072257		3489.18	-0.00374235		4019.18	-0.02065619
309.4	-0.00285449		839.39	0.00051873		1369.39	0.00008726		1899.38	0.0017729		2429.38	-0.00462919		2959.38	0.01088362		3489.38	-0.00370159		4019.38	-0.02051194
309.6	-0.00451775		839.59	-0.00013981		1369.59	0.00052146		1899.58	0.0008756		2429.58	-0.00530667		2959.58	0.01124508		3489.58	-0.0026992		4019.58	-0.02096463
309.8	-0.0050161		839.79	0.00059227		1369.79	0.00155357		1899.78	0.0004805		2429.78	-0.00480189		2959.78	0.01179287		3489.78	-0.0027112		4019.78	-0.02140957
310	-0.0038539		839.99	0.00034726		1369.99	0.00152586		1899.98	0.00015738		2429.98	-0.00562965		2959.98	0.01109831		3489.98	-0.00244712		4019.98	-0.02256008
310.2	-0.00413136		840.19	0.00059399		1370.19	0.00265916		1900.18	-0.00054723		2430.18	-0.00544457		2960.18	0.01162981		3490.18	-0.00216845		4020.18	-0.02202268
310.4	-0.00390633		840.39	0.00124639		1370.39	0.00279408		1900.38	-0.00075443		2430.38	-0.00529856		2960.38	0.01089468		3490.38	-0.00254749		4020.38	-0.02151138
310.6	-0.0039861		840.59	0.0007924		1370.59	0.00268965		1900.58	-0.00074681		2430.58	-0.00578484		2960.58	0.01050842		3490.58	-0.00161017		4020.58	-0.02219471
310.8	-0.00437879		840.79	-0.00016942		1370.79	0.00279397		1900.78	-0.00083718		2430.78	-0.00578897		2960.78	0.01003696		3490.78	-0.00169304		4020.78	-0.02278708
311	-0.00431209		840.99	-0.0003918		1370.99	0.00355144		1900.98	-0.00056038		2430.98	-0.0055451		2960.98	0.0099707		3490.98	-0.00202597		4020.98	-0.02307686
311.2	-0.00423585		841.19	-0.00096128		1371.19	0.00175429		1901.18	-0.00108305		2431.18	-0.00480874		2961.18	0.00981509		3491.18	-0.00262596		4021.18	-0.02261345
311.4	-0.00470715		841.39	-0.00082055		1371.39	0.00039184		1901.38	-0.00070449		2431.38	-0.00354531		2961.38	0.01060585		3491.38	-0.00384685		4021.38	-0.022494
311.6	-0.00328925		841.59	-0.00187138		1371.59	-0.00118395		1901.58	-0.00072415		2431.58	-0.00362953		2961.58	0.00947145		3491.58	-0.00426523		4021.58	-0.02067812
311.8	-0.00252186		841.79	-0.00158168		1371.79	-0.00124805		1901.78	-0.0000271		2431.78	-0.00408189		2961.78	0.01050639		3491.78	-0.00480389		4021.78	-0.0200271
312	-0.00203029		841.99	-0.00154522		1371.99	-0.00131185		1901.98	0.00049293		2431.98	-0.00414489		2961.98	0.01088099		3491.98	-0.00479006		4021.98	-0.01930883
312.2	-0.00212609		842.19	-0.00177136		1372.19	-0.00230901		1902.18	0.0008243		2432.18	-0.00362225		2962.18	0.012083		3492.18	-0.00412472		4022.18	-0.01815595
312.4	-0.0021271		842.39	-0.0023684		1372.39	-0.00191631		1902.38	0.00077373		2432.38	-0.00407088		2962.38	0.01263357		3492.38	-0.00471654		4022.38	-0.01790243
312.6	-0.00202384		842.59	-0.00214784		1372.59	-0.00231087		1902.58	0.00097692		2432.58	-0.00443916		2962.58	0.01194458		3492.58	-0.00512362		4022.58	-0.01873022
312.8	-0.002416		842.79	-0.00244892		1372.79	-0.00228655		1902.78	0.00185669		2432.78	-0.00501284		2962.78	0.01219916		3492.78	-0.00538191		4022.78	-0.01878945
313	-0.00178243		842.99	-0.00284223		1372.99	-0.00309565		1902.98	0.00297804		2432.98	-0.00493016		2962.98	0.01263069		3492.98	-0.00596024		4022.98	-0.01838562
313.2	-0.00166702		843.19	-0.00305013		1373.19	-0.00316837		1903.18	0.00409084		2433.18	-0.00339253		2963.18	0.0124216		3493.18	-0.00625927		4023.18	-0.01859545
313.4	-0.00115965		843.39	-0.00276019		1373.39	-0.00253888		1903.38	0.0042864		2433.38	-0.00356031		2963.38	0.0128158		3493.38	-0.00677237		4023.38	-0.01835573
313.6	-0.00120638		843.59	-0.00141713		1373.59	-0.00202555		1903.58	0.00385257		2433.58	-0.00409452		2963.58	0.01284552		3493.58	-0.00643129		4023.58	-0.0187314
313.8	-0.00048654		843.79	-0.00007861		1373.79	-0.00137728		1903.78	0.00400208		2433.78	-0.00388922		2963.78	0.01343928		3493.78	-0.00702263		4023.78	-0.01890532
314	0.00019945		843.99	0.00069753		1373.99	-0.00168994		1903.98	0.00356882		2433.98	-0.00379262		2963.98	0.01322967		3493.98	-0.00602371		4023.98	-0.0196174
314.2	0.00033924		844.19	0.00093062		1374.19	-0.00163379		1904.18	0.00369012		2434.18	-0.00341999		2964.18	0.01325047		3494.18	-0.00590934		4024.18	-0.01931732
314.4	0.00066825		844.39	0.00254763		1374.39	-0.00224205		1904.38	0.00268049		2434.38	-0.00291829		2964.38	0.01274012		3494.38	-0.00608924		4024.38	-0.01979199
314.6	0.00059878		844.59	0.00225593		1374.59	-0.00216916		1904.58	0.00295051		2434.58	-0.0022374		2964.58	0.01208256		3494.58	-0.00586159		4024.58	-0.02031941
314.8	-0.00015075		844.79	0.00200502		1374.79	-0.00303552		1904.78	0.00280175		2434.78	-0.0020477		2964.78	0.0119475		3494.78	-0.00620661		4024.78	-0.02064639
315	-0.00033277		844.99	0.00266894		1374.99	-0.00302566		1904.98	0.00164297		2434.98	-0.00284634		2964.98	0.01158144		3494.98	-0.00615877		4024.98	-0.01996187
315.2	-0.00040531		845.19	0.00318137		1375.19	-0.00460792		1905.18	0.00087757		2435.18	-0.00262017		2965.18	0.01203107		3495.18	-0.00582706		4025.18	-0.01903679
315.4	-0.00003436		845.39	0.00364125		1375.39	-0.00470158		1905.38	0.0007578		2435.38	-0.00411002		2965.38	0.01205609		3495.38	-0.00566356		4025.38	-0.01832242
315.6	0.00062167		845.59	0.00206219		1375.59	-0.00434806		1905.58	-0.00169766		2435.58	-0.00543082		2965.58	0.01172953		3495.58	-0.00513588		4025.58	-0.01712046
315.8	0.00000642		845.79	0.00222779		1375.79	-0.00382791		1905.78	-0.00162		2435.78	-0.00681488		2965.78	0.01247942		3495.78	-0.00361567		4025.78	-0.01813847
316	-0.00095133		845.99	0.00175887		1375.99	-0.00335855		1905.98	-0.00229197		2435.98	-0.00708557		2965.98	0.01275814		3495.98	-0.00237882		4025.98	-0.01834076
316.2	-0.00063943		846.19	0.00166071		1376.19	-0.00352904		1906.18	-0.00318377		2436.18	-0.00775643		2966.18	0.0135434		3496.18	-0.00124231		4026.18	-0.018292
316.4	-0.00137022		846.39	0.00082701		1376.39	-0.00268756		1906.38	-0.00371641		2436.38	-0.00959196		2966.38	0.01275589		3496.38	-0.00114341		4026.38	-0.01849767
316.6	-0.00104675		846.59	-0.00007774		1376.59	-0.00307201		1906.58	-0.00296032		2436.58	-0.01037357		2966.58	0.01205587		3496.58	-0.00111755		4026.58	-0.01817348
316.8	-0.00171188		846.79	-0.00084845		1376.79	-0.00286025		1906.78	-0.00176788		2436.78	-0.0107709		2966.78	0.01284172		3496.78	-0.00124909		4026.78	-0.01794787
317	-0.00133597		846.99	-0.00049337		1376.99	-0.00225542		1906.98	-0.00091933		2436.98	-0.01016371		2966.98	0.01272971		3496.98	-0.00249207		4026.98	-0.0178477
317.2	-0.00169007		847.19	-0.0006476		1377.19	-0.0017846		1907.18	-0.00042055		2437.18	-0.00978429		2967.18	0.01258311		3497.18	-0.00287551		4027.18	-0.01722336
317.4	-0.00196878		847.39	0.00054217		1377.39	-0.00097076		1907.38	-0.00036906		2437.38	-0.01020608		2967.38	0.01288588		3497.38	-0.00286706		4027.38	-0.01665878
317.6	-0.00168853		847.59	0.00080816		1377.59	-0.00148215		1907.58	0.00033088		2437.58	-0.01041294		2967.58	0.01274557		3497.58	-0.00302801		4027.58	-0.01669394
317.8	-0.00135778		847.79	0.00000762		1377.79	-0.00081626		1907.78	0.00102154		2437.78	-0.00984239		2967.78	0.01332155		3497.78	-0.00255565		4027.78	-0.01753134
318	-0.00082662		847.99	-0.00024466		1377.99	-0.00143816		1907.98	0.00188648		2437.98	-0.00940058		2967.98	0.0133502		3497.98	-0.00221599		4027.98	-0.01763637
318.2	-0.00102182		848.19	-0.00005337		1378.19	-0.00179042		1908.18	0.00230161		2438.18	-0.00939922		2968.18	0.01321359		3498.18	-0.00271035		4028.18	-0.01766988
318.4	-0.0012584		848.39	0.00037342		1378.39	-0.00207231		1908.38	0.00279632		2438.38	-0.00906407		2968.38	0.01344395		3498.38	-0.0031446		4028.38	-0.01795286
318.6	-0.00140361		848.59	0.00010651		1378.59	-0.00295423		1908.58	0.00386103		2438.58	-0.00861526		2968.58	0.01326526		3498.58	-0.00358787		4028.58	-0.01856692
318.8	-0.00212609		848.79	0.00041517		1378.79	-0.00308152		1908.78	0.00369173		2438.78	-0.00897566		2968.78	0.01305721		3498.78	-0.00341126		4028.78	-0.0194003
319	-0.00257443		848.99	0.00164582		1378.99	-0.00300756		1908.98	0.00335086		2438.98	-0.00959985		2968.98	0.01276348		3498.98	-0.00269044		4028.98	-0.01932121
319.2	-0.00249155		849.19	0.00239683		1379.19	-0.00418586		1909.18	0.00385032		2439.18	-0.0093001		2969.18	0.01353117		3499.18	-0.00231157		4029.18	-0.01958962
319.4	-0.00231023		849.39	0.00177826		1379.39	-0.00434364		1909.38	0.00295404		2439.38	-0.00995921		2969.38	0.01286953		3499.38	-0.00202227		4029.38	-0.02015658
319.6	-0.00399686		849.59	0.00105864		1379.59	-0.00447819		1909.58	0.00182676		2439.58	-0.00948717		2969.58	0.0128964		3499.58	-0.00230485		4029.58	-0.0205722
319.8	-0.00471286		849.79	0.00111218		1379.79	-0.0045435		1909.78	0.00283576		2439.78	-0.00995026		2969.78	0.0131068		3499.78	-0.00169731		4029.78	-0.02168025
320	-0.00508909		849.99	0.00158657		1379.99	-0.00437445		1909.98	0.00213353		2439.98	-0.00911946		2969.98	0.01238615		3499.98	-0.00169521		4029.98	-0.02235545
320.2	-0.00511704		850.19	0.00134659		1380.19	-0.00389407		1910.18	0.00175618		2440.18	-0.008936		2970.18	0.0119795		3500.18	-0.00234522		4030.18	-0.02312394
320.4	-0.00618369		850.39	0.0011223		1380.39	-0.0033004		1910.38	0.0010986		2440.38	-0.00889638		2970.38	0.01133866		3500.38	-0.00274862		4030.38	-0.02330767
320.6	-0.00507276		850.59	0.00113935		1380.59	-0.00299672		1910.58	0.00088531		2440.58	-0.00860248		2970.58	0.01159849		3500.58	-0.00314129		4030.58	-0.02360469
320.8	-0.00493984		850.79	0.00182408		1380.79	-0.00295776		1910.78	0.00091284		2440.78	-0.00806796		2970.78	0.01171276		3500.78	-0.0042738		4030.78	-0.02448684
321	-0.00442174		850.99	0.00170494		1380.99	-0.00281257		1910.98	0.00141102		2440.98	-0.00707436		2970.98	0.01133514		3500.98	-0.00494192		4030.98	-0.02434596
321.2	-0.00471557		851.19	0.00165888		1381.19	-0.00254282		1911.18	0.00097467		2441.18	-0.00636878		2971.18	0.01108035		3501.18	-0.00527506		4031.18	-0.02391881
321.4	-0.00405885		851.39	0.00138609		1381.39	-0.00253198		1911.38	0.00127231		2441.38	-0.00605837		2971.38	0.01106278		3501.38	-0.00539662		4031.38	-0.0241062
321.6	-0.00278325		851.59	0.00095688		1381.59	-0.00243004		1911.58	0.00169861		2441.58	-0.00542316		2971.58	0.01091426		3501.58	-0.00555984		4031.58	-0.02509506
321.8	-0.0014681		851.79	0.00073984		1381.79	-0.00106553		1911.78	0.00168767		2441.78	-0.00486775		2971.78	0.0112179		3501.78	-0.00487823		4031.78	-0.02501297
322	-0.00050906		851.99	0.00118546		1381.99	-0.0008551		1911.98	0.00228754		2441.98	-0.00451977		2971.98	0.01168503		3501.98	-0.0054078		4031.98	-0.02521751
322.2	0.000265		852.19	0.00181917		1382.19	-0.00057143		1912.18	0.00251029		2442.18	-0.00397277		2972.18	0.01231746		3502.18	-0.00602862		4032.18	-0.02483665
322.4	0.00139802		852.39	0.00163425		1382.39	0.00007969		1912.38	0.00293986		2442.38	-0.0035819		2972.38	0.01277905		3502.38	-0.00578483		4032.38	-0.02447827
322.6	0.00174299		852.59	0.00235701		1382.59	-0.00017418		1912.58	0.00244301		2442.58	-0.0038		2972.58	0.01301016		3502.58	-0.00551712		4032.58	-0.02375596
322.8	0.00197825		852.79	0.00337389		1382.79	0.00109831		1912.78	0.00295576		2442.78	-0.00473991		2972.78	0.01267842		3502.78	-0.00441618		4032.78	-0.0227196
323	0.00238567		852.99	0.00342473		1382.99	0.00001344		1912.98	0.00342612		2442.98	-0.00575899		2972.98	0.01376842		3502.98	-0.0037927		4032.98	-0.02074463
323.2	0.00235691		853.19	0.00245439		1383.19	0.0001655		1913.18	0.00372177		2443.18	-0.00585418		2973.18	0.01410528		3503.18	-0.0044542		4033.18	-0.02035918
323.4	0.00184941		853.39	0.00165805		1383.39	-0.00041151		1913.38	0.00257272		2443.38	-0.00609469		2973.38	0.01427293		3503.38	-0.00418965		4033.38	-0.01965908
323.6	0.00066655		853.59	0.0017457		1383.59	-0.00119672		1913.58	0.00192661		2443.58	-0.00626087		2973.58	0.01440074		3503.58	-0.00397061		4033.58	-0.01821928
323.8	0.00011933		853.79	0.00193457		1383.79	-0.00073012		1913.78	0.00101062		2443.78	-0.00701263		2973.78	0.01396175		3503.78	-0.00415355		4033.78	-0.01792035
324	-0.00029145		853.99	0.00241855		1383.99	-0.0005556		1913.98	-0.00037721		2443.98	-0.00647425		2973.98	0.01349569		3503.98	-0.00374599		4033.98	-0.01781529
324.2	-0.0012385		854.19	0.00144093		1384.19	-0.00064044		1914.18	-0.00090038		2444.18	-0.00647722		2974.18	0.0141881		3504.18	-0.00377154		4034.18	-0.01722408
324.4	-0.00242967		854.39	0.00140514		1384.39	-0.00089345		1914.38	-0.00105279		2444.38	-0.0065718		2974.38	0.01481508		3504.38	-0.00235144		4034.38	-0.01667575
324.6	-0.00248173		854.59	0.00124195		1384.59	-0.00074998		1914.58	-0.0006685		2444.58	-0.00686913		2974.58	0.01536964		3504.58	-0.00110488		4034.58	-0.01743376
324.8	-0.00325667		854.79	0.00043931		1384.79	-0.00140131		1914.78	-0.00077223		2444.78	-0.00675066		2974.78	0.01510307		3504.78	-0.00098695		4034.78	-0.01772153
325	-0.00377297		854.99	-0.00002159		1384.99	-0.00163765		1914.98	-0.00029645		2444.98	-0.00686228		2974.98	0.01480738		3504.98	-0.00032367		4034.98	-0.01767946
325.2	-0.00481403		855.19	-0.00069906		1385.19	-0.00137747		1915.18	0.00025184		2445.18	-0.00617132		2975.18	0.0143142		3505.18	-0.00013295		4035.18	-0.01741052
325.4	-0.00482009		855.39	-0.00067445		1385.39	-0.00176094		1915.38	0.00132671		2445.38	-0.00690969		2975.38	0.01400693		3505.38	-0.00007195		4035.38	-0.01865198
325.6	-0.00525267		855.59	-0.00036897		1385.59	-0.00127879		1915.58	0.00188752		2445.58	-0.00653425		2975.58	0.01320417		3505.58	0.00030271		4035.58	-0.02004012
325.8	-0.00495396		855.79	-0.00079858		1385.79	-0.00149289		1915.78	0.00298512		2445.78	-0.00588795		2975.78	0.01290661		3505.78	0.00006191		4035.78	-0.02115894
326	-0.00510568		855.99	-0.00032161		1385.99	-0.00176487		1915.98	0.00373621		2445.98	-0.00566709		2975.98	0.01252048		3505.98	-0.00127132		4035.98	-0.02304767
326.2	-0.0049097		856.19	-0.00118094		1386.19	-0.0021873		1916.18	0.00385488		2446.18	-0.00599587		2976.18	0.01266491		3506.18	-0.00249084		4036.18	-0.02309517
326.4	-0.00504727		856.39	-0.00087802		1386.39	-0.00155865		1916.38	0.00445953		2446.38	-0.00707001		2976.38	0.01150708		3506.38	-0.00250642		4036.38	-0.0232906
326.6	-0.0044215		856.59	-0.00167584		1386.59	-0.00210149		1916.58	0.00512592		2446.58	-0.00860024		2976.58	0.01088183		3506.58	-0.00307459		4036.58	-0.02257271
326.8	-0.00336052		856.79	-0.0020181		1386.79	-0.0017179		1916.78	0.00475748		2446.78	-0.01029673		2976.78	0.01018725		3506.78	-0.00369845		4036.78	-0.02241465
327	-0.00292007		856.99	-0.00297597		1386.99	-0.00272193		1916.98	0.00437187		2446.98	-0.01073182		2976.98	0.01062681		3506.98	-0.0046818		4036.98	-0.02233599
327.2	-0.00242988		857.19	-0.00306892		1387.19	-0.00257738		1917.18	0.0042336		2447.18	-0.01035525		2977.18	0.01012884		3507.18	-0.00548578		4037.18	-0.02246689
327.4	-0.0015297		857.39	-0.00242544		1387.39	-0.00321101		1917.38	0.00328597		2447.38	-0.01077801		2977.38	0.00960879		3507.38	-0.00618537		4037.38	-0.02202617
327.6	-0.00088492		857.59	-0.00158091		1387.59	-0.00313148		1917.58	0.00275483		2447.58	-0.0108302		2977.58	0.0094954		3507.58	-0.00640578		4037.58	-0.02086857
327.8	-0.00083052		857.79	-0.00098299		1387.79	-0.00226619		1917.78	0.00268406		2447.78	-0.01014327		2977.78	0.0098109		3507.78	-0.007214		4037.78	-0.02074238
328	-0.00039056		857.99	-0.0006335		1387.99	-0.00157982		1917.98	0.00277813		2447.98	-0.00931815		2977.98	0.01071823		3507.98	-0.00669842		4037.98	-0.019448
328.2	-0.00063645		858.19	-0.00054977		1388.19	-0.0018394		1918.18	0.00343112		2448.18	-0.00979778		2978.18	0.01105072		3508.18	-0.00568517		4038.18	-0.01890938
328.4	0.00007196		858.39	-0.00062379		1388.39	-0.00108608		1918.38	0.00273391		2448.38	-0.00938329		2978.38	0.01187556		3508.38	-0.0043395		4038.38	-0.01924724
328.6	0.00082652		858.59	-0.00039917		1388.59	-0.0007234		1918.58	0.00237797		2448.58	-0.00905137		2978.58	0.0124929		3508.58	-0.00366792		4038.58	-0.01964231
328.8	0.0008062		858.79	0.00010296		1388.79	-0.00083889		1918.78	0.0021383		2448.78	-0.00826656		2978.78	0.01262975		3508.78	-0.0037024		4038.78	-0.01971458
329	0.00036637		858.99	0.00108316		1388.99	-0.00111908		1918.98	0.00294112		2448.98	-0.00732333		2978.98	0.01302542		3508.98	-0.00301732		4038.98	-0.01942933
329.2	0.00003319		859.19	0.00080455		1389.19	-0.00083582		1919.18	0.00320653		2449.18	-0.0061274		2979.18	0.01304814		3509.18	-0.00202841		4039.18	-0.02011158
329.4	-0.00052401		859.39	0.00134494		1389.39	-0.00148756		1919.38	0.00309826		2449.38	-0.00639364		2979.38	0.01385073		3509.38	-0.00225732		4039.38	-0.02087669
329.6	-0.0010201		859.59	0.00127911		1389.59	-0.00160065		1919.58	0.00352422		2449.58	-0.00556315		2979.58	0.01382311		3509.58	-0.00175128		4039.58	-0.02124077
329.8	-0.00111642		859.79	0.00133217		1389.79	-0.00206958		1919.78	0.00357725		2449.78	-0.00459744		2979.78	0.0140895		3509.78	-0.00179346		4039.78	-0.02172544
330	-0.00180291		859.99	0.00079975		1389.99	-0.00201528		1919.98	0.00311886		2449.98	-0.00454425		2979.98	0.01398485		3509.98	-0.00305284		4039.98	-0.02179515
330.2	-0.00192064		860.19	0.00094712		1390.19	-0.00274446		1920.18	0.00290588		2450.18	-0.00480122		2980.18	0.01412015		3510.18	-0.00270321		4040.18	-0.02197968
330.4	-0.00188548		860.39	0.00138425		1390.39	-0.00289863		1920.38	0.00226671		2450.38	-0.00491676		2980.38	0.01374739		3510.38	-0.00283779		4040.38	-0.02219921
330.6	-0.00136232		860.59	-0.00047752		1390.59	-0.00317684		1920.58	0.00090089		2450.58	-0.00572214		2980.58	0.01423025		3510.58	-0.0034931		4040.58	-0.02212274
330.8	-0.00163075		860.79	-0.00082148		1390.79	-0.00407581		1920.78	-0.00008435		2450.78	-0.00538612		2980.78	0.01432344		3510.78	-0.00343746		4040.78	-0.02200813
331	-0.002231		860.99	-0.00103183		1390.99	-0.00384222		1920.98	0.00060539		2450.98	-0.00421062		2980.98	0.01480993		3510.98	-0.00366006		4040.98	-0.02238081
331.2	-0.00184413		861.19	-0.00101444		1391.19	-0.00390028		1921.18	0.00028858		2451.18	-0.00428331		2981.18	0.01438253		3511.18	-0.004496		4041.18	-0.02218606
331.4	-0.00185894		861.39	-0.00109487		1391.39	-0.00358181		1921.38	-0.00040911		2451.38	-0.0038287		2981.38	0.01360591		3511.38	-0.00501225		4041.38	-0.02232235
331.6	-0.00195864		861.59	-0.00036724		1391.59	-0.00284024		1921.58	-0.00038276		2451.58	-0.00376649		2981.58	0.01332739		3511.58	-0.00461529		4041.58	-0.02150672
331.8	-0.00216091		861.79	0.00009625		1391.79	-0.00251761		1921.78	0.00031468		2451.78	-0.00325898		2981.78	0.01333788		3511.78	-0.00400506		4041.78	-0.02140554
332	-0.00119051		861.99	0.00052507		1391.99	-0.00172515		1921.98	0.00053733		2451.98	-0.00333258		2981.98	0.01351154		3511.98	-0.00318841		4041.98	-0.02114848
332.2	-0.00116475		862.19	0.00055581		1392.19	-0.00168013		1922.18	0.00090927		2452.18	-0.00383252		2982.18	0.01325993		3512.18	-0.00294613		4042.18	-0.02248196
332.4	-0.00108192		862.39	0.00078567		1392.39	-0.00083779		1922.38	-0.00026512		2452.38	-0.00387854		2982.38	0.01326471		3512.38	-0.00373864		4042.38	-0.02335674
332.6	-0.00249144		862.59	0.00137851		1392.59	-0.00086993		1922.58	0.00084216		2452.58	-0.00448738		2982.58	0.01278724		3512.58	-0.00334578		4042.58	-0.02393566
332.8	-0.00270083		862.79	0.00219618		1392.79	-0.00062563		1922.78	0.00127042		2452.78	-0.00450742		2982.78	0.01275034		3512.78	-0.0039239		4042.78	-0.02477396
333	-0.00325863		862.99	0.00237726		1392.99	-0.00142308		1922.98	0.00183191		2452.98	-0.00493534		2982.98	0.01258018		3512.98	-0.0039596		4042.98	-0.02464486
333.2	-0.00312867		863.19	0.00171919		1393.19	-0.00183015		1923.18	0.00235214		2453.18	-0.00595393		2983.18	0.01202652		3513.18	-0.00371301		4043.18	-0.02463435
333.4	-0.00355064		863.39	0.0023432		1393.39	-0.00259962		1923.38	0.00242879		2453.38	-0.00623196		2983.38	0.01281902		3513.38	-0.00366453		4043.38	-0.02370979
333.6	-0.00347184		863.59	0.00271297		1393.59	-0.00264482		1923.58	0.00303221		2453.58	-0.00664461		2983.58	0.01259818		3513.58	-0.00283688		4043.58	-0.02291275
333.8	-0.00343339		863.79	0.0026011		1393.79	-0.00264696		1923.78	0.00223098		2453.78	-0.00698464		2983.78	0.01283614		3513.78	-0.00263685		4043.78	-0.02352354
334	-0.00313567		863.99	0.0028248		1393.99	-0.00250494		1923.98	0.00164967		2453.98	-0.00685433		2983.98	0.01238462		3513.98	-0.00311928		4043.98	-0.02358749
334.2	-0.00211292		864.19	0.00325036		1394.19	-0.0026506		1924.18	0.00066269		2454.18	-0.00697922		2984.18	0.01252336		3514.18	-0.00243081		4044.18	-0.02452577
334.4	-0.00191828		864.39	0.00181206		1394.39	-0.00232442		1924.38	-0.0003717		2454.38	-0.00713108		2984.38	0.013254		3514.38	-0.00333752		4044.38	-0.02435066
334.6	-0.0021334		864.59	-0.00010745		1394.59	-0.00205464		1924.58	-0.00117053		2454.58	-0.00691179		2984.58	0.01408612		3514.58	-0.00378673		4044.58	-0.02413288
334.8	-0.00238585		864.79	0.00013141		1394.79	-0.00194692		1924.78	-0.00123864		2454.78	-0.00677258		2984.78	0.01456964		3514.78	-0.00282605		4044.78	-0.02357863
335	-0.00250135		864.99	-0.0004965		1394.99	-0.0014278		1924.98	-0.00163331		2454.98	-0.00654669		2984.98	0.01516153		3514.98	-0.00303554		4044.98	-0.0239812
335.2	-0.00203992		865.19	-0.00071133		1395.19	-0.00091289		1925.18	-0.00193228		2455.18	-0.00646316		2985.18	0.01427558		3515.18	-0.00385999		4045.18	-0.02365667
335.4	-0.00187567		865.39	-0.00128724		1395.39	0.00016002		1925.38	-0.00125424		2455.38	-0.00511367		2985.38	0.01451539		3515.38	-0.00370106		4045.38	-0.02401248
335.6	-0.00187079		865.59	-0.00076954		1395.59	0.00076979		1925.58	-0.00001884		2455.58	-0.00581056		2985.58	0.01521641		3515.58	-0.00384191		4045.58	-0.0238249
335.8	-0.00194535		865.79	-0.00109185		1395.79	0.00134473		1925.78	0.00021183		2455.78	-0.00481095		2985.78	0.01542205		3515.78	-0.00373849		4045.78	-0.02370363
336	-0.00201388		865.99	-0.00159688		1395.99	0.00166024		1925.98	0.00080775		2455.98	-0.00435347		2985.98	0.01655758		3515.98	-0.00473803		4045.98	-0.02401882
336.2	-0.00321882		866.19	-0.00214934		1396.19	0.00180027		1926.18	0.00125841		2456.18	-0.0045047		2986.18	0.01568822		3516.18	-0.00516959		4046.18	-0.02543318
336.4	-0.00314849		866.39	-0.00157634		1396.39	0.00132078		1926.38	0.00146624		2456.38	-0.00455681		2986.38	0.01506463		3516.38	-0.0055663		4046.38	-0.0252695
336.6	-0.00394902		866.59	-0.00196179		1396.59	0.00048834		1926.58	0.00226429		2456.58	-0.00437456		2986.58	0.01461221		3516.58	-0.00527723		4046.58	-0.02550077
336.8	-0.0036101		866.79	-0.00096452		1396.79	0.00006839		1926.78	0.0024778		2456.78	-0.00435879		2986.78	0.01470993		3516.78	-0.00580646		4046.78	-0.02543043
337	-0.00359533		866.99	-0.00055135		1396.99	-0.00094149		1926.98	0.00251167		2456.98	-0.00563567		2986.98	0.01495686		3516.98	-0.00548624		4046.98	-0.02431446
337.2	-0.0037499		867.19	0.00026114		1397.19	-0.00149766		1927.18	0.00224084		2457.18	-0.00576965		2987.18	0.01470804		3517.18	-0.00569809		4047.18	-0.02379149
337.4	-0.00366412		867.39	0.00052153		1397.39	-0.00208416		1927.38	0.00166371		2457.38	-0.00602445		2987.38	0.01608273		3517.38	-0.00595719		4047.38	-0.02362336
337.6	-0.00353278		867.59	0.00057541		1397.59	-0.00256309		1927.58	0.00102066		2457.58	-0.00706253		2987.58	0.01649085		3517.58	-0.00551643		4047.58	-0.02352432
337.8	-0.00254843		867.79	0.00160514		1397.79	-0.00248891		1927.78	0.00019936		2457.78	-0.00727072		2987.78	0.01616782		3517.78	-0.00575421		4047.78	-0.02369577
338	-0.00151728		867.99	0.00273454		1397.99	-0.00196254		1927.98	-0.00138622		2457.98	-0.00706913		2987.98	0.01611265		3517.98	-0.00512581		4047.98	-0.0230662
338.2	-0.0012762		868.19	0.00273812		1398.19	-0.00246691		1928.18	-0.00264079		2458.18	-0.0074742		2988.18	0.01666407		3518.18	-0.00487999		4048.18	-0.02357147
338.4	-0.00073795		868.39	0.00277297		1398.39	-0.0026477		1928.38	-0.00302057		2458.38	-0.00821302		2988.38	0.01752811		3518.38	-0.00484361		4048.38	-0.02267155
338.6	-0.00045003		868.59	0.00269248		1398.59	-0.00214604		1928.58	-0.00359126		2458.58	-0.00792006		2988.58	0.01793362		3518.58	-0.00420389		4048.58	-0.0225696
338.8	-0.0003825		868.79	0.00417372		1398.79	-0.001215		1928.78	-0.00315685		2458.78	-0.00863253		2988.78	0.01751595		3518.78	-0.00326379		4048.78	-0.02214796
339	-0.00020063		868.99	0.00332423		1398.99	-0.00084595		1928.98	-0.0025085		2458.98	-0.00895613		2988.98	0.0168844		3518.98	-0.0041587		4048.98	-0.02211217
339.2	-0.00050082		869.19	0.00431043		1399.19	-0.00008421		1929.18	-0.00231382		2459.18	-0.00890316		2989.18	0.01562511		3519.18	-0.0044654		4049.18	-0.0217885
339.4	-0.00058664		869.39	0.00411218		1399.39	-0.00010011		1929.38	-0.00191248		2459.38	-0.00836469		2989.38	0.01598319		3519.38	-0.0037137		4049.38	-0.02133853
339.6	-0.00083552		869.59	0.00422219		1399.59	0.00018511		1929.58	-0.00201636		2459.58	-0.0085617		2989.58	0.01631737		3519.58	-0.00369212		4049.58	-0.02062757
339.8	-0.00049146		869.79	0.00359352		1399.79	0.00070636		1929.78	-0.00119772		2459.78	-0.00770747		2989.78	0.0156709		3519.78	-0.00313793		4049.78	-0.0211059
340	-0.0006186		869.99	0.00379283		1399.99	-0.00029731		1929.98	0.00052306		2459.98	-0.00726288		2989.98	0.0153798		3519.98	-0.00323551		4049.98	-0.02185522
340.2	-0.00050678		870.19	0.00378026		1400.19	0.00008539		1930.18	0.00186934		2460.18	-0.00631496		2990.18	0.01391118		3520.18	-0.00319575		4050.18	-0.02220265
340.4	-0.00046197		870.39	0.00392087		1400.39	-0.00014111		1930.38	0.00286876		2460.38	-0.00470302		2990.38	0.01340333		3520.38	-0.00319604		4050.38	-0.02187376
340.6	-0.00018913		870.59	0.00318895		1400.59	-0.00096813		1930.58	0.00339974		2460.58	-0.00433903		2990.58	0.01321412		3520.58	-0.00378062		4050.58	-0.02197596
340.8	-0.00080691		870.79	0.00310582		1400.79	-0.0010155		1930.78	0.00341358		2460.78	-0.00497976		2990.78	0.01353065		3520.78	-0.00423812		4050.78	-0.02150324
341	-0.00128746		870.99	0.00202601		1400.99	-0.00159984		1930.98	0.003446		2460.98	-0.00501607		2990.98	0.01340397		3520.98	-0.00389285		4050.98	-0.02097915
341.2	-0.00222714		871.19	0.00090396		1401.19	-0.0019329		1931.18	0.00327161		2461.18	-0.00469004		2991.18	0.01310123		3521.18	-0.00509665		4051.18	-0.02112711
341.4	-0.00169147		871.39	-0.00007121		1401.39	-0.00217618		1931.38	0.0036056		2461.38	-0.00584755		2991.38	0.01393742		3521.38	-0.0054299		4051.38	-0.02125984
341.6	-0.0020383		871.59	0.00033535		1401.59	-0.00203435		1931.58	0.0024156		2461.58	-0.00639288		2991.58	0.01438976		3521.58	-0.00495917		4051.58	-0.02122333
341.8	-0.00067342		871.79	0.00076634		1401.79	-0.00241176		1931.78	0.00211702		2461.78	-0.0062523		2991.78	0.01430739		3521.78	-0.004864		4051.78	-0.02055817
342	0.00035156		871.99	0.00019332		1401.99	-0.00223979		1931.98	0.00072432		2461.98	-0.00598863		2991.98	0.01470075		3521.98	-0.00429156		4051.98	-0.02056555
342.2	-0.00044324		872.19	0.00019424		1402.19	-0.00252873		1932.18	0.00094391		2462.18	-0.00661376		2992.18	0.01488422		3522.18	-0.00507883		4052.18	-0.02099845
342.4	-0.00039956		872.39	-0.0001684		1402.39	-0.00193526		1932.38	0.00021756		2462.38	-0.00717135		2992.38	0.01524783		3522.38	-0.0051209		4052.38	-0.02117762
342.6	-0.00009425		872.59	-0.00072983		1402.59	-0.00133519		1932.58	0.00008474		2462.58	-0.00682092		2992.58	0.01500303		3522.58	-0.00549645		4052.58	-0.02106978
342.8	-0.00038274		872.79	-0.00057315		1402.79	-0.00054738		1932.78	0.00015902		2462.78	-0.00811115		2992.78	0.01518953		3522.78	-0.00483533		4052.78	-0.02016996
343	-0.00055945		872.99	-0.00081524		1402.99	-0.00100006		1932.98	-0.00033532		2462.98	-0.00866719		2992.98	0.01525144		3522.98	-0.00476315		4052.98	-0.01964495
343.2	-0.00073933		873.19	-0.00028446		1403.19	-0.00185834		1933.18	-0.0005315		2463.18	-0.00871206		2993.18	0.01557997		3523.18	-0.00392719		4053.18	-0.01943096
343.4	0.00015967		873.39	-0.00064		1403.39	-0.00137897		1933.38	-0.00050124		2463.38	-0.00852567		2993.38	0.01608674		3523.38	-0.00314646		4053.38	-0.01974152
343.6	-0.00003112		873.59	-0.00020099		1403.59	-0.00039778		1933.58	0.0001634		2463.58	-0.00889553		2993.58	0.01658391		3523.58	-0.0029312		4053.58	-0.02064309
343.8	0.00084162		873.79	0.0002339		1403.79	-0.00080962		1933.78	0.00163189		2463.78	-0.00916957		2993.78	0.01677669		3523.78	-0.00321668		4053.78	-0.02140277
344	0.00069459		873.99	0.00108485		1403.99	-0.00150136		1933.98	0.00234264		2463.98	-0.00792902		2993.98	0.01548809		3523.98	-0.00382134		4053.98	-0.02151406
344.2	0.00052217		874.19	0.0005786		1404.19	-0.00132383		1934.18	0.00288243		2464.18	-0.00692924		2994.18	0.01563571		3524.18	-0.00496415		4054.18	-0.02157925
344.4	0.00050617		874.39	0.00049932		1404.39	-0.00104487		1934.38	0.00331248		2464.38	-0.00628015		2994.38	0.01532135		3524.38	-0.00446279		4054.38	-0.02200608
344.6	0.00050183		874.59	0.00010188		1404.59	-0.00150106		1934.58	0.00321277		2464.58	-0.00616576		2994.58	0.01566536		3524.58	-0.0050004		4054.58	-0.02210769
344.8	-0.00041782		874.79	-0.00009326		1404.79	-0.00157946		1934.78	0.003221		2464.78	-0.00639661		2994.78	0.01525079		3524.78	-0.00534956		4054.78	-0.02218291
345	-0.00116893		874.99	-0.00043823		1404.99	-0.00188824		1934.98	0.0024587		2464.98	-0.00623865		2994.98	0.01532899		3524.98	-0.00529554		4054.98	-0.02238423
345.2	-0.00143972		875.19	-0.00048019		1405.19	-0.00192378		1935.18	0.00177238		2465.18	-0.00680069		2995.18	0.01536362		3525.18	-0.00554875		4055.18	-0.02267998
345.4	-0.0014757		875.39	0.0002159		1405.39	-0.00265173		1935.38	0.00212684		2465.38	-0.00723108		2995.38	0.0155798		3525.38	-0.0054587		4055.38	-0.02265037
345.6	-0.00178744		875.59	0.00050042		1405.59	-0.00259347		1935.58	0.00155447		2465.58	-0.00683758		2995.58	0.01642194		3525.58	-0.00483604		4055.58	-0.02237107
345.8	-0.00127575		875.79	0.000799		1405.79	-0.00297685		1935.78	0.00117309		2465.78	-0.00660523		2995.78	0.01687092		3525.78	-0.00480524		4055.78	-0.02195699
346	-0.0018073		875.99	0.00066159		1405.99	-0.00212558		1935.98	0.00047835		2465.98	-0.00612368		2995.98	0.01710396		3525.98	-0.00513904		4055.98	-0.02231352
346.2	-0.00227823		876.19	0.0005708		1406.19	-0.00241584		1936.18	-0.00008139		2466.18	-0.00632622		2996.18	0.01746278		3526.18	-0.00601064		4056.18	-0.02290292
346.4	-0.0019191		876.39	0.00056866		1406.39	-0.00151093		1936.38	-0.00084003		2466.38	-0.00595703		2996.38	0.0181964		3526.38	-0.00568617		4056.38	-0.02233541
346.6	-0.00155579		876.59	0.00076475		1406.59	-0.00139927		1936.58	-0.00015526		2466.58	-0.005332		2996.58	0.01848132		3526.58	-0.00565576		4056.58	-0.0212529
346.8	-0.00257336		876.79	0.00107549		1406.79	-0.00083146		1936.78	-0.00033454		2466.78	-0.00567296		2996.78	0.01918062		3526.78	-0.00392738		4056.78	-0.02148495
347	-0.00249036		876.99	0.00078711		1406.99	-0.00104133		1936.98	-0.00009715		2466.98	-0.00552883		2996.98	0.01892627		3526.98	-0.00426985		4056.98	-0.02202185
347.2	-0.00205825		877.19	0.00043133		1407.19	-0.00074397		1937.18	0.00029985		2467.18	-0.00593086		2997.18	0.01949588		3527.18	-0.00421625		4057.18	-0.02237164
347.4	-0.00194051		877.39	0.00109381		1407.39	-0.00032051		1937.38	0.00039484		2467.38	-0.0058778		2997.38	0.01941169		3527.38	-0.00411498		4057.38	-0.02277464
347.6	-0.0023825		877.59	0.00224707		1407.59	-0.00037724		1937.58	0.00113052		2467.58	-0.00587302		2997.58	0.01939749		3527.58	-0.00412978		4057.58	-0.02269788
347.8	-0.00135008		877.79	0.00203072		1407.79	-0.00105731		1937.78	0.00189489		2467.78	-0.00574788		2997.78	0.01921093		3527.78	-0.00475989		4057.78	-0.02345969
348	-0.00151955		877.99	0.00146583		1407.99	-0.00094552		1937.98	0.0021819		2467.98	-0.00532391		2997.98	0.0183179		3527.98	-0.00517562		4057.98	-0.02388896
348.2	-0.00153561		878.19	0.00119881		1408.19	-0.00105243		1938.18	0.0029858		2468.18	-0.00539601		2998.18	0.01853692		3528.18	-0.00595225		4058.18	-0.02417024
348.4	-0.00131001		878.39	0.00147642		1408.39	-0.00050148		1938.38	0.00299794		2468.38	-0.00568494		2998.38	0.01829422		3528.38	-0.00544844		4058.38	-0.024947
348.6	-0.00104918		878.59	0.00133333		1408.59	-0.0003393		1938.58	0.00329436		2468.58	-0.00591848		2998.58	0.01821986		3528.58	-0.00563355		4058.58	-0.02540493
348.8	-0.00067454		878.79	0.00107776		1408.79	-0.0005716		1938.78	0.00394557		2468.78	-0.00656422		2998.78	0.01790578		3528.78	-0.0056645		4058.78	-0.02484599
349	-0.00139925		878.99	0.00065002		1408.99	-0.00073792		1938.98	0.00315253		2468.98	-0.00672898		2998.98	0.0187067		3528.98	-0.00457237		4058.98	-0.02551453
349.2	-0.00152361		879.19	0.00046364		1409.19	-0.00102269		1939.18	0.00365667		2469.18	-0.00696776		2999.18	0.01875728		3529.18	-0.00417084		4059.18	-0.02485755
349.4	-0.00190745		879.39	0.00018573		1409.39	-0.00129646		1939.38	0.00358443		2469.38	-0.00794655		2999.38	0.01803075		3529.38	-0.00390998		4059.38	-0.02499156
349.6	-0.00142976		879.59	-0.00032546		1409.59	-0.00111899		1939.58	0.00310647		2469.58	-0.00803235		2999.58	0.01846903		3529.58	-0.00391642		4059.58	-0.02526626
349.8	-0.00211967		879.79	-0.00017446		1409.79	-0.00169992		1939.78	0.00255332		2469.78	-0.00864504		2999.78	0.01913367		3529.78	-0.00394682		4059.78	-0.02506253
350	-0.0021737		879.99	-0.0008136		1409.99	-0.002688		1939.98	0.00244105		2469.98	-0.00764636		2999.98	0.0190444		3529.98	-0.00406166		4059.98	-0.02472968
350.2	-0.00199083		880.19	-0.00006977		1410.19	-0.00285374		1940.18	0.00251978		2470.18	-0.00733346		3000.18	0.0184384		3530.18	-0.00374823		4060.18	-0.0241306
350.4	-0.00260227		880.39	0.00040811		1410.39	-0.00193433		1940.38	0.0025619		2470.38	-0.00659979		3000.38	0.01811819		3530.38	-0.00313987		4060.38	-0.02261175
350.6	-0.00291552		880.59	-0.00001044		1410.59	-0.00214634		1940.58	0.00331284		2470.58	-0.00626057		3000.58	0.01829871		3530.58	-0.00229676		4060.58	-0.02194246
350.8	-0.00282607		880.79	-0.00040039		1410.79	-0.00193367		1940.78	0.00319182		2470.78	-0.00635326		3000.78	0.01840537		3530.78	-0.00143903		4060.78	-0.02233251
351	-0.00229838		880.99	-0.00048259		1410.99	-0.00197686		1940.98	0.00320896		2470.98	-0.00616372		3000.98	0.01780435		3530.98	-0.00203525		4060.98	-0.02128934
351.2	-0.00231029		881.19	-0.00020829		1411.19	-0.00268013		1941.18	0.0030187		2471.18	-0.00631384		3001.18	0.01782781		3531.18	-0.00131039		4061.18	-0.01994505
351.4	-0.00217489		881.39	0.00007687		1411.39	-0.00338158		1941.38	0.00398274		2471.38	-0.00625991		3001.38	0.01743226		3531.38	-0.00111666		4061.38	-0.01967423
351.6	-0.00209446		881.59	-0.00018278		1411.59	-0.00307874		1941.58	0.00472627		2471.58	-0.00596755		3001.58	0.01725754		3531.58	-0.00084494		4061.58	-0.02037556
351.8	-0.00173206		881.79	-0.00146234		1411.79	-0.00326114		1941.78	0.0050385		2471.78	-0.00521151		3001.78	0.01707809		3531.78	-0.00105664		4061.78	-0.02058922
352	-0.00179964		881.99	-0.00101815		1411.99	-0.00380728		1941.98	0.00423043		2471.98	-0.00464882		3001.98	0.01713468		3531.98	-0.00214099		4061.98	-0.02073319
352.2	-0.00131704		882.19	-0.00012279		1412.19	-0.00418208		1942.18	0.00461422		2472.18	-0.00440627		3002.18	0.01669856		3532.18	-0.00259132		4062.18	-0.02087983
352.4	-0.00187617		882.39	0.00039917		1412.39	-0.00434239		1942.38	0.00329967		2472.38	-0.00519865		3002.38	0.01712981		3532.38	-0.00259494		4062.38	-0.02190802
352.6	-0.00202195		882.59	0.00107		1412.59	-0.00432438		1942.58	0.00265754		2472.58	-0.00488771		3002.58	0.01717857		3532.58	-0.00309363		4062.58	-0.0222027
352.8	-0.00219005		882.79	0.00134275		1412.79	-0.00512267		1942.78	0.00212697		2472.78	-0.00515536		3002.78	0.01729333		3532.78	-0.00329246		4062.78	-0.02309452
353	-0.00339551		882.99	0.00224652		1412.99	-0.004528		1942.98	0.00099734		2472.98	-0.00501197		3002.98	0.01715511		3532.98	-0.00395116		4062.98	-0.02463052
353.2	-0.00294487		883.19	0.00239386		1413.19	-0.00401763		1943.18	0.00054591		2473.18	-0.00588519		3003.18	0.01715204		3533.18	-0.00453516		4063.18	-0.02497756
353.4	-0.00296029		883.39	0.00238806		1413.39	-0.00445562		1943.38	-0.00086158		2473.38	-0.00679391		3003.38	0.01750468		3533.38	-0.00477462		4063.38	-0.02634153
353.6	-0.00384591		883.59	0.00239957		1413.59	-0.0046045		1943.58	-0.00100407		2473.58	-0.00703777		3003.58	0.01826813		3533.58	-0.00555387		4063.58	-0.02638474
353.8	-0.00444773		883.79	0.00290335		1413.79	-0.00458166		1943.78	-0.00161597		2473.78	-0.00713314		3003.78	0.01884857		3533.78	-0.00573728		4063.78	-0.02568868
354	-0.00394418		883.99	0.00295582		1413.99	-0.00503769		1943.98	-0.00236141		2473.98	-0.00672606		3003.98	0.01870714		3533.98	-0.00540605		4063.98	-0.02494023
354.2	-0.00377703		884.19	0.0032062		1414.19	-0.00358622		1944.18	-0.00208601		2474.18	-0.00670845		3004.18	0.01832023		3534.18	-0.00504774		4064.18	-0.02417209
354.4	-0.00292021		884.39	0.00170593		1414.39	-0.00241383		1944.38	-0.00229037		2474.38	-0.00651563		3004.38	0.01895769		3534.38	-0.00491673		4064.38	-0.02351284
354.6	-0.00140661		884.59	0.00093248		1414.59	-0.00232028		1944.58	-0.00166859		2474.58	-0.00793331		3004.58	0.02019107		3534.58	-0.00404234		4064.58	-0.02290915
354.8	-0.00120503		884.79	0.00031353		1414.79	-0.00192291		1944.78	-0.00140324		2474.78	-0.00828128		3004.78	0.02004273		3534.78	-0.00393718		4064.78	-0.02284204
355	-0.00049886		884.99	0.00046201		1414.99	-0.00192741		1944.98	-0.00058516		2474.98	-0.00855233		3004.98	0.01900249		3534.98	-0.0041455		4064.98	-0.02232406
355.2	-0.00105345		885.19	-0.00080488		1415.19	-0.0023737		1945.18	0.00009621		2475.18	-0.00908618		3005.18	0.01891988		3535.18	-0.00353891		4065.18	-0.02202124
355.4	-0.00078197		885.39	-0.00170871		1415.39	-0.00259238		1945.38	0.00085968		2475.38	-0.0092201		3005.38	0.01929188		3535.38	-0.00364913		4065.38	-0.02263399
355.6	-0.00106379		885.59	-0.00215292		1415.59	-0.00263151		1945.58	0.00160139		2475.58	-0.00905964		3005.58	0.01882086		3535.58	-0.00320103		4065.58	-0.02307852
355.8	-0.00134247		885.79	-0.00293449		1415.79	-0.00318434		1945.78	0.00160814		2475.78	-0.00904314		3005.78	0.01803594		3535.78	-0.00355918		4065.78	-0.02260698
356	-0.0018719		885.99	-0.00202711		1415.99	-0.00449739		1945.98	0.00160116		2475.98	-0.00958847		3005.98	0.0184597		3535.98	-0.00349986		4065.98	-0.02339962
356.2	-0.00224917		886.19	-0.00229469		1416.19	-0.00477606		1946.18	0.00110683		2476.18	-0.01052546		3006.18	0.01835085		3536.18	-0.00266201		4066.18	-0.02337899
356.4	-0.00382123		886.39	-0.00217445		1416.39	-0.00496195		1946.38	0.00020234		2476.38	-0.01093728		3006.38	0.01872362		3536.38	-0.00237258		4066.38	-0.02400712
356.6	-0.00427397		886.59	-0.00201971		1416.59	-0.00470852		1946.58	-0.00024782		2476.58	-0.01038677		3006.58	0.01790705		3536.58	-0.00230304		4066.58	-0.02391914
356.8	-0.00476577		886.79	-0.00133893		1416.79	-0.00500824		1946.78	0.0008875		2476.78	-0.01123121		3006.78	0.01771772		3536.78	-0.00204683		4066.78	-0.02367359
357	-0.00587729		886.99	-0.0010767		1416.99	-0.00410563		1946.98	0.00087891		2476.98	-0.01137406		3006.98	0.01693759		3536.98	-0.00254257		4066.98	-0.02268851
357.2	-0.0055511		887.19	-0.00111854		1417.19	-0.00387246		1947.18	0.00134266		2477.18	-0.01152901		3007.18	0.01724624		3537.18	-0.00258592		4067.18	-0.02260945
357.4	-0.00566115		887.39	-0.00040369		1417.39	-0.00394702		1947.38	0.00070548		2477.38	-0.01093822		3007.38	0.01772792		3537.38	-0.00324208		4067.38	-0.0220996
357.6	-0.00538473		887.59	-0.00033745		1417.59	-0.00383811		1947.58	0.00017751		2477.58	-0.0102842		3007.58	0.01705581		3537.58	-0.00322174		4067.58	-0.0210763
357.8	-0.00369444		887.79	-0.00010616		1417.79	-0.00343937		1947.78	-0.00004286		2477.78	-0.00978726		3007.78	0.01760379		3537.78	-0.0033674		4067.78	-0.02084472
358	-0.00235207		887.99	-0.00007505		1417.99	-0.00251407		1947.98	-0.00035992		2477.98	-0.00945437		3007.98	0.01713189		3537.98	-0.00231115		4067.98	-0.01985164
358.2	-0.00209332		888.19	-0.0000775		1418.19	-0.00124497		1948.18	0.00002347		2478.18	-0.00790783		3008.18	0.01803685		3538.18	-0.00250691		4068.18	-0.01937457
358.4	-0.00093928		888.39	-0.00020829		1418.39	-0.00052197		1948.38	0.00003195		2478.38	-0.00738149		3008.38	0.01883878		3538.38	-0.00276132		4068.38	-0.01904444
358.6	-0.00030884		888.59	0.00000463		1418.59	-0.00125122		1948.58	0.00121398		2478.58	-0.00729442		3008.58	0.01844156		3538.58	-0.00269706		4068.58	-0.01986031
358.8	-0.00002707		888.79	0.00024163		1418.79	-0.00119867		1948.78	0.00262202		2478.78	-0.00608117		3008.78	0.01768087		3538.78	-0.00378569		4068.78	-0.0205823
359	-0.00016641		888.99	0.00073045		1418.99	-0.00173299		1948.98	0.00351805		2478.98	-0.00545847		3008.98	0.01737437		3538.98	-0.00403615		4068.98	-0.02181471
359.2	-0.00131939		889.19	-0.00075217		1419.19	-0.00191386		1949.18	0.00338986		2479.18	-0.0055708		3009.18	0.01687641		3539.18	-0.00343005		4069.18	-0.02255461
359.4	-0.00123294		889.39	-0.00067565		1419.39	-0.00237634		1949.38	0.0041604		2479.38	-0.00604504		3009.38	0.01609035		3539.38	-0.00322791		4069.38	-0.02346815
359.6	-0.00110422		889.59	-0.00061535		1419.59	-0.00183185		1949.58	0.00467641		2479.58	-0.00650069		3009.58	0.014925		3539.58	-0.0029803		4069.58	-0.02425792
359.8	-0.00133564		889.79	-0.00094636		1419.79	-0.00229204		1949.78	0.00452629		2479.78	-0.0072873		3009.78	0.01503402		3539.78	-0.00273989		4069.78	-0.02489413
360	-0.0021741		889.99	0.00027783		1419.99	-0.00312272		1949.98	0.00366425		2479.98	-0.00753197		3009.98	0.0149991		3539.98	-0.0015132		4069.98	-0.02621374
360.2	-0.00160186		890.19	0.00027693		1420.19	-0.00198781		1950.18	0.00262154		2480.18	-0.00782663		3010.18	0.01453633		3540.18	-0.00067109		4070.18	-0.02751582
360.4	-0.00107542		890.39	0.00124186		1420.39	-0.00232398		1950.38	0.00266894		2480.38	-0.00811755		3010.38	0.01445908		3540.38	-0.0009432		4070.38	-0.02676778
360.6	-0.00093955		890.59	0.00123978		1420.59	-0.00263666		1950.58	0.00216125		2480.58	-0.00806766		3010.58	0.01449907		3540.58	-0.00108185		4070.58	-0.02718019
360.8	-0.00156164		890.79	0.0018447		1420.79	-0.00285699		1950.78	0.00196096		2480.78	-0.00840428		3010.78	0.01399481		3540.78	-0.00176265		4070.78	-0.02730425
361	-0.00102481		890.99	0.00220792		1420.99	-0.00289926		1950.98	0.00164156		2480.98	-0.00766503		3010.98	0.01420958		3540.98	-0.00227547		4070.98	-0.02790414
361.2	0.00016502		891.19	0.00334183		1421.19	-0.00223155		1951.18	0.00155786		2481.18	-0.00691231		3011.18	0.01502381		3541.18	-0.00288608		4071.18	-0.02877756
361.4	0.00112223		891.39	0.00309971		1421.39	-0.00285084		1951.38	0.00112284		2481.38	-0.00602177		3011.38	0.01551948		3541.38	-0.00313088		4071.38	-0.02822393
361.6	0.00221929		891.59	0.00320112		1421.59	-0.00321229		1951.58	0.00029844		2481.58	-0.0058262		3011.58	0.01607268		3541.58	-0.00327696		4071.58	-0.02796442
361.8	0.00320293		891.79	0.00352276		1421.79	-0.0023723		1951.78	0.00106155		2481.78	-0.00569269		3011.78	0.01680795		3541.78	-0.0038299		4071.78	-0.02777846
362	0.00283483		891.99	0.00361429		1421.99	-0.0011033		1951.98	0.00090132		2481.98	-0.00561252		3011.98	0.01683708		3541.98	-0.0034761		4071.98	-0.02693364
362.2	0.00235778		892.19	0.00333755		1422.19	-0.00136804		1952.18	0.00108653		2482.18	-0.00434615		3012.18	0.01777506		3542.18	-0.00352613		4072.18	-0.02668989
362.4	0.00250264		892.39	0.0025126		1422.39	-0.00106003		1952.38	0.002218		2482.38	-0.00458517		3012.38	0.01764934		3542.38	-0.00451596		4072.38	-0.02638271
362.6	0.00201426		892.59	0.00243048		1422.59	-0.0008528		1952.58	0.00302665		2482.58	-0.00387625		3012.58	0.01763369		3542.58	-0.00471278		4072.58	-0.02651609
362.8	0.00094099		892.79	0.00132162		1422.79	-0.00061141		1952.78	0.00347519		2482.78	-0.00395358		3012.78	0.01803833		3542.78	-0.00523571		4072.78	-0.02583212
363	-0.00100727		892.99	0.00057288		1422.99	-0.00038689		1952.98	0.00382764		2482.98	-0.00416095		3012.98	0.01803414		3542.98	-0.00472492		4072.98	-0.02471843
363.2	-0.00253984		893.19	-0.00068028		1423.19	-0.00014903		1953.18	0.00395945		2483.18	-0.00543255		3013.18	0.01743372		3543.18	-0.00468161		4073.18	-0.02380684
363.4	-0.003157		893.39	-0.0004385		1423.39	-0.00003244		1953.38	0.00417973		2483.38	-0.0064069		3013.38	0.01723749		3543.38	-0.00542632		4073.38	-0.02329954
363.6	-0.00377971		893.59	-0.00103879		1423.59	0.00009782		1953.58	0.00379978		2483.58	-0.00721824		3013.58	0.01702621		3543.58	-0.00463932		4073.58	-0.02237437
363.8	-0.00462972		893.79	-0.00037819		1423.79	-0.00036998		1953.78	0.00327492		2483.78	-0.00847231		3013.78	0.01667379		3543.78	-0.00421018		4073.78	-0.0220678
364	-0.00480061		893.99	-0.00004724		1423.99	0.0001796		1953.98	0.0025347		2483.98	-0.00894417		3013.98	0.01629743		3543.98	-0.00354461		4073.98	-0.02176375
364.2	-0.00438414		894.19	0.00039693		1424.19	0.00087484		1954.18	0.00207704		2484.18	-0.0088898		3014.18	0.01724459		3544.18	-0.00343349		4074.18	-0.02072372
364.4	-0.00472319		894.39	0.00074724		1424.39	-0.00052883		1954.38	0.00098272		2484.38	-0.00950201		3014.38	0.01718173		3544.38	-0.00343953		4074.38	-0.0189109
364.6	-0.00495123		894.59	0.00019278		1424.59	-0.00116561		1954.58	0.00048063		2484.58	-0.01010422		3014.58	0.01678573		3544.58	-0.00326365		4074.58	-0.01932408
364.8	-0.00520934		894.79	0.00047922		1424.79	-0.00140556		1954.78	-0.00060955		2484.78	-0.00985478		3014.78	0.01660242		3544.78	-0.00337108		4074.78	-0.01860564
365	-0.00372087		894.99	0.00126917		1424.99	-0.00234787		1954.98	0.00012622		2484.98	-0.00933231		3014.98	0.01712229		3544.98	-0.00307621		4074.98	-0.01806913
365.2	-0.00339761		895.19	0.00104566		1425.19	-0.00164951		1955.18	0.00056617		2485.18	-0.00964977		3015.18	0.01648579		3545.18	-0.00364785		4075.18	-0.01791824
365.4	-0.00289027		895.39	0.00035517		1425.39	-0.00221536		1955.38	0.00082839		2485.38	-0.00956509		3015.38	0.01558013		3545.38	-0.00295717		4075.38	-0.01833294
365.6	-0.00137821		895.59	0.00029226		1425.59	-0.00252811		1955.58	0.00036857		2485.58	-0.00953808		3015.58	0.01583916		3545.58	-0.00302127		4075.58	-0.01854147
365.8	-0.00060422		895.79	-0.00023822		1425.79	-0.00228247		1955.78	0.00089449		2485.78	-0.00897835		3015.78	0.01548472		3545.78	-0.00255309		4075.78	-0.01948237
366	-0.00026492		895.99	0.00042417		1425.99	-0.00081659		1955.98	0.00056071		2485.98	-0.00974051		3015.98	0.01446371		3545.98	-0.00173845		4075.98	-0.02033207
366.2	0.00052764		896.19	0.0000393		1426.19	-0.00132799		1956.18	0.00053363		2486.18	-0.0082275		3016.18	0.014042		3546.18	-0.00155504		4076.18	-0.0205253
366.4	0.00026957		896.39	-0.00054729		1426.39	-0.00144207		1956.38	0.00071717		2486.38	-0.00748502		3016.38	0.01391997		3546.38	-0.00236472		4076.38	-0.02138393
366.6	0.00026894		896.59	-0.00038104		1426.59	-0.00132107		1956.58	0.00127124		2486.58	-0.00704474		3016.58	0.01459711		3546.58	-0.00179677		4076.58	-0.0227593
366.8	-0.00042644		896.79	-0.00093459		1426.79	-0.00172203		1956.78	0.00157499		2486.78	-0.00743138		3016.78	0.01510182		3546.78	-0.00210993		4076.78	-0.02391739
367	-0.00072246		896.99	-0.00099077		1426.99	-0.00195967		1956.98	0.00190583		2486.98	-0.00784987		3016.98	0.01582608		3546.98	-0.00283278		4076.98	-0.02443583
367.2	-0.00093697		897.19	-0.00080423		1427.19	-0.00216432		1957.18	0.00229629		2487.18	-0.00891706		3017.18	0.01652476		3547.18	-0.00343228		4077.18	-0.02630747
367.4	0.00002979		897.39	0.00019543		1427.39	-0.00245825		1957.38	0.00297695		2487.38	-0.00872664		3017.38	0.01738477		3547.38	-0.00342376		4077.38	-0.02735495
367.6	0.0002114		897.59	0.00098717		1427.59	-0.00267087		1957.58	0.00347383		2487.58	-0.00889358		3017.58	0.01760169		3547.58	-0.00221105		4077.58	-0.02703791
367.8	-0.00041851		897.79	0.00225816		1427.79	-0.00169585		1957.78	0.00287512		2487.78	-0.0090512		3017.78	0.01792806		3547.78	-0.00301268		4077.78	-0.02725203
368	-0.00065363		897.99	0.00201197		1427.99	-0.00132453		1957.98	0.0030057		2487.98	-0.00942694		3017.98	0.01844615		3547.98	-0.00285761		4077.98	-0.02733762
368.2	-0.00142616		898.19	0.00330143		1428.19	-0.00197019		1958.18	0.00364308		2488.18	-0.00871407		3018.18	0.01892729		3548.18	-0.00250168		4078.18	-0.02624047
368.4	-0.00144222		898.39	0.00335954		1428.39	-0.00333828		1958.38	0.00289606		2488.38	-0.0094574		3018.38	0.01828718		3548.38	-0.0026826		4078.38	-0.02602818
368.6	-0.00122102		898.59	0.00356723		1428.59	-0.0035398		1958.58	0.00275478		2488.58	-0.00938575		3018.58	0.01836656		3548.58	-0.00329467		4078.58	-0.02551428
368.8	-0.00159588		898.79	0.00397993		1428.79	-0.00345841		1958.78	0.0025359		2488.78	-0.00870058		3018.78	0.01861197		3548.78	-0.00326161		4078.78	-0.02440405
369	-0.00116757		898.99	0.0039121		1428.99	-0.00324592		1958.98	0.00354918		2488.98	-0.00839058		3018.98	0.01716296		3548.98	-0.00243233		4078.98	-0.02323606
369.2	-0.00153989		899.19	0.00275868		1429.19	-0.00276319		1959.18	0.00346272		2489.18	-0.00870067		3019.18	0.01621033		3549.18	-0.0026352		4079.18	-0.02271131
369.4	-0.00042607		899.39	0.00256195		1429.39	-0.00298554		1959.38	0.00281457		2489.38	-0.00793581		3019.38	0.01576619		3549.38	-0.00108859		4079.38	-0.02232688
369.6	0.00074505		899.59	0.00190056		1429.59	-0.00378946		1959.58	0.00223089		2489.58	-0.00820043		3019.58	0.01588587		3549.58	-0.00102105		4079.58	-0.02199904
369.8	0.00074122		899.79	0.00127135		1429.79	-0.00386454		1959.78	0.00216353		2489.78	-0.00767157		3019.78	0.01509543		3549.78	-0.00068611		4079.78	-0.02237926
370	0.00082595		899.99	0.00172458		1429.99	-0.00336893		1959.98	0.00232351		2489.98	-0.00808434		3019.98	0.01488557		3549.98	-0.00098849		4079.98	-0.02183081
370.2	0.00044876		900.19	0.00017493		1430.19	-0.00452291		1960.18	0.0025022		2490.18	-0.00765913		3020.18	0.01499193		3550.18	-0.00164734		4080.18	-0.02234792
370.4	0.00042881		900.39	-0.00121331		1430.39	-0.0044314		1960.38	0.00317751		2490.38	-0.00835734		3020.38	0.01512081		3550.38	-0.00207169		4080.38	-0.02304297
370.6	0.00096317		900.59	-0.00185803		1430.59	-0.00470344		1960.58	0.00414376		2490.58	-0.00927977		3020.58	0.01631307		3550.58	-0.00290153		4080.58	-0.0238119
370.8	0.00053472		900.79	-0.00241474		1430.79	-0.00505844		1960.78	0.00415981		2490.78	-0.01006206		3020.78	0.01642163		3550.78	-0.00384436		4080.78	-0.02338511
371	0.00061025		900.99	-0.00228589		1430.99	-0.00479719		1960.98	0.00417446		2490.98	-0.01087567		3020.98	0.01689209		3550.98	-0.00415568		4080.98	-0.0238004
371.2	0.00017036		901.19	-0.00221716		1431.19	-0.00493271		1961.18	0.00422929		2491.18	-0.01078492		3021.18	0.01741151		3551.18	-0.00388941		4081.18	-0.02476493
371.4	0.00065449		901.39	-0.00141175		1431.39	-0.00408501		1961.38	0.00440187		2491.38	-0.0099201		3021.38	0.01719766		3551.38	-0.00313026		4081.38	-0.02542558
371.6	0.00029406		901.59	-0.00079458		1431.59	-0.00335571		1961.58	0.00362531		2491.58	-0.00944611		3021.58	0.01691679		3551.58	-0.00312191		4081.58	-0.02561999
371.8	-0.00096559		901.79	-0.00070616		1431.79	-0.00233936		1961.78	0.00321367		2491.78	-0.00928695		3021.78	0.01713093		3551.78	-0.00383294		4081.78	-0.02734108
372	-0.00136742		901.99	-0.0004455		1431.99	-0.00221178		1961.98	0.00357166		2491.98	-0.00948189		3021.98	0.0171488		3551.98	-0.00373427		4081.98	-0.02787326
372.2	-0.00213315		902.19	0.00064642		1432.19	-0.00220076		1962.18	0.00349777		2492.18	-0.00867654		3022.18	0.017394		3552.18	-0.00443324		4082.18	-0.02767552
372.4	-0.00230006		902.39	0.00101093		1432.39	-0.00206416		1962.38	0.00248953		2492.38	-0.00898688		3022.38	0.01629694		3552.38	-0.00517322		4082.38	-0.02865805
372.6	-0.00216984		902.59	0.00122214		1432.59	-0.00111926		1962.58	0.00305391		2492.58	-0.00781487		3022.58	0.01633707		3552.58	-0.00504423		4082.58	-0.02789246
372.8	-0.00185967		902.79	0.00137908		1432.79	-0.00106587		1962.78	0.0036756		2492.78	-0.00724626		3022.78	0.01618276		3552.78	-0.00467332		4082.78	-0.02716637
373	-0.001498		902.99	0.0012579		1432.99	-0.00039166		1962.98	0.00353531		2492.98	-0.00674839		3022.98	0.01535945		3552.98	-0.00425235		4082.98	-0.02751348
373.2	-0.00130556		903.19	0.00089424		1433.19	-0.00066699		1963.18	0.00323819		2493.18	-0.00681686		3023.18	0.0156534		3553.18	-0.00466989		4083.18	-0.02750423
373.4	-0.00009752		903.39	0.0009966		1433.39	-0.00032083		1963.38	0.00322106		2493.38	-0.00627023		3023.38	0.01587835		3553.38	-0.00357799		4083.38	-0.02781077
373.6	-0.00007174		903.59	0.00019375		1433.59	-0.00077919		1963.58	0.00322959		2493.58	-0.00655819		3023.58	0.01631557		3553.58	-0.00450103		4083.58	-0.02791344
373.8	-0.00074557		903.79	-0.00046373		1433.79	0.00013313		1963.78	0.00357918		2493.78	-0.00691332		3023.78	0.01613501		3553.78	-0.00421934		4083.78	-0.02758099
374	-0.00050952		903.99	-0.00144729		1433.99	0.00079233		1963.98	0.0039292		2493.98	-0.00775662		3023.98	0.01603073		3553.98	-0.00391343		4083.98	-0.0267214
374.2	0.00025754		904.19	-0.00288567		1434.19	0.00076387		1964.18	0.00432901		2494.18	-0.00837262		3024.18	0.01622849		3554.18	-0.00433039		4084.18	-0.02584264
374.4	0.00073958		904.39	-0.00359284		1434.39	0.00027745		1964.38	0.00508214		2494.38	-0.00846821		3024.38	0.01695116		3554.38	-0.00487301		4084.38	-0.0247292
374.6	0.00074959		904.59	-0.00410311		1434.59	-0.00035759		1964.58	0.00521772		2494.58	-0.00924579		3024.58	0.01851563		3554.58	-0.00490702		4084.58	-0.0244375
374.8	0.00114647		904.79	-0.00352745		1434.79	0.00021476		1964.78	0.00540965		2494.78	-0.00983912		3024.78	0.01791381		3554.78	-0.0035007		4084.78	-0.02390058
375	0.00105301		904.99	-0.00354198		1434.99	0.00069889		1964.98	0.00463014		2494.98	-0.0092652		3024.98	0.0182992		3554.98	-0.00242824		4084.98	-0.02437214
375.2	0.0004499		905.19	-0.00289059		1435.19	-0.00038785		1965.18	0.00416501		2495.18	-0.009765		3025.18	0.01850381		3555.18	-0.00086838		4085.18	-0.02450343
375.4	0.00167957		905.39	-0.00174099		1435.39	-0.00024321		1965.38	0.00393742		2495.38	-0.00986423		3025.38	0.01871521		3555.38	0.00026583		4085.38	-0.02522454
375.6	0.00165654		905.59	-0.0017539		1435.59	-0.00149896		1965.58	0.00300836		2495.58	-0.01020714		3025.58	0.01993102		3555.58	-0.00011232		4085.58	-0.02515973
375.8	0.00111996		905.79	-0.00100905		1435.79	-0.0015393		1965.78	0.00329165		2495.78	-0.01025708		3025.78	0.02060896		3555.78	0.00009159		4085.78	-0.02554005
376	0.00134744		905.99	0.00004746		1435.99	-0.0014504		1965.98	0.00222651		2495.98	-0.01053107		3025.98	0.02004937		3555.98	0.00012973		4085.98	-0.02463503
376.2	0.00153188		906.19	0.00076173		1436.19	-0.00172048		1966.18	0.00208026		2496.18	-0.01004479		3026.18	0.01941665		3556.18	-0.00093231		4086.18	-0.02366962
376.4	0.00199344		906.39	0.00113292		1436.39	-0.00180387		1966.38	0.00194212		2496.38	-0.00935702		3026.38	0.01831016		3556.38	-0.00040319		4086.38	-0.02354743
376.6	0.00252035		906.59	0.00103272		1436.59	-0.00211771		1966.58	0.00143535		2496.58	-0.00822206		3026.58	0.01834736		3556.58	-0.0002826		4086.58	-0.02298366
376.8	0.00197525		906.79	0.00194173		1436.79	-0.00257327		1966.78	0.00129821		2496.78	-0.0085556		3026.78	0.01753399		3556.78	-0.00056772		4086.78	-0.02322904
377	0.00096304		906.99	0.0018288		1436.99	-0.00236001		1966.98	0.00146488		2496.98	-0.00831981		3026.98	0.01630016		3556.98	-0.00134081		4086.98	-0.02344572
377.2	0.00081581		907.19	0.00068233		1437.19	-0.0030141		1967.18	0.00241997		2497.18	-0.00856462		3027.18	0.0155047		3557.18	-0.0022369		4087.18	-0.02261874
377.4	0.00113781		907.39	0.00061062		1437.39	-0.00193058		1967.38	0.00218495		2497.38	-0.00854203		3027.38	0.01489934		3557.38	-0.00198663		4087.38	-0.02283774
377.6	0.00031967		907.59	-0.00050928		1437.59	-0.00154038		1967.58	0.00239726		2497.58	-0.00881149		3027.58	0.01395645		3557.58	-0.00301186		4087.58	-0.02286992
377.8	0.00005177		907.79	-0.00085954		1437.79	-0.00105392		1967.78	0.00262137		2497.78	-0.00887624		3027.78	0.01294161		3557.78	-0.00308093		4087.78	-0.0233133
378	0.00037074		907.99	-0.00162215		1437.99	-0.00136744		1967.98	0.00257538		2497.98	-0.00820605		3027.98	0.01282993		3557.98	-0.00406931		4087.98	-0.02341401
378.2	0.00055538		908.19	-0.00150917		1438.19	-0.00179012		1968.18	0.00262929		2498.18	-0.00783676		3028.18	0.01364117		3558.18	-0.00556036		4088.18	-0.02368718
378.4	0.00017992		908.39	-0.00139831		1438.39	-0.0020762		1968.38	0.00260646		2498.38	-0.00795657		3028.38	0.01421565		3558.38	-0.00637873		4088.38	-0.02494358
378.6	-0.0000251		908.59	-0.00142106		1438.59	-0.00176874		1968.58	0.00218186		2498.58	-0.00873596		3028.58	0.01472388		3558.58	-0.00648652		4088.58	-0.02583531
378.8	0.0000172		908.79	-0.00092831		1438.79	-0.00173302		1968.78	0.00176823		2498.78	-0.00899369		3028.78	0.01419122		3558.78	-0.00664602		4088.78	-0.02634055
379	-0.00071965		908.99	-0.00106357		1438.99	-0.00246188		1968.98	0.00070564		2498.98	-0.00937954		3028.98	0.01507421		3558.98	-0.00709961		4088.98	-0.02687434
379.2	-0.00084277		909.19	-0.00020683		1439.19	-0.00354156		1969.18	-0.00010236		2499.18	-0.0110377		3029.18	0.01598922		3559.18	-0.00729617		4089.18	-0.02710684
379.4	-0.00053996		909.39	-0.00049195		1439.39	-0.00343134		1969.38	-0.0010229		2499.38	-0.0114651		3029.38	0.01691647		3559.38	-0.00837583		4089.38	-0.02757653
379.6	-0.00091969		909.59	-0.00067257		1439.59	-0.00380151		1969.58	-0.00223463		2499.58	-0.01207862		3029.58	0.01763068		3559.58	-0.0094005		4089.58	-0.02742412
379.8	-0.00084959		909.79	0.00014879		1439.79	-0.003306		1969.78	-0.00296494		2499.78	-0.01236358		3029.78	0.01783733		3559.78	-0.00958037		4089.78	-0.02730134
379.99	-0.00084959		909.99	0.00014879		1439.99	-0.003306		1969.98	-0.00296494		2499.98	-0.01236358		3029.98	0.01783733		3559.98	-0.00958037		4089.98	-0.02730134
380.19	0.000743		910.19	-0.00075096		1440.19	-0.00402798		1970.18	-0.00188053		2500.18	-0.01290703		3030.18	0.01931501		3560.18	-0.01037349		4090.18	-0.02710909
380.39	0.00118359		910.39	-0.00120413		1440.39	-0.00500838		1970.38	-0.00153061		2500.38	-0.01326219		3030.38	0.02028292		3560.38	-0.01046999		4090.38	-0.02706078
380.59	0.00244707		910.59	-0.00136373		1440.59	-0.00606788		1970.58	-0.00112771		2500.58	-0.01354825		3030.58	0.0210599		3560.58	-0.01047373		4090.58	-0.02669697
380.79	0.00322436		910.79	-0.00159194		1440.79	-0.00718041		1970.78	-0.00129607		2500.78	-0.01395136		3030.78	0.02162526		3560.78	-0.01093564		4090.78	-0.02594178
380.99	0.00334125		910.99	-0.00115505		1440.99	-0.00828713		1970.98	-0.00121464		2500.98	-0.0139697		3030.98	0.02235563		3560.98	-0.01107579		4090.98	-0.0255741
381.19	0.00452532		911.19	-0.00095175		1441.19	-0.00878519		1971.18	-0.00067504		2501.18	-0.0146919		3031.18	0.02322341		3561.18	-0.01140648		4091.18	-0.02568128
381.39	0.00515794		911.39	-0.00066573		1441.39	-0.00914736		1971.38	-0.00012144		2501.38	-0.01506004		3031.38	0.02357323		3561.38	-0.01144649		4091.38	-0.02511987
381.59	0.00528376		911.59	-0.00105319		1441.59	-0.00846625		1971.58	-0.00024645		2501.58	-0.0149858		3031.58	0.02436991		3561.58	-0.01133775		4091.58	-0.02495123
381.79	0.00544002		911.79	-0.00241831		1441.79	-0.00773116		1971.78	-0.00053799		2501.78	-0.0148011		3031.78	0.02466638		3561.78	-0.01143721		4091.78	-0.02440852
381.99	0.00547807		911.99	-0.00258941		1441.99	-0.00684344		1971.98	-0.00043302		2501.98	-0.01480764		3031.98	0.02446775		3561.98	-0.01116879		4091.98	-0.02449747
382.19	0.00545165		912.19	-0.00317558		1442.19	-0.00601753		1972.18	-0.00062376		2502.18	-0.01471906		3032.18	0.02359015		3562.18	-0.01062622		4092.18	-0.02347033
382.39	0.00469577		912.39	-0.00311453		1442.39	-0.00601024		1972.38	-0.00078779		2502.38	-0.01472435		3032.38	0.02369677		3562.38	-0.01016395		4092.38	-0.0221137
382.59	0.00514947		912.59	-0.00202245		1442.59	-0.00655783		1972.58	-0.00074486		2502.58	-0.01440987		3032.58	0.02248691		3562.58	-0.00998885		4092.58	-0.0215834
382.79	0.00524697		912.79	-0.00141483		1442.79	-0.00619273		1972.78	-0.00101194		2502.78	-0.01420472		3032.78	0.02257662		3562.78	-0.01018564		4092.78	-0.02099004
382.99	0.00570303		912.99	-0.00071696		1442.99	-0.00567466		1972.98	-0.00092889		2502.98	-0.01427134		3032.98	0.02178823		3562.98	-0.01034625		4092.98	-0.02135749
383.19	0.00603936		913.19	-0.00092856		1443.19	-0.00575703		1973.18	-0.00057485		2503.18	-0.01428854		3033.18	0.02177991		3563.18	-0.01029656		4093.18	-0.02133654
383.39	0.00571411		913.39	-0.00120104		1443.39	-0.00617918		1973.38	-0.00097365		2503.38	-0.0145255		3033.38	0.0218959		3563.38	-0.01065127		4093.38	-0.02116812
383.59	0.00627185		913.59	-0.00166899		1443.59	-0.00558063		1973.58	-0.0006938		2503.58	-0.01441308		3033.58	0.02235165		3563.58	-0.01070911		4093.58	-0.0211115
383.79	0.00655442		913.79	-0.00222403		1443.79	-0.00549019		1973.78	-0.00113026		2503.78	-0.01498656		3033.78	0.02314498		3563.78	-0.01081041		4093.78	-0.02173732
383.99	0.00602202		913.99	-0.0037755		1443.99	-0.00488441		1973.98	-0.00042865		2503.98	-0.0152381		3033.98	0.02287959		3563.98	-0.01106337		4093.98	-0.02201393
384.19	0.00621532		914.19	-0.00520178		1444.19	-0.00500432		1974.18	-0.00008864		2504.18	-0.01445759		3034.18	0.0235133		3564.18	-0.0105936		4094.18	-0.02201558
384.39	0.00509044		914.39	-0.00511032		1444.39	-0.00457009		1974.38	-0.00057118		2504.38	-0.01450296		3034.38	0.02334505		3564.38	-0.01055898		4094.38	-0.02290802
384.59	0.0051725		914.59	-0.00410775		1444.59	-0.00419878		1974.58	-0.00108356		2504.58	-0.01418459		3034.58	0.02372122		3564.58	-0.01113071		4094.58	-0.02268603
384.79	0.00408898		914.79	-0.00390967		1444.79	-0.00495647		1974.78	-0.0018802		2504.78	-0.01402055		3034.78	0.02408553		3564.78	-0.01174093		4094.78	-0.023235
384.99	0.00370897		914.99	-0.00263877		1444.99	-0.00509355		1974.98	-0.00186143		2504.98	-0.01356634		3034.98	0.02505884		3564.98	-0.01227146		4094.98	-0.02326715
385.19	0.00348497		915.19	-0.00218309		1445.19	-0.00445905		1975.18	-0.00116021		2505.18	-0.01455049		3035.18	0.02551284		3565.18	-0.01246422		4095.18	-0.02353333
385.39	0.00294689		915.39	-0.00163329		1445.39	-0.00416681		1975.38	-0.00058804		2505.38	-0.01448811		3035.38	0.02561503		3565.38	-0.01219771		4095.38	-0.02337996
385.59	0.00245174		915.59	-0.00174435		1445.59	-0.00337324		1975.58	-0.00131084		2505.58	-0.01412003		3035.58	0.02573178		3565.58	-0.01146968		4095.58	-0.0245526
385.79	0.00193224		915.79	-0.00214238		1445.79	-0.00389574		1975.78	-0.00079279		2505.78	-0.01473339		3035.78	0.02464225		3565.78	-0.01113499		4095.78	-0.02492389
385.99	0.00158179		915.99	-0.00080458		1445.99	-0.00334922		1975.98	-0.00009043		2505.98	-0.01525004		3035.98	0.02357163		3565.98	-0.01082759		4095.98	-0.02504641
386.19	0.00133617		916.19	-0.00056921		1446.19	-0.00369541		1976.18	-0.00024455		2506.18	-0.01633026		3036.18	0.02289514		3566.18	-0.00991509		4096.18	-0.02370825
386.39	0.00082882		916.39	0.00026165		1446.39	-0.0042226		1976.38	0.00033426		2506.38	-0.01521236		3036.38	0.02324365		3566.38	-0.00907564		4096.38	-0.02424934
386.59	0.00191701		916.59	0.000846		1446.59	-0.00459469		1976.58	0.00029155		2506.58	-0.01434077		3036.58	0.02237687		3566.58	-0.00824867		4096.58	-0.02294989
386.79	0.00208421		916.79	0.00054081		1446.79	-0.00484312		1976.78	0.00046566		2506.78	-0.013745		3036.78	0.02193604		3566.78	-0.0078517		4096.78	-0.02281221
386.99	0.00249294		916.99	0.00031966		1446.99	-0.00496964		1976.98	0.00114785		2506.98	-0.01381616		3036.98	0.02143751		3566.98	-0.00761193		4096.98	-0.02301419
387.19	0.00332097		917.19	0.00013317		1447.19	-0.00529761		1977.18	0.00129494		2507.18	-0.01338851		3037.18	0.02161664		3567.18	-0.00702374		4097.18	-0.02234998
387.39	0.0034986		917.39	-0.00098412		1447.39	-0.00533666		1977.38	0.00054744		2507.38	-0.0139143		3037.38	0.02236343		3567.38	-0.00656149		4097.38	-0.02292338
387.59	0.00413648		917.59	-0.0020369		1447.59	-0.0053987		1977.58	0.00061076		2507.58	-0.01355886		3037.58	0.02279236		3567.58	-0.00575103		4097.58	-0.02241108
387.79	0.00532607		917.79	-0.00288873		1447.79	-0.00634038		1977.78	-0.00028555		2507.78	-0.01405353		3037.78	0.02332189		3567.78	-0.00507962		4097.78	-0.0228981
387.99	0.00641146		917.99	-0.00303047		1447.99	-0.006681		1977.98	-0.00022683		2507.98	-0.01261682		3037.98	0.0227996		3567.98	-0.00535055		4097.98	-0.02258407
388.19	0.00708162		918.19	-0.00282911		1448.19	-0.0065705		1978.18	-0.00085614		2508.18	-0.01287348		3038.18	0.02409546		3568.18	-0.00611017		4098.18	-0.0229922
388.39	0.00696364		918.39	-0.00240357		1448.39	-0.00627069		1978.38	-0.00091319		2508.38	-0.01250935		3038.38	0.02472939		3568.38	-0.00757533		4098.38	-0.02352285
388.59	0.00651367		918.59	-0.0022489		1448.59	-0.006255		1978.58	-0.00230568		2508.58	-0.01132023		3038.58	0.02547632		3568.58	-0.00789914		4098.58	-0.02293925
388.79	0.00595258		918.79	-0.00246609		1448.79	-0.00686637		1978.78	-0.00284615		2508.78	-0.01114937		3038.78	0.02577551		3568.78	-0.00856874		4098.78	-0.02256253
388.99	0.00561499		918.99	-0.00123192		1448.99	-0.00665363		1978.98	-0.00231391		2508.98	-0.01130668		3038.98	0.02565159		3568.98	-0.00969999		4098.98	-0.02232401
389.19	0.00498793		919.19	-0.00139062		1449.19	-0.00710477		1979.18	-0.00204668		2509.18	-0.01191974		3039.18	0.0247822		3569.18	-0.00970404		4099.18	-0.02289943
389.39	0.0052303		919.39	-0.00060609		1449.39	-0.00681737		1979.38	-0.00150111		2509.38	-0.01173723		3039.38	0.02323893		3569.38	-0.00999381		4099.38	-0.0239622
389.59	0.00449361		919.59	-0.00063255		1449.59	-0.00628506		1979.58	-0.00146794		2509.58	-0.01207353		3039.58	0.02240597		3569.58	-0.00927368		4099.58	-0.02486594
389.79	0.00386258		919.79	-0.00127608		1449.79	-0.00592895		1979.78	-0.00018382		2509.78	-0.01291695		3039.78	0.02123105		3569.78	-0.00958591		4099.78	-0.02513361
389.99	0.00379472		919.99	-0.0008678		1449.99	-0.00446486		1979.98	0.00048809		2509.98	-0.01384767		3039.98	0.02043826		3569.98	-0.00954281		4099.98	-0.02508898
390.19	0.00382661		920.19	-0.00093605		1450.19	-0.00413194		1980.18	0.00106249		2510.18	-0.01397504		3040.18	0.02045323		3570.18	-0.0084857		4100.18	-0.02494831
390.39	0.00284181		920.39	-0.00121031		1450.39	-0.00399406		1980.38	0.00137132		2510.38	-0.01308116		3040.38	0.02055445		3570.38	-0.00766847		4100.38	-0.02488485
390.59	0.00244462		920.59	-0.00110218		1450.59	-0.00391587		1980.58	0.0009029		2510.58	-0.01317542		3040.58	0.02064375		3570.58	-0.00719721		4100.58	-0.02420335
390.79	0.00240902		920.79	-0.00119301		1450.79	-0.00361166		1980.78	0.00153034		2510.78	-0.01335983		3040.78	0.02001072		3570.78	-0.00614422		4100.78	-0.02528556
390.99	0.00296323		920.99	-0.00109315		1450.99	-0.00298698		1980.98	0.0020046		2510.98	-0.01433154		3040.98	0.02088634		3570.98	-0.00580365		4100.98	-0.02528225
391.19	0.00353252		921.19	-0.00115021		1451.19	-0.00298363		1981.18	0.00111749		2511.18	-0.01403757		3041.18	0.02136563		3571.18	-0.00526555		4101.18	-0.02485471
391.39	0.00373095		921.39	-0.00185519		1451.39	-0.00351089		1981.38	0.00038585		2511.38	-0.01403714		3041.38	0.02189052		3571.38	-0.00468178		4101.38	-0.02556673
391.59	0.00400831		921.59	-0.00249612		1451.59	-0.00508313		1981.58	0.00023741		2511.58	-0.01269692		3041.58	0.02222369		3571.58	-0.00471692		4101.58	-0.02495156
391.79	0.00435737		921.79	-0.00237096		1451.79	-0.00590929		1981.78	-0.00077833		2511.78	-0.01199013		3041.78	0.02311088		3571.78	-0.00479593		4101.78	-0.02484639
391.99	0.00439266		921.99	-0.00205279		1451.99	-0.00575403		1981.98	-0.00102		2511.98	-0.0109947		3041.98	0.02374037		3571.98	-0.00536942		4101.98	-0.02460029
392.19	0.00430633		922.19	-0.00252059		1452.19	-0.0049602		1982.18	-0.00152514		2512.18	-0.01093281		3042.18	0.02483588		3572.18	-0.00605295		4102.18	-0.02415857
392.39	0.0040724		922.39	-0.00236173		1452.39	-0.00543619		1982.38	-0.00136903		2512.38	-0.00991381		3042.38	0.02540947		3572.38	-0.00550088		4102.38	-0.02298458
392.59	0.00390737		922.59	-0.00262502		1452.59	-0.0052872		1982.58	-0.00200914		2512.58	-0.00976494		3042.58	0.02558068		3572.58	-0.00549062		4102.58	-0.02234981
392.79	0.00444547		922.79	-0.00272957		1452.79	-0.00586252		1982.78	-0.00169469		2512.78	-0.00980516		3042.78	0.02540789		3572.78	-0.00690789		4102.78	-0.02196128
392.99	0.00500772		922.99	-0.00285091		1452.99	-0.00639626		1982.98	-0.00067905		2512.98	-0.009938		3042.98	0.02464464		3572.98	-0.00794896		4102.98	-0.02246511
393.19	0.00604112		923.19	-0.00377542		1453.19	-0.00647954		1983.18	-0.00081965		2513.18	-0.0098658		3043.18	0.02454781		3573.18	-0.00717924		4103.18	-0.02145038
393.39	0.00608795		923.39	-0.00352919		1453.39	-0.00537117		1983.38	0.00001176		2513.38	-0.00927154		3043.38	0.02393985		3573.38	-0.00769583		4103.38	-0.02138802
393.59	0.00648482		923.59	-0.00446746		1453.59	-0.00498636		1983.58	0.00094104		2513.58	-0.00930435		3043.58	0.02478516		3573.58	-0.00765281		4103.58	-0.02051312
393.79	0.00682197		923.79	-0.00476772		1453.79	-0.00414213		1983.78	0.00183715		2513.78	-0.00935505		3043.78	0.02358638		3573.78	-0.00786749		4103.78	-0.02062874
393.99	0.00672851		923.99	-0.00486754		1453.99	-0.00401869		1983.98	0.00225264		2513.98	-0.00934672		3043.98	0.0235049		3573.98	-0.00710344		4103.98	-0.01967887
394.19	0.00593163		924.19	-0.0051857		1454.19	-0.00400138		1984.18	0.00203398		2514.18	-0.00924732		3044.18	0.02380981		3574.18	-0.00704888		4104.18	-0.01943446
394.39	0.00575072		924.39	-0.00464617		1454.39	-0.00393053		1984.38	0.00197096		2514.38	-0.00936546		3044.38	0.0236323		3574.38	-0.00688632		4104.38	-0.01931098
394.59	0.00609605		924.59	-0.00363428		1454.59	-0.00424775		1984.58	0.00226284		2514.58	-0.00929605		3044.58	0.02411535		3574.58	-0.0067151		4104.58	-0.01922641
394.79	0.00643197		924.79	-0.00374929		1454.79	-0.00443013		1984.78	0.00292467		2514.78	-0.00865915		3044.78	0.0239994		3574.78	-0.00620801		4104.78	-0.01943191
394.99	0.00700684		924.99	-0.00379184		1454.99	-0.00539435		1984.98	0.00209082		2514.98	-0.00917986		3044.98	0.02381522		3574.98	-0.00670344		4104.98	-0.01908256
395.19	0.00657672		925.19	-0.00366744		1455.19	-0.0057014		1985.18	0.00054356		2515.18	-0.0091031		3045.18	0.02283624		3575.18	-0.00625887		4105.18	-0.01923273
395.39	0.0051926		925.39	-0.00342982		1455.39	-0.00706883		1985.38	0.00066147		2515.38	-0.00968782		3045.38	0.02298071		3575.38	-0.00662124		4105.38	-0.01980544
395.59	0.00455503		925.59	-0.00360369		1455.59	-0.00724064		1985.58	0.0000007		2515.58	-0.00984342		3045.58	0.023464		3575.58	-0.00674942		4105.58	-0.01998317
395.79	0.00349232		925.79	-0.00291465		1455.79	-0.00761551		1985.78	-0.00069615		2515.78	-0.008903		3045.78	0.02426526		3575.78	-0.00646605		4105.78	-0.01993676
395.99	0.00346038		925.99	-0.00148444		1455.99	-0.00742934		1985.98	-0.00091517		2515.98	-0.00997762		3045.98	0.02451812		3575.98	-0.00723025		4105.98	-0.0207722
396.19	0.00358244		926.19	-0.0005786		1456.19	-0.00741905		1986.18	-0.0015805		2516.18	-0.01074523		3046.18	0.02361467		3576.18	-0.00775711		4106.18	-0.02216499
396.39	0.00349133		926.39	0.00031754		1456.39	-0.00717045		1986.38	-0.00169523		2516.38	-0.01130407		3046.38	0.02429755		3576.38	-0.00703935		4106.38	-0.02312353
396.59	0.00410153		926.59	0.00042584		1456.59	-0.00650344		1986.58	-0.00209643		2516.58	-0.01256164		3046.58	0.02399025		3576.58	-0.00759706		4106.58	-0.0237864
396.79	0.00391996		926.79	0.0001853		1456.79	-0.00581967		1986.78	-0.00255558		2516.78	-0.01306992		3046.78	0.0237681		3576.78	-0.00745145		4106.78	-0.02444878
396.99	0.00385292		926.99	0.0004429		1456.99	-0.00497427		1986.98	-0.00191717		2516.98	-0.01402		3046.98	0.02442805		3576.98	-0.00600986		4106.98	-0.02451272
397.19	0.00412847		927.19	0.00079395		1457.19	-0.00470648		1987.18	-0.00241166		2517.18	-0.0133689		3047.18	0.02489712		3577.18	-0.00548081		4107.18	-0.02382162
397.39	0.00416149		927.39	0.00124845		1457.39	-0.00377823		1987.38	-0.00189663		2517.38	-0.01330155		3047.38	0.02403902		3577.38	-0.00551825		4107.38	-0.02429758
397.59	0.00513895		927.59	0.00201804		1457.59	-0.00364255		1987.58	-0.00067816		2517.58	-0.01320237		3047.58	0.02464303		3577.58	-0.00497921		4107.58	-0.02389427
397.79	0.00427822		927.79	0.00166877		1457.79	-0.00283133		1987.78	0.00011653		2517.78	-0.01254117		3047.78	0.02435531		3577.78	-0.0045715		4107.78	-0.02423246
397.99	0.00389979		927.99	0.00142236		1457.99	-0.00293735		1987.98	0.00066927		2517.98	-0.011798		3047.98	0.0245772		3577.98	-0.00354031		4107.98	-0.02348207
398.19	0.00404931		928.19	0.0014076		1458.19	-0.00210561		1988.18	0.00083303		2518.18	-0.01165472		3048.18	0.0242556		3578.18	-0.0041953		4108.18	-0.0235899
398.39	0.00568096		928.39	0.00119087		1458.39	-0.0015034		1988.38	0.00193259		2518.38	-0.01058725		3048.38	0.02434549		3578.38	-0.00443535		4108.38	-0.02306776
398.59	0.00520861		928.59	-0.00035433		1458.59	-0.00212155		1988.58	0.00214773		2518.58	-0.00965741		3048.58	0.02439125		3578.58	-0.00381441		4108.58	-0.0226422
398.79	0.00496583		928.79	-0.00101667		1458.79	-0.00160588		1988.78	0.00208159		2518.78	-0.00913071		3048.78	0.02419877		3578.78	-0.00429576		4108.78	-0.02329078
398.99	0.00491493		928.99	-0.00112122		1458.99	-0.00161638		1988.98	0.00202679		2518.98	-0.00999599		3048.98	0.02350992		3578.98	-0.00410244		4108.98	-0.02377681
399.19	0.00370884		929.19	-0.00172558		1459.19	-0.00148266		1989.18	0.00261694		2519.18	-0.01101296		3049.18	0.02424314		3579.18	-0.00440818		4109.18	-0.02336876
399.39	0.00217908		929.39	-0.002299		1459.39	-0.00271572		1989.38	0.00330283		2519.38	-0.01075355		3049.38	0.02460326		3579.38	-0.00488107		4109.38	-0.02291046
399.59	0.00164808		929.59	-0.00188144		1459.59	-0.00253295		1989.58	0.00347605		2519.58	-0.00968985		3049.58	0.02425477		3579.58	-0.00522882		4109.58	-0.02327823
399.79	0.00165621		929.79	-0.0012678		1459.79	-0.00282194		1989.78	0.00300931		2519.78	-0.00913721		3049.78	0.02429256		3579.78	-0.00593048		4109.78	-0.02330919
399.99	0.00219075		929.99	-0.00103499		1459.99	-0.00280038		1989.98	0.00256681		2519.98	-0.00999553		3049.98	0.02351751		3579.98	-0.00708902		4109.98	-0.02363693
400.19	0.00249546		930.19	-0.00116589		1460.19	-0.00279819		1990.18	0.00211071		2520.18	-0.01053527		3050.18	0.02341281		3580.18	-0.0066565		4110.18	-0.02410717
400.39	0.00201469		930.39	-0.00106477		1460.39	-0.00266279		1990.38	0.00210395		2520.38	-0.01047407		3050.38	0.02390102		3580.38	-0.00596956		4110.38	-0.02334365
400.59	0.00297908		930.59	-0.00123665		1460.59	-0.00310365		1990.58	0.00207579		2520.58	-0.01052808		3050.58	0.02340908		3580.58	-0.00599114		4110.58	-0.0225176
400.79	0.00197645		930.79	-0.00187159		1460.79	-0.00393006		1990.78	0.00251309		2520.78	-0.01098752		3050.78	0.02342192		3580.78	-0.00580767		4110.78	-0.02209023
400.99	0.00296075		930.99	-0.00125621		1460.99	-0.00438293		1990.98	0.00290225		2520.98	-0.0110247		3050.98	0.02415069		3580.98	-0.00587913		4110.98	-0.02187183
401.19	0.00462104		931.19	-0.00062152		1461.19	-0.00534831		1991.18	0.0026278		2521.18	-0.01079459		3051.18	0.02320744		3581.18	-0.00637737		4111.18	-0.0222522
401.39	0.00514892		931.39	-0.00032435		1461.39	-0.00459408		1991.38	0.00378542		2521.38	-0.01129713		3051.38	0.02263769		3581.38	-0.00529668		4111.38	-0.02234244
401.59	0.00553395		931.59	0.00000935		1461.59	-0.00512235		1991.58	0.00483731		2521.58	-0.01091385		3051.58	0.02350434		3581.58	-0.00557849		4111.58	-0.02235858
401.79	0.00565697		931.79	-0.00158368		1461.79	-0.00496089		1991.78	0.00446466		2521.78	-0.01062784		3051.78	0.02399		3581.78	-0.00558577		4111.78	-0.02259896
401.99	0.00683737		931.99	-0.00152387		1461.99	-0.00513361		1991.98	0.00449609		2521.98	-0.01073067		3051.98	0.02374036		3581.98	-0.00509187		4111.98	-0.02251862
402.19	0.00756799		932.19	-0.00278353		1462.19	-0.00553841		1992.18	0.00421468		2522.18	-0.01102089		3052.18	0.02300501		3582.18	-0.00610167		4112.18	-0.02250466
402.39	0.00823578		932.39	-0.00387092		1462.39	-0.00577967		1992.38	0.00390712		2522.38	-0.01058787		3052.38	0.02345525		3582.38	-0.00718301		4112.38	-0.02311315
402.59	0.0076424		932.59	-0.00479043		1462.59	-0.00501059		1992.58	0.00367816		2522.58	-0.0101853		3052.58	0.02346896		3582.58	-0.00705888		4112.58	-0.02392935
402.79	0.0074629		932.79	-0.00519901		1462.79	-0.00431452		1992.78	0.00300818		2522.78	-0.01079608		3052.78	0.02378217		3582.78	-0.00772805		4112.78	-0.02411728
402.99	0.00746265		932.99	-0.005928		1462.99	-0.00537657		1992.98	0.00283654		2522.98	-0.01172944		3052.98	0.02421056		3582.98	-0.00748116		4112.98	-0.02361807
403.19	0.00630154		933.19	-0.00619059		1463.19	-0.00516555		1993.18	0.00203514		2523.18	-0.01204136		3053.18	0.02518443		3583.18	-0.00774973		4113.18	-0.02256363
403.39	0.00548141		933.39	-0.00514364		1463.39	-0.00467786		1993.38	0.00122227		2523.38	-0.01150813		3053.38	0.0248791		3583.38	-0.00759072		4113.38	-0.02278497
403.59	0.00540762		933.59	-0.00451883		1463.59	-0.00346474		1993.58	0.00033492		2523.58	-0.01015322		3053.58	0.02475494		3583.58	-0.00773753		4113.58	-0.02291231
403.79	0.00628941		933.79	-0.00464356		1463.79	-0.00311991		1993.78	-0.00127711		2523.78	-0.00988603		3053.78	0.0249421		3583.78	-0.0070518		4113.78	-0.02231626
403.99	0.00595851		933.99	-0.0048887		1463.99	-0.0024705		1993.98	-0.00181694		2523.98	-0.00937958		3053.98	0.02495406		3583.98	-0.00665219		4113.98	-0.02255367
404.19	0.00510745		934.19	-0.00402063		1464.19	-0.00234069		1994.18	-0.00183269		2524.18	-0.00971716		3054.18	0.02515114		3584.18	-0.00553774		4114.18	-0.02228839
404.39	0.00480802		934.39	-0.00465302		1464.39	-0.00253512		1994.38	-0.00238775		2524.38	-0.00926017		3054.38	0.02518402		3584.38	-0.00521977		4114.38	-0.02155763
404.59	0.00557295		934.59	-0.00484229		1464.59	-0.00252953		1994.58	-0.0023485		2524.58	-0.01001459		3054.58	0.02553913		3584.58	-0.00528764		4114.58	-0.02101301
404.79	0.00470904		934.79	-0.00480362		1464.79	-0.00184109		1994.78	-0.00213708		2524.78	-0.00967584		3054.78	0.02496778		3584.78	-0.00539944		4114.78	-0.02083442
404.99	0.00571696		934.99	-0.00344636		1464.99	-0.00110592		1994.98	-0.00197444		2524.98	-0.0094689		3054.98	0.02435373		3584.98	-0.00442841		4114.98	-0.02123372
405.19	0.00647649		935.19	-0.00300739		1465.19	-0.0015542		1995.18	-0.0010425		2525.18	-0.00943943		3055.18	0.02428756		3585.18	-0.003035		4115.18	-0.02181559
405.39	0.00663555		935.39	-0.00312923		1465.39	-0.0006863		1995.38	0.00024488		2525.38	-0.00949119		3055.38	0.02456439		3585.38	-0.0028846		4115.38	-0.02183414
405.59	0.00671743		935.59	-0.00265018		1465.59	-0.0013555		1995.58	0.00056261		2525.58	-0.00938649		3055.58	0.02531546		3585.58	-0.0028893		4115.58	-0.02246627
405.79	0.00630118		935.79	-0.00287021		1465.79	-0.00161148		1995.78	0.00074436		2525.78	-0.0097573		3055.78	0.02537227		3585.78	-0.00323004		4115.78	-0.0226257
405.99	0.00579151		935.99	-0.00188553		1465.99	-0.00174414		1995.98	0.00220151		2525.98	-0.0107103		3055.98	0.02458188		3585.98	-0.0039526		4115.98	-0.02226269
406.19	0.00590952		936.19	-0.00178717		1466.19	-0.00245302		1996.18	0.00298083		2526.18	-0.01087111		3056.18	0.02435942		3586.18	-0.00527948		4116.18	-0.02236178
406.39	0.00523484		936.39	-0.00174569		1466.39	-0.00289416		1996.38	0.00359392		2526.38	-0.01067033		3056.38	0.0243579		3586.38	-0.00606355		4116.38	-0.02285022
406.59	0.00498454		936.59	-0.00187492		1466.59	-0.00263108		1996.58	0.00433656		2526.58	-0.00983904		3056.58	0.02327576		3586.58	-0.00612237		4116.58	-0.022536
406.79	0.00448116		936.79	-0.00230069		1466.79	-0.00328628		1996.78	0.00391858		2526.78	-0.00985679		3056.78	0.0226126		3586.78	-0.00623249		4116.78	-0.02265055
406.99	0.0041092		936.99	-0.00195464		1466.99	-0.00418684		1996.98	0.00366043		2526.98	-0.01021076		3056.98	0.02341072		3586.98	-0.00652582		4116.98	-0.02296128
407.19	0.00368772		937.19	-0.00053044		1467.19	-0.00308018		1997.18	0.00370688		2527.18	-0.0101421		3057.18	0.02334331		3587.18	-0.00675769		4117.18	-0.02383264
407.39	0.00374189		937.39	0.00019583		1467.39	-0.00251789		1997.38	0.00377052		2527.38	-0.01088237		3057.38	0.02270019		3587.38	-0.00681124		4117.38	-0.02426278
407.59	0.00375092		937.59	-0.00041952		1467.59	-0.00171894		1997.58	0.00371665		2527.58	-0.0100431		3057.58	0.022508		3587.58	-0.00645722		4117.58	-0.02403939
407.79	0.00470368		937.79	-0.00055741		1467.79	-0.00062457		1997.78	0.00269267		2527.78	-0.01066123		3057.78	0.02306604		3587.78	-0.00629016		4117.78	-0.02339865
407.99	0.00458343		937.99	-0.00142309		1467.99	0.00038042		1997.98	0.00284335		2527.98	-0.01074317		3057.98	0.02391385		3587.98	-0.0062465		4117.98	-0.02410401
408.19	0.00464694		938.19	-0.00133366		1468.19	0.0000432		1998.18	0.00205248		2528.18	-0.01107585		3058.18	0.02411605		3588.18	-0.00554377		4118.18	-0.02333457
408.39	0.00543875		938.39	-0.0019747		1468.39	0.00012183		1998.38	0.00213258		2528.38	-0.01150522		3058.38	0.02455937		3588.38	-0.00578501		4118.38	-0.02268116
408.59	0.00632218		938.59	-0.00159406		1468.59	0.00003937		1998.58	0.0025258		2528.58	-0.01200997		3058.58	0.0243117		3588.58	-0.0053737		4118.58	-0.02211665
408.79	0.00662971		938.79	-0.00162406		1468.79	-0.00001661		1998.78	0.00274296		2528.78	-0.01149455		3058.78	0.02408569		3588.78	-0.0053309		4118.78	-0.0211844
408.99	0.00756614		938.99	-0.00183994		1468.99	-0.000147		1998.98	0.00303982		2528.98	-0.01163288		3058.98	0.02429093		3588.98	-0.00418073		4118.98	-0.02057814
409.19	0.00893334		939.19	-0.00229924		1469.19	-0.00004116		1999.18	0.00315964		2529.18	-0.01175494		3059.18	0.02521711		3589.18	-0.00376625		4119.18	-0.02064373
409.39	0.00925911		939.39	-0.00244835		1469.39	0.00053591		1999.38	0.00281043		2529.38	-0.01245843		3059.38	0.02541054		3589.38	-0.00416186		4119.38	-0.02069777
409.59	0.00911775		939.59	-0.00226748		1469.59	-0.00083616		1999.58	0.00241592		2529.58	-0.01299847		3059.58	0.02621062		3589.58	-0.00428657		4119.58	-0.01989344
409.79	0.00861401		939.79	-0.00219544		1469.79	-0.00149262		1999.78	0.0026105		2529.78	-0.01279609		3059.78	0.02587635		3589.78	-0.00462766		4119.78	-0.01911756
409.99	0.00828544		939.99	-0.00161987		1469.99	-0.00255179		1999.98	0.00337895		2529.98	-0.01297317		3059.98	0.02634284		3589.98	-0.00480089		4119.98	-0.01890606
410.19	0.0084378		940.19	-0.00203217		1470.19	-0.00336175		2000.18	0.0029871		2530.18	-0.01243694		3060.18	0.02641741		3590.18	-0.00497079		4120.18	-0.01964956
410.39	0.0073859		940.39	-0.00289689		1470.39	-0.00408217		2000.38	0.00185479		2530.38	-0.01165027		3060.38	0.02541486		3590.38	-0.00486269		4120.38	-0.02045662
410.59	0.00743121		940.59	-0.00277368		1470.59	-0.00481658		2000.58	0.00094213		2530.58	-0.01086486		3060.58	0.02523327		3590.58	-0.00475348		4120.58	-0.02118606
410.79	0.00743805		940.79	-0.00282201		1470.79	-0.00539775		2000.78	-0.00021155		2530.78	-0.01087866		3060.78	0.02541213		3590.78	-0.00400501		4120.78	-0.02279298
410.99	0.00760604		940.99	-0.00260833		1470.99	-0.00561422		2000.98	-0.00070642		2530.98	-0.01041839		3060.98	0.02588614		3590.98	-0.00393104		4120.98	-0.02342462
411.19	0.00734235		941.19	-0.00247799		1471.19	-0.00468348		2001.18	-0.00076961		2531.18	-0.01035225		3061.18	0.02438763		3591.18	-0.00408467		4121.18	-0.02368064
411.39	0.00749677		941.39	-0.00326042		1471.39	-0.00455918		2001.38	-0.00075135		2531.38	-0.01016897		3061.38	0.02429555		3591.38	-0.00448995		4121.38	-0.0237967
411.59	0.00716063		941.59	-0.00280398		1471.59	-0.00451324		2001.58	-0.00104167		2531.58	-0.00949859		3061.58	0.02431816		3591.58	-0.00477068		4121.58	-0.02441509
411.79	0.00761242		941.79	-0.00264129		1471.79	-0.00357395		2001.78	-0.00039997		2531.78	-0.00947258		3061.78	0.02468292		3591.78	-0.00520154		4121.78	-0.02428347
411.99	0.00640216		941.99	-0.00282809		1471.99	-0.00400638		2001.98	0.00071671		2531.98	-0.00900657		3061.98	0.02419918		3591.98	-0.00501153		4121.98	-0.02478865
412.19	0.00556218		942.19	-0.00179983		1472.19	-0.00405667		2002.18	0.00064575		2532.18	-0.00916018		3062.18	0.02416133		3592.18	-0.00499578		4122.18	-0.0232876
412.39	0.00542306		942.39	-0.00069754		1472.39	-0.00386898		2002.38	0.00191891		2532.38	-0.01011181		3062.38	0.02458117		3592.38	-0.0054118		4122.38	-0.02186154
412.59	0.00582615		942.59	-0.0004313		1472.59	-0.00368363		2002.58	0.00258684		2532.58	-0.01053491		3062.58	0.0244866		3592.58	-0.00580784		4122.58	-0.02124504
412.79	0.00520756		942.79	-0.00042139		1472.79	-0.00307236		2002.78	0.00363629		2532.78	-0.01136808		3062.78	0.02442867		3592.78	-0.00690872		4122.78	-0.01957888
412.99	0.00488771		942.99	0.00074271		1472.99	-0.00190415		2002.98	0.00475219		2532.98	-0.01142257		3062.98	0.02435209		3592.98	-0.0066641		4122.98	-0.01925042
413.19	0.00487773		943.19	0.00117524		1473.19	-0.00126484		2003.18	0.00564646		2533.18	-0.01157651		3063.18	0.02360405		3593.18	-0.0067347		4123.18	-0.01895195
413.39	0.00412712		943.39	0.0019003		1473.39	-0.00111523		2003.38	0.0055635		2533.38	-0.01259167		3063.38	0.02422186		3593.38	-0.00749918		4123.38	-0.01886251
413.59	0.00468073		943.59	0.00225318		1473.59	-0.00227712		2003.58	0.00526841		2533.58	-0.01270168		3063.58	0.02419388		3593.58	-0.00742997		4123.58	-0.01825664
413.79	0.00407865		943.79	0.00230142		1473.79	-0.00242169		2003.78	0.00444543		2533.78	-0.01214411		3063.78	0.02417474		3593.78	-0.00689413		4123.78	-0.01831007
413.99	0.00415324		943.99	0.00190567		1473.99	-0.00253976		2003.98	0.00434966		2533.98	-0.01314036		3063.98	0.02395833		3593.98	-0.0066525		4123.98	-0.01864181
414.19	0.00569149		944.19	0.00134794		1474.19	-0.00223127		2004.18	0.00308506		2534.18	-0.0134032		3064.18	0.02302154		3594.18	-0.00656784		4124.18	-0.01870678
414.39	0.00642636		944.39	0.00073955		1474.39	-0.00309047		2004.38	0.001899		2534.38	-0.0131813		3064.38	0.02289619		3594.38	-0.00621089		4124.38	-0.01978407
414.59	0.0070804		944.59	0.00056431		1474.59	-0.00328065		2004.58	0.00130282		2534.58	-0.01277314		3064.58	0.02328261		3594.58	-0.00565397		4124.58	-0.01952518
414.79	0.00786204		944.79	-0.00000376		1474.79	-0.00311911		2004.78	0.00058169		2534.78	-0.01236526		3064.78	0.02334153		3594.78	-0.00522692		4124.78	-0.02015278
414.99	0.00838427		944.99	-0.00078123		1474.99	-0.00304629		2004.98	0.00021338		2534.98	-0.01197199		3064.98	0.02366058		3594.98	-0.00540245		4124.98	-0.02033526
415.19	0.00788695		945.19	-0.00128093		1475.19	-0.00351431		2005.18	-0.00058555		2535.18	-0.01209729		3065.18	0.02297497		3595.18	-0.005191		4125.18	-0.01994645
415.39	0.00822577		945.39	-0.00109289		1475.39	-0.00345889		2005.38	-0.00028977		2535.38	-0.0124269		3065.38	0.02398		3595.38	-0.00546849		4125.38	-0.02052262
415.59	0.00739861		945.59	-0.00042896		1475.59	-0.0032607		2005.58	0.00009937		2535.58	-0.01274705		3065.58	0.02410459		3595.58	-0.00482296		4125.58	-0.02106815
415.79	0.00693066		945.79	-0.00121428		1475.79	-0.00271063		2005.78	0.00084663		2535.78	-0.0120819		3065.78	0.02488777		3595.78	-0.00512283		4125.78	-0.02020767
415.99	0.00629187		945.99	-0.00127108		1475.99	-0.00279324		2005.98	0.0009868		2535.98	-0.0117877		3065.98	0.02498514		3595.98	-0.00499336		4125.98	-0.01998207
416.19	0.00646411		946.19	-0.0006157		1476.19	-0.00228621		2006.18	0.00137951		2536.18	-0.01152952		3066.18	0.02728049		3596.18	-0.00534928		4126.18	-0.01956489
416.39	0.00655231		946.39	0.00034021		1476.39	-0.00171841		2006.38	0.00207361		2536.38	-0.0118111		3066.38	0.02769914		3596.38	-0.00575061		4126.38	-0.01998031
416.59	0.00606759		946.59	-0.00010644		1476.59	-0.00157467		2006.58	0.00226338		2536.58	-0.01156933		3066.58	0.02727188		3596.58	-0.00686764		4126.58	-0.02025666
416.79	0.0050272		946.79	-0.00000375		1476.79	-0.00208388		2006.78	0.00319403		2536.78	-0.01162246		3066.78	0.0271388		3596.78	-0.00693582		4126.78	-0.01966458
416.99	0.00481566		946.99	0.00148953		1476.99	-0.00199712		2006.98	0.00321813		2536.98	-0.01103638		3066.98	0.0270834		3596.98	-0.00630699		4126.98	-0.01976127
417.19	0.00450688		947.19	0.00165781		1477.19	-0.00153699		2007.18	0.00295523		2537.18	-0.01142619		3067.18	0.02664442		3597.18	-0.00613156		4127.18	-0.01907573
417.39	0.00452365		947.39	0.00220735		1477.39	-0.00166029		2007.38	0.00263949		2537.38	-0.01225902		3067.38	0.02639992		3597.38	-0.00589214		4127.38	-0.01958809
417.59	0.00511159		947.59	0.00186963		1477.59	-0.00248889		2007.58	0.00230792		2537.58	-0.01142863		3067.58	0.02575346		3597.58	-0.00565146		4127.58	-0.01938644
417.79	0.00504189		947.79	0.00141605		1477.79	-0.00237088		2007.78	0.00158959		2537.78	-0.01127329		3067.78	0.02573388		3597.78	-0.00555167		4127.78	-0.01861144
417.99	0.0052029		947.99	0.00111982		1477.99	-0.00272878		2007.98	0.0018804		2537.98	-0.0116921		3067.98	0.02495981		3597.98	-0.00591462		4127.98	-0.01854253
418.19	0.00590297		948.19	0.00091576		1478.19	-0.00319384		2008.18	0.00051455		2538.18	-0.0117805		3068.18	0.0247777		3598.18	-0.00647205		4128.18	-0.01901168
418.39	0.00502884		948.39	0.00071278		1478.39	-0.00298834		2008.38	0.00021617		2538.38	-0.01141822		3068.38	0.02575084		3598.38	-0.00606947		4128.38	-0.0196231
418.59	0.00480281		948.59	0.00032469		1478.59	-0.00306209		2008.58	0.00061015		2538.58	-0.01053184		3068.58	0.02567485		3598.58	-0.00583434		4128.58	-0.01985173
418.79	0.00521586		948.79	-0.00075743		1478.79	-0.00252237		2008.78	0.00035221		2538.78	-0.01074481		3068.78	0.02561924		3598.78	-0.00569064		4128.78	-0.02019628
418.99	0.00474109		948.99	-0.00141842		1478.99	-0.00255917		2008.98	0.00110532		2538.98	-0.01006757		3068.98	0.0259045		3598.98	-0.0048741		4128.98	-0.02012264
419.19	0.00387719		949.19	-0.00150087		1479.19	-0.00229784		2009.18	0.00155984		2539.18	-0.00985709		3069.18	0.02531189		3599.18	-0.00464551		4129.18	-0.01951928
419.39	0.00382278		949.39	-0.00173164		1479.39	-0.00179966		2009.38	0.00166654		2539.38	-0.00988907		3069.38	0.02648691		3599.38	-0.00534428		4129.38	-0.02050189
419.59	0.00356878		949.59	-0.00165561		1479.59	-0.00165149		2009.58	0.00221235		2539.58	-0.00965799		3069.58	0.02652563		3599.58	-0.00479816		4129.58	-0.0206482
419.79	0.00412565		949.79	-0.00125883		1479.79	-0.00133907		2009.78	0.00234974		2539.78	-0.00991602		3069.78	0.02590615		3599.78	-0.00490335		4129.78	-0.01981345
419.99	0.00469269		949.99	-0.00125356		1479.99	-0.00074419		2009.98	0.00266526		2539.98	-0.01018425		3069.98	0.02551357		3599.98	-0.00462656		4129.98	-0.01987031
420.19	0.00517983		950.19	-0.00089747		1480.19	-0.00115012		2010.18	0.00295657		2540.18	-0.0101329		3070.18	0.02552699		3600.18	-0.00480405		4130.18	-0.02014469
420.39	0.00519248		950.39	-0.00084233		1480.39	-0.00067605		2010.38	0.00251282		2540.38	-0.01129723		3070.38	0.02496339		3600.38	-0.00600705		4130.38	-0.02039872
420.59	0.00574543		950.59	-0.00125002		1480.59	-0.00044744		2010.58	0.00208149		2540.58	-0.01200321		3070.58	0.02460519		3600.58	-0.00675312		4130.58	-0.01988249
420.79	0.00638161		950.79	-0.00032402		1480.79	-0.00164729		2010.78	0.00246505		2540.78	-0.01309478		3070.78	0.02473557		3600.78	-0.0063619		4130.78	-0.01925429
420.99	0.00692381		950.99	0.00081068		1480.99	-0.00056186		2010.98	0.00273692		2540.98	-0.01341581		3070.98	0.02470346		3600.98	-0.0062501		4130.98	-0.01900587
421.19	0.00689095		951.19	0.00098232		1481.19	-0.00047348		2011.18	0.00271375		2541.18	-0.0137408		3071.18	0.02395802		3601.18	-0.00648063		4131.18	-0.01892352
421.39	0.00656704		951.39	0.00073082		1481.39	-0.00032237		2011.38	0.00226098		2541.38	-0.01408531		3071.38	0.02333716		3601.38	-0.00637513		4131.38	-0.01925405
421.59	0.00598562		951.59	0.00033112		1481.59	-0.00076001		2011.58	0.00100526		2541.58	-0.01334524		3071.58	0.0242132		3601.58	-0.00680207		4131.58	-0.01903679
421.79	0.00620715		951.79	0.00016528		1481.79	-0.00094521		2011.78	-0.00034335		2541.78	-0.01422567		3071.78	0.02427862		3601.78	-0.00672416		4131.78	-0.01890393
421.99	0.006378		951.99	0.00020767		1481.99	-0.00211816		2011.98	-0.00094717		2541.98	-0.01426195		3071.98	0.02421217		3601.98	-0.00674053		4131.98	-0.01975716
422.19	0.00701417		952.19	-0.00003371		1482.19	-0.0022432		2012.18	-0.0012419		2542.18	-0.01344234		3072.18	0.02429181		3602.18	-0.00643089		4132.18	-0.02176627
422.39	0.00649493		952.39	-0.00078705		1482.39	-0.00267391		2012.38	-0.00051802		2542.38	-0.01246013		3072.38	0.02439447		3602.38	-0.00601045		4132.38	-0.02241751
422.59	0.00715119		952.59	-0.0019244		1482.59	-0.00319962		2012.58	-0.00062255		2542.58	-0.01130659		3072.58	0.02309435		3602.58	-0.00500257		4132.58	-0.02283359
422.79	0.00668081		952.79	-0.00301067		1482.79	-0.0027576		2012.78	-0.00116474		2542.78	-0.01009568		3072.78	0.02325768		3602.78	-0.00402142		4132.78	-0.02262537
422.99	0.00613555		952.99	-0.00312322		1482.99	-0.00367918		2012.98	-0.0006857		2542.98	-0.00894403		3072.98	0.02407079		3602.98	-0.00265124		4132.98	-0.02301096
423.19	0.00584406		953.19	-0.00311039		1483.19	-0.00391385		2013.18	-0.00037723		2543.18	-0.00777588		3073.18	0.02454159		3603.18	-0.00228055		4133.18	-0.02324897
423.39	0.00572113		953.39	-0.00317684		1483.39	-0.00405468		2013.38	-0.00013075		2543.38	-0.00783594		3073.38	0.02540844		3603.38	-0.00180696		4133.38	-0.02362957
423.59	0.00513357		953.59	-0.00313054		1483.59	-0.00340755		2013.58	0.00056976		2543.58	-0.00776852		3073.58	0.02539158		3603.58	-0.00098446		4133.58	-0.02312309
423.79	0.00575856		953.79	-0.00238248		1483.79	-0.00255866		2013.78	0.00121559		2543.78	-0.0086845		3073.78	0.02474135		3603.78	-0.00083821		4133.78	-0.0220883
423.99	0.00546243		953.99	-0.0020435		1483.99	-0.00292257		2013.98	0.00161318		2543.98	-0.00897418		3073.98	0.02568686		3603.98	-0.00129619		4133.98	-0.02145044
424.19	0.00527572		954.19	-0.00195909		1484.19	-0.00314492		2014.18	0.00256734		2544.18	-0.00974778		3074.18	0.02553773		3604.18	-0.0017563		4134.18	-0.02169817
424.39	0.00568581		954.39	-0.00083961		1484.39	-0.00265861		2014.38	0.00267133		2544.38	-0.01004721		3074.38	0.02674449		3604.38	-0.00266529		4134.38	-0.0217961
424.59	0.00467126		954.59	0.00075624		1484.59	-0.00263967		2014.58	0.00318217		2544.58	-0.0111004		3074.58	0.0263432		3604.58	-0.00213523		4134.58	-0.02139133
424.79	0.00446073		954.79	0.00178406		1484.79	-0.00374106		2014.78	0.0040191		2544.78	-0.01223089		3074.78	0.0266979		3604.78	-0.00222753		4134.78	-0.02126361
424.99	0.00441154		954.99	0.00205121		1484.99	-0.00378284		2014.98	0.00436581		2544.98	-0.01198032		3074.98	0.02602169		3604.98	-0.00256043		4134.98	-0.02116762
425.19	0.00409828		955.19	0.00210444		1485.19	-0.00531167		2015.18	0.00349369		2545.18	-0.01191979		3075.18	0.02561536		3605.18	-0.00358602		4135.18	-0.02046506
425.39	0.00297209		955.39	0.00210025		1485.39	-0.00582859		2015.38	0.00273653		2545.38	-0.01290023		3075.38	0.02523471		3605.38	-0.0034275		4135.38	-0.02054336
425.59	0.00237835		955.59	0.00237733		1485.59	-0.0062467		2015.58	0.00251537		2545.58	-0.01291241		3075.58	0.02579213		3605.58	-0.00351234		4135.58	-0.02061278
425.79	0.00344999		955.79	0.00254872		1485.79	-0.00642018		2015.78	0.00199314		2545.78	-0.01357293		3075.78	0.02550067		3605.78	-0.00394617		4135.78	-0.02007831
425.99	0.00387007		955.99	0.00263835		1485.99	-0.00736987		2015.98	0.0015629		2545.98	-0.01279025		3075.98	0.02449557		3605.98	-0.00413457		4135.98	-0.02081951
426.19	0.00428744		956.19	0.00202206		1486.19	-0.0070111		2016.18	0.00094846		2546.18	-0.01247711		3076.18	0.0246405		3606.18	-0.00482993		4136.18	-0.02096573
426.39	0.00380843		956.39	0.00182378		1486.39	-0.00684651		2016.38	0.00021798		2546.38	-0.0127693		3076.38	0.02414564		3606.38	-0.00431097		4136.38	-0.02008557
426.59	0.00430075		956.59	0.00226947		1486.59	-0.00519193		2016.58	0.00019502		2546.58	-0.01233997		3076.58	0.02360229		3606.58	-0.00350702		4136.58	-0.02002841
426.79	0.00414016		956.79	0.00190564		1486.79	-0.00442011		2016.78	0.00077264		2546.78	-0.01221881		3076.78	0.02404434		3606.78	-0.00276968		4136.78	-0.02051011
426.99	0.003852		956.99	0.00052298		1486.99	-0.00411363		2016.98	0.00130748		2546.98	-0.01178771		3076.98	0.02500356		3606.98	-0.00294228		4136.98	-0.02046675
427.19	0.0038832		957.19	-0.00038291		1487.19	-0.00316575		2017.18	0.00287282		2547.18	-0.01193865		3077.18	0.024541		3607.18	-0.00327797		4137.18	-0.0205925
427.39	0.00427626		957.39	-0.00091603		1487.39	-0.00260215		2017.38	0.0034476		2547.38	-0.01315551		3077.38	0.02500511		3607.38	-0.00390241		4137.38	-0.020919
427.59	0.00442596		957.59	-0.00193013		1487.59	-0.00139883		2017.58	0.00374335		2547.58	-0.01343535		3077.58	0.0252041		3607.58	-0.00414545		4137.58	-0.02148949
427.79	0.00500101		957.79	-0.00167649		1487.79	-0.00107577		2017.78	0.00412453		2547.78	-0.01472878		3077.78	0.0254002		3607.78	-0.00438792		4137.78	-0.02145941
427.99	0.00435266		957.99	-0.00168024		1487.99	-0.00203308		2017.98	0.004238		2547.98	-0.01526274		3077.98	0.02593592		3607.98	-0.00460948		4137.98	-0.021375
428.19	0.00482478		958.19	-0.0020501		1488.19	-0.00218974		2018.18	0.00406902		2548.18	-0.015158		3078.18	0.0249876		3608.18	-0.00452591		4138.18	-0.02275995
428.39	0.00438797		958.39	-0.00041864		1488.39	-0.00324724		2018.38	0.00316768		2548.38	-0.01499853		3078.38	0.02508757		3608.38	-0.00460651		4138.38	-0.02339767
428.59	0.00389231		958.59	-0.00002771		1488.59	-0.00409087		2018.58	0.00314777		2548.58	-0.01539452		3078.58	0.02458978		3608.58	-0.00485018		4138.58	-0.02374217
428.79	0.00478754		958.79	-0.00039306		1488.79	-0.00507414		2018.78	0.00275226		2548.78	-0.01516138		3078.78	0.02426844		3608.78	-0.00566824		4138.78	-0.02474633
428.99	0.00402359		958.99	-0.00036972		1488.99	-0.00614003		2018.98	0.00247758		2548.98	-0.01402737		3078.98	0.02370119		3608.98	-0.00549827		4138.98	-0.02433856
429.19	0.00378663		959.19	-0.0010437		1489.19	-0.00630877		2019.18	0.00272265		2549.18	-0.01355199		3079.18	0.0245575		3609.18	-0.00533227		4139.18	-0.02492663
429.39	0.00301599		959.39	-0.00119035		1489.39	-0.00707488		2019.38	0.00286973		2549.38	-0.01353629		3079.38	0.02414214		3609.38	-0.00504796		4139.38	-0.0253007
429.59	0.00303464		959.59	-0.00084251		1489.59	-0.00722537		2019.58	0.00239017		2549.58	-0.01296349		3079.58	0.02394059		3609.58	-0.00460066		4139.58	-0.02463423
429.79	0.0040023		959.79	-0.00007392		1489.79	-0.00800181		2019.78	0.00177967		2549.78	-0.01291335		3079.78	0.02387978		3609.78	-0.00497186		4139.78	-0.02392973
429.99	0.00392244		959.99	0.00025104		1489.99	-0.00750825		2019.98	0.00134983		2549.98	-0.01203272		3079.98	0.02361415		3609.98	-0.00439213		4139.98	-0.02422895
430.19	0.00411992		960.19	0.00088323		1490.19	-0.00611845		2020.18	0.00126103		2550.18	-0.0114808		3080.18	0.02456971		3610.18	-0.00417776		4140.18	-0.02328052
430.39	0.00424271		960.39	0.00122428		1490.39	-0.00435295		2020.38	0.0020489		2550.38	-0.01177795		3080.38	0.02347329		3610.38	-0.00345158		4140.38	-0.02302465
430.59	0.00490727		960.59	0.00215106		1490.59	-0.0028616		2020.58	0.00339515		2550.58	-0.01156576		3080.58	0.02360967		3610.58	-0.00333812		4140.58	-0.02256383
430.79	0.00401433		960.79	0.00186137		1490.79	-0.00303668		2020.78	0.00344465		2550.78	-0.01179582		3080.78	0.02382257		3610.78	-0.00263521		4140.78	-0.02134324
430.99	0.00337102		960.99	0.00145305		1490.99	-0.00236553		2020.98	0.00324367		2550.98	-0.01153496		3080.98	0.02366561		3610.98	-0.00243684		4140.98	-0.02079184
431.19	0.00440683		961.19	0.00164144		1491.19	-0.0012298		2021.18	0.00359275		2551.18	-0.0127306		3081.18	0.02338501		3611.18	-0.00164111		4141.18	-0.02046398
431.39	0.00476725		961.39	0.00165322		1491.39	-0.00140458		2021.38	0.00354689		2551.38	-0.01335757		3081.38	0.02398269		3611.38	-0.00206024		4141.38	-0.01998532
431.59	0.00389674		961.59	0.0014846		1491.59	-0.00140351		2021.58	0.0041026		2551.58	-0.01354548		3081.58	0.02339803		3611.58	-0.00193223		4141.58	-0.01912961
431.79	0.00418703		961.79	0.00152976		1491.79	-0.00218312		2021.78	0.00351515		2551.78	-0.01405997		3081.78	0.02414363		3611.78	-0.00168881		4141.78	-0.01817885
431.99	0.00387613		961.99	0.00163875		1491.99	-0.00226979		2021.98	0.00343195		2551.98	-0.01415901		3081.98	0.02318863		3611.98	-0.0015434		4141.98	-0.01768529
432.19	0.00447645		962.19	0.00174293		1492.19	-0.00217393		2022.18	0.00271324		2552.18	-0.01485271		3082.18	0.02274545		3612.18	-0.00164237		4142.18	-0.01816325
432.39	0.00408173		962.39	0.00217392		1492.39	-0.00337542		2022.38	0.00196454		2552.38	-0.01512625		3082.38	0.0229382		3612.38	-0.00170373		4142.38	-0.01867004
432.59	0.00496655		962.59	0.00190445		1492.59	-0.00349849		2022.58	0.00183663		2552.58	-0.01494823		3082.58	0.02266951		3612.58	-0.00173523		4142.58	-0.01844652
432.79	0.00512054		962.79	0.00074038		1492.79	-0.0033569		2022.78	0.00171296		2552.78	-0.01508359		3082.78	0.02220685		3612.78	-0.00166175		4142.78	-0.01914473
432.99	0.00484593		962.99	-0.00016384		1492.99	-0.00321572		2022.98	0.00210471		2552.98	-0.01468421		3082.98	0.02339936		3612.98	-0.00156833		4142.98	-0.01940684
433.19	0.00561001		963.19	-0.00192066		1493.19	-0.00302901		2023.18	0.00251121		2553.18	-0.01476396		3083.18	0.02296013		3613.18	-0.0020551		4143.18	-0.0202632
433.39	0.00629248		963.39	-0.00133426		1493.39	-0.00350822		2023.38	0.00216028		2553.38	-0.01486516		3083.38	0.02208961		3613.38	-0.00232522		4143.38	-0.01979756
433.59	0.00666972		963.59	-0.00125381		1493.59	-0.00388758		2023.58	0.00167782		2553.58	-0.01437868		3083.58	0.02183914		3613.58	-0.00239203		4143.58	-0.02028236
433.79	0.00690629		963.79	-0.00102222		1493.79	-0.00331299		2023.78	0.00133491		2553.78	-0.01470789		3083.78	0.02237212		3613.78	-0.00328836		4143.78	-0.02126826
433.99	0.00692105		963.99	-0.00221437		1493.99	-0.00213493		2023.98	0.00130049		2553.98	-0.01300282		3083.98	0.02224053		3613.98	-0.00308565		4143.98	-0.02197508
434.19	0.00655069		964.19	-0.00222571		1494.19	-0.00148639		2024.18	0.00093101		2554.18	-0.01260872		3084.18	0.02207064		3614.18	-0.0032977		4144.18	-0.02228826
434.39	0.00716832		964.39	-0.00183696		1494.39	-0.00118192		2024.38	0.00072518		2554.38	-0.01234345		3084.38	0.02152152		3614.38	-0.00346107		4144.38	-0.02290191
434.59	0.0062885		964.59	-0.00086537		1494.59	-0.00210433		2024.58	0.00173454		2554.58	-0.01161188		3084.58	0.02259509		3614.58	-0.00306096		4144.58	-0.02315099
434.79	0.00523398		964.79	-0.00078932		1494.79	-0.00185861		2024.78	0.00122953		2554.78	-0.01136923		3084.78	0.0229707		3614.78	-0.00322582		4144.78	-0.02277822
434.99	0.00542083		964.99	-0.00060727		1494.99	-0.00116162		2024.98	0.00163713		2554.98	-0.01106384		3084.98	0.0230361		3614.98	-0.00375993		4144.98	-0.02327813
435.19	0.00501716		965.19	-0.00067817		1495.19	-0.00164342		2025.18	0.00223554		2555.18	-0.01117791		3085.18	0.02351831		3615.18	-0.0040614		4145.18	-0.02266018
435.39	0.00463576		965.39	0.00024401		1495.39	-0.00196318		2025.38	0.00232459		2555.38	-0.01184264		3085.38	0.0230984		3615.38	-0.00492697		4145.38	-0.02198178
435.59	0.00367207		965.59	0.00110978		1495.59	-0.00242475		2025.58	0.00310115		2555.58	-0.01216316		3085.58	0.02304278		3615.58	-0.00547769		4145.58	-0.02137981
435.79	0.00440653		965.79	0.00159214		1495.79	-0.00287598		2025.78	0.00335709		2555.78	-0.01310851		3085.78	0.02318599		3615.78	-0.00533748		4145.78	-0.02149424
435.99	0.00375255		965.99	0.00182323		1495.99	-0.00251492		2025.98	0.00430304		2555.98	-0.01381346		3085.98	0.02219726		3615.98	-0.00599016		4145.98	-0.02095256
436.19	0.0041454		966.19	0.00216287		1496.19	-0.00296306		2026.18	0.00395109		2556.18	-0.0146917		3086.18	0.02260663		3616.18	-0.00558152		4146.18	-0.02089777
436.39	0.00493168		966.39	0.00196864		1496.39	-0.00342293		2026.38	0.00361359		2556.38	-0.01433606		3086.38	0.02242657		3616.38	-0.00491241		4146.38	-0.02090267
436.59	0.00559346		966.59	0.00179685		1496.59	-0.00303381		2026.58	0.00342944		2556.58	-0.01392065		3086.58	0.0223144		3616.58	-0.00461154		4146.58	-0.02048518
436.79	0.00584018		966.79	0.00120725		1496.79	-0.00271971		2026.78	0.00377431		2556.78	-0.01348371		3086.78	0.02235414		3616.78	-0.00484904		4146.78	-0.02058416
436.99	0.00563209		966.99	0.00085488		1496.99	-0.00222653		2026.98	0.00376184		2556.98	-0.01398533		3086.98	0.02359262		3616.98	-0.00485461		4146.98	-0.02023205
437.19	0.00618108		967.19	0.00114169		1497.19	-0.00212857		2027.18	0.00312615		2557.18	-0.01353647		3087.18	0.02300711		3617.18	-0.00417657		4147.18	-0.02081483
437.39	0.00563378		967.39	0.00106592		1497.39	-0.0022125		2027.38	0.00266761		2557.38	-0.0129528		3087.38	0.02367718		3617.38	-0.00349487		4147.38	-0.02054005
437.59	0.00519996		967.59	0.00018612		1497.59	-0.00216399		2027.58	0.00170633		2557.58	-0.01246433		3087.58	0.02374414		3617.58	-0.00357792		4147.58	-0.02141863
437.79	0.00521427		967.79	-0.00077124		1497.79	-0.00119177		2027.78	0.00105581		2557.78	-0.01170883		3087.78	0.02377991		3617.78	-0.00283723		4147.78	-0.02247728
437.99	0.00498304		967.99	-0.00167175		1497.99	-0.00097327		2027.98	0.0014224		2557.98	-0.01023164		3087.98	0.02439881		3617.98	-0.00167956		4147.98	-0.02288055
438.19	0.00525908		968.19	-0.00151863		1498.19	-0.00122963		2028.18	0.00110473		2558.18	-0.00956145		3088.18	0.02435179		3618.18	-0.00098023		4148.18	-0.02295041
438.39	0.00488937		968.39	-0.00202461		1498.39	-0.00099791		2028.38	0.00136015		2558.38	-0.00896633		3088.38	0.02526172		3618.38	-0.00082569		4148.38	-0.023356
438.59	0.0047679		968.59	-0.00305181		1498.59	-0.00013793		2028.58	0.00243271		2558.58	-0.00953338		3088.58	0.02570065		3618.58	-0.00025738		4148.58	-0.0233336
438.79	0.00462553		968.79	-0.00316355		1498.79	0.00052687		2028.78	0.00257371		2558.78	-0.00986707		3088.78	0.02638116		3618.78	-0.00111335		4148.78	-0.02323215
438.99	0.00456647		968.99	-0.00260654		1498.99	0.00044223		2028.98	0.00291898		2558.98	-0.01050295		3088.98	0.02637889		3618.98	-0.00181969		4148.98	-0.02345879
439.19	0.00417826		969.19	-0.00267749		1499.19	0.0004044		2029.18	0.00305232		2559.18	-0.01092388		3089.18	0.02639141		3619.18	-0.00220847		4149.18	-0.02268984
439.39	0.00422049		969.39	-0.00186082		1499.39	0.00073576		2029.38	0.0025414		2559.38	-0.01208464		3089.38	0.02564424		3619.38	-0.00334201		4149.38	-0.02186277
439.59	0.00446853		969.59	-0.00169813		1499.59	0.00007602		2029.58	0.0027184		2559.58	-0.01331023		3089.58	0.0257687		3619.58	-0.00420162		4149.58	-0.02147191
439.79	0.00535417		969.79	-0.00141009		1499.79	-0.00009872		2029.78	0.00286345		2559.78	-0.01389037		3089.78	0.02487457		3619.78	-0.00418884		4149.78	-0.02097953
439.99	0.00585816		969.99	-0.0013458		1499.99	-0.00044505		2029.98	0.00271971		2559.98	-0.01375186		3089.98	0.02412679		3619.98	-0.0046113		4149.98	-0.02021328
440.19	0.00655862		970.19	-0.00145056		1500.19	-0.00087625		2030.18	0.00180515		2560.18	-0.01381724		3090.18	0.02379616		3620.18	-0.00401292		4150.18	-0.0200712
440.39	0.00694408		970.39	-0.00180727		1500.39	-0.00135718		2030.38	0.00115765		2560.38	-0.01350499		3090.38	0.02283295		3620.38	-0.00356535		4150.38	-0.01977447
440.59	0.00709789		970.59	-0.00157524		1500.59	-0.00177854		2030.58	0.00076499		2560.58	-0.01296578		3090.58	0.02264132		3620.58	-0.00408667		4150.58	-0.0208561
440.79	0.00693943		970.79	-0.00167118		1500.79	-0.00226274		2030.78	0.0013323		2560.78	-0.01285465		3090.78	0.02231714		3620.78	-0.00391817		4150.78	-0.02007419
440.99	0.00682123		970.99	-0.00151467		1500.99	-0.00237551		2030.98	0.0004445		2560.98	-0.01240399		3090.98	0.02230548		3620.98	-0.00301237		4150.98	-0.02002527
441.19	0.00639335		971.19	-0.00074791		1501.19	-0.002651		2031.18	-0.00031738		2561.18	-0.01113056		3091.18	0.02192408		3621.18	-0.00206852		4151.18	-0.02127552
441.39	0.00524719		971.39	-0.00139215		1501.39	-0.00198453		2031.38	-0.0000196		2561.38	-0.01112422		3091.38	0.02206177		3621.38	-0.00180129		4151.38	-0.02191863
441.59	0.00543961		971.59	-0.00141764		1501.59	-0.0018902		2031.58	0.00050449		2561.58	-0.01214577		3091.58	0.02114627		3621.58	-0.00087544		4151.58	-0.0223872
441.79	0.0055083		971.79	-0.00205501		1501.79	-0.0014461		2031.78	0.00117567		2561.78	-0.01179033		3091.78	0.02115612		3621.78	-0.0001807		4151.78	-0.02212547
441.99	0.00528458		971.99	-0.00170151		1501.99	-0.00161417		2031.98	0.00152434		2561.98	-0.01144954		3091.98	0.02192123		3621.98	0.0002153		4151.98	-0.02137802
442.19	0.00656659		972.19	-0.00175237		1502.19	-0.00198685		2032.18	0.00166631		2562.18	-0.01129283		3092.18	0.02220968		3622.18	0.0010491		4152.18	-0.02088426
442.39	0.00554053		972.39	-0.00234408		1502.39	-0.00065466		2032.38	0.00164607		2562.38	-0.01254999		3092.38	0.02355284		3622.38	0.00114418		4152.38	-0.02167241
442.59	0.00597928		972.59	-0.00201323		1502.59	-0.00014712		2032.58	0.00240646		2562.58	-0.01356417		3092.58	0.02354859		3622.58	0.00185171		4152.58	-0.02170754
442.79	0.00474087		972.79	-0.00134511		1502.79	-0.00099344		2032.78	0.00294089		2562.78	-0.01373672		3092.78	0.02479096		3622.78	0.00045583		4152.78	-0.02186576
442.99	0.00396838		972.99	-0.00034973		1502.99	-0.00078105		2032.98	0.00350105		2562.98	-0.01413313		3092.98	0.02434074		3622.98	-0.00039906		4152.98	-0.02053025
443.19	0.00345467		973.19	-0.00047164		1503.19	-0.0008414		2033.18	0.00361679		2563.18	-0.01472691		3093.18	0.02446549		3623.18	-0.00119451		4153.18	-0.01979544
443.39	0.0036488		973.39	0.00064426		1503.39	-0.00147383		2033.38	0.00355722		2563.38	-0.01595884		3093.38	0.02509728		3623.38	-0.00206666		4153.38	-0.01920243
443.59	0.00397378		973.59	0.00087376		1503.59	-0.00229834		2033.58	0.00423064		2563.58	-0.01600372		3093.58	0.02604772		3623.58	-0.00268758		4153.58	-0.01887657
443.79	0.00468791		973.79	0.00081457		1503.79	-0.00342143		2033.78	0.00499124		2563.78	-0.01591781		3093.78	0.02572326		3623.78	-0.0034733		4153.78	-0.01801571
443.99	0.00431616		973.99	0.00188615		1503.99	-0.00400856		2033.98	0.00458508		2563.98	-0.01533098		3093.98	0.02563277		3623.98	-0.00476039		4153.98	-0.01718467
444.19	0.00461124		974.19	0.00071658		1504.19	-0.00370278		2034.18	0.00360249		2564.18	-0.01497597		3094.18	0.02439421		3624.18	-0.00501429		4154.18	-0.016572
444.39	0.00477253		974.39	0.00006313		1504.39	-0.00410839		2034.38	0.00282333		2564.38	-0.01364627		3094.38	0.02430803		3624.38	-0.00500758		4154.38	-0.01758091
444.59	0.00524552		974.59	-0.00042085		1504.59	-0.00402584		2034.58	0.00292577		2564.58	-0.01323928		3094.58	0.02415908		3624.58	-0.00585412		4154.58	-0.01865757
444.79	0.00540275		974.79	-0.00068817		1504.79	-0.00416508		2034.78	0.00312236		2564.78	-0.01267038		3094.78	0.02399217		3624.78	-0.00613963		4154.78	-0.01779787
444.99	0.00586698		974.99	-0.00078019		1504.99	-0.00419564		2034.98	0.00230456		2564.98	-0.01207907		3094.98	0.02344961		3624.98	-0.00659985		4154.98	-0.01786283
445.19	0.0054322		975.19	-0.00050082		1505.19	-0.00382033		2035.18	0.00260844		2565.18	-0.01254741		3095.18	0.02369789		3625.18	-0.00639419		4155.18	-0.01894858
445.39	0.00600802		975.39	-0.00076056		1505.39	-0.00305783		2035.38	0.00250265		2565.38	-0.0131052		3095.38	0.02267468		3625.38	-0.00647281		4155.38	-0.02018873
445.59	0.00562023		975.59	-0.00092491		1505.59	-0.00321147		2035.58	0.0023395		2565.58	-0.0134322		3095.58	0.02150976		3625.58	-0.00624574		4155.58	-0.02017854
445.79	0.00563823		975.79	-0.00100283		1505.79	-0.00270382		2035.78	0.00155607		2565.78	-0.01194047		3095.78	0.02218408		3625.78	-0.00516978		4155.78	-0.02029122
445.99	0.00597721		975.99	-0.00049049		1505.99	-0.00296099		2035.98	0.00121617		2565.98	-0.01027073		3095.98	0.02240769		3625.98	-0.00441761		4155.98	-0.02091178
446.19	0.00612896		976.19	-0.00149519		1506.19	-0.00250069		2036.18	0.00149015		2566.18	-0.01061392		3096.18	0.02276659		3626.18	-0.00320417		4156.18	-0.02182882
446.39	0.00504966		976.39	-0.00128994		1506.39	-0.0014985		2036.38	0.0015278		2566.38	-0.0108088		3096.38	0.02340245		3626.38	-0.00322414		4156.38	-0.02362158
446.59	0.00506176		976.59	-0.00088072		1506.59	-0.0010354		2036.58	0.00233245		2566.58	-0.01056449		3096.58	0.02347363		3626.58	-0.00247624		4156.58	-0.02307803
446.79	0.00429008		976.79	-0.00002922		1506.79	-0.00141819		2036.78	0.00280187		2566.78	-0.0104854		3096.78	0.02391173		3626.78	-0.00292645		4156.78	-0.02294128
446.99	0.00334003		976.99	0.000515		1506.99	-0.00124033		2036.98	0.00272424		2566.98	-0.01043865		3096.98	0.02309724		3626.98	-0.00253875		4156.98	-0.02193904
447.19	0.00281182		977.19	0.00048542		1507.19	-0.00120125		2037.18	0.00248964		2567.18	-0.01125056		3097.18	0.02337708		3627.18	-0.00279717		4157.18	-0.02156108
447.39	0.00274875		977.39	0.00080052		1507.39	-0.0013233		2037.38	0.00320376		2567.38	-0.0116334		3097.38	0.02451559		3627.38	-0.0028995		4157.38	-0.02143952
447.59	0.00284125		977.59	0.00018766		1507.59	-0.00146788		2037.58	0.0035238		2567.58	-0.01148948		3097.58	0.02519524		3627.58	-0.00333226		4157.58	-0.02033742
447.79	0.00386281		977.79	0.00012661		1507.79	-0.00198837		2037.78	0.00335983		2567.78	-0.01245139		3097.78	0.02432954		3627.78	-0.00375627		4157.78	-0.01897593
447.99	0.0037832		977.99	0.0003952		1507.99	-0.00096337		2037.98	0.0020385		2567.98	-0.0118653		3097.98	0.02384122		3627.98	-0.00387282		4157.98	-0.01827604
448.19	0.00406094		978.19	-0.0011119		1508.19	-0.00136806		2038.18	0.00095002		2568.18	-0.01176125		3098.18	0.02253567		3628.18	-0.0030915		4158.18	-0.01869385
448.39	0.0041092		978.39	-0.00199454		1508.39	-0.00184674		2038.38	0.00091865		2568.38	-0.01156851		3098.38	0.02267866		3628.38	-0.00296531		4158.38	-0.01945893
448.59	0.00459428		978.59	-0.00217093		1508.59	-0.00163359		2038.58	0.00089787		2568.58	-0.01164036		3098.58	0.02262963		3628.58	-0.00249943		4158.58	-0.01900789
448.79	0.00552025		978.79	-0.00243929		1508.79	-0.00175246		2038.78	0.00112684		2568.78	-0.01154729		3098.78	0.0223662		3628.78	-0.00308829		4158.78	-0.01934649
448.99	0.00546035		978.99	-0.00294164		1508.99	-0.00177673		2038.98	0.00137934		2568.98	-0.01173403		3098.98	0.02176831		3628.98	-0.00286044		4158.98	-0.01911751
449.19	0.00521087		979.19	-0.00231122		1509.19	-0.00102877		2039.18	0.00168653		2569.18	-0.01174028		3099.18	0.02177617		3629.18	-0.00173367		4159.18	-0.0196968
449.39	0.00549858		979.39	-0.00223038		1509.39	-0.00080118		2039.38	0.00192721		2569.38	-0.01100805		3099.38	0.02088593		3629.38	-0.00174229		4159.38	-0.02052013
449.59	0.00470131		979.59	-0.00257565		1509.59	-0.00093205		2039.58	0.00283485		2569.58	-0.01126868		3099.58	0.0212938		3629.58	-0.0013638		4159.58	-0.02003729
449.79	0.00399812		979.79	-0.00263857		1509.79	-0.00109597		2039.78	0.00419304		2569.78	-0.0105671		3099.78	0.02228362		3629.78	-0.00031521		4159.78	-0.02057545
449.99	0.00445517		979.99	-0.00254902		1509.99	-0.00083954		2039.98	0.00489939		2569.98	-0.00944651		3099.98	0.02216673		3629.98	-0.00086467		4159.98	-0.02131443
450.19	0.00416939		980.19	-0.00246351		1510.19	-0.00100245		2040.18	0.0055305		2570.18	-0.01016862		3100.18	0.02301593		3630.18	-0.00106654		4160.18	-0.02189034
450.39	0.00433932		980.39	-0.00135883		1510.39	-0.0009561		2040.38	0.006603		2570.38	-0.01047856		3100.38	0.02332039		3630.38	-0.0018148		4160.38	-0.02191173
450.59	0.00432439		980.59	-0.00060536		1510.59	-0.00112401		2040.58	0.00707225		2570.58	-0.01013227		3100.58	0.02361438		3630.58	-0.00208282		4160.58	-0.02078518
450.79	0.00383365		980.79	0.00025647		1510.79	-0.0021636		2040.78	0.00676104		2570.78	-0.01041649		3100.78	0.02341211		3630.78	-0.00315766		4160.78	-0.02067813
450.99	0.00336726		980.99	-0.00034774		1510.99	-0.00187002		2040.98	0.00595354		2570.98	-0.01018602		3100.98	0.02305274		3630.98	-0.00360529		4160.98	-0.02034128
451.19	0.00334434		981.19	0.00068756		1511.19	-0.00163906		2041.18	0.00558088		2571.18	-0.01085623		3101.18	0.02345698		3631.18	-0.00421872		4161.18	-0.01998855
451.39	0.00440627		981.39	0.00015521		1511.39	-0.00192145		2041.38	0.00503172		2571.38	-0.01129534		3101.38	0.02380821		3631.38	-0.00491478		4161.38	-0.02043987
451.59	0.00558356		981.59	0.00023545		1511.59	-0.0022425		2041.58	0.0043334		2571.58	-0.01117246		3101.58	0.02340405		3631.58	-0.00523954		4161.58	-0.01941672
451.79	0.00606203		981.79	0.00037683		1511.79	-0.00200583		2041.78	0.00326705		2571.78	-0.0106807		3101.78	0.02233909		3631.78	-0.0056174		4161.78	-0.01898648
451.99	0.00586244		981.99	-0.0000026		1511.99	-0.00101119		2041.98	0.00129667		2571.98	-0.00997449		3101.98	0.02287611		3631.98	-0.00572403		4161.98	-0.01917834
452.19	0.00564862		982.19	-0.00044784		1512.19	-0.00227994		2042.18	0.00050731		2572.18	-0.00965426		3102.18	0.0226801		3632.18	-0.0062403		4162.18	-0.01962329
452.39	0.00536046		982.39	-0.00137887		1512.39	-0.0015876		2042.38	0.0000351		2572.38	-0.00926552		3102.38	0.02256192		3632.38	-0.00532612		4162.38	-0.01929131
452.59	0.00552044		982.59	-0.00185141		1512.59	-0.0013155		2042.58	-0.00103188		2572.58	-0.00889384		3102.58	0.02359765		3632.58	-0.00375024		4162.58	-0.01901059
452.79	0.00518247		982.79	-0.00262532		1512.79	-0.0015326		2042.78	-0.00161706		2572.78	-0.00910696		3102.78	0.02345154		3632.78	-0.00403292		4162.78	-0.01959754
452.99	0.00434834		982.99	-0.00317208		1512.99	-0.00133953		2042.98	-0.00125938		2572.98	-0.00964616		3102.98	0.02368053		3632.98	-0.00324867		4162.98	-0.01844232
453.19	0.00398967		983.19	-0.00265203		1513.19	-0.00013916		2043.18	-0.00061216		2573.18	-0.0096098		3103.18	0.02382919		3633.18	-0.00234268		4163.18	-0.01849404
453.39	0.00333065		983.39	-0.0028922		1513.39	0.00019261		2043.38	-0.00023925		2573.38	-0.0099546		3103.38	0.02415136		3633.38	-0.00188035		4163.38	-0.0191326
453.59	0.00215818		983.59	-0.00283615		1513.59	0.00012864		2043.58	0.00055875		2573.58	-0.01088978		3103.58	0.02465664		3633.58	-0.00060571		4163.58	-0.0187659
453.79	0.00181801		983.79	-0.0024823		1513.79	0.00067956		2043.78	0.00175869		2573.78	-0.01000198		3103.78	0.02441794		3633.78	0.0002395		4163.78	-0.02022777
453.99	0.0020646		983.99	-0.00217282		1513.99	0.00032428		2043.98	0.00119317		2573.98	-0.01042293		3103.98	0.02353006		3633.98	0.00005815		4163.98	-0.02053154
454.19	0.00132915		984.19	-0.00132541		1514.19	-0.0004733		2044.18	0.00196102		2574.18	-0.01200247		3104.18	0.02426721		3634.18	0.00013356		4164.18	-0.02063585
454.39	0.00080636		984.39	-0.00009099		1514.39	-0.00086649		2044.38	0.00228275		2574.38	-0.01281886		3104.38	0.0247659		3634.38	-0.00015421		4164.38	-0.0203313
454.59	0.0015942		984.59	0.00020974		1514.59	-0.00218836		2044.58	0.00166139		2574.58	-0.01311344		3104.58	0.02520736		3634.58	-0.00016532		4164.58	-0.02046143
454.79	0.001648		984.79	0.00040649		1514.79	-0.00254614		2044.78	0.00122082		2574.78	-0.01338107		3104.78	0.02509467		3634.78	-0.00026435		4164.78	-0.02050884
454.99	0.00223119		984.99	0.00057458		1514.99	-0.00238116		2044.98	0.00146967		2574.98	-0.01239444		3104.98	0.02482103		3634.98	-0.00015722		4164.98	-0.0201992
455.19	0.00281959		985.19	0.00133693		1515.19	-0.00276903		2045.18	0.00053902		2575.18	-0.01249295		3105.18	0.02435198		3635.18	-0.00058467		4165.18	-0.02001243
455.39	0.0036017		985.39	0.00093625		1515.39	-0.00388173		2045.38	0.00023365		2575.38	-0.01218701		3105.38	0.02277293		3635.38	-0.00161045		4165.38	-0.01969378
455.59	0.0042462		985.59	0.00092508		1515.59	-0.00344827		2045.58	-0.00001254		2575.58	-0.01185365		3105.58	0.02269123		3635.58	-0.00188851		4165.58	-0.01955091
455.79	0.00442409		985.79	0.00069698		1515.79	-0.00334801		2045.78	-0.00055583		2575.78	-0.01168437		3105.78	0.0225446		3635.78	-0.00302717		4165.78	-0.01989329
455.99	0.00448431		985.99	-0.00026715		1515.99	-0.00368536		2045.98	-0.00136239		2575.98	-0.01172998		3105.98	0.02270928		3635.98	-0.00367727		4165.98	-0.02015958
456.19	0.00498094		986.19	-0.00121565		1516.19	-0.00441776		2046.18	-0.00149874		2576.18	-0.01169944		3106.18	0.02224633		3636.18	-0.00405661		4166.18	-0.02005405
456.39	0.00503136		986.39	-0.00182543		1516.39	-0.00408099		2046.38	-0.0019946		2576.38	-0.01154955		3106.38	0.02191931		3636.38	-0.00343134		4166.38	-0.02057265
456.59	0.00540062		986.59	-0.00200966		1516.59	-0.00453168		2046.58	-0.0028288		2576.58	-0.01208727		3106.58	0.02208816		3636.58	-0.00335159		4166.58	-0.02032317
456.79	0.00568864		986.79	-0.00208052		1516.79	-0.00428866		2046.78	-0.00159268		2576.78	-0.01146005		3106.78	0.0208859		3636.78	-0.00337656		4166.78	-0.02082234
456.99	0.00553578		986.99	-0.00212567		1516.99	-0.00467233		2046.98	-0.00034558		2576.98	-0.01148128		3106.98	0.02095261		3636.98	-0.00286731		4166.98	-0.02037017
457.19	0.00511455		987.19	-0.00192408		1517.19	-0.00386477		2047.18	0.00099964		2577.18	-0.01047052		3107.18	0.02046393		3637.18	-0.00216678		4167.18	-0.02113738
457.39	0.00429114		987.39	-0.00198487		1517.39	-0.00395351		2047.38	0.00183861		2577.38	-0.01070209		3107.38	0.02117357		3637.38	-0.00139518		4167.38	-0.02188002
457.59	0.00380477		987.59	-0.00176858		1517.59	-0.00395383		2047.58	0.00289492		2577.58	-0.01140748		3107.58	0.02131315		3637.58	-0.00041894		4167.58	-0.02203697
457.79	0.00345941		987.79	-0.00113194		1517.79	-0.00365567		2047.78	0.00355914		2577.78	-0.01185745		3107.78	0.0222106		3637.78	-0.00102157		4167.78	-0.02340638
457.99	0.00185081		987.99	-0.00058583		1517.99	-0.00400635		2047.98	0.00316682		2577.98	-0.01356399		3107.98	0.02282441		3637.98	-0.00144293		4167.98	-0.0234367
458.19	0.00149141		988.19	-0.00010496		1518.19	-0.00404457		2048.18	0.00332359		2578.18	-0.01403974		3108.18	0.02504002		3638.18	-0.00115424		4168.18	-0.02331478
458.39	0.00143067		988.39	0.00008612		1518.39	-0.00420218		2048.38	0.00336073		2578.38	-0.01461366		3108.38	0.02593166		3638.38	-0.00151606		4168.38	-0.0227669
458.59	0.00173798		988.59	-0.00065725		1518.59	-0.00455101		2048.58	0.003736		2578.58	-0.01500532		3108.58	0.02668763		3638.58	-0.00167161		4168.58	-0.02263371
458.79	0.00128896		988.79	-0.00021415		1518.79	-0.00435946		2048.78	0.00485197		2578.78	-0.0146641		3108.78	0.02706527		3638.78	-0.00190683		4168.78	-0.02199076
458.99	0.00198819		988.99	-0.00038728		1518.99	-0.00404878		2048.98	0.00491786		2578.98	-0.01497187		3108.98	0.02644526		3638.98	-0.00168542		4168.98	-0.02140829
459.19	0.00173669		989.19	-0.0004388		1519.19	-0.00403403		2049.18	0.0037147		2579.18	-0.01529205		3109.18	0.02621054		3639.18	-0.00227015		4169.18	-0.02105406
459.39	0.0018146		989.39	0.00010701		1519.39	-0.00469889		2049.38	0.00303011		2579.38	-0.0153657		3109.38	0.02567504		3639.38	-0.00233619		4169.38	-0.02082309
459.59	0.00211099		989.59	-0.00033079		1519.59	-0.00397711		2049.58	0.00191984		2579.58	-0.01539085		3109.58	0.02587295		3639.58	-0.00281655		4169.58	-0.02098932
459.79	0.00221899		989.79	0.00005484		1519.79	-0.0048193		2049.78	0.00214263		2579.78	-0.01513217		3109.78	0.02527078		3639.78	-0.00362256		4169.78	-0.02106037
459.99	0.00253615		989.99	0.00016863		1519.99	-0.00492614		2049.98	0.00190442		2579.98	-0.01548714		3109.98	0.02507215		3639.98	-0.00434087		4169.98	-0.02113225
460.19	0.00322154		990.19	0.00006515		1520.19	-0.00452885		2050.18	0.00171241		2580.18	-0.01562483		3110.18	0.02435161		3640.18	-0.00449089		4170.18	-0.02107152
460.39	0.00275828		990.39	0.00056616		1520.39	-0.00459827		2050.38	0.00136306		2580.38	-0.0160482		3110.38	0.02373861		3640.38	-0.00392483		4170.38	-0.02105219
460.59	0.00279189		990.59	0.00013372		1520.59	-0.00477296		2050.58	0.00043195		2580.58	-0.01664381		3110.58	0.02249767		3640.58	-0.0030754		4170.58	-0.02000983
460.79	0.00269714		990.79	-0.00013536		1520.79	-0.00496029		2050.78	0.00112367		2580.78	-0.01494484		3110.78	0.02237949		3640.78	-0.00257985		4170.78	-0.0202951
460.99	0.00154365		990.99	0.00043658		1520.99	-0.00548429		2050.98	0.00045418		2580.98	-0.01481411		3110.98	0.02257977		3640.98	-0.00281272		4170.98	-0.02003092
461.19	0.00134585		991.19	0.00056108		1521.19	-0.00461358		2051.18	0.00083961		2581.18	-0.01474769		3111.18	0.02213029		3641.18	-0.00336625		4171.18	-0.01989873
461.39	0.00055197		991.39	0.00091573		1521.39	-0.00475867		2051.38	0.00092841		2581.38	-0.01573544		3111.38	0.02326006		3641.38	-0.00307301		4171.38	-0.02006243
461.59	-0.0001499		991.59	0.00183357		1521.59	-0.00446966		2051.58	0.00144101		2581.58	-0.0160432		3111.58	0.02396424		3641.58	-0.00403895		4171.58	-0.01987056
461.79	-0.001439		991.79	0.00207073		1521.79	-0.00370898		2051.78	0.00154341		2581.78	-0.01581097		3111.78	0.02427549		3641.78	-0.0052384		4171.78	-0.01942235
461.99	-0.00205621		991.99	0.00196184		1521.99	-0.00321447		2051.98	0.00178495		2581.98	-0.01557175		3111.98	0.02487069		3641.98	-0.0053883		4171.98	-0.01900595
462.19	-0.00128222		992.19	0.00146545		1522.19	-0.00321118		2052.18	0.00192749		2582.18	-0.01551246		3112.18	0.02617489		3642.18	-0.00564129		4172.18	-0.01849911
462.39	-0.00138516		992.39	0.00129044		1522.39	-0.00288405		2052.38	0.00226303		2582.38	-0.01532804		3112.38	0.0264718		3642.38	-0.00635447		4172.38	-0.01900596
462.59	-0.00006582		992.59	0.00088877		1522.59	-0.00299597		2052.58	0.00171502		2582.58	-0.0145616		3112.58	0.02652289		3642.58	-0.00635912		4172.58	-0.01939662
462.79	0.00134173		992.79	0.00057183		1522.79	-0.00317961		2052.78	0.00171924		2582.78	-0.01403331		3112.78	0.02590278		3642.78	-0.00611786		4172.78	-0.01887087
462.99	0.00300414		992.99	0.00044771		1522.99	-0.00305196		2052.98	0.00077167		2582.98	-0.01398769		3112.98	0.02471211		3642.98	-0.00596217		4172.98	-0.01907012
463.19	0.00337391		993.19	0.00048697		1523.19	-0.00349665		2053.18	-0.00014981		2583.18	-0.01272844		3113.18	0.02495888		3643.18	-0.00583235		4173.18	-0.01901746
463.39	0.00379723		993.39	0.00067221		1523.39	-0.00425563		2053.38	-0.00043463		2583.38	-0.01276851		3113.38	0.02494424		3643.38	-0.00568197		4173.38	-0.01958093
463.59	0.00439163		993.59	0.00112005		1523.59	-0.00469707		2053.58	-0.00065784		2583.58	-0.0126398		3113.58	0.02387048		3643.58	-0.00584301		4173.58	-0.02060831
463.79	0.00494261		993.79	0.0012719		1523.79	-0.00529499		2053.78	-0.00037834		2583.78	-0.01233642		3113.78	0.02419383		3643.78	-0.0052349		4173.78	-0.02119268
463.99	0.0055566		993.99	0.00101823		1523.99	-0.00491853		2053.98	-0.00062241		2583.98	-0.01296718		3113.98	0.02437387		3643.98	-0.00435282		4173.98	-0.02183877
464.19	0.00536616		994.19	0.00064437		1524.19	-0.00452561		2054.18	-0.00060929		2584.18	-0.01257243		3114.18	0.02479314		3644.18	-0.00306059		4174.18	-0.02214195
464.39	0.0046834		994.39	0.00068806		1524.39	-0.00491201		2054.38	-0.00025105		2584.38	-0.0131428		3114.38	0.02459803		3644.38	-0.00231082		4174.38	-0.02259474
464.59	0.00448994		994.59	-0.00040576		1524.59	-0.00534791		2054.58	-0.00065405		2584.58	-0.01289565		3114.58	0.02438434		3644.58	-0.00218928		4174.58	-0.0234145
464.79	0.00379863		994.79	0.00036174		1524.79	-0.00484399		2054.78	0.00007429		2584.78	-0.01261067		3114.78	0.02371319		3644.78	-0.00239455		4174.78	-0.0242821
464.99	0.00353913		994.99	0.00090583		1524.99	-0.00434237		2054.98	0.00003866		2584.98	-0.01343758		3114.98	0.02260558		3644.98	-0.00257248		4174.98	-0.02422204
465.19	0.00370108		995.19	0.00122422		1525.19	-0.00374064		2055.18	0.00152794		2585.18	-0.01456116		3115.18	0.02305493		3645.18	-0.00260181		4175.18	-0.02345966
465.39	0.00326866		995.39	0.00175609		1525.39	-0.0035511		2055.38	0.00237957		2585.38	-0.01454588		3115.38	0.02357373		3645.38	-0.00232014		4175.38	-0.02383969
465.59	0.00221172		995.59	0.00216484		1525.59	-0.00284898		2055.58	0.00315462		2585.58	-0.01401841		3115.58	0.02379034		3645.58	-0.00341638		4175.58	-0.02343466
465.79	0.00212634		995.79	0.00143952		1525.79	-0.00186203		2055.78	0.00387382		2585.78	-0.01464255		3115.78	0.02338073		3645.78	-0.00335274		4175.78	-0.02263337
465.99	0.00187462		995.99	0.00145798		1525.99	-0.00209404		2055.98	0.00436651		2585.98	-0.01502296		3115.98	0.02386819		3645.98	-0.00335394		4175.98	-0.02260801
466.19	0.00211328		996.19	0.00084834		1526.19	-0.00209044		2056.18	0.00396855		2586.18	-0.01504034		3116.18	0.02369014		3646.18	-0.00399027		4176.18	-0.02217541
466.39	0.00204418		996.39	0.00018774		1526.39	-0.00234358		2056.38	0.00351061		2586.38	-0.0148215		3116.38	0.02238752		3646.38	-0.00399214		4176.38	-0.02209724
466.59	0.00378836		996.59	-0.00054222		1526.59	-0.00327315		2056.58	0.00297735		2586.58	-0.01416873		3116.58	0.02253348		3646.58	-0.00359741		4176.58	-0.02107083
466.79	0.00460077		996.79	-0.0012805		1526.79	-0.0034674		2056.78	0.00255211		2586.78	-0.01428468		3116.78	0.02146339		3646.78	-0.00404304		4176.78	-0.0206773
466.99	0.00533516		996.99	-0.00192394		1526.99	-0.00359698		2056.98	0.00207876		2586.98	-0.01420289		3116.98	0.02101338		3646.98	-0.00470828		4176.98	-0.02040836
467.19	0.00541075		997.19	-0.002928		1527.19	-0.00329413		2057.18	0.00112271		2587.18	-0.0133686		3117.18	0.02086273		3647.18	-0.00459449		4177.18	-0.02056209
467.39	0.00561626		997.39	-0.00257095		1527.39	-0.00328524		2057.38	0.00122621		2587.38	-0.0138628		3117.38	0.02009672		3647.38	-0.00506307		4177.38	-0.02018286
467.59	0.0057191		997.59	-0.00233173		1527.59	-0.00342043		2057.58	0.00022527		2587.58	-0.01306733		3117.58	0.01965876		3647.58	-0.00446539		4177.58	-0.02005294
467.79	0.00689745		997.79	-0.00295139		1527.79	-0.00337607		2057.78	0.00050135		2587.78	-0.01156351		3117.78	0.02023418		3647.78	-0.00433785		4177.78	-0.02021053
467.99	0.00731802		997.99	-0.00350855		1527.99	-0.00355351		2057.98	0.00084638		2587.98	-0.01183539		3117.98	0.0206434		3647.98	-0.0038155		4177.98	-0.0200528
468.19	0.00656137		998.19	-0.00321505		1528.19	-0.00387094		2058.18	0.00139964		2588.18	-0.01180539		3118.18	0.02064828		3648.18	-0.00443393		4178.18	-0.02021032
468.39	0.00618209		998.39	-0.00366034		1528.39	-0.00432694		2058.38	0.00201648		2588.38	-0.01190548		3118.38	0.02002565		3648.38	-0.00485289		4178.38	-0.0201615
468.59	0.00645806		998.59	-0.00314236		1528.59	-0.00381659		2058.58	0.00203911		2588.58	-0.01152516		3118.58	0.01982299		3648.58	-0.0052951		4178.58	-0.01939338
468.79	0.00647321		998.79	-0.00126721		1528.79	-0.00285116		2058.78	0.00281194		2588.78	-0.01202374		3118.78	0.01926184		3648.78	-0.00565029		4178.78	-0.01901832
468.99	0.00642326		998.99	-0.0002025		1528.99	-0.00198921		2058.98	0.00319596		2588.98	-0.01226826		3118.98	0.0200754		3648.98	-0.00567606		4178.98	-0.01845801
469.19	0.00482652		999.19	0.00043069		1529.19	-0.00110031		2059.18	0.0040081		2589.18	-0.01174276		3119.18	0.02173132		3649.18	-0.00576912		4179.18	-0.01869532
469.39	0.00460448		999.39	-0.00010786		1529.39	-0.00100203		2059.38	0.00321044		2589.38	-0.0116745		3119.38	0.02232828		3649.38	-0.00620644		4179.38	-0.01906093
469.59	0.00336473		999.59	0.00033591		1529.59	-0.0009434		2059.58	0.00398787		2589.58	-0.01229955		3119.58	0.02293059		3649.58	-0.00692804		4179.58	-0.01899902
469.79	0.00363619		999.79	0.00026645		1529.79	-0.00074355		2059.78	0.00438428		2589.78	-0.01232361		3119.78	0.02297225		3649.78	-0.00706887		4179.78	-0.01773493
469.99	0.00289549		999.99	0.00016801		1529.99	-0.00126619		2059.98	0.004042		2589.98	-0.01235293		3119.98	0.02401505		3649.98	-0.00719179		4179.98	-0.0180803
470.19	0.00280767		1000.19	0.00015788		1530.19	-0.00157161		2060.18	0.00414313		2590.18	-0.01258171		3120.18	0.02458963		3650.18	-0.00779325		4180.18	-0.01877378
470.39	0.00248477		1000.39	-0.00065422		1530.39	-0.00226113		2060.38	0.00443666		2590.38	-0.01236587		3120.38	0.0245464		3650.38	-0.00771897		4180.38	-0.01926078
470.59	0.00300983		1000.59	-0.00158548		1530.59	-0.00246019		2060.58	0.00361633		2590.58	-0.01200166		3120.58	0.02536444		3650.58	-0.0080047		4180.58	-0.01981843
470.79	0.00271729		1000.79	-0.00167199		1530.79	-0.00265319		2060.78	0.00267102		2590.78	-0.01216653		3120.78	0.0241192		3650.78	-0.00885664		4180.78	-0.02072646
470.99	0.00185569		1000.99	-0.00233343		1530.99	-0.00297201		2060.98	0.0020831		2590.98	-0.01168277		3120.98	0.02362096		3650.98	-0.008975		4180.98	-0.02137697
471.19	0.00151693		1001.19	-0.00253644		1531.19	-0.0034665		2061.18	0.00160741		2591.18	-0.01215802		3121.18	0.02235147		3651.18	-0.00850088		4181.18	-0.02188701
471.39	0.00063594		1001.39	-0.00212077		1531.39	-0.00477656		2061.38	0.00158517		2591.38	-0.01268097		3121.38	0.02186279		3651.38	-0.00761494		4181.38	-0.02204287
471.59	0.00023838		1001.59	-0.00252705		1531.59	-0.00546375		2061.58	0.0011036		2591.58	-0.01177599		3121.58	0.02219459		3651.58	-0.00741298		4181.58	-0.0230172
471.79	0.00049488		1001.79	-0.00319098		1531.79	-0.00634985		2061.78	0.00198882		2591.78	-0.01223397		3121.78	0.02125542		3651.78	-0.00644464		4181.78	-0.02344219
471.99	-0.00044362		1001.99	-0.00322888		1531.99	-0.00651182		2061.98	0.00166833		2591.98	-0.01377115		3121.98	0.02089836		3651.98	-0.00588028		4181.98	-0.02383509
472.19	-0.00119567		1002.19	-0.00181215		1532.19	-0.00718222		2062.18	0.00165274		2592.18	-0.01404612		3122.18	0.02021175		3652.18	-0.00609057		4182.18	-0.02378123
472.39	-0.00152373		1002.39	-0.00168906		1532.39	-0.0069898		2062.38	0.00154211		2592.38	-0.01381161		3122.38	0.02036916		3652.38	-0.00546414		4182.38	-0.02366184
472.59	-0.00183864		1002.59	-0.00059616		1532.59	-0.00662934		2062.58	0.0012356		2592.58	-0.01382926		3122.58	0.020174		3652.58	-0.00480267		4182.58	-0.02349473
472.79	-0.00234122		1002.79	0.00025746		1532.79	-0.00620149		2062.78	0.0011358		2592.78	-0.01464179		3122.78	0.02010252		3652.78	-0.00399073		4182.78	-0.02375221
472.99	-0.0019933		1002.99	0.00088665		1532.99	-0.00484671		2062.98	0.00120003		2592.98	-0.01518989		3122.98	0.02045836		3652.98	-0.00341008		4182.98	-0.02410782
473.19	-0.00223284		1003.19	0.00051671		1533.19	-0.00466522		2063.18	0.00041359		2593.18	-0.0142517		3123.18	0.02165315		3653.18	-0.00377064		4183.18	-0.0239634
473.39	-0.00052868		1003.39	0.00012346		1533.39	-0.0043539		2063.38	0.00139475		2593.38	-0.01490526		3123.38	0.02219405		3653.38	-0.00423568		4183.38	-0.02325968
473.59	-0.00009487		1003.59	0.00043739		1533.59	-0.00420561		2063.58	0.00194791		2593.58	-0.0138199		3123.58	0.02223746		3653.58	-0.00432878		4183.58	-0.02255089
473.79	0.00136739		1003.79	-0.00020516		1533.79	-0.00411145		2063.78	0.00176231		2593.78	-0.01350092		3123.78	0.02208037		3653.78	-0.00451571		4183.78	-0.02180229
473.99	0.00232505		1003.99	-0.00045177		1533.99	-0.00357364		2063.98	0.00225479		2593.98	-0.01414909		3123.98	0.02285772		3653.98	-0.00467654		4183.98	-0.02226475
474.19	0.00357592		1004.19	-0.00076776		1534.19	-0.00418304		2064.18	0.00278685		2594.18	-0.0136861		3124.18	0.02290609		3654.18	-0.00402549		4184.18	-0.02247262
474.39	0.00440454		1004.39	-0.00202755		1534.39	-0.00381244		2064.38	0.00292843		2594.38	-0.01334264		3124.38	0.02237985		3654.38	-0.00487069		4184.38	-0.02172863
474.59	0.00512188		1004.59	-0.00244092		1534.59	-0.00299982		2064.58	0.00218755		2594.58	-0.01315074		3124.58	0.02207744		3654.58	-0.00465211		4184.58	-0.02169535
474.79	0.00512201		1004.79	-0.00231891		1534.79	-0.00344822		2064.78	0.00251544		2594.78	-0.01300053		3124.78	0.02183788		3654.78	-0.00515956		4184.78	-0.02138076
474.99	0.00509612		1004.99	-0.00260029		1534.99	-0.00353957		2064.98	0.0027334		2594.98	-0.01284052		3124.98	0.02240604		3654.98	-0.00554776		4184.98	-0.02118023
475.19	0.00457911		1005.19	-0.00196697		1535.19	-0.00392665		2065.18	0.00295857		2595.18	-0.01401056		3125.18	0.02210252		3655.18	-0.00531375		4185.18	-0.02143142
475.39	0.003853		1005.39	-0.0017584		1535.39	-0.00470442		2065.38	0.00271082		2595.38	-0.01408224		3125.38	0.02243106		3655.38	-0.00500193		4185.38	-0.02187036
475.59	0.00269483		1005.59	-0.0015834		1535.59	-0.00452526		2065.58	0.00317747		2595.58	-0.01409891		3125.58	0.02294142		3655.58	-0.0053265		4185.58	-0.02131595
475.79	0.00116051		1005.79	-0.00147309		1535.79	-0.00478007		2065.78	0.0039193		2595.78	-0.01441265		3125.78	0.02278304		3655.78	-0.00464218		4185.78	-0.02149917
475.99	0.00002223		1005.99	-0.00031425		1535.99	-0.00441607		2065.98	0.00331234		2595.98	-0.0144978		3125.98	0.02315586		3655.98	-0.00497958		4185.98	-0.02263276
476.19	-0.00124651		1006.19	0.00038389		1536.19	-0.00484876		2066.18	0.00287954		2596.18	-0.01499395		3126.18	0.02278788		3656.18	-0.00376322		4186.18	-0.02216508
476.39	-0.00264182		1006.39	0.00012952		1536.39	-0.00548742		2066.38	0.00221746		2596.38	-0.01540377		3126.38	0.02303822		3656.38	-0.00363904		4186.38	-0.02260384
476.59	-0.00365759		1006.59	0.00114437		1536.59	-0.00522306		2066.58	0.00165136		2596.58	-0.01615733		3126.58	0.02336296		3656.58	-0.00315028		4186.58	-0.02220669
476.79	-0.00353918		1006.79	0.00229442		1536.79	-0.00485557		2066.78	0.0012039		2596.78	-0.01700476		3126.78	0.02311817		3656.78	-0.00266474		4186.78	-0.02169503
476.99	-0.00263704		1006.99	0.00211309		1536.99	-0.0039495		2066.98	0.00121017		2596.98	-0.01653997		3126.98	0.02313782		3656.98	-0.00379093		4186.98	-0.0212169
477.19	-0.00197721		1007.19	0.00195056		1537.19	-0.00401988		2067.18	0.00117961		2597.18	-0.0162787		3127.18	0.02338762		3657.18	-0.004611		4187.18	-0.02139999
477.39	-0.00084691		1007.39	0.00129284		1537.39	-0.00373817		2067.38	0.00196833		2597.38	-0.01655816		3127.38	0.02307096		3657.38	-0.00528283		4187.38	-0.02145777
477.59	0.00036617		1007.59	0.00119473		1537.59	-0.00356858		2067.58	0.00115728		2597.58	-0.01611245		3127.58	0.02217555		3657.58	-0.00497586		4187.58	-0.02050612
477.79	0.0022573		1007.79	-0.00014953		1537.79	-0.00418011		2067.78	0.00108349		2597.78	-0.01625238		3127.78	0.02190261		3657.78	-0.00493254		4187.78	-0.02041847
477.99	0.00407102		1007.99	-0.00082447		1537.99	-0.0036566		2067.98	0.00067263		2597.98	-0.01507391		3127.98	0.02218156		3657.98	-0.00481617		4187.98	-0.02021019
478.19	0.00543328		1008.19	-0.0015014		1538.19	-0.0034762		2068.18	0.00048778		2598.18	-0.01442278		3128.18	0.02136994		3658.18	-0.00454975		4188.18	-0.02011795
478.39	0.0062153		1008.39	-0.002639		1538.39	-0.00312535		2068.38	0.00019578		2598.38	-0.01376995		3128.38	0.01989994		3658.38	-0.00598532		4188.38	-0.02006317
478.59	0.00656214		1008.59	-0.00360246		1538.59	-0.00253503		2068.58	-0.00013906		2598.58	-0.01286279		3128.58	0.01864912		3658.58	-0.00503512		4188.58	-0.02054791
478.79	0.00660417		1008.79	-0.00345622		1538.79	-0.00315502		2068.78	-0.00009206		2598.78	-0.01258499		3128.78	0.01879614		3658.78	-0.00600015		4188.78	-0.02071391
478.99	0.00630631		1008.99	-0.00333281		1538.99	-0.00298921		2068.98	0.00033702		2598.98	-0.0120688		3128.98	0.01908654		3658.98	-0.00644127		4188.98	-0.02093911
479.19	0.00615065		1009.19	-0.00339817		1539.19	-0.00355534		2069.18	0.00061164		2599.18	-0.01280919		3129.18	0.01812691		3659.18	-0.00557682		4189.18	-0.02193055
479.39	0.00536654		1009.39	-0.00361662		1539.39	-0.00484417		2069.38	0.00080516		2599.38	-0.01271699		3129.38	0.01792746		3659.38	-0.00559612		4189.38	-0.02261325
479.59	0.00464153		1009.59	-0.0035221		1539.59	-0.00483566		2069.58	0.00116028		2599.58	-0.01220224		3129.58	0.01809543		3659.58	-0.00585009		4189.58	-0.02289883
479.79	0.00362917		1009.79	-0.00300766		1539.79	-0.0052319		2069.78	0.00166966		2599.78	-0.01155942		3129.78	0.01809351		3659.78	-0.00504791		4189.78	-0.02454078
479.99	0.00272766		1009.99	-0.00198576		1539.99	-0.00497107		2069.98	0.00172103		2599.98	-0.01233793		3129.98	0.01895004		3659.98	-0.00438812		4189.98	-0.02474388
480.19	0.00175816		1010.19	-0.00183058		1540.19	-0.00548829		2070.18	0.00174654		2600.18	-0.01249354		3130.18	0.01899111		3660.18	-0.00317908		4190.18	-0.02489264
480.39	0.00140304		1010.39	-0.00073403		1540.39	-0.00610268		2070.38	0.00098562		2600.38	-0.01315365		3130.38	0.02054407		3660.38	-0.00410722		4190.38	-0.02526208
480.59	0.00125058		1010.59	0.00060473		1540.59	-0.00546999		2070.58	0.00122687		2600.58	-0.01351949		3130.58	0.02152117		3660.58	-0.00368811		4190.58	-0.02547533
480.79	0.00220851		1010.79	0.00098629		1540.79	-0.0055438		2070.78	0.00119715		2600.78	-0.01353107		3130.78	0.02179541		3660.78	-0.0038568		4190.78	-0.02496274
480.99	0.00293737		1010.99	0.00165675		1540.99	-0.00496789		2070.98	0.00161749		2600.98	-0.01387315		3130.98	0.02158449		3660.98	-0.00482891		4190.98	-0.02552731
481.19	0.00297176		1011.19	0.00273957		1541.19	-0.00438382		2071.18	0.00103809		2601.18	-0.01452578		3131.18	0.02275929		3661.18	-0.00529546		4191.18	-0.02591229
481.39	0.0031681		1011.39	0.00250028		1541.39	-0.00493767		2071.38	0.00103328		2601.38	-0.01389933		3131.38	0.02276115		3661.38	-0.00526106		4191.38	-0.02449238
481.59	0.00388669		1011.59	0.00189538		1541.59	-0.00507602		2071.58	0.00101042		2601.58	-0.01315444		3131.58	0.02265714		3661.58	-0.00494675		4191.58	-0.0224758
481.79	0.00396597		1011.79	0.00007393		1541.79	-0.00511626		2071.78	0.00094752		2601.78	-0.0126978		3131.78	0.02264338		3661.78	-0.00438813		4191.78	-0.02161361
481.99	0.00444715		1011.99	0.00007249		1541.99	-0.00468846		2071.98	0.00086166		2601.98	-0.01174726		3131.98	0.0223234		3661.98	-0.00481986		4191.98	-0.02113963
482.19	0.00437805		1012.19	0.00003407		1542.19	-0.00463081		2072.18	0.00109582		2602.18	-0.01148632		3132.18	0.02202856		3662.18	-0.00546344		4192.18	-0.02075592
482.39	0.00412839		1012.39	-0.00112234		1542.39	-0.00581555		2072.38	0.00009244		2602.38	-0.00976096		3132.38	0.02080714		3662.38	-0.0059092		4192.38	-0.02023522
482.59	0.00327231		1012.59	-0.00175018		1542.59	-0.00498525		2072.58	0.00064828		2602.58	-0.00940118		3132.58	0.02098208		3662.58	-0.00613666		4192.58	-0.01891552
482.79	0.00278826		1012.79	-0.00196247		1542.79	-0.00506241		2072.78	0.00161321		2602.78	-0.00919299		3132.78	0.02144797		3662.78	-0.00651222		4192.78	-0.018311
482.99	0.00260266		1012.99	-0.00288584		1542.99	-0.00525404		2072.98	0.0024837		2602.98	-0.00939858		3132.98	0.02145265		3662.98	-0.00656027		4192.98	-0.01834029
483.19	0.0030669		1013.19	-0.00369938		1543.19	-0.00599852		2073.18	0.00297251		2603.18	-0.01044342		3133.18	0.02121707		3663.18	-0.00584136		4193.18	-0.01952268
483.39	0.00224394		1013.39	-0.00404776		1543.39	-0.00656808		2073.38	0.0029516		2603.38	-0.01023442		3133.38	0.02209222		3663.38	-0.00612226		4193.38	-0.02051486
483.59	0.0018806		1013.59	-0.00398973		1543.59	-0.00552247		2073.58	0.00296813		2603.58	-0.01027566		3133.58	0.02274907		3663.58	-0.00612011		4193.58	-0.02116207
483.79	0.00142411		1013.79	-0.00354235		1543.79	-0.00568167		2073.78	0.0031115		2603.78	-0.01040574		3133.78	0.0239195		3663.78	-0.00604488		4193.78	-0.02188515
483.99	0.00204952		1013.99	-0.00260356		1543.99	-0.00530747		2073.98	0.00326936		2603.98	-0.0108447		3133.98	0.02533558		3663.98	-0.00623781		4193.98	-0.02238079
484.19	0.00277646		1014.19	-0.0022275		1544.19	-0.00528865		2074.18	0.00333775		2604.18	-0.01163871		3134.18	0.02598824		3664.18	-0.0064829		4194.18	-0.02343584
484.39	0.00275782		1014.39	-0.00192459		1544.39	-0.0049656		2074.38	0.00322727		2604.38	-0.01382216		3134.38	0.02737892		3664.38	-0.00688066		4194.38	-0.02372392
484.59	0.0027308		1014.59	-0.00130764		1544.59	-0.00454052		2074.58	0.00328032		2604.58	-0.01396749		3134.58	0.02676508		3664.58	-0.00675322		4194.58	-0.02375369
484.79	0.0035138		1014.79	-0.00072072		1544.79	-0.00378748		2074.78	0.00318915		2604.78	-0.01464956		3134.78	0.02660734		3664.78	-0.00724618		4194.78	-0.02396747
484.99	0.00228218		1014.99	0.00081171		1544.99	-0.00321135		2074.98	0.00271685		2604.98	-0.0159587		3134.98	0.02626257		3664.98	-0.00717117		4194.98	-0.02514719
485.19	0.00145444		1015.19	0.00022291		1545.19	-0.00310459		2075.18	0.00274481		2605.18	-0.01554338		3135.18	0.02641171		3665.18	-0.00737787		4195.18	-0.02484632
485.39	0.00146565		1015.39	-0.00021164		1545.39	-0.00362249		2075.38	0.00307517		2605.38	-0.01584264		3135.38	0.02515879		3665.38	-0.00633714		4195.38	-0.0239426
485.59	0.00151361		1015.59	-0.00071981		1545.59	-0.00396663		2075.58	0.0023673		2605.58	-0.01609317		3135.58	0.02459351		3665.58	-0.00629472		4195.58	-0.02345948
485.79	0.0015011		1015.79	-0.00130457		1545.79	-0.00369663		2075.78	0.00229746		2605.78	-0.01588418		3135.78	0.02366885		3665.78	-0.00620791		4195.78	-0.02361928
485.99	0.00195252		1015.99	-0.0010495		1545.99	-0.00442427		2075.98	0.00192144		2605.98	-0.01571677		3135.98	0.02158772		3665.98	-0.00671228		4195.98	-0.02356799
486.19	0.0012108		1016.19	-0.00107678		1546.19	-0.00422877		2076.18	0.002141		2606.18	-0.01557417		3136.18	0.02063371		3666.18	-0.00754452		4196.18	-0.02278186
486.39	0.00073296		1016.39	-0.00210922		1546.39	-0.00531896		2076.38	0.0015861		2606.38	-0.01499902		3136.38	0.01882996		3666.38	-0.00744022		4196.38	-0.02167534
486.59	0.00010037		1016.59	-0.00180123		1546.59	-0.00446836		2076.58	0.00274632		2606.58	-0.01550773		3136.58	0.0184356		3666.58	-0.00705107		4196.58	-0.02069611
486.79	0.00007225		1016.79	-0.00289552		1546.79	-0.00526592		2076.78	0.00269877		2606.78	-0.01532694		3136.78	0.01780057		3666.78	-0.00612805		4196.78	-0.02081877
486.99	-0.00065628		1016.99	-0.00349337		1546.99	-0.00534764		2076.98	0.00152644		2606.98	-0.01586435		3136.98	0.01758249		3666.98	-0.00616922		4196.98	-0.02063756
487.19	-0.00120674		1017.19	-0.00406263		1547.19	-0.0053857		2077.18	0.00112273		2607.18	-0.0158502		3137.18	0.01757694		3667.18	-0.00505748		4197.18	-0.02133514
487.39	-0.00108848		1017.39	-0.00343713		1547.39	-0.00537316		2077.38	0.00143585		2607.38	-0.01523919		3137.38	0.01762481		3667.38	-0.00470439		4197.38	-0.02133597
487.59	-0.00081739		1017.59	-0.00339554		1547.59	-0.00475398		2077.58	0.00092681		2607.58	-0.016245		3137.58	0.01769756		3667.58	-0.00445704		4197.58	-0.02099639
487.79	-0.00011144		1017.79	-0.00320717		1547.79	-0.00535589		2077.78	0.00139288		2607.78	-0.01639141		3137.78	0.0184926		3667.78	-0.00464168		4197.78	-0.02102603
487.99	0.00035076		1017.99	-0.00166765		1547.99	-0.00517628		2077.98	0.00177837		2607.98	-0.01696246		3137.98	0.01947072		3667.98	-0.00458582		4197.98	-0.02153518
488.19	0.00039287		1018.19	-0.00139863		1548.19	-0.00446016		2078.18	0.00213179		2608.18	-0.01796111		3138.18	0.02107142		3668.18	-0.004853		4198.18	-0.02167522
488.39	0.00008085		1018.39	-0.00115749		1548.39	-0.00410119		2078.38	0.0027653		2608.38	-0.01850946		3138.38	0.02197957		3668.38	-0.00451883		4198.38	-0.02176714
488.59	0.00046002		1018.59	-0.00052464		1548.59	-0.00376918		2078.58	0.00341459		2608.58	-0.01868895		3138.58	0.02237316		3668.58	-0.00506407		4198.58	-0.02190566
488.79	0.00066323		1018.79	0.00052322		1548.79	-0.00332168		2078.78	0.00427904		2608.78	-0.01922127		3138.78	0.02319334		3668.78	-0.00582158		4198.78	-0.02280664
488.99	-0.0009505		1018.99	0.00093184		1548.99	-0.00308598		2078.98	0.00416444		2608.98	-0.01988353		3138.98	0.02375951		3668.98	-0.00600181		4198.98	-0.02271274
489.19	-0.00089945		1019.19	0.00032834		1549.19	-0.00299121		2079.18	0.00456204		2609.18	-0.01900794		3139.18	0.0241304		3669.18	-0.00638354		4199.18	-0.02301171
489.39	-0.0007625		1019.39	0.00008963		1549.39	-0.00266729		2079.38	0.00434868		2609.38	-0.01936602		3139.38	0.02414382		3669.38	-0.00589161		4199.38	-0.02297002
489.59	-0.00007073		1019.59	0.00005086		1549.59	-0.00350315		2079.58	0.00435156		2609.58	-0.01849849		3139.58	0.02416809		3669.58	-0.00566127		4199.58	-0.02267515
489.79	-0.00006683		1019.79	-0.00065072		1549.79	-0.00350113		2079.78	0.00440407		2609.78	-0.01803792		3139.78	0.02305971		3669.78	-0.00610774		4199.78	-0.02286827
489.99	-0.00069853		1019.99	-0.00163832		1549.99	-0.00420616		2079.98	0.00400015		2609.98	-0.01805702		3139.98	0.022565		3669.98	-0.00583478		4199.98	-0.02287925
490.19	-0.00112968		1020.19	-0.00225143		1550.19	-0.00428326		2080.18	0.00391998		2610.18	-0.01771074		3140.18	0.02227415		3670.18	-0.00667209		4200.18	-0.02346815
490.39	-0.00169878		1020.39	-0.0032158		1550.39	-0.0048892		2080.38	0.00302715		2610.38	-0.0170206		3140.38	0.02207947		3670.38	-0.00585081		4200.38	-0.02353343
490.59	-0.00158255		1020.59	-0.0031881		1550.59	-0.00522493		2080.58	0.00252006		2610.58	-0.01653656		3140.58	0.0220267		3670.58	-0.00503708		4200.58	-0.02325105
490.79	-0.000783		1020.79	-0.00410143		1550.79	-0.00563045		2080.78	0.00162061		2610.78	-0.01542152		3140.78	0.02227379		3670.78	-0.00474619		4200.78	-0.02339684
490.99	-0.00077909		1020.99	-0.00364408		1550.99	-0.00574667		2080.98	0.00065836		2610.98	-0.01551354		3140.98	0.02135885		3670.98	-0.00434686		4200.98	-0.02373093
491.19	0.00023076		1021.19	-0.00364834		1551.19	-0.00558333		2081.18	0.00072175		2611.18	-0.01555391		3141.18	0.02130741		3671.18	-0.00335292		4201.18	-0.02481896
491.39	0.00127204		1021.39	-0.00270678		1551.39	-0.00572286		2081.38	0.00028756		2611.38	-0.01539641		3141.38	0.02094995		3671.38	-0.00325058		4201.38	-0.02473793
491.59	0.00171719		1021.59	-0.00284698		1551.59	-0.00547094		2081.58	-0.00047451		2611.58	-0.01631124		3141.58	0.02156604		3671.58	-0.00313646		4201.58	-0.02498648
491.79	0.00142218		1021.79	-0.00206058		1551.79	-0.00559627		2081.78	0.00091661		2611.78	-0.01643556		3141.78	0.02193764		3671.78	-0.00315392		4201.78	-0.02455607
491.99	0.00169273		1021.99	-0.00117321		1551.99	-0.00505166		2081.98	0.00048577		2611.98	-0.01667791		3141.98	0.02203519		3671.98	-0.00351865		4201.98	-0.02474769
492.19	0.00219154		1022.19	-0.00204928		1552.19	-0.00417484		2082.18	0.00157698		2612.18	-0.01675417		3142.18	0.02258285		3672.18	-0.00460932		4202.18	-0.02483876
492.39	0.00246856		1022.39	-0.00168986		1552.39	-0.00335847		2082.38	0.00285669		2612.38	-0.01659411		3142.38	0.02231092		3672.38	-0.00567039		4202.38	-0.02470241
492.59	0.00307312		1022.59	-0.00155471		1552.59	-0.00303889		2082.58	0.00354526		2612.58	-0.01674376		3142.58	0.02251316		3672.58	-0.00731756		4202.58	-0.02402286
492.79	0.00301863		1022.79	-0.00073391		1552.79	-0.00267707		2082.78	0.00369784		2612.78	-0.01637292		3142.78	0.02121562		3672.78	-0.00827019		4202.78	-0.0236362
492.99	0.00316667		1022.99	-0.00134329		1552.99	-0.00263376		2082.98	0.00396906		2612.98	-0.01618528		3142.98	0.02092521		3672.98	-0.00849498		4202.98	-0.02300377
493.19	0.00353075		1023.19	-0.00149653		1553.19	-0.00267168		2083.18	0.00444392		2613.18	-0.01597308		3143.18	0.02060598		3673.18	-0.00839782		4203.18	-0.02279428
493.39	0.00357122		1023.39	-0.00149341		1553.39	-0.00257552		2083.38	0.00486054		2613.38	-0.01570535		3143.38	0.01988842		3673.38	-0.00769946		4203.38	-0.02200757
493.59	0.00432311		1023.59	-0.00116218		1553.59	-0.00383662		2083.58	0.00530261		2613.58	-0.01528553		3143.58	0.01896372		3673.58	-0.00768745		4203.58	-0.021974
493.79	0.00317168		1023.79	-0.00173311		1553.79	-0.00441857		2083.78	0.00492955		2613.78	-0.01530977		3143.78	0.01840765		3673.78	-0.00770001		4203.78	-0.02304549
493.99	0.00249638		1023.99	-0.00273007		1553.99	-0.00482458		2083.98	0.00448474		2613.98	-0.0154077		3143.98	0.01770408		3673.98	-0.0071137		4203.98	-0.02393984
494.19	0.00155889		1024.19	-0.00288757		1554.19	-0.00510335		2084.18	0.0045154		2614.18	-0.0157236		3144.18	0.01687475		3674.18	-0.00593485		4204.18	-0.02554582
494.39	0.00106336		1024.39	-0.0023171		1554.39	-0.00667086		2084.38	0.00365967		2614.38	-0.01505344		3144.38	0.01765192		3674.38	-0.00545028		4204.38	-0.02556315
494.59	0.00155457		1024.59	-0.00130486		1554.59	-0.00780452		2084.58	0.00308644		2614.58	-0.01516448		3144.58	0.01732548		3674.58	-0.00461926		4204.58	-0.02549653
494.79	0.00161706		1024.79	-0.00081938		1554.79	-0.00786549		2084.78	0.00307551		2614.78	-0.01545527		3144.78	0.01728805		3674.78	-0.00405592		4204.78	-0.02596655
494.99	0.00106945		1024.99	0.00027304		1554.99	-0.00845565		2084.98	0.00178693		2614.98	-0.01569349		3144.98	0.01668206		3674.98	-0.0033188		4204.98	-0.02616022
495.19	0.00060767		1025.19	0.00067474		1555.19	-0.00843455		2085.18	0.00143345		2615.18	-0.01591089		3145.18	0.01732132		3675.18	-0.00332387		4205.18	-0.02664747
495.39	0.0003467		1025.39	0.00182198		1555.39	-0.00795486		2085.38	0.00130403		2615.38	-0.0152078		3145.38	0.01788587		3675.38	-0.00395991		4205.38	-0.02679572
495.59	0.00049949		1025.59	0.00145743		1555.59	-0.00792605		2085.58	0.00155842		2615.58	-0.01562404		3145.58	0.01914474		3675.58	-0.00450278		4205.58	-0.02645928
495.79	0.000081		1025.79	0.00142072		1555.79	-0.00730663		2085.78	0.00199448		2615.78	-0.01554286		3145.78	0.0199923		3675.78	-0.00561805		4205.78	-0.02542419
495.99	0.00040377		1025.99	0.00078017		1555.99	-0.00648335		2085.98	0.00104033		2615.98	-0.01501972		3145.98	0.0202914		3675.98	-0.00753616		4205.98	-0.02602416
496.19	0.00085315		1026.19	0.00008661		1556.19	-0.00520022		2086.18	0.00117295		2616.18	-0.01531873		3146.18	0.02146818		3676.18	-0.00974314		4206.18	-0.02674239
496.39	0.0014888		1026.39	0.0006116		1556.39	-0.00430702		2086.38	0.00048478		2616.38	-0.01466302		3146.38	0.02190432		3676.38	-0.01045114		4206.38	-0.02690988
496.59	0.00165821		1026.59	0.00055957		1556.59	-0.00434413		2086.58	-0.00015914		2616.58	-0.01434399		3146.58	0.02234686		3676.58	-0.01098387		4206.58	-0.02591303
496.79	0.00151438		1026.79	0.00043706		1556.79	-0.00425828		2086.78	-0.00052921		2616.78	-0.01422914		3146.78	0.02152224		3676.78	-0.01143502		4206.78	-0.02489687
496.99	0.00203046		1026.99	-0.00051759		1556.99	-0.0037638		2086.98	-0.00082686		2616.98	-0.01408979		3146.98	0.02192702		3676.98	-0.01139455		4206.98	-0.02355279
497.19	0.00153454		1027.19	-0.00010306		1557.19	-0.00262898		2087.18	-0.00101115		2617.18	-0.01433952		3147.18	0.02160962		3677.18	-0.01128791		4207.18	-0.02289074
497.39	0.00123825		1027.39	-0.00009633		1557.39	-0.00215473		2087.38	-0.00071847		2617.38	-0.01329456		3147.38	0.02142237		3677.38	-0.00997524		4207.38	-0.02232443
497.59	0.00102187		1027.59	-0.00034604		1557.59	-0.00251515		2087.58	-0.00111269		2617.58	-0.0131421		3147.58	0.02057215		3677.58	-0.00960234		4207.58	-0.02162651
497.79	-0.00001872		1027.79	-0.00010556		1557.79	-0.0024541		2087.78	-0.001138		2617.78	-0.01318448		3147.78	0.02088541		3677.78	-0.0082219		4207.78	-0.02180901
497.99	-0.00006475		1027.99	-0.00042507		1557.99	-0.00319035		2087.98	-0.0011877		2617.98	-0.01281507		3147.98	0.02007343		3677.98	-0.00700878		4207.98	-0.02167559
498.19	-0.00077053		1028.19	0.00005167		1558.19	-0.00433344		2088.18	-0.00121554		2618.18	-0.01225867		3148.18	0.02123166		3678.18	-0.00565576		4208.18	-0.02169789
498.39	-0.00073096		1028.39	0.00074719		1558.39	-0.00561979		2088.38	-0.00165904		2618.38	-0.0120038		3148.38	0.02168253		3678.38	-0.00562969		4208.38	-0.02048886
498.59	-0.00123114		1028.59	0.00055088		1558.59	-0.00564956		2088.58	-0.00153297		2618.58	-0.01261312		3148.58	0.02146744		3678.58	-0.00353555		4208.58	-0.02047365
498.79	-0.00179533		1028.79	-0.00020802		1558.79	-0.00600226		2088.78	-0.00129939		2618.78	-0.01353184		3148.78	0.02155556		3678.78	-0.00254514		4208.78	-0.02073998
498.99	-0.001723		1028.99	0.00054063		1558.99	-0.00676014		2088.98	-0.00142122		2618.98	-0.01338676		3148.98	0.02217237		3678.98	-0.00175402		4208.98	-0.02069403
499.19	-0.00138873		1029.19	0.00010034		1559.19	-0.00755478		2089.18	-0.00068468		2619.18	-0.01335455		3149.18	0.02342308		3679.18	-0.00215987		4209.18	-0.02108025
499.39	-0.00133907		1029.39	0.00015748		1559.39	-0.00726905		2089.38	-0.00034888		2619.38	-0.0141679		3149.38	0.02443814		3679.38	-0.00265604		4209.38	-0.02168577
499.59	-0.00071559		1029.59	-0.00061929		1559.59	-0.00732063		2089.58	-0.00116398		2619.58	-0.01455251		3149.58	0.0249817		3679.58	-0.00283331		4209.58	-0.02184535
499.79	-0.00018352		1029.79	-0.00069195		1559.79	-0.00706866		2089.78	-0.00137312		2619.78	-0.01541026		3149.78	0.02584337		3679.78	-0.00375257		4209.78	-0.02184968
499.99	0.00011734		1029.99	-0.00113066		1559.99	-0.00753948		2089.98	-0.0015717		2619.98	-0.01610791		3149.98	0.02499658		3679.98	-0.0042868		4209.98	-0.02158555
500.19	0.00088071		1030.19	-0.00106052		1560.19	-0.00688809		2090.18	-0.00147117		2620.18	-0.01736979		3150.18	0.02494137		3680.18	-0.00476775		4210.18	-0.02174081
500.39	0.00133907		1030.39	-0.0009752		1560.39	-0.00699304		2090.38	-0.001237		2620.38	-0.01631131		3150.38	0.02437838		3680.38	-0.00468772		4210.38	-0.02208653
500.59	0.00152445		1030.59	-0.00122864		1560.59	-0.00679983		2090.58	-0.00156536		2620.58	-0.01632251		3150.58	0.02409787		3680.58	-0.00569305		4210.58	-0.02109222
500.79	0.00271412		1030.79	-0.00083765		1560.79	-0.00699624		2090.78	-0.00202863		2620.78	-0.01626739		3150.78	0.02391485		3680.78	-0.00671169		4210.78	-0.02115375
500.99	0.00286341		1030.99	-0.00115036		1560.99	-0.00610056		2090.98	-0.0023469		2620.98	-0.01606285		3150.98	0.02365987		3680.98	-0.00660357		4210.98	-0.02088437
501.19	0.00329599		1031.19	-0.00052706		1561.19	-0.00611433		2091.18	-0.00269475		2621.18	-0.0153667		3151.18	0.02248492		3681.18	-0.00726875		4211.18	-0.02157144
501.39	0.00266675		1031.39	-0.00091293		1561.39	-0.00605373		2091.38	-0.00296274		2621.38	-0.01451614		3151.38	0.0223802		3681.38	-0.00747361		4211.38	-0.02123615
501.59	0.00286698		1031.59	-0.00091975		1561.59	-0.00593218		2091.58	-0.00246562		2621.58	-0.01478134		3151.58	0.0217443		3681.58	-0.00833861		4211.58	-0.02201203
501.79	0.00279915		1031.79	-0.0002216		1561.79	-0.00605441		2091.78	-0.00207185		2621.78	-0.01402199		3151.78	0.02168909		3681.78	-0.00820511		4211.78	-0.02310976
501.99	0.00321155		1031.99	-0.00066473		1561.99	-0.00704487		2091.98	-0.00130648		2621.98	-0.01376182		3151.98	0.02104576		3681.98	-0.00786704		4211.98	-0.02374386
502.19	0.00345258		1032.19	-0.0012722		1562.19	-0.00628008		2092.18	-0.00120473		2622.18	-0.01374959		3152.18	0.02192511		3682.18	-0.00775885		4212.18	-0.024891
502.39	0.00352405		1032.39	-0.00181736		1562.39	-0.00572454		2092.38	-0.00072351		2622.38	-0.0144296		3152.38	0.02187116		3682.38	-0.00784142		4212.38	-0.02560632
502.59	0.00385795		1032.59	-0.00274279		1562.59	-0.00474743		2092.58	0.00030443		2622.58	-0.01437039		3152.58	0.02233133		3682.58	-0.00709979		4212.58	-0.02718582
502.79	0.0037348		1032.79	-0.00332161		1562.79	-0.00459427		2092.78	0.00107407		2622.78	-0.01514876		3152.78	0.02300494		3682.78	-0.00679943		4212.78	-0.02779998
502.99	0.00366485		1032.99	-0.00256034		1562.99	-0.00455445		2092.98	0.00196613		2622.98	-0.0151727		3152.98	0.02376824		3682.98	-0.00606564		4212.98	-0.02830291
503.19	0.00381601		1033.19	-0.00343641		1563.19	-0.00424992		2093.18	0.00198059		2623.18	-0.01580942		3153.18	0.02363632		3683.18	-0.00603442		4213.18	-0.02860724
503.39	0.00276163		1033.39	-0.00376754		1563.39	-0.00397089		2093.38	0.00178601		2623.38	-0.01699636		3153.38	0.02324872		3683.38	-0.00568051		4213.38	-0.02871467
503.59	0.00254159		1033.59	-0.00405089		1563.59	-0.0036183		2093.58	0.00154549		2623.58	-0.0173852		3153.58	0.02297573		3683.58	-0.00562819		4213.58	-0.0276849
503.79	0.00220094		1033.79	-0.0034926		1563.79	-0.00404414		2093.78	0.00182185		2623.78	-0.01850863		3153.78	0.02216086		3683.78	-0.00593407		4213.78	-0.02665096
503.99	0.00159397		1033.99	-0.00329885		1563.99	-0.00443377		2093.98	0.00235916		2623.98	-0.01869388		3153.98	0.01995439		3683.98	-0.0060365		4213.98	-0.02575927
504.19	0.00130782		1034.19	-0.00296977		1564.19	-0.00401318		2094.18	0.00221444		2624.18	-0.0187453		3154.18	0.01953781		3684.18	-0.00654636		4214.18	-0.02632253
504.39	0.00080028		1034.39	-0.00305711		1564.39	-0.00429703		2094.38	0.00180515		2624.38	-0.01810477		3154.38	0.01920168		3684.38	-0.00627319		4214.38	-0.02561745
504.59	0.00080426		1034.59	-0.00278995		1564.59	-0.00432092		2094.58	0.00067383		2624.58	-0.01885476		3154.58	0.01882883		3684.58	-0.00728785		4214.58	-0.02369514
504.79	0.00127662		1034.79	-0.00226666		1564.79	-0.00492718		2094.78	-0.00024757		2624.78	-0.01891706		3154.78	0.01757089		3684.78	-0.00743665		4214.78	-0.02315177
504.99	0.00058536		1034.99	-0.00228716		1564.99	-0.00580711		2094.98	-0.00038855		2624.98	-0.01869584		3154.98	0.0168009		3684.98	-0.00690425		4214.98	-0.02242919
505.19	0.00039984		1035.19	-0.001822		1565.19	-0.0070676		2095.18	-0.00126349		2625.18	-0.01812618		3155.18	0.01551989		3685.18	-0.00734846		4215.18	-0.02188407
505.39	-0.00110733		1035.39	-0.00227626		1565.39	-0.00717831		2095.38	-0.00137011		2625.38	-0.01848271		3155.38	0.01538893		3685.38	-0.00675449		4215.38	-0.02188792
505.59	-0.0008377		1035.59	-0.00146209		1565.59	-0.00755835		2095.58	-0.0011672		2625.58	-0.01870785		3155.58	0.01523011		3685.58	-0.00604587		4215.58	-0.02329821
505.79	-0.00126304		1035.79	-0.00174298		1565.79	-0.00797093		2095.78	-0.00157981		2625.78	-0.01801027		3155.78	0.01526417		3685.78	-0.00565366		4215.78	-0.02330255
505.99	-0.00056257		1035.99	-0.00215558		1565.99	-0.0079674		2095.98	-0.00049535		2625.98	-0.01784498		3155.98	0.01622464		3685.98	-0.0049478		4215.98	-0.02415124
506.19	-0.00018243		1036.19	-0.00213509		1566.19	-0.00718804		2096.18	-0.00015633		2626.18	-0.01671223		3156.18	0.01794507		3686.18	-0.00399783		4216.18	-0.0246484
506.39	0.00066512		1036.39	-0.0019312		1566.39	-0.00623615		2096.38	0.00080204		2626.38	-0.01584496		3156.38	0.01952909		3686.38	-0.00309252		4216.38	-0.02508156
506.59	0.00150705		1036.59	-0.00188784		1566.59	-0.00552113		2096.58	0.00129033		2626.58	-0.01482016		3156.58	0.0209951		3686.58	-0.00244728		4216.58	-0.02567279
506.79	0.00133181		1036.79	-0.00219827		1566.79	-0.00576012		2096.78	0.00140142		2626.78	-0.01440429		3156.78	0.0214717		3686.78	-0.00147933		4216.78	-0.02573587
506.99	0.00160134		1036.99	-0.00247676		1566.99	-0.00517774		2096.98	0.00248247		2626.98	-0.01399477		3156.98	0.02173045		3686.98	-0.00097029		4216.98	-0.02588642
507.19	0.00181979		1037.19	-0.00318004		1567.19	-0.00535881		2097.18	0.00228005		2627.18	-0.01425774		3157.18	0.02211899		3687.18	-0.00103163		4217.18	-0.02556927
507.39	0.00199649		1037.39	-0.00300291		1567.39	-0.00551999		2097.38	0.00185445		2627.38	-0.01410791		3157.38	0.0229632		3687.38	-0.00144288		4217.38	-0.02567333
507.59	0.0024445		1037.59	-0.00219228		1567.59	-0.00512738		2097.58	0.00140178		2627.58	-0.01483981		3157.58	0.02289702		3687.58	-0.00238733		4217.58	-0.02522079
507.79	0.00250907		1037.79	-0.00216892		1567.79	-0.00513077		2097.78	0.00115194		2627.78	-0.01462104		3157.78	0.02221004		3687.78	-0.00330059		4217.78	-0.02594088
507.99	0.00255669		1037.99	-0.00240239		1567.99	-0.00583184		2097.98	0.0004951		2627.98	-0.01496826		3157.98	0.02187589		3687.98	-0.00439122		4217.98	-0.02588404
508.19	0.00340321		1038.19	-0.00267456		1568.19	-0.00540627		2098.18	-0.00078388		2628.18	-0.01501666		3158.18	0.02213862		3688.18	-0.00532978		4218.18	-0.02612529
508.39	0.00371222		1038.39	-0.00225707		1568.39	-0.00541411		2098.38	-0.00051884		2628.38	-0.0150392		3158.38	0.02204315		3688.38	-0.0059181		4218.38	-0.02518202
508.59	0.00419727		1038.59	-0.00184502		1568.59	-0.00607944		2098.58	-0.000602		2628.58	-0.01567583		3158.58	0.02073584		3688.58	-0.0072563		4218.58	-0.0248261
508.79	0.00418439		1038.79	-0.00195645		1568.79	-0.00714982		2098.78	-0.00113181		2628.78	-0.015629		3158.78	0.01886159		3688.78	-0.00719817		4218.78	-0.02502008
508.99	0.00334377		1038.99	-0.00131524		1568.99	-0.00811092		2098.98	-0.00089339		2628.98	-0.01542384		3158.98	0.01905019		3688.98	-0.00680529		4218.98	-0.02537815
509.19	0.00257528		1039.19	-0.00100156		1569.19	-0.00887342		2099.18	-0.00120334		2629.18	-0.01564442		3159.18	0.01824999		3689.18	-0.0065013		4219.18	-0.02530684
509.39	0.00195403		1039.39	-0.00104262		1569.39	-0.00919601		2099.38	-0.00098794		2629.38	-0.01614471		3159.38	0.0186861		3689.38	-0.00594133		4219.38	-0.02655171
509.59	0.00236132		1039.59	-0.00093757		1569.59	-0.00937557		2099.58	-0.00133859		2629.58	-0.01594633		3159.58	0.01876126		3689.58	-0.0054769		4219.58	-0.02742303
509.79	0.00175848		1039.79	-0.00211019		1569.79	-0.00945786		2099.78	-0.00109152		2629.78	-0.01636013		3159.78	0.01885406		3689.78	-0.00522361		4219.78	-0.02769825
509.99	0.00204072		1039.99	-0.00085908		1569.99	-0.00895988		2099.98	-0.0005331		2629.98	-0.01549033		3159.98	0.02012252		3689.98	-0.00392109		4219.98	-0.02894546
510.19	0.00187263		1040.19	-0.00048398		1570.19	-0.00828019		2100.18	-0.00012759		2630.18	-0.01566901		3160.18	0.02133609		3690.18	-0.00336653		4220.18	-0.02938174
510.39	0.00192221		1040.39	-0.00075744		1570.39	-0.0064		2100.38	0.00020456		2630.38	-0.01592373		3160.38	0.02210272		3690.38	-0.00289127		4220.38	-0.02959141
510.59	0.00155221		1040.59	-0.00079831		1570.59	-0.00609163		2100.58	0.00064404		2630.58	-0.01593875		3160.58	0.022128		3690.58	-0.00318831		4220.58	-0.03046113
510.79	0.0008746		1040.79	-0.00141309		1570.79	-0.00572063		2100.78	0.0019623		2630.78	-0.01639296		3160.78	0.022355		3690.78	-0.00283921		4220.78	-0.03007682
510.99	0.0009638		1040.99	-0.00272029		1570.99	-0.0044622		2100.98	0.00281589		2630.98	-0.01723858		3160.98	0.02269216		3690.98	-0.00384877		4220.98	-0.03030945
511.19	0.00110734		1041.19	-0.00288924		1571.19	-0.00395356		2101.18	0.00286472		2631.18	-0.01736661		3161.18	0.02299598		3691.18	-0.00482498		4221.18	-0.02998554
511.39	0.00088627		1041.39	-0.00245013		1571.39	-0.00318084		2101.38	0.00277772		2631.38	-0.01809796		3161.38	0.02327921		3691.38	-0.00549272		4221.38	-0.03002621
511.59	0.00094752		1041.59	-0.0027234		1571.59	-0.00288112		2101.58	0.0018985		2631.58	-0.01875404		3161.58	0.02240681		3691.58	-0.00626261		4221.58	-0.02906693
511.79	0.00062608		1041.79	-0.00328466		1571.79	-0.00195627		2101.78	0.00206852		2631.78	-0.01866467		3161.78	0.02208081		3691.78	-0.00693537		4221.78	-0.028689
511.99	0.00143822		1041.99	-0.00331974		1571.99	-0.00287055		2101.98	0.00144886		2631.98	-0.0193243		3161.98	0.0217021		3691.98	-0.00753427		4221.98	-0.02786375
512.19	0.00126053		1042.19	-0.00349563		1572.19	-0.00256325		2102.18	0.00049246		2632.18	-0.01901773		3162.18	0.02165713		3692.18	-0.00750585		4222.18	-0.02732145
512.39	0.0012134		1042.39	-0.00276539		1572.39	-0.00308601		2102.38	0.00151738		2632.38	-0.01910068		3162.38	0.02134597		3692.38	-0.0071354		4222.38	-0.02651212
512.59	0.00049644		1042.59	-0.00318663		1572.59	-0.00451713		2102.58	0.00065871		2632.58	-0.01823274		3162.58	0.02069294		3692.58	-0.00732489		4222.58	-0.02665027
512.79	0.00087639		1042.79	-0.00322451		1572.79	-0.00551262		2102.78	0.00017338		2632.78	-0.0177266		3162.78	0.02019935		3692.78	-0.00699125		4222.78	-0.02615123
512.99	0.00108589		1042.99	-0.00286537		1572.99	-0.00594108		2102.98	-0.00002794		2632.98	-0.01748274		3162.98	0.02034667		3692.98	-0.0069679		4222.98	-0.0262581
513.19	0.00101288		1043.19	-0.00278238		1573.19	-0.00739215		2103.18	-0.00109669		2633.18	-0.01714332		3163.18	0.02057136		3693.18	-0.00680015		4223.18	-0.02578677
513.39	0.00241624		1043.39	-0.0031271		1573.39	-0.00782747		2103.38	-0.00152991		2633.38	-0.01605401		3163.38	0.02146848		3693.38	-0.00747716		4223.38	-0.02577088
513.59	0.00321326		1043.59	-0.00357083		1573.59	-0.0079489		2103.58	-0.00250756		2633.58	-0.01574895		3163.58	0.02126659		3693.58	-0.00678935		4223.58	-0.02552323
513.79	0.00354415		1043.79	-0.00301909		1573.79	-0.00788692		2103.78	-0.00370137		2633.78	-0.0156157		3163.78	0.0218411		3693.78	-0.00627435		4223.78	-0.02629841
513.99	0.00346485		1043.99	-0.00202246		1573.99	-0.00721144		2103.98	-0.00313106		2633.98	-0.0149575		3163.98	0.02243254		3693.98	-0.00546985		4223.98	-0.02710585
514.19	0.00280436		1044.19	-0.00212283		1574.19	-0.00684596		2104.18	-0.00300812		2634.18	-0.0152764		3164.18	0.02286319		3694.18	-0.00606702		4224.18	-0.02696281
514.39	0.00255837		1044.39	-0.00137266		1574.39	-0.0064049		2104.38	-0.00292517		2634.38	-0.01565051		3164.38	0.02272293		3694.38	-0.00548974		4224.38	-0.0270878
514.59	0.00279274		1044.59	-0.00126975		1574.59	-0.00667419		2104.58	-0.00297459		2634.58	-0.01494863		3164.58	0.02219905		3694.58	-0.00588923		4224.58	-0.02729439
514.79	0.00195805		1044.79	-0.00147283		1574.79	-0.00590752		2104.78	-0.00283395		2634.78	-0.0150551		3164.78	0.02242076		3694.78	-0.00677612		4224.78	-0.02563413
514.99	0.00206317		1044.99	-0.00170413		1574.99	-0.0055665		2104.98	-0.00237848		2634.98	-0.01440622		3164.98	0.02203492		3694.98	-0.0079732		4224.98	-0.02591331
515.19	0.00132205		1045.19	-0.00092022		1575.19	-0.00489973		2105.18	-0.00147239		2635.18	-0.01444404		3165.18	0.02203865		3695.18	-0.00894179		4225.18	-0.02538348
515.39	0.00050891		1045.39	-0.00162287		1575.39	-0.00473752		2105.38	-0.00041062		2635.38	-0.01555353		3165.38	0.02152343		3695.38	-0.00860917		4225.38	-0.02456575
515.59	0.00044609		1045.59	-0.00171829		1575.59	-0.00426467		2105.58	-0.00049692		2635.58	-0.01490537		3165.58	0.02064082		3695.58	-0.00898197		4225.58	-0.02349225
515.79	0.00000555		1045.79	-0.0017557		1575.79	-0.00373872		2105.78	0.00011236		2635.78	-0.01522154		3165.78	0.02016966		3695.78	-0.009049		4225.78	-0.02306165
515.99	-0.00027403		1045.99	-0.00227685		1575.99	-0.00498501		2105.98	-0.00005091		2635.98	-0.01570878		3165.98	0.01963079		3695.98	-0.00951703		4225.98	-0.02278582
516.19	-0.00081232		1046.19	-0.00232592		1576.19	-0.00492207		2106.18	0.00013269		2636.18	-0.01605055		3166.18	0.01942639		3696.18	-0.0085984		4226.18	-0.02263374
516.39	-0.0011411		1046.39	-0.00215364		1576.39	-0.00524749		2106.38	0.00135264		2636.38	-0.01616406		3166.38	0.01858773		3696.38	-0.00824961		4226.38	-0.02318946
516.59	-0.00187178		1046.59	-0.00267515		1576.59	-0.00591641		2106.58	0.00115911		2636.58	-0.01572714		3166.58	0.01792256		3696.58	-0.00835659		4226.58	-0.0242027
516.79	-0.00159663		1046.79	-0.00246367		1576.79	-0.00690739		2106.78	0.00177426		2636.78	-0.0162346		3166.78	0.01772948		3696.78	-0.00864176		4226.78	-0.02416968
516.99	-0.0019662		1046.99	-0.00290742		1576.99	-0.00645435		2106.98	0.00205714		2636.98	-0.01717061		3166.98	0.01781129		3696.98	-0.00877791		4226.98	-0.02450093
517.19	-0.00181874		1047.19	-0.00291041		1577.19	-0.00712187		2107.18	0.00133577		2637.18	-0.01745169		3167.18	0.01906489		3697.18	-0.00846261		4227.18	-0.02445373
517.39	-0.00064901		1047.39	-0.00324442		1577.39	-0.00646431		2107.38	0.00107384		2637.38	-0.0175273		3167.38	0.01995107		3697.38	-0.00742954		4227.38	-0.02518668
517.59	-0.00096419		1047.59	-0.00334043		1577.59	-0.00584589		2107.58	-0.00035268		2637.58	-0.01893774		3167.58	0.02001863		3697.58	-0.00612544		4227.58	-0.0251773
517.79	-0.0009701		1047.79	-0.00297433		1577.79	-0.00604195		2107.78	-0.00076924		2637.78	-0.01938258		3167.78	0.02045582		3697.78	-0.00480173		4227.78	-0.02603977
517.99	-0.00188544		1047.99	-0.00281819		1577.99	-0.00572602		2107.98	0.00003429		2637.98	-0.02025554		3167.98	0.02110698		3697.98	-0.00533365		4227.98	-0.02666776
518.19	-0.00152228		1048.19	-0.00280563		1578.19	-0.00598481		2108.18	-0.00043735		2638.18	-0.02129335		3168.18	0.02211868		3698.18	-0.00556982		4228.18	-0.02642223
518.39	-0.00078232		1048.39	-0.00173723		1578.39	-0.00619634		2108.38	-0.00062776		2638.38	-0.02166112		3168.38	0.02205576		3698.38	-0.00613032		4228.38	-0.02592206
518.59	-0.00057201		1048.59	-0.00154519		1578.59	-0.00656249		2108.58	-0.00115183		2638.58	-0.02126658		3168.58	0.02214698		3698.58	-0.00674899		4228.58	-0.02525704
518.79	-0.0004022		1048.79	-0.0014416		1578.79	-0.00683902		2108.78	-0.00058007		2638.78	-0.02134512		3168.78	0.02285529		3698.78	-0.00756682		4228.78	-0.02481245
518.99	-0.00018053		1048.99	-0.00143871		1578.99	-0.00689145		2108.98	-0.00040094		2638.98	-0.02114733		3168.98	0.02311417		3698.98	-0.00837944		4228.98	-0.02491303
519.19	-0.0002856		1049.19	-0.00243464		1579.19	-0.00571242		2109.18	0.00019733		2639.18	-0.02200623		3169.18	0.02287314		3699.18	-0.00893262		4229.18	-0.02436228
519.39	-0.00018871		1049.39	-0.00329173		1579.39	-0.00598844		2109.38	0.00112675		2639.38	-0.02124892		3169.38	0.02281336		3699.38	-0.00872212		4229.38	-0.02483329
519.59	-0.00060587		1049.59	-0.00309029		1579.59	-0.00665976		2109.58	0.00099866		2639.58	-0.01915687		3169.58	0.02296758		3699.58	-0.00937619		4229.58	-0.02524495
519.79	-0.00058608		1049.79	-0.00327908		1579.79	-0.00727888		2109.78	0.00082439		2639.78	-0.01833323		3169.78	0.02214287		3699.78	-0.00908057		4229.78	-0.02540819
519.99	-0.0006508		1049.99	-0.00350037		1579.99	-0.00819775		2109.98	0.00126844		2639.98	-0.01827561		3169.98	0.02105456		3699.98	-0.00877147		4229.98	-0.02594258
520.19	-0.00094162		1050.19	-0.0038011		1580.19	-0.00855794		2110.18	0.00234132		2640.18	-0.01772007		3170.18	0.02039532		3700.18	-0.00804733		4230.18	-0.02655747
520.39	-0.00125764		1050.39	-0.00486778		1580.39	-0.00901189		2110.38	0.00271898		2640.38	-0.01705999		3170.38	0.01889666		3700.38	-0.00833846		4230.38	-0.02718596
520.59	-0.00067552		1050.59	-0.00558629		1580.59	-0.00908992		2110.58	0.00274166		2640.58	-0.01565739		3170.58	0.01882715		3700.58	-0.00900888		4230.58	-0.02808109
520.79	-0.00033443		1050.79	-0.0060707		1580.79	-0.00923916		2110.78	0.0036156		2640.78	-0.01476697		3170.78	0.01899147		3700.78	-0.00882476		4230.78	-0.02818826
520.99	0.0001274		1050.99	-0.00634371		1580.99	-0.00835959		2110.98	0.00378741		2640.98	-0.01574764		3170.98	0.01927279		3700.98	-0.00813283		4230.98	-0.02772295
521.19	0.00025643		1051.19	-0.00644936		1581.19	-0.00829005		2111.18	0.0038242		2641.18	-0.01551359		3171.18	0.01990831		3701.18	-0.00758553		4231.18	-0.02858967
521.39	0.00060429		1051.39	-0.00632513		1581.39	-0.00730268		2111.38	0.00340676		2641.38	-0.01560787		3171.38	0.0204837		3701.38	-0.00687185		4231.38	-0.02861989
521.59	0.00056281		1051.59	-0.00653514		1581.59	-0.00719032		2111.58	0.00270558		2641.58	-0.01684809		3171.58	0.02141673		3701.58	-0.00724187		4231.58	-0.02845128
521.79	0.00042306		1051.79	-0.00626564		1581.79	-0.00750463		2111.78	0.00312609		2641.78	-0.01759238		3171.78	0.02207755		3701.78	-0.00751458		4231.78	-0.02892587
521.99	0.00007865		1051.99	-0.00575152		1581.99	-0.00721626		2111.98	0.00268124		2641.98	-0.01908518		3171.98	0.0226332		3701.98	-0.00927965		4231.98	-0.0288762
522.19	0.00100708		1052.19	-0.00456564		1582.19	-0.00697255		2112.18	0.00256894		2642.18	-0.02030433		3172.18	0.02443978		3702.18	-0.00962379		4232.18	-0.02748783
522.39	0.00128152		1052.39	-0.00298372		1582.39	-0.00702544		2112.38	0.0024643		2642.38	-0.02037337		3172.38	0.02407178		3702.38	-0.01026717		4232.38	-0.02692739
522.59	0.00124845		1052.59	-0.00257472		1582.59	-0.00669941		2112.58	0.00220172		2642.58	-0.02111656		3172.58	0.02488486		3702.58	-0.01028694		4232.58	-0.02617274
522.79	0.00146327		1052.79	-0.00237705		1582.79	-0.00583588		2112.78	0.0024055		2642.78	-0.021153		3172.78	0.02502627		3702.78	-0.01012217		4232.78	-0.02589749
522.99	0.0005994		1052.99	-0.00200708		1582.99	-0.00511921		2112.98	0.00160594		2642.98	-0.02141781		3172.98	0.025046		3702.98	-0.01105944		4232.98	-0.0256605
523.19	0.00017436		1053.19	-0.00252799		1583.19	-0.00492231		2113.18	0.00168896		2643.18	-0.02185531		3173.18	0.02494415		3703.18	-0.01051291		4233.18	-0.02538698
523.39	-0.00070482		1053.39	-0.00193191		1583.39	-0.00630859		2113.38	0.00178931		2643.38	-0.02065463		3173.38	0.02450976		3703.38	-0.01039251		4233.38	-0.02564757
523.59	-0.00104676		1053.59	-0.00180471		1583.59	-0.00682926		2113.58	0.00142468		2643.58	-0.01985292		3173.58	0.02312184		3703.58	-0.00922496		4233.58	-0.02568753
523.79	-0.00094224		1053.79	-0.00175638		1583.79	-0.0071015		2113.78	0.00052913		2643.78	-0.02023998		3173.78	0.02170267		3703.78	-0.00817434		4233.78	-0.02593417
523.99	0.00001359		1053.99	-0.00255776		1583.99	-0.00712128		2113.98	0.00111248		2643.98	-0.02052473		3173.98	0.02064378		3703.98	-0.00724168		4233.98	-0.02673966
524.19	0.00089029		1054.19	-0.0038586		1584.19	-0.00764995		2114.18	0.00065087		2644.18	-0.01971917		3174.18	0.01980081		3704.18	-0.00675244		4234.18	-0.02678787
524.39	0.00133264		1054.39	-0.00506881		1584.39	-0.00771839		2114.38	0.00013103		2644.38	-0.018927		3174.38	0.01842656		3704.38	-0.00648235		4234.38	-0.02663187
524.59	0.00140756		1054.59	-0.00572069		1584.59	-0.00798966		2114.58	0.00015987		2644.58	-0.01753311		3174.58	0.01785946		3704.58	-0.00602631		4234.58	-0.02749902
524.79	0.00048455		1054.79	-0.00687634		1584.79	-0.00755433		2114.78	0.00054549		2644.78	-0.01799079		3174.78	0.0180622		3704.78	-0.00520855		4234.78	-0.02690564
524.99	0.00010609		1054.99	-0.00713227		1584.99	-0.00768527		2114.98	0.00020814		2644.98	-0.01855214		3174.98	0.0182574		3704.98	-0.00531403		4234.98	-0.02711751
525.19	-0.00047092		1055.19	-0.00764845		1585.19	-0.00817926		2115.18	0.00026546		2645.18	-0.01822041		3175.18	0.01809995		3705.18	-0.0054051		4235.18	-0.02801922
525.39	-0.00085142		1055.39	-0.00755186		1585.39	-0.00801492		2115.38	-0.00038944		2645.38	-0.01795219		3175.38	0.0180391		3705.38	-0.00638878		4235.38	-0.02739296
525.59	-0.00152149		1055.59	-0.0074068		1585.59	-0.00812974		2115.58	-0.00064882		2645.58	-0.0181629		3175.58	0.01829697		3705.58	-0.00686868		4235.58	-0.02779368
525.79	-0.00248277		1055.79	-0.00679086		1585.79	-0.0076155		2115.78	-0.00050063		2645.78	-0.01775113		3175.78	0.01820869		3705.78	-0.00789358		4235.78	-0.02740096
525.99	-0.00277203		1055.99	-0.00572017		1585.99	-0.00685399		2115.98	-0.00011004		2645.98	-0.01728441		3175.98	0.01908876		3705.98	-0.00852826		4235.98	-0.02637593
526.19	-0.00253121		1056.19	-0.00483495		1586.19	-0.00631693		2116.18	0.00030166		2646.18	-0.0166965		3176.18	0.02094794		3706.18	-0.00870339		4236.18	-0.02503745
526.39	-0.00332925		1056.39	-0.00410044		1586.39	-0.00555535		2116.38	0.00027256		2646.38	-0.01642966		3176.38	0.02049677		3706.38	-0.00945833		4236.38	-0.02486555
526.59	-0.00362846		1056.59	-0.00296322		1586.59	-0.0050147		2116.58	0.00084421		2646.58	-0.01676486		3176.58	0.0210726		3706.58	-0.01022972		4236.58	-0.02411516
526.79	-0.00378337		1056.79	-0.00269364		1586.79	-0.0053462		2116.78	0.00037077		2646.78	-0.01625814		3176.78	0.02108677		3706.78	-0.01084638		4236.78	-0.02349128
526.99	-0.00365738		1056.99	-0.00231467		1586.99	-0.00639228		2116.98	0.0001106		2646.98	-0.01614516		3176.98	0.02118464		3706.98	-0.01149322		4236.98	-0.02330406
527.19	-0.00355771		1057.19	-0.00223383		1587.19	-0.00672925		2117.18	-0.00042946		2647.18	-0.0164048		3177.18	0.02081029		3707.18	-0.01079137		4237.18	-0.02276259
527.39	-0.00312486		1057.39	-0.0017777		1587.39	-0.00704877		2117.38	-0.00037593		2647.38	-0.0168927		3177.38	0.02045501		3707.38	-0.00981863		4237.38	-0.02246654
527.59	-0.00196784		1057.59	-0.00230818		1587.59	-0.00736912		2117.58	-0.00106775		2647.58	-0.01717863		3177.58	0.02021315		3707.58	-0.00855947		4237.58	-0.0239315
527.79	-0.0008505		1057.79	-0.00253778		1587.79	-0.00829195		2117.78	-0.00189576		2647.78	-0.01767746		3177.78	0.02040972		3707.78	-0.00812796		4237.78	-0.02406435
527.99	-0.00018982		1057.99	-0.00299935		1587.99	-0.0088753		2117.98	-0.00215126		2647.98	-0.01867629		3177.98	0.01990675		3707.98	-0.00687709		4237.98	-0.02448906
528.19	0.00070462		1058.19	-0.00383254		1588.19	-0.00956223		2118.18	-0.00360322		2648.18	-0.01931709		3178.18	0.01943921		3708.18	-0.00580508		4238.18	-0.02575137
528.39	0.00048769		1058.39	-0.00454579		1588.39	-0.01012912		2118.38	-0.00361247		2648.38	-0.01922875		3178.38	0.01930422		3708.38	-0.00546775		4238.38	-0.02663729
528.59	0.00060086		1058.59	-0.00508097		1588.59	-0.01104113		2118.58	-0.00316686		2648.58	-0.01988002		3178.58	0.01914934		3708.58	-0.00513322		4238.58	-0.02763219
528.79	0.00051374		1058.79	-0.00639317		1588.79	-0.01104568		2118.78	-0.00257503		2648.78	-0.02064971		3178.78	0.01943363		3708.78	-0.00519386		4238.78	-0.0282489
528.99	0.0019651		1058.99	-0.00680865		1588.99	-0.01157873		2118.98	-0.00256015		2648.98	-0.02043493		3178.98	0.0185223		3708.98	-0.0055538		4238.98	-0.02831051
529.19	0.00133108		1059.19	-0.00720271		1589.19	-0.01210798		2119.18	-0.00186942		2649.18	-0.02028928		3179.18	0.01774685		3709.18	-0.00593133		4239.18	-0.0289721
529.39	0.00119448		1059.39	-0.00718357		1589.39	-0.01111742		2119.38	-0.00130545		2649.38	-0.01963584		3179.38	0.0176971		3709.38	-0.00653698		4239.38	-0.02943494
529.59	0.00135861		1059.59	-0.00776367		1589.59	-0.01017319		2119.58	-0.0002992		2649.58	-0.01986477		3179.58	0.01742075		3709.58	-0.00663424		4239.58	-0.02942602
529.79	0.00125775		1059.79	-0.00718382		1589.79	-0.00872668		2119.78	0.00013756		2649.78	-0.01974104		3179.78	0.01769062		3709.78	-0.00726067		4239.78	-0.02905795
529.99	0.00144087		1059.99	-0.00693359		1589.99	-0.00688957		2119.98	0.00037303		2649.98	-0.02002377		3179.98	0.01825744		3709.98	-0.00785985		4239.98	-0.02901784
530.19	0.00163203		1060.19	-0.00628964		1590.19	-0.00628024		2120.18	0.00013139		2650.18	-0.01942338		3180.18	0.01872585		3710.18	-0.00830223		4240.18	-0.02974738
530.39	0.00116023		1060.39	-0.00448148		1590.39	-0.00567983		2120.38	0.00046995		2650.38	-0.01963544		3180.38	0.01934751		3710.38	-0.00900453		4240.38	-0.03004096
530.59	0.00134512		1060.59	-0.00381606		1590.59	-0.0063244		2120.58	0.0005152		2650.58	-0.0194097		3180.58	0.01943641		3710.58	-0.00929009		4240.58	-0.02943091
530.79	0.00159624		1060.79	-0.00308819		1590.79	-0.0062946		2120.78	0.00051923		2650.78	-0.01832444		3180.78	0.01882463		3710.78	-0.01003713		4240.78	-0.02895068
530.99	0.0014762		1060.99	-0.00217939		1590.99	-0.00650464		2120.98	0.00077935		2650.98	-0.01863297		3180.98	0.01872153		3710.98	-0.01002979		4240.98	-0.02838402
531.19	0.00139975		1061.19	-0.00168578		1591.19	-0.00625962		2121.18	0.00039771		2651.18	-0.01848329		3181.18	0.01901657		3711.18	-0.0099814		4241.18	-0.02718235
531.39	0.00160477		1061.39	-0.00139783		1591.39	-0.00666391		2121.38	0.00044617		2651.38	-0.01812786		3181.38	0.01956633		3711.38	-0.00970529		4241.38	-0.02680075
531.59	0.00143354		1061.59	-0.00064656		1591.59	-0.00764682		2121.58	-0.00024232		2651.58	-0.01751754		3181.58	0.01930953		3711.58	-0.00951279		4241.58	-0.02725583
531.79	0.0008868		1061.79	-0.00020581		1591.79	-0.00824052		2121.78	-0.00027181		2651.78	-0.01671157		3181.78	0.01886764		3711.78	-0.00924962		4241.78	-0.02658314
531.99	0.00066495		1061.99	-0.00058532		1591.99	-0.00886221		2121.98	-0.0003396		2651.98	-0.01711035		3181.98	0.01834546		3711.98	-0.00858644		4241.98	-0.02718271
532.19	0.00127689		1062.19	-0.00102982		1592.19	-0.00898802		2122.18	-0.00028798		2652.18	-0.01725642		3182.18	0.01911313		3712.18	-0.00817575		4242.18	-0.02770584
532.39	0.00081809		1062.39	-0.00199315		1592.39	-0.01019656		2122.38	0.00041071		2652.38	-0.01677671		3182.38	0.01975703		3712.38	-0.00839218		4242.38	-0.02776521
532.59	0.00050744		1062.59	-0.00289709		1592.59	-0.01127052		2122.58	0.00116368		2652.58	-0.01742771		3182.58	0.01965663		3712.58	-0.00756226		4242.58	-0.027448
532.79	0.00114577		1062.79	-0.00345592		1592.79	-0.01147669		2122.78	0.00048959		2652.78	-0.01694636		3182.78	0.01998264		3712.78	-0.00781034		4242.78	-0.02712008
532.99	0.00091576		1062.99	-0.00366298		1592.99	-0.01142997		2122.98	0.00054377		2652.98	-0.01750825		3182.98	0.01980268		3712.98	-0.00781176		4242.98	-0.02651394
533.19	0.00093761		1063.19	-0.00369745		1593.19	-0.01114816		2123.18	0.00105358		2653.18	-0.01793354		3183.18	0.02008354		3713.18	-0.00777939		4243.18	-0.02786888
533.39	0.00117767		1063.39	-0.0044281		1593.39	-0.00980258		2123.38	0.00054205		2653.38	-0.01863593		3183.38	0.02037742		3713.38	-0.0080546		4243.38	-0.02816971
533.59	0.00130335		1063.59	-0.00501977		1593.59	-0.00893462		2123.58	0.00070654		2653.58	-0.02005356		3183.58	0.02039534		3713.58	-0.00819442		4243.58	-0.02833026
533.79	0.00091253		1063.79	-0.00413221		1593.79	-0.00865347		2123.78	-0.00051796		2653.78	-0.02017652		3183.78	0.02062428		3713.78	-0.00830836		4243.78	-0.02885692
533.99	-0.00018459		1063.99	-0.00475087		1593.99	-0.00814102		2123.98	-0.00056318		2653.98	-0.02056764		3183.98	0.02039178		3713.98	-0.00810152		4243.98	-0.02973675
534.19	-0.00042027		1064.19	-0.00409604		1594.19	-0.00850886		2124.18	-0.00087049		2654.18	-0.02068995		3184.18	0.02089557		3714.18	-0.00825724		4244.18	-0.03009794
534.39	-0.00124798		1064.39	-0.00389831		1594.39	-0.00841687		2124.38	-0.00087199		2654.38	-0.02103655		3184.38	0.02136401		3714.38	-0.00819978		4244.38	-0.02847635
534.59	-0.00200332		1064.59	-0.00402279		1594.59	-0.00845617		2124.58	-0.00106629		2654.58	-0.02076872		3184.58	0.01976678		3714.58	-0.00782056		4244.58	-0.02792068
534.79	-0.00262099		1064.79	-0.00313398		1594.79	-0.00795463		2124.78	-0.00070871		2654.78	-0.02030152		3184.78	0.01870202		3714.78	-0.00804264		4244.78	-0.0273512
534.99	-0.00298152		1064.99	-0.00354339		1594.99	-0.00844605		2124.98	-0.00141628		2654.98	-0.02061552		3184.98	0.0196383		3714.98	-0.00773933		4244.98	-0.02636091
535.19	-0.0027403		1065.19	-0.00358377		1595.19	-0.00984637		2125.18	-0.00196591		2655.18	-0.02051682		3185.18	0.01913513		3715.18	-0.00705524		4245.18	-0.02617644
535.39	-0.00289047		1065.39	-0.00401456		1595.39	-0.01022453		2125.38	-0.00185978		2655.38	-0.02003045		3185.38	0.01888502		3715.38	-0.00695718		4245.38	-0.02583427
535.59	-0.00315419		1065.59	-0.00410576		1595.59	-0.01096349		2125.58	-0.00215428		2655.58	-0.01960501		3185.58	0.01821776		3715.58	-0.00657688		4245.58	-0.02558232
535.79	-0.00316685		1065.79	-0.00474255		1595.79	-0.01137695		2125.78	-0.00148402		2655.78	-0.01941942		3185.78	0.0180833		3715.78	-0.00677255		4245.78	-0.02595904
535.99	-0.0028212		1065.99	-0.00629217		1595.99	-0.01125965		2125.98	-0.00145945		2655.98	-0.01972286		3185.98	0.01806078		3715.98	-0.00656015		4245.98	-0.02611673
536.19	-0.00242051		1066.19	-0.00669735		1596.19	-0.01096288		2126.18	-0.00114458		2656.18	-0.02083809		3186.18	0.01867586		3716.18	-0.00583118		4246.18	-0.02657109
536.39	-0.00289693		1066.39	-0.00788821		1596.39	-0.01169423		2126.38	-0.00077007		2656.38	-0.02031227		3186.38	0.01822421		3716.38	-0.00524867		4246.38	-0.02691118
536.59	-0.00239894		1066.59	-0.00692677		1596.59	-0.01096371		2126.58	-0.00097581		2656.58	-0.02080244		3186.58	0.01838763		3716.58	-0.0050258		4246.58	-0.0263048
536.79	-0.00163955		1066.79	-0.00624378		1596.79	-0.0105666		2126.78	-0.0017375		2656.78	-0.02073658		3186.78	0.01846274		3716.78	-0.00568747		4246.78	-0.0264126
536.99	-0.001291		1066.99	-0.00646602		1596.99	-0.00977736		2126.98	-0.00037087		2656.98	-0.02110744		3186.98	0.01767236		3716.98	-0.00499832		4246.98	-0.02721062
537.19	0.00001216		1067.19	-0.00566418		1597.19	-0.00867268		2127.18	-0.00055272		2657.18	-0.02123807		3187.18	0.01800649		3717.18	-0.0053925		4247.18	-0.02771245
537.39	-0.00070239		1067.39	-0.00520443		1597.39	-0.00833126		2127.38	-0.00128585		2657.38	-0.02103482		3187.38	0.01826956		3717.38	-0.00557205		4247.38	-0.02794869
537.59	-0.00040546		1067.59	-0.00441505		1597.59	-0.00827915		2127.58	-0.00066454		2657.58	-0.02117106		3187.58	0.01750866		3717.58	-0.0060442		4247.58	-0.0286728
537.79	-0.00069267		1067.79	-0.00366805		1597.79	-0.00865572		2127.78	-0.00110728		2657.78	-0.02067952		3187.78	0.01800312		3717.78	-0.00672015		4247.78	-0.02829778
537.99	-0.00085992		1067.99	-0.00434539		1597.99	-0.00840886		2127.98	-0.00043835		2657.98	-0.02007743		3187.98	0.0181969		3717.98	-0.00713478		4247.98	-0.02859553
538.19	-0.00001724		1068.19	-0.00375033		1598.19	-0.00805596		2128.18	-0.00120884		2658.18	-0.020364		3188.18	0.01802965		3718.18	-0.0085876		4248.18	-0.0283094
538.39	-0.00049348		1068.39	-0.00352229		1598.39	-0.00832841		2128.38	-0.00044652		2658.38	-0.02021689		3188.38	0.01701216		3718.38	-0.00823957		4248.38	-0.02833782
538.59	-0.00077781		1068.59	-0.00329288		1598.59	-0.00832063		2128.58	0.00004929		2658.58	-0.02024947		3188.58	0.01630498		3718.58	-0.00787302		4248.58	-0.02893854
538.79	-0.0005207		1068.79	-0.00400855		1598.79	-0.00877751		2128.78	-0.00019102		2658.78	-0.01963067		3188.78	0.0167532		3718.78	-0.00850226		4248.78	-0.02898405
538.99	0.00005865		1068.99	-0.00468949		1598.99	-0.00926241		2128.98	-0.00057724		2658.98	-0.01940974		3188.98	0.01709507		3718.98	-0.00844929		4248.98	-0.02942584
539.19	-0.0003352		1069.19	-0.00533478		1599.19	-0.01092489		2129.18	-0.00082452		2659.18	-0.01940491		3189.18	0.01662203		3719.18	-0.00872448		4249.18	-0.02956047
539.39	-0.00001166		1069.39	-0.00608888		1599.39	-0.01011774		2129.38	-0.00140252		2659.38	-0.01991195		3189.38	0.01643606		3719.38	-0.0093701		4249.38	-0.02949725
539.59	0.00008917		1069.59	-0.0064468		1599.59	-0.0109244		2129.58	-0.00197337		2659.58	-0.02059107		3189.58	0.01596943		3719.58	-0.00916177		4249.58	-0.03011179
539.79	-0.00008986		1069.79	-0.00662191		1599.79	-0.01027401		2129.78	-0.002521		2659.78	-0.02057793		3189.78	0.016323		3719.78	-0.00897254		4249.78	-0.03020806
539.99	-0.00033673		1069.99	-0.00804048		1599.99	-0.01008101		2129.98	-0.00253846		2659.98	-0.02029161		3189.98	0.01627404		3719.98	-0.00832236		4249.98	-0.03029159
540.19	-0.00075587		1070.19	-0.00722812		1600.19	-0.00980427		2130.18	-0.00231985		2660.18	-0.02181784		3190.18	0.01659634		3720.18	-0.00779376		4250.18	-0.03085095
540.39	-0.00158429		1070.39	-0.00607689		1600.39	-0.00985379		2130.38	-0.00284415		2660.38	-0.02143579		3190.38	0.01687051		3720.38	-0.00807913		4250.38	-0.03034481
540.59	-0.00168926		1070.59	-0.00522623		1600.59	-0.00951842		2130.58	-0.00183419		2660.58	-0.02209703		3190.58	0.01766042		3720.58	-0.00807542		4250.58	-0.03002628
540.79	-0.0021733		1070.79	-0.00530966		1600.79	-0.00943092		2130.78	-0.00149476		2660.78	-0.02166413		3190.78	0.01841418		3720.78	-0.00760724		4250.78	-0.02975311
540.99	-0.00256829		1070.99	-0.00483361		1600.99	-0.00862114		2130.98	0.00003737		2660.98	-0.02169917		3190.98	0.01908608		3720.98	-0.00689789		4250.98	-0.02935576
541.19	-0.00333108		1071.19	-0.00359206		1601.19	-0.00809929		2131.18	-0.00018507		2661.18	-0.02175158		3191.18	0.02010711		3721.18	-0.00773574		4251.18	-0.02847498
541.39	-0.00351168		1071.39	-0.00360534		1601.39	-0.00765279		2131.38	0.00023112		2661.38	-0.0212435		3191.38	0.02036422		3721.38	-0.00796804		4251.38	-0.02856378
541.59	-0.00380807		1071.59	-0.00397849		1601.59	-0.00737192		2131.58	0.00092279		2661.58	-0.02148717		3191.58	0.01998946		3721.58	-0.00888997		4251.58	-0.02771723
541.79	-0.00332266		1071.79	-0.00314681		1601.79	-0.00742853		2131.78	0.00110003		2661.78	-0.02139519		3191.78	0.02101932		3721.78	-0.0092905		4251.78	-0.02631779
541.99	-0.00335194		1071.99	-0.00373529		1601.99	-0.00685748		2131.98	0.00201019		2661.98	-0.0207404		3191.98	0.01984218		3721.98	-0.01032168		4251.98	-0.0260767
542.19	-0.00247521		1072.19	-0.00305038		1602.19	-0.00746269		2132.18	0.00207094		2662.18	-0.02158031		3192.18	0.01857875		3722.18	-0.01090761		4252.18	-0.02568104
542.39	-0.00200325		1072.39	-0.00335627		1602.39	-0.00802865		2132.38	0.00323062		2662.38	-0.02120825		3192.38	0.0172855		3722.38	-0.0104759		4252.38	-0.02576133
542.59	-0.00144609		1072.59	-0.00393317		1602.59	-0.00861423		2132.58	0.00349553		2662.58	-0.02013305		3192.58	0.01762589		3722.58	-0.01006279		4252.58	-0.02514727
542.79	-0.00070654		1072.79	-0.00514861		1602.79	-0.00964587		2132.78	0.00355492		2662.78	-0.0199256		3192.78	0.01796754		3722.78	-0.01022256		4252.78	-0.0250503
542.99	-0.00081483		1072.99	-0.00542375		1602.99	-0.01027496		2132.98	0.00309755		2662.98	-0.01997007		3192.98	0.01763267		3722.98	-0.01031814		4252.98	-0.02583159
543.19	-0.00101798		1073.19	-0.0062307		1603.19	-0.01110748		2133.18	0.00204396		2663.18	-0.02090956		3193.18	0.01795018		3723.18	-0.01021841		4253.18	-0.02603307
543.39	-0.00011079		1073.39	-0.0065334		1603.39	-0.0110849		2133.38	0.00010385		2663.38	-0.02137706		3193.38	0.01726851		3723.38	-0.00943467		4253.38	-0.02665043
543.59	-0.00031197		1073.59	-0.0064727		1603.59	-0.01105635		2133.58	-0.00017805		2663.58	-0.02031972		3193.58	0.01770632		3723.58	-0.00882567		4253.58	-0.02693773
543.79	-0.00081517		1073.79	-0.00644163		1603.79	-0.01077085		2133.78	-0.00051558		2663.78	-0.01945634		3193.78	0.01837164		3723.78	-0.00910302		4253.78	-0.02747137
543.99	-0.00183161		1073.99	-0.00650884		1603.99	-0.01132581		2133.98	0.00014183		2663.98	-0.02015971		3193.98	0.01903253		3723.98	-0.00889135		4253.98	-0.02839161
544.19	-0.00287222		1074.19	-0.00580376		1604.19	-0.01128535		2134.18	-0.00052623		2664.18	-0.02157776		3194.18	0.01990087		3724.18	-0.00888391		4254.18	-0.0291952
544.39	-0.00294972		1074.39	-0.00486977		1604.39	-0.01131244		2134.38	-0.00046417		2664.38	-0.02149908		3194.38	0.0205378		3724.38	-0.00869045		4254.38	-0.03010831
544.59	-0.00343791		1074.59	-0.00516591		1604.59	-0.01086416		2134.58	0.00043452		2664.58	-0.02150303		3194.58	0.02175926		3724.58	-0.00763782		4254.58	-0.03020117
544.79	-0.00348357		1074.79	-0.00489809		1604.79	-0.01019539		2134.78	0.00035323		2664.78	-0.02155675		3194.78	0.02249883		3724.78	-0.00762463		4254.78	-0.03051966
544.99	-0.00407655		1074.99	-0.00389582		1604.99	-0.00910517		2134.98	0.00073068		2664.98	-0.02195203		3194.98	0.02274329		3724.98	-0.00780506		4254.98	-0.03054415
545.19	-0.00371525		1075.19	-0.00381602		1605.19	-0.00902228		2135.18	0.0005233		2665.18	-0.02130147		3195.18	0.02270422		3725.18	-0.00853288		4255.18	-0.02992131
545.39	-0.00372819		1075.39	-0.00348377		1605.39	-0.00731303		2135.38	0.00053369		2665.38	-0.02149305		3195.38	0.02197934		3725.38	-0.00911016		4255.38	-0.02966431
545.59	-0.00379276		1075.59	-0.00338715		1605.59	-0.00709622		2135.58	0.00124593		2665.58	-0.02135132		3195.58	0.02089216		3725.58	-0.00905305		4255.58	-0.02891823
545.79	-0.0026246		1075.79	-0.00268714		1605.79	-0.00685529		2135.78	0.00182088		2665.78	-0.0210563		3195.78	0.02020214		3725.78	-0.00943277		4255.78	-0.02808396
545.99	-0.002241		1075.99	-0.00394658		1605.99	-0.00679336		2135.98	0.0020911		2665.98	-0.02107453		3195.98	0.01925707		3725.98	-0.01031731		4255.98	-0.0278798
546.19	-0.00173733		1076.19	-0.00417436		1606.19	-0.00774658		2136.18	0.00189503		2666.18	-0.02140688		3196.18	0.01831186		3726.18	-0.00945952		4256.18	-0.02751227
546.39	-0.00140779		1076.39	-0.0043192		1606.39	-0.00798135		2136.38	0.00266703		2666.38	-0.02024649		3196.38	0.01799237		3726.38	-0.00936143		4256.38	-0.02679205
546.59	-0.00180259		1076.59	-0.00496218		1606.59	-0.00892149		2136.58	0.00288792		2666.58	-0.02035218		3196.58	0.01889537		3726.58	-0.00862063		4256.58	-0.02658534
546.79	-0.00210378		1076.79	-0.00598875		1606.79	-0.0092634		2136.78	0.00253446		2666.78	-0.02038877		3196.78	0.01878794		3726.78	-0.00888896		4256.78	-0.02646963
546.99	-0.00281275		1076.99	-0.00655942		1606.99	-0.0101377		2136.98	0.00143559		2666.98	-0.02033053		3196.98	0.01785154		3726.98	-0.00927078		4256.98	-0.02713179
547.19	-0.00235412		1077.19	-0.00718786		1607.19	-0.0114601		2137.18	0.0002562		2667.18	-0.02034787		3197.18	0.01727488		3727.18	-0.00847586		4257.18	-0.02685654
547.39	-0.00237538		1077.39	-0.00718341		1607.39	-0.01169071		2137.38	-0.00050366		2667.38	-0.01986334		3197.38	0.01673258		3727.38	-0.00859496		4257.38	-0.02679346
547.59	-0.00295551		1077.59	-0.00686269		1607.59	-0.01125874		2137.58	-0.00025083		2667.58	-0.01999856		3197.58	0.01723609		3727.58	-0.00860131		4257.58	-0.02744514
547.79	-0.00386374		1077.79	-0.00696734		1607.79	-0.01144775		2137.78	-0.00081465		2667.78	-0.02054236		3197.78	0.01807568		3727.78	-0.00855975		4257.78	-0.02767631
547.99	-0.00459849		1077.99	-0.00677717		1607.99	-0.01132447		2137.98	-0.00132409		2667.98	-0.02165045		3197.98	0.01873924		3727.98	-0.00826095		4257.98	-0.02790307
548.19	-0.00412952		1078.19	-0.00661618		1608.19	-0.01064708		2138.18	-0.00217515		2668.18	-0.02265354		3198.18	0.01983096		3728.18	-0.00839038		4258.18	-0.02832144
548.39	-0.00335206		1078.39	-0.00601179		1608.39	-0.0098817		2138.38	-0.00153638		2668.38	-0.02231113		3198.38	0.0210223		3728.38	-0.00838073		4258.38	-0.02884832
548.59	-0.00353324		1078.59	-0.00651732		1608.59	-0.00965963		2138.58	-0.00177436		2668.58	-0.02248885		3198.58	0.02164702		3728.58	-0.00835301		4258.58	-0.02898162
548.79	-0.00264733		1078.79	-0.0061783		1608.79	-0.00954696		2138.78	-0.00107257		2668.78	-0.02326907		3198.78	0.02118112		3728.78	-0.00885895		4258.78	-0.02950382
548.99	-0.00225903		1078.99	-0.00562969		1608.99	-0.00920953		2138.98	-0.00144796		2668.98	-0.02311595		3198.98	0.02118696		3728.98	-0.00957408		4258.98	-0.02919471
549.19	-0.0013116		1079.19	-0.00571237		1609.19	-0.00905987		2139.18	-0.0006555		2669.18	-0.0225642		3199.18	0.02109284		3729.18	-0.00985299		4259.18	-0.02939639
549.39	-0.00059469		1079.39	-0.00592336		1609.39	-0.00815402		2139.38	-0.00008267		2669.38	-0.02248246		3199.38	0.02022319		3729.38	-0.01016683		4259.38	-0.02881355
549.59	0.00021336		1079.59	-0.00591248		1609.59	-0.00927155		2139.58	0.00042385		2669.58	-0.02173921		3199.58	0.01936103		3729.58	-0.0097402		4259.58	-0.02794795
549.79	0.00058026		1079.79	-0.00640223		1609.79	-0.00886155		2139.78	0.00029294		2669.78	-0.02154626		3199.78	0.01923276		3729.78	-0.01059566		4259.78	-0.02708729
549.99	0.00062156		1079.99	-0.00694926		1609.99	-0.00904856		2139.98	0.00059798		2669.98	-0.0214357		3199.98	0.01800919		3729.98	-0.01116219		4259.98	-0.02755423
550.19	0.00000524		1080.19	-0.00642592		1610.19	-0.00936179		2140.18	0.00100424		2670.18	-0.02021967		3200.18	0.01656562		3730.18	-0.01117407		4260.18	-0.02747623
550.39	0.00033529		1080.39	-0.00652708		1610.39	-0.00966237		2140.38	0.000703		2670.38	-0.01892095		3200.38	0.01570638		3730.38	-0.01180326		4260.38	-0.02707583
550.59	-0.0004525		1080.59	-0.0059915		1610.59	-0.01092675		2140.58	-0.00034478		2670.58	-0.01913432		3200.58	0.01458741		3730.58	-0.01271175		4260.58	-0.02735667
550.79	-0.00118641		1080.79	-0.00615882		1610.79	-0.01211044		2140.78	-0.00131768		2670.78	-0.01811801		3200.78	0.01317468		3730.78	-0.01309339		4260.78	-0.02797482
550.99	-0.00122523		1080.99	-0.00504758		1610.99	-0.01306019		2140.98	-0.00145585		2670.98	-0.01803853		3200.98	0.01218359		3730.98	-0.01336177		4260.98	-0.02887025
551.19	-0.0014087		1081.19	-0.00444357		1611.19	-0.01321368		2141.18	-0.00156783		2671.18	-0.0179163		3201.18	0.012326		3731.18	-0.01289052		4261.18	-0.02923761
551.39	-0.00231506		1081.39	-0.00416173		1611.39	-0.01189088		2141.38	-0.00129882		2671.38	-0.01784614		3201.38	0.01309049		3731.38	-0.01236142		4261.38	-0.02974372
551.59	-0.00277698		1081.59	-0.00402931		1611.59	-0.0105314		2141.58	-0.00182604		2671.58	-0.01876668		3201.58	0.01405647		3731.58	-0.01203675		4261.58	-0.03028168
551.79	-0.00308801		1081.79	-0.00350924		1611.79	-0.01007618		2141.78	-0.00186493		2671.78	-0.01963468		3201.78	0.01486047		3731.78	-0.01283737		4261.78	-0.03030815
551.99	-0.00293922		1081.99	-0.00329764		1611.99	-0.0091312		2141.98	-0.00178012		2671.98	-0.02076564		3201.98	0.01584656		3731.98	-0.01256713		4261.98	-0.03110409
552.19	-0.00266636		1082.19	-0.00359174		1612.19	-0.00864298		2142.18	-0.00162966		2672.18	-0.02109696		3202.18	0.01725601		3732.18	-0.01337258		4262.18	-0.03200865
552.39	-0.00295587		1082.39	-0.00436907		1612.39	-0.00882427		2142.38	-0.00111714		2672.38	-0.02088906		3202.38	0.01811502		3732.38	-0.01303235		4262.38	-0.0328169
552.59	-0.00284312		1082.59	-0.00438077		1612.59	-0.00877745		2142.58	-0.00116612		2672.58	-0.02193624		3202.58	0.01782935		3732.58	-0.01239526		4262.58	-0.0329166
552.79	-0.0020133		1082.79	-0.00386864		1612.79	-0.00849224		2142.78	-0.00074599		2672.78	-0.02246145		3202.78	0.01803081		3732.78	-0.0124557		4262.78	-0.03269451
552.99	-0.00228924		1082.99	-0.00410282		1612.99	-0.0089925		2142.98	-0.0009559		2672.98	-0.02243281		3202.98	0.01803197		3732.98	-0.01302893		4262.98	-0.03243805
553.19	-0.00254988		1083.19	-0.00434933		1613.19	-0.0091351		2143.18	-0.00017302		2673.18	-0.0224242		3203.18	0.01836858		3733.18	-0.0125146		4263.18	-0.03200809
553.39	-0.00110735		1083.39	-0.00469285		1613.39	-0.00953916		2143.38	-0.00000218		2673.38	-0.02297385		3203.38	0.01767648		3733.38	-0.01199171		4263.38	-0.03055342
553.59	-0.00094886		1083.59	-0.00450693		1613.59	-0.00981619		2143.58	0.00028086		2673.58	-0.0224075		3203.58	0.01719732		3733.58	-0.01185649		4263.58	-0.03015593
553.79	-0.00043514		1083.79	-0.00564203		1613.79	-0.00938477		2143.78	0.0002323		2673.78	-0.02285929		3203.78	0.01623983		3733.78	-0.01182532		4263.78	-0.02965448
553.99	-0.0003424		1083.99	-0.00547217		1613.99	-0.00964251		2143.98	0.00013616		2673.98	-0.02213978		3203.98	0.01507399		3733.98	-0.01173214		4263.98	-0.02980406
554.19	-0.00058318		1084.19	-0.00543324		1614.19	-0.01027477		2144.18	-0.00071488		2674.18	-0.02165998		3204.18	0.01490701		3734.18	-0.01114666		4264.18	-0.02938423
554.39	-0.00117906		1084.39	-0.00537053		1614.39	-0.01032667		2144.38	-0.00177124		2674.38	-0.02159827		3204.38	0.01528814		3734.38	-0.01083907		4264.38	-0.02869931
554.59	-0.00152849		1084.59	-0.00442106		1614.59	-0.01121483		2144.58	-0.00227484		2674.58	-0.02100113		3204.58	0.01541082		3734.58	-0.01122688		4264.58	-0.02890668
554.79	-0.00242108		1084.79	-0.00523356		1614.79	-0.01126102		2144.78	-0.00295088		2674.78	-0.01942512		3204.78	0.0156821		3734.78	-0.01071989		4264.78	-0.0298643
554.99	-0.00252138		1084.99	-0.0042635		1614.99	-0.01070495		2144.98	-0.00291759		2674.98	-0.01915733		3204.98	0.0166587		3734.98	-0.01033121		4264.98	-0.02962253
555.19	-0.00237525		1085.19	-0.0050565		1615.19	-0.01060377		2145.18	-0.00332781		2675.18	-0.01907245		3205.18	0.0174479		3735.18	-0.00977222		4265.18	-0.0297379
555.39	-0.00266567		1085.39	-0.00571362		1615.39	-0.01010242		2145.38	-0.00373094		2675.38	-0.01962775		3205.38	0.01852019		3735.38	-0.0097739		4265.38	-0.03028852
555.59	-0.00302322		1085.59	-0.00617217		1615.59	-0.00923498		2145.58	-0.00445144		2675.58	-0.02093426		3205.58	0.01918635		3735.58	-0.01029591		4265.58	-0.03067579
555.79	-0.00305911		1085.79	-0.00607595		1615.79	-0.00950595		2145.78	-0.00497969		2675.78	-0.0208721		3205.78	0.01988025		3735.78	-0.010473		4265.78	-0.03179446
555.99	-0.00304249		1085.99	-0.00620148		1615.99	-0.00956644		2145.98	-0.00491993		2675.98	-0.02164694		3205.98	0.02071674		3735.98	-0.00974648		4265.98	-0.0318256
556.19	-0.0029852		1086.19	-0.00674906		1616.19	-0.01090699		2146.18	-0.0045084		2676.18	-0.02171937		3206.18	0.02138892		3736.18	-0.0104226		4266.18	-0.03067852
556.39	-0.00330669		1086.39	-0.00586674		1616.39	-0.01183071		2146.38	-0.00439288		2676.38	-0.02219155		3206.38	0.02107055		3736.38	-0.01011487		4266.38	-0.02998195
556.59	-0.00313081		1086.59	-0.00559609		1616.59	-0.01159108		2146.58	-0.00368965		2676.58	-0.02323432		3206.58	0.02085646		3736.58	-0.01038116		4266.58	-0.02907849
556.79	-0.00365748		1086.79	-0.00605918		1616.79	-0.01197982		2146.78	-0.00300099		2676.78	-0.0233696		3206.78	0.02090451		3736.78	-0.01108474		4266.78	-0.02868507
556.99	-0.00393785		1086.99	-0.00581498		1616.99	-0.01290354		2146.98	-0.00255299		2676.98	-0.02310094		3206.98	0.020292		3736.98	-0.01120237		4266.98	-0.02950963
557.19	-0.00302779		1087.19	-0.00589184		1617.19	-0.01392268		2147.18	-0.00097712		2677.18	-0.02305672		3207.18	0.01990568		3737.18	-0.01075953		4267.18	-0.02939181
557.39	-0.00098052		1087.39	-0.00648099		1617.39	-0.01393799		2147.38	-0.00070131		2677.38	-0.02333992		3207.38	0.01944933		3737.38	-0.01025303		4267.38	-0.02957421
557.59	-0.00076414		1087.59	-0.00686435		1617.59	-0.01403971		2147.58	-0.00037904		2677.58	-0.0227743		3207.58	0.01897594		3737.58	-0.0099866		4267.58	-0.03030313
557.79	-0.00024024		1087.79	-0.00760006		1617.79	-0.01413852		2147.78	-0.00126729		2677.78	-0.02284522		3207.78	0.0183254		3737.78	-0.00911177		4267.78	-0.03024099
557.99	-0.00017815		1087.99	-0.00767075		1617.99	-0.01401678		2147.98	-0.00143523		2677.98	-0.02198205		3207.98	0.01845653		3737.98	-0.00844456		4267.98	-0.03095397
558.19	-0.00009835		1088.19	-0.00798088		1618.19	-0.01409603		2148.18	-0.00158966		2678.18	-0.0217518		3208.18	0.01835913		3738.18	-0.00773324		4268.18	-0.0312119
558.39	-0.0001402		1088.39	-0.00793552		1618.39	-0.01325872		2148.38	-0.00162685		2678.38	-0.02123146		3208.38	0.01827437		3738.38	-0.00757792		4268.38	-0.0310365
558.59	0.00024941		1088.59	-0.00790984		1618.59	-0.01295999		2148.58	-0.00194806		2678.58	-0.02034423		3208.58	0.01763633		3738.58	-0.0076473		4268.58	-0.03156688
558.79	-0.00029954		1088.79	-0.0079439		1618.79	-0.01223098		2148.78	-0.00228803		2678.78	-0.01979564		3208.78	0.01736959		3738.78	-0.00722784		4268.78	-0.03183794
558.99	-0.00012423		1088.99	-0.00743749		1618.99	-0.01144311		2148.98	-0.00205605		2678.98	-0.02002502		3208.98	0.01732362		3738.98	-0.0065663		4268.98	-0.03148433
559.19	-0.00008669		1089.19	-0.00759901		1619.19	-0.01047555		2149.18	-0.00190596		2679.18	-0.02021813		3209.18	0.01679763		3739.18	-0.00641885		4269.18	-0.03175313
559.39	-0.00103016		1089.39	-0.00738036		1619.39	-0.00895941		2149.38	-0.00186716		2679.38	-0.02085315		3209.38	0.01700342		3739.38	-0.0063518		4269.38	-0.03176224
559.59	-0.00168933		1089.59	-0.00706154		1619.59	-0.00775157		2149.58	-0.00182352		2679.58	-0.02128958		3209.58	0.01656981		3739.58	-0.00593457		4269.58	-0.03118382
559.79	-0.00190886		1089.79	-0.00616643		1619.79	-0.00729857		2149.78	-0.00142929		2679.78	-0.02169091		3209.78	0.01645048		3739.78	-0.005955		4269.78	-0.03042508
