# Supplementary material for: Functional development of a V3/glycan-specific broadly neutralizing antibody isolated from a case of HIV superinfection
Source: eLife journal article supplement (doi:10.7554/elife.68110), 2021-07-15
Supplement: fig2-data2 [file F7.xls]

Vers 3.43 Data Simulation
Conc1	3.125E-08	3.125E-08	3.125E-08	3.125E-08	3.125E-08	3.125E-08	3.125E-08
Start1	200	730.02	1260.01	1790.04	2320.04	2850.04	3380.04
Stop1	559.79	1089.82	1619.81	2149.84	2679.84	3209.84	3739.84
Time1	Data1	Sim1	Time2	Data2	Sim2	Time3	Data3	Sim3	Time4	Data4	Sim4	Time5	Data5	Sim5	Time6	Data6	Sim6	Time7	Data7	Sim7
200	-0.00366117		730.02	-0.00739954		1260.01	0.00096006		1790.04	-0.00118283		2320.04	-0.00000438		2850.04	-0.00163415		3380.04	-0.00404169
200.2	-0.00349263		730.22	-0.0070359		1260.21	0.00199299		1790.24	-0.00027928		2320.24	0.00054991		2850.24	-0.00269832		3380.24	-0.00376779
200.4	-0.00325447		730.42	-0.00732217		1260.41	0.00203962		1790.44	0.0007358		2320.44	0.0007895		2850.44	-0.00333905		3380.44	-0.00363372
200.6	-0.003008		730.62	-0.007346		1260.61	0.00296601		1790.64	0.00176485		2320.64	0.00047227		2850.64	-0.00435176		3380.64	-0.00369928
200.8	-0.00220911		730.82	-0.00678306		1260.81	0.00353983		1790.84	0.00300229		2320.84	0.00035394		2850.84	-0.00499468		3380.84	-0.00407178
201	-0.00204907		731.02	-0.00612219		1261.01	0.00455283		1791.04	0.0034828		2321.04	0.00070594		2851.04	-0.00528406		3381.04	-0.00404588
201.2	-0.0016959		731.22	-0.0059366		1261.21	0.00577467		1791.24	0.00329204		2321.24	0.0003373		2851.24	-0.00631633		3381.24	-0.0039841
201.4	-0.00167615		731.42	-0.00571311		1261.41	0.00640401		1791.44	0.00394061		2321.44	0.00053866		2851.44	-0.00713177		3381.44	-0.00411745
201.6	-0.00127112		731.62	-0.00562667		1261.61	0.00675958		1791.64	0.00416307		2321.64	0.00002014		2851.64	-0.00726963		3381.64	-0.00389338
201.8	-0.00098879		731.82	-0.00550685		1261.81	0.00758858		1791.84	0.00469516		2321.84	-0.00072772		2851.84	-0.007756		3381.84	-0.00451242
202	-0.00129952		732.02	-0.00502948		1262.01	0.00790624		1792.04	0.00479352		2322.04	-0.00149356		2852.04	-0.0082575		3382.04	-0.00481875
202.2	-0.00129746		732.22	-0.00507753		1262.21	0.0076572		1792.24	0.00489309		2322.24	-0.00219794		2852.24	-0.00791348		3382.24	-0.00565399
202.4	-0.00160129		732.42	-0.0052715		1262.41	0.0079143		1792.44	0.00469992		2322.44	-0.00232837		2852.44	-0.00682351		3382.44	-0.00604337
202.6	-0.00157333		732.62	-0.0046327		1262.61	0.00844368		1792.64	0.00546402		2322.64	-0.00350331		2852.64	-0.00658442		3382.64	-0.00532552
202.8	-0.00036875		732.82	-0.00391024		1262.81	0.00863259		1792.84	0.00547258		2322.84	-0.00274364		2852.84	-0.00765011		3382.84	-0.00470697
203	-0.00019875		733.02	-0.00388782		1263.01	0.00816212		1793.04	0.0047049		2323.04	-0.00210023		2853.04	-0.00746084		3383.04	-0.00403309
203.2	-0.00003049		733.22	-0.00382491		1263.21	0.00870975		1793.24	0.00437345		2323.24	-0.00222911		2853.24	-0.00812489		3383.24	-0.00294653
203.4	-0.00111794		733.42	-0.00388536		1263.41	0.00819609		1793.44	0.00372261		2323.44	-0.00303759		2853.44	-0.00771066		3383.44	-0.00329911
203.6	-0.00078456		733.62	-0.00442481		1263.61	0.00731007		1793.64	0.00334785		2323.64	-0.00236033		2853.64	-0.00700905		3383.64	-0.00342718
203.8	-0.00074445		733.82	-0.0042546		1263.81	0.00707033		1793.84	0.00346407		2323.84	-0.00183919		2853.84	-0.00683473		3383.84	-0.00260713
204	-0.00044754		734.02	-0.00523186		1264.01	0.00564576		1794.04	0.00343081		2324.04	-0.00208374		2854.04	-0.00608185		3384.04	-0.00318064
204.2	-0.00099074		734.22	-0.00543348		1264.21	0.00648139		1794.24	0.00292688		2324.24	-0.00115376		2854.24	-0.00646693		3384.24	-0.00286528
204.4	-0.00120296		734.42	-0.00626897		1264.41	0.00539414		1794.44	0.00335507		2324.44	-0.00089007		2854.44	-0.0062648		3384.44	-0.00350022
204.6	-0.00086079		734.62	-0.00548744		1264.61	0.0054869		1794.64	0.00325516		2324.64	-0.00081064		2854.64	-0.00687365		3384.64	-0.00431962
204.8	-0.00040442		734.82	-0.00499014		1264.81	0.00477955		1794.84	0.0028478		2324.84	-0.00038235		2854.84	-0.00665598		3384.84	-0.00441402
205	-0.00135117		735.02	-0.00524895		1265.01	0.00472845		1795.04	0.0023152		2325.04	0.00006123		2855.04	-0.00710709		3385.04	-0.00429108
205.2	-0.00147509		735.22	-0.00577124		1265.21	0.00421903		1795.24	0.00177567		2325.24	-0.00019337		2855.24	-0.00758682		3385.24	-0.00471464
205.4	-0.00119473		735.42	-0.00609006		1265.41	0.00377189		1795.44	0.00222015		2325.44	-0.00038884		2855.44	-0.00821278		3385.44	-0.00534069
205.6	-0.00209461		735.62	-0.00655662		1265.61	0.00439341		1795.64	0.00272969		2325.64	-0.00171107		2855.64	-0.00837698		3385.64	-0.00600468
205.8	-0.00176974		735.82	-0.00621617		1265.81	0.00507951		1795.84	0.00367632		2325.84	-0.00209188		2855.84	-0.00869942		3385.84	-0.00695169
206	-0.00145414		736.02	-0.00616407		1266.01	0.00472615		1796.04	0.00359438		2326.04	-0.00216153		2856.04	-0.00818727		3386.04	-0.00647436
206.2	-0.00159415		736.22	-0.00630235		1266.21	0.00523772		1796.24	0.00397656		2326.24	-0.00209941		2856.24	-0.00805702		3386.24	-0.00689855
206.4	-0.00220385		736.42	-0.00521608		1266.41	0.00575244		1796.44	0.00361201		2326.44	-0.00276303		2856.44	-0.00725001		3386.44	-0.0065968
206.6	-0.00114187		736.62	-0.00489644		1266.61	0.0063281		1796.64	0.00462258		2326.64	-0.00296545		2856.64	-0.00754767		3386.64	-0.00588697
206.8	-0.00025557		736.82	-0.00404573		1266.81	0.00718507		1796.84	0.00424965		2326.84	-0.00217721		2856.84	-0.00750363		3386.84	-0.00598374
207	-0.00120009		737.02	-0.00461086		1267.01	0.00759903		1797.04	0.00364997		2327.04	-0.00270277		2857.04	-0.00703239		3387.04	-0.00493569
207.2	-0.00112573		737.22	-0.00477506		1267.21	0.00879698		1797.24	0.003587		2327.24	-0.00354256		2857.24	-0.00641099		3387.24	-0.00494884
207.4	-0.00131711		737.42	-0.00531223		1267.41	0.00826359		1797.44	0.00432454		2327.44	-0.00386967		2857.44	-0.00571432		3387.44	-0.00571191
207.6	-0.00116511		737.62	-0.00625776		1267.61	0.00788197		1797.64	0.00451133		2327.64	-0.00356188		2857.64	-0.00510041		3387.64	-0.00538057
207.8	-0.00137337		737.82	-0.00622467		1267.81	0.00755632		1797.84	0.00430191		2327.84	-0.00372542		2857.84	-0.00427016		3387.84	-0.00520565
208	-0.00082263		738.02	-0.00686267		1268.01	0.00745092		1798.04	0.00402045		2328.04	-0.00301215		2858.04	-0.00446355		3388.04	-0.00584562
208.2	-0.00091972		738.22	-0.00677411		1268.21	0.00642279		1798.24	0.00338305		2328.24	-0.00301835		2858.24	-0.00468893		3388.24	-0.00611781
208.4	-0.00092304		738.42	-0.00609534		1268.41	0.00522357		1798.44	0.00410112		2328.44	-0.00243722		2858.44	-0.00465922		3388.44	-0.00651413
208.6	-0.00000323		738.62	-0.00536452		1268.61	0.00496417		1798.64	0.00417965		2328.64	-0.00281916		2858.64	-0.00471726		3388.64	-0.0066113
208.8	0.00012048		738.82	-0.0054167		1268.81	0.00433708		1798.84	0.00469811		2328.84	-0.00239789		2858.84	-0.00427028		3388.84	-0.00648905
209	0.00030916		739.02	-0.00557329		1269.01	0.00364711		1799.04	0.00448633		2329.04	-0.0019293		2859.04	-0.00456611		3389.04	-0.00687747
209.2	0.00085226		739.22	-0.00516044		1269.21	0.00275578		1799.24	0.00492765		2329.24	-0.00166235		2859.24	-0.00387435		3389.24	-0.00724092
209.4	0.00152039		739.42	-0.00523473		1269.41	0.00257032		1799.44	0.00575702		2329.44	-0.00120642		2859.44	-0.0049781		3389.44	-0.00751415
209.6	0.00129928		739.62	-0.00557122		1269.61	0.00272431		1799.64	0.00662402		2329.64	-0.00091404		2859.64	-0.00495607		3389.64	-0.00739741
209.8	0.00284577		739.82	-0.00523532		1269.81	0.00277574		1799.84	0.00732774		2329.84	-0.00055653		2859.84	-0.0048931		3389.84	-0.00610816
210	0.00287644		740.02	-0.00579301		1270.01	0.00297239		1800.04	0.00692817		2330.04	-0.00062701		2860.04	-0.00473879		3390.04	-0.00480428
210.2	0.00305988		740.22	-0.00518772		1270.21	0.00413694		1800.24	0.00690174		2330.24	-0.00068556		2860.24	-0.00539271		3390.24	-0.00562189
210.4	0.00300045		740.42	-0.0048657		1270.41	0.00373078		1800.44	0.00658506		2330.44	-0.00105739		2860.44	-0.00471947		3390.44	-0.00515675
210.6	0.00468505		740.62	-0.00546258		1270.61	0.00453194		1800.64	0.00682564		2330.64	-0.00092533		2860.64	-0.00428023		3390.64	-0.0050372
210.8	0.00357355		740.82	-0.00559982		1270.81	0.00505967		1800.84	0.00679919		2330.84	-0.00138862		2860.84	-0.00374108		3390.84	-0.00485456
211	0.00283542		741.02	-0.00607892		1271.01	0.00494644		1801.04	0.00599274		2331.04	-0.00284588		2861.04	-0.00395811		3391.04	-0.00419593
211.2	0.00293723		741.22	-0.00648326		1271.21	0.00497591		1801.24	0.00573065		2331.24	-0.00265879		2861.24	-0.00361256		3391.24	-0.00434831
211.4	0.00292128		741.42	-0.00691279		1271.41	0.00399151		1801.44	0.00524147		2331.44	-0.00312485		2861.44	-0.00433424		3391.44	-0.00426191
211.6	0.00202721		741.62	-0.00763273		1271.61	0.00336743		1801.64	0.00439207		2331.64	-0.00251953		2861.64	-0.0040052		3391.64	-0.00440073
211.8	0.00171058		741.82	-0.00760767		1271.81	0.00273261		1801.84	0.00418242		2331.84	-0.00230896		2861.84	-0.00367985		3391.84	-0.00397968
212	0.00162785		742.02	-0.00776292		1272.01	0.00258047		1802.04	0.00358387		2332.04	-0.0019347		2862.04	-0.00337259		3392.04	-0.00399895
212.2	0.00098316		742.22	-0.00723634		1272.21	0.00253171		1802.24	0.00316528		2332.24	-0.00197116		2862.24	-0.00244523		3392.24	-0.00414593
212.4	-0.00000022		742.42	-0.00689228		1272.41	0.0030421		1802.44	0.00368486		2332.44	-0.00189594		2862.44	-0.00245345		3392.44	-0.00474334
212.6	0.00092439		742.62	-0.00704212		1272.61	0.00315213		1802.64	0.00359441		2332.64	-0.00224018		2862.64	-0.00236027		3392.64	-0.00455278
212.8	0.00056606		742.82	-0.00689286		1272.81	0.00283511		1802.84	0.00325031		2332.84	-0.00185576		2862.84	-0.0025195		3392.84	-0.00566788
213	0.0007147		743.02	-0.00675514		1273.01	0.00254909		1803.04	0.0022924		2333.04	-0.00151066		2863.04	-0.00334954		3393.04	-0.00537821
213.2	0.00017476		743.22	-0.0068951		1273.21	0.00289009		1803.24	0.00204688		2333.24	-0.00145709		2863.24	-0.00373269		3393.24	-0.00596695
213.4	-0.00031076		743.42	-0.00663859		1273.41	0.0028596		1803.44	0.00154569		2333.44	-0.00129461		2863.44	-0.00496063		3393.44	-0.00661183
213.6	-0.00028376		743.62	-0.00705646		1273.61	0.00322988		1803.64	0.00111014		2333.64	-0.0015415		2863.64	-0.00550134		3393.64	-0.00644613
213.8	-0.00060462		743.82	-0.00617846		1273.81	0.00353385		1803.84	0.00136339		2333.84	-0.00199802		2863.84	-0.00539338		3393.84	-0.00633914
214	-0.00077867		744.02	-0.00643782		1274.01	0.00309589		1804.04	0.00075113		2334.04	-0.00237974		2864.04	-0.0055897		3394.04	-0.00643621
214.2	-0.00020177		744.22	-0.00510482		1274.21	0.0038693		1804.24	0.00027865		2334.24	-0.00234228		2864.24	-0.00624089		3394.24	-0.00717689
214.4	-0.00021051		744.42	-0.0048858		1274.41	0.00370629		1804.44	0.00044543		2334.44	-0.00227004		2864.44	-0.00605647		3394.44	-0.00657677
214.6	0.00049596		744.62	-0.00495185		1274.61	0.00368399		1804.64	0.00103135		2334.64	-0.00228547		2864.64	-0.00537732		3394.64	-0.00652102
214.8	-0.00071238		744.82	-0.0053244		1274.81	0.00349852		1804.84	0.00242761		2334.84	-0.00201533		2864.84	-0.005327		3394.84	-0.00697496
215	-0.00057401		745.02	-0.00564918		1275.01	0.00343211		1805.04	0.00340627		2335.04	-0.00198288		2865.04	-0.00554765		3395.04	-0.00659296
215.2	-0.00025849		745.22	-0.00616125		1275.21	0.00285632		1805.24	0.0048184		2335.24	-0.00093826		2865.24	-0.00549033		3395.24	-0.00670846
215.4	0.00003771		745.42	-0.00631292		1275.41	0.00263096		1805.44	0.00555676		2335.44	-0.00135624		2865.44	-0.00549906		3395.44	-0.00692484
215.6	-0.000242		745.62	-0.00638605		1275.61	0.001547		1805.64	0.0066099		2335.64	-0.0008244		2865.64	-0.00459731		3395.64	-0.00719229
215.8	-0.0006806		745.82	-0.00620226		1275.81	0.00207044		1805.84	0.00803893		2335.84	-0.00073858		2865.84	-0.00373224		3395.84	-0.00613833
216	-0.00011762		746.02	-0.00623909		1276.01	0.00227662		1806.04	0.0087459		2336.04	-0.00020628		2866.04	-0.00333396		3396.04	-0.00684279
216.2	-0.00084097		746.22	-0.0056425		1276.21	0.00203158		1806.24	0.00990077		2336.24	-0.00117656		2866.24	-0.00344887		3396.24	-0.00698378
216.4	-0.00087928		746.42	-0.00529694		1276.41	0.00184674		1806.44	0.01027424		2336.44	-0.0019995		2866.44	-0.00423611		3396.44	-0.00719963
216.6	0.00032015		746.62	-0.00535096		1276.61	0.0016822		1806.64	0.01030986		2336.64	-0.00207559		2866.64	-0.0053315		3396.64	-0.00650354
216.8	0.00008387		746.82	-0.00493694		1276.81	0.00187011		1806.84	0.00967201		2336.84	-0.00245885		2866.84	-0.00527896		3396.84	-0.00742154
217	0.00032561		747.02	-0.0047717		1277.01	0.00287165		1807.04	0.00904006		2337.04	-0.0026638		2867.04	-0.00588055		3397.04	-0.00670782
217.2	0.00039321		747.22	-0.00461069		1277.21	0.00295009		1807.24	0.0083305		2337.24	-0.00311222		2867.24	-0.00666084		3397.24	-0.00742735
217.4	0.00053572		747.42	-0.00358116		1277.41	0.0022226		1807.44	0.00783196		2337.44	-0.00231303		2867.44	-0.0067176		3397.44	-0.00750261
217.6	0.00085369		747.62	-0.00351324		1277.61	0.00186876		1807.64	0.00773971		2337.64	-0.00163012		2867.64	-0.00624306		3397.64	-0.00756749
217.8	0.00030089		747.82	-0.00320906		1277.81	0.00169186		1807.84	0.00746871		2337.84	-0.00185667		2867.84	-0.00542065		3397.84	-0.00691881
218	0.00017117		748.02	-0.00346374		1278.01	0.00255901		1808.04	0.00659361		2338.04	-0.00250853		2868.04	-0.00669129		3398.04	-0.00606882
218.2	0.00096595		748.22	-0.00326741		1278.21	0.00396796		1808.24	0.00630585		2338.24	-0.00161636		2868.24	-0.00704183		3398.24	-0.00617652
218.4	0.00169317		748.42	-0.00402708		1278.41	0.00417985		1808.44	0.00739133		2338.44	-0.00051866		2868.44	-0.00648579		3398.44	-0.00634563
218.6	0.00153724		748.62	-0.00482508		1278.61	0.00435624		1808.64	0.00638048		2338.64	0.00009103		2868.64	-0.00664309		3398.64	-0.00553207
218.8	0.00211725		748.82	-0.00550921		1278.81	0.00534472		1808.84	0.00717009		2338.84	0.00034095		2868.84	-0.00671039		3398.84	-0.00555611
219	0.00297405		749.02	-0.00660176		1279.01	0.00640787		1809.04	0.00720315		2339.04	0.00017922		2869.04	-0.00666079		3399.04	-0.00440898
219.2	0.00339306		749.22	-0.00716005		1279.21	0.00675811		1809.24	0.00662863		2339.24	0.00065117		2869.24	-0.0062777		3399.24	-0.00366869
219.4	0.00344935		749.42	-0.00761391		1279.41	0.00746387		1809.44	0.00636118		2339.44	-0.00026178		2869.44	-0.00624948		3399.44	-0.0035479
219.6	0.00355146		749.62	-0.00789904		1279.61	0.00742974		1809.64	0.0062191		2339.64	-0.00066456		2869.64	-0.00703562		3399.64	-0.00336236
219.8	0.00232467		749.82	-0.00796949		1279.81	0.0084304		1809.84	0.00656979		2339.84	-0.00105651		2869.84	-0.00689177		3399.84	-0.0030629
220	0.00212031		750.02	-0.00749203		1280.01	0.00873896		1810.04	0.00604083		2340.04	-0.00089534		2870.04	-0.00712651		3400.04	-0.00356804
220.2	0.00100336		750.22	-0.00682774		1280.21	0.00871121		1810.24	0.00577605		2340.24	-0.0025064		2870.24	-0.00764087		3400.24	-0.00368493
220.4	0.00081837		750.42	-0.0066933		1280.41	0.00883006		1810.44	0.00587995		2340.44	-0.00231507		2870.44	-0.00802295		3400.44	-0.0044726
220.6	0.00113305		750.62	-0.00667178		1280.61	0.00813881		1810.64	0.00609887		2340.64	-0.00270234		2870.64	-0.00801273		3400.64	-0.00462851
220.8	0.00070686		750.82	-0.00636891		1280.81	0.00792388		1810.84	0.00605987		2340.84	-0.00302185		2870.84	-0.0070001		3400.84	-0.00562603
221	0.00009606		751.02	-0.00607571		1281.01	0.007864		1811.04	0.00648816		2341.04	-0.0027663		2871.04	-0.00740143		3401.04	-0.00579866
221.2	-0.00028874		751.22	-0.00539396		1281.21	0.00647496		1811.24	0.00655029		2341.24	-0.00222965		2871.24	-0.00699678		3401.24	-0.00569249
221.4	-0.00090917		751.42	-0.00474645		1281.41	0.00620262		1811.44	0.00632569		2341.44	-0.00144187		2871.44	-0.00599223		3401.44	-0.00612243
221.6	-0.00144107		751.62	-0.00407288		1281.61	0.00497765		1811.64	0.00655532		2341.64	-0.0013014		2871.64	-0.00507579		3401.64	-0.00630255
221.8	-0.00130469		751.82	-0.00330206		1281.81	0.00447329		1811.84	0.00643809		2341.84	-0.00156926		2871.84	-0.00477932		3401.84	-0.00628868
222	-0.00124441		752.02	-0.00247611		1282.01	0.00381491		1812.04	0.00593775		2342.04	-0.001023		2872.04	-0.00533262		3402.04	-0.0066384
222.2	-0.000754		752.22	-0.00206229		1282.21	0.0032021		1812.24	0.00569195		2342.24	0.00018291		2872.24	-0.00404225		3402.24	-0.00694601
222.4	-0.00034854		752.42	-0.00157045		1282.41	0.00307902		1812.44	0.00535236		2342.44	0.00083047		2872.44	-0.00342866		3402.44	-0.007108
222.6	0.0002802		752.62	-0.00123355		1282.61	0.00296742		1812.64	0.00387166		2342.64	0.00120199		2872.64	-0.00373814		3402.64	-0.0062568
222.8	0.0015645		752.82	-0.00141479		1282.81	0.00356466		1812.84	0.00507342		2342.84	0.00074381		2872.84	-0.00299318		3402.84	-0.00602341
223	0.0020618		753.02	-0.00194891		1283.01	0.00388675		1813.04	0.00436932		2343.04	0.00048639		2873.04	-0.00253994		3403.04	-0.00559819
223.2	0.00250759		753.22	-0.00222281		1283.21	0.00396315		1813.24	0.00411382		2343.24	0.00066544		2873.24	-0.00206351		3403.24	-0.00469887
223.4	0.00359062		753.42	-0.00281195		1283.41	0.00430121		1813.44	0.00432688		2343.44	0.00061739		2873.44	-0.00300717		3403.44	-0.00598899
223.6	0.00419469		753.62	-0.00293403		1283.61	0.0041843		1813.64	0.00393031		2343.64	0.00140328		2873.64	-0.00359123		3403.64	-0.00581219
223.8	0.00370468		753.82	-0.00293598		1283.81	0.00428579		1813.84	0.00352374		2343.84	0.00205104		2873.84	-0.00279019		3403.84	-0.00590116
224	0.00415506		754.02	-0.00383579		1284.01	0.00487895		1814.04	0.00277481		2344.04	0.00218747		2874.04	-0.00299281		3404.04	-0.00605659
224.2	0.00380738		754.22	-0.00510459		1284.21	0.00470544		1814.24	0.00290541		2344.24	0.00076592		2874.24	-0.00368138		3404.24	-0.00681694
224.4	0.0036311		754.42	-0.00597611		1284.41	0.0041133		1814.44	0.00381483		2344.44	0.00111986		2874.44	-0.00379568		3404.44	-0.00757246
224.6	0.00381699		754.62	-0.00621849		1284.61	0.00385512		1814.64	0.00375059		2344.64	0.00007843		2874.64	-0.00381107		3404.64	-0.00693121
224.8	0.00365875		754.82	-0.00687782		1284.81	0.00400805		1814.84	0.00414064		2344.84	0.00000528		2874.84	-0.00425789		3404.84	-0.00722397
225	0.00323189		755.02	-0.0068393		1285.01	0.00478096		1815.04	0.0051486		2345.04	-0.00064924		2875.04	-0.00425771		3405.04	-0.0068734
225.2	0.00258272		755.22	-0.00650329		1285.21	0.00404812		1815.24	0.00564552		2345.24	-0.00021441		2875.24	-0.00423038		3405.24	-0.00683545
225.4	0.00238804		755.42	-0.00615863		1285.41	0.00405129		1815.44	0.00602116		2345.44	-0.00002566		2875.44	-0.00474221		3405.44	-0.00758415
225.6	0.00236435		755.62	-0.00514564		1285.61	0.00297657		1815.64	0.00617235		2345.64	-0.0005054		2875.64	-0.00510481		3405.64	-0.0072863
225.8	0.00242441		755.82	-0.00452463		1285.81	0.00294626		1815.84	0.00668802		2345.84	-0.00064526		2875.84	-0.005189		3405.84	-0.00763205
226	0.00142565		756.02	-0.00363833		1286.01	0.00315579		1816.04	0.00624157		2346.04	-0.00004473		2876.04	-0.00500482		3406.04	-0.00780497
226.2	0.00018939		756.22	-0.00300817		1286.21	0.00448151		1816.24	0.00620462		2346.24	-0.00041158		2876.24	-0.00511529		3406.24	-0.00771906
226.4	0.00078462		756.42	-0.00202785		1286.41	0.00464962		1816.44	0.00643046		2346.44	-0.00114958		2876.44	-0.00550269		3406.44	-0.00787157
226.6	0.00076148		756.62	-0.00180962		1286.61	0.00542547		1816.64	0.00635561		2346.64	-0.00086336		2876.64	-0.00571238		3406.64	-0.00782151
226.8	0.00110305		756.82	-0.00092454		1286.81	0.00619844		1816.84	0.00659209		2346.84	-0.00172924		2876.84	-0.00536103		3406.84	-0.00719874
227	0.00086296		757.02	-0.00041219		1287.01	0.00622799		1817.04	0.00597822		2347.04	-0.00148414		2877.04	-0.00539056		3407.04	-0.00746983
227.2	0.00128965		757.22	-0.00025548		1287.21	0.00630687		1817.24	0.00593589		2347.24	-0.00153398		2877.24	-0.00590748		3407.24	-0.00723019
227.4	0.00157922		757.42	-0.00037155		1287.41	0.00606152		1817.44	0.00596938		2347.44	-0.00037973		2877.44	-0.00631365		3407.44	-0.00845458
227.6	0.0016291		757.62	-0.00032089		1287.61	0.00546552		1817.64	0.00470915		2347.64	0.00012065		2877.64	-0.00603022		3407.64	-0.00816372
227.8	0.00153256		757.82	-0.00056858		1287.81	0.00542194		1817.84	0.00393239		2347.84	-0.00045551		2877.84	-0.00611166		3407.84	-0.00830236
228	0.00188297		758.02	-0.0015333		1288.01	0.00577827		1818.04	0.00350371		2348.04	-0.00075324		2878.04	-0.00583676		3408.04	-0.00823826
228.2	0.00205753		758.22	-0.00188481		1288.21	0.00619597		1818.24	0.00369119		2348.24	-0.00069816		2878.24	-0.00562346		3408.24	-0.00852417
228.4	0.00287039		758.42	-0.00205004		1288.41	0.00623473		1818.44	0.0037628		2348.44	-0.00033284		2878.44	-0.00504466		3408.44	-0.00878004
228.6	0.00378282		758.62	-0.00290787		1288.61	0.00604635		1818.64	0.00339521		2348.64	-0.00152919		2878.64	-0.0044574		3408.64	-0.0075211
228.8	0.00407719		758.82	-0.00329235		1288.81	0.00638246		1818.84	0.00428357		2348.84	-0.00156412		2878.84	-0.00473154		3408.84	-0.00868699
229	0.0042233		759.02	-0.00399057		1289.01	0.00671385		1819.04	0.00400012		2349.04	-0.00123381		2879.04	-0.00457488		3409.04	-0.00798003
229.2	0.00469358		759.22	-0.00493666		1289.21	0.00569152		1819.24	0.00306454		2349.24	-0.00030319		2879.24	-0.00468341		3409.24	-0.00813793
229.4	0.00518729		759.42	-0.00530909		1289.41	0.00590654		1819.44	0.00267344		2349.44	-0.00036281		2879.44	-0.00504245		3409.44	-0.00818727
229.6	0.00451716		759.62	-0.00522876		1289.61	0.00584153		1819.64	0.00254697		2349.64	-0.00117323		2879.64	-0.00547743		3409.64	-0.00780277
229.8	0.00374427		759.82	-0.00526159		1289.81	0.00585347		1819.84	0.00214975		2349.84	-0.00088462		2879.84	-0.00529773		3409.84	-0.00835079
230	0.00317302		760.02	-0.00455809		1290.01	0.00669066		1820.04	0.0018282		2350.04	-0.00120082		2880.04	-0.00530869		3410.04	-0.00870656
230.2	0.0022255		760.22	-0.00515063		1290.21	0.00725381		1820.24	0.00131443		2350.24	-0.00194645		2880.24	-0.00566692		3410.24	-0.00816264
230.4	0.00271081		760.42	-0.00459842		1290.41	0.00695871		1820.44	0.00117427		2350.44	-0.00262376		2880.44	-0.00542702		3410.44	-0.00777778
230.6	0.00180166		760.62	-0.00466787		1290.61	0.00734387		1820.64	0.00095353		2350.64	-0.00135109		2880.64	-0.00562123		3410.64	-0.00731624
230.8	0.00153802		760.82	-0.00342274		1290.81	0.00718436		1820.84	0.00111183		2350.84	-0.00181719		2880.84	-0.00591868		3410.84	-0.00636062
231	0.00130705		761.02	-0.0034765		1291.01	0.00651145		1821.04	0.001608		2351.04	-0.00218744		2881.04	-0.00601277		3411.04	-0.00683659
231.2	0.00100701		761.22	-0.00330855		1291.21	0.00591244		1821.24	0.00150809		2351.24	-0.00295762		2881.24	-0.00568565		3411.24	-0.00700983
231.4	0.0009771		761.42	-0.00348917		1291.41	0.00580052		1821.44	0.00250868		2351.44	-0.00267633		2881.44	-0.00506456		3411.44	-0.00766105
231.6	0.00149365		761.62	-0.00319352		1291.61	0.00527497		1821.64	0.00266435		2351.64	-0.00364683		2881.64	-0.00490695		3411.64	-0.00766714
231.8	0.00198328		761.82	-0.00358782		1291.81	0.00467683		1821.84	0.00368283		2351.84	-0.00392798		2881.84	-0.00449878		3411.84	-0.0075223
232	0.00266263		762.02	-0.00262177		1292.01	0.00497484		1822.04	0.00396037		2352.04	-0.00328905		2882.04	-0.00308775		3412.04	-0.00775366
232.2	0.00368736		762.22	-0.00254906		1292.21	0.00494018		1822.24	0.00481279		2352.24	-0.00325146		2882.24	-0.00376364		3412.24	-0.00826252
232.4	0.00400063		762.42	-0.00318329		1292.41	0.00408745		1822.44	0.00505229		2352.44	-0.00356195		2882.44	-0.00375293		3412.44	-0.00858585
232.6	0.00441921		762.62	-0.00352909		1292.61	0.00387113		1822.64	0.00602167		2352.64	-0.0038354		2882.64	-0.00381708		3412.64	-0.00820644
232.8	0.0047617		762.82	-0.00388011		1292.81	0.00344113		1822.84	0.00646609		2352.84	-0.0031574		2882.84	-0.00411986		3412.84	-0.00925257
233	0.00527288		763.02	-0.00417156		1293.01	0.00362372		1823.04	0.00581432		2353.04	-0.00245458		2883.04	-0.00387244		3413.04	-0.00900124
233.2	0.00559588		763.22	-0.00418134		1293.21	0.00319225		1823.24	0.00548484		2353.24	-0.00169634		2883.24	-0.00384075		3413.24	-0.00888121
233.4	0.00507013		763.42	-0.00322357		1293.41	0.00338424		1823.44	0.00574881		2353.44	-0.0009324		2883.44	-0.00401733		3413.44	-0.00947576
233.6	0.00479024		763.62	-0.00265729		1293.61	0.00332925		1823.64	0.00571526		2353.64	-0.00092798		2883.64	-0.0046149		3413.64	-0.00948328
233.8	0.00428652		763.82	-0.00254006		1293.81	0.003799		1823.84	0.00503652		2353.84	-0.00026609		2883.84	-0.00464809		3413.84	-0.00937305
234	0.00425023		764.02	-0.00196871		1294.01	0.00436732		1824.04	0.00554329		2354.04	-0.00085882		2884.04	-0.0048214		3414.04	-0.0093714
234.2	0.004141		764.22	-0.00235333		1294.21	0.00436869		1824.24	0.00541034		2354.24	0.00027764		2884.24	-0.00478797		3414.24	-0.00882968
234.4	0.00358594		764.42	-0.00161734		1294.41	0.00496747		1824.44	0.00535218		2354.44	0.00073941		2884.44	-0.00509638		3414.44	-0.00804329
234.6	0.0038944		764.62	-0.00145008		1294.61	0.00577277		1824.64	0.00543425		2354.64	0.00157891		2884.64	-0.00569608		3414.64	-0.00722399
234.8	0.00385587		764.82	-0.00098761		1294.81	0.00631949		1824.84	0.00567806		2354.84	0.00155006		2884.84	-0.00494156		3414.84	-0.00738113
235	0.00343692		765.02	-0.00088988		1295.01	0.00640275		1825.04	0.0064214		2355.04	0.00146418		2885.04	-0.00474742		3415.04	-0.00745912
235.2	0.00294217		765.22	-0.00091058		1295.21	0.00694168		1825.24	0.00681545		2355.24	0.00124022		2885.24	-0.00450932		3415.24	-0.00729165
235.4	0.00313774		765.42	-0.00174578		1295.41	0.00728798		1825.44	0.00734174		2355.44	0.00094331		2885.44	-0.00494827		3415.44	-0.00747338
235.6	0.00312635		765.62	-0.00209591		1295.61	0.00698319		1825.64	0.00686042		2355.64	0.00105187		2885.64	-0.00542888		3415.64	-0.00776425
235.8	0.00346518		765.82	-0.00202521		1295.81	0.00664412		1825.84	0.00665267		2355.84	0.00156444		2885.84	-0.00580623		3415.84	-0.00721753
236	0.00374754		766.02	-0.0014984		1296.01	0.00739894		1826.04	0.00612724		2356.04	0.00163308		2886.04	-0.00648387		3416.04	-0.00746564
236.2	0.00336705		766.22	-0.00275173		1296.21	0.00748043		1826.24	0.00678398		2356.24	0.00195024		2886.24	-0.00737117		3416.24	-0.00836984
236.4	0.00300638		766.42	-0.00373592		1296.41	0.00828882		1826.44	0.00717137		2356.44	0.00165308		2886.44	-0.00733501		3416.44	-0.00856325
236.6	0.00314354		766.62	-0.00375387		1296.61	0.0082949		1826.64	0.007711		2356.64	0.00213938		2886.64	-0.00739796		3416.64	-0.0093112
236.8	0.0038022		766.82	-0.00396776		1296.81	0.00823002		1826.84	0.00709148		2356.84	0.00246949		2886.84	-0.00751145		3416.84	-0.00912811
237	0.00404692		767.02	-0.0033095		1297.01	0.00839623		1827.04	0.00750263		2357.04	0.00218008		2887.04	-0.00714478		3417.04	-0.00881164
237.2	0.0039087		767.22	-0.00314742		1297.21	0.00802223		1827.24	0.00712995		2357.24	0.00175481		2887.24	-0.00721268		3417.24	-0.00870792
237.4	0.00449478		767.42	-0.00228729		1297.41	0.00830967		1827.44	0.00783292		2357.44	0.00060801		2887.44	-0.00707946		3417.44	-0.00920177
237.6	0.00470559		767.62	-0.00293162		1297.61	0.0078559		1827.64	0.00749622		2357.64	0.00040837		2887.64	-0.0082338		3417.64	-0.0089403
237.8	0.0040929		767.82	-0.00301542		1297.81	0.00793766		1827.84	0.00804381		2357.84	-0.00007822		2887.84	-0.00845078		3417.84	-0.00961958
238	0.00440842		768.02	-0.00296158		1298.01	0.0073669		1828.04	0.00820949		2358.04	-0.00121369		2888.04	-0.0078861		3418.04	-0.010889
238.2	0.004708		768.22	-0.00321529		1298.21	0.00699633		1828.24	0.00798873		2358.24	-0.00071476		2888.24	-0.00777883		3418.24	-0.01064321
238.4	0.00433732		768.42	-0.00303612		1298.41	0.00704914		1828.44	0.00731006		2358.44	-0.00104598		2888.44	-0.00763744		3418.44	-0.01019783
238.6	0.00486517		768.62	-0.00310139		1298.61	0.00667433		1828.64	0.00782027		2358.64	-0.00109299		2888.64	-0.00695372		3418.64	-0.01034602
238.8	0.00465569		768.82	-0.00275112		1298.81	0.00607145		1828.84	0.0076988		2358.84	-0.00116303		2888.84	-0.00567403		3418.84	-0.01029613
239	0.0051594		769.02	-0.00335544		1299.01	0.00572431		1829.04	0.00803401		2359.04	-0.0005365		2889.04	-0.00551534		3419.04	-0.00955625
239.2	0.00555583		769.22	-0.00373386		1299.21	0.00542212		1829.24	0.00767386		2359.24	-0.00118367		2889.24	-0.00456653		3419.24	-0.00970919
239.4	0.00577636		769.42	-0.00375652		1299.41	0.00522445		1829.44	0.00610972		2359.44	-0.00076328		2889.44	-0.00417046		3419.44	-0.01033557
239.6	0.0051559		769.62	-0.00383949		1299.61	0.00512083		1829.64	0.00601008		2359.64	-0.00015428		2889.64	-0.00437243		3419.64	-0.01060333
239.8	0.00501021		769.82	-0.00462971		1299.81	0.00517348		1829.84	0.0056437		2359.84	0.00018702		2889.84	-0.00459017		3419.84	-0.00990609
240	0.00461295		770.02	-0.00560329		1300.01	0.00464865		1830.04	0.00640625		2360.04	0.00111837		2890.04	-0.00397002		3420.04	-0.0100814
240.2	0.00391604		770.22	-0.00576533		1300.21	0.00462298		1830.24	0.00665515		2360.24	0.00248019		2890.24	-0.0032883		3420.24	-0.01033382
240.4	0.00402951		770.42	-0.00609721		1300.41	0.00489706		1830.44	0.00633762		2360.44	0.00178847		2890.44	-0.00355229		3420.44	-0.00985832
240.6	0.00379253		770.62	-0.00618923		1300.61	0.00466809		1830.64	0.00546299		2360.64	0.00272433		2890.64	-0.00382774		3420.64	-0.00918011
240.8	0.00276115		770.82	-0.00581395		1300.81	0.00532749		1830.84	0.00532176		2360.84	0.00275531		2890.84	-0.0041214		3420.84	-0.00801246
241	0.00230259		771.02	-0.0055773		1301.01	0.00518933		1831.04	0.00562076		2361.04	0.00230291		2891.04	-0.00463333		3421.04	-0.00669798
241.2	0.00140491		771.22	-0.00515565		1301.21	0.00556484		1831.24	0.00464003		2361.24	0.00168259		2891.24	-0.00579616		3421.24	-0.00649955
241.4	0.00178606		771.42	-0.00464515		1301.41	0.00587495		1831.44	0.00467285		2361.44	0.00162905		2891.44	-0.00644107		3421.44	-0.00578933
241.6	0.00088466		771.62	-0.00544957		1301.61	0.00592845		1831.64	0.0040794		2361.64	0.00231919		2891.64	-0.00835503		3421.64	-0.00653757
241.8	0.00108899		771.82	-0.00480115		1301.81	0.00595674		1831.84	0.00433948		2361.84	0.00239953		2891.84	-0.00797308		3421.84	-0.00798563
242	0.00085081		772.02	-0.00396346		1302.01	0.00529282		1832.04	0.00348924		2362.04	0.00182325		2892.04	-0.00783704		3422.04	-0.00795961
242.2	0.00092049		772.22	-0.00389539		1302.21	0.00493984		1832.24	0.00258064		2362.24	0.0015072		2892.24	-0.00820915		3422.24	-0.00668091
242.4	0.00115317		772.42	-0.00351369		1302.41	0.00520221		1832.44	0.00186331		2362.44	0.00138866		2892.44	-0.00760442		3422.44	-0.00620228
242.6	0.00158413		772.62	-0.00249777		1302.61	0.00581128		1832.64	0.00220284		2362.64	0.00099125		2892.64	-0.00743093		3422.64	-0.00671661
242.8	0.0022138		772.82	-0.00211029		1302.81	0.00588654		1832.84	0.00166335		2362.84	0.00093915		2892.84	-0.00727009		3422.84	-0.00626341
243	0.002327		773.02	-0.0024367		1303.01	0.00656375		1833.04	0.00188458		2363.04	0.00093169		2893.04	-0.0068435		3423.04	-0.00632921
243.2	0.00270002		773.22	-0.00136297		1303.21	0.00688928		1833.24	0.00195453		2363.24	-0.00022106		2893.24	-0.00603974		3423.24	-0.00704392
243.4	0.00263077		773.42	-0.00122606		1303.41	0.00690333		1833.44	0.00237126		2363.44	0.00041922		2893.44	-0.00540094		3423.44	-0.00786477
243.6	0.00237955		773.62	-0.00175391		1303.61	0.00697383		1833.64	0.00326694		2363.64	0.00021294		2893.64	-0.00510434		3423.64	-0.00864568
243.8	0.00343409		773.82	-0.00230685		1303.81	0.00724287		1833.84	0.00369072		2363.84	0.00068509		2893.84	-0.00367718		3423.84	-0.00895616
244	0.00405893		774.02	-0.00202666		1304.01	0.00647956		1834.04	0.00551834		2364.04	0.00098815		2894.04	-0.00305927		3424.04	-0.00947555
244.2	0.00413994		774.22	-0.00251044		1304.21	0.00657396		1834.24	0.00539921		2364.24	0.0005946		2894.24	-0.00298334		3424.24	-0.00956104
244.4	0.00399179		774.42	-0.00362068		1304.41	0.00667893		1834.44	0.00597007		2364.44	-0.00020861		2894.44	-0.00356592		3424.44	-0.00973375
244.6	0.00384213		774.62	-0.00364469		1304.61	0.00712144		1834.64	0.00665183		2364.64	0.0004129		2894.64	-0.00349825		3424.64	-0.00949163
244.8	0.00348108		774.82	-0.00254629		1304.81	0.007155		1834.84	0.00747907		2364.84	0.00020319		2894.84	-0.00341854		3424.84	-0.0094821
245	0.00372961		775.02	-0.00277394		1305.01	0.00667489		1835.04	0.00735227		2365.04	-0.00063251		2895.04	-0.00365383		3425.04	-0.00909832
245.2	0.0036502		775.22	-0.00296673		1305.21	0.00633804		1835.24	0.00815761		2365.24	-0.00089012		2895.24	-0.00370284		3425.24	-0.00915081
245.4	0.00313413		775.42	-0.00309905		1305.41	0.00598914		1835.44	0.00871182		2365.44	-0.00090129		2895.44	-0.00395286		3425.44	-0.00930267
245.6	0.00276589		775.62	-0.00299357		1305.61	0.00555891		1835.64	0.00899895		2365.64	0.00012245		2895.64	-0.00483272		3425.64	-0.00928861
245.8	0.00258796		775.82	-0.00273534		1305.81	0.00468743		1835.84	0.00886444		2365.84	0.00025326		2895.84	-0.00468712		3425.84	-0.00953788
246	0.00184513		776.02	-0.00259823		1306.01	0.00468148		1836.04	0.00884029		2366.04	-0.00059653		2896.04	-0.00594747		3426.04	-0.00838119
246.2	0.00230406		776.22	-0.00330934		1306.21	0.00531168		1836.24	0.0086296		2366.24	-0.00049924		2896.24	-0.00600452		3426.24	-0.00787907
246.4	0.00230861		776.42	-0.00298119		1306.41	0.00530065		1836.44	0.00887364		2366.44	0.00003356		2896.44	-0.00656263		3426.44	-0.00777237
246.6	0.00287051		776.62	-0.00288393		1306.61	0.0054617		1836.64	0.00928211		2366.64	-0.00050754		2896.64	-0.00746045		3426.64	-0.007498
246.8	0.00234545		776.82	-0.0036783		1306.81	0.00493984		1836.84	0.0092715		2366.84	-0.00049495		2896.84	-0.0077246		3426.84	-0.00702633
247	0.0026427		777.02	-0.00322695		1307.01	0.00566209		1837.04	0.00942972		2367.04	-0.00040975		2897.04	-0.00740869		3427.04	-0.00682818
247.2	0.00365258		777.22	-0.00332636		1307.21	0.00587858		1837.24	0.00847314		2367.24	-0.00128959		2897.24	-0.00715575		3427.24	-0.00663373
247.4	0.00390593		777.42	-0.00370079		1307.41	0.00611568		1837.44	0.00804234		2367.44	-0.00125418		2897.44	-0.00675279		3427.44	-0.00693878
247.6	0.00536017		777.62	-0.00361527		1307.61	0.00607408		1837.64	0.00757341		2367.64	-0.0011018		2897.64	-0.00667453		3427.64	-0.00739397
247.8	0.0062462		777.82	-0.00356049		1307.81	0.00613491		1837.84	0.00732785		2367.84	-0.0009237		2897.84	-0.0058895		3427.84	-0.00695616
248	0.00614952		778.02	-0.00453568		1308.01	0.00531568		1838.04	0.00685464		2368.04	-0.00068556		2898.04	-0.00635756		3428.04	-0.00718261
248.2	0.00683448		778.22	-0.00620552		1308.21	0.00490353		1838.24	0.00579938		2368.24	-0.00067623		2898.24	-0.00656407		3428.24	-0.00639375
248.4	0.00686618		778.42	-0.00665552		1308.41	0.00535817		1838.44	0.00574952		2368.44	-0.00009009		2898.44	-0.0062838		3428.44	-0.00629904
248.6	0.00722408		778.62	-0.00558112		1308.61	0.00563501		1838.64	0.00577465		2368.64	-0.00037002		2898.64	-0.00519517		3428.64	-0.00679204
248.8	0.00766202		778.82	-0.00470129		1308.81	0.00496302		1838.84	0.00497122		2368.84	-0.00028483		2898.84	-0.00398466		3428.84	-0.00650715
249	0.00685667		779.02	-0.00489334		1309.01	0.00436588		1839.04	0.00556741		2369.04	-0.00034872		2899.04	-0.00369544		3429.04	-0.00739219
249.2	0.00755575		779.22	-0.00533722		1309.21	0.00444889		1839.24	0.00628259		2369.24	0.00060475		2899.24	-0.00264561		3429.24	-0.00706868
249.4	0.00661335		779.42	-0.00479266		1309.41	0.00501195		1839.44	0.00603126		2369.44	0.0018825		2899.44	-0.00217946		3429.44	-0.00688146
249.6	0.00606316		779.62	-0.00438617		1309.61	0.00518605		1839.64	0.00617668		2369.64	0.00271471		2899.64	-0.00175536		3429.64	-0.00682856
249.8	0.00525576		779.82	-0.00361454		1309.81	0.00594794		1839.84	0.00634315		2369.84	0.00196575		2899.84	-0.00209875		3429.84	-0.00670224
250	0.00562455		780.02	-0.00333179		1310.01	0.0072688		1840.04	0.00693375		2370.04	0.00182467		2900.04	-0.00196032		3430.04	-0.00604653
250.2	0.00554114		780.22	-0.00316124		1310.21	0.00734852		1840.24	0.00708913		2370.24	0.00193084		2900.24	-0.00139284		3430.24	-0.00665304
250.4	0.00427767		780.42	-0.00256747		1310.41	0.00762586		1840.44	0.0077693		2370.44	0.00159375		2900.44	-0.00159155		3430.44	-0.00638989
250.6	0.00419009		780.62	-0.00210604		1310.61	0.00813113		1840.64	0.0078035		2370.64	0.00054441		2900.64	-0.00149518		3430.64	-0.00698198
250.8	0.00343135		780.82	-0.00113874		1310.81	0.00773172		1840.84	0.00811585		2370.84	0.00012425		2900.84	-0.00173193		3430.84	-0.00765762
251	0.00331366		781.02	-0.00048173		1311.01	0.00866617		1841.04	0.00820787		2371.04	-0.00039215		2901.04	-0.00176216		3431.04	-0.00715796
251.2	0.00328514		781.22	-0.00129809		1311.21	0.00867305		1841.24	0.00724274		2371.24	-0.00155624		2901.24	-0.00206596		3431.24	-0.00712036
251.4	0.00366054		781.42	-0.00132716		1311.41	0.00841762		1841.44	0.00774819		2371.44	-0.00114688		2901.44	-0.00234806		3431.44	-0.00701224
251.6	0.00425011		781.62	-0.00125386		1311.61	0.00762143		1841.64	0.00756375		2371.64	-0.0005269		2901.64	-0.00295553		3431.64	-0.00732979
251.8	0.00338637		781.82	-0.00121325		1311.81	0.00736989		1841.84	0.00697976		2371.84	-0.0009384		2901.84	-0.00306032		3431.84	-0.00815732
252	0.00365859		782.02	-0.00275516		1312.01	0.00717288		1842.04	0.00590443		2372.04	-0.00095725		2902.04	-0.00385154		3432.04	-0.00836216
252.2	0.00473287		782.22	-0.00395065		1312.21	0.00690383		1842.24	0.0060991		2372.24	-0.00074662		2902.24	-0.00454635		3432.24	-0.00832733
252.4	0.00467185		782.42	-0.00398346		1312.41	0.00640435		1842.44	0.00633086		2372.44	-0.00002959		2902.44	-0.00483714		3432.44	-0.00844571
252.6	0.0049022		782.62	-0.00348838		1312.61	0.00613226		1842.64	0.0069442		2372.64	-0.00058927		2902.64	-0.00458454		3432.64	-0.00872242
252.8	0.00630015		782.82	-0.00347035		1312.81	0.00460602		1842.84	0.00745489		2372.84	0.00006679		2902.84	-0.00448288		3432.84	-0.00855379
253	0.0061853		783.02	-0.00405476		1313.01	0.00456067		1843.04	0.00851829		2373.04	0.00087092		2903.04	-0.00490114		3433.04	-0.00935719
253.2	0.0071525		783.22	-0.00397375		1313.21	0.00510261		1843.24	0.00866345		2373.24	0.00191481		2903.24	-0.00449426		3433.24	-0.00887214
253.4	0.00658628		783.42	-0.00297983		1313.41	0.00537036		1843.44	0.00893852		2373.44	0.00226731		2903.44	-0.00538444		3433.44	-0.0088443
253.6	0.00680399		783.62	-0.00317749		1313.61	0.00593887		1843.64	0.0084318		2373.64	0.00123144		2903.64	-0.00576492		3433.64	-0.00811469
253.8	0.00720193		783.82	-0.00127716		1313.81	0.00610474		1843.84	0.00822674		2373.84	0.00107957		2903.84	-0.00621513		3433.84	-0.00752745
254	0.00661745		784.02	-0.00149092		1314.01	0.00607637		1844.04	0.00754119		2374.04	0.00138931		2904.04	-0.00546632		3434.04	-0.00736231
254.2	0.00578139		784.22	-0.00170444		1314.21	0.00607295		1844.24	0.00714901		2374.24	0.00135104		2904.24	-0.00557189		3434.24	-0.0074446
254.4	0.00520342		784.42	-0.00086956		1314.41	0.00603467		1844.44	0.00698172		2374.44	0.00131123		2904.44	-0.00536059		3434.44	-0.00761979
254.6	0.00560416		784.62	-0.0005952		1314.61	0.00610941		1844.64	0.00654178		2374.64	0.00096146		2904.64	-0.00502248		3434.64	-0.00775135
254.8	0.0048544		784.82	-0.00021887		1314.81	0.00635797		1844.84	0.00614576		2374.84	0.00126267		2904.84	-0.00504328		3434.84	-0.00727828
255	0.00482055		785.02	-0.00117264		1315.01	0.00707531		1845.04	0.00578544		2375.04	0.00118146		2905.04	-0.0047836		3435.04	-0.00770035
255.2	0.00471104		785.22	-0.00188604		1315.21	0.00781474		1845.24	0.00554481		2375.24	0.00154794		2905.24	-0.00458426		3435.24	-0.00798718
255.4	0.00449		785.42	-0.00156387		1315.41	0.00795455		1845.44	0.00559936		2375.44	0.00168222		2905.44	-0.00476824		3435.44	-0.00805745
255.6	0.00452842		785.62	-0.00238128		1315.61	0.00801208		1845.64	0.00601492		2375.64	0.00125071		2905.64	-0.00492459		3435.64	-0.00860275
255.8	0.00356119		785.82	-0.00276242		1315.81	0.00866072		1845.84	0.00608952		2375.84	0.00109624		2905.84	-0.00483937		3435.84	-0.00907146
256	0.00382521		786.02	-0.00442795		1316.01	0.00818454		1846.04	0.00683956		2376.04	0.00118665		2906.04	-0.00509792		3436.04	-0.00809813
256.2	0.00336757		786.22	-0.00584911		1316.21	0.00781547		1846.24	0.00773859		2376.24	0.00174707		2906.24	-0.0057432		3436.24	-0.00885973
256.4	0.00362605		786.42	-0.00681999		1316.41	0.00766447		1846.44	0.00820567		2376.44	0.00166817		2906.44	-0.00672559		3436.44	-0.00823818
256.6	0.00324641		786.62	-0.00757339		1316.61	0.00734742		1846.64	0.01004777		2376.64	0.00143849		2906.64	-0.00678593		3436.64	-0.00777804
256.8	0.00323329		786.82	-0.00791004		1316.81	0.00709147		1846.84	0.01124651		2376.84	0.00229841		2906.84	-0.00698074		3436.84	-0.00766897
257	0.0031982		787.02	-0.00852657		1317.01	0.00721849		1847.04	0.01159708		2377.04	0.00245536		2907.04	-0.00739552		3437.04	-0.00749583
257.2	0.00297735		787.22	-0.00844784		1317.21	0.00723287		1847.24	0.01160519		2377.24	0.00250404		2907.24	-0.00814233		3437.24	-0.00702958
257.4	0.00334514		787.42	-0.00832618		1317.41	0.00677847		1847.44	0.01141559		2377.44	0.00123734		2907.44	-0.0088228		3437.44	-0.00651746
257.6	0.00455505		787.62	-0.00785921		1317.61	0.00675402		1847.64	0.01112098		2377.64	0.00020814		2907.64	-0.00876788		3437.64	-0.005875
257.8	0.0042913		787.82	-0.00616256		1317.81	0.00578152		1847.84	0.01078145		2377.84	-0.00042518		2907.84	-0.00893151		3437.84	-0.00558286
258	0.00311683		788.02	-0.00597952		1318.01	0.00550748		1848.04	0.01042123		2378.04	-0.00104594		2908.04	-0.00854535		3438.04	-0.00451265
258.2	0.00368482		788.22	-0.00513398		1318.21	0.00567359		1848.24	0.00997273		2378.24	-0.00144443		2908.24	-0.00897571		3438.24	-0.00400402
258.4	0.00376969		788.42	-0.00419025		1318.41	0.00524415		1848.44	0.00934199		2378.44	-0.00106148		2908.44	-0.00896621		3438.44	-0.00425142
258.6	0.00367529		788.62	-0.00370645		1318.61	0.00610748		1848.64	0.00909152		2378.64	-0.00169705		2908.64	-0.00880479		3438.64	-0.00390485
258.8	0.00354289		788.82	-0.00280698		1318.81	0.0063067		1848.84	0.00838209		2378.84	-0.001317		2908.84	-0.00811785		3438.84	-0.00406496
259	0.00441361		789.02	-0.00181693		1319.01	0.00652966		1849.04	0.00815121		2379.04	-0.00170401		2909.04	-0.00782675		3439.04	-0.00457029
259.2	0.00401316		789.22	-0.00062662		1319.21	0.00776613		1849.24	0.00763989		2379.24	-0.00135103		2909.24	-0.00772231		3439.24	-0.00448463
259.4	0.0035162		789.42	0.00024685		1319.41	0.00784578		1849.44	0.00715526		2379.44	-0.00164302		2909.44	-0.00785854		3439.44	-0.00473121
259.6	0.00340017		789.62	-0.00013009		1319.61	0.00816114		1849.64	0.00664391		2379.64	-0.00162172		2909.64	-0.00737538		3439.64	-0.00513842
259.8	0.00297029		789.82	-0.00000966		1319.81	0.00851035		1849.84	0.00675653		2379.84	-0.0010578		2909.84	-0.00721071		3439.84	-0.00582419
260	0.00383137		790.02	-0.00039301		1320.01	0.0080224		1850.04	0.00655336		2380.04	-0.00066986		2910.04	-0.00643168		3440.04	-0.00677046
260.2	0.00405857		790.22	-0.00137765		1320.21	0.00856089		1850.24	0.00628685		2380.24	-0.00051186		2910.24	-0.0058801		3440.24	-0.00888993
260.4	0.0049854		790.42	-0.00159777		1320.41	0.00816512		1850.44	0.00574752		2380.44	-0.00030791		2910.44	-0.00603677		3440.44	-0.00908006
260.6	0.00455377		790.62	-0.00186796		1320.61	0.00763742		1850.64	0.0062149		2380.64	-0.00021926		2910.64	-0.00563817		3440.64	-0.01009364
260.8	0.00398366		790.82	-0.00253295		1320.81	0.00777562		1850.84	0.00589652		2380.84	0.0006048		2910.84	-0.00519378		3440.84	-0.01111524
261	0.00448726		791.02	-0.00290041		1321.01	0.00663167		1851.04	0.0053112		2381.04	0.00093295		2911.04	-0.00480841		3441.04	-0.01170625
261.2	0.00429837		791.22	-0.00299729		1321.21	0.00687391		1851.24	0.00464413		2381.24	0.00111318		2911.24	-0.00413125		3441.24	-0.01237377
261.4	0.0046044		791.42	-0.00316517		1321.41	0.0068523		1851.44	0.00446057		2381.44	0.00036457		2911.44	-0.00377119		3441.44	-0.0131747
261.6	0.00488959		791.62	-0.00291629		1321.61	0.00704002		1851.64	0.00478992		2381.64	0.00078051		2911.64	-0.0032016		3441.64	-0.01304905
261.8	0.00338364		791.82	-0.0029146		1321.81	0.0070851		1851.84	0.0040293		2381.84	0.00081698		2911.84	-0.00326866		3441.84	-0.01241117
262	0.00282105		792.02	-0.00338399		1322.01	0.00699711		1852.04	0.0050255		2382.04	0.00103477		2912.04	-0.00265513		3442.04	-0.01133146
262.2	0.00320515		792.22	-0.0042807		1322.21	0.00704372		1852.24	0.00605014		2382.24	0.00147157		2912.24	-0.00308443		3442.24	-0.01045405
262.4	0.00255163		792.42	-0.00547174		1322.41	0.0073044		1852.44	0.00663422		2382.44	0.00132962		2912.44	-0.00280542		3442.44	-0.00953219
262.6	0.00254171		792.62	-0.00522496		1322.61	0.00750947		1852.64	0.00661697		2382.64	0.0009209		2912.64	-0.00244237		3442.64	-0.00811669
262.8	0.00267271		792.82	-0.00481982		1322.81	0.00711807		1852.84	0.00741464		2382.84	0.00228586		2912.84	-0.00244365		3442.84	-0.0067945
263	0.00305525		793.02	-0.00398126		1323.01	0.00752667		1853.04	0.00767096		2383.04	0.00230586		2913.04	-0.00375056		3443.04	-0.00606002
263.2	0.00253647		793.22	-0.00374519		1323.21	0.00861965		1853.24	0.00750278		2383.24	0.0020462		2913.24	-0.00412459		3443.24	-0.00547097
263.4	0.00267867		793.42	-0.00341517		1323.41	0.0081206		1853.44	0.0076787		2383.44	0.00121326		2913.44	-0.00411178		3443.44	-0.00535371
263.6	0.00339338		793.62	-0.00348016		1323.61	0.00806022		1853.64	0.00721857		2383.64	0.00083221		2913.64	-0.00417008		3443.64	-0.005
263.8	0.00416594		793.82	-0.00289157		1323.81	0.00889274		1853.84	0.00830709		2383.84	0.00037015		2913.84	-0.00445478		3443.84	-0.00521068
264	0.00516534		794.02	-0.00194774		1324.01	0.00883848		1854.04	0.00836779		2384.04	0.00042006		2914.04	-0.00463252		3444.04	-0.00647234
264.2	0.00597352		794.22	-0.00245211		1324.21	0.00851016		1854.24	0.00863993		2384.24	-0.00023458		2914.24	-0.00511273		3444.24	-0.00711571
264.4	0.00557689		794.42	-0.00128983		1324.41	0.00773154		1854.44	0.0084582		2384.44	-0.00053164		2914.44	-0.00611236		3444.44	-0.00742611
264.6	0.00590416		794.62	-0.00130644		1324.61	0.00769786		1854.64	0.00903136		2384.64	-0.00081095		2914.64	-0.00646026		3444.64	-0.00782469
264.8	0.00583798		794.82	-0.00164475		1324.81	0.00751905		1854.84	0.00923974		2384.84	-0.00047884		2914.84	-0.00622566		3444.84	-0.00837312
265	0.00653948		795.02	-0.00113042		1325.01	0.0071882		1855.04	0.00912861		2385.04	0.00004249		2915.04	-0.00603845		3445.04	-0.00885934
265.2	0.00663934		795.22	-0.00098564		1325.21	0.00749529		1855.24	0.00831181		2385.24	-0.00072092		2915.24	-0.00621125		3445.24	-0.00850533
265.4	0.00628929		795.42	-0.00131224		1325.41	0.00741594		1855.44	0.00823867		2385.44	-0.00063495		2915.44	-0.00615873		3445.44	-0.00907132
265.6	0.00687084		795.62	-0.00165442		1325.61	0.00738682		1855.64	0.00841116		2385.64	-0.00031706		2915.64	-0.00579433		3445.64	-0.00845403
265.8	0.00661156		795.82	-0.00160665		1325.81	0.00721032		1855.84	0.00799881		2385.84	-0.00061673		2915.84	-0.0057225		3445.84	-0.00852157
266	0.00733061		796.02	-0.00295282		1326.01	0.00646299		1856.04	0.0088256		2386.04	-0.00054595		2916.04	-0.0049046		3446.04	-0.00795546
266.2	0.0072196		796.22	-0.0037544		1326.21	0.00654104		1856.24	0.00865659		2386.24	-0.00080515		2916.24	-0.00525767		3446.24	-0.00759236
266.4	0.00709478		796.42	-0.00457717		1326.41	0.00707148		1856.44	0.00820767		2386.44	-0.0008225		2916.44	-0.00438371		3446.44	-0.00744541
266.6	0.00695125		796.62	-0.00457038		1326.61	0.00612909		1856.64	0.00786287		2386.64	-0.00011301		2916.64	-0.00457315		3446.64	-0.00727617
266.8	0.00673991		796.82	-0.00392598		1326.81	0.00679141		1856.84	0.00875793		2386.84	0.00126441		2916.84	-0.00531212		3446.84	-0.00754233
267	0.00684136		797.02	-0.00353105		1327.01	0.00750801		1857.04	0.00771991		2387.04	0.001359		2917.04	-0.00552889		3447.04	-0.00798024
267.2	0.0068672		797.22	-0.00331837		1327.21	0.00791257		1857.24	0.00743285		2387.24	0.00111266		2917.24	-0.00530422		3447.24	-0.00826675
267.4	0.00722922		797.42	-0.00300336		1327.41	0.00725219		1857.44	0.00734245		2387.44	0.00108368		2917.44	-0.00534992		3447.44	-0.00838498
267.6	0.00729635		797.62	-0.00353312		1327.61	0.00730234		1857.64	0.00710447		2387.64	0.00100516		2917.64	-0.00544811		3447.64	-0.00913991
267.8	0.00707055		797.82	-0.00313505		1327.81	0.00806766		1857.84	0.00751769		2387.84	0.00062348		2917.84	-0.00534533		3447.84	-0.01047
268	0.00649825		798.02	-0.0036097		1328.01	0.00807987		1858.04	0.00757319		2388.04	0.00072627		2918.04	-0.0050247		3448.04	-0.0115082
268.2	0.00672298		798.22	-0.0032914		1328.21	0.00838344		1858.24	0.00682469		2388.24	0.000757		2918.24	-0.00468837		3448.24	-0.01149377
268.4	0.00579841		798.42	-0.0022232		1328.41	0.00808638		1858.44	0.00670181		2388.44	0.00061189		2918.44	-0.00508859		3448.44	-0.0114038
268.6	0.00601874		798.62	-0.00211738		1328.61	0.00822964		1858.64	0.00651755		2388.64	0.00086901		2918.64	-0.0056413		3448.64	-0.01140889
268.8	0.00561533		798.82	-0.00226116		1328.81	0.00823467		1858.84	0.00624494		2388.84	0.00059602		2918.84	-0.00577512		3448.84	-0.01174805
269	0.00597974		799.02	-0.00130919		1329.01	0.00778184		1859.04	0.00615308		2389.04	0.00080145		2919.04	-0.0057988		3449.04	-0.01113557
269.2	0.00557452		799.22	-0.00067057		1329.21	0.00768361		1859.24	0.00586087		2389.24	-0.00012876		2919.24	-0.00576611		3449.24	-0.01028962
269.4	0.00544731		799.42	-0.00061967		1329.41	0.00797218		1859.44	0.00688518		2389.44	-0.00021181		2919.44	-0.00547282		3449.44	-0.01070477
269.6	0.00557696		799.62	-0.00078986		1329.61	0.00868594		1859.64	0.00717205		2389.64	-0.00030912		2919.64	-0.00478124		3449.64	-0.00980535
269.8	0.00522865		799.82	-0.00034159		1329.81	0.00895968		1859.84	0.00684577		2389.84	-0.00107451		2919.84	-0.00433682		3449.84	-0.00986851
270	0.00463614		800.02	-0.00068397		1330.01	0.00941216		1860.04	0.00690546		2390.04	-0.00101171		2920.04	-0.00380888		3450.04	-0.00963428
270.2	0.00408705		800.22	-0.00082586		1330.21	0.01025182		1860.24	0.00685688		2390.24	-0.0007332		2920.24	-0.00369026		3450.24	-0.00843973
270.4	0.00389043		800.42	-0.00109653		1330.41	0.01055211		1860.44	0.00703605		2390.44	0.0000648		2920.44	-0.003792		3450.44	-0.00754861
270.6	0.00316974		800.62	-0.00113054		1330.61	0.01120358		1860.64	0.00656275		2390.64	-0.00050815		2920.64	-0.00413168		3450.64	-0.0071323
270.8	0.00305067		800.82	-0.00047724		1330.81	0.01201348		1860.84	0.00629856		2390.84	-0.0002792		2920.84	-0.00456769		3450.84	-0.00704264
271	0.00407926		801.02	-0.0011677		1331.01	0.01190364		1861.04	0.00560257		2391.04	-0.00076911		2921.04	-0.00490846		3451.04	-0.0073589
271.2	0.00513944		801.22	-0.00134422		1331.21	0.01088964		1861.24	0.00620393		2391.24	-0.00117819		2921.24	-0.00460413		3451.24	-0.00765024
271.4	0.00572578		801.42	-0.00178577		1331.41	0.01017223		1861.44	0.00600846		2391.44	-0.00202585		2921.44	-0.00447306		3451.44	-0.00741485
271.6	0.00629238		801.62	-0.00288787		1331.61	0.0090201		1861.64	0.0054097		2391.64	-0.00210283		2921.64	-0.00375666		3451.64	-0.00865964
271.8	0.00700381		801.82	-0.00306812		1331.81	0.00860812		1861.84	0.00368656		2391.84	-0.00181908		2921.84	-0.0041801		3451.84	-0.00908651
272	0.00713988		802.02	-0.00330217		1332.01	0.0075102		1862.04	0.00225682		2392.04	-0.00130026		2922.04	-0.00400345		3452.04	-0.009235
272.2	0.00741063		802.22	-0.00297939		1332.21	0.00670915		1862.24	0.00200713		2392.24	-0.00045421		2922.24	-0.00400959		3452.24	-0.0093168
272.4	0.00744771		802.42	-0.00299077		1332.41	0.00581521		1862.44	0.00221548		2392.44	-0.0007516		2922.44	-0.00438548		3452.44	-0.00981835
272.6	0.00743292		802.62	-0.00270729		1332.61	0.00517975		1862.64	0.00295962		2392.64	0.00013811		2922.64	-0.00452513		3452.64	-0.01076236
272.8	0.00781958		802.82	-0.00318924		1332.81	0.00484657		1862.84	0.00341884		2392.84	0.00046245		2922.84	-0.0046837		3452.84	-0.01112309
273	0.00810111		803.02	-0.00234105		1333.01	0.00437477		1863.04	0.00438174		2393.04	0.0004534		2923.04	-0.00520391		3453.04	-0.01143145
273.2	0.00784676		803.22	-0.00194013		1333.21	0.00459532		1863.24	0.00539458		2393.24	0.00030466		2923.24	-0.00597451		3453.24	-0.01202599
273.4	0.00757083		803.42	-0.0019636		1333.41	0.00543156		1863.44	0.00672582		2393.44	0.00037357		2923.44	-0.00570644		3453.44	-0.01163781
273.6	0.00719962		803.62	-0.00249523		1333.61	0.0061708		1863.64	0.00717711		2393.64	0.00090808		2923.64	-0.00504596		3453.64	-0.01108898
273.8	0.00686312		803.82	-0.00227559		1333.81	0.00692615		1863.84	0.007174		2393.84	0.00113195		2923.84	-0.00488091		3453.84	-0.01118016
274	0.00628499		804.02	-0.00258835		1334.01	0.00889832		1864.04	0.00788506		2394.04	0.00181174		2924.04	-0.00464701		3454.04	-0.00940492
274.2	0.00577869		804.22	-0.00280617		1334.21	0.00927482		1864.24	0.00856496		2394.24	0.00210029		2924.24	-0.00450553		3454.24	-0.00796772
274.4	0.00510496		804.42	-0.00285311		1334.41	0.01018148		1864.44	0.00868275		2394.44	0.00116179		2924.44	-0.00463151		3454.44	-0.00735187
274.6	0.0045559		804.62	-0.00275407		1334.61	0.01079971		1864.64	0.00878483		2394.64	-0.00025408		2924.64	-0.00414845		3454.64	-0.00841106
274.8	0.00429285		804.82	-0.00225079		1334.81	0.0111034		1864.84	0.00894846		2394.84	-0.00053795		2924.84	-0.00395482		3454.84	-0.00875352
275	0.0054708		805.02	-0.00180353		1335.01	0.01164053		1865.04	0.00931614		2395.04	-0.00132331		2925.04	-0.00403221		3455.04	-0.00847404
275.2	0.005641		805.22	-0.00192901		1335.21	0.01141731		1865.24	0.00933539		2395.24	-0.00118384		2925.24	-0.00344419		3455.24	-0.00806984
275.4	0.00558247		805.42	-0.00204129		1335.41	0.01120545		1865.44	0.00877116		2395.44	-0.00189635		2925.44	-0.00374696		3455.44	-0.00711076
275.6	0.00538385		805.62	-0.00231045		1335.61	0.0105		1865.64	0.00853677		2395.64	-0.00137349		2925.64	-0.0045822		3455.64	-0.00777872
275.8	0.00552483		805.82	-0.00235492		1335.81	0.01047162		1865.84	0.00744789		2395.84	-0.00133124		2925.84	-0.00570752		3455.84	-0.00795054
276	0.00506382		806.02	-0.00254774		1336.01	0.01012888		1866.04	0.00756793		2396.04	-0.0016719		2926.04	-0.00482007		3456.04	-0.00761327
276.2	0.00462232		806.22	-0.00191156		1336.21	0.01091415		1866.24	0.0078965		2396.24	-0.00150123		2926.24	-0.0043716		3456.24	-0.00790907
276.4	0.00498141		806.42	-0.00172633		1336.41	0.01019415		1866.44	0.00727781		2396.44	-0.00205137		2926.44	-0.00492151		3456.44	-0.00847451
276.6	0.00463449		806.62	-0.00185868		1336.61	0.00995508		1866.64	0.00722779		2396.64	-0.00151965		2926.64	-0.00523772		3456.64	-0.00880373
276.8	0.00456403		806.82	-0.00207811		1336.81	0.0095077		1866.84	0.0065272		2396.84	-0.0022217		2926.84	-0.00541677		3456.84	-0.00922114
277	0.00437609		807.02	-0.00185009		1337.01	0.00919383		1867.04	0.00661768		2397.04	-0.00225057		2927.04	-0.0057068		3457.04	-0.00935301
277.2	0.00408022		807.22	-0.00193939		1337.21	0.00904389		1867.24	0.00602473		2397.24	-0.00175242		2927.24	-0.00551158		3457.24	-0.00926588
277.4	0.00383081		807.42	-0.0022696		1337.41	0.00883125		1867.44	0.00591398		2397.44	-0.00158766		2927.44	-0.00450557		3457.44	-0.00866356
277.6	0.00425237		807.62	-0.0029204		1337.61	0.00870128		1867.64	0.00563974		2397.64	-0.00097304		2927.64	-0.00477156		3457.64	-0.00881042
277.8	0.00512535		807.82	-0.00361339		1337.81	0.0083762		1867.84	0.00612535		2397.84	-0.0000206		2927.84	-0.00389984		3457.84	-0.00859946
278	0.00518921		808.02	-0.00354199		1338.01	0.00835555		1868.04	0.00626252		2398.04	-0.00007249		2928.04	-0.00382561		3458.04	-0.00720566
278.2	0.00533921		808.22	-0.00307897		1338.21	0.00693102		1868.24	0.00660846		2398.24	0.00017521		2928.24	-0.00377948		3458.24	-0.00735899
278.4	0.00569139		808.42	-0.00266666		1338.41	0.00640897		1868.44	0.00668772		2398.44	-0.00031822		2928.44	-0.00376102		3458.44	-0.00727211
278.6	0.00567213		808.62	-0.00233636		1338.61	0.00520716		1868.64	0.00685837		2398.64	-0.0000453		2928.64	-0.00370893		3458.64	-0.00824123
278.8	0.0055167		808.82	-0.00234675		1338.81	0.00510821		1868.84	0.00643171		2398.84	0.00062465		2928.84	-0.00396465		3458.84	-0.00797967
279	0.00620177		809.02	-0.00252089		1339.01	0.00476903		1869.04	0.00621259		2399.04	0.00075812		2929.04	-0.0043632		3459.04	-0.00710463
279.2	0.00591387		809.22	-0.00343542		1339.21	0.00413232		1869.24	0.00625215		2399.24	0.00150556		2929.24	-0.00521074		3459.24	-0.00772529
279.4	0.00552398		809.42	-0.00349167		1339.41	0.00357232		1869.44	0.00704975		2399.44	0.0016095		2929.44	-0.00599229		3459.44	-0.00798149
279.6	0.00570241		809.62	-0.00328173		1339.61	0.00337615		1869.64	0.00827099		2399.64	0.00192099		2929.64	-0.00696547		3459.64	-0.00845428
279.8	0.00569392		809.82	-0.00276723		1339.81	0.00386267		1869.84	0.00777935		2399.84	0.00258318		2929.84	-0.00688593		3459.84	-0.00885141
280	0.00576968		810.02	-0.0022801		1340.01	0.00440165		1870.04	0.00790999		2400.04	0.00218383		2930.04	-0.00646344		3460.04	-0.00922104
280.2	0.00580729		810.22	-0.00158838		1340.21	0.00556728		1870.24	0.0075459		2400.24	0.00167888		2930.24	-0.0064663		3460.24	-0.00966002
280.4	0.00562785		810.42	-0.00201968		1340.41	0.0059335		1870.44	0.00746538		2400.44	0.00128839		2930.44	-0.0067966		3460.44	-0.00961732
280.6	0.00455503		810.62	-0.00196007		1340.61	0.00697795		1870.64	0.0075928		2400.64	0.00094396		2930.64	-0.00657009		3460.64	-0.01037055
280.8	0.00475977		810.82	-0.00148956		1340.81	0.00764497		1870.84	0.00789543		2400.84	-0.00013083		2930.84	-0.00648802		3460.84	-0.01005733
281	0.00483588		811.02	-0.00145506		1341.01	0.00839032		1871.04	0.0085072		2401.04	-0.00009824		2931.04	-0.00583125		3461.04	-0.0102409
281.2	0.00411164		811.22	-0.00128735		1341.21	0.00866254		1871.24	0.00841338		2401.24	-0.00096937		2931.24	-0.00523398		3461.24	-0.01071433
281.4	0.00422107		811.42	-0.00143616		1341.41	0.00868007		1871.44	0.0079892		2401.44	-0.00126917		2931.44	-0.00433799		3461.44	-0.01090426
281.6	0.00500082		811.62	-0.00102775		1341.61	0.00897688		1871.64	0.00813787		2401.64	-0.00089099		2931.64	-0.00444436		3461.64	-0.0106756
281.8	0.00518972		811.82	-0.00097568		1341.81	0.0091649		1871.84	0.00920551		2401.84	-0.00040859		2931.84	-0.00362026		3461.84	-0.00999158
282	0.00455657		812.02	-0.00085867		1342.01	0.00978006		1872.04	0.00794222		2402.04	-0.00185089		2932.04	-0.00346163		3462.04	-0.00931608
282.2	0.00534476		812.22	-0.00108069		1342.21	0.00949045		1872.24	0.00788861		2402.24	-0.00202977		2932.24	-0.00391053		3462.24	-0.00865886
282.4	0.00546013		812.42	-0.00154565		1342.41	0.00857974		1872.44	0.0076346		2402.44	-0.00269048		2932.44	-0.00311241		3462.44	-0.00844304
282.6	0.00503823		812.62	-0.00200684		1342.61	0.00808386		1872.64	0.00678534		2402.64	-0.00219958		2932.64	-0.00324754		3462.64	-0.00871875
282.8	0.00484585		812.82	-0.00236914		1342.81	0.00771332		1872.84	0.00589964		2402.84	-0.00162945		2932.84	-0.00378838		3462.84	-0.00829568
283	0.00517096		813.02	-0.00294781		1343.01	0.00752021		1873.04	0.00589199		2403.04	-0.00185495		2933.04	-0.00401522		3463.04	-0.00802725
283.2	0.00552474		813.22	-0.00287624		1343.21	0.00695603		1873.24	0.00624669		2403.24	-0.00139607		2933.24	-0.00482943		3463.24	-0.00802257
283.4	0.00559422		813.42	-0.00262771		1343.41	0.00660014		1873.44	0.00678084		2403.44	-0.00056488		2933.44	-0.00472931		3463.44	-0.00828255
283.6	0.00532296		813.62	-0.00216588		1343.61	0.00585505		1873.64	0.00663983		2403.64	-0.00045826		2933.64	-0.00527685		3463.64	-0.00784704
283.8	0.00465226		813.82	-0.00190546		1343.81	0.00575354		1873.84	0.00655102		2403.84	-0.00034926		2933.84	-0.00530482		3463.84	-0.00834298
284	0.00477514		814.02	-0.00201624		1344.01	0.00578031		1874.04	0.00681992		2404.04	-0.00015287		2934.04	-0.00634112		3464.04	-0.00857353
284.2	0.00464165		814.22	-0.00233715		1344.21	0.00558067		1874.24	0.00615502		2404.24	0.00035718		2934.24	-0.00644096		3464.24	-0.00859873
284.4	0.00414487		814.42	-0.00268033		1344.41	0.005873		1874.44	0.00653273		2404.44	0.00107154		2934.44	-0.00673256		3464.44	-0.00888215
284.6	0.00392755		814.62	-0.00223037		1344.61	0.00503414		1874.64	0.00611853		2404.64	0.00084105		2934.64	-0.00681756		3464.64	-0.00956787
284.8	0.00453055		814.82	-0.0015288		1344.81	0.00475709		1874.84	0.00645134		2404.84	-0.00059081		2934.84	-0.00739824		3464.84	-0.00913036
285	0.00494842		815.02	-0.00160543		1345.01	0.0040283		1875.04	0.00647838		2405.04	-0.0003355		2935.04	-0.00655949		3465.04	-0.0100649
285.2	0.00483167		815.22	-0.00175668		1345.21	0.0045329		1875.24	0.00675963		2405.24	-0.00031761		2935.24	-0.00660671		3465.24	-0.01100375
285.4	0.00502789		815.42	-0.00093884		1345.41	0.0052151		1875.44	0.00634062		2405.44	0.00055967		2935.44	-0.00584488		3465.44	-0.01078256
285.6	0.0060416		815.62	0.00030739		1345.61	0.00589344		1875.64	0.00684574		2405.64	0.00055837		2935.64	-0.00584122		3465.64	-0.010901
285.8	0.00603718		815.82	-0.00055127		1345.81	0.00641274		1875.84	0.00703472		2405.84	0.00049962		2935.84	-0.00509498		3465.84	-0.01123424
286	0.0062753		816.02	-0.00162156		1346.01	0.0066918		1876.04	0.0057827		2406.04	-0.00077786		2936.04	-0.00459956		3466.04	-0.01068573
286.2	0.00702761		816.22	-0.00142542		1346.21	0.006533		1876.24	0.00521534		2406.24	-0.00120984		2936.24	-0.00456016		3466.24	-0.01060758
286.4	0.00667669		816.42	-0.0011016		1346.41	0.00615411		1876.44	0.00467874		2406.44	-0.00130189		2936.44	-0.00297724		3466.44	-0.01046611
286.6	0.0068253		816.62	-0.00007527		1346.61	0.00678988		1876.64	0.00434834		2406.64	-0.00162912		2936.64	-0.00322701		3466.64	-0.0104802
286.8	0.00755837		816.82	0.00044837		1346.81	0.00710965		1876.84	0.00392414		2406.84	-0.00130049		2936.84	-0.00291311		3466.84	-0.01042989
287	0.00841833		817.02	-0.00019479		1347.01	0.00689796		1877.04	0.00411234		2407.04	-0.00134301		2937.04	-0.00273287		3467.04	-0.01073583
287.2	0.00862636		817.22	-0.00022273		1347.21	0.00617222		1877.24	0.00402197		2407.24	-0.00078084		2937.24	-0.00278968		3467.24	-0.01044534
287.4	0.00806452		817.42	-0.00079397		1347.41	0.00566898		1877.44	0.0042437		2407.44	-0.00053858		2937.44	-0.00219087		3467.44	-0.01045156
287.6	0.00677804		817.62	-0.00094672		1347.61	0.00532678		1877.64	0.0035228		2407.64	0.0004486		2937.64	-0.00318318		3467.64	-0.0097636
287.8	0.00652089		817.82	-0.00202291		1347.81	0.00516416		1877.84	0.00344277		2407.84	0.00120282		2937.84	-0.00361263		3467.84	-0.01041572
288	0.0058343		818.02	-0.00246252		1348.01	0.00559924		1878.04	0.00328385		2408.04	0.00161103		2938.04	-0.00460736		3468.04	-0.01048377
288.2	0.00546392		818.22	-0.0031236		1348.21	0.00504175		1878.24	0.00379871		2408.24	0.00178146		2938.24	-0.00446616		3468.24	-0.00993452
288.4	0.00510414		818.42	-0.00326707		1348.41	0.005741		1878.44	0.004106		2408.44	0.00165116		2938.44	-0.00551696		3468.44	-0.00980535
288.6	0.00514111		818.62	-0.00319582		1348.61	0.00568864		1878.64	0.00428902		2408.64	0.00152467		2938.64	-0.00656721		3468.64	-0.0092698
288.8	0.00522117		818.82	-0.00334952		1348.81	0.00594214		1878.84	0.00521611		2408.84	0.00143551		2938.84	-0.00731988		3468.84	-0.0098009
289	0.00516865		819.02	-0.00369211		1349.01	0.0061297		1879.04	0.00577533		2409.04	0.00236085		2939.04	-0.00754642		3469.04	-0.00975979
289.2	0.0051343		819.22	-0.00287595		1349.21	0.00730533		1879.24	0.00630081		2409.24	0.00270609		2939.24	-0.00759272		3469.24	-0.00941587
289.4	0.00501342		819.42	-0.00202253		1349.41	0.0074161		1879.44	0.00631169		2409.44	0.00285415		2939.44	-0.00693586		3469.44	-0.00877271
289.6	0.00514453		819.62	-0.0017933		1349.61	0.00764861		1879.64	0.00653715		2409.64	0.00236021		2939.64	-0.00680671		3469.64	-0.00871086
289.8	0.00471799		819.82	-0.00274073		1349.81	0.00764674		1879.84	0.0066752		2409.84	0.00145627		2939.84	-0.00630741		3469.84	-0.00830122
290	0.00494237		820.02	-0.00271634		1350.01	0.00782136		1880.04	0.00593194		2410.04	-0.00014174		2940.04	-0.00560243		3470.04	-0.0076333
290.2	0.00515963		820.22	-0.00172836		1350.21	0.0074075		1880.24	0.0059963		2410.24	0.0001011		2940.24	-0.00452848		3470.24	-0.00685104
290.4	0.00516603		820.42	-0.00057824		1350.41	0.00694461		1880.44	0.00640475		2410.44	0.0002452		2940.44	-0.00364928		3470.44	-0.00655229
290.6	0.00588753		820.62	0.00065822		1350.61	0.00679575		1880.64	0.00670408		2410.64	-0.00002125		2940.64	-0.00327646		3470.64	-0.00727967
290.8	0.00723467		820.82	-0.00006349		1350.81	0.00703657		1880.84	0.00577375		2410.84	0.00073981		2940.84	-0.00305877		3470.84	-0.00808234
291	0.00793275		821.02	-0.00040852		1351.01	0.0053683		1881.04	0.00578764		2411.04	0.00110627		2941.04	-0.00292644		3471.04	-0.00825288
291.2	0.00833619		821.22	-0.00055221		1351.21	0.00484243		1881.24	0.00530045		2411.24	0.00141022		2941.24	-0.00250472		3471.24	-0.00828837
291.4	0.00839381		821.42	-0.00042878		1351.41	0.0046705		1881.44	0.00505935		2411.44	0.00128249		2941.44	-0.00277943		3471.44	-0.00858508
291.6	0.00870662		821.62	-0.00052546		1351.61	0.00449706		1881.64	0.00434689		2411.64	0.00157127		2941.64	-0.00367457		3471.64	-0.00919966
291.8	0.00946327		821.82	-0.00128144		1351.81	0.00440031		1881.84	0.00520735		2411.84	-0.00002496		2941.84	-0.00377664		3471.84	-0.01049391
292	0.00986941		822.02	-0.0009306		1352.01	0.00462293		1882.04	0.00644759		2412.04	-0.0005124		2942.04	-0.00402723		3472.04	-0.0106094
292.2	0.00974301		822.22	-0.00115936		1352.21	0.00467845		1882.24	0.0068619		2412.24	-0.00028275		2942.24	-0.00497057		3472.24	-0.01062586
292.4	0.00994409		822.42	-0.00077575		1352.41	0.00530132		1882.44	0.00756453		2412.44	-0.00033958		2942.44	-0.0058931		3472.44	-0.01132647
292.6	0.00946145		822.62	-0.00101125		1352.61	0.00566726		1882.64	0.00804248		2412.64	-0.00036772		2942.64	-0.00644791		3472.64	-0.01195644
292.8	0.00879026		822.82	-0.00064107		1352.81	0.00496595		1882.84	0.00832121		2412.84	-0.00094725		2942.84	-0.00663855		3472.84	-0.01243812
293	0.00825312		823.02	-0.00112598		1353.01	0.00494654		1883.04	0.00871019		2413.04	-0.00135966		2943.04	-0.00790319		3473.04	-0.01218787
293.2	0.0077924		823.22	-0.00152893		1353.21	0.0055618		1883.24	0.00900825		2413.24	-0.0019186		2943.24	-0.00852108		3473.24	-0.01262249
293.4	0.00750766		823.42	-0.00221032		1353.41	0.00506584		1883.44	0.00912017		2413.44	-0.00221899		2943.44	-0.00882874		3473.44	-0.01336291
293.6	0.00667782		823.62	-0.00232124		1353.61	0.00578599		1883.64	0.00950511		2413.64	-0.0023974		2943.64	-0.00894598		3473.64	-0.01301637
293.8	0.00613548		823.82	-0.00306985		1353.81	0.0056339		1883.84	0.00997762		2413.84	-0.00219322		2943.84	-0.00874643		3473.84	-0.01248883
294	0.00555828		824.02	-0.00343325		1354.01	0.0060821		1884.04	0.00990002		2414.04	-0.00180438		2944.04	-0.00836578		3474.04	-0.01185727
294.2	0.0047748		824.22	-0.00354817		1354.21	0.00617553		1884.24	0.01056995		2414.24	-0.00058867		2944.24	-0.00736897		3474.24	-0.01071013
294.4	0.0041899		824.42	-0.00415406		1354.41	0.00667432		1884.44	0.00975167		2414.44	-0.00068339		2944.44	-0.00680149		3474.44	-0.01015842
294.6	0.00368382		824.62	-0.00451925		1354.61	0.00705546		1884.64	0.00864432		2414.64	-0.00001785		2944.64	-0.0062178		3474.64	-0.00967846
294.8	0.00478058		824.82	-0.00594152		1354.81	0.00710044		1884.84	0.00746851		2414.84	0.0008148		2944.84	-0.00593056		3474.84	-0.00949254
295	0.0052659		825.02	-0.00646508		1355.01	0.00620885		1885.04	0.00715582		2415.04	0.00096339		2945.04	-0.00513479		3475.04	-0.00915838
295.2	0.00525284		825.22	-0.00644343		1355.21	0.0068944		1885.24	0.00670339		2415.24	0.00044563		2945.24	-0.00459007		3475.24	-0.00854873
295.4	0.00512408		825.42	-0.00568105		1355.41	0.00725104		1885.44	0.00607898		2415.44	0.00022699		2945.44	-0.00407894		3475.44	-0.0085198
295.6	0.00618834		825.62	-0.00500765		1355.61	0.00764854		1885.64	0.00596075		2415.64	-0.00033175		2945.64	-0.00337832		3475.64	-0.00769222
295.8	0.00688427		825.82	-0.00506191		1355.81	0.00856428		1885.84	0.00669697		2415.84	-0.00035568		2945.84	-0.0024603		3475.84	-0.00853899
296	0.00705116		826.02	-0.00421675		1356.01	0.00890344		1886.04	0.00698177		2416.04	0.00071408		2946.04	-0.0020928		3476.04	-0.00847847
296.2	0.00673989		826.22	-0.00409424		1356.21	0.00891159		1886.24	0.00723418		2416.24	0.00059988		2946.24	-0.00198658		3476.24	-0.00853902
296.4	0.00759092		826.42	-0.00334439		1356.41	0.00877452		1886.44	0.00767525		2416.44	0.0001663		2946.44	-0.00154043		3476.44	-0.00915982
296.6	0.00745126		826.62	-0.00341243		1356.61	0.00878452		1886.64	0.00730555		2416.64	-0.00052867		2946.64	-0.00170219		3476.64	-0.00974826
296.8	0.00771581		826.82	-0.00296578		1356.81	0.00868587		1886.84	0.00727092		2416.84	-0.00121404		2946.84	-0.00127093		3476.84	-0.00957393
297	0.00745569		827.02	-0.00316067		1357.01	0.00886667		1887.04	0.00777208		2417.04	-0.0007179		2947.04	-0.00159203		3477.04	-0.01028198
297.2	0.00741189		827.22	-0.00273366		1357.21	0.00902589		1887.24	0.00720564		2417.24	-0.00112698		2947.24	-0.00202666		3477.24	-0.01114186
297.4	0.00775892		827.42	-0.00308339		1357.41	0.00857497		1887.44	0.00741552		2417.44	-0.00055394		2947.44	-0.00225105		3477.44	-0.0116546
297.6	0.00735358		827.62	-0.0026853		1357.61	0.00873025		1887.64	0.00754474		2417.64	-0.00046945		2947.64	-0.00231685		3477.64	-0.01222911
297.8	0.00688111		827.82	-0.00292654		1357.81	0.00822625		1887.84	0.00817907		2417.84	-0.00003632		2947.84	-0.00243686		3477.84	-0.01240938
298	0.00706555		828.02	-0.0028144		1358.01	0.00844837		1888.04	0.00768474		2418.04	-0.00003924		2948.04	-0.00244324		3478.04	-0.01207657
298.2	0.00738952		828.22	-0.00266758		1358.21	0.00876771		1888.24	0.00737234		2418.24	-0.00014333		2948.24	-0.00222925		3478.24	-0.01155702
298.4	0.00812092		828.42	-0.00333987		1358.41	0.00847258		1888.44	0.00679245		2418.44	0.00023956		2948.44	-0.00270714		3478.44	-0.01039284
298.6	0.00788673		828.62	-0.00288149		1358.61	0.00770084		1888.64	0.00670247		2418.64	0.00067983		2948.64	-0.00332947		3478.64	-0.01029021
298.8	0.00868242		828.82	-0.00304775		1358.81	0.00700373		1888.84	0.00716398		2418.84	0.00118798		2948.84	-0.00445729		3478.84	-0.00995881
299	0.00913178		829.02	-0.00348966		1359.01	0.00708099		1889.04	0.00716991		2419.04	0.00083525		2949.04	-0.00526167		3479.04	-0.00986152
299.2	0.00883014		829.22	-0.00298305		1359.21	0.00760895		1889.24	0.00716317		2419.24	0.00095657		2949.24	-0.0054862		3479.24	-0.00973291
299.4	0.00886238		829.42	-0.00267726		1359.41	0.00710034		1889.44	0.00669906		2419.44	0.00150495		2949.44	-0.00503809		3479.44	-0.00920782
299.6	0.00952371		829.62	-0.00317356		1359.61	0.00669712		1889.64	0.00700442		2419.64	0.00157145		2949.64	-0.00620944		3479.64	-0.00926347
299.8	0.00891161		829.82	-0.00353647		1359.81	0.0066611		1889.84	0.00668624		2419.84	0.00234143		2949.84	-0.00580544		3479.84	-0.00952992
300	0.00837484		830.02	-0.00315648		1360.01	0.0061308		1890.04	0.00638525		2420.04	0.0030118		2950.04	-0.00601519		3480.04	-0.00866044
300.2	0.00800878		830.22	-0.00265607		1360.21	0.00644041		1890.24	0.00653021		2420.24	0.00272279		2950.24	-0.00604817		3480.24	-0.0083697
300.4	0.00784161		830.42	-0.00228742		1360.41	0.00611048		1890.44	0.00621698		2420.44	0.00203652		2950.44	-0.00566193		3480.44	-0.00854672
300.6	0.00770274		830.62	-0.00245056		1360.61	0.00653679		1890.64	0.0066008		2420.64	0.0020724		2950.64	-0.0051977		3480.64	-0.00793831
300.8	0.00752085		830.82	-0.00266223		1360.81	0.00735606		1890.84	0.0064282		2420.84	0.00215363		2950.84	-0.00437328		3480.84	-0.00767225
301	0.00653353		831.02	-0.00277395		1361.01	0.00717485		1891.04	0.00672923		2421.04	0.00196928		2951.04	-0.00438459		3481.04	-0.00860232
301.2	0.00619028		831.22	-0.00216032		1361.21	0.00691689		1891.24	0.00625032		2421.24	0.00209673		2951.24	-0.00517374		3481.24	-0.00878285
301.4	0.00562506		831.42	-0.00277942		1361.41	0.00666571		1891.44	0.00670457		2421.44	0.0018725		2951.44	-0.00407224		3481.44	-0.0094451
301.6	0.0053039		831.62	-0.00090126		1361.61	0.00654722		1891.64	0.00664199		2421.64	0.00161096		2951.64	-0.00423435		3481.64	-0.01070786
301.8	0.00558663		831.82	-0.00011176		1361.81	0.00673521		1891.84	0.00691873		2421.84	0.00103693		2951.84	-0.00376317		3481.84	-0.01012493
302	0.006381		832.02	0.00047845		1362.01	0.00701844		1892.04	0.00645335		2422.04	0.00123626		2952.04	-0.00267056		3482.04	-0.00987229
302.2	0.00651393		832.22	0.00162595		1362.21	0.00722038		1892.24	0.00613779		2422.24	0.00065349		2952.24	-0.00261553		3482.24	-0.00857061
302.4	0.00739038		832.42	0.00141564		1362.41	0.00704544		1892.44	0.00620308		2422.44	0.00105615		2952.44	-0.00279873		3482.44	-0.00845255
302.6	0.00679784		832.62	0.0018653		1362.61	0.00722271		1892.64	0.00675856		2422.64	0.00088645		2952.64	-0.0035822		3482.64	-0.00850392
302.8	0.00762201		832.82	0.00089102		1362.81	0.007003		1892.84	0.00685477		2422.84	0.00038355		2952.84	-0.0042062		3482.84	-0.00811762
303	0.00855029		833.02	-0.00008679		1363.01	0.007287		1893.04	0.00592916		2423.04	0.00044913		2953.04	-0.00424127		3483.04	-0.00853758
303.2	0.00904838		833.22	-0.00100271		1363.21	0.00716606		1893.24	0.00513969		2423.24	0.00099976		2953.24	-0.00464156		3483.24	-0.00841251
303.4	0.00961355		833.42	-0.0011409		1363.41	0.00635361		1893.44	0.00404918		2423.44	0.00079547		2953.44	-0.00468391		3483.44	-0.00750566
303.6	0.00918256		833.62	-0.00177622		1363.61	0.00631131		1893.64	0.00343528		2423.64	0.00127885		2953.64	-0.00574972		3483.64	-0.00742153
303.8	0.00879618		833.82	-0.00213318		1363.81	0.00649349		1893.84	0.00232799		2423.84	0.00118426		2953.84	-0.00502451		3483.84	-0.00733968
304	0.00959535		834.02	-0.00258252		1364.01	0.00665388		1894.04	0.00284402		2424.04	0.00168913		2954.04	-0.00553333		3484.04	-0.00752633
304.2	0.00974645		834.22	-0.00221591		1364.21	0.00750383		1894.24	0.00347503		2424.24	0.00167293		2954.24	-0.0056175		3484.24	-0.00829118
304.4	0.00988725		834.42	-0.00363335		1364.41	0.00714726		1894.44	0.00416903		2424.44	0.00168699		2954.44	-0.00575267		3484.44	-0.0090019
304.6	0.01032827		834.62	-0.00410715		1364.61	0.00830673		1894.64	0.00424188		2424.64	0.00189332		2954.64	-0.0058063		3484.64	-0.00885766
304.8	0.01037734		834.82	-0.00416156		1364.81	0.00867948		1894.84	0.00441929		2424.84	0.001765		2954.84	-0.00492342		3484.84	-0.00967733
305	0.00964203		835.02	-0.00362451		1365.01	0.00895175		1895.04	0.00457606		2425.04	0.00134366		2955.04	-0.00404535		3485.04	-0.01040092
305.2	0.00881901		835.22	-0.00274914		1365.21	0.00914475		1895.24	0.00483725		2425.24	0.00238595		2955.24	-0.00349431		3485.24	-0.01055575
305.4	0.00895709		835.42	-0.0029826		1365.41	0.00905009		1895.44	0.00566917		2425.44	0.00250544		2955.44	-0.00269066		3485.44	-0.01151649
305.6	0.00853694		835.62	-0.0020291		1365.61	0.00914107		1895.64	0.00653602		2425.64	0.00244653		2955.64	-0.00307196		3485.64	-0.01138358
305.8	0.00917988		835.82	-0.00199784		1365.81	0.00836324		1895.84	0.00658949		2425.84	0.00196421		2955.84	-0.00211532		3485.84	-0.01070658
306	0.00878548		836.02	-0.00146518		1366.01	0.00818943		1896.04	0.00656982		2426.04	0.00199218		2956.04	-0.00175721		3486.04	-0.01055248
306.2	0.00842232		836.22	-0.00083264		1366.21	0.00810521		1896.24	0.00659947		2426.24	0.00198693		2956.24	-0.00264144		3486.24	-0.00969104
306.4	0.00826702		836.42	-0.00141414		1366.41	0.00849524		1896.44	0.00702047		2426.44	0.00217602		2956.44	-0.00256593		3486.44	-0.01023694
306.6	0.0082872		836.62	-0.00167736		1366.61	0.00863019		1896.64	0.00716039		2426.64	0.00210596		2956.64	-0.00349912		3486.64	-0.00931623
306.8	0.00920068		836.82	-0.00175795		1366.81	0.00769919		1896.84	0.00706597		2426.84	0.00179495		2956.84	-0.00424981		3486.84	-0.00861197
307	0.00880228		837.02	-0.00137019		1367.01	0.00773019		1897.04	0.00648897		2427.04	0.00192472		2957.04	-0.00528702		3487.04	-0.00881287
307.2	0.00916797		837.22	-0.00097247		1367.21	0.00685304		1897.24	0.00598601		2427.24	0.00226568		2957.24	-0.00639276		3487.24	-0.00833218
307.4	0.00841468		837.42	-0.00067882		1367.41	0.00665706		1897.44	0.00628133		2427.44	0.00197468		2957.44	-0.00617492		3487.44	-0.00779985
307.6	0.00750835		837.62	-0.00094058		1367.61	0.00663143		1897.64	0.00710313		2427.64	0.0020718		2957.64	-0.00695382		3487.64	-0.00865016
307.8	0.00777007		837.82	-0.00123746		1367.81	0.00622151		1897.84	0.00759995		2427.84	0.00181397		2957.84	-0.00718315		3487.84	-0.01008741
308	0.00778031		838.02	-0.00083507		1368.01	0.00638501		1898.04	0.00801031		2428.04	0.00163134		2958.04	-0.00834193		3488.04	-0.01026095
308.2	0.00692784		838.22	-0.00032423		1368.21	0.0068708		1898.24	0.0084479		2428.24	0.00086967		2958.24	-0.00881735		3488.24	-0.01103051
308.4	0.00617537		838.42	-0.00021876		1368.41	0.00625788		1898.44	0.00877039		2428.44	0.00037147		2958.44	-0.00839155		3488.44	-0.01122541
308.6	0.00611337		838.62	0.00017189		1368.61	0.0069433		1898.64	0.00857765		2428.64	0.00000592		2958.64	-0.00731052		3488.64	-0.01181592
308.8	0.00629316		838.82	0.00078683		1368.81	0.00715558		1898.84	0.00890873		2428.84	0.00021418		2958.84	-0.00673973		3488.84	-0.01219103
309	0.00548041		839.02	0.00053752		1369.01	0.00785581		1899.04	0.00918084		2429.04	0.00032856		2959.04	-0.00621208		3489.04	-0.01268599
309.2	0.00532129		839.22	0.00042603		1369.21	0.00781757		1899.24	0.00972595		2429.24	0.00135037		2959.24	-0.00549617		3489.24	-0.01334655
309.4	0.00582715		839.42	0.00030209		1369.41	0.00685485		1899.44	0.01022951		2429.44	0.00139898		2959.44	-0.00548176		3489.44	-0.01360884
309.6	0.00566637		839.62	0.00048138		1369.61	0.00723856		1899.64	0.00929932		2429.64	0.00095395		2959.64	-0.00480651		3489.64	-0.01330355
309.8	0.00694219		839.82	0.00005197		1369.81	0.00627932		1899.84	0.00800796		2429.84	0.00143043		2959.84	-0.00447188		3489.84	-0.01351545
310	0.0063032		840.02	-0.00017117		1370.01	0.00643976		1900.04	0.00795102		2430.04	0.00158866		2960.04	-0.00402414		3490.04	-0.01396168
310.2	0.00627642		840.22	-0.00063736		1370.21	0.00632633		1900.24	0.0077268		2430.24	0.00290984		2960.24	-0.00392686		3490.24	-0.01397991
310.4	0.00677128		840.42	-0.00044161		1370.41	0.00746966		1900.44	0.00771884		2430.44	0.002699		2960.44	-0.00325789		3490.44	-0.01322979
310.6	0.00811841		840.62	-0.00062026		1370.61	0.00730392		1900.64	0.00717162		2430.64	0.00272387		2960.64	-0.00425737		3490.64	-0.01278739
310.8	0.00811896		840.82	-0.00084209		1370.81	0.00730625		1900.84	0.00779402		2430.84	0.00214264		2960.84	-0.00425026		3490.84	-0.01308865
311	0.00706177		841.02	-0.00013833		1371.01	0.00770923		1901.04	0.00752418		2431.04	0.00216731		2961.04	-0.00450957		3491.04	-0.01271635
311.2	0.00777326		841.22	0.00020151		1371.21	0.00856066		1901.24	0.00805438		2431.24	0.00203338		2961.24	-0.00474674		3491.24	-0.01162476
311.4	0.00794236		841.42	-0.00096397		1371.41	0.00948649		1901.44	0.00877244		2431.44	0.00143241		2961.44	-0.00481521		3491.44	-0.0111596
311.6	0.00840766		841.62	-0.00108607		1371.61	0.00872683		1901.64	0.00898409		2431.64	0.0014285		2961.64	-0.00540945		3491.64	-0.01123604
311.8	0.0082297		841.82	-0.00091453		1371.81	0.00840483		1901.84	0.00783404		2431.84	0.00149145		2961.84	-0.00571184		3491.84	-0.01087347
312	0.00758377		842.02	-0.00077077		1372.01	0.00882845		1902.04	0.00704812		2432.04	0.000299		2962.04	-0.00580158		3492.04	-0.01023855
312.2	0.00749097		842.22	-0.00075924		1372.21	0.00901428		1902.24	0.00730846		2432.24	0.00049836		2962.24	-0.00525972		3492.24	-0.01016438
312.4	0.00694909		842.42	-0.00069987		1372.41	0.00826736		1902.44	0.0065057		2432.44	0.0003595		2962.44	-0.00454562		3492.44	-0.00966393
312.6	0.00710984		842.62	-0.00127866		1372.61	0.00859798		1902.64	0.00677838		2432.64	-0.00024751		2962.64	-0.00490151		3492.64	-0.0098864
312.8	0.00725262		842.82	-0.00065107		1372.81	0.00836511		1902.84	0.00668753		2432.84	0.00000598		2962.84	-0.0055049		3492.84	-0.00915748
313	0.00641665		843.02	-0.00177928		1373.01	0.00862375		1903.04	0.00657467		2433.04	0.00082258		2963.04	-0.00521688		3493.04	-0.00871356
313.2	0.00671938		843.22	-0.00193692		1373.21	0.00789267		1903.24	0.00586983		2433.24	0.00079146		2963.24	-0.00493157		3493.24	-0.00938416
313.4	0.00664999		843.42	-0.00187351		1373.41	0.00756507		1903.44	0.00542122		2433.44	0.0009126		2963.44	-0.00565194		3493.44	-0.00999984
313.6	0.00672563		843.62	-0.00278911		1373.61	0.00723487		1903.64	0.00494841		2433.64	0.00144854		2963.64	-0.00510677		3493.64	-0.01033552
313.8	0.00655356		843.82	-0.00370698		1373.81	0.00631204		1903.84	0.00487303		2433.84	0.00205093		2963.84	-0.00456686		3493.84	-0.01052108
314	0.00603345		844.02	-0.00360322		1374.01	0.00627164		1904.04	0.00487132		2434.04	0.00229192		2964.04	-0.00463735		3494.04	-0.01081558
314.2	0.00646829		844.22	-0.00352647		1374.21	0.00622656		1904.24	0.0048431		2434.24	0.00291122		2964.24	-0.00497077		3494.24	-0.01022386
314.4	0.00732263		844.42	-0.00330769		1374.41	0.00697082		1904.44	0.00504713		2434.44	0.00185749		2964.44	-0.00500394		3494.44	-0.00948515
314.6	0.00748183		844.62	-0.00457247		1374.61	0.00711916		1904.64	0.00491337		2434.64	0.00115692		2964.64	-0.00527973		3494.64	-0.00987495
314.8	0.00694713		844.82	-0.00500658		1374.81	0.00773194		1904.84	0.00613426		2434.84	0.00068449		2964.84	-0.00480719		3494.84	-0.01074258
315	0.00674666		845.02	-0.00397849		1375.01	0.00814574		1905.04	0.00573666		2435.04	0.00042782		2965.04	-0.00509269		3495.04	-0.01065493
315.2	0.00775141		845.22	-0.00398491		1375.21	0.00848753		1905.24	0.00663585		2435.24	0.00050855		2965.24	-0.00480558		3495.24	-0.01063928
315.4	0.00724125		845.42	-0.00367058		1375.41	0.00716637		1905.44	0.00598023		2435.44	0.00057639		2965.44	-0.00482632		3495.44	-0.01024269
315.6	0.00656615		845.62	-0.0020926		1375.61	0.0058175		1905.64	0.005845		2435.64	0.001562		2965.64	-0.00463708		3495.64	-0.00986249
315.8	0.00592968		845.82	-0.00159202		1375.81	0.00613705		1905.84	0.00472134		2435.84	0.00135774		2965.84	-0.00354048		3495.84	-0.01098404
316	0.00532691		846.02	-0.0016456		1376.01	0.00622092		1906.04	0.004685		2436.04	0.00067303		2966.04	-0.00275407		3496.04	-0.01124615
316.2	0.00517836		846.22	-0.00125972		1376.21	0.00646312		1906.24	0.00544456		2436.24	0.00066756		2966.24	-0.00342851		3496.24	-0.01152699
316.4	0.00465231		846.42	-0.00101108		1376.41	0.00602091		1906.44	0.00569117		2436.44	0.00030311		2966.44	-0.0045729		3496.44	-0.01169209
316.6	0.00413162		846.62	-0.00116563		1376.61	0.00609066		1906.64	0.00676056		2436.64	0.00024034		2966.64	-0.0049361		3496.64	-0.0113989
316.8	0.00362296		846.82	-0.00077717		1376.81	0.00632906		1906.84	0.00707583		2436.84	0.00103271		2966.84	-0.00531973		3496.84	-0.01083156
317	0.00282658		847.02	-0.00131653		1377.01	0.00637613		1907.04	0.00791392		2437.04	0.0015792		2967.04	-0.00538185		3497.04	-0.01134152
317.2	0.00318308		847.22	-0.00111466		1377.21	0.00564099		1907.24	0.00781824		2437.24	0.00166922		2967.24	-0.00557153		3497.24	-0.01198789
317.4	0.0032176		847.42	-0.00087968		1377.41	0.00553079		1907.44	0.00860062		2437.44	0.00157016		2967.44	-0.00575931		3497.44	-0.01268307
317.6	0.00336859		847.62	-0.00128018		1377.61	0.00528117		1907.64	0.00787317		2437.64	0.00184571		2967.64	-0.00646577		3497.64	-0.013
317.8	0.00293039		847.82	-0.00090721		1377.81	0.00585038		1907.84	0.00670961		2437.84	0.00198225		2967.84	-0.0067075		3497.84	-0.01192714
318	0.00358999		848.02	-0.00101668		1378.01	0.00607634		1908.04	0.00656466		2438.04	0.001237		2968.04	-0.00750975		3498.04	-0.01141688
318.2	0.00341914		848.22	-0.0019247		1378.21	0.00687203		1908.24	0.00626792		2438.24	0.00119264		2968.24	-0.00704247		3498.24	-0.01064739
318.4	0.00388139		848.42	-0.00192349		1378.41	0.00730784		1908.44	0.00605998		2438.44	0.00031432		2968.44	-0.00674822		3498.44	-0.00933519
318.6	0.00357519		848.62	-0.00302128		1378.61	0.00720336		1908.64	0.00549392		2438.64	0.00027794		2968.64	-0.00584871		3498.64	-0.0087584
318.8	0.00332503		848.82	-0.00293789		1378.81	0.00674372		1908.84	0.00503857		2438.84	0.00070275		2968.84	-0.00518216		3498.84	-0.00868786
319	0.00391059		849.02	-0.00199891		1379.01	0.0064779		1909.04	0.00371959		2439.04	0.00085986		2969.04	-0.00469011		3499.04	-0.00775483
319.2	0.00415694		849.22	-0.00190871		1379.21	0.00627661		1909.24	0.00396566		2439.24	0.00159525		2969.24	-0.003772		3499.24	-0.00747757
319.4	0.00417781		849.42	-0.00150446		1379.41	0.00579248		1909.44	0.00289865		2439.44	0.00120177		2969.44	-0.00372738		3499.44	-0.0072633
319.6	0.0048073		849.62	-0.00132774		1379.61	0.0058103		1909.64	0.00254699		2439.64	0.00186118		2969.64	-0.00250286		3499.64	-0.00825348
319.8	0.0053755		849.82	-0.00151926		1379.81	0.00664964		1909.84	0.00199435		2439.84	0.00180774		2969.84	-0.00190342		3499.84	-0.00999164
320	0.00542052		850.02	-0.00156477		1380.01	0.00651276		1910.04	0.0024883		2440.04	0.00125557		2970.04	-0.00169593		3500.04	-0.00975966
320.2	0.00608927		850.22	-0.00144955		1380.21	0.00695412		1910.24	0.0038195		2440.24	0.00171246		2970.24	-0.00226272		3500.24	-0.00985978
320.4	0.00598361		850.42	-0.00192471		1380.41	0.00720671		1910.44	0.00378797		2440.44	0.00162505		2970.44	-0.00196811		3500.44	-0.00983256
320.6	0.00636152		850.62	-0.00249539		1380.61	0.00693767		1910.64	0.00430784		2440.64	0.00129866		2970.64	-0.00071633		3500.64	-0.01012869
320.8	0.00703594		850.82	-0.00221536		1380.81	0.00752538		1910.84	0.00553994		2440.84	0.00167302		2970.84	-0.00033289		3500.84	-0.01060043
321	0.0069904		851.02	-0.00240193		1381.01	0.0073516		1911.04	0.00592082		2441.04	0.00226721		2971.04	-0.00001652		3501.04	-0.01176135
321.2	0.00723668		851.22	-0.00254517		1381.21	0.00669851		1911.24	0.00533321		2441.24	0.00275685		2971.24	-0.00127401		3501.24	-0.01194566
321.4	0.00639533		851.42	-0.00290759		1381.41	0.00695428		1911.44	0.00573976		2441.44	0.00225552		2971.44	-0.00195069		3501.44	-0.01334689
321.6	0.00646226		851.62	-0.00324236		1381.61	0.00744649		1911.64	0.00523698		2441.64	0.00274842		2971.64	-0.00232876		3501.64	-0.01309724
321.8	0.00589223		851.82	-0.00353113		1381.81	0.0075117		1911.84	0.00560236		2441.84	0.00317734		2971.84	-0.00203791		3501.84	-0.01253172
322	0.00568607		852.02	-0.00366708		1382.01	0.0073703		1912.04	0.00558472		2442.04	0.00303159		2972.04	-0.00259122		3502.04	-0.01206218
322.2	0.00524467		852.22	-0.00482972		1382.21	0.00747341		1912.24	0.00502824		2442.24	0.00336945		2972.24	-0.00231589		3502.24	-0.01117617
322.4	0.00546365		852.42	-0.00458935		1382.41	0.00737949		1912.44	0.00493517		2442.44	0.00269418		2972.44	-0.00293771		3502.44	-0.00998046
322.6	0.00454086		852.62	-0.00515852		1382.61	0.00726991		1912.64	0.00408214		2442.64	0.00291221		2972.64	-0.00280637		3502.64	-0.00937499
322.8	0.00420802		852.82	-0.00468031		1382.81	0.00741525		1912.84	0.00454368		2442.84	0.00274841		2972.84	-0.00227924		3502.84	-0.00958562
323	0.00489097		853.02	-0.00442297		1383.01	0.00768092		1913.04	0.0043653		2443.04	0.00268273		2973.04	-0.00197502		3503.04	-0.00968032
323.2	0.0051954		853.22	-0.00446414		1383.21	0.00747534		1913.24	0.00395361		2443.24	0.00211373		2973.24	-0.00192155		3503.24	-0.01070983
323.4	0.00532373		853.42	-0.00460378		1383.41	0.00714395		1913.44	0.00410359		2443.44	0.00176234		2973.44	-0.00170175		3503.44	-0.01179853
323.6	0.00617083		853.62	-0.00457261		1383.61	0.007286		1913.64	0.00345723		2443.64	0.00182986		2973.64	-0.00155465		3503.64	-0.012617
323.8	0.00689237		853.82	-0.00453858		1383.81	0.00724409		1913.84	0.00311204		2443.84	0.00064831		2973.84	-0.00257261		3503.84	-0.01307731
324	0.00699687		854.02	-0.00384933		1384.01	0.00708386		1914.04	0.00285673		2444.04	-0.00061951		2974.04	-0.00269111		3504.04	-0.0128018
324.2	0.00726845		854.22	-0.00345297		1384.21	0.00723737		1914.24	0.00406116		2444.24	-0.00149513		2974.24	-0.00273951		3504.24	-0.01248015
324.4	0.00704542		854.42	-0.00307685		1384.41	0.00731539		1914.44	0.00469159		2444.44	-0.00245796		2974.44	-0.00254437		3504.44	-0.01238439
324.6	0.00813035		854.62	-0.00278152		1384.61	0.0070906		1914.64	0.00517018		2444.64	-0.00233015		2974.64	-0.00312379		3504.64	-0.01280447
324.8	0.00827721		854.82	-0.00232313		1384.81	0.00714272		1914.84	0.00582122		2444.84	-0.00225501		2974.84	-0.00331515		3504.84	-0.01277619
325	0.00787852		855.02	-0.00188422		1385.01	0.00709888		1915.04	0.00523929		2445.04	-0.00223033		2975.04	-0.00388597		3505.04	-0.01299988
325.2	0.00765134		855.22	-0.00136207		1385.21	0.00750606		1915.24	0.00552946		2445.24	-0.00204905		2975.24	-0.00399763		3505.24	-0.01258566
325.4	0.00740789		855.42	-0.00202395		1385.41	0.0075519		1915.44	0.00645767		2445.44	-0.00217653		2975.44	-0.00396713		3505.44	-0.01214601
325.6	0.0083237		855.62	-0.00155514		1385.61	0.0074866		1915.64	0.00676751		2445.64	-0.00087387		2975.64	-0.00357893		3505.64	-0.01122643
325.8	0.00795242		855.82	-0.00107337		1385.81	0.00784816		1915.84	0.00697559		2445.84	-0.00066102		2975.84	-0.00378924		3505.84	-0.01119104
326	0.00848434		856.02	-0.00061914		1386.01	0.00846326		1916.04	0.00687429		2446.04	-0.00100121		2976.04	-0.00426558		3506.04	-0.01013536
326.2	0.00821096		856.22	-0.00096763		1386.21	0.00908171		1916.24	0.00744817		2446.24	-0.0013268		2976.24	-0.00388406		3506.24	-0.00989084
326.4	0.00841432		856.42	-0.0005238		1386.41	0.00979673		1916.44	0.00725994		2446.44	-0.00162158		2976.44	-0.00383475		3506.44	-0.00924288
326.6	0.00773656		856.62	-0.00010463		1386.61	0.00961473		1916.64	0.0075759		2446.64	-0.00151987		2976.64	-0.00284783		3506.64	-0.00859713
326.8	0.00790115		856.82	-0.00007585		1386.81	0.00987546		1916.84	0.00788049		2446.84	-0.00107302		2976.84	-0.00219206		3506.84	-0.00894804
327	0.00802954		857.02	-0.00068667		1387.01	0.00978744		1917.04	0.00692081		2447.04	-0.00097949		2977.04	-0.0025239		3507.04	-0.00850911
327.2	0.00819983		857.22	-0.00088369		1387.21	0.00890409		1917.24	0.00692685		2447.24	-0.00082674		2977.24	-0.00262702		3507.24	-0.00957855
327.4	0.00764931		857.42	-0.00169859		1387.41	0.0088572		1917.44	0.00729322		2447.44	-0.00026227		2977.44	-0.00294968		3507.44	-0.01029014
327.6	0.0079004		857.62	-0.00193817		1387.61	0.00922715		1917.64	0.00662151		2447.64	0.00015496		2977.64	-0.00363185		3507.64	-0.01119791
327.8	0.00729624		857.82	-0.00180645		1387.81	0.00883449		1917.84	0.00641259		2447.84	-0.00035286		2977.84	-0.00409307		3507.84	-0.01212003
328	0.00755495		858.02	-0.00174033		1388.01	0.00821744		1918.04	0.0062079		2448.04	0.00023937		2978.04	-0.00480739		3508.04	-0.01214054
328.2	0.00703776		858.22	-0.00267004		1388.21	0.00719343		1918.24	0.00682858		2448.24	0.0009056		2978.24	-0.00406573		3508.24	-0.01193822
328.4	0.00682468		858.42	-0.00300063		1388.41	0.00685057		1918.44	0.00627803		2448.44	0.00171372		2978.44	-0.00467239		3508.44	-0.01252089
328.6	0.00688769		858.62	-0.00378753		1388.61	0.00633892		1918.64	0.00581849		2448.64	0.00226082		2978.64	-0.00538812		3508.64	-0.01240738
328.8	0.00720856		858.82	-0.00451514		1388.81	0.00581697		1918.84	0.00563427		2448.84	0.00249461		2978.84	-0.00459637		3508.84	-0.01235331
329	0.00734372		859.02	-0.00504943		1389.01	0.00612422		1919.04	0.00496972		2449.04	0.00278754		2979.04	-0.00455395		3509.04	-0.01229746
329.2	0.0074331		859.22	-0.00562688		1389.21	0.00652328		1919.24	0.0048772		2449.24	0.00352943		2979.24	-0.00478272		3509.24	-0.01112362
329.4	0.00768391		859.42	-0.00637839		1389.41	0.00519636		1919.44	0.00544012		2449.44	0.00337218		2979.44	-0.00531319		3509.44	-0.01149176
329.6	0.00865972		859.62	-0.00615595		1389.61	0.00529974		1919.64	0.0056777		2449.64	0.00369468		2979.64	-0.00537752		3509.64	-0.01194668
329.8	0.00942865		859.82	-0.00618522		1389.81	0.00524118		1919.84	0.00584457		2449.84	0.00215122		2979.84	-0.00512234		3509.84	-0.01201304
330	0.00970787		860.02	-0.00568749		1390.01	0.00530213		1920.04	0.00622055		2450.04	0.00111882		2980.04	-0.00555825		3510.04	-0.0112259
330.2	0.00883925		860.22	-0.00551826		1390.21	0.00585218		1920.24	0.0060646		2450.24	0.00042218		2980.24	-0.00580834		3510.24	-0.01039712
330.4	0.00961871		860.42	-0.00544262		1390.41	0.00594925		1920.44	0.00568485		2450.44	0.0002297		2980.44	-0.00611542		3510.44	-0.00952274
330.6	0.00915857		860.62	-0.00549671		1390.61	0.00602128		1920.64	0.00537602		2450.64	0.00028116		2980.64	-0.00633129		3510.64	-0.00879093
330.8	0.00938962		860.82	-0.00498152		1390.81	0.00659947		1920.84	0.00472777		2450.84	0.00040428		2980.84	-0.00694523		3510.84	-0.00888411
331	0.00911013		861.02	-0.00428804		1391.01	0.0062799		1921.04	0.00476067		2451.04	0.00030665		2981.04	-0.00693537		3511.04	-0.00907573
331.2	0.00840123		861.22	-0.00392517		1391.21	0.00563789		1921.24	0.00539227		2451.24	0.00110352		2981.24	-0.00683545		3511.24	-0.00955074
331.4	0.00802856		861.42	-0.00324565		1391.41	0.00643962		1921.44	0.00479037		2451.44	0.00103497		2981.44	-0.00623018		3511.44	-0.00971657
331.6	0.00803158		861.62	-0.00222347		1391.61	0.00694022		1921.64	0.00402805		2451.64	0.00129221		2981.64	-0.00593141		3511.64	-0.01061986
331.8	0.00812713		861.82	-0.00153401		1391.81	0.00692061		1921.84	0.00317472		2451.84	0.00065235		2981.84	-0.0048779		3511.84	-0.01127624
332	0.00840636		862.02	-0.00143306		1392.01	0.00617253		1922.04	0.0031666		2452.04	0.00094729		2982.04	-0.00478312		3512.04	-0.01176093
332.2	0.0074308		862.22	-0.0015896		1392.21	0.00681272		1922.24	0.00331639		2452.24	0.0017102		2982.24	-0.00385728		3512.24	-0.01159086
332.4	0.00753429		862.42	-0.00171666		1392.41	0.0067058		1922.44	0.00308354		2452.44	0.00130245		2982.44	-0.00433963		3512.44	-0.01160219
332.6	0.0064009		862.62	-0.00181341		1392.61	0.00656218		1922.64	0.00400323		2452.64	0.00152748		2982.64	-0.00400879		3512.64	-0.01158072
332.8	0.00665351		862.82	-0.00216441		1392.81	0.00644529		1922.84	0.00367079		2452.84	0.0008804		2982.84	-0.00364756		3512.84	-0.01208763
333	0.0065889		863.02	-0.002988		1393.01	0.00618724		1923.04	0.00327235		2453.04	0.0007021		2983.04	-0.00305477		3513.04	-0.0129354
333.2	0.00633878		863.22	-0.00248341		1393.21	0.00608972		1923.24	0.00397748		2453.24	0.00002638		2983.24	-0.00372319		3513.24	-0.01295484
333.4	0.00627318		863.42	-0.00276132		1393.41	0.00568821		1923.44	0.00463019		2453.44	-0.00083493		2983.44	-0.00362818		3513.44	-0.01406082
333.6	0.00691978		863.62	-0.00319422		1393.61	0.00583408		1923.64	0.00423578		2453.64	-0.00132124		2983.64	-0.00337542		3513.64	-0.01372935
333.8	0.00628369		863.82	-0.00403345		1393.81	0.00587925		1923.84	0.00490636		2453.84	-0.00201091		2983.84	-0.00280129		3513.84	-0.01366801
334	0.00535329		864.02	-0.00452257		1394.01	0.00661564		1924.04	0.00503153		2454.04	-0.00173763		2984.04	-0.00254251		3514.04	-0.01319402
334.2	0.00494088		864.22	-0.0058584		1394.21	0.00670166		1924.24	0.00503251		2454.24	-0.00095892		2984.24	-0.00293109		3514.24	-0.01319781
334.4	0.00494398		864.42	-0.00587406		1394.41	0.00696671		1924.44	0.00445934		2454.44	-0.00017536		2984.44	-0.00263922		3514.44	-0.01323643
334.6	0.00565403		864.62	-0.00614348		1394.61	0.00739623		1924.64	0.00359694		2454.64	-0.00057745		2984.64	-0.00267228		3514.64	-0.01272073
334.8	0.00570849		864.82	-0.00575583		1394.81	0.00767872		1924.84	0.00372182		2454.84	0.00013699		2984.84	-0.00285037		3514.84	-0.01259546
335	0.00555814		865.02	-0.00543052		1395.01	0.00693366		1925.04	0.0039883		2455.04	0.00040372		2985.04	-0.00256153		3515.04	-0.01193761
335.2	0.0053379		865.22	-0.00525475		1395.21	0.00770665		1925.24	0.00322549		2455.24	0.00120181		2985.24	-0.00274313		3515.24	-0.01175665
335.4	0.00668381		865.42	-0.0042054		1395.41	0.00843253		1925.44	0.0022953		2455.44	0.00104413		2985.44	-0.0034912		3515.44	-0.01223988
335.6	0.00679014		865.62	-0.00338976		1395.61	0.00840393		1925.64	0.00228977		2455.64	0.00153991		2985.64	-0.00472588		3515.64	-0.01267066
335.8	0.00696108		865.82	-0.00312134		1395.81	0.00848209		1925.84	0.00233992		2455.84	0.00214139		2985.84	-0.00524965		3515.84	-0.01314215
336	0.00610279		866.02	-0.0030959		1396.01	0.00770498		1926.04	0.0030018		2456.04	0.0029142		2986.04	-0.00583515		3516.04	-0.01288205
336.2	0.00580727		866.22	-0.00201014		1396.21	0.00888086		1926.24	0.00257658		2456.24	0.00382631		2986.24	-0.00577594		3516.24	-0.01234683
336.4	0.00584039		866.42	-0.00121144		1396.41	0.00875187		1926.44	0.0032052		2456.44	0.00325703		2986.44	-0.00633897		3516.44	-0.01216309
336.6	0.00486793		866.62	-0.00009153		1396.61	0.00982499		1926.64	0.00466143		2456.64	0.00310199		2986.64	-0.00631562		3516.64	-0.01243738
336.8	0.00564431		866.82	-0.000833		1396.81	0.01001222		1926.84	0.00459924		2456.84	0.00211414		2986.84	-0.00621005		3516.84	-0.01224691
337	0.00589415		867.02	-0.00027712		1397.01	0.00977192		1927.04	0.00544792		2457.04	0.00259903		2987.04	-0.00561711		3517.04	-0.01226853
337.2	0.00585179		867.22	0.0009411		1397.21	0.01035178		1927.24	0.00631133		2457.24	0.00202735		2987.24	-0.00632059		3517.24	-0.01143469
337.4	0.00625441		867.42	0.00029016		1397.41	0.01037187		1927.44	0.0059901		2457.44	0.00201398		2987.44	-0.00572113		3517.44	-0.01160228
337.6	0.00537242		867.62	-0.00025369		1397.61	0.00985557		1927.64	0.00553744		2457.64	0.00167779		2987.64	-0.0045085		3517.64	-0.0113664
337.8	0.00530977		867.82	-0.00155117		1397.81	0.00986853		1927.84	0.00711538		2457.84	0.00180128		2987.84	-0.00389328		3517.84	-0.01112289
338	0.00529436		868.02	-0.00165343		1398.01	0.01006103		1928.04	0.00704257		2458.04	0.00198791		2988.04	-0.0024286		3518.04	-0.01071384
338.2	0.00548593		868.22	-0.00187149		1398.21	0.00986951		1928.24	0.00665375		2458.24	0.00162396		2988.24	-0.00276008		3518.24	-0.01089795
338.4	0.00535474		868.42	-0.00118021		1398.41	0.01023996		1928.44	0.00613018		2458.44	0.00096965		2988.44	-0.00210473		3518.44	-0.01040741
338.6	0.00586256		868.62	-0.00204415		1398.61	0.00986132		1928.64	0.00575186		2458.64	0.00059577		2988.64	-0.00255003		3518.64	-0.01064051
338.8	0.00533132		868.82	-0.00237935		1398.81	0.00949862		1928.84	0.00573738		2458.84	0.00180628		2988.84	-0.00389195		3518.84	-0.01075605
339	0.00554591		869.02	-0.00274064		1399.01	0.00922484		1929.04	0.00517908		2459.04	0.00136455		2989.04	-0.00414593		3519.04	-0.0116143
339.2	0.00530701		869.22	-0.00348361		1399.21	0.00996581		1929.24	0.00427401		2459.24	0.00169878		2989.24	-0.00555551		3519.24	-0.0123503
339.4	0.00533667		869.42	-0.00338539		1399.41	0.00879969		1929.44	0.00427209		2459.44	0.00172062		2989.44	-0.00720172		3519.44	-0.0127889
339.6	0.00406372		869.62	-0.00407355		1399.61	0.00802941		1929.64	0.0033846		2459.64	0.00268535		2989.64	-0.00738512		3519.64	-0.01328979
339.8	0.00409661		869.82	-0.00412912		1399.81	0.00780579		1929.84	0.0028568		2459.84	0.00371806		2989.84	-0.00763158		3519.84	-0.01367157
340	0.00411553		870.02	-0.0038789		1400.01	0.00758924		1930.04	0.00230376		2460.04	0.00384258		2990.04	-0.00682436		3520.04	-0.01410198
340.2	0.0054864		870.22	-0.0027251		1400.21	0.00791068		1930.24	0.00225769		2460.24	0.00426833		2990.24	-0.00639714		3520.24	-0.01395158
340.4	0.00641872		870.42	-0.00306186		1400.41	0.00799847		1930.44	0.00335857		2460.44	0.00376956		2990.44	-0.00693039		3520.44	-0.01362745
340.6	0.00726327		870.62	-0.00291516		1400.61	0.00890437		1930.64	0.00382849		2460.64	0.00303845		2990.64	-0.00626612		3520.64	-0.01274707
340.8	0.00855465		870.82	-0.00312264		1400.81	0.00874754		1930.84	0.00415557		2460.84	0.00211229		2990.84	-0.00555297		3520.84	-0.01260823
341	0.00928258		871.02	-0.00251268		1401.01	0.0084895		1931.04	0.00524487		2461.04	0.00168565		2991.04	-0.00547566		3521.04	-0.01279025
341.2	0.00985612		871.22	-0.00291999		1401.21	0.00876588		1931.24	0.00595457		2461.24	0.00095235		2991.24	-0.00497494		3521.24	-0.01247455
341.4	0.01033154		871.42	-0.00338635		1401.41	0.00805075		1931.44	0.00608075		2461.44	0.00066255		2991.44	-0.00422863		3521.44	-0.01224108
341.6	0.00963832		871.62	-0.00324535		1401.61	0.00782107		1931.64	0.00712115		2461.64	0.00038629		2991.64	-0.00387248		3521.64	-0.01233278
341.8	0.0108074		871.82	-0.00327519		1401.81	0.00852919		1931.84	0.00828115		2461.84	0.00029586		2991.84	-0.00365805		3521.84	-0.01153846
342	0.01052306		872.02	-0.00251584		1402.01	0.00914857		1932.04	0.00753881		2462.04	0.00003677		2992.04	-0.00280811		3522.04	-0.0121802
342.2	0.0103826		872.22	-0.00273977		1402.21	0.00902448		1932.24	0.00701153		2462.24	-0.00019719		2992.24	-0.00351622		3522.24	-0.01286721
342.4	0.00967673		872.42	-0.00278267		1402.41	0.00910608		1932.44	0.00740816		2462.44	-0.0010251		2992.44	-0.00351112		3522.44	-0.01283539
342.6	0.00915267		872.62	-0.0036121		1402.61	0.00939469		1932.64	0.00691352		2462.64	-0.00069087		2992.64	-0.00418316		3522.64	-0.01356572
342.8	0.00826956		872.82	-0.00327262		1402.81	0.01019723		1932.84	0.0067679		2462.84	-0.00025583		2992.84	-0.00532299		3522.84	-0.01325135
343	0.00711553		873.02	-0.00303069		1403.01	0.01089087		1933.04	0.00614026		2463.04	-0.00042147		2993.04	-0.00533917		3523.04	-0.01390578
343.2	0.00638194		873.22	-0.00280645		1403.21	0.0111722		1933.24	0.00575206		2463.24	0.00003252		2993.24	-0.00623581		3523.24	-0.01383497
343.4	0.00548092		873.42	-0.00203526		1403.41	0.0106037		1933.44	0.00506877		2463.44	0.00120677		2993.44	-0.00593673		3523.44	-0.01478331
343.6	0.00480246		873.62	-0.00193137		1403.61	0.01060773		1933.64	0.0042263		2463.64	0.00216929		2993.64	-0.00555104		3523.64	-0.01504449
343.8	0.00544415		873.82	-0.00098455		1403.81	0.00961307		1933.84	0.00358351		2463.84	0.00326719		2993.84	-0.00516901		3523.84	-0.01558104
344	0.00566656		874.02	-0.00062657		1404.01	0.00892964		1934.04	0.00260429		2464.04	0.00294964		2994.04	-0.00501762		3524.04	-0.01582835
344.2	0.00606252		874.22	0.00024156		1404.21	0.00823781		1934.24	0.00330686		2464.24	0.00254955		2994.24	-0.00532529		3524.24	-0.01510732
344.4	0.00602737		874.42	0.00052266		1404.41	0.00870855		1934.44	0.00339425		2464.44	0.00169779		2994.44	-0.00556157		3524.44	-0.0150112
344.6	0.00538767		874.62	0.00101435		1404.61	0.00835391		1934.64	0.003564		2464.64	0.00137246		2994.64	-0.00445725		3524.64	-0.0144328
344.8	0.00575242		874.82	0.00053225		1404.81	0.00738372		1934.84	0.0045334		2464.84	0.00140741		2994.84	-0.0042715		3524.84	-0.01474567
345	0.00545202		875.02	0.00001704		1405.01	0.00714944		1935.04	0.00562239		2465.04	0.00176914		2995.04	-0.00405106		3525.04	-0.01475893
345.2	0.00599456		875.22	-0.00107561		1405.21	0.00692168		1935.24	0.00635451		2465.24	0.00153517		2995.24	-0.00356152		3525.24	-0.01459358
345.4	0.00584531		875.42	-0.00134371		1405.41	0.00698653		1935.44	0.00657455		2465.44	0.00168396		2995.44	-0.00306575		3525.44	-0.01510098
345.6	0.00533821		875.62	-0.00183634		1405.61	0.0073593		1935.64	0.00761964		2465.64	0.00075794		2995.64	-0.00308891		3525.64	-0.01565196
345.8	0.00581248		875.82	-0.00222033		1405.81	0.00784606		1935.84	0.00720544		2465.84	0.00060781		2995.84	-0.00179794		3525.84	-0.01464726
346	0.00548565		876.02	-0.00214876		1406.01	0.00789487		1936.04	0.00695693		2466.04	0.00026206		2996.04	-0.00108881		3526.04	-0.01481042
346.2	0.00521473		876.22	-0.00303972		1406.21	0.00817159		1936.24	0.00733384		2466.24	0.00038551		2996.24	-0.00126163		3526.24	-0.01435852
346.4	0.00511173		876.42	-0.00261573		1406.41	0.00853112		1936.44	0.00692908		2466.44	0.000162		2996.44	-0.00163382		3526.44	-0.01357215
346.6	0.00505219		876.62	-0.00220363		1406.61	0.0087974		1936.64	0.00619729		2466.64	0.00063561		2996.64	-0.0022907		3526.64	-0.01272381
346.8	0.00510702		876.82	-0.00186976		1406.81	0.00889178		1936.84	0.00650178		2466.84	0.00079286		2996.84	-0.00261021		3526.84	-0.01217128
347	0.0052439		877.02	-0.00132818		1407.01	0.00903759		1937.04	0.00611752		2467.04	0.00072676		2997.04	-0.00263344		3527.04	-0.0122543
347.2	0.00637085		877.22	-0.00151716		1407.21	0.00865542		1937.24	0.00570604		2467.24	0.00109854		2997.24	-0.00277817		3527.24	-0.01187539
347.4	0.00573403		877.42	-0.00050948		1407.41	0.00785393		1937.44	0.00499704		2467.44	0.00135358		2997.44	-0.00346574		3527.44	-0.0125144
347.6	0.00591676		877.62	-0.00083748		1407.61	0.0070965		1937.64	0.00499554		2467.64	0.00142956		2997.64	-0.00423107		3527.64	-0.01208478
347.8	0.006792		877.82	-0.00067529		1407.81	0.00602128		1937.84	0.00498092		2467.84	0.00115067		2997.84	-0.00450547		3527.84	-0.01202901
348	0.00662872		878.02	-0.00066864		1408.01	0.00549803		1938.04	0.00547659		2468.04	0.00014674		2998.04	-0.00589133		3528.04	-0.01248555
348.2	0.00665747		878.22	-0.00024324		1408.21	0.00461221		1938.24	0.00558337		2468.24	0.00062419		2998.24	-0.00616691		3528.24	-0.01250972
348.4	0.00649567		878.42	-0.00021806		1408.41	0.0050932		1938.44	0.00535778		2468.44	0.00146291		2998.44	-0.00571543		3528.44	-0.01285312
348.6	0.00582559		878.62	-0.00098023		1408.61	0.00379041		1938.64	0.00566034		2468.64	0.00190065		2998.64	-0.00475455		3528.64	-0.01270651
348.8	0.00659629		878.82	-0.00193195		1408.81	0.004519		1938.84	0.00546208		2468.84	0.00180203		2998.84	-0.00526203		3528.84	-0.01241333
349	0.00613216		879.02	-0.00263318		1409.01	0.0050912		1939.04	0.00640683		2469.04	0.00164935		2999.04	-0.00554325		3529.04	-0.01250452
349.2	0.00622835		879.22	-0.00389841		1409.21	0.00548979		1939.24	0.00659475		2469.24	0.00113139		2999.24	-0.00568272		3529.24	-0.01229935
349.4	0.0062344		879.42	-0.00436659		1409.41	0.0060552		1939.44	0.00671751		2469.44	0.00057244		2999.44	-0.00492685		3529.44	-0.01283464
349.6	0.0055923		879.62	-0.00518145		1409.61	0.00593151		1939.64	0.0069138		2469.64	0.00026871		2999.64	-0.00430163		3529.64	-0.01271237
349.8	0.00551338		879.82	-0.00557747		1409.81	0.00663031		1939.84	0.00734535		2469.84	0.0009054		2999.84	-0.00307229		3529.84	-0.01282261
350	0.00476846		880.02	-0.0054427		1410.01	0.00669466		1940.04	0.00762507		2470.04	0.00050393		3000.04	-0.00268211		3530.04	-0.01274135
350.2	0.00446837		880.22	-0.00560186		1410.21	0.00660701		1940.24	0.00724947		2470.24	0.00106355		3000.24	-0.00273725		3530.24	-0.0128758
350.4	0.004434		880.42	-0.00505245		1410.41	0.00647899		1940.44	0.00701677		2470.44	0.00120544		3000.44	-0.0028334		3530.44	-0.01312877
350.6	0.00411983		880.62	-0.00531177		1410.61	0.0065526		1940.64	0.00723935		2470.64	0.00106521		3000.64	-0.00205985		3530.64	-0.01401401
350.8	0.00406677		880.82	-0.0060702		1410.81	0.00663547		1940.84	0.00752678		2470.84	0.00102661		3000.84	-0.00133783		3530.84	-0.01494908
351	0.00439288		881.02	-0.00568583		1411.01	0.0071079		1941.04	0.00675468		2471.04	0.00101302		3001.04	-0.00178939		3531.04	-0.01519899
351.2	0.00510606		881.22	-0.00610034		1411.21	0.0064865		1941.24	0.00691155		2471.24	0.00137571		3001.24	-0.0019867		3531.24	-0.01556888
351.4	0.00500969		881.42	-0.00554242		1411.41	0.00648167		1941.44	0.0071543		2471.44	0.00165269		3001.44	-0.00234461		3531.44	-0.01662063
351.6	0.00505391		881.62	-0.00564135		1411.61	0.00563572		1941.64	0.00743684		2471.64	0.00142397		3001.64	-0.00179854		3531.64	-0.01651886
351.8	0.00585623		881.82	-0.00492501		1411.81	0.0049171		1941.84	0.00792263		2471.84	0.00080204		3001.84	-0.00185845		3531.84	-0.01749625
352	0.00546322		882.02	-0.00494206		1412.01	0.00492825		1942.04	0.00785576		2472.04	0.00137084		3002.04	-0.00164094		3532.04	-0.01805619
352.2	0.00582075		882.22	-0.00478085		1412.21	0.00537727		1942.24	0.00723561		2472.24	0.00171734		3002.24	-0.0012494		3532.24	-0.0172592
352.4	0.00623689		882.42	-0.00403983		1412.41	0.00655896		1942.44	0.00683646		2472.44	0.00154573		3002.44	-0.00039805		3532.44	-0.01579754
352.6	0.00678202		882.62	-0.00377548		1412.61	0.00643973		1942.64	0.00589121		2472.64	0.00174335		3002.64	-0.00015792		3532.64	-0.01458865
352.8	0.00702402		882.82	-0.0031978		1412.81	0.00715784		1942.84	0.00553946		2472.84	0.00156515		3002.84	-0.00082786		3532.84	-0.0129917
353	0.00738632		883.02	-0.002492		1413.01	0.00662226		1943.04	0.00632484		2473.04	0.00155083		3003.04	-0.00155843		3533.04	-0.01189015
353.2	0.0078452		883.22	-0.00243077		1413.21	0.0069393		1943.24	0.00546392		2473.24	0.00156646		3003.24	-0.0018252		3533.24	-0.01111065
353.4	0.00751642		883.42	-0.00182506		1413.41	0.00739176		1943.44	0.00516833		2473.44	0.00097644		3003.44	-0.00171068		3533.44	-0.01047836
353.6	0.00756527		883.62	-0.0012055		1413.61	0.00788758		1943.64	0.00482793		2473.64	0.00143366		3003.64	-0.00238586		3533.64	-0.01026897
353.8	0.00763532		883.82	-0.00056633		1413.81	0.00783289		1943.84	0.00540257		2473.84	0.00082449		3003.84	-0.0028792		3533.84	-0.00931128
354	0.00727805		884.02	0.0001502		1414.01	0.00667197		1944.04	0.00529865		2474.04	0.00056762		3004.04	-0.00296948		3534.04	-0.0090202
354.2	0.00766973		884.22	-0.00049081		1414.21	0.00694955		1944.24	0.00528975		2474.24	0.00118019		3004.24	-0.00321122		3534.24	-0.00954424
354.4	0.00794265		884.42	-0.00102174		1414.41	0.00762667		1944.44	0.0055081		2474.44	0.00101834		3004.44	-0.00393313		3534.44	-0.01087818
354.6	0.00764544		884.62	-0.00134876		1414.61	0.00774305		1944.64	0.00509087		2474.64	0.00078146		3004.64	-0.00341205		3534.64	-0.01163476
354.8	0.0078635		884.82	-0.00176849		1414.81	0.00789141		1944.84	0.00506357		2474.84	0.00059488		3004.84	-0.00324359		3534.84	-0.01214759
355	0.00787857		885.02	-0.00165316		1415.01	0.00799487		1945.04	0.00536536		2475.04	0.00048227		3005.04	-0.003449		3535.04	-0.01251832
355.2	0.00737962		885.22	-0.00230252		1415.21	0.00762569		1945.24	0.00573877		2475.24	0.00085677		3005.24	-0.00286027		3535.24	-0.01390054
355.4	0.00755998		885.42	-0.00214531		1415.41	0.00732283		1945.44	0.00565426		2475.44	0.00045973		3005.44	-0.00270614		3535.44	-0.01481086
355.6	0.00662099		885.62	-0.00228399		1415.61	0.00642078		1945.64	0.0051986		2475.64	0.00000011		3005.64	-0.00300737		3535.64	-0.01556344
355.8	0.0070992		885.82	-0.00306272		1415.81	0.00685488		1945.84	0.00571278		2475.84	0.00011298		3005.84	-0.00338346		3535.84	-0.01598323
356	0.0064196		886.02	-0.0036418		1416.01	0.00756202		1946.04	0.00601666		2476.04	-0.00007157		3006.04	-0.00331425		3536.04	-0.01595327
356.2	0.00628787		886.22	-0.00292749		1416.21	0.00788156		1946.24	0.0056677		2476.24	0.00014816		3006.24	-0.00319046		3536.24	-0.01547949
356.4	0.00582635		886.42	-0.00190657		1416.41	0.00802154		1946.44	0.00546706		2476.44	0.00022846		3006.44	-0.00312073		3536.44	-0.01520907
356.6	0.00578895		886.62	-0.00163213		1416.61	0.00735278		1946.64	0.00504403		2476.64	0.0005902		3006.64	-0.00287276		3536.64	-0.0159261
356.8	0.00489785		886.82	-0.00127485		1416.81	0.00694073		1946.84	0.00509999		2476.84	-0.00013723		3006.84	-0.00319239		3536.84	-0.01505284
357	0.00490544		887.02	-0.00116963		1417.01	0.00688042		1947.04	0.00547009		2477.04	0.0002101		3007.04	-0.00407602		3537.04	-0.01487906
357.2	0.00499833		887.22	-0.00138201		1417.21	0.007189		1947.24	0.0049533		2477.24	0.00016244		3007.24	-0.00433194		3537.24	-0.0140049
357.4	0.00509359		887.42	-0.00138923		1417.41	0.00727299		1947.44	0.00549243		2477.44	-0.00039906		3007.44	-0.00430992		3537.44	-0.01309113
357.6	0.00639405		887.62	-0.00166678		1417.61	0.00716925		1947.64	0.0054548		2477.64	-0.00074411		3007.64	-0.00460449		3537.64	-0.01318618
357.8	0.00639283		887.82	-0.00184792		1417.81	0.00594802		1947.84	0.00643176		2477.84	-0.0008436		3007.84	-0.00420185		3537.84	-0.01184256
358	0.00674764		888.02	-0.00230596		1418.01	0.00619974		1948.04	0.00655536		2478.04	-0.00019684		3008.04	-0.00398298		3538.04	-0.0117425
358.2	0.0073924		888.22	-0.00344373		1418.21	0.00727911		1948.24	0.00606139		2478.24	-0.00069072		3008.24	-0.00345417		3538.24	-0.01131027
358.4	0.00712869		888.42	-0.00390808		1418.41	0.00863138		1948.44	0.00586692		2478.44	-0.00172646		3008.44	-0.00318259		3538.44	-0.01170826
358.6	0.0066889		888.62	-0.00368696		1418.61	0.00831384		1948.64	0.00622144		2478.64	-0.00136484		3008.64	-0.00195975		3538.64	-0.01159138
358.8	0.00591514		888.82	-0.00440975		1418.81	0.00868496		1948.84	0.00636566		2478.84	-0.00081576		3008.84	-0.00156075		3538.84	-0.01184979
359	0.00584418		889.02	-0.00497928		1419.01	0.00877211		1949.04	0.00677315		2479.04	-0.00024955		3009.04	-0.00151244		3539.04	-0.01205082
359.2	0.00566414		889.22	-0.005808		1419.21	0.0081668		1949.24	0.00733837		2479.24	-0.00067641		3009.24	-0.00141292		3539.24	-0.01273283
359.4	0.00598146		889.42	-0.00557855		1419.41	0.00818687		1949.44	0.00695079		2479.44	-0.00124296		3009.44	-0.00187957		3539.44	-0.01340295
359.6	0.00527645		889.62	-0.00498274		1419.61	0.00811159		1949.64	0.00679606		2479.64	-0.00106594		3009.64	-0.00261859		3539.64	-0.01432328
359.8	0.00553792		889.82	-0.00548954		1419.81	0.00848457		1949.84	0.00729108		2479.84	-0.00111854		3009.84	-0.00340647		3539.84	-0.01418626
360	0.00490617		890.02	-0.00486539		1420.01	0.00858449		1950.04	0.0075766		2480.04	-0.00095327		3010.04	-0.00474993		3540.04	-0.0147577
360.2	0.00527013		890.22	-0.00370943		1420.21	0.00875699		1950.24	0.00724347		2480.24	-0.00003512		3010.24	-0.0052345		3540.24	-0.01516392
360.4	0.0053422		890.42	-0.00309123		1420.41	0.00876351		1950.44	0.0072229		2480.44	0.00032151		3010.44	-0.0060205		3540.44	-0.01533343
360.6	0.00548232		890.62	-0.00316441		1420.61	0.00810006		1950.64	0.00728368		2480.64	0.00091093		3010.64	-0.00560811		3540.64	-0.01631134
360.8	0.00616569		890.82	-0.00243761		1420.81	0.00866963		1950.84	0.00776954		2480.84	0.00066859		3010.84	-0.0064654		3540.84	-0.01524435
361	0.00720713		891.02	-0.0021527		1421.01	0.00847569		1951.04	0.00784226		2481.04	0.00090277		3011.04	-0.00680105		3541.04	-0.01567503
361.2	0.00827115		891.22	-0.00206476		1421.21	0.00826478		1951.24	0.00786156		2481.24	-0.00005362		3011.24	-0.00661317		3541.24	-0.01514025
361.4	0.00853291		891.42	-0.00308903		1421.41	0.00785256		1951.44	0.00795451		2481.44	-0.00023664		3011.44	-0.00690036		3541.44	-0.0152302
361.6	0.00943147		891.62	-0.00206729		1421.61	0.00752329		1951.64	0.00752463		2481.64	0.00035751		3011.64	-0.00649613		3541.64	-0.01461289
361.8	0.00906802		891.82	-0.001729		1421.81	0.00693879		1951.84	0.00700261		2481.84	0.0000557		3011.84	-0.00638668		3541.84	-0.01370165
362	0.00831368		892.02	-0.00212221		1422.01	0.00786555		1952.04	0.00580082		2482.04	-0.00031794		3012.04	-0.00582301		3542.04	-0.01357687
362.2	0.00736246		892.22	-0.00198966		1422.21	0.00795409		1952.24	0.00553076		2482.24	-0.00068738		3012.24	-0.00529115		3542.24	-0.01316177
362.4	0.00617376		892.42	-0.00165602		1422.41	0.0080455		1952.44	0.00599029		2482.44	-0.00102327		3012.44	-0.00525446		3542.44	-0.01307523
362.6	0.00513717		892.62	-0.00055637		1422.61	0.00718946		1952.64	0.00581902		2482.64	-0.00022973		3012.64	-0.004742		3542.64	-0.01238516
362.8	0.00434058		892.82	-0.00145272		1422.81	0.00737033		1952.84	0.00595953		2482.84	-0.00046131		3012.84	-0.00420978		3542.84	-0.01173714
363	0.00407103		893.02	-0.00086845		1423.01	0.00711976		1953.04	0.00630966		2483.04	-0.00099213		3013.04	-0.00391576		3543.04	-0.0116002
363.2	0.00415833		893.22	-0.00120918		1423.21	0.00678685		1953.24	0.00674706		2483.24	-0.00200782		3013.24	-0.0031942		3543.24	-0.01174111
363.4	0.00369591		893.42	-0.00079442		1423.41	0.00769974		1953.44	0.00613347		2483.44	-0.00244422		3013.44	-0.00299227		3543.44	-0.01242066
363.6	0.00358414		893.62	-0.00091972		1423.61	0.00824523		1953.64	0.00721835		2483.64	-0.00259558		3013.64	-0.00304021		3543.64	-0.01273164
363.8	0.00377313		893.82	-0.00125944		1423.81	0.00852185		1953.84	0.007021		2483.84	-0.00172091		3013.84	-0.00312255		3543.84	-0.01292412
364	0.00321155		894.02	-0.00054441		1424.01	0.00853741		1954.04	0.00690786		2484.04	-0.00153688		3014.04	-0.00340864		3544.04	-0.01339365
364.2	0.00430987		894.22	-0.00118791		1424.21	0.00820437		1954.24	0.00697639		2484.24	-0.00126583		3014.24	-0.0034801		3544.24	-0.01404934
364.4	0.00472673		894.42	-0.00201761		1424.41	0.00798287		1954.44	0.00703917		2484.44	-0.00119918		3014.44	-0.00376312		3544.44	-0.01435513
364.6	0.0046977		894.62	-0.00241135		1424.61	0.00793523		1954.64	0.00719465		2484.64	-0.00096913		3014.64	-0.00400846		3544.64	-0.01511941
364.8	0.00546608		894.82	-0.0019191		1424.81	0.00804405		1954.84	0.00728354		2484.84	-0.00167261		3014.84	-0.00494962		3544.84	-0.01505101
365	0.0057282		895.02	-0.00164877		1425.01	0.00728031		1955.04	0.00712343		2485.04	-0.00219346		3015.04	-0.00492498		3545.04	-0.01611487
365.2	0.00556336		895.22	-0.00244864		1425.21	0.00683224		1955.24	0.0073882		2485.24	-0.00239477		3015.24	-0.00503392		3545.24	-0.01568607
365.4	0.00623598		895.42	-0.00284633		1425.41	0.00690926		1955.44	0.00638909		2485.44	-0.00103265		3015.44	-0.00521839		3545.44	-0.01633788
365.6	0.00699035		895.62	-0.0017305		1425.61	0.00666105		1955.64	0.00622675		2485.64	-0.00086231		3015.64	-0.00449704		3545.64	-0.01636764
365.8	0.00631092		895.82	-0.00183804		1425.81	0.0070226		1955.84	0.0056499		2485.84	-0.00091095		3015.84	-0.00451492		3545.84	-0.01632756
366	0.00600555		896.02	-0.00160443		1426.01	0.00684935		1956.04	0.00530143		2486.04	-0.00016027		3016.04	-0.0043171		3546.04	-0.01582129
366.2	0.00562206		896.22	-0.00033126		1426.21	0.00707988		1956.24	0.00569785		2486.24	0.00032235		3016.24	-0.00432505		3546.24	-0.01519102
366.4	0.00604072		896.42	0.00041383		1426.41	0.00749431		1956.44	0.00518703		2486.44	0.00018887		3016.44	-0.00459622		3546.44	-0.01417225
366.6	0.00666331		896.62	0.00101775		1426.61	0.00797811		1956.64	0.0048769		2486.64	0.001109		3016.64	-0.00428522		3546.64	-0.01369603
366.8	0.00772077		896.82	0.00052714		1426.81	0.0090908		1956.84	0.00550432		2486.84	0.00062476		3016.84	-0.00407534		3546.84	-0.01378609
367	0.00779968		897.02	0.00099492		1427.01	0.00871426		1957.04	0.0054507		2487.04	0.00094746		3017.04	-0.00414913		3547.04	-0.01382812
367.2	0.00884194		897.22	0.00058126		1427.21	0.00925197		1957.24	0.00612033		2487.24	0.00128834		3017.24	-0.00345922		3547.24	-0.01432207
367.4	0.00885797		897.42	0.00155768		1427.41	0.01014948		1957.44	0.00689001		2487.44	0.00139497		3017.44	-0.00330644		3547.44	-0.01491981
367.6	0.00959873		897.62	0.00172936		1427.61	0.01016602		1957.64	0.00675075		2487.64	0.00205796		3017.64	-0.00261822		3547.64	-0.0155121
367.8	0.00962344		897.82	0.00200695		1427.81	0.00966764		1957.84	0.00606373		2487.84	0.00193308		3017.84	-0.00278787		3547.84	-0.01550097
368	0.01009508		898.02	0.00188458		1428.01	0.00953667		1958.04	0.00580483		2488.04	0.00143579		3018.04	-0.0034489		3548.04	-0.0158629
368.2	0.01044895		898.22	0.00004257		1428.21	0.00868256		1958.24	0.00591895		2488.24	0.00216732		3018.24	-0.00343445		3548.24	-0.01603566
368.4	0.00941776		898.42	-0.00084266		1428.41	0.00880343		1958.44	0.00549317		2488.44	0.00202243		3018.44	-0.00343597		3548.44	-0.01610977
368.6	0.00884822		898.62	-0.00066089		1428.61	0.00885836		1958.64	0.00540091		2488.64	0.00236302		3018.64	-0.00422396		3548.64	-0.01561249
368.8	0.00888526		898.82	-0.00107718		1428.81	0.00850057		1958.84	0.00564567		2488.84	0.00208633		3018.84	-0.00493146		3548.84	-0.01514557
369	0.00773491		899.02	-0.00144287		1429.01	0.00790909		1959.04	0.00558298		2489.04	0.00206365		3019.04	-0.00453494		3549.04	-0.01497234
369.2	0.00712513		899.22	-0.00266323		1429.21	0.00770649		1959.24	0.00501906		2489.24	0.00267288		3019.24	-0.0054852		3549.24	-0.01396361
369.4	0.00738623		899.42	-0.00306498		1429.41	0.00713184		1959.44	0.00487183		2489.44	0.0028567		3019.44	-0.00656068		3549.44	-0.01419081
369.6	0.00643996		899.62	-0.00383922		1429.61	0.00634854		1959.64	0.00492864		2489.64	0.00242921		3019.64	-0.00642066		3549.64	-0.01367764
369.8	0.00602777		899.82	-0.00492332		1429.81	0.00654479		1959.84	0.00472976		2489.84	0.00210853		3019.84	-0.00625813		3549.84	-0.01217877
370	0.00502683		900.02	-0.00544582		1430.01	0.00649664		1960.04	0.00428279		2490.04	0.00172226		3020.04	-0.00634785		3550.04	-0.01136053
370.2	0.00497151		900.22	-0.00505549		1430.21	0.0067118		1960.24	0.00484235		2490.24	0.00078474		3020.24	-0.00601514		3550.24	-0.01190214
370.4	0.00505688		900.42	-0.00555857		1430.41	0.00615418		1960.44	0.00378056		2490.44	-0.00008742		3020.44	-0.00659756		3550.44	-0.01124099
370.6	0.00479502		900.62	-0.00538433		1430.61	0.00660692		1960.64	0.00417473		2490.64	-0.0007156		3020.64	-0.00564584		3550.64	-0.01177239
370.8	0.00457302		900.82	-0.00496233		1430.81	0.00650804		1960.84	0.00393144		2490.84	-0.00164497		3020.84	-0.00486356		3550.84	-0.01163384
371	0.00461062		901.02	-0.00437714		1431.01	0.0055965		1961.04	0.00343312		2491.04	-0.00089959		3021.04	-0.00465396		3551.04	-0.01119145
371.2	0.00518723		901.22	-0.00316099		1431.21	0.00658899		1961.24	0.00339346		2491.24	-0.00056406		3021.24	-0.0039779		3551.24	-0.01099208
371.4	0.00528434		901.42	-0.00256147		1431.41	0.00633289		1961.44	0.00371632		2491.44	-0.00064393		3021.44	-0.00285647		3551.44	-0.01167575
371.6	0.00527764		901.62	-0.00178573		1431.61	0.00728538		1961.64	0.00233543		2491.64	-0.00023223		3021.64	-0.00188815		3551.64	-0.01246499
371.8	0.00549675		901.82	-0.001553		1431.81	0.00771335		1961.84	0.00302345		2491.84	-0.00026881		3021.84	-0.00229183		3551.84	-0.01258659
372	0.00590417		902.02	-0.00111142		1432.01	0.00757613		1962.04	0.00271745		2492.04	0.00016598		3022.04	-0.00177356		3552.04	-0.01325474
372.2	0.00512462		902.22	-0.00158409		1432.21	0.00791046		1962.24	0.00247394		2492.24	0.00038292		3022.24	-0.00123512		3552.24	-0.01329793
372.4	0.00573156		902.42	-0.00147145		1432.41	0.00878874		1962.44	0.00301355		2492.44	0.00033381		3022.44	-0.00145176		3552.44	-0.01258624
372.6	0.00603771		902.62	-0.00155417		1432.61	0.00905689		1962.64	0.00373611		2492.64	0.00067405		3022.64	-0.00201629		3552.64	-0.01174481
372.8	0.00638929		902.82	-0.00188651		1432.81	0.009255		1962.84	0.00470876		2492.84	0.00128984		3022.84	-0.00219525		3552.84	-0.01134094
373	0.0058878		903.02	-0.00257168		1433.01	0.00870669		1963.04	0.005429		2493.04	0.00171474		3023.04	-0.00271562		3553.04	-0.0117057
373.2	0.00692168		903.22	-0.00250199		1433.21	0.00797819		1963.24	0.00678813		2493.24	0.00157309		3023.24	-0.00316588		3553.24	-0.01153682
373.4	0.00659693		903.42	-0.00256452		1433.41	0.00689799		1963.44	0.00732464		2493.44	0.00171987		3023.44	-0.00341985		3553.44	-0.01152737
373.6	0.00636752		903.62	-0.0040088		1433.61	0.00708621		1963.64	0.00780915		2493.64	0.0014954		3023.64	-0.00319345		3553.64	-0.01133787
373.8	0.00641164		903.82	-0.00380324		1433.81	0.00727007		1963.84	0.00808764		2493.84	0.00067862		3023.84	-0.00420218		3553.84	-0.01103794
374	0.006201		904.02	-0.00284253		1434.01	0.00719463		1964.04	0.00820768		2494.04	0.00040169		3024.04	-0.00483975		3554.04	-0.01212436
374.2	0.00604158		904.22	-0.00226945		1434.21	0.00693442		1964.24	0.007934		2494.24	-0.00082483		3024.24	-0.0052048		3554.24	-0.01276039
374.4	0.0062538		904.42	-0.00214694		1434.41	0.00723804		1964.44	0.00686919		2494.44	-0.00134807		3024.44	-0.00557745		3554.44	-0.01245877
374.6	0.00606257		904.62	-0.00092373		1434.61	0.0074215		1964.64	0.00720219		2494.64	-0.00124892		3024.64	-0.00562956		3554.64	-0.01260745
374.8	0.00686138		904.82	-0.00018295		1434.81	0.00694227		1964.84	0.00691961		2494.84	-0.0007411		3024.84	-0.0059983		3554.84	-0.01285945
375	0.00717337		905.02	-0.00006466		1435.01	0.00677851		1965.04	0.00684357		2495.04	-0.00027589		3025.04	-0.00716204		3555.04	-0.01267697
375.2	0.00696039		905.22	0.00048343		1435.21	0.00643583		1965.24	0.00739767		2495.24	-0.00015279		3025.24	-0.00667059		3555.24	-0.01332642
375.4	0.00720218		905.42	0.00050186		1435.41	0.00582264		1965.44	0.0079385		2495.44	-0.00051821		3025.44	-0.00585849		3555.44	-0.01417101
375.6	0.00784677		905.62	0.00094102		1435.61	0.00577559		1965.64	0.00768205		2495.64	-0.00021471		3025.64	-0.00542473		3555.64	-0.01403883
375.8	0.00843765		905.82	0.00075212		1435.81	0.00441807		1965.84	0.00789973		2495.84	-0.00017432		3025.84	-0.00579089		3555.84	-0.01396073
376	0.00856471		906.02	0.00058439		1436.01	0.00399229		1966.04	0.00693035		2496.04	-0.00033807		3026.04	-0.00569493		3556.04	-0.01358139
376.2	0.00850883		906.22	0.00040584		1436.21	0.00553252		1966.24	0.00743311		2496.24	-0.00018859		3026.24	-0.00545436		3556.24	-0.01361286
376.4	0.00953327		906.42	-0.00015618		1436.41	0.0054787		1966.44	0.00839604		2496.44	0.00000964		3026.44	-0.00454882		3556.44	-0.0125838
376.6	0.00861085		906.62	-0.00007452		1436.61	0.00552646		1966.64	0.00846564		2496.64	0.00009743		3026.64	-0.00401944		3556.64	-0.01238009
376.8	0.00881977		906.82	-0.00076858		1436.81	0.00622527		1966.84	0.00856642		2496.84	0.00118423		3026.84	-0.00301175		3556.84	-0.01296646
377	0.0088574		907.02	-0.00173167		1437.01	0.00558659		1967.04	0.00852554		2497.04	0.00229619		3027.04	-0.00289045		3557.04	-0.01290243
377.2	0.00961271		907.22	-0.0020294		1437.21	0.00517439		1967.24	0.0085928		2497.24	0.00243813		3027.24	-0.00255578		3557.24	-0.01269234
377.4	0.00836667		907.42	-0.00289099		1437.41	0.00549465		1967.44	0.0075221		2497.44	0.00311517		3027.44	-0.00241558		3557.44	-0.01235383
377.6	0.00874865		907.62	-0.00397755		1437.61	0.00635664		1967.64	0.00719814		2497.64	0.00278719		3027.64	-0.00257819		3557.64	-0.01268318
377.8	0.00902845		907.82	-0.00353587		1437.81	0.00647657		1967.84	0.00630543		2497.84	0.00200074		3027.84	-0.00296728		3557.84	-0.01302028
378	0.00933243		908.02	-0.00380349		1438.01	0.00698246		1968.04	0.00575827		2498.04	0.0013009		3028.04	-0.00268561		3558.04	-0.01338744
378.2	0.00912995		908.22	-0.0039346		1438.21	0.00763545		1968.24	0.00495416		2498.24	0.00053348		3028.24	-0.00274307		3558.24	-0.01309761
378.4	0.00973082		908.42	-0.00370519		1438.41	0.0081237		1968.44	0.0050471		2498.44	0.00030238		3028.44	-0.00269122		3558.44	-0.01316124
378.6	0.00933229		908.62	-0.0031477		1438.61	0.00829459		1968.64	0.00541979		2498.64	-0.00000625		3028.64	-0.00298297		3558.64	-0.01288825
378.8	0.00968602		908.82	-0.00290956		1438.81	0.00860162		1968.84	0.00583052		2498.84	-0.00031974		3028.84	-0.00285438		3558.84	-0.01293711
379	0.00912975		909.02	-0.00273302		1439.01	0.00839585		1969.04	0.00612672		2499.04	-0.00078547		3029.04	-0.00317734		3559.04	-0.01217713
379.2	0.00904688		909.22	-0.00218004		1439.21	0.00836277		1969.24	0.00670283		2499.24	-0.00109548		3029.24	-0.00225391		3559.24	-0.01200166
379.4	0.0089993		909.42	-0.00168903		1439.41	0.00849043		1969.44	0.00698626		2499.44	-0.00159909		3029.44	-0.00209458		3559.44	-0.01125523
379.6	0.00876967		909.62	-0.00120606		1439.61	0.00837422		1969.64	0.00724852		2499.64	-0.00128075		3029.64	-0.00221607		3559.64	-0.01058111
379.8	0.00797838		909.82	-0.00048303		1439.81	0.00879695		1969.84	0.00731488		2499.84	-0.00119043		3029.84	-0.00277262		3559.84	-0.01045543
379.99	0.00797838		910.02	-0.00048303		1440.01	0.00879695		1970.04	0.00731488		2500.04	-0.00119043		3030.04	-0.00277262		3560.04	-0.01045543
380.19	0.00822075		910.22	0.00041844		1440.21	0.0083313		1970.24	0.0066671		2500.24	-0.00044029		3030.24	-0.00198625		3560.24	-0.01067811
380.39	0.00867541		910.42	0.00121303		1440.41	0.00805659		1970.44	0.00704714		2500.44	0.00003908		3030.44	-0.00155457		3560.44	-0.01077726
380.59	0.00964142		910.62	0.00160072		1440.61	0.00845118		1970.64	0.0070438		2500.64	0.00090112		3030.64	-0.00098199		3560.64	-0.01114188
380.79	0.0103157		910.82	0.00273019		1440.81	0.00849138		1970.84	0.0067562		2500.84	0.00189632		3030.84	-0.0005573		3560.84	-0.01061904
380.99	0.0104014		911.02	0.00353903		1441.01	0.00832645		1971.04	0.00641091		2501.04	0.00198112		3031.04	-0.00024027		3561.04	-0.01019826
381.19	0.01106113		911.22	0.00287662		1441.21	0.008342		1971.24	0.00625505		2501.24	0.00194765		3031.24	-0.00030363		3561.24	-0.01073036
381.39	0.0110698		911.42	0.00251577		1441.41	0.00902488		1971.44	0.00578968		2501.44	0.00229278		3031.44	-0.00084091		3561.44	-0.01052705
381.59	0.01122152		911.62	0.00240709		1441.61	0.00875203		1971.64	0.00494444		2501.64	0.00218859		3031.64	-0.00233301		3561.64	-0.01039895
381.79	0.01111159		911.82	0.0024648		1441.81	0.00861165		1971.84	0.00513477		2501.84	0.00246528		3031.84	-0.00252307		3561.84	-0.00968841
381.99	0.01144205		912.02	0.00192928		1442.01	0.00829944		1972.04	0.0046393		2502.04	0.00177667		3032.04	-0.0026657		3562.04	-0.00984912
382.19	0.0115601		912.22	0.00145145		1442.21	0.00826981		1972.24	0.00510842		2502.24	0.00212656		3032.24	-0.00312364		3562.24	-0.00980706
382.39	0.01193535		912.42	0.00115758		1442.41	0.00796048		1972.44	0.00569921		2502.44	0.00226975		3032.44	-0.00355497		3562.44	-0.00938143
382.59	0.01159253		912.62	0.0010704		1442.61	0.00777325		1972.64	0.00554208		2502.64	0.00268615		3032.64	-0.00458079		3562.64	-0.00962591
382.79	0.01237959		912.82	0.00195392		1442.81	0.00793552		1972.84	0.00610136		2502.84	0.00202832		3032.84	-0.00533601		3562.84	-0.00930336
382.99	0.01206197		913.02	0.00103527		1443.01	0.00717951		1973.04	0.0066191		2503.04	0.00091644		3033.04	-0.00527302		3563.04	-0.00982888
383.19	0.01103676		913.22	0.00164716		1443.21	0.00633465		1973.24	0.00724707		2503.24	0.00239163		3033.24	-0.00485671		3563.24	-0.00946005
383.39	0.01154854		913.42	0.00117091		1443.41	0.00544005		1973.44	0.00802551		2503.44	0.00183916		3033.44	-0.00406419		3563.44	-0.00958292
383.59	0.01174497		913.62	0.00195776		1443.61	0.00549956		1973.64	0.00718591		2503.64	0.0011688		3033.64	-0.00435778		3563.64	-0.00967321
383.79	0.01146594		913.82	0.00206947		1443.81	0.00538476		1973.84	0.00666491		2503.84	0.00101609		3033.84	-0.00362085		3563.84	-0.01010669
383.99	0.01170878		914.02	0.00205613		1444.01	0.00455325		1974.04	0.00661094		2504.04	0.00204345		3034.04	-0.0027262		3564.04	-0.00990253
384.19	0.00982206		914.22	0.00233389		1444.21	0.00453001		1974.24	0.00733847		2504.24	0.00167692		3034.24	-0.0016936		3564.24	-0.0106653
384.39	0.00893956		914.42	0.00266555		1444.41	0.00569232		1974.44	0.00784365		2504.44	0.00179294		3034.44	-0.00127364		3564.44	-0.01078813
384.59	0.00913705		914.62	0.00328075		1444.61	0.006252		1974.64	0.00796876		2504.64	0.00209221		3034.64	0.00001261		3564.64	-0.01136643
384.79	0.00865866		914.82	0.00410722		1444.81	0.0060519		1974.84	0.00758041		2504.84	0.00206137		3034.84	-0.00017908		3564.84	-0.01133873
384.99	0.00812986		915.02	0.00419797		1445.01	0.00620836		1975.04	0.00737699		2505.04	0.00144889		3035.04	-0.00037453		3565.04	-0.01177771
385.19	0.00823887		915.22	0.00296784		1445.21	0.00706377		1975.24	0.00716326		2505.24	0.00120841		3035.24	-0.00043045		3565.24	-0.01221946
385.39	0.00818394		915.42	0.00366224		1445.41	0.00802429		1975.44	0.00639386		2505.44	0.00177833		3035.44	-0.00080974		3565.44	-0.01193433
385.59	0.00858913		915.62	0.00423567		1445.61	0.00738898		1975.64	0.00637528		2505.64	0.00080737		3035.64	-0.00123868		3565.64	-0.01143243
385.79	0.00876262		915.82	0.00459703		1445.81	0.00724713		1975.84	0.00697754		2505.84	0.00080053		3035.84	-0.0004345		3565.84	-0.01114536
385.99	0.00946527		916.02	0.0043154		1446.01	0.00710984		1976.04	0.00609922		2506.04	0.00105305		3036.04	-0.00067184		3566.04	-0.01144342
386.19	0.00977904		916.22	0.00488668		1446.21	0.00745454		1976.24	0.00656		2506.24	0.00178598		3036.24	-0.00100285		3566.24	-0.01118357
386.39	0.00974066		916.42	0.00534907		1446.41	0.00653603		1976.44	0.0062257		2506.44	0.00217332		3036.44	-0.00230707		3566.44	-0.01042495
386.59	0.00960582		916.62	0.00578491		1446.61	0.00582806		1976.64	0.00576248		2506.64	0.00202813		3036.64	-0.00264761		3566.64	-0.00943
386.79	0.0102018		916.82	0.00585442		1446.81	0.00545612		1976.84	0.006341		2506.84	0.0012062		3036.84	-0.00287782		3566.84	-0.00914958
386.99	0.00999766		917.02	0.00494873		1447.01	0.00569659		1977.04	0.00647881		2507.04	0.00028047		3037.04	-0.00257666		3567.04	-0.00832633
387.19	0.01028113		917.22	0.00432015		1447.21	0.00519926		1977.24	0.00603054		2507.24	0.00079132		3037.24	-0.00192253		3567.24	-0.00789159
387.39	0.01073386		917.42	0.00385446		1447.41	0.00491969		1977.44	0.00535905		2507.44	-0.00110058		3037.44	-0.00209466		3567.44	-0.00782683
387.59	0.01079715		917.62	0.00372216		1447.61	0.0052547		1977.64	0.00457054		2507.64	-0.00152389		3037.64	-0.0013214		3567.64	-0.0072114
387.79	0.01028711		917.82	0.00418556		1447.81	0.00482198		1977.84	0.00481632		2507.84	-0.00164755		3037.84	-0.00114253		3567.84	-0.00709472
387.99	0.01020577		918.02	0.00442514		1448.01	0.00523477		1978.04	0.00542833		2508.04	-0.00184389		3038.04	-0.00050781		3568.04	-0.00750396
388.19	0.00879337		918.22	0.00351261		1448.21	0.00564559		1978.24	0.00621172		2508.24	-0.00260349		3038.24	-0.00099945		3568.24	-0.00862136
388.39	0.00885702		918.42	0.00323698		1448.41	0.00661166		1978.44	0.0055112		2508.44	-0.00242318		3038.44	-0.00102933		3568.44	-0.00938412
388.59	0.0094608		918.62	0.00321387		1448.61	0.0057828		1978.64	0.00580193		2508.64	-0.00264274		3038.64	-0.00142785		3568.64	-0.00997621
388.79	0.00870304		918.82	0.00287619		1448.81	0.00566204		1978.84	0.00492223		2508.84	-0.00251545		3038.84	-0.00189023		3568.84	-0.01114699
388.99	0.00867023		919.02	0.00261569		1449.01	0.00616442		1979.04	0.00471709		2509.04	-0.00266703		3039.04	-0.0016451		3569.04	-0.01151869
389.19	0.00821308		919.22	0.00179673		1449.21	0.00632285		1979.24	0.00477302		2509.24	-0.00252082		3039.24	-0.00133021		3569.24	-0.01214803
389.39	0.00854504		919.42	0.00241595		1449.41	0.00609214		1979.44	0.00508652		2509.44	-0.00214395		3039.44	-0.00114765		3569.44	-0.01203154
389.59	0.00820883		919.62	0.00219451		1449.61	0.00609921		1979.64	0.0060201		2509.64	-0.00252514		3039.64	-0.00086407		3569.64	-0.01234657
389.79	0.00820781		919.82	0.0026007		1449.81	0.00621571		1979.84	0.00659701		2509.84	-0.00181919		3039.84	-0.00020363		3569.84	-0.01289201
389.99	0.00842043		920.02	0.00246834		1450.01	0.00644239		1980.04	0.00643848		2510.04	-0.00071407		3040.04	-0.00062962		3570.04	-0.01247652
390.19	0.00934312		920.22	0.00277972		1450.21	0.00593988		1980.24	0.00709313		2510.24	-0.00100573		3040.24	-0.00059389		3570.24	-0.01288576
390.39	0.00970896		920.42	0.00328769		1450.41	0.00536872		1980.44	0.00726463		2510.44	-0.00121207		3040.44	-0.00140268		3570.44	-0.01177706
390.59	0.01029253		920.62	0.0036725		1450.61	0.0052611		1980.64	0.00728415		2510.64	-0.0020898		3040.64	-0.00106302		3570.64	-0.01161906
390.79	0.01100458		920.82	0.00381594		1450.81	0.00533923		1980.84	0.00710255		2510.84	-0.00235754		3040.84	-0.0007564		3570.84	-0.01199113
390.99	0.01097717		921.02	0.00402682		1451.01	0.00569633		1981.04	0.00724211		2511.04	-0.002461		3041.04	-0.00092554		3571.04	-0.01247182
391.19	0.01131828		921.22	0.00426524		1451.21	0.0049421		1981.24	0.00658356		2511.24	-0.00144928		3041.24	-0.00139633		3571.24	-0.01301223
391.39	0.01171912		921.42	0.00550376		1451.41	0.00496038		1981.44	0.00659423		2511.44	-0.00206012		3041.44	-0.00186849		3571.44	-0.01219883
391.59	0.01192341		921.62	0.00518064		1451.61	0.00437986		1981.64	0.0070479		2511.64	-0.00157157		3041.64	-0.00174958		3571.64	-0.01109065
391.79	0.01155039		921.82	0.00537385		1451.81	0.00465317		1981.84	0.00680893		2511.84	-0.00158949		3041.84	-0.00204192		3571.84	-0.01174955
391.99	0.01148357		922.02	0.00462213		1452.01	0.00474483		1982.04	0.00606704		2512.04	-0.0016748		3042.04	-0.00182071		3572.04	-0.01313761
392.19	0.01123807		922.22	0.00380464		1452.21	0.00457684		1982.24	0.0049176		2512.24	-0.00203		3042.24	-0.00228537		3572.24	-0.01355223
392.39	0.01048216		922.42	0.00409971		1452.41	0.00433206		1982.44	0.00378409		2512.44	-0.00232496		3042.44	-0.00269343		3572.44	-0.01342264
392.59	0.00931595		922.62	0.00374443		1452.61	0.00367941		1982.64	0.0031098		2512.64	-0.00269695		3042.64	-0.00345484		3572.64	-0.01324422
392.79	0.00849195		922.82	0.00309109		1452.81	0.00386781		1982.84	0.00219504		2512.84	-0.00173026		3042.84	-0.00272968		3572.84	-0.01420559
392.99	0.00776203		923.02	0.0025244		1453.01	0.0041913		1983.04	0.002265		2513.04	-0.00132299		3043.04	-0.00253849		3573.04	-0.01363192
393.19	0.00716706		923.22	0.00188152		1453.21	0.00395924		1983.24	0.00324283		2513.24	-0.00023036		3043.24	-0.00244538		3573.24	-0.01372051
393.39	0.00716057		923.42	0.0017075		1453.41	0.00391071		1983.44	0.00392978		2513.44	-0.00020949		3043.44	-0.0016063		3573.44	-0.01322794
393.59	0.00622352		923.62	0.00106575		1453.61	0.00526952		1983.64	0.00416097		2513.64	-0.00024521		3043.64	-0.00102938		3573.64	-0.01305412
393.79	0.00639523		923.82	0.00147726		1453.81	0.00515429		1983.84	0.00488397		2513.84	-0.00025467		3043.84	-0.00101108		3573.84	-0.01285118
393.99	0.00635507		924.02	0.00199565		1454.01	0.00500213		1984.04	0.00557889		2514.04	-0.0003067		3044.04	-0.00125834		3574.04	-0.01253775
394.19	0.00609502		924.22	0.00216903		1454.21	0.00470563		1984.24	0.00588115		2514.24	-0.00105783		3044.24	-0.00062171		3574.24	-0.01315323
394.39	0.00608483		924.42	0.00246967		1454.41	0.00484232		1984.44	0.00616559		2514.44	-0.00132602		3044.44	-0.00012892		3574.44	-0.01254121
394.59	0.00649993		924.62	0.00347922		1454.61	0.00514034		1984.64	0.00614153		2514.64	-0.00117031		3044.64	0.00073746		3574.64	-0.01285014
394.79	0.00656994		924.82	0.00329728		1454.81	0.00486074		1984.84	0.00658852		2514.84	-0.0018189		3044.84	0.00074754		3574.84	-0.01312622
394.99	0.00699712		925.02	0.0040258		1455.01	0.00506723		1985.04	0.00746536		2515.04	-0.00138003		3045.04	-0.00014816		3575.04	-0.01408114
395.19	0.00794455		925.22	0.00445826		1455.21	0.00432325		1985.24	0.00703274		2515.24	-0.00126563		3045.24	0.00024801		3575.24	-0.01337035
395.39	0.00826055		925.42	0.00474557		1455.41	0.00412497		1985.44	0.00769159		2515.44	-0.00224295		3045.44	0.00020569		3575.44	-0.01222362
395.59	0.00802152		925.62	0.00447127		1455.61	0.00403388		1985.64	0.0076922		2515.64	-0.00185571		3045.64	-0.00007184		3575.64	-0.01197291
395.79	0.0084404		925.82	0.00428302		1455.81	0.00376029		1985.84	0.00718036		2515.84	-0.00205836		3045.84	-0.0003997		3575.84	-0.01293963
395.99	0.00903818		926.02	0.00428232		1456.01	0.00267732		1986.04	0.00607569		2516.04	-0.00238883		3046.04	-0.00177911		3576.04	-0.01237913
396.19	0.00945256		926.22	0.00518611		1456.21	0.00272884		1986.24	0.005616		2516.24	-0.00266506		3046.24	-0.00210667		3576.24	-0.01244314
396.39	0.00900788		926.42	0.0051419		1456.41	0.00237311		1986.44	0.00531532		2516.44	-0.00295226		3046.44	-0.00316715		3576.44	-0.01271386
396.59	0.00943174		926.62	0.00425866		1456.61	0.00231284		1986.64	0.00422555		2516.64	-0.00282975		3046.64	-0.003603		3576.64	-0.01222515
396.79	0.0102367		926.82	0.00364681		1456.81	0.00254632		1986.84	0.00416364		2516.84	-0.00180571		3046.84	-0.00425093		3576.84	-0.01182576
396.99	0.00983429		927.02	0.00317812		1457.01	0.00214831		1987.04	0.00424365		2517.04	-0.00127629		3047.04	-0.00493676		3577.04	-0.01186068
397.19	0.010388		927.22	0.00225985		1457.21	0.0022304		1987.24	0.00432183		2517.24	-0.00098388		3047.24	-0.00550225		3577.24	-0.01137487
397.39	0.0099602		927.42	0.00138923		1457.41	0.00294225		1987.44	0.00354303		2517.44	-0.00201497		3047.44	-0.00572361		3577.44	-0.0111023
397.59	0.00935327		927.62	0.00112443		1457.61	0.00339369		1987.64	0.00279183		2517.64	-0.00276466		3047.64	-0.00492836		3577.64	-0.01077725
397.79	0.00877917		927.82	0.00071877		1457.81	0.00330496		1987.84	0.00385524		2517.84	-0.00245484		3047.84	-0.00477961		3577.84	-0.01136315
397.99	0.00817831		928.02	0.00048958		1458.01	0.00304585		1988.04	0.00388758		2518.04	-0.00272687		3048.04	-0.00436529		3578.04	-0.01203039
398.19	0.00733656		928.22	-0.00078783		1458.21	0.00312978		1988.24	0.00303546		2518.24	-0.00316418		3048.24	-0.00371994		3578.24	-0.01247525
398.39	0.00744881		928.42	-0.00065543		1458.41	0.00302636		1988.44	0.00322233		2518.44	-0.00359173		3048.44	-0.00312123		3578.44	-0.01230026
398.59	0.00706252		928.62	-0.00041484		1458.61	0.00302455		1988.64	0.00360949		2518.64	-0.00363209		3048.64	-0.00267114		3578.64	-0.01241873
398.79	0.00746476		928.82	-0.00044555		1458.81	0.00276901		1988.84	0.00396145		2518.84	-0.00318246		3048.84	-0.002447		3578.84	-0.01276623
398.99	0.00762229		929.02	-0.00012407		1459.01	0.00328674		1989.04	0.00428678		2519.04	-0.00317539		3049.04	-0.00255537		3579.04	-0.01303381
399.19	0.00725835		929.22	-0.00017364		1459.21	0.00295046		1989.24	0.00375878		2519.24	-0.00343295		3049.24	-0.00201076		3579.24	-0.0120898
399.39	0.00708119		929.42	0.00020071		1459.41	0.00273091		1989.44	0.00393194		2519.44	-0.00310745		3049.44	-0.00261312		3579.44	-0.01111922
399.59	0.00667633		929.62	0.00025246		1459.61	0.00336314		1989.64	0.00374319		2519.64	-0.00232998		3049.64	-0.0041513		3579.64	-0.01135845
399.79	0.00735884		929.82	0.00036133		1459.81	0.00326864		1989.84	0.00381976		2519.84	-0.00304058		3049.84	-0.00541801		3579.84	-0.01177444
399.99	0.00692045		930.02	0.00049867		1460.01	0.0037846		1990.04	0.00358624		2520.04	-0.00307183		3050.04	-0.00633177		3580.04	-0.01086331
400.19	0.00700854		930.22	0.00198644		1460.21	0.00417451		1990.24	0.00393265		2520.24	-0.00325438		3050.24	-0.00638178		3580.24	-0.01150253
400.39	0.00733419		930.42	0.00205661		1460.41	0.00406466		1990.44	0.00361127		2520.44	-0.00284967		3050.44	-0.00677291		3580.44	-0.01238217
400.59	0.00697881		930.62	0.00156039		1460.61	0.00368913		1990.64	0.00360358		2520.64	-0.00316005		3050.64	-0.00637886		3580.64	-0.01143473
400.79	0.00769254		930.82	0.00135997		1460.81	0.0030197		1990.84	0.00420026		2520.84	-0.00267965		3050.84	-0.00649926		3580.84	-0.01151203
400.99	0.00747028		931.02	0.00115601		1461.01	0.00195648		1991.04	0.00437341		2521.04	-0.00257795		3051.04	-0.00599627		3581.04	-0.01244065
401.19	0.00745449		931.22	0.00107887		1461.21	0.00204105		1991.24	0.00502395		2521.24	-0.00351002		3051.24	-0.0052318		3581.24	-0.01213974
401.39	0.00706443		931.42	0.00057555		1461.41	0.00163223		1991.44	0.00517881		2521.44	-0.0038115		3051.44	-0.00538521		3581.44	-0.01185761
401.59	0.00732308		931.62	0.00015441		1461.61	0.00104718		1991.64	0.00507558		2521.64	-0.00384599		3051.64	-0.00386176		3581.64	-0.01234288
401.79	0.00731064		931.82	0.00021394		1461.81	0.00074866		1991.84	0.00561487		2521.84	-0.0041059		3051.84	-0.00371866		3581.84	-0.01262889
401.99	0.00758413		932.02	0.00019111		1462.01	0.00048795		1992.04	0.00511024		2522.04	-0.00474716		3052.04	-0.00333811		3582.04	-0.01244575
402.19	0.00670153		932.22	0.00053895		1462.21	0.00118062		1992.24	0.00497936		2522.24	-0.0049368		3052.24	-0.00236001		3582.24	-0.01243635
402.39	0.00672852		932.42	0.00144934		1462.41	0.00081724		1992.44	0.00561733		2522.44	-0.00513188		3052.44	-0.00210098		3582.44	-0.01269335
402.59	0.00686994		932.62	0.00186573		1462.61	0.00134405		1992.64	0.00530473		2522.64	-0.00428339		3052.64	-0.00103669		3582.64	-0.0129538
402.79	0.00706575		932.82	0.00213387		1462.81	0.00179508		1992.84	0.00433894		2522.84	-0.00391109		3052.84	-0.00077597		3582.84	-0.01222485
402.99	0.0059895		933.02	0.00134335		1463.01	0.00245724		1993.04	0.00336168		2523.04	-0.00407038		3053.04	-0.0007763		3583.04	-0.01225711
403.19	0.00537952		933.22	0.00112944		1463.21	0.00290314		1993.24	0.00282077		2523.24	-0.00363729		3053.24	-0.00075553		3583.24	-0.01175223
403.39	0.00479021		933.42	0.00060698		1463.41	0.00289739		1993.44	0.00293385		2523.44	-0.00348576		3053.44	-0.00139407		3583.44	-0.01084582
403.59	0.00436557		933.62	0.0000016		1463.61	0.0041144		1993.64	0.00280519		2523.64	-0.00335561		3053.64	-0.00327011		3583.64	-0.01065911
403.79	0.00461872		933.82	-0.0003322		1463.81	0.00451649		1993.84	0.00289822		2523.84	-0.00403082		3053.84	-0.00351687		3583.84	-0.01046828
403.99	0.00365375		934.02	0.00011531		1464.01	0.00466369		1994.04	0.00192345		2524.04	-0.00383789		3054.04	-0.00449274		3584.04	-0.00976658
404.19	0.004057		934.22	0.00057596		1464.21	0.00451207		1994.24	0.00170595		2524.24	-0.0037101		3054.24	-0.00463321		3584.24	-0.00971916
404.39	0.00393829		934.42	0.00070321		1464.41	0.00454331		1994.44	0.00157374		2524.44	-0.00349564		3054.44	-0.00485507		3584.44	-0.01027525
404.59	0.00339926		934.62	0.00021342		1464.61	0.0038949		1994.64	0.00189109		2524.64	-0.00463519		3054.64	-0.0049332		3584.64	-0.00937098
404.79	0.00427465		934.82	0.00038496		1464.81	0.00314871		1994.84	0.00219636		2524.84	-0.00495398		3054.84	-0.00485675		3584.84	-0.00941297
404.99	0.00433104		935.02	0.00038201		1465.01	0.0032582		1995.04	0.00351373		2525.04	-0.00530724		3055.04	-0.00548039		3585.04	-0.01039392
405.19	0.00423296		935.22	0.00014467		1465.21	0.00262095		1995.24	0.00337934		2525.24	-0.00574972		3055.24	-0.00606476		3585.24	-0.00975301
405.39	0.00525721		935.42	-0.00104388		1465.41	0.00215228		1995.44	0.00350976		2525.44	-0.00557891		3055.44	-0.00702876		3585.44	-0.00948089
405.59	0.00594411		935.62	-0.00131224		1465.61	0.0019037		1995.64	0.00353129		2525.64	-0.00617176		3055.64	-0.00598477		3585.64	-0.01067963
405.79	0.0059098		935.82	-0.00070137		1465.81	0.00162246		1995.84	0.00430114		2525.84	-0.00688214		3055.84	-0.00586351		3585.84	-0.01161767
405.99	0.00587296		936.02	-0.00093709		1466.01	0.00119708		1996.04	0.00463462		2526.04	-0.00679724		3056.04	-0.00574559		3586.04	-0.01200251
406.19	0.00573509		936.22	-0.00024377		1466.21	0.00088421		1996.24	0.00514277		2526.24	-0.00661572		3056.24	-0.00559987		3586.24	-0.01316237
406.39	0.00618461		936.42	0.00034387		1466.41	-0.00036463		1996.44	0.00537517		2526.44	-0.00618719		3056.44	-0.00603031		3586.44	-0.01333742
406.59	0.00609382		936.62	0.00079421		1466.61	0.00007619		1996.64	0.00461204		2526.64	-0.00566452		3056.64	-0.00561297		3586.64	-0.01340663
406.79	0.00567854		936.82	0.00062963		1466.81	-0.00048136		1996.84	0.00457088		2526.84	-0.00520967		3056.84	-0.00495423		3586.84	-0.01324951
406.99	0.00528441		937.02	0.00061535		1467.01	-0.00004822		1997.04	0.00431738		2527.04	-0.00473248		3057.04	-0.00469225		3587.04	-0.01382301
407.19	0.00501649		937.22	0.00060089		1467.21	-0.00033993		1997.24	0.00453864		2527.24	-0.00526504		3057.24	-0.00434191		3587.24	-0.01388764
407.39	0.00439719		937.42	0.0014805		1467.41	-0.00047742		1997.44	0.00435515		2527.44	-0.00544602		3057.44	-0.00421605		3587.44	-0.01364619
407.59	0.00458353		937.62	0.00187796		1467.61	0.00077597		1997.64	0.00435426		2527.64	-0.00532201		3057.64	-0.00427351		3587.64	-0.01369963
407.79	0.00438744		937.82	0.00201889		1467.81	0.00141447		1997.84	0.00381687		2527.84	-0.00496982		3057.84	-0.0035719		3587.84	-0.01394301
407.99	0.00372917		938.02	0.00254539		1468.01	0.00186065		1998.04	0.00291635		2528.04	-0.00409223		3058.04	-0.00405466		3588.04	-0.01452525
408.19	0.00435645		938.22	0.00289865		1468.21	0.00235512		1998.24	0.00328601		2528.24	-0.00397138		3058.24	-0.00337246		3588.24	-0.01430231
408.39	0.00347484		938.42	0.00359168		1468.41	0.00296113		1998.44	0.00371094		2528.44	-0.00346277		3058.44	-0.00332837		3588.44	-0.01485901
408.59	0.00364034		938.62	0.00281608		1468.61	0.00314158		1998.64	0.00373803		2528.64	-0.00312464		3058.64	-0.00295203		3588.64	-0.01556631
408.79	0.00390419		938.82	0.00260675		1468.81	0.00393694		1998.84	0.00403082		2528.84	-0.00226819		3058.84	-0.0032172		3588.84	-0.01600393
408.99	0.00506178		939.02	0.00154746		1469.01	0.00408273		1999.04	0.00419393		2529.04	-0.00165778		3059.04	-0.00415486		3589.04	-0.01637679
409.19	0.00479028		939.22	0.00025915		1469.21	0.00318543		1999.24	0.00276598		2529.24	-0.00163063		3059.24	-0.00389952		3589.24	-0.01601052
409.39	0.00536562		939.42	-0.00037927		1469.41	0.00371324		1999.44	0.0033606		2529.44	-0.0013835		3059.44	-0.00381815		3589.44	-0.01637651
409.59	0.00475326		939.62	-0.00033774		1469.61	0.00318917		1999.64	0.00321178		2529.64	-0.00142487		3059.64	-0.00302121		3589.64	-0.01634046
409.79	0.00490272		939.82	-0.00069491		1469.81	0.00329489		1999.84	0.00334761		2529.84	-0.00058312		3059.84	-0.00320114		3589.84	-0.01605432
409.99	0.00515553		940.02	-0.00026955		1470.01	0.00218872		2000.04	0.00251885		2530.04	-0.00088557		3060.04	-0.00360164		3590.04	-0.01527268
410.19	0.00509571		940.22	0.00003151		1470.21	0.00174164		2000.24	0.00212778		2530.24	-0.00037232		3060.24	-0.00440838		3590.24	-0.01476394
410.39	0.00627797		940.42	0.00044107		1470.41	0.000836		2000.44	0.00115188		2530.44	-0.00019832		3060.44	-0.00449656		3590.44	-0.01410079
410.59	0.00691612		940.62	0.00055815		1470.61	0.00140104		2000.64	0.00047433		2530.64	-0.00085348		3060.64	-0.00373347		3590.64	-0.01369857
410.79	0.00706198		940.82	0.00097743		1470.81	0.00132473		2000.84	0.00071038		2530.84	-0.00127432		3060.84	-0.00334545		3590.84	-0.01357621
410.99	0.00695279		941.02	0.00117473		1471.01	0.00143094		2001.04	0.00026715		2531.04	-0.00185669		3061.04	-0.00427846		3591.04	-0.01336508
411.19	0.00665732		941.22	0.00091062		1471.21	0.00148486		2001.24	-0.0003123		2531.24	-0.00253149		3061.24	-0.00375149		3591.24	-0.01444611
411.39	0.00650654		941.42	0.00123381		1471.41	0.0026094		2001.44	-0.00026512		2531.44	-0.00364681		3061.44	-0.0037482		3591.44	-0.01528319
411.59	0.0068202		941.62	0.00021373		1471.61	0.00387222		2001.64	-0.000292		2531.64	-0.00382166		3061.64	-0.00317017		3591.64	-0.01513041
411.79	0.00605465		941.82	-0.00024199		1471.81	0.00382402		2001.84	-0.00047417		2531.84	-0.00351411		3061.84	-0.00343664		3591.84	-0.01625669
411.99	0.00544482		942.02	-0.00028739		1472.01	0.00348042		2002.04	-0.00072147		2532.04	-0.00380541		3062.04	-0.00384601		3592.04	-0.0169423
412.19	0.0050669		942.22	-0.00013863		1472.21	0.00343281		2002.24	-0.00079617		2532.24	-0.00476843		3062.24	-0.00409411		3592.24	-0.01728289
412.39	0.00425963		942.42	0.0001831		1472.41	0.00414601		2002.44	-0.00141295		2532.44	-0.00431319		3062.44	-0.00417761		3592.44	-0.01829362
412.59	0.00446015		942.62	0.00056844		1472.61	0.00433007		2002.64	-0.00156854		2532.64	-0.00468561		3062.64	-0.00406429		3592.64	-0.01875432
412.79	0.00455793		942.82	0.00085996		1472.81	0.00424745		2002.84	-0.00143831		2532.84	-0.00445345		3062.84	-0.00421618		3592.84	-0.0183765
412.99	0.00458475		943.02	0.00099218		1473.01	0.00432065		2003.04	-0.00163321		2533.04	-0.005167		3063.04	-0.00333268		3593.04	-0.01780386
413.19	0.00316755		943.22	0.00131319		1473.21	0.00411089		2003.24	-0.00186718		2533.24	-0.00558917		3063.24	-0.00234477		3593.24	-0.01774294
413.39	0.00308186		943.42	0.00184528		1473.41	0.0040465		2003.44	-0.00150361		2533.44	-0.00517218		3063.44	-0.00251295		3593.44	-0.01723288
413.59	0.0022879		943.62	0.0024984		1473.61	0.00288219		2003.64	-0.00121912		2533.64	-0.00474291		3063.64	-0.0025056		3593.64	-0.0172425
413.79	0.00220148		943.82	0.00283477		1473.81	0.00285358		2003.84	-0.00102325		2533.84	-0.00404611		3063.84	-0.00267368		3593.84	-0.0169131
413.99	0.00195207		944.02	0.0037039		1474.01	0.0016139		2004.04	-0.00136311		2534.04	-0.00457683		3064.04	-0.00314412		3594.04	-0.01651563
414.19	0.00236718		944.22	0.00340738		1474.21	0.00037938		2004.24	-0.00089568		2534.24	-0.00313101		3064.24	-0.00311783		3594.24	-0.01566508
414.39	0.003354		944.42	0.00313494		1474.41	-0.00032616		2004.44	-0.00085286		2534.44	-0.00341582		3064.44	-0.00277874		3594.44	-0.01534683
414.59	0.00351098		944.62	0.00309226		1474.61	-0.00038916		2004.64	-0.00006549		2534.64	-0.0037713		3064.64	-0.00178093		3594.64	-0.01523925
414.79	0.00392005		944.82	0.0034033		1474.81	-0.00072385		2004.84	0.00027079		2534.84	-0.00345351		3064.84	-0.00269848		3594.84	-0.01558161
414.99	0.00323542		945.02	0.002683		1475.01	-0.00069046		2005.04	0.00020437		2535.04	-0.00280912		3065.04	-0.00272048		3595.04	-0.01551726
415.19	0.00291084		945.22	0.00216165		1475.21	-0.00087265		2005.24	0.00012413		2535.24	-0.00351442		3065.24	-0.00297669		3595.24	-0.01605154
415.39	0.00255519		945.42	0.00195713		1475.41	0.00020524		2005.44	0.00069886		2535.44	-0.00332576		3065.44	-0.0039345		3595.44	-0.0153637
415.59	0.00272156		945.62	0.00152779		1475.61	0.00026657		2005.64	0.00137722		2535.64	-0.00276089		3065.64	-0.00478096		3595.64	-0.01467485
415.79	0.00251729		945.82	0.00047418		1475.81	0.00011937		2005.84	0.00222122		2535.84	-0.00204052		3065.84	-0.00578892		3595.84	-0.01533154
415.99	0.00308091		946.02	0.00028331		1476.01	0.00047873		2006.04	0.00183694		2536.04	-0.00212544		3066.04	-0.00628656		3596.04	-0.01521576
416.19	0.00317009		946.22	0.00040492		1476.21	0.00123058		2006.24	0.00120682		2536.24	-0.0024659		3066.24	-0.0060257		3596.24	-0.01563229
416.39	0.00429977		946.42	0.00003921		1476.41	0.00181019		2006.44	0.0012627		2536.44	-0.00201448		3066.44	-0.00584072		3596.44	-0.01523758
416.59	0.00488026		946.62	-0.00002711		1476.61	0.00232838		2006.64	0.00222722		2536.64	-0.0022064		3066.64	-0.00554161		3596.64	-0.01503135
416.79	0.00544925		946.82	-0.00067449		1476.81	0.00243306		2006.84	0.00271931		2536.84	-0.00239846		3066.84	-0.00585318		3596.84	-0.01458318
416.99	0.0055273		947.02	-0.00082235		1477.01	0.00275861		2007.04	0.00248799		2537.04	-0.00222641		3067.04	-0.00593618		3597.04	-0.01439689
417.19	0.00590406		947.22	-0.00105388		1477.21	0.00229075		2007.24	0.00280168		2537.24	-0.00172249		3067.24	-0.00625404		3597.24	-0.01451201
417.39	0.00612453		947.42	-0.00150764		1477.41	0.00237045		2007.44	0.00225811		2537.44	-0.00137063		3067.44	-0.00671502		3597.44	-0.01472911
417.59	0.00643211		947.62	-0.00139028		1477.61	0.00117177		2007.64	0.00226519		2537.64	-0.00153888		3067.64	-0.00675952		3597.64	-0.0150977
417.79	0.00638278		947.82	-0.00135208		1477.81	0.00044403		2007.84	0.00186584		2537.84	-0.00128951		3067.84	-0.00741433		3597.84	-0.01464283
417.99	0.00642378		948.02	-0.0017616		1478.01	-0.00043108		2008.04	0.0018787		2538.04	-0.0012042		3068.04	-0.00746496		3598.04	-0.01432881
418.19	0.00648156		948.22	-0.00232939		1478.21	-0.00095316		2008.24	0.00213148		2538.24	-0.00112588		3068.24	-0.00725608		3598.24	-0.01409621
418.39	0.00673383		948.42	-0.00256093		1478.41	-0.00154131		2008.44	0.00144507		2538.44	-0.00264591		3068.44	-0.00674188		3598.44	-0.01482609
418.59	0.00687158		948.62	-0.00175643		1478.61	-0.00140662		2008.64	0.00139963		2538.64	-0.00301893		3068.64	-0.00613433		3598.64	-0.01412498
418.79	0.00553632		948.82	-0.00144315		1478.81	-0.00148849		2008.84	0.00120442		2538.84	-0.00354615		3068.84	-0.00656672		3598.84	-0.01409855
418.99	0.00477339		949.02	-0.00150567		1479.01	-0.00170879		2009.04	0.0014292		2539.04	-0.00474326		3069.04	-0.00684519		3599.04	-0.01354198
419.19	0.00393282		949.22	-0.0012566		1479.21	-0.00181633		2009.24	0.00132287		2539.24	-0.00562558		3069.24	-0.00767842		3599.24	-0.01375122
419.39	0.00379598		949.42	-0.00138191		1479.41	-0.00077872		2009.44	0.00135125		2539.44	-0.00539629		3069.44	-0.00757634		3599.44	-0.01388931
419.59	0.00377836		949.62	-0.00102222		1479.61	-0.00086295		2009.64	0.0026594		2539.64	-0.00636254		3069.64	-0.00738445		3599.64	-0.01422191
419.79	0.00384141		949.82	-0.001412		1479.81	-0.00052356		2009.84	0.00216414		2539.84	-0.00644131		3069.84	-0.00643461		3599.84	-0.01403529
419.99	0.00300197		950.02	-0.00095042		1480.01	-0.00081137		2010.04	0.00151751		2540.04	-0.00669241		3070.04	-0.00610604		3600.04	-0.01454254
420.19	0.00329102		950.22	-0.00067665		1480.21	-0.00115619		2010.24	0.0021281		2540.24	-0.00732221		3070.24	-0.00584411		3600.24	-0.01488755
420.39	0.00329322		950.42	-0.00088859		1480.41	-0.00136773		2010.44	0.00252615		2540.44	-0.00759152		3070.44	-0.00624105		3600.44	-0.01508661
420.59	0.00219828		950.62	-0.00041469		1480.61	-0.00059186		2010.64	0.00258902		2540.64	-0.00778072		3070.64	-0.00648337		3600.64	-0.01517241
420.79	0.00141272		950.82	-0.00090577		1480.81	-0.00087713		2010.84	0.00265663		2540.84	-0.00717509		3070.84	-0.00643416		3600.84	-0.01542113
420.99	0.00135629		951.02	-0.00038461		1481.01	-0.00066462		2011.04	0.00191545		2541.04	-0.00609831		3071.04	-0.00565008		3601.04	-0.01570508
421.19	0.00135569		951.22	-0.00027678		1481.21	-0.00030282		2011.24	0.00248364		2541.24	-0.00593103		3071.24	-0.00567393		3601.24	-0.01569601
421.39	0.00103488		951.42	-0.00105996		1481.41	0.00030411		2011.44	0.00129638		2541.44	-0.00590967		3071.44	-0.00594547		3601.44	-0.01570335
421.59	0.0015845		951.62	-0.00070716		1481.61	-0.00081607		2011.64	0.00164364		2541.64	-0.0054505		3071.64	-0.00665702		3601.64	-0.0159892
421.79	0.00196323		951.82	-0.00061819		1481.81	-0.00060496		2011.84	0.0025782		2541.84	-0.00514772		3071.84	-0.00750755		3601.84	-0.01620315
421.99	0.00204773		952.02	-0.00241697		1482.01	-0.00049751		2012.04	0.00319696		2542.04	-0.00462646		3072.04	-0.00704761		3602.04	-0.01637747
422.19	0.00281224		952.22	-0.00265616		1482.21	-0.00063981		2012.24	0.00268083		2542.24	-0.00527772		3072.24	-0.00735717		3602.24	-0.01675254
422.39	0.00321165		952.42	-0.00305804		1482.41	-0.00066166		2012.44	0.00277851		2542.44	-0.00554538		3072.44	-0.00691249		3602.44	-0.01685596
422.59	0.00308665		952.62	-0.00281947		1482.61	-0.00025584		2012.64	0.00285098		2542.64	-0.00581149		3072.64	-0.0073745		3602.64	-0.01638906
422.79	0.00332429		952.82	-0.00319084		1482.81	-0.00045101		2012.84	0.00277962		2542.84	-0.00604105		3072.84	-0.00767679		3602.84	-0.0165839
422.99	0.00463067		953.02	-0.00338611		1483.01	-0.00066118		2013.04	0.00281175		2543.04	-0.00633153		3073.04	-0.00803064		3603.04	-0.01637503
423.19	0.00444064		953.22	-0.00361001		1483.21	-0.00018394		2013.24	0.00245553		2543.24	-0.00570509		3073.24	-0.00804434		3603.24	-0.01728873
423.39	0.00491975		953.42	-0.00299937		1483.41	-0.00031159		2013.44	0.00240183		2543.44	-0.0057858		3073.44	-0.00734109		3603.44	-0.01681799
423.59	0.00526173		953.62	-0.0022217		1483.61	-0.00060397		2013.64	0.00283872		2543.64	-0.00631576		3073.64	-0.00750322		3603.64	-0.01633779
423.79	0.00505178		953.82	-0.00238744		1483.81	-0.00080535		2013.84	0.00144287		2543.84	-0.00650653		3073.84	-0.00744374		3603.84	-0.0164285
423.99	0.00480231		954.02	-0.00245187		1484.01	-0.00108761		2014.04	0.0009252		2544.04	-0.00711635		3074.04	-0.00814922		3604.04	-0.01658461
424.19	0.00587475		954.22	-0.00225909		1484.21	-0.00011392		2014.24	0.00111391		2544.24	-0.0078693		3074.24	-0.00866295		3604.24	-0.01589482
424.39	0.00482128		954.42	-0.00255953		1484.41	0.00011227		2014.44	0.0000239		2544.44	-0.00757914		3074.44	-0.00861596		3604.44	-0.01645469
424.59	0.00363541		954.62	-0.00275803		1484.61	0.00003568		2014.64	0.00049978		2544.64	-0.00798642		3074.64	-0.00803577		3604.64	-0.01664474
424.79	0.00391254		954.82	-0.00274583		1484.81	0.00011645		2014.84	0.00070702		2544.84	-0.00855433		3074.84	-0.00709685		3604.84	-0.01705995
424.99	0.00411465		955.02	-0.00176917		1485.01	0.00054481		2015.04	0.00066245		2545.04	-0.00890528		3075.04	-0.00696384		3605.04	-0.01677479
425.19	0.00364329		955.22	-0.00193749		1485.21	0.00044161		2015.24	-0.00001151		2545.24	-0.00947201		3075.24	-0.00759998		3605.24	-0.01648967
425.39	0.00387463		955.42	-0.00178085		1485.41	0.00038208		2015.44	-0.00015007		2545.44	-0.0099564		3075.44	-0.00743045		3605.44	-0.01642904
425.59	0.00455656		955.62	-0.00139237		1485.61	-0.00091227		2015.64	0.00046535		2545.64	-0.00979611		3075.64	-0.00754058		3605.64	-0.0163964
425.79	0.00453929		955.82	-0.00188401		1485.81	-0.00047375		2015.84	0.00094186		2545.84	-0.01028434		3075.84	-0.00764619		3605.84	-0.01681891
425.99	0.00334581		956.02	-0.0024725		1486.01	-0.00093874		2016.04	0.00027293		2546.04	-0.00945414		3076.04	-0.00706303		3606.04	-0.01757833
426.19	0.00352436		956.22	-0.00165999		1486.21	-0.00104556		2016.24	-0.00021364		2546.24	-0.00977749		3076.24	-0.0069476		3606.24	-0.01770259
426.39	0.00324169		956.42	-0.00249527		1486.41	-0.00097437		2016.44	0.00063934		2546.44	-0.00828262		3076.44	-0.00591008		3606.44	-0.01757953
426.59	0.00401137		956.62	-0.00173189		1486.61	-0.00142587		2016.64	0.00073034		2546.64	-0.00799044		3076.64	-0.00565756		3606.64	-0.01737468
426.79	0.00441937		956.82	-0.00169358		1486.81	-0.00171482		2016.84	0.00080642		2546.84	-0.00691867		3076.84	-0.0053239		3606.84	-0.01695507
426.99	0.00477714		957.02	-0.0023763		1487.01	-0.00144275		2017.04	0.00129633		2547.04	-0.00686829		3077.04	-0.00536498		3607.04	-0.01681557
427.19	0.00495808		957.22	-0.00219097		1487.21	-0.00115886		2017.24	0.00063048		2547.24	-0.00599291		3077.24	-0.0054964		3607.24	-0.01752742
427.39	0.00526358		957.42	-0.00175711		1487.41	-0.00054706		2017.44	0.00037391		2547.44	-0.00591351		3077.44	-0.0052974		3607.44	-0.01644008
427.59	0.00444798		957.62	-0.00188142		1487.61	-0.00054973		2017.64	0.00007767		2547.64	-0.0054944		3077.64	-0.00490653		3607.64	-0.01564233
427.79	0.00397063		957.82	-0.0023659		1487.81	0.00010996		2017.84	0.00004686		2547.84	-0.00558642		3077.84	-0.00465897		3607.84	-0.01536789
427.99	0.00506808		958.02	-0.00279216		1488.01	0.00048474		2018.04	-0.00019886		2548.04	-0.00531119		3078.04	-0.00469702		3608.04	-0.0153864
428.19	0.00456662		958.22	-0.00379456		1488.21	0.00171078		2018.24	-0.00039636		2548.24	-0.00441749		3078.24	-0.00483841		3608.24	-0.01462679
428.39	0.0045628		958.42	-0.00386406		1488.41	0.00154186		2018.44	-0.00056633		2548.44	-0.0047219		3078.44	-0.00472114		3608.44	-0.01499061
428.59	0.00410994		958.62	-0.00395451		1488.61	0.0013643		2018.64	-0.00059157		2548.64	-0.00530793		3078.64	-0.00458706		3608.64	-0.01489387
428.79	0.00488309		958.82	-0.00263732		1488.81	0.00172271		2018.84	-0.00051803		2548.84	-0.00577039		3078.84	-0.0052938		3608.84	-0.0142361
428.99	0.00396126		959.02	-0.00196522		1489.01	0.00168611		2019.04	-0.00100881		2549.04	-0.00557314		3079.04	-0.00625204		3609.04	-0.01441978
429.19	0.0040781		959.22	-0.00163394		1489.21	0.0015068		2019.24	-0.00156688		2549.24	-0.00628349		3079.24	-0.00632377		3609.24	-0.0142635
429.39	0.00407691		959.42	-0.00107147		1489.41	0.00121259		2019.44	-0.00091471		2549.44	-0.00634704		3079.44	-0.00605099		3609.44	-0.01487841
429.59	0.00365985		959.62	-0.00143895		1489.61	0.00128481		2019.64	-0.00082851		2549.64	-0.00614616		3079.64	-0.0069567		3609.64	-0.01502277
429.79	0.00248217		959.82	-0.00154325		1489.81	0.00187586		2019.84	-0.00058784		2549.84	-0.00678805		3079.84	-0.00754813		3609.84	-0.01590804
429.99	0.00147265		960.02	-0.00161579		1490.01	0.00074864		2020.04	-0.00072255		2550.04	-0.00667899		3080.04	-0.00715111		3610.04	-0.01610299
430.19	0.00218308		960.22	-0.00161931		1490.21	0.00075209		2020.24	-0.00025758		2550.24	-0.00711008		3080.24	-0.00681221		3610.24	-0.0150729
430.39	0.0022223		960.42	-0.00221911		1490.41	0.00046017		2020.44	0.00013532		2550.44	-0.00637926		3080.44	-0.00612361		3610.44	-0.01576484
430.59	0.00196588		960.62	-0.00195029		1490.61	0.00017002		2020.64	0.00026746		2550.64	-0.00674161		3080.64	-0.00689944		3610.64	-0.01559702
430.79	0.00151769		960.82	-0.00264089		1490.81	-0.00057305		2020.84	-0.00002475		2550.84	-0.00665667		3080.84	-0.00764313		3610.84	-0.01642091
430.99	0.0015982		961.02	-0.00319462		1491.01	-0.00119787		2021.04	0.0001142		2551.04	-0.00685868		3081.04	-0.0082665		3611.04	-0.01642474
431.19	0.00175801		961.22	-0.00211624		1491.21	-0.00205192		2021.24	0.00034705		2551.24	-0.00620988		3081.24	-0.00812466		3611.24	-0.0166734
431.39	0.00151368		961.42	-0.00173361		1491.41	-0.001794		2021.44	0.00139571		2551.44	-0.00631052		3081.44	-0.00780519		3611.44	-0.01609043
431.59	0.00088835		961.62	-0.00122743		1491.61	-0.00264331		2021.64	0.001635		2551.64	-0.00548373		3081.64	-0.00694343		3611.64	-0.0164281
431.79	0.00176424		961.82	-0.00184271		1491.81	-0.00230756		2021.84	0.00138988		2551.84	-0.00547138		3081.84	-0.00754295		3611.84	-0.01722015
431.99	0.00213449		962.02	-0.00207941		1492.01	-0.00265285		2022.04	0.00092873		2552.04	-0.00474799		3082.04	-0.00742122		3612.04	-0.0176626
432.19	0.00179878		962.22	-0.00228471		1492.21	-0.00230887		2022.24	0.00058151		2552.24	-0.0045969		3082.24	-0.00758806		3612.24	-0.01692874
432.39	0.0028373		962.42	-0.00084534		1492.41	-0.00267932		2022.44	0.00005197		2552.44	-0.00558171		3082.44	-0.00716303		3612.44	-0.01768141
432.59	0.00243972		962.62	-0.00059637		1492.61	-0.00313988		2022.64	-0.00011343		2552.64	-0.00547934		3082.64	-0.0071657		3612.64	-0.01762047
432.79	0.00271053		962.82	-0.0004214		1492.81	-0.00361304		2022.84	0.0005873		2552.84	-0.00624045		3082.84	-0.00747411		3612.84	-0.01769967
432.99	0.00261726		963.02	-0.00052492		1493.01	-0.0035984		2023.04	0.00026017		2553.04	-0.00628296		3083.04	-0.00693509		3613.04	-0.01837506
433.19	0.00366827		963.22	-0.00057642		1493.21	-0.00289535		2023.24	0.00035432		2553.24	-0.00605918		3083.24	-0.00674726		3613.24	-0.01841568
433.39	0.0036211		963.42	-0.00081994		1493.41	-0.00190914		2023.44	0.00096167		2553.44	-0.00556914		3083.44	-0.00615201		3613.44	-0.01888668
433.59	0.00374317		963.62	-0.00160189		1493.61	-0.0009692		2023.64	0.00141216		2553.64	-0.00614287		3083.64	-0.0067091		3613.64	-0.01844562
433.79	0.00329825		963.82	-0.00193327		1493.81	-0.00081653		2023.84	0.00190822		2553.84	-0.00589516		3083.84	-0.00633944		3613.84	-0.01840071
433.99	0.0035616		964.02	-0.00198659		1494.01	-0.00004112		2024.04	0.00180926		2554.04	-0.0054284		3084.04	-0.00621686		3614.04	-0.01822575
434.19	0.00414126		964.22	-0.00189325		1494.21	0.0010028		2024.24	0.00160992		2554.24	-0.00542497		3084.24	-0.00612172		3614.24	-0.01789447
434.39	0.00372264		964.42	-0.00296823		1494.41	0.0005951		2024.44	0.00111236		2554.44	-0.00472661		3084.44	-0.00720778		3614.44	-0.01922243
434.59	0.00376033		964.62	-0.00340384		1494.61	0.00020709		2024.64	0.00130962		2554.64	-0.00516378		3084.64	-0.00864784		3614.64	-0.01927356
434.79	0.00392447		964.82	-0.0037556		1494.81	-0.00034282		2024.84	0.00162581		2554.84	-0.00542225		3084.84	-0.00931311		3614.84	-0.02022279
434.99	0.00364265		965.02	-0.00416251		1495.01	-0.00079456		2025.04	0.00123181		2555.04	-0.00619103		3085.04	-0.00980736		3615.04	-0.02029517
435.19	0.00393979		965.22	-0.00312022		1495.21	-0.00107884		2025.24	0.00157591		2555.24	-0.00698075		3085.24	-0.01061805		3615.24	-0.01992362
435.39	0.00353697		965.42	-0.00329792		1495.41	-0.0006392		2025.44	0.00102487		2555.44	-0.00787274		3085.44	-0.01106035		3615.44	-0.01901979
435.59	0.00290519		965.62	-0.00324662		1495.61	-0.00145899		2025.64	0.00035364		2555.64	-0.00730408		3085.64	-0.01207505		3615.64	-0.0191333
435.79	0.00291958		965.82	-0.00390039		1495.81	-0.00141877		2025.84	-0.00026066		2555.84	-0.00783031		3085.84	-0.01225316		3615.84	-0.01949101
435.99	0.00224723		966.02	-0.00357157		1496.01	-0.00219986		2026.04	-0.0002122		2556.04	-0.007692		3086.04	-0.01191534		3616.04	-0.01937075
436.19	0.00112728		966.22	-0.00254026		1496.21	-0.00189476		2026.24	-0.0010613		2556.24	-0.00815378		3086.24	-0.01122126		3616.24	-0.01901065
436.39	0.0011587		966.42	-0.00246218		1496.41	-0.00179907		2026.44	-0.00214426		2556.44	-0.00818321		3086.44	-0.01019181		3616.44	-0.01923393
436.59	0.000354		966.62	-0.00253307		1496.61	-0.00196535		2026.64	-0.0026665		2556.64	-0.00797808		3086.64	-0.0101996		3616.64	-0.01775421
436.79	0.00064531		966.82	-0.00306218		1496.81	-0.00245422		2026.84	-0.0026171		2556.84	-0.00788838		3086.84	-0.00921471		3616.84	-0.01833225
436.99	0.00111221		967.02	-0.00217367		1497.01	-0.00200146		2027.04	-0.0036897		2557.04	-0.0077691		3087.04	-0.00772094		3617.04	-0.01809415
437.19	0.00066977		967.22	-0.00151012		1497.21	-0.00156266		2027.24	-0.00357776		2557.24	-0.00708361		3087.24	-0.00729724		3617.24	-0.01781876
437.39	0.00031889		967.42	-0.00127256		1497.41	-0.00133818		2027.44	-0.00271968		2557.44	-0.0068745		3087.44	-0.00588384		3617.44	-0.01824956
437.59	0.00004636		967.62	-0.00064019		1497.61	-0.00123128		2027.64	-0.00272065		2557.64	-0.00645442		3087.64	-0.00597982		3617.64	-0.01987117
437.79	-0.00020891		967.82	-0.00025088		1497.81	-0.00150943		2027.84	-0.0026305		2557.84	-0.00530091		3087.84	-0.00575887		3617.84	-0.02037294
437.99	0.00009399		968.02	-0.00106584		1498.01	-0.00153292		2028.04	-0.00273124		2558.04	-0.00506031		3088.04	-0.00497721		3618.04	-0.02082512
438.19	-0.00055551		968.22	-0.00170173		1498.21	-0.00172719		2028.24	-0.00241753		2558.24	-0.00544504		3088.24	-0.00451086		3618.24	-0.02027059
438.39	-0.00046083		968.42	-0.0025805		1498.41	-0.00306708		2028.44	-0.00184249		2558.44	-0.00522774		3088.44	-0.00577274		3618.44	-0.02129106
438.59	-0.00010281		968.62	-0.00268129		1498.61	-0.00365453		2028.64	-0.00079479		2558.64	-0.00556		3088.64	-0.00564275		3618.64	-0.02156646
438.79	-0.00051344		968.82	-0.0032111		1498.81	-0.00448664		2028.84	-0.0003644		2558.84	-0.00549854		3088.84	-0.00576511		3618.84	-0.02141073
438.99	-0.00013547		969.02	-0.00356223		1499.01	-0.00583781		2029.04	-0.00076459		2559.04	-0.00662832		3089.04	-0.00650485		3619.04	-0.02102277
439.19	-0.00053358		969.22	-0.00383804		1499.21	-0.00651597		2029.24	-0.00017589		2559.24	-0.00684233		3089.24	-0.00711367		3619.24	-0.01978972
439.39	-0.00077652		969.42	-0.00429455		1499.41	-0.00591964		2029.44	-0.00040839		2559.44	-0.00715663		3089.44	-0.00724797		3619.44	-0.01916852
439.59	-0.00016911		969.62	-0.00515225		1499.61	-0.00640467		2029.64	0.0002579		2559.64	-0.0077307		3089.64	-0.00824002		3619.64	-0.01947967
439.79	0.000443		969.82	-0.00567153		1499.81	-0.00603746		2029.84	0.00069605		2559.84	-0.00861294		3089.84	-0.00759066		3619.84	-0.01913017
439.99	0.00054602		970.02	-0.00512004		1500.01	-0.00529562		2030.04	0.00045002		2560.04	-0.00848878		3090.04	-0.00721328		3620.04	-0.01818223
440.19	0.00011584		970.22	-0.00454449		1500.21	-0.00405195		2030.24	0.00030783		2560.24	-0.00958131		3090.24	-0.00701082		3620.24	-0.01758316
440.39	0.00045412		970.42	-0.00527777		1500.41	-0.00380713		2030.44	-0.00007671		2560.44	-0.00946808		3090.44	-0.00691179		3620.44	-0.0177435
440.59	0.00030086		970.62	-0.00476182		1500.61	-0.00345259		2030.64	-0.00144136		2560.64	-0.0099239		3090.64	-0.0076447		3620.64	-0.01686949
440.79	0.00085457		970.82	-0.00488876		1500.81	-0.00353164		2030.84	-0.00159065		2560.84	-0.01080434		3090.84	-0.00729426		3620.84	-0.01736483
440.99	0.00077275		971.02	-0.00415978		1501.01	-0.00247281		2031.04	-0.00232349		2561.04	-0.01080795		3091.04	-0.00699735		3621.04	-0.01690149
441.19	0.00032431		971.22	-0.00324376		1501.21	-0.00217491		2031.24	-0.00186583		2561.24	-0.01090964		3091.24	-0.00734262		3621.24	-0.01741091
441.39	0.00037161		971.42	-0.00295485		1501.41	-0.00170575		2031.44	-0.00167024		2561.44	-0.0105756		3091.44	-0.00647275		3621.44	-0.01889256
441.59	0.00053778		971.62	-0.00258941		1501.61	-0.00162344		2031.64	-0.00219432		2561.64	-0.01051906		3091.64	-0.00673421		3621.64	-0.01981085
441.79	0.00048851		971.82	-0.0030315		1501.81	-0.00153449		2031.84	-0.0020708		2561.84	-0.01075565		3091.84	-0.00581517		3621.84	-0.01969512
441.99	0.00006715		972.02	-0.00351794		1502.01	-0.00043173		2032.04	-0.00140024		2562.04	-0.01075785		3092.04	-0.00541745		3622.04	-0.01928914
442.19	0.00006397		972.22	-0.00302118		1502.21	-0.00031331		2032.24	-0.0009793		2562.24	-0.01014223		3092.24	-0.00644353		3622.24	-0.01907008
442.39	0.00025231		972.42	-0.00295396		1502.41	-0.00123227		2032.44	-0.00094149		2562.44	-0.0092733		3092.44	-0.00707753		3622.44	-0.02055954
442.59	0.00048378		972.62	-0.00273037		1502.61	-0.0019729		2032.64	-0.00135129		2562.64	-0.00864415		3092.64	-0.00628948		3622.64	-0.02045987
442.79	0.00017121		972.82	-0.00284445		1502.81	-0.00177644		2032.84	-0.00223285		2562.84	-0.00822608		3092.84	-0.00616074		3622.84	-0.01971851
442.99	-0.00010429		973.02	-0.0028522		1503.01	-0.00177482		2033.04	-0.00291851		2563.04	-0.00847701		3093.04	-0.00643807		3623.04	-0.0194979
443.19	-0.00064758		973.22	-0.00355903		1503.21	-0.0015063		2033.24	-0.00195196		2563.24	-0.00832253		3093.24	-0.00600206		3623.24	-0.01896573
443.39	0.0004854		973.42	-0.00327171		1503.41	-0.0011856		2033.44	-0.00159298		2563.44	-0.00858215		3093.44	-0.00581617		3623.44	-0.01828542
443.59	0.00077322		973.62	-0.00393274		1503.61	-0.00210992		2033.64	-0.00103438		2563.64	-0.00959943		3093.64	-0.00595598		3623.64	-0.01786051
443.79	0.0007896		973.82	-0.00390004		1503.81	-0.00219533		2033.84	-0.00098205		2563.84	-0.00939125		3093.84	-0.00482542		3623.84	-0.01727483
443.99	0.00020311		974.02	-0.00374246		1504.01	-0.00187561		2034.04	-0.00139897		2564.04	-0.00888072		3094.04	-0.00499001		3624.04	-0.0171173
444.19	-0.00031668		974.22	-0.0035625		1504.21	-0.00147825		2034.24	-0.00150456		2564.24	-0.00924764		3094.24	-0.00554271		3624.24	-0.01709177
444.39	-0.00115312		974.42	-0.003912		1504.41	-0.0020806		2034.44	-0.00215966		2564.44	-0.00869374		3094.44	-0.00589952		3624.44	-0.01740966
444.59	-0.00064893		974.62	-0.0040142		1504.61	-0.00173471		2034.64	-0.00314086		2564.64	-0.00809594		3094.64	-0.00656566		3624.64	-0.01756408
444.79	-0.00072046		974.82	-0.00417272		1504.81	-0.00185394		2034.84	-0.00310289		2564.84	-0.00778948		3094.84	-0.00675054		3624.84	-0.01771702
444.99	-0.00120562		975.02	-0.0039456		1505.01	-0.00189271		2035.04	-0.002686		2565.04	-0.00685681		3095.04	-0.00650326		3625.04	-0.01821329
445.19	-0.00193671		975.22	-0.00423384		1505.21	-0.00222704		2035.24	-0.00300547		2565.24	-0.00694122		3095.24	-0.00692078		3625.24	-0.01851247
445.39	-0.00250406		975.42	-0.00492445		1505.41	-0.00219987		2035.44	-0.00274452		2565.44	-0.00622224		3095.44	-0.00746568		3625.44	-0.01896022
445.59	-0.0021076		975.62	-0.00523923		1505.61	-0.00173564		2035.64	-0.00254941		2565.64	-0.0063597		3095.64	-0.00874205		3625.64	-0.01926401
445.79	-0.00238048		975.82	-0.00524999		1505.81	-0.00110547		2035.84	-0.00168081		2565.84	-0.00631458		3095.84	-0.00950178		3625.84	-0.01988292
445.99	-0.00199999		976.02	-0.00512633		1506.01	-0.0009965		2036.04	-0.00092836		2566.04	-0.00599306		3096.04	-0.01131112		3626.04	-0.01947233
446.19	-0.00197577		976.22	-0.00528261		1506.21	-0.00198194		2036.24	-0.00055373		2566.24	-0.00494811		3096.24	-0.01230642		3626.24	-0.02019779
446.39	-0.00201859		976.42	-0.00576851		1506.41	-0.00159637		2036.44	-0.00159211		2566.44	-0.004994		3096.44	-0.01206312		3626.44	-0.01998854
446.59	-0.00187428		976.62	-0.00600993		1506.61	-0.00139721		2036.64	-0.00206647		2566.64	-0.00513806		3096.64	-0.01249571		3626.64	-0.01995618
446.79	-0.00236229		976.82	-0.00624812		1506.81	-0.00007542		2036.84	-0.00174813		2566.84	-0.00575976		3096.84	-0.01266916		3626.84	-0.0193069
446.99	-0.00338295		977.02	-0.00663125		1507.01	-0.0007256		2037.04	-0.00169834		2567.04	-0.0065327		3097.04	-0.01299565		3627.04	-0.01886519
447.19	-0.00277819		977.22	-0.00703696		1507.21	-0.00100463		2037.24	-0.00049771		2567.24	-0.00706622		3097.24	-0.01293718		3627.24	-0.0185218
447.39	-0.00181135		977.42	-0.00599844		1507.41	-0.00158588		2037.44	-0.00060445		2567.44	-0.00816677		3097.44	-0.01250643		3627.44	-0.0185112
447.59	-0.00160284		977.62	-0.00645111		1507.61	-0.0021285		2037.64	-0.00096427		2567.64	-0.00915595		3097.64	-0.01201144		3627.64	-0.01859904
447.79	-0.00073807		977.82	-0.00617378		1507.81	-0.00179711		2037.84	-0.00110636		2567.84	-0.00934978		3097.84	-0.01178392		3627.84	-0.01804057
447.99	-0.00125533		978.02	-0.00531011		1508.01	-0.00090685		2038.04	-0.00174755		2568.04	-0.00936255		3098.04	-0.0123266		3628.04	-0.01775165
448.19	0.00001549		978.22	-0.00418678		1508.21	-0.00073077		2038.24	-0.00264438		2568.24	-0.00951106		3098.24	-0.01171454		3628.24	-0.01732693
448.39	-0.00000958		978.42	-0.0041901		1508.41	-0.00115697		2038.44	-0.00276723		2568.44	-0.0087669		3098.44	-0.01118811		3628.44	-0.01759014
448.59	0.00008736		978.62	-0.00337701		1508.61	-0.00103434		2038.64	-0.00386455		2568.64	-0.00858597		3098.64	-0.01040716		3628.64	-0.01808994
448.79	-0.00056978		978.82	-0.00278306		1508.81	-0.0014508		2038.84	-0.00476792		2568.84	-0.00808755		3098.84	-0.00959519		3628.84	-0.01840807
448.99	-0.00090348		979.02	-0.00173714		1509.01	-0.00132117		2039.04	-0.00452079		2569.04	-0.00843503		3099.04	-0.0083987		3629.04	-0.01902234
449.19	-0.00153486		979.22	-0.00235102		1509.21	-0.00075852		2039.24	-0.00558334		2569.24	-0.00787979		3099.24	-0.00838225		3629.24	-0.01878112
449.39	-0.0017769		979.42	-0.00262312		1509.41	-0.00066137		2039.44	-0.00462632		2569.44	-0.00794602		3099.44	-0.00899666		3629.44	-0.0192503
449.59	-0.00146591		979.62	-0.00199891		1509.61	-0.00037435		2039.64	-0.00437372		2569.64	-0.00800196		3099.64	-0.00910432		3629.64	-0.01986204
449.79	-0.00221012		979.82	-0.00131764		1509.81	-0.00055262		2039.84	-0.00437896		2569.84	-0.00811643		3099.84	-0.00970026		3629.84	-0.02009976
449.99	-0.00203982		980.02	-0.00148266		1510.01	-0.00136108		2040.04	-0.00397182		2570.04	-0.00783018		3100.04	-0.01046887		3630.04	-0.01977821
450.19	-0.00295435		980.22	-0.0022441		1510.21	-0.00055648		2040.24	-0.0038749		2570.24	-0.00728728		3100.24	-0.00996		3630.24	-0.019705
450.39	-0.00337672		980.42	-0.00348512		1510.41	-0.00082363		2040.44	-0.00436508		2570.44	-0.00718666		3100.44	-0.01000769		3630.44	-0.01908672
450.59	-0.00445327		980.62	-0.00399211		1510.61	-0.00090948		2040.64	-0.00410483		2570.64	-0.00653083		3100.64	-0.01043788		3630.64	-0.01928976
450.79	-0.00518676		980.82	-0.00408175		1510.81	-0.0008673		2040.84	-0.00464243		2570.84	-0.0071341		3100.84	-0.01026725		3630.84	-0.01933806
450.99	-0.00597251		981.02	-0.00475202		1511.01	-0.00156022		2041.04	-0.00467926		2571.04	-0.00761322		3101.04	-0.01013283		3631.04	-0.01980695
451.19	-0.00537524		981.22	-0.0042936		1511.21	-0.00158679		2041.24	-0.00381006		2571.24	-0.0078894		3101.24	-0.01077728		3631.24	-0.02005853
451.39	-0.00476064		981.42	-0.00435378		1511.41	-0.00241253		2041.44	-0.00362129		2571.44	-0.00864042		3101.44	-0.01086903		3631.44	-0.02023848
451.59	-0.0046434		981.62	-0.00501333		1511.61	-0.00276397		2041.64	-0.00382077		2571.64	-0.00878549		3101.64	-0.01057519		3631.64	-0.0200806
451.79	-0.00430709		981.82	-0.00490621		1511.81	-0.0024062		2041.84	-0.00371727		2571.84	-0.00918208		3101.84	-0.01088486		3631.84	-0.01941506
451.99	-0.00513779		982.02	-0.00463407		1512.01	-0.00175248		2042.04	-0.00389587		2572.04	-0.00928336		3102.04	-0.01096211		3632.04	-0.01858016
452.19	-0.00448409		982.22	-0.00420104		1512.21	-0.00282754		2042.24	-0.00310947		2572.24	-0.0090478		3102.24	-0.0098366		3632.24	-0.01838888
452.39	-0.00510229		982.42	-0.00409991		1512.41	-0.00322144		2042.44	-0.00236074		2572.44	-0.00923966		3102.44	-0.00894382		3632.44	-0.01938904
452.59	-0.00518628		982.62	-0.00405445		1512.61	-0.00383111		2042.64	-0.00350357		2572.64	-0.01023299		3102.64	-0.00871625		3632.64	-0.02065231
452.79	-0.00496414		982.82	-0.0037796		1512.81	-0.00325315		2042.84	-0.0034187		2572.84	-0.00992583		3102.84	-0.00835471		3632.84	-0.02139752
452.99	-0.00420045		983.02	-0.0035352		1513.01	-0.00354118		2043.04	-0.00269579		2573.04	-0.01039149		3103.04	-0.00854405		3633.04	-0.02179253
453.19	-0.00397913		983.22	-0.00547276		1513.21	-0.00418481		2043.24	-0.00274479		2573.24	-0.01021962		3103.24	-0.00947996		3633.24	-0.02191736
453.39	-0.00328022		983.42	-0.00584837		1513.41	-0.00422783		2043.44	-0.00232584		2573.44	-0.01114208		3103.44	-0.00968682		3633.44	-0.0223552
453.59	-0.00254868		983.62	-0.00531509		1513.61	-0.00411346		2043.64	-0.00269008		2573.64	-0.01079769		3103.64	-0.0102202		3633.64	-0.02294666
453.79	-0.001484		983.82	-0.00571785		1513.81	-0.00464401		2043.84	-0.00249323		2573.84	-0.01039086		3103.84	-0.01093275		3633.84	-0.0234423
453.99	-0.0003171		984.02	-0.0059917		1514.01	-0.00491486		2044.04	-0.0019917		2574.04	-0.00958299		3104.04	-0.01109929		3634.04	-0.02285618
454.19	-0.00096393		984.22	-0.00620273		1514.21	-0.00515771		2044.24	-0.00188096		2574.24	-0.00924442		3104.24	-0.01019569		3634.24	-0.02218008
454.39	-0.00149819		984.42	-0.0070384		1514.41	-0.00581179		2044.44	-0.00209745		2574.44	-0.00862757		3104.44	-0.01072452		3634.44	-0.02206546
454.59	-0.00199872		984.62	-0.00678444		1514.61	-0.00529871		2044.64	-0.00214574		2574.64	-0.0079949		3104.64	-0.01117635		3634.64	-0.02236831
454.79	-0.00147717		984.82	-0.00657519		1514.81	-0.00529323		2044.84	-0.00247783		2574.84	-0.00815932		3104.84	-0.01113941		3634.84	-0.02325996
454.99	-0.00188722		985.02	-0.00618037		1515.01	-0.00560817		2045.04	-0.0013978		2575.04	-0.0076146		3105.04	-0.0120151		3635.04	-0.02271089
455.19	-0.00164133		985.22	-0.0052355		1515.21	-0.00521306		2045.24	-0.00164413		2575.24	-0.00732428		3105.24	-0.01219969		3635.24	-0.02226816
455.39	-0.00186093		985.42	-0.00520521		1515.41	-0.00540754		2045.44	-0.00189611		2575.44	-0.00724446		3105.44	-0.01157813		3635.44	-0.02175351
455.59	-0.00237003		985.62	-0.00455557		1515.61	-0.00545406		2045.64	-0.00150415		2575.64	-0.00719707		3105.64	-0.01067154		3635.64	-0.0218111
455.79	-0.00313802		985.82	-0.00454393		1515.81	-0.00514281		2045.84	-0.00169192		2575.84	-0.00705849		3105.84	-0.00966773		3635.84	-0.02173746
455.99	-0.00447702		986.02	-0.00441804		1516.01	-0.00560774		2046.04	-0.00164465		2576.04	-0.00694356		3106.04	-0.00859282		3636.04	-0.02178645
456.19	-0.00497235		986.22	-0.00437456		1516.21	-0.00639233		2046.24	-0.00108959		2576.24	-0.00695085		3106.24	-0.00796421		3636.24	-0.0226536
456.39	-0.00593159		986.42	-0.00429285		1516.41	-0.0063014		2046.44	-0.00142953		2576.44	-0.0071385		3106.44	-0.00795524		3636.44	-0.02346541
456.59	-0.00632853		986.62	-0.00516311		1516.61	-0.00617084		2046.64	-0.00343522		2576.64	-0.00727274		3106.64	-0.00848406		3636.64	-0.02357973
456.79	-0.00669433		986.82	-0.00491855		1516.81	-0.00574856		2046.84	-0.00373598		2576.84	-0.00764319		3106.84	-0.00824406		3636.84	-0.02311826
456.99	-0.00626687		987.02	-0.00612358		1517.01	-0.00640403		2047.04	-0.00354097		2577.04	-0.0080427		3107.04	-0.00836874		3637.04	-0.02312658
457.19	-0.0068198		987.22	-0.00765537		1517.21	-0.00619227		2047.24	-0.00445026		2577.24	-0.00860954		3107.24	-0.00770639		3637.24	-0.02286008
457.39	-0.00663604		987.42	-0.00717523		1517.41	-0.00600938		2047.44	-0.00531757		2577.44	-0.0095545		3107.44	-0.00715327		3637.44	-0.02172693
457.59	-0.00650777		987.62	-0.00702214		1517.61	-0.00610355		2047.64	-0.00538653		2577.64	-0.00958058		3107.64	-0.00740524		3637.64	-0.02193682
457.79	-0.00573861		987.82	-0.00772194		1517.81	-0.00646648		2047.84	-0.00506921		2577.84	-0.0103659		3107.84	-0.00767853		3637.84	-0.02118918
457.99	-0.00588423		988.02	-0.00770379		1518.01	-0.00523139		2048.04	-0.00508186		2578.04	-0.01080771		3108.04	-0.00745015		3638.04	-0.0202435
458.19	-0.00614034		988.22	-0.00851606		1518.21	-0.00501735		2048.24	-0.00488689		2578.24	-0.01087893		3108.24	-0.00783498		3638.24	-0.01970106
458.39	-0.00639245		988.42	-0.00929098		1518.41	-0.00417865		2048.44	-0.00495664		2578.44	-0.01058403		3108.44	-0.00878552		3638.44	-0.02018185
458.59	-0.00614502		988.62	-0.0087866		1518.61	-0.00372374		2048.64	-0.00512016		2578.64	-0.01043561		3108.64	-0.00938577		3638.64	-0.02020321
458.79	-0.00484394		988.82	-0.00855248		1518.81	-0.00318272		2048.84	-0.0051272		2578.84	-0.01050299		3108.84	-0.00958442		3638.84	-0.01950125
458.99	-0.00474637		989.02	-0.00834101		1519.01	-0.00160632		2049.04	-0.00464274		2579.04	-0.01047774		3109.04	-0.01004285		3639.04	-0.01969398
459.19	-0.00423523		989.22	-0.00965169		1519.21	-0.00115909		2049.24	-0.00467802		2579.24	-0.01088967		3109.24	-0.00989317		3639.24	-0.02002471
459.39	-0.00421645		989.42	-0.00913346		1519.41	-0.00117757		2049.44	-0.0039381		2579.44	-0.0104351		3109.44	-0.00995203		3639.44	-0.0201824
459.59	-0.00464612		989.62	-0.00935169		1519.61	-0.00137217		2049.64	-0.00319593		2579.64	-0.00999282		3109.64	-0.00929238		3639.64	-0.02117833
459.79	-0.00478698		989.82	-0.00952881		1519.81	-0.00137498		2049.84	-0.00344456		2579.84	-0.0096009		3109.84	-0.00937178		3639.84	-0.02225957
459.99	-0.00518561		990.02	-0.00905838		1520.01	-0.00180696		2050.04	-0.00274919		2580.04	-0.00913921		3110.04	-0.00979972		3640.04	-0.02306218
460.19	-0.00505452		990.22	-0.00885718		1520.21	-0.00197277		2050.24	-0.0027361		2580.24	-0.00859012		3110.24	-0.00988704		3640.24	-0.02335247
460.39	-0.0046478		990.42	-0.0089056		1520.41	-0.00260301		2050.44	-0.00313892		2580.44	-0.00854526		3110.44	-0.01017533		3640.44	-0.02345773
460.59	-0.00407432		990.62	-0.0098704		1520.61	-0.00344368		2050.64	-0.00420816		2580.64	-0.00867025		3110.64	-0.01005809		3640.64	-0.02397358
460.79	-0.00335569		990.82	-0.00883885		1520.81	-0.00457945		2050.84	-0.00341341		2580.84	-0.00962379		3110.84	-0.00995094		3640.84	-0.02479575
460.99	-0.00305675		991.02	-0.00858685		1521.01	-0.00567996		2051.04	-0.00305209		2581.04	-0.009843		3111.04	-0.01001723		3641.04	-0.02480851
461.19	-0.003459		991.22	-0.00774481		1521.21	-0.00644834		2051.24	-0.0035991		2581.24	-0.01088101		3111.24	-0.00909152		3641.24	-0.02330476
461.39	-0.00236737		991.42	-0.00668084		1521.41	-0.00762675		2051.44	-0.00310247		2581.44	-0.01192344		3111.44	-0.00881182		3641.44	-0.02199916
461.59	-0.00206699		991.62	-0.0069551		1521.61	-0.00742445		2051.64	-0.00218105		2581.64	-0.01223704		3111.64	-0.00859249		3641.64	-0.02199783
461.79	-0.00183787		991.82	-0.00675975		1521.81	-0.00759432		2051.84	-0.00164673		2581.84	-0.01231308		3111.84	-0.00856465		3641.84	-0.02153678
461.99	-0.00114264		992.02	-0.00578204		1522.01	-0.00704688		2052.04	-0.00158806		2582.04	-0.0121041		3112.04	-0.00790784		3642.04	-0.0219996
462.19	-0.00067031		992.22	-0.00503166		1522.21	-0.00677784		2052.24	-0.00175598		2582.24	-0.01139902		3112.24	-0.00808372		3642.24	-0.02176429
462.39	-0.00103329		992.42	-0.00484705		1522.41	-0.00731119		2052.44	-0.00272477		2582.44	-0.01165821		3112.44	-0.00743644		3642.44	-0.02226941
462.59	-0.00067089		992.62	-0.00471941		1522.61	-0.00696865		2052.64	-0.00324621		2582.64	-0.011976		3112.64	-0.00764823		3642.64	-0.02155996
462.79	-0.0002134		992.82	-0.00555768		1522.81	-0.00598559		2052.84	-0.00275858		2582.84	-0.01160879		3112.84	-0.00805768		3642.84	-0.02149841
462.99	-0.00076538		993.02	-0.00620573		1523.01	-0.00482877		2053.04	-0.0030948		2583.04	-0.01126066		3113.04	-0.00849718		3643.04	-0.02270598
463.19	-0.00182439		993.22	-0.00677651		1523.21	-0.00500415		2053.24	-0.00319894		2583.24	-0.01157891		3113.24	-0.00910034		3643.24	-0.02245589
463.39	-0.00297069		993.42	-0.00535982		1523.41	-0.00476744		2053.44	-0.00336599		2583.44	-0.0103895		3113.44	-0.00916779		3643.44	-0.02246923
463.59	-0.003611		993.62	-0.00538681		1523.61	-0.0041401		2053.64	-0.00286866		2583.64	-0.00952592		3113.64	-0.00991278		3643.64	-0.02259703
463.79	-0.00373216		993.82	-0.00543163		1523.81	-0.00384755		2053.84	-0.0036093		2583.84	-0.0094799		3113.84	-0.01058792		3643.84	-0.0229156
463.99	-0.00419318		994.02	-0.00592982		1524.01	-0.00390853		2054.04	-0.00378871		2584.04	-0.00959755		3114.04	-0.01058653		3644.04	-0.02323566
464.19	-0.00375672		994.22	-0.00713842		1524.21	-0.00453674		2054.24	-0.00430101		2584.24	-0.00917896		3114.24	-0.01094589		3644.24	-0.02307313
464.39	-0.00299382		994.42	-0.00727062		1524.41	-0.00463903		2054.44	-0.00457457		2584.44	-0.00884883		3114.44	-0.01211082		3644.44	-0.02260251
464.59	-0.00319732		994.62	-0.00774555		1524.61	-0.00508807		2054.64	-0.0046155		2584.64	-0.00892763		3114.64	-0.01227754		3644.64	-0.02315972
464.79	-0.00298041		994.82	-0.00716237		1524.81	-0.00522526		2054.84	-0.00431566		2584.84	-0.00953546		3114.84	-0.01243855		3644.84	-0.02294368
464.99	-0.00383815		995.02	-0.00758447		1525.01	-0.00577874		2055.04	-0.00464598		2585.04	-0.00928137		3115.04	-0.01208635		3645.04	-0.02197918
465.19	-0.0039478		995.22	-0.00832017		1525.21	-0.00576859		2055.24	-0.00415216		2585.24	-0.0095225		3115.24	-0.01146888		3645.24	-0.02050302
465.39	-0.00311653		995.42	-0.00885563		1525.41	-0.00549884		2055.44	-0.00361471		2585.44	-0.00978678		3115.44	-0.01098054		3645.44	-0.02017323
465.59	-0.00349325		995.62	-0.00891712		1525.61	-0.00443966		2055.64	-0.00278586		2585.64	-0.00976658		3115.64	-0.0106458		3645.64	-0.02012143
465.79	-0.00396778		995.82	-0.00862115		1525.81	-0.00440432		2055.84	-0.00236374		2585.84	-0.00967255		3115.84	-0.01030561		3645.84	-0.02069836
465.99	-0.00379812		996.02	-0.00851294		1526.01	-0.0042518		2056.04	-0.00184258		2586.04	-0.00943448		3116.04	-0.00965113		3646.04	-0.02077878
466.19	-0.00365588		996.22	-0.00883161		1526.21	-0.00431351		2056.24	-0.00200535		2586.24	-0.01007529		3116.24	-0.00943166		3646.24	-0.02020712
466.39	-0.00372193		996.42	-0.00874066		1526.41	-0.00491817		2056.44	-0.00152426		2586.44	-0.0109928		3116.44	-0.00930982		3646.44	-0.0206218
466.59	-0.00365443		996.62	-0.00890708		1526.61	-0.00469318		2056.64	-0.00138703		2586.64	-0.01135519		3116.64	-0.00985916		3646.64	-0.02096985
466.79	-0.00349297		996.82	-0.00951338		1526.81	-0.00500993		2056.84	-0.00087775		2586.84	-0.01109506		3116.84	-0.0094513		3646.84	-0.02175319
466.99	-0.0037833		997.02	-0.00942836		1527.01	-0.0054214		2057.04	-0.00132476		2587.04	-0.01096594		3117.04	-0.00998611		3647.04	-0.02230837
467.19	-0.00422036		997.22	-0.00921834		1527.21	-0.00642382		2057.24	-0.00175967		2587.24	-0.01143283		3117.24	-0.0100831		3647.24	-0.02209551
467.39	-0.00461063		997.42	-0.00918119		1527.41	-0.006853		2057.44	-0.00216809		2587.44	-0.01083163		3117.44	-0.01124889		3647.44	-0.02203551
467.59	-0.00402117		997.62	-0.00856585		1527.61	-0.00642923		2057.64	-0.00321971		2587.64	-0.01142405		3117.64	-0.01151878		3647.64	-0.02219031
467.79	-0.00377669		997.82	-0.00904337		1527.81	-0.00686463		2057.84	-0.0040552		2587.84	-0.01139914		3117.84	-0.0106241		3647.84	-0.02283297
467.99	-0.00363738		998.02	-0.00852919		1528.01	-0.00748573		2058.04	-0.0045094		2588.04	-0.01162788		3118.04	-0.01079807		3648.04	-0.02304803
468.19	-0.00320423		998.22	-0.00783507		1528.21	-0.00754943		2058.24	-0.00471216		2588.24	-0.01119555		3118.24	-0.01075498		3648.24	-0.02241418
468.39	-0.00303979		998.42	-0.00742231		1528.41	-0.0074486		2058.44	-0.00569992		2588.44	-0.0109913		3118.44	-0.01040589		3648.44	-0.0218775
468.59	-0.00414982		998.62	-0.00797609		1528.61	-0.0076638		2058.64	-0.00606309		2588.64	-0.01144253		3118.64	-0.00991008		3648.64	-0.02252525
468.79	-0.00445768		998.82	-0.00752869		1528.81	-0.00700433		2058.84	-0.00679278		2588.84	-0.01142407		3118.84	-0.00915213		3648.84	-0.02232768
468.99	-0.00518929		999.02	-0.00749154		1529.01	-0.00638448		2059.04	-0.00744319		2589.04	-0.01135361		3119.04	-0.0085812		3649.04	-0.02263845
469.19	-0.00496773		999.22	-0.00765856		1529.21	-0.00560862		2059.24	-0.00726755		2589.24	-0.01162914		3119.24	-0.00884443		3649.24	-0.02222327
469.39	-0.00510583		999.42	-0.00746079		1529.41	-0.00509133		2059.44	-0.00737734		2589.44	-0.01196771		3119.44	-0.00846638		3649.44	-0.02285177
469.59	-0.00586782		999.62	-0.00686164		1529.61	-0.00468414		2059.64	-0.00629591		2589.64	-0.01173604		3119.64	-0.00848638		3649.64	-0.02299429
469.79	-0.00655957		999.82	-0.00664609		1529.81	-0.00479891		2059.84	-0.00573503		2589.84	-0.0122239		3119.84	-0.00839953		3649.84	-0.02327475
469.99	-0.00631018		1000.02	-0.00640289		1530.01	-0.00498063		2060.04	-0.00543911		2590.04	-0.01319478		3120.04	-0.00807837		3650.04	-0.02341629
470.19	-0.00587413		1000.22	-0.00656233		1530.21	-0.00582518		2060.24	-0.00485813		2590.24	-0.01377749		3120.24	-0.00819495		3650.24	-0.02308118
470.39	-0.00578639		1000.42	-0.00600731		1530.41	-0.00634866		2060.44	-0.00338955		2590.44	-0.01388914		3120.44	-0.00829259		3650.44	-0.02400624
470.59	-0.0056297		1000.62	-0.00713303		1530.61	-0.00641377		2060.64	-0.00308918		2590.64	-0.01348211		3120.64	-0.00813457		3650.64	-0.02411398
470.79	-0.00585947		1000.82	-0.00707185		1530.81	-0.00701304		2060.84	-0.00252297		2590.84	-0.01296131		3120.84	-0.00921753		3650.84	-0.02354124
470.99	-0.00628961		1001.02	-0.00715259		1531.01	-0.00718629		2061.04	-0.00295126		2591.04	-0.01190314		3121.04	-0.01114861		3651.04	-0.02244327
471.19	-0.00695884		1001.22	-0.00771878		1531.21	-0.00765597		2061.24	-0.0029376		2591.24	-0.01199032		3121.24	-0.01265045		3651.24	-0.02186497
471.39	-0.00685422		1001.42	-0.00792547		1531.41	-0.0075824		2061.44	-0.00329793		2591.44	-0.01147334		3121.44	-0.01353548		3651.44	-0.0217353
471.59	-0.00554284		1001.62	-0.00742966		1531.61	-0.00787179		2061.64	-0.00278867		2591.64	-0.01143838		3121.64	-0.01331365		3651.64	-0.0215132
471.79	-0.00581241		1001.82	-0.00795878		1531.81	-0.00840174		2061.84	-0.00195648		2591.84	-0.01054503		3121.84	-0.01320433		3651.84	-0.02226574
471.99	-0.00539154		1002.02	-0.00757067		1532.01	-0.00838488		2062.04	-0.00315495		2592.04	-0.0104913		3122.04	-0.01332804		3652.04	-0.0216624
472.19	-0.0050653		1002.22	-0.00857988		1532.21	-0.00804978		2062.24	-0.00299549		2592.24	-0.01020205		3122.24	-0.01262002		3652.24	-0.02127172
472.39	-0.00542494		1002.42	-0.00938238		1532.41	-0.00766132		2062.44	-0.00370589		2592.44	-0.01008609		3122.44	-0.01251088		3652.44	-0.02177375
472.59	-0.00516154		1002.62	-0.0093178		1532.61	-0.00702635		2062.64	-0.00328985		2592.64	-0.01014485		3122.64	-0.01253781		3652.64	-0.02222011
472.79	-0.00476435		1002.82	-0.00929059		1532.81	-0.00666356		2062.84	-0.0033019		2592.84	-0.01010537		3122.84	-0.01174099		3652.84	-0.0224901
472.99	-0.00394274		1003.02	-0.00956887		1533.01	-0.00629153		2063.04	-0.00298737		2593.04	-0.01057892		3123.04	-0.01181269		3653.04	-0.02263785
473.19	-0.00388289		1003.22	-0.00994704		1533.21	-0.00697781		2063.24	-0.00263543		2593.24	-0.01075275		3123.24	-0.01222923		3653.24	-0.02253113
473.39	-0.0038113		1003.42	-0.01066258		1533.41	-0.00695601		2063.44	-0.00266138		2593.44	-0.01074633		3123.44	-0.01179803		3653.44	-0.0224348
473.59	-0.00319505		1003.62	-0.01027956		1533.61	-0.00704341		2063.64	-0.00247575		2593.64	-0.01158671		3123.64	-0.01173442		3653.64	-0.02228135
473.79	-0.00397805		1003.82	-0.010554		1533.81	-0.0070512		2063.84	-0.00222356		2593.84	-0.01319791		3123.84	-0.01140275		3653.84	-0.02250241
473.99	-0.00327963		1004.02	-0.01026939		1534.01	-0.00715641		2064.04	-0.00163318		2594.04	-0.01405451		3124.04	-0.01113007		3654.04	-0.02271631
474.19	-0.00334708		1004.22	-0.00910463		1534.21	-0.00749572		2064.24	-0.00117372		2594.24	-0.01344889		3124.24	-0.01101624		3654.24	-0.02301329
474.39	-0.00415089		1004.42	-0.00785886		1534.41	-0.0065225		2064.44	-0.00142803		2594.44	-0.01426465		3124.44	-0.01074376		3654.44	-0.02372781
474.59	-0.00486759		1004.62	-0.00747196		1534.61	-0.00576274		2064.64	-0.00183275		2594.64	-0.01439997		3124.64	-0.01091125		3654.64	-0.02296471
474.79	-0.00571254		1004.82	-0.00738572		1534.81	-0.00595352		2064.84	-0.00144986		2594.84	-0.01405403		3124.84	-0.01163861		3654.84	-0.02184045
474.99	-0.00553997		1005.02	-0.00758352		1535.01	-0.00566642		2065.04	-0.00242937		2595.04	-0.01383891		3125.04	-0.01147066		3655.04	-0.02118824
475.19	-0.00587171		1005.22	-0.00756611		1535.21	-0.00554571		2065.24	-0.00228072		2595.24	-0.01424091		3125.24	-0.01202702		3655.24	-0.02095643
475.39	-0.00537006		1005.42	-0.00728715		1535.41	-0.00585356		2065.44	-0.00201572		2595.44	-0.01381299		3125.44	-0.01148584		3655.44	-0.02135848
475.59	-0.00506606		1005.62	-0.0072196		1535.61	-0.00633444		2065.64	-0.0023071		2595.64	-0.01437301		3125.64	-0.01124735		3655.64	-0.0219221
475.79	-0.00555048		1005.82	-0.00730756		1535.81	-0.00635874		2065.84	-0.00343493		2595.84	-0.01438741		3125.84	-0.01093951		3655.84	-0.02282343
475.99	-0.00478705		1006.02	-0.00700235		1536.01	-0.0064731		2066.04	-0.00488025		2596.04	-0.01382631		3126.04	-0.01064276		3656.04	-0.0222831
476.19	-0.00508456		1006.22	-0.00772038		1536.21	-0.00676594		2066.24	-0.00481705		2596.24	-0.01366485		3126.24	-0.01008808		3656.24	-0.02227958
476.39	-0.00547891		1006.42	-0.00768853		1536.41	-0.00609765		2066.44	-0.00590083		2596.44	-0.01393472		3126.44	-0.01018036		3656.44	-0.02292466
476.59	-0.00500883		1006.62	-0.00845463		1536.61	-0.00736804		2066.64	-0.00550444		2596.64	-0.01352046		3126.64	-0.00920992		3656.64	-0.02278875
476.79	-0.00401577		1006.82	-0.00902585		1536.81	-0.00828484		2066.84	-0.00598568		2596.84	-0.01383426		3126.84	-0.00869693		3656.84	-0.02236083
476.99	-0.00403283		1007.02	-0.00928969		1537.01	-0.00846148		2067.04	-0.00653127		2597.04	-0.01367037		3127.04	-0.00995243		3657.04	-0.02231289
477.19	-0.00473276		1007.22	-0.01024849		1537.21	-0.00900417		2067.24	-0.00703877		2597.24	-0.01392195		3127.24	-0.01087031		3657.24	-0.02250755
477.39	-0.00486178		1007.42	-0.01096284		1537.41	-0.00942458		2067.44	-0.00754362		2597.44	-0.01363826		3127.44	-0.0114939		3657.44	-0.0219734
477.59	-0.00443502		1007.62	-0.01110769		1537.61	-0.0099633		2067.64	-0.00680463		2597.64	-0.01320911		3127.64	-0.0116389		3657.64	-0.02232398
477.79	-0.00548581		1007.82	-0.01080181		1537.81	-0.01024153		2067.84	-0.00619071		2597.84	-0.01328056		3127.84	-0.01222158		3657.84	-0.02193151
477.99	-0.00425398		1008.02	-0.0100553		1538.01	-0.00979882		2068.04	-0.00560546		2598.04	-0.01320097		3128.04	-0.01240866		3658.04	-0.0221933
478.19	-0.00437348		1008.22	-0.00971512		1538.21	-0.0090133		2068.24	-0.0053155		2598.24	-0.0129142		3128.24	-0.01300078		3658.24	-0.02240355
478.39	-0.00500853		1008.42	-0.00990208		1538.41	-0.00798327		2068.44	-0.00508372		2598.44	-0.0133467		3128.44	-0.0136638		3658.44	-0.02145966
478.59	-0.00492		1008.62	-0.01030954		1538.61	-0.00803329		2068.64	-0.00318631		2598.64	-0.01318397		3128.64	-0.01372483		3658.64	-0.02095044
478.79	-0.00531076		1008.82	-0.01056832		1538.81	-0.00713262		2068.84	-0.00242909		2598.84	-0.01223378		3128.84	-0.01332472		3658.84	-0.02089359
478.99	-0.00511527		1009.02	-0.01034901		1539.01	-0.00555754		2069.04	-0.00212632		2599.04	-0.01252174		3129.04	-0.01308288		3659.04	-0.02119588
479.19	-0.0066103		1009.22	-0.00988652		1539.21	-0.00538327		2069.24	-0.00113519		2599.24	-0.01250384		3129.24	-0.01294158		3659.24	-0.02102283
479.39	-0.00657017		1009.42	-0.00978488		1539.41	-0.00432109		2069.44	-0.00062628		2599.44	-0.01199515		3129.44	-0.01209544		3659.44	-0.0224405
479.59	-0.00597776		1009.62	-0.00918063		1539.61	-0.00269265		2069.64	-0.00097478		2599.64	-0.01247041		3129.64	-0.01212466		3659.64	-0.02228198
479.79	-0.00665475		1009.82	-0.00950989		1539.81	-0.00195174		2069.84	-0.00078644		2599.84	-0.01204847		3129.84	-0.01127641		3659.84	-0.02237911
479.99	-0.00655798		1010.02	-0.00917727		1540.01	-0.00187474		2070.04	-0.00177742		2600.04	-0.01165674		3130.04	-0.01082076		3660.04	-0.02246693
480.19	-0.0071394		1010.22	-0.00919036		1540.21	-0.00156906		2070.24	-0.00196618		2600.24	-0.01222911		3130.24	-0.009624		3660.24	-0.02287507
480.39	-0.00749101		1010.42	-0.00920602		1540.41	-0.00186341		2070.44	-0.00251261		2600.44	-0.01226983		3130.44	-0.00915387		3660.44	-0.02345614
480.59	-0.00748789		1010.62	-0.00893337		1540.61	-0.00336676		2070.64	-0.0022816		2600.64	-0.01260386		3130.64	-0.00851761		3660.64	-0.02341501
480.79	-0.00667674		1010.82	-0.00830144		1540.81	-0.00341193		2070.84	-0.00296832		2600.84	-0.01304768		3130.84	-0.00945655		3660.84	-0.0234889
480.99	-0.00725497		1011.02	-0.00799248		1541.01	-0.0036741		2071.04	-0.00423218		2601.04	-0.01216422		3131.04	-0.01052325		3661.04	-0.02373244
481.19	-0.0072271		1011.22	-0.00904748		1541.21	-0.00362429		2071.24	-0.00420955		2601.24	-0.01244013		3131.24	-0.01062798		3661.24	-0.02384039
481.39	-0.00691268		1011.42	-0.00918383		1541.41	-0.00403489		2071.44	-0.00432122		2601.44	-0.01198698		3131.44	-0.01090507		3661.44	-0.02309067
481.59	-0.00688993		1011.62	-0.00938214		1541.61	-0.00497369		2071.64	-0.00382886		2601.64	-0.01170906		3131.64	-0.0112652		3661.64	-0.02300262
481.79	-0.0073045		1011.82	-0.00925674		1541.81	-0.00613514		2071.84	-0.0045581		2601.84	-0.01162677		3131.84	-0.01253572		3661.84	-0.02201244
481.99	-0.00695042		1012.02	-0.00949772		1542.01	-0.00674443		2072.04	-0.00466285		2602.04	-0.01133046		3132.04	-0.01337911		3662.04	-0.02239323
482.19	-0.00711503		1012.22	-0.00962269		1542.21	-0.00684912		2072.24	-0.00476867		2602.24	-0.01134493		3132.24	-0.01445695		3662.24	-0.02143008
482.39	-0.00769887		1012.42	-0.00913894		1542.41	-0.00682791		2072.44	-0.00455596		2602.44	-0.01157476		3132.44	-0.01567147		3662.44	-0.0209178
482.59	-0.00801414		1012.62	-0.00962512		1542.61	-0.0070551		2072.64	-0.00526133		2602.64	-0.01123973		3132.64	-0.01510118		3662.64	-0.02172173
482.79	-0.0079418		1012.82	-0.00969159		1542.81	-0.00644682		2072.84	-0.0061536		2602.84	-0.01120631		3132.84	-0.015579		3662.84	-0.02178188
482.99	-0.00805139		1013.02	-0.01006983		1543.01	-0.00511063		2073.04	-0.00579063		2603.04	-0.01081462		3133.04	-0.01605996		3663.04	-0.02203624
483.19	-0.00829081		1013.22	-0.00948615		1543.21	-0.00511474		2073.24	-0.00642517		2603.24	-0.01061481		3133.24	-0.01598056		3663.24	-0.02208761
483.39	-0.00722367		1013.42	-0.00977988		1543.41	-0.00383581		2073.44	-0.0062937		2603.44	-0.00989315		3133.44	-0.01605553		3663.44	-0.02268278
483.59	-0.0068708		1013.62	-0.01038501		1543.61	-0.00383462		2073.64	-0.00625894		2603.64	-0.01048492		3133.64	-0.01590953		3663.64	-0.02212703
483.79	-0.00728275		1013.82	-0.01094416		1543.81	-0.00542657		2073.84	-0.00638887		2603.84	-0.01046575		3133.84	-0.01489901		3663.84	-0.02269626
483.99	-0.00652149		1014.02	-0.01017979		1544.01	-0.00546059		2074.04	-0.00595719		2604.04	-0.01078473		3134.04	-0.01513181		3664.04	-0.02282867
484.19	-0.00666556		1014.22	-0.00994979		1544.21	-0.00576953		2074.24	-0.00483344		2604.24	-0.01130421		3134.24	-0.01365369		3664.24	-0.0231119
484.39	-0.00632991		1014.42	-0.01024148		1544.41	-0.00652715		2074.44	-0.00437891		2604.44	-0.01131345		3134.44	-0.01400706		3664.44	-0.02331345
484.59	-0.00634025		1014.62	-0.00956166		1544.61	-0.00634643		2074.64	-0.00484734		2604.64	-0.01196315		3134.64	-0.0131147		3664.64	-0.02366488
484.79	-0.00583569		1014.82	-0.00972918		1544.81	-0.00544126		2074.84	-0.00463543		2604.84	-0.01129306		3134.84	-0.01330074		3664.84	-0.02407142
484.99	-0.00604133		1015.02	-0.01005284		1545.01	-0.00510316		2075.04	-0.0048053		2605.04	-0.01125464		3135.04	-0.01237551		3665.04	-0.02460469
485.19	-0.0065197		1015.22	-0.01075438		1545.21	-0.00431859		2075.24	-0.00397529		2605.24	-0.01182052		3135.24	-0.01165317		3665.24	-0.02513943
485.39	-0.00620054		1015.42	-0.01092918		1545.41	-0.00497763		2075.44	-0.0035189		2605.44	-0.01138566		3135.44	-0.01088618		3665.44	-0.02483595
485.59	-0.00626347		1015.62	-0.0110538		1545.61	-0.00563		2075.64	-0.00301171		2605.64	-0.01101256		3135.64	-0.01052416		3665.64	-0.02479242
485.79	-0.00632467		1015.82	-0.01029554		1545.81	-0.0059688		2075.84	-0.00301413		2605.84	-0.0098621		3135.84	-0.0103078		3665.84	-0.02493294
485.99	-0.00612839		1016.02	-0.00974844		1546.01	-0.00622128		2076.04	-0.00288329		2606.04	-0.01051146		3136.04	-0.01040448		3666.04	-0.02518618
486.19	-0.00612201		1016.22	-0.00965128		1546.21	-0.00584456		2076.24	-0.00319518		2606.24	-0.01132674		3136.24	-0.01064848		3666.24	-0.02466646
486.39	-0.00537276		1016.42	-0.00966019		1546.41	-0.00599282		2076.44	-0.00309626		2606.44	-0.0118958		3136.44	-0.01091435		3666.44	-0.02527888
486.59	-0.00456316		1016.62	-0.01001826		1546.61	-0.00627103		2076.64	-0.00401153		2606.64	-0.01171715		3136.64	-0.01085944		3666.64	-0.02545152
486.79	-0.0047748		1016.82	-0.00997629		1546.81	-0.00744837		2076.84	-0.0033903		2606.84	-0.01240093		3136.84	-0.01183224		3666.84	-0.02551493
486.99	-0.00590898		1017.02	-0.00985334		1547.01	-0.00737234		2077.04	-0.00321033		2607.04	-0.01172565		3137.04	-0.01215387		3667.04	-0.0259444
487.19	-0.00589124		1017.22	-0.01062524		1547.21	-0.00811809		2077.24	-0.00384584		2607.24	-0.01273263		3137.24	-0.01205158		3667.24	-0.02618857
487.39	-0.00645168		1017.42	-0.01099117		1547.41	-0.00783701		2077.44	-0.00372078		2607.44	-0.0127621		3137.44	-0.01187644		3667.44	-0.02572397
487.59	-0.00730744		1017.62	-0.01177494		1547.61	-0.00864691		2077.64	-0.00366488		2607.64	-0.01329524		3137.64	-0.0118343		3667.64	-0.0259577
487.79	-0.00845195		1017.82	-0.01108928		1547.81	-0.00899109		2077.84	-0.00338544		2607.84	-0.01320978		3137.84	-0.01193829		3667.84	-0.02584875
487.99	-0.00859159		1018.02	-0.01178993		1548.01	-0.0093708		2078.04	-0.00364702		2608.04	-0.01368772		3138.04	-0.01172761		3668.04	-0.02544491
488.19	-0.00869147		1018.22	-0.01187026		1548.21	-0.00968461		2078.24	-0.00347767		2608.24	-0.01374709		3138.24	-0.01151834		3668.24	-0.02572062
488.39	-0.00887244		1018.42	-0.01165678		1548.41	-0.00918551		2078.44	-0.0043689		2608.44	-0.01383497		3138.44	-0.01256863		3668.44	-0.02598236
488.59	-0.00989264		1018.62	-0.0115078		1548.61	-0.0089172		2078.64	-0.00524549		2608.64	-0.01391394		3138.64	-0.0124774		3668.64	-0.02596001
488.79	-0.00984769		1018.82	-0.01160517		1548.81	-0.0078304		2078.84	-0.00493481		2608.84	-0.0129901		3138.84	-0.01229687		3668.84	-0.02626168
488.99	-0.01085859		1019.02	-0.01182818		1549.01	-0.00717642		2079.04	-0.00510177		2609.04	-0.01307436		3139.04	-0.01162049		3669.04	-0.02684607
489.19	-0.01017262		1019.22	-0.01186464		1549.21	-0.00617625		2079.24	-0.0051313		2609.24	-0.01296423		3139.24	-0.01138308		3669.24	-0.0268779
489.39	-0.00917748		1019.42	-0.01225403		1549.41	-0.00641722		2079.44	-0.00456181		2609.44	-0.01270503		3139.44	-0.01149843		3669.44	-0.02659266
489.59	-0.00904672		1019.62	-0.01104419		1549.61	-0.00626993		2079.64	-0.00483003		2609.64	-0.01295425		3139.64	-0.01249935		3669.64	-0.02711235
489.79	-0.00841575		1019.82	-0.00983394		1549.81	-0.00678597		2079.84	-0.00464892		2609.84	-0.01342425		3139.84	-0.01234152		3669.84	-0.02745266
489.99	-0.0077555		1020.02	-0.00962957		1550.01	-0.00733574		2080.04	-0.00485671		2610.04	-0.01402608		3140.04	-0.01252087		3670.04	-0.02647132
490.19	-0.00717064		1020.22	-0.00978417		1550.21	-0.00769794		2080.24	-0.00572		2610.24	-0.01532181		3140.24	-0.01245668		3670.24	-0.02592451
490.39	-0.00545069		1020.42	-0.00958322		1550.41	-0.00859249		2080.44	-0.00572195		2610.44	-0.01545174		3140.44	-0.01193528		3670.44	-0.02618881
490.59	-0.00585437		1020.62	-0.00928564		1550.61	-0.00850713		2080.64	-0.00626996		2610.64	-0.01590333		3140.64	-0.01173936		3670.64	-0.02562074
490.79	-0.0065098		1020.82	-0.00906271		1550.81	-0.00925538		2080.84	-0.00647698		2610.84	-0.01738189		3140.84	-0.01200138		3670.84	-0.02511073
490.99	-0.00673602		1021.02	-0.00872007		1551.01	-0.0095332		2081.04	-0.00594163		2611.04	-0.01729867		3141.04	-0.01182824		3671.04	-0.02545523
491.19	-0.00650652		1021.22	-0.00915305		1551.21	-0.00939168		2081.24	-0.00535555		2611.24	-0.0180885		3141.24	-0.01088007		3671.24	-0.02512516
491.39	-0.00674005		1021.42	-0.00897925		1551.41	-0.00915644		2081.44	-0.00459266		2611.44	-0.01702281		3141.44	-0.01030632		3671.44	-0.02374413
491.59	-0.00714055		1021.62	-0.0097321		1551.61	-0.00953369		2081.64	-0.00491986		2611.64	-0.01668992		3141.64	-0.00986026		3671.64	-0.02367636
491.79	-0.00683715		1021.82	-0.00929049		1551.81	-0.01007721		2081.84	-0.0045045		2611.84	-0.01652333		3141.84	-0.00964397		3671.84	-0.02265316
491.99	-0.00561391		1022.02	-0.01001676		1552.01	-0.00974911		2082.04	-0.00457989		2612.04	-0.01614109		3142.04	-0.01009689		3672.04	-0.02225218
492.19	-0.00509961		1022.22	-0.00942928		1552.21	-0.00878556		2082.24	-0.00371583		2612.24	-0.01516646		3142.24	-0.01054725		3672.24	-0.0229178
492.39	-0.00532815		1022.42	-0.00946134		1552.41	-0.00765387		2082.44	-0.00395539		2612.44	-0.01463969		3142.44	-0.01075285		3672.44	-0.0231055
492.59	-0.00573296		1022.62	-0.00991511		1552.61	-0.00730437		2082.64	-0.00345194		2612.64	-0.01300488		3142.64	-0.01168265		3672.64	-0.02344822
492.79	-0.00562027		1022.82	-0.00997156		1552.81	-0.00640457		2082.84	-0.00345947		2612.84	-0.01163713		3142.84	-0.01148971		3672.84	-0.02455793
492.99	-0.00587236		1023.02	-0.01052038		1553.01	-0.0067227		2083.04	-0.00370009		2613.04	-0.01133116		3143.04	-0.01249471		3673.04	-0.02442862
493.19	-0.00522445		1023.22	-0.01117612		1553.21	-0.00663353		2083.24	-0.00332314		2613.24	-0.01117965		3143.24	-0.01285211		3673.24	-0.02433487
493.39	-0.0058311		1023.42	-0.01141743		1553.41	-0.00717041		2083.44	-0.00326805		2613.44	-0.01071581		3143.44	-0.01360779		3673.44	-0.02495893
493.59	-0.00621028		1023.62	-0.01134608		1553.61	-0.00776055		2083.64	-0.00432763		2613.64	-0.01113932		3143.64	-0.0138		3673.64	-0.02526684
493.79	-0.00649191		1023.82	-0.01189891		1553.81	-0.00784058		2083.84	-0.00479585		2613.84	-0.01143398		3143.84	-0.01307852		3673.84	-0.02529468
493.99	-0.0070196		1024.02	-0.01194638		1554.01	-0.00773476		2084.04	-0.00554274		2614.04	-0.01162542		3144.04	-0.01239932		3674.04	-0.02467795
494.19	-0.00751115		1024.22	-0.01226977		1554.21	-0.00773162		2084.24	-0.00588471		2614.24	-0.01211684		3144.24	-0.01217647		3674.24	-0.02510914
494.39	-0.0081489		1024.42	-0.01225775		1554.41	-0.00770021		2084.44	-0.00593955		2614.44	-0.01224895		3144.44	-0.0117195		3674.44	-0.02581872
494.59	-0.00911182		1024.62	-0.01290296		1554.61	-0.00744552		2084.64	-0.00576408		2614.64	-0.01327672		3144.64	-0.01129858		3674.64	-0.02535341
494.79	-0.01048596		1024.82	-0.0130462		1554.81	-0.00876332		2084.84	-0.00557641		2614.84	-0.0142536		3144.84	-0.01200819		3674.84	-0.02537481
494.99	-0.01152398		1025.02	-0.0126004		1555.01	-0.00938314		2085.04	-0.00438484		2615.04	-0.0145228		3145.04	-0.011324		3675.04	-0.0256641
495.19	-0.01183057		1025.22	-0.01243226		1555.21	-0.00919168		2085.24	-0.00466738		2615.24	-0.01506605		3145.24	-0.01083192		3675.24	-0.02504856
495.39	-0.01215735		1025.42	-0.01301027		1555.41	-0.00827883		2085.44	-0.00565742		2615.44	-0.01407009		3145.44	-0.01135548		3675.44	-0.0243555
495.59	-0.01234199		1025.62	-0.0131361		1555.61	-0.00817633		2085.64	-0.00615168		2615.64	-0.01485849		3145.64	-0.01108468		3675.64	-0.02467025
495.79	-0.0115299		1025.82	-0.0123124		1555.81	-0.00800705		2085.84	-0.00600367		2615.84	-0.01509243		3145.84	-0.0109276		3675.84	-0.02464912
495.99	-0.01218994		1026.02	-0.01284065		1556.01	-0.00737121		2086.04	-0.00628637		2616.04	-0.01488649		3146.04	-0.01146251		3676.04	-0.02528185
496.19	-0.01237953		1026.22	-0.01276084		1556.21	-0.00826455		2086.24	-0.00625888		2616.24	-0.01487002		3146.24	-0.01162593		3676.24	-0.0254037
496.39	-0.01256195		1026.42	-0.01242064		1556.41	-0.00810564		2086.44	-0.00611656		2616.44	-0.01414061		3146.44	-0.01160826		3676.44	-0.02542844
496.59	-0.01227184		1026.62	-0.01203934		1556.61	-0.0082164		2086.64	-0.00692114		2616.64	-0.01353559		3146.64	-0.01226601		3676.64	-0.02562117
496.79	-0.01203449		1026.82	-0.01172179		1556.81	-0.00896083		2086.84	-0.00732732		2616.84	-0.01391336		3146.84	-0.01210158		3676.84	-0.02522679
496.99	-0.01180401		1027.02	-0.01160732		1557.01	-0.00865803		2087.04	-0.00659563		2617.04	-0.01421875		3147.04	-0.01271361		3677.04	-0.02382246
497.19	-0.01224064		1027.22	-0.01178603		1557.21	-0.00866276		2087.24	-0.00637249		2617.24	-0.01453551		3147.24	-0.01282062		3677.24	-0.02415725
497.39	-0.01242741		1027.42	-0.01183699		1557.41	-0.00841407		2087.44	-0.00678148		2617.44	-0.01341716		3147.44	-0.01293191		3677.44	-0.02418073
497.59	-0.01181205		1027.62	-0.01122292		1557.61	-0.00873156		2087.64	-0.00738463		2617.64	-0.01348595		3147.64	-0.01300526		3677.64	-0.02355027
497.79	-0.01193644		1027.82	-0.01078534		1557.81	-0.00857763		2087.84	-0.00739012		2617.84	-0.01245304		3147.84	-0.01240034		3677.84	-0.02312084
497.99	-0.01172077		1028.02	-0.01034749		1558.01	-0.00893157		2088.04	-0.00713164		2618.04	-0.0119905		3148.04	-0.0119088		3678.04	-0.0235023
498.19	-0.01161541		1028.22	-0.01059066		1558.21	-0.00855671		2088.24	-0.00666426		2618.24	-0.01128052		3148.24	-0.01193822		3678.24	-0.02376903
498.39	-0.01188925		1028.42	-0.01028246		1558.41	-0.00860434		2088.44	-0.00674219		2618.44	-0.01194208		3148.44	-0.01187938		3678.44	-0.02422196
498.59	-0.01144876		1028.62	-0.0097108		1558.61	-0.00939061		2088.64	-0.00683252		2618.64	-0.01191904		3148.64	-0.01194247		3678.64	-0.02469253
498.79	-0.01172381		1028.82	-0.00916413		1558.81	-0.00935937		2088.84	-0.00719603		2618.84	-0.01266478		3148.84	-0.01261167		3678.84	-0.02476383
498.99	-0.01136027		1029.02	-0.00860423		1559.01	-0.00876452		2089.04	-0.00698352		2619.04	-0.01205261		3149.04	-0.01198884		3679.04	-0.0246869
499.19	-0.0103674		1029.22	-0.00897893		1559.21	-0.00870398		2089.24	-0.00786584		2619.24	-0.01234865		3149.24	-0.01161658		3679.24	-0.02572351
499.39	-0.01003886		1029.42	-0.0094429		1559.41	-0.00860985		2089.44	-0.00803471		2619.44	-0.0118994		3149.44	-0.01289578		3679.44	-0.0263195
499.59	-0.0088154		1029.62	-0.00949871		1559.61	-0.00960482		2089.64	-0.00752388		2619.64	-0.01263947		3149.64	-0.01268231		3679.64	-0.02694628
499.79	-0.00914062		1029.82	-0.00947084		1559.81	-0.0092491		2089.84	-0.0076327		2619.84	-0.01240092		3149.84	-0.01306996		3679.84	-0.02705387
499.99	-0.01012148		1030.02	-0.00984688		1560.01	-0.00942296		2090.04	-0.00741901		2620.04	-0.01242925		3150.04	-0.0145149		3680.04	-0.02690064
500.19	-0.00945363		1030.22	-0.00904553		1560.21	-0.01000005		2090.24	-0.0070472		2620.24	-0.01258856		3150.24	-0.01511611		3680.24	-0.02630346
500.39	-0.00919921		1030.42	-0.00869879		1560.41	-0.00989205		2090.44	-0.00741352		2620.44	-0.01159188		3150.44	-0.01643434		3680.44	-0.02671129
500.59	-0.00895638		1030.62	-0.00879254		1560.61	-0.01032281		2090.64	-0.00793636		2620.64	-0.01191727		3150.64	-0.01759643		3680.64	-0.02651828
500.79	-0.00942838		1030.82	-0.00872104		1560.81	-0.01057875		2090.84	-0.00736447		2620.84	-0.01239278		3150.84	-0.01791773		3680.84	-0.02578006
500.99	-0.00954619		1031.02	-0.00910461		1561.01	-0.01001354		2091.04	-0.00748487		2621.04	-0.01232583		3151.04	-0.01790341		3681.04	-0.02536696
501.19	-0.01019292		1031.22	-0.0098499		1561.21	-0.01058102		2091.24	-0.00810799		2621.24	-0.01238653		3151.24	-0.01826409		3681.24	-0.02498668
501.39	-0.01117022		1031.42	-0.01000988		1561.41	-0.01029744		2091.44	-0.00786301		2621.44	-0.01191956		3151.44	-0.01758193		3681.44	-0.02422057
501.59	-0.01114199		1031.62	-0.00931603		1561.61	-0.01019932		2091.64	-0.00733944		2621.64	-0.013164		3151.64	-0.01698609		3681.64	-0.0235087
501.79	-0.01196961		1031.82	-0.00957394		1561.81	-0.01047947		2091.84	-0.00785996		2621.84	-0.01391048		3151.84	-0.01636433		3681.84	-0.02320374
501.99	-0.01267471		1032.02	-0.00993358		1562.01	-0.010422		2092.04	-0.00760424		2622.04	-0.01436802		3152.04	-0.01550146		3682.04	-0.02359431
502.19	-0.0131861		1032.22	-0.00926523		1562.21	-0.00934606		2092.24	-0.00713614		2622.24	-0.01525838		3152.24	-0.01440871		3682.24	-0.02298229
502.39	-0.01355288		1032.42	-0.00924571		1562.41	-0.00923569		2092.44	-0.00743861		2622.44	-0.01592065		3152.44	-0.01381102		3682.44	-0.02301778
502.59	-0.01359865		1032.62	-0.00877239		1562.61	-0.00980024		2092.64	-0.00768375		2622.64	-0.01590521		3152.64	-0.01335555		3682.64	-0.02341782
502.79	-0.01372127		1032.82	-0.00983504		1562.81	-0.00915923		2092.84	-0.00744557		2622.84	-0.01640825		3152.84	-0.01285775		3682.84	-0.02274668
502.99	-0.01406493		1033.02	-0.01022077		1563.01	-0.0086196		2093.04	-0.006852		2623.04	-0.01628428		3153.04	-0.01165246		3683.04	-0.02318474
503.19	-0.01359777		1033.22	-0.00992019		1563.21	-0.0091071		2093.24	-0.00575879		2623.24	-0.0172049		3153.24	-0.01263566		3683.24	-0.02390919
503.39	-0.01336632		1033.42	-0.01031358		1563.41	-0.00886852		2093.44	-0.00532991		2623.44	-0.01740246		3153.44	-0.01338474		3683.44	-0.02388148
503.59	-0.01255957		1033.62	-0.01030332		1563.61	-0.00839186		2093.64	-0.00491544		2623.64	-0.01735182		3153.64	-0.01278671		3683.64	-0.02480879
503.79	-0.01317751		1033.82	-0.00984833		1563.81	-0.00839392		2093.84	-0.0044915		2623.84	-0.016844		3153.84	-0.01365914		3683.84	-0.02482943
503.99	-0.01288287		1034.02	-0.00912183		1564.01	-0.00873599		2094.04	-0.00475683		2624.04	-0.01704941		3154.04	-0.01410817		3684.04	-0.02473993
504.19	-0.01165147		1034.22	-0.00907485		1564.21	-0.00938602		2094.24	-0.00412326		2624.24	-0.01634488		3154.24	-0.01508436		3684.24	-0.02495401
504.39	-0.01067537		1034.42	-0.00990101		1564.41	-0.00965375		2094.44	-0.00499601		2624.44	-0.01633954		3154.44	-0.01591722		3684.44	-0.02580025
504.59	-0.01027131		1034.62	-0.01047793		1564.61	-0.00996644		2094.64	-0.00513465		2624.64	-0.0163978		3154.64	-0.0153533		3684.64	-0.02569452
504.79	-0.01032369		1034.82	-0.01050781		1564.81	-0.01054087		2094.84	-0.00498385		2624.84	-0.01650865		3154.84	-0.01475568		3684.84	-0.02555207
504.99	-0.00977058		1035.02	-0.01136392		1565.01	-0.00988466		2095.04	-0.00502937		2625.04	-0.01627372		3155.04	-0.0142807		3685.04	-0.02591066
505.19	-0.00983887		1035.22	-0.01183617		1565.21	-0.01008625		2095.24	-0.00511164		2625.24	-0.01670949		3155.24	-0.01401026		3685.24	-0.02530911
505.39	-0.01027546		1035.42	-0.01149391		1565.41	-0.01017449		2095.44	-0.00492843		2625.44	-0.0170544		3155.44	-0.01335429		3685.44	-0.02603786
505.59	-0.00996913		1035.62	-0.01109619		1565.61	-0.00959412		2095.64	-0.00420395		2625.64	-0.01722175		3155.64	-0.01399581		3685.64	-0.02564801
505.79	-0.01107141		1035.82	-0.01055921		1565.81	-0.01015474		2095.84	-0.00552463		2625.84	-0.01671816		3155.84	-0.01386818		3685.84	-0.02571411
505.99	-0.01135987		1036.02	-0.01074268		1566.01	-0.00981362		2096.04	-0.00501898		2626.04	-0.0157488		3156.04	-0.01276051		3686.04	-0.025403
506.19	-0.01101045		1036.22	-0.01054828		1566.21	-0.00845111		2096.24	-0.0056686		2626.24	-0.0152737		3156.24	-0.01256517		3686.24	-0.02523839
506.39	-0.01129595		1036.42	-0.0107613		1566.41	-0.00814923		2096.44	-0.00644469		2626.44	-0.01490265		3156.44	-0.01331117		3686.44	-0.02466354
506.59	-0.01123074		1036.62	-0.01045331		1566.61	-0.00764699		2096.64	-0.00603432		2626.64	-0.01438382		3156.64	-0.01349333		3686.64	-0.0247024
506.79	-0.01079982		1036.82	-0.01089742		1566.81	-0.00690404		2096.84	-0.00578876		2626.84	-0.01431657		3156.84	-0.01353917		3686.84	-0.02410608
506.99	-0.01171794		1037.02	-0.01067099		1567.01	-0.00628061		2097.04	-0.0052478		2627.04	-0.01434921		3157.04	-0.01254245		3687.04	-0.02415817
507.19	-0.01139531		1037.22	-0.01070244		1567.21	-0.00625376		2097.24	-0.00492988		2627.24	-0.01351844		3157.24	-0.01279098		3687.24	-0.02419699
507.39	-0.01105346		1037.42	-0.01130712		1567.41	-0.00611914		2097.44	-0.00611419		2627.44	-0.01331949		3157.44	-0.0123777		3687.44	-0.02402831
507.59	-0.01082625		1037.62	-0.01060123		1567.61	-0.00672488		2097.64	-0.00595264		2627.64	-0.01240213		3157.64	-0.01299836		3687.64	-0.02469108
507.79	-0.0109048		1037.82	-0.0100136		1567.81	-0.00809818		2097.84	-0.00579883		2627.84	-0.01290663		3157.84	-0.01338845		3687.84	-0.02429121
507.99	-0.01077832		1038.02	-0.01046942		1568.01	-0.00848067		2098.04	-0.00614352		2628.04	-0.0128992		3158.04	-0.01334497		3688.04	-0.02459275
508.19	-0.01006877		1038.22	-0.01106714		1568.21	-0.00921567		2098.24	-0.00622277		2628.24	-0.01345055		3158.24	-0.01390361		3688.24	-0.02412073
508.39	-0.01024439		1038.42	-0.01179482		1568.41	-0.01011317		2098.44	-0.00668814		2628.44	-0.0133101		3158.44	-0.01343351		3688.44	-0.02351228
508.59	-0.01028431		1038.62	-0.01216013		1568.61	-0.01131914		2098.64	-0.00665637		2628.64	-0.01301971		3158.64	-0.01291883		3688.64	-0.02296939
508.79	-0.01015331		1038.82	-0.01235718		1568.81	-0.01198558		2098.84	-0.00687943		2628.84	-0.01348893		3158.84	-0.01314061		3688.84	-0.02386388
508.99	-0.00919644		1039.02	-0.01381815		1569.01	-0.01173168		2099.04	-0.00773234		2629.04	-0.01394268		3159.04	-0.01317203		3689.04	-0.02443855
509.19	-0.00903506		1039.22	-0.01347024		1569.21	-0.01344417		2099.24	-0.00842309		2629.24	-0.01410994		3159.24	-0.01354744		3689.24	-0.02480394
509.39	-0.00969294		1039.42	-0.0132578		1569.41	-0.01384901		2099.44	-0.00772712		2629.44	-0.0139119		3159.44	-0.01462568		3689.44	-0.02563584
509.59	-0.00982843		1039.62	-0.01315907		1569.61	-0.01382932		2099.64	-0.00733161		2629.64	-0.01397364		3159.64	-0.01603241		3689.64	-0.02527595
509.79	-0.01019094		1039.82	-0.0134241		1569.81	-0.01438491		2099.84	-0.00727707		2629.84	-0.01442375		3159.84	-0.01578926		3689.84	-0.02565954
509.99	-0.00975779		1040.02	-0.01404755		1570.01	-0.01434876		2100.04	-0.00705819		2630.04	-0.014494		3160.04	-0.01585043		3690.04	-0.02557501
510.19	-0.00916638		1040.22	-0.01453489		1570.21	-0.01342125		2100.24	-0.00730596		2630.24	-0.01526416		3160.24	-0.0160464		3690.24	-0.02536584
510.39	-0.00919715		1040.42	-0.01423584		1570.41	-0.01293544		2100.44	-0.00622355		2630.44	-0.01523725		3160.44	-0.01655137		3690.44	-0.02488023
510.59	-0.00853746		1040.62	-0.01449138		1570.61	-0.01235082		2100.64	-0.00582027		2630.64	-0.01477753		3160.64	-0.01632088		3690.64	-0.0247087
510.79	-0.0088306		1040.82	-0.01464794		1570.81	-0.01215181		2100.84	-0.0057545		2630.84	-0.0139989		3160.84	-0.01604852		3690.84	-0.02449841
510.99	-0.00957207		1041.02	-0.01540616		1571.01	-0.01118308		2101.04	-0.00587642		2631.04	-0.01346943		3161.04	-0.01523368		3691.04	-0.0241496
511.19	-0.00948578		1041.22	-0.01511156		1571.21	-0.01106515		2101.24	-0.00646669		2631.24	-0.01296276		3161.24	-0.01513101		3691.24	-0.02473949
511.39	-0.00965619		1041.42	-0.01460761		1571.41	-0.01118165		2101.44	-0.00709462		2631.44	-0.01384299		3161.44	-0.01622949		3691.44	-0.02466411
511.59	-0.00981669		1041.62	-0.01349692		1571.61	-0.01061029		2101.64	-0.00683688		2631.64	-0.01379084		3161.64	-0.01643219		3691.64	-0.02583561
511.79	-0.00998555		1041.82	-0.01313511		1571.81	-0.01062329		2101.84	-0.00748333		2631.84	-0.01429996		3161.84	-0.01523377		3691.84	-0.02659539
511.99	-0.00954549		1042.02	-0.01412049		1572.01	-0.00994471		2102.04	-0.00764838		2632.04	-0.01371892		3162.04	-0.01492828		3692.04	-0.02622551
512.19	-0.00998772		1042.22	-0.01418502		1572.21	-0.00993441		2102.24	-0.00804412		2632.24	-0.01378681		3162.24	-0.01421396		3692.24	-0.02599618
512.39	-0.0106001		1042.42	-0.01477064		1572.41	-0.00971891		2102.44	-0.00777704		2632.44	-0.0132338		3162.44	-0.0140951		3692.44	-0.02628636
512.59	-0.0109684		1042.62	-0.01474379		1572.61	-0.00989261		2102.64	-0.00828523		2632.64	-0.01408767		3162.64	-0.01333565		3692.64	-0.02753073
512.79	-0.01102063		1042.82	-0.01488142		1572.81	-0.00989856		2102.84	-0.00856376		2632.84	-0.01477106		3162.84	-0.01388098		3692.84	-0.02887713
512.99	-0.01116895		1043.02	-0.01488322		1573.01	-0.00969018		2103.04	-0.00879761		2633.04	-0.01515287		3163.04	-0.01378201		3693.04	-0.02847886
513.19	-0.01241585		1043.22	-0.01384965		1573.21	-0.00989191		2103.24	-0.00798338		2633.24	-0.01594893		3163.24	-0.01319328		3693.24	-0.02805828
513.39	-0.01264238		1043.42	-0.01339794		1573.41	-0.01026604		2103.44	-0.00665407		2633.44	-0.01649326		3163.44	-0.01366745		3693.44	-0.02784468
513.59	-0.01225033		1043.62	-0.01355474		1573.61	-0.01098104		2103.64	-0.00585194		2633.64	-0.01785458		3163.64	-0.01451431		3693.64	-0.02804507
513.79	-0.01268981		1043.82	-0.01333573		1573.81	-0.01128774		2103.84	-0.00571697		2633.84	-0.01866859		3163.84	-0.01440014		3693.84	-0.0274324
513.99	-0.01265982		1044.02	-0.01255171		1574.01	-0.01175479		2104.04	-0.00662167		2634.04	-0.01928941		3164.04	-0.01429703		3694.04	-0.02779284
514.19	-0.01231316		1044.22	-0.01281416		1574.21	-0.01131219		2104.24	-0.00589715		2634.24	-0.0194258		3164.24	-0.01475089		3694.24	-0.02726984
514.39	-0.01185135		1044.42	-0.01231716		1574.41	-0.01114532		2104.44	-0.00502604		2634.44	-0.01877023		3164.44	-0.01472474		3694.44	-0.02653886
514.59	-0.01185477		1044.62	-0.01262348		1574.61	-0.0115333		2104.64	-0.00577871		2634.64	-0.01862503		3164.64	-0.01484553		3694.64	-0.02703202
514.79	-0.01236126		1044.82	-0.01222624		1574.81	-0.01151256		2104.84	-0.005671		2634.84	-0.01770536		3164.84	-0.01568926		3694.84	-0.02710754
514.99	-0.01173951		1045.02	-0.01212275		1575.01	-0.01168592		2105.04	-0.00625465		2635.04	-0.01744286		3165.04	-0.01583127		3695.04	-0.02763368
515.19	-0.01229751		1045.22	-0.01135894		1575.21	-0.01239441		2105.24	-0.00637509		2635.24	-0.01674275		3165.24	-0.0165613		3695.24	-0.02805214
515.39	-0.01168738		1045.42	-0.01152167		1575.41	-0.01248637		2105.44	-0.00638492		2635.44	-0.01636969		3165.44	-0.01803415		3695.44	-0.02802445
515.59	-0.01129846		1045.62	-0.01162741		1575.61	-0.01199679		2105.64	-0.00656254		2635.64	-0.01543977		3165.64	-0.01861438		3695.64	-0.02907316
515.79	-0.01119663		1045.82	-0.01251589		1575.81	-0.01173362		2105.84	-0.00742762		2635.84	-0.01484084		3165.84	-0.01876043		3695.84	-0.02866905
515.99	-0.01020015		1046.02	-0.01340167		1576.01	-0.01197367		2106.04	-0.00743852		2636.04	-0.01407835		3166.04	-0.0191721		3696.04	-0.02835854
516.19	-0.01188667		1046.22	-0.01304705		1576.21	-0.01186077		2106.24	-0.00848834		2636.24	-0.0136628		3166.24	-0.01969769		3696.24	-0.02881102
516.39	-0.01238487		1046.42	-0.01325525		1576.41	-0.01168493		2106.44	-0.00919647		2636.44	-0.01418589		3166.44	-0.01901199		3696.44	-0.02895303
516.59	-0.01247471		1046.62	-0.01305893		1576.61	-0.01189947		2106.64	-0.00971673		2636.64	-0.01386398		3166.64	-0.01776852		3696.64	-0.02903658
516.79	-0.01206971		1046.82	-0.01286135		1576.81	-0.01109063		2106.84	-0.009385		2636.84	-0.01358801		3166.84	-0.01784972		3696.84	-0.02846256
516.99	-0.01211101		1047.02	-0.01243644		1577.01	-0.01049008		2107.04	-0.00960952		2637.04	-0.01432636		3167.04	-0.01696852		3697.04	-0.02768207
517.19	-0.01225683		1047.22	-0.01280675		1577.21	-0.01066837		2107.24	-0.00905092		2637.24	-0.01461836		3167.24	-0.01575985		3697.24	-0.02799727
517.39	-0.01152813		1047.42	-0.01348273		1577.41	-0.0114401		2107.44	-0.00859976		2637.44	-0.01522738		3167.44	-0.01577419		3697.44	-0.02819914
517.59	-0.01183117		1047.62	-0.01392219		1577.61	-0.01140341		2107.64	-0.00927793		2637.64	-0.01591259		3167.64	-0.01560446		3697.64	-0.02878348
517.79	-0.01223605		1047.82	-0.01389642		1577.81	-0.01091868		2107.84	-0.0097912		2637.84	-0.01656373		3167.84	-0.01457443		3697.84	-0.02845293
517.99	-0.0124694		1048.02	-0.01408698		1578.01	-0.0111883		2108.04	-0.01027433		2638.04	-0.01671432		3168.04	-0.01377955		3698.04	-0.02944007
518.19	-0.01292252		1048.22	-0.0146922		1578.21	-0.01062224		2108.24	-0.00979036		2638.24	-0.01635431		3168.24	-0.01369827		3698.24	-0.02904295
518.39	-0.01304696		1048.42	-0.01446838		1578.41	-0.01063307		2108.44	-0.00999782		2638.44	-0.01621128		3168.44	-0.01257733		3698.44	-0.02869536
518.59	-0.01373113		1048.62	-0.01448269		1578.61	-0.01050257		2108.64	-0.00974664		2638.64	-0.01618169		3168.64	-0.01216132		3698.64	-0.02870978
518.79	-0.01424709		1048.82	-0.01429674		1578.81	-0.01091569		2108.84	-0.00917519		2638.84	-0.0150704		3168.84	-0.01216932		3698.84	-0.02739382
518.99	-0.01375819		1049.02	-0.0152229		1579.01	-0.01105172		2109.04	-0.00908619		2639.04	-0.01496171		3169.04	-0.01127535		3699.04	-0.02711555
519.19	-0.01430604		1049.22	-0.01472111		1579.21	-0.01118796		2109.24	-0.00882193		2639.24	-0.01497851		3169.24	-0.01163574		3699.24	-0.02712266
519.39	-0.01379842		1049.42	-0.01454434		1579.41	-0.01083758		2109.44	-0.00875477		2639.44	-0.01533628		3169.44	-0.01247247		3699.44	-0.0271581
519.59	-0.01419683		1049.62	-0.01433215		1579.61	-0.0106735		2109.64	-0.00873681		2639.64	-0.01632206		3169.64	-0.01302108		3699.64	-0.02688794
519.79	-0.01455358		1049.82	-0.0135991		1579.81	-0.01064275		2109.84	-0.0090563		2639.84	-0.01643217		3169.84	-0.01223092		3699.84	-0.02599457
519.99	-0.01395676		1050.02	-0.0130664		1580.01	-0.0105662		2110.04	-0.00926912		2640.04	-0.01680105		3170.04	-0.01207017		3700.04	-0.02569659
520.19	-0.0148793		1050.22	-0.0121028		1580.21	-0.0101972		2110.24	-0.00970897		2640.24	-0.01719664		3170.24	-0.0125113		3700.24	-0.02539117
520.39	-0.01428985		1050.42	-0.01212617		1580.41	-0.01140097		2110.44	-0.00945129		2640.44	-0.01739061		3170.44	-0.01177905		3700.44	-0.02556178
520.59	-0.01438022		1050.62	-0.01124084		1580.61	-0.01111147		2110.64	-0.00872141		2640.64	-0.01694915		3170.64	-0.01247384		3700.64	-0.02532343
520.79	-0.0138072		1050.82	-0.01016379		1580.81	-0.01070826		2110.84	-0.00892278		2640.84	-0.0171235		3170.84	-0.01368734		3700.84	-0.02546189
520.99	-0.01351257		1051.02	-0.01098127		1581.01	-0.01167033		2111.04	-0.00979861		2641.04	-0.01800336		3171.04	-0.01399308		3701.04	-0.02622555
521.19	-0.01281815		1051.22	-0.01148976		1581.21	-0.01217327		2111.24	-0.01045298		2641.24	-0.01738193		3171.24	-0.01508985		3701.24	-0.02669063
521.39	-0.0123769		1051.42	-0.01244358		1581.41	-0.01258267		2111.44	-0.01083413		2641.44	-0.01741425		3171.44	-0.01558232		3701.44	-0.02658292
521.59	-0.0120701		1051.62	-0.01282801		1581.61	-0.01325232		2111.64	-0.01159753		2641.64	-0.01716648		3171.64	-0.01650103		3701.64	-0.0271277
521.79	-0.01174387		1051.82	-0.01299654		1581.81	-0.01265627		2111.84	-0.0116743		2641.84	-0.01746719		3171.84	-0.01716692		3701.84	-0.02670659
521.99	-0.01102031		1052.02	-0.01346186		1582.01	-0.0129552		2112.04	-0.01261636		2642.04	-0.01678831		3172.04	-0.01791823		3702.04	-0.02706288
522.19	-0.0112481		1052.22	-0.0142611		1582.21	-0.01292177		2112.24	-0.01242206		2642.24	-0.01699193		3172.24	-0.01815708		3702.24	-0.02619823
522.39	-0.01038098		1052.42	-0.01396809		1582.41	-0.01326871		2112.44	-0.01267508		2642.44	-0.01702085		3172.44	-0.01737352		3702.44	-0.02545715
522.59	-0.01017491		1052.62	-0.01422761		1582.61	-0.01261748		2112.64	-0.0120239		2642.64	-0.01697515		3172.64	-0.01633682		3702.64	-0.02422666
522.79	-0.01009653		1052.82	-0.01513477		1582.81	-0.01307754		2112.84	-0.01185009		2642.84	-0.01722165		3172.84	-0.01590258		3702.84	-0.02324843
522.99	-0.01006371		1053.02	-0.01545102		1583.01	-0.01206555		2113.04	-0.01144021		2643.04	-0.01795141		3173.04	-0.01548872		3703.04	-0.0243564
523.19	-0.01084331		1053.22	-0.01447466		1583.21	-0.01187793		2113.24	-0.01119652		2643.24	-0.01855963		3173.24	-0.01556793		3703.24	-0.02510661
523.39	-0.01111867		1053.42	-0.01454516		1583.41	-0.01163448		2113.44	-0.00951805		2643.44	-0.01916039		3173.44	-0.01484453		3703.44	-0.02425851
523.59	-0.0110477		1053.62	-0.01437978		1583.61	-0.01155608		2113.64	-0.00826666		2643.64	-0.02089529		3173.64	-0.01408049		3703.64	-0.02415572
523.79	-0.01048467		1053.82	-0.01496766		1583.81	-0.01100103		2113.84	-0.00823961		2643.84	-0.02069279		3173.84	-0.01258002		3703.84	-0.02377621
523.99	-0.00937092		1054.02	-0.01532104		1584.01	-0.01065744		2114.04	-0.00700375		2644.04	-0.02137495		3174.04	-0.01308373		3704.04	-0.02387359
524.19	-0.00974315		1054.22	-0.01477396		1584.21	-0.01090281		2114.24	-0.00576029		2644.24	-0.02105429		3174.24	-0.01360051		3704.24	-0.02491141
524.39	-0.01049979		1054.42	-0.01441071		1584.41	-0.01087294		2114.44	-0.00535757		2644.44	-0.02135873		3174.44	-0.01416406		3704.44	-0.02567392
524.59	-0.01100873		1054.62	-0.0146538		1584.61	-0.01032572		2114.64	-0.00566304		2644.64	-0.02126555		3174.64	-0.01482138		3704.64	-0.02672814
524.79	-0.01058035		1054.82	-0.01516313		1584.81	-0.0102929		2114.84	-0.00621463		2644.84	-0.02085848		3174.84	-0.0157576		3704.84	-0.02778921
524.99	-0.01086931		1055.02	-0.01602976		1585.01	-0.01069105		2115.04	-0.00603145		2645.04	-0.02084102		3175.04	-0.01572795		3705.04	-0.02874529
525.19	-0.01083876		1055.22	-0.01603595		1585.21	-0.01060409		2115.24	-0.00619473		2645.24	-0.0201137		3175.24	-0.01659957		3705.24	-0.02887681
525.39	-0.01118609		1055.42	-0.01712967		1585.41	-0.01011248		2115.44	-0.00629152		2645.44	-0.01968987		3175.44	-0.01684127		3705.44	-0.02982281
525.59	-0.01128949		1055.62	-0.01745747		1585.61	-0.00992463		2115.64	-0.00654739		2645.64	-0.02020635		3175.64	-0.01770832		3705.64	-0.0292117
525.79	-0.01178346		1055.82	-0.01673927		1585.81	-0.00903103		2115.84	-0.00690908		2645.84	-0.02006107		3175.84	-0.01805032		3705.84	-0.02914101
525.99	-0.01189896		1056.02	-0.01650153		1586.01	-0.00992991		2116.04	-0.00754492		2646.04	-0.01974276		3176.04	-0.01765984		3706.04	-0.0296789
526.19	-0.01309498		1056.22	-0.01653812		1586.21	-0.01089894		2116.24	-0.00708805		2646.24	-0.01958581		3176.24	-0.01665454		3706.24	-0.02986249
526.39	-0.01316086		1056.42	-0.01529341		1586.41	-0.01102441		2116.44	-0.00748209		2646.44	-0.01895026		3176.44	-0.01517819		3706.44	-0.03054441
526.59	-0.01485652		1056.62	-0.01520044		1586.61	-0.01064022		2116.64	-0.00742464		2646.64	-0.01787674		3176.64	-0.01424462		3706.64	-0.03042205
526.79	-0.01551901		1056.82	-0.01537985		1586.81	-0.0114037		2116.84	-0.00727222		2646.84	-0.01770689		3176.84	-0.01401532		3706.84	-0.03088511
526.99	-0.01622898		1057.02	-0.0147324		1587.01	-0.01095541		2117.04	-0.00723406		2647.04	-0.01690136		3177.04	-0.0135432		3707.04	-0.03138737
527.19	-0.01677812		1057.22	-0.01380271		1587.21	-0.01158587		2117.24	-0.00678171		2647.24	-0.01681806		3177.24	-0.01293583		3707.24	-0.03112136
527.39	-0.01552147		1057.42	-0.01315682		1587.41	-0.01189798		2117.44	-0.0054662		2647.44	-0.01723561		3177.44	-0.01202531		3707.44	-0.02988289
527.59	-0.01438547		1057.62	-0.01330401		1587.61	-0.01142859		2117.64	-0.00583633		2647.64	-0.01746394		3177.64	-0.01208997		3707.64	-0.02988535
527.79	-0.01360829		1057.82	-0.0136746		1587.81	-0.01093877		2117.84	-0.00631657		2647.84	-0.01698311		3177.84	-0.01151934		3707.84	-0.02908791
527.99	-0.01240019		1058.02	-0.01345715		1588.01	-0.0104267		2118.04	-0.0055203		2648.04	-0.01643114		3178.04	-0.01155192		3708.04	-0.02942758
528.19	-0.01254673		1058.22	-0.0135131		1588.21	-0.01037515		2118.24	-0.00579529		2648.24	-0.01584879		3178.24	-0.01204363		3708.24	-0.03006221
528.39	-0.01251587		1058.42	-0.01380644		1588.41	-0.00992144		2118.44	-0.00648707		2648.44	-0.01628149		3178.44	-0.01286469		3708.44	-0.02969224
528.59	-0.01208741		1058.62	-0.01530143		1588.61	-0.00953798		2118.64	-0.00697243		2648.64	-0.01610583		3178.64	-0.01245712		3708.64	-0.02986099
528.79	-0.01168742		1058.82	-0.01474095		1588.81	-0.00938127		2118.84	-0.00679516		2648.84	-0.01570951		3178.84	-0.01308989		3708.84	-0.02959167
528.99	-0.01187872		1059.02	-0.01432871		1589.01	-0.00905948		2119.04	-0.00740904		2649.04	-0.01651439		3179.04	-0.01314065		3709.04	-0.02943534
529.19	-0.01250733		1059.22	-0.01466955		1589.21	-0.00895708		2119.24	-0.00794767		2649.24	-0.01701095		3179.24	-0.01385326		3709.24	-0.02873555
529.39	-0.01297505		1059.42	-0.01517991		1589.41	-0.00813851		2119.44	-0.00913617		2649.44	-0.01780011		3179.44	-0.01412509		3709.44	-0.02797849
529.59	-0.01336649		1059.62	-0.01477531		1589.61	-0.00839966		2119.64	-0.00994411		2649.64	-0.0181625		3179.64	-0.01401758		3709.64	-0.02697799
529.79	-0.01371944		1059.82	-0.01303771		1589.81	-0.0087683		2119.84	-0.00961734		2649.84	-0.01818187		3179.84	-0.01417525		3709.84	-0.0276461
529.99	-0.01424486		1060.02	-0.01311478		1590.01	-0.00919495		2120.04	-0.00929817		2650.04	-0.01822127		3180.04	-0.01393597		3710.04	-0.0283055
530.19	-0.0148363		1060.22	-0.01295706		1590.21	-0.01050862		2120.24	-0.0088904		2650.24	-0.01836846		3180.24	-0.0134012		3710.24	-0.02902934
530.39	-0.01617771		1060.42	-0.01230553		1590.41	-0.01069571		2120.44	-0.00912198		2650.44	-0.01757253		3180.44	-0.01334446		3710.44	-0.02948701
530.59	-0.01691363		1060.62	-0.01224715		1590.61	-0.01166424		2120.64	-0.00913761		2650.64	-0.01757455		3180.64	-0.01391988		3710.64	-0.02954152
530.79	-0.0167096		1060.82	-0.01177566		1590.81	-0.01235726		2120.84	-0.00938993		2650.84	-0.01710541		3180.84	-0.01494038		3710.84	-0.02917749
530.99	-0.01690337		1061.02	-0.01081538		1591.01	-0.01296818		2121.04	-0.00906453		2651.04	-0.01668306		3181.04	-0.0142795		3711.04	-0.02854602
531.19	-0.01693322		1061.22	-0.01059454		1591.21	-0.01415375		2121.24	-0.00879988		2651.24	-0.01650905		3181.24	-0.01367887		3711.24	-0.02890946
531.39	-0.0163868		1061.42	-0.01113085		1591.41	-0.01414102		2121.44	-0.00815935		2651.44	-0.01616711		3181.44	-0.01373809		3711.44	-0.02946267
531.59	-0.01651533		1061.62	-0.01197943		1591.61	-0.01395947		2121.64	-0.00828245		2651.64	-0.01533122		3181.64	-0.01324664		3711.64	-0.02951322
531.79	-0.0159388		1061.82	-0.01182408		1591.81	-0.01346254		2121.84	-0.00915064		2651.84	-0.01506145		3181.84	-0.01336994		3711.84	-0.02952019
531.99	-0.01487447		1062.02	-0.01268774		1592.01	-0.01299073		2122.04	-0.00885918		2652.04	-0.01445301		3182.04	-0.01282557		3712.04	-0.03033038
532.19	-0.01458058		1062.22	-0.01298415		1592.21	-0.01299986		2122.24	-0.00864226		2652.24	-0.01487258		3182.24	-0.01343467		3712.24	-0.03042931
532.39	-0.0137137		1062.42	-0.01350802		1592.41	-0.011515		2122.44	-0.00864503		2652.44	-0.01535544		3182.44	-0.01453277		3712.44	-0.03001624
532.59	-0.01275259		1062.62	-0.01352685		1592.61	-0.01055235		2122.64	-0.00927127		2652.64	-0.01621828		3182.64	-0.01470254		3712.64	-0.03040988
532.79	-0.01229881		1062.82	-0.01304424		1592.81	-0.01022137		2122.84	-0.00959198		2652.84	-0.01640819		3182.84	-0.01581697		3712.84	-0.03024761
532.99	-0.01273834		1063.02	-0.01337083		1593.01	-0.00876349		2123.04	-0.0103267		2653.04	-0.01717397		3183.04	-0.01618417		3713.04	-0.03025185
533.19	-0.01301473		1063.22	-0.01390748		1593.21	-0.00835499		2123.24	-0.01006873		2653.24	-0.01776589		3183.24	-0.01630686		3713.24	-0.02958651
533.39	-0.01281496		1063.42	-0.01420028		1593.41	-0.00755199		2123.44	-0.0102845		2653.44	-0.01753116		3183.44	-0.01691079		3713.44	-0.02922418
533.59	-0.01233178		1063.62	-0.01389998		1593.61	-0.00725419		2123.64	-0.00954335		2653.64	-0.01793554		3183.64	-0.01706271		3713.64	-0.02991798
533.79	-0.01128581		1063.82	-0.01323402		1593.81	-0.00732947		2123.84	-0.00915567		2653.84	-0.01842295		3183.84	-0.01744802		3713.84	-0.02997318
533.99	-0.01141095		1064.02	-0.01452658		1594.01	-0.00754218		2124.04	-0.00888577		2654.04	-0.01808926		3184.04	-0.01713292		3714.04	-0.03026874
534.19	-0.01225256		1064.22	-0.01476481		1594.21	-0.00799803		2124.24	-0.00897346		2654.24	-0.01870502		3184.24	-0.01737759		3714.24	-0.03058625
534.39	-0.01302424		1064.42	-0.01600299		1594.41	-0.00765728		2124.44	-0.00832416		2654.44	-0.01861443		3184.44	-0.01793352		3714.44	-0.03029524
534.59	-0.01286505		1064.62	-0.01598109		1594.61	-0.00786945		2124.64	-0.00809755		2654.64	-0.01913273		3184.64	-0.01752947		3714.64	-0.02925757
534.79	-0.01353276		1064.82	-0.01615369		1594.81	-0.00807444		2124.84	-0.00859236		2654.84	-0.01829586		3184.84	-0.01718773		3714.84	-0.02820565
534.99	-0.0140789		1065.02	-0.0159396		1595.01	-0.00921581		2125.04	-0.00822169		2655.04	-0.01878107		3185.04	-0.01589649		3715.04	-0.02829479
535.19	-0.01449		1065.22	-0.01642284		1595.21	-0.00978934		2125.24	-0.00857076		2655.24	-0.01879872		3185.24	-0.01541002		3715.24	-0.0292514
535.39	-0.01587734		1065.42	-0.01691795		1595.41	-0.00972195		2125.44	-0.008182		2655.44	-0.01841916		3185.44	-0.01535753		3715.44	-0.02977378
535.59	-0.01664222		1065.62	-0.01694358		1595.61	-0.00987756		2125.64	-0.0088379		2655.64	-0.0181013		3185.64	-0.01434577		3715.64	-0.029268
535.79	-0.01663297		1065.82	-0.01613412		1595.81	-0.00994701		2125.84	-0.00940409		2655.84	-0.0197258		3185.84	-0.01422617		3715.84	-0.02954865
535.99	-0.01708418		1066.02	-0.01660632		1596.01	-0.01053676		2126.04	-0.0093678		2656.04	-0.01972876		3186.04	-0.01340622		3716.04	-0.03000322
536.19	-0.01716552		1066.22	-0.01585268		1596.21	-0.01046855		2126.24	-0.00975984		2656.24	-0.01980843		3186.24	-0.01471594		3716.24	-0.03008885
536.39	-0.01749421		1066.42	-0.01549649		1596.41	-0.00923464		2126.44	-0.00984181		2656.44	-0.01999427		3186.44	-0.01575104		3716.44	-0.03097216
536.59	-0.01786324		1066.62	-0.01449032		1596.61	-0.00957258		2126.64	-0.0102673		2656.64	-0.01997833		3186.64	-0.01526952		3716.64	-0.03157093
536.79	-0.01888463		1066.82	-0.0150363		1596.81	-0.00969227		2126.84	-0.00981022		2656.84	-0.01913286		3186.84	-0.01539016		3716.84	-0.03187778
536.99	-0.01893618		1067.02	-0.01402947		1597.01	-0.00993342		2127.04	-0.0103389		2657.04	-0.01885941		3187.04	-0.01502639		3717.04	-0.03235129
537.19	-0.01867822		1067.22	-0.01444033		1597.21	-0.00969609		2127.24	-0.01026546		2657.24	-0.01891782		3187.24	-0.01472057		3717.24	-0.03322581
537.39	-0.01835394		1067.42	-0.0140489		1597.41	-0.00992901		2127.44	-0.01072342		2657.44	-0.01781686		3187.44	-0.01457462		3717.44	-0.0342725
537.59	-0.01756816		1067.62	-0.01462364		1597.61	-0.01037379		2127.64	-0.01057016		2657.64	-0.01769808		3187.64	-0.01376989		3717.64	-0.03468977
537.79	-0.01660245		1067.82	-0.0157583		1597.81	-0.01117242		2127.84	-0.0106247		2657.84	-0.01675953		3187.84	-0.01338854		3717.84	-0.03386074
537.99	-0.01713084		1068.02	-0.01668109		1598.01	-0.01123603		2128.04	-0.00978109		2658.04	-0.01640883		3188.04	-0.01367402		3718.04	-0.03329128
538.19	-0.01699623		1068.22	-0.01687768		1598.21	-0.01131202		2128.24	-0.00983251		2658.24	-0.01645012		3188.24	-0.01398716		3718.24	-0.03185984
538.39	-0.0160628		1068.42	-0.01722602		1598.41	-0.01134423		2128.44	-0.00892606		2658.44	-0.0159074		3188.44	-0.01403514		3718.44	-0.03078969
538.59	-0.01551346		1068.62	-0.01665675		1598.61	-0.01156718		2128.64	-0.00841212		2658.64	-0.0155947		3188.64	-0.01331809		3718.64	-0.02919332
538.79	-0.01535677		1068.82	-0.01689069		1598.81	-0.01253567		2128.84	-0.00915874		2658.84	-0.01603898		3188.84	-0.01398957		3718.84	-0.02914881
538.99	-0.01534958		1069.02	-0.0166535		1599.01	-0.01297475		2129.04	-0.00863898		2659.04	-0.01698702		3189.04	-0.01421378		3719.04	-0.02916295
539.19	-0.01540992		1069.22	-0.01751459		1599.21	-0.01322036		2129.24	-0.00898205		2659.24	-0.01653725		3189.24	-0.01461837		3719.24	-0.02829306
539.39	-0.01557494		1069.42	-0.0178645		1599.41	-0.01328161		2129.44	-0.0092614		2659.44	-0.01708785		3189.44	-0.01507033		3719.44	-0.02801812
539.59	-0.01525776		1069.62	-0.01756625		1599.61	-0.01356602		2129.64	-0.00998835		2659.64	-0.01788266		3189.64	-0.01562287		3719.64	-0.02841008
539.79	-0.01518989		1069.82	-0.01634647		1599.81	-0.01417734		2129.84	-0.00931216		2659.84	-0.01909701		3189.84	-0.01671646		3719.84	-0.02842772
539.99	-0.01594793		1070.02	-0.01655526		1600.01	-0.01406169		2130.04	-0.00972701		2660.04	-0.01900909		3190.04	-0.0176039		3720.04	-0.02905415
540.19	-0.01591921		1070.22	-0.0159612		1600.21	-0.01357853		2130.24	-0.00892373		2660.24	-0.01918684		3190.24	-0.01940015		3720.24	-0.02981268
540.39	-0.01753834		1070.42	-0.01602701		1600.41	-0.01258055		2130.44	-0.00917916		2660.44	-0.01941915		3190.44	-0.0197767		3720.44	-0.03032808
540.59	-0.01768432		1070.62	-0.01543018		1600.61	-0.01306478		2130.64	-0.0090752		2660.64	-0.01995026		3190.64	-0.01989626		3720.64	-0.03083525
540.79	-0.01906064		1070.82	-0.01538336		1600.81	-0.01245509		2130.84	-0.00852096		2660.84	-0.0195869		3190.84	-0.02015351		3720.84	-0.03148768
540.99	-0.01912743		1071.02	-0.01474867		1601.01	-0.01213708		2131.04	-0.00901585		2661.04	-0.0195872		3191.04	-0.01986844		3721.04	-0.03122688
541.19	-0.01951753		1071.22	-0.01542437		1601.21	-0.01119986		2131.24	-0.00900442		2661.24	-0.01954458		3191.24	-0.01966859		3721.24	-0.03181664
541.39	-0.02034976		1071.42	-0.0153258		1601.41	-0.01157133		2131.44	-0.009072		2661.44	-0.01923772		3191.44	-0.01905467		3721.44	-0.03192127
541.59	-0.02018603		1071.62	-0.01602029		1601.61	-0.01136205		2131.64	-0.00893612		2661.64	-0.01864628		3191.64	-0.01834517		3721.64	-0.03138424
541.79	-0.0204105		1071.82	-0.01611371		1601.81	-0.0116182		2131.84	-0.00897887		2661.84	-0.01840511		3191.84	-0.01786657		3721.84	-0.03005664
541.99	-0.02071643		1072.02	-0.01579736		1602.01	-0.01230901		2132.04	-0.00940261		2662.04	-0.01834976		3192.04	-0.01747747		3722.04	-0.02927955
542.19	-0.0197341		1072.22	-0.01571303		1602.21	-0.0123145		2132.24	-0.0096786		2662.24	-0.01722717		3192.24	-0.01685294		3722.24	-0.0286544
542.39	-0.01971421		1072.42	-0.01581043		1602.41	-0.01239157		2132.44	-0.0091969		2662.44	-0.01694821		3192.44	-0.01661195		3722.44	-0.02872096
542.59	-0.01908562		1072.62	-0.01593765		1602.61	-0.01329257		2132.64	-0.0094899		2662.64	-0.01702316		3192.64	-0.01548589		3722.64	-0.02825696
542.79	-0.018782		1072.82	-0.01652013		1602.81	-0.01438722		2132.84	-0.01005852		2662.84	-0.01730294		3192.84	-0.01572075		3722.84	-0.02871257
542.99	-0.01839037		1073.02	-0.01651482		1603.01	-0.01414554		2133.04	-0.01000481		2663.04	-0.01701041		3193.04	-0.01547624		3723.04	-0.02785206
543.19	-0.01744937		1073.22	-0.01661582		1603.21	-0.01431369		2133.24	-0.01073075		2663.24	-0.01619085		3193.24	-0.01520119		3723.24	-0.0277763
543.39	-0.01580847		1073.42	-0.01646926		1603.41	-0.01407555		2133.44	-0.01077662		2663.44	-0.01688682		3193.44	-0.01459685		3723.44	-0.02866698
543.59	-0.0147187		1073.62	-0.01568877		1603.61	-0.01441299		2133.64	-0.01095373		2663.64	-0.01715022		3193.64	-0.01448844		3723.64	-0.02954752
543.79	-0.01433858		1073.82	-0.01529244		1603.81	-0.01469102		2133.84	-0.00993423		2663.84	-0.017606		3193.84	-0.01458861		3723.84	-0.02936889
543.99	-0.01389555		1074.02	-0.01587766		1604.01	-0.01358051		2134.04	-0.01029198		2664.04	-0.01848435		3194.04	-0.01428518		3724.04	-0.02984989
544.19	-0.01367964		1074.22	-0.01573765		1604.21	-0.01271705		2134.24	-0.00997117		2664.24	-0.01802742		3194.24	-0.01452024		3724.24	-0.0305864
544.39	-0.01486323		1074.42	-0.015233		1604.41	-0.01232729		2134.44	-0.01012316		2664.44	-0.01840216		3194.44	-0.01447134		3724.44	-0.03011132
544.59	-0.01438259		1074.62	-0.01525083		1604.61	-0.01202193		2134.64	-0.00904606		2664.64	-0.0190604		3194.64	-0.01454065		3724.64	-0.03043877
544.79	-0.01548839		1074.82	-0.01621266		1604.81	-0.01109128		2134.84	-0.00841232		2664.84	-0.0191285		3194.84	-0.0151433		3724.84	-0.03056393
544.99	-0.01482916		1075.02	-0.01530697		1605.01	-0.01091751		2135.04	-0.00915262		2665.04	-0.01908054		3195.04	-0.01524486		3725.04	-0.03011083
545.19	-0.01545894		1075.22	-0.0155534		1605.21	-0.01059529		2135.24	-0.00876686		2665.24	-0.01995146		3195.24	-0.01552185		3725.24	-0.03054592
545.39	-0.01568039		1075.42	-0.01489411		1605.41	-0.01062665		2135.44	-0.00905359		2665.44	-0.02067798		3195.44	-0.01534144		3725.44	-0.03036287
545.59	-0.01664462		1075.62	-0.01503565		1605.61	-0.01012117		2135.64	-0.00981253		2665.64	-0.01969402		3195.64	-0.01475066		3725.64	-0.02973019
545.79	-0.01711024		1075.82	-0.01564161		1605.81	-0.01024487		2135.84	-0.00984366		2665.84	-0.01998334		3195.84	-0.0148293		3725.84	-0.02921549
545.99	-0.01717136		1076.02	-0.01629323		1606.01	-0.01013905		2136.04	-0.01046381		2666.04	-0.01985723		3196.04	-0.01527244		3726.04	-0.0288818
546.19	-0.01730026		1076.22	-0.01574583		1606.21	-0.00919301		2136.24	-0.01101324		2666.24	-0.01989235		3196.24	-0.01582205		3726.24	-0.02853925
546.39	-0.01873876		1076.42	-0.01526806		1606.41	-0.010535		2136.44	-0.01155415		2666.44	-0.02016578		3196.44	-0.01578021		3726.44	-0.02818625
546.59	-0.01825483		1076.62	-0.01577089		1606.61	-0.01079548		2136.64	-0.01150351		2666.64	-0.02030456		3196.64	-0.01541023		3726.64	-0.02830578
546.79	-0.01857324		1076.82	-0.01612811		1606.81	-0.0107851		2136.84	-0.01192786		2666.84	-0.02056916		3196.84	-0.0169909		3726.84	-0.02838284
546.99	-0.01828269		1077.02	-0.01624635		1607.01	-0.01021829		2137.04	-0.01242358		2667.04	-0.02029284		3197.04	-0.01771507		3727.04	-0.02833366
547.19	-0.01765411		1077.22	-0.01631876		1607.21	-0.01027408		2137.24	-0.01249477		2667.24	-0.01971918		3197.24	-0.01718087		3727.24	-0.0283868
547.39	-0.01674365		1077.42	-0.01644703		1607.41	-0.01033456		2137.44	-0.01212391		2667.44	-0.02008417		3197.44	-0.01698689		3727.44	-0.0285234
547.59	-0.01630162		1077.62	-0.01588161		1607.61	-0.01028912		2137.64	-0.0120845		2667.64	-0.02033192		3197.64	-0.01717276		3727.64	-0.02851878
547.79	-0.01653442		1077.82	-0.01673202		1607.81	-0.00980251		2137.84	-0.01130002		2667.84	-0.0204362		3197.84	-0.01704733		3727.84	-0.02865839
547.99	-0.016207		1078.02	-0.01733983		1608.01	-0.00973977		2138.04	-0.0116561		2668.04	-0.02053147		3198.04	-0.01654979		3728.04	-0.02916647
548.19	-0.01688585		1078.22	-0.01777014		1608.21	-0.00978506		2138.24	-0.01060809		2668.24	-0.0198894		3198.24	-0.01629701		3728.24	-0.03005446
548.39	-0.01741761		1078.42	-0.01818672		1608.41	-0.01119124		2138.44	-0.01003735		2668.44	-0.02048549		3198.44	-0.01590711		3728.44	-0.02983015
548.59	-0.01749856		1078.62	-0.01888474		1608.61	-0.01198017		2138.64	-0.0097581		2668.64	-0.02027055		3198.64	-0.01628809		3728.64	-0.03108378
548.79	-0.01779137		1078.82	-0.01849252		1608.81	-0.01212761		2138.84	-0.00910433		2668.84	-0.02050893		3198.84	-0.01669125		3728.84	-0.03159595
548.99	-0.01708127		1079.02	-0.0171692		1609.01	-0.01278813		2139.04	-0.0089458		2669.04	-0.01951276		3199.04	-0.01641427		3729.04	-0.03215918
549.19	-0.01838105		1079.22	-0.01770989		1609.21	-0.01254636		2139.24	-0.00842791		2669.24	-0.02029577		3199.24	-0.01621643		3729.24	-0.0319232
549.39	-0.01837091		1079.42	-0.01718699		1609.41	-0.01328194		2139.44	-0.00871151		2669.44	-0.01990267		3199.44	-0.01580968		3729.44	-0.03151893
549.59	-0.0188294		1079.62	-0.0181708		1609.61	-0.01293717		2139.64	-0.00901557		2669.64	-0.01916724		3199.64	-0.01570313		3729.64	-0.03190174
549.79	-0.01832507		1079.82	-0.01835954		1609.81	-0.01301094		2139.84	-0.00867145		2669.84	-0.0192768		3199.84	-0.01606893		3729.84	-0.0322735
549.99	-0.01868508		1080.02	-0.01803217		1610.01	-0.01333783		2140.04	-0.00953347		2670.04	-0.01955833		3200.04	-0.01614682		3730.04	-0.03162234
550.19	-0.01925781		1080.22	-0.01728693		1610.21	-0.01316769		2140.24	-0.01007728		2670.24	-0.02001767		3200.24	-0.01545173		3730.24	-0.03107506
550.39	-0.01952777		1080.42	-0.0176085		1610.41	-0.01376088		2140.44	-0.01048252		2670.44	-0.02000283		3200.44	-0.01518597		3730.44	-0.0306711
550.59	-0.01888039		1080.62	-0.01860782		1610.61	-0.01321488		2140.64	-0.01056112		2670.64	-0.020641		3200.64	-0.0152668		3730.64	-0.03033304
550.79	-0.01895134		1080.82	-0.01897037		1610.81	-0.01294505		2140.84	-0.0115179		2670.84	-0.02109937		3200.84	-0.01589438		3730.84	-0.03080888
550.99	-0.01885402		1081.02	-0.01882513		1611.01	-0.01320321		2141.04	-0.01177537		2671.04	-0.02046079		3201.04	-0.01603776		3731.04	-0.03104191
551.19	-0.01937137		1081.22	-0.0192716		1611.21	-0.01307847		2141.24	-0.0116292		2671.24	-0.01990678		3201.24	-0.0158822		3731.24	-0.03019262
551.39	-0.01885825		1081.42	-0.0189026		1611.41	-0.01308751		2141.44	-0.01151954		2671.44	-0.01945016		3201.44	-0.01613895		3731.44	-0.03046992
551.59	-0.01942071		1081.62	-0.01931368		1611.61	-0.01324381		2141.64	-0.01166128		2671.64	-0.01887184		3201.64	-0.0160437		3731.64	-0.03007168
551.79	-0.01948181		1081.82	-0.01916423		1611.81	-0.01381823		2141.84	-0.01120848		2671.84	-0.01868748		3201.84	-0.01522826		3731.84	-0.03015591
551.99	-0.01974819		1082.02	-0.01911406		1612.01	-0.01428698		2142.04	-0.01144364		2672.04	-0.01808714		3202.04	-0.0146738		3732.04	-0.02978263
552.19	-0.02029587		1082.22	-0.01897338		1612.21	-0.01506276		2142.24	-0.01045869		2672.24	-0.01776292		3202.24	-0.0142687		3732.24	-0.03017971
552.39	-0.02019455		1082.42	-0.01898304		1612.41	-0.01503793		2142.44	-0.01052171		2672.44	-0.01724006		3202.44	-0.01399887		3732.44	-0.02986472
552.59	-0.01969367		1082.62	-0.01809588		1612.61	-0.01498092		2142.64	-0.01013279		2672.64	-0.0166705		3202.64	-0.01352003		3732.64	-0.03102831
552.79	-0.01941219		1082.82	-0.01742037		1612.81	-0.01430725		2142.84	-0.00979555		2672.84	-0.01663		3202.84	-0.01421115		3732.84	-0.03064566
552.99	-0.01930209		1083.02	-0.01702513		1613.01	-0.01393625		2143.04	-0.00999494		2673.04	-0.0163149		3203.04	-0.01428746		3733.04	-0.03093153
553.19	-0.01996339		1083.22	-0.01754557		1613.21	-0.01412613		2143.24	-0.01007897		2673.24	-0.01708012		3203.24	-0.01390102		3733.24	-0.03021364
553.39	-0.02019509		1083.42	-0.01710294		1613.41	-0.01556346		2143.44	-0.01033145		2673.44	-0.01728687		3203.44	-0.0144966		3733.44	-0.03003509
553.59	-0.01988618		1083.62	-0.01711655		1613.61	-0.01569586		2143.64	-0.00973246		2673.64	-0.01817839		3203.64	-0.01561087		3733.64	-0.03012391
553.79	-0.02025133		1083.82	-0.01669025		1613.81	-0.01589766		2143.84	-0.00915329		2673.84	-0.01806027		3203.84	-0.01507243		3733.84	-0.03032497
553.99	-0.02036987		1084.02	-0.01696136		1614.01	-0.01517492		2144.04	-0.00875892		2674.04	-0.01899816		3204.04	-0.01526969		3734.04	-0.03000322
554.19	-0.02033306		1084.22	-0.01654479		1614.21	-0.01446043		2144.24	-0.00922718		2674.24	-0.02005469		3204.24	-0.01555242		3734.24	-0.02977876
554.39	-0.02020928		1084.42	-0.01656973		1614.41	-0.0137437		2144.44	-0.00910643		2674.44	-0.0203417		3204.44	-0.01602397		3734.44	-0.03015272
554.59	-0.02010245		1084.62	-0.01707644		1614.61	-0.01378035		2144.64	-0.00944076		2674.64	-0.02117324		3204.64	-0.01647937		3734.64	-0.03104673
554.79	-0.02048201		1084.82	-0.01674109		1614.81	-0.01404114		2144.84	-0.00967118		2674.84	-0.02186571		3204.84	-0.01734648		3734.84	-0.0323243
554.99	-0.02005965		1085.02	-0.01601683		1615.01	-0.01447577		2145.04	-0.01015425		2675.04	-0.02160537		3205.04	-0.01841298		3735.04	-0.03177502
555.19	-0.02012307		1085.22	-0.01612744		1615.21	-0.01372629		2145.24	-0.00953379		2675.24	-0.02122161		3205.24	-0.01940209		3735.24	-0.03145235
555.39	-0.02002935		1085.42	-0.01631526		1615.41	-0.01347921		2145.44	-0.00915911		2675.44	-0.02054631		3205.44	-0.01992076		3735.44	-0.03205011
555.59	-0.02045656		1085.62	-0.0159875		1615.61	-0.01261923		2145.64	-0.00898281		2675.64	-0.02041438		3205.64	-0.0200859		3735.64	-0.03229479
555.79	-0.0199955		1085.82	-0.01556254		1615.81	-0.01280638		2145.84	-0.00886023		2675.84	-0.02044752		3205.84	-0.01963616		3735.84	-0.03222835
555.99	-0.0201314		1086.02	-0.01649253		1616.01	-0.01212822		2146.04	-0.00911762		2676.04	-0.02005645		3206.04	-0.01943147		3736.04	-0.03226453
556.19	-0.01959864		1086.22	-0.0167802		1616.21	-0.01177131		2146.24	-0.0092114		2676.24	-0.01953267		3206.24	-0.01956238		3736.24	-0.03256653
556.39	-0.01850776		1086.42	-0.01669111		1616.41	-0.01025838		2146.44	-0.00987913		2676.44	-0.01956248		3206.44	-0.01894671		3736.44	-0.03282139
556.59	-0.01759533		1086.62	-0.01691682		1616.61	-0.01104138		2146.64	-0.01028519		2676.64	-0.01971036		3206.64	-0.01840181		3736.64	-0.03351561
556.79	-0.01777354		1086.82	-0.01746119		1616.81	-0.01213189		2146.84	-0.01091606		2676.84	-0.01882524		3206.84	-0.01898732		3736.84	-0.0329779
556.99	-0.01749622		1087.02	-0.01751302		1617.01	-0.01211379		2147.04	-0.01124478		2677.04	-0.01891692		3207.04	-0.01830444		3737.04	-0.03344488
557.19	-0.01700585		1087.22	-0.01796381		1617.21	-0.01308543		2147.24	-0.01214658		2677.24	-0.01925957		3207.24	-0.01809959		3737.24	-0.03361384
557.39	-0.01727725		1087.42	-0.01760456		1617.41	-0.01373414		2147.44	-0.01171667		2677.44	-0.01960354		3207.44	-0.01844086		3737.44	-0.03413312
557.59	-0.01638003		1087.62	-0.0181261		1617.61	-0.01409231		2147.64	-0.01117483		2677.64	-0.0196665		3207.64	-0.01819988		3737.64	-0.03469771
557.79	-0.01625742		1087.82	-0.01833642		1617.81	-0.01376412		2147.84	-0.01175509		2677.84	-0.01914364		3207.84	-0.01714969		3737.84	-0.0348864
557.99	-0.01615836		1088.02	-0.01854456		1618.01	-0.01331893		2148.04	-0.01222008		2678.04	-0.01964733		3208.04	-0.0172498		3738.04	-0.03460977
558.19	-0.0161022		1088.22	-0.0180131		1618.21	-0.01372624		2148.24	-0.01332501		2678.24	-0.01979807		3208.24	-0.01696818		3738.24	-0.03433861
558.39	-0.01594916		1088.42	-0.0179882		1618.41	-0.01371824		2148.44	-0.01315394		2678.44	-0.01943163		3208.44	-0.01642412		3738.44	-0.03431974
558.59	-0.01605776		1088.62	-0.01794721		1618.61	-0.01417044		2148.64	-0.01357589		2678.64	-0.01980604		3208.64	-0.01627158		3738.64	-0.03379212
558.79	-0.01636263		1088.82	-0.01733705		1618.81	-0.01426567		2148.84	-0.01336993		2678.84	-0.01999235		3208.84	-0.0162855		3738.84	-0.03279089
558.99	-0.01613442		1089.02	-0.01702791		1619.01	-0.01373583		2149.04	-0.01305684		2679.04	-0.01962877		3209.04	-0.01629413		3739.04	-0.03164026
559.19	-0.01683982		1089.22	-0.01714947		1619.21	-0.01298887		2149.24	-0.01189155		2679.24	-0.01924083		3209.24	-0.01660917		3739.24	-0.03142572
559.39	-0.01744729		1089.42	-0.01758248		1619.41	-0.0126396		2149.44	-0.01140747		2679.44	-0.01909734		3209.44	-0.01652987		3739.44	-0.03109554
559.59	-0.01755802		1089.62	-0.01669438		1619.61	-0.01227021		2149.64	-0.01110234		2679.64	-0.01917728		3209.64	-0.01635841		3739.64	-0.03063774
559.79	-0.01816527		1089.82	-0.01695685		1619.81	-0.01275251		2149.84	-0.0106568		2679.84	-0.01918494		3209.84	-0.0159144		3739.84	-0.02963235
