# Supplementary material for: Functional development of a V3/glycan-specific broadly neutralizing antibody isolated from a case of HIV superinfection
Source: eLife journal article supplement (doi:10.7554/elife.68110), 2021-07-15
Supplement: fig2-data2 [file F9.xls]

Vers 3.43 Data Simulation
Conc1	1.563E-08	1.563E-08	1.563E-08	1.563E-08	6.25E-08	6.25E-08	6.25E-08	6.25E-08
Start1	199.99	729.99	1259.98	1789.99	2319.98	2850.01	3380	3910
Stop1	559.79	1089.79	1619.78	2149.79	2679.78	3209.81	3739.8	4269.8
Time1	Data1	Sim1	Time2	Data2	Sim2	Time3	Data3	Sim3	Time4	Data4	Sim4	Time5	Data5	Sim5	Time6	Data6	Sim6	Time7	Data7	Sim7	Time8	Data8	Sim8
199.99	0.0084143		729.99	0.00668564		1259.98	0.00627084		1789.99	0.0013909		2319.98	0.0005446		2850.01	0.00084954		3380	0.00672566		3910	-0.00070066
200.19	0.00862169		730.19	0.00588827		1260.18	0.00624866		1790.19	0.00125675		2320.18	-0.00019825		2850.21	0.00114213		3380.2	0.00716889		3910.2	-0.00015837
200.39	0.00879705		730.39	0.00623828		1260.38	0.00616794		1790.39	0.00154986		2320.38	-0.00141243		2850.41	0.00139168		3380.4	0.00730872		3910.4	0.0005336
200.59	0.00868644		730.59	0.0070408		1260.58	0.00690208		1790.59	0.00188153		2320.58	-0.00205604		2850.61	0.00111797		3380.6	0.00758454		3910.6	0.00053531
200.79	0.00797013		730.79	0.00829928		1260.78	0.00638784		1790.79	0.0023401		2320.78	-0.00300928		2850.81	0.00158925		3380.8	0.00844807		3910.8	0.00070205
200.99	0.00756514		730.99	0.00834186		1260.98	0.00606845		1790.99	0.00274026		2320.98	-0.00360953		2851.01	0.00235876		3381	0.00820787		3911	0.00056487
201.19	0.00734225		731.19	0.00899011		1261.18	0.00534417		1791.19	0.00321701		2321.18	-0.0041978		2851.21	0.00272233		3381.2	0.00877507		3911.2	-0.00023291
201.39	0.00672381		731.39	0.00886001		1261.38	0.00568558		1791.39	0.0033051		2321.38	-0.00420788		2851.41	0.00246822		3381.4	0.00866134		3911.4	-0.00038064
201.59	0.00683198		731.59	0.00778422		1261.58	0.0053353		1791.59	0.00359957		2321.58	-0.00423022		2851.61	0.00285303		3381.6	0.00869453		3911.6	-0.00058481
201.79	0.00671021		731.79	0.00764086		1261.78	0.00482721		1791.79	0.00359671		2321.78	-0.00467222		2851.81	0.00295267		3381.8	0.00823743		3911.8	-0.00118471
201.99	0.00645527		731.99	0.00774512		1261.98	0.00468812		1791.99	0.00354906		2321.98	-0.00414419		2852.01	0.00268271		3382	0.00792753		3912	-0.00128466
202.19	0.00628679		732.19	0.00735248		1262.18	0.00555143		1792.19	0.00327092		2322.18	-0.00362526		2852.21	0.00232669		3382.2	0.00801782		3912.2	-0.00196307
202.39	0.00706071		732.39	0.00729058		1262.38	0.00476397		1792.39	0.00338862		2322.38	-0.00316036		2852.41	0.00180573		3382.4	0.00856079		3912.4	-0.00241917
202.59	0.00751517		732.59	0.00775318		1262.58	0.00479153		1792.59	0.00290602		2322.58	-0.003154		2852.61	0.00139124		3382.6	0.0088065		3912.6	-0.00223399
202.79	0.00813436		732.79	0.00867357		1262.78	0.00509323		1792.79	0.00262527		2322.78	-0.00399749		2852.81	-0.00000307		3382.8	0.00873923		3912.8	-0.00337938
202.99	0.00879158		732.99	0.00933791		1262.98	0.00517955		1792.99	0.00202369		2322.98	-0.00432269		2853.01	0.0001592		3383	0.00922473		3913	-0.00400494
203.19	0.00964157		733.19	0.00953437		1263.18	0.00540148		1793.19	0.00304718		2323.18	-0.00410584		2853.21	0.00027058		3383.2	0.00966613		3913.2	-0.00356849
203.39	0.01061534		733.39	0.00900063		1263.38	0.00616428		1793.39	0.00236898		2323.38	-0.00425621		2853.41	-0.00058917		3383.4	0.00991184		3913.4	-0.00395761
203.59	0.01095367		733.59	0.00869085		1263.58	0.00585098		1793.59	0.0024862		2323.58	-0.00506951		2853.61	-0.00097117		3383.6	0.00936266		3913.6	-0.00368398
203.79	0.01122262		733.79	0.00978474		1263.78	0.00636346		1793.79	0.00146073		2323.78	-0.00534031		2853.81	-0.00146773		3383.8	0.009647		3913.8	-0.00304047
203.99	0.01153239		733.99	0.00848084		1263.98	0.00614162		1793.99	0.00067073		2323.98	-0.00496134		2854.01	-0.00077784		3384	0.00967274		3914	-0.00160286
204.19	0.01267858		734.19	0.00812162		1264.18	0.00649742		1794.19	0.00027287		2324.18	-0.00509272		2854.21	-0.00147467		3384.2	0.00991793		3914.2	-0.00107032
204.39	0.01284574		734.39	0.00838888		1264.38	0.00739502		1794.39	0.00078247		2324.38	-0.00544174		2854.41	-0.00159388		3384.4	0.00920362		3914.4	-0.00099354
204.59	0.01253897		734.59	0.00929876		1264.58	0.00797291		1794.59	0.00091131		2324.58	-0.00435243		2854.61	-0.0012088		3384.6	0.0091449		3914.6	-0.00181918
204.79	0.01270921		734.79	0.00943406		1264.78	0.00747333		1794.79	0.00065129		2324.78	-0.00506168		2854.81	-0.00068366		3384.8	0.00820806		3914.8	-0.00203253
204.99	0.01252787		734.99	0.00873839		1264.98	0.00812098		1794.99	0.00095384		2324.98	-0.00541756		2855.01	-0.00009333		3385	0.00691376		3915	-0.00316843
205.19	0.01275231		735.19	0.00913631		1265.18	0.00814715		1795.19	0.00086934		2325.18	-0.00585755		2855.21	0.00016197		3385.2	0.0067806		3915.2	-0.00337645
205.39	0.01266066		735.39	0.00846508		1265.38	0.0092426		1795.39	0.00164606		2325.38	-0.00545665		2855.41	0.00061279		3385.4	0.00666231		3915.4	-0.00316869
205.59	0.01234194		735.59	0.0066931		1265.58	0.00881379		1795.59	0.00184402		2325.58	-0.00540335		2855.61	0.00108557		3385.6	0.00669002		3915.6	-0.00312946
205.79	0.01058947		735.79	0.00688799		1265.78	0.00865599		1795.79	0.00195044		2325.78	-0.00592555		2855.81	0.00153623		3385.8	0.00651777		3915.8	-0.00299875
205.99	0.00967561		735.99	0.00757844		1265.98	0.00930868		1795.99	0.00246438		2325.98	-0.00554335		2856.01	0.00099813		3386	0.00647808		3916	-0.00333696
206.19	0.00933578		736.19	0.0075575		1266.18	0.00946182		1796.19	0.00238137		2326.18	-0.00583903		2856.21	0.00130309		3386.2	0.00673039		3916.2	-0.00490148
206.39	0.0099384		736.39	0.00756172		1266.38	0.00824259		1796.39	0.00281479		2326.38	-0.00586491		2856.41	0.0016776		3386.4	0.00614252		3916.4	-0.00578479
206.59	0.00926983		736.59	0.0072957		1266.58	0.00810397		1796.59	0.00233641		2326.58	-0.00545809		2856.61	0.00250589		3386.6	0.00487888		3916.6	-0.00597248
206.79	0.01061075		736.79	0.0076432		1266.78	0.00713923		1796.79	0.00192219		2326.78	-0.00549871		2856.81	0.00284993		3386.8	0.00441448		3916.8	-0.00642072
206.99	0.0096055		736.99	0.00688574		1266.98	0.00675128		1796.99	0.0008382		2326.98	-0.0060871		2857.01	0.00305943		3387	0.00411377		3917	-0.00566341
207.19	0.00930533		737.19	0.0071908		1267.18	0.00632204		1797.19	0.00261337		2327.18	-0.00636128		2857.21	0.00215716		3387.2	0.00331213		3917.2	-0.00558452
207.39	0.00933867		737.39	0.00793301		1267.38	0.00645935		1797.39	0.00212836		2327.38	-0.00660902		2857.41	0.00125966		3387.4	0.00381097		3917.4	-0.00660877
207.59	0.00868452		737.59	0.00798684		1267.58	0.00573432		1797.59	0.00188763		2327.58	-0.00684675		2857.61	0.00108818		3387.6	0.00418721		3917.6	-0.00595321
207.79	0.00948041		737.79	0.00774747		1267.78	0.00557503		1797.79	0.00087971		2327.78	-0.00609359		2857.81	0.00100541		3387.8	0.0052676		3917.8	-0.00529157
207.99	0.01045642		737.99	0.00740929		1267.98	0.00481698		1797.99	0.00065271		2327.98	-0.0057729		2858.01	0.00060442		3388	0.00459785		3918	-0.00440949
208.19	0.01122819		738.19	0.00766757		1268.18	0.00501776		1798.19	0.00036626		2328.18	-0.00545591		2858.21	0.00021263		3388.2	0.00457074		3918.2	-0.00413283
208.39	0.01153052		738.39	0.00719832		1268.38	0.00554957		1798.39	0.00034575		2328.38	-0.00560544		2858.41	0.00033976		3388.4	0.00463091		3918.4	-0.00449367
208.59	0.01272412		738.59	0.00815359		1268.58	0.00583369		1798.59	-0.00033368		2328.58	-0.0056927		2858.61	0.00090893		3388.6	0.00515169		3918.6	-0.00550596
208.79	0.01352251		738.79	0.00814298		1268.78	0.00621113		1798.79	-0.00095843		2328.78	-0.00664803		2858.81	0.0003267		3388.8	0.00500662		3918.8	-0.00521752
208.99	0.01445582		738.99	0.00831302		1268.98	0.00686216		1798.99	-0.00050564		2328.98	-0.00657403		2859.01	0.00024979		3389	0.00634154		3919	-0.00562576
209.19	0.01544722		739.19	0.00843727		1269.18	0.00692352		1799.19	-0.00027133		2329.18	-0.00699177		2859.21	0.00065223		3389.2	0.00732153		3919.2	-0.00532233
209.39	0.01532211		739.39	0.00751475		1269.38	0.00773415		1799.39	0.00056827		2329.38	-0.00671497		2859.41	0.0005084		3389.4	0.00787235		3919.4	-0.00484662
209.59	0.01476109		739.59	0.00625214		1269.58	0.00815003		1799.59	0.00046084		2329.58	-0.00712323		2859.61	-0.000068		3389.6	0.00757386		3919.6	-0.00478641
209.79	0.01478841		739.79	0.00682178		1269.78	0.00885521		1799.79	0.00035061		2329.78	-0.0073332		2859.81	-0.00005057		3389.8	0.00726375		3919.8	-0.00495036
209.99	0.01531012		739.99	0.00727479		1269.98	0.00973027		1799.99	0.00063079		2329.98	-0.00695312		2860.01	-0.00025193		3390	0.00625779		3920	-0.00558809
210.19	0.01528659		740.19	0.00750538		1270.18	0.00974778		1800.19	0.00041532		2330.18	-0.00688874		2860.21	0.00068964		3390.2	0.00590476		3920.2	-0.00566112
210.39	0.0155535		740.39	0.00738565		1270.38	0.00978174		1800.39	0.00038399		2330.38	-0.00665743		2860.41	0.00078269		3390.4	0.00489125		3920.4	-0.00514036
210.59	0.01515635		740.59	0.00767103		1270.58	0.00979412		1800.59	-0.00038877		2330.58	-0.00593506		2860.61	0.00123495		3390.6	0.00488917		3920.6	-0.00522812
210.79	0.0153393		740.79	0.00803152		1270.78	0.00874067		1800.79	-0.00025108		2330.78	-0.00517981		2860.81	0.00067709		3390.8	0.00509367		3920.8	-0.00519833
210.99	0.0132723		740.99	0.00790929		1270.98	0.0084389		1800.99	-0.00051994		2330.98	-0.00572745		2861.01	-0.00015858		3391	0.00477479		3921	-0.00429188
211.19	0.01332995		741.19	0.00777734		1271.18	0.00885097		1801.19	0.00031159		2331.18	-0.00501648		2861.21	-0.00060519		3391.2	0.00518343		3921.2	-0.00453765
211.39	0.01280842		741.39	0.00846952		1271.38	0.0099417		1801.39	-0.00033074		2331.38	-0.00455637		2861.41	-0.00027624		3391.4	0.00512947		3921.4	-0.00351959
211.59	0.01205063		741.59	0.00831856		1271.58	0.00945153		1801.59	-0.00024838		2331.58	-0.00467977		2861.61	0.00020572		3391.6	0.00556592		3921.6	-0.00281972
211.79	0.0122248		741.79	0.00882609		1271.78	0.0092087		1801.79	-0.00074463		2331.78	-0.00420537		2861.81	0.00147288		3391.8	0.00515726		3921.8	-0.00286351
211.99	0.01255111		741.99	0.00919857		1271.98	0.00902018		1801.99	-0.00045834		2331.98	-0.00446245		2862.01	0.00154736		3392	0.00542395		3922	-0.00213918
212.19	0.01312726		742.19	0.0091492		1272.18	0.00868785		1802.19	-0.0006839		2332.18	-0.00399365		2862.21	0.00150348		3392.2	0.00604468		3922.2	-0.00113925
212.39	0.01297648		742.39	0.00879512		1272.38	0.00798583		1802.39	-0.00032689		2332.38	-0.00391863		2862.41	0.00160896		3392.4	0.00672182		3922.4	-0.00178036
212.59	0.013595		742.59	0.00932275		1272.58	0.00767764		1802.59	0.00039724		2332.58	-0.0038625		2862.61	0.00223071		3392.6	0.00777649		3922.6	-0.00216299
212.79	0.01391379		742.79	0.00916675		1272.78	0.00758759		1802.79	0.00025912		2332.78	-0.00395709		2862.81	0.00160893		3392.8	0.00743865		3922.8	-0.00217376
212.99	0.01545185		742.99	0.0094132		1272.98	0.00763794		1802.99	0.00110024		2332.98	-0.00438357		2863.01	0.00078803		3393	0.00789493		3923	-0.00334873
213.19	0.01618464		743.19	0.00934377		1273.18	0.00777327		1803.19	0.0016468		2333.18	-0.00482425		2863.21	0.00108451		3393.2	0.00737808		3923.2	-0.00341025
213.39	0.01703648		743.39	0.00866959		1273.38	0.0079651		1803.39	0.00176454		2333.38	-0.00454129		2863.41	0.00081878		3393.4	0.00683157		3923.4	-0.00304723
213.59	0.01775589		743.59	0.00861018		1273.58	0.0073843		1803.59	0.00171323		2333.58	-0.00385581		2863.61	0.00119421		3393.6	0.00699589		3923.6	-0.00415166
213.79	0.01842571		743.79	0.00908898		1273.78	0.00694987		1803.79	0.00132121		2333.78	-0.00373574		2863.81	0.00078741		3393.8	0.00627514		3923.8	-0.00400303
213.99	0.01888544		743.99	0.00975224		1273.98	0.00661387		1803.99	0.00184753		2333.98	-0.00356062		2864.01	0.00105547		3394	0.00542301		3924	-0.00364378
214.19	0.01884207		744.19	0.01077354		1274.18	0.00615364		1804.19	0.00173699		2334.18	-0.00370074		2864.21	0.00168108		3394.2	0.00546424		3924.2	-0.00412752
214.39	0.01918483		744.39	0.01104579		1274.38	0.00525715		1804.39	0.00140901		2334.38	-0.0032184		2864.41	0.00104189		3394.4	0.00529341		3924.4	-0.00451414
214.59	0.01867773		744.59	0.011643		1274.58	0.004118		1804.59	0.00092533		2334.58	-0.00262555		2864.61	0.00060697		3394.6	0.00560741		3924.6	-0.00538846
214.79	0.01865579		744.79	0.0111017		1274.78	0.00337341		1804.79	0.00044521		2334.78	-0.00247854		2864.81	0.00037863		3394.8	0.00453476		3924.8	-0.00493763
214.99	0.018924		744.99	0.01041114		1274.98	0.00326362		1804.99	-0.00031544		2334.98	-0.0032125		2865.01	0.0005507		3395	0.00462116		3925	-0.00451721
215.19	0.01816544		745.19	0.00999646		1275.18	0.00462566		1805.19	0.0000236		2335.18	-0.00240388		2865.21	0.00064857		3395.2	0.00485504		3925.2	-0.00446029
215.39	0.01723552		745.39	0.01066011		1275.38	0.00542454		1805.39	-0.00015666		2335.38	-0.00183221		2865.41	0.00098763		3395.4	0.00469044		3925.4	-0.00392757
215.59	0.01667429		745.59	0.01063827		1275.58	0.00517971		1805.59	-0.00064064		2335.58	-0.00184346		2865.61	0.0018391		3395.6	0.00589091		3925.6	-0.00456076
215.79	0.01645404		745.79	0.01069388		1275.78	0.00585371		1805.79	-0.00066447		2335.78	-0.00168141		2865.81	0.00155608		3395.8	0.0054899		3925.8	-0.00414488
215.99	0.01742415		745.99	0.00941075		1275.98	0.00601603		1805.99	-0.00021156		2335.98	-0.001351		2866.01	0.00032872		3396	0.00555353		3926	-0.00413555
216.19	0.01691312		746.19	0.0092101		1276.18	0.00567342		1806.19	-0.00054971		2336.18	-0.00047818		2866.21	-0.00008982		3396.2	0.00565471		3926.2	-0.00322817
216.39	0.01630309		746.39	0.00831173		1276.38	0.00669266		1806.39	0.0001486		2336.38	-0.00064773		2866.41	0.00039073		3396.4	0.00644808		3926.4	-0.00354447
216.59	0.01648809		746.59	0.0089807		1276.58	0.00796975		1806.59	0.00062569		2336.58	-0.00127966		2866.61	0.00006724		3396.6	0.00724062		3926.6	-0.00358431
216.79	0.01598131		746.79	0.00824562		1276.78	0.00891343		1806.79	0.00047213		2336.78	-0.00255267		2866.81	0.00016126		3396.8	0.00694705		3926.8	-0.00380404
216.99	0.01641121		746.99	0.00782173		1276.98	0.00870331		1806.99	0.0007139		2336.98	-0.00226127		2867.01	-0.0001837		3397	0.00787117		3927	-0.00364352
217.19	0.01638806		747.19	0.0079062		1277.18	0.00877582		1807.19	0.0004006		2337.18	-0.002255		2867.21	0.00061644		3397.2	0.00801365		3927.2	-0.00321762
217.39	0.0159848		747.39	0.00757449		1277.38	0.00835699		1807.39	0.00042829		2337.38	-0.00248652		2867.41	0.00106269		3397.4	0.00830853		3927.4	-0.00363169
217.59	0.01582913		747.59	0.00782872		1277.58	0.00788461		1807.59	-0.00000876		2337.58	-0.0022292		2867.61	0.00141412		3397.6	0.00795666		3927.6	-0.00418352
217.79	0.0148499		747.79	0.00880243		1277.78	0.00746609		1807.79	-0.00034678		2337.78	-0.00328463		2867.81	0.00126796		3397.8	0.00749646		3927.8	-0.00346477
217.99	0.01493204		747.99	0.00910466		1277.98	0.00724099		1807.99	-0.00002545		2337.98	-0.00297466		2868.01	0.00109938		3398	0.0069371		3928	-0.00371672
218.19	0.01467431		748.19	0.00953278		1278.18	0.00704874		1808.19	-0.00014995		2338.18	-0.00314411		2868.21	0.00116175		3398.2	0.00617366		3928.2	-0.00421503
218.39	0.0147583		748.39	0.00955064		1278.38	0.00701998		1808.39	0.00017605		2338.38	-0.00302213		2868.41	0.00084062		3398.4	0.0058575		3928.4	-0.00443205
218.59	0.01513574		748.59	0.00917948		1278.58	0.00651463		1808.59	0.00017607		2338.58	-0.00307097		2868.61	0.00173614		3398.6	0.00583674		3928.6	-0.00500598
218.79	0.01560197		748.79	0.00801023		1278.78	0.00607553		1808.79	0.00048158		2338.78	-0.00361382		2868.81	0.0026118		3398.8	0.00586178		3928.8	-0.00530934
218.99	0.01564495		748.99	0.00839917		1278.98	0.00649952		1808.99	0.00049125		2338.98	-0.00325798		2869.01	0.00310124		3399	0.00604348		3929	-0.00585388
219.19	0.01473009		749.19	0.00896556		1279.18	0.00733936		1809.19	0.00036678		2339.18	-0.00241285		2869.21	0.00289359		3399.2	0.00591579		3929.2	-0.00557455
219.39	0.01524415		749.39	0.00923085		1279.38	0.00731548		1809.39	-0.00061343		2339.38	-0.00203805		2869.41	0.00307252		3399.4	0.00539309		3929.4	-0.00517024
219.59	0.0162564		749.59	0.00929237		1279.58	0.00663517		1809.59	-0.00059032		2339.58	-0.00295329		2869.61	0.00355293		3399.6	0.00509582		3929.6	-0.00448935
219.79	0.0169822		749.79	0.00925494		1279.78	0.00695558		1809.79	0.00030081		2339.78	-0.00223918		2869.81	0.00293402		3399.8	0.00439467		3929.8	-0.00417109
219.99	0.01821887		749.99	0.00900285		1279.98	0.00741127		1809.99	0.00015952		2339.98	-0.0017802		2870.01	0.00312272		3400	0.00452626		3930	-0.00395428
220.19	0.01818597		750.19	0.00950824		1280.18	0.00790922		1810.19	-0.00035905		2340.18	-0.00142341		2870.21	0.00340753		3400.2	0.005687		3930.2	-0.00271293
220.39	0.01951342		750.39	0.01036722		1280.38	0.0090699		1810.39	0.00014124		2340.38	-0.00253389		2870.41	0.00276683		3400.4	0.00635298		3930.4	-0.00275868
220.59	0.01929066		750.59	0.01126207		1280.58	0.00905302		1810.59	0.00069037		2340.58	-0.00311825		2870.61	0.0026953		3400.6	0.0064557		3930.6	-0.00215962
220.79	0.01935462		750.79	0.0109365		1280.78	0.00819497		1810.79	0.00094085		2340.78	-0.00382872		2870.81	0.00289907		3400.8	0.00702953		3930.8	-0.0013299
220.99	0.02021661		750.99	0.01051997		1280.98	0.00864785		1810.99	0.00069338		2340.98	-0.0034107		2871.01	0.00175451		3401	0.00704332		3931	-0.00156377
221.19	0.02098079		751.19	0.01010618		1281.18	0.00908458		1811.19	0.00148688		2341.18	-0.00442375		2871.21	0.00148208		3401.2	0.00679312		3931.2	-0.00242864
221.39	0.02159783		751.39	0.00995729		1281.38	0.00932466		1811.39	0.00220079		2341.38	-0.00455957		2871.41	0.00095041		3401.4	0.0071913		3931.4	-0.00257539
221.59	0.02209461		751.59	0.00964513		1281.58	0.00931964		1811.59	0.00199115		2341.58	-0.00427779		2871.61	0.00071342		3401.6	0.00727395		3931.6	-0.00278077
221.79	0.02195702		751.79	0.00958244		1281.78	0.00964572		1811.79	0.00230081		2341.78	-0.00451407		2871.81	0.00018717		3401.8	0.00798321		3931.8	-0.0017427
221.99	0.0228833		751.99	0.00904862		1281.98	0.01025698		1811.99	0.00318149		2341.98	-0.00395666		2872.01	-0.00051768		3402	0.00807716		3932	-0.00253962
222.19	0.02365074		752.19	0.00885933		1282.18	0.0108438		1812.19	0.0036515		2342.18	-0.00380287		2872.21	-0.00068839		3402.2	0.00796953		3932.2	-0.00230891
222.39	0.02356134		752.39	0.00830173		1282.38	0.01102317		1812.39	0.00461767		2342.38	-0.00279314		2872.41	-0.00027347		3402.4	0.00820247		3932.4	-0.00320738
222.59	0.02468796		752.59	0.00811583		1282.58	0.01078869		1812.59	0.00507108		2342.58	-0.00187949		2872.61	0.00007068		3402.6	0.00884893		3932.6	-0.00332485
222.79	0.02492422		752.79	0.00781458		1282.78	0.01031746		1812.79	0.00486941		2342.78	-0.00150357		2872.81	-0.00048277		3402.8	0.00852238		3932.8	-0.0036627
222.99	0.02538812		752.99	0.00876875		1282.98	0.00994645		1812.99	0.00485294		2342.98	-0.00062659		2873.01	-0.00033455		3403	0.00852148		3933	-0.00396
223.19	0.02510147		753.19	0.00884217		1283.18	0.00915258		1813.19	0.00385725		2343.18	-0.00042556		2873.21	-0.00022253		3403.2	0.00766589		3933.2	-0.00370483
223.39	0.02526538		753.39	0.00870988		1283.38	0.00882465		1813.39	0.00341326		2343.38	0.00037017		2873.41	0.00006038		3403.4	0.00715045		3933.4	-0.00360333
223.59	0.02547575		753.59	0.00875544		1283.58	0.00791539		1813.59	0.00305497		2343.58	0.00099383		2873.61	0.00058652		3403.6	0.00750345		3933.6	-0.00311824
223.79	0.02478357		753.79	0.00920937		1283.78	0.00799447		1813.79	0.00270398		2343.78	0.00220847		2873.81	-0.00005743		3403.8	0.008058		3933.8	-0.00347847
223.99	0.02503333		753.99	0.0098206		1283.98	0.00805371		1813.99	0.00118246		2343.98	0.00185675		2874.01	0.00087981		3404	0.00840716		3934	-0.00344784
224.19	0.02460157		754.19	0.01035943		1284.18	0.00789827		1814.19	0.00079046		2344.18	0.00154766		2874.21	0.00124893		3404.2	0.00921023		3934.2	-0.00374978
224.39	0.02407913		754.39	0.01092396		1284.38	0.0073563		1814.39	0.00053911		2344.38	0.00065665		2874.41	0.00115053		3404.4	0.0091278		3934.4	-0.00316172
224.59	0.02400344		754.59	0.01082731		1284.58	0.00594583		1814.59	0.0005047		2344.58	0.0001079		2874.61	0.002375		3404.6	0.00952716		3934.6	-0.00333387
224.79	0.02372441		754.79	0.01083987		1284.78	0.00607369		1814.79	-0.00023762		2344.78	-0.00049999		2874.81	0.00248973		3404.8	0.00990689		3934.8	-0.00301581
224.99	0.02387675		754.99	0.00968239		1284.98	0.00726005		1814.99	-0.00005245		2344.98	-0.00100768		2875.01	0.00185182		3405	0.01006496		3935	-0.00341406
225.19	0.02408357		755.19	0.00940636		1285.18	0.00734394		1815.19	-0.00017033		2345.18	-0.0020652		2875.21	0.00126998		3405.2	0.01024449		3935.2	-0.00306412
225.39	0.02439059		755.39	0.00949373		1285.38	0.00761131		1815.39	-0.00061065		2345.38	-0.00235249		2875.41	0.00141012		3405.4	0.01112978		3935.4	-0.00227843
225.59	0.02487463		755.59	0.00906086		1285.58	0.00837075		1815.59	-0.00101189		2345.58	-0.00280247		2875.61	0.00252122		3405.6	0.01149086		3935.6	-0.00187668
225.79	0.02480118		755.79	0.00914925		1285.78	0.00932928		1815.79	-0.0010821		2345.78	-0.00345702		2875.81	0.00255921		3405.8	0.01197251		3935.8	-0.00071515
225.99	0.02467335		755.99	0.00893089		1285.98	0.00910952		1815.99	-0.00121542		2345.98	-0.00321413		2876.01	0.00241286		3406	0.012133		3936	-0.00141024
226.19	0.02534235		756.19	0.00839941		1286.18	0.00969554		1816.19	-0.0009931		2346.18	-0.00254673		2876.21	0.00207544		3406.2	0.0111083		3936.2	-0.00086665
226.39	0.02528911		756.39	0.0083561		1286.38	0.00973548		1816.39	-0.00094721		2346.38	-0.0019739		2876.41	0.00180744		3406.4	0.01116713		3936.4	-0.00081564
226.59	0.02631549		756.59	0.00797925		1286.58	0.009393		1816.59	-0.00027386		2346.58	-0.00181042		2876.61	0.00159112		3406.6	0.01038734		3936.6	-0.00015632
226.79	0.0265462		756.79	0.00773917		1286.78	0.00919467		1816.79	-0.00032419		2346.78	-0.00166304		2876.81	0.00098421		3406.8	0.00947894		3936.8	-0.00137976
226.99	0.02672291		756.99	0.00890719		1286.98	0.00880384		1816.99	-0.00020009		2346.98	-0.00125267		2877.01	0.00090555		3407	0.00934521		3937	-0.00184695
227.19	0.026614		757.19	0.00830115		1287.18	0.00931382		1817.19	-0.00176556		2347.18	-0.00104049		2877.21	0.00127037		3407.2	0.00714076		3937.2	-0.00172301
227.39	0.02672923		757.39	0.00869999		1287.38	0.00943309		1817.39	-0.00152058		2347.38	-0.00051455		2877.41	0.00106936		3407.4	0.00672335		3937.4	-0.00194552
227.59	0.02619189		757.59	0.008905		1287.58	0.00893188		1817.59	-0.00182928		2347.58	-0.00029477		2877.61	0.00217683		3407.6	0.00664091		3937.6	-0.00199133
227.79	0.0257181		757.79	0.00942894		1287.78	0.00938286		1817.79	-0.00133086		2347.78	-0.00026496		2877.81	0.00221247		3407.8	0.00643712		3937.8	-0.00242815
227.99	0.02636742		757.99	0.00948088		1287.98	0.00911538		1817.99	-0.00154759		2347.98	0.00016378		2878.01	0.00372715		3408	0.00574014		3938	-0.00308066
228.19	0.02633472		758.19	0.00954649		1288.18	0.00869518		1818.19	-0.00085212		2348.18	-0.0007376		2878.21	0.00374258		3408.2	0.00597052		3938.2	-0.00295756
228.39	0.02641582		758.39	0.00973352		1288.38	0.00780626		1818.39	-0.00081809		2348.38	-0.00136888		2878.41	0.00473242		3408.4	0.00526135		3938.4	-0.00290881
228.59	0.0273556		758.59	0.01143531		1288.58	0.00700279		1818.59	-0.0007304		2348.58	-0.00169361		2878.61	0.00518761		3408.6	0.0056678		3938.6	-0.00375876
228.79	0.02740773		758.79	0.01154825		1288.78	0.00825961		1818.79	-0.00020667		2348.78	-0.00182798		2878.81	0.00475126		3408.8	0.00549889		3938.8	-0.0031007
228.99	0.02711436		758.99	0.01196368		1288.98	0.00859139		1818.99	0.00043673		2348.98	-0.001731		2879.01	0.00421858		3409	0.00564712		3939	-0.00327434
229.19	0.02775093		759.19	0.01251455		1289.18	0.00920249		1819.19	-0.00013779		2349.18	-0.00177344		2879.21	0.00350102		3409.2	0.00570321		3939.2	-0.00315285
229.39	0.02893944		759.39	0.01268885		1289.38	0.01026349		1819.39	0.00040447		2349.38	-0.00210208		2879.41	0.00447541		3409.4	0.00602347		3939.4	-0.0032935
229.59	0.02928074		759.59	0.01313582		1289.58	0.01095504		1819.59	0.00039899		2349.58	-0.00290423		2879.61	0.00499354		3409.6	0.00546987		3939.6	-0.003203
229.79	0.02971545		759.79	0.01315926		1289.78	0.01056703		1819.79	0.00065432		2349.78	-0.00330775		2879.81	0.00423434		3409.8	0.00481652		3939.8	-0.00296089
229.99	0.03049574		759.99	0.01266579		1289.98	0.01075354		1819.99	0.00094443		2349.98	-0.0028827		2880.01	0.00389268		3410	0.00467382		3940	-0.00303412
230.19	0.03126932		760.19	0.01227407		1290.18	0.01179486		1820.19	0.00088147		2350.18	-0.00288709		2880.21	0.00382025		3410.2	0.00444708		3940.2	-0.00288636
230.39	0.03108656		760.39	0.01240752		1290.38	0.01197313		1820.39	0.00069157		2350.38	-0.00321038		2880.41	0.00365348		3410.4	0.00498806		3940.4	-0.00294251
230.59	0.03124228		760.59	0.01145515		1290.58	0.01252237		1820.59	0.0016896		2350.58	-0.00236379		2880.61	0.00426741		3410.6	0.00369231		3940.6	-0.00372774
230.79	0.03193302		760.79	0.0113372		1290.78	0.01346483		1820.79	0.00091162		2350.78	-0.0020189		2880.81	0.0042619		3410.8	0.00448779		3940.8	-0.00429911
230.99	0.03187433		760.99	0.01126913		1290.98	0.01252268		1820.99	0.00010855		2350.98	-0.00219959		2881.01	0.00468147		3411	0.00415344		3941	-0.00415353
231.19	0.03181353		761.19	0.01038012		1291.18	0.01255177		1821.19	0.00045161		2351.18	-0.00232356		2881.21	0.0051589		3411.2	0.00416585		3941.2	-0.00416933
231.39	0.03169067		761.39	0.0099445		1291.38	0.01194466		1821.39	0.0009239		2351.38	-0.00197039		2881.41	0.00460866		3411.4	0.0055792		3941.4	-0.00439833
231.59	0.03153216		761.59	0.00946001		1291.58	0.0114432		1821.59	0.00116051		2351.58	-0.00156337		2881.61	0.00447498		3411.6	0.00612884		3941.6	-0.00448525
231.79	0.03118691		761.79	0.00814113		1291.78	0.01065882		1821.79	0.0008279		2351.78	-0.00141231		2881.81	0.00411151		3411.8	0.00692293		3941.8	-0.00484725
231.99	0.03114814		761.99	0.00750239		1291.98	0.00951569		1821.99	0.00081997		2351.98	-0.00151271		2882.01	0.00445977		3412	0.00791053		3942	-0.00542534
232.19	0.03148393		762.19	0.00815118		1292.18	0.00875631		1822.19	0.00066926		2352.18	-0.00252802		2882.21	0.00439277		3412.2	0.00908476		3942.2	-0.0057344
232.39	0.0314397		762.39	0.0077286		1292.38	0.00718206		1822.39	0.00038522		2352.38	-0.00226599		2882.41	0.00483595		3412.4	0.01039191		3942.4	-0.00593806
232.59	0.03071214		762.59	0.00823817		1292.58	0.0062533		1822.59	0.00020381		2352.58	-0.00190313		2882.61	0.00369065		3412.6	0.01178522		3942.6	-0.00555839
232.79	0.03060076		762.79	0.00778187		1292.78	0.00619411		1822.79	0.0003934		2352.78	-0.00220904		2882.81	0.00405796		3412.8	0.01265282		3942.8	-0.00488753
232.99	0.03018431		762.99	0.0090925		1292.98	0.00503037		1822.99	0.0001694		2352.98	-0.00178042		2883.01	0.00393332		3413	0.01385198		3943	-0.00499305
233.19	0.03118129		763.19	0.00956584		1293.18	0.00494509		1823.19	0.00011355		2353.18	-0.00193619		2883.21	0.00404683		3413.2	0.01473044		3943.2	-0.00501444
233.39	0.03133341		763.39	0.00993259		1293.38	0.00568212		1823.39	-0.00023031		2353.38	-0.00294781		2883.41	0.00404728		3413.4	0.01498686		3943.4	-0.00498062
233.59	0.03109634		763.59	0.01027331		1293.58	0.00500724		1823.59	-0.00100635		2353.58	-0.00335768		2883.61	0.0042008		3413.6	0.01456707		3943.6	-0.00392294
233.79	0.03165158		763.79	0.01057588		1293.78	0.00476141		1823.79	-0.00132623		2353.78	-0.00327475		2883.81	0.0039994		3413.8	0.01469645		3943.8	-0.0035353
233.99	0.03139811		763.99	0.01132951		1293.98	0.00617486		1823.99	-0.00119767		2353.98	-0.00349478		2884.01	0.00424055		3414	0.01513549		3944	-0.00273017
234.19	0.03125775		764.19	0.01189371		1294.18	0.00708703		1824.19	-0.00115628		2354.18	-0.00387363		2884.21	0.004639		3414.2	0.01438988		3944.2	-0.00317973
234.39	0.03106459		764.39	0.01258116		1294.38	0.00799695		1824.39	-0.00112719		2354.38	-0.00347251		2884.41	0.0052965		3414.4	0.01324013		3944.4	-0.00333599
234.59	0.03119607		764.59	0.01303781		1294.58	0.00882729		1824.59	-0.00040873		2354.58	-0.00339281		2884.61	0.00583248		3414.6	0.01148992		3944.6	-0.00403147
234.79	0.03161831		764.79	0.01379356		1294.78	0.00916625		1824.79	-0.0010099		2354.78	-0.0036434		2884.81	0.00577776		3414.8	0.01111568		3944.8	-0.00356988
234.99	0.03077425		764.99	0.01409707		1294.98	0.00996022		1824.99	-0.0002846		2354.98	-0.00296479		2885.01	0.00567272		3415	0.00944564		3945	-0.00425576
235.19	0.03018408		765.19	0.01376159		1295.18	0.01081868		1825.19	0.00056253		2355.18	-0.00231868		2885.21	0.00521389		3415.2	0.00915581		3945.2	-0.00473005
235.39	0.03021902		765.39	0.01261459		1295.38	0.01120027		1825.39	-0.00021429		2355.38	-0.00249972		2885.41	0.00453761		3415.4	0.00811795		3945.4	-0.00511438
235.59	0.02984957		765.59	0.01221112		1295.58	0.011533		1825.59	-0.00021521		2355.58	-0.00204945		2885.61	0.005131		3415.6	0.00685575		3945.6	-0.00571217
235.79	0.02934993		765.79	0.01143937		1295.78	0.01141469		1825.79	-0.00051388		2355.78	-0.00193369		2885.81	0.00494405		3415.8	0.00692986		3945.8	-0.0062597
235.99	0.02944855		765.99	0.01203566		1295.98	0.01114905		1825.99	0.00028427		2355.98	-0.00190847		2886.01	0.00511339		3416	0.0068133		3946	-0.00668852
236.19	0.02961984		766.19	0.01187964		1296.18	0.01107531		1826.19	-0.00034167		2356.18	-0.00198011		2886.21	0.00482096		3416.2	0.00670711		3946.2	-0.00684548
236.39	0.02880455		766.39	0.01127172		1296.38	0.01033336		1826.39	-0.00021465		2356.38	-0.00153227		2886.41	0.00479892		3416.4	0.00719388		3946.4	-0.00630247
236.59	0.02819081		766.59	0.01125344		1296.58	0.00993518		1826.59	0.00008209		2356.58	-0.00052526		2886.61	0.00456243		3416.6	0.00704409		3946.6	-0.00622272
236.79	0.02872366		766.79	0.01180211		1296.78	0.00944532		1826.79	0.00035535		2356.78	-0.00062693		2886.81	0.00527458		3416.8	0.00822357		3946.8	-0.00671348
236.99	0.02975279		766.99	0.01227566		1296.98	0.00903692		1826.99	0.0004645		2356.98	0.00046507		2887.01	0.00508711		3417	0.009405		3947	-0.00762606
237.19	0.03014086		767.19	0.01221926		1297.18	0.00971107		1827.19	0.00054057		2357.18	0.00065887		2887.21	0.00517707		3417.2	0.01006302		3947.2	-0.00761155
237.39	0.03052823		767.39	0.01173699		1297.38	0.01017856		1827.39	-0.00114697		2357.38	0.0014829		2887.41	0.00450608		3417.4	0.01032409		3947.4	-0.00730139
237.59	0.03167359		767.59	0.01212651		1297.58	0.01012042		1827.59	-0.00211307		2357.58	0.00202185		2887.61	0.00506327		3417.6	0.01071983		3947.6	-0.00629262
237.79	0.0334202		767.79	0.01224633		1297.78	0.01029477		1827.79	-0.00257541		2357.78	0.00161099		2887.81	0.0046132		3417.8	0.01088595		3947.8	-0.005948
237.99	0.03437529		767.99	0.01242268		1297.98	0.01115891		1827.99	-0.00295256		2357.98	0.00132677		2888.01	0.00493336		3418	0.0102959		3948	-0.00526112
238.19	0.03626906		768.19	0.01260526		1298.18	0.01092366		1828.19	-0.00299103		2358.18	0.00102857		2888.21	0.005017		3418.2	0.0100481		3948.2	-0.00503073
238.39	0.037377		768.39	0.01275005		1298.38	0.01119925		1828.39	-0.00369936		2358.38	0.0011818		2888.41	0.0055389		3418.4	0.00963757		3948.4	-0.00411483
238.59	0.03873319		768.59	0.0128128		1298.58	0.01109349		1828.59	-0.00370921		2358.58	0.00079777		2888.61	0.00607795		3418.6	0.00946692		3948.6	-0.00377208
238.79	0.03959579		768.79	0.01202518		1298.78	0.01172041		1828.79	-0.00404061		2358.78	0.00207117		2888.81	0.00623054		3418.8	0.00954501		3948.8	-0.0033144
238.99	0.04004924		768.99	0.01021526		1298.98	0.01176635		1828.99	-0.00325138		2358.98	0.00260789		2889.01	0.0064088		3419	0.00913766		3949	-0.00324785
239.19	0.04031325		769.19	0.00966121		1299.18	0.01038556		1829.19	-0.00316341		2359.18	0.00212442		2889.21	0.00653295		3419.2	0.00959231		3949.2	-0.0034653
239.39	0.04056573		769.39	0.00953383		1299.38	0.01049621		1829.39	-0.00287757		2359.38	0.00113895		2889.41	0.00689877		3419.4	0.00895166		3949.4	-0.00276184
239.59	0.04035482		769.59	0.00860606		1299.58	0.01072602		1829.59	-0.00276085		2359.58	0.00116775		2889.61	0.00708763		3419.6	0.00950279		3949.6	-0.0026433
239.79	0.04004048		769.79	0.00931208		1299.78	0.01043238		1829.79	-0.00227966		2359.78	0.00078538		2889.81	0.00646198		3419.8	0.00964697		3949.8	-0.00319567
239.99	0.03943919		769.99	0.00976922		1299.98	0.00983373		1829.99	-0.00141244		2359.98	0.00086287		2890.01	0.00709993		3420	0.00943432		3950	-0.00227963
240.19	0.03947512		770.19	0.01061729		1300.18	0.00978681		1830.19	-0.00110771		2360.18	0.00119464		2890.21	0.00681256		3420.2	0.009477		3950.2	-0.00192888
240.39	0.03858849		770.39	0.01091083		1300.38	0.00945862		1830.39	0.00005191		2360.38	0.00213292		2890.41	0.00693519		3420.4	0.01014208		3950.4	-0.002304
240.59	0.03775192		770.59	0.01117651		1300.58	0.00917843		1830.59	0.00024564		2360.58	0.00259215		2890.61	0.00634673		3420.6	0.01017444		3950.6	-0.00310047
240.79	0.03739092		770.79	0.01142683		1300.78	0.00906805		1830.79	0.00045636		2360.78	0.00204832		2890.81	0.00601869		3420.8	0.01089251		3950.8	-0.00437546
240.99	0.03761631		770.99	0.01233315		1300.98	0.00956805		1830.99	0.00133029		2360.98	0.00196231		2891.01	0.00552027		3421	0.01023644		3951	-0.00446193
241.19	0.03648897		771.19	0.01275264		1301.18	0.00998788		1831.19	0.00167145		2361.18	0.00153913		2891.21	0.00499706		3421.2	0.01084073		3951.2	-0.00511733
241.39	0.03693167		771.39	0.01339064		1301.38	0.01104196		1831.39	0.00141499		2361.38	0.00133689		2891.41	0.00450179		3421.4	0.01070425		3951.4	-0.00527388
241.59	0.03802601		771.59	0.01372252		1301.58	0.0114275		1831.59	0.00147691		2361.58	0.00054622		2891.61	0.00425936		3421.6	0.01025891		3951.6	-0.00506787
241.79	0.03813323		771.79	0.01335095		1301.78	0.01166064		1831.79	0.00201837		2361.78	-0.00008979		2891.81	0.00393541		3421.8	0.00983433		3951.8	-0.00541511
241.99	0.03830711		771.99	0.01350078		1301.98	0.01233757		1831.99	0.00209235		2361.98	0.00024388		2892.01	0.00395987		3422	0.00958243		3952	-0.00534046
242.19	0.03876285		772.19	0.01436907		1302.18	0.01220909		1832.19	0.00285333		2362.18	0.00021305		2892.21	0.00373722		3422.2	0.00955462		3952.2	-0.00552225
242.39	0.03803046		772.39	0.01375842		1302.38	0.01218262		1832.39	0.002436		2362.38	-0.00007956		2892.41	0.00452293		3422.4	0.00841968		3952.4	-0.00495963
242.59	0.03836412		772.59	0.01321739		1302.58	0.01196053		1832.59	0.00180308		2362.58	0.00007392		2892.61	0.00512396		3422.6	0.00823205		3952.6	-0.00568476
242.79	0.03864198		772.79	0.01244696		1302.78	0.01134808		1832.79	0.00246537		2362.78	0.00073763		2892.81	0.00499504		3422.8	0.00880218		3952.8	-0.00609728
242.99	0.03863622		772.99	0.01203577		1302.98	0.01028178		1832.99	0.0021642		2362.98	0.00059614		2893.01	0.00569041		3423	0.00923607		3953	-0.0056331
243.19	0.03825998		773.19	0.013026		1303.18	0.0101123		1833.19	0.00153954		2363.18	0.00041809		2893.21	0.00715399		3423.2	0.00955518		3953.2	-0.00577548
243.39	0.03785968		773.39	0.01283328		1303.38	0.01018898		1833.39	0.00121419		2363.38	0.00064631		2893.41	0.00764046		3423.4	0.00950863		3953.4	-0.00466974
243.59	0.03806616		773.59	0.01234732		1303.58	0.00977436		1833.59	0.00032351		2363.58	0.00103965		2893.61	0.00739695		3423.6	0.01077828		3953.6	-0.00484697
243.79	0.03883447		773.79	0.01300176		1303.78	0.00961416		1833.79	0.00009351		2363.78	0.00192537		2893.81	0.00720373		3423.8	0.01111748		3953.8	-0.00471655
243.99	0.03931646		773.99	0.01294719		1303.98	0.01002081		1833.99	0.00005343		2363.98	0.00262836		2894.01	0.00702093		3424	0.01158293		3954	-0.00357828
244.19	0.04004715		774.19	0.01330248		1304.18	0.01046398		1834.19	-0.00094001		2364.18	0.00405961		2894.21	0.00626661		3424.2	0.01223104		3954.2	-0.00335035
244.39	0.0397666		774.39	0.01237686		1304.38	0.01106461		1834.39	-0.00140165		2364.38	0.00471849		2894.41	0.00656231		3424.4	0.01304855		3954.4	-0.0032131
244.59	0.03975216		774.59	0.01244704		1304.58	0.01105114		1834.59	-0.00155219		2364.58	0.00419168		2894.61	0.00608673		3424.6	0.01325679		3954.6	-0.00290595
244.79	0.03987586		774.79	0.01194845		1304.78	0.01153127		1834.79	-0.00121179		2364.78	0.00360157		2894.81	0.0065044		3424.8	0.01350646		3954.8	-0.0030205
244.99	0.04087197		774.99	0.0123967		1304.98	0.01246212		1834.99	-0.00052241		2364.98	0.00293161		2895.01	0.00602687		3425	0.01317917		3955	-0.00253753
245.19	0.04090412		775.19	0.01169744		1305.18	0.01255987		1835.19	-0.00072953		2365.18	0.00291895		2895.21	0.00608699		3425.2	0.0135205		3955.2	-0.00313119
245.39	0.04178212		775.39	0.01170135		1305.38	0.01342558		1835.39	-0.00005605		2365.38	0.00320569		2895.41	0.00626963		3425.4	0.01323931		3955.4	-0.00276197
245.59	0.04159467		775.59	0.01092304		1305.58	0.01281799		1835.59	0.00005263		2365.58	0.00304174		2895.61	0.00570472		3425.6	0.01300744		3955.6	-0.00305654
245.79	0.04086781		775.79	0.01087996		1305.78	0.01291718		1835.79	0.00014335		2365.78	0.0033602		2895.81	0.00539501		3425.8	0.01253649		3955.8	-0.00311895
245.99	0.04068429		775.99	0.01093399		1305.98	0.01277066		1835.99	0.00030585		2365.98	0.00338639		2896.01	0.00487684		3426	0.01164124		3956	-0.00288924
246.19	0.04031031		776.19	0.01093333		1306.18	0.01235274		1836.19	0.00045104		2366.18	0.00273059		2896.21	0.00535619		3426.2	0.0104166		3956.2	-0.00325515
246.39	0.03995155		776.39	0.01022465		1306.38	0.01152393		1836.39	0.00002885		2366.38	0.00209301		2896.41	0.00588036		3426.4	0.00939185		3956.4	-0.003015
246.59	0.03990393		776.59	0.01037662		1306.58	0.01140611		1836.59	-0.00050856		2366.58	0.00212385		2896.61	0.00651344		3426.6	0.00953192		3956.6	-0.0042865
246.79	0.04046229		776.79	0.01115679		1306.78	0.01143825		1836.79	0.00067232		2366.78	0.00212993		2896.81	0.00648486		3426.8	0.00963166		3956.8	-0.00446538
246.99	0.04022385		776.99	0.01213843		1306.98	0.0117055		1836.99	-0.00114897		2366.98	0.00205626		2897.01	0.00694369		3427	0.00959473		3957	-0.00425664
247.19	0.04057168		777.19	0.01265464		1307.18	0.01165216		1837.19	-0.00110785		2367.18	0.00162164		2897.21	0.00725189		3427.2	0.0085974		3957.2	-0.0040967
247.39	0.04074288		777.39	0.0127603		1307.38	0.01113664		1837.39	-0.0012031		2367.38	0.0014888		2897.41	0.00595026		3427.4	0.00929269		3957.4	-0.00363476
247.59	0.04156318		777.59	0.01300804		1307.58	0.0114714		1837.59	-0.00151937		2367.58	0.00114311		2897.61	0.00509401		3427.6	0.00959395		3957.6	-0.00483249
247.79	0.04206293		777.79	0.01314759		1307.78	0.01276686		1837.79	-0.00213887		2367.78	0.00208934		2897.81	0.0045133		3427.8	0.00902804		3957.8	-0.00499762
247.99	0.04178852		777.99	0.01349314		1307.98	0.01374023		1837.99	-0.00258977		2367.98	0.00223513		2898.01	0.0035431		3428	0.00872884		3958	-0.00501786
248.19	0.04279277		778.19	0.01455636		1308.18	0.01378275		1838.19	-0.00276274		2368.18	0.00339908		2898.21	0.00335953		3428.2	0.00875565		3958.2	-0.0045438
248.39	0.0436436		778.39	0.014659		1308.38	0.01407439		1838.39	-0.00140688		2368.38	0.0027819		2898.41	0.00407833		3428.4	0.00869678		3958.4	-0.00388398
248.59	0.04409816		778.59	0.01479991		1308.58	0.01331636		1838.59	-0.00158791		2368.58	0.00191224		2898.61	0.00404474		3428.6	0.00896486		3958.6	-0.00341249
248.79	0.04468122		778.79	0.01502519		1308.78	0.01345303		1838.79	-0.00152949		2368.78	0.0009204		2898.81	0.00470379		3428.8	0.00805731		3958.8	-0.00375938
248.99	0.04535387		778.99	0.01516285		1308.98	0.01340559		1838.99	-0.00136255		2368.98	0.00015313		2899.01	0.00385653		3429	0.00744492		3959	-0.00335392
249.19	0.04522506		779.19	0.01487213		1309.18	0.01338957		1839.19	-0.00035534		2369.18	-0.00017205		2899.21	0.00456266		3429.2	0.00730306		3959.2	-0.0030309
249.39	0.04460339		779.39	0.01443364		1309.38	0.01312792		1839.39	0.00080407		2369.38	-0.00011348		2899.41	0.00505369		3429.4	0.00767995		3959.4	-0.00261413
249.59	0.04449433		779.59	0.01268416		1309.58	0.01307478		1839.59	0.00066273		2369.58	-0.00094876		2899.61	0.00477207		3429.6	0.00733619		3959.6	-0.00246605
249.79	0.04403611		779.79	0.01282271		1309.78	0.01344852		1839.79	0.00040618		2369.78	-0.00053361		2899.81	0.00524408		3429.8	0.00654751		3959.8	-0.00156252
249.99	0.04398272		779.99	0.01242631		1309.98	0.01366964		1839.99	0.00182898		2369.98	-0.00013444		2900.01	0.00533825		3430	0.00647634		3960	-0.00150515
250.19	0.04371673		780.19	0.01150213		1310.18	0.01414405		1840.19	0.00141842		2370.18	0.00058263		2900.21	0.00645774		3430.2	0.00639293		3960.2	-0.0016816
250.39	0.04310241		780.39	0.01063537		1310.38	0.0143835		1840.39	0.0011263		2370.38	0.00012669		2900.41	0.00711913		3430.4	0.00599531		3960.4	-0.00186651
250.59	0.04279776		780.59	0.01016157		1310.58	0.01478017		1840.59	0.00054605		2370.58	0.00023603		2900.61	0.00743676		3430.6	0.00703791		3960.6	-0.00235669
250.79	0.04371143		780.79	0.01017578		1310.78	0.01508833		1840.79	0.00094814		2370.78	-0.00026895		2900.81	0.00726056		3430.8	0.00757762		3960.8	-0.00162715
250.99	0.04283143		780.99	0.01036782		1310.98	0.01441853		1840.99	-0.00093008		2370.98	-0.00080083		2901.01	0.00677308		3431	0.00774188		3961	-0.00253985
251.19	0.04256712		781.19	0.00995675		1311.18	0.01379068		1841.19	-0.00111662		2371.18	-0.00091488		2901.21	0.00677406		3431.2	0.00736322		3961.2	-0.00256181
251.39	0.04253447		781.39	0.01015498		1311.38	0.01382664		1841.39	-0.00120068		2371.38	-0.00091832		2901.41	0.00615833		3431.4	0.00846738		3961.4	-0.00349628
251.59	0.04222569		781.59	0.00909959		1311.58	0.01332363		1841.59	-0.00220474		2371.58	-0.00042832		2901.61	0.0060186		3431.6	0.00778856		3961.6	-0.00464434
251.79	0.04202124		781.79	0.00968634		1311.78	0.01299936		1841.79	-0.00318042		2371.78	-0.00029513		2901.81	0.00611892		3431.8	0.00806672		3961.8	-0.00372417
251.99	0.04278164		781.99	0.01062691		1311.98	0.01212554		1841.99	-0.00315685		2371.98	0.0003291		2902.01	0.0054328		3432	0.00876446		3962	-0.003634
252.19	0.04375025		782.19	0.01093779		1312.18	0.01156949		1842.19	-0.00326401		2372.18	0.00104143		2902.21	0.00653373		3432.2	0.00869275		3962.2	-0.00270414
252.39	0.04432468		782.39	0.0101387		1312.38	0.01097198		1842.39	-0.00259212		2372.38	0.00072349		2902.41	0.00741867		3432.4	0.00908078		3962.4	-0.00255355
252.59	0.04485255		782.59	0.01060267		1312.58	0.0095531		1842.59	-0.00353501		2372.58	0.00049958		2902.61	0.00730224		3432.6	0.00969784		3962.6	-0.0032206
252.79	0.04489774		782.79	0.0113425		1312.78	0.00892056		1842.79	-0.0028447		2372.78	0.00024232		2902.81	0.00759994		3432.8	0.00914468		3962.8	-0.00325312
252.99	0.04532222		782.99	0.01157568		1312.98	0.00881853		1842.99	-0.00242152		2372.98	0.00106966		2903.01	0.00733699		3433	0.00962236		3963	-0.00348607
253.19	0.04626973		783.19	0.01140036		1313.18	0.00893454		1843.19	-0.00193415		2373.18	0.00078533		2903.21	0.00815211		3433.2	0.00966734		3963.2	-0.00387145
253.39	0.0457204		783.39	0.01101871		1313.38	0.00857032		1843.39	-0.00198304		2373.38	0.00193247		2903.41	0.00828562		3433.4	0.00946198		3963.4	-0.00409483
253.59	0.04636504		783.59	0.01135184		1313.58	0.00965175		1843.59	-0.001981		2373.58	0.00224389		2903.61	0.00805611		3433.6	0.00932498		3963.6	-0.00380843
253.79	0.04492694		783.79	0.01322169		1313.78	0.00938311		1843.79	-0.00168471		2373.78	0.00354074		2903.81	0.00861258		3433.8	0.00905425		3963.8	-0.00317676
253.99	0.04505476		783.99	0.01287848		1313.98	0.01044356		1843.99	-0.00084404		2373.98	0.00426902		2904.01	0.0091347		3434	0.0089891		3964	-0.00323222
254.19	0.04476489		784.19	0.01288613		1314.18	0.01015079		1844.19	-0.00186954		2374.18	0.00427062		2904.21	0.0096677		3434.2	0.00887715		3964.2	-0.00335964
254.39	0.04512979		784.39	0.01235386		1314.38	0.01112735		1844.39	-0.00233111		2374.38	0.00330594		2904.41	0.00946303		3434.4	0.00801226		3964.4	-0.00405706
254.59	0.04591793		784.59	0.01238202		1314.58	0.01150056		1844.59	-0.00205638		2374.58	0.00325326		2904.61	0.00943407		3434.6	0.00847373		3964.6	-0.00404194
254.79	0.04592868		784.79	0.01340878		1314.78	0.01213262		1844.79	-0.0017992		2374.78	0.00174927		2904.81	0.00863167		3434.8	0.00807702		3964.8	-0.00452297
254.99	0.04526887		784.99	0.01380639		1314.98	0.01208153		1844.99	-0.00237971		2374.98	0.00073608		2905.01	0.00811629		3435	0.00823705		3965	-0.00573587
255.19	0.04528936		785.19	0.01398007		1315.18	0.01281284		1845.19	-0.00169158		2375.18	0.00049399		2905.21	0.00776621		3435.2	0.00820817		3965.2	-0.00554417
255.39	0.04566574		785.39	0.01366308		1315.38	0.01382487		1845.39	-0.00125715		2375.38	0.00029667		2905.41	0.00674489		3435.4	0.00810586		3965.4	-0.00602327
255.59	0.04518577		785.59	0.01368073		1315.58	0.01353725		1845.59	-0.00195762		2375.58	-0.00010504		2905.61	0.00623179		3435.6	0.00858119		3965.6	-0.00522627
255.79	0.04558342		785.79	0.01453299		1315.78	0.01422617		1845.79	-0.00218819		2375.78	-0.00045617		2905.81	0.00653106		3435.8	0.00939859		3965.8	-0.00455245
255.99	0.04585497		785.99	0.01446014		1315.98	0.01440489		1845.99	-0.0018195		2375.98	0.00040413		2906.01	0.00635025		3436	0.00952954		3966	-0.00530286
256.19	0.04562265		786.19	0.01401967		1316.18	0.01541813		1846.19	-0.00251894		2376.18	0.00015409		2906.21	0.00629927		3436.2	0.0097694		3966.2	-0.00521904
256.39	0.04600078		786.39	0.01440163		1316.38	0.01503789		1846.39	-0.00233059		2376.38	0.00066485		2906.41	0.00551944		3436.4	0.01080642		3966.4	-0.00548294
256.59	0.04595595		786.59	0.01453036		1316.58	0.01418072		1846.59	-0.00320379		2376.58	0.000613		2906.61	0.00523421		3436.6	0.01178778		3966.6	-0.00585475
256.79	0.04590953		786.79	0.01417776		1316.78	0.01384725		1846.79	-0.003784		2376.78	0.00052229		2906.81	0.00503547		3436.8	0.01276888		3966.8	-0.0058161
256.99	0.0461319		786.99	0.01428259		1316.98	0.01394256		1846.99	-0.0041335		2376.98	0.00097249		2907.01	0.00442971		3437	0.01345347		3967	-0.00653827
257.19	0.04597497		787.19	0.0144225		1317.18	0.01404234		1847.19	-0.00463197		2377.18	0.00056661		2907.21	0.00479259		3437.2	0.01306488		3967.2	-0.00580372
257.39	0.04503469		787.39	0.01410887		1317.38	0.01359443		1847.39	-0.00445722		2377.38	0.00141947		2907.41	0.00490099		3437.4	0.01251214		3967.4	-0.00595851
257.59	0.04467846		787.59	0.01486178		1317.58	0.01396451		1847.59	-0.00473146		2377.58	0.00139035		2907.61	0.00494428		3437.6	0.01200845		3967.6	-0.00507325
257.79	0.04341157		787.79	0.01509221		1317.78	0.01405021		1847.79	-0.00517043		2377.78	0.00258122		2907.81	0.00571946		3437.8	0.01113512		3967.8	-0.00449756
257.99	0.04458414		787.99	0.0152771		1317.98	0.01495546		1847.99	-0.0049808		2377.98	0.00272291		2908.01	0.00625303		3438	0.0108344		3968	-0.00490443
258.19	0.04539182		788.19	0.01585943		1318.18	0.01476293		1848.19	-0.00513095		2378.18	0.00326962		2908.21	0.00607425		3438.2	0.01014061		3968.2	-0.00496984
258.39	0.04616888		788.39	0.01461783		1318.38	0.01557826		1848.39	-0.00467267		2378.38	0.00320998		2908.41	0.00622273		3438.4	0.00949373		3968.4	-0.00490775
258.59	0.04681367		788.59	0.01509807		1318.58	0.01520949		1848.59	-0.0038457		2378.58	0.0028639		2908.61	0.00754932		3438.6	0.00902359		3968.6	-0.00469411
258.79	0.04717958		788.79	0.01518069		1318.78	0.0161233		1848.79	-0.00310017		2378.78	0.00276802		2908.81	0.00653341		3438.8	0.00938713		3968.8	-0.00561562
258.99	0.04894301		788.99	0.01522569		1318.98	0.01530876		1848.99	-0.00148783		2378.98	0.00285936		2909.01	0.00698479		3439	0.01020949		3969	-0.00534494
259.19	0.0497792		789.19	0.01506525		1319.18	0.01567216		1849.19	-0.00018275		2379.18	0.00325895		2909.21	0.00644628		3439.2	0.01006095		3969.2	-0.00585665
259.39	0.05087099		789.39	0.01474721		1319.38	0.01546553		1849.39	0.00054887		2379.38	0.0028945		2909.41	0.00637054		3439.4	0.00959		3969.4	-0.00520524
259.59	0.05143554		789.59	0.01577877		1319.58	0.01531388		1849.59	0.00096109		2379.58	0.00213434		2909.61	0.00699314		3439.6	0.01027561		3969.6	-0.00494198
259.79	0.05185376		789.79	0.01521658		1319.78	0.01523871		1849.79	0.00102592		2379.78	0.00223778		2909.81	0.00780268		3439.8	0.01008659		3969.8	-0.00508562
259.99	0.0521593		789.99	0.01510693		1319.98	0.01523857		1849.99	0.00121278		2379.98	0.00193838		2910.01	0.00691602		3440	0.01028736		3970	-0.00485526
260.19	0.05254965		790.19	0.01574905		1320.18	0.01502534		1850.19	0.00133336		2380.18	0.00193912		2910.21	0.00656922		3440.2	0.01099247		3970.2	-0.0043555
260.39	0.05284226		790.39	0.0154889		1320.38	0.0140537		1850.39	0.0018038		2380.38	0.00251758		2910.41	0.00600887		3440.4	0.01213002		3970.4	-0.00386897
260.59	0.05236687		790.59	0.01484413		1320.58	0.01345494		1850.59	0.0014203		2380.58	0.00170592		2910.61	0.00648803		3440.6	0.01268		3970.6	-0.00430227
260.79	0.05223689		790.79	0.01520913		1320.78	0.01298602		1850.79	0.00114585		2380.78	0.00109951		2910.81	0.00611343		3440.8	0.01263198		3970.8	-0.0048616
260.99	0.05136508		790.99	0.0151522		1320.98	0.01328415		1850.99	0.00060081		2380.98	0.00127078		2911.01	0.00635258		3441	0.01226976		3971	-0.00497442
261.19	0.05089696		791.19	0.01456661		1321.18	0.01314867		1851.19	-0.0003832		2381.18	0.00168546		2911.21	0.00637671		3441.2	0.01105525		3971.2	-0.00530269
261.39	0.05039668		791.39	0.01457001		1321.38	0.01362693		1851.39	-0.00098922		2381.38	0.00119079		2911.41	0.00554926		3441.4	0.01108003		3971.4	-0.00556038
261.59	0.04957913		791.59	0.01601101		1321.58	0.01339644		1851.59	-0.00122906		2381.58	0.00140814		2911.61	0.00501692		3441.6	0.01091244		3971.6	-0.00532674
261.79	0.04875082		791.79	0.01593073		1321.78	0.0136319		1851.79	-0.00091782		2381.78	0.00209207		2911.81	0.00498953		3441.8	0.0103816		3971.8	-0.00546612
261.99	0.04958438		791.99	0.01585594		1321.98	0.01367396		1851.99	-0.00111685		2381.98	0.00177672		2912.01	0.00490301		3442	0.01008819		3972	-0.0064092
262.19	0.04943109		792.19	0.01543659		1322.18	0.01362908		1852.19	-0.00150864		2382.18	0.00245029		2912.21	0.00493716		3442.2	0.01012965		3972.2	-0.0062197
262.39	0.04935468		792.39	0.01440945		1322.38	0.01353488		1852.39	-0.00181287		2382.38	0.00194951		2912.41	0.00518794		3442.4	0.00996141		3972.4	-0.00713546
262.59	0.0490581		792.59	0.01419562		1322.58	0.01293055		1852.59	-0.00212884		2382.58	0.00182425		2912.61	0.00506753		3442.6	0.00984243		3972.6	-0.00755337
262.79	0.04933531		792.79	0.01380063		1322.78	0.01328792		1852.79	-0.00112181		2382.78	0.00213934		2912.81	0.00358286		3442.8	0.01007532		3972.8	-0.00744073
262.99	0.04930724		792.99	0.01344407		1322.98	0.01269219		1852.99	-0.00090447		2382.98	0.00234531		2913.01	0.00407707		3443	0.01086655		3973	-0.00739427
263.19	0.04854439		793.19	0.01233125		1323.18	0.01306459		1853.19	-0.00125738		2383.18	0.00212305		2913.21	0.00426472		3443.2	0.01031503		3973.2	-0.00697119
263.39	0.04898466		793.39	0.01154042		1323.38	0.013245		1853.39	-0.00141158		2383.38	0.00194659		2913.41	0.00557174		3443.4	0.00920912		3973.4	-0.00667272
263.59	0.04913825		793.59	0.01171609		1323.58	0.01340612		1853.59	-0.00157116		2383.58	0.00174114		2913.61	0.00611975		3443.6	0.0100883		3973.6	-0.00682516
263.79	0.04939797		793.79	0.01171243		1323.78	0.01268554		1853.79	-0.00182124		2383.78	0.00162333		2913.81	0.00652225		3443.8	0.00968038		3973.8	-0.00665998
263.99	0.04997473		793.99	0.01195198		1323.98	0.01292076		1853.99	-0.0016744		2383.98	0.00101616		2914.01	0.0069532		3444	0.00990085		3974	-0.00573997
264.19	0.05036212		794.19	0.01232792		1324.18	0.01287825		1854.19	-0.00116965		2384.18	0.00154437		2914.21	0.00702431		3444.2	0.01013738		3974.2	-0.00595361
264.39	0.050327		794.39	0.01213277		1324.38	0.01276776		1854.39	-0.00229728		2384.38	0.00121326		2914.41	0.00668297		3444.4	0.01068696		3974.4	-0.00575887
264.59	0.05065686		794.59	0.01171091		1324.58	0.01262342		1854.59	-0.00295063		2384.58	0.00063778		2914.61	0.00705956		3444.6	0.01041251		3974.6	-0.00582632
264.79	0.05112627		794.79	0.0120493		1324.78	0.01366673		1854.79	-0.00367946		2384.78	0.00049449		2914.81	0.00734113		3444.8	0.00953804		3974.8	-0.00612652
264.99	0.05099666		794.99	0.01230834		1324.98	0.01373131		1854.99	-0.00309903		2384.98	0.00047572		2915.01	0.00705858		3445	0.00952403		3975	-0.00631321
265.19	0.05186753		795.19	0.01285851		1325.18	0.01333795		1855.19	-0.00336985		2385.18	0.00050533		2915.21	0.00689097		3445.2	0.00892924		3975.2	-0.00619239
265.39	0.05257478		795.39	0.01421352		1325.38	0.01363042		1855.39	-0.00280954		2385.38	0.00029894		2915.41	0.00758822		3445.4	0.00946464		3975.4	-0.00519277
265.59	0.05239533		795.59	0.01496934		1325.58	0.0132913		1855.59	-0.00206797		2385.58	0.00038369		2915.61	0.00798178		3445.6	0.00885483		3975.6	-0.0053397
265.79	0.05292459		795.79	0.0149225		1325.78	0.01335506		1855.79	-0.0019146		2385.78	0.00018901		2915.81	0.00793843		3445.8	0.00876883		3975.8	-0.00514592
265.99	0.05448573		795.99	0.01542575		1325.98	0.01312202		1855.99	-0.00234814		2385.98	-0.00005287		2916.01	0.00762702		3446	0.00936028		3976	-0.00488514
266.19	0.05423732		796.19	0.01568389		1326.18	0.0129167		1856.19	-0.00288906		2386.18	0.00033728		2916.21	0.00780144		3446.2	0.0101357		3976.2	-0.00459834
266.39	0.05406923		796.39	0.0162416		1326.38	0.01289094		1856.39	-0.00353069		2386.38	-0.00021075		2916.41	0.00744497		3446.4	0.01026618		3976.4	-0.00471073
266.59	0.05318716		796.59	0.01610385		1326.58	0.01284398		1856.59	-0.00318069		2386.58	0.00022341		2916.61	0.00667924		3446.6	0.0103486		3976.6	-0.00384669
266.79	0.05368286		796.79	0.01592101		1326.78	0.01342611		1856.79	-0.00329495		2386.78	0.00033422		2916.81	0.00638669		3446.8	0.01004794		3976.8	-0.00376037
266.99	0.05363955		796.99	0.01627834		1326.98	0.0142174		1856.99	-0.00303494		2386.98	0.00107563		2917.01	0.00658446		3447	0.01052288		3977	-0.00309582
267.19	0.05429841		797.19	0.01655041		1327.18	0.01500471		1857.19	-0.00186091		2387.18	0.00146494		2917.21	0.00692701		3447.2	0.00989806		3977.2	-0.00261428
267.39	0.05529067		797.39	0.01612522		1327.38	0.0151954		1857.39	-0.00131159		2387.38	0.00142088		2917.41	0.00694678		3447.4	0.00908617		3977.4	-0.00258386
267.59	0.0550751		797.59	0.01702954		1327.58	0.01457462		1857.59	-0.00111797		2387.58	0.00118232		2917.61	0.00706272		3447.6	0.0091653		3977.6	-0.00220135
267.79	0.05492512		797.79	0.01689956		1327.78	0.01427174		1857.79	0.00002981		2387.78	0.00071315		2917.81	0.00808143		3447.8	0.00830107		3977.8	-0.00171429
267.99	0.05483063		797.99	0.01637662		1327.98	0.01458399		1857.99	0.00057013		2387.98	0.00062182		2918.01	0.00855487		3448	0.00821395		3978	-0.00132368
268.19	0.05452189		798.19	0.01563826		1328.18	0.01375284		1858.19	0.00129507		2388.18	0.00115302		2918.21	0.00824488		3448.2	0.00857		3978.2	-0.00192187
268.39	0.05545646		798.39	0.01553339		1328.38	0.01352297		1858.39	0.0007406		2388.38	0.00048947		2918.41	0.00798509		3448.4	0.00874888		3978.4	-0.00179564
268.59	0.05633102		798.59	0.01458406		1328.58	0.01328517		1858.59	0.00232758		2388.58	0.00064901		2918.61	0.00793972		3448.6	0.00744775		3978.6	-0.00222529
268.79	0.05651107		798.79	0.01456295		1328.78	0.01423222		1858.79	0.00346202		2388.78	0.00074884		2918.81	0.00784447		3448.8	0.00670755		3978.8	-0.00219802
268.99	0.05650172		798.99	0.0150407		1328.98	0.01259365		1858.99	0.00420485		2388.98	0.00080223		2919.01	0.00767626		3449	0.00725015		3979	-0.00286825
269.19	0.056523		799.19	0.01498643		1329.18	0.01250088		1859.19	0.00338779		2389.18	0.00135938		2919.21	0.00751877		3449.2	0.00733945		3979.2	-0.00297244
269.39	0.05669605		799.39	0.01558185		1329.38	0.01246805		1859.39	0.0034912		2389.38	0.00107025		2919.41	0.00764612		3449.4	0.00832239		3979.4	-0.00327496
269.59	0.05712376		799.59	0.01676449		1329.58	0.01283453		1859.59	0.00260333		2389.58	0.00082556		2919.61	0.00697958		3449.6	0.00907744		3979.6	-0.0041158
269.79	0.0577686		799.79	0.01697171		1329.78	0.01257521		1859.79	0.00178476		2389.78	0.00111212		2919.81	0.00668301		3449.8	0.00852116		3979.8	-0.00465595
269.99	0.05892941		799.99	0.016643		1329.98	0.01246686		1859.99	0.00030511		2389.98	0.0012712		2920.01	0.00613707		3450	0.01000249		3980	-0.00534634
270.19	0.05856628		800.19	0.01680276		1330.18	0.01228288		1860.19	-0.00098543		2390.18	0.00168763		2920.21	0.0064283		3450.2	0.00993066		3980.2	-0.00620924
270.39	0.05863963		800.39	0.01732485		1330.38	0.01244146		1860.39	-0.00216467		2390.38	0.00184707		2920.41	0.00605605		3450.4	0.0102455		3980.4	-0.00712506
270.59	0.05889826		800.59	0.01696288		1330.58	0.01263067		1860.59	-0.00282163		2390.58	0.00217675		2920.61	0.00538692		3450.6	0.00996115		3980.6	-0.00818133
270.79	0.05966291		800.79	0.01786514		1330.78	0.01271138		1860.79	-0.00309502		2390.78	0.00277714		2920.81	0.00521947		3450.8	0.00998558		3980.8	-0.00820774
270.99	0.05968261		800.99	0.01761204		1330.98	0.01399667		1860.99	-0.00296428		2390.98	0.00303404		2921.01	0.00526691		3451	0.01005284		3981	-0.00745922
271.19	0.05863724		801.19	0.01726237		1331.18	0.01495062		1861.19	-0.00267612		2391.18	0.00313123		2921.21	0.00526872		3451.2	0.00985676		3981.2	-0.0077703
271.39	0.05809605		801.39	0.01651933		1331.38	0.01400385		1861.39	-0.00259778		2391.38	0.00227908		2921.41	0.00524537		3451.4	0.00882284		3981.4	-0.00756515
271.59	0.05672695		801.59	0.01646216		1331.58	0.0134885		1861.59	-0.00263921		2391.58	0.00255557		2921.61	0.00681839		3451.6	0.00928061		3981.6	-0.00721196
271.79	0.05601712		801.79	0.01530402		1331.78	0.01339219		1861.79	-0.00155218		2391.78	0.00249094		2921.81	0.00732508		3451.8	0.00974963		3981.8	-0.00726603
271.99	0.05570653		801.99	0.01530456		1331.98	0.01323664		1861.99	-0.00167055		2391.98	0.0029953		2922.01	0.00793645		3452	0.01025265		3982	-0.00785683
272.19	0.05609045		802.19	0.01466641		1332.18	0.01242577		1862.19	-0.0013239		2392.18	0.00300179		2922.21	0.00848093		3452.2	0.01054532		3982.2	-0.00711175
272.39	0.05645805		802.39	0.01431126		1332.38	0.01258524		1862.39	-0.00216112		2392.38	0.00314764		2922.41	0.00843475		3452.4	0.0103322		3982.4	-0.00709033
272.59	0.05631784		802.59	0.01328646		1332.58	0.01227398		1862.59	-0.00097834		2392.58	0.0036829		2922.61	0.00821031		3452.6	0.00998831		3982.6	-0.00670175
272.79	0.05615735		802.79	0.01287787		1332.78	0.01351727		1862.79	-0.00041389		2392.78	0.00352038		2922.81	0.00828095		3452.8	0.0104336		3982.8	-0.00569747
272.99	0.05583856		802.99	0.01314942		1332.98	0.01348729		1862.99	-0.00034938		2392.98	0.00364383		2923.01	0.00825334		3453	0.01051975		3983	-0.00577339
273.19	0.05591386		803.19	0.01361275		1333.18	0.01453121		1863.19	-0.00057577		2393.18	0.00346031		2923.21	0.0080763		3453.2	0.01051695		3983.2	-0.00449694
273.39	0.05692747		803.39	0.01361712		1333.38	0.01543384		1863.39	-0.00055763		2393.38	0.0029966		2923.41	0.00823575		3453.4	0.01056658		3983.4	-0.00384077
273.59	0.05848594		803.59	0.01383303		1333.58	0.01575557		1863.59	-0.00130949		2393.58	0.00331088		2923.61	0.00784243		3453.6	0.00955074		3983.6	-0.00343544
273.79	0.05939897		803.79	0.01304232		1333.78	0.01591747		1863.79	-0.00127511		2393.78	0.00333286		2923.81	0.0085054		3453.8	0.00863868		3983.8	-0.00400215
273.99	0.06025444		803.99	0.01272997		1333.98	0.01551546		1863.99	-0.00129196		2393.98	0.00385883		2924.01	0.00818487		3454	0.00985654		3984	-0.00441974
274.19	0.06045474		804.19	0.01337829		1334.18	0.01519438		1864.19	-0.00141976		2394.18	0.00328223		2924.21	0.00830668		3454.2	0.00935713		3984.2	-0.00406751
274.39	0.06063581		804.39	0.01331875		1334.38	0.0152166		1864.39	-0.00185101		2394.38	0.00329256		2924.41	0.00829965		3454.4	0.00950785		3984.4	-0.00479874
274.59	0.06044084		804.59	0.013955		1334.58	0.01467313		1864.59	-0.00149702		2394.58	0.00359103		2924.61	0.00752923		3454.6	0.00965559		3984.6	-0.00443981
274.79	0.06003223		804.79	0.01395285		1334.78	0.0144336		1864.79	-0.00143139		2394.78	0.00409		2924.81	0.00725449		3454.8	0.00947559		3984.8	-0.00336221
274.99	0.05981115		804.99	0.01323671		1334.98	0.01482695		1864.99	-0.00159612		2394.98	0.00336769		2925.01	0.00675228		3455	0.00937532		3985	-0.00329213
275.19	0.05891831		805.19	0.01365337		1335.18	0.01426857		1865.19	-0.00085883		2395.18	0.00359461		2925.21	0.00655446		3455.2	0.00932655		3985.2	-0.00346781
275.39	0.05897082		805.39	0.01401293		1335.38	0.01399807		1865.39	0.00014158		2395.38	0.003435		2925.41	0.00650026		3455.4	0.0089211		3985.4	-0.00309784
275.59	0.05781527		805.59	0.0143145		1335.58	0.0144287		1865.59	0.00028209		2395.58	0.00407401		2925.61	0.00660177		3455.6	0.00956373		3985.6	-0.00308246
275.79	0.05749745		805.79	0.0144581		1335.78	0.01410401		1865.79	0.00012616		2395.78	0.00369093		2925.81	0.00647193		3455.8	0.00980562		3985.8	-0.00354216
275.99	0.05713632		805.99	0.0146005		1335.98	0.01437027		1865.99	-0.00064256		2395.98	0.00414816		2926.01	0.00698557		3456	0.0097994		3986	-0.00416687
276.19	0.05779525		806.19	0.01452479		1336.18	0.0142801		1866.19	-0.00107788		2396.18	0.00372998		2926.21	0.00774048		3456.2	0.00964426		3986.2	-0.00406659
276.39	0.05746425		806.39	0.0156799		1336.38	0.01448167		1866.39	-0.00130753		2396.38	0.00391126		2926.41	0.00791869		3456.4	0.01001989		3986.4	-0.00452331
276.59	0.057954		806.59	0.01610063		1336.58	0.01466142		1866.59	-0.00051154		2396.58	0.00360259		2926.61	0.00849705		3456.6	0.00991188		3986.6	-0.00467971
276.79	0.05856172		806.79	0.01632917		1336.78	0.01539191		1866.79	-0.00019543		2396.78	0.00308201		2926.81	0.00920693		3456.8	0.00974804		3986.8	-0.00493955
276.99	0.05864021		806.99	0.01655689		1336.98	0.0153912		1866.99	-0.00069509		2396.98	0.0032093		2927.01	0.00920165		3457	0.0096439		3987	-0.00537027
277.19	0.05990773		807.19	0.01656376		1337.18	0.01531084		1867.19	-0.00153291		2397.18	0.002821		2927.21	0.01040585		3457.2	0.0101227		3987.2	-0.00575403
277.39	0.06053176		807.39	0.01650576		1337.38	0.01539347		1867.39	-0.00119992		2397.38	0.00223576		2927.41	0.01012886		3457.4	0.00977419		3987.4	-0.00663223
277.59	0.06158502		807.59	0.01667005		1337.58	0.01527579		1867.59	-0.00115567		2397.58	0.00190866		2927.61	0.00958558		3457.6	0.00945606		3987.6	-0.00782326
277.79	0.06129589		807.79	0.01693177		1337.78	0.01532882		1867.79	-0.00106281		2397.78	0.00099669		2927.81	0.00926854		3457.8	0.00918089		3987.8	-0.00829718
277.99	0.06166663		807.99	0.01728224		1337.98	0.01508379		1867.99	-0.00099862		2397.98	0.00106159		2928.01	0.00879403		3458	0.00940727		3988	-0.00745697
278.19	0.06181908		808.19	0.01748764		1338.18	0.01500751		1868.19	-0.00165163		2398.18	0.000137		2928.21	0.00830459		3458.2	0.00953447		3988.2	-0.00736572
278.39	0.06191571		808.39	0.01753039		1338.38	0.01495849		1868.39	-0.00115518		2398.38	0.00073538		2928.41	0.00798773		3458.4	0.00970673		3988.4	-0.00772852
278.59	0.06166292		808.59	0.01785128		1338.58	0.01414434		1868.59	-0.0006724		2398.58	0.00117147		2928.61	0.00724388		3458.6	0.01060518		3988.6	-0.00713901
278.79	0.06177868		808.79	0.01732599		1338.78	0.01475798		1868.79	-0.00041626		2398.78	0.00233971		2928.81	0.00670102		3458.8	0.0104218		3988.8	-0.00684609
278.99	0.06162654		808.99	0.01726528		1338.98	0.01532461		1868.99	0.00028768		2398.98	0.00168331		2929.01	0.00677867		3459	0.01030372		3989	-0.00684182
279.19	0.06147089		809.19	0.01662559		1339.18	0.01516807		1869.19	0.00123863		2399.18	0.00211843		2929.21	0.0070663		3459.2	0.01079011		3989.2	-0.00567798
279.39	0.06113311		809.39	0.01679374		1339.38	0.01622326		1869.39	0.00183864		2399.38	0.00194566		2929.41	0.00664628		3459.4	0.010617		3989.4	-0.00540911
279.59	0.06050022		809.59	0.01676633		1339.58	0.01681512		1869.59	0.00158669		2399.58	0.00184622		2929.61	0.00691497		3459.6	0.01130817		3989.6	-0.00568978
279.79	0.06055323		809.79	0.01638918		1339.78	0.01685104		1869.79	0.00143435		2399.78	0.00174089		2929.81	0.00703369		3459.8	0.01205163		3989.8	-0.00541374
279.99	0.06114112		809.99	0.01642943		1339.98	0.01693597		1869.99	0.00101255		2399.98	0.00160844		2930.01	0.00702895		3460	0.01210636		3990	-0.00547264
280.19	0.0620309		810.19	0.01642568		1340.18	0.01686495		1870.19	0.0008437		2400.18	0.00089804		2930.21	0.00780942		3460.2	0.01206113		3990.2	-0.00574854
280.39	0.06229338		810.39	0.0165224		1340.38	0.01631448		1870.39	0.00064003		2400.38	0.00134039		2930.41	0.00766569		3460.4	0.01182489		3990.4	-0.00549904
280.59	0.06305708		810.59	0.01576632		1340.58	0.01512694		1870.59	-0.00018525		2400.58	0.00142479		2930.61	0.00752297		3460.6	0.01203032		3990.6	-0.0053251
280.79	0.06332671		810.79	0.01505016		1340.78	0.01462775		1870.79	-0.000717		2400.78	0.00201736		2930.81	0.00736181		3460.8	0.01179115		3990.8	-0.0059643
280.99	0.06316227		810.99	0.01467234		1340.98	0.01411885		1870.99	-0.00176665		2400.98	0.00204451		2931.01	0.00775649		3461	0.01138923		3991	-0.00611687
281.19	0.06415935		811.19	0.01414405		1341.18	0.01439773		1871.19	-0.00296557		2401.18	0.00230799		2931.21	0.00829725		3461.2	0.01135515		3991.2	-0.00670369
281.39	0.06352531		811.39	0.01426626		1341.38	0.01444414		1871.39	-0.00371504		2401.38	0.0019758		2931.41	0.00665665		3461.4	0.0106417		3991.4	-0.00619094
281.59	0.06343696		811.59	0.01340858		1341.58	0.01499576		1871.59	-0.00462108		2401.58	0.00256337		2931.61	0.0057442		3461.6	0.01006755		3991.6	-0.0062932
281.79	0.06305785		811.79	0.01320624		1341.78	0.01517217		1871.79	-0.00624904		2401.78	0.00263352		2931.81	0.00578135		3461.8	0.00883281		3991.8	-0.00515777
281.99	0.06364204		811.99	0.01350718		1341.98	0.01535389		1871.99	-0.00625238		2401.98	0.00261081		2932.01	0.00602636		3462	0.00876914		3992	-0.00515443
282.19	0.06312033		812.19	0.01361735		1342.18	0.01629592		1872.19	-0.00672002		2402.18	0.00312293		2932.21	0.00611523		3462.2	0.00940247		3992.2	-0.00552018
282.39	0.06329008		812.39	0.01376305		1342.38	0.01655304		1872.39	-0.00542349		2402.38	0.00340434		2932.41	0.00609621		3462.4	0.00995531		3992.4	-0.00585995
282.59	0.0627882		812.59	0.01376636		1342.58	0.01681523		1872.59	-0.00535951		2402.58	0.0035723		2932.61	0.00585026		3462.6	0.00996882		3992.6	-0.00530068
282.79	0.06324929		812.79	0.01443608		1342.78	0.01756508		1872.79	-0.00498986		2402.78	0.00394581		2932.81	0.00607475		3462.8	0.00928896		3992.8	-0.00465475
282.99	0.06295271		812.99	0.01539227		1342.98	0.01790834		1872.99	-0.00440064		2402.98	0.00316389		2933.01	0.00677376		3463	0.00942264		3993	-0.00421594
283.19	0.06350671		813.19	0.01523131		1343.18	0.01777095		1873.19	-0.00297433		2403.18	0.00337844		2933.21	0.00675339		3463.2	0.01080101		3993.2	-0.00409554
283.39	0.06341384		813.39	0.01609365		1343.38	0.01822024		1873.39	-0.00281471		2403.38	0.00311866		2933.41	0.00639458		3463.4	0.01032747		3993.4	-0.00514412
283.59	0.06383003		813.59	0.01703413		1343.58	0.01868807		1873.59	-0.00191749		2403.58	0.00348648		2933.61	0.0062951		3463.6	0.01055517		3993.6	-0.00533488
283.79	0.06442548		813.79	0.01743671		1343.78	0.01907091		1873.79	-0.00087111		2403.78	0.00317905		2933.81	0.00652786		3463.8	0.01001839		3993.8	-0.00515389
283.99	0.06473926		813.99	0.01783597		1343.98	0.01839872		1873.99	-0.00115097		2403.98	0.0020657		2934.01	0.00663942		3464	0.00940038		3994	-0.0054131
284.19	0.06456448		814.19	0.01719469		1344.18	0.01762915		1874.19	-0.00064355		2404.18	0.00160082		2934.21	0.0058044		3464.2	0.00958115		3994.2	-0.00604314
284.39	0.06477622		814.39	0.01715861		1344.38	0.01758667		1874.39	-0.00062763		2404.38	0.0018051		2934.41	0.00594587		3464.4	0.00893388		3994.4	-0.00545209
284.59	0.06432999		814.59	0.01746663		1344.58	0.01739411		1874.59	-0.00070414		2404.58	0.00209936		2934.61	0.00603741		3464.6	0.00938518		3994.6	-0.00501771
284.79	0.06366025		814.79	0.01787532		1344.78	0.01716486		1874.79	-0.0009203		2404.78	0.00252502		2934.81	0.0061332		3464.8	0.00958804		3994.8	-0.00558805
284.99	0.06377677		814.99	0.01846027		1344.98	0.01784122		1874.99	-0.0015686		2404.98	0.00273667		2935.01	0.00622531		3465	0.01005353		3995	-0.00507557
285.19	0.06416715		815.19	0.01775697		1345.18	0.0177765		1875.19	-0.00207576		2405.18	0.00333265		2935.21	0.00665716		3465.2	0.01030704		3995.2	-0.00511595
285.39	0.06404933		815.39	0.01733837		1345.38	0.01698639		1875.39	-0.00191462		2405.38	0.00298209		2935.41	0.00625875		3465.4	0.01008974		3995.4	-0.00472167
285.59	0.06359374		815.59	0.01665755		1345.58	0.01692413		1875.59	-0.0021431		2405.58	0.00397066		2935.61	0.0060708		3465.6	0.0097554		3995.6	-0.00515009
285.79	0.06307093		815.79	0.01592718		1345.78	0.01633933		1875.79	-0.00270947		2405.78	0.00319558		2935.81	0.00596582		3465.8	0.00882503		3995.8	-0.00504228
285.99	0.06256443		815.99	0.01573551		1345.98	0.01662981		1875.99	-0.00198113		2405.98	0.0026223		2936.01	0.00594919		3466	0.00936949		3996	-0.0057225
286.19	0.06217322		816.19	0.01569971		1346.18	0.01713814		1876.19	-0.00221306		2406.18	0.00276853		2936.21	0.00609674		3466.2	0.00990251		3996.2	-0.00578278
286.39	0.0626016		816.39	0.0155025		1346.38	0.01723083		1876.39	-0.00145644		2406.38	0.00306496		2936.41	0.00533158		3466.4	0.00971127		3996.4	-0.00602759
286.59	0.06260855		816.59	0.01547872		1346.58	0.01765508		1876.59	-0.00177676		2406.58	0.00295579		2936.61	0.00589088		3466.6	0.00924862		3996.6	-0.00478107
286.79	0.06245593		816.79	0.01605332		1346.78	0.01773093		1876.79	-0.00110593		2406.78	0.00360033		2936.81	0.00614491		3466.8	0.00982283		3996.8	-0.00479258
286.99	0.06272393		816.99	0.01571083		1346.98	0.01814262		1876.99	-0.00079313		2406.98	0.00442277		2937.01	0.00627713		3467	0.01098696		3997	-0.00531891
287.19	0.063693		817.19	0.01471663		1347.18	0.01752649		1877.19	-0.00079712		2407.18	0.00474025		2937.21	0.00712605		3467.2	0.01131074		3997.2	-0.00598503
287.39	0.06484494		817.39	0.01511286		1347.38	0.01772033		1877.39	-0.00109794		2407.38	0.00519356		2937.41	0.00768638		3467.4	0.00995912		3997.4	-0.00636892
287.59	0.06552323		817.59	0.01449905		1347.58	0.01760978		1877.59	-0.00120222		2407.58	0.00489871		2937.61	0.00884912		3467.6	0.0103494		3997.6	-0.00688511
287.79	0.06560175		817.79	0.01475144		1347.78	0.01764466		1877.79	-0.00178142		2407.78	0.00493135		2937.81	0.01018205		3467.8	0.00917663		3997.8	-0.00721363
287.99	0.06606783		817.99	0.01428974		1347.98	0.01700395		1877.99	-0.00273237		2407.98	0.00411126		2938.01	0.01003423		3468	0.00990936		3998	-0.00756164
288.19	0.06668237		818.19	0.01413123		1348.18	0.01637556		1878.19	-0.00275818		2408.18	0.00375508		2938.21	0.00934663		3468.2	0.01002158		3998.2	-0.00739972
288.39	0.06705502		818.39	0.01433064		1348.38	0.0171058		1878.39	-0.00281124		2408.38	0.00358254		2938.41	0.01004864		3468.4	0.00981487		3998.4	-0.00728056
288.59	0.06716713		818.59	0.01555383		1348.58	0.01674067		1878.59	-0.00326801		2408.58	0.00428362		2938.61	0.00968522		3468.6	0.00997435		3998.6	-0.00739176
288.79	0.06831233		818.79	0.01687612		1348.78	0.01678601		1878.79	-0.00398296		2408.78	0.00392705		2938.81	0.00920535		3468.8	0.01070894		3998.8	-0.00720594
288.99	0.06893791		818.99	0.01726892		1348.98	0.01745284		1878.99	-0.00475536		2408.98	0.00420432		2939.01	0.00984386		3469	0.01031678		3999	-0.00640891
289.19	0.06932601		819.19	0.01670607		1349.18	0.01619763		1879.19	-0.00558536		2409.18	0.00389311		2939.21	0.00977524		3469.2	0.01018421		3999.2	-0.00660578
289.39	0.06925872		819.39	0.01667478		1349.38	0.01602741		1879.39	-0.00588015		2409.38	0.00348255		2939.41	0.00875673		3469.4	0.00946745		3999.4	-0.00600739
289.59	0.06853989		819.59	0.01597204		1349.58	0.01588203		1879.59	-0.00612896		2409.58	0.00351889		2939.61	0.00830577		3469.6	0.00862641		3999.6	-0.00631436
289.79	0.06759329		819.79	0.01539548		1349.78	0.01623422		1879.79	-0.00685567		2409.78	0.00265633		2939.81	0.00807743		3469.8	0.00814585		3999.8	-0.00687692
289.99	0.0685066		819.99	0.01543378		1349.98	0.01700055		1879.99	-0.00652088		2409.98	0.00248491		2940.01	0.00788198		3470	0.00799978		4000	-0.00634573
290.19	0.06931169		820.19	0.01553634		1350.18	0.01699178		1880.19	-0.00620825		2410.18	0.00225306		2940.21	0.00696709		3470.2	0.00803451		4000.2	-0.00581944
290.39	0.06956462		820.39	0.01552037		1350.38	0.0171773		1880.39	-0.00545534		2410.38	0.00339662		2940.41	0.00573833		3470.4	0.00809889		4000.4	-0.00534056
290.59	0.06871684		820.59	0.01553883		1350.58	0.01695735		1880.59	-0.00544572		2410.58	0.00349286		2940.61	0.00627837		3470.6	0.00772559		4000.6	-0.00470861
290.79	0.06880691		820.79	0.01568696		1350.78	0.01721781		1880.79	-0.00467728		2410.78	0.00416911		2940.81	0.00554343		3470.8	0.00864075		4000.8	-0.00462966
290.99	0.06975431		820.99	0.01562521		1350.98	0.01724468		1880.99	-0.00520531		2410.98	0.0040031		2941.01	0.00520856		3471	0.0088592		4001	-0.00453557
291.19	0.07087743		821.19	0.01496112		1351.18	0.01676654		1881.19	-0.00504752		2411.18	0.00433071		2941.21	0.00509479		3471.2	0.00827174		4001.2	-0.0045281
291.39	0.07094348		821.39	0.01492699		1351.38	0.01721841		1881.39	-0.0042961		2411.38	0.00390751		2941.41	0.00562582		3471.4	0.00796411		4001.4	-0.00447914
291.59	0.07046685		821.59	0.01449013		1351.58	0.01705406		1881.59	-0.00432215		2411.58	0.00393953		2941.61	0.00618387		3471.6	0.00831103		4001.6	-0.00451216
291.79	0.07060821		821.79	0.01488782		1351.78	0.01740215		1881.79	-0.00401141		2411.78	0.00427447		2941.81	0.00573209		3471.8	0.00772077		4001.8	-0.0038427
291.99	0.07170441		821.99	0.0145781		1351.98	0.01769129		1881.99	-0.00355461		2411.98	0.00338616		2942.01	0.00454959		3472	0.00875889		4002	-0.00375703
292.19	0.07099615		822.19	0.01514472		1352.18	0.01762553		1882.19	-0.00391064		2412.18	0.00350295		2942.21	0.00443695		3472.2	0.00780725		4002.2	-0.00388981
292.39	0.07066145		822.39	0.01450333		1352.38	0.01728701		1882.39	-0.00333485		2412.38	0.00320314		2942.41	0.0054038		3472.4	0.00779477		4002.4	-0.00387468
292.59	0.07041509		822.59	0.01502766		1352.58	0.01712476		1882.59	-0.00355875		2412.58	0.00313339		2942.61	0.00580587		3472.6	0.00719479		4002.6	-0.00385932
292.79	0.07045452		822.79	0.01509577		1352.78	0.0171689		1882.79	-0.0033227		2412.78	0.00253686		2942.81	0.00610161		3472.8	0.00824352		4002.8	-0.00397295
292.99	0.07015958		822.99	0.01461246		1352.98	0.01640973		1882.99	-0.00342687		2412.98	0.00193769		2943.01	0.00702885		3473	0.00837925		4003	-0.00415573
293.19	0.07011733		823.19	0.01471075		1353.18	0.01599858		1883.19	-0.00299873		2413.18	0.0018902		2943.21	0.00713422		3473.2	0.00875242		4003.2	-0.00477094
293.39	0.07004691		823.39	0.01485056		1353.38	0.01645796		1883.39	-0.00250373		2413.38	0.00177949		2943.41	0.00774002		3473.4	0.00851024		4003.4	-0.00474037
293.59	0.06986578		823.59	0.0146096		1353.58	0.0163001		1883.59	-0.00122214		2413.58	0.00200608		2943.61	0.00881089		3473.6	0.00833661		4003.6	-0.0055074
293.79	0.07013518		823.79	0.01511977		1353.78	0.01587574		1883.79	-0.00116835		2413.78	0.00170664		2943.81	0.00894974		3473.8	0.0086979		4003.8	-0.00556236
293.99	0.07076578		823.99	0.01585041		1353.98	0.01537127		1883.99	-0.00056965		2413.98	0.00151743		2944.01	0.00917981		3474	0.0085949		4004	-0.00453116
294.19	0.07057965		824.19	0.01673054		1354.18	0.01450928		1884.19	-0.00028537		2414.18	0.00156325		2944.21	0.00887238		3474.2	0.00905616		4004.2	-0.00462511
294.39	0.07041944		824.39	0.01701648		1354.38	0.01471961		1884.39	-0.00001506		2414.38	0.00246293		2944.41	0.0092292		3474.4	0.00892462		4004.4	-0.00488288
294.59	0.07058444		824.59	0.01730052		1354.58	0.01467813		1884.59	-0.00108293		2414.58	0.00192476		2944.61	0.00975765		3474.6	0.00849913		4004.6	-0.00526131
294.79	0.07040399		824.79	0.01760073		1354.78	0.01536257		1884.79	-0.00090717		2414.78	0.00250216		2944.81	0.00894148		3474.8	0.00890439		4004.8	-0.00499352
294.99	0.07085649		824.99	0.01699572		1354.98	0.01570385		1884.99	-0.00123675		2414.98	0.00294583		2945.01	0.0087936		3475	0.00882487		4005	-0.00509069
295.19	0.07150631		825.19	0.01582661		1355.18	0.01670522		1885.19	-0.00079657		2415.18	0.00432974		2945.21	0.00908073		3475.2	0.0082325		4005.2	-0.00583163
295.39	0.07088938		825.39	0.01566529		1355.38	0.01793336		1885.39	-0.00066042		2415.38	0.00435531		2945.41	0.0095148		3475.4	0.00851713		4005.4	-0.00562215
295.59	0.07102588		825.59	0.01532786		1355.58	0.01792488		1885.59	-0.00092077		2415.58	0.00452961		2945.61	0.00839819		3475.6	0.0091518		4005.6	-0.00573539
295.79	0.07098708		825.79	0.014649		1355.78	0.01801395		1885.79	-0.00083372		2415.78	0.00454339		2945.81	0.00787071		3475.8	0.00921177		4005.8	-0.00516627
295.99	0.07114842		825.99	0.01460387		1355.98	0.01893713		1885.99	-0.00105872		2415.98	0.00461599		2946.01	0.00810605		3476	0.00878014		4006	-0.00588957
296.19	0.07094429		826.19	0.01404083		1356.18	0.01910495		1886.19	-0.00174059		2416.18	0.0055786		2946.21	0.0088416		3476.2	0.00814031		4006.2	-0.00577623
296.39	0.07063833		826.39	0.01346552		1356.38	0.01834519		1886.39	-0.00189377		2416.38	0.00526654		2946.41	0.00875428		3476.4	0.00860462		4006.4	-0.00583657
296.59	0.07066152		826.59	0.01324589		1356.58	0.01860565		1886.59	-0.0016195		2416.58	0.005045		2946.61	0.00796407		3476.6	0.00855822		4006.6	-0.00652921
296.79	0.07160121		826.79	0.01276258		1356.78	0.01820392		1886.79	-0.0022875		2416.78	0.00517799		2946.81	0.0081752		3476.8	0.00975821		4006.8	-0.00644095
296.99	0.07199078		826.99	0.01321976		1356.98	0.01830308		1886.99	-0.00232635		2416.98	0.00558388		2947.01	0.0081188		3477	0.01068361		4007	-0.00679107
297.19	0.07174777		827.19	0.01394246		1357.18	0.0189712		1887.19	-0.00210587		2417.18	0.00603985		2947.21	0.00794587		3477.2	0.01113218		4007.2	-0.00686835
297.39	0.07170049		827.39	0.01455212		1357.38	0.01927265		1887.39	-0.0016054		2417.38	0.00576054		2947.41	0.00853087		3477.4	0.01103628		4007.4	-0.00649064
297.59	0.07161609		827.59	0.01548134		1357.58	0.01983363		1887.59	-0.00132599		2417.58	0.00562194		2947.61	0.00902706		3477.6	0.01098654		4007.6	-0.0059209
297.79	0.07207364		827.79	0.01629749		1357.78	0.01878431		1887.79	-0.00157376		2417.78	0.00452547		2947.81	0.00888471		3477.8	0.01163295		4007.8	-0.00525499
297.99	0.07200217		827.99	0.01687266		1357.98	0.01869166		1887.99	-0.00239453		2417.98	0.00412654		2948.01	0.00830156		3478	0.01213327		4008	-0.00453956
298.19	0.07315947		828.19	0.01723938		1358.18	0.01834761		1888.19	-0.00210339		2418.18	0.00461548		2948.21	0.00811567		3478.2	0.01205603		4008.2	-0.00443434
298.39	0.0737698		828.39	0.01688293		1358.38	0.01847061		1888.39	-0.00256626		2418.38	0.00480421		2948.41	0.00843986		3478.4	0.01137134		4008.4	-0.00419044
298.59	0.07451838		828.59	0.01716362		1358.58	0.01754557		1888.59	-0.00295812		2418.58	0.00424486		2948.61	0.00810519		3478.6	0.01159366		4008.6	-0.00440021
298.79	0.07423981		828.79	0.0175027		1358.78	0.01749649		1888.79	-0.00224709		2418.78	0.0041798		2948.81	0.00833817		3478.8	0.01157749		4008.8	-0.00373041
298.99	0.0743734		828.99	0.01745387		1358.98	0.01755537		1888.99	-0.00149376		2418.98	0.00381754		2949.01	0.008421		3479	0.01135535		4009	-0.00361677
299.19	0.07422712		829.19	0.01807768		1359.18	0.01727435		1889.19	-0.0012387		2419.18	0.00408888		2949.21	0.00815624		3479.2	0.01060677		4009.2	-0.00393442
299.39	0.07400712		829.39	0.01813601		1359.38	0.01671053		1889.39	-0.00135034		2419.38	0.00283027		2949.41	0.00737266		3479.4	0.01027047		4009.4	-0.00370975
299.59	0.07443349		829.59	0.01757957		1359.58	0.01604435		1889.59	-0.00123017		2419.58	0.0015851		2949.61	0.00756544		3479.6	0.00997782		4009.6	-0.00408111
299.79	0.07481061		829.79	0.0175754		1359.78	0.01690599		1889.79	-0.00065213		2419.78	0.00139421		2949.81	0.00738057		3479.8	0.00892962		4009.8	-0.00400643
299.99	0.07558256		829.99	0.01827685		1359.98	0.01825699		1889.99	-0.00057762		2419.98	0.00146437		2950.01	0.00722231		3480	0.00730808		4010	-0.00427455
300.19	0.07617686		830.19	0.01829934		1360.18	0.01790873		1890.19	-0.00061351		2420.18	0.00184659		2950.21	0.00639916		3480.2	0.00698306		4010.2	-0.00393138
300.39	0.07566298		830.39	0.01847726		1360.38	0.01739212		1890.39	-0.00118808		2420.38	0.00165858		2950.41	0.00621334		3480.4	0.00721781		4010.4	-0.00416382
300.59	0.07602617		830.59	0.01716605		1360.58	0.01709977		1890.59	-0.00116969		2420.58	0.00106125		2950.61	0.00717541		3480.6	0.00725866		4010.6	-0.00395685
300.79	0.07576666		830.79	0.0173782		1360.78	0.01672723		1890.79	-0.00224907		2420.78	0.00190283		2950.81	0.00731188		3480.8	0.0080649		4010.8	-0.00417378
300.99	0.07525023		830.99	0.01810661		1360.98	0.01730032		1890.99	-0.00272542		2420.98	0.00272365		2951.01	0.00763894		3481	0.00896592		4011	-0.00491503
301.19	0.07454956		831.19	0.01793056		1361.18	0.01832626		1891.19	-0.00350278		2421.18	0.00233338		2951.21	0.00885596		3481.2	0.00926532		4011.2	-0.00501165
301.39	0.07443561		831.39	0.01771836		1361.38	0.01913135		1891.39	-0.00423874		2421.38	0.00211626		2951.41	0.00952673		3481.4	0.00887012		4011.4	-0.0045671
301.59	0.07518493		831.59	0.01794431		1361.58	0.02007474		1891.59	-0.00498941		2421.58	0.00255606		2951.61	0.01021358		3481.6	0.00955197		4011.6	-0.00469345
301.79	0.0754669		831.79	0.01685917		1361.78	0.01878905		1891.79	-0.0048691		2421.78	0.0029001		2951.81	0.01015973		3481.8	0.01073143		4011.8	-0.00459369
301.99	0.07573468		831.99	0.01656545		1361.98	0.01848341		1891.99	-0.00586687		2421.98	0.00371415		2952.01	0.00942106		3482	0.01167184		4012	-0.00471347
302.19	0.07587232		832.19	0.01618474		1362.18	0.017957		1892.19	-0.00537359		2422.18	0.00480139		2952.21	0.00989279		3482.2	0.01108162		4012.2	-0.00474738
302.39	0.07615223		832.39	0.01583455		1362.38	0.01757613		1892.39	-0.00581707		2422.38	0.00527728		2952.41	0.00979827		3482.4	0.0111771		4012.4	-0.00545272
302.59	0.07580424		832.59	0.01598821		1362.58	0.01746547		1892.59	-0.00555697		2422.58	0.00519989		2952.61	0.00995857		3482.6	0.01193388		4012.6	-0.00630908
302.79	0.07463708		832.79	0.01600507		1362.78	0.01795686		1892.79	-0.00496964		2422.78	0.00545991		2952.81	0.00982693		3482.8	0.01104917		4012.8	-0.00605789
302.99	0.07347046		832.99	0.01592276		1362.98	0.01825735		1892.99	-0.00485769		2422.98	0.00606704		2953.01	0.00979713		3483	0.01092058		4013	-0.00631381
303.19	0.07299877		833.19	0.0152997		1363.18	0.01847886		1893.19	-0.00476853		2423.18	0.0056342		2953.21	0.00938216		3483.2	0.01022991		4013.2	-0.00672707
303.39	0.07276707		833.39	0.01471613		1363.38	0.01825651		1893.39	-0.00397564		2423.38	0.00440454		2953.41	0.00823121		3483.4	0.00938766		4013.4	-0.00684017
303.59	0.07335191		833.59	0.0142112		1363.58	0.01850487		1893.59	-0.00321207		2423.58	0.00434491		2953.61	0.00779129		3483.6	0.00941063		4013.6	-0.00803131
303.79	0.07343247		833.79	0.01485051		1363.78	0.01862114		1893.79	-0.00289231		2423.78	0.00370815		2953.81	0.0069443		3483.8	0.00863008		4013.8	-0.00778069
303.99	0.07419273		833.99	0.01456041		1363.98	0.01864744		1893.99	-0.00209158		2423.98	0.00352025		2954.01	0.00734965		3484	0.00840094		4014	-0.00776358
304.19	0.0748789		834.19	0.01405231		1364.18	0.01769751		1894.19	-0.00182627		2424.18	0.00292862		2954.21	0.00697596		3484.2	0.00887912		4014.2	-0.00816537
304.39	0.0751746		834.39	0.01349855		1364.38	0.01673913		1894.39	-0.00197821		2424.38	0.00295966		2954.41	0.00732962		3484.4	0.0090521		4014.4	-0.00807717
304.59	0.07528135		834.59	0.01240252		1364.58	0.01598979		1894.59	-0.002624		2424.58	0.00249706		2954.61	0.00834174		3484.6	0.00936128		4014.6	-0.0076403
304.79	0.07557562		834.79	0.01250613		1364.78	0.01619734		1894.79	-0.00379131		2424.78	0.00301106		2954.81	0.00819323		3484.8	0.00990564		4014.8	-0.00731922
304.99	0.07601103		834.99	0.01214338		1364.98	0.01714091		1894.99	-0.00439161		2424.98	0.00338669		2955.01	0.00952546		3485	0.01051421		4015	-0.00693937
305.19	0.07670495		835.19	0.01218249		1365.18	0.01755125		1895.19	-0.00490221		2425.18	0.00252108		2955.21	0.01038371		3485.2	0.00981479		4015.2	-0.00652231
305.39	0.0772688		835.39	0.01263069		1365.38	0.01674748		1895.39	-0.00526833		2425.38	0.00195956		2955.41	0.00989495		3485.4	0.00928116		4015.4	-0.0061951
305.59	0.07856895		835.59	0.01268478		1365.58	0.01615892		1895.59	-0.00557981		2425.58	0.00239878		2955.61	0.01049891		3485.6	0.01023345		4015.6	-0.00614525
305.79	0.07909969		835.79	0.01226896		1365.78	0.01430882		1895.79	-0.00608715		2425.78	0.00243368		2955.81	0.0105488		3485.8	0.01048041		4015.8	-0.00562347
305.99	0.07944518		835.99	0.01240209		1365.98	0.01324595		1895.99	-0.00659548		2425.98	0.00219835		2956.01	0.01028123		3486	0.01030982		4016	-0.00600898
306.19	0.07961314		836.19	0.01266181		1366.18	0.01243873		1896.19	-0.00686316		2426.18	0.00307769		2956.21	0.01090658		3486.2	0.00970556		4016.2	-0.00582691
306.39	0.07991747		836.39	0.01377703		1366.38	0.01234735		1896.39	-0.00705875		2426.38	0.00422919		2956.41	0.01042015		3486.4	0.0101336		4016.4	-0.00651367
306.59	0.07942018		836.59	0.01430702		1366.58	0.01336374		1896.59	-0.00710638		2426.58	0.00486536		2956.61	0.01135891		3486.6	0.01001378		4016.6	-0.00617583
306.79	0.0788494		836.79	0.01477772		1366.78	0.01333241		1896.79	-0.00735881		2426.78	0.0060156		2956.81	0.0112083		3486.8	0.00975516		4016.8	-0.00553746
306.99	0.0783267		836.99	0.01550659		1366.98	0.01353632		1896.99	-0.00747098		2426.98	0.00599981		2957.01	0.01116204		3487	0.00951971		4017	-0.00523438
307.19	0.07731859		837.19	0.01625606		1367.18	0.01390451		1897.19	-0.00691835		2427.18	0.00585825		2957.21	0.0107715		3487.2	0.00927005		4017.2	-0.00436874
307.39	0.07739011		837.39	0.0175848		1367.38	0.01334102		1897.39	-0.00696208		2427.38	0.00576421		2957.41	0.01061389		3487.4	0.00930467		4017.4	-0.00445795
307.59	0.07732967		837.59	0.01778992		1367.58	0.01357255		1897.59	-0.00675448		2427.58	0.00615587		2957.61	0.01056593		3487.6	0.00969338		4017.6	-0.00547856
307.79	0.07709731		837.79	0.01785957		1367.78	0.01429209		1897.79	-0.0072111		2427.78	0.00491593		2957.81	0.0105078		3487.8	0.00957127		4017.8	-0.00528561
307.99	0.07770284		837.99	0.01786375		1367.98	0.01595934		1897.99	-0.00638436		2427.98	0.00539794		2958.01	0.0101687		3488	0.00996237		4018	-0.00568295
308.19	0.07750448		838.19	0.01741697		1368.18	0.01639652		1898.19	-0.00644332		2428.18	0.00615888		2958.21	0.00934454		3488.2	0.00968563		4018.2	-0.00581616
308.39	0.07779381		838.39	0.01695581		1368.38	0.01668072		1898.39	-0.00626783		2428.38	0.00640845		2958.41	0.00900064		3488.4	0.00958709		4018.4	-0.00537508
308.59	0.07756428		838.59	0.01651221		1368.58	0.01737891		1898.59	-0.00663549		2428.58	0.00666122		2958.61	0.00841806		3488.6	0.01080618		4018.6	-0.00522902
308.79	0.07728938		838.79	0.01626888		1368.78	0.01846045		1898.79	-0.00593947		2428.78	0.00705148		2958.81	0.00802602		3488.8	0.01130301		4018.8	-0.0052794
308.99	0.07668936		838.99	0.01615619		1368.98	0.01887457		1898.99	-0.00562062		2428.98	0.00689763		2959.01	0.00802637		3489	0.01119347		4019	-0.00591025
309.19	0.07750975		839.19	0.01657736		1369.18	0.01827948		1899.19	-0.00477409		2429.18	0.00509077		2959.21	0.00787814		3489.2	0.01069869		4019.2	-0.0063906
309.39	0.07786413		839.39	0.01657888		1369.38	0.01786198		1899.39	-0.00420517		2429.38	0.00523912		2959.41	0.00703702		3489.4	0.01104182		4019.4	-0.00705721
309.59	0.07862804		839.59	0.01573565		1369.58	0.01758164		1899.59	-0.00380022		2429.58	0.00504685		2959.61	0.00802182		3489.6	0.01125386		4019.6	-0.00744165
309.79	0.07914206		839.79	0.01561855		1369.78	0.01764145		1899.79	-0.00353941		2429.78	0.00411368		2959.81	0.00816429		3489.8	0.01104726		4019.8	-0.00813736
309.99	0.07966089		839.99	0.01590998		1369.98	0.01700874		1899.99	-0.00237257		2429.98	0.00453343		2960.01	0.00783939		3490	0.01074565		4020	-0.00876998
310.19	0.08015627		840.19	0.01629617		1370.18	0.01655763		1900.19	-0.00272847		2430.18	0.00522697		2960.21	0.00819392		3490.2	0.01072317		4020.2	-0.00922145
310.39	0.08017743		840.39	0.01686866		1370.38	0.01668004		1900.39	-0.00217361		2430.38	0.00552357		2960.41	0.0080451		3490.4	0.01071032		4020.4	-0.00948726
310.59	0.07993346		840.59	0.01646834		1370.58	0.01733908		1900.59	-0.00228197		2430.58	0.00579741		2960.61	0.00955564		3490.6	0.00999484		4020.6	-0.00909479
310.79	0.07945158		840.79	0.01694585		1370.78	0.01676184		1900.79	-0.00199998		2430.78	0.00596833		2960.81	0.00939946		3490.8	0.00956735		4020.8	-0.00839904
310.99	0.07920858		840.99	0.01755399		1370.98	0.01738653		1900.99	-0.00192402		2430.98	0.00551234		2961.01	0.00995332		3491	0.00827121		4021	-0.00801013
311.19	0.07933783		841.19	0.01838894		1371.18	0.017443		1901.19	-0.00267344		2431.18	0.00555768		2961.21	0.01093951		3491.2	0.00828851		4021.2	-0.00748168
311.39	0.07965108		841.39	0.01870829		1371.38	0.01722963		1901.39	-0.00378425		2431.38	0.00546358		2961.41	0.01146902		3491.4	0.00799126		4021.4	-0.00819044
311.59	0.07960964		841.59	0.01861958		1371.58	0.0179377		1901.59	-0.00401943		2431.58	0.0050933		2961.61	0.01136808		3491.6	0.0078812		4021.6	-0.00801338
311.79	0.07927064		841.79	0.01842211		1371.78	0.01817183		1901.79	-0.00552914		2431.78	0.00381063		2961.81	0.0118617		3491.8	0.00771202		4021.8	-0.00791903
311.99	0.07963163		841.99	0.01855211		1371.98	0.01843039		1901.99	-0.00635229		2431.98	0.00419243		2962.01	0.01226519		3492	0.00757429		4022	-0.00744678
312.19	0.07919888		842.19	0.01802255		1372.18	0.01760306		1902.19	-0.00693837		2432.18	0.00435158		2962.21	0.01249812		3492.2	0.00756869		4022.2	-0.00687447
312.39	0.07818514		842.39	0.01831995		1372.38	0.01702521		1902.39	-0.00656938		2432.38	0.00410888		2962.41	0.01251015		3492.4	0.00771401		4022.4	-0.00682845
312.59	0.0775693		842.59	0.01811699		1372.58	0.01694025		1902.59	-0.00687053		2432.58	0.0043722		2962.61	0.01224066		3492.6	0.00843433		4022.6	-0.00686092
312.79	0.07713669		842.79	0.01747782		1372.78	0.01670505		1902.79	-0.00596164		2432.78	0.00462427		2962.81	0.01260253		3492.8	0.00846891		4022.8	-0.00691355
312.99	0.07709664		842.99	0.01735646		1372.98	0.01627768		1902.99	-0.00620362		2432.98	0.00432155		2963.01	0.01233043		3493	0.00814323		4023	-0.0076234
313.19	0.07884935		843.19	0.01756564		1373.18	0.01631283		1903.19	-0.0051777		2433.18	0.00372808		2963.21	0.01153094		3493.2	0.00827199		4023.2	-0.00808616
313.39	0.07866336		843.39	0.01707329		1373.38	0.01723267		1903.39	-0.00493227		2433.38	0.00387301		2963.41	0.01093729		3493.4	0.00839903		4023.4	-0.00796187
313.59	0.07915919		843.59	0.01613237		1373.58	0.01785187		1903.59	-0.00451838		2433.58	0.00329851		2963.61	0.01051219		3493.6	0.00863643		4023.6	-0.00857277
313.79	0.07982584		843.79	0.01643413		1373.78	0.01783554		1903.79	-0.00327833		2433.78	0.00375871		2963.81	0.00945341		3493.8	0.00939325		4023.8	-0.00851306
313.99	0.08066255		843.99	0.01718475		1373.98	0.01728967		1903.99	-0.00177143		2433.98	0.00380567		2964.01	0.00866149		3494	0.00943194		4024	-0.00837004
314.19	0.07979566		844.19	0.01667099		1374.18	0.01758228		1904.19	-0.00191362		2434.18	0.00341754		2964.21	0.00799298		3494.2	0.00946177		4024.2	-0.00889221
314.39	0.08000295		844.39	0.01614825		1374.38	0.01751494		1904.39	-0.00111958		2434.38	0.00383744		2964.41	0.00780899		3494.4	0.0094281		4024.4	-0.00890042
314.59	0.08063158		844.59	0.01587515		1374.58	0.01793559		1904.59	-0.00057151		2434.58	0.00424095		2964.61	0.00814292		3494.6	0.00879024		4024.6	-0.00855089
314.79	0.08157904		844.79	0.01597301		1374.78	0.01829603		1904.79	-0.00069834		2434.78	0.0042186		2964.81	0.00827847		3494.8	0.00823285		4024.8	-0.00844631
314.99	0.08150337		844.99	0.0170086		1374.98	0.01805821		1904.99	-0.0010297		2434.98	0.00435209		2965.01	0.00806251		3495	0.00813052		4025	-0.00914696
315.19	0.08255856		845.19	0.01728902		1375.18	0.01825414		1905.19	-0.00160232		2435.18	0.00410551		2965.21	0.00861524		3495.2	0.00902392		4025.2	-0.0091619
315.39	0.08291143		845.39	0.01709894		1375.38	0.01822383		1905.39	-0.00198713		2435.38	0.00462135		2965.41	0.00817366		3495.4	0.00883767		4025.4	-0.00845015
315.59	0.08366349		845.59	0.01715513		1375.58	0.01788253		1905.59	-0.00185292		2435.58	0.00391974		2965.61	0.00815095		3495.6	0.00929907		4025.6	-0.00779954
315.79	0.08396804		845.79	0.0174307		1375.78	0.01707876		1905.79	-0.00300819		2435.78	0.00443086		2965.81	0.00864089		3495.8	0.01023881		4025.8	-0.00783542
315.99	0.08434918		845.99	0.01788489		1375.98	0.01726611		1905.99	-0.00266471		2435.98	0.00496858		2966.01	0.00851728		3496	0.01030971		4026	-0.00768485
316.19	0.08352722		846.19	0.01744783		1376.18	0.01651926		1906.19	-0.00258417		2436.18	0.00507767		2966.21	0.00797278		3496.2	0.01040545		4026.2	-0.00709457
316.39	0.08355502		846.39	0.01759557		1376.38	0.01686515		1906.39	-0.00237883		2436.38	0.00538498		2966.41	0.0088114		3496.4	0.01041637		4026.4	-0.00725878
316.59	0.08494902		846.59	0.01668555		1376.58	0.0162242		1906.59	-0.00306027		2436.58	0.00522069		2966.61	0.00884096		3496.6	0.01005309		4026.6	-0.00774456
316.79	0.08522025		846.79	0.01701323		1376.78	0.01642644		1906.79	-0.00333738		2436.78	0.00615681		2966.81	0.00826021		3496.8	0.00990458		4026.8	-0.00793759
316.99	0.08555609		846.99	0.01718521		1376.98	0.01706483		1906.99	-0.00367538		2436.98	0.00554301		2967.01	0.00851556		3497	0.00918461		4027	-0.00793375
317.19	0.08607304		847.19	0.01718888		1377.18	0.01801381		1907.19	-0.00383417		2437.18	0.00550072		2967.21	0.00824748		3497.2	0.00920315		4027.2	-0.00775752
317.39	0.08520303		847.39	0.01702161		1377.38	0.01876774		1907.39	-0.00336876		2437.38	0.00501493		2967.41	0.00845416		3497.4	0.00915195		4027.4	-0.00780228
317.59	0.08642482		847.59	0.01717889		1377.58	0.01833353		1907.59	-0.00346081		2437.58	0.00479194		2967.61	0.00873942		3497.6	0.00941369		4027.6	-0.00749235
317.79	0.08610899		847.79	0.01765352		1377.78	0.0185971		1907.79	-0.00326594		2437.78	0.00557337		2967.81	0.00859642		3497.8	0.00901412		4027.8	-0.00701523
317.99	0.08535443		847.99	0.01799243		1377.98	0.01916167		1907.99	-0.00347455		2437.98	0.00464901		2968.01	0.00917481		3498	0.00832424		4028	-0.00663191
318.19	0.08454719		848.19	0.01794939		1378.18	0.01899703		1908.19	-0.00340615		2438.18	0.00502937		2968.21	0.0093504		3498.2	0.00832305		4028.2	-0.00644476
318.39	0.08537044		848.39	0.01744163		1378.38	0.01882822		1908.39	-0.00363424		2438.38	0.00572772		2968.41	0.00966712		3498.4	0.00825272		4028.4	-0.00639254
318.59	0.08584232		848.59	0.01710707		1378.58	0.01884354		1908.59	-0.00399103		2438.58	0.00578671		2968.61	0.01032008		3498.6	0.00752357		4028.6	-0.00586771
318.79	0.08484095		848.79	0.01681266		1378.78	0.01878496		1908.79	-0.00418584		2438.78	0.00585766		2968.81	0.01083671		3498.8	0.00742389		4028.8	-0.0056135
318.99	0.08418395		848.99	0.01805658		1378.98	0.01826599		1908.99	-0.00372897		2438.98	0.00579701		2969.01	0.00984987		3499	0.00823137		4029	-0.00560135
319.19	0.08527073		849.19	0.01696488		1379.18	0.01860534		1909.19	-0.0036916		2439.18	0.00580286		2969.21	0.01098341		3499.2	0.00791487		4029.2	-0.00508495
319.39	0.0848315		849.39	0.01636817		1379.38	0.01812005		1909.39	-0.00317777		2439.38	0.00682615		2969.41	0.01020832		3499.4	0.00799188		4029.4	-0.00500238
319.59	0.08494901		849.59	0.01643496		1379.58	0.01743271		1909.59	-0.00247177		2439.58	0.00625473		2969.61	0.01000957		3499.6	0.00851045		4029.6	-0.00535678
319.79	0.08466737		849.79	0.01641024		1379.78	0.017658		1909.79	-0.0026299		2439.78	0.00692819		2969.81	0.00924517		3499.8	0.00933939		4029.8	-0.00546242
319.99	0.08386832		849.99	0.01606045		1379.98	0.0182725		1909.99	-0.00215034		2439.98	0.00543741		2970.01	0.00788143		3500	0.0093042		4030	-0.00517779
320.19	0.08437005		850.19	0.01549025		1380.18	0.01828765		1910.19	-0.00245562		2440.18	0.00447341		2970.21	0.00718065		3500.2	0.01017579		4030.2	-0.0047451
320.39	0.08590656		850.39	0.016512		1380.38	0.01889033		1910.39	-0.00240572		2440.38	0.00391393		2970.41	0.00822851		3500.4	0.01038836		4030.4	-0.00513597
320.59	0.08670032		850.59	0.0166765		1380.58	0.01870279		1910.59	-0.00284203		2440.58	0.00356633		2970.61	0.00722519		3500.6	0.01010677		4030.6	-0.00562282
320.79	0.0866179		850.79	0.01734206		1380.78	0.01975457		1910.79	-0.00348211		2440.78	0.00355545		2970.81	0.00693252		3500.8	0.0106009		4030.8	-0.00512414
320.99	0.08641274		850.99	0.01664262		1380.98	0.02022877		1910.99	-0.00351549		2440.98	0.00295681		2971.01	0.00750675		3501	0.01044631		4031	-0.0054965
321.19	0.08638951		851.19	0.01691755		1381.18	0.0206376		1911.19	-0.00308404		2441.18	0.00258826		2971.21	0.00736535		3501.2	0.01114267		4031.2	-0.00612732
321.39	0.08605877		851.39	0.0167882		1381.38	0.02061218		1911.39	-0.00318577		2441.38	0.00136917		2971.41	0.00806912		3501.4	0.01189921		4031.4	-0.00594293
321.59	0.08635011		851.59	0.01637723		1381.58	0.02018415		1911.59	-0.00400342		2441.58	0.0011813		2971.61	0.00897978		3501.6	0.01219944		4031.6	-0.00623147
321.79	0.08590289		851.79	0.01648313		1381.78	0.02031532		1911.79	-0.00383143		2441.78	0.00244357		2971.81	0.00887024		3501.8	0.01171005		4031.8	-0.00635125
321.99	0.08573028		851.99	0.01707922		1381.98	0.02044011		1911.99	-0.00353424		2441.98	0.00180555		2972.01	0.01013313		3502	0.01183349		4032	-0.00594243
322.19	0.08684967		852.19	0.01719139		1382.18	0.02071071		1912.19	-0.00314951		2442.18	0.00188491		2972.21	0.00994674		3502.2	0.01168552		4032.2	-0.00642888
322.39	0.08706821		852.39	0.01625848		1382.38	0.01960006		1912.39	-0.00330143		2442.38	0.00222745		2972.41	0.00989813		3502.4	0.01022331		4032.4	-0.00625678
322.59	0.08674382		852.59	0.01618144		1382.58	0.01923619		1912.59	-0.00324717		2442.58	0.00234063		2972.61	0.01057703		3502.6	0.01004303		4032.6	-0.00611694
322.79	0.08659806		852.79	0.01633744		1382.78	0.01879561		1912.79	-0.00257844		2442.78	0.00312274		2972.81	0.01129871		3502.8	0.00990228		4032.8	-0.00503361
322.99	0.08636057		852.99	0.01636619		1382.98	0.01875133		1912.99	-0.00191637		2442.98	0.00290744		2973.01	0.01217228		3503	0.00964462		4033	-0.00516388
323.19	0.08572302		853.19	0.01524874		1383.18	0.0180629		1913.19	-0.00095178		2443.18	0.00376818		2973.21	0.01277406		3503.2	0.00958924		4033.2	-0.00568781
323.39	0.08532752		853.39	0.01555283		1383.38	0.01810428		1913.39	-0.00000911		2443.38	0.0035183		2973.41	0.01293642		3503.4	0.00970264		4033.4	-0.00602008
323.59	0.08540375		853.59	0.01592198		1383.58	0.01870835		1913.59	0.00043027		2443.58	0.00287802		2973.61	0.01225347		3503.6	0.01023853		4033.6	-0.00585264
323.79	0.08486033		853.79	0.01666504		1383.78	0.01928297		1913.79	0.00055544		2443.78	0.0030426		2973.81	0.0121659		3503.8	0.01062358		4033.8	-0.00472403
323.99	0.08549193		853.99	0.01722379		1383.98	0.01988147		1913.99	-0.00008614		2443.98	0.00203252		2974.01	0.01172632		3504	0.0108334		4034	-0.00432158
324.19	0.08675007		854.19	0.01799259		1384.18	0.01990708		1914.19	-0.00038555		2444.18	0.00240833		2974.21	0.01175503		3504.2	0.0114239		4034.2	-0.00501657
324.39	0.08711237		854.39	0.01863376		1384.38	0.02004738		1914.39	-0.00098269		2444.38	0.00271018		2974.41	0.01232637		3504.4	0.01119496		4034.4	-0.00417813
324.59	0.08716393		854.59	0.01851225		1384.58	0.0204232		1914.59	-0.00155581		2444.58	0.00335746		2974.61	0.01142021		3504.6	0.01173968		4034.6	-0.00390325
324.79	0.08621042		854.79	0.01755527		1384.78	0.02086292		1914.79	-0.00246312		2444.78	0.00363566		2974.81	0.01155179		3504.8	0.01271421		4034.8	-0.00373079
324.99	0.08640897		854.99	0.01759169		1384.98	0.02196572		1914.99	-0.00308309		2444.98	0.00444054		2975.01	0.01113121		3505	0.01273676		4035	-0.00449356
325.19	0.08682951		855.19	0.01825648		1385.18	0.02191992		1915.19	-0.00343067		2445.18	0.00438791		2975.21	0.01058215		3505.2	0.01369199		4035.2	-0.00519743
325.39	0.08676838		855.39	0.01795595		1385.38	0.0224599		1915.39	-0.00412299		2445.38	0.00426683		2975.41	0.01059656		3505.4	0.01431852		4035.4	-0.00501222
325.59	0.08750176		855.59	0.01771476		1385.58	0.02212182		1915.59	-0.00420921		2445.58	0.00465037		2975.61	0.01061613		3505.6	0.01343848		4035.6	-0.00616882
325.79	0.08842369		855.79	0.01777258		1385.78	0.02206287		1915.79	-0.00419314		2445.78	0.00517337		2975.81	0.00960346		3505.8	0.0124897		4035.8	-0.00600335
325.99	0.08874825		855.99	0.01804163		1385.98	0.02254642		1915.99	-0.00360706		2445.98	0.00500835		2976.01	0.00966433		3506	0.01228419		4036	-0.0057267
326.19	0.08952209		856.19	0.01699177		1386.18	0.02203389		1916.19	-0.00415602		2446.18	0.00533883		2976.21	0.00894892		3506.2	0.01149341		4036.2	-0.00667658
326.39	0.08951706		856.39	0.01666629		1386.38	0.02048327		1916.39	-0.00432942		2446.38	0.00593907		2976.41	0.00806199		3506.4	0.0107417		4036.4	-0.0066929
326.59	0.08968155		856.59	0.01616747		1386.58	0.02104553		1916.59	-0.00409241		2446.58	0.0065164		2976.61	0.00763751		3506.6	0.01066796		4036.6	-0.0069421
326.79	0.08998056		856.79	0.01610007		1386.78	0.0202246		1916.79	-0.0040132		2446.78	0.00691589		2976.81	0.00782951		3506.8	0.01001804		4036.8	-0.00593614
326.99	0.08883397		856.99	0.01625654		1386.98	0.01992001		1916.99	-0.00302756		2446.98	0.00650976		2977.01	0.00750667		3507	0.01016543		4037	-0.00656041
327.19	0.08931826		857.19	0.01705188		1387.18	0.01913987		1917.19	-0.00218744		2447.18	0.00579197		2977.21	0.0071287		3507.2	0.01005505		4037.2	-0.00743233
327.39	0.08947121		857.39	0.01687428		1387.38	0.0187711		1917.39	-0.00181303		2447.38	0.004375		2977.41	0.00843549		3507.4	0.01012964		4037.4	-0.00805175
327.59	0.0896659		857.59	0.01671044		1387.58	0.01911367		1917.59	-0.0022965		2447.58	0.00434546		2977.61	0.00815258		3507.6	0.01006937		4037.6	-0.00844879
327.79	0.08872721		857.79	0.01729425		1387.78	0.01781339		1917.79	-0.00217216		2447.78	0.00355883		2977.81	0.00815418		3507.8	0.00912465		4037.8	-0.00858148
327.99	0.08999986		857.99	0.01722862		1387.98	0.01770536		1917.99	-0.00267563		2447.98	0.00341764		2978.01	0.0082106		3508	0.00929589		4038	-0.00925134
328.19	0.08962822		858.19	0.01755129		1388.18	0.01733538		1918.19	-0.00365924		2448.18	0.00279157		2978.21	0.0083633		3508.2	0.0094335		4038.2	-0.01027738
328.39	0.08947333		858.39	0.01781583		1388.38	0.017553		1918.39	-0.00395009		2448.38	0.00341233		2978.41	0.009189		3508.4	0.00974978		4038.4	-0.00922412
328.59	0.09009252		858.59	0.01766791		1388.58	0.01712519		1918.59	-0.00447117		2448.58	0.00305131		2978.61	0.00905317		3508.6	0.00994463		4038.6	-0.0099947
328.79	0.08954694		858.79	0.01817806		1388.78	0.01753315		1918.79	-0.00558233		2448.78	0.00320327		2978.81	0.0092058		3508.8	0.01087581		4038.8	-0.01054493
328.99	0.08981196		858.99	0.01960504		1388.98	0.01778544		1918.99	-0.00543107		2448.98	0.00318913		2979.01	0.00947508		3509	0.01043834		4039	-0.01072499
329.19	0.09037374		859.19	0.02070573		1389.18	0.01726965		1919.19	-0.00509786		2449.18	0.00290574		2979.21	0.01012612		3509.2	0.01134627		4039.2	-0.01092859
329.39	0.09047185		859.39	0.02074219		1389.38	0.01764119		1919.39	-0.00445674		2449.38	0.00204525		2979.41	0.01041008		3509.4	0.0109551		4039.4	-0.01009174
329.59	0.09093334		859.59	0.01988001		1389.58	0.01676267		1919.59	-0.00404586		2449.58	0.00181517		2979.61	0.01033569		3509.6	0.01080229		4039.6	-0.00937298
329.79	0.09146263		859.79	0.01953957		1389.78	0.01677751		1919.79	-0.00318953		2449.78	0.00166189		2979.81	0.00989871		3509.8	0.01149826		4039.8	-0.0085189
329.99	0.09206319		859.99	0.01907004		1389.98	0.01748071		1919.99	-0.00314595		2449.98	0.00289459		2980.01	0.01067902		3510	0.01289491		4040	-0.00739273
330.19	0.09245068		860.19	0.01861986		1390.18	0.01734462		1920.19	-0.00350858		2450.18	0.00318718		2980.21	0.01065235		3510.2	0.01309416		4040.2	-0.0074991
330.39	0.09197162		860.39	0.01878284		1390.38	0.01743578		1920.39	-0.0028028		2450.38	0.00333589		2980.41	0.0100261		3510.4	0.0128232		4040.4	-0.00622814
330.59	0.09152436		860.59	0.01844487		1390.58	0.0182373		1920.59	-0.00305976		2450.58	0.00360502		2980.61	0.01028397		3510.6	0.01330102		4040.6	-0.00504807
330.79	0.09111824		860.79	0.01858624		1390.78	0.01871853		1920.79	-0.00333009		2450.78	0.00403981		2980.81	0.01080791		3510.8	0.01314866		4040.8	-0.00378189
330.99	0.09104192		860.99	0.01850252		1390.98	0.01912573		1920.99	-0.00290444		2450.98	0.00443291		2981.01	0.01083541		3511	0.01356549		4041	-0.00340884
331.19	0.09131069		861.19	0.01754069		1391.18	0.01969637		1921.19	-0.00270478		2451.18	0.00405654		2981.21	0.01106871		3511.2	0.01346563		4041.2	-0.00339052
331.39	0.09111629		861.39	0.01722488		1391.38	0.02023863		1921.39	-0.00321677		2451.38	0.00377071		2981.41	0.01125701		3511.4	0.0136818		4041.4	-0.00421017
331.59	0.09173197		861.59	0.01707271		1391.58	0.0212406		1921.59	-0.00378296		2451.58	0.00494268		2981.61	0.01080749		3511.6	0.01267818		4041.6	-0.00443445
331.79	0.09060407		861.79	0.0171984		1391.78	0.02171076		1921.79	-0.00427216		2451.78	0.00434278		2981.81	0.01051115		3511.8	0.01196479		4041.8	-0.00414072
331.99	0.09151125		861.99	0.01794244		1391.98	0.02255659		1921.99	-0.00541185		2451.98	0.00415164		2982.01	0.01106257		3512	0.01122114		4042	-0.00467834
332.19	0.09151924		862.19	0.01808285		1392.18	0.02270062		1922.19	-0.00608372		2452.18	0.00373708		2982.21	0.01115201		3512.2	0.01078531		4042.2	-0.00553406
332.39	0.0920102		862.39	0.0184904		1392.38	0.02301931		1922.39	-0.00576727		2452.38	0.00399902		2982.41	0.01179217		3512.4	0.01004486		4042.4	-0.00603258
332.59	0.09221441		862.59	0.01916344		1392.58	0.02242706		1922.59	-0.00595057		2452.58	0.00290013		2982.61	0.01077478		3512.6	0.00989878		4042.6	-0.00671372
332.79	0.09143151		862.79	0.01974338		1392.78	0.02235804		1922.79	-0.00546614		2452.78	0.00400234		2982.81	0.01034101		3512.8	0.00859473		4042.8	-0.00698874
332.99	0.09200077		862.99	0.02008547		1392.98	0.02150467		1922.99	-0.00469196		2452.98	0.00352801		2983.01	0.01035449		3513	0.00767165		4043	-0.00749187
333.19	0.09350761		863.19	0.01947943		1393.18	0.0200921		1923.19	-0.00365919		2453.18	0.00275535		2983.21	0.00926766		3513.2	0.00720921		4043.2	-0.00819087
333.39	0.09334447		863.39	0.01875492		1393.38	0.01920231		1923.39	-0.00343054		2453.38	0.00245968		2983.41	0.00800279		3513.4	0.00634777		4043.4	-0.00792635
333.59	0.09356369		863.59	0.01769633		1393.58	0.01878736		1923.59	-0.00324624		2453.58	0.00264225		2983.61	0.00692675		3513.6	0.00657073		4043.6	-0.0078203
333.79	0.09421479		863.79	0.01760535		1393.78	0.01819281		1923.79	-0.00304689		2453.78	0.0034077		2983.81	0.00677947		3513.8	0.00676232		4043.8	-0.00810256
333.99	0.09440131		863.99	0.01785384		1393.98	0.01851898		1923.99	-0.00376432		2453.98	0.00496928		2984.01	0.00632377		3514	0.00689782		4044	-0.00781666
334.19	0.09410433		864.19	0.01744999		1394.18	0.01758373		1924.19	-0.00364313		2454.18	0.00452707		2984.21	0.00695528		3514.2	0.00675315		4044.2	-0.00768679
334.39	0.0936171		864.39	0.01623125		1394.38	0.0173339		1924.39	-0.00449724		2454.38	0.00533673		2984.41	0.00702837		3514.4	0.00675261		4044.4	-0.00796606
334.59	0.09377619		864.59	0.01573001		1394.58	0.01817481		1924.59	-0.00479115		2454.58	0.00658943		2984.61	0.00810501		3514.6	0.00787178		4044.6	-0.00805084
334.79	0.09374817		864.79	0.01495138		1394.78	0.01889604		1924.79	-0.00467695		2454.78	0.00727714		2984.81	0.00830035		3514.8	0.00769979		4044.8	-0.00766025
334.99	0.09346071		864.99	0.01449031		1394.98	0.0192498		1924.99	-0.00539922		2454.98	0.00750182		2985.01	0.00800974		3515	0.0080306		4045	-0.00763469
335.19	0.09401322		865.19	0.01351694		1395.18	0.02038164		1925.19	-0.00555049		2455.18	0.00674121		2985.21	0.00852605		3515.2	0.00832104		4045.2	-0.00680767
335.39	0.09414973		865.39	0.01406156		1395.38	0.02077061		1925.39	-0.00631254		2455.38	0.00713364		2985.41	0.00970185		3515.4	0.00874359		4045.4	-0.007002
335.59	0.09423616		865.59	0.01396862		1395.58	0.02128519		1925.59	-0.0064865		2455.58	0.00778646		2985.61	0.01022729		3515.6	0.00847359		4045.6	-0.0067077
335.79	0.09302237		865.79	0.01375935		1395.78	0.02240868		1925.79	-0.00647181		2455.78	0.00675341		2985.81	0.01036191		3515.8	0.00839634		4045.8	-0.00549641
335.99	0.09253041		865.99	0.01432204		1395.98	0.0224882		1925.99	-0.00617411		2455.98	0.00612295		2986.01	0.01122792		3516	0.0089539		4046	-0.0064953
336.19	0.09267457		866.19	0.01450824		1396.18	0.02251205		1926.19	-0.00455739		2456.18	0.00614068		2986.21	0.01119752		3516.2	0.00974592		4046.2	-0.00614059
336.39	0.09204263		866.39	0.01499826		1396.38	0.02202179		1926.39	-0.00411716		2456.38	0.00579829		2986.41	0.01104864		3516.4	0.00952194		4046.4	-0.00590665
336.59	0.09254504		866.59	0.01579391		1396.58	0.02147832		1926.59	-0.00366434		2456.58	0.00618213		2986.61	0.00990291		3516.6	0.00971013		4046.6	-0.00599082
336.79	0.09279773		866.79	0.0149533		1396.78	0.02139452		1926.79	-0.00343533		2456.78	0.00646858		2986.81	0.00973374		3516.8	0.00843255		4046.8	-0.00587345
336.99	0.09354754		866.99	0.01520155		1396.98	0.02157727		1926.99	-0.00269752		2456.98	0.00583412		2987.01	0.0092464		3517	0.00924902		4047	-0.00626027
337.19	0.09421949		867.19	0.0144352		1397.18	0.02086225		1927.19	-0.00208425		2457.18	0.00502451		2987.21	0.00873692		3517.2	0.00855008		4047.2	-0.00638533
337.39	0.09384742		867.39	0.01531871		1397.38	0.02052767		1927.39	-0.0026347		2457.38	0.00517602		2987.41	0.00819196		3517.4	0.00820573		4047.4	-0.00633314
337.59	0.09414005		867.59	0.01545188		1397.58	0.02010586		1927.59	-0.00336209		2457.58	0.00442908		2987.61	0.00752772		3517.6	0.00736603		4047.6	-0.00705781
337.79	0.09462136		867.79	0.01653888		1397.78	0.0199091		1927.79	-0.00376656		2457.78	0.00472864		2987.81	0.00709095		3517.8	0.00795056		4047.8	-0.00766727
337.99	0.0956063		867.99	0.01692333		1397.98	0.01938227		1927.99	-0.00444725		2457.98	0.0049704		2988.01	0.00695344		3518	0.00806388		4048	-0.00761808
338.19	0.09645609		868.19	0.01618794		1398.18	0.01870408		1928.19	-0.00470512		2458.18	0.00431455		2988.21	0.00822019		3518.2	0.00911201		4048.2	-0.00701992
338.39	0.09699794		868.39	0.01640011		1398.38	0.01853285		1928.39	-0.00543413		2458.38	0.00536299		2988.41	0.00778455		3518.4	0.0095103		4048.4	-0.00734905
338.59	0.09697091		868.59	0.01677837		1398.58	0.01918417		1928.59	-0.00519323		2458.58	0.0053091		2988.61	0.00877564		3518.6	0.01017151		4048.6	-0.00750544
338.79	0.09767265		868.79	0.01624064		1398.78	0.01986514		1928.79	-0.00564792		2458.78	0.00462945		2988.81	0.00799277		3518.8	0.00997697		4048.8	-0.00665044
338.99	0.09790889		868.99	0.01623515		1398.98	0.01996846		1928.99	-0.00641125		2458.98	0.00466598		2989.01	0.00778608		3519	0.01026098		4049	-0.00670359
339.19	0.09848413		869.19	0.01547396		1399.18	0.02015967		1929.19	-0.0058718		2459.18	0.00432812		2989.21	0.00781289		3519.2	0.01113956		4049.2	-0.00596583
339.39	0.09693072		869.39	0.01588389		1399.38	0.02015852		1929.39	-0.00624209		2459.38	0.00500617		2989.41	0.00879271		3519.4	0.0114421		4049.4	-0.00672529
339.59	0.0962385		869.59	0.01623488		1399.58	0.02048958		1929.59	-0.00602617		2459.58	0.00457922		2989.61	0.0086864		3519.6	0.01112537		4049.6	-0.00722618
339.79	0.09416757		869.79	0.01596999		1399.78	0.02033499		1929.79	-0.00623668		2459.78	0.00449154		2989.81	0.00829624		3519.8	0.01155756		4049.8	-0.00704592
339.99	0.09336259		869.99	0.01701267		1399.98	0.01928742		1929.99	-0.0061839		2459.98	0.00441091		2990.01	0.00832283		3520	0.01157179		4050	-0.0080311
340.19	0.09374322		870.19	0.01713862		1400.18	0.01913078		1930.19	-0.0055232		2460.18	0.00442308		2990.21	0.0077771		3520.2	0.01199349		4050.2	-0.00862788
340.39	0.09348542		870.39	0.01760487		1400.38	0.01884145		1930.39	-0.00618475		2460.38	0.00467014		2990.41	0.00743054		3520.4	0.01191066		4050.4	-0.00905487
340.59	0.09424525		870.59	0.01808871		1400.58	0.01929884		1930.59	-0.00567249		2460.58	0.00455586		2990.61	0.00754102		3520.6	0.01174819		4050.6	-0.00928423
340.79	0.09378585		870.79	0.01717478		1400.78	0.01992252		1930.79	-0.00590947		2460.78	0.0041314		2990.81	0.00814161		3520.8	0.01167519		4050.8	-0.00883432
340.99	0.09318052		870.99	0.01748137		1400.98	0.01994282		1930.99	-0.00565283		2460.98	0.00415496		2991.01	0.0079318		3521	0.01122365		4051	-0.00880371
341.19	0.0929336		871.19	0.01755281		1401.18	0.01969094		1931.19	-0.00650715		2461.18	0.00342877		2991.21	0.00853466		3521.2	0.01027357		4051.2	-0.00889133
341.39	0.09243389		871.39	0.01797238		1401.38	0.01969885		1931.39	-0.00677091		2461.38	0.00356731		2991.41	0.00873374		3521.4	0.00975695		4051.4	-0.00871872
341.59	0.09269125		871.59	0.0178846		1401.58	0.01939754		1931.59	-0.00737476		2461.58	0.00370079		2991.61	0.00895038		3521.6	0.00921474		4051.6	-0.00903377
341.79	0.09330703		871.79	0.01807216		1401.78	0.01994833		1931.79	-0.00726297		2461.78	0.00428931		2991.81	0.00858665		3521.8	0.00994057		4051.8	-0.00873737
341.99	0.09420021		871.99	0.01751404		1401.98	0.01927114		1931.99	-0.00721984		2461.98	0.00449268		2992.01	0.00955386		3522	0.009215		4052	-0.00792375
342.19	0.09441741		872.19	0.01759167		1402.18	0.02000959		1932.19	-0.00675362		2462.18	0.00427462		2992.21	0.01024253		3522.2	0.00855298		4052.2	-0.0070339
342.39	0.09459358		872.39	0.01710128		1402.38	0.02035103		1932.39	-0.00662878		2462.38	0.00490425		2992.41	0.01026761		3522.4	0.00837537		4052.4	-0.00737791
342.59	0.09445041		872.59	0.01617852		1402.58	0.021159		1932.59	-0.0064841		2462.58	0.00441302		2992.61	0.01122455		3522.6	0.00813941		4052.6	-0.00768365
342.79	0.09570917		872.79	0.01526424		1402.78	0.02185898		1932.79	-0.00575674		2462.78	0.00460555		2992.81	0.01116468		3522.8	0.00806093		4052.8	-0.00691918
342.99	0.09560529		872.99	0.01504883		1402.98	0.02172447		1932.99	-0.00557883		2462.98	0.00523897		2993.01	0.01191833		3523	0.00860624		4053	-0.00718774
343.19	0.095935		873.19	0.01449536		1403.18	0.02195145		1933.19	-0.0049019		2463.18	0.00546246		2993.21	0.01151254		3523.2	0.00894946		4053.2	-0.00648055
343.39	0.09550971		873.39	0.01530822		1403.38	0.02158255		1933.39	-0.00571437		2463.38	0.0057335		2993.41	0.01222746		3523.4	0.00954389		4053.4	-0.0071222
343.59	0.09582469		873.59	0.01566581		1403.58	0.02161987		1933.59	-0.00586651		2463.58	0.00596785		2993.61	0.01140758		3523.6	0.00992676		4053.6	-0.00667982
343.79	0.09581819		873.79	0.01672865		1403.78	0.02159924		1933.79	-0.0062552		2463.78	0.00642717		2993.81	0.01079323		3523.8	0.01078892		4053.8	-0.00603794
343.99	0.09647877		873.99	0.01670503		1403.98	0.02093486		1933.99	-0.00557441		2463.98	0.00663711		2994.01	0.01108179		3524	0.01184461		4054	-0.00575315
344.19	0.09713727		874.19	0.01646736		1404.18	0.02117747		1934.19	-0.00511055		2464.18	0.0070911		2994.21	0.01048899		3524.2	0.01273879		4054.2	-0.0060476
344.39	0.09709772		874.39	0.01629618		1404.38	0.0210797		1934.39	-0.00500954		2464.38	0.00698104		2994.41	0.01076584		3524.4	0.01247046		4054.4	-0.00489461
344.59	0.09703558		874.59	0.01566098		1404.58	0.02040977		1934.59	-0.00481953		2464.58	0.0076272		2994.61	0.01084669		3524.6	0.01310001		4054.6	-0.00465692
344.79	0.09634442		874.79	0.01548245		1404.78	0.02007471		1934.79	-0.00610715		2464.78	0.00787476		2994.81	0.0110259		3524.8	0.01286836		4054.8	-0.00476159
344.99	0.09625658		874.99	0.01567098		1404.98	0.02006105		1934.99	-0.00688149		2464.98	0.00796812		2995.01	0.01076455		3525	0.0126378		4055	-0.00412614
345.19	0.0965259		875.19	0.01661191		1405.18	0.02034776		1935.19	-0.00692792		2465.18	0.00802558		2995.21	0.01106654		3525.2	0.01202069		4055.2	-0.00395536
345.39	0.09661176		875.39	0.01618112		1405.38	0.0201985		1935.39	-0.00616941		2465.38	0.00757427		2995.41	0.0108125		3525.4	0.01161542		4055.4	-0.00391458
345.59	0.09711912		875.59	0.01610765		1405.58	0.02066107		1935.59	-0.00597501		2465.58	0.00677515		2995.61	0.01020293		3525.6	0.01147259		4055.6	-0.00407893
345.79	0.09695048		875.79	0.0166431		1405.78	0.02147162		1935.79	-0.00593106		2465.78	0.00540955		2995.81	0.00975952		3525.8	0.0113257		4055.8	-0.00500899
345.99	0.09724322		875.99	0.01731449		1405.98	0.02149211		1935.99	-0.00631898		2465.98	0.00497366		2996.01	0.01052855		3526	0.0098448		4056	-0.0050051
346.19	0.09714384		876.19	0.01756566		1406.18	0.02156387		1936.19	-0.0064588		2466.18	0.00472547		2996.21	0.01066818		3526.2	0.00972341		4056.2	-0.00559945
346.39	0.09712921		876.39	0.01639772		1406.38	0.0214885		1936.39	-0.00634732		2466.38	0.00523923		2996.41	0.01039442		3526.4	0.01054397		4056.4	-0.00636617
346.59	0.09702972		876.59	0.01593277		1406.58	0.02161947		1936.59	-0.00710036		2466.58	0.00432197		2996.61	0.01044892		3526.6	0.01001432		4056.6	-0.00685313
346.79	0.09765027		876.79	0.01653812		1406.78	0.02137747		1936.79	-0.00642155		2466.78	0.00396207		2996.81	0.01071742		3526.8	0.01018994		4056.8	-0.00726871
346.99	0.09841932		876.99	0.01682957		1406.98	0.0209747		1936.99	-0.00697056		2466.98	0.00351604		2997.01	0.01111254		3527	0.01086323		4057	-0.00738067
347.19	0.09856873		877.19	0.01748093		1407.18	0.02008626		1937.19	-0.00596066		2467.18	0.00357803		2997.21	0.01091835		3527.2	0.01137191		4057.2	-0.00766401
347.39	0.09795245		877.39	0.01808011		1407.38	0.01951081		1937.39	-0.00705346		2467.38	0.00299058		2997.41	0.01123434		3527.4	0.01151386		4057.4	-0.00813726
347.59	0.09778352		877.59	0.01795132		1407.58	0.0201179		1937.59	-0.00656666		2467.58	0.00285174		2997.61	0.01112846		3527.6	0.01163357		4057.6	-0.00744771
347.79	0.09764229		877.79	0.01848026		1407.78	0.02002278		1937.79	-0.00590346		2467.78	0.00355071		2997.81	0.01150071		3527.8	0.01212452		4057.8	-0.00739724
347.99	0.09742594		877.99	0.01818645		1407.98	0.01938721		1937.99	-0.00506416		2467.98	0.00395706		2998.01	0.01238395		3528	0.01172527		4058	-0.00827484
348.19	0.0974063		878.19	0.0179459		1408.18	0.01904644		1938.19	-0.00513573		2468.18	0.00493275		2998.21	0.01201838		3528.2	0.01091257		4058.2	-0.00840028
348.39	0.09699886		878.39	0.01722907		1408.38	0.01906378		1938.39	-0.00547072		2468.38	0.00498162		2998.41	0.01276672		3528.4	0.01049418		4058.4	-0.00813952
348.59	0.09735024		878.59	0.01740546		1408.58	0.01834534		1938.59	-0.00582325		2468.58	0.00604529		2998.61	0.01276473		3528.6	0.01053496		4058.6	-0.00841451
348.79	0.09824472		878.79	0.01780284		1408.78	0.01879153		1938.79	-0.00571592		2468.78	0.00593507		2998.81	0.01286929		3528.8	0.00953834		4058.8	-0.00862439
348.99	0.09918199		878.99	0.01822183		1408.98	0.01919136		1938.99	-0.00522175		2468.98	0.00549026		2999.01	0.01257193		3529	0.00910889		4059	-0.00760774
349.19	0.10021939		879.19	0.01946963		1409.18	0.01995001		1939.19	-0.00391949		2469.18	0.00559728		2999.21	0.01251313		3529.2	0.00879177		4059.2	-0.00763373
349.39	0.10106421		879.39	0.01869268		1409.38	0.02019776		1939.39	-0.00327165		2469.38	0.00508366		2999.41	0.01103513		3529.4	0.00933373		4059.4	-0.00731884
349.59	0.10203		879.59	0.0192786		1409.58	0.02091026		1939.59	-0.00307627		2469.58	0.0051573		2999.61	0.01090849		3529.6	0.01039443		4059.6	-0.00807712
349.79	0.10276677		879.79	0.02023344		1409.78	0.02054376		1939.79	-0.00370456		2469.78	0.00571449		2999.81	0.01078969		3529.8	0.01055939		4059.8	-0.00840088
349.99	0.1029401		879.99	0.02073024		1409.98	0.0204103		1939.99	-0.00459521		2469.98	0.00641502		3000.01	0.01038681		3530	0.01016793		4060	-0.0071929
350.19	0.10257008		880.19	0.02043968		1410.18	0.02010793		1940.19	-0.00512146		2470.18	0.00741085		3000.21	0.00999622		3530.2	0.01111759		4060.2	-0.00758753
350.39	0.10336587		880.39	0.02014787		1410.38	0.02053875		1940.39	-0.00513638		2470.38	0.00802349		3000.41	0.00935138		3530.4	0.01143261		4060.4	-0.00699738
350.59	0.1029066		880.59	0.02015417		1410.58	0.02100216		1940.59	-0.00579031		2470.58	0.00712125		3000.61	0.00968761		3530.6	0.01089356		4060.6	-0.0072537
350.79	0.10343579		880.79	0.02070447		1410.78	0.0211892		1940.79	-0.00524663		2470.78	0.00676323		3000.81	0.0095015		3530.8	0.01125436		4060.8	-0.00763619
350.99	0.10326158		880.99	0.02052238		1410.98	0.02134988		1940.99	-0.00583893		2470.98	0.00687904		3001.01	0.01002975		3531	0.01199849		4061	-0.00726643
351.19	0.10207287		881.19	0.02084276		1411.18	0.02126079		1941.19	-0.00504011		2471.18	0.0068414		3001.21	0.01039589		3531.2	0.01250355		4061.2	-0.00690993
351.39	0.10104313		881.39	0.02087919		1411.38	0.02092531		1941.39	-0.00521919		2471.38	0.00628824		3001.41	0.01038911		3531.4	0.01219022		4061.4	-0.00627165
351.59	0.10055544		881.59	0.02093884		1411.58	0.02082919		1941.59	-0.00427962		2471.58	0.0062428		3001.61	0.01059282		3531.6	0.01192663		4061.6	-0.00625255
351.79	0.10003653		881.79	0.02133439		1411.78	0.02122991		1941.79	-0.00441246		2471.78	0.00692229		3001.81	0.01136318		3531.8	0.01168126		4061.8	-0.00673942
351.99	0.09963851		881.99	0.0211338		1411.98	0.02119802		1941.99	-0.00546779		2471.98	0.0071769		3002.01	0.01256915		3532	0.01117046		4062	-0.00748247
352.19	0.09921979		882.19	0.02011779		1412.18	0.0211759		1942.19	-0.00582175		2472.18	0.00696765		3002.21	0.01247249		3532.2	0.01063253		4062.2	-0.00726884
352.39	0.09871891		882.39	0.01987501		1412.38	0.02115971		1942.39	-0.00526835		2472.38	0.00657343		3002.41	0.01260638		3532.4	0.0101877		4062.4	-0.00751937
352.59	0.10007098		882.59	0.01953405		1412.58	0.02138082		1942.59	-0.0049021		2472.58	0.00639915		3002.61	0.01259599		3532.6	0.00984443		4062.6	-0.0077382
352.79	0.10047202		882.79	0.01951066		1412.78	0.02150481		1942.79	-0.00424118		2472.78	0.00609946		3002.81	0.01252925		3532.8	0.01016578		4062.8	-0.00835155
352.99	0.10082195		882.99	0.01992795		1412.98	0.02111181		1942.99	-0.0038544		2472.98	0.00548634		3003.01	0.01232423		3533	0.01087324		4063	-0.0078224
353.19	0.10146488		883.19	0.01932726		1413.18	0.02172013		1943.19	-0.00289268		2473.18	0.00598932		3003.21	0.01237346		3533.2	0.01215502		4063.2	-0.00832049
353.39	0.10181604		883.39	0.01841677		1413.38	0.02074219		1943.39	-0.003672		2473.38	0.0059025		3003.41	0.01079358		3533.4	0.01326706		4063.4	-0.00819142
353.59	0.1021337		883.59	0.01850266		1413.58	0.02095653		1943.59	-0.00446503		2473.58	0.00548332		3003.61	0.01074342		3533.6	0.01343816		4063.6	-0.00854877
353.79	0.10327157		883.79	0.01873817		1413.78	0.02072279		1943.79	-0.00523842		2473.78	0.00576228		3003.81	0.01000509		3533.8	0.01313636		4063.8	-0.00866019
353.99	0.10243279		883.99	0.01845731		1413.98	0.02102286		1943.99	-0.00619073		2473.98	0.00585542		3004.01	0.00926313		3534	0.01276262		4064	-0.00868598
354.19	0.10309846		884.19	0.01808424		1414.18	0.02128602		1944.19	-0.00602885		2474.18	0.00644565		3004.21	0.0088036		3534.2	0.0124974		4064.2	-0.00875059
354.39	0.10429643		884.39	0.01818406		1414.38	0.02213485		1944.39	-0.00576936		2474.38	0.00575511		3004.41	0.00810615		3534.4	0.01220973		4064.4	-0.00894542
354.59	0.10415329		884.59	0.01852909		1414.58	0.02286106		1944.59	-0.00547739		2474.58	0.00501158		3004.61	0.00796003		3534.6	0.01195443		4064.6	-0.00911599
354.79	0.10477189		884.79	0.01875489		1414.78	0.0227661		1944.79	-0.00459534		2474.78	0.0044135		3004.81	0.00738633		3534.8	0.0117151		4064.8	-0.00845058
354.99	0.10448636		884.99	0.01958368		1414.98	0.02322063		1944.99	-0.00494398		2474.98	0.00489983		3005.01	0.00771646		3535	0.01199711		4065	-0.00733953
355.19	0.10516863		885.19	0.01986164		1415.18	0.02296107		1945.19	-0.00440392		2475.18	0.00440149		3005.21	0.00720043		3535.2	0.01201112		4065.2	-0.00585851
355.39	0.10436368		885.39	0.01973596		1415.38	0.02216654		1945.39	-0.0036759		2475.38	0.00425939		3005.41	0.00750279		3535.4	0.01112373		4065.4	-0.00560738
355.59	0.10479675		885.59	0.01953277		1415.58	0.02251187		1945.59	-0.00430116		2475.58	0.00454728		3005.61	0.0085047		3535.6	0.0106552		4065.6	-0.00631202
355.79	0.10404783		885.79	0.01934598		1415.78	0.02358568		1945.79	-0.00548215		2475.78	0.00541565		3005.81	0.01047805		3535.8	0.01027961		4065.8	-0.00604146
355.99	0.10379343		885.99	0.01960077		1415.98	0.0240344		1945.99	-0.00578746		2475.98	0.00633551		3006.01	0.01115399		3536	0.01049063		4066	-0.00596391
356.19	0.10357654		886.19	0.0191267		1416.18	0.02344171		1946.19	-0.00482432		2476.18	0.00586257		3006.21	0.01199915		3536.2	0.01028805		4066.2	-0.00560297
356.39	0.10312503		886.39	0.01845642		1416.38	0.02334248		1946.39	-0.00411093		2476.38	0.00626655		3006.41	0.0122936		3536.4	0.01018696		4066.4	-0.00575761
356.59	0.10394438		886.59	0.01808648		1416.58	0.02338622		1946.59	-0.00361303		2476.58	0.00613484		3006.61	0.01291991		3536.6	0.01144369		4066.6	-0.00604818
356.79	0.10353113		886.79	0.0174579		1416.78	0.02302666		1946.79	-0.00351502		2476.78	0.00605064		3006.81	0.01388363		3536.8	0.01225356		4066.8	-0.00658076
356.99	0.1037826		886.99	0.01725487		1416.98	0.02279015		1946.99	-0.00419336		2476.98	0.00588702		3007.01	0.01443108		3537	0.01379323		4067	-0.00628429
357.19	0.10329489		887.19	0.01691866		1417.18	0.02271326		1947.19	-0.00441854		2477.18	0.00584236		3007.21	0.01448783		3537.2	0.01450405		4067.2	-0.00532593
357.39	0.10270418		887.39	0.01755986		1417.38	0.02171319		1947.39	-0.00535755		2477.38	0.00625498		3007.41	0.01360939		3537.4	0.01446833		4067.4	-0.00534174
357.59	0.10269028		887.59	0.01671906		1417.58	0.02211965		1947.59	-0.00535092		2477.58	0.00596769		3007.61	0.01349157		3537.6	0.01431041		4067.6	-0.00607898
357.79	0.10331017		887.79	0.01690298		1417.78	0.02225796		1947.79	-0.00580352		2477.78	0.00609692		3007.81	0.01387147		3537.8	0.01399902		4067.8	-0.00738337
357.99	0.10269815		887.99	0.01633695		1417.98	0.02329244		1947.99	-0.00641325		2477.98	0.00510997		3008.01	0.01332298		3538	0.0133706		4068	-0.00726633
358.19	0.10326416		888.19	0.01684106		1418.18	0.02406569		1948.19	-0.006092		2478.18	0.0044986		3008.21	0.01267584		3538.2	0.01235935		4068.2	-0.00738039
358.39	0.10380913		888.39	0.01705616		1418.38	0.02383392		1948.39	-0.00631989		2478.38	0.00288061		3008.41	0.01224345		3538.4	0.01259213		4068.4	-0.00837121
358.59	0.10295808		888.59	0.01806226		1418.58	0.02399216		1948.59	-0.00546811		2478.58	0.00289581		3008.61	0.01130481		3538.6	0.01243027		4068.6	-0.00780539
358.79	0.10330395		888.79	0.01795936		1418.78	0.02358837		1948.79	-0.00501168		2478.78	0.00320758		3008.81	0.01028336		3538.8	0.01205776		4068.8	-0.00816892
358.99	0.1033097		888.99	0.01895728		1418.98	0.02417329		1948.99	-0.00582242		2478.98	0.00370359		3009.01	0.01020061		3539	0.01216458		4069	-0.00797355
359.19	0.10343655		889.19	0.01870925		1419.18	0.02441471		1949.19	-0.0051212		2479.18	0.00368541		3009.21	0.01031694		3539.2	0.01220009		4069.2	-0.00750269
359.39	0.10263555		889.39	0.01895053		1419.38	0.02463608		1949.39	-0.00484137		2479.38	0.00407038		3009.41	0.01115317		3539.4	0.01131494		4069.4	-0.00817944
359.59	0.1030608		889.59	0.01891059		1419.58	0.02525752		1949.59	-0.00583393		2479.58	0.00517764		3009.61	0.01160709		3539.6	0.01095021		4069.6	-0.00833831
359.79	0.1027775		889.79	0.01981405		1419.78	0.02566238		1949.79	-0.00624363		2479.78	0.00551915		3009.81	0.0122021		3539.8	0.01162932		4069.8	-0.00811327
359.99	0.10299233		889.99	0.01969967		1419.98	0.02558437		1949.99	-0.00560909		2479.98	0.00574559		3010.01	0.01185296		3540	0.01222874		4070	-0.0087739
360.19	0.10291185		890.19	0.01934468		1420.18	0.02398622		1950.19	-0.0050025		2480.18	0.00541915		3010.21	0.0119756		3540.2	0.0125193		4070.2	-0.00922978
360.39	0.10308441		890.39	0.01945312		1420.38	0.02399294		1950.39	-0.004317		2480.38	0.00478965		3010.41	0.01122204		3540.4	0.0125738		4070.4	-0.00908204
360.59	0.10394126		890.59	0.0199768		1420.58	0.02362121		1950.59	-0.00365427		2480.58	0.00499525		3010.61	0.01146767		3540.6	0.01348518		4070.6	-0.00973424
360.79	0.10422552		890.79	0.01948913		1420.78	0.02369595		1950.79	-0.00397821		2480.78	0.0044386		3010.81	0.01163155		3540.8	0.01363706		4070.8	-0.00963731
360.99	0.1037508		890.99	0.02071633		1420.98	0.02278373		1950.99	-0.00392961		2480.98	0.00440629		3011.01	0.01198685		3541	0.01411382		4071	-0.00849161
361.19	0.10359085		891.19	0.02160578		1421.18	0.02242655		1951.19	-0.00358157		2481.18	0.00516041		3011.21	0.01217402		3541.2	0.01392649		4071.2	-0.00838774
361.39	0.10410736		891.39	0.02093898		1421.38	0.02176045		1951.39	-0.00366542		2481.38	0.00591214		3011.41	0.01260731		3541.4	0.01353956		4071.4	-0.00930237
361.59	0.10451534		891.59	0.01983302		1421.58	0.02252446		1951.59	-0.00433984		2481.58	0.0047544		3011.61	0.01299857		3541.6	0.0136614		4071.6	-0.00950919
361.79	0.10469667		891.79	0.02104801		1421.78	0.02290385		1951.79	-0.00527149		2481.78	0.0038871		3011.81	0.01268455		3541.8	0.01232792		4071.8	-0.00958722
361.99	0.10429862		891.99	0.02066357		1421.98	0.02304378		1951.99	-0.00534686		2481.98	0.00366361		3012.01	0.01229107		3542	0.01155722		4072	-0.00914518
362.19	0.10466023		892.19	0.02055547		1422.18	0.02278864		1952.19	-0.00480992		2482.18	0.00422408		3012.21	0.01271965		3542.2	0.01070197		4072.2	-0.00965147
362.39	0.1051705		892.39	0.02057423		1422.38	0.02316186		1952.39	-0.00532915		2482.38	0.00464026		3012.41	0.01287984		3542.4	0.01108019		4072.4	-0.00925162
362.59	0.10429537		892.59	0.02066512		1422.58	0.02316998		1952.59	-0.00531259		2482.58	0.0053276		3012.61	0.01288867		3542.6	0.01071		4072.6	-0.00928373
362.79	0.10483459		892.79	0.02019773		1422.78	0.02340745		1952.79	-0.00546439		2482.78	0.00621897		3012.81	0.01318547		3542.8	0.00992199		4072.8	-0.00914017
362.99	0.10470281		892.99	0.02021075		1422.98	0.02341966		1952.99	-0.006372		2482.98	0.0065123		3013.01	0.01478167		3543	0.00935935		4073	-0.00834914
363.19	0.10466448		893.19	0.01957197		1423.18	0.02352119		1953.19	-0.006315		2483.18	0.00680514		3013.21	0.01393038		3543.2	0.00937911		4073.2	-0.00795134
363.39	0.10466804		893.39	0.01985677		1423.38	0.02242499		1953.39	-0.00666497		2483.38	0.00689255		3013.41	0.01378746		3543.4	0.00780752		4073.4	-0.00781271
363.59	0.10473785		893.59	0.01982843		1423.58	0.02227321		1953.59	-0.00695443		2483.58	0.00646228		3013.61	0.01381318		3543.6	0.00809892		4073.6	-0.00794213
363.79	0.10487082		893.79	0.02005731		1423.78	0.02176413		1953.79	-0.00654963		2483.78	0.0059247		3013.81	0.01394062		3543.8	0.00855716		4073.8	-0.00871498
363.99	0.10469939		893.99	0.0193121		1423.98	0.0223055		1953.99	-0.00666065		2483.98	0.0059386		3014.01	0.01303531		3544	0.00796786		4074	-0.00874987
364.19	0.10514674		894.19	0.01953506		1424.18	0.0220662		1954.19	-0.00670401		2484.18	0.0056938		3014.21	0.0127471		3544.2	0.00795111		4074.2	-0.00830797
364.39	0.1055114		894.39	0.01956532		1424.38	0.02266875		1954.39	-0.0065836		2484.38	0.00490178		3014.41	0.01228434		3544.4	0.00746932		4074.4	-0.00783479
364.59	0.10579113		894.59	0.01996506		1424.58	0.02351461		1954.59	-0.00616518		2484.58	0.00538038		3014.61	0.0117597		3544.6	0.00774211		4074.6	-0.00847493
364.79	0.10571313		894.79	0.0197406		1424.78	0.02340482		1954.79	-0.00600416		2484.78	0.00525627		3014.81	0.01182494		3544.8	0.00817733		4074.8	-0.00856856
364.99	0.10581139		894.99	0.02018608		1424.98	0.02293906		1954.99	-0.00582086		2484.98	0.00536091		3015.01	0.01265385		3545	0.00874553		4075	-0.00883304
365.19	0.106842		895.19	0.01957017		1425.18	0.02362484		1955.19	-0.00544067		2485.18	0.00529839		3015.21	0.01272922		3545.2	0.00905579		4075.2	-0.01001099
365.39	0.10764394		895.39	0.01886987		1425.38	0.02360059		1955.39	-0.00558844		2485.38	0.0051383		3015.41	0.01211306		3545.4	0.00917718		4075.4	-0.01022366
365.59	0.1073184		895.59	0.01901879		1425.58	0.0240539		1955.59	-0.00594689		2485.58	0.00414653		3015.61	0.0120339		3545.6	0.00944455		4075.6	-0.01009863
365.79	0.10781525		895.79	0.01936095		1425.78	0.02393092		1955.79	-0.00513864		2485.78	0.004448		3015.81	0.01192803		3545.8	0.00864205		4075.8	-0.0099084
365.99	0.10858354		895.99	0.01909406		1425.98	0.02418043		1955.99	-0.0046535		2485.98	0.0051878		3016.01	0.01256516		3546	0.00908166		4076	-0.0098259
366.19	0.10919332		896.19	0.01899859		1426.18	0.02413039		1956.19	-0.00435887		2486.18	0.00500699		3016.21	0.0124657		3546.2	0.00909995		4076.2	-0.00952411
366.39	0.10925118		896.39	0.01946385		1426.38	0.02444893		1956.39	-0.00504999		2486.38	0.00571442		3016.41	0.01278618		3546.4	0.01047533		4076.4	-0.0084581
366.59	0.10852905		896.59	0.01888043		1426.58	0.02360603		1956.59	-0.00507903		2486.58	0.00603722		3016.61	0.01317792		3546.6	0.01079578		4076.6	-0.00889124
366.79	0.1088642		896.79	0.01921053		1426.78	0.02366819		1956.79	-0.00455838		2486.78	0.00649401		3016.81	0.01326847		3546.8	0.01069867		4076.8	-0.00799558
366.99	0.10794899		896.99	0.01942121		1426.98	0.02312674		1956.99	-0.00523783		2486.98	0.00648565		3017.01	0.01313677		3547	0.01099258		4077	-0.00884991
367.19	0.10759961		897.19	0.01958645		1427.18	0.02248223		1957.19	-0.00505829		2487.18	0.00612988		3017.21	0.01107177		3547.2	0.01102856		4077.2	-0.0090688
367.39	0.10701303		897.39	0.02075964		1427.38	0.02169505		1957.39	-0.00492049		2487.38	0.0055173		3017.41	0.01150809		3547.4	0.01088491		4077.4	-0.00903844
367.59	0.1068618		897.59	0.02044459		1427.58	0.0210482		1957.59	-0.00484995		2487.58	0.00559931		3017.61	0.01046299		3547.6	0.01113347		4077.6	-0.00939162
367.79	0.10660354		897.79	0.02015553		1427.78	0.02071666		1957.79	-0.00490976		2487.78	0.00551162		3017.81	0.0099845		3547.8	0.01095792		4077.8	-0.00897927
367.99	0.10670747		897.99	0.02052219		1427.98	0.02068972		1957.99	-0.00524256		2487.98	0.00526183		3018.01	0.00966577		3548	0.01043473		4078	-0.00846996
368.19	0.10682786		898.19	0.02117531		1428.18	0.02066937		1958.19	-0.00516704		2488.18	0.00451226		3018.21	0.00968213		3548.2	0.01016517		4078.2	-0.00834819
368.39	0.10595443		898.39	0.02119008		1428.38	0.02071745		1958.39	-0.00485755		2488.38	0.00443227		3018.41	0.00895559		3548.4	0.01016839		4078.4	-0.00830093
368.59	0.10532429		898.59	0.02124396		1428.58	0.02071492		1958.59	-0.00470375		2488.58	0.00424916		3018.61	0.0090294		3548.6	0.00971137		4078.6	-0.00849191
368.79	0.10505023		898.79	0.02072383		1428.78	0.02088988		1958.79	-0.00471072		2488.78	0.00433215		3018.81	0.00914356		3548.8	0.00967443		4078.8	-0.00864548
368.99	0.1051429		898.99	0.02019844		1428.98	0.02079197		1958.99	-0.00471374		2488.98	0.00334508		3019.01	0.00963674		3549	0.01003549		4079	-0.00877511
369.19	0.10525661		899.19	0.02034141		1429.18	0.02168972		1959.19	-0.00487833		2489.18	0.00360018		3019.21	0.00916311		3549.2	0.0099153		4079.2	-0.00967434
369.39	0.10447218		899.39	0.02078714		1429.38	0.0215265		1959.39	-0.00546552		2489.38	0.00357898		3019.41	0.00875887		3549.4	0.01023817		4079.4	-0.00959349
369.59	0.10453041		899.59	0.02166788		1429.58	0.02160462		1959.59	-0.00562013		2489.58	0.00248924		3019.61	0.00893058		3549.6	0.00929535		4079.6	-0.00914394
369.79	0.10506049		899.79	0.02179163		1429.78	0.02131136		1959.79	-0.00533968		2489.78	0.00370688		3019.81	0.00877084		3549.8	0.00868871		4079.8	-0.00887427
369.99	0.10509436		899.99	0.02232761		1429.98	0.02087982		1959.99	-0.00567677		2489.98	0.00458423		3020.01	0.00914415		3550	0.00927974		4080	-0.00886672
370.19	0.10515064		900.19	0.02151779		1430.18	0.02003689		1960.19	-0.00611138		2490.18	0.0048959		3020.21	0.00866819		3550.2	0.00975672		4080.2	-0.00845758
370.39	0.10617694		900.39	0.0209192		1430.38	0.01964284		1960.39	-0.00609087		2490.38	0.00637573		3020.41	0.00991925		3550.4	0.01069671		4080.4	-0.00807909
370.59	0.10597447		900.59	0.02030714		1430.58	0.01983465		1960.59	-0.00619441		2490.58	0.00645629		3020.61	0.00993396		3550.6	0.01118527		4080.6	-0.00911337
370.79	0.1066367		900.79	0.02006038		1430.78	0.01944227		1960.79	-0.00617383		2490.78	0.00700724		3020.81	0.00908145		3550.8	0.0109095		4080.8	-0.0095084
370.99	0.10647554		900.99	0.0199162		1430.98	0.01912882		1960.99	-0.00676264		2490.98	0.00712535		3021.01	0.00858221		3551	0.01023651		4081	-0.01013154
371.19	0.10793404		901.19	0.01945386		1431.18	0.01837068		1961.19	-0.00657957		2491.18	0.00722565		3021.21	0.00912388		3551.2	0.00992189		4081.2	-0.00993184
371.39	0.10884682		901.39	0.01965516		1431.38	0.017735		1961.39	-0.00622357		2491.38	0.00642338		3021.41	0.00990546		3551.4	0.01044324		4081.4	-0.01037878
371.59	0.11032673		901.59	0.01952953		1431.58	0.017361		1961.59	-0.00578333		2491.58	0.0069714		3021.61	0.0099645		3551.6	0.00977706		4081.6	-0.01015477
371.79	0.11045892		901.79	0.01930318		1431.78	0.01905807		1961.79	-0.00578641		2491.78	0.00627149		3021.81	0.01135666		3551.8	0.00981684		4081.8	-0.00964881
371.99	0.11170876		901.99	0.01852657		1431.98	0.01915775		1961.99	-0.00560661		2491.98	0.0060888		3022.01	0.01196964		3552	0.00900837		4082	-0.00954139
372.19	0.11187551		902.19	0.01811621		1432.18	0.01959596		1962.19	-0.00560747		2492.18	0.00546854		3022.21	0.01148401		3552.2	0.0094419		4082.2	-0.00920278
372.39	0.11215262		902.39	0.0173326		1432.38	0.01951068		1962.39	-0.00545598		2492.38	0.0048684		3022.41	0.01140669		3552.4	0.01026622		4082.4	-0.00917909
372.59	0.1123247		902.59	0.01735032		1432.58	0.01964716		1962.59	-0.00579325		2492.58	0.00468392		3022.61	0.01182415		3552.6	0.01078505		4082.6	-0.00901887
372.79	0.11230604		902.79	0.01768275		1432.78	0.01962411		1962.79	-0.00514206		2492.78	0.00489524		3022.81	0.01179974		3552.8	0.01192542		4082.8	-0.00866237
372.99	0.11175522		902.99	0.01835648		1432.98	0.02001754		1962.99	-0.00515752		2492.98	0.00466009		3023.01	0.01153547		3553	0.0132077		4083	-0.00925942
373.19	0.11185384		903.19	0.01873678		1433.18	0.02127503		1963.19	-0.00482358		2493.18	0.00415065		3023.21	0.01142628		3553.2	0.01319754		4083.2	-0.00967746
373.39	0.11162893		903.39	0.0192302		1433.38	0.02222756		1963.39	-0.00442892		2493.38	0.00285239		3023.41	0.01083548		3553.4	0.01326287		4083.4	-0.00967476
373.59	0.11215372		903.59	0.02009064		1433.58	0.02261574		1963.59	-0.00385104		2493.58	0.00185009		3023.61	0.01066459		3553.6	0.01332513		4083.6	-0.00941896
373.79	0.1114144		903.79	0.02040444		1433.78	0.02220997		1963.79	-0.00367488		2493.78	0.00367		3023.81	0.01020415		3553.8	0.01387238		4083.8	-0.00916706
373.99	0.11130645		903.99	0.02089225		1433.98	0.02279166		1963.99	-0.00250686		2493.98	0.00318719		3024.01	0.0104655		3554	0.01424878		4084	-0.00923378
374.19	0.11117762		904.19	0.02012755		1434.18	0.02295937		1964.19	-0.00190984		2494.18	0.00248209		3024.21	0.01004389		3554.2	0.01432563		4084.2	-0.00905076
374.39	0.11109405		904.39	0.02007351		1434.38	0.02276545		1964.39	-0.00124682		2494.38	0.00287804		3024.41	0.01000685		3554.4	0.01405306		4084.4	-0.00844015
374.59	0.11054717		904.59	0.02031083		1434.58	0.02310291		1964.59	-0.0012954		2494.58	0.00212324		3024.61	0.00937748		3554.6	0.01367574		4084.6	-0.00893622
374.79	0.1113379		904.79	0.02071404		1434.78	0.02293924		1964.79	-0.0018551		2494.78	0.00238677		3024.81	0.0097218		3554.8	0.0126167		4084.8	-0.00844788
374.99	0.11084614		904.99	0.02080227		1434.98	0.02336335		1964.99	-0.00140937		2494.98	0.002667		3025.01	0.01017892		3555	0.01143245		4085	-0.00819555
375.19	0.11117335		905.19	0.01962217		1435.18	0.02390408		1965.19	-0.00124281		2495.18	0.00324435		3025.21	0.01150977		3555.2	0.01087436		4085.2	-0.00781943
375.39	0.11096172		905.39	0.01943214		1435.38	0.02493455		1965.39	-0.00187213		2495.38	0.0031582		3025.41	0.01142305		3555.4	0.01028995		4085.4	-0.00818999
375.59	0.11008801		905.59	0.01926092		1435.58	0.02550297		1965.59	-0.0029032		2495.58	0.00386232		3025.61	0.01177529		3555.6	0.00828804		4085.6	-0.00776384
375.79	0.1093051		905.79	0.01838047		1435.78	0.02510954		1965.79	-0.00385096		2495.78	0.00456067		3025.81	0.01241369		3555.8	0.00730664		4085.8	-0.00749023
375.99	0.11004756		905.99	0.01856292		1435.98	0.02414783		1965.99	-0.0047351		2495.98	0.00471864		3026.01	0.01269911		3556	0.00588212		4086	-0.00689672
376.19	0.11051914		906.19	0.01879989		1436.18	0.02420733		1966.19	-0.00610703		2496.18	0.00480316		3026.21	0.01232611		3556.2	0.00692602		4086.2	-0.00703159
376.39	0.11121219		906.39	0.01852322		1436.38	0.02370859		1966.39	-0.00684364		2496.38	0.00491136		3026.41	0.01272413		3556.4	0.00799789		4086.4	-0.0072968
376.59	0.11112041		906.59	0.01819466		1436.58	0.02336013		1966.59	-0.0075922		2496.58	0.00657181		3026.61	0.01336345		3556.6	0.00846273		4086.6	-0.00718925
376.79	0.11064511		906.79	0.01870481		1436.78	0.02260621		1966.79	-0.00825078		2496.78	0.00735128		3026.81	0.01284551		3556.8	0.00891454		4086.8	-0.00820799
376.99	0.11125477		906.99	0.01874386		1436.98	0.02374179		1966.99	-0.00942139		2496.98	0.00799009		3027.01	0.01217589		3557	0.00909053		4087	-0.0090441
377.19	0.11176673		907.19	0.01844111		1437.18	0.02387668		1967.19	-0.00912315		2497.18	0.00715785		3027.21	0.01278249		3557.2	0.00954873		4087.2	-0.00863675
377.39	0.11177593		907.39	0.01927585		1437.38	0.02421072		1967.39	-0.0089422		2497.38	0.00720806		3027.41	0.01257471		3557.4	0.01020577		4087.4	-0.00858041
377.59	0.11206364		907.59	0.02029473		1437.58	0.02355269		1967.59	-0.0082232		2497.58	0.00728342		3027.61	0.01264613		3557.6	0.01127715		4087.6	-0.00848346
377.79	0.11206031		907.79	0.0209459		1437.78	0.0238291		1967.79	-0.00781973		2497.78	0.00821957		3027.81	0.01216432		3557.8	0.01181136		4087.8	-0.00880473
377.99	0.11258201		907.99	0.02083406		1437.98	0.02444498		1967.99	-0.00673128		2497.98	0.00734106		3028.01	0.0122783		3558	0.01233879		4088	-0.00919592
378.19	0.11264685		908.19	0.02064975		1438.18	0.02415645		1968.19	-0.00651385		2498.18	0.00715286		3028.21	0.01166126		3558.2	0.01271374		4088.2	-0.00919307
378.39	0.11300342		908.39	0.02088155		1438.38	0.02368957		1968.39	-0.00624976		2498.38	0.0072756		3028.41	0.01095668		3558.4	0.01290768		4088.4	-0.00897541
378.59	0.11324597		908.59	0.02101512		1438.58	0.02349769		1968.59	-0.00609185		2498.58	0.00661049		3028.61	0.01090988		3558.6	0.01289847		4088.6	-0.00921698
378.79	0.11324699		908.79	0.02098133		1438.78	0.02336922		1968.79	-0.00579751		2498.78	0.00664246		3028.81	0.01090874		3558.8	0.01244462		4088.8	-0.00888088
378.99	0.11253642		908.99	0.02018644		1438.98	0.02326		1968.99	-0.00489652		2498.98	0.00690205		3029.01	0.01049776		3559	0.01118672		4089	-0.00875678
379.19	0.11242554		909.19	0.01944862		1439.18	0.02297728		1969.19	-0.00496898		2499.18	0.00623028		3029.21	0.01105324		3559.2	0.01003795		4089.2	-0.00849171
379.39	0.11187858		909.39	0.01999673		1439.38	0.02237808		1969.39	-0.0053366		2499.38	0.0053223		3029.41	0.01078195		3559.4	0.00852407		4089.4	-0.00893009
379.59	0.11132617		909.59	0.02022071		1439.58	0.02124746		1969.59	-0.00535113		2499.58	0.00460578		3029.61	0.01108148		3559.6	0.00682897		4089.6	-0.00871559
379.79	0.11164483		909.79	0.02046684		1439.78	0.0205769		1969.79	-0.00542583		2499.78	0.00433826		3029.81	0.01165699		3559.8	0.00583467		4089.8	-0.00822723
379.99	0.11164483		909.99	0.02046684		1439.98	0.0205769		1969.99	-0.00542583		2499.98	0.00433826		3030.01	0.01165699		3560	0.00583467		4090	-0.00822723
380.19	0.11169342		910.19	0.01904604		1440.18	0.0205924		1970.19	-0.00558195		2500.18	0.00459169		3030.21	0.01174704		3560.2	0.00611885		4090.2	-0.00822984
380.39	0.11203265		910.39	0.01760391		1440.38	0.02126339		1970.39	-0.00506366		2500.38	0.00463728		3030.41	0.01161263		3560.4	0.00631854		4090.4	-0.00853099
380.59	0.11202009		910.59	0.01703961		1440.58	0.02141827		1970.59	-0.00493845		2500.58	0.00558008		3030.61	0.01158646		3560.6	0.00664368		4090.6	-0.00830505
380.79	0.11150689		910.79	0.01580364		1440.78	0.02098385		1970.79	-0.00521429		2500.78	0.00599901		3030.81	0.01086736		3560.8	0.00669846		4090.8	-0.00749606
380.99	0.11126937		910.99	0.01522121		1440.98	0.02087444		1970.99	-0.00567205		2500.98	0.00747638		3031.01	0.01034374		3561	0.00652776		4091	-0.00738465
381.19	0.11119209		911.19	0.01497331		1441.18	0.02058268		1971.19	-0.00553031		2501.18	0.00829557		3031.21	0.01011161		3561.2	0.00623126		4091.2	-0.00659631
381.39	0.11123401		911.39	0.01425261		1441.38	0.02128742		1971.39	-0.00572061		2501.38	0.00916054		3031.41	0.01075981		3561.4	0.00581378		4091.4	-0.00608831
381.59	0.1109507		911.59	0.01495995		1441.58	0.0210322		1971.59	-0.00572959		2501.58	0.00973419		3031.61	0.0113208		3561.6	0.00544412		4091.6	-0.00572638
381.79	0.11104922		911.79	0.01519217		1441.78	0.02066126		1971.79	-0.00568861		2501.78	0.01034971		3031.81	0.0115165		3561.8	0.00548828		4091.8	-0.00598957
381.99	0.11099486		911.99	0.0149925		1441.98	0.02041492		1971.99	-0.00546316		2501.98	0.01088945		3032.01	0.01226159		3562	0.00503466		4092	-0.00589428
382.19	0.11093057		912.19	0.0160199		1442.18	0.01995222		1972.19	-0.00585733		2502.18	0.01026756		3032.21	0.0122942		3562.2	0.00506778		4092.2	-0.00639439
382.39	0.11032874		912.39	0.01624173		1442.38	0.01969018		1972.39	-0.00674123		2502.38	0.01027095		3032.41	0.01228039		3562.4	0.00395626		4092.4	-0.00645352
382.59	0.11016245		912.59	0.01641313		1442.58	0.02022192		1972.59	-0.00672784		2502.58	0.00994584		3032.61	0.01204901		3562.6	0.0036644		4092.6	-0.0066932
382.79	0.10998653		912.79	0.0160617		1442.78	0.02053166		1972.79	-0.00687555		2502.78	0.00937951		3032.81	0.01203562		3562.8	0.00356694		4092.8	-0.00755901
382.99	0.10953524		912.99	0.01568946		1442.98	0.02109375		1972.99	-0.0066914		2502.98	0.00879398		3033.01	0.01255765		3563	0.00390935		4093	-0.00821107
383.19	0.10994803		913.19	0.01606391		1443.18	0.02112784		1973.19	-0.00610414		2503.18	0.00903389		3033.21	0.01169572		3563.2	0.00452916		4093.2	-0.00853401
383.39	0.10980702		913.39	0.01627659		1443.38	0.02142901		1973.39	-0.00584661		2503.38	0.00874064		3033.41	0.011733		3563.4	0.00505861		4093.4	-0.00819172
383.59	0.10965744		913.59	0.01634047		1443.58	0.01995072		1973.59	-0.00532056		2503.58	0.00825641		3033.61	0.01258708		3563.6	0.00466332		4093.6	-0.00872333
383.79	0.10926531		913.79	0.01719764		1443.78	0.02011886		1973.79	-0.00549134		2503.78	0.00720367		3033.81	0.01221834		3563.8	0.00537554		4093.8	-0.00916647
383.99	0.10907747		913.99	0.0170205		1443.98	0.01982082		1973.99	-0.00583199		2503.98	0.00603089		3034.01	0.01171798		3564	0.00567616		4094	-0.0089705
384.19	0.10936568		914.19	0.01619397		1444.18	0.02023379		1974.19	-0.00514979		2504.18	0.00568754		3034.21	0.01156654		3564.2	0.00542195		4094.2	-0.00975672
384.39	0.10988837		914.39	0.01621047		1444.38	0.0201681		1974.39	-0.00451531		2504.38	0.00571236		3034.41	0.01059244		3564.4	0.00512355		4094.4	-0.01044138
384.59	0.10986421		914.59	0.01640249		1444.58	0.01892955		1974.59	-0.00467319		2504.58	0.00616084		3034.61	0.00987486		3564.6	0.00570349		4094.6	-0.01012898
384.79	0.11015724		914.79	0.01640368		1444.78	0.01844015		1974.79	-0.00498896		2504.78	0.00604496		3034.81	0.00851557		3564.8	0.00606682		4094.8	-0.00935214
384.99	0.11062752		914.99	0.01642785		1444.98	0.01838767		1974.99	-0.00507815		2504.98	0.00690314		3035.01	0.00800845		3565	0.00638198		4095	-0.00968311
385.19	0.11111521		915.19	0.01664219		1445.18	0.01835978		1975.19	-0.00533458		2505.18	0.00693007		3035.21	0.00861465		3565.2	0.00635512		4095.2	-0.00856362
385.39	0.11087832		915.39	0.01619379		1445.38	0.01868932		1975.39	-0.00584658		2505.38	0.00759627		3035.41	0.00898562		3565.4	0.00642974		4095.4	-0.00901176
385.59	0.11077004		915.59	0.01643224		1445.58	0.01826765		1975.59	-0.00581526		2505.58	0.00863868		3035.61	0.00858454		3565.6	0.00683657		4095.6	-0.00837688
385.79	0.11076407		915.79	0.01539104		1445.78	0.01803007		1975.79	-0.00582642		2505.78	0.00927489		3035.81	0.00850751		3565.8	0.0075956		4095.8	-0.00888421
385.99	0.11132729		915.99	0.01509975		1445.98	0.01895323		1975.99	-0.00636346		2505.98	0.0089919		3036.01	0.00949604		3566	0.00720928		4096	-0.00765992
386.19	0.11149349		916.19	0.01592216		1446.18	0.01849467		1976.19	-0.00833375		2506.18	0.00816557		3036.21	0.00939169		3566.2	0.00723025		4096.2	-0.00730069
386.39	0.11225241		916.39	0.01574743		1446.38	0.01947821		1976.39	-0.00914424		2506.38	0.00771783		3036.41	0.01065429		3566.4	0.00726826		4096.4	-0.00718629
386.59	0.1117921		916.59	0.01569741		1446.58	0.0199932		1976.59	-0.00893846		2506.58	0.00671014		3036.61	0.01113456		3566.6	0.00787758		4096.6	-0.0070821
386.79	0.11231148		916.79	0.0149189		1446.78	0.02112267		1976.79	-0.00955461		2506.78	0.00640237		3036.81	0.0120231		3566.8	0.00708287		4096.8	-0.00696269
386.99	0.11219883		916.99	0.01502349		1446.98	0.02137269		1976.99	-0.00962554		2506.98	0.00707325		3037.01	0.01277388		3567	0.00674901		4097	-0.00626493
387.19	0.11198635		917.19	0.01514246		1447.18	0.02121656		1977.19	-0.00949357		2507.18	0.00693732		3037.21	0.01222701		3567.2	0.00748392		4097.2	-0.00589285
387.39	0.11122172		917.39	0.0147755		1447.38	0.02065671		1977.39	-0.00976202		2507.38	0.00587446		3037.41	0.01321963		3567.4	0.00744196		4097.4	-0.00559731
387.59	0.11072028		917.59	0.01484748		1447.58	0.02028902		1977.59	-0.00927394		2507.58	0.00663822		3037.61	0.0136607		3567.6	0.00659251		4097.6	-0.00624027
387.79	0.11064177		917.79	0.01506008		1447.78	0.02092214		1977.79	-0.00865994		2507.78	0.00589153		3037.81	0.01319933		3567.8	0.00604137		4097.8	-0.00637254
387.99	0.11073873		917.99	0.01386802		1447.98	0.01928732		1977.99	-0.00809941		2507.98	0.00518064		3038.01	0.0129208		3568	0.00466145		4098	-0.00597516
388.19	0.11075021		918.19	0.0132854		1448.18	0.019481		1978.19	-0.00814932		2508.18	0.00545929		3038.21	0.01226824		3568.2	0.0037671		4098.2	-0.00668322
388.39	0.11178788		918.39	0.01379198		1448.38	0.01904985		1978.39	-0.00721026		2508.38	0.00477245		3038.41	0.01157935		3568.4	0.00329512		4098.4	-0.00755056
388.59	0.11222865		918.59	0.01402885		1448.58	0.0184231		1978.59	-0.00699262		2508.58	0.00469404		3038.61	0.01012658		3568.6	0.00356814		4098.6	-0.00790496
388.79	0.11290366		918.79	0.01401446		1448.78	0.0187901		1978.79	-0.00664036		2508.78	0.00442995		3038.81	0.00997277		3568.8	0.00336708		4098.8	-0.0081579
388.99	0.11284859		918.99	0.01371303		1448.98	0.01820086		1978.99	-0.0054054		2508.98	0.00498351		3039.01	0.01026378		3569	0.00319335		4099	-0.00840126
389.19	0.11295808		919.19	0.01376789		1449.18	0.01812458		1979.19	-0.00470005		2509.18	0.00484958		3039.21	0.01039484		3569.2	0.00277671		4099.2	-0.00812098
389.39	0.11260247		919.39	0.01329883		1449.38	0.01843104		1979.39	-0.00450426		2509.38	0.00453511		3039.41	0.00975228		3569.4	0.00294605		4099.4	-0.00813531
389.59	0.1122869		919.59	0.01318731		1449.58	0.01888689		1979.59	-0.00405107		2509.58	0.00413852		3039.61	0.01003384		3569.6	0.00377572		4099.6	-0.00674209
389.79	0.11279218		919.79	0.01326704		1449.78	0.01887243		1979.79	-0.00374904		2509.78	0.00329271		3039.81	0.01029439		3569.8	0.00442022		4099.8	-0.00704868
389.99	0.113602		919.99	0.01398504		1449.98	0.01907427		1979.99	-0.00430834		2509.98	0.00261601		3040.01	0.01097714		3570	0.00469445		4100	-0.0068295
390.19	0.11370649		920.19	0.01509144		1450.18	0.01858355		1980.19	-0.00543911		2510.18	0.00209882		3040.21	0.01101331		3570.2	0.00496653		4100.2	-0.00723576
390.39	0.11349979		920.39	0.01507652		1450.38	0.01879876		1980.39	-0.00576551		2510.38	0.00202327		3040.41	0.0118177		3570.4	0.00545003		4100.4	-0.00820961
390.59	0.11267022		920.59	0.01578787		1450.58	0.01792292		1980.59	-0.00584309		2510.58	0.00175135		3040.61	0.01244161		3570.6	0.00567937		4100.6	-0.00848534
390.79	0.11292124		920.79	0.01546401		1450.78	0.01810223		1980.79	-0.0061577		2510.78	0.00220926		3040.81	0.01273711		3570.8	0.00574707		4100.8	-0.00929789
390.99	0.1121969		920.99	0.01595698		1450.98	0.01719746		1980.99	-0.00651268		2510.98	0.00236726		3041.01	0.01183556		3571	0.00646165		4101	-0.00952645
391.19	0.11116953		921.19	0.01603477		1451.18	0.01665908		1981.19	-0.00653719		2511.18	0.00170109		3041.21	0.01088129		3571.2	0.00686752		4101.2	-0.00910662
391.39	0.11044132		921.39	0.01605804		1451.38	0.01627378		1981.39	-0.00619676		2511.38	0.00096908		3041.41	0.01136642		3571.4	0.00680324		4101.4	-0.00941272
391.59	0.11022805		921.59	0.01629694		1451.58	0.01627513		1981.59	-0.00587564		2511.58	0.00107681		3041.61	0.01158041		3571.6	0.00626719		4101.6	-0.00994045
391.79	0.11093596		921.79	0.01595098		1451.78	0.0158855		1981.79	-0.00599463		2511.78	0.00055639		3041.81	0.01133333		3571.8	0.00568216		4101.8	-0.00949603
391.99	0.11107849		921.99	0.01532433		1451.98	0.01495949		1981.99	-0.00617118		2511.98	0.0006518		3042.01	0.01084262		3572	0.00534846		4102	-0.00909637
392.19	0.11104802		922.19	0.01496089		1452.18	0.01705231		1982.19	-0.00684655		2512.18	0.00204434		3042.21	0.01023809		3572.2	0.00434157		4102.2	-0.00949172
392.39	0.11131319		922.39	0.0155537		1452.38	0.01763425		1982.39	-0.0066572		2512.38	0.00275313		3042.41	0.01030611		3572.4	0.00402275		4102.4	-0.00968033
392.59	0.11120698		922.59	0.01565225		1452.58	0.01760787		1982.59	-0.00638516		2512.58	0.00368899		3042.61	0.00976494		3572.6	0.00341765		4102.6	-0.00979565
392.79	0.11168621		922.79	0.01531897		1452.78	0.01814737		1982.79	-0.00488255		2512.78	0.00398272		3042.81	0.01061483		3572.8	0.00258073		4102.8	-0.00915942
392.99	0.11147286		922.99	0.01557148		1452.98	0.01812701		1982.99	-0.00373293		2512.98	0.00404805		3043.01	0.01017481		3573	0.00265306		4103	-0.00899055
393.19	0.11100815		923.19	0.01531181		1453.18	0.01850213		1983.19	-0.00429215		2513.18	0.00447647		3043.21	0.00933264		3573.2	0.00235404		4103.2	-0.00891964
393.39	0.11071065		923.39	0.01608746		1453.38	0.01898183		1983.39	-0.00473926		2513.38	0.00443038		3043.41	0.00906911		3573.4	0.00213344		4103.4	-0.00829098
393.59	0.11059323		923.59	0.01693145		1453.58	0.01912369		1983.59	-0.0043377		2513.58	0.0049749		3043.61	0.01019165		3573.6	0.00188149		4103.6	-0.00817875
393.79	0.11193503		923.79	0.01739382		1453.78	0.0197929		1983.79	-0.00433937		2513.78	0.00550483		3043.81	0.00970876		3573.8	0.00173929		4103.8	-0.00868479
393.99	0.11222754		923.99	0.0179063		1453.98	0.0197458		1983.99	-0.00468194		2513.98	0.00610905		3044.01	0.01040495		3574	0.00167771		4104	-0.00919879
394.19	0.11214537		924.19	0.01812188		1454.18	0.01932296		1984.19	-0.00452573		2514.18	0.00711258		3044.21	0.01118504		3574.2	0.00094618		4104.2	-0.00894139
394.39	0.11158639		924.39	0.01753385		1454.38	0.01869857		1984.39	-0.00461902		2514.38	0.00764094		3044.41	0.01179973		3574.4	0.00100603		4104.4	-0.00859409
394.59	0.11177638		924.59	0.01817408		1454.58	0.01800559		1984.59	-0.00472745		2514.58	0.00638756		3044.61	0.01168992		3574.6	0.00135091		4104.6	-0.00825432
394.79	0.11156465		924.79	0.01829913		1454.78	0.01743818		1984.79	-0.00486576		2514.78	0.00520659		3044.81	0.01137965		3574.8	0.00106135		4104.8	-0.00806666
394.99	0.11095193		924.99	0.01869245		1454.98	0.01657118		1984.99	-0.00486415		2514.98	0.00456774		3045.01	0.01077078		3575	0.00155455		4105	-0.00804368
395.19	0.11085664		925.19	0.01852187		1455.18	0.01601179		1985.19	-0.00471408		2515.18	0.00368005		3045.21	0.01120407		3575.2	0.00107781		4105.2	-0.00805992
395.39	0.11067743		925.39	0.01797462		1455.38	0.01645638		1985.39	-0.00479317		2515.38	0.00377963		3045.41	0.01191472		3575.4	0.0005962		4105.4	-0.00827447
395.59	0.11122984		925.59	0.01792766		1455.58	0.01661516		1985.59	-0.00521337		2515.58	0.00325141		3045.61	0.01120323		3575.6	-0.00016589		4105.6	-0.00763942
395.79	0.11194178		925.79	0.01787034		1455.78	0.01623473		1985.79	-0.00477872		2515.78	0.00345222		3045.81	0.01107204		3575.8	-0.00010304		4105.8	-0.00686863
395.99	0.11141981		925.99	0.01738204		1455.98	0.01595914		1985.99	-0.00470186		2515.98	0.00376694		3046.01	0.01068788		3576	0.0004814		4106	-0.00622302
396.19	0.11026757		926.19	0.0170093		1456.18	0.01666288		1986.19	-0.00455479		2516.18	0.00419281		3046.21	0.01064891		3576.2	-0.00002127		4106.2	-0.00601331
396.39	0.11056941		926.39	0.01644178		1456.38	0.01755407		1986.39	-0.0044881		2516.38	0.00404441		3046.41	0.01117558		3576.4	0.00044626		4106.4	-0.00674371
396.59	0.11052233		926.59	0.0159162		1456.58	0.01751888		1986.59	-0.0039638		2516.58	0.00391582		3046.61	0.00998539		3576.6	0.00070457		4106.6	-0.00718823
396.79	0.11125448		926.79	0.01504189		1456.78	0.01765784		1986.79	-0.00373877		2516.78	0.00287482		3046.81	0.00946319		3576.8	0.00090055		4106.8	-0.00677627
396.99	0.11111793		926.99	0.01425398		1456.98	0.01845877		1986.99	-0.00402952		2516.98	0.00263194		3047.01	0.00940085		3577	0.00155289		4107	-0.00680842
397.19	0.11096945		927.19	0.01382074		1457.18	0.0195508		1987.19	-0.00402437		2517.18	0.00385181		3047.21	0.00882741		3577.2	0.00205024		4107.2	-0.00718051
397.39	0.11114482		927.39	0.01384657		1457.38	0.02017557		1987.39	-0.00361825		2517.38	0.00349184		3047.41	0.00865672		3577.4	0.00253749		4107.4	-0.00745547
397.59	0.11176597		927.59	0.01388582		1457.58	0.02099365		1987.59	-0.00398977		2517.58	0.00353289		3047.61	0.00924406		3577.6	0.00228743		4107.6	-0.00726021
397.79	0.11235126		927.79	0.01316311		1457.78	0.02133624		1987.79	-0.0042365		2517.78	0.00343946		3047.81	0.00848928		3577.8	0.0030205		4107.8	-0.00710364
397.99	0.11160909		927.99	0.01237069		1457.98	0.02050968		1987.99	-0.0046579		2517.98	0.00379315		3048.01	0.00881243		3578	0.00361853		4108	-0.00728788
398.19	0.11098007		928.19	0.01218978		1458.18	0.01970232		1988.19	-0.0052097		2518.18	0.00417669		3048.21	0.00907104		3578.2	0.00345805		4108.2	-0.00725553
398.39	0.11045732		928.39	0.01286533		1458.38	0.01937126		1988.39	-0.00523947		2518.38	0.0036832		3048.41	0.00870668		3578.4	0.0036041		4108.4	-0.00643011
398.59	0.1110176		928.59	0.01354287		1458.58	0.01904231		1988.59	-0.00569971		2518.58	0.00269421		3048.61	0.00860845		3578.6	0.00400676		4108.6	-0.00695561
398.79	0.1113938		928.79	0.01349008		1458.78	0.01863969		1988.79	-0.00564541		2518.78	0.00264904		3048.81	0.00827205		3578.8	0.00336405		4108.8	-0.00669699
398.99	0.11197601		928.99	0.01340026		1458.98	0.01845585		1988.99	-0.00569644		2518.98	0.00276368		3049.01	0.00864854		3579	0.00384016		4109	-0.00686679
399.19	0.11230689		929.19	0.01279059		1459.18	0.01885395		1989.19	-0.00566637		2519.18	0.00266994		3049.21	0.00930315		3579.2	0.00298435		4109.2	-0.00609523
399.39	0.11200807		929.39	0.01290879		1459.38	0.019145		1989.39	-0.00530906		2519.38	0.00331315		3049.41	0.00924247		3579.4	0.00155331		4109.4	-0.00575784
399.59	0.11305104		929.59	0.01296067		1459.58	0.01835661		1989.59	-0.00533722		2519.58	0.00343201		3049.61	0.00958587		3579.6	0.00062796		4109.6	-0.00507373
399.79	0.11315185		929.79	0.01294315		1459.78	0.01802239		1989.79	-0.0047278		2519.78	0.003882		3049.81	0.01040808		3579.8	0.00089841		4109.8	-0.00495404
399.99	0.11272634		929.99	0.0122717		1459.98	0.01758639		1989.99	-0.00500354		2519.98	0.00378001		3050.01	0.01000855		3580	0.00010733		4110	-0.00519557
400.19	0.11308666		930.19	0.01177721		1460.18	0.01753853		1990.19	-0.0048054		2520.18	0.00376853		3050.21	0.01024072		3580.2	0.00037256		4110.2	-0.00505773
400.39	0.11391385		930.39	0.01109199		1460.38	0.0173165		1990.39	-0.00528024		2520.38	0.00381991		3050.41	0.0105105		3580.4	0.00062051		4110.4	-0.00584862
400.59	0.11392288		930.59	0.01123259		1460.58	0.0170142		1990.59	-0.00514791		2520.58	0.00296932		3050.61	0.01018439		3580.6	0.00069934		4110.6	-0.00646019
400.79	0.11493687		930.79	0.01134982		1460.78	0.01747019		1990.79	-0.00491006		2520.78	0.00228986		3050.81	0.01072727		3580.8	0.00146088		4110.8	-0.00619124
400.99	0.11423268		930.99	0.01127516		1460.98	0.01831612		1990.99	-0.00503579		2520.98	0.00275145		3051.01	0.01191734		3581	0.00211242		4111	-0.00754804
401.19	0.11380119		931.19	0.01183668		1461.18	0.01790601		1991.19	-0.00520564		2521.18	0.00274852		3051.21	0.01168213		3581.2	0.0028103		4111.2	-0.00965003
401.39	0.11324868		931.39	0.01245678		1461.38	0.01747974		1991.39	-0.00583797		2521.38	0.00172936		3051.41	0.01171391		3581.4	0.0031648		4111.4	-0.01008634
401.59	0.11261165		931.59	0.01423545		1461.58	0.01736963		1991.59	-0.00616986		2521.58	0.00133747		3051.61	0.01184122		3581.6	0.0026249		4111.6	-0.01105793
401.79	0.11141674		931.79	0.0145905		1461.78	0.01755361		1991.79	-0.00695025		2521.78	0.00152222		3051.81	0.01198256		3581.8	0.00331119		4111.8	-0.01238034
401.99	0.11009503		931.99	0.01480806		1461.98	0.01720163		1991.99	-0.00714997		2521.98	0.00176903		3052.01	0.01156805		3582	0.00363782		4112	-0.01348354
402.19	0.10951313		932.19	0.01573165		1462.18	0.01706774		1992.19	-0.00689855		2522.18	0.00151401		3052.21	0.01186811		3582.2	0.00325389		4112.2	-0.01370131
402.39	0.10887724		932.39	0.01632924		1462.38	0.01763419		1992.39	-0.00621515		2522.38	0.00060881		3052.41	0.01126123		3582.4	0.00388661		4112.4	-0.01305662
402.59	0.10960906		932.59	0.01612177		1462.58	0.01865444		1992.59	-0.00644372		2522.58	0.0001603		3052.61	0.01117562		3582.6	0.00405136		4112.6	-0.01266242
402.79	0.10930268		932.79	0.01600436		1462.78	0.0193293		1992.79	-0.00673371		2522.78	-0.00012791		3052.81	0.01074753		3582.8	0.00403141		4112.8	-0.01198744
402.99	0.10900879		932.99	0.01560939		1462.98	0.01959498		1992.99	-0.00659361		2522.98	-0.00009198		3053.01	0.01172888		3583	0.00475187		4113	-0.01167417
403.19	0.10873229		933.19	0.01536098		1463.18	0.02110216		1993.19	-0.00676567		2523.18	0.00066508		3053.21	0.0116484		3583.2	0.00459742		4113.2	-0.01063769
403.39	0.10874637		933.39	0.01472038		1463.38	0.02100738		1993.39	-0.00704407		2523.38	0.00167848		3053.41	0.01094161		3583.4	0.00410623		4113.4	-0.01026451
403.59	0.10882723		933.59	0.01395977		1463.58	0.02104978		1993.59	-0.00738256		2523.58	0.00177749		3053.61	0.01084301		3583.6	0.0040326		4113.6	-0.00899212
403.79	0.10907383		933.79	0.01362026		1463.78	0.02023415		1993.79	-0.00679745		2523.78	0.00231233		3053.81	0.01005857		3583.8	0.00361035		4113.8	-0.00853187
403.99	0.10895682		933.99	0.01264022		1463.98	0.01950404		1993.99	-0.00686883		2523.98	0.00320203		3054.01	0.00890387		3584	0.00376566		4114	-0.00858897
404.19	0.10968336		934.19	0.01247723		1464.18	0.01852953		1994.19	-0.00701763		2524.18	0.0032283		3054.21	0.00905228		3584.2	0.0038324		4114.2	-0.00798699
404.39	0.10954566		934.39	0.01210289		1464.38	0.01759946		1994.39	-0.00729689		2524.38	0.00318585		3054.41	0.00823655		3584.4	0.00344655		4114.4	-0.00810297
404.59	0.10915849		934.59	0.01166941		1464.58	0.01745595		1994.59	-0.0076039		2524.58	0.00301961		3054.61	0.00877784		3584.6	0.00293616		4114.6	-0.00860259
404.79	0.10936554		934.79	0.01129528		1464.78	0.01698545		1994.79	-0.00859213		2524.78	0.00366568		3054.81	0.00894915		3584.8	0.00317548		4114.8	-0.00888352
404.99	0.10846738		934.99	0.01103029		1464.98	0.01591891		1994.99	-0.00906904		2524.98	0.00302715		3055.01	0.00972858		3585	0.00250556		4115	-0.01026075
405.19	0.10893577		935.19	0.01138681		1465.18	0.01522731		1995.19	-0.00938426		2525.18	0.00319323		3055.21	0.00861475		3585.2	0.00229185		4115.2	-0.0104661
405.39	0.10853909		935.39	0.01164308		1465.38	0.01548636		1995.39	-0.00909347		2525.38	0.00256458		3055.41	0.00798605		3585.4	0.00223021		4115.4	-0.01059897
405.59	0.10752747		935.59	0.01255222		1465.58	0.01616614		1995.59	-0.00859985		2525.58	0.00286474		3055.61	0.00788024		3585.6	0.00117071		4115.6	-0.01201003
405.79	0.10760223		935.79	0.01254463		1465.78	0.01648771		1995.79	-0.00911603		2525.78	0.00176705		3055.81	0.00764582		3585.8	0.0009202		4115.8	-0.01262843
405.99	0.10770692		935.99	0.0125007		1465.98	0.01614648		1995.99	-0.00799476		2525.98	0.001487		3056.01	0.0079572		3586	0.00082362		4116	-0.01300474
406.19	0.10781129		936.19	0.01356442		1466.18	0.01653823		1996.19	-0.00704302		2526.18	0.0009215		3056.21	0.00888651		3586.2	0.00076355		4116.2	-0.01242162
406.39	0.10730133		936.39	0.01429246		1466.38	0.01683303		1996.39	-0.00628137		2526.38	-0.00004874		3056.41	0.0081921		3586.4	0.00097465		4116.4	-0.01164965
406.59	0.10750673		936.59	0.01440348		1466.58	0.01728941		1996.59	-0.00610735		2526.58	0.00028249		3056.61	0.00847058		3586.6	0.00066623		4116.6	-0.01182115
406.79	0.10770861		936.79	0.01449532		1466.78	0.01747227		1996.79	-0.00599539		2526.78	-0.00032062		3056.81	0.00832925		3586.8	0.00129465		4116.8	-0.01260479
406.99	0.10874941		936.99	0.0151717		1466.98	0.01707965		1996.99	-0.00621067		2526.98	0.00003016		3057.01	0.00836874		3587	0.00170071		4117	-0.01252623
407.19	0.10916308		937.19	0.01546824		1467.18	0.01797546		1997.19	-0.00628968		2527.18	0.00033321		3057.21	0.00756989		3587.2	0.00188015		4117.2	-0.01276245
407.39	0.10877911		937.39	0.01562329		1467.38	0.01796937		1997.39	-0.00629083		2527.38	0.00059781		3057.41	0.00738545		3587.4	0.00230514		4117.4	-0.01271665
407.59	0.10896429		937.59	0.01546132		1467.58	0.01802189		1997.59	-0.00602812		2527.58	0.00090134		3057.61	0.00801432		3587.6	0.0022568		4117.6	-0.0121461
407.79	0.10943404		937.79	0.01494077		1467.78	0.01731358		1997.79	-0.00586284		2527.78	0.00165045		3057.81	0.008112		3587.8	0.00184365		4117.8	-0.01292794
407.99	0.10878285		937.99	0.01483355		1467.98	0.01769099		1997.99	-0.00665531		2527.98	0.00232869		3058.01	0.00857951		3588	0.00253106		4118	-0.01324978
408.19	0.10821431		938.19	0.01478673		1468.18	0.01692016		1998.19	-0.00727186		2528.18	0.00198068		3058.21	0.00871623		3588.2	0.00229434		4118.2	-0.01271145
408.39	0.10671306		938.39	0.01496907		1468.38	0.01636843		1998.39	-0.00748491		2528.38	0.00264627		3058.41	0.00840311		3588.4	0.00285616		4118.4	-0.01214245
408.59	0.10634247		938.59	0.01450685		1468.58	0.01642002		1998.59	-0.00798047		2528.58	0.00285885		3058.61	0.00870011		3588.6	0.00349672		4118.6	-0.01200484
408.79	0.10583223		938.79	0.0153193		1468.78	0.0167912		1998.79	-0.00911751		2528.78	0.0025528		3058.81	0.00810936		3588.8	0.00316155		4118.8	-0.01230685
408.99	0.10587869		938.99	0.01578829		1468.98	0.01755563		1998.99	-0.00906363		2528.98	0.00249873		3059.01	0.00725522		3589	0.00343573		4119	-0.01167047
409.19	0.10626704		939.19	0.01583296		1469.18	0.01835526		1999.19	-0.0096343		2529.18	0.00230768		3059.21	0.00618767		3589.2	0.0039203		4119.2	-0.01057256
409.39	0.10558048		939.39	0.01561201		1469.38	0.01926347		1999.39	-0.00929913		2529.38	0.00155561		3059.41	0.00560538		3589.4	0.00390502		4119.4	-0.01089328
409.59	0.10604545		939.59	0.01562837		1469.58	0.02008988		1999.59	-0.00879778		2529.58	0.00101993		3059.61	0.00519456		3589.6	0.00366615		4119.6	-0.01107593
409.79	0.10784123		939.79	0.01563052		1469.78	0.01986946		1999.79	-0.0086485		2529.78	0.00002056		3059.81	0.00504254		3589.8	0.00348204		4119.8	-0.01108866
409.99	0.10765467		939.99	0.0150756		1469.98	0.01999424		1999.99	-0.00813447		2529.98	0.0011713		3060.01	0.00590547		3590	0.00311643		4120	-0.01105681
410.19	0.10796737		940.19	0.0151952		1470.18	0.01989389		2000.19	-0.0079986		2530.18	0.00090107		3060.21	0.00597099		3590.2	0.00292564		4120.2	-0.01095932
410.39	0.10840389		940.39	0.01485559		1470.38	0.01943772		2000.39	-0.00810052		2530.38	0.00061122		3060.41	0.00509417		3590.4	0.00236536		4120.4	-0.01092637
410.59	0.10905862		940.59	0.01393185		1470.58	0.01976777		2000.59	-0.00929311		2530.58	-0.00001261		3060.61	0.00570378		3590.6	0.00146194		4120.6	-0.01186356
410.79	0.10987527		940.79	0.01345447		1470.78	0.01953298		2000.79	-0.00988392		2530.78	-0.00063484		3060.81	0.0063965		3590.8	0.00221022		4120.8	-0.01156169
410.99	0.11020086		940.99	0.013918		1470.98	0.01899233		2000.99	-0.01026796		2530.98	-0.00034019		3061.01	0.00732185		3591	0.00204001		4121	-0.01131923
411.19	0.11000117		941.19	0.0129471		1471.18	0.01877155		2001.19	-0.00942949		2531.18	0.00039369		3061.21	0.00805409		3591.2	0.00114202		4121.2	-0.01181635
411.39	0.10898802		941.39	0.01149778		1471.38	0.01869636		2001.39	-0.0099556		2531.38	0.00012119		3061.41	0.0089649		3591.4	0.00166739		4121.4	-0.01149524
411.59	0.10923238		941.59	0.01096319		1471.58	0.01831905		2001.59	-0.00996899		2531.58	0.00063916		3061.61	0.0094884		3591.6	0.00182847		4121.6	-0.01168511
411.79	0.10874609		941.79	0.01025368		1471.78	0.01863343		2001.79	-0.00992782		2531.78	0.00143353		3061.81	0.00983499		3591.8	0.00183154		4121.8	-0.01187076
411.99	0.10862563		941.99	0.01055705		1471.98	0.01813237		2001.99	-0.01008588		2531.98	0.00253012		3062.01	0.00972642		3592	0.00226336		4122	-0.01162208
412.19	0.10746445		942.19	0.01092003		1472.18	0.01747181		2002.19	-0.00975432		2532.18	0.00283426		3062.21	0.00942045		3592.2	0.00298835		4122.2	-0.01126545
412.39	0.1069667		942.39	0.01109424		1472.38	0.01761214		2002.39	-0.00977862		2532.38	0.00311368		3062.41	0.00881894		3592.4	0.00282483		4122.4	-0.01075393
412.59	0.10702548		942.59	0.01091185		1472.58	0.01768193		2002.59	-0.0093742		2532.58	0.00373446		3062.61	0.00771786		3592.6	0.00317627		4122.6	-0.01126688
412.79	0.1060069		942.79	0.01238899		1472.78	0.01758782		2002.79	-0.00966179		2532.78	0.00341867		3062.81	0.00698589		3592.8	0.00321427		4122.8	-0.01078135
412.99	0.10637214		942.99	0.01264475		1472.98	0.01840315		2002.99	-0.0087898		2532.98	0.00311138		3063.01	0.00690543		3593	0.0042451		4123	-0.00948808
413.19	0.10655784		943.19	0.0127059		1473.18	0.01827904		2003.19	-0.00843943		2533.18	0.00236984		3063.21	0.00602663		3593.2	0.00506739		4123.2	-0.00958509
413.39	0.10730054		943.39	0.01330488		1473.38	0.01834217		2003.39	-0.00753256		2533.38	0.00239595		3063.41	0.00503992		3593.4	0.00511597		4123.4	-0.00990977
413.59	0.10867078		943.59	0.01356615		1473.58	0.0183345		2003.59	-0.00713913		2533.58	0.00180086		3063.61	0.0055245		3593.6	0.00488438		4123.6	-0.0095906
413.79	0.10905121		943.79	0.01349349		1473.78	0.01792923		2003.79	-0.00729076		2533.78	0.00167154		3063.81	0.00562455		3593.8	0.00399055		4123.8	-0.00944113
413.99	0.10835457		943.99	0.01362363		1473.98	0.01783772		2003.99	-0.00737597		2533.98	0.00194223		3064.01	0.0053781		3594	0.00423586		4124	-0.00981577
414.19	0.10836294		944.19	0.01411418		1474.18	0.01717516		2004.19	-0.0073821		2534.18	0.00116098		3064.21	0.00503468		3594.2	0.00418988		4124.2	-0.00986045
414.39	0.10902535		944.39	0.01492491		1474.38	0.01672849		2004.39	-0.00734902		2534.38	0.0005482		3064.41	0.00552098		3594.4	0.00405057		4124.4	-0.0095752
414.59	0.10923259		944.59	0.01510848		1474.58	0.01604915		2004.59	-0.00797607		2534.58	-0.00010413		3064.61	0.00679799		3594.6	0.0039487		4124.6	-0.00938452
414.79	0.10981543		944.79	0.01536159		1474.78	0.01561489		2004.79	-0.00763728		2534.78	-0.00024328		3064.81	0.00761008		3594.8	0.0041785		4124.8	-0.00956369
414.99	0.10942192		944.99	0.01536527		1474.98	0.01509027		2004.99	-0.00727135		2534.98	-0.00027386		3065.01	0.00870193		3595	0.00298689		4125	-0.0104584
415.19	0.10943185		945.19	0.01485599		1475.18	0.01504909		2005.19	-0.00698876		2535.18	0.00023423		3065.21	0.00904781		3595.2	0.00229123		4125.2	-0.011115
415.39	0.1089055		945.39	0.01423521		1475.38	0.01527503		2005.39	-0.00774617		2535.38	-0.00101019		3065.41	0.00937471		3595.4	0.00267817		4125.4	-0.01190882
415.59	0.10949159		945.59	0.0149273		1475.58	0.01554327		2005.59	-0.00741775		2535.58	0.00005806		3065.61	0.00954956		3595.6	0.00295253		4125.6	-0.01284946
415.79	0.10920599		945.79	0.01437712		1475.78	0.0162929		2005.79	-0.00803825		2535.78	-0.00007749		3065.81	0.00975492		3595.8	0.0029601		4125.8	-0.01322024
415.99	0.10920268		945.99	0.01418498		1475.98	0.01633357		2005.99	-0.00871118		2535.98	-0.00025836		3066.01	0.00933979		3596	0.00335657		4126	-0.01407966
416.19	0.1080543		946.19	0.0136021		1476.18	0.01711356		2006.19	-0.00954646		2536.18	-0.00079279		3066.21	0.00962983		3596.2	0.00335073		4126.2	-0.01525059
416.39	0.1080863		946.39	0.01320851		1476.38	0.01774385		2006.39	-0.00968268		2536.38	-0.0006375		3066.41	0.00910666		3596.4	0.00296024		4126.4	-0.01580774
416.59	0.10782255		946.59	0.01301012		1476.58	0.01727502		2006.59	-0.00966518		2536.58	-0.000359		3066.61	0.00862267		3596.6	0.00321063		4126.6	-0.01610393
416.79	0.10802079		946.79	0.01395505		1476.78	0.01784508		2006.79	-0.00965129		2536.78	-0.00083867		3066.81	0.00858713		3596.8	0.00372226		4126.8	-0.01560619
416.99	0.10806048		946.99	0.0130005		1476.98	0.01833602		2006.99	-0.009169		2536.98	-0.00105038		3067.01	0.00932107		3597	0.00365156		4127	-0.01580251
417.19	0.10822133		947.19	0.01212087		1477.18	0.01845504		2007.19	-0.00953951		2537.18	-0.00086717		3067.21	0.00881693		3597.2	0.00336361		4127.2	-0.01569594
417.39	0.10898816		947.39	0.01255628		1477.38	0.01892982		2007.39	-0.00917835		2537.38	-0.00057579		3067.41	0.00916841		3597.4	0.00275903		4127.4	-0.01569548
417.59	0.10941439		947.59	0.01173172		1477.58	0.01877082		2007.59	-0.00977204		2537.58	-0.00054806		3067.61	0.00967705		3597.6	0.00273471		4127.6	-0.01564076
417.79	0.10922493		947.79	0.01136828		1477.78	0.01830515		2007.79	-0.01004597		2537.78	-0.00012442		3067.81	0.0091581		3597.8	0.0023521		4127.8	-0.01554065
417.99	0.10926067		947.99	0.01180453		1477.98	0.01800613		2007.99	-0.0101449		2537.98	-0.00046425		3068.01	0.00825459		3598	0.00219969		4128	-0.0154169
418.19	0.10940719		948.19	0.01224358		1478.18	0.01695342		2008.19	-0.01009735		2538.18	-0.0003914		3068.21	0.00871319		3598.2	0.00171726		4128.2	-0.01525898
418.39	0.10981367		948.39	0.01256349		1478.38	0.01622755		2008.39	-0.01073117		2538.38	-0.00022416		3068.41	0.00816018		3598.4	0.00140664		4128.4	-0.01527015
418.59	0.1098063		948.59	0.01265359		1478.58	0.01553882		2008.59	-0.01072543		2538.58	0.00031017		3068.61	0.00788253		3598.6	0.00114082		4128.6	-0.0152981
418.79	0.10954361		948.79	0.01284661		1478.78	0.01521208		2008.79	-0.01054148		2538.78	0.00061815		3068.81	0.00806074		3598.8	0.00067269		4128.8	-0.01526805
418.99	0.10888906		948.99	0.01266443		1478.98	0.0147725		2008.99	-0.01078583		2538.98	0.00090256		3069.01	0.00849358		3599	0.00001326		4129	-0.0150581
419.19	0.10907458		949.19	0.01234782		1479.18	0.01398715		2009.19	-0.01127185		2539.18	0.0009925		3069.21	0.0082374		3599.2	-0.00029403		4129.2	-0.01481106
419.39	0.10900429		949.39	0.0124906		1479.38	0.01459996		2009.39	-0.0117187		2539.38	0.00098187		3069.41	0.00837257		3599.4	-0.00026273		4129.4	-0.01472022
419.59	0.10905961		949.59	0.01238948		1479.58	0.0142029		2009.59	-0.01140597		2539.58	0.00139426		3069.61	0.00802632		3599.6	0.00004683		4129.6	-0.01381954
419.79	0.10894658		949.79	0.01224857		1479.78	0.01463381		2009.79	-0.01176977		2539.78	0.00096335		3069.81	0.00811222		3599.8	0.00031659		4129.8	-0.01366714
419.99	0.10920341		949.99	0.01224073		1479.98	0.01532641		2009.99	-0.01192897		2539.98	0.00108949		3070.01	0.00794707		3600	0.00086631		4130	-0.01357988
420.19	0.10974738		950.19	0.01239543		1480.18	0.01528683		2010.19	-0.01183719		2540.18	0.00102031		3070.21	0.0086968		3600.2	0.00056921		4130.2	-0.01342985
420.39	0.11030006		950.39	0.01277296		1480.38	0.01486783		2010.39	-0.01044864		2540.38	0.0020022		3070.41	0.00838749		3600.4	0.00103659		4130.4	-0.01251078
420.59	0.1106654		950.59	0.01276153		1480.58	0.01422758		2010.59	-0.01041458		2540.58	0.00137156		3070.61	0.00863783		3600.6	0.00096264		4130.6	-0.01190147
420.79	0.11076174		950.79	0.01329397		1480.78	0.01444016		2010.79	-0.00958333		2540.78	0.00127773		3070.81	0.00890094		3600.8	0.00114989		4130.8	-0.01238754
420.99	0.10932851		950.99	0.01290719		1480.98	0.01457237		2010.99	-0.00914115		2540.98	0.00108609		3071.01	0.01020381		3601	0.00146457		4131	-0.01233779
421.19	0.10902901		951.19	0.01364257		1481.18	0.01466544		2011.19	-0.00920001		2541.18	0.00126109		3071.21	0.01027327		3601.2	0.00140881		4131.2	-0.01167593
421.39	0.10897119		951.39	0.014671		1481.38	0.01489352		2011.39	-0.00859594		2541.38	0.00093617		3071.41	0.00978414		3601.4	0.00185902		4131.4	-0.012215
421.59	0.10882739		951.59	0.0140813		1481.58	0.01455868		2011.59	-0.00906526		2541.58	0.00168705		3071.61	0.00972006		3601.6	0.00250397		4131.6	-0.01214203
421.79	0.10881214		951.79	0.01428476		1481.78	0.01484528		2011.79	-0.00895823		2541.78	0.00135463		3071.81	0.00929982		3601.8	0.00160767		4131.8	-0.0117376
421.99	0.10860515		951.99	0.01415392		1481.98	0.01508869		2011.99	-0.00822231		2541.98	0.00081393		3072.01	0.00808896		3602	0.00185319		4132	-0.01165742
422.19	0.10793934		952.19	0.01404992		1482.18	0.01456647		2012.19	-0.00859123		2542.18	0.00145953		3072.21	0.00745351		3602.2	0.00204471		4132.2	-0.01203499
422.39	0.10679146		952.39	0.01279205		1482.38	0.01479042		2012.39	-0.00900434		2542.38	0.00147731		3072.41	0.00606417		3602.4	0.00228525		4132.4	-0.01166034
422.59	0.10615433		952.59	0.01183503		1482.58	0.01557454		2012.59	-0.00926973		2542.58	0.00139604		3072.61	0.00634394		3602.6	0.00239411		4132.6	-0.01207775
422.79	0.10570392		952.79	0.01106266		1482.78	0.01574553		2012.79	-0.0099312		2542.78	0.00143235		3072.81	0.00521045		3602.8	0.00218403		4132.8	-0.01206039
422.99	0.10523981		952.99	0.01014804		1482.98	0.01660482		2012.99	-0.01102654		2542.98	0.0007354		3073.01	0.00465631		3603	0.00113399		4133	-0.01263226
423.19	0.1050235		953.19	0.00932561		1483.18	0.01675856		2013.19	-0.01170695		2543.18	0.00080283		3073.21	0.00526895		3603.2	0.00068463		4133.2	-0.01290685
423.39	0.1052037		953.39	0.00947704		1483.38	0.01718328		2013.39	-0.01189087		2543.38	0.00097973		3073.41	0.00520508		3603.4	0.00001389		4133.4	-0.01271905
423.59	0.10554655		953.59	0.00911407		1483.58	0.01589237		2013.59	-0.01137045		2543.58	0.00018335		3073.61	0.00529057		3603.6	0.00004422		4133.6	-0.01189527
423.79	0.10583992		953.79	0.00960142		1483.78	0.01563919		2013.79	-0.011623		2543.78	-0.00000888		3073.81	0.00548465		3603.8	0.00092371		4133.8	-0.01275211
423.99	0.10681142		953.99	0.00958985		1483.98	0.01513373		2013.99	-0.01251272		2543.98	-0.00016291		3074.01	0.00563529		3604	0.0017167		4134	-0.01232949
424.19	0.10748597		954.19	0.01021123		1484.18	0.01432571		2014.19	-0.01250371		2544.18	-0.00049128		3074.21	0.00696589		3604.2	0.00144131		4134.2	-0.01195989
424.39	0.10747907		954.39	0.0112088		1484.38	0.01412101		2014.39	-0.01239772		2544.38	-0.00062175		3074.41	0.00727757		3604.4	0.00122912		4134.4	-0.01237827
424.59	0.10748013		954.59	0.01250252		1484.58	0.01381624		2014.59	-0.01303558		2544.58	-0.00187343		3074.61	0.0079762		3604.6	0.00132473		4134.6	-0.01322073
424.79	0.10702783		954.79	0.01345721		1484.78	0.01461679		2014.79	-0.0121148		2544.78	-0.00226415		3074.81	0.00841849		3604.8	0.0017536		4134.8	-0.01363971
424.99	0.10663609		954.99	0.01472839		1484.98	0.01489855		2014.99	-0.0123934		2544.98	-0.00295773		3075.01	0.00949439		3605	0.00208249		4135	-0.01347595
425.19	0.1069966		955.19	0.01547714		1485.18	0.01457978		2015.19	-0.01210767		2545.18	-0.00279502		3075.21	0.00902666		3605.2	0.00127242		4135.2	-0.01281557
425.39	0.10707033		955.39	0.01591974		1485.38	0.01484511		2015.39	-0.01143327		2545.38	-0.00302336		3075.41	0.00971275		3605.4	0.00169722		4135.4	-0.01312969
425.59	0.10786771		955.59	0.01585506		1485.58	0.01584377		2015.59	-0.01126666		2545.58	-0.00240632		3075.61	0.00987199		3605.6	0.00165376		4135.6	-0.01346844
425.79	0.10780852		955.79	0.0154911		1485.78	0.01626486		2015.79	-0.01063147		2545.78	-0.00251316		3075.81	0.00984868		3605.8	0.0014087		4135.8	-0.01323046
425.99	0.10755422		955.99	0.01515269		1485.98	0.0170586		2015.99	-0.01019788		2545.98	-0.00192528		3076.01	0.0096056		3606	0.00152001		4136	-0.01395733
426.19	0.10637223		956.19	0.01534127		1486.18	0.01719731		2016.19	-0.0104812		2546.18	-0.00075813		3076.21	0.00938013		3606.2	0.00122827		4136.2	-0.0142756
426.39	0.10527259		956.39	0.01411084		1486.38	0.01849487		2016.39	-0.01042472		2546.38	-0.00023636		3076.41	0.00878631		3606.4	0.000951		4136.4	-0.01401726
426.59	0.10470865		956.59	0.01344805		1486.58	0.01912695		2016.59	-0.01075275		2546.58	0.00053251		3076.61	0.0079368		3606.6	0.00028319		4136.6	-0.01455449
426.79	0.104173		956.79	0.01242438		1486.78	0.01935378		2016.79	-0.01057436		2546.78	0.00066029		3076.81	0.0069604		3606.8	-0.00001982		4136.8	-0.01497259
426.99	0.10371769		956.99	0.01197908		1486.98	0.01948104		2016.99	-0.01049788		2546.98	0.00133629		3077.01	0.00731829		3607	-0.00122314		4137	-0.01494007
427.19	0.10417018		957.19	0.01168733		1487.18	0.01910469		2017.19	-0.01095653		2547.18	0.00194724		3077.21	0.00673882		3607.2	-0.0011352		4137.2	-0.01525775
427.39	0.104439		957.39	0.01163696		1487.38	0.01826684		2017.39	-0.01082892		2547.38	0.00219952		3077.41	0.00551625		3607.4	-0.00172713		4137.4	-0.0153384
427.59	0.10472295		957.59	0.01164975		1487.58	0.01730722		2017.59	-0.01026379		2547.58	0.0022403		3077.61	0.00463479		3607.6	-0.00055385		4137.6	-0.01564537
427.79	0.10536527		957.79	0.01186562		1487.78	0.01661384		2017.79	-0.01058443		2547.78	0.00291432		3077.81	0.00440583		3607.8	0.00042723		4137.8	-0.0160905
427.99	0.1065173		957.99	0.01173278		1487.98	0.0157805		2017.99	-0.01143109		2547.98	0.00353335		3078.01	0.00431651		3608	0.0001909		4138	-0.01501674
428.19	0.10606365		958.19	0.01230036		1488.18	0.0152309		2018.19	-0.01139904		2548.18	0.00340869		3078.21	0.00500621		3608.2	0.00006141		4138.2	-0.01512834
428.39	0.10616382		958.39	0.0127369		1488.38	0.01491268		2018.39	-0.01115499		2548.38	0.00316453		3078.41	0.00513173		3608.4	0.0000407		4138.4	-0.01546814
428.59	0.10628102		958.59	0.01300503		1488.58	0.0143508		2018.59	-0.01155579		2548.58	0.0026277		3078.61	0.00512754		3608.6	0.00077389		4138.6	-0.01586485
428.79	0.10658598		958.79	0.01295025		1488.78	0.01459937		2018.79	-0.01183466		2548.78	0.00186972		3078.81	0.00541412		3608.8	0.00027741		4138.8	-0.01603452
428.99	0.10674884		958.99	0.01347925		1488.98	0.01408229		2018.99	-0.01248239		2548.98	0.00163929		3079.01	0.00613346		3609	0.0000725		4139	-0.01652134
429.19	0.1069508		959.19	0.01316523		1489.18	0.01356764		2019.19	-0.01278745		2549.18	0.00135821		3079.21	0.00677233		3609.2	-0.00009553		4139.2	-0.01635693
429.39	0.10585227		959.39	0.01305898		1489.38	0.01388448		2019.39	-0.01324333		2549.38	0.00092914		3079.41	0.00768399		3609.4	0.00009342		4139.4	-0.01732161
429.59	0.10611531		959.59	0.01318324		1489.58	0.01455235		2019.59	-0.01378783		2549.58	0.00011294		3079.61	0.00781672		3609.6	0.00071405		4139.6	-0.01724633
429.79	0.10560016		959.79	0.01334385		1489.78	0.01404017		2019.79	-0.0131267		2549.78	0.00034145		3079.81	0.00826326		3609.8	0.00021147		4139.8	-0.01716988
429.99	0.10572703		959.99	0.0136645		1489.98	0.0142985		2019.99	-0.01282548		2549.98	0.00007849		3080.01	0.00877873		3610	-0.00084484		4140	-0.01697107
430.19	0.10514686		960.19	0.01355128		1490.18	0.01426489		2020.19	-0.01239049		2550.18	0.00005667		3080.21	0.00925334		3610.2	-0.00031043		4140.2	-0.01635748
430.39	0.10570962		960.39	0.01258123		1490.38	0.01518913		2020.39	-0.01244501		2550.38	-0.00043658		3080.41	0.00918555		3610.4	-0.00097474		4140.4	-0.01554102
430.59	0.10612368		960.59	0.01195098		1490.58	0.01525477		2020.59	-0.01175133		2550.58	-0.00019928		3080.61	0.00988326		3610.6	-0.00137857		4140.6	-0.0155674
430.79	0.10673504		960.79	0.01118887		1490.78	0.01506732		2020.79	-0.01098097		2550.78	-0.00081904		3080.81	0.00952839		3610.8	-0.00165762		4140.8	-0.01512303
430.99	0.10712753		960.99	0.01240935		1490.98	0.01532812		2020.99	-0.01075872		2550.98	-0.00092946		3081.01	0.00874402		3611	-0.00126538		4141	-0.01479809
431.19	0.10790688		961.19	0.01245182		1491.18	0.01580892		2021.19	-0.01116094		2551.18	-0.00093318		3081.21	0.00744552		3611.2	-0.00062069		4141.2	-0.01555675
431.39	0.10764963		961.39	0.012427		1491.38	0.01588635		2021.39	-0.01054853		2551.38	-0.00124484		3081.41	0.00766399		3611.4	-0.00032334		4141.4	-0.0157708
431.59	0.10824516		961.59	0.01266202		1491.58	0.01629644		2021.59	-0.01015547		2551.58	-0.0011665		3081.61	0.00789212		3611.6	0.00094803		4141.6	-0.01572132
431.79	0.10839468		961.79	0.01253689		1491.78	0.01713654		2021.79	-0.01063404		2551.78	-0.00111101		3081.81	0.0085838		3611.8	0.00054803		4141.8	-0.01535176
431.99	0.10814463		961.99	0.01199279		1491.98	0.01735738		2021.99	-0.01111721		2551.98	-0.00079885		3082.01	0.00867268		3612	0.00011024		4142	-0.01506483
432.19	0.10728241		962.19	0.01192306		1492.18	0.0175013		2022.19	-0.01086168		2552.18	-0.00071124		3082.21	0.00913445		3612.2	0.0006634		4142.2	-0.01583644
432.39	0.10717193		962.39	0.01236229		1492.38	0.01748936		2022.39	-0.01096308		2552.38	-0.00066327		3082.41	0.00863031		3612.4	0.0010561		4142.4	-0.01529863
432.59	0.10669208		962.59	0.01224083		1492.58	0.01769142		2022.59	-0.01222317		2552.58	-0.00015359		3082.61	0.00730417		3612.6	0.00110242		4142.6	-0.01583932
432.79	0.10608139		962.79	0.01188871		1492.78	0.0179312		2022.79	-0.01257743		2552.78	0.00071608		3082.81	0.00656788		3612.8	0.00082608		4142.8	-0.01616759
432.99	0.10596446		962.99	0.01166213		1492.98	0.01697329		2022.99	-0.01256372		2552.98	0.0009117		3083.01	0.00618104		3613	0.00069762		4143	-0.01656482
433.19	0.10573051		963.19	0.01053445		1493.18	0.01652117		2023.19	-0.01358704		2553.18	0.00053963		3083.21	0.00597885		3613.2	0.00006584		4143.2	-0.01720757
433.39	0.10496014		963.39	0.01060615		1493.38	0.01629768		2023.39	-0.01318005		2553.38	0.00034562		3083.41	0.00517781		3613.4	0.00003011		4143.4	-0.01752061
433.59	0.1062881		963.59	0.01105616		1493.58	0.01585969		2023.59	-0.01314998		2553.58	0.00040896		3083.61	0.00475625		3613.6	-0.00008768		4143.6	-0.01638087
433.79	0.10598736		963.79	0.01075497		1493.78	0.01521577		2023.79	-0.0119664		2553.78	0.00049363		3083.81	0.00460035		3613.8	-0.00170227		4143.8	-0.01603059
433.99	0.1065535		963.99	0.00994308		1493.98	0.01537094		2023.99	-0.01201841		2553.98	0.00036125		3084.01	0.00538167		3614	-0.00132224		4144	-0.01478153
434.19	0.10660176		964.19	0.00929795		1494.18	0.01533854		2024.19	-0.01157063		2554.18	0.00065811		3084.21	0.00548772		3614.2	-0.00131897		4144.2	-0.01447149
434.39	0.10708468		964.39	0.00908402		1494.38	0.01525136		2024.39	-0.0116411		2554.38	0.00097547		3084.41	0.00512612		3614.4	-0.0026642		4144.4	-0.01403287
434.59	0.10712163		964.59	0.00939935		1494.58	0.01493156		2024.59	-0.01064856		2554.58	0.00195354		3084.61	0.00535867		3614.6	-0.00339434		4144.6	-0.01360548
434.79	0.1069668		964.79	0.01047318		1494.78	0.01503089		2024.79	-0.0101787		2554.78	0.00110161		3084.81	0.00421038		3614.8	-0.00294607		4144.8	-0.01302362
434.99	0.10595632		964.99	0.01146312		1494.98	0.0159097		2024.99	-0.00969369		2554.98	0.00098703		3085.01	0.00405033		3615	-0.00161387		4145	-0.01343826
435.19	0.10577905		965.19	0.01092102		1495.18	0.01612462		2025.19	-0.00979578		2555.18	0.00126987		3085.21	0.00405671		3615.2	-0.00238798		4145.2	-0.01367608
435.39	0.10537938		965.39	0.01104104		1495.38	0.01644028		2025.39	-0.00942366		2555.38	0.00031447		3085.41	0.00544374		3615.4	-0.00192913		4145.4	-0.01356548
435.59	0.10604445		965.59	0.01095369		1495.58	0.01763702		2025.59	-0.00963737		2555.58	0.00027598		3085.61	0.00715809		3615.6	-0.00195111		4145.6	-0.01323765
435.79	0.10502122		965.79	0.01049453		1495.78	0.01809063		2025.79	-0.00957313		2555.78	0.0006181		3085.81	0.00707365		3615.8	-0.00271965		4145.8	-0.01330405
435.99	0.10548052		965.99	0.01050522		1495.98	0.01804791		2025.99	-0.00917758		2555.98	0.0014626		3086.01	0.00662792		3616	-0.00211867		4146	-0.01352556
436.19	0.10501857		966.19	0.01114311		1496.18	0.01774521		2026.19	-0.00906219		2556.18	0.00115052		3086.21	0.00626298		3616.2	-0.00126542		4146.2	-0.01327957
436.39	0.10418692		966.39	0.01191687		1496.38	0.01691549		2026.39	-0.00975596		2556.38	0.00081875		3086.41	0.00504746		3616.4	-0.00111661		4146.4	-0.01312643
436.59	0.1040243		966.59	0.01114703		1496.58	0.01697268		2026.59	-0.00996414		2556.58	0.00099529		3086.61	0.00438542		3616.6	-0.00108355		4146.6	-0.0139635
436.79	0.10439016		966.79	0.01019723		1496.78	0.01601595		2026.79	-0.00995907		2556.78	0.00148082		3086.81	0.00415938		3616.8	-0.00093801		4146.8	-0.01513368
436.99	0.10505754		966.99	0.00988057		1496.98	0.01522785		2026.99	-0.00990973		2556.98	0.00115956		3087.01	0.00443367		3617	-0.001552		4147	-0.01576593
437.19	0.1046268		967.19	0.00933122		1497.18	0.01519946		2027.19	-0.01001686		2557.18	0.00063653		3087.21	0.00489286		3617.2	-0.00173194		4147.2	-0.01666745
437.39	0.10420941		967.39	0.00964606		1497.38	0.01436987		2027.39	-0.01019119		2557.38	0.0007845		3087.41	0.00513452		3617.4	-0.00050245		4147.4	-0.01689446
437.59	0.10409484		967.59	0.00943439		1497.58	0.01474755		2027.59	-0.01072934		2557.58	0.00106148		3087.61	0.005312		3617.6	-0.00096136		4147.6	-0.01584795
437.79	0.10252129		967.79	0.00918642		1497.78	0.01438196		2027.79	-0.01040923		2557.78	0.00062426		3087.81	0.00517594		3617.8	-0.00026322		4147.8	-0.01639571
437.99	0.10285499		967.99	0.00959427		1497.98	0.01464567		2027.99	-0.01046393		2557.98	0.0010518		3088.01	0.00597301		3618	0.00063461		4148	-0.01624899
438.19	0.10206749		968.19	0.00981328		1498.18	0.01437277		2028.19	-0.00972616		2558.18	0.00141861		3088.21	0.00602989		3618.2	0.00008892		4148.2	-0.01618307
438.39	0.10234519		968.39	0.00981208		1498.38	0.01492938		2028.39	-0.010019		2558.38	0.00121877		3088.41	0.00589943		3618.4	0.00013372		4148.4	-0.01643239
438.59	0.10232881		968.59	0.01016542		1498.58	0.01603268		2028.59	-0.00871843		2558.58	0.00097212		3088.61	0.00649941		3618.6	0.00026598		4148.6	-0.01683009
438.79	0.10184436		968.79	0.01024208		1498.78	0.01598675		2028.79	-0.0090528		2558.78	0.0001298		3088.81	0.00614147		3618.8	0.00096255		4148.8	-0.01639943
438.99	0.10233673		968.99	0.00985032		1498.98	0.01615319		2028.99	-0.00793581		2558.98	-0.00042323		3089.01	0.00674571		3619	0.00152977		4149	-0.01613028
439.19	0.10344759		969.19	0.00962664		1499.18	0.01531369		2029.19	-0.00872428		2559.18	-0.00059587		3089.21	0.00728542		3619.2	0.00070654		4149.2	-0.01566088
439.39	0.10398142		969.39	0.0102175		1499.38	0.01504787		2029.39	-0.00838215		2559.38	-0.00114469		3089.41	0.00859578		3619.4	0.00144187		4149.4	-0.01554817
439.59	0.10493197		969.59	0.00999396		1499.58	0.0156699		2029.59	-0.00873736		2559.58	-0.00143674		3089.61	0.00925092		3619.6	0.00168741		4149.6	-0.01519887
439.79	0.10511864		969.79	0.01074167		1499.78	0.01513834		2029.79	-0.00917072		2559.78	-0.00108707		3089.81	0.00792919		3619.8	0.00225283		4149.8	-0.01540997
439.99	0.10612627		969.99	0.01171112		1499.98	0.01538446		2029.99	-0.00981663		2559.98	-0.00130024		3090.01	0.00755326		3620	0.003155		4150	-0.01592496
440.19	0.10551473		970.19	0.01219127		1500.18	0.01404706		2030.19	-0.01078446		2560.18	-0.00185347		3090.21	0.00786809		3620.2	0.003535		4150.2	-0.01548534
440.39	0.10538145		970.39	0.01149577		1500.38	0.01324376		2030.39	-0.01132306		2560.38	-0.00206191		3090.41	0.00670623		3620.4	0.00331634		4150.4	-0.01521087
440.59	0.10590272		970.59	0.0106975		1500.58	0.0135477		2030.59	-0.0115943		2560.58	-0.00113252		3090.61	0.00710809		3620.6	0.00287417		4150.6	-0.01500146
440.79	0.10547475		970.79	0.00987849		1500.78	0.0135441		2030.79	-0.01241367		2560.78	0.00011656		3090.81	0.00646606		3620.8	0.00236056		4150.8	-0.01546686
440.99	0.10526845		970.99	0.01090821		1500.98	0.01312549		2030.99	-0.01282097		2560.98	0.00079763		3091.01	0.00682027		3621	0.00180276		4151	-0.01485114
441.19	0.1047901		971.19	0.01054059		1501.18	0.01289526		2031.19	-0.0135771		2561.18	0.00068265		3091.21	0.00704184		3621.2	0.00172371		4151.2	-0.0157077
441.39	0.10364976		971.39	0.01051388		1501.38	0.01226238		2031.39	-0.0139551		2561.38	0.00178078		3091.41	0.00698202		3621.4	0.00157586		4151.4	-0.01576474
441.59	0.1032516		971.59	0.01051888		1501.58	0.01269167		2031.59	-0.01343665		2561.58	0.00214483		3091.61	0.00658056		3621.6	0.00093647		4151.6	-0.01539513
441.79	0.10228776		971.79	0.0108578		1501.78	0.01264365		2031.79	-0.01297969		2561.78	0.00199782		3091.81	0.00632412		3621.8	0.00090108		4151.8	-0.0162741
441.99	0.10200326		971.99	0.01087981		1501.98	0.01309261		2031.99	-0.01308881		2561.98	0.00228798		3092.01	0.00632374		3622	-0.00004004		4152	-0.01598414
442.19	0.10156656		972.19	0.01021228		1502.18	0.01372035		2032.19	-0.01315084		2562.18	0.00238862		3092.21	0.00534878		3622.2	-0.00133965		4152.2	-0.01548609
442.39	0.10155245		972.39	0.00913324		1502.38	0.01461457		2032.39	-0.01281874		2562.38	0.00185569		3092.41	0.00449666		3622.4	-0.00178946		4152.4	-0.01553939
442.59	0.10097705		972.59	0.00923454		1502.58	0.01456967		2032.59	-0.01251393		2562.58	0.00059832		3092.61	0.00462094		3622.6	-0.00264644		4152.6	-0.01604982
442.79	0.10138218		972.79	0.00958824		1502.78	0.01492162		2032.79	-0.012517		2562.78	0.00059356		3092.81	0.00386204		3622.8	-0.00352922		4152.8	-0.01579868
442.99	0.10265037		972.99	0.00971348		1502.98	0.01620711		2032.99	-0.01226111		2562.98	-0.00056012		3093.01	0.00338244		3623	-0.00342548		4153	-0.0157026
443.19	0.10300535		973.19	0.01046258		1503.18	0.01592055		2033.19	-0.01280104		2563.18	-0.00119626		3093.21	0.00371615		3623.2	-0.00402733		4153.2	-0.01583772
443.39	0.1023245		973.39	0.01172701		1503.38	0.01645193		2033.39	-0.01317229		2563.38	-0.00184871		3093.41	0.00398326		3623.4	-0.00458666		4153.4	-0.01592969
443.59	0.10313822		973.59	0.01233942		1503.58	0.01689071		2033.59	-0.01377942		2563.58	-0.00192403		3093.61	0.00322681		3623.6	-0.00469625		4153.6	-0.01597788
443.79	0.10291306		973.79	0.01270857		1503.78	0.01694235		2033.79	-0.01371213		2563.78	-0.00180005		3093.81	0.00298274		3623.8	-0.00393705		4153.8	-0.0155903
443.99	0.10307684		973.99	0.01251808		1503.98	0.01719767		2033.99	-0.01352463		2563.98	-0.00192866		3094.01	0.00337177		3624	-0.00387093		4154	-0.0155503
444.19	0.10268993		974.19	0.01219894		1504.18	0.01597397		2034.19	-0.01389232		2564.18	-0.00249965		3094.21	0.00399884		3624.2	-0.0036596		4154.2	-0.01508816
444.39	0.10320542		974.39	0.01167777		1504.38	0.01625789		2034.39	-0.01378502		2564.38	-0.00332261		3094.41	0.00433562		3624.4	-0.00372392		4154.4	-0.01476677
444.59	0.1030357		974.59	0.01164413		1504.58	0.01595907		2034.59	-0.0142245		2564.58	-0.00263486		3094.61	0.00579614		3624.6	-0.00472294		4154.6	-0.01573632
444.79	0.10334273		974.79	0.01131986		1504.78	0.01620466		2034.79	-0.013741		2564.78	-0.00259057		3094.81	0.00616533		3624.8	-0.00473049		4154.8	-0.01624484
444.99	0.10431013		974.99	0.01197008		1504.98	0.01448594		2034.99	-0.01332685		2564.98	-0.0027597		3095.01	0.00699397		3625	-0.00417335		4155	-0.01606762
445.19	0.10433742		975.19	0.01104039		1505.18	0.01413128		2035.19	-0.01215123		2565.18	-0.00276636		3095.21	0.00814612		3625.2	-0.00442201		4155.2	-0.01688162
445.39	0.1048672		975.39	0.01112431		1505.38	0.01351285		2035.39	-0.01173799		2565.38	-0.00203811		3095.41	0.00819007		3625.4	-0.00377637		4155.4	-0.0172397
445.59	0.10510707		975.59	0.01019748		1505.58	0.01376411		2035.59	-0.01187777		2565.58	-0.0017309		3095.61	0.00892623		3625.6	-0.00264068		4155.6	-0.01774941
445.79	0.10510943		975.79	0.00958895		1505.78	0.01375569		2035.79	-0.01193012		2565.78	-0.00146555		3095.81	0.00914831		3625.8	-0.00217939		4155.8	-0.01808578
445.99	0.10533224		975.99	0.00967456		1505.98	0.01407932		2035.99	-0.01207761		2565.98	-0.0008757		3096.01	0.00873566		3626	-0.00186782		4156	-0.0177225
446.19	0.10615264		976.19	0.00957397		1506.18	0.01368912		2036.19	-0.01132733		2566.18	-0.00059474		3096.21	0.00839023		3626.2	-0.00208054		4156.2	-0.01626854
446.39	0.10622225		976.39	0.00896023		1506.38	0.01333806		2036.39	-0.01045683		2566.38	-0.00074226		3096.41	0.00829134		3626.4	-0.00112208		4156.4	-0.01584207
446.59	0.10589828		976.59	0.00893547		1506.58	0.01306221		2036.59	-0.01076123		2566.58	-0.00065776		3096.61	0.00779407		3626.6	-0.00109611		4156.6	-0.01565649
446.79	0.10677973		976.79	0.0088429		1506.78	0.01389579		2036.79	-0.00978823		2566.78	0.00020111		3096.81	0.00680323		3626.8	-0.00090161		4156.8	-0.01514071
446.99	0.10688429		976.99	0.00862776		1506.98	0.01422463		2036.99	-0.0110229		2566.98	-0.00063882		3097.01	0.00611766		3627	0.00008535		4157	-0.0150749
447.19	0.10593073		977.19	0.00954035		1507.18	0.01322588		2037.19	-0.01054765		2567.18	-0.0006907		3097.21	0.00697657		3627.2	-0.00008399		4157.2	-0.01521875
447.39	0.10502304		977.39	0.00995767		1507.38	0.01317105		2037.39	-0.011067		2567.38	-0.00057522		3097.41	0.00619751		3627.4	-0.00069166		4157.4	-0.01406615
447.59	0.10522278		977.59	0.01049908		1507.58	0.01307052		2037.59	-0.01118404		2567.58	-0.00080616		3097.61	0.00598928		3627.6	0.00032942		4157.6	-0.01342476
447.79	0.10399193		977.79	0.01026906		1507.78	0.01313528		2037.79	-0.0111756		2567.78	-0.00199595		3097.81	0.00598918		3627.8	0.00135877		4157.8	-0.0140079
447.99	0.10421593		977.99	0.01143825		1507.98	0.01315648		2037.99	-0.01280709		2567.98	-0.00282202		3098.01	0.00635749		3628	0.00090446		4158	-0.01437765
448.19	0.10398115		978.19	0.01183917		1508.18	0.012682		2038.19	-0.01348274		2568.18	-0.00344138		3098.21	0.00749847		3628.2	0.00133776		4158.2	-0.01470955
448.39	0.10458166		978.39	0.0117724		1508.38	0.01214032		2038.39	-0.01345057		2568.38	-0.00439833		3098.41	0.00793375		3628.4	0.00042684		4158.4	-0.0145915
448.59	0.10435493		978.59	0.01244881		1508.58	0.01187633		2038.59	-0.01335759		2568.58	-0.00479089		3098.61	0.00756038		3628.6	-0.00008314		4158.6	-0.01503538
448.79	0.10449771		978.79	0.01292858		1508.78	0.01221274		2038.79	-0.0119623		2568.78	-0.00571044		3098.81	0.00749322		3628.8	0.00000361		4158.8	-0.01469392
448.99	0.10484919		978.99	0.01287022		1508.98	0.01096253		2038.99	-0.01204455		2568.98	-0.00594255		3099.01	0.00729799		3629	0.00033751		4159	-0.0148183
449.19	0.10580205		979.19	0.01315102		1509.18	0.01210723		2039.19	-0.01190585		2569.18	-0.00572218		3099.21	0.00808474		3629.2	-0.00048056		4159.2	-0.01515475
449.39	0.10749598		979.39	0.01349857		1509.38	0.01239406		2039.39	-0.01329916		2569.38	-0.00553802		3099.41	0.00791349		3629.4	0.00037572		4159.4	-0.01512597
449.59	0.10659891		979.59	0.01340348		1509.58	0.01196378		2039.59	-0.01316146		2569.58	-0.00533301		3099.61	0.00789802		3629.6	0.00038043		4159.6	-0.01500564
449.79	0.10740894		979.79	0.0141665		1509.78	0.01134985		2039.79	-0.01254665		2569.78	-0.00494759		3099.81	0.00839977		3629.8	0.00046877		4159.8	-0.01507323
449.99	0.10853983		979.99	0.01477617		1509.98	0.01145472		2039.99	-0.01214143		2569.98	-0.00450646		3100.01	0.00791378		3630	0.00021526		4160	-0.01459313
450.19	0.10874233		980.19	0.01377612		1510.18	0.01091077		2040.19	-0.01184624		2570.18	-0.00325705		3100.21	0.00793695		3630.2	-0.0001693		4160.2	-0.01348988
450.39	0.10846856		980.39	0.01228888		1510.38	0.01120958		2040.39	-0.01164229		2570.38	-0.00187533		3100.41	0.00762744		3630.4	-0.00010857		4160.4	-0.01384277
450.59	0.10820101		980.59	0.01169211		1510.58	0.01114288		2040.59	-0.01175949		2570.58	-0.0010429		3100.61	0.00705395		3630.6	-0.00059693		4160.6	-0.01375779
450.79	0.10890246		980.79	0.01112435		1510.78	0.01094891		2040.79	-0.01144616		2570.78	-0.00091255		3100.81	0.006623		3630.8	-0.00120366		4160.8	-0.01528801
450.99	0.10824557		980.99	0.0109552		1510.98	0.01082085		2040.99	-0.01189172		2570.98	-0.00021723		3101.01	0.00598579		3631	-0.00148425		4161	-0.0155788
451.19	0.10757959		981.19	0.01103387		1511.18	0.01021805		2041.19	-0.01140901		2571.18	0.0000206		3101.21	0.00530556		3631.2	-0.00189806		4161.2	-0.01464354
451.39	0.10731907		981.39	0.00994455		1511.38	0.01059359		2041.39	-0.01152694		2571.38	-0.00115879		3101.41	0.00405268		3631.4	-0.00186078		4161.4	-0.0145441
451.59	0.10660978		981.59	0.00958263		1511.58	0.01061648		2041.59	-0.01222605		2571.58	-0.00135174		3101.61	0.00427559		3631.6	-0.00102864		4161.6	-0.01540626
451.79	0.10595457		981.79	0.00926736		1511.78	0.01046383		2041.79	-0.01200227		2571.78	-0.00206535		3101.81	0.0033829		3631.8	-0.00046088		4161.8	-0.01697746
451.99	0.10649688		981.99	0.00921729		1511.98	0.01120723		2041.99	-0.01258086		2571.98	-0.00153704		3102.01	0.00315448		3632	-0.00088263		4162	-0.0165487
452.19	0.10654147		982.19	0.00814943		1512.18	0.01152358		2042.19	-0.01203821		2572.18	-0.00177988		3102.21	0.00288625		3632.2	-0.00083095		4162.2	-0.01661142
452.39	0.10643955		982.39	0.0077133		1512.38	0.01210014		2042.39	-0.01157199		2572.38	-0.00181463		3102.41	0.0025546		3632.4	-0.0012418		4162.4	-0.01629034
452.59	0.10591715		982.59	0.00776511		1512.58	0.01334029		2042.59	-0.01162095		2572.58	-0.00165736		3102.61	0.00201467		3632.6	-0.00083217		4162.6	-0.01687529
452.79	0.10515519		982.79	0.00770122		1512.78	0.01422703		2042.79	-0.01060201		2572.78	-0.00222589		3102.81	0.00268121		3632.8	-0.00154175		4162.8	-0.01701849
452.99	0.10574575		982.99	0.00756863		1512.98	0.01456784		2042.99	-0.01111645		2572.98	-0.00203056		3103.01	0.00329844		3633	-0.00202687		4163	-0.01711428
453.19	0.10581949		983.19	0.00850077		1513.18	0.01531117		2043.19	-0.01081627		2573.18	-0.00205812		3103.21	0.00417585		3633.2	-0.00164816		4163.2	-0.01740712
453.39	0.10498489		983.39	0.00876983		1513.38	0.01496233		2043.39	-0.01112871		2573.38	-0.00228274		3103.41	0.00383059		3633.4	-0.00071453		4163.4	-0.01736276
453.59	0.10411855		983.59	0.00908105		1513.58	0.01495585		2043.59	-0.01020205		2573.58	-0.00211579		3103.61	0.00402762		3633.6	-0.00072583		4163.6	-0.01767001
453.79	0.10452377		983.79	0.00984995		1513.78	0.01467932		2043.79	-0.01062108		2573.78	-0.00156658		3103.81	0.00518099		3633.8	-0.00048784		4163.8	-0.01728239
453.99	0.10505807		983.99	0.00983128		1513.98	0.01511747		2043.99	-0.01130654		2573.98	-0.00179228		3104.01	0.00503097		3634	-0.00062109		4164	-0.01734153
454.19	0.10462742		984.19	0.00968069		1514.18	0.01500289		2044.19	-0.01148535		2574.18	-0.0008403		3104.21	0.00615145		3634.2	-0.00087427		4164.2	-0.01687107
454.39	0.10463827		984.39	0.00986832		1514.38	0.01459866		2044.39	-0.01141181		2574.38	-0.00064847		3104.41	0.00606572		3634.4	-0.00126038		4164.4	-0.01712242
454.59	0.10478484		984.59	0.0109867		1514.58	0.01413454		2044.59	-0.01177764		2574.58	-0.00075115		3104.61	0.00547597		3634.6	-0.00106385		4164.6	-0.0170755
454.79	0.10472019		984.79	0.01164012		1514.78	0.01274828		2044.79	-0.01202388		2574.78	-0.00092339		3104.81	0.00435628		3634.8	-0.00153877		4164.8	-0.01712816
454.99	0.10432306		984.99	0.01218447		1514.98	0.01247032		2044.99	-0.01237064		2574.98	-0.00043686		3105.01	0.00354323		3635	-0.00146977		4165	-0.01613236
455.19	0.10457304		985.19	0.01226632		1515.18	0.01196289		2045.19	-0.0127775		2575.18	-0.00123918		3105.21	0.00392441		3635.2	-0.00112171		4165.2	-0.01601859
455.39	0.10518307		985.39	0.01201913		1515.38	0.01120308		2045.39	-0.01361586		2575.38	-0.0020409		3105.41	0.00440059		3635.4	-0.0007712		4165.4	-0.01683144
455.59	0.10447139		985.59	0.01218515		1515.58	0.01073203		2045.59	-0.01480896		2575.58	-0.00216379		3105.61	0.00483714		3635.6	-0.00067125		4165.6	-0.01730169
455.79	0.10414536		985.79	0.01181965		1515.78	0.01047991		2045.79	-0.01485421		2575.78	-0.00264784		3105.81	0.00415097		3635.8	-0.00032968		4165.8	-0.01754789
455.99	0.10395797		985.99	0.01110204		1515.98	0.01059627		2045.99	-0.01492502		2575.98	-0.00266004		3106.01	0.0039452		3636	-0.00098921		4166	-0.01762748
456.19	0.10383855		986.19	0.01053278		1516.18	0.01051492		2046.19	-0.01506		2576.18	-0.00253119		3106.21	0.004077		3636.2	-0.00133309		4166.2	-0.01809178
456.39	0.10363191		986.39	0.01030639		1516.38	0.01040636		2046.39	-0.01541881		2576.38	-0.00171333		3106.41	0.00472821		3636.4	-0.00179924		4166.4	-0.01862484
456.59	0.10296727		986.59	0.00964112		1516.58	0.01056676		2046.59	-0.01608328		2576.58	-0.00192219		3106.61	0.00471546		3636.6	-0.00180592		4166.6	-0.01974505
456.79	0.10292185		986.79	0.00964113		1516.78	0.01064733		2046.79	-0.01518465		2576.78	-0.00257973		3106.81	0.00575529		3636.8	-0.00246206		4166.8	-0.01987302
456.99	0.10273752		986.99	0.00957039		1516.98	0.01020679		2046.99	-0.01538099		2576.98	-0.00265454		3107.01	0.00591534		3637	-0.00233959		4167	-0.01931566
457.19	0.10274097		987.19	0.00953324		1517.18	0.01087108		2047.19	-0.01467359		2577.18	-0.00285295		3107.21	0.00624289		3637.2	-0.00155745		4167.2	-0.01913553
457.39	0.10317948		987.39	0.00946912		1517.38	0.01084597		2047.39	-0.01466426		2577.38	-0.00259311		3107.41	0.00619251		3637.4	-0.00216508		4167.4	-0.01742303
457.59	0.10350004		987.59	0.01021276		1517.58	0.01153153		2047.59	-0.01471926		2577.58	-0.00281169		3107.61	0.00626555		3637.6	-0.00214938		4167.6	-0.01607297
457.79	0.10406283		987.79	0.01117538		1517.78	0.01217598		2047.79	-0.01561318		2577.78	-0.00294835		3107.81	0.00605456		3637.8	-0.002384		4167.8	-0.0152251
457.99	0.10432299		987.99	0.01109325		1517.98	0.01256982		2047.99	-0.01520967		2577.98	-0.00373606		3108.01	0.00655986		3638	-0.001821		4168	-0.01508296
458.19	0.10504772		988.19	0.01140124		1518.18	0.01248785		2048.19	-0.01509065		2578.18	-0.00281571		3108.21	0.00732059		3638.2	-0.00104255		4168.2	-0.01422238
458.39	0.10545018		988.39	0.01170589		1518.38	0.01313208		2048.39	-0.01473045		2578.38	-0.0031679		3108.41	0.00741874		3638.4	-0.00151145		4168.4	-0.01412469
458.59	0.10593795		988.59	0.01285817		1518.58	0.01321143		2048.59	-0.01406392		2578.58	-0.00359994		3108.61	0.00671331		3638.6	-0.0013285		4168.6	-0.01323353
458.79	0.10610793		988.79	0.01374869		1518.78	0.01245989		2048.79	-0.01402032		2578.78	-0.00372202		3108.81	0.00651125		3638.8	-0.00190186		4168.8	-0.01327666
458.99	0.10634433		988.99	0.01342579		1518.98	0.01365483		2048.99	-0.01433663		2578.98	-0.00307276		3109.01	0.00677551		3639	-0.00125513		4169	-0.01351667
459.19	0.10630428		989.19	0.01327322		1519.18	0.0135941		2049.19	-0.01417142		2579.18	-0.00332288		3109.21	0.00756896		3639.2	-0.00131257		4169.2	-0.01398795
459.39	0.10646008		989.39	0.01302596		1519.38	0.01327987		2049.39	-0.01455466		2579.38	-0.00314055		3109.41	0.00748235		3639.4	-0.001779		4169.4	-0.01501326
459.59	0.10496907		989.59	0.01183327		1519.58	0.01358058		2049.59	-0.01365488		2579.58	-0.00371052		3109.61	0.00647824		3639.6	-0.00211602		4169.6	-0.01642748
459.79	0.10456824		989.79	0.01087215		1519.78	0.01359392		2049.79	-0.01386511		2579.78	-0.00438149		3109.81	0.00583044		3639.8	-0.00136688		4169.8	-0.01725822
459.99	0.10389541		989.99	0.01082365		1519.98	0.01387793		2049.99	-0.01388483		2579.98	-0.00502556		3110.01	0.00494748		3640	-0.00142382		4170	-0.01881265
460.19	0.10414803		990.19	0.0101686		1520.18	0.01377084		2050.19	-0.01430714		2580.18	-0.00429632		3110.21	0.00482851		3640.2	-0.00112396		4170.2	-0.01946178
460.39	0.10303715		990.39	0.00961157		1520.38	0.01362448		2050.39	-0.0150765		2580.38	-0.00415574		3110.41	0.00488678		3640.4	-0.001214		4170.4	-0.02047538
460.59	0.10193473		990.59	0.00960409		1520.58	0.01437806		2050.59	-0.01516409		2580.58	-0.00384266		3110.61	0.00446036		3640.6	-0.00016932		4170.6	-0.0211885
460.79	0.1017145		990.79	0.00970114		1520.78	0.01405116		2050.79	-0.01456913		2580.78	-0.00375156		3110.81	0.0049165		3640.8	-0.00082118		4170.8	-0.01982059
460.99	0.10105308		990.99	0.00958508		1520.98	0.01366586		2050.99	-0.01515406		2580.98	-0.00350119		3111.01	0.00454481		3641	-0.00021141		4171	-0.01813214
461.19	0.1013007		991.19	0.01031502		1521.18	0.01400353		2051.19	-0.01528307		2581.18	-0.00337325		3111.21	0.00477691		3641.2	-0.00003098		4171.2	-0.01694565
461.39	0.10118582		991.39	0.0101394		1521.38	0.0135498		2051.39	-0.01555487		2581.38	-0.00256906		3111.41	0.00388099		3641.4	0.00011416		4171.4	-0.0158606
461.59	0.10143698		991.59	0.01002436		1521.58	0.01403682		2051.59	-0.01615589		2581.58	-0.00231932		3111.61	0.00376525		3641.6	-0.00017728		4171.6	-0.01519756
461.79	0.1017147		991.79	0.01003684		1521.78	0.01386404		2051.79	-0.0160752		2581.78	-0.00154252		3111.81	0.00338895		3641.8	-0.00117615		4171.8	-0.01534314
461.99	0.10213746		991.99	0.00935603		1521.98	0.01361698		2051.99	-0.01537051		2581.98	-0.00108437		3112.01	0.00377215		3642	-0.00112008		4172	-0.01548727
462.19	0.10330583		992.19	0.00901615		1522.18	0.0140659		2052.19	-0.01519934		2582.18	-0.00124133		3112.21	0.00345741		3642.2	-0.0021861		4172.2	-0.01552143
462.39	0.10306464		992.39	0.01000939		1522.38	0.01470289		2052.39	-0.01431866		2582.38	-0.00173932		3112.41	0.00363293		3642.4	-0.00340236		4172.4	-0.01440793
462.59	0.10302017		992.59	0.01059887		1522.58	0.01514115		2052.59	-0.01395881		2582.58	-0.00195259		3112.61	0.00308442		3642.6	-0.00306362		4172.6	-0.01372453
462.79	0.10341615		992.79	0.01090031		1522.78	0.01502792		2052.79	-0.01418781		2582.78	-0.00144729		3112.81	0.00313499		3642.8	-0.00301229		4172.8	-0.01380449
462.99	0.10304064		992.99	0.00990049		1522.98	0.01560959		2052.99	-0.01416764		2582.98	-0.00193471		3113.01	0.00344228		3643	-0.00286542		4173	-0.01452282
463.19	0.10313001		993.19	0.00958752		1523.18	0.01508617		2053.19	-0.01358657		2583.18	-0.00236413		3113.21	0.00350577		3643.2	-0.00370832		4173.2	-0.01515218
463.39	0.10362988		993.39	0.00908908		1523.38	0.01457293		2053.39	-0.01363082		2583.38	-0.00267335		3113.41	0.00303638		3643.4	-0.00338881		4173.4	-0.01614358
463.59	0.10311297		993.59	0.00885352		1523.58	0.01558478		2053.59	-0.01326152		2583.58	-0.0036558		3113.61	0.00188509		3643.6	-0.00273317		4173.6	-0.01705935
463.79	0.10302621		993.79	0.00864248		1523.78	0.01598147		2053.79	-0.01458365		2583.78	-0.00432437		3113.81	0.00189597		3643.8	-0.00169176		4173.8	-0.01778313
463.99	0.10234697		993.99	0.00838087		1523.98	0.01610865		2053.99	-0.01497188		2583.98	-0.00446858		3114.01	0.00182776		3644	-0.00175383		4174	-0.01924867
464.19	0.10272026		994.19	0.0079468		1524.18	0.0162274		2054.19	-0.01479735		2584.18	-0.00493239		3114.21	0.00256233		3644.2	-0.00136894		4174.2	-0.01942105
464.39	0.10129109		994.39	0.00840415		1524.38	0.016045		2054.39	-0.01478929		2584.38	-0.00501023		3114.41	0.00340021		3644.4	-0.00067487		4174.4	-0.02049978
464.59	0.10071539		994.59	0.00796244		1524.58	0.01598678		2054.59	-0.01414771		2584.58	-0.00446767		3114.61	0.00309596		3644.6	-0.00074481		4174.6	-0.01998861
464.79	0.10044403		994.79	0.00727213		1524.78	0.01498545		2054.79	-0.01370249		2584.78	-0.0041128		3114.81	0.0037849		3644.8	-0.00112272		4174.8	-0.01889415
464.99	0.10075563		994.99	0.00615025		1524.98	0.01475478		2054.99	-0.01342187		2584.98	-0.00373366		3115.01	0.00358753		3645	-0.0010103		4175	-0.01866421
465.19	0.10046942		995.19	0.00690699		1525.18	0.01416818		2055.19	-0.0127258		2585.18	-0.00335429		3115.21	0.00331916		3645.2	-0.00120465		4175.2	-0.01878295
465.39	0.10105442		995.39	0.00585052		1525.38	0.01362552		2055.39	-0.01219395		2585.38	-0.00221703		3115.41	0.00334968		3645.4	-0.00156021		4175.4	-0.01906244
465.59	0.10184862		995.59	0.00556039		1525.58	0.01314358		2055.59	-0.01178243		2585.58	-0.00154137		3115.61	0.00445077		3645.6	-0.00242534		4175.6	-0.01944708
465.79	0.10251066		995.79	0.00580001		1525.78	0.01328384		2055.79	-0.01163687		2585.78	-0.00058236		3115.81	0.00350838		3645.8	-0.00298114		4175.8	-0.01961494
465.99	0.10284836		995.99	0.00550012		1525.98	0.01354375		2055.99	-0.01144938		2585.98	-0.00094946		3116.01	0.00357516		3646	-0.00296254		4176	-0.01881103
466.19	0.10266891		996.19	0.00658577		1526.18	0.0138197		2056.19	-0.01204144		2586.18	-0.00148288		3116.21	0.00449666		3646.2	-0.00359361		4176.2	-0.01757728
466.39	0.10286065		996.39	0.00763899		1526.38	0.01388897		2056.39	-0.01238227		2586.38	-0.00158682		3116.41	0.00599893		3646.4	-0.00289312		4176.4	-0.01585908
466.59	0.10371991		996.59	0.00756412		1526.58	0.0133186		2056.59	-0.01254521		2586.58	-0.00140544		3116.61	0.00699139		3646.6	-0.00307622		4176.6	-0.01526808
466.79	0.10458135		996.79	0.00828558		1526.78	0.01266459		2056.79	-0.01301149		2586.78	-0.00143779		3116.81	0.00772909		3646.8	-0.00239901		4176.8	-0.01457612
466.99	0.10437874		996.99	0.00855026		1526.98	0.01268953		2056.99	-0.01363722		2586.98	-0.00250689		3117.01	0.00858941		3647	-0.00193033		4177	-0.01468149
467.19	0.10508757		997.19	0.00876855		1527.18	0.01246142		2057.19	-0.01482895		2587.18	-0.00265155		3117.21	0.00835372		3647.2	-0.00129488		4177.2	-0.01429643
467.39	0.10482357		997.39	0.00921883		1527.38	0.01211922		2057.39	-0.01537275		2587.38	-0.00266526		3117.41	0.0085389		3647.4	-0.00072616		4177.4	-0.01482445
467.59	0.10484106		997.59	0.00969026		1527.58	0.01256856		2057.59	-0.01612529		2587.58	-0.00311524		3117.61	0.00829304		3647.6	-0.00055363		4177.6	-0.01572065
467.79	0.10441726		997.79	0.01009658		1527.78	0.01205764		2057.79	-0.01738751		2587.78	-0.00383478		3117.81	0.00826656		3647.8	-0.00056425		4177.8	-0.0171784
467.99	0.10408208		997.99	0.01047967		1527.98	0.01144771		2057.99	-0.01791759		2587.98	-0.00460124		3118.01	0.00813206		3648	-0.000751		4178	-0.01768394
468.19	0.10353099		998.19	0.01100327		1528.18	0.01138814		2058.19	-0.01726892		2588.18	-0.00510801		3118.21	0.00769927		3648.2	-0.00149302		4178.2	-0.01798562
468.39	0.10216569		998.39	0.01104843		1528.38	0.0110166		2058.39	-0.01707819		2588.38	-0.00436992		3118.41	0.0072117		3648.4	-0.00131607		4178.4	-0.01880832
468.59	0.10204594		998.59	0.01039734		1528.58	0.01108868		2058.59	-0.01634284		2588.58	-0.00428793		3118.61	0.00632548		3648.6	-0.00124425		4178.6	-0.01825483
468.79	0.10172824		998.79	0.0104136		1528.78	0.01147015		2058.79	-0.01509135		2588.78	-0.00420458		3118.81	0.00641246		3648.8	-0.00095674		4178.8	-0.0186673
468.99	0.10121579		998.99	0.00991392		1528.98	0.01238206		2058.99	-0.01447572		2588.98	-0.00430307		3119.01	0.00596878		3649	-0.00134225		4179	-0.01819469
469.19	0.10039182		999.19	0.01008223		1529.18	0.01207219		2059.19	-0.01385908		2589.18	-0.00378085		3119.21	0.00551021		3649.2	-0.00124969		4179.2	-0.01790878
469.39	0.10032853		999.39	0.00883245		1529.38	0.01268525		2059.39	-0.01373433		2589.38	-0.00314941		3119.41	0.00542673		3649.4	-0.00159758		4179.4	-0.01770995
469.59	0.10021771		999.59	0.00923689		1529.58	0.01287872		2059.59	-0.01339806		2589.58	-0.00298048		3119.61	0.00526997		3649.6	-0.0013657		4179.6	-0.0176207
469.79	0.09955455		999.79	0.00986282		1529.78	0.01287957		2059.79	-0.0137864		2589.78	-0.00326232		3119.81	0.00461437		3649.8	-0.00115492		4179.8	-0.01677319
469.99	0.09916686		999.99	0.0093886		1529.98	0.01286039		2059.99	-0.01345481		2589.98	-0.00393847		3120.01	0.0045435		3650	-0.00166898		4180	-0.01583282
470.19	0.10012017		1000.19	0.00956005		1530.18	0.0133736		2060.19	-0.01366691		2590.18	-0.00389748		3120.21	0.00554515		3650.2	-0.00198807		4180.2	-0.01506249
470.39	0.10074741		1000.39	0.00916417		1530.38	0.01241002		2060.39	-0.01369795		2590.38	-0.00412398		3120.41	0.00645993		3650.4	-0.00231348		4180.4	-0.01487981
470.59	0.10147924		1000.59	0.00931876		1530.58	0.01265331		2060.59	-0.01353314		2590.58	-0.00322139		3120.61	0.00653191		3650.6	-0.00327581		4180.6	-0.01463104
470.79	0.10165125		1000.79	0.00966592		1530.78	0.01337665		2060.79	-0.01432399		2590.78	-0.00282293		3120.81	0.00549539		3650.8	-0.00263573		4180.8	-0.01418591
470.99	0.10187294		1000.99	0.00892929		1530.98	0.01328381		2060.99	-0.01513342		2590.98	-0.00272031		3121.01	0.00551126		3651	-0.00307839		4181	-0.01424917
471.19	0.10151347		1001.19	0.00830813		1531.18	0.0133146		2061.19	-0.01540241		2591.18	-0.00212611		3121.21	0.00420031		3651.2	-0.00275493		4181.2	-0.01536083
471.39	0.10095861		1001.39	0.00768644		1531.38	0.01305674		2061.39	-0.01493261		2591.38	-0.00162261		3121.41	0.00399713		3651.4	-0.00378383		4181.4	-0.01595063
471.59	0.10147998		1001.59	0.00743639		1531.58	0.01283077		2061.59	-0.01578599		2591.58	-0.00220182		3121.61	0.00343469		3651.6	-0.00389711		4181.6	-0.01617096
471.79	0.10130317		1001.79	0.00723078		1531.78	0.01290899		2061.79	-0.01611136		2591.78	-0.00217078		3121.81	0.00289968		3651.8	-0.00475764		4181.8	-0.0163842
471.99	0.10157692		1001.99	0.00721075		1531.98	0.0123357		2061.99	-0.01589907		2591.98	-0.00281117		3122.01	0.00225972		3652	-0.00550388		4182	-0.01643701
472.19	0.10128884		1002.19	0.00655147		1532.18	0.0128827		2062.19	-0.01569603		2592.18	-0.00246619		3122.21	0.00190326		3652.2	-0.00607533		4182.2	-0.01724103
472.39	0.10102123		1002.39	0.00576281		1532.38	0.01366718		2062.39	-0.01589201		2592.38	-0.00248424		3122.41	0.00250766		3652.4	-0.00513636		4182.4	-0.01720262
472.59	0.10067209		1002.59	0.00573122		1532.58	0.01390477		2062.59	-0.01493098		2592.58	-0.00269661		3122.61	0.00315801		3652.6	-0.00420454		4182.6	-0.0173782
472.79	0.10021626		1002.79	0.00534123		1532.78	0.01413345		2062.79	-0.01514435		2592.78	-0.00284294		3122.81	0.00336981		3652.8	-0.00481091		4182.8	-0.01722545
472.99	0.10036606		1002.99	0.0050727		1532.98	0.01515956		2062.99	-0.01552941		2592.98	-0.00270581		3123.01	0.00303582		3653	-0.00456983		4183	-0.01692804
473.19	0.10106283		1003.19	0.00561589		1533.18	0.01464848		2063.19	-0.01531127		2593.18	-0.00255158		3123.21	0.00266107		3653.2	-0.00517497		4183.2	-0.01775151
473.39	0.10113946		1003.39	0.0061212		1533.38	0.01456609		2063.39	-0.01477546		2593.38	-0.00347881		3123.41	0.00318705		3653.4	-0.00508856		4183.4	-0.01784198
473.59	0.10163215		1003.59	0.00718652		1533.58	0.01451335		2063.59	-0.01506007		2593.58	-0.00386		3123.61	0.00358809		3653.6	-0.00427079		4183.6	-0.01866438
473.79	0.10213001		1003.79	0.00713318		1533.78	0.01445744		2063.79	-0.01560599		2593.78	-0.00432813		3123.81	0.00382466		3653.8	-0.00433515		4183.8	-0.01900089
473.99	0.10347429		1003.99	0.0068732		1533.98	0.01412756		2063.99	-0.01602898		2593.98	-0.00440344		3124.01	0.00379139		3654	-0.00449453		4184	-0.01958543
474.19	0.10423548		1004.19	0.0078057		1534.18	0.01389579		2064.19	-0.01568457		2594.18	-0.00508642		3124.21	0.00436612		3654.2	-0.0045993		4184.2	-0.01927306
474.39	0.10414576		1004.39	0.00840918		1534.38	0.0127546		2064.39	-0.01565272		2594.38	-0.00512323		3124.41	0.00428981		3654.4	-0.0050461		4184.4	-0.01946458
474.59	0.10483906		1004.59	0.00873339		1534.58	0.01301155		2064.59	-0.01528944		2594.58	-0.00504766		3124.61	0.00275118		3654.6	-0.00483022		4184.6	-0.01949017
474.79	0.10440748		1004.79	0.00811896		1534.78	0.01299426		2064.79	-0.01573907		2594.78	-0.00481063		3124.81	0.00123294		3654.8	-0.00396311		4184.8	-0.01892633
474.99	0.10386123		1004.99	0.00767943		1534.98	0.01310419		2064.99	-0.01562867		2594.98	-0.00477461		3125.01	0.00135501		3655	-0.00460185		4185	-0.01959843
475.19	0.10286119		1005.19	0.00765426		1535.18	0.01322229		2065.19	-0.0149719		2595.18	-0.00463387		3125.21	0.00051872		3655.2	-0.0043132		4185.2	-0.01953283
475.39	0.10304249		1005.39	0.00755083		1535.38	0.01219059		2065.39	-0.01469531		2595.38	-0.00512454		3125.41	0.000552		3655.4	-0.00520828		4185.4	-0.01830208
475.59	0.10318991		1005.59	0.00754317		1535.58	0.01218397		2065.59	-0.01477341		2595.58	-0.00566311		3125.61	0.00018158		3655.6	-0.00465919		4185.6	-0.01845782
475.79	0.10326839		1005.79	0.00739005		1535.78	0.01220689		2065.79	-0.01425283		2595.78	-0.00569307		3125.81	-0.00068199		3655.8	-0.00505763		4185.8	-0.0179213
475.99	0.10320427		1005.99	0.00763614		1535.98	0.01198475		2065.99	-0.01419669		2595.98	-0.00661786		3126.01	-0.00101195		3656	-0.00475258		4186	-0.01806201
476.19	0.10185529		1006.19	0.00747254		1536.18	0.01248483		2066.19	-0.014052		2596.18	-0.00614979		3126.21	0.00016196		3656.2	-0.00336448		4186.2	-0.01710126
476.39	0.10068724		1006.39	0.00815789		1536.38	0.01282555		2066.39	-0.01425818		2596.38	-0.00598161		3126.41	0.00046584		3656.4	-0.00266003		4186.4	-0.01625087
476.59	0.1008833		1006.59	0.00864034		1536.58	0.01276061		2066.59	-0.01448465		2596.58	-0.00657383		3126.61	0.00101463		3656.6	-0.00160295		4186.6	-0.01656553
476.79	0.10123946		1006.79	0.00879769		1536.78	0.01186759		2066.79	-0.01464859		2596.78	-0.00709242		3126.81	0.00143946		3656.8	-0.00202099		4186.8	-0.01578188
476.99	0.10089853		1006.99	0.00911947		1536.98	0.01347536		2066.99	-0.01459052		2596.98	-0.00640679		3127.01	0.00171543		3657	-0.00150383		4187	-0.01643781
477.19	0.10156701		1007.19	0.00952181		1537.18	0.01306811		2067.19	-0.01367432		2597.18	-0.00703623		3127.21	0.00244711		3657.2	-0.00167408		4187.2	-0.01614471
477.39	0.10112099		1007.39	0.0092353		1537.38	0.01333296		2067.39	-0.01334585		2597.38	-0.00800595		3127.41	0.00340767		3657.4	-0.00121234		4187.4	-0.01550767
477.59	0.10135959		1007.59	0.0085327		1537.58	0.01386777		2067.59	-0.01456476		2597.58	-0.00722707		3127.61	0.00353567		3657.6	-0.00072257		4187.6	-0.01591278
477.79	0.10222844		1007.79	0.0087019		1537.78	0.01383136		2067.79	-0.01519746		2597.78	-0.0070353		3127.81	0.00442202		3657.8	-0.00054349		4187.8	-0.01552894
477.99	0.10218227		1007.99	0.00875257		1537.98	0.01338755		2067.99	-0.01528234		2597.98	-0.00700323		3128.01	0.00500586		3658	0.00001398		4188	-0.01578539
478.19	0.10315155		1008.19	0.00935195		1538.18	0.01307048		2068.19	-0.01423894		2598.18	-0.00766177		3128.21	0.00530483		3658.2	-0.00088832		4188.2	-0.0150268
478.39	0.10298082		1008.39	0.00906808		1538.38	0.01249469		2068.39	-0.01449759		2598.38	-0.00758259		3128.41	0.00559867		3658.4	-0.00053659		4188.4	-0.01525656
478.59	0.10338996		1008.59	0.00892134		1538.58	0.0123845		2068.59	-0.0146255		2598.58	-0.00761337		3128.61	0.0041086		3658.6	-0.00103242		4188.6	-0.01564137
478.79	0.10322209		1008.79	0.00877562		1538.78	0.01221094		2068.79	-0.01494775		2598.78	-0.00709269		3128.81	0.00443861		3658.8	-0.0016533		4188.8	-0.01646628
478.99	0.10365944		1008.99	0.00861986		1538.98	0.01210084		2068.99	-0.01368827		2598.98	-0.00666204		3129.01	0.00476101		3659	-0.00312201		4189	-0.01688794
479.19	0.10361706		1009.19	0.00821146		1539.18	0.01169953		2069.19	-0.01293438		2599.18	-0.00642425		3129.21	0.00454396		3659.2	-0.00251236		4189.2	-0.01768924
479.39	0.10396905		1009.39	0.00823337		1539.38	0.01076698		2069.39	-0.01308956		2599.38	-0.00647663		3129.41	0.00410631		3659.4	-0.00306608		4189.4	-0.01816664
479.59	0.10404511		1009.59	0.0078516		1539.58	0.01158185		2069.59	-0.01301084		2599.58	-0.00609939		3129.61	0.00402864		3659.6	-0.00213233		4189.6	-0.01903313
479.79	0.10416012		1009.79	0.00746129		1539.78	0.01178836		2069.79	-0.01281489		2599.78	-0.00538153		3129.81	0.00343031		3659.8	-0.00238837		4189.8	-0.01861785
479.99	0.10402765		1009.99	0.00711923		1539.98	0.01210569		2069.99	-0.01324857		2599.98	-0.00573999		3130.01	0.00370208		3660	-0.0020496		4190	-0.0189683
480.19	0.10326174		1010.19	0.00723677		1540.18	0.01209978		2070.19	-0.0132856		2600.18	-0.00475783		3130.21	0.00490866		3660.2	-0.00168145		4190.2	-0.01840938
480.39	0.10308473		1010.39	0.00756674		1540.38	0.01250036		2070.39	-0.01374365		2600.38	-0.00400491		3130.41	0.00417262		3660.4	-0.0026341		4190.4	-0.01838588
480.59	0.10359244		1010.59	0.00666527		1540.58	0.01250213		2070.59	-0.01445056		2600.58	-0.00338532		3130.61	0.00494654		3660.6	-0.00185663		4190.6	-0.01903912
480.79	0.10266534		1010.79	0.0065325		1540.78	0.01238327		2070.79	-0.01402976		2600.78	-0.00284023		3130.81	0.00456661		3660.8	-0.00287189		4190.8	-0.01910015
480.99	0.10184203		1010.99	0.00695999		1540.98	0.0140299		2070.99	-0.01457787		2600.98	-0.00198391		3131.01	0.00429235		3661	-0.003029		4191	-0.01894843
481.19	0.10177602		1011.19	0.00705772		1541.18	0.01271139		2071.19	-0.01496018		2601.18	-0.0018419		3131.21	0.00371902		3661.2	-0.00383036		4191.2	-0.01801051
481.39	0.10082477		1011.39	0.00710805		1541.38	0.01269699		2071.39	-0.01599879		2601.38	-0.00142957		3131.41	0.00362449		3661.4	-0.00461898		4191.4	-0.01742487
481.59	0.10075792		1011.59	0.00703595		1541.58	0.012262		2071.59	-0.01710702		2601.58	-0.00191912		3131.61	0.00403179		3661.6	-0.00518993		4191.6	-0.01700687
481.79	0.10131902		1011.79	0.00799176		1541.78	0.01203201		2071.79	-0.0177139		2601.78	-0.00174977		3131.81	0.00443835		3661.8	-0.00504149		4191.8	-0.01571626
481.99	0.10161649		1011.99	0.00833715		1541.98	0.01118191		2071.99	-0.01735861		2601.98	-0.00178143		3132.01	0.00444978		3662	-0.00559087		4192	-0.01533733
482.19	0.10241273		1012.19	0.00924913		1542.18	0.0107379		2072.19	-0.01694304		2602.18	-0.00207589		3132.21	0.00441427		3662.2	-0.00586698		4192.2	-0.01523644
482.39	0.10192393		1012.39	0.00981552		1542.38	0.01069252		2072.39	-0.01713314		2602.38	-0.00236666		3132.41	0.00412998		3662.4	-0.00561631		4192.4	-0.0157315
482.59	0.10251351		1012.59	0.01005014		1542.58	0.01064321		2072.59	-0.01686131		2602.58	-0.00277017		3132.61	0.00303827		3662.6	-0.00617541		4192.6	-0.01652323
482.79	0.10277751		1012.79	0.00989542		1542.78	0.01032754		2072.79	-0.01682084		2602.78	-0.00331869		3132.81	0.00366825		3662.8	-0.00624362		4192.8	-0.0177248
482.99	0.10265055		1012.99	0.0093822		1542.98	0.01111473		2072.99	-0.0164702		2602.98	-0.00350733		3133.01	0.00327237		3663	-0.00592323		4193	-0.01886367
483.19	0.10264352		1013.19	0.00961719		1543.18	0.01151391		2073.19	-0.01716864		2603.18	-0.00509498		3133.21	0.00317866		3663.2	-0.00473356		4193.2	-0.02094037
483.39	0.10272451		1013.39	0.00949859		1543.38	0.01116454		2073.39	-0.01778299		2603.38	-0.00500847		3133.41	0.00365751		3663.4	-0.00424793		4193.4	-0.02072806
483.59	0.10279634		1013.59	0.00866287		1543.58	0.01229795		2073.59	-0.0176615		2603.58	-0.00533041		3133.61	0.00374258		3663.6	-0.00363083		4193.6	-0.02103416
483.79	0.10351656		1013.79	0.00735654		1543.78	0.01181593		2073.79	-0.01675434		2603.78	-0.00523222		3133.81	0.00329767		3663.8	-0.00383577		4193.8	-0.02152949
483.99	0.10401107		1013.99	0.0067993		1543.98	0.01230597		2073.99	-0.01697623		2603.98	-0.00614087		3134.01	0.00344105		3664	-0.00367981		4194	-0.02145971
484.19	0.10418041		1014.19	0.00633769		1544.18	0.01229489		2074.19	-0.01680705		2604.18	-0.00551546		3134.21	0.00432254		3664.2	-0.00246432		4194.2	-0.02102977
484.39	0.10372855		1014.39	0.00573948		1544.38	0.01263785		2074.39	-0.01636106		2604.38	-0.00590146		3134.41	0.00402175		3664.4	-0.00206123		4194.4	-0.02093962
484.59	0.10366936		1014.59	0.00535372		1544.58	0.01287406		2074.59	-0.01692113		2604.58	-0.00563268		3134.61	0.00443204		3664.6	-0.0009916		4194.6	-0.0212063
484.79	0.1031649		1014.79	0.00581167		1544.78	0.01320698		2074.79	-0.0164643		2604.78	-0.00576759		3134.81	0.00431304		3664.8	-0.00106647		4194.8	-0.02093046
484.99	0.10261456		1014.99	0.00604113		1544.98	0.01326872		2074.99	-0.01643236		2604.98	-0.00576823		3135.01	0.00406998		3665	-0.00076546		4195	-0.02028811
485.19	0.10200299		1015.19	0.00499271		1545.18	0.0125286		2075.19	-0.01702803		2605.18	-0.00650585		3135.21	0.00313132		3665.2	-0.00113087		4195.2	-0.01924764
485.39	0.10121311		1015.39	0.00428554		1545.38	0.01291628		2075.39	-0.01620425		2605.38	-0.00664715		3135.41	0.00243893		3665.4	-0.00052848		4195.4	-0.01910861
485.59	0.10027747		1015.59	0.00427978		1545.58	0.01295022		2075.59	-0.01618839		2605.58	-0.00733298		3135.61	0.00310437		3665.6	-0.00053882		4195.6	-0.0183225
485.79	0.10091244		1015.79	0.00433044		1545.78	0.01268417		2075.79	-0.01667069		2605.78	-0.00642711		3135.81	0.00231164		3665.8	-0.00071631		4195.8	-0.01726532
485.99	0.10097845		1015.99	0.00427642		1545.98	0.01266215		2075.99	-0.01664447		2605.98	-0.0059138		3136.01	0.00182051		3666	-0.00113452		4196	-0.01761717
486.19	0.10021441		1016.19	0.00508626		1546.18	0.01293956		2076.19	-0.01694732		2606.18	-0.00531895		3136.21	0.0013551		3666.2	-0.00166063		4196.2	-0.01840207
486.39	0.09952646		1016.39	0.00556196		1546.38	0.01325495		2076.39	-0.01708438		2606.38	-0.00523676		3136.41	0.0007137		3666.4	-0.00217511		4196.4	-0.01884505
486.59	0.09921803		1016.59	0.00582496		1546.58	0.01383224		2076.59	-0.01742212		2606.58	-0.00503899		3136.61	-0.00026535		3666.6	-0.00293506		4196.6	-0.01950247
486.79	0.09893584		1016.79	0.00666951		1546.78	0.0135723		2076.79	-0.018421		2606.78	-0.00517411		3136.81	-0.00026482		3666.8	-0.0034984		4196.8	-0.01990159
486.99	0.09868622		1016.99	0.00774823		1546.98	0.01409248		2076.99	-0.01902252		2606.98	-0.00533225		3137.01	0.00006555		3667	-0.0034819		4197	-0.02017724
487.19	0.09889014		1017.19	0.00800285		1547.18	0.0138219		2077.19	-0.01861065		2607.18	-0.00614959		3137.21	0.00024863		3667.2	-0.00412717		4197.2	-0.01982185
487.39	0.09868704		1017.39	0.00913918		1547.38	0.01358796		2077.39	-0.01864151		2607.38	-0.00480792		3137.41	0.0003866		3667.4	-0.00418433		4197.4	-0.01913852
487.59	0.0992796		1017.59	0.00954918		1547.58	0.01354113		2077.59	-0.01853344		2607.58	-0.00513405		3137.61	0.00076067		3667.6	-0.00485802		4197.6	-0.0189148
487.79	0.10027696		1017.79	0.00954382		1547.78	0.01305858		2077.79	-0.01817019		2607.78	-0.00512993		3137.81	0.00100362		3667.8	-0.00498121		4197.8	-0.01836848
487.99	0.10074112		1017.99	0.01031253		1547.98	0.01372524		2077.99	-0.0178649		2607.98	-0.00577728		3138.01	0.0020031		3668	-0.00462385		4198	-0.01726136
488.19	0.10115094		1018.19	0.01066392		1548.18	0.0134125		2078.19	-0.01776944		2608.18	-0.00519627		3138.21	0.00326265		3668.2	-0.00357369		4198.2	-0.01651665
488.39	0.10088795		1018.39	0.01090671		1548.38	0.01367369		2078.39	-0.01806388		2608.38	-0.005104		3138.41	0.00243092		3668.4	-0.00402438		4198.4	-0.01657606
488.59	0.10106212		1018.59	0.01202771		1548.58	0.01379271		2078.59	-0.01773807		2608.58	-0.00431133		3138.61	0.00269283		3668.6	-0.00351405		4198.6	-0.0170471
488.79	0.10142922		1018.79	0.01223027		1548.78	0.01388071		2078.79	-0.01752975		2608.78	-0.00406369		3138.81	0.00312396		3668.8	-0.00278186		4198.8	-0.01752787
488.99	0.10134298		1018.99	0.01166632		1548.98	0.01334305		2078.99	-0.01726834		2608.98	-0.00391391		3139.01	0.00353009		3669	-0.00226819		4199	-0.01766541
489.19	0.10047518		1019.19	0.010953		1549.18	0.01320253		2079.19	-0.01715675		2609.18	-0.0039681		3139.21	0.00304273		3669.2	-0.00237102		4199.2	-0.01754158
489.39	0.10078324		1019.39	0.01002696		1549.38	0.01340889		2079.39	-0.01658715		2609.38	-0.00324295		3139.41	0.00311384		3669.4	-0.00203989		4199.4	-0.01904445
489.59	0.10120381		1019.59	0.00948335		1549.58	0.01333261		2079.59	-0.01781026		2609.58	-0.00357209		3139.61	0.00375838		3669.6	-0.00256658		4199.6	-0.0193805
489.79	0.1017515		1019.79	0.00920815		1549.78	0.01282199		2079.79	-0.01805131		2609.78	-0.0036346		3139.81	0.00261104		3669.8	-0.00285004		4199.8	-0.01979675
489.99	0.1012173		1019.99	0.00823547		1549.98	0.01260764		2079.99	-0.01861754		2609.98	-0.00248863		3140.01	0.00256916		3670	-0.003187		4200	-0.02097217
490.19	0.10115099		1020.19	0.00833763		1550.18	0.01240236		2080.19	-0.01782813		2610.18	-0.00191956		3140.21	0.00259084		3670.2	-0.00346727		4200.2	-0.02235905
490.39	0.10186309		1020.39	0.00760312		1550.38	0.01176434		2080.39	-0.01782963		2610.38	-0.00186242		3140.41	0.00173863		3670.4	-0.00402846		4200.4	-0.02228061
490.59	0.10158806		1020.59	0.00793676		1550.58	0.01216913		2080.59	-0.01799618		2610.58	-0.00214686		3140.61	0.00133766		3670.6	-0.00407336		4200.6	-0.0222938
490.79	0.10203781		1020.79	0.00715296		1550.78	0.01179894		2080.79	-0.01795766		2610.78	-0.00247762		3140.81	0.00135022		3670.8	-0.00413348		4200.8	-0.0225098
490.99	0.10232369		1020.99	0.00705701		1550.98	0.0110781		2080.99	-0.01750473		2610.98	-0.00300541		3141.01	0.00120247		3671	-0.00356186		4201	-0.02211705
491.19	0.10175103		1021.19	0.00687938		1551.18	0.01042111		2081.19	-0.0169806		2611.18	-0.00367715		3141.21	0.00022625		3671.2	-0.00361334		4201.2	-0.02200959
491.39	0.10162731		1021.39	0.00773648		1551.38	0.01000735		2081.39	-0.01589356		2611.38	-0.00372812		3141.41	-0.00019119		3671.4	-0.00240411		4201.4	-0.02181295
491.59	0.10136394		1021.59	0.00748215		1551.58	0.00977068		2081.59	-0.01625901		2611.58	-0.00483433		3141.61	0.0004608		3671.6	-0.00355461		4201.6	-0.02154702
491.79	0.10104879		1021.79	0.0077706		1551.78	0.00960981		2081.79	-0.0157894		2611.78	-0.00547332		3141.81	-0.0006015		3671.8	-0.00368214		4201.8	-0.02083591
491.99	0.10087771		1021.99	0.00741354		1551.98	0.00910547		2081.99	-0.01529988		2611.98	-0.00587862		3142.01	-0.00100587		3672	-0.00365347		4202	-0.02031412
492.19	0.10059874		1022.19	0.00692439		1552.18	0.00904121		2082.19	-0.01561765		2612.18	-0.00485415		3142.21	-0.00150717		3672.2	-0.00335018		4202.2	-0.02014699
492.39	0.10089842		1022.39	0.00703411		1552.38	0.00874461		2082.39	-0.01579062		2612.38	-0.00507974		3142.41	-0.00192439		3672.4	-0.00327514		4202.4	-0.01998734
492.59	0.10171636		1022.59	0.00804468		1552.58	0.00845724		2082.59	-0.0152789		2612.58	-0.00473175		3142.61	-0.00102449		3672.6	-0.00316873		4202.6	-0.01962753
492.79	0.10212507		1022.79	0.00778989		1552.78	0.00845476		2082.79	-0.01571903		2612.78	-0.00469567		3142.81	-0.00010626		3672.8	-0.00290077		4202.8	-0.01923898
492.99	0.10191032		1022.99	0.00769531		1552.98	0.00831737		2082.99	-0.01517406		2612.98	-0.00386824		3143.01	0.00033574		3673	-0.00354958		4203	-0.01915182
493.19	0.10175628		1023.19	0.0081288		1553.18	0.0087052		2083.19	-0.01519723		2613.18	-0.00449732		3143.21	-0.00037342		3673.2	-0.00336553		4203.2	-0.01951992
493.39	0.1026127		1023.39	0.00862713		1553.38	0.00947441		2083.39	-0.01515309		2613.38	-0.00417411		3143.41	0.00007022		3673.4	-0.00369928		4203.4	-0.01924263
493.59	0.10288344		1023.59	0.0086693		1553.58	0.010263		2083.59	-0.01563172		2613.58	-0.00390197		3143.61	0.00024888		3673.6	-0.00415122		4203.6	-0.01939937
493.79	0.10282675		1023.79	0.00877222		1553.78	0.01044145		2083.79	-0.01532037		2613.78	-0.0032886		3143.81	0.00008143		3673.8	-0.004469		4203.8	-0.01909125
493.99	0.10343597		1023.99	0.00757585		1553.98	0.01072331		2083.99	-0.01624558		2613.98	-0.00195442		3144.01	0.00017134		3674	-0.00475248		4204	-0.01910387
494.19	0.10403797		1024.19	0.00799055		1554.18	0.01096532		2084.19	-0.01601595		2614.18	-0.00182664		3144.21	0.0004322		3674.2	-0.00493474		4204.2	-0.01956959
494.39	0.10416081		1024.39	0.00744402		1554.38	0.01146502		2084.39	-0.01647955		2614.38	-0.00185452		3144.41	-0.00003611		3674.4	-0.00574984		4204.4	-0.01839246
494.59	0.10372638		1024.59	0.00750317		1554.58	0.01185458		2084.59	-0.01569335		2614.58	-0.00194372		3144.61	-0.00003969		3674.6	-0.00528074		4204.6	-0.0189
494.79	0.1045381		1024.79	0.00703969		1554.78	0.01104167		2084.79	-0.01530806		2614.78	-0.00211389		3144.81	-0.00066324		3674.8	-0.00506082		4204.8	-0.01865128
494.99	0.10387567		1024.99	0.00779446		1554.98	0.0107565		2084.99	-0.01512063		2614.98	-0.00276784		3145.01	-0.00054986		3675	-0.00449004		4205	-0.01845637
495.19	0.10326179		1025.19	0.00801285		1555.18	0.01094985		2085.19	-0.01457553		2615.18	-0.00331963		3145.21	-0.00095418		3675.2	-0.0045968		4205.2	-0.0186154
495.39	0.10317723		1025.39	0.00788278		1555.38	0.01045672		2085.39	-0.01466791		2615.38	-0.0035961		3145.41	-0.000961		3675.4	-0.00481545		4205.4	-0.01914525
495.59	0.10248332		1025.59	0.00810982		1555.58	0.01067755		2085.59	-0.01566689		2615.58	-0.00457623		3145.61	-0.00035887		3675.6	-0.00525021		4205.6	-0.01936096
495.79	0.10243958		1025.79	0.00808003		1555.78	0.01045211		2085.79	-0.01543635		2615.78	-0.00472444		3145.81	-0.00016029		3675.8	-0.00476749		4205.8	-0.01977747
495.99	0.10249352		1025.99	0.00700661		1555.98	0.01012419		2085.99	-0.01511095		2615.98	-0.00595942		3146.01	0.00089843		3676	-0.00452138		4206	-0.01986189
496.19	0.10309694		1026.19	0.00703565		1556.18	0.01033176		2086.19	-0.0152551		2616.18	-0.00562478		3146.21	0.00210499		3676.2	-0.00333998		4206.2	-0.02012997
496.39	0.10356442		1026.39	0.00642727		1556.38	0.01021364		2086.39	-0.01509923		2616.38	-0.00613148		3146.41	0.00345619		3676.4	-0.0029667		4206.4	-0.01946108
496.59	0.10378572		1026.59	0.0059312		1556.58	0.01106461		2086.59	-0.01513548		2616.58	-0.00630602		3146.61	0.00357701		3676.6	-0.00317403		4206.6	-0.01935676
496.79	0.10322502		1026.79	0.00503789		1556.78	0.01087489		2086.79	-0.01531648		2616.78	-0.00664013		3146.81	0.0040691		3676.8	-0.00314673		4206.8	-0.01991934
496.99	0.10316599		1026.99	0.00572899		1556.98	0.01110238		2086.99	-0.01563023		2616.98	-0.00632018		3147.01	0.00433952		3677	-0.00352761		4207	-0.02031329
497.19	0.10298753		1027.19	0.00570096		1557.18	0.0110571		2087.19	-0.01610969		2617.18	-0.00673495		3147.21	0.00516695		3677.2	-0.0027875		4207.2	-0.01983414
497.39	0.10250871		1027.39	0.00622716		1557.38	0.01214208		2087.39	-0.01612597		2617.38	-0.00648949		3147.41	0.00540182		3677.4	-0.00340073		4207.4	-0.0191228
497.59	0.102185		1027.59	0.00547831		1557.58	0.01246422		2087.59	-0.01698002		2617.58	-0.00630043		3147.61	0.00537141		3677.6	-0.00362059		4207.6	-0.01972899
497.79	0.10181528		1027.79	0.00534776		1557.78	0.01248945		2087.79	-0.01761756		2617.78	-0.00550135		3147.81	0.004109		3677.8	-0.00333968		4207.8	-0.01903848
497.99	0.10142894		1027.99	0.00448044		1557.98	0.011837		2087.99	-0.01823755		2617.98	-0.00480242		3148.01	0.0035136		3678	-0.00296395		4208	-0.01864621
498.19	0.10099231		1028.19	0.00475146		1558.18	0.01162827		2088.19	-0.01862391		2618.18	-0.00447332		3148.21	0.00273701		3678.2	-0.00367303		4208.2	-0.01941284
498.39	0.10069144		1028.39	0.00462576		1558.38	0.01153029		2088.39	-0.01809255		2618.38	-0.00483987		3148.41	0.00185281		3678.4	-0.00365386		4208.4	-0.0187635
498.59	0.10078199		1028.59	0.00511285		1558.58	0.01079669		2088.59	-0.01779629		2618.58	-0.00457002		3148.61	0.00146589		3678.6	-0.00364595		4208.6	-0.01953611
498.79	0.1018619		1028.79	0.00622709		1558.78	0.0098263		2088.79	-0.01853097		2618.78	-0.00454175		3148.81	0.00163683		3678.8	-0.00343398		4208.8	-0.01934135
498.99	0.10185399		1028.99	0.00707678		1558.98	0.00972877		2088.99	-0.01898739		2618.98	-0.00493236		3149.01	0.00154089		3679	-0.00385668		4209	-0.02053031
499.19	0.10244754		1029.19	0.0072118		1559.18	0.00978622		2089.19	-0.01874712		2619.18	-0.00485282		3149.21	0.00068349		3679.2	-0.00502477		4209.2	-0.02137627
499.39	0.10257704		1029.39	0.00727068		1559.38	0.00992652		2089.39	-0.01899046		2619.38	-0.0047832		3149.41	0.00008776		3679.4	-0.00602897		4209.4	-0.02210997
499.59	0.10267181		1029.59	0.00743431		1559.58	0.01026616		2089.59	-0.01857912		2619.58	-0.00587755		3149.61	0.00061118		3679.6	-0.0064893		4209.6	-0.02248417
499.79	0.10309526		1029.79	0.00702132		1559.78	0.01004845		2089.79	-0.01901823		2619.78	-0.0061407		3149.81	0.00041695		3679.8	-0.00626904		4209.8	-0.02334089
499.99	0.10342091		1029.99	0.0061525		1559.98	0.01062624		2089.99	-0.01832162		2619.98	-0.00723424		3150.01	0.00092644		3680	-0.0060896		4210	-0.02283732
500.19	0.10369885		1030.19	0.00538192		1560.18	0.01120645		2090.19	-0.01780232		2620.18	-0.00669242		3150.21	0.00091209		3680.2	-0.00601254		4210.2	-0.02324253
500.39	0.10303217		1030.39	0.00345945		1560.38	0.01134441		2090.39	-0.01723415		2620.38	-0.00692743		3150.41	0.00144197		3680.4	-0.00653318		4210.4	-0.02180281
500.59	0.10326985		1030.59	0.00355378		1560.58	0.01169257		2090.59	-0.01683896		2620.58	-0.00750066		3150.61	0.00099831		3680.6	-0.00679424		4210.6	-0.02129109
500.79	0.10274717		1030.79	0.00287572		1560.78	0.01084815		2090.79	-0.0169476		2620.78	-0.00754061		3150.81	0.0018003		3680.8	-0.00698569		4210.8	-0.02151088
500.99	0.10226689		1030.99	0.00334499		1560.98	0.0111776		2090.99	-0.01723796		2620.98	-0.00677256		3151.01	0.00317001		3681	-0.00689169		4211	-0.02134803
501.19	0.10172759		1031.19	0.00328968		1561.18	0.0112133		2091.19	-0.0169104		2621.18	-0.0071354		3151.21	0.00365726		3681.2	-0.0066344		4211.2	-0.0212276
501.39	0.10067563		1031.39	0.00389829		1561.38	0.01163083		2091.39	-0.01686109		2621.38	-0.00743716		3151.41	0.00339037		3681.4	-0.00671617		4211.4	-0.0204003
501.59	0.09984326		1031.59	0.00343058		1561.58	0.01159963		2091.59	-0.01772607		2621.58	-0.00718992		3151.61	0.00408187		3681.6	-0.00624363		4211.6	-0.02021359
501.79	0.09912655		1031.79	0.00364114		1561.78	0.01148218		2091.79	-0.01796002		2621.78	-0.00695886		3151.81	0.00450848		3681.8	-0.00572222		4211.8	-0.01899353
501.99	0.09814597		1031.99	0.00417411		1561.98	0.01107553		2091.99	-0.01839223		2621.98	-0.00713914		3152.01	0.00531988		3682	-0.0046377		4212	-0.01930566
502.19	0.09798333		1032.19	0.00452342		1562.18	0.01084128		2092.19	-0.01964883		2622.18	-0.0072348		3152.21	0.00518624		3682.2	-0.0037349		4212.2	-0.01977521
502.39	0.09782463		1032.39	0.00492506		1562.38	0.01066507		2092.39	-0.01946165		2622.38	-0.00702241		3152.41	0.00596249		3682.4	-0.00297032		4212.4	-0.01976943
502.59	0.09834158		1032.59	0.00628399		1562.58	0.01070651		2092.59	-0.01913109		2622.58	-0.00587077		3152.61	0.00659634		3682.6	-0.00251791		4212.6	-0.02027183
502.79	0.09914727		1032.79	0.00731519		1562.78	0.010392		2092.79	-0.01976361		2622.78	-0.00590157		3152.81	0.00602588		3682.8	-0.00233805		4212.8	-0.02044133
502.99	0.09882575		1032.99	0.00792383		1562.98	0.01087785		2092.99	-0.01973686		2622.98	-0.0056978		3153.01	0.00565808		3683	-0.00260868		4213	-0.02070982
503.19	0.09950599		1033.19	0.00826409		1563.18	0.01162434		2093.19	-0.01899141		2623.18	-0.00550081		3153.21	0.00401371		3683.2	-0.00268276		4213.2	-0.02076444
503.39	0.09995248		1033.39	0.00901632		1563.38	0.01174161		2093.39	-0.01857228		2623.38	-0.0062258		3153.41	0.0038961		3683.4	-0.00230003		4213.4	-0.02085975
503.59	0.10105626		1033.59	0.00905452		1563.58	0.01111707		2093.59	-0.01867823		2623.58	-0.00759535		3153.61	0.00345733		3683.6	-0.00116443		4213.6	-0.02078541
503.79	0.10181185		1033.79	0.00869716		1563.78	0.01118072		2093.79	-0.01832173		2623.78	-0.00771105		3153.81	0.003496		3683.8	-0.0007168		4213.8	-0.02024461
503.99	0.10273728		1033.99	0.0089574		1563.98	0.0110755		2093.99	-0.01792276		2623.98	-0.00807397		3154.01	0.00280655		3684	-0.00159948		4214	-0.02029044
504.19	0.1028913		1034.19	0.00874167		1564.18	0.01055224		2094.19	-0.01721842		2624.18	-0.00835095		3154.21	0.00202226		3684.2	-0.00211635		4214.2	-0.019993
504.39	0.10240855		1034.39	0.00792427		1564.38	0.01010224		2094.39	-0.01763688		2624.38	-0.00848422		3154.41	0.00183288		3684.4	-0.00239396		4214.4	-0.01936161
504.59	0.10256586		1034.59	0.00810115		1564.58	0.00972891		2094.59	-0.0175457		2624.58	-0.00795715		3154.61	0.00099351		3684.6	-0.0020994		4214.6	-0.01956314
504.79	0.10252424		1034.79	0.00762886		1564.78	0.0094851		2094.79	-0.01789606		2624.78	-0.00802301		3154.81	0.00121255		3684.8	-0.00262688		4214.8	-0.02062879
504.99	0.10265673		1034.99	0.00775847		1564.98	0.0097643		2094.99	-0.01842401		2624.98	-0.00844282		3155.01	0.00203616		3685	-0.00295561		4215	-0.02086243
505.19	0.10208175		1035.19	0.00702121		1565.18	0.0098739		2095.19	-0.01801646		2625.18	-0.00908284		3155.21	0.00150788		3685.2	-0.00354283		4215.2	-0.02167794
505.39	0.10100388		1035.39	0.00667899		1565.38	0.00991771		2095.39	-0.01776389		2625.38	-0.00864085		3155.41	0.00190002		3685.4	-0.00369817		4215.4	-0.0211655
505.59	0.10081673		1035.59	0.0063692		1565.58	0.01019372		2095.59	-0.01841922		2625.58	-0.00822397		3155.61	0.00235432		3685.6	-0.00409957		4215.6	-0.02241628
505.79	0.10015419		1035.79	0.00612011		1565.78	0.00954132		2095.79	-0.01842348		2625.78	-0.00825102		3155.81	0.00293093		3685.8	-0.00443655		4215.8	-0.02255635
505.99	0.09917505		1035.99	0.00587986		1565.98	0.00964995		2095.99	-0.01892711		2625.98	-0.00768392		3156.01	0.00217911		3686	-0.00444033		4216	-0.02361384
506.19	0.09858559		1036.19	0.0047542		1566.18	0.00972798		2096.19	-0.0191973		2626.18	-0.00711725		3156.21	0.00064842		3686.2	-0.00487125		4216.2	-0.02377403
506.39	0.09920761		1036.39	0.00416965		1566.38	0.01046597		2096.39	-0.01843759		2626.38	-0.00649695		3156.41	0.00099453		3686.4	-0.00554629		4216.4	-0.02368153
506.59	0.0990165		1036.59	0.00441816		1566.58	0.01109842		2096.59	-0.01821362		2626.58	-0.00644228		3156.61	0.00048052		3686.6	-0.00618181		4216.6	-0.02328169
506.79	0.0986711		1036.79	0.00380952		1566.78	0.01094819		2096.79	-0.01853015		2626.78	-0.00716987		3156.81	0.00001222		3686.8	-0.00694556		4216.8	-0.02323178
506.99	0.09865821		1036.99	0.00435395		1566.98	0.01066352		2096.99	-0.01778234		2626.98	-0.00631656		3157.01	0.00033228		3687	-0.00738996		4217	-0.02277715
507.19	0.09948943		1037.19	0.0051384		1567.18	0.01007259		2097.19	-0.0166941		2627.18	-0.00697303		3157.21	-0.00011409		3687.2	-0.00718323		4217.2	-0.02250726
507.39	0.10002916		1037.39	0.00552203		1567.38	0.01042594		2097.39	-0.01682982		2627.38	-0.00730981		3157.41	0.00047747		3687.4	-0.00659508		4217.4	-0.02240424
507.59	0.10041129		1037.59	0.00472645		1567.58	0.01050389		2097.59	-0.01686259		2627.58	-0.00626159		3157.61	0.00069207		3687.6	-0.00649593		4217.6	-0.02194955
507.79	0.10090622		1037.79	0.00471864		1567.78	0.01070661		2097.79	-0.0171909		2627.78	-0.00606141		3157.81	0.00157262		3687.8	-0.00691065		4217.8	-0.0217119
507.99	0.10134945		1037.99	0.00532694		1567.98	0.01026565		2097.99	-0.01775625		2627.98	-0.00547968		3158.01	0.0006761		3688	-0.00674103		4218	-0.02132006
508.19	0.10119246		1038.19	0.00462461		1568.18	0.00988147		2098.19	-0.01783964		2628.18	-0.00537227		3158.21	0.00153463		3688.2	-0.00577699		4218.2	-0.01972079
508.39	0.10072389		1038.39	0.00417429		1568.38	0.00982653		2098.39	-0.01891714		2628.38	-0.00494026		3158.41	0.00213724		3688.4	-0.00471557		4218.4	-0.0200233
508.59	0.10087331		1038.59	0.00492838		1568.58	0.00933082		2098.59	-0.01927621		2628.58	-0.00505939		3158.61	0.002445		3688.6	-0.00398915		4218.6	-0.019522
508.79	0.10051711		1038.79	0.00500628		1568.78	0.00964528		2098.79	-0.01982421		2628.78	-0.00564923		3158.81	0.00331778		3688.8	-0.00360961		4218.8	-0.019509
508.99	0.10029756		1038.99	0.00520263		1568.98	0.00924068		2098.99	-0.02007012		2628.98	-0.00616243		3159.01	0.00378293		3689	-0.00278516		4219	-0.01986433
509.19	0.09998913		1039.19	0.00517924		1569.18	0.00936519		2099.19	-0.01974806		2629.18	-0.00557342		3159.21	0.003418		3689.2	-0.00283303		4219.2	-0.02119501
509.39	0.10058675		1039.39	0.00622674		1569.38	0.00958796		2099.39	-0.01936314		2629.38	-0.00497765		3159.41	0.0038796		3689.4	-0.00290755		4219.4	-0.02111391
509.59	0.10069485		1039.59	0.00615499		1569.58	0.00953739		2099.59	-0.0196011		2629.58	-0.00462772		3159.61	0.00404487		3689.6	-0.00368773		4219.6	-0.02155528
509.79	0.09995516		1039.79	0.00580008		1569.78	0.00914686		2099.79	-0.01919147		2629.78	-0.0056646		3159.81	0.00397927		3689.8	-0.0035657		4219.8	-0.02051534
509.99	0.10001714		1039.99	0.00613209		1569.98	0.00993936		2099.99	-0.01922248		2629.98	-0.00594419		3160.01	0.00279924		3690	-0.00376446		4220	-0.0205175
510.19	0.10059516		1040.19	0.00599145		1570.18	0.0106247		2100.19	-0.01993617		2630.18	-0.0060301		3160.21	0.00239409		3690.2	-0.00410018		4220.2	-0.02034755
510.39	0.10201255		1040.39	0.0058908		1570.38	0.01143406		2100.39	-0.01997075		2630.38	-0.00700597		3160.41	0.00268805		3690.4	-0.0050646		4220.4	-0.01980664
510.59	0.10154229		1040.59	0.0056695		1570.58	0.01201846		2100.59	-0.02016839		2630.58	-0.00724346		3160.61	0.00219569		3690.6	-0.00517281		4220.6	-0.01947792
510.79	0.10217417		1040.79	0.00536736		1570.78	0.01231557		2100.79	-0.01981526		2630.78	-0.00711851		3160.81	0.00189761		3690.8	-0.0057073		4220.8	-0.0196258
510.99	0.10224203		1040.99	0.00577107		1570.98	0.01319439		2100.99	-0.01888789		2630.98	-0.00601869		3161.01	0.00120582		3691	-0.00582537		4221	-0.01919665
511.19	0.10237878		1041.19	0.00601471		1571.18	0.01315981		2101.19	-0.01870932		2631.18	-0.00575919		3161.21	0.00057342		3691.2	-0.00568465		4221.2	-0.01969806
511.39	0.10170216		1041.39	0.00572485		1571.38	0.01423041		2101.39	-0.01867894		2631.38	-0.00471695		3161.41	0.00103361		3691.4	-0.00513359		4221.4	-0.01983153
511.59	0.10191413		1041.59	0.00521803		1571.58	0.01456985		2101.59	-0.01825591		2631.58	-0.00343677		3161.61	0.00179262		3691.6	-0.00484934		4221.6	-0.0196711
511.79	0.10243195		1041.79	0.00530956		1571.78	0.01429758		2101.79	-0.0177925		2631.78	-0.00417265		3161.81	0.00163056		3691.8	-0.00517267		4221.8	-0.01920779
511.99	0.10244139		1041.99	0.00505974		1571.98	0.01371333		2101.99	-0.01806623		2631.98	-0.0043531		3162.01	0.00144773		3692	-0.00519323		4222	-0.01806601
512.19	0.10203967		1042.19	0.00429326		1572.18	0.01284072		2102.19	-0.01939856		2632.18	-0.00476437		3162.21	0.00146018		3692.2	-0.00440104		4222.2	-0.01741942
512.39	0.10159721		1042.39	0.00427849		1572.38	0.01279992		2102.39	-0.02034665		2632.38	-0.00547048		3162.41	0.00122055		3692.4	-0.00456226		4222.4	-0.01838815
512.59	0.10148973		1042.59	0.00429468		1572.58	0.01147701		2102.59	-0.02019352		2632.58	-0.00596692		3162.61	0.00045849		3692.6	-0.00483471		4222.6	-0.01795226
512.79	0.10020959		1042.79	0.00440703		1572.78	0.01085194		2102.79	-0.02083345		2632.78	-0.0059898		3162.81	0.00059236		3692.8	-0.00387896		4222.8	-0.01855294
512.99	0.10057117		1042.99	0.00496751		1572.98	0.01006828		2102.99	-0.02133693		2632.98	-0.00630067		3163.01	0.00020505		3693	-0.00346627		4223	-0.0198417
513.19	0.10116091		1043.19	0.00533588		1573.18	0.00957371		2103.19	-0.02206685		2633.18	-0.00570454		3163.21	0.00079041		3693.2	-0.00302938		4223.2	-0.02015788
513.39	0.10116027		1043.39	0.0058121		1573.38	0.00909465		2103.39	-0.02258327		2633.38	-0.00543005		3163.41	0.00073023		3693.4	-0.00315371		4223.4	-0.02023092
513.59	0.10016064		1043.59	0.00599374		1573.58	0.00744952		2103.59	-0.0232821		2633.58	-0.00625026		3163.61	0.00024776		3693.6	-0.00226315		4223.6	-0.02011766
513.79	0.10006316		1043.79	0.00637754		1573.78	0.00673871		2103.79	-0.02328259		2633.78	-0.0070733		3163.81	-0.00034683		3693.8	-0.00184358		4223.8	-0.02061093
513.99	0.10017686		1043.99	0.006831		1573.98	0.00654113		2103.99	-0.02373894		2633.98	-0.00715891		3164.01	-0.00063744		3694	-0.00157843		4224	-0.02194092
514.19	0.10005713		1044.19	0.0074182		1574.18	0.0067889		2104.19	-0.02413419		2634.18	-0.00708234		3164.21	-0.00054062		3694.2	-0.00178926		4224.2	-0.02236854
514.39	0.09967444		1044.39	0.0068823		1574.38	0.0076486		2104.39	-0.02357283		2634.38	-0.00816492		3164.41	-0.00000449		3694.4	-0.00210269		4224.4	-0.02254715
514.59	0.09879237		1044.59	0.00614792		1574.58	0.00759136		2104.59	-0.0227908		2634.58	-0.00766639		3164.61	0.0001935		3694.6	-0.00167532		4224.6	-0.02249316
514.79	0.09929947		1044.79	0.00656887		1574.78	0.00824973		2104.79	-0.02153577		2634.78	-0.0073025		3164.81	-0.0000435		3694.8	-0.00215382		4224.8	-0.0223906
514.99	0.09872332		1044.99	0.00619654		1574.98	0.00817358		2104.99	-0.02003233		2634.98	-0.00679516		3165.01	0.00034786		3695	-0.00252731		4225	-0.02203274
515.19	0.09842374		1045.19	0.00609323		1575.18	0.00817419		2105.19	-0.01942225		2635.18	-0.00675099		3165.21	0.00060241		3695.2	-0.00316741		4225.2	-0.02268461
515.39	0.09801934		1045.39	0.00562665		1575.38	0.00923973		2105.39	-0.01864757		2635.38	-0.00592522		3165.41	0.00138692		3695.4	-0.00354347		4225.4	-0.02250591
515.59	0.09895498		1045.59	0.00490591		1575.58	0.00980246		2105.59	-0.01855194		2635.58	-0.00571405		3165.61	0.00183321		3695.6	-0.00453975		4225.6	-0.02264676
515.79	0.09900346		1045.79	0.0039734		1575.78	0.01004817		2105.79	-0.01833287		2635.78	-0.00584841		3165.81	0.00229553		3695.8	-0.00606645		4225.8	-0.0225658
515.99	0.09973684		1045.99	0.00303563		1575.98	0.01095411		2105.99	-0.01912433		2635.98	-0.00612159		3166.01	0.00228968		3696	-0.00704183		4226	-0.02215685
516.19	0.10005251		1046.19	0.00203822		1576.18	0.01152767		2106.19	-0.01907505		2636.18	-0.00556409		3166.21	0.00169947		3696.2	-0.00729146		4226.2	-0.02118547
516.39	0.10052076		1046.39	0.0018687		1576.38	0.01083943		2106.39	-0.01809983		2636.38	-0.00610331		3166.41	0.00164945		3696.4	-0.0079767		4226.4	-0.02061661
516.59	0.10058303		1046.59	0.0014344		1576.58	0.01040181		2106.59	-0.0176035		2636.58	-0.0058727		3166.61	0.00199213		3696.6	-0.00817488		4226.6	-0.02008657
516.79	0.10038072		1046.79	0.00166372		1576.78	0.0111331		2106.79	-0.01824894		2636.78	-0.00658188		3166.81	0.00278782		3696.8	-0.00769451		4226.8	-0.02033684
516.99	0.10063121		1046.99	0.00133529		1576.98	0.01130991		2106.99	-0.0182056		2636.98	-0.00682814		3167.01	0.00270846		3697	-0.00804838		4227	-0.02076673
517.19	0.10132964		1047.19	0.00195278		1577.18	0.0108154		2107.19	-0.01873833		2637.18	-0.00651112		3167.21	0.00287454		3697.2	-0.00779319		4227.2	-0.02083331
517.39	0.10090301		1047.39	0.00177068		1577.38	0.01004482		2107.39	-0.01915563		2637.38	-0.00671105		3167.41	0.00201751		3697.4	-0.00834233		4227.4	-0.02086964
517.59	0.10071225		1047.59	0.00231408		1577.58	0.00891058		2107.59	-0.01919817		2637.58	-0.00707807		3167.61	0.00135441		3697.6	-0.00735797		4227.6	-0.02119394
517.79	0.10085275		1047.79	0.00174167		1577.78	0.00806053		2107.79	-0.01826231		2637.78	-0.00614369		3167.81	0.00111134		3697.8	-0.00690955		4227.8	-0.02146808
517.99	0.10016271		1047.99	0.00178114		1577.98	0.00861506		2107.99	-0.01849952		2637.98	-0.00660561		3168.01	0.00114256		3698	-0.00689503		4228	-0.02106829
518.19	0.09937483		1048.19	0.00267304		1578.18	0.00878891		2108.19	-0.01802208		2638.18	-0.00667344		3168.21	0.00105646		3698.2	-0.00653396		4228.2	-0.0214185
518.39	0.09860629		1048.39	0.00270062		1578.38	0.00826697		2108.39	-0.01802028		2638.38	-0.00659868		3168.41	0.00098956		3698.4	-0.00591579		4228.4	-0.02133234
518.59	0.09916115		1048.59	0.00287757		1578.58	0.00816118		2108.59	-0.01790649		2638.58	-0.00668885		3168.61	0.00122903		3698.6	-0.00526584		4228.6	-0.02107202
518.79	0.09972423		1048.79	0.00342748		1578.78	0.00906262		2108.79	-0.01826925		2638.78	-0.00773789		3168.81	0.00103215		3698.8	-0.00560675		4228.8	-0.02146001
518.99	0.09901357		1048.99	0.0024718		1578.98	0.00919874		2108.99	-0.01801316		2638.98	-0.00693388		3169.01	0.00153744		3699	-0.0058833		4229	-0.02178547
519.19	0.09825173		1049.19	0.00281602		1579.18	0.00953334		2109.19	-0.01881207		2639.18	-0.00612155		3169.21	0.00206318		3699.2	-0.00583356		4229.2	-0.02273896
519.39	0.09826938		1049.39	0.00341016		1579.38	0.00910426		2109.39	-0.01995107		2639.38	-0.00533888		3169.41	0.00186779		3699.4	-0.00595425		4229.4	-0.02293029
519.59	0.09915569		1049.59	0.00371024		1579.58	0.00930316		2109.59	-0.02060795		2639.58	-0.00541157		3169.61	0.00200681		3699.6	-0.00576344		4229.6	-0.02292487
519.79	0.09974608		1049.79	0.00470489		1579.78	0.01044794		2109.79	-0.0207639		2639.78	-0.00495487		3169.81	0.00187497		3699.8	-0.00640747		4229.8	-0.02313602
519.99	0.10051754		1049.99	0.00554316		1579.98	0.01121362		2109.99	-0.02055637		2639.98	-0.00503428		3170.01	0.00114777		3700	-0.00605555		4230	-0.02227745
520.19	0.10062688		1050.19	0.00618725		1580.18	0.01179998		2110.19	-0.02000097		2640.18	-0.00484994		3170.21	0.00105919		3700.2	-0.00504437		4230.2	-0.02126774
520.39	0.10073085		1050.39	0.0066239		1580.38	0.01119447		2110.39	-0.01993875		2640.38	-0.00502581		3170.41	0.00184242		3700.4	-0.00533836		4230.4	-0.02162662
520.59	0.10051604		1050.59	0.00614604		1580.58	0.01184263		2110.59	-0.01997905		2640.58	-0.00520457		3170.61	0.00174224		3700.6	-0.00534925		4230.6	-0.02204916
520.79	0.1001125		1050.79	0.00606812		1580.78	0.01150375		2110.79	-0.02046246		2640.78	-0.005958		3170.81	0.00108542		3700.8	-0.00559734		4230.8	-0.02213606
520.99	0.09976123		1050.99	0.0066354		1580.98	0.01033234		2110.99	-0.02048217		2640.98	-0.00624814		3171.01	0.00144572		3701	-0.00625182		4231	-0.02223987
521.19	0.1003394		1051.19	0.00583438		1581.18	0.00964231		2111.19	-0.02095947		2641.18	-0.00591206		3171.21	0.00158338		3701.2	-0.00619895		4231.2	-0.02257188
521.39	0.10053028		1051.39	0.00533873		1581.38	0.00933306		2111.39	-0.02143938		2641.38	-0.00610958		3171.41	0.00072411		3701.4	-0.00603602		4231.4	-0.02236102
521.59	0.10068229		1051.59	0.00536317		1581.58	0.00867141		2111.59	-0.02210615		2641.58	-0.00686839		3171.61	0.00055837		3701.6	-0.00546788		4231.6	-0.0230621
521.79	0.10010636		1051.79	0.00536901		1581.78	0.00868275		2111.79	-0.02198837		2641.78	-0.00673786		3171.81	0.00053677		3701.8	-0.00502517		4231.8	-0.02254435
521.99	0.09922295		1051.99	0.00576781		1581.98	0.00996484		2111.99	-0.02218595		2641.98	-0.00736295		3172.01	0.00061236		3702	-0.00533646		4232	-0.02353963
522.19	0.09869411		1052.19	0.00613368		1582.18	0.00983274		2112.19	-0.02235766		2642.18	-0.00707908		3172.21	0.0002781		3702.2	-0.00421459		4232.2	-0.02432915
522.39	0.09861303		1052.39	0.00500248		1582.38	0.00964768		2112.39	-0.022569		2642.38	-0.00714602		3172.41	0.00000086		3702.4	-0.00439725		4232.4	-0.02387983
522.59	0.0988746		1052.59	0.00434523		1582.58	0.01057428		2112.59	-0.02258168		2642.58	-0.00765629		3172.61	0.00076775		3702.6	-0.00511021		4232.6	-0.02367986
522.79	0.09814673		1052.79	0.00464615		1582.78	0.01092485		2112.79	-0.02281399		2642.78	-0.0077708		3172.81	0.00049047		3702.8	-0.00491188		4232.8	-0.02288232
522.99	0.09766908		1052.99	0.00400929		1582.98	0.01110877		2112.99	-0.02284539		2642.98	-0.00632765		3173.01	0.00092533		3703	-0.00427495		4233	-0.02289358
523.19	0.09760169		1053.19	0.00441532		1583.18	0.01103698		2113.19	-0.02345614		2643.18	-0.00598001		3173.21	0.00111629		3703.2	-0.00385086		4233.2	-0.02316542
523.39	0.09698672		1053.39	0.0049207		1583.38	0.01125859		2113.39	-0.02379296		2643.38	-0.0059481		3173.41	0.00001897		3703.4	-0.00287369		4233.4	-0.02265905
523.59	0.0969133		1053.59	0.00507884		1583.58	0.01272237		2113.59	-0.02269629		2643.58	-0.00525696		3173.61	0.00012927		3703.6	-0.00289105		4233.6	-0.02242432
523.79	0.09683329		1053.79	0.00579027		1583.78	0.01351443		2113.79	-0.02231156		2643.78	-0.00550376		3173.81	-0.00010953		3703.8	-0.0029877		4233.8	-0.02208687
523.99	0.09679481		1053.99	0.00670644		1583.98	0.01375214		2113.99	-0.02211797		2643.98	-0.00552892		3174.01	-0.0004081		3704	-0.00218467		4234	-0.02074161
524.19	0.09625493		1054.19	0.00683769		1584.18	0.01339223		2114.19	-0.02231457		2644.18	-0.00581729		3174.21	-0.00064939		3704.2	-0.00262133		4234.2	-0.01993689
524.39	0.09619459		1054.39	0.00655711		1584.38	0.01259532		2114.39	-0.02178077		2644.38	-0.00582805		3174.41	-0.00028928		3704.4	-0.00324224		4234.4	-0.02071887
524.59	0.09554669		1054.59	0.00602675		1584.58	0.01162849		2114.59	-0.02147089		2644.58	-0.00663118		3174.61	-0.00144338		3704.6	-0.00337141		4234.6	-0.02081644
524.79	0.09488591		1054.79	0.00572795		1584.78	0.010168		2114.79	-0.02153414		2644.78	-0.00796665		3174.81	-0.00088425		3704.8	-0.00362808		4234.8	-0.0207066
524.99	0.0951799		1054.99	0.00573291		1584.98	0.00966524		2114.99	-0.02102739		2644.98	-0.0088382		3175.01	-0.00035234		3705	-0.00401607		4235	-0.02111244
525.19	0.09554808		1055.19	0.00496891		1585.18	0.00924176		2115.19	-0.02031702		2645.18	-0.00839173		3175.21	-0.00052465		3705.2	-0.00349677		4235.2	-0.02153502
525.39	0.09609401		1055.39	0.00610805		1585.38	0.00820759		2115.39	-0.02021568		2645.38	-0.00879369		3175.41	-0.00127199		3705.4	-0.00307627		4235.4	-0.02159678
525.59	0.09591886		1055.59	0.00584915		1585.58	0.00712584		2115.59	-0.02043993		2645.58	-0.00903538		3175.61	-0.00089274		3705.6	-0.00278466		4235.6	-0.02220365
525.79	0.0956428		1055.79	0.00558517		1585.78	0.00685935		2115.79	-0.02003478		2645.78	-0.00771663		3175.81	-0.00157235		3705.8	-0.00238326		4235.8	-0.02215791
525.99	0.09550254		1055.99	0.00421894		1585.98	0.00595837		2115.99	-0.01914458		2645.98	-0.00717014		3176.01	-0.00158768		3706	-0.00255732		4236	-0.02269234
526.19	0.09598485		1056.19	0.00382744		1586.18	0.00558428		2116.19	-0.01899251		2646.18	-0.00656557		3176.21	-0.00165111		3706.2	-0.00250476		4236.2	-0.02187734
526.39	0.09659013		1056.39	0.00319455		1586.38	0.00545675		2116.39	-0.01764827		2646.38	-0.00579232		3176.41	-0.00119319		3706.4	-0.00389089		4236.4	-0.02165529
526.59	0.09692393		1056.59	0.00302687		1586.58	0.0056348		2116.59	-0.01782869		2646.58	-0.00492553		3176.61	-0.00121399		3706.6	-0.00435991		4236.6	-0.02234833
526.79	0.09712225		1056.79	0.00265765		1586.78	0.00567643		2116.79	-0.01757678		2646.78	-0.00426316		3176.81	-0.00156505		3706.8	-0.0040533		4236.8	-0.02250476
526.99	0.09730214		1056.99	0.00220679		1586.98	0.0068672		2116.99	-0.01808764		2646.98	-0.00335097		3177.01	-0.00137225		3707	-0.00450717		4237	-0.02406649
527.19	0.09669187		1057.19	0.0015612		1587.18	0.00767233		2117.19	-0.01815175		2647.18	-0.0030873		3177.21	-0.00085084		3707.2	-0.00494955		4237.2	-0.02320867
527.39	0.09615665		1057.39	0.00173234		1587.38	0.00830713		2117.39	-0.018404		2647.38	-0.00265947		3177.41	-0.000688		3707.4	-0.00527207		4237.4	-0.02234054
527.59	0.0973338		1057.59	0.00185207		1587.58	0.00849098		2117.59	-0.01855568		2647.58	-0.00263047		3177.61	-0.00041583		3707.6	-0.00618968		4237.6	-0.02186147
527.79	0.09802531		1057.79	0.00209616		1587.78	0.00891677		2117.79	-0.01900311		2647.78	-0.00297392		3177.81	-0.00098724		3707.8	-0.00683664		4237.8	-0.02182465
527.99	0.09810917		1057.99	0.00270296		1587.98	0.00926206		2117.99	-0.02001193		2647.98	-0.00317479		3178.01	-0.00038561		3708	-0.00771363		4238	-0.02122538
528.19	0.09832268		1058.19	0.00161927		1588.18	0.00924243		2118.19	-0.02027588		2648.18	-0.00396725		3178.21	-0.00044017		3708.2	-0.007916		4238.2	-0.02073312
528.39	0.09885708		1058.39	0.00168857		1588.38	0.01013743		2118.39	-0.0198941		2648.38	-0.00438408		3178.41	-0.00050609		3708.4	-0.00782556		4238.4	-0.02126455
528.59	0.09893728		1058.59	0.00163249		1588.58	0.01051374		2118.59	-0.02037271		2648.58	-0.00462081		3178.61	-0.00102612		3708.6	-0.00723352		4238.6	-0.02017368
528.79	0.09956044		1058.79	0.00218655		1588.78	0.00994085		2118.79	-0.01994101		2648.78	-0.0058538		3178.81	-0.00036441		3708.8	-0.0070841		4238.8	-0.01933659
528.99	0.1002794		1058.99	0.00312996		1588.98	0.0099267		2118.99	-0.01982116		2648.98	-0.00564357		3179.01	-0.00096781		3709	-0.00711257		4239	-0.01975169
529.19	0.10014433		1059.19	0.00360103		1589.18	0.00922055		2119.19	-0.01936836		2649.18	-0.00554381		3179.21	-0.00068335		3709.2	-0.00673762		4239.2	-0.01972042
529.39	0.10052974		1059.39	0.00355401		1589.38	0.00906936		2119.39	-0.01982652		2649.38	-0.00598452		3179.41	-0.00104349		3709.4	-0.00619407		4239.4	-0.02015376
529.59	0.10136173		1059.59	0.0024213		1589.58	0.00921146		2119.59	-0.01997926		2649.58	-0.00619668		3179.61	-0.00062769		3709.6	-0.00623349		4239.6	-0.02034633
529.79	0.10101945		1059.79	0.00260887		1589.78	0.00880336		2119.79	-0.0200973		2649.78	-0.00622741		3179.81	-0.00084019		3709.8	-0.00629067		4239.8	-0.02017453
529.99	0.10066082		1059.99	0.00277388		1589.98	0.00832884		2119.99	-0.01990615		2649.98	-0.00635074		3180.01	-0.0000262		3710	-0.00693479		4240	-0.01959476
530.19	0.10145289		1060.19	0.00298468		1590.18	0.00910844		2120.19	-0.01981434		2650.18	-0.00579317		3180.21	-0.00030834		3710.2	-0.00675266		4240.2	-0.01912395
530.39	0.1007929		1060.39	0.00277718		1590.38	0.00944966		2120.39	-0.01955119		2650.38	-0.00458775		3180.41	-0.00001467		3710.4	-0.0080872		4240.4	-0.01956118
530.59	0.10055044		1060.59	0.00261856		1590.58	0.00942079		2120.59	-0.02011637		2650.58	-0.00501976		3180.61	-0.00079436		3710.6	-0.00822006		4240.6	-0.02062667
530.79	0.09934787		1060.79	0.00224202		1590.78	0.00989624		2120.79	-0.02031594		2650.78	-0.00516267		3180.81	-0.00175483		3710.8	-0.00835597		4240.8	-0.02085125
530.99	0.09817652		1060.99	0.00230389		1590.98	0.01135017		2120.99	-0.02092423		2650.98	-0.00478017		3181.01	-0.0014595		3711	-0.00835613		4241	-0.0207696
531.19	0.09706999		1061.19	0.00194638		1591.18	0.01153795		2121.19	-0.02074997		2651.18	-0.00511716		3181.21	-0.00137951		3711.2	-0.0085856		4241.2	-0.01996686
531.39	0.09733599		1061.39	0.00247594		1591.38	0.01097993		2121.39	-0.0209249		2651.38	-0.005637		3181.41	-0.00164137		3711.4	-0.00835648		4241.4	-0.02007523
531.59	0.09795189		1061.59	0.00274024		1591.58	0.01000116		2121.59	-0.02143158		2651.58	-0.00636733		3181.61	-0.00182048		3711.6	-0.00834508		4241.6	-0.0199114
531.79	0.0976118		1061.79	0.00268349		1591.78	0.01039531		2121.79	-0.0208731		2651.78	-0.00683881		3181.81	-0.00165485		3711.8	-0.00770516		4241.8	-0.02005399
531.99	0.09734371		1061.99	0.0029107		1591.98	0.0093138		2121.99	-0.02088465		2651.98	-0.00842003		3182.01	-0.00106651		3712	-0.00743027		4242	-0.01908386
532.19	0.09735272		1062.19	0.00284551		1592.18	0.00912739		2122.19	-0.02063894		2652.18	-0.00941287		3182.21	-0.0012336		3712.2	-0.00705694		4242.2	-0.01881703
532.39	0.09742337		1062.39	0.0039393		1592.38	0.00917193		2122.39	-0.02041541		2652.38	-0.00950272		3182.41	-0.00104533		3712.4	-0.00737941		4242.4	-0.01880993
532.59	0.09749341		1062.59	0.00472349		1592.58	0.00837295		2122.59	-0.01985993		2652.58	-0.00970633		3182.61	-0.00086713		3712.6	-0.00770535		4242.6	-0.01912389
532.79	0.09798625		1062.79	0.00498499		1592.78	0.00753375		2122.79	-0.01877312		2652.78	-0.01041586		3182.81	-0.00093103		3712.8	-0.00719189		4242.8	-0.01987397
532.99	0.0977561		1062.99	0.00519469		1592.98	0.00737177		2122.99	-0.01905698		2652.98	-0.01093585		3183.01	-0.0009649		3713	-0.00706619		4243	-0.02095175
533.19	0.09746586		1063.19	0.00561399		1593.18	0.00643962		2123.19	-0.01934535		2653.18	-0.01092839		3183.21	-0.00059123		3713.2	-0.00679811		4243.2	-0.02115007
533.39	0.09744842		1063.39	0.00598496		1593.38	0.00626414		2123.39	-0.01994093		2653.38	-0.01082964		3183.41	-0.00083334		3713.4	-0.00682191		4243.4	-0.02150771
533.59	0.09745845		1063.59	0.00530484		1593.58	0.00494671		2123.59	-0.02006543		2653.58	-0.01040927		3183.61	-0.00026063		3713.6	-0.00786019		4243.6	-0.02130721
533.79	0.09636497		1063.79	0.00546974		1593.78	0.00440399		2123.79	-0.02083908		2653.78	-0.01019153		3183.81	0.00012604		3713.8	-0.0083741		4243.8	-0.021233
533.99	0.09591821		1063.99	0.00532327		1593.98	0.00417511		2123.99	-0.02038789		2653.98	-0.00939102		3184.01	0.0004232		3714	-0.00862518		4244	-0.02063929
534.19	0.09680767		1064.19	0.00430924		1594.18	0.0047771		2124.19	-0.01944118		2654.18	-0.00815842		3184.21	0.00070136		3714.2	-0.00806539		4244.2	-0.02044332
534.39	0.09610098		1064.39	0.00352045		1594.38	0.00567258		2124.39	-0.01991522		2654.38	-0.00749987		3184.41	0.00116259		3714.4	-0.00872877		4244.4	-0.02083219
534.59	0.09690443		1064.59	0.00231698		1594.58	0.00611677		2124.59	-0.01989529		2654.58	-0.00742281		3184.61	0.00069836		3714.6	-0.00861122		4244.6	-0.02151104
534.79	0.09662647		1064.79	0.00135009		1594.78	0.00693468		2124.79	-0.01992886		2654.78	-0.00654952		3184.81	0.00036275		3714.8	-0.00836094		4244.8	-0.02147636
534.99	0.09685637		1064.99	0.00144378		1594.98	0.0081239		2124.99	-0.01971202		2654.98	-0.00643086		3185.01	0.00064109		3715	-0.00801463		4245	-0.02094002
535.19	0.09756642		1065.19	0.00117136		1595.18	0.00796393		2125.19	-0.01957162		2655.18	-0.00664099		3185.21	0.00096157		3715.2	-0.00734465		4245.2	-0.02028476
535.39	0.09906565		1065.39	0.00070054		1595.38	0.00767594		2125.39	-0.01943443		2655.38	-0.00676172		3185.41	0.00063304		3715.4	-0.00749918		4245.4	-0.02002404
535.59	0.10024665		1065.59	0.00066227		1595.58	0.00798616		2125.59	-0.0193148		2655.58	-0.00746729		3185.61	0.00025627		3715.6	-0.00697994		4245.6	-0.02053921
535.79	0.10041745		1065.79	0.00016134		1595.78	0.00878471		2125.79	-0.01846839		2655.78	-0.00776101		3185.81	0.00090387		3715.8	-0.00608934		4245.8	-0.02015802
535.99	0.1007238		1065.99	0.00000963		1595.98	0.00880256		2125.99	-0.01809296		2655.98	-0.00844541		3186.01	0.00170134		3716	-0.00676993		4246	-0.02037124
536.19	0.10092404		1066.19	0.00049579		1596.18	0.00963368		2126.19	-0.01858788		2656.18	-0.00881658		3186.21	0.00193581		3716.2	-0.00679054		4246.2	-0.02121054
536.39	0.10121767		1066.39	0.0013957		1596.38	0.01009393		2126.39	-0.01856001		2656.38	-0.00799158		3186.41	0.00171799		3716.4	-0.00705501		4246.4	-0.02156364
536.59	0.10061707		1066.59	0.00215078		1596.58	0.00983243		2126.59	-0.01864251		2656.58	-0.00837475		3186.61	0.00163735		3716.6	-0.00625143		4246.6	-0.0227982
536.79	0.10086383		1066.79	0.00212232		1596.78	0.00993901		2126.79	-0.01943875		2656.78	-0.00809062		3186.81	0.00092689		3716.8	-0.0056813		4246.8	-0.02264774
536.99	0.10039076		1066.99	0.00315928		1596.98	0.00909352		2126.99	-0.01991579		2656.98	-0.00845817		3187.01	0.00084608		3717	-0.00547428		4247	-0.02304936
537.19	0.0987762		1067.19	0.00426562		1597.18	0.0079273		2127.19	-0.02012354		2657.18	-0.00827675		3187.21	0.00011686		3717.2	-0.00507729		4247.2	-0.02369338
537.39	0.09771655		1067.39	0.00432434		1597.38	0.00793759		2127.39	-0.02058069		2657.38	-0.0086065		3187.41	-0.00033367		3717.4	-0.00524805		4247.4	-0.02371273
537.59	0.09622358		1067.59	0.00389143		1597.58	0.00757542		2127.59	-0.021368		2657.58	-0.00830322		3187.61	-0.00057071		3717.6	-0.00674147		4247.6	-0.02382169
537.79	0.09582767		1067.79	0.00448165		1597.78	0.00849275		2127.79	-0.02145969		2657.78	-0.00824512		3187.81	-0.00071923		3717.8	-0.00697224		4247.8	-0.02402047
537.99	0.09590748		1067.99	0.00432899		1597.98	0.00921894		2127.99	-0.02147234		2657.98	-0.00770087		3188.01	-0.00127861		3718	-0.00620106		4248	-0.02373033
538.19	0.09603177		1068.19	0.00341156		1598.18	0.00957594		2128.19	-0.02178152		2658.18	-0.00632549		3188.21	-0.00146048		3718.2	-0.00565671		4248.2	-0.02364024
538.39	0.09563232		1068.39	0.00337105		1598.38	0.01038527		2128.39	-0.0225766		2658.38	-0.00597269		3188.41	-0.00240027		3718.4	-0.00621797		4248.4	-0.02302819
538.59	0.0958736		1068.59	0.00258267		1598.58	0.01042635		2128.59	-0.02318369		2658.58	-0.00572429		3188.61	-0.00265501		3718.6	-0.00642264		4248.6	-0.02282095
538.79	0.09619738		1068.79	0.00233162		1598.78	0.01095986		2128.79	-0.02334459		2658.78	-0.00546392		3188.81	-0.00269422		3718.8	-0.00669808		4248.8	-0.02251488
538.99	0.09588341		1068.99	0.00188063		1598.98	0.01049217		2128.99	-0.02380452		2658.98	-0.00555202		3189.01	-0.0038216		3719	-0.00647968		4249	-0.02190243
539.19	0.096237		1069.19	0.00108683		1599.18	0.00961066		2129.19	-0.0235988		2659.18	-0.00532669		3189.21	-0.00326508		3719.2	-0.00593581		4249.2	-0.02227134
539.39	0.09667531		1069.39	0.00121351		1599.38	0.00827567		2129.39	-0.02346194		2659.38	-0.00515633		3189.41	-0.00321338		3719.4	-0.00598478		4249.4	-0.02337428
539.59	0.09668611		1069.59	0.00111557		1599.58	0.00821764		2129.59	-0.02223752		2659.58	-0.00677976		3189.61	-0.00259216		3719.6	-0.00435069		4249.6	-0.02390764
539.79	0.09677985		1069.79	0.00152009		1599.78	0.00756371		2129.79	-0.02204145		2659.78	-0.00672995		3189.81	-0.00176102		3719.8	-0.00435264		4249.8	-0.02363949
539.99	0.09695869		1069.99	0.00187177		1599.98	0.00711398		2129.99	-0.02131483		2659.98	-0.00792602		3190.01	-0.00083919		3720	-0.00437595		4250	-0.0244055
540.19	0.0968453		1070.19	0.00227029		1600.18	0.0061749		2130.19	-0.02110312		2660.18	-0.00830527		3190.21	-0.00083887		3720.2	-0.00418706		4250.2	-0.02515233
540.39	0.097034		1070.39	0.00298515		1600.38	0.00592992		2130.39	-0.02089145		2660.38	-0.00753064		3190.41	0.00052131		3720.4	-0.00423509		4250.4	-0.02543598
540.59	0.09700994		1070.59	0.00291651		1600.58	0.00463927		2130.59	-0.02037987		2660.58	-0.00819608		3190.61	0.00146328		3720.6	-0.0035591		4250.6	-0.0258623
540.79	0.09735979		1070.79	0.00332981		1600.78	0.00406834		2130.79	-0.01926713		2660.78	-0.00842521		3190.81	0.00161674		3720.8	-0.00345449		4250.8	-0.02540633
540.99	0.0971466		1070.99	0.00400833		1600.98	0.00398807		2130.99	-0.01778613		2660.98	-0.00989115		3191.01	0.00196558		3721	-0.00290452		4251	-0.02591828
541.19	0.09609516		1071.19	0.00413815		1601.18	0.00394328		2131.19	-0.01737923		2661.18	-0.00982427		3191.21	0.00167441		3721.2	-0.00419274		4251.2	-0.02611295
541.39	0.09591834		1071.39	0.00428005		1601.38	0.00449657		2131.39	-0.01776552		2661.38	-0.00992314		3191.41	0.00139835		3721.4	-0.00491487		4251.4	-0.02537156
541.59	0.09510268		1071.59	0.00487165		1601.58	0.00487185		2131.59	-0.01843041		2661.58	-0.00956491		3191.61	0.00171475		3721.6	-0.0066481		4251.6	-0.02535117
541.79	0.09596382		1071.79	0.00490304		1601.78	0.0061291		2131.79	-0.01767119		2661.78	-0.00955558		3191.81	0.00138292		3721.8	-0.00612602		4251.8	-0.02544989
541.99	0.09681897		1071.99	0.00482225		1601.98	0.00711752		2131.99	-0.01830685		2661.98	-0.00911257		3192.01	0.00097624		3722	-0.00649847		4252	-0.02474806
542.19	0.09635705		1072.19	0.00503459		1602.18	0.00778935		2132.19	-0.01810952		2662.18	-0.00792049		3192.21	0.00092986		3722.2	-0.00692384		4252.2	-0.02434771
542.39	0.0967453		1072.39	0.00566295		1602.38	0.0087615		2132.39	-0.01817403		2662.38	-0.00801761		3192.41	0.00081006		3722.4	-0.00778054		4252.4	-0.02385022
542.59	0.09775915		1072.59	0.00442263		1602.58	0.01001823		2132.59	-0.01910671		2662.58	-0.00806233		3192.61	0.00023845		3722.6	-0.00778321		4252.6	-0.02347691
542.79	0.09842929		1072.79	0.00388958		1602.78	0.01041104		2132.79	-0.01961027		2662.78	-0.00833559		3192.81	0.00031584		3722.8	-0.0080858		4252.8	-0.02347257
542.99	0.09761321		1072.99	0.0036246		1602.98	0.01049003		2132.99	-0.01971093		2662.98	-0.00831583		3193.01	-0.00030198		3723	-0.00736001		4253	-0.02347085
543.19	0.09784542		1073.19	0.00436837		1603.18	0.01111657		2133.19	-0.01997868		2663.18	-0.00899504		3193.21	0.00077186		3723.2	-0.00762651		4253.2	-0.02332073
543.39	0.09747389		1073.39	0.00514134		1603.38	0.01067		2133.39	-0.01989813		2663.38	-0.00963217		3193.41	0.00053472		3723.4	-0.00743108		4253.4	-0.02299401
543.59	0.0973839		1073.59	0.00489527		1603.58	0.01063265		2133.59	-0.01953969		2663.58	-0.01050806		3193.61	0.00016365		3723.6	-0.00770593		4253.6	-0.02259715
543.79	0.09726365		1073.79	0.00499335		1603.78	0.0104862		2133.79	-0.02062169		2663.78	-0.01002261		3193.81	-0.00029265		3723.8	-0.0082434		4253.8	-0.02230004
543.99	0.09641523		1073.99	0.00482939		1603.98	0.0102221		2133.99	-0.02051504		2663.98	-0.01083881		3194.01	0.00076041		3724	-0.00759352		4254	-0.02213365
544.19	0.09633449		1074.19	0.0049776		1604.18	0.00955849		2134.19	-0.02027359		2664.18	-0.00966015		3194.21	0.00068684		3724.2	-0.00724658		4254.2	-0.02223839
544.39	0.09597282		1074.39	0.00543127		1604.38	0.00939358		2134.39	-0.0205669		2664.38	-0.00984022		3194.41	0.00182287		3724.4	-0.00732214		4254.4	-0.02195512
544.59	0.09536349		1074.59	0.00428057		1604.58	0.00802713		2134.59	-0.02061052		2664.58	-0.01004352		3194.61	0.0021357		3724.6	-0.00681122		4254.6	-0.02227248
544.79	0.09447886		1074.79	0.00416296		1604.78	0.0078853		2134.79	-0.02023479		2664.78	-0.00994207		3194.81	0.0021081		3724.8	-0.00703206		4254.8	-0.02284018
544.99	0.09479275		1074.99	0.00337546		1604.98	0.00745055		2134.99	-0.01982005		2664.98	-0.00996628		3195.01	0.00143754		3725	-0.00821091		4255	-0.02326535
545.19	0.09514902		1075.19	0.00291993		1605.18	0.00694668		2135.19	-0.02023013		2665.18	-0.00970333		3195.21	0.00075868		3725.2	-0.0090203		4255.2	-0.0237309
545.39	0.09505924		1075.39	0.00254352		1605.38	0.00693102		2135.39	-0.02100725		2665.38	-0.01011415		3195.41	0.00081376		3725.4	-0.00825559		4255.4	-0.02388324
545.59	0.09618995		1075.59	0.00239003		1605.58	0.00701976		2135.59	-0.02162435		2665.58	-0.00997105		3195.61	0.00030344		3725.6	-0.00846412		4255.6	-0.02398245
545.79	0.09719809		1075.79	0.00228592		1605.78	0.00774658		2135.79	-0.02150245		2665.78	-0.00961763		3195.81	-0.00074619		3725.8	-0.00816706		4255.8	-0.02433861
545.99	0.0979448		1075.99	0.00193394		1605.98	0.00809753		2135.99	-0.02172611		2665.98	-0.00824109		3196.01	-0.00081793		3726	-0.00804527		4256	-0.02415
546.19	0.09830202		1076.19	0.00118897		1606.18	0.00726135		2136.19	-0.02153741		2666.18	-0.0073158		3196.21	-0.00070979		3726.2	-0.00717364		4256.2	-0.02461338
546.39	0.09958517		1076.39	0.00084178		1606.38	0.00760823		2136.39	-0.02197073		2666.38	-0.0076581		3196.41	-0.00096341		3726.4	-0.0069571		4256.4	-0.02465573
546.59	0.09995282		1076.59	-0.00001665		1606.58	0.00789543		2136.59	-0.0229305		2666.58	-0.00840048		3196.61	-0.00221781		3726.6	-0.00615722		4256.6	-0.02408044
546.79	0.09999864		1076.79	0.00019117		1606.78	0.00818664		2136.79	-0.02302424		2666.78	-0.00933906		3196.81	-0.00219049		3726.8	-0.00588227		4256.8	-0.02435328
546.99	0.09932075		1076.99	0.00100263		1606.98	0.008583		2136.99	-0.02318923		2666.98	-0.00937413		3197.01	-0.00271246		3727	-0.00533617		4257	-0.02405033
547.19	0.09919565		1077.19	0.00193371		1607.18	0.0090344		2137.19	-0.02403736		2667.18	-0.0104522		3197.21	-0.00273713		3727.2	-0.00584886		4257.2	-0.02355196
547.39	0.09855368		1077.39	0.00283442		1607.38	0.00807529		2137.39	-0.02348451		2667.38	-0.0105455		3197.41	-0.00291649		3727.4	-0.00611968		4257.4	-0.02407711
547.59	0.09830197		1077.59	0.00216383		1607.58	0.00853018		2137.59	-0.02355054		2667.58	-0.01029637		3197.61	-0.0028892		3727.6	-0.0067586		4257.6	-0.02371019
547.79	0.09761695		1077.79	0.00212374		1607.78	0.00856583		2137.79	-0.02345107		2667.78	-0.01001984		3197.81	-0.0028351		3727.8	-0.00651641		4257.8	-0.02358375
547.99	0.09695666		1077.99	0.00320328		1607.98	0.00858505		2137.99	-0.02221775		2667.98	-0.01019355		3198.01	-0.00254556		3728	-0.00611904		4258	-0.02382037
548.19	0.09674055		1078.19	0.00333115		1608.18	0.00863344		2138.19	-0.02140983		2668.18	-0.01019385		3198.21	-0.0027298		3728.2	-0.00637046		4258.2	-0.02364845
548.39	0.09597157		1078.39	0.0033582		1608.38	0.0083391		2138.39	-0.02107475		2668.38	-0.01113811		3198.41	-0.00169318		3728.4	-0.00666966		4258.4	-0.02398299
548.59	0.09557894		1078.59	0.00257221		1608.58	0.0073955		2138.59	-0.02090734		2668.58	-0.01060206		3198.61	-0.00149063		3728.6	-0.00643137		4258.6	-0.02390804
548.79	0.09557654		1078.79	0.002493		1608.78	0.00706044		2138.79	-0.02046626		2668.78	-0.01055281		3198.81	-0.00125546		3728.8	-0.00760573		4258.8	-0.02392535
548.99	0.09622855		1078.99	0.00249725		1608.98	0.00691911		2138.99	-0.02000417		2668.98	-0.01036452		3199.01	-0.00106561		3729	-0.00777656		4259	-0.02317488
549.19	0.09659869		1079.19	0.00268334		1609.18	0.00667269		2139.19	-0.0205077		2669.18	-0.00997977		3199.21	-0.00091067		3729.2	-0.00788841		4259.2	-0.02369606
549.39	0.09626476		1079.39	0.00246926		1609.38	0.00662162		2139.39	-0.02129715		2669.38	-0.0091757		3199.41	-0.00044417		3729.4	-0.00771668		4259.4	-0.02244601
549.59	0.0974543		1079.59	0.00275921		1609.58	0.00637929		2139.59	-0.02130224		2669.58	-0.00815091		3199.61	-0.00018603		3729.6	-0.0086597		4259.6	-0.02215874
549.79	0.09739805		1079.79	0.00298822		1609.78	0.00643215		2139.79	-0.02124176		2669.78	-0.00755655		3199.81	0.00052271		3729.8	-0.00810301		4259.8	-0.02215039
549.99	0.09702295		1079.99	0.00237163		1609.98	0.00625095		2139.99	-0.02101525		2669.98	-0.00700145		3200.01	0.00077184		3730	-0.00746461		4260	-0.02232031
550.19	0.09695457		1080.19	0.00215375		1610.18	0.00560338		2140.19	-0.02149054		2670.18	-0.00643093		3200.21	0.00042826		3730.2	-0.00770952		4260.2	-0.02162359
550.39	0.09649213		1080.39	0.00226576		1610.38	0.00571403		2140.39	-0.02155084		2670.38	-0.0065242		3200.41	0.00014282		3730.4	-0.00764864		4260.4	-0.02084144
550.59	0.09563645		1080.59	0.00253776		1610.58	0.00539854		2140.59	-0.02240062		2670.58	-0.00716		3200.61	-0.00056924		3730.6	-0.00716108		4260.6	-0.02115275
550.79	0.09577247		1080.79	0.00310105		1610.78	0.00605506		2140.79	-0.02268947		2670.78	-0.00711238		3200.81	-0.00144753		3730.8	-0.00680206		4260.8	-0.02169798
550.99	0.09507404		1080.99	0.00332274		1610.98	0.00574711		2140.99	-0.02353338		2670.98	-0.00734715		3201.01	-0.00188736		3731	-0.00732337		4261	-0.02145543
551.19	0.09493928		1081.19	0.0027405		1611.18	0.00615867		2141.19	-0.02344923		2671.18	-0.00796448		3201.21	-0.00201245		3731.2	-0.00837601		4261.2	-0.02136578
551.39	0.09515868		1081.39	0.00244658		1611.38	0.00621584		2141.39	-0.02316823		2671.38	-0.0078201		3201.41	-0.00268551		3731.4	-0.00866476		4261.4	-0.02178181
551.59	0.09487361		1081.59	0.00172017		1611.58	0.00745142		2141.59	-0.02278576		2671.58	-0.00858388		3201.61	-0.0039244		3731.6	-0.00902266		4261.6	-0.02242655
551.79	0.09362471		1081.79	0.00162324		1611.78	0.00775274		2141.79	-0.02166296		2671.78	-0.00922812		3201.81	-0.00436193		3731.8	-0.00950338		4261.8	-0.02278841
551.99	0.09365996		1081.99	0.00211056		1611.98	0.008804		2141.99	-0.02118883		2671.98	-0.00968653		3202.01	-0.0048936		3732	-0.00905375		4262	-0.02293731
552.19	0.09291791		1082.19	0.00165289		1612.18	0.00833018		2142.19	-0.0213084		2672.18	-0.01023518		3202.21	-0.00416685		3732.2	-0.00945473		4262.2	-0.02299999
552.39	0.09268292		1082.39	0.00193373		1612.38	0.00812399		2142.39	-0.02143364		2672.38	-0.01079523		3202.41	-0.00362419		3732.4	-0.01022001		4262.4	-0.0238005
552.59	0.09262558		1082.59	0.0012693		1612.58	0.00762496		2142.59	-0.02213606		2672.58	-0.01045405		3202.61	-0.00425293		3732.6	-0.00994775		4262.6	-0.02364575
552.79	0.09242257		1082.79	0.00053398		1612.78	0.00711219		2142.79	-0.02203005		2672.78	-0.00989218		3202.81	-0.00339842		3732.8	-0.01096622		4262.8	-0.02398099
552.99	0.09271696		1082.99	0.00129886		1612.98	0.00670215		2142.99	-0.02202443		2672.98	-0.00995869		3203.01	-0.00315084		3733	-0.01027618		4263	-0.0239387
553.19	0.09300171		1083.19	0.00083979		1613.18	0.00647938		2143.19	-0.02243877		2673.18	-0.00940246		3203.21	-0.00247706		3733.2	-0.0101955		4263.2	-0.02479853
553.39	0.09353732		1083.39	0.00110592		1613.38	0.00679067		2143.39	-0.02327585		2673.38	-0.00953761		3203.41	-0.00191655		3733.4	-0.01022479		4263.4	-0.02391402
553.59	0.09465432		1083.59	0.00142687		1613.58	0.00672596		2143.59	-0.02321672		2673.58	-0.00910467		3203.61	-0.00146847		3733.6	-0.00972303		4263.6	-0.02483822
553.79	0.09513434		1083.79	0.0018969		1613.78	0.00703457		2143.79	-0.02338498		2673.78	-0.00879946		3203.81	-0.00122123		3733.8	-0.00809037		4263.8	-0.02462083
553.99	0.09442186		1083.99	0.00251675		1613.98	0.00723874		2143.99	-0.02342891		2673.98	-0.00858646		3204.01	-0.00157486		3734	-0.00855942		4264	-0.02432841
554.19	0.09486165		1084.19	0.00247207		1614.18	0.00673207		2144.19	-0.02318787		2674.18	-0.00817727		3204.21	-0.00109749		3734.2	-0.00810885		4264.2	-0.02343776
554.39	0.09558983		1084.39	0.0022658		1614.38	0.00659979		2144.39	-0.02321319		2674.38	-0.00896459		3204.41	-0.00085826		3734.4	-0.00761445		4264.4	-0.02327263
554.59	0.09542228		1084.59	0.00296433		1614.58	0.00696767		2144.59	-0.02388219		2674.58	-0.00996304		3204.61	-0.00102415		3734.6	-0.00734707		4264.6	-0.02415512
554.79	0.09620818		1084.79	0.00277877		1614.78	0.00637152		2144.79	-0.02290043		2674.78	-0.01034901		3204.81	-0.00209563		3734.8	-0.00770395		4264.8	-0.02380134
554.99	0.09686017		1084.99	0.00229442		1614.98	0.00540045		2144.99	-0.02251312		2674.98	-0.01064037		3205.01	-0.00126896		3735	-0.00807009		4265	-0.02299508
555.19	0.09707468		1085.19	0.00271635		1615.18	0.00525078		2145.19	-0.02212457		2675.18	-0.01088804		3205.21	-0.00114192		3735.2	-0.00853883		4265.2	-0.02309232
555.39	0.0971119		1085.39	0.00281205		1615.38	0.00483268		2145.39	-0.02149954		2675.38	-0.0105423		3205.41	-0.00118185		3735.4	-0.0081948		4265.4	-0.02352565
555.59	0.09646849		1085.59	0.00308222		1615.58	0.00570363		2145.59	-0.0204095		2675.58	-0.01107533		3205.61	-0.00144146		3735.6	-0.00863146		4265.6	-0.02351835
555.79	0.09552742		1085.79	0.00254578		1615.78	0.00645429		2145.79	-0.02031781		2675.78	-0.01158341		3205.81	-0.00012624		3735.8	-0.00904805		4265.8	-0.02303845
555.99	0.09623176		1085.99	0.0029036		1615.98	0.00691216		2145.99	-0.021109		2675.98	-0.01103293		3206.01	-0.00059861		3736	-0.00868344		4266	-0.02320415
556.19	0.0955964		1086.19	0.00298622		1616.18	0.00622472		2146.19	-0.02200016		2676.18	-0.01094547		3206.21	-0.00035204		3736.2	-0.0091635		4266.2	-0.02413367
556.39	0.09652462		1086.39	0.00293557		1616.38	0.00589891		2146.39	-0.02212355		2676.38	-0.01087727		3206.41	-0.00053895		3736.4	-0.00943336		4266.4	-0.02451397
556.59	0.0960499		1086.59	0.00196991		1616.58	0.00537421		2146.59	-0.02272294		2676.58	-0.01076347		3206.61	-0.00137165		3736.6	-0.00925264		4266.6	-0.02424607
556.79	0.09574336		1086.79	0.00112246		1616.78	0.00494936		2146.79	-0.0226424		2676.78	-0.01065609		3206.81	-0.00084903		3736.8	-0.00981767		4266.8	-0.02358819
556.99	0.09613178		1086.99	0.0017506		1616.98	0.00533126		2146.99	-0.02339115		2676.98	-0.0106502		3207.01	-0.00077977		3737	-0.00906161		4267	-0.02322679
557.19	0.09582464		1087.19	0.00091628		1617.18	0.00583988		2147.19	-0.02399161		2677.18	-0.00990324		3207.21	-0.00112234		3737.2	-0.00878657		4267.2	-0.02320578
557.39	0.09643471		1087.39	0.0008791		1617.38	0.00571206		2147.39	-0.02493274		2677.38	-0.00902366		3207.41	-0.00130952		3737.4	-0.00865028		4267.4	-0.02220873
557.59	0.09684211		1087.59	0.00097881		1617.58	0.00543713		2147.59	-0.02518631		2677.58	-0.00825847		3207.61	-0.00137949		3737.6	-0.00796177		4267.6	-0.02247187
557.79	0.09624352		1087.79	0.00147363		1617.78	0.00541921		2147.79	-0.02534048		2677.78	-0.00762221		3207.81	-0.00201441		3737.8	-0.00750321		4267.8	-0.02199828
557.99	0.09533618		1087.99	0.00168478		1617.98	0.00527582		2147.99	-0.02540945		2677.98	-0.00775725		3208.01	-0.00278249		3738	-0.00757942		4268	-0.02199074
558.19	0.09546492		1088.19	0.00097235		1618.18	0.00494928		2148.19	-0.02515523		2678.18	-0.00765654		3208.21	-0.00274376		3738.2	-0.00679199		4268.2	-0.02205184
558.39	0.09510332		1088.39	0.00070066		1618.38	0.00504817		2148.39	-0.02509469		2678.38	-0.00783223		3208.41	-0.00334337		3738.4	-0.00704895		4268.4	-0.02246424
558.59	0.09456264		1088.59	0.00077688		1618.58	0.00453844		2148.59	-0.02472991		2678.58	-0.00782048		3208.61	-0.00325936		3738.6	-0.00739412		4268.6	-0.02318564
558.79	0.09514552		1088.79	0.00016759		1618.78	0.0036541		2148.79	-0.02383504		2678.78	-0.00749817		3208.81	-0.00319888		3738.8	-0.00777972		4268.8	-0.02325756
558.99	0.09527565		1088.99	0.0000316		1618.98	0.00331826		2148.99	-0.02388213		2678.98	-0.00709315		3209.01	-0.00219351		3739	-0.00790453		4269	-0.02355885
559.19	0.09506685		1089.19	0.00015276		1619.18	0.0034069		2149.19	-0.02359865		2679.18	-0.00715096		3209.21	-0.00177402		3739.2	-0.00864306		4269.2	-0.02409345
559.39	0.09509951		1089.39	-0.00073467		1619.38	0.00371856		2149.39	-0.02312918		2679.38	-0.00709133		3209.41	-0.00104373		3739.4	-0.00862379		4269.4	-0.02446847
559.59	0.09526355		1089.59	-0.00124506		1619.58	0.00481635		2149.59	-0.02303414		2679.58	-0.00762994		3209.61	-0.00044116		3739.6	-0.00906622		4269.6	-0.02494606
559.79	0.09565412		1089.79	-0.00160087		1619.78	0.00507438		2149.79	-0.02342636		2679.78	-0.00819691		3209.81	0.00069927		3739.8	-0.0095099		4269.8	-0.02590972
