# Supplementary material for: Functional development of a V3/glycan-specific broadly neutralizing antibody isolated from a case of HIV superinfection
Source: eLife journal article supplement (doi:10.7554/elife.68110), 2021-07-15
Supplement: fig2-data2 [file F9.xls]

Vers 3.43 Data Simulation
Conc1	1.563E-08	1.563E-08	1.563E-08	1.563E-08	1.563E-08	1.563E-08	1.563E-08
Start1	199.99	729.99	1259.98	1789.98	2319.97	2849.97	3380
Stop1	559.79	1089.79	1619.78	2149.78	2679.77	3209.77	3739.8
Time1	Data1	Sim1	Time2	Data2	Sim2	Time3	Data3	Sim3	Time4	Data4	Sim4	Time5	Data5	Sim5	Time6	Data6	Sim6	Time7	Data7	Sim7
199.99	0.00504245		729.99	-0.00789386		1259.98	-0.00237312		1789.98	0.0047242		2319.97	0.0000222		2849.97	0.00038193		3380	-0.00258898
200.19	0.00378646		730.19	-0.00896005		1260.18	-0.00267976		1790.18	0.0051645		2320.17	0.00046768		2850.17	-0.00006417		3380.2	-0.00277665
200.39	0.00246893		730.39	-0.00955235		1260.38	-0.0027045		1790.38	0.00554736		2320.37	0.00122353		2850.37	-0.00071027		3380.4	-0.00230306
200.59	0.00177265		730.59	-0.01074105		1260.58	-0.00291038		1790.58	0.00615828		2320.57	0.00231477		2850.57	-0.00193037		3380.6	-0.0020463
200.79	0.00110415		730.79	-0.01119045		1260.78	-0.00287103		1790.78	0.00657301		2320.77	0.00252494		2850.77	-0.00266159		3380.8	-0.00140813
200.99	-0.00005363		730.99	-0.01157467		1260.98	-0.00332242		1790.98	0.00710887		2320.97	0.00348276		2850.97	-0.0036714		3381	-0.00042227
201.19	0.00006793		731.19	-0.01234124		1261.18	-0.00331813		1791.18	0.00751928		2321.17	0.00366259		2851.17	-0.00501621		3381.2	0.00013911
201.39	0.00065447		731.39	-0.01316615		1261.38	-0.00318041		1791.38	0.00822966		2321.37	0.0036448		2851.37	-0.00531309		3381.4	0.00097877
201.59	0.0013995		731.59	-0.0137309		1261.58	-0.00373508		1791.58	0.00886946		2321.57	0.00340328		2851.57	-0.00591893		3381.6	0.00155324
201.79	0.00239872		731.79	-0.01422622		1261.78	-0.0036706		1791.78	0.00936187		2321.77	0.00395003		2851.77	-0.00597008		3381.8	0.00185276
201.99	0.00345868		731.99	-0.01498236		1261.98	-0.00317368		1791.98	0.00952238		2321.97	0.00444351		2851.97	-0.00542604		3382	0.00161793
202.19	0.00460371		732.19	-0.01553832		1262.18	-0.00289586		1792.18	0.00970097		2322.17	0.00468452		2852.17	-0.00469856		3382.2	0.00079163
202.39	0.00504049		732.39	-0.01556408		1262.38	-0.00249196		1792.38	0.01024645		2322.37	0.00452865		2852.37	-0.00485468		3382.4	0.00051986
202.59	0.00561072		732.59	-0.01569322		1262.58	-0.00234558		1792.58	0.00942602		2322.57	0.00393407		2852.57	-0.00529067		3382.6	0.00021589
202.79	0.00543075		732.79	-0.0155357		1262.78	-0.00252431		1792.78	0.00900263		2322.77	0.00331236		2852.77	-0.00567475		3382.8	-0.00078549
202.99	0.00624869		732.99	-0.01548311		1262.98	-0.00298629		1792.98	0.00808577		2322.97	0.00272506		2852.97	-0.00621309		3383	-0.0014189
203.19	0.00594434		733.19	-0.01579239		1263.18	-0.00306065		1793.18	0.00764662		2323.17	0.00219575		2853.17	-0.00592327		3383.2	-0.00139415
203.39	0.00634196		733.39	-0.01567667		1263.38	-0.00349736		1793.38	0.00723681		2323.37	0.00259303		2853.37	-0.00575007		3383.4	-0.00228483
203.59	0.00481109		733.59	-0.0160825		1263.58	-0.0032086		1793.58	0.00638725		2323.57	0.00322814		2853.57	-0.00602031		3383.6	-0.00256303
203.79	0.00393217		733.79	-0.01577311		1263.78	-0.00302377		1793.78	0.00598395		2323.77	0.00225937		2853.77	-0.00627093		3383.8	-0.00245827
203.99	0.00344472		733.99	-0.01540593		1263.98	-0.00265325		1793.98	0.00570492		2323.97	0.00203015		2853.97	-0.00536437		3384	-0.00332407
204.19	0.00275842		734.19	-0.01592733		1264.18	-0.00352554		1794.18	0.0055237		2324.17	0.00185896		2854.17	-0.00547179		3384.2	-0.00411941
204.39	0.00281295		734.39	-0.01529132		1264.38	-0.00345825		1794.38	0.00598477		2324.37	0.00187829		2854.37	-0.00584858		3384.4	-0.00365408
204.59	0.00334601		734.59	-0.01509038		1264.58	-0.00347718		1794.58	0.00661952		2324.57	0.00182656		2854.57	-0.005952		3384.6	-0.00314164
204.79	0.00242063		734.79	-0.01442016		1264.78	-0.00355847		1794.78	0.00671992		2324.77	0.00107422		2854.77	-0.00553998		3384.8	-0.00220836
204.99	0.0025256		734.99	-0.01429093		1264.98	-0.00412255		1794.98	0.00702266		2324.97	0.00167269		2854.97	-0.00575953		3385	-0.00146899
205.19	0.00402201		735.19	-0.0143143		1265.18	-0.00411239		1795.18	0.00731112		2325.17	0.00087928		2855.17	-0.00558527		3385.2	-0.00093219
205.39	0.00425486		735.39	-0.01395395		1265.38	-0.0041097		1795.38	0.00800714		2325.37	0.00086683		2855.37	-0.00510438		3385.4	-0.00014741
205.59	0.00429978		735.59	-0.01428155		1265.58	-0.00444622		1795.58	0.00851013		2325.57	0.00023559		2855.57	-0.00480377		3385.6	0.00066064
205.79	0.00507425		735.79	-0.01421188		1265.78	-0.00293567		1795.78	0.00840457		2325.77	0.00083931		2855.77	-0.0036879		3385.8	0.00098544
205.99	0.00484989		735.99	-0.01472502		1265.98	-0.00240032		1795.98	0.00889922		2325.97	0.00133398		2855.97	-0.00315807		3386	0.00041277
206.19	0.00507598		736.19	-0.01492017		1266.18	-0.0017125		1796.18	0.00901993		2326.17	0.00036293		2856.17	-0.00287058		3386.2	0.00047715
206.39	0.00546852		736.39	-0.01422889		1266.38	-0.00133186		1796.38	0.00855136		2326.37	0.00007156		2856.37	-0.00336008		3386.4	0.00089829
206.59	0.00560964		736.59	-0.01423615		1266.58	-0.00145618		1796.58	0.00759995		2326.57	0.00012666		2856.57	-0.00362543		3386.6	0.00120495
206.79	0.00682591		736.79	-0.01482317		1266.78	-0.00133905		1796.78	0.0066473		2326.77	0.0008869		2856.77	-0.00421871		3386.8	0.00065414
206.99	0.00722086		736.99	-0.01557623		1266.98	-0.00097537		1796.98	0.00620087		2326.97	0.00133894		2856.97	-0.00433848		3387	0.00077143
207.19	0.00680168		737.19	-0.0164107		1267.18	-0.00032812		1797.18	0.00649933		2327.17	0.0021804		2857.17	-0.0039239		3387.2	0.00071308
207.39	0.00705847		737.39	-0.01786989		1267.38	0.00045617		1797.38	0.00566861		2327.37	0.0026447		2857.37	-0.00461568		3387.4	0.00137704
207.59	0.00683044		737.59	-0.01734512		1267.58	0.00041453		1797.58	0.0048484		2327.57	0.00355345		2857.57	-0.00490614		3387.6	0.00136492
207.79	0.00735148		737.79	-0.01754323		1267.78	0.00069974		1797.78	0.00490928		2327.77	0.00337806		2857.77	-0.00527438		3387.8	0.00036168
207.99	0.00732182		737.99	-0.01722338		1267.98	0.00072585		1797.98	0.00520624		2327.97	0.00390577		2857.97	-0.00544877		3388	-0.00106945
208.19	0.00697406		738.19	-0.01684981		1268.18	0.00050858		1798.18	0.00598166		2328.17	0.00372459		2858.17	-0.00608451		3388.2	-0.0022384
208.39	0.00717201		738.39	-0.0161737		1268.38	0.00096508		1798.38	0.00663727		2328.37	0.00360639		2858.37	-0.00557143		3388.4	-0.00310202
208.59	0.00744634		738.59	-0.01583157		1268.58	0.00049198		1798.58	0.00751016		2328.57	0.00400729		2858.57	-0.00529524		3388.6	-0.00348227
208.79	0.0065603		738.79	-0.01564115		1268.78	0.00038336		1798.78	0.00750584		2328.77	0.00397088		2858.77	-0.00572583		3388.8	-0.00372527
208.99	0.0065769		738.99	-0.01493814		1268.98	-0.00067009		1798.98	0.00707551		2328.97	0.00395542		2858.97	-0.00571713		3389	-0.00366323
209.19	0.00677741		739.19	-0.01426377		1269.18	-0.00098164		1799.18	0.00682833		2329.17	0.00355375		2859.17	-0.00602128		3389.2	-0.00381455
209.39	0.00642738		739.39	-0.01371817		1269.38	-0.00146582		1799.38	0.00719055		2329.37	0.00347484		2859.37	-0.00691214		3389.4	-0.00343083
209.59	0.00625292		739.59	-0.01391902		1269.58	-0.00110884		1799.58	0.00743583		2329.57	0.00279294		2859.57	-0.00661102		3389.6	-0.00297389
209.79	0.00724231		739.79	-0.01325634		1269.78	-0.00105227		1799.78	0.00710724		2329.77	0.0027763		2859.77	-0.00637394		3389.8	-0.00317566
209.99	0.00696279		739.99	-0.01317721		1269.98	-0.000567		1799.98	0.00699449		2329.97	0.00193748		2859.97	-0.00662744		3390	-0.003278
210.19	0.00784307		740.19	-0.01291658		1270.18	0.00057438		1800.18	0.00668045		2330.17	0.00013477		2860.17	-0.00594774		3390.2	-0.00277619
210.39	0.00831915		740.39	-0.01225309		1270.38	0.00075889		1800.38	0.00674858		2330.37	0.00057162		2860.37	-0.005429		3390.4	-0.00282898
210.59	0.00758548		740.59	-0.01202187		1270.58	-0.00010543		1800.58	0.00593043		2330.57	0.001133		2860.57	-0.00542464		3390.6	-0.00315573
210.79	0.00831358		740.79	-0.01212368		1270.78	0.00009843		1800.78	0.00647638		2330.77	0.00224923		2860.77	-0.00469015		3390.8	-0.00279407
210.99	0.0075388		740.99	-0.01207506		1270.98	0.00057997		1800.98	0.00729853		2330.97	0.00231221		2860.97	-0.00401044		3391	-0.00224078
211.19	0.00716316		741.19	-0.01154805		1271.18	0.00203754		1801.18	0.00789772		2331.17	0.00237254		2861.17	-0.00415348		3391.2	-0.00198437
211.39	0.00843818		741.39	-0.01243081		1271.38	0.00240567		1801.38	0.00759267		2331.37	0.00252204		2861.37	-0.00432277		3391.4	-0.00216153
211.59	0.00900202		741.59	-0.01145068		1271.58	0.00214308		1801.58	0.00775274		2331.57	0.00323926		2861.57	-0.00399576		3391.6	-0.00275588
211.79	0.00854477		741.79	-0.01257881		1271.78	0.00190307		1801.78	0.00755619		2331.77	0.00307418		2861.77	-0.00495738		3391.8	-0.00247905
211.99	0.00826479		741.99	-0.0127342		1271.98	0.00114263		1801.98	0.00755551		2331.97	0.00262519		2861.97	-0.00521833		3392	-0.00285858
212.19	0.00760822		742.19	-0.01257171		1272.18	0.00014736		1802.18	0.00758963		2332.17	0.00158677		2862.17	-0.00512795		3392.2	-0.00404292
212.39	0.00774962		742.39	-0.01284987		1272.38	-0.00014562		1802.38	0.00810206		2332.37	0.00136709		2862.37	-0.00495734		3392.4	-0.00461486
212.59	0.00724491		742.59	-0.01322825		1272.58	-0.00077925		1802.58	0.00800772		2332.57	0.00159901		2862.57	-0.00555845		3392.6	-0.0036981
212.79	0.00584954		742.79	-0.01399668		1272.78	-0.00100971		1802.78	0.00732846		2332.77	0.00074462		2862.77	-0.00601193		3392.8	-0.00329433
212.99	0.00634755		742.99	-0.01421711		1272.98	-0.00303833		1802.98	0.0073078		2332.97	0.00067505		2862.97	-0.00621713		3393	-0.00302067
213.19	0.00678123		743.19	-0.01478478		1273.18	-0.00356095		1803.18	0.00709904		2333.17	0.00084906		2863.17	-0.00654718		3393.2	-0.00321395
213.39	0.00705063		743.39	-0.01516949		1273.38	-0.00466948		1803.38	0.00778966		2333.37	0.0015152		2863.37	-0.00734478		3393.4	-0.00200242
213.59	0.00795346		743.59	-0.01560773		1273.58	-0.00441589		1803.58	0.00699014		2333.57	0.00097757		2863.57	-0.00698486		3393.6	-0.00205463
213.79	0.00900779		743.79	-0.01500997		1273.78	-0.0051373		1803.78	0.00662506		2333.77	0.0005775		2863.77	-0.00747511		3393.8	-0.00234558
213.99	0.00953037		743.99	-0.01493451		1273.98	-0.00380664		1803.98	0.00657245		2333.97	0.00011685		2863.97	-0.00759042		3394	-0.00215773
214.19	0.00977055		744.19	-0.01418287		1274.18	-0.00320498		1804.18	0.00697731		2334.17	0.0004519		2864.17	-0.00766896		3394.2	-0.00286124
214.39	0.00997153		744.39	-0.01354472		1274.38	-0.00378686		1804.38	0.00750047		2334.37	0.00141765		2864.37	-0.00749181		3394.4	-0.00345055
214.59	0.01011974		744.59	-0.01380215		1274.58	-0.00314102		1804.58	0.00761112		2334.57	0.00226562		2864.57	-0.00791994		3394.6	-0.00308533
214.79	0.01137246		744.79	-0.01383215		1274.78	-0.00115293		1804.78	0.00903433		2334.77	0.00214873		2864.77	-0.00726886		3394.8	-0.00200964
214.99	0.01149625		744.99	-0.01291286		1274.98	-0.00018663		1804.98	0.00989712		2334.97	0.00217074		2864.97	-0.00690395		3395	-0.00146565
215.19	0.01178355		745.19	-0.01308323		1275.18	0.00111181		1805.18	0.01073653		2335.17	0.00172901		2865.17	-0.00669233		3395.2	-0.00119662
215.39	0.01253994		745.39	-0.01493095		1275.38	0.00052984		1805.38	0.01069843		2335.37	0.00186853		2865.37	-0.00618442		3395.4	-0.00145638
215.59	0.01212284		745.59	-0.01450622		1275.58	0.00094796		1805.58	0.0098757		2335.57	0.00196682		2865.57	-0.00630426		3395.6	-0.00126639
215.79	0.01219086		745.79	-0.01481999		1275.78	0.00129364		1805.78	0.00912471		2335.77	0.001888		2865.77	-0.00644162		3395.8	-0.00158258
215.99	0.01237733		745.99	-0.01528451		1275.98	0.00127058		1805.98	0.00933883		2335.97	0.00123956		2865.97	-0.00598796		3396	-0.00207599
216.19	0.0112753		746.19	-0.01402733		1276.18	0.00176857		1806.18	0.00946037		2336.17	0.00138921		2866.17	-0.00522014		3396.2	-0.0022604
216.39	0.01062423		746.39	-0.01420623		1276.38	0.00235683		1806.38	0.00900832		2336.37	0.00142266		2866.37	-0.00492939		3396.4	-0.00209184
216.59	0.00964777		746.59	-0.01453235		1276.58	0.00193688		1806.58	0.00832117		2336.57	0.00183781		2866.57	-0.00512028		3396.6	-0.00210043
216.79	0.00859969		746.79	-0.01451195		1276.78	0.0018965		1806.78	0.0086417		2336.77	0.00166184		2866.77	-0.0049503		3396.8	-0.00278128
216.99	0.00921898		746.99	-0.01408065		1276.98	0.00073025		1806.98	0.00808642		2336.97	0.00190134		2866.97	-0.00486493		3397	-0.00270597
217.19	0.0090291		747.19	-0.01433737		1277.18	0.00044458		1807.18	0.00744791		2337.17	0.00247546		2867.17	-0.00431402		3397.2	-0.00236463
217.39	0.0086887		747.39	-0.01332793		1277.38	-0.00037905		1807.38	0.00774398		2337.37	0.0028383		2867.37	-0.00458348		3397.4	-0.00178958
217.59	0.0086743		747.59	-0.01246317		1277.58	-0.00050019		1807.58	0.00705923		2337.57	0.00274193		2867.57	-0.00411646		3397.6	-0.00185887
217.79	0.00857135		747.79	-0.0120717		1277.78	-0.00127827		1807.78	0.00699014		2337.77	0.00319584		2867.77	-0.00501492		3397.8	-0.00172622
217.99	0.0090494		747.99	-0.01235544		1277.98	-0.0005423		1807.98	0.00698967		2337.97	0.00260043		2867.97	-0.00494863		3398	-0.00137866
218.19	0.00901768		748.19	-0.01202607		1278.18	-0.00074881		1808.18	0.00673022		2338.17	0.00312476		2868.17	-0.00602779		3398.2	-0.00106753
218.39	0.00926255		748.39	-0.01253814		1278.38	-0.00059981		1808.38	0.00662011		2338.37	0.00244208		2868.37	-0.00599936		3398.4	-0.0010629
218.59	0.00985189		748.59	-0.01275223		1278.58	0.00041531		1808.58	0.00690288		2338.57	0.0023804		2868.57	-0.00570358		3398.6	-0.00068824
218.79	0.01001527		748.79	-0.01228759		1278.78	0.00008189		1808.78	0.00752099		2338.77	0.00160844		2868.77	-0.0051367		3398.8	-0.00103594
218.99	0.00953936		748.99	-0.01208594		1278.98	-0.00038704		1808.98	0.00693242		2338.97	0.00112906		2868.97	-0.00458048		3399	-0.00104688
219.19	0.01048759		749.19	-0.0127175		1279.18	-0.00104825		1809.18	0.00703346		2339.17	0.00067427		2869.17	-0.00403614		3399.2	-0.00111245
219.39	0.01079329		749.39	-0.01350647		1279.38	-0.00147623		1809.38	0.0066666		2339.37	0.00122111		2869.37	-0.0040483		3399.4	-0.00208604
219.59	0.01124364		749.59	-0.01326817		1279.58	-0.00039938		1809.58	0.00606922		2339.57	0.00158023		2869.57	-0.003904		3399.6	-0.00275905
219.79	0.01203519		749.79	-0.01359347		1279.78	-0.00128278		1809.78	0.00610038		2339.77	0.00138015		2869.77	-0.00335987		3399.8	-0.00333898
219.99	0.01225906		749.99	-0.01427943		1279.98	-0.00176396		1809.98	0.00596479		2339.97	0.00179804		2869.97	-0.00332546		3400	-0.00322637
220.19	0.01267236		750.19	-0.0138545		1280.18	-0.00319292		1810.18	0.00573633		2340.17	0.00220185		2870.17	-0.00248911		3400.2	-0.00360067
220.39	0.01204648		750.39	-0.01415877		1280.38	-0.00367529		1810.38	0.00577546		2340.37	0.00263312		2870.37	-0.00277341		3400.4	-0.00433684
220.59	0.01225591		750.59	-0.01407555		1280.58	-0.00404494		1810.58	0.00606291		2340.57	0.00299088		2870.57	-0.00329154		3400.6	-0.00480586
220.79	0.01177539		750.79	-0.01401302		1280.78	-0.00391957		1810.78	0.00585483		2340.77	0.00319122		2870.77	-0.00241521		3400.8	-0.00522284
220.99	0.01281094		750.99	-0.01413238		1280.98	-0.00469597		1810.98	0.00630327		2340.97	0.00314954		2870.97	-0.00241421		3401	-0.00494801
221.19	0.01325445		751.19	-0.01350165		1281.18	-0.00421347		1811.18	0.00676715		2341.17	0.00413113		2871.17	-0.00208881		3401.2	-0.00491309
221.39	0.01256962		751.39	-0.0129924		1281.38	-0.00482643		1811.38	0.00822456		2341.37	0.00440181		2871.37	-0.00211473		3401.4	-0.00418068
221.59	0.01322186		751.59	-0.01361797		1281.58	-0.00445966		1811.58	0.00904005		2341.57	0.00489423		2871.57	-0.00126144		3401.6	-0.00350356
221.79	0.01406499		751.79	-0.01461471		1281.78	-0.00413683		1811.78	0.00915995		2341.77	0.00484039		2871.77	-0.00159059		3401.8	-0.00334034
221.99	0.01446318		751.99	-0.01486681		1281.98	-0.003124		1811.98	0.00923677		2341.97	0.00436209		2871.97	-0.00125432		3402	-0.00294614
222.19	0.01401391		752.19	-0.01451527		1282.18	-0.00213588		1812.18	0.00944574		2342.17	0.00378345		2872.17	-0.00145642		3402.2	-0.00311633
222.39	0.01296538		752.39	-0.01411581		1282.38	-0.00167309		1812.38	0.00932861		2342.37	0.00265592		2872.37	-0.00134138		3402.4	-0.00405817
222.59	0.01318371		752.59	-0.01317002		1282.58	-0.00147825		1812.58	0.01015901		2342.57	0.0019817		2872.57	-0.00036621		3402.6	-0.00400824
222.79	0.01267226		752.79	-0.01194333		1282.78	-0.0009301		1812.78	0.00967246		2342.77	0.00132898		2872.77	-0.00054674		3402.8	-0.00439187
222.99	0.01236471		752.99	-0.01230859		1282.98	-0.00052852		1812.98	0.00875841		2342.97	0.0012583		2872.97	-0.00024445		3403	-0.00422886
223.19	0.01341776		753.19	-0.01291935		1283.18	-0.00016384		1813.18	0.0087802		2343.17	0.00228013		2873.17	-0.00129557		3403.2	-0.00452085
223.39	0.01294039		753.39	-0.01384689		1283.38	0.0005128		1813.38	0.00860148		2343.37	0.00202309		2873.37	-0.00243328		3403.4	-0.00424988
223.59	0.01251547		753.59	-0.01420686		1283.58	0.00155631		1813.58	0.00885086		2343.57	0.00196167		2873.57	-0.00295716		3403.6	-0.00442936
223.79	0.01319891		753.79	-0.01411708		1283.78	0.00032955		1813.78	0.00826944		2343.77	0.00193513		2873.77	-0.00306045		3403.8	-0.00395831
223.99	0.01233867		753.99	-0.01408253		1283.98	-0.00027904		1813.98	0.00781919		2343.97	0.00226508		2873.97	-0.00373677		3404	-0.00421031
224.19	0.01254836		754.19	-0.01434711		1284.18	-0.00120889		1814.18	0.00799379		2344.17	0.00235233		2874.17	-0.00354899		3404.2	-0.0041718
224.39	0.01166227		754.39	-0.01461355		1284.38	-0.00093395		1814.38	0.00820103		2344.37	0.00240485		2874.37	-0.00385501		3404.4	-0.00377725
224.59	0.01236653		754.59	-0.01496122		1284.58	-0.00176889		1814.58	0.00779249		2344.57	0.00227194		2874.57	-0.0040526		3404.6	-0.0040757
224.79	0.01273999		754.79	-0.01572081		1284.78	-0.00293693		1814.78	0.00788772		2344.77	0.00227717		2874.77	-0.00332715		3404.8	-0.00487616
224.99	0.01391262		754.99	-0.01554889		1284.98	-0.00286341		1814.98	0.0079842		2344.97	0.00268301		2874.97	-0.00322428		3405	-0.00459534
225.19	0.01399118		755.19	-0.01487024		1285.18	-0.00292824		1815.18	0.00799499		2345.17	0.00358527		2875.17	-0.00272623		3405.2	-0.00456269
225.39	0.01424259		755.39	-0.01549257		1285.38	-0.00379397		1815.38	0.00976867		2345.37	0.0036864		2875.37	-0.00191495		3405.4	-0.00347469
225.59	0.01530961		755.59	-0.01595315		1285.58	-0.00321184		1815.58	0.00944483		2345.57	0.0034239		2875.57	-0.00139559		3405.6	-0.00331541
225.79	0.01592335		755.79	-0.01575374		1285.78	-0.00338433		1815.78	0.00927023		2345.77	0.00360662		2875.77	-0.00095214		3405.8	-0.0029849
225.99	0.01676773		755.99	-0.01513416		1285.98	-0.00337159		1815.98	0.00901689		2345.97	0.00265068		2875.97	-0.00088462		3406	-0.00237731
226.19	0.01692548		756.19	-0.01524331		1286.18	-0.00277321		1816.18	0.00970014		2346.17	0.00207811		2876.17	-0.00138892		3406.2	-0.00224363
226.39	0.01744258		756.39	-0.0149917		1286.38	-0.00259873		1816.38	0.0102009		2346.37	0.00199498		2876.37	-0.00191714		3406.4	-0.00241517
226.59	0.01889401		756.59	-0.01462266		1286.58	-0.00192578		1816.58	0.01012925		2346.57	0.00188874		2876.57	-0.00153542		3406.6	-0.00211606
226.79	0.01900019		756.79	-0.01464814		1286.78	-0.00042496		1816.78	0.01055364		2346.77	0.00270186		2876.77	-0.00263676		3406.8	-0.00253304
226.99	0.01965486		756.99	-0.01586122		1286.98	0.00003601		1816.98	0.01037582		2346.97	0.00246097		2876.97	-0.00360681		3407	-0.00190317
227.19	0.01950491		757.19	-0.01617491		1287.18	0.00116191		1817.18	0.01060138		2347.17	0.00268787		2877.17	-0.00461665		3407.2	-0.00180469
227.39	0.01910552		757.39	-0.01522703		1287.38	0.00213562		1817.38	0.00996846		2347.37	0.00186728		2877.37	-0.00460785		3407.4	-0.00131561
227.59	0.01914983		757.59	-0.01494278		1287.58	0.00256245		1817.58	0.00949872		2347.57	0.00167229		2877.57	-0.00452673		3407.6	-0.00145721
227.79	0.0195636		757.79	-0.0147288		1287.78	0.00212072		1817.78	0.00846953		2347.77	0.00071255		2877.77	-0.00441665		3407.8	-0.00183653
227.99	0.01868762		757.99	-0.01468728		1287.98	0.00167583		1817.98	0.00827958		2347.97	0.0001347		2877.97	-0.00443895		3408	-0.00254736
228.19	0.01912347		758.19	-0.01495911		1288.18	0.0022087		1818.18	0.0091022		2348.17	-0.00009477		2878.17	-0.00450401		3408.2	-0.00281949
228.39	0.01823527		758.39	-0.01523438		1288.38	0.00168756		1818.38	0.00924685		2348.37	-0.00001505		2878.37	-0.00428901		3408.4	-0.00351829
228.59	0.01826227		758.59	-0.01514827		1288.58	0.00117602		1818.58	0.00885795		2348.57	0.00045248		2878.57	-0.00406621		3408.6	-0.00428284
228.79	0.01789843		758.79	-0.01494676		1288.78	0.00054681		1818.78	0.0082972		2348.77	0.00072482		2878.77	-0.00309722		3408.8	-0.00392843
228.99	0.01663282		758.99	-0.01432329		1288.98	0.00084897		1818.98	0.0079805		2348.97	0.0012096		2878.97	-0.00328761		3409	-0.00288199
229.19	0.01593998		759.19	-0.01391426		1289.18	-0.00013234		1819.18	0.00799193		2349.17	0.00147831		2879.17	-0.00368751		3409.2	-0.00225111
229.39	0.01556446		759.39	-0.0138523		1289.38	-0.00040121		1819.38	0.00776138		2349.37	0.00126849		2879.37	-0.00328132		3409.4	-0.00109634
229.59	0.01577853		759.59	-0.01358047		1289.58	-0.00109947		1819.58	0.00704859		2349.57	0.0006689		2879.57	-0.00353852		3409.6	-0.00130931
229.79	0.015851		759.79	-0.01238019		1289.78	-0.00208889		1819.78	0.00729638		2349.77	0.00093671		2879.77	-0.00302844		3409.8	-0.00127665
229.99	0.01671477		759.99	-0.01236381		1289.98	-0.00255568		1819.98	0.00721041		2349.97	0.00166645		2879.97	-0.00355289		3410	-0.00116572
230.19	0.0169375		760.19	-0.01396365		1290.18	-0.00204153		1820.18	0.00788459		2350.17	0.0019318		2880.17	-0.0024376		3410.2	-0.00148718
230.39	0.01763008		760.39	-0.01394019		1290.38	-0.00162782		1820.38	0.00787631		2350.37	0.00216157		2880.37	-0.00188093		3410.4	-0.00225877
230.59	0.0179048		760.59	-0.01352058		1290.58	-0.00137375		1820.58	0.00746322		2350.57	0.00294261		2880.57	-0.0012388		3410.6	-0.00205984
230.79	0.01713216		760.79	-0.01345593		1290.78	-0.00045805		1820.78	0.00824452		2350.77	0.00309789		2880.77	-0.00161683		3410.8	-0.00240044
230.99	0.01777332		760.99	-0.01321765		1290.98	-0.00031273		1820.98	0.00738967		2350.97	0.00256426		2880.97	-0.00139255		3411	-0.00265092
231.19	0.01757677		761.19	-0.0130084		1291.18	0.0011346		1821.18	0.00732152		2351.17	0.00264102		2881.17	-0.00096342		3411.2	-0.00330034
231.39	0.01805276		761.39	-0.01222339		1291.38	0.00197005		1821.38	0.00658841		2351.37	0.00260103		2881.37	-0.00054696		3411.4	-0.00321059
231.59	0.0186305		761.59	-0.01258019		1291.58	0.00202863		1821.58	0.00681442		2351.57	0.00164707		2881.57	-0.00052264		3411.6	-0.00404306
231.79	0.01910353		761.79	-0.01282745		1291.78	0.00303023		1821.78	0.00751177		2351.77	0.00141809		2881.77	-0.00031716		3411.8	-0.00478015
231.99	0.01936047		761.99	-0.01319755		1291.98	0.00259026		1821.98	0.00825522		2351.97	0.00224985		2881.97	-0.00096292		3412	-0.00447598
232.19	0.01944939		762.19	-0.01303326		1292.18	0.00307942		1822.18	0.00875325		2352.17	0.0020511		2882.17	-0.0017819		3412.2	-0.00488896
232.39	0.01915564		762.39	-0.01329051		1292.38	0.00314073		1822.38	0.00965917		2352.37	0.00233232		2882.37	-0.00240399		3412.4	-0.00443569
232.59	0.01894543		762.59	-0.0127853		1292.58	0.00326371		1822.58	0.00955011		2352.57	0.0025376		2882.57	-0.00264632		3412.6	-0.00383955
232.79	0.01890527		762.79	-0.01287634		1292.78	0.00224713		1822.78	0.00982299		2352.77	0.00213708		2882.77	-0.00348685		3412.8	-0.0034235
232.99	0.01891702		762.99	-0.01307108		1292.98	0.00212042		1822.98	0.00966309		2352.97	0.00162636		2882.97	-0.0050739		3413	-0.00260947
233.19	0.01974937		763.19	-0.0132176		1293.18	0.00064927		1823.18	0.00962217		2353.17	0.00170111		2883.17	-0.00556582		3413.2	-0.00203338
233.39	0.01958404		763.39	-0.01322272		1293.38	0.00053232		1823.38	0.00936031		2353.37	0.00146581		2883.37	-0.00517613		3413.4	-0.00147122
233.59	0.02054306		763.59	-0.01301728		1293.58	0.00011985		1823.58	0.00954227		2353.57	0.00206875		2883.57	-0.00557681		3413.6	-0.00244685
233.79	0.02143518		763.79	-0.01219407		1293.78	0.00028656		1823.78	0.00955166		2353.77	0.00327976		2883.77	-0.00512034		3413.8	-0.00238295
233.99	0.02199614		763.99	-0.01297289		1293.98	-0.00044304		1823.98	0.00916774		2353.97	0.00373663		2883.97	-0.00437251		3414	-0.00266232
234.19	0.02224839		764.19	-0.01391625		1294.18	-0.00004822		1824.18	0.00864058		2354.17	0.00351633		2884.17	-0.00304211		3414.2	-0.00248613
234.39	0.02188256		764.39	-0.01325761		1294.38	0.00091759		1824.38	0.00781011		2354.37	0.00360373		2884.37	-0.00319947		3414.4	-0.00259643
234.59	0.02147685		764.59	-0.01292509		1294.58	0.00101221		1824.58	0.00730035		2354.57	0.0041656		2884.57	-0.00307185		3414.6	-0.00209342
234.79	0.02097397		764.79	-0.01276596		1294.78	0.0015423		1824.78	0.00719463		2354.77	0.00467208		2884.77	-0.00336502		3414.8	-0.0020946
234.99	0.02132256		764.99	-0.01308699		1294.98	0.00154134		1824.98	0.00731808		2354.97	0.00466487		2884.97	-0.00293889		3415	-0.00265423
235.19	0.02122941		765.19	-0.01337495		1295.18	0.00163326		1825.18	0.00716171		2355.17	0.00452985		2885.17	-0.00343741		3415.2	-0.00281975
235.39	0.0207487		765.39	-0.01267149		1295.38	0.00187162		1825.38	0.00798574		2355.37	0.00487924		2885.37	-0.00355094		3415.4	-0.00269111
235.59	0.0206887		765.59	-0.01277192		1295.58	0.00125514		1825.58	0.00821978		2355.57	0.00437709		2885.57	-0.00344305		3415.6	-0.00389912
235.79	0.02039274		765.79	-0.01306689		1295.78	0.00168764		1825.78	0.0080703		2355.77	0.00468186		2885.77	-0.00377189		3415.8	-0.00416914
235.99	0.02033998		765.99	-0.01289801		1295.98	0.00146116		1825.98	0.00779798		2355.97	0.00444216		2885.97	-0.00389836		3416	-0.00443896
236.19	0.0193881		766.19	-0.01208192		1296.18	0.00124209		1826.18	0.00819772		2356.17	0.00332257		2886.17	-0.00399721		3416.2	-0.00586394
236.39	0.01915647		766.39	-0.01213601		1296.38	0.00165998		1826.38	0.00847503		2356.37	0.00288421		2886.37	-0.00380742		3416.4	-0.00597335
236.59	0.01901832		766.59	-0.01203966		1296.58	0.00105291		1826.58	0.00757127		2356.57	0.00239199		2886.57	-0.00359072		3416.6	-0.00620592
236.79	0.02000168		766.79	-0.0130104		1296.78	-0.00000157		1826.78	0.00765113		2356.77	0.00141529		2886.77	-0.00367127		3416.8	-0.00570655
236.99	0.0195896		766.99	-0.01350892		1296.98	0.00002471		1826.98	0.00700427		2356.97	0.00093548		2886.97	-0.00313463		3417	-0.00538623
237.19	0.01931346		767.19	-0.01359999		1297.18	-0.00094241		1827.18	0.0075796		2357.17	0.00101506		2887.17	-0.00285249		3417.2	-0.00525555
237.39	0.01950487		767.39	-0.01347009		1297.38	-0.00046912		1827.38	0.00735278		2357.37	0.0007272		2887.37	-0.00244522		3417.4	-0.00541059
237.59	0.02056687		767.59	-0.01317552		1297.58	-0.0005535		1827.58	0.0069334		2357.57	0.00134411		2887.57	-0.00211726		3417.6	-0.00540522
237.79	0.02180336		767.79	-0.01297313		1297.78	-0.00009981		1827.78	0.0072207		2357.77	0.000743		2887.77	-0.00102235		3417.8	-0.00495838
237.99	0.02213322		767.99	-0.01335379		1297.98	-0.00039673		1827.98	0.00630963		2357.97	0.00056926		2887.97	-0.00028147		3418	-0.00509513
238.19	0.02274007		768.19	-0.01362731		1298.18	0.00111297		1828.18	0.00607382		2358.17	0.00037588		2888.17	-0.00031655		3418.2	-0.00420849
238.39	0.02329366		768.39	-0.01374859		1298.38	0.00146274		1828.38	0.00634641		2358.37	-0.00012753		2888.37	-0.00041599		3418.4	-0.0043494
238.59	0.02370331		768.59	-0.01319943		1298.58	0.00077331		1828.58	0.00607312		2358.57	0.00026993		2888.57	-0.00015022		3418.6	-0.00371275
238.79	0.02368636		768.79	-0.01232432		1298.78	0.00148373		1828.78	0.00616464		2358.77	0.00058668		2888.77	-0.00045446		3418.8	-0.0036968
238.99	0.02442877		768.99	-0.01229357		1298.98	0.00131796		1828.98	0.00632183		2358.97	-0.00027791		2888.97	-0.00083011		3419	-0.00385486
239.19	0.02451929		769.19	-0.01149729		1299.18	0.00132797		1829.18	0.006235		2359.17	-0.00035768		2889.17	-0.0012291		3419.2	-0.00315824
239.39	0.02485872		769.39	-0.01061256		1299.38	0.00214005		1829.38	0.00665333		2359.37	-0.00030679		2889.37	-0.00138044		3419.4	-0.00335512
239.59	0.02476838		769.59	-0.01054909		1299.58	0.00234698		1829.58	0.00604499		2359.57	0.00017792		2889.57	-0.00128717		3419.6	-0.00353474
239.79	0.02418585		769.79	-0.00996522		1299.78	0.00266161		1829.78	0.0059019		2359.77	0.00030977		2889.77	-0.00150979		3419.8	-0.00433964
239.99	0.02349428		769.99	-0.01029839		1299.98	0.00309369		1829.98	0.00587919		2359.97	-0.00032648		2889.97	-0.0009734		3420	-0.00440728
240.19	0.02216262		770.19	-0.01079387		1300.18	0.00146142		1830.18	0.00632011		2360.17	-0.00032287		2890.17	-0.00196497		3420.2	-0.00468713
240.39	0.02199392		770.39	-0.01170417		1300.38	0.00201215		1830.38	0.00655348		2360.37	-0.00022111		2890.37	-0.00220937		3420.4	-0.00397345
240.59	0.02149787		770.59	-0.01198112		1300.58	0.00071316		1830.58	0.00731386		2360.57	0.00027915		2890.57	-0.00201608		3420.6	-0.00425933
240.79	0.02171196		770.79	-0.01263936		1300.78	0.00100969		1830.78	0.00841254		2360.77	0.00068532		2890.77	-0.00213339		3420.8	-0.00393816
240.99	0.02122617		770.99	-0.01361279		1300.98	0.00030169		1830.98	0.00950307		2360.97	0.00071656		2890.97	-0.00148885		3421	-0.00471344
241.19	0.02121963		771.19	-0.01407689		1301.18	-0.00017557		1831.18	0.01055789		2361.17	0.00124682		2891.17	-0.00150735		3421.2	-0.00448274
241.39	0.02147459		771.39	-0.014557		1301.38	-0.00054731		1831.38	0.01044347		2361.37	0.00089875		2891.37	-0.00104778		3421.4	-0.00451119
241.59	0.02196408		771.59	-0.01505811		1301.58	-0.00044148		1831.58	0.01090168		2361.57	0.00159245		2891.57	-0.00059804		3421.6	-0.00372501
241.79	0.02216908		771.79	-0.01490536		1301.78	-0.00058067		1831.78	0.01162286		2361.77	0.00209786		2891.77	-0.00074251		3421.8	-0.00342297
241.99	0.02294445		771.99	-0.01475118		1301.98	-0.00094179		1831.98	0.01103626		2361.97	0.00207258		2891.97	-0.00066198		3422	-0.00383923
242.19	0.0236035		772.19	-0.01466174		1302.18	-0.00119374		1832.18	0.01105656		2362.17	0.00225609		2892.17	-0.00130178		3422.2	-0.00360228
242.39	0.02440488		772.39	-0.01448787		1302.38	-0.00207024		1832.38	0.01041495		2362.37	0.00266336		2892.37	-0.00056816		3422.4	-0.00399288
242.59	0.02438153		772.59	-0.01381551		1302.58	-0.00170317		1832.58	0.0094686		2362.57	0.00265679		2892.57	0.00036688		3422.6	-0.00352733
242.79	0.02463756		772.79	-0.01334347		1302.78	-0.00170851		1832.78	0.00876633		2362.77	0.00279665		2892.77	-0.0000492		3422.8	-0.00358669
242.99	0.02586534		772.99	-0.01266606		1302.98	-0.0025893		1832.98	0.0082131		2362.97	0.00251658		2892.97	-0.00006814		3423	-0.0030837
243.19	0.02606351		773.19	-0.01335552		1303.18	-0.00317759		1833.18	0.00822632		2363.17	0.00253227		2893.17	0.00082401		3423.2	-0.0027197
243.39	0.02662736		773.39	-0.01322696		1303.38	-0.00318978		1833.38	0.00818243		2363.37	0.00288799		2893.37	0.00053286		3423.4	-0.00374518
243.59	0.02548235		773.59	-0.01272532		1303.58	-0.00391583		1833.58	0.00773956		2363.57	0.00314787		2893.57	0.00106802		3423.6	-0.00394446
243.79	0.02567756		773.79	-0.01250574		1303.78	-0.00471432		1833.78	0.00657357		2363.77	0.00233898		2893.77	0.00108304		3423.8	-0.00550644
243.99	0.02546981		773.99	-0.01277528		1303.98	-0.00425472		1833.98	0.00671317		2363.97	0.00102372		2893.97	0.0007792		3424	-0.0054867
244.19	0.02504955		774.19	-0.01390129		1304.18	-0.00480959		1834.18	0.0072406		2364.17	0.00074856		2894.17	-0.00006104		3424.2	-0.00576761
244.39	0.02474276		774.39	-0.01427397		1304.38	-0.00335058		1834.38	0.00830294		2364.37	-0.00031669		2894.37	-0.00051143		3424.4	-0.00574254
244.59	0.02416164		774.59	-0.01399942		1304.58	-0.00305096		1834.58	0.00836905		2364.57	-0.00030561		2894.57	-0.00017703		3424.6	-0.00596684
244.79	0.02418995		774.79	-0.01438962		1304.78	-0.00217839		1834.78	0.00842765		2364.77	-0.00096328		2894.77	-0.00045368		3424.8	-0.0058685
244.99	0.02410195		774.99	-0.0149337		1304.98	-0.00223434		1834.98	0.0084539		2364.97	-0.00123477		2894.97	0.0006353		3425	-0.00605091
245.19	0.02420399		775.19	-0.01424269		1305.18	-0.00194823		1835.18	0.00807922		2365.17	-0.00075547		2895.17	0.00044573		3425.2	-0.00553716
245.39	0.02428759		775.39	-0.01378386		1305.38	-0.00135081		1835.38	0.00861166		2365.37	-0.0008519		2895.37	-0.00080066		3425.4	-0.00519447
245.59	0.02485889		775.59	-0.01370278		1305.58	-0.00047456		1835.58	0.00865583		2365.57	-0.00061438		2895.57	-0.00130441		3425.6	-0.00438898
245.79	0.02572056		775.79	-0.01320351		1305.78	-0.0004287		1835.78	0.00791441		2365.77	0.00026899		2895.77	-0.0018224		3425.8	-0.00386927
245.99	0.0267095		775.99	-0.01336366		1305.98	-0.00041854		1835.98	0.00730351		2365.97	-0.0000029		2895.97	-0.00205384		3426	-0.00400303
246.19	0.02690959		776.19	-0.01374853		1306.18	-0.00063279		1836.18	0.00736057		2366.17	0.00075788		2896.17	-0.00198474		3426.2	-0.00311753
246.39	0.02741114		776.39	-0.01377582		1306.38	-0.0000298		1836.38	0.00743376		2366.37	0.00051195		2896.37	-0.00197065		3426.4	-0.0034162
246.59	0.02768361		776.59	-0.01361806		1306.58	0.00007067		1836.58	0.00765599		2366.57	0.00108484		2896.57	-0.00187078		3426.6	-0.00269536
246.79	0.02843543		776.79	-0.01341825		1306.78	0.00010767		1836.78	0.00764033		2366.77	0.0015416		2896.77	-0.00260769		3426.8	-0.00303105
246.99	0.02951311		776.99	-0.01294793		1306.98	0.00015675		1836.98	0.0078772		2366.97	0.00117074		2896.97	-0.00228186		3427	-0.00348191
247.19	0.02988614		777.19	-0.0138211		1307.18	-0.00031418		1837.18	0.00781019		2367.17	0.0018862		2897.17	-0.00112871		3427.2	-0.00448481
247.39	0.0304961		777.39	-0.0132972		1307.38	-0.00075288		1837.38	0.00755912		2367.37	0.00283268		2897.37	-0.00136945		3427.4	-0.00511076
247.59	0.03085462		777.59	-0.01235418		1307.58	-0.00029924		1837.58	0.00719564		2367.57	0.00232921		2897.57	-0.00059903		3427.6	-0.00606323
247.79	0.03112987		777.79	-0.01243512		1307.78	0.00030064		1837.78	0.00676356		2367.77	0.00190342		2897.77	-0.00009598		3427.8	-0.00590161
247.99	0.03024846		777.99	-0.0125196		1307.98	0.00087269		1837.98	0.00734691		2367.97	0.0009722		2897.97	0.00050515		3428	-0.00561498
248.19	0.02900598		778.19	-0.01369324		1308.18	0.00178777		1838.18	0.00679749		2368.17	0.00139586		2898.17	0.00078131		3428.2	-0.00503818
248.39	0.02760334		778.39	-0.0131781		1308.38	0.0020611		1838.38	0.00714515		2368.37	0.00182439		2898.37	0.00125699		3428.4	-0.0046852
248.59	0.02655075		778.59	-0.01268304		1308.58	0.00279934		1838.58	0.00652725		2368.57	0.00320883		2898.57	0.00249955		3428.6	-0.0050324
248.79	0.02611174		778.79	-0.01228515		1308.78	0.00276396		1838.78	0.00639702		2368.77	0.00387109		2898.77	0.00308163		3428.8	-0.00557341
248.99	0.02586988		778.99	-0.01236164		1308.98	0.00299154		1838.98	0.00649001		2368.97	0.00486204		2898.97	0.00352919		3429	-0.00488291
249.19	0.0254095		779.19	-0.01212997		1309.18	0.00345836		1839.18	0.00685296		2369.17	0.00498815		2899.17	0.00208129		3429.2	-0.00395294
249.39	0.02501611		779.39	-0.01254371		1309.38	0.00425297		1839.38	0.00774127		2369.37	0.00506269		2899.37	0.00071183		3429.4	-0.00321379
249.59	0.02545883		779.59	-0.01288507		1309.58	0.00407993		1839.58	0.0072304		2369.57	0.00503334		2899.57	0.00035793		3429.6	-0.00261737
249.79	0.02587636		779.79	-0.01245641		1309.78	0.00402734		1839.78	0.00731931		2369.77	0.00626185		2899.77	-0.00035766		3429.8	-0.00195877
249.99	0.02549194		779.99	-0.01239516		1309.98	0.00336572		1839.98	0.00836528		2369.97	0.00564568		2899.97	-0.00130376		3430	-0.0018515
250.19	0.02527405		780.19	-0.01336848		1310.18	0.00258694		1840.18	0.00941821		2370.17	0.00536523		2900.17	-0.00128325		3430.2	-0.00154614
250.39	0.02578243		780.39	-0.01293908		1310.38	0.00234958		1840.38	0.01001209		2370.37	0.00459759		2900.37	-0.00273353		3430.4	-0.00246652
250.59	0.02645038		780.59	-0.01296565		1310.58	0.00225662		1840.58	0.01060938		2370.57	0.00506538		2900.57	-0.00291543		3430.6	-0.00259898
250.79	0.02700509		780.79	-0.01237342		1310.78	0.0024794		1840.78	0.01084565		2370.77	0.00435893		2900.77	-0.00385149		3430.8	-0.00378771
250.99	0.02775621		780.99	-0.01267977		1310.98	0.00147284		1840.98	0.01083641		2370.97	0.00366672		2900.97	-0.00361657		3431	-0.00375635
251.19	0.02882434		781.19	-0.01348368		1311.18	0.00151542		1841.18	0.01051554		2371.17	0.00384267		2901.17	-0.00399474		3431.2	-0.00438351
251.39	0.02995812		781.39	-0.01331399		1311.38	0.00169054		1841.38	0.01120231		2371.37	0.0031477		2901.37	-0.00406399		3431.4	-0.00427569
251.59	0.03022151		781.59	-0.01278235		1311.58	0.00149658		1841.58	0.01103497		2371.57	0.00256779		2901.57	-0.00308475		3431.6	-0.00545886
251.79	0.03041555		781.79	-0.01367137		1311.78	0.0006407		1841.78	0.0098405		2371.77	0.00211267		2901.77	-0.00300091		3431.8	-0.00469166
251.99	0.02992237		781.99	-0.01330229		1311.98	-0.00002408		1841.98	0.00892112		2371.97	0.00189897		2901.97	-0.00254901		3432	-0.00580518
252.19	0.02988964		782.19	-0.01380689		1312.18	-0.00100996		1842.18	0.00770352		2372.17	0.00304128		2902.17	-0.00155862		3432.2	-0.00563901
252.39	0.02945211		782.39	-0.01380114		1312.38	-0.00160103		1842.38	0.00813524		2372.37	0.0035628		2902.37	-0.00139372		3432.4	-0.00618535
252.59	0.02973073		782.59	-0.01376971		1312.58	-0.0010342		1842.58	0.00781533		2372.57	0.00381663		2902.57	-0.00009776		3432.6	-0.00657436
252.79	0.02948474		782.79	-0.01306488		1312.78	-0.00146856		1842.78	0.00783374		2372.77	0.00434307		2902.77	-0.00019427		3432.8	-0.0063747
252.99	0.02950267		782.99	-0.01288668		1312.98	-0.00187482		1842.98	0.00791241		2372.97	0.004182		2902.97	0.00008917		3433	-0.00506431
253.19	0.03044711		783.19	-0.01226566		1313.18	-0.00164594		1843.18	0.00760615		2373.17	0.00381614		2903.17	-0.0002952		3433.2	-0.00457581
253.39	0.03180512		783.39	-0.01177127		1313.38	-0.00154		1843.38	0.00772367		2373.37	0.00452496		2903.37	-0.000427		3433.4	-0.00409793
253.59	0.03270103		783.59	-0.01119075		1313.58	-0.00161852		1843.58	0.00729286		2373.57	0.00490994		2903.57	-0.00055728		3433.6	-0.00352523
253.79	0.03403416		783.79	-0.01104692		1313.78	-0.00180518		1843.78	0.00729268		2373.77	0.0049671		2903.77	-0.00133693		3433.8	-0.0030354
253.99	0.0341824		783.99	-0.01122904		1313.98	-0.00278189		1843.98	0.00824956		2373.97	0.00405124		2903.97	-0.00157196		3434	-0.00296665
254.19	0.03446861		784.19	-0.01138248		1314.18	-0.00249992		1844.18	0.0085423		2374.17	0.00429813		2904.17	-0.00193915		3434.2	-0.002517
254.39	0.0350274		784.39	-0.01088571		1314.38	-0.00206159		1844.38	0.00856897		2374.37	0.00396505		2904.37	-0.00247334		3434.4	-0.00266293
254.59	0.03430427		784.59	-0.01078718		1314.58	-0.00120325		1844.58	0.00809176		2374.57	0.00421035		2904.57	-0.00255829		3434.6	-0.00268108
254.79	0.03390782		784.79	-0.01055862		1314.78	-0.00071676		1844.78	0.0073075		2374.77	0.00401931		2904.77	-0.00264888		3434.8	-0.00305978
254.99	0.03429536		784.99	-0.01191829		1314.98	-0.00063369		1844.98	0.00685306		2374.97	0.00369535		2904.97	-0.00209232		3435	-0.0032318
255.19	0.03448355		785.19	-0.01192387		1315.18	0.00091904		1845.18	0.00618827		2375.17	0.0030812		2905.17	-0.00235258		3435.2	-0.00397651
255.39	0.03406037		785.39	-0.01221009		1315.38	0.00007566		1845.38	0.00605474		2375.37	0.00312585		2905.37	-0.00148855		3435.4	-0.0045176
255.59	0.0329083		785.59	-0.01269286		1315.58	0.00003723		1845.58	0.00530851		2375.57	0.0034099		2905.57	-0.00109581		3435.6	-0.00536363
255.79	0.03204481		785.79	-0.01357539		1315.78	-0.00003256		1845.78	0.00485172		2375.77	0.00335219		2905.77	-0.00103662		3435.8	-0.00560326
255.99	0.0305028		785.99	-0.01386535		1315.98	-0.00005387		1845.98	0.00512691		2375.97	0.00369957		2905.97	-0.00024411		3436	-0.00708098
256.19	0.030253		786.19	-0.01438352		1316.18	-0.0004036		1846.18	0.005725		2376.17	0.00446202		2906.17	0.00006697		3436.2	-0.00709314
256.39	0.02913966		786.39	-0.01404274		1316.38	0.00000613		1846.38	0.00647589		2376.37	0.00523798		2906.37	-0.00047134		3436.4	-0.00732442
256.59	0.02894309		786.59	-0.01382141		1316.58	-0.00030777		1846.58	0.00708565		2376.57	0.00569513		2906.57	0.000656		3436.6	-0.00713169
256.79	0.02870168		786.79	-0.01352292		1316.78	-0.00087575		1846.78	0.00736327		2376.77	0.00597197		2906.77	-0.00022249		3436.8	-0.00707382
256.99	0.02870926		786.99	-0.01336072		1316.98	-0.00115044		1846.98	0.0074054		2376.97	0.0055216		2906.97	-0.00049038		3437	-0.00707379
257.19	0.03020798		787.19	-0.01404491		1317.18	-0.00117476		1847.18	0.0076118		2377.17	0.0050895		2907.17	-0.00121241		3437.2	-0.00709441
257.39	0.03064919		787.39	-0.01444804		1317.38	-0.00103913		1847.38	0.00843243		2377.37	0.00527876		2907.37	-0.00231918		3437.4	-0.00655519
257.59	0.03094708		787.59	-0.01478644		1317.58	-0.00060893		1847.58	0.0087968		2377.57	0.0052813		2907.57	-0.00256393		3437.6	-0.00556979
257.79	0.0319351		787.79	-0.01564216		1317.78	-0.00079799		1847.78	0.00840964		2377.77	0.00461189		2907.77	-0.00328611		3437.8	-0.00581904
257.99	0.03157572		787.99	-0.01515645		1317.98	-0.00044846		1847.98	0.00836887		2377.97	0.00414295		2907.97	-0.0034504		3438	-0.00510049
258.19	0.03157972		788.19	-0.0151284		1318.18	0.00113421		1848.18	0.0079641		2378.17	0.00416949		2908.17	-0.00316392		3438.2	-0.00538622
258.39	0.03180991		788.39	-0.01545168		1318.38	0.0011952		1848.38	0.00792821		2378.37	0.0036234		2908.37	-0.00274117		3438.4	-0.00526501
258.59	0.03227719		788.59	-0.01438297		1318.58	0.00217195		1848.58	0.00796753		2378.57	0.00395219		2908.57	-0.00226226		3438.6	-0.00514719
258.79	0.03276887		788.79	-0.01342538		1318.78	0.00268615		1848.78	0.00786251		2378.77	0.00327337		2908.77	-0.00182064		3438.8	-0.00565424
258.99	0.03301789		788.99	-0.01246755		1318.98	0.00294475		1848.98	0.00846489		2378.97	0.00282585		2908.97	-0.00112559		3439	-0.00594211
259.19	0.03250663		789.19	-0.01194294		1319.18	0.00445758		1849.18	0.0091335		2379.17	0.0022955		2909.17	-0.00020031		3439.2	-0.00642739
259.39	0.03178315		789.39	-0.01188882		1319.38	0.00389412		1849.38	0.00958977		2379.37	0.00280014		2909.37	0.00099565		3439.4	-0.00773892
259.59	0.03097292		789.59	-0.01148551		1319.58	0.00448256		1849.58	0.01003944		2379.57	0.00331958		2909.57	0.00179905		3439.6	-0.00758658
259.79	0.03090893		789.79	-0.01139555		1319.78	0.003638		1849.78	0.01036609		2379.77	0.00354759		2909.77	0.0023849		3439.8	-0.00846978
259.99	0.03021565		789.99	-0.01073023		1319.98	0.0035545		1849.98	0.01033901		2379.97	0.0038093		2909.97	0.00309424		3440	-0.00815887
260.19	0.03002156		790.19	-0.00986049		1320.18	0.00181046		1850.18	0.00996742		2380.17	0.0042112		2910.17	0.00369164		3440.2	-0.00744453
260.39	0.03022272		790.39	-0.00915816		1320.38	0.00084569		1850.38	0.01037094		2380.37	0.0049495		2910.37	0.00335804		3440.4	-0.00721596
260.59	0.03117331		790.59	-0.00899352		1320.58	0.00001505		1850.58	0.0109652		2380.57	0.00501549		2910.57	0.00323978		3440.6	-0.00695556
260.79	0.03137534		790.79	-0.00894817		1320.78	-0.00023949		1850.78	0.01052299		2380.77	0.00431666		2910.77	0.00277641		3440.8	-0.00655844
260.99	0.03250881		790.99	-0.00895562		1320.98	-0.00029362		1850.98	0.01085517		2380.97	0.00409784		2910.97	0.00212806		3441	-0.00589791
261.19	0.03349107		791.19	-0.01000788		1321.18	-0.00049226		1851.18	0.01176812		2381.17	0.00363789		2911.17	0.00174931		3441.2	-0.00447769
261.39	0.03366895		791.39	-0.00968662		1321.38	-0.00037087		1851.38	0.01145992		2381.37	0.00356282		2911.37	0.000816		3441.4	-0.00340164
261.59	0.03444931		791.59	-0.01053498		1321.58	0.0000005		1851.58	0.0105926		2381.57	0.00312124		2911.57	0.00043485		3441.6	-0.00269403
261.79	0.03455458		791.79	-0.01137523		1321.78	0.0000742		1851.78	0.00956692		2381.77	0.00231637		2911.77	0.00055577		3441.8	-0.00228294
261.99	0.03490359		791.99	-0.0111481		1321.98	0.00073001		1851.98	0.00957216		2381.97	0.00119111		2911.97	0.00046355		3442	-0.00109157
262.19	0.03541041		792.19	-0.01303282		1322.18	0.00175001		1852.18	0.00947088		2382.17	0.00117422		2912.17	0.00060106		3442.2	-0.00104284
262.39	0.03602977		792.39	-0.01318786		1322.38	0.00144927		1852.38	0.00975587		2382.37	0.00079793		2912.37	0.00012658		3442.4	-0.00042223
262.59	0.03634312		792.59	-0.0128206		1322.58	0.00273039		1852.58	0.01027729		2382.57	0.00073594		2912.57	-0.00009616		3442.6	-0.00039737
262.79	0.03524438		792.79	-0.01336116		1322.78	0.00234863		1852.78	0.01013796		2382.77	0.00045422		2912.77	-0.00057894		3442.8	-0.00176173
262.99	0.03548703		792.99	-0.01391735		1322.98	0.00286632		1852.98	0.01003885		2382.97	0.00170364		2912.97	-0.00021246		3443	-0.00216664
263.19	0.03486005		793.19	-0.01488849		1323.18	0.00387238		1853.18	0.00963272		2383.17	0.00256671		2913.17	0.00006796		3443.2	-0.00264768
263.39	0.0339927		793.39	-0.01552658		1323.38	0.00281603		1853.38	0.00876621		2383.37	0.00399725		2913.37	-0.00046647		3443.4	-0.00326026
263.59	0.03343818		793.59	-0.01560569		1323.58	0.00311859		1853.58	0.00857913		2383.57	0.00530117		2913.57	-0.00043081		3443.6	-0.00370679
263.79	0.03315932		793.79	-0.01567814		1323.78	0.00214571		1853.78	0.00685232		2383.77	0.00604507		2913.77	-0.00015367		3443.8	-0.00448811
263.99	0.03259654		793.99	-0.01483317		1323.98	0.00148231		1853.98	0.00589867		2383.97	0.00671513		2913.97	0.00067841		3444	-0.00420945
264.19	0.03254316		794.19	-0.0144847		1324.18	0.00027375		1854.18	0.00553288		2384.17	0.00720688		2914.17	0.00125617		3444.2	-0.00494968
264.39	0.03297055		794.39	-0.013562		1324.38	-0.00005603		1854.38	0.00620188		2384.37	0.0083406		2914.37	0.00036503		3444.4	-0.00450762
264.59	0.03485079		794.59	-0.01300942		1324.58	-0.00014879		1854.58	0.00589796		2384.57	0.00857353		2914.57	0.0006152		3444.6	-0.00391364
264.79	0.0352258		794.79	-0.01257389		1324.78	-0.00012121		1854.78	0.00595498		2384.77	0.00816681		2914.77	0.00085661		3444.8	-0.00372708
264.99	0.03696362		794.99	-0.01229595		1324.98	0.00041686		1854.98	0.00644417		2384.97	0.00836001		2914.97	0.00081864		3445	-0.00371093
265.19	0.03728286		795.19	-0.01070488		1325.18	0.00018		1855.18	0.0066837		2385.17	0.00800315		2915.17	0.00032751		3445.2	-0.00315046
265.39	0.03785301		795.39	-0.00975423		1325.38	0.00055823		1855.38	0.00696468		2385.37	0.0072998		2915.37	0.000096		3445.4	-0.00298778
265.59	0.03786498		795.59	-0.00997911		1325.58	0.00100589		1855.58	0.00806425		2385.57	0.00667706		2915.57	0.0002499		3445.6	-0.00340971
265.79	0.03765631		795.79	-0.00942463		1325.78	0.00180349		1855.78	0.00804272		2385.77	0.00602384		2915.77	0.00151642		3445.8	-0.00311159
265.99	0.03763182		795.99	-0.00917184		1325.98	0.00186562		1855.98	0.00773048		2385.97	0.00458162		2915.97	0.00087702		3446	-0.00325623
266.19	0.03672542		796.19	-0.00994608		1326.18	0.00197052		1856.18	0.00899188		2386.17	0.00449444		2916.17	0.00098407		3446.2	-0.0035761
266.39	0.03692496		796.39	-0.01005762		1326.38	0.00233762		1856.38	0.00981283		2386.37	0.00374427		2916.37	0.00050068		3446.4	-0.00429269
266.59	0.0362679		796.59	-0.01055079		1326.58	0.00349919		1856.58	0.01009072		2386.57	0.00380773		2916.57	0.00019917		3446.6	-0.00439326
266.79	0.03607703		796.79	-0.01108908		1326.78	0.00301791		1856.78	0.0098398		2386.77	0.00379494		2916.77	0.00004583		3446.8	-0.0052817
266.99	0.03649157		796.99	-0.01080474		1326.98	0.0044638		1856.98	0.01018164		2386.97	0.00395227		2916.97	0.00049353		3447	-0.00509968
267.19	0.03593405		797.19	-0.01105626		1327.18	0.00449585		1857.18	0.01084705		2387.17	0.00395655		2917.17	-0.00024312		3447.2	-0.00544548
267.39	0.03523748		797.39	-0.01130492		1327.38	0.0030868		1857.38	0.01063361		2387.37	0.00405143		2917.37	-0.0007146		3447.4	-0.00534306
267.59	0.03485756		797.59	-0.01079656		1327.58	0.00321241		1857.58	0.01057258		2387.57	0.00424554		2917.57	-0.00012371		3447.6	-0.00469253
267.79	0.03406765		797.79	-0.0106996		1327.78	0.00262241		1857.78	0.01009758		2387.77	0.00454288		2917.77	0.0000511		3447.8	-0.00431434
267.99	0.03316057		797.99	-0.01017051		1327.98	0.00214456		1857.98	0.01019066		2387.97	0.0052213		2917.97	-0.00001422		3448	-0.0038195
268.19	0.03358885		798.19	-0.0111963		1328.18	0.00194772		1858.18	0.00964281		2388.17	0.005495		2918.17	-0.00007905		3448.2	-0.0043604
268.39	0.03427122		798.39	-0.01175235		1328.38	0.0008655		1858.38	0.00985347		2388.37	0.0060656		2918.37	-0.00017918		3448.4	-0.00353028
268.59	0.03515911		798.59	-0.0129853		1328.58	0.00060323		1858.58	0.0094591		2388.57	0.00629918		2918.57	0.00068879		3448.6	-0.00442196
268.79	0.03472999		798.79	-0.01370519		1328.78	0.00080338		1858.78	0.00947403		2388.77	0.00677816		2918.77	0.00075317		3448.8	-0.00495668
268.99	0.03608113		798.99	-0.01388152		1328.98	0.00094767		1858.98	0.00942673		2388.97	0.00684198		2918.97	0.00134483		3449	-0.00449488
269.19	0.0368311		799.19	-0.01254634		1329.18	0.00038864		1859.18	0.00960559		2389.17	0.00628222		2919.17	0.00075914		3449.2	-0.0042422
269.39	0.03699892		799.39	-0.01302384		1329.38	0.00036355		1859.38	0.01027738		2389.37	0.00584474		2919.37	0.00117526		3449.4	-0.00385373
269.59	0.03753766		799.59	-0.01275196		1329.58	-0.00016193		1859.58	0.00959268		2389.57	0.00588504		2919.57	0.00099405		3449.6	-0.00442962
269.79	0.03846903		799.79	-0.0123125		1329.78	0.00006277		1859.78	0.0088193		2389.77	0.00554382		2919.77	0.00228616		3449.8	-0.0043501
269.99	0.03905576		799.99	-0.01304948		1329.98	0.00046708		1859.98	0.00924001		2389.97	0.00523146		2919.97	0.00161441		3450	-0.00416557
270.19	0.03987916		800.19	-0.013858		1330.18	0.00093342		1860.18	0.0108862		2390.17	0.00505629		2920.17	0.0025002		3450.2	-0.00434106
270.39	0.04101646		800.39	-0.01454218		1330.38	0.00199562		1860.38	0.01058165		2390.37	0.00470887		2920.37	0.00257586		3450.4	-0.00564461
270.59	0.04105188		800.59	-0.01432442		1330.58	0.00316429		1860.58	0.00988741		2390.57	0.00517803		2920.57	0.00324691		3450.6	-0.00619793
270.79	0.04147579		800.79	-0.01362537		1330.78	0.00432776		1860.78	0.01021727		2390.77	0.0047744		2920.77	0.00324322		3450.8	-0.00725138
270.99	0.04120649		800.99	-0.01306898		1330.98	0.00470616		1860.98	0.01067967		2390.97	0.00438004		2920.97	0.00313279		3451	-0.00663903
271.19	0.04092839		801.19	-0.01244353		1331.18	0.00428457		1861.18	0.01060611		2391.17	0.00429532		2921.17	0.00275948		3451.2	-0.00602488
271.39	0.04011269		801.39	-0.01186713		1331.38	0.00400707		1861.38	0.01042963		2391.37	0.00368473		2921.37	0.00315718		3451.4	-0.00536948
271.59	0.03957108		801.59	-0.01121233		1331.58	0.00408808		1861.58	0.0107054		2391.57	0.00392558		2921.57	0.00308616		3451.6	-0.00521581
271.79	0.03847767		801.79	-0.01133004		1331.78	0.00477847		1861.78	0.01063825		2391.77	0.0043301		2921.77	0.00280294		3451.8	-0.00578675
271.99	0.03700992		801.99	-0.01108623		1331.98	0.004774		1861.98	0.01028335		2391.97	0.00387967		2921.97	0.00228692		3452	-0.00586592
272.19	0.03709817		802.19	-0.01196058		1332.18	0.00472272		1862.18	0.010454		2392.17	0.00340412		2922.17	0.00277098		3452.2	-0.00684688
272.39	0.03587555		802.39	-0.01250815		1332.38	0.00442856		1862.38	0.01109484		2392.37	0.0033061		2922.37	0.00263802		3452.4	-0.00674151
272.59	0.03474426		802.59	-0.013191		1332.58	0.00454555		1862.58	0.01075488		2392.57	0.00239862		2922.57	0.00191124		3452.6	-0.00687379
272.79	0.03445747		802.79	-0.01229257		1332.78	0.00494348		1862.78	0.01044952		2392.77	0.0022725		2922.77	0.00141926		3452.8	-0.00640465
272.99	0.03505337		802.99	-0.01184109		1332.98	0.00381664		1862.98	0.0097097		2392.97	0.00083647		2922.97	0.00156611		3453	-0.00576476
273.19	0.03534713		803.19	-0.01113188		1333.18	0.00291169		1863.18	0.00907122		2393.17	0.0002636		2923.17	0.00116523		3453.2	-0.00580032
273.39	0.03554197		803.39	-0.01103607		1333.38	0.0017101		1863.38	0.00808896		2393.37	0.00012724		2923.37	0.00126771		3453.4	-0.00519241
273.59	0.03656911		803.59	-0.01113989		1333.58	0.00121309		1863.58	0.00762462		2393.57	0.00055479		2923.57	0.00069648		3453.6	-0.00549284
273.79	0.03784491		803.79	-0.01079628		1333.78	0.00119933		1863.78	0.00816358		2393.77	0.00083368		2923.77	0.0012154		3453.8	-0.00532039
273.99	0.03838787		803.99	-0.01120276		1333.98	0.00114116		1863.98	0.00821358		2393.97	0.00130927		2923.97	0.00029032		3454	-0.0051281
274.19	0.0387986		804.19	-0.01076922		1334.18	0.00144957		1864.18	0.00823531		2394.17	0.00198939		2924.17	0.00067401		3454.2	-0.00601321
274.39	0.03940659		804.39	-0.01142889		1334.38	0.00203291		1864.38	0.00797708		2394.37	0.00252314		2924.37	0.00011598		3454.4	-0.00729346
274.59	0.03964774		804.59	-0.01208264		1334.58	0.00237986		1864.58	0.00690166		2394.57	0.00303398		2924.57	-0.00017547		3454.6	-0.00751482
274.79	0.03952701		804.79	-0.01144789		1334.78	0.00187843		1864.78	0.00697921		2394.77	0.00267883		2924.77	-0.0008532		3454.8	-0.00761225
274.99	0.03983666		804.99	-0.01198891		1334.98	0.00113968		1864.98	0.00747945		2394.97	0.00267759		2924.97	-0.00054566		3455	-0.00640788
275.19	0.03966619		805.19	-0.01221882		1335.18	0.00139865		1865.18	0.0083278		2395.17	0.00349241		2925.17	-0.00015713		3455.2	-0.00697052
275.39	0.03984887		805.39	-0.01296029		1335.38	0.00163104		1865.38	0.0083733		2395.37	0.0035974		2925.37	0.00025717		3455.4	-0.00719225
275.59	0.03953221		805.59	-0.0135561		1335.58	0.00212792		1865.58	0.00897729		2395.57	0.00507281		2925.57	0.00000921		3455.6	-0.00790409
275.79	0.03945015		805.79	-0.01344982		1335.78	0.00323064		1865.78	0.00975821		2395.77	0.00620804		2925.77	0.0006793		3455.8	-0.00847042
275.99	0.0391658		805.99	-0.01381605		1335.98	0.00414723		1865.98	0.01058792		2395.97	0.00582007		2925.97	0.00043884		3456	-0.00819589
276.19	0.03977508		806.19	-0.01408212		1336.18	0.00432454		1866.18	0.01131669		2396.17	0.00592414		2926.17	0.00137659		3456.2	-0.00877536
276.39	0.03962077		806.39	-0.01432547		1336.38	0.00440731		1866.38	0.01172959		2396.37	0.00550112		2926.37	0.00135874		3456.4	-0.0089405
276.59	0.03932672		806.59	-0.01493983		1336.58	0.00384551		1866.58	0.01110191		2396.57	0.00512808		2926.57	0.00131873		3456.6	-0.0084937
276.79	0.03954383		806.79	-0.01429823		1336.78	0.00384203		1866.78	0.01122108		2396.77	0.00475398		2926.77	0.00284416		3456.8	-0.00816984
276.99	0.03976921		806.99	-0.01453713		1336.98	0.0027543		1866.98	0.01102395		2396.97	0.00409479		2926.97	0.00359228		3457	-0.00720534
277.19	0.04021585		807.19	-0.01423285		1337.18	0.00268639		1867.18	0.0105344		2397.17	0.00379265		2927.17	0.00356019		3457.2	-0.007271
277.39	0.04056234		807.39	-0.01334784		1337.38	0.00208953		1867.38	0.01021177		2397.37	0.00387905		2927.37	0.00310907		3457.4	-0.00619839
277.59	0.0413934		807.59	-0.01328696		1337.58	0.00222143		1867.58	0.00998007		2397.57	0.00415409		2927.57	0.00250927		3457.6	-0.00543517
277.79	0.0419789		807.79	-0.01216962		1337.78	0.00160431		1867.78	0.00950172		2397.77	0.00418514		2927.77	0.00274143		3457.8	-0.00490427
277.99	0.04156716		807.99	-0.01229506		1337.98	0.00226982		1867.98	0.00855603		2397.97	0.00409617		2927.97	0.00302472		3458	-0.00436193
278.19	0.04252916		808.19	-0.01166256		1338.18	0.00239743		1868.18	0.00867833		2398.17	0.00328374		2928.17	0.00323847		3458.2	-0.00451427
278.39	0.04281067		808.39	-0.01177183		1338.38	0.00168298		1868.38	0.00828991		2398.37	0.00254305		2928.37	0.00306748		3458.4	-0.00418365
278.59	0.04251926		808.59	-0.01089036		1338.58	0.00226881		1868.58	0.00691277		2398.57	0.00267861		2928.57	0.00281178		3458.6	-0.00437764
278.79	0.04228927		808.79	-0.00967403		1338.78	0.00258431		1868.78	0.00681018		2398.77	0.00260753		2928.77	0.00285381		3458.8	-0.00374798
278.99	0.0421508		808.99	-0.01005502		1338.98	0.00318072		1868.98	0.00685192		2398.97	0.00316071		2928.97	0.00290564		3459	-0.00295078
279.19	0.04086209		809.19	-0.00997964		1339.18	0.00363688		1869.18	0.00643678		2399.17	0.00409175		2929.17	0.00201145		3459.2	-0.00358788
279.39	0.04079618		809.39	-0.00955344		1339.38	0.00332572		1869.38	0.00579835		2399.37	0.00527574		2929.37	0.00193104		3459.4	-0.00372937
279.59	0.04130213		809.59	-0.00946184		1339.58	0.00343838		1869.58	0.00612676		2399.57	0.00665784		2929.57	0.00189914		3459.6	-0.00437673
279.79	0.04151944		809.79	-0.00901513		1339.78	0.00323988		1869.78	0.00650631		2399.77	0.00658967		2929.77	0.0019855		3459.8	-0.0046298
279.99	0.04151659		809.99	-0.01016727		1339.98	0.00338184		1869.98	0.00654378		2399.97	0.00634809		2929.97	0.00166122		3460	-0.00448402
280.19	0.04212488		810.19	-0.00984581		1340.18	0.00186572		1870.18	0.0081323		2400.17	0.00748651		2930.17	0.00305543		3460.2	-0.00544739
280.39	0.04200573		810.39	-0.01012858		1340.38	0.00081405		1870.38	0.00884089		2400.37	0.00760793		2930.37	0.00302263		3460.4	-0.00569073
280.59	0.04225325		810.59	-0.01127197		1340.58	0.00004156		1870.58	0.00891082		2400.57	0.00778536		2930.57	0.00261017		3460.6	-0.0053154
280.79	0.04298961		810.79	-0.01134543		1340.78	-0.00020089		1870.78	0.0099047		2400.77	0.00776553		2930.77	0.00385078		3460.8	-0.0054891
280.99	0.04345639		810.99	-0.01205381		1340.98	-0.00063564		1870.98	0.00959803		2400.97	0.00886493		2930.97	0.00344006		3461	-0.00538316
281.19	0.04350493		811.19	-0.01334875		1341.18	-0.00043216		1871.18	0.00908289		2401.17	0.008402		2931.17	0.00254798		3461.2	-0.00575899
281.39	0.04387279		811.39	-0.01392402		1341.38	-0.00105039		1871.38	0.0094297		2401.37	0.00946955		2931.37	0.00184537		3461.4	-0.00573473
281.59	0.04496147		811.59	-0.01470406		1341.58	-0.00084848		1871.58	0.00945037		2401.57	0.00959859		2931.57	0.00206442		3461.6	-0.00566237
281.79	0.04536555		811.79	-0.01488173		1341.78	-0.00115446		1871.78	0.01021352		2401.77	0.00906617		2931.77	0.0021987		3461.8	-0.00633929
281.99	0.04542508		811.99	-0.01488542		1341.98	-0.0000346		1871.98	0.01041366		2401.97	0.00898849		2931.97	0.00197141		3462	-0.00615191
282.19	0.04592689		812.19	-0.01416687		1342.18	0.00116313		1872.18	0.0108181		2402.17	0.00827067		2932.17	0.00165074		3462.2	-0.00647905
282.39	0.04561767		812.39	-0.0144061		1342.38	0.00176958		1872.38	0.01042574		2402.37	0.00839047		2932.37	0.00090164		3462.4	-0.00717096
282.59	0.04559369		812.59	-0.01449845		1342.58	0.00306544		1872.58	0.00936985		2402.57	0.00806464		2932.57	0.00088363		3462.6	-0.00728943
282.79	0.04544377		812.79	-0.01450876		1342.78	0.00300275		1872.78	0.00889843		2402.77	0.00699967		2932.77	0.00049159		3462.8	-0.00640624
282.99	0.04565121		812.99	-0.01438465		1342.98	0.00297927		1872.98	0.0081277		2402.97	0.00694088		2932.97	-0.00010314		3463	-0.0065429
283.19	0.04594571		813.19	-0.01396468		1343.18	0.00314455		1873.18	0.00801086		2403.17	0.00726278		2933.17	-0.00045239		3463.2	-0.00671107
283.39	0.0458191		813.39	-0.01383054		1343.38	0.00290603		1873.38	0.0081369		2403.37	0.00701773		2933.37	0.00031532		3463.4	-0.00671642
283.59	0.04748155		813.59	-0.01357566		1343.58	0.00349115		1873.58	0.0088304		2403.57	0.00698487		2933.57	0.0011351		3463.6	-0.00664913
283.79	0.04722709		813.79	-0.01298147		1343.78	0.0036777		1873.78	0.01013379		2403.77	0.00663923		2933.77	0.00139038		3463.8	-0.00703862
283.99	0.04715411		813.99	-0.01227399		1343.98	0.00400812		1873.98	0.01050136		2403.97	0.00681817		2933.97	0.00263421		3464	-0.007149
284.19	0.04716086		814.19	-0.01146814		1344.18	0.00297611		1874.18	0.01113689		2404.17	0.00623806		2934.17	0.00366982		3464.2	-0.00670653
284.39	0.04721276		814.39	-0.01080684		1344.38	0.00284422		1874.38	0.01037132		2404.37	0.00619889		2934.37	0.003578		3464.4	-0.00608486
284.59	0.04809645		814.59	-0.01119505		1344.58	0.00318074		1874.58	0.01079888		2404.57	0.00614825		2934.57	0.0038322		3464.6	-0.00506724
284.79	0.04853396		814.79	-0.01057475		1344.78	0.00296106		1874.78	0.01130325		2404.77	0.00693197		2934.77	0.0048248		3464.8	-0.00423522
284.99	0.04852991		814.99	-0.01060296		1344.98	0.00299459		1874.98	0.01035137		2404.97	0.0071496		2934.97	0.00415968		3465	-0.00391236
285.19	0.04828613		815.19	-0.01022208		1345.18	0.00342774		1875.18	0.01060289		2405.17	0.00691055		2935.17	0.00333834		3465.2	-0.00393965
285.39	0.0490934		815.39	-0.00893276		1345.38	0.00281066		1875.38	0.01081278		2405.37	0.00666979		2935.37	0.00409938		3465.4	-0.00407135
285.59	0.04952897		815.59	-0.00889336		1345.58	0.00384475		1875.58	0.0105854		2405.57	0.00630392		2935.57	0.00480071		3465.6	-0.0031284
285.79	0.04876136		815.79	-0.0089105		1345.78	0.00390767		1875.78	0.01059693		2405.77	0.00625787		2935.77	0.00483408		3465.8	-0.0033315
285.99	0.04830068		815.99	-0.00929356		1345.98	0.00474943		1875.98	0.00970371		2405.97	0.00643869		2935.97	0.00481011		3466	-0.00313792
286.19	0.04799349		816.19	-0.00994699		1346.18	0.00468414		1876.18	0.00946386		2406.17	0.00615761		2936.17	0.00445399		3466.2	-0.00356708
286.39	0.0471531		816.39	-0.00986352		1346.38	0.00422228		1876.38	0.00971087		2406.37	0.00586585		2936.37	0.00386294		3466.4	-0.00389277
286.59	0.04699157		816.59	-0.00987613		1346.58	0.00351159		1876.58	0.00913611		2406.57	0.00558106		2936.57	0.00412143		3466.6	-0.00348417
286.79	0.04783029		816.79	-0.01049244		1346.78	0.00291739		1876.78	0.00888665		2406.77	0.00578153		2936.77	0.00324384		3466.8	-0.00422669
286.99	0.04800435		816.99	-0.01078795		1346.98	0.00347904		1876.98	0.00921692		2406.97	0.00638918		2936.97	0.00295586		3467	-0.00484341
287.19	0.04801972		817.19	-0.01154074		1347.18	0.00437499		1877.18	0.01040082		2407.17	0.00740339		2937.17	0.00356995		3467.2	-0.00525209
287.39	0.0471903		817.39	-0.0118583		1347.38	0.00466853		1877.38	0.01062184		2407.37	0.00746771		2937.37	0.00374006		3467.4	-0.00504405
287.59	0.04786099		817.59	-0.01126402		1347.58	0.00532852		1877.58	0.01134556		2407.57	0.00783625		2937.57	0.00362374		3467.6	-0.00526226
287.79	0.04680222		817.79	-0.01138054		1347.78	0.00581266		1877.78	0.01164951		2407.77	0.00726124		2937.77	0.00391774		3467.8	-0.00618353
287.99	0.04601975		817.99	-0.01133854		1347.98	0.00519965		1877.98	0.01131269		2407.97	0.0064424		2937.97	0.00368177		3468	-0.0061413
288.19	0.04556941		818.19	-0.0114092		1348.18	0.00467839		1878.18	0.01141745		2408.17	0.00603752		2938.17	0.00283885		3468.2	-0.0062264
288.39	0.04580143		818.39	-0.0114571		1348.38	0.00359335		1878.38	0.01130251		2408.37	0.00701087		2938.37	0.00292086		3468.4	-0.00691204
288.59	0.04461217		818.59	-0.01205607		1348.58	0.00378907		1878.58	0.01234766		2408.57	0.00651019		2938.57	0.0025574		3468.6	-0.00668265
288.79	0.04382514		818.79	-0.01169313		1348.78	0.00362235		1878.78	0.01195462		2408.77	0.00630548		2938.77	0.00196476		3468.8	-0.00652384
288.99	0.04431116		818.99	-0.01223031		1348.98	0.00320995		1878.98	0.01121646		2408.97	0.00560255		2938.97	0.0015911		3469	-0.00717996
289.19	0.04415496		819.19	-0.01127819		1349.18	0.00296085		1879.18	0.01186866		2409.17	0.00509757		2939.17	0.00136918		3469.2	-0.00693321
289.39	0.04409617		819.39	-0.01092084		1349.38	0.00266312		1879.38	0.01078823		2409.37	0.00501691		2939.37	0.00223253		3469.4	-0.00658227
289.59	0.04426127		819.59	-0.01165904		1349.58	0.00324956		1879.58	0.01040073		2409.57	0.00583174		2939.57	0.0025886		3469.6	-0.00638335
289.79	0.04380828		819.79	-0.01136518		1349.78	0.00238636		1879.78	0.01035438		2409.77	0.00606319		2939.77	0.00266553		3469.8	-0.00675441
289.99	0.04447366		819.99	-0.01135281		1349.98	0.00196952		1879.98	0.00969637		2409.97	0.0058614		2939.97	0.00227527		3470	-0.00643715
290.19	0.04420397		820.19	-0.01064076		1350.18	0.00158603		1880.18	0.00939934		2410.17	0.00607689		2940.17	0.00180288		3470.2	-0.00640355
290.39	0.04448482		820.39	-0.01056894		1350.38	0.00197577		1880.38	0.00970836		2410.37	0.00553686		2940.37	0.00183262		3470.4	-0.00603392
290.59	0.04506516		820.59	-0.01094176		1350.58	0.00159709		1880.58	0.00903372		2410.57	0.00501441		2940.57	0.00229663		3470.6	-0.00592003
290.79	0.04612402		820.79	-0.01146854		1350.78	0.00223734		1880.78	0.00932178		2410.77	0.00559335		2940.77	0.001509		3470.8	-0.00629351
290.99	0.04610056		820.99	-0.01135242		1350.98	0.00356389		1880.98	0.00969362		2410.97	0.00534475		2940.97	0.00157491		3471	-0.00569333
291.19	0.04662688		821.19	-0.01173286		1351.18	0.00439446		1881.18	0.01009568		2411.17	0.00572478		2941.17	0.00282396		3471.2	-0.00480762
291.39	0.04691774		821.39	-0.01177266		1351.38	0.00528309		1881.38	0.00947698		2411.37	0.00504332		2941.37	0.00286401		3471.4	-0.00430514
291.59	0.04707863		821.59	-0.01116462		1351.58	0.00580312		1881.58	0.0092028		2411.57	0.00443881		2941.57	0.00284632		3471.6	-0.00414146
291.79	0.04737399		821.79	-0.01180437		1351.78	0.00619823		1881.78	0.00859324		2411.77	0.00380956		2941.77	0.00400469		3471.8	-0.00376969
291.99	0.04755583		821.99	-0.01257627		1351.98	0.00518458		1881.98	0.008395		2411.97	0.00413748		2941.97	0.00439536		3472	-0.00372514
292.19	0.0474376		822.19	-0.01285407		1352.18	0.00520054		1882.18	0.00813207		2412.17	0.00441932		2942.17	0.0044481		3472.2	-0.00368932
292.39	0.0475994		822.39	-0.01392376		1352.38	0.00428605		1882.38	0.00805523		2412.37	0.00519966		2942.37	0.00520098		3472.4	-0.00417428
292.59	0.04702698		822.59	-0.01387608		1352.58	0.00519121		1882.58	0.00867769		2412.57	0.00564755		2942.57	0.00540305		3472.6	-0.0037723
292.79	0.04728981		822.79	-0.01391911		1352.78	0.00480464		1882.78	0.00818384		2412.77	0.00595487		2942.77	0.00552309		3472.8	-0.00393657
292.99	0.04770072		822.99	-0.01393837		1352.98	0.00375212		1882.98	0.00890211		2412.97	0.00698317		2942.97	0.00620264		3473	-0.00390105
293.19	0.04792764		823.19	-0.01232791		1353.18	0.00312313		1883.18	0.00948765		2413.17	0.00803894		2943.17	0.00584616		3473.2	-0.00342509
293.39	0.04818713		823.39	-0.0117346		1353.38	0.00367115		1883.38	0.00927104		2413.37	0.00936388		2943.37	0.00621704		3473.4	-0.00402446
293.59	0.04832014		823.59	-0.0113597		1353.58	0.0035845		1883.58	0.00988284		2413.57	0.00939803		2943.57	0.00667349		3473.6	-0.00468611
293.79	0.048197		823.79	-0.01033588		1353.78	0.00363649		1883.78	0.00910778		2413.77	0.00877518		2943.77	0.00600115		3473.8	-0.00543992
293.99	0.04842417		823.99	-0.01009756		1353.98	0.00304059		1883.98	0.00903458		2413.97	0.00810661		2943.97	0.00529885		3474	-0.0057828
294.19	0.04847715		824.19	-0.00924121		1354.18	0.00298789		1884.18	0.00891985		2414.17	0.00767203		2944.17	0.0045435		3474.2	-0.00608599
294.39	0.04849322		824.39	-0.00983384		1354.38	0.00344621		1884.38	0.0093481		2414.37	0.00679103		2944.37	0.00440758		3474.4	-0.00587537
294.59	0.04827869		824.59	-0.0088288		1354.58	0.00416959		1884.58	0.00993642		2414.57	0.00580726		2944.57	0.00441621		3474.6	-0.00629759
294.79	0.04903784		824.79	-0.00908939		1354.78	0.00465188		1884.78	0.0109438		2414.77	0.00580511		2944.77	0.00382432		3474.8	-0.00658574
294.99	0.04860781		824.99	-0.00889509		1354.98	0.00548317		1884.98	0.01102356		2414.97	0.00502448		2944.97	0.00435586		3475	-0.0067398
295.19	0.04847725		825.19	-0.00953625		1355.18	0.00566913		1885.18	0.0112787		2415.17	0.00413892		2945.17	0.00495343		3475.2	-0.00607619
295.39	0.0481314		825.39	-0.00976051		1355.38	0.00601774		1885.38	0.01062365		2415.37	0.00359881		2945.37	0.00497164		3475.4	-0.0065158
295.59	0.04804263		825.59	-0.01015175		1355.58	0.00710298		1885.58	0.01004567		2415.57	0.00424649		2945.57	0.00470401		3475.6	-0.00613221
295.79	0.04831288		825.79	-0.01142243		1355.78	0.00746805		1885.78	0.00892005		2415.77	0.00386801		2945.77	0.00494935		3475.8	-0.00651683
295.99	0.04905712		825.99	-0.01200369		1355.98	0.0063882		1885.98	0.00884142		2415.97	0.00447809		2945.97	0.00475553		3476	-0.00682249
296.19	0.04893894		826.19	-0.01137283		1356.18	0.00641305		1886.18	0.00848055		2416.17	0.00486513		2946.17	0.0047288		3476.2	-0.00664215
296.39	0.04923136		826.39	-0.011722		1356.38	0.00620809		1886.38	0.00918348		2416.37	0.00482062		2946.37	0.00442031		3476.4	-0.0069361
296.59	0.04946251		826.59	-0.01166244		1356.58	0.00567816		1886.58	0.0092713		2416.57	0.00532849		2946.57	0.00434001		3476.6	-0.00663728
296.79	0.04942038		826.79	-0.01171556		1356.78	0.00463468		1886.78	0.00995458		2416.77	0.00571211		2946.77	0.00394143		3476.8	-0.00623909
296.99	0.04974982		826.99	-0.01057884		1356.98	0.0033079		1886.98	0.0110213		2416.97	0.00684893		2946.97	0.00342047		3477	-0.0051834
297.19	0.05054928		827.19	-0.00992519		1357.18	0.00300401		1887.18	0.01096269		2417.17	0.00688349		2947.17	0.00239045		3477.2	-0.00467171
297.39	0.05037299		827.39	-0.0095425		1357.38	0.00354387		1887.38	0.01092339		2417.37	0.00610298		2947.37	0.00214135		3477.4	-0.00444383
297.59	0.05095403		827.59	-0.00951584		1357.58	0.00278114		1887.58	0.01151066		2417.57	0.00624064		2947.57	0.00219033		3477.6	-0.00383448
297.79	0.05166084		827.79	-0.00968492		1357.78	0.00181463		1887.78	0.0108273		2417.77	0.0057067		2947.77	0.0019497		3477.8	-0.00401309
297.99	0.05194049		827.99	-0.00978785		1357.98	0.00089245		1887.98	0.01081641		2417.97	0.00630164		2947.97	0.00234776		3478	-0.00381245
298.19	0.05247549		828.19	-0.00985459		1358.18	0.00112706		1888.18	0.01142512		2418.17	0.00649596		2948.17	0.00169981		3478.2	-0.0035496
298.39	0.05277951		828.39	-0.01046461		1358.38	0.00195318		1888.38	0.01158271		2418.37	0.00643802		2948.37	0.00223714		3478.4	-0.0035885
298.59	0.05370789		828.59	-0.01002503		1358.58	0.00157408		1888.58	0.01261649		2418.57	0.00628503		2948.57	0.00299873		3478.6	-0.00374253
298.79	0.0534993		828.79	-0.01074392		1358.78	0.00179641		1888.78	0.01222808		2418.77	0.00610734		2948.77	0.00400782		3478.8	-0.00401442
298.99	0.05293319		828.99	-0.01084361		1358.98	0.0027381		1888.98	0.01205313		2418.97	0.00677256		2948.97	0.00499387		3479	-0.00369443
299.19	0.05206256		829.19	-0.01149125		1359.18	0.00250597		1889.18	0.01193128		2419.17	0.00607829		2949.17	0.00605944		3479.2	-0.00419978
299.39	0.05147202		829.39	-0.0112555		1359.38	0.00341207		1889.38	0.01100274		2419.37	0.00640072		2949.37	0.0061303		3479.4	-0.00574562
299.59	0.05156343		829.59	-0.0114505		1359.58	0.00521762		1889.58	0.01000368		2419.57	0.00696714		2949.57	0.00572012		3479.6	-0.00575047
299.79	0.05103046		829.79	-0.01121546		1359.78	0.00494345		1889.78	0.00959796		2419.77	0.00630988		2949.77	0.00631666		3479.8	-0.00603664
299.99	0.0516847		829.99	-0.01070593		1359.98	0.00473204		1889.98	0.00907031		2419.97	0.0066384		2949.97	0.00694676		3480	-0.00640443
300.19	0.05154162		830.19	-0.01049493		1360.18	0.00471264		1890.18	0.00941994		2420.17	0.00663768		2950.17	0.00634271		3480.2	-0.00676679
300.39	0.05197467		830.39	-0.01052965		1360.38	0.00385328		1890.38	0.00973734		2420.37	0.00612543		2950.37	0.00568329		3480.4	-0.00680809
300.59	0.05213123		830.59	-0.01003236		1360.58	0.00309604		1890.58	0.00961844		2420.57	0.00735134		2950.57	0.00565687		3480.6	-0.00729778
300.79	0.05180681		830.79	-0.00897373		1360.78	0.00227553		1890.78	0.01005978		2420.77	0.00782983		2950.77	0.00571985		3480.8	-0.00793743
300.99	0.05225571		830.99	-0.00905074		1360.98	0.00145311		1890.98	0.00920044		2420.97	0.00791533		2950.97	0.00588736		3481	-0.00802772
301.19	0.05254017		831.19	-0.00935961		1361.18	0.00154494		1891.18	0.00881815		2421.17	0.00768079		2951.17	0.00639508		3481.2	-0.00854083
301.39	0.05238676		831.39	-0.0088044		1361.38	0.00130759		1891.38	0.00881292		2421.37	0.00852151		2951.37	0.00682198		3481.4	-0.0084291
301.59	0.05312828		831.59	-0.00873164		1361.58	0.00100498		1891.58	0.00928538		2421.57	0.00895701		2951.57	0.00630376		3481.6	-0.0087916
301.79	0.05285493		831.79	-0.00918703		1361.78	0.0007284		1891.78	0.00913579		2421.77	0.00916223		2951.77	0.00596828		3481.8	-0.00842536
301.99	0.0533593		831.99	-0.0090902		1361.98	0.0011368		1891.98	0.00982615		2421.97	0.00943908		2951.97	0.00571951		3482	-0.00846306
302.19	0.05379932		832.19	-0.00984506		1362.18	0.00142716		1892.18	0.01078642		2422.17	0.00946132		2952.17	0.0050645		3482.2	-0.00872541
302.39	0.05490389		832.39	-0.00991067		1362.38	0.00199461		1892.38	0.01002917		2422.37	0.00903906		2952.37	0.00536788		3482.4	-0.00821283
302.59	0.05552078		832.59	-0.00995707		1362.58	0.00260995		1892.58	0.01017535		2422.57	0.00923402		2952.57	0.00523383		3482.6	-0.00788495
302.79	0.05473802		832.79	-0.01036746		1362.78	0.00359868		1892.78	0.01022304		2422.77	0.00870126		2952.77	0.00513896		3482.8	-0.00706326
302.99	0.05454102		832.99	-0.01032458		1362.98	0.00440047		1892.98	0.01106569		2422.97	0.0095118		2952.97	0.00502718		3483	-0.00636557
303.19	0.05364477		833.19	-0.01033853		1363.18	0.00487709		1893.18	0.01071496		2423.17	0.00865006		2953.17	0.00387886		3483.2	-0.00669405
303.39	0.05377645		833.39	-0.01002429		1363.38	0.00563578		1893.38	0.01012606		2423.37	0.00855457		2953.37	0.00278927		3483.4	-0.00657113
303.59	0.05344526		833.59	-0.01040083		1363.58	0.00606026		1893.58	0.00897955		2423.57	0.00893877		2953.57	0.00269514		3483.6	-0.00567899
303.79	0.05340953		833.79	-0.01060962		1363.78	0.0062515		1893.78	0.00881158		2423.77	0.0086069		2953.77	0.00298637		3483.8	-0.00563735
303.99	0.05427765		833.99	-0.01132047		1363.98	0.00566531		1893.98	0.00770198		2423.97	0.00833624		2953.97	0.00280681		3484	-0.00601698
304.19	0.05352961		834.19	-0.01165038		1364.18	0.00545566		1894.18	0.00829821		2424.17	0.00788514		2954.17	0.00220222		3484.2	-0.00657829
304.39	0.05287272		834.39	-0.01171193		1364.38	0.00493568		1894.38	0.00719416		2424.37	0.00817867		2954.37	0.00301774		3484.4	-0.00648733
304.59	0.05274516		834.59	-0.01158742		1364.58	0.00400825		1894.58	0.00639288		2424.57	0.00863198		2954.57	0.00315565		3484.6	-0.00706097
304.79	0.0526523		834.79	-0.01233244		1364.78	0.00345857		1894.78	0.00570937		2424.77	0.00819607		2954.77	0.00352345		3484.8	-0.0082617
304.99	0.05353774		834.99	-0.01285147		1364.98	0.00240946		1894.98	0.00531884		2424.97	0.00832471		2954.97	0.00403646		3485	-0.00821088
305.19	0.05327227		835.19	-0.01207009		1365.18	0.00297646		1895.18	0.00603705		2425.17	0.00893797		2955.17	0.00479975		3485.2	-0.0081446
305.39	0.05268481		835.39	-0.01157487		1365.38	0.00332211		1895.38	0.00634012		2425.37	0.00886867		2955.37	0.00425515		3485.4	-0.00735793
305.59	0.05337071		835.59	-0.01156887		1365.58	0.00379921		1895.58	0.00702603		2425.57	0.00852172		2955.57	0.00389563		3485.6	-0.00679481
305.79	0.05305561		835.79	-0.01103744		1365.78	0.00409182		1895.78	0.00824498		2425.77	0.00873642		2955.77	0.00453304		3485.8	-0.00558876
305.99	0.05298815		835.99	-0.01028197		1365.98	0.00492477		1895.98	0.00909358		2425.97	0.00860942		2955.97	0.00486779		3486	-0.00605147
306.19	0.05255563		836.19	-0.00973352		1366.18	0.00514162		1896.18	0.01036319		2426.17	0.00834413		2956.17	0.00467033		3486.2	-0.00584944
306.39	0.05342226		836.39	-0.00987438		1366.38	0.00508126		1896.38	0.01100429		2426.37	0.00794009		2956.37	0.00445548		3486.4	-0.0054897
306.59	0.05348693		836.59	-0.00955685		1366.58	0.00534952		1896.58	0.01116375		2426.57	0.00884695		2956.57	0.00423583		3486.6	-0.00542658
306.79	0.05327041		836.79	-0.00967517		1366.78	0.00554885		1896.78	0.01152043		2426.77	0.00894387		2956.77	0.00480435		3486.8	-0.00506591
306.99	0.05345885		836.99	-0.0100525		1366.98	0.00565007		1896.98	0.01218928		2426.97	0.00949967		2956.97	0.00476403		3487	-0.00522801
307.19	0.05235074		837.19	-0.00981772		1367.18	0.00574904		1897.18	0.01186325		2427.17	0.00894614		2957.17	0.00367511		3487.2	-0.00535673
307.39	0.05256463		837.39	-0.00960422		1367.38	0.00583959		1897.38	0.01136862		2427.37	0.00829111		2957.37	0.00390098		3487.4	-0.00669123
307.59	0.05294336		837.59	-0.01066517		1367.58	0.0059861		1897.58	0.01069255		2427.57	0.008096		2957.57	0.00408508		3487.6	-0.00690603
307.79	0.0532217		837.79	-0.0112371		1367.78	0.00556015		1897.78	0.01042996		2427.77	0.00753758		2957.77	0.00378786		3487.8	-0.00705756
307.99	0.05290125		837.99	-0.01214804		1367.98	0.00490744		1897.98	0.01015452		2427.97	0.00715687		2957.97	0.00344168		3488	-0.00766339
308.19	0.05216701		838.19	-0.01219376		1368.18	0.00420704		1898.18	0.01015363		2428.17	0.00675256		2958.17	0.00321339		3488.2	-0.00837347
308.39	0.05374121		838.39	-0.01196138		1368.38	0.00306279		1898.38	0.00891569		2428.37	0.00678482		2958.37	0.00344101		3488.4	-0.00792126
308.59	0.05475451		838.59	-0.01289492		1368.58	0.00175625		1898.58	0.00894577		2428.57	0.00661294		2958.57	0.00341164		3488.6	-0.00852379
308.79	0.05549947		838.79	-0.01297054		1368.78	0.00191474		1898.78	0.00928451		2428.77	0.00573634		2958.77	0.00326184		3488.8	-0.00916608
308.99	0.05622955		838.99	-0.0129643		1368.98	0.00115043		1898.98	0.01019496		2428.97	0.00561464		2958.97	0.0035621		3489	-0.00915313
309.19	0.05659645		839.19	-0.01248517		1369.18	0.0021245		1899.18	0.01066676		2429.17	0.00519239		2959.17	0.00366241		3489.2	-0.00870457
309.39	0.05672178		839.39	-0.01207639		1369.38	0.00208558		1899.38	0.01076516		2429.37	0.00456088		2959.37	0.00297252		3489.4	-0.00858193
309.59	0.0578302		839.59	-0.01151534		1369.58	0.00206742		1899.58	0.01071977		2429.57	0.00565831		2959.57	0.00330989		3489.6	-0.00839213
309.79	0.05747932		839.79	-0.01051167		1369.78	0.00158017		1899.78	0.01163263		2429.77	0.00529589		2959.77	0.00406583		3489.8	-0.00811093
309.99	0.0569346		839.99	-0.01041559		1369.98	0.00100707		1899.98	0.0114582		2429.97	0.00561549		2959.97	0.00419718		3490	-0.00890797
310.19	0.05674057		840.19	-0.00965001		1370.18	0.00053386		1900.18	0.01267677		2430.17	0.00530731		2960.17	0.00466672		3490.2	-0.00877714
310.39	0.05653853		840.39	-0.01018809		1370.38	0.00025907		1900.38	0.01166499		2430.37	0.00578211		2960.37	0.00554266		3490.4	-0.00821853
310.59	0.05555639		840.59	-0.00921332		1370.58	0.00135467		1900.58	0.01067025		2430.57	0.00640631		2960.57	0.00607674		3490.6	-0.00758118
310.79	0.05489662		840.79	-0.00932363		1370.78	0.00268086		1900.78	0.01095243		2430.77	0.00716939		2960.77	0.00622608		3490.8	-0.0068273
310.99	0.05308718		840.99	-0.00824693		1370.98	0.00281051		1900.98	0.01161499		2430.97	0.00686146		2960.97	0.00618309		3491	-0.00663724
311.19	0.05190482		841.19	-0.00747376		1371.18	0.00346459		1901.18	0.01116765		2431.17	0.00644195		2961.17	0.00583922		3491.2	-0.00605309
311.39	0.05236257		841.39	-0.00790735		1371.38	0.00417436		1901.38	0.01042669		2431.37	0.00677783		2961.37	0.00668706		3491.4	-0.0063295
311.59	0.05253949		841.59	-0.00866999		1371.58	0.00434531		1901.58	0.0105594		2431.57	0.00637933		2961.57	0.00662318		3491.6	-0.00611148
311.79	0.05250909		841.79	-0.00808117		1371.78	0.0039527		1901.78	0.00962872		2431.77	0.0067299		2961.77	0.00640813		3491.8	-0.00667283
311.99	0.05230402		841.99	-0.00783799		1371.98	0.00399062		1901.98	0.00912862		2431.97	0.00701841		2961.97	0.00648233		3492	-0.00700723
312.19	0.05309716		842.19	-0.00838977		1372.18	0.00413692		1902.18	0.00935473		2432.17	0.00762374		2962.17	0.00668138		3492.2	-0.00685592
312.39	0.05406303		842.39	-0.0087267		1372.38	0.00416471		1902.38	0.0106158		2432.37	0.00714792		2962.37	0.00655118		3492.4	-0.00700738
312.59	0.05446494		842.59	-0.00898534		1372.58	0.00450875		1902.58	0.01133714		2432.57	0.00750382		2962.57	0.00542684		3492.6	-0.00625919
312.79	0.05481523		842.79	-0.00879884		1372.78	0.00483775		1902.78	0.01130933		2432.77	0.00759329		2962.77	0.0047638		3492.8	-0.0066063
312.99	0.05623834		842.99	-0.00977556		1372.98	0.00517813		1902.98	0.01148753		2432.97	0.00794229		2962.97	0.00433105		3493	-0.0076055
313.19	0.05696426		843.19	-0.00939149		1373.18	0.00544041		1903.18	0.01151449		2433.17	0.00785928		2963.17	0.00334882		3493.2	-0.00750715
313.39	0.05811552		843.39	-0.00927527		1373.38	0.00454227		1903.38	0.01191608		2433.37	0.00845865		2963.37	0.00331217		3493.4	-0.00847827
313.59	0.05891515		843.59	-0.00992896		1373.58	0.00410069		1903.58	0.01121219		2433.57	0.01009952		2963.57	0.00338279		3493.6	-0.00846826
313.79	0.05796769		843.79	-0.01008135		1373.78	0.00400856		1903.78	0.01174374		2433.77	0.00938793		2963.77	0.00386558		3493.8	-0.00990094
313.99	0.05813299		843.99	-0.01011074		1373.98	0.00425431		1903.98	0.01138868		2433.97	0.00950101		2963.97	0.00328705		3494	-0.00959966
314.19	0.05891504		844.19	-0.01004349		1374.18	0.00499579		1904.18	0.01210696		2434.17	0.00969109		2964.17	0.00376047		3494.2	-0.00968664
314.39	0.05791478		844.39	-0.01060718		1374.38	0.00493438		1904.38	0.01219862		2434.37	0.00958291		2964.37	0.00371467		3494.4	-0.00957322
314.59	0.0570267		844.59	-0.01077317		1374.58	0.00588261		1904.58	0.01210616		2434.57	0.00961293		2964.57	0.00390094		3494.6	-0.00988748
314.79	0.0561522		844.79	-0.01095183		1374.78	0.00577022		1904.78	0.01158578		2434.77	0.00993153		2964.77	0.0038874		3494.8	-0.00981288
314.99	0.0554774		844.99	-0.01027976		1374.98	0.00548345		1904.98	0.01123672		2434.97	0.00918359		2964.97	0.00467619		3495	-0.01002159
315.19	0.05527761		845.19	-0.01046332		1375.18	0.00507613		1905.18	0.01112064		2435.17	0.00899766		2965.17	0.00490448		3495.2	-0.00943051
315.39	0.0540099		845.39	-0.01061236		1375.38	0.00565389		1905.38	0.01030432		2435.37	0.00911528		2965.37	0.00562032		3495.4	-0.0097737
315.59	0.05418118		845.59	-0.01025991		1375.58	0.00573078		1905.58	0.01016319		2435.57	0.00893286		2965.57	0.00505945		3495.6	-0.01045653
315.79	0.05426185		845.79	-0.00983977		1375.78	0.00500544		1905.78	0.00960097		2435.77	0.00934019		2965.77	0.00576079		3495.8	-0.01078092
315.99	0.05378158		845.99	-0.01048346		1375.98	0.00469392		1905.98	0.00964866		2435.97	0.00968402		2965.97	0.0055026		3496	-0.01025534
316.19	0.0542729		846.19	-0.01148647		1376.18	0.00526871		1906.18	0.01058247		2436.17	0.00966024		2966.17	0.00588517		3496.2	-0.00975952
316.39	0.05424056		846.39	-0.01140887		1376.38	0.00478487		1906.38	0.01105964		2436.37	0.00870029		2966.37	0.0052308		3496.4	-0.00978386
316.59	0.05499331		846.59	-0.01133962		1376.58	0.00464764		1906.58	0.01012066		2436.57	0.00952219		2966.57	0.00533926		3496.6	-0.00886446
316.79	0.05545505		846.79	-0.01199546		1376.78	0.00445779		1906.78	0.01021841		2436.77	0.00976556		2966.77	0.00617889		3496.8	-0.00927903
316.99	0.05627992		846.99	-0.01230598		1376.98	0.00438486		1906.98	0.01072581		2436.97	0.00948388		2966.97	0.00695386		3497	-0.00939121
317.19	0.05657737		847.19	-0.01210691		1377.18	0.00414229		1907.18	0.01107602		2437.17	0.01004015		2967.17	0.00711906		3497.2	-0.00849097
317.39	0.05779957		847.39	-0.01130758		1377.38	0.0043733		1907.38	0.0114043		2437.37	0.01072729		2967.37	0.00754425		3497.4	-0.00839612
317.59	0.0582768		847.59	-0.01152029		1377.58	0.00519616		1907.58	0.0114553		2437.57	0.01036311		2967.57	0.00766731		3497.6	-0.00839581
317.79	0.05905452		847.79	-0.01124994		1377.78	0.00514874		1907.78	0.01233938		2437.77	0.00942646		2967.77	0.00790093		3497.8	-0.0089344
317.99	0.06039608		847.99	-0.01082081		1377.98	0.00549363		1907.98	0.01184668		2437.97	0.00938446		2967.97	0.00801161		3498	-0.00791604
318.19	0.06083223		848.19	-0.01150719		1378.18	0.0055935		1908.18	0.0118518		2438.17	0.00921729		2968.17	0.00776057		3498.2	-0.00883412
318.39	0.05924514		848.39	-0.01196015		1378.38	0.00515059		1908.38	0.01204827		2438.37	0.00813926		2968.37	0.00694528		3498.4	-0.00932987
318.59	0.05894765		848.59	-0.01202895		1378.58	0.00459863		1908.58	0.01163171		2438.57	0.00710782		2968.57	0.00713976		3498.6	-0.00869004
318.79	0.05891506		848.79	-0.0110627		1378.78	0.00464145		1908.78	0.01115697		2438.77	0.00638749		2968.77	0.0069981		3498.8	-0.00844191
318.99	0.05843376		848.99	-0.01046533		1378.98	0.00504294		1908.98	0.01106319		2438.97	0.00598976		2968.97	0.00726556		3499	-0.00754631
319.19	0.05702682		849.19	-0.00981179		1379.18	0.00518627		1909.18	0.01060818		2439.17	0.00564398		2969.17	0.00659003		3499.2	-0.00678887
319.39	0.05582807		849.39	-0.00881726		1379.38	0.00584118		1909.38	0.00973795		2439.37	0.00562233		2969.37	0.00611737		3499.4	-0.00612923
319.59	0.05641536		849.59	-0.00832634		1379.58	0.00533688		1909.58	0.00984219		2439.57	0.00596986		2969.57	0.00561666		3499.6	-0.00596306
319.79	0.05589268		849.79	-0.00833802		1379.78	0.00475777		1909.78	0.00942034		2439.77	0.00532045		2969.77	0.00553386		3499.8	-0.0054998
319.99	0.05597845		849.99	-0.00825434		1379.98	0.00561929		1909.98	0.00858826		2439.97	0.00544908		2969.97	0.0053876		3500	-0.00534963
320.19	0.05656656		850.19	-0.0080936		1380.18	0.00604653		1910.18	0.00878597		2440.17	0.00480188		2970.17	0.0056785		3500.2	-0.00546011
320.39	0.05671052		850.39	-0.00810362		1380.38	0.00521194		1910.38	0.00914584		2440.37	0.00422608		2970.37	0.00503261		3500.4	-0.00520595
320.59	0.05710064		850.59	-0.00840922		1380.58	0.00511714		1910.58	0.00952385		2440.57	0.00538919		2970.57	0.00566861		3500.6	-0.00507723
320.79	0.05834029		850.79	-0.00793967		1380.78	0.00472879		1910.78	0.00943562		2440.77	0.00594165		2970.77	0.00513217		3500.8	-0.00567524
320.99	0.05815859		850.99	-0.00843913		1380.98	0.00434235		1910.98	0.01018585		2440.97	0.00685232		2970.97	0.00566251		3501	-0.00628936
321.19	0.05906751		851.19	-0.00854272		1381.18	0.00524432		1911.18	0.01025611		2441.17	0.00767234		2971.17	0.00560454		3501.2	-0.00592467
321.39	0.06005623		851.39	-0.00746746		1381.38	0.00568057		1911.38	0.01016217		2441.37	0.00847979		2971.37	0.00504963		3501.4	-0.00552418
321.59	0.05979405		851.59	-0.00754327		1381.58	0.00576746		1911.58	0.01007098		2441.57	0.00854243		2971.57	0.00521843		3501.6	-0.00594002
321.79	0.06030861		851.79	-0.00828704		1381.78	0.00576195		1911.78	0.00923781		2441.77	0.00979848		2971.77	0.00482789		3501.8	-0.00613781
321.99	0.06085886		851.99	-0.00847767		1381.98	0.00637471		1911.98	0.00783232		2441.97	0.01029036		2971.97	0.00486341		3502	-0.00623523
322.19	0.06107114		852.19	-0.00924022		1382.18	0.00685912		1912.18	0.00764224		2442.17	0.00987926		2972.17	0.00411848		3502.2	-0.006829
322.39	0.0613611		852.39	-0.00940764		1382.38	0.00660568		1912.38	0.00830078		2442.37	0.00956765		2972.37	0.00432171		3502.4	-0.00716563
322.59	0.06181363		852.59	-0.00869823		1382.58	0.00577975		1912.58	0.00845665		2442.57	0.00932881		2972.57	0.00463581		3502.6	-0.00647001
322.79	0.06210191		852.79	-0.00864533		1382.78	0.00611742		1912.78	0.00859562		2442.77	0.00879987		2972.77	0.00478155		3502.8	-0.00645836
322.99	0.06203391		852.99	-0.00835081		1382.98	0.00634554		1912.98	0.00890075		2442.97	0.00945188		2972.97	0.00542844		3503	-0.00596593
323.19	0.06143117		853.19	-0.00860638		1383.18	0.0063149		1913.18	0.00909263		2443.17	0.00933061		2973.17	0.0049125		3503.2	-0.00703622
323.39	0.06118903		853.39	-0.00778326		1383.38	0.00606954		1913.38	0.00912523		2443.37	0.00886483		2973.37	0.00505296		3503.4	-0.00685448
323.59	0.06138483		853.59	-0.00801654		1383.58	0.00570472		1913.58	0.00963985		2443.57	0.00850768		2973.57	0.00515967		3503.6	-0.00714911
323.79	0.06125814		853.79	-0.00836047		1383.78	0.00598254		1913.78	0.00946568		2443.77	0.00772934		2973.77	0.0051174		3503.8	-0.00664589
323.99	0.06138635		853.99	-0.00798959		1383.98	0.00610712		1913.98	0.0095394		2443.97	0.0073865		2973.97	0.00551794		3504	-0.00733758
324.19	0.06163945		854.19	-0.00774645		1384.18	0.00484827		1914.18	0.01017085		2444.17	0.00675164		2974.17	0.00527034		3504.2	-0.00776969
324.39	0.06150508		854.39	-0.00804617		1384.38	0.00436575		1914.38	0.0109206		2444.37	0.00672421		2974.37	0.00515486		3504.4	-0.0078651
324.59	0.06093012		854.59	-0.00781111		1384.58	0.00451146		1914.58	0.01101723		2444.57	0.0074155		2974.57	0.00505292		3504.6	-0.00896847
324.79	0.06127283		854.79	-0.00789923		1384.78	0.00417106		1914.78	0.01063837		2444.77	0.00748289		2974.77	0.00511573		3504.8	-0.00924466
324.99	0.06077242		854.99	-0.00849727		1384.98	0.00479885		1914.98	0.01196084		2444.97	0.00734199		2974.97	0.00586192		3505	-0.00896419
325.19	0.06116023		855.19	-0.00804319		1385.18	0.00529397		1915.18	0.01037854		2445.17	0.00731577		2975.17	0.00638592		3505.2	-0.00755513
325.39	0.06150475		855.39	-0.00794434		1385.38	0.00549505		1915.38	0.00904002		2445.37	0.00814159		2975.37	0.0060473		3505.4	-0.00735098
325.59	0.06131919		855.59	-0.00825146		1385.58	0.00593249		1915.58	0.00802191		2445.57	0.0081492		2975.57	0.00631201		3505.6	-0.00748438
325.79	0.06210782		855.79	-0.00898977		1385.78	0.00666593		1915.78	0.00700358		2445.77	0.0086606		2975.77	0.00633604		3505.8	-0.00738771
325.99	0.06243791		855.99	-0.00848385		1385.98	0.00769227		1915.98	0.0065004		2445.97	0.00825075		2975.97	0.00640911		3506	-0.00710749
326.19	0.06246915		856.19	-0.0088664		1386.18	0.00778397		1916.18	0.00635352		2446.17	0.0081492		2976.17	0.00663523		3506.2	-0.00725335
326.39	0.06273254		856.39	-0.00984724		1386.38	0.00761802		1916.38	0.00700136		2446.37	0.00846414		2976.37	0.00672081		3506.4	-0.00672699
326.59	0.06251534		856.59	-0.00933317		1386.58	0.00704429		1916.58	0.00689936		2446.57	0.00804546		2976.57	0.00726558		3506.6	-0.00638485
326.79	0.06290369		856.79	-0.01027494		1386.78	0.00689982		1916.78	0.00715847		2446.77	0.00696128		2976.77	0.00719498		3506.8	-0.00638782
326.99	0.06223934		856.99	-0.01045708		1386.98	0.00745419		1916.98	0.00713858		2446.97	0.00665355		2976.97	0.00738152		3507	-0.00736282
327.19	0.06167864		857.19	-0.01111393		1387.18	0.00719381		1917.18	0.00642375		2447.17	0.00672027		2977.17	0.00651162		3507.2	-0.00786942
327.39	0.06182693		857.39	-0.01125051		1387.38	0.00669842		1917.38	0.00706698		2447.37	0.00649669		2977.37	0.00679935		3507.4	-0.00703099
327.59	0.06243565		857.59	-0.01099697		1387.58	0.00660772		1917.58	0.00773551		2447.57	0.00640324		2977.57	0.00637825		3507.6	-0.0066579
327.79	0.06186405		857.79	-0.01076161		1387.78	0.00657375		1917.78	0.00690367		2447.77	0.00626632		2977.77	0.00591583		3507.8	-0.00693468
327.99	0.06235081		857.99	-0.00896264		1387.98	0.00498209		1917.98	0.00723034		2447.97	0.00664262		2977.97	0.00642231		3508	-0.0082174
328.19	0.06256043		858.19	-0.0081893		1388.18	0.00454215		1918.18	0.00714214		2448.17	0.00706447		2978.17	0.00634212		3508.2	-0.00835821
328.39	0.06263368		858.39	-0.00853024		1388.38	0.00458107		1918.38	0.00758309		2448.37	0.00800009		2978.37	0.00572841		3508.4	-0.00846416
328.59	0.06244087		858.59	-0.00801747		1388.58	0.0044823		1918.58	0.00720762		2448.57	0.00816273		2978.57	0.00594865		3508.6	-0.00917267
328.79	0.0640843		858.79	-0.00774268		1388.78	0.00463334		1918.78	0.00730052		2448.77	0.0082849		2978.77	0.00568001		3508.8	-0.00864835
328.99	0.06548843		858.99	-0.00775997		1388.98	0.0044516		1918.98	0.00789338		2448.97	0.00863456		2978.97	0.00605141		3509	-0.00858888
329.19	0.06626917		859.19	-0.00741529		1389.18	0.00383487		1919.18	0.00671		2449.17	0.0088721		2979.17	0.00642335		3509.2	-0.00789383
329.39	0.06707129		859.39	-0.00775269		1389.38	0.00426054		1919.38	0.00635887		2449.37	0.0094575		2979.37	0.00570445		3509.4	-0.00724197
329.59	0.06673263		859.59	-0.00748007		1389.58	0.0042081		1919.58	0.00714413		2449.57	0.00997668		2979.57	0.0054628		3509.6	-0.00709835
329.79	0.06615298		859.79	-0.00763586		1389.78	0.00504342		1919.78	0.00737147		2449.77	0.01013532		2979.77	0.00562334		3509.8	-0.00680184
329.99	0.0664227		859.99	-0.00791172		1389.98	0.00505535		1919.98	0.00773129		2449.97	0.01066013		2979.97	0.00528128		3510	-0.00578039
330.19	0.06636833		860.19	-0.008591		1390.18	0.00457757		1920.18	0.00755434		2450.17	0.01109254		2980.17	0.00567177		3510.2	-0.00571862
330.39	0.06643699		860.39	-0.00856973		1390.38	0.00516206		1920.38	0.00819022		2450.37	0.01096859		2980.37	0.00589386		3510.4	-0.00546864
330.59	0.06599903		860.59	-0.00861517		1390.58	0.00469927		1920.58	0.00794295		2450.57	0.01069422		2980.57	0.00613099		3510.6	-0.00535267
330.79	0.06585707		860.79	-0.00949077		1390.78	0.00516301		1920.78	0.00786254		2450.77	0.009495		2980.77	0.00594557		3510.8	-0.00517791
330.99	0.0648068		860.99	-0.00899564		1390.98	0.00497268		1920.98	0.00841393		2450.97	0.00916865		2980.97	0.00601477		3511	-0.00507616
331.19	0.06412102		861.19	-0.00897041		1391.18	0.00497211		1921.18	0.00873769		2451.17	0.00923883		2981.17	0.00648409		3511.2	-0.00494923
331.39	0.06400997		861.39	-0.00902995		1391.38	0.00506286		1921.38	0.01002977		2451.37	0.0087217		2981.37	0.00688886		3511.4	-0.00543974
331.59	0.06371784		861.59	-0.00811272		1391.58	0.005483		1921.58	0.00991996		2451.57	0.00807541		2981.57	0.0070611		3511.6	-0.00567425
331.79	0.06340813		861.79	-0.00769507		1391.78	0.00486813		1921.78	0.00918751		2451.77	0.00792385		2981.77	0.00767519		3511.8	-0.00658073
331.99	0.06388119		861.99	-0.00667524		1391.98	0.00454253		1921.98	0.00962049		2451.97	0.00768906		2981.97	0.00769639		3512	-0.00723824
332.19	0.0635367		862.19	-0.00705521		1392.18	0.00533147		1922.18	0.0088891		2452.17	0.00761458		2982.17	0.00739826		3512.2	-0.00750185
332.39	0.06401415		862.39	-0.00801777		1392.38	0.00533513		1922.38	0.00931239		2452.37	0.0071925		2982.37	0.00710102		3512.4	-0.00819702
332.59	0.06463305		862.59	-0.00849617		1392.58	0.00569807		1922.58	0.00886217		2452.57	0.00674446		2982.57	0.00703505		3512.6	-0.0088829
332.79	0.06605042		862.79	-0.00928328		1392.78	0.00502243		1922.78	0.00922548		2452.77	0.00631895		2982.77	0.00710575		3512.8	-0.00884486
332.99	0.06736218		862.99	-0.00965261		1392.98	0.00516185		1922.98	0.00936948		2452.97	0.00671789		2982.97	0.00690368		3513	-0.00954463
333.19	0.06728915		863.19	-0.00950529		1393.18	0.00549973		1923.18	0.00873561		2453.17	0.00619057		2983.17	0.00617878		3513.2	-0.00959432
333.39	0.06705244		863.39	-0.01022676		1393.38	0.00591867		1923.38	0.00883411		2453.37	0.00717942		2983.37	0.00573943		3513.4	-0.01019469
333.59	0.06666027		863.59	-0.01084196		1393.58	0.00521898		1923.58	0.01000155		2453.57	0.0076144		2983.57	0.00468		3513.6	-0.01073811
333.79	0.06681824		863.79	-0.0106559		1393.78	0.00566761		1923.78	0.00937563		2453.77	0.00766619		2983.77	0.0045553		3513.8	-0.01086914
333.99	0.0679127		863.99	-0.01079072		1393.98	0.00520014		1923.98	0.00954453		2453.97	0.00771046		2983.97	0.00412243		3514	-0.01001839
334.19	0.06776297		864.19	-0.0113881		1394.18	0.00479895		1924.18	0.00875376		2454.17	0.00816062		2984.17	0.00408391		3514.2	-0.01032977
334.39	0.06829082		864.39	-0.0113579		1394.38	0.00516682		1924.38	0.00838463		2454.37	0.00854401		2984.37	0.00436042		3514.4	-0.010441
334.59	0.0683947		864.59	-0.0115524		1394.58	0.00488417		1924.58	0.00755752		2454.57	0.00881465		2984.57	0.00432441		3514.6	-0.00977197
334.79	0.06813029		864.79	-0.01098364		1394.78	0.00592409		1924.78	0.00707525		2454.77	0.00857364		2984.77	0.00465446		3514.8	-0.00915558
334.99	0.06732343		864.99	-0.01118649		1394.98	0.00554324		1924.98	0.00684542		2454.97	0.00888692		2984.97	0.00390399		3515	-0.00874436
335.19	0.06666265		865.19	-0.01153168		1395.18	0.00613425		1925.18	0.00639014		2455.17	0.00927037		2985.17	0.00454994		3515.2	-0.00922836
335.39	0.06679494		865.39	-0.01142492		1395.38	0.00647136		1925.38	0.00656506		2455.37	0.00974508		2985.37	0.00482024		3515.4	-0.00943065
335.59	0.0663722		865.59	-0.01160383		1395.58	0.00676292		1925.58	0.00644473		2455.57	0.00976108		2985.57	0.00527608		3515.6	-0.00929293
335.79	0.06670521		865.79	-0.01112976		1395.78	0.00634993		1925.78	0.00644303		2455.77	0.00921353		2985.77	0.00605437		3515.8	-0.00932906
335.99	0.06591294		865.99	-0.01055014		1395.98	0.0065668		1925.98	0.00706636		2455.97	0.00881157		2985.97	0.00609819		3516	-0.00970217
336.19	0.06571414		866.19	-0.01127671		1396.18	0.00629585		1926.18	0.00707513		2456.17	0.00857014		2986.17	0.006622		3516.2	-0.00950824
336.39	0.06586205		866.39	-0.01168615		1396.38	0.00615479		1926.38	0.00795771		2456.37	0.00763503		2986.37	0.00611159		3516.4	-0.00871229
336.59	0.06632444		866.59	-0.01191341		1396.58	0.00537872		1926.58	0.00847046		2456.57	0.00761263		2986.57	0.0064734		3516.6	-0.00844403
336.79	0.06624368		866.79	-0.01164118		1396.78	0.00557866		1926.78	0.00961469		2456.77	0.00745745		2986.77	0.00619439		3516.8	-0.00826593
336.99	0.06566839		866.99	-0.01071345		1396.98	0.00624208		1926.98	0.00996158		2456.97	0.00779057		2986.97	0.00544225		3517	-0.00818331
337.19	0.06525501		867.19	-0.01028409		1397.18	0.00675279		1927.18	0.01041627		2457.17	0.0076228		2987.17	0.00588413		3517.2	-0.00796068
337.39	0.06556892		867.39	-0.01029807		1397.38	0.00654311		1927.38	0.01120677		2457.37	0.00766451		2987.37	0.00611567		3517.4	-0.00813129
337.59	0.06586372		867.59	-0.00967351		1397.58	0.00651541		1927.58	0.01237226		2457.57	0.00736191		2987.57	0.00557899		3517.6	-0.00794109
337.79	0.06595242		867.79	-0.00838108		1397.78	0.00724849		1927.78	0.01126869		2457.77	0.00711381		2987.77	0.00577876		3517.8	-0.00853381
337.99	0.0666053		867.99	-0.00857912		1397.98	0.00641763		1927.98	0.01136349		2457.97	0.00672954		2987.97	0.00616434		3518	-0.00719132
338.19	0.06670221		868.19	-0.00872534		1398.18	0.00596785		1928.18	0.01040563		2458.17	0.00716054		2988.17	0.00694834		3518.2	-0.0069424
338.39	0.06718529		868.39	-0.00803746		1398.38	0.00679694		1928.38	0.00909361		2458.37	0.00768897		2988.37	0.00746807		3518.4	-0.00677861
338.59	0.06741791		868.59	-0.00814084		1398.58	0.00716607		1928.58	0.0084588		2458.57	0.00835127		2988.57	0.00686439		3518.6	-0.00660574
338.79	0.06712948		868.79	-0.00905674		1398.78	0.00765933		1928.78	0.00821118		2458.77	0.00965531		2988.77	0.00669177		3518.8	-0.00611062
338.99	0.06741991		868.99	-0.01036169		1398.98	0.00711485		1928.98	0.00838621		2458.97	0.01025338		2988.97	0.00659551		3519	-0.00644396
339.19	0.06822241		869.19	-0.01047969		1399.18	0.00734598		1929.18	0.00813544		2459.17	0.01051207		2989.17	0.00783686		3519.2	-0.00706737
339.39	0.06864893		869.39	-0.01084124		1399.38	0.00662364		1929.38	0.00941051		2459.37	0.01034441		2989.37	0.00832139		3519.4	-0.00700888
339.59	0.06874205		869.59	-0.01122298		1399.58	0.00605662		1929.58	0.00987345		2459.57	0.01030807		2989.57	0.00848087		3519.6	-0.00747382
339.79	0.06871955		869.79	-0.01100766		1399.78	0.00575166		1929.78	0.01039593		2459.77	0.00963934		2989.77	0.00922461		3519.8	-0.00753945
339.99	0.06818126		869.99	-0.01097302		1399.98	0.00593821		1929.98	0.01085194		2459.97	0.0098385		2989.97	0.00877086		3520	-0.00790491
340.19	0.06844938		870.19	-0.01174131		1400.18	0.00603311		1930.18	0.01124246		2460.17	0.00919371		2990.17	0.00773015		3520.2	-0.00803893
340.39	0.0684278		870.39	-0.01249627		1400.38	0.00613903		1930.38	0.01115279		2460.37	0.0085759		2990.37	0.00667222		3520.4	-0.00778824
340.59	0.0676111		870.59	-0.01254931		1400.58	0.00526687		1930.58	0.0115063		2460.57	0.00866199		2990.57	0.00655709		3520.6	-0.00780503
340.79	0.06670586		870.79	-0.01256094		1400.78	0.00617379		1930.78	0.01124008		2460.77	0.00913451		2990.77	0.00517667		3520.8	-0.0083006
340.99	0.06641957		870.99	-0.01169556		1400.98	0.00535609		1930.98	0.01120678		2460.97	0.00913544		2990.97	0.00516585		3521	-0.00843879
341.19	0.06756685		871.19	-0.01128244		1401.18	0.00570856		1931.18	0.01173721		2461.17	0.00895612		2991.17	0.00495443		3521.2	-0.00761748
341.39	0.06796999		871.39	-0.01063079		1401.38	0.00525683		1931.38	0.01186128		2461.37	0.00954243		2991.37	0.00487554		3521.4	-0.00863371
341.59	0.06726053		871.59	-0.00990412		1401.58	0.00522267		1931.58	0.01206603		2461.57	0.00987819		2991.57	0.00433041		3521.6	-0.00912843
341.79	0.06794293		871.79	-0.00946725		1401.78	0.00491233		1931.78	0.0108343		2461.77	0.00995296		2991.77	0.00400779		3521.8	-0.00849934
341.99	0.06829056		871.99	-0.00959042		1401.98	0.00433218		1931.98	0.01042316		2461.97	0.00971128		2991.97	0.00490301		3522	-0.00810887
342.19	0.06886064		872.19	-0.00907089		1402.18	0.00437965		1932.18	0.00983885		2462.17	0.01033015		2992.17	0.00565019		3522.2	-0.00775467
342.39	0.06889863		872.39	-0.00894369		1402.38	0.00408417		1932.38	0.00810092		2462.37	0.01078044		2992.37	0.00525304		3522.4	-0.00769011
342.59	0.06882202		872.59	-0.00969963		1402.58	0.00413314		1932.58	0.00805672		2462.57	0.01200258		2992.57	0.00476274		3522.6	-0.00769473
342.79	0.06946862		872.79	-0.01028119		1402.78	0.00407423		1932.78	0.00820324		2462.77	0.01341605		2992.77	0.00533254		3522.8	-0.00723361
342.99	0.0703272		872.99	-0.00991289		1402.98	0.00369127		1932.98	0.00791021		2462.97	0.01277957		2992.97	0.00502028		3523	-0.00763682
343.19	0.07141567		873.19	-0.00941184		1403.18	0.00379083		1933.18	0.00731864		2463.17	0.01226816		2993.17	0.00529616		3523.2	-0.00720803
343.39	0.07115147		873.39	-0.01004758		1403.38	0.00343732		1933.38	0.00798966		2463.37	0.0118466		2993.37	0.00535772		3523.4	-0.00682105
343.59	0.07018071		873.59	-0.00963492		1403.58	0.00408277		1933.58	0.00767408		2463.57	0.01139096		2993.57	0.00565568		3523.6	-0.00728449
343.79	0.06944469		873.79	-0.00980225		1403.78	0.00534187		1933.78	0.00811742		2463.77	0.01102607		2993.77	0.00579801		3523.8	-0.00776282
343.99	0.06985071		873.99	-0.00957025		1403.98	0.00571102		1933.98	0.00817441		2463.97	0.01044391		2993.97	0.00619237		3524	-0.00858517
344.19	0.06996015		874.19	-0.01053428		1404.18	0.0062933		1934.18	0.00839338		2464.17	0.00947963		2994.17	0.00580621		3524.2	-0.00927613
344.39	0.07063693		874.39	-0.01135109		1404.38	0.00641014		1934.38	0.00810487		2464.37	0.00920595		2994.37	0.00609017		3524.4	-0.0095313
344.59	0.07049537		874.59	-0.01117293		1404.58	0.00698477		1934.58	0.00843998		2464.57	0.00969495		2994.57	0.00601938		3524.6	-0.00943394
344.79	0.07159532		874.79	-0.01116417		1404.78	0.00771679		1934.78	0.00960231		2464.77	0.0106327		2994.77	0.00553329		3524.8	-0.01005613
344.99	0.0719397		874.99	-0.0102867		1404.98	0.00780076		1934.98	0.01068857		2464.97	0.01066861		2994.97	0.00661223		3525	-0.00895161
345.19	0.073068		875.19	-0.01040581		1405.18	0.00881524		1935.18	0.01152422		2465.17	0.01128702		2995.17	0.00629084		3525.2	-0.00766144
345.39	0.07316758		875.39	-0.00968728		1405.38	0.00895703		1935.38	0.01164055		2465.37	0.01250803		2995.37	0.00601866		3525.4	-0.00863828
345.59	0.07329661		875.59	-0.00899777		1405.58	0.0087191		1935.58	0.01218813		2465.57	0.01247572		2995.57	0.00589964		3525.6	-0.0074145
345.79	0.07414239		875.79	-0.00904148		1405.78	0.0089935		1935.78	0.01179288		2465.77	0.01289596		2995.77	0.00634542		3525.8	-0.0067332
345.99	0.07370327		875.99	-0.00849987		1405.98	0.00866575		1935.98	0.01111267		2465.97	0.01260302		2995.97	0.00658095		3526	-0.00719009
346.19	0.07410868		876.19	-0.00820893		1406.18	0.00844162		1936.18	0.01186126		2466.17	0.01314312		2996.17	0.00669121		3526.2	-0.00586766
346.39	0.07306412		876.39	-0.0084801		1406.38	0.00737389		1936.38	0.0114912		2466.37	0.01269466		2996.37	0.00672036		3526.4	-0.00575108
346.59	0.07309743		876.59	-0.00938861		1406.58	0.00725823		1936.58	0.01179997		2466.57	0.01323133		2996.57	0.00628187		3526.6	-0.00545209
346.79	0.07374006		876.79	-0.00901686		1406.78	0.00695911		1936.78	0.01166655		2466.77	0.01267937		2996.77	0.00612652		3526.8	-0.00513065
346.99	0.07323849		876.99	-0.00854492		1406.98	0.00605567		1936.98	0.01065414		2466.97	0.01163684		2996.97	0.00499419		3527	-0.00531935
347.19	0.07288413		877.19	-0.00838584		1407.18	0.00535412		1937.18	0.00987041		2467.17	0.01111096		2997.17	0.00565643		3527.2	-0.00512286
347.39	0.07190318		877.39	-0.00896358		1407.38	0.00533597		1937.38	0.00987556		2467.37	0.01109892		2997.37	0.00658772		3527.4	-0.00570116
347.59	0.07073173		877.59	-0.00819188		1407.58	0.00462766		1937.58	0.01053738		2467.57	0.01124565		2997.57	0.00702608		3527.6	-0.0058206
347.79	0.07122554		877.79	-0.00837181		1407.78	0.00412965		1937.78	0.0100797		2467.77	0.01132266		2997.77	0.00840251		3527.8	-0.00532161
347.99	0.07271491		877.99	-0.00826058		1407.98	0.00358098		1937.98	0.01031501		2467.97	0.01035956		2997.97	0.00833234		3528	-0.00569004
348.19	0.07317491		878.19	-0.00797659		1408.18	0.00386886		1938.18	0.01006709		2468.17	0.00977688		2998.17	0.00807832		3528.2	-0.00570576
348.39	0.07354176		878.39	-0.0086401		1408.38	0.0042291		1938.38	0.01016956		2468.37	0.01032345		2998.37	0.0084052		3528.4	-0.00632107
348.59	0.07346041		878.59	-0.00883034		1408.58	0.00535585		1938.58	0.01063029		2468.57	0.00992154		2998.57	0.00786776		3528.6	-0.00647313
348.79	0.07390816		878.79	-0.00823427		1408.78	0.00569197		1938.78	0.01194907		2468.77	0.01004222		2998.77	0.0078586		3528.8	-0.00574253
348.99	0.07354615		878.99	-0.00838474		1408.98	0.0063367		1938.98	0.01116958		2468.97	0.00968786		2998.97	0.00882509		3529	-0.00553175
349.19	0.07337284		879.19	-0.00810883		1409.18	0.00731751		1939.18	0.0112375		2469.17	0.00994382		2999.17	0.00731897		3529.2	-0.00598135
349.39	0.07242091		879.39	-0.00726752		1409.38	0.00705287		1939.38	0.01136412		2469.37	0.01036874		2999.37	0.00690451		3529.4	-0.00626765
349.59	0.0724717		879.59	-0.00739679		1409.58	0.0067047		1939.58	0.01095488		2469.57	0.01035549		2999.57	0.00755511		3529.6	-0.00587775
349.79	0.07183615		879.79	-0.00751504		1409.78	0.00729091		1939.78	0.01044412		2469.77	0.01042404		2999.77	0.00697641		3529.8	-0.0061167
349.99	0.07229552		879.99	-0.00754716		1409.98	0.00716152		1939.98	0.01060749		2469.97	0.0095741		2999.97	0.00660676		3530	-0.0066933
350.19	0.07209059		880.19	-0.00793046		1410.18	0.00694288		1940.18	0.0111845		2470.17	0.00949306		3000.17	0.00663901		3530.2	-0.00690228
350.39	0.07168941		880.39	-0.0078355		1410.38	0.00691276		1940.38	0.01090814		2470.37	0.00870562		3000.37	0.00655215		3530.4	-0.00728842
350.59	0.07169363		880.59	-0.00803611		1410.58	0.00777042		1940.58	0.01009529		2470.57	0.00822272		3000.57	0.00608159		3530.6	-0.00703837
350.79	0.07095388		880.79	-0.00791885		1410.78	0.00864976		1940.78	0.00958921		2470.77	0.00835391		3000.77	0.00603551		3530.8	-0.00713836
350.99	0.07052952		880.99	-0.00748733		1410.98	0.00881872		1940.98	0.00971614		2470.97	0.0086582		3000.97	0.0056161		3531	-0.00768829
351.19	0.07094858		881.19	-0.00732429		1411.18	0.00832933		1941.18	0.00946583		2471.17	0.00907931		3001.17	0.00622024		3531.2	-0.00782234
351.39	0.07093316		881.39	-0.00767369		1411.38	0.00867434		1941.38	0.0102577		2471.37	0.00950441		3001.37	0.00701555		3531.4	-0.00783886
351.59	0.07134693		881.59	-0.00785252		1411.58	0.00669965		1941.58	0.01028561		2471.57	0.00972407		3001.57	0.0068713		3531.6	-0.00681506
351.79	0.07295406		881.79	-0.00755415		1411.78	0.00604607		1941.78	0.00946054		2471.77	0.01037795		3001.77	0.00770302		3531.8	-0.00582696
351.99	0.07403761		881.99	-0.00749975		1411.98	0.00634917		1941.98	0.00976184		2471.97	0.01009896		3001.97	0.00667071		3532	-0.00657433
352.19	0.0743553		882.19	-0.00813166		1412.18	0.00601126		1942.18	0.00922321		2472.17	0.01038455		3002.17	0.00731551		3532.2	-0.00586983
352.39	0.07458175		882.39	-0.00960555		1412.38	0.0061275		1942.38	0.00928001		2472.37	0.01185052		3002.37	0.00671674		3532.4	-0.00629675
352.59	0.07589396		882.59	-0.01022753		1412.58	0.00620639		1942.58	0.00969543		2472.57	0.0117958		3002.57	0.00580977		3532.6	-0.00630859
352.79	0.07639185		882.79	-0.01066754		1412.78	0.00514464		1942.78	0.01064677		2472.77	0.01252469		3002.77	0.0060107		3532.8	-0.0063481
352.99	0.07623824		882.99	-0.01086977		1412.98	0.004876		1942.98	0.01043298		2472.97	0.01325794		3002.97	0.00633977		3533	-0.00691053
353.19	0.07602267		883.19	-0.01029378		1413.18	0.00524253		1943.18	0.01152448		2473.17	0.01407887		3003.17	0.00513938		3533.2	-0.00668969
353.39	0.0769357		883.39	-0.01054337		1413.38	0.00428922		1943.38	0.01159219		2473.37	0.01404708		3003.37	0.00539806		3533.4	-0.00642559
353.59	0.07790444		883.59	-0.01067179		1413.58	0.00429685		1943.58	0.01068546		2473.57	0.01351668		3003.57	0.00617339		3533.6	-0.00638069
353.79	0.0782164		883.79	-0.00960515		1413.78	0.00416253		1943.78	0.01123169		2473.77	0.01368954		3003.77	0.00662465		3533.8	-0.00653993
353.99	0.07933748		883.99	-0.00962603		1413.98	0.00352127		1943.98	0.01072423		2473.97	0.01369006		3003.97	0.00692967		3534	-0.00673011
354.19	0.07895755		884.19	-0.00858829		1414.18	0.00396166		1944.18	0.01003727		2474.17	0.01328407		3004.17	0.00783197		3534.2	-0.00682023
354.39	0.07828875		884.39	-0.00800824		1414.38	0.00464577		1944.38	0.01006538		2474.37	0.0120263		3004.37	0.00823099		3534.4	-0.00635017
354.59	0.077699		884.59	-0.0077166		1414.58	0.00551555		1944.58	0.00968574		2474.57	0.01159575		3004.57	0.0084022		3534.6	-0.00620392
354.79	0.07748872		884.79	-0.0081365		1414.78	0.00616482		1944.78	0.00928237		2474.77	0.01143829		3004.77	0.00895082		3534.8	-0.00690785
354.99	0.07754183		884.99	-0.00787634		1414.98	0.00627905		1944.98	0.01001865		2474.97	0.01102574		3004.97	0.00909234		3535	-0.0072395
355.19	0.07717837		885.19	-0.00839805		1415.18	0.00640828		1945.18	0.00973487		2475.17	0.01080031		3005.17	0.00988221		3535.2	-0.00734179
355.39	0.07631592		885.39	-0.00889365		1415.38	0.00701909		1945.38	0.0101931		2475.37	0.0103216		3005.37	0.01046826		3535.4	-0.00735427
355.59	0.0769744		885.59	-0.00944667		1415.58	0.00619226		1945.58	0.00919347		2475.57	0.01072283		3005.57	0.01076571		3535.6	-0.00723917
355.79	0.07674551		885.79	-0.00992034		1415.78	0.00795086		1945.78	0.00801145		2475.77	0.01107781		3005.77	0.01090556		3535.8	-0.00711604
355.99	0.07671545		885.99	-0.01069614		1415.98	0.00882712		1945.98	0.00701166		2475.97	0.01126102		3005.97	0.01082919		3536	-0.00701619
356.19	0.0760592		886.19	-0.01139184		1416.18	0.00860531		1946.18	0.00549155		2476.17	0.01185163		3006.17	0.01008737		3536.2	-0.00639321
356.39	0.07593913		886.39	-0.01158907		1416.38	0.00851048		1946.38	0.00471694		2476.37	0.01176065		3006.37	0.00934687		3536.4	-0.00697221
356.59	0.07550727		886.59	-0.01145924		1416.58	0.00763053		1946.58	0.0048933		2476.57	0.01151874		3006.57	0.00895276		3536.6	-0.00733774
356.79	0.0748618		886.79	-0.0117579		1416.78	0.00697811		1946.78	0.0053525		2476.77	0.0119259		3006.77	0.00883696		3536.8	-0.00694936
356.99	0.07329506		886.99	-0.01081121		1416.98	0.00668207		1946.98	0.00471592		2476.97	0.01154173		3006.97	0.00802528		3537	-0.00719095
357.19	0.0723475		887.19	-0.01083036		1417.18	0.00617507		1947.18	0.00474496		2477.17	0.01119264		3007.17	0.00699489		3537.2	-0.00737708
357.39	0.07262168		887.39	-0.01101644		1417.38	0.00585195		1947.38	0.00485576		2477.37	0.01036169		3007.37	0.00743413		3537.4	-0.00747551
357.59	0.0721322		887.59	-0.01088479		1417.58	0.00559243		1947.58	0.00485		2477.57	0.01086559		3007.57	0.00732344		3537.6	-0.00723992
357.79	0.07200245		887.79	-0.01046525		1417.78	0.00438629		1947.78	0.00484705		2477.77	0.01154386		3007.77	0.0071162		3537.8	-0.00758847
357.99	0.07195587		887.99	-0.01091316		1417.98	0.00418013		1947.98	0.00454353		2477.97	0.01105211		3007.97	0.00642307		3538	-0.0075189
358.19	0.07158617		888.19	-0.01022888		1418.18	0.00490241		1948.18	0.00545232		2478.17	0.01031532		3008.17	0.00683903		3538.2	-0.00799884
358.39	0.07136094		888.39	-0.01034595		1418.38	0.00464762		1948.38	0.00655213		2478.37	0.00996643		3008.37	0.00569786		3538.4	-0.00826468
358.59	0.07190717		888.59	-0.00968032		1418.58	0.00448662		1948.58	0.00671613		2478.57	0.01036951		3008.57	0.00543001		3538.6	-0.00892151
358.79	0.07219524		888.79	-0.01062105		1418.78	0.00462776		1948.78	0.00728584		2478.77	0.01028874		3008.77	0.00623365		3538.8	-0.0087823
358.99	0.07239679		888.99	-0.01081684		1418.98	0.00539085		1948.98	0.00816645		2478.97	0.01052957		3008.97	0.00665442		3539	-0.0084648
359.19	0.07269719		889.19	-0.01146967		1419.18	0.00627672		1949.18	0.00937361		2479.17	0.01063687		3009.17	0.00753656		3539.2	-0.00782728
359.39	0.07240509		889.39	-0.01148315		1419.38	0.00590749		1949.38	0.00962585		2479.37	0.01103201		3009.37	0.00711202		3539.4	-0.00827388
359.59	0.0740631		889.59	-0.01182956		1419.58	0.00621746		1949.58	0.00956498		2479.57	0.01102261		3009.57	0.00724378		3539.6	-0.00878192
359.79	0.07450125		889.79	-0.01185397		1419.78	0.00741796		1949.78	0.00955275		2479.77	0.01067978		3009.77	0.00711557		3539.8	-0.00911233
359.99	0.07586261		889.99	-0.01073696		1419.98	0.00727778		1949.98	0.00941716		2479.97	0.01151855		3009.97	0.0073108		3540	-0.00884199
360.19	0.07628719		890.19	-0.00994267		1420.18	0.00750913		1950.18	0.00995521		2480.17	0.01087392		3010.17	0.00599443		3540.2	-0.00896364
360.39	0.07678638		890.39	-0.00935264		1420.38	0.0077124		1950.38	0.01104024		2480.37	0.01052509		3010.37	0.0064612		3540.4	-0.00981186
360.59	0.07587289		890.59	-0.00848086		1420.58	0.00739055		1950.58	0.01150876		2480.57	0.01135737		3010.57	0.00589147		3540.6	-0.01023695
360.79	0.07542947		890.79	-0.00874995		1420.78	0.00826058		1950.78	0.01135278		2480.77	0.01163893		3010.77	0.00489047		3540.8	-0.00990364
360.99	0.07523515		890.99	-0.0081261		1420.98	0.00779381		1950.98	0.01186671		2480.97	0.01181115		3010.97	0.00448542		3541	-0.01050545
361.19	0.07529187		891.19	-0.0075429		1421.18	0.00861488		1951.18	0.01166842		2481.17	0.01176863		3011.17	0.00418817		3541.2	-0.01039494
361.39	0.0760037		891.39	-0.00733412		1421.38	0.00889253		1951.38	0.0119753		2481.37	0.01157994		3011.37	0.00398044		3541.4	-0.01051039
361.59	0.07471394		891.59	-0.00744293		1421.58	0.00888441		1951.58	0.01170652		2481.57	0.01187662		3011.57	0.00410184		3541.6	-0.01090179
361.79	0.07531021		891.79	-0.0070451		1421.78	0.00843488		1951.78	0.01129831		2481.77	0.01116681		3011.77	0.0046946		3541.8	-0.01134214
361.99	0.07558727		891.99	-0.00688867		1421.98	0.00884191		1951.98	0.0120075		2481.97	0.010376		3011.97	0.00479149		3542	-0.01139065
362.19	0.07605917		892.19	-0.00612055		1422.18	0.00899254		1952.18	0.01218507		2482.17	0.01063103		3012.17	0.00529312		3542.2	-0.01122986
362.39	0.07655962		892.39	-0.0055995		1422.38	0.00779854		1952.38	0.01118058		2482.37	0.01092256		3012.37	0.005327		3542.4	-0.01068378
362.59	0.07690083		892.59	-0.00571416		1422.58	0.00667536		1952.58	0.01055438		2482.57	0.01066066		3012.57	0.00654589		3542.6	-0.01028884
362.79	0.07704993		892.79	-0.00608456		1422.78	0.00745251		1952.78	0.01085561		2482.77	0.01101019		3012.77	0.00732648		3542.8	-0.00867642
362.99	0.07657819		892.99	-0.00621211		1422.98	0.00737206		1952.98	0.0102361		2482.97	0.01094718		3012.97	0.00765668		3543	-0.00828196
363.19	0.0761961		893.19	-0.00644964		1423.18	0.00635759		1953.18	0.00971435		2483.17	0.01118116		3013.17	0.00847525		3543.2	-0.00806203
363.39	0.07616604		893.39	-0.0067274		1423.38	0.00526811		1953.38	0.00867427		2483.37	0.01063492		3013.37	0.0076019		3543.4	-0.00792589
363.59	0.0766556		893.59	-0.00789313		1423.58	0.00566196		1953.58	0.0085402		2483.57	0.00980919		3013.57	0.00759445		3543.6	-0.00764196
363.79	0.07648464		893.79	-0.00809286		1423.78	0.00563085		1953.78	0.00845438		2483.77	0.01021876		3013.77	0.00731779		3543.8	-0.00715297
363.99	0.076079		893.99	-0.00861274		1423.98	0.00582421		1953.98	0.00879738		2483.97	0.01182555		3013.97	0.00709998		3544	-0.00623678
364.19	0.07586733		894.19	-0.00890481		1424.18	0.00685079		1954.18	0.01011554		2484.17	0.01203732		3014.17	0.00633666		3544.2	-0.00650041
364.39	0.07503348		894.39	-0.0092627		1424.38	0.00699722		1954.38	0.01033546		2484.37	0.01264483		3014.37	0.00683129		3544.4	-0.00618651
364.59	0.07416714		894.59	-0.00967871		1424.58	0.00638386		1954.58	0.01019007		2484.57	0.01349068		3014.57	0.00554596		3544.6	-0.00545721
364.79	0.07434948		894.79	-0.00960664		1424.78	0.00623871		1954.78	0.00975671		2484.77	0.01418173		3014.77	0.00485054		3544.8	-0.00470088
364.99	0.07521568		894.99	-0.00932824		1424.98	0.00619326		1954.98	0.01023477		2484.97	0.01400625		3014.97	0.00422813		3545	-0.00483175
365.19	0.07516069		895.19	-0.00884237		1425.18	0.00557705		1955.18	0.00872574		2485.17	0.01324688		3015.17	0.00405424		3545.2	-0.00521555
365.39	0.07570426		895.39	-0.00867244		1425.38	0.00507188		1955.38	0.00825441		2485.37	0.0134181		3015.37	0.00452507		3545.4	-0.00551085
365.59	0.07643127		895.59	-0.0086092		1425.58	0.00583704		1955.58	0.00886687		2485.57	0.01313532		3015.57	0.00556294		3545.6	-0.0061416
365.79	0.0778533		895.79	-0.00768214		1425.78	0.00569385		1955.78	0.00788125		2485.77	0.01231502		3015.77	0.00612814		3545.8	-0.00639909
365.99	0.07839668		895.99	-0.00705915		1425.98	0.00603141		1955.98	0.00845814		2485.97	0.01205612		3015.97	0.00644159		3546	-0.00694858
366.19	0.07932159		896.19	-0.00729568		1426.18	0.00721933		1956.18	0.00870046		2486.17	0.01258731		3016.17	0.00664596		3546.2	-0.00759788
366.39	0.0791628		896.39	-0.00716175		1426.38	0.00735084		1956.38	0.0090447		2486.37	0.01249721		3016.37	0.00656116		3546.4	-0.00799893
366.59	0.07931545		896.59	-0.00751557		1426.58	0.00766557		1956.58	0.00894438		2486.57	0.01199473		3016.57	0.00733165		3546.6	-0.00820374
366.79	0.07916799		896.79	-0.00700957		1426.78	0.00789773		1956.78	0.00878847		2486.77	0.01147798		3016.77	0.00738379		3546.8	-0.00882855
366.99	0.07885847		896.99	-0.00813965		1426.98	0.00723989		1956.98	0.00774618		2486.97	0.01056938		3016.97	0.00795776		3547	-0.00930357
367.19	0.07929718		897.19	-0.00896535		1427.18	0.00748015		1957.18	0.00740955		2487.17	0.01017005		3017.17	0.00859981		3547.2	-0.00949174
367.39	0.07894069		897.39	-0.01039643		1427.38	0.00761175		1957.38	0.00750884		2487.37	0.00922424		3017.37	0.00797972		3547.4	-0.00854172
367.59	0.07788194		897.59	-0.01088219		1427.58	0.0084199		1957.58	0.00764969		2487.57	0.00928072		3017.57	0.00805593		3547.6	-0.00828643
367.79	0.07819042		897.79	-0.01105613		1427.78	0.00885494		1957.78	0.00763582		2487.77	0.00944798		3017.77	0.00866305		3547.8	-0.00889081
367.99	0.07748721		897.99	-0.01157098		1427.98	0.00874823		1957.98	0.00759152		2487.97	0.01008255		3017.97	0.0091432		3548	-0.00916802
368.19	0.07765732		898.19	-0.01134033		1428.18	0.00886078		1958.18	0.00811282		2488.17	0.01004568		3018.17	0.00905569		3548.2	-0.00985162
368.39	0.07745522		898.39	-0.01150685		1428.38	0.00744664		1958.38	0.00859232		2488.37	0.01010981		3018.37	0.00950718		3548.4	-0.00863423
368.59	0.07730684		898.59	-0.01118665		1428.58	0.00618212		1958.58	0.00834872		2488.57	0.00995363		3018.57	0.00909546		3548.6	-0.00889063
368.79	0.07785816		898.79	-0.00981688		1428.78	0.00488313		1958.78	0.00780786		2488.77	0.01008029		3018.77	0.00837357		3548.8	-0.00880554
368.99	0.07770003		898.99	-0.00963045		1428.98	0.00378553		1958.98	0.00749769		2488.97	0.00975467		3018.97	0.0081672		3549	-0.00871419
369.19	0.07821324		899.19	-0.0088039		1429.18	0.00325187		1959.18	0.00683676		2489.17	0.01027773		3019.17	0.00876758		3549.2	-0.00783308
369.39	0.0780551		899.39	-0.00822533		1429.38	0.00388023		1959.38	0.00725992		2489.37	0.01066367		3019.37	0.00953244		3549.4	-0.00702033
369.59	0.07850734		899.59	-0.0086432		1429.58	0.0044576		1959.58	0.00828021		2489.57	0.01018782		3019.57	0.00933094		3549.6	-0.00646424
369.79	0.07760242		899.79	-0.00800151		1429.78	0.00433272		1959.78	0.00766018		2489.77	0.00958141		3019.77	0.00916373		3549.8	-0.00658455
369.99	0.07804763		899.99	-0.00832758		1429.98	0.00519941		1959.98	0.00931155		2489.97	0.00991057		3019.97	0.00897746		3550	-0.00647932
370.19	0.07831934		900.19	-0.00872925		1430.18	0.00575655		1960.18	0.01021893		2490.17	0.0098769		3020.17	0.00813936		3550.2	-0.00619019
370.39	0.07774986		900.39	-0.00826304		1430.38	0.00568555		1960.38	0.01010804		2490.37	0.00982402		3020.37	0.00818969		3550.4	-0.00581245
370.59	0.0786154		900.59	-0.0087931		1430.58	0.00597508		1960.58	0.00969813		2490.57	0.00958701		3020.57	0.0092224		3550.6	-0.00624806
370.79	0.0787504		900.79	-0.00895581		1430.78	0.00597708		1960.78	0.0101278		2490.77	0.00948615		3020.77	0.009399		3550.8	-0.0070341
370.99	0.07907717		900.99	-0.00946194		1430.98	0.00614669		1960.98	0.01003458		2490.97	0.00991437		3020.97	0.00970938		3551	-0.00631618
371.19	0.07968106		901.19	-0.01035738		1431.18	0.00680196		1961.18	0.01050948		2491.17	0.01008373		3021.17	0.00976571		3551.2	-0.00621475
371.39	0.07928052		901.39	-0.01098521		1431.38	0.00699304		1961.38	0.0104925		2491.37	0.01121869		3021.37	0.00962291		3551.4	-0.00536971
371.59	0.07929881		901.59	-0.01160126		1431.58	0.00791726		1961.58	0.01105279		2491.57	0.01125848		3021.57	0.00922929		3551.6	-0.00599857
371.79	0.07985449		901.79	-0.0115132		1431.78	0.00762551		1961.78	0.01121713		2491.77	0.01163328		3021.77	0.00979162		3551.8	-0.00709229
371.99	0.07908894		901.99	-0.01197835		1431.98	0.00679086		1961.98	0.01122179		2491.97	0.0115159		3021.97	0.00987245		3552	-0.00699505
372.19	0.07818255		902.19	-0.0123135		1432.18	0.00570946		1962.18	0.01208135		2492.17	0.01138249		3022.17	0.00988753		3552.2	-0.00679041
372.39	0.07796162		902.39	-0.01210676		1432.38	0.00522964		1962.38	0.0122107		2492.37	0.01089323		3022.37	0.01005291		3552.4	-0.00578057
372.59	0.07704813		902.59	-0.01211691		1432.58	0.00490661		1962.58	0.01142323		2492.57	0.01056561		3022.57	0.00981755		3552.6	-0.0071016
372.79	0.0773654		902.79	-0.0114801		1432.78	0.00433315		1962.78	0.011779		2492.77	0.01114131		3022.77	0.00926231		3552.8	-0.00678637
372.99	0.07664494		902.99	-0.01264836		1432.98	0.00464385		1962.98	0.01125831		2492.97	0.01052615		3022.97	0.00871304		3553	-0.00702467
373.19	0.07742135		903.19	-0.01267588		1433.18	0.00521275		1963.18	0.01057119		2493.17	0.01057869		3023.17	0.00804777		3553.2	-0.00670141
373.39	0.07706974		903.39	-0.0133626		1433.38	0.00528024		1963.38	0.01032384		2493.37	0.01020305		3023.37	0.0085783		3553.4	-0.00622928
373.59	0.07709999		903.59	-0.01305783		1433.58	0.00539041		1963.58	0.00921731		2493.57	0.00921137		3023.57	0.00785251		3553.6	-0.00662855
373.79	0.07743862		903.79	-0.01183175		1433.78	0.00607654		1963.78	0.00869401		2493.77	0.00933328		3023.77	0.00724698		3553.8	-0.00696073
373.99	0.07820699		903.99	-0.01161781		1433.98	0.0067506		1963.98	0.00861477		2493.97	0.00988386		3023.97	0.00696255		3554	-0.00602999
374.19	0.07866842		904.19	-0.0111645		1434.18	0.0062955		1964.18	0.007916		2494.17	0.01049705		3024.17	0.00685364		3554.2	-0.00501023
374.39	0.07844439		904.39	-0.01032203		1434.38	0.00683238		1964.38	0.00711146		2494.37	0.01155592		3024.37	0.00664529		3554.4	-0.00515216
374.59	0.07893154		904.59	-0.01011499		1434.58	0.00686719		1964.58	0.00718237		2494.57	0.0119909		3024.57	0.00707983		3554.6	-0.00598856
374.79	0.07906593		904.79	-0.00941963		1434.78	0.00672286		1964.78	0.0057001		2494.77	0.01239328		3024.77	0.00717838		3554.8	-0.00599798
374.99	0.08000087		904.99	-0.00938107		1434.98	0.0065981		1964.98	0.00537123		2494.97	0.01302679		3024.97	0.00739775		3555	-0.00502037
375.19	0.08056826		905.19	-0.00990852		1435.18	0.00784149		1965.18	0.00617831		2495.17	0.01356157		3025.17	0.00744627		3555.2	-0.00595028
375.39	0.08041959		905.39	-0.0094568		1435.38	0.00789355		1965.38	0.00596212		2495.37	0.014712		3025.37	0.00741141		3555.4	-0.00594034
375.59	0.08052868		905.59	-0.00969632		1435.58	0.0080721		1965.58	0.00688377		2495.57	0.01364656		3025.57	0.0074886		3555.6	-0.00645782
375.79	0.08067336		905.79	-0.00911668		1435.78	0.00785451		1965.78	0.00643221		2495.77	0.01368242		3025.77	0.00804717		3555.8	-0.00659407
375.99	0.07951004		905.99	-0.00947152		1435.98	0.00764221		1965.98	0.00650156		2495.97	0.01297732		3025.97	0.0085083		3556	-0.00626952
376.19	0.07912255		906.19	-0.00941385		1436.18	0.00703114		1966.18	0.00637173		2496.17	0.01296018		3026.17	0.00803754		3556.2	-0.00642007
376.39	0.07964483		906.39	-0.00951137		1436.38	0.00690743		1966.38	0.00684297		2496.37	0.01238175		3026.37	0.00850222		3556.4	-0.00728403
376.59	0.07999066		906.59	-0.01052366		1436.58	0.00705377		1966.58	0.00690749		2496.57	0.01180596		3026.57	0.00877389		3556.6	-0.00909753
376.79	0.08048266		906.79	-0.01025777		1436.78	0.00641815		1966.78	0.00868966		2496.77	0.01139564		3026.77	0.00789743		3556.8	-0.00926916
376.99	0.08054062		906.99	-0.01095824		1436.98	0.00611445		1966.98	0.00855939		2496.97	0.01068198		3026.97	0.00790779		3557	-0.01023096
377.19	0.08113373		907.19	-0.01102317		1437.18	0.00560771		1967.18	0.00791587		2497.17	0.010376		3027.17	0.00879521		3557.2	-0.01015211
377.39	0.08098897		907.39	-0.01099161		1437.38	0.00549265		1967.38	0.00890852		2497.37	0.0098483		3027.37	0.0095942		3557.4	-0.00944796
377.59	0.08101485		907.59	-0.01078956		1437.58	0.00557689		1967.58	0.00914752		2497.57	0.01011751		3027.57	0.00966795		3557.6	-0.00942057
377.79	0.08177759		907.79	-0.01126923		1437.78	0.00556629		1967.78	0.01002678		2497.77	0.0111449		3027.77	0.00938232		3557.8	-0.00893169
377.99	0.08168284		907.99	-0.01178095		1437.98	0.00486242		1967.98	0.01022739		2497.97	0.01167337		3027.97	0.00933588		3558	-0.00841084
378.19	0.08148059		908.19	-0.01173885		1438.18	0.00432098		1968.18	0.01038126		2498.17	0.01235038		3028.17	0.00939176		3558.2	-0.00812637
378.39	0.08092679		908.39	-0.01118466		1438.38	0.00439757		1968.38	0.01068801		2498.37	0.01240958		3028.37	0.00898521		3558.4	-0.00861355
378.59	0.08086142		908.59	-0.01101121		1438.58	0.00467666		1968.58	0.01061538		2498.57	0.01213607		3028.57	0.00942001		3558.6	-0.00907683
378.79	0.08095062		908.79	-0.01060516		1438.78	0.00547232		1968.78	0.009721		2498.77	0.01195762		3028.77	0.00973721		3558.8	-0.00881578
378.99	0.08103058		908.99	-0.00993775		1438.98	0.00632404		1968.98	0.01028392		2498.97	0.01214364		3028.97	0.00994764		3559	-0.00869676
379.19	0.08059271		909.19	-0.00886223		1439.18	0.00755825		1969.18	0.01014863		2499.17	0.01193769		3029.17	0.01000049		3559.2	-0.00954205
379.39	0.08004389		909.39	-0.00787998		1439.38	0.00766532		1969.38	0.00925135		2499.37	0.01203146		3029.37	0.01002265		3559.4	-0.00905978
379.59	0.07974073		909.59	-0.00713023		1439.58	0.00871829		1969.58	0.00932691		2499.57	0.01157671		3029.57	0.00997092		3559.6	-0.00890441
379.79	0.07917323		909.79	-0.00606335		1439.78	0.00947014		1969.78	0.00825919		2499.77	0.01166762		3029.77	0.00982116		3559.8	-0.00901397
379.99	0.07917323		909.99	-0.00606335		1439.98	0.00947014		1969.98	0.00825919		2499.97	0.01166762		3029.97	0.00982116		3560	-0.00901397
380.19	0.07884919		910.19	-0.00579694		1440.18	0.00877594		1970.18	0.00800905		2500.17	0.01214535		3030.17	0.00863081		3560.2	-0.00856999
380.39	0.07930252		910.39	-0.00521348		1440.38	0.00808434		1970.38	0.00783756		2500.37	0.01253088		3030.37	0.00755652		3560.4	-0.00804821
380.59	0.07892654		910.59	-0.00412058		1440.58	0.00761161		1970.58	0.00762932		2500.57	0.01325211		3030.57	0.00672347		3560.6	-0.00770816
380.79	0.07845055		910.79	-0.00369398		1440.78	0.00738819		1970.78	0.00710517		2500.77	0.01315154		3030.77	0.00605783		3560.8	-0.0073576
380.99	0.07805541		910.99	-0.00335398		1440.98	0.00587554		1970.98	0.00688942		2500.97	0.01312059		3030.97	0.0049649		3561	-0.00661142
381.19	0.07777213		911.19	-0.00334577		1441.18	0.00549189		1971.18	0.00667525		2501.17	0.01268451		3031.17	0.00485253		3561.2	-0.00598482
381.39	0.07771705		911.39	-0.00295787		1441.38	0.00545195		1971.38	0.00632317		2501.37	0.01183816		3031.37	0.004555		3561.4	-0.00588016
381.59	0.07808664		911.59	-0.00262508		1441.58	0.0059302		1971.58	0.00578661		2501.57	0.01167119		3031.57	0.00428559		3561.6	-0.0059371
381.79	0.07756005		911.79	-0.00270364		1441.78	0.00618961		1971.78	0.00525361		2501.77	0.01213552		3031.77	0.00475354		3561.8	-0.00669406
381.99	0.07774679		911.99	-0.00350864		1441.98	0.00687937		1971.98	0.00472404		2501.97	0.01258155		3031.97	0.00512556		3562	-0.0070304
382.19	0.07784067		912.19	-0.00379401		1442.18	0.00738711		1972.18	0.00466542		2502.17	0.01230937		3032.17	0.00549851		3562.2	-0.00749105
382.39	0.07718076		912.39	-0.00314817		1442.38	0.00749441		1972.38	0.0045076		2502.37	0.01211877		3032.37	0.00640289		3562.4	-0.00695356
382.59	0.07774005		912.59	-0.00298477		1442.58	0.00847097		1972.58	0.00480096		2502.57	0.01267891		3032.57	0.00684623		3562.6	-0.00721239
382.79	0.07864553		912.79	-0.00350604		1442.78	0.00901763		1972.78	0.00479908		2502.77	0.01222465		3032.77	0.00701822		3562.8	-0.00683062
382.99	0.07894135		912.99	-0.00342351		1442.98	0.00961762		1972.98	0.00559955		2502.97	0.01247369		3032.97	0.00702543		3563	-0.00749495
383.19	0.07964791		913.19	-0.00383438		1443.18	0.01037338		1973.18	0.00610498		2503.17	0.01123941		3033.17	0.00685098		3563.2	-0.00803396
383.39	0.07899323		913.39	-0.00373223		1443.38	0.01072754		1973.38	0.00651503		2503.37	0.01161011		3033.37	0.0069061		3563.4	-0.00839546
383.59	0.07813154		913.59	-0.00437814		1443.58	0.00981912		1973.58	0.00788436		2503.57	0.01187454		3033.57	0.00725828		3563.6	-0.00861477
383.79	0.0780005		913.79	-0.00455621		1443.78	0.00954497		1973.78	0.00827028		2503.77	0.01208354		3033.77	0.00800336		3563.8	-0.00843324
383.99	0.07834724		913.99	-0.00492077		1443.98	0.00901698		1973.98	0.0078856		2503.97	0.0124207		3033.97	0.00928689		3564	-0.00800515
384.19	0.0788336		914.19	-0.0043569		1444.18	0.00863693		1974.18	0.00803429		2504.17	0.01228315		3034.17	0.00938277		3564.2	-0.00811236
384.39	0.07925069		914.39	-0.00309788		1444.38	0.00883505		1974.38	0.00833644		2504.37	0.01200359		3034.37	0.00982226		3564.4	-0.00768822
384.59	0.0789875		914.59	-0.00233338		1444.58	0.00860477		1974.58	0.00925418		2504.57	0.0117835		3034.57	0.01023467		3564.6	-0.00710244
384.79	0.0792792		914.79	-0.00284377		1444.78	0.00799839		1974.78	0.00963692		2504.77	0.01115974		3034.77	0.01006332		3564.8	-0.00702917
384.99	0.08012768		914.99	-0.00248369		1444.98	0.00665472		1974.98	0.01035628		2504.97	0.01054026		3034.97	0.01035471		3565	-0.00677063
385.19	0.08099397		915.19	-0.00229932		1445.18	0.00725131		1975.18	0.01119839		2505.17	0.01018073		3035.17	0.00997324		3565.2	-0.00685555
385.39	0.08181102		915.39	-0.00183343		1445.38	0.00745606		1975.38	0.01129179		2505.37	0.01005967		3035.37	0.00886539		3565.4	-0.00702342
385.59	0.0817109		915.59	-0.0018232		1445.58	0.00759197		1975.58	0.01149859		2505.57	0.01127139		3035.57	0.00838175		3565.6	-0.00682703
385.79	0.0813023		915.79	-0.00266326		1445.78	0.00732297		1975.78	0.01139955		2505.77	0.01238795		3035.77	0.00811261		3565.8	-0.00719373
385.99	0.08137675		915.99	-0.00310261		1445.98	0.00747866		1975.98	0.01194172		2505.97	0.01330808		3035.97	0.00722223		3566	-0.00711161
386.19	0.0807678		916.19	-0.00327107		1446.18	0.00751604		1976.18	0.01252009		2506.17	0.01382628		3036.17	0.00683663		3566.2	-0.00712935
386.39	0.07966197		916.39	-0.00348574		1446.38	0.00750585		1976.38	0.01226219		2506.37	0.01388966		3036.37	0.00672318		3566.4	-0.00666993
386.59	0.08011465		916.59	-0.00443245		1446.58	0.00799932		1976.58	0.01253164		2506.57	0.01353226		3036.57	0.00593911		3566.6	-0.007089
386.79	0.08071617		916.79	-0.00524134		1446.78	0.00907328		1976.78	0.01203696		2506.77	0.01303824		3036.77	0.00544632		3566.8	-0.00758215
386.99	0.08061683		916.99	-0.00565948		1446.98	0.00874572		1976.98	0.012599		2506.97	0.01356114		3036.97	0.00594014		3567	-0.00879474
387.19	0.07950983		917.19	-0.00541316		1447.18	0.00846751		1977.18	0.01225747		2507.17	0.01342517		3037.17	0.00543163		3567.2	-0.00916399
387.39	0.07867786		917.39	-0.00518693		1447.38	0.00910155		1977.38	0.01185124		2507.37	0.0144772		3037.37	0.00582252		3567.4	-0.00883096
387.59	0.07821547		917.59	-0.00600119		1447.58	0.00917427		1977.58	0.01091306		2507.57	0.01504381		3037.57	0.00630082		3567.6	-0.00868603
387.79	0.07798935		917.79	-0.00635108		1447.78	0.00898271		1977.78	0.01054498		2507.77	0.01485656		3037.77	0.00679181		3567.8	-0.00851035
387.99	0.07753205		917.99	-0.00624309		1447.98	0.00919401		1977.98	0.0100849		2507.97	0.01425198		3037.97	0.00830094		3568	-0.00793409
388.19	0.07792243		918.19	-0.00554127		1448.18	0.00906531		1978.18	0.01093868		2508.17	0.01351433		3038.17	0.00920213		3568.2	-0.00743205
388.39	0.07880714		918.39	-0.00536268		1448.38	0.00939345		1978.38	0.01160311		2508.37	0.01368045		3038.37	0.01009185		3568.4	-0.00716351
388.59	0.07883667		918.59	-0.00574641		1448.58	0.00843671		1978.58	0.01268335		2508.57	0.0132027		3038.57	0.01113759		3568.6	-0.00718406
388.79	0.07957861		918.79	-0.00578476		1448.78	0.00785084		1978.78	0.01258051		2508.77	0.01352528		3038.77	0.0115805		3568.8	-0.00734598
388.99	0.08000047		918.99	-0.00485083		1448.98	0.00739511		1978.98	0.01267403		2508.97	0.01313758		3038.97	0.01234957		3569	-0.00724389
389.19	0.07986797		919.19	-0.00478518		1449.18	0.00742277		1979.18	0.01278537		2509.17	0.01342085		3039.17	0.01270838		3569.2	-0.00665751
389.39	0.07965323		919.39	-0.00461097		1449.38	0.00687686		1979.38	0.01183875		2509.37	0.01352861		3039.37	0.01333915		3569.4	-0.00660838
389.59	0.07964832		919.59	-0.00433498		1449.58	0.00676967		1979.58	0.01214485		2509.57	0.01310298		3039.57	0.01429121		3569.6	-0.00691939
389.79	0.07940294		919.79	-0.00450876		1449.78	0.00732474		1979.78	0.01217885		2509.77	0.01314134		3039.77	0.01400739		3569.8	-0.00638644
389.99	0.07919269		919.99	-0.00398912		1449.98	0.00809858		1979.98	0.01198523		2509.97	0.0132244		3039.97	0.01409013		3570	-0.00674802
390.19	0.07933017		920.19	-0.00431426		1450.18	0.00825971		1980.18	0.0110333		2510.17	0.01260747		3040.17	0.01398538		3570.2	-0.00656663
390.39	0.08029682		920.39	-0.00378032		1450.38	0.00885253		1980.38	0.01008039		2510.37	0.01109006		3040.37	0.01341304		3570.4	-0.00659925
390.59	0.08158236		920.59	-0.00374866		1450.58	0.00893645		1980.58	0.01001252		2510.57	0.01082003		3040.57	0.01311194		3570.6	-0.00642329
390.79	0.08200383		920.79	-0.00282823		1450.78	0.00996486		1980.78	0.00978798		2510.77	0.0113946		3040.77	0.01180336		3570.8	-0.0066638
390.99	0.08147746		920.99	-0.00187243		1450.98	0.0089365		1980.98	0.00968868		2510.97	0.01155787		3040.97	0.01093167		3571	-0.00722222
391.19	0.0809758		921.19	-0.00108871		1451.18	0.00900449		1981.18	0.01008087		2511.17	0.01227747		3041.17	0.00964812		3571.2	-0.00694811
391.39	0.08088449		921.39	-0.00077774		1451.38	0.00910126		1981.38	0.01021062		2511.37	0.01333106		3041.37	0.0088025		3571.4	-0.00768093
391.59	0.08059294		921.59	-0.00067688		1451.58	0.00927578		1981.58	0.01021233		2511.57	0.01354916		3041.57	0.00848949		3571.6	-0.00838171
391.79	0.08075356		921.79	-0.00059788		1451.78	0.00904342		1981.78	0.01235161		2511.77	0.0135744		3041.77	0.0084183		3571.8	-0.00752568
391.99	0.08097601		921.99	-0.00082867		1451.98	0.00802021		1981.98	0.01377172		2511.97	0.01344494		3041.97	0.00824699		3572	-0.00791232
392.19	0.082441		922.19	-0.00154004		1452.18	0.00676773		1982.18	0.01505109		2512.17	0.01347746		3042.17	0.00764039		3572.2	-0.00728983
392.39	0.08208366		922.39	-0.00168533		1452.38	0.00616949		1982.38	0.01581151		2512.37	0.01427488		3042.37	0.00711133		3572.4	-0.0075874
392.59	0.08150777		922.59	-0.00222535		1452.58	0.00432151		1982.58	0.01701797		2512.57	0.01401509		3042.57	0.00691588		3572.6	-0.00797085
392.79	0.0820064		922.79	-0.00293176		1452.78	0.00425812		1982.78	0.01742943		2512.77	0.01387649		3042.77	0.00614146		3572.8	-0.00840518
392.99	0.08122878		922.99	-0.00357625		1452.98	0.00408961		1982.98	0.01707728		2512.97	0.01309467		3042.97	0.00668897		3573	-0.00883721
393.19	0.08130488		923.19	-0.0046823		1453.18	0.00434545		1983.18	0.01712463		2513.17	0.01281774		3043.17	0.00688614		3573.2	-0.00887937
393.39	0.08115818		923.39	-0.00575711		1453.38	0.00370352		1983.38	0.01661548		2513.37	0.01160928		3043.37	0.00729289		3573.4	-0.00882899
393.59	0.08123831		923.59	-0.00685602		1453.58	0.00392912		1983.58	0.0170092		2513.57	0.01065101		3043.57	0.00733095		3573.6	-0.00843207
393.79	0.08059709		923.79	-0.00736222		1453.78	0.00450255		1983.78	0.01610812		2513.77	0.01026747		3043.77	0.0070258		3573.8	-0.00713423
393.99	0.07951167		923.99	-0.00706403		1453.98	0.00546959		1983.98	0.01536179		2513.97	0.00991681		3043.97	0.00686357		3574	-0.00778933
394.19	0.07921341		924.19	-0.00714479		1454.18	0.00610326		1984.18	0.01410723		2514.17	0.00931965		3044.17	0.0068473		3574.2	-0.00689866
394.39	0.07948724		924.39	-0.00724966		1454.38	0.00723383		1984.38	0.01371991		2514.37	0.0089005		3044.37	0.00658278		3574.4	-0.00705081
394.59	0.07937058		924.59	-0.00660548		1454.58	0.00718945		1984.58	0.01349437		2514.57	0.00909236		3044.57	0.0063996		3574.6	-0.00638401
394.79	0.07849675		924.79	-0.00624409		1454.78	0.00781058		1984.78	0.01370476		2514.77	0.00864316		3044.77	0.00618175		3574.8	-0.00662747
394.99	0.07817984		924.99	-0.0058623		1454.98	0.00737274		1984.98	0.0136821		2514.97	0.00880377		3044.97	0.00713882		3575	-0.00684283
395.19	0.07864255		925.19	-0.00572582		1455.18	0.00727856		1985.18	0.01350602		2515.17	0.00976228		3045.17	0.00710789		3575.2	-0.00742071
395.39	0.07831908		925.39	-0.00526238		1455.38	0.00809636		1985.38	0.01353477		2515.37	0.00979103		3045.37	0.00742031		3575.4	-0.00794725
395.59	0.07830719		925.59	-0.00597336		1455.58	0.00882677		1985.58	0.01409319		2515.57	0.00943522		3045.57	0.00757903		3575.6	-0.00784272
395.79	0.07789617		925.79	-0.00622279		1455.78	0.00866923		1985.78	0.01541954		2515.77	0.00941234		3045.77	0.00779249		3575.8	-0.00658728
395.99	0.07810217		925.99	-0.00548277		1455.98	0.00738772		1985.98	0.016959		2515.97	0.00994582		3045.97	0.00706063		3576	-0.00722888
396.19	0.07783882		926.19	-0.00451838		1456.18	0.00665939		1986.18	0.01727667		2516.17	0.01022696		3046.17	0.00663603		3576.2	-0.0071908
396.39	0.07753138		926.39	-0.00316075		1456.38	0.006187		1986.38	0.01751026		2516.37	0.01037887		3046.37	0.00700315		3576.4	-0.00802807
396.59	0.07828883		926.59	-0.00398753		1456.58	0.00541405		1986.58	0.01900682		2516.57	0.0104612		3046.57	0.00676521		3576.6	-0.00905866
396.79	0.07879686		926.79	-0.00415483		1456.78	0.00580561		1986.78	0.01946197		2516.77	0.01041099		3046.77	0.0067263		3576.8	-0.00907019
396.99	0.07909602		926.99	-0.00370585		1456.98	0.00547131		1986.98	0.01910183		2516.97	0.01077897		3046.97	0.00752699		3577	-0.00878046
397.19	0.07948086		927.19	-0.00356484		1457.18	0.0051941		1987.18	0.01915455		2517.17	0.01075359		3047.17	0.007639		3577.2	-0.00841045
397.39	0.07926867		927.39	-0.00404097		1457.38	0.00451509		1987.38	0.01807653		2517.37	0.01013107		3047.37	0.00866051		3577.4	-0.0079894
397.59	0.07923286		927.59	-0.00399503		1457.58	0.00490675		1987.58	0.01867272		2517.57	0.01076723		3047.57	0.0088809		3577.6	-0.00810905
397.79	0.07803986		927.79	-0.00291654		1457.78	0.00615641		1987.78	0.01809284		2517.77	0.01037998		3047.77	0.00920265		3577.8	-0.00817885
397.99	0.07707549		927.99	-0.00292499		1457.98	0.00666033		1987.98	0.01759321		2517.97	0.01056767		3047.97	0.00960236		3578	-0.00800936
398.19	0.07744243		928.19	-0.00338362		1458.18	0.00581516		1988.18	0.01611689		2518.17	0.01030206		3048.17	0.00981611		3578.2	-0.00681239
398.39	0.07728592		928.39	-0.00431533		1458.38	0.0050143		1988.38	0.01559098		2518.37	0.0099688		3048.37	0.00998186		3578.4	-0.00706081
398.59	0.07734572		928.59	-0.00438897		1458.58	0.0049484		1988.58	0.01375357		2518.57	0.01000694		3048.57	0.01035228		3578.6	-0.00679037
398.79	0.07733584		928.79	-0.00474999		1458.78	0.00471841		1988.78	0.01303454		2518.77	0.00933006		3048.77	0.01126262		3578.8	-0.00729059
398.99	0.0774175		928.99	-0.00514922		1458.98	0.00475364		1988.98	0.01163605		2518.97	0.00857765		3048.97	0.01056445		3579	-0.00713682
399.19	0.07713312		929.19	-0.00594378		1459.18	0.00503624		1989.18	0.01032411		2519.17	0.00800525		3049.17	0.00946724		3579.2	-0.00783634
399.39	0.07640475		929.39	-0.00570045		1459.38	0.00531857		1989.38	0.01101051		2519.37	0.00703231		3049.37	0.00962011		3579.4	-0.00748155
399.59	0.07672336		929.59	-0.00588658		1459.58	0.00455095		1989.58	0.01245295		2519.57	0.00679934		3049.57	0.00851324		3579.6	-0.00762858
399.79	0.0772005		929.79	-0.00514737		1459.78	0.00499127		1989.78	0.01457145		2519.77	0.00728168		3049.77	0.00771673		3579.8	-0.00780016
399.99	0.07813791		929.99	-0.00397601		1459.98	0.00392538		1989.98	0.01646832		2519.97	0.00807392		3049.97	0.00575549		3580	-0.00849285
400.19	0.0783544		930.19	-0.00394675		1460.18	0.00436999		1990.18	0.0172842		2520.17	0.00766836		3050.17	0.00466345		3580.2	-0.00942987
400.39	0.07886697		930.39	-0.00378021		1460.38	0.00478058		1990.38	0.01861334		2520.37	0.00806159		3050.37	0.00424255		3580.4	-0.01004495
400.59	0.07907214		930.59	-0.00419262		1460.58	0.00456476		1990.58	0.0202359		2520.57	0.00937103		3050.57	0.00318487		3580.6	-0.01078793
400.79	0.07993166		930.79	-0.00327676		1460.78	0.00498999		1990.78	0.02119139		2520.77	0.00957719		3050.77	0.00289397		3580.8	-0.01072755
400.99	0.0802508		930.99	-0.00231698		1460.98	0.00547954		1990.98	0.02124774		2520.97	0.00970723		3050.97	0.00305615		3581	-0.01108135
401.19	0.08007882		931.19	-0.00220667		1461.18	0.00591224		1991.18	0.02152091		2521.17	0.00925742		3051.17	0.00315237		3581.2	-0.01102563
401.39	0.07946495		931.39	-0.00233589		1461.38	0.00595642		1991.38	0.02163051		2521.37	0.00949635		3051.37	0.00321922		3581.4	-0.01077225
401.59	0.07916905		931.59	-0.00240349		1461.58	0.00622163		1991.58	0.02260559		2521.57	0.01000814		3051.57	0.00342693		3581.6	-0.01034971
401.79	0.07833476		931.79	-0.00263662		1461.78	0.00660764		1991.78	0.0222135		2521.77	0.00984526		3051.77	0.00374726		3581.8	-0.00955374
401.99	0.07750795		931.99	-0.00354024		1461.98	0.00557079		1991.98	0.02147952		2521.97	0.01050478		3051.97	0.00399971		3582	-0.00796454
402.19	0.07675899		932.19	-0.00455826		1462.18	0.00446579		1992.18	0.01997473		2522.17	0.0104091		3052.17	0.00360194		3582.2	-0.00687212
402.39	0.07584981		932.39	-0.00528312		1462.38	0.00410079		1992.38	0.0178402		2522.37	0.00981002		3052.37	0.00458831		3582.4	-0.00687229
402.59	0.07605377		932.59	-0.00491109		1462.58	0.00428402		1992.58	0.01525104		2522.57	0.00975531		3052.57	0.00546035		3582.6	-0.00660862
402.79	0.07656951		932.79	-0.00489097		1462.78	0.00405496		1992.78	0.01410909		2522.77	0.00894834		3052.77	0.00702916		3582.8	-0.00665224
402.99	0.07602002		932.99	-0.00523423		1462.98	0.0032499		1992.98	0.01249968		2522.97	0.00875456		3052.97	0.00750936		3583	-0.00629254
403.19	0.07614853		933.19	-0.00530261		1463.18	0.0032988		1993.18	0.01190996		2523.17	0.00903157		3053.17	0.00844528		3583.2	-0.00633228
403.39	0.07653544		933.39	-0.00439659		1463.38	0.00261154		1993.38	0.01286448		2523.37	0.00929833		3053.37	0.00908391		3583.4	-0.00536097
403.59	0.077608		933.59	-0.00452251		1463.58	0.00244686		1993.58	0.01408732		2523.57	0.00995154		3053.57	0.00838705		3583.6	-0.00497734
403.79	0.07784677		933.79	-0.00504255		1463.78	0.00322337		1993.78	0.01408794		2523.77	0.01031356		3053.77	0.00825988		3583.8	-0.00603243
403.99	0.07798359		933.99	-0.0039809		1463.98	0.0042517		1993.98	0.01376515		2523.97	0.01101261		3053.97	0.00781962		3584	-0.00634262
404.19	0.07821404		934.19	-0.00435765		1464.18	0.00493319		1994.18	0.01517028		2524.17	0.01056782		3054.17	0.00756844		3584.2	-0.00717828
404.39	0.07834065		934.39	-0.0043243		1464.38	0.00472593		1994.38	0.0163835		2524.37	0.0114993		3054.37	0.00778674		3584.4	-0.00882063
404.59	0.07893479		934.59	-0.00393521		1464.58	0.00443573		1994.58	0.01755989		2524.57	0.01264964		3054.57	0.00730632		3584.6	-0.00982342
404.79	0.07960734		934.79	-0.00377444		1464.78	0.0052093		1994.78	0.01781462		2524.77	0.01272895		3054.77	0.0069594		3584.8	-0.0097389
404.99	0.08004375		934.99	-0.00358647		1464.98	0.0052757		1994.98	0.01803024		2524.97	0.01280772		3054.97	0.00689199		3585	-0.01017275
405.19	0.07967825		935.19	-0.00414143		1465.18	0.00500423		1995.18	0.01863653		2525.17	0.01278808		3055.17	0.00645947		3585.2	-0.01023103
405.39	0.07992186		935.39	-0.00397438		1465.38	0.0054293		1995.38	0.01937559		2525.37	0.01277564		3055.37	0.00568807		3585.4	-0.0100079
405.59	0.07912377		935.59	-0.00449179		1465.58	0.00582815		1995.58	0.02011133		2525.57	0.01240934		3055.57	0.00468411		3585.6	-0.01050927
405.79	0.0776537		935.79	-0.00396361		1465.78	0.00581696		1995.78	0.02026891		2525.77	0.01312683		3055.77	0.00451976		3585.8	-0.00978197
405.99	0.07676844		935.99	-0.00416899		1465.98	0.00532864		1995.98	0.01909408		2525.97	0.01287348		3055.97	0.00371089		3586	-0.00878113
406.19	0.07678596		936.19	-0.00478483		1466.18	0.0052988		1996.18	0.01715329		2526.17	0.01178045		3056.17	0.00405554		3586.2	-0.00845129
406.39	0.07669324		936.39	-0.00403282		1466.38	0.00531893		1996.38	0.01621419		2526.37	0.01096505		3056.37	0.00507559		3586.4	-0.00850426
406.59	0.07743325		936.59	-0.00357328		1466.58	0.00531804		1996.58	0.01519684		2526.57	0.01061169		3056.57	0.00539271		3586.6	-0.00901961
406.79	0.07732248		936.79	-0.0037493		1466.78	0.00573808		1996.78	0.01535805		2526.77	0.00986167		3056.77	0.00646203		3586.8	-0.00929015
406.99	0.07663906		936.99	-0.00331973		1466.98	0.00522779		1996.98	0.01519232		2526.97	0.00912662		3056.97	0.00646593		3587	-0.00865892
407.19	0.07609691		937.19	-0.00276791		1467.18	0.00563475		1997.18	0.01535582		2527.17	0.00794711		3057.17	0.00573418		3587.2	-0.00753513
407.39	0.07507459		937.39	-0.00269349		1467.38	0.00591369		1997.38	0.01571605		2527.37	0.00768098		3057.37	0.00610625		3587.4	-0.00748741
407.59	0.07535674		937.59	-0.00290502		1467.58	0.0057302		1997.58	0.01631316		2527.57	0.00759775		3057.57	0.00602228		3587.6	-0.00788613
407.79	0.07481565		937.79	-0.00308943		1467.78	0.00606713		1997.78	0.01609153		2527.77	0.00781316		3057.77	0.00618712		3587.8	-0.00835231
407.99	0.07532824		937.99	-0.00275284		1467.98	0.00643724		1997.98	0.01681476		2527.97	0.00752249		3057.97	0.00636889		3588	-0.00848353
408.19	0.07592666		938.19	-0.00432509		1468.18	0.0044954		1998.18	0.01843739		2528.17	0.00736562		3058.17	0.00613463		3588.2	-0.00893359
408.39	0.07588205		938.39	-0.00431342		1468.38	0.0040814		1998.38	0.01868936		2528.37	0.00815285		3058.37	0.00701354		3588.4	-0.00923661
408.59	0.07575489		938.59	-0.00432617		1468.58	0.00361633		1998.58	0.01931864		2528.57	0.00834171		3058.57	0.00692799		3588.6	-0.00873478
408.79	0.07560578		938.79	-0.00444985		1468.78	0.00314998		1998.78	0.0187889		2528.77	0.00768183		3058.77	0.00715453		3588.8	-0.00884627
408.99	0.07625802		938.99	-0.0043903		1468.98	0.0023753		1998.98	0.01976305		2528.97	0.00758777		3058.97	0.00786085		3589	-0.00967619
409.19	0.07553351		939.19	-0.00476715		1469.18	0.00206099		1999.18	0.02021921		2529.17	0.00703777		3059.17	0.00772201		3589.2	-0.00947725
409.39	0.07643438		939.39	-0.00456166		1469.38	0.00260203		1999.38	0.02056472		2529.37	0.00685674		3059.37	0.00739976		3589.4	-0.00943782
409.59	0.07539659		939.59	-0.00480511		1469.58	0.00195875		1999.58	0.01962771		2529.57	0.00741035		3059.57	0.00675387		3589.6	-0.00842527
409.79	0.07547875		939.79	-0.00462461		1469.78	0.00188407		1999.78	0.0183586		2529.77	0.00848014		3059.77	0.00729924		3589.8	-0.0066691
409.99	0.07563681		939.99	-0.00451592		1469.98	0.00187647		1999.98	0.01683339		2529.97	0.00825617		3059.97	0.00746509		3590	-0.00544749
410.19	0.07628938		940.19	-0.00417173		1470.18	0.00280948		2000.18	0.0156796		2530.17	0.00781302		3060.17	0.00797394		3590.2	-0.00590717
410.39	0.07632125		940.39	-0.00353538		1470.38	0.00255876		2000.38	0.01528333		2530.37	0.00758101		3060.37	0.00772588		3590.4	-0.00652666
410.59	0.076616		940.59	-0.00319413		1470.58	0.00243866		2000.58	0.01495269		2530.57	0.00708742		3060.57	0.00731721		3590.6	-0.00693302
410.79	0.07555191		940.79	-0.00328682		1470.78	0.00269172		2000.78	0.01517347		2530.77	0.00678548		3060.77	0.00682692		3590.8	-0.00664297
410.99	0.07545364		940.99	-0.00326082		1470.98	0.00263789		2000.98	0.01477887		2530.97	0.00652136		3060.97	0.00652038		3591	-0.00646767
411.19	0.07521061		941.19	-0.00386424		1471.18	0.0026297		2001.18	0.01409086		2531.17	0.00649629		3061.17	0.00566445		3591.2	-0.00676769
411.39	0.07463438		941.39	-0.00453711		1471.38	0.00300831		2001.38	0.01418871		2531.37	0.00717121		3061.37	0.00633491		3591.4	-0.0082125
411.59	0.07440915		941.59	-0.00490094		1471.58	0.00341675		2001.58	0.01452772		2531.57	0.00694083		3061.57	0.00589929		3591.6	-0.00884323
411.79	0.07422397		941.79	-0.00484524		1471.78	0.00368352		2001.78	0.01474586		2531.77	0.00711573		3061.77	0.00571024		3591.8	-0.00928184
411.99	0.07463919		941.99	-0.00517078		1471.98	0.00338132		2001.98	0.01455808		2531.97	0.00720991		3061.97	0.00621578		3592	-0.01006464
412.19	0.07452525		942.19	-0.00505721		1472.18	0.00329137		2002.18	0.01491053		2532.17	0.00894846		3062.17	0.00630395		3592.2	-0.01074734
412.39	0.0741535		942.39	-0.00455014		1472.38	0.0034867		2002.38	0.01521198		2532.37	0.00940996		3062.37	0.00637166		3592.4	-0.01143663
412.59	0.07424183		942.59	-0.00431491		1472.58	0.00292144		2002.58	0.01566428		2532.57	0.00916347		3062.57	0.00597216		3592.6	-0.01313006
412.79	0.07515903		942.79	-0.00379865		1472.78	0.00225259		2002.78	0.01461502		2532.77	0.00880804		3062.77	0.00608243		3592.8	-0.01393279
412.99	0.07585572		942.99	-0.00383281		1472.98	0.00276769		2002.98	0.01435292		2532.97	0.00894685		3062.97	0.00678296		3593	-0.0140989
413.19	0.0765137		943.19	-0.00419805		1473.18	0.00249229		2003.18	0.01370467		2533.17	0.00805425		3063.17	0.00686376		3593.2	-0.01398523
413.39	0.07726363		943.39	-0.00488867		1473.38	0.00243069		2003.38	0.01384334		2533.37	0.00841595		3063.37	0.00665061		3593.4	-0.01325657
413.59	0.0771476		943.59	-0.00445348		1473.58	0.00239461		2003.58	0.0125687		2533.57	0.00929805		3063.57	0.00652692		3593.6	-0.01275482
413.79	0.07648857		943.79	-0.00387585		1473.78	0.0028904		2003.78	0.01161252		2533.77	0.00968439		3063.77	0.00767889		3593.8	-0.01209896
413.99	0.07559759		943.99	-0.00316066		1473.98	0.00277755		2003.98	0.01152545		2533.97	0.00965949		3063.97	0.00792346		3594	-0.01184011
414.19	0.07598584		944.19	-0.00374038		1474.18	0.00312148		2004.18	0.01082607		2534.17	0.00886224		3064.17	0.0074385		3594.2	-0.01260323
414.39	0.07499945		944.39	-0.0040855		1474.38	0.0023396		2004.38	0.00992294		2534.37	0.00864651		3064.37	0.00734441		3594.4	-0.01184604
414.59	0.07459926		944.59	-0.00443937		1474.58	0.00251995		2004.58	0.00960056		2534.57	0.00923234		3064.57	0.00754844		3594.6	-0.0107677
414.79	0.07412355		944.79	-0.00558979		1474.78	0.0023674		2004.78	0.00901684		2534.77	0.00947388		3064.77	0.00674025		3594.8	-0.01066635
414.99	0.07451454		944.99	-0.00624327		1474.98	0.00206031		2004.98	0.00835663		2534.97	0.00880666		3064.97	0.00739997		3595	-0.01043795
415.19	0.0731524		945.19	-0.00733922		1475.18	0.00173859		2005.18	0.00814515		2535.17	0.00868673		3065.17	0.00655821		3595.2	-0.01056129
415.39	0.0718289		945.39	-0.00728315		1475.38	0.00175104		2005.38	0.00914728		2535.37	0.00866854		3065.37	0.00741306		3595.4	-0.01079833
415.59	0.07237374		945.59	-0.00745136		1475.58	0.00285325		2005.58	0.00926246		2535.57	0.00878213		3065.57	0.00709639		3595.6	-0.01010663
415.79	0.07207318		945.79	-0.00715986		1475.78	0.00240017		2005.78	0.0100017		2535.77	0.01034954		3065.77	0.00662106		3595.8	-0.01041039
415.99	0.07267062		945.99	-0.00618125		1475.98	0.00245431		2005.98	0.00972058		2535.97	0.01140275		3065.97	0.00646777		3596	-0.01121622
416.19	0.07258551		946.19	-0.00588108		1476.18	0.00238728		2006.18	0.01068583		2536.17	0.0122002		3066.17	0.00635888		3596.2	-0.01125456
416.39	0.07337988		946.39	-0.00606085		1476.38	0.00253651		2006.38	0.0108102		2536.37	0.01155386		3066.37	0.00577409		3596.4	-0.01282121
416.59	0.07462101		946.59	-0.00548273		1476.58	0.00272014		2006.58	0.01074374		2536.57	0.01119292		3066.57	0.00564095		3596.6	-0.01420419
416.79	0.07537281		946.79	-0.00513037		1476.78	0.00301151		2006.78	0.01035156		2536.77	0.01114391		3066.77	0.00509833		3596.8	-0.01435199
416.99	0.07546996		946.99	-0.00538837		1476.98	0.00333346		2006.98	0.01062207		2536.97	0.01023813		3066.97	0.00419073		3597	-0.01467639
417.19	0.07538336		947.19	-0.00534812		1477.18	0.0023017		2007.18	0.01092725		2537.17	0.01012702		3067.17	0.00353008		3597.2	-0.01494976
417.39	0.07493577		947.39	-0.00503209		1477.38	0.00284148		2007.38	0.01111354		2537.37	0.00997859		3067.37	0.00296612		3597.4	-0.01497777
417.59	0.07507675		947.59	-0.00426704		1477.58	0.00377413		2007.58	0.01005493		2537.57	0.01029743		3067.57	0.00356		3597.6	-0.01533365
417.79	0.0750466		947.79	-0.00504312		1477.78	0.00397084		2007.78	0.01012268		2537.77	0.00903253		3067.77	0.00421446		3597.8	-0.01381597
417.99	0.07506702		947.99	-0.00509372		1477.98	0.00414556		2007.98	0.01013039		2537.97	0.00812405		3067.97	0.00376101		3598	-0.01436581
418.19	0.07568806		948.19	-0.00488038		1478.18	0.00443258		2008.18	0.00904226		2538.17	0.00708248		3068.17	0.00329593		3598.2	-0.01408055
418.39	0.07590597		948.39	-0.00462722		1478.38	0.00486038		2008.38	0.00850406		2538.37	0.00632327		3068.37	0.00353487		3598.4	-0.01343211
418.59	0.07626744		948.59	-0.00548542		1478.58	0.00516016		2008.58	0.00919166		2538.57	0.00674525		3068.57	0.00335535		3598.6	-0.01273246
418.79	0.0764386		948.79	-0.00584626		1478.78	0.00428635		2008.78	0.00869327		2538.77	0.00577955		3068.77	0.00331255		3598.8	-0.01214923
418.99	0.07662834		948.99	-0.00605663		1478.98	0.00388892		2008.98	0.00822053		2538.97	0.00513864		3068.97	0.00338232		3599	-0.01149068
419.19	0.07595953		949.19	-0.00630178		1479.18	0.00410063		2009.18	0.00819951		2539.17	0.00473087		3069.17	0.00389226		3599.2	-0.01136222
419.39	0.07648197		949.39	-0.00658432		1479.38	0.00385386		2009.38	0.00804387		2539.37	0.00470808		3069.37	0.00527889		3599.4	-0.01102583
419.59	0.07783174		949.59	-0.00657349		1479.58	0.00360765		2009.58	0.00791796		2539.57	0.00511363		3069.57	0.00553354		3599.6	-0.01074545
419.79	0.07657763		949.79	-0.00569973		1479.78	0.00303292		2009.78	0.00862068		2539.77	0.00490964		3069.77	0.00578074		3599.8	-0.01109978
419.99	0.07683093		949.99	-0.00529421		1479.98	0.00313473		2009.98	0.00881551		2539.97	0.00433587		3069.97	0.00634975		3600	-0.01198478
420.19	0.07710635		950.19	-0.00703757		1480.18	0.0021402		2010.18	0.00876076		2540.17	0.00451111		3070.17	0.00659006		3600.2	-0.01209647
420.39	0.07764289		950.39	-0.00719111		1480.38	0.00226518		2010.38	0.00919356		2540.37	0.00525021		3070.37	0.00677764		3600.4	-0.01339029
420.59	0.07804292		950.59	-0.0072088		1480.58	0.001664		2010.58	0.00940476		2540.57	0.00571507		3070.57	0.00597341		3600.6	-0.01316998
420.79	0.07727014		950.79	-0.00844386		1480.78	0.001026		2010.78	0.00890365		2540.77	0.00626439		3070.77	0.00465472		3600.8	-0.01237664
420.99	0.07716092		950.99	-0.00853183		1480.98	0.00022554		2010.98	0.00869254		2540.97	0.00577364		3070.97	0.00450294		3601	-0.01242346
421.19	0.07640071		951.19	-0.00824584		1481.18	0.00002886		2011.18	0.00795614		2541.17	0.00672968		3071.17	0.00516604		3601.2	-0.01247415
421.39	0.07582581		951.39	-0.00877441		1481.38	0.00055776		2011.38	0.00824713		2541.37	0.00654065		3071.37	0.00542292		3601.4	-0.01298166
421.59	0.0759693		951.59	-0.00935292		1481.58	0.0007605		2011.58	0.00778235		2541.57	0.00629831		3071.57	0.00470309		3601.6	-0.01227367
421.79	0.07615743		951.79	-0.00981711		1481.78	-0.00018213		2011.78	0.0082293		2541.77	0.00573725		3071.77	0.00409482		3601.8	-0.01203102
421.99	0.07575989		951.99	-0.0083413		1481.98	0.00025082		2011.98	0.00827029		2541.97	0.00628595		3071.97	0.00394985		3602	-0.01365365
422.19	0.07552347		952.19	-0.00755863		1482.18	0.00100703		2012.18	0.007962		2542.17	0.00631308		3072.17	0.00413451		3602.2	-0.01330162
422.39	0.07502864		952.39	-0.00737977		1482.38	0.00133094		2012.38	0.00839134		2542.37	0.00639033		3072.37	0.00384923		3602.4	-0.01315382
422.59	0.07477074		952.59	-0.00737525		1482.58	0.00108339		2012.58	0.0082425		2542.57	0.00700579		3072.57	0.00420475		3602.6	-0.01260212
422.79	0.07385873		952.79	-0.00710663		1482.78	0.00128055		2012.78	0.00729558		2542.77	0.00583472		3072.77	0.00473377		3602.8	-0.01138857
422.99	0.07391224		952.99	-0.00657309		1482.98	0.00216905		2012.98	0.00769948		2542.97	0.00515261		3072.97	0.00468886		3603	-0.0116446
423.19	0.07352777		953.19	-0.00672027		1483.18	0.00204927		2013.18	0.00790662		2543.17	0.00485642		3073.17	0.00474356		3603.2	-0.01218367
423.39	0.07404866		953.39	-0.00715813		1483.38	0.0014121		2013.38	0.00848167		2543.37	0.00501901		3073.37	0.00472583		3603.4	-0.01285931
423.59	0.07470767		953.59	-0.0066836		1483.58	0.00188414		2013.58	0.00888604		2543.57	0.00444409		3073.57	0.00402583		3603.6	-0.01293951
423.79	0.074544		953.79	-0.00642165		1483.78	0.00233318		2013.78	0.00898076		2543.77	0.00440809		3073.77	0.00447847		3603.8	-0.01300839
423.99	0.07479632		953.99	-0.00716636		1483.98	0.00302626		2013.98	0.00895451		2543.97	0.00492931		3073.97	0.00430851		3604	-0.01288196
424.19	0.07581181		954.19	-0.00732591		1484.18	0.0030741		2014.18	0.00854105		2544.17	0.00626172		3074.17	0.00445684		3604.2	-0.01193418
424.39	0.07615337		954.39	-0.00778696		1484.38	0.00294717		2014.38	0.0089983		2544.37	0.00658461		3074.37	0.0047498		3604.4	-0.01157045
424.59	0.07677869		954.59	-0.00807288		1484.58	0.00252528		2014.58	0.00795759		2544.57	0.00667666		3074.57	0.0047172		3604.6	-0.01086162
424.79	0.07647939		954.79	-0.00850284		1484.78	0.00227138		2014.78	0.00766824		2544.77	0.00736609		3074.77	0.00458062		3604.8	-0.01056225
424.99	0.07644865		954.99	-0.00706044		1484.98	0.00088525		2014.98	0.00757231		2544.97	0.00702819		3074.97	0.00531891		3605	-0.01069521
425.19	0.07603905		955.19	-0.00675313		1485.18	0.00026587		2015.18	0.00715793		2545.17	0.00742481		3075.17	0.00536971		3605.2	-0.01118052
425.39	0.07572988		955.39	-0.00733626		1485.38	-0.00063491		2015.38	0.00752822		2545.37	0.00711065		3075.37	0.00570763		3605.4	-0.01094396
425.59	0.075118		955.59	-0.0064407		1485.58	-0.00067224		2015.58	0.00659152		2545.57	0.00712733		3075.57	0.00520863		3605.6	-0.0114345
425.79	0.07404514		955.79	-0.00595236		1485.78	-0.00064734		2015.78	0.00741039		2545.77	0.00675453		3075.77	0.00510526		3605.8	-0.01243797
425.99	0.07357659		955.99	-0.00519318		1485.98	0.0005461		2015.98	0.00707013		2545.97	0.00718636		3075.97	0.00533741		3606	-0.01328857
426.19	0.07283033		956.19	-0.00371191		1486.18	0.00060739		2016.18	0.00639016		2546.17	0.0071884		3076.17	0.0055079		3606.2	-0.01357497
426.39	0.07210153		956.39	-0.00460002		1486.38	0.00029749		2016.38	0.00611276		2546.37	0.00644097		3076.37	0.00544255		3606.4	-0.01381373
426.59	0.07131686		956.59	-0.00469987		1486.58	0.00044543		2016.58	0.00548296		2546.57	0.00632969		3076.57	0.00630399		3606.6	-0.01464158
426.79	0.07014126		956.79	-0.00523509		1486.78	0.00099559		2016.78	0.00614377		2546.77	0.00505208		3076.77	0.0057118		3606.8	-0.01529091
426.99	0.06998659		956.99	-0.00509094		1486.98	0.00169075		2016.98	0.00675685		2546.97	0.00521778		3076.97	0.00400309		3607	-0.01676561
427.19	0.0702282		957.19	-0.00587576		1487.18	0.00159327		2017.18	0.0065622		2547.17	0.00486241		3077.17	0.00319		3607.2	-0.01735984
427.39	0.06993741		957.39	-0.00653468		1487.38	0.0023504		2017.38	0.00653155		2547.37	0.00495689		3077.37	0.00283548		3607.4	-0.01729334
427.59	0.07009976		957.59	-0.00707421		1487.58	0.00269237		2017.58	0.0058155		2547.57	0.00463874		3077.57	0.00244779		3607.6	-0.016473
427.79	0.07023967		957.79	-0.00803307		1487.78	0.00292894		2017.78	0.00614561		2547.77	0.00544692		3077.77	0.00295113		3607.8	-0.01655772
427.99	0.07061658		957.99	-0.00957688		1487.98	0.00312332		2017.98	0.00572002		2547.97	0.00570657		3077.97	0.00239734		3608	-0.01583802
428.19	0.07060765		958.19	-0.0098528		1488.18	0.00314869		2018.18	0.00589652		2548.17	0.00619009		3078.17	0.00276388		3608.2	-0.01614345
428.39	0.07147976		958.39	-0.01116017		1488.38	0.00190929		2018.38	0.00560939		2548.37	0.00652363		3078.37	0.00222681		3608.4	-0.01621082
428.59	0.07160414		958.59	-0.01074147		1488.58	0.00130337		2018.58	0.00529555		2548.57	0.00776638		3078.57	0.00262892		3608.6	-0.01538238
428.79	0.07194367		958.79	-0.01105206		1488.78	0.0004266		2018.78	0.00655678		2548.77	0.00798798		3078.77	0.00262716		3608.8	-0.01473027
428.99	0.07139101		958.99	-0.01021566		1488.98	-0.00089385		2018.98	0.00629959		2548.97	0.0079007		3078.97	0.00234452		3609	-0.01403743
429.19	0.07097103		959.19	-0.01045564		1489.18	-0.00068087		2019.18	0.00593017		2549.17	0.00814507		3079.17	0.00333017		3609.2	-0.01335891
429.39	0.07118984		959.39	-0.01027393		1489.38	-0.00023587		2019.38	0.00593886		2549.37	0.00808234		3079.37	0.00347768		3609.4	-0.01237436
429.59	0.07112392		959.59	-0.00872014		1489.58	0.00044741		2019.58	0.00581607		2549.57	0.00830605		3079.57	0.00309612		3609.6	-0.0125276
429.79	0.07172634		959.79	-0.00850005		1489.78	0.00090169		2019.78	0.00614121		2549.77	0.00775739		3079.77	0.00292485		3609.8	-0.01184929
429.99	0.0727427		959.99	-0.00819652		1489.98	0.00116886		2019.98	0.00569537		2549.97	0.0083131		3079.97	0.00282833		3610	-0.01179778
430.19	0.07336655		960.19	-0.00729734		1490.18	0.00071036		2020.18	0.00536313		2550.17	0.00831069		3080.17	0.00375115		3610.2	-0.011952
430.39	0.07437214		960.39	-0.00860844		1490.38	0.00127773		2020.38	0.00555462		2550.37	0.00772798		3080.37	0.00364927		3610.4	-0.01202666
430.59	0.07435079		960.59	-0.00768104		1490.58	0.00109865		2020.58	0.00580184		2550.57	0.00787672		3080.57	0.00402228		3610.6	-0.0125395
430.79	0.0745563		960.79	-0.00740762		1490.78	0.00191031		2020.78	0.00580857		2550.77	0.007281		3080.77	0.00305497		3610.8	-0.01298671
430.99	0.07477881		960.99	-0.00735566		1490.98	0.00199897		2020.98	0.00512963		2550.97	0.00707862		3080.97	0.00258594		3611	-0.01292029
431.19	0.07592133		961.19	-0.00762901		1491.18	0.00184737		2021.18	0.004513		2551.17	0.00675116		3081.17	0.00333431		3611.2	-0.01255937
431.39	0.07545495		961.39	-0.00736498		1491.38	0.00218568		2021.38	0.00544209		2551.37	0.00699747		3081.37	0.00327775		3611.4	-0.0119574
431.59	0.07588816		961.59	-0.00753162		1491.58	0.00140694		2021.58	0.00594424		2551.57	0.00718074		3081.57	0.0041015		3611.6	-0.01262682
431.79	0.07525674		961.79	-0.00800057		1491.78	0.00177763		2021.78	0.00678427		2551.77	0.00649509		3081.77	0.00424442		3611.8	-0.01351531
431.99	0.07485717		961.99	-0.00777219		1491.98	0.00146165		2021.98	0.00753406		2551.97	0.00613697		3081.97	0.00422252		3612	-0.01329206
432.19	0.0738229		962.19	-0.00683844		1492.18	0.00218031		2022.18	0.00801692		2552.17	0.00655497		3082.17	0.00457482		3612.2	-0.01413054
432.39	0.07394431		962.39	-0.00661281		1492.38	0.00118784		2022.38	0.00844313		2552.37	0.00700406		3082.37	0.00483454		3612.4	-0.01283718
432.59	0.07322327		962.59	-0.00577789		1492.58	0.0014965		2022.58	0.00830376		2552.57	0.00745683		3082.57	0.00490958		3612.6	-0.01249272
432.79	0.07252526		962.79	-0.0059516		1492.78	0.00163858		2022.78	0.00901096		2552.77	0.0065515		3082.77	0.00476025		3612.8	-0.01277433
432.99	0.07075859		962.99	-0.00478406		1492.98	0.00141009		2022.98	0.0083004		2552.97	0.00681769		3082.97	0.00422134		3613	-0.01287038
433.19	0.07032927		963.19	-0.005129		1493.18	0.00098552		2023.18	0.00795442		2553.17	0.00652255		3083.17	0.00584852		3613.2	-0.01248426
433.39	0.07084035		963.39	-0.00477012		1493.38	0.00056669		2023.38	0.00799179		2553.37	0.00590832		3083.37	0.00546528		3613.4	-0.01308702
433.59	0.07060302		963.59	-0.00508678		1493.58	-0.00000559		2023.58	0.00683269		2553.57	0.00618357		3083.57	0.00638075		3613.6	-0.01312821
433.79	0.0705942		963.79	-0.00615829		1493.78	-0.00027581		2023.78	0.00688072		2553.77	0.00541926		3083.77	0.00668231		3613.8	-0.01351115
433.99	0.07050411		963.99	-0.00731989		1493.98	-0.00092294		2023.98	0.00622487		2553.97	0.00544442		3083.97	0.00596589		3614	-0.01407281
434.19	0.07124747		964.19	-0.00768647		1494.18	-0.00155222		2024.18	0.00549285		2554.17	0.00583635		3084.17	0.00640117		3614.2	-0.01439724
434.39	0.07135345		964.39	-0.00881485		1494.38	-0.00126702		2024.38	0.0054005		2554.37	0.00614199		3084.37	0.00576626		3614.4	-0.01470276
434.59	0.07113454		964.59	-0.00909487		1494.58	-0.00103286		2024.58	0.00357561		2554.57	0.00614088		3084.57	0.005761		3614.6	-0.0151773
434.79	0.07214237		964.79	-0.00898132		1494.78	-0.00042798		2024.78	0.00311799		2554.77	0.00621736		3084.77	0.00457029		3614.8	-0.01595304
434.99	0.07290471		964.99	-0.00933836		1494.98	-0.00105866		2024.98	0.00298951		2554.97	0.00637114		3084.97	0.00465438		3615	-0.015869
435.19	0.07362312		965.19	-0.0088478		1495.18	0.00047572		2025.18	0.00324397		2555.17	0.00691928		3085.17	0.00421003		3615.2	-0.01619497
435.39	0.07301329		965.39	-0.00760701		1495.38	0.00018617		2025.38	0.0037803		2555.37	0.00688675		3085.37	0.00428859		3615.4	-0.01649177
435.59	0.07271847		965.59	-0.00805416		1495.58	0.00024236		2025.58	0.00313258		2555.57	0.00704439		3085.57	0.00378687		3615.6	-0.0164979
435.79	0.07288361		965.79	-0.00760521		1495.78	0.00044251		2025.78	0.00269657		2555.77	0.00592433		3085.77	0.00392023		3615.8	-0.01681909
435.99	0.07265747		965.99	-0.00726172		1495.98	0.00050493		2025.98	0.00274792		2555.97	0.00571505		3085.97	0.00363321		3616	-0.01707427
436.19	0.07277828		966.19	-0.00667543		1496.18	0.00098047		2026.18	0.00269261		2556.17	0.00612172		3086.17	0.00383371		3616.2	-0.01693703
436.39	0.07295402		966.39	-0.0077216		1496.38	0.0011023		2026.38	0.00313752		2556.37	0.00590483		3086.37	0.00305689		3616.4	-0.01568257
436.59	0.07285666		966.59	-0.00769201		1496.58	0.00185362		2026.58	0.00352318		2556.57	0.00551194		3086.57	0.00167171		3616.6	-0.01574163
436.79	0.07213676		966.79	-0.00937241		1496.78	0.00130088		2026.78	0.00413448		2556.77	0.0050073		3086.77	0.0011779		3616.8	-0.01557871
436.99	0.07159873		966.99	-0.00951138		1496.98	0.00123847		2026.98	0.00498869		2556.97	0.00479529		3086.97	0.00110037		3617	-0.01477034
437.19	0.0720401		967.19	-0.01139296		1497.18	0.0006224		2027.18	0.0049362		2557.17	0.00380563		3087.17	0.00157188		3617.2	-0.01356656
437.39	0.07225462		967.39	-0.0118764		1497.38	0.00035615		2027.38	0.00517118		2557.37	0.00309276		3087.37	0.00136314		3617.4	-0.01344473
437.59	0.07178321		967.59	-0.01317771		1497.58	-0.00047746		2027.58	0.00520223		2557.57	0.00313354		3087.57	0.00174717		3617.6	-0.01275385
437.79	0.07158505		967.79	-0.01311938		1497.78	-0.00034927		2027.78	0.00606478		2557.77	0.00315861		3087.77	0.0009926		3617.8	-0.01277869
437.99	0.07169522		967.99	-0.01341097		1497.98	-0.00090865		2027.98	0.00536262		2557.97	0.00389546		3087.97	0.0009789		3618	-0.01225145
438.19	0.07204798		968.19	-0.01280337		1498.18	-0.0009258		2028.18	0.00589906		2558.17	0.00462226		3088.17	0.00199246		3618.2	-0.01197796
438.39	0.07236936		968.39	-0.01234464		1498.38	-0.00047841		2028.38	0.00593071		2558.37	0.0048436		3088.37	0.00122642		3618.4	-0.01199957
438.59	0.07235369		968.59	-0.01184054		1498.58	-0.00039475		2028.58	0.00493631		2558.57	0.00483281		3088.57	0.00136052		3618.6	-0.01282316
438.79	0.07226154		968.79	-0.01017585		1498.78	-0.00037255		2028.78	0.00536161		2558.77	0.00539194		3088.77	0.00175814		3618.8	-0.01306724
438.99	0.07169315		968.99	-0.00951634		1498.98	0.00022244		2028.98	0.00495266		2558.97	0.00593267		3088.97	0.00205819		3619	-0.01367469
439.19	0.07223654		969.19	-0.00812705		1499.18	0.00133832		2029.18	0.00388437		2559.17	0.00628238		3089.17	0.00213933		3619.2	-0.01498362
439.39	0.07180821		969.39	-0.00669099		1499.38	0.00063688		2029.38	0.00380368		2559.37	0.0062418		3089.37	0.00264663		3619.4	-0.01557825
439.59	0.07145261		969.59	-0.00572621		1499.58	0.00079181		2029.58	0.00320435		2559.57	0.00615235		3089.57	0.00283143		3619.6	-0.01581999
439.79	0.07110883		969.79	-0.00564062		1499.78	0.00031209		2029.78	0.0036621		2559.77	0.00655236		3089.77	0.00393019		3619.8	-0.01764979
439.99	0.07057463		969.99	-0.0051078		1499.98	0.0003643		2029.98	0.00393227		2559.97	0.00560417		3089.97	0.00415129		3620	-0.0178416
440.19	0.07054405		970.19	-0.00525431		1500.18	0.00046305		2030.18	0.00431963		2560.17	0.00595258		3090.17	0.00444144		3620.2	-0.01809452
440.39	0.07105986		970.39	-0.0062835		1500.38	0.00071499		2030.38	0.00392014		2560.37	0.00568177		3090.37	0.0041139		3620.4	-0.01757997
440.59	0.07105087		970.59	-0.00695492		1500.58	0.0003856		2030.58	0.00477083		2560.57	0.00495998		3090.57	0.00394423		3620.6	-0.01699312
440.79	0.0713492		970.79	-0.00797147		1500.78	0.00005487		2030.78	0.00535353		2560.77	0.00521366		3090.77	0.00380332		3620.8	-0.01722524
440.99	0.07190766		970.99	-0.00807932		1500.98	0.00022767		2030.98	0.00606204		2560.97	0.00439125		3090.97	0.0039758		3621	-0.01662932
441.19	0.07248417		971.19	-0.00927845		1501.18	-0.00021277		2031.18	0.00603901		2561.17	0.00403481		3091.17	0.00312336		3621.2	-0.01561581
441.39	0.07218767		971.39	-0.00944171		1501.38	-0.00020928		2031.38	0.00628567		2561.37	0.00431964		3091.37	0.00267694		3621.4	-0.01499114
441.59	0.07195315		971.59	-0.01033314		1501.58	-0.00042151		2031.58	0.00626751		2561.57	0.00488301		3091.57	0.00256384		3621.6	-0.01468215
441.79	0.07193938		971.79	-0.01026515		1501.78	0.00019391		2031.78	0.00629068		2561.77	0.00593209		3091.77	0.00161342		3621.8	-0.01576503
441.99	0.07173668		971.99	-0.01046024		1501.98	-0.00029264		2031.98	0.00651278		2561.97	0.00566289		3091.97	0.00152516		3622	-0.01493045
442.19	0.07140178		972.19	-0.01037874		1502.18	-0.00034723		2032.18	0.00724591		2562.17	0.00580163		3092.17	0.0018838		3622.2	-0.01443894
442.39	0.07135939		972.39	-0.00988155		1502.38	0.00004881		2032.38	0.00667907		2562.37	0.00585843		3092.37	0.00126712		3622.4	-0.01443009
442.59	0.07070479		972.59	-0.00971718		1502.58	0.00065101		2032.58	0.00606562		2562.57	0.00624344		3092.57	0.00181978		3622.6	-0.01446717
442.79	0.07014411		972.79	-0.00887775		1502.78	0.00105768		2032.78	0.00597279		2562.77	0.00649244		3092.77	0.00175196		3622.8	-0.01404857
442.99	0.0703349		972.99	-0.00896996		1502.98	0.00176568		2032.98	0.00614567		2562.97	0.00636805		3092.97	0.00069126		3623	-0.01410695
443.19	0.0704324		973.19	-0.00835363		1503.18	0.00195703		2033.18	0.00591844		2563.17	0.00650309		3093.17	0.00092557		3623.2	-0.01426687
443.39	0.06939962		973.39	-0.00768939		1503.38	0.00209877		2033.38	0.00635051		2563.37	0.00646563		3093.37	0.00034512		3623.4	-0.01431275
443.59	0.06936515		973.59	-0.00793519		1503.58	0.00186254		2033.58	0.00582885		2563.57	0.00672234		3093.57	0.00022337		3623.6	-0.01416779
443.79	0.06972188		973.79	-0.00866056		1503.78	0.00127626		2033.78	0.00583268		2563.77	0.00612713		3093.77	0.00040283		3623.8	-0.01455495
443.99	0.07019404		973.99	-0.00835631		1503.98	0.00073149		2033.98	0.00552625		2563.97	0.00535328		3093.97	0.00052228		3624	-0.01434181
444.19	0.06934206		974.19	-0.00864849		1504.18	0.00047304		2034.18	0.0055728		2564.17	0.00600673		3094.17	0.00029717		3624.2	-0.01410278
444.39	0.06984022		974.39	-0.00926085		1504.38	0.00024293		2034.38	0.0051079		2564.37	0.00606059		3094.37	-0.000106		3624.4	-0.01397116
444.59	0.06907042		974.59	-0.00988479		1504.58	-0.00032281		2034.58	0.00505061		2564.57	0.00597872		3094.57	-0.00047433		3624.6	-0.01469566
444.79	0.06900487		974.79	-0.00977644		1504.78	-0.00079317		2034.78	0.00539821		2564.77	0.00637147		3094.77	-0.00036118		3624.8	-0.01527568
444.99	0.06799763		974.99	-0.01049285		1504.98	-0.0008827		2034.98	0.00513358		2564.97	0.00607218		3094.97	-0.00049566		3625	-0.01528932
445.19	0.06738553		975.19	-0.01094878		1505.18	-0.00075238		2035.18	0.00489345		2565.17	0.0064267		3095.17	-0.0012811		3625.2	-0.01509638
445.39	0.06761081		975.39	-0.01158488		1505.38	-0.00077558		2035.38	0.0048247		2565.37	0.00705184		3095.37	-0.00143447		3625.4	-0.0151175
445.59	0.06752512		975.59	-0.01216419		1505.58	-0.00140401		2035.58	0.00463873		2565.57	0.00704084		3095.57	-0.00105257		3625.6	-0.01576226
445.79	0.06772439		975.79	-0.01171854		1505.78	-0.00129633		2035.78	0.0043006		2565.77	0.00684677		3095.77	-0.00141681		3625.8	-0.01587069
445.99	0.0679633		975.99	-0.01079755		1505.98	-0.00159858		2035.98	0.0038869		2565.97	0.00658337		3095.97	-0.00049476		3626	-0.01442848
446.19	0.06864234		976.19	-0.01107761		1506.18	-0.00184774		2036.18	0.00355948		2566.17	0.00719408		3096.17	0.00165403		3626.2	-0.01445318
446.39	0.0693235		976.39	-0.01021136		1506.38	-0.00145377		2036.38	0.00290295		2566.37	0.00690395		3096.37	0.00181029		3626.4	-0.01526878
446.59	0.06902481		976.59	-0.01040266		1506.58	-0.0007392		2036.58	0.00269812		2566.57	0.0070707		3096.57	0.00220145		3626.6	-0.01617615
446.79	0.06956891		976.79	-0.01016877		1506.78	-0.0011091		2036.78	0.00287304		2566.77	0.00636604		3096.77	0.00250111		3626.8	-0.01596419
446.99	0.07009135		976.99	-0.01041254		1506.98	-0.00109341		2036.98	0.0036003		2566.97	0.0064348		3096.97	0.00278913		3627	-0.01569829
447.19	0.07030007		977.19	-0.00938298		1507.18	-0.00071624		2037.18	0.00365764		2567.17	0.00623742		3097.17	0.00345072		3627.2	-0.01650508
447.39	0.07100783		977.39	-0.00927093		1507.38	-0.0007637		2037.38	0.00363665		2567.37	0.00545371		3097.37	0.00322502		3627.4	-0.01658511
447.59	0.07141397		977.59	-0.00999075		1507.58	-0.00071904		2037.58	0.00404963		2567.57	0.00557648		3097.57	0.00333086		3627.6	-0.01685766
447.79	0.07140553		977.79	-0.00950222		1507.78	-0.00152935		2037.78	0.0049095		2567.77	0.00424125		3097.77	0.00327402		3627.8	-0.01718837
447.99	0.07157198		977.99	-0.00915662		1507.98	-0.00145285		2037.98	0.00506385		2567.97	0.00527151		3097.97	0.00284781		3628	-0.01696752
448.19	0.07069493		978.19	-0.00910798		1508.18	-0.00130276		2038.18	0.00519892		2568.17	0.00556188		3098.17	0.00188074		3628.2	-0.01670477
448.39	0.07046599		978.39	-0.00995468		1508.38	-0.00184023		2038.38	0.00494187		2568.37	0.00607393		3098.37	0.001363		3628.4	-0.01794411
448.59	0.06971048		978.59	-0.00983044		1508.58	-0.00188667		2038.58	0.00482625		2568.57	0.00689913		3098.57	0.00129632		3628.6	-0.01781626
448.79	0.06981817		978.79	-0.01024378		1508.78	-0.00237241		2038.78	0.00549333		2568.77	0.00708743		3098.77	0.00053749		3628.8	-0.01802066
448.99	0.06939336		978.99	-0.01032732		1508.98	-0.00198642		2038.98	0.00524819		2568.97	0.00787718		3098.97	-0.00008553		3629	-0.01794984
449.19	0.06888283		979.19	-0.01053071		1509.18	-0.0013458		2039.18	0.00456137		2569.17	0.00771641		3099.17	-0.00055594		3629.2	-0.01751655
449.39	0.0690868		979.39	-0.01164006		1509.38	-0.00128327		2039.38	0.00408799		2569.37	0.0075505		3099.37	-0.00138432		3629.4	-0.01727012
449.59	0.06904536		979.59	-0.01173725		1509.58	-0.00126537		2039.58	0.00282838		2569.57	0.00753026		3099.57	-0.00128785		3629.6	-0.01688056
449.79	0.06962911		979.79	-0.01121035		1509.78	-0.00055703		2039.78	0.00220624		2569.77	0.00784264		3099.77	-0.00169659		3629.8	-0.01601731
449.99	0.06860457		979.99	-0.01146812		1509.98	-0.00084335		2039.98	0.0015033		2569.97	0.00768765		3099.97	-0.00147603		3630	-0.0168552
450.19	0.06855412		980.19	-0.01254283		1510.18	-0.001338		2040.18	0.00123542		2570.17	0.00743432		3100.17	-0.00158733		3630.2	-0.01759651
450.39	0.06837073		980.39	-0.0128812		1510.38	-0.00126039		2040.38	0.00059875		2570.37	0.00652017		3100.37	-0.00176998		3630.4	-0.01768335
450.59	0.0674612		980.59	-0.01331381		1510.58	-0.00058858		2040.58	0.00023578		2570.57	0.00629467		3100.57	-0.0011623		3630.6	-0.018051
450.79	0.0678308		980.79	-0.01310333		1510.78	-0.00092678		2040.78	0.00062836		2570.77	0.00571791		3100.77	-0.00110114		3630.8	-0.01741723
450.99	0.06792243		980.99	-0.01312826		1510.98	-0.00139409		2040.98	0.00099674		2570.97	0.00539235		3100.97	-0.00152721		3631	-0.01760819
451.19	0.06761933		981.19	-0.01305459		1511.18	-0.00200498		2041.18	0.00130856		2571.17	0.00483743		3101.17	-0.00125819		3631.2	-0.01834564
451.39	0.06764731		981.39	-0.01295543		1511.38	-0.00299668		2041.38	0.00158855		2571.37	0.00438869		3101.37	-0.00126853		3631.4	-0.01810188
451.59	0.06691646		981.59	-0.01316334		1511.58	-0.00289823		2041.58	0.00262737		2571.57	0.00368319		3101.57	-0.00093303		3631.6	-0.01813017
451.79	0.06749734		981.79	-0.01247692		1511.78	-0.00302287		2041.78	0.00237078		2571.77	0.00296219		3101.77	-0.00069288		3631.8	-0.018171
451.99	0.06849569		981.99	-0.01268905		1511.98	-0.00320008		2041.98	0.00160111		2571.97	0.00339506		3101.97	-0.00060585		3632	-0.01787309
452.19	0.06788216		982.19	-0.01332466		1512.18	-0.00310722		2042.18	0.00166658		2572.17	0.00328679		3102.17	-0.0011096		3632.2	-0.01753965
452.39	0.06771346		982.39	-0.01287197		1512.38	-0.00388518		2042.38	0.00143753		2572.37	0.00302328		3102.37	-0.00065026		3632.4	-0.01748079
452.59	0.06732288		982.59	-0.0126719		1512.58	-0.00331517		2042.58	0.00108004		2572.57	0.00304916		3102.57	-0.00077835		3632.6	-0.01747451
452.79	0.06675891		982.79	-0.0125675		1512.78	-0.0034291		2042.78	0.00089953		2572.77	0.00297013		3102.77	-0.00080367		3632.8	-0.01785052
452.99	0.06632171		982.99	-0.01252582		1512.98	-0.00345297		2042.98	0.00076735		2572.97	0.00313955		3102.97	-0.00041883		3633	-0.01758392
453.19	0.06521782		983.19	-0.01288929		1513.18	-0.00273797		2043.18	0.00037731		2573.17	0.00168452		3103.17	-0.0005732		3633.2	-0.017218
453.39	0.06514986		983.39	-0.01295644		1513.38	-0.0022187		2043.38	0.0004596		2573.37	0.00107322		3103.37	-0.00061219		3633.4	-0.01678735
453.59	0.06557666		983.59	-0.01228195		1513.58	-0.00206431		2043.58	0.00009607		2573.57	0.00148636		3103.57	-0.00016614		3633.6	-0.01685505
453.79	0.06516674		983.79	-0.01186264		1513.78	-0.00184968		2043.78	0.00082016		2573.77	0.00174608		3103.77	-0.00065686		3633.8	-0.0160752
453.99	0.0643957		983.99	-0.01255168		1513.98	-0.00204394		2043.98	0.00055088		2573.97	0.00173252		3103.97	-0.00021008		3634	-0.0163597
454.19	0.06527751		984.19	-0.01277829		1514.18	-0.00235865		2044.18	0.00077121		2574.17	0.00231566		3104.17	0.00018246		3634.2	-0.01629835
454.39	0.06493666		984.39	-0.01217571		1514.38	-0.00218591		2044.38	0.00051796		2574.37	0.00262336		3104.37	0.00106358		3634.4	-0.01681129
454.59	0.06532127		984.59	-0.01160112		1514.58	-0.00160181		2044.58	0.00049756		2574.57	0.0029892		3104.57	0.00079411		3634.6	-0.01715658
454.79	0.06602159		984.79	-0.0114363		1514.78	-0.00189192		2044.78	0.00141555		2574.77	0.00343646		3104.77	0.00003969		3634.8	-0.01702733
454.99	0.06673498		984.99	-0.01090694		1514.98	-0.0027798		2044.98	0.00229538		2574.97	0.0034232		3104.97	-0.00009692		3635	-0.01642369
455.19	0.06642589		985.19	-0.01142769		1515.18	-0.00280072		2045.18	0.00269323		2575.17	0.00341549		3105.17	0.00108878		3635.2	-0.01632285
455.39	0.06607619		985.39	-0.01052723		1515.38	-0.00231162		2045.38	0.00307253		2575.37	0.0034502		3105.37	0.00110237		3635.4	-0.01611486
455.59	0.06645395		985.59	-0.01035519		1515.58	-0.001727		2045.58	0.00430275		2575.57	0.00369158		3105.57	0.00098827		3635.6	-0.01603095
455.79	0.06712662		985.79	-0.01057743		1515.78	-0.0011612		2045.78	0.00272505		2575.77	0.00475158		3105.77	0.0011747		3635.8	-0.01668024
455.99	0.06758943		985.99	-0.01073682		1515.98	-0.00130938		2045.98	0.00347307		2575.97	0.00459951		3105.97	0.00109423		3636	-0.0164662
456.19	0.06711532		986.19	-0.01030387		1516.18	-0.00131136		2046.18	0.00360479		2576.17	0.00520289		3106.17	0.00042774		3636.2	-0.01686269
456.39	0.06618218		986.39	-0.01027161		1516.38	-0.00178375		2046.38	0.00355726		2576.37	0.00512631		3106.37	0.00037939		3636.4	-0.01720783
456.59	0.06509993		986.59	-0.01122403		1516.58	-0.0015496		2046.58	0.00324456		2576.57	0.00608657		3106.57	0.00043493		3636.6	-0.01763186
456.79	0.06533487		986.79	-0.0125432		1516.78	-0.00175898		2046.78	0.00297269		2576.77	0.0064749		3106.77	0.00058271		3636.8	-0.01782399
456.99	0.06577854		986.99	-0.01324617		1516.98	-0.00178395		2046.98	0.00281123		2576.97	0.00624988		3106.97	0.00011147		3637	-0.01723879
457.19	0.06492958		987.19	-0.01381942		1517.18	-0.00203803		2047.18	0.00240465		2577.17	0.00537764		3107.17	0.00028741		3637.2	-0.01739389
457.39	0.06439437		987.39	-0.01416768		1517.38	-0.00252084		2047.38	0.00198002		2577.37	0.00561767		3107.37	0.00002184		3637.4	-0.01737698
457.59	0.06462496		987.59	-0.0144464		1517.58	-0.00324522		2047.58	0.00113319		2577.57	0.00571526		3107.57	0.00100013		3637.6	-0.01733844
457.79	0.06533137		987.79	-0.01499921		1517.78	-0.0036311		2047.78	0.001628		2577.77	0.00606819		3107.77	0.00126576		3637.8	-0.01676807
457.99	0.06521745		987.99	-0.01582416		1517.98	-0.00445979		2047.98	0.00087594		2577.97	0.00581027		3107.97	0.00194269		3638	-0.01764844
458.19	0.06542345		988.19	-0.01580802		1518.18	-0.00430823		2048.18	0.0003612		2578.17	0.00458771		3108.17	0.00112413		3638.2	-0.01799502
458.39	0.06617328		988.39	-0.0154656		1518.38	-0.00447055		2048.38	-0.00022369		2578.37	0.00354933		3108.37	0.00082625		3638.4	-0.01788294
458.59	0.06703303		988.59	-0.01540617		1518.58	-0.00447122		2048.58	0.00041033		2578.57	0.00277278		3108.57	-0.00010209		3638.6	-0.01764026
458.79	0.06685294		988.79	-0.01517899		1518.78	-0.00390936		2048.78	0.00098632		2578.77	0.00092467		3108.77	-0.00016228		3638.8	-0.01754704
458.99	0.06670129		988.99	-0.01512612		1518.98	-0.00407991		2048.98	0.00085012		2578.97	0.00042528		3108.97	-0.00066953		3639	-0.0177119
459.19	0.06702979		989.19	-0.01539663		1519.18	-0.00443482		2049.18	0.00073022		2579.17	0.0002603		3109.17	-0.00102631		3639.2	-0.01798288
459.39	0.06658354		989.39	-0.01366047		1519.38	-0.00460312		2049.38	0.00179265		2579.37	-0.00007359		3109.37	-0.00124372		3639.4	-0.01758936
459.59	0.06730875		989.59	-0.01279629		1519.58	-0.00447526		2049.58	0.00254869		2579.57	0.00035886		3109.57	-0.00113213		3639.6	-0.01789433
459.79	0.06721269		989.79	-0.0127846		1519.78	-0.00391066		2049.78	0.0020212		2579.77	0.00102264		3109.77	-0.00144061		3639.8	-0.01761579
459.99	0.06698808		989.99	-0.01217654		1519.98	-0.00421612		2049.98	0.00306463		2579.97	0.00100383		3109.97	-0.00170084		3640	-0.01726356
460.19	0.06682636		990.19	-0.01177227		1520.18	-0.00364329		2050.18	0.00284765		2580.17	0.00123108		3110.17	-0.00240922		3640.2	-0.01737259
460.39	0.0658939		990.39	-0.01238227		1520.38	-0.00338519		2050.38	0.00316153		2580.37	0.00232503		3110.37	-0.0022201		3640.4	-0.01756511
460.59	0.06536765		990.59	-0.01269835		1520.58	-0.00348211		2050.58	0.00244785		2580.57	0.00260039		3110.57	-0.00185611		3640.6	-0.01774434
460.79	0.06562189		990.79	-0.01244475		1520.78	-0.00279568		2050.78	0.0027201		2580.77	0.00288442		3110.77	-0.00176793		3640.8	-0.01817403
460.99	0.06514279		990.99	-0.01205098		1520.98	-0.00261572		2050.98	0.0023953		2580.97	0.00380065		3110.97	-0.00161083		3641	-0.01820868
461.19	0.06473935		991.19	-0.01201179		1521.18	-0.00337681		2051.18	0.00226611		2581.17	0.00417571		3111.17	-0.00107288		3641.2	-0.01967758
461.39	0.06527594		991.39	-0.01269069		1521.38	-0.00302249		2051.38	0.00227368		2581.37	0.00497299		3111.37	-0.00083743		3641.4	-0.01983295
461.59	0.06579901		991.59	-0.01386576		1521.58	-0.00232399		2051.58	0.00214991		2581.57	0.00505974		3111.57	0.0006857		3641.6	-0.02070563
461.79	0.06640974		991.79	-0.01459735		1521.78	-0.00258688		2051.78	0.00237065		2581.77	0.00566165		3111.77	-0.00030023		3641.8	-0.02139119
461.99	0.06553209		991.99	-0.01499826		1521.98	-0.00278979		2051.98	0.00193215		2581.97	0.00506793		3111.97	-0.00024023		3642	-0.02159546
462.19	0.06582482		992.19	-0.0152052		1522.18	-0.00141013		2052.18	0.00163837		2582.17	0.00422221		3112.17	-0.00168369		3642.2	-0.02183788
462.39	0.06662965		992.39	-0.01542206		1522.38	-0.00181879		2052.38	0.00217165		2582.37	0.00301305		3112.37	-0.00081338		3642.4	-0.02274362
462.59	0.06670483		992.59	-0.01508839		1522.58	-0.00190286		2052.58	0.00230975		2582.57	0.0028832		3112.57	-0.00099395		3642.6	-0.02333997
462.79	0.06637419		992.79	-0.01547633		1522.78	-0.00181569		2052.78	0.00192608		2582.77	0.00227497		3112.77	-0.00076311		3642.8	-0.02407232
462.99	0.06622484		992.99	-0.01596492		1522.98	-0.00200786		2052.98	0.00159063		2582.97	0.00196985		3112.97	-0.00077679		3643	-0.02405427
463.19	0.06676831		993.19	-0.01562313		1523.18	-0.00200437		2053.18	0.00136648		2583.17	0.00239404		3113.17	0.0001402		3643.2	-0.02372073
463.39	0.06719868		993.39	-0.01478064		1523.38	-0.00096192		2053.38	0.00138411		2583.37	0.00163204		3113.37	0.00147828		3643.4	-0.02257693
463.59	0.06720674		993.59	-0.01493127		1523.58	-0.00064919		2053.58	0.00142055		2583.57	0.00198274		3113.57	0.00203221		3643.6	-0.02169646
463.79	0.06695896		993.79	-0.01542046		1523.78	-0.00022367		2053.78	0.00167553		2583.77	0.00237611		3113.77	0.00099912		3643.8	-0.02083653
463.99	0.06736808		993.99	-0.01519079		1523.98	0.00007591		2053.98	0.00217469		2583.97	0.00176555		3113.97	0.00082491		3644	-0.02039625
464.19	0.06762864		994.19	-0.01462757		1524.18	0.00030158		2054.18	0.00256031		2584.17	0.00136759		3114.17	-0.00035505		3644.2	-0.02004855
464.39	0.06738662		994.39	-0.01448291		1524.38	-0.00026644		2054.38	0.00285977		2584.37	0.00212711		3114.37	-0.00103994		3644.4	-0.01999039
464.59	0.06740392		994.59	-0.01438483		1524.58	-0.00024284		2054.58	0.00236004		2584.57	0.00167147		3114.57	-0.00121892		3644.6	-0.0197808
464.79	0.06788631		994.79	-0.01434473		1524.78	-0.00012933		2054.78	0.00253855		2584.77	0.00280197		3114.77	-0.00148841		3644.8	-0.01958894
464.99	0.06882529		994.99	-0.01462603		1524.98	0.00000159		2054.98	0.00233143		2584.97	0.00352062		3114.97	-0.00089947		3645	-0.01934974
465.19	0.06879593		995.19	-0.0141342		1525.18	-0.00087936		2055.18	0.00226891		2585.17	0.00346149		3115.17	-0.00050497		3645.2	-0.01960966
465.39	0.06908558		995.39	-0.0144815		1525.38	-0.00114317		2055.38	0.00388711		2585.37	0.00335911		3115.37	-0.0010588		3645.4	-0.01944912
465.59	0.06859002		995.59	-0.01402554		1525.58	-0.00187707		2055.58	0.00383234		2585.57	0.00344283		3115.57	-0.001397		3645.6	-0.01916056
465.79	0.06858292		995.79	-0.01354927		1525.78	-0.00271505		2055.78	0.0046092		2585.77	0.00367389		3115.77	-0.00201517		3645.8	-0.01867519
465.99	0.06845213		995.99	-0.01265951		1525.98	-0.00394117		2055.98	0.00478139		2585.97	0.00333996		3115.97	-0.00130334		3646	-0.01995429
466.19	0.06875379		996.19	-0.01270695		1526.18	-0.00432202		2056.18	0.00419974		2586.17	0.00231276		3116.17	-0.00126164		3646.2	-0.02085182
466.39	0.06929845		996.39	-0.01266779		1526.38	-0.00559146		2056.38	0.003883		2586.37	0.00213148		3116.37	0.00007316		3646.4	-0.02155226
466.59	0.06980119		996.59	-0.01229027		1526.58	-0.00639713		2056.58	0.00282931		2586.57	0.00262364		3116.57	-0.0003095		3646.6	-0.02150076
466.79	0.06884683		996.79	-0.01344945		1526.78	-0.00720093		2056.78	0.00236147		2586.77	0.00245146		3116.77	-0.00003164		3646.8	-0.02239162
466.99	0.06775829		996.99	-0.01326118		1526.98	-0.00647904		2056.98	0.00116908		2586.97	0.00184476		3116.97	0.00077914		3647	-0.02202967
467.19	0.06770479		997.19	-0.01335317		1527.18	-0.00587764		2057.18	0.00028493		2587.17	0.0028432		3117.17	0.00060489		3647.2	-0.02199021
467.39	0.06710318		997.39	-0.01443402		1527.38	-0.00675207		2057.38	-0.00009015		2587.37	0.00306797		3117.37	0.00068805		3647.4	-0.02086913
467.59	0.06557198		997.59	-0.01486495		1527.58	-0.00664695		2057.58	0.00015035		2587.57	0.00360018		3117.57	0.00062076		3647.6	-0.02100532
467.79	0.06566319		997.79	-0.0154242		1527.78	-0.00669868		2057.78	0.00036562		2587.77	0.00379017		3117.77	-0.00043603		3647.8	-0.02097284
467.99	0.06580603		997.99	-0.01576279		1527.98	-0.00643461		2057.98	0.00037922		2587.97	0.00393185		3117.97	-0.00088703		3648	-0.02026831
468.19	0.06536851		998.19	-0.01642111		1528.18	-0.00605442		2058.18	-0.00048505		2588.17	0.00413733		3118.17	-0.0016772		3648.2	-0.01978972
468.39	0.06564079		998.39	-0.01687707		1528.38	-0.00546255		2058.38	-0.00074566		2588.37	0.00519189		3118.37	-0.00200382		3648.4	-0.01953262
468.59	0.06507947		998.59	-0.01798452		1528.58	-0.00508851		2058.58	-0.0009181		2588.57	0.00577041		3118.57	-0.00141703		3648.6	-0.01889925
468.79	0.06484064		998.79	-0.01829031		1528.78	-0.00496762		2058.78	-0.00109307		2588.77	0.00616904		3118.77	-0.00096441		3648.8	-0.01752658
468.99	0.06458314		998.99	-0.01828821		1528.98	-0.00437891		2058.98	-0.00047157		2588.97	0.00635788		3118.97	0.00013487		3649	-0.01750614
469.19	0.0634173		999.19	-0.01836247		1529.18	-0.00472734		2059.18	-0.00045605		2589.17	0.00618066		3119.17	-0.00052174		3649.2	-0.0173039
469.39	0.06309249		999.39	-0.0183409		1529.38	-0.00363094		2059.38	0.00107845		2589.37	0.00594664		3119.37	-0.00086614		3649.4	-0.01697528
469.59	0.0635631		999.59	-0.0174675		1529.58	-0.00315781		2059.58	0.00012437		2589.57	0.00614169		3119.57	-0.00064489		3649.6	-0.01690107
469.79	0.06415209		999.79	-0.01827561		1529.78	-0.00235479		2059.78	0.00178406		2589.77	0.00493828		3119.77	-0.00077941		3649.8	-0.01822419
469.99	0.06497887		999.99	-0.01731644		1529.98	-0.00222037		2059.98	0.00171181		2589.97	0.00413827		3119.97	0.00024958		3650	-0.01964273
470.19	0.06501936		1000.19	-0.01756852		1530.18	-0.00184543		2060.18	0.00176931		2590.17	0.00301286		3120.17	0.0004397		3650.2	-0.01947655
470.39	0.06578146		1000.39	-0.01724415		1530.38	-0.00154071		2060.38	0.00219122		2590.37	0.00260912		3120.37	0.00004188		3650.4	-0.02006337
470.59	0.06619259		1000.59	-0.01737974		1530.58	-0.00178369		2060.58	0.00235827		2590.57	0.00159421		3120.57	-0.00089817		3650.6	-0.02030214
470.79	0.06608247		1000.79	-0.01737425		1530.78	-0.00166092		2060.78	0.00175609		2590.77	0.00105683		3120.77	-0.00147751		3650.8	-0.02046579
470.99	0.06587472		1000.99	-0.01640987		1530.98	-0.00088056		2060.98	0.0010042		2590.97	0.00057992		3120.97	-0.0019938		3651	-0.02041627
471.19	0.06645428		1001.19	-0.01641765		1531.18	-0.00078583		2061.18	0.00051442		2591.17	0.00044211		3121.17	-0.00330632		3651.2	-0.0208672
471.39	0.0662871		1001.39	-0.01690233		1531.38	-0.00196445		2061.38	0.0002488		2591.37	0.00061447		3121.37	-0.00341313		3651.4	-0.02122873
471.59	0.06740784		1001.59	-0.01576243		1531.58	-0.00177897		2061.58	-0.00004797		2591.57	-0.00014101		3121.57	-0.00321464		3651.6	-0.0215655
471.79	0.06844613		1001.79	-0.01520509		1531.78	-0.0025384		2061.78	-0.00007048		2591.77	-0.000493		3121.77	-0.00364141		3651.8	-0.02078466
471.99	0.06860193		1001.99	-0.01514611		1531.98	-0.00276175		2061.98	-0.00019749		2591.97	-0.00003514		3121.97	-0.00381771		3652	-0.02040252
472.19	0.06879442		1002.19	-0.0147954		1532.18	-0.00277158		2062.18	-0.00032337		2592.17	-0.00010867		3122.17	-0.00387121		3652.2	-0.02079789
472.39	0.06825152		1002.39	-0.01474653		1532.38	-0.00354642		2062.38	-0.00009148		2592.37	0.00026677		3122.37	-0.00367629		3652.4	-0.02082987
472.59	0.06746995		1002.59	-0.01512223		1532.58	-0.00375742		2062.58	-0.00052714		2592.57	0.0007839		3122.57	-0.003576		3652.6	-0.02010325
472.79	0.06701628		1002.79	-0.01484269		1532.78	-0.00455606		2062.78	-0.00108972		2592.77	0.00113514		3122.77	-0.00318843		3652.8	-0.01908139
472.99	0.06679834		1002.99	-0.01622216		1532.98	-0.00528105		2062.98	-0.00125121		2592.97	0.0013304		3122.97	-0.00290618		3653	-0.01985276
473.19	0.0661796		1003.19	-0.01681493		1533.18	-0.005457		2063.18	-0.00113471		2593.17	0.0016976		3123.17	-0.00322785		3653.2	-0.0192474
473.39	0.06554636		1003.39	-0.01568809		1533.38	-0.00461583		2063.38	-0.00106902		2593.37	0.00175644		3123.37	-0.00302042		3653.4	-0.01863199
473.59	0.0657819		1003.59	-0.01565688		1533.58	-0.00471407		2063.58	-0.00102961		2593.57	0.00195976		3123.57	-0.00271421		3653.6	-0.0184113
473.79	0.06535216		1003.79	-0.01654266		1533.78	-0.00462199		2063.78	0.0005979		2593.77	0.00089783		3123.77	-0.00166876		3653.8	-0.01886018
473.99	0.06496308		1003.99	-0.01651119		1533.98	-0.00381605		2063.98	0.00077745		2593.97	0.00164134		3123.97	-0.00052892		3654	-0.01879865
474.19	0.06456913		1004.19	-0.01654029		1534.18	-0.00437119		2064.18	0.0007013		2594.17	0.00118557		3124.17	-0.00175309		3654.2	-0.01930913
474.39	0.06517023		1004.39	-0.01642999		1534.38	-0.00453513		2064.38	0.0011394		2594.37	0.00188152		3124.37	-0.00180098		3654.4	-0.01929637
474.59	0.06512016		1004.59	-0.01638395		1534.58	-0.00483448		2064.58	0.00139588		2594.57	0.00159696		3124.57	-0.00160148		3654.6	-0.01953555
474.79	0.06451492		1004.79	-0.01612463		1534.78	-0.00429067		2064.78	0.00078301		2594.77	0.00192904		3124.77	-0.00230605		3654.8	-0.0188067
474.99	0.06384043		1004.99	-0.0161565		1534.98	-0.00359511		2064.98	0.00092147		2594.97	0.00258567		3124.97	-0.00201696		3655	-0.01909144
475.19	0.06406995		1005.19	-0.01627509		1535.18	-0.00411866		2065.18	0.00111111		2595.17	0.00233076		3125.17	-0.0014319		3655.2	-0.01971934
475.39	0.06449251		1005.39	-0.01652392		1535.38	-0.00428525		2065.38	0.00126733		2595.37	0.00249927		3125.37	-0.00132239		3655.4	-0.01930855
475.59	0.06528075		1005.59	-0.01553849		1535.58	-0.00450447		2065.58	0.00081363		2595.57	0.00258132		3125.57	-0.00110815		3655.6	-0.01859692
475.79	0.06551311		1005.79	-0.01532381		1535.78	-0.00394809		2065.78	0.00163512		2595.77	0.00257273		3125.77	-0.00049346		3655.8	-0.01919411
475.99	0.06527094		1005.99	-0.01525051		1535.98	-0.00373574		2065.98	0.00124414		2595.97	0.0028839		3125.97	-0.00002308		3656	-0.01935797
476.19	0.06494616		1006.19	-0.01514784		1536.18	-0.00375781		2066.18	0.00120786		2596.17	0.00226189		3126.17	0.00043995		3656.2	-0.0197846
476.39	0.06485755		1006.39	-0.01537538		1536.38	-0.00411541		2066.38	0.0015825		2596.37	0.00246767		3126.37	-0.00002198		3656.4	-0.01954713
476.59	0.06541917		1006.59	-0.01532649		1536.58	-0.00382198		2066.58	0.00080791		2596.57	0.00342323		3126.57	-0.00000448		3656.6	-0.01935704
476.79	0.06588801		1006.79	-0.01598987		1536.78	-0.00475686		2066.78	-0.00012581		2596.77	0.00324487		3126.77	0.00003102		3656.8	-0.01888946
476.99	0.06569363		1006.99	-0.01675259		1536.98	-0.0048159		2066.98	-0.00068384		2596.97	0.00243981		3126.97	-0.00046507		3657	-0.01953128
477.19	0.06527659		1007.19	-0.01570466		1537.18	-0.00372289		2067.18	-0.00044641		2597.17	0.0021221		3127.17	-0.001125		3657.2	-0.01845929
477.39	0.06520812		1007.39	-0.01456787		1537.38	-0.00325277		2067.38	-0.0007463		2597.37	0.00214513		3127.37	-0.00111846		3657.4	-0.01817679
477.59	0.06479271		1007.59	-0.01452121		1537.58	-0.00349426		2067.58	-0.00159286		2597.57	0.00155388		3127.57	-0.0014531		3657.6	-0.01830749
477.79	0.06475931		1007.79	-0.01471575		1537.78	-0.00355284		2067.78	-0.00258185		2597.77	0.00037988		3127.77	-0.00116142		3657.8	-0.01837708
477.99	0.06511004		1007.99	-0.01418917		1537.98	-0.00329462		2067.98	-0.0029087		2597.97	0.00050546		3127.97	-0.00220202		3658	-0.01965345
478.19	0.06525446		1008.19	-0.01377189		1538.18	-0.00443139		2068.18	-0.00380025		2598.17	-0.00042991		3128.17	-0.0031881		3658.2	-0.02005146
478.39	0.06485236		1008.39	-0.0139636		1538.38	-0.00483859		2068.38	-0.00333329		2598.37	-0.00073173		3128.37	-0.00297805		3658.4	-0.02017597
478.59	0.06398441		1008.59	-0.01414706		1538.58	-0.00461066		2068.58	-0.00290969		2598.57	-0.00204267		3128.57	-0.00312232		3658.6	-0.0203857
478.79	0.06314307		1008.79	-0.0146859		1538.78	-0.00459397		2068.78	-0.00244757		2598.77	-0.00105406		3128.77	-0.00418475		3658.8	-0.01998537
478.99	0.06285819		1008.99	-0.01535005		1538.98	-0.00419467		2068.98	-0.00243666		2598.97	-0.00144322		3128.97	-0.00418955		3659	-0.02073298
479.19	0.06302047		1009.19	-0.01605083		1539.18	-0.00495052		2069.18	-0.00147329		2599.17	-0.00184627		3129.17	-0.00489452		3659.2	-0.02153248
479.39	0.06265374		1009.39	-0.01589113		1539.38	-0.00466984		2069.38	-0.0010425		2599.37	-0.0015744		3129.37	-0.0056824		3659.4	-0.02137877
479.59	0.06231973		1009.59	-0.0155902		1539.58	-0.00511921		2069.58	-0.00097321		2599.57	-0.00140002		3129.57	-0.00541889		3659.6	-0.02185664
479.79	0.06243102		1009.79	-0.01610026		1539.78	-0.00446896		2069.78	-0.00063425		2599.77	-0.00133838		3129.77	-0.00530755		3659.8	-0.0226348
479.99	0.06185668		1009.99	-0.0158483		1539.98	-0.00478954		2069.98	-0.00062711		2599.97	-0.00084101		3129.97	-0.00556362		3660	-0.02238121
480.19	0.06243703		1010.19	-0.01569444		1540.18	-0.00488419		2070.18	0.00029513		2600.17	-0.00002783		3130.17	-0.00587515		3660.2	-0.02263613
480.39	0.06307725		1010.39	-0.01646119		1540.38	-0.00465313		2070.38	0.00095227		2600.37	0.00067082		3130.37	-0.00698172		3660.4	-0.02290731
480.59	0.06309518		1010.59	-0.01689053		1540.58	-0.00391232		2070.58	0.00049204		2600.57	0.00187094		3130.57	-0.00688675		3660.6	-0.02295616
480.79	0.06326187		1010.79	-0.01742085		1540.78	-0.00387085		2070.78	0.00044252		2600.77	0.00149028		3130.77	-0.00683022		3660.8	-0.02199538
480.99	0.06312005		1010.99	-0.01707686		1540.98	-0.00249118		2070.98	0.00052048		2600.97	0.00089093		3130.97	-0.00623184		3661	-0.02173583
481.19	0.06372327		1011.19	-0.01660818		1541.18	-0.00198982		2071.18	0.00109568		2601.17	0.0013598		3131.17	-0.00612285		3661.2	-0.02116619
481.39	0.06412351		1011.39	-0.01631118		1541.38	-0.00238276		2071.38	0.00092418		2601.37	0.00189896		3131.37	-0.00579807		3661.4	-0.02148351
481.59	0.06448352		1011.59	-0.01567047		1541.58	-0.00270552		2071.58	-0.0005945		2601.57	0.00108951		3131.57	-0.00644785		3661.6	-0.02123505
481.79	0.06492231		1011.79	-0.0158131		1541.78	-0.00314384		2071.78	-0.00144812		2601.77	0.00121946		3131.77	-0.00525292		3661.8	-0.0205283
481.99	0.06583135		1011.99	-0.01481166		1541.98	-0.0035052		2071.98	-0.00124017		2601.97	0.0013365		3131.97	-0.00491576		3662	-0.02057821
482.19	0.0658089		1012.19	-0.01477417		1542.18	-0.00354694		2072.18	-0.00200894		2602.17	0.00082314		3132.17	-0.00468901		3662.2	-0.01974351
482.39	0.06535609		1012.39	-0.0142116		1542.38	-0.00351522		2072.38	-0.00197096		2602.37	0.00095863		3132.37	-0.0047943		3662.4	-0.0200386
482.59	0.06530095		1012.59	-0.01386323		1542.58	-0.0036822		2072.58	-0.00184228		2602.57	0.00102822		3132.57	-0.00533709		3662.6	-0.01942503
482.79	0.0646864		1012.79	-0.01428518		1542.78	-0.00405839		2072.78	-0.00172095		2602.77	0.00134446		3132.77	-0.00592138		3662.8	-0.019472
482.99	0.06416129		1012.99	-0.01447312		1542.98	-0.00334783		2072.98	-0.00218172		2602.97	0.00009446		3132.97	-0.00582227		3663	-0.02000839
483.19	0.06412832		1013.19	-0.01430966		1543.18	-0.00417937		2073.18	-0.00150324		2603.17	-0.00070496		3133.17	-0.00578171		3663.2	-0.01994861
483.39	0.06359175		1013.39	-0.01361245		1543.38	-0.00430436		2073.38	-0.00160532		2603.37	-0.0014239		3133.37	-0.00567035		3663.4	-0.01866687
483.59	0.06428389		1013.59	-0.0136356		1543.58	-0.00417769		2073.58	-0.00215861		2603.57	-0.00107684		3133.57	-0.00575783		3663.6	-0.01822686
483.79	0.06464552		1013.79	-0.01349837		1543.78	-0.00323501		2073.78	-0.00213806		2603.77	-0.00098235		3133.77	-0.00564725		3663.8	-0.01830471
483.99	0.06484523		1013.99	-0.01328716		1543.98	-0.00334505		2073.98	-0.00171785		2603.97	-0.00048864		3133.97	-0.00544367		3664	-0.01894126
484.19	0.06528185		1014.19	-0.01362562		1544.18	-0.00299446		2074.18	-0.00100356		2604.17	-0.00012165		3134.17	-0.00490393		3664.2	-0.0190611
484.39	0.06448232		1014.39	-0.01480941		1544.38	-0.00319955		2074.38	-0.00116252		2604.37	-0.00024368		3134.37	-0.00517121		3664.4	-0.02014309
484.59	0.06406984		1014.59	-0.01501196		1544.58	-0.00237548		2074.58	-0.00129833		2604.57	0.00006211		3134.57	-0.00335518		3664.6	-0.02010893
484.79	0.06438064		1014.79	-0.01498992		1544.78	-0.00263798		2074.78	-0.00141984		2604.77	0.00025424		3134.77	-0.00213934		3664.8	-0.02008591
484.99	0.06423234		1014.99	-0.01497905		1544.98	-0.00276258		2074.98	-0.00116696		2604.97	0.00021735		3134.97	-0.0011063		3665	-0.02068118
485.19	0.06482575		1015.19	-0.01514524		1545.18	-0.00390104		2075.18	-0.00119827		2605.17	0.00098601		3135.17	-0.00110578		3665.2	-0.02093708
485.39	0.06427531		1015.39	-0.01483665		1545.38	-0.00445473		2075.38	-0.00153314		2605.37	0.00158826		3135.37	-0.00068077		3665.4	-0.02193534
485.59	0.06374087		1015.59	-0.01413083		1545.58	-0.00412631		2075.58	-0.00267269		2605.57	0.00102076		3135.57	-0.00026201		3665.6	-0.02188543
485.79	0.06376211		1015.79	-0.01392386		1545.78	-0.00508646		2075.78	-0.00348606		2605.77	0.00101027		3135.77	0.00129843		3665.8	-0.02149496
485.99	0.06401648		1015.99	-0.01337852		1545.98	-0.00501898		2075.98	-0.00312281		2605.97	0.001322		3135.97	0.00195322		3666	-0.02087427
486.19	0.06304302		1016.19	-0.01350901		1546.18	-0.00569172		2076.18	-0.00368035		2606.17	0.00110679		3136.17	0.0016081		3666.2	-0.02085104
486.39	0.06269315		1016.39	-0.01448839		1546.38	-0.00625002		2076.38	-0.0039695		2606.37	0.00139289		3136.37	0.00203711		3666.4	-0.02143433
486.59	0.06241431		1016.59	-0.01494447		1546.58	-0.00687988		2076.58	-0.00401359		2606.57	0.00101042		3136.57	0.00183773		3666.6	-0.02121865
486.79	0.06201689		1016.79	-0.01582244		1546.78	-0.0073263		2076.78	-0.00439675		2606.77	0.00087056		3136.77	0.00251273		3666.8	-0.02172044
486.99	0.06228889		1016.99	-0.01634889		1546.98	-0.00704839		2076.98	-0.0053335		2606.97	-0.00010398		3136.97	0.00304377		3667	-0.0222149
487.19	0.06269703		1017.19	-0.01596141		1547.18	-0.00724263		2077.18	-0.00491829		2607.17	-0.00096824		3137.17	0.0032782		3667.2	-0.02096647
487.39	0.06286371		1017.39	-0.01614535		1547.38	-0.00767736		2077.38	-0.00442056		2607.37	-0.00065004		3137.37	0.00285333		3667.4	-0.02074173
487.59	0.06379363		1017.59	-0.01695875		1547.58	-0.00696228		2077.58	-0.00409439		2607.57	0.00018595		3137.57	0.00212696		3667.6	-0.02051666
487.79	0.06374889		1017.79	-0.01728547		1547.78	-0.00700901		2077.78	-0.00335433		2607.77	-0.00006268		3137.77	0.00188132		3667.8	-0.02074677
487.99	0.06396088		1017.99	-0.01826423		1547.98	-0.0072402		2077.98	-0.00218032		2607.97	-0.00044335		3137.97	0.0012756		3668	-0.02165368
488.19	0.06376717		1018.19	-0.01847662		1548.18	-0.00655189		2078.18	-0.00169391		2608.17	-0.00097443		3138.17	0.00123225		3668.2	-0.02175693
488.39	0.06340216		1018.39	-0.01925206		1548.38	-0.00618438		2078.38	-0.00177624		2608.37	-0.00070384		3138.37	0.00020478		3668.4	-0.02253089
488.59	0.06321246		1018.59	-0.01857849		1548.58	-0.00587872		2078.58	-0.00127552		2608.57	-0.00083917		3138.57	0.00076		3668.6	-0.02173126
488.79	0.06318296		1018.79	-0.01822938		1548.78	-0.00624722		2078.78	-0.00100151		2608.77	-0.00027652		3138.77	-0.00020004		3668.8	-0.02214165
488.99	0.06279399		1018.99	-0.01801388		1548.98	-0.00615233		2078.98	-0.0008457		2608.97	-0.00053416		3138.97	-0.00052267		3669	-0.02201021
489.19	0.06250906		1019.19	-0.01779742		1549.18	-0.00577841		2079.18	-0.00067031		2609.17	-0.00074884		3139.17	-0.00114039		3669.2	-0.02269711
489.39	0.06152289		1019.39	-0.01702186		1549.38	-0.00501913		2079.38	-0.00073115		2609.37	-0.00054392		3139.37	-0.00193069		3669.4	-0.02340069
489.59	0.06127254		1019.59	-0.01624387		1549.58	-0.00448853		2079.58	-0.00137464		2609.57	-0.00132799		3139.57	-0.00197984		3669.6	-0.02250445
489.79	0.06136058		1019.79	-0.01644277		1549.78	-0.0045714		2079.78	-0.00085698		2609.77	-0.00090285		3139.77	-0.00152757		3669.8	-0.02286367
489.99	0.06084061		1019.99	-0.01632865		1549.98	-0.00430035		2079.98	-0.00076284		2609.97	-0.00056574		3139.97	-0.00197366		3670	-0.02248714
490.19	0.06056459		1020.19	-0.01654043		1550.18	-0.00500466		2080.18	-0.00127972		2610.17	-0.00061934		3140.17	-0.00257465		3670.2	-0.02271504
490.39	0.06091207		1020.39	-0.01609001		1550.38	-0.00462777		2080.38	-0.00224471		2610.37	-0.00057372		3140.37	-0.00216044		3670.4	-0.0229388
490.59	0.06118017		1020.59	-0.01497122		1550.58	-0.00439103		2080.58	-0.00223454		2610.57	-0.00062313		3140.57	-0.00218092		3670.6	-0.02232928
490.79	0.0618198		1020.79	-0.015313		1550.78	-0.00436552		2080.78	-0.00283163		2610.77	-0.00032593		3140.77	-0.00173359		3670.8	-0.02244846
490.99	0.06290093		1020.99	-0.0148775		1550.98	-0.00444395		2080.98	-0.00369819		2610.97	-0.00012233		3140.97	-0.00129546		3671	-0.02147577
491.19	0.06304594		1021.19	-0.01474195		1551.18	-0.00447453		2081.18	-0.00319226		2611.17	-0.00003683		3141.17	-0.00063964		3671.2	-0.02012553
491.39	0.06383127		1021.39	-0.01572202		1551.38	-0.00518102		2081.38	-0.00307051		2611.37	-0.00013581		3141.37	-0.00070091		3671.4	-0.01959586
491.59	0.06463583		1021.59	-0.01648898		1551.58	-0.0051996		2081.58	-0.00287111		2611.57	-0.00024463		3141.57	-0.00223789		3671.6	-0.0193036
491.79	0.06440347		1021.79	-0.01610036		1551.78	-0.00627405		2081.78	-0.00243005		2611.77	-0.0009164		3141.77	-0.00245538		3671.8	-0.02000684
491.99	0.06472531		1021.99	-0.01726235		1551.98	-0.00594178		2081.98	-0.00183777		2611.97	-0.00177474		3141.97	-0.00282241		3672	-0.02036047
492.19	0.06409622		1022.19	-0.01756219		1552.18	-0.00580025		2082.18	-0.00230183		2612.17	-0.00154631		3142.17	-0.00351529		3672.2	-0.02035461
492.39	0.06399659		1022.39	-0.01820223		1552.38	-0.00679253		2082.38	-0.00216246		2612.37	-0.00162078		3142.37	-0.00367166		3672.4	-0.02054884
492.59	0.06345409		1022.59	-0.01789912		1552.58	-0.00819157		2082.58	-0.00208086		2612.57	-0.00135739		3142.57	-0.00345454		3672.6	-0.02071746
492.79	0.06387167		1022.79	-0.01818048		1552.78	-0.0081094		2082.78	-0.00244921		2612.77	-0.00181076		3142.77	-0.0037373		3672.8	-0.0207222
492.99	0.06330686		1022.99	-0.01855709		1552.98	-0.00875163		2082.98	-0.00242872		2612.97	-0.00217582		3142.97	-0.00321204		3673	-0.0208948
493.19	0.06284585		1023.19	-0.01956824		1553.18	-0.00835358		2083.18	-0.00259364		2613.17	-0.00241316		3143.17	-0.00315722		3673.2	-0.0217362
493.39	0.06218863		1023.39	-0.02004921		1553.38	-0.00773817		2083.38	-0.00303961		2613.37	-0.00148236		3143.37	-0.00312272		3673.4	-0.02177833
493.59	0.06082142		1023.59	-0.02055274		1553.58	-0.006825		2083.58	-0.00324219		2613.57	-0.00146827		3143.57	-0.00291302		3673.6	-0.0225654
493.79	0.05932901		1023.79	-0.02091584		1553.78	-0.00609704		2083.78	-0.00256194		2613.77	-0.0015746		3143.77	-0.00331501		3673.8	-0.02340628
493.99	0.05976749		1023.99	-0.02075194		1553.98	-0.00560257		2083.98	-0.00314682		2613.97	-0.00165475		3143.97	-0.00388187		3674	-0.02323917
494.19	0.06032109		1024.19	-0.02082748		1554.18	-0.00459942		2084.18	-0.00356651		2614.17	-0.00166988		3144.17	-0.00420617		3674.2	-0.02290885
494.39	0.060409		1024.39	-0.02036386		1554.38	-0.00277131		2084.38	-0.00363075		2614.37	-0.00153836		3144.37	-0.00433218		3674.4	-0.02265426
494.59	0.05960931		1024.59	-0.01996517		1554.58	-0.00176026		2084.58	-0.00304393		2614.57	-0.00209489		3144.57	-0.00429775		3674.6	-0.02243142
494.79	0.05962349		1024.79	-0.01974681		1554.78	-0.00131549		2084.78	-0.00364777		2614.77	-0.0016716		3144.77	-0.0050578		3674.8	-0.02153902
494.99	0.05906833		1024.99	-0.01879702		1554.98	-0.00169071		2084.98	-0.00380507		2614.97	-0.0013504		3144.97	-0.00457009		3675	-0.0200552
495.19	0.05910294		1025.19	-0.01898838		1555.18	-0.00180847		2085.18	-0.00295828		2615.17	-0.00168391		3145.17	-0.00442876		3675.2	-0.02012965
495.39	0.06022625		1025.39	-0.01863334		1555.38	-0.00181221		2085.38	-0.00284282		2615.37	-0.00213797		3145.37	-0.0047433		3675.4	-0.01975541
495.59	0.0601265		1025.59	-0.01774152		1555.58	-0.00251888		2085.58	-0.00265804		2615.57	-0.00157177		3145.57	-0.00529696		3675.6	-0.02036958
495.79	0.0595988		1025.79	-0.01670705		1555.78	-0.00287764		2085.78	-0.0022215		2615.77	-0.00184011		3145.77	-0.00498692		3675.8	-0.02037027
495.99	0.0599976		1025.99	-0.0171379		1555.98	-0.00344171		2085.98	-0.0018181		2615.97	-0.00146025		3145.97	-0.00486769		3676	-0.0200697
496.19	0.05989824		1026.19	-0.01671444		1556.18	-0.00406656		2086.18	-0.00168836		2616.17	-0.00105691		3146.17	-0.00473458		3676.2	-0.02066004
496.39	0.0604185		1026.39	-0.01619191		1556.38	-0.00542592		2086.38	-0.00116525		2616.37	-0.00150387		3146.37	-0.00370401		3676.4	-0.02079893
496.59	0.0613136		1026.59	-0.01610287		1556.58	-0.00637564		2086.58	-0.00064723		2616.57	-0.001949		3146.57	-0.00334661		3676.6	-0.02088546
496.79	0.06198107		1026.79	-0.01627069		1556.78	-0.0065124		2086.78	-0.00130263		2616.77	-0.00251126		3146.77	-0.00270441		3676.8	-0.02095801
496.99	0.06215963		1026.99	-0.01697796		1556.98	-0.00719554		2086.98	-0.00113965		2616.97	-0.00254261		3146.97	-0.00188842		3677	-0.02162147
497.19	0.06250085		1027.19	-0.01755067		1557.18	-0.0074191		2087.18	-0.00156385		2617.17	-0.0022537		3147.17	-0.00154528		3677.2	-0.02257605
497.39	0.06212886		1027.39	-0.01771503		1557.38	-0.0076479		2087.38	-0.00166364		2617.37	-0.00250922		3147.37	-0.00146974		3677.4	-0.0238238
497.59	0.0620636		1027.59	-0.01851408		1557.58	-0.00774648		2087.58	-0.00232686		2617.57	-0.00295623		3147.57	-0.00158162		3677.6	-0.02456347
497.79	0.06172859		1027.79	-0.01855451		1557.78	-0.00858975		2087.78	-0.00286563		2617.77	-0.00291493		3147.77	-0.00237372		3677.8	-0.024698
497.99	0.0629079		1027.99	-0.01902759		1557.98	-0.00794607		2087.98	-0.00336297		2617.97	-0.00266074		3147.97	-0.00178014		3678	-0.02511963
498.19	0.06283183		1028.19	-0.01865577		1558.18	-0.00772166		2088.18	-0.0036767		2618.17	-0.00303501		3148.17	-0.00213464		3678.2	-0.02529407
498.39	0.06115244		1028.39	-0.01825665		1558.38	-0.00652993		2088.38	-0.00385558		2618.37	-0.0027636		3148.37	-0.00225386		3678.4	-0.02492099
498.59	0.0602103		1028.59	-0.01707639		1558.58	-0.00693744		2088.58	-0.00465612		2618.57	-0.00281249		3148.57	-0.00247139		3678.6	-0.02497605
498.79	0.06064877		1028.79	-0.0169011		1558.78	-0.00685263		2088.78	-0.00521129		2618.77	-0.00163133		3148.77	-0.00350215		3678.8	-0.02431034
498.99	0.06071904		1028.99	-0.01834568		1558.98	-0.00683024		2088.98	-0.00504831		2618.97	-0.00095521		3148.97	-0.00320341		3679	-0.02370823
499.19	0.06140142		1029.19	-0.01837506		1559.18	-0.00712213		2089.18	-0.00473764		2619.17	-0.00086376		3149.17	-0.00349805		3679.2	-0.02429239
499.39	0.06157194		1029.39	-0.01836786		1559.38	-0.00669565		2089.38	-0.00473016		2619.37	-0.00099257		3149.37	-0.00293227		3679.4	-0.02360826
499.59	0.06117059		1029.59	-0.01790803		1559.58	-0.00660656		2089.58	-0.00401552		2619.57	-0.00031108		3149.57	-0.00268847		3679.6	-0.02357754
499.79	0.06049598		1029.79	-0.01802164		1559.78	-0.00588088		2089.78	-0.0038633		2619.77	-0.00054676		3149.77	-0.00304051		3679.8	-0.02293627
499.99	0.06178667		1029.99	-0.0178173		1559.98	-0.00529361		2089.98	-0.00287261		2619.97	-0.000319		3149.97	-0.00285176		3680	-0.02269699
500.19	0.06236629		1030.19	-0.01793334		1560.18	-0.0046521		2090.18	-0.00285039		2620.17	-0.00032513		3150.17	-0.00354675		3680.2	-0.0224911
500.39	0.06259702		1030.39	-0.01747486		1560.38	-0.00417753		2090.38	-0.00209666		2620.37	-0.00050325		3150.37	-0.00380955		3680.4	-0.02240963
500.59	0.06340766		1030.59	-0.01733534		1560.58	-0.00391161		2090.58	-0.00181621		2620.57	-0.00107408		3150.57	-0.0042568		3680.6	-0.02259289
500.79	0.06332323		1030.79	-0.01742895		1560.78	-0.0038013		2090.78	-0.0028386		2620.77	-0.0007648		3150.77	-0.00454312		3680.8	-0.02250203
500.99	0.06292257		1030.99	-0.01733975		1560.98	-0.00391814		2090.98	-0.00306172		2620.97	-0.00110541		3150.97	-0.00473797		3681	-0.02257629
501.19	0.06263244		1031.19	-0.01733783		1561.18	-0.00445227		2091.18	-0.003207		2621.17	-0.00102893		3151.17	-0.00516703		3681.2	-0.02273565
501.39	0.06221725		1031.39	-0.01763223		1561.38	-0.00418948		2091.38	-0.00332886		2621.37	-0.00124292		3151.37	-0.00545979		3681.4	-0.02305947
501.59	0.06228229		1031.59	-0.01826948		1561.58	-0.00468993		2091.58	-0.0038465		2621.57	-0.00149919		3151.57	-0.00466708		3681.6	-0.02221252
501.79	0.06129164		1031.79	-0.01779046		1561.78	-0.00472876		2091.78	-0.00398332		2621.77	-0.00145183		3151.77	-0.0047113		3681.8	-0.02230217
501.99	0.06054111		1031.99	-0.01731712		1561.98	-0.0050137		2091.98	-0.00352164		2621.97	-0.00151874		3151.97	-0.00424492		3682	-0.02173075
502.19	0.06062134		1032.19	-0.01710301		1562.18	-0.00616097		2092.18	-0.003702		2622.17	-0.00140757		3152.17	-0.00437404		3682.2	-0.02111159
502.39	0.06024707		1032.39	-0.01751129		1562.38	-0.00682486		2092.38	-0.00374159		2622.37	-0.0007146		3152.37	-0.00337391		3682.4	-0.02033407
502.59	0.06027828		1032.59	-0.01794056		1562.58	-0.00783024		2092.58	-0.00380767		2622.57	-0.00035178		3152.57	-0.00309644		3682.6	-0.02065515
502.79	0.0606936		1032.79	-0.01909199		1562.78	-0.00785417		2092.78	-0.00405401		2622.77	-0.00008903		3152.77	-0.00397524		3682.8	-0.0201767
502.99	0.06093427		1032.99	-0.02023526		1562.98	-0.00857006		2092.98	-0.00397136		2622.97	-0.00093516		3152.97	-0.00394462		3683	-0.02050077
503.19	0.06056674		1033.19	-0.01976306		1563.18	-0.00868178		2093.18	-0.00338591		2623.17	-0.00114604		3153.17	-0.00332165		3683.2	-0.02066714
503.39	0.06120702		1033.39	-0.01956247		1563.38	-0.00850431		2093.38	-0.00303777		2623.37	-0.00124427		3153.37	-0.00288455		3683.4	-0.01994343
503.59	0.0605562		1033.59	-0.01949273		1563.58	-0.00808248		2093.58	-0.00255886		2623.57	-0.00100362		3153.57	-0.00290339		3683.6	-0.0196352
503.79	0.06066502		1033.79	-0.01937274		1563.78	-0.00763152		2093.78	-0.00263351		2623.77	-0.00061292		3153.77	-0.00320673		3683.8	-0.01989586
503.99	0.06208596		1033.99	-0.01885906		1563.98	-0.00775779		2093.98	-0.00250881		2623.97	-0.00121239		3153.97	-0.00303668		3684	-0.02057791
504.19	0.0617386		1034.19	-0.01851406		1564.18	-0.00815179		2094.18	-0.00266464		2624.17	-0.00083841		3154.17	-0.00361261		3684.2	-0.02083874
504.39	0.06116526		1034.39	-0.01752206		1564.38	-0.0075793		2094.38	-0.00221043		2624.37	-0.00121522		3154.37	-0.0032144		3684.4	-0.02199044
504.59	0.06074251		1034.59	-0.01755907		1564.58	-0.00786404		2094.58	-0.00210828		2624.57	-0.00147999		3154.57	-0.00374859		3684.6	-0.02233393
504.79	0.05926867		1034.79	-0.01781724		1564.78	-0.00776836		2094.78	-0.00262863		2624.77	-0.00116656		3154.77	-0.00427875		3684.8	-0.0223866
504.99	0.05833914		1034.99	-0.01761122		1564.98	-0.00769103		2094.98	-0.00214932		2624.97	-0.00135239		3154.97	-0.0046192		3685	-0.02286016
505.19	0.05869884		1035.19	-0.01734134		1565.18	-0.00736775		2095.18	-0.00216611		2625.17	-0.00087183		3155.17	-0.00548741		3685.2	-0.02344942
505.39	0.05838266		1035.39	-0.01744275		1565.38	-0.00722574		2095.38	-0.0026059		2625.37	-0.00126683		3155.37	-0.00545991		3685.4	-0.02386736
505.59	0.05885138		1035.59	-0.01660499		1565.58	-0.00800266		2095.58	-0.00328044		2625.57	-0.00163009		3155.57	-0.00504419		3685.6	-0.02394582
505.79	0.05822681		1035.79	-0.01663885		1565.78	-0.00803144		2095.78	-0.00326071		2625.77	-0.00107944		3155.77	-0.00554983		3685.8	-0.02372693
505.99	0.05860683		1035.99	-0.01688193		1565.98	-0.00841213		2095.98	-0.00383573		2625.97	-0.00079142		3155.97	-0.00551326		3686	-0.0229069
506.19	0.05957865		1036.19	-0.01782225		1566.18	-0.00769738		2096.18	-0.00433776		2626.17	-0.00031684		3156.17	-0.0056553		3686.2	-0.02253042
506.39	0.05951058		1036.39	-0.01840078		1566.38	-0.00714197		2096.38	-0.00453828		2626.37	-0.00009967		3156.37	-0.00604038		3686.4	-0.0217368
506.59	0.05958538		1036.59	-0.01962963		1566.58	-0.00618261		2096.58	-0.00514847		2626.57	0.00017215		3156.57	-0.00653598		3686.6	-0.02106816
506.79	0.06005433		1036.79	-0.01983872		1566.78	-0.00576428		2096.78	-0.00489366		2626.77	-0.00070437		3156.77	-0.00765779		3686.8	-0.02148386
506.99	0.06046709		1036.99	-0.01996199		1566.98	-0.00608212		2096.98	-0.0038616		2626.97	-0.00152788		3156.97	-0.0072745		3687	-0.02153549
507.19	0.06004516		1037.19	-0.01927675		1567.18	-0.00616538		2097.18	-0.00322185		2627.17	-0.00091669		3157.17	-0.0065938		3687.2	-0.02132684
507.39	0.0600681		1037.39	-0.0190077		1567.38	-0.00680795		2097.38	-0.00247124		2627.37	-0.00087772		3157.37	-0.00720065		3687.4	-0.02190893
507.59	0.06001284		1037.59	-0.01969375		1567.58	-0.00686965		2097.58	-0.00227142		2627.57	-0.00162523		3157.57	-0.00689144		3687.6	-0.02195769
507.79	0.06084769		1037.79	-0.01951566		1567.78	-0.00704204		2097.78	-0.00151348		2627.77	-0.00183495		3157.77	-0.00641146		3687.8	-0.02278244
507.99	0.06119909		1037.99	-0.01952947		1567.98	-0.00700013		2097.98	-0.00098503		2627.97	-0.00339452		3157.97	-0.00564461		3688	-0.02282781
508.19	0.0608737		1038.19	-0.01956086		1568.18	-0.00703458		2098.18	-0.0001165		2628.17	-0.00289613		3158.17	-0.00477007		3688.2	-0.02295574
508.39	0.06048973		1038.39	-0.01997726		1568.38	-0.00723336		2098.38	0.00010395		2628.37	-0.00326233		3158.37	-0.00431147		3688.4	-0.02379243
508.59	0.06010995		1038.59	-0.02072386		1568.58	-0.00799472		2098.58	0.00027415		2628.57	-0.00369469		3158.57	-0.00386085		3688.6	-0.02325344
508.79	0.05941149		1038.79	-0.02018374		1568.78	-0.00841498		2098.78	-0.00028996		2628.77	-0.0041584		3158.77	-0.00350655		3688.8	-0.02379775
508.99	0.06019668		1038.99	-0.0198354		1568.98	-0.00873691		2098.98	-0.00043227		2628.97	-0.00424773		3158.97	-0.00330576		3689	-0.02418121
509.19	0.06043845		1039.19	-0.01923279		1569.18	-0.00951108		2099.18	-0.00124182		2629.17	-0.00386216		3159.17	-0.00368193		3689.2	-0.02477417
509.39	0.05981769		1039.39	-0.01888146		1569.38	-0.00988811		2099.38	-0.0016774		2629.37	-0.00477512		3159.37	-0.0038896		3689.4	-0.02408831
509.59	0.05981229		1039.59	-0.01833748		1569.58	-0.00996679		2099.58	-0.00248063		2629.57	-0.00429033		3159.57	-0.00470907		3689.6	-0.02289878
509.79	0.05964313		1039.79	-0.0189952		1569.78	-0.0091358		2099.78	-0.00360045		2629.77	-0.0042269		3159.77	-0.00474966		3689.8	-0.02233801
509.99	0.05984669		1039.99	-0.01870078		1569.98	-0.00851491		2099.98	-0.00492163		2629.97	-0.00412671		3159.97	-0.0048318		3690	-0.02157332
510.19	0.05923423		1040.19	-0.01902499		1570.18	-0.00726		2100.18	-0.00515115		2630.17	-0.00375546		3160.17	-0.00613772		3690.2	-0.02143414
510.39	0.05881443		1040.39	-0.01882144		1570.38	-0.0073717		2100.38	-0.00597877		2630.37	-0.00318726		3160.37	-0.00604687		3690.4	-0.02047514
510.59	0.05803676		1040.59	-0.01842795		1570.58	-0.0076162		2100.58	-0.00596814		2630.57	-0.00349032		3160.57	-0.00602846		3690.6	-0.02050152
510.79	0.05799023		1040.79	-0.01733052		1570.78	-0.00756066		2100.78	-0.00484319		2630.77	-0.00380984		3160.77	-0.00668884		3690.8	-0.02131575
510.99	0.05745938		1040.99	-0.01608169		1570.98	-0.0074042		2100.98	-0.00439283		2630.97	-0.00365866		3160.97	-0.00680312		3691	-0.02069803
511.19	0.05750599		1041.19	-0.01573599		1571.18	-0.00801125		2101.18	-0.00415357		2631.17	-0.00361512		3161.17	-0.00669653		3691.2	-0.02174549
511.39	0.05848115		1041.39	-0.01658726		1571.38	-0.00825662		2101.38	-0.00375559		2631.37	-0.00367532		3161.37	-0.00728852		3691.4	-0.02172893
511.59	0.05869755		1041.59	-0.01654167		1571.58	-0.00884958		2101.58	-0.00371033		2631.57	-0.00496938		3161.57	-0.00730985		3691.6	-0.02124771
511.79	0.05947794		1041.79	-0.01666019		1571.78	-0.00862005		2101.78	-0.00326197		2631.77	-0.00517746		3161.77	-0.00732506		3691.8	-0.02173491
511.99	0.06001224		1041.99	-0.01717971		1571.98	-0.00865147		2101.98	-0.00356076		2631.97	-0.00623187		3161.97	-0.0068338		3692	-0.02132724
512.19	0.05969987		1042.19	-0.01792555		1572.18	-0.00877416		2102.18	-0.00449597		2632.17	-0.00514512		3162.17	-0.00652912		3692.2	-0.02088863
512.39	0.06041757		1042.39	-0.01912373		1572.38	-0.00915895		2102.38	-0.0054681		2632.37	-0.0052713		3162.37	-0.00644196		3692.4	-0.02133595
512.59	0.06054053		1042.59	-0.0198756		1572.58	-0.00930033		2102.58	-0.00595642		2632.57	-0.00514493		3162.57	-0.00579186		3692.6	-0.02092283
512.79	0.06043278		1042.79	-0.01996619		1572.78	-0.00898406		2102.78	-0.00630468		2632.77	-0.00493239		3162.77	-0.00561671		3692.8	-0.02144749
512.99	0.06059012		1042.99	-0.02023964		1572.98	-0.00905293		2102.98	-0.00653765		2632.97	-0.00442069		3162.97	-0.00578053		3693	-0.02138502
513.19	0.06078529		1043.19	-0.01951556		1573.18	-0.0093852		2103.18	-0.00699471		2633.17	-0.00397119		3163.17	-0.00530254		3693.2	-0.02136789
513.39	0.06044691		1043.39	-0.01916173		1573.38	-0.00843856		2103.38	-0.0074037		2633.37	-0.00406394		3163.37	-0.00520822		3693.4	-0.0212429
513.59	0.0600615		1043.59	-0.01943059		1573.58	-0.00852725		2103.58	-0.00822836		2633.57	-0.00346802		3163.57	-0.00458216		3693.6	-0.02036931
513.79	0.05989434		1043.79	-0.01954681		1573.78	-0.00783202		2103.78	-0.00901086		2633.77	-0.00302426		3163.77	-0.00342192		3693.8	-0.02048658
513.99	0.05950081		1043.99	-0.01911832		1573.98	-0.00737359		2103.98	-0.00926853		2633.97	-0.0018888		3163.97	-0.00302325		3694	-0.0203865
514.19	0.0589869		1044.19	-0.01965262		1574.18	-0.00659459		2104.18	-0.00913615		2634.17	-0.00149907		3164.17	-0.00323103		3694.2	-0.02014544
514.39	0.05877319		1044.39	-0.02006619		1574.38	-0.00676518		2104.38	-0.00938155		2634.37	-0.00071806		3164.37	-0.00255864		3694.4	-0.01960334
514.59	0.05827783		1044.59	-0.0200103		1574.58	-0.00644989		2104.58	-0.0086647		2634.57	-0.00104651		3164.57	-0.00301131		3694.6	-0.02023482
514.79	0.0584093		1044.79	-0.01923881		1574.78	-0.00629969		2104.78	-0.00780525		2634.77	-0.00050574		3164.77	-0.00325021		3694.8	-0.02035348
514.99	0.05790517		1044.99	-0.01805784		1574.98	-0.00741128		2104.98	-0.00779556		2634.97	-0.00122221		3164.97	-0.00349579		3695	-0.02020093
515.19	0.05932462		1045.19	-0.01846654		1575.18	-0.00881656		2105.18	-0.00653672		2635.17	-0.00140291		3165.17	-0.00307063		3695.2	-0.02129365
515.39	0.05987284		1045.39	-0.0181725		1575.38	-0.00922908		2105.38	-0.00600745		2635.37	-0.00170039		3165.37	-0.00365849		3695.4	-0.02078841
515.59	0.06000424		1045.59	-0.01818656		1575.58	-0.01008315		2105.58	-0.00522531		2635.57	-0.00287647		3165.57	-0.00394411		3695.6	-0.02113537
515.79	0.0616458		1045.79	-0.0184489		1575.78	-0.00962421		2105.78	-0.00560123		2635.77	-0.0040453		3165.77	-0.00407276		3695.8	-0.02148989
515.99	0.06202143		1045.99	-0.01882281		1575.98	-0.01021895		2105.98	-0.00605883		2635.97	-0.00470802		3165.97	-0.00375774		3696	-0.0213225
516.19	0.06238951		1046.19	-0.01960388		1576.18	-0.00989946		2106.18	-0.00598929		2636.17	-0.00475942		3166.17	-0.00389858		3696.2	-0.02144386
516.39	0.06321968		1046.39	-0.02009744		1576.38	-0.0100014		2106.38	-0.00608597		2636.37	-0.00516052		3166.37	-0.00336476		3696.4	-0.02151031
516.59	0.06293803		1046.59	-0.02049051		1576.58	-0.00980227		2106.58	-0.00554418		2636.57	-0.00496777		3166.57	-0.00297688		3696.6	-0.02133666
516.79	0.06256459		1046.79	-0.02028852		1576.78	-0.00942563		2106.78	-0.00577253		2636.77	-0.0056739		3166.77	-0.00278656		3696.8	-0.02189528
516.99	0.06212391		1046.99	-0.01919276		1576.98	-0.00955259		2106.98	-0.00620569		2636.97	-0.00584641		3166.97	-0.00305686		3697	-0.02200304
517.19	0.06156712		1047.19	-0.01841379		1577.18	-0.0094623		2107.18	-0.00633853		2637.17	-0.00546844		3167.17	-0.00185767		3697.2	-0.0224452
517.39	0.06088524		1047.39	-0.0189181		1577.38	-0.01011426		2107.38	-0.00708792		2637.37	-0.00539989		3167.37	-0.00287842		3697.4	-0.02201596
517.59	0.0592891		1047.59	-0.01947485		1577.58	-0.01122775		2107.58	-0.00752697		2637.57	-0.0042569		3167.57	-0.00374581		3697.6	-0.0208942
517.79	0.05844099		1047.79	-0.01993279		1577.78	-0.01150734		2107.78	-0.00829564		2637.77	-0.00364592		3167.77	-0.00472433		3697.8	-0.0210385
517.99	0.05776812		1047.99	-0.01997145		1577.98	-0.01179416		2107.98	-0.0088927		2637.97	-0.00308816		3167.97	-0.00519745		3698	-0.02160896
518.19	0.05611271		1048.19	-0.02069932		1578.18	-0.0120835		2108.18	-0.00887955		2638.17	-0.00305037		3168.17	-0.00635265		3698.2	-0.02077616
518.39	0.05516619		1048.39	-0.02133233		1578.38	-0.01268068		2108.38	-0.00931669		2638.37	-0.00257229		3168.37	-0.00661688		3698.4	-0.02164705
518.59	0.05400725		1048.59	-0.02149378		1578.58	-0.0129564		2108.58	-0.00878473		2638.57	-0.00176311		3168.57	-0.00738109		3698.6	-0.02210838
518.79	0.0540707		1048.79	-0.02109602		1578.78	-0.01416645		2108.78	-0.00865338		2638.77	-0.0005265		3168.77	-0.00783169		3698.8	-0.02288854
518.99	0.05406358		1048.99	-0.02068707		1578.98	-0.01471202		2108.98	-0.00885023		2638.97	-0.00016268		3168.97	-0.00802206		3699	-0.02289799
519.19	0.05433333		1049.19	-0.02084596		1579.18	-0.01446108		2109.18	-0.00747648		2639.17	0.00078398		3169.17	-0.00774193		3699.2	-0.02412116
519.39	0.05515999		1049.39	-0.02069063		1579.38	-0.0135894		2109.38	-0.00758047		2639.37	0.0007582		3169.37	-0.0086658		3699.4	-0.02437566
519.59	0.05619585		1049.59	-0.02076371		1579.58	-0.01317576		2109.58	-0.00735666		2639.57	0.00045682		3169.57	-0.00875642		3699.6	-0.02459706
519.79	0.05733951		1049.79	-0.02111117		1579.78	-0.01183626		2109.78	-0.00761222		2639.77	-0.00096718		3169.77	-0.00863487		3699.8	-0.02421775
519.99	0.05784115		1049.99	-0.02160657		1579.98	-0.01129366		2109.98	-0.00756488		2639.97	-0.00111206		3169.97	-0.00829216		3700	-0.02404984
520.19	0.05872917		1050.19	-0.02256928		1580.18	-0.01020271		2110.18	-0.00709843		2640.17	-0.00150025		3170.17	-0.00699271		3700.2	-0.02352841
520.39	0.05863396		1050.39	-0.02258936		1580.38	-0.00905901		2110.38	-0.0068813		2640.37	-0.00137618		3170.37	-0.00668145		3700.4	-0.02328551
520.59	0.05881996		1050.59	-0.02295382		1580.58	-0.00871953		2110.58	-0.00640085		2640.57	-0.00135024		3170.57	-0.00660142		3700.6	-0.02315164
520.79	0.05897838		1050.79	-0.02287004		1580.78	-0.00785035		2110.78	-0.00645651		2640.77	-0.0030191		3170.77	-0.00662986		3700.8	-0.02313162
520.99	0.05871768		1050.99	-0.02309351		1580.98	-0.00795781		2110.98	-0.00689032		2640.97	-0.00335685		3170.97	-0.00678812		3701	-0.02276888
521.19	0.05748899		1051.19	-0.0241781		1581.18	-0.00824547		2111.18	-0.00702537		2641.17	-0.00358123		3171.17	-0.00700471		3701.2	-0.02199845
521.39	0.05794687		1051.39	-0.02450797		1581.38	-0.00887611		2111.38	-0.00736559		2641.37	-0.00395748		3171.37	-0.00856548		3701.4	-0.02162847
521.59	0.05644188		1051.59	-0.02449233		1581.58	-0.00866941		2111.58	-0.00744592		2641.57	-0.00448255		3171.57	-0.00911617		3701.6	-0.02099577
521.79	0.05549334		1051.79	-0.0248876		1581.78	-0.00795167		2111.78	-0.00818002		2641.77	-0.00585619		3171.77	-0.00918699		3701.8	-0.0215401
521.99	0.05464819		1051.99	-0.02437512		1581.98	-0.00717227		2111.98	-0.00864892		2641.97	-0.00544069		3171.97	-0.0087743		3702	-0.02110816
522.19	0.05351972		1052.19	-0.02428394		1582.18	-0.00700562		2112.18	-0.00814323		2642.17	-0.0057769		3172.17	-0.00842521		3702.2	-0.02052069
522.39	0.05350168		1052.39	-0.02458554		1582.38	-0.00744492		2112.38	-0.007815		2642.37	-0.00528985		3172.37	-0.00860424		3702.4	-0.0213442
522.59	0.05347339		1052.59	-0.02463667		1582.58	-0.00812875		2112.58	-0.00733027		2642.57	-0.00452296		3172.57	-0.00789447		3702.6	-0.0216649
522.79	0.0541418		1052.79	-0.0239617		1582.78	-0.0085561		2112.78	-0.00730668		2642.77	-0.00425377		3172.77	-0.00738529		3702.8	-0.02206534
522.99	0.05418227		1052.99	-0.02269409		1582.98	-0.00946944		2112.98	-0.00719959		2642.97	-0.00427717		3172.97	-0.00730354		3703	-0.02121684
523.19	0.05436155		1053.19	-0.02224722		1583.18	-0.0102167		2113.18	-0.00614334		2643.17	-0.00445041		3173.17	-0.00735807		3703.2	-0.02241913
523.39	0.05539187		1053.39	-0.02173136		1583.38	-0.01054747		2113.38	-0.0062954		2643.37	-0.00482539		3173.37	-0.00772862		3703.4	-0.02202705
523.59	0.05613707		1053.59	-0.02144529		1583.58	-0.01019166		2113.58	-0.00567124		2643.57	-0.00506851		3173.57	-0.00722111		3703.6	-0.02133411
523.79	0.05727492		1053.79	-0.02090119		1583.78	-0.01086305		2113.78	-0.00575696		2643.77	-0.00573103		3173.77	-0.00688657		3703.8	-0.02116246
523.99	0.05794824		1053.99	-0.02028868		1583.98	-0.01119349		2113.98	-0.00659203		2643.97	-0.0053987		3173.97	-0.00638195		3704	-0.02092408
524.19	0.05897521		1054.19	-0.02058414		1584.18	-0.01101951		2114.18	-0.00666358		2644.17	-0.00485817		3174.17	-0.00515391		3704.2	-0.02060588
524.39	0.05857401		1054.39	-0.01991578		1584.38	-0.01203105		2114.38	-0.00591379		2644.37	-0.00556371		3174.37	-0.00547341		3704.4	-0.0197075
524.59	0.05861781		1054.59	-0.01981661		1584.58	-0.01191144		2114.58	-0.00533031		2644.57	-0.00545467		3174.57	-0.0055169		3704.6	-0.01892977
524.79	0.05849655		1054.79	-0.02006672		1584.78	-0.01275822		2114.78	-0.00545814		2644.77	-0.00606366		3174.77	-0.00528191		3704.8	-0.01899707
524.99	0.05795073		1054.99	-0.02071265		1584.98	-0.01308843		2114.98	-0.00581577		2644.97	-0.00550968		3174.97	-0.00504881		3705	-0.01941778
525.19	0.05774446		1055.19	-0.01996415		1585.18	-0.01251837		2115.18	-0.00656787		2645.17	-0.00596077		3175.17	-0.00514424		3705.2	-0.01900416
525.39	0.05793039		1055.39	-0.01955194		1585.38	-0.01125305		2115.38	-0.00656021		2645.37	-0.00600715		3175.37	-0.00582956		3705.4	-0.0196049
525.59	0.05661985		1055.59	-0.01965671		1585.58	-0.01041846		2115.58	-0.00645581		2645.57	-0.00655922		3175.57	-0.00650488		3705.6	-0.01899447
525.79	0.05716997		1055.79	-0.01995822		1585.78	-0.0096247		2115.78	-0.00642189		2645.77	-0.00626517		3175.77	-0.00701065		3705.8	-0.02036618
525.99	0.05759469		1055.99	-0.01885638		1585.98	-0.00957142		2115.98	-0.00605917		2645.97	-0.00617754		3175.97	-0.00804063		3706	-0.02058566
526.19	0.05786809		1056.19	-0.01852252		1586.18	-0.00962175		2116.18	-0.00563063		2646.17	-0.00683062		3176.17	-0.00869363		3706.2	-0.02244304
526.39	0.05829584		1056.39	-0.01866398		1586.38	-0.0098937		2116.38	-0.00591575		2646.37	-0.0069428		3176.37	-0.00984418		3706.4	-0.02364277
526.59	0.05845903		1056.59	-0.01834774		1586.58	-0.01009532		2116.58	-0.00607778		2646.57	-0.00677908		3176.57	-0.00948352		3706.6	-0.02379784
526.79	0.05858876		1056.79	-0.01882305		1586.78	-0.01061277		2116.78	-0.0059787		2646.77	-0.00657288		3176.77	-0.01032496		3706.8	-0.02395265
526.99	0.0581661		1056.99	-0.01933208		1586.98	-0.01106669		2116.98	-0.00607326		2646.97	-0.00620306		3176.97	-0.011391		3707	-0.02443228
527.19	0.05778664		1057.19	-0.0198919		1587.18	-0.0110162		2117.18	-0.00530205		2647.17	-0.00658708		3177.17	-0.01113765		3707.2	-0.02580856
527.39	0.05785081		1057.39	-0.02046108		1587.38	-0.01142001		2117.38	-0.00558832		2647.37	-0.00601707		3177.37	-0.01221896		3707.4	-0.02590852
527.59	0.05830097		1057.59	-0.02038777		1587.58	-0.01081687		2117.58	-0.00548474		2647.57	-0.00572107		3177.57	-0.01279266		3707.6	-0.02560536
527.79	0.05858095		1057.79	-0.02094449		1587.78	-0.01198299		2117.78	-0.00594719		2647.77	-0.00513313		3177.77	-0.01303945		3707.8	-0.02507494
527.99	0.05771747		1057.99	-0.02159354		1587.98	-0.01158207		2117.98	-0.00589177		2647.97	-0.00521856		3177.97	-0.01204004		3708	-0.02432307
528.19	0.05666038		1058.19	-0.02217106		1588.18	-0.01148599		2118.18	-0.00515394		2648.17	-0.00503779		3178.17	-0.01142116		3708.2	-0.02398831
528.39	0.05621404		1058.39	-0.02187288		1588.38	-0.01257913		2118.38	-0.00459644		2648.37	-0.00607749		3178.37	-0.01034572		3708.4	-0.02294109
528.59	0.05657323		1058.59	-0.0219874		1588.58	-0.01203295		2118.58	-0.00558594		2648.57	-0.00503406		3178.57	-0.0098815		3708.6	-0.02312424
528.79	0.05668143		1058.79	-0.0214518		1588.78	-0.01262646		2118.78	-0.00638124		2648.77	-0.00564139		3178.77	-0.00903089		3708.8	-0.02307855
528.99	0.05647866		1058.99	-0.02070985		1588.98	-0.01071517		2118.98	-0.00704974		2648.97	-0.00596014		3178.97	-0.00805478		3709	-0.02293681
529.19	0.05656279		1059.19	-0.01966678		1589.18	-0.01038507		2119.18	-0.00749407		2649.17	-0.00618091		3179.17	-0.00844261		3709.2	-0.02186642
529.39	0.05649292		1059.39	-0.01979774		1589.38	-0.01016605		2119.38	-0.00736441		2649.37	-0.00709057		3179.37	-0.00888075		3709.4	-0.02177595
529.59	0.05707505		1059.59	-0.01958391		1589.58	-0.01078166		2119.58	-0.00727611		2649.57	-0.00748623		3179.57	-0.0083064		3709.6	-0.02220455
529.79	0.05749479		1059.79	-0.01921582		1589.78	-0.0108133		2119.78	-0.00785411		2649.77	-0.00795098		3179.77	-0.00779885		3709.8	-0.02355764
529.99	0.05753501		1059.99	-0.01900928		1589.98	-0.01086706		2119.98	-0.00759441		2649.97	-0.00928156		3179.97	-0.00813582		3710	-0.02381571
530.19	0.0576791		1060.19	-0.01980448		1590.18	-0.01066477		2120.18	-0.00857825		2650.17	-0.00957409		3180.17	-0.00821698		3710.2	-0.02449236
530.39	0.0579729		1060.39	-0.02013581		1590.38	-0.01045093		2120.38	-0.00892558		2650.37	-0.00921122		3180.37	-0.00811145		3710.4	-0.02361549
530.59	0.0580459		1060.59	-0.02045676		1590.58	-0.01094566		2120.58	-0.00856699		2650.57	-0.00854378		3180.57	-0.00727845		3710.6	-0.02369856
530.79	0.05767417		1060.79	-0.02173079		1590.78	-0.01104895		2120.78	-0.00799814		2650.77	-0.00850813		3180.77	-0.00719586		3710.8	-0.02380661
530.99	0.05736932		1060.99	-0.02199207		1590.98	-0.01035486		2120.98	-0.00748521		2650.97	-0.00801905		3180.97	-0.00713928		3711	-0.02437808
531.19	0.05725719		1061.19	-0.02187137		1591.18	-0.01027839		2121.18	-0.00634701		2651.17	-0.00794384		3181.17	-0.00631117		3711.2	-0.02530886
531.39	0.05788592		1061.39	-0.02280662		1591.38	-0.01047122		2121.38	-0.00600493		2651.37	-0.00697656		3181.37	-0.00649448		3711.4	-0.02557248
531.59	0.05786779		1061.59	-0.0229536		1591.58	-0.01071475		2121.58	-0.00501678		2651.57	-0.00623167		3181.57	-0.00570841		3711.6	-0.02579731
531.79	0.05805911		1061.79	-0.02384908		1591.78	-0.01174765		2121.78	-0.00449752		2651.77	-0.00637829		3181.77	-0.00541496		3711.8	-0.02561205
531.99	0.05770767		1061.99	-0.02305385		1591.98	-0.01094235		2121.98	-0.00324412		2651.97	-0.00644532		3181.97	-0.00482128		3712	-0.02609067
532.19	0.05743212		1062.19	-0.02330436		1592.18	-0.01092692		2122.18	-0.00303867		2652.17	-0.00614211		3182.17	-0.00517551		3712.2	-0.0258523
532.39	0.05818188		1062.39	-0.02296069		1592.38	-0.01102565		2122.38	-0.00329003		2652.37	-0.00711043		3182.37	-0.00549077		3712.4	-0.02532421
532.59	0.05753326		1062.59	-0.02249186		1592.58	-0.00994836		2122.58	-0.00311941		2652.57	-0.00723503		3182.57	-0.00637803		3712.6	-0.02602936
532.79	0.05614106		1062.79	-0.02133189		1592.78	-0.00947818		2122.78	-0.0027288		2652.77	-0.0081467		3182.77	-0.00633411		3712.8	-0.02581964
532.99	0.05610012		1062.99	-0.02110509		1592.98	-0.00979822		2122.98	-0.00294499		2652.97	-0.00782806		3182.97	-0.00682292		3713	-0.02557249
533.19	0.05635092		1063.19	-0.02060314		1593.18	-0.01001316		2123.18	-0.00339237		2653.17	-0.00758523		3183.17	-0.00774554		3713.2	-0.02512257
533.39	0.05586178		1063.39	-0.02126273		1593.38	-0.00992904		2123.38	-0.00391926		2653.37	-0.00802319		3183.37	-0.00782855		3713.4	-0.02580338
533.59	0.05573963		1063.59	-0.02149879		1593.58	-0.00997521		2123.58	-0.00444184		2653.57	-0.00776521		3183.57	-0.00733658		3713.6	-0.02541597
533.79	0.05579701		1063.79	-0.02238846		1593.78	-0.01000516		2123.78	-0.00513159		2653.77	-0.00747565		3183.77	-0.00782635		3713.8	-0.02520638
533.99	0.0560803		1063.99	-0.02332222		1593.98	-0.01032916		2123.98	-0.00603929		2653.97	-0.00834872		3183.97	-0.00917186		3714	-0.02566865
534.19	0.05628876		1064.19	-0.02322406		1594.18	-0.01051006		2124.18	-0.00633935		2654.17	-0.00723718		3184.17	-0.00990542		3714.2	-0.02561592
534.39	0.05624894		1064.39	-0.02315349		1594.38	-0.01096856		2124.38	-0.00632422		2654.37	-0.00630394		3184.37	-0.00930745		3714.4	-0.02493796
534.59	0.05594156		1064.59	-0.02340834		1594.58	-0.01085666		2124.58	-0.0064069		2654.57	-0.00627373		3184.57	-0.00916801		3714.6	-0.02443901
534.79	0.05532364		1064.79	-0.02357162		1594.78	-0.01096464		2124.78	-0.00688487		2654.77	-0.00643517		3184.77	-0.00896497		3714.8	-0.02455092
534.99	0.05589083		1064.99	-0.02321617		1594.98	-0.01113783		2124.98	-0.00750092		2654.97	-0.00560949		3184.97	-0.00866095		3715	-0.02455904
535.19	0.05602188		1065.19	-0.023156		1595.18	-0.01201374		2125.18	-0.0069889		2655.17	-0.0051143		3185.17	-0.00799424		3715.2	-0.02460263
535.39	0.05710267		1065.39	-0.02292717		1595.38	-0.01244346		2125.38	-0.00643017		2655.37	-0.00489786		3185.37	-0.00725192		3715.4	-0.02446786
535.59	0.05699661		1065.59	-0.02294189		1595.58	-0.01247947		2125.58	-0.00582462		2655.57	-0.00486002		3185.57	-0.00783899		3715.6	-0.02435647
535.79	0.05684794		1065.79	-0.02277311		1595.78	-0.01205654		2125.78	-0.00592442		2655.77	-0.00564019		3185.77	-0.00765955		3715.8	-0.0236292
535.99	0.05622057		1065.99	-0.02189112		1595.98	-0.01110314		2125.98	-0.00501906		2655.97	-0.00503118		3185.97	-0.00753419		3716	-0.02384948
536.19	0.05575109		1066.19	-0.02257499		1596.18	-0.01111075		2126.18	-0.00482408		2656.17	-0.00617371		3186.17	-0.00818097		3716.2	-0.02388707
536.39	0.05603548		1066.39	-0.02158232		1596.38	-0.0110535		2126.38	-0.00430241		2656.37	-0.00758548		3186.37	-0.0082655		3716.4	-0.02437582
536.59	0.05606933		1066.59	-0.02105215		1596.58	-0.01141308		2126.58	-0.00375807		2656.57	-0.00692058		3186.57	-0.00807106		3716.6	-0.02545055
536.79	0.05606482		1066.79	-0.02014887		1596.78	-0.01229858		2126.78	-0.00479932		2656.77	-0.00734358		3186.77	-0.00790796		3716.8	-0.02537632
536.99	0.05662696		1066.99	-0.02074528		1596.98	-0.01234604		2126.98	-0.00622624		2656.97	-0.00736008		3186.97	-0.00820324		3717	-0.02472059
537.19	0.0557583		1067.19	-0.0208779		1597.18	-0.01136646		2127.18	-0.00728884		2657.17	-0.00785326		3187.17	-0.00766323		3717.2	-0.0251343
537.39	0.05614859		1067.39	-0.02102643		1597.38	-0.01100821		2127.38	-0.0071145		2657.37	-0.0079175		3187.37	-0.00769261		3717.4	-0.02464561
537.59	0.05673538		1067.59	-0.02133911		1597.58	-0.01103926		2127.58	-0.00770745		2657.57	-0.00793342		3187.57	-0.00738317		3717.6	-0.02442827
537.79	0.05743552		1067.79	-0.02218154		1597.78	-0.01143939		2127.78	-0.00849779		2657.77	-0.00766243		3187.77	-0.00698804		3717.8	-0.02583581
537.99	0.05649982		1067.99	-0.02220306		1597.98	-0.01135662		2127.98	-0.00989449		2657.97	-0.00714528		3187.97	-0.00668685		3718	-0.02676897
538.19	0.05658193		1068.19	-0.02195774		1598.18	-0.01142991		2128.18	-0.01027357		2658.17	-0.00622706		3188.17	-0.00652505		3718.2	-0.0261991
538.39	0.05522843		1068.39	-0.02236905		1598.38	-0.01140007		2128.38	-0.01150216		2658.37	-0.00666471		3188.37	-0.00568945		3718.4	-0.02602356
538.59	0.05436815		1068.59	-0.02264228		1598.58	-0.01157		2128.58	-0.01183844		2658.57	-0.00635245		3188.57	-0.00617405		3718.6	-0.02626771
538.79	0.05429753		1068.79	-0.02287205		1598.78	-0.01217038		2128.78	-0.0119534		2658.77	-0.00636217		3188.77	-0.00480194		3718.8	-0.02630727
538.99	0.0550508		1068.99	-0.02315689		1598.98	-0.01252258		2128.98	-0.01062971		2658.97	-0.0060273		3188.97	-0.00505851		3719	-0.02621445
539.19	0.05406022		1069.19	-0.02317349		1599.18	-0.01243372		2129.18	-0.00919496		2659.17	-0.00644782		3189.17	-0.00486536		3719.2	-0.02632417
539.39	0.05448361		1069.39	-0.02269832		1599.38	-0.01152312		2129.38	-0.00796003		2659.37	-0.00657453		3189.37	-0.00426649		3719.4	-0.02599233
539.59	0.05418289		1069.59	-0.02336717		1599.58	-0.0111879		2129.58	-0.00708169		2659.57	-0.00709575		3189.57	-0.00512451		3719.6	-0.02531304
539.79	0.05400162		1069.79	-0.02279182		1599.78	-0.01145641		2129.78	-0.00727944		2659.77	-0.00704599		3189.77	-0.00448893		3719.8	-0.02447447
539.99	0.05446995		1069.99	-0.02219722		1599.98	-0.01096024		2129.98	-0.00574224		2659.97	-0.00694883		3189.97	-0.0052801		3720	-0.02536155
540.19	0.05552066		1070.19	-0.02282164		1600.18	-0.01056543		2130.18	-0.00528679		2660.17	-0.00861317		3190.17	-0.006198		3720.2	-0.0265181
540.39	0.05615682		1070.39	-0.02190248		1600.38	-0.01060971		2130.38	-0.00549417		2660.37	-0.00890633		3190.37	-0.00598175		3720.4	-0.02653272
540.59	0.05584501		1070.59	-0.02184076		1600.58	-0.0115965		2130.58	-0.00520445		2660.57	-0.00836978		3190.57	-0.00707273		3720.6	-0.02590234
540.79	0.05573441		1070.79	-0.02167907		1600.78	-0.01223848		2130.78	-0.00596107		2660.77	-0.00928381		3190.77	-0.00712026		3720.8	-0.02632409
540.99	0.0551811		1070.99	-0.02256413		1600.98	-0.0115186		2130.98	-0.00717994		2660.97	-0.00954047		3190.97	-0.00703053		3721	-0.02594441
541.19	0.05484708		1071.19	-0.02175327		1601.18	-0.0114663		2131.18	-0.00698591		2661.17	-0.00989995		3191.17	-0.00659687		3721.2	-0.0256476
541.39	0.05549072		1071.39	-0.02148376		1601.38	-0.01125386		2131.38	-0.00640664		2661.37	-0.00962652		3191.37	-0.00801477		3721.4	-0.02449925
541.59	0.05501039		1071.59	-0.02154092		1601.58	-0.0121411		2131.58	-0.00672409		2661.57	-0.00936345		3191.57	-0.00859104		3721.6	-0.02541473
541.79	0.0556299		1071.79	-0.02201379		1601.78	-0.01314494		2131.78	-0.00842111		2661.77	-0.00916565		3191.77	-0.00868662		3721.8	-0.02546561
541.99	0.05543787		1071.99	-0.02150083		1601.98	-0.01294797		2131.98	-0.00931348		2661.97	-0.00865203		3191.97	-0.00885315		3722	-0.0257049
542.19	0.05582391		1072.19	-0.02116322		1602.18	-0.0129445		2132.18	-0.01007091		2662.17	-0.00933119		3192.17	-0.00976557		3722.2	-0.02601617
542.39	0.05554935		1072.39	-0.02051783		1602.38	-0.01268555		2132.38	-0.00997049		2662.37	-0.00961896		3192.37	-0.00990566		3722.4	-0.02575684
542.59	0.0560658		1072.59	-0.02087904		1602.58	-0.01330294		2132.58	-0.00924055		2662.57	-0.00972976		3192.57	-0.0103128		3722.6	-0.02532406
542.79	0.05644654		1072.79	-0.02108116		1602.78	-0.01366431		2132.78	-0.00948904		2662.77	-0.00963173		3192.77	-0.0097718		3722.8	-0.02495228
542.99	0.05618107		1072.99	-0.0217953		1602.98	-0.01385647		2132.98	-0.00948704		2662.97	-0.01045743		3192.97	-0.01092519		3723	-0.02583092
543.19	0.05474235		1073.19	-0.02135398		1603.18	-0.01429356		2133.18	-0.00945189		2663.17	-0.01050936		3193.17	-0.01137816		3723.2	-0.02504259
543.39	0.05473096		1073.39	-0.02125149		1603.38	-0.01374454		2133.38	-0.00908978		2663.37	-0.01020085		3193.37	-0.01099545		3723.4	-0.02489653
543.59	0.05557537		1073.59	-0.02165841		1603.58	-0.01444258		2133.58	-0.00881625		2663.57	-0.01036692		3193.57	-0.01083809		3723.6	-0.02466737
543.79	0.05562693		1073.79	-0.02201043		1603.78	-0.013465		2133.78	-0.00870935		2663.77	-0.00941383		3193.77	-0.01045152		3723.8	-0.02488154
543.99	0.05558983		1073.99	-0.02266352		1603.98	-0.01247323		2133.98	-0.0073828		2663.97	-0.00977328		3193.97	-0.01101439		3724	-0.02601298
544.19	0.0559774		1074.19	-0.02414141		1604.18	-0.01201311		2134.18	-0.00696952		2664.17	-0.00984117		3194.17	-0.01125589		3724.2	-0.02631174
544.39	0.0554054		1074.39	-0.0246338		1604.38	-0.01227465		2134.38	-0.00670868		2664.37	-0.00902838		3194.37	-0.01073598		3724.4	-0.02607635
544.59	0.05436547		1074.59	-0.02606012		1604.58	-0.01288906		2134.58	-0.00617766		2664.57	-0.00784463		3194.57	-0.01054559		3724.6	-0.02621574
544.79	0.05394697		1074.79	-0.0260003		1604.78	-0.0122077		2134.78	-0.00657707		2664.77	-0.00754331		3194.77	-0.00960595		3724.8	-0.02716604
544.99	0.05349294		1074.99	-0.02651364		1604.98	-0.01153002		2134.98	-0.00584677		2664.97	-0.00723321		3194.97	-0.00858079		3725	-0.0260764
545.19	0.05338752		1075.19	-0.026754		1605.18	-0.01129368		2135.18	-0.00549844		2665.17	-0.00620885		3195.17	-0.00851735		3725.2	-0.0246331
545.39	0.05360443		1075.39	-0.02718277		1605.38	-0.0112613		2135.38	-0.00485037		2665.37	-0.00632137		3195.37	-0.00946975		3725.4	-0.02425958
545.59	0.05355253		1075.59	-0.02642247		1605.58	-0.01161214		2135.58	-0.00470237		2665.57	-0.00641611		3195.57	-0.00966624		3725.6	-0.02421261
545.79	0.05438306		1075.79	-0.02639091		1605.78	-0.01129701		2135.78	-0.00509407		2665.77	-0.00644899		3195.77	-0.00924628		3725.8	-0.02323259
545.99	0.05506822		1075.99	-0.02515308		1605.98	-0.01121407		2135.98	-0.00493158		2665.97	-0.00716654		3195.97	-0.00898227		3726	-0.02378176
546.19	0.05555747		1076.19	-0.02494189		1606.18	-0.01117969		2136.18	-0.00563778		2666.17	-0.00799915		3196.17	-0.00925963		3726.2	-0.02248969
546.39	0.0552688		1076.39	-0.0243256		1606.38	-0.01140661		2136.38	-0.00560388		2666.37	-0.00875982		3196.37	-0.00890211		3726.4	-0.02115005
546.59	0.0550047		1076.59	-0.02464932		1606.58	-0.01240308		2136.58	-0.00593429		2666.57	-0.00887175		3196.57	-0.00911825		3726.6	-0.02117243
546.79	0.05444499		1076.79	-0.02378826		1606.78	-0.01217062		2136.78	-0.00660801		2666.77	-0.00903848		3196.77	-0.00993452		3726.8	-0.02160106
546.99	0.05355636		1076.99	-0.02334691		1606.98	-0.01247362		2136.98	-0.00662944		2666.97	-0.01029238		3196.97	-0.01090039		3727	-0.02167732
547.19	0.05346568		1077.19	-0.02250476		1607.18	-0.01341065		2137.18	-0.00602621		2667.17	-0.01061055		3197.17	-0.01082228		3727.2	-0.02181538
547.39	0.05425276		1077.39	-0.02222415		1607.38	-0.01374516		2137.38	-0.00627888		2667.37	-0.01083624		3197.37	-0.01020447		3727.4	-0.0225613
547.59	0.05499751		1077.59	-0.02196945		1607.58	-0.01517279		2137.58	-0.0068563		2667.57	-0.01029665		3197.57	-0.01050166		3727.6	-0.02314412
547.79	0.0537708		1077.79	-0.02238488		1607.78	-0.01422807		2137.78	-0.00628306		2667.77	-0.00981599		3197.77	-0.0112392		3727.8	-0.02394452
547.99	0.05331169		1077.99	-0.02213297		1607.98	-0.01446514		2137.98	-0.00629482		2667.97	-0.01016717		3197.97	-0.01174484		3728	-0.02479928
548.19	0.05373839		1078.19	-0.02263907		1608.18	-0.01388222		2138.18	-0.0058404		2668.17	-0.00902585		3198.17	-0.01151695		3728.2	-0.02493753
548.39	0.05252004		1078.39	-0.02260155		1608.38	-0.01309902		2138.38	-0.00664621		2668.37	-0.00929813		3198.37	-0.01108634		3728.4	-0.02551144
548.59	0.05197782		1078.59	-0.023353		1608.58	-0.01254324		2138.58	-0.0070474		2668.57	-0.00851317		3198.57	-0.01087307		3728.6	-0.02557337
548.79	0.05218013		1078.79	-0.02264737		1608.78	-0.0118162		2138.78	-0.00693905		2668.77	-0.00843015		3198.77	-0.01044855		3728.8	-0.02613055
548.99	0.05253679		1078.99	-0.02302699		1608.98	-0.01181655		2138.98	-0.00679037		2668.97	-0.00791172		3198.97	-0.01047843		3729	-0.02540684
549.19	0.05242753		1079.19	-0.02300533		1609.18	-0.01154869		2139.18	-0.00737271		2669.17	-0.00747691		3199.17	-0.01024955		3729.2	-0.0253684
549.39	0.05267027		1079.39	-0.02321023		1609.38	-0.01205528		2139.38	-0.00667214		2669.37	-0.00795786		3199.37	-0.01069688		3729.4	-0.02599142
549.59	0.05235701		1079.59	-0.02318103		1609.58	-0.01178846		2139.58	-0.00742605		2669.57	-0.00847183		3199.57	-0.0100373		3729.6	-0.02554615
549.79	0.05273655		1079.79	-0.02358087		1609.78	-0.01154254		2139.78	-0.00785117		2669.77	-0.00888617		3199.77	-0.00962045		3729.8	-0.02614188
549.99	0.05233913		1079.99	-0.02354209		1609.98	-0.01307877		2139.98	-0.00787278		2669.97	-0.00841782		3199.97	-0.00998448		3730	-0.02613135
550.19	0.05206813		1080.19	-0.02455771		1610.18	-0.01225919		2140.18	-0.00857803		2670.17	-0.0085934		3200.17	-0.00955097		3730.2	-0.02555033
550.39	0.05149171		1080.39	-0.02461117		1610.38	-0.0120088		2140.38	-0.00775511		2670.37	-0.00824729		3200.37	-0.00909119		3730.4	-0.02564947
550.59	0.05130207		1080.59	-0.02516812		1610.58	-0.01237705		2140.58	-0.00733213		2670.57	-0.0080705		3200.57	-0.01007988		3730.6	-0.02618934
550.79	0.05231062		1080.79	-0.02485424		1610.78	-0.01203486		2140.78	-0.00762367		2670.77	-0.00890751		3200.77	-0.01029917		3730.8	-0.02614369
550.99	0.05310462		1080.99	-0.02525964		1610.98	-0.0124239		2140.98	-0.00802702		2670.97	-0.00900508		3200.97	-0.01054835		3731	-0.02568913
551.19	0.05419592		1081.19	-0.02540714		1611.18	-0.01337112		2141.18	-0.00825092		2671.17	-0.00924546		3201.17	-0.00972091		3731.2	-0.0261999
551.39	0.05398194		1081.39	-0.02535972		1611.38	-0.01300989		2141.38	-0.0076847		2671.37	-0.00822638		3201.37	-0.00953091		3731.4	-0.02614912
551.59	0.05338747		1081.59	-0.02515024		1611.58	-0.01252116		2141.58	-0.00725338		2671.57	-0.00768109		3201.57	-0.00964504		3731.6	-0.02609408
551.79	0.05297874		1081.79	-0.02604333		1611.78	-0.01194762		2141.78	-0.00660438		2671.77	-0.00801988		3201.77	-0.00938617		3731.8	-0.02674456
551.99	0.05307924		1081.99	-0.02550698		1611.98	-0.01190076		2141.98	-0.00718363		2671.97	-0.00794035		3201.97	-0.00915543		3732	-0.02686527
552.19	0.05352075		1082.19	-0.02591776		1612.18	-0.01148821		2142.18	-0.00763487		2672.17	-0.00768754		3202.17	-0.00873352		3732.2	-0.0263234
552.39	0.05297356		1082.39	-0.02555694		1612.38	-0.01113024		2142.38	-0.00853346		2672.37	-0.00792355		3202.37	-0.00833554		3732.4	-0.02598912
552.59	0.05353444		1082.59	-0.02510145		1612.58	-0.01167043		2142.58	-0.00858732		2672.57	-0.00756798		3202.57	-0.00798354		3732.6	-0.02573741
552.79	0.05348568		1082.79	-0.02403928		1612.78	-0.01185475		2142.78	-0.00829929		2672.77	-0.00774731		3202.77	-0.0083131		3732.8	-0.02531424
552.99	0.05297517		1082.99	-0.0235663		1612.98	-0.01182329		2142.98	-0.0083689		2672.97	-0.00803641		3202.97	-0.0090379		3733	-0.02521066
553.19	0.05263636		1083.19	-0.02341525		1613.18	-0.01115794		2143.18	-0.00892826		2673.17	-0.00840136		3203.17	-0.00832972		3733.2	-0.02539448
553.39	0.0529965		1083.39	-0.02302174		1613.38	-0.01048216		2143.38	-0.00920982		2673.37	-0.00897806		3203.37	-0.00837985		3733.4	-0.0252589
553.59	0.05210419		1083.59	-0.02283432		1613.58	-0.01062934		2143.58	-0.01019261		2673.57	-0.00969052		3203.57	-0.00756039		3733.6	-0.02562789
553.79	0.05177677		1083.79	-0.02259282		1613.78	-0.01198006		2143.78	-0.01005965		2673.77	-0.0100779		3203.77	-0.0088535		3733.8	-0.02613331
553.99	0.05148523		1083.99	-0.02261161		1613.98	-0.01228691		2143.98	-0.0088479		2673.97	-0.00880422		3203.97	-0.00881292		3734	-0.02576641
554.19	0.05230754		1084.19	-0.02304074		1614.18	-0.0115349		2144.18	-0.0089014		2674.17	-0.00933316		3204.17	-0.0087124		3734.2	-0.02606361
554.39	0.05262477		1084.39	-0.02330103		1614.38	-0.01195309		2144.38	-0.00833365		2674.37	-0.01012542		3204.37	-0.00903083		3734.4	-0.02538947
554.59	0.05320585		1084.59	-0.02359032		1614.58	-0.01168241		2144.58	-0.00898138		2674.57	-0.00998556		3204.57	-0.01014888		3734.6	-0.02493471
554.79	0.05426857		1084.79	-0.02449978		1614.78	-0.01188574		2144.78	-0.00872238		2674.77	-0.01061644		3204.77	-0.00999328		3734.8	-0.02468165
554.99	0.05377851		1084.99	-0.02484149		1614.98	-0.01180467		2144.98	-0.00779211		2674.97	-0.01052033		3204.97	-0.0101957		3735	-0.0241294
555.19	0.05313148		1085.19	-0.02567473		1615.18	-0.01160271		2145.18	-0.00691419		2675.17	-0.01070069		3205.17	-0.00934152		3735.2	-0.02393695
555.39	0.0522471		1085.39	-0.02529729		1615.38	-0.01118871		2145.38	-0.00527687		2675.37	-0.01101762		3205.37	-0.0098614		3735.4	-0.02355576
555.59	0.05266117		1085.59	-0.02561702		1615.58	-0.0114556		2145.58	-0.00480784		2675.57	-0.01190336		3205.57	-0.01052438		3735.6	-0.02401557
555.79	0.05245854		1085.79	-0.02688445		1615.78	-0.01067898		2145.78	-0.00530006		2675.77	-0.01205218		3205.77	-0.01044295		3735.8	-0.02460645
555.99	0.05229744		1085.99	-0.02726228		1615.98	-0.01061945		2145.98	-0.00620454		2675.97	-0.0124969		3205.97	-0.0105656		3736	-0.02409934
556.19	0.05216167		1086.19	-0.02806313		1616.18	-0.01024106		2146.18	-0.00614285		2676.17	-0.01218419		3206.17	-0.01052985		3736.2	-0.0235727
556.39	0.05220239		1086.39	-0.02814221		1616.38	-0.01028067		2146.38	-0.00677995		2676.37	-0.01168968		3206.37	-0.01086547		3736.4	-0.02375612
556.59	0.05213763		1086.59	-0.02800555		1616.58	-0.01037832		2146.58	-0.00691769		2676.57	-0.01166041		3206.57	-0.01104572		3736.6	-0.02456937
556.79	0.05129213		1086.79	-0.02777603		1616.78	-0.00931891		2146.78	-0.00732147		2676.77	-0.01126721		3206.77	-0.01163508		3736.8	-0.02500281
556.99	0.05076455		1086.99	-0.02732644		1616.98	-0.00895365		2146.98	-0.00815051		2676.97	-0.01171338		3206.97	-0.01184501		3737	-0.02627432
557.19	0.05076408		1087.19	-0.02767711		1617.18	-0.00868013		2147.18	-0.0091068		2677.17	-0.01162444		3207.17	-0.01150676		3737.2	-0.02674384
557.39	0.05128568		1087.39	-0.02699851		1617.38	-0.00994627		2147.38	-0.00935668		2677.37	-0.01165613		3207.37	-0.0114207		3737.4	-0.02739682
557.59	0.05040763		1087.59	-0.02758924		1617.58	-0.01119525		2147.58	-0.01043397		2677.57	-0.0112126		3207.57	-0.01188954		3737.6	-0.0284795
557.79	0.05122744		1087.79	-0.02725864		1617.78	-0.0127486		2147.78	-0.01044687		2677.77	-0.01069611		3207.77	-0.01263413		3737.8	-0.02798335
557.99	0.05192634		1087.99	-0.02727363		1617.98	-0.0126346		2147.98	-0.00999935		2677.97	-0.009462		3207.97	-0.01215189		3738	-0.02807976
558.19	0.05274845		1088.19	-0.02693448		1618.18	-0.01353147		2148.18	-0.01072724		2678.17	-0.0093447		3208.17	-0.01239947		3738.2	-0.02789447
558.39	0.05298371		1088.39	-0.02712893		1618.38	-0.01386046		2148.38	-0.01109816		2678.37	-0.00933728		3208.37	-0.01198639		3738.4	-0.02771657
558.59	0.05315243		1088.59	-0.02686986		1618.58	-0.01364121		2148.58	-0.01113496		2678.57	-0.0084059		3208.57	-0.01157273		3738.6	-0.02773283
558.79	0.05314996		1088.79	-0.02721054		1618.78	-0.01394537		2148.78	-0.01039951		2678.77	-0.00866729		3208.77	-0.01074333		3738.8	-0.02802962
558.99	0.05303957		1088.99	-0.02652277		1618.98	-0.01309885		2148.98	-0.01022689		2678.97	-0.00843858		3208.97	-0.01003606		3739	-0.02764017
559.19	0.05328453		1089.19	-0.02646867		1619.18	-0.0119423		2149.18	-0.01010585		2679.17	-0.00873816		3209.17	-0.0092001		3739.2	-0.02765582
559.39	0.05358057		1089.39	-0.02560707		1619.38	-0.01135653		2149.38	-0.00961033		2679.37	-0.00915648		3209.37	-0.00912852		3739.4	-0.02788616
559.59	0.05427992		1089.59	-0.02624665		1619.58	-0.00947178		2149.58	-0.00964365		2679.57	-0.00904328		3209.57	-0.00847707		3739.6	-0.02817039
559.79	0.05401467		1089.79	-0.02675903		1619.78	-0.00769442		2149.78	-0.0103275		2679.77	-0.00882968		3209.77	-0.00738936		3739.8	-0.02810243
