# Supplementary material for: Functional development of a V3/glycan-specific broadly neutralizing antibody isolated from a case of HIV superinfection
Source: eLife journal article supplement (doi:10.7554/elife.68110), 2021-07-15
Supplement: fig2-data2 [file G1.xls]

Vers 3.43 Data Simulation
Conc1	7.81E-09	7.81E-09	7.81E-09	7.81E-09
Start1	200.03	730.02	1260.02	1790.01
Stop1	559.82	1089.82	1619.82	2149.81
Time1	Data1	Sim1	Time2	Data2	Sim2	Time3	Data3	Sim3	Time4	Data4	Sim4
200.03	0.00380697		730.02	-0.00305257		1260.02	0.00713122		1790.01	-0.00143953
200.23	0.00386593		730.22	-0.00315713		1260.22	0.0074919		1790.21	-0.00141162
200.43	0.00375404		730.42	-0.00312063		1260.42	0.00770623		1790.41	-0.00069239
200.63	0.00385581		730.62	-0.0028173		1260.62	0.00823163		1790.61	0.00088639
200.83	0.0032906		730.82	-0.00324358		1260.82	0.00865324		1790.81	0.00141522
201.03	0.00352626		731.02	-0.00229226		1261.02	0.00923405		1791.01	0.00198777
201.23	0.0040078		731.22	-0.00181442		1261.22	0.00997727		1791.21	0.00228084
201.43	0.00336336		731.42	-0.00088855		1261.42	0.01010252		1791.41	0.00256679
201.63	0.00334287		731.62	-0.00038475		1261.62	0.00983651		1791.61	0.00282031
201.83	0.00363911		731.82	0.00048305		1261.82	0.00939168		1791.81	0.0031923
202.03	0.00388406		732.02	0.00070477		1262.02	0.0090999		1792.01	0.00404664
202.23	0.00383707		732.22	0.00183231		1262.22	0.00789001		1792.21	0.00390528
202.43	0.00418222		732.42	0.00103726		1262.42	0.00876799		1792.41	0.00382123
202.63	0.00420966		732.62	0.00128796		1262.62	0.0081902		1792.61	0.00403674
202.83	0.00484627		732.82	0.00125704		1262.82	0.00812007		1792.81	0.00270256
203.03	0.00487287		733.02	0.00156749		1263.02	0.00879587		1793.01	0.00236879
203.23	0.00473416		733.22	0.00089278		1263.22	0.00967689		1793.21	0.0016998
203.43	0.00398969		733.42	0.00067847		1263.42	0.00955511		1793.41	0.00163499
203.63	0.00404657		733.62	0.00085763		1263.62	0.01014943		1793.61	0.00196365
203.83	0.00502508		733.82	0.00082269		1263.82	0.01083532		1793.81	0.00195006
204.03	0.00550162		734.02	0.00050957		1264.02	0.01193226		1794.01	0.00210421
204.23	0.00589184		734.22	0.00004741		1264.22	0.01085138		1794.21	0.00211078
204.43	0.00575851		734.42	-0.00006577		1264.42	0.01025986		1794.41	0.00228154
204.63	0.00602529		734.62	0.00037936		1264.62	0.01036367		1794.61	0.00210032
204.83	0.0054505		734.82	0.00039428		1264.82	0.00996107		1794.81	0.00035058
205.03	0.00606134		735.02	0.00176012		1265.02	0.00980505		1795.01	-0.00022886
205.23	0.00574239		735.22	0.00235025		1265.22	0.00947961		1795.21	-0.00116251
205.43	0.00553391		735.42	0.00282112		1265.42	0.00810256		1795.41	-0.00156767
205.63	0.0057839		735.62	0.00292904		1265.62	0.00680149		1795.61	-0.0016475
205.83	0.00599844		735.82	0.00318252		1265.82	0.00602075		1795.81	-0.00163973
206.03	0.00614463		736.02	0.00362164		1266.02	0.00564544		1796.01	-0.00100789
206.23	0.00598356		736.22	0.00450045		1266.22	0.00503169		1796.21	-0.00147757
206.43	0.00663474		736.42	0.00385491		1266.42	0.00542922		1796.41	-0.0011201
206.63	0.00704989		736.62	0.00403656		1266.62	0.00418698		1796.61	-0.00093526
206.83	0.00797069		736.82	0.00341936		1266.82	0.00527108		1796.81	-0.00122575
207.03	0.00763738		737.02	0.00335829		1267.02	0.00536833		1797.01	-0.00072141
207.23	0.00768804		737.22	0.00285966		1267.22	0.00639255		1797.21	-0.00040773
207.43	0.0083401		737.42	0.00223207		1267.42	0.00760162		1797.41	0.0003962
207.63	0.00874605		737.62	0.00214026		1267.62	0.00929766		1797.61	0.00171131
207.83	0.00788536		737.82	0.00179861		1267.82	0.01017156		1797.81	0.00272226
208.03	0.00753432		738.02	0.00200283		1268.02	0.0105292		1798.01	0.00261231
208.23	0.00680003		738.22	0.00124284		1268.22	0.01095432		1798.21	0.00221956
208.43	0.00625748		738.42	0.00153689		1268.42	0.01114592		1798.41	0.00166709
208.63	0.00603067		738.62	0.00139478		1268.62	0.01221601		1798.61	0.00169197
208.83	0.00658568		738.82	0.00112486		1268.82	0.01217727		1798.81	0.00169258
209.03	0.0070936		739.02	0.00142922		1269.02	0.01245399		1799.01	0.00266913
209.23	0.00745531		739.22	0.00197411		1269.22	0.01244671		1799.21	0.00270504
209.43	0.00825515		739.42	0.00099489		1269.42	0.01192039		1799.41	0.00318799
209.63	0.00774522		739.62	0.0011751		1269.62	0.01146359		1799.61	0.00246188
209.83	0.00788321		739.82	0.00182279		1269.82	0.01154384		1799.81	0.00245622
210.03	0.00834686		740.02	0.002081		1270.02	0.01247647		1800.01	0.00267819
210.23	0.00854003		740.22	0.00185276		1270.22	0.01218953		1800.21	0.00277496
210.43	0.00864849		740.42	0.00110542		1270.42	0.01181591		1800.41	0.00265443
210.63	0.00940537		740.62	0.00068827		1270.62	0.01150375		1800.61	0.00309099
210.83	0.00998412		740.82	0.00086872		1270.82	0.01170735		1800.81	0.00245423
211.03	0.00925702		741.02	0.00002635		1271.02	0.01043728		1801.01	0.00201773
211.23	0.008916		741.22	-0.0004826		1271.22	0.01035426		1801.21	0.00200425
211.43	0.00854595		741.42	-0.00099101		1271.42	0.01042857		1801.41	0.00228769
211.63	0.00774455		741.62	-0.00084503		1271.62	0.01103712		1801.61	0.00192749
211.83	0.00639187		741.82	-0.00105157		1271.82	0.01142235		1801.81	0.00207608
212.03	0.00710915		742.02	-0.00105649		1272.02	0.01172913		1802.01	0.00188377
212.23	0.00702164		742.22	-0.00131251		1272.22	0.01208721		1802.21	0.00186568
212.43	0.00709101		742.42	-0.00004808		1272.42	0.01168398		1802.41	0.00231688
212.63	0.00767525		742.62	-0.00061709		1272.62	0.0116292		1802.61	0.0022773
212.83	0.00898076		742.82	0.00045503		1272.82	0.01086259		1802.81	0.00253342
213.03	0.00875169		743.02	0.00120171		1273.02	0.01084451		1803.01	0.00251021
213.23	0.00950623		743.22	0.00232174		1273.22	0.01015664		1803.21	0.00321686
213.43	0.00883178		743.42	0.00284126		1273.42	0.00985766		1803.41	0.00362458
213.63	0.0080837		743.62	0.00354625		1273.62	0.01015546		1803.61	0.00278569
213.83	0.00883958		743.82	0.0035798		1273.82	0.01068471		1803.81	0.00303113
214.03	0.00907064		744.02	0.00337549		1274.02	0.01109141		1804.01	0.00234916
214.23	0.00908185		744.22	0.00358686		1274.22	0.01061149		1804.21	0.00261013
214.43	0.00874538		744.42	0.0026555		1274.42	0.01076559		1804.41	0.00209657
214.63	0.00953709		744.62	0.00275997		1274.62	0.01024923		1804.61	0.00184114
214.83	0.00993567		744.82	0.00314858		1274.82	0.00980634		1804.81	0.00118728
215.03	0.00939363		745.02	0.00203126		1275.02	0.0091815		1805.01	0.0006315
215.23	0.01013832		745.22	0.00243928		1275.22	0.00926658		1805.21	0.00065261
215.43	0.01046358		745.42	0.00354801		1275.42	0.01046782		1805.41	0.00106371
215.63	0.0102468		745.62	0.0042443		1275.62	0.01099484		1805.61	0.00080351
215.83	0.01033446		745.82	0.00442439		1275.82	0.01163966		1805.81	0.00185332
216.03	0.01122476		746.02	0.00451352		1276.02	0.01171085		1806.01	0.00228625
216.23	0.01158138		746.22	0.00494955		1276.22	0.01106645		1806.21	0.00220003
216.43	0.01150001		746.42	0.00488051		1276.42	0.01027491		1806.41	0.00253854
216.63	0.01155592		746.62	0.0045368		1276.62	0.0105186		1806.61	0.00311594
216.83	0.01131717		746.82	0.00522447		1276.82	0.01073048		1806.81	0.0043137
217.03	0.01119206		747.02	0.00506471		1277.02	0.01072228		1807.01	0.00533918
217.23	0.01061233		747.22	0.0047212		1277.22	0.01066722		1807.21	0.00659914
217.43	0.01012595		747.42	0.00467802		1277.42	0.01029713		1807.41	0.00557409
217.63	0.01072493		747.62	0.00437128		1277.62	0.00979716		1807.61	0.00538561
217.83	0.01183654		747.82	0.00421174		1277.82	0.00958774		1807.81	0.00485731
218.03	0.01119406		748.02	0.00380945		1278.02	0.00879312		1808.01	0.00382645
218.23	0.01109837		748.22	0.00308675		1278.22	0.00848751		1808.21	0.00477115
218.43	0.01095444		748.42	0.00280525		1278.42	0.00891208		1808.41	0.00423122
218.63	0.01218485		748.62	0.00221246		1278.62	0.00849179		1808.61	0.00385233
218.83	0.01178309		748.82	0.00246596		1278.82	0.00877056		1808.81	0.00329483
219.03	0.0111111		749.02	0.00216161		1279.02	0.00858845		1809.01	0.00215815
219.23	0.01174899		749.22	0.00224946		1279.22	0.00897352		1809.21	0.00123124
219.43	0.01182632		749.42	0.00223553		1279.42	0.0092015		1809.41	0.00059775
219.63	0.01168238		749.62	0.00111789		1279.62	0.00852382		1809.61	0.0000949
219.83	0.01151601		749.82	0.0004694		1279.82	0.00851642		1809.81	0.00121773
220.03	0.012467		750.02	0.00025491		1280.02	0.008731		1810.01	0.00128414
220.23	0.0127579		750.22	-0.00051385		1280.22	0.00821834		1810.21	0.0012579
220.43	0.01197946		750.42	-0.0015849		1280.42	0.00833458		1810.41	0.00211558
220.63	0.01193137		750.62	-0.00144736		1280.62	0.00843477		1810.61	0.00299054
220.83	0.01214829		750.82	-0.00160555		1280.82	0.00793658		1810.81	0.00280432
221.03	0.01263759		751.02	-0.00267716		1281.02	0.00736651		1811.01	0.0037351
221.23	0.0126314		751.22	-0.00274428		1281.22	0.00701726		1811.21	0.00337302
221.43	0.01338409		751.42	-0.00173967		1281.42	0.00670796		1811.41	0.00361812
221.63	0.01291042		751.62	-0.00180707		1281.62	0.00675843		1811.61	0.0050773
221.83	0.01280147		751.82	-0.00229639		1281.82	0.0067881		1811.81	0.00522984
222.03	0.012143		752.02	-0.00222506		1282.02	0.00699842		1812.01	0.00584181
222.23	0.01178234		752.22	-0.00178905		1282.22	0.00859206		1812.21	0.00687328
222.43	0.01220814		752.42	-0.0010269		1282.42	0.00951774		1812.41	0.00648375
222.63	0.01230889		752.62	-0.00100774		1282.62	0.00983321		1812.61	0.00639741
222.83	0.01164671		752.82	0.0008102		1282.82	0.01050692		1812.81	0.00632259
223.03	0.01162214		753.02	0.0017377		1283.02	0.01053218		1813.01	0.00647478
223.23	0.01197429		753.22	0.00281011		1283.22	0.01083217		1813.21	0.00590137
223.43	0.01242587		753.42	0.0031065		1283.42	0.01050232		1813.41	0.00637016
223.63	0.01220674		753.62	0.00349701		1283.62	0.0100722		1813.61	0.00630089
223.83	0.01210398		753.82	0.00418647		1283.82	0.00988722		1813.81	0.00696134
224.03	0.01264871		754.02	0.00471953		1284.02	0.00944929		1814.01	0.0064012
224.23	0.01239645		754.22	0.00377633		1284.22	0.00744664		1814.21	0.00740675
224.43	0.01226884		754.42	0.0042973		1284.42	0.00660929		1814.41	0.00784136
224.63	0.01333521		754.62	0.00495852		1284.62	0.0051905		1814.61	0.00763068
224.83	0.01407707		754.82	0.00466906		1284.82	0.00476591		1814.81	0.00799422
225.03	0.01443158		755.02	0.00429669		1285.02	0.00500252		1815.01	0.00888871
225.23	0.01446744		755.22	0.00401776		1285.22	0.00531888		1815.21	0.00764588
225.43	0.01448431		755.42	0.00381624		1285.42	0.00658328		1815.41	0.00739355
225.63	0.01434243		755.62	0.00261295		1285.62	0.00549754		1815.61	0.00655834
225.83	0.01521255		755.82	0.00247884		1285.82	0.00615566		1815.81	0.00567759
226.03	0.01532076		756.02	0.00264509		1286.02	0.00739826		1816.01	0.00477424
226.23	0.01578712		756.22	0.00235638		1286.22	0.00808647		1816.21	0.00415318
226.43	0.01653659		756.42	0.0023037		1286.42	0.00848477		1816.41	0.00334719
226.63	0.01670353		756.62	0.00253368		1286.62	0.00933252		1816.61	0.00271536
226.83	0.01646565		756.82	0.00218333		1286.82	0.01047487		1816.81	0.00301244
227.03	0.01551181		757.02	0.00141464		1287.02	0.01119192		1817.01	0.0028063
227.23	0.01541746		757.22	0.00089787		1287.22	0.01191216		1817.21	0.00241685
227.43	0.01575157		757.42	0.00024444		1287.42	0.01219091		1817.41	0.00297401
227.63	0.01517963		757.62	0.00008752		1287.62	0.01155676		1817.61	0.00274223
227.83	0.01447006		757.82	-0.00023309		1287.82	0.01091382		1817.81	0.00343575
228.03	0.01410431		758.02	0.00066259		1288.02	0.01089753		1818.01	0.00412797
228.23	0.01369828		758.22	-0.00038553		1288.22	0.01073091		1818.21	0.00527707
228.43	0.01404905		758.42	0.00091514		1288.42	0.01069396		1818.41	0.00538561
228.63	0.01554808		758.62	0.001279		1288.62	0.01075097		1818.61	0.00549843
228.83	0.01629878		758.82	0.00167619		1288.82	0.01081503		1818.81	0.00615303
229.03	0.01650822		759.02	0.00217202		1289.02	0.01190581		1819.01	0.00630882
229.23	0.01688024		759.22	0.00201111		1289.22	0.01191989		1819.21	0.00535574
229.43	0.01711752		759.42	0.00291926		1289.42	0.01198973		1819.41	0.00508722
229.63	0.017488		759.62	0.00233218		1289.62	0.0105639		1819.61	0.00469132
229.83	0.01945183		759.82	0.0021567		1289.82	0.01113236		1819.81	0.00507887
230.03	0.01986067		760.02	0.00260854		1290.02	0.01017646		1820.01	0.00533699
230.23	0.02058148		760.22	0.00263205		1290.22	0.00998308		1820.21	0.00515684
230.43	0.02134081		760.42	0.00216372		1290.42	0.00945274		1820.41	0.00466587
230.63	0.02146203		760.62	0.00135714		1290.62	0.00974794		1820.61	0.00456835
230.83	0.02109959		760.82	0.00036361		1290.82	0.01035322		1820.81	0.0049887
231.03	0.02092543		761.02	0.0009583		1291.02	0.01064315		1821.01	0.00464025
231.23	0.02080155		761.22	0.00125855		1291.22	0.01024065		1821.21	0.00484987
231.43	0.02043892		761.42	0.00112249		1291.42	0.00971397		1821.41	0.00500451
231.63	0.02004579		761.62	0.0006888		1291.62	0.00833984		1821.61	0.00448554
231.83	0.01933689		761.82	0.00016347		1291.82	0.00925829		1821.81	0.00469118
232.03	0.01881042		762.02	0.0009458		1292.02	0.01020322		1822.01	0.00540331
232.23	0.01789802		762.22	0.00088331		1292.22	0.01140208		1822.21	0.00546849
232.43	0.01895707		762.42	0.00171955		1292.42	0.01160016		1822.41	0.00571779
232.63	0.01941608		762.62	0.00153061		1292.62	0.01147364		1822.61	0.00593157
232.83	0.01852749		762.82	0.00178216		1292.82	0.01110913		1822.81	0.00669451
233.03	0.01779015		763.02	0.00192375		1293.02	0.01202238		1823.01	0.00716534
233.23	0.01771354		763.22	0.00157663		1293.22	0.01200264		1823.21	0.0068123
233.43	0.01793355		763.42	0.00114484		1293.42	0.01254991		1823.41	0.00712268
233.63	0.01867557		763.62	0.00077111		1293.62	0.01288753		1823.61	0.00729026
233.83	0.01986043		763.82	0.00125063		1293.82	0.01448881		1823.81	0.00737421
234.03	0.01940768		764.02	0.0019983		1294.02	0.01473339		1824.01	0.00600765
234.23	0.01936169		764.22	0.00154033		1294.22	0.01532108		1824.21	0.00497552
234.43	0.0200135		764.42	0.00082664		1294.42	0.01515106		1824.41	0.00473452
234.63	0.02062789		764.62	0.00057134		1294.62	0.01601309		1824.61	0.00455874
234.83	0.02066092		764.82	0.00174192		1294.82	0.01584993		1824.81	0.00463486
235.03	0.02108612		765.02	0.00161172		1295.02	0.01519069		1825.01	0.00399371
235.23	0.0208458		765.22	0.00136935		1295.22	0.01390177		1825.21	0.0034056
235.43	0.02007495		765.42	0.00077968		1295.42	0.01229012		1825.41	0.00333378
235.63	0.01973271		765.62	0.0007736		1295.62	0.011528		1825.61	0.00320489
235.83	0.01983517		765.82	0.00095358		1295.82	0.01270333		1825.81	0.00378255
236.03	0.02026545		766.02	0.00192926		1296.02	0.01241673		1826.01	0.00377942
236.23	0.02068288		766.22	0.00243824		1296.22	0.0122608		1826.21	0.00428269
236.43	0.0214892		766.42	0.00198107		1296.42	0.01110915		1826.41	0.00432577
236.63	0.02189483		766.62	0.00168765		1296.62	0.01028515		1826.61	0.00515702
236.83	0.02151259		766.82	0.00153619		1296.82	0.00895488		1826.81	0.00594273
237.03	0.0224978		767.02	0.00152896		1297.02	0.0089768		1827.01	0.0062225
237.23	0.02305252		767.22	0.00076045		1297.22	0.00939737		1827.21	0.00608522
237.43	0.0242116		767.42	0.00069271		1297.42	0.01022639		1827.41	0.00517344
237.63	0.0239603		767.62	0.00102836		1297.62	0.01131539		1827.61	0.00424381
237.83	0.02381836		767.82	0.00140695		1297.82	0.01213834		1827.81	0.00369386
238.03	0.02325506		768.02	0.0012315		1298.02	0.01192335		1828.01	0.00325827
238.23	0.02350978		768.22	0.00141354		1298.22	0.01131863		1828.21	0.00371417
238.43	0.02357256		768.42	0.00182096		1298.42	0.01158795		1828.41	0.00453584
238.63	0.02292207		768.62	0.00200575		1298.62	0.01163796		1828.61	0.00474802
238.83	0.02112884		768.82	0.00248767		1298.82	0.01146233		1828.81	0.0050781
239.03	0.02033051		769.02	0.00201719		1299.02	0.01085646		1829.01	0.00484424
239.23	0.01922456		769.22	0.00269421		1299.22	0.01065937		1829.21	0.00413597
239.43	0.01861522		769.42	0.00229166		1299.42	0.00997117		1829.41	0.00500459
239.63	0.01892576		769.62	0.00231528		1299.62	0.0101834		1829.61	0.0046822
239.83	0.01963964		769.82	0.00262038		1299.82	0.01129654		1829.81	0.00507666
240.03	0.01932678		770.02	0.00275936		1300.02	0.01112828		1830.01	0.0051756
240.23	0.01920291		770.22	0.00250136		1300.22	0.01147278		1830.21	0.00561586
240.43	0.01911817		770.42	0.00162811		1300.42	0.01141035		1830.41	0.00642174
240.63	0.0195842		770.62	0.00086796		1300.62	0.01087761		1830.61	0.00801114
240.83	0.02004729		770.82	0.0005219		1300.82	0.01008787		1830.81	0.00877341
241.03	0.02118158		771.02	0.00009398		1301.02	0.01034886		1831.01	0.00869749
241.23	0.02138129		771.22	-0.00057474		1301.22	0.01131413		1831.21	0.00780166
241.43	0.022234		771.42	-0.00011113		1301.42	0.01133506		1831.41	0.00674282
241.63	0.02193861		771.62	0.00015132		1301.62	0.0113272		1831.61	0.00637869
241.83	0.02142443		771.82	0.00077744		1301.82	0.01103682		1831.81	0.00675728
242.03	0.02107441		772.02	0.00031584		1302.02	0.01088339		1832.01	0.00737093
242.23	0.02097647		772.22	0.00018909		1302.22	0.0108054		1832.21	0.00740001
242.43	0.02096057		772.42	0.00027443		1302.42	0.01082798		1832.41	0.00764944
242.63	0.02058153		772.62	0.00079097		1302.62	0.01067531		1832.61	0.0070757
242.83	0.02071457		772.82	0.00168841		1302.82	0.01091018		1832.81	0.00705858
243.03	0.02082767		773.02	0.00249609		1303.02	0.01031147		1833.01	0.00666001
243.23	0.02134151		773.22	0.00289753		1303.22	0.01033783		1833.21	0.00635854
243.43	0.02139771		773.42	0.00332283		1303.42	0.01040424		1833.41	0.00647608
243.63	0.02186726		773.62	0.00409884		1303.62	0.01068165		1833.61	0.00624295
243.83	0.02175182		773.82	0.00497851		1303.82	0.01134562		1833.81	0.00660768
244.03	0.02086809		774.02	0.00444934		1304.02	0.01019245		1834.01	0.00614282
244.23	0.02082446		774.22	0.00439099		1304.22	0.009751		1834.21	0.00612198
244.43	0.02044954		774.42	0.00396303		1304.42	0.00992165		1834.41	0.00650936
244.63	0.02154484		774.62	0.00404386		1304.62	0.01073872		1834.61	0.00659772
244.83	0.02204306		774.82	0.00402664		1304.82	0.01090988		1834.81	0.00704179
245.03	0.02271783		775.02	0.00419673		1305.02	0.01090897		1835.01	0.00687188
245.23	0.02318396		775.22	0.00388368		1305.22	0.01165229		1835.21	0.00590914
245.43	0.02434446		775.42	0.00467842		1305.42	0.01120577		1835.41	0.00571437
245.63	0.02520812		775.62	0.00431506		1305.62	0.01173066		1835.61	0.00535678
245.83	0.02449059		775.82	0.00372879		1305.82	0.01197783		1835.81	0.00665829
246.03	0.02533557		776.02	0.00201984		1306.02	0.01208297		1836.01	0.00727363
246.23	0.02577444		776.22	0.00243143		1306.22	0.01284149		1836.21	0.00760372
246.43	0.02652453		776.42	0.00301442		1306.42	0.01250587		1836.41	0.00820126
246.63	0.02594643		776.62	0.0036592		1306.62	0.01279225		1836.61	0.00807918
246.83	0.02674797		776.82	0.0040335		1306.82	0.01273725		1836.81	0.00832989
247.03	0.0262408		777.02	0.00419122		1307.02	0.01246089		1837.01	0.00853787
247.23	0.02646054		777.22	0.00403194		1307.22	0.01280529		1837.21	0.00870677
247.43	0.02692558		777.42	0.00497469		1307.42	0.01201179		1837.41	0.00945766
247.63	0.02696065		777.62	0.00493287		1307.62	0.0106409		1837.61	0.00985679
247.83	0.02630162		777.82	0.00483486		1307.82	0.01031263		1837.81	0.01018668
248.03	0.02645146		778.02	0.00438396		1308.02	0.00859158		1838.01	0.00973387
248.23	0.02648533		778.22	0.00452616		1308.22	0.00858571		1838.21	0.01004282
248.43	0.02603089		778.42	0.00416048		1308.42	0.00886139		1838.41	0.00962801
248.63	0.02609788		778.62	0.00380918		1308.62	0.00904909		1838.61	0.01003253
248.83	0.02502115		778.82	0.00344383		1308.82	0.00821374		1838.81	0.01094511
249.03	0.02515264		779.02	0.00315497		1309.02	0.00788678		1839.01	0.01036895
249.23	0.02538254		779.22	0.0029216		1309.22	0.00829913		1839.21	0.00994827
249.43	0.02597518		779.42	0.00328346		1309.42	0.00827028		1839.41	0.0095605
249.63	0.02554831		779.62	0.00272146		1309.62	0.00960435		1839.61	0.00932264
249.83	0.02431703		779.82	0.00193558		1309.82	0.01011419		1839.81	0.01020114
250.03	0.02451517		780.02	0.00077994		1310.02	0.01071773		1840.01	0.00968393
250.23	0.02344433		780.22	0.00210625		1310.22	0.01140804		1840.21	0.01061531
250.43	0.02260415		780.42	0.00261404		1310.42	0.01104466		1840.41	0.01073682
250.63	0.02166254		780.62	0.00282641		1310.62	0.01086769		1840.61	0.00921388
250.83	0.02254552		780.82	0.00337323		1310.82	0.01120279		1840.81	0.0084678
251.03	0.02204324		781.02	0.00333177		1311.02	0.01138166		1841.01	0.00767916
251.23	0.02219464		781.22	0.00428002		1311.22	0.01049791		1841.21	0.00743709
251.43	0.02303269		781.42	0.00598304		1311.42	0.00924039		1841.41	0.00730627
251.63	0.02314165		781.62	0.00580404		1311.62	0.00874686		1841.61	0.00755343
251.83	0.02381654		781.82	0.00560243		1311.82	0.00930072		1841.81	0.00775475
252.03	0.0250351		782.02	0.00535932		1312.02	0.00828162		1842.01	0.00778781
252.23	0.02514309		782.22	0.00523241		1312.22	0.00896671		1842.21	0.00752038
252.43	0.02535335		782.42	0.00504059		1312.42	0.00866048		1842.41	0.00800868
252.63	0.02549394		782.62	0.00537011		1312.62	0.00919685		1842.61	0.00879085
252.83	0.02602488		782.82	0.00577563		1312.82	0.00921902		1842.81	0.00948589
253.03	0.02662216		783.02	0.00646745		1313.02	0.00897156		1843.01	0.00959579
253.23	0.02750218		783.22	0.00689835		1313.22	0.00979409		1843.21	0.01028786
253.43	0.02728593		783.42	0.00655806		1313.42	0.0106105		1843.41	0.00993381
253.63	0.02745889		783.62	0.00625526		1313.62	0.01167713		1843.61	0.01057403
253.83	0.02709355		783.82	0.00531959		1313.82	0.01126971		1843.81	0.0113541
254.03	0.0269074		784.02	0.00489254		1314.02	0.01105094		1844.01	0.01151035
254.23	0.02674516		784.22	0.0050596		1314.22	0.01087337		1844.21	0.01168032
254.43	0.02699714		784.42	0.00344575		1314.42	0.01081967		1844.41	0.01026076
254.63	0.02674062		784.62	0.00290831		1314.62	0.01101368		1844.61	0.00849644
254.83	0.027485		784.82	0.00234692		1314.82	0.0114645		1844.81	0.00746239
255.03	0.02759781		785.02	0.00162363		1315.02	0.01033299		1845.01	0.00735917
255.23	0.02661689		785.22	0.00182841		1315.22	0.00960338		1845.21	0.00794489
255.43	0.02661848		785.42	0.00080787		1315.42	0.00938196		1845.41	0.00697627
255.63	0.02683902		785.62	-0.00096546		1315.62	0.00884684		1845.61	0.00731414
255.83	0.02764158		785.82	-0.00178699		1315.82	0.00908754		1845.81	0.00661938
256.03	0.02795949		786.02	-0.00260951		1316.02	0.00899483		1846.01	0.00719455
256.23	0.02786526		786.22	-0.00217278		1316.22	0.00923397		1846.21	0.00714744
256.43	0.02835858		786.42	-0.00214889		1316.42	0.00911914		1846.41	0.00794712
256.63	0.02819196		786.62	-0.00128634		1316.62	0.00889782		1846.61	0.00934537
256.83	0.02777299		786.82	-0.00037122		1316.82	0.00873642		1846.81	0.00980957
257.03	0.02783293		787.02	0.00089885		1317.02	0.00869426		1847.01	0.01044976
257.23	0.02840645		787.22	0.00165497		1317.22	0.00923517		1847.21	0.01046711
257.43	0.02875385		787.42	0.00180567		1317.42	0.00975677		1847.41	0.01037756
257.63	0.02950436		787.62	0.00196823		1317.62	0.01048948		1847.61	0.01086569
257.83	0.02933589		787.82	0.00258948		1317.82	0.01044365		1847.81	0.01061736
258.03	0.02987583		788.02	0.00310935		1318.02	0.01153045		1848.01	0.01034824
258.23	0.03059372		788.22	0.00367581		1318.22	0.01196783		1848.21	0.00937519
258.43	0.03090888		788.42	0.00439302		1318.42	0.01231288		1848.41	0.00823324
258.63	0.0307633		788.62	0.00588548		1318.62	0.01153799		1848.61	0.00773291
258.83	0.0314257		788.82	0.00635557		1318.82	0.01051551		1848.81	0.00776084
259.03	0.03092597		789.02	0.005775		1319.02	0.00936396		1849.01	0.0086115
259.23	0.0293273		789.22	0.00622913		1319.22	0.00862992		1849.21	0.00916176
259.43	0.03003186		789.42	0.00551915		1319.42	0.0083815		1849.41	0.00762581
259.63	0.03070631		789.62	0.00481479		1319.62	0.00761846		1849.61	0.00770504
259.83	0.03033364		789.82	0.00455337		1319.82	0.00808177		1849.81	0.00691653
260.03	0.03036841		790.02	0.00256026		1320.02	0.0077465		1850.01	0.00723543
260.23	0.03055451		790.22	0.00238379		1320.22	0.00675471		1850.21	0.00744536
260.43	0.03143925		790.42	0.00204251		1320.42	0.00710158		1850.41	0.00775441
260.63	0.03126725		790.62	0.0028266		1320.62	0.00763713		1850.61	0.00904594
260.83	0.03118199		790.82	0.00368338		1320.82	0.0088631		1850.81	0.00880189
261.03	0.03254384		791.02	0.00342036		1321.02	0.01005185		1851.01	0.00865691
261.23	0.03260371		791.22	0.00239019		1321.22	0.01035611		1851.21	0.00878693
261.43	0.03308577		791.42	0.0017245		1321.42	0.01133611		1851.41	0.00813845
261.63	0.03360861		791.62	0.00238851		1321.62	0.01229377		1851.61	0.00848259
261.83	0.03347385		791.82	0.00360484		1321.82	0.01175063		1851.81	0.00795279
262.03	0.03367201		792.02	0.00426918		1322.02	0.01175612		1852.01	0.00809634
262.23	0.0335999		792.22	0.00489733		1322.22	0.01130348		1852.21	0.00762718
262.43	0.03410851		792.42	0.00533743		1322.42	0.01042227		1852.41	0.00685644
262.63	0.03455535		792.62	0.0058064		1322.62	0.00934618		1852.61	0.0065767
262.83	0.03438385		792.82	0.0058524		1322.82	0.00904729		1852.81	0.00767252
263.03	0.0336949		793.02	0.00506872		1323.02	0.00879436		1853.01	0.00822963
263.23	0.03381459		793.22	0.00521332		1323.22	0.00801655		1853.21	0.00818788
263.43	0.03435485		793.42	0.00498015		1323.42	0.00848785		1853.41	0.00699688
263.63	0.03378462		793.62	0.00390365		1323.62	0.0086685		1853.61	0.00671378
263.83	0.03295832		793.82	0.00271731		1323.82	0.00872744		1853.81	0.00602617
264.03	0.03267183		794.02	0.00228825		1324.02	0.00865413		1854.01	0.00627757
264.23	0.03244755		794.22	0.0023317		1324.22	0.00889934		1854.21	0.00598937
264.43	0.03264301		794.42	0.00301138		1324.42	0.01025089		1854.41	0.00511539
264.63	0.03157585		794.62	0.00354854		1324.62	0.01068086		1854.61	0.00534594
264.83	0.03055561		794.82	0.00244392		1324.82	0.01060282		1854.81	0.00458817
265.03	0.03012459		795.02	0.00153806		1325.02	0.01062604		1855.01	0.00364121
265.23	0.02907918		795.22	0.00105632		1325.22	0.0099728		1855.21	0.0039283
265.43	0.0292738		795.42	0.00149174		1325.42	0.01003898		1855.41	0.00305406
265.63	0.0293187		795.62	0.00172204		1325.62	0.01011539		1855.61	0.00442124
265.83	0.02854766		795.82	0.00184442		1325.82	0.00942334		1855.81	0.00406384
266.03	0.02921136		796.02	0.00171334		1326.02	0.00862551		1856.01	0.00479984
266.23	0.02910518		796.22	0.00173916		1326.22	0.00846845		1856.21	0.00508118
266.43	0.03016562		796.42	0.00253295		1326.42	0.00793535		1856.41	0.00539506
266.63	0.0295076		796.62	0.00251698		1326.62	0.00773931		1856.61	0.00627551
266.83	0.0289376		796.82	0.00227305		1326.82	0.00816601		1856.81	0.0084971
267.03	0.02999242		797.02	0.00218998		1327.02	0.00899589		1857.01	0.00892469
267.23	0.03044802		797.22	0.00167417		1327.22	0.00935161		1857.21	0.00945195
267.43	0.03045998		797.42	0.00238431		1327.42	0.01063119		1857.41	0.0099767
267.63	0.03027741		797.62	0.00158798		1327.62	0.01126357		1857.61	0.01076101
267.83	0.03009627		797.82	0.00224303		1327.82	0.01184702		1857.81	0.01136156
268.03	0.0301072		798.02	0.00264602		1328.02	0.012254		1858.01	0.01105694
268.23	0.03126431		798.22	0.00168519		1328.22	0.01256984		1858.21	0.0112321
268.43	0.03180514		798.42	0.00216116		1328.42	0.01273276		1858.41	0.01049467
268.63	0.03125376		798.62	0.00203294		1328.62	0.01259807		1858.61	0.01030291
268.83	0.03123985		798.82	0.00122908		1328.82	0.01286529		1858.81	0.00907813
269.03	0.0321485		799.02	0.00208075		1329.02	0.0135221		1859.01	0.00840736
269.23	0.03312448		799.22	0.00185761		1329.22	0.01313901		1859.21	0.00779368
269.43	0.03309589		799.42	0.00174785		1329.42	0.0129894		1859.41	0.0071906
269.63	0.03298219		799.62	0.00221172		1329.62	0.01220226		1859.61	0.00703006
269.83	0.03344555		799.82	0.00236046		1329.82	0.01122044		1859.81	0.00646633
270.03	0.03431817		800.02	0.00320384		1330.02	0.00933966		1860.01	0.00620098
270.23	0.03421626		800.22	0.00409708		1330.22	0.0086039		1860.21	0.00596312
270.43	0.03455862		800.42	0.00494546		1330.42	0.00842598		1860.41	0.00663529
270.63	0.03428162		800.62	0.00470354		1330.62	0.00819134		1860.61	0.0074059
270.83	0.03503226		800.82	0.0057592		1330.82	0.00843386		1860.81	0.00795921
271.03	0.03607634		801.02	0.0057028		1331.02	0.00820987		1861.01	0.00842834
271.23	0.03580667		801.22	0.00583555		1331.22	0.00730045		1861.21	0.00897939
271.43	0.0365266		801.42	0.00642379		1331.42	0.0073718		1861.41	0.01036716
271.63	0.0370902		801.62	0.00600683		1331.62	0.00663014		1861.61	0.01136436
271.83	0.03670466		801.82	0.00643098		1331.82	0.00785796		1861.81	0.01117712
272.03	0.03734779		802.02	0.0056557		1332.02	0.00702786		1862.01	0.01103418
272.23	0.03808014		802.22	0.00539335		1332.22	0.00739052		1862.21	0.01113515
272.43	0.03776218		802.42	0.00563576		1332.42	0.00698844		1862.41	0.01075701
272.63	0.03718756		802.62	0.00528805		1332.62	0.00690729		1862.61	0.01055323
272.83	0.03706435		802.82	0.00498061		1332.82	0.00685186		1862.81	0.01065837
273.03	0.03689381		803.02	0.0043051		1333.02	0.00700874		1863.01	0.00960392
273.23	0.03623025		803.22	0.00245245		1333.22	0.00684959		1863.21	0.00894784
273.43	0.03461659		803.42	0.00254932		1333.42	0.00694863		1863.41	0.00845474
273.63	0.03463238		803.62	0.00279882		1333.62	0.00730758		1863.61	0.00749711
273.83	0.03505779		803.82	0.0017068		1333.82	0.00758732		1863.81	0.00611831
274.03	0.03421568		804.02	0.0028574		1334.02	0.00784956		1864.01	0.00560423
274.23	0.03388707		804.22	0.00307752		1334.22	0.00871319		1864.21	0.00574502
274.43	0.03412145		804.42	0.00228662		1334.42	0.00947562		1864.41	0.00548924
274.63	0.0341481		804.62	0.00234279		1334.62	0.0094522		1864.61	0.00525876
274.83	0.03417922		804.82	0.0029937		1334.82	0.00932288		1864.81	0.00471269
275.03	0.03382339		805.02	0.00256096		1335.02	0.00928548		1865.01	0.00521505
275.23	0.03426317		805.22	0.00302378		1335.22	0.00951926		1865.21	0.00479353
275.43	0.03465254		805.42	0.00280284		1335.42	0.00938425		1865.41	0.00533013
275.63	0.03477819		805.62	0.00279706		1335.62	0.00964915		1865.61	0.00594033
275.83	0.03473675		805.82	0.00316285		1335.82	0.00982303		1865.81	0.00589301
276.03	0.03574677		806.02	0.00417537		1336.02	0.00889013		1866.01	0.00630421
276.23	0.03602973		806.22	0.00441922		1336.22	0.00917815		1866.21	0.00674135
276.43	0.03561057		806.42	0.00476327		1336.42	0.00941676		1866.41	0.00733805
276.63	0.03601792		806.62	0.00451989		1336.62	0.00917091		1866.61	0.00756816
276.83	0.03626331		806.82	0.00428269		1336.82	0.00870584		1866.81	0.00804603
277.03	0.03574289		807.02	0.00371778		1337.02	0.00915417		1867.01	0.00724401
277.23	0.03593285		807.22	0.00329053		1337.22	0.00935954		1867.21	0.00736036
277.43	0.03592924		807.42	0.0047215		1337.42	0.00945708		1867.41	0.00700549
277.63	0.03649871		807.62	0.00452291		1337.62	0.00979286		1867.61	0.00683366
277.83	0.03644389		807.82	0.00399983		1337.82	0.00966796		1867.81	0.00644355
278.03	0.03576048		808.02	0.00505312		1338.02	0.00974899		1868.01	0.00660637
278.23	0.03608585		808.22	0.00389364		1338.22	0.00981928		1868.21	0.00660264
278.43	0.03575021		808.42	0.00328898		1338.42	0.00962705		1868.41	0.00634214
278.63	0.03508678		808.62	0.00389908		1338.62	0.00899775		1868.61	0.00656245
278.83	0.03528679		808.82	0.00364823		1338.82	0.0090571		1868.81	0.00616164
279.03	0.03533758		809.02	0.00339541		1339.02	0.00971288		1869.01	0.00563168
279.23	0.03627143		809.22	0.00357574		1339.22	0.00910399		1869.21	0.00566031
279.43	0.03642301		809.42	0.00366507		1339.42	0.00866604		1869.41	0.00553792
279.63	0.03687708		809.62	0.00406057		1339.62	0.00868907		1869.61	0.0067883
279.83	0.03701185		809.82	0.00482209		1339.82	0.0087675		1869.81	0.00606144
280.03	0.03635674		810.02	0.00570333		1340.02	0.00884648		1870.01	0.00630614
280.23	0.03670272		810.22	0.00542765		1340.22	0.00958458		1870.21	0.00608278
280.43	0.03637613		810.42	0.00662156		1340.42	0.01011258		1870.41	0.00521639
280.63	0.03658146		810.62	0.00662136		1340.62	0.00996624		1870.61	0.00461827
280.83	0.03689398		810.82	0.00650024		1340.82	0.01018634		1870.81	0.00464545
281.03	0.03654098		811.02	0.00673171		1341.02	0.01026512		1871.01	0.00480948
281.23	0.0364582		811.22	0.00663258		1341.22	0.01028018		1871.21	0.00533492
281.43	0.03663984		811.42	0.00727209		1341.42	0.00968622		1871.41	0.00578898
281.63	0.03738674		811.62	0.00658029		1341.62	0.00881757		1871.61	0.00574086
281.83	0.03799589		811.82	0.00623389		1341.82	0.00801373		1871.81	0.00587158
282.03	0.03740149		812.02	0.00563585		1342.02	0.00816242		1872.01	0.00634984
282.23	0.03716837		812.22	0.00476238		1342.22	0.00824948		1872.21	0.00688571
282.43	0.03651057		812.42	0.00445821		1342.42	0.00802003		1872.41	0.00693655
282.63	0.03663819		812.62	0.00327055		1342.62	0.00824056		1872.61	0.00658755
282.83	0.03681061		812.82	0.00248455		1342.82	0.00866352		1872.81	0.00722601
283.03	0.03759039		813.02	0.00209618		1343.02	0.00930841		1873.01	0.0078195
283.23	0.03742321		813.22	0.00168119		1343.22	0.0090368		1873.21	0.00868162
283.43	0.03691291		813.42	0.00160917		1343.42	0.00915734		1873.41	0.00827402
283.63	0.03673986		813.62	0.00135037		1343.62	0.00955528		1873.61	0.00939894
283.83	0.03633042		813.82	0.00071848		1343.82	0.00946453		1873.81	0.00888433
284.03	0.03564331		814.02	0.00085123		1344.02	0.00877669		1874.01	0.00890218
284.23	0.03614355		814.22	0.00095402		1344.22	0.00950408		1874.21	0.00840416
284.43	0.03563895		814.42	0.00192737		1344.42	0.00950515		1874.41	0.0077127
284.63	0.03658048		814.62	0.00185333		1344.62	0.00955834		1874.61	0.00709292
284.83	0.0374218		814.82	0.00209289		1344.82	0.00860789		1874.81	0.00768822
285.03	0.03852787		815.02	0.00294213		1345.02	0.00806853		1875.01	0.00780468
285.23	0.0393252		815.22	0.0040445		1345.22	0.00790079		1875.21	0.00768003
285.43	0.04007743		815.42	0.0051638		1345.42	0.00693251		1875.41	0.00729263
285.63	0.04031526		815.62	0.00569297		1345.62	0.00707669		1875.61	0.00711185
285.83	0.04045029		815.82	0.00599433		1345.82	0.00712931		1875.81	0.00657803
286.03	0.03953295		816.02	0.00645034		1346.02	0.00763588		1876.01	0.00613308
286.23	0.03961341		816.22	0.00679442		1346.22	0.00789068		1876.21	0.0060924
286.43	0.03997325		816.42	0.00620823		1346.42	0.0091179		1876.41	0.00661955
286.63	0.03943944		816.62	0.00583545		1346.62	0.00956082		1876.61	0.00724793
286.83	0.03918977		816.82	0.00554651		1346.82	0.00976428		1876.81	0.00848674
287.03	0.03881472		817.02	0.00470644		1347.02	0.01067063		1877.01	0.00872573
287.23	0.03809831		817.22	0.00445256		1347.22	0.01050402		1877.21	0.00910261
287.43	0.03803875		817.42	0.00443152		1347.42	0.01044749		1877.41	0.00887613
287.63	0.0377899		817.62	0.00360096		1347.62	0.01077868		1877.61	0.00943992
287.83	0.03744289		817.82	0.0030705		1347.82	0.00942011		1877.81	0.00956404
288.03	0.03693388		818.02	0.00370576		1348.02	0.00923394		1878.01	0.01008264
288.23	0.03638881		818.22	0.00353306		1348.22	0.00885393		1878.21	0.01029341
288.43	0.03661943		818.42	0.00320675		1348.42	0.00829622		1878.41	0.00921291
288.63	0.03703128		818.62	0.00353958		1348.62	0.00785538		1878.61	0.00886557
288.83	0.03760639		818.82	0.00377883		1348.82	0.00696582		1878.81	0.00914418
289.03	0.03810941		819.02	0.00435718		1349.02	0.00761704		1879.01	0.0087889
289.23	0.03787884		819.22	0.00550905		1349.22	0.00783473		1879.21	0.007763
289.43	0.03735994		819.42	0.00573932		1349.42	0.00744544		1879.41	0.00659419
289.63	0.03747634		819.62	0.00554246		1349.62	0.00818131		1879.61	0.00645478
289.83	0.03756214		819.82	0.00537185		1349.82	0.00778852		1879.81	0.00566227
290.03	0.03768189		820.02	0.00561187		1350.02	0.00838898		1880.01	0.00686065
290.23	0.03859911		820.22	0.00501577		1350.22	0.00910557		1880.21	0.00788813
290.43	0.03831195		820.42	0.0047911		1350.42	0.01020908		1880.41	0.00801767
290.63	0.03778187		820.62	0.0044175		1350.62	0.00937831		1880.61	0.0075962
290.83	0.0385212		820.82	0.0041575		1350.82	0.00917529		1880.81	0.00708984
291.03	0.03801756		821.02	0.00401405		1351.02	0.00986406		1881.01	0.00633209
291.23	0.0387736		821.22	0.00494837		1351.22	0.00979863		1881.21	0.00592081
291.43	0.03919339		821.42	0.00386398		1351.42	0.01049312		1881.41	0.00561307
291.63	0.03869651		821.62	0.00345144		1351.62	0.0103262		1881.61	0.00625233
291.83	0.0385931		821.82	0.00358982		1351.82	0.00955799		1881.81	0.00634629
292.03	0.03908953		822.02	0.00350101		1352.02	0.0102079		1882.01	0.00563601
292.23	0.04006749		822.22	0.00358487		1352.22	0.01028872		1882.21	0.00557597
292.43	0.04081045		822.42	0.00389742		1352.42	0.01017417		1882.41	0.00569978
292.63	0.04070876		822.62	0.00494051		1352.62	0.01007292		1882.61	0.00641888
292.83	0.04183211		822.82	0.00465657		1352.82	0.01050621		1882.81	0.00660575
293.03	0.04120955		823.02	0.00500615		1353.02	0.01064706		1883.01	0.00593636
293.23	0.04198234		823.22	0.00503717		1353.22	0.00986216		1883.21	0.00561176
293.43	0.04161008		823.42	0.00447095		1353.42	0.00929553		1883.41	0.00660551
293.63	0.0416851		823.62	0.00373193		1353.62	0.00995442		1883.61	0.00778131
293.83	0.04175735		823.82	0.00436279		1353.82	0.00899384		1883.81	0.00864853
294.03	0.04196745		824.02	0.00409566		1354.02	0.00846433		1884.01	0.00979783
294.23	0.04244669		824.22	0.00365691		1354.22	0.00847251		1884.21	0.0099985
294.43	0.04119766		824.42	0.00393368		1354.42	0.00800366		1884.41	0.00994913
294.63	0.04180205		824.62	0.00343441		1354.62	0.0069841		1884.61	0.00926998
294.83	0.04157065		824.82	0.00382978		1354.82	0.0070517		1884.81	0.00919415
295.03	0.04026559		825.02	0.00399935		1355.02	0.00675478		1885.01	0.00918978
295.23	0.04067586		825.22	0.00475177		1355.22	0.00720895		1885.21	0.00962194
295.43	0.04030915		825.42	0.00449592		1355.42	0.00783503		1885.41	0.01015601
295.63	0.03999239		825.62	0.00494878		1355.62	0.00814041		1885.61	0.01026971
295.83	0.04035605		825.82	0.00482311		1355.82	0.00820827		1885.81	0.00963106
296.03	0.04080188		826.02	0.0049536		1356.02	0.00879964		1886.01	0.00877477
296.23	0.04101253		826.22	0.00529533		1356.22	0.00856617		1886.21	0.00976974
296.43	0.03998646		826.42	0.00549242		1356.42	0.00865302		1886.41	0.00980885
296.63	0.03935532		826.62	0.00562003		1356.62	0.00879865		1886.61	0.00942778
296.83	0.04050631		826.82	0.00400921		1356.82	0.00883232		1886.81	0.0088711
297.03	0.0403301		827.02	0.00393947		1357.02	0.00853735		1887.01	0.00860195
297.23	0.04128023		827.22	0.00383217		1357.22	0.00893052		1887.21	0.00848712
297.43	0.04217183		827.42	0.00388981		1357.42	0.00896605		1887.41	0.00894978
297.63	0.04290226		827.62	0.00387111		1357.62	0.0092852		1887.61	0.0082471
297.83	0.0435036		827.82	0.00458021		1357.82	0.00878466		1887.81	0.00845131
298.03	0.04432191		828.02	0.00353515		1358.02	0.00918599		1888.01	0.0083245
298.23	0.04508064		828.22	0.00360696		1358.22	0.00943749		1888.21	0.00785422
298.43	0.04410788		828.42	0.00424377		1358.42	0.00874784		1888.41	0.00734437
298.63	0.04493692		828.62	0.00413508		1358.62	0.00847024		1888.61	0.00691837
298.83	0.04397129		828.82	0.00450449		1358.82	0.0082916		1888.81	0.00700252
299.03	0.04400087		829.02	0.0044446		1359.02	0.00832514		1889.01	0.00715622
299.23	0.04456193		829.22	0.00471258		1359.22	0.00910622		1889.21	0.00676927
299.43	0.04393293		829.42	0.00461259		1359.42	0.00924148		1889.41	0.00715385
299.63	0.04348837		829.62	0.00399289		1359.62	0.00882455		1889.61	0.00706295
299.83	0.04288005		829.82	0.00256722		1359.82	0.00859445		1889.81	0.00660589
300.03	0.04184461		830.02	0.00270027		1360.02	0.0090555		1890.01	0.00679015
300.23	0.04217283		830.22	0.00255778		1360.22	0.00920066		1890.21	0.00777356
300.43	0.04153923		830.42	0.00320385		1360.42	0.00858213		1890.41	0.00776345
300.63	0.04207918		830.62	0.00334269		1360.62	0.00817857		1890.61	0.0078753
300.83	0.04346653		830.82	0.00335327		1360.82	0.00789674		1890.81	0.00861126
301.03	0.0430258		831.02	0.00456843		1361.02	0.00743324		1891.01	0.00884694
301.23	0.0435558		831.22	0.00562418		1361.22	0.00692764		1891.21	0.00872907
301.43	0.04463084		831.42	0.00574103		1361.42	0.00685269		1891.41	0.00940885
301.63	0.04436614		831.62	0.00538199		1361.62	0.007469		1891.61	0.01003715
301.83	0.04506148		831.82	0.00580239		1361.82	0.00837633		1891.81	0.0104693
302.03	0.04571801		832.02	0.00581918		1362.02	0.00864427		1892.01	0.01070699
302.23	0.04499709		832.22	0.00599539		1362.22	0.00843743		1892.21	0.01059213
302.43	0.04432992		832.42	0.00680629		1362.42	0.00785168		1892.41	0.0103143
302.63	0.04474892		832.62	0.00651163		1362.62	0.00741988		1892.61	0.01069382
302.83	0.04469136		832.82	0.00586194		1362.82	0.00742517		1892.81	0.0108937
303.03	0.04568574		833.02	0.00558566		1363.02	0.00737835		1893.01	0.01106106
303.23	0.04613072		833.22	0.00540296		1363.22	0.00693593		1893.21	0.01081879
303.43	0.04578785		833.42	0.00490016		1363.42	0.00721297		1893.41	0.01094717
303.63	0.04596789		833.62	0.00477031		1363.62	0.00627024		1893.61	0.00987008
303.83	0.04611363		833.82	0.00409484		1363.82	0.00664319		1893.81	0.0093831
304.03	0.04615574		834.02	0.00517586		1364.02	0.00620795		1894.01	0.0085733
304.23	0.0468495		834.22	0.00552942		1364.22	0.00474658		1894.21	0.00817787
304.43	0.04562431		834.42	0.00610487		1364.42	0.00411226		1894.41	0.00792579
304.63	0.04596663		834.62	0.00602269		1364.62	0.00474504		1894.61	0.00761264
304.83	0.04545498		834.82	0.00555935		1364.82	0.00437187		1894.81	0.00743579
305.03	0.04520921		835.02	0.00492765		1365.02	0.00387417		1895.01	0.00733523
305.23	0.04625958		835.22	0.00442711		1365.22	0.00454354		1895.21	0.00806762
305.43	0.04695841		835.42	0.0032696		1365.42	0.0056325		1895.41	0.00804314
305.63	0.04728651		835.62	0.00212992		1365.62	0.00563806		1895.61	0.00918059
305.83	0.04778991		835.82	0.00207749		1365.82	0.0061801		1895.81	0.00995498
306.03	0.0476643		836.02	0.00194493		1366.02	0.00563998		1896.01	0.01091134
306.23	0.04705279		836.22	0.00190136		1366.22	0.00522981		1896.21	0.01134681
306.43	0.04719221		836.42	0.00248356		1366.42	0.00462284		1896.41	0.01174331
306.63	0.04691564		836.62	0.00274288		1366.62	0.00490005		1896.61	0.01261449
306.83	0.04649042		836.82	0.0029692		1366.82	0.00545247		1896.81	0.01179607
307.03	0.04624677		837.02	0.00387441		1367.02	0.00537322		1897.01	0.01103039
307.23	0.04641822		837.22	0.00379421		1367.22	0.00533846		1897.21	0.01074714
307.43	0.04525978		837.42	0.00479664		1367.42	0.00454149		1897.41	0.00998235
307.63	0.04542611		837.62	0.00539121		1367.62	0.00423575		1897.61	0.00946108
307.83	0.04503525		837.82	0.00557882		1367.82	0.00421775		1897.81	0.00835062
308.03	0.0452057		838.02	0.00597242		1368.02	0.00360715		1898.01	0.00699805
308.23	0.04522414		838.22	0.00575252		1368.22	0.00380563		1898.21	0.0062978
308.43	0.04406835		838.42	0.00507191		1368.42	0.00438534		1898.41	0.00597589
308.63	0.04389182		838.62	0.00446374		1368.62	0.00505149		1898.61	0.00572943
308.83	0.04364963		838.82	0.00335002		1368.82	0.0058186		1898.81	0.0056349
309.03	0.04431231		839.02	0.00288949		1369.02	0.00536727		1899.01	0.00598216
309.23	0.04499601		839.22	0.00204468		1369.22	0.00542736		1899.21	0.00695827
309.43	0.04538039		839.42	0.00130495		1369.42	0.00555936		1899.41	0.00693245
309.63	0.04606754		839.62	0.00215964		1369.62	0.00545883		1899.61	0.00829325
309.83	0.04636563		839.82	0.00197426		1369.82	0.0061662		1899.81	0.00889098
310.03	0.04639228		840.02	0.0025339		1370.02	0.00652399		1900.01	0.00905236
310.23	0.04720615		840.22	0.0025928		1370.22	0.00589271		1900.21	0.00939178
310.43	0.04739017		840.42	0.00278553		1370.42	0.00624656		1900.41	0.00983683
310.63	0.0470646		840.62	0.00351079		1370.62	0.00674427		1900.61	0.00976884
310.83	0.04737055		840.82	0.00461405		1370.82	0.00754084		1900.81	0.01003547
311.03	0.04814271		841.02	0.0044632		1371.02	0.0068278		1901.01	0.01002735
311.23	0.04823617		841.22	0.00547539		1371.22	0.00707459		1901.21	0.01043566
311.43	0.04851919		841.42	0.00581124		1371.42	0.00692334		1901.41	0.0104423
311.63	0.04965181		841.62	0.00538334		1371.62	0.00821178		1901.61	0.01005656
311.83	0.04951676		841.82	0.00441997		1371.82	0.00851292		1901.81	0.00863439
312.03	0.05022714		842.02	0.00432866		1372.02	0.00869476		1902.01	0.00891742
312.23	0.04909302		842.22	0.00367728		1372.22	0.00905718		1902.21	0.00868619
312.43	0.04819706		842.42	0.00295371		1372.42	0.00909178		1902.41	0.00919477
312.63	0.0476418		842.62	0.00274702		1372.62	0.00989314		1902.61	0.00948527
312.83	0.04809537		842.82	0.00251164		1372.82	0.01029065		1902.81	0.00936624
313.03	0.04814293		843.02	0.00257886		1373.02	0.00960404		1903.01	0.00924011
313.23	0.04881573		843.22	0.00310019		1373.22	0.01023816		1903.21	0.00961186
313.43	0.04906523		843.42	0.00453975		1373.42	0.01017389		1903.41	0.00936155
313.63	0.04921203		843.62	0.00548353		1373.62	0.00979045		1903.61	0.00931869
313.83	0.0494002		843.82	0.00474417		1373.82	0.00873352		1903.81	0.0091007
314.03	0.04960715		844.02	0.00490071		1374.02	0.00835475		1904.01	0.0085018
314.23	0.05017971		844.22	0.00505606		1374.22	0.00730941		1904.21	0.00773275
314.43	0.05028513		844.42	0.00570516		1374.42	0.0069086		1904.41	0.00736708
314.63	0.04991922		844.62	0.0053758		1374.62	0.00580753		1904.61	0.0072671
314.83	0.05066757		844.82	0.00474876		1374.82	0.00576803		1904.81	0.00676165
315.03	0.05109123		845.02	0.00372773		1375.02	0.00519757		1905.01	0.0059097
315.23	0.05075726		845.22	0.00466263		1375.22	0.00537035		1905.21	0.00611873
315.43	0.0511794		845.42	0.0031878		1375.42	0.00570455		1905.41	0.0060691
315.63	0.05119682		845.62	0.00218577		1375.62	0.00638499		1905.61	0.00612334
315.83	0.05055687		845.82	0.00140367		1375.82	0.00569178		1905.81	0.00610203
316.03	0.04989366		846.02	0.00211462		1376.02	0.00565798		1906.01	0.00748804
316.23	0.04843713		846.22	0.00143598		1376.22	0.00572668		1906.21	0.00729576
316.43	0.04877443		846.42	0.00148403		1376.42	0.0056326		1906.41	0.00820754
316.63	0.04917098		846.62	0.00267312		1376.62	0.00652626		1906.61	0.00834321
316.83	0.04880046		846.82	0.00386364		1376.82	0.00665537		1906.81	0.00915146
317.03	0.04908848		847.02	0.00491651		1377.02	0.00652948		1907.01	0.00986576
317.23	0.05021076		847.22	0.00583057		1377.22	0.00645404		1907.21	0.01122577
317.43	0.05040587		847.42	0.0063704		1377.42	0.00612501		1907.41	0.01134506
317.63	0.05046007		847.62	0.00656116		1377.62	0.00664546		1907.61	0.01157137
317.83	0.05123989		847.82	0.00731564		1377.82	0.00693685		1907.81	0.01142855
318.03	0.05113245		848.02	0.00741267		1378.02	0.00739186		1908.01	0.01171402
318.23	0.05177753		848.22	0.0081266		1378.22	0.00688604		1908.21	0.01139004
318.43	0.05248465		848.42	0.00875244		1378.42	0.00644053		1908.41	0.01105743
318.63	0.05303345		848.62	0.00743905		1378.62	0.00682584		1908.61	0.01126882
318.83	0.05345835		848.82	0.00623633		1378.82	0.00791257		1908.81	0.01050529
319.03	0.05373109		849.02	0.00677062		1379.02	0.00843249		1909.01	0.01026609
319.23	0.05402439		849.22	0.00673823		1379.22	0.00796759		1909.21	0.00938143
319.43	0.0542425		849.42	0.00523504		1379.42	0.00859196		1909.41	0.00878529
319.63	0.05464251		849.62	0.00505035		1379.62	0.00835541		1909.61	0.00836504
319.83	0.0537317		849.82	0.00512968		1379.82	0.00829997		1909.81	0.00738484
320.03	0.05261055		850.02	0.00505773		1380.02	0.00866503		1910.01	0.00697003
320.23	0.05195047		850.22	0.00428742		1380.22	0.00851293		1910.21	0.00682016
320.43	0.05167152		850.42	0.00508432		1380.42	0.00838003		1910.41	0.00693477
320.63	0.0517411		850.62	0.00530665		1380.62	0.00824572		1910.61	0.00676734
320.83	0.05105049		850.82	0.00528691		1380.82	0.00619195		1910.81	0.00745333
321.03	0.05116057		851.02	0.00499064		1381.02	0.00625404		1911.01	0.00721001
321.23	0.0510507		851.22	0.00512101		1381.22	0.00616388		1911.21	0.00693467
321.43	0.05088168		851.42	0.00477547		1381.42	0.00658782		1911.41	0.00677808
321.63	0.05050936		851.62	0.00433747		1381.62	0.00581739		1911.61	0.00763143
321.83	0.05047933		851.82	0.00441134		1381.82	0.00504608		1911.81	0.00720746
322.03	0.04998371		852.02	0.00443966		1382.02	0.00424706		1912.01	0.00764544
322.23	0.05130273		852.22	0.0047164		1382.22	0.00365109		1912.21	0.0075204
322.43	0.05048714		852.42	0.0052264		1382.42	0.0031816		1912.41	0.00774929
322.63	0.05095716		852.62	0.00451274		1382.62	0.00380021		1912.61	0.00905348
322.83	0.04975204		852.82	0.00427242		1382.82	0.00375236		1912.81	0.00897086
323.03	0.05124721		853.02	0.00464706		1383.02	0.00378014		1913.01	0.00853078
323.23	0.0514007		853.22	0.00407591		1383.22	0.00280727		1913.21	0.00928176
323.43	0.05097959		853.42	0.00374316		1383.42	0.00353197		1913.41	0.00955669
323.63	0.05046561		853.62	0.00489511		1383.62	0.004068		1913.61	0.00985084
323.83	0.04961125		853.82	0.00538312		1383.82	0.00487694		1913.81	0.01027294
324.03	0.04962109		854.02	0.00561023		1384.02	0.00527471		1914.01	0.01038062
324.23	0.05024388		854.22	0.00595176		1384.22	0.00622475		1914.21	0.0105256
324.43	0.05109236		854.42	0.00646439		1384.42	0.0075686		1914.41	0.00959981
324.63	0.05151876		854.62	0.00662692		1384.62	0.00699143		1914.61	0.00976824
324.83	0.05100399		854.82	0.00644491		1384.82	0.00721486		1914.81	0.00909275
325.03	0.05101433		855.02	0.00615798		1385.02	0.00831782		1915.01	0.00867761
325.23	0.05103999		855.22	0.00573486		1385.22	0.00813167		1915.21	0.00894139
325.43	0.05085275		855.42	0.00483788		1385.42	0.00799586		1915.41	0.00910394
325.63	0.05088333		855.62	0.00369777		1385.62	0.00685026		1915.61	0.00842759
325.83	0.05066849		855.82	0.00365343		1385.82	0.00641353		1915.81	0.0078418
326.03	0.05112682		856.02	0.004369		1386.02	0.00570489		1916.01	0.00779268
326.23	0.05123571		856.22	0.00437694		1386.22	0.00521549		1916.21	0.00897774
326.43	0.0496253		856.42	0.00433201		1386.42	0.00443653		1916.41	0.00824414
326.63	0.05050892		856.62	0.00456715		1386.62	0.00490169		1916.61	0.00859076
326.83	0.05009745		856.82	0.00409752		1386.82	0.00539113		1916.81	0.00735796
327.03	0.05086898		857.02	0.00440404		1387.02	0.00453974		1917.01	0.00761489
327.23	0.0501709		857.22	0.00466244		1387.22	0.00390205		1917.21	0.00837413
327.43	0.04989514		857.42	0.00530418		1387.42	0.00456431		1917.41	0.00813757
327.63	0.04966469		857.62	0.00617373		1387.62	0.0042454		1917.61	0.00824168
327.83	0.05045974		857.82	0.00645588		1387.82	0.00450521		1917.81	0.00792544
328.03	0.05151813		858.02	0.00646348		1388.02	0.00546539		1918.01	0.00771181
328.23	0.05320398		858.22	0.00795075		1388.22	0.00630718		1918.21	0.0075864
328.43	0.05455846		858.42	0.00873073		1388.42	0.00681488		1918.41	0.00777133
328.63	0.05496192		858.62	0.00930229		1388.62	0.00631656		1918.61	0.00755754
328.83	0.05484224		858.82	0.0084817		1388.82	0.00736729		1918.81	0.00786609
329.03	0.05587232		859.02	0.00897031		1389.02	0.00771223		1919.01	0.00846724
329.23	0.05581769		859.22	0.00885592		1389.22	0.0071783		1919.21	0.00943418
329.43	0.05594912		859.42	0.00918409		1389.42	0.00757686		1919.41	0.00945695
329.63	0.05618267		859.62	0.00812507		1389.62	0.00697893		1919.61	0.00976116
329.83	0.05558801		859.82	0.00810955		1389.82	0.00740798		1919.81	0.01029853
330.03	0.05548236		860.02	0.0084649		1390.02	0.00720449		1920.01	0.01045806
330.23	0.0552746		860.22	0.00695926		1390.22	0.00721908		1920.21	0.01076693
330.43	0.05542357		860.42	0.00614387		1390.42	0.00722864		1920.41	0.01024574
330.63	0.05637166		860.62	0.00605155		1390.62	0.00871164		1920.61	0.01015932
330.83	0.05713862		860.82	0.00525828		1390.82	0.00907233		1920.81	0.01003326
331.03	0.05673406		861.02	0.00496102		1391.02	0.00814346		1921.01	0.01036446
331.23	0.0573947		861.22	0.0038908		1391.22	0.00779946		1921.21	0.0098446
331.43	0.05745859		861.42	0.00401098		1391.42	0.00716981		1921.41	0.00959625
331.63	0.05742373		861.62	0.00335168		1391.62	0.00657084		1921.61	0.00932681
331.83	0.05816883		861.82	0.00351369		1391.82	0.00665907		1921.81	0.00926801
332.03	0.05857353		862.02	0.00362304		1392.02	0.00613523		1922.01	0.00882657
332.23	0.0587899		862.22	0.00459323		1392.22	0.00479708		1922.21	0.00783804
332.43	0.05833112		862.42	0.00462318		1392.42	0.00425182		1922.41	0.00798804
332.63	0.05758098		862.62	0.00416712		1392.62	0.00399661		1922.61	0.00697706
332.83	0.05759403		862.82	0.00396851		1392.82	0.0041271		1922.81	0.00734907
333.03	0.05823839		863.02	0.00449752		1393.02	0.00393011		1923.01	0.00679547
333.23	0.0578172		863.22	0.00388286		1393.22	0.00335864		1923.21	0.00749754
333.43	0.05704169		863.42	0.00405038		1393.42	0.00443819		1923.41	0.00740547
333.63	0.05624766		863.62	0.00398217		1393.62	0.00383031		1923.61	0.00746831
333.83	0.05644418		863.82	0.00506206		1393.82	0.00398429		1923.81	0.00812575
334.03	0.05594779		864.02	0.005527		1394.02	0.00337956		1924.01	0.00897369
334.23	0.05602287		864.22	0.00524401		1394.22	0.00361846		1924.21	0.0095969
334.43	0.05582776		864.42	0.00688273		1394.42	0.00419964		1924.41	0.00975674
334.63	0.0565793		864.62	0.00813082		1394.62	0.0047717		1924.61	0.00939448
334.83	0.0566405		864.82	0.0086097		1394.82	0.00496583		1924.81	0.00932893
335.03	0.0570961		865.02	0.00875432		1395.02	0.00520156		1925.01	0.00880003
335.23	0.0580924		865.22	0.00854921		1395.22	0.00520616		1925.21	0.00949673
335.43	0.05771735		865.42	0.00933223		1395.42	0.00486807		1925.41	0.00974656
335.63	0.05758642		865.62	0.00881429		1395.62	0.00488078		1925.61	0.00987746
335.83	0.05745019		865.82	0.00872169		1395.82	0.00509283		1925.81	0.00921105
336.03	0.05673793		866.02	0.00832409		1396.02	0.00452147		1926.01	0.00948858
336.23	0.05656696		866.22	0.0076878		1396.22	0.00378716		1926.21	0.00956115
336.43	0.05719957		866.42	0.006671		1396.42	0.00440333		1926.41	0.00990471
336.63	0.05735974		866.62	0.00496012		1396.62	0.00497892		1926.61	0.00953229
336.83	0.05785432		866.82	0.003817		1396.82	0.00627067		1926.81	0.0094382
337.03	0.05752009		867.02	0.00236578		1397.02	0.00630701		1927.01	0.0091392
337.23	0.05674896		867.22	0.00148402		1397.22	0.00638025		1927.21	0.00944241
337.43	0.05619507		867.42	0.00102496		1397.42	0.00689536		1927.41	0.01007797
337.63	0.05543351		867.62	0.00054888		1397.62	0.00660099		1927.61	0.01091924
337.83	0.05507392		867.82	0.00089181		1397.82	0.0057239		1927.81	0.01117124
338.03	0.05357242		868.02	0.00019324		1398.02	0.00508533		1928.01	0.01130002
338.23	0.05319826		868.22	0.00010165		1398.22	0.00553138		1928.21	0.01176699
338.43	0.05292973		868.42	0.00091497		1398.42	0.00540564		1928.41	0.01190812
338.63	0.05424359		868.62	0.00132604		1398.62	0.00564245		1928.61	0.01087507
338.83	0.05365071		868.82	0.00136074		1398.82	0.00610402		1928.81	0.00978949
339.03	0.05437851		869.02	0.00195178		1399.02	0.00506874		1929.01	0.00936974
339.23	0.05413089		869.22	0.00296434		1399.22	0.005168		1929.21	0.01016668
339.43	0.0538433		869.42	0.0034688		1399.42	0.00462067		1929.41	0.0091437
339.63	0.05418151		869.62	0.00400065		1399.62	0.00458018		1929.61	0.00867353
339.83	0.05410933		869.82	0.00527455		1399.82	0.00418511		1929.81	0.00863009
340.03	0.05387956		870.02	0.00600255		1400.02	0.00436676		1930.01	0.00885094
340.23	0.05511888		870.22	0.00609168		1400.22	0.00422488		1930.21	0.00848197
340.43	0.05596966		870.42	0.00696998		1400.42	0.00477865		1930.41	0.00924193
340.63	0.0564696		870.62	0.00646069		1400.62	0.00539235		1930.61	0.00936106
340.83	0.05779301		870.82	0.00708501		1400.82	0.00527473		1930.81	0.00996053
341.03	0.05834116		871.02	0.00715108		1401.02	0.00472558		1931.01	0.01021475
341.23	0.05822866		871.22	0.0074092		1401.22	0.00524831		1931.21	0.01029466
341.43	0.05854645		871.42	0.00613435		1401.42	0.00609148		1931.41	0.01088325
341.63	0.05894408		871.62	0.00646429		1401.62	0.00612195		1931.61	0.01076946
341.83	0.06007594		871.82	0.00633254		1401.82	0.0062873		1931.81	0.01048724
342.03	0.06063332		872.02	0.00595666		1402.02	0.00719805		1932.01	0.01063451
342.23	0.0611395		872.22	0.00672031		1402.22	0.00794999		1932.21	0.01159872
342.43	0.06140655		872.42	0.0067182		1402.42	0.00810848		1932.41	0.01089384
342.63	0.06202618		872.62	0.006889		1402.62	0.00852517		1932.61	0.0091541
342.83	0.06025373		872.82	0.00686291		1402.82	0.00893863		1932.81	0.00805309
343.03	0.06067404		873.02	0.00732825		1403.02	0.00901062		1933.01	0.00800508
343.23	0.06090415		873.22	0.00688736		1403.22	0.0090375		1933.21	0.00780094
343.43	0.06039654		873.42	0.00625908		1403.42	0.00861514		1933.41	0.006787
343.63	0.06032445		873.62	0.00713702		1403.62	0.00815282		1933.61	0.00736226
343.83	0.05990793		873.82	0.00761674		1403.82	0.00789616		1933.81	0.00797063
344.03	0.0591364		874.02	0.00770054		1404.02	0.00792529		1934.01	0.00790414
344.23	0.05979007		874.22	0.00786468		1404.22	0.00661527		1934.21	0.0086751
344.43	0.05947605		874.42	0.00658736		1404.42	0.00640274		1934.41	0.01034734
344.63	0.05942762		874.62	0.00500155		1404.62	0.00575501		1934.61	0.0108266
344.83	0.05973084		874.82	0.00502902		1404.82	0.00503118		1934.81	0.01175901
345.03	0.05917418		875.02	0.0043805		1405.02	0.00536867		1935.01	0.0111485
345.23	0.05889653		875.22	0.0036712		1405.22	0.00603062		1935.21	0.01070116
345.43	0.0589407		875.42	0.00266135		1405.42	0.00647203		1935.41	0.01066693
345.63	0.05969952		875.62	0.00275831		1405.62	0.00516173		1935.61	0.01067025
345.83	0.06010565		875.82	0.00256942		1405.82	0.00527477		1935.81	0.01138251
346.03	0.05887792		876.02	0.00367149		1406.02	0.00462658		1936.01	0.01120246
346.23	0.05900792		876.22	0.00358111		1406.22	0.0049707		1936.21	0.01070623
346.43	0.05941971		876.42	0.00346346		1406.42	0.00562297		1936.41	0.0097899
346.63	0.05946034		876.62	0.00365162		1406.62	0.00616792		1936.61	0.00913957
346.83	0.05933397		876.82	0.00463834		1406.82	0.00692039		1936.81	0.0081143
347.03	0.06122148		877.02	0.00444119		1407.02	0.00771223		1937.01	0.00802023
347.23	0.06172556		877.22	0.00482916		1407.22	0.00689591		1937.21	0.00693256
347.43	0.06172509		877.42	0.0047819		1407.42	0.00731544		1937.41	0.00778094
347.63	0.0621318		877.62	0.00488553		1407.62	0.00800729		1937.61	0.00849019
347.83	0.06176343		877.82	0.00535118		1407.82	0.00865489		1937.81	0.00882735
348.03	0.0623034		878.02	0.00501769		1408.02	0.00798398		1938.01	0.00887172
348.23	0.06185564		878.22	0.00367728		1408.22	0.00819004		1938.21	0.00892595
348.43	0.06142433		878.42	0.0028638		1408.42	0.00804674		1938.41	0.01001756
348.63	0.06097367		878.62	0.00272292		1408.62	0.0074053		1938.61	0.00957357
348.83	0.06114899		878.82	0.00357526		1408.82	0.00794534		1938.81	0.00919677
349.03	0.06064155		879.02	0.00395548		1409.02	0.00887381		1939.01	0.00925247
349.23	0.0605561		879.22	0.00443243		1409.22	0.00880664		1939.21	0.00868931
349.43	0.06060141		879.42	0.00493909		1409.42	0.00825946		1939.41	0.0090219
349.63	0.06049314		879.62	0.00499511		1409.62	0.00622		1939.61	0.00901863
349.83	0.06066412		879.82	0.00632427		1409.82	0.00555678		1939.81	0.00881306
350.03	0.06041053		880.02	0.00657078		1410.02	0.00525348		1940.01	0.00858866
350.23	0.06206497		880.22	0.00632513		1410.22	0.00599555		1940.21	0.0068559
350.43	0.06310183		880.42	0.00674228		1410.42	0.00559965		1940.41	0.00724211
350.63	0.06359602		880.62	0.00657566		1410.62	0.00594193		1940.61	0.00729776
350.83	0.06371169		880.82	0.0069373		1410.82	0.00606352		1940.81	0.0074486
351.03	0.06429789		881.02	0.00658822		1411.02	0.00621142		1941.01	0.00713428
351.23	0.06477779		881.22	0.00691167		1411.22	0.0062904		1941.21	0.00674621
351.43	0.06521858		881.42	0.00594631		1411.42	0.00737352		1941.41	0.00760992
351.63	0.06527991		881.62	0.00592014		1411.62	0.00800691		1941.61	0.00794508
351.83	0.06505415		881.82	0.00617908		1411.82	0.00813605		1941.81	0.0081955
352.03	0.06561366		882.02	0.00516763		1412.02	0.00762278		1942.01	0.00856011
352.23	0.06406068		882.22	0.00442316		1412.22	0.00770957		1942.21	0.00953337
352.43	0.0632482		882.42	0.0050446		1412.42	0.00748254		1942.41	0.01027121
352.63	0.06172691		882.62	0.00506531		1412.62	0.00708244		1942.61	0.01119335
352.83	0.06130677		882.82	0.00548579		1412.82	0.00705418		1942.81	0.01122212
353.03	0.06107938		883.02	0.00517225		1413.02	0.00682899		1943.01	0.01188331
353.23	0.06078064		883.22	0.00488753		1413.22	0.00605143		1943.21	0.01217725
353.43	0.06070414		883.42	0.00504364		1413.42	0.00534328		1943.41	0.01280586
353.63	0.06041253		883.62	0.00504903		1413.62	0.00391379		1943.61	0.01245683
353.83	0.06086594		883.82	0.00537631		1413.82	0.00358948		1943.81	0.01236711
354.03	0.06068151		884.02	0.0040093		1414.02	0.00359674		1944.01	0.01242878
354.23	0.06115868		884.22	0.00353421		1414.22	0.00357657		1944.21	0.01120819
354.43	0.06170581		884.42	0.00287632		1414.42	0.00343658		1944.41	0.01169982
354.63	0.06270402		884.62	0.00276906		1414.62	0.00311846		1944.61	0.01167157
354.83	0.06306375		884.82	0.00358238		1414.82	0.00360985		1944.81	0.01068115
355.03	0.0641297		885.02	0.00372886		1415.02	0.00361558		1945.01	0.00878419
355.23	0.06525153		885.22	0.00340514		1415.22	0.00443276		1945.21	0.00815476
355.43	0.06574925		885.42	0.00409742		1415.42	0.00504445		1945.41	0.00825473
355.63	0.0653845		885.62	0.00358027		1415.62	0.00513389		1945.61	0.00816614
355.83	0.06616918		885.82	0.00397369		1415.82	0.00578794		1945.81	0.00832398
356.03	0.06592936		886.02	0.00436723		1416.02	0.00572556		1946.01	0.00864377
356.23	0.06542218		886.22	0.00476848		1416.22	0.0058981		1946.21	0.00889992
356.43	0.06492027		886.42	0.00482544		1416.42	0.00581894		1946.41	0.00808315
356.63	0.06486096		886.62	0.00545424		1416.62	0.00489286		1946.61	0.00907474
356.83	0.06554962		886.82	0.00542371		1416.82	0.00503915		1946.81	0.00933533
357.03	0.06630749		887.02	0.0050486		1417.02	0.00504878		1947.01	0.01020998
357.23	0.06606757		887.22	0.00512515		1417.22	0.00536001		1947.21	0.01094024
357.43	0.06636307		887.42	0.00562096		1417.42	0.00482609		1947.41	0.01050915
357.63	0.0657562		887.62	0.00476342		1417.62	0.00520347		1947.61	0.01046933
357.83	0.06499857		887.82	0.00470945		1417.82	0.00539101		1947.81	0.01102546
358.03	0.06435333		888.02	0.00372446		1418.02	0.00494708		1948.01	0.01045964
358.23	0.06461598		888.22	0.00349183		1418.22	0.00542667		1948.21	0.01031366
358.43	0.06445029		888.42	0.0033166		1418.42	0.00494444		1948.41	0.01137963
358.63	0.06504806		888.62	0.00413122		1418.62	0.00363941		1948.61	0.01109878
358.83	0.06449942		888.82	0.00495334		1418.82	0.00368961		1948.81	0.010722
359.03	0.06349225		889.02	0.00496812		1419.02	0.00358961		1949.01	0.01147038
359.23	0.06256105		889.22	0.00553912		1419.22	0.00398883		1949.21	0.01198482
359.43	0.0626163		889.42	0.00653215		1419.42	0.00505754		1949.41	0.01203299
359.63	0.06222647		889.62	0.00647579		1419.62	0.00502453		1949.61	0.01166948
359.83	0.06224429		889.82	0.00819753		1419.82	0.00518932		1949.81	0.01150086
360.03	0.0614205		890.02	0.00887274		1420.02	0.00560709		1950.01	0.01013647
360.23	0.06210091		890.22	0.00808459		1420.22	0.00583179		1950.21	0.00945409
360.43	0.06193802		890.42	0.00834899		1420.42	0.00559616		1950.41	0.0088858
360.63	0.06239624		890.62	0.0093234		1420.62	0.00609369		1950.61	0.00891208
360.83	0.06341088		890.82	0.00985811		1420.82	0.00659059		1950.81	0.00925954
361.03	0.06409121		891.02	0.00932092		1421.02	0.006337		1951.01	0.00931224
361.23	0.0639621		891.22	0.00873389		1421.22	0.0063624		1951.21	0.00876292
361.43	0.06416388		891.42	0.00789328		1421.42	0.00672813		1951.41	0.00730587
361.63	0.06403476		891.62	0.00638659		1421.62	0.00715984		1951.61	0.00741906
361.83	0.06478231		891.82	0.00588931		1421.82	0.00704523		1951.81	0.00748628
362.03	0.0647709		892.02	0.00351628		1422.02	0.00671885		1952.01	0.00699833
362.23	0.06454947		892.22	0.00259219		1422.22	0.00647134		1952.21	0.00826388
362.43	0.063834		892.42	0.00215813		1422.42	0.0054143		1952.41	0.00919948
362.63	0.06484434		892.62	0.00212862		1422.62	0.00435338		1952.61	0.00937664
362.83	0.06488717		892.82	0.00163162		1422.82	0.00427382		1952.81	0.00964169
363.03	0.0648957		893.02	0.00114141		1423.02	0.00443337		1953.01	0.01054822
363.23	0.06463794		893.22	0.0017011		1423.22	0.00483878		1953.21	0.01038994
363.43	0.06489517		893.42	0.00247511		1423.42	0.00574853		1953.41	0.01105252
363.63	0.06448482		893.62	0.00267798		1423.62	0.00616711		1953.61	0.01123128
363.83	0.06416574		893.82	0.00390426		1423.82	0.00637348		1953.81	0.01040131
364.03	0.06453155		894.02	0.00410605		1424.02	0.0067023		1954.01	0.00995688
364.23	0.06561647		894.22	0.00458126		1424.22	0.00692557		1954.21	0.01048778
364.43	0.06693185		894.42	0.00606707		1424.42	0.00714625		1954.41	0.0110294
364.63	0.06767351		894.62	0.00736407		1424.62	0.00823307		1954.61	0.01107295
364.83	0.06889667		894.82	0.00842923		1424.82	0.00837838		1954.81	0.01194796
365.03	0.06953531		895.02	0.00849993		1425.02	0.0086603		1955.01	0.01184675
365.23	0.06869093		895.22	0.00826908		1425.22	0.00868411		1955.21	0.01112237
365.43	0.06947253		895.42	0.00784525		1425.42	0.0093704		1955.41	0.01047101
365.63	0.06859079		895.62	0.00672133		1425.62	0.00878729		1955.61	0.01060539
365.83	0.06851455		895.82	0.00609164		1425.82	0.00906675		1955.81	0.00918984
366.03	0.06815095		896.02	0.00494618		1426.02	0.00799294		1956.01	0.00935793
366.23	0.06785783		896.22	0.00547904		1426.22	0.00761216		1956.21	0.00938093
366.43	0.06778897		896.42	0.00500444		1426.42	0.00608798		1956.41	0.00934332
366.63	0.06844137		896.62	0.00390149		1426.62	0.00537876		1956.61	0.00950636
366.83	0.06813128		896.82	0.00320996		1426.82	0.00598422		1956.81	0.00912474
367.03	0.06746512		897.02	0.00328493		1427.02	0.00642322		1957.01	0.01030048
367.23	0.0668208		897.22	0.00359746		1427.22	0.00683962		1957.21	0.00995474
367.43	0.0665968		897.42	0.00411547		1427.42	0.00773813		1957.41	0.01073824
367.63	0.06688436		897.62	0.00442262		1427.62	0.0076533		1957.61	0.01062197
367.83	0.06695926		897.82	0.00535297		1427.82	0.00696158		1957.81	0.01156658
368.03	0.0680098		898.02	0.00508681		1428.02	0.00702738		1958.01	0.01297465
368.23	0.06971514		898.22	0.00620111		1428.22	0.00775921		1958.21	0.01331665
368.43	0.07129993		898.42	0.00554722		1428.42	0.007079		1958.41	0.01361328
368.63	0.07130081		898.62	0.00564808		1428.62	0.00769706		1958.61	0.01432425
368.83	0.07194936		898.82	0.00573528		1428.82	0.0069643		1958.81	0.01466408
369.03	0.07152609		899.02	0.0058317		1429.02	0.00635499		1959.01	0.01427959
369.23	0.07066777		899.22	0.00590267		1429.22	0.00578465		1959.21	0.01339855
369.43	0.0707028		899.42	0.0060924		1429.42	0.0064198		1959.41	0.01143663
369.63	0.06913648		899.62	0.0057687		1429.62	0.0062256		1959.61	0.01074354
369.83	0.0689811		899.82	0.0059812		1429.82	0.0057796		1959.81	0.00935577
370.03	0.06877617		900.02	0.00657976		1430.02	0.00475287		1960.01	0.00943671
370.23	0.06802158		900.22	0.00682051		1430.22	0.00471118		1960.21	0.00910407
370.43	0.06651543		900.42	0.00678131		1430.42	0.00387552		1960.41	0.00901725
370.63	0.06587073		900.62	0.0070632		1430.62	0.00464072		1960.61	0.0078771
370.83	0.06550735		900.82	0.00721626		1430.82	0.00492401		1960.81	0.00778115
371.03	0.06491803		901.02	0.00821722		1431.02	0.00442009		1961.01	0.00754556
371.23	0.06491636		901.22	0.00849094		1431.22	0.00473895		1961.21	0.00696185
371.43	0.06469118		901.42	0.00937666		1431.42	0.00521936		1961.41	0.00779166
371.63	0.06592126		901.62	0.00817191		1431.62	0.00422091		1961.61	0.00834456
371.83	0.06575856		901.82	0.00781586		1431.82	0.00481682		1961.81	0.00965356
372.03	0.06697224		902.02	0.00695735		1432.02	0.00530194		1962.01	0.00932431
372.23	0.06773751		902.22	0.00677842		1432.22	0.00553198		1962.21	0.00913974
372.43	0.06818937		902.42	0.00507699		1432.42	0.00504506		1962.41	0.01065152
372.63	0.0686863		902.62	0.00517277		1432.62	0.00594821		1962.61	0.01182919
372.83	0.06951285		902.82	0.00470887		1432.82	0.00600398		1962.81	0.01167104
373.03	0.06958475		903.02	0.00437242		1433.02	0.00609509		1963.01	0.01177198
373.23	0.06949271		903.22	0.0043728		1433.22	0.00689396		1963.21	0.01095576
373.43	0.06937205		903.42	0.00398413		1433.42	0.00708459		1963.41	0.01132207
373.63	0.06942686		903.62	0.0035892		1433.62	0.00710037		1963.61	0.01113481
373.83	0.07042008		903.82	0.00349761		1433.82	0.00695416		1963.81	0.01077765
374.03	0.07041604		904.02	0.00456628		1434.02	0.00565825		1964.01	0.01007922
374.23	0.07047274		904.22	0.00414584		1434.22	0.00516839		1964.21	0.00964226
374.43	0.06976126		904.42	0.00441304		1434.42	0.00497994		1964.41	0.00908602
374.63	0.06943679		904.62	0.0049092		1434.62	0.00419816		1964.61	0.00801314
374.83	0.06920277		904.82	0.00503856		1434.82	0.00476429		1964.81	0.00847583
375.03	0.06844584		905.02	0.00596883		1435.02	0.00500143		1965.01	0.00844616
375.23	0.06802374		905.22	0.00568477		1435.22	0.00499425		1965.21	0.00907539
375.43	0.06840193		905.42	0.00572268		1435.42	0.00536247		1965.41	0.00886915
375.63	0.06856623		905.62	0.00575677		1435.62	0.00521981		1965.61	0.00874914
375.83	0.06743287		905.82	0.00611264		1435.82	0.00619694		1965.81	0.00870281
376.03	0.06725268		906.02	0.00625148		1436.02	0.00648605		1966.01	0.00855806
376.23	0.06729416		906.22	0.00632871		1436.22	0.00682014		1966.21	0.00891179
376.43	0.06644892		906.42	0.00526064		1436.42	0.00703107		1966.41	0.01002391
376.63	0.06640825		906.62	0.00564945		1436.62	0.00733273		1966.61	0.01088118
376.83	0.06590379		906.82	0.00476829		1436.82	0.00768301		1966.81	0.0111502
377.03	0.06548362		907.02	0.00483978		1437.02	0.00772571		1967.01	0.01092645
377.23	0.06544668		907.22	0.00478858		1437.22	0.00785417		1967.21	0.01033541
377.43	0.06644999		907.42	0.00438045		1437.42	0.00730417		1967.41	0.01139565
377.63	0.06732933		907.62	0.00458529		1437.62	0.00752291		1967.61	0.01024688
377.83	0.06781502		907.82	0.00400869		1437.82	0.00647218		1967.81	0.01009711
378.03	0.06730065		908.02	0.00411527		1438.02	0.00499446		1968.01	0.00926656
378.23	0.0678346		908.22	0.00339238		1438.22	0.0048956		1968.21	0.00937481
378.43	0.06801275		908.42	0.00373975		1438.42	0.00472653		1968.41	0.00950978
378.63	0.06832078		908.62	0.00463324		1438.62	0.00423734		1968.61	0.00937174
378.83	0.06909035		908.82	0.00532586		1438.82	0.00470688		1968.81	0.01008947
379.03	0.0697064		909.02	0.00609468		1439.02	0.00389442		1969.01	0.01062612
379.23	0.07073743		909.22	0.00684791		1439.22	0.00314817		1969.21	0.01109629
379.43	0.07194852		909.42	0.00799003		1439.42	0.00327589		1969.41	0.01086823
379.63	0.0725144		909.62	0.009038		1439.62	0.00262363		1969.61	0.01125386
379.83	0.07341887		909.82	0.00910943		1439.82	0.00251865		1969.81	0.01188592
380.02	0.07341887		910.02	0.00910943		1440.02	0.00251865		1970.01	0.01188592
380.22	0.07402188		910.22	0.0097637		1440.22	0.00270425		1970.21	0.01187211
380.42	0.0744299		910.42	0.01022021		1440.42	0.0026436		1970.41	0.01185816
380.62	0.07461711		910.62	0.01058782		1440.62	0.00287686		1970.61	0.01109249
380.82	0.07457579		910.82	0.01107364		1440.82	0.00242204		1970.81	0.01178422
381.02	0.07507948		911.02	0.01215595		1441.02	0.0030025		1971.01	0.01202663
381.22	0.0746899		911.22	0.01252237		1441.22	0.00208692		1971.21	0.01252516
381.42	0.07497607		911.42	0.01289297		1441.42	0.0016957		1971.41	0.01237091
381.62	0.07454402		911.62	0.01277132		1441.62	0.00187378		1971.61	0.01159105
381.82	0.07419117		911.82	0.01225303		1441.82	0.00149179		1971.81	0.01290497
382.02	0.07325903		912.02	0.01173754		1442.02	0.00064903		1972.01	0.01399638
382.22	0.07155044		912.22	0.01141399		1442.22	0.00002206		1972.21	0.01496619
382.42	0.07099253		912.42	0.01052409		1442.42	0.00013715		1972.41	0.01496145
382.62	0.07217702		912.62	0.01022315		1442.62	-0.00129141		1972.61	0.01466766
382.82	0.07229386		912.82	0.00956535		1442.82	-0.00194185		1972.81	0.01500986
383.02	0.07311623		913.02	0.00859838		1443.02	-0.00201457		1973.01	0.01490162
383.22	0.07370655		913.22	0.00815346		1443.22	-0.00202249		1973.21	0.01522746
383.42	0.0726974		913.42	0.00777651		1443.42	-0.00288967		1973.41	0.01528145
383.62	0.07271645		913.62	0.00783506		1443.62	-0.00294277		1973.61	0.01544044
383.82	0.07229964		913.82	0.00838108		1443.82	-0.00327984		1973.81	0.01498
384.02	0.07160073		914.02	0.00846449		1444.02	-0.00264541		1974.01	0.01490389
384.22	0.07150418		914.22	0.00916348		1444.22	-0.00257689		1974.21	0.01446399
384.42	0.07100688		914.42	0.00949942		1444.42	-0.00128432		1974.41	0.01384049
384.62	0.07069406		914.62	0.00986917		1444.62	-0.00043704		1974.61	0.01272788
384.82	0.07078449		914.82	0.01090903		1444.82	-0.00094669		1974.81	0.01324381
385.02	0.07128631		915.02	0.01257321		1445.02	-0.00008129		1975.01	0.01259646
385.22	0.07108373		915.22	0.01324718		1445.22	-0.00147291		1975.21	0.01245381
385.42	0.07209822		915.42	0.01407401		1445.42	-0.00089446		1975.41	0.01116967
385.62	0.07206253		915.62	0.01426338		1445.62	-0.00067448		1975.61	0.01070901
385.82	0.07290771		915.82	0.01429927		1445.82	-0.00119342		1975.81	0.01150741
386.02	0.07264606		916.02	0.01420272		1446.02	-0.00175785		1976.01	0.01149852
386.22	0.07257095		916.22	0.01401467		1446.22	-0.00190026		1976.21	0.01252695
386.42	0.07316995		916.42	0.01371521		1446.42	-0.00178589		1976.41	0.01245602
386.62	0.07463947		916.62	0.01302122		1446.62	-0.00306581		1976.61	0.01234475
386.82	0.07468382		916.82	0.0129211		1446.82	-0.00205233		1976.81	0.01204916
387.02	0.07472491		917.02	0.01301003		1447.02	-0.00182248		1977.01	0.01290131
387.22	0.07472455		917.22	0.01310383		1447.22	-0.00228591		1977.21	0.01315125
387.42	0.07364391		917.42	0.01329982		1447.42	-0.00186935		1977.41	0.01340139
387.62	0.07392587		917.62	0.01320302		1447.62	-0.00142665		1977.61	0.01292656
387.82	0.07360694		917.82	0.01271464		1447.82	-0.00081917		1977.81	0.01232797
388.02	0.07227076		918.02	0.01302802		1448.02	-0.00019598		1978.01	0.01094977
388.22	0.0720145		918.22	0.01326842		1448.22	0.00046775		1978.21	0.01062958
388.42	0.07157931		918.42	0.01325169		1448.42	0.00175214		1978.41	0.01013843
388.62	0.0716547		918.62	0.01313886		1448.62	0.00126102		1978.61	0.00917433
388.82	0.07222061		918.82	0.01387982		1448.82	0.00086321		1978.81	0.00921659
389.02	0.07199474		919.02	0.01457825		1449.02	0.00144543		1979.01	0.00992218
389.22	0.07228248		919.22	0.01480172		1449.22	0.00080202		1979.21	0.00952524
389.42	0.0727618		919.42	0.0156491		1449.42	0.00102042		1979.41	0.00900188
389.62	0.07206743		919.62	0.0151754		1449.62	0.00129022		1979.61	0.00958755
389.82	0.07290449		919.82	0.01386187		1449.82	0.00086817		1979.81	0.01003657
390.02	0.0722766		920.02	0.01270597		1450.02	-0.00004369		1980.01	0.01146091
390.22	0.07213099		920.22	0.01124562		1450.22	-0.00151284		1980.21	0.01265507
390.42	0.07224067		920.42	0.01027984		1450.42	-0.00226514		1980.41	0.01248406
390.62	0.07290591		920.62	0.00939108		1450.62	-0.00261862		1980.61	0.01262374
390.82	0.07192687		920.82	0.00932697		1450.82	-0.00203802		1980.81	0.01330348
391.02	0.07217269		921.02	0.0090149		1451.02	-0.00290218		1981.01	0.01349365
391.22	0.07239162		921.22	0.00889316		1451.22	-0.00288037		1981.21	0.01356843
391.42	0.07169859		921.42	0.00908862		1451.42	-0.00190276		1981.41	0.01370506
391.62	0.07169374		921.62	0.00789604		1451.62	-0.00128643		1981.61	0.01262033
391.82	0.07141933		921.82	0.00825088		1451.82	-0.00074433		1981.81	0.01174251
392.02	0.07133375		922.02	0.00866483		1452.02	0.0000573		1982.01	0.01077056
392.22	0.0709885		922.22	0.00952232		1452.22	0.00042246		1982.21	0.01003452
392.42	0.07007401		922.42	0.00964332		1452.42	0.00122339		1982.41	0.00907022
392.62	0.06958295		922.62	0.00950352		1452.62	0.00096805		1982.61	0.00802113
392.82	0.06901889		922.82	0.01002059		1452.82	0.00087782		1982.81	0.00825986
393.02	0.06872056		923.02	0.01060267		1453.02	0.00125859		1983.01	0.00803816
393.22	0.06882256		923.22	0.01155392		1453.22	0.00069921		1983.21	0.0082437
393.42	0.06920513		923.42	0.01253636		1453.42	0.0001643		1983.41	0.00831535
393.62	0.06870191		923.62	0.01166139		1453.62	0.00004446		1983.61	0.00898409
393.82	0.06950377		923.82	0.0115181		1453.82	-0.00103278		1983.81	0.00920702
394.02	0.0696368		924.02	0.01107748		1454.02	-0.00237646		1984.01	0.00975178
394.22	0.06983635		924.22	0.01001157		1454.22	-0.00352155		1984.21	0.00984443
394.42	0.07013986		924.42	0.01023047		1454.42	-0.00409795		1984.41	0.01006411
394.62	0.07040803		924.62	0.01034954		1454.62	-0.00397932		1984.61	0.0101327
394.82	0.07017313		924.82	0.00996895		1454.82	-0.00388123		1984.81	0.01039332
395.02	0.07137668		925.02	0.00954968		1455.02	-0.00400795		1985.01	0.01044088
395.22	0.07019221		925.22	0.00982277		1455.22	-0.00358493		1985.21	0.01132072
395.42	0.06996844		925.42	0.0099188		1455.42	-0.00291508		1985.41	0.01166171
395.62	0.06942259		925.62	0.0101033		1455.62	-0.00270779		1985.61	0.01166749
395.82	0.07029663		925.82	0.01057128		1455.82	-0.00142655		1985.81	0.01171618
396.02	0.07016432		926.02	0.01007709		1456.02	-0.00019645		1986.01	0.01124653
396.22	0.06850303		926.22	0.00979223		1456.22	-0.00046457		1986.21	0.01111847
396.42	0.06722908		926.42	0.00806816		1456.42	0.00004385		1986.41	0.011465
396.62	0.06696849		926.62	0.00844104		1456.62	-0.0002001		1986.61	0.01164271
396.82	0.0673816		926.82	0.00844886		1456.82	-0.00011753		1986.81	0.01203893
397.02	0.06830012		927.02	0.00865476		1457.02	-0.00054731		1987.01	0.01314546
397.22	0.06906493		927.22	0.00926432		1457.22	-0.00147627		1987.21	0.01363091
397.42	0.06939075		927.42	0.00996286		1457.42	-0.00276827		1987.41	0.01348363
397.62	0.06874848		927.62	0.00963809		1457.62	-0.0029045		1987.61	0.01369639
397.82	0.06931065		927.82	0.01009026		1457.82	-0.00360974		1987.81	0.013574
398.02	0.07039664		928.02	0.01025502		1458.02	-0.00386421		1988.01	0.01399959
398.22	0.07088499		928.22	0.01014125		1458.22	-0.00411833		1988.21	0.01401169
398.42	0.07110864		928.42	0.0104217		1458.42	-0.00470702		1988.41	0.01386102
398.62	0.0726167		928.62	0.01047528		1458.62	-0.00442829		1988.61	0.01359619
398.82	0.07312749		928.82	0.01111955		1458.82	-0.00445858		1988.81	0.01302177
399.02	0.07343677		929.02	0.01111186		1459.02	-0.00361472		1989.01	0.01233591
399.22	0.07235952		929.22	0.01189076		1459.22	-0.00275746		1989.21	0.01153746
399.42	0.07265315		929.42	0.01165969		1459.42	-0.00214068		1989.41	0.01095792
399.62	0.07380266		929.62	0.01067184		1459.62	-0.00167451		1989.61	0.01036403
399.82	0.07505066		929.82	0.01034617		1459.82	-0.0002503		1989.81	0.00945378
400.02	0.07361193		930.02	0.01003062		1460.02	-0.00016112		1990.01	0.00942559
400.22	0.07290973		930.22	0.00874898		1460.22	-0.00035892		1990.21	0.00953789
400.42	0.07203665		930.42	0.00862524		1460.42	0.00014196		1990.41	0.00885866
400.62	0.07185027		930.62	0.00858124		1460.62	-0.00003455		1990.61	0.00833588
400.82	0.07069255		930.82	0.00848084		1460.82	-0.00014363		1990.81	0.00831607
401.02	0.07032552		931.02	0.00837787		1461.02	-0.00121795		1991.01	0.00914415
401.22	0.07026355		931.22	0.00927615		1461.22	-0.00164086		1991.21	0.00893937
401.42	0.06898919		931.42	0.00842222		1461.42	-0.00232836		1991.41	0.01006369
401.62	0.0681477		931.62	0.00737081		1461.62	-0.00224867		1991.61	0.01054232
401.82	0.06886173		931.82	0.0076063		1461.82	-0.00316552		1991.81	0.01169783
402.02	0.06911843		932.02	0.0075776		1462.02	-0.00349854		1992.01	0.01292513
402.22	0.06857709		932.22	0.00674099		1462.22	-0.00451215		1992.21	0.01402041
402.42	0.06874382		932.42	0.00680018		1462.42	-0.00478374		1992.41	0.01397121
402.62	0.06995127		932.62	0.00745174		1462.62	-0.00516812		1992.61	0.01389691
402.82	0.06976066		932.82	0.00801891		1462.82	-0.00412005		1992.81	0.01287052
403.02	0.07024184		933.02	0.00753825		1463.02	-0.0036466		1993.01	0.01241899
403.22	0.07002241		933.22	0.00813089		1463.22	-0.00346055		1993.21	0.01255919
403.42	0.07099052		933.42	0.00824643		1463.42	-0.00385726		1993.41	0.0117763
403.62	0.07152255		933.62	0.0084438		1463.62	-0.00266902		1993.61	0.01018156
403.82	0.07102114		933.82	0.00921848		1463.82	-0.00152804		1993.81	0.00945232
404.02	0.07070764		934.02	0.00968761		1464.02	-0.00170242		1994.01	0.0085066
404.22	0.07135663		934.22	0.01026881		1464.22	-0.00240802		1994.21	0.00733638
404.42	0.0704481		934.42	0.01114135		1464.42	-0.00222322		1994.41	0.00637943
404.62	0.07039678		934.62	0.0101509		1464.62	-0.00224923		1994.61	0.00655099
404.82	0.06942915		934.82	0.01157584		1464.82	-0.00202955		1994.81	0.00756545
405.02	0.0696886		935.02	0.01160047		1465.02	-0.00305855		1995.01	0.0082958
405.22	0.06927328		935.22	0.01158304		1465.22	-0.00331471		1995.21	0.00886299
405.42	0.06921752		935.42	0.00941612		1465.42	-0.00420082		1995.41	0.00905844
405.62	0.06963734		935.62	0.00929286		1465.62	-0.00518085		1995.61	0.0098183
405.82	0.07052369		935.82	0.00805739		1465.82	-0.00594075		1995.81	0.01075045
406.02	0.07045386		936.02	0.00693146		1466.02	-0.0058126		1996.01	0.01210377
406.22	0.07073785		936.22	0.00646573		1466.22	-0.00609938		1996.21	0.01296084
406.42	0.07131471		936.42	0.0065133		1466.42	-0.0057123		1996.41	0.01178427
406.62	0.07204447		936.62	0.00586839		1466.62	-0.00630581		1996.61	0.01204185
406.82	0.07148989		936.82	0.00517448		1466.82	-0.00576604		1996.81	0.01248232
407.02	0.07148376		937.02	0.00491142		1467.02	-0.00609768		1997.01	0.01276296
407.22	0.07133297		937.22	0.00526204		1467.22	-0.00516455		1997.21	0.01218764
407.42	0.07144253		937.42	0.00517877		1467.42	-0.00363785		1997.41	0.00986747
407.62	0.07064751		937.62	0.00506169		1467.62	-0.00141783		1997.61	0.00875699
407.82	0.07006666		937.82	0.00490825		1467.82	-0.00174346		1997.81	0.00836738
408.02	0.07003534		938.02	0.00527456		1468.02	-0.00216816		1998.01	0.00741303
408.22	0.07034027		938.22	0.00561994		1468.22	-0.00251625		1998.21	0.00720144
408.42	0.0690246		938.42	0.00527794		1468.42	-0.00249235		1998.41	0.0078649
408.62	0.06817758		938.62	0.00516501		1468.62	-0.00249727		1998.61	0.0085663
408.82	0.06693399		938.82	0.00593913		1468.82	-0.00268516		1998.81	0.00860009
409.02	0.06621555		939.02	0.00557107		1469.02	-0.00395788		1999.01	0.00820112
409.22	0.06636324		939.22	0.00557622		1469.22	-0.00544987		1999.21	0.00875197
409.42	0.0672652		939.42	0.00508323		1469.42	-0.00657478		1999.41	0.00917309
409.62	0.06746201		939.62	0.0056373		1469.62	-0.00639878		1999.61	0.00948586
409.82	0.06809288		939.82	0.00496837		1469.82	-0.00642335		1999.81	0.01004283
410.02	0.06790067		940.02	0.00584705		1470.02	-0.00606888		2000.01	0.00988596
410.22	0.0686909		940.22	0.00706991		1470.22	-0.00634443		2000.21	0.00966145
410.42	0.06918839		940.42	0.00754393		1470.42	-0.00601542		2000.41	0.00895614
410.62	0.07012487		940.62	0.00688729		1470.62	-0.00642225		2000.61	0.00922007
410.82	0.07000823		940.82	0.00690906		1470.82	-0.00618348		2000.81	0.00952186
411.02	0.07104297		941.02	0.00762993		1471.02	-0.00581894		2001.01	0.00875001
411.22	0.07096397		941.22	0.00817507		1471.22	-0.00479092		2001.21	0.0078541
411.42	0.07170212		941.42	0.00787966		1471.42	-0.00341508		2001.41	0.00792866
411.62	0.07107712		941.62	0.00846633		1471.62	-0.00333121		2001.61	0.00789905
411.82	0.07096496		941.82	0.00822775		1471.82	-0.00406844		2001.81	0.00838299
412.02	0.0706457		942.02	0.00766321		1472.02	-0.00359677		2002.01	0.00817385
412.22	0.07096406		942.22	0.00779663		1472.22	-0.00376543		2002.21	0.0084887
412.42	0.06949434		942.42	0.00748252		1472.42	-0.00363871		2002.41	0.0085186
412.62	0.06885304		942.62	0.0070897		1472.62	-0.00375633		2002.61	0.00844826
412.82	0.06876548		942.82	0.00622295		1472.82	-0.00470991		2002.81	0.00828475
413.02	0.06855164		943.02	0.00577026		1473.02	-0.00622988		2003.01	0.00916158
413.22	0.067952		943.22	0.00511383		1473.22	-0.00677706		2003.21	0.00907872
413.42	0.067519		943.42	0.00547872		1473.42	-0.00605115		2003.41	0.00913859
413.62	0.06785517		943.62	0.00643672		1473.62	-0.00553718		2003.61	0.00869151
413.82	0.06762274		943.82	0.00677099		1473.82	-0.00579426		2003.81	0.00873018
414.02	0.06796988		944.02	0.00690708		1474.02	-0.00523251		2004.01	0.0081595
414.22	0.06929518		944.22	0.00651714		1474.22	-0.00545858		2004.21	0.00856999
414.42	0.06936038		944.42	0.00639296		1474.42	-0.00560775		2004.41	0.00763469
414.62	0.07010462		944.62	0.00644674		1474.62	-0.00531694		2004.61	0.00739772
414.82	0.07076128		944.82	0.0067711		1474.82	-0.00526105		2004.81	0.00744509
415.02	0.06994319		945.02	0.00797062		1475.02	-0.0048371		2005.01	0.0075252
415.22	0.06980439		945.22	0.00832759		1475.22	-0.00444285		2005.21	0.0076877
415.42	0.07041802		945.42	0.00871215		1475.42	-0.00392083		2005.41	0.00815188
415.62	0.07003891		945.62	0.00956159		1475.62	-0.00497573		2005.61	0.00693294
415.82	0.06942191		945.82	0.00894187		1475.82	-0.00466915		2005.81	0.00694053
416.02	0.06896976		946.02	0.00907985		1476.02	-0.00436015		2006.01	0.00614176
416.22	0.06860526		946.22	0.00942061		1476.22	-0.00378666		2006.21	0.00598969
416.42	0.06757895		946.42	0.00939328		1476.42	-0.00396513		2006.41	0.00599092
416.62	0.06794837		946.62	0.00875552		1476.62	-0.00428383		2006.61	0.00692378
416.82	0.06781046		946.82	0.00880424		1476.82	-0.00472948		2006.81	0.0068957
417.02	0.0674389		947.02	0.00784168		1477.02	-0.00482253		2007.01	0.00803287
417.22	0.06643678		947.22	0.00766525		1477.22	-0.00470209		2007.21	0.00764356
417.42	0.0667773		947.42	0.00804584		1477.42	-0.00383092		2007.41	0.00837637
417.62	0.06731334		947.62	0.0076801		1477.62	-0.00415873		2007.61	0.00834327
417.82	0.06740707		947.82	0.00608444		1477.82	-0.00431785		2007.81	0.00826623
418.02	0.06818999		948.02	0.00564618		1478.02	-0.00465156		2008.01	0.00906376
418.22	0.06793977		948.22	0.00617548		1478.22	-0.00572928		2008.21	0.00904665
418.42	0.06739173		948.42	0.00687445		1478.42	-0.00599879		2008.41	0.00877175
418.62	0.06706022		948.62	0.0071256		1478.62	-0.00536549		2008.61	0.00893749
418.82	0.06726411		948.82	0.00830138		1478.82	-0.00541307		2008.81	0.00828899
419.02	0.06586711		949.02	0.00864278		1479.02	-0.00564117		2009.01	0.00835559
419.22	0.06672275		949.22	0.00879763		1479.22	-0.00587306		2009.21	0.00773693
419.42	0.06679501		949.42	0.00876043		1479.42	-0.00562813		2009.41	0.0075034
419.62	0.06633949		949.62	0.00850399		1479.62	-0.00628896		2009.61	0.00675804
419.82	0.06519661		949.82	0.0086706		1479.82	-0.00530533		2009.81	0.00740959
420.02	0.0651875		950.02	0.00882516		1480.02	-0.0045938		2010.01	0.007111
420.22	0.06524123		950.22	0.00904528		1480.22	-0.00406513		2010.21	0.00732107
420.42	0.06594156		950.42	0.00926942		1480.42	-0.00400721		2010.41	0.00706556
420.62	0.06694489		950.62	0.00908313		1480.62	-0.00404186		2010.61	0.0076588
420.82	0.06690021		950.82	0.00856163		1480.82	-0.00404943		2010.81	0.00710989
421.02	0.06668616		951.02	0.0075823		1481.02	-0.0038993		2011.01	0.00746524
421.22	0.06701978		951.22	0.00791765		1481.22	-0.00435759		2011.21	0.00673015
421.42	0.06778373		951.42	0.00746652		1481.42	-0.00457713		2011.41	0.00609304
421.62	0.06813138		951.62	0.00711598		1481.62	-0.00581209		2011.61	0.00576251
421.82	0.06897108		951.82	0.00649022		1481.82	-0.00627097		2011.81	0.00603361
422.02	0.06895916		952.02	0.0073653		1482.02	-0.00733519		2012.01	0.00613624
422.22	0.06860317		952.22	0.00780996		1482.22	-0.00808526		2012.21	0.00500524
422.42	0.06823871		952.42	0.00760715		1482.42	-0.00792976		2012.41	0.00494398
422.62	0.06799105		952.62	0.00781044		1482.62	-0.00785911		2012.61	0.00453559
422.82	0.06886572		952.82	0.00793195		1482.82	-0.00846637		2012.81	0.00423105
423.02	0.06823438		953.02	0.00634892		1483.02	-0.00850748		2013.01	0.00483825
423.22	0.06871877		953.22	0.00553527		1483.22	-0.00851177		2013.21	0.00487403
423.42	0.06776422		953.42	0.00509012		1483.42	-0.00825063		2013.41	0.00481317
423.62	0.06635292		953.62	0.00448196		1483.62	-0.0076544		2013.61	0.00535297
423.82	0.06620699		953.82	0.0038217		1483.82	-0.00720665		2013.81	0.00638242
424.02	0.06616676		954.02	0.00350098		1484.02	-0.00789653		2014.01	0.00577579
424.22	0.06617487		954.22	0.00425115		1484.22	-0.00849935		2014.21	0.00625262
424.42	0.06563345		954.42	0.00470509		1484.42	-0.00865996		2014.41	0.00570108
424.62	0.06464094		954.62	0.00514373		1484.62	-0.00902357		2014.61	0.00723956
424.82	0.06398359		954.82	0.00535944		1484.82	-0.00922517		2014.81	0.00728784
425.02	0.06321371		955.02	0.00546065		1485.02	-0.00955857		2015.01	0.00805409
425.22	0.06361205		955.22	0.00615078		1485.22	-0.00942193		2015.21	0.00853711
425.42	0.06415194		955.42	0.00606111		1485.42	-0.00906822		2015.41	0.00805046
425.62	0.06466818		955.62	0.00625366		1485.62	-0.00892851		2015.61	0.00773951
425.82	0.06558122		955.82	0.00663556		1485.82	-0.00817309		2015.81	0.00723748
426.02	0.0660289		956.02	0.00728851		1486.02	-0.00779515		2016.01	0.00697262
426.22	0.06610911		956.22	0.00799795		1486.22	-0.00770347		2016.21	0.00728414
426.42	0.06664016		956.42	0.00756972		1486.42	-0.00703698		2016.41	0.00708142
426.62	0.06729658		956.62	0.00772228		1486.62	-0.00699598		2016.61	0.00675894
426.82	0.06768236		956.82	0.00722934		1486.82	-0.00614511		2016.81	0.00666011
427.02	0.06792658		957.02	0.00727072		1487.02	-0.00477508		2017.01	0.00579876
427.22	0.06790396		957.22	0.00658085		1487.22	-0.0042158		2017.21	0.00486776
427.42	0.06777988		957.42	0.00723271		1487.42	-0.00322604		2017.41	0.0042002
427.62	0.06765376		957.62	0.00668931		1487.62	-0.00194566		2017.61	0.00501312
427.82	0.06755689		957.82	0.00636153		1487.82	-0.00285475		2017.81	0.00484187
428.02	0.06745709		958.02	0.00692782		1488.02	-0.00429709		2018.01	0.00461974
428.22	0.06630338		958.22	0.00748075		1488.22	-0.00502948		2018.21	0.00487656
428.42	0.06497984		958.42	0.00803615		1488.42	-0.00524822		2018.41	0.00530787
428.62	0.06392347		958.62	0.00895608		1488.62	-0.00598868		2018.61	0.00665665
428.82	0.06336962		958.82	0.0082315		1488.82	-0.00670907		2018.81	0.00687043
429.02	0.0626203		959.02	0.00722812		1489.02	-0.00737832		2019.01	0.0071675
429.22	0.06270147		959.22	0.00716066		1489.22	-0.00805794		2019.21	0.00642006
429.42	0.06416674		959.42	0.00650387		1489.42	-0.00851668		2019.41	0.00565352
429.62	0.06493149		959.62	0.00652668		1489.62	-0.00886917		2019.61	0.00545845
429.82	0.06526114		959.82	0.00553284		1489.82	-0.00901729		2019.81	0.00543995
430.02	0.06585184		960.02	0.00601376		1490.02	-0.0098625		2020.01	0.00595779
430.22	0.06627708		960.22	0.00566273		1490.22	-0.01072406		2020.21	0.00606461
430.42	0.06650043		960.42	0.00506621		1490.42	-0.01089203		2020.41	0.00519952
430.62	0.06694425		960.62	0.00579981		1490.62	-0.01011109		2020.61	0.00589621
430.82	0.06719542		960.82	0.00512462		1490.82	-0.00948745		2020.81	0.00620384
431.02	0.06700902		961.02	0.00545553		1491.02	-0.00847235		2021.01	0.00602722
431.22	0.06617598		961.22	0.00566003		1491.22	-0.00829556		2021.21	0.00676073
431.42	0.06549799		961.42	0.00608432		1491.42	-0.00736334		2021.41	0.00693011
431.62	0.06450333		961.62	0.00592025		1491.62	-0.00677746		2021.61	0.00791654
431.82	0.06411209		961.82	0.00571377		1491.82	-0.00686551		2021.81	0.00834216
432.02	0.0636801		962.02	0.00589894		1492.02	-0.00687265		2022.01	0.00930124
432.22	0.06285395		962.22	0.00611324		1492.22	-0.00667277		2022.21	0.00909587
432.42	0.06208232		962.42	0.00683984		1492.42	-0.00656388		2022.41	0.01011979
432.62	0.06212271		962.62	0.00683478		1492.62	-0.0068371		2022.61	0.01011955
432.82	0.06166533		962.82	0.00540078		1492.82	-0.00654926		2022.81	0.01029128
433.02	0.06152985		963.02	0.00411914		1493.02	-0.00690789		2023.01	0.00994294
433.22	0.0628557		963.22	0.0032557		1493.22	-0.00756608		2023.21	0.01005776
433.42	0.06422818		963.42	0.00205642		1493.42	-0.00669853		2023.41	0.01019132
433.62	0.06503357		963.62	0.00225535		1493.62	-0.00681094		2023.61	0.01013824
433.82	0.06476903		963.82	0.00186817		1493.82	-0.00738179		2023.81	0.00929284
434.02	0.06530619		964.02	0.00304388		1494.02	-0.00795293		2024.01	0.0088892
434.22	0.06688759		964.22	0.00334239		1494.22	-0.0086241		2024.21	0.00822869
434.42	0.06761032		964.42	0.00373886		1494.42	-0.00874981		2024.41	0.00808345
434.62	0.06775498		964.62	0.00348036		1494.62	-0.00893114		2024.61	0.00838482
434.82	0.06735405		964.82	0.00361924		1494.82	-0.00939122		2024.81	0.00736693
435.02	0.06551458		965.02	0.00445		1495.02	-0.00905205		2025.01	0.00682302
435.22	0.06483075		965.22	0.00451571		1495.22	-0.00941206		2025.21	0.00641396
435.42	0.06439273		965.42	0.00440395		1495.42	-0.00886911		2025.41	0.00538235
435.62	0.06401906		965.62	0.00461481		1495.62	-0.00899734		2025.61	0.00613722
435.82	0.06403016		965.82	0.00437039		1495.82	-0.00862318		2025.81	0.00496983
436.02	0.06374136		966.02	0.00485615		1496.02	-0.00879163		2026.01	0.004253
436.22	0.06258188		966.22	0.00511455		1496.22	-0.00876607		2026.21	0.00343705
436.42	0.06155488		966.42	0.00482071		1496.42	-0.00968653		2026.41	0.00391451
436.62	0.06164646		966.62	0.00419575		1496.62	-0.00989592		2026.61	0.00404587
436.82	0.06110191		966.82	0.00257336		1496.82	-0.01013058		2026.81	0.00506401
437.02	0.06092167		967.02	0.00155867		1497.02	-0.01009113		2027.01	0.00523551
437.22	0.06135994		967.22	0.00169264		1497.22	-0.0104419		2027.21	0.00622257
437.42	0.06200085		967.42	0.0016235		1497.42	-0.00963458		2027.41	0.00621593
437.62	0.06274868		967.62	0.00278331		1497.62	-0.00972812		2027.61	0.0070797
437.82	0.06353185		967.82	0.00303954		1497.82	-0.00925227		2027.81	0.00673087
438.02	0.06492911		968.02	0.0035439		1498.02	-0.00961475		2028.01	0.00701847
438.22	0.06631686		968.22	0.00395484		1498.22	-0.00933857		2028.21	0.0073381
438.42	0.06726177		968.42	0.00411209		1498.42	-0.00888875		2028.41	0.00785188
438.62	0.06732415		968.62	0.00411604		1498.62	-0.00850934		2028.61	0.00735376
438.82	0.06743271		968.82	0.00551542		1498.82	-0.00753474		2028.81	0.00684797
439.02	0.06735757		969.02	0.00623029		1499.02	-0.00721458		2029.01	0.00743817
439.22	0.06858795		969.22	0.00559578		1499.22	-0.00673657		2029.21	0.00661694
439.42	0.06819564		969.42	0.00557435		1499.42	-0.00665603		2029.41	0.00629868
439.62	0.06800237		969.62	0.00557021		1499.62	-0.0067618		2029.61	0.00639822
439.82	0.06784642		969.82	0.00473162		1499.82	-0.00673505		2029.81	0.00509739
440.02	0.0674457		970.02	0.00443768		1500.02	-0.00764494		2030.01	0.00478919
440.22	0.06585185		970.22	0.00403035		1500.22	-0.00800818		2030.21	0.00456545
440.42	0.06559911		970.42	0.0039616		1500.42	-0.00885924		2030.41	0.00449187
440.62	0.0657154		970.62	0.00425899		1500.62	-0.00939103		2030.61	0.0043601
440.82	0.06545966		970.82	0.00347602		1500.82	-0.00936067		2030.81	0.00469402
441.02	0.06447939		971.02	0.00435204		1501.02	-0.00926195		2031.01	0.00462194
441.22	0.06486342		971.22	0.00482705		1501.22	-0.00927728		2031.21	0.00589731
441.42	0.06564965		971.42	0.00478763		1501.42	-0.00814833		2031.41	0.00541826
441.62	0.06476714		971.62	0.00547314		1501.62	-0.00782211		2031.61	0.00529915
441.82	0.06495659		971.82	0.00539929		1501.82	-0.00759093		2031.81	0.0047424
442.02	0.06392958		972.02	0.00591559		1502.02	-0.00761661		2032.01	0.00456116
442.22	0.06429957		972.22	0.00625167		1502.22	-0.00604002		2032.21	0.00508561
442.42	0.06470779		972.42	0.00683371		1502.42	-0.00624532		2032.41	0.00439738
442.62	0.06491959		972.62	0.00669711		1502.62	-0.00609408		2032.61	0.00400293
442.82	0.06522217		972.82	0.00748482		1502.82	-0.0066109		2032.81	0.0039549
443.02	0.0654834		973.02	0.00755207		1503.02	-0.0069105		2033.01	0.00392032
443.22	0.06530089		973.22	0.00622224		1503.22	-0.00691094		2033.21	0.00349505
443.42	0.06453916		973.42	0.00569896		1503.42	-0.00801187		2033.41	0.0041726
443.62	0.06438631		973.62	0.00551807		1503.62	-0.00830718		2033.61	0.00489764
443.82	0.06412116		973.82	0.00397969		1503.82	-0.00919454		2033.81	0.00571569
444.02	0.06408623		974.02	0.00334493		1504.02	-0.01004873		2034.01	0.00535737
444.22	0.0636334		974.22	0.00373733		1504.22	-0.01067718		2034.21	0.0061472
444.42	0.06442936		974.42	0.00401549		1504.42	-0.0111245		2034.41	0.00640243
444.62	0.06482825		974.62	0.00354199		1504.62	-0.0116898		2034.61	0.00700643
444.82	0.06461127		974.82	0.00270682		1504.82	-0.01103013		2034.81	0.00800601
445.02	0.06440914		975.02	0.00336902		1505.02	-0.01022769		2035.01	0.00795937
445.22	0.06454907		975.22	0.00250119		1505.22	-0.00997884		2035.21	0.00851883
445.42	0.06479233		975.42	0.00218791		1505.42	-0.00971647		2035.41	0.00741524
445.62	0.06454		975.62	0.00280398		1505.62	-0.00981605		2035.61	0.00782431
445.82	0.06464843		975.82	0.00248846		1505.82	-0.00935538		2035.81	0.00797419
446.02	0.06479006		976.02	0.00246897		1506.02	-0.0087012		2036.01	0.00729461
446.22	0.06581934		976.22	0.00262231		1506.22	-0.00908208		2036.21	0.00638125
446.42	0.06589488		976.42	0.00287212		1506.42	-0.01013335		2036.41	0.00514971
446.62	0.06697842		976.62	0.00330935		1506.62	-0.0104173		2036.61	0.00354615
446.82	0.06639475		976.82	0.00518555		1506.82	-0.0106644		2036.81	0.00332442
447.02	0.06491792		977.02	0.00545862		1507.02	-0.01088497		2037.01	0.0031868
447.22	0.06449009		977.22	0.00472361		1507.22	-0.01064003		2037.21	0.00288099
447.42	0.06436439		977.42	0.00441205		1507.42	-0.01152944		2037.41	0.00320004
447.62	0.06346696		977.62	0.00492853		1507.62	-0.01097801		2037.61	0.00376823
447.82	0.06330716		977.82	0.00442832		1507.82	-0.01078255		2037.81	0.00388371
448.02	0.06286014		978.02	0.00409906		1508.02	-0.01108176		2038.01	0.00367257
448.22	0.06225003		978.22	0.00432728		1508.22	-0.01105681		2038.21	0.00459727
448.42	0.06193941		978.42	0.00379294		1508.42	-0.01014175		2038.41	0.00446934
448.62	0.06223091		978.62	0.00298311		1508.62	-0.00960723		2038.61	0.00495563
448.82	0.06285739		978.82	0.00228426		1508.82	-0.00955206		2038.81	0.00498539
449.02	0.06368657		979.02	0.00233282		1509.02	-0.00957699		2039.01	0.00638216
449.22	0.06423048		979.22	0.00137037		1509.22	-0.01013002		2039.21	0.00683023
449.42	0.06433111		979.42	0.00196145		1509.42	-0.00954268		2039.41	0.00698839
449.62	0.06423292		979.62	0.00225654		1509.62	-0.00882009		2039.61	0.00768728
449.82	0.06421418		979.82	0.00192334		1509.82	-0.00867458		2039.81	0.00711537
450.02	0.06372591		980.02	0.00205565		1510.02	-0.00870591		2040.01	0.00584046
450.22	0.06362442		980.22	0.00245413		1510.22	-0.00922749		2040.21	0.00512248
450.42	0.06310044		980.42	0.00264922		1510.42	-0.00888189		2040.41	0.00500136
450.62	0.06313763		980.62	0.00327905		1510.62	-0.00849407		2040.61	0.0044077
450.82	0.06208848		980.82	0.00369976		1510.82	-0.00760806		2040.81	0.00409188
451.02	0.06147819		981.02	0.00280104		1511.02	-0.00706569		2041.01	0.00351737
451.22	0.06124631		981.22	0.00272125		1511.22	-0.0058956		2041.21	0.00322587
451.42	0.06032525		981.42	0.00260847		1511.42	-0.0050259		2041.41	0.00433098
451.62	0.05943254		981.62	0.00269059		1511.62	-0.00457983		2041.61	0.00418056
451.82	0.05980967		981.82	0.00194097		1511.82	-0.00434407		2041.81	0.00434762
452.02	0.05932723		982.02	0.00151372		1512.02	-0.00503483		2042.01	0.00414641
452.22	0.05921602		982.22	0.00140019		1512.22	-0.00567986		2042.21	0.00467478
452.42	0.06008415		982.42	0.00112337		1512.42	-0.00678035		2042.41	0.00502215
452.62	0.06273993		982.62	0.00143089		1512.62	-0.00760359		2042.61	0.00599134
452.82	0.06331302		982.82	0.00169322		1512.82	-0.00864194		2042.81	0.00517126
453.02	0.06401671		983.02	0.00256754		1513.02	-0.00929568		2043.01	0.00639062
453.22	0.06452562		983.22	0.00298763		1513.22	-0.01081042		2043.21	0.00573893
453.42	0.06429445		983.42	0.00402189		1513.42	-0.01156925		2043.41	0.00570823
453.62	0.06480412		983.62	0.0040788		1513.62	-0.01226413		2043.61	0.00592088
453.82	0.06464524		983.82	0.0046907		1513.82	-0.01343376		2043.81	0.00571186
454.02	0.06452649		984.02	0.00571827		1514.02	-0.01315341		2044.01	0.00522037
454.22	0.06496682		984.22	0.00616726		1514.22	-0.01293531		2044.21	0.00575597
454.42	0.06521612		984.42	0.0072278		1514.42	-0.01325995		2044.41	0.00619664
454.62	0.06510868		984.62	0.00725113		1514.62	-0.01235261		2044.61	0.00654921
454.82	0.06452786		984.82	0.00753568		1514.82	-0.01129432		2044.81	0.00578826
455.02	0.06408189		985.02	0.00718184		1515.02	-0.01155504		2045.01	0.00637784
455.22	0.0635239		985.22	0.00641978		1515.22	-0.01096553		2045.21	0.00669315
455.42	0.06333779		985.42	0.00512068		1515.42	-0.01023092		2045.41	0.00700243
455.62	0.06365471		985.62	0.00433587		1515.62	-0.01083641		2045.61	0.00636884
455.82	0.06389479		985.82	0.00360515		1515.82	-0.01038539		2045.81	0.00670535
456.02	0.06300816		986.02	0.00320772		1516.02	-0.0110521		2046.01	0.00660581
456.22	0.06291567		986.22	0.0032609		1516.22	-0.01088718		2046.21	0.00706162
456.42	0.06347968		986.42	0.00305007		1516.42	-0.0096123		2046.41	0.00697096
456.62	0.06417844		986.62	0.00436114		1516.62	-0.00816413		2046.61	0.00633552
456.82	0.06279283		986.82	0.00506733		1516.82	-0.00755044		2046.81	0.00444202
457.02	0.06337093		987.02	0.00554858		1517.02	-0.00778159		2047.01	0.00396735
457.22	0.06336325		987.22	0.00538464		1517.22	-0.0077957		2047.21	0.00311857
457.42	0.06228965		987.42	0.0055621		1517.42	-0.00655666		2047.41	0.00248625
457.62	0.06115944		987.62	0.0054336		1517.62	-0.00666603		2047.61	0.00299167
457.82	0.06038106		987.82	0.00590345		1517.82	-0.00676501		2047.81	0.0035167
458.02	0.06098917		988.02	0.0062739		1518.02	-0.00641068		2048.01	0.00290866
458.22	0.05987921		988.22	0.00629209		1518.22	-0.00668694		2048.21	0.00365747
458.42	0.06039273		988.42	0.00600041		1518.42	-0.00823865		2048.41	0.0044668
458.62	0.05940847		988.62	0.00488487		1518.62	-0.00808685		2048.61	0.00484564
458.82	0.05946971		988.82	0.00437478		1518.82	-0.00939842		2048.81	0.00565407
459.02	0.0591449		989.02	0.00230072		1519.02	-0.01102162		2049.01	0.0061803
459.22	0.05976333		989.22	0.00078276		1519.22	-0.01129831		2049.21	0.00725161
459.42	0.06040191		989.42	-0.00013561		1519.42	-0.0116238		2049.41	0.00734205
459.62	0.06144267		989.62	-0.00095671		1519.62	-0.01243721		2049.61	0.00716683
459.82	0.06187807		989.82	-0.00072538		1519.82	-0.01231904		2049.81	0.00704455
460.02	0.06242293		990.02	-0.0012627		1520.02	-0.0126962		2050.01	0.00716868
460.22	0.06274922		990.22	-0.00069718		1520.22	-0.01215132		2050.21	0.00670973
460.42	0.06291186		990.42	-0.00014556		1520.42	-0.01094427		2050.41	0.00575326
460.62	0.06387489		990.62	0.00080456		1520.62	-0.01032133		2050.61	0.00438768
460.82	0.06406166		990.82	0.00086991		1520.82	-0.01053349		2050.81	0.00408268
461.02	0.06522755		991.02	0.00135415		1521.02	-0.01054501		2051.01	0.00411566
461.22	0.06486211		991.22	0.00142804		1521.22	-0.00993751		2051.21	0.00415565
461.42	0.06432809		991.42	0.00142985		1521.42	-0.00992859		2051.41	0.00371941
461.62	0.06487959		991.62	0.00189031		1521.62	-0.01000123		2051.61	0.00394783
461.82	0.06437435		991.82	0.00268774		1521.82	-0.01029991		2051.81	0.003154
462.02	0.06463159		992.02	0.00323972		1522.02	-0.01010691		2052.01	0.00203794
462.22	0.06358684		992.22	0.0038221		1522.22	-0.01109613		2052.21	0.00166053
462.42	0.06387682		992.42	0.00375841		1522.42	-0.01161835		2052.41	0.0016841
462.62	0.06358464		992.62	0.00403857		1522.62	-0.01207379		2052.61	0.00242078
462.82	0.06357221		992.82	0.00397979		1522.82	-0.01328983		2052.81	0.00306045
463.02	0.06378829		993.02	0.00364164		1523.02	-0.01315576		2053.01	0.00295195
463.22	0.06410061		993.22	0.00357459		1523.22	-0.01316348		2053.21	0.00352887
463.42	0.06435937		993.42	0.00381645		1523.42	-0.01296345		2053.41	0.00322991
463.62	0.0646826		993.62	0.00422886		1523.62	-0.01281856		2053.61	0.00403387
463.82	0.06446007		993.82	0.00485198		1523.82	-0.01249131		2053.81	0.0045512
464.02	0.06407018		994.02	0.00406465		1524.02	-0.01233749		2054.01	0.00517081
464.22	0.0630236		994.22	0.0037176		1524.22	-0.01242079		2054.21	0.00550664
464.42	0.06320938		994.42	0.00320798		1524.42	-0.01192342		2054.41	0.00665998
464.62	0.06432167		994.62	0.00276386		1524.62	-0.01222585		2054.61	0.00782673
464.82	0.06408894		994.82	0.00306471		1524.82	-0.01285818		2054.81	0.0089033
465.02	0.06377706		995.02	0.00292199		1525.02	-0.01233476		2055.01	0.00898851
465.22	0.06326342		995.22	0.00264647		1525.22	-0.01147024		2055.21	0.00817801
465.42	0.06346926		995.42	0.00212025		1525.42	-0.01100642		2055.41	0.0072982
465.62	0.06344784		995.62	0.00178118		1525.62	-0.00967913		2055.61	0.00722251
465.82	0.06284061		995.82	0.0020232		1525.82	-0.00997126		2055.81	0.0065514
466.02	0.0622841		996.02	0.00278048		1526.02	-0.00975933		2056.01	0.00614445
466.22	0.06190715		996.22	0.00321201		1526.22	-0.0101361		2056.21	0.00576374
466.42	0.06256124		996.42	0.00328681		1526.42	-0.00971033		2056.41	0.00585131
466.62	0.06208202		996.62	0.0032146		1526.62	-0.01070119		2056.61	0.00665183
466.82	0.06119988		996.82	0.00334319		1526.82	-0.01046351		2056.81	0.00692148
467.02	0.0613225		997.02	0.00368384		1527.02	-0.0103639		2057.01	0.00742669
467.22	0.06077518		997.22	0.00419294		1527.22	-0.01123202		2057.21	0.0078073
467.42	0.06087292		997.42	0.0047444		1527.42	-0.01093462		2057.41	0.00812994
467.62	0.06124188		997.62	0.00500276		1527.62	-0.01168063		2057.61	0.00792312
467.82	0.06058913		997.82	0.00474143		1527.82	-0.01236394		2057.81	0.00725878
468.02	0.06017225		998.02	0.00509633		1528.02	-0.01259291		2058.01	0.00739268
468.22	0.06033645		998.22	0.00481407		1528.22	-0.01338596		2058.21	0.00726489
468.42	0.06130237		998.42	0.00500317		1528.42	-0.01306029		2058.41	0.00787286
468.62	0.06149141		998.62	0.00559832		1528.62	-0.01344519		2058.61	0.00755862
468.82	0.06069855		998.82	0.00523737		1528.82	-0.01315621		2058.81	0.00703249
469.02	0.06027359		999.02	0.00528209		1529.02	-0.01221365		2059.01	0.0070762
469.22	0.06070036		999.22	0.00530985		1529.22	-0.01118257		2059.21	0.00600581
469.42	0.06161427		999.42	0.00439526		1529.42	-0.01048867		2059.41	0.00514042
469.62	0.06228205		999.62	0.00552451		1529.62	-0.01002279		2059.61	0.00460147
469.82	0.06307709		999.82	0.0058311		1529.82	-0.00961206		2059.81	0.00447009
470.02	0.06250553		1000.02	0.00557601		1530.02	-0.00910939		2060.01	0.00462325
470.22	0.06224702		1000.22	0.00442763		1530.22	-0.00882851		2060.21	0.0041203
470.42	0.06247308		1000.42	0.00309049		1530.42	-0.00837018		2060.41	0.0045369
470.62	0.06124224		1000.62	0.00351651		1530.62	-0.00807331		2060.61	0.00459676
470.82	0.06183522		1000.82	0.00280794		1530.82	-0.00809795		2060.81	0.00486259
471.02	0.06271787		1001.02	0.00162951		1531.02	-0.00899347		2061.01	0.00499784
471.22	0.0629691		1001.22	0.00138643		1531.22	-0.01022439		2061.21	0.00502861
471.42	0.06305821		1001.42	0.00044842		1531.42	-0.01122736		2061.41	0.00496156
471.62	0.06347199		1001.62	-0.00005052		1531.62	-0.012397		2061.61	0.00474112
471.82	0.06326085		1001.82	0.00044684		1531.82	-0.01237003		2061.81	0.00530165
472.02	0.0640589		1002.02	0.00111865		1532.02	-0.01243687		2062.01	0.00621599
472.22	0.06400239		1002.22	0.00040171		1532.22	-0.01359385		2062.21	0.00673034
472.42	0.06368348		1002.42	-0.00030278		1532.42	-0.01373706		2062.41	0.00764172
472.62	0.06303132		1002.62	-0.00005302		1532.62	-0.0147397		2062.61	0.00663814
472.82	0.0625904		1002.82	0.00021156		1532.82	-0.01384807		2062.81	0.00623787
473.02	0.06216856		1003.02	0.00134941		1533.02	-0.01354851		2063.01	0.00584386
473.22	0.06205937		1003.22	0.00157416		1533.22	-0.01301597		2063.21	0.00427565
473.42	0.06211188		1003.42	0.0023616		1533.42	-0.01292839		2063.41	0.00349113
473.62	0.06144872		1003.62	0.00381126		1533.62	-0.01333664		2063.61	0.0031196
473.82	0.06086724		1003.82	0.00296902		1533.82	-0.01285351		2063.81	0.00301104
474.02	0.05990858		1004.02	0.00235916		1534.02	-0.01275624		2064.01	0.00242751
474.22	0.05858947		1004.22	0.00231472		1534.22	-0.01213167		2064.21	0.0015549
474.42	0.05864004		1004.42	0.00247885		1534.42	-0.01078308		2064.41	0.00128523
474.62	0.05836775		1004.62	0.00341346		1534.62	-0.01075182		2064.61	0.00071197
474.82	0.05915341		1004.82	0.00238159		1534.82	-0.01051494		2064.81	0.00127815
475.02	0.05908998		1005.02	0.00238028		1535.02	-0.01083997		2065.01	0.00188627
475.22	0.0589128		1005.22	0.0020367		1535.22	-0.01136005		2065.21	0.00179444
475.42	0.05852585		1005.42	0.00163421		1535.42	-0.01201815		2065.41	0.00209996
475.62	0.05865132		1005.62	0.00204508		1535.62	-0.01219303		2065.61	0.00284043
475.82	0.0596749		1005.82	0.00172738		1535.82	-0.0122407		2065.81	0.00369135
476.02	0.06029267		1006.02	0.00074785		1536.02	-0.013495		2066.01	0.00458168
476.22	0.05952991		1006.22	0.00002616		1536.22	-0.01401215		2066.21	0.00406264
476.42	0.05936708		1006.42	-0.00037064		1536.42	-0.01450373		2066.41	0.00396939
476.62	0.06011234		1006.62	0.00100902		1536.62	-0.01462271		2066.61	0.00264128
476.82	0.06089647		1006.82	0.00210214		1536.82	-0.01452529		2066.81	0.00337651
477.02	0.06006686		1007.02	0.00224044		1537.02	-0.01454849		2067.01	0.00383582
477.22	0.06035897		1007.22	0.00203169		1537.22	-0.01484007		2067.21	0.0033709
477.42	0.06071152		1007.42	0.00239534		1537.42	-0.01537785		2067.41	0.00362922
477.62	0.06090588		1007.62	0.00328552		1537.62	-0.01491563		2067.61	0.00430992
477.82	0.06022569		1007.82	0.00337445		1537.82	-0.01434987		2067.81	0.00502354
478.02	0.06120107		1008.02	0.00349054		1538.02	-0.01307573		2068.01	0.00519028
478.22	0.06073559		1008.22	0.00410558		1538.22	-0.01206423		2068.21	0.00535308
478.42	0.06119946		1008.42	0.00425638		1538.42	-0.01179047		2068.41	0.00562713
478.62	0.06187944		1008.62	0.00438244		1538.62	-0.01144976		2068.61	0.00622642
478.82	0.06243798		1008.82	0.00368972		1538.82	-0.01107736		2068.81	0.00648718
479.02	0.06231388		1009.02	0.00440151		1539.02	-0.01139477		2069.01	0.00628487
479.22	0.06225698		1009.22	0.00377322		1539.22	-0.01112067		2069.21	0.00672559
479.42	0.06261551		1009.42	0.00381941		1539.42	-0.01146821		2069.41	0.00648625
479.62	0.06252406		1009.62	0.00293585		1539.62	-0.01222157		2069.61	0.00685984
479.82	0.0627979		1009.82	0.00237203		1539.82	-0.01273806		2069.81	0.00586284
480.02	0.06245164		1010.02	0.00169543		1540.02	-0.01374203		2070.01	0.00563549
480.22	0.06158969		1010.22	0.00149214		1540.22	-0.01415759		2070.21	0.00441435
480.42	0.06094686		1010.42	0.00094946		1540.42	-0.01522975		2070.41	0.00455256
480.62	0.06124525		1010.62	0.00179965		1540.62	-0.0150351		2070.61	0.00404948
480.82	0.06067569		1010.82	0.00209578		1540.82	-0.01492245		2070.81	0.00473357
481.02	0.05887807		1011.02	0.00182826		1541.02	-0.01391964		2071.01	0.0053321
481.22	0.05861804		1011.22	0.00230367		1541.22	-0.01392776		2071.21	0.0046699
481.42	0.05848076		1011.42	0.00289977		1541.42	-0.01289748		2071.41	0.00505672
481.62	0.05855336		1011.62	0.00326553		1541.62	-0.01201636		2071.61	0.00509048
481.82	0.05761155		1011.82	0.00265429		1541.82	-0.0120839		2071.81	0.00508699
482.02	0.05823176		1012.02	0.00271199		1542.02	-0.01141557		2072.01	0.00383207
482.22	0.05720425		1012.22	0.00267852		1542.22	-0.01182571		2072.21	0.00319991
482.42	0.0569759		1012.42	0.0023616		1542.42	-0.01208591		2072.41	0.00275987
482.62	0.05736101		1012.62	0.00233435		1542.62	-0.01150554		2072.61	0.00230131
482.82	0.05786029		1012.82	0.00213799		1542.82	-0.01203759		2072.81	0.00233515
483.02	0.05869585		1013.02	0.00300489		1543.02	-0.01185963		2073.01	0.00186621
483.22	0.05940644		1013.22	0.00175851		1543.22	-0.01170823		2073.21	0.00228849
483.42	0.05967035		1013.42	0.00139073		1543.42	-0.01305722		2073.41	0.00142642
483.62	0.05910334		1013.62	0.00135796		1543.62	-0.01392494		2073.61	0.00068384
483.82	0.05998544		1013.82	0.00160289		1543.82	-0.01457346		2073.81	0.00068854
484.02	0.06062674		1014.02	0.00048746		1544.02	-0.01408846		2074.01	0.00046299
484.22	0.06079658		1014.22	0.00069004		1544.22	-0.01416826		2074.21	-0.00010698
484.42	0.06080972		1014.42	0.00096233		1544.42	-0.01387762		2074.41	-0.00025307
484.62	0.06133489		1014.62	0.00145214		1544.62	-0.01382928		2074.61	0.0000628
484.82	0.06156066		1014.82	0.00173241		1544.82	-0.01296469		2074.81	0.00018949
485.02	0.061325		1015.02	0.00205169		1545.02	-0.01283297		2075.01	0.00100973
485.22	0.06145047		1015.22	0.00204392		1545.22	-0.01247105		2075.21	0.00102911
485.42	0.06185814		1015.42	0.00214776		1545.42	-0.01139075		2075.41	0.00147215
485.62	0.06135015		1015.62	0.00100482		1545.62	-0.01136263		2075.61	0.00124645
485.82	0.06006739		1015.82	0.00070082		1545.82	-0.011068		2075.81	0.00194262
486.02	0.05932685		1016.02	0.00116984		1546.02	-0.01107559		2076.01	0.00201253
486.22	0.05851171		1016.22	0.0004518		1546.22	-0.01156966		2076.21	0.00203598
486.42	0.05783156		1016.42	0.00071002		1546.42	-0.01191171		2076.41	0.00254711
486.62	0.05806742		1016.62	0.00066231		1546.62	-0.01195131		2076.61	0.00293445
486.82	0.05829246		1016.82	0.00070394		1546.82	-0.01284612		2076.81	0.00313528
487.02	0.05846304		1017.02	0.00047689		1547.02	-0.01319604		2077.01	0.00358833
487.22	0.05794265		1017.22	-0.00006909		1547.22	-0.01369736		2077.21	0.00367792
487.42	0.0572436		1017.42	0.00071417		1547.42	-0.01428836		2077.41	0.00341747
487.62	0.0581294		1017.62	0.00071842		1547.62	-0.01463837		2077.61	0.00332982
487.82	0.05895618		1017.82	0.00075297		1547.82	-0.01517835		2077.81	0.00427093
488.02	0.05982915		1018.02	0.00055722		1548.02	-0.01502085		2078.01	0.00330024
488.22	0.0604819		1018.22	0.00151859		1548.22	-0.01544626		2078.21	0.00289321
488.42	0.06061053		1018.42	0.00163914		1548.42	-0.01593518		2078.41	0.00266016
488.62	0.06061661		1018.62	0.00125603		1548.62	-0.01648561		2078.61	0.00210339
488.82	0.05987042		1018.82	0.0021562		1548.82	-0.01686615		2078.81	0.0021489
489.02	0.05922838		1019.02	0.00282758		1549.02	-0.01653194		2079.01	0.00281877
489.22	0.05878059		1019.22	0.00278986		1549.22	-0.01625482		2079.21	0.00320346
489.42	0.05857299		1019.42	0.00354155		1549.42	-0.01626014		2079.41	0.00306136
489.62	0.05776381		1019.62	0.00311602		1549.62	-0.01676242		2079.61	0.00289316
489.82	0.05666819		1019.82	0.00312679		1549.82	-0.01717382		2079.81	0.00316731
490.02	0.0567528		1020.02	0.00352809		1550.02	-0.01811136		2080.01	0.00284971
490.22	0.05666707		1020.22	0.00289555		1550.22	-0.01790374		2080.21	0.00219853
490.42	0.05664051		1020.42	0.00359197		1550.42	-0.01785986		2080.41	0.00244266
490.62	0.05670934		1020.62	0.00259832		1550.62	-0.01832997		2080.61	0.00240717
490.82	0.05698334		1020.82	0.0024057		1550.82	-0.01912188		2080.81	0.00310798
491.02	0.05702786		1021.02	0.00154329		1551.02	-0.01986857		2081.01	0.00455493
491.22	0.05713115		1021.22	0.00023677		1551.22	-0.01965375		2081.21	0.00556627
491.42	0.05845739		1021.42	-0.00056537		1551.42	-0.01915239		2081.41	0.00677365
491.62	0.05899211		1021.62	-0.00179718		1551.62	-0.01970523		2081.61	0.00711799
491.82	0.05899319		1021.82	-0.00188348		1551.82	-0.01857249		2081.81	0.00628019
492.02	0.0598863		1022.02	-0.00201467		1552.02	-0.01785222		2082.01	0.00619586
492.22	0.05976438		1022.22	-0.00158276		1552.22	-0.01701785		2082.21	0.00521034
492.42	0.05957339		1022.42	-0.00105078		1552.42	-0.01654603		2082.41	0.00451474
492.62	0.0591134		1022.62	-0.00099341		1552.62	-0.01634306		2082.61	0.00480007
492.82	0.0583536		1022.82	0.00032508		1552.82	-0.0154581		2082.81	0.00466986
493.02	0.05880467		1023.02	0.00067956		1553.02	-0.01454961		2083.01	0.00365575
493.22	0.05775758		1023.22	0.00064406		1553.22	-0.01474472		2083.21	0.00306923
493.42	0.05765662		1023.42	0.00193536		1553.42	-0.01459283		2083.41	0.00258591
493.62	0.05767751		1023.62	0.00177474		1553.62	-0.01424197		2083.61	0.00240085
493.82	0.05723009		1023.82	0.00151117		1553.82	-0.01338172		2083.81	0.0017035
494.02	0.05831803		1024.02	0.00221008		1554.02	-0.01387724		2084.01	0.00186254
494.22	0.05910939		1024.22	0.00212394		1554.22	-0.01330582		2084.21	0.00115195
494.42	0.05938094		1024.42	0.00223352		1554.42	-0.01373162		2084.41	0.00099405
494.62	0.0595168		1024.62	0.00176093		1554.62	-0.01434262		2084.61	0.00181126
494.82	0.06040067		1024.82	0.00214024		1554.82	-0.01417978		2084.81	0.00289562
495.02	0.06088275		1025.02	0.00142916		1555.02	-0.01431692		2085.01	0.00364604
495.22	0.06173064		1025.22	0.00026467		1555.22	-0.01419431		2085.21	0.00331329
495.42	0.06203164		1025.42	0.00033545		1555.42	-0.01437592		2085.41	0.00336423
495.62	0.06102126		1025.62	-0.00036757		1555.62	-0.01440436		2085.61	0.00225446
495.82	0.06156851		1025.82	-0.00041201		1555.82	-0.01357606		2085.81	0.00090828
496.02	0.06190949		1026.02	-0.0002082		1556.02	-0.01407512		2086.01	0.00228122
496.22	0.06122028		1026.22	0.00091952		1556.22	-0.01369301		2086.21	0.00179034
496.42	0.06122049		1026.42	0.00245947		1556.42	-0.01316644		2086.41	0.00266305
496.62	0.06047788		1026.62	0.003013		1556.62	-0.01341387		2086.61	0.00292783
496.82	0.05921895		1026.82	0.0042579		1556.82	-0.01237318		2086.81	0.00154603
497.02	0.05834985		1027.02	0.0043638		1557.02	-0.01312458		2087.01	0.00196669
497.22	0.05664164		1027.22	0.00425473		1557.22	-0.01297562		2087.21	0.00355968
497.42	0.05598239		1027.42	0.00532306		1557.42	-0.01317735		2087.41	0.00417871
497.62	0.05492985		1027.62	0.00386054		1557.62	-0.01286236		2087.61	0.00458361
497.82	0.05392732		1027.82	0.00361107		1557.82	-0.01284158		2087.81	0.00429117
498.02	0.0533246		1028.02	0.002873		1558.02	-0.01346718		2088.01	0.00495923
498.22	0.05349975		1028.22	0.00246831		1558.22	-0.01261395		2088.21	0.00427928
498.42	0.05371717		1028.42	0.00159684		1558.42	-0.01226574		2088.41	0.00430194
498.62	0.05428631		1028.62	0.00032888		1558.62	-0.01207412		2088.61	0.00507098
498.82	0.05608163		1028.82	-0.00043816		1558.82	-0.0126869		2088.81	0.00469283
499.02	0.05687864		1029.02	-0.00160326		1559.02	-0.01385937		2089.01	0.00465688
499.22	0.0570422		1029.22	-0.0021767		1559.22	-0.01466918		2089.21	0.00420024
499.42	0.05718267		1029.42	-0.00238434		1559.42	-0.01434734		2089.41	0.00380812
499.62	0.05771197		1029.62	-0.00348		1559.62	-0.01376779		2089.61	0.00337763
499.82	0.05885097		1029.82	-0.00274671		1559.82	-0.01336079		2089.81	0.00353952
500.02	0.05939335		1030.02	-0.00161448		1560.02	-0.01360225		2090.01	0.00433295
500.22	0.05954591		1030.22	0.0006783		1560.22	-0.01368381		2090.21	0.0033813
500.42	0.06113468		1030.42	0.00225038		1560.42	-0.01391752		2090.41	0.00368041
500.62	0.06092741		1030.62	0.00299341		1560.62	-0.01349004		2090.61	0.00286286
500.82	0.0609118		1030.82	0.00405884		1560.82	-0.01335636		2090.81	0.00411837
501.02	0.06064377		1031.02	0.00385697		1561.02	-0.01348628		2091.01	0.00464503
501.22	0.05948885		1031.22	0.00399769		1561.22	-0.01351039		2091.21	0.00429023
501.42	0.05882217		1031.42	0.00360737		1561.42	-0.01341276		2091.41	0.00444551
501.62	0.05832574		1031.62	0.0021805		1561.62	-0.01409379		2091.61	0.00445089
501.82	0.05796621		1031.82	0.00216565		1561.82	-0.01384742		2091.81	0.00407224
502.02	0.05759024		1032.02	0.00197007		1562.02	-0.01355277		2092.01	0.00373547
502.22	0.05775136		1032.22	0.00201765		1562.22	-0.01306584		2092.21	0.00346707
502.42	0.0576523		1032.42	0.00093377		1562.42	-0.01344501		2092.41	0.00394475
502.62	0.05750951		1032.62	0.00050582		1562.62	-0.01456583		2092.61	0.00426742
502.82	0.05812356		1032.82	0.00032641		1562.82	-0.01590121		2092.81	0.00389066
503.02	0.05782558		1033.02	0.00024129		1563.02	-0.01680807		2093.01	0.00402975
503.22	0.05730451		1033.22	0.00045109		1563.22	-0.01639597		2093.21	0.00376933
503.42	0.0576888		1033.42	0.00046249		1563.42	-0.01565064		2093.41	0.00288775
503.62	0.05817684		1033.62	0.00020808		1563.62	-0.01526166		2093.61	0.00375033
503.82	0.05906136		1033.82	0.00030673		1563.82	-0.01525149		2093.81	0.00409953
504.02	0.05887576		1034.02	0.00055121		1564.02	-0.01571048		2094.01	0.00416947
504.22	0.05908309		1034.22	0.0011891		1564.22	-0.01545492		2094.21	0.00421502
504.42	0.05955136		1034.42	0.00078204		1564.42	-0.01475425		2094.41	0.00492005
504.62	0.05936961		1034.62	0.0004394		1564.62	-0.01439521		2094.61	0.00537054
504.82	0.05973718		1034.82	0.00123249		1564.82	-0.01481291		2094.81	0.00508226
505.02	0.05878977		1035.02	0.00084032		1565.02	-0.01417078		2095.01	0.00431614
505.22	0.05823958		1035.22	0.00157923		1565.22	-0.01437521		2095.21	0.00471282
505.42	0.05851928		1035.42	0.00088105		1565.42	-0.01413226		2095.41	0.00483683
505.62	0.05748065		1035.62	0.00108022		1565.62	-0.01440159		2095.61	0.00396473
505.82	0.05698774		1035.82	0.00172381		1565.82	-0.01350027		2095.81	0.00356058
506.02	0.05700687		1036.02	0.00231383		1566.02	-0.01338556		2096.01	0.00355258
506.22	0.05633418		1036.22	0.00268535		1566.22	-0.01200637		2096.21	0.00450204
506.42	0.056326		1036.42	0.00147566		1566.42	-0.0119561		2096.41	0.00543783
506.62	0.05683191		1036.62	0.00166598		1566.62	-0.01267006		2096.61	0.00498627
506.82	0.05792671		1036.82	0.00136408		1566.82	-0.01272718		2096.81	0.0051276
507.02	0.05844103		1037.02	0.00162867		1567.02	-0.0135365		2097.01	0.00528323
507.22	0.05818294		1037.22	0.001335		1567.22	-0.01317091		2097.21	0.00569792
507.42	0.05837153		1037.42	0.00050169		1567.42	-0.01356494		2097.41	0.00554839
507.62	0.05954106		1037.62	-0.00020317		1567.62	-0.01264301		2097.61	0.00617832
507.82	0.05936493		1037.82	-0.00050495		1567.82	-0.01333723		2097.81	0.00555952
508.02	0.05929747		1038.02	-0.00026327		1568.02	-0.01336411		2098.01	0.00502415
508.22	0.05965282		1038.22	-0.00044168		1568.22	-0.01334373		2098.21	0.00435272
508.42	0.05957071		1038.42	-0.00023107		1568.42	-0.01388088		2098.41	0.00328329
508.62	0.05971771		1038.62	0.00076956		1568.62	-0.01451608		2098.61	0.00233458
508.82	0.05901762		1038.82	0.00205073		1568.82	-0.01411307		2098.81	0.00040831
509.02	0.05786221		1039.02	0.00234809		1569.02	-0.01383434		2099.01	0.00087761
509.22	0.05766624		1039.22	0.00324501		1569.22	-0.01370731		2099.21	-0.00053678
509.42	0.05788097		1039.42	0.00292564		1569.42	-0.01373625		2099.41	-0.00151966
509.62	0.0567031		1039.62	0.00387707		1569.62	-0.01363705		2099.61	-0.00111582
509.82	0.05708908		1039.82	0.00400369		1569.82	-0.01339269		2099.81	-0.00148782
510.02	0.05764157		1040.02	0.00421114		1570.02	-0.01311641		2100.01	-0.0007505
510.22	0.05755526		1040.22	0.00384223		1570.22	-0.01290803		2100.21	0.00034571
510.42	0.05745897		1040.42	0.00242847		1570.42	-0.01431271		2100.41	0.00080692
510.62	0.05799976		1040.62	0.00224001		1570.62	-0.01549294		2100.61	0.00144998
510.82	0.05841587		1040.82	0.00184093		1570.82	-0.0159639		2100.81	0.00298547
511.02	0.0583593		1041.02	0.00174935		1571.02	-0.01600692		2101.01	0.00389347
511.22	0.05723652		1041.22	0.00096001		1571.22	-0.01519009		2101.21	0.00488178
511.42	0.05765774		1041.42	0.00003337		1571.42	-0.01452982		2101.41	0.00627504
511.62	0.05826064		1041.62	-0.00112319		1571.62	-0.01372179		2101.61	0.00700812
511.82	0.05811645		1041.82	-0.00183436		1571.82	-0.01426609		2101.81	0.00657164
512.02	0.05828507		1042.02	-0.00255965		1572.02	-0.01303516		2102.01	0.0062848
512.22	0.0582296		1042.22	-0.00246792		1572.22	-0.01280136		2102.21	0.00513449
512.42	0.05710397		1042.42	-0.00242716		1572.42	-0.01139435		2102.41	0.00414068
512.62	0.05626409		1042.62	-0.00236646		1572.62	-0.01129189		2102.61	0.00316002
512.82	0.05623603		1042.82	-0.00102557		1572.82	-0.01084723		2102.81	0.00258734
513.02	0.05625426		1043.02	-0.00104086		1573.02	-0.01122955		2103.01	0.00255553
513.22	0.05611207		1043.22	-0.00037626		1573.22	-0.01141261		2103.21	0.00183676
513.42	0.05590559		1043.42	-0.00025992		1573.42	-0.01100835		2103.41	0.00238505
513.62	0.05546833		1043.62	-0.00012853		1573.62	-0.012152		2103.61	0.00165075
513.82	0.05582396		1043.82	0.00001507		1573.82	-0.01326569		2103.81	0.00000566
514.02	0.05635462		1044.02	0.00006128		1574.02	-0.01477868		2104.01	0.00081747
514.22	0.05676875		1044.22	-0.00014377		1574.22	-0.01668756		2104.21	0.00159884
514.42	0.05636881		1044.42	-0.00035982		1574.42	-0.01739337		2104.41	0.00168565
514.62	0.05726771		1044.62	-0.00066577		1574.62	-0.01686548		2104.61	0.00303424
514.82	0.05762236		1044.82	0.00013758		1574.82	-0.01658688		2104.81	0.0038635
515.02	0.05836269		1045.02	0.00038007		1575.02	-0.01635332		2105.01	0.00417498
515.22	0.05844939		1045.22	0.00034384		1575.22	-0.0158067		2105.21	0.00471957
515.42	0.05894055		1045.42	-0.0000411		1575.42	-0.01622124		2105.41	0.00500386
515.62	0.05872509		1045.62	-0.00148123		1575.62	-0.01588767		2105.61	0.00441066
515.82	0.05838201		1045.82	-0.00092898		1575.82	-0.01511675		2105.81	0.0038645
516.02	0.05773386		1046.02	-0.0002972		1576.02	-0.01480954		2106.01	0.00245011
516.22	0.05722201		1046.22	0.00084299		1576.22	-0.01451738		2106.21	0.00169066
516.42	0.05685734		1046.42	0.00042626		1576.42	-0.01344234		2106.41	0.0011141
516.62	0.05800224		1046.62	0.00071233		1576.62	-0.01389604		2106.61	0.00083309
516.82	0.05853721		1046.82	0.00111313		1576.82	-0.01304081		2106.81	0.0007015
517.02	0.05769509		1047.02	0.00006291		1577.02	-0.01254599		2107.01	0.00079425
517.22	0.05759719		1047.22	-0.00020766		1577.22	-0.01208739		2107.21	0.00102716
517.42	0.05666165		1047.42	-0.00142853		1577.42	-0.01199217		2107.41	0.00112551
517.62	0.05596198		1047.62	-0.00196061		1577.62	-0.01380336		2107.61	0.0007057
517.82	0.05553616		1047.82	-0.00168501		1577.82	-0.01429105		2107.81	0.00196048
518.02	0.0559996		1048.02	-0.00219643		1578.02	-0.01422222		2108.01	0.00301839
518.22	0.05614065		1048.22	-0.00197173		1578.22	-0.01420197		2108.21	0.00450312
518.42	0.05622219		1048.42	-0.00272035		1578.42	-0.01380837		2108.41	0.00519415
518.62	0.05633824		1048.62	-0.00283592		1578.62	-0.0132081		2108.61	0.00642935
518.82	0.05653345		1048.82	-0.00326667		1578.82	-0.01366584		2108.81	0.00730338
519.02	0.05802035		1049.02	-0.00289421		1579.02	-0.01368549		2109.01	0.00730266
519.22	0.05857862		1049.22	-0.00293686		1579.22	-0.01378581		2109.21	0.00783566
519.42	0.05778369		1049.42	-0.00286295		1579.42	-0.01433101		2109.41	0.00684173
519.62	0.05789424		1049.62	-0.00279738		1579.62	-0.01389132		2109.61	0.00722338
519.82	0.05792506		1049.82	-0.00131705		1579.82	-0.01359129		2109.81	0.00726309
520.02	0.05887538		1050.02	0.0001601		1580.02	-0.01301222		2110.01	0.00590282
520.22	0.05932977		1050.22	0.00032834		1580.22	-0.01232549		2110.21	0.00510064
520.42	0.05977003		1050.42	0.00002896		1580.42	-0.0123289		2110.41	0.00405811
520.62	0.06035966		1050.62	0.00046728		1580.62	-0.01219418		2110.61	0.00407788
520.82	0.05943274		1050.82	0.00018754		1580.82	-0.01205792		2110.81	0.00312736
521.02	0.05826826		1051.02	0.0011764		1581.02	-0.01268346		2111.01	0.00331923
521.22	0.05797465		1051.22	0.00171162		1581.22	-0.01330702		2111.21	0.00344922
521.42	0.0561932		1051.42	0.00192513		1581.42	-0.01333111		2111.41	0.00378006
521.62	0.05572003		1051.62	0.00273904		1581.62	-0.01403769		2111.61	0.0036687
521.82	0.05572353		1051.82	0.00302408		1581.82	-0.01443144		2111.81	0.00419562
522.02	0.05540967		1052.02	0.00257316		1582.02	-0.01392071		2112.01	0.00394799
522.22	0.05466827		1052.22	0.0021664		1582.22	-0.01463507		2112.21	0.00410311
522.42	0.05463841		1052.42	0.00146029		1582.42	-0.01527505		2112.41	0.00425954
522.62	0.05426129		1052.62	0.00091727		1582.62	-0.01429983		2112.61	0.00413131
522.82	0.05514732		1052.82	0.00063902		1582.82	-0.01400956		2112.81	0.00460658
523.02	0.05678815		1053.02	0.00117686		1583.02	-0.01394562		2113.01	0.00446589
523.22	0.05679754		1053.22	0.00064235		1583.22	-0.01384917		2113.21	0.00467615
523.42	0.05687951		1053.42	0.00112409		1583.42	-0.01278022		2113.41	0.00320324
523.62	0.05771328		1053.62	0.00099132		1583.62	-0.01259888		2113.61	0.00248503
523.82	0.05726701		1053.82	0.00135763		1583.82	-0.0126208		2113.81	0.00210648
524.02	0.05680009		1054.02	0.00153593		1584.02	-0.01219053		2114.01	0.00077245
524.22	0.05606735		1054.22	0.00142074		1584.22	-0.0127377		2114.21	-0.00053944
524.42	0.05526211		1054.42	0.00189743		1584.42	-0.01440415		2114.41	-0.00154438
524.62	0.05439979		1054.62	0.00267403		1584.62	-0.01447248		2114.61	-0.00156058
524.82	0.05354585		1054.82	0.00258461		1584.82	-0.01520321		2114.81	-0.0021877
525.02	0.05295004		1055.02	0.00361038		1585.02	-0.01525872		2115.01	-0.00116773
525.22	0.05299402		1055.22	0.00358295		1585.22	-0.0153958		2115.21	-0.00049512
525.42	0.05284052		1055.42	0.00282356		1585.42	-0.01523926		2115.41	0.00070937
525.62	0.05246372		1055.62	0.00251114		1585.62	-0.01613359		2115.61	0.0020156
525.82	0.05281164		1055.82	0.00187371		1585.82	-0.01683261		2115.81	0.00317703
526.02	0.05292229		1056.02	0.00062913		1586.02	-0.01661551		2116.01	0.00440716
526.22	0.05329128		1056.22	-0.0001343		1586.22	-0.01635059		2116.21	0.00537362
526.42	0.05426993		1056.42	-0.00033188		1586.42	-0.01565928		2116.41	0.00653375
526.62	0.05463696		1056.62	-0.00064118		1586.62	-0.01410409		2116.61	0.00750535
526.82	0.05614997		1056.82	-0.00030953		1586.82	-0.01426179		2116.81	0.0077354
527.02	0.05766089		1057.02	-0.00037592		1587.02	-0.01358844		2117.01	0.00784586
527.22	0.0578025		1057.22	-0.00011791		1587.22	-0.01308603		2117.21	0.00744482
527.42	0.05814325		1057.42	-0.00016639		1587.42	-0.01283329		2117.41	0.00582229
527.62	0.05804069		1057.62	-0.00043942		1587.62	-0.0131041		2117.61	0.004991
527.82	0.05671162		1057.82	0.00031895		1587.82	-0.01322278		2117.81	0.00523054
528.02	0.05651513		1058.02	0.00106085		1588.02	-0.01295466		2118.01	0.00357018
528.22	0.05621075		1058.22	0.00215893		1588.22	-0.01362657		2118.21	0.00199949
528.42	0.05533153		1058.42	0.00274756		1588.42	-0.01498827		2118.41	0.00143909
528.62	0.05473645		1058.62	0.00315052		1588.62	-0.0143851		2118.61	0.00102509
528.82	0.05431033		1058.82	0.00286059		1588.82	-0.01559475		2118.81	0.00079835
529.02	0.05384587		1059.02	0.00224059		1589.02	-0.01616258		2119.01	0.00166262
529.22	0.05371876		1059.22	0.00197769		1589.22	-0.01636382		2119.21	0.00151364
529.42	0.05365383		1059.42	0.00129319		1589.42	-0.01669412		2119.41	0.00221633
529.62	0.05361336		1059.62	0.00119802		1589.62	-0.01684286		2119.61	0.00185552
529.82	0.05427541		1059.82	0.00034292		1589.82	-0.01697131		2119.81	0.00185838
530.02	0.05474704		1060.02	-0.00094207		1590.02	-0.01644162		2120.01	0.00170633
530.22	0.05475391		1060.22	-0.00094849		1590.22	-0.01570249		2120.21	0.00178799
530.42	0.0551825		1060.42	-0.00067543		1590.42	-0.01571642		2120.41	0.001231
530.62	0.0557345		1060.62	-0.00004629		1590.62	-0.01553671		2120.61	0.00157045
530.82	0.05662687		1060.82	-0.0002481		1590.82	-0.01610404		2120.81	0.00056999
531.02	0.05702601		1061.02	0.00094812		1591.02	-0.01532445		2121.01	0.00033263
531.22	0.05704077		1061.22	0.00039282		1591.22	-0.01580957		2121.21	0.00009379
531.42	0.05781565		1061.42	0.00070571		1591.42	-0.01651542		2121.41	-0.00082213
531.62	0.05827403		1061.62	0.00158412		1591.62	-0.016828		2121.61	-0.00091035
531.82	0.05764668		1061.82	0.00226953		1591.82	-0.01771073		2121.81	-0.00094657
532.02	0.05773942		1062.02	0.0033662		1592.02	-0.01853167		2122.01	-0.00141037
532.22	0.05778169		1062.22	0.00395953		1592.22	-0.01859724		2122.21	-0.00070868
532.42	0.05829796		1062.42	0.0037511		1592.42	-0.0189762		2122.41	-0.00005886
532.62	0.05716364		1062.62	0.003406		1592.62	-0.01920893		2122.61	-0.00023597
532.82	0.05664756		1062.82	0.00315825		1592.82	-0.02006493		2122.81	0.00018722
533.02	0.05700815		1063.02	0.00223463		1593.02	-0.01949758		2123.01	0.00016539
533.22	0.05756261		1063.22	0.00142762		1593.22	-0.01861006		2123.21	0.00004268
533.42	0.0578606		1063.42	0.00017596		1593.42	-0.01906569		2123.41	0.00087775
533.62	0.05802425		1063.62	-0.00086433		1593.62	-0.0182324		2123.61	0.00088552
533.82	0.05769305		1063.82	-0.00147222		1593.82	-0.01833523		2123.81	0.00122368
534.02	0.0573846		1064.02	-0.00194217		1594.02	-0.01806742		2124.01	0.00080617
534.22	0.05723654		1064.22	-0.0020342		1594.22	-0.01747726		2124.21	0.00194249
534.42	0.05698854		1064.42	-0.00245877		1594.42	-0.01707084		2124.41	0.00226926
534.62	0.05636244		1064.62	-0.00259958		1594.62	-0.01646417		2124.61	0.00192559
534.82	0.0557605		1064.82	-0.003367		1594.82	-0.01607099		2124.81	0.00121503
535.02	0.05533288		1065.02	-0.00308831		1595.02	-0.01573525		2125.01	0.00131214
535.22	0.05570958		1065.22	-0.00437041		1595.22	-0.01603812		2125.21	0.00119498
535.42	0.0554175		1065.42	-0.00338861		1595.42	-0.01601353		2125.41	0.0007073
535.62	0.05517299		1065.62	-0.00310198		1595.62	-0.0153764		2125.61	0.0014503
535.82	0.05452622		1065.82	-0.0026739		1595.82	-0.01590085		2125.81	0.0017139
536.02	0.05418964		1066.02	-0.00236457		1596.02	-0.01499848		2126.01	0.00212184
536.22	0.05412267		1066.22	-0.00295363		1596.22	-0.01445458		2126.21	0.00241174
536.42	0.0536887		1066.42	-0.00268538		1596.42	-0.01485536		2126.41	0.00191608
536.62	0.05303186		1066.62	-0.00261183		1596.62	-0.01535917		2126.61	0.0014005
536.82	0.05396726		1066.82	-0.00291633		1596.82	-0.01430959		2126.81	0.00154717
537.02	0.05424038		1067.02	-0.00370762		1597.02	-0.01441087		2127.01	0.00167636
537.22	0.05492974		1067.22	-0.00400669		1597.22	-0.01493731		2127.21	0.00221365
537.42	0.05570802		1067.42	-0.00416996		1597.42	-0.01618094		2127.41	0.002559
537.62	0.05577967		1067.62	-0.00366608		1597.62	-0.01626434		2127.61	0.00262217
537.82	0.05605575		1067.82	-0.00253669		1597.82	-0.01700815		2127.81	0.00298581
538.02	0.05629525		1068.02	-0.00294657		1598.02	-0.01669403		2128.01	0.00305575
538.22	0.05687452		1068.22	-0.00216323		1598.22	-0.0168962		2128.21	0.00373646
538.42	0.05645336		1068.42	-0.00209608		1598.42	-0.01707729		2128.41	0.00371056
538.62	0.05649887		1068.62	-0.00228481		1598.62	-0.01686605		2128.61	0.00343971
538.82	0.05659239		1068.82	-0.00209836		1598.82	-0.01697622		2128.81	0.00416622
539.02	0.05587099		1069.02	-0.00180708		1599.02	-0.01660699		2129.01	0.00527415
539.22	0.05625964		1069.22	-0.00160259		1599.22	-0.01557682		2129.21	0.00500979
539.42	0.05574793		1069.42	-0.00052378		1599.42	-0.01504792		2129.41	0.00541616
539.62	0.05567472		1069.62	-0.00035781		1599.62	-0.01473255		2129.61	0.00557902
539.82	0.05426426		1069.82	-0.00060839		1599.82	-0.0153858		2129.81	0.00529603
540.02	0.05371992		1070.02	-0.00175493		1600.02	-0.01512985		2130.01	0.00456376
540.22	0.05308642		1070.22	-0.00237567		1600.22	-0.01551508		2130.21	0.00443097
540.42	0.05262027		1070.42	-0.00189853		1600.42	-0.01619192		2130.41	0.00445549
540.62	0.05251025		1070.62	-0.00232801		1600.62	-0.01618812		2130.61	0.00400519
540.82	0.05246351		1070.82	-0.00270644		1600.82	-0.0154649		2130.81	0.0034134
541.02	0.05259992		1071.02	-0.00265426		1601.02	-0.01638224		2131.01	0.00242478
541.22	0.05313015		1071.22	-0.00191469		1601.22	-0.01619433		2131.21	0.00139793
541.42	0.05437221		1071.42	-0.00243002		1601.42	-0.01690365		2131.41	0.00154122
541.62	0.05434835		1071.62	-0.00143056		1601.62	-0.01671259		2131.61	0.0019375
541.82	0.05498747		1071.82	-0.00121687		1601.82	-0.0172056		2131.81	0.00164429
542.02	0.05482489		1072.02	-0.00173943		1602.02	-0.01740263		2132.01	0.00117928
542.22	0.05481344		1072.22	-0.00084573		1602.22	-0.01814894		2132.21	0.00096295
542.42	0.05535973		1072.42	-0.00136115		1602.42	-0.01901721		2132.41	0.00135486
542.62	0.0553775		1072.62	-0.00122828		1602.62	-0.01879745		2132.61	0.00034441
542.82	0.05508087		1072.82	-0.00077422		1602.82	-0.0193127		2132.81	0.00010037
543.02	0.05467682		1073.02	-0.00058946		1603.02	-0.0187185		2133.01	-0.00053049
543.22	0.05492267		1073.22	-0.00048394		1603.22	-0.01886873		2133.21	-0.00131172
543.42	0.05464456		1073.42	-0.00016101		1603.42	-0.01923369		2133.41	-0.0021155
543.62	0.05474091		1073.62	-0.00037731		1603.62	-0.01944721		2133.61	-0.00270644
543.82	0.05409524		1073.82	-0.0002268		1603.82	-0.01967502		2133.81	-0.00305256
544.02	0.05385935		1074.02	-0.00027246		1604.02	-0.01926197		2134.01	-0.0028451
544.22	0.05388272		1074.22	-0.00092627		1604.22	-0.01969269		2134.21	-0.00162444
544.42	0.05415493		1074.42	-0.00057959		1604.42	-0.01970121		2134.41	-0.00099373
544.62	0.05498528		1074.62	-0.00039927		1604.62	-0.01946035		2134.61	-0.00143505
544.82	0.05563401		1074.82	-0.00101888		1604.82	-0.01937818		2134.81	-0.00093169
545.02	0.0557187		1075.02	-0.0007889		1605.02	-0.01902419		2135.01	0.00031651
545.22	0.05551362		1075.22	0.00012016		1605.22	-0.01891279		2135.21	0.00081406
545.42	0.05621472		1075.42	0.00046899		1605.42	-0.01834078		2135.41	0.00287782
545.62	0.05555155		1075.62	0.00094761		1605.62	-0.0183825		2135.61	0.00301851
545.82	0.05594721		1075.82	0.00024775		1605.82	-0.01842599		2135.81	0.00315486
546.02	0.05596766		1076.02	0.00033081		1606.02	-0.01813739		2136.01	0.00288609
546.22	0.05606311		1076.22	0.00054233		1606.22	-0.01809059		2136.21	0.0033151
546.42	0.05513524		1076.42	0.00003553		1606.42	-0.01783861		2136.41	0.00384765
546.62	0.05389895		1076.62	0.0007012		1606.62	-0.01665619		2136.61	0.00195027
546.82	0.05392772		1076.82	0.00030312		1606.82	-0.01700121		2136.81	0.00139954
547.02	0.05339212		1077.02	-0.00022747		1607.02	-0.01610388		2137.01	0.00093652
547.22	0.05223695		1077.22	-0.0001815		1607.22	-0.01558415		2137.21	0.0001062
547.42	0.05103419		1077.42	-0.00061701		1607.42	-0.01409446		2137.41	-0.00084726
547.62	0.05109374		1077.62	0.00017529		1607.62	-0.01315662		2137.61	-0.00136752
547.82	0.0509797		1077.82	-0.00074196		1607.82	-0.01317618		2137.81	-0.00167569
548.02	0.05043445		1078.02	-0.0022436		1608.02	-0.01364738		2138.01	-0.00191894
548.22	0.05087885		1078.22	-0.00396253		1608.22	-0.01461159		2138.21	-0.00198322
548.42	0.05101336		1078.42	-0.00335284		1608.42	-0.0141869		2138.41	-0.00124235
548.62	0.05197307		1078.62	-0.0035463		1608.62	-0.01400279		2138.61	-0.00119374
548.82	0.05254173		1078.82	-0.00422922		1608.82	-0.01509764		2138.81	-0.00032081
549.02	0.0528305		1079.02	-0.0028906		1609.02	-0.01504152		2139.01	0.00029403
549.22	0.05370344		1079.22	-0.00248895		1609.22	-0.01531722		2139.21	0.00061915
549.42	0.05542363		1079.42	-0.00267967		1609.42	-0.01530437		2139.41	0.00203777
549.62	0.05606832		1079.62	-0.00357077		1609.62	-0.01615847		2139.61	0.00159217
549.82	0.05654938		1079.82	-0.00357488		1609.82	-0.01623508		2139.81	0.00150067
550.02	0.0560336		1080.02	-0.00317414		1610.02	-0.01627471		2140.01	0.00179969
550.22	0.0549913		1080.22	-0.00246417		1610.22	-0.01687175		2140.21	0.00275409
550.42	0.05454386		1080.42	-0.00226769		1610.42	-0.01666803		2140.41	0.00225951
550.62	0.05515714		1080.62	-0.00083875		1610.62	-0.01684181		2140.61	0.00144823
550.82	0.05557742		1080.82	-0.00067712		1610.82	-0.01677222		2140.81	0.00162814
551.02	0.0544051		1081.02	-0.00102826		1611.02	-0.01641475		2141.01	0.00155686
551.22	0.05365987		1081.22	-0.00042058		1611.22	-0.01576741		2141.21	0.00172741
551.42	0.05307077		1081.42	-0.00082193		1611.42	-0.01520777		2141.41	0.00189333
551.62	0.05449374		1081.62	-0.0010843		1611.62	-0.01560267		2141.61	0.00125343
551.82	0.05496374		1081.82	-0.00284164		1611.82	-0.01622863		2141.81	0.00203513
552.02	0.05399588		1082.02	-0.00238775		1612.02	-0.01513729		2142.01	0.00161305
552.22	0.05484379		1082.22	-0.00240003		1612.22	-0.01514219		2142.21	0.00280784
552.42	0.055458		1082.42	-0.00140639		1612.42	-0.01399557		2142.41	0.00340923
552.62	0.05672694		1082.62	-0.00213609		1612.62	-0.01429812		2142.61	0.00345574
552.82	0.05777308		1082.82	-0.00246879		1612.82	-0.01535474		2142.81	0.00328384
553.02	0.05822392		1083.02	-0.00166589		1613.02	-0.0154458		2143.01	0.00380738
553.22	0.05857599		1083.22	-0.0034174		1613.22	-0.01553947		2143.21	0.00481293
553.42	0.05879196		1083.42	-0.00435884		1613.42	-0.0157074		2143.41	0.00507706
553.62	0.05804788		1083.62	-0.0053847		1613.62	-0.01571873		2143.61	0.00458883
553.82	0.05686668		1083.82	-0.00511282		1613.82	-0.01550861		2143.81	0.00501328
554.02	0.05620034		1084.02	-0.00527121		1614.02	-0.01536796		2144.01	0.00579442
554.22	0.05561791		1084.22	-0.00426005		1614.22	-0.01675771		2144.21	0.00626658
554.42	0.05569428		1084.42	-0.00379127		1614.42	-0.01698952		2144.41	0.00571765
554.62	0.0552206		1084.62	-0.00305214		1614.62	-0.0164232		2144.61	0.00581877
554.82	0.05474398		1084.82	-0.00280229		1614.82	-0.01551605		2144.81	0.00501888
555.02	0.05399509		1085.02	-0.00364649		1615.02	-0.01535733		2145.01	0.00462768
555.22	0.05338544		1085.22	-0.00305195		1615.22	-0.01472801		2145.21	0.00430945
555.42	0.05346964		1085.42	-0.0029162		1615.42	-0.01409474		2145.41	0.00370985
555.62	0.05369145		1085.62	-0.00306171		1615.62	-0.01378807		2145.61	0.00296381
555.82	0.05303994		1085.82	-0.00314821		1615.82	-0.0133197		2145.81	0.00361649
556.02	0.05241706		1086.02	-0.00217234		1616.02	-0.01270209		2146.01	0.00276882
556.22	0.05380964		1086.22	-0.00245943		1616.22	-0.01321152		2146.21	0.00297254
556.42	0.05442983		1086.42	-0.00242726		1616.42	-0.01344415		2146.41	0.00145475
556.62	0.05509514		1086.62	-0.0017968		1616.62	-0.01428247		2146.61	0.00106269
556.82	0.05572627		1086.82	-0.00134905		1616.82	-0.01468689		2146.81	0.00006905
557.02	0.0566178		1087.02	-0.00085355		1617.02	-0.01532244		2147.01	0.00112577
557.22	0.05730549		1087.22	-0.00115734		1617.22	-0.01564486		2147.21	0.00132618
557.42	0.05779007		1087.42	-0.00165041		1617.42	-0.01654152		2147.41	0.00127525
557.62	0.05772146		1087.62	-0.00177558		1617.62	-0.01685071		2147.61	0.00070492
557.82	0.05713299		1087.82	-0.0018229		1617.82	-0.01709179		2147.81	0.00143995
558.02	0.05693362		1088.02	-0.00202162		1618.02	-0.01777959		2148.01	0.00155826
558.22	0.05633315		1088.22	-0.00150101		1618.22	-0.01866092		2148.21	0.00155946
558.42	0.05597242		1088.42	-0.00157186		1618.42	-0.01779728		2148.41	0.00075924
558.62	0.05552233		1088.62	-0.00170788		1618.62	-0.01644018		2148.61	0.00053097
558.82	0.05493112		1088.82	-0.00165685		1618.82	-0.01553537		2148.81	-0.00015755
559.02	0.0539636		1089.02	-0.00172676		1619.02	-0.01482051		2149.01	-0.00059342
559.22	0.05293869		1089.22	-0.001194		1619.22	-0.01407227		2149.21	-0.00123957
559.42	0.05261979		1089.42	-0.00099708		1619.42	-0.01311681		2149.41	-0.00140898
559.62	0.05151667		1089.62	-0.00120185		1619.62	-0.01239486		2149.61	-0.00171724
559.82	0.0512444		1089.82	-0.00123883		1619.82	-0.01148455		2149.81	-0.00151157
