# Supplementary material for: Functional development of a V3/glycan-specific broadly neutralizing antibody isolated from a case of HIV superinfection
Source: eLife journal article supplement (doi:10.7554/elife.68110), 2021-07-15
Supplement: fig2-data2 [file G1.xls]

Vers 3.43 Data Simulation
Conc1	3.13E-08	3.13E-08	3.13E-08	3.13E-08	3.13E-08
Start1	199.99	730	1259.99	1790	2320
Stop1	559.79	1089.8	1619.79	2149.8	2679.8
Time1	Data1	Sim1	Time2	Data2	Sim2	Time3	Data3	Sim3	Time4	Data4	Sim4	Time5	Data5	Sim5
199.99	-0.00886859		730	-0.00827847		1259.99	-0.00704371		1790	-0.00412039		2320	0.00061019
200.19	-0.00872277		730.2	-0.0092143		1260.19	-0.00768514		1790.2	-0.00444789		2320.2	-0.0000938
200.39	-0.00854389		730.4	-0.01040996		1260.39	-0.00845217		1790.4	-0.00431426		2320.4	-0.00009141
200.59	-0.00899427		730.6	-0.01107293		1260.59	-0.00914591		1790.6	-0.00448435		2320.6	-0.00046701
200.79	-0.00853124		730.8	-0.01089629		1260.79	-0.0100384		1790.8	-0.00450717		2320.8	-0.00096769
200.99	-0.00805086		731	-0.01039498		1260.99	-0.01016662		1791	-0.00495792		2321	-0.00158787
201.19	-0.00727463		731.2	-0.01003064		1261.19	-0.00999799		1791.2	-0.00508575		2321.2	-0.00141605
201.39	-0.00749304		731.4	-0.00952149		1261.39	-0.01038594		1791.4	-0.00433618		2321.4	-0.00104075
201.59	-0.00697034		731.6	-0.00913219		1261.59	-0.01097873		1791.6	-0.0041707		2321.6	-0.00090893
201.79	-0.00725454		731.8	-0.00786346		1261.79	-0.01059795		1791.8	-0.00337587		2321.8	-0.00122267
201.99	-0.00736977		732	-0.00738807		1261.99	-0.01050444		1792	-0.0031709		2322	-0.0006294
202.19	-0.00742177		732.2	-0.00673775		1262.19	-0.01053609		1792.2	-0.00234945		2322.2	-0.00027509
202.39	-0.00737301		732.4	-0.00675271		1262.39	-0.0107647		1792.4	-0.00193742		2322.4	-0.00018362
202.59	-0.00698308		732.6	-0.00598193		1262.59	-0.01074375		1792.6	-0.00137503		2322.6	-0.00028102
202.79	-0.00674846		732.8	-0.0062518		1262.79	-0.0103907		1792.8	-0.00129802		2322.8	-0.00050852
202.99	-0.00604643		733	-0.00645191		1262.99	-0.01061716		1793	-0.00160503		2323	-0.00022472
203.19	-0.00654833		733.2	-0.00640545		1263.19	-0.0101792		1793.2	-0.00137395		2323.2	-0.00085239
203.39	-0.00655161		733.4	-0.00632992		1263.39	-0.01025268		1793.4	-0.00120185		2323.4	-0.00142745
203.59	-0.00635225		733.6	-0.00708784		1263.59	-0.01042035		1793.6	-0.00069908		2323.6	-0.00159238
203.79	-0.00646467		733.8	-0.00770276		1263.79	-0.01061946		1793.8	-0.00046191		2323.8	-0.00255436
203.99	-0.00609127		734	-0.00807997		1263.99	-0.01066683		1794	-0.00042674		2324	-0.00232094
204.19	-0.0060362		734.2	-0.00784417		1264.19	-0.01081779		1794.2	0.00002653		2324.2	-0.00335284
204.39	-0.00639553		734.4	-0.00784705		1264.39	-0.01181459		1794.4	-0.0001348		2324.4	-0.00313485
204.59	-0.00731507		734.6	-0.00687797		1264.59	-0.01181959		1794.6	-0.00063822		2324.6	-0.00420249
204.79	-0.0071279		734.8	-0.00637917		1264.79	-0.01159239		1794.8	-0.00111401		2324.8	-0.0051005
204.99	-0.00689104		735	-0.00627234		1264.99	-0.01090965		1795	-0.00102393		2325	-0.00496181
205.19	-0.00672843		735.2	-0.00632905		1265.19	-0.00926088		1795.2	-0.00022089		2325.2	-0.00491915
205.39	-0.00744468		735.4	-0.00637715		1265.39	-0.00903029		1795.4	0.00072245		2325.4	-0.00454584
205.59	-0.00738985		735.6	-0.00634661		1265.59	-0.00812809		1795.6	0.00125901		2325.6	-0.00424514
205.79	-0.00848041		735.8	-0.00617679		1265.79	-0.00684738		1795.8	0.00237266		2325.8	-0.00371336
205.99	-0.00854648		736	-0.00682501		1265.99	-0.00665816		1796	0.00271741		2326	-0.00242146
206.19	-0.00811818		736.2	-0.00735139		1266.19	-0.00596501		1796.2	0.00322833		2326.2	-0.00227242
206.39	-0.00795439		736.4	-0.00755625		1266.39	-0.0056189		1796.4	0.00305623		2326.4	-0.00183925
206.59	-0.00718391		736.6	-0.00781437		1266.59	-0.00479578		1796.6	0.00364683		2326.6	-0.00204112
206.79	-0.00736964		736.8	-0.00760095		1266.79	-0.00452281		1796.8	0.00394229		2326.8	-0.00087507
206.99	-0.00625947		737	-0.00741486		1266.99	-0.00486079		1797	0.00342977		2327	-0.00082354
207.19	-0.00646236		737.2	-0.0069808		1267.19	-0.00571361		1797.2	0.00363976		2327.2	-0.00103829
207.39	-0.00551077		737.4	-0.00709254		1267.39	-0.00609836		1797.4	0.00314962		2327.4	-0.00115421
207.59	-0.00523863		737.6	-0.00718837		1267.59	-0.00666882		1797.6	0.00289832		2327.6	-0.0024151
207.79	-0.00472398		737.8	-0.00647151		1267.79	-0.007351		1797.8	0.00201071		2327.8	-0.00381272
207.99	-0.00448884		738	-0.00638333		1267.99	-0.00823561		1798	0.00159854		2328	-0.00416571
208.19	-0.00468096		738.2	-0.00563791		1268.19	-0.00896715		1798.2	0.00032565		2328.2	-0.00463358
208.39	-0.00472532		738.4	-0.00609666		1268.39	-0.01041205		1798.4	-0.00059583		2328.4	-0.00552488
208.59	-0.00503878		738.6	-0.00619039		1268.59	-0.01042545		1798.6	-0.00118997		2328.6	-0.00618697
208.79	-0.00536602		738.8	-0.00683933		1268.79	-0.01030857		1798.8	-0.00133656		2328.8	-0.00598453
208.99	-0.0051986		739	-0.00676519		1268.99	-0.00948621		1799	-0.00073132		2329	-0.00545631
209.19	-0.0054558		739.2	-0.00707323		1269.19	-0.00858729		1799.2	-0.00044866		2329.2	-0.00570832
209.39	-0.00554803		739.4	-0.00784985		1269.39	-0.00888557		1799.4	-0.00036604		2329.4	-0.00472135
209.59	-0.00602223		739.6	-0.0079383		1269.59	-0.00856428		1799.6	0.00016457		2329.6	-0.00394294
209.79	-0.0065706		739.8	-0.00815764		1269.79	-0.00884096		1799.8	0.00050467		2329.8	-0.00421625
209.99	-0.00578991		740	-0.00850139		1269.99	-0.00840407		1800	0.00119664		2330	-0.00429416
210.19	-0.00488396		740.2	-0.00886802		1270.19	-0.00714408		1800.2	0.00194561		2330.2	-0.00460568
210.39	-0.00452767		740.4	-0.00867298		1270.39	-0.00664354		1800.4	0.00193765		2330.4	-0.00444181
210.59	-0.00478266		740.6	-0.00768125		1270.59	-0.00641366		1800.6	0.00193509		2330.6	-0.00463887
210.79	-0.00509534		740.8	-0.00655664		1270.79	-0.0067065		1800.8	0.00143302		2330.8	-0.00411682
210.99	-0.00450155		741	-0.0064955		1270.99	-0.00761557		1801	0.00130361		2331	-0.00380696
211.19	-0.00423669		741.2	-0.00533472		1271.19	-0.00846717		1801.2	0.00113303		2331.2	-0.00368827
211.39	-0.00395891		741.4	-0.00460883		1271.39	-0.00823732		1801.4	0.00076705		2331.4	-0.00344395
211.59	-0.00445467		741.6	-0.00360518		1271.59	-0.00880272		1801.6	-0.00024053		2331.6	-0.00407379
211.79	-0.00350714		741.8	-0.00354337		1271.79	-0.00907049		1801.8	-0.0010834		2331.8	-0.0040117
211.99	-0.00397705		742	-0.00350518		1271.99	-0.00902939		1802	-0.00087324		2332	-0.00378787
212.19	-0.00424478		742.2	-0.00307318		1272.19	-0.00904316		1802.2	-0.00118029		2332.2	-0.00356421
212.39	-0.00408206		742.4	-0.00296655		1272.39	-0.00998548		1802.4	-0.00164979		2332.4	-0.00344052
212.59	-0.00480743		742.6	-0.00218982		1272.59	-0.00907693		1802.6	-0.00166861		2332.6	-0.00249765
212.79	-0.00546788		742.8	-0.00172028		1272.79	-0.00855561		1802.8	-0.00132731		2332.8	-0.00147558
212.99	-0.00564856		743	-0.00103544		1272.99	-0.0087783		1803	-0.00045404		2333	-0.00161504
213.19	-0.00568345		743.2	-0.00149374		1273.19	-0.00912752		1803.2	0.00002399		2333.2	-0.00198509
213.39	-0.00560105		743.4	-0.00264239		1273.39	-0.00863016		1803.4	0.00011173		2333.4	-0.00170823
213.59	-0.00575683		743.6	-0.00312426		1273.59	-0.00870206		1803.6	0.0001814		2333.6	-0.00244053
213.79	-0.00508595		743.8	-0.00375588		1273.79	-0.00882184		1803.8	0.00064859		2333.8	-0.00333946
213.99	-0.00395958		744	-0.00358731		1273.99	-0.00864338		1804	0.00165998		2334	-0.00330752
214.19	-0.00403015		744.2	-0.00385929		1274.19	-0.0082267		1804.2	0.00185194		2334.2	-0.00344443
214.39	-0.00413777		744.4	-0.00415176		1274.39	-0.00848114		1804.4	0.00159235		2334.4	-0.00377118
214.59	-0.00431926		744.6	-0.00385936		1274.59	-0.00843495		1804.6	0.00145379		2334.6	-0.00436145
214.79	-0.00423041		744.8	-0.00474181		1274.79	-0.00839071		1804.8	0.00114596		2334.8	-0.004558
214.99	-0.00415983		745	-0.00555186		1274.99	-0.00952143		1805	0.00182673		2335	-0.00383673
215.19	-0.00376848		745.2	-0.00549797		1275.19	-0.00969422		1805.2	0.00088914		2335.2	-0.00344909
215.39	-0.00393348		745.4	-0.00589278		1275.39	-0.00911353		1805.4	0.00001283		2335.4	-0.00313456
215.59	-0.00364928		745.6	-0.00625088		1275.59	-0.00906334		1805.6	-0.00077664		2335.6	-0.00348483
215.79	-0.00227441		745.8	-0.0071581		1275.79	-0.0090658		1805.8	-0.0009669		2335.8	-0.00320341
215.99	-0.00179127		746	-0.00763382		1275.99	-0.00866331		1806	-0.00054746		2336	-0.00271064
216.19	-0.00097107		746.2	-0.00780668		1276.19	-0.00854944		1806.2	-0.0009037		2336.2	-0.00270974
216.39	-0.00024244		746.4	-0.00719064		1276.39	-0.00769247		1806.4	-0.0016157		2336.4	-0.00200775
216.59	-0.00026876		746.6	-0.00678445		1276.59	-0.00650318		1806.6	-0.00116679		2336.6	-0.00163186
216.79	-0.00029221		746.8	-0.00644956		1276.79	-0.00595086		1806.8	-0.00140476		2336.8	-0.00159178
216.99	0.0001055		747	-0.00664069		1276.99	-0.00672993		1807	-0.00096057		2337	-0.00208879
217.19	0.00072302		747.2	-0.00652562		1277.19	-0.0067733		1807.2	-0.00132514		2337.2	-0.00306561
217.39	0.00072113		747.4	-0.00697436		1277.39	-0.0061048		1807.4	-0.00150748		2337.4	-0.00303659
217.59	0.00048785		747.6	-0.0065966		1277.59	-0.00594985		1807.6	-0.00181896		2337.6	-0.0038885
217.79	0.00041216		747.8	-0.00592433		1277.79	-0.007015		1807.8	-0.00121442		2337.8	-0.00418688
217.99	-0.00060084		748	-0.00501392		1277.99	-0.00775212		1808	-0.00096285		2338	-0.00421888
218.19	-0.00156969		748.2	-0.00469662		1278.19	-0.00760471		1808.2	-0.00062124		2338.2	-0.00514101
218.39	-0.00125597		748.4	-0.00504563		1278.39	-0.00810501		1808.4	0.00014682		2338.4	-0.00513401
218.59	-0.00174744		748.6	-0.00413406		1278.59	-0.00738722		1808.6	0.00041135		2338.6	-0.00527589
218.79	-0.00221086		748.8	-0.00347451		1278.79	-0.00777656		1808.8	0.00026751		2338.8	-0.00525735
218.99	-0.00225072		749	-0.00293969		1278.99	-0.00780769		1809	0.00107903		2339	-0.0041461
219.19	-0.00228348		749.2	-0.00241164		1279.19	-0.00814684		1809.2	0.00066423		2339.2	-0.0036147
219.39	-0.00268943		749.4	-0.00220091		1279.39	-0.00784678		1809.4	-0.0002685		2339.4	-0.00278194
219.59	-0.00160024		749.6	-0.00269195		1279.59	-0.00801417		1809.6	0.00014416		2339.6	-0.00219108
219.79	-0.00127263		749.8	-0.00323187		1279.79	-0.00856895		1809.8	0.0001937		2339.8	-0.0011116
219.99	-0.00112815		750	-0.00323879		1279.99	-0.00778984		1810	0.00070294		2340	-0.00072172
220.19	-0.00129945		750.2	-0.00325414		1280.19	-0.00852435		1810.2	0.00084592		2340.2	-0.00011967
220.39	-0.00178384		750.4	-0.00343447		1280.39	-0.00833027		1810.4	0.00108595		2340.4	0.00064657
220.59	-0.00218502		750.6	-0.00437523		1280.59	-0.00874385		1810.6	0.00128383		2340.6	0.00104494
220.79	-0.00210095		750.8	-0.0046273		1280.79	-0.00852564		1810.8	0.00120309		2340.8	0.00083521
220.99	-0.00268022		751	-0.00487103		1280.99	-0.00945727		1811	0.0020428		2341	0.00131746
221.19	-0.00331567		751.2	-0.00441589		1281.19	-0.00867641		1811.2	0.00293572		2341.2	-0.00023293
221.39	-0.00392764		751.4	-0.00477276		1281.39	-0.00765147		1811.4	0.00344596		2341.4	-0.00003438
221.59	-0.00511409		751.6	-0.00529093		1281.59	-0.00711035		1811.6	0.00424598		2341.6	-0.00061316
221.79	-0.00537184		751.8	-0.00541117		1281.79	-0.00790798		1811.8	0.00470433		2341.8	-0.00137792
221.99	-0.0055682		752	-0.00481451		1281.99	-0.00719374		1812	0.00560282		2342	-0.00225618
222.19	-0.00581083		752.2	-0.00416757		1282.19	-0.00640914		1812.2	0.00557065		2342.2	-0.00321414
222.39	-0.00474455		752.4	-0.00384042		1282.39	-0.00609887		1812.4	0.00585526		2342.4	-0.00392785
222.59	-0.00496697		752.6	-0.00260849		1282.59	-0.0043879		1812.6	0.00547749		2342.6	-0.00453319
222.79	-0.00533067		752.8	-0.00190101		1282.79	-0.00425555		1812.8	0.00457791		2342.8	-0.00525606
222.99	-0.00451432		753	-0.00199711		1282.99	-0.00381762		1813	0.00457011		2343	-0.00547682
223.19	-0.00447776		753.2	-0.0015361		1283.19	-0.00401753		1813.2	0.00457902		2343.2	-0.00498807
223.39	-0.00389294		753.4	-0.00170287		1283.39	-0.00310679		1813.4	0.00292946		2343.4	-0.00487652
223.59	-0.00320908		753.6	-0.00197592		1283.59	-0.00353551		1813.6	0.0026805		2343.6	-0.00496692
223.79	-0.00362083		753.8	-0.00206145		1283.79	-0.00359396		1813.8	0.00266356		2343.8	-0.00491662
223.99	-0.00261378		754	-0.00213123		1283.99	-0.00331214		1814	0.00213209		2344	-0.00495102
224.19	-0.00175454		754.2	-0.00173555		1284.19	-0.00422945		1814.2	0.00170352		2344.2	-0.00462789
224.39	-0.00125442		754.4	-0.0027725		1284.39	-0.00402991		1814.4	0.00209711		2344.4	-0.00495816
224.59	-0.0005668		754.6	-0.00255316		1284.59	-0.00366506		1814.6	0.00202833		2344.6	-0.00425976
224.79	-0.00037109		754.8	-0.00226033		1284.79	-0.00366554		1814.8	0.00209604		2344.8	-0.00340319
224.99	-0.00043296		755	-0.00197584		1284.99	-0.00418836		1815	0.00190381		2345	-0.00298978
225.19	-0.00040561		755.2	-0.00254409		1285.19	-0.00455485		1815.2	0.00192935		2345.2	-0.00374792
225.39	0.00013809		755.4	-0.00401877		1285.39	-0.00490816		1815.4	0.0021365		2345.4	-0.00330965
225.59	0.0009065		755.6	-0.00509241		1285.59	-0.00486908		1815.6	0.00241867		2345.6	-0.00353201
225.79	0.00134634		755.8	-0.00521588		1285.79	-0.00538603		1815.8	0.00239297		2345.8	-0.00388134
225.99	0.001029		756	-0.00501192		1285.99	-0.00555827		1816	0.00309543		2346	-0.00421095
226.19	0.0013926		756.2	-0.00514655		1286.19	-0.00564054		1816.2	0.00230594		2346.2	-0.00379994
226.39	0.00191577		756.4	-0.00547714		1286.39	-0.00566834		1816.4	0.00284045		2346.4	-0.00446859
226.59	0.00073836		756.6	-0.00613185		1286.59	-0.00516091		1816.6	0.00296931		2346.6	-0.00437234
226.79	0.00045103		756.8	-0.0057701		1286.79	-0.00536442		1816.8	0.00331475		2346.8	-0.00414747
226.99	0.00121098		757	-0.00584516		1286.99	-0.00575851		1817	0.00384559		2347	-0.00382614
227.19	0.00093546		757.2	-0.00565794		1287.19	-0.00540381		1817.2	0.00338599		2347.2	-0.00342939
227.39	0.00138331		757.4	-0.00547417		1287.39	-0.00556093		1817.4	0.00183493		2347.4	-0.00384479
227.59	0.000574		757.6	-0.00532444		1287.59	-0.00559598		1817.6	0.00213219		2347.6	-0.00390503
227.79	0.00020139		757.8	-0.00540542		1287.79	-0.00563898		1817.8	0.00181292		2347.8	-0.00464468
227.99	0.00048329		758	-0.00387879		1287.99	-0.00651159		1818	0.00150235		2348	-0.00478615
228.19	-0.00010295		758.2	-0.00274362		1288.19	-0.00671195		1818.2	0.00190306		2348.2	-0.00509577
228.39	-0.00027076		758.4	-0.00234181		1288.39	-0.00698343		1818.4	0.00265423		2348.4	-0.00492142
228.59	-0.00113149		758.6	-0.00132264		1288.59	-0.00653234		1818.6	0.00304502		2348.6	-0.00346831
228.79	-0.00075602		758.8	-0.00102211		1288.79	-0.00711382		1818.8	0.00278999		2348.8	-0.00345859
228.99	-0.00065717		759	-0.00102173		1288.99	-0.00753342		1819	0.00224078		2349	-0.00347853
229.19	-0.00074008		759.2	-0.00125145		1289.19	-0.00748648		1819.2	0.00240255		2349.2	-0.00333094
229.39	0.00034722		759.4	-0.00132094		1289.39	-0.0067852		1819.4	0.00260227		2349.4	-0.00313785
229.59	0.00096438		759.6	-0.00094872		1289.59	-0.0060522		1819.6	0.00272953		2349.6	-0.00237598
229.79	-0.00022423		759.8	-0.00079432		1289.79	-0.0055814		1819.8	0.00292734		2349.8	-0.00187003
229.99	-0.0002086		760	-0.00076969		1289.99	-0.00546344		1820	0.00327484		2350	-0.00118093
230.19	0.00057576		760.2	-0.0006976		1290.19	-0.00496674		1820.2	0.00326301		2350.2	-0.0005594
230.39	0.00072147		760.4	-0.0008645		1290.39	-0.00439831		1820.4	0.00324346		2350.4	-0.00062451
230.59	0.00063954		760.6	-0.00029832		1290.59	-0.00424043		1820.6	0.00352176		2350.6	-0.00030468
230.79	0.00147532		760.8	-0.00083531		1290.79	-0.00462561		1820.8	0.00356444		2350.8	0.00044427
230.99	0.00180351		761	-0.00103088		1290.99	-0.00487377		1821	0.00343922		2351	0.00005066
231.19	0.00220034		761.2	-0.0017346		1291.19	-0.00511681		1821.2	0.00298257		2351.2	0.00036874
231.39	0.0023345		761.4	-0.0014847		1291.39	-0.005384		1821.4	0.00365588		2351.4	-0.00050019
231.59	0.00215445		761.6	-0.00223783		1291.59	-0.00621638		1821.6	0.00401307		2351.6	-0.00102857
231.79	0.00244165		761.8	-0.00274814		1291.79	-0.00679303		1821.8	0.00401574		2351.8	-0.00265446
231.99	0.00272588		762	-0.00255183		1291.99	-0.00801036		1822	0.00420188		2352	-0.00330723
232.19	0.00327282		762.2	-0.00343045		1292.19	-0.00710582		1822.2	0.00426315		2352.2	-0.00429543
232.39	0.00346586		762.4	-0.0035436		1292.39	-0.00721892		1822.4	0.00471894		2352.4	-0.00418539
232.59	0.00355529		762.6	-0.00450468		1292.59	-0.00623665		1822.6	0.00520709		2352.6	-0.00418455
232.79	0.00404464		762.8	-0.0035459		1292.79	-0.00629189		1822.8	0.00466778		2352.8	-0.00504388
232.99	0.0036668		763	-0.00441779		1292.99	-0.00592872		1823	0.00428664		2353	-0.004292
233.19	0.00376436		763.2	-0.00408978		1293.19	-0.00473427		1823.2	0.00462706		2353.2	-0.00459432
233.39	0.00387502		763.4	-0.00363955		1293.39	-0.00338773		1823.4	0.00497172		2353.4	-0.00399157
233.59	0.00298366		763.6	-0.00372809		1293.59	-0.00267237		1823.6	0.00455557		2353.6	-0.0033184
233.79	0.00307057		763.8	-0.00373609		1293.79	-0.00148366		1823.8	0.00397355		2353.8	-0.0033936
233.99	0.00333353		764	-0.0027379		1293.99	-0.0013215		1824	0.00375897		2354	-0.00273408
234.19	0.00323816		764.2	-0.00244148		1294.19	-0.00094568		1824.2	0.00312425		2354.2	-0.00262166
234.39	0.00355216		764.4	-0.00186429		1294.39	-0.00061232		1824.4	0.00228928		2354.4	-0.00225878
234.59	0.00194605		764.6	-0.00143934		1294.59	-0.00106821		1824.6	0.00214336		2354.6	-0.00235492
234.79	0.00200944		764.8	-0.00175366		1294.79	-0.00160851		1824.8	0.00308869		2354.8	-0.00262925
234.99	0.00156849		765	-0.00104279		1294.99	-0.00238605		1825	0.00425887		2355	-0.00284983
235.19	0.00079376		765.2	-0.0008034		1295.19	-0.0034222		1825.2	0.00482251		2355.2	-0.00273315
235.39	0.00103147		765.4	-0.00088306		1295.39	-0.00377835		1825.4	0.00455058		2355.4	-0.0030823
235.59	0.00125827		765.6	-0.00163852		1295.59	-0.00472009		1825.6	0.0043698		2355.6	-0.00357733
235.79	0.00192372		765.8	-0.00197053		1295.79	-0.00415621		1825.8	0.00473346		2355.8	-0.0047736
235.99	0.00182521		766	-0.00195034		1295.99	-0.0048186		1826	0.00461913		2356	-0.00557286
236.19	0.00244861		766.2	-0.00171354		1296.19	-0.00427045		1826.2	0.00438284		2356.2	-0.0054159
236.39	0.00216367		766.4	-0.00220933		1296.39	-0.00430182		1826.4	0.00478763		2356.4	-0.00489787
236.59	0.00231697		766.6	-0.00248984		1296.59	-0.0034072		1826.6	0.0054276		2356.6	-0.00501319
236.79	0.00303117		766.8	-0.00119428		1296.79	-0.00340575		1826.8	0.00493064		2356.8	-0.00585245
236.99	0.00345752		767	-0.00215722		1296.99	-0.00324731		1827	0.00477923		2357	-0.00483604
237.19	0.00451368		767.2	-0.00274314		1297.19	-0.00206319		1827.2	0.00533589		2357.2	-0.00442
237.39	0.00484468		767.4	-0.0028921		1297.39	-0.00208419		1827.4	0.00436308		2357.4	-0.00330546
237.59	0.00508411		767.6	-0.00339025		1297.59	-0.00199308		1827.6	0.00257586		2357.6	-0.0029815
237.79	0.00574912		767.8	-0.00397001		1297.79	-0.00160692		1827.8	0.00210023		2357.8	-0.00359089
237.99	0.00512461		768	-0.00376688		1297.99	-0.00255987		1828	0.00120127		2358	-0.00314317
238.19	0.00368719		768.2	-0.00358285		1298.19	-0.00238186		1828.2	0.00016003		2358.2	-0.00342233
238.39	0.00335388		768.4	-0.0027462		1298.39	-0.00240542		1828.4	-0.00009275		2358.4	-0.00384916
238.59	0.00183784		768.6	-0.0019834		1298.59	-0.00346602		1828.6	0.00041999		2358.6	-0.00425401
238.79	0.0013583		768.8	-0.00127155		1298.79	-0.00393072		1828.8	0.00099648		2358.8	-0.0041134
238.99	-0.00025582		769	-0.00078051		1298.99	-0.00402813		1829	0.00112839		2359	-0.00372179
239.19	-0.00074198		769.2	-0.00022092		1299.19	-0.0038916		1829.2	0.00138027		2359.2	-0.00380882
239.39	-0.00085326		769.4	-0.00072911		1299.39	-0.00416206		1829.4	0.00098273		2359.4	-0.00325924
239.59	-0.00152807		769.6	-0.00080954		1299.59	-0.00388593		1829.6	0.00142437		2359.6	-0.00384502
239.79	-0.00136555		769.8	-0.00060015		1299.79	-0.0034131		1829.8	0.00147984		2359.8	-0.00489051
239.99	-0.00243174		770	-0.00008751		1299.99	-0.00342289		1830	0.00137482		2360	-0.00544718
240.19	-0.00210871		770.2	-0.00022499		1300.19	-0.00297335		1830.2	0.00148494		2360.2	-0.00472305
240.39	-0.00187536		770.4	-0.00042385		1300.39	-0.00296933		1830.4	0.00205707		2360.4	-0.00478065
240.59	-0.00122164		770.6	0.00046373		1300.59	-0.00296498		1830.6	0.00223645		2360.6	-0.00483351
240.79	-0.00013414		770.8	0.00127567		1300.79	-0.00334918		1830.8	0.00144662		2360.8	-0.00530295
240.99	-0.00011785		771	0.00052694		1300.99	-0.00369388		1831	0.00095132		2361	-0.0042035
241.19	0.00168879		771.2	-0.00056822		1301.19	-0.00325292		1831.2	0.00060572		2361.2	-0.00413557
241.39	0.00224583		771.4	-0.00076354		1301.39	-0.00470374		1831.4	-0.00021356		2361.4	-0.00436665
241.59	0.00259635		771.6	-0.00126288		1301.59	-0.00450344		1831.6	-0.00031367		2361.6	-0.00459429
241.79	0.00308072		771.8	-0.00208807		1301.79	-0.0049781		1831.8	0.00002928		2361.8	-0.00564812
241.99	0.00362252		772	-0.00194227		1301.99	-0.0054708		1832	0.00016512		2362	-0.00531894
242.19	0.00448274		772.2	-0.00231287		1302.19	-0.00452758		1832.2	0.00022875		2362.2	-0.00535043
242.39	0.00507949		772.4	-0.0026471		1302.39	-0.00457597		1832.4	0.00105237		2362.4	-0.00505065
242.59	0.00461427		772.6	-0.00295789		1302.59	-0.00534366		1832.6	0.00112519		2362.6	-0.00455507
242.79	0.00390285		772.8	-0.00324861		1302.79	-0.00491478		1832.8	0.00203823		2362.8	-0.00400297
242.99	0.00361323		773	-0.00403839		1302.99	-0.00471437		1833	0.003388		2363	-0.00348983
243.19	0.00349472		773.2	-0.00365452		1303.19	-0.00404349		1833.2	0.00370526		2363.2	-0.00279337
243.39	0.00333112		773.4	-0.00483473		1303.39	-0.00392864		1833.4	0.00326442		2363.4	-0.00253558
243.59	0.00226175		773.6	-0.00513939		1303.59	-0.00317065		1833.6	0.00304723		2363.6	-0.00244151
243.79	0.00221612		773.8	-0.00437218		1303.79	-0.00312296		1833.8	0.00298278		2363.8	-0.00230207
243.99	0.00067058		774	-0.0040263		1303.99	-0.00283618		1834	0.00340479		2364	-0.00182471
244.19	0.000427		774.2	-0.00335927		1304.19	-0.00186506		1834.2	0.00323651		2364.2	-0.00107359
244.39	-0.00033963		774.4	-0.00299682		1304.39	-0.00181717		1834.4	0.00264662		2364.4	-0.0009569
244.59	-0.00098168		774.6	-0.00237373		1304.59	-0.00086434		1834.6	0.00220536		2364.6	-0.00123782
244.79	-0.00116482		774.8	-0.00170688		1304.79	-0.00154557		1834.8	0.00149046		2364.8	-0.00180276
244.99	-0.00081733		775	-0.00153008		1304.99	-0.00196012		1835	0.00130244		2365	-0.00174865
245.19	-0.00015055		775.2	-0.00144673		1305.19	-0.00165641		1835.2	0.00162247		2365.2	-0.00227577
245.39	-0.00000648		775.4	-0.00157874		1305.39	-0.00342818		1835.4	0.00180582		2365.4	-0.00274362
245.59	0.00024174		775.6	-0.00191586		1305.59	-0.00407389		1835.6	0.003173		2365.6	-0.00356413
245.79	0.00128142		775.8	-0.00170036		1305.79	-0.00499758		1835.8	0.00389802		2365.8	-0.00482825
245.99	0.00151648		776	-0.00227769		1305.99	-0.00531005		1836	0.004219		2366	-0.00435864
246.19	0.00222907		776.2	-0.00300282		1306.19	-0.00506387		1836.2	0.00489625		2366.2	-0.00471265
246.39	0.00299449		776.4	-0.002556		1306.39	-0.00584705		1836.4	0.00561863		2366.4	-0.00532128
246.59	0.00370056		776.6	-0.00304031		1306.59	-0.00614507		1836.6	0.00574399		2366.6	-0.00570133
246.79	0.00391611		776.8	-0.0024335		1306.79	-0.00551637		1836.8	0.00652154		2366.8	-0.00558907
246.99	0.00513703		777	-0.00226054		1306.99	-0.00512112		1837	0.00555475		2367	-0.00525158
247.19	0.00467801		777.2	-0.00177778		1307.19	-0.0048988		1837.2	0.00492798		2367.2	-0.00527875
247.39	0.00562549		777.4	-0.00198624		1307.39	-0.00537538		1837.4	0.00429927		2367.4	-0.00610905
247.59	0.00522715		777.6	-0.00166988		1307.59	-0.00491157		1837.6	0.0045351		2367.6	-0.00538575
247.79	0.00583123		777.8	-0.00125643		1307.79	-0.0048253		1837.8	0.00375487		2367.8	-0.00527871
247.99	0.00539126		778	-0.00139534		1307.99	-0.00440082		1838	0.00326719		2368	-0.00542666
248.19	0.00579673		778.2	-0.00074654		1308.19	-0.0034371		1838.2	0.00261859		2368.2	-0.00508399
248.39	0.00473288		778.4	-0.00198343		1308.39	-0.00321378		1838.4	0.00217074		2368.4	-0.00484778
248.59	0.00532861		778.6	-0.00199409		1308.59	-0.00367928		1838.6	0.00175933		2368.6	-0.00440823
248.79	0.00562305		778.8	-0.00209007		1308.79	-0.00417309		1838.8	0.00182562		2368.8	-0.00370621
248.99	0.00628576		779	-0.00260495		1308.99	-0.00310589		1839	0.00296004		2369	-0.00368059
249.19	0.00632931		779.2	-0.00329902		1309.19	-0.00293117		1839.2	0.00321683		2369.2	-0.0033766
249.39	0.00643821		779.4	-0.00319665		1309.39	-0.00349739		1839.4	0.00404247		2369.4	-0.00314761
249.59	0.00633289		779.6	-0.00405934		1309.59	-0.00246996		1839.6	0.00506609		2369.6	-0.0033374
249.79	0.00584127		779.8	-0.00421316		1309.79	-0.00204191		1839.8	0.00538437		2369.8	-0.00293896
249.99	0.00535		780	-0.00477753		1309.99	-0.00102189		1840	0.00581884		2370	-0.00210612
250.19	0.00563912		780.2	-0.00411558		1310.19	0.0000381		1840.2	0.0065826		2370.2	-0.00281016
250.39	0.0063713		780.4	-0.00411824		1310.39	0.00037818		1840.4	0.00646293		2370.4	-0.00290285
250.59	0.00546141		780.6	-0.00431288		1310.59	0.00104987		1840.6	0.00612547		2370.6	-0.00253817
250.79	0.00495698		780.8	-0.00387418		1310.79	0.00186892		1840.8	0.00521303		2370.8	-0.00259487
250.99	0.00457114		781	-0.00327187		1310.99	0.00092442		1841	0.00438867		2371	-0.00379787
251.19	0.00404867		781.2	-0.00338773		1311.19	0.00031107		1841.2	0.0045656		2371.2	-0.00463966
251.39	0.00445114		781.4	-0.00199159		1311.39	0.00115569		1841.4	0.00421346		2371.4	-0.00510437
251.59	0.00417244		781.6	-0.00162584		1311.59	0.0017144		1841.6	0.00447484		2371.6	-0.00526552
251.79	0.0034836		781.8	-0.00115532		1311.79	0.00140352		1841.8	0.00293617		2371.8	-0.00593397
251.99	0.00387391		782	-0.0010322		1311.99	0.00096996		1842	0.00308219		2372	-0.00703113
252.19	0.00328557		782.2	-0.00133025		1312.19	0.00058547		1842.2	0.00301		2372.2	-0.00653423
252.39	0.00168937		782.4	-0.00255135		1312.39	-0.00026077		1842.4	0.0029633		2372.4	-0.00617495
252.59	0.00240997		782.6	-0.00223217		1312.59	-0.00089228		1842.6	0.00255829		2372.6	-0.00508651
252.79	0.00251147		782.8	-0.00213441		1312.79	-0.00090461		1842.8	0.0030359		2372.8	-0.00493422
252.99	0.00269448		783	-0.00199443		1312.99	-0.00146444		1843	0.00317537		2373	-0.00490881
253.19	0.0024348		783.2	-0.0026887		1313.19	-0.00193896		1843.2	0.00236069		2373.2	-0.0035546
253.39	0.00182319		783.4	-0.00233764		1313.39	-0.00200072		1843.4	0.00213531		2373.4	-0.00378513
253.59	0.00194607		783.6	-0.00296621		1313.59	-0.00262306		1843.6	0.0023524		2373.6	-0.00328938
253.79	0.00098935		783.8	-0.00320552		1313.79	-0.00291582		1843.8	0.00298784		2373.8	-0.00281506
253.99	0.00090665		784	-0.00293053		1313.99	-0.00206916		1844	0.00301763		2374	-0.00255372
254.19	0.00157356		784.2	-0.00283996		1314.19	-0.00267279		1844.2	0.00248529		2374.2	-0.00321177
254.39	0.00222711		784.4	-0.00194564		1314.39	-0.00318384		1844.4	0.00248612		2374.4	-0.0028663
254.59	0.00175307		784.6	-0.00169095		1314.59	-0.00370688		1844.6	0.00209851		2374.6	-0.00230281
254.79	0.00234565		784.8	-0.00105849		1314.79	-0.00451613		1844.8	0.00245192		2374.8	-0.00232662
254.99	0.00251257		785	0.00023458		1314.99	-0.00501612		1845	0.00234061		2375	-0.00249098
255.19	0.00377459		785.2	0.00080374		1315.19	-0.00407003		1845.2	0.00363087		2375.2	-0.00254308
255.39	0.00444839		785.4	0.00257817		1315.39	-0.00291064		1845.4	0.00406511		2375.4	-0.00236439
255.59	0.00491737		785.6	0.00209624		1315.59	-0.00282589		1845.6	0.0037028		2375.6	-0.00271132
255.79	0.00499435		785.8	0.00220073		1315.79	-0.00252979		1845.8	0.00465117		2375.8	-0.00353634
255.99	0.00480708		786	0.00158369		1315.99	-0.00216831		1846	0.00548052		2376	-0.00373412
256.19	0.00397456		786.2	0.00151078		1316.19	-0.00224378		1846.2	0.0059461		2376.2	-0.00281147
256.39	0.00378404		786.4	0.00116846		1316.39	-0.00292136		1846.4	0.00620947		2376.4	-0.00280893
256.59	0.00537238		786.6	0.0003232		1316.59	-0.00285411		1846.6	0.00614796		2376.6	-0.00247502
256.79	0.00497212		786.8	0.00028859		1316.79	-0.00294068		1846.8	0.00656819		2376.8	-0.00329808
256.99	0.00458641		787	-0.00053827		1316.99	-0.00253503		1847	0.00611051		2377	-0.00361816
257.19	0.00421632		787.2	-0.00215686		1317.19	-0.00249039		1847.2	0.00545686		2377.2	-0.00392135
257.39	0.0039359		787.4	-0.00208185		1317.39	-0.00213172		1847.4	0.00540686		2377.4	-0.0044148
257.59	0.00427507		787.6	-0.00233217		1317.59	-0.00258392		1847.6	0.0048528		2377.6	-0.0039899
257.79	0.00460055		787.8	-0.0026465		1317.79	-0.00169176		1847.8	0.00433624		2377.8	-0.00432197
257.99	0.00526493		788	-0.00264084		1317.99	-0.00174175		1848	0.00361903		2378	-0.00491631
258.19	0.00631425		788.2	-0.00296936		1318.19	-0.00182891		1848.2	0.00343042		2378.2	-0.00525742
258.39	0.00624267		788.4	-0.00207997		1318.39	-0.00176395		1848.4	0.00324074		2378.4	-0.00468158
258.59	0.00699506		788.6	-0.00204846		1318.59	-0.00184432		1848.6	0.00226221		2378.6	-0.00451233
258.79	0.0083568		788.8	-0.00125871		1318.79	-0.00207689		1848.8	0.00175962		2378.8	-0.00474225
258.99	0.00895588		789	-0.00024592		1318.99	-0.00036666		1849	0.00108441		2379	-0.00406785
259.19	0.00948913		789.2	0.0005637		1319.19	-0.00020171		1849.2	0.00116181		2379.2	-0.00465916
259.39	0.00939531		789.4	0.00151115		1319.39	0.00064922		1849.4	0.00038598		2379.4	-0.00396428
259.59	0.00911197		789.6	0.00087727		1319.59	0.00121981		1849.6	-0.0005118		2379.6	-0.00326403
259.79	0.00884127		789.8	0.0012434		1319.79	0.00197147		1849.8	0.00026817		2379.8	-0.00304702
259.99	0.00907544		790	0.00100603		1319.99	0.00202951		1850	-0.00020777		2380	-0.00258552
260.19	0.00933422		790.2	0.00135224		1320.19	0.00140044		1850.2	-0.00014774		2380.2	-0.00259486
260.39	0.00899609		790.4	0.00108057		1320.39	0.00194963		1850.4	-0.00006866		2380.4	-0.00214422
260.59	0.00899102		790.6	0.00023836		1320.59	0.00141275		1850.6	0.00005325		2380.6	-0.00189161
260.79	0.00765708		790.8	0.00101113		1320.79	0.00107292		1850.8	0.00018091		2380.8	-0.00106276
260.99	0.00735577		791	0.0004459		1320.99	0.00058325		1851	0.00015393		2381	-0.00081836
261.19	0.00668155		791.2	0.00008742		1321.19	-0.00062741		1851.2	-0.00036646		2381.2	-0.00101232
261.39	0.00677285		791.4	-0.00007701		1321.39	-0.00071159		1851.4	0.0000688		2381.4	-0.00066882
261.59	0.00676077		791.6	-0.00037775		1321.59	-0.00197362		1851.6	-0.00076415		2381.6	-0.00091032
261.79	0.00706715		791.8	-0.00140915		1321.79	-0.00198124		1851.8	0.00036787		2381.8	-0.00189568
261.99	0.00610235		792	-0.00164897		1321.99	-0.00249434		1852	0.00086296		2382	-0.00255659
262.19	0.00613119		792.2	-0.00158393		1322.19	-0.00283496		1852.2	0.00150366		2382.2	-0.00283677
262.39	0.00537569		792.4	-0.00137059		1322.39	-0.00339619		1852.4	0.00184315		2382.4	-0.00310366
262.59	0.00605002		792.6	-0.00125962		1322.59	-0.00392384		1852.6	0.00202062		2382.6	-0.00413312
262.79	0.00566559		792.8	-0.00164358		1322.79	-0.00392112		1852.8	0.00177452		2382.8	-0.00454068
262.99	0.00501013		793	-0.00173046		1322.99	-0.00342259		1853	0.00233871		2383	-0.00521294
263.19	0.0049548		793.2	-0.00190408		1323.19	-0.00267135		1853.2	0.00144911		2383.2	-0.00568747
263.39	0.00536148		793.4	-0.00151276		1323.39	-0.00112176		1853.4	0.00158164		2383.4	-0.00497323
263.59	0.00655508		793.6	-0.0021152		1323.59	-0.00074698		1853.6	0.00157407		2383.6	-0.00438263
263.79	0.00679602		793.8	-0.00141889		1323.79	-0.00037798		1853.8	0.0015154		2383.8	-0.00492436
263.99	0.00704118		794	-0.00003804		1323.99	0.00020033		1854	0.00073803		2384	-0.00530223
264.19	0.00622322		794.2	-0.00024003		1324.19	0.00006899		1854.2	0.00097061		2384.2	-0.00470782
264.39	0.0064943		794.4	0.00062624		1324.39	0.00065058		1854.4	0.00099703		2384.4	-0.00409285
264.59	0.0067942		794.6	0.00009122		1324.59	-0.00098763		1854.6	0.0006155		2384.6	-0.00447838
264.79	0.00709882		794.8	-0.00002567		1324.79	-0.00040225		1854.8	0.00114596		2384.8	-0.00437634
264.99	0.00740336		795	-0.00079605		1324.99	-0.00095323		1855	0.00143109		2385	-0.00429436
265.19	0.00833013		795.2	-0.00122781		1325.19	-0.00153803		1855.2	0.00135849		2385.2	-0.00452921
265.39	0.00959702		795.4	-0.00194592		1325.39	-0.00178736		1855.4	0.00135219		2385.4	-0.00423364
265.59	0.00985221		795.6	-0.00197492		1325.59	-0.00206893		1855.6	0.00142276		2385.6	-0.00452832
265.79	0.00947339		795.8	-0.00227831		1325.79	-0.00282052		1855.8	0.00283851		2385.8	-0.00500834
265.99	0.00917448		796	-0.0007102		1325.99	-0.0038888		1856	0.00400603		2386	-0.00412236
266.19	0.00843069		796.2	-0.00132666		1326.19	-0.00419503		1856.2	0.00502173		2386.2	-0.00372439
266.39	0.00839854		796.4	-0.00159783		1326.39	-0.0044518		1856.4	0.0060561		2386.4	-0.00296869
266.59	0.00865583		796.6	-0.0022491		1326.59	-0.00553305		1856.6	0.00623331		2386.6	-0.00347566
266.79	0.00801122		796.8	-0.0030018		1326.79	-0.00481176		1856.8	0.00606333		2386.8	-0.00334628
266.99	0.0073128		797	-0.00200964		1326.99	-0.00485846		1857	0.00567307		2387	-0.00385719
267.19	0.00770875		797.2	-0.00171451		1327.19	-0.00324946		1857.2	0.00511976		2387.2	-0.00340302
267.39	0.00765254		797.4	-0.00076977		1327.39	-0.0028524		1857.4	0.00620145		2387.4	-0.00315893
267.59	0.00664654		797.6	-0.00062848		1327.59	-0.00324462		1857.6	0.00600339		2387.6	-0.00291909
267.79	0.00524794		797.8	0.00068766		1327.79	-0.00234503		1857.8	0.00563899		2387.8	-0.00282505
267.99	0.00423933		798	0.00138125		1327.99	-0.00193881		1858	0.00578261		2388	-0.00282234
268.19	0.00447617		798.2	0.0006454		1328.19	-0.00200865		1858.2	0.00557398		2388.2	-0.00312985
268.39	0.00492285		798.4	0.00064364		1328.39	-0.00198043		1858.4	0.0051857		2388.4	-0.00341807
268.59	0.00433595		798.6	0.00014997		1328.59	-0.00134931		1858.6	0.00473235		2388.6	-0.00362326
268.79	0.00490613		798.8	-0.00018714		1328.79	-0.00131374		1858.8	0.00500635		2388.8	-0.00330445
268.99	0.00520653		799	-0.00025554		1328.99	-0.00145369		1859	0.0044178		2389	-0.00269528
269.19	0.00604624		799.2	0.0003211		1329.19	-0.0012206		1859.2	0.00362339		2389.2	-0.00240769
269.39	0.00596826		799.4	0.00015167		1329.39	-0.00025315		1859.4	0.00296288		2389.4	-0.00179107
269.59	0.00543248		799.6	0.00127542		1329.59	-0.00044094		1859.6	0.00361636		2389.6	-0.00191282
269.79	0.00471133		799.8	0.00152942		1329.79	-0.00005778		1859.8	0.00324798		2389.8	-0.0019619
269.99	0.00549881		800	0.00218429		1329.99	0.00013027		1860	0.00368344		2390	-0.00074848
270.19	0.00549433		800.2	0.00011143		1330.19	-0.00008796		1860.2	0.00345285		2390.2	-0.0009415
270.39	0.00635477		800.4	-0.00052564		1330.39	-0.00016515		1860.4	0.00347901		2390.4	-0.00073897
270.59	0.00672204		800.6	-0.0011918		1330.59	-0.00049562		1860.6	0.00306867		2390.6	-0.00168581
270.79	0.00706376		800.8	-0.00125688		1330.79	-0.00014447		1860.8	0.00292072		2390.8	-0.00157469
270.99	0.00720115		801	-0.00135642		1330.99	0.00021957		1861	0.00261428		2391	-0.0027915
271.19	0.0080983		801.2	-0.00242747		1331.19	0.00109456		1861.2	0.00323755		2391.2	-0.00322135
271.39	0.00844157		801.4	-0.00288988		1331.39	0.00157854		1861.4	0.00365004		2391.4	-0.00321362
271.59	0.00815159		801.6	-0.0030593		1331.59	0.00176712		1861.6	0.00358489		2391.6	-0.0036512
271.79	0.00831515		801.8	-0.00286519		1331.79	0.00286644		1861.8	0.00393356		2391.8	-0.00438123
271.99	0.00880755		802	-0.0032812		1331.99	0.00271908		1862	0.00399582		2392	-0.00495396
272.19	0.00917624		802.2	-0.00413225		1332.19	0.00254235		1862.2	0.00363425		2392.2	-0.00486375
272.39	0.00963638		802.4	-0.00404631		1332.39	0.0018256		1862.4	0.00416765		2392.4	-0.0045138
272.59	0.00895311		802.6	-0.00301372		1332.59	0.0023508		1862.6	0.0036063		2392.6	-0.00497714
272.79	0.00917956		802.8	-0.00340917		1332.79	0.00157362		1862.8	0.00314258		2392.8	-0.00511105
272.99	0.00933649		803	-0.00314124		1332.99	0.00115817		1863	0.00329038		2393	-0.0043852
273.19	0.00904788		803.2	-0.00173939		1333.19	0.00052373		1863.2	0.00367669		2393.2	-0.00360275
273.39	0.00889543		803.4	-0.00110616		1333.39	-0.00050913		1863.4	0.00403067		2393.4	-0.00364816
273.59	0.00835744		803.6	0.00050092		1333.59	-0.00166987		1863.6	0.00344592		2393.6	-0.00373808
273.79	0.00798581		803.8	0.00030621		1333.79	-0.0012297		1863.8	0.0026499		2393.8	-0.00372721
273.99	0.00776174		804	0.00068661		1333.99	-0.00247991		1864	0.00304925		2394	-0.00282316
274.19	0.00624321		804.2	0.0006508		1334.19	-0.00367139		1864.2	0.00258785		2394.2	-0.00312264
274.39	0.00595628		804.4	0.00145914		1334.39	-0.00350653		1864.4	0.0025283		2394.4	-0.00279656
274.59	0.00560421		804.6	0.00280981		1334.59	-0.00462598		1864.6	0.00229878		2394.6	-0.00261553
274.79	0.00536966		804.8	0.00294591		1334.79	-0.00517167		1864.8	0.00293779		2394.8	-0.00221611
274.99	0.00484634		805	0.00270089		1334.99	-0.00476335		1865	0.00304181		2395	-0.00241529
275.19	0.00514474		805.2	0.00407525		1335.19	-0.00441764		1865.2	0.00300374		2395.2	-0.00163222
275.39	0.00571142		805.4	0.00451271		1335.39	-0.00394849		1865.4	0.00359131		2395.4	-0.00128789
275.59	0.00557218		805.6	0.00492705		1335.59	-0.00355401		1865.6	0.00463117		2395.6	-0.0007961
275.79	0.00555022		805.8	0.00500975		1335.79	-0.0026872		1865.8	0.00482655		2395.8	-0.00062184
275.99	0.00571094		806	0.00441599		1335.99	-0.00195976		1866	0.0051731		2396	0.00014855
276.19	0.00615912		806.2	0.0036449		1336.19	-0.00137018		1866.2	0.00455183		2396.2	0.00163353
276.39	0.00688207		806.4	0.00321227		1336.39	-0.00047701		1866.4	0.00436331		2396.4	0.0012723
276.59	0.00679716		806.6	0.00240539		1336.59	0.00082563		1866.6	0.00466737		2396.6	0.00123692
276.79	0.00781853		806.8	0.00141018		1336.79	0.00085949		1866.8	0.00560664		2396.8	0.00097165
276.99	0.00914338		807	0.00040002		1336.99	0.00053776		1867	0.0066367		2397	0.00055366
277.19	0.01001231		807.2	0.00059892		1337.19	0.00122865		1867.2	0.00704015		2397.2	-0.00041961
277.39	0.01100236		807.4	-0.00051175		1337.39	0.00151275		1867.4	0.00647302		2397.4	-0.00110507
277.59	0.01136698		807.6	-0.00112438		1337.59	0.00262851		1867.6	0.00658969		2397.6	-0.00196725
277.79	0.01157329		807.8	-0.00169306		1337.79	0.00266676		1867.8	0.00649454		2397.8	-0.00313713
277.99	0.01143345		808	-0.00180511		1337.99	0.00175839		1868	0.00656793		2398	-0.00397421
278.19	0.01121151		808.2	-0.00185567		1338.19	0.00141583		1868.2	0.00621467		2398.2	-0.00529843
278.39	0.01130905		808.4	-0.00224272		1338.39	0.00205609		1868.4	0.00628322		2398.4	-0.00553879
278.59	0.01045735		808.6	-0.00205902		1338.59	0.00091288		1868.6	0.00549395		2398.6	-0.00575474
278.79	0.01013533		808.8	-0.0028849		1338.79	0.00085038		1868.8	0.00538807		2398.8	-0.00628661
278.99	0.0106472		809	-0.00268161		1338.99	0.00116594		1869	0.00536848		2399	-0.00579043
279.19	0.01073334		809.2	-0.00160512		1339.19	0.00135499		1869.2	0.00496708		2399.2	-0.00541104
279.39	0.01033244		809.4	-0.00167929		1339.39	-0.00000344		1869.4	0.00466101		2399.4	-0.00509786
279.59	0.00960157		809.6	-0.00204916		1339.59	0.00012554		1869.6	0.00454429		2399.6	-0.00467826
279.79	0.00839167		809.8	-0.00278962		1339.79	0.00035497		1869.8	0.00415542		2399.8	-0.00404752
279.99	0.00849453		810	-0.00358371		1339.99	0.00062511		1870	0.00352806		2400	-0.00260645
280.19	0.00885474		810.2	-0.00388108		1340.19	0.00083492		1870.2	0.00325347		2400.2	-0.00105975
280.39	0.00833466		810.4	-0.00435726		1340.39	0.00098693		1870.4	0.00428638		2400.4	-0.00055062
280.59	0.00894006		810.6	-0.00410829		1340.59	0.00201942		1870.6	0.00425843		2400.6	0.00029985
280.79	0.00918067		810.8	-0.00392777		1340.79	0.00171526		1870.8	0.00446424		2400.8	0.00020115
280.99	0.00953014		811	-0.0044835		1340.99	0.00175295		1871	0.00424932		2401	-0.00027266
281.19	0.00947897		811.2	-0.00459902		1341.19	0.00193976		1871.2	0.00417234		2401.2	-0.00055205
281.39	0.00900053		811.4	-0.00444246		1341.39	0.0016986		1871.4	0.0047456		2401.4	-0.00152351
281.59	0.00910818		811.6	-0.00346308		1341.59	0.00118237		1871.6	0.00557086		2401.6	-0.00269117
281.79	0.00885433		811.8	-0.00206882		1341.79	0.00091658		1871.8	0.00528531		2401.8	-0.00348051
281.99	0.00917707		812	-0.00155836		1341.99	0.001448		1872	0.00559527		2402	-0.00440888
282.19	0.00882099		812.2	-0.0008429		1342.19	0.0011506		1872.2	0.00589089		2402.2	-0.00493511
282.39	0.0088235		812.4	-0.00049909		1342.39	0.00099667		1872.4	0.00584142		2402.4	-0.00514891
282.59	0.00889916		812.6	-0.00029614		1342.59	0.00051077		1872.6	0.00433823		2402.6	-0.00579077
282.79	0.00942802		812.8	-0.00033442		1342.79	0.00073433		1872.8	0.00414609		2402.8	-0.00551778
282.99	0.00955018		813	0.00079675		1342.99	0.00026802		1873	0.00481514		2403	-0.00528778
283.19	0.00915962		813.2	0.00149712		1343.19	-0.00032497		1873.2	0.00459324		2403.2	-0.00509989
283.39	0.0090248		813.4	0.00158059		1343.39	-0.00208053		1873.4	0.00408297		2403.4	-0.00454982
283.59	0.00923167		813.6	0.00182515		1343.59	-0.00125951		1873.6	0.00462719		2403.6	-0.00521868
283.79	0.00914983		813.8	0.00151224		1343.79	-0.00166105		1873.8	0.00397875		2403.8	-0.00436065
283.99	0.01083399		814	0.00155118		1343.99	-0.0018173		1874	0.00396751		2404	-0.00370154
284.19	0.01156733		814.2	0.00136091		1344.19	-0.00203788		1874.2	0.00384912		2404.2	-0.00280488
284.39	0.01173796		814.4	0.00098371		1344.39	-0.00203195		1874.4	0.00418503		2404.4	-0.00146548
284.59	0.01212742		814.6	0.00162515		1344.59	-0.0020522		1874.6	0.00374765		2404.6	-0.00125223
284.79	0.01152809		814.8	0.00135257		1344.79	-0.002245		1874.8	0.0043283		2404.8	-0.00137954
284.99	0.01161267		815	0.00025483		1344.99	-0.00229112		1875	0.00528088		2405	-0.00235519
285.19	0.01128142		815.2	-0.00090565		1345.19	-0.00131143		1875.2	0.00579034		2405.2	-0.00221483
285.39	0.01116314		815.4	-0.00037404		1345.39	-0.00088271		1875.4	0.00599366		2405.4	-0.00265066
285.59	0.01155617		815.6	-0.00019811		1345.59	-0.00059209		1875.6	0.00639507		2405.6	-0.0026316
285.79	0.01123963		815.8	-0.00007854		1345.79	0.00015698		1875.8	0.00682056		2405.8	-0.00243454
285.99	0.01131033		816	0.00000666		1345.99	0.00054793		1876	0.00682119		2406	-0.00338249
286.19	0.01062837		816.2	-0.00000172		1346.19	-0.0006197		1876.2	0.00705636		2406.2	-0.0036944
286.39	0.01052138		816.4	0.00031561		1346.39	0.00000518		1876.4	0.00720743		2406.4	-0.00389786
286.59	0.00974954		816.6	0.00039822		1346.59	0.0006263		1876.6	0.0078164		2406.6	-0.00437209
286.79	0.00913782		816.8	0.00098167		1346.79	0.0000543		1876.8	0.00871218		2406.8	-0.00410357
286.99	0.00801307		817	0.00113517		1346.99	0.00010514		1877	0.00937969		2407	-0.0054392
287.19	0.00852895		817.2	0.00145282		1347.19	-0.00043937		1877.2	0.00828224		2407.2	-0.00570678
287.39	0.00853092		817.4	0.00209002		1347.39	-0.00069855		1877.4	0.00791952		2407.4	-0.00615048
287.59	0.0084611		817.6	0.00288403		1347.59	-0.00024701		1877.6	0.00678131		2407.6	-0.006917
287.79	0.00831113		817.8	0.00310597		1347.79	-0.00059255		1877.8	0.00527825		2407.8	-0.00652383
287.99	0.00866149		818	0.0030102		1347.99	-0.00173212		1878	0.00567704		2408	-0.00673193
288.19	0.00908943		818.2	0.00310902		1348.19	-0.00098868		1878.2	0.00480674		2408.2	-0.00621463
288.39	0.00861784		818.4	0.00359301		1348.39	-0.00101036		1878.4	0.00494776		2408.4	-0.00645935
288.59	0.0083451		818.6	0.00340159		1348.59	-0.00104476		1878.6	0.00446782		2408.6	-0.00679127
288.79	0.00871902		818.8	0.00215488		1348.79	0.00017426		1878.8	0.00333187		2408.8	-0.00727747
288.99	0.00910125		819	0.00093374		1348.99	-0.00054137		1879	0.00304276		2409	-0.00674504
289.19	0.00947595		819.2	0.00022067		1349.19	0.00011052		1879.2	0.00147067		2409.2	-0.00562205
289.39	0.01013362		819.4	0.0007725		1349.39	-0.00065589		1879.4	0.00034778		2409.4	-0.00498225
289.59	0.01009786		819.6	0.00018016		1349.59	-0.00015311		1879.6	0.00122222		2409.6	-0.00427683
289.79	0.00909927		819.8	0.00009962		1349.79	-0.00009156		1879.8	0.0010642		2409.8	-0.00363766
289.99	0.00880803		820	0.00101424		1349.99	-0.00046492		1880	0.0008039		2410	-0.00411028
290.19	0.0080285		820.2	-0.00002831		1350.19	-0.00033544		1880.2	0.0021186		2410.2	-0.00353774
290.39	0.00773728		820.4	0.00064311		1350.39	0.00017788		1880.4	0.00323786		2410.4	-0.00379843
290.59	0.00691082		820.6	-0.00040737		1350.59	0.00038973		1880.6	0.00490677		2410.6	-0.00484895
290.79	0.00659584		820.8	0.00008505		1350.79	0.00052129		1880.8	0.00524215		2410.8	-0.00499963
290.99	0.00719385		821	-0.00046589		1350.99	0.00086034		1881	0.00571335		2411	-0.00547547
291.19	0.00792765		821.2	0.00013086		1351.19	0.00016564		1881.2	0.00629191		2411.2	-0.00521047
291.39	0.0082326		821.4	0.00026365		1351.39	0.00110981		1881.4	0.0073033		2411.4	-0.00459347
291.59	0.00859577		821.6	0.00152526		1351.59	0.0008937		1881.6	0.00634997		2411.6	-0.00450436
291.79	0.00836818		821.8	0.00211172		1351.79	0.00180969		1881.8	0.0072087		2411.8	-0.00561704
291.99	0.00879143		822	0.00149847		1351.99	0.00199222		1882	0.00826087		2412	-0.00554286
292.19	0.00919427		822.2	0.00157949		1352.19	0.00226395		1882.2	0.0083842		2412.2	-0.0054694
292.39	0.00873094		822.4	0.00151586		1352.39	0.00112779		1882.4	0.0084302		2412.4	-0.00567523
292.59	0.00843338		822.6	0.00161444		1352.59	0.00088943		1882.6	0.0071842		2412.6	-0.00503393
292.79	0.00887339		822.8	0.00117215		1352.79	0.00060176		1882.8	0.00639086		2412.8	-0.00540942
292.99	0.00924229		823	0.00108822		1352.99	-0.00061972		1883	0.00639041		2413	-0.00408709
293.19	0.01038792		823.2	0.00118863		1353.19	-0.00049372		1883.2	0.00603396		2413.2	-0.00449479
293.39	0.01143651		823.4	0.00128568		1353.39	-0.00090904		1883.4	0.00606686		2413.4	-0.00411815
293.59	0.01139991		823.6	0.00130233		1353.59	-0.00075269		1883.6	0.00656013		2413.6	-0.00377001
293.79	0.01095822		823.8	0.00150238		1353.79	-0.00108387		1883.8	0.00610448		2413.8	-0.00315428
293.99	0.01129626		824	0.00292651		1353.99	-0.00091825		1884	0.00558941		2414	-0.0030742
294.19	0.01156918		824.2	0.00295048		1354.19	0.00052069		1884.2	0.00679161		2414.2	-0.00331221
294.39	0.01204796		824.4	0.00367488		1354.39	0.00108505		1884.4	0.00666798		2414.4	-0.00380191
294.59	0.01251025		824.6	0.00324907		1354.59	0.00215023		1884.6	0.0072613		2414.6	-0.00360157
294.79	0.01354113		824.8	0.00431733		1354.79	0.00259227		1884.8	0.00764484		2414.8	-0.00242332
294.99	0.0136043		825	0.00427475		1354.99	0.00263653		1885	0.00721765		2415	-0.00219011
295.19	0.01282794		825.2	0.00375652		1355.19	0.00265268		1885.2	0.0078032		2415.2	-0.0020928
295.39	0.0129364		825.4	0.00355397		1355.39	0.0031176		1885.4	0.00755249		2415.4	-0.00164615
295.59	0.01191317		825.6	0.00416435		1355.59	0.00324833		1885.6	0.00718699		2415.6	-0.00208951
295.79	0.01120373		825.8	0.00283213		1355.79	0.00385312		1885.8	0.00791123		2415.8	-0.00213401
295.99	0.01078255		826	0.00296659		1355.99	0.0031959		1886	0.00764382		2416	-0.00148051
296.19	0.01084177		826.2	0.00351486		1356.19	0.00255631		1886.2	0.0075761		2416.2	-0.00208377
296.39	0.01050526		826.4	0.00336775		1356.39	0.00322212		1886.4	0.00673576		2416.4	-0.00256124
296.59	0.00993802		826.6	0.00393447		1356.59	0.00284406		1886.6	0.00536229		2416.6	-0.0033224
296.79	0.00983528		826.8	0.00242024		1356.79	0.00276078		1886.8	0.00556338		2416.8	-0.0042055
296.99	0.01029236		827	0.00195583		1356.99	0.00192152		1887	0.0054452		2417	-0.00394812
297.19	0.01116744		827.2	0.00129212		1357.19	0.0013583		1887.2	0.00520084		2417.2	-0.00482264
297.39	0.01103024		827.4	0.00041143		1357.39	0.00102148		1887.4	0.00538834		2417.4	-0.00473707
297.59	0.01077722		827.6	0.00059577		1357.59	0.00147899		1887.6	0.00573187		2417.6	-0.00399515
297.79	0.01081879		827.8	0.00097951		1357.79	0.00183477		1887.8	0.00521981		2417.8	-0.00398639
297.99	0.01138281		828	0.00167353		1357.99	0.00166056		1888	0.00555107		2418	-0.00435169
298.19	0.01231933		828.2	0.00169797		1358.19	0.00201687		1888.2	0.00685177		2418.2	-0.00397098
298.39	0.01292831		828.4	0.00129771		1358.39	0.00201678		1888.4	0.00719739		2418.4	-0.00342747
298.59	0.01246798		828.6	0.00119163		1358.59	0.00202349		1888.6	0.00813643		2418.6	-0.0027501
298.79	0.01131012		828.8	0.00108945		1358.79	0.00134111		1888.8	0.00790147		2418.8	-0.00279882
298.99	0.01031754		829	0.00052794		1358.99	-0.00013872		1889	0.00673706		2419	-0.0030685
299.19	0.00947226		829.2	-0.00057489		1359.19	-0.00110184		1889.2	0.00729139		2419.2	-0.00353133
299.39	0.00962107		829.4	-0.00030162		1359.39	-0.00169016		1889.4	0.00671898		2419.4	-0.00354274
299.59	0.00913116		829.6	-0.00036396		1359.59	-0.00181076		1889.6	0.00641995		2419.6	-0.00328688
299.79	0.00991854		829.8	-0.00064226		1359.79	-0.00235763		1889.8	0.00632975		2419.8	-0.00349396
299.99	0.00981422		830	0.0008039		1359.99	-0.00212617		1890	0.00630235		2420	-0.00402444
300.19	0.01022062		830.2	0.00113175		1360.19	-0.00177587		1890.2	0.00644899		2420.2	-0.00526296
300.39	0.01088069		830.4	0.00179581		1360.39	-0.00117891		1890.4	0.00671074		2420.4	-0.00525528
300.59	0.01085045		830.6	0.00189821		1360.59	-0.00106882		1890.6	0.00594807		2420.6	-0.00540531
300.79	0.01136751		830.8	0.00200037		1360.79	-0.00051		1890.8	0.0056412		2420.8	-0.0048071
300.99	0.01144953		831	0.00257418		1360.99	-0.00043278		1891	0.00522329		2421	-0.00400106
301.19	0.01107942		831.2	0.00249219		1361.19	-0.00003673		1891.2	0.00460214		2421.2	-0.00418824
301.39	0.01072413		831.4	0.0027209		1361.39	0.00021282		1891.4	0.00510801		2421.4	-0.00413745
301.59	0.01159832		831.6	0.00412267		1361.59	0.0009413		1891.6	0.00493615		2421.6	-0.00411503
301.79	0.01181905		831.8	0.00454789		1361.79	0.00138474		1891.8	0.00512746		2421.8	-0.00477966
301.99	0.01240838		832	0.00445921		1361.99	0.0012537		1892	0.00644105		2422	-0.00437315
302.19	0.01282869		832.2	0.005191		1362.19	0.00182422		1892.2	0.00788833		2422.2	-0.00366234
302.39	0.01280224		832.4	0.00490646		1362.39	0.00226147		1892.4	0.00822938		2422.4	-0.0036099
302.59	0.01131576		832.6	0.00541963		1362.59	0.00205976		1892.6	0.00781319		2422.6	-0.00384404
302.79	0.01125279		832.8	0.00490693		1362.79	0.00189841		1892.8	0.0063079		2422.8	-0.00379405
302.99	0.01074678		833	0.00406993		1362.99	0.00115382		1893	0.0062947		2423	-0.00371449
303.19	0.01034336		833.2	0.00346303		1363.19	0.00127197		1893.2	0.00681086		2423.2	-0.00389834
303.39	0.01150885		833.4	0.00331668		1363.39	0.00159968		1893.4	0.00680267		2423.4	-0.00361453
303.59	0.01221831		833.6	0.00302244		1363.59	0.00185525		1893.6	0.00787034		2423.6	-0.00276004
303.79	0.01223768		833.8	0.00293863		1363.79	0.00181854		1893.8	0.00793152		2423.8	-0.00301913
303.99	0.0127281		834	0.00313993		1363.99	0.00219894		1894	0.00856861		2424	-0.00239004
304.19	0.01374191		834.2	0.00332959		1364.19	0.00273418		1894.2	0.00768128		2424.2	-0.00271148
304.39	0.01476529		834.4	0.0034014		1364.39	0.00266063		1894.4	0.00742273		2424.4	-0.00261332
304.59	0.01432316		834.6	0.00284851		1364.59	0.00303259		1894.6	0.00611722		2424.6	-0.00293181
304.79	0.01458236		834.8	0.00304519		1364.79	0.0027363		1894.8	0.00567697		2424.8	-0.00230808
304.99	0.01423989		835	0.0030055		1364.99	0.00281362		1895	0.00590782		2425	-0.00291481
305.19	0.01506832		835.2	0.00327824		1365.19	0.00237065		1895.2	0.005273		2425.2	-0.00429398
305.39	0.01553043		835.4	0.00357331		1365.39	0.0023361		1895.4	0.00562718		2425.4	-0.00402012
305.59	0.0152575		835.6	0.00392604		1365.59	0.00213956		1895.6	0.00546408		2425.6	-0.00449335
305.79	0.0146741		835.8	0.0035426		1365.79	0.00244686		1895.8	0.00554915		2425.8	-0.00386226
305.99	0.01452286		836	0.00460764		1365.99	0.00151611		1896	0.00619539		2426	-0.00399265
306.19	0.01302375		836.2	0.00499907		1366.19	0.00146418		1896.2	0.00609479		2426.2	-0.00345838
306.39	0.01172566		836.4	0.00455543		1366.39	0.00085346		1896.4	0.0050669		2426.4	-0.00344429
306.59	0.01108768		836.6	0.00465515		1366.59	0.00090941		1896.6	0.00434648		2426.6	-0.00406422
306.79	0.0104468		836.8	0.00360541		1366.79	0.00041135		1896.8	0.00395308		2426.8	-0.00347904
306.99	0.00939387		837	0.0030403		1366.99	0.00042808		1897	0.00520623		2427	-0.00390355
307.19	0.00963681		837.2	0.00280128		1367.19	0.00020732		1897.2	0.00556257		2427.2	-0.00391855
307.39	0.00945554		837.4	0.00238061		1367.39	0.00049473		1897.4	0.00524861		2427.4	-0.00378404
307.59	0.00920658		837.6	0.00206215		1367.59	0.0004857		1897.6	0.00498518		2427.6	-0.00288308
307.79	0.00877093		837.8	0.00149848		1367.79	0.0005389		1897.8	0.00380064		2427.8	-0.00316711
307.99	0.01014919		838	0.00092963		1367.99	0.00163735		1898	0.00447459		2428	-0.00278555
308.19	0.0107825		838.2	0.00041892		1368.19	0.00214492		1898.2	0.00342758		2428.2	-0.00349189
308.39	0.01129311		838.4	0.00012613		1368.39	0.00201755		1898.4	0.00382059		2428.4	-0.00409316
308.59	0.01234544		838.6	-0.00003725		1368.59	0.0027119		1898.6	0.00405303		2428.6	-0.00310816
308.79	0.01338592		838.8	0.00008266		1368.79	0.00302799		1898.8	0.00457016		2428.8	-0.00329743
308.99	0.0137895		839	0.0004132		1368.99	0.00348801		1899	0.00517041		2429	-0.00357278
309.19	0.01450992		839.2	0.00058698		1369.19	0.0030935		1899.2	0.00544743		2429.2	-0.00355073
309.39	0.01377942		839.4	0.00079079		1369.39	0.00288121		1899.4	0.00645539		2429.4	-0.00307066
309.59	0.01364003		839.6	0.00112159		1369.59	0.00302508		1899.6	0.00633988		2429.6	-0.00416654
309.79	0.01301765		839.8	0.00157622		1369.79	0.00276998		1899.8	0.00657589		2429.8	-0.00373012
309.99	0.01203183		840	0.00176088		1369.99	0.00194		1900	0.00749835		2430	-0.00522579
310.19	0.01110791		840.2	0.00125568		1370.19	0.00164841		1900.2	0.00678124		2430.2	-0.00547737
310.39	0.01119989		840.4	0.00127982		1370.39	0.00107812		1900.4	0.00649962		2430.4	-0.00597387
310.59	0.01217094		840.6	0.00110229		1370.59	0.00124198		1900.6	0.00647534		2430.6	-0.00644962
310.79	0.01187551		840.8	0.0012016		1370.79	0.00090095		1900.8	0.00739423		2430.8	-0.00629603
310.99	0.01190514		841	0.00080875		1370.99	0.00089953		1901	0.00837555		2431	-0.00634549
311.19	0.0120969		841.2	0.00077548		1371.19	0.000505		1901.2	0.00755383		2431.2	-0.00611108
311.39	0.01196598		841.4	0.00085464		1371.39	0.00104419		1901.4	0.0063916		2431.4	-0.00632987
311.59	0.012692		841.6	0.00150798		1371.59	0.00141742		1901.6	0.00616503		2431.6	-0.00559204
311.79	0.01330367		841.8	0.00216841		1371.79	0.00051534		1901.8	0.00586512		2431.8	-0.00524244
311.99	0.01482066		842	0.00314119		1371.99	0.00067078		1902	0.00539709		2432	-0.00521001
312.19	0.01526925		842.2	0.00300117		1372.19	-0.00015804		1902.2	0.00437134		2432.2	-0.00458599
312.39	0.01607852		842.4	0.00365442		1372.39	-0.0004714		1902.4	0.00397057		2432.4	-0.00416256
312.59	0.01645379		842.6	0.00363639		1372.59	-0.00086145		1902.6	0.00395238		2432.6	-0.00291971
312.79	0.01628945		842.8	0.00384913		1372.79	-0.00101033		1902.8	0.00403024		2432.8	-0.00305495
312.99	0.01619822		843	0.00310873		1372.99	-0.00080072		1903	0.0035025		2433	-0.00252512
313.19	0.01607491		843.2	0.00268094		1373.19	-0.00145113		1903.2	0.00263646		2433.2	-0.00213264
313.39	0.01574765		843.4	0.00275187		1373.39	-0.00126201		1903.4	0.0023466		2433.4	-0.00231934
313.59	0.01567304		843.6	0.00268922		1373.59	-0.00055115		1903.6	0.00219571		2433.6	-0.00256044
313.79	0.01511736		843.8	0.00318361		1373.79	-0.00085581		1903.8	0.0029048		2433.8	-0.00231173
313.99	0.01430898		844	0.00278849		1373.99	-0.00021938		1904	0.00361699		2434	-0.00298664
314.19	0.01440504		844.2	0.00313646		1374.19	0.00067216		1904.2	0.00405464		2434.2	-0.00212775
314.39	0.01472869		844.4	0.00329856		1374.39	0.00067656		1904.4	0.00462975		2434.4	-0.00155785
314.59	0.01555771		844.6	0.00308286		1374.59	0.00101414		1904.6	0.00496138		2434.6	-0.00147611
314.79	0.01527342		844.8	0.00330166		1374.79	0.00120276		1904.8	0.0060355		2434.8	-0.00083479
314.99	0.01439646		845	0.00348015		1374.99	0.00119011		1905	0.0064725		2435	-0.00035259
315.19	0.01355345		845.2	0.00366024		1375.19	0.00158603		1905.2	0.00700123		2435.2	-0.00084938
315.39	0.01329087		845.4	0.00420006		1375.39	0.00192098		1905.4	0.00758675		2435.4	-0.00139061
315.59	0.0136612		845.6	0.00443315		1375.59	0.00084468		1905.6	0.0078163		2435.6	-0.00079927
315.79	0.01376229		845.8	0.0047941		1375.79	-0.00012605		1905.8	0.00745684		2435.8	-0.00108712
315.99	0.01444119		846	0.00490017		1375.99	0.00040609		1906	0.00763128		2436	-0.00141482
316.19	0.01393262		846.2	0.00360688		1376.19	0.00019219		1906.2	0.00793675		2436.2	-0.00094918
316.39	0.01316728		846.4	0.00348094		1376.39	0.00018678		1906.4	0.00757226		2436.4	-0.00140612
316.59	0.01236188		846.6	0.00307589		1376.59	0.00010322		1906.6	0.0064865		2436.6	-0.00180557
316.79	0.01175935		846.8	0.00230849		1376.79	0.00069799		1906.8	0.00549842		2436.8	-0.0019953
316.99	0.01167655		847	0.00193821		1376.99	0.00216519		1907	0.00440356		2437	-0.00246547
317.19	0.01154947		847.2	0.00149499		1377.19	0.00260578		1907.2	0.00417879		2437.2	-0.00364158
317.39	0.01167901		847.4	0.00194365		1377.39	0.00388771		1907.4	0.00515822		2437.4	-0.00482158
317.59	0.01187093		847.6	0.0021743		1377.59	0.00514792		1907.6	0.00593707		2437.6	-0.00461141
317.79	0.01240532		847.8	0.00230299		1377.79	0.00566525		1907.8	0.00574846		2437.8	-0.00560259
317.99	0.01200374		848	0.00151479		1377.99	0.00531164		1908	0.00602317		2438	-0.0055516
318.19	0.01213027		848.2	0.00146593		1378.19	0.00543323		1908.2	0.00648253		2438.2	-0.0059844
318.39	0.01251542		848.4	0.00185175		1378.39	0.00496343		1908.4	0.00623193		2438.4	-0.00573731
318.59	0.01275973		848.6	0.00235244		1378.59	0.00406377		1908.6	0.00571726		2438.6	-0.00602321
318.79	0.01232878		848.8	0.00256635		1378.79	0.00408357		1908.8	0.00602664		2438.8	-0.00602459
318.99	0.01133118		849	0.00322023		1378.99	0.00411318		1909	0.00714268		2439	-0.00571288
319.19	0.0116596		849.2	0.00322772		1379.19	0.00368164		1909.2	0.00746935		2439.2	-0.00560682
319.39	0.01273257		849.4	0.00356587		1379.39	0.00341989		1909.4	0.00733358		2439.4	-0.00501147
319.59	0.01301241		849.6	0.00378597		1379.59	0.00255792		1909.6	0.00673612		2439.6	-0.00429938
319.79	0.01338239		849.8	0.0043154		1379.79	0.00333806		1909.8	0.00689177		2439.8	-0.00351756
319.99	0.0136486		850	0.00427369		1379.99	0.00278991		1910	0.00792419		2440	-0.00377436
320.19	0.01360901		850.2	0.00452108		1380.19	0.00194931		1910.2	0.00701508		2440.2	-0.00308419
320.39	0.01359262		850.4	0.00517408		1380.39	0.00162228		1910.4	0.00675188		2440.4	-0.00276298
320.59	0.0132409		850.6	0.00518714		1380.59	0.00181717		1910.6	0.00636097		2440.6	-0.00287495
320.79	0.01350424		850.8	0.00497876		1380.79	0.00271118		1910.8	0.00709298		2440.8	-0.00263787
320.99	0.0138371		851	0.00537754		1380.99	0.00236238		1911	0.00729743		2441	-0.00320874
321.19	0.01354951		851.2	0.00506527		1381.19	0.00187333		1911.2	0.00769984		2441.2	-0.0034918
321.39	0.0132558		851.4	0.0049205		1381.39	0.00125292		1911.4	0.007822		2441.4	-0.00290988
321.59	0.01322125		851.6	0.00441566		1381.59	0.00035816		1911.6	0.00717727		2441.6	-0.00270734
321.79	0.01297282		851.8	0.00424377		1381.79	-0.00046269		1911.8	0.00717964		2441.8	-0.00354159
321.99	0.01335612		852	0.0045345		1381.99	-0.0009116		1912	0.00793159		2442	-0.00379292
322.19	0.01338296		852.2	0.00473741		1382.19	-0.00097977		1912.2	0.00800063		2442.2	-0.0043275
322.39	0.01332705		852.4	0.00535359		1382.39	-0.00069235		1912.4	0.00791751		2442.4	-0.00348178
322.59	0.01397562		852.6	0.00460464		1382.59	-0.00126973		1912.6	0.00776597		2442.6	-0.00328649
322.79	0.0133186		852.8	0.00370769		1382.79	-0.00030051		1912.8	0.0075997		2442.8	-0.00312937
322.99	0.01302589		853	0.00313914		1382.99	-0.00047446		1913	0.00774624		2443	-0.00248147
323.19	0.01336805		853.2	0.00275563		1383.19	0.00001585		1913.2	0.00659878		2443.2	-0.00271637
323.39	0.01338589		853.4	0.00299142		1383.39	0.0009636		1913.4	0.00591971		2443.4	-0.00261608
323.59	0.01314774		853.6	0.00351302		1383.59	0.00102259		1913.6	0.00532006		2443.6	-0.00212972
323.79	0.01367335		853.8	0.0029925		1383.79	0.00185907		1913.8	0.00497372		2443.8	-0.00212769
323.99	0.01400214		854	0.00267568		1383.99	0.00062642		1914	0.00487103		2444	-0.00317764
324.19	0.01420781		854.2	0.00236403		1384.19	0.00062846		1914.2	0.00393087		2444.2	-0.0032938
324.39	0.01494301		854.4	0.00225057		1384.39	0.00035443		1914.4	0.00427889		2444.4	-0.00251014
324.59	0.0143739		854.6	0.00202237		1384.59	0.00048374		1914.6	0.00437197		2444.6	-0.0026276
324.79	0.01417889		854.8	0.00287381		1384.79	0.00038316		1914.8	0.00564925		2444.8	-0.00243291
324.99	0.0137681		855	0.00308967		1384.99	-0.00010933		1915	0.0054299		2445	-0.00256662
325.19	0.01371856		855.2	0.00342097		1385.19	0.00036049		1915.2	0.00612908		2445.2	-0.00243402
325.39	0.01396672		855.4	0.00308301		1385.39	0.00036333		1915.4	0.00629455		2445.4	-0.00261347
325.59	0.01418424		855.6	0.00344418		1385.59	0.00008348		1915.6	0.00713221		2445.6	-0.00273457
325.79	0.01390995		855.8	0.00409352		1385.79	0.00041712		1915.8	0.00864642		2445.8	-0.00275805
325.99	0.01476969		856	0.00487643		1385.99	-0.00020343		1916	0.00914771		2446	-0.00311462
326.19	0.01480571		856.2	0.00411948		1386.19	0.0001983		1916.2	0.00956461		2446.2	-0.00307864
326.39	0.01490829		856.4	0.00411878		1386.39	0.000708		1916.4	0.01052026		2446.4	-0.00363215
326.59	0.01567027		856.6	0.00295587		1386.59	0.00061692		1916.6	0.01033779		2446.6	-0.00375417
326.79	0.01467952		856.8	0.00295708		1386.79	0.00125606		1916.8	0.01028932		2446.8	-0.00409976
326.99	0.01440807		857	0.00290536		1386.99	0.00162152		1917	0.01023432		2447	-0.00404615
327.19	0.01403002		857.2	0.00303817		1387.19	0.00227616		1917.2	0.00987348		2447.2	-0.00394924
327.39	0.0143953		857.4	0.00340968		1387.39	0.00227262		1917.4	0.00897116		2447.4	-0.00397169
327.59	0.01399876		857.6	0.0036427		1387.59	0.00237017		1917.6	0.00894457		2447.6	-0.00377242
327.79	0.01413402		857.8	0.00232482		1387.79	0.00252605		1917.8	0.00842666		2447.8	-0.00358651
327.99	0.01390362		858	0.0026701		1387.99	0.00217044		1918	0.00841839		2448	-0.00427573
328.19	0.01359799		858.2	0.00259515		1388.19	0.00267783		1918.2	0.00773817		2448.2	-0.00381448
328.39	0.0134751		858.4	0.00295523		1388.39	0.00284206		1918.4	0.00740537		2448.4	-0.00289736
328.59	0.01233638		858.6	0.00298548		1388.59	0.00334169		1918.6	0.00704723		2448.6	-0.00362629
328.79	0.0119847		858.8	0.00346279		1388.79	0.00385398		1918.8	0.00717538		2448.8	-0.00343064
328.99	0.01252131		859	0.00254819		1388.99	0.00491368		1919	0.00630036		2449	-0.00337891
329.19	0.01355399		859.2	0.00249952		1389.19	0.00477719		1919.2	0.00587554		2449.2	-0.00355912
329.39	0.01323565		859.4	0.0015499		1389.39	0.00451814		1919.4	0.0053255		2449.4	-0.00363862
329.59	0.01310459		859.6	0.00089273		1389.59	0.00398152		1919.6	0.00515952		2449.6	-0.00377178
329.79	0.01340173		859.8	0.00104742		1389.79	0.0035598		1919.8	0.00443227		2449.8	-0.00416174
329.99	0.01458541		860	0.00140724		1389.99	0.00297608		1920	0.00451315		2450	-0.00460842
330.19	0.01503949		860.2	0.00100669		1390.19	0.00298408		1920.2	0.00482186		2450.2	-0.00507875
330.39	0.01520251		860.4	0.00183959		1390.39	0.0023873		1920.4	0.0048465		2450.4	-0.00539401
330.59	0.01554243		860.6	0.00185374		1390.59	0.00221375		1920.6	0.00493553		2450.6	-0.00535233
330.79	0.01498995		860.8	0.00164304		1390.79	0.00180861		1920.8	0.00546775		2450.8	-0.00463881
330.99	0.01500547		861	0.00080595		1390.99	0.00176796		1921	0.00577927		2451	-0.00425824
331.19	0.01511185		861.2	0.00061408		1391.19	0.00199038		1921.2	0.00618481		2451.2	-0.00362545
331.39	0.01534667		861.4	0.00078916		1391.39	0.00296885		1921.4	0.00618283		2451.4	-0.00303273
331.59	0.01496706		861.6	0.00086014		1391.59	0.0033349		1921.6	0.00771263		2451.6	-0.00259387
331.79	0.01493232		861.8	0.00018367		1391.79	0.00298871		1921.8	0.00827906		2451.8	-0.00272603
331.99	0.01496235		862	0.000857		1391.99	0.00340279		1922	0.00872453		2452	-0.00255043
332.19	0.01492393		862.2	0.00083307		1392.19	0.00357955		1922.2	0.00972446		2452.2	-0.00089037
332.39	0.01469489		862.4	0.00092469		1392.39	0.0047264		1922.4	0.01045807		2452.4	-0.00149898
332.59	0.01520223		862.6	0.00072259		1392.59	0.00431417		1922.6	0.01029474		2452.6	-0.00109042
332.79	0.01606463		862.8	0.00130677		1392.79	0.00439256		1922.8	0.01013614		2452.8	-0.00037057
332.99	0.0162375		863	0.00114362		1392.99	0.00359226		1923	0.01047081		2453	-0.00061753
333.19	0.01647715		863.2	0.00115175		1393.19	0.00369632		1923.2	0.00947465		2453.2	-0.00067012
333.39	0.01599963		863.4	0.00085273		1393.39	0.00351177		1923.4	0.00859586		2453.4	-0.00030102
333.59	0.0162985		863.6	0.00081055		1393.59	0.00373138		1923.6	0.0089391		2453.6	-0.00022431
333.79	0.01653175		863.8	0.00192355		1393.79	0.00366004		1923.8	0.00915843		2453.8	0.00007362
333.99	0.01666941		864	0.0021795		1393.99	0.00294984		1924	0.00896987		2454	-0.00019188
334.19	0.01621904		864.2	0.00330877		1394.19	0.00324802		1924.2	0.0081543		2454.2	-0.00023978
334.39	0.01564555		864.4	0.00279126		1394.39	0.00312587		1924.4	0.00790398		2454.4	-0.000136
334.59	0.01535888		864.6	0.00195279		1394.59	0.0034418		1924.6	0.00709081		2454.6	-0.00061454
334.79	0.01523131		864.8	0.0012918		1394.79	0.0030416		1924.8	0.00681794		2454.8	-0.00018655
334.99	0.01506242		865	0.00059786		1394.99	0.00316231		1925	0.00643018		2455	-0.00005369
335.19	0.01455239		865.2	0.00015936		1395.19	0.00366053		1925.2	0.00697515		2455.2	0.00032466
335.39	0.01457741		865.4	-0.00062923		1395.39	0.00380567		1925.4	0.00704636		2455.4	-0.00048408
335.59	0.01532768		865.6	-0.00052502		1395.59	0.00339346		1925.6	0.00783435		2455.6	-0.0013765
335.79	0.01571824		865.8	-0.00024511		1395.79	0.00408964		1925.8	0.00859332		2455.8	-0.00105657
335.99	0.01626556		866	0.00041313		1395.99	0.00409145		1926	0.00885674		2456	0.00020104
336.19	0.01612463		866.2	0.00063767		1396.19	0.00443026		1926.2	0.00858949		2456.2	0.00023226
336.39	0.01605003		866.4	0.00116491		1396.39	0.00400349		1926.4	0.00765531		2456.4	-0.00059947
336.59	0.01663555		866.6	0.00147358		1396.59	0.00257703		1926.6	0.00703772		2456.6	0.00034538
336.79	0.01620217		866.8	0.00227404		1396.79	0.001772		1926.8	0.00687109		2456.8	-0.00031393
336.99	0.01555177		867	0.0023073		1396.99	0.00109665		1927	0.00744692		2457	-0.00126035
337.19	0.01565798		867.2	0.00284273		1397.19	0.0024155		1927.2	0.00686713		2457.2	-0.00097468
337.39	0.01453462		867.4	0.00363649		1397.39	0.00191713		1927.4	0.0068626		2457.4	-0.00185401
337.59	0.01433899		867.6	0.00411445		1397.59	0.00257555		1927.6	0.0081055		2457.6	-0.00228473
337.79	0.01443008		867.8	0.00482738		1397.79	0.00275785		1927.8	0.00756856		2457.8	-0.00293384
337.99	0.01428316		868	0.00508504		1397.99	0.00229863		1928	0.00685424		2458	-0.00345116
338.19	0.01337647		868.2	0.00527229		1398.19	0.00301173		1928.2	0.00665032		2458.2	-0.00333299
338.39	0.01304928		868.4	0.0039916		1398.39	0.00210969		1928.4	0.00683945		2458.4	-0.00329922
338.59	0.01318708		868.6	0.00321599		1398.59	0.00210605		1928.6	0.0058326		2458.6	-0.00389149
338.79	0.01326882		868.8	0.00246128		1398.79	0.00196403		1928.8	0.00623473		2458.8	-0.00404405
338.99	0.0126441		869	0.00113713		1398.99	0.00105468		1929	0.00612096		2459	-0.00424339
339.19	0.01282518		869.2	0.00040451		1399.19	0.00230532		1929.2	0.00703555		2459.2	-0.00469551
339.39	0.01420231		869.4	-0.0000338		1399.39	0.00317134		1929.4	0.00744014		2459.4	-0.00492664
339.59	0.01499114		869.6	0.00004377		1399.59	0.00403869		1929.6	0.00751945		2459.6	-0.00448752
339.79	0.01469915		869.8	-0.00067381		1399.79	0.00542897		1929.8	0.00751389		2459.8	-0.00399202
339.99	0.01423763		870	-0.00078287		1399.99	0.00552574		1930	0.00703426		2460	-0.00366452
340.19	0.01458667		870.2	-0.00151241		1400.19	0.00473047		1930.2	0.00668501		2460.2	-0.00373922
340.39	0.01548591		870.4	-0.00168494		1400.39	0.00442601		1930.4	0.0066197		2460.4	-0.00354912
340.59	0.0162868		870.6	-0.00240698		1400.59	0.00443592		1930.6	0.00689631		2460.6	-0.003508
340.79	0.01593173		870.8	-0.00182638		1400.79	0.00463064		1930.8	0.00821846		2460.8	-0.00424971
340.99	0.01722651		871	-0.00108074		1400.99	0.005618		1931	0.00885866		2461	-0.00395383
341.19	0.01790123		871.2	-0.00018887		1401.19	0.00664569		1931.2	0.00908569		2461.2	-0.0037719
341.39	0.01822686		871.4	0.00114049		1401.39	0.00649599		1931.4	0.00950645		2461.4	-0.00439412
341.59	0.01932375		871.6	0.00207458		1401.59	0.00680565		1931.6	0.00978195		2461.6	-0.00409397
341.79	0.01905971		871.8	0.00277743		1401.79	0.00668856		1931.8	0.00931351		2461.8	-0.00387112
341.99	0.01883838		872	0.00348397		1401.99	0.00581584		1932	0.00908046		2462	-0.00403727
342.19	0.01843943		872.2	0.00371387		1402.19	0.00456283		1932.2	0.00902789		2462.2	-0.00388807
342.39	0.01888196		872.4	0.0040879		1402.39	0.00425659		1932.4	0.00843202		2462.4	-0.00378009
342.59	0.01800748		872.6	0.00354314		1402.59	0.00386884		1932.6	0.00791632		2462.6	-0.00394636
342.79	0.01730356		872.8	0.00403418		1402.79	0.00416375		1932.8	0.00753377		2462.8	-0.00387616
342.99	0.01712275		873	0.00405832		1402.99	0.0034162		1933	0.00746332		2463	-0.00402086
343.19	0.01625344		873.2	0.00483712		1403.19	0.00453332		1933.2	0.00734313		2463.2	-0.00418204
343.39	0.01596335		873.4	0.00479448		1403.39	0.00408278		1933.4	0.00758869		2463.4	-0.00383245
343.59	0.01622124		873.6	0.00471924		1403.59	0.00505269		1933.6	0.00760463		2463.6	-0.00472607
343.79	0.01628738		873.8	0.00431006		1403.79	0.00530597		1933.8	0.00772966		2463.8	-0.0039782
343.99	0.01656402		874	0.00397441		1403.99	0.00377184		1934	0.00836903		2464	-0.00412264
344.19	0.01746998		874.2	0.00283274		1404.19	0.00277587		1934.2	0.00923694		2464.2	-0.00418199
344.39	0.01733438		874.4	0.00257155		1404.39	0.0038431		1934.4	0.00935611		2464.4	-0.00394088
344.59	0.0162438		874.6	0.00213387		1404.59	0.00419913		1934.6	0.01040168		2464.6	-0.0033611
344.79	0.01552456		874.8	0.00154684		1404.79	0.00426919		1934.8	0.01120234		2464.8	-0.00285252
344.99	0.0169424		875	0.00108572		1404.99	0.00462109		1935	0.01149977		2465	-0.00293273
345.19	0.01719546		875.2	0.00077082		1405.19	0.00451013		1935.2	0.01169079		2465.2	-0.00381036
345.39	0.01715765		875.4	0.00102627		1405.39	0.0044449		1935.4	0.01141944		2465.4	-0.00421876
345.59	0.01667566		875.6	0.0009084		1405.59	0.00436467		1935.6	0.01139244		2465.6	-0.00388675
345.79	0.0163703		875.8	0.00100773		1405.79	0.00335368		1935.8	0.01116794		2465.8	-0.00302049
345.99	0.01593409		876	0.00105143		1405.99	0.00287583		1936	0.01115927		2466	-0.00380095
346.19	0.01535985		876.2	0.00175573		1406.19	0.00221374		1936.2	0.01139977		2466.2	-0.00291425
346.39	0.01537759		876.4	0.00152635		1406.39	0.00275446		1936.4	0.01026798		2466.4	-0.00257641
346.59	0.01497891		876.6	0.00129517		1406.59	0.00248608		1936.6	0.00995604		2466.6	-0.00214939
346.79	0.01522838		876.8	0.00153904		1406.79	0.00288033		1936.8	0.00946939		2466.8	-0.00229432
346.99	0.01461546		877	0.00100056		1406.99	0.00253573		1937	0.00999233		2467	-0.00170763
347.19	0.01402681		877.2	0.00086214		1407.19	0.00262682		1937.2	0.00948519		2467.2	-0.00194104
347.39	0.01538614		877.4	0.00153064		1407.39	0.00321695		1937.4	0.00978995		2467.4	-0.00163911
347.59	0.01712414		877.6	0.00177329		1407.59	0.00455323		1937.6	0.01038997		2467.6	-0.00218287
347.79	0.01689732		877.8	0.00183353		1407.79	0.00376472		1937.8	0.00945018		2467.8	-0.00125797
347.99	0.01666897		878	0.00130852		1407.99	0.00382436		1938	0.01029297		2468	-0.00230515
348.19	0.01596919		878.2	0.00154263		1408.19	0.00428696		1938.2	0.01095726		2468.2	-0.0020473
348.39	0.01467241		878.4	0.00138709		1408.39	0.00430532		1938.4	0.01078902		2468.4	-0.0022568
348.59	0.01346214		878.6	0.00079545		1408.59	0.00411196		1938.6	0.01053368		2468.6	-0.00273252
348.79	0.01418745		878.8	0.00013616		1408.79	0.00337718		1938.8	0.01028769		2468.8	-0.00426457
348.99	0.01531258		879	0.00091695		1408.99	0.00297196		1939	0.00961793		2469	-0.00520414
349.19	0.0154056		879.2	0.0016653		1409.19	0.00320686		1939.2	0.00881466		2469.2	-0.0057737
349.39	0.01472388		879.4	0.00251146		1409.39	0.00338437		1939.4	0.00814284		2469.4	-0.0054924
349.59	0.01480747		879.6	0.00373055		1409.59	0.00270485		1939.6	0.00756433		2469.6	-0.0048053
349.79	0.01433719		879.8	0.00338973		1409.79	0.00182506		1939.8	0.00685646		2469.8	-0.00526997
349.99	0.01332267		880	0.00363452		1409.99	0.00249486		1940	0.00719358		2470	-0.00596165
350.19	0.01355379		880.2	0.00366606		1410.19	0.00215039		1940.2	0.00699343		2470.2	-0.00546806
350.39	0.01394693		880.4	0.00280497		1410.39	0.00163533		1940.4	0.00587134		2470.4	-0.00429192
350.59	0.01476987		880.6	0.00301801		1410.59	0.00192076		1940.6	0.005656		2470.6	-0.0032341
350.79	0.01440447		880.8	0.0030908		1410.79	0.0017734		1940.8	0.00571955		2470.8	-0.00349746
350.99	0.01348735		881	0.00318264		1410.99	0.00234663		1941	0.00610444		2471	-0.00243236
351.19	0.0140698		881.2	0.00389622		1411.19	0.00281071		1941.2	0.00625661		2471.2	-0.00309286
351.39	0.01462785		881.4	0.0050997		1411.39	0.00319812		1941.4	0.00652787		2471.4	-0.00275581
351.59	0.01494687		881.6	0.00482915		1411.59	0.00381014		1941.6	0.00712259		2471.6	-0.00277847
351.79	0.01417394		881.8	0.00456817		1411.79	0.00406782		1941.8	0.00680295		2471.8	-0.00254938
351.99	0.01473995		882	0.00352094		1411.99	0.00501407		1942	0.00758389		2472	-0.00297327
352.19	0.0140824		882.2	0.00383202		1412.19	0.00512281		1942.2	0.00760287		2472.2	-0.00321283
352.39	0.01428977		882.4	0.00326549		1412.39	0.00611154		1942.4	0.007659		2472.4	-0.003385
352.59	0.01508743		882.6	0.00375324		1412.59	0.00666663		1942.6	0.00773868		2472.6	-0.00410075
352.79	0.01562698		882.8	0.00450959		1412.79	0.00751162		1942.8	0.00837982		2472.8	-0.00468473
352.99	0.01616084		883	0.00429983		1412.99	0.0082706		1943	0.00766081		2473	-0.00460109
353.19	0.0166267		883.2	0.00422244		1413.19	0.0085388		1943.2	0.00856079		2473.2	-0.00495498
353.39	0.0164473		883.4	0.004911		1413.39	0.00787394		1943.4	0.00882771		2473.4	-0.00483498
353.59	0.01713787		883.6	0.00477098		1413.59	0.0069796		1943.6	0.00973226		2473.6	-0.00466366
353.79	0.01643615		883.8	0.00344617		1413.79	0.00711489		1943.8	0.01103785		2473.8	-0.00557573
353.99	0.01592037		884	0.0031559		1413.99	0.0071328		1944	0.01231648		2474	-0.00511848
354.19	0.01639176		884.2	0.0025821		1414.19	0.00621926		1944.2	0.01167494		2474.2	-0.0047732
354.39	0.01620058		884.4	0.00249767		1414.39	0.00535396		1944.4	0.01130165		2474.4	-0.00405962
354.59	0.01673903		884.6	0.00311832		1414.59	0.00522895		1944.6	0.01092149		2474.6	-0.00443082
354.79	0.01613259		884.8	0.00384851		1414.79	0.00525912		1944.8	0.01166416		2474.8	-0.0049267
354.99	0.01642958		885	0.0041263		1414.99	0.00576635		1945	0.01211751		2475	-0.00473414
355.19	0.01665409		885.2	0.00429704		1415.19	0.00481031		1945.2	0.01216723		2475.2	-0.00488281
355.39	0.01690268		885.4	0.00375545		1415.39	0.00430705		1945.4	0.01151808		2475.4	-0.00501999
355.59	0.01730752		885.6	0.00327706		1415.59	0.00488876		1945.6	0.01092445		2475.6	-0.00533084
355.79	0.01681241		885.8	0.00323056		1415.79	0.00485129		1945.8	0.01058719		2475.8	-0.00583208
355.99	0.01698095		886	0.00404168		1415.99	0.00447498		1946	0.01006973		2476	-0.00610366
356.19	0.01604571		886.2	0.00451689		1416.19	0.00460411		1946.2	0.00920354		2476.2	-0.00587532
356.39	0.01596347		886.4	0.00528153		1416.39	0.00394289		1946.4	0.00894101		2476.4	-0.00583096
356.59	0.01557397		886.6	0.00510992		1416.59	0.00323574		1946.6	0.00824686		2476.6	-0.00618523
356.79	0.01483758		886.8	0.00579316		1416.79	0.00396036		1946.8	0.00837211		2476.8	-0.00688446
356.99	0.0152491		887	0.00471458		1416.99	0.00319769		1947	0.0077083		2477	-0.00739153
357.19	0.01489986		887.2	0.00404512		1417.19	0.00179079		1947.2	0.00858658		2477.2	-0.00712401
357.39	0.01439984		887.4	0.00454505		1417.39	0.00123007		1947.4	0.0097176		2477.4	-0.00591015
357.59	0.01327283		887.6	0.00397315		1417.59	0.00154414		1947.6	0.01032857		2477.6	-0.00527302
357.79	0.01219563		887.8	0.00413288		1417.79	0.00251599		1947.8	0.01080846		2477.8	-0.00478125
357.99	0.01093796		888	0.00408854		1417.99	0.00271262		1948	0.01041605		2478	-0.00444954
358.19	0.01135866		888.2	0.00407542		1418.19	0.00300727		1948.2	0.0097856		2478.2	-0.00392507
358.39	0.01142899		888.4	0.00434249		1418.39	0.00413019		1948.4	0.01006085		2478.4	-0.0034256
358.59	0.01224265		888.6	0.0052063		1418.59	0.00473465		1948.6	0.00940736		2478.6	-0.00366279
358.79	0.0121978		888.8	0.00552389		1418.79	0.00627817		1948.8	0.00965862		2478.8	-0.00314566
358.99	0.01272961		889	0.00458579		1418.99	0.00672776		1949	0.00913907		2479	-0.00256732
359.19	0.01282015		889.2	0.00358594		1419.19	0.006155		1949.2	0.00988789		2479.2	-0.00200931
359.39	0.01305944		889.4	0.0032162		1419.39	0.00696729		1949.4	0.00987625		2479.4	-0.00282327
359.59	0.01415564		889.6	0.00433184		1419.59	0.0074898		1949.6	0.00900628		2479.6	-0.00255882
359.79	0.01407674		889.8	0.00522489		1419.79	0.00684126		1949.8	0.00926097		2479.8	-0.00261743
359.99	0.01494749		890	0.00578199		1419.99	0.00609458		1950	0.00856961		2480	-0.00256174
360.19	0.01554707		890.2	0.00476111		1420.19	0.0053488		1950.2	0.00800521		2480.2	-0.00240588
360.39	0.01574536		890.4	0.00510021		1420.39	0.00421716		1950.4	0.00742791		2480.4	-0.00271917
360.59	0.01677165		890.6	0.00451532		1420.59	0.00425089		1950.6	0.00741845		2480.6	-0.00315126
360.79	0.01722066		890.8	0.00526708		1420.79	0.00482873		1950.8	0.0078158		2480.8	-0.00398294
360.99	0.01807265		891	0.00412174		1420.99	0.00420066		1951	0.00758538		2481	-0.00384295
361.19	0.01885036		891.2	0.00420726		1421.19	0.00384432		1951.2	0.00864281		2481.2	-0.00289188
361.39	0.01865321		891.4	0.00521699		1421.39	0.00415119		1951.4	0.00942566		2481.4	-0.00172521
361.59	0.01836898		891.6	0.00498488		1421.59	0.00470756		1951.6	0.0088576		2481.6	-0.00166667
361.79	0.01893989		891.8	0.00575055		1421.79	0.00436665		1951.8	0.00916739		2481.8	-0.00148981
361.99	0.0181291		892	0.00626332		1421.99	0.0046643		1952	0.00867481		2482	-0.0016183
362.19	0.01865638		892.2	0.00562059		1422.19	0.004423		1952.2	0.00985369		2482.2	-0.00144892
362.39	0.01799882		892.4	0.00510602		1422.39	0.00501926		1952.4	0.01010471		2482.4	-0.00147687
362.59	0.01786558		892.6	0.00440878		1422.59	0.00473712		1952.6	0.01034582		2482.6	-0.00243901
362.79	0.01724936		892.8	0.00348354		1422.79	0.00572277		1952.8	0.01055728		2482.8	-0.00196714
362.99	0.01747757		893	0.00252469		1422.99	0.00552685		1953	0.01083808		2483	-0.00177281
363.19	0.01752266		893.2	0.00236837		1423.19	0.00514882		1953.2	0.01213329		2483.2	-0.00163191
363.39	0.01672087		893.4	0.002678		1423.39	0.00562114		1953.4	0.01086404		2483.4	-0.00227289
363.59	0.0171371		893.6	0.00273612		1423.59	0.00487144		1953.6	0.01024061		2483.6	-0.00186771
363.79	0.01653327		893.8	0.00180539		1423.79	0.00381339		1953.8	0.01016061		2483.8	-0.00158086
363.99	0.01669204		894	0.00123151		1423.99	0.00407708		1954	0.01038586		2484	-0.00164124
364.19	0.01644532		894.2	0.00070893		1424.19	0.00368692		1954.2	0.01031291		2484.2	-0.00147562
364.39	0.01613816		894.4	0.00107345		1424.39	0.0038627		1954.4	0.00924624		2484.4	-0.00126611
364.59	0.01593446		894.6	0.00187976		1424.59	0.0036877		1954.6	0.00951247		2484.6	-0.00177134
364.79	0.01611543		894.8	0.00233918		1424.79	0.00346351		1954.8	0.00867541		2484.8	-0.00212992
364.99	0.01753738		895	0.00224905		1424.99	0.00307545		1955	0.00897991		2485	-0.0017414
365.19	0.0183827		895.2	0.00307096		1425.19	0.00256408		1955.2	0.00875877		2485.2	-0.00086676
365.39	0.01817089		895.4	0.00314318		1425.39	0.00270483		1955.4	0.00815832		2485.4	-0.00077896
365.59	0.01867098		895.6	0.00312499		1425.59	0.00252719		1955.6	0.0074452		2485.6	-0.00095839
365.79	0.01937648		895.8	0.00417494		1425.79	0.00286147		1955.8	0.00752726		2485.8	-0.00134591
365.99	0.01877185		896	0.00431351		1425.99	0.00261652		1956	0.00797378		2486	-0.00150824
366.19	0.01894164		896.2	0.00357733		1426.19	0.00296579		1956.2	0.00879576		2486.2	-0.0024917
366.39	0.0190497		896.4	0.00252676		1426.39	0.00350178		1956.4	0.00839205		2486.4	-0.00315072
366.59	0.01916111		896.6	0.00211519		1426.59	0.00384914		1956.6	0.00900465		2486.6	-0.00410586
366.79	0.01934913		896.8	0.0026215		1426.79	0.00425602		1956.8	0.00852951		2486.8	-0.00435149
366.99	0.02008948		897	0.00328877		1426.99	0.0045345		1957	0.00890701		2487	-0.0047192
367.19	0.01987495		897.2	0.00330828		1427.19	0.00456511		1957.2	0.00895731		2487.2	-0.00484295
367.39	0.01889617		897.4	0.00227696		1427.39	0.00466926		1957.4	0.00865216		2487.4	-0.00508316
367.59	0.01920227		897.6	0.00223458		1427.59	0.00494019		1957.6	0.0088223		2487.6	-0.00437183
367.79	0.01889031		897.8	0.00234124		1427.79	0.00533803		1957.8	0.00881404		2487.8	-0.00457056
367.99	0.0195084		898	0.0032067		1427.99	0.00594752		1958	0.00925728		2488	-0.00510053
368.19	0.01946275		898.2	0.00312491		1428.19	0.00514084		1958.2	0.00893536		2488.2	-0.0046815
368.39	0.01944242		898.4	0.00338432		1428.39	0.00496103		1958.4	0.0090908		2488.4	-0.00488251
368.59	0.0192026		898.6	0.00405319		1428.59	0.00450667		1958.6	0.00999355		2488.6	-0.00534591
368.79	0.01975812		898.8	0.00439726		1428.79	0.00409195		1958.8	0.01021292		2488.8	-0.00530015
368.99	0.02047333		899	0.00429197		1428.99	0.0044275		1959	0.01078961		2489	-0.00518608
369.19	0.01978272		899.2	0.00515441		1429.19	0.00465838		1959.2	0.00987284		2489.2	-0.00487723
369.39	0.01973632		899.4	0.00603466		1429.39	0.0048893		1959.4	0.0097073		2489.4	-0.00412216
369.59	0.02001463		899.6	0.00659099		1429.59	0.00483086		1959.6	0.00927612		2489.6	-0.00446371
369.79	0.02046623		899.8	0.00692539		1429.79	0.00523627		1959.8	0.00968366		2489.8	-0.004952
369.99	0.01985481		900	0.00711099		1429.99	0.00535734		1960	0.00957131		2490	-0.00472509
370.19	0.01987313		900.2	0.00619889		1430.19	0.00682012		1960.2	0.00930722		2490.2	-0.00501215
370.39	0.01967454		900.4	0.00476112		1430.39	0.00737649		1960.4	0.00952374		2490.4	-0.00491813
370.59	0.01909409		900.6	0.00554618		1430.59	0.00789922		1960.6	0.00924713		2490.6	-0.00499161
370.79	0.01845864		900.8	0.00579656		1430.79	0.00828024		1960.8	0.00926063		2490.8	-0.00428792
370.99	0.01899348		901	0.00606496		1430.99	0.00909439		1961	0.00956351		2491	-0.00392235
371.19	0.01847288		901.2	0.00581081		1431.19	0.00848148		1961.2	0.00881239		2491.2	-0.00289397
371.39	0.01827499		901.4	0.00519552		1431.39	0.00881781		1961.4	0.00926249		2491.4	-0.0027603
371.59	0.01815837		901.6	0.00554777		1431.59	0.00860527		1961.6	0.00908343		2491.6	-0.00231234
371.79	0.01804604		901.8	0.0059736		1431.79	0.00878951		1961.8	0.00910034		2491.8	-0.00246294
371.99	0.01826746		902	0.00579459		1431.99	0.00770276		1962	0.00999331		2492	-0.00175887
372.19	0.01772991		902.2	0.00419186		1432.19	0.00688656		1962.2	0.01000786		2492.2	-0.00156114
372.39	0.01732108		902.4	0.0041544		1432.39	0.0062048		1962.4	0.01048647		2492.4	-0.00139051
372.59	0.01674585		902.6	0.00509347		1432.59	0.00512931		1962.6	0.00980326		2492.6	-0.00094551
372.79	0.01651448		902.8	0.00569875		1432.79	0.00497453		1962.8	0.00953479		2492.8	-0.00037424
372.99	0.01604543		903	0.00654583		1432.99	0.00456103		1963	0.00893635		2493	0.00000697
373.19	0.01591865		903.2	0.00714098		1433.19	0.00445343		1963.2	0.0087072		2493.2	0.00034986
373.39	0.01678344		903.4	0.00746768		1433.39	0.00417619		1963.4	0.00797716		2493.4	0.0001598
373.59	0.0180914		903.6	0.0075332		1433.59	0.00496962		1963.6	0.00818265		2493.6	-0.000629
373.79	0.01864027		903.8	0.0076078		1433.79	0.00534365		1963.8	0.00852415		2493.8	-0.00072605
373.99	0.01932291		904	0.00737157		1433.99	0.00558321		1964	0.0086077		2494	-0.0005626
374.19	0.02010717		904.2	0.00617469		1434.19	0.00565318		1964.2	0.00908339		2494.2	-0.00121507
374.39	0.0204364		904.4	0.00603069		1434.39	0.00562619		1964.4	0.00905079		2494.4	-0.00180592
374.59	0.02102021		904.6	0.00641279		1434.59	0.00536933		1964.6	0.00898265		2494.6	-0.00215511
374.79	0.0203321		904.8	0.00635687		1434.79	0.00598512		1964.8	0.00960649		2494.8	-0.00205905
374.99	0.02065531		905	0.00617355		1434.99	0.00628932		1965	0.0101178		2495	-0.0027633
375.19	0.02019738		905.2	0.00495265		1435.19	0.00556043		1965.2	0.01036374		2495.2	-0.00305278
375.39	0.01996224		905.4	0.00394796		1435.39	0.00580582		1965.4	0.01110985		2495.4	-0.00437945
375.59	0.01916636		905.6	0.00381316		1435.59	0.00512577		1965.6	0.01114462		2495.6	-0.00429449
375.79	0.01888708		905.8	0.00344964		1435.79	0.0052811		1965.8	0.01137204		2495.8	-0.00398999
375.99	0.01838866		906	0.00189619		1435.99	0.0046074		1966	0.01199142		2496	-0.00394799
376.19	0.01780074		906.2	0.00164984		1436.19	0.00464254		1966.2	0.01142329		2496.2	-0.00453457
376.39	0.01721689		906.4	0.00252739		1436.39	0.00369725		1966.4	0.01098252		2496.4	-0.00395935
376.59	0.01634836		906.6	0.00341699		1436.59	0.00374246		1966.6	0.01060071		2496.6	-0.00342842
376.79	0.01591639		906.8	0.00390516		1436.79	0.00409717		1966.8	0.01100926		2496.8	-0.00337517
376.99	0.01614215		907	0.00476779		1436.99	0.00400994		1967	0.01095868		2497	-0.00409037
377.19	0.01720127		907.2	0.00437351		1437.19	0.00443234		1967.2	0.0115222		2497.2	-0.00422136
377.39	0.01803947		907.4	0.00431092		1437.39	0.00459635		1967.4	0.01059863		2497.4	-0.00452762
377.59	0.0197021		907.6	0.00402881		1437.59	0.00492734		1967.6	0.01056172		2497.6	-0.00428629
377.79	0.02031863		907.8	0.00376571		1437.79	0.00429024		1967.8	0.01055937		2497.8	-0.00468186
377.99	0.02143764		908	0.00359555		1437.99	0.00419711		1968	0.01071711		2498	-0.0048503
378.19	0.02220588		908.2	0.00354558		1438.19	0.00446087		1968.2	0.010711		2498.2	-0.00532548
378.39	0.02286		908.4	0.00397431		1438.39	0.00467392		1968.4	0.01050894		2498.4	-0.00552239
378.59	0.02333271		908.6	0.00433309		1438.59	0.00519809		1968.6	0.01065146		2498.6	-0.00541563
378.79	0.02279918		908.8	0.00486382		1438.79	0.00590275		1968.8	0.01086711		2498.8	-0.00539062
378.99	0.02323151		909	0.0045931		1438.99	0.00595501		1969	0.01130725		2499	-0.0051623
379.19	0.02363441		909.2	0.00482961		1439.19	0.00578907		1969.2	0.0112405		2499.2	-0.00492122
379.39	0.02349471		909.4	0.00584454		1439.39	0.00609955		1969.4	0.01112306		2499.4	-0.00459408
379.59	0.02313814		909.6	0.0065354		1439.59	0.00627594		1969.6	0.01112392		2499.6	-0.00362192
379.79	0.02300319		909.8	0.00676547		1439.79	0.00673104		1969.8	0.01147678		2499.8	-0.00300462
379.99	0.02300319		910	0.00676547		1439.99	0.00673104		1970	0.01147678		2500	-0.00300462
380.19	0.02342463		910.2	0.00787684		1440.19	0.0065973		1970.2	0.01124198		2500.2	-0.00309269
380.39	0.02364915		910.4	0.00907695		1440.39	0.00676869		1970.4	0.01046473		2500.4	-0.00349577
380.59	0.02338038		910.6	0.00995687		1440.59	0.00755069		1970.6	0.01022372		2500.6	-0.00400519
380.79	0.02324809		910.8	0.01048665		1440.79	0.00799861		1970.8	0.01003323		2500.8	-0.00493114
380.99	0.02309134		911	0.01161455		1440.99	0.00783283		1971	0.0102842		2501	-0.00522145
381.19	0.02398606		911.2	0.01234183		1441.19	0.00793597		1971.2	0.0105148		2501.2	-0.00595037
381.39	0.02364939		911.4	0.01300117		1441.39	0.00811988		1971.4	0.0112493		2501.4	-0.0065138
381.59	0.0239985		911.6	0.01292194		1441.59	0.00793569		1971.6	0.01160061		2501.6	-0.00664164
381.79	0.02431322		911.8	0.01260469		1441.79	0.00877266		1971.8	0.01221076		2501.8	-0.00742021
381.99	0.02449151		912	0.01269614		1441.99	0.00876842		1972	0.01286816		2502	-0.00813092
382.19	0.02488032		912.2	0.01201543		1442.19	0.0088558		1972.2	0.01327174		2502.2	-0.00864996
382.39	0.02394179		912.4	0.01226544		1442.39	0.0087392		1972.4	0.01498959		2502.4	-0.00895444
382.59	0.02456515		912.6	0.01173848		1442.59	0.0084811		1972.6	0.01507568		2502.6	-0.00918779
382.79	0.02499731		912.8	0.01126639		1442.79	0.00947958		1972.8	0.0151158		2502.8	-0.0100653
382.99	0.02458289		913	0.01103344		1442.99	0.00994025		1973	0.01481278		2503	-0.01062584
383.19	0.02444305		913.2	0.01064529		1443.19	0.00946024		1973.2	0.01496918		2503.2	-0.01023502
383.39	0.02472092		913.4	0.01074632		1443.39	0.01006397		1973.4	0.0140457		2503.4	-0.00948927
383.59	0.02448464		913.6	0.01090465		1443.59	0.01123751		1973.6	0.01438178		2503.6	-0.00823299
383.79	0.02395786		913.8	0.01127934		1443.79	0.01150949		1973.8	0.01282159		2503.8	-0.00687079
383.99	0.02456251		914	0.01033463		1443.99	0.01167822		1974	0.01256662		2504	-0.00699604
384.19	0.02391603		914.2	0.01086342		1444.19	0.01085862		1974.2	0.0120248		2504.2	-0.00618283
384.39	0.02414433		914.4	0.01082972		1444.39	0.0109514		1974.4	0.01079613		2504.4	-0.00624754
384.59	0.02352416		914.6	0.01069694		1444.59	0.0112372		1974.6	0.01046443		2504.6	-0.00586377
384.79	0.02270545		914.8	0.01077149		1444.79	0.01041547		1974.8	0.01047734		2504.8	-0.00570324
384.99	0.02220503		915	0.01175339		1444.99	0.00985991		1975	0.01048885		2505	-0.00546056
385.19	0.02269697		915.2	0.01243614		1445.19	0.00995039		1975.2	0.01066324		2505.2	-0.00537178
385.39	0.02168581		915.4	0.01239403		1445.39	0.00935806		1975.4	0.01066471		2505.4	-0.00518936
385.59	0.02321981		915.6	0.01252307		1445.59	0.00903054		1975.6	0.01085408		2505.6	-0.00528456
385.79	0.02374332		915.8	0.01213945		1445.79	0.00935039		1975.8	0.0113166		2505.8	-0.00574038
385.99	0.02417573		916	0.01244406		1445.99	0.00820704		1976	0.01167665		2506	-0.0061863
386.19	0.02427969		916.2	0.01237581		1446.19	0.00882015		1976.2	0.01252948		2506.2	-0.00639096
386.39	0.02458212		916.4	0.0120353		1446.39	0.00883093		1976.4	0.01374267		2506.4	-0.00595852
386.59	0.02495667		916.6	0.01171251		1446.59	0.00863827		1976.6	0.01403192		2506.6	-0.00551387
386.79	0.02373364		916.8	0.011449		1446.79	0.00910256		1976.8	0.01468716		2506.8	-0.00524029
386.99	0.02397341		917	0.011227		1446.99	0.00896218		1977	0.01439302		2507	-0.00525526
387.19	0.02342811		917.2	0.01000275		1447.19	0.00924215		1977.2	0.01453068		2507.2	-0.00484551
387.39	0.02440326		917.4	0.01006269		1447.39	0.00951938		1977.4	0.015223		2507.4	-0.00467093
387.59	0.02399413		917.6	0.01004025		1447.59	0.01038695		1977.6	0.0151257		2507.6	-0.00440184
387.79	0.02427579		917.8	0.00964445		1447.79	0.01091999		1977.8	0.0144463		2507.8	-0.00460765
387.99	0.02440393		918	0.00875219		1447.99	0.01173852		1978	0.01425945		2508	-0.00499898
388.19	0.02323531		918.2	0.00936163		1448.19	0.01177845		1978.2	0.01431322		2508.2	-0.0053077
388.39	0.02295993		918.4	0.00867072		1448.39	0.01189342		1978.4	0.01387555		2508.4	-0.00517914
388.59	0.02159315		918.6	0.00923878		1448.59	0.0124796		1978.6	0.01469468		2508.6	-0.00484693
388.79	0.02056737		918.8	0.00962025		1448.79	0.012372		1978.8	0.01494037		2508.8	-0.00524344
388.99	0.02018471		919	0.00935116		1448.99	0.01248461		1979	0.0150222		2509	-0.00547753
389.19	0.02065087		919.2	0.01013141		1449.19	0.01224853		1979.2	0.01442655		2509.2	-0.00523137
389.39	0.02052295		919.4	0.01050601		1449.39	0.01120313		1979.4	0.01345501		2509.4	-0.00544434
389.59	0.02178133		919.6	0.01162597		1449.59	0.01107078		1979.6	0.01390408		2509.6	-0.00494419
389.79	0.0216086		919.8	0.01148591		1449.79	0.01099004		1979.8	0.01410532		2509.8	-0.00483793
389.99	0.02167231		920	0.01201115		1449.99	0.01114313		1980	0.0137354		2510	-0.00532719
390.19	0.02169344		920.2	0.012909		1450.19	0.01183211		1980.2	0.01380911		2510.2	-0.00499696
390.39	0.02209377		920.4	0.0128469		1450.39	0.01079863		1980.4	0.01395687		2510.4	-0.00435359
390.59	0.022374		920.6	0.01364476		1450.59	0.00967313		1980.6	0.01385164		2510.6	-0.00408766
390.79	0.02322041		920.8	0.01372547		1450.79	0.00902241		1980.8	0.01388328		2510.8	-0.00473245
390.99	0.02398203		921	0.01448535		1450.99	0.00849169		1981	0.01425322		2511	-0.00469929
391.19	0.02396238		921.2	0.01420993		1451.19	0.00884822		1981.2	0.01407295		2511.2	-0.0044846
391.39	0.02483993		921.4	0.01499494		1451.39	0.00900626		1981.4	0.01469069		2511.4	-0.00427918
391.59	0.02386326		921.6	0.01532068		1451.59	0.00925009		1981.6	0.01405569		2511.6	-0.00453701
391.79	0.02420522		921.8	0.01584477		1451.79	0.00959534		1981.8	0.01374519		2511.8	-0.00561184
391.99	0.0231781		922	0.01571376		1451.99	0.01002816		1982	0.01388964		2512	-0.00647698
392.19	0.02272902		922.2	0.01633696		1452.19	0.01064852		1982.2	0.01427338		2512.2	-0.00668893
392.39	0.02295472		922.4	0.01514237		1452.39	0.01031109		1982.4	0.01426951		2512.4	-0.00611062
392.59	0.02303271		922.6	0.01536306		1452.59	0.01076959		1982.6	0.01517087		2512.6	-0.00724197
392.79	0.02295664		922.8	0.01460478		1452.79	0.01127199		1982.8	0.0148292		2512.8	-0.00770005
392.99	0.02257145		923	0.01387965		1452.99	0.01173346		1983	0.01473379		2513	-0.00807584
393.19	0.02325318		923.2	0.01369007		1453.19	0.01172411		1983.2	0.01342035		2513.2	-0.00819066
393.39	0.02280235		923.4	0.01351976		1453.39	0.01151324		1983.4	0.01346072		2513.4	-0.00813195
393.59	0.02330686		923.6	0.01339757		1453.59	0.01187477		1983.6	0.013866		2513.6	-0.00798368
393.79	0.02294124		923.8	0.01347423		1453.79	0.01214478		1983.8	0.01349934		2513.8	-0.00912013
393.99	0.02270275		924	0.0130924		1453.99	0.01246454		1984	0.01224896		2514	-0.00946236
394.19	0.02270661		924.2	0.01371916		1454.19	0.01189295		1984.2	0.01271068		2514.2	-0.00946096
394.39	0.02353735		924.4	0.01291716		1454.39	0.01203404		1984.4	0.0125302		2514.4	-0.00902106
394.59	0.02390213		924.6	0.01364779		1454.59	0.01166437		1984.6	0.01274281		2514.6	-0.00914658
394.79	0.02396093		924.8	0.01302043		1454.79	0.01232278		1984.8	0.01338564		2514.8	-0.00858802
394.99	0.0232166		925	0.01243675		1454.99	0.01237782		1985	0.01441805		2515	-0.00756182
395.19	0.02337561		925.2	0.01189369		1455.19	0.01249485		1985.2	0.01338545		2515.2	-0.00731936
395.39	0.0236415		925.4	0.01267701		1455.39	0.01290844		1985.4	0.0130608		2515.4	-0.00742335
395.59	0.02302221		925.6	0.01322127		1455.59	0.01266525		1985.6	0.01242563		2515.6	-0.00749392
395.79	0.02328882		925.8	0.01346963		1455.79	0.01270631		1985.8	0.012636		2515.8	-0.00724292
395.99	0.0230547		926	0.01349551		1455.99	0.01274345		1986	0.01298846		2516	-0.00641232
396.19	0.02389097		926.2	0.01351614		1456.19	0.01239939		1986.2	0.01216127		2516.2	-0.00644115
396.39	0.02429355		926.4	0.01249399		1456.39	0.01110499		1986.4	0.01279455		2516.4	-0.00620185
396.59	0.02409813		926.6	0.01232292		1456.59	0.01094754		1986.6	0.01327906		2516.6	-0.00622345
396.79	0.02317967		926.8	0.01166521		1456.79	0.01182232		1986.8	0.01359815		2516.8	-0.00636211
396.99	0.02286473		927	0.01113308		1456.99	0.01099292		1987	0.01312484		2517	-0.00608394
397.19	0.02275471		927.2	0.00967841		1457.19	0.01038431		1987.2	0.01301841		2517.2	-0.00531079
397.39	0.02166348		927.4	0.00995427		1457.39	0.00978498		1987.4	0.01309652		2517.4	-0.005475
397.59	0.02188421		927.6	0.01029038		1457.59	0.00923911		1987.6	0.01302353		2517.6	-0.00601944
397.79	0.02077657		927.8	0.01099192		1457.79	0.00967122		1987.8	0.0119078		2517.8	-0.0063328
397.99	0.02034631		928	0.00997481		1457.99	0.01024764		1988	0.01107269		2518	-0.00621907
398.19	0.02037215		928.2	0.00960858		1458.19	0.01016222		1988.2	0.01215141		2518.2	-0.00678224
398.39	0.02103995		928.4	0.00917287		1458.39	0.0112372		1988.4	0.01298054		2518.4	-0.00651283
398.59	0.02031624		928.6	0.00976746		1458.59	0.01170021		1988.6	0.01331382		2518.6	-0.00666481
398.79	0.02010373		928.8	0.00934772		1458.79	0.01227167		1988.8	0.01359559		2518.8	-0.00612446
398.99	0.02036863		929	0.00995126		1458.99	0.01177843		1989	0.01376937		2519	-0.00660607
399.19	0.02054032		929.2	0.01089692		1459.19	0.01174784		1989.2	0.01258226		2519.2	-0.00647852
399.39	0.02103393		929.4	0.01152424		1459.39	0.01176916		1989.4	0.01258648		2519.4	-0.00607527
399.59	0.0202886		929.6	0.01100742		1459.59	0.01164174		1989.6	0.01327375		2519.6	-0.00610524
399.79	0.02072329		929.8	0.01148173		1459.79	0.01161233		1989.8	0.0133262		2519.8	-0.00574563
399.99	0.0212666		930	0.01281077		1459.99	0.01138459		1990	0.01303227		2520	-0.00692292
400.19	0.02293497		930.2	0.01357188		1460.19	0.01115592		1990.2	0.0124477		2520.2	-0.00704566
400.39	0.02295337		930.4	0.01386901		1460.39	0.01162927		1990.4	0.01288515		2520.4	-0.00652062
400.59	0.02307388		930.6	0.01372079		1460.59	0.01141038		1990.6	0.01269013		2520.6	-0.00702107
400.79	0.02288388		930.8	0.01427245		1460.79	0.01192058		1990.8	0.01306356		2520.8	-0.00829467
400.99	0.02330973		931	0.01410261		1460.99	0.01078623		1991	0.01229719		2521	-0.00737231
401.19	0.02340586		931.2	0.01359374		1461.19	0.01067093		1991.2	0.01218081		2521.2	-0.00787696
401.39	0.02264295		931.4	0.01432206		1461.39	0.00920766		1991.4	0.01145561		2521.4	-0.00760204
401.59	0.02264098		931.6	0.01499242		1461.59	0.00924654		1991.6	0.01119152		2521.6	-0.00739535
401.79	0.02214573		931.8	0.01472864		1461.79	0.00951162		1991.8	0.01007098		2521.8	-0.00666543
401.99	0.02271527		932	0.01351861		1461.99	0.01024781		1992	0.01043089		2522	-0.00695273
402.19	0.02245112		932.2	0.01313395		1462.19	0.00981736		1992.2	0.01131711		2522.2	-0.00765351
402.39	0.02280223		932.4	0.01285094		1462.39	0.01051751		1992.4	0.01137091		2522.4	-0.00706186
402.59	0.02184888		932.6	0.01270503		1462.59	0.01099714		1992.6	0.01079136		2522.6	-0.00680623
402.79	0.02079909		932.8	0.01247925		1462.79	0.01050963		1992.8	0.01131219		2522.8	-0.00692956
402.99	0.02036512		933	0.01231652		1462.99	0.01026604		1993	0.01160976		2523	-0.00737444
403.19	0.01897515		933.2	0.01153559		1463.19	0.01066309		1993.2	0.01193552		2523.2	-0.00631931
403.39	0.01886479		933.4	0.01103308		1463.39	0.01056356		1993.4	0.01256214		2523.4	-0.00695633
403.59	0.01799695		933.6	0.01047818		1463.59	0.01068298		1993.6	0.01239067		2523.6	-0.00779723
403.79	0.01897808		933.8	0.01132079		1463.79	0.01075677		1993.8	0.01209918		2523.8	-0.00748894
403.99	0.0192586		934	0.0112252		1463.99	0.0111532		1994	0.01201036		2524	-0.00774695
404.19	0.01962219		934.2	0.01138452		1464.19	0.01090982		1994.2	0.01163907		2524.2	-0.00736192
404.39	0.01961094		934.4	0.01118765		1464.39	0.01186019		1994.4	0.01130647		2524.4	-0.00809618
404.59	0.0202398		934.6	0.01045807		1464.59	0.01153905		1994.6	0.01206395		2524.6	-0.00959513
404.79	0.02099074		934.8	0.01166184		1464.79	0.01162091		1994.8	0.01172137		2524.8	-0.01011892
404.99	0.02171493		935	0.01154407		1464.99	0.01153672		1995	0.01171079		2525	-0.00917365
405.19	0.02096825		935.2	0.01195548		1465.19	0.0116984		1995.2	0.0115369		2525.2	-0.00913878
405.39	0.02041206		935.4	0.01314714		1465.39	0.01176839		1995.4	0.01155719		2525.4	-0.00832071
405.59	0.02054955		935.6	0.01261327		1465.59	0.01250382		1995.6	0.01244148		2525.6	-0.00795172
405.79	0.02045669		935.8	0.01219043		1465.79	0.01267061		1995.8	0.01282137		2525.8	-0.008036
405.99	0.02023982		936	0.01230391		1465.99	0.01375428		1996	0.01285437		2526	-0.0085094
406.19	0.02052273		936.2	0.0125815		1466.19	0.01298264		1996.2	0.0125285		2526.2	-0.00872721
406.39	0.02089939		936.4	0.01236624		1466.39	0.01301444		1996.4	0.01291774		2526.4	-0.00822772
406.59	0.01994602		936.6	0.01261579		1466.59	0.01329435		1996.6	0.01312423		2526.6	-0.00769037
406.79	0.01986108		936.8	0.01259071		1466.79	0.01259064		1996.8	0.01324965		2526.8	-0.00730135
406.99	0.02005115		937	0.01256519		1466.99	0.01246719		1997	0.01342747		2527	-0.0069951
407.19	0.01954694		937.2	0.01222964		1467.19	0.01121517		1997.2	0.01418132		2527.2	-0.00666077
407.39	0.01938609		937.4	0.01245549		1467.39	0.00973233		1997.4	0.01488014		2527.4	-0.00733315
407.59	0.01888926		937.6	0.01163394		1467.59	0.00947802		1997.6	0.01545064		2527.6	-0.00699562
407.79	0.01960944		937.8	0.01198291		1467.79	0.00913129		1997.8	0.01540018		2527.8	-0.00631533
407.99	0.01927939		938	0.01202229		1467.99	0.00891105		1998	0.01496678		2528	-0.00718497
408.19	0.01964165		938.2	0.01302554		1468.19	0.0085527		1998.2	0.01507986		2528.2	-0.007426
408.39	0.02075121		938.4	0.01291338		1468.39	0.00989629		1998.4	0.01530164		2528.4	-0.00732548
408.59	0.02135548		938.6	0.01318976		1468.59	0.0107098		1998.6	0.01576894		2528.6	-0.0077186
408.79	0.02301127		938.8	0.01384553		1468.79	0.01110775		1998.8	0.01495158		2528.8	-0.00709535
408.99	0.02266712		939	0.01358012		1468.99	0.01171235		1999	0.01490981		2529	-0.00692492
409.19	0.021459		939.2	0.01307151		1469.19	0.0122079		1999.2	0.01428945		2529.2	-0.00729988
409.39	0.02149398		939.4	0.01256643		1469.39	0.01243882		1999.4	0.01390468		2529.4	-0.00770758
409.59	0.02152318		939.6	0.0107058		1469.59	0.01261788		1999.6	0.01375409		2529.6	-0.00744894
409.79	0.02099154		939.8	0.01097214		1469.79	0.01315602		1999.8	0.01264779		2529.8	-0.00802669
409.99	0.02160097		940	0.01086284		1469.99	0.01328322		2000	0.01216244		2530	-0.00744305
410.19	0.02218563		940.2	0.01079929		1470.19	0.01301557		2000.2	0.01177976		2530.2	-0.00749665
410.39	0.02245174		940.4	0.01012662		1470.39	0.01277322		2000.4	0.01213421		2530.4	-0.00658824
410.59	0.02233149		940.6	0.00956363		1470.59	0.01239504		2000.6	0.01204029		2530.6	-0.00592073
410.79	0.02282586		940.8	0.00908017		1470.79	0.01133712		2000.8	0.01171217		2530.8	-0.00599866
410.99	0.0221676		941	0.00830448		1470.99	0.01056251		2001	0.01172208		2531	-0.00579255
411.19	0.02187794		941.2	0.00800276		1471.19	0.00907644		2001.2	0.01356065		2531.2	-0.00600853
411.39	0.02083155		941.4	0.00799112		1471.39	0.00885766		2001.4	0.01472359		2531.4	-0.00589212
411.59	0.02031895		941.6	0.00798393		1471.59	0.00899988		2001.6	0.01525853		2531.6	-0.00627242
411.79	0.02006456		941.8	0.00942326		1471.79	0.00870419		2001.8	0.01445652		2531.8	-0.00664246
411.99	0.01963675		942	0.0102012		1471.99	0.00887987		2002	0.01519611		2532	-0.00691184
412.19	0.01934243		942.2	0.01100843		1472.19	0.00870501		2002.2	0.01558285		2532.2	-0.0063784
412.39	0.0200121		942.4	0.01137141		1472.39	0.00992812		2002.4	0.01569247		2532.4	-0.00624688
412.59	0.02115353		942.6	0.01185395		1472.59	0.01086701		2002.6	0.01540261		2532.6	-0.00652111
412.79	0.02149994		942.8	0.01206368		1472.79	0.01096688		2002.8	0.01552674		2532.8	-0.00682376
412.99	0.02065679		943	0.01263044		1472.99	0.01163785		2003	0.01467374		2533	-0.00660205
413.19	0.02082036		943.2	0.01217653		1473.19	0.01197202		2003.2	0.01453205		2533.2	-0.00645038
413.39	0.02101324		943.4	0.01231167		1473.39	0.01210665		2003.4	0.01350447		2533.4	-0.00620683
413.59	0.02103045		943.6	0.01196335		1473.59	0.01292149		2003.6	0.01372576		2533.6	-0.00623513
413.79	0.02044321		943.8	0.01281278		1473.79	0.01345665		2003.8	0.01416632		2533.8	-0.00626794
413.99	0.02057374		944	0.01295285		1473.99	0.0133688		2004	0.01450347		2534	-0.00638187
414.19	0.02043393		944.2	0.01316473		1474.19	0.01377239		2004.2	0.01435656		2534.2	-0.00660662
414.39	0.02059363		944.4	0.01327227		1474.39	0.01354692		2004.4	0.01433519		2534.4	-0.00621121
414.59	0.0204654		944.6	0.01305216		1474.59	0.01292353		2004.6	0.01408133		2534.6	-0.00596745
414.79	0.02045225		944.8	0.01324015		1474.79	0.01231505		2004.8	0.01305081		2534.8	-0.0066253
414.99	0.01985504		945	0.01247082		1474.99	0.01196435		2005	0.01352603		2535	-0.00669526
415.19	0.01924678		945.2	0.01274798		1475.19	0.01172807		2005.2	0.01410339		2535.2	-0.00685961
415.39	0.01797516		945.4	0.01310752		1475.39	0.0114656		2005.4	0.01354337		2535.4	-0.00699608
415.59	0.01747433		945.6	0.01355698		1475.59	0.01115436		2005.6	0.01288394		2535.6	-0.00738145
415.79	0.01730408		945.8	0.01322198		1475.79	0.0102338		2005.8	0.01229655		2535.8	-0.00717578
415.99	0.01681834		946	0.01364134		1475.99	0.00986273		2006	0.01300658		2536	-0.00672729
416.19	0.01769786		946.2	0.01316864		1476.19	0.00924448		2006.2	0.01265731		2536.2	-0.00815877
416.39	0.01861424		946.4	0.012684		1476.39	0.00915104		2006.4	0.01172116		2536.4	-0.00783954
416.59	0.0197524		946.6	0.01257174		1476.59	0.00897316		2006.6	0.01210341		2536.6	-0.00754371
416.79	0.02032689		946.8	0.0130382		1476.79	0.00965493		2006.8	0.01244732		2536.8	-0.00732261
416.99	0.02084373		947	0.01364489		1476.99	0.0099003		2007	0.01127521		2537	-0.00741666
417.19	0.02103225		947.2	0.01369983		1477.19	0.00911062		2007.2	0.01124013		2537.2	-0.0079064
417.39	0.02091675		947.4	0.01370315		1477.39	0.0092711		2007.4	0.01074691		2537.4	-0.00863137
417.59	0.02029811		947.6	0.01276201		1477.59	0.00998218		2007.6	0.01175456		2537.6	-0.00890695
417.79	0.02007996		947.8	0.01247148		1477.79	0.01051946		2007.8	0.01205651		2537.8	-0.00884952
417.99	0.01987181		948	0.01276942		1477.99	0.01091961		2008	0.01197204		2538	-0.00906054
418.19	0.02032191		948.2	0.01359043		1478.19	0.01188591		2008.2	0.01215074		2538.2	-0.00886384
418.39	0.0201953		948.4	0.01417737		1478.39	0.01232396		2008.4	0.01265288		2538.4	-0.00882084
418.59	0.02011875		948.6	0.01428556		1478.59	0.01243119		2008.6	0.01249957		2538.6	-0.00821741
418.79	0.01950353		948.8	0.01404113		1478.79	0.01321423		2008.8	0.01230224		2538.8	-0.0084087
418.99	0.01981217		949	0.01335733		1478.99	0.01377529		2009	0.01250297		2539	-0.00830729
419.19	0.01910419		949.2	0.01406234		1479.19	0.01392648		2009.2	0.01265575		2539.2	-0.00775122
419.39	0.01954151		949.4	0.01462057		1479.39	0.01338514		2009.4	0.01315814		2539.4	-0.00664769
419.59	0.01964231		949.6	0.0139281		1479.59	0.0123143		2009.6	0.01391264		2539.6	-0.00587415
419.79	0.01937683		949.8	0.01325547		1479.79	0.0120569		2009.8	0.0147789		2539.8	-0.00596558
419.99	0.01957289		950	0.01324001		1479.99	0.01184527		2010	0.01468831		2540	-0.00575727
420.19	0.01989444		950.2	0.01231197		1480.19	0.01149859		2010.2	0.01507638		2540.2	-0.00602138
420.39	0.01988824		950.4	0.01237654		1480.39	0.01146898		2010.4	0.01512749		2540.4	-0.00573009
420.59	0.02050324		950.6	0.01280374		1480.59	0.01138402		2010.6	0.01625533		2540.6	-0.00588426
420.79	0.02046219		950.8	0.01313893		1480.79	0.01151946		2010.8	0.01620467		2540.8	-0.00650784
420.99	0.01980434		951	0.01332572		1480.99	0.01083746		2011	0.01582176		2541	-0.00727346
421.19	0.01916998		951.2	0.01259552		1481.19	0.01054597		2011.2	0.01577213		2541.2	-0.00776734
421.39	0.01917455		951.4	0.01115289		1481.39	0.01101088		2011.4	0.01601858		2541.4	-0.00818005
421.59	0.01862015		951.6	0.01054522		1481.59	0.01122214		2011.6	0.01630846		2541.6	-0.00830906
421.79	0.01917646		951.8	0.0105785		1481.79	0.01132966		2011.8	0.01581077		2541.8	-0.00828028
421.99	0.01916295		952	0.01129219		1481.99	0.01239262		2012	0.01525076		2542	-0.00901754
422.19	0.01919758		952.2	0.01185208		1482.19	0.01221947		2012.2	0.01495504		2542.2	-0.00833574
422.39	0.01962802		952.4	0.01170902		1482.39	0.01187804		2012.4	0.01442428		2542.4	-0.00832127
422.59	0.01901734		952.6	0.0116627		1482.59	0.01210967		2012.6	0.01291528		2542.6	-0.00808659
422.79	0.01917922		952.8	0.01136624		1482.79	0.0113487		2012.8	0.0127055		2542.8	-0.00854708
422.99	0.01935164		953	0.01202565		1482.99	0.01068511		2013	0.01226179		2543	-0.00764788
423.19	0.01908173		953.2	0.01256305		1483.19	0.01008958		2013.2	0.01203228		2543.2	-0.00595555
423.39	0.01900074		953.4	0.01256728		1483.39	0.00973796		2013.4	0.0115266		2543.4	-0.00416248
423.59	0.01872541		953.6	0.01204121		1483.59	0.00897495		2013.6	0.01101716		2543.6	-0.00375088
423.79	0.01880568		953.8	0.01236701		1483.79	0.00980155		2013.8	0.01094451		2543.8	-0.003758
423.99	0.0189599		954	0.01204242		1483.99	0.00944768		2014	0.01124835		2544	-0.00299278
424.19	0.01833154		954.2	0.0126324		1484.19	0.00938109		2014.2	0.01268462		2544.2	-0.0032858
424.39	0.01835901		954.4	0.01303751		1484.39	0.00993475		2014.4	0.01337237		2544.4	-0.00407724
424.59	0.01807911		954.6	0.01292802		1484.59	0.00998965		2014.6	0.01400984		2544.6	-0.0041151
424.79	0.01767224		954.8	0.01323173		1484.79	0.01076841		2014.8	0.0145486		2544.8	-0.00438776
424.99	0.01756623		955	0.013623		1484.99	0.01123821		2015	0.01432411		2545	-0.00497001
425.19	0.01818031		955.2	0.01283155		1485.19	0.01239076		2015.2	0.01419716		2545.2	-0.00572872
425.39	0.01829062		955.4	0.01398361		1485.39	0.01330246		2015.4	0.01409169		2545.4	-0.00703194
425.59	0.01834574		955.6	0.01476464		1485.59	0.01337831		2015.6	0.01320286		2545.6	-0.00819178
425.79	0.01897043		955.8	0.01513347		1485.79	0.0134923		2015.8	0.01312293		2545.8	-0.00928159
425.99	0.01929544		956	0.0154165		1485.99	0.01338153		2016	0.01282944		2546	-0.00995204
426.19	0.01899042		956.2	0.01617333		1486.19	0.01253373		2016.2	0.01337761		2546.2	-0.00954093
426.39	0.01950607		956.4	0.01615166		1486.39	0.01209514		2016.4	0.01364172		2546.4	-0.01039508
426.59	0.01857208		956.6	0.01642023		1486.59	0.01185926		2016.6	0.01310594		2546.6	-0.01080752
426.79	0.01886979		956.8	0.01624318		1486.79	0.01079526		2016.8	0.0125276		2546.8	-0.01078391
426.99	0.01937693		957	0.01625887		1486.99	0.01143489		2017	0.01143721		2547	-0.00953844
427.19	0.01998688		957.2	0.01561659		1487.19	0.01101439		2017.2	0.01002274		2547.2	-0.00919971
427.39	0.01943023		957.4	0.01505802		1487.39	0.01141922		2017.4	0.00935471		2547.4	-0.00862228
427.59	0.01985826		957.6	0.01468391		1487.59	0.01078269		2017.6	0.00914543		2547.6	-0.00823719
427.79	0.02000091		957.8	0.01411632		1487.79	0.01056419		2017.8	0.00992662		2547.8	-0.00769138
427.99	0.01986368		958	0.01298275		1487.99	0.00983704		2018	0.01063813		2548	-0.00725765
428.19	0.01917712		958.2	0.01206057		1488.19	0.01024222		2018.2	0.01051857		2548.2	-0.00745846
428.39	0.01852851		958.4	0.01133891		1488.39	0.01117645		2018.4	0.01128202		2548.4	-0.00674223
428.59	0.01859718		958.6	0.01087969		1488.59	0.01109958		2018.6	0.01118723		2548.6	-0.00725216
428.79	0.01869117		958.8	0.01077446		1488.79	0.01153445		2018.8	0.01175108		2548.8	-0.00678124
428.99	0.0185112		959	0.01106845		1488.99	0.01149436		2019	0.0113323		2549	-0.00692448
429.19	0.0186702		959.2	0.01056928		1489.19	0.01212092		2019.2	0.01133927		2549.2	-0.00768508
429.39	0.01822005		959.4	0.01191272		1489.39	0.01177265		2019.4	0.0105559		2549.4	-0.00881079
429.59	0.01881014		959.6	0.01194506		1489.59	0.0109863		2019.6	0.01067895		2549.6	-0.00883741
429.79	0.01902406		959.8	0.01242466		1489.79	0.01093058		2019.8	0.0119824		2549.8	-0.00953807
429.99	0.01925724		960	0.01314599		1489.99	0.01068417		2020	0.01256599		2550	-0.00889559
430.19	0.01852424		960.2	0.01362643		1490.19	0.01133596		2020.2	0.0144084		2550.2	-0.00890351
430.39	0.01911244		960.4	0.01372316		1490.39	0.01218853		2020.4	0.01545204		2550.4	-0.009186
430.59	0.01883236		960.6	0.01338059		1490.59	0.01286206		2020.6	0.01440551		2550.6	-0.00906474
430.79	0.01848455		960.8	0.01366907		1490.79	0.01388259		2020.8	0.01409251		2550.8	-0.00874293
430.99	0.01920804		961	0.01438042		1490.99	0.01316488		2021	0.01378783		2551	-0.00873997
431.19	0.01870127		961.2	0.01454152		1491.19	0.01258635		2021.2	0.01320075		2551.2	-0.00769185
431.39	0.0186535		961.4	0.01384553		1491.39	0.01315149		2021.4	0.01305782		2551.4	-0.00695828
431.59	0.01870856		961.6	0.0131605		1491.59	0.01222649		2021.6	0.01270291		2551.6	-0.00625336
431.79	0.01852972		961.8	0.01283904		1491.79	0.01152751		2021.8	0.01268685		2551.8	-0.00591567
431.99	0.01879556		962	0.01193658		1491.99	0.01148674		2022	0.01305575		2552	-0.00512727
432.19	0.01773279		962.2	0.01134244		1492.19	0.01156656		2022.2	0.01282973		2552.2	-0.00467458
432.39	0.01850516		962.4	0.01117006		1492.39	0.01161101		2022.4	0.0130683		2552.4	-0.0044344
432.59	0.01912213		962.6	0.01086466		1492.59	0.01145569		2022.6	0.01257283		2552.6	-0.00454154
432.79	0.01903496		962.8	0.01028793		1492.79	0.01141115		2022.8	0.01196138		2552.8	-0.00401476
432.99	0.01825886		963	0.00973301		1492.99	0.01090444		2023	0.01023516		2553	-0.00468181
433.19	0.01811851		963.2	0.00904476		1493.19	0.01113449		2023.2	0.01018327		2553.2	-0.00533949
433.39	0.01854252		963.4	0.01028745		1493.39	0.01082708		2023.4	0.00955091		2553.4	-0.0053731
433.59	0.01899543		963.6	0.01087756		1493.59	0.01105297		2023.6	0.01057613		2553.6	-0.00592086
433.79	0.01861553		963.8	0.01145372		1493.79	0.01074032		2023.8	0.0109805		2553.8	-0.00677402
433.99	0.01865013		964	0.01216942		1493.99	0.01093972		2024	0.01137926		2554	-0.00587701
434.19	0.01867711		964.2	0.01186119		1494.19	0.01197438		2024.2	0.01208559		2554.2	-0.00633981
434.39	0.0179246		964.4	0.01174916		1494.39	0.01308758		2024.4	0.01221717		2554.4	-0.00668851
434.59	0.01804751		964.6	0.01171375		1494.59	0.01302913		2024.6	0.01220533		2554.6	-0.00593042
434.79	0.01808974		964.8	0.01226874		1494.79	0.01271063		2024.8	0.01206065		2554.8	-0.00695768
434.99	0.01894991		965	0.01175677		1494.99	0.0112896		2025	0.01185599		2555	-0.00669095
435.19	0.01866569		965.2	0.01132572		1495.19	0.01194448		2025.2	0.01229816		2555.2	-0.00654286
435.39	0.01881149		965.4	0.01090452		1495.39	0.01190244		2025.4	0.01173498		2555.4	-0.00708352
435.59	0.01900495		965.6	0.01091454		1495.59	0.01143587		2025.6	0.01191083		2555.6	-0.00762749
435.79	0.01894622		965.8	0.01136136		1495.79	0.01118178		2025.8	0.01207308		2555.8	-0.00689129
435.99	0.01919704		966	0.01058963		1495.99	0.01125537		2026	0.01243677		2556	-0.00612927
436.19	0.0192196		966.2	0.010535		1496.19	0.01102538		2026.2	0.011381		2556.2	-0.00699764
436.39	0.01940031		966.4	0.01050034		1496.39	0.01127696		2026.4	0.0109795		2556.4	-0.00774396
436.59	0.01868648		966.6	0.01044104		1496.59	0.01123399		2026.6	0.01077275		2556.6	-0.00681238
436.79	0.01805641		966.8	0.00948267		1496.79	0.01104738		2026.8	0.0096247		2556.8	-0.00791648
436.99	0.01738972		967	0.00875335		1496.99	0.0118526		2027	0.00939803		2557	-0.00835927
437.19	0.01692752		967.2	0.00916302		1497.19	0.01190426		2027.2	0.01046359		2557.2	-0.00893654
437.39	0.01735181		967.4	0.01050974		1497.39	0.01225418		2027.4	0.01083897		2557.4	-0.00909504
437.59	0.01815629		967.6	0.0108589		1497.59	0.01234583		2027.6	0.01144427		2557.6	-0.00969108
437.79	0.0182671		967.8	0.0116922		1497.79	0.01242778		2027.8	0.01101183		2557.8	-0.00952119
437.99	0.01882541		968	0.01192931		1497.99	0.01334049		2028	0.01137339		2558	-0.00909394
438.19	0.01877232		968.2	0.01165117		1498.19	0.01310625		2028.2	0.01105971		2558.2	-0.01037385
438.39	0.01864802		968.4	0.01242392		1498.39	0.01294316		2028.4	0.01157552		2558.4	-0.0104917
438.59	0.01932034		968.6	0.01319859		1498.59	0.01219347		2028.6	0.01197398		2558.6	-0.01042611
438.79	0.01928079		968.8	0.01298839		1498.79	0.01198993		2028.8	0.01142471		2558.8	-0.01126862
438.99	0.01946966		969	0.01241938		1498.99	0.01212689		2029	0.0113845		2559	-0.01072617
439.19	0.01913644		969.2	0.01266366		1499.19	0.01136451		2029.2	0.01200914		2559.2	-0.01092051
439.39	0.0191563		969.4	0.01272955		1499.39	0.01173852		2029.4	0.01108577		2559.4	-0.01043724
439.59	0.01903541		969.6	0.01332033		1499.59	0.01227938		2029.6	0.01095139		2559.6	-0.01032924
439.79	0.01854068		969.8	0.01279543		1499.79	0.01277548		2029.8	0.01070623		2559.8	-0.00918172
439.99	0.01848042		970	0.0120401		1499.99	0.01287294		2030	0.01118548		2560	-0.00922048
440.19	0.01837092		970.2	0.01207512		1500.19	0.01326291		2030.2	0.01114556		2560.2	-0.00900563
440.39	0.01666405		970.4	0.01097452		1500.39	0.01385584		2030.4	0.0116453		2560.4	-0.00850653
440.59	0.01701228		970.6	0.01042512		1500.59	0.01356197		2030.6	0.01177181		2560.6	-0.00720937
440.79	0.0173022		970.8	0.01017129		1500.79	0.0137852		2030.8	0.01196824		2560.8	-0.00719924
440.99	0.01735317		971	0.0099098		1500.99	0.01455044		2031	0.01293209		2561	-0.00719524
441.19	0.0174458		971.2	0.00923984		1501.19	0.01463945		2031.2	0.01336525		2561.2	-0.00688035
441.39	0.01813474		971.4	0.00931342		1501.39	0.01455682		2031.4	0.01411891		2561.4	-0.00652724
441.59	0.01887805		971.6	0.0091435		1501.59	0.01389145		2031.6	0.01452355		2561.6	-0.00686012
441.79	0.01909384		971.8	0.00955103		1501.79	0.01323238		2031.8	0.01423473		2561.8	-0.0074394
441.99	0.01921396		972	0.00874662		1501.99	0.01231807		2032	0.0142472		2562	-0.00811458
442.19	0.01872931		972.2	0.00958937		1502.19	0.01109674		2032.2	0.01397905		2562.2	-0.00845465
442.39	0.01886854		972.4	0.01058659		1502.39	0.01031057		2032.4	0.01454065		2562.4	-0.00750322
442.59	0.01832866		972.6	0.01049407		1502.59	0.00948458		2032.6	0.01439305		2562.6	-0.00843667
442.79	0.01849357		972.8	0.00971745		1502.79	0.008802		2032.8	0.01469783		2562.8	-0.00883128
442.99	0.01812854		973	0.00961986		1502.99	0.00840387		2033	0.01442346		2563	-0.00927258
443.19	0.01781043		973.2	0.01025268		1503.19	0.00768008		2033.2	0.01465683		2563.2	-0.00990939
443.39	0.01749133		973.4	0.01068572		1503.39	0.00869293		2033.4	0.01383719		2563.4	-0.00995794
443.59	0.0172571		973.6	0.01176759		1503.59	0.00901545		2033.6	0.01287352		2563.6	-0.00988392
443.79	0.01654219		973.8	0.01117024		1503.79	0.01016793		2033.8	0.01271099		2563.8	-0.00916487
443.99	0.01618634		974	0.01113929		1503.99	0.01035545		2034	0.01322181		2564	-0.00786263
444.19	0.0156552		974.2	0.01056377		1504.19	0.01081227		2034.2	0.01251322		2564.2	-0.0072267
444.39	0.01561767		974.4	0.01043079		1504.39	0.01153535		2034.4	0.01240863		2564.4	-0.0065709
444.59	0.01588322		974.6	0.01139011		1504.59	0.01189598		2034.6	0.01184851		2564.6	-0.0051773
444.79	0.01587083		974.8	0.01125073		1504.79	0.01276228		2034.8	0.01212189		2564.8	-0.00486313
444.99	0.01577393		975	0.01058836		1504.99	0.01384916		2035	0.0117771		2565	-0.00514592
445.19	0.01614958		975.2	0.01082556		1505.19	0.01448978		2035.2	0.01141436		2565.2	-0.00442933
445.39	0.01626817		975.4	0.01145991		1505.39	0.0152875		2035.4	0.01190059		2565.4	-0.0046922
445.59	0.01688733		975.6	0.01143978		1505.59	0.01535689		2035.6	0.01245284		2565.6	-0.00533109
445.79	0.0166025		975.8	0.01193243		1505.79	0.01532286		2035.8	0.01279029		2565.8	-0.00614879
445.99	0.01651129		976	0.01223279		1505.99	0.01579656		2036	0.01310305		2566	-0.00630499
446.19	0.01657074		976.2	0.013756		1506.19	0.01575461		2036.2	0.01369471		2566.2	-0.00596551
446.39	0.01680422		976.4	0.01419825		1506.39	0.01494334		2036.4	0.01401525		2566.4	-0.00607598
446.59	0.01608658		976.6	0.01334384		1506.59	0.01432153		2036.6	0.01410671		2566.6	-0.0074357
446.79	0.01644887		976.8	0.01291926		1506.79	0.01413031		2036.8	0.015157		2566.8	-0.00827088
446.99	0.01637829		977	0.01269595		1506.99	0.01401755		2037	0.01418136		2567	-0.00886425
447.19	0.01648095		977.2	0.01274369		1507.19	0.01369741		2037.2	0.01444355		2567.2	-0.00857971
447.39	0.01641136		977.4	0.01330701		1507.39	0.01397077		2037.4	0.01391941		2567.4	-0.00802008
447.59	0.01571141		977.6	0.0131543		1507.59	0.01404118		2037.6	0.0135527		2567.6	-0.00799094
447.79	0.01478238		977.8	0.01156668		1507.79	0.01412102		2037.8	0.01411265		2567.8	-0.00838713
447.99	0.01476661		978	0.00959009		1507.99	0.0138601		2038	0.01403661		2568	-0.00789271
448.19	0.01467879		978.2	0.0088363		1508.19	0.01299692		2038.2	0.01309597		2568.2	-0.00788505
448.39	0.01418324		978.4	0.00830225		1508.39	0.01404473		2038.4	0.01295214		2568.4	-0.00768257
448.59	0.01377587		978.6	0.00774815		1508.59	0.01305357		2038.6	0.01306968		2568.6	-0.0077249
448.79	0.01421431		978.8	0.00733196		1508.79	0.01365973		2038.8	0.01375181		2568.8	-0.00861636
448.99	0.01396178		979	0.00772076		1508.99	0.01369002		2039	0.01391481		2569	-0.00863203
449.19	0.01435477		979.2	0.00832041		1509.19	0.01379226		2039.2	0.01404131		2569.2	-0.00871136
449.39	0.01466022		979.4	0.00857413		1509.39	0.01363661		2039.4	0.01485146		2569.4	-0.009428
449.59	0.01514708		979.6	0.00953605		1509.59	0.01297987		2039.6	0.0146491		2569.6	-0.01059994
449.79	0.01494832		979.8	0.01049416		1509.79	0.01234165		2039.8	0.01474643		2569.8	-0.01056905
449.99	0.01600738		980	0.01183631		1509.99	0.01215423		2040	0.0138208		2570	-0.00963021
450.19	0.01680343		980.2	0.0124689		1510.19	0.01140646		2040.2	0.01348356		2570.2	-0.00917504
450.39	0.01758079		980.4	0.01306281		1510.39	0.01050959		2040.4	0.01270879		2570.4	-0.00888587
450.59	0.01807807		980.6	0.01269014		1510.59	0.01159368		2040.6	0.01259982		2570.6	-0.00865006
450.79	0.01937002		980.8	0.01280951		1510.79	0.01191932		2040.8	0.01241282		2570.8	-0.0086895
450.99	0.01969269		981	0.01300466		1510.99	0.01211754		2041	0.01124452		2571	-0.00826421
451.19	0.02026158		981.2	0.01360607		1511.19	0.01220676		2041.2	0.01150954		2571.2	-0.0082595
451.39	0.02059129		981.4	0.01450103		1511.39	0.01200385		2041.4	0.01208		2571.4	-0.00987137
451.59	0.0197193		981.6	0.01270186		1511.59	0.01172606		2041.6	0.01271385		2571.6	-0.00980735
451.79	0.01925938		981.8	0.01210793		1511.79	0.01089891		2041.8	0.01321238		2571.8	-0.01052101
451.99	0.01885857		982	0.01155923		1511.99	0.01090804		2042	0.01261952		2572	-0.00974271
452.19	0.01863664		982.2	0.01143249		1512.19	0.00974838		2042.2	0.01313443		2572.2	-0.0093792
452.39	0.01818058		982.4	0.0107007		1512.39	0.00994196		2042.4	0.01419341		2572.4	-0.00949167
452.59	0.01857592		982.6	0.01167228		1512.59	0.00890793		2042.6	0.01553408		2572.6	-0.00974115
452.79	0.01816199		982.8	0.0119754		1512.79	0.01002136		2042.8	0.01614229		2572.8	-0.01025739
452.99	0.01757114		983	0.01224189		1512.99	0.00905776		2043	0.01617145		2573	-0.01014107
453.19	0.0175513		983.2	0.01283248		1513.19	0.00929077		2043.2	0.01561957		2573.2	-0.00997102
453.39	0.01774706		983.4	0.01358063		1513.39	0.00859947		2043.4	0.01549156		2573.4	-0.01019861
453.59	0.0176976		983.6	0.01396016		1513.59	0.009154		2043.6	0.01454301		2573.6	-0.01040724
453.79	0.01722753		983.8	0.01328313		1513.79	0.00906357		2043.8	0.01441615		2573.8	-0.00873402
453.99	0.01778842		984	0.01338499		1513.99	0.00923184		2044	0.01315457		2574	-0.00841196
454.19	0.01863153		984.2	0.01272742		1514.19	0.00957381		2044.2	0.01275421		2574.2	-0.00792131
454.39	0.01875195		984.4	0.01274485		1514.39	0.01034808		2044.4	0.01139505		2574.4	-0.00761637
454.59	0.01873244		984.6	0.01146599		1514.59	0.01129994		2044.6	0.01107592		2574.6	-0.00780727
454.79	0.01836796		984.8	0.01104176		1514.79	0.01109477		2044.8	0.01105896		2574.8	-0.00823191
454.99	0.01811592		985	0.01090414		1514.99	0.01023042		2045	0.01088144		2575	-0.00903615
455.19	0.01881737		985.2	0.01059825		1515.19	0.01002889		2045.2	0.01162218		2575.2	-0.00972413
455.39	0.01822275		985.4	0.01017951		1515.39	0.00910897		2045.4	0.01208483		2575.4	-0.01015437
455.59	0.01730737		985.6	0.00958664		1515.59	0.008229		2045.6	0.0120446		2575.6	-0.00871964
455.79	0.01666967		985.8	0.00936986		1515.79	0.00752886		2045.8	0.01233523		2575.8	-0.00958125
455.99	0.0159968		986	0.00908684		1515.99	0.00756276		2046	0.01290299		2576	-0.00899878
456.19	0.01610005		986.2	0.00921904		1516.19	0.00688322		2046.2	0.01357679		2576.2	-0.00801394
456.39	0.0162051		986.4	0.0098305		1516.39	0.00654124		2046.4	0.01374584		2576.4	-0.00903197
456.59	0.01622233		986.6	0.01092548		1516.59	0.00704129		2046.6	0.01314056		2576.6	-0.00816036
456.79	0.01580472		986.8	0.0109127		1516.79	0.00809687		2046.8	0.01215212		2576.8	-0.00795683
456.99	0.01617059		987	0.01233443		1516.99	0.00747187		2047	0.01098574		2577	-0.00726557
457.19	0.01612436		987.2	0.01304015		1517.19	0.00851175		2047.2	0.01077402		2577.2	-0.00696186
457.39	0.01613555		987.4	0.01320484		1517.39	0.0095415		2047.4	0.01132868		2577.4	-0.00794122
457.59	0.01561009		987.6	0.01308462		1517.59	0.01094084		2047.6	0.01125222		2577.6	-0.0080865
457.79	0.01511925		987.8	0.01303881		1517.79	0.01089546		2047.8	0.01134414		2577.8	-0.00712998
457.99	0.01568987		988	0.01352795		1517.99	0.01103978		2048	0.01075279		2578	-0.00693137
458.19	0.01592882		988.2	0.0135788		1518.19	0.01160238		2048.2	0.01122158		2578.2	-0.00618499
458.39	0.01584548		988.4	0.01346168		1518.39	0.01208705		2048.4	0.01070114		2578.4	-0.00662203
458.59	0.01573507		988.6	0.01256426		1518.59	0.01178716		2048.6	0.01223549		2578.6	-0.00743926
458.79	0.01550676		988.8	0.01310734		1518.79	0.01159217		2048.8	0.01240964		2578.8	-0.00752693
458.99	0.01563574		989	0.01274616		1518.99	0.01060936		2049	0.01306941		2579	-0.00786597
459.19	0.01672716		989.2	0.01280434		1519.19	0.01126336		2049.2	0.0136625		2579.2	-0.00859984
459.39	0.01637317		989.4	0.01261298		1519.39	0.01128714		2049.4	0.01374648		2579.4	-0.00836068
459.59	0.01697421		989.6	0.01258957		1519.59	0.01117355		2049.6	0.01484633		2579.6	-0.00830323
459.79	0.01725593		989.8	0.01198635		1519.79	0.01197699		2049.8	0.01500491		2579.8	-0.00907364
459.99	0.01711472		990	0.01236283		1519.99	0.01164071		2050	0.01512364		2580	-0.00865308
460.19	0.01779031		990.2	0.01243374		1520.19	0.01116126		2050.2	0.01446343		2580.2	-0.0073463
460.39	0.01774351		990.4	0.01178823		1520.39	0.01055714		2050.4	0.01336939		2580.4	-0.00806527
460.59	0.0175242		990.6	0.01211174		1520.59	0.01117425		2050.6	0.01271		2580.6	-0.00604038
460.79	0.01711589		990.8	0.01203168		1520.79	0.01163082		2050.8	0.0121783		2580.8	-0.00548032
460.99	0.01754457		991	0.01256452		1520.99	0.01085017		2051	0.01229184		2581	-0.00545298
461.19	0.01700972		991.2	0.01205328		1521.19	0.01134692		2051.2	0.01320417		2581.2	-0.00590755
461.39	0.01758762		991.4	0.01221295		1521.39	0.01155431		2051.4	0.01381078		2581.4	-0.00597469
461.59	0.01745304		991.6	0.01184927		1521.59	0.00999708		2051.6	0.01284167		2581.6	-0.00570222
461.79	0.01712827		991.8	0.01155416		1521.79	0.00935219		2051.8	0.01311355		2581.8	-0.00513224
461.99	0.01797158		992	0.01134972		1521.99	0.00950926		2052	0.01307917		2582	-0.00537277
462.19	0.0175439		992.2	0.01077178		1522.19	0.009931		2052.2	0.01405623		2582.2	-0.00532615
462.39	0.01659434		992.4	0.01041973		1522.39	0.01090828		2052.4	0.0141079		2582.4	-0.00604141
462.59	0.01549757		992.6	0.00962036		1522.59	0.01019525		2052.6	0.01414367		2582.6	-0.00698709
462.79	0.01529283		992.8	0.01016648		1522.79	0.0111888		2052.8	0.01364001		2582.8	-0.00747806
462.99	0.01566734		993	0.0097602		1522.99	0.01189268		2053	0.0144611		2583	-0.00843474
463.19	0.01585613		993.2	0.00996765		1523.19	0.01260052		2053.2	0.01440078		2583.2	-0.0088592
463.39	0.01614735		993.4	0.00972531		1523.39	0.01401016		2053.4	0.01403414		2583.4	-0.0087439
463.59	0.01631452		993.6	0.00984484		1523.59	0.01396611		2053.6	0.01413269		2583.6	-0.00934566
463.79	0.0161286		993.8	0.01012289		1523.79	0.01436556		2053.8	0.01277419		2583.8	-0.00961455
463.99	0.01515038		994	0.01040236		1523.99	0.01437061		2054	0.01234586		2584	-0.00930579
464.19	0.01470441		994.2	0.01034242		1524.19	0.01455983		2054.2	0.01179747		2584.2	-0.00891523
464.39	0.01408551		994.4	0.00976037		1524.39	0.01416726		2054.4	0.01063558		2584.4	-0.00884199
464.59	0.0141362		994.6	0.01004425		1524.59	0.01411743		2054.6	0.01027499		2584.6	-0.00794211
464.79	0.01383678		994.8	0.00974361		1524.79	0.01369405		2054.8	0.0097499		2584.8	-0.00714586
464.99	0.01454779		995	0.01021178		1524.99	0.01267588		2055	0.00960228		2585	-0.00727721
465.19	0.01508526		995.2	0.00997898		1525.19	0.01211809		2055.2	0.0092858		2585.2	-0.00641627
465.39	0.01594701		995.4	0.00975102		1525.39	0.0107744		2055.4	0.00910125		2585.4	-0.00642169
465.59	0.01550423		995.6	0.00902236		1525.59	0.00927132		2055.6	0.00906862		2585.6	-0.00672737
465.79	0.01526369		995.8	0.00882267		1525.79	0.00968407		2055.8	0.00998089		2585.8	-0.00636238
465.99	0.01609995		996	0.00934199		1525.99	0.00919239		2056	0.01074688		2586	-0.00689656
466.19	0.01532747		996.2	0.00877628		1526.19	0.00946411		2056.2	0.01181067		2586.2	-0.00740439
466.39	0.01491334		996.4	0.00868698		1526.39	0.00930414		2056.4	0.01167066		2586.4	-0.00864942
466.59	0.01571412		996.6	0.00842318		1526.59	0.00856073		2056.6	0.01125179		2586.6	-0.00898863
466.79	0.01589879		996.8	0.00904254		1526.79	0.00994541		2056.8	0.01173274		2586.8	-0.00848473
466.99	0.01685467		997	0.00871083		1526.99	0.00988086		2057	0.0121917		2587	-0.00898927
467.19	0.01707068		997.2	0.00869578		1527.19	0.0099983		2057.2	0.01210097		2587.2	-0.00907465
467.39	0.01729362		997.4	0.00874005		1527.39	0.01081303		2057.4	0.01224402		2587.4	-0.00973594
467.59	0.01733298		997.6	0.00939695		1527.59	0.01108318		2057.6	0.01255084		2587.6	-0.00967568
467.79	0.01773039		997.8	0.00937974		1527.79	0.01103315		2057.8	0.01209285		2587.8	-0.0092874
467.99	0.01708033		998	0.00955893		1527.99	0.01172311		2058	0.01194637		2588	-0.00942193
468.19	0.01645025		998.2	0.00902161		1528.19	0.01203915		2058.2	0.01201915		2588.2	-0.00931976
468.39	0.01593834		998.4	0.00905124		1528.39	0.01180542		2058.4	0.01141757		2588.4	-0.00859018
468.59	0.01616262		998.6	0.00919932		1528.59	0.01191522		2058.6	0.01094633		2588.6	-0.00833768
468.79	0.01530685		998.8	0.0099624		1528.79	0.01197255		2058.8	0.01068853		2588.8	-0.00774833
468.99	0.01520756		999	0.01004763		1528.99	0.01161716		2059	0.01011447		2589	-0.00812343
469.19	0.01486278		999.2	0.00928147		1529.19	0.01235397		2059.2	0.00997361		2589.2	-0.00807356
469.39	0.0149702		999.4	0.00952155		1529.39	0.01191447		2059.4	0.00993899		2589.4	-0.00849016
469.59	0.01448429		999.6	0.01005162		1529.59	0.01251123		2059.6	0.01004608		2589.6	-0.00865964
469.79	0.01419865		999.8	0.00996409		1529.79	0.01299017		2059.8	0.01041097		2589.8	-0.00885115
469.99	0.01408882		1000	0.00944051		1529.99	0.01285561		2060	0.01062163		2590	-0.00972274
470.19	0.01383804		1000.2	0.00840981		1530.19	0.01312799		2060.2	0.01104048		2590.2	-0.00969592
470.39	0.01427407		1000.4	0.00854642		1530.39	0.01312136		2060.4	0.00987343		2590.4	-0.00932517
470.59	0.01467822		1000.6	0.00790561		1530.59	0.0136243		2060.6	0.01030028		2590.6	-0.00826699
470.79	0.01422028		1000.8	0.0079479		1530.79	0.01362499		2060.8	0.01059703		2590.8	-0.00795854
470.99	0.01542237		1001	0.00766508		1530.99	0.01377495		2061	0.010434		2591	-0.00785176
471.19	0.01498449		1001.2	0.00776083		1531.19	0.01338713		2061.2	0.01027853		2591.2	-0.00748946
471.39	0.01487941		1001.4	0.00794749		1531.39	0.01348205		2061.4	0.010565		2591.4	-0.007685
471.59	0.01537236		1001.6	0.00769865		1531.59	0.01464741		2061.6	0.01091588		2591.6	-0.00710253
471.79	0.01534834		1001.8	0.00763012		1531.79	0.01391177		2061.8	0.01102489		2591.8	-0.00766372
471.99	0.01484452		1002	0.00830437		1531.99	0.01404464		2062	0.01122953		2592	-0.00779639
472.19	0.0150238		1002.2	0.00885674		1532.19	0.01487726		2062.2	0.01225038		2592.2	-0.00751783
472.39	0.01504859		1002.4	0.00984145		1532.39	0.01427964		2062.4	0.0117648		2592.4	-0.0070265
472.59	0.01593689		1002.6	0.01035166		1532.59	0.01384819		2062.6	0.01207936		2592.6	-0.00735638
472.79	0.01600015		1002.8	0.01128578		1532.79	0.01383488		2062.8	0.0127719		2592.8	-0.00752567
472.99	0.01702477		1003	0.01145901		1532.99	0.01469875		2063	0.01287404		2593	-0.00829062
473.19	0.01706275		1003.2	0.01169671		1533.19	0.01505562		2063.2	0.01235825		2593.2	-0.00911468
473.39	0.01735179		1003.4	0.01238269		1533.39	0.01390953		2063.4	0.01249252		2593.4	-0.00975227
473.59	0.01688152		1003.6	0.01233595		1533.59	0.01421027		2063.6	0.01215838		2593.6	-0.01032484
473.79	0.01690568		1003.8	0.01211747		1533.79	0.01341182		2063.8	0.0126958		2593.8	-0.01055677
473.99	0.01802015		1004	0.0125576		1533.99	0.01337331		2064	0.01194167		2594	-0.0111674
474.19	0.01829381		1004.2	0.01349489		1534.19	0.01301729		2064.2	0.01212316		2594.2	-0.01112858
474.39	0.01867173		1004.4	0.01389198		1534.39	0.01309053		2064.4	0.01222543		2594.4	-0.01158016
474.59	0.01846592		1004.6	0.01372931		1534.59	0.01200983		2064.6	0.01279213		2594.6	-0.01127781
474.79	0.01808761		1004.8	0.01447678		1534.79	0.01096697		2064.8	0.01236863		2594.8	-0.01161531
474.99	0.01828273		1005	0.0142631		1534.99	0.01129954		2065	0.0115986		2595	-0.01170776
475.19	0.01732205		1005.2	0.01390696		1535.19	0.01137716		2065.2	0.01121053		2595.2	-0.01223319
475.39	0.01728039		1005.4	0.01377079		1535.39	0.01193271		2065.4	0.01172046		2595.4	-0.01257875
475.59	0.01708731		1005.6	0.01338389		1535.59	0.0131971		2065.6	0.0119109		2595.6	-0.01208565
475.79	0.01679768		1005.8	0.01285458		1535.79	0.01218691		2065.8	0.01151749		2595.8	-0.01258492
475.99	0.01654486		1006	0.01242204		1535.99	0.01270207		2066	0.01196404		2596	-0.01099851
476.19	0.01731917		1006.2	0.01178076		1536.19	0.01328473		2066.2	0.01219783		2596.2	-0.00936001
476.39	0.01679739		1006.4	0.01112497		1536.39	0.01232291		2066.4	0.01147088		2596.4	-0.00849533
476.59	0.01785485		1006.6	0.0102358		1536.59	0.0128906		2066.6	0.0118791		2596.6	-0.00863077
476.79	0.01766895		1006.8	0.00951953		1536.79	0.01304981		2066.8	0.01223921		2596.8	-0.00819898
476.99	0.01755573		1007	0.00916177		1536.99	0.01270245		2067	0.01111713		2597	-0.00853113
477.19	0.01692326		1007.2	0.00879741		1537.19	0.01206412		2067.2	0.01109348		2597.2	-0.00784318
477.39	0.01778684		1007.4	0.00812774		1537.39	0.0116529		2067.4	0.01152653		2597.4	-0.00754048
477.59	0.01777335		1007.6	0.00795591		1537.59	0.01156966		2067.6	0.01120174		2597.6	-0.0072396
477.79	0.01841738		1007.8	0.00857145		1537.79	0.01062508		2067.8	0.01245375		2597.8	-0.00789043
477.99	0.01911249		1008	0.00898276		1537.99	0.01098235		2068	0.01260379		2598	-0.00782819
478.19	0.01883143		1008.2	0.01009176		1538.19	0.01078365		2068.2	0.0133834		2598.2	-0.00803725
478.39	0.01870196		1008.4	0.00995064		1538.39	0.01058708		2068.4	0.01307478		2598.4	-0.00845371
478.59	0.01763335		1008.6	0.01002459		1538.59	0.0092627		2068.6	0.0122333		2598.6	-0.00794814
478.79	0.0171972		1008.8	0.01080478		1538.79	0.00916664		2068.8	0.01220561		2598.8	-0.00859866
478.99	0.01701675		1009	0.01091752		1538.99	0.00927632		2069	0.01210298		2599	-0.00864174
479.19	0.01644182		1009.2	0.01107349		1539.19	0.00933479		2069.2	0.01229225		2599.2	-0.0084496
479.39	0.01576502		1009.4	0.01119994		1539.39	0.00934852		2069.4	0.01202985		2599.4	-0.00827189
479.59	0.01536903		1009.6	0.01100589		1539.59	0.01052161		2069.6	0.01118982		2599.6	-0.00891089
479.79	0.01475839		1009.8	0.01069275		1539.79	0.01070197		2069.8	0.01097639		2599.8	-0.00906715
479.99	0.01420111		1010	0.01058533		1539.99	0.01126936		2070	0.01108118		2600	-0.00883916
480.19	0.01539049		1010.2	0.01087583		1540.19	0.01154798		2070.2	0.01048237		2600.2	-0.00839277
480.39	0.01458544		1010.4	0.01028694		1540.39	0.01247521		2070.4	0.01039283		2600.4	-0.00901475
480.59	0.014733		1010.6	0.00978507		1540.59	0.01265969		2070.6	0.01055099		2600.6	-0.00905295
480.79	0.01444645		1010.8	0.00982338		1540.79	0.01221577		2070.8	0.01045043		2600.8	-0.00918797
480.99	0.01450207		1011	0.01052435		1540.99	0.01203362		2071	0.00967881		2601	-0.00932256
481.19	0.01492503		1011.2	0.01074202		1541.19	0.01350257		2071.2	0.01047753		2601.2	-0.00814389
481.39	0.01528621		1011.4	0.01021373		1541.39	0.01326928		2071.4	0.01064863		2601.4	-0.00902321
481.59	0.01548835		1011.6	0.00914804		1541.59	0.01334355		2071.6	0.01092704		2601.6	-0.00850881
481.79	0.01635773		1011.8	0.00882516		1541.79	0.01345799		2071.8	0.01155833		2601.8	-0.00856295
481.99	0.01715065		1012	0.00860116		1541.99	0.01442965		2072	0.01125159		2602	-0.00801836
482.19	0.01695305		1012.2	0.00912126		1542.19	0.01407018		2072.2	0.01060271		2602.2	-0.00932341
482.39	0.01697001		1012.4	0.00900167		1542.39	0.01377782		2072.4	0.01081983		2602.4	-0.00913184
482.59	0.01697507		1012.6	0.00897418		1542.59	0.01272174		2072.6	0.01102208		2602.6	-0.00872263
482.79	0.01783822		1012.8	0.00962845		1542.79	0.01260953		2072.8	0.01143794		2602.8	-0.00907959
482.99	0.01750482		1013	0.00881696		1542.99	0.01253142		2073	0.01174499		2603	-0.00973093
483.19	0.01783372		1013.2	0.00922108		1543.19	0.01179004		2073.2	0.01162		2603.2	-0.00987071
483.39	0.01772052		1013.4	0.00949883		1543.39	0.01105767		2073.4	0.01128337		2603.4	-0.00985152
483.59	0.01753817		1013.6	0.01037735		1543.59	0.01185656		2073.6	0.0114898		2603.6	-0.01026372
483.79	0.0175341		1013.8	0.01101397		1543.79	0.0112197		2073.8	0.01113659		2603.8	-0.00969182
483.99	0.01773459		1014	0.01119777		1543.99	0.01041545		2074	0.01129599		2604	-0.0097216
484.19	0.01869046		1014.2	0.01142678		1544.19	0.01036335		2074.2	0.01116832		2604.2	-0.00887411
484.39	0.01804889		1014.4	0.01044847		1544.39	0.01067519		2074.4	0.01114451		2604.4	-0.00848063
484.59	0.01783294		1014.6	0.0104879		1544.59	0.01003102		2074.6	0.01001199		2604.6	-0.00881941
484.79	0.01796854		1014.8	0.01098521		1544.79	0.01015355		2074.8	0.00938139		2604.8	-0.00925801
484.99	0.01836535		1015	0.0102692		1544.99	0.01060839		2075	0.00945821		2605	-0.00949359
485.19	0.01837087		1015.2	0.01022402		1545.19	0.01136997		2075.2	0.00972244		2605.2	-0.00943195
485.39	0.01838823		1015.4	0.00958122		1545.39	0.01037616		2075.4	0.00963396		2605.4	-0.00989586
485.59	0.01881765		1015.6	0.00911512		1545.59	0.01105094		2075.6	0.00928432		2605.6	-0.00995123
485.79	0.01867455		1015.8	0.00984245		1545.79	0.01149301		2075.8	0.00984773		2605.8	-0.01052005
485.99	0.01847848		1016	0.01007558		1545.99	0.01232395		2076	0.00991896		2606	-0.01100123
486.19	0.01737735		1016.2	0.0105569		1546.19	0.01218973		2076.2	0.01070066		2606.2	-0.01132871
486.39	0.01730301		1016.4	0.01191414		1546.39	0.01287969		2076.4	0.01176099		2606.4	-0.01136871
486.59	0.01642332		1016.6	0.01173825		1546.59	0.01245181		2076.6	0.01190917		2606.6	-0.01243799
486.79	0.01591544		1016.8	0.01232136		1546.79	0.01325669		2076.8	0.01248906		2606.8	-0.01272567
486.99	0.01507249		1017	0.01226995		1546.99	0.01258384		2077	0.01319142		2607	-0.01323454
487.19	0.01521593		1017.2	0.01338672		1547.19	0.01199609		2077.2	0.01314397		2607.2	-0.01261348
487.39	0.01455782		1017.4	0.01358021		1547.39	0.0116007		2077.4	0.01329822		2607.4	-0.01195504
487.59	0.01423968		1017.6	0.01378059		1547.59	0.01179141		2077.6	0.01306856		2607.6	-0.01115713
487.79	0.01354229		1017.8	0.01402011		1547.79	0.01067342		2077.8	0.01304742		2607.8	-0.01065471
487.99	0.01404092		1018	0.01363153		1547.99	0.01006692		2078	0.0140288		2608	-0.00974879
488.19	0.01496532		1018.2	0.01376169		1548.19	0.00989262		2078.2	0.01412443		2608.2	-0.00940236
488.39	0.01564063		1018.4	0.0135837		1548.39	0.01026191		2078.4	0.01301135		2608.4	-0.00857261
488.59	0.01653574		1018.6	0.01365115		1548.59	0.01006349		2078.6	0.01207816		2608.6	-0.008691
488.79	0.01783472		1018.8	0.01300347		1548.79	0.00967897		2078.8	0.01209019		2608.8	-0.00808542
488.99	0.01939447		1019	0.01205419		1548.99	0.00980648		2079	0.0123351		2609	-0.00788214
489.19	0.01940053		1019.2	0.01279053		1549.19	0.01000468		2079.2	0.01123714		2609.2	-0.00770455
489.39	0.02006931		1019.4	0.01295986		1549.39	0.00958975		2079.4	0.0107748		2609.4	-0.00687112
489.59	0.02122406		1019.6	0.01348666		1549.59	0.01029964		2079.6	0.01103092		2609.6	-0.00728672
489.79	0.02114886		1019.8	0.01326075		1549.79	0.01061948		2079.8	0.011719		2609.8	-0.00680854
489.99	0.02102485		1020	0.01340634		1549.99	0.01116531		2080	0.01115271		2610	-0.00694912
490.19	0.02078506		1020.2	0.01280259		1550.19	0.01112681		2080.2	0.01115636		2610.2	-0.00707477
490.39	0.02015593		1020.4	0.01307299		1550.39	0.01095887		2080.4	0.01127393		2610.4	-0.00762174
490.59	0.01948095		1020.6	0.012247		1550.59	0.01109074		2080.6	0.01128723		2610.6	-0.00824233
490.79	0.01863818		1020.8	0.01202792		1550.79	0.0124043		2080.8	0.01146755		2610.8	-0.00820936
490.99	0.01794116		1021	0.01191683		1550.99	0.0118402		2081	0.01125506		2611	-0.00830082
491.19	0.0175423		1021.2	0.01133468		1551.19	0.01256797		2081.2	0.01103049		2611.2	-0.00842684
491.39	0.01670497		1021.4	0.01036093		1551.39	0.01174518		2081.4	0.01123901		2611.4	-0.00880205
491.59	0.01611571		1021.6	0.01084209		1551.59	0.01158418		2081.6	0.01126837		2611.6	-0.00900098
491.79	0.01465091		1021.8	0.01124865		1551.79	0.01084658		2081.8	0.01156614		2611.8	-0.00985585
491.99	0.0152658		1022	0.0115026		1551.99	0.01108294		2082	0.01221846		2612	-0.00942349
492.19	0.0156619		1022.2	0.01172646		1552.19	0.01146724		2082.2	0.01139934		2612.2	-0.00967387
492.39	0.01567612		1022.4	0.01163448		1552.39	0.011904		2082.4	0.01053784		2612.4	-0.00830219
492.59	0.0157441		1022.6	0.01158775		1552.59	0.01137922		2082.6	0.01105347		2612.6	-0.00824113
492.79	0.01581291		1022.8	0.01101116		1552.79	0.01135874		2082.8	0.01142335		2612.8	-0.00763588
492.99	0.01639421		1023	0.01114351		1552.99	0.01109205		2083	0.01213946		2613	-0.00770987
493.19	0.01640897		1023.2	0.01133059		1553.19	0.01112753		2083.2	0.01148549		2613.2	-0.00755249
493.39	0.01711119		1023.4	0.01106061		1553.39	0.00972077		2083.4	0.01289977		2613.4	-0.0070599
493.59	0.01712715		1023.6	0.01085869		1553.59	0.00978994		2083.6	0.01387374		2613.6	-0.0074354
493.79	0.01657188		1023.8	0.01097255		1553.79	0.01055431		2083.8	0.01434121		2613.8	-0.0063365
493.99	0.01724418		1024	0.01093087		1553.99	0.01104424		2084	0.01390795		2614	-0.0063254
494.19	0.01688821		1024.2	0.00971215		1554.19	0.01086399		2084.2	0.01430778		2614.2	-0.00599085
494.39	0.0166028		1024.4	0.00994154		1554.39	0.01092103		2084.4	0.01478037		2614.4	-0.00525031
494.59	0.0165025		1024.6	0.00979549		1554.59	0.01171099		2084.6	0.01479787		2614.6	-0.00612352
494.79	0.01589954		1024.8	0.00963043		1554.79	0.01183148		2084.8	0.01437082		2614.8	-0.00716812
494.99	0.01571681		1025	0.00943053		1554.99	0.0115099		2085	0.01400721		2615	-0.00742686
495.19	0.01597697		1025.2	0.00877431		1555.19	0.01195833		2085.2	0.01360403		2615.2	-0.00763146
495.39	0.0158515		1025.4	0.009174		1555.39	0.01147039		2085.4	0.01291185		2615.4	-0.00848932
495.59	0.01530835		1025.6	0.01065188		1555.59	0.01172685		2085.6	0.01247649		2615.6	-0.01007254
495.79	0.01485371		1025.8	0.01053494		1555.79	0.010914		2085.8	0.01166319		2615.8	-0.0109347
495.99	0.01511825		1026	0.01022434		1555.99	0.01110833		2086	0.01173515		2616	-0.01063139
496.19	0.01430805		1026.2	0.00964269		1556.19	0.01059542		2086.2	0.01177798		2616.2	-0.01031323
496.39	0.01415536		1026.4	0.0106393		1556.39	0.00955774		2086.4	0.01182292		2616.4	-0.01068859
496.59	0.01396703		1026.6	0.01015272		1556.59	0.00939956		2086.6	0.01154083		2616.6	-0.01167179
496.79	0.0139234		1026.8	0.01003674		1556.79	0.00920216		2086.8	0.01129615		2616.8	-0.01233632
496.99	0.01401266		1027	0.00978747		1556.99	0.00830715		2087	0.01105036		2617	-0.01314999
497.19	0.01400043		1027.2	0.00963479		1557.19	0.00823286		2087.2	0.01082131		2617.2	-0.01415527
497.39	0.01397908		1027.4	0.01001856		1557.39	0.00813154		2087.4	0.01073313		2617.4	-0.01364854
497.59	0.01401114		1027.6	0.01083984		1557.59	0.0087837		2087.6	0.01061706		2617.6	-0.01338406
497.79	0.01537192		1027.8	0.01201518		1557.79	0.00957373		2087.8	0.01071164		2617.8	-0.01224417
497.99	0.0165298		1028	0.01195903		1557.99	0.00912319		2088	0.0110982		2618	-0.01294663
498.19	0.01588035		1028.2	0.01233637		1558.19	0.00891663		2088.2	0.01111516		2618.2	-0.01248186
498.39	0.01627414		1028.4	0.01304784		1558.39	0.00959964		2088.4	0.01104481		2618.4	-0.01225536
498.59	0.01597062		1028.6	0.01272876		1558.59	0.01054388		2088.6	0.01114166		2618.6	-0.01270933
498.79	0.01581831		1028.8	0.01268903		1558.79	0.01119907		2088.8	0.01104513		2618.8	-0.01248926
498.99	0.01620544		1029	0.01286905		1558.99	0.01156459		2089	0.01106917		2619	-0.01133838
499.19	0.01682092		1029.2	0.0129808		1559.19	0.01247255		2089.2	0.0108526		2619.2	-0.01064264
499.39	0.01639262		1029.4	0.01289257		1559.39	0.01312267		2089.4	0.0104071		2619.4	-0.01126728
499.59	0.01515379		1029.6	0.0124249		1559.59	0.01292851		2089.6	0.01065543		2619.6	-0.0113188
499.79	0.01539153		1029.8	0.01204028		1559.79	0.01255815		2089.8	0.01033341		2619.8	-0.01022628
499.99	0.01559486		1030	0.01139321		1559.99	0.01260978		2090	0.01155776		2620	-0.01002992
500.19	0.01463357		1030.2	0.01032751		1560.19	0.01244858		2090.2	0.01168581		2620.2	-0.01052564
500.39	0.01532509		1030.4	0.00990584		1560.39	0.01218036		2090.4	0.01121791		2620.4	-0.01139585
500.59	0.01515274		1030.6	0.00891284		1560.59	0.01297445		2090.6	0.01082987		2620.6	-0.01203081
500.79	0.01489132		1030.8	0.00902012		1560.79	0.01209362		2090.8	0.0112828		2620.8	-0.01264124
500.99	0.01468163		1031	0.00789155		1560.99	0.01186121		2091	0.01077394		2621	-0.01283136
501.19	0.01468002		1031.2	0.00829219		1561.19	0.01138407		2091.2	0.01115507		2621.2	-0.01344535
501.39	0.01515828		1031.4	0.00853039		1561.39	0.01036459		2091.4	0.0101677		2621.4	-0.01292158
501.59	0.0160789		1031.6	0.00893489		1561.59	0.00899473		2091.6	0.01033024		2621.6	-0.01321085
501.79	0.01639722		1031.8	0.00953845		1561.79	0.00853842		2091.8	0.01092648		2621.8	-0.01248442
501.99	0.01582638		1032	0.01031017		1561.99	0.00789171		2092	0.01156331		2622	-0.01288978
502.19	0.01541841		1032.2	0.01045312		1562.19	0.00766993		2092.2	0.01070042		2622.2	-0.01161942
502.39	0.01501423		1032.4	0.01048288		1562.39	0.00830704		2092.4	0.01023831		2622.4	-0.01130225
502.59	0.01445953		1032.6	0.01051634		1562.59	0.0078184		2092.6	0.01002363		2622.6	-0.01074653
502.79	0.01435484		1032.8	0.0108128		1562.79	0.00820501		2092.8	0.01020075		2622.8	-0.0099629
502.99	0.01416094		1033	0.01051383		1562.99	0.00869621		2093	0.00919		2623	-0.00893029
503.19	0.01393108		1033.2	0.01090303		1563.19	0.0100093		2093.2	0.00929117		2623.2	-0.00848351
503.39	0.01311881		1033.4	0.01149368		1563.39	0.01050416		2093.4	0.00903442		2623.4	-0.00737189
503.59	0.01334842		1033.6	0.01201378		1563.59	0.01029039		2093.6	0.00986563		2623.6	-0.00718164
503.79	0.0145891		1033.8	0.0125718		1563.79	0.01096693		2093.8	0.0098367		2623.8	-0.00783647
503.99	0.01437414		1034	0.01295046		1563.99	0.01070929		2094	0.010023		2624	-0.00780787
504.19	0.01354934		1034.2	0.01178077		1564.19	0.01064763		2094.2	0.01049129		2624.2	-0.00868265
504.39	0.0143022		1034.4	0.01190828		1564.39	0.01133166		2094.4	0.01055724		2624.4	-0.00887098
504.59	0.01424059		1034.6	0.01186769		1564.59	0.01201994		2094.6	0.01099024		2624.6	-0.00971453
504.79	0.01388758		1034.8	0.01153917		1564.79	0.01148708		2094.8	0.01180375		2624.8	-0.00944118
504.99	0.01443613		1035	0.01060201		1564.99	0.01219234		2095	0.01239746		2625	-0.01000279
505.19	0.01465901		1035.2	0.01057095		1565.19	0.01114301		2095.2	0.01343797		2625.2	-0.01093513
505.39	0.0145669		1035.4	0.01092107		1565.39	0.01080321		2095.4	0.01338412		2625.4	-0.01101765
505.59	0.01452697		1035.6	0.01075764		1565.59	0.01106834		2095.6	0.01342446		2625.6	-0.0105967
505.79	0.01365186		1035.8	0.0108706		1565.79	0.01181622		2095.8	0.01419364		2625.8	-0.00986468
505.99	0.01358236		1036	0.01128745		1565.99	0.01142685		2096	0.01370009		2626	-0.00956845
506.19	0.01413354		1036.2	0.01076718		1566.19	0.01025054		2096.2	0.01291345		2626.2	-0.00894739
506.39	0.01289919		1036.4	0.01087008		1566.39	0.01133576		2096.4	0.01233458		2626.4	-0.00970193
506.59	0.01299985		1036.6	0.01114741		1566.59	0.01124807		2096.6	0.01244965		2626.6	-0.00949503
506.79	0.01407548		1036.8	0.01026721		1566.79	0.01191129		2096.8	0.01206911		2626.8	-0.0088336
506.99	0.01390076		1037	0.01042566		1566.99	0.0121028		2097	0.01120771		2627	-0.00861569
507.19	0.01436716		1037.2	0.01132096		1567.19	0.01244537		2097.2	0.01135384		2627.2	-0.00924492
507.39	0.01500037		1037.4	0.01165557		1567.39	0.01228894		2097.4	0.01061544		2627.4	-0.00900891
507.59	0.01642812		1037.6	0.01075989		1567.59	0.01115551		2097.6	0.01049053		2627.6	-0.00958139
507.79	0.01651499		1037.8	0.00989025		1567.79	0.01094112		2097.8	0.00961605		2627.8	-0.01041797
507.99	0.01578436		1038	0.01031162		1567.99	0.01047068		2098	0.009146		2628	-0.01008829
508.19	0.01623892		1038.2	0.00936833		1568.19	0.01065784		2098.2	0.00907349		2628.2	-0.01089101
508.39	0.01678232		1038.4	0.01004432		1568.39	0.0104481		2098.4	0.00826868		2628.4	-0.01078503
508.59	0.01723357		1038.6	0.00938788		1568.59	0.0106493		2098.6	0.00828654		2628.6	-0.01110692
508.79	0.01709689		1038.8	0.00995967		1568.79	0.00961177		2098.8	0.00936326		2628.8	-0.01174192
508.99	0.01782306		1039	0.00939803		1568.99	0.00944905		2099	0.00952298		2629	-0.01248704
509.19	0.01691129		1039.2	0.00974386		1569.19	0.0085042		2099.2	0.00937338		2629.2	-0.01245561
509.39	0.01582866		1039.4	0.01068462		1569.39	0.00810475		2099.4	0.00897077		2629.4	-0.01286027
509.59	0.01557157		1039.6	0.01032055		1569.59	0.00765206		2099.6	0.00931967		2629.6	-0.01253331
509.79	0.01492923		1039.8	0.01028387		1569.79	0.00750769		2099.8	0.00974649		2629.8	-0.0122282
509.99	0.01486088		1040	0.01028544		1569.99	0.00698469		2100	0.00930041		2630	-0.01238366
510.19	0.01478065		1040.2	0.01015957		1570.19	0.00630569		2100.2	0.00997825		2630.2	-0.01289835
510.39	0.01462923		1040.4	0.00959086		1570.39	0.0074453		2100.4	0.00983413		2630.4	-0.01368151
510.59	0.01511222		1040.6	0.00949079		1570.59	0.0073047		2100.6	0.01007756		2630.6	-0.01337243
510.79	0.01514199		1040.8	0.00870502		1570.79	0.00726108		2100.8	0.0100984		2630.8	-0.01280487
510.99	0.01418171		1041	0.00818891		1570.99	0.0082238		2101	0.01025367		2631	-0.01356815
511.19	0.01470302		1041.2	0.00778303		1571.19	0.00882877		2101.2	0.01077831		2631.2	-0.01350537
511.39	0.01520808		1041.4	0.00674173		1571.39	0.00841568		2101.4	0.01118268		2631.4	-0.01272692
511.59	0.01499394		1041.6	0.00552668		1571.59	0.00865617		2101.6	0.01199626		2631.6	-0.01210139
511.79	0.01449911		1041.8	0.00590577		1571.79	0.01057337		2101.8	0.01215224		2631.8	-0.01263622
511.99	0.01300587		1042	0.00679655		1571.99	0.0116633		2102	0.0125824		2632	-0.01219886
512.19	0.01375561		1042.2	0.0062458		1572.19	0.01220308		2102.2	0.01277653		2632.2	-0.01248757
512.39	0.01268708		1042.4	0.00662127		1572.39	0.01251459		2102.4	0.01295241		2632.4	-0.01266387
512.59	0.01307461		1042.6	0.00643429		1572.59	0.01289663		2102.6	0.01325534		2632.6	-0.01311853
512.79	0.01305291		1042.8	0.006865		1572.79	0.01203662		2102.8	0.01388796		2632.8	-0.01336566
512.99	0.01362721		1043	0.00682337		1572.99	0.01199693		2103	0.01319073		2633	-0.01277778
513.19	0.01330043		1043.2	0.00772368		1573.19	0.01241992		2103.2	0.01326088		2633.2	-0.01266967
513.39	0.01298542		1043.4	0.0080799		1573.39	0.01160461		2103.4	0.01316842		2633.4	-0.01253787
513.59	0.01364835		1043.6	0.00765718		1573.59	0.01105875		2103.6	0.01324668		2633.6	-0.01210466
513.79	0.01435126		1043.8	0.00768241		1573.79	0.01083605		2103.8	0.01191849		2633.8	-0.01198945
513.99	0.01497663		1044	0.00856006		1573.99	0.01039661		2104	0.01143869		2634	-0.01186224
514.19	0.01572573		1044.2	0.00894829		1574.19	0.00896564		2104.2	0.01179745		2634.2	-0.01248851
514.39	0.01617209		1044.4	0.00907325		1574.39	0.00920796		2104.4	0.01066321		2634.4	-0.01196285
514.59	0.01583248		1044.6	0.00905962		1574.59	0.00904518		2104.6	0.01015203		2634.6	-0.01147037
514.79	0.01557328		1044.8	0.00902776		1574.79	0.00785086		2104.8	0.01020519		2634.8	-0.01016626
514.99	0.01527469		1045	0.00885505		1574.99	0.00735924		2105	0.01020431		2635	-0.01047762
515.19	0.01544575		1045.2	0.0098561		1575.19	0.00731002		2105.2	0.01003114		2635.2	-0.00979708
515.39	0.01447569		1045.4	0.00972831		1575.39	0.00782277		2105.4	0.0102332		2635.4	-0.00950982
515.59	0.01376363		1045.6	0.01104121		1575.59	0.00839391		2105.6	0.00986126		2635.6	-0.00976855
515.79	0.01346053		1045.8	0.0116922		1575.79	0.00923952		2105.8	0.00929475		2635.8	-0.01003666
515.99	0.0121157		1046	0.01175473		1575.99	0.01000817		2106	0.00961287		2636	-0.01044655
516.19	0.01276401		1046.2	0.01138401		1576.19	0.00984327		2106.2	0.00941242		2636.2	-0.01089907
516.39	0.01254499		1046.4	0.01197102		1576.39	0.01026783		2106.4	0.00842082		2636.4	-0.01075226
516.59	0.01376211		1046.6	0.0121135		1576.59	0.01067478		2106.6	0.00849009		2636.6	-0.01064173
516.79	0.01420023		1046.8	0.01203771		1576.79	0.01141979		2106.8	0.00883935		2636.8	-0.00985891
516.99	0.01475079		1047	0.01209986		1576.99	0.01098272		2107	0.00833524		2637	-0.00959574
517.19	0.01443905		1047.2	0.01187685		1577.19	0.01150678		2107.2	0.00816228		2637.2	-0.00996585
517.39	0.01504166		1047.4	0.01143844		1577.39	0.01099232		2107.4	0.00774475		2637.4	-0.00914986
517.59	0.0158892		1047.6	0.01129943		1577.59	0.01100869		2107.6	0.00747658		2637.6	-0.00880272
517.79	0.01628586		1047.8	0.01090496		1577.79	0.01097555		2107.8	0.00655352		2637.8	-0.00848302
517.99	0.01588053		1048	0.01021929		1577.99	0.01178441		2108	0.00655488		2638	-0.00937373
518.19	0.01564545		1048.2	0.00927981		1578.19	0.01193167		2108.2	0.00659917		2638.2	-0.01001123
518.39	0.01527762		1048.4	0.0084397		1578.39	0.01307806		2108.4	0.00624073		2638.4	-0.00938262
518.59	0.01487603		1048.6	0.00772397		1578.59	0.01265551		2108.6	0.00683046		2638.6	-0.00970005
518.79	0.01453869		1048.8	0.00785627		1578.79	0.01245188		2108.8	0.00716196		2638.8	-0.00959253
518.99	0.01385419		1049	0.00748867		1578.99	0.01299062		2109	0.00807062		2639	-0.0103963
519.19	0.01323815		1049.2	0.00840947		1579.19	0.01403582		2109.2	0.00832144		2639.2	-0.01062102
519.39	0.01274065		1049.4	0.0082352		1579.39	0.01424535		2109.4	0.00962081		2639.4	-0.01102306
519.59	0.01319477		1049.6	0.00863329		1579.59	0.01389215		2109.6	0.01005925		2639.6	-0.01119972
519.79	0.01319064		1049.8	0.00761557		1579.79	0.01401342		2109.8	0.01111622		2639.8	-0.01125225
519.99	0.01308542		1050	0.00812017		1579.99	0.01424861		2110	0.01122406		2640	-0.01208058
520.19	0.01409864		1050.2	0.00849902		1580.19	0.01329126		2110.2	0.0112777		2640.2	-0.0134222
520.39	0.01529843		1050.4	0.00877265		1580.39	0.01258453		2110.4	0.01111788		2640.4	-0.01368293
520.59	0.01548851		1050.6	0.00877355		1580.59	0.01189903		2110.6	0.01146992		2640.6	-0.01306777
520.79	0.01599376		1050.8	0.00851544		1580.79	0.01083863		2110.8	0.01217256		2640.8	-0.01188445
520.99	0.01568217		1051	0.00919434		1580.99	0.0100277		2111	0.01156405		2641	-0.0115614
521.19	0.01477193		1051.2	0.008976		1581.19	0.00980414		2111.2	0.01212278		2641.2	-0.01052321
521.39	0.01511161		1051.4	0.00897515		1581.39	0.01017308		2111.4	0.0120151		2641.4	-0.00942727
521.59	0.0147032		1051.6	0.00871161		1581.59	0.00992071		2111.6	0.01138041		2641.6	-0.00967753
521.79	0.01427076		1051.8	0.00836935		1581.79	0.01014346		2111.8	0.01063775		2641.8	-0.00934295
521.99	0.0137975		1052	0.00844819		1581.99	0.01056397		2112	0.01066476		2642	-0.00982418
522.19	0.01394586		1052.2	0.00765935		1582.19	0.01054266		2112.2	0.01109579		2642.2	-0.00942013
522.39	0.01335831		1052.4	0.00778932		1582.39	0.01159092		2112.4	0.01115089		2642.4	-0.00923482
522.59	0.01288198		1052.6	0.00746819		1582.59	0.01225203		2112.6	0.01175768		2642.6	-0.00891378
522.79	0.01264473		1052.8	0.00720476		1582.79	0.01248831		2112.8	0.01130815		2642.8	-0.00868479
522.99	0.01209093		1053	0.00657721		1582.99	0.01164694		2113	0.012126		2643	-0.00843588
523.19	0.01207292		1053.2	0.00633502		1583.19	0.0112612		2113.2	0.01308836		2643.2	-0.00844504
523.39	0.0121488		1053.4	0.00613963		1583.39	0.01071266		2113.4	0.0129885		2643.4	-0.00886036
523.59	0.01246038		1053.6	0.00625		1583.59	0.01028377		2113.6	0.01283997		2643.6	-0.00869901
523.79	0.01253566		1053.8	0.00592152		1583.79	0.01039412		2113.8	0.01283966		2643.8	-0.01067894
523.99	0.01285458		1054	0.00654394		1583.99	0.00975308		2114	0.01163787		2644	-0.01170711
524.19	0.01414079		1054.2	0.00704434		1584.19	0.00926079		2114.2	0.0110944		2644.2	-0.01238182
524.39	0.01525044		1054.4	0.00701241		1584.39	0.00872978		2114.4	0.0104361		2644.4	-0.01253835
524.59	0.01592943		1054.6	0.00739839		1584.59	0.00909792		2114.6	0.0097109		2644.6	-0.01098091
524.79	0.01634353		1054.8	0.00693079		1584.79	0.00958144		2114.8	0.01027767		2644.8	-0.01076515
524.99	0.01590688		1055	0.00775994		1584.99	0.01021291		2115	0.009818		2645	-0.01094412
525.19	0.01672968		1055.2	0.00724072		1585.19	0.0101234		2115.2	0.00974094		2645.2	-0.01034899
525.39	0.01788145		1055.4	0.00757093		1585.39	0.01073002		2115.4	0.00964126		2645.4	-0.0108008
525.59	0.01829213		1055.6	0.00717744		1585.59	0.01010432		2115.6	0.00927906		2645.6	-0.01055926
525.79	0.01868047		1055.8	0.00725186		1585.79	0.01076276		2115.8	0.00925247		2645.8	-0.0095556
525.99	0.0190624		1056	0.00701801		1585.99	0.01124709		2116	0.0088183		2646	-0.00954516
526.19	0.0191277		1056.2	0.00738356		1586.19	0.01255901		2116.2	0.00888013		2646.2	-0.01011022
526.39	0.01753518		1056.4	0.00817552		1586.39	0.01348399		2116.4	0.00881302		2646.4	-0.0103896
526.59	0.01799605		1056.6	0.00773448		1586.59	0.01305066		2116.6	0.0093088		2646.6	-0.01026077
526.79	0.0176532		1056.8	0.00751698		1586.79	0.0122371		2116.8	0.00896483		2646.8	-0.01051069
526.99	0.01707671		1057	0.00736347		1586.99	0.01162515		2117	0.00954705		2647	-0.01086135
527.19	0.01635486		1057.2	0.00749099		1587.19	0.01115188		2117.2	0.00937963		2647.2	-0.01159324
527.39	0.01575344		1057.4	0.00903204		1587.39	0.01051865		2117.4	0.00823473		2647.4	-0.01184709
527.59	0.01493635		1057.6	0.00896996		1587.59	0.00998306		2117.6	0.00873271		2647.6	-0.01171122
527.79	0.01438994		1057.8	0.00850164		1587.79	0.01033138		2117.8	0.0091072		2647.8	-0.01258436
527.99	0.0146584		1058	0.00920961		1587.99	0.00941259		2118	0.00903349		2648	-0.0120531
528.19	0.01535689		1058.2	0.00965812		1588.19	0.00986246		2118.2	0.00846137		2648.2	-0.0121751
528.39	0.01530429		1058.4	0.00976784		1588.39	0.00978407		2118.4	0.00883677		2648.4	-0.0124667
528.59	0.01553804		1058.6	0.0094451		1588.59	0.00899598		2118.6	0.00919392		2648.6	-0.01208758
528.79	0.01468182		1058.8	0.00927095		1588.79	0.00888476		2118.8	0.01066085		2648.8	-0.01269028
528.99	0.01470077		1059	0.00966172		1588.99	0.00836479		2119	0.01060427		2649	-0.01222813
529.19	0.01521552		1059.2	0.00892213		1589.19	0.00792419		2119.2	0.01135655		2649.2	-0.01207138
529.39	0.01529233		1059.4	0.00894434		1589.39	0.00808186		2119.4	0.01276344		2649.4	-0.0122302
529.59	0.01503379		1059.6	0.00829293		1589.59	0.0082699		2119.6	0.01295768		2649.6	-0.01172949
529.79	0.01466734		1059.8	0.00864197		1589.79	0.00960307		2119.8	0.01296344		2649.8	-0.01174045
529.99	0.01427805		1060	0.00893475		1589.99	0.01012138		2120	0.01231571		2650	-0.01262751
530.19	0.01430801		1060.2	0.00987382		1590.19	0.01012154		2120.2	0.01181164		2650.2	-0.01292519
530.39	0.01276586		1060.4	0.00981527		1590.39	0.00953885		2120.4	0.01123388		2650.4	-0.01284398
530.59	0.01280515		1060.6	0.00999368		1590.59	0.00851959		2120.6	0.01136819		2650.6	-0.01224848
530.79	0.01215111		1060.8	0.00977218		1590.79	0.00869878		2120.8	0.01057001		2650.8	-0.01223517
530.99	0.0117698		1061	0.01017457		1590.99	0.00843691		2121	0.00936369		2651	-0.01185476
531.19	0.01078322		1061.2	0.01106338		1591.19	0.00799639		2121.2	0.00796269		2651.2	-0.01167971
531.39	0.01101783		1061.4	0.01207314		1591.39	0.00782125		2121.4	0.00682155		2651.4	-0.01163036
531.59	0.01081123		1061.6	0.01182726		1591.59	0.00860299		2121.6	0.00648093		2651.6	-0.01163529
531.79	0.01163318		1061.8	0.01255822		1591.79	0.00900115		2121.8	0.00614324		2651.8	-0.0115062
531.99	0.01267078		1062	0.01280006		1591.99	0.00856045		2122	0.0060713		2652	-0.0114899
532.19	0.01264663		1062.2	0.01245225		1592.19	0.00873808		2122.2	0.00565266		2652.2	-0.01177932
532.39	0.01256798		1062.4	0.01186998		1592.39	0.00893977		2122.4	0.00609883		2652.4	-0.01129278
532.59	0.0133652		1062.6	0.01155228		1592.59	0.00799415		2122.6	0.00693788		2652.6	-0.01081854
532.79	0.01351417		1062.8	0.01116263		1592.79	0.0085403		2122.8	0.00861677		2652.8	-0.00983138
532.99	0.0144725		1063	0.01033155		1592.99	0.00894571		2123	0.0087874		2653	-0.0098235
533.19	0.01473203		1063.2	0.00917027		1593.19	0.00965202		2123.2	0.01007262		2653.2	-0.00996565
533.39	0.01502074		1063.4	0.00802506		1593.39	0.01034512		2123.4	0.01138183		2653.4	-0.00990191
533.59	0.01499063		1063.6	0.00749476		1593.59	0.01078246		2123.6	0.01181427		2653.6	-0.00995647
533.79	0.01472684		1063.8	0.00725173		1593.79	0.01176206		2123.8	0.0121568		2653.8	-0.00988482
533.99	0.01441425		1064	0.00615512		1593.99	0.01113089		2124	0.01166854		2654	-0.00966309
534.19	0.01421499		1064.2	0.00604834		1594.19	0.01082162		2124.2	0.01185921		2654.2	-0.0088632
534.39	0.01265062		1064.4	0.00581274		1594.39	0.01104604		2124.4	0.01251038		2654.4	-0.00934485
534.59	0.01325817		1064.6	0.00656826		1594.59	0.01050185		2124.6	0.01362255		2654.6	-0.00910117
534.79	0.01368798		1064.8	0.00772901		1594.79	0.01125285		2124.8	0.01327132		2654.8	-0.00961839
534.99	0.01329247		1065	0.00892939		1594.99	0.01107862		2125	0.01236542		2655	-0.01037551
535.19	0.0131158		1065.2	0.01015597		1595.19	0.01090605		2125.2	0.01122145		2655.2	-0.01146135
535.39	0.01339075		1065.4	0.01047789		1595.39	0.00996599		2125.4	0.01060202		2655.4	-0.0123493
535.59	0.01292328		1065.6	0.01064842		1595.59	0.00977581		2125.6	0.01026215		2655.6	-0.0122795
535.79	0.01314697		1065.8	0.00981386		1595.79	0.00860199		2125.8	0.01003823		2655.8	-0.01225692
535.99	0.01226239		1066	0.00848908		1595.99	0.00827757		2126	0.00960779		2656	-0.01279822
536.19	0.0109595		1066.2	0.00829488		1596.19	0.00808967		2126.2	0.00930888		2656.2	-0.01257522
536.39	0.01163677		1066.4	0.00776834		1596.39	0.00763475		2126.4	0.00885928		2656.4	-0.01161371
536.59	0.01180376		1066.6	0.00839182		1596.59	0.00650594		2126.6	0.00914925		2656.6	-0.01149634
536.79	0.01160228		1066.8	0.00779417		1596.79	0.00624578		2126.8	0.00973138		2656.8	-0.01184016
536.99	0.01085579		1067	0.00757813		1596.99	0.00650283		2127	0.00981796		2657	-0.01193059
537.19	0.01069029		1067.2	0.00698046		1597.19	0.00623152		2127.2	0.01020865		2657.2	-0.01191058
537.39	0.01109001		1067.4	0.00644863		1597.39	0.00629715		2127.4	0.01066342		2657.4	-0.01255634
537.59	0.01097248		1067.6	0.00688554		1597.59	0.00676637		2127.6	0.01019584		2657.6	-0.01198089
537.79	0.01116429		1067.8	0.0063781		1597.79	0.0075156		2127.8	0.01014536		2657.8	-0.01105717
537.99	0.01138657		1068	0.00588506		1597.99	0.007729		2128	0.00974685		2658	-0.01064969
538.19	0.01206394		1068.2	0.00671845		1598.19	0.00866342		2128.2	0.01057555		2658.2	-0.01078973
538.39	0.01255575		1068.4	0.00738969		1598.39	0.00912626		2128.4	0.01096739		2658.4	-0.01116926
538.59	0.01353516		1068.6	0.00890313		1598.59	0.00947499		2128.6	0.01161876		2658.6	-0.01105749
538.79	0.01336219		1068.8	0.00975929		1598.79	0.01047149		2128.8	0.01087395		2658.8	-0.01110268
538.99	0.01254968		1069	0.00968935		1598.99	0.01089375		2129	0.0099129		2659	-0.01133817
539.19	0.01219872		1069.2	0.00971143		1599.19	0.01157527		2129.2	0.00979468		2659.2	-0.01083716
539.39	0.0120937		1069.4	0.00942767		1599.39	0.01102463		2129.4	0.01030171		2659.4	-0.01013348
539.59	0.01177849		1069.6	0.00800562		1599.59	0.01224395		2129.6	0.00986005		2659.6	-0.01079112
539.79	0.01079868		1069.8	0.00633016		1599.79	0.01291621		2129.8	0.01055554		2659.8	-0.01049111
539.99	0.00985311		1070	0.0062326		1599.99	0.01323194		2130	0.01035433		2660	-0.01054041
540.19	0.0100823		1070.2	0.00600646		1600.19	0.01332538		2130.2	0.01078038		2660.2	-0.0099808
540.39	0.0110092		1070.4	0.0056455		1600.39	0.01290061		2130.4	0.0103046		2660.4	-0.00980896
540.59	0.01135175		1070.6	0.00592515		1600.59	0.01340915		2130.6	0.01073792		2660.6	-0.00979236
540.79	0.01137125		1070.8	0.00564819		1600.79	0.01277751		2130.8	0.01136889		2660.8	-0.01002681
540.99	0.01157638		1071	0.00565152		1600.99	0.01300082		2131	0.0112366		2661	-0.00984017
541.19	0.0132593		1071.2	0.00640422		1601.19	0.01187292		2131.2	0.01170938		2661.2	-0.01002842
541.39	0.01399461		1071.4	0.0065538		1601.39	0.01160075		2131.4	0.01106027		2661.4	-0.01044365
541.59	0.01419322		1071.6	0.00617297		1601.59	0.01073843		2131.6	0.00962299		2661.6	-0.01026223
541.79	0.01491842		1071.8	0.00698082		1601.79	0.01023919		2131.8	0.00930926		2661.8	-0.01034454
541.99	0.0147382		1072	0.00726081		1601.99	0.01024107		2132	0.00901115		2662	-0.01145515
542.19	0.01571389		1072.2	0.00812718		1602.19	0.00991907		2132.2	0.00910995		2662.2	-0.01137102
542.39	0.0160483		1072.4	0.00803113		1602.39	0.01033893		2132.4	0.00888707		2662.4	-0.01234049
542.59	0.01509149		1072.6	0.0084572		1602.59	0.01071752		2132.6	0.0086029		2662.6	-0.0113591
542.79	0.01409544		1072.8	0.00821639		1602.79	0.01104853		2132.8	0.00805058		2662.8	-0.01180373
542.99	0.01325744		1073	0.0082574		1602.99	0.01133642		2133	0.00803812		2663	-0.01172936
543.19	0.0132259		1073.2	0.00884534		1603.19	0.01109398		2133.2	0.0079013		2663.2	-0.01185884
543.39	0.01294762		1073.4	0.00900479		1603.39	0.01024044		2133.4	0.00838731		2663.4	-0.01176245
543.59	0.01236302		1073.6	0.00846569		1603.59	0.01078004		2133.6	0.00794828		2663.6	-0.01197237
543.79	0.0118872		1073.8	0.00882048		1603.79	0.01072736		2133.8	0.00851681		2663.8	-0.01132744
543.99	0.01120222		1074	0.00802903		1603.99	0.0110195		2134	0.0081169		2664	-0.0116923
544.19	0.01115258		1074.2	0.0073926		1604.19	0.01147691		2134.2	0.00882955		2664.2	-0.01181192
544.39	0.01121107		1074.4	0.0072942		1604.39	0.01141987		2134.4	0.00833329		2664.4	-0.01149309
544.59	0.01114974		1074.6	0.00764383		1604.59	0.01168209		2134.6	0.00873734		2664.6	-0.01083015
544.79	0.01095224		1074.8	0.00741571		1604.79	0.01085804		2134.8	0.00853633		2664.8	-0.01086428
544.99	0.01082964		1075	0.00728554		1604.99	0.0105929		2135	0.00794116		2665	-0.00993062
545.19	0.01028618		1075.2	0.00811841		1605.19	0.00972134		2135.2	0.00839385		2665.2	-0.00996825
545.39	0.00844353		1075.4	0.00695196		1605.39	0.01016498		2135.4	0.00746062		2665.4	-0.00996446
545.59	0.00791791		1075.6	0.00654811		1605.59	0.00958259		2135.6	0.00696103		2665.6	-0.01114876
545.79	0.00785601		1075.8	0.00696859		1605.79	0.0102667		2135.8	0.00758537		2665.8	-0.01053522
545.99	0.00800015		1076	0.0066043		1605.99	0.01032682		2136	0.0072467		2666	-0.01114053
546.19	0.0090574		1076.2	0.00708752		1606.19	0.01019787		2136.2	0.00775143		2666.2	-0.01067778
546.39	0.00870598		1076.4	0.0065637		1606.39	0.01032276		2136.4	0.00746747		2666.4	-0.0110244
546.59	0.00838171		1076.6	0.00619923		1606.59	0.0102347		2136.6	0.00715311		2666.6	-0.010318
546.79	0.00882354		1076.8	0.00630511		1606.79	0.01083027		2136.8	0.00682144		2666.8	-0.01095659
546.99	0.00950931		1077	0.00641279		1606.99	0.0107098		2137	0.007327		2667	-0.01027843
547.19	0.01062704		1077.2	0.00691896		1607.19	0.01027896		2137.2	0.0071276		2667.2	-0.0098735
547.39	0.01215068		1077.4	0.00773749		1607.39	0.00967462		2137.4	0.00756967		2667.4	-0.01013383
547.59	0.01362395		1077.6	0.00795765		1607.59	0.01006608		2137.6	0.00717747		2667.6	-0.0100929
547.79	0.01382397		1077.8	0.00786033		1607.79	0.01007989		2137.8	0.00751583		2667.8	-0.01048951
547.99	0.01357015		1078	0.00763408		1607.99	0.01020702		2138	0.00844011		2668	-0.01039607
548.19	0.01459341		1078.2	0.00802071		1608.19	0.01011509		2138.2	0.00895413		2668.2	-0.01045825
548.39	0.01454914		1078.4	0.00855556		1608.39	0.00964302		2138.4	0.0080776		2668.4	-0.01008688
548.59	0.01438813		1078.6	0.00908319		1608.59	0.00902687		2138.6	0.00888376		2668.6	-0.00967356
548.79	0.0135906		1078.8	0.0087879		1608.79	0.00914116		2138.8	0.00872682		2668.8	-0.01024156
548.99	0.01254679		1079	0.01021965		1608.99	0.00918998		2139	0.00895277		2669	-0.01006685
549.19	0.01151484		1079.2	0.01113931		1609.19	0.00905207		2139.2	0.01033305		2669.2	-0.01103089
549.39	0.01120304		1079.4	0.01074779		1609.39	0.00998037		2139.4	0.01046339		2669.4	-0.01112189
549.59	0.01188289		1079.6	0.01150615		1609.59	0.01022548		2139.6	0.01126723		2669.6	-0.01244835
549.79	0.01152746		1079.8	0.0117775		1609.79	0.010807		2139.8	0.01170072		2669.8	-0.01175727
549.99	0.01202448		1080	0.01224019		1609.99	0.01079877		2140	0.01100538		2670	-0.01262923
550.19	0.01193595		1080.2	0.01306676		1610.19	0.01138986		2140.2	0.01138422		2670.2	-0.01312343
550.39	0.0118212		1080.4	0.01227747		1610.39	0.01136167		2140.4	0.010431		2670.4	-0.01319196
550.59	0.01318887		1080.6	0.01203198		1610.59	0.01207788		2140.6	0.01009834		2670.6	-0.01359814
550.79	0.01387248		1080.8	0.01180913		1610.79	0.0123134		2140.8	0.01005914		2670.8	-0.01290516
550.99	0.01405363		1081	0.01134712		1610.99	0.01164327		2141	0.01074513		2671	-0.01263
551.19	0.01518932		1081.2	0.01085982		1611.19	0.01137566		2141.2	0.01013387		2671.2	-0.01231883
551.39	0.01549167		1081.4	0.01077533		1611.39	0.01073598		2141.4	0.00916383		2671.4	-0.0124218
551.59	0.01522877		1081.6	0.0092331		1611.59	0.010452		2141.6	0.00876925		2671.6	-0.01134099
551.79	0.01509774		1081.8	0.00820613		1611.79	0.01028189		2141.8	0.0089951		2671.8	-0.01071383
551.99	0.01526711		1082	0.00809516		1611.99	0.01015748		2142	0.0098626		2672	-0.00963003
552.19	0.01480315		1082.2	0.00813116		1612.19	0.01006595		2142.2	0.00980163		2672.2	-0.00889572
552.39	0.01425649		1082.4	0.0086397		1612.39	0.00888472		2142.4	0.00919261		2672.4	-0.00860588
552.59	0.01441048		1082.6	0.00887296		1612.59	0.008851		2142.6	0.00950586		2672.6	-0.00838287
552.79	0.01429323		1082.8	0.00916292		1612.79	0.00915825		2142.8	0.00904192		2672.8	-0.00839981
552.99	0.01476137		1083	0.01029988		1612.99	0.00874595		2143	0.00911236		2673	-0.00760924
553.19	0.01411536		1083.2	0.01016447		1613.19	0.00918235		2143.2	0.00935753		2673.2	-0.00737425
553.39	0.01398576		1083.4	0.01027294		1613.39	0.00990363		2143.4	0.00810624		2673.4	-0.00683695
553.59	0.01378862		1083.6	0.01090839		1613.59	0.01063743		2143.6	0.0086385		2673.6	-0.0066852
553.79	0.01399307		1083.8	0.01071745		1613.79	0.01022267		2143.8	0.00835849		2673.8	-0.00603928
553.99	0.01460538		1084	0.0118872		1613.99	0.0105776		2144	0.00778923		2674	-0.00648443
554.19	0.01495005		1084.2	0.01232025		1614.19	0.0107907		2144.2	0.00795692		2674.2	-0.00757491
554.39	0.01556671		1084.4	0.01157504		1614.39	0.01067405		2144.4	0.00721315		2674.4	-0.00756453
554.59	0.01576714		1084.6	0.01115339		1614.59	0.0104502		2144.6	0.00768288		2674.6	-0.00741431
554.79	0.01502049		1084.8	0.01113593		1614.79	0.01043453		2144.8	0.00807179		2674.8	-0.00766772
554.99	0.01379956		1085	0.01160444		1614.99	0.01008936		2145	0.00831085		2675	-0.00748586
555.19	0.01348592		1085.2	0.01074445		1615.19	0.01048121		2145.2	0.00836873		2675.2	-0.00774179
555.39	0.01306182		1085.4	0.01036181		1615.39	0.01066239		2145.4	0.00857527		2675.4	-0.00866415
555.59	0.01335592		1085.6	0.00974563		1615.59	0.01108926		2145.6	0.00936642		2675.6	-0.00917682
555.79	0.01350411		1085.8	0.00982358		1615.79	0.01113446		2145.8	0.00977853		2675.8	-0.01015252
555.99	0.01299662		1086	0.01024062		1615.99	0.01112043		2146	0.01039243		2676	-0.01035535
556.19	0.0125224		1086.2	0.00989433		1616.19	0.01078452		2146.2	0.01054468		2676.2	-0.01120872
556.39	0.01248334		1086.4	0.00955304		1616.39	0.01047754		2146.4	0.01048478		2676.4	-0.01206648
556.59	0.0127579		1086.6	0.00888754		1616.59	0.01084285		2146.6	0.00993916		2676.6	-0.01243742
556.79	0.01227488		1086.8	0.00902033		1616.79	0.0104358		2146.8	0.00978748		2676.8	-0.01261282
556.99	0.01160585		1087	0.00870282		1616.99	0.01009371		2147	0.00936297		2677	-0.01185526
557.19	0.01096045		1087.2	0.00847839		1617.19	0.01083455		2147.2	0.0085582		2677.2	-0.01221033
557.39	0.01026928		1087.4	0.00897238		1617.39	0.01144642		2147.4	0.00748087		2677.4	-0.01214845
557.59	0.00989023		1087.6	0.00911711		1617.59	0.01180786		2147.6	0.00820546		2677.6	-0.01258637
557.79	0.01009548		1087.8	0.00866031		1617.79	0.01181323		2147.8	0.00764048		2677.8	-0.01280265
557.99	0.01007436		1088	0.00925648		1617.99	0.0124584		2148	0.00699909		2678	-0.01330401
558.19	0.01061957		1088.2	0.00842417		1618.19	0.01252381		2148.2	0.00674711		2678.2	-0.01316671
558.39	0.01070239		1088.4	0.00794301		1618.39	0.01212038		2148.4	0.00630249		2678.4	-0.01214038
558.59	0.01077904		1088.6	0.00808634		1618.59	0.01155655		2148.6	0.00683724		2678.6	-0.01140901
558.79	0.01143595		1088.8	0.0091181		1618.79	0.01166793		2148.8	0.00674976		2678.8	-0.0110764
558.99	0.01192072		1089	0.00972483		1618.99	0.01104851		2149	0.0070107		2679	-0.00978756
559.19	0.01305222		1089.2	0.0097778		1619.19	0.01068033		2149.2	0.00752573		2679.2	-0.00978405
559.39	0.01454251		1089.4	0.01018749		1619.39	0.01005293		2149.4	0.00788613		2679.4	-0.00961172
559.59	0.01556903		1089.6	0.01042387		1619.59	0.00918546		2149.6	0.00820496		2679.6	-0.00865888
559.79	0.0164097		1089.8	0.01047273		1619.79	0.00806464		2149.8	0.00853457		2679.8	-0.008092
