# Supplementary material for: Functional development of a V3/glycan-specific broadly neutralizing antibody isolated from a case of HIV superinfection
Source: eLife journal article supplement (doi:10.7554/elife.68110), 2021-07-15
Supplement: fig2-data2 [file G1.xls]

Vers 3.43 Data Simulation
Conc1	7.81E-09	7.81E-09	7.81E-09	7.81E-09	7.81E-09
Start1	200	729.99	1260	1790	2320
Stop1	559.8	1089.79	1619.8	2149.8	2679.8
Time1	Data1	Sim1	Time2	Data2	Sim2	Time3	Data3	Sim3	Time4	Data4	Sim4	Time5	Data5	Sim5
200	0.00545512		729.99	0.00408445		1260	0.00148092		1790	0.00082013		2320	-0.00005486
200.2	0.00618421		730.19	0.00446891		1260.2	0.00067609		1790.2	0.001133		2320.2	0.00114174
200.4	0.00608783		730.39	0.00612159		1260.4	-0.000305		1790.4	0.0013987		2320.4	0.00233195
200.6	0.00649313		730.59	0.00677456		1260.6	-0.00047568		1790.6	0.00169953		2320.6	0.00389311
200.8	0.0061007		730.79	0.00726493		1260.8	-0.00151881		1790.8	0.00150142		2320.8	0.00513397
201	0.00585495		730.99	0.00770697		1261	-0.00251148		1791	0.00155941		2321	0.00620536
201.2	0.0061781		731.19	0.00762987		1261.2	-0.00312793		1791.2	0.00196521		2321.2	0.00686162
201.4	0.00660459		731.39	0.0070663		1261.4	-0.00359184		1791.4	0.00215322		2321.4	0.00771119
201.6	0.00688302		731.59	0.00762506		1261.6	-0.00361206		1791.6	0.00310473		2321.6	0.00834601
201.8	0.00772246		731.79	0.00785183		1261.8	-0.0044425		1791.8	0.00277873		2321.8	0.0086376
202	0.00784426		731.99	0.00856405		1262	-0.00467976		1792	0.00239877		2322	0.00827203
202.2	0.00810043		732.19	0.00767487		1262.2	-0.0045679		1792.2	0.00171112		2322.2	0.0082439
202.4	0.00827789		732.39	0.0077136		1262.4	-0.00452322		1792.4	0.00177354		2322.4	0.00749232
202.6	0.00913474		732.59	0.00780387		1262.6	-0.00460866		1792.6	0.00123764		2322.6	0.00688241
202.8	0.00841731		732.79	0.00787559		1262.8	-0.00466864		1792.8	0.00114856		2322.8	0.00603279
203	0.00824852		732.99	0.00820801		1263	-0.00440227		1793	0.0002333		2323	0.00633726
203.2	0.00904482		733.19	0.00782197		1263.2	-0.00395943		1793.2	0.00085269		2323.2	0.00606655
203.4	0.00932134		733.39	0.00773309		1263.4	-0.00372717		1793.4	0.00092605		2323.4	0.00635868
203.6	0.0090797		733.59	0.00720313		1263.6	-0.00371614		1793.6	0.00071573		2323.6	0.0066161
203.8	0.00980351		733.79	0.00762566		1263.8	-0.00356678		1793.8	0.00106993		2323.8	0.00606552
204	0.0097164		733.99	0.007484		1264	-0.0036175		1794	0.00101427		2324	0.00632524
204.2	0.00924845		734.19	0.00790459		1264.2	-0.0036006		1794.2	0.00097163		2324.2	0.00700941
204.4	0.00853371		734.39	0.00796359		1264.4	-0.00331561		1794.4	0.00128012		2324.4	0.00748679
204.6	0.00798625		734.59	0.00689004		1264.6	-0.00281084		1794.6	0.00216788		2324.6	0.00833641
204.8	0.00707702		734.79	0.00610979		1264.8	-0.00347113		1794.8	0.00209689		2324.8	0.00833933
205	0.00740127		734.99	0.00555222		1265	-0.00379822		1795	0.00376814		2325	0.00926903
205.2	0.00719385		735.19	0.0043349		1265.2	-0.00348218		1795.2	0.00432355		2325.2	0.00953109
205.4	0.00714878		735.39	0.00408297		1265.4	-0.00377514		1795.4	0.00479194		2325.4	0.00957536
205.6	0.007516		735.59	0.00473378		1265.6	-0.00435871		1795.6	0.00513034		2325.6	0.00963726
205.8	0.00840702		735.79	0.00443185		1265.8	-0.00586335		1795.8	0.0042017		2325.8	0.00981084
206	0.00771441		735.99	0.0044709		1266	-0.00654044		1796	0.00384431		2326	0.00953858
206.2	0.0076246		736.19	0.00414032		1266.2	-0.00731746		1796.2	0.00330852		2326.2	0.01007238
206.4	0.00765234		736.39	0.00521528		1266.4	-0.00768654		1796.4	0.00336342		2326.4	0.00818011
206.6	0.00735361		736.59	0.00553017		1266.6	-0.00810204		1796.6	0.00241841		2326.6	0.00722095
206.8	0.00654612		736.79	0.00631038		1266.8	-0.00867998		1796.8	0.00219306		2326.8	0.00624503
207	0.00664704		736.99	0.00719047		1267	-0.00866641		1797	0.00139538		2327	0.00631375
207.2	0.00669354		737.19	0.00791348		1267.2	-0.00885832		1797.2	0.00133414		2327.2	0.00571112
207.4	0.00646871		737.39	0.00794501		1267.4	-0.00954154		1797.4	0.00079833		2327.4	0.00553282
207.6	0.0063183		737.59	0.00870051		1267.6	-0.00943569		1797.6	0.00077765		2327.6	0.00486683
207.8	0.00572406		737.79	0.00971777		1267.8	-0.00963689		1797.8	0.00147298		2327.8	0.00448809
208	0.00647911		737.99	0.0099137		1268	-0.00954591		1798	0.00164069		2328	0.0048176
208.2	0.00658652		738.19	0.00923925		1268.2	-0.00864562		1798.2	0.00189349		2328.2	0.00494151
208.4	0.006645		738.39	0.00934574		1268.4	-0.00768058		1798.4	0.0023359		2328.4	0.00451052
208.6	0.00704827		738.59	0.00993063		1268.6	-0.00709438		1798.6	0.00273458		2328.6	0.0050271
208.8	0.00739844		738.79	0.00995075		1268.8	-0.00645228		1798.8	0.00345712		2328.8	0.00496909
209	0.00797795		738.99	0.00999106		1269	-0.00551584		1799	0.00485872		2329	0.00571047
209.2	0.00703394		739.19	0.00962005		1269.2	-0.00470263		1799.2	0.00390969		2329.2	0.00534632
209.4	0.00692529		739.39	0.0090356		1269.4	-0.00493332		1799.4	0.00478734		2329.4	0.00536347
209.6	0.0070118		739.59	0.00887532		1269.6	-0.00499013		1799.6	0.00520605		2329.6	0.00637151
209.8	0.00693315		739.79	0.00879065		1269.8	-0.00518075		1799.8	0.00538157		2329.8	0.0071863
210	0.00620331		739.99	0.00898181		1270	-0.00462799		1800	0.00561332		2330	0.00772419
210.2	0.00698587		740.19	0.00951185		1270.2	-0.00530358		1800.2	0.00569137		2330.2	0.00846768
210.4	0.00778965		740.39	0.00908254		1270.4	-0.00504463		1800.4	0.00552896		2330.4	0.00790607
210.6	0.00764243		740.59	0.00859117		1270.6	-0.00448082		1800.6	0.00504821		2330.6	0.00797202
210.8	0.00810513		740.79	0.00818879		1270.8	-0.00484687		1800.8	0.00480253		2330.8	0.00784832
211	0.00828726		740.99	0.00825096		1271	-0.00471166		1801	0.00428962		2331	0.00832571
211.2	0.0084584		741.19	0.00782498		1271.2	-0.00471698		1801.2	0.00414595		2331.2	0.00807342
211.4	0.01000741		741.39	0.008563		1271.4	-0.00444361		1801.4	0.00441741		2331.4	0.00761528
211.6	0.01006031		741.59	0.0087924		1271.6	-0.00466823		1801.6	0.00437592		2331.6	0.00762437
211.8	0.01065371		741.79	0.00859249		1271.8	-0.00461978		1801.8	0.00407226		2331.8	0.00838166
212	0.01236261		741.99	0.00829583		1272	-0.00407309		1802	0.00422503		2332	0.00849062
212.2	0.01234646		742.19	0.00890185		1272.2	-0.00313777		1802.2	0.00417448		2332.2	0.00873749
212.4	0.01250457		742.39	0.00911472		1272.4	-0.00291722		1802.4	0.00451605		2332.4	0.00739714
212.6	0.01324329		742.59	0.00890738		1272.6	-0.00282391		1802.6	0.00492223		2332.6	0.00754207
212.8	0.01321399		742.79	0.00858915		1272.8	-0.00296443		1802.8	0.00491436		2332.8	0.00697448
213	0.01258354		742.99	0.00841528		1273	-0.00357467		1803	0.00507181		2333	0.00720524
213.2	0.01055198		743.19	0.00797367		1273.2	-0.00410548		1803.2	0.00482317		2333.2	0.00765229
213.4	0.00970465		743.39	0.00797434		1273.4	-0.00506678		1803.4	0.00590232		2333.4	0.00797408
213.6	0.00849899		743.59	0.00916255		1273.6	-0.00512723		1803.6	0.00576293		2333.6	0.00762074
213.8	0.00816517		743.79	0.00902604		1273.8	-0.00538537		1803.8	0.00568658		2333.8	0.0084741
214	0.00709726		743.99	0.00886044		1274	-0.00495297		1804	0.00541395		2334	0.0086334
214.2	0.00740432		744.19	0.00866791		1274.2	-0.00539565		1804.2	0.00501731		2334.2	0.00842722
214.4	0.00733926		744.39	0.00840882		1274.4	-0.00515579		1804.4	0.00495464		2334.4	0.0083894
214.6	0.00655491		744.59	0.00844054		1274.6	-0.00420964		1804.6	0.00487052		2334.6	0.00751056
214.8	0.00700377		744.79	0.00846711		1274.8	-0.00396081		1804.8	0.00333128		2334.8	0.00670731
215	0.00645226		744.99	0.00789118		1275	-0.00349803		1805	0.00241727		2335	0.00620803
215.2	0.00702995		745.19	0.00739164		1275.2	-0.0030932		1805.2	0.0024366		2335.2	0.00594929
215.4	0.00827707		745.39	0.00777792		1275.4	-0.00324048		1805.4	0.00227188		2335.4	0.00574007
215.6	0.00789696		745.59	0.00663989		1275.6	-0.00350229		1805.6	0.00252196		2335.6	0.00658088
215.8	0.00855406		745.79	0.00646913		1275.8	-0.00351981		1805.8	0.00235418		2335.8	0.00644644
216	0.00895776		745.99	0.00607459		1276	-0.00407991		1806	0.00336246		2336	0.00576403
216.2	0.00932934		746.19	0.00553975		1276.2	-0.00378368		1806.2	0.00284801		2336.2	0.00631191
216.4	0.0100762		746.39	0.00443847		1276.4	-0.00413274		1806.4	0.00311579		2336.4	0.00524671
216.6	0.01027387		746.59	0.00417889		1276.6	-0.00496891		1806.6	0.0030023		2336.6	0.00597499
216.8	0.01087059		746.79	0.00460057		1276.8	-0.00599483		1806.8	0.00276859		2336.8	0.00597933
217	0.00985494		746.99	0.00509942		1277	-0.00717645		1807	0.00346609		2337	0.00681356
217.2	0.0092085		747.19	0.00586658		1277.2	-0.00673377		1807.2	0.00357473		2337.2	0.00764301
217.4	0.00840482		747.39	0.00742344		1277.4	-0.00715293		1807.4	0.00393401		2337.4	0.00733678
217.6	0.00716877		747.59	0.00786532		1277.6	-0.00684307		1807.6	0.00387853		2337.6	0.00746823
217.8	0.0073826		747.79	0.00703642		1277.8	-0.00634475		1807.8	0.00355558		2337.8	0.00919353
218	0.00679655		747.99	0.00749449		1278	-0.00552707		1808	0.00409846		2338	0.00858674
218.2	0.0073453		748.19	0.00782544		1278.2	-0.00535669		1808.2	0.00451703		2338.2	0.00806062
218.4	0.00731525		748.39	0.00861611		1278.4	-0.00514888		1808.4	0.00474639		2338.4	0.0081152
218.6	0.00772087		748.59	0.00891359		1278.6	-0.00365671		1808.6	0.00494389		2338.6	0.00788471
218.8	0.00828393		748.79	0.00953835		1278.8	-0.00365219		1808.8	0.00460309		2338.8	0.00740637
219	0.00841458		748.99	0.0083517		1279	-0.00410185		1809	0.00521699		2339	0.00690439
219.2	0.00939568		749.19	0.00800515		1279.2	-0.00363053		1809.2	0.0060908		2339.2	0.0071926
219.4	0.01063902		749.39	0.00784574		1279.4	-0.00395098		1809.4	0.00610113		2339.4	0.00697924
219.6	0.01093035		749.59	0.00732547		1279.6	-0.00376773		1809.6	0.00605579		2339.6	0.00687613
219.8	0.01186459		749.79	0.0072984		1279.8	-0.00421021		1809.8	0.00554245		2339.8	0.00653897
220	0.01238578		749.99	0.00744328		1280	-0.00430715		1810	0.00677171		2340	0.00651466
220.2	0.01315588		750.19	0.00725		1280.2	-0.00391088		1810.2	0.00543083		2340.2	0.00737968
220.4	0.01392155		750.39	0.00717236		1280.4	-0.00443007		1810.4	0.00425641		2340.4	0.00729463
220.6	0.01302252		750.59	0.00723344		1280.6	-0.0048558		1810.6	0.00357406		2340.6	0.00722307
220.8	0.01312725		750.79	0.00762417		1280.8	-0.00567289		1810.8	0.00258591		2340.8	0.00680214
221	0.01250299		750.99	0.00758595		1281	-0.00527962		1811	0.00184315		2341	0.00724952
221.2	0.01219172		751.19	0.00770657		1281.2	-0.00524049		1811.2	0.00253043		2341.2	0.00706845
221.4	0.0108374		751.39	0.00779281		1281.4	-0.00553855		1811.4	0.00240656		2341.4	0.00673758
221.6	0.01044905		751.59	0.00799802		1281.6	-0.00516089		1811.6	0.00179794		2341.6	0.00735954
221.8	0.01065306		751.79	0.00715697		1281.8	-0.00479489		1811.8	0.00165266		2341.8	0.00744925
222	0.00912836		751.99	0.0068697		1282	-0.00550589		1812	0.00273362		2342	0.00648064
222.2	0.0084579		752.19	0.00659208		1282.2	-0.00626764		1812.2	0.00292741		2342.2	0.00632052
222.4	0.00800073		752.39	0.0071122		1282.4	-0.00628748		1812.4	0.00334457		2342.4	0.00627603
222.6	0.00865722		752.59	0.00681224		1282.6	-0.005785		1812.6	0.004405		2342.6	0.00570611
222.8	0.00782573		752.79	0.00665074		1282.8	-0.00612369		1812.8	0.00473894		2342.8	0.005111
223	0.00802873		752.99	0.0056436		1283	-0.00606237		1813	0.00519176		2343	0.00438509
223.2	0.00812687		753.19	0.00545323		1283.2	-0.00576235		1813.2	0.00624593		2343.2	0.00454936
223.4	0.00817846		753.39	0.0059849		1283.4	-0.00619171		1813.4	0.00698774		2343.4	0.00424587
223.6	0.00811307		753.59	0.00551431		1283.6	-0.00567271		1813.6	0.00734447		2343.6	0.00437042
223.8	0.00849795		753.79	0.00589907		1283.8	-0.00552053		1813.8	0.0073241		2343.8	0.00508101
224	0.00878926		753.99	0.00642591		1284	-0.00506137		1814	0.00749185		2344	0.005407
224.2	0.00846266		754.19	0.00620027		1284.2	-0.00471171		1814.2	0.00621771		2344.2	0.00532535
224.4	0.00846826		754.39	0.00594974		1284.4	-0.00500633		1814.4	0.00577338		2344.4	0.00522231
224.6	0.00896254		754.59	0.00495677		1284.6	-0.00462241		1814.6	0.00586074		2344.6	0.00557247
224.8	0.0105277		754.79	0.00533615		1284.8	-0.00439797		1814.8	0.0054485		2344.8	0.0057811
225	0.0117615		754.99	0.00585859		1285	-0.00356755		1815	0.0057096		2345	0.00639017
225.2	0.01168058		755.19	0.00672129		1285.2	-0.00401437		1815.2	0.00642206		2345.2	0.00586163
225.4	0.0105645		755.39	0.00736434		1285.4	-0.00327637		1815.4	0.00516272		2345.4	0.00660527
225.6	0.01057682		755.59	0.00847643		1285.6	-0.00298237		1815.6	0.00472528		2345.6	0.00682239
225.8	0.01084605		755.79	0.00788582		1285.8	-0.00393363		1815.8	0.00451412		2345.8	0.00633454
226	0.01016437		755.99	0.00761415		1286	-0.00493821		1816	0.00411541		2346	0.00608536
226.2	0.01104352		756.19	0.00794487		1286.2	-0.00533643		1816.2	0.0044216		2346.2	0.00635535
226.4	0.0113317		756.39	0.008352		1286.4	-0.00519097		1816.4	0.00445806		2346.4	0.00568803
226.6	0.01155042		756.59	0.0085511		1286.6	-0.00555919		1816.6	0.00440606		2346.6	0.00668898
226.8	0.01099572		756.79	0.00953376		1286.8	-0.00641924		1816.8	0.0047924		2346.8	0.00643948
227	0.01071081		756.99	0.01026526		1287	-0.00695275		1817	0.00553733		2347	0.00548663
227.2	0.0104981		757.19	0.00999503		1287.2	-0.00656115		1817.2	0.00612763		2347.2	0.00510078
227.4	0.01091674		757.39	0.01044785		1287.4	-0.00687974		1817.4	0.00614602		2347.4	0.00451577
227.6	0.01087313		757.59	0.01029814		1287.6	-0.00660775		1817.6	0.00627792		2347.6	0.00490484
227.8	0.01141005		757.79	0.01073755		1287.8	-0.00731177		1817.8	0.00646813		2347.8	0.00490288
228	0.01178069		757.99	0.0109148		1288	-0.00697292		1818	0.00738039		2348	0.00423868
228.2	0.0120063		758.19	0.01000467		1288.2	-0.00704911		1818.2	0.00845314		2348.2	0.00349716
228.4	0.01307647		758.39	0.00913326		1288.4	-0.00656871		1818.4	0.00892361		2348.4	0.00362168
228.6	0.01369526		758.59	0.00792539		1288.6	-0.00625633		1818.6	0.00888251		2348.6	0.00294724
228.8	0.01436932		758.79	0.00809203		1288.8	-0.00634657		1818.8	0.00903983		2348.8	0.00225971
229	0.01397303		758.99	0.00778961		1289	-0.00627707		1819	0.0090958		2349	0.00198968
229.2	0.01261437		759.19	0.00747698		1289.2	-0.00577059		1819.2	0.00846357		2349.2	0.00094584
229.4	0.01168652		759.39	0.0070966		1289.4	-0.00530283		1819.4	0.00714844		2349.4	0.0017035
229.6	0.01177879		759.59	0.00746099		1289.6	-0.00548909		1819.6	0.00704843		2349.6	0.00129028
229.8	0.01188419		759.79	0.00648579		1289.8	-0.00607913		1819.8	0.00618116		2349.8	0.00158622
230	0.01146782		759.99	0.00548661		1290	-0.00587004		1820	0.00518695		2350	0.0019455
230.2	0.01094762		760.19	0.00507626		1290.2	-0.00561939		1820.2	0.00549986		2350.2	0.00356744
230.4	0.010413		760.39	0.00579195		1290.4	-0.00581553		1820.4	0.0046958		2350.4	0.00472239
230.6	0.01050066		760.59	0.00661996		1290.6	-0.00615077		1820.6	0.00445808		2350.6	0.00596676
230.8	0.01043624		760.79	0.00758328		1290.8	-0.00548358		1820.8	0.00498778		2350.8	0.00466685
231	0.01069634		760.99	0.00805525		1291	-0.00465254		1821	0.00439179		2351	0.00497251
231.2	0.0120488		761.19	0.00804213		1291.2	-0.00394706		1821.2	0.00373761		2351.2	0.00451919
231.4	0.01292587		761.39	0.00888043		1291.4	-0.00465214		1821.4	0.00443886		2351.4	0.00499457
231.6	0.0126363		761.59	0.0091854		1291.6	-0.00402941		1821.6	0.00485892		2351.6	0.00496143
231.8	0.01280762		761.79	0.0098199		1291.8	-0.00383648		1821.8	0.00553993		2351.8	0.00459888
232	0.01331178		761.99	0.00956543		1292	-0.00294867		1822	0.00604704		2352	0.00452741
232.2	0.01330092		762.19	0.009136		1292.2	-0.00275297		1822.2	0.00624738		2352.2	0.00431767
232.4	0.01306764		762.39	0.00919145		1292.4	-0.00271631		1822.4	0.00602131		2352.4	0.00376984
232.6	0.01266416		762.59	0.0089932		1292.6	-0.00275108		1822.6	0.00543562		2352.6	0.00271627
232.8	0.012558		762.79	0.00870151		1292.8	-0.00223582		1822.8	0.00526987		2352.8	0.00320476
233	0.01145563		762.99	0.00869624		1293	-0.00143508		1823	0.00471334		2353	0.00328155
233.2	0.01100556		763.19	0.00875731		1293.2	-0.0013166		1823.2	0.00485033		2353.2	0.002853
233.4	0.01025817		763.39	0.0087635		1293.4	-0.00182537		1823.4	0.00517385		2353.4	0.0029872
233.6	0.00987667		763.59	0.00902864		1293.6	-0.00214071		1823.6	0.00572239		2353.6	0.00299788
233.8	0.00931665		763.79	0.00844598		1293.8	-0.00239944		1823.8	0.00502711		2353.8	0.00365819
234	0.00939099		763.99	0.0083792		1294	-0.00259698		1824	0.0052259		2354	0.00439731
234.2	0.00872588		764.19	0.00866444		1294.2	-0.00314207		1824.2	0.00587332		2354.2	0.00576424
234.4	0.00979439		764.39	0.00991352		1294.4	-0.00418757		1824.4	0.00598059		2354.4	0.00608714
234.6	0.01027629		764.59	0.00974171		1294.6	-0.00480129		1824.6	0.00654009		2354.6	0.00566659
234.8	0.01053145		764.79	0.00949819		1294.8	-0.00516321		1824.8	0.00673874		2354.8	0.00511035
235	0.01167962		764.99	0.009033		1295	-0.00537391		1825	0.00695346		2355	0.00502372
235.2	0.01205368		765.19	0.00843522		1295.2	-0.00564502		1825.2	0.00771849		2355.2	0.00397794
235.4	0.01191084		765.39	0.00802523		1295.4	-0.00606032		1825.4	0.00810211		2355.4	0.00343987
235.6	0.01124308		765.59	0.00741554		1295.6	-0.00556244		1825.6	0.00755792		2355.6	0.00321718
235.8	0.01131548		765.79	0.00706229		1295.8	-0.00510811		1825.8	0.00801377		2355.8	0.00384855
236	0.01232061		765.99	0.00573718		1296	-0.00524054		1826	0.00750607		2356	0.00479557
236.2	0.01172007		766.19	0.00505671		1296.2	-0.00530751		1826.2	0.00748709		2356.2	0.00513944
236.4	0.01136383		766.39	0.00533825		1296.4	-0.00549369		1826.4	0.00686913		2356.4	0.00438102
236.6	0.01092193		766.59	0.005206		1296.6	-0.00560437		1826.6	0.00678975		2356.6	0.00404753
236.8	0.01060054		766.79	0.00543001		1296.8	-0.00466071		1826.8	0.0071971		2356.8	0.00424245
237	0.01088061		766.99	0.00629573		1297	-0.00486232		1827	0.00776467		2357	0.00332223
237.2	0.01036339		767.19	0.00652015		1297.2	-0.00553138		1827.2	0.00837732		2357.2	0.00245344
237.4	0.01003226		767.39	0.00749167		1297.4	-0.00500834		1827.4	0.00841631		2357.4	0.0021786
237.6	0.01028925		767.59	0.00844686		1297.6	-0.00440379		1827.6	0.00831877		2357.6	0.00209638
237.8	0.01052935		767.79	0.00883862		1297.8	-0.00400606		1827.8	0.00807631		2357.8	0.0028351
238	0.01150759		767.99	0.00873012		1298	-0.00403206		1828	0.00851986		2358	0.00371324
238.2	0.01204753		768.19	0.00887242		1298.2	-0.00400274		1828.2	0.00845927		2358.2	0.00395761
238.4	0.0134914		768.39	0.00945637		1298.4	-0.00446413		1828.4	0.00819643		2358.4	0.0037658
238.6	0.01373484		768.59	0.00907644		1298.6	-0.00432511		1828.6	0.00783092		2358.6	0.00300048
238.8	0.01459729		768.79	0.00911143		1298.8	-0.00413993		1828.8	0.00812509		2358.8	0.00246405
239	0.01480883		768.99	0.00878191		1299	-0.00355869		1829	0.00791181		2359	0.00209365
239.2	0.01433166		769.19	0.00904225		1299.2	-0.00331447		1829.2	0.00779838		2359.2	0.00188296
239.4	0.01427401		769.39	0.0079059		1299.4	-0.00340114		1829.4	0.00666004		2359.4	0.0023387
239.6	0.01386032		769.59	0.00724781		1299.6	-0.00359644		1829.6	0.00647962		2359.6	0.00297266
239.8	0.01358773		769.79	0.00583689		1299.8	-0.00350385		1829.8	0.00654749		2359.8	0.00381765
240	0.01371507		769.99	0.00545027		1300	-0.00397971		1830	0.00582195		2360	0.00451474
240.2	0.0117369		770.19	0.0054055		1300.2	-0.00444326		1830.2	0.00579472		2360.2	0.00450165
240.4	0.01136794		770.39	0.00630041		1300.4	-0.00445645		1830.4	0.0057352		2360.4	0.00340353
240.6	0.01106526		770.59	0.00549626		1300.6	-0.00474736		1830.6	0.00580077		2360.6	0.00369359
240.8	0.00996397		770.79	0.0056738		1300.8	-0.00331683		1830.8	0.00591305		2360.8	0.00435146
241	0.00925839		770.99	0.00603439		1301	-0.00391923		1831	0.00609345		2361	0.00436653
241.2	0.00888565		771.19	0.00593864		1301.2	-0.00353361		1831.2	0.00636845		2361.2	0.00441716
241.4	0.00901273		771.39	0.00645186		1301.4	-0.00290908		1831.4	0.00701147		2361.4	0.00527581
241.6	0.00950908		771.59	0.00705449		1301.6	-0.0033231		1831.6	0.00709218		2361.6	0.00564247
241.8	0.00957497		771.79	0.00713179		1301.8	-0.00329759		1831.8	0.00706198		2361.8	0.00616997
242	0.01004839		771.99	0.00615789		1302	-0.00348648		1832	0.00691958		2362	0.00611786
242.2	0.01077113		772.19	0.00699619		1302.2	-0.00387394		1832.2	0.0068334		2362.2	0.00585337
242.4	0.01183535		772.39	0.00776712		1302.4	-0.00388913		1832.4	0.00700654		2362.4	0.00518178
242.6	0.01225941		772.59	0.00822544		1302.6	-0.00395268		1832.6	0.0070247		2362.6	0.0045835
242.8	0.012249		772.79	0.00882324		1302.8	-0.00378174		1832.8	0.00745829		2362.8	0.00385988
243	0.01187221		772.99	0.00884134		1303	-0.00375879		1833	0.00750907		2363	0.00265008
243.2	0.01260339		773.19	0.00909487		1303.2	-0.00312861		1833.2	0.00750936		2363.2	0.00255615
243.4	0.01273798		773.39	0.00915747		1303.4	-0.00286001		1833.4	0.00659521		2363.4	0.00192615
243.6	0.01275528		773.59	0.0091784		1303.6	-0.00228866		1833.6	0.00686487		2363.6	0.0014873
243.8	0.01256726		773.79	0.00868524		1303.8	-0.00161689		1833.8	0.00683825		2363.8	0.00183648
244	0.01238338		773.99	0.00973642		1304	-0.00166604		1834	0.00646652		2364	0.0012601
244.2	0.01154867		774.19	0.00961934		1304.2	-0.00182089		1834.2	0.00714323		2364.2	0.00089755
244.4	0.0122978		774.39	0.00906936		1304.4	-0.00113552		1834.4	0.00670432		2364.4	0.00059356
244.6	0.01164915		774.59	0.00800654		1304.6	-0.00092565		1834.6	0.00592775		2364.6	0.00171119
244.8	0.01103947		774.79	0.00741354		1304.8	-0.00054463		1834.8	0.00625828		2364.8	0.00223804
245	0.01164734		774.99	0.00770441		1305	-0.00071625		1835	0.0068262		2365	0.00219803
245.2	0.0125688		775.19	0.00711612		1305.2	-0.00052004		1835.2	0.00712335		2365.2	0.00264193
245.4	0.01297726		775.39	0.00764407		1305.4	-0.00081887		1835.4	0.00781474		2365.4	0.0028832
245.6	0.01346101		775.59	0.00781062		1305.6	-0.00210403		1835.6	0.00785304		2365.6	0.00234094
245.8	0.01335461		775.79	0.00730508		1305.8	-0.00226483		1835.8	0.00877909		2365.8	0.00214814
246	0.01358709		775.99	0.00714255		1306	-0.00227486		1836	0.00903312		2366	0.00207789
246.2	0.01463786		776.19	0.00832947		1306.2	-0.0026118		1836.2	0.00959228		2366.2	0.0029465
246.4	0.01484191		776.39	0.00793091		1306.4	-0.00256141		1836.4	0.01039678		2366.4	0.00301973
246.6	0.01381301		776.59	0.00740779		1306.6	-0.00321856		1836.6	0.01074012		2366.6	0.00302467
246.8	0.01325692		776.79	0.00728382		1306.8	-0.00266068		1836.8	0.01165343		2366.8	0.00292892
247	0.01395467		776.99	0.0067732		1307	-0.00271169		1837	0.01178749		2367	0.00293594
247.2	0.01435834		777.19	0.00668822		1307.2	-0.00273035		1837.2	0.0111563		2367.2	0.00373408
247.4	0.01394063		777.39	0.00719194		1307.4	-0.0024319		1837.4	0.01109264		2367.4	0.00327973
247.6	0.0135276		777.59	0.00642971		1307.6	-0.00269827		1837.6	0.01183518		2367.6	0.00378771
247.8	0.01311929		777.79	0.00596928		1307.8	-0.00401815		1837.8	0.01195155		2367.8	0.00440513
248	0.01300332		777.99	0.00578208		1308	-0.00483646		1838	0.01239277		2368	0.00456075
248.2	0.01209199		778.19	0.00571222		1308.2	-0.00425665		1838.2	0.01216803		2368.2	0.00430481
248.4	0.01249563		778.39	0.00528543		1308.4	-0.00373984		1838.4	0.01140938		2368.4	0.00362258
248.6	0.01199032		778.59	0.00521437		1308.6	-0.0040747		1838.6	0.01036821		2368.6	0.00384608
248.8	0.01274945		778.79	0.00521162		1308.8	-0.00486534		1838.8	0.01048047		2368.8	0.0028318
249	0.01258412		778.99	0.00559751		1309	-0.00524827		1839	0.00998681		2369	0.00295236
249.2	0.01239315		779.19	0.00595854		1309.2	-0.00649852		1839.2	0.0091127		2369.2	0.0031773
249.4	0.01243809		779.39	0.00646124		1309.4	-0.00678516		1839.4	0.00870926		2369.4	0.0028762
249.6	0.01249523		779.59	0.00621834		1309.6	-0.00672446		1839.6	0.00747535		2369.6	0.00267818
249.8	0.01272469		779.79	0.00749832		1309.8	-0.00662879		1839.8	0.00744949		2369.8	0.00275126
250	0.0126813		779.99	0.00799143		1310	-0.00651081		1840	0.0062425		2370	0.00324223
250.2	0.01341466		780.19	0.00830722		1310.2	-0.00654054		1840.2	0.00579302		2370.2	0.00424873
250.4	0.01303161		780.39	0.00743668		1310.4	-0.00624489		1840.4	0.00521847		2370.4	0.00490452
250.6	0.01252012		780.59	0.00743993		1310.6	-0.00653079		1840.6	0.00458249		2370.6	0.00596743
250.8	0.01250379		780.79	0.0082724		1310.8	-0.00643058		1840.8	0.0039779		2370.8	0.00658349
251	0.01234057		780.99	0.008455		1311	-0.00714402		1841	0.0029575		2371	0.00695503
251.2	0.01175063		781.19	0.00879388		1311.2	-0.00720502		1841.2	0.0026707		2371.2	0.00761233
251.4	0.01112933		781.39	0.00934158		1311.4	-0.00605656		1841.4	0.00333873		2371.4	0.00777319
251.6	0.01034807		781.59	0.00920722		1311.6	-0.00662897		1841.6	0.00414041		2371.6	0.00774486
251.8	0.01016412		781.79	0.00865697		1311.8	-0.00681221		1841.8	0.00452326		2371.8	0.00756197
252	0.0099033		781.99	0.00902877		1312	-0.00612664		1842	0.00529969		2372	0.0071923
252.2	0.00945406		782.19	0.00972677		1312.2	-0.00480707		1842.2	0.00517928		2372.2	0.00634095
252.4	0.01067572		782.39	0.0092418		1312.4	-0.0051746		1842.4	0.0058081		2372.4	0.00560817
252.6	0.01070869		782.59	0.00878554		1312.6	-0.00560345		1842.6	0.00623004		2372.6	0.00468254
252.8	0.01071442		782.79	0.00832256		1312.8	-0.00656844		1842.8	0.00747227		2372.8	0.00401788
253	0.01021802		782.99	0.00719171		1313	-0.00595983		1843	0.00807355		2373	0.00474926
253.2	0.01091674		783.19	0.00675128		1313.2	-0.00563071		1843.2	0.00824818		2373.2	0.00457806
253.4	0.01160833		783.39	0.00546877		1313.4	-0.0044403		1843.4	0.00882638		2373.4	0.00401782
253.6	0.01280558		783.59	0.00577127		1313.6	-0.00348296		1843.6	0.00904528		2373.6	0.00331467
253.8	0.01318371		783.79	0.00603414		1313.8	-0.003264		1843.8	0.01056801		2373.8	0.00301882
254	0.01366318		783.99	0.0050418		1314	-0.00306424		1844	0.00996814		2374	0.00267685
254.2	0.01454249		784.19	0.00506866		1314.2	-0.0022898		1844.2	0.01043181		2374.2	0.00251398
254.4	0.01410165		784.39	0.00486651		1314.4	-0.00176327		1844.4	0.01023001		2374.4	0.0024936
254.6	0.01334267		784.59	0.00609286		1314.6	-0.00206175		1844.6	0.00972286		2374.6	0.00234759
254.8	0.01328183		784.79	0.00641517		1314.8	-0.00281827		1844.8	0.00955812		2374.8	0.002252
255	0.01303534		784.99	0.00647407		1315	-0.00364981		1845	0.00951861		2375	0.00282224
255.2	0.01329288		785.19	0.00683053		1315.2	-0.00381581		1845.2	0.0094762		2375.2	0.00283217
255.4	0.01291319		785.39	0.00720123		1315.4	-0.00434109		1845.4	0.00913971		2375.4	0.00265429
255.6	0.01312487		785.59	0.0075823		1315.6	-0.00484458		1845.6	0.00900684		2375.6	0.00286365
255.8	0.01291519		785.79	0.00791053		1315.8	-0.00535268		1845.8	0.00877903		2375.8	0.00353515
256	0.01324093		785.99	0.00784877		1316	-0.00593856		1846	0.00904276		2376	0.0043692
256.2	0.01393533		786.19	0.00835759		1316.2	-0.00612568		1846.2	0.00899551		2376.2	0.00426257
256.4	0.01472022		786.39	0.00766117		1316.4	-0.00667003		1846.4	0.00924712		2376.4	0.00402026
256.6	0.01471893		786.59	0.0078554		1316.6	-0.00706934		1846.6	0.00951985		2376.6	0.0033665
256.8	0.01404578		786.79	0.00710207		1316.8	-0.00774656		1846.8	0.0093645		2376.8	0.00424815
257	0.01454996		786.99	0.0068695		1317	-0.00670429		1847	0.00946616		2377	0.00534927
257.2	0.01511063		787.19	0.00614544		1317.2	-0.00716633		1847.2	0.00927295		2377.2	0.005007
257.4	0.01430579		787.39	0.00582098		1317.4	-0.00648985		1847.4	0.00947678		2377.4	0.00431309
257.6	0.01412339		787.59	0.00631811		1317.6	-0.00631373		1847.6	0.00896179		2377.6	0.00347717
257.8	0.01377545		787.79	0.00552326		1317.8	-0.00606453		1847.8	0.00978094		2377.8	0.00250548
258	0.01365596		787.99	0.00530404		1318	-0.00576871		1848	0.00942943		2378	0.00140978
258.2	0.01351466		788.19	0.00652764		1318.2	-0.00561525		1848.2	0.01038046		2378.2	0.00015998
258.4	0.01296205		788.39	0.0073387		1318.4	-0.00462977		1848.4	0.01022158		2378.4	-0.00041244
258.6	0.01293789		788.59	0.00799865		1318.6	-0.00550158		1848.6	0.01003907		2378.6	0.00018889
258.8	0.0134848		788.79	0.00775227		1318.8	-0.00609845		1848.8	0.01068341		2378.8	0.00003505
259	0.01278007		788.99	0.00853352		1319	-0.00633153		1849	0.01096954		2379	0.0003035
259.2	0.01264884		789.19	0.00837233		1319.2	-0.00645321		1849.2	0.01120047		2379.2	-0.00054658
259.4	0.01230997		789.39	0.00828669		1319.4	-0.00629669		1849.4	0.01109078		2379.4	0.00031987
259.6	0.01266551		789.59	0.00856048		1319.6	-0.00577353		1849.6	0.01131596		2379.6	0.00079963
259.8	0.0127851		789.79	0.00828158		1319.8	-0.00606804		1849.8	0.011535		2379.8	0.00127131
260	0.01372333		789.99	0.00791227		1320	-0.00610521		1850	0.0118523		2380	0.00166368
260.2	0.01458321		790.19	0.00808673		1320.2	-0.00608634		1850.2	0.01195376		2380.2	0.001238
260.4	0.01497198		790.39	0.00769042		1320.4	-0.00570358		1850.4	0.01182342		2380.4	0.00121893
260.6	0.01504769		790.59	0.0084699		1320.6	-0.00654704		1850.6	0.01153568		2380.6	0.00143229
260.8	0.01490224		790.79	0.00794809		1320.8	-0.00632896		1850.8	0.01032664		2380.8	0.00251565
261	0.01533133		790.99	0.00827668		1321	-0.00543297		1851	0.00967573		2381	0.00252389
261.2	0.01492817		791.19	0.007892		1321.2	-0.00591272		1851.2	0.0085318		2381.2	0.00246614
261.4	0.01414179		791.39	0.0079125		1321.4	-0.00539848		1851.4	0.00860635		2381.4	0.0016462
261.6	0.01443002		791.59	0.00777416		1321.6	-0.00552338		1851.6	0.00785904		2381.6	0.00246712
261.8	0.01452113		791.79	0.00754264		1321.8	-0.00487517		1851.8	0.00829307		2381.8	0.00198171
262	0.01401022		791.99	0.00825707		1322	-0.00485735		1852	0.00788883		2382	0.00259919
262.2	0.01402405		792.19	0.00919407		1322.2	-0.00460935		1852.2	0.0076763		2382.2	0.00269212
262.4	0.01394691		792.39	0.00884331		1322.4	-0.00413587		1852.4	0.00794708		2382.4	0.00330498
262.6	0.01439782		792.59	0.00867466		1322.6	-0.00505792		1852.6	0.00839283		2382.6	0.00388224
262.8	0.01357607		792.79	0.00896948		1322.8	-0.00494876		1852.8	0.00873544		2382.8	0.00317542
263	0.01275006		792.99	0.00916181		1323	-0.00516071		1853	0.00814222		2383	0.00338094
263.2	0.01249696		793.19	0.00848975		1323.2	-0.00530591		1853.2	0.0082929		2383.2	0.00277048
263.4	0.01211418		793.39	0.00786448		1323.4	-0.0053975		1853.4	0.00855151		2383.4	0.00279594
263.6	0.01219935		793.59	0.00783326		1323.6	-0.00543574		1853.6	0.0091411		2383.6	0.00264274
263.8	0.01266855		793.79	0.00755064		1323.8	-0.00512253		1853.8	0.01050617		2383.8	0.00222818
264	0.01399029		793.99	0.00708031		1324	-0.00530216		1854	0.01145051		2384	0.00251126
264.2	0.01493803		794.19	0.0070514		1324.2	-0.00624458		1854.2	0.01199971		2384.2	0.00138991
264.4	0.01447112		794.39	0.00767542		1324.4	-0.00588141		1854.4	0.01148183		2384.4	0.00056769
264.6	0.01434739		794.59	0.00765168		1324.6	-0.00727328		1854.6	0.01166592		2384.6	-0.00024971
264.8	0.0137656		794.79	0.00663225		1324.8	-0.0073089		1854.8	0.01090094		2384.8	-0.00088519
265	0.01382669		794.99	0.00629367		1325	-0.00768076		1855	0.01102529		2385	-0.00172712
265.2	0.01354319		795.19	0.00573618		1325.2	-0.00829772		1855.2	0.01094938		2385.2	-0.00113483
265.4	0.01404153		795.39	0.00523678		1325.4	-0.00818557		1855.4	0.0118065		2385.4	-0.00156447
265.6	0.01421888		795.59	0.00502089		1325.6	-0.00855648		1855.6	0.01122617		2385.6	-0.00028436
265.8	0.01454541		795.79	0.00469043		1325.8	-0.00847658		1855.8	0.01105098		2385.8	-0.00056032
266	0.01427261		795.99	0.00503494		1326	-0.00827799		1856	0.0106798		2386	0.00075366
266.2	0.01489527		796.19	0.00529988		1326.2	-0.00813512		1856.2	0.00974434		2386.2	0.00120957
266.4	0.01551291		796.39	0.0053699		1326.4	-0.00796637		1856.4	0.00981032		2386.4	0.00143274
266.6	0.01581507		796.59	0.00555933		1326.6	-0.00793963		1856.6	0.00914755		2386.6	0.00140245
266.8	0.01460256		796.79	0.00555633		1326.8	-0.00749611		1856.8	0.00823566		2386.8	0.00207656
267	0.01466683		796.99	0.00539637		1327	-0.00663858		1857	0.00797214		2387	0.00219072
267.2	0.01481016		797.19	0.0048965		1327.2	-0.00607224		1857.2	0.00858472		2387.2	0.00234731
267.4	0.01430316		797.39	0.00497515		1327.4	-0.00560802		1857.4	0.00846637		2387.4	0.00218124
267.6	0.01371014		797.59	0.0054529		1327.6	-0.0051348		1857.6	0.00852758		2387.6	0.00201993
267.8	0.01424531		797.79	0.00574286		1327.8	-0.00440032		1857.8	0.00876436		2387.8	0.00188587
268	0.0144683		797.99	0.00586943		1328	-0.00402744		1858	0.00875385		2388	0.00269041
268.2	0.01362877		798.19	0.00606662		1328.2	-0.00398665		1858.2	0.00896071		2388.2	0.00156028
268.4	0.01236824		798.39	0.00617844		1328.4	-0.00351916		1858.4	0.00959707		2388.4	0.00020852
268.6	0.01247472		798.59	0.00493613		1328.6	-0.00446473		1858.6	0.01056549		2388.6	0.00014009
268.8	0.01233181		798.79	0.00478043		1328.8	-0.00496639		1858.8	0.01045487		2388.8	0.00029859
269	0.01306562		798.99	0.00492276		1329	-0.0051261		1859	0.01065274		2389	0.00062661
269.2	0.0128691		799.19	0.00513308		1329.2	-0.00564503		1859.2	0.01043071		2389.2	0.00168016
269.4	0.01289567		799.39	0.00575207		1329.4	-0.00550037		1859.4	0.01069714		2389.4	0.00177993
269.6	0.01282392		799.59	0.00527566		1329.6	-0.00614657		1859.6	0.01041322		2389.6	0.00239036
269.8	0.0136718		799.79	0.00592457		1329.8	-0.00611367		1859.8	0.00997157		2389.8	0.00254604
270	0.01348901		799.99	0.00654312		1330	-0.00627129		1860	0.009094		2390	0.00354908
270.2	0.01413648		800.19	0.00634107		1330.2	-0.00664042		1860.2	0.00872246		2390.2	0.00416685
270.4	0.01408739		800.39	0.00652422		1330.4	-0.00599023		1860.4	0.00914592		2390.4	0.00462266
270.6	0.01419693		800.59	0.00628584		1330.6	-0.00675262		1860.6	0.00850261		2390.6	0.00469637
270.8	0.01381277		800.79	0.00609676		1330.8	-0.00628708		1860.8	0.00831845		2390.8	0.0057096
271	0.01397407		800.99	0.00621962		1331	-0.00640827		1861	0.00813109		2391	0.00501662
271.2	0.01428164		801.19	0.00624845		1331.2	-0.00699788		1861.2	0.00742801		2391.2	0.0048615
271.4	0.013536		801.39	0.00638955		1331.4	-0.00719766		1861.4	0.00723848		2391.4	0.00495074
271.6	0.01321641		801.59	0.00614747		1331.6	-0.00722982		1861.6	0.00727291		2391.6	0.00510355
271.8	0.01366788		801.79	0.00599988		1331.8	-0.00643709		1861.8	0.0079001		2391.8	0.00538847
272	0.01383897		801.99	0.00626615		1332	-0.00609217		1862	0.00816615		2392	0.00483261
272.2	0.01382919		802.19	0.00622256		1332.2	-0.00592086		1862.2	0.00892755		2392.2	0.00337187
272.4	0.01457796		802.39	0.00625425		1332.4	-0.0060073		1862.4	0.00961307		2392.4	0.00135692
272.6	0.01557496		802.59	0.00547878		1332.6	-0.006679		1862.6	0.00925619		2392.6	0.00172963
272.8	0.01636284		802.79	0.00596714		1332.8	-0.00632348		1862.8	0.00971284		2392.8	0.00149724
273	0.01728211		802.99	0.00640343		1333	-0.00556609		1863	0.00921355		2393	0.00182296
273.2	0.01679475		803.19	0.00602518		1333.2	-0.00523937		1863.2	0.00953727		2393.2	0.00187512
273.4	0.01740027		803.39	0.00565799		1333.4	-0.00539166		1863.4	0.01034051		2393.4	0.00081294
273.6	0.01720467		803.59	0.00535752		1333.6	-0.00582744		1863.6	0.0106425		2393.6	0.00069118
273.8	0.01708058		803.79	0.005502		1333.8	-0.00564668		1863.8	0.0104492		2393.8	0.00037725
274	0.01645859		803.99	0.00561218		1334	-0.00562241		1864	0.01043712		2394	0.00070517
274.2	0.01642774		804.19	0.00601549		1334.2	-0.00590536		1864.2	0.01089399		2394.2	0.00012616
274.4	0.01587303		804.39	0.00723972		1334.4	-0.00608363		1864.4	0.00997115		2394.4	0.0005556
274.6	0.01626808		804.59	0.00698184		1334.6	-0.00595183		1864.6	0.00919692		2394.6	0.00044462
274.8	0.01519077		804.79	0.0067236		1334.8	-0.00615794		1864.8	0.00872424		2394.8	0.00033278
275	0.0144597		804.99	0.00716611		1335	-0.00648687		1865	0.00878838		2395	0.00019023
275.2	0.01398381		805.19	0.00705187		1335.2	-0.00686201		1865.2	0.0092653		2395.2	0.00126867
275.4	0.01365808		805.39	0.00684481		1335.4	-0.00702701		1865.4	0.00952006		2395.4	0.00163394
275.6	0.01371361		805.59	0.00782186		1335.6	-0.0070484		1865.6	0.00914907		2395.6	0.00184054
275.8	0.0128714		805.79	0.00811451		1335.8	-0.00688127		1865.8	0.00912318		2395.8	0.00099028
276	0.01401475		805.99	0.00907496		1336	-0.0071548		1866	0.00879583		2396	0.00054991
276.2	0.01348702		806.19	0.00881558		1336.2	-0.00669654		1866.2	0.00940117		2396.2	-0.00042408
276.4	0.01471101		806.39	0.00909542		1336.4	-0.00695474		1866.4	0.00967562		2396.4	-0.00108456
276.6	0.01532125		806.59	0.00890942		1336.6	-0.00685268		1866.6	0.00952133		2396.6	0.00039905
276.8	0.0164197		806.79	0.00871569		1336.8	-0.00561327		1866.8	0.00977217		2396.8	0.00065917
277	0.01676133		806.99	0.00913006		1337	-0.00630048		1867	0.00968407		2397	0.00055334
277.2	0.01679886		807.19	0.00838454		1337.2	-0.00644787		1867.2	0.0100888		2397.2	-0.00010753
277.4	0.0171809		807.39	0.00852902		1337.4	-0.00696997		1867.4	0.01002291		2397.4	-0.0003559
277.6	0.01677572		807.59	0.00825117		1337.6	-0.00555136		1867.6	0.00921915		2397.6	0.00013944
277.8	0.01684189		807.79	0.00754163		1337.8	-0.00482335		1867.8	0.00847306		2397.8	-0.00019463
278	0.01712247		807.99	0.00735537		1338	-0.00462959		1868	0.00738536		2398	-0.00048374
278.2	0.01724424		808.19	0.00752323		1338.2	-0.003859		1868.2	0.00671381		2398.2	-0.00033445
278.4	0.01667935		808.39	0.00719795		1338.4	-0.00303425		1868.4	0.00497225		2398.4	0.00004117
278.6	0.0160214		808.59	0.00660004		1338.6	-0.0027481		1868.6	0.00480006		2398.6	0.00018733
278.8	0.01456784		808.79	0.00652747		1338.8	-0.00337819		1868.8	0.00416487		2398.8	0.00022676
279	0.01440367		808.99	0.00693541		1339	-0.00266439		1869	0.00509256		2399	0.00025183
279.2	0.01438145		809.19	0.00644002		1339.2	-0.0026958		1869.2	0.00550821		2399.2	0.00105798
279.4	0.014964		809.39	0.00611129		1339.4	-0.0029691		1869.4	0.00444315		2399.4	0.00030816
279.6	0.01448323		809.59	0.00674917		1339.6	-0.00287842		1869.6	0.00439433		2399.6	0.00063259
279.8	0.01388726		809.79	0.00588116		1339.8	-0.00278696		1869.8	0.00456185		2399.8	0.00033134
280	0.01489093		809.99	0.00668864		1340	-0.00225597		1870	0.00522414		2400	0.00043715
280.2	0.01389794		810.19	0.00675105		1340.2	-0.00225265		1870.2	0.006342		2400.2	-0.00018205
280.4	0.01406484		810.39	0.00722607		1340.4	-0.002732		1870.4	0.00763204		2400.4	-0.00017431
280.6	0.01427728		810.59	0.00657927		1340.6	-0.00248738		1870.6	0.00810941		2400.6	-0.00042708
280.8	0.01427116		810.79	0.00662114		1340.8	-0.00271901		1870.8	0.00883072		2400.8	-0.00170018
281	0.0140102		810.99	0.00693579		1341	-0.00335861		1871	0.00908384		2401	-0.0028012
281.2	0.01396928		811.19	0.0063075		1341.2	-0.0034998		1871.2	0.00936423		2401.2	-0.00291601
281.4	0.01429823		811.39	0.00602711		1341.4	-0.00316566		1871.4	0.00940136		2401.4	-0.00366377
281.6	0.01392886		811.59	0.00574121		1341.6	-0.00259597		1871.6	0.00883935		2401.6	-0.00340705
281.8	0.01356234		811.79	0.00559428		1341.8	-0.00256258		1871.8	0.00867191		2401.8	-0.00413356
282	0.01348446		811.99	0.00541583		1342	-0.00272552		1872	0.00817086		2402	-0.00465765
282.2	0.01341548		812.19	0.00555523		1342.2	-0.00278596		1872.2	0.00825399		2402.2	-0.00468374
282.4	0.01310172		812.39	0.0047012		1342.4	-0.00349012		1872.4	0.00733414		2402.4	-0.00505869
282.6	0.01295558		812.59	0.00533401		1342.6	-0.00398165		1872.6	0.00750383		2402.6	-0.00425982
282.8	0.01364658		812.79	0.00512627		1342.8	-0.00380943		1872.8	0.00765059		2402.8	-0.00399174
283	0.01395587		812.99	0.00535955		1343	-0.00331436		1873	0.00856427		2403	-0.00324728
283.2	0.01441001		813.19	0.00512221		1343.2	-0.00294946		1873.2	0.0079067		2403.2	-0.00277383
283.4	0.01471918		813.39	0.00537754		1343.4	-0.00366729		1873.4	0.00810743		2403.4	-0.00254847
283.6	0.01414142		813.59	0.00622312		1343.6	-0.00333841		1873.6	0.00841607		2403.6	-0.00091336
283.8	0.01500685		813.79	0.00667231		1343.8	-0.00292636		1873.8	0.00885006		2403.8	-0.00094605
284	0.01445555		813.99	0.00750722		1344	-0.00271948		1874	0.009729		2404	-0.00133032
284.2	0.01440151		814.19	0.00764687		1344.2	-0.0030506		1874.2	0.01079461		2404.2	-0.00120843
284.4	0.01448633		814.39	0.00777778		1344.4	-0.00292621		1874.4	0.01180032		2404.4	-0.00061186
284.6	0.01547936		814.59	0.00764533		1344.6	-0.00288116		1874.6	0.01148243		2404.6	-0.00019557
284.8	0.01486125		814.79	0.00835156		1344.8	-0.0034074		1874.8	0.01185148		2404.8	0.00057213
285	0.01520547		814.99	0.00850814		1345	-0.00355849		1875	0.01167582		2405	0.00087185
285.2	0.01551638		815.19	0.00880865		1345.2	-0.00378776		1875.2	0.01207586		2405.2	0.00124201
285.4	0.01584038		815.39	0.00924711		1345.4	-0.00340397		1875.4	0.01145676		2405.4	0.000989
285.6	0.01515346		815.59	0.00958936		1345.6	-0.00345798		1875.6	0.01142878		2405.6	0.00108964
285.8	0.01546517		815.79	0.00921415		1345.8	-0.00331803		1875.8	0.0111649		2405.8	0.0007485
286	0.01595348		815.99	0.00818466		1346	-0.00293399		1876	0.01030087		2406	0.00053079
286.2	0.01627855		816.19	0.00697838		1346.2	-0.00351483		1876.2	0.01011114		2406.2	-0.00002927
286.4	0.0156747		816.39	0.00641357		1346.4	-0.0039776		1876.4	0.00893933		2406.4	0.00016269
286.6	0.01611213		816.59	0.00756915		1346.6	-0.00422294		1876.6	0.00829454		2406.6	0.00057548
286.8	0.01656014		816.79	0.00741238		1346.8	-0.0045418		1876.8	0.00843671		2406.8	0.00031587
287	0.01649411		816.99	0.00734857		1347	-0.00479942		1877	0.0074067		2407	0.00030664
287.2	0.01654622		817.19	0.00698341		1347.2	-0.0052032		1877.2	0.00688544		2407.2	-0.00094115
287.4	0.01653038		817.39	0.00734662		1347.4	-0.00572149		1877.4	0.00798604		2407.4	-0.0012843
287.6	0.01619639		817.59	0.00686776		1347.6	-0.00537016		1877.6	0.00722348		2407.6	-0.00180095
287.8	0.01701003		817.79	0.00667839		1347.8	-0.00586696		1877.8	0.00759123		2407.8	-0.00355358
288	0.01568296		817.99	0.00636735		1348	-0.00628132		1878	0.00805371		2408	-0.00378043
288.2	0.01678238		818.19	0.00622439		1348.2	-0.00623031		1878.2	0.0088088		2408.2	-0.00308244
288.4	0.01690275		818.39	0.00584489		1348.4	-0.00634706		1878.4	0.00931104		2408.4	-0.00238982
288.6	0.01703675		818.59	0.00625558		1348.6	-0.00684316		1878.6	0.00940585		2408.6	-0.00170109
288.8	0.01677567		818.79	0.00706886		1348.8	-0.00708798		1878.8	0.01019076		2408.8	-0.00166019
289	0.01702329		818.99	0.00709292		1349	-0.00729868		1879	0.01038928		2409	-0.001785
289.2	0.0174756		819.19	0.00690662		1349.2	-0.00703494		1879.2	0.01121349		2409.2	-0.00176699
289.4	0.01749371		819.39	0.00691942		1349.4	-0.0068542		1879.4	0.01156788		2409.4	-0.00151711
289.6	0.01625166		819.59	0.00688337		1349.6	-0.00650335		1879.6	0.01156901		2409.6	-0.00125409
289.8	0.01621253		819.79	0.00686057		1349.8	-0.00588335		1879.8	0.01097975		2409.8	-0.00015732
290	0.01547506		819.99	0.00663279		1350	-0.00515169		1880	0.01036058		2410	-0.00019136
290.2	0.01465446		820.19	0.00602243		1350.2	-0.00606243		1880.2	0.01031316		2410.2	-0.0000991
290.4	0.01408727		820.39	0.00641376		1350.4	-0.00535154		1880.4	0.00930403		2410.4	0.00013115
290.6	0.01489401		820.59	0.0076078		1350.6	-0.00568204		1880.6	0.00850019		2410.6	0.00011586
290.8	0.0151196		820.79	0.00734042		1350.8	-0.00573332		1880.8	0.00814098		2410.8	-0.00013848
291	0.01443162		820.99	0.00737581		1351	-0.00554763		1881	0.00789107		2411	-0.00074876
291.2	0.01451314		821.19	0.00751866		1351.2	-0.00471928		1881.2	0.0084678		2411.2	-0.00081273
291.4	0.01430157		821.39	0.00785451		1351.4	-0.00455459		1881.4	0.00856076		2411.4	-0.00037595
291.6	0.01439539		821.59	0.00710192		1351.6	-0.00471917		1881.6	0.00700489		2411.6	-0.00052963
291.8	0.01426729		821.79	0.00740911		1351.8	-0.00494265		1881.8	0.00699108		2411.8	-0.00048612
292	0.01410688		821.99	0.00684962		1352	-0.00427069		1882	0.00715487		2412	0.00004466
292.2	0.01429988		822.19	0.00657147		1352.2	-0.00426285		1882.2	0.00683182		2412.2	0.00005293
292.4	0.01340987		822.39	0.00692687		1352.4	-0.00443026		1882.4	0.00680959		2412.4	0.00029392
292.6	0.01309549		822.59	0.00715281		1352.6	-0.00494224		1882.6	0.00703002		2412.6	0.00059642
292.8	0.01275989		822.79	0.00746038		1352.8	-0.00532737		1882.8	0.00770176		2412.8	0.00041694
293	0.01259888		822.99	0.00661089		1353	-0.00489745		1883	0.00782428		2413	0.00100587
293.2	0.01259084		823.19	0.0060204		1353.2	-0.00395184		1883.2	0.00866082		2413.2	0.00146725
293.4	0.01190985		823.39	0.00571844		1353.4	-0.00360536		1883.4	0.00805834		2413.4	0.00247534
293.6	0.01077552		823.59	0.0058473		1353.6	-0.00334725		1883.6	0.00820992		2413.6	0.00302096
293.8	0.01092791		823.79	0.00557946		1353.8	-0.00355152		1883.8	0.00852976		2413.8	0.00285083
294	0.01068609		823.99	0.00511019		1354	-0.00399721		1884	0.00891942		2414	0.00277649
294.2	0.01138588		824.19	0.00470812		1354.2	-0.00427483		1884.2	0.00869909		2414.2	0.00262842
294.4	0.01188673		824.39	0.00486729		1354.4	-0.00397063		1884.4	0.00875122		2414.4	0.00225297
294.6	0.012281		824.59	0.00577069		1354.6	-0.00510192		1884.6	0.00875987		2414.6	0.002553
294.8	0.01216221		824.79	0.00603298		1354.8	-0.00497308		1884.8	0.00909536		2414.8	0.00205564
295	0.01210548		824.99	0.00623875		1355	-0.00429732		1885	0.00973257		2415	0.00162096
295.2	0.01386039		825.19	0.00657701		1355.2	-0.00473558		1885.2	0.00930893		2415.2	0.00156355
295.4	0.01400787		825.39	0.00693382		1355.4	-0.00533009		1885.4	0.00877157		2415.4	0.00126031
295.6	0.0155529		825.59	0.00703226		1355.6	-0.00562773		1885.6	0.00802857		2415.6	0.00028834
295.8	0.01585155		825.79	0.00793174		1355.8	-0.00491707		1885.8	0.00852124		2415.8	-0.00101528
296	0.01663666		825.99	0.00818341		1356	-0.00479347		1886	0.00859511		2416	-0.00139491
296.2	0.01629937		826.19	0.00882388		1356.2	-0.00525583		1886.2	0.00812632		2416.2	-0.00249538
296.4	0.01665667		826.39	0.00897926		1356.4	-0.00507693		1886.4	0.00860713		2416.4	-0.00295714
296.6	0.01785557		826.59	0.00900662		1356.6	-0.00493994		1886.6	0.00929661		2416.6	-0.0036747
296.8	0.01771636		826.79	0.00897547		1356.8	-0.00466281		1886.8	0.00937741		2416.8	-0.00373983
297	0.01821687		826.99	0.00817805		1357	-0.00465333		1887	0.00937516		2417	-0.00357133
297.2	0.01829474		827.19	0.00822161		1357.2	-0.00457606		1887.2	0.0101109		2417.2	-0.00432745
297.4	0.01794217		827.39	0.00802752		1357.4	-0.00498001		1887.4	0.01017311		2417.4	-0.00442687
297.6	0.01790233		827.59	0.00714933		1357.6	-0.00550157		1887.6	0.01105262		2417.6	-0.00421598
297.8	0.0177299		827.79	0.00663508		1357.8	-0.00569259		1887.8	0.01051871		2417.8	-0.00407942
298	0.01770613		827.99	0.00617432		1358	-0.00543609		1888	0.01023983		2418	-0.00296507
298.2	0.01774756		828.19	0.00633765		1358.2	-0.00498345		1888.2	0.01025625		2418.2	-0.00263175
298.4	0.01707522		828.39	0.00596898		1358.4	-0.00492345		1888.4	0.01138333		2418.4	-0.00209114
298.6	0.01593891		828.59	0.00573853		1358.6	-0.00521133		1888.6	0.01169293		2418.6	-0.00174655
298.8	0.01534023		828.79	0.00475489		1358.8	-0.00480715		1888.8	0.01177682		2418.8	-0.00186569
299	0.01495717		828.99	0.00466863		1359	-0.00462577		1889	0.01216178		2419	-0.00155085
299.2	0.01550105		829.19	0.00515947		1359.2	-0.00572658		1889.2	0.01231665		2419.2	-0.00119955
299.4	0.01551068		829.39	0.00551481		1359.4	-0.00556468		1889.4	0.01243719		2419.4	-0.00119197
299.6	0.01601883		829.59	0.00580726		1359.6	-0.00603838		1889.6	0.01178875		2419.6	-0.00124955
299.8	0.01580851		829.79	0.00678554		1359.8	-0.00518803		1889.8	0.01185337		2419.8	-0.00120015
300	0.01549233		829.99	0.00740646		1360	-0.00576407		1890	0.01264891		2420	-0.00039739
300.2	0.01545374		830.19	0.00777321		1360.2	-0.00514462		1890.2	0.01187811		2420.2	-0.00128839
300.4	0.01522416		830.39	0.00770495		1360.4	-0.00478179		1890.4	0.01184029		2420.4	-0.00070302
300.6	0.01527597		830.59	0.00764873		1360.6	-0.00514093		1890.6	0.01126795		2420.6	-0.00035048
300.8	0.01351556		830.79	0.00742925		1360.8	-0.00521041		1890.8	0.01018098		2420.8	0.00007318
301	0.01348204		830.99	0.00721944		1361	-0.00672354		1891	0.01027467		2421	-0.0002224
301.2	0.0129055		831.19	0.00747369		1361.2	-0.00640667		1891.2	0.00967871		2421.2	-0.00066502
301.4	0.01278688		831.39	0.00777424		1361.4	-0.00631975		1891.4	0.00906924		2421.4	0.00037628
301.6	0.01257934		831.59	0.00736965		1361.6	-0.00578819		1891.6	0.00894786		2421.6	0.00118368
301.8	0.01265077		831.79	0.00721986		1361.8	-0.00527491		1891.8	0.00867367		2421.8	0.00135853
302	0.01327659		831.99	0.00675553		1362	-0.00495403		1892	0.00895871		2422	0.00181292
302.2	0.01294491		832.19	0.00678201		1362.2	-0.00549696		1892.2	0.00996419		2422.2	0.00113669
302.4	0.01210931		832.39	0.00602857		1362.4	-0.0056983		1892.4	0.01043754		2422.4	0.00129761
302.6	0.01265341		832.59	0.00575172		1362.6	-0.00595996		1892.6	0.01012731		2422.6	0.00128475
302.8	0.01316319		832.79	0.00542983		1362.8	-0.00616555		1892.8	0.01033808		2422.8	0.00119848
303	0.01388592		832.99	0.0062915		1363	-0.00642112		1893	0.01070922		2423	0.00041142
303.2	0.01512705		833.19	0.00682979		1363.2	-0.00667649		1893.2	0.01094831		2423.2	0.00005011
303.4	0.01604561		833.39	0.00743384		1363.4	-0.0061757		1893.4	0.01093721		2423.4	-0.00003698
303.6	0.01653921		833.59	0.00730039		1363.6	-0.00634838		1893.6	0.01079931		2423.6	-0.00046898
303.8	0.01671403		833.79	0.0077178		1363.8	-0.0054132		1893.8	0.01107928		2423.8	-0.0005829
304	0.01658036		833.99	0.00724459		1364	-0.00498948		1894	0.01082547		2424	-0.00109169
304.2	0.01628729		834.19	0.00763359		1364.2	-0.00477637		1894.2	0.0097117		2424.2	-0.002019
304.4	0.01610167		834.39	0.00711566		1364.4	-0.00473047		1894.4	0.00918567		2424.4	-0.00234189
304.6	0.01662477		834.59	0.00678325		1364.6	-0.00482417		1894.6	0.00903288		2424.6	-0.00270409
304.8	0.01626071		834.79	0.00730757		1364.8	-0.00433149		1894.8	0.00874472		2424.8	-0.00310589
305	0.01706297		834.99	0.00749774		1365	-0.00482041		1895	0.00837821		2425	-0.00314696
305.2	0.01711342		835.19	0.0080363		1365.2	-0.0045099		1895.2	0.00852474		2425.2	-0.00271424
305.4	0.01736043		835.39	0.00832636		1365.4	-0.00432661		1895.4	0.00872918		2425.4	-0.0021901
305.6	0.01688133		835.59	0.0076939		1365.6	-0.00363807		1895.6	0.00885093		2425.6	-0.0022582
305.8	0.01747987		835.79	0.00746176		1365.8	-0.00357825		1895.8	0.00880203		2425.8	-0.00201504
306	0.01675839		835.99	0.00731971		1366	-0.00396169		1896	0.00869018		2426	-0.00130259
306.2	0.015932		836.19	0.00691306		1366.2	-0.0040426		1896.2	0.00845947		2426.2	-0.00090433
306.4	0.01589599		836.39	0.00701254		1366.4	-0.00343012		1896.4	0.00838574		2426.4	-0.00042851
306.6	0.01669759		836.59	0.00713318		1366.6	-0.00387738		1896.6	0.00743478		2426.6	0.00005703
306.8	0.01590075		836.79	0.00713528		1366.8	-0.00462877		1896.8	0.00726168		2426.8	-0.00052958
307	0.01596565		836.99	0.00804377		1367	-0.00424735		1897	0.00705465		2427	-0.00120969
307.2	0.01542827		837.19	0.00839318		1367.2	-0.00465568		1897.2	0.00753919		2427.2	-0.00088004
307.4	0.0153281		837.39	0.00896493		1367.4	-0.00478395		1897.4	0.00764812		2427.4	-0.00120135
307.6	0.01464884		837.59	0.00828192		1367.6	-0.00484003		1897.6	0.00788624		2427.6	-0.00200197
307.8	0.01414464		837.79	0.00901039		1367.8	-0.00496452		1897.8	0.00764883		2427.8	-0.0018514
308	0.01398179		837.99	0.00950573		1368	-0.00653055		1898	0.00818998		2428	-0.00247661
308.2	0.01323678		838.19	0.01057829		1368.2	-0.00758345		1898.2	0.00853162		2428.2	-0.00310481
308.4	0.01287923		838.39	0.0102117		1368.4	-0.0072806		1898.4	0.00841494		2428.4	-0.0032579
308.6	0.01248314		838.59	0.01040507		1368.6	-0.0080088		1898.6	0.00898661		2428.6	-0.00243755
308.8	0.01186282		838.79	0.01039559		1368.8	-0.00807622		1898.8	0.00897746		2428.8	-0.00232271
309	0.01175909		838.99	0.00995749		1369	-0.00880227		1899	0.00926794		2429	-0.00190827
309.2	0.01175885		839.19	0.01004276		1369.2	-0.00917253		1899.2	0.00937998		2429.2	-0.00166272
309.4	0.01202601		839.39	0.00998503		1369.4	-0.00868328		1899.4	0.00918662		2429.4	-0.00218324
309.6	0.01114193		839.59	0.00905187		1369.6	-0.00736972		1899.6	0.00894713		2429.6	-0.0022893
309.8	0.01109055		839.79	0.00801952		1369.8	-0.0067997		1899.8	0.00861358		2429.8	-0.00176703
310	0.01016683		839.99	0.00682007		1370	-0.00633446		1900	0.0083236		2430	-0.00046421
310.2	0.01057857		840.19	0.00647457		1370.2	-0.00489673		1900.2	0.00753464		2430.2	-0.00019685
310.4	0.01170754		840.39	0.00587515		1370.4	-0.00505716		1900.4	0.00835406		2430.4	-0.00037341
310.6	0.01227096		840.59	0.00558123		1370.6	-0.00425977		1900.6	0.00753606		2430.6	-0.0008063
310.8	0.01268426		840.79	0.00574273		1370.8	-0.00415851		1900.8	0.00784631		2430.8	-0.00186716
311	0.01324913		840.99	0.00589315		1371	-0.00372133		1901	0.00882435		2431	-0.00201625
311.2	0.01377599		841.19	0.00551058		1371.2	-0.00374642		1901.2	0.01044608		2431.2	-0.00224184
311.4	0.01453292		841.39	0.00583065		1371.4	-0.00286539		1901.4	0.01076996		2431.4	-0.00241379
311.6	0.01436414		841.59	0.00534812		1371.6	-0.00263354		1901.6	0.01037235		2431.6	-0.00205625
311.8	0.01516876		841.79	0.00622945		1371.8	-0.00310801		1901.8	0.01020397		2431.8	-0.00197881
312	0.01586462		841.99	0.00617701		1372	-0.00392198		1902	0.00962119		2432	-0.00229332
312.2	0.0163645		842.19	0.00596393		1372.2	-0.00439186		1902.2	0.00882448		2432.2	-0.00230991
312.4	0.01667736		842.39	0.00523737		1372.4	-0.00501681		1902.4	0.00808196		2432.4	-0.00232431
312.6	0.015985		842.59	0.00484066		1372.6	-0.00586339		1902.6	0.00828374		2432.6	-0.0023831
312.8	0.01636507		842.79	0.00450564		1372.8	-0.00571247		1902.8	0.00793192		2432.8	-0.00255011
313	0.01607821		842.99	0.00506337		1373	-0.00715028		1903	0.00732737		2433	-0.00241117
313.2	0.01602027		843.19	0.00573515		1373.2	-0.00813516		1903.2	0.00621778		2433.2	-0.00242002
313.4	0.01558513		843.39	0.00521226		1373.4	-0.00734967		1903.4	0.00585266		2433.4	-0.00271758
313.6	0.01464794		843.59	0.00530156		1373.6	-0.00668324		1903.6	0.00544429		2433.6	-0.00205659
313.8	0.01412806		843.79	0.00514817		1373.8	-0.0068464		1903.8	0.00514718		2433.8	-0.00159844
314	0.01410034		843.99	0.00618793		1374	-0.00630333		1904	0.0056006		2434	-0.00139936
314.2	0.01430535		844.19	0.00683365		1374.2	-0.00598709		1904.2	0.00580346		2434.2	-0.00190406
314.4	0.01421682		844.39	0.00668548		1374.4	-0.0048231		1904.4	0.00733983		2434.4	-0.00256995
314.6	0.01486864		844.59	0.00751721		1374.6	-0.00373217		1904.6	0.00704814		2434.6	-0.00328242
314.8	0.01480745		844.79	0.00822466		1374.8	-0.00409146		1904.8	0.00839325		2434.8	-0.00332119
315	0.01460463		844.99	0.0085941		1375	-0.00391751		1905	0.00968399		2435	-0.0035704
315.2	0.01517703		845.19	0.00853133		1375.2	-0.00268094		1905.2	0.01031		2435.2	-0.00348957
315.4	0.01589147		845.39	0.00929574		1375.4	-0.00170917		1905.4	0.01086645		2435.4	-0.00313761
315.6	0.01605661		845.59	0.00898906		1375.6	-0.00133603		1905.6	0.01022823		2435.6	-0.00353123
315.8	0.01731082		845.79	0.00913136		1375.8	-0.00135298		1905.8	0.01032532		2435.8	-0.00404974
316	0.01844944		845.99	0.00885187		1376	-0.00205956		1906	0.00970294		2436	-0.00421237
316.2	0.01871609		846.19	0.0080704		1376.2	-0.00207066		1906.2	0.01036377		2436.2	-0.0039359
316.4	0.01823745		846.39	0.00806349		1376.4	-0.00164548		1906.4	0.01004172		2436.4	-0.00286774
316.6	0.01734705		846.59	0.00779665		1376.6	-0.00119201		1906.6	0.01068392		2436.6	-0.00198821
316.8	0.01762769		846.79	0.00754129		1376.8	-0.00158481		1906.8	0.0102114		2436.8	-0.00095108
317	0.01619391		846.99	0.00749664		1377	-0.00320109		1907	0.01025003		2437	0.00007131
317.2	0.01577535		847.19	0.00751928		1377.2	-0.00283623		1907.2	0.00917614		2437.2	0.00018272
317.4	0.01541915		847.39	0.00686084		1377.4	-0.00236007		1907.4	0.00922101		2437.4	-0.00038541
317.6	0.01420149		847.59	0.00758545		1377.6	-0.00317646		1907.6	0.00884313		2437.6	0.00016914
317.8	0.01335271		847.79	0.00785655		1377.8	-0.00389672		1907.8	0.00802831		2437.8	-0.00077049
318	0.01324511		847.99	0.00889663		1378	-0.00334163		1908	0.00823341		2438	-0.00102261
318.2	0.01275516		848.19	0.00881261		1378.2	-0.00376235		1908.2	0.00772052		2438.2	-0.00110718
318.4	0.01279591		848.39	0.00833751		1378.4	-0.00382648		1908.4	0.00772918		2438.4	-0.00178605
318.6	0.01397626		848.59	0.00855758		1378.6	-0.00356314		1908.6	0.00723827		2438.6	-0.00231225
318.8	0.01332497		848.79	0.00838463		1378.8	-0.00396335		1908.8	0.00788566		2438.8	-0.0030196
319	0.01370028		848.99	0.00830025		1379	-0.00434576		1909	0.00805425		2439	-0.00356637
319.2	0.01438094		849.19	0.0082015		1379.2	-0.00373665		1909.2	0.00834686		2439.2	-0.00362806
319.4	0.01520035		849.39	0.00781028		1379.4	-0.00391914		1909.4	0.00850295		2439.4	-0.00440822
319.6	0.01585314		849.59	0.00714751		1379.6	-0.00439367		1909.6	0.0075206		2439.6	-0.00562893
319.8	0.01638293		849.79	0.00713118		1379.8	-0.00478705		1909.8	0.00738597		2439.8	-0.00579899
320	0.01664359		849.99	0.00702125		1380	-0.00470357		1910	0.00785206		2440	-0.00505292
320.2	0.01662815		850.19	0.00719064		1380.2	-0.00384443		1910.2	0.00858882		2440.2	-0.0045609
320.4	0.01650876		850.39	0.00718665		1380.4	-0.00312103		1910.4	0.00855825		2440.4	-0.00415389
320.6	0.01618319		850.59	0.00662247		1380.6	-0.0032964		1910.6	0.00915039		2440.6	-0.00332062
320.8	0.0165525		850.79	0.00745657		1380.8	-0.00374535		1910.8	0.00944519		2440.8	-0.00345295
321	0.01629464		850.99	0.00748039		1381	-0.00431397		1911	0.00926732		2441	-0.00300249
321.2	0.01658993		851.19	0.00744063		1381.2	-0.00429333		1911.2	0.00927603		2441.2	-0.00278364
321.4	0.01658956		851.39	0.00717666		1381.4	-0.004803		1911.4	0.00984673		2441.4	-0.00251092
321.6	0.01656152		851.59	0.00846072		1381.6	-0.00461093		1911.6	0.00938951		2441.6	-0.0010121
321.8	0.01665654		851.79	0.00866125		1381.8	-0.00494251		1911.8	0.00922232		2441.8	-0.0005738
322	0.01695805		851.99	0.00948611		1382	-0.00511293		1912	0.00963136		2442	-0.00003306
322.2	0.01744471		852.19	0.00895831		1382.2	-0.00606575		1912.2	0.00973604		2442.2	0.00014248
322.4	0.01741854		852.39	0.00870533		1382.4	-0.00641166		1912.4	0.01024251		2442.4	-0.00051041
322.6	0.0175931		852.59	0.00912041		1382.6	-0.00510786		1912.6	0.0103912		2442.6	-0.00072913
322.8	0.01726362		852.79	0.0085512		1382.8	-0.00632323		1912.8	0.0104743		2442.8	-0.00120153
323	0.01752834		852.99	0.00800377		1383	-0.00612899		1913	0.01035548		2443	-0.00083077
323.2	0.01726233		853.19	0.00774465		1383.2	-0.0058949		1913.2	0.00966135		2443.2	-0.0016489
323.4	0.0171581		853.39	0.00692044		1383.4	-0.006236		1913.4	0.00900206		2443.4	-0.00253503
323.6	0.0166661		853.59	0.00664427		1383.6	-0.00699719		1913.6	0.00871415		2443.6	-0.00289104
323.8	0.01620369		853.79	0.00630474		1383.8	-0.00704701		1913.8	0.00890028		2443.8	-0.00209885
324	0.01569053		853.99	0.00642644		1384	-0.00687526		1914	0.00936056		2444	-0.00244425
324.2	0.015499		854.19	0.00657667		1384.2	-0.00671153		1914.2	0.00968491		2444.2	-0.00223549
324.4	0.01537868		854.39	0.0064436		1384.4	-0.00602222		1914.4	0.00963618		2444.4	-0.00218814
324.6	0.01618013		854.59	0.0068397		1384.6	-0.00640896		1914.6	0.00929952		2444.6	-0.0020248
324.8	0.01662059		854.79	0.00671831		1384.8	-0.0062856		1914.8	0.00981566		2444.8	-0.00234053
325	0.0163828		854.99	0.00455282		1385	-0.00608957		1915	0.00917021		2445	-0.00174559
325.2	0.01721895		855.19	0.0041814		1385.2	-0.00523852		1915.2	0.00985097		2445.2	-0.00172938
325.4	0.01659554		855.39	0.00360195		1385.4	-0.00427279		1915.4	0.00964221		2445.4	-0.00219035
325.6	0.01675233		855.59	0.00350659		1385.6	-0.00396546		1915.6	0.00931375		2445.6	-0.00204871
325.8	0.01651672		855.79	0.00341431		1385.8	-0.00467319		1915.8	0.00972005		2445.8	-0.00328744
326	0.01733745		855.99	0.00366572		1386	-0.00497348		1916	0.00940831		2446	-0.00444367
326.2	0.01762514		856.19	0.00348397		1386.2	-0.00514305		1916.2	0.009657		2446.2	-0.00499705
326.4	0.01741141		856.39	0.00493662		1386.4	-0.00525588		1916.4	0.00969773		2446.4	-0.00602513
326.6	0.01712843		856.59	0.00491471		1386.6	-0.00493122		1916.6	0.00977823		2446.6	-0.0060555
326.8	0.01659096		856.79	0.00527769		1386.8	-0.00594435		1916.8	0.00929431		2446.8	-0.00628511
327	0.01643387		856.99	0.00571422		1387	-0.00622033		1917	0.00906289		2447	-0.00604352
327.2	0.01574461		857.19	0.00706967		1387.2	-0.0065459		1917.2	0.00914374		2447.2	-0.00620581
327.4	0.01579479		857.39	0.0071488		1387.4	-0.00748563		1917.4	0.00951323		2447.4	-0.00533826
327.6	0.0152212		857.59	0.00791385		1387.6	-0.00732768		1917.6	0.00996924		2447.6	-0.00405219
327.8	0.01518109		857.79	0.0089567		1387.8	-0.00737205		1917.8	0.01030677		2447.8	-0.00277533
328	0.01541175		857.99	0.00993848		1388	-0.00725183		1918	0.01041296		2448	-0.00288161
328.2	0.01598072		858.19	0.01041		1388.2	-0.00714126		1918.2	0.01047073		2448.2	-0.00180511
328.4	0.01603436		858.39	0.01104048		1388.4	-0.0071048		1918.4	0.0099123		2448.4	-0.00173916
328.6	0.0160706		858.59	0.01073081		1388.6	-0.00719092		1918.6	0.01000159		2448.6	-0.00185497
328.8	0.01566217		858.79	0.00982231		1388.8	-0.00726843		1918.8	0.01065388		2448.8	-0.00127252
329	0.01560094		858.99	0.00981136		1389	-0.00666768		1919	0.01082825		2449	-0.00168603
329.2	0.01691341		859.19	0.01017654		1389.2	-0.00567543		1919.2	0.01139278		2449.2	-0.00253325
329.4	0.01606013		859.39	0.0092663		1389.4	-0.005869		1919.4	0.01027361		2449.4	-0.00257013
329.6	0.01689942		859.59	0.00902433		1389.6	-0.00615108		1919.6	0.00977184		2449.6	-0.00306679
329.8	0.01818226		859.79	0.00940188		1389.8	-0.00579999		1919.8	0.00956695		2449.8	-0.00439427
330	0.01891752		859.99	0.00949658		1390	-0.00544033		1920	0.00830972		2450	-0.0040595
330.2	0.01936531		860.19	0.01008934		1390.2	-0.00538363		1920.2	0.00864991		2450.2	-0.00480643
330.4	0.01961178		860.39	0.00945826		1390.4	-0.00487836		1920.4	0.00840876		2450.4	-0.004889
330.6	0.019064		860.59	0.00820927		1390.6	-0.00501123		1920.6	0.00843547		2450.6	-0.00534574
330.8	0.0192298		860.79	0.00854211		1390.8	-0.00542017		1920.8	0.00840544		2450.8	-0.00517035
331	0.01919935		860.99	0.00804144		1391	-0.00531624		1921	0.00905431		2451	-0.00464876
331.2	0.01894009		861.19	0.00759873		1391.2	-0.00541951		1921.2	0.009529		2451.2	-0.00397133
331.4	0.01853675		861.39	0.00681272		1391.4	-0.0058758		1921.4	0.00988504		2451.4	-0.00356827
331.6	0.0173094		861.59	0.00739356		1391.6	-0.00515681		1921.6	0.00961972		2451.6	-0.00308532
331.8	0.0166709		861.79	0.00753766		1391.8	-0.0055331		1921.8	0.00963855		2451.8	-0.00296107
332	0.01622732		861.99	0.00713692		1392	-0.00620694		1922	0.01048351		2452	-0.00254442
332.2	0.0151365		862.19	0.00694728		1392.2	-0.00657178		1922.2	0.01042785		2452.2	-0.00231508
332.4	0.01407327		862.39	0.00629		1392.4	-0.00721349		1922.4	0.01127311		2452.4	-0.00213685
332.6	0.01399738		862.59	0.00635816		1392.6	-0.00718379		1922.6	0.01279158		2452.6	-0.00216058
332.8	0.01429653		862.79	0.00718431		1392.8	-0.00748475		1922.8	0.01287745		2452.8	-0.0024592
333	0.01420844		862.99	0.00817157		1393	-0.00794194		1923	0.01309266		2453	-0.0027532
333.2	0.01531467		863.19	0.00795118		1393.2	-0.00805127		1923.2	0.01286683		2453.2	-0.00218231
333.4	0.01489617		863.39	0.00812607		1393.4	-0.0089893		1923.4	0.01188259		2453.4	-0.00159449
333.6	0.0161196		863.59	0.00850557		1393.6	-0.00864556		1923.6	0.01225838		2453.6	-0.00193648
333.8	0.01663692		863.79	0.00824293		1393.8	-0.00861632		1923.8	0.01217084		2453.8	-0.00204668
334	0.01637321		863.99	0.0081363		1394	-0.00840502		1924	0.01153579		2454	-0.00162405
334.2	0.01729055		864.19	0.00777242		1394.2	-0.00833408		1924.2	0.01225816		2454.2	-0.00208507
334.4	0.0175757		864.39	0.0078222		1394.4	-0.00737069		1924.4	0.01208587		2454.4	-0.00183763
334.6	0.01708045		864.59	0.00850015		1394.6	-0.00786673		1924.6	0.0117908		2454.6	-0.00215629
334.8	0.0171001		864.79	0.0087456		1394.8	-0.00746851		1924.8	0.01130272		2454.8	-0.00084927
335	0.0174606		864.99	0.00840375		1395	-0.00709408		1925	0.01047299		2455	-0.00111691
335.2	0.01731616		865.19	0.00843147		1395.2	-0.00673566		1925.2	0.00969006		2455.2	-0.00094358
335.4	0.0168936		865.39	0.00873618		1395.4	-0.00613831		1925.4	0.00971902		2455.4	-0.00099135
335.6	0.01685945		865.59	0.00897533		1395.6	-0.00568984		1925.6	0.00931099		2455.6	-0.00119996
335.8	0.01754889		865.79	0.00953995		1395.8	-0.00477441		1925.8	0.00963461		2455.8	-0.00070301
336	0.01746357		865.99	0.00949583		1396	-0.00421587		1926	0.00961694		2456	-0.00071628
336.2	0.01794505		866.19	0.00948072		1396.2	-0.00300963		1926.2	0.00936048		2456.2	-0.00155607
336.4	0.017915		866.39	0.00860296		1396.4	-0.00228494		1926.4	0.00981491		2456.4	-0.00229092
336.6	0.01810606		866.59	0.00931308		1396.6	-0.00204704		1926.6	0.00908027		2456.6	-0.00261012
336.8	0.01810472		866.79	0.00948627		1396.8	-0.00268183		1926.8	0.00827187		2456.8	-0.00312479
337	0.01763742		866.99	0.00853739		1397	-0.00335817		1927	0.0086882		2457	-0.00236559
337.2	0.0176186		867.19	0.00807623		1397.2	-0.00362915		1927.2	0.00938961		2457.2	-0.00158928
337.4	0.01746158		867.39	0.00745559		1397.4	-0.00365426		1927.4	0.00949181		2457.4	-0.00216397
337.6	0.01756182		867.59	0.00719017		1397.6	-0.00316866		1927.6	0.01104616		2457.6	-0.00239438
337.8	0.01703298		867.79	0.00726214		1397.8	-0.00308932		1927.8	0.01064667		2457.8	-0.00268541
338	0.01700441		867.99	0.00773698		1398	-0.00311095		1928	0.01100905		2458	-0.00322497
338.2	0.01762366		868.19	0.00820086		1398.2	-0.00430314		1928.2	0.01142272		2458.2	-0.00377715
338.4	0.01749531		868.39	0.00845039		1398.4	-0.00404976		1928.4	0.01021847		2458.4	-0.00288554
338.6	0.01781735		868.59	0.00750527		1398.6	-0.00458675		1928.6	0.00868516		2458.6	-0.00292948
338.8	0.01767134		868.79	0.0074495		1398.8	-0.0041364		1928.8	0.00854955		2458.8	-0.00229623
339	0.01779975		868.99	0.00695582		1399	-0.00414356		1929	0.0084371		2459	-0.00290425
339.2	0.01797842		869.19	0.0071268		1399.2	-0.00448369		1929.2	0.00876103		2459.2	-0.00268667
339.4	0.0181896		869.39	0.0071933		1399.4	-0.00461077		1929.4	0.00935088		2459.4	-0.00224097
339.6	0.01907719		869.59	0.00781863		1399.6	-0.00441939		1929.6	0.00948055		2459.6	-0.00156242
339.8	0.01946774		869.79	0.00798565		1399.8	-0.00331772		1929.8	0.00960174		2459.8	-0.00113347
340	0.01851275		869.99	0.00766245		1400	-0.00315754		1930	0.00978492		2460	-0.00179519
340.2	0.01847805		870.19	0.00748457		1400.2	-0.00330678		1930.2	0.01015985		2460.2	-0.00203799
340.4	0.01810233		870.39	0.00705497		1400.4	-0.00427374		1930.4	0.0097011		2460.4	-0.00188201
340.6	0.01727979		870.59	0.0076878		1400.6	-0.00540666		1930.6	0.00968394		2460.6	-0.001463
340.8	0.01704091		870.79	0.00782498		1400.8	-0.00636593		1930.8	0.0099719		2460.8	-0.00141222
341	0.01611088		870.99	0.00694019		1401	-0.00605638		1931	0.01017274		2461	-0.0010281
341.2	0.01554283		871.19	0.00726921		1401.2	-0.00536072		1931.2	0.01019794		2461.2	-0.00119376
341.4	0.01633822		871.39	0.00736474		1401.4	-0.0048246		1931.4	0.01016487		2461.4	-0.00196755
341.6	0.01575005		871.59	0.00801977		1401.6	-0.00407508		1931.6	0.01036136		2461.6	-0.00204359
341.8	0.01573048		871.79	0.00785734		1401.8	-0.00400242		1931.8	0.0095475		2461.8	-0.0028558
342	0.01582193		871.99	0.00750866		1402	-0.00435385		1932	0.01001976		2462	-0.0032823
342.2	0.01645528		872.19	0.00730202		1402.2	-0.0048229		1932.2	0.00955109		2462.2	-0.00318391
342.4	0.01686777		872.39	0.00650222		1402.4	-0.00515068		1932.4	0.00921348		2462.4	-0.00203411
342.6	0.01707435		872.59	0.00680033		1402.6	-0.00539971		1932.6	0.00935389		2462.6	-0.00279769
342.8	0.01680474		872.79	0.00692893		1402.8	-0.00526367		1932.8	0.0102299		2462.8	-0.00256116
343	0.01715551		872.99	0.00632375		1403	-0.00595826		1933	0.00984096		2463	-0.00325812
343.2	0.01812215		873.19	0.00646606		1403.2	-0.0061556		1933.2	0.01005366		2463.2	-0.0024347
343.4	0.01786499		873.39	0.00680638		1403.4	-0.00601655		1933.4	0.01025383		2463.4	-0.00186271
343.6	0.01780572		873.59	0.00723789		1403.6	-0.00571561		1933.6	0.01062278		2463.6	-0.00126429
343.8	0.01761519		873.79	0.00715207		1403.8	-0.00522993		1933.8	0.01056524		2463.8	-0.00175205
344	0.01774815		873.99	0.00750166		1404	-0.00588617		1934	0.01089034		2464	-0.00112402
344.2	0.01788552		874.19	0.0076533		1404.2	-0.00597502		1934.2	0.0110008		2464.2	-0.00179672
344.4	0.01756441		874.39	0.00720714		1404.4	-0.00651466		1934.4	0.01071639		2464.4	-0.00121919
344.6	0.01685182		874.59	0.0067427		1404.6	-0.00694988		1934.6	0.01047831		2464.6	-0.00157886
344.8	0.01626093		874.79	0.00608067		1404.8	-0.00724165		1934.8	0.00934875		2464.8	-0.00214995
345	0.01595026		874.99	0.00497189		1405	-0.0073019		1935	0.00826376		2465	-0.00271517
345.2	0.01529055		875.19	0.00564684		1405.2	-0.00670575		1935.2	0.00796321		2465.2	-0.00285586
345.4	0.01545092		875.39	0.00511148		1405.4	-0.00704395		1935.4	0.00816704		2465.4	-0.00382852
345.6	0.0147997		875.59	0.0047867		1405.6	-0.00672137		1935.6	0.00814963		2465.6	-0.00469989
345.8	0.01506797		875.79	0.00435563		1405.8	-0.00721251		1935.8	0.00897732		2465.8	-0.00586266
346	0.01529312		875.99	0.00507234		1406	-0.00716301		1936	0.01008523		2466	-0.00601561
346.2	0.01517595		876.19	0.0047624		1406.2	-0.00816834		1936.2	0.01002741		2466.2	-0.00580812
346.4	0.01547875		876.39	0.00424746		1406.4	-0.00832768		1936.4	0.01071871		2466.4	-0.00593045
346.6	0.01536293		876.59	0.00492861		1406.6	-0.00777679		1936.6	0.01102844		2466.6	-0.00633156
346.8	0.01515532		876.79	0.00450806		1406.8	-0.00794061		1936.8	0.01104541		2466.8	-0.00644716
347	0.01573926		876.99	0.00411324		1407	-0.00863327		1937	0.01076045		2467	-0.00624733
347.2	0.01628448		877.19	0.00450104		1407.2	-0.00830359		1937.2	0.01050846		2467.2	-0.00514315
347.4	0.01559855		877.39	0.00512529		1407.4	-0.00821301		1937.4	0.01049925		2467.4	-0.00536656
347.6	0.01607006		877.59	0.0047263		1407.6	-0.00787348		1937.6	0.01084651		2467.6	-0.00443174
347.8	0.0168212		877.79	0.00410059		1407.8	-0.00714069		1937.8	0.01040231		2467.8	-0.00360266
348	0.01683686		877.99	0.00305127		1408	-0.00709834		1938	0.01039827		2468	-0.00256647
348.2	0.01666764		878.19	0.00318422		1408.2	-0.00622048		1938.2	0.01019063		2468.2	-0.00308774
348.4	0.0166025		878.39	0.0030075		1408.4	-0.00673995		1938.4	0.0102926		2468.4	-0.00222128
348.6	0.01654856		878.59	0.00318546		1408.6	-0.00662071		1938.6	0.0101184		2468.6	-0.0026815
348.8	0.01622343		878.79	0.00387681		1408.8	-0.00643774		1938.8	0.00959364		2468.8	-0.00215481
349	0.01635261		878.99	0.00424786		1409	-0.00636963		1939	0.00932528		2469	-0.00240959
349.2	0.01583457		879.19	0.00509496		1409.2	-0.00540524		1939.2	0.00999487		2469.2	-0.00282467
349.4	0.01666018		879.39	0.00499414		1409.4	-0.00574339		1939.4	0.01012581		2469.4	-0.00423139
349.6	0.01732916		879.59	0.00614448		1409.6	-0.00620241		1939.6	0.00995726		2469.6	-0.00438576
349.8	0.01762776		879.79	0.00666815		1409.8	-0.00594779		1939.8	0.01065156		2469.8	-0.00408676
350	0.01719251		879.99	0.00739399		1410	-0.00536925		1940	0.01084284		2470	-0.00406162
350.2	0.01727435		880.19	0.00668527		1410.2	-0.00544099		1940.2	0.01053462		2470.2	-0.00397141
350.4	0.0170339		880.39	0.00671065		1410.4	-0.00522631		1940.4	0.01095793		2470.4	-0.00428361
350.6	0.01614179		880.59	0.00764071		1410.6	-0.0062474		1940.6	0.01064816		2470.6	-0.00466068
350.8	0.01637675		880.79	0.00811092		1410.8	-0.0073897		1940.8	0.01049605		2470.8	-0.0049191
351	0.01684018		880.99	0.00806048		1411	-0.00804218		1941	0.01042887		2471	-0.00536676
351.2	0.01682193		881.19	0.0080497		1411.2	-0.00804559		1941.2	0.00949904		2471.2	-0.00572333
351.4	0.01633534		881.39	0.00720821		1411.4	-0.00794303		1941.4	0.00958645		2471.4	-0.00587095
351.6	0.01642983		881.59	0.00618464		1411.6	-0.00764186		1941.6	0.00987038		2471.6	-0.00534914
351.8	0.01588353		881.79	0.00614861		1411.8	-0.00755136		1941.8	0.00988516		2471.8	-0.00522554
352	0.01561983		881.99	0.00650768		1412	-0.00784428		1942	0.00995508		2472	-0.00536269
352.2	0.01596163		882.19	0.00696267		1412.2	-0.00754005		1942.2	0.010894		2472.2	-0.00600056
352.4	0.01635573		882.39	0.00689676		1412.4	-0.00768304		1942.4	0.01118065		2472.4	-0.00596017
352.6	0.01616308		882.59	0.00575643		1412.6	-0.00706896		1942.6	0.01032702		2472.6	-0.0060852
352.8	0.01659555		882.79	0.00564796		1412.8	-0.0076636		1942.8	0.01033618		2472.8	-0.0060309
353	0.01662608		882.99	0.00570994		1413	-0.00747753		1943	0.01031545		2473	-0.00637189
353.2	0.01681965		883.19	0.0053178		1413.2	-0.00765396		1943.2	0.01167809		2473.2	-0.00637269
353.4	0.01769401		883.39	0.0049521		1413.4	-0.00792737		1943.4	0.0112594		2473.4	-0.00578428
353.6	0.01850018		883.59	0.0050704		1413.6	-0.00759867		1943.6	0.01145761		2473.6	-0.00507534
353.8	0.0186539		883.79	0.0047205		1413.8	-0.00752009		1943.8	0.01190187		2473.8	-0.00466441
354	0.01879409		883.99	0.00428597		1414	-0.00730058		1944	0.01194562		2474	-0.00432381
354.2	0.01910001		884.19	0.00438007		1414.2	-0.00740333		1944.2	0.01199201		2474.2	-0.00342109
354.4	0.01852923		884.39	0.00493056		1414.4	-0.00805736		1944.4	0.01218371		2474.4	-0.0031092
354.6	0.01724495		884.59	0.00537939		1414.6	-0.00887467		1944.6	0.01180467		2474.6	-0.00293176
354.8	0.01772698		884.79	0.00585797		1414.8	-0.00872018		1944.8	0.01190878		2474.8	-0.00268445
355	0.01759706		884.99	0.005863		1415	-0.00879944		1945	0.01123792		2475	-0.00236
355.2	0.01740998		885.19	0.00560972		1415.2	-0.00799218		1945.2	0.01058525		2475.2	-0.00155083
355.4	0.01667355		885.39	0.00529667		1415.4	-0.00732703		1945.4	0.01103533		2475.4	-0.00218678
355.6	0.01539108		885.59	0.00528203		1415.6	-0.00691377		1945.6	0.01109307		2475.6	-0.00295068
355.8	0.01521308		885.79	0.00575814		1415.8	-0.00738155		1945.8	0.01083808		2475.8	-0.00352678
356	0.01555715		885.99	0.00590314		1416	-0.00730608		1946	0.01035613		2476	-0.00323987
356.2	0.01543137		886.19	0.0055888		1416.2	-0.0069605		1946.2	0.01161466		2476.2	-0.00379777
356.4	0.01555499		886.39	0.00506991		1416.4	-0.00723659		1946.4	0.01039792		2476.4	-0.00396563
356.6	0.01534858		886.59	0.00460385		1416.6	-0.00702778		1946.6	0.00997726		2476.6	-0.00461855
356.8	0.01568656		886.79	0.00530794		1416.8	-0.00639555		1946.8	0.01030016		2476.8	-0.00526077
357	0.01492054		886.99	0.00562972		1417	-0.00578822		1947	0.01056502		2477	-0.00522106
357.2	0.01536846		887.19	0.00498065		1417.2	-0.00633871		1947.2	0.0113583		2477.2	-0.00519597
357.4	0.01598293		887.39	0.00477261		1417.4	-0.00627301		1947.4	0.01055224		2477.4	-0.00503525
357.6	0.01685974		887.59	0.00583337		1417.6	-0.00595754		1947.6	0.01105432		2477.6	-0.00564132
357.8	0.01706707		887.79	0.00536739		1417.8	-0.00608867		1947.8	0.01105753		2477.8	-0.00482091
358	0.01737767		887.99	0.00523712		1418	-0.00616074		1948	0.01119034		2478	-0.00420857
358.2	0.01739081		888.19	0.00531019		1418.2	-0.00627368		1948.2	0.0109635		2478.2	-0.00348672
358.4	0.01677461		888.39	0.00570326		1418.4	-0.00636065		1948.4	0.01063607		2478.4	-0.00368068
358.6	0.01572979		888.59	0.00604797		1418.6	-0.00635809		1948.6	0.00990172		2478.6	-0.00341465
358.8	0.01601582		888.79	0.00623229		1418.8	-0.00616584		1948.8	0.00994355		2478.8	-0.00361807
359	0.01535761		888.99	0.005949		1419	-0.00701716		1949	0.00941172		2479	-0.00315923
359.2	0.01482975		889.19	0.006422		1419.2	-0.00657154		1949.2	0.00999314		2479.2	-0.00294037
359.4	0.01393508		889.39	0.00587872		1419.4	-0.0066606		1949.4	0.01046627		2479.4	-0.00357744
359.6	0.01415091		889.59	0.00593408		1419.6	-0.00702453		1949.6	0.01040762		2479.6	-0.0037165
359.8	0.01502534		889.79	0.00653523		1419.8	-0.00717553		1949.8	0.01057674		2479.8	-0.00291336
360	0.01484437		889.99	0.00627979		1420	-0.00711488		1950	0.01075007		2480	-0.00142543
360.2	0.01464854		890.19	0.00600202		1420.2	-0.00737939		1950.2	0.0118057		2480.2	-0.00155365
360.4	0.01540427		890.39	0.00590461		1420.4	-0.00744966		1950.4	0.01122564		2480.4	-0.00179944
360.6	0.01570822		890.59	0.00626056		1420.6	-0.00695554		1950.6	0.01189593		2480.6	-0.0017809
360.8	0.01558948		890.79	0.00630101		1420.8	-0.0067376		1950.8	0.0120286		2480.8	-0.00151502
361	0.01600841		890.99	0.00581905		1421	-0.00693855		1951	0.01273573		2481	-0.0020073
361.2	0.01636867		891.19	0.00578079		1421.2	-0.00710964		1951.2	0.01345232		2481.2	-0.00168896
361.4	0.01661678		891.39	0.00541091		1421.4	-0.00738673		1951.4	0.01339745		2481.4	-0.00168398
361.6	0.01652252		891.59	0.00564058		1421.6	-0.00623934		1951.6	0.01332943		2481.6	-0.00216055
361.8	0.01634378		891.79	0.00457401		1421.8	-0.0060462		1951.8	0.01313779		2481.8	-0.00202277
362	0.01696625		891.99	0.00514242		1422	-0.00641219		1952	0.01265594		2482	-0.00271389
362.2	0.0172748		892.19	0.00463788		1422.2	-0.00613437		1952.2	0.01245009		2482.2	-0.00346553
362.4	0.01624006		892.39	0.00515113		1422.4	-0.00607411		1952.4	0.01176312		2482.4	-0.00407432
362.6	0.01523615		892.59	0.00502255		1422.6	-0.00656386		1952.6	0.01166001		2482.6	-0.0043866
362.8	0.01506531		892.79	0.00526851		1422.8	-0.00595619		1952.8	0.01176103		2482.8	-0.00500972
363	0.01480191		892.99	0.00602676		1423	-0.006501		1953	0.01121927		2483	-0.00534936
363.2	0.01542458		893.19	0.00622811		1423.2	-0.00573264		1953.2	0.01087169		2483.2	-0.00533622
363.4	0.01494673		893.39	0.00653614		1423.4	-0.00494708		1953.4	0.00987999		2483.4	-0.00524473
363.6	0.01613651		893.59	0.00726724		1423.6	-0.00510572		1953.6	0.0083937		2483.6	-0.00603187
363.8	0.01622674		893.79	0.00759644		1423.8	-0.00466036		1953.8	0.00803681		2483.8	-0.00479209
364	0.01592712		893.99	0.00764499		1424	-0.00444904		1954	0.00817535		2484	-0.00383338
364.2	0.01679365		894.19	0.00782808		1424.2	-0.00485555		1954.2	0.00811778		2484.2	-0.00362133
364.4	0.017712		894.39	0.00840576		1424.4	-0.00447352		1954.4	0.00793508		2484.4	-0.00354952
364.6	0.01756984		894.59	0.00881588		1424.6	-0.00469072		1954.6	0.00823122		2484.6	-0.00312756
364.8	0.01792667		894.79	0.00831299		1424.8	-0.0044996		1954.8	0.00781241		2484.8	-0.00379774
365	0.01822233		894.99	0.00774204		1425	-0.00445126		1955	0.00796674		2485	-0.00397506
365.2	0.01754595		895.19	0.00802279		1425.2	-0.0048181		1955.2	0.00855947		2485.2	-0.003096
365.4	0.01704249		895.39	0.0074899		1425.4	-0.00511464		1955.4	0.00881191		2485.4	-0.00317102
365.6	0.01594958		895.59	0.006981		1425.6	-0.0051125		1955.6	0.00983968		2485.6	-0.00322426
365.8	0.01624537		895.79	0.00670784		1425.8	-0.00560016		1955.8	0.00996352		2485.8	-0.00319841
366	0.01629749		895.99	0.0060997		1426	-0.00709922		1956	0.01041801		2486	-0.00335296
366.2	0.01510517		896.19	0.00453145		1426.2	-0.00734692		1956.2	0.01142174		2486.2	-0.00347818
366.4	0.01373863		896.39	0.00401792		1426.4	-0.00719471		1956.4	0.01197825		2486.4	-0.00292801
366.6	0.01372698		896.59	0.00417047		1426.6	-0.0076882		1956.6	0.01282002		2486.6	-0.00360927
366.8	0.01458969		896.79	0.00428672		1426.8	-0.00736018		1956.8	0.01267275		2486.8	-0.00403896
367	0.01540597		896.99	0.00434981		1427	-0.00772515		1957	0.01220213		2487	-0.00414451
367.2	0.01610494		897.19	0.00407083		1427.2	-0.00789182		1957.2	0.01196048		2487.2	-0.00318262
367.4	0.01568235		897.39	0.00479102		1427.4	-0.00764347		1957.4	0.01202708		2487.4	-0.00327582
367.6	0.01670567		897.59	0.00467126		1427.6	-0.00798926		1957.6	0.01230898		2487.6	-0.00387597
367.8	0.01709979		897.79	0.00481763		1427.8	-0.00747462		1957.8	0.01270993		2487.8	-0.00293845
368	0.01730943		897.99	0.00438345		1428	-0.00748568		1958	0.01263715		2488	-0.00317201
368.2	0.01721292		898.19	0.004346		1428.2	-0.00753301		1958.2	0.01144397		2488.2	-0.00382044
368.4	0.01730191		898.39	0.00493232		1428.4	-0.0066893		1958.4	0.01077729		2488.4	-0.00434676
368.6	0.01724649		898.59	0.00525347		1428.6	-0.00612713		1958.6	0.01076275		2488.6	-0.00401303
368.8	0.01735841		898.79	0.00477857		1428.8	-0.00491689		1958.8	0.01027994		2488.8	-0.00473795
369	0.01778947		898.99	0.00532993		1429	-0.00452559		1959	0.00980394		2489	-0.00418477
369.2	0.01756633		899.19	0.0055752		1429.2	-0.00393711		1959.2	0.01035569		2489.2	-0.00369233
369.4	0.01658736		899.39	0.00561456		1429.4	-0.00385315		1959.4	0.01022152		2489.4	-0.00443381
369.6	0.01632306		899.59	0.00556895		1429.6	-0.00386973		1959.6	0.01052582		2489.6	-0.00379094
369.8	0.01628179		899.79	0.00539656		1429.8	-0.0022046		1959.8	0.00998644		2489.8	-0.00408731
370	0.015453		899.99	0.00561591		1430	-0.00246117		1960	0.00995855		2490	-0.00361367
370.2	0.01479355		900.19	0.00577494		1430.2	-0.00165256		1960.2	0.01011718		2490.2	-0.00305093
370.4	0.01483374		900.39	0.00658717		1430.4	-0.00154553		1960.4	0.01022827		2490.4	-0.00260108
370.6	0.0156403		900.59	0.00780243		1430.6	-0.00195463		1960.6	0.01037861		2490.6	-0.00265241
370.8	0.01655841		900.79	0.00779473		1430.8	-0.00275271		1960.8	0.00972359		2490.8	-0.00217368
371	0.01764705		900.99	0.00906783		1431	-0.00328516		1961	0.00968416		2491	-0.00170243
371.2	0.01798426		901.19	0.00979801		1431.2	-0.00422272		1961.2	0.01008177		2491.2	-0.00161834
371.4	0.01774734		901.39	0.00967415		1431.4	-0.00407604		1961.4	0.01038087		2491.4	-0.00257863
371.6	0.01853819		901.59	0.00907028		1431.6	-0.00517306		1961.6	0.01054135		2491.6	-0.00296993
371.8	0.01883398		901.79	0.00934881		1431.8	-0.00585816		1961.8	0.01063097		2491.8	-0.0041285
372	0.01859522		901.99	0.00867967		1432	-0.00643926		1962	0.01045293		2492	-0.00508394
372.2	0.01886403		902.19	0.00955965		1432.2	-0.005632		1962.2	0.01071944		2492.2	-0.00536555
372.4	0.0188354		902.39	0.00939313		1432.4	-0.00588039		1962.4	0.01147218		2492.4	-0.00547252
372.6	0.01898318		902.59	0.0088372		1432.6	-0.0059312		1962.6	0.01184386		2492.6	-0.00578707
372.8	0.01836642		902.79	0.00813101		1432.8	-0.00551774		1962.8	0.0121989		2492.8	-0.00659319
373	0.01767834		902.99	0.00781096		1433	-0.00579125		1963	0.01185106		2493	-0.0068524
373.2	0.01694017		903.19	0.00768713		1433.2	-0.00590728		1963.2	0.01294555		2493.2	-0.00725517
373.4	0.01658414		903.39	0.00701091		1433.4	-0.00594631		1963.4	0.01285962		2493.4	-0.00798877
373.6	0.01592528		903.59	0.00583561		1433.6	-0.00503419		1963.6	0.01282181		2493.6	-0.00717714
373.8	0.01504895		903.79	0.00541399		1433.8	-0.00344418		1963.8	0.01266722		2493.8	-0.00652933
374	0.01411959		903.99	0.00549414		1434	-0.00351829		1964	0.01309252		2494	-0.00564652
374.2	0.01438671		904.19	0.00553027		1434.2	-0.00343119		1964.2	0.01341358		2494.2	-0.0054333
374.4	0.01451835		904.39	0.00492451		1434.4	-0.00345323		1964.4	0.01346422		2494.4	-0.00470653
374.6	0.01488911		904.59	0.00442954		1434.6	-0.00386606		1964.6	0.01380416		2494.6	-0.00375025
374.8	0.01555503		904.79	0.00405701		1434.8	-0.00451238		1964.8	0.01272873		2494.8	-0.00371798
375	0.01584322		904.99	0.00476732		1435	-0.00469837		1965	0.01227576		2495	-0.00384918
375.2	0.01596826		905.19	0.00446045		1435.2	-0.00467154		1965.2	0.01199371		2495.2	-0.00412989
375.4	0.01583736		905.39	0.00348699		1435.4	-0.00472229		1965.4	0.01131061		2495.4	-0.00347653
375.6	0.01703829		905.59	0.00266286		1435.6	-0.00485169		1965.6	0.01101405		2495.6	-0.00322303
375.8	0.01766711		905.79	0.0034375		1435.8	-0.00462609		1965.8	0.01075179		2495.8	-0.00367159
376	0.01826196		905.99	0.0036083		1436	-0.00444328		1966	0.01004938		2496	-0.00304762
376.2	0.01933533		906.19	0.00395254		1436.2	-0.00396338		1966.2	0.01063084		2496.2	-0.00255461
376.4	0.01825808		906.39	0.00393288		1436.4	-0.0044885		1966.4	0.0108115		2496.4	-0.00296669
376.6	0.01849314		906.59	0.00443643		1436.6	-0.00446172		1966.6	0.01035911		2496.6	-0.00234039
376.8	0.01741527		906.79	0.00456691		1436.8	-0.00422756		1966.8	0.01088757		2496.8	-0.00243999
377	0.01746041		906.99	0.00442278		1437	-0.00394574		1967	0.01085273		2497	-0.00220929
377.2	0.01781399		907.19	0.00489169		1437.2	-0.00370557		1967.2	0.01135837		2497.2	-0.00186879
377.4	0.01768074		907.39	0.00484371		1437.4	-0.00353563		1967.4	0.01036616		2497.4	-0.00119765
377.6	0.01723203		907.59	0.00505421		1437.6	-0.00324507		1967.6	0.01070967		2497.6	-0.00065271
377.8	0.01766565		907.79	0.00573992		1437.8	-0.00310501		1967.8	0.01128828		2497.8	-0.00095997
378	0.01793389		907.99	0.00573219		1438	-0.00354124		1968	0.01195585		2498	-0.0020753
378.2	0.01842652		908.19	0.00595826		1438.2	-0.00427316		1968.2	0.01195494		2498.2	-0.00287878
378.4	0.01808043		908.39	0.00533043		1438.4	-0.00492314		1968.4	0.0122161		2498.4	-0.00326561
378.6	0.01788248		908.59	0.00535473		1438.6	-0.0055896		1968.6	0.0124166		2498.6	-0.00416394
378.8	0.01753195		908.79	0.00556965		1438.8	-0.00600047		1968.8	0.01193062		2498.8	-0.00542755
379	0.01679991		908.99	0.00555773		1439	-0.00666938		1969	0.01210564		2499	-0.00609847
379.2	0.01661412		909.19	0.005194		1439.2	-0.00673757		1969.2	0.01215289		2499.2	-0.00630327
379.4	0.01636923		909.39	0.00452749		1439.4	-0.00704121		1969.4	0.01210579		2499.4	-0.00622846
379.6	0.01653517		909.59	0.00419254		1439.6	-0.00710434		1969.6	0.0122057		2499.6	-0.006895
379.8	0.01627712		909.79	0.00460638		1439.8	-0.00752254		1969.8	0.01241227		2499.8	-0.00730584
380	0.01627712		909.99	0.00460638		1440	-0.00752254		1970	0.01241227		2500	-0.00730584
380.2	0.01516968		910.19	0.00323372		1440.2	-0.00803467		1970.2	0.01325061		2500.2	-0.00676155
380.4	0.01451453		910.39	0.00342145		1440.4	-0.00831471		1970.4	0.01326409		2500.4	-0.00667287
380.6	0.01328895		910.59	0.00251784		1440.6	-0.00936223		1970.6	0.01323753		2500.6	-0.00626277
380.8	0.01269618		910.79	0.00082425		1440.8	-0.00900933		1970.8	0.01332124		2500.8	-0.00612923
381	0.01148709		910.99	0.00014123		1441	-0.00929826		1971	0.01267084		2501	-0.00552462
381.2	0.01116901		911.19	-0.00047215		1441.2	-0.00886878		1971.2	0.01270419		2501.2	-0.00496546
381.4	0.01076474		911.39	-0.00106949		1441.4	-0.00858088		1971.4	0.01164605		2501.4	-0.00473256
381.6	0.01023745		911.59	-0.00144985		1441.6	-0.00856658		1971.6	0.01068197		2501.6	-0.00460308
381.8	0.01034665		911.79	-0.00154631		1441.8	-0.00781353		1971.8	0.0100344		2501.8	-0.00506494
382	0.01100565		911.99	-0.00138262		1442	-0.00738138		1972	0.00949284		2502	-0.0055606
382.2	0.01268868		912.19	-0.00086678		1442.2	-0.00709542		1972.2	0.00850041		2502.2	-0.00559067
382.4	0.01319668		912.39	-0.00148526		1442.4	-0.0078492		1972.4	0.00661769		2502.4	-0.00476177
382.6	0.01392758		912.59	-0.00067088		1442.6	-0.00811822		1972.6	0.00509279		2502.6	-0.0045648
382.8	0.01508678		912.79	-0.00066669		1442.8	-0.00889769		1972.8	0.00474074		2502.8	-0.00383692
383	0.01668121		912.99	-0.00100458		1443	-0.00985601		1973	0.00515305		2503	-0.00360824
383.2	0.0177784		913.19	-0.00059703		1443.2	-0.01041813		1973.2	0.00558215		2503.2	-0.00409624
383.4	0.01773005		913.39	0.00049293		1443.4	-0.00944334		1973.4	0.00615241		2503.4	-0.00552642
383.6	0.01730722		913.59	0.00114802		1443.6	-0.00973828		1973.6	0.00697395		2503.6	-0.00634115
383.8	0.01712103		913.79	0.00229591		1443.8	-0.00944427		1973.8	0.00731619		2503.8	-0.00653297
384	0.01689673		913.99	0.0029634		1444	-0.01007332		1974	0.00747628		2504	-0.00616554
384.2	0.01615862		914.19	0.00272948		1444.2	-0.00993335		1974.2	0.00869119		2504.2	-0.00665383
384.4	0.01533338		914.39	0.0030048		1444.4	-0.00967141		1974.4	0.00911707		2504.4	-0.00701346
384.6	0.01421787		914.59	0.00157932		1444.6	-0.0088958		1974.6	0.01007654		2504.6	-0.00682523
384.8	0.0140437		914.79	0.00067043		1444.8	-0.00802257		1974.8	0.01090356		2504.8	-0.00727782
385	0.01268871		914.99	0.00151719		1445	-0.00784119		1975	0.01031391		2505	-0.00723437
385.2	0.01180262		915.19	0.00109228		1445.2	-0.00717713		1975.2	0.01054323		2505.2	-0.00812383
385.4	0.01127978		915.39	0.00082498		1445.4	-0.00695752		1975.4	0.00935975		2505.4	-0.00852272
385.6	0.01078744		915.59	0.00117922		1445.6	-0.00732654		1975.6	0.00917223		2505.6	-0.00854903
385.8	0.01067229		915.79	0.00104875		1445.8	-0.00691526		1975.8	0.00914216		2505.8	-0.0090941
386	0.01043277		915.99	0.00097765		1446	-0.00744076		1976	0.00867309		2506	-0.00861223
386.2	0.01064687		916.19	0.00110598		1446.2	-0.00826396		1976.2	0.00779593		2506.2	-0.00788305
386.4	0.00932303		916.39	0.0009947		1446.4	-0.00882042		1976.4	0.00674461		2506.4	-0.0069728
386.6	0.01006618		916.59	0.00133363		1446.6	-0.00977722		1976.6	0.00679246		2506.6	-0.00704877
386.8	0.01081557		916.79	0.00037677		1446.8	-0.01020955		1976.8	0.00738581		2506.8	-0.00695478
387	0.01168326		916.99	0.00039173		1447	-0.01029742		1977	0.00740324		2507	-0.00714396
387.2	0.01053944		917.19	0.00074008		1447.2	-0.0099814		1977.2	0.00749105		2507.2	-0.00777153
387.4	0.01031536		917.39	0.00139463		1447.4	-0.00980451		1977.4	0.00754808		2507.4	-0.00817373
387.6	0.0097692		917.59	0.00135168		1447.6	-0.00998201		1977.6	0.00679101		2507.6	-0.00748818
387.8	0.00922081		917.79	0.001413		1447.8	-0.00998141		1977.8	0.0073533		2507.8	-0.00581681
388	0.00951986		917.99	0.00037366		1448	-0.00967154		1978	0.00708087		2508	-0.00508584
388.2	0.01023965		918.19	0.00005381		1448.2	-0.00970882		1978.2	0.00753723		2508.2	-0.00439005
388.4	0.00944412		918.39	-0.00071478		1448.4	-0.00888677		1978.4	0.00896945		2508.4	-0.00467101
388.6	0.00977594		918.59	-0.00071942		1448.6	-0.00836522		1978.6	0.00878845		2508.6	-0.0041048
388.8	0.00983802		918.79	-0.00056927		1448.8	-0.00787653		1978.8	0.00836159		2508.8	-0.00380227
389	0.00962119		918.99	-0.00059209		1449	-0.00725371		1979	0.00883059		2509	-0.00352974
389.2	0.0092467		919.19	-0.00137252		1449.2	-0.00719825		1979.2	0.00879277		2509.2	-0.00394884
389.4	0.01002851		919.39	-0.00080636		1449.4	-0.00734052		1979.4	0.00848103		2509.4	-0.00369799
389.6	0.01000089		919.59	-0.00020631		1449.6	-0.00729378		1979.6	0.0090721		2509.6	-0.00381643
389.8	0.00961488		919.79	-0.00015498		1449.8	-0.00659567		1979.8	0.00961308		2509.8	-0.0043671
390	0.00977614		919.99	-0.00012681		1450	-0.00659132		1980	0.00971957		2510	-0.00472401
390.2	0.01001031		920.19	-0.00036149		1450.2	-0.00684006		1980.2	0.00960372		2510.2	-0.0052853
390.4	0.01027136		920.39	-0.00099895		1450.4	-0.00722904		1980.4	0.00928084		2510.4	-0.00615757
390.6	0.01133809		920.59	-0.00140697		1450.6	-0.00761341		1980.6	0.00980255		2510.6	-0.00697717
390.8	0.01108021		920.79	-0.00134645		1450.8	-0.00734371		1980.8	0.00902979		2510.8	-0.00715503
391	0.01061323		920.99	-0.00092601		1451	-0.0076382		1981	0.00829321		2511	-0.00692284
391.2	0.00998896		921.19	-0.0009652		1451.2	-0.00888785		1981.2	0.00766595		2511.2	-0.00706833
391.4	0.01036112		921.39	-0.00094816		1451.4	-0.00988345		1981.4	0.00739028		2511.4	-0.00680558
391.6	0.01012677		921.59	-0.00098017		1451.6	-0.01004751		1981.6	0.00715855		2511.6	-0.00708716
391.8	0.00988065		921.79	-0.00124231		1451.8	-0.01048944		1981.8	0.00750825		2511.8	-0.00741017
392	0.01052598		921.99	-0.00167051		1452	-0.01037773		1982	0.00723377		2512	-0.00834903
392.2	0.0109729		922.19	-0.00194142		1452.2	-0.01038628		1982.2	0.0078444		2512.2	-0.00847535
392.4	0.00973959		922.39	-0.00196721		1452.4	-0.01022071		1982.4	0.00805798		2512.4	-0.00850817
392.6	0.01019245		922.59	-0.0022783		1452.6	-0.0099771		1982.6	0.00732527		2512.6	-0.00785429
392.8	0.00985982		922.79	-0.0023575		1452.8	-0.00999269		1982.8	0.00757229		2512.8	-0.00741437
393	0.01054342		922.99	-0.00293507		1453	-0.01115832		1983	0.00882324		2513	-0.0079988
393.2	0.01015877		923.19	-0.00284621		1453.2	-0.01140967		1983.2	0.00847905		2513.2	-0.00840851
393.4	0.01045011		923.39	-0.00229868		1453.4	-0.01201038		1983.4	0.00903351		2513.4	-0.00867048
393.6	0.01070944		923.59	-0.00238007		1453.6	-0.01144964		1983.6	0.00927961		2513.6	-0.00859709
393.8	0.01097835		923.79	-0.0022595		1453.8	-0.01106119		1983.8	0.00974614		2513.8	-0.00883783
394	0.01151049		923.99	-0.00253636		1454	-0.01121349		1984	0.00974589		2514	-0.00940536
394.2	0.01146526		924.19	-0.00246171		1454.2	-0.01171845		1984.2	0.00966548		2514.2	-0.00920116
394.4	0.01142302		924.39	-0.00237027		1454.4	-0.01187293		1984.4	0.00943262		2514.4	-0.00966029
394.6	0.01085666		924.59	-0.00132535		1454.6	-0.01108637		1984.6	0.00916794		2514.6	-0.00892009
394.8	0.01000483		924.79	-0.00081509		1454.8	-0.01089721		1984.8	0.00816475		2514.8	-0.00855416
395	0.01017952		924.99	-0.00073761		1455	-0.01139994		1985	0.00777541		2515	-0.00807395
395.2	0.0095238		925.19	-0.00070109		1455.2	-0.01187816		1985.2	0.00769123		2515.2	-0.00797031
395.4	0.00886495		925.39	-0.00132103		1455.4	-0.01185371		1985.4	0.00755046		2515.4	-0.00820615
395.6	0.00842242		925.59	-0.00166154		1455.6	-0.0108884		1985.6	0.00760228		2515.6	-0.00826513
395.8	0.00806689		925.79	-0.00175464		1455.8	-0.00984067		1985.8	0.0077581		2515.8	-0.00859188
396	0.00896127		925.99	-0.00161359		1456	-0.0098798		1986	0.00764545		2516	-0.00795462
396.2	0.00892986		926.19	-0.00128464		1456.2	-0.00955953		1986.2	0.00699703		2516.2	-0.00692887
396.4	0.00873518		926.39	-0.0005382		1456.4	-0.00958513		1986.4	0.00689141		2516.4	-0.00652129
396.6	0.0088673		926.59	-0.00090099		1456.6	-0.00938029		1986.6	0.00685211		2516.6	-0.00649599
396.8	0.00925792		926.79	0.00004668		1456.8	-0.01001029		1986.8	0.00680643		2516.8	-0.00638864
397	0.01076375		926.99	0.00059251		1457	-0.01028456		1987	0.00748828		2517	-0.00663278
397.2	0.01045695		927.19	0.00100033		1457.2	-0.00998744		1987.2	0.00776125		2517.2	-0.00714691
397.4	0.01103853		927.39	0.00055787		1457.4	-0.01015149		1987.4	0.00781783		2517.4	-0.00791681
397.6	0.01195487		927.59	0.00064401		1457.6	-0.01007395		1987.6	0.00841498		2517.6	-0.00792992
397.8	0.01200822		927.79	0.00066232		1457.8	-0.00947547		1987.8	0.0090123		2517.8	-0.00884175
398	0.01203944		927.99	0.00026491		1458	-0.00936711		1988	0.00898494		2518	-0.00947117
398.2	0.01219453		928.19	-0.00016709		1458.2	-0.00974739		1988.2	0.00920589		2518.2	-0.00917613
398.4	0.01216325		928.39	-0.00082243		1458.4	-0.00924638		1988.4	0.00975249		2518.4	-0.01004987
398.6	0.01222545		928.59	-0.00082744		1458.6	-0.00917561		1988.6	0.00904442		2518.6	-0.00986553
398.8	0.0112496		928.79	-0.00223469		1458.8	-0.00973783		1988.8	0.00903782		2518.8	-0.01055052
399	0.01123029		928.99	-0.00205796		1459	-0.00947402		1989	0.00969875		2519	-0.01045284
399.2	0.01009272		929.19	-0.00268295		1459.2	-0.00919849		1989.2	0.00896991		2519.2	-0.01068317
399.4	0.00955163		929.39	-0.00336303		1459.4	-0.0095094		1989.4	0.00829777		2519.4	-0.01027538
399.6	0.00881961		929.59	-0.00308338		1459.6	-0.00910145		1989.6	0.00756242		2519.6	-0.00970413
399.8	0.00867782		929.79	-0.00273395		1459.8	-0.00938153		1989.8	0.00740043		2519.8	-0.00988403
400	0.00869818		929.99	-0.0016317		1460	-0.01050213		1990	0.00673157		2520	-0.00895966
400.2	0.00901574		930.19	-0.00081593		1460.2	-0.01076996		1990.2	0.00581203		2520.2	-0.00857298
400.4	0.0093613		930.39	-0.00031155		1460.4	-0.01117959		1990.4	0.00547179		2520.4	-0.00797608
400.6	0.00921779		930.59	-0.00034027		1460.6	-0.0116169		1990.6	0.00495514		2520.6	-0.00685046
400.8	0.0091801		930.79	0.00104794		1460.8	-0.01253163		1990.8	0.00481595		2520.8	-0.00649159
401	0.00981139		930.99	0.00089108		1461	-0.01226548		1991	0.00504271		2521	-0.00631749
401.2	0.00991497		931.19	0.00061154		1461.2	-0.01143961		1991.2	0.00528378		2521.2	-0.00656264
401.4	0.01062822		931.39	-0.00061664		1461.4	-0.01108647		1991.4	0.00509908		2521.4	-0.00697693
401.6	0.01091482		931.59	-0.00024461		1461.6	-0.01150596		1991.6	0.00525509		2521.6	-0.00633531
401.8	0.01102294		931.79	-0.001093		1461.8	-0.01144356		1991.8	0.00501043		2521.8	-0.00671262
402	0.01110522		931.99	-0.00121345		1462	-0.01141361		1992	0.00543066		2522	-0.00674279
402.2	0.0117531		932.19	-0.00173979		1462.2	-0.01219685		1992.2	0.00608914		2522.2	-0.00727417
402.4	0.0116704		932.39	-0.00157625		1462.4	-0.01257953		1992.4	0.00615751		2522.4	-0.00855953
402.6	0.01135509		932.59	-0.0015596		1462.6	-0.01274854		1992.6	0.00537374		2522.6	-0.00949721
402.8	0.01038174		932.79	-0.00180114		1462.8	-0.01258196		1992.8	0.00658094		2522.8	-0.01081158
403	0.01034972		932.99	-0.00109161		1463	-0.01204127		1993	0.00707189		2523	-0.01073258
403.2	0.00890378		933.19	-0.00147007		1463.2	-0.01222296		1993.2	0.00657184		2523.2	-0.01079499
403.4	0.00746902		933.39	-0.00169964		1463.4	-0.01252817		1993.4	0.00759852		2523.4	-0.01072653
403.6	0.0065492		933.59	-0.0021746		1463.6	-0.01343352		1993.6	0.00826552		2523.6	-0.01090589
403.8	0.00613312		933.79	-0.00270413		1463.8	-0.0133945		1993.8	0.00923286		2523.8	-0.01127575
404	0.00585989		933.99	-0.00223852		1464	-0.01398927		1994	0.0099659		2524	-0.01120189
404.2	0.00583067		934.19	-0.00224665		1464.2	-0.01505242		1994.2	0.00985839		2524.2	-0.01102232
404.4	0.00560182		934.39	-0.00225642		1464.4	-0.01495895		1994.4	0.0104708		2524.4	-0.00991227
404.6	0.00555276		934.59	-0.00216615		1464.6	-0.01463513		1994.6	0.01037878		2524.6	-0.00920221
404.8	0.00620269		934.79	-0.0016428		1464.8	-0.01433523		1994.8	0.01023643		2524.8	-0.0091977
405	0.00809946		934.99	-0.00234778		1465	-0.0137346		1995	0.00946765		2525	-0.0088684
405.2	0.00919985		935.19	-0.00257365		1465.2	-0.01335445		1995.2	0.00854929		2525.2	-0.00907051
405.4	0.00994237		935.39	-0.00308553		1465.4	-0.01365535		1995.4	0.00732933		2525.4	-0.00941271
405.6	0.01057421		935.59	-0.00263734		1465.6	-0.01443724		1995.6	0.0063955		2525.6	-0.00885171
405.8	0.01111024		935.79	-0.00292412		1465.8	-0.01458603		1995.8	0.00602332		2525.8	-0.00937994
406	0.01105916		935.99	-0.00280087		1466	-0.01453875		1996	0.00563229		2526	-0.00957429
406.2	0.01146377		936.19	-0.00339568		1466.2	-0.01535065		1996.2	0.00488002		2526.2	-0.01018123
406.4	0.01119393		936.39	-0.00313154		1466.4	-0.01581769		1996.4	0.00402988		2526.4	-0.01049873
406.6	0.01080389		936.59	-0.00372135		1466.6	-0.01550264		1996.6	0.00368311		2526.6	-0.01094117
406.8	0.01074304		936.79	-0.00422021		1466.8	-0.01569972		1996.8	0.00456616		2526.8	-0.01127994
407	0.0098691		936.99	-0.00466285		1467	-0.01537449		1997	0.00490979		2527	-0.01122684
407.2	0.00893406		937.19	-0.00539437		1467.2	-0.01449842		1997.2	0.00478261		2527.2	-0.0111102
407.4	0.0076599		937.39	-0.00614306		1467.4	-0.01340769		1997.4	0.0052415		2527.4	-0.01158812
407.6	0.00703381		937.59	-0.00659677		1467.6	-0.01330364		1997.6	0.00614299		2527.6	-0.0115506
407.8	0.00644955		937.79	-0.00606538		1467.8	-0.01245406		1997.8	0.00665053		2527.8	-0.01103171
408	0.00642622		937.99	-0.00526054		1468	-0.01216802		1998	0.00716		2528	-0.01119745
408.2	0.00634066		938.19	-0.00505797		1468.2	-0.01193297		1998.2	0.0077073		2528.2	-0.0113419
408.4	0.00708786		938.39	-0.00339279		1468.4	-0.01082324		1998.4	0.00842189		2528.4	-0.01100869
408.6	0.00702101		938.59	-0.00303757		1468.6	-0.01018768		1998.6	0.00846378		2528.6	-0.01069421
408.8	0.0072064		938.79	-0.00233687		1468.8	-0.00939859		1998.8	0.00867014		2528.8	-0.01045242
409	0.00774729		938.99	-0.00252837		1469	-0.00913791		1999	0.00839933		2529	-0.01125817
409.2	0.00834227		939.19	-0.00191433		1469.2	-0.00883746		1999.2	0.00796308		2529.2	-0.01132287
409.4	0.00852686		939.39	-0.00196191		1469.4	-0.00861831		1999.4	0.00813778		2529.4	-0.01145795
409.6	0.00882459		939.59	-0.00204045		1469.6	-0.00868576		1999.6	0.00813866		2529.6	-0.0122812
409.8	0.00805674		939.79	-0.00158042		1469.8	-0.00954361		1999.8	0.008684		2529.8	-0.01236573
410	0.0067331		939.99	-0.00184395		1470	-0.01030046		2000	0.00905747		2530	-0.01204396
410.2	0.00594901		940.19	-0.00126065		1470.2	-0.01101968		2000.2	0.00850061		2530.2	-0.01287651
410.4	0.00572393		940.39	-0.00111201		1470.4	-0.01186028		2000.4	0.00825397		2530.4	-0.01234268
410.6	0.00571079		940.59	-0.00176957		1470.6	-0.01219851		2000.6	0.00798334		2530.6	-0.01220441
410.8	0.00564368		940.79	-0.00229752		1470.8	-0.01263199		2000.8	0.00751409		2530.8	-0.01256494
411	0.00540892		940.99	-0.00293232		1471	-0.01251746		2001	0.00680426		2531	-0.01239077
411.2	0.00523041		941.19	-0.00332521		1471.2	-0.01225046		2001.2	0.00561876		2531.2	-0.01110328
411.4	0.00482994		941.39	-0.00323161		1471.4	-0.01207707		2001.4	0.00557751		2531.4	-0.01131381
411.6	0.00537632		941.59	-0.00344868		1471.6	-0.0130415		2001.6	0.00569068		2531.6	-0.01120394
411.8	0.00572289		941.79	-0.00342822		1471.8	-0.01299875		2001.8	0.0054041		2531.8	-0.01116111
412	0.00628024		941.99	-0.00374831		1472	-0.01272003		2002	0.00529462		2532	-0.01168595
412.2	0.00716675		942.19	-0.00344788		1472.2	-0.01274777		2002.2	0.0058981		2532.2	-0.01146568
412.4	0.00707011		942.39	-0.00268338		1472.4	-0.01226685		2002.4	0.00580049		2532.4	-0.01164443
412.6	0.00745137		942.59	-0.00361811		1472.6	-0.01240626		2002.6	0.00602775		2532.6	-0.01153582
412.8	0.00905223		942.79	-0.00322804		1472.8	-0.01216328		2002.8	0.0053651		2532.8	-0.01169844
413	0.01039361		942.99	-0.00345851		1473	-0.01247302		2003	0.00527525		2533	-0.0123236
413.2	0.0112265		943.19	-0.0030829		1473.2	-0.01328256		2003.2	0.0050191		2533.2	-0.01159273
413.4	0.01090368		943.39	-0.00339467		1473.4	-0.01340473		2003.4	0.00557157		2533.4	-0.01208017
413.6	0.0108973		943.59	-0.00299644		1473.6	-0.01349731		2003.6	0.00584926		2533.6	-0.01206098
413.8	0.00901817		943.79	-0.00294433		1473.8	-0.01386615		2003.8	0.00632602		2533.8	-0.01210141
414	0.00843487		943.99	-0.00237078		1474	-0.01358647		2004	0.00664936		2534	-0.01219004
414.2	0.00838447		944.19	-0.00189254		1474.2	-0.0140894		2004.2	0.00648289		2534.2	-0.01161353
414.4	0.00799047		944.39	-0.00262703		1474.4	-0.01434795		2004.4	0.00611588		2534.4	-0.01055828
414.6	0.00751179		944.59	-0.00303644		1474.6	-0.01394969		2004.6	0.00560138		2534.6	-0.01029693
414.8	0.00624349		944.79	-0.00315956		1474.8	-0.01392581		2004.8	0.00538689		2534.8	-0.01076225
415	0.0055083		944.99	-0.00300168		1475	-0.01414347		2005	0.00574138		2535	-0.00986743
415.2	0.00411791		945.19	-0.00280622		1475.2	-0.01348308		2005.2	0.00612291		2535.2	-0.00942733
415.4	0.0044676		945.39	-0.00313018		1475.4	-0.01286947		2005.4	0.006974		2535.4	-0.01011374
415.6	0.00458676		945.59	-0.00371837		1475.6	-0.01274881		2005.6	0.00702012		2535.6	-0.01032324
415.8	0.00446773		945.79	-0.00401438		1475.8	-0.01181897		2005.8	0.00668736		2535.8	-0.01063119
416	0.00450239		945.99	-0.00302606		1476	-0.01220528		2006	0.00594839		2536	-0.01025322
416.2	0.00500122		946.19	-0.00274555		1476.2	-0.01231541		2006.2	0.00612924		2536.2	-0.01012091
416.4	0.00544013		946.39	-0.00332311		1476.4	-0.01234328		2006.4	0.00631213		2536.4	-0.01072241
416.6	0.0067274		946.59	-0.00302856		1476.6	-0.01342525		2006.6	0.0060933		2536.6	-0.01076187
416.8	0.00737827		946.79	-0.00268825		1476.8	-0.01318626		2006.8	0.00526901		2536.8	-0.01103275
417	0.00717797		946.99	-0.00286914		1477	-0.0137988		2007	0.00547842		2537	-0.01121278
417.2	0.00758451		947.19	-0.00270326		1477.2	-0.01463028		2007.2	0.00513469		2537.2	-0.01194292
417.4	0.0075057		947.39	-0.00261173		1477.4	-0.01417595		2007.4	0.00498619		2537.4	-0.01214417
417.6	0.00835409		947.59	-0.00272079		1477.6	-0.01340511		2007.6	0.00533725		2537.6	-0.01262313
417.8	0.00730424		947.79	-0.00303342		1477.8	-0.01393813		2007.8	0.00534651		2537.8	-0.01282149
418	0.00834026		947.99	-0.00176522		1478	-0.01349911		2008	0.00552348		2538	-0.01245825
418.2	0.00768594		948.19	-0.00214427		1478.2	-0.01325825		2008.2	0.00567823		2538.2	-0.01212668
418.4	0.00618298		948.39	-0.00223782		1478.4	-0.01239544		2008.4	0.00583487		2538.4	-0.01229083
418.6	0.00638279		948.59	-0.00261515		1478.6	-0.01172438		2008.6	0.00652283		2538.6	-0.01154168
418.8	0.00533059		948.79	-0.00327606		1478.8	-0.01152412		2008.8	0.00686985		2538.8	-0.01106855
419	0.00441429		948.99	-0.00395123		1479	-0.01135723		2009	0.00769453		2539	-0.0109615
419.2	0.00377147		949.19	-0.00470543		1479.2	-0.01123884		2009.2	0.00865347		2539.2	-0.01105685
419.4	0.00432213		949.39	-0.00516142		1479.4	-0.01089793		2009.4	0.00888822		2539.4	-0.01072134
419.6	0.00368208		949.59	-0.00598843		1479.6	-0.01130063		2009.6	0.00876034		2539.6	-0.00996628
419.8	0.0041958		949.79	-0.00586484		1479.8	-0.01142108		2009.8	0.00889156		2539.8	-0.00989954
420	0.00365177		949.99	-0.00544762		1480	-0.01210366		2010	0.00934519		2540	-0.00905663
420.2	0.00402102		950.19	-0.00580959		1480.2	-0.01159403		2010.2	0.00979823		2540.2	-0.00888911
420.4	0.00449638		950.39	-0.00604952		1480.4	-0.01155185		2010.4	0.00992573		2540.4	-0.00937419
420.6	0.00433007		950.59	-0.00554092		1480.6	-0.0121487		2010.6	0.0090164		2540.6	-0.00937845
420.8	0.00414109		950.79	-0.00602718		1480.8	-0.01225724		2010.8	0.00753229		2540.8	-0.00979277
421	0.00476776		950.99	-0.00643511		1481	-0.01363291		2011	0.00729632		2541	-0.01056873
421.2	0.0056758		951.19	-0.00576749		1481.2	-0.0143328		2011.2	0.00633354		2541.2	-0.01206847
421.4	0.0059343		951.39	-0.00533696		1481.4	-0.01394368		2011.4	0.00547015		2541.4	-0.01275209
421.6	0.00636732		951.59	-0.00494396		1481.6	-0.01505801		2011.6	0.00554078		2541.6	-0.01260898
421.8	0.00545108		951.79	-0.00384609		1481.8	-0.01517509		2011.8	0.0048333		2541.8	-0.01157945
422	0.00587728		951.99	-0.00286022		1482	-0.01450234		2012	0.00476912		2542	-0.01231854
422.2	0.00580032		952.19	-0.00262467		1482.2	-0.01456069		2012.2	0.00406953		2542.2	-0.01196012
422.4	0.00530654		952.39	-0.00293408		1482.4	-0.01482975		2012.4	0.00401555		2542.4	-0.01084373
422.6	0.00631081		952.59	-0.00356944		1482.6	-0.01439235		2012.6	0.00454719		2542.6	-0.01032971
422.8	0.00563228		952.79	-0.00415797		1482.8	-0.01462499		2012.8	0.00446159		2542.8	-0.0106817
423	0.00511478		952.99	-0.00369134		1483	-0.01479251		2013	0.0055188		2543	-0.01159162
423.2	0.00546334		953.19	-0.00319791		1483.2	-0.01514879		2013.2	0.00629525		2543.2	-0.01069461
423.4	0.00621636		953.39	-0.00338544		1483.4	-0.01472559		2013.4	0.00724526		2543.4	-0.01043368
423.6	0.0055341		953.59	-0.00391477		1483.6	-0.01516452		2013.6	0.00798273		2543.6	-0.0098415
423.8	0.00582409		953.79	-0.00400922		1483.8	-0.01471159		2013.8	0.0084165		2543.8	-0.01091097
424	0.00551132		953.99	-0.00368492		1484	-0.01390506		2014	0.00908145		2544	-0.0108657
424.2	0.00555375		954.19	-0.00394235		1484.2	-0.01292223		2014.2	0.00996059		2544.2	-0.01112728
424.4	0.00587834		954.39	-0.00420088		1484.4	-0.01284794		2014.4	0.00973216		2544.4	-0.01104487
424.6	0.00541999		954.59	-0.00471727		1484.6	-0.0133033		2014.6	0.00912589		2544.6	-0.01054361
424.8	0.00575271		954.79	-0.00536271		1484.8	-0.01356806		2014.8	0.00850046		2544.8	-0.01135422
425	0.00597489		954.99	-0.00580741		1485	-0.01341124		2015	0.00881234		2545	-0.01198497
425.2	0.00531344		955.19	-0.00613673		1485.2	-0.01375798		2015.2	0.00807325		2545.2	-0.01261796
425.4	0.00478462		955.39	-0.00571633		1485.4	-0.01394755		2015.4	0.0081535		2545.4	-0.01259798
425.6	0.00425132		955.59	-0.00560749		1485.6	-0.01464899		2015.6	0.00782509		2545.6	-0.01204869
425.8	0.0034647		955.79	-0.00521642		1485.8	-0.01377624		2015.8	0.00748281		2545.8	-0.01194015
426	0.0038317		955.99	-0.00512449		1486	-0.01380615		2016	0.00679222		2546	-0.01182997
426.2	0.00404673		956.19	-0.00555724		1486.2	-0.01395949		2016.2	0.00547605		2546.2	-0.01128014
426.4	0.00311502		956.39	-0.00554698		1486.4	-0.01351264		2016.4	0.00600342		2546.4	-0.01071867
426.6	0.00376711		956.59	-0.00576338		1486.6	-0.01277167		2016.6	0.00644003		2546.6	-0.0114791
426.8	0.00352549		956.79	-0.0059822		1486.8	-0.01259664		2016.8	0.00631995		2546.8	-0.01151685
427	0.00308554		956.99	-0.00558614		1487	-0.01302899		2017	0.00638394		2547	-0.01164734
427.2	0.00341328		957.19	-0.00632042		1487.2	-0.01294733		2017.2	0.00603514		2547.2	-0.01178346
427.4	0.00325615		957.39	-0.00625309		1487.4	-0.01229189		2017.4	0.00613867		2547.4	-0.01272438
427.6	0.00280565		957.59	-0.00593361		1487.6	-0.01207236		2017.6	0.00563026		2547.6	-0.01262159
427.8	0.0035928		957.79	-0.00618536		1487.8	-0.01192144		2017.8	0.0059202		2547.8	-0.01367923
428	0.00418635		957.99	-0.00579655		1488	-0.01153306		2018	0.00617149		2548	-0.01339241
428.2	0.00481848		958.19	-0.00603138		1488.2	-0.01173455		2018.2	0.00621785		2548.2	-0.01318349
428.4	0.00546483		958.39	-0.00553878		1488.4	-0.01191341		2018.4	0.00488412		2548.4	-0.01357677
428.6	0.00612247		958.59	-0.00555951		1488.6	-0.01210059		2018.6	0.00454079		2548.6	-0.01387259
428.8	0.0063205		958.79	-0.00545089		1488.8	-0.01147697		2018.8	0.0048242		2548.8	-0.01392067
429	0.00647539		958.99	-0.00580339		1489	-0.01126268		2019	0.00461596		2549	-0.01385919
429.2	0.00706878		959.19	-0.00566249		1489.2	-0.01308826		2019.2	0.00502216		2549.2	-0.01399806
429.4	0.00751794		959.39	-0.00446173		1489.4	-0.01394511		2019.4	0.00525063		2549.4	-0.01359457
429.6	0.00681413		959.59	-0.00502451		1489.6	-0.01346143		2019.6	0.00513849		2549.6	-0.01404361
429.8	0.0058158		959.79	-0.00526219		1489.8	-0.01371319		2019.8	0.00573248		2549.8	-0.01336795
430	0.006265		959.99	-0.00468477		1490	-0.01441281		2020	0.00556461		2550	-0.01212079
430.2	0.00568589		960.19	-0.00554797		1490.2	-0.01457436		2020.2	0.00552161		2550.2	-0.01202963
430.4	0.00522104		960.39	-0.00498286		1490.4	-0.01477478		2020.4	0.00558645		2550.4	-0.01109581
430.6	0.0049327		960.59	-0.00541714		1490.6	-0.01438158		2020.6	0.00566012		2550.6	-0.01061048
430.8	0.00412724		960.79	-0.00613221		1490.8	-0.01472037		2020.8	0.00631802		2550.8	-0.01000053
431	0.00460658		960.99	-0.00597824		1491	-0.01526991		2021	0.0061864		2551	-0.0102618
431.2	0.00529739		961.19	-0.00633123		1491.2	-0.01413866		2021.2	0.00637671		2551.2	-0.01004676
431.4	0.00536883		961.39	-0.00588694		1491.4	-0.01445707		2021.4	0.00720032		2551.4	-0.00995547
431.6	0.00534838		961.59	-0.00611461		1491.6	-0.01445659		2021.6	0.00754005		2551.6	-0.00940764
431.8	0.00531146		961.79	-0.00672604		1491.8	-0.01436401		2021.8	0.00754066		2551.8	-0.00985154
432	0.00501798		961.99	-0.00574604		1492	-0.01345341		2022	0.00664165		2552	-0.01035341
432.2	0.00477221		962.19	-0.00538968		1492.2	-0.01313567		2022.2	0.00593463		2552.2	-0.01184401
432.4	0.0047726		962.39	-0.0043669		1492.4	-0.01248066		2022.4	0.00562291		2552.4	-0.01324627
432.6	0.00464198		962.59	-0.00410193		1492.6	-0.01208283		2022.6	0.00532219		2552.6	-0.01328176
432.8	0.00407317		962.79	-0.00390354		1492.8	-0.01145075		2022.8	0.00459479		2552.8	-0.01272087
433	0.00382399		962.99	-0.00392376		1493	-0.01231498		2023	0.00483518		2553	-0.01318294
433.2	0.00363509		963.19	-0.00407613		1493.2	-0.01353371		2023.2	0.00459919		2553.2	-0.01362833
433.4	0.00227764		963.39	-0.00403451		1493.4	-0.01386267		2023.4	0.00463247		2553.4	-0.01382254
433.6	0.00081182		963.59	-0.00545159		1493.6	-0.01367466		2023.6	0.00500154		2553.6	-0.014363
433.8	0.00055093		963.79	-0.00641541		1493.8	-0.01436304		2023.8	0.00553255		2553.8	-0.01334031
434	0.00096947		963.99	-0.00607058		1494	-0.01455538		2024	0.00540898		2554	-0.01341706
434.2	0.00112194		964.19	-0.00739658		1494.2	-0.01433903		2024.2	0.0054626		2554.2	-0.01329784
434.4	0.00155233		964.39	-0.00688649		1494.4	-0.0153365		2024.4	0.00548859		2554.4	-0.01262806
434.6	0.00197094		964.59	-0.0073143		1494.6	-0.01468045		2024.6	0.00652661		2554.6	-0.01180659
434.8	0.00343992		964.79	-0.00743516		1494.8	-0.01567652		2024.8	0.00798538		2554.8	-0.01195594
435	0.0051505		964.99	-0.00678301		1495	-0.01525922		2025	0.00821256		2555	-0.01166151
435.2	0.00549422		965.19	-0.00707765		1495.2	-0.01552588		2025.2	0.00884084		2555.2	-0.01135369
435.4	0.00583537		965.39	-0.00719842		1495.4	-0.01660889		2025.4	0.00938269		2555.4	-0.01151761
435.6	0.00622534		965.59	-0.00706291		1495.6	-0.01564777		2025.6	0.00894709		2555.6	-0.01188202
435.8	0.00660123		965.79	-0.00635951		1495.8	-0.01537536		2025.8	0.00842347		2555.8	-0.01256214
436	0.006259		965.99	-0.0054042		1496	-0.01485953		2026	0.00771667		2556	-0.0131009
436.2	0.00661145		966.19	-0.00572198		1496.2	-0.01545723		2026.2	0.00662946		2556.2	-0.01407212
436.4	0.00736387		966.39	-0.00496238		1496.4	-0.01508394		2026.4	0.00671164		2556.4	-0.01330958
436.6	0.00673235		966.59	-0.00530915		1496.6	-0.01480561		2026.6	0.00579402		2556.6	-0.01255677
436.8	0.0064864		966.79	-0.00505831		1496.8	-0.01494998		2026.8	0.00622438		2556.8	-0.01236189
437	0.00541803		966.99	-0.00519139		1497	-0.01599935		2027	0.00632034		2557	-0.01291336
437.2	0.00546239		967.19	-0.00585912		1497.2	-0.01609203		2027.2	0.00496629		2557.2	-0.01222478
437.4	0.00492368		967.39	-0.00573692		1497.4	-0.01594037		2027.4	0.00540475		2557.4	-0.01197223
437.6	0.00415236		967.59	-0.00678665		1497.6	-0.01575415		2027.6	0.00613008		2557.6	-0.01181376
437.8	0.00403079		967.79	-0.00734774		1497.8	-0.01521963		2027.8	0.00655601		2557.8	-0.01178819
438	0.00405725		967.99	-0.00683588		1498	-0.01474166		2028	0.00631708		2558	-0.01191782
438.2	0.00361912		968.19	-0.00639873		1498.2	-0.01471241		2028.2	0.00759752		2558.2	-0.01106751
438.4	0.00383175		968.39	-0.0055624		1498.4	-0.01483827		2028.4	0.00755019		2558.4	-0.01048572
438.6	0.00386603		968.59	-0.00609106		1498.6	-0.01417527		2028.6	0.00853954		2558.6	-0.0099156
438.8	0.00382954		968.79	-0.00554763		1498.8	-0.01450475		2028.8	0.00905283		2558.8	-0.01019395
439	0.00416578		968.99	-0.00632155		1499	-0.01410112		2029	0.00964409		2559	-0.01004873
439.2	0.00425967		969.19	-0.00691032		1499.2	-0.01513951		2029.2	0.01077385		2559.2	-0.01038814
439.4	0.00512136		969.39	-0.00724382		1499.4	-0.01576756		2029.4	0.01066119		2559.4	-0.00972561
439.6	0.00546336		969.59	-0.00755729		1499.6	-0.0154908		2029.6	0.00959698		2559.6	-0.01013638
439.8	0.00559852		969.79	-0.00797237		1499.8	-0.01567413		2029.8	0.00981724		2559.8	-0.01012619
440	0.00556596		969.99	-0.00835473		1500	-0.01587803		2030	0.00900703		2560	-0.01001006
440.2	0.00617045		970.19	-0.00843246		1500.2	-0.0160024		2030.2	0.00795517		2560.2	-0.01013403
440.4	0.00674374		970.39	-0.00818638		1500.4	-0.01505577		2030.4	0.00783932		2560.4	-0.00991039
440.6	0.00664944		970.59	-0.00818039		1500.6	-0.01525104		2030.6	0.00684583		2560.6	-0.01044652
440.8	0.00652809		970.79	-0.00798655		1500.8	-0.01576922		2030.8	0.0065803		2560.8	-0.0106884
441	0.00603408		970.99	-0.00846863		1501	-0.01566545		2031	0.00539185		2561	-0.01101122
441.2	0.00660479		971.19	-0.00905266		1501.2	-0.01481509		2031.2	0.00441569		2561.2	-0.01088583
441.4	0.00591545		971.39	-0.00912118		1501.4	-0.01464554		2031.4	0.00464778		2561.4	-0.01252413
441.6	0.00432423		971.59	-0.0093402		1501.6	-0.01387295		2031.6	0.00478371		2561.6	-0.01318918
441.8	0.00367539		971.79	-0.00950792		1501.8	-0.01321294		2031.8	0.00474032		2561.8	-0.01340452
442	0.00323091		971.99	-0.00865071		1502	-0.01222592		2032	0.00444581		2562	-0.01394597
442.2	0.00251814		972.19	-0.00799764		1502.2	-0.01222777		2032.2	0.00546533		2562.2	-0.01412155
442.4	0.00289959		972.39	-0.00805975		1502.4	-0.01195832		2032.4	0.00577915		2562.4	-0.01396706
442.6	0.00255142		972.59	-0.00827012		1502.6	-0.01216239		2032.6	0.00748473		2562.6	-0.0143773
442.8	0.00283377		972.79	-0.00824611		1502.8	-0.01260634		2032.8	0.00782113		2562.8	-0.01433063
443	0.00269902		972.99	-0.00852759		1503	-0.01321744		2033	0.00861172		2563	-0.01476747
443.2	0.00263563		973.19	-0.00789125		1503.2	-0.0141082		2033.2	0.00921303		2563.2	-0.01520518
443.4	0.00194388		973.39	-0.00744173		1503.4	-0.01417603		2033.4	0.00828595		2563.4	-0.01456101
443.6	0.00168327		973.59	-0.00687455		1503.6	-0.01451174		2033.6	0.00841586		2563.6	-0.01493089
443.8	0.0023551		973.79	-0.00643622		1503.8	-0.01517066		2033.8	0.0091894		2563.8	-0.01482723
444	0.0027736		973.99	-0.00594561		1504	-0.01499133		2034	0.00880434		2564	-0.01417486
444.2	0.00343484		974.19	-0.00596997		1504.2	-0.01575626		2034.2	0.00837806		2564.2	-0.01357781
444.4	0.00482357		974.39	-0.0050813		1504.4	-0.01580554		2034.4	0.0088127		2564.4	-0.01332259
444.6	0.00455912		974.59	-0.00540447		1504.6	-0.01657348		2034.6	0.0088499		2564.6	-0.01318942
444.8	0.00488865		974.79	-0.00611616		1504.8	-0.01727803		2034.8	0.00927256		2564.8	-0.01269661
445	0.00470535		974.99	-0.00691536		1505	-0.01705365		2035	0.00844675		2565	-0.01329949
445.2	0.00535897		975.19	-0.00851733		1505.2	-0.01664393		2035.2	0.007876		2565.2	-0.01354211
445.4	0.00477439		975.39	-0.00865521		1505.4	-0.01724161		2035.4	0.00819871		2565.4	-0.01296976
445.6	0.00453016		975.59	-0.0088793		1505.6	-0.01593987		2035.6	0.00834309		2565.6	-0.01240684
445.8	0.00453425		975.79	-0.00865418		1505.8	-0.01638967		2035.8	0.00890268		2565.8	-0.01184507
446	0.00511842		975.99	-0.00831065		1506	-0.01616219		2036	0.00855883		2566	-0.01212482
446.2	0.0054122		976.19	-0.00823895		1506.2	-0.01591963		2036.2	0.00853641		2566.2	-0.01217247
446.4	0.00579657		976.39	-0.00863323		1506.4	-0.01563512		2036.4	0.00854947		2566.4	-0.01187908
446.6	0.00596925		976.59	-0.00868389		1506.6	-0.01557498		2036.6	0.00888129		2566.6	-0.01295124
446.8	0.0053822		976.79	-0.00891124		1506.8	-0.01574684		2036.8	0.00773543		2566.8	-0.01321136
447	0.00507826		976.99	-0.00865031		1507	-0.01560472		2037	0.00775429		2567	-0.01425806
447.2	0.00553391		977.19	-0.00814186		1507.2	-0.01508836		2037.2	0.00855504		2567.2	-0.01457112
447.4	0.00554437		977.39	-0.00761569		1507.4	-0.01485547		2037.4	0.00724472		2567.4	-0.01481092
447.6	0.00652538		977.59	-0.00708011		1507.6	-0.0153478		2037.6	0.00701148		2567.6	-0.01421202
447.8	0.00706086		977.79	-0.0073422		1507.8	-0.01526981		2037.8	0.00714306		2567.8	-0.01454897
448	0.00687582		977.99	-0.00692248		1508	-0.01446496		2038	0.00693959		2568	-0.01457439
448.2	0.00651237		978.19	-0.007057		1508.2	-0.0146785		2038.2	0.00649605		2568.2	-0.0147851
448.4	0.00587109		978.39	-0.00649335		1508.4	-0.01472235		2038.4	0.00679096		2568.4	-0.01464322
448.6	0.00476816		978.59	-0.00647508		1508.6	-0.01585433		2038.6	0.00619997		2568.6	-0.0144523
448.8	0.00483576		978.79	-0.0064991		1508.8	-0.01641848		2038.8	0.0064197		2568.8	-0.01480947
449	0.00430766		978.99	-0.00700381		1509	-0.01634044		2039	0.00562631		2569	-0.01410361
449.2	0.00454519		979.19	-0.00737113		1509.2	-0.01601661		2039.2	0.00625293		2569.2	-0.01382233
449.4	0.00392269		979.39	-0.0064931		1509.4	-0.01704715		2039.4	0.00644834		2569.4	-0.01315668
449.6	0.00367171		979.59	-0.00564839		1509.6	-0.01642362		2039.6	0.00606036		2569.6	-0.01350814
449.8	0.0037754		979.79	-0.00520233		1509.8	-0.01700109		2039.8	0.00585657		2569.8	-0.01284183
450	0.0040854		979.99	-0.00523528		1510	-0.01659657		2040	0.00581901		2570	-0.01351172
450.2	0.00392899		980.19	-0.00571463		1510.2	-0.01674455		2040.2	0.00508183		2570.2	-0.01355741
450.4	0.00390652		980.39	-0.00607101		1510.4	-0.01623018		2040.4	0.00564453		2570.4	-0.01379074
450.6	0.00386875		980.59	-0.00553627		1510.6	-0.0158393		2040.6	0.00550699		2570.6	-0.01406426
450.8	0.00358213		980.79	-0.00608426		1510.8	-0.01624641		2040.8	0.00589454		2570.8	-0.01434724
451	0.00386186		980.99	-0.00647876		1511	-0.0167304		2041	0.00638934		2571	-0.01436329
451.2	0.0046019		981.19	-0.0066764		1511.2	-0.01657587		2041.2	0.00657905		2571.2	-0.01405105
451.4	0.00492516		981.39	-0.00658404		1511.4	-0.01630855		2041.4	0.00538699		2571.4	-0.01404636
451.6	0.00479685		981.59	-0.00723886		1511.6	-0.01636927		2041.6	0.00566045		2571.6	-0.01346334
451.8	0.00446997		981.79	-0.00797738		1511.8	-0.01608357		2041.8	0.00605956		2571.8	-0.01497137
452	0.00439829		981.99	-0.00793937		1512	-0.0153127		2042	0.00540978		2572	-0.01513742
452.2	0.00387858		982.19	-0.00856443		1512.2	-0.01561477		2042.2	0.00567848		2572.2	-0.01549192
452.4	0.00332355		982.39	-0.00820588		1512.4	-0.0160557		2042.4	0.00676885		2572.4	-0.01557512
452.6	0.00314348		982.59	-0.00804699		1512.6	-0.01654951		2042.6	0.0068156		2572.6	-0.01604991
452.8	0.00333668		982.79	-0.00764735		1512.8	-0.01640183		2042.8	0.00745532		2572.8	-0.0169929
453	0.0031416		982.99	-0.00782378		1513	-0.01554345		2043	0.00779456		2573	-0.01623119
453.2	0.00319721		983.19	-0.00720733		1513.2	-0.01530925		2043.2	0.00863726		2573.2	-0.01720082
453.4	0.00258635		983.39	-0.00676573		1513.4	-0.0160283		2043.4	0.00845759		2573.4	-0.01646023
453.6	0.00332336		983.59	-0.00615094		1513.6	-0.01677073		2043.6	0.00848629		2573.6	-0.01589258
453.8	0.00334592		983.79	-0.0062075		1513.8	-0.01591923		2043.8	0.00862109		2573.8	-0.01558973
454	0.00245707		983.99	-0.00637067		1514	-0.01596271		2044	0.00894672		2574	-0.01566626
454.2	0.00224072		984.19	-0.00727231		1514.2	-0.01574137		2044.2	0.00847189		2574.2	-0.0152269
454.4	0.00179369		984.39	-0.00810666		1514.4	-0.01470728		2044.4	0.00892754		2574.4	-0.01445541
454.6	0.0018007		984.59	-0.00836412		1514.6	-0.01499856		2044.6	0.0085589		2574.6	-0.01357368
454.8	0.00170533		984.79	-0.0089947		1514.8	-0.01496792		2044.8	0.00856395		2574.8	-0.01304054
455	0.00215064		984.99	-0.00962355		1515	-0.01471186		2045	0.00780159		2575	-0.01278626
455.2	0.00324098		985.19	-0.00985949		1515.2	-0.01409294		2045.2	0.00772168		2575.2	-0.01292692
455.4	0.00315104		985.39	-0.00958373		1515.4	-0.01408351		2045.4	0.00701159		2575.4	-0.01347302
455.6	0.00306449		985.59	-0.01033363		1515.6	-0.01419284		2045.6	0.00708606		2575.6	-0.01405772
455.8	0.00308233		985.79	-0.0101208		1515.8	-0.01394687		2045.8	0.00689418		2575.8	-0.01558268
456	0.00371769		985.99	-0.01038394		1516	-0.01403546		2046	0.00718555		2576	-0.01618138
456.2	0.00321431		986.19	-0.01010988		1516.2	-0.01439269		2046.2	0.0077544		2576.2	-0.01732681
456.4	0.00317153		986.39	-0.00904444		1516.4	-0.01469743		2046.4	0.00829451		2576.4	-0.01779136
456.6	0.00338095		986.59	-0.00893263		1516.6	-0.01567766		2046.6	0.00788142		2576.6	-0.01844282
456.8	0.00360773		986.79	-0.0079036		1516.8	-0.01525481		2046.8	0.00813757		2576.8	-0.01835267
457	0.00359149		986.99	-0.00861487		1517	-0.01514565		2047	0.00826456		2577	-0.01787533
457.2	0.00359342		987.19	-0.00865814		1517.2	-0.01593833		2047.2	0.00828938		2577.2	-0.01763704
457.4	0.00359893		987.39	-0.00833209		1517.4	-0.01664679		2047.4	0.00804684		2577.4	-0.01676115
457.6	0.00396042		987.59	-0.00824858		1517.6	-0.01771996		2047.6	0.00845804		2577.6	-0.01651004
457.8	0.00318577		987.79	-0.00827142		1517.8	-0.01641314		2047.8	0.00846377		2577.8	-0.01608538
458	0.00291126		987.99	-0.00926737		1518	-0.01650966		2048	0.00823761		2578	-0.01540581
458.2	0.0035042		988.19	-0.00983936		1518.2	-0.01621957		2048.2	0.00769713		2578.2	-0.01432891
458.4	0.00349744		988.39	-0.01057979		1518.4	-0.01576459		2048.4	0.00670597		2578.4	-0.01336284
458.6	0.00325105		988.59	-0.01019222		1518.6	-0.01563814		2048.6	0.00633419		2578.6	-0.01317542
458.8	0.00298365		988.79	-0.0096844		1518.8	-0.01471618		2048.8	0.00577033		2578.8	-0.01218257
459	0.00332028		988.99	-0.01023131		1519	-0.01516716		2049	0.00553354		2579	-0.0127359
459.2	0.00275873		989.19	-0.01047788		1519.2	-0.0156946		2049.2	0.00564678		2579.2	-0.01307767
459.4	0.00282213		989.39	-0.01031819		1519.4	-0.01590609		2049.4	0.00494893		2579.4	-0.01272984
459.6	0.00308945		989.59	-0.01076923		1519.6	-0.01571873		2049.6	0.00537114		2579.6	-0.01309903
459.8	0.00268018		989.79	-0.01088396		1519.8	-0.01603648		2049.8	0.00552411		2579.8	-0.01342764
460	0.00282735		989.99	-0.01081427		1520	-0.0162933		2050	0.0064034		2580	-0.0132471
460.2	0.00239239		990.19	-0.01033207		1520.2	-0.0162029		2050.2	0.00677744		2580.2	-0.01247429
460.4	0.00272154		990.39	-0.01018807		1520.4	-0.01626449		2050.4	0.00770573		2580.4	-0.01222318
460.6	0.00338663		990.59	-0.01086333		1520.6	-0.01606588		2050.6	0.00739144		2580.6	-0.01202713
460.8	0.00285334		990.79	-0.01092161		1520.8	-0.01551685		2050.8	0.00745051		2580.8	-0.01218628
461	0.00307798		990.99	-0.01124918		1521	-0.01556249		2051	0.00816956		2581	-0.0119673
461.2	0.00280973		991.19	-0.0109982		1521.2	-0.01487264		2051.2	0.00829425		2581.2	-0.01213109
461.4	0.00338166		991.39	-0.01015172		1521.4	-0.01499234		2051.4	0.00863		2581.4	-0.01197062
461.6	0.00325025		991.59	-0.00968049		1521.6	-0.01543347		2051.6	0.00821664		2581.6	-0.01194917
461.8	0.00334462		991.79	-0.00928847		1521.8	-0.01494294		2051.8	0.00694773		2581.8	-0.01235319
462	0.00438678		991.99	-0.0089839		1522	-0.01470606		2052	0.00610331		2582	-0.01274299
462.2	0.00484465		992.19	-0.00836052		1522.2	-0.01514477		2052.2	0.00651657		2582.2	-0.01314823
462.4	0.0044534		992.39	-0.00848781		1522.4	-0.01463157		2052.4	0.00608035		2582.4	-0.01403154
462.6	0.00455642		992.59	-0.00738174		1522.6	-0.01568843		2052.6	0.00627718		2582.6	-0.01450061
462.8	0.00441222		992.79	-0.00746009		1522.8	-0.01603229		2052.8	0.00535652		2582.8	-0.01438955
463	0.0052479		992.99	-0.00765349		1523	-0.01729988		2053	0.00434091		2583	-0.01503873
463.2	0.00583373		993.19	-0.00806215		1523.2	-0.01795216		2053.2	0.00430536		2583.2	-0.01506144
463.4	0.00655179		993.39	-0.00741504		1523.4	-0.01854955		2053.4	0.00360959		2583.4	-0.01408699
463.6	0.0064284		993.59	-0.00763625		1523.6	-0.01851603		2053.6	0.00389586		2583.6	-0.01436158
463.8	0.00571659		993.79	-0.00789822		1523.8	-0.01925779		2053.8	0.00474434		2583.8	-0.01398855
464	0.00552193		993.99	-0.00781698		1524	-0.01918934		2054	0.0061072		2584	-0.01380479
464.2	0.00494791		994.19	-0.00906777		1524.2	-0.0195667		2054.2	0.00662035		2584.2	-0.01302375
464.4	0.00452315		994.39	-0.00941475		1524.4	-0.01944948		2054.4	0.00734109		2584.4	-0.01340491
464.6	0.00406778		994.59	-0.0096154		1524.6	-0.0194273		2054.6	0.00774848		2584.6	-0.01281182
464.8	0.00312956		994.79	-0.01046632		1524.8	-0.01890975		2054.8	0.00870178		2584.8	-0.01313267
465	0.00205236		994.99	-0.01087303		1525	-0.01880554		2055	0.00876981		2585	-0.0135401
465.2	0.00157012		995.19	-0.01133068		1525.2	-0.01783032		2055.2	0.00807897		2585.2	-0.01415553
465.4	0.00125813		995.39	-0.01096001		1525.4	-0.01813112		2055.4	0.00762318		2585.4	-0.01444806
465.6	0.00059416		995.59	-0.01074734		1525.6	-0.01802809		2055.6	0.00684583		2585.6	-0.01510686
465.8	0.0006294		995.79	-0.01044806		1525.8	-0.01787333		2055.8	0.00636629		2585.8	-0.01625535
466	0.00063095		995.99	-0.01103829		1526	-0.01758203		2056	0.00634343		2586	-0.01636076
466.2	0.00124443		996.19	-0.01142154		1526.2	-0.01780282		2056.2	0.00637487		2586.2	-0.01739198
466.4	0.00143114		996.39	-0.01094226		1526.4	-0.01768873		2056.4	0.00519128		2586.4	-0.01842723
466.6	0.00127068		996.59	-0.00990447		1526.6	-0.01797341		2056.6	0.00399023		2586.6	-0.01903239
466.8	0.00129576		996.79	-0.01027318		1526.8	-0.0183625		2056.8	0.00210033		2586.8	-0.01878953
467	0.00198689		996.99	-0.00936567		1527	-0.01849927		2057	0.00111729		2587	-0.0189254
467.2	0.00264471		997.19	-0.00989564		1527.2	-0.01837887		2057.2	0.00082112		2587.2	-0.01837423
467.4	0.00247225		997.39	-0.00907499		1527.4	-0.01795441		2057.4	0.00097008		2587.4	-0.01856159
467.6	0.00210326		997.59	-0.00883849		1527.6	-0.01820775		2057.6	0.00140848		2587.6	-0.019196
467.8	0.0025873		997.79	-0.00839086		1527.8	-0.01870826		2057.8	0.00236876		2587.8	-0.01923937
468	0.002487		997.99	-0.00797131		1528	-0.01872133		2058	0.00302484		2588	-0.01883434
468.2	0.00166525		998.19	-0.00841608		1528.2	-0.01923373		2058.2	0.00362995		2588.2	-0.01742032
468.4	0.00128588		998.39	-0.00808516		1528.4	-0.01899618		2058.4	0.00421592		2588.4	-0.01720995
468.6	0.00126366		998.59	-0.00781045		1528.6	-0.01926547		2058.6	0.00557052		2588.6	-0.01579372
468.8	0.0015077		998.79	-0.00813423		1528.8	-0.01890761		2058.8	0.00690672		2588.8	-0.01535351
469	0.00096033		998.99	-0.00772278		1529	-0.01856102		2059	0.00685746		2589	-0.01496769
469.2	0.00169066		999.19	-0.00720607		1529.2	-0.01821407		2059.2	0.00752143		2589.2	-0.01443042
469.4	0.00072584		999.39	-0.00676026		1529.4	-0.01889867		2059.4	0.00811527		2589.4	-0.01434974
469.6	0.00104416		999.59	-0.00695219		1529.6	-0.01914726		2059.6	0.00843834		2589.6	-0.01348763
469.8	0.00101547		999.79	-0.00732073		1529.8	-0.0193806		2059.8	0.00818317		2589.8	-0.01310509
470	0.00171805		999.99	-0.00812677		1530	-0.01925137		2060	0.00795362		2590	-0.01297651
470.2	0.00325129		1000.19	-0.00848117		1530.2	-0.01952012		2060.2	0.00754916		2590.2	-0.01359901
470.4	0.00261376		1000.39	-0.00817957		1530.4	-0.01941325		2060.4	0.00746675		2590.4	-0.01432153
470.6	0.00259859		1000.59	-0.00882539		1530.6	-0.01869829		2060.6	0.00639642		2590.6	-0.01499976
470.8	0.00259345		1000.79	-0.00910053		1530.8	-0.01891521		2060.8	0.00521052		2590.8	-0.01530809
471	0.00251256		1000.99	-0.00914515		1531	-0.01906888		2061	0.0052408		2591	-0.01566881
471.2	0.00271142		1001.19	-0.0098536		1531.2	-0.01851667		2061.2	0.00518501		2591.2	-0.01585513
471.4	0.00285771		1001.39	-0.00902339		1531.4	-0.0184751		2061.4	0.00502383		2591.4	-0.01677937
471.6	0.00243455		1001.59	-0.00864292		1531.6	-0.01956806		2061.6	0.00461015		2591.6	-0.01728666
471.8	0.00318189		1001.79	-0.00835281		1531.8	-0.01954696		2061.8	0.00437618		2591.8	-0.01787955
472	0.00258917		1001.99	-0.00887862		1532	-0.01953725		2062	0.00445556		2592	-0.01813514
472.2	0.0017231		1002.19	-0.00913762		1532.2	-0.02011469		2062.2	0.00483798		2592.2	-0.01782849
472.4	0.00172313		1002.39	-0.00881552		1532.4	-0.02007017		2062.4	0.00487335		2592.4	-0.01869881
472.6	0.00175394		1002.59	-0.00865162		1532.6	-0.01989539		2062.6	0.00616188		2592.6	-0.018183
472.8	0.00214542		1002.79	-0.00856723		1532.8	-0.01910877		2062.8	0.00682037		2592.8	-0.01756501
473	0.00182934		1002.99	-0.00863214		1533	-0.0190051		2063	0.00620509		2593	-0.01790235
473.2	0.00204423		1003.19	-0.00875804		1533.2	-0.0190671		2063.2	0.00636146		2593.2	-0.01840999
473.4	0.00173145		1003.39	-0.00884654		1533.4	-0.01908615		2063.4	0.00693784		2593.4	-0.01861274
473.6	0.00211447		1003.59	-0.00886719		1533.6	-0.018427		2063.6	0.00616539		2593.6	-0.01797813
473.8	0.00201632		1003.79	-0.00888133		1533.8	-0.01798688		2063.8	0.00560937		2593.8	-0.01883335
474	0.00244746		1003.99	-0.00903295		1534	-0.01751621		2064	0.00514266		2594	-0.01909754
474.2	0.00301624		1004.19	-0.00939486		1534.2	-0.01725048		2064.2	0.00477808		2594.2	-0.01943776
474.4	0.00273772		1004.39	-0.00926262		1534.4	-0.01707275		2064.4	0.005347		2594.4	-0.01987721
474.6	0.00296539		1004.59	-0.00913882		1534.6	-0.01698873		2064.6	0.00509356		2594.6	-0.01954757
474.8	0.00245766		1004.79	-0.00874714		1534.8	-0.01707565		2064.8	0.00457883		2594.8	-0.01905261
475	0.00239761		1004.99	-0.00856039		1535	-0.01713132		2065	0.00444645		2595	-0.01833452
475.2	0.00250484		1005.19	-0.00855654		1535.2	-0.01686409		2065.2	0.00427672		2595.2	-0.01772854
475.4	0.00328397		1005.39	-0.00814591		1535.4	-0.01846426		2065.4	0.00419648		2595.4	-0.01691299
475.6	0.0030196		1005.59	-0.00876469		1535.6	-0.01868129		2065.6	0.0038123		2595.6	-0.01689987
475.8	0.00288899		1005.79	-0.00899062		1535.8	-0.01822446		2065.8	0.00410844		2595.8	-0.01637069
476	0.00221694		1005.99	-0.00973569		1536	-0.01849003		2066	0.00442781		2596	-0.01604788
476.2	0.00066785		1006.19	-0.00966939		1536.2	-0.01932524		2066.2	0.00465996		2596.2	-0.01552981
476.4	0.00068673		1006.39	-0.00997649		1536.4	-0.0185559		2066.4	0.00510722		2596.4	-0.0152903
476.6	0.0005668		1006.59	-0.01011913		1536.6	-0.01800171		2066.6	0.00533252		2596.6	-0.01516962
476.8	0.00128108		1006.79	-0.00986182		1536.8	-0.01749015		2066.8	0.00540703		2596.8	-0.01425572
477	0.00134801		1006.99	-0.01023888		1537	-0.01713852		2067	0.00512218		2597	-0.01429616
477.2	0.00162668		1007.19	-0.00960579		1537.2	-0.01715482		2067.2	0.00568633		2597.2	-0.0141925
477.4	0.00192553		1007.39	-0.00908746		1537.4	-0.0172802		2067.4	0.00660091		2597.4	-0.01434545
477.6	0.00266675		1007.59	-0.00875587		1537.6	-0.01733068		2067.6	0.00589864		2597.6	-0.01476639
477.8	0.00285096		1007.79	-0.00856062		1537.8	-0.01805665		2067.8	0.00615842		2597.8	-0.01534546
478	0.00362937		1007.99	-0.00789618		1538	-0.01829527		2068	0.00624716		2598	-0.01500368
478.2	0.00429282		1008.19	-0.00798935		1538.2	-0.01893123		2068.2	0.00615475		2598.2	-0.01602015
478.4	0.00481898		1008.39	-0.00781507		1538.4	-0.02000532		2068.4	0.00665804		2598.4	-0.01686195
478.6	0.00544646		1008.59	-0.00731964		1538.6	-0.02053706		2068.6	0.00585272		2598.6	-0.01671718
478.8	0.00463666		1008.79	-0.00732305		1538.8	-0.02025167		2068.8	0.00510878		2598.8	-0.0164483
479	0.00466085		1008.99	-0.00679086		1539	-0.02049432		2069	0.00453467		2599	-0.01627701
479.2	0.00540972		1009.19	-0.00695028		1539.2	-0.0208746		2069.2	0.0049349		2599.2	-0.01619174
479.4	0.00557151		1009.39	-0.00693133		1539.4	-0.02121875		2069.4	0.0044081		2599.4	-0.01576829
479.6	0.00509513		1009.59	-0.00765833		1539.6	-0.01988707		2069.6	0.00443414		2599.6	-0.01591878
479.8	0.00386383		1009.79	-0.00807249		1539.8	-0.01926055		2069.8	0.00457216		2599.8	-0.01522602
480	0.00394903		1009.99	-0.00877965		1540	-0.01931185		2070	0.00534311		2600	-0.01548293
480.2	0.0029443		1010.19	-0.00912599		1540.2	-0.01816858		2070.2	0.0058648		2600.2	-0.01590458
480.4	0.00319055		1010.39	-0.00936429		1540.4	-0.0175162		2070.4	0.00558268		2600.4	-0.01622784
480.6	0.00334371		1010.59	-0.00954869		1540.6	-0.01660454		2070.6	0.00528645		2600.6	-0.01701895
480.8	0.00329667		1010.79	-0.00970968		1540.8	-0.0160218		2070.8	0.00507075		2600.8	-0.01673055
481	0.00336827		1010.99	-0.00970037		1541	-0.01570058		2071	0.00491945		2601	-0.01685847
481.2	0.00324129		1011.19	-0.01030929		1541.2	-0.01520319		2071.2	0.00538457		2601.2	-0.01793619
481.4	0.00291209		1011.39	-0.01055592		1541.4	-0.01435105		2071.4	0.00492287		2601.4	-0.01779811
481.6	0.00284419		1011.59	-0.01094235		1541.6	-0.01440299		2071.6	0.00453715		2601.6	-0.0180435
481.8	0.00186367		1011.79	-0.01086913		1541.8	-0.01492057		2071.8	0.00376425		2601.8	-0.01816671
482	0.00172794		1011.99	-0.01085049		1542	-0.01520646		2072	0.00237244		2602	-0.0181356
482.2	0.00073032		1012.19	-0.01173693		1542.2	-0.01624218		2072.2	0.00194669		2602.2	-0.01843037
482.4	0.00054619		1012.39	-0.01156435		1542.4	-0.01710187		2072.4	0.00127524		2602.4	-0.01838024
482.6	0.00052754		1012.59	-0.01135722		1542.6	-0.01721546		2072.6	0.00004804		2602.6	-0.01758611
482.8	-0.00092549		1012.79	-0.01096464		1542.8	-0.01745282		2072.8	0.00013217		2602.8	-0.01668518
483	-0.00026607		1012.99	-0.01068325		1543	-0.01863193		2073	0.0009477		2603	-0.01634228
483.2	0.00011426		1013.19	-0.01136273		1543.2	-0.01829532		2073.2	0.00152867		2603.2	-0.01589557
483.4	0.00022542		1013.39	-0.01079621		1543.4	-0.01923266		2073.4	0.00204978		2603.4	-0.01520051
483.6	0.00015721		1013.59	-0.01101141		1543.6	-0.01977111		2073.6	0.00334229		2603.6	-0.01481065
483.8	-0.00006153		1013.79	-0.01064689		1543.8	-0.02007509		2073.8	0.00374487		2603.8	-0.01425041
484	0.0003599		1013.99	-0.01071832		1544	-0.02076326		2074	0.00514849		2604	-0.01490212
484.2	0.00012841		1014.19	-0.01026043		1544.2	-0.02065146		2074.2	0.00529379		2604.2	-0.01527218
484.4	0.00063406		1014.39	-0.01001608		1544.4	-0.02111774		2074.4	0.00497973		2604.4	-0.01622591
484.6	0.0016323		1014.59	-0.01027796		1544.6	-0.02091417		2074.6	0.00600086		2604.6	-0.01708241
484.8	0.0014832		1014.79	-0.01049375		1544.8	-0.02066696		2074.8	0.00672267		2604.8	-0.01784526
485	0.00173305		1014.99	-0.01100053		1545	-0.01951045		2075	0.00734484		2605	-0.01832601
485.2	0.00055553		1015.19	-0.01182145		1545.2	-0.01860072		2075.2	0.00681542		2605.2	-0.0186187
485.4	0.00035745		1015.39	-0.01053856		1545.4	-0.01822541		2075.4	0.00628187		2605.4	-0.01782116
485.6	0.0008527		1015.59	-0.01115913		1545.6	-0.01834881		2075.6	0.00569704		2605.6	-0.01806345
485.8	0.00029473		1015.79	-0.01063541		1545.8	-0.01855545		2075.8	0.00478582		2605.8	-0.01845871
486	0.00038449		1015.99	-0.01109141		1546	-0.01890689		2076	0.00422847		2606	-0.01862731
486.2	0.00103796		1016.19	-0.0114885		1546.2	-0.01971572		2076.2	0.00453656		2606.2	-0.01910261
486.4	0.00041379		1016.39	-0.01142542		1546.4	-0.0203626		2076.4	0.00340348		2606.4	-0.01916991
486.6	0.00009341		1016.59	-0.01145842		1546.6	-0.02066085		2076.6	0.00364793		2606.6	-0.01973898
486.8	0.00037081		1016.79	-0.01129029		1546.8	-0.02170673		2076.8	0.00356207		2606.8	-0.01944581
487	0.00129457		1016.99	-0.0117094		1547	-0.02192732		2077	0.00359545		2607	-0.01876959
487.2	0.00114969		1017.19	-0.01160285		1547.2	-0.0211608		2077.2	0.00371026		2607.2	-0.01835293
487.4	0.0006513		1017.39	-0.01063476		1547.4	-0.02239315		2077.4	0.00308144		2607.4	-0.01827831
487.6	-0.00025276		1017.59	-0.01057072		1547.6	-0.02250445		2077.6	0.0013844		2607.6	-0.01861875
487.8	-0.00017061		1017.79	-0.0098788		1547.8	-0.02308684		2077.8	0.00183822		2607.8	-0.01766914
488	-0.0009307		1017.99	-0.00958825		1548	-0.02297774		2078	0.0022832		2608	-0.01769564
488.2	-0.00077391		1018.19	-0.00948786		1548.2	-0.02283348		2078.2	0.00299033		2608.2	-0.01722117
488.4	-0.00008108		1018.39	-0.00943567		1548.4	-0.02256453		2078.4	0.00309804		2608.4	-0.01762455
488.6	-0.00048029		1018.59	-0.00951016		1548.6	-0.02234456		2078.6	0.00430509		2608.6	-0.01692405
488.8	-0.0006162		1018.79	-0.00911084		1548.8	-0.02202774		2078.8	0.00581548		2608.8	-0.01640789
489	-0.00061208		1018.99	-0.00977665		1549	-0.02093267		2079	0.00592461		2609	-0.01521307
489.2	-0.00180421		1019.19	-0.00955696		1549.2	-0.02010053		2079.2	0.00548951		2609.2	-0.01429071
489.4	-0.00110237		1019.39	-0.00924705		1549.4	-0.01981003		2079.4	0.00609834		2609.4	-0.01398123
489.6	-0.00174089		1019.59	-0.01001834		1549.6	-0.01964959		2079.6	0.0056553		2609.6	-0.01409515
489.8	-0.00166615		1019.79	-0.00911901		1549.8	-0.01981411		2079.8	0.00603106		2609.8	-0.01493314
490	-0.00096543		1019.99	-0.00963086		1550	-0.01958369		2080	0.00632603		2610	-0.01518749
490.2	-0.00049217		1020.19	-0.01011841		1550.2	-0.01953991		2080.2	0.00688392		2610.2	-0.0152707
490.4	-0.00196964		1020.39	-0.01025125		1550.4	-0.01924274		2080.4	0.00648718		2610.4	-0.0155347
490.6	-0.00130354		1020.59	-0.01071508		1550.6	-0.01869518		2080.6	0.00628598		2610.6	-0.01629706
490.8	-0.00047362		1020.79	-0.01081451		1550.8	-0.01886482		2080.8	0.00587558		2610.8	-0.01548058
491	-0.00077036		1020.99	-0.01036771		1551	-0.01885758		2081	0.00506813		2611	-0.01557809
491.2	-0.00135269		1021.19	-0.01017496		1551.2	-0.01838758		2081.2	0.00534102		2611.2	-0.01537296
491.4	-0.00062526		1021.39	-0.00974242		1551.4	-0.01857653		2081.4	0.00421397		2611.4	-0.01629635
491.6	-0.00037475		1021.59	-0.00965048		1551.6	-0.01821245		2081.6	0.00372298		2611.6	-0.01526036
491.8	-0.00061331		1021.79	-0.00888116		1551.8	-0.01866037		2081.8	0.00483035		2611.8	-0.01415902
492	-0.00091878		1021.99	-0.00881013		1552	-0.01857699		2082	0.00424783		2612	-0.01473819
492.2	-0.00042963		1022.19	-0.00929187		1552.2	-0.01913215		2082.2	0.00464075		2612.2	-0.01453333
492.4	-0.00035917		1022.39	-0.00893728		1552.4	-0.01954954		2082.4	0.00439283		2612.4	-0.01443171
492.6	-0.00064897		1022.59	-0.00904206		1552.6	-0.01975923		2082.6	0.00414589		2612.6	-0.01411523
492.8	-0.00026093		1022.79	-0.0094794		1552.8	-0.02008625		2082.8	0.00406408		2612.8	-0.01405105
493	-0.00031989		1022.99	-0.01094397		1553	-0.01976228		2083	0.00314991		2613	-0.0137676
493.2	-0.00070794		1023.19	-0.01119194		1553.2	-0.01992102		2083.2	0.00277945		2613.2	-0.0143741
493.4	0.00029091		1023.39	-0.0111825		1553.4	-0.02095685		2083.4	0.00217789		2613.4	-0.01480841
493.6	0.00054077		1023.59	-0.01070298		1553.6	-0.02077173		2083.6	0.0019831		2613.6	-0.0147088
493.8	0.00139876		1023.79	-0.01043259		1553.8	-0.02079014		2083.8	0.00261843		2613.8	-0.01523001
494	0.00189129		1023.99	-0.01148997		1554	-0.01990657		2084	0.00242271		2614	-0.0152891
494.2	0.00196432		1024.19	-0.01184124		1554.2	-0.01987985		2084.2	0.00149774		2614.2	-0.01608734
494.4	0.00089042		1024.39	-0.01186917		1554.4	-0.02020912		2084.4	0.00146003		2614.4	-0.01770949
494.6	0.00041718		1024.59	-0.01118869		1554.6	-0.01994668		2084.6	0.00217556		2614.6	-0.01828276
494.8	-0.00060393		1024.79	-0.00977008		1554.8	-0.02034673		2084.8	0.0025098		2614.8	-0.01834237
495	-0.00013893		1024.99	-0.00937527		1555	-0.01996056		2085	0.00279217		2615	-0.01887734
495.2	-0.00034891		1025.19	-0.00939478		1555.2	-0.01903278		2085.2	0.00383867		2615.2	-0.01850238
495.4	0.0001824		1025.39	-0.00982413		1555.4	-0.01942265		2085.4	0.0045786		2615.4	-0.01888957
495.6	-0.00052812		1025.59	-0.01060506		1555.6	-0.01911799		2085.6	0.00460024		2615.6	-0.01886219
495.8	-0.0017804		1025.79	-0.01079344		1555.8	-0.01899541		2085.8	0.00520774		2615.8	-0.01979463
496	-0.00159548		1025.99	-0.01130852		1556	-0.01868833		2086	0.0059369		2616	-0.02022718
496.2	-0.00185935		1026.19	-0.01133709		1556.2	-0.01780212		2086.2	0.00622048		2616.2	-0.01997628
496.4	-0.00190048		1026.39	-0.01180111		1556.4	-0.01720374		2086.4	0.00605633		2616.4	-0.01928723
496.6	-0.00155524		1026.59	-0.01199655		1556.6	-0.01651938		2086.6	0.00533432		2616.6	-0.01919753
496.8	-0.00063205		1026.79	-0.01229956		1556.8	-0.01611384		2086.8	0.00550084		2616.8	-0.01879723
497	0.00030303		1026.99	-0.01289623		1557	-0.01611392		2087	0.00592862		2617	-0.01868947
497.2	0.00097306		1027.19	-0.01218167		1557.2	-0.01528654		2087.2	0.00577239		2617.2	-0.01908489
497.4	0.00141613		1027.39	-0.01176753		1557.4	-0.01557839		2087.4	0.00544327		2617.4	-0.01823048
497.6	0.00149697		1027.59	-0.01133623		1557.6	-0.01584672		2087.6	0.0055911		2617.6	-0.01675722
497.8	0.00212673		1027.79	-0.01134261		1557.8	-0.0166381		2087.8	0.00513137		2617.8	-0.01680765
498	0.0024423		1027.99	-0.0107974		1558	-0.01707618		2088	0.00406053		2618	-0.01686389
498.2	0.00212396		1028.19	-0.01006672		1558.2	-0.01774614		2088.2	0.00404644		2618.2	-0.01764582
498.4	0.00198329		1028.39	-0.00923125		1558.4	-0.01888484		2088.4	0.00496939		2618.4	-0.01807085
498.6	0.00179495		1028.59	-0.00845444		1558.6	-0.01849322		2088.6	0.00512669		2618.6	-0.01704279
498.8	0.00075145		1028.79	-0.00831631		1558.8	-0.01931566		2088.8	0.00461217		2618.8	-0.01555516
499	0.00062687		1028.99	-0.008936		1559	-0.02046961		2089	0.00444144		2619	-0.01478081
499.2	0.00023601		1029.19	-0.01014151		1559.2	-0.02109606		2089.2	0.00326478		2619.2	-0.01522463
499.4	0.0000236		1029.39	-0.01112989		1559.4	-0.02164542		2089.4	0.00377641		2619.4	-0.01559807
499.6	-0.00048561		1029.59	-0.01177266		1559.6	-0.02156254		2089.6	0.00330564		2619.6	-0.01617394
499.8	-0.0006551		1029.79	-0.01204121		1559.8	-0.02080626		2089.8	0.00318422		2619.8	-0.01493393
500	-0.00039605		1029.99	-0.01234597		1560	-0.02028652		2090	0.00254331		2620	-0.01394702
500.2	-0.00055276		1030.19	-0.01214414		1560.2	-0.01922085		2090.2	0.00192399		2620.2	-0.01385038
500.4	-0.00011898		1030.39	-0.01261795		1560.4	-0.01883754		2090.4	0.00255235		2620.4	-0.01328429
500.6	0.00003016		1030.59	-0.01216507		1560.6	-0.01880025		2090.6	0.00253895		2620.6	-0.01367401
500.8	0.00029615		1030.79	-0.01241356		1560.8	-0.01861964		2090.8	0.00319586		2620.8	-0.01436706
501	-0.00021945		1030.99	-0.01235699		1561	-0.01896913		2091	0.00390831		2621	-0.01588001
501.2	0.00052777		1031.19	-0.01181177		1561.2	-0.01918205		2091.2	0.00315109		2621.2	-0.01683934
501.4	0.00010049		1031.39	-0.0121895		1561.4	-0.01998042		2091.4	0.00314707		2621.4	-0.01744577
501.6	0.00008368		1031.59	-0.0119868		1561.6	-0.02131366		2091.6	0.00306994		2621.6	-0.01804344
501.8	0.00043943		1031.79	-0.01167689		1561.8	-0.02172496		2091.8	0.00283434		2621.8	-0.0199939
502	0.00042925		1031.99	-0.01178908		1562	-0.02195802		2092	0.00312218		2622	-0.02055578
502.2	0.00103245		1032.19	-0.01131187		1562.2	-0.0222495		2092.2	0.00358699		2622.2	-0.0212939
502.4	0.00197342		1032.39	-0.01097664		1562.4	-0.0233058		2092.4	0.00408673		2622.4	-0.02060338
502.6	0.00179831		1032.59	-0.01114951		1562.6	-0.02346393		2092.6	0.00359832		2622.6	-0.01957315
502.8	0.00036525		1032.79	-0.01133265		1562.8	-0.02376968		2092.8	0.00348089		2622.8	-0.01911302
503	0.00032287		1032.99	-0.01140976		1563	-0.02406271		2093	0.00296388		2623	-0.0199044
503.2	0.0002009		1033.19	-0.01142198		1563.2	-0.02337314		2093.2	0.00224032		2623.2	-0.02039137
503.4	-0.00055512		1033.39	-0.01104923		1563.4	-0.02235763		2093.4	0.00274404		2623.4	-0.02008322
503.6	-0.00027746		1033.59	-0.01076283		1563.6	-0.02162052		2093.6	0.00231001		2623.6	-0.01925852
503.8	-0.00001275		1033.79	-0.01034446		1563.8	-0.0201335		2093.8	0.00182697		2623.8	-0.01734155
504	-0.00027464		1033.99	-0.0103554		1564	-0.01955064		2094	0.00116802		2624	-0.01682218
504.2	0.00011108		1034.19	-0.00984985		1564.2	-0.01873726		2094.2	0.00195688		2624.2	-0.01708481
504.4	0.00065509		1034.39	-0.00980864		1564.4	-0.01885791		2094.4	0.00243982		2624.4	-0.01667252
504.6	0.00089122		1034.59	-0.01038619		1564.6	-0.01932935		2094.6	0.00206355		2624.6	-0.01709045
504.8	0.0003329		1034.79	-0.01071581		1564.8	-0.01959328		2094.8	0.00190926		2624.8	-0.01809608
505	0.00048322		1034.99	-0.01050688		1565	-0.01937189		2095	0.00203481		2625	-0.01892043
505.2	0.0012089		1035.19	-0.01079375		1565.2	-0.02029877		2095.2	0.00171101		2625.2	-0.01999289
505.4	0.00041779		1035.39	-0.01117371		1565.4	-0.02045512		2095.4	0.00207575		2625.4	-0.01997313
505.6	0.00084094		1035.59	-0.01183451		1565.6	-0.02096126		2095.6	0.0016204		2625.6	-0.0199469
505.8	0.00087346		1035.79	-0.01197118		1565.8	-0.02119746		2095.8	0.00120254		2625.8	-0.02051099
506	0.00123299		1035.99	-0.01196531		1566	-0.0216955		2096	0.00080794		2626	-0.02017383
506.2	0.00190311		1036.19	-0.01130206		1566.2	-0.02225539		2096.2	0.00025253		2626.2	-0.02009839
506.4	0.00194329		1036.39	-0.01194331		1566.4	-0.02320556		2096.4	-0.00028728		2626.4	-0.01970521
506.6	0.00123699		1036.59	-0.01210797		1566.6	-0.02361731		2096.6	-0.00068176		2626.6	-0.01951532
506.8	0.00014635		1036.79	-0.01243417		1566.8	-0.02282076		2096.8	-0.00048528		2626.8	-0.01990335
507	0.00031989		1036.99	-0.01300639		1567	-0.02289147		2097	-0.00052787		2627	-0.0202501
507.2	0.00047568		1037.19	-0.01276148		1567.2	-0.02284563		2097.2	-0.00033922		2627.2	-0.01950331
507.4	0.00110543		1037.39	-0.01312854		1567.4	-0.02229545		2097.4	-0.00040323		2627.4	-0.01936303
507.6	0.00130364		1037.59	-0.01296799		1567.6	-0.02248134		2097.6	0.00003014		2627.6	-0.01933843
507.8	0.00185994		1037.79	-0.01264346		1567.8	-0.0227355		2097.8	-0.00005558		2627.8	-0.01874922
508	0.00176059		1037.99	-0.0123633		1568	-0.02345589		2098	0.00045231		2628	-0.01907556
508.2	0.002072		1038.19	-0.01282642		1568.2	-0.0231805		2098.2	0.00139582		2628.2	-0.01958105
508.4	0.00225101		1038.39	-0.01258183		1568.4	-0.02324091		2098.4	0.00204008		2628.4	-0.01914393
508.6	0.00272427		1038.59	-0.01246131		1568.6	-0.02346186		2098.6	0.00247581		2628.6	-0.020277
508.8	0.00212185		1038.79	-0.01114717		1568.8	-0.02309387		2098.8	0.00370321		2628.8	-0.01991476
509	0.00205159		1038.99	-0.01064671		1569	-0.02268029		2099	0.00502376		2629	-0.01968495
509.2	0.0015721		1039.19	-0.01085225		1569.2	-0.02274987		2099.2	0.00578863		2629.2	-0.01974415
509.4	0.00064362		1039.39	-0.01097903		1569.4	-0.02201962		2099.4	0.00524217		2629.4	-0.01855597
509.6	-0.00047845		1039.59	-0.01155803		1569.6	-0.02158875		2099.6	0.00472851		2629.6	-0.01917384
509.8	-0.00181347		1039.79	-0.01068127		1569.8	-0.02145194		2099.8	0.00410337		2629.8	-0.01892703
510	-0.00266231		1039.99	-0.0103991		1570	-0.02127674		2100	0.00358087		2630	-0.0186152
510.2	-0.00328584		1040.19	-0.01049736		1570.2	-0.02093438		2100.2	0.00401257		2630.2	-0.01799808
510.4	-0.00476301		1040.39	-0.01029682		1570.4	-0.02122662		2100.4	0.00382753		2630.4	-0.01814944
510.6	-0.00505296		1040.59	-0.01030049		1570.6	-0.02112434		2100.6	0.00421377		2630.6	-0.01768485
510.8	-0.00558566		1040.79	-0.01075903		1570.8	-0.02021955		2100.8	0.00399504		2630.8	-0.01789342
511	-0.00546473		1040.99	-0.01156064		1571	-0.01988217		2101	0.00394393		2631	-0.0165583
511.2	-0.00517998		1041.19	-0.01216402		1571.2	-0.01996944		2101.2	0.00334916		2631.2	-0.01630337
511.4	-0.00500841		1041.39	-0.01258133		1571.4	-0.01977558		2101.4	0.00199423		2631.4	-0.01694374
511.6	-0.00500182		1041.59	-0.01281112		1571.6	-0.01980769		2101.6	0.00143059		2631.6	-0.01768009
511.8	-0.00296078		1041.79	-0.01233623		1571.8	-0.01971369		2101.8	0.00134396		2631.8	-0.01776223
512	-0.00278964		1041.99	-0.01234774		1572	-0.01873258		2102	0.00153909		2632	-0.01830688
512.2	-0.0010511		1042.19	-0.01276309		1572.2	-0.01854344		2102.2	0.00231283		2632.2	-0.01916255
512.4	0.00042317		1042.39	-0.01249886		1572.4	-0.01877246		2102.4	0.00267617		2632.4	-0.01923892
512.6	0.00159593		1042.59	-0.01239015		1572.6	-0.0192692		2102.6	0.00259058		2632.6	-0.01971876
512.8	0.00180254		1042.79	-0.0128808		1572.8	-0.01965712		2102.8	0.00283151		2632.8	-0.01955919
513	0.00225276		1042.99	-0.01362909		1573	-0.01997579		2103	0.00265992		2633	-0.02045483
513.2	0.00279616		1043.19	-0.01383858		1573.2	-0.02066387		2103.2	0.00253403		2633.2	-0.02148051
513.4	0.00230984		1043.39	-0.01420972		1573.4	-0.02145212		2103.4	0.0018593		2633.4	-0.02118478
513.6	0.0016665		1043.59	-0.01447414		1573.6	-0.02187716		2103.6	0.00205029		2633.6	-0.02265184
513.8	0.00141891		1043.79	-0.01402961		1573.8	-0.02331643		2103.8	0.00204158		2633.8	-0.02194556
514	0.00130189		1043.99	-0.01342609		1574	-0.02387065		2104	0.00265518		2634	-0.02209203
514.2	0.0010115		1044.19	-0.01324667		1574.2	-0.02457599		2104.2	0.00247623		2634.2	-0.02291612
514.4	-0.00016486		1044.39	-0.01245101		1574.4	-0.02522183		2104.4	0.00205114		2634.4	-0.02292886
514.6	-0.00037066		1044.59	-0.01293824		1574.6	-0.02522147		2104.6	0.00213507		2634.6	-0.022543
514.8	-0.00098327		1044.79	-0.0129534		1574.8	-0.02534837		2104.8	0.00205016		2634.8	-0.02242987
515	-0.00064506		1044.99	-0.01283439		1575	-0.02504189		2105	0.00249464		2635	-0.02159338
515.2	-0.00053218		1045.19	-0.01286665		1575.2	-0.02554496		2105.2	0.00191961		2635.2	-0.02212212
515.4	0.00015296		1045.39	-0.01257493		1575.4	-0.02493635		2105.4	0.00230293		2635.4	-0.02149631
515.6	0.00013571		1045.59	-0.01214605		1575.6	-0.02426768		2105.6	0.00189736		2635.6	-0.02152619
515.8	0.00126582		1045.79	-0.01190194		1575.8	-0.02276077		2105.8	0.0026313		2635.8	-0.02158132
516	0.00115835		1045.99	-0.01203984		1576	-0.02187074		2106	0.00243618		2636	-0.0217111
516.2	0.00178394		1046.19	-0.01129603		1576.2	-0.02182298		2106.2	0.0028072		2636.2	-0.02099644
516.4	0.00107266		1046.39	-0.01162845		1576.4	-0.02162002		2106.4	0.0023856		2636.4	-0.02065997
516.6	0.00032112		1046.59	-0.01067343		1576.6	-0.02214619		2106.6	0.00242414		2636.6	-0.0198106
516.8	0.00040606		1046.79	-0.01058997		1576.8	-0.02154056		2106.8	0.00317563		2636.8	-0.02032859
517	0.00050694		1046.99	-0.01029552		1577	-0.02107062		2107	0.00338296		2637	-0.02018899
517.2	-0.00025232		1047.19	-0.00977226		1577.2	-0.02158838		2107.2	0.00322419		2637.2	-0.02025114
517.4	-0.00115643		1047.39	-0.00980919		1577.4	-0.02131982		2107.4	0.0023704		2637.4	-0.02024513
517.6	-0.00200794		1047.59	-0.00942159		1577.6	-0.02066547		2107.6	0.00239792		2637.6	-0.02072098
517.8	-0.00202801		1047.79	-0.00892476		1577.8	-0.02102691		2107.8	0.00288827		2637.8	-0.01963574
518	-0.0023842		1047.99	-0.00867362		1578	-0.02063063		2108	0.0025692		2638	-0.01963487
518.2	-0.00276787		1048.19	-0.00960352		1578.2	-0.02104481		2108.2	0.00168059		2638.2	-0.01975962
518.4	-0.00329576		1048.39	-0.00983697		1578.4	-0.02085692		2108.4	0.00204682		2638.4	-0.01930613
518.6	-0.00303182		1048.59	-0.01039434		1578.6	-0.02152229		2108.6	0.00243466		2638.6	-0.01866333
518.8	-0.00260781		1048.79	-0.01009629		1578.8	-0.02195692		2108.8	0.00357418		2638.8	-0.01821869
519	-0.00191656		1048.99	-0.01020011		1579	-0.02196771		2109	0.00479763		2639	-0.01844388
519.2	-0.00217978		1049.19	-0.01041752		1579.2	-0.02264906		2109.2	0.00484843		2639.2	-0.01767429
519.4	-0.00188		1049.39	-0.01186692		1579.4	-0.02294226		2109.4	0.0054192		2639.4	-0.0174246
519.6	-0.00212761		1049.59	-0.01244535		1579.6	-0.02288819		2109.6	0.00443392		2639.6	-0.01739046
519.8	-0.00087941		1049.79	-0.01312882		1579.8	-0.02211626		2109.8	0.00478361		2639.8	-0.01762261
520	-0.00016326		1049.99	-0.01370115		1580	-0.02203986		2110	0.00409917		2640	-0.01787521
520.2	-0.00027087		1050.19	-0.01315006		1580.2	-0.02238749		2110.2	0.00440973		2640.2	-0.01726545
520.4	-0.00042902		1050.39	-0.01328785		1580.4	-0.0222389		2110.4	0.00477022		2640.4	-0.01764449
520.6	-0.00017564		1050.59	-0.01228936		1580.6	-0.02224857		2110.6	0.00534899		2640.6	-0.0172683
520.8	-0.00006513		1050.79	-0.01238263		1580.8	-0.02102858		2110.8	0.00650751		2640.8	-0.01740281
521	-0.00009739		1050.99	-0.01220568		1581	-0.02085598		2111	0.00576397		2641	-0.01752981
521.2	-0.00090285		1051.19	-0.01161183		1581.2	-0.02051335		2111.2	0.00580556		2641.2	-0.01756939
521.4	-0.00113911		1051.39	-0.0114504		1581.4	-0.02045573		2111.4	0.00508015		2641.4	-0.0180131
521.6	-0.00145396		1051.59	-0.01183885		1581.6	-0.01914507		2111.6	0.00540416		2641.6	-0.01726087
521.8	-0.00060316		1051.79	-0.0112877		1581.8	-0.0196767		2111.8	0.00585885		2641.8	-0.01821886
522	-0.0006991		1051.99	-0.01122703		1582	-0.02010273		2112	0.00524654		2642	-0.01848635
522.2	-0.00112117		1052.19	-0.01087155		1582.2	-0.01969176		2112.2	0.00507286		2642.2	-0.0188867
522.4	-0.0016144		1052.39	-0.01085354		1582.4	-0.01980885		2112.4	0.00561387		2642.4	-0.01918203
522.6	-0.00142162		1052.59	-0.01030266		1582.6	-0.02031102		2112.6	0.00634666		2642.6	-0.01867339
522.8	-0.00089181		1052.79	-0.01103833		1582.8	-0.0202143		2112.8	0.00680748		2642.8	-0.01814277
523	-0.00072548		1052.99	-0.01149653		1583	-0.0207071		2113	0.00652304		2643	-0.01856075
523.2	-0.00043407		1053.19	-0.01202332		1583.2	-0.02130248		2113.2	0.00637212		2643.2	-0.01750331
523.4	0.00022692		1053.39	-0.01319817		1583.4	-0.02168463		2113.4	0.00632489		2643.4	-0.01741204
523.6	0.001162		1053.59	-0.01307736		1583.6	-0.02060035		2113.6	0.00592288		2643.6	-0.01761937
523.8	0.00187481		1053.79	-0.01319739		1583.8	-0.02019095		2113.8	0.00549195		2643.8	-0.01851205
524	0.00208454		1053.99	-0.01319073		1584	-0.01947717		2114	0.00482185		2644	-0.01905336
524.2	0.00147575		1054.19	-0.01174489		1584.2	-0.01941296		2114.2	0.00459218		2644.2	-0.01892108
524.4	0.00142976		1054.39	-0.01114873		1584.4	-0.01874857		2114.4	0.00484624		2644.4	-0.01895508
524.6	0.00054636		1054.59	-0.0102669		1584.6	-0.01930878		2114.6	0.00430633		2644.6	-0.01929008
524.8	0.00039886		1054.79	-0.00978108		1584.8	-0.01874084		2114.8	0.00458237		2644.8	-0.01872589
525	0.00029504		1054.99	-0.00943076		1585	-0.01919828		2115	0.00378272		2645	-0.01890459
525.2	-0.00061311		1055.19	-0.00931991		1585.2	-0.01960024		2115.2	0.00348728		2645.2	-0.01939518
525.4	-0.00082839		1055.39	-0.00920717		1585.4	-0.02104173		2115.4	0.00265607		2645.4	-0.01943047
525.6	-0.00051018		1055.59	-0.00917022		1585.6	-0.02098379		2115.6	0.00287228		2645.6	-0.01950585
525.8	-0.0003704		1055.79	-0.00777266		1585.8	-0.02228697		2115.8	0.00256399		2645.8	-0.02013327
526	-0.00092469		1055.99	-0.00776201		1586	-0.02259628		2116	0.00285051		2646	-0.01947359
526.2	-0.00134597		1056.19	-0.00778551		1586.2	-0.02263864		2116.2	0.00328399		2646.2	-0.01932505
526.4	-0.00150142		1056.39	-0.0088158		1586.4	-0.0229814		2116.4	0.00359396		2646.4	-0.01936277
526.6	-0.00062436		1056.59	-0.00964031		1586.6	-0.02341371		2116.6	0.00381238		2646.6	-0.01848432
526.8	-0.00081751		1056.79	-0.011129		1586.8	-0.02317227		2116.8	0.00355363		2646.8	-0.01742083
527	-0.00156312		1056.99	-0.01188221		1587	-0.02324197		2117	0.00364445		2647	-0.01768982
527.2	-0.00247469		1057.19	-0.01255791		1587.2	-0.02326648		2117.2	0.00379714		2647.2	-0.01773408
527.4	-0.00275901		1057.39	-0.01283875		1587.4	-0.0227279		2117.4	0.00423711		2647.4	-0.01776381
527.6	-0.00292316		1057.59	-0.01294423		1587.6	-0.02182614		2117.6	0.00398982		2647.6	-0.01762085
527.8	-0.00272411		1057.79	-0.01319232		1587.8	-0.02177929		2117.8	0.00335886		2647.8	-0.01759663
528	-0.00284055		1057.99	-0.01395634		1588	-0.02044913		2118	0.00335202		2648	-0.01800707
528.2	-0.00410334		1058.19	-0.01294194		1588.2	-0.02055475		2118.2	0.00358602		2648.2	-0.01807512
528.4	-0.00468122		1058.39	-0.01324824		1588.4	-0.020505		2118.4	0.00474263		2648.4	-0.0183636
528.6	-0.0047542		1058.59	-0.01295047		1588.6	-0.02041162		2118.6	0.00450477		2648.6	-0.01832796
528.8	-0.00431975		1058.79	-0.01267459		1588.8	-0.02018648		2118.8	0.00439705		2648.8	-0.01832637
529	-0.00471393		1058.99	-0.01281304		1589	-0.02057907		2119	0.00376948		2649	-0.01851574
529.2	-0.00514059		1059.19	-0.01263188		1589.2	-0.02141375		2119.2	0.00338412		2649.2	-0.01906844
529.4	-0.00450514		1059.39	-0.0125785		1589.4	-0.02199667		2119.4	0.00320897		2649.4	-0.01818277
529.6	-0.00395769		1059.59	-0.01237859		1589.6	-0.02217285		2119.6	0.0026501		2649.6	-0.01815567
529.8	-0.0031443		1059.79	-0.01216173		1589.8	-0.02213585		2119.8	0.00150659		2649.8	-0.01732283
530	-0.002887		1059.99	-0.01247406		1590	-0.02136602		2120	0.00134918		2650	-0.01708163
530.2	-0.00266312		1060.19	-0.01306864		1590.2	-0.0213242		2120.2	0.00099241		2650.2	-0.01710187
530.4	-0.00270399		1060.39	-0.01376823		1590.4	-0.02128008		2120.4	0.00079568		2650.4	-0.01709117
530.6	-0.00225892		1060.59	-0.01429819		1590.6	-0.02141469		2120.6	0.00074716		2650.6	-0.01623476
530.8	-0.00305579		1060.79	-0.01457946		1590.8	-0.02112868		2120.8	0.00102301		2650.8	-0.01659832
531	-0.00343827		1060.99	-0.01500305		1591	-0.02104201		2121	0.00132906		2651	-0.01714298
531.2	-0.00284482		1061.19	-0.01504575		1591.2	-0.02123082		2121.2	0.00114133		2651.2	-0.01658148
531.4	-0.00169121		1061.39	-0.01626583		1591.4	-0.02104017		2121.4	0.00191343		2651.4	-0.01644293
531.6	-0.00118618		1061.59	-0.01670899		1591.6	-0.02091529		2121.6	0.0016978		2651.6	-0.01667249
531.8	-0.00123743		1061.79	-0.0166055		1591.8	-0.02154567		2121.8	0.00188289		2651.8	-0.01720965
532	-0.00237373		1061.99	-0.01616463		1592	-0.02142497		2122	0.00244574		2652	-0.01813484
532.2	-0.0028178		1062.19	-0.01529201		1592.2	-0.02152593		2122.2	0.0031787		2652.2	-0.01858686
532.4	-0.00289602		1062.39	-0.0153326		1592.4	-0.02165436		2122.4	0.00364298		2652.4	-0.01929781
532.6	-0.00255334		1062.59	-0.01520073		1592.6	-0.02197904		2122.6	0.00319564		2652.6	-0.01989021
532.8	-0.0030367		1062.79	-0.01494677		1592.8	-0.022518		2122.8	0.00269646		2652.8	-0.02119126
533	-0.00339581		1062.99	-0.01546526		1593	-0.02271894		2123	0.00272005		2653	-0.02141833
533.2	-0.00343673		1063.19	-0.01584872		1593.2	-0.02326212		2123.2	0.002527		2653.2	-0.02167556
533.4	-0.00331589		1063.39	-0.01621724		1593.4	-0.02321792		2123.4	0.00236137		2653.4	-0.02121681
533.6	-0.0039479		1063.59	-0.01542017		1593.6	-0.02365855		2123.6	0.00106689		2653.6	-0.02112732
533.8	-0.00471291		1063.79	-0.01503922		1593.8	-0.02357126		2123.8	0.00012959		2653.8	-0.02068531
534	-0.00540121		1063.99	-0.01497032		1594	-0.02410615		2124	-0.00057443		2654	-0.02054403
534.2	-0.0053738		1064.19	-0.01513152		1594.2	-0.02471506		2124.2	-0.00002713		2654.2	-0.02024937
534.4	-0.00537315		1064.39	-0.0152675		1594.4	-0.024345		2124.4	0.00011287		2654.4	-0.02028294
534.6	-0.00514477		1064.59	-0.01526283		1594.6	-0.02427779		2124.6	0.00024081		2654.6	-0.02009154
534.8	-0.00438541		1064.79	-0.01496758		1594.8	-0.02434151		2124.8	0.00138093		2654.8	-0.02071103
535	-0.0037286		1064.99	-0.01507724		1595	-0.02362323		2125	0.00165904		2655	-0.02069133
535.2	-0.00279295		1065.19	-0.01448516		1595.2	-0.02366925		2125.2	0.00207054		2655.2	-0.02021993
535.4	-0.00275421		1065.39	-0.01442017		1595.4	-0.02343087		2125.4	0.00262358		2655.4	-0.0210055
535.6	-0.00295163		1065.59	-0.01247031		1595.6	-0.02345111		2125.6	0.00211856		2655.6	-0.02152389
535.8	-0.0025732		1065.79	-0.01145417		1595.8	-0.02300178		2125.8	0.00188158		2655.8	-0.02161316
536	-0.00227152		1065.99	-0.0104865		1596	-0.02221021		2126	0.00243832		2656	-0.022319
536.2	-0.00154544		1066.19	-0.01066412		1596.2	-0.02162874		2126.2	0.00272354		2656.2	-0.02238102
536.4	-0.0013501		1066.39	-0.0096781		1596.4	-0.0221075		2126.4	0.00315637		2656.4	-0.02316474
536.6	-0.00113973		1066.59	-0.01038207		1596.6	-0.02223144		2126.6	0.00305512		2656.6	-0.02370334
536.8	-0.00101704		1066.79	-0.00986939		1596.8	-0.02165491		2126.8	0.00267362		2656.8	-0.0231662
537	-0.00043746		1066.99	-0.00911287		1597	-0.02088852		2127	0.0031415		2657	-0.02342068
537.2	-0.00096354		1067.19	-0.01051765		1597.2	-0.02103564		2127.2	0.00374732		2657.2	-0.02227528
537.4	-0.00097086		1067.39	-0.01010442		1597.4	-0.021437		2127.4	0.0034308		2657.4	-0.02203952
537.6	-0.00113055		1067.59	-0.00935581		1597.6	-0.02197273		2127.6	0.00289363		2657.6	-0.02163717
537.8	-0.00205426		1067.79	-0.00992787		1597.8	-0.02238347		2127.8	0.0021623		2657.8	-0.02141836
538	-0.00223937		1067.99	-0.01048002		1598	-0.02325354		2128	0.00224038		2658	-0.02096048
538.2	-0.00195847		1068.19	-0.01146438		1598.2	-0.02325229		2128.2	0.00300046		2658.2	-0.02050084
538.4	-0.0021967		1068.39	-0.01210695		1598.4	-0.02297508		2128.4	0.00299164		2658.4	-0.02129372
538.6	-0.0027693		1068.59	-0.01246112		1598.6	-0.02375846		2128.6	0.0030512		2658.6	-0.02185269
538.8	-0.00208676		1068.79	-0.01285553		1598.8	-0.02376173		2128.8	0.00331728		2658.8	-0.02246483
539	-0.00216339		1068.99	-0.01387089		1599	-0.02351983		2129	0.00296979		2659	-0.02210824
539.2	-0.00221648		1069.19	-0.01344019		1599.2	-0.02340075		2129.2	0.0030839		2659.2	-0.02187674
539.4	-0.00227025		1069.39	-0.01380042		1599.4	-0.02299829		2129.4	0.00257137		2659.4	-0.0221595
539.6	-0.00212047		1069.59	-0.01404187		1599.6	-0.02280527		2129.6	0.0016393		2659.6	-0.02287521
539.8	-0.00123307		1069.79	-0.01502436		1599.8	-0.0220659		2129.8	0.00197222		2659.8	-0.02275731
540	-0.00126542		1069.99	-0.01536621		1600	-0.02206909		2130	0.00228155		2660	-0.02306973
540.2	-0.00126155		1070.19	-0.01575944		1600.2	-0.02259214		2130.2	0.00237544		2660.2	-0.02243134
540.4	-0.0010231		1070.39	-0.01527419		1600.4	-0.02294423		2130.4	0.00245555		2660.4	-0.02273198
540.6	-0.00114348		1070.59	-0.01555728		1600.6	-0.02285426		2130.6	0.00267608		2660.6	-0.02283581
540.8	-0.00050516		1070.79	-0.0149716		1600.8	-0.02214601		2130.8	0.00259781		2660.8	-0.02212546
541	-0.00052156		1070.99	-0.01401223		1601	-0.02148555		2131	0.0040544		2661	-0.02196787
541.2	-0.00149699		1071.19	-0.01491853		1601.2	-0.02163168		2131.2	0.00437883		2661.2	-0.02058316
541.4	-0.00108589		1071.39	-0.01336671		1601.4	-0.02175662		2131.4	0.00455782		2661.4	-0.0204021
541.6	-0.00185461		1071.59	-0.01250333		1601.6	-0.02217851		2131.6	0.00452223		2661.6	-0.01984079
541.8	-0.00269278		1071.79	-0.01240324		1601.8	-0.0227236		2131.8	0.00412637		2661.8	-0.01949104
542	-0.00287076		1071.99	-0.0121614		1602	-0.0238751		2132	0.00464313		2662	-0.01936909
542.2	-0.00327816		1072.19	-0.01204127		1602.2	-0.02410907		2132.2	0.0046457		2662.2	-0.01903323
542.4	-0.00431106		1072.39	-0.01173219		1602.4	-0.0245709		2132.4	0.00415826		2662.4	-0.01966096
542.6	-0.00409083		1072.59	-0.01252665		1602.6	-0.02509589		2132.6	0.00308264		2662.6	-0.01941778
542.8	-0.00321299		1072.79	-0.01268744		1602.8	-0.02575614		2132.8	0.00281942		2662.8	-0.01946737
543	-0.00283543		1072.99	-0.01289961		1603	-0.02540557		2133	0.00237625		2663	-0.01921197
543.2	-0.0029319		1073.19	-0.01250515		1603.2	-0.02502507		2133.2	0.00237843		2663.2	-0.01939759
543.4	-0.00244466		1073.39	-0.01298953		1603.4	-0.02465266		2133.4	0.00203489		2663.4	-0.01998133
543.6	-0.0014221		1073.59	-0.01280632		1603.6	-0.02480812		2133.6	0.0013307		2663.6	-0.02013464
543.8	-0.00083779		1073.79	-0.01364631		1603.8	-0.02525149		2133.8	0.0008165		2663.8	-0.02066166
544	-0.00149403		1073.99	-0.01416407		1604	-0.02524066		2134	0.00024237		2664	-0.02168409
544.2	-0.00223583		1074.19	-0.01485779		1604.2	-0.02547714		2134.2	-0.00042179		2664.2	-0.02101402
544.4	-0.00232988		1074.39	-0.01451917		1604.4	-0.02517398		2134.4	-0.00072353		2664.4	-0.02146018
544.6	-0.00272367		1074.59	-0.0149441		1604.6	-0.02421133		2134.6	0.00019098		2664.6	-0.02176645
544.8	-0.00261891		1074.79	-0.01500893		1604.8	-0.02333327		2134.8	0.00084529		2664.8	-0.02121209
545	-0.00347792		1074.99	-0.01401659		1605	-0.02237891		2135	0.00202833		2665	-0.02123929
545.2	-0.00388675		1075.19	-0.01469447		1605.2	-0.02184409		2135.2	0.0022117		2665.2	-0.02160003
545.4	-0.00396567		1075.39	-0.01428162		1605.4	-0.02133709		2135.4	0.00293605		2665.4	-0.02185412
545.6	-0.0042194		1075.59	-0.01370725		1605.6	-0.02143925		2135.6	0.00283436		2665.6	-0.02220839
545.8	-0.00439248		1075.79	-0.01455194		1605.8	-0.02131502		2135.8	0.00325884		2665.8	-0.02124015
546	-0.00453679		1075.99	-0.01466971		1606	-0.02163961		2136	0.00347112		2666	-0.0218361
546.2	-0.00521858		1076.19	-0.01415792		1606.2	-0.02055129		2136.2	0.00416888		2666.2	-0.02215684
546.4	-0.0052342		1076.39	-0.01456399		1606.4	-0.02046275		2136.4	0.00372121		2666.4	-0.02261661
546.6	-0.00503459		1076.59	-0.01443027		1606.6	-0.0207491		2136.6	0.00315891		2666.6	-0.02326022
546.8	-0.0055989		1076.79	-0.01327247		1606.8	-0.02150565		2136.8	0.00303086		2666.8	-0.02349792
547	-0.00538517		1076.99	-0.01304628		1607	-0.02072025		2137	0.00245136		2667	-0.0230611
547.2	-0.00495232		1077.19	-0.01307042		1607.2	-0.02063515		2137.2	0.00239651		2667.2	-0.02375763
547.4	-0.0036848		1077.39	-0.01289727		1607.4	-0.02055599		2137.4	0.00203959		2667.4	-0.02407253
547.6	-0.0030941		1077.59	-0.01265834		1607.6	-0.02103559		2137.6	0.00182277		2667.6	-0.02448188
547.8	-0.00348736		1077.79	-0.01341864		1607.8	-0.02049737		2137.8	0.00131189		2667.8	-0.02479071
548	-0.00432741		1077.99	-0.01341807		1608	-0.02035123		2138	0.00091979		2668	-0.02449313
548.2	-0.00444124		1078.19	-0.01381421		1608.2	-0.01986702		2138.2	0.00072473		2668.2	-0.02425923
548.4	-0.00414111		1078.39	-0.01292743		1608.4	-0.02037753		2138.4	0.00027074		2668.4	-0.02426407
548.6	-0.00408342		1078.59	-0.01296052		1608.6	-0.02025835		2138.6	0.0005934		2668.6	-0.02359019
548.8	-0.0033849		1078.79	-0.01258089		1608.8	-0.02045929		2138.8	0.00087667		2668.8	-0.02328453
549	-0.00382173		1078.99	-0.0129255		1609	-0.01996383		2139	0.00046295		2669	-0.02368463
549.2	-0.00409464		1079.19	-0.01318875		1609.2	-0.02003314		2139.2	0.00070661		2669.2	-0.02306684
549.4	-0.00458886		1079.39	-0.01280482		1609.4	-0.02044564		2139.4	0.00092241		2669.4	-0.02289061
549.6	-0.00458299		1079.59	-0.01339948		1609.6	-0.02033415		2139.6	0.00069715		2669.6	-0.02198784
549.8	-0.00531192		1079.79	-0.01442587		1609.8	-0.02006202		2139.8	0.00147024		2669.8	-0.02098709
550	-0.00598464		1079.99	-0.01483881		1610	-0.01957053		2140	0.00256556		2670	-0.02169075
550.2	-0.00642072		1080.19	-0.01378407		1610.2	-0.01923871		2140.2	0.00298759		2670.2	-0.02144932
550.4	-0.00686112		1080.39	-0.01413715		1610.4	-0.02020862		2140.4	0.00274072		2670.4	-0.02096418
550.6	-0.00739595		1080.59	-0.0135531		1610.6	-0.02127674		2140.6	0.00300384		2670.6	-0.0209773
550.8	-0.00800689		1080.79	-0.01392327		1610.8	-0.0214838		2140.8	0.00318834		2670.8	-0.02051957
551	-0.00753257		1080.99	-0.01469205		1611	-0.0214953		2141	0.00355799		2671	-0.0208983
551.2	-0.00604833		1081.19	-0.01437258		1611.2	-0.02189269		2141.2	0.00415029		2671.2	-0.02199298
551.4	-0.00547241		1081.39	-0.01367801		1611.4	-0.02202216		2141.4	0.00484237		2671.4	-0.02179628
551.6	-0.00448191		1081.59	-0.01388132		1611.6	-0.02251809		2141.6	0.00449479		2671.6	-0.02210445
551.8	-0.00382151		1081.79	-0.0137499		1611.8	-0.02229		2141.8	0.00405602		2671.8	-0.02257588
552	-0.00393022		1081.99	-0.01396091		1612	-0.02311704		2142	0.00331732		2672	-0.02304154
552.2	-0.00320396		1082.19	-0.01397259		1612.2	-0.02418361		2142.2	0.00314035		2672.2	-0.02346401
552.4	-0.00308889		1082.39	-0.01392827		1612.4	-0.02423161		2142.4	0.00195014		2672.4	-0.02272489
552.6	-0.00276848		1082.59	-0.0136677		1612.6	-0.02395397		2142.6	0.00185744		2672.6	-0.02166925
552.8	-0.00263451		1082.79	-0.01357885		1612.8	-0.02458499		2142.8	0.00172463		2672.8	-0.0217394
553	-0.00319179		1082.99	-0.01428485		1613	-0.02447261		2143	0.00117306		2673	-0.02193577
553.2	-0.00467342		1083.19	-0.01469787		1613.2	-0.025116		2143.2	0.00074134		2673.2	-0.02177893
553.4	-0.00533212		1083.39	-0.01479785		1613.4	-0.02464369		2143.4	0.00063993		2673.4	-0.02184822
553.6	-0.00539604		1083.59	-0.01498648		1613.6	-0.02409927		2143.6	0.00078291		2673.6	-0.02137152
553.8	-0.0060541		1083.79	-0.01467229		1613.8	-0.02318897		2143.8	0.001756		2673.8	-0.02194961
554	-0.00576584		1083.99	-0.01456968		1614	-0.02232017		2144	0.00181605		2674	-0.02170643
554.2	-0.005056		1084.19	-0.01389138		1614.2	-0.02281782		2144.2	0.0013747		2674.2	-0.02159877
554.4	-0.0050097		1084.39	-0.01515262		1614.4	-0.02310559		2144.4	0.00176885		2674.4	-0.02168408
554.6	-0.00574242		1084.59	-0.01472418		1614.6	-0.02303117		2144.6	0.00206877		2674.6	-0.02156642
554.8	-0.00663973		1084.79	-0.01516272		1614.8	-0.02223024		2144.8	0.0026356		2674.8	-0.0222336
555	-0.00649348		1084.99	-0.014641		1615	-0.02267214		2145	0.00281217		2675	-0.02295338
555.2	-0.00578989		1085.19	-0.01444421		1615.2	-0.02304139		2145.2	0.00346798		2675.2	-0.0229455
555.4	-0.00608957		1085.39	-0.01437118		1615.4	-0.02291613		2145.4	0.00384833		2675.4	-0.02374862
555.6	-0.0059738		1085.59	-0.0149578		1615.6	-0.02262528		2145.6	0.00418659		2675.6	-0.02382491
555.8	-0.00630464		1085.79	-0.01450033		1615.8	-0.02253515		2145.8	0.00476972		2675.8	-0.02424163
556	-0.00728856		1085.99	-0.01485485		1616	-0.02246307		2146	0.00546711		2676	-0.02376134
556.2	-0.00709805		1086.19	-0.01537155		1616.2	-0.0228609		2146.2	0.00546665		2676.2	-0.02336627
556.4	-0.00733983		1086.39	-0.01560858		1616.4	-0.02089234		2146.4	0.00535427		2676.4	-0.02242688
556.6	-0.00716092		1086.59	-0.01499595		1616.6	-0.02195208		2146.6	0.00534258		2676.6	-0.02144524
556.8	-0.00693387		1086.79	-0.01503885		1616.8	-0.02251216		2146.8	0.00523784		2676.8	-0.02146933
557	-0.00705177		1086.99	-0.01449568		1617	-0.02150101		2147	0.00499843		2677	-0.02176273
557.2	-0.00755498		1087.19	-0.01465572		1617.2	-0.02133122		2147.2	0.00484639		2677.2	-0.02157416
557.4	-0.00642132		1087.39	-0.01414316		1617.4	-0.02052663		2147.4	0.00486888		2677.4	-0.02101544
557.6	-0.00556435		1087.59	-0.01396263		1617.6	-0.02036031		2147.6	0.00379102		2677.6	-0.02017206
557.8	-0.0047736		1087.79	-0.01391019		1617.8	-0.01942284		2147.8	0.0027378		2677.8	-0.02103239
558	-0.00390878		1087.99	-0.01417403		1618	-0.01967747		2148	0.00134069		2678	-0.02078584
558.2	-0.00328571		1088.19	-0.01461164		1618.2	-0.0203595		2148.2	0.00046433		2678.2	-0.02088285
558.4	-0.00320337		1088.39	-0.01484085		1618.4	-0.02082135		2148.4	-0.00005275		2678.4	-0.02072214
558.6	-0.00375045		1088.59	-0.01440277		1618.6	-0.02116795		2148.6	-0.00062535		2678.6	-0.0205908
558.8	-0.00391689		1088.79	-0.01466341		1618.8	-0.02186383		2148.8	-0.00091898		2678.8	-0.02089176
559	-0.00378977		1088.99	-0.01457178		1619	-0.02335621		2149	-0.00139983		2679	-0.02036246
559.2	-0.00368031		1089.19	-0.01474929		1619.2	-0.02453212		2149.2	-0.00123394		2679.2	-0.01966832
559.4	-0.00411723		1089.39	-0.01433167		1619.4	-0.02535767		2149.4	-0.00127287		2679.4	-0.01961324
559.6	-0.00453034		1089.59	-0.01424424		1619.6	-0.02627065		2149.6	-0.00120265		2679.6	-0.01836795
559.8	-0.00451784		1089.79	-0.01397356		1619.8	-0.02770831		2149.8	-0.0014855		2679.8	-0.01788618
