# Supplementary material for: Functional development of a V3/glycan-specific broadly neutralizing antibody isolated from a case of HIV superinfection
Source: eLife journal article supplement (doi:10.7554/elife.68110), 2021-07-15
Supplement: fig2-data2 [file G3.xls]

Vers 3.43 Data Simulation
Conc1	7.81E-09	7.81E-09	7.81E-09	7.81E-09	7.81E-09
Start1	200	729.99	1259.99	1789.98	2320.01
Stop1	559.8	1089.79	1619.78	2149.78	2679.81
Time1	Data1	Sim1	Time2	Data2	Sim2	Time3	Data3	Sim3	Time4	Data4	Sim4	Time5	Data5	Sim5
200	0.00919231		729.99	0.00576048		1259.99	-0.00488521		1789.98	0.00405531		2320.01	-0.0064072
200.2	0.00813721		730.19	0.00527096		1260.19	-0.00359395		1790.18	0.00338803		2320.21	-0.00635303
200.4	0.00763461		730.39	0.00539774		1260.39	-0.00318291		1790.38	0.00225176		2320.41	-0.00563043
200.6	0.00739613		730.59	0.00565164		1260.59	-0.00292071		1790.58	0.00103987		2320.61	-0.00575528
200.8	0.00680291		730.79	0.00565067		1260.79	-0.00257531		1790.78	-0.00013213		2320.81	-0.00572219
201	0.00648712		730.99	0.00503627		1260.99	-0.00187686		1790.98	-0.00084841		2321.01	-0.0060241
201.2	0.00606594		731.19	0.0049875		1261.19	-0.00189945		1791.18	-0.0015619		2321.21	-0.00668708
201.4	0.00640355		731.39	0.00475359		1261.39	-0.00186593		1791.38	-0.00210555		2321.41	-0.00696998
201.6	0.00601054		731.59	0.00410447		1261.59	-0.00239943		1791.58	-0.00325067		2321.61	-0.0066589
201.8	0.00696189		731.79	0.00355462		1261.79	-0.00251618		1791.78	-0.00343411		2321.81	-0.00634171
202	0.00833375		731.99	0.00316491		1261.99	-0.00246759		1791.98	-0.00367531		2322.01	-0.00672121
202.2	0.00949718		732.19	0.00294632		1262.19	-0.00301252		1792.18	-0.00374611		2322.21	-0.00683827
202.4	0.01038581		732.39	0.00297493		1262.39	-0.00375491		1792.38	-0.00403618		2322.41	-0.00658616
202.6	0.01085485		732.59	0.00317753		1262.59	-0.00367587		1792.58	-0.00447953		2322.61	-0.00641975
202.8	0.01058328		732.79	0.0033527		1262.79	-0.0030422		1792.78	-0.00440205		2322.81	-0.00654497
203	0.01021444		732.99	0.00416636		1262.99	-0.00261581		1792.98	-0.00459497		2323.01	-0.00783005
203.2	0.00989337		733.19	0.00455664		1263.19	-0.00255058		1793.18	-0.00438646		2323.21	-0.00787038
203.4	0.00986548		733.39	0.00433617		1263.39	-0.00251525		1793.38	-0.0037439		2323.41	-0.00697466
203.6	0.00971167		733.59	0.00438213		1263.59	-0.00271508		1793.58	-0.00359046		2323.61	-0.00655633
203.8	0.00882137		733.79	0.00360471		1263.79	-0.00274932		1793.78	-0.00412798		2323.81	-0.00614153
204	0.00885361		733.99	0.00327842		1263.99	-0.00237838		1793.98	-0.00349428		2324.01	-0.00597916
204.2	0.00923599		734.19	0.00337747		1264.19	-0.00316594		1794.18	-0.00325474		2324.21	-0.00606285
204.4	0.00946225		734.39	0.003943		1264.39	-0.00473044		1794.38	-0.00321907		2324.41	-0.00632293
204.6	0.00945142		734.59	0.00346273		1264.59	-0.00506377		1794.58	-0.00312285		2324.61	-0.00730841
204.8	0.00877709		734.79	0.00285847		1264.79	-0.00507558		1794.78	-0.00377007		2324.81	-0.0065001
205	0.00840062		734.99	0.00188302		1264.99	-0.00493108		1794.98	-0.00382961		2325.01	-0.00678422
205.2	0.00839939		735.19	0.00214895		1265.19	-0.00612139		1795.18	-0.0033463		2325.21	-0.00647088
205.4	0.00899718		735.39	0.00171509		1265.39	-0.00617524		1795.38	-0.00285125		2325.41	-0.00603451
205.6	0.00905928		735.59	0.0014206		1265.59	-0.00611505		1795.58	-0.00243729		2325.61	-0.00580222
205.8	0.00999289		735.79	0.00123847		1265.79	-0.00496792		1795.78	-0.00185577		2325.81	-0.00524936
206	0.00970996		735.99	0.00103684		1265.99	-0.00487617		1795.98	-0.00164017		2326.01	-0.00523409
206.2	0.00866205		736.19	0.00091446		1266.19	-0.00479396		1796.18	-0.00140354		2326.21	-0.00498281
206.4	0.00814074		736.39	0.00042043		1266.39	-0.00410001		1796.38	-0.00141476		2326.41	-0.00530547
206.6	0.00752783		736.59	0.00087935		1266.59	-0.002614		1796.58	-0.0012124		2326.61	-0.00629914
206.8	0.0070396		736.79	0.00103208		1266.79	-0.00160447		1796.78	-0.00081316		2326.81	-0.00746477
207	0.00717658		736.99	0.00140749		1266.99	-0.00139369		1796.98	-0.00028983		2327.01	-0.00704729
207.2	0.00711452		737.19	0.00123352		1267.19	-0.00173277		1797.18	0.00023084		2327.21	-0.00705093
207.4	0.00761564		737.39	0.00119584		1267.39	-0.00177599		1797.38	0.00005327		2327.41	-0.00719875
207.6	0.00743311		737.59	0.00042111		1267.59	-0.00128421		1797.58	-0.00003131		2327.61	-0.00791264
207.8	0.00793872		737.79	0.00017922		1267.79	-0.00039747		1797.78	-0.00053299		2327.81	-0.00812258
208	0.00802213		737.99	0.00063249		1267.99	-0.00053016		1797.98	-0.00089574		2328.01	-0.00651146
208.2	0.0075378		738.19	0.00123016		1268.19	-0.00174122		1798.18	-0.00126241		2328.21	-0.00666381
208.4	0.00723611		738.39	0.00061268		1268.39	-0.00193079		1798.38	-0.00152788		2328.41	-0.00711967
208.6	0.00732421		738.59	-0.00045205		1268.59	-0.00193091		1798.58	-0.00261196		2328.61	-0.00630859
208.8	0.00751536		738.79	0.00054356		1268.79	-0.00241535		1798.78	-0.00367824		2328.81	-0.00442587
209	0.0076383		738.99	0.00141721		1268.99	-0.00279676		1798.98	-0.00356755		2329.01	-0.00372559
209.2	0.00838009		739.19	0.00179956		1269.19	-0.00366865		1799.18	-0.00340342		2329.21	-0.00304979
209.4	0.00890381		739.39	0.00212383		1269.39	-0.0031402		1799.38	-0.00369084		2329.41	-0.00363334
209.6	0.00846258		739.59	0.00210419		1269.59	-0.00324171		1799.58	-0.0041478		2329.61	-0.00334604
209.8	0.00753676		739.79	0.00181092		1269.79	-0.00415501		1799.78	-0.00485089		2329.81	-0.0028217
210	0.00739517		739.99	0.00174293		1269.99	-0.00507468		1799.98	-0.00427084		2330.01	-0.00316389
210.2	0.00689252		740.19	0.00226416		1270.19	-0.00525505		1800.18	-0.00430526		2330.21	-0.00422948
210.4	0.00772211		740.39	0.00214152		1270.39	-0.00457789		1800.38	-0.00362921		2330.41	-0.00583319
210.6	0.00738407		740.59	0.00201391		1270.59	-0.00392975		1800.58	-0.00385979		2330.61	-0.00657901
210.8	0.00757371		740.79	0.00251727		1270.79	-0.00401001		1800.78	-0.00370439		2330.81	-0.00809067
211	0.00857966		740.99	0.00286804		1270.99	-0.00395938		1800.98	-0.0037816		2331.01	-0.00767721
211.2	0.01005767		741.19	0.00296533		1271.19	-0.00463287		1801.18	-0.00350927		2331.21	-0.00841642
211.4	0.01074222		741.39	0.00226494		1271.39	-0.00421656		1801.38	-0.00389897		2331.41	-0.00898811
211.6	0.01090209		741.59	0.00183833		1271.59	-0.00422499		1801.58	-0.00408046		2331.61	-0.00908701
211.8	0.01058123		741.79	0.00105126		1271.79	-0.00497455		1801.78	-0.00376118		2331.81	-0.00913193
212	0.00948235		741.99	0.00069686		1271.99	-0.00581073		1801.98	-0.00377031		2332.01	-0.00850547
212.2	0.00931064		742.19	0.00089017		1272.19	-0.0062616		1802.18	-0.00272929		2332.21	-0.01005918
212.4	0.01047583		742.39	0.0004048		1272.39	-0.00693692		1802.38	-0.00214936		2332.41	-0.01048342
212.6	0.01129237		742.59	0.00101802		1272.59	-0.00750957		1802.58	-0.00247427		2332.61	-0.00940634
212.8	0.01165379		742.79	0.00224563		1272.79	-0.00778115		1802.78	-0.00195608		2332.81	-0.00887902
213	0.01189759		742.99	0.00219107		1272.99	-0.00717117		1802.98	-0.00116712		2333.01	-0.00900071
213.2	0.01218738		743.19	0.00168624		1273.19	-0.00781541		1803.18	-0.0002937		2333.21	-0.00977637
213.4	0.01234205		743.39	0.00216463		1273.39	-0.00704216		1803.38	-0.00048406		2333.41	-0.01075053
213.6	0.0122563		743.59	0.00172867		1273.59	-0.00786924		1803.58	-0.00031875		2333.61	-0.01023881
213.8	0.01203455		743.79	0.0018633		1273.79	-0.00720878		1803.78	-0.00027837		2333.81	-0.00967162
214	0.01251009		743.99	0.00265354		1273.99	-0.00706037		1803.98	0.00041476		2334.01	-0.0099818
214.2	0.01206467		744.19	0.00320995		1274.19	-0.00658244		1804.18	0.00062748		2334.21	-0.0094847
214.4	0.01279494		744.39	0.00358345		1274.39	-0.00522548		1804.38	0.00081906		2334.41	-0.00980499
214.6	0.01180041		744.59	0.00420603		1274.59	-0.00521862		1804.58	0.00046558		2334.61	-0.00912471
214.8	0.01196586		744.79	0.00532314		1274.79	-0.00535613		1804.78	-0.00025187		2334.81	-0.00932855
215	0.01227673		744.99	0.00519875		1274.99	-0.00497663		1804.98	-0.00066492		2335.01	-0.00876116
215.2	0.01173954		745.19	0.00524288		1275.19	-0.00591949		1805.18	-0.00178122		2335.21	-0.0089501
215.4	0.01087557		745.39	0.00501914		1275.39	-0.00610803		1805.38	-0.00259729		2335.41	-0.00885408
215.6	0.01018123		745.59	0.00517258		1275.59	-0.00626976		1805.58	-0.00341289		2335.61	-0.00956544
215.8	0.00922497		745.79	0.00424296		1275.79	-0.00667739		1805.78	-0.00336008		2335.81	-0.01015543
216	0.00939906		745.99	0.00388115		1275.99	-0.00686844		1805.98	-0.0040843		2336.01	-0.01018823
216.2	0.01071175		746.19	0.00411653		1276.19	-0.00698716		1806.18	-0.00403691		2336.21	-0.01027086
216.4	0.01131749		746.39	0.00398324		1276.39	-0.00610837		1806.38	-0.00447464		2336.41	-0.0110708
216.6	0.01190284		746.59	0.0035803		1276.59	-0.00592788		1806.58	-0.00469973		2336.61	-0.01084748
216.8	0.0125622		746.79	0.00271303		1276.79	-0.00613304		1806.78	-0.00420967		2336.81	-0.01121252
217	0.01336576		746.99	0.00196363		1276.99	-0.00606705		1806.98	-0.00398815		2337.01	-0.01118163
217.2	0.01418307		747.19	0.0014605		1277.19	-0.00600734		1807.18	-0.00413319		2337.21	-0.01150501
217.4	0.01475089		747.39	0.00120579		1277.39	-0.00444286		1807.38	-0.00458016		2337.41	-0.01073661
217.6	0.01491924		747.59	-0.00001669		1277.59	-0.00516458		1807.58	-0.00408939		2337.61	-0.00942011
217.8	0.01485999		747.79	0.000629		1277.79	-0.00402803		1807.78	-0.00398456		2337.81	-0.00923724
218	0.01517732		747.99	0.00050075		1277.99	-0.00457072		1807.98	-0.00358156		2338.01	-0.01006297
218.2	0.01445393		748.19	0.00002122		1278.19	-0.00409952		1808.18	-0.00340281		2338.21	-0.00963059
218.4	0.01474329		748.39	0.00057483		1278.39	-0.00468946		1808.38	-0.00358142		2338.41	-0.0103742
218.6	0.01355139		748.59	0.00011901		1278.59	-0.00569044		1808.58	-0.00279938		2338.61	-0.00940634
218.8	0.01383932		748.79	0.0010054		1278.79	-0.00603139		1808.78	-0.00350424		2338.81	-0.00978746
219	0.0134047		748.99	0.00059619		1278.99	-0.0063332		1808.98	-0.00341142		2339.01	-0.0101102
219.2	0.01220238		749.19	0.00064344		1279.19	-0.00706582		1809.18	-0.00397378		2339.21	-0.00938612
219.4	0.0122726		749.39	0.00034921		1279.39	-0.00738576		1809.38	-0.00408393		2339.41	-0.00904741
219.6	0.01210174		749.59	0.00063085		1279.59	-0.00694796		1809.58	-0.00423248		2339.61	-0.00920813
219.8	0.01165672		749.79	0.00040759		1279.79	-0.00727491		1809.78	-0.00410939		2339.81	-0.00888727
220	0.01237179		749.99	0.00140612		1279.99	-0.00779926		1809.98	-0.00470412		2340.01	-0.00859714
220.2	0.01263438		750.19	0.0020171		1280.19	-0.006912		1810.18	-0.00463573		2340.21	-0.00914193
220.4	0.01293635		750.39	0.00202322		1280.39	-0.0065003		1810.38	-0.00461747		2340.41	-0.00947783
220.6	0.01395746		750.59	0.00136564		1280.59	-0.00787523		1810.58	-0.00540051		2340.61	-0.00863586
220.8	0.01506965		750.79	0.00117854		1280.79	-0.00805355		1810.78	-0.00550555		2340.81	-0.00767157
221	0.01612538		750.99	0.00213494		1280.99	-0.00754043		1810.98	-0.00586737		2341.01	-0.00731248
221.2	0.01719771		751.19	0.00185982		1281.19	-0.0063109		1811.18	-0.0055802		2341.21	-0.00720378
221.4	0.01764622		751.39	0.00231605		1281.39	-0.00632029		1811.38	-0.00541422		2341.41	-0.00704759
221.6	0.01750002		751.59	0.00264508		1281.59	-0.00664934		1811.58	-0.00494875		2341.61	-0.0077903
221.8	0.01794404		751.79	0.00330234		1281.79	-0.00571303		1811.78	-0.00503621		2341.81	-0.00940555
222	0.01768246		751.99	0.00288453		1281.99	-0.00538949		1811.98	-0.00471603		2342.01	-0.01066324
222.2	0.01782579		752.19	0.00304345		1282.19	-0.00535684		1812.18	-0.00458559		2342.21	-0.01112569
222.4	0.01858745		752.39	0.00269835		1282.39	-0.00555308		1812.38	-0.00452312		2342.41	-0.01139911
222.6	0.01816503		752.59	0.00155378		1282.59	-0.0050968		1812.58	-0.00433262		2342.61	-0.0117778
222.8	0.01847807		752.79	0.00142833		1282.79	-0.00439563		1812.78	-0.0045749		2342.81	-0.0132833
223	0.01754148		752.99	-0.00024364		1282.99	-0.00411704		1812.98	-0.00342475		2343.01	-0.01313407
223.2	0.0172394		753.19	-0.00098669		1283.19	-0.00408921		1813.18	-0.00272936		2343.21	-0.01318683
223.4	0.01604326		753.39	-0.00200417		1283.39	-0.00454363		1813.38	-0.00319119		2343.41	-0.01411778
223.6	0.01479637		753.59	-0.00163483		1283.59	-0.00420273		1813.58	-0.00273538		2343.61	-0.01419839
223.8	0.0141285		753.79	-0.00202924		1283.79	-0.00422816		1813.78	-0.00404111		2343.81	-0.01453515
224	0.01421799		753.99	-0.00118005		1283.99	-0.00480856		1813.98	-0.00460962		2344.01	-0.0142073
224.2	0.01422848		754.19	-0.00164939		1284.19	-0.00439497		1814.18	-0.00524843		2344.21	-0.01305295
224.4	0.01430943		754.39	-0.00160923		1284.39	-0.00512476		1814.38	-0.00620423		2344.41	-0.01180497
224.6	0.01473962		754.59	-0.00197491		1284.59	-0.00505263		1814.58	-0.00765997		2344.61	-0.01017391
224.8	0.01472723		754.79	-0.00115821		1284.79	-0.00457109		1814.78	-0.0072621		2344.81	-0.00924264
225	0.01551822		754.99	-0.00000218		1284.99	-0.00451811		1814.98	-0.00785745		2345.01	-0.00882112
225.2	0.01578849		755.19	0.00039806		1285.19	-0.00386028		1815.18	-0.00794349		2345.21	-0.00855024
225.4	0.01561552		755.39	0.00190687		1285.39	-0.0047695		1815.38	-0.00791908		2345.41	-0.00867115
225.6	0.01473031		755.59	0.00298352		1285.59	-0.00503268		1815.58	-0.0083849		2345.61	-0.00796465
225.8	0.01539658		755.79	0.00365954		1285.79	-0.00578904		1815.78	-0.0086683		2345.81	-0.00838694
226	0.01525104		755.99	0.00468578		1285.99	-0.00630381		1815.98	-0.00805354		2346.01	-0.00839064
226.2	0.01553723		756.19	0.00496427		1286.19	-0.00587799		1816.18	-0.00874143		2346.21	-0.00836687
226.4	0.01526116		756.39	0.00479921		1286.39	-0.0057887		1816.38	-0.00897126		2346.41	-0.00844802
226.6	0.01453103		756.59	0.004129		1286.59	-0.00512386		1816.58	-0.00825454		2346.61	-0.0090592
226.8	0.01374635		756.79	0.00401135		1286.79	-0.00440214		1816.78	-0.00712758		2346.81	-0.00918649
227	0.0121732		756.99	0.00350276		1286.99	-0.00495217		1816.98	-0.00595396		2347.01	-0.0087218
227.2	0.01160694		757.19	0.00333708		1287.19	-0.00538922		1817.18	-0.00572393		2347.21	-0.01021437
227.4	0.01021866		757.39	0.00264676		1287.39	-0.00651352		1817.38	-0.00612109		2347.41	-0.01078959
227.6	0.01004078		757.59	0.00245146		1287.59	-0.00628527		1817.58	-0.00602441		2347.61	-0.01065336
227.8	0.011163		757.79	0.00232666		1287.79	-0.0066343		1817.78	-0.00706264		2347.81	-0.01072389
228	0.01208568		757.99	0.00156865		1287.99	-0.00579057		1817.98	-0.00709272		2348.01	-0.01046244
228.2	0.01329189		758.19	0.00087954		1288.19	-0.00631769		1818.18	-0.00663257		2348.21	-0.00970007
228.4	0.01447947		758.39	0.00111541		1288.39	-0.00574869		1818.38	-0.00703672		2348.41	-0.0106061
228.6	0.01555701		758.59	-0.00001557		1288.59	-0.00500892		1818.58	-0.00711908		2348.61	-0.01057292
228.8	0.01606623		758.79	0.00033583		1288.79	-0.00457188		1818.78	-0.0062646		2348.81	-0.01204698
229	0.01748848		758.99	0.00084477		1288.99	-0.00460233		1818.98	-0.00601353		2349.01	-0.01197411
229.2	0.0191632		759.19	0.00078196		1289.19	-0.00466025		1819.18	-0.00545873		2349.21	-0.0127839
229.4	0.02016166		759.39	0.00101034		1289.39	-0.00605218		1819.38	-0.00515543		2349.41	-0.01352507
229.6	0.02101842		759.59	0.00105977		1289.59	-0.00671393		1819.58	-0.00557146		2349.61	-0.01341412
229.8	0.0221485		759.79	0.00138526		1289.79	-0.00732576		1819.78	-0.00449259		2349.81	-0.01384965
230	0.02200408		759.99	0.00192015		1289.99	-0.00710558		1819.98	-0.00385114		2350.01	-0.01394747
230.2	0.02262058		760.19	0.00220361		1290.19	-0.00602945		1820.18	-0.00505525		2350.21	-0.01339788
230.4	0.02243177		760.39	0.00284795		1290.39	-0.0059163		1820.38	-0.00483685		2350.41	-0.0135927
230.6	0.02140902		760.59	0.00230216		1290.59	-0.0050711		1820.58	-0.00434997		2350.61	-0.0135924
230.8	0.02016103		760.79	0.00322552		1290.79	-0.00512884		1820.78	-0.00458403		2350.81	-0.01266107
231	0.0177011		760.99	0.00326996		1290.99	-0.00556708		1820.98	-0.00553484		2351.01	-0.01308313
231.2	0.01735534		761.19	0.00318907		1291.19	-0.00575289		1821.18	-0.0068248		2351.21	-0.01379221
231.4	0.01713207		761.39	0.00313515		1291.39	-0.00633212		1821.38	-0.00798197		2351.41	-0.01310838
231.6	0.01714939		761.59	0.00230514		1291.59	-0.0055933		1821.58	-0.00939274		2351.61	-0.01273265
231.8	0.01689822		761.79	0.00288643		1291.79	-0.00558843		1821.78	-0.0101332		2351.81	-0.01257044
232	0.01694931		761.99	0.00186606		1291.99	-0.00477331		1821.98	-0.01051949		2352.01	-0.01298336
232.2	0.01749869		762.19	0.00222238		1292.19	-0.00550404		1822.18	-0.00990401		2352.21	-0.01311978
232.4	0.01691669		762.39	0.00224938		1292.39	-0.00525315		1822.38	-0.01002256		2352.41	-0.01388062
232.6	0.01637099		762.59	0.00183074		1292.59	-0.0049242		1822.58	-0.01019901		2352.61	-0.0138734
232.8	0.01637147		762.79	0.00199965		1292.79	-0.00492101		1822.78	-0.00971901		2352.81	-0.01403423
233	0.01772395		762.99	0.00107273		1292.99	-0.00471476		1822.98	-0.0090987		2353.01	-0.01329162
233.2	0.0185196		763.19	-0.00014357		1293.19	-0.00464088		1823.18	-0.00876488		2353.21	-0.01362175
233.4	0.01843377		763.39	0.00076704		1293.39	-0.00513044		1823.38	-0.00745691		2353.41	-0.0131054
233.6	0.01825983		763.59	0.00073903		1293.59	-0.00459511		1823.58	-0.00716387		2353.61	-0.01278409
233.8	0.01818646		763.79	0.00127611		1293.79	-0.00467115		1823.78	-0.00659166		2353.81	-0.01262148
234	0.01886285		763.99	0.00189835		1293.99	-0.00395998		1823.98	-0.00605946		2354.01	-0.01267156
234.2	0.01945538		764.19	0.00242834		1294.19	-0.00244915		1824.18	-0.00611327		2354.21	-0.01202374
234.4	0.01905904		764.39	0.00370069		1294.39	-0.00244081		1824.38	-0.00458073		2354.41	-0.0120839
234.6	0.01949784		764.59	0.00300123		1294.59	-0.00240137		1824.58	-0.00349509		2354.61	-0.01180966
234.8	0.01916108		764.79	0.00353378		1294.79	-0.00213983		1824.78	-0.00289696		2354.81	-0.01152848
235	0.01833602		764.99	0.00292108		1294.99	-0.00265644		1824.98	-0.00333152		2355.01	-0.0123661
235.2	0.01922095		765.19	0.00230634		1295.19	-0.00260214		1825.18	-0.00431803		2355.21	-0.01222526
235.4	0.01894297		765.39	0.00244285		1295.39	-0.00287769		1825.38	-0.00418714		2355.41	-0.0116783
235.6	0.01829764		765.59	0.00167966		1295.59	-0.00314627		1825.58	-0.00470198		2355.61	-0.01172901
235.8	0.01775794		765.79	0.00198514		1295.79	-0.00398201		1825.78	-0.00387854		2355.81	-0.01247768
236	0.01799583		765.99	0.00148995		1295.99	-0.00391545		1825.98	-0.00340819		2356.01	-0.01303853
236.2	0.01837842		766.19	0.00071453		1296.19	-0.00472715		1826.18	-0.00257929		2356.21	-0.01251367
236.4	0.01759817		766.39	0.00061077		1296.39	-0.00545634		1826.38	-0.00262014		2356.41	-0.01285939
236.6	0.01828361		766.59	0.00099625		1296.59	-0.00529353		1826.58	-0.00293508		2356.61	-0.01226829
236.8	0.01909449		766.79	0.00034507		1296.79	-0.0051151		1826.78	-0.00288808		2356.81	-0.01187246
237	0.02072392		766.99	0.00019892		1296.99	-0.00466211		1826.98	-0.00308174		2357.01	-0.01165239
237.2	0.02131714		767.19	0.00083512		1297.19	-0.00517845		1827.18	-0.0033817		2357.21	-0.01146211
237.4	0.02177306		767.39	0.00205468		1297.39	-0.00591195		1827.38	-0.00344843		2357.41	-0.01108668
237.6	0.02188988		767.59	0.00245457		1297.59	-0.00528471		1827.58	-0.00391257		2357.61	-0.01116576
237.8	0.02219101		767.79	0.00335406		1297.79	-0.00517857		1827.78	-0.00434895		2357.81	-0.01171407
238	0.02314232		767.99	0.0037129		1297.99	-0.00459295		1827.98	-0.005165		2358.01	-0.01160392
238.2	0.02378447		768.19	0.00424007		1298.19	-0.00396566		1828.18	-0.00459631		2358.21	-0.01187178
238.4	0.0244738		768.39	0.0050549		1298.39	-0.00431097		1828.38	-0.00441227		2358.41	-0.01254017
238.6	0.02584214		768.59	0.00371231		1298.59	-0.00377609		1828.58	-0.00444962		2358.61	-0.01294315
238.8	0.02606755		768.79	0.00440191		1298.79	-0.0033255		1828.78	-0.00469571		2358.81	-0.01357253
239	0.02546387		768.99	0.00444583		1298.99	-0.00365089		1828.98	-0.00560352		2359.01	-0.0138768
239.2	0.02414254		769.19	0.0040118		1299.19	-0.0029257		1829.18	-0.00698225		2359.21	-0.01386793
239.4	0.02298178		769.39	0.00450963		1299.39	-0.00394524		1829.38	-0.00685369		2359.41	-0.01414085
239.6	0.02273248		769.59	0.00413972		1299.59	-0.00373223		1829.58	-0.00714384		2359.61	-0.01459826
239.8	0.02237878		769.79	0.00494344		1299.79	-0.00344606		1829.78	-0.0068338		2359.81	-0.01500657
240	0.0221075		769.99	0.00520603		1299.99	-0.00276319		1829.98	-0.00734869		2360.01	-0.01533907
240.2	0.02214262		770.19	0.00522725		1300.19	-0.00312759		1830.18	-0.00776809		2360.21	-0.01504086
240.4	0.02121712		770.39	0.00538929		1300.39	-0.0031823		1830.38	-0.00737057		2360.41	-0.01461339
240.6	0.02158587		770.59	0.00469067		1300.59	-0.0033322		1830.58	-0.00641398		2360.61	-0.01478445
240.8	0.02179697		770.79	0.00406107		1300.79	-0.00317282		1830.78	-0.00656713		2360.81	-0.01493944
241	0.02266886		770.99	0.00332832		1300.99	-0.00367602		1830.98	-0.00657541		2361.01	-0.01488298
241.2	0.02312229		771.19	0.00265695		1301.19	-0.00438327		1831.18	-0.00634764		2361.21	-0.01447252
241.4	0.02185473		771.39	0.00237348		1301.39	-0.00451376		1831.38	-0.00541803		2361.41	-0.01422033
241.6	0.02122583		771.59	0.00160458		1301.59	-0.00444645		1831.58	-0.00488192		2361.61	-0.01457653
241.8	0.0207191		771.79	0.00127861		1301.79	-0.00465287		1831.78	-0.00518072		2361.81	-0.01510133
242	0.02100728		771.99	0.00131224		1301.99	-0.00456023		1831.98	-0.00495236		2362.01	-0.01446185
242.2	0.02115937		772.19	0.00093234		1302.19	-0.00430054		1832.18	-0.00367688		2362.21	-0.01524218
242.4	0.02134249		772.39	0.00153799		1302.39	-0.00481727		1832.38	-0.00347079		2362.41	-0.01582808
242.6	0.02161327		772.59	0.00070792		1302.59	-0.00528423		1832.58	-0.00370034		2362.61	-0.01583416
242.8	0.0216725		772.79	0.00106605		1302.79	-0.00558917		1832.78	-0.00341597		2362.81	-0.01611837
243	0.02102984		772.99	0.00104634		1302.99	-0.00619895		1832.98	-0.00348249		2363.01	-0.01655591
243.2	0.02036441		773.19	0.00142774		1303.19	-0.00627253		1833.18	-0.0034845		2363.21	-0.01683267
243.4	0.02104263		773.39	0.00142436		1303.39	-0.00659928		1833.38	-0.00324013		2363.41	-0.01699805
243.6	0.02149089		773.59	0.00156764		1303.59	-0.0064975		1833.58	-0.00329742		2363.61	-0.0167935
243.8	0.02149933		773.79	0.00209863		1303.79	-0.0065847		1833.78	-0.00353997		2363.81	-0.01703175
244	0.02187787		773.99	0.00164257		1303.99	-0.00634289		1833.98	-0.00383247		2364.01	-0.01709021
244.2	0.02192861		774.19	0.0012649		1304.19	-0.00611667		1834.18	-0.00389339		2364.21	-0.01666451
244.4	0.02158311		774.39	0.00118787		1304.39	-0.00625227		1834.38	-0.00329078		2364.41	-0.01698021
244.6	0.02195618		774.59	0.00105346		1304.59	-0.00589634		1834.58	-0.00318514		2364.61	-0.01722928
244.8	0.02294203		774.79	0.00080004		1304.79	-0.00593493		1834.78	-0.00396567		2364.81	-0.01662583
245	0.0233461		774.99	0.00125441		1304.99	-0.00568279		1834.98	-0.00425402		2365.01	-0.01600476
245.2	0.02366293		775.19	0.00147367		1305.19	-0.00559		1835.18	-0.00453583		2365.21	-0.01545696
245.4	0.02328998		775.39	0.00151362		1305.39	-0.00476327		1835.38	-0.00507598		2365.41	-0.0146565
245.6	0.02427017		775.59	0.00106341		1305.59	-0.00481588		1835.58	-0.00575119		2365.61	-0.01417882
245.8	0.02429818		775.79	0.00182222		1305.79	-0.00452619		1835.78	-0.00629543		2365.81	-0.01381294
246	0.02441789		775.99	0.00256344		1305.99	-0.00382195		1835.98	-0.00623428		2366.01	-0.01411416
246.2	0.02545888		776.19	0.00203408		1306.19	-0.00426494		1836.18	-0.00675815		2366.21	-0.01469457
246.4	0.02598172		776.39	0.00216788		1306.39	-0.00483326		1836.38	-0.00705861		2366.41	-0.01426235
246.6	0.02602323		776.59	0.00120242		1306.59	-0.00464191		1836.58	-0.00788208		2366.61	-0.01385403
246.8	0.0267857		776.79	0.00160303		1306.79	-0.00485222		1836.78	-0.00804193		2366.81	-0.01392736
247	0.02733539		776.99	0.00184966		1306.99	-0.00552845		1836.98	-0.00767151		2367.01	-0.01388357
247.2	0.02749089		777.19	0.00205506		1307.19	-0.00546825		1837.18	-0.00773943		2367.21	-0.01282859
247.4	0.02764468		777.39	0.00110449		1307.39	-0.00558498		1837.38	-0.00786178		2367.41	-0.01325746
247.6	0.02822851		777.59	0.00117681		1307.59	-0.00666379		1837.58	-0.00783305		2367.61	-0.01318636
247.8	0.02795128		777.79	0.00054371		1307.79	-0.00615041		1837.78	-0.0079482		2367.81	-0.01322475
248	0.02744411		777.99	0.00073487		1307.99	-0.00543245		1837.98	-0.00851502		2368.01	-0.01270764
248.2	0.02690745		778.19	0.00136083		1308.19	-0.0053266		1838.18	-0.00928907		2368.21	-0.01414691
248.4	0.02676535		778.39	0.00193378		1308.39	-0.00486434		1838.38	-0.00955165		2368.41	-0.01419421
248.6	0.02684639		778.59	0.00209603		1308.59	-0.00492835		1838.58	-0.0093161		2368.61	-0.01353053
248.8	0.02676097		778.79	0.00227615		1308.79	-0.00479322		1838.78	-0.00936694		2368.81	-0.01361233
249	0.02599819		778.99	0.00328456		1308.99	-0.00393429		1838.98	-0.00985287		2369.01	-0.01353212
249.2	0.02583278		779.19	0.00285617		1309.19	-0.00378011		1839.18	-0.00983758		2369.21	-0.01378438
249.4	0.02542702		779.39	0.00290617		1309.39	-0.00298564		1839.38	-0.00952236		2369.41	-0.01343203
249.6	0.02477132		779.59	0.00290327		1309.59	-0.00244436		1839.58	-0.00880447		2369.61	-0.01393662
249.8	0.02403842		779.79	0.00312373		1309.79	-0.00261415		1839.78	-0.00862579		2369.81	-0.01427332
250	0.02407237		779.99	0.00356809		1309.99	-0.00214256		1839.98	-0.00764049		2370.01	-0.01485885
250.2	0.02441002		780.19	0.00355927		1310.19	-0.00240947		1840.18	-0.00757991		2370.21	-0.01421711
250.4	0.0235357		780.39	0.00366089		1310.39	-0.00269443		1840.38	-0.00745394		2370.41	-0.01327086
250.6	0.02285453		780.59	0.00404642		1310.59	-0.00284533		1840.58	-0.00728412		2370.61	-0.01353463
250.8	0.02317774		780.79	0.00476428		1310.79	-0.00367571		1840.78	-0.00720626		2370.81	-0.01426049
251	0.02345922		780.99	0.00466421		1310.99	-0.00385664		1840.98	-0.0058572		2371.01	-0.01372665
251.2	0.02400758		781.19	0.00525909		1311.19	-0.00414914		1841.18	-0.00588972		2371.21	-0.01334942
251.4	0.02398616		781.39	0.00537427		1311.39	-0.00451823		1841.38	-0.00485271		2371.41	-0.0140563
251.6	0.02474799		781.59	0.00464165		1311.59	-0.00544729		1841.58	-0.00492542		2371.61	-0.01305884
251.8	0.0246778		781.79	0.0039727		1311.79	-0.00509528		1841.78	-0.00546863		2371.81	-0.01272256
252	0.02507601		781.99	0.00453727		1311.99	-0.00517341		1841.98	-0.00593123		2372.01	-0.01265497
252.2	0.02586963		782.19	0.00458334		1312.19	-0.00616825		1842.18	-0.00640767		2372.21	-0.01293585
252.4	0.02700619		782.39	0.00408648		1312.39	-0.00565279		1842.38	-0.00567906		2372.41	-0.01239881
252.6	0.02751495		782.59	0.00470693		1312.59	-0.00639685		1842.58	-0.00560146		2372.61	-0.01219944
252.8	0.02706423		782.79	0.00458597		1312.79	-0.00571028		1842.78	-0.00551379		2372.81	-0.01291851
253	0.02683238		782.99	0.00425092		1312.99	-0.00507635		1842.98	-0.00560348		2373.01	-0.01403182
253.2	0.02624712		783.19	0.00384451		1313.19	-0.00560106		1843.18	-0.00436248		2373.21	-0.01369436
253.4	0.02637214		783.39	0.00443145		1313.39	-0.0050411		1843.38	-0.00433294		2373.41	-0.01337442
253.6	0.02669683		783.59	0.00396367		1313.59	-0.00495316		1843.58	-0.00520558		2373.61	-0.01313987
253.8	0.0277708		783.79	0.00333155		1313.79	-0.00522594		1843.78	-0.00576346		2373.81	-0.01308305
254	0.02798478		783.99	0.00348203		1313.99	-0.00514025		1843.98	-0.00671798		2374.01	-0.01381689
254.2	0.02764299		784.19	0.00279278		1314.19	-0.00492366		1844.18	-0.00836644		2374.21	-0.0138315
254.4	0.02730087		784.39	0.0024645		1314.39	-0.00474518		1844.38	-0.00859145		2374.41	-0.01439292
254.6	0.02652215		784.59	0.0020123		1314.59	-0.00496356		1844.58	-0.00866055		2374.61	-0.01563789
254.8	0.02723526		784.79	0.00183458		1314.79	-0.00467364		1844.78	-0.00880785		2374.81	-0.01675082
255	0.02701501		784.99	0.00105645		1314.99	-0.00514175		1844.98	-0.00855106		2375.01	-0.01661022
255.2	0.02663755		785.19	0.00075081		1315.19	-0.00534424		1845.18	-0.00799016		2375.21	-0.01661661
255.4	0.02671385		785.39	0.00055857		1315.39	-0.00500564		1845.38	-0.00734636		2375.41	-0.01644369
255.6	0.02677952		785.59	-0.00075386		1315.59	-0.00489422		1845.58	-0.00801711		2375.61	-0.01650079
255.8	0.02682487		785.79	-0.00054876		1315.79	-0.00500245		1845.78	-0.00845066		2375.81	-0.01716244
256	0.02652106		785.99	0.00027792		1315.99	-0.0056454		1845.98	-0.00759588		2376.01	-0.01806805
256.2	0.02682863		786.19	0.00093277		1316.19	-0.00620178		1846.18	-0.00761114		2376.21	-0.01768174
256.4	0.02722245		786.39	0.0007614		1316.39	-0.00607379		1846.38	-0.00700382		2376.41	-0.01846783
256.6	0.0264582		786.59	0.00154035		1316.59	-0.00696842		1846.58	-0.00763998		2376.61	-0.01854449
256.8	0.02571209		786.79	0.00151438		1316.79	-0.0063804		1846.78	-0.00761096		2376.81	-0.01849711
257	0.02529868		786.99	0.00185888		1316.99	-0.00656616		1846.98	-0.00758543		2377.01	-0.01794683
257.2	0.02566039		787.19	0.00327452		1317.19	-0.00653775		1847.18	-0.00728079		2377.21	-0.01570303
257.4	0.02656599		787.39	0.0044873		1317.39	-0.00650689		1847.38	-0.00822319		2377.41	-0.01509271
257.6	0.02693288		787.59	0.00437693		1317.59	-0.00639667		1847.58	-0.00900517		2377.61	-0.01486893
257.8	0.02763059		787.79	0.00427646		1317.79	-0.00660415		1847.78	-0.00940855		2377.81	-0.01493921
258	0.02821376		787.99	0.00440493		1317.99	-0.00586471		1847.98	-0.01025849		2378.01	-0.01520877
258.2	0.0293412		788.19	0.00404007		1318.19	-0.00537958		1848.18	-0.01009573		2378.21	-0.01516619
258.4	0.02931061		788.39	0.00403328		1318.39	-0.00576102		1848.38	-0.00837213		2378.41	-0.01562228
258.6	0.03028111		788.59	0.003788		1318.59	-0.0059697		1848.58	-0.00806095		2378.61	-0.01586339
258.8	0.03056528		788.79	0.00410065		1318.79	-0.00560549		1848.78	-0.0075499		2378.81	-0.01599981
259	0.03026687		788.99	0.00394517		1318.99	-0.00552327		1848.98	-0.00683782		2379.01	-0.01625895
259.2	0.03013947		789.19	0.00427939		1319.19	-0.00474998		1849.18	-0.005616		2379.21	-0.01629619
259.4	0.03126936		789.39	0.00456864		1319.39	-0.00317343		1849.38	-0.00467605		2379.41	-0.01600207
259.6	0.03092761		789.59	0.00397727		1319.59	-0.00336095		1849.58	-0.00443223		2379.61	-0.01675369
259.8	0.03106016		789.79	0.00487327		1319.79	-0.00417236		1849.78	-0.00458443		2379.81	-0.01713677
260	0.03130415		789.99	0.00461304		1319.99	-0.00453439		1849.98	-0.00473212		2380.01	-0.01732779
260.2	0.03154126		790.19	0.00527464		1320.19	-0.00425499		1850.18	-0.00540826		2380.21	-0.01693922
260.4	0.03149148		790.39	0.00478961		1320.39	-0.00389605		1850.38	-0.00538008		2380.41	-0.01764819
260.6	0.03088113		790.59	0.00512233		1320.59	-0.00414109		1850.58	-0.00629904		2380.61	-0.01758525
260.8	0.03136801		790.79	0.00459532		1320.79	-0.00347076		1850.78	-0.0063994		2380.81	-0.01718093
261	0.03091407		790.99	0.0040719		1320.99	-0.00375407		1850.98	-0.00698045		2381.01	-0.01781355
261.2	0.03028148		791.19	0.00506819		1321.19	-0.00319302		1851.18	-0.00769346		2381.21	-0.01707169
261.4	0.03045757		791.39	0.00438599		1321.39	-0.00381812		1851.38	-0.00887786		2381.41	-0.01729485
261.6	0.03031656		791.59	0.00392067		1321.59	-0.0041783		1851.58	-0.00984194		2381.61	-0.01755131
261.8	0.03038566		791.79	0.00359291		1321.79	-0.00364318		1851.78	-0.00996507		2381.81	-0.01788793
262	0.0308886		791.99	0.00306047		1321.99	-0.00375913		1851.98	-0.01063046		2382.01	-0.01834929
262.2	0.03081547		792.19	0.0034977		1322.19	-0.00480451		1852.18	-0.00997989		2382.21	-0.01808936
262.4	0.03014861		792.39	0.00321632		1322.39	-0.00523595		1852.38	-0.00976246		2382.41	-0.01854246
262.6	0.03008512		792.59	0.00412355		1322.59	-0.00529048		1852.58	-0.00996339		2382.61	-0.0185416
262.8	0.02931641		792.79	0.00448145		1322.79	-0.00576188		1852.78	-0.00953142		2382.81	-0.01799167
263	0.02916633		792.99	0.0046962		1322.99	-0.00477641		1852.98	-0.0096332		2383.01	-0.01754584
263.2	0.02920831		793.19	0.00579559		1323.19	-0.00481902		1853.18	-0.00853842		2383.21	-0.01651539
263.4	0.02990103		793.39	0.00568133		1323.39	-0.00469201		1853.38	-0.00753532		2383.41	-0.01622546
263.6	0.02965081		793.59	0.00516977		1323.59	-0.00555883		1853.58	-0.0082086		2383.61	-0.01593743
263.8	0.03023124		793.79	0.0053131		1323.79	-0.00495746		1853.78	-0.00867506		2383.81	-0.01599524
264	0.03063419		793.99	0.00429939		1323.99	-0.00453167		1853.98	-0.0081409		2384.01	-0.01618003
264.2	0.03051111		794.19	0.00479592		1324.19	-0.00278276		1854.18	-0.00752683		2384.21	-0.01635625
264.4	0.03069449		794.39	0.00392449		1324.39	-0.00163207		1854.38	-0.00790346		2384.41	-0.01644667
264.6	0.03087716		794.59	0.00381559		1324.59	-0.00185057		1854.58	-0.00797315		2384.61	-0.01665061
264.8	0.03133524		794.79	0.00226027		1324.79	-0.00215623		1854.78	-0.00817673		2384.81	-0.01736769
265	0.03030957		794.99	0.00175966		1324.99	-0.00245872		1854.98	-0.00845747		2385.01	-0.01720213
265.2	0.03063418		795.19	0.00217735		1325.19	-0.00257653		1855.18	-0.00902789		2385.21	-0.01701929
265.4	0.03101746		795.39	0.00115539		1325.39	-0.00310531		1855.38	-0.0097822		2385.41	-0.01676535
265.6	0.03145627		795.59	0.00052683		1325.59	-0.00388619		1855.58	-0.01020646		2385.61	-0.01779078
265.8	0.03071575		795.79	0.0002895		1325.79	-0.00433703		1855.78	-0.01014855		2385.81	-0.01832553
266	0.03017532		795.99	-0.0001501		1325.99	-0.00565435		1855.98	-0.01038378		2386.01	-0.01797978
266.2	0.02952161		796.19	0.00077477		1326.19	-0.00603657		1856.18	-0.00977295		2386.21	-0.01811885
266.4	0.02958363		796.39	0.00069077		1326.39	-0.0069247		1856.38	-0.0093558		2386.41	-0.01821649
266.6	0.0289164		796.59	0.00227446		1326.59	-0.00740678		1856.58	-0.00930333		2386.61	-0.01841031
266.8	0.02976033		796.79	0.00333323		1326.79	-0.00839781		1856.78	-0.00878837		2386.81	-0.01776346
267	0.03004304		796.99	0.00507442		1326.99	-0.00830829		1856.98	-0.00902541		2387.01	-0.01710802
267.2	0.03097887		797.19	0.00617375		1327.19	-0.0096419		1857.18	-0.00832707		2387.21	-0.01710063
267.4	0.03148786		797.39	0.00580743		1327.39	-0.00982632		1857.38	-0.00832683		2387.41	-0.01832072
267.6	0.03227347		797.59	0.00631265		1327.59	-0.00925453		1857.58	-0.00884248		2387.61	-0.01835064
267.8	0.03357616		797.79	0.00702465		1327.79	-0.00770604		1857.78	-0.00859077		2387.81	-0.01874778
268	0.03384837		797.99	0.00656764		1327.99	-0.00770852		1857.98	-0.00791284		2388.01	-0.01821266
268.2	0.03350608		798.19	0.00722676		1328.19	-0.00632632		1858.18	-0.0080667		2388.21	-0.01849655
268.4	0.03335815		798.39	0.00720886		1328.39	-0.00663413		1858.38	-0.008605		2388.41	-0.01830311
268.6	0.03422367		798.59	0.00748312		1328.59	-0.00707509		1858.58	-0.00803004		2388.61	-0.01878755
268.8	0.03435213		798.79	0.00715		1328.79	-0.00750628		1858.78	-0.00865881		2388.81	-0.01869503
269	0.03451153		798.99	0.00744041		1328.99	-0.0067971		1858.98	-0.00841256		2389.01	-0.01732515
269.2	0.0350216		799.19	0.0066274		1329.19	-0.00646846		1859.18	-0.0093474		2389.21	-0.01764448
269.4	0.03411925		799.39	0.00559225		1329.39	-0.00651575		1859.38	-0.00973222		2389.41	-0.01716133
269.6	0.03411336		799.59	0.00432526		1329.59	-0.00714793		1859.58	-0.01005245		2389.61	-0.01774374
269.8	0.03248728		799.79	0.00374251		1329.79	-0.00680404		1859.78	-0.00924309		2389.81	-0.01765565
270	0.03229043		799.99	0.00295137		1329.99	-0.00565816		1859.98	-0.00907579		2390.01	-0.01667446
270.2	0.03238465		800.19	0.00370091		1330.19	-0.00568205		1860.18	-0.00869984		2390.21	-0.01696987
270.4	0.03288085		800.39	0.0045574		1330.39	-0.00526022		1860.38	-0.00735771		2390.41	-0.01609769
270.6	0.03234995		800.59	0.0058223		1330.59	-0.00449477		1860.58	-0.00791854		2390.61	-0.01590011
270.8	0.03351748		800.79	0.00565708		1330.79	-0.00441204		1860.78	-0.00708984		2390.81	-0.01528336
271	0.03342796		800.99	0.00578629		1330.99	-0.00368164		1860.98	-0.00682241		2391.01	-0.01487627
271.2	0.03397177		801.19	0.0058722		1331.19	-0.00351546		1861.18	-0.00626047		2391.21	-0.01538709
271.4	0.03459222		801.39	0.00599866		1331.39	-0.00310151		1861.38	-0.00583387		2391.41	-0.01667692
271.6	0.03555643		801.59	0.00668402		1331.59	-0.00289655		1861.58	-0.00549829		2391.61	-0.01632258
271.8	0.03624654		801.79	0.00656148		1331.79	-0.00259792		1861.78	-0.00455326		2391.81	-0.01634764
272	0.03590425		801.99	0.00630865		1331.99	-0.003335		1861.98	-0.00409095		2392.01	-0.0164057
272.2	0.03557514		802.19	0.00719046		1332.19	-0.00360917		1862.18	-0.0047862		2392.21	-0.01760026
272.4	0.03537422		802.39	0.00646527		1332.39	-0.00377716		1862.38	-0.0047733		2392.41	-0.01750322
272.6	0.03572921		802.59	0.00661145		1332.59	-0.0042765		1862.58	-0.00425886		2392.61	-0.01785482
272.8	0.03507638		802.79	0.00666462		1332.79	-0.0053935		1862.78	-0.00489575		2392.81	-0.01784008
273	0.03521464		802.99	0.00606208		1332.99	-0.00594607		1862.98	-0.00457543		2393.01	-0.01808812
273.2	0.03451949		803.19	0.00563494		1333.19	-0.00634613		1863.18	-0.00519293		2393.21	-0.01882272
273.4	0.03388982		803.39	0.00520149		1333.39	-0.00772355		1863.38	-0.0057038		2393.41	-0.01937802
273.6	0.03419141		803.59	0.00416672		1333.59	-0.00850342		1863.58	-0.00587331		2393.61	-0.02012422
273.8	0.03418236		803.79	0.00342284		1333.79	-0.00787197		1863.78	-0.00589458		2393.81	-0.02025163
274	0.0340103		803.99	0.00343611		1333.99	-0.00768189		1863.98	-0.00590786		2394.01	-0.01970713
274.2	0.03423374		804.19	0.00400996		1334.19	-0.00719032		1864.18	-0.00497849		2394.21	-0.01938545
274.4	0.03454198		804.39	0.00494643		1334.39	-0.00690531		1864.38	-0.00506309		2394.41	-0.01872335
274.6	0.03452607		804.59	0.00488455		1334.59	-0.00624749		1864.58	-0.00595021		2394.61	-0.01842921
274.8	0.03471619		804.79	0.00490834		1334.79	-0.00607757		1864.78	-0.00531047		2394.81	-0.01883741
275	0.0345123		804.99	0.00593451		1334.99	-0.00555697		1864.98	-0.00579409		2395.01	-0.01917331
275.2	0.03440507		805.19	0.00648224		1335.19	-0.00513881		1865.18	-0.00621804		2395.21	-0.01849742
275.4	0.03426975		805.39	0.00663025		1335.39	-0.00481155		1865.38	-0.00700754		2395.41	-0.01830454
275.6	0.03472059		805.59	0.0070217		1335.59	-0.00446097		1865.58	-0.0079893		2395.61	-0.01741149
275.8	0.03436077		805.79	0.00689149		1335.79	-0.00416076		1865.78	-0.00889145		2395.81	-0.01773458
276	0.03368758		805.99	0.00729855		1335.99	-0.00420665		1865.98	-0.00996542		2396.01	-0.01781073
276.2	0.03324074		806.19	0.00803365		1336.19	-0.00472022		1866.18	-0.01067685		2396.21	-0.01761613
276.4	0.03275483		806.39	0.00747229		1336.39	-0.00473675		1866.38	-0.01090999		2396.41	-0.01724301
276.6	0.03266886		806.59	0.00799786		1336.59	-0.00543014		1866.58	-0.01203153		2396.61	-0.01621777
276.8	0.03226928		806.79	0.0076645		1336.79	-0.00569546		1866.78	-0.01301575		2396.81	-0.01661873
277	0.03217976		806.99	0.00694333		1336.99	-0.00588391		1866.98	-0.01254176		2397.01	-0.01672125
277.2	0.03174605		807.19	0.00645846		1337.19	-0.0055906		1867.18	-0.01274777		2397.21	-0.01693291
277.4	0.03234018		807.39	0.00563496		1337.39	-0.00698617		1867.38	-0.01263632		2397.41	-0.01717349
277.6	0.03297242		807.59	0.00460014		1337.59	-0.00767663		1867.58	-0.01234064		2397.61	-0.01746683
277.8	0.03307997		807.79	0.00474059		1337.79	-0.00805899		1867.78	-0.01204597		2397.81	-0.01727642
278	0.03310962		807.99	0.00523312		1337.99	-0.00827608		1867.98	-0.01170036		2398.01	-0.01800566
278.2	0.03427911		808.19	0.00613121		1338.19	-0.0080436		1868.18	-0.01187576		2398.21	-0.01785015
278.4	0.03538417		808.39	0.00680556		1338.39	-0.00839595		1868.38	-0.01205236		2398.41	-0.01870145
278.6	0.03591628		808.59	0.0066792		1338.59	-0.00811654		1868.58	-0.01162432		2398.61	-0.01924573
278.8	0.03587098		808.79	0.00731127		1338.79	-0.00779231		1868.78	-0.01076461		2398.81	-0.01993793
279	0.03618707		808.99	0.00768842		1338.99	-0.00697633		1868.98	-0.01045816		2399.01	-0.02038401
279.2	0.03694258		809.19	0.00737342		1339.19	-0.00660976		1869.18	-0.01044674		2399.21	-0.01995699
279.4	0.03726466		809.39	0.00757976		1339.39	-0.00663631		1869.38	-0.01022036		2399.41	-0.02033119
279.6	0.03782839		809.59	0.00781529		1339.59	-0.00651454		1869.58	-0.00985888		2399.61	-0.02015454
279.8	0.03732112		809.79	0.00836179		1339.79	-0.00677592		1869.78	-0.0097438		2399.81	-0.02076747
280	0.03787401		809.99	0.00915667		1339.99	-0.00716066		1869.98	-0.01033743		2400.01	-0.02032741
280.2	0.03779228		810.19	0.00936693		1340.19	-0.00782028		1870.18	-0.00937892		2400.21	-0.0198475
280.4	0.03769763		810.39	0.00929286		1340.39	-0.00745584		1870.38	-0.00972291		2400.41	-0.01966093
280.6	0.03733723		810.59	0.0089992		1340.59	-0.00729759		1870.58	-0.0096719		2400.61	-0.01978361
280.8	0.03693137		810.79	0.00824539		1340.79	-0.00717434		1870.78	-0.0092789		2400.81	-0.02038337
281	0.03621087		810.99	0.00771701		1340.99	-0.00730107		1870.98	-0.00855267		2401.01	-0.02069663
281.2	0.03588671		811.19	0.00762453		1341.19	-0.0078248		1871.18	-0.00900972		2401.21	-0.02090097
281.4	0.03558634		811.39	0.00698489		1341.39	-0.00923743		1871.38	-0.00836807		2401.41	-0.01987422
281.6	0.03526152		811.59	0.00670028		1341.59	-0.01001202		1871.58	-0.00864017		2401.61	-0.01959016
281.8	0.03485541		811.79	0.00699063		1341.79	-0.01102208		1871.78	-0.0081453		2401.81	-0.0195541
282	0.0351623		811.99	0.00723035		1341.99	-0.01057958		1871.98	-0.00852702		2402.01	-0.01902745
282.2	0.03609881		812.19	0.00673484		1342.19	-0.00931485		1872.18	-0.00826906		2402.21	-0.01793399
282.4	0.03655188		812.39	0.00653981		1342.39	-0.00920896		1872.38	-0.00687204		2402.41	-0.01740558
282.6	0.03686877		812.59	0.00633107		1342.59	-0.00912338		1872.58	-0.00643572		2402.61	-0.01609483
282.8	0.03740312		812.79	0.00644821		1342.79	-0.00800684		1872.78	-0.00537803		2402.81	-0.01565825
283	0.03805724		812.99	0.00604311		1342.99	-0.00739355		1872.98	-0.00466524		2403.01	-0.0151646
283.2	0.03899732		813.19	0.0060746		1343.19	-0.00689476		1873.18	-0.00504657		2403.21	-0.01509897
283.4	0.03933073		813.39	0.00620029		1343.39	-0.00622655		1873.38	-0.00467182		2403.41	-0.01427888
283.6	0.04026451		813.59	0.00583767		1343.59	-0.00618024		1873.58	-0.00481482		2403.61	-0.01399072
283.8	0.04057734		813.79	0.00614885		1343.79	-0.00641584		1873.78	-0.00518525		2403.81	-0.01509014
284	0.04058136		813.99	0.00602959		1343.99	-0.00650563		1873.98	-0.00616992		2404.01	-0.01467074
284.2	0.04049147		814.19	0.00598629		1344.19	-0.00665577		1874.18	-0.00595167		2404.21	-0.01539577
284.4	0.04041354		814.39	0.00658257		1344.39	-0.00694824		1874.38	-0.00736553		2404.41	-0.01620594
284.6	0.0402122		814.59	0.00684704		1344.59	-0.00715444		1874.58	-0.00785049		2404.61	-0.01747516
284.8	0.03891556		814.79	0.0069396		1344.79	-0.00638485		1874.78	-0.00883548		2404.81	-0.01837892
285	0.03784224		814.99	0.00718781		1344.99	-0.00631184		1874.98	-0.00868397		2405.01	-0.01918084
285.2	0.03760244		815.19	0.0074394		1345.19	-0.00649879		1875.18	-0.00957766		2405.21	-0.01894401
285.4	0.03711214		815.39	0.0068733		1345.39	-0.00694791		1875.38	-0.00928435		2405.41	-0.01900669
285.6	0.03700019		815.59	0.00670955		1345.59	-0.00739887		1875.58	-0.01032272		2405.61	-0.01900932
285.8	0.03662674		815.79	0.0066175		1345.79	-0.00717167		1875.78	-0.00953077		2405.81	-0.01942189
286	0.03744927		815.99	0.00627965		1345.99	-0.00647978		1875.98	-0.00999105		2406.01	-0.01940787
286.2	0.03747502		816.19	0.00595502		1346.19	-0.0060925		1876.18	-0.00912618		2406.21	-0.01962839
286.4	0.03746373		816.39	0.00645928		1346.39	-0.00645817		1876.38	-0.00839905		2406.41	-0.01983354
286.6	0.03742144		816.59	0.00545614		1346.59	-0.00567249		1876.58	-0.0085447		2406.61	-0.0197511
286.8	0.03701124		816.79	0.00430751		1346.79	-0.00500926		1876.78	-0.00822201		2406.81	-0.02047893
287	0.0368061		816.99	0.00382487		1346.99	-0.00495069		1876.98	-0.00827353		2407.01	-0.02014307
287.2	0.0371196		817.19	0.0037345		1347.19	-0.0047628		1877.18	-0.00934892		2407.21	-0.02019538
287.4	0.03734278		817.39	0.00279568		1347.39	-0.00473765		1877.38	-0.00985181		2407.41	-0.02048563
287.6	0.03743304		817.59	0.00263585		1347.59	-0.00600183		1877.58	-0.01044773		2407.61	-0.02088739
287.8	0.03719069		817.79	0.00409948		1347.79	-0.00600812		1877.78	-0.01121162		2407.81	-0.02199404
288	0.03676873		817.99	0.00430847		1347.99	-0.00608583		1877.98	-0.01225295		2408.01	-0.02149051
288.2	0.0371968		818.19	0.00435965		1348.19	-0.00575507		1878.18	-0.01225091		2408.21	-0.02187276
288.4	0.03777283		818.39	0.00501024		1348.39	-0.00592425		1878.38	-0.01239391		2408.41	-0.02195239
288.6	0.03823531		818.59	0.0052447		1348.59	-0.00531542		1878.58	-0.01136148		2408.61	-0.02231183
288.8	0.03845916		818.79	0.00596333		1348.79	-0.00499221		1878.78	-0.01116383		2408.81	-0.02221251
289	0.03949422		818.99	0.00674576		1348.99	-0.00453275		1878.98	-0.00991119		2409.01	-0.02122555
289.2	0.04062164		819.19	0.00707301		1349.19	-0.00472541		1879.18	-0.00995486		2409.21	-0.02143431
289.4	0.04146573		819.39	0.00751466		1349.39	-0.00498551		1879.38	-0.00875314		2409.41	-0.02170422
289.6	0.04190029		819.59	0.00723359		1349.59	-0.00489691		1879.58	-0.00855137		2409.61	-0.02126602
289.8	0.04268012		819.79	0.00704028		1349.79	-0.00483397		1879.78	-0.0069268		2409.81	-0.02207819
290	0.04403354		819.99	0.00692211		1349.99	-0.00507779		1879.98	-0.00652096		2410.01	-0.02217118
290.2	0.04337072		820.19	0.00680843		1350.19	-0.00482056		1880.18	-0.00606376		2410.21	-0.02256828
290.4	0.04395366		820.39	0.00628638		1350.39	-0.00531884		1880.38	-0.00560893		2410.41	-0.0228872
290.6	0.04287883		820.59	0.00614242		1350.59	-0.00500199		1880.58	-0.00529292		2410.61	-0.02252067
290.8	0.04280014		820.79	0.00520023		1350.79	-0.00493649		1880.78	-0.00469557		2410.81	-0.02175401
291	0.04274621		820.99	0.00537571		1350.99	-0.00517074		1880.98	-0.00490561		2411.01	-0.02004619
291.2	0.0429087		821.19	0.00484629		1351.19	-0.00518778		1881.18	-0.00588765		2411.21	-0.01936893
291.4	0.04236241		821.39	0.00492103		1351.39	-0.00591087		1881.38	-0.00622513		2411.41	-0.01985406
291.6	0.04197004		821.59	0.00507526		1351.59	-0.00621436		1881.58	-0.00706921		2411.61	-0.01850666
291.8	0.04082745		821.79	0.00519839		1351.79	-0.00615397		1881.78	-0.00757391		2411.81	-0.01870616
292	0.03978319		821.99	0.00489854		1351.99	-0.00596045		1881.98	-0.00820573		2412.01	-0.01832507
292.2	0.03946243		822.19	0.00473809		1352.19	-0.00592486		1882.18	-0.00809823		2412.21	-0.01826451
292.4	0.04006069		822.39	0.0054185		1352.39	-0.00662745		1882.38	-0.00856089		2412.41	-0.018296
292.6	0.039857		822.59	0.00561116		1352.59	-0.00644831		1882.58	-0.00840072		2412.61	-0.01835191
292.8	0.03993951		822.79	0.00664896		1352.79	-0.00667942		1882.78	-0.00880195		2412.81	-0.01849639
293	0.04012742		822.99	0.00736958		1352.99	-0.00613245		1882.98	-0.00921172		2413.01	-0.01891448
293.2	0.04010897		823.19	0.00784879		1353.19	-0.00618208		1883.18	-0.00998514		2413.21	-0.01943055
293.4	0.04045873		823.39	0.00837663		1353.39	-0.00568158		1883.38	-0.00988827		2413.41	-0.01911295
293.6	0.04098102		823.59	0.00761166		1353.59	-0.00549349		1883.58	-0.01025085		2413.61	-0.01962513
293.8	0.042044		823.79	0.00761307		1353.79	-0.00472439		1883.78	-0.00976546		2413.81	-0.01964194
294	0.04222867		823.99	0.00816393		1353.99	-0.00384913		1883.98	-0.01021475		2414.01	-0.02013361
294.2	0.04209605		824.19	0.00875336		1354.19	-0.00378235		1884.18	-0.01018956		2414.21	-0.02020083
294.4	0.04302896		824.39	0.00968179		1354.39	-0.00372687		1884.38	-0.0094719		2414.41	-0.01968797
294.6	0.04289243		824.59	0.01043741		1354.59	-0.00222267		1884.58	-0.00964316		2414.61	-0.0192555
294.8	0.04393462		824.79	0.01047027		1354.79	-0.00177656		1884.78	-0.0086737		2414.81	-0.01927019
295	0.0445982		824.99	0.01136334		1354.99	-0.0015046		1884.98	-0.00880236		2415.01	-0.01914284
295.2	0.04530105		825.19	0.01121226		1355.19	-0.00146067		1885.18	-0.00874871		2415.21	-0.02020928
295.4	0.04438292		825.39	0.01129076		1355.39	-0.00197928		1885.38	-0.00884536		2415.41	-0.02121562
295.6	0.04390714		825.59	0.0102338		1355.59	-0.00086731		1885.58	-0.00854922		2415.61	-0.02147172
295.8	0.04346871		825.79	0.00977759		1355.79	-0.00109574		1885.78	-0.00860641		2415.81	-0.02267138
296	0.04312266		825.99	0.0098039		1355.99	-0.00205102		1885.98	-0.00864347		2416.01	-0.02271302
296.2	0.04349349		826.19	0.0097545		1356.19	-0.0031807		1886.18	-0.00776622		2416.21	-0.0229733
296.4	0.04343601		826.39	0.0097341		1356.39	-0.00337747		1886.38	-0.00794905		2416.41	-0.023125
296.6	0.0432656		826.59	0.00988782		1356.59	-0.00353853		1886.58	-0.00758899		2416.61	-0.02394825
296.8	0.04388505		826.79	0.01023234		1356.79	-0.00470019		1886.78	-0.00726776		2416.81	-0.02387667
297	0.04383721		826.99	0.00951161		1356.99	-0.00545387		1886.98	-0.0078676		2417.01	-0.02286531
297.2	0.04416113		827.19	0.00840208		1357.19	-0.00653295		1887.18	-0.00780019		2417.21	-0.02243538
297.4	0.04489877		827.39	0.00805225		1357.39	-0.00740262		1887.38	-0.00723154		2417.41	-0.02116718
297.6	0.04476891		827.59	0.00723988		1357.59	-0.00779534		1887.58	-0.00668219		2417.61	-0.02160578
297.8	0.04382752		827.79	0.00634842		1357.79	-0.00818222		1887.78	-0.00665524		2417.81	-0.02086346
298	0.0431259		827.99	0.00623245		1357.99	-0.00878511		1887.98	-0.00644709		2418.01	-0.02041274
298.2	0.04270056		828.19	0.0063481		1358.19	-0.01017814		1888.18	-0.00665879		2418.21	-0.01924201
298.4	0.04243659		828.39	0.00635687		1358.39	-0.01051714		1888.38	-0.00653338		2418.41	-0.01924363
298.6	0.04153696		828.59	0.00634051		1358.59	-0.01020932		1888.58	-0.00663639		2418.61	-0.01894739
298.8	0.04158577		828.79	0.00690629		1358.79	-0.01031532		1888.78	-0.00549805		2418.81	-0.01921763
299	0.04132891		828.99	0.00620857		1358.99	-0.00876247		1888.98	-0.0058103		2419.01	-0.01950542
299.2	0.04036329		829.19	0.0055959		1359.19	-0.00903909		1889.18	-0.00579774		2419.21	-0.02031344
299.4	0.03964079		829.39	0.00507619		1359.39	-0.00863287		1889.38	-0.00615698		2419.41	-0.02052097
299.6	0.04009128		829.59	0.00444664		1359.59	-0.00678942		1889.58	-0.00593006		2419.61	-0.02056458
299.8	0.04040096		829.79	0.00483668		1359.79	-0.00625846		1889.78	-0.00654037		2419.81	-0.01992797
300	0.04120579		829.99	0.00613762		1359.99	-0.00649268		1889.98	-0.00620348		2420.01	-0.02013187
300.2	0.04179003		830.19	0.0071907		1360.19	-0.0056109		1890.18	-0.00633932		2420.21	-0.02030088
300.4	0.04254294		830.39	0.00742917		1360.39	-0.00415319		1890.38	-0.00699035		2420.41	-0.02058799
300.6	0.04459234		830.59	0.00792448		1360.59	-0.00413607		1890.58	-0.00695886		2420.61	-0.02029861
300.8	0.04541035		830.79	0.00827651		1360.79	-0.00422415		1890.78	-0.00754971		2420.81	-0.01965728
301	0.04615645		830.99	0.00799499		1360.99	-0.00437556		1890.98	-0.00801577		2421.01	-0.01928983
301.2	0.0473066		831.19	0.00859856		1361.19	-0.00399395		1891.18	-0.0080807		2421.21	-0.01951666
301.4	0.0465413		831.39	0.00922077		1361.39	-0.00360928		1891.38	-0.0081069		2421.41	-0.0185683
301.6	0.0460073		831.59	0.00875512		1361.59	-0.00324537		1891.58	-0.00792965		2421.61	-0.01840671
301.8	0.04528691		831.79	0.00754925		1361.79	-0.0041169		1891.78	-0.00828414		2421.81	-0.01708215
302	0.04513287		831.99	0.00728054		1361.99	-0.00429346		1891.98	-0.0080556		2422.01	-0.01685378
302.2	0.04429811		832.19	0.00675148		1362.19	-0.00475635		1892.18	-0.00862854		2422.21	-0.01702174
302.4	0.04442368		832.39	0.00647655		1362.39	-0.00489206		1892.38	-0.00747849		2422.41	-0.01734589
302.6	0.04350013		832.59	0.00693682		1362.59	-0.00529819		1892.58	-0.00814032		2422.61	-0.01733998
302.8	0.04387322		832.79	0.00643781		1362.79	-0.00637062		1892.78	-0.00750903		2422.81	-0.01788192
303	0.04294198		832.99	0.00549497		1362.99	-0.005996		1892.98	-0.00816306		2423.01	-0.01870485
303.2	0.043252		833.19	0.00615852		1363.19	-0.00774558		1893.18	-0.00795294		2423.21	-0.01877796
303.4	0.04342107		833.39	0.00645499		1363.39	-0.00765564		1893.38	-0.00845731		2423.41	-0.01962787
303.6	0.04398367		833.59	0.00638744		1363.59	-0.00789195		1893.58	-0.00837967		2423.61	-0.02057823
303.8	0.04481808		833.79	0.00694838		1363.79	-0.0080471		1893.78	-0.00855653		2423.81	-0.02119429
304	0.04559129		833.99	0.00759277		1363.99	-0.00891032		1893.98	-0.0088531		2424.01	-0.02163614
304.2	0.04562352		834.19	0.00694501		1364.19	-0.00890242		1894.18	-0.00948362		2424.21	-0.02205487
304.4	0.0459135		834.39	0.00710869		1364.39	-0.00900139		1894.38	-0.00932626		2424.41	-0.02308453
304.6	0.04563516		834.59	0.0072697		1364.59	-0.00949048		1894.58	-0.00948673		2424.61	-0.02316555
304.8	0.04490802		834.79	0.00791891		1364.79	-0.00937232		1894.78	-0.00960767		2424.81	-0.02337386
305	0.04544146		834.99	0.00797305		1364.99	-0.00828139		1894.98	-0.00959092		2425.01	-0.02306588
305.2	0.04428897		835.19	0.00828699		1365.19	-0.00731199		1895.18	-0.00927702		2425.21	-0.02224552
305.4	0.04331613		835.39	0.00815212		1365.39	-0.00735632		1895.38	-0.0087261		2425.41	-0.0215353
305.6	0.04344001		835.59	0.00787549		1365.59	-0.00703922		1895.58	-0.00931273		2425.61	-0.02070981
305.8	0.04338241		835.79	0.00704341		1365.79	-0.0070915		1895.78	-0.00988647		2425.81	-0.02052003
306	0.04312183		835.99	0.00701012		1365.99	-0.00676763		1895.98	-0.00921957		2426.01	-0.02165011
306.2	0.04361741		836.19	0.00703854		1366.19	-0.00664641		1896.18	-0.00877479		2426.21	-0.02172316
306.4	0.04443143		836.39	0.00759499		1366.39	-0.00650675		1896.38	-0.00838792		2426.41	-0.02247257
306.6	0.04421939		836.59	0.007662		1366.59	-0.00700903		1896.58	-0.00859925		2426.61	-0.02253713
306.8	0.04501822		836.79	0.00697489		1366.79	-0.00664836		1896.78	-0.00835961		2426.81	-0.02268956
307	0.04485956		836.99	0.0070317		1366.99	-0.00566672		1896.98	-0.00839326		2427.01	-0.02193194
307.2	0.04547242		837.19	0.00697689		1367.19	-0.00585608		1897.18	-0.00778709		2427.21	-0.02139499
307.4	0.04507541		837.39	0.0068508		1367.39	-0.00527158		1897.38	-0.00840487		2427.41	-0.02176287
307.6	0.04593461		837.59	0.00657427		1367.59	-0.00519218		1897.58	-0.00895749		2427.61	-0.02174806
307.8	0.04658483		837.79	0.00725795		1367.79	-0.00423105		1897.78	-0.00898281		2427.81	-0.02120759
308	0.04662454		837.99	0.00714593		1367.99	-0.00414967		1897.98	-0.00869744		2428.01	-0.02139027
308.2	0.04597655		838.19	0.00781784		1368.19	-0.00418223		1898.18	-0.00893608		2428.21	-0.0223536
308.4	0.04552398		838.39	0.0089956		1368.39	-0.00388531		1898.38	-0.00938013		2428.41	-0.02193616
308.6	0.04590283		838.59	0.00894517		1368.59	-0.00337384		1898.58	-0.00992098		2428.61	-0.02124815
308.8	0.04634834		838.79	0.00932753		1368.79	-0.0027797		1898.78	-0.00953105		2428.81	-0.02073449
309	0.04664751		838.99	0.00937747		1368.99	-0.00224071		1898.98	-0.00964879		2429.01	-0.02025627
309.2	0.04662725		839.19	0.00987162		1369.19	-0.00272154		1899.18	-0.00931129		2429.21	-0.01965112
309.4	0.04703155		839.39	0.01025244		1369.39	-0.00298283		1899.38	-0.00988298		2429.41	-0.01981943
309.6	0.04648923		839.59	0.01078986		1369.59	-0.00292823		1899.58	-0.01061306		2429.61	-0.0199153
309.8	0.04714372		839.79	0.01031902		1369.79	-0.00281694		1899.78	-0.01035381		2429.81	-0.02059154
310	0.0469997		839.99	0.00992925		1369.99	-0.00420675		1899.98	-0.0093695		2430.01	-0.02129597
310.2	0.04775535		840.19	0.00923487		1370.19	-0.00400141		1900.18	-0.00983517		2430.21	-0.02180937
310.4	0.0478874		840.39	0.00893922		1370.39	-0.00395916		1900.38	-0.00950464		2430.41	-0.02207961
310.6	0.04766722		840.59	0.00806436		1370.59	-0.00402578		1900.58	-0.00916929		2430.61	-0.02161737
310.8	0.04818064		840.79	0.00772388		1370.79	-0.00396795		1900.78	-0.00950893		2430.81	-0.02188757
311	0.04713773		840.99	0.0071084		1370.99	-0.00406202		1900.98	-0.00922954		2431.01	-0.02141736
311.2	0.04740802		841.19	0.00632764		1371.19	-0.00449223		1901.18	-0.00928912		2431.21	-0.02126813
311.4	0.04856269		841.39	0.00640629		1371.39	-0.00413356		1901.38	-0.00985049		2431.41	-0.0214312
311.6	0.04883761		841.59	0.0060005		1371.59	-0.00417571		1901.58	-0.0090079		2431.61	-0.02149572
311.8	0.04984362		841.79	0.0065823		1371.79	-0.00462711		1901.78	-0.00845506		2431.81	-0.02123536
312	0.0503846		841.99	0.00702824		1371.99	-0.00559455		1901.98	-0.00872146		2432.01	-0.02199664
312.2	0.05099027		842.19	0.00722144		1372.19	-0.00600679		1902.18	-0.00950705		2432.21	-0.02220272
312.4	0.05210876		842.39	0.00693201		1372.39	-0.00550613		1902.38	-0.00949183		2432.41	-0.02116532
312.6	0.05193517		842.59	0.0066342		1372.59	-0.00579044		1902.58	-0.00934258		2432.61	-0.02074297
312.8	0.05184915		842.79	0.00664006		1372.79	-0.00556397		1902.78	-0.00942299		2432.81	-0.0206187
313	0.05212841		842.99	0.00651573		1372.99	-0.00599299		1902.98	-0.00999667		2433.01	-0.0196785
313.2	0.05173258		843.19	0.00625411		1373.19	-0.00653299		1903.18	-0.01056107		2433.21	-0.02092672
313.4	0.05090562		843.39	0.00622298		1373.39	-0.00701524		1903.38	-0.01048153		2433.41	-0.02080958
313.6	0.05025616		843.59	0.00616727		1373.59	-0.00697384		1903.58	-0.01096665		2433.61	-0.02145958
313.8	0.05106036		843.79	0.00601979		1373.79	-0.00767589		1903.78	-0.01182254		2433.81	-0.02232452
314	0.05052025		843.99	0.00571683		1373.99	-0.00919901		1903.98	-0.01180689		2434.01	-0.02293862
314.2	0.05073345		844.19	0.00585196		1374.19	-0.00841626		1904.18	-0.013101		2434.21	-0.02321211
314.4	0.05021369		844.39	0.00659266		1374.39	-0.00847806		1904.38	-0.01294244		2434.41	-0.02217188
314.6	0.05004506		844.59	0.00703722		1374.59	-0.00840662		1904.58	-0.01313467		2434.61	-0.02254376
314.8	0.04994881		844.79	0.00741403		1374.79	-0.00918271		1904.78	-0.01243511		2434.81	-0.02296578
315	0.04908924		844.99	0.00713857		1374.99	-0.00904965		1904.98	-0.01139452		2435.01	-0.02249992
315.2	0.04875314		845.19	0.00701391		1375.19	-0.00883261		1905.18	-0.01087524		2435.21	-0.02173297
315.4	0.04951588		845.39	0.00768966		1375.39	-0.00855521		1905.38	-0.00975345		2435.41	-0.02167848
315.6	0.04883091		845.59	0.00880118		1375.59	-0.00827857		1905.58	-0.00861618		2435.61	-0.02103974
315.8	0.0500204		845.79	0.00940798		1375.79	-0.0083044		1905.78	-0.00888823		2435.81	-0.02156768
316	0.05096171		845.99	0.00984518		1375.99	-0.0078648		1905.98	-0.0086762		2436.01	-0.02183877
316.2	0.05150363		846.19	0.0098321		1376.19	-0.00672141		1906.18	-0.0085655		2436.21	-0.02193658
316.4	0.05178179		846.39	0.00998533		1376.39	-0.00596618		1906.38	-0.0081315		2436.41	-0.02147293
316.6	0.05146784		846.59	0.0101301		1376.59	-0.00522304		1906.58	-0.00898007		2436.61	-0.02164679
316.8	0.05199551		846.79	0.00981362		1376.79	-0.00417276		1906.78	-0.00909805		2436.81	-0.02201892
317	0.05257841		846.99	0.0098529		1376.99	-0.00471962		1906.98	-0.00925086		2437.01	-0.02215322
317.2	0.0527999		847.19	0.0100055		1377.19	-0.00544932		1907.18	-0.00957171		2437.21	-0.02332493
317.4	0.05269067		847.39	0.01011288		1377.39	-0.00527207		1907.38	-0.01041554		2437.41	-0.0227723
317.6	0.05265058		847.59	0.01001615		1377.59	-0.00507986		1907.58	-0.01141742		2437.61	-0.02368586
317.8	0.0526078		847.79	0.00957127		1377.79	-0.0056958		1907.78	-0.01114109		2437.81	-0.02452368
318	0.05240344		847.99	0.00844661		1377.99	-0.00612913		1907.98	-0.01213243		2438.01	-0.02443577
318.2	0.05252035		848.19	0.00780364		1378.19	-0.00597668		1908.18	-0.01226473		2438.21	-0.02349599
318.4	0.05235752		848.39	0.00751343		1378.39	-0.00652732		1908.38	-0.0115979		2438.41	-0.02288962
318.6	0.05301925		848.59	0.00768737		1378.59	-0.00757131		1908.58	-0.01109393		2438.61	-0.02383544
318.8	0.05245232		848.79	0.00668023		1378.79	-0.00737411		1908.78	-0.01056582		2438.81	-0.02373396
319	0.05206854		848.99	0.00621727		1378.99	-0.00736452		1908.98	-0.01061159		2439.01	-0.02307089
319.2	0.05198658		849.19	0.00599143		1379.19	-0.00758404		1909.18	-0.01157285		2439.21	-0.02254373
319.4	0.05286014		849.39	0.00644858		1379.39	-0.00832824		1909.38	-0.01110025		2439.41	-0.02193219
319.6	0.05318997		849.59	0.00694031		1379.59	-0.00800317		1909.58	-0.0109451		2439.61	-0.02214153
319.8	0.05383211		849.79	0.00703576		1379.79	-0.00795406		1909.78	-0.01153421		2439.81	-0.02289857
320	0.05475138		849.99	0.00760137		1379.99	-0.00808696		1909.98	-0.01157236		2440.01	-0.02311988
320.2	0.05489002		850.19	0.00897686		1380.19	-0.00814186		1910.18	-0.01125308		2440.21	-0.02364915
320.4	0.05518432		850.39	0.00891986		1380.39	-0.00856083		1910.38	-0.01134959		2440.41	-0.02297784
320.6	0.05489277		850.59	0.01062761		1380.59	-0.00822472		1910.58	-0.01216262		2440.61	-0.02276343
320.8	0.05495869		850.79	0.01125465		1380.79	-0.00839167		1910.78	-0.01187834		2440.81	-0.02285603
321	0.05505785		850.99	0.01217233		1380.99	-0.00827459		1910.98	-0.01260994		2441.01	-0.02302927
321.2	0.05427694		851.19	0.0127522		1381.19	-0.0085587		1911.18	-0.01274889		2441.21	-0.02273528
321.4	0.05301671		851.39	0.0125312		1381.39	-0.00849514		1911.38	-0.01274129		2441.41	-0.02268783
321.6	0.05190422		851.59	0.01276622		1381.59	-0.00823968		1911.58	-0.01224368		2441.61	-0.02276505
321.8	0.0515432		851.79	0.01331178		1381.79	-0.00802989		1911.78	-0.01142634		2441.81	-0.0231039
322	0.05161671		851.99	0.01294569		1381.99	-0.0077281		1911.98	-0.01155234		2442.01	-0.02366564
322.2	0.05152652		852.19	0.0131116		1382.19	-0.00775791		1912.18	-0.01044703		2442.21	-0.02301855
322.4	0.05213513		852.39	0.01356915		1382.39	-0.00750558		1912.38	-0.01011111		2442.41	-0.02290681
322.6	0.05245069		852.59	0.01393879		1382.59	-0.00761462		1912.58	-0.0100312		2442.61	-0.02307037
322.8	0.05293502		852.79	0.01302226		1382.79	-0.00718062		1912.78	-0.00991474		2442.81	-0.02282664
323	0.05370612		852.99	0.01296234		1382.99	-0.00738685		1912.98	-0.01015834		2443.01	-0.0223673
323.2	0.05345619		853.19	0.01360354		1383.19	-0.0065609		1913.18	-0.01033023		2443.21	-0.02238947
323.4	0.05338842		853.39	0.01352515		1383.39	-0.00648705		1913.38	-0.00989722		2443.41	-0.02244108
323.6	0.05461063		853.59	0.01407797		1383.59	-0.00579401		1913.58	-0.01015709		2443.61	-0.02244295
323.8	0.05518203		853.79	0.01365219		1383.79	-0.0053604		1913.78	-0.01062546		2443.81	-0.02255706
324	0.05558204		853.99	0.01318924		1383.99	-0.0051991		1913.98	-0.00964954		2444.01	-0.02267056
324.2	0.05524608		854.19	0.01330084		1384.19	-0.00610748		1914.18	-0.00953541		2444.21	-0.02158534
324.4	0.05511767		854.39	0.01293434		1384.39	-0.0064895		1914.38	-0.0096534		2444.41	-0.02099416
324.6	0.05465602		854.59	0.01288453		1384.59	-0.00610981		1914.58	-0.01026075		2444.61	-0.02145906
324.8	0.05487486		854.79	0.01089232		1384.79	-0.00611087		1914.78	-0.01044774		2444.81	-0.02167641
325	0.05443068		854.99	0.01094387		1384.99	-0.0063041		1914.98	-0.01099485		2445.01	-0.02172495
325.2	0.05366461		855.19	0.00952212		1385.19	-0.00726351		1915.18	-0.01067625		2445.21	-0.02169014
325.4	0.05308011		855.39	0.00872796		1385.39	-0.00672738		1915.38	-0.01129003		2445.41	-0.02229296
325.6	0.0526631		855.59	0.00890545		1385.59	-0.00629385		1915.58	-0.01184702		2445.61	-0.02274336
325.8	0.05318602		855.79	0.00879479		1385.79	-0.00690531		1915.78	-0.0104755		2445.81	-0.02338742
326	0.05312495		855.99	0.00854208		1385.99	-0.00743078		1915.98	-0.01059103		2446.01	-0.02383084
326.2	0.05315831		856.19	0.00839991		1386.19	-0.00773409		1916.18	-0.01018565		2446.21	-0.02251393
326.4	0.05332248		856.39	0.008708		1386.39	-0.00794909		1916.38	-0.00916017		2446.41	-0.02256839
326.6	0.05325313		856.59	0.00840824		1386.59	-0.00796932		1916.58	-0.00927261		2446.61	-0.02256179
326.8	0.05423543		856.79	0.0087186		1386.79	-0.00878356		1916.78	-0.01035891		2446.81	-0.02241548
327	0.05401462		856.99	0.00857379		1386.99	-0.00859596		1916.98	-0.01050798		2447.01	-0.02242484
327.2	0.05400254		857.19	0.00965455		1387.19	-0.00844526		1917.18	-0.01065288		2447.21	-0.02259876
327.4	0.0554335		857.39	0.00936774		1387.39	-0.0084844		1917.38	-0.01079779		2447.41	-0.02272844
327.6	0.05617353		857.59	0.0094705		1387.59	-0.00776074		1917.58	-0.01060492		2447.61	-0.02240845
327.8	0.05594887		857.79	0.00894791		1387.79	-0.00733917		1917.78	-0.01038849		2447.81	-0.02306562
328	0.05523055		857.99	0.00980153		1387.99	-0.00787925		1917.98	-0.00944163		2448.01	-0.02386742
328.2	0.05473581		858.19	0.0095489		1388.19	-0.00903753		1918.18	-0.00938172		2448.21	-0.02404991
328.4	0.05420403		858.39	0.00992706		1388.39	-0.00880905		1918.38	-0.00863338		2448.41	-0.02395972
328.6	0.05447886		858.59	0.00931908		1388.59	-0.00820308		1918.58	-0.00893521		2448.61	-0.02392257
328.8	0.05492685		858.79	0.00860657		1388.79	-0.00809917		1918.78	-0.0082159		2448.81	-0.02445701
329	0.05448864		858.99	0.00938869		1388.99	-0.00745048		1918.98	-0.0082066		2449.01	-0.02361823
329.2	0.05400974		859.19	0.00811158		1389.19	-0.00693601		1919.18	-0.0089862		2449.21	-0.02296248
329.4	0.05326976		859.39	0.00781775		1389.39	-0.00631274		1919.38	-0.00927398		2449.41	-0.02216045
329.6	0.05339808		859.59	0.00781314		1389.59	-0.00678197		1919.58	-0.00834262		2449.61	-0.02234471
329.8	0.05309108		859.79	0.00773305		1389.79	-0.00699129		1919.78	-0.00738822		2449.81	-0.0223672
330	0.05283438		859.99	0.00830445		1389.99	-0.0064585		1919.98	-0.00740576		2450.01	-0.02178922
330.2	0.05361254		860.19	0.00782873		1390.19	-0.00581089		1920.18	-0.0070932		2450.21	-0.02124581
330.4	0.05377984		860.39	0.00876233		1390.39	-0.00585275		1920.38	-0.00746716		2450.41	-0.02087018
330.6	0.05458438		860.59	0.00856562		1390.59	-0.00601142		1920.58	-0.00820631		2450.61	-0.02072423
330.8	0.05525008		860.79	0.0090481		1390.79	-0.00683062		1920.78	-0.00929643		2450.81	-0.02072905
331	0.05555286		860.99	0.00875485		1390.99	-0.00667622		1920.98	-0.00866389		2451.01	-0.0208558
331.2	0.05677968		861.19	0.00970201		1391.19	-0.00590879		1921.18	-0.00845689		2451.21	-0.02061816
331.4	0.05741922		861.39	0.00962773		1391.39	-0.00609006		1921.38	-0.00772962		2451.41	-0.01995686
331.6	0.05723018		861.59	0.00857061		1391.59	-0.00641774		1921.58	-0.00741958		2451.61	-0.01995646
331.8	0.0571271		861.79	0.00968037		1391.79	-0.0071234		1921.78	-0.00733609		2451.81	-0.02056846
332	0.05671608		861.99	0.01074338		1391.99	-0.00850549		1921.98	-0.00716996		2452.01	-0.02156486
332.2	0.05703356		862.19	0.0103088		1392.19	-0.00846109		1922.18	-0.00780568		2452.21	-0.02108314
332.4	0.05659568		862.39	0.01060428		1392.39	-0.00835913		1922.38	-0.00846087		2452.41	-0.0207134
332.6	0.05726287		862.59	0.01055865		1392.59	-0.00834632		1922.58	-0.00859321		2452.61	-0.02097658
332.8	0.05710155		862.79	0.01076897		1392.79	-0.00804949		1922.78	-0.00872126		2452.81	-0.02079733
333	0.056695		862.99	0.01127311		1392.99	-0.00807627		1922.98	-0.00963125		2453.01	-0.01988251
333.2	0.05643074		863.19	0.01055725		1393.19	-0.00786672		1923.18	-0.01104044		2453.21	-0.01995726
333.4	0.05558185		863.39	0.01040398		1393.39	-0.00756172		1923.38	-0.01085987		2453.41	-0.02024627
333.6	0.05575097		863.59	0.01080398		1393.59	-0.0076322		1923.58	-0.0106215		2453.61	-0.02168694
333.8	0.0558354		863.79	0.01150211		1393.79	-0.0075225		1923.78	-0.01067981		2453.81	-0.0213723
334	0.05672659		863.99	0.01142884		1393.99	-0.00765784		1923.98	-0.0102564		2454.01	-0.0215536
334.2	0.05748902		864.19	0.01192174		1394.19	-0.00813451		1924.18	-0.01033999		2454.21	-0.0213765
334.4	0.05700026		864.39	0.01263534		1394.39	-0.00800717		1924.38	-0.01052854		2454.41	-0.02122943
334.6	0.0568364		864.59	0.0116546		1394.59	-0.00743546		1924.58	-0.0100338		2454.61	-0.02122068
334.8	0.05639811		864.79	0.01173025		1394.79	-0.00738341		1924.78	-0.01016634		2454.81	-0.02069174
335	0.05648351		864.99	0.0117583		1394.99	-0.00750709		1924.98	-0.00975771		2455.01	-0.02056309
335.2	0.05580631		865.19	0.01051525		1395.19	-0.00708554		1925.18	-0.00897837		2455.21	-0.01992248
335.4	0.05565857		865.39	0.00965938		1395.39	-0.0083372		1925.38	-0.00781859		2455.41	-0.01935808
335.6	0.05505739		865.59	0.00876523		1395.59	-0.00804297		1925.58	-0.00799623		2455.61	-0.02044254
335.8	0.05444899		865.79	0.00945425		1395.79	-0.00810054		1925.78	-0.00817184		2455.81	-0.02038047
336	0.05400372		865.99	0.00883083		1395.99	-0.00828771		1925.98	-0.00887024		2456.01	-0.02106434
336.2	0.05441295		866.19	0.00830596		1396.19	-0.00735131		1926.18	-0.00896473		2456.21	-0.02088407
336.4	0.05452364		866.39	0.00825214		1396.39	-0.00815095		1926.38	-0.00930367		2456.41	-0.02129818
336.6	0.05502319		866.59	0.00837946		1396.59	-0.00785573		1926.58	-0.00923181		2456.61	-0.02105854
336.8	0.05548031		866.79	0.00882411		1396.79	-0.00718655		1926.78	-0.00971879		2456.81	-0.02070119
337	0.0555398		866.99	0.00828474		1396.99	-0.00718165		1926.98	-0.01011443		2457.01	-0.02084216
337.2	0.05598678		867.19	0.00831402		1397.19	-0.00620269		1927.18	-0.01138491		2457.21	-0.02138035
337.4	0.05566878		867.39	0.00880398		1397.39	-0.00616335		1927.38	-0.01112836		2457.41	-0.02088923
337.6	0.05684141		867.59	0.00965576		1397.59	-0.00661754		1927.58	-0.01126413		2457.61	-0.02110542
337.8	0.05738851		867.79	0.00978012		1397.79	-0.00731237		1927.78	-0.01126273		2457.81	-0.02028376
338	0.05757163		867.99	0.01009669		1397.99	-0.00780374		1927.98	-0.0108744		2458.01	-0.02050159
338.2	0.05783124		868.19	0.01093411		1398.19	-0.00816534		1928.18	-0.01177167		2458.21	-0.02059383
338.4	0.05784323		868.39	0.01157121		1398.39	-0.00799551		1928.38	-0.01181665		2458.41	-0.02080823
338.6	0.05812229		868.59	0.01217576		1398.59	-0.00794974		1928.58	-0.01186239		2458.61	-0.02102934
338.8	0.05862187		868.79	0.01317686		1398.79	-0.00842464		1928.78	-0.01245385		2458.81	-0.02202187
339	0.05849463		868.99	0.01370841		1398.99	-0.00824484		1928.98	-0.01227943		2459.01	-0.02305931
339.2	0.05831595		869.19	0.01369214		1399.19	-0.00884364		1929.18	-0.01094644		2459.21	-0.02272991
339.4	0.05829781		869.39	0.01457545		1399.39	-0.00942642		1929.38	-0.01041301		2459.41	-0.02318588
339.6	0.05703254		869.59	0.01507782		1399.59	-0.0094666		1929.58	-0.01139947		2459.61	-0.02389628
339.8	0.05630903		869.79	0.01528665		1399.79	-0.00957999		1929.78	-0.01093659		2459.81	-0.02376725
340	0.05567725		869.99	0.01513697		1399.99	-0.00985835		1929.98	-0.01036451		2460.01	-0.02366074
340.2	0.05584653		870.19	0.01547491		1400.19	-0.01006047		1930.18	-0.0101439		2460.21	-0.02313781
340.4	0.05635184		870.39	0.01448967		1400.39	-0.01066681		1930.38	-0.00994875		2460.41	-0.02335898
340.6	0.05600434		870.59	0.01403076		1400.59	-0.00999326		1930.58	-0.01021184		2460.61	-0.02306375
340.8	0.05678585		870.79	0.0134675		1400.79	-0.0098755		1930.78	-0.00973566		2460.81	-0.02239506
341	0.05708516		870.99	0.01160932		1400.99	-0.00962487		1930.98	-0.01033807		2461.01	-0.02271396
341.2	0.05723819		871.19	0.01172675		1401.19	-0.00908417		1931.18	-0.01090242		2461.21	-0.02290177
341.4	0.0572651		871.39	0.01127951		1401.39	-0.00848578		1931.38	-0.01036445		2461.41	-0.02292441
341.6	0.05841932		871.59	0.01016525		1401.59	-0.00897797		1931.58	-0.00949027		2461.61	-0.02361178
341.8	0.0586151		871.79	0.00893778		1401.79	-0.00886343		1931.78	-0.00960432		2461.81	-0.02384667
342	0.06001924		871.99	0.00895365		1401.99	-0.00841346		1931.98	-0.01009823		2462.01	-0.0243175
342.2	0.06054037		872.19	0.00879621		1402.19	-0.00880255		1932.18	-0.01138329		2462.21	-0.02394375
342.4	0.06129141		872.39	0.0095107		1402.39	-0.00806609		1932.38	-0.01093122		2462.41	-0.02405616
342.6	0.06186345		872.59	0.00950102		1402.59	-0.00764616		1932.58	-0.01110174		2462.61	-0.0246938
342.8	0.06184269		872.79	0.00940469		1402.79	-0.00735967		1932.78	-0.01134973		2462.81	-0.0243093
343	0.06131292		872.99	0.00999611		1402.99	-0.00661865		1932.98	-0.01075085		2463.01	-0.02383561
343.2	0.06102352		873.19	0.01044169		1403.19	-0.00705412		1933.18	-0.01075575		2463.21	-0.02310309
343.4	0.05942899		873.39	0.01064935		1403.39	-0.00672961		1933.38	-0.0114621		2463.41	-0.02354831
343.6	0.05951714		873.59	0.01036109		1403.59	-0.00737143		1933.58	-0.01107195		2463.61	-0.02384907
343.8	0.05887244		873.79	0.01055526		1403.79	-0.0070296		1933.78	-0.01054785		2463.81	-0.02298088
344	0.05919458		873.99	0.01085435		1403.99	-0.00709403		1933.98	-0.01018959		2464.01	-0.02222857
344.2	0.05930356		874.19	0.01144399		1404.19	-0.00665393		1934.18	-0.00965327		2464.21	-0.02263764
344.4	0.05938768		874.39	0.01089502		1404.39	-0.00705393		1934.38	-0.00882193		2464.41	-0.02306048
344.6	0.05840677		874.59	0.01106165		1404.59	-0.00681859		1934.58	-0.00890838		2464.61	-0.02326581
344.8	0.05891307		874.79	0.01101435		1404.79	-0.0075829		1934.78	-0.00780445		2464.81	-0.02291964
345	0.05887154		874.99	0.01052775		1404.99	-0.00746977		1934.98	-0.0082463		2465.01	-0.02372633
345.2	0.05882547		875.19	0.01087473		1405.19	-0.00737428		1935.18	-0.0063763		2465.21	-0.02439211
345.4	0.05966932		875.39	0.01005336		1405.39	-0.00704933		1935.38	-0.00490111		2465.41	-0.02545837
345.6	0.06085765		875.59	0.00827633		1405.59	-0.00790639		1935.58	-0.00506603		2465.61	-0.02661501
345.8	0.06189948		875.79	0.00799238		1405.79	-0.00788293		1935.78	-0.00600407		2465.81	-0.02637057
346	0.06216301		875.99	0.00855217		1405.99	-0.00792637		1935.98	-0.00635923		2466.01	-0.02603486
346.2	0.06152133		876.19	0.00826524		1406.19	-0.00757555		1936.18	-0.00692417		2466.21	-0.02560788
346.4	0.06225684		876.39	0.00897457		1406.39	-0.00674104		1936.38	-0.00778443		2466.41	-0.02613591
346.6	0.06194196		876.59	0.00889764		1406.59	-0.00694893		1936.58	-0.00844752		2466.61	-0.02580242
346.8	0.06108237		876.79	0.0093409		1406.79	-0.00701069		1936.78	-0.00879644		2466.81	-0.02495509
347	0.06090822		876.99	0.00894493		1406.99	-0.00614515		1936.98	-0.00873073		2467.01	-0.02488603
347.2	0.06075238		877.19	0.00899634		1407.19	-0.00703856		1937.18	-0.00884788		2467.21	-0.02416535
347.4	0.06067701		877.39	0.00869187		1407.39	-0.00774553		1937.38	-0.00917213		2467.41	-0.02407322
347.6	0.06110987		877.59	0.00822235		1407.59	-0.00841796		1937.58	-0.00903355		2467.61	-0.02348621
347.8	0.06018581		877.79	0.00908599		1407.79	-0.00862381		1937.78	-0.01061361		2467.81	-0.02286415
348	0.06007027		877.99	0.00929799		1407.99	-0.00864562		1937.98	-0.00973812		2468.01	-0.02345594
348.2	0.05914281		878.19	0.0095123		1408.19	-0.00897544		1938.18	-0.0098286		2468.21	-0.02308454
348.4	0.05827344		878.39	0.00943605		1408.39	-0.00941479		1938.38	-0.00998454		2468.41	-0.0226553
348.6	0.05749107		878.59	0.00957137		1408.59	-0.00903177		1938.58	-0.00991091		2468.61	-0.02234524
348.8	0.05809872		878.79	0.00988955		1408.79	-0.00958718		1938.78	-0.00970949		2468.81	-0.02173039
349	0.05851273		878.99	0.00988294		1408.99	-0.00891587		1938.98	-0.00953674		2469.01	-0.02177897
349.2	0.05865666		879.19	0.00927233		1409.19	-0.00815046		1939.18	-0.00816114		2469.21	-0.02223196
349.4	0.05890316		879.39	0.00878542		1409.39	-0.00762429		1939.38	-0.0088376		2469.41	-0.02268452
349.6	0.05922908		879.59	0.00865933		1409.59	-0.00798215		1939.58	-0.01083055		2469.61	-0.02304514
349.8	0.06034732		879.79	0.00970531		1409.79	-0.00802043		1939.78	-0.0114111		2469.81	-0.02231933
350	0.06022748		879.99	0.01139019		1409.99	-0.00760273		1939.98	-0.0123943		2470.01	-0.02286746
350.2	0.06065274		880.19	0.011941		1410.19	-0.00698265		1940.18	-0.01371694		2470.21	-0.02242874
350.4	0.06092607		880.39	0.01267617		1410.39	-0.00734512		1940.38	-0.01446399		2470.41	-0.02244069
350.6	0.06098162		880.59	0.01259969		1410.59	-0.00772975		1940.58	-0.01397056		2470.61	-0.02221855
350.8	0.06082455		880.79	0.01280468		1410.79	-0.0077114		1940.78	-0.01276799		2470.81	-0.02243585
351	0.0609803		880.99	0.01230705		1410.99	-0.00767242		1940.98	-0.0117355		2471.01	-0.02217191
351.2	0.06107806		881.19	0.01265315		1411.19	-0.00809195		1941.18	-0.01057421		2471.21	-0.02177084
351.4	0.0616211		881.39	0.01156578		1411.39	-0.00829763		1941.38	-0.01015204		2471.41	-0.02175883
351.6	0.06162137		881.59	0.0119265		1411.59	-0.0083777		1941.58	-0.00917063		2471.61	-0.02242733
351.8	0.06181586		881.79	0.01204534		1411.79	-0.00810753		1941.78	-0.00859357		2471.81	-0.02284269
352	0.06161961		881.99	0.0118245		1411.99	-0.00713826		1941.98	-0.0075598		2472.01	-0.02294614
352.2	0.06139042		882.19	0.01087045		1412.19	-0.00689956		1942.18	-0.00838853		2472.21	-0.02286773
352.4	0.06141141		882.39	0.01026112		1412.39	-0.0065802		1942.38	-0.00769002		2472.41	-0.02309444
352.6	0.06149607		882.59	0.00992519		1412.59	-0.00658444		1942.58	-0.00711419		2472.61	-0.02353795
352.8	0.06162526		882.79	0.00975474		1412.79	-0.00615831		1942.78	-0.00729538		2472.81	-0.02402147
353	0.06154606		882.99	0.00887578		1412.99	-0.00524633		1942.98	-0.00723173		2473.01	-0.02476722
353.2	0.06108313		883.19	0.0081234		1413.19	-0.00504313		1943.18	-0.0077058		2473.21	-0.02542615
353.4	0.06121278		883.39	0.0084867		1413.39	-0.00525109		1943.38	-0.00897656		2473.41	-0.02543382
353.6	0.0616349		883.59	0.00897279		1413.59	-0.00603628		1943.58	-0.01045503		2473.61	-0.02549154
353.8	0.06245621		883.79	0.00887482		1413.79	-0.00558873		1943.78	-0.01109313		2473.81	-0.02582461
354	0.06238969		883.99	0.00917245		1413.99	-0.00646151		1943.98	-0.01162947		2474.01	-0.02595725
354.2	0.06247385		884.19	0.00915414		1414.19	-0.00688108		1944.18	-0.01253607		2474.21	-0.02563009
354.4	0.06188933		884.39	0.00901421		1414.39	-0.00680349		1944.38	-0.01173319		2474.41	-0.02563698
354.6	0.06222931		884.59	0.00939009		1414.59	-0.0063701		1944.58	-0.01134441		2474.61	-0.02544704
354.8	0.06224556		884.79	0.01004793		1414.79	-0.00671878		1944.78	-0.0097285		2474.81	-0.02567582
355	0.06215857		884.99	0.0102173		1414.99	-0.00689725		1944.98	-0.00881342		2475.01	-0.02534972
355.2	0.06272242		885.19	0.01051968		1415.19	-0.00604531		1945.18	-0.00842585		2475.21	-0.02489377
355.4	0.06330058		885.39	0.0104791		1415.39	-0.00655514		1945.38	-0.00801183		2475.41	-0.02432897
355.6	0.06459757		885.59	0.01114963		1415.59	-0.00637826		1945.58	-0.00716631		2475.61	-0.02430195
355.8	0.06528546		885.79	0.01063327		1415.79	-0.00579701		1945.78	-0.00747693		2475.81	-0.02328294
356	0.06564468		885.99	0.01043327		1415.99	-0.00551142		1945.98	-0.00822394		2476.01	-0.0224246
356.2	0.06599145		886.19	0.00972333		1416.19	-0.00586671		1946.18	-0.00817323		2476.21	-0.02290259
356.4	0.06620337		886.39	0.01005126		1416.39	-0.00644397		1946.38	-0.0079071		2476.41	-0.02315173
356.6	0.06586835		886.59	0.01072804		1416.59	-0.0068786		1946.58	-0.00807339		2476.61	-0.02316848
356.8	0.06519501		886.79	0.01046846		1416.79	-0.00651623		1946.78	-0.00859926		2476.81	-0.02351496
357	0.06494984		886.99	0.00926506		1416.99	-0.00697125		1946.98	-0.00912094		2477.01	-0.02409381
357.2	0.06416168		887.19	0.0087778		1417.19	-0.00753497		1947.18	-0.00935012		2477.21	-0.02321688
357.4	0.06374114		887.39	0.00862888		1417.39	-0.00812982		1947.38	-0.00970613		2477.41	-0.02263465
357.6	0.06382267		887.59	0.00886122		1417.59	-0.00850263		1947.58	-0.01011212		2477.61	-0.02313418
357.8	0.06360752		887.79	0.00916895		1417.79	-0.00888388		1947.78	-0.0105841		2477.81	-0.02295435
358	0.06376205		887.99	0.00960678		1417.99	-0.01063738		1947.98	-0.01046692		2478.01	-0.02333572
358.2	0.06297276		888.19	0.01042682		1418.19	-0.01022199		1948.18	-0.01073419		2478.21	-0.02323732
358.4	0.06236368		888.39	0.01018685		1418.39	-0.00949699		1948.38	-0.01076211		2478.41	-0.02324119
358.6	0.06246858		888.59	0.01045588		1418.59	-0.00904139		1948.58	-0.01122408		2478.61	-0.02329388
358.8	0.06212871		888.79	0.01180359		1418.79	-0.00892188		1948.78	-0.011244		2478.81	-0.02350178
359	0.06245786		888.99	0.01248558		1418.99	-0.00814371		1948.98	-0.01132142		2479.01	-0.02341011
359.2	0.06266973		889.19	0.012917		1419.19	-0.00761669		1949.18	-0.01168523		2479.21	-0.0230909
359.4	0.0632462		889.39	0.01292932		1419.39	-0.00758738		1949.38	-0.01128064		2479.41	-0.02286895
359.6	0.06465644		889.59	0.01288309		1419.59	-0.00621254		1949.58	-0.01143017		2479.61	-0.02277719
359.8	0.06496021		889.79	0.01366466		1419.79	-0.0053911		1949.78	-0.01169659		2479.81	-0.02196038
360	0.06495401		889.99	0.01365497		1419.99	-0.00483922		1949.98	-0.01109437		2480.01	-0.02184162
360.2	0.06502806		890.19	0.01363397		1420.19	-0.00471616		1950.18	-0.01064795		2480.21	-0.02297642
360.4	0.06503497		890.39	0.01388327		1420.39	-0.00512805		1950.38	-0.01157697		2480.41	-0.02301108
360.6	0.06464462		890.59	0.01350003		1420.59	-0.00522104		1950.58	-0.01222286		2480.61	-0.02281584
360.8	0.06466428		890.79	0.01212088		1420.79	-0.00565466		1950.78	-0.01293358		2480.81	-0.0230082
361	0.06464401		890.99	0.01107697		1420.99	-0.00606488		1950.98	-0.0132452		2481.01	-0.02229084
361.2	0.06410627		891.19	0.01121974		1421.19	-0.00635819		1951.18	-0.01343374		2481.21	-0.02168383
361.4	0.06478489		891.39	0.0115955		1421.39	-0.00708814		1951.38	-0.01390681		2481.41	-0.02157458
361.6	0.06592414		891.59	0.01184551		1421.59	-0.00772148		1951.58	-0.01394749		2481.61	-0.02192289
361.8	0.06516044		891.79	0.01168306		1421.79	-0.00886867		1951.78	-0.01425243		2481.81	-0.02188603
362	0.06551898		891.99	0.01184991		1421.99	-0.00882767		1951.98	-0.014366		2482.01	-0.02203681
362.2	0.06512229		892.19	0.01153725		1422.19	-0.00868662		1952.18	-0.01459343		2482.21	-0.02145577
362.4	0.06519875		892.39	0.01065437		1422.39	-0.008383		1952.38	-0.01506378		2482.41	-0.02104005
362.6	0.0646356		892.59	0.0112117		1422.59	-0.00719076		1952.58	-0.01428597		2482.61	-0.02072237
362.8	0.064846		892.79	0.01120958		1422.79	-0.00699526		1952.78	-0.01404777		2482.81	-0.0210845
363	0.06583909		892.99	0.0110791		1422.99	-0.00722624		1952.98	-0.01303669		2483.01	-0.0213083
363.2	0.06583747		893.19	0.01064104		1423.19	-0.00715938		1953.18	-0.01263449		2483.21	-0.02140906
363.4	0.06654123		893.39	0.0104693		1423.39	-0.00639385		1953.38	-0.01156923		2483.41	-0.02244592
363.6	0.06621252		893.59	0.01170921		1423.59	-0.00522034		1953.58	-0.01124251		2483.61	-0.0221643
363.8	0.06669502		893.79	0.01256916		1423.79	-0.00531818		1953.78	-0.00992278		2483.81	-0.0224109
364	0.06681402		893.99	0.0127203		1423.99	-0.00472528		1953.98	-0.00887679		2484.01	-0.02287538
364.2	0.0666989		894.19	0.01310824		1424.19	-0.00481432		1954.18	-0.00873527		2484.21	-0.02396298
364.4	0.06642994		894.39	0.0130127		1424.39	-0.00518582		1954.38	-0.00905943		2484.41	-0.02437192
364.6	0.06580903		894.59	0.01222267		1424.59	-0.00396599		1954.58	-0.00839957		2484.61	-0.02440898
364.8	0.0661381		894.79	0.01197712		1424.79	-0.00452463		1954.78	-0.00786692		2484.81	-0.02464153
365	0.0650648		894.99	0.01232038		1424.99	-0.00452117		1954.98	-0.00758845		2485.01	-0.02443854
365.2	0.06487676		895.19	0.01359355		1425.19	-0.0048024		1955.18	-0.00779653		2485.21	-0.02403759
365.4	0.06490054		895.39	0.01338502		1425.39	-0.00588626		1955.38	-0.00763558		2485.41	-0.02357623
365.6	0.06541123		895.59	0.01296647		1425.59	-0.00681855		1955.58	-0.00659052		2485.61	-0.02361629
365.8	0.06485936		895.79	0.01299553		1425.79	-0.00677071		1955.78	-0.00724375		2485.81	-0.02336146
366	0.06528084		895.99	0.01344511		1425.99	-0.00639424		1955.98	-0.00654799		2486.01	-0.02281608
366.2	0.06477209		896.19	0.01227432		1426.19	-0.00703429		1956.18	-0.00598577		2486.21	-0.02213538
366.4	0.06513758		896.39	0.01165131		1426.39	-0.0069418		1956.38	-0.00627495		2486.41	-0.02201382
366.6	0.06440019		896.59	0.01074765		1426.59	-0.0072992		1956.58	-0.00638396		2486.61	-0.02236267
366.8	0.06578834		896.79	0.01019914		1426.79	-0.00793754		1956.78	-0.00692752		2486.81	-0.02213527
367	0.0668802		896.99	0.01047192		1426.99	-0.00913752		1956.98	-0.00667398		2487.01	-0.02221044
367.2	0.06709065		897.19	0.0103621		1427.19	-0.00871819		1957.18	-0.00644625		2487.21	-0.02202488
367.4	0.06722198		897.39	0.01079839		1427.39	-0.0086991		1957.38	-0.00616425		2487.41	-0.02224761
367.6	0.06707861		897.59	0.01151116		1427.59	-0.00849024		1957.58	-0.00696548		2487.61	-0.02197537
367.8	0.06812944		897.79	0.01126905		1427.79	-0.008759		1957.78	-0.0069509		2487.81	-0.02294734
368	0.06842039		897.99	0.01147177		1427.99	-0.00822238		1957.98	-0.00751246		2488.01	-0.0235316
368.2	0.06772395		898.19	0.01121658		1428.19	-0.00818826		1958.18	-0.00818293		2488.21	-0.02439567
368.4	0.06804216		898.39	0.01081371		1428.39	-0.00761619		1958.38	-0.00902462		2488.41	-0.02486539
368.6	0.06796059		898.59	0.01070468		1428.59	-0.00640601		1958.58	-0.00965617		2488.61	-0.0250602
368.8	0.0682205		898.79	0.01109664		1428.79	-0.00729225		1958.78	-0.0100964		2488.81	-0.02579841
369	0.06732605		898.99	0.01133093		1428.99	-0.00743517		1958.98	-0.01062235		2489.01	-0.02536868
369.2	0.06747375		899.19	0.01209728		1429.19	-0.00776374		1959.18	-0.01043057		2489.21	-0.02494447
369.4	0.0674826		899.39	0.01168072		1429.39	-0.00814151		1959.38	-0.00998137		2489.41	-0.02515518
369.6	0.06802288		899.59	0.01154088		1429.59	-0.00732725		1959.58	-0.00970199		2489.61	-0.02527118
369.8	0.06688674		899.79	0.01134723		1429.79	-0.00627208		1959.78	-0.01057123		2489.81	-0.02469762
370	0.06675209		899.99	0.01100656		1429.99	-0.00655867		1959.98	-0.01054934		2490.01	-0.02461324
370.2	0.06642982		900.19	0.01079424		1430.19	-0.0071349		1960.18	-0.01164805		2490.21	-0.02459057
370.4	0.06694663		900.39	0.01039101		1430.39	-0.0072239		1960.38	-0.012968		2490.41	-0.02474407
370.6	0.06741371		900.59	0.00952109		1430.59	-0.0075427		1960.58	-0.01290561		2490.61	-0.02471873
370.8	0.0689687		900.79	0.00985063		1430.79	-0.00704171		1960.78	-0.0126994		2490.81	-0.02432731
371	0.06970624		900.99	0.00932339		1430.99	-0.00821878		1960.98	-0.01163089		2491.01	-0.02416656
371.2	0.06937002		901.19	0.00903797		1431.19	-0.00806066		1961.18	-0.01129627		2491.21	-0.02380917
371.4	0.06967314		901.39	0.00929337		1431.39	-0.00839318		1961.38	-0.01145161		2491.41	-0.02373556
371.6	0.07030705		901.59	0.00853996		1431.59	-0.00828109		1961.58	-0.01246412		2491.61	-0.02384138
371.8	0.07092322		901.79	0.00857667		1431.79	-0.00788976		1961.78	-0.01165103		2491.81	-0.02417936
372	0.07045558		901.99	0.00901906		1431.99	-0.00738944		1961.98	-0.01174928		2492.01	-0.02475739
372.2	0.07016868		902.19	0.00984893		1432.19	-0.00713161		1962.18	-0.01224507		2492.21	-0.02516605
372.4	0.0709484		902.39	0.01016793		1432.39	-0.00715989		1962.38	-0.01241807		2492.41	-0.0253005
372.6	0.07057183		902.59	0.01044028		1432.59	-0.00732701		1962.58	-0.01178731		2492.61	-0.02531571
372.8	0.07002094		902.79	0.01109084		1432.79	-0.00780341		1962.78	-0.01084254		2492.81	-0.0257766
373	0.06923709		902.99	0.01185719		1432.99	-0.00773066		1962.98	-0.01029206		2493.01	-0.02566324
373.2	0.06887018		903.19	0.01322529		1433.19	-0.00800543		1963.18	-0.00976094		2493.21	-0.02572788
373.4	0.06835947		903.39	0.01327214		1433.39	-0.00713459		1963.38	-0.00915296		2493.41	-0.02604466
373.6	0.06781688		903.59	0.01347424		1433.59	-0.00698757		1963.58	-0.00941682		2493.61	-0.0254057
373.8	0.06743897		903.79	0.01340837		1433.79	-0.00614173		1963.78	-0.00984311		2493.81	-0.0248354
374	0.06803241		903.99	0.01448192		1433.99	-0.00736809		1963.98	-0.01038958		2494.01	-0.0248088
374.2	0.06763008		904.19	0.01587627		1434.19	-0.00698154		1964.18	-0.01040711		2494.21	-0.02543339
374.4	0.06789371		904.39	0.01522194		1434.39	-0.00678249		1964.38	-0.01019224		2494.41	-0.02555949
374.6	0.06907091		904.59	0.01493847		1434.59	-0.00682275		1964.58	-0.00933534		2494.61	-0.02601365
374.8	0.0690096		904.79	0.01567368		1434.79	-0.0066761		1964.78	-0.00899998		2494.81	-0.02589731
375	0.06905375		904.99	0.01634204		1434.99	-0.00674959		1964.98	-0.00905041		2495.01	-0.02578469
375.2	0.0686468		905.19	0.01693712		1435.19	-0.00611553		1965.18	-0.00902052		2495.21	-0.02609982
375.4	0.06914523		905.39	0.01640123		1435.39	-0.00575341		1965.38	-0.00858643		2495.41	-0.02614204
375.6	0.06941621		905.59	0.0152694		1435.59	-0.006212		1965.58	-0.00856762		2495.61	-0.026491
375.8	0.06930954		905.79	0.01552647		1435.79	-0.0061326		1965.78	-0.00764403		2495.81	-0.0268896
376	0.06918801		905.99	0.01563356		1435.99	-0.0067491		1965.98	-0.00898321		2496.01	-0.02716458
376.2	0.07014927		906.19	0.0150498		1436.19	-0.00762535		1966.18	-0.00951749		2496.21	-0.02647699
376.4	0.07012684		906.39	0.01402059		1436.39	-0.0082216		1966.38	-0.01010319		2496.41	-0.02655461
376.6	0.07022062		906.59	0.01295255		1436.59	-0.00881223		1966.58	-0.00985309		2496.61	-0.02720876
376.8	0.07095236		906.79	0.01225543		1436.79	-0.00897645		1966.78	-0.0107366		2496.81	-0.02765687
377	0.07135664		906.99	0.01170431		1436.99	-0.00925468		1966.98	-0.01076002		2497.01	-0.0277685
377.2	0.07162005		907.19	0.01098517		1437.19	-0.0090388		1967.18	-0.01086612		2497.21	-0.02749699
377.4	0.07160852		907.39	0.01001877		1437.39	-0.00844798		1967.38	-0.01177722		2497.41	-0.02676356
377.6	0.07188144		907.59	0.00989766		1437.59	-0.00899448		1967.58	-0.01250233		2497.61	-0.02519109
377.8	0.07244115		907.79	0.00947675		1437.79	-0.00864076		1967.78	-0.01312979		2497.81	-0.02536886
378	0.07258542		907.99	0.00980919		1437.99	-0.00929039		1967.98	-0.01335436		2498.01	-0.02553485
378.2	0.07209993		908.19	0.00949982		1438.19	-0.00837029		1968.18	-0.01319759		2498.21	-0.02593498
378.4	0.0720425		908.39	0.00871741		1438.39	-0.00825207		1968.38	-0.01318018		2498.41	-0.02589938
378.6	0.07206093		908.59	0.00906866		1438.59	-0.00772041		1968.58	-0.01306656		2498.61	-0.02598402
378.8	0.07086384		908.79	0.00998247		1438.79	-0.0068179		1968.78	-0.01266615		2498.81	-0.02584895
379	0.06998025		908.99	0.0103464		1438.99	-0.00613452		1968.98	-0.01227118		2499.01	-0.0256998
379.2	0.06898817		909.19	0.01001496		1439.19	-0.00592797		1969.18	-0.01102221		2499.21	-0.02571264
379.4	0.06807065		909.39	0.00950064		1439.39	-0.0058491		1969.38	-0.01027631		2499.41	-0.02569579
379.6	0.06717814		909.59	0.00971989		1439.59	-0.00599998		1969.58	-0.00991443		2499.61	-0.02557125
379.8	0.06618649		909.79	0.01001186		1439.79	-0.00574848		1969.78	-0.00940535		2499.81	-0.02530129
380	0.06618649		909.99	0.01001186		1439.98	-0.00574848		1969.98	-0.00940535		2500.01	-0.02530129
380.2	0.0657329		910.19	0.00897025		1440.18	-0.00532821		1970.18	-0.01093919		2500.21	-0.02363771
380.4	0.06546258		910.39	0.00823752		1440.38	-0.00470908		1970.38	-0.01244722		2500.41	-0.02329719
380.6	0.06486236		910.59	0.00689299		1440.58	-0.00456975		1970.58	-0.01354401		2500.61	-0.02282735
380.8	0.06463397		910.79	0.00637006		1440.78	-0.0038102		1970.78	-0.01455719		2500.81	-0.02157866
381	0.06423751		910.99	0.00586399		1440.98	-0.00302482		1970.98	-0.01504885		2501.01	-0.02034491
381.2	0.06393854		911.19	0.00616159		1441.18	-0.00305672		1971.18	-0.01598481		2501.21	-0.01959253
381.4	0.06451507		911.39	0.00621586		1441.38	-0.00330953		1971.38	-0.01692687		2501.41	-0.01919575
381.6	0.06448496		911.59	0.00595109		1441.58	-0.00312074		1971.58	-0.01734068		2501.61	-0.01864466
381.8	0.06481004		911.79	0.00612338		1441.78	-0.00348713		1971.78	-0.01744618		2501.81	-0.01889524
382	0.06475379		911.99	0.00571862		1441.98	-0.0029051		1971.98	-0.01739398		2502.01	-0.01908951
382.2	0.06508267		912.19	0.00569649		1442.18	-0.00343906		1972.18	-0.01738934		2502.21	-0.0203113
382.4	0.0656039		912.39	0.00523366		1442.38	-0.00351695		1972.38	-0.01774747		2502.41	-0.01988314
382.6	0.06635872		912.59	0.00543079		1442.58	-0.00362073		1972.58	-0.017573		2502.61	-0.01963003
382.8	0.06684471		912.79	0.00609053		1442.78	-0.00299768		1972.78	-0.017443		2502.81	-0.01961998
383	0.06738231		912.99	0.00640547		1442.98	-0.00229596		1972.98	-0.01787734		2503.01	-0.01876647
383.2	0.06827891		913.19	0.00675372		1443.18	-0.00178333		1973.18	-0.01738361		2503.21	-0.01826024
383.4	0.06904881		913.39	0.0068304		1443.38	-0.00178356		1973.38	-0.01707362		2503.41	-0.01752878
383.6	0.06983835		913.59	0.0077545		1443.58	-0.00119716		1973.58	-0.01628236		2503.61	-0.01702991
383.8	0.06999382		913.79	0.00809121		1443.78	-0.00214353		1973.78	-0.01544496		2503.81	-0.01692963
384	0.06972698		913.99	0.00847329		1443.98	-0.00205367		1973.98	-0.01497565		2504.01	-0.01661542
384.2	0.06923237		914.19	0.00834598		1444.18	-0.00192421		1974.18	-0.0150214		2504.21	-0.01675015
384.4	0.0694766		914.39	0.00893451		1444.38	-0.00216325		1974.38	-0.01514452		2504.41	-0.01734928
384.6	0.06968949		914.59	0.00865266		1444.58	-0.00265778		1974.58	-0.01451253		2504.61	-0.01832199
384.8	0.07000265		914.79	0.00963566		1444.78	-0.00221232		1974.78	-0.01443669		2504.81	-0.01758364
385	0.06949743		914.99	0.00972801		1444.98	-0.00309924		1974.98	-0.01414664		2505.01	-0.01780136
385.2	0.06941815		915.19	0.01045374		1445.18	-0.00382817		1975.18	-0.01506624		2505.21	-0.01768587
385.4	0.07006409		915.39	0.01001501		1445.38	-0.00360005		1975.38	-0.01547422		2505.41	-0.01764479
385.6	0.06936824		915.59	0.00925855		1445.58	-0.00325114		1975.58	-0.01507113		2505.61	-0.01772701
385.8	0.06902397		915.79	0.00918556		1445.78	-0.00288616		1975.78	-0.01563341		2505.81	-0.0182885
386	0.06869671		915.99	0.0083336		1445.98	-0.00230709		1975.98	-0.01614841		2506.01	-0.01822679
386.2	0.0692304		916.19	0.00823671		1446.18	-0.00257662		1976.18	-0.01697197		2506.21	-0.01842337
386.4	0.06865624		916.39	0.00819012		1446.38	-0.002794		1976.38	-0.01661337		2506.41	-0.01804141
386.6	0.06885924		916.59	0.0076336		1446.58	-0.00293819		1976.58	-0.01663542		2506.61	-0.01824312
386.8	0.06760339		916.79	0.00812582		1446.78	-0.00310662		1976.78	-0.01735727		2506.81	-0.01834128
387	0.06797017		916.99	0.00830167		1446.98	-0.00288114		1976.98	-0.01767154		2507.01	-0.01775744
387.2	0.06819564		917.19	0.00891236		1447.18	-0.00264295		1977.18	-0.01672605		2507.21	-0.01782281
387.4	0.0677054		917.39	0.00941908		1447.38	-0.00216064		1977.38	-0.016113		2507.41	-0.01794989
387.6	0.06750735		917.59	0.01044222		1447.58	-0.00182708		1977.58	-0.01599505		2507.61	-0.0172434
387.8	0.06830394		917.79	0.011117		1447.78	-0.00248699		1977.78	-0.01528167		2507.81	-0.01739839
388	0.06789528		917.99	0.01148384		1447.98	-0.00242264		1977.98	-0.01569296		2508.01	-0.01706882
388.2	0.06794188		918.19	0.01166636		1448.18	-0.00203214		1978.18	-0.01586074		2508.21	-0.01786803
388.4	0.06866569		918.39	0.01173951		1448.38	-0.00183422		1978.38	-0.01584248		2508.41	-0.01786909
388.6	0.06822815		918.59	0.01176306		1448.58	-0.00109045		1978.58	-0.01490562		2508.61	-0.0187944
388.8	0.06766699		918.79	0.01186604		1448.78	-0.00037321		1978.78	-0.01463303		2508.81	-0.01802927
389	0.06750051		918.99	0.01168125		1448.98	-0.00021404		1978.98	-0.01484101		2509.01	-0.0181994
389.2	0.06745301		919.19	0.01200819		1449.18	0.00137845		1979.18	-0.01526117		2509.21	-0.01782423
389.4	0.06784179		919.39	0.01134162		1449.38	0.00223946		1979.38	-0.01518718		2509.41	-0.01857473
389.6	0.06813905		919.59	0.01074175		1449.58	0.00233634		1979.58	-0.01500556		2509.61	-0.01880171
389.8	0.0683202		919.79	0.01060484		1449.78	0.00238436		1979.78	-0.0152048		2509.81	-0.01856103
390	0.06825389		919.99	0.00961257		1449.98	0.00146885		1979.98	-0.01523734		2510.01	-0.01867774
390.2	0.06795138		920.19	0.00937229		1450.18	0.00102103		1980.18	-0.01592945		2510.21	-0.01843946
390.4	0.06678719		920.39	0.0088953		1450.38	-0.00024764		1980.38	-0.01572657		2510.41	-0.01821102
390.6	0.06692376		920.59	0.00861553		1450.58	-0.00090464		1980.58	-0.01523645		2510.61	-0.0186419
390.8	0.06618736		920.79	0.00878949		1450.78	-0.00151583		1980.78	-0.01536484		2510.81	-0.01847382
391	0.06667968		920.99	0.00862493		1450.98	-0.00208681		1980.98	-0.01531546		2511.01	-0.01810917
391.2	0.06764776		921.19	0.00871994		1451.18	-0.00244493		1981.18	-0.01500334		2511.21	-0.01749088
391.4	0.06795375		921.39	0.00822581		1451.38	-0.00262972		1981.38	-0.01504666		2511.41	-0.01796889
391.6	0.06905076		921.59	0.00844951		1451.58	-0.00412602		1981.58	-0.0149604		2511.61	-0.01789795
391.8	0.07036918		921.79	0.00881007		1451.78	-0.00547223		1981.78	-0.01481964		2511.81	-0.01806945
392	0.07001557		921.99	0.00877931		1451.98	-0.00490489		1981.98	-0.01501353		2512.01	-0.01754726
392.2	0.06979639		922.19	0.00899564		1452.18	-0.00407213		1982.18	-0.01452011		2512.21	-0.01757774
392.4	0.06962439		922.39	0.00871438		1452.38	-0.00351499		1982.38	-0.01387822		2512.41	-0.01719428
392.6	0.06906996		922.59	0.00908077		1452.58	-0.00278547		1982.58	-0.0139252		2512.61	-0.01655138
392.8	0.06912183		922.79	0.0089709		1452.78	-0.00210199		1982.78	-0.01525363		2512.81	-0.01677381
393	0.06945247		922.99	0.00892547		1452.98	-0.00134878		1982.98	-0.01557781		2513.01	-0.01724884
393.2	0.06922632		923.19	0.00840602		1453.18	-0.00043177		1983.18	-0.01662346		2513.21	-0.01777078
393.4	0.06950566		923.39	0.00859405		1453.38	-0.00012934		1983.38	-0.01783064		2513.41	-0.01873255
393.6	0.06934332		923.59	0.00833014		1453.58	0.00011983		1983.58	-0.01813869		2513.61	-0.01894884
393.8	0.06885443		923.79	0.00896652		1453.78	0.00011897		1983.78	-0.01815244		2513.81	-0.01956978
394	0.06873687		923.99	0.00891068		1453.98	0.00007641		1983.98	-0.01849882		2514.01	-0.02001492
394.2	0.06885113		924.19	0.01000639		1454.18	0.00100388		1984.18	-0.01893332		2514.21	-0.01954569
394.4	0.06845369		924.39	0.01064203		1454.38	0.00123814		1984.38	-0.01804983		2514.41	-0.01988905
394.6	0.06824438		924.59	0.01153431		1454.58	0.00176682		1984.58	-0.01749221		2514.61	-0.02001809
394.8	0.06904752		924.79	0.01212685		1454.78	0.00157949		1984.78	-0.01732426		2514.81	-0.01929669
395	0.06952154		924.99	0.01265735		1454.98	0.00102075		1984.98	-0.01752383		2515.01	-0.01920189
395.2	0.0694665		925.19	0.01306197		1455.18	0.00061981		1985.18	-0.01717588		2515.21	-0.01813087
395.4	0.06921045		925.39	0.01305518		1455.38	0.0005308		1985.38	-0.01737372		2515.41	-0.01897651
395.6	0.06994764		925.59	0.01386183		1455.58	-0.00053682		1985.58	-0.01725806		2515.61	-0.01778076
395.8	0.07023932		925.79	0.01423715		1455.78	-0.00073535		1985.78	-0.01663408		2515.81	-0.0169203
396	0.07007651		925.99	0.01386024		1455.98	-0.00045125		1985.98	-0.01644804		2516.01	-0.01668709
396.2	0.07053678		926.19	0.0132898		1456.18	-0.00049294		1986.18	-0.01621323		2516.21	-0.01624592
396.4	0.07023788		926.39	0.01247548		1456.38	-0.00052252		1986.38	-0.01640191		2516.41	-0.01601426
396.6	0.06961263		926.59	0.01215589		1456.58	-0.00088673		1986.58	-0.01721978		2516.61	-0.01478344
396.8	0.06907164		926.79	0.01113076		1456.78	-0.00153964		1986.78	-0.01758148		2516.81	-0.01475552
397	0.06866513		926.99	0.01004632		1456.98	-0.00083862		1986.98	-0.01720877		2517.01	-0.01525229
397.2	0.06880414		927.19	0.00935216		1457.18	-0.00100521		1987.18	-0.01824061		2517.21	-0.01587611
397.4	0.06854495		927.39	0.0099754		1457.38	-0.00087604		1987.38	-0.01871937		2517.41	-0.01584421
397.6	0.06938988		927.59	0.00958823		1457.58	-0.00090629		1987.58	-0.01763236		2517.61	-0.01640656
397.8	0.0696461		927.79	0.01059952		1457.78	-0.00192063		1987.78	-0.01655918		2517.81	-0.01636354
398	0.06949423		927.99	0.01030657		1457.98	-0.00146037		1987.98	-0.01549526		2518.01	-0.01548983
398.2	0.06978822		928.19	0.01043442		1458.18	-0.001201		1988.18	-0.01501831		2518.21	-0.01523505
398.4	0.06945706		928.39	0.01041691		1458.38	-0.001607		1988.38	-0.01427366		2518.41	-0.01544505
398.6	0.06892764		928.59	0.01089652		1458.58	-0.00162196		1988.58	-0.01454134		2518.61	-0.01537367
398.8	0.06955956		928.79	0.01065077		1458.78	-0.00198323		1988.78	-0.01424731		2518.81	-0.0157439
399	0.0688678		928.99	0.01023998		1458.98	-0.00149009		1988.98	-0.01509902		2519.01	-0.01597898
399.2	0.06850088		929.19	0.01017726		1459.18	-0.00095083		1989.18	-0.01457137		2519.21	-0.01606371
399.4	0.06882438		929.39	0.01030718		1459.38	-0.00030165		1989.38	-0.01428512		2519.41	-0.01711322
399.6	0.06944367		929.59	0.01127262		1459.58	0.00016476		1989.58	-0.01365501		2519.61	-0.0163014
399.8	0.06939757		929.79	0.01159251		1459.78	-0.0000462		1989.78	-0.01334387		2519.81	-0.01659885
400	0.06932525		929.99	0.01133128		1459.98	-0.00008369		1989.98	-0.01330702		2520.01	-0.01613121
400.2	0.06931622		930.19	0.01143836		1460.18	0.00083867		1990.18	-0.01322474		2520.21	-0.01552431
400.4	0.06801792		930.39	0.01151172		1460.38	0.00046104		1990.38	-0.0134355		2520.41	-0.01540066
400.6	0.06710322		930.59	0.01102876		1460.58	-0.00023835		1990.58	-0.01279663		2520.61	-0.01486029
400.8	0.06659156		930.79	0.0098132		1460.78	0.00023779		1990.78	-0.01225489		2520.81	-0.01486987
401	0.06593171		930.99	0.00888232		1460.98	0.00117045		1990.98	-0.01240127		2521.01	-0.01591766
401.2	0.06592128		931.19	0.00882006		1461.18	0.00084487		1991.18	-0.01216003		2521.21	-0.01616506
401.4	0.06521946		931.39	0.009293		1461.38	0.00121482		1991.38	-0.01249485		2521.41	-0.01617323
401.6	0.06602904		931.59	0.00947737		1461.58	0.00074581		1991.58	-0.01181951		2521.61	-0.01688895
401.8	0.06520476		931.79	0.00991602		1461.78	0.00054119		1991.78	-0.01130368		2521.81	-0.01590614
402	0.06522745		931.99	0.00991084		1461.98	0.00076761		1991.98	-0.01095276		2522.01	-0.0154338
402.2	0.06631479		932.19	0.00958246		1462.18	0.00035143		1992.18	-0.01083365		2522.21	-0.01578696
402.4	0.06659986		932.39	0.00948818		1462.38	-0.00013783		1992.38	-0.01210436		2522.41	-0.01664218
402.6	0.06718367		932.59	0.00953369		1462.58	-0.0004878		1992.58	-0.01305682		2522.61	-0.01720595
402.8	0.06897243		932.79	0.00910822		1462.78	0.00029698		1992.78	-0.01297634		2522.81	-0.01759403
403	0.06914089		932.99	0.01018984		1462.98	0.00066128		1992.98	-0.01330192		2523.01	-0.0173737
403.2	0.07003939		933.19	0.01028548		1463.18	0.00034692		1993.18	-0.01306869		2523.21	-0.01742162
403.4	0.0706377		933.39	0.01096601		1463.38	-0.0006108		1993.38	-0.0136867		2523.41	-0.01715856
403.6	0.07147629		933.59	0.01133207		1463.58	-0.00085267		1993.58	-0.01385371		2523.61	-0.0164581
403.8	0.07187529		933.79	0.01064746		1463.78	-0.00139864		1993.78	-0.01373831		2523.81	-0.01616538
404	0.07302228		933.99	0.01056914		1463.98	-0.00166327		1993.98	-0.01350848		2524.01	-0.01515441
404.2	0.07316788		934.19	0.01033721		1464.18	-0.00154468		1994.18	-0.01375275		2524.21	-0.01560472
404.4	0.07286701		934.39	0.0095134		1464.38	-0.00191025		1994.38	-0.0138147		2524.41	-0.01578375
404.6	0.07302518		934.59	0.00900401		1464.58	-0.00124861		1994.58	-0.01277896		2524.61	-0.01529108
404.8	0.07271273		934.79	0.00870906		1464.78	-0.00057859		1994.78	-0.0128055		2524.81	-0.0154947
405	0.07130983		934.99	0.00877389		1464.98	-0.00048779		1994.98	-0.01228413		2525.01	-0.01604623
405.2	0.07115349		935.19	0.00988991		1465.18	0.00020911		1995.18	-0.01201525		2525.21	-0.01622724
405.4	0.0704459		935.39	0.01024214		1465.38	0.00017074		1995.38	-0.01144522		2525.41	-0.0172663
405.6	0.07076462		935.59	0.0103572		1465.58	-0.00042973		1995.58	-0.01134963		2525.61	-0.01746865
405.8	0.06968552		935.79	0.01069565		1465.78	-0.00020366		1995.78	-0.01061912		2525.81	-0.01714918
406	0.06926274		935.99	0.00991263		1465.98	-0.00016212		1995.98	-0.01057375		2526.01	-0.0173235
406.2	0.06923225		936.19	0.00988255		1466.18	-0.00018392		1996.18	-0.01097113		2526.21	-0.01807858
406.4	0.06904762		936.39	0.01069907		1466.38	-0.00027201		1996.38	-0.01192306		2526.41	-0.01888905
406.6	0.06983152		936.59	0.01137081		1466.58	-0.00003752		1996.58	-0.01172618		2526.61	-0.01920881
406.8	0.06978709		936.79	0.01182523		1466.78	0.00084586		1996.78	-0.01178443		2526.81	-0.01923781
407	0.06938428		936.99	0.01173906		1466.98	-0.00041467		1996.98	-0.01279035		2527.01	-0.01878419
407.2	0.0694346		937.19	0.01034223		1467.18	-0.00066763		1997.18	-0.0131505		2527.21	-0.01807518
407.4	0.07016291		937.39	0.01032068		1467.38	-0.00082702		1997.38	-0.01386147		2527.41	-0.0177232
407.6	0.07025118		937.59	0.00958775		1467.58	0.00071294		1997.58	-0.01340434		2527.61	-0.01744115
407.8	0.07027847		937.79	0.00898335		1467.78	0.00143306		1997.78	-0.01432072		2527.81	-0.01691504
408	0.07092954		937.99	0.00963222		1467.98	0.00202707		1997.98	-0.01409575		2528.01	-0.01609179
408.2	0.07055671		938.19	0.00894991		1468.18	0.00213879		1998.18	-0.01377087		2528.21	-0.01613904
408.4	0.069804		938.39	0.0096049		1468.38	0.00248118		1998.38	-0.01338257		2528.41	-0.0153392
408.6	0.06945332		938.59	0.01030395		1468.58	0.00270524		1998.58	-0.01269518		2528.61	-0.01435343
408.8	0.06873457		938.79	0.01035946		1468.78	0.0024173		1998.78	-0.01213771		2528.81	-0.01468519
409	0.06839998		938.99	0.01113005		1468.98	0.00179826		1998.98	-0.01114161		2529.01	-0.01471682
409.2	0.06840587		939.19	0.01098447		1469.18	0.00114263		1999.18	-0.0105286		2529.21	-0.01488086
409.4	0.06879277		939.39	0.0105823		1469.38	-0.00012332		1999.38	-0.01011859		2529.41	-0.01518491
409.6	0.06887827		939.59	0.01090888		1469.58	-0.00054005		1999.58	-0.01031308		2529.61	-0.01506441
409.8	0.06895538		939.79	0.01039744		1469.78	-0.00011802		1999.78	-0.01003985		2529.81	-0.01576234
410	0.06955394		939.99	0.01056572		1469.98	-0.00059287		1999.98	-0.01012278		2530.01	-0.01681563
410.2	0.06985836		940.19	0.0115871		1470.18	-0.00082907		2000.18	-0.00962937		2530.21	-0.01820225
410.4	0.0703927		940.39	0.01211578		1470.38	-0.00031447		2000.38	-0.00985445		2530.41	-0.01894876
410.6	0.07043178		940.59	0.0125229		1470.58	-0.00016253		2000.58	-0.01045233		2530.61	-0.02008332
410.8	0.07064778		940.79	0.01220874		1470.78	-0.00078664		2000.78	-0.01164753		2530.81	-0.02014066
411	0.07143814		940.99	0.01191943		1470.98	-0.00054209		2000.98	-0.01202778		2531.01	-0.02000315
411.2	0.07160569		941.19	0.01186048		1471.18	0.00076231		2001.18	-0.01212455		2531.21	-0.01983148
411.4	0.07255016		941.39	0.01204993		1471.38	0.00226242		2001.38	-0.01259094		2531.41	-0.02036886
411.6	0.07172351		941.59	0.01219106		1471.58	0.00371711		2001.58	-0.01292939		2531.61	-0.0200839
411.8	0.07192384		941.79	0.01231526		1471.78	0.00413707		2001.78	-0.01369368		2531.81	-0.01911951
412	0.07177867		941.99	0.01189954		1471.98	0.0049139		2001.98	-0.01279991		2532.01	-0.01804773
412.2	0.07088066		942.19	0.01133355		1472.18	0.00463359		2002.18	-0.01268824		2532.21	-0.0173602
412.4	0.07097983		942.39	0.01187979		1472.38	0.00505629		2002.38	-0.01276286		2532.41	-0.01642041
412.6	0.07007924		942.59	0.01188451		1472.58	0.00476611		2002.58	-0.01249601		2532.61	-0.01611142
412.8	0.06977384		942.79	0.01150709		1472.78	0.00439539		2002.78	-0.01225401		2532.81	-0.01617383
413	0.06926965		942.99	0.01153507		1472.98	0.00356889		2002.98	-0.01143519		2533.01	-0.01599854
413.2	0.06903162		943.19	0.01062687		1473.18	0.00256574		2003.18	-0.01123633		2533.21	-0.01595509
413.4	0.0693949		943.39	0.01100055		1473.38	0.00201607		2003.38	-0.01076579		2533.41	-0.01563132
413.6	0.06872231		943.59	0.01092324		1473.58	0.00115555		2003.58	-0.01062504		2533.61	-0.01611576
413.8	0.06897138		943.79	0.01026626		1473.78	0.00052325		2003.78	-0.01028445		2533.81	-0.01654643
414	0.06807386		943.99	0.01077946		1473.98	-0.00042252		2003.98	-0.00965374		2534.01	-0.01675795
414.2	0.06749033		944.19	0.01079082		1474.18	-0.00093093		2004.18	-0.00967538		2534.21	-0.01713527
414.4	0.06741318		944.39	0.01127005		1474.38	-0.00187873		2004.38	-0.01002632		2534.41	-0.01734311
414.6	0.06703209		944.59	0.01143539		1474.58	-0.00240509		2004.58	-0.01001091		2534.61	-0.01792786
414.8	0.06804949		944.79	0.01173229		1474.78	-0.00307247		2004.78	-0.01085505		2534.81	-0.01736754
415	0.06826175		944.99	0.01195316		1474.98	-0.00117807		2004.98	-0.01029931		2535.01	-0.01744897
415.2	0.06780103		945.19	0.01205617		1475.18	-0.0005915		2005.18	-0.0104876		2535.21	-0.01812108
415.4	0.06823719		945.39	0.01210824		1475.38	-0.00026656		2005.38	-0.01073201		2535.41	-0.01754515
415.6	0.06830292		945.59	0.01254606		1475.58	0.00031419		2005.58	-0.01154117		2535.61	-0.01648376
415.8	0.06878579		945.79	0.01214394		1475.78	0.00080596		2005.78	-0.01209178		2535.81	-0.01545764
416	0.06865813		945.99	0.01141303		1475.98	0.00135191		2005.98	-0.01234944		2536.01	-0.01483016
416.2	0.06977861		946.19	0.01183051		1476.18	0.00218452		2006.18	-0.01267219		2536.21	-0.01501577
416.4	0.07077424		946.39	0.01184192		1476.38	0.00313094		2006.38	-0.01296258		2536.41	-0.01525517
416.6	0.07058213		946.59	0.01192363		1476.58	0.00290738		2006.58	-0.01243277		2536.61	-0.01553394
416.8	0.07132076		946.79	0.01172264		1476.78	0.00360747		2006.78	-0.01235608		2536.81	-0.01569169
417	0.07191512		946.99	0.01133899		1476.98	0.00392544		2006.98	-0.01212937		2537.01	-0.01629437
417.2	0.07295647		947.19	0.01031293		1477.18	0.00358926		2007.18	-0.01219488		2537.21	-0.01660486
417.4	0.07307695		947.39	0.01035838		1477.38	0.00385954		2007.38	-0.01236469		2537.41	-0.01643118
417.6	0.07259325		947.59	0.01047978		1477.58	0.00378757		2007.58	-0.01375932		2537.61	-0.01648523
417.8	0.07229534		947.79	0.01064495		1477.78	0.00439656		2007.78	-0.01341395		2537.81	-0.01676049
418	0.07168203		947.99	0.01065599		1477.98	0.00432997		2007.98	-0.01307879		2538.01	-0.01667092
418.2	0.07182772		948.19	0.01116903		1478.18	0.0037694		2008.18	-0.01330755		2538.21	-0.01698047
418.4	0.07177562		948.39	0.01093018		1478.38	0.00381092		2008.38	-0.01328111		2538.41	-0.01659994
418.6	0.07165396		948.59	0.0115032		1478.58	0.00471543		2008.58	-0.01355912		2538.61	-0.01625963
418.8	0.07137013		948.79	0.01248942		1478.78	0.0040365		2008.78	-0.01351775		2538.81	-0.0162643
419	0.07073994		948.99	0.01226603		1478.98	0.00433998		2008.98	-0.01222362		2539.01	-0.01665395
419.2	0.07023896		949.19	0.01204573		1479.18	0.00298865		2009.18	-0.01172585		2539.21	-0.01611298
419.4	0.06972698		949.39	0.01151199		1479.38	0.00165792		2009.38	-0.01175095		2539.41	-0.01564866
419.6	0.06922364		949.59	0.01058693		1479.58	0.00211295		2009.58	-0.01188282		2539.61	-0.01470083
419.8	0.06865815		949.79	0.00979643		1479.78	0.00173133		2009.78	-0.01162946		2539.81	-0.01501006
420	0.06825266		949.99	0.00969222		1479.98	0.00170308		2009.98	-0.01078759		2540.01	-0.01545061
420.2	0.06836987		950.19	0.01014228		1480.18	0.00181499		2010.18	-0.01009342		2540.21	-0.01526902
420.4	0.06783465		950.39	0.01009546		1480.38	0.00096308		2010.38	-0.01048808		2540.41	-0.01529636
420.6	0.06785086		950.59	0.01000806		1480.58	0.000521		2010.58	-0.01024809		2540.61	-0.01511472
420.8	0.06778363		950.79	0.00933521		1480.78	0.00086291		2010.78	-0.0105443		2540.81	-0.01450873
421	0.06843683		950.99	0.00819237		1480.98	-0.00015978		2010.98	-0.01114073		2541.01	-0.01523535
421.2	0.06901416		951.19	0.00833337		1481.18	-0.00072161		2011.18	-0.01154543		2541.21	-0.0148205
421.4	0.06931173		951.39	0.00935819		1481.38	-0.0008093		2011.38	-0.01213156		2541.41	-0.01433442
421.6	0.06890026		951.59	0.01048518		1481.58	-0.00111197		2011.58	-0.01280229		2541.61	-0.01429269
421.8	0.06966354		951.79	0.01003468		1481.78	-0.00168877		2011.78	-0.01233526		2541.81	-0.01434009
422	0.0697784		951.99	0.01076397		1481.98	-0.00213774		2011.98	-0.01220147		2542.01	-0.01350046
422.2	0.07040415		952.19	0.01064793		1482.18	-0.00163484		2012.18	-0.01308363		2542.21	-0.01339418
422.4	0.07086432		952.39	0.01061624		1482.38	-0.00122636		2012.38	-0.01361375		2542.41	-0.01346018
422.6	0.07129666		952.59	0.01120309		1482.58	-0.00044123		2012.58	-0.01321993		2542.61	-0.01370314
422.8	0.07177141		952.79	0.01129072		1482.78	-0.00145095		2012.78	-0.01322255		2542.81	-0.01374082
423	0.07082341		952.99	0.01128231		1482.98	-0.00086604		2012.98	-0.01333174		2543.01	-0.01382687
423.2	0.07030546		953.19	0.01093623		1483.18	-0.00082236		2013.18	-0.01407056		2543.21	-0.01430218
423.4	0.06997307		953.39	0.01078846		1483.38	-0.00039969		2013.38	-0.01465521		2543.41	-0.01507658
423.6	0.06977252		953.59	0.0105773		1483.58	0.00112782		2013.58	-0.01466581		2543.61	-0.01446694
423.8	0.0693525		953.79	0.01148194		1483.78	0.00126812		2013.78	-0.01457467		2543.81	-0.016136
424	0.06835727		953.99	0.01170582		1483.98	0.00176988		2013.98	-0.01480136		2544.01	-0.01635741
424.2	0.06735322		954.19	0.01126914		1484.18	0.00196316		2014.18	-0.01583283		2544.21	-0.01586218
424.4	0.06761712		954.39	0.01044648		1484.38	0.0026149		2014.38	-0.01651614		2544.41	-0.01638997
424.6	0.06797296		954.59	0.00985457		1484.58	0.00270173		2014.58	-0.0161289		2544.61	-0.01597289
424.8	0.06801237		954.79	0.00962453		1484.78	0.00296125		2014.78	-0.01682957		2544.81	-0.01653326
425	0.06883555		954.99	0.01026309		1484.98	0.00270564		2014.98	-0.01638587		2545.01	-0.0183381
425.2	0.06958182		955.19	0.01095813		1485.18	0.00282576		2015.18	-0.01616809		2545.21	-0.01751415
425.4	0.07036601		955.39	0.01059318		1485.38	0.00331279		2015.38	-0.01576707		2545.41	-0.01773309
425.6	0.07070506		955.59	0.01029646		1485.58	0.00191964		2015.58	-0.01532989		2545.61	-0.0179429
425.8	0.07129403		955.79	0.00926105		1485.78	0.00130569		2015.78	-0.01534432		2545.81	-0.01731476
426	0.07115574		955.99	0.00973173		1485.98	0.00138938		2015.98	-0.01524456		2546.01	-0.01653102
426.2	0.0717405		956.19	0.00893175		1486.18	0.00205856		2016.18	-0.01485993		2546.21	-0.01651709
426.4	0.07178107		956.39	0.00923936		1486.38	0.0017011		2016.38	-0.01385725		2546.41	-0.01576006
426.6	0.07204139		956.59	0.00954022		1486.58	0.00163865		2016.58	-0.01326955		2546.61	-0.01589993
426.8	0.07228184		956.79	0.0097387		1486.78	0.00080576		2016.78	-0.01230358		2546.81	-0.01535354
427	0.0716217		956.99	0.01037678		1486.98	0.00038742		2016.98	-0.0122647		2547.01	-0.01536426
427.2	0.07190698		957.19	0.00999358		1487.18	0.00046159		2017.18	-0.01164756		2547.21	-0.01498431
427.4	0.07281172		957.39	0.01013962		1487.38	0.00084935		2017.38	-0.01103949		2547.41	-0.01474751
427.6	0.07322341		957.59	0.01095805		1487.58	0.00097801		2017.58	-0.01010705		2547.61	-0.01479297
427.8	0.0730183		957.79	0.01131913		1487.78	0.0008207		2017.78	-0.01025308		2547.81	-0.01541613
428	0.07226901		957.99	0.01116032		1487.98	0.00128029		2017.98	-0.00986641		2548.01	-0.01519445
428.2	0.07232631		958.19	0.01110303		1488.18	0.0012635		2018.18	-0.01000847		2548.21	-0.01490303
428.4	0.07232347		958.39	0.01163842		1488.38	0.00106769		2018.38	-0.00951742		2548.41	-0.01508073
428.6	0.07165255		958.59	0.01254683		1488.58	0.00076601		2018.58	-0.01013676		2548.61	-0.01536601
428.8	0.0705262		958.79	0.01332504		1488.78	0.00163477		2018.78	-0.01067857		2548.81	-0.01630468
429	0.07019017		958.99	0.01466886		1488.98	0.0016223		2018.98	-0.00962299		2549.01	-0.01695322
429.2	0.06991397		959.19	0.01367883		1489.18	0.00216242		2019.18	-0.01055206		2549.21	-0.01611996
429.4	0.06914761		959.39	0.01353028		1489.38	0.00252424		2019.38	-0.01118566		2549.41	-0.01617483
429.6	0.06843445		959.59	0.01359051		1489.58	0.00134381		2019.58	-0.01172904		2549.61	-0.01574649
429.8	0.06727288		959.79	0.01346163		1489.78	0.00170445		2019.78	-0.0130543		2549.81	-0.01520977
430	0.06645657		959.99	0.01323322		1489.98	0.00186107		2019.98	-0.01329036		2550.01	-0.01497023
430.2	0.0663638		960.19	0.01274647		1490.18	0.0017957		2020.18	-0.0132088		2550.21	-0.01490815
430.4	0.06628763		960.39	0.01169864		1490.38	0.00183541		2020.38	-0.01332024		2550.41	-0.01441655
430.6	0.0665469		960.59	0.01169251		1490.58	0.00201462		2020.58	-0.01420867		2550.61	-0.01537533
430.8	0.06644953		960.79	0.01121498		1490.78	0.00154822		2020.78	-0.0143026		2550.81	-0.0149297
431	0.06679679		960.99	0.01039043		1490.98	0.00145174		2020.98	-0.01561371		2551.01	-0.01476577
431.2	0.06694314		961.19	0.00944652		1491.18	0.00242496		2021.18	-0.01539908		2551.21	-0.01513237
431.4	0.06730682		961.39	0.01006739		1491.38	0.00271325		2021.38	-0.01516259		2551.41	-0.01545884
431.6	0.06728286		961.59	0.01096062		1491.58	0.00210884		2021.58	-0.0147453		2551.61	-0.0153922
431.8	0.066837		961.79	0.01059131		1491.78	0.00238719		2021.78	-0.01487		2551.81	-0.01583808
432	0.06746864		961.99	0.0106618		1491.98	0.00171169		2021.98	-0.01329728		2552.01	-0.01584872
432.2	0.0680504		962.19	0.01032065		1492.18	0.00152257		2022.18	-0.01313686		2552.21	-0.01594067
432.4	0.06786143		962.39	0.01031991		1492.38	0.00096942		2022.38	-0.01211606		2552.41	-0.01610423
432.6	0.06843642		962.59	0.01099007		1492.58	0.00132155		2022.58	-0.01123245		2552.61	-0.01596248
432.8	0.06839132		962.79	0.01143819		1492.78	0.00170658		2022.78	-0.01111608		2552.81	-0.01574499
433	0.06886071		962.99	0.01146197		1492.98	0.00172568		2022.98	-0.01085009		2553.01	-0.01567501
433.2	0.0702002		963.19	0.01083702		1493.18	0.00229554		2023.18	-0.01182684		2553.21	-0.01497853
433.4	0.07075302		963.39	0.01150186		1493.38	0.00177517		2023.38	-0.01211835		2553.41	-0.01473406
433.6	0.07161454		963.59	0.01142871		1493.58	0.00139274		2023.58	-0.01182936		2553.61	-0.01429954
433.8	0.07167893		963.79	0.01118597		1493.78	0.00120059		2023.78	-0.012534		2553.81	-0.01360241
434	0.07180752		963.99	0.0105636		1493.98	0.00120815		2023.98	-0.01338301		2554.01	-0.01310712
434.2	0.07247873		964.19	0.01062588		1494.18	0.00185383		2024.18	-0.0138232		2554.21	-0.01301564
434.4	0.07300803		964.39	0.01090838		1494.38	0.0025833		2024.38	-0.01388954		2554.41	-0.01316103
434.6	0.07228467		964.59	0.01186602		1494.58	0.00218608		2024.58	-0.01479439		2554.61	-0.01362884
434.8	0.07158301		964.79	0.01179499		1494.78	0.00195728		2024.78	-0.01509875		2554.81	-0.01417827
435	0.07192803		964.99	0.01120194		1494.98	0.00137205		2024.98	-0.01500313		2555.01	-0.01441333
435.2	0.0712908		965.19	0.01159345		1495.18	0.00110409		2025.18	-0.01473542		2555.21	-0.01495837
435.4	0.07029264		965.39	0.0119546		1495.38	0.00094253		2025.38	-0.01475086		2555.41	-0.01480083
435.6	0.06990942		965.59	0.0113882		1495.58	0.00051633		2025.58	-0.01417872		2555.61	-0.0145972
435.8	0.07014862		965.79	0.01036372		1495.78	0.00113492		2025.78	-0.01414767		2555.81	-0.01573305
436	0.06950587		965.99	0.00994361		1495.98	0.00030246		2025.98	-0.01348944		2556.01	-0.01676973
436.2	0.06911886		966.19	0.01005586		1496.18	0.0006048		2026.18	-0.01426969		2556.21	-0.01725411
436.4	0.06858767		966.39	0.01062839		1496.38	0.00085629		2026.38	-0.01373492		2556.41	-0.01806827
436.6	0.06886307		966.59	0.01139187		1496.58	0.00120965		2026.58	-0.01368816		2556.61	-0.01770291
436.8	0.06828699		966.79	0.01158842		1496.78	0.00104746		2026.78	-0.01363981		2556.81	-0.01748911
437	0.06882193		966.99	0.01160417		1496.98	0.00134841		2026.98	-0.0132885		2557.01	-0.0176637
437.2	0.06913345		967.19	0.01211004		1497.18	0.0012296		2027.18	-0.01235226		2557.21	-0.01740419
437.4	0.06861753		967.39	0.01248158		1497.38	0.00087541		2027.38	-0.01177995		2557.41	-0.01694292
437.6	0.06815817		967.59	0.01181182		1497.58	-0.00016143		2027.58	-0.01136859		2557.61	-0.01574758
437.8	0.0677045		967.79	0.01203726		1497.78	0.0000716		2027.78	-0.01175871		2557.81	-0.01535076
438	0.06758235		967.99	0.01265694		1497.98	0.00023026		2027.98	-0.01183725		2558.01	-0.01500893
438.2	0.0683186		968.19	0.01270825		1498.18	0.00004375		2028.18	-0.01151255		2558.21	-0.01453826
438.4	0.0687631		968.39	0.01212941		1498.38	0.00036228		2028.38	-0.01105036		2558.41	-0.01459014
438.6	0.06878478		968.59	0.01120319		1498.58	-0.00017059		2028.58	-0.01149024		2558.61	-0.01489691
438.8	0.06956848		968.79	0.01092303		1498.78	0.00037399		2028.78	-0.01171826		2558.81	-0.01437599
439	0.07046973		968.99	0.01051356		1498.98	-0.00005689		2028.98	-0.01227115		2559.01	-0.01333449
439.2	0.07036093		969.19	0.01019714		1499.18	0.00049741		2029.18	-0.01306894		2559.21	-0.01288767
439.4	0.06992257		969.39	0.00985042		1499.38	0.00121744		2029.38	-0.0138388		2559.41	-0.01317326
439.6	0.07025908		969.59	0.00987858		1499.58	0.00168101		2029.58	-0.01345995		2559.61	-0.0123058
439.8	0.06996693		969.79	0.00997102		1499.78	0.00259294		2029.78	-0.01368009		2559.81	-0.01316456
440	0.06963929		969.99	0.01067858		1499.98	0.00161695		2029.98	-0.01414718		2560.01	-0.01380368
440.2	0.07011385		970.19	0.01130871		1500.18	0.00301388		2030.18	-0.01491672		2560.21	-0.01442244
440.4	0.07054407		970.39	0.01146872		1500.38	0.00347557		2030.38	-0.01419149		2560.41	-0.0150375
440.6	0.07088822		970.59	0.01219709		1500.58	0.00378906		2030.58	-0.01349202		2560.61	-0.01459784
440.8	0.07091607		970.79	0.0120367		1500.78	0.00363263		2030.78	-0.01300325		2560.81	-0.01364045
441	0.07046445		970.99	0.0113689		1500.98	0.00344387		2030.98	-0.01330449		2561.01	-0.01406328
441.2	0.06975459		971.19	0.01096496		1501.18	0.00274209		2031.18	-0.01252418		2561.21	-0.01391586
441.4	0.06887027		971.39	0.0112271		1501.38	0.00186247		2031.38	-0.01367319		2561.41	-0.01376997
441.6	0.068523		971.59	0.01151527		1501.58	0.00088726		2031.58	-0.01447866		2561.61	-0.01387158
441.8	0.06821094		971.79	0.01253365		1501.78	0.00159399		2031.78	-0.01486513		2561.81	-0.01453443
442	0.06844969		971.99	0.01238255		1501.98	0.00108244		2031.98	-0.0151155		2562.01	-0.01397061
442.2	0.06874377		972.19	0.01237361		1502.18	0.00117783		2032.18	-0.01541916		2562.21	-0.01363439
442.4	0.06969249		972.39	0.01205642		1502.38	0.00155548		2032.38	-0.01508688		2562.41	-0.01412888
442.6	0.06969854		972.59	0.01210176		1502.58	0.00182316		2032.58	-0.01556593		2562.61	-0.01410358
442.8	0.07033162		972.79	0.01259193		1502.78	0.00214112		2032.78	-0.01610241		2562.81	-0.01377342
443	0.06976439		972.99	0.0126393		1502.98	0.00259466		2032.98	-0.01651035		2563.01	-0.01379477
443.2	0.06911407		973.19	0.01269463		1503.18	0.00302409		2033.18	-0.01570976		2563.21	-0.01476257
443.4	0.06918492		973.39	0.01247884		1503.38	0.00323588		2033.38	-0.0149634		2563.41	-0.01524233
443.6	0.06919598		973.59	0.0124571		1503.58	0.00348741		2033.58	-0.01361985		2563.61	-0.01506439
443.8	0.06862709		973.79	0.0125109		1503.78	0.00418085		2033.78	-0.01326774		2563.81	-0.0157775
444	0.06946477		973.99	0.01271324		1503.98	0.00374221		2033.98	-0.01417638		2564.01	-0.01628383
444.2	0.06979078		974.19	0.01243289		1504.18	0.00472152		2034.18	-0.01430903		2564.21	-0.01682444
444.4	0.06933657		974.39	0.0121969		1504.38	0.00369795		2034.38	-0.01358736		2564.41	-0.01649069
444.6	0.06851909		974.59	0.01147179		1504.58	0.00306483		2034.58	-0.01363916		2564.61	-0.01607042
444.8	0.06736704		974.79	0.01000591		1504.78	0.0016986		2034.78	-0.0141695		2564.81	-0.01520503
445	0.06622098		974.99	0.00955533		1504.98	0.00174177		2034.98	-0.01435851		2565.01	-0.01545388
445.2	0.06586573		975.19	0.01040194		1505.18	0.00136566		2035.18	-0.01448998		2565.21	-0.01551972
445.4	0.06483175		975.39	0.0113637		1505.38	0.0001441		2035.38	-0.01493298		2565.41	-0.01553908
445.6	0.064565		975.59	0.01203192		1505.58	0.00016253		2035.58	-0.0142384		2565.61	-0.01569782
445.8	0.06437883		975.79	0.01168725		1505.78	0.00046375		2035.78	-0.01483749		2565.81	-0.01509559
446	0.06453587		975.99	0.01217143		1505.98	0.00078666		2035.98	-0.01421964		2566.01	-0.01492101
446.2	0.06457548		976.19	0.01358463		1506.18	0.00120837		2036.18	-0.014707		2566.21	-0.01495634
446.4	0.06522294		976.39	0.01308453		1506.38	0.00137686		2036.38	-0.0141446		2566.41	-0.01488086
446.6	0.06537305		976.59	0.01295385		1506.58	0.00214859		2036.58	-0.01431195		2566.61	-0.0156629
446.8	0.06651438		976.79	0.01235704		1506.78	0.00196169		2036.78	-0.01434668		2566.81	-0.01676529
447	0.06649272		976.99	0.01212531		1506.98	0.00299871		2036.98	-0.01355615		2567.01	-0.01692875
447.2	0.06763277		977.19	0.01230189		1507.18	0.00247625		2037.18	-0.01232916		2567.21	-0.01727958
447.4	0.06971992		977.39	0.01196741		1507.38	0.00304133		2037.38	-0.01168522		2567.41	-0.01675771
447.6	0.07022662		977.59	0.01137519		1507.58	0.00353232		2037.58	-0.01115313		2567.61	-0.01729116
447.8	0.07115909		977.79	0.01168214		1507.78	0.00362274		2037.78	-0.01127019		2567.81	-0.01676934
448	0.07066276		977.99	0.01158093		1507.98	0.00315089		2037.98	-0.01152888		2568.01	-0.01722879
448.2	0.07028222		978.19	0.01149088		1508.18	0.00277581		2038.18	-0.01120138		2568.21	-0.01654012
448.4	0.06983497		978.39	0.01069456		1508.38	0.00300431		2038.38	-0.01060774		2568.41	-0.01631395
448.6	0.06992811		978.59	0.00980527		1508.58	0.00318957		2038.58	-0.01099296		2568.61	-0.01552963
448.8	0.07049154		978.79	0.00973258		1508.78	0.00288271		2038.78	-0.01116701		2568.81	-0.01495183
449	0.07093402		978.99	0.00965		1508.98	0.00268354		2038.98	-0.01101273		2569.01	-0.01402394
449.2	0.0705352		979.19	0.00976096		1509.18	0.00209568		2039.18	-0.01125421		2569.21	-0.01414984
449.4	0.06992407		979.39	0.00931038		1509.38	0.00260661		2039.38	-0.0112837		2569.41	-0.01413697
449.6	0.06970643		979.59	0.00825914		1509.58	0.00411219		2039.58	-0.01220064		2569.61	-0.01416961
449.8	0.06952027		979.79	0.00781874		1509.78	0.0051901		2039.78	-0.01347232		2569.81	-0.01426532
450	0.06871437		979.99	0.0083803		1509.98	0.00616832		2039.98	-0.01354886		2570.01	-0.01459103
450.2	0.06844871		980.19	0.00875874		1510.18	0.0066214		2040.18	-0.01533326		2570.21	-0.0149399
450.4	0.06841277		980.39	0.00849912		1510.38	0.00671127		2040.38	-0.0152125		2570.41	-0.01512015
450.6	0.06877414		980.59	0.00878524		1510.58	0.00677393		2040.58	-0.01569328		2570.61	-0.01642988
450.8	0.06813589		980.79	0.00928075		1510.78	0.00607562		2040.78	-0.01599497		2570.81	-0.01684298
451	0.06857154		980.99	0.01065704		1510.98	0.00573864		2040.98	-0.015667		2571.01	-0.01685964
451.2	0.0685507		981.19	0.01077329		1511.18	0.00515763		2041.18	-0.01554304		2571.21	-0.01708893
451.4	0.06917728		981.39	0.01081689		1511.38	0.00485361		2041.38	-0.01525971		2571.41	-0.01680875
451.6	0.06822425		981.59	0.01141038		1511.58	0.00408918		2041.58	-0.01455528		2571.61	-0.0175251
451.8	0.0676341		981.79	0.01237546		1511.78	0.00335956		2041.78	-0.01416585		2571.81	-0.01723213
452	0.06713297		981.99	0.01312111		1511.98	0.00316513		2041.98	-0.01324607		2572.01	-0.01725386
452.2	0.06780491		982.19	0.01410279		1512.18	0.00300843		2042.18	-0.01227557		2572.21	-0.01630089
452.4	0.0683793		982.39	0.01371999		1512.38	0.00242343		2042.38	-0.01199153		2572.41	-0.01594335
452.6	0.06914092		982.59	0.01362134		1512.58	0.00102976		2042.58	-0.01111387		2572.61	-0.01495611
452.8	0.06934709		982.79	0.01403425		1512.78	0.00034896		2042.78	-0.01141502		2572.81	-0.01423431
453	0.06838033		982.99	0.01404992		1512.98	0.00015672		2042.98	-0.01100608		2573.01	-0.01327368
453.2	0.06808125		983.19	0.01448021		1513.18	0.00048462		2043.18	-0.01101826		2573.21	-0.01348209
453.4	0.06764593		983.39	0.01447298		1513.38	0.00179683		2043.38	-0.01073965		2573.41	-0.01400529
453.6	0.06714302		983.59	0.01396268		1513.58	0.00196863		2043.58	-0.01052422		2573.61	-0.01359991
453.8	0.06727377		983.79	0.01447362		1513.78	0.00124198		2043.78	-0.01062453		2573.81	-0.01410217
454	0.06723424		983.99	0.01392781		1513.98	0.00166764		2043.98	-0.01193492		2574.01	-0.01425017
454.2	0.06732027		984.19	0.01372362		1514.18	0.002447		2044.18	-0.01248118		2574.21	-0.01537174
454.4	0.06748547		984.39	0.01365011		1514.38	0.00202739		2044.38	-0.01201362		2574.41	-0.01600377
454.6	0.06763972		984.59	0.01425564		1514.58	0.00215413		2044.58	-0.01165859		2574.61	-0.01641784
454.8	0.06689814		984.79	0.01374141		1514.78	0.00176938		2044.78	-0.01219207		2574.81	-0.01721906
455	0.06818161		984.99	0.01271852		1514.98	0.00217053		2044.98	-0.01225963		2575.01	-0.01756953
455.2	0.0679214		985.19	0.01152644		1515.18	0.00236311		2045.18	-0.01290248		2575.21	-0.01790023
455.4	0.06971957		985.39	0.01156609		1515.38	0.00147445		2045.38	-0.01276581		2575.41	-0.01846488
455.6	0.06990575		985.59	0.01204399		1515.58	0.00161633		2045.58	-0.01305409		2575.61	-0.01932067
455.8	0.07071638		985.79	0.01109643		1515.78	0.00085553		2045.78	-0.01329793		2575.81	-0.01874261
456	0.07125578		985.99	0.01168347		1515.98	0.00038543		2045.98	-0.0128803		2576.01	-0.0183942
456.2	0.07013371		986.19	0.01117644		1516.18	-0.00069236		2046.18	-0.01340401		2576.21	-0.01769526
456.4	0.07050815		986.39	0.01065881		1516.38	-0.00180627		2046.38	-0.01381359		2576.41	-0.0168193
456.6	0.07110005		986.59	0.01121768		1516.58	-0.0014763		2046.58	-0.01310377		2576.61	-0.01628835
456.8	0.07011971		986.79	0.01252485		1516.78	-0.00048793		2046.78	-0.01363192		2576.81	-0.01533814
457	0.06947726		986.99	0.0132975		1516.98	-0.00077357		2046.98	-0.01302134		2577.01	-0.0144137
457.2	0.06945303		987.19	0.01416635		1517.18	-0.00078033		2047.18	-0.01284165		2577.21	-0.0137274
457.4	0.06900675		987.39	0.01404652		1517.38	0.00004963		2047.38	-0.0128419		2577.41	-0.01340269
457.6	0.06899488		987.59	0.01439599		1517.58	-0.00104557		2047.58	-0.0130519		2577.61	-0.01257039
457.8	0.06934247		987.79	0.01411139		1517.78	-0.00143095		2047.78	-0.01344511		2577.81	-0.01319013
458	0.069021		987.99	0.01382876		1517.98	-0.00035857		2047.98	-0.01287357		2578.01	-0.01327242
458.2	0.06880949		988.19	0.01373984		1518.18	-0.0001796		2048.18	-0.01120774		2578.21	-0.01397979
458.4	0.0697353		988.39	0.01417779		1518.38	0.0002634		2048.38	-0.01009207		2578.41	-0.01392424
458.6	0.06889919		988.59	0.01449946		1518.58	0.00132414		2048.58	-0.00928095		2578.61	-0.0132239
458.8	0.06872402		988.79	0.01328175		1518.78	0.00165298		2048.78	-0.00942703		2578.81	-0.01328817
459	0.06901282		988.99	0.01300141		1518.98	0.00153727		2048.98	-0.00899555		2579.01	-0.0135148
459.2	0.06966058		989.19	0.01352311		1519.18	0.00130919		2049.18	-0.00934145		2579.21	-0.01457743
459.4	0.07054726		989.39	0.01309951		1519.38	0.00113611		2049.38	-0.00909793		2579.41	-0.01573103
459.6	0.06992195		989.59	0.01366742		1519.58	0.00100012		2049.58	-0.00940415		2579.61	-0.01571024
459.8	0.07050551		989.79	0.01333016		1519.78	0.00061009		2049.78	-0.00919771		2579.81	-0.01598277
460	0.07005472		989.99	0.01330427		1519.98	0.00043369		2049.98	-0.00852355		2580.01	-0.01680743
460.2	0.06960476		990.19	0.01218954		1520.18	0.00108047		2050.18	-0.00913148		2580.21	-0.01656358
460.4	0.06959234		990.39	0.0130889		1520.38	0.00162064		2050.38	-0.00979004		2580.41	-0.01655122
460.6	0.07009847		990.59	0.01336322		1520.58	0.00218491		2050.58	-0.00972879		2580.61	-0.01659435
460.8	0.06823857		990.79	0.01334672		1520.78	0.00295243		2050.78	-0.0112057		2580.81	-0.01577401
461	0.0678181		990.99	0.01289437		1520.98	0.00294957		2050.98	-0.01248646		2581.01	-0.0151518
461.2	0.06864649		991.19	0.01225209		1521.18	0.00330375		2051.18	-0.01351841		2581.21	-0.01505644
461.4	0.06810144		991.39	0.01129437		1521.38	0.00335802		2051.38	-0.01449347		2581.41	-0.01471183
461.6	0.06785118		991.59	0.01068847		1521.58	0.00264708		2051.58	-0.0153909		2581.61	-0.01459616
461.8	0.06717213		991.79	0.00960795		1521.78	0.00292329		2051.78	-0.0156978		2581.81	-0.01491734
462	0.06663067		991.99	0.00940886		1521.98	0.00312076		2051.98	-0.01580159		2582.01	-0.01539431
462.2	0.06634062		992.19	0.00896637		1522.18	0.00304726		2052.18	-0.01570923		2582.21	-0.01565693
462.4	0.06598155		992.39	0.00904225		1522.38	0.0034271		2052.38	-0.01553697		2582.41	-0.01523994
462.6	0.06505809		992.59	0.00843816		1522.58	0.00280908		2052.58	-0.01494185		2582.61	-0.01482486
462.8	0.06565914		992.79	0.00842499		1522.78	0.00188598		2052.78	-0.01411731		2582.81	-0.01510208
463	0.06573089		992.99	0.00852259		1522.98	0.00208751		2052.98	-0.01367391		2583.01	-0.01559149
463.2	0.06669367		993.19	0.00944708		1523.18	0.00265378		2053.18	-0.01337471		2583.21	-0.0162262
463.4	0.06678265		993.39	0.00975125		1523.38	0.00291933		2053.38	-0.01229809		2583.41	-0.01723278
463.6	0.06712836		993.59	0.01120325		1523.58	0.00342778		2053.58	-0.01129113		2583.61	-0.0175984
463.8	0.06778202		993.79	0.0114543		1523.78	0.00381718		2053.78	-0.01057686		2583.81	-0.01772406
464	0.06723957		993.99	0.01200395		1523.98	0.00399529		2053.98	-0.00965272		2584.01	-0.01765524
464.2	0.0672918		994.19	0.01267455		1524.18	0.00470466		2054.18	-0.01032805		2584.21	-0.01746423
464.4	0.06723122		994.39	0.01351782		1524.38	0.0038302		2054.38	-0.00997057		2584.41	-0.01798767
464.6	0.06759257		994.59	0.01305797		1524.58	0.00385527		2054.58	-0.00947353		2584.61	-0.01812098
464.8	0.06692666		994.79	0.01278906		1524.78	0.00392805		2054.78	-0.0103468		2584.81	-0.01790685
465	0.06757924		994.99	0.01316874		1524.98	0.00361806		2054.98	-0.01070951		2585.01	-0.0178535
465.2	0.06790406		995.19	0.01245396		1525.18	0.00307067		2055.18	-0.01124235		2585.21	-0.01770757
465.4	0.06677595		995.39	0.0120011		1525.38	0.00217469		2055.38	-0.01238897		2585.41	-0.01707631
465.6	0.06665262		995.59	0.01251023		1525.58	0.00160352		2055.58	-0.01237292		2585.61	-0.01746135
465.8	0.0669103		995.79	0.01240235		1525.78	0.00132087		2055.78	-0.01288921		2585.81	-0.01706097
466	0.06744709		995.99	0.01242833		1525.98	0.00026293		2055.98	-0.01372467		2586.01	-0.01756075
466.2	0.06736333		996.19	0.01243495		1526.18	-0.00035874		2056.18	-0.01405237		2586.21	-0.01711537
466.4	0.06786396		996.39	0.01225027		1526.38	-0.00028468		2056.38	-0.01369359		2586.41	-0.01718271
466.6	0.06786297		996.59	0.01268145		1526.58	-0.00032099		2056.58	-0.01292328		2586.61	-0.01680227
466.8	0.06837084		996.79	0.01284657		1526.78	0.00061386		2056.78	-0.01302091		2586.81	-0.01666304
467	0.06902958		996.99	0.0126586		1526.98	0.00201568		2056.98	-0.01347231		2587.01	-0.01647146
467.2	0.06929393		997.19	0.0130802		1527.18	0.00233263		2057.18	-0.01274244		2587.21	-0.01677349
467.4	0.06931952		997.39	0.01321167		1527.38	0.00270901		2057.38	-0.01248345		2587.41	-0.0163726
467.6	0.06912429		997.59	0.01338685		1527.58	0.00353849		2057.58	-0.01272044		2587.61	-0.01543482
467.8	0.0691771		997.79	0.01389437		1527.78	0.0040048		2057.78	-0.01262724		2587.81	-0.01461696
468	0.06860334		997.99	0.01422898		1527.98	0.00416516		2057.98	-0.01241483		2588.01	-0.01453024
468.2	0.06840812		998.19	0.0139374		1528.18	0.0037733		2058.18	-0.01201479		2588.21	-0.01538853
468.4	0.06821156		998.39	0.01350891		1528.38	0.00367193		2058.38	-0.01200219		2588.41	-0.01569733
468.6	0.06795198		998.59	0.01219162		1528.58	0.00421988		2058.58	-0.01244277		2588.61	-0.01541271
468.8	0.06811751		998.79	0.01290584		1528.78	0.00424863		2058.78	-0.01288998		2588.81	-0.01517169
469	0.06706305		998.99	0.01266421		1528.98	0.00418819		2058.98	-0.0129533		2589.01	-0.01583105
469.2	0.06671424		999.19	0.01244518		1529.18	0.0043201		2059.18	-0.01329696		2589.21	-0.01535754
469.4	0.06668837		999.39	0.01273223		1529.38	0.0043118		2059.38	-0.01331417		2589.41	-0.01576783
469.6	0.06734765		999.59	0.01298889		1529.58	0.00448842		2059.58	-0.01299751		2589.61	-0.01641234
469.8	0.0685131		999.79	0.01229993		1529.78	0.00432818		2059.78	-0.01306461		2589.81	-0.0167384
470	0.06908566		999.99	0.0123226		1529.98	0.00392695		2059.98	-0.01314472		2590.01	-0.01752886
470.2	0.06925399		1000.19	0.01191403		1530.18	0.0033552		2060.18	-0.01294037		2590.21	-0.01803063
470.4	0.0691723		1000.39	0.01199385		1530.38	0.00311114		2060.38	-0.01163142		2590.41	-0.01923658
470.6	0.06924963		1000.59	0.01260335		1530.58	0.00318157		2060.58	-0.01048945		2590.61	-0.01920711
470.8	0.06978473		1000.79	0.01155825		1530.78	0.00354916		2060.78	-0.01067578		2590.81	-0.01888282
471	0.0700569		1000.99	0.01196057		1530.98	0.00275624		2060.98	-0.01000742		2591.01	-0.01865402
471.2	0.07003243		1001.19	0.0119659		1531.18	0.0019004		2061.18	-0.00958023		2591.21	-0.01789005
471.4	0.0691471		1001.39	0.01208268		1531.38	0.00118686		2061.38	-0.01021964		2591.41	-0.01738784
471.6	0.06884756		1001.59	0.01227821		1531.58	0.00089103		2061.58	-0.01032113		2591.61	-0.0169344
471.8	0.06773198		1001.79	0.0128103		1531.78	0.00051265		2061.78	-0.00983983		2591.81	-0.01684631
472	0.06676314		1001.99	0.01255812		1531.98	-0.00007362		2061.98	-0.00944631		2592.01	-0.01701816
472.2	0.06636265		1002.19	0.01253762		1532.18	0.00012036		2062.18	-0.00964405		2592.21	-0.01772248
472.4	0.06602102		1002.39	0.01240025		1532.38	0.00044422		2062.38	-0.01071991		2592.41	-0.01729886
472.6	0.0664528		1002.59	0.01143205		1532.58	0.00065229		2062.58	-0.01027233		2592.61	-0.01650778
472.8	0.06587859		1002.79	0.01207924		1532.78	0.00158011		2062.78	-0.01130167		2592.81	-0.01546289
473	0.06535836		1002.99	0.01181531		1532.98	0.00236755		2062.98	-0.01180017		2593.01	-0.0154511
473.2	0.06548134		1003.19	0.01264831		1533.18	0.00426337		2063.18	-0.01234902		2593.21	-0.01498604
473.4	0.06597156		1003.39	0.01198652		1533.38	0.00400734		2063.38	-0.01317336		2593.41	-0.01580493
473.6	0.06702939		1003.59	0.01192568		1533.58	0.00381675		2063.58	-0.01337825		2593.61	-0.01621189
473.8	0.0682118		1003.79	0.01166149		1533.78	0.00411737		2063.78	-0.0129471		2593.81	-0.01730943
474	0.06900772		1003.99	0.01130711		1533.98	0.0036988		2063.98	-0.01267988		2594.01	-0.01710328
474.2	0.06882964		1004.19	0.01128608		1534.18	0.0036077		2064.18	-0.01263497		2594.21	-0.01810137
474.4	0.06844233		1004.39	0.01222662		1534.38	0.00380248		2064.38	-0.0117963		2594.41	-0.01848152
474.6	0.06893727		1004.59	0.01213584		1534.58	0.00384449		2064.58	-0.0110681		2594.61	-0.01841788
474.8	0.06916876		1004.79	0.01236035		1534.78	0.00308254		2064.78	-0.01201483		2594.81	-0.01857236
475	0.06926843		1004.99	0.01250905		1534.98	0.00213353		2064.98	-0.01197353		2595.01	-0.01902652
475.2	0.07002724		1005.19	0.01238406		1535.18	0.00181406		2065.18	-0.01226023		2595.21	-0.01880467
475.4	0.06910501		1005.39	0.01234731		1535.38	0.00140922		2065.38	-0.01239599		2595.41	-0.0194891
475.6	0.0688326		1005.59	0.01231946		1535.58	0.00056606		2065.58	-0.01205481		2595.61	-0.0199661
475.8	0.06797657		1005.79	0.01190358		1535.78	-0.00000642		2065.78	-0.01109821		2595.81	-0.01954101
476	0.06830061		1005.99	0.01208264		1535.98	-0.00040731		2065.98	-0.01085756		2596.01	-0.0193702
476.2	0.06766421		1006.19	0.01157409		1536.18	-0.00069042		2066.18	-0.0118725		2596.21	-0.01864861
476.4	0.06760082		1006.39	0.01114833		1536.38	-0.00086208		2066.38	-0.01267635		2596.41	-0.01804249
476.6	0.06785144		1006.59	0.01121609		1536.58	0.00001307		2066.58	-0.01312294		2596.61	-0.01708922
476.8	0.06647503		1006.79	0.01179589		1536.78	0.00150949		2066.78	-0.01446138		2596.81	-0.0160468
477	0.066387		1006.99	0.01245988		1536.98	0.0023925		2066.98	-0.01375514		2597.01	-0.01583733
477.2	0.06638084		1007.19	0.01331812		1537.18	0.00272518		2067.18	-0.01435605		2597.21	-0.01517125
477.4	0.06732948		1007.39	0.01237716		1537.38	0.00268653		2067.38	-0.01396139		2597.41	-0.0153508
477.6	0.0682435		1007.59	0.01305685		1537.58	0.00317608		2067.58	-0.01349537		2597.61	-0.01536057
477.8	0.06874116		1007.79	0.01302397		1537.78	0.00364342		2067.78	-0.01312182		2597.81	-0.01584199
478	0.06869184		1007.99	0.01359509		1537.98	0.00329698		2067.98	-0.01243848		2598.01	-0.01583497
478.2	0.06917614		1008.19	0.01388872		1538.18	0.00378303		2068.18	-0.01261931		2598.21	-0.01617525
478.4	0.06981314		1008.39	0.01409242		1538.38	0.00410703		2068.38	-0.0121882		2598.41	-0.01620019
478.6	0.06994153		1008.59	0.01392129		1538.58	0.00345015		2068.58	-0.01212244		2598.61	-0.01677762
478.8	0.06957896		1008.79	0.01458531		1538.78	0.00330619		2068.78	-0.01231968		2598.81	-0.01682411
479	0.06899766		1008.99	0.01377673		1538.98	0.00430295		2068.98	-0.01173617		2599.01	-0.01762825
479.2	0.06945307		1009.19	0.0141106		1539.18	0.00437814		2069.18	-0.01106489		2599.21	-0.01815467
479.4	0.06894701		1009.39	0.01450889		1539.38	0.00339822		2069.38	-0.01116565		2599.41	-0.0192937
479.6	0.06865081		1009.59	0.01355659		1539.58	0.00198982		2069.58	-0.01076707		2599.61	-0.01952538
479.8	0.06899826		1009.79	0.01321788		1539.78	0.00182767		2069.78	-0.01102976		2599.81	-0.01889003
480	0.06882072		1009.99	0.0133066		1539.98	0.00163016		2069.98	-0.01229593		2600.01	-0.01897388
480.2	0.06821518		1010.19	0.01301825		1540.18	0.00115639		2070.18	-0.01254419		2600.21	-0.01932227
480.4	0.06773799		1010.39	0.01324509		1540.38	0.00209154		2070.38	-0.01310769		2600.41	-0.01964765
480.6	0.06645929		1010.59	0.01424941		1540.58	0.0018729		2070.58	-0.01401357		2600.61	-0.01978518
480.8	0.06632559		1010.79	0.01322576		1540.78	0.00195427		2070.78	-0.01413484		2600.81	-0.01919405
481	0.06641646		1010.99	0.01289432		1540.98	0.00216713		2070.98	-0.01384989		2601.01	-0.01793704
481.2	0.06698987		1011.19	0.01317881		1541.18	0.00171691		2071.18	-0.01442143		2601.21	-0.01727397
481.4	0.06702577		1011.39	0.01178522		1541.38	0.00298319		2071.38	-0.0142337		2601.41	-0.01787924
481.6	0.06694114		1011.59	0.01306523		1541.58	0.00279372		2071.58	-0.0150427		2601.61	-0.01751946
481.8	0.06698598		1011.79	0.01320458		1541.78	0.00291792		2071.78	-0.01412467		2601.81	-0.01802311
482	0.06685979		1011.99	0.01324231		1541.98	0.00263146		2071.98	-0.01395214		2602.01	-0.01774137
482.2	0.06699037		1012.19	0.01273103		1542.18	0.00329087		2072.18	-0.01404353		2602.21	-0.01680468
482.4	0.0664364		1012.39	0.01207947		1542.38	0.00351001		2072.38	-0.01324689		2602.41	-0.01651905
482.6	0.0651622		1012.59	0.01197076		1542.58	0.00288487		2072.58	-0.01309926		2602.61	-0.01631924
482.8	0.06470751		1012.79	0.01168022		1542.78	0.00446367		2072.78	-0.01227747		2602.81	-0.01638771
483	0.06572141		1012.99	0.01109843		1542.98	0.00515155		2072.98	-0.0118336		2603.01	-0.01724458
483.2	0.0670413		1013.19	0.01048417		1543.18	0.00431409		2073.18	-0.01179143		2603.21	-0.01642155
483.4	0.06808795		1013.39	0.01083362		1543.38	0.00396616		2073.38	-0.01185948		2603.41	-0.01674369
483.6	0.06824741		1013.59	0.00962639		1543.58	0.00371734		2073.58	-0.01218771		2603.61	-0.01687326
483.8	0.06863846		1013.79	0.00989359		1543.78	0.00453026		2073.78	-0.01265075		2603.81	-0.01691373
484	0.06798847		1013.99	0.00999485		1543.98	0.00449507		2073.98	-0.01248303		2604.01	-0.01651077
484.2	0.06741315		1014.19	0.01026771		1544.18	0.00425586		2074.18	-0.01226719		2604.21	-0.01719406
484.4	0.06687115		1014.39	0.00994355		1544.38	0.00497416		2074.38	-0.01354164		2604.41	-0.01682806
484.6	0.06711286		1014.59	0.00931502		1544.58	0.00379892		2074.58	-0.01401858		2604.61	-0.01728125
484.8	0.06836689		1014.79	0.00836026		1544.78	0.00395502		2074.78	-0.01368528		2604.81	-0.01741397
485	0.06864415		1014.99	0.00870556		1544.98	0.0040853		2074.98	-0.0139215		2605.01	-0.01781886
485.2	0.06864566		1015.19	0.0092525		1545.18	0.00361716		2075.18	-0.01460182		2605.21	-0.01836106
485.4	0.06836105		1015.39	0.00940838		1545.38	0.00385887		2075.38	-0.01505582		2605.41	-0.01892701
485.6	0.06864046		1015.59	0.00989721		1545.58	0.00310754		2075.58	-0.0145875		2605.61	-0.01938402
485.8	0.06905435		1015.79	0.0104209		1545.78	0.00228403		2075.78	-0.01385368		2605.81	-0.01991509
486	0.0684877		1015.99	0.01014384		1545.98	0.00188483		2075.98	-0.01397858		2606.01	-0.01982732
486.2	0.06795402		1016.19	0.0097901		1546.18	0.00140256		2076.18	-0.01354868		2606.21	-0.01980658
486.4	0.06769713		1016.39	0.00968265		1546.38	0.00015511		2076.38	-0.01292037		2606.41	-0.02069449
486.6	0.06718116		1016.59	0.01002875		1546.58	-0.00002178		2076.58	-0.0129152		2606.61	-0.02102247
486.8	0.06771505		1016.79	0.01011587		1546.78	0.00019258		2076.78	-0.01194597		2606.81	-0.02082407
487	0.06776019		1016.99	0.01046856		1546.98	-0.00026193		2076.98	-0.01138853		2607.01	-0.02004169
487.2	0.06705742		1017.19	0.01048795		1547.18	-0.00049525		2077.18	-0.01124596		2607.21	-0.01884246
487.4	0.06632038		1017.39	0.01149416		1547.38	-0.00012083		2077.38	-0.01076199		2607.41	-0.01839059
487.6	0.06482654		1017.59	0.01111163		1547.58	0.00049101		2077.58	-0.0110753		2607.61	-0.01872743
487.8	0.06398696		1017.79	0.01171256		1547.78	0.00164549		2077.78	-0.01158796		2607.81	-0.01782527
488	0.06308397		1017.99	0.01197447		1547.98	0.0014204		2077.98	-0.01156692		2608.01	-0.01795704
488.2	0.06303218		1018.19	0.01182402		1548.18	0.00205416		2078.18	-0.01240119		2608.21	-0.01781451
488.4	0.06289234		1018.39	0.01175173		1548.38	0.00196473		2078.38	-0.01326023		2608.41	-0.01771279
488.6	0.06304658		1018.59	0.01196581		1548.58	0.00157516		2078.58	-0.01361156		2608.61	-0.0180191
488.8	0.06293428		1018.79	0.01343781		1548.78	0.00166273		2078.78	-0.0136737		2608.81	-0.01798598
489	0.06324944		1018.99	0.01365737		1548.98	0.00179741		2078.98	-0.0144891		2609.01	-0.01767053
489.2	0.06335347		1019.19	0.01308485		1549.18	0.00180787		2079.18	-0.01433071		2609.21	-0.01683035
489.4	0.06369193		1019.39	0.01228396		1549.38	0.00129757		2079.38	-0.014026		2609.41	-0.0170494
489.6	0.06430055		1019.59	0.01111273		1549.58	0.00071567		2079.58	-0.01355464		2609.61	-0.01677064
489.8	0.06480121		1019.79	0.01174084		1549.78	0.0007607		2079.78	-0.01303719		2609.81	-0.01670331
490	0.06502845		1019.99	0.01031589		1549.98	0.00111994		2079.98	-0.01199375		2610.01	-0.01687954
490.2	0.06520403		1020.19	0.01010515		1550.18	-0.00031614		2080.18	-0.01088064		2610.21	-0.01742937
490.4	0.06529899		1020.39	0.01002366		1550.38	-0.00093691		2080.38	-0.00946335		2610.41	-0.01771658
490.6	0.06508707		1020.59	0.00897597		1550.58	-0.00110729		2080.58	-0.00937449		2610.61	-0.01668125
490.8	0.06517537		1020.79	0.0092842		1550.78	-0.00182815		2080.78	-0.00854478		2610.81	-0.01560117
491	0.06488913		1020.99	0.00940734		1550.98	-0.00161783		2080.98	-0.00797543		2611.01	-0.01569626
491.2	0.06508736		1021.19	0.00864338		1551.18	-0.00196174		2081.18	-0.00785499		2611.21	-0.01530566
491.4	0.06562015		1021.39	0.00884202		1551.38	-0.00141659		2081.38	-0.00797996		2611.41	-0.01554687
491.6	0.06727911		1021.59	0.0087788		1551.58	-0.00126617		2081.58	-0.00924306		2611.61	-0.01692367
491.8	0.06767582		1021.79	0.00937176		1551.78	-0.00165205		2081.78	-0.0105621		2611.81	-0.01765536
492	0.06797595		1021.99	0.00991208		1551.98	-0.0014636		2081.98	-0.01105125		2612.01	-0.01852466
492.2	0.06793049		1022.19	0.01065978		1552.18	-0.00057684		2082.18	-0.01268865		2612.21	-0.01751754
492.4	0.06794755		1022.39	0.01233114		1552.38	-0.00108449		2082.38	-0.0144589		2612.41	-0.01773874
492.6	0.06778704		1022.59	0.0129737		1552.58	-0.00142943		2082.58	-0.01532599		2612.61	-0.017081
492.8	0.06742231		1022.79	0.01333346		1552.78	-0.00128799		2082.78	-0.01504993		2612.81	-0.01693689
493	0.06739187		1022.99	0.01248075		1552.98	-0.00123633		2082.98	-0.01541578		2613.01	-0.01719005
493.2	0.06707288		1023.19	0.01169428		1553.18	-0.00111819		2083.18	-0.0157359		2613.21	-0.01758667
493.4	0.06634464		1023.39	0.01226411		1553.38	-0.00122568		2083.38	-0.01575719		2613.41	-0.01765388
493.6	0.06623932		1023.59	0.01247504		1553.58	-0.00063111		2083.58	-0.01561188		2613.61	-0.0168202
493.8	0.06622346		1023.79	0.01309636		1553.78	0.00015916		2083.78	-0.01489541		2613.81	-0.01678603
494	0.06587955		1023.99	0.01284869		1553.98	0.00042975		2083.98	-0.01409773		2614.01	-0.01705577
494.2	0.06478334		1024.19	0.01312754		1554.18	0.00055165		2084.18	-0.0133374		2614.21	-0.01640198
494.4	0.06455076		1024.39	0.01288448		1554.38	0.00102883		2084.38	-0.01284591		2614.41	-0.01613199
494.6	0.06436312		1024.59	0.01271064		1554.58	0.00067263		2084.58	-0.01332887		2614.61	-0.01631399
494.8	0.06451414		1024.79	0.01276879		1554.78	0.00071352		2084.78	-0.01228523		2614.81	-0.01655844
495	0.06474853		1024.99	0.01226654		1554.98	0.00184768		2084.98	-0.01137199		2615.01	-0.01635532
495.2	0.06459331		1025.19	0.01179268		1555.18	0.00188181		2085.18	-0.01150882		2615.21	-0.01594594
495.4	0.06496982		1025.39	0.01125342		1555.38	0.0019731		2085.38	-0.01165478		2615.41	-0.01717038
495.6	0.06570617		1025.59	0.01088846		1555.58	0.00178309		2085.58	-0.01180881		2615.61	-0.01773894
495.8	0.06524763		1025.79	0.01142997		1555.78	0.00195399		2085.78	-0.01203807		2615.81	-0.01840256
496	0.06592153		1025.99	0.01104081		1555.98	0.00273661		2085.98	-0.01232699		2616.01	-0.01884579
496.2	0.06643771		1026.19	0.01059357		1556.18	0.0023217		2086.18	-0.01334782		2616.21	-0.01897173
496.4	0.06675581		1026.39	0.01026848		1556.38	0.00254766		2086.38	-0.01402985		2616.41	-0.01951513
496.6	0.06587348		1026.59	0.00901661		1556.58	0.00145908		2086.58	-0.01339826		2616.61	-0.01949538
496.8	0.06657859		1026.79	0.00846126		1556.78	0.00151459		2086.78	-0.01336133		2616.81	-0.02010852
497	0.06631252		1026.99	0.00806599		1556.98	0.00061465		2086.98	-0.01440503		2617.01	-0.02031154
497.2	0.06656195		1027.19	0.00855806		1557.18	0.0001841		2087.18	-0.01482042		2617.21	-0.01999498
497.4	0.06637819		1027.39	0.00890298		1557.38	-0.00004556		2087.38	-0.01420569		2617.41	-0.01912995
497.6	0.06643688		1027.59	0.00941217		1557.58	-0.00038544		2087.58	-0.01453726		2617.61	-0.01862359
497.8	0.06656479		1027.79	0.00918768		1557.78	-0.00068435		2087.78	-0.01412988		2617.81	-0.01862437
498	0.06627451		1027.99	0.00992727		1557.98	-0.00035771		2087.98	-0.01348586		2618.01	-0.01863545
498.2	0.06607526		1028.19	0.0096082		1558.18	0.00038175		2088.18	-0.01336086		2618.21	-0.01766878
498.4	0.06692014		1028.39	0.01027428		1558.38	0.00095375		2088.38	-0.01351971		2618.41	-0.01763899
498.6	0.06653279		1028.59	0.01063149		1558.58	0.00140597		2088.58	-0.01337314		2618.61	-0.01732023
498.8	0.06628905		1028.79	0.01005706		1558.78	0.00174583		2088.78	-0.01221988		2618.81	-0.01600866
499	0.06644207		1028.99	0.01120701		1558.98	0.0026583		2088.98	-0.01244028		2619.01	-0.01545843
499.2	0.06624031		1029.19	0.01147529		1559.18	0.0018895		2089.18	-0.01188308		2619.21	-0.01531223
499.4	0.06610461		1029.39	0.01080787		1559.38	0.00237635		2089.38	-0.01206616		2619.41	-0.01589849
499.6	0.06679464		1029.59	0.01063102		1559.58	0.00241706		2089.58	-0.012035		2619.61	-0.01528757
499.8	0.06715067		1029.79	0.01079426		1559.78	0.00226951		2089.78	-0.01238843		2619.81	-0.01506812
500	0.06651083		1029.99	0.01003029		1559.98	0.00219759		2089.98	-0.01244146		2620.01	-0.01577738
500.2	0.06612682		1030.19	0.00924792		1560.18	0.00221068		2090.18	-0.0132082		2620.21	-0.01547631
500.4	0.06543496		1030.39	0.0083112		1560.38	0.00289775		2090.38	-0.01311378		2620.41	-0.01563069
500.6	0.06505568		1030.59	0.00808164		1560.58	0.00145089		2090.58	-0.01290823		2620.61	-0.01659566
500.8	0.06511755		1030.79	0.00818792		1560.78	0.00161013		2090.78	-0.01318383		2620.81	-0.01671916
501	0.06379913		1030.99	0.00852087		1560.98	0.00072729		2090.98	-0.01320577		2621.01	-0.01582274
501.2	0.06406476		1031.19	0.00895869		1561.18	0.00040675		2091.18	-0.01273537		2621.21	-0.01529943
501.4	0.06361309		1031.39	0.00878489		1561.38	-0.00062356		2091.38	-0.01262773		2621.41	-0.01545196
501.6	0.06303787		1031.59	0.00954572		1561.58	-0.00064219		2091.58	-0.01290579		2621.61	-0.01548045
501.8	0.06263424		1031.79	0.0094708		1561.78	-0.00119658		2091.78	-0.01220863		2621.81	-0.0162802
502	0.06252376		1031.99	0.01076627		1561.98	-0.00030905		2091.98	-0.0116888		2622.01	-0.01631096
502.2	0.06306365		1032.19	0.01076517		1562.18	0.0005059		2092.18	-0.01241205		2622.21	-0.01660355
502.4	0.06407836		1032.39	0.01164721		1562.38	0.0007831		2092.38	-0.0130609		2622.41	-0.01689728
502.6	0.06415014		1032.59	0.01140205		1562.58	0.00137711		2092.58	-0.01364846		2622.61	-0.01659979
502.8	0.06498879		1032.79	0.01127917		1562.78	0.00209307		2092.78	-0.01363145		2622.81	-0.01683513
503	0.0650058		1032.99	0.0117045		1562.98	0.00326913		2092.98	-0.01445777		2623.01	-0.01721237
503.2	0.06512546		1033.19	0.01085291		1563.18	0.00344387		2093.18	-0.01442072		2623.21	-0.01666854
503.4	0.06540246		1033.39	0.0099251		1563.38	0.00432222		2093.38	-0.01514939		2623.41	-0.01699765
503.6	0.06622233		1033.59	0.00977977		1563.58	0.00417404		2093.58	-0.01506765		2623.61	-0.0166553
503.8	0.065673		1033.79	0.01063912		1563.78	0.00395294		2093.78	-0.01513631		2623.81	-0.01746514
504	0.06523391		1033.99	0.00960781		1563.98	0.0041432		2093.98	-0.01500998		2624.01	-0.01851002
504.2	0.06564497		1034.19	0.00899818		1564.18	0.00481544		2094.18	-0.01461706		2624.21	-0.01920169
504.4	0.06574245		1034.39	0.00835476		1564.38	0.00452523		2094.38	-0.01369818		2624.41	-0.02044236
504.6	0.06545259		1034.59	0.00859203		1564.58	0.00397512		2094.58	-0.01303797		2624.61	-0.02061201
504.8	0.06563367		1034.79	0.00882876		1564.78	0.00362161		2094.78	-0.01210404		2624.81	-0.01988094
505	0.06569427		1034.99	0.00856706		1564.98	0.00318926		2094.98	-0.01202846		2625.01	-0.01933728
505.2	0.0662729		1035.19	0.00809122		1565.18	0.00222131		2095.18	-0.01234934		2625.21	-0.01976599
505.4	0.06618094		1035.39	0.00791085		1565.38	0.00028898		2095.38	-0.01206729		2625.41	-0.01928616
505.6	0.06614407		1035.59	0.00818305		1565.58	0.00024981		2095.58	-0.01168786		2625.61	-0.01919236
505.8	0.06621008		1035.79	0.00847302		1565.78	-0.00049902		2095.78	-0.01065067		2625.81	-0.01953238
506	0.06569772		1035.99	0.00908625		1565.98	-0.00047999		2095.98	-0.01022312		2626.01	-0.01925552
506.2	0.06722691		1036.19	0.00899974		1566.18	-0.00129066		2096.18	-0.01081265		2626.21	-0.01980752
506.4	0.06763073		1036.39	0.00923016		1566.38	-0.00044979		2096.38	-0.01154128		2626.41	-0.01985009
506.6	0.06733165		1036.59	0.00889377		1566.58	0.00071671		2096.58	-0.01216944		2626.61	-0.02009547
506.8	0.0670126		1036.79	0.0090867		1566.78	0.00114517		2096.78	-0.01207822		2626.81	-0.02072386
507	0.06561194		1036.99	0.00897255		1566.98	0.00179098		2096.98	-0.0122143		2627.01	-0.02031297
507.2	0.06593401		1037.19	0.0094072		1567.18	0.00164315		2097.18	-0.01272223		2627.21	-0.02044016
507.4	0.06592246		1037.39	0.00994804		1567.38	0.00224161		2097.38	-0.01308501		2627.41	-0.02043266
507.6	0.06602271		1037.59	0.01111564		1567.58	0.00214914		2097.58	-0.01336055		2627.61	-0.01958862
507.8	0.06550175		1037.79	0.01155626		1567.78	0.00149695		2097.78	-0.01298023		2627.81	-0.01941668
508	0.06595716		1037.99	0.01149579		1567.98	0.00183333		2097.98	-0.01179266		2628.01	-0.01968961
508.2	0.06594325		1038.19	0.0122351		1568.18	0.00180626		2098.18	-0.01163967		2628.21	-0.01950527
508.4	0.06549591		1038.39	0.01233683		1568.38	0.00111459		2098.38	-0.01141657		2628.41	-0.01914234
508.6	0.06471727		1038.59	0.01233485		1568.58	0.00124514		2098.58	-0.01182522		2628.61	-0.0184195
508.8	0.06452922		1038.79	0.01190484		1568.78	0.00126702		2098.78	-0.01117753		2628.81	-0.01817438
509	0.06332741		1038.99	0.01142503		1568.98	0.00128779		2098.98	-0.01154029		2629.01	-0.01728955
509.2	0.06309592		1039.19	0.01077564		1569.18	0.00062128		2099.18	-0.01247206		2629.21	-0.01809735
509.4	0.06319684		1039.39	0.01059602		1569.38	-0.00052612		2099.38	-0.0123049		2629.41	-0.01763799
509.6	0.06215744		1039.59	0.01065057		1569.58	0.00037558		2099.58	-0.01171371		2629.61	-0.01865539
509.8	0.06191028		1039.79	0.01077058		1569.78	0.00067474		2099.78	-0.01204457		2629.81	-0.0195451
510	0.06124757		1039.99	0.01065609		1569.98	0.00055667		2099.98	-0.01242869		2630.01	-0.02011363
510.2	0.06223763		1040.19	0.01093181		1570.18	0.00067793		2100.18	-0.01308264		2630.21	-0.0213399
510.4	0.06178222		1040.39	0.01098231		1570.38	0.00170914		2100.38	-0.01419822		2630.41	-0.02254334
510.6	0.06178582		1040.59	0.01090612		1570.58	0.00227074		2100.58	-0.0147904		2630.61	-0.02326447
510.8	0.06229363		1040.79	0.01078964		1570.78	0.003205		2100.78	-0.01504736		2630.81	-0.02377338
511	0.06244284		1040.99	0.01062131		1570.98	0.00376803		2100.98	-0.01549536		2631.01	-0.02314133
511.2	0.06290646		1041.19	0.01035013		1571.18	0.00378589		2101.18	-0.01584907		2631.21	-0.02345542
511.4	0.06340522		1041.39	0.00990851		1571.38	0.00455179		2101.38	-0.01618689		2631.41	-0.02254802
511.6	0.06399233		1041.59	0.01066003		1571.58	0.0039218		2101.58	-0.01504626		2631.61	-0.02224566
511.8	0.06409004		1041.79	0.0113252		1571.78	0.00416937		2101.78	-0.01419137		2631.81	-0.0220025
512	0.06446857		1041.99	0.01145238		1571.98	0.00473254		2101.98	-0.01363		2632.01	-0.02182105
512.2	0.06314431		1042.19	0.01141075		1572.18	0.00408522		2102.18	-0.01378714		2632.21	-0.02053553
512.4	0.06180805		1042.39	0.01165858		1572.38	0.00396438		2102.38	-0.01278731		2632.41	-0.01900919
512.6	0.06093139		1042.59	0.01140588		1572.58	0.00405181		2102.58	-0.01219987		2632.61	-0.01868768
512.8	0.06015206		1042.79	0.01069358		1572.78	0.0038865		2102.78	-0.01097135		2632.81	-0.01825501
513	0.05886675		1042.99	0.01095716		1572.98	0.00272003		2102.98	-0.01068671		2633.01	-0.01779154
513.2	0.05832156		1043.19	0.01020447		1573.18	0.0016757		2103.18	-0.01108805		2633.21	-0.01870877
513.4	0.05824579		1043.39	0.0102291		1573.38	0.00032315		2103.38	-0.01065151		2633.41	-0.01866755
513.6	0.05831019		1043.59	0.0099036		1573.58	0.00021003		2103.58	-0.01012436		2633.61	-0.01922146
513.8	0.05908621		1043.79	0.00993792		1573.78	-0.00061385		2103.78	-0.01121392		2633.81	-0.01901384
514	0.05848949		1043.99	0.0102257		1573.98	-0.00137358		2103.98	-0.01164046		2634.01	-0.01908634
514.2	0.05922475		1044.19	0.01068284		1574.18	-0.00177322		2104.18	-0.01219282		2634.21	-0.01968266
514.4	0.06086031		1044.39	0.01024297		1574.38	-0.0016952		2104.38	-0.01341964		2634.41	-0.01993246
514.6	0.06229303		1044.59	0.01083648		1574.58	-0.00116473		2104.58	-0.01403647		2634.61	-0.02017942
514.8	0.06335368		1044.79	0.01119464		1574.78	-0.00106227		2104.78	-0.01420522		2634.81	-0.02065702
515	0.06352635		1044.99	0.01149484		1574.98	-0.00169015		2104.98	-0.01447769		2635.01	-0.02076564
515.2	0.06458193		1045.19	0.01153993		1575.18	-0.00144229		2105.18	-0.01498468		2635.21	-0.02210746
515.4	0.06623948		1045.39	0.01183117		1575.38	-0.00080886		2105.38	-0.01436859		2635.41	-0.0222272
515.6	0.06663712		1045.59	0.01273153		1575.58	-0.00135698		2105.58	-0.01411317		2635.61	-0.02199892
515.8	0.06764433		1045.79	0.01315074		1575.78	-0.00053952		2105.78	-0.01514446		2635.81	-0.02086253
516	0.06760913		1045.99	0.0130499		1575.98	-0.00101404		2105.98	-0.01605788		2636.01	-0.02068259
516.2	0.06703045		1046.19	0.01357835		1576.18	-0.00122377		2106.18	-0.01601481		2636.21	-0.02032043
516.4	0.06674697		1046.39	0.01346413		1576.38	-0.00100774		2106.38	-0.01559111		2636.41	-0.01982718
516.6	0.06663147		1046.59	0.0134078		1576.58	-0.00073726		2106.58	-0.01538626		2636.61	-0.02006324
516.8	0.06577473		1046.79	0.01262832		1576.78	-0.00041806		2106.78	-0.0140957		2636.81	-0.01976108
517	0.06353596		1046.99	0.01169647		1576.98	-0.00141192		2106.98	-0.01364133		2637.01	-0.01904337
517.2	0.06282502		1047.19	0.01078584		1577.18	-0.00185206		2107.18	-0.01321697		2637.21	-0.01885954
517.4	0.06275268		1047.39	0.01020117		1577.38	-0.00124275		2107.38	-0.01226927		2637.41	-0.01916712
517.6	0.06231056		1047.59	0.00967235		1577.58	-0.00059264		2107.58	-0.01119087		2637.61	-0.01853898
517.8	0.06094805		1047.79	0.00981683		1577.78	0.0002732		2107.78	-0.01090838		2637.81	-0.01866266
518	0.06044892		1047.99	0.00929798		1577.98	0.00091794		2107.98	-0.01020362		2638.01	-0.01870015
518.2	0.06143516		1048.19	0.00863206		1578.18	0.00134728		2108.18	-0.00968557		2638.21	-0.01894465
518.4	0.06171095		1048.39	0.00796099		1578.38	0.00143318		2108.38	-0.01025403		2638.41	-0.01957174
518.6	0.0613393		1048.59	0.007871		1578.58	0.00174769		2108.58	-0.01013504		2638.61	-0.01976336
518.8	0.06136224		1048.79	0.00789183		1578.78	0.00178614		2108.78	-0.010008		2638.81	-0.02005249
519	0.06136719		1048.99	0.00715363		1578.98	0.00146531		2108.98	-0.01004334		2639.01	-0.02068617
519.2	0.0621835		1049.19	0.00718863		1579.18	0.00128267		2109.18	-0.01106509		2639.21	-0.021133
519.4	0.06245601		1049.39	0.00658917		1579.38	0.00184485		2109.38	-0.0113254		2639.41	-0.02104546
519.6	0.0612458		1049.59	0.00669936		1579.58	0.00108411		2109.58	-0.01242433		2639.61	-0.02065968
519.8	0.06212053		1049.79	0.00709115		1579.78	0.0014698		2109.78	-0.01449201		2639.81	-0.02145254
520	0.06188376		1049.99	0.00690179		1579.98	0.00048615		2109.98	-0.01506102		2640.01	-0.02233435
520.2	0.06133745		1050.19	0.00682003		1580.18	0.00066784		2110.18	-0.01478219		2640.21	-0.02232602
520.4	0.06132936		1050.39	0.00733771		1580.38	0.00058885		2110.38	-0.01532464		2640.41	-0.02200572
520.6	0.06077207		1050.59	0.00850094		1580.58	0.00074388		2110.58	-0.01581482		2640.61	-0.02064195
520.8	0.05991748		1050.79	0.0089791		1580.78	0.00050933		2110.78	-0.0152569		2640.81	-0.02043474
521	0.05866544		1050.99	0.00899557		1580.98	0.00014102		2110.98	-0.01610217		2641.01	-0.0194682
521.2	0.0590275		1051.19	0.01039961		1581.18	0.00081553		2111.18	-0.01606		2641.21	-0.01982634
521.4	0.05874615		1051.39	0.01140373		1581.38	0.00240133		2111.38	-0.01566143		2641.41	-0.02034915
521.6	0.05889223		1051.59	0.01139867		1581.58	0.0030448		2111.58	-0.01542923		2641.61	-0.01962641
521.8	0.05960907		1051.79	0.01163182		1581.78	0.0039102		2111.78	-0.01460986		2641.81	-0.02042498
522	0.06092045		1051.99	0.01151518		1581.98	0.00349937		2111.98	-0.01408164		2642.01	-0.02021545
522.2	0.06251838		1052.19	0.01069993		1582.18	0.00360345		2112.18	-0.01400459		2642.21	-0.0210265
522.4	0.06302459		1052.39	0.0104237		1582.38	0.00337144		2112.38	-0.01364276		2642.41	-0.02081841
522.6	0.06392351		1052.59	0.01090123		1582.58	0.0037062		2112.58	-0.01369699		2642.61	-0.02039003
522.8	0.06490487		1052.79	0.01117177		1582.78	0.00300503		2112.78	-0.01399328		2642.81	-0.02080209
523	0.06529362		1052.99	0.01081682		1582.98	0.00234646		2112.98	-0.01382152		2643.01	-0.02088231
523.2	0.06511426		1053.19	0.01086872		1583.18	0.00219681		2113.18	-0.01407607		2643.21	-0.0211146
523.4	0.06504009		1053.39	0.01016329		1583.38	0.00233233		2113.38	-0.01345122		2643.41	-0.02099245
523.6	0.06449274		1053.59	0.01015691		1583.58	0.0011901		2113.58	-0.01305457		2643.61	-0.02152985
523.8	0.06539673		1053.79	0.01016456		1583.78	0.00100481		2113.78	-0.0133533		2643.81	-0.02150001
524	0.06473626		1053.99	0.01022296		1583.98	0.00058842		2113.98	-0.01268611		2644.01	-0.0212118
524.2	0.06313661		1054.19	0.01040172		1584.18	0.00031553		2114.18	-0.01258028		2644.21	-0.02025403
524.4	0.06315847		1054.39	0.0113474		1584.38	0.00029603		2114.38	-0.01271663		2644.41	-0.01946274
524.6	0.06251725		1054.59	0.01147448		1584.58	-0.00096432		2114.58	-0.01360951		2644.61	-0.01833032
524.8	0.06180997		1054.79	0.01156176		1584.78	-0.00130914		2114.78	-0.01410829		2644.81	-0.01904496
525	0.06151019		1054.99	0.0117154		1584.98	-0.00025521		2114.98	-0.01509773		2645.01	-0.0190616
525.2	0.06204697		1055.19	0.01194742		1585.18	0.00046131		2115.18	-0.01568554		2645.21	-0.01913917
525.4	0.06193773		1055.39	0.01158561		1585.38	0.00114075		2115.38	-0.01621667		2645.41	-0.01959112
525.6	0.06280838		1055.59	0.01064318		1585.58	0.00074554		2115.58	-0.01633106		2645.61	-0.01837009
525.8	0.06397735		1055.79	0.01103883		1585.78	0.00045087		2115.78	-0.01589411		2645.81	-0.01913144
526	0.06487356		1055.99	0.01050425		1585.98	-0.00003726		2115.98	-0.01649575		2646.01	-0.01947035
526.2	0.06605177		1056.19	0.00964943		1586.18	0.00042103		2116.18	-0.01680917		2646.21	-0.01988222
526.4	0.06613821		1056.39	0.01002093		1586.38	-0.00017603		2116.38	-0.01695475		2646.41	-0.02000163
526.6	0.06585111		1056.59	0.01046699		1586.58	-0.00023265		2116.58	-0.01828228		2646.61	-0.02042636
526.8	0.06560389		1056.79	0.00961473		1586.78	-0.00052073		2116.78	-0.01850931		2646.81	-0.02160102
527	0.0657138		1056.99	0.00938647		1586.98	-0.00103217		2116.98	-0.01817511		2647.01	-0.02195552
527.2	0.06438435		1057.19	0.00969288		1587.18	-0.00030103		2117.18	-0.01794497		2647.21	-0.02250755
527.4	0.0648698		1057.39	0.01011692		1587.38	-0.0003007		2117.38	-0.01782629		2647.41	-0.02300858
527.6	0.06397594		1057.59	0.00968964		1587.58	-0.00006581		2117.58	-0.01697743		2647.61	-0.02374122
527.8	0.06331529		1057.79	0.0097064		1587.78	0.0003255		2117.78	-0.01552005		2647.81	-0.02325222
528	0.06202416		1057.99	0.01014721		1587.98	0.00147817		2117.98	-0.01444957		2648.01	-0.0237025
528.2	0.06109942		1058.19	0.01005864		1588.18	0.00092434		2118.18	-0.01376488		2648.21	-0.02330107
528.4	0.06135251		1058.39	0.01101578		1588.38	0.00078771		2118.38	-0.01331262		2648.41	-0.02360308
528.6	0.06018043		1058.59	0.01044416		1588.58	-0.0002178		2118.58	-0.01347427		2648.61	-0.022998
528.8	0.05947899		1058.79	0.01092754		1588.78	0.00086405		2118.78	-0.01263989		2648.81	-0.02371137
529	0.05986281		1058.99	0.01130041		1588.98	0.00110338		2118.98	-0.01260146		2649.01	-0.02404181
529.2	0.06017934		1059.19	0.01167694		1589.18	0.00109334		2119.18	-0.01269877		2649.21	-0.02338891
529.4	0.05930446		1059.39	0.01079366		1589.38	0.0005617		2119.38	-0.01315528		2649.41	-0.02307488
529.6	0.05992242		1059.59	0.01004947		1589.58	-0.00014253		2119.58	-0.0126697		2649.61	-0.02216142
529.8	0.06050674		1059.79	0.01036938		1589.78	-0.00024314		2119.78	-0.0124172		2649.81	-0.02278373
530	0.06099962		1059.99	0.00908911		1589.98	-0.00071991		2119.98	-0.01275753		2650.01	-0.02217422
530.2	0.06169927		1060.19	0.0091046		1590.18	-0.00100093		2120.18	-0.01245483		2650.21	-0.0228992
530.4	0.06248117		1060.39	0.00933015		1590.38	-0.00182141		2120.38	-0.01310445		2650.41	-0.02293025
530.6	0.06297571		1060.59	0.00932074		1590.58	-0.00168665		2120.58	-0.01420815		2650.61	-0.02233578
530.8	0.06309678		1060.79	0.00859159		1590.78	-0.00135761		2120.78	-0.01468911		2650.81	-0.02245283
531	0.06423067		1060.99	0.00882419		1590.98	-0.00223357		2120.98	-0.01431084		2651.01	-0.02149247
531.2	0.06491722		1061.19	0.00913791		1591.18	-0.00184765		2121.18	-0.01462311		2651.21	-0.02094832
531.4	0.06625525		1061.39	0.00874938		1591.38	-0.00203399		2121.38	-0.01371391		2651.41	-0.02011742
531.6	0.06526842		1061.59	0.00875323		1591.58	-0.00206861		2121.58	-0.01298703		2651.61	-0.01980978
531.8	0.06541762		1061.79	0.00956594		1591.78	-0.00175135		2121.78	-0.01237492		2651.81	-0.0191991
532	0.06564881		1061.99	0.0105718		1591.98	-0.00185098		2121.98	-0.01234738		2652.01	-0.01908525
532.2	0.06506488		1062.19	0.01103103		1592.18	-0.00247794		2122.18	-0.01344785		2652.21	-0.01876454
532.4	0.06424815		1062.39	0.01143871		1592.38	-0.00191423		2122.38	-0.01339606		2652.41	-0.01909176
532.6	0.06335051		1062.59	0.01107755		1592.58	-0.00166603		2122.58	-0.01299823		2652.61	-0.01903274
532.8	0.06292787		1062.79	0.01076436		1592.78	-0.00087126		2122.78	-0.01311572		2652.81	-0.01981666
533	0.06298668		1062.99	0.00990535		1592.98	-0.00047695		2122.98	-0.01405761		2653.01	-0.02049585
533.2	0.06212528		1063.19	0.0100378		1593.18	0.00091695		2123.18	-0.01396962		2653.21	-0.01924325
533.4	0.06106338		1063.39	0.00831981		1593.38	0.00146427		2123.38	-0.01465227		2653.41	-0.01933815
533.6	0.06175565		1063.59	0.00791829		1593.58	0.00156148		2123.58	-0.01444738		2653.61	-0.02062876
533.8	0.062656		1063.79	0.00761232		1593.78	0.00208021		2123.78	-0.01448643		2653.81	-0.02127231
534	0.06332294		1063.99	0.00728296		1593.98	0.00227568		2123.98	-0.01516591		2654.01	-0.02143439
534.2	0.06387115		1064.19	0.00809526		1594.18	0.00290061		2124.18	-0.01562907		2654.21	-0.02213353
534.4	0.0639209		1064.39	0.00753069		1594.38	0.00241193		2124.38	-0.01656775		2654.41	-0.02132915
534.6	0.06394407		1064.59	0.00740822		1594.58	0.00238241		2124.58	-0.01676632		2654.61	-0.02113738
534.8	0.06400711		1064.79	0.00708832		1594.78	0.00163923		2124.78	-0.01704171		2654.81	-0.02133643
535	0.06487857		1064.99	0.00731449		1594.98	0.00106196		2124.98	-0.0163674		2655.01	-0.02110212
535.2	0.06539099		1065.19	0.00781702		1595.18	0.00022639		2125.18	-0.01620898		2655.21	-0.02102741
535.4	0.06482368		1065.39	0.0089316		1595.38	0.0000059		2125.38	-0.01534267		2655.41	-0.01985959
535.6	0.06361084		1065.59	0.00972177		1595.58	-0.00023962		2125.58	-0.01543559		2655.61	-0.02028375
535.8	0.06376686		1065.79	0.01063783		1595.78	-0.00092955		2125.78	-0.01504679		2655.81	-0.02012454
536	0.06307445		1065.99	0.01115912		1595.98	-0.00134624		2125.98	-0.0147915		2656.01	-0.02001397
536.2	0.06131054		1066.19	0.01244459		1596.18	-0.00068766		2126.18	-0.01492768		2656.21	-0.02021003
536.4	0.06097553		1066.39	0.01242216		1596.38	-0.00084002		2126.38	-0.01427543		2656.41	-0.02039226
536.6	0.06080652		1066.59	0.01244567		1596.58	-0.00064647		2126.58	-0.01330947		2656.61	-0.02077954
536.8	0.06055935		1066.79	0.01217588		1596.78	-0.00015751		2126.78	-0.0124706		2656.81	-0.0205197
537	0.0609914		1066.99	0.01222115		1596.98	-0.00010777		2126.98	-0.01326276		2657.01	-0.02081362
537.2	0.06010283		1067.19	0.01234421		1597.18	0.00067226		2127.18	-0.01397272		2657.21	-0.02011814
537.4	0.05929238		1067.39	0.01146388		1597.38	0.00013911		2127.38	-0.01464165		2657.41	-0.02054395
537.6	0.0602386		1067.59	0.01108744		1597.58	-0.00047544		2127.58	-0.01502977		2657.61	-0.02079877
537.8	0.0608621		1067.79	0.01082178		1597.78	-0.00033968		2127.78	-0.01549179		2657.81	-0.02065379
538	0.06074246		1067.99	0.01114469		1597.98	0.00007261		2127.98	-0.01554814		2658.01	-0.02044583
538.2	0.05994657		1068.19	0.01059256		1598.18	0.00018984		2128.18	-0.01582434		2658.21	-0.02011684
538.4	0.05990978		1068.39	0.00984302		1598.38	-0.00051637		2128.38	-0.01597324		2658.41	-0.02033284
538.6	0.06103874		1068.59	0.00949613		1598.58	-0.00032817		2128.58	-0.01542484		2658.61	-0.02115138
538.8	0.06102319		1068.79	0.00863001		1598.78	-0.0012343		2128.78	-0.01526988		2658.81	-0.02165855
539	0.06107907		1068.99	0.00853128		1598.98	-0.00119509		2128.98	-0.01511359		2659.01	-0.02196398
539.2	0.06141137		1069.19	0.00843167		1599.18	-0.00190678		2129.18	-0.01586721		2659.21	-0.02159479
539.4	0.06103167		1069.39	0.00892876		1599.38	-0.00150999		2129.38	-0.015689		2659.41	-0.02158496
539.6	0.06013117		1069.59	0.00876995		1599.58	-0.00131719		2129.58	-0.01549402		2659.61	-0.02216511
539.8	0.05999675		1069.79	0.00911557		1599.78	-0.00221129		2129.78	-0.01549345		2659.81	-0.02183629
540	0.05940261		1069.99	0.00908616		1599.98	-0.00151864		2129.98	-0.01510585		2660.01	-0.02194886
540.2	0.05892492		1070.19	0.0095656		1600.18	-0.00102979		2130.18	-0.01521433		2660.21	-0.02253005
540.4	0.05865417		1070.39	0.00870063		1600.38	-0.00059855		2130.38	-0.01526555		2660.41	-0.02258389
540.6	0.05920955		1070.59	0.00844614		1600.58	-0.00029447		2130.58	-0.01486233		2660.61	-0.02243421
540.8	0.06012138		1070.79	0.00764484		1600.78	-0.00007699		2130.78	-0.01457874		2660.81	-0.02211023
541	0.06072164		1070.99	0.00652556		1600.98	-0.0007888		2130.98	-0.01623326		2661.01	-0.02268915
541.2	0.06097743		1071.19	0.00611131		1601.18	-0.00044354		2131.18	-0.01597398		2661.21	-0.02224598
541.4	0.06165398		1071.39	0.00506392		1601.38	-0.00113901		2131.38	-0.01555891		2661.41	-0.0217842
541.6	0.06266356		1071.59	0.0043531		1601.58	-0.0006621		2131.58	-0.01516925		2661.61	-0.02116092
541.8	0.06258898		1071.79	0.00375002		1601.78	-0.00061024		2131.78	-0.01567235		2661.81	-0.02154906
542	0.06167642		1071.99	0.00370482		1601.98	-0.00013514		2131.98	-0.01490153		2662.01	-0.02131264
542.2	0.06171797		1072.19	0.00352187		1602.18	-0.00089117		2132.18	-0.0151226		2662.21	-0.02106732
542.4	0.0617435		1072.39	0.00350496		1602.38	-0.00126287		2132.38	-0.01531393		2662.41	-0.02144508
542.6	0.06191268		1072.59	0.00347203		1602.58	-0.00159768		2132.58	-0.01439877		2662.61	-0.02182004
542.8	0.06246151		1072.79	0.00380674		1602.78	-0.00194863		2132.78	-0.01542175		2662.81	-0.02229023
543	0.06262875		1072.99	0.00451921		1602.98	-0.00097019		2132.98	-0.0156508		2663.01	-0.02238739
543.2	0.06261103		1073.19	0.00583695		1603.18	-0.00033338		2133.18	-0.01587454		2663.21	-0.02314267
543.4	0.06215313		1073.39	0.00685598		1603.38	-0.00013108		2133.38	-0.01474587		2663.41	-0.02356992
543.6	0.06192609		1073.59	0.00784476		1603.58	-0.00044586		2133.58	-0.01514804		2663.61	-0.02248659
543.8	0.06201008		1073.79	0.00891125		1603.78	-0.0004451		2133.78	-0.01506324		2663.81	-0.0221597
544	0.06122954		1073.99	0.00900882		1603.98	0.00010727		2133.98	-0.0147757		2664.01	-0.02207074
544.2	0.06169853		1074.19	0.00907253		1604.18	-0.00026594		2134.18	-0.01544262		2664.21	-0.02217224
544.4	0.06093348		1074.39	0.00946219		1604.38	-0.00008129		2134.38	-0.01586082		2664.41	-0.02168752
544.6	0.06144933		1074.59	0.0090435		1604.58	0.00022761		2134.58	-0.01535153		2664.61	-0.02161601
544.8	0.06192715		1074.79	0.00843493		1604.78	0.00096157		2134.78	-0.0149226		2664.81	-0.0215975
545	0.06215198		1074.99	0.00801045		1604.98	0.00044128		2134.98	-0.01594314		2665.01	-0.021093
545.2	0.06295455		1075.19	0.00746998		1605.18	0.00047353		2135.18	-0.01558164		2665.21	-0.02026802
545.4	0.0627401		1075.39	0.00600664		1605.38	0.00060371		2135.38	-0.01664274		2665.41	-0.01972103
545.6	0.06269125		1075.59	0.00594738		1605.58	0.00042682		2135.58	-0.0163986		2665.61	-0.01962725
545.8	0.06199252		1075.79	0.00560871		1605.78	-0.00034547		2135.78	-0.017447		2665.81	-0.01968118
546	0.06209753		1075.99	0.00590997		1605.98	-0.00049214		2135.98	-0.01709896		2666.01	-0.01939364
546.2	0.06255176		1076.19	0.00485628		1606.18	-0.00032441		2136.18	-0.01724944		2666.21	-0.02036596
546.4	0.06216823		1076.39	0.00485228		1606.38	-0.00005529		2136.38	-0.0167903		2666.41	-0.02070783
546.6	0.06253948		1076.59	0.00508068		1606.58	-0.00025421		2136.58	-0.01575875		2666.61	-0.02117854
546.8	0.06308994		1076.79	0.00504893		1606.78	-0.00049892		2136.78	-0.0162301		2666.81	-0.02121084
547	0.06184909		1076.99	0.00524257		1606.98	-0.0001389		2136.98	-0.01462114		2667.01	-0.02126733
547.2	0.06216389		1077.19	0.00626054		1607.18	-0.00020018		2137.18	-0.01385631		2667.21	-0.02198302
547.4	0.06221631		1077.39	0.006306		1607.38	-0.00076643		2137.38	-0.01361903		2667.41	-0.02204561
547.6	0.06156265		1077.59	0.0071365		1607.58	-0.00173773		2137.58	-0.01370449		2667.61	-0.02234597
547.8	0.06167984		1077.79	0.00718668		1607.78	-0.00139246		2137.78	-0.0131486		2667.81	-0.02261218
548	0.06109362		1077.99	0.00672928		1607.98	-0.00165135		2137.98	-0.01344704		2668.01	-0.0232663
548.2	0.06196413		1078.19	0.00786161		1608.18	-0.00182036		2138.18	-0.01429666		2668.21	-0.02341003
548.4	0.06082639		1078.39	0.00850377		1608.38	-0.0008587		2138.38	-0.0138024		2668.41	-0.0232739
548.6	0.0612596		1078.59	0.0080288		1608.58	-0.00071433		2138.58	-0.01310399		2668.61	-0.02306021
548.8	0.0616032		1078.79	0.00758808		1608.78	-0.00076695		2138.78	-0.01344479		2668.81	-0.02199029
549	0.06177703		1078.99	0.00754783		1608.98	-0.00145942		2138.98	-0.01446407		2669.01	-0.02126807
549.2	0.06229335		1079.19	0.0073088		1609.18	-0.00174149		2139.18	-0.01536046		2669.21	-0.02206372
549.4	0.06194166		1079.39	0.0068112		1609.38	-0.00168973		2139.38	-0.01674059		2669.41	-0.0222066
549.6	0.06175771		1079.59	0.0072637		1609.58	-0.00219084		2139.58	-0.01647966		2669.61	-0.02322424
549.8	0.06132016		1079.79	0.00705044		1609.78	-0.00217821		2139.78	-0.01717737		2669.81	-0.02328296
550	0.06173552		1079.99	0.00694396		1609.98	-0.00264941		2139.98	-0.01675115		2670.01	-0.02336442
550.2	0.06082034		1080.19	0.00597667		1610.18	-0.00351302		2140.18	-0.0164508		2670.21	-0.02323415
550.4	0.06014259		1080.39	0.00670945		1610.38	-0.00443096		2140.38	-0.01620795		2670.41	-0.02269834
550.6	0.05925158		1080.59	0.00634263		1610.58	-0.00475399		2140.58	-0.01601528		2670.61	-0.0225716
550.8	0.05841623		1080.79	0.00565727		1610.78	-0.00485411		2140.78	-0.01635503		2670.81	-0.02204772
551	0.05702807		1080.99	0.00553964		1610.98	-0.00460049		2140.98	-0.01518497		2671.01	-0.02226669
551.2	0.05742064		1081.19	0.00526425		1611.18	-0.00459652		2141.18	-0.01540626		2671.21	-0.02356279
551.4	0.0570901		1081.39	0.0052256		1611.38	-0.00477282		2141.38	-0.01542886		2671.41	-0.024213
551.6	0.0571519		1081.59	0.0051028		1611.58	-0.00466418		2141.58	-0.01509967		2671.61	-0.02433678
551.8	0.0581514		1081.79	0.00550169		1611.78	-0.00392477		2141.78	-0.01502808		2671.81	-0.0243553
552	0.05818028		1081.99	0.00606497		1611.98	-0.00249506		2141.98	-0.01479823		2672.01	-0.0251569
552.2	0.05931933		1082.19	0.00652978		1612.18	-0.00231542		2142.18	-0.01460623		2672.21	-0.02476996
552.4	0.05983536		1082.39	0.00655693		1612.38	-0.00151255		2142.38	-0.01441164		2672.41	-0.02452359
552.6	0.06116996		1082.59	0.00591516		1612.58	-0.00139337		2142.58	-0.01564648		2672.61	-0.02471988
552.8	0.06201532		1082.79	0.00560211		1612.78	-0.00056356		2142.78	-0.01723614		2672.81	-0.02486074
553	0.06224958		1082.99	0.00649203		1612.98	-0.00044043		2142.98	-0.01849094		2673.01	-0.02524891
553.2	0.06314571		1083.19	0.00661203		1613.18	-0.00002641		2143.18	-0.01952312		2673.21	-0.02546015
553.4	0.06278707		1083.39	0.00707119		1613.38	0.00071466		2143.38	-0.01991427		2673.41	-0.02436258
553.6	0.06278002		1083.59	0.00792765		1613.58	0.00109068		2143.58	-0.01925915		2673.61	-0.0238905
553.8	0.0635553		1083.79	0.00741107		1613.78	0.00145445		2143.78	-0.01877981		2673.81	-0.02266399
554	0.06334484		1083.99	0.00716291		1613.98	0.00112543		2143.98	-0.01867677		2674.01	-0.02127238
554.2	0.06285692		1084.19	0.00691149		1614.18	0.00070099		2144.18	-0.01843939		2674.21	-0.02069884
554.4	0.06191893		1084.39	0.00755888		1614.38	0.00099329		2144.38	-0.01782991		2674.41	-0.02063982
554.6	0.06107111		1084.59	0.00653119		1614.58	0.00044805		2144.58	-0.01712636		2674.61	-0.02002624
554.8	0.06011537		1084.79	0.00664134		1614.78	-0.00053246		2144.78	-0.0166474		2674.81	-0.02011389
555	0.05984402		1084.99	0.00613546		1614.98	-0.00072551		2144.98	-0.01563978		2675.01	-0.02011006
555.2	0.06052647		1085.19	0.00594615		1615.18	-0.00101579		2145.18	-0.01536888		2675.21	-0.02039868
555.4	0.06016915		1085.39	0.00615206		1615.38	-0.00097694		2145.38	-0.01480547		2675.41	-0.02026538
555.6	0.06045898		1085.59	0.00548709		1615.58	-0.00141923		2145.58	-0.01495948		2675.61	-0.02018518
555.8	0.06019166		1085.79	0.00600549		1615.78	-0.00119371		2145.78	-0.01502009		2675.81	-0.02160893
556	0.05968504		1085.99	0.00565737		1615.98	-0.00107082		2145.98	-0.01526035		2676.01	-0.02204033
556.2	0.06069422		1086.19	0.00588624		1616.18	-0.00235203		2146.18	-0.01565791		2676.21	-0.02233262
556.4	0.06076728		1086.39	0.00560524		1616.38	-0.00296157		2146.38	-0.0167974		2676.41	-0.02275733
556.6	0.06176548		1086.59	0.0059782		1616.58	-0.00308565		2146.58	-0.0176821		2676.61	-0.02427716
556.8	0.06235815		1086.79	0.00670004		1616.78	-0.00303606		2146.78	-0.01774609		2676.81	-0.02554776
557	0.06228796		1086.99	0.00713596		1616.98	-0.00334946		2146.98	-0.01689179		2677.01	-0.02508889
557.2	0.06290558		1087.19	0.00676802		1617.18	-0.00336995		2147.18	-0.01668327		2677.21	-0.024842
557.4	0.06233939		1087.39	0.00720219		1617.38	-0.00225275		2147.38	-0.01644146		2677.41	-0.02441987
557.6	0.06234073		1087.59	0.0070518		1617.58	-0.00220328		2147.58	-0.01607794		2677.61	-0.0244789
557.8	0.06228547		1087.79	0.00701353		1617.78	-0.00253427		2147.78	-0.01609718		2677.81	-0.02447071
558	0.06151635		1087.99	0.00768454		1617.98	-0.00308353		2147.98	-0.01632125		2678.01	-0.02436526
558.2	0.060997		1088.19	0.00838653		1618.18	-0.00371131		2148.18	-0.01571769		2678.21	-0.02448451
558.4	0.06005573		1088.39	0.00894135		1618.38	-0.00399492		2148.38	-0.01568088		2678.41	-0.02440563
558.6	0.05997655		1088.59	0.00869013		1618.58	-0.00441302		2148.58	-0.01563531		2678.61	-0.02433576
558.8	0.06009205		1088.79	0.00910619		1618.78	-0.00403192		2148.78	-0.01569587		2678.81	-0.02460138
559	0.06039254		1088.99	0.00863941		1618.98	-0.00314898		2148.98	-0.0157536		2679.01	-0.02435719
559.2	0.06015913		1089.19	0.00878383		1619.18	-0.00320136		2149.18	-0.01598714		2679.21	-0.02418155
559.4	0.05971442		1089.39	0.0084146		1619.38	-0.00272389		2149.38	-0.01651752		2679.41	-0.02443515
559.6	0.05993776		1089.59	0.00811478		1619.58	-0.00279021		2149.58	-0.01686078		2679.61	-0.02445941
559.8	0.05968303		1089.79	0.00844035		1619.78	-0.00223046		2149.78	-0.01699848		2679.81	-0.02526091
