# Supplementary material for: Functional development of a V3/glycan-specific broadly neutralizing antibody isolated from a case of HIV superinfection
Source: eLife journal article supplement (doi:10.7554/elife.68110), 2021-07-15
Supplement: fig2-data2 [file G3.xls]

Vers 3.43 Data Simulation
Conc1	1.563E-08	1.563E-08	1.563E-08	1.563E-08	1.563E-08	1.563E-08
Start1	290	879.99	1469.99	2059.98	2649.98	3239.98
Stop1	649.8	1239.79	1829.79	2419.78	3009.78	3599.78
Time1	Data1	Sim1	Time2	Data2	Sim2	Time3	Data3	Sim3	Time4	Data4	Sim4	Time5	Data5	Sim5	Time6	Data6	Sim6
290	0.00085468		879.99	-0.00153734		1469.99	0.00139458		2059.98	-0.00273119		2649.98	0.00018864		3239.98	-0.00502301
290.2	0.00109453		880.19	-0.00307832		1470.19	0.00140061		2060.18	-0.00272377		2650.18	-0.00060742		3240.18	-0.00442665
290.4	0.00080307		880.39	-0.00463609		1470.39	0.00140945		2060.38	-0.00276159		2650.38	-0.0015496		3240.38	-0.0042891
290.6	0.00110027		880.59	-0.00646982		1470.59	0.00137248		2060.58	-0.00298214		2650.58	-0.00230357		3240.58	-0.00406184
290.8	0.0012015		880.79	-0.0075672		1470.79	0.00150811		2060.78	-0.00346425		2650.78	-0.00289359		3240.78	-0.00346505
291	0.00141116		880.99	-0.00856366		1470.99	0.00179084		2060.98	-0.00427909		2650.98	-0.00360456		3240.98	-0.00327344
291.2	0.00142339		881.19	-0.00889591		1471.19	0.00174348		2061.18	-0.00486229		2651.18	-0.00377646		3241.18	-0.00279471
291.4	0.00173316		881.39	-0.0089546		1471.39	0.00190234		2061.38	-0.00484257		2651.38	-0.00352436		3241.38	-0.00385061
291.6	0.00105952		881.59	-0.00891861		1471.59	0.00227695		2061.58	-0.00510173		2651.58	-0.00376211		3241.58	-0.00435015
291.8	0.00062939		881.79	-0.00863245		1471.79	0.00233119		2061.78	-0.00457806		2651.78	-0.00352767		3241.78	-0.00487128
292	0.00084922		881.99	-0.00763054		1471.99	0.00245608		2061.98	-0.00467763		2651.98	-0.00289705		3241.98	-0.00437503
292.2	0.00088593		882.19	-0.00677211		1472.19	0.00233906		2062.18	-0.00475879		2652.18	-0.00262258		3242.18	-0.00438556
292.4	0.00047045		882.39	-0.00663369		1472.39	0.00222219		2062.38	-0.00427477		2652.38	-0.00195597		3242.38	-0.00506746
292.6	-0.00035974		882.59	-0.00625042		1472.59	0.00350629		2062.58	-0.00387171		2652.58	-0.00231558		3242.58	-0.00566674
292.8	-0.00121642		882.79	-0.00625898		1472.79	0.00313757		2062.78	-0.00239399		2652.78	-0.00266904		3242.78	-0.00527651
293	-0.00211952		882.99	-0.00644116		1472.99	0.0032198		2062.98	-0.00307266		2652.98	-0.00200715		3242.98	-0.00501634
293.2	-0.00116633		883.19	-0.00725632		1473.19	0.00225274		2063.18	-0.00349259		2653.18	-0.00209198		3243.18	-0.0049599
293.4	-0.00114585		883.39	-0.00763067		1473.39	0.00233675		2063.38	-0.00302558		2653.38	-0.001567		3243.38	-0.00474446
293.6	-0.0008794		883.59	-0.00825089		1473.59	0.00183335		2063.58	-0.00266697		2653.58	-0.00145436		3243.58	-0.00462762
293.8	-0.00041479		883.79	-0.00926292		1473.79	0.00145108		2063.78	-0.00170596		2653.78	-0.00151807		3243.78	-0.0040595
294	0.00017044		883.99	-0.01009442		1473.99	0.00138638		2063.98	-0.00138517		2653.98	-0.00110249		3243.98	-0.00346456
294.2	-0.00015275		884.19	-0.0103632		1474.19	0.00209758		2064.18	-0.00137681		2654.18	-0.00086189		3244.18	-0.0032246
294.4	-0.00022792		884.39	-0.00973501		1474.39	0.00279648		2064.38	-0.00145976		2654.38	-0.00102557		3244.38	-0.00311913
294.6	0.0001536		884.59	-0.00975563		1474.59	0.00320493		2064.58	-0.00156741		2654.58	-0.0007609		3244.58	-0.00332678
294.8	-0.00031247		884.79	-0.00930242		1474.79	0.00344046		2064.78	-0.00202249		2654.78	-0.00080561		3244.78	-0.00299834
295	0.00099358		884.99	-0.00812334		1474.99	0.00348615		2064.98	-0.00234198		2654.98	-0.00129984		3244.98	-0.0036425
295.2	0.00192012		885.19	-0.0066465		1475.19	0.00303785		2065.18	-0.00263912		2655.18	-0.00108533		3245.18	-0.00425974
295.4	0.002536		885.39	-0.00549782		1475.39	0.00337815		2065.38	-0.00250447		2655.38	-0.00122336		3245.38	-0.00552656
295.6	0.00246145		885.59	-0.00470419		1475.59	0.004199		2065.58	-0.00296247		2655.58	-0.00157809		3245.58	-0.00552914
295.8	0.00336131		885.79	-0.00390555		1475.79	0.00426175		2065.78	-0.00310736		2655.78	-0.00201582		3245.78	-0.00461885
296	0.00390116		885.99	-0.0032037		1475.99	0.00511333		2065.98	-0.00341883		2655.98	-0.00194253		3245.98	-0.0043052
296.2	0.00329524		886.19	-0.00395031		1476.19	0.00519797		2066.18	-0.00394822		2656.18	-0.00287604		3246.18	-0.00469066
296.4	0.00328778		886.39	-0.00504527		1476.39	0.00559212		2066.38	-0.00334349		2656.38	-0.0030442		3246.38	-0.00479807
296.6	0.00235492		886.59	-0.00500596		1476.59	0.00619426		2066.58	-0.00309228		2656.58	-0.00263879		3246.58	-0.00475726
296.8	0.00190792		886.79	-0.00495068		1476.79	0.00597255		2066.78	-0.00317255		2656.78	-0.00156185		3246.78	-0.00423629
297	0.00205672		886.99	-0.00599198		1476.99	0.00582779		2066.98	-0.00373304		2656.98	-0.00045225		3246.98	-0.00429492
297.2	0.00218527		887.19	-0.00699044		1477.19	0.00514516		2067.18	-0.00411707		2657.18	0.00042595		3247.18	-0.00414182
297.4	0.00180342		887.39	-0.0074661		1477.39	0.00411106		2067.38	-0.00384279		2657.38	0.00096353		3247.38	-0.00462082
297.6	0.00102303		887.59	-0.0084609		1477.59	0.00382174		2067.58	-0.00285798		2657.58	0.00169599		3247.58	-0.00479061
297.8	0.00063081		887.79	-0.00864505		1477.79	0.00424684		2067.78	-0.00332931		2657.78	0.00217061		3247.78	-0.00449388
298	0.00015126		887.99	-0.00942413		1477.99	0.0039981		2067.98	-0.00312147		2657.98	0.00259956		3247.98	-0.00518448
298.2	-0.00004741		888.19	-0.00843959		1478.19	0.00439202		2068.18	-0.00340512		2658.18	0.00261913		3248.18	-0.00552837
298.4	-0.00004675		888.39	-0.00735868		1478.39	0.00463687		2068.38	-0.00295082		2658.38	0.0025485		3248.38	-0.00570912
298.6	0.00006717		888.59	-0.007403		1478.59	0.00351603		2068.58	-0.00258675		2658.58	0.00195614		3248.58	-0.0064332
298.8	0.00073288		888.79	-0.00610309		1478.79	0.00224241		2068.78	-0.00258756		2658.78	0.00071935		3248.78	-0.00605344
299	0.00322598		888.99	-0.00489465		1478.99	0.00156113		2068.98	-0.00236515		2658.98	-0.00008299		3248.98	-0.00590686
299.2	0.00326246		889.19	-0.0039139		1479.19	0.00095158		2069.18	-0.00222018		2659.18	-0.00129127		3249.18	-0.00578072
299.4	0.00370172		889.39	-0.00410112		1479.39	0.00153019		2069.38	-0.00174037		2659.38	-0.00251997		3249.38	-0.00570289
299.6	0.00474753		889.59	-0.00441481		1479.59	0.00182447		2069.58	-0.00174223		2659.58	-0.00253084		3249.58	-0.00506247
299.8	0.00568742		889.79	-0.00422364		1479.79	0.00193384		2069.78	-0.00120835		2659.78	-0.00333564		3249.78	-0.0042022
300	0.00487144		889.99	-0.00435133		1479.99	0.00202549		2069.98	0.00003411		2659.98	-0.00347202		3249.98	-0.00488084
300.2	0.00486134		890.19	-0.00503011		1480.19	0.00195229		2070.18	0.00018574		2660.18	-0.00336972		3250.18	-0.00409162
300.4	0.00457443		890.39	-0.00525211		1480.39	0.00275871		2070.38	0.00098671		2660.38	-0.00221347		3250.38	-0.00383161
300.6	0.00456201		890.59	-0.00514839		1480.59	0.00307243		2070.58	0.00062864		2660.58	-0.00119773		3250.58	-0.00447541
300.8	0.00452841		890.79	-0.00525781		1480.79	0.00306109		2070.78	0.00116964		2660.78	-0.000742		3250.78	-0.00401383
301	0.00484299		890.99	-0.00646343		1480.99	0.00323116		2070.98	0.00091863		2660.98	-0.00078336		3250.98	-0.00376127
301.2	0.00459432		891.19	-0.00680914		1481.19	0.00265246		2071.18	0.00003795		2661.18	-0.0004373		3251.18	-0.00374843
301.4	0.00382474		891.39	-0.00764972		1481.39	0.00258803		2071.38	-0.00110415		2661.38	-0.00079718		3251.38	-0.00476782
301.6	0.00309699		891.59	-0.00878784		1481.59	0.00363165		2071.58	-0.00162711		2661.58	-0.0007122		3251.58	-0.0046177
301.8	0.00326994		891.79	-0.00878926		1481.79	0.00395289		2071.78	-0.00325505		2661.78	-0.00037621		3251.78	-0.0043075
302	0.00262298		891.99	-0.00992841		1481.99	0.00359475		2071.98	-0.00284073		2661.98	-0.00000477		3251.98	-0.00512205
302.2	0.00255402		892.19	-0.00866155		1482.19	0.00403541		2072.18	-0.00400438		2662.18	0.0000175		3252.18	-0.00482975
302.4	0.00240817		892.39	-0.00750579		1482.39	0.00406392		2072.38	-0.00378084		2662.38	0.0002469		3252.38	-0.00465622
302.6	0.00319711		892.59	-0.00693929		1482.59	0.00302497		2072.58	-0.00441138		2662.58	-0.00011376		3252.58	-0.00388033
302.8	0.00295361		892.79	-0.00615493		1482.79	0.00326705		2072.78	-0.00406632		2662.78	-0.00056737		3252.78	-0.00413991
303	0.00343892		892.99	-0.00608895		1482.99	0.00340583		2072.98	-0.00463908		2662.98	-0.00041626		3252.98	-0.0035571
303.2	0.00217143		893.19	-0.0059088		1483.19	0.00379903		2073.18	-0.00456489		2663.18	-0.00047761		3253.18	-0.004158
303.4	0.00268483		893.39	-0.00599686		1483.39	0.00382604		2073.38	-0.00434153		2663.38	0.00010318		3253.38	-0.00504212
303.6	0.00265184		893.59	-0.00460494		1483.59	0.00404067		2073.58	-0.00375723		2663.58	0.00097505		3253.58	-0.00501881
303.8	0.00226299		893.79	-0.00353581		1483.79	0.00399547		2073.78	-0.00359336		2663.78	0.00038288		3253.78	-0.00608434
304	0.00209513		893.99	-0.00343128		1483.99	0.00449732		2073.98	-0.00283311		2663.98	0.00012118		3253.98	-0.00668315
304.2	0.00321526		894.19	-0.00313884		1484.19	0.00513229		2074.18	-0.002865		2664.18	0.00040854		3254.18	-0.00732287
304.4	0.00366276		894.39	-0.00344052		1484.39	0.0062068		2074.38	-0.00238639		2664.38	0.0003595		3254.38	-0.0078385
304.6	0.00441615		894.59	-0.00421932		1484.59	0.00600448		2074.58	-0.0017528		2664.58	-0.00033149		3254.58	-0.00869577
304.8	0.00405016		894.79	-0.00392432		1484.79	0.00649771		2074.78	-0.00091903		2664.78	-0.00001151		3254.78	-0.0076129
305	0.00403035		894.99	-0.00480196		1484.99	0.00620856		2074.98	-0.00206005		2664.98	-0.00044492		3254.98	-0.00791665
305.2	0.00316234		895.19	-0.00582778		1485.19	0.00616011		2075.18	-0.00246775		2665.18	-0.00046822		3255.18	-0.00794817
305.4	0.00271857		895.39	-0.00730662		1485.39	0.00563301		2075.38	-0.00327139		2665.38	-0.00049819		3255.38	-0.00820412
305.6	0.00331739		895.59	-0.00876318		1485.59	0.00508677		2075.58	-0.00331428		2665.58	-0.00063523		3255.58	-0.00797258
305.8	0.00332805		895.79	-0.00797474		1485.79	0.00459901		2075.78	-0.00307727		2665.78	-0.00026259		3255.78	-0.00735374
306	0.00318066		895.99	-0.00801208		1485.99	0.00452701		2075.98	-0.00258082		2665.98	0.00029739		3255.98	-0.00654773
306.2	0.00327701		896.19	-0.00706413		1486.19	0.00440071		2076.18	-0.00281397		2666.18	-0.00009731		3256.18	-0.00628391
306.4	0.00343629		896.39	-0.00718475		1486.39	0.0036565		2076.38	-0.0024454		2666.38	0.00031898		3256.38	-0.00528813
306.6	0.00375036		896.59	-0.00760441		1486.59	0.00329669		2076.58	-0.00262465		2666.58	0.00023397		3256.58	-0.00509377
306.8	0.00244356		896.79	-0.00756388		1486.79	0.00383665		2076.78	-0.00132569		2666.78	0.00005702		3256.78	-0.00602856
307	0.0017512		896.99	-0.00792517		1486.99	0.00373783		2076.98	-0.00147117		2666.98	0.00074957		3256.98	-0.00475434
307.2	-0.00001159		897.19	-0.00762026		1487.19	0.0043566		2077.18	-0.00107886		2667.18	0.00170287		3257.18	-0.00499729
307.4	0.00023399		897.39	-0.00688087		1487.39	0.00423765		2077.38	-0.00106013		2667.38	0.00156884		3257.38	-0.00544712
307.6	-0.00013253		897.59	-0.00635976		1487.59	0.00502755		2077.58	-0.00056707		2667.58	0.00200627		3257.58	-0.00586244
307.8	0.00021599		897.79	-0.00655213		1487.79	0.00504585		2077.78	-0.00122039		2667.78	0.00155643		3257.78	-0.00581222
308	0.00159415		897.99	-0.00683107		1487.99	0.00606473		2077.98	-0.00051071		2667.98	0.00173906		3257.98	-0.00507308
308.2	0.00194723		898.19	-0.00670954		1488.19	0.00608549		2078.18	-0.00066329		2668.18	0.00178682		3258.18	-0.00482034
308.4	0.00263854		898.39	-0.00757191		1488.39	0.0066221		2078.38	-0.0010416		2668.38	0.00246922		3258.38	-0.00464652
308.6	0.00227034		898.59	-0.00772929		1488.59	0.00620672		2078.58	-0.00070882		2668.58	0.0024393		3258.58	-0.00413901
308.8	0.00257007		898.79	-0.00716207		1488.79	0.00700729		2078.78	-0.00007767		2668.78	0.00297709		3258.78	-0.00366066
309	0.00274873		898.99	-0.00729073		1488.99	0.00752375		2078.98	-0.00088126		2668.98	0.00272388		3258.98	-0.00381169
309.2	0.00273956		899.19	-0.00779024		1489.19	0.00727224		2079.18	-0.00043605		2669.18	0.00294062		3259.18	-0.00412345
309.4	0.00343894		899.39	-0.00822346		1489.39	0.00633671		2079.38	-0.00127034		2669.38	0.0023093		3259.38	-0.0049319
309.6	0.004311		899.59	-0.00726529		1489.59	0.00654382		2079.58	-0.00062954		2669.58	0.00154201		3259.58	-0.00528857
309.8	0.00406422		899.79	-0.00611727		1489.79	0.00699019		2079.78	-0.00070025		2669.78	0.00106034		3259.78	-0.00556479
310	0.00435449		899.99	-0.00594273		1489.99	0.00723687		2079.98	-0.00049247		2669.98	0.00122944		3259.98	-0.00629422
310.2	0.00417426		900.19	-0.00570308		1490.19	0.00662157		2080.18	-0.00059203		2670.18	0.00058257		3260.18	-0.00731431
310.4	0.00396482		900.39	-0.00563814		1490.39	0.00638543		2080.38	-0.00045944		2670.38	0.00098822		3260.38	-0.00690062
310.6	0.00341729		900.59	-0.00482557		1490.59	0.0067147		2080.58	-0.00049934		2670.58	0.00092611		3260.58	-0.00732885
310.8	0.00193553		900.79	-0.00427537		1490.79	0.00714808		2080.78	0.0004036		2670.78	0.00088306		3260.78	-0.00702632
311	0.00176936		900.99	-0.00475082		1490.99	0.0063096		2080.98	-0.00078942		2670.98	0.00090551		3260.98	-0.00571495
311.2	0.00196152		901.19	-0.00383551		1491.19	0.00641533		2081.18	-0.00120404		2671.18	0.00157265		3261.18	-0.00605999
311.4	0.00278857		901.39	-0.00409151		1491.39	0.00568268		2081.38	-0.00111026		2671.38	0.00137376		3261.38	-0.00648492
311.6	0.00219231		901.59	-0.00413002		1491.59	0.0053865		2081.58	-0.00014256		2671.58	0.00148971		3261.58	-0.00692765
311.8	0.00242779		901.79	-0.00424057		1491.79	0.00497014		2081.78	-0.00101946		2671.78	0.00141151		3261.78	-0.00587702
312	0.00251231		901.99	-0.00438389		1491.99	0.00471554		2081.98	-0.00080101		2671.98	0.00108477		3261.98	-0.00519949
312.2	0.0024253		902.19	-0.00422688		1492.19	0.0039706		2082.18	-0.0012328		2672.18	0.00097288		3262.18	-0.00523381
312.4	0.00300033		902.39	-0.00571016		1492.39	0.00357389		2082.38	-0.00182955		2672.38	0.00177612		3262.38	-0.00544502
312.6	0.00301549		902.59	-0.00584967		1492.59	0.00332018		2082.58	-0.00092555		2672.58	0.00164743		3262.58	-0.0036772
312.8	0.00361725		902.79	-0.00577562		1492.79	0.00293925		2082.78	-0.00038335		2672.78	0.00207117		3262.78	-0.00484008
313	0.00350831		902.99	-0.00564038		1492.99	0.00296126		2082.98	-0.00077605		2672.98	0.0034664		3262.98	-0.00483533
313.2	0.00374175		903.19	-0.00586807		1493.19	0.00234651		2083.18	-0.00015283		2673.18	0.00335518		3263.18	-0.00600564
313.4	0.00414777		903.39	-0.00618723		1493.39	0.00249509		2083.38	-0.00003279		2673.38	0.00305232		3263.38	-0.00565499
313.6	0.00354095		903.59	-0.00565051		1493.59	0.0030862		2083.58	0.001088		2673.58	0.00302549		3263.58	-0.00566573
313.8	0.00311066		903.79	-0.00525717		1493.79	0.00346828		2083.78	0.00086015		2673.78	0.00306404		3263.78	-0.00573026
314	0.0033809		903.99	-0.00393378		1493.99	0.0029917		2083.98	0.00170491		2673.98	0.00425091		3263.98	-0.00520923
314.2	0.00392456		904.19	-0.00317451		1494.19	0.00245727		2084.18	0.0018156		2674.18	0.00453962		3264.18	-0.00446857
314.4	0.00381174		904.39	-0.00229775		1494.39	0.00250598		2084.38	0.0019022		2674.38	0.0047318		3264.38	-0.00368807
314.6	0.00400073		904.59	-0.00175606		1494.59	0.00208491		2084.58	0.0014747		2674.58	0.00373208		3264.58	-0.00349995
314.8	0.00465236		904.79	-0.00188159		1494.79	0.00188586		2084.78	0.0017443		2674.78	0.0026591		3264.78	-0.00318925
315	0.00566619		904.99	-0.00253459		1494.99	0.00155906		2084.98	0.0016753		2674.98	0.00226071		3264.98	-0.00341005
315.2	0.0062057		905.19	-0.0023284		1495.19	0.00258219		2085.18	0.00284046		2675.18	0.00147589		3265.18	-0.0040477
315.4	0.00637537		905.39	-0.00268919		1495.39	0.00278393		2085.38	0.00301014		2675.38	0.00032919		3265.38	-0.00462905
315.6	0.00594068		905.59	-0.00309894		1495.59	0.00357758		2085.58	0.00288586		2675.58	-0.00012557		3265.58	-0.00530651
315.8	0.0060287		905.79	-0.00306432		1495.79	0.0037551		2085.78	0.00103092		2675.78	-0.00055347		3265.78	-0.00557855
316	0.00525387		905.99	-0.00364549		1495.99	0.00433918		2085.98	0.00042221		2675.98	-0.00115465		3265.98	-0.00570471
316.2	0.00610241		906.19	-0.00444313		1496.19	0.00462284		2086.18	-0.00057852		2676.18	-0.00084598		3266.18	-0.00623966
316.4	0.00663399		906.39	-0.00687835		1496.39	0.00464758		2086.38	-0.00142214		2676.38	-0.00015107		3266.38	-0.00622584
316.6	0.00679102		906.59	-0.00707262		1496.59	0.00494888		2086.58	-0.00195768		2676.58	0.00045752		3266.58	-0.00554306
316.8	0.00655227		906.79	-0.00703439		1496.79	0.00484552		2086.78	-0.002487		2676.78	0.00063579		3266.78	-0.00664445
317	0.00673781		906.99	-0.00707584		1496.99	0.00592166		2086.98	-0.00312839		2676.98	0.00206356		3266.98	-0.00515714
317.2	0.00695423		907.19	-0.00693735		1497.19	0.00569979		2087.18	-0.00331095		2677.18	0.00207872		3267.18	-0.00549065
317.4	0.00648922		907.39	-0.00757422		1497.39	0.00538099		2087.38	-0.00386589		2677.38	0.00257822		3267.38	-0.00481129
317.6	0.00595271		907.59	-0.00768444		1497.59	0.00465412		2087.58	-0.00359218		2677.58	0.00232373		3267.58	-0.00545677
317.8	0.00694764		907.79	-0.00742268		1497.79	0.00341305		2087.78	-0.00356502		2677.78	0.00234793		3267.78	-0.00507263
318	0.00655017		907.99	-0.00702429		1497.99	0.00244265		2087.98	-0.00293512		2677.98	0.00347501		3267.98	-0.00451697
318.2	0.0059742		908.19	-0.00727234		1498.19	0.00223805		2088.18	-0.00273449		2678.18	0.00377833		3268.18	-0.00447945
318.4	0.00550768		908.39	-0.00700828		1498.39	0.00233227		2088.38	-0.00331		2678.38	0.00376402		3268.38	-0.00478279
318.6	0.0064219		908.59	-0.00705806		1498.59	0.0024581		2088.58	-0.0034321		2678.58	0.00316348		3268.58	-0.00563319
318.8	0.00680871		908.79	-0.00711538		1498.79	0.00341125		2088.78	-0.00254496		2678.78	0.0036633		3268.78	-0.00585772
319	0.00626552		908.99	-0.00734456		1498.99	0.00403831		2088.98	-0.00129659		2678.98	0.00342677		3268.98	-0.00585059
319.2	0.00688548		909.19	-0.00720379		1499.19	0.00525439		2089.18	-0.00015466		2679.18	0.00320646		3269.18	-0.00642244
319.4	0.00596746		909.39	-0.0069555		1499.39	0.00512075		2089.38	-0.00071011		2679.38	0.00355179		3269.38	-0.00670306
319.6	0.00452317		909.59	-0.00721233		1499.59	0.00610672		2089.58	-0.00099524		2679.58	0.0042748		3269.58	-0.00704258
319.8	0.00430621		909.79	-0.00669599		1499.79	0.00561088		2089.78	-0.00083252		2679.78	0.00392328		3269.78	-0.00784123
320	0.00383253		909.99	-0.00754039		1499.99	0.00528799		2089.98	-0.00070784		2679.98	0.00343903		3269.98	-0.00735196
320.2	0.0038405		910.19	-0.00777076		1500.19	0.00526535		2090.18	-0.00069323		2680.18	0.00280348		3270.18	-0.00727183
320.4	0.00297394		910.39	-0.00861123		1500.39	0.00538545		2090.38	-0.00067217		2680.38	0.00279035		3270.38	-0.00734791
320.6	0.00247995		910.59	-0.00756826		1500.59	0.00571214		2090.58	-0.00077241		2680.58	0.00230084		3270.58	-0.00629083
320.8	0.0022487		910.79	-0.0069714		1500.79	0.00568706		2090.78	0.00028278		2680.78	0.00166574		3270.78	-0.00634141
321	0.00255277		910.99	-0.00658002		1500.99	0.00586587		2090.98	0.00024622		2680.98	0.00258993		3270.98	-0.00536255
321.2	0.00230572		911.19	-0.00604177		1501.19	0.00558614		2091.18	0.00012505		2681.18	0.00240638		3271.18	-0.00597802
321.4	0.00282143		911.39	-0.00620789		1501.39	0.00562957		2091.38	-0.00013468		2681.38	0.00180021		3271.38	-0.00631921
321.6	0.00325648		911.59	-0.00611994		1501.59	0.00475039		2091.58	0.00027899		2681.58	0.00075039		3271.58	-0.00619504
321.8	0.0037133		911.79	-0.006248		1501.79	0.00477628		2091.78	-0.00040674		2681.78	0.00107619		3271.78	-0.00608227
322	0.00313466		911.99	-0.0067767		1501.99	0.00455801		2091.98	-0.00037029		2681.98	0.0015988		3271.98	-0.0057597
322.2	0.00370267		912.19	-0.00714157		1502.19	0.0048312		2092.18	-0.00136594		2682.18	0.00258906		3272.18	-0.00618524
322.4	0.00492794		912.39	-0.00631267		1502.39	0.00476844		2092.38	-0.00160824		2682.38	0.0031841		3272.38	-0.00629486
322.6	0.00580217		912.59	-0.00712001		1502.59	0.00470447		2092.58	-0.00127171		2682.58	0.00333652		3272.58	-0.00607781
322.8	0.00562693		912.79	-0.00776534		1502.79	0.004832		2092.78	-0.00103357		2682.78	0.00352274		3272.78	-0.00557411
323	0.00535094		912.99	-0.00779158		1502.99	0.00418611		2092.98	-0.00058859		2682.98	0.00335628		3272.98	-0.00519987
323.2	0.00619863		913.19	-0.00703515		1503.19	0.00413704		2093.18	-0.00020098		2683.18	0.00335558		3273.18	-0.00588006
323.4	0.00510036		913.39	-0.00702148		1503.39	0.00364232		2093.38	-0.00067976		2683.38	0.00327263		3273.38	-0.00499647
323.6	0.00562804		913.59	-0.00676865		1503.59	0.00468675		2093.58	-0.0002916		2683.58	0.0029154		3273.58	-0.00577333
323.8	0.00630356		913.79	-0.00691226		1503.79	0.00326286		2093.78	-0.00063412		2683.78	0.00212172		3273.78	-0.00615568
324	0.00513441		913.99	-0.00749831		1503.99	0.00296915		2093.98	-0.00117448		2683.98	0.00091362		3273.98	-0.00530024
324.2	0.00506066		914.19	-0.00782605		1504.19	0.00313439		2094.18	-0.00076454		2684.18	0.00059844		3274.18	-0.00541364
324.4	0.00502044		914.39	-0.0082744		1504.39	0.00318995		2094.38	-0.00053603		2684.38	0.00060924		3274.38	-0.00511867
324.6	0.00534003		914.59	-0.00844927		1504.59	0.00342579		2094.58	0.00012327		2684.58	0.00070246		3274.58	-0.00486821
324.8	0.00541522		914.79	-0.00812339		1504.79	0.00364842		2094.78	-0.00030686		2684.78	0.0012736		3274.78	-0.00553216
325	0.00610902		914.99	-0.00788756		1504.99	0.00483936		2094.98	-0.00013246		2684.98	0.00175272		3274.98	-0.00489828
325.2	0.00614794		915.19	-0.00719448		1505.19	0.00525976		2095.18	-0.00078217		2685.18	0.00209261		3275.18	-0.00504808
325.4	0.0067243		915.39	-0.00671781		1505.39	0.00548677		2095.38	-0.00141691		2685.38	0.00169559		3275.38	-0.00499056
325.6	0.00734703		915.59	-0.00620219		1505.59	0.00477822		2095.58	-0.00111415		2685.58	0.00181241		3275.58	-0.00494949
325.8	0.00777103		915.79	-0.00711558		1505.79	0.00409223		2095.78	-0.00100766		2685.78	0.00254074		3275.78	-0.00521206
326	0.00776434		915.99	-0.00719285		1505.99	0.00269442		2095.98	-0.00065447		2685.98	0.00350332		3275.98	-0.00526946
326.2	0.0074461		916.19	-0.00627096		1506.19	0.00278348		2096.18	-0.00078385		2686.18	0.0049812		3276.18	-0.00534944
326.4	0.00686086		916.39	-0.00589411		1506.39	0.00309504		2096.38	0.00040613		2686.38	0.00500672		3276.38	-0.00450955
326.6	0.00590948		916.59	-0.00672716		1506.59	0.00296826		2096.58	-0.0003924		2686.58	0.00474466		3276.58	-0.00441569
326.8	0.00546465		916.79	-0.00635618		1506.79	0.00257011		2096.78	-0.00068837		2686.78	0.00455584		3276.78	-0.00437995
327	0.00587831		916.99	-0.00522519		1506.99	0.00234411		2096.98	-0.00047678		2686.98	0.00449623		3276.98	-0.00423643
327.2	0.00589033		917.19	-0.00502704		1507.19	0.00263395		2097.18	-0.00003132		2687.18	0.00445909		3277.18	-0.00448793
327.4	0.00566749		917.39	-0.00470875		1507.39	0.00356772		2097.38	-0.00017991		2687.38	0.00454196		3277.38	-0.00394175
327.6	0.0063113		917.59	-0.0042536		1507.59	0.00469428		2097.58	-0.00059914		2687.58	0.00337545		3277.58	-0.00461786
327.8	0.00633367		917.79	-0.00513111		1507.79	0.00359494		2097.78	-0.00123901		2687.78	0.00353807		3277.78	-0.00449217
328	0.00620196		917.99	-0.00508044		1507.99	0.00367214		2097.98	-0.0012102		2687.98	0.00310556		3277.98	-0.00515128
328.2	0.00680937		918.19	-0.00539312		1508.19	0.00334695		2098.18	-0.00132266		2688.18	0.0034331		3278.18	-0.00505861
328.4	0.00649322		918.39	-0.0057767		1508.39	0.00383397		2098.38	-0.0016092		2688.38	0.00381728		3278.38	-0.00549021
328.6	0.00629612		918.59	-0.00666185		1508.59	0.00460749		2098.58	-0.00185856		2688.58	0.00369097		3278.58	-0.00705442
328.8	0.00599834		918.79	-0.00625959		1508.79	0.00468719		2098.78	-0.00241861		2688.78	0.0038418		3278.78	-0.00768967
329	0.00647929		918.99	-0.00659447		1508.99	0.00581526		2098.98	-0.00073274		2688.98	0.0041729		3278.98	-0.00738302
329.2	0.00633947		919.19	-0.00627556		1509.19	0.00542818		2099.18	-0.00096675		2689.18	0.00445074		3279.18	-0.00737193
329.4	0.00677342		919.39	-0.00583635		1509.39	0.0060046		2099.38	-0.00022982		2689.38	0.00417481		3279.38	-0.00787107
329.6	0.00764758		919.59	-0.005475		1509.59	0.00518449		2099.58	0.00060134		2689.58	0.0042975		3279.58	-0.0080641
329.8	0.00672096		919.79	-0.00619761		1509.79	0.00488376		2099.78	0.00102851		2689.78	0.00438938		3279.78	-0.00832977
330	0.00694824		919.99	-0.00599332		1509.99	0.00531009		2099.98	0.00067455		2689.98	0.00451007		3279.98	-0.00852369
330.2	0.00698774		920.19	-0.00618604		1510.19	0.00579521		2100.18	0.00134922		2690.18	0.00386292		3280.18	-0.0076042
330.4	0.00645666		920.39	-0.00681345		1510.39	0.00611042		2100.38	0.00165784		2690.38	0.0027193		3280.38	-0.00741004
330.6	0.00611948		920.59	-0.00688366		1510.59	0.00574151		2100.58	0.00060424		2690.58	0.00258727		3280.58	-0.00742449
330.8	0.00644785		920.79	-0.00620681		1510.79	0.00515799		2100.78	0.00088234		2690.78	0.00232047		3280.78	-0.0071494
331	0.00722954		920.99	-0.00515583		1510.99	0.00500107		2100.98	0.0014172		2690.98	0.00272033		3280.98	-0.00637817
331.2	0.0072046		921.19	-0.00495936		1511.19	0.00468886		2101.18	0.0011153		2691.18	0.00289704		3281.18	-0.00554308
331.4	0.00781146		921.39	-0.00414846		1511.39	0.00490554		2101.38	0.00007766		2691.38	0.00260727		3281.38	-0.00490281
331.6	0.00838409		921.59	-0.00382451		1511.59	0.00539292		2101.58	-0.00101662		2691.58	0.00234017		3281.58	-0.00505079
331.8	0.00844832		921.79	-0.0042181		1511.79	0.00452221		2101.78	-0.00209758		2691.78	0.00326413		3281.78	-0.00475286
332	0.00826014		921.99	-0.0033844		1511.99	0.00463141		2101.98	-0.00270283		2691.98	0.0031535		3281.98	-0.00502344
332.2	0.00825692		922.19	-0.00334714		1512.19	0.00472974		2102.18	-0.00241968		2692.18	0.00372177		3282.18	-0.0040002
332.4	0.00835809		922.39	-0.00380122		1512.39	0.00564439		2102.38	-0.00231194		2692.38	0.00444029		3282.38	-0.00466848
332.6	0.00824665		922.59	-0.00359544		1512.59	0.00624604		2102.58	-0.00277207		2692.58	0.00409776		3282.58	-0.00498802
332.8	0.00766262		922.79	-0.00324326		1512.79	0.0069328		2102.78	-0.002254		2692.78	0.0052305		3282.78	-0.00454266
333	0.0077057		922.99	-0.00308151		1512.99	0.00775202		2102.98	-0.00137694		2692.98	0.00601986		3282.98	-0.00406769
333.2	0.00759439		923.19	-0.00357402		1513.19	0.00791591		2103.18	-0.0012562		2693.18	0.00578294		3283.18	-0.0041594
333.4	0.00715799		923.39	-0.0035787		1513.39	0.00824598		2103.38	-0.00115883		2693.38	0.00596308		3283.38	-0.0038811
333.6	0.00781889		923.59	-0.0041305		1513.59	0.00824443		2103.58	-0.00137423		2693.58	0.00534491		3283.58	-0.00347812
333.8	0.0071541		923.79	-0.00439799		1513.79	0.00892846		2103.78	-0.00077212		2693.78	0.00554704		3283.78	-0.00485827
334	0.00751403		923.99	-0.0054432		1513.99	0.00857424		2103.98	-0.00113495		2693.98	0.00442983		3283.98	-0.00439385
334.2	0.00670905		924.19	-0.00544862		1514.19	0.00756149		2104.18	-0.00034919		2694.18	0.00331515		3284.18	-0.00462604
334.4	0.00520545		924.39	-0.00522712		1514.39	0.00792876		2104.38	-0.00067238		2694.38	0.00276114		3284.38	-0.00472962
334.6	0.00485947		924.59	-0.00470174		1514.59	0.00788232		2104.58	-0.00086739		2694.58	0.00262295		3284.58	-0.00536921
334.8	0.00447487		924.79	-0.00424551		1514.79	0.00707083		2104.78	-0.00021955		2694.78	0.00177237		3284.78	-0.00496939
335	0.00453114		924.99	-0.00449879		1514.99	0.00731741		2104.98	-0.00054419		2694.98	0.00214972		3284.98	-0.00426826
335.2	0.00426724		925.19	-0.00533864		1515.19	0.00748514		2105.18	-0.00113507		2695.18	0.00178834		3285.18	-0.00373978
335.4	0.0041969		925.39	-0.00452339		1515.39	0.00716275		2105.38	-0.00189842		2695.38	0.00158813		3285.38	-0.00467446
335.6	0.0041415		925.59	-0.00514537		1515.59	0.00785533		2105.58	-0.00175373		2695.58	0.00176462		3285.58	-0.00489896
335.8	0.00406808		925.79	-0.00513514		1515.79	0.00676531		2105.78	-0.00117975		2695.78	0.00138662		3285.78	-0.00471061
336	0.00468165		925.99	-0.00463299		1515.99	0.00601962		2105.98	-0.00118161		2695.98	0.00132571		3285.98	-0.00514732
336.2	0.00493089		926.19	-0.004427		1516.19	0.0066337		2106.18	-0.00081381		2696.18	0.00268256		3286.18	-0.00511963
336.4	0.00564161		926.39	-0.00433109		1516.39	0.00673695		2106.38	-0.00108127		2696.38	0.00385237		3286.38	-0.00578956
336.6	0.00535711		926.59	-0.00388208		1516.59	0.00594356		2106.58	-0.00184614		2696.58	0.00420511		3286.58	-0.00588034
336.8	0.00479503		926.79	-0.00392712		1516.79	0.00586117		2106.78	-0.00089111		2696.78	0.0044768		3286.78	-0.00623173
337	0.00452821		926.99	-0.00414791		1516.99	0.00579967		2106.98	-0.00062459		2696.98	0.00439169		3286.98	-0.00582382
337.2	0.00522107		927.19	-0.00409874		1517.19	0.00529171		2107.18	-0.00019381		2697.18	0.00454507		3287.18	-0.00540348
337.4	0.00478692		927.39	-0.00308563		1517.39	0.00505508		2107.38	0.00021396		2697.38	0.0049555		3287.38	-0.00435909
337.6	0.00665291		927.59	-0.00256398		1517.59	0.00549463		2107.58	-0.00004641		2697.58	0.00415185		3287.58	-0.00536163
337.8	0.00605705		927.79	-0.00188454		1517.79	0.00525631		2107.78	-0.0001194		2697.78	0.00436446		3287.78	-0.00611618
338	0.00605041		927.99	-0.00259147		1517.99	0.00398243		2107.98	-0.0003105		2697.98	0.00343016		3287.98	-0.00523963
338.2	0.00524324		928.19	-0.0019605		1518.19	0.0035307		2108.18	-0.0001493		2698.18	0.0029696		3288.18	-0.00561771
338.4	0.00483779		928.39	-0.00154462		1518.39	0.00314125		2108.38	-0.00059956		2698.38	0.00198608		3288.38	-0.00532945
338.6	0.00517365		928.59	-0.00137611		1518.59	0.00255827		2108.58	-0.00062794		2698.58	0.00227533		3288.58	-0.00553473
338.8	0.00511583		928.79	-0.00128646		1518.79	0.00257731		2108.78	-0.0003519		2698.78	0.00272642		3288.78	-0.00515965
339	0.00505932		928.99	-0.00152877		1518.99	0.00307337		2108.98	-0.000613		2698.98	0.00296735		3288.98	-0.00508816
339.2	0.00530611		929.19	-0.00167042		1519.19	0.00275589		2109.18	0.00031402		2699.18	0.00265473		3289.18	-0.00488149
339.4	0.00517875		929.39	-0.00110189		1519.39	0.00314588		2109.38	-0.00005186		2699.38	0.00270231		3289.38	-0.00525097
339.6	0.00451472		929.59	-0.00276		1519.59	0.00375059		2109.58	0.00079638		2699.58	0.00292233		3289.58	-0.00510995
339.8	0.00405908		929.79	-0.00377687		1519.79	0.00417765		2109.78	0.00075413		2699.78	0.00226992		3289.78	-0.00552145
340	0.00357967		929.99	-0.00470379		1519.99	0.00521433		2109.98	0.00041714		2699.98	0.00266846		3289.98	-0.0059439
340.2	0.00303188		930.19	-0.0050928		1520.19	0.00709411		2110.18	0.00017617		2700.18	0.0033758		3290.18	-0.00563156
340.4	0.0035663		930.39	-0.00586834		1520.39	0.00681226		2110.38	0.00065616		2700.38	0.00392228		3290.38	-0.00633748
340.6	0.00307318		930.59	-0.00622999		1520.59	0.00742883		2110.58	0.00026222		2700.58	0.00335977		3290.58	-0.00610571
340.8	0.00297387		930.79	-0.0061231		1520.79	0.00892657		2110.78	0.00094068		2700.78	0.00265445		3290.78	-0.00523523
341	0.0026507		930.99	-0.00633214		1520.99	0.00988185		2110.98	0.00119081		2700.98	0.00332495		3290.98	-0.00413059
341.2	0.00414115		931.19	-0.00599524		1521.19	0.01029926		2111.18	0.00115728		2701.18	0.00431869		3291.18	-0.00405393
341.4	0.00432556		931.39	-0.00530848		1521.39	0.01048662		2111.38	0.00043751		2701.38	0.00392525		3291.38	-0.00404072
341.6	0.00618071		931.59	-0.00501621		1521.59	0.010165		2111.58	-0.00110296		2701.58	0.00370513		3291.58	-0.00458726
341.8	0.005881		931.79	-0.00531432		1521.79	0.00946297		2111.78	-0.00258227		2701.78	0.00444291		3291.78	-0.00480091
342	0.00603591		931.99	-0.00547221		1521.99	0.0081697		2111.98	-0.00277364		2701.98	0.00396745		3291.98	-0.00483776
342.2	0.00541569		932.19	-0.00465981		1522.19	0.0073954		2112.18	-0.00334005		2702.18	0.00419145		3292.18	-0.00500317
342.4	0.00642032		932.39	-0.00381326		1522.39	0.00617607		2112.38	-0.00333062		2702.38	0.00377093		3292.38	-0.0044262
342.6	0.00686578		932.59	-0.00342142		1522.59	0.00576935		2112.58	-0.00339974		2702.58	0.00416129		3292.58	-0.00474135
342.8	0.00676846		932.79	-0.00312685		1522.79	0.00460854		2112.78	-0.0033597		2702.78	0.00423808		3292.78	-0.00519355
343	0.00683601		932.99	-0.00261095		1522.99	0.00352886		2112.98	-0.00272602		2702.98	0.00330889		3292.98	-0.00439005
343.2	0.00685505		933.19	-0.00261616		1523.19	0.00344845		2113.18	-0.00218546		2703.18	0.00350812		3293.18	-0.0050016
343.4	0.00632332		933.39	-0.00284304		1523.39	0.00298361		2113.38	-0.00176177		2703.38	0.0040385		3293.38	-0.00496857
343.6	0.00560715		933.59	-0.00438475		1523.59	0.00301245		2113.58	-0.00078663		2703.58	0.00380569		3293.58	-0.00580157
343.8	0.00596787		933.79	-0.00533075		1523.79	0.00415265		2113.78	-0.00041286		2703.78	0.00356936		3293.78	-0.00620507
344	0.00620899		933.99	-0.00449577		1523.99	0.00443284		2113.98	-0.00047686		2703.98	0.0029069		3293.98	-0.00649741
344.2	0.00642681		934.19	-0.00431436		1524.19	0.0049606		2114.18	-0.00123585		2704.18	0.00255508		3294.18	-0.00694531
344.4	0.00684087		934.39	-0.00449624		1524.39	0.00453223		2114.38	-0.00041822		2704.38	0.00268229		3294.38	-0.00728266
344.6	0.00677274		934.59	-0.00425014		1524.59	0.00511604		2114.58	-0.00071593		2704.58	0.00197588		3294.58	-0.00666695
344.8	0.00734396		934.79	-0.0038616		1524.79	0.00594173		2114.78	-0.00038198		2704.78	0.00265252		3294.78	-0.00518867
345	0.00711923		934.99	-0.0040456		1524.99	0.00642873		2114.98	-0.00091421		2704.98	0.00370699		3294.98	-0.0053545
345.2	0.007851		935.19	-0.00438173		1525.19	0.00743781		2115.18	-0.00165868		2705.18	0.00429641		3295.18	-0.00604518
345.4	0.00743612		935.39	-0.00390213		1525.39	0.0079307		2115.38	-0.00244984		2705.38	0.00353937		3295.38	-0.00634258
345.6	0.00787865		935.59	-0.00396445		1525.59	0.00814871		2115.58	-0.00291011		2705.58	0.00386925		3295.58	-0.00584248
345.8	0.00787807		935.79	-0.00412305		1525.79	0.00894242		2115.78	-0.00269365		2705.78	0.00412908		3295.78	-0.00635039
346	0.00768106		935.99	-0.00356441		1525.99	0.00916712		2115.98	-0.00179182		2705.98	0.00372562		3295.98	-0.00587162
346.2	0.00767691		936.19	-0.0034579		1526.19	0.00962801		2116.18	-0.00114963		2706.18	0.00411381		3296.18	-0.00497041
346.4	0.00793057		936.39	-0.00357759		1526.39	0.00956972		2116.38	-0.0007517		2706.38	0.00331037		3296.38	-0.0047873
346.6	0.00779256		936.59	-0.00365311		1526.59	0.00917115		2116.58	-0.00101263		2706.58	0.00313538		3296.58	-0.00566684
346.8	0.006792		936.79	-0.00373049		1526.79	0.00884338		2116.78	-0.00130377		2706.78	0.0041858		3296.78	-0.00557269
347	0.0074097		936.99	-0.00426403		1526.99	0.00887134		2116.98	-0.00033191		2706.98	0.00453586		3296.98	-0.00567138
347.2	0.00709437		937.19	-0.00440007		1527.19	0.00917502		2117.18	-0.00058416		2707.18	0.00529622		3297.18	-0.00592827
347.4	0.00687113		937.39	-0.0049013		1527.39	0.00786833		2117.38	-0.00054061		2707.38	0.00630224		3297.38	-0.00561075
347.6	0.00737125		937.59	-0.00542011		1527.59	0.00830714		2117.58	-0.00118985		2707.58	0.00575967		3297.58	-0.0061924
347.8	0.00853286		937.79	-0.00529096		1527.79	0.00880534		2117.78	-0.00219197		2707.78	0.00561248		3297.78	-0.00636697
348	0.00826375		937.99	-0.00447785		1527.99	0.0086199		2117.98	-0.00345956		2707.98	0.00448077		3297.98	-0.00582534
348.2	0.00833466		938.19	-0.00492276		1528.19	0.00772376		2118.18	-0.00317921		2708.18	0.00445146		3298.18	-0.0052707
348.4	0.00784373		938.39	-0.0052223		1528.39	0.00738461		2118.38	-0.00308598		2708.38	0.00503		3298.38	-0.0049686
348.6	0.00772578		938.59	-0.00487487		1528.59	0.0073461		2118.58	-0.00341831		2708.58	0.00511986		3298.58	-0.00382959
348.8	0.00742551		938.79	-0.00453378		1528.79	0.00759974		2118.78	-0.00353988		2708.78	0.00570579		3298.78	-0.00318119
349	0.00675547		938.99	-0.00490987		1528.99	0.00862541		2118.98	-0.0032981		2708.98	0.00536375		3298.98	-0.00348354
349.2	0.00614823		939.19	-0.0056272		1529.19	0.0094702		2119.18	-0.00202486		2709.18	0.00502096		3299.18	-0.0039734
349.4	0.00588089		939.39	-0.00605271		1529.39	0.0090157		2119.38	-0.00208043		2709.38	0.00511856		3299.38	-0.00372701
349.6	0.00636381		939.59	-0.00555529		1529.59	0.00827687		2119.58	-0.00161212		2709.58	0.00577811		3299.58	-0.00297834
349.8	0.0073851		939.79	-0.00520289		1529.79	0.0081926		2119.78	-0.00078924		2709.78	0.00574996		3299.78	-0.00322673
350	0.00751128		939.99	-0.00536316		1529.99	0.00756645		2119.98	-0.00018152		2709.98	0.00524001		3299.98	-0.00315848
350.2	0.00764874		940.19	-0.00519252		1530.19	0.00721244		2120.18	0.00033121		2710.18	0.00558954		3300.18	-0.00386547
350.4	0.00725755		940.39	-0.00509818		1530.39	0.0069014		2120.38	-0.00014136		2710.38	0.00559499		3300.38	-0.0050526
350.6	0.00685306		940.59	-0.00463489		1530.59	0.00661871		2120.58	0.00023481		2710.58	0.00512199		3300.58	-0.0056733
350.8	0.00604186		940.79	-0.00514206		1530.79	0.00657336		2120.78	-0.00021392		2710.78	0.00500259		3300.78	-0.00563733
351	0.00725016		940.99	-0.00558325		1530.99	0.0061665		2120.98	-0.00060008		2710.98	0.00416801		3300.98	-0.00574644
351.2	0.00709807		941.19	-0.0049923		1531.19	0.00660137		2121.18	-0.00147713		2711.18	0.00435031		3301.18	-0.00620521
351.4	0.0074773		941.39	-0.00533137		1531.39	0.00626771		2121.38	-0.0018897		2711.38	0.00412591		3301.38	-0.00720441
351.6	0.00824605		941.59	-0.00391908		1531.59	0.00706353		2121.58	-0.00195031		2711.58	0.00357206		3301.58	-0.00749407
351.8	0.00870935		941.79	-0.0038795		1531.79	0.0073582		2121.78	-0.00149394		2711.78	0.00346752		3301.78	-0.00769123
352	0.007882		941.99	-0.0034159		1531.99	0.00734184		2121.98	-0.00138752		2711.98	0.00358282		3301.98	-0.00767573
352.2	0.00760463		942.19	-0.00418272		1532.19	0.00711279		2122.18	-0.0010231		2712.18	0.00434436		3302.18	-0.00841122
352.4	0.00668988		942.39	-0.00408205		1532.39	0.00742164		2122.38	-0.00115484		2712.38	0.00504576		3302.38	-0.00901522
352.6	0.00644734		942.59	-0.00362127		1532.59	0.00725418		2122.58	-0.0007999		2712.58	0.00477685		3302.58	-0.00844575
352.8	0.0059034		942.79	-0.00380498		1532.79	0.00674614		2122.78	0.00070462		2712.78	0.00496051		3302.78	-0.0091886
353	0.00521692		942.99	-0.00406637		1532.99	0.00735668		2122.98	0.00207786		2712.98	0.00497802		3302.98	-0.00927784
353.2	0.00417998		943.19	-0.00489695		1533.19	0.00608617		2123.18	0.00253078		2713.18	0.00574609		3303.18	-0.01004225
353.4	0.00478918		943.39	-0.00436807		1533.39	0.00476489		2123.38	0.00256478		2713.38	0.00659684		3303.38	-0.0097963
353.6	0.00469992		943.59	-0.00381307		1533.59	0.00437732		2123.58	0.00278856		2713.58	0.00612438		3303.58	-0.00916275
353.8	0.00537633		943.79	-0.00436584		1533.79	0.00357003		2123.78	0.00374245		2713.78	0.00590151		3303.78	-0.00947622
354	0.00587943		943.99	-0.0047874		1533.99	0.00218293		2123.98	0.00417505		2713.98	0.00581749		3303.98	-0.0093437
354.2	0.00641606		944.19	-0.0047052		1534.19	0.00231987		2124.18	0.00444755		2714.18	0.00566383		3304.18	-0.00986731
354.4	0.00580461		944.39	-0.00475149		1534.39	0.00239681		2124.38	0.00425123		2714.38	0.00548114		3304.38	-0.01000729
354.6	0.00629222		944.59	-0.0048976		1534.59	0.00286482		2124.58	0.00427844		2714.58	0.00472411		3304.58	-0.00960153
354.8	0.00734995		944.79	-0.00568694		1534.79	0.00340972		2124.78	0.00331004		2714.78	0.00496795		3304.78	-0.00948256
355	0.00857933		944.99	-0.00549737		1534.99	0.0043719		2124.98	0.00187805		2714.98	0.00532725		3304.98	-0.01014653
355.2	0.00886693		945.19	-0.00522211		1535.19	0.00512095		2125.18	0.00156231		2715.18	0.00617354		3305.18	-0.00995585
355.4	0.00944048		945.39	-0.00523765		1535.39	0.00577236		2125.38	0.0015788		2715.38	0.00677437		3305.38	-0.00910239
355.6	0.00942735		945.59	-0.00457968		1535.59	0.00630549		2125.58	0.00191897		2715.58	0.00773022		3305.58	-0.00849105
355.8	0.00971985		945.79	-0.00469655		1535.79	0.00644113		2125.78	0.00132159		2715.78	0.00780311		3305.78	-0.00806194
356	0.00954179		945.99	-0.0046348		1535.99	0.00614354		2125.98	0.00060993		2715.98	0.00771825		3305.98	-0.00748216
356.2	0.00988303		946.19	-0.00492539		1536.19	0.00645471		2126.18	-0.00070539		2716.18	0.00794379		3306.18	-0.00712976
356.4	0.00924429		946.39	-0.00346303		1536.39	0.00654859		2126.38	-0.00069851		2716.38	0.00766171		3306.38	-0.00660877
356.6	0.0083719		946.59	-0.00260683		1536.59	0.00620268		2126.58	-0.00093787		2716.58	0.00778643		3306.58	-0.00642876
356.8	0.00750046		946.79	-0.00231433		1536.79	0.00589458		2126.78	0.00018094		2716.78	0.00745379		3306.78	-0.0065421
357	0.00590214		946.99	-0.00208713		1536.99	0.00637352		2126.98	0.00085506		2716.98	0.00736585		3306.98	-0.00649098
357.2	0.00468673		947.19	-0.0021088		1537.19	0.00614328		2127.18	-0.00006806		2717.18	0.00670206		3307.18	-0.00664148
357.4	0.00432224		947.39	-0.00226179		1537.39	0.0064067		2127.38	-0.00006142		2717.38	0.00571506		3307.38	-0.00619304
357.6	0.00401332		947.59	-0.00360598		1537.59	0.00664028		2127.58	0.00007831		2717.58	0.00483983		3307.58	-0.00623959
357.8	0.00445262		947.79	-0.0046222		1537.79	0.00644713		2127.78	0.00108893		2717.78	0.00472584		3307.78	-0.00629283
358	0.00507741		947.99	-0.00519253		1537.99	0.00650795		2127.98	0.00053088		2717.98	0.00495768		3307.98	-0.00697421
358.2	0.0047644		948.19	-0.00613085		1538.19	0.00725861		2128.18	0.0005512		2718.18	0.00441357		3308.18	-0.00843027
358.4	0.00441999		948.39	-0.00645626		1538.39	0.00742446		2128.38	-0.00012434		2718.38	0.00506383		3308.38	-0.00885372
358.6	0.00513099		948.59	-0.00742306		1538.59	0.0070625		2128.58	0.00015085		2718.58	0.00495406		3308.58	-0.00907529
358.8	0.00520659		948.79	-0.00827595		1538.79	0.00702749		2128.78	-0.00085738		2718.78	0.00518819		3308.78	-0.00902209
359	0.00443768		948.99	-0.00814402		1538.99	0.00615917		2128.98	-0.00113783		2718.98	0.00597691		3308.98	-0.00923796
359.2	0.005133		949.19	-0.00825315		1539.19	0.00537835		2129.18	-0.00078725		2719.18	0.0061994		3309.18	-0.00824643
359.4	0.00566425		949.39	-0.00893127		1539.39	0.00556821		2129.38	-0.00119692		2719.38	0.0068232		3309.38	-0.00786183
359.6	0.00593621		949.59	-0.00868362		1539.59	0.00517835		2129.58	-0.00128855		2719.58	0.00681419		3309.58	-0.0079311
359.8	0.00716935		949.79	-0.00745711		1539.79	0.00518827		2129.78	-0.00191226		2719.78	0.0065703		3309.78	-0.00781022
360	0.00754797		949.99	-0.00776789		1539.99	0.00506609		2129.98	-0.00187937		2719.98	0.00595183		3309.98	-0.00743453
360.2	0.00757813		950.19	-0.00700727		1540.19	0.00618083		2130.18	-0.00262756		2720.18	0.00634925		3310.18	-0.0074238
360.4	0.00796795		950.39	-0.00447723		1540.39	0.00586025		2130.38	-0.0029801		2720.38	0.00678053		3310.38	-0.00701674
360.6	0.00843036		950.59	-0.00467038		1540.59	0.00594187		2130.58	-0.00281142		2720.58	0.00710102		3310.58	-0.00664557
360.8	0.00937867		950.79	-0.00378464		1540.79	0.00677788		2130.78	-0.00230828		2720.78	0.00695387		3310.78	-0.00654894
361	0.00912979		950.99	-0.004093		1540.99	0.00713802		2130.98	-0.00224762		2720.98	0.00642474		3310.98	-0.00700186
361.2	0.00941048		951.19	-0.0038817		1541.19	0.00667386		2131.18	-0.00292546		2721.18	0.00581736		3311.18	-0.00728613
361.4	0.0101605		951.39	-0.00449108		1541.39	0.00685521		2131.38	-0.00308239		2721.38	0.00568245		3311.38	-0.00634417
361.6	0.01131586		951.59	-0.00449278		1541.59	0.0072535		2131.58	-0.0030905		2721.58	0.00602276		3311.58	-0.0053738
361.8	0.01164899		951.79	-0.00420933		1541.79	0.00637969		2131.78	-0.00286188		2721.78	0.00619881		3311.78	-0.0046019
362	0.0116845		951.99	-0.00312341		1541.99	0.00599393		2131.98	-0.00364183		2721.98	0.00666519		3311.98	-0.00473367
362.2	0.01108683		952.19	-0.0026839		1542.19	0.00543819		2132.18	-0.00295736		2722.18	0.00623851		3312.18	-0.00433482
362.4	0.0107794		952.39	-0.00187916		1542.39	0.00476365		2132.38	-0.00331782		2722.38	0.0063971		3312.38	-0.004178
362.6	0.01017519		952.59	-0.00178398		1542.59	0.0035035		2132.58	-0.00285704		2722.58	0.00621079		3312.58	-0.00447116
362.8	0.00923087		952.79	-0.00176132		1542.79	0.00307006		2132.78	-0.00272162		2722.78	0.00619877		3312.78	-0.00469111
363	0.00957438		952.99	-0.00101171		1542.99	0.00246327		2132.98	-0.00168188		2722.98	0.00671636		3312.98	-0.00619104
363.2	0.00993987		953.19	-0.00134903		1543.19	0.00246885		2133.18	-0.00172473		2723.18	0.00678687		3313.18	-0.0067469
363.4	0.00786579		953.39	-0.00145632		1543.39	0.0029762		2133.38	-0.00168808		2723.38	0.00695057		3313.38	-0.0072621
363.6	0.00757163		953.59	-0.00121429		1543.59	0.0035177		2133.58	-0.00085801		2723.58	0.00623773		3313.58	-0.00740694
363.8	0.00676547		953.79	-0.0005668		1543.79	0.00493644		2133.78	0.0001556		2723.78	0.00628824		3313.78	-0.00762828
364	0.00604093		953.99	-0.00039375		1543.99	0.00586059		2133.98	-0.00002435		2723.98	0.0062366		3313.98	-0.00731967
364.2	0.00551975		954.19	-0.00008296		1544.19	0.00680207		2134.18	-0.00072893		2724.18	0.00677444		3314.18	-0.00839141
364.4	0.00588541		954.39	0.00081873		1544.39	0.00710757		2134.38	-0.0008768		2724.38	0.00717213		3314.38	-0.00887898
364.6	0.00568978		954.59	-0.00027884		1544.59	0.0082734		2134.58	-0.00026894		2724.58	0.00690494		3314.58	-0.00784961
364.8	0.00651336		954.79	-0.0006899		1544.79	0.00855721		2134.78	-0.00043104		2724.78	0.00645889		3314.78	-0.00807795
365	0.00637285		954.99	-0.00200048		1544.99	0.0086001		2134.98	-0.00070253		2724.98	0.00598893		3314.98	-0.00867314
365.2	0.00617269		955.19	-0.00245884		1545.19	0.00858811		2135.18	-0.00035707		2725.18	0.00634383		3315.18	-0.0079125
365.4	0.0065529		955.39	-0.00312993		1545.39	0.00834446		2135.38	-0.00011912		2725.38	0.00615885		3315.38	-0.006766
365.6	0.00779219		955.59	-0.00309973		1545.59	0.00844454		2135.58	0.00038541		2725.58	0.00581778		3315.58	-0.00559432
365.8	0.00822496		955.79	-0.0026929		1545.79	0.00774728		2135.78	0.00089219		2725.78	0.00606479		3315.78	-0.00550813
366	0.00833225		955.99	-0.00173224		1545.99	0.00799476		2135.98	0.00036414		2725.98	0.00632382		3315.98	-0.0049131
366.2	0.0088635		956.19	-0.0019075		1546.19	0.00712242		2136.18	0.00039846		2726.18	0.00662586		3316.18	-0.00573101
366.4	0.00911355		956.39	-0.00283936		1546.39	0.00664257		2136.38	0.00041284		2726.38	0.0074235		3316.38	-0.00611708
366.6	0.00901411		956.59	-0.00285949		1546.59	0.00635201		2136.58	0.00147744		2726.58	0.00749604		3316.58	-0.00666342
366.8	0.00860861		956.79	-0.00305023		1546.79	0.00593321		2136.78	0.00117225		2726.78	0.00729078		3316.78	-0.00746889
367	0.00888838		956.99	-0.00292796		1546.99	0.00593048		2136.98	0.00064391		2726.98	0.00685705		3316.98	-0.00725201
367.2	0.00792653		957.19	-0.00279012		1547.19	0.00547999		2137.18	0.00011001		2727.18	0.00649863		3317.18	-0.00673924
367.4	0.0071996		957.39	-0.00216524		1547.39	0.00552782		2137.38	0.00061582		2727.38	0.00536101		3317.38	-0.00655828
367.6	0.00812255		957.59	-0.00262681		1547.59	0.00611108		2137.58	0.00084567		2727.58	0.00457305		3317.58	-0.00720878
367.8	0.00776611		957.79	-0.00197004		1547.79	0.00638386		2137.78	0.00111823		2727.78	0.00482755		3317.78	-0.00716659
368	0.00740448		957.99	-0.00134502		1547.99	0.00615537		2137.98	0.00004776		2727.98	0.00510236		3317.98	-0.00753443
368.2	0.00744398		958.19	-0.00142671		1548.19	0.00633363		2138.18	-0.00033138		2728.18	0.0050207		3318.18	-0.00845936
368.4	0.00769465		958.39	-0.00120094		1548.39	0.00626449		2138.38	0.00022552		2728.38	0.00422266		3318.38	-0.00777568
368.6	0.00721418		958.59	-0.00210361		1548.59	0.00623539		2138.58	0.00042495		2728.58	0.00427604		3318.58	-0.00716433
368.8	0.00769012		958.79	-0.0031224		1548.79	0.00614723		2138.78	-0.00009619		2728.78	0.0041523		3318.78	-0.00797262
369	0.0071365		958.99	-0.0031316		1548.99	0.00641082		2138.98	-0.00001403		2728.98	0.00420471		3318.98	-0.00843886
369.2	0.0066256		959.19	-0.00422496		1549.19	0.00539653		2139.18	0.00080483		2729.18	0.00447171		3319.18	-0.00845072
369.4	0.00738816		959.39	-0.00437077		1549.39	0.00465059		2139.38	0.00030491		2729.38	0.00491626		3319.38	-0.00881222
369.6	0.00856873		959.59	-0.00382184		1549.59	0.00436456		2139.58	-0.00030004		2729.58	0.00506534		3319.58	-0.00834618
369.8	0.00857098		959.79	-0.00392104		1549.79	0.00328553		2139.78	-0.00046673		2729.78	0.00565248		3319.78	-0.00889374
370	0.00876921		959.99	-0.00367173		1549.99	0.00315848		2139.98	-0.00038934		2729.98	0.00588895		3319.98	-0.00930297
370.2	0.00864297		960.19	-0.00324378		1550.19	0.00281318		2140.18	-0.00045394		2730.18	0.00699641		3320.18	-0.00971491
370.4	0.00798758		960.39	-0.00281075		1550.39	0.00309828		2140.38	-0.00071898		2730.38	0.00776136		3320.38	-0.00893076
370.6	0.00689687		960.59	-0.00205586		1550.59	0.00282301		2140.58	-0.00126975		2730.58	0.00683859		3320.58	-0.00976334
370.8	0.00639851		960.79	-0.0013668		1550.79	0.00250386		2140.78	-0.00250765		2730.78	0.00690075		3320.78	-0.00882563
371	0.00652177		960.99	-0.00028489		1550.99	0.00233183		2140.98	-0.00226773		2730.98	0.00698545		3320.98	-0.00797219
371.2	0.00737672		961.19	-0.00021913		1551.19	0.00256099		2141.18	-0.00214591		2731.18	0.00664347		3321.18	-0.00807677
371.4	0.00723642		961.39	0.00068779		1551.39	0.0030423		2141.38	-0.00123423		2731.38	0.00595933		3321.38	-0.00864504
371.6	0.00743378		961.59	0.00030437		1551.59	0.00311287		2141.58	-0.00092403		2731.58	0.00613187		3321.58	-0.00841083
371.8	0.00763071		961.79	0.00147697		1551.79	0.00326684		2141.78	-0.00088856		2731.78	0.00611707		3321.78	-0.00686614
372	0.00755374		961.99	0.00183937		1551.99	0.00420011		2141.98	-0.00012535		2731.98	0.0069192		3321.98	-0.00763597
372.2	0.00821701		962.19	0.00218016		1552.19	0.00519458		2142.18	0.00006567		2732.18	0.00621225		3322.18	-0.00731021
372.4	0.00751399		962.39	0.0014666		1552.39	0.00593941		2142.38	0.00147627		2732.38	0.00613306		3322.38	-0.00688405
372.6	0.00709592		962.59	0.00065312		1552.59	0.00691248		2142.58	0.00218244		2732.58	0.00621197		3322.58	-0.00670482
372.8	0.0079436		962.79	-0.00009892		1552.79	0.00740755		2142.78	0.00244505		2732.78	0.00612457		3322.78	-0.00680394
373	0.00803985		962.99	-0.00039162		1552.99	0.00780329		2142.98	0.00167273		2732.98	0.00613398		3322.98	-0.00726395
373.2	0.00802484		963.19	-0.00098802		1553.19	0.00699514		2143.18	0.00160223		2733.18	0.00605641		3323.18	-0.00748591
373.4	0.00894795		963.39	-0.00171379		1553.39	0.00704216		2143.38	0.00139115		2733.38	0.00576289		3323.38	-0.00747759
373.6	0.00979954		963.59	-0.00241246		1553.59	0.0073002		2143.58	0.00240053		2733.58	0.00567586		3323.58	-0.00748906
373.8	0.00971399		963.79	-0.00293007		1553.79	0.00639548		2143.78	0.00273728		2733.78	0.00616465		3323.78	-0.0079237
374	0.01031762		963.99	-0.0026413		1553.99	0.0062469		2143.98	0.00313176		2733.98	0.00601955		3323.98	-0.00796252
374.2	0.00971704		964.19	-0.00217721		1554.19	0.00600578		2144.18	0.00270461		2734.18	0.00650325		3324.18	-0.00827877
374.4	0.00926184		964.39	-0.00211623		1554.39	0.00515497		2144.38	0.00236089		2734.38	0.0069491		3324.38	-0.00834563
374.6	0.00818551		964.59	-0.00234955		1554.59	0.0045268		2144.58	0.0021622		2734.58	0.00676453		3324.58	-0.00867503
374.8	0.00825835		964.79	-0.00163587		1554.79	0.00397325		2144.78	0.00196414		2734.78	0.00761932		3324.78	-0.00754656
375	0.00685382		964.99	-0.00130356		1554.99	0.00385126		2144.98	0.00177049		2734.98	0.00670279		3324.98	-0.00734043
375.2	0.00667155		965.19	-0.00124178		1555.19	0.00389193		2145.18	0.00152587		2735.18	0.00655341		3325.18	-0.00747803
375.4	0.00584709		965.39	-0.00102601		1555.39	0.0045044		2145.38	0.00166491		2735.38	0.00643157		3325.38	-0.00755383
375.6	0.00584151		965.59	-0.00121468		1555.59	0.00450929		2145.58	0.00124023		2735.58	0.00708313		3325.58	-0.00709242
375.8	0.00547513		965.79	-0.00053764		1555.79	0.00440939		2145.78	0.00052556		2735.78	0.00710279		3325.78	-0.00687623
376	0.00541652		965.99	-0.00081249		1555.99	0.00419383		2145.98	0.000649		2735.98	0.00772711		3325.98	-0.00766199
376.2	0.00490029		966.19	-0.0003096		1556.19	0.00495708		2146.18	0.00010856		2736.18	0.00705334		3326.18	-0.006754
376.4	0.00466059		966.39	-0.00114197		1556.39	0.00556015		2146.38	0.00038463		2736.38	0.00776405		3326.38	-0.00586686
376.6	0.00483003		966.59	-0.00150503		1556.59	0.00632559		2146.58	0.00032251		2736.58	0.00684405		3326.58	-0.00606736
376.8	0.00532759		966.79	-0.00131856		1556.79	0.00689373		2146.78	-0.00024709		2736.78	0.00666799		3326.78	-0.00692073
377	0.00536537		966.99	-0.00094146		1556.99	0.00790242		2146.98	-0.00080229		2736.98	0.00555851		3326.98	-0.00682694
377.2	0.00568212		967.19	-0.00070371		1557.19	0.00793765		2147.18	0.00044228		2737.18	0.00463677		3327.18	-0.00638739
377.4	0.0067779		967.39	-0.00128654		1557.39	0.00822859		2147.38	0.0011577		2737.38	0.0047361		3327.38	-0.00618218
377.6	0.00756973		967.59	-0.00052839		1557.59	0.00813492		2147.58	0.00137291		2737.58	0.00411457		3327.58	-0.00643558
377.8	0.00768702		967.79	0.00006416		1557.79	0.00671709		2147.78	0.00165686		2737.78	0.00341469		3327.78	-0.00691795
378	0.00759035		967.99	-0.00003533		1557.99	0.00699268		2147.98	0.00229349		2737.98	0.0028781		3327.98	-0.00722094
378.2	0.00693433		968.19	0.00028386		1558.19	0.00703381		2148.18	0.00275839		2738.18	0.0027678		3328.18	-0.00803304
378.4	0.00702457		968.39	0.0007491		1558.39	0.0063193		2148.38	0.00347286		2738.38	0.00264553		3328.38	-0.00816108
378.6	0.00638626		968.59	0.00075202		1558.59	0.00637627		2148.58	0.00347653		2738.58	0.00285531		3328.58	-0.00762307
378.8	0.00648369		968.79	0.00104391		1558.79	0.00597035		2148.78	0.00378808		2738.78	0.00305999		3328.78	-0.00744016
379	0.00539476		968.99	0.00158023		1558.99	0.00519318		2148.98	0.00340448		2738.98	0.00301296		3328.98	-0.00737494
379.2	0.00540025		969.19	0.00134563		1559.19	0.00426278		2149.18	0.00335544		2739.18	0.00473242		3329.18	-0.00765593
379.4	0.00568388		969.39	0.0008239		1559.39	0.00437966		2149.38	0.00288347		2739.38	0.00473303		3329.38	-0.00746135
379.6	0.00577624		969.59	0.00021844		1559.59	0.00295066		2149.58	0.00206345		2739.58	0.00601862		3329.58	-0.00760199
379.8	0.00590909		969.79	-0.00071249		1559.79	0.00284892		2149.78	0.00160117		2739.78	0.00636112		3329.78	-0.00757235
380	0.00697556		969.99	-0.00202445		1559.99	0.0022498		2149.98	0.00114788		2739.98	0.00676261		3329.98	-0.00799275
380.2	0.0071806		970.19	-0.00206621		1560.19	0.00310016		2150.18	0.00006982		2740.18	0.00734191		3330.18	-0.00763192
380.4	0.00711011		970.39	-0.00315937		1560.39	0.00301506		2150.38	-0.00063421		2740.38	0.00791781		3330.38	-0.00770158
380.6	0.00699394		970.59	-0.0035796		1560.59	0.00343902		2150.58	-0.00118756		2740.58	0.00701783		3330.58	-0.00814331
380.8	0.00753352		970.79	-0.00386121		1560.79	0.00406229		2150.78	-0.00144063		2740.78	0.00689408		3330.78	-0.00779678
381	0.00781428		970.99	-0.00354216		1560.99	0.004236		2150.98	-0.00128971		2740.98	0.00650092		3330.98	-0.00730827
381.2	0.00756193		971.19	-0.00351839		1561.19	0.00352472		2151.18	-0.0012274		2741.18	0.00651206		3331.18	-0.00690608
381.4	0.00812538		971.39	-0.00386397		1561.39	0.00329051		2151.38	-0.00185024		2741.38	0.00667172		3331.38	-0.0072695
381.6	0.00769382		971.59	-0.00456273		1561.59	0.00328055		2151.58	-0.00155762		2741.58	0.00614768		3331.58	-0.00723007
381.8	0.00651185		971.79	-0.005428		1561.79	0.00359935		2151.78	-0.00102593		2741.78	0.00639616		3331.78	-0.0072189
382	0.00636518		971.99	-0.00585876		1561.99	0.00425774		2151.98	-0.0008419		2741.98	0.00671333		3331.98	-0.0072538
382.2	0.00606811		972.19	-0.00584372		1562.19	0.00487531		2152.18	-0.00004461		2742.18	0.00652191		3332.18	-0.00712958
382.4	0.0056082		972.39	-0.00525335		1562.39	0.00551996		2152.38	-0.00077485		2742.38	0.00776829		3332.38	-0.00746723
382.6	0.00473242		972.59	-0.00454159		1562.59	0.00623555		2152.58	-0.00128022		2742.58	0.00839926		3332.58	-0.00670045
382.8	0.00444482		972.79	-0.00399081		1562.79	0.00684616		2152.78	-0.00102728		2742.78	0.00830633		3332.78	-0.00691731
383	0.00383603		972.99	-0.00333715		1562.99	0.00721312		2152.98	-0.00126693		2742.98	0.00851251		3332.98	-0.0063664
383.2	0.00330126		973.19	-0.00286248		1563.19	0.00756066		2153.18	-0.00114218		2743.18	0.00782474		3333.18	-0.006435
383.4	0.00451493		973.39	-0.00247517		1563.39	0.0083158		2153.38	-0.00058314		2743.38	0.00732312		3333.38	-0.00685565
383.6	0.0049397		973.59	-0.00316209		1563.59	0.00874981		2153.58	-0.00102422		2743.58	0.00782106		3333.58	-0.00772023
383.8	0.00525959		973.79	-0.00248501		1563.79	0.00933887		2153.78	-0.00112882		2743.78	0.00695655		3333.78	-0.00855195
384	0.00556232		973.99	-0.00177046		1563.99	0.00871863		2153.98	-0.0018152		2743.98	0.00681034		3333.98	-0.0086146
384.2	0.00547804		974.19	-0.00106748		1564.19	0.00927736		2154.18	-0.00187042		2744.18	0.00654028		3334.18	-0.00826033
384.4	0.00540932		974.39	-0.00040108		1564.39	0.00896451		2154.38	-0.00177626		2744.38	0.00596429		3334.38	-0.00864799
384.6	0.00612771		974.59	0.00048072		1564.59	0.00876745		2154.58	-0.00168359		2744.58	0.00557265		3334.58	-0.00855094
384.8	0.0075974		974.79	0.00091972		1564.79	0.00852173		2154.78	-0.00096935		2744.78	0.00544678		3334.78	-0.00852522
385	0.00801998		974.99	0.00176051		1564.99	0.00758892		2154.98	-0.0014877		2744.98	0.00547585		3334.98	-0.00902055
385.2	0.00836557		975.19	0.00156878		1565.19	0.00672269		2155.18	-0.00062485		2745.18	0.00613559		3335.18	-0.00913071
385.4	0.00959683		975.39	0.0016965		1565.39	0.00672752		2155.38	0.00024446		2745.38	0.00675958		3335.38	-0.00925733
385.6	0.00902771		975.59	0.00124022		1565.59	0.00713765		2155.58	0.001319		2745.58	0.00670463		3335.58	-0.00828835
385.8	0.00906967		975.79	0.00101458		1565.79	0.00686287		2155.78	0.00142105		2745.78	0.00708245		3335.78	-0.00736244
386	0.00937269		975.99	0.00100146		1565.99	0.00650415		2155.98	0.00141949		2745.98	0.00766953		3335.98	-0.00741728
386.2	0.00903445		976.19	0.00080292		1566.19	0.0065128		2156.18	0.00176283		2746.18	0.00807615		3336.18	-0.00727447
386.4	0.00874571		976.39	0.00123284		1566.39	0.00661918		2156.38	0.00130058		2746.38	0.00858529		3336.38	-0.00682125
386.6	0.0085324		976.59	0.00087884		1566.59	0.00726029		2156.58	0.00142352		2746.58	0.00754562		3336.58	-0.00643392
386.8	0.00832591		976.79	0.00045195		1566.79	0.0077947		2156.78	0.00106812		2746.78	0.00799675		3336.78	-0.00662784
387	0.00793001		976.99	0.00076392		1566.99	0.00790525		2156.98	0.00083119		2746.98	0.00734447		3336.98	-0.00608936
387.2	0.0075798		977.19	0.00027892		1567.19	0.00791859		2157.18	0.00078215		2747.18	0.00738773		3337.18	-0.0069413
387.4	0.00820006		977.39	-0.00014041		1567.39	0.00912724		2157.38	0.00098532		2747.38	0.00772418		3337.38	-0.00769732
387.6	0.00751549		977.59	-0.0007338		1567.59	0.00923651		2157.58	-0.00016881		2747.58	0.00788903		3337.58	-0.00781249
387.8	0.00656636		977.79	-0.00071175		1567.79	0.00804556		2157.78	0.00023416		2747.78	0.00730626		3337.78	-0.00779286
388	0.00591988		977.99	-0.00113631		1567.99	0.00765189		2157.98	0.00058464		2747.98	0.00753066		3337.98	-0.00752845
388.2	0.0063422		978.19	-0.00108541		1568.19	0.00743875		2158.18	0.00105343		2748.18	0.00763649		3338.18	-0.00724869
388.4	0.00669488		978.39	-0.00100828		1568.39	0.00659497		2158.38	0.00078287		2748.38	0.00839095		3338.38	-0.0085934
388.6	0.00787538		978.59	-0.00130979		1568.59	0.00612285		2158.58	0.00062384		2748.58	0.00928022		3338.58	-0.0089003
388.8	0.00778161		978.79	-0.00145449		1568.79	0.00577648		2158.78	0.00122264		2748.78	0.00919196		3338.78	-0.01013934
389	0.00756065		978.99	-0.00137711		1568.99	0.00501274		2158.98	0.00081318		2748.98	0.00907321		3338.98	-0.00972331
389.2	0.0079199		979.19	-0.00107806		1569.19	0.00430205		2159.18	0.00177079		2749.18	0.00914035		3339.18	-0.00940947
389.4	0.00774174		979.39	-0.00101607		1569.39	0.00346555		2159.38	0.00303778		2749.38	0.00857543		3339.38	-0.00881528
389.6	0.00636056		979.59	-0.00053385		1569.59	0.00322958		2159.58	0.00275211		2749.58	0.00832821		3339.58	-0.00764597
389.8	0.00672632		979.79	-0.00098622		1569.79	0.00270351		2159.78	0.00286528		2749.78	0.00832924		3339.78	-0.00699676
390	0.0068531		979.99	-0.00082184		1569.99	0.0026283		2159.98	0.00332438		2749.98	0.00827992		3339.98	-0.00702986
390.2	0.00723472		980.19	-0.00088867		1570.19	0.00219633		2160.18	0.00345423		2750.18	0.00777597		3340.18	-0.00716586
390.4	0.00743375		980.39	-0.00142734		1570.39	0.00229716		2160.38	0.00281027		2750.38	0.00784433		3340.38	-0.00694217
390.6	0.00757162		980.59	-0.00177266		1570.59	0.00229947		2160.58	0.00221961		2750.58	0.00726755		3340.58	-0.00712423
390.8	0.00723527		980.79	-0.00229776		1570.79	0.00187619		2160.78	0.00213897		2750.78	0.00711195		3340.78	-0.0076535
391	0.00770079		980.99	-0.00234238		1570.99	0.00271852		2160.98	0.00279474		2750.98	0.00635356		3340.98	-0.00697461
391.2	0.00811272		981.19	-0.00301504		1571.19	0.00247044		2161.18	0.00279694		2751.18	0.00709486		3341.18	-0.00725388
391.4	0.00801977		981.39	-0.00270187		1571.39	0.00317209		2161.38	0.00278669		2751.38	0.0064453		3341.38	-0.00738831
391.6	0.00741257		981.59	-0.00278876		1571.59	0.00332816		2161.58	0.00287366		2751.58	0.00653875		3341.58	-0.00655983
391.8	0.0071951		981.79	-0.00336643		1571.79	0.00328558		2161.78	0.00347809		2751.78	0.00661219		3341.78	-0.00627672
392	0.00754582		981.99	-0.00364569		1571.99	0.00404897		2161.98	0.00368824		2751.98	0.00711934		3341.98	-0.00634797
392.2	0.00863942		982.19	-0.00447019		1572.19	0.00462083		2162.18	0.00322675		2752.18	0.0074445		3342.18	-0.0064167
392.4	0.00907177		982.39	-0.00494715		1572.39	0.0049187		2162.38	0.00216975		2752.38	0.00743427		3342.38	-0.00729408
392.6	0.0097274		982.59	-0.00419925		1572.59	0.00512208		2162.58	0.00225613		2752.58	0.00766138		3342.58	-0.00768311
392.8	0.00868014		982.79	-0.0038931		1572.79	0.00503542		2162.78	0.00245583		2752.78	0.00694403		3342.78	-0.00838815
393	0.00893906		982.99	-0.0036661		1572.99	0.00365036		2162.98	0.00112667		2752.98	0.00644496		3342.98	-0.00754327
393.2	0.00897504		983.19	-0.00302041		1573.19	0.00352327		2163.18	0.00059938		2753.18	0.00737328		3343.18	-0.00771524
393.4	0.00790344		983.39	-0.00339655		1573.39	0.00299484		2163.38	0.00079114		2753.38	0.00732467		3343.38	-0.00702397
393.6	0.00713943		983.59	-0.00244568		1573.59	0.00465134		2163.58	-0.00039035		2753.58	0.00704193		3343.58	-0.00681308
393.8	0.00694591		983.79	-0.00296998		1573.79	0.00562708		2163.78	-0.0005913		2753.78	0.00713873		3343.78	-0.00754182
394	0.00642673		983.99	-0.00296002		1573.99	0.00573685		2163.98	-0.00042715		2753.98	0.00778408		3343.98	-0.00824908
394.2	0.00580576		984.19	-0.00230745		1574.19	0.00518403		2164.18	-0.00154637		2754.18	0.00739036		3344.18	-0.00903677
394.4	0.00490598		984.39	-0.00334668		1574.39	0.00582167		2164.38	-0.00174325		2754.38	0.00812066		3344.38	-0.00941909
394.6	0.00392489		984.59	-0.00241621		1574.59	0.00501014		2164.58	-0.00059035		2754.58	0.00783136		3344.58	-0.0090221
394.8	0.0036069		984.79	-0.00244805		1574.79	0.0051977		2164.78	0.00007224		2754.78	0.00862414		3344.78	-0.00920651
395	0.00379199		984.99	-0.0014636		1574.99	0.00514252		2164.98	0.00147613		2754.98	0.00948239		3344.98	-0.00805485
395.2	0.00322178		985.19	-0.00123237		1575.19	0.00521091		2165.18	0.00183353		2755.18	0.00976087		3345.18	-0.00832854
395.4	0.00301359		985.39	-0.0002285		1575.39	0.00673307		2165.38	0.00270164		2755.38	0.00910147		3345.38	-0.0088661
395.6	0.00282063		985.59	-0.00055544		1575.59	0.0067941		2165.58	0.00276563		2755.58	0.00906354		3345.58	-0.00876322
395.8	0.00335711		985.79	-0.00141303		1575.79	0.00644475		2165.78	0.00314677		2755.78	0.00820331		3345.78	-0.0089275
396	0.00445069		985.99	-0.00188771		1575.99	0.00611638		2165.98	0.00362699		2755.98	0.00797787		3345.98	-0.00907362
396.2	0.00548787		986.19	-0.0017553		1576.19	0.0062091		2166.18	0.00381339		2756.18	0.00758522		3346.18	-0.00953712
396.4	0.00606977		986.39	-0.00102459		1576.39	0.00595344		2166.38	0.00295694		2756.38	0.00698658		3346.38	-0.00919559
396.6	0.00665214		986.59	-0.00119698		1576.59	0.00554755		2166.58	0.00378176		2756.58	0.00713584		3346.58	-0.0089015
396.8	0.00748093		986.79	-0.00122968		1576.79	0.00531221		2166.78	0.0032696		2756.78	0.00673422		3346.78	-0.00880152
397	0.00802651		986.99	-0.00171983		1576.99	0.00526942		2166.98	0.00184241		2756.98	0.00766587		3346.98	-0.0081194
397.2	0.00851016		987.19	-0.00173895		1577.19	0.00589294		2167.18	0.00162316		2757.18	0.00813072		3347.18	-0.00748778
397.4	0.00805798		987.39	-0.00204352		1577.39	0.00629639		2167.38	0.00045872		2757.38	0.00808007		3347.38	-0.00634488
397.6	0.00768954		987.59	-0.00183167		1577.59	0.00754303		2167.58	-0.00031263		2757.58	0.00764903		3347.58	-0.00639342
397.8	0.00726178		987.79	-0.00230375		1577.79	0.00739178		2167.78	-0.00053349		2757.78	0.00754945		3347.78	-0.00590167
398	0.00683141		987.99	-0.00265973		1577.99	0.00704508		2167.98	-0.00056714		2757.98	0.00800432		3347.98	-0.00579119
398.2	0.00651829		988.19	-0.00258163		1578.19	0.00777502		2168.18	-0.00100488		2758.18	0.00728476		3348.18	-0.00510855
398.4	0.00590737		988.39	-0.00278581		1578.39	0.00814248		2168.38	0.00002768		2758.38	0.00834479		3348.38	-0.00465655
398.6	0.0057199		988.59	-0.00214837		1578.59	0.00742314		2168.58	-0.00006958		2758.58	0.00849928		3348.58	-0.00420165
398.8	0.00549664		988.79	-0.00308652		1578.79	0.00777855		2168.78	0.00031988		2758.78	0.00952577		3348.78	-0.00390486
399	0.00563325		988.99	-0.00369479		1578.99	0.00730626		2168.98	0.0006424		2758.98	0.00969361		3348.98	-0.00393866
399.2	0.00544713		989.19	-0.00403204		1579.19	0.00747288		2169.18	0.00036113		2759.18	0.00970145		3349.18	-0.00466065
399.4	0.00510948		989.39	-0.00451585		1579.39	0.00652235		2169.38	-0.00018725		2759.38	0.00946826		3349.38	-0.00489589
399.6	0.00447725		989.59	-0.00491041		1579.59	0.00503784		2169.58	-0.00031648		2759.58	0.0094539		3349.58	-0.00513605
399.8	0.0042967		989.79	-0.00449511		1579.79	0.00469969		2169.78	0.00013971		2759.78	0.00970993		3349.78	-0.00511671
400	0.00478902		989.99	-0.00399923		1579.99	0.00450243		2169.98	0.00047005		2759.98	0.01066251		3349.98	-0.00546856
400.2	0.00433187		990.19	-0.00305651		1580.19	0.00457933		2170.18	0.0002001		2760.18	0.01086664		3350.18	-0.00586462
400.4	0.00416964		990.39	-0.00344631		1580.39	0.00495355		2170.38	-0.00050025		2760.38	0.01103258		3350.38	-0.00554549
400.6	0.00377802		990.59	-0.00355672		1580.59	0.0052738		2170.58	0.00024656		2760.58	0.01151312		3350.58	-0.00636759
400.8	0.00397851		990.79	-0.00311501		1580.79	0.00510819		2170.78	-0.00079766		2760.78	0.01242229		3350.78	-0.00718837
401	0.00344194		990.99	-0.00298937		1580.99	0.00613828		2170.98	-0.0015825		2760.98	0.0136384		3350.98	-0.00768499
401.2	0.00358107		991.19	-0.00223613		1581.19	0.00627145		2171.18	-0.00128941		2761.18	0.01288173		3351.18	-0.00847353
401.4	0.00387667		991.39	-0.00110959		1581.39	0.00729304		2171.38	-0.00185716		2761.38	0.01222577		3351.38	-0.00871403
401.6	0.00358074		991.59	-0.00066976		1581.59	0.00747465		2171.58	-0.00115804		2761.58	0.01112692		3351.58	-0.00947425
401.8	0.00363588		991.79	-0.00025106		1581.79	0.00787455		2171.78	-0.00079003		2761.78	0.0106774		3351.78	-0.01000131
402	0.00338284		991.99	-0.00077064		1581.99	0.00795343		2171.98	-0.00028322		2761.98	0.01102199		3351.98	-0.01021759
402.2	0.00379603		992.19	-0.00091817		1582.19	0.00817933		2172.18	-0.00012438		2762.18	0.01040234		3352.18	-0.01083747
402.4	0.00378497		992.39	-0.00105548		1582.39	0.00798755		2172.38	0.00029524		2762.38	0.01037626		3352.38	-0.01113394
402.6	0.00399897		992.59	-0.00235005		1582.59	0.00740306		2172.58	0.00013329		2762.58	0.00958584		3352.58	-0.01132747
402.8	0.00449003		992.79	-0.00330197		1582.79	0.00752209		2172.78	0.0009263		2762.78	0.00915708		3352.78	-0.01144863
403	0.00571588		992.99	-0.00331963		1582.99	0.00743277		2172.98	0.00047689		2762.98	0.00870002		3352.98	-0.0115505
403.2	0.00572607		993.19	-0.00291072		1583.19	0.00760018		2173.18	0.00105038		2763.18	0.00832336		3353.18	-0.011475
403.4	0.00549155		993.39	-0.00354445		1583.39	0.00705254		2173.38	0.00155826		2763.38	0.00796203		3353.38	-0.01109046
403.6	0.00502744		993.59	-0.00333305		1583.59	0.00632436		2173.58	0.00207137		2763.58	0.00812961		3353.58	-0.01156741
403.8	0.00517265		993.79	-0.00290627		1583.79	0.00636189		2173.78	0.00182932		2763.78	0.00822166		3353.78	-0.011438
404	0.00520455		993.99	-0.00276123		1583.99	0.00639046		2173.98	0.00221556		2763.98	0.00770712		3353.98	-0.01149648
404.2	0.00475556		994.19	-0.00309402		1584.19	0.00638939		2174.18	0.00259689		2764.18	0.0072456		3354.18	-0.01094892
404.4	0.00446656		994.39	-0.00327396		1584.39	0.00615799		2174.38	0.00265599		2764.38	0.00757687		3354.38	-0.01072563
404.6	0.00385555		994.59	-0.00338319		1584.59	0.00618658		2174.58	0.00281012		2764.58	0.00746635		3354.58	-0.01125778
404.8	0.00407783		994.79	-0.00338764		1584.79	0.00599569		2174.78	0.00236715		2764.78	0.00790467		3354.78	-0.0108827
405	0.00453569		994.99	-0.00309483		1584.99	0.00646477		2174.98	0.00330448		2764.98	0.00723995		3354.98	-0.01095153
405.2	0.00502871		995.19	-0.00295176		1585.19	0.00657849		2175.18	0.00337619		2765.18	0.00662336		3355.18	-0.01141635
405.4	0.0058451		995.39	-0.00203098		1585.39	0.00745778		2175.38	0.00366909		2765.38	0.00679831		3355.38	-0.01097688
405.6	0.00508138		995.59	-0.00180815		1585.59	0.00749267		2175.58	0.00387712		2765.58	0.00751587		3355.58	-0.01119359
405.8	0.00557917		995.79	-0.00159379		1585.79	0.00741596		2175.78	0.00337998		2765.78	0.00811488		3355.78	-0.01104263
406	0.00620642		995.99	-0.00172609		1585.99	0.00707374		2175.98	0.00274708		2765.98	0.00820039		3355.98	-0.01086095
406.2	0.00698736		996.19	-0.0020239		1586.19	0.00782911		2176.18	0.00189886		2766.18	0.00804531		3356.18	-0.01156201
406.4	0.0071321		996.39	-0.00214891		1586.39	0.0080044		2176.38	0.00125705		2766.38	0.00726605		3356.38	-0.01109377
406.6	0.00739251		996.59	-0.00139748		1586.59	0.00789975		2176.58	0.0013368		2766.58	0.00711951		3356.58	-0.01126254
406.8	0.00841018		996.79	-0.00138171		1586.79	0.00811672		2176.78	0.00071681		2766.78	0.00741766		3356.78	-0.01065134
407	0.00830755		996.99	-0.00065711		1586.99	0.00831176		2176.98	0.00030812		2766.98	0.00753476		3356.98	-0.01049726
407.2	0.00805988		997.19	-0.00080264		1587.19	0.00853114		2177.18	0.00055469		2767.18	0.00810049		3357.18	-0.01084283
407.4	0.00744754		997.39	-0.00178542		1587.39	0.00868229		2177.38	0.00010456		2767.38	0.00763614		3357.38	-0.01019293
407.6	0.00671578		997.59	-0.00169331		1587.59	0.00898532		2177.58	-0.00088562		2767.58	0.00734847		3357.58	-0.01044595
407.8	0.00724289		997.79	-0.0010431		1587.79	0.00921174		2177.78	-0.00117969		2767.78	0.00698972		3357.78	-0.01016358
408	0.00641311		997.99	-0.00094415		1587.99	0.00885536		2177.98	-0.00121151		2767.98	0.00728419		3357.98	-0.00991965
408.2	0.00547325		998.19	-0.00100985		1588.19	0.00875983		2178.18	-0.00109502		2768.18	0.00718067		3358.18	-0.00950893
408.4	0.00531459		998.39	-0.00070365		1588.39	0.00841434		2178.38	-0.00139053		2768.38	0.00705419		3358.38	-0.0094112
408.6	0.00475142		998.59	-0.00073628		1588.59	0.00815692		2178.58	-0.00038924		2768.58	0.0068239		3358.58	-0.00974668
408.8	0.0042114		998.79	-0.00111871		1588.79	0.00745082		2178.78	-0.00014455		2768.78	0.00748204		3358.78	-0.00917566
409	0.00419654		998.99	-0.00133987		1588.99	0.00698839		2178.98	0.00103211		2768.98	0.00690377		3358.98	-0.00939534
409.2	0.00419327		999.19	-0.00090016		1589.19	0.00715367		2179.18	0.00102001		2769.18	0.00730895		3359.18	-0.00956774
409.4	0.00470099		999.39	0.00031587		1589.39	0.00667563		2179.38	0.00159418		2769.38	0.00703113		3359.38	-0.00907106
409.6	0.00464349		999.59	0.00097387		1589.59	0.00612804		2179.58	0.00142184		2769.58	0.00704301		3359.58	-0.00959027
409.8	0.00570126		999.79	0.0014973		1589.79	0.00548141		2179.78	0.00071424		2769.78	0.00723335		3359.78	-0.00999797
410	0.0066539		999.99	0.00138597		1589.99	0.0058278		2179.98	0.00048717		2769.98	0.00751101		3359.98	-0.01083288
410.2	0.00672637		1000.19	0.00167728		1590.19	0.00546307		2180.18	0.00076553		2770.18	0.00792209		3360.18	-0.01135639
410.4	0.00681055		1000.39	0.00296102		1590.39	0.00387599		2180.38	0.00168034		2770.38	0.00805365		3360.38	-0.01185041
410.6	0.00729213		1000.59	0.00228959		1590.59	0.00375018		2180.58	0.002599		2770.58	0.00814133		3360.58	-0.01287653
410.8	0.00783615		1000.79	0.00109119		1590.79	0.00346593		2180.78	0.00278498		2770.78	0.00847044		3360.78	-0.01230242
411	0.00783952		1000.99	0.00028896		1590.99	0.00409981		2180.98	0.00307611		2770.98	0.00864952		3360.98	-0.01355295
411.2	0.00840339		1001.19	-0.00099159		1591.19	0.00477648		2181.18	0.00303988		2771.18	0.00872762		3361.18	-0.01423982
411.4	0.00823749		1001.39	-0.00185683		1591.39	0.00580396		2181.38	0.00286917		2771.38	0.00793936		3361.38	-0.01388333
411.6	0.00845799		1001.59	-0.00272378		1591.59	0.00589566		2181.58	0.0032764		2771.58	0.00829096		3361.58	-0.01362918
411.8	0.00857116		1001.79	-0.00238842		1591.79	0.00618038		2181.78	0.00412512		2771.78	0.00876729		3361.78	-0.0130517
412	0.00792302		1001.99	-0.0017875		1591.99	0.00677658		2181.98	0.00321406		2771.98	0.00852751		3361.98	-0.01237458
412.2	0.00740946		1002.19	-0.00237059		1592.19	0.00774302		2182.18	0.00304719		2772.18	0.00785572		3362.18	-0.01211848
412.4	0.00768756		1002.39	-0.00276596		1592.39	0.00809677		2182.38	0.00230096		2772.38	0.00664736		3362.38	-0.011759
412.6	0.0069152		1002.59	-0.00234067		1592.59	0.00776915		2182.58	0.0023544		2772.58	0.00746358		3362.58	-0.01144954
412.8	0.00716595		1002.79	-0.00235715		1592.79	0.00797406		2182.78	0.00164042		2772.78	0.0074356		3362.78	-0.01024679
413	0.00698863		1002.99	-0.00277174		1592.99	0.0076714		2182.98	0.00181986		2772.98	0.00712476		3362.98	-0.00983911
413.2	0.00610594		1003.19	-0.00266389		1593.19	0.00708639		2183.18	0.0011188		2773.18	0.00720681		3363.18	-0.00925576
413.4	0.00674733		1003.39	-0.00225639		1593.39	0.0066712		2183.38	0.00086605		2773.38	0.00694275		3363.38	-0.00859248
413.6	0.00711884		1003.59	-0.00274538		1593.59	0.00670965		2183.58	0.00037		2773.58	0.00712443		3363.58	-0.00820806
413.8	0.00711852		1003.79	-0.00218184		1593.79	0.00603654		2183.78	-0.0002476		2773.78	0.00794407		3363.78	-0.00843888
414	0.00695119		1003.99	-0.0015479		1593.99	0.00633467		2183.98	-0.00050249		2773.98	0.00813322		3363.98	-0.00852198
414.2	0.00687021		1004.19	-0.00093495		1594.19	0.00591287		2184.18	0.00019356		2774.18	0.00785544		3364.18	-0.00798925
414.4	0.00671499		1004.39	-0.00177017		1594.39	0.00551727		2184.38	0.00061112		2774.38	0.00750591		3364.38	-0.00860258
414.6	0.00716446		1004.59	-0.00336296		1594.59	0.00542555		2184.58	0.00054972		2774.58	0.00732382		3364.58	-0.00919097
414.8	0.00754923		1004.79	-0.00420943		1594.79	0.00567382		2184.78	0.00081357		2774.78	0.00721989		3364.78	-0.00895757
415	0.00752471		1004.99	-0.0044774		1594.99	0.00638043		2184.98	0.0012378		2774.98	0.00756748		3364.98	-0.00971589
415.2	0.00723221		1005.19	-0.00368015		1595.19	0.0063206		2185.18	0.00147778		2775.18	0.00726653		3365.18	-0.00971412
415.4	0.00670029		1005.39	-0.00335113		1595.39	0.00632905		2185.38	0.00135612		2775.38	0.00713258		3365.38	-0.00929907
415.6	0.00720829		1005.59	-0.00381347		1595.59	0.00730858		2185.58	0.00093323		2775.58	0.00727691		3365.58	-0.00836922
415.8	0.00695863		1005.79	-0.00296665		1595.79	0.00767643		2185.78	0.00075476		2775.78	0.00712203		3365.78	-0.00821963
416	0.00670714		1005.99	-0.00249899		1595.99	0.00848767		2185.98	-0.00054834		2775.98	0.00657086		3365.98	-0.008331
416.2	0.00689007		1006.19	-0.00214558		1596.19	0.00879049		2186.18	-0.00003607		2776.18	0.00704135		3366.18	-0.00846855
416.4	0.0072209		1006.39	-0.00074112		1596.39	0.00851109		2186.38	-0.00034941		2776.38	0.00683787		3366.38	-0.00894942
416.6	0.00758459		1006.59	0.00039365		1596.59	0.00814901		2186.58	0.00008272		2776.58	0.0082501		3366.58	-0.00898974
416.8	0.00781059		1006.79	0.00019752		1596.79	0.00829998		2186.78	0.00022697		2776.78	0.008826		3366.78	-0.00867295
417	0.00744004		1006.99	-0.00009979		1596.99	0.00760246		2186.98	0.0004782		2776.98	0.01046679		3366.98	-0.00865574
417.2	0.00676508		1007.19	0.00004503		1597.19	0.00619164		2187.18	0.00055176		2777.18	0.01081313		3367.18	-0.00927919
417.4	0.0079325		1007.39	0.00003475		1597.39	0.00543707		2187.38	0.00075329		2777.38	0.01120597		3367.38	-0.00827552
417.6	0.00782168		1007.59	-0.00030898		1597.59	0.0045028		2187.58	0.00041814		2777.58	0.01157338		3367.58	-0.00782488
417.8	0.00675707		1007.79	0.00038833		1597.79	0.00409504		2187.78	0.00021741		2777.78	0.01267729		3367.78	-0.00759924
418	0.00707253		1007.99	0.00028435		1597.99	0.00371215		2187.98	-0.00027323		2777.98	0.0121352		3367.98	-0.00740075
418.2	0.00733587		1008.19	-0.00003969		1598.19	0.0029806		2188.18	0.00090093		2778.18	0.01137122		3368.18	-0.00697403
418.4	0.00700811		1008.39	-0.00073904		1598.39	0.00272191		2188.38	0.00093545		2778.38	0.01108264		3368.38	-0.0069519
418.6	0.00729666		1008.59	-0.00114942		1598.59	0.00183597		2188.58	0.0008142		2778.58	0.01088925		3368.58	-0.00656887
418.8	0.00742543		1008.79	-0.00195438		1598.79	0.00154841		2188.78	0.00144783		2778.78	0.01070578		3368.78	-0.0059413
419	0.00670003		1008.99	-0.00179819		1598.99	0.00196636		2188.98	0.00161474		2778.98	0.0107745		3368.98	-0.00674972
419.2	0.00657131		1009.19	-0.00168385		1599.19	0.00218977		2189.18	0.0013321		2779.18	0.01058909		3369.18	-0.00771866
419.4	0.00639198		1009.39	-0.00265518		1599.39	0.00282691		2189.38	0.00079934		2779.38	0.01037247		3369.38	-0.0073166
419.6	0.00687852		1009.59	-0.00293616		1599.59	0.0034596		2189.58	0.00029294		2779.58	0.00989745		3369.58	-0.0069003
419.8	0.0058564		1009.79	-0.00311153		1599.79	0.00392564		2189.78	0.00089949		2779.78	0.00883777		3369.78	-0.00736928
420	0.0063057		1009.99	-0.00291571		1599.99	0.00501065		2189.98	0.0006694		2779.98	0.00889884		3369.98	-0.00746101
420.2	0.00669612		1010.19	-0.00312809		1600.19	0.00539632		2190.18	0.00131122		2780.18	0.00902698		3370.18	-0.00735879
420.4	0.00726728		1010.39	-0.00349184		1600.39	0.00554614		2190.38	0.00102948		2780.38	0.00891617		3370.38	-0.00812607
420.6	0.00806739		1010.59	-0.00434393		1600.59	0.00647621		2190.58	0.00129388		2780.58	0.00932046		3370.58	-0.00785925
420.8	0.00901831		1010.79	-0.00468692		1600.79	0.00612544		2190.78	0.00065121		2780.78	0.00953138		3370.78	-0.00767477
421	0.01009262		1010.99	-0.00422567		1600.99	0.00571232		2190.98	-0.00015105		2780.98	0.01016731		3370.98	-0.00717577
421.2	0.01016113		1011.19	-0.00409545		1601.19	0.00536707		2191.18	-0.00077275		2781.18	0.00996319		3371.18	-0.00718083
421.4	0.01146905		1011.39	-0.00430767		1601.39	0.00585779		2191.38	-0.00123815		2781.38	0.00926349		3371.38	-0.00653497
421.6	0.01113107		1011.59	-0.00411872		1601.59	0.00675633		2191.58	-0.00213959		2781.58	0.00957195		3371.58	-0.00709421
421.8	0.01164458		1011.79	-0.00297343		1601.79	0.00721653		2191.78	-0.00251303		2781.78	0.00945374		3371.78	-0.00769744
422	0.01163523		1011.99	-0.00199981		1601.99	0.00686316		2191.98	-0.00288316		2781.98	0.0084984		3371.98	-0.00790943
422.2	0.01134588		1012.19	-0.00086436		1602.19	0.00718959		2192.18	-0.00188149		2782.18	0.00815562		3372.18	-0.00820751
422.4	0.01166055		1012.39	-0.00076614		1602.39	0.00687644		2192.38	-0.00118104		2782.38	0.00879794		3372.38	-0.00808406
422.6	0.01129721		1012.59	-0.00065087		1602.59	0.00648591		2192.58	-0.0006565		2782.58	0.00884617		3372.58	-0.00837618
422.8	0.01066796		1012.79	-0.0008464		1602.79	0.00716096		2192.78	0.0006829		2782.78	0.00928179		3372.78	-0.00939367
423	0.00950242		1012.99	-0.00053995		1602.99	0.00767765		2192.98	0.0020206		2782.98	0.00911845		3372.98	-0.01138434
423.2	0.00844995		1013.19	-0.00046705		1603.19	0.00769344		2193.18	0.00252462		2783.18	0.00942165		3373.18	-0.01108874
423.4	0.00694435		1013.39	-0.00080631		1603.39	0.00713708		2193.38	0.00318574		2783.38	0.00910022		3373.38	-0.01022227
423.6	0.0058943		1013.59	-0.00058392		1603.59	0.00740384		2193.58	0.00368628		2783.58	0.00850609		3373.58	-0.01000819
423.8	0.0053663		1013.79	-0.0010604		1603.79	0.00786742		2193.78	0.00371582		2783.78	0.00795378		3373.78	-0.01031012
424	0.00536775		1013.99	-0.00170272		1603.99	0.0073443		2193.98	0.00380992		2783.98	0.00871746		3373.98	-0.00915657
424.2	0.00539658		1014.19	-0.00254344		1604.19	0.00681813		2194.18	0.00388419		2784.18	0.00819356		3374.18	-0.00883444
424.4	0.00563117		1014.39	-0.00309152		1604.39	0.00644678		2194.38	0.00325726		2784.38	0.00848762		3374.38	-0.00907733
424.6	0.00610216		1014.59	-0.00304742		1604.59	0.0064047		2194.58	0.00340443		2784.58	0.00904467		3374.58	-0.00811155
424.8	0.0066739		1014.79	-0.00307363		1604.79	0.00443627		2194.78	0.00248658		2784.78	0.00936286		3374.78	-0.00759245
425	0.00724165		1014.99	-0.00318895		1604.99	0.00420561		2194.98	0.00120402		2784.98	0.01007478		3374.98	-0.0064321
425.2	0.00691677		1015.19	-0.00278482		1605.19	0.00378666		2195.18	0.00121739		2785.18	0.01021714		3375.18	-0.00718805
425.4	0.00700198		1015.39	-0.00262215		1605.39	0.00458036		2195.38	0.00120896		2785.38	0.01020463		3375.38	-0.00742588
425.6	0.00724834		1015.59	-0.00180923		1605.59	0.00384477		2195.58	0.00042933		2785.58	0.01109482		3375.58	-0.00800602
425.8	0.00832447		1015.79	-0.00050215		1605.79	0.00342321		2195.78	0.00003461		2785.78	0.01077238		3375.78	-0.00854676
426	0.00787185		1015.99	-0.00001826		1605.99	0.00322233		2195.98	0.00012968		2785.98	0.01000279		3375.98	-0.00910068
426.2	0.00848785		1016.19	0.00076642		1606.19	0.00377872		2196.18	-0.00027645		2786.18	0.00982804		3376.18	-0.01078042
426.4	0.00938504		1016.39	0.00033662		1606.39	0.00422808		2196.38	-0.00015444		2786.38	0.01004856		3376.38	-0.01167523
426.6	0.00946648		1016.59	0.00078456		1606.59	0.00501585		2196.58	-0.00041091		2786.58	0.00944923		3376.58	-0.01227318
426.8	0.00959849		1016.79	0.00035442		1606.79	0.00601335		2196.78	0.00030428		2786.78	0.00912297		3376.78	-0.01269612
427	0.00955558		1016.99	0.00036014		1606.99	0.00581185		2196.98	0.00033219		2786.98	0.00948145		3376.98	-0.01239707
427.2	0.00905445		1017.19	0.00064356		1607.19	0.00609056		2197.18	-0.00006578		2787.18	0.00890123		3377.18	-0.01170737
427.4	0.00873979		1017.39	0.00079315		1607.39	0.00629763		2197.38	0.00069328		2787.38	0.0083233		3377.38	-0.01133979
427.6	0.00913464		1017.59	0.00045217		1607.59	0.00696222		2197.58	-0.00023547		2787.58	0.00753379		3377.58	-0.0115818
427.8	0.0092981		1017.79	0.00029556		1607.79	0.00645805		2197.78	-0.00116659		2787.78	0.00739411		3377.78	-0.01244778
428	0.00825789		1017.99	-0.00058637		1607.99	0.00664395		2197.98	-0.00115836		2787.98	0.00776084		3377.98	-0.01204489
428.2	0.00779877		1018.19	-0.00046629		1608.19	0.00626789		2198.18	-0.00155512		2788.18	0.00772942		3378.18	-0.01212272
428.4	0.00698994		1018.39	-0.00050175		1608.39	0.00595202		2198.38	-0.0015665		2788.38	0.00853658		3378.38	-0.0116381
428.6	0.00733925		1018.59	-0.00035779		1608.59	0.00498073		2198.58	-0.00065148		2788.58	0.00928208		3378.58	-0.01075403
428.8	0.00680276		1018.79	-0.00084418		1608.79	0.00457462		2198.78	-0.00099024		2788.78	0.00950138		3378.78	-0.01059057
429	0.00674654		1018.99	-0.00122993		1608.99	0.00458144		2198.98	-0.00084888		2788.98	0.00969785		3378.98	-0.00992973
429.2	0.00591401		1019.19	-0.00105338		1609.19	0.00365756		2199.18	-0.00049299		2789.18	0.00975525		3379.18	-0.01030644
429.4	0.0055334		1019.39	-0.00117816		1609.39	0.00359705		2199.38	-0.00068663		2789.38	0.00974799		3379.38	-0.0094709
429.6	0.00568572		1019.59	-0.00151996		1609.59	0.00234137		2199.58	-0.00094832		2789.58	0.00893596		3379.58	-0.00962529
429.8	0.00524823		1019.79	-0.00205988		1609.79	0.0030125		2199.78	-0.0013932		2789.78	0.00844433		3379.78	-0.01005112
430	0.00497571		1019.99	-0.00231153		1609.99	0.00372893		2199.98	-0.00115141		2789.98	0.00771887		3379.98	-0.01074611
430.2	0.0050362		1020.19	-0.00242353		1610.19	0.00490799		2200.18	-0.00224536		2790.18	0.00821124		3380.18	-0.0116871
430.4	0.00569527		1020.39	-0.00282948		1610.39	0.00479963		2200.38	-0.00215404		2790.38	0.00869878		3380.38	-0.01112598
430.6	0.00541123		1020.59	-0.00244653		1610.59	0.00557498		2200.58	-0.00224301		2790.58	0.00883779		3380.58	-0.01084979
430.8	0.0051256		1020.79	-0.00304745		1610.79	0.00660265		2200.78	-0.00198883		2790.78	0.00853115		3380.78	-0.00970582
431	0.00531227		1020.99	-0.0031007		1610.99	0.00619786		2200.98	-0.00150705		2790.98	0.00863297		3380.98	-0.0101576
431.2	0.00528411		1021.19	-0.00279922		1611.19	0.00632238		2201.18	-0.00087088		2791.18	0.0070059		3381.18	-0.01083564
431.4	0.00483222		1021.39	-0.00331913		1611.39	0.00649554		2201.38	-0.00063456		2791.38	0.00684213		3381.38	-0.01047823
431.6	0.00561343		1021.59	-0.00354226		1611.59	0.00649002		2201.58	-0.00076822		2791.58	0.0063518		3381.58	-0.01095085
431.8	0.00539671		1021.79	-0.00325059		1611.79	0.00665366		2201.78	-0.00063677		2791.78	0.00694738		3381.78	-0.01072953
432	0.00503042		1021.99	-0.00349748		1611.99	0.00666739		2201.98	-0.00096282		2791.98	0.00671055		3381.98	-0.01088869
432.2	0.00532093		1022.19	-0.00347336		1612.19	0.00630037		2202.18	-0.00021296		2792.18	0.0065943		3382.18	-0.00956707
432.4	0.0068954		1022.39	-0.00367912		1612.39	0.00660783		2202.38	0.0000569		2792.38	0.00676935		3382.38	-0.0091592
432.6	0.00806582		1022.59	-0.00363134		1612.59	0.00608445		2202.58	0.00052474		2792.58	0.0070589		3382.58	-0.008519
432.8	0.00845456		1022.79	-0.00324284		1612.79	0.00630691		2202.78	0.00023942		2792.78	0.00721427		3382.78	-0.00828362
433	0.0094222		1022.99	-0.00308534		1612.99	0.00545624		2202.98	0.00043449		2792.98	0.00706427		3382.98	-0.00729756
433.2	0.00925887		1023.19	-0.00318301		1613.19	0.00504599		2203.18	0.00028753		2793.18	0.00834215		3383.18	-0.00691266
433.4	0.00960099		1023.39	-0.00304351		1613.39	0.00501824		2203.38	0.00009469		2793.38	0.00788839		3383.38	-0.00656173
433.6	0.01035719		1023.59	-0.00342746		1613.59	0.00490421		2203.58	0.00037184		2793.58	0.00840768		3383.58	-0.00598017
433.8	0.01068747		1023.79	-0.00347593		1613.79	0.00496249		2203.78	0.00002878		2793.78	0.00921678		3383.78	-0.00556736
434	0.01089895		1023.99	-0.00349321		1613.99	0.00512032		2203.98	0.00047221		2793.98	0.01030489		3383.98	-0.00510886
434.2	0.0100733		1024.19	-0.00327059		1614.19	0.00458505		2204.18	-0.00020544		2794.18	0.01130681		3384.18	-0.00594923
434.4	0.00927561		1024.39	-0.00282168		1614.39	0.00358318		2204.38	0.00028379		2794.38	0.01186118		3384.38	-0.00571586
434.6	0.00809035		1024.59	-0.00264614		1614.59	0.00496355		2204.58	0.00050945		2794.58	0.0124222		3384.58	-0.00642373
434.8	0.00776637		1024.79	-0.00237565		1614.79	0.00402128		2204.78	0.00115534		2794.78	0.01204529		3384.78	-0.0061764
435	0.00785256		1024.99	-0.00170133		1614.99	0.00286684		2204.98	0.00084636		2794.98	0.01230847		3384.98	-0.00744968
435.2	0.0071308		1025.19	-0.00174615		1615.19	0.00226375		2205.18	0.00018902		2795.18	0.01173398		3385.18	-0.00792626
435.4	0.00741347		1025.39	-0.00202861		1615.39	0.0014399		2205.38	0.0003176		2795.38	0.0118445		3385.38	-0.00757749
435.6	0.00712936		1025.59	-0.00223301		1615.59	0.00155456		2205.58	-0.00023524		2795.58	0.01152519		3385.58	-0.00788386
435.8	0.00578678		1025.79	-0.00266164		1615.79	0.00196051		2205.78	-0.00118594		2795.78	0.01192095		3385.78	-0.00961536
436	0.0049267		1025.99	-0.00320558		1615.99	0.00144307		2205.98	-0.00145773		2795.98	0.01138406		3385.98	-0.01116524
436.2	0.00483536		1026.19	-0.00314395		1616.19	0.00202121		2206.18	-0.00013029		2796.18	0.0116106		3386.18	-0.01124513
436.4	0.00567471		1026.39	-0.00227102		1616.39	0.00208985		2206.38	-0.00091434		2796.38	0.01125247		3386.38	-0.01189321
436.6	0.00592702		1026.59	-0.00202675		1616.59	0.00204046		2206.58	-0.00093944		2796.58	0.01121536		3386.58	-0.01185013
436.8	0.00623278		1026.79	-0.00146323		1616.79	0.00278316		2206.78	-0.00090181		2796.78	0.01095208		3386.78	-0.01259667
437	0.0069402		1026.99	-0.00057908		1616.99	0.00250761		2206.98	-0.00048175		2796.98	0.01090535		3386.98	-0.0124061
437.2	0.00668661		1027.19	-0.00114756		1617.19	0.00286026		2207.18	-0.00030412		2797.18	0.01082724		3387.18	-0.01213472
437.4	0.00700414		1027.39	-0.00053995		1617.39	0.00318815		2207.38	0.00022759		2797.38	0.00965622		3387.38	-0.01134239
437.6	0.00754192		1027.59	-0.00081795		1617.59	0.00415753		2207.58	0.00071613		2797.58	0.01038133		3387.58	-0.01050237
437.8	0.00719983		1027.79	-0.00074695		1617.79	0.00384032		2207.78	0.00138622		2797.78	0.01012258		3387.78	-0.00974771
438	0.00683721		1027.99	-0.00092905		1617.99	0.00432495		2207.98	0.00147518		2797.98	0.01064945		3387.98	-0.00957516
438.2	0.0071353		1028.19	-0.00070562		1618.19	0.00477462		2208.18	0.00163829		2798.18	0.01026853		3388.18	-0.01031307
438.4	0.00701647		1028.39	-0.00030912		1618.39	0.00536704		2208.38	0.00281425		2798.38	0.01007987		3388.38	-0.00970295
438.6	0.00779193		1028.59	-0.00007673		1618.59	0.00614271		2208.58	0.00375503		2798.58	0.01059335		3388.58	-0.00972901
438.8	0.0089284		1028.79	-0.00013068		1618.79	0.00540521		2208.78	0.00332676		2798.78	0.01048675		3388.78	-0.00879683
439	0.008702		1028.99	0.00051833		1618.99	0.00540084		2208.98	0.0031609		2798.98	0.01009097		3388.98	-0.0082546
439.2	0.00857393		1029.19	0.00042493		1619.19	0.00604192		2209.18	0.00307767		2799.18	0.00975091		3389.18	-0.00858668
439.4	0.00811804		1029.39	0.00040662		1619.39	0.00574661		2209.38	0.00280973		2799.38	0.00948745		3389.38	-0.00836312
439.6	0.00660518		1029.59	0.00022122		1619.59	0.00601172		2209.58	0.00175167		2799.58	0.00917592		3389.58	-0.00870717
439.8	0.0064144		1029.79	0.00055196		1619.79	0.00667122		2209.78	0.00178246		2799.78	0.00917081		3389.78	-0.00994382
440	0.00650569		1029.99	0.00099071		1619.99	0.00657436		2209.98	0.00216789		2799.98	0.00858256		3389.98	-0.01031608
440.2	0.00662739		1030.19	0.00174346		1620.19	0.00711054		2210.18	0.00164876		2800.18	0.00862871		3390.18	-0.01092407
440.4	0.00672968		1030.39	0.00152362		1620.39	0.00677613		2210.38	0.0012689		2800.38	0.00820336		3390.38	-0.01052148
440.6	0.00638498		1030.59	0.00088276		1620.59	0.00666545		2210.58	0.00077348		2800.58	0.00848385		3390.58	-0.01015869
440.8	0.00615381		1030.79	0.00213573		1620.79	0.00650033		2210.78	0.00093436		2800.78	0.00820064		3390.78	-0.01096518
441	0.00565725		1030.99	0.00242668		1620.99	0.00577628		2210.98	0.00103702		2800.98	0.00841567		3390.98	-0.01061946
441.2	0.00477948		1031.19	0.00241584		1621.19	0.00689824		2211.18	0.00076179		2801.18	0.00787904		3391.18	-0.01074887
441.4	0.00450734		1031.39	0.00283291		1621.39	0.00695318		2211.38	0.00012405		2801.38	0.00832425		3391.38	-0.01090475
441.6	0.00497173		1031.59	0.00181495		1621.59	0.00659419		2211.58	-0.00060833		2801.58	0.00850436		3391.58	-0.01131666
441.8	0.00512074		1031.79	0.00108452		1621.79	0.00615231		2211.78	-0.00031575		2801.78	0.00853302		3391.78	-0.01129598
442	0.0057642		1031.99	0.0006699		1621.99	0.00713464		2211.98	-0.00070702		2801.98	0.0087737		3391.98	-0.01198868
442.2	0.00666523		1032.19	0.00044206		1622.19	0.00750557		2212.18	0.00010664		2802.18	0.00928585		3392.18	-0.01302413
442.4	0.00724553		1032.39	0.00003183		1622.39	0.00762423		2212.38	0.00186322		2802.38	0.00882075		3392.38	-0.01335091
442.6	0.00882448		1032.59	-0.00083461		1622.59	0.00732388		2212.58	0.00204049		2802.58	0.00857422		3392.58	-0.01346996
442.8	0.00902721		1032.79	-0.00136084		1622.79	0.00782198		2212.78	0.00214209		2802.78	0.00805247		3392.78	-0.01326624
443	0.00888812		1032.99	-0.0006884		1622.99	0.00842425		2212.98	0.00248208		2802.98	0.00746998		3392.98	-0.01436784
443.2	0.00991071		1033.19	-0.00069596		1623.19	0.00867645		2213.18	0.00155756		2803.18	0.00731138		3393.18	-0.01494009
443.4	0.00976606		1033.39	-0.00101546		1623.39	0.00801346		2213.38	0.00188427		2803.38	0.00686112		3393.38	-0.01479446
443.6	0.01030737		1033.59	-0.00141937		1623.59	0.00842047		2213.58	0.00061761		2803.58	0.0069295		3393.58	-0.0148749
443.8	0.01060987		1033.79	-0.00105306		1623.79	0.00894525		2213.78	0.00094628		2803.78	0.00793494		3393.78	-0.01436734
444	0.01034266		1033.99	-0.00094783		1623.99	0.00828133		2213.98	0.00118065		2803.98	0.00715262		3393.98	-0.01415184
444.2	0.00933306		1034.19	-0.00041191		1624.19	0.00852816		2214.18	-0.00038063		2804.18	0.00789007		3394.18	-0.0139788
444.4	0.00879204		1034.39	-0.00007576		1624.39	0.00907543		2214.38	-0.000464		2804.38	0.00755879		3394.38	-0.01311221
444.6	0.00839015		1034.59	0.00096296		1624.59	0.00942564		2214.58	-0.00128203		2804.58	0.00755107		3394.58	-0.01213723
444.8	0.00807048		1034.79	0.00177417		1624.79	0.00955102		2214.78	-0.00135368		2804.78	0.00741289		3394.78	-0.01285675
445	0.00707028		1034.99	0.0014567		1624.99	0.00963441		2214.98	-0.0016976		2804.98	0.00849699		3394.98	-0.01213247
445.2	0.00680811		1035.19	0.0018286		1625.19	0.01035474		2215.18	-0.0021997		2805.18	0.00880123		3395.18	-0.01191472
445.4	0.00686548		1035.39	0.00147931		1625.39	0.00918873		2215.38	-0.00253514		2805.38	0.00930522		3395.38	-0.01172373
445.6	0.00649421		1035.59	0.0009769		1625.59	0.00914921		2215.58	-0.00200885		2805.58	0.00929687		3395.58	-0.01075627
445.8	0.00575962		1035.79	0.00042286		1625.79	0.00946386		2215.78	-0.00175229		2805.78	0.00985107		3395.78	-0.01065032
446	0.00611615		1035.99	0.0003597		1625.99	0.00902509		2215.98	-0.00130893		2805.98	0.009533		3395.98	-0.01029193
446.2	0.00607844		1036.19	0.00003227		1626.19	0.00823592		2216.18	0.00030515		2806.18	0.00981035		3396.18	-0.01044073
446.4	0.00686584		1036.39	-0.00098775		1626.39	0.00792953		2216.38	0.00138434		2806.38	0.00936063		3396.38	-0.01061872
446.6	0.0082447		1036.59	-0.00103564		1626.59	0.0073419		2216.58	0.001425		2806.58	0.00956083		3396.58	-0.01033091
446.8	0.0088801		1036.79	-0.00085003		1626.79	0.0067266		2216.78	0.0023629		2806.78	0.00913237		3396.78	-0.01058567
447	0.01009777		1036.99	-0.00085367		1626.99	0.00635618		2216.98	0.0031572		2806.98	0.00857545		3396.98	-0.01055259
447.2	0.01066452		1037.19	-0.00079943		1627.19	0.00575207		2217.18	0.00280068		2807.18	0.00852586		3397.18	-0.01024731
447.4	0.0105854		1037.39	-0.00107304		1627.39	0.00434174		2217.38	0.00300434		2807.38	0.00891133		3397.38	-0.00993684
447.6	0.01036834		1037.59	-0.00157259		1627.59	0.00366991		2217.58	0.00190589		2807.58	0.00919702		3397.58	-0.00987771
447.8	0.01053693		1037.79	-0.00216537		1627.79	0.00309024		2217.78	0.00226865		2807.78	0.00902827		3397.78	-0.00927261
448	0.01019136		1037.99	-0.0014582		1627.99	0.0030254		2217.98	0.00204972		2807.98	0.00893466		3397.98	-0.00986496
448.2	0.00989976		1038.19	-0.00049517		1628.19	0.00372331		2218.18	0.00133869		2808.18	0.00900517		3398.18	-0.01048072
448.4	0.01008805		1038.39	-0.00010274		1628.39	0.00450084		2218.38	0.00162878		2808.38	0.00879862		3398.38	-0.01088916
448.6	0.00953115		1038.59	0.00006503		1628.59	0.00456163		2218.58	0.00224815		2808.58	0.00796061		3398.58	-0.01098512
448.8	0.0090085		1038.79	0.0000232		1628.79	0.00430809		2218.78	0.00197257		2808.78	0.00817826		3398.78	-0.01190349
449	0.00885026		1038.99	0.0004093		1628.99	0.00489576		2218.98	0.0024866		2808.98	0.00927442		3398.98	-0.01161807
449.2	0.00908677		1039.19	0.00051852		1629.19	0.00524865		2219.18	0.00159009		2809.18	0.00919165		3399.18	-0.01167451
449.4	0.00882944		1039.39	0.00109591		1629.39	0.00532121		2219.38	0.00138072		2809.38	0.00979153		3399.38	-0.01228546
449.6	0.00779527		1039.59	0.00095859		1629.59	0.00610312		2219.58	0.00131678		2809.58	0.00942518		3399.58	-0.0122524
449.8	0.00763736		1039.79	0.00104488		1629.79	0.00558531		2219.78	0.00082567		2809.78	0.00989791		3399.78	-0.01308796
450	0.00816773		1039.99	0.00084816		1629.99	0.00514574		2219.98	0.0015101		2809.98	0.0097935		3399.98	-0.0130554
450.2	0.00798548		1040.19	0.00033562		1630.19	0.00476634		2220.18	0.00171945		2810.18	0.00973745		3400.18	-0.01377617
450.4	0.00950995		1040.39	-0.0004821		1630.39	0.00487423		2220.38	0.0015632		2810.38	0.01033133		3400.38	-0.01323319
450.6	0.01028386		1040.59	0.0003528		1630.59	0.00498408		2220.58	0.00133644		2810.58	0.00991678		3400.58	-0.012906
450.8	0.0098015		1040.79	0.00064987		1630.79	0.00477773		2220.78	0.00130323		2810.78	0.00865211		3400.78	-0.01359584
451	0.00976298		1040.99	-0.000019		1630.99	0.00563981		2220.98	0.0015378		2810.98	0.00867989		3400.98	-0.01368951
451.2	0.00907325		1041.19	0.00011856		1631.19	0.00544159		2221.18	0.00088945		2811.18	0.0087815		3401.18	-0.01418808
451.4	0.00828005		1041.39	-0.00120484		1631.39	0.00462121		2221.38	0.00093146		2811.38	0.00866283		3401.38	-0.01441489
451.6	0.00763046		1041.59	-0.0013821		1631.59	0.00474747		2221.58	0.00109479		2811.58	0.00810585		3401.58	-0.01413476
451.8	0.00738531		1041.79	-0.00086053		1631.79	0.00461075		2221.78	0.00135937		2811.78	0.00815226		3401.78	-0.01387091
452	0.00626352		1041.99	0.0001369		1631.99	0.00476885		2221.98	0.00201302		2811.98	0.00893366		3401.98	-0.01388482
452.2	0.00507441		1042.19	0.00075629		1632.19	0.0049875		2222.18	0.00207622		2812.18	0.00874291		3402.18	-0.01335466
452.4	0.00460193		1042.39	0.00038354		1632.39	0.00474627		2222.38	0.00268934		2812.38	0.00930819		3402.38	-0.01217958
452.6	0.0040402		1042.59	0.0001145		1632.59	0.00512285		2222.58	0.00271166		2812.58	0.00896809		3402.58	-0.01118501
452.8	0.00458128		1042.79	-0.00018286		1632.79	0.00542188		2222.78	0.00257019		2812.78	0.01005543		3402.78	-0.01137572
453	0.00458876		1042.99	0.00029979		1632.99	0.00642787		2222.98	0.00265413		2812.98	0.01012676		3402.98	-0.01046993
453.2	0.00462606		1043.19	-0.00010111		1633.19	0.00672728		2223.18	0.00141901		2813.18	0.01014873		3403.18	-0.01020879
453.4	0.00471576		1043.39	0.00074928		1633.39	0.00751374		2223.38	0.00127787		2813.38	0.01037861		3403.38	-0.01004524
453.6	0.00436652		1043.59	0.00082954		1633.59	0.00754771		2223.58	0.00027036		2813.58	0.01020924		3403.58	-0.00977476
453.8	0.0042954		1043.79	0.00025243		1633.79	0.00682008		2223.78	-0.00064903		2813.78	0.01062499		3403.78	-0.00908078
454	0.00467779		1043.99	0.00025803		1633.99	0.00768102		2223.98	-0.00069721		2813.98	0.01065041		3403.98	-0.00913691
454.2	0.00506996		1044.19	0.00011013		1634.19	0.00784706		2224.18	-0.00122113		2814.18	0.01096188		3404.18	-0.00882821
454.4	0.00603971		1044.39	0.00017458		1634.39	0.00878657		2224.38	-0.00174611		2814.38	0.0115106		3404.38	-0.00808788
454.6	0.00595253		1044.59	0.00014856		1634.59	0.00909206		2224.58	-0.00182813		2814.58	0.01090389		3404.58	-0.00842178
454.8	0.00611119		1044.79	-0.00078042		1634.79	0.0092614		2224.78	-0.00161581		2814.78	0.01102865		3404.78	-0.00897878
455	0.00624627		1044.99	-0.00147364		1634.99	0.0098568		2224.98	-0.0005526		2814.98	0.0106206		3404.98	-0.00856724
455.2	0.00615208		1045.19	-0.00153261		1635.19	0.00945786		2225.18	0.000139		2815.18	0.00931762		3405.18	-0.00922215
455.4	0.0056495		1045.39	-0.00250656		1635.39	0.00913254		2225.38	0.00026884		2815.38	0.00933544		3405.38	-0.00888018
455.6	0.00594278		1045.59	-0.00150319		1635.59	0.00907054		2225.58	0.00092573		2815.58	0.0099032		3405.58	-0.00826734
455.8	0.00507803		1045.79	-0.00034626		1635.79	0.0083086		2225.78	0.00277626		2815.78	0.00971283		3405.78	-0.00869245
456	0.00538936		1045.99	-0.00116516		1635.99	0.00823696		2225.98	0.0029525		2815.98	0.00959049		3405.98	-0.0090199
456.2	0.0053916		1046.19	-0.00131126		1636.19	0.00790853		2226.18	0.0036258		2816.18	0.00940394		3406.18	-0.00867338
456.4	0.00567354		1046.39	-0.00202945		1636.39	0.0069914		2226.38	0.00448542		2816.38	0.00882145		3406.38	-0.00837424
456.6	0.00613349		1046.59	-0.00191097		1636.59	0.00758636		2226.58	0.00459543		2816.58	0.00848369		3406.58	-0.00949108
456.8	0.00641721		1046.79	-0.00094029		1636.79	0.00755719		2226.78	0.00548997		2816.78	0.00807632		3406.78	-0.01000879
457	0.00666276		1046.99	-0.00084313		1636.99	0.00719045		2226.98	0.00491865		2816.98	0.00804818		3406.98	-0.00990519
457.2	0.00700172		1047.19	-0.00153368		1637.19	0.00669799		2227.18	0.0036776		2817.18	0.00781647		3407.18	-0.01029183
457.4	0.0073503		1047.39	-0.00050932		1637.39	0.0070333		2227.38	0.00256499		2817.38	0.00838254		3407.38	-0.01044434
457.6	0.00777813		1047.59	-0.00080317		1637.59	0.00700176		2227.58	0.00135274		2817.58	0.00915724		3407.58	-0.01087009
457.8	0.00784858		1047.79	-0.00171309		1637.79	0.00672016		2227.78	0.0010221		2817.78	0.00909344		3407.78	-0.01067785
458	0.0077487		1047.99	-0.00101513		1637.99	0.00713304		2227.98	0.00047485		2817.98	0.00906156		3407.98	-0.01149722
458.2	0.0080893		1048.19	-0.0024236		1638.19	0.00700924		2228.18	-0.00030577		2818.18	0.00933007		3408.18	-0.01114311
458.4	0.00864443		1048.39	-0.00330092		1638.39	0.00722901		2228.38	-0.00141249		2818.38	0.00939665		3408.38	-0.01054727
458.6	0.00896359		1048.59	-0.0046984		1638.59	0.00675137		2228.58	-0.0015487		2818.58	0.00904906		3408.58	-0.01065318
458.8	0.00902018		1048.79	-0.004338		1638.79	0.00726921		2228.78	-0.00151761		2818.78	0.00926998		3408.78	-0.01035341
459	0.00824692		1048.99	-0.0040786		1638.99	0.00804129		2228.98	-0.00203009		2818.98	0.00894999		3408.98	-0.00948265
459.2	0.00807501		1049.19	-0.00415931		1639.19	0.00827562		2229.18	-0.00240227		2819.18	0.0096872		3409.18	-0.01035063
459.4	0.0065832		1049.39	-0.00423065		1639.39	0.00871334		2229.38	-0.00198212		2819.38	0.0106327		3409.38	-0.00967534
459.6	0.00624965		1049.59	-0.00365289		1639.59	0.00814485		2229.58	-0.00129913		2819.58	0.01079187		3409.58	-0.00922387
459.8	0.00498908		1049.79	-0.00296121		1639.79	0.00736691		2229.78	-0.00027933		2819.78	0.00988682		3409.78	-0.00938497
460	0.00478534		1049.99	-0.00296336		1639.99	0.00741514		2229.98	-0.00099433		2819.98	0.00957472		3409.98	-0.00941809
460.2	0.00345578		1050.19	-0.00218669		1640.19	0.00680807		2230.18	-0.00046292		2820.18	0.0091717		3410.18	-0.00971109
460.4	0.00274301		1050.39	-0.00179069		1640.39	0.0061389		2230.38	-0.00004282		2820.38	0.00903129		3410.38	-0.00943994
460.6	0.00294828		1050.59	-0.00073685		1640.59	0.00681716		2230.58	0.00065718		2820.58	0.00928647		3410.58	-0.00997357
460.8	0.00289557		1050.79	0.00021383		1640.79	0.00714402		2230.78	0.00177159		2820.78	0.01028567		3410.78	-0.00972958
461	0.00366638		1050.99	-0.00054838		1640.99	0.00737371		2230.98	0.00113021		2820.98	0.01028984		3410.98	-0.01026297
461.2	0.00375365		1051.19	-0.00017426		1641.19	0.00737578		2231.18	0.00103115		2821.18	0.01001801		3411.18	-0.01066748
461.4	0.0037092		1051.39	0.00020758		1641.39	0.00713315		2231.38	0.00134189		2821.38	0.00970016		3411.38	-0.01074006
461.6	0.00439194		1051.59	-0.00009208		1641.59	0.00682347		2231.58	0.00111074		2821.58	0.0095829		3411.58	-0.01154075
461.8	0.00459631		1051.79	0.00007617		1641.79	0.00616245		2231.78	0.00104032		2821.78	0.009194		3411.78	-0.01173325
462	0.00430534		1051.99	-0.00014876		1641.99	0.00582956		2231.98	0.00090174		2821.98	0.00909091		3411.98	-0.01256937
462.2	0.00434975		1052.19	-0.00099014		1642.19	0.00603595		2232.18	0.00072442		2822.18	0.00918082		3412.18	-0.0127433
462.4	0.00547389		1052.39	-0.0010778		1642.39	0.00601035		2232.38	0.00050708		2822.38	0.00892061		3412.38	-0.01191283
462.6	0.0057986		1052.59	-0.0016518		1642.59	0.00570606		2232.58	0.00120466		2822.58	0.00855954		3412.58	-0.01208416
462.8	0.00608637		1052.79	-0.00133314		1642.79	0.00590308		2232.78	0.00122934		2822.78	0.00839422		3412.78	-0.01108407
463	0.00616089		1052.99	-0.00160481		1642.99	0.00588201		2232.98	0.00115032		2822.98	0.00924993		3412.98	-0.01119455
463.2	0.00659205		1053.19	-0.00172372		1643.19	0.00569888		2233.18	0.00225173		2823.18	0.00878135		3413.18	-0.01169418
463.4	0.00612494		1053.39	-0.00190879		1643.39	0.00496905		2233.38	0.00271146		2823.38	0.00924306		3413.38	-0.01055379
463.6	0.00683929		1053.59	-0.0024811		1643.59	0.00463921		2233.58	0.00217321		2823.58	0.00985751		3413.58	-0.01015511
463.8	0.00698285		1053.79	-0.00225917		1643.79	0.0051722		2233.78	0.00259973		2823.78	0.01013031		3413.78	-0.01073896
464	0.00687129		1053.99	-0.00231724		1643.99	0.00584048		2233.98	0.00297083		2823.98	0.0099041		3413.98	-0.01045222
464.2	0.00666846		1054.19	-0.00288683		1644.19	0.00601847		2234.18	0.00291858		2824.18	0.01029836		3414.18	-0.0103351
464.4	0.00759446		1054.39	-0.00380532		1644.39	0.00660074		2234.38	0.00429352		2824.38	0.01067217		3414.38	-0.0091196
464.6	0.00839666		1054.59	-0.00323381		1644.59	0.00767379		2234.58	0.00466784		2824.58	0.01051515		3414.58	-0.0089672
464.8	0.00810478		1054.79	-0.00331294		1644.79	0.00794195		2234.78	0.00518881		2824.78	0.01048571		3414.78	-0.00851201
465	0.00853729		1054.99	-0.00350705		1644.99	0.0072621		2234.98	0.00446133		2824.98	0.00959283		3414.98	-0.00838417
465.2	0.0084732		1055.19	-0.00386838		1645.19	0.00682177		2235.18	0.00424519		2825.18	0.00892526		3415.18	-0.00833439
465.4	0.00837125		1055.39	-0.00338674		1645.39	0.00607597		2235.38	0.00444383		2825.38	0.00745096		3415.38	-0.00784011
465.6	0.00889107		1055.59	-0.00270773		1645.59	0.00580001		2235.58	0.00354786		2825.58	0.00775962		3415.58	-0.00847698
465.8	0.00853656		1055.79	-0.00164508		1645.79	0.00519401		2235.78	0.00250718		2825.78	0.00681164		3415.78	-0.00856468
466	0.00692519		1055.99	-0.00230182		1645.99	0.00551733		2235.98	0.00209464		2825.98	0.00690686		3415.98	-0.00853618
466.2	0.00623534		1056.19	-0.00170065		1646.19	0.00553915		2236.18	0.00201732		2826.18	0.00677466		3416.18	-0.00869728
466.4	0.00662938		1056.39	-0.0018541		1646.39	0.00460861		2236.38	0.00102227		2826.38	0.00695597		3416.38	-0.00816888
466.6	0.00591255		1056.59	-0.00188254		1646.59	0.00383669		2236.58	0.00013572		2826.58	0.00705413		3416.58	-0.00897238
466.8	0.00684617		1056.79	-0.00146065		1646.79	0.00335379		2236.78	0.00030809		2826.78	0.00658025		3416.78	-0.00885855
467	0.00757651		1056.99	-0.00108314		1646.99	0.00358014		2236.98	0.00068708		2826.98	0.00732813		3416.98	-0.00932504
467.2	0.00771294		1057.19	-0.00130184		1647.19	0.00435413		2237.18	0.0004139		2827.18	0.00742364		3417.18	-0.0093678
467.4	0.00724494		1057.39	-0.00100453		1647.39	0.00411634		2237.38	-0.0004896		2827.38	0.0091012		3417.38	-0.01016741
467.6	0.00789664		1057.59	-0.00134658		1647.59	0.00453032		2237.58	-0.00101785		2827.58	0.0096456		3417.58	-0.01166232
467.8	0.00835864		1057.79	-0.00145293		1647.79	0.00468553		2237.78	-0.00009614		2827.78	0.01068478		3417.78	-0.01205907
468	0.00854703		1057.99	-0.00201329		1647.99	0.00476951		2237.98	0.00043892		2827.98	0.01140942		3417.98	-0.01192233
468.2	0.00893677		1058.19	-0.00242432		1648.19	0.0045116		2238.18	0.00075673		2828.18	0.01231319		3418.18	-0.01174506
468.4	0.00961739		1058.39	-0.00276008		1648.39	0.00435888		2238.38	0.00174248		2828.38	0.01240368		3418.38	-0.01127047
468.6	0.00945006		1058.59	-0.00214302		1648.59	0.0042245		2238.58	0.00169097		2828.58	0.01199174		3418.58	-0.0108072
468.8	0.00899057		1058.79	-0.00208147		1648.79	0.00377119		2238.78	0.00219542		2828.78	0.01175584		3418.78	-0.01020212
469	0.0094764		1058.99	-0.00176999		1648.99	0.00330576		2238.98	0.002189		2828.98	0.01123745		3418.98	-0.00946135
469.2	0.00925238		1059.19	-0.00157145		1649.19	0.00349226		2239.18	0.00219473		2829.18	0.01008372		3419.18	-0.00863583
469.4	0.00867766		1059.39	-0.00035879		1649.39	0.0029289		2239.38	0.00247036		2829.38	0.00925397		3419.38	-0.00786799
469.6	0.00780126		1059.59	0.00030853		1649.59	0.00275673		2239.58	0.0018062		2829.58	0.00898572		3419.58	-0.00741162
469.8	0.00668759		1059.79	0.00107197		1649.79	0.00260081		2239.78	0.0011449		2829.78	0.00822182		3419.78	-0.00669751
470	0.00668759		1059.99	0.00107197		1649.99	0.00260081		2239.98	0.0011449		2829.98	0.00822182		3419.98	-0.00669751
470.2	0.00654588		1060.19	0.00114176		1650.19	0.00211512		2240.18	0.00098099		2830.18	0.00817587		3420.18	-0.0068243
470.4	0.00599018		1060.39	0.00112111		1650.39	0.00197131		2240.38	0.00149801		2830.38	0.00889709		3420.38	-0.00622119
470.6	0.00603293		1060.59	0.00092388		1650.59	0.00188936		2240.58	0.00181479		2830.58	0.00822526		3420.58	-0.00624791
470.8	0.00591893		1060.79	0.00140438		1650.79	0.00116632		2240.78	0.00184117		2830.78	0.00778538		3420.78	-0.00611121
471	0.00584595		1060.99	0.00087083		1650.99	0.0013915		2240.98	0.00161283		2830.98	0.00820656		3420.98	-0.00563389
471.2	0.005724		1061.19	0.00117842		1651.19	0.00167665		2241.18	0.00178503		2831.18	0.00847783		3421.18	-0.00611335
471.4	0.0061306		1061.39	0.00112541		1651.39	0.00146614		2241.38	0.00213281		2831.38	0.00900285		3421.38	-0.00586953
471.6	0.00608547		1061.59	0.00062853		1651.59	0.00151329		2241.58	0.0022918		2831.58	0.00875724		3421.58	-0.00564426
471.8	0.00636995		1061.79	0.00096252		1651.79	0.0019726		2241.78	0.0018974		2831.78	0.0092322		3421.78	-0.00602369
472	0.00691421		1061.99	0.00172363		1651.99	0.00255828		2241.98	0.00192778		2831.98	0.00918353		3421.98	-0.00631343
472.2	0.00747469		1062.19	0.00155673		1652.19	0.00292201		2242.18	0.00218582		2832.18	0.00923747		3422.18	-0.00647819
472.4	0.00847557		1062.39	0.00154299		1652.39	0.00374318		2242.38	0.0026361		2832.38	0.00885645		3422.38	-0.00676255
472.6	0.00838958		1062.59	0.00129256		1652.59	0.00333303		2242.58	0.00264878		2832.58	0.00859186		3422.58	-0.00694743
472.8	0.00822659		1062.79	0.00088032		1652.79	0.00398646		2242.78	0.00356863		2832.78	0.008645		3422.78	-0.0069045
473	0.00866766		1062.99	0.00109908		1652.99	0.00372917		2242.98	0.00296071		2832.98	0.00851214		3422.98	-0.0062279
473.2	0.00864383		1063.19	0.00164821		1653.19	0.00275151		2243.18	0.00224767		2833.18	0.00775312		3423.18	-0.00667427
473.4	0.00788076		1063.39	0.00132181		1653.39	0.00305948		2243.38	0.00197801		2833.38	0.0085882		3423.38	-0.00685023
473.6	0.00727201		1063.59	0.00195878		1653.59	0.00198269		2243.58	0.0015201		2833.58	0.00915503		3423.58	-0.00720806
473.8	0.00693536		1063.79	0.00266399		1653.79	0.00185929		2243.78	0.00181232		2833.78	0.00933664		3423.78	-0.00653284
474	0.00690564		1063.99	0.00326909		1653.99	0.00168394		2243.98	0.00162276		2833.98	0.00863938		3423.98	-0.00653075
474.2	0.00706659		1064.19	0.00307654		1654.19	0.00088814		2244.18	0.00133009		2834.18	0.0081488		3424.18	-0.00711149
474.4	0.00588954		1064.39	0.00290251		1654.39	0.00079858		2244.38	0.00114829		2834.38	0.00841244		3424.38	-0.00667916
474.6	0.00631551		1064.59	0.00248676		1654.59	0.00028648		2244.58	0.00001459		2834.58	0.00738305		3424.58	-0.00610683
474.8	0.00615655		1064.79	0.00202342		1654.79	0.00008464		2244.78	0.00017587		2834.78	0.00743211		3424.78	-0.00599509
475	0.00549214		1064.99	0.00097561		1654.99	0.00042244		2244.98	0.00020946		2834.98	0.00797179		3424.98	-0.00608029
475.2	0.00510761		1065.19	0.0008116		1655.19	0.0005432		2245.18	0.00105099		2835.18	0.00797587		3425.18	-0.00642238
475.4	0.00518949		1065.39	-0.00044042		1655.39	-0.00065165		2245.38	0.00225753		2835.38	0.00798371		3425.38	-0.00654601
475.6	0.00507461		1065.59	-0.00216868		1655.59	-0.00056689		2245.58	0.00269845		2835.58	0.00763949		3425.58	-0.00608474
475.8	0.00518439		1065.79	-0.00221352		1655.79	-0.00043745		2245.78	0.00312819		2835.78	0.00838692		3425.78	-0.00603093
476	0.00564568		1065.99	-0.00288728		1655.99	0.00022948		2245.98	0.00351023		2835.98	0.00759643		3425.98	-0.00587486
476.2	0.00576943		1066.19	-0.00475397		1656.19	0.00089938		2246.18	0.00393374		2836.18	0.00766574		3426.18	-0.00613737
476.4	0.00604096		1066.39	-0.00373553		1656.39	0.0016258		2246.38	0.00382737		2836.38	0.00728041		3426.38	-0.00599177
476.6	0.00538		1066.59	-0.00309781		1656.59	0.00172577		2246.58	0.00439493		2836.58	0.00747875		3426.58	-0.00615714
476.8	0.00530715		1066.79	-0.00261129		1656.79	0.001486		2246.78	0.00430316		2836.78	0.00748002		3426.78	-0.00622692
477	0.00531324		1066.99	-0.00144209		1656.99	0.00109161		2246.98	0.00262557		2836.98	0.00783535		3426.98	-0.00610012
477.2	0.00521145		1067.19	-0.00100261		1657.19	0.0016461		2247.18	0.00237073		2837.18	0.00804158		3427.18	-0.00668646
477.4	0.00535418		1067.39	0.00002389		1657.39	0.00237759		2247.38	0.00242488		2837.38	0.00797594		3427.38	-0.00750078
477.6	0.00615095		1067.59	0.00097589		1657.59	0.00211432		2247.58	0.00153724		2837.58	0.00782011		3427.58	-0.00690861
477.8	0.00615995		1067.79	0.00099166		1657.79	0.00301294		2247.78	0.00141899		2837.78	0.00741667		3427.78	-0.00631376
478	0.00654719		1067.99	0.00128324		1657.99	0.00288154		2247.98	0.00175555		2837.98	0.00767216		3427.98	-0.00688611
478.2	0.00687165		1068.19	0.00116691		1658.19	0.00265816		2248.18	0.00158029		2838.18	0.00841735		3428.18	-0.00714812
478.4	0.00584292		1068.39	0.00118119		1658.39	0.00244712		2248.38	0.00023145		2838.38	0.00933282		3428.38	-0.00658052
478.6	0.00697482		1068.59	0.00100166		1658.59	0.00240387		2248.58	0.00036719		2838.58	0.00961738		3428.58	-0.00614852
478.8	0.00620939		1068.79	0.00116864		1658.79	0.00205563		2248.78	0.00128659		2838.78	0.00980642		3428.78	-0.0066821
479	0.00580639		1068.99	0.00112998		1658.99	0.0014534		2248.98	0.00154414		2838.98	0.00979845		3428.98	-0.00649102
479.2	0.00531519		1069.19	0.00130505		1659.19	0.00132594		2249.18	0.00219453		2839.18	0.00998448		3429.18	-0.00659845
479.4	0.00603105		1069.39	0.00132716		1659.39	-0.00006695		2249.38	0.00238606		2839.38	0.01042849		3429.38	-0.00726906
479.6	0.00596202		1069.59	0.00032355		1659.59	0.00041286		2249.58	0.00197045		2839.58	0.00990755		3429.58	-0.00644039
479.8	0.00585997		1069.79	0.00078101		1659.79	-0.00047272		2249.78	0.00198196		2839.78	0.00968902		3429.78	-0.00609807
480	0.00544412		1069.99	0.001266		1659.99	0.00004066		2249.98	0.00144082		2839.98	0.00869176		3429.98	-0.00632103
480.2	0.00476449		1070.19	0.00085936		1660.19	0.00010475		2250.18	0.00156872		2840.18	0.00855135		3430.18	-0.0066896
480.4	0.00390527		1070.39	0.00221022		1660.39	0.00003268		2250.38	0.0013527		2840.38	0.00823493		3430.38	-0.00680495
480.6	0.00374497		1070.59	0.00170844		1660.59	-0.00018007		2250.58	0.00137206		2840.58	0.00789676		3430.58	-0.00785453
480.8	0.00401805		1070.79	0.00207266		1660.79	0.0002545		2250.78	0.00161278		2840.78	0.0074519		3430.78	-0.00856745
481	0.00414097		1070.99	0.00227334		1660.99	0.00157374		2250.98	0.00083288		2840.98	0.00748493		3430.98	-0.00902185
481.2	0.00408905		1071.19	0.00156097		1661.19	0.00138304		2251.18	0.001421		2841.18	0.00754785		3431.18	-0.0094582
481.4	0.0037994		1071.39	0.00144632		1661.39	0.00136958		2251.38	0.00183459		2841.38	0.00657543		3431.38	-0.00909009
481.6	0.00410645		1071.59	0.0012967		1661.59	0.00189363		2251.58	0.00193867		2841.58	0.00667831		3431.58	-0.00761758
481.8	0.00379091		1071.79	0.00048078		1661.79	0.00211014		2251.78	0.00303938		2841.78	0.00703798		3431.78	-0.00726447
482	0.00386757		1071.99	-0.00036639		1661.99	0.00232769		2251.98	0.00329303		2841.98	0.00759146		3431.98	-0.0070309
482.2	0.00364642		1072.19	-0.00087002		1662.19	0.00255129		2252.18	0.00384721		2842.18	0.0079338		3432.18	-0.00645373
482.4	0.00280955		1072.39	-0.0012249		1662.39	0.00288828		2252.38	0.00319431		2842.38	0.00831881		3432.38	-0.00554352
482.6	0.00310915		1072.59	-0.00160941		1662.59	0.00403308		2252.58	0.00370297		2842.58	0.00784906		3432.58	-0.00546188
482.8	0.00233386		1072.79	-0.00151665		1662.79	0.00408809		2252.78	0.00315495		2842.78	0.00785882		3432.78	-0.0052831
483	0.00151706		1072.99	-0.00185825		1662.99	0.00393872		2252.98	0.00327406		2842.98	0.00852704		3432.98	-0.0050288
483.2	0.00108361		1073.19	-0.00142469		1663.19	0.00378713		2253.18	0.00325453		2843.18	0.00849448		3433.18	-0.00580108
483.4	0.00170902		1073.39	-0.0016557		1663.39	0.00338218		2253.38	0.00284494		2843.38	0.00892516		3433.38	-0.00618963
483.6	0.00108257		1073.59	-0.00177994		1663.59	0.00380105		2253.58	0.00255233		2843.58	0.00800185		3433.58	-0.00585237
483.8	0.00133137		1073.79	-0.00183659		1663.79	0.0029874		2253.78	0.0025165		2843.78	0.00810779		3433.78	-0.00632155
484	0.00145146		1073.99	-0.00147184		1663.99	0.0027929		2253.98	0.00214699		2843.98	0.00777945		3433.98	-0.00661814
484.2	0.00126205		1074.19	-0.00194489		1664.19	0.00305829		2254.18	0.00213193		2844.18	0.00801541		3434.18	-0.00674249
484.4	0.00062943		1074.39	-0.00164891		1664.39	0.00241735		2254.38	0.00175661		2844.38	0.00867585		3434.38	-0.00738039
484.6	0.00093476		1074.59	-0.00173398		1664.59	0.0020068		2254.58	0.00195222		2844.58	0.00864826		3434.58	-0.00844721
484.8	0.00036831		1074.79	-0.00136445		1664.79	0.00275063		2254.78	0.00214843		2844.78	0.00819456		3434.78	-0.00890174
485	0.00007066		1074.99	-0.00121446		1664.99	0.00224813		2254.98	0.00144804		2844.98	0.00825104		3434.98	-0.00887856
485.2	-0.00009319		1075.19	-0.00092873		1665.19	0.00097067		2255.18	0.00190323		2845.18	0.00796941		3435.18	-0.00819558
485.4	-0.00070036		1075.39	0.00069347		1665.39	0.00107476		2255.38	0.00152016		2845.38	0.00679187		3435.38	-0.00732087
485.6	0.00000395		1075.59	0.00165039		1665.59	0.00144763		2255.58	0.00103917		2845.58	0.00662917		3435.58	-0.00683066
485.8	0.00016497		1075.79	0.00159622		1665.79	0.00198806		2255.78	0.00072768		2845.78	0.00598777		3435.78	-0.00613961
486	-0.00039507		1075.99	0.00143735		1665.99	0.00262453		2255.98	0.00045756		2845.98	0.00627016		3435.98	-0.00534767
486.2	0.00001152		1076.19	0.00243102		1666.19	0.00293143		2256.18	0.00032616		2846.18	0.00673512		3436.18	-0.00481397
486.4	-0.00054756		1076.39	0.00279874		1666.39	0.00305242		2256.38	-0.00072967		2846.38	0.00676297		3436.38	-0.00495307
486.6	0.0000716		1076.59	0.00325468		1666.59	0.00331936		2256.58	-0.00079647		2846.58	0.00722452		3436.58	-0.00587228
486.8	-0.00018371		1076.79	0.00343056		1666.79	0.0025983		2256.78	-0.00156524		2846.78	0.00850056		3436.78	-0.00615739
487	-0.00026546		1076.99	0.00354152		1666.99	0.00224439		2256.98	-0.00102378		2846.98	0.0090298		3436.98	-0.00583757
487.2	0.00107315		1077.19	0.0037224		1667.19	0.00177674		2257.18	-0.00128827		2847.18	0.00897672		3437.18	-0.00675878
487.4	0.00186464		1077.39	0.0034931		1667.39	0.00115511		2257.38	-0.00209421		2847.38	0.00936449		3437.38	-0.00723547
487.6	0.00236389		1077.59	0.00307731		1667.59	0.00139588		2257.58	-0.00225188		2847.58	0.00920679		3437.58	-0.00816854
487.8	0.00266489		1077.79	0.00205288		1667.79	0.00097449		2257.78	-0.00257463		2847.78	0.00985402		3437.78	-0.00902696
488	0.00332987		1077.99	0.00212019		1667.99	0.00131964		2257.98	-0.00243005		2847.98	0.00946081		3437.98	-0.00938153
488.2	0.00260694		1078.19	0.00199179		1668.19	0.00156518		2258.18	-0.00249496		2848.18	0.01033621		3438.18	-0.00950663
488.4	0.00185459		1078.39	0.00153654		1668.39	0.00197717		2258.38	-0.00247164		2848.38	0.01088819		3438.38	-0.01046988
488.6	0.00159474		1078.59	0.00070983		1668.59	0.00278476		2258.58	-0.00199041		2848.58	0.00999484		3438.58	-0.0111166
488.8	0.001245		1078.79	-0.00012997		1668.79	0.00448537		2258.78	-0.00185767		2848.78	0.0096655		3438.78	-0.01108437
489	0.00064913		1078.99	-0.00082675		1668.99	0.00446584		2258.98	-0.00141972		2848.98	0.00925264		3438.98	-0.0109449
489.2	0.00032168		1079.19	-0.00130278		1669.19	0.00394841		2259.18	-0.00119265		2849.18	0.00935773		3439.18	-0.0100784
489.4	0.00002054		1079.39	-0.00087741		1669.39	0.00386477		2259.38	-0.00138453		2849.38	0.00918892		3439.38	-0.00969879
489.6	0.0000652		1079.59	-0.00236107		1669.59	0.00416543		2259.58	-0.00050651		2849.58	0.00958671		3439.58	-0.00963321
489.8	-0.00103887		1079.79	-0.00286769		1669.79	0.00407743		2259.78	0.00009182		2849.78	0.00970753		3439.78	-0.00888883
490	-0.0012693		1079.99	-0.00382176		1669.99	0.00341699		2259.98	0.00027459		2849.98	0.0101331		3439.98	-0.00828721
490.2	-0.00064358		1080.19	-0.00337265		1670.19	0.0034166		2260.18	0.00021582		2850.18	0.01090307		3440.18	-0.00878096
490.4	-0.00021828		1080.39	-0.00333481		1670.39	0.0029798		2260.38	0.00067573		2850.38	0.01089085		3440.38	-0.00819809
490.6	0.00035826		1080.59	-0.00373205		1670.59	0.00196851		2260.58	0.00087494		2850.58	0.01169315		3440.58	-0.0083091
490.8	0.00110536		1080.79	-0.0048516		1670.79	0.00172634		2260.78	0.00031654		2850.78	0.01201654		3440.78	-0.00853527
491	0.00210408		1080.99	-0.00498305		1670.99	0.00161648		2260.98	0.00002318		2850.98	0.01134591		3440.98	-0.00880042
491.2	0.00297975		1081.19	-0.00475821		1671.19	0.00038514		2261.18	-0.00041753		2851.18	0.01138095		3441.18	-0.00979836
491.4	0.00353431		1081.39	-0.00461976		1671.39	-0.00005704		2261.38	-0.0005818		2851.38	0.01061842		3441.38	-0.01045405
491.6	0.00432531		1081.59	-0.00538988		1671.59	0.00014329		2261.58	-0.00038122		2851.58	0.01002319		3441.58	-0.01115881
491.8	0.00441557		1081.79	-0.00491518		1671.79	0.00029843		2261.78	-0.00030187		2851.78	0.00950496		3441.78	-0.01101693
492	0.00523581		1081.99	-0.00433762		1671.99	0.00068503		2261.98	0.00013545		2851.98	0.00839126		3441.98	-0.01142364
492.2	0.00590889		1082.19	-0.00350444		1672.19	0.0005485		2262.18	-0.00033815		2852.18	0.00842765		3442.18	-0.01083734
492.4	0.00598584		1082.39	-0.00412044		1672.39	0.00101537		2262.38	-0.00005036		2852.38	0.0080868		3442.38	-0.01134668
492.6	0.00681145		1082.59	-0.00422058		1672.59	0.00087885		2262.58	-0.00009928		2852.58	0.0068092		3442.58	-0.01205792
492.8	0.00712091		1082.79	-0.00386501		1672.79	0.00093296		2262.78	0.00035164		2852.78	0.0058738		3442.78	-0.01188678
493	0.0064837		1082.99	-0.00429122		1672.99	-0.0003358		2262.98	0.00058563		2852.98	0.00569362		3442.98	-0.01104484
493.2	0.00677434		1083.19	-0.00379166		1673.19	-0.00108989		2263.18	0.00090959		2853.18	0.00561472		3443.18	-0.00988437
493.4	0.00657435		1083.39	-0.00308257		1673.39	-0.00136294		2263.38	0.00066657		2853.38	0.00543105		3443.38	-0.00948321
493.6	0.00643969		1083.59	-0.00358471		1673.59	-0.00181224		2263.58	0.00137759		2853.58	0.00550198		3443.58	-0.00910477
493.8	0.00565938		1083.79	-0.00345648		1673.79	-0.00147867		2263.78	0.0004687		2853.78	0.00585784		3443.78	-0.00797267
494	0.00575697		1083.99	-0.00356142		1673.99	-0.00123187		2263.98	0.00036798		2853.98	0.0052169		3443.98	-0.00733341
494.2	0.00512026		1084.19	-0.00284985		1674.19	-0.0014602		2264.18	0.00041885		2854.18	0.0051239		3444.18	-0.00740058
494.4	0.00462475		1084.39	-0.00297919		1674.39	-0.00117265		2264.38	-0.0001795		2854.38	0.00554782		3444.38	-0.00683081
494.6	0.00345024		1084.59	-0.00349591		1674.59	-0.00129431		2264.58	-0.00025318		2854.58	0.00592556		3444.58	-0.00689242
494.8	0.00292546		1084.79	-0.00359745		1674.79	-0.0007948		2264.78	-0.00057461		2854.78	0.00563623		3444.78	-0.00749813
495	0.00145978		1084.99	-0.00297585		1674.99	-0.00062427		2264.98	-0.00042887		2854.98	0.00583226		3444.98	-0.0072806
495.2	0.00070658		1085.19	-0.00278992		1675.19	-0.00128387		2265.18	0.00022117		2855.18	0.00636068		3445.18	-0.00681709
495.4	-0.00009754		1085.39	-0.002922		1675.39	-0.00123672		2265.38	0.00117734		2855.38	0.00659116		3445.38	-0.00678977
495.6	-0.00066672		1085.59	-0.00358585		1675.59	-0.00058364		2265.58	0.00143589		2855.58	0.00651869		3445.58	-0.00658667
495.8	-0.00131389		1085.79	-0.00335799		1675.79	0.00012736		2265.78	0.00110939		2855.78	0.00661527		3445.78	-0.00638907
496	-0.000595		1085.99	-0.00335306		1675.99	0.0004464		2265.98	0.0013174		2855.98	0.00641354		3445.98	-0.00679671
496.2	-0.00001657		1086.19	-0.00346798		1676.19	0.0002564		2266.18	0.00104306		2856.18	0.00666713		3446.18	-0.00738414
496.4	-0.00003794		1086.39	-0.00360024		1676.39	0.00016208		2266.38	0.00115111		2856.38	0.00720373		3446.38	-0.00857973
496.6	-0.00045143		1086.59	-0.00326697		1676.59	0.00013233		2266.58	0.00200383		2856.58	0.00723971		3446.58	-0.00948564
496.8	0.00008515		1086.79	-0.00270894		1676.79	0.00011485		2266.78	0.00151513		2856.78	0.00788114		3446.78	-0.00930741
497	0.00020771		1086.99	-0.00272207		1676.99	-0.00012422		2266.98	0.00149825		2856.98	0.00912624		3446.98	-0.00955929
497.2	0.00068828		1087.19	-0.00244914		1677.19	0.00047057		2267.18	0.00170082		2857.18	0.00865767		3447.18	-0.00967325
497.4	0.00089795		1087.39	-0.00304265		1677.39	0.00000485		2267.38	0.00125781		2857.38	0.00927344		3447.38	-0.00994382
497.6	0.00158093		1087.59	-0.00310546		1677.59	0.00036888		2267.58	0.00175705		2857.58	0.00900962		3447.58	-0.00966144
497.8	0.00144846		1087.79	-0.00257842		1677.79	0.0007326		2267.78	0.00098649		2857.78	0.00888028		3447.78	-0.01025361
498	0.00153069		1087.99	-0.00230832		1677.99	-0.00009645		2267.98	0.00133494		2857.98	0.00813382		3447.98	-0.00979493
498.2	0.00204785		1088.19	-0.00245335		1678.19	-0.00030779		2268.18	0.00185493		2858.18	0.00736415		3448.18	-0.01025812
498.4	0.00178804		1088.39	-0.0022294		1678.39	0.0000813		2268.38	0.00128228		2858.38	0.00792732		3448.38	-0.01021995
498.6	0.0014904		1088.59	-0.00290503		1678.59	-0.00022543		2268.58	0.00225318		2858.58	0.00765445		3448.58	-0.00971468
498.8	0.00080762		1088.79	-0.00291105		1678.79	-0.00014704		2268.78	0.00271877		2858.78	0.00674628		3448.78	-0.01037695
499	0.00037319		1088.99	-0.00229887		1678.99	-0.00012805		2268.98	0.00240406		2858.98	0.00780201		3448.98	-0.01025884
499.2	0.00110752		1089.19	-0.00279025		1679.19	-0.00011701		2269.18	0.00224602		2859.18	0.00729022		3449.18	-0.01027445
499.4	0.00114616		1089.39	-0.00262736		1679.39	0.00020651		2269.38	0.001967		2859.38	0.00756911		3449.38	-0.00994817
499.6	0.00126431		1089.59	-0.00286891		1679.59	0.00092276		2269.58	0.00052569		2859.58	0.00731422		3449.58	-0.00956994
499.8	0.00216108		1089.79	-0.00326813		1679.79	0.0010496		2269.78	0.0001787		2859.78	0.00658852		3449.78	-0.010116
500	0.00275865		1089.99	-0.00267465		1679.99	0.00082563		2269.98	0.00059376		2859.98	0.0061005		3449.98	-0.00982568
500.2	0.0026619		1090.19	-0.00219968		1680.19	0.00004111		2270.18	0.00064515		2860.18	0.0062805		3450.18	-0.01042488
500.4	0.00336268		1090.39	-0.00142514		1680.39	0.00008469		2270.38	0.00026324		2860.38	0.00648053		3450.38	-0.0103816
500.6	0.00342507		1090.59	-0.00133554		1680.59	-0.0006434		2270.58	0.00099032		2860.58	0.00700426		3450.58	-0.00990106
500.8	0.00402894		1090.79	-0.000647		1680.79	-0.00133699		2270.78	0.00011805		2860.78	0.00743761		3450.78	-0.00954855
501	0.0038206		1090.99	-0.0009954		1680.99	-0.001283		2270.98	0.00035056		2860.98	0.00719106		3450.98	-0.00997268
501.2	0.00280867		1091.19	-0.00166588		1681.19	-0.00160339		2271.18	0.00016866		2861.18	0.00700687		3451.18	-0.00937229
501.4	0.00200809		1091.39	-0.00123864		1681.39	-0.00252107		2271.38	0.00004619		2861.38	0.00765355		3451.38	-0.00945265
501.6	0.00185501		1091.59	-0.00089456		1681.59	-0.00274472		2271.58	-0.00019914		2861.58	0.00641485		3451.58	-0.00909173
501.8	0.00113356		1091.79	-0.00046144		1681.79	-0.00323586		2271.78	-0.00048762		2861.78	0.00641987		3451.78	-0.00947562
502	0.00046046		1091.99	-0.00144762		1681.99	-0.0033952		2271.98	-0.00017781		2861.98	0.00657261		3451.98	-0.00852412
502.2	0.00000403		1092.19	-0.0025025		1682.19	-0.00349105		2272.18	-0.00023911		2862.18	0.00616575		3452.18	-0.00888654
502.4	-0.00086219		1092.39	-0.00301677		1682.39	-0.00355314		2272.38	-0.00120358		2862.38	0.00643032		3452.38	-0.00862808
502.6	-0.0007768		1092.59	-0.00429511		1682.59	-0.0032943		2272.58	-0.00135838		2862.58	0.00594815		3452.58	-0.00884334
502.8	-0.00081486		1092.79	-0.00396022		1682.79	-0.00376785		2272.78	-0.00177394		2862.78	0.00551541		3452.78	-0.01016435
503	-0.00006251		1092.99	-0.00423447		1682.99	-0.00431368		2272.98	-0.00307355		2862.98	0.0066988		3452.98	-0.01082141
503.2	0.00036248		1093.19	-0.00472877		1683.19	-0.003089		2273.18	-0.00383094		2863.18	0.00674441		3453.18	-0.01182141
503.4	0.00045743		1093.39	-0.00474761		1683.39	-0.00247019		2273.38	-0.004875		2863.38	0.00677009		3453.38	-0.01184554
503.6	0.00067888		1093.59	-0.00474063		1683.59	-0.00189116		2273.58	-0.0052113		2863.58	0.00640183		3453.58	-0.01235372
503.8	0.00192422		1093.79	-0.00441236		1683.79	-0.00088489		2273.78	-0.00510983		2863.78	0.00557656		3453.78	-0.01278825
504	0.00227823		1093.99	-0.00342765		1683.99	-0.00063043		2273.98	-0.00487634		2863.98	0.00593471		3453.98	-0.01246976
504.2	0.00335969		1094.19	-0.00366208		1684.19	-0.00036236		2274.18	-0.00380731		2864.18	0.00510121		3454.18	-0.01222555
504.4	0.00441192		1094.39	-0.00377339		1684.39	-0.00084723		2274.38	-0.003977		2864.38	0.00478621		3454.38	-0.01159478
504.6	0.00411301		1094.59	-0.00408279		1684.59	-0.00135063		2274.58	-0.00274712		2864.58	0.00493094		3454.58	-0.01156366
504.8	0.00300227		1094.79	-0.00443381		1684.79	-0.00145576		2274.78	-0.00250918		2864.78	0.00456464		3454.78	-0.01241965
505	0.00255979		1094.99	-0.0041306		1684.99	-0.00071799		2274.98	-0.00293897		2864.98	0.00477797		3454.98	-0.01328841
505.2	0.00141937		1095.19	-0.00344111		1685.19	-0.00069258		2275.18	-0.00195239		2865.18	0.00518913		3455.18	-0.01316861
505.4	0.00115075		1095.39	-0.00242827		1685.39	-0.00088209		2275.38	-0.00139805		2865.38	0.00589319		3455.38	-0.01270168
505.6	0.00072127		1095.59	-0.00197981		1685.59	-0.00094541		2275.58	-0.00129671		2865.58	0.00541265		3455.58	-0.01271411
505.8	0.00032331		1095.79	-0.00185993		1685.79	-0.00084275		2275.78	-0.00090289		2865.78	0.00614076		3455.78	-0.01213605
506	0.00020357		1095.99	-0.00191526		1685.99	-0.00177025		2275.98	-0.00127261		2865.98	0.00629663		3455.98	-0.01119436
506.2	-0.00019689		1096.19	-0.00222196		1686.19	-0.00250204		2276.18	-0.00118606		2866.18	0.00651567		3456.18	-0.01117326
506.4	0.00007877		1096.39	-0.00231445		1686.39	-0.00279812		2276.38	-0.00131659		2866.38	0.00639675		3456.38	-0.01070486
506.6	-0.00044419		1096.59	-0.00274094		1686.59	-0.00316384		2276.58	-0.00159094		2866.58	0.00695797		3456.58	-0.01093427
506.8	-0.00047468		1096.79	-0.00229309		1686.79	-0.00388544		2276.78	-0.00122408		2866.78	0.00702762		3456.78	-0.01136535
507	-0.00016568		1096.99	-0.00246254		1686.99	-0.00331953		2276.98	-0.00237052		2866.98	0.00736856		3456.98	-0.01133469
507.2	0.00012009		1097.19	-0.00249		1687.19	-0.00195855		2277.18	-0.0022618		2867.18	0.00671043		3457.18	-0.01127174
507.4	0.00034578		1097.39	-0.00298859		1687.39	-0.00244204		2277.38	-0.00282665		2867.38	0.00584614		3457.38	-0.01133948
507.6	0.00059003		1097.59	-0.00343677		1687.59	-0.00212958		2277.58	-0.00297062		2867.58	0.00672151		3457.58	-0.01123715
507.8	0.00151591		1097.79	-0.00371436		1687.79	-0.00193729		2277.78	-0.00301894		2867.78	0.00645297		3457.78	-0.01164962
508	0.0009713		1097.99	-0.00451394		1687.99	-0.00263114		2277.98	-0.00212342		2867.98	0.00711966		3457.98	-0.01170123
508.2	0.00074151		1098.19	-0.00563956		1688.19	-0.00266391		2278.18	-0.00062156		2868.18	0.00591628		3458.18	-0.01165993
508.4	0.00004663		1098.39	-0.00540239		1688.39	-0.00333832		2278.38	-0.00030306		2868.38	0.00642004		3458.38	-0.01263678
508.6	-0.00112488		1098.59	-0.00573278		1688.59	-0.00289988		2278.58	0.00120671		2868.58	0.00701099		3458.58	-0.01355196
508.8	-0.00128561		1098.79	-0.00579854		1688.79	-0.00225029		2278.78	0.00198333		2868.78	0.00654519		3458.78	-0.01386296
509	-0.00095346		1098.99	-0.00458433		1688.99	-0.00181328		2278.98	0.00249015		2868.98	0.00726886		3458.98	-0.01326469
509.2	-0.00029803		1099.19	-0.00413167		1689.19	-0.00137959		2279.18	0.00367569		2869.18	0.00688855		3459.18	-0.0119902
509.4	0.00089546		1099.39	-0.00373022		1689.39	-0.0016961		2279.38	0.00335183		2869.38	0.00726164		3459.38	-0.01154809
509.6	0.00122835		1099.59	-0.0032863		1689.59	-0.00166754		2279.58	0.00359433		2869.58	0.00672597		3459.58	-0.0117522
509.8	0.00171251		1099.79	-0.00350471		1689.79	-0.0014312		2279.78	0.00318319		2869.78	0.00769166		3459.78	-0.01051563
510	0.00097043		1099.99	-0.00328161		1689.99	-0.00209805		2279.98	0.00273824		2869.98	0.0078628		3459.98	-0.00957023
510.2	0.00116335		1100.19	-0.00392965		1690.19	-0.00161598		2280.18	0.00222445		2870.18	0.00747189		3460.18	-0.01003148
510.4	0.00073166		1100.39	-0.00439382		1690.39	-0.0014101		2280.38	0.00152609		2870.38	0.00642604		3460.38	-0.00937326
510.6	0.00078983		1100.59	-0.00439472		1690.59	-0.00143027		2280.58	0.0010145		2870.58	0.00645032		3460.58	-0.00936101
510.8	0.00107078		1100.79	-0.00472348		1690.79	-0.0012585		2280.78	0.00094324		2870.78	0.00583606		3460.78	-0.00904857
511	0.00041638		1100.99	-0.00494514		1690.99	-0.00145853		2280.98	-0.00103748		2870.98	0.0062661		3460.98	-0.00920821
511.2	-0.00019869		1101.19	-0.00525191		1691.19	-0.00057773		2281.18	-0.00116015		2871.18	0.00710086		3461.18	-0.00978413
511.4	-0.00139982		1101.39	-0.00591971		1691.39	-0.00089178		2281.38	-0.00293485		2871.38	0.00780993		3461.38	-0.01041731
511.6	-0.00079052		1101.59	-0.0057773		1691.59	-0.00111453		2281.58	-0.00324462		2871.58	0.00915078		3461.58	-0.01017677
511.8	-0.00065411		1101.79	-0.00554204		1691.79	-0.00209589		2281.78	-0.00288021		2871.78	0.00908464		3461.78	-0.01141252
512	-0.00217113		1101.99	-0.00564408		1691.99	-0.00235988		2281.98	-0.00183987		2871.98	0.01013402		3461.98	-0.01208554
512.2	-0.00256006		1102.19	-0.00583417		1692.19	-0.002545		2282.18	-0.00094225		2872.18	0.00996062		3462.18	-0.01342655
512.4	-0.0026612		1102.39	-0.00521098		1692.39	-0.00208157		2282.38	-0.00104038		2872.38	0.01029138		3462.38	-0.0136216
512.6	-0.00230104		1102.59	-0.00536327		1692.59	-0.00189675		2282.58	-0.00017802		2872.58	0.01024014		3462.58	-0.01333411
512.8	-0.00197675		1102.79	-0.00459577		1692.79	-0.00145069		2282.78	-0.00024204		2872.78	0.00999868		3462.78	-0.01230191
513	-0.00120589		1102.99	-0.00320685		1692.99	-0.00130563		2282.98	-0.00053775		2872.98	0.01003346		3462.98	-0.01233452
513.2	-0.00019764		1103.19	-0.00335252		1693.19	-0.00130401		2283.18	-0.00045245		2873.18	0.00891381		3463.18	-0.01214906
513.4	0.00081998		1103.39	-0.00306534		1693.39	-0.00120206		2283.38	-0.00048108		2873.38	0.00880395		3463.38	-0.01186641
513.6	0.00154112		1103.59	-0.00291871		1693.59	-0.00180685		2283.58	-0.00055391		2873.58	0.0083227		3463.58	-0.01154979
513.8	0.00198118		1103.79	-0.00295776		1693.79	-0.00180458		2283.78	-0.00053512		2873.78	0.00819023		3463.78	-0.01172199
514	0.00226436		1103.99	-0.00296991		1693.99	-0.00216787		2283.98	-0.00094118		2873.98	0.00651135		3463.98	-0.01230421
514.2	0.0028307		1104.19	-0.00318772		1694.19	-0.00235804		2284.18	-0.00184119		2874.18	0.0051898		3464.18	-0.0136853
514.4	0.0025471		1104.39	-0.00389177		1694.39	-0.00266968		2284.38	-0.00160895		2874.38	0.00409386		3464.38	-0.01356537
514.6	0.00282649		1104.59	-0.00376311		1694.59	-0.003134		2284.58	-0.00204016		2874.58	0.00392955		3464.58	-0.01367048
514.8	0.00251718		1104.79	-0.00441721		1694.79	-0.00397055		2284.78	-0.00273007		2874.78	0.00386461		3464.78	-0.01324549
515	0.00144795		1104.99	-0.0044491		1694.99	-0.0041848		2284.98	-0.00365388		2874.98	0.00471097		3464.98	-0.01317114
515.2	0.00160426		1105.19	-0.00480536		1695.19	-0.0033674		2285.18	-0.00370819		2875.18	0.00527537		3465.18	-0.01331859
515.4	0.00162835		1105.39	-0.00516867		1695.39	-0.00422935		2285.38	-0.00354844		2875.38	0.00517439		3465.38	-0.01225857
515.6	0.00215606		1105.59	-0.00451146		1695.59	-0.0044066		2285.58	-0.00291098		2875.58	0.00516175		3465.58	-0.01154325
515.8	0.00162249		1105.79	-0.00401435		1695.79	-0.00469303		2285.78	-0.00242703		2875.78	0.00535806		3465.78	-0.01178819
516	0.00123047		1105.99	-0.00451761		1695.99	-0.00434947		2285.98	-0.00211992		2875.98	0.00667272		3465.98	-0.01145931
516.2	0.00126248		1106.19	-0.00520817		1696.19	-0.00377424		2286.18	-0.00245851		2876.18	0.00671694		3466.18	-0.01064145
516.4	0.0006913		1106.39	-0.00450944		1696.39	-0.00229568		2286.38	-0.00262996		2876.38	0.00619773		3466.38	-0.0105206
516.6	0.00036255		1106.59	-0.00430846		1696.59	-0.00260532		2286.58	-0.00212718		2876.58	0.00684711		3466.58	-0.00966783
516.8	-0.00002403		1106.79	-0.00434006		1696.79	-0.00179993		2286.78	-0.00225056		2876.78	0.00712575		3466.78	-0.00995302
517	0.00049628		1106.99	-0.00390035		1696.99	-0.00200256		2286.98	-0.00204295		2876.98	0.00636113		3466.98	-0.01114718
517.2	0.00106274		1107.19	-0.00416712		1697.19	-0.00191361		2287.18	-0.0013298		2877.18	0.00608636		3467.18	-0.01130769
517.4	0.00187249		1107.39	-0.00331426		1697.39	-0.00163527		2287.38	-0.00072925		2877.38	0.00586374		3467.38	-0.01123821
517.6	0.00248757		1107.59	-0.00288201		1697.59	-0.00156678		2287.58	-0.00010548		2877.58	0.00561851		3467.58	-0.01253196
517.8	0.00171037		1107.79	-0.00265547		1697.79	-0.00107557		2287.78	0.00119478		2877.78	0.00541389		3467.78	-0.01368263
518	0.00153704		1107.99	-0.00303855		1697.99	-0.00165148		2287.98	0.00139602		2877.98	0.00496764		3467.98	-0.01398695
518.2	0.00124939		1108.19	-0.0037396		1698.19	-0.00232431		2288.18	0.00069447		2878.18	0.00408913		3468.18	-0.01474983
518.4	0.00091925		1108.39	-0.00444685		1698.39	-0.00268233		2288.38	0.00084284		2878.38	0.00376119		3468.38	-0.01381566
518.6	0.00051124		1108.59	-0.00436075		1698.59	-0.00412937		2288.58	0.00036327		2878.58	0.00325487		3468.58	-0.01389366
518.8	-0.00012163		1108.79	-0.00475304		1698.79	-0.00454397		2288.78	-0.00044305		2878.78	0.00378434		3468.78	-0.01302293
519	-0.00069598		1108.99	-0.00511564		1698.99	-0.00438402		2288.98	-0.00096045		2878.98	0.0032284		3468.98	-0.01189737
519.2	-0.00068229		1109.19	-0.00591611		1699.19	-0.00410905		2289.18	-0.00212444		2879.18	0.00346687		3469.18	-0.01144953
519.4	-0.00028043		1109.39	-0.00606542		1699.39	-0.00401113		2289.38	-0.0022923		2879.38	0.00393912		3469.38	-0.01115918
519.6	-0.00110002		1109.59	-0.00605766		1699.59	-0.00333079		2289.58	-0.00291084		2879.58	0.00362084		3469.58	-0.01052815
519.8	-0.00100122		1109.79	-0.0058999		1699.79	-0.0035382		2289.78	-0.00304868		2879.78	0.0042242		3469.78	-0.01078283
520	-0.00154415		1109.99	-0.00696587		1699.99	-0.00277802		2289.98	-0.00268669		2879.98	0.00472342		3469.98	-0.01091846
520.2	-0.00194809		1110.19	-0.00776777		1700.19	-0.00283842		2290.18	-0.00290929		2880.18	0.00407719		3470.18	-0.01061888
520.4	-0.002179		1110.39	-0.00673447		1700.39	-0.00305859		2290.38	-0.00279189		2880.38	0.00384674		3470.38	-0.01157818
520.6	-0.00216079		1110.59	-0.00676324		1700.59	-0.00305246		2290.58	-0.00263016		2880.58	0.00389374		3470.58	-0.01102304
520.8	-0.00195764		1110.79	-0.00650578		1700.79	-0.00255951		2290.78	-0.00238842		2880.78	0.00404301		3470.78	-0.01256639
521	-0.00205912		1110.99	-0.00591282		1700.99	-0.00265176		2290.98	-0.00269376		2880.98	0.00398237		3470.98	-0.0136048
521.2	-0.00135936		1111.19	-0.0051859		1701.19	-0.00222244		2291.18	-0.00224641		2881.18	0.00429256		3471.18	-0.01394832
521.4	-0.00174071		1111.39	-0.00368474		1701.39	-0.00156056		2291.38	-0.00188799		2881.38	0.0043527		3471.38	-0.01393392
521.6	-0.0017485		1111.59	-0.00315459		1701.59	-0.00152223		2291.58	-0.00184076		2881.58	0.00429604		3471.58	-0.01414828
521.8	-0.00136562		1111.79	-0.00336492		1701.79	-0.00165424		2291.78	-0.00159653		2881.78	0.00458207		3471.78	-0.01455666
522	-0.00106072		1111.99	-0.00378329		1701.99	-0.00207499		2291.98	-0.0021557		2881.98	0.00442853		3471.98	-0.01380848
522.2	-0.00079691		1112.19	-0.00373441		1702.19	-0.0024696		2292.18	-0.00309994		2882.18	0.00414974		3472.18	-0.01389861
522.4	-0.00127385		1112.39	-0.00365485		1702.39	-0.00268143		2292.38	-0.00296514		2882.38	0.00512437		3472.38	-0.01330593
522.6	-0.00064485		1112.59	-0.00238043		1702.59	-0.00330031		2292.58	-0.00310082		2882.58	0.00488937		3472.58	-0.01401787
522.8	-0.00010168		1112.79	-0.00187941		1702.79	-0.00285929		2292.78	-0.00365322		2882.78	0.00554147		3472.78	-0.01341296
523	0.00062464		1112.99	-0.00191138		1702.99	-0.00297352		2292.98	-0.00441392		2882.98	0.00524178		3472.98	-0.01298306
523.2	0.00005296		1113.19	-0.00188817		1703.19	-0.00304651		2293.18	-0.00492762		2883.18	0.00633362		3473.18	-0.01417974
523.4	0.00055598		1113.39	-0.00135684		1703.39	-0.00300784		2293.38	-0.0039713		2883.38	0.00629864		3473.38	-0.01444814
523.6	0.0007305		1113.59	-0.00116957		1703.59	-0.00271762		2293.58	-0.00385584		2883.58	0.00543446		3473.58	-0.01399183
523.8	0.00094074		1113.79	-0.00198935		1703.79	-0.00361931		2293.78	-0.00306411		2883.78	0.00582411		3473.78	-0.0145948
524	0.00025909		1113.99	-0.00293748		1703.99	-0.00340707		2293.98	-0.00252981		2883.98	0.00680275		3473.98	-0.01472736
524.2	0.0007993		1114.19	-0.00384881		1704.19	-0.00428562		2294.18	-0.00257395		2884.18	0.00648721		3474.18	-0.01428182
524.4	0.00079784		1114.39	-0.00396911		1704.39	-0.00395202		2294.38	-0.00257785		2884.38	0.00690839		3474.38	-0.01427176
524.6	0.00031607		1114.59	-0.00494769		1704.59	-0.00347937		2294.58	-0.00228099		2884.58	0.00687628		3474.58	-0.01488676
524.8	0.00063358		1114.79	-0.0050781		1704.79	-0.00389423		2294.78	-0.00202463		2884.78	0.00785044		3474.78	-0.01560604
525	0.00031714		1114.99	-0.00543533		1704.99	-0.00342699		2294.98	-0.00257288		2884.98	0.00771991		3474.98	-0.01582331
525.2	0.00060308		1115.19	-0.00597054		1705.19	-0.00368246		2295.18	-0.00269999		2885.18	0.0074828		3475.18	-0.01589572
525.4	0.00014459		1115.39	-0.00560839		1705.39	-0.00296962		2295.38	-0.00266509		2885.38	0.00777509		3475.38	-0.01584039
525.6	0.00029059		1115.59	-0.00684504		1705.59	-0.00288621		2295.58	-0.00371015		2885.58	0.00735606		3475.58	-0.01565915
525.8	0.00054317		1115.79	-0.0071838		1705.79	-0.0031787		2295.78	-0.00352115		2885.78	0.00798093		3475.78	-0.01621089
526	0.00062684		1115.99	-0.00674498		1705.99	-0.00378615		2295.98	-0.00328607		2885.98	0.00754174		3475.98	-0.01557091
526.2	0.00026372		1116.19	-0.00579		1706.19	-0.00337206		2296.18	-0.00242724		2886.18	0.00754926		3476.18	-0.01553109
526.4	-0.00012609		1116.39	-0.00490753		1706.39	-0.00269904		2296.38	-0.00173285		2886.38	0.00819499		3476.38	-0.01565895
526.6	0.00022063		1116.59	-0.0033807		1706.59	-0.00271625		2296.58	-0.00156199		2886.58	0.00842368		3476.58	-0.01585151
526.8	-0.00041243		1116.79	-0.00315297		1706.79	-0.00290791		2296.78	-0.00194406		2886.78	0.00914528		3476.78	-0.01479261
527	-0.00096592		1116.99	-0.00255039		1706.99	-0.00349781		2296.98	-0.00179232		2886.98	0.0087465		3476.98	-0.01465645
527.2	-0.00132508		1117.19	-0.00214912		1707.19	-0.00430339		2297.18	-0.00127578		2887.18	0.00805538		3477.18	-0.0145371
527.4	-0.0011673		1117.39	-0.00206242		1707.39	-0.00408949		2297.38	-0.0006796		2887.38	0.00770855		3477.38	-0.01442568
527.6	-0.00152523		1117.59	-0.00261921		1707.59	-0.00437637		2297.58	-0.00031204		2887.58	0.00672912		3477.58	-0.01394321
527.8	-0.00229282		1117.79	-0.00349174		1707.79	-0.00524185		2297.78	-0.00040857		2887.78	0.00682262		3477.78	-0.01364968
528	-0.0032609		1117.99	-0.00371994		1707.99	-0.00531251		2297.98	-0.00055798		2887.98	0.00697652		3477.98	-0.01264611
528.2	-0.00347416		1118.19	-0.00466111		1708.19	-0.00478993		2298.18	-0.00113737		2888.18	0.00613079		3478.18	-0.01200394
528.4	-0.00404829		1118.39	-0.00517107		1708.39	-0.00467077		2298.38	-0.0020187		2888.38	0.00587138		3478.38	-0.01240059
528.6	-0.00395559		1118.59	-0.00509035		1708.59	-0.00490552		2298.58	-0.00238657		2888.58	0.00571573		3478.58	-0.01259513
528.8	-0.00400686		1118.79	-0.00486974		1708.79	-0.00529957		2298.78	-0.00356561		2888.78	0.00564043		3478.78	-0.01233625
529	-0.00460174		1118.99	-0.00508113		1708.99	-0.00531523		2298.98	-0.00421977		2888.98	0.00466528		3478.98	-0.01254663
529.2	-0.00402196		1119.19	-0.00537139		1709.19	-0.00545981		2299.18	-0.00503122		2889.18	0.00419693		3479.18	-0.01282357
529.4	-0.00338519		1119.39	-0.00411578		1709.39	-0.00525923		2299.38	-0.00459013		2889.38	0.00473027		3479.38	-0.01281162
529.6	-0.003026		1119.59	-0.00443529		1709.59	-0.0045309		2299.58	-0.00536093		2889.58	0.00386839		3479.58	-0.01286192
529.8	-0.00253481		1119.79	-0.00330391		1709.79	-0.00481204		2299.78	-0.00520718		2889.78	0.00429636		3479.78	-0.01348569
530	-0.00225331		1119.99	-0.00285407		1709.99	-0.00428124		2299.98	-0.00470776		2889.98	0.00437301		3479.98	-0.01338348
530.2	-0.00165507		1120.19	-0.00254479		1710.19	-0.00304815		2300.18	-0.00365065		2890.18	0.00483257		3480.18	-0.01344094
530.4	-0.00094495		1120.39	-0.00285013		1710.39	-0.00247627		2300.38	-0.00299935		2890.38	0.00529094		3480.38	-0.01347656
530.6	-0.00120806		1120.59	-0.00297219		1710.59	-0.0022966		2300.58	-0.00300081		2890.58	0.00627718		3480.58	-0.01402116
530.8	-0.00150342		1120.79	-0.00334061		1710.79	-0.00296225		2300.78	-0.003325		2890.78	0.00642992		3480.78	-0.0138751
531	-0.00153665		1120.99	-0.0034406		1710.99	-0.00316446		2300.98	-0.00186471		2890.98	0.00627788		3480.98	-0.01445935
531.2	-0.0015152		1121.19	-0.00348145		1711.19	-0.00254196		2301.18	-0.00129244		2891.18	0.00675661		3481.18	-0.01442255
531.4	-0.00240918		1121.39	-0.00441073		1711.39	-0.00185662		2301.38	-0.00098545		2891.38	0.00687602		3481.38	-0.01429163
531.6	-0.00236871		1121.59	-0.0050673		1711.59	-0.00184904		2301.58	-0.00039217		2891.58	0.00620771		3481.58	-0.01396393
531.8	-0.00247691		1121.79	-0.00506787		1711.79	-0.00245167		2301.78	-0.00111089		2891.78	0.00624663		3481.78	-0.01317155
532	-0.00347039		1121.99	-0.00601499		1711.99	-0.00170203		2301.98	-0.00123467		2891.98	0.00577889		3481.98	-0.01310354
532.2	-0.00386841		1122.19	-0.00683981		1712.19	-0.0013302		2302.18	-0.0012892		2892.18	0.00564936		3482.18	-0.01358682
532.4	-0.00391881		1122.39	-0.00703559		1712.39	-0.00236212		2302.38	-0.00173856		2892.38	0.00489306		3482.38	-0.01377694
532.6	-0.00369465		1122.59	-0.00750254		1712.59	-0.0028929		2302.58	-0.00260082		2892.58	0.00583072		3482.58	-0.01314732
532.8	-0.0030237		1122.79	-0.00743439		1712.79	-0.00359218		2302.78	-0.00323912		2892.78	0.00548616		3482.78	-0.01272031
533	-0.00197071		1122.99	-0.00785052		1712.99	-0.00421868		2302.98	-0.00322689		2892.98	0.00555451		3482.98	-0.01317581
533.2	-0.0009887		1123.19	-0.00728944		1713.19	-0.00369467		2303.18	-0.00343255		2893.18	0.0054916		3483.18	-0.01331059
533.4	-0.00096665		1123.39	-0.00765808		1713.39	-0.00420708		2303.38	-0.00308324		2893.38	0.00558097		3483.38	-0.01299925
533.6	-0.00087565		1123.59	-0.00809192		1713.59	-0.00439946		2303.58	-0.00365998		2893.58	0.0056044		3483.58	-0.01339509
533.8	-0.00060905		1123.79	-0.007612		1713.79	-0.00591869		2303.78	-0.00406274		2893.78	0.00579093		3483.78	-0.01382419
534	-0.00022768		1123.99	-0.00767543		1713.99	-0.00659994		2303.98	-0.00336807		2893.98	0.00606712		3483.98	-0.01454553
534.2	0.00022622		1124.19	-0.00804615		1714.19	-0.00712766		2304.18	-0.00254052		2894.18	0.00499632		3484.18	-0.01455222
534.4	-0.00016052		1124.39	-0.00787527		1714.39	-0.00712954		2304.38	-0.00242067		2894.38	0.00509441		3484.38	-0.01450754
534.6	-0.00081478		1124.59	-0.00673255		1714.59	-0.00755404		2304.58	-0.00326476		2894.58	0.00542634		3484.58	-0.01452333
534.8	-0.00089263		1124.79	-0.0066524		1714.79	-0.00811448		2304.78	-0.00399835		2894.78	0.00597965		3484.78	-0.01406247
535	-0.00157974		1124.99	-0.00561848		1714.99	-0.00786169		2304.98	-0.00281715		2894.98	0.00584461		3484.98	-0.01459877
535.2	-0.00171799		1125.19	-0.00518371		1715.19	-0.00703411		2305.18	-0.00317063		2895.18	0.00584307		3485.18	-0.01487526
535.4	-0.00314335		1125.39	-0.00580108		1715.39	-0.00722849		2305.38	-0.00310472		2895.38	0.00492172		3485.38	-0.01478573
535.6	-0.00356534		1125.59	-0.00559535		1715.59	-0.00706276		2305.58	-0.0034269		2895.58	0.00481389		3485.58	-0.0145141
535.8	-0.00390811		1125.79	-0.00555319		1715.79	-0.00669899		2305.78	-0.00349973		2895.78	0.00540334		3485.78	-0.01333802
536	-0.00492481		1125.99	-0.00573035		1715.99	-0.00597364		2305.98	-0.0032648		2895.98	0.00482469		3485.98	-0.01339083
536.2	-0.00498086		1126.19	-0.00600292		1716.19	-0.00544988		2306.18	-0.00278542		2896.18	0.00544922		3486.18	-0.01275892
536.4	-0.00497257		1126.39	-0.00651287		1716.39	-0.00487932		2306.38	-0.00247911		2896.38	0.00544891		3486.38	-0.01214013
536.6	-0.00420407		1126.59	-0.00673165		1716.59	-0.00430926		2306.58	-0.00285785		2896.58	0.00582818		3486.58	-0.01147677
536.8	-0.00269349		1126.79	-0.00657099		1716.79	-0.00361693		2306.78	-0.00318006		2896.78	0.00577073		3486.78	-0.01176848
537	-0.00354948		1126.99	-0.00646011		1716.99	-0.00353857		2306.98	-0.00328855		2896.98	0.0060102		3486.98	-0.01197859
537.2	-0.00376838		1127.19	-0.00653025		1717.19	-0.00290239		2307.18	-0.003115		2897.18	0.00611418		3487.18	-0.01221112
537.4	-0.00424155		1127.39	-0.0073262		1717.39	-0.00362877		2307.38	-0.00282705		2897.38	0.006366		3487.38	-0.01230708
537.6	-0.00434883		1127.59	-0.0069471		1717.59	-0.00455488		2307.58	-0.0027759		2897.58	0.00608408		3487.58	-0.0127816
537.8	-0.00436366		1127.79	-0.006273		1717.79	-0.00546958		2307.78	-0.00350825		2897.78	0.00606613		3487.78	-0.01271064
538	-0.00411033		1127.99	-0.00694031		1717.99	-0.00642965		2307.98	-0.00370613		2897.98	0.00608382		3487.98	-0.0132858
538.2	-0.00334937		1128.19	-0.00710011		1718.19	-0.00746318		2308.18	-0.00362662		2898.18	0.00524092		3488.18	-0.01293101
538.4	-0.00302013		1128.39	-0.00645937		1718.39	-0.00790469		2308.38	-0.00390771		2898.38	0.00567093		3488.38	-0.01323035
538.6	-0.00280273		1128.59	-0.00567382		1718.59	-0.00833038		2308.58	-0.00383052		2898.58	0.00568131		3488.58	-0.01287841
538.8	-0.00301562		1128.79	-0.00604154		1718.79	-0.00944667		2308.78	-0.00388503		2898.78	0.00562285		3488.78	-0.01368643
539	-0.00332342		1128.99	-0.0061195		1718.99	-0.00928782		2308.98	-0.00292662		2898.98	0.0050787		3488.98	-0.01407058
539.2	-0.00358744		1129.19	-0.00708072		1719.19	-0.0085829		2309.18	-0.00324708		2899.18	0.00524336		3489.18	-0.01473225
539.4	-0.00419204		1129.39	-0.00821375		1719.39	-0.00918646		2309.38	-0.00309968		2899.38	0.00593706		3489.38	-0.01480583
539.6	-0.00347022		1129.59	-0.00849009		1719.59	-0.00865516		2309.58	-0.00307499		2899.58	0.00633451		3489.58	-0.01407965
539.8	-0.00294756		1129.79	-0.00837419		1719.79	-0.00784522		2309.78	-0.00304995		2899.78	0.00754104		3489.78	-0.01369033
540	-0.00236576		1129.99	-0.0082602		1719.99	-0.00745201		2309.98	-0.0029438		2899.98	0.00673665		3489.98	-0.01406441
540.2	-0.00142641		1130.19	-0.0085744		1720.19	-0.00599964		2310.18	-0.00288037		2900.18	0.00733814		3490.18	-0.01410512
540.4	-0.00031393		1130.39	-0.00903031		1720.39	-0.00530495		2310.38	-0.00262528		2900.38	0.00703338		3490.38	-0.01404388
540.6	-0.00003648		1130.59	-0.00832576		1720.59	-0.00473505		2310.58	-0.00313888		2900.58	0.00650527		3490.58	-0.01385639
540.8	0.00015509		1130.79	-0.00817505		1720.79	-0.00468025		2310.78	-0.00340971		2900.78	0.00616168		3490.78	-0.0142996
541	-0.00058628		1130.99	-0.0077771		1720.99	-0.00443994		2310.98	-0.00271863		2900.98	0.00550525		3490.98	-0.0136816
541.2	-0.00081703		1131.19	-0.00757131		1721.19	-0.00301453		2311.18	-0.00285397		2901.18	0.00521893		3491.18	-0.01460693
541.4	-0.00154372		1131.39	-0.00711079		1721.39	-0.00338131		2311.38	-0.00324849		2901.38	0.00401724		3491.38	-0.0142672
541.6	-0.00193718		1131.59	-0.00683922		1721.59	-0.0037055		2311.58	-0.00426315		2901.58	0.00351297		3491.58	-0.01409416
541.8	-0.00209263		1131.79	-0.00645082		1721.79	-0.00388451		2311.78	-0.00540026		2901.78	0.00377212		3491.78	-0.01334307
542	-0.00235007		1131.99	-0.00686582		1721.99	-0.00415283		2311.98	-0.00516896		2901.98	0.00300652		3491.98	-0.01337583
542.2	-0.00274753		1132.19	-0.00627719		1722.19	-0.00446173		2312.18	-0.00543849		2902.18	0.00250678		3492.18	-0.01347572
542.4	-0.00364162		1132.39	-0.00574761		1722.39	-0.00513222		2312.38	-0.00480073		2902.38	0.00190473		3492.38	-0.01325172
542.6	-0.0033344		1132.59	-0.00591641		1722.59	-0.00481967		2312.58	-0.00408991		2902.58	0.00189938		3492.58	-0.01266839
542.8	-0.00348667		1132.79	-0.00663974		1722.79	-0.00549179		2312.78	-0.00449097		2902.78	0.00193585		3492.78	-0.01192538
543	-0.00346799		1132.99	-0.00762227		1722.99	-0.00477843		2312.98	-0.0032014		2902.98	0.00263982		3492.98	-0.01221834
543.2	-0.00332545		1133.19	-0.00813077		1723.19	-0.00469489		2313.18	-0.00312584		2903.18	0.0022921		3493.18	-0.01244853
543.4	-0.00321669		1133.39	-0.00793583		1723.39	-0.00550237		2313.38	-0.00275867		2903.38	0.00279855		3493.38	-0.01180866
543.6	-0.00301214		1133.59	-0.00708519		1723.59	-0.00542978		2313.58	-0.00234762		2903.58	0.00274371		3493.58	-0.01125896
543.8	-0.0026863		1133.79	-0.00650033		1723.79	-0.0055012		2313.78	-0.00291474		2903.78	0.00337347		3493.78	-0.01102223
544	-0.001747		1133.99	-0.00698284		1723.99	-0.00507342		2313.98	-0.00265692		2903.98	0.00319456		3493.98	-0.01124842
544.2	-0.00124217		1134.19	-0.00711469		1724.19	-0.00471034		2314.18	-0.00170405		2904.18	0.00393274		3494.18	-0.01059567
544.4	-0.00025181		1134.39	-0.00780468		1724.39	-0.00460214		2314.38	-0.00140241		2904.38	0.00437135		3494.38	-0.00987977
544.6	0.00014894		1134.59	-0.00670525		1724.59	-0.00507824		2314.58	-0.00114676		2904.58	0.00445538		3494.58	-0.00939664
544.8	0.00047544		1134.79	-0.00650065		1724.79	-0.00562496		2314.78	-0.00128216		2904.78	0.00416809		3494.78	-0.00983538
545	-0.00016073		1134.99	-0.00653123		1724.99	-0.00529394		2314.98	-0.00090144		2904.98	0.00409183		3494.98	-0.01013372
545.2	-0.0007085		1135.19	-0.00644418		1725.19	-0.00512197		2315.18	-0.00097174		2905.18	0.00419365		3495.18	-0.01067748
545.4	-0.00054903		1135.39	-0.0066239		1725.39	-0.0059322		2315.38	-0.00093398		2905.38	0.00394973		3495.38	-0.01098823
545.6	-0.00111345		1135.59	-0.00701751		1725.59	-0.00590969		2315.58	-0.00126378		2905.58	0.00431819		3495.58	-0.0114728
545.8	-0.00165571		1135.79	-0.00612768		1725.79	-0.00637917		2315.78	-0.00071635		2905.78	0.00443775		3495.78	-0.01127589
546	-0.0017671		1135.99	-0.00603244		1725.99	-0.00640267		2315.98	-0.00025081		2905.98	0.00514109		3495.98	-0.01197609
546.2	-0.00229998		1136.19	-0.00499882		1726.19	-0.00701095		2316.18	-0.00143595		2906.18	0.00557162		3496.18	-0.0125001
546.4	-0.00240106		1136.39	-0.00485705		1726.39	-0.00724856		2316.38	-0.0009178		2906.38	0.0059149		3496.38	-0.01283776
546.6	-0.00157542		1136.59	-0.00566024		1726.59	-0.00679926		2316.58	-0.00231849		2906.58	0.00694702		3496.58	-0.01354039
546.8	-0.00177596		1136.79	-0.00636506		1726.79	-0.00750128		2316.78	-0.00290498		2906.78	0.00690299		3496.78	-0.01326029
547	-0.00187734		1136.99	-0.0069135		1726.99	-0.00789095		2316.98	-0.00322859		2906.98	0.00662904		3496.98	-0.01322722
547.2	-0.0021591		1137.19	-0.00649121		1727.19	-0.00758513		2317.18	-0.0039458		2907.18	0.00578958		3497.18	-0.01335761
547.4	-0.00355501		1137.39	-0.00645696		1727.39	-0.00699895		2317.38	-0.00417771		2907.38	0.00521242		3497.38	-0.01322664
547.6	-0.00385497		1137.59	-0.00630996		1727.59	-0.0067128		2317.58	-0.00494074		2907.58	0.00576954		3497.58	-0.01293257
547.8	-0.00358542		1137.79	-0.00689478		1727.79	-0.0059758		2317.78	-0.00580782		2907.78	0.00533943		3497.78	-0.0127695
548	-0.00330821		1137.99	-0.00876922		1727.99	-0.00433441		2317.98	-0.0058058		2907.98	0.00560798		3497.98	-0.01329027
548.2	-0.00248184		1138.19	-0.00887815		1728.19	-0.0041834		2318.18	-0.00573748		2908.18	0.00615574		3498.18	-0.01313473
548.4	-0.00186827		1138.39	-0.00932535		1728.39	-0.00409091		2318.38	-0.00636227		2908.38	0.00611934		3498.38	-0.01299
548.6	-0.00202918		1138.59	-0.0088193		1728.59	-0.0047264		2318.58	-0.00655566		2908.58	0.00549648		3498.58	-0.01298471
548.8	-0.00306998		1138.79	-0.00965858		1728.79	-0.00486391		2318.78	-0.00670627		2908.78	0.00504208		3498.78	-0.01269604
549	-0.0031184		1138.99	-0.01017373		1728.99	-0.00455773		2318.98	-0.00609411		2908.98	0.00437664		3498.98	-0.0127799
549.2	-0.00252208		1139.19	-0.01065711		1729.19	-0.00464226		2319.18	-0.00641708		2909.18	0.00369442		3499.18	-0.01247605
549.4	-0.00282914		1139.39	-0.0099232		1729.39	-0.00458476		2319.38	-0.00608562		2909.38	0.00331159		3499.38	-0.01292196
549.6	-0.00364575		1139.59	-0.00926525		1729.59	-0.0050612		2319.58	-0.00608342		2909.58	0.00295015		3499.58	-0.0134377
549.8	-0.00339029		1139.79	-0.00759989		1729.79	-0.00573326		2319.78	-0.00563974		2909.78	0.00270601		3499.78	-0.01303572
550	-0.00328178		1139.99	-0.00702749		1729.99	-0.0051609		2319.98	-0.00542718		2909.98	0.00294842		3499.98	-0.01279467
550.2	-0.00277977		1140.19	-0.0060246		1730.19	-0.00584312		2320.18	-0.0059156		2910.18	0.00205107		3500.18	-0.01264385
550.4	-0.00218049		1140.39	-0.00634317		1730.39	-0.0059353		2320.38	-0.00546545		2910.38	0.00173448		3500.38	-0.01296077
550.6	-0.00174443		1140.59	-0.00689125		1730.59	-0.00636913		2320.58	-0.0064662		2910.58	0.00184813		3500.58	-0.0132212
550.8	-0.00190653		1140.79	-0.00718968		1730.79	-0.0065824		2320.78	-0.00579953		2910.78	0.00166908		3500.78	-0.01320822
551	-0.00202368		1140.99	-0.00677651		1730.99	-0.00675573		2320.98	-0.00544442		2910.98	0.00096081		3500.98	-0.01344628
551.2	-0.00234321		1141.19	-0.00685766		1731.19	-0.00611734		2321.18	-0.00437561		2911.18	0.00098827		3501.18	-0.01482308
551.4	-0.00341997		1141.39	-0.00706504		1731.39	-0.00585963		2321.38	-0.00387729		2911.38	0.00064066		3501.38	-0.01420305
551.6	-0.00331983		1141.59	-0.00645884		1731.59	-0.00579983		2321.58	-0.0039528		2911.58	0.00277826		3501.58	-0.01413436
551.8	-0.00312858		1141.79	-0.00717512		1731.79	-0.00505225		2321.78	-0.0032626		2911.78	0.00290208		3501.78	-0.01551146
552	-0.00311386		1141.99	-0.00763064		1731.99	-0.00479007		2321.98	-0.00290861		2911.98	0.00366336		3501.98	-0.01572294
552.2	-0.00294843		1142.19	-0.00773852		1732.19	-0.00530364		2322.18	-0.00275642		2912.18	0.00464159		3502.18	-0.01548776
552.4	-0.0036272		1142.39	-0.00729984		1732.39	-0.00541449		2322.38	-0.00217737		2912.38	0.00457548		3502.38	-0.0152137
552.6	-0.00437809		1142.59	-0.00711559		1732.59	-0.00542449		2322.58	-0.00222882		2912.58	0.00574939		3502.58	-0.01430363
552.8	-0.00484152		1142.79	-0.00764326		1732.79	-0.005241		2322.78	-0.00293939		2912.78	0.00582398		3502.78	-0.0138486
553	-0.00506913		1142.99	-0.00801631		1732.99	-0.00576648		2322.98	-0.00298286		2912.98	0.0061108		3502.98	-0.01356499
553.2	-0.00536558		1143.19	-0.00828408		1733.19	-0.00608174		2323.18	-0.00286672		2913.18	0.00620433		3503.18	-0.01255074
553.4	-0.00590325		1143.39	-0.00775171		1733.39	-0.00587476		2323.38	-0.00246979		2913.38	0.00562225		3503.38	-0.01181608
553.6	-0.00594946		1143.59	-0.00713639		1733.59	-0.00585545		2323.58	-0.00322046		2913.58	0.00464486		3503.58	-0.01149998
553.8	-0.00578193		1143.79	-0.00634372		1733.79	-0.00606039		2323.78	-0.0034426		2913.78	0.00374779		3503.78	-0.01055232
554	-0.005313		1143.99	-0.00644279		1733.99	-0.00601931		2323.98	-0.00327983		2913.98	0.00358569		3503.98	-0.01035917
554.2	-0.00435711		1144.19	-0.00662078		1734.19	-0.00641008		2324.18	-0.00310148		2914.18	0.00280242		3504.18	-0.00994715
554.4	-0.00413874		1144.39	-0.00717025		1734.39	-0.00615369		2324.38	-0.00383155		2914.38	0.00287501		3504.38	-0.01043089
554.6	-0.00436467		1144.59	-0.00730795		1734.59	-0.00645866		2324.58	-0.00439781		2914.58	0.00318273		3504.58	-0.01098266
554.8	-0.0043517		1144.79	-0.00790169		1734.79	-0.00591282		2324.78	-0.00375507		2914.78	0.00349988		3504.78	-0.01118081
555	-0.00430612		1144.99	-0.00813792		1734.99	-0.00621448		2324.98	-0.00320689		2914.98	0.00326955		3504.98	-0.01153057
555.2	-0.0045136		1145.19	-0.00813363		1735.19	-0.0063519		2325.18	-0.00316878		2915.18	0.00371182		3505.18	-0.01201684
555.4	-0.00529596		1145.39	-0.00823207		1735.39	-0.00553914		2325.38	-0.00324932		2915.38	0.0047614		3505.38	-0.01234174
555.6	-0.00467223		1145.59	-0.00801641		1735.59	-0.00492242		2325.58	-0.00324284		2915.58	0.00628757		3505.58	-0.01341868
555.8	-0.00439069		1145.79	-0.00877836		1735.79	-0.00447133		2325.78	-0.00355612		2915.78	0.00575749		3505.78	-0.01475592
556	-0.00479632		1145.99	-0.00824451		1735.99	-0.00431133		2325.98	-0.00435125		2915.98	0.00655581		3505.98	-0.01489091
556.2	-0.00510506		1146.19	-0.00853038		1736.19	-0.00464389		2326.18	-0.00413101		2916.18	0.00709854		3506.18	-0.0152192
556.4	-0.00578099		1146.39	-0.00858592		1736.39	-0.00406018		2326.38	-0.00431314		2916.38	0.0071932		3506.38	-0.01556439
556.6	-0.00534899		1146.59	-0.00843091		1736.59	-0.00386648		2326.58	-0.0050471		2916.58	0.008206		3506.58	-0.01569327
556.8	-0.00511195		1146.79	-0.00926647		1736.79	-0.00383259		2326.78	-0.00576087		2916.78	0.00763742		3506.78	-0.01586242
557	-0.00419417		1146.99	-0.00957737		1736.99	-0.00400252		2326.98	-0.00595992		2916.98	0.00778687		3506.98	-0.01474928
557.2	-0.00344852		1147.19	-0.0090221		1737.19	-0.00326439		2327.18	-0.00614551		2917.18	0.00721598		3507.18	-0.01444491
557.4	-0.00293837		1147.39	-0.00846993		1737.39	-0.00281518		2327.38	-0.00736839		2917.38	0.00669261		3507.38	-0.01418192
557.6	-0.00269145		1147.59	-0.00742369		1737.59	-0.00282306		2327.58	-0.00755211		2917.58	0.00613736		3507.58	-0.01491485
557.8	-0.00235917		1147.79	-0.00720298		1737.79	-0.00344536		2327.78	-0.00821547		2917.78	0.00492648		3507.78	-0.01543029
558	-0.00187883		1147.99	-0.00833355		1737.99	-0.00371841		2327.98	-0.00814069		2917.98	0.00379424		3507.98	-0.01542856
558.2	-0.00131608		1148.19	-0.00856524		1738.19	-0.00369442		2328.18	-0.00900625		2918.18	0.00279471		3508.18	-0.01491024
558.4	-0.00194233		1148.39	-0.00901134		1738.39	-0.00453158		2328.38	-0.00992732		2918.38	0.00215126		3508.38	-0.01502524
558.6	-0.00267468		1148.59	-0.00871824		1738.59	-0.00505602		2328.58	-0.01009719		2918.58	0.00177119		3508.58	-0.01469845
558.8	-0.0038818		1148.79	-0.00983453		1738.79	-0.00558662		2328.78	-0.00946249		2918.78	0.00108994		3508.78	-0.01441933
559	-0.00417801		1148.99	-0.00997158		1738.99	-0.00690301		2328.98	-0.00902249		2918.98	0.00075352		3508.98	-0.01527185
559.2	-0.0048232		1149.19	-0.01049954		1739.19	-0.00747853		2329.18	-0.0084462		2919.18	0.0004484		3509.18	-0.01594844
559.4	-0.00536653		1149.39	-0.0111398		1739.39	-0.00728709		2329.38	-0.00840605		2919.38	0.00100227		3509.38	-0.01632545
559.6	-0.00518972		1149.59	-0.01101731		1739.59	-0.00736645		2329.58	-0.00855547		2919.58	0.0014808		3509.58	-0.01655878
559.8	-0.00603723		1149.79	-0.01117655		1739.79	-0.00808024		2329.78	-0.00853882		2919.78	0.00170196		3509.78	-0.01611058
560	-0.0061031		1149.99	-0.01026956		1739.99	-0.00883187		2329.98	-0.00797926		2919.98	0.00247272		3509.98	-0.01653049
560.2	-0.00640341		1150.19	-0.01030342		1740.19	-0.00929067		2330.18	-0.00779972		2920.18	0.00243734		3510.18	-0.01592821
560.4	-0.00505661		1150.39	-0.01050192		1740.39	-0.00872339		2330.38	-0.00718014		2920.38	0.00298291		3510.38	-0.01587817
560.6	-0.00381659		1150.59	-0.00887195		1740.59	-0.008962		2330.58	-0.0068468		2920.58	0.00362154		3510.58	-0.01545162
560.8	-0.00273256		1150.79	-0.00934431		1740.79	-0.00869986		2330.78	-0.00679954		2920.78	0.00391576		3510.78	-0.01494434
561	-0.00155471		1150.99	-0.00894292		1740.99	-0.00791688		2330.98	-0.00640879		2920.98	0.00424674		3510.98	-0.01471198
561.2	-0.00133791		1151.19	-0.00834541		1741.19	-0.00789775		2331.18	-0.0057681		2921.18	0.00424033		3511.18	-0.01511753
561.4	-0.00121649		1151.39	-0.00733356		1741.39	-0.0082163		2331.38	-0.00484924		2921.38	0.0045739		3511.38	-0.01547901
561.6	-0.00172154		1151.59	-0.00659762		1741.59	-0.0079432		2331.58	-0.00368881		2921.58	0.00395042		3511.58	-0.01611476
561.8	-0.0013298		1151.79	-0.00680603		1741.79	-0.00724609		2331.78	-0.00527857		2921.78	0.00292299		3511.78	-0.01688748
562	-0.00153546		1151.99	-0.00710023		1741.99	-0.00621425		2331.98	-0.00611827		2921.98	0.00245269		3511.98	-0.0162544
562.2	-0.00088496		1152.19	-0.0060826		1742.19	-0.00641402		2332.18	-0.00782999		2922.18	0.00261899		3512.18	-0.01582037
562.4	-0.00150241		1152.39	-0.0064559		1742.39	-0.00748266		2332.38	-0.00823331		2922.38	0.00177182		3512.38	-0.01621284
562.6	-0.00160817		1152.59	-0.00658723		1742.59	-0.00795578		2332.58	-0.00831843		2922.58	0.00127327		3512.58	-0.01692863
562.8	-0.00230848		1152.79	-0.00738762		1742.79	-0.00848008		2332.78	-0.00757006		2922.78	0.00066274		3512.78	-0.01756162
563	-0.00141679		1152.99	-0.00741577		1742.99	-0.00858164		2332.98	-0.00758704		2922.98	0.00078195		3512.98	-0.01889933
563.2	-0.00181755		1153.19	-0.00759332		1743.19	-0.00793585		2333.18	-0.00809655		2923.18	0.0005558		3513.18	-0.01860921
563.4	-0.00202877		1153.39	-0.00713851		1743.39	-0.00713344		2333.38	-0.00866936		2923.38	0.0010042		3513.38	-0.01829352
563.6	-0.00193302		1153.59	-0.00723346		1743.59	-0.0067006		2333.58	-0.00913262		2923.58	0.00142158		3513.58	-0.01850824
563.8	-0.00193033		1153.79	-0.00650611		1743.79	-0.00780839		2333.78	-0.00897944		2923.78	0.00127063		3513.78	-0.01808561
564	-0.00164768		1153.99	-0.00696943		1743.99	-0.00743237		2333.98	-0.00904287		2923.98	0.00208269		3513.98	-0.01845207
564.2	-0.00200183		1154.19	-0.00754876		1744.19	-0.00668471		2334.18	-0.0092032		2924.18	0.00225237		3514.18	-0.01726984
564.4	-0.00045255		1154.39	-0.0079848		1744.39	-0.00556874		2334.38	-0.00833942		2924.38	0.00315045		3514.38	-0.01692335
564.6	-0.00042284		1154.59	-0.00854941		1744.59	-0.00505778		2334.58	-0.0081037		2924.58	0.00391746		3514.58	-0.01640875
564.8	-0.00023304		1154.79	-0.00920271		1744.79	-0.0044717		2334.78	-0.00795238		2924.78	0.00433851		3514.78	-0.01639906
565	-0.0009589		1154.99	-0.00954146		1744.99	-0.00455842		2334.98	-0.00651689		2924.98	0.00447838		3514.98	-0.01614832
565.2	-0.00163794		1155.19	-0.00983844		1745.19	-0.00555181		2335.18	-0.00558172		2925.18	0.00502422		3515.18	-0.01640223
565.4	-0.00255727		1155.39	-0.00967366		1745.39	-0.00531834		2335.38	-0.00509852		2925.38	0.00637628		3515.38	-0.01588556
565.6	-0.00367074		1155.59	-0.00981029		1745.59	-0.00483069		2335.58	-0.00547516		2925.58	0.00716121		3515.58	-0.01617249
565.8	-0.00272034		1155.79	-0.00980717		1745.79	-0.00552215		2335.78	-0.00709551		2925.78	0.00688862		3515.78	-0.01519063
566	-0.00318485		1155.99	-0.00980881		1745.99	-0.00622139		2335.98	-0.00729469		2925.98	0.00712015		3515.98	-0.01432941
566.2	-0.00355747		1156.19	-0.00979805		1746.19	-0.00790301		2336.18	-0.00718763		2926.18	0.00730947		3516.18	-0.01394804
566.4	-0.00430579		1156.39	-0.01123372		1746.39	-0.00825502		2336.38	-0.00704947		2926.38	0.00700692		3516.38	-0.0138481
566.6	-0.00474536		1156.59	-0.01059431		1746.59	-0.00836439		2336.58	-0.00615917		2926.58	0.00671983		3516.58	-0.01467627
566.8	-0.00508715		1156.79	-0.01111173		1746.79	-0.00743705		2336.78	-0.00603532		2926.78	0.00632658		3516.78	-0.01412291
567	-0.00475005		1156.99	-0.01074634		1746.99	-0.00724419		2336.98	-0.00644113		2926.98	0.00604553		3516.98	-0.01426402
567.2	-0.00619752		1157.19	-0.01101027		1747.19	-0.0070591		2337.18	-0.00735327		2927.18	0.00555398		3517.18	-0.01406794
567.4	-0.00620777		1157.39	-0.01053602		1747.39	-0.00681411		2337.38	-0.0069275		2927.38	0.00533734		3517.38	-0.01429197
567.6	-0.00616803		1157.59	-0.01090555		1747.59	-0.00677491		2337.58	-0.00748547		2927.58	0.00511634		3517.58	-0.01466263
567.8	-0.00624329		1157.79	-0.01126778		1747.79	-0.00666593		2337.78	-0.00726909		2927.78	0.0053044		3517.78	-0.015115
568	-0.00591765		1157.99	-0.01179105		1747.99	-0.00556394		2337.98	-0.00740927		2927.98	0.00510978		3517.98	-0.01499573
568.2	-0.00535232		1158.19	-0.01189019		1748.19	-0.00510959		2338.18	-0.00746609		2928.18	0.00434323		3518.18	-0.01458456
568.4	-0.00410936		1158.39	-0.01159033		1748.39	-0.00391995		2338.38	-0.00725982		2928.38	0.00453681		3518.38	-0.01484823
568.6	-0.003288		1158.59	-0.01144191		1748.59	-0.00444053		2338.58	-0.00717613		2928.58	0.00461887		3518.58	-0.01511949
568.8	-0.00282985		1158.79	-0.01072254		1748.79	-0.00445566		2338.78	-0.00696987		2928.78	0.00466457		3518.78	-0.01541461
569	-0.00308005		1158.99	-0.01087911		1748.99	-0.00537868		2338.98	-0.00589537		2928.98	0.00502015		3518.98	-0.01606807
569.2	-0.00255057		1159.19	-0.01110039		1749.19	-0.00596811		2339.18	-0.00623275		2929.18	0.00557421		3519.18	-0.01627627
569.4	-0.00245507		1159.39	-0.01028918		1749.39	-0.00578839		2339.38	-0.00631693		2929.38	0.00604471		3519.38	-0.01592173
569.6	-0.00285036		1159.59	-0.00948538		1749.59	-0.00641267		2339.58	-0.0060171		2929.58	0.00506447		3519.58	-0.0164484
569.8	-0.00255631		1159.79	-0.00941923		1749.79	-0.00719459		2339.78	-0.00524866		2929.78	0.00420111		3519.78	-0.01612227
570	-0.00310601		1159.99	-0.00927908		1749.99	-0.00763905		2339.98	-0.00492998		2929.98	0.00386539		3519.98	-0.01713345
570.2	-0.00360735		1160.19	-0.00918323		1750.19	-0.00702479		2340.18	-0.00455468		2930.18	0.003978		3520.18	-0.01704211
570.4	-0.00337317		1160.39	-0.00895438		1750.39	-0.00671078		2340.38	-0.00430865		2930.38	0.00390289		3520.38	-0.01676545
570.6	-0.00346835		1160.59	-0.00860358		1750.59	-0.00628732		2340.58	-0.0038735		2930.58	0.00337118		3520.58	-0.01742003
570.8	-0.00380345		1160.79	-0.00929089		1750.79	-0.00670816		2340.78	-0.00434951		2930.78	0.00375887		3520.78	-0.01691102
571	-0.00421807		1160.99	-0.00896311		1750.99	-0.00694401		2340.98	-0.00482525		2930.98	0.00282625		3520.98	-0.01669942
571.2	-0.00557756		1161.19	-0.00866832		1751.19	-0.00736436		2341.18	-0.0053348		2931.18	0.00286474		3521.18	-0.01683513
571.4	-0.00501801		1161.39	-0.0087175		1751.39	-0.00728557		2341.38	-0.00464979		2931.38	0.00351827		3521.38	-0.01665431
571.6	-0.00427307		1161.59	-0.00826154		1751.59	-0.00775472		2341.58	-0.0042929		2931.58	0.00347382		3521.58	-0.01710465
571.8	-0.00426921		1161.79	-0.00896091		1751.79	-0.00773067		2341.78	-0.00486092		2931.78	0.00255583		3521.78	-0.01738978
572	-0.0045027		1161.99	-0.00845075		1751.99	-0.00834638		2341.98	-0.00523322		2931.98	0.00164384		3521.98	-0.01616734
572.2	-0.0052133		1162.19	-0.0083699		1752.19	-0.00915594		2342.18	-0.00616631		2932.18	0.00190301		3522.18	-0.01619019
572.4	-0.00525804		1162.39	-0.00776457		1752.39	-0.00939533		2342.38	-0.00679641		2932.38	0.00203255		3522.38	-0.01636504
572.6	-0.00443807		1162.59	-0.00762452		1752.59	-0.00900032		2342.58	-0.00725484		2932.58	0.00234682		3522.58	-0.01699444
572.8	-0.00371146		1162.79	-0.00738297		1752.79	-0.00878484		2342.78	-0.00693722		2932.78	0.00200564		3522.78	-0.01694852
573	-0.00306448		1162.99	-0.00739867		1752.99	-0.0086435		2342.98	-0.00719931		2932.98	0.00169296		3522.98	-0.01770589
573.2	-0.00240633		1163.19	-0.00795072		1753.19	-0.00771527		2343.18	-0.00768514		2933.18	0.00136372		3523.18	-0.01797993
573.4	-0.00272834		1163.39	-0.0072175		1753.39	-0.00658154		2343.38	-0.00754809		2933.38	0.00076236		3523.38	-0.01860978
573.6	-0.00370357		1163.59	-0.00688841		1753.59	-0.00558675		2343.58	-0.00705135		2933.58	-0.00003185		3523.58	-0.01865597
573.8	-0.003666		1163.79	-0.00723058		1753.79	-0.0048716		2343.78	-0.00666983		2933.78	0.00043349		3523.78	-0.01906021
574	-0.00325102		1163.99	-0.006593		1753.99	-0.00403247		2343.98	-0.00779681		2933.98	0.00035794		3523.98	-0.01880433
574.2	-0.00396025		1164.19	-0.00710957		1754.19	-0.00360172		2344.18	-0.00758705		2934.18	0.00074486		3524.18	-0.01912654
574.4	-0.00410678		1164.39	-0.00697229		1754.39	-0.00357764		2344.38	-0.00707548		2934.38	0.0008779		3524.38	-0.01830117
574.6	-0.00404869		1164.59	-0.00779732		1754.59	-0.00394128		2344.58	-0.00626652		2934.58	0.00061705		3524.58	-0.01816373
574.8	-0.0041994		1164.79	-0.00791411		1754.79	-0.00469398		2344.78	-0.00693554		2934.78	0.00181318		3524.78	-0.01689829
575	-0.0045449		1164.99	-0.00747082		1754.99	-0.00395978		2344.98	-0.00629368		2934.98	0.00157812		3524.98	-0.01584926
575.2	-0.00449684		1165.19	-0.00737213		1755.19	-0.00524661		2345.18	-0.0060389		2935.18	0.00237166		3525.18	-0.01541232
575.4	-0.00335068		1165.39	-0.00813141		1755.39	-0.00601705		2345.38	-0.005637		2935.38	0.00309292		3525.38	-0.01531386
575.6	-0.00316143		1165.59	-0.0077146		1755.59	-0.00677174		2345.58	-0.00559399		2935.58	0.0018864		3525.58	-0.01466298
575.8	-0.0036478		1165.79	-0.00905289		1755.79	-0.00756442		2345.78	-0.00679496		2935.78	0.00189148		3525.78	-0.01407741
576	-0.00431412		1165.99	-0.00841661		1755.99	-0.00909584		2345.98	-0.00740108		2935.98	0.00222979		3525.98	-0.01386572
576.2	-0.00468389		1166.19	-0.00893144		1756.19	-0.01054998		2346.18	-0.00831431		2936.18	0.00342438		3526.18	-0.01388121
576.4	-0.0043638		1166.39	-0.00950074		1756.39	-0.01122215		2346.38	-0.00854193		2936.38	0.00331247		3526.38	-0.01446138
576.6	-0.00324006		1166.59	-0.00977668		1756.59	-0.01103466		2346.58	-0.00795516		2936.58	0.00380708		3526.58	-0.01441417
576.8	-0.00259597		1166.79	-0.0101598		1756.79	-0.01189424		2346.78	-0.00759109		2936.78	0.00279235		3526.78	-0.01503239
577	-0.00261539		1166.99	-0.00992066		1756.99	-0.01189641		2346.98	-0.00828004		2936.98	0.00279312		3526.98	-0.01582138
577.2	-0.00367143		1167.19	-0.00997412		1757.19	-0.01216931		2347.18	-0.00871539		2937.18	0.00230518		3527.18	-0.01599214
577.4	-0.00463093		1167.39	-0.00923917		1757.39	-0.0122143		2347.38	-0.00952235		2937.38	0.00273062		3527.38	-0.01614655
577.6	-0.00497603		1167.59	-0.00867402		1757.59	-0.01182678		2347.58	-0.00901604		2937.58	0.00311058		3527.58	-0.01636572
577.8	-0.00454743		1167.79	-0.00858941		1757.79	-0.01178863		2347.78	-0.00974755		2937.78	0.00325976		3527.78	-0.01701059
578	-0.00433531		1167.99	-0.00840364		1757.99	-0.01181775		2347.98	-0.01012621		2937.98	0.00285214		3527.98	-0.01732754
578.2	-0.00412982		1168.19	-0.00852125		1758.19	-0.01209728		2348.18	-0.0086889		2938.18	0.00227466		3528.18	-0.01840995
578.4	-0.004852		1168.39	-0.00790483		1758.39	-0.01119448		2348.38	-0.00721966		2938.38	0.00227321		3528.38	-0.01767383
578.6	-0.00433744		1168.59	-0.0076667		1758.59	-0.01137605		2348.58	-0.00712072		2938.58	0.00227276		3528.58	-0.01779266
578.8	-0.00493919		1168.79	-0.00757473		1758.79	-0.01022046		2348.78	-0.00773614		2938.78	0.00355909		3528.78	-0.01674142
579	-0.00548755		1168.99	-0.00700181		1758.99	-0.00998184		2348.98	-0.00699888		2938.98	0.00285005		3528.98	-0.01635143
579.2	-0.00603309		1169.19	-0.00689734		1759.19	-0.00960924		2349.18	-0.00739584		2939.18	0.00220848		3529.18	-0.0156539
579.4	-0.00562839		1169.39	-0.00648938		1759.39	-0.00852226		2349.38	-0.00756212		2939.38	0.00275337		3529.38	-0.01612794
579.6	-0.00539409		1169.59	-0.00678267		1759.59	-0.00780082		2349.58	-0.00759041		2939.58	0.00171945		3529.58	-0.01534303
579.8	-0.00495662		1169.79	-0.00701003		1759.79	-0.00794054		2349.78	-0.0074904		2939.78	0.00316546		3529.78	-0.01535296
580	-0.00653165		1169.99	-0.00725512		1759.99	-0.00817177		2349.98	-0.0080499		2939.98	0.00273212		3529.98	-0.01577084
580.2	-0.00642052		1170.19	-0.00844238		1760.19	-0.00819989		2350.18	-0.00727461		2940.18	0.00381562		3530.18	-0.01577413
580.4	-0.00637101		1170.39	-0.00822491		1760.39	-0.00838056		2350.38	-0.00712784		2940.38	0.00391739		3530.38	-0.0165993
580.6	-0.00608502		1170.59	-0.00820413		1760.59	-0.00794539		2350.58	-0.00725773		2940.58	0.00363565		3530.58	-0.01678953
580.8	-0.0061445		1170.79	-0.00835614		1760.79	-0.00840435		2350.78	-0.00763551		2940.78	0.00260626		3530.78	-0.01784067
581	-0.00653689		1170.99	-0.00755452		1760.99	-0.00902015		2350.98	-0.00860921		2940.98	0.00304507		3530.98	-0.01790775
581.2	-0.006662		1171.19	-0.00759703		1761.19	-0.00980408		2351.18	-0.00885163		2941.18	0.00366757		3531.18	-0.01801575
581.4	-0.0060383		1171.39	-0.00739551		1761.39	-0.01024036		2351.38	-0.00904263		2941.38	0.00388596		3531.38	-0.01811422
581.6	-0.0049951		1171.59	-0.00731841		1761.59	-0.01055993		2351.58	-0.00811913		2941.58	0.00401247		3531.58	-0.01749955
581.8	-0.00437441		1171.79	-0.00743261		1761.79	-0.01167519		2351.78	-0.00890345		2941.78	0.00398727		3531.78	-0.01807947
582	-0.00375516		1171.99	-0.00770331		1761.99	-0.01188122		2351.98	-0.00778106		2941.98	0.00356804		3531.98	-0.01827951
582.2	-0.00383312		1172.19	-0.00791002		1762.19	-0.01156341		2352.18	-0.00668492		2942.18	0.00269408		3532.18	-0.01762589
582.4	-0.00495848		1172.39	-0.00859664		1762.39	-0.01199103		2352.38	-0.00667737		2942.38	0.00281301		3532.38	-0.01669672
582.6	-0.00407536		1172.59	-0.00910665		1762.59	-0.01304443		2352.58	-0.00664202		2942.58	0.00210338		3532.58	-0.01611723
582.8	-0.00562082		1172.79	-0.00938362		1762.79	-0.01298719		2352.78	-0.00570744		2942.78	0.00201801		3532.78	-0.0148625
583	-0.00545192		1172.99	-0.00934827		1762.99	-0.01313061		2352.98	-0.00585037		2942.98	0.00061851		3532.98	-0.01438767
583.2	-0.00617492		1173.19	-0.00921647		1763.19	-0.01206085		2353.18	-0.00569769		2943.18	0.00050495		3533.18	-0.01333058
583.4	-0.00535103		1173.39	-0.00969104		1763.39	-0.01147491		2353.38	-0.00585836		2943.38	0.00075745		3533.38	-0.01369702
583.6	-0.00604347		1173.59	-0.01059599		1763.59	-0.01164469		2353.58	-0.00611431		2943.58	0.00004599		3533.58	-0.01359643
583.8	-0.00696308		1173.79	-0.01031662		1763.79	-0.01148946		2353.78	-0.0057523		2943.78	0.00140212		3533.78	-0.01474989
584	-0.00795866		1173.99	-0.01043708		1763.99	-0.01065761		2353.98	-0.00647199		2943.98	0.00092695		3533.98	-0.01536199
584.2	-0.00703942		1174.19	-0.01048585		1764.19	-0.0103145		2354.18	-0.00588382		2944.18	0.0017605		3534.18	-0.01624998
584.4	-0.00766457		1174.39	-0.0097711		1764.39	-0.00998522		2354.38	-0.00679944		2944.38	0.00199028		3534.38	-0.01666782
584.6	-0.00856399		1174.59	-0.00966698		1764.59	-0.00860969		2354.58	-0.00659239		2944.58	0.00144302		3534.58	-0.01756406
584.8	-0.00828084		1174.79	-0.00881288		1764.79	-0.00870872		2354.78	-0.00725836		2944.78	0.00231445		3534.78	-0.01808146
585	-0.00840951		1174.99	-0.00787874		1764.99	-0.00737632		2354.98	-0.00680158		2944.98	0.00382212		3534.98	-0.01866266
585.2	-0.00821937		1175.19	-0.00818565		1765.19	-0.00744716		2355.18	-0.00670987		2945.18	0.00409253		3535.18	-0.01872307
585.4	-0.00745059		1175.39	-0.00847054		1765.39	-0.00766685		2355.38	-0.00725042		2945.38	0.00391711		3535.38	-0.0186505
585.6	-0.0071666		1175.59	-0.00885315		1765.59	-0.00809471		2355.58	-0.00732151		2945.58	0.00488182		3535.58	-0.0182363
585.8	-0.00676272		1175.79	-0.00908697		1765.79	-0.00871919		2355.78	-0.00702544		2945.78	0.00519997		3535.78	-0.01911774
586	-0.00715629		1175.99	-0.00854796		1765.99	-0.00857945		2355.98	-0.00617374		2945.98	0.0044046		3535.98	-0.01869884
586.2	-0.00757734		1176.19	-0.00918721		1766.19	-0.00851717		2356.18	-0.00632431		2946.18	0.00397395		3536.18	-0.01716114
586.4	-0.00752787		1176.39	-0.00975839		1766.39	-0.00932353		2356.38	-0.006566		2946.38	0.00346837		3536.38	-0.01684958
586.6	-0.00779444		1176.59	-0.01018118		1766.59	-0.00974983		2356.58	-0.00596158		2946.58	0.00177452		3536.58	-0.01718647
586.8	-0.0079555		1176.79	-0.01089972		1766.79	-0.00954849		2356.78	-0.00590463		2946.78	0.00167899		3536.78	-0.01725368
587	-0.00765735		1176.99	-0.01125069		1766.99	-0.01007146		2356.98	-0.00593728		2946.98	0.0010079		3536.98	-0.01686117
587.2	-0.0075687		1177.19	-0.01109747		1767.19	-0.00998855		2357.18	-0.00594476		2947.18	0.00120292		3537.18	-0.01622368
587.4	-0.00704486		1177.39	-0.01125338		1767.39	-0.01096173		2357.38	-0.006108		2947.38	0.00168633		3537.38	-0.0168068
587.6	-0.00767475		1177.59	-0.01134168		1767.59	-0.01144059		2357.58	-0.00697298		2947.58	0.00153373		3537.58	-0.01706488
587.8	-0.00655854		1177.79	-0.01085851		1767.79	-0.01106961		2357.78	-0.00680332		2947.78	0.00220491		3537.78	-0.01770944
588	-0.00575059		1177.99	-0.01079033		1767.99	-0.0109012		2357.98	-0.00700974		2947.98	0.00131244		3537.98	-0.01714745
588.2	-0.00532543		1178.19	-0.01062776		1768.19	-0.0110169		2358.18	-0.00754441		2948.18	0.0014895		3538.18	-0.01817699
588.4	-0.00608433		1178.39	-0.01002922		1768.39	-0.01076471		2358.38	-0.00782564		2948.38	0.00126257		3538.38	-0.01805743
588.6	-0.00552839		1178.59	-0.00967954		1768.59	-0.01022829		2358.58	-0.00713803		2948.58	0.00073739		3538.58	-0.01897419
588.8	-0.00458768		1178.79	-0.00901664		1768.79	-0.0099144		2358.78	-0.00799115		2948.78	0.00106114		3538.78	-0.01884371
589	-0.00455835		1178.99	-0.00832423		1768.99	-0.01026827		2358.98	-0.00756533		2948.98	0.00003317		3538.98	-0.01943648
589.2	-0.00478849		1179.19	-0.00833997		1769.19	-0.01111441		2359.18	-0.00772937		2949.18	-0.00059104		3539.18	-0.01887624
589.4	-0.00478128		1179.39	-0.00837144		1769.39	-0.0112677		2359.38	-0.00803115		2949.38	-0.00057019		3539.38	-0.01879618
589.6	-0.00544874		1179.59	-0.008572		1769.59	-0.01054999		2359.58	-0.00693001		2949.58	-0.00020957		3539.58	-0.0186015
589.8	-0.0052369		1179.79	-0.00841639		1769.79	-0.01018183		2359.78	-0.00623351		2949.78	-0.000829		3539.78	-0.01849315
590	-0.00622627		1179.99	-0.00771681		1769.99	-0.01055218		2359.98	-0.00611472		2949.98	-0.00105139		3539.98	-0.01795978
590.2	-0.00623914		1180.19	-0.00883188		1770.19	-0.010716		2360.18	-0.00616927		2950.18	-0.00054498		3540.18	-0.01728694
590.4	-0.00638234		1180.39	-0.00879676		1770.39	-0.01106559		2360.38	-0.0058664		2950.38	-0.00081153		3540.38	-0.01745776
590.6	-0.00689052		1180.59	-0.00968212		1770.59	-0.01085791		2360.58	-0.00531863		2950.58	-0.0006508		3540.58	-0.01724297
590.8	-0.00660343		1180.79	-0.01050777		1770.79	-0.01105541		2360.78	-0.00475777		2950.78	0.00051949		3540.78	-0.0170385
591	-0.00690045		1180.99	-0.0100438		1770.99	-0.01139503		2360.98	-0.00446081		2950.98	0.00095966		3540.98	-0.01742298
591.2	-0.00651674		1181.19	-0.00985726		1771.19	-0.01137299		2361.18	-0.00482931		2951.18	0.00161995		3541.18	-0.01710802
591.4	-0.00644948		1181.39	-0.01007422		1771.39	-0.01112472		2361.38	-0.00522754		2951.38	0.00270769		3541.38	-0.01703988
591.6	-0.00591559		1181.59	-0.0102216		1771.59	-0.00970257		2361.58	-0.00635896		2951.58	0.00286664		3541.58	-0.01685227
591.8	-0.005719		1181.79	-0.00959712		1771.79	-0.00902811		2361.78	-0.00631713		2951.78	0.00326818		3541.78	-0.01662343
592	-0.00617032		1181.99	-0.01066961		1771.99	-0.00858507		2361.98	-0.00682871		2951.98	0.00298171		3541.98	-0.01683983
592.2	-0.0073969		1182.19	-0.01070714		1772.19	-0.00831747		2362.18	-0.00772487		2952.18	0.00350689		3542.18	-0.01716804
592.4	-0.00800397		1182.39	-0.01023065		1772.39	-0.00884837		2362.38	-0.00719519		2952.38	0.00311275		3542.38	-0.01722958
592.6	-0.00788148		1182.59	-0.01059586		1772.59	-0.00826792		2362.58	-0.00750613		2952.58	0.00300889		3542.58	-0.01794725
592.8	-0.00925868		1182.79	-0.00955782		1772.79	-0.00791451		2362.78	-0.00815788		2952.78	0.00306191		3542.78	-0.01771672
593	-0.0100689		1182.99	-0.00901763		1772.99	-0.00825327		2362.98	-0.00814081		2952.98	0.00299274		3542.98	-0.01811588
593.2	-0.01062681		1183.19	-0.00953207		1773.19	-0.00696204		2363.18	-0.00742517		2953.18	0.0034438		3543.18	-0.01771124
593.4	-0.01094317		1183.39	-0.00986978		1773.39	-0.00635073		2363.38	-0.00705543		2953.38	0.00322987		3543.38	-0.01885636
593.6	-0.01132179		1183.59	-0.00954475		1773.59	-0.00538794		2363.58	-0.00592218		2953.58	0.00299672		3543.58	-0.01936631
593.8	-0.01063836		1183.79	-0.00892284		1773.79	-0.00611275		2363.78	-0.0063042		2953.78	0.00273822		3543.78	-0.0192958
594	-0.01089519		1183.99	-0.00878838		1773.99	-0.00667873		2363.98	-0.00649018		2953.98	0.00339628		3543.98	-0.01922714
594.2	-0.0105325		1184.19	-0.00890797		1774.19	-0.00702802		2364.18	-0.00622403		2954.18	0.00293758		3544.18	-0.01933366
594.4	-0.00983365		1184.39	-0.00902618		1774.39	-0.00643843		2364.38	-0.00600062		2954.38	0.003561		3544.38	-0.01932674
594.6	-0.00930839		1184.59	-0.01002605		1774.59	-0.00583876		2364.58	-0.00556593		2954.58	0.00398105		3544.58	-0.0189556
594.8	-0.00799504		1184.79	-0.0101597		1774.79	-0.00581387		2364.78	-0.00609705		2954.78	0.00410804		3544.78	-0.01953958
595	-0.00689413		1184.99	-0.01038353		1774.99	-0.00597885		2364.98	-0.0061692		2954.98	0.00372873		3544.98	-0.01904174
595.2	-0.00611551		1185.19	-0.0102879		1775.19	-0.00563738		2365.18	-0.00649152		2955.18	0.0033871		3545.18	-0.01807299
595.4	-0.00496989		1185.39	-0.0109548		1775.39	-0.00537856		2365.38	-0.00675118		2955.38	0.00366446		3545.38	-0.01824914
595.6	-0.00408056		1185.59	-0.01124856		1775.59	-0.00572033		2365.58	-0.0075296		2955.58	0.00321665		3545.58	-0.01942335
595.8	-0.00450664		1185.79	-0.01198811		1775.79	-0.0056128		2365.78	-0.00796396		2955.78	0.00245943		3545.78	-0.01991789
596	-0.00424908		1185.99	-0.01321722		1775.99	-0.00570844		2365.98	-0.00797673		2955.98	0.00217992		3545.98	-0.02007556
596.2	-0.00400087		1186.19	-0.01327019		1776.19	-0.00609237		2366.18	-0.00862129		2956.18	0.00220352		3546.18	-0.01959122
596.4	-0.00393672		1186.39	-0.01374417		1776.39	-0.00682998		2366.38	-0.00837562		2956.38	0.00183316		3546.38	-0.02036267
596.6	-0.0044081		1186.59	-0.01417691		1776.59	-0.0068553		2366.58	-0.0087371		2956.58	0.001871		3546.58	-0.0207391
596.8	-0.004888		1186.79	-0.01369795		1776.79	-0.00722331		2366.78	-0.0090226		2956.78	0.00242264		3546.78	-0.02003235
597	-0.00464209		1186.99	-0.01364913		1776.99	-0.00714284		2366.98	-0.00950144		2956.98	0.00321519		3546.98	-0.01999539
597.2	-0.00516629		1187.19	-0.01399201		1777.19	-0.00783501		2367.18	-0.00924195		2957.18	0.00215355		3547.18	-0.01944474
597.4	-0.00569744		1187.39	-0.01313343		1777.39	-0.00827251		2367.38	-0.00813938		2957.38	0.00247321		3547.38	-0.01979551
597.6	-0.0059667		1187.59	-0.0123847		1777.59	-0.00866112		2367.58	-0.00814784		2957.58	0.00252212		3547.58	-0.01977331
597.8	-0.00559074		1187.79	-0.01164654		1777.79	-0.00926421		2367.78	-0.00799486		2957.78	0.00234053		3547.78	-0.01903065
598	-0.00651698		1187.99	-0.01035306		1777.99	-0.00959469		2367.98	-0.0070971		2957.98	0.00271013		3547.98	-0.0185501
598.2	-0.00649574		1188.19	-0.01011158		1778.19	-0.00976312		2368.18	-0.00607044		2958.18	0.00253072		3548.18	-0.01820496
598.4	-0.00680784		1188.39	-0.00975124		1778.39	-0.00872121		2368.38	-0.00608914		2958.38	0.00327864		3548.38	-0.01810714
598.6	-0.00660039		1188.59	-0.00925454		1778.59	-0.00858349		2368.58	-0.00552706		2958.58	0.00348041		3548.58	-0.01796227
598.8	-0.00620449		1188.79	-0.00893905		1778.79	-0.0088852		2368.78	-0.00495158		2958.78	0.0029334		3548.78	-0.01731802
599	-0.00595949		1188.99	-0.00897503		1778.99	-0.00859344		2368.98	-0.00373547		2958.98	0.00255225		3548.98	-0.01700961
599.2	-0.00651407		1189.19	-0.00799441		1779.19	-0.00866264		2369.18	-0.00407263		2959.18	0.00232259		3549.18	-0.01763432
599.4	-0.00690375		1189.39	-0.00781441		1779.39	-0.00967168		2369.38	-0.00424891		2959.38	0.00257265		3549.38	-0.01864947
599.6	-0.00668914		1189.59	-0.00784334		1779.59	-0.01010677		2369.58	-0.00531851		2959.58	0.00244703		3549.58	-0.01984712
599.8	-0.00704252		1189.79	-0.00817547		1779.79	-0.00970169		2369.78	-0.00472445		2959.78	0.00199845		3549.78	-0.01954738
600	-0.00740897		1189.99	-0.00817016		1779.99	-0.01047179		2369.98	-0.00478915		2959.98	0.00129143		3549.98	-0.0190075
600.2	-0.00717283		1190.19	-0.00937515		1780.19	-0.01073326		2370.18	-0.00508586		2960.18	0.00086635		3550.18	-0.01960724
600.4	-0.00786803		1190.39	-0.01015493		1780.39	-0.01075562		2370.38	-0.0049384		2960.38	0.00099453		3550.38	-0.02027775
600.6	-0.00827182		1190.59	-0.01066158		1780.59	-0.01063264		2370.58	-0.0058921		2960.58	0.00143281		3550.58	-0.02075595
600.8	-0.00820775		1190.79	-0.01174247		1780.79	-0.01009601		2370.78	-0.00697198		2960.78	0.00184919		3550.78	-0.01999342
601	-0.0086482		1190.99	-0.0125681		1780.99	-0.00950547		2370.98	-0.00796909		2960.98	0.00158302		3550.98	-0.01996458
601.2	-0.00947749		1191.19	-0.01325223		1781.19	-0.01004667		2371.18	-0.00804988		2961.18	0.0009837		3551.18	-0.02017081
601.4	-0.00959282		1191.39	-0.01268491		1781.39	-0.01016683		2371.38	-0.00800205		2961.38	0.00185976		3551.38	-0.02005249
601.6	-0.00965593		1191.59	-0.01285012		1781.59	-0.00971581		2371.58	-0.009263		2961.58	0.00193707		3551.58	-0.02027364
601.8	-0.00967797		1191.79	-0.01210639		1781.79	-0.01026148		2371.78	-0.00920407		2961.78	0.00208429		3551.78	-0.01946799
602	-0.01022233		1191.99	-0.01220672		1781.99	-0.01018651		2371.98	-0.00923144		2961.98	0.00280209		3551.98	-0.01959947
602.2	-0.01003318		1192.19	-0.01264685		1782.19	-0.00969325		2372.18	-0.00963433		2962.18	0.00321028		3552.18	-0.01960363
602.4	-0.01042844		1192.39	-0.0113412		1782.39	-0.00916186		2372.38	-0.01007654		2962.38	0.0031738		3552.38	-0.02004445
602.6	-0.0096912		1192.59	-0.01115687		1782.59	-0.00916969		2372.58	-0.00920864		2962.58	0.00333205		3552.58	-0.0197179
602.8	-0.00892677		1192.79	-0.01041243		1782.79	-0.00995926		2372.78	-0.00893747		2962.78	0.00307473		3552.78	-0.0189366
603	-0.00936416		1192.99	-0.00958931		1782.99	-0.00926484		2372.98	-0.00911308		2962.98	0.00270082		3552.98	-0.01905903
603.2	-0.01037044		1193.19	-0.00926844		1783.19	-0.00989894		2373.18	-0.00943863		2963.18	0.00372228		3553.18	-0.01904273
603.4	-0.01067932		1193.39	-0.0087864		1783.39	-0.01164988		2373.38	-0.00902475		2963.38	0.00428955		3553.38	-0.01850443
603.6	-0.00991352		1193.59	-0.0087758		1783.59	-0.0119057		2373.58	-0.0084336		2963.58	0.00354514		3553.58	-0.01902092
603.8	-0.0104078		1193.79	-0.00865335		1783.79	-0.01212199		2373.78	-0.00753758		2963.78	0.00300223		3553.78	-0.01859204
604	-0.010855		1193.99	-0.00839568		1783.99	-0.01284538		2373.98	-0.00804276		2963.98	0.00170169		3553.98	-0.01763781
604.2	-0.01026346		1194.19	-0.00895033		1784.19	-0.01234111		2374.18	-0.00689457		2964.18	0.00221561		3554.18	-0.01712086
604.4	-0.01018361		1194.39	-0.00876266		1784.39	-0.01144946		2374.38	-0.00675718		2964.38	0.00303475		3554.38	-0.01773678
604.6	-0.0096247		1194.59	-0.00914943		1784.59	-0.01110331		2374.58	-0.00654291		2964.58	0.00273939		3554.58	-0.01806868
604.8	-0.00930741		1194.79	-0.00959762		1784.79	-0.01107435		2374.78	-0.00642495		2964.78	0.00224395		3554.78	-0.01743217
605	-0.00980026		1194.99	-0.01009739		1784.99	-0.01117939		2374.98	-0.0063079		2964.98	0.00170353		3554.98	-0.01826833
605.2	-0.01050667		1195.19	-0.00954605		1785.19	-0.01221708		2375.18	-0.00627139		2965.18	0.00197301		3555.18	-0.01863552
605.4	-0.0105133		1195.39	-0.00959565		1785.39	-0.01199673		2375.38	-0.00566393		2965.38	0.0016784		3555.38	-0.01795686
605.6	-0.01053326		1195.59	-0.00989438		1785.59	-0.0115851		2375.58	-0.00621309		2965.58	0.00137861		3555.58	-0.01846803
605.8	-0.0105921		1195.79	-0.00992494		1785.79	-0.01192216		2375.78	-0.00618841		2965.78	0.001337		3555.78	-0.01865968
606	-0.01069657		1195.99	-0.01047245		1785.99	-0.01144339		2375.98	-0.00587578		2965.98	0.00147442		3555.98	-0.01931749
606.2	-0.01001677		1196.19	-0.00992349		1786.19	-0.01156705		2376.18	-0.00614125		2966.18	0.00248666		3556.18	-0.01959549
606.4	-0.01012288		1196.39	-0.00920335		1786.39	-0.01161844		2376.38	-0.00619836		2966.38	0.0019803		3556.38	-0.01961844
606.6	-0.01027486		1196.59	-0.00966518		1786.59	-0.01110477		2376.58	-0.00561302		2966.58	0.00287495		3556.58	-0.01970469
606.8	-0.01002739		1196.79	-0.01059176		1786.79	-0.01128536		2376.78	-0.00580553		2966.78	0.00302565		3556.78	-0.01944363
607	-0.0101801		1196.99	-0.01100482		1786.99	-0.00990424		2376.98	-0.00491552		2966.98	0.00318276		3556.98	-0.01930574
607.2	-0.00986755		1197.19	-0.0116904		1787.19	-0.01039837		2377.18	-0.00472138		2967.18	0.00429945		3557.18	-0.01963738
607.4	-0.00965836		1197.39	-0.01100673		1787.39	-0.01089745		2377.38	-0.00489947		2967.38	0.00379584		3557.38	-0.01901203
607.6	-0.00944586		1197.59	-0.01144495		1787.59	-0.00977184		2377.58	-0.00546296		2967.58	0.00314598		3557.58	-0.01934056
607.8	-0.00936723		1197.79	-0.01199669		1787.79	-0.00937294		2377.78	-0.00544547		2967.78	0.0038382		3557.78	-0.01883855
608	-0.00834148		1197.99	-0.01208783		1787.99	-0.00915974		2377.98	-0.00531761		2967.98	0.00397358		3557.98	-0.0186854
608.2	-0.00782041		1198.19	-0.01197109		1788.19	-0.00804296		2378.18	-0.00473483		2968.18	0.00424815		3558.18	-0.01938069
608.4	-0.00788773		1198.39	-0.01160211		1788.39	-0.00699194		2378.38	-0.00489183		2968.38	0.00396678		3558.38	-0.02022389
608.6	-0.0076702		1198.59	-0.01149573		1788.59	-0.0073859		2378.58	-0.00495909		2968.58	0.0029656		3558.58	-0.02019332
608.8	-0.00805872		1198.79	-0.01109998		1788.79	-0.0080185		2378.78	-0.00562016		2968.78	0.00269325		3558.78	-0.02069204
609	-0.00871415		1198.99	-0.01076505		1788.99	-0.00833798		2378.98	-0.00547562		2968.98	0.00197845		3558.98	-0.02119902
609.2	-0.00926286		1199.19	-0.01047902		1789.19	-0.00924706		2379.18	-0.00571264		2969.18	0.0016548		3559.18	-0.02098511
609.4	-0.00950887		1199.39	-0.01114387		1789.39	-0.00919751		2379.38	-0.00552797		2969.38	0.00065147		3559.38	-0.02176181
609.6	-0.0100225		1199.59	-0.01116654		1789.59	-0.00901513		2379.58	-0.00570507		2969.58	0.00002068		3559.58	-0.02186608
609.8	-0.01062058		1199.79	-0.01122908		1789.79	-0.0094127		2379.78	-0.00548467		2969.78	0.00055357		3559.78	-0.02180015
610	-0.01009323		1199.99	-0.0110561		1789.99	-0.00997296		2379.98	-0.00510614		2969.98	0.0006369		3559.98	-0.02152034
610.2	-0.01010673		1200.19	-0.01029464		1790.19	-0.01029193		2380.18	-0.00541936		2970.18	0.00073837		3560.18	-0.0211346
610.4	-0.01142014		1200.39	-0.01018228		1790.39	-0.010392		2380.38	-0.00466807		2970.38	0.00034353		3560.38	-0.02095157
610.6	-0.01114714		1200.59	-0.01068547		1790.59	-0.01030868		2380.58	-0.00403646		2970.58	0.00119706		3560.58	-0.02051988
610.8	-0.00980419		1200.79	-0.01119958		1790.79	-0.01130664		2380.78	-0.00326269		2970.78	0.00147224		3560.78	-0.02008767
611	-0.00960303		1200.99	-0.01021319		1790.99	-0.01132889		2380.98	-0.00288443		2970.98	0.00168761		3560.98	-0.01974778
611.2	-0.00958955		1201.19	-0.01045174		1791.19	-0.01159182		2381.18	-0.00410812		2971.18	0.00255857		3561.18	-0.01992051
611.4	-0.00979094		1201.39	-0.01005114		1791.39	-0.01213592		2381.38	-0.00467086		2971.38	0.00296677		3561.38	-0.01894989
611.6	-0.01009138		1201.59	-0.0105063		1791.59	-0.01103619		2381.58	-0.00506839		2971.58	0.00372082		3561.58	-0.01868963
611.8	-0.01004624		1201.79	-0.01087867		1791.79	-0.01101646		2381.78	-0.00473536		2971.78	0.00350264		3561.78	-0.0183386
612	-0.00949338		1201.99	-0.01039955		1791.99	-0.01095394		2381.98	-0.00508841		2971.98	0.00339615		3561.98	-0.01821454
612.2	-0.01011342		1202.19	-0.00986893		1792.19	-0.00982972		2382.18	-0.0055816		2972.18	0.00223892		3562.18	-0.01875992
612.4	-0.01048392		1202.39	-0.01003604		1792.39	-0.0089696		2382.38	-0.00634725		2972.38	0.00256806		3562.38	-0.01909218
612.6	-0.00994773		1202.59	-0.01062475		1792.59	-0.00966409		2382.58	-0.00684095		2972.58	0.00287424		3562.58	-0.01839587
612.8	-0.00987318		1202.79	-0.01071537		1792.79	-0.00958947		2382.78	-0.00769058		2972.78	0.00320241		3562.78	-0.01866672
613	-0.00994796		1202.99	-0.01113345		1792.99	-0.00967392		2382.98	-0.00785403		2972.98	0.00275022		3562.98	-0.01755251
613.2	-0.00962282		1203.19	-0.01180858		1793.19	-0.01027261		2383.18	-0.00847749		2973.18	0.00194728		3563.18	-0.01752078
613.4	-0.00977544		1203.39	-0.01221719		1793.39	-0.00937652		2383.38	-0.00857944		2973.38	0.00151327		3563.38	-0.01791887
613.6	-0.00981475		1203.59	-0.01309273		1793.59	-0.00904088		2383.58	-0.00873382		2973.58	0.00199533		3563.58	-0.01748761
613.8	-0.00951899		1203.79	-0.01339572		1793.79	-0.00926618		2383.78	-0.00876512		2973.78	0.00196255		3563.78	-0.01719588
614	-0.00976396		1203.99	-0.0133268		1793.99	-0.0089824		2383.98	-0.0088306		2973.98	0.00113408		3563.98	-0.01755276
614.2	-0.01014956		1204.19	-0.01330983		1794.19	-0.00937925		2384.18	-0.00945084		2974.18	0.00097772		3564.18	-0.01770834
614.4	-0.01036032		1204.39	-0.01352175		1794.39	-0.00983767		2384.38	-0.00866995		2974.38	0.00130183		3564.38	-0.01828463
614.6	-0.00903038		1204.59	-0.01303067		1794.59	-0.01027154		2384.58	-0.00800658		2974.58	0.00214086		3564.58	-0.01848608
614.8	-0.00897663		1204.79	-0.01216562		1794.79	-0.01165984		2384.78	-0.00843949		2974.78	0.00241112		3564.78	-0.01864281
615	-0.00904198		1204.99	-0.011839		1794.99	-0.01177231		2384.98	-0.00871109		2974.98	0.00207181		3564.98	-0.01860472
615.2	-0.00890551		1205.19	-0.01141432		1795.19	-0.01208003		2385.18	-0.00934379		2975.18	0.00297907		3565.18	-0.01906632
615.4	-0.0096031		1205.39	-0.01031452		1795.39	-0.01191863		2385.38	-0.00908379		2975.38	0.00272228		3565.38	-0.01811468
615.6	-0.00988072		1205.59	-0.00976167		1795.59	-0.01110791		2385.58	-0.00873261		2975.58	0.00264245		3565.58	-0.01804981
615.8	-0.01049678		1205.79	-0.00953088		1795.79	-0.0113793		2385.78	-0.00812246		2975.78	0.00243667		3565.78	-0.01764678
616	-0.00964756		1205.99	-0.00870183		1795.99	-0.01069251		2385.98	-0.007998		2975.98	0.00276735		3565.98	-0.01857715
616.2	-0.00996539		1206.19	-0.00920956		1796.19	-0.009891		2386.18	-0.00790777		2976.18	0.00220911		3566.18	-0.01881627
616.4	-0.01000563		1206.39	-0.01010728		1796.39	-0.00968083		2386.38	-0.00897613		2976.38	0.00325356		3566.38	-0.01896518
616.6	-0.00985279		1206.59	-0.01110987		1796.59	-0.00960856		2386.58	-0.00915643		2976.58	0.00289837		3566.58	-0.01836735
616.8	-0.00974914		1206.79	-0.01111365		1796.79	-0.00910563		2386.78	-0.00941866		2976.78	0.00212929		3566.78	-0.01912868
617	-0.00965161		1206.99	-0.01179644		1796.99	-0.00879169		2386.98	-0.0099695		2976.98	0.00120619		3566.98	-0.01959691
617.2	-0.00898552		1207.19	-0.01214701		1797.19	-0.00823927		2387.18	-0.01063895		2977.18	0.00051182		3567.18	-0.02043973
617.4	-0.00893566		1207.39	-0.012698		1797.39	-0.00767901		2387.38	-0.01017128		2977.38	0.0012568		3567.38	-0.02113366
617.6	-0.00891081		1207.59	-0.01407892		1797.59	-0.00790872		2387.58	-0.01067221		2977.58	0.00189455		3567.58	-0.02158166
617.8	-0.00844474		1207.79	-0.01425155		1797.79	-0.00735725		2387.78	-0.01077698		2977.78	0.00097308		3567.78	-0.02119408
618	-0.00882203		1207.99	-0.0145197		1797.99	-0.00817944		2387.98	-0.01124605		2977.98	0.00076015		3567.98	-0.02165641
618.2	-0.00878199		1208.19	-0.01415235		1798.19	-0.00919949		2388.18	-0.01166129		2978.18	0.00053032		3568.18	-0.0217471
618.4	-0.0090619		1208.39	-0.01362218		1798.39	-0.01016923		2388.38	-0.01147507		2978.38	0.00107707		3568.38	-0.02131866
618.6	-0.00782339		1208.59	-0.01295878		1798.59	-0.01080243		2388.58	-0.01140109		2978.58	0.00152567		3568.58	-0.02075009
618.8	-0.00784327		1208.79	-0.01235699		1798.79	-0.01189797		2388.78	-0.01095191		2978.78	0.00086454		3568.78	-0.02018735
619	-0.00748442		1208.99	-0.01302383		1798.99	-0.01183919		2388.98	-0.00948994		2978.98	0.00085584		3568.98	-0.02124022
619.2	-0.00752084		1209.19	-0.01221063		1799.19	-0.01202246		2389.18	-0.00950333		2979.18	0.00110596		3569.18	-0.02070537
619.4	-0.00773318		1209.39	-0.01143777		1799.39	-0.01284919		2389.38	-0.0087448		2979.38	0.00069764		3569.38	-0.01996157
619.6	-0.0071502		1209.59	-0.01148089		1799.59	-0.0137621		2389.58	-0.00803378		2979.58	0.00090912		3569.58	-0.0200968
619.8	-0.00702869		1209.79	-0.0114944		1799.79	-0.01404081		2389.78	-0.0069409		2979.78	0.00152225		3569.78	-0.01998713
620	-0.00641971		1209.99	-0.01151642		1799.99	-0.01417347		2389.98	-0.00674875		2979.98	0.00051986		3569.98	-0.02074024
620.2	-0.00742736		1210.19	-0.0123264		1800.19	-0.01506589		2390.18	-0.00570241		2980.18	0.00028656		3570.18	-0.01964314
620.4	-0.00771525		1210.39	-0.01286678		1800.39	-0.01526753		2390.38	-0.00552172		2980.38	0.00141676		3570.38	-0.02013048
620.6	-0.00908596		1210.59	-0.01314604		1800.59	-0.0142708		2390.58	-0.00527754		2980.58	0.00062842		3570.58	-0.01995109
620.8	-0.00895729		1210.79	-0.0130434		1800.79	-0.01337706		2390.78	-0.00491352		2980.78	0.00050153		3570.78	-0.02012797
621	-0.0092879		1210.99	-0.01344312		1800.99	-0.01241976		2390.98	-0.00529816		2980.98	0.00114342		3570.98	-0.02093664
621.2	-0.00928829		1211.19	-0.01333104		1801.19	-0.01199826		2391.18	-0.00583376		2981.18	0.00136929		3571.18	-0.02042237
621.4	-0.00967132		1211.39	-0.01343115		1801.39	-0.01146836		2391.38	-0.00658241		2981.38	0.00250219		3571.38	-0.02034612
621.6	-0.01009418		1211.59	-0.01333893		1801.59	-0.01050117		2391.58	-0.00782691		2981.58	0.0026947		3571.58	-0.02040274
621.8	-0.01032572		1211.79	-0.01306213		1801.79	-0.01035996		2391.78	-0.00845784		2981.78	0.00220645		3571.78	-0.0196496
622	-0.01134931		1211.99	-0.01280727		1801.99	-0.01036006		2391.98	-0.00792405		2981.98	0.00302279		3571.98	-0.01981211
622.2	-0.01243661		1212.19	-0.01275837		1802.19	-0.00970303		2392.18	-0.00847305		2982.18	0.00338878		3572.18	-0.02018136
622.4	-0.0122205		1212.39	-0.01306234		1802.39	-0.0096708		2392.38	-0.00914671		2982.38	0.0045866		3572.38	-0.02041588
622.6	-0.01177655		1212.59	-0.01286544		1802.59	-0.00950861		2392.58	-0.00852981		2982.58	0.00475734		3572.58	-0.02033711
622.8	-0.01293662		1212.79	-0.01252584		1802.79	-0.00997581		2392.78	-0.00799276		2982.78	0.0043886		3572.78	-0.02141616
623	-0.01252728		1212.99	-0.01277841		1802.99	-0.00993844		2392.98	-0.00817612		2982.98	0.00412052		3572.98	-0.02225633
623.2	-0.01240359		1213.19	-0.01217887		1803.19	-0.01030017		2393.18	-0.00810673		2983.18	0.00373922		3573.18	-0.0211005
623.4	-0.01219566		1213.39	-0.0120984		1803.39	-0.01142118		2393.38	-0.00727308		2983.38	0.00296961		3573.38	-0.02164152
623.6	-0.01174333		1213.59	-0.01230166		1803.59	-0.01193187		2393.58	-0.00729374		2983.58	0.00272146		3573.58	-0.02218934
623.8	-0.01198003		1213.79	-0.01273593		1803.79	-0.01282726		2393.78	-0.00675724		2983.78	0.0031468		3573.78	-0.02228163
624	-0.01195702		1213.99	-0.01267204		1803.99	-0.01339288		2393.98	-0.00659088		2983.98	0.00169608		3573.98	-0.02262246
624.2	-0.01215153		1214.19	-0.01280516		1804.19	-0.01361484		2394.18	-0.00623769		2984.18	0.00138954		3574.18	-0.02203037
624.4	-0.01113137		1214.39	-0.01276092		1804.39	-0.01249602		2394.38	-0.00691608		2984.38	0.00211484		3574.38	-0.02271148
624.6	-0.01165766		1214.59	-0.01248103		1804.59	-0.01120427		2394.58	-0.00771236		2984.58	0.0010822		3574.58	-0.02183254
624.8	-0.01077746		1214.79	-0.01305811		1804.79	-0.01081286		2394.78	-0.00899064		2984.78	0.00152082		3574.78	-0.02141768
625	-0.01063461		1214.99	-0.01346607		1804.99	-0.01073828		2394.98	-0.0092898		2984.98	0.00238823		3574.98	-0.02163149
625.2	-0.01038446		1215.19	-0.01297085		1805.19	-0.01047544		2395.18	-0.0097855		2985.18	0.00101844		3575.18	-0.02122775
625.4	-0.01000241		1215.39	-0.01273308		1805.39	-0.01018058		2395.38	-0.0105973		2985.38	0.00167955		3575.38	-0.02073993
625.6	-0.00983805		1215.59	-0.01205792		1805.59	-0.01030517		2395.58	-0.01089713		2985.58	0.00061602		3575.58	-0.02077558
625.8	-0.00933359		1215.79	-0.01196993		1805.79	-0.00943014		2395.78	-0.01095335		2985.78	0.00069005		3575.78	-0.02015736
626	-0.00972835		1215.99	-0.01164738		1805.99	-0.00862856		2395.98	-0.01023855		2985.98	0.00090787		3575.98	-0.02056297
626.2	-0.01022868		1216.19	-0.01161029		1806.19	-0.00864877		2396.18	-0.0105842		2986.18	0.00091675		3576.18	-0.02142775
626.4	-0.01015618		1216.39	-0.01128321		1806.39	-0.0089168		2396.38	-0.01066938		2986.38	0.00174838		3576.38	-0.02050733
626.6	-0.0105038		1216.59	-0.01044717		1806.59	-0.00946313		2396.58	-0.01025535		2986.58	0.00183117		3576.58	-0.01946565
626.8	-0.0113226		1216.79	-0.01079233		1806.79	-0.0103149		2396.78	-0.01005917		2986.78	0.00058518		3576.78	-0.01941691
627	-0.01050791		1216.99	-0.01107514		1806.99	-0.01040931		2396.98	-0.00901472		2986.98	0.00028153		3576.98	-0.01913897
627.2	-0.01071284		1217.19	-0.01135169		1807.19	-0.01039527		2397.18	-0.00750098		2987.18	0.00050511		3577.18	-0.01928903
627.4	-0.01083809		1217.39	-0.01188415		1807.39	-0.01110238		2397.38	-0.00669648		2987.38	0.0000753		3577.38	-0.01991675
627.6	-0.01119823		1217.59	-0.01265207		1807.59	-0.01160872		2397.58	-0.00689251		2987.58	0.00059892		3577.58	-0.0203292
627.8	-0.01188738		1217.79	-0.01309625		1807.79	-0.01181426		2397.78	-0.00652413		2987.78	0.00045747		3577.78	-0.02013287
628	-0.01139653		1217.99	-0.01320213		1807.99	-0.01189302		2397.98	-0.00625331		2987.98	-0.00101043		3577.98	-0.02050225
628.2	-0.01033419		1218.19	-0.01412048		1808.19	-0.0111478		2398.18	-0.00666859		2988.18	-0.00055159		3578.18	-0.01984271
628.4	-0.01022261		1218.39	-0.01423112		1808.39	-0.01053414		2398.38	-0.00692527		2988.38	0.00019577		3578.38	-0.0194869
628.6	-0.01092565		1218.59	-0.01456707		1808.59	-0.0108853		2398.58	-0.00694906		2988.58	0.00041147		3578.58	-0.01921801
628.8	-0.01082785		1218.79	-0.01497732		1808.79	-0.01078416		2398.78	-0.00723345		2988.78	0.00110276		3578.78	-0.01953862
629	-0.01026849		1218.99	-0.01503134		1808.99	-0.01101235		2398.98	-0.00620396		2988.98	0.00063509		3578.98	-0.02014434
629.2	-0.00979265		1219.19	-0.01439311		1809.19	-0.01102169		2399.18	-0.00660106		2989.18	-0.00025956		3579.18	-0.01985926
629.4	-0.00964641		1219.39	-0.0144173		1809.39	-0.01114829		2399.38	-0.0071606		2989.38	0.00096835		3579.38	-0.01923977
629.6	-0.00961543		1219.59	-0.01413468		1809.59	-0.01007822		2399.58	-0.00636412		2989.58	0.00070451		3579.58	-0.0198174
629.8	-0.0097787		1219.79	-0.01341751		1809.79	-0.00893246		2399.78	-0.00639145		2989.78	0.00076106		3579.78	-0.01895974
630	-0.00949792		1219.99	-0.01294028		1809.99	-0.00940324		2399.98	-0.00627163		2989.98	0.00037776		3579.98	-0.01893468
630.2	-0.00933429		1220.19	-0.01301761		1810.19	-0.01003925		2400.18	-0.00669595		2990.18	0.00111393		3580.18	-0.01926647
630.4	-0.00868598		1220.39	-0.01270307		1810.39	-0.01016628		2400.38	-0.00748737		2990.38	0.0011027		3580.38	-0.0184975
630.6	-0.00867833		1220.59	-0.01260913		1810.59	-0.01046732		2400.58	-0.00718807		2990.58	0.00131882		3580.58	-0.0193505
630.8	-0.00904405		1220.79	-0.01341763		1810.79	-0.01068324		2400.78	-0.00747546		2990.78	0.00089814		3580.78	-0.0196441
631	-0.00823267		1220.99	-0.01318414		1810.99	-0.01046156		2400.98	-0.00647685		2990.98	0.00164082		3580.98	-0.0197837
631.2	-0.00852564		1221.19	-0.0133395		1811.19	-0.00992474		2401.18	-0.00637429		2991.18	0.00178165		3581.18	-0.01975376
631.4	-0.00981568		1221.39	-0.01333717		1811.39	-0.01024175		2401.38	-0.0061351		2991.38	0.00145659		3581.38	-0.01933328
631.6	-0.01083905		1221.59	-0.01334934		1811.59	-0.01034147		2401.58	-0.00769029		2991.58	0.00206147		3581.58	-0.01961353
631.8	-0.01154783		1221.79	-0.01324439		1811.79	-0.0103742		2401.78	-0.00797823		2991.78	0.00181445		3581.78	-0.01977967
632	-0.01075529		1221.99	-0.0139237		1811.99	-0.01065107		2401.98	-0.00836953		2991.98	0.00186467		3581.98	-0.0195011
632.2	-0.01094648		1222.19	-0.01393615		1812.19	-0.01141884		2402.18	-0.00870637		2992.18	0.00235843		3582.18	-0.01895286
632.4	-0.0126518		1222.39	-0.01380126		1812.39	-0.01216594		2402.38	-0.00894018		2992.38	0.0023839		3582.38	-0.01934002
632.6	-0.01344261		1222.59	-0.01377823		1812.59	-0.01281966		2402.58	-0.00872623		2992.58	0.00293398		3582.58	-0.01927909
632.8	-0.01327998		1222.79	-0.01397108		1812.79	-0.01345968		2402.78	-0.00955391		2992.78	0.00293109		3582.78	-0.01953533
633	-0.01376725		1222.99	-0.01420328		1812.99	-0.01447819		2402.98	-0.01033153		2992.98	0.00196139		3582.98	-0.01925706
633.2	-0.01417555		1223.19	-0.01431594		1813.19	-0.01457613		2403.18	-0.01054766		2993.18	0.00222457		3583.18	-0.01887935
633.4	-0.01472441		1223.39	-0.01487626		1813.39	-0.0144909		2403.38	-0.01008966		2993.38	0.00189359		3583.38	-0.01897952
633.6	-0.01453156		1223.59	-0.01394036		1813.59	-0.01364539		2403.58	-0.00952126		2993.58	0.00095884		3583.58	-0.01875182
633.8	-0.01442772		1223.79	-0.01355376		1813.79	-0.01336533		2403.78	-0.01049977		2993.78	-0.00012904		3583.78	-0.01836422
634	-0.01307297		1223.99	-0.01309983		1813.99	-0.01358538		2403.98	-0.0106484		2993.98	-0.00044763		3583.98	-0.01892021
634.2	-0.01336		1224.19	-0.01296873		1814.19	-0.01298223		2404.18	-0.01078339		2994.18	0.00045528		3584.18	-0.02001274
634.4	-0.01334737		1224.39	-0.01246442		1814.39	-0.01240908		2404.38	-0.01065583		2994.38	0.00009772		3584.38	-0.0203041
634.6	-0.01330988		1224.59	-0.01341579		1814.59	-0.01115992		2404.58	-0.01006934		2994.58	0.00057186		3584.58	-0.02099767
634.8	-0.01266848		1224.79	-0.01347451		1814.79	-0.01142099		2404.78	-0.00954664		2994.78	-0.00007574		3584.78	-0.0212236
635	-0.01168808		1224.99	-0.01326216		1814.99	-0.01102345		2404.98	-0.00825899		2994.98	-0.00016773		3584.98	-0.02165912
635.2	-0.01164671		1225.19	-0.01349034		1815.19	-0.01029656		2405.18	-0.00800368		2995.18	0.0003954		3585.18	-0.02236888
635.4	-0.01180679		1225.39	-0.01270147		1815.39	-0.01042695		2405.38	-0.00776245		2995.38	0.00067495		3585.38	-0.02352857
635.6	-0.0117054		1225.59	-0.01245989		1815.59	-0.01019366		2405.58	-0.00846064		2995.58	0.00138567		3585.58	-0.02393564
635.8	-0.01183297		1225.79	-0.0125766		1815.79	-0.01019195		2405.78	-0.00778705		2995.78	0.00064464		3585.78	-0.02350093
636	-0.01202206		1225.99	-0.01264043		1815.99	-0.01031944		2405.98	-0.00735428		2995.98	0.00034781		3585.98	-0.02307749
636.2	-0.01243881		1226.19	-0.01292067		1816.19	-0.01149238		2406.18	-0.00733936		2996.18	-0.00057908		3586.18	-0.0225378
636.4	-0.01274447		1226.39	-0.01312073		1816.39	-0.01138598		2406.38	-0.00788925		2996.38	-0.00028948		3586.38	-0.02243198
636.6	-0.01237387		1226.59	-0.013531		1816.59	-0.01275422		2406.58	-0.00777635		2996.58	-0.00025942		3586.58	-0.02185999
636.8	-0.01195586		1226.79	-0.01432917		1816.79	-0.01414347		2406.78	-0.00852839		2996.78	-0.00074558		3586.78	-0.02132886
637	-0.01200276		1226.99	-0.01451212		1816.99	-0.01496557		2406.98	-0.0086967		2996.98	-0.00199382		3586.98	-0.01993909
637.2	-0.01143069		1227.19	-0.01421595		1817.19	-0.01422336		2407.18	-0.00866894		2997.18	-0.00130888		3587.18	-0.01980293
637.4	-0.0114285		1227.39	-0.0144868		1817.39	-0.0138019		2407.38	-0.00907886		2997.38	-0.00138042		3587.38	-0.01976503
637.6	-0.01099298		1227.59	-0.01367643		1817.59	-0.01336769		2407.58	-0.0098924		2997.58	-0.00127933		3587.58	-0.0199095
637.8	-0.01056971		1227.79	-0.0139249		1817.79	-0.01327835		2407.78	-0.01019152		2997.78	-0.00048945		3587.78	-0.02074103
638	-0.01026912		1227.99	-0.01374918		1817.99	-0.01349433		2407.98	-0.0102194		2997.98	0.00039822		3587.98	-0.02156548
638.2	-0.01038669		1228.19	-0.01377434		1818.19	-0.01325791		2408.18	-0.01016509		2998.18	0.0018598		3588.18	-0.02208052
638.4	-0.01054142		1228.39	-0.01379495		1818.39	-0.01326911		2408.38	-0.01044171		2998.38	0.00214029		3588.38	-0.02177103
638.6	-0.01021766		1228.59	-0.01444506		1818.59	-0.01218453		2408.58	-0.0097669		2998.58	0.00264795		3588.58	-0.02253555
638.8	-0.01002764		1228.79	-0.0134703		1818.79	-0.01309175		2408.78	-0.00945953		2998.78	0.0027199		3588.78	-0.02282725
639	-0.01025078		1228.99	-0.01347308		1818.99	-0.01259531		2408.98	-0.00890975		2998.98	0.00323165		3588.98	-0.02265253
639.2	-0.00994104		1229.19	-0.01355499		1819.19	-0.01196677		2409.18	-0.00890055		2999.18	0.0036626		3589.18	-0.02285619
639.4	-0.00999284		1229.39	-0.01234324		1819.39	-0.01205714		2409.38	-0.00903763		2999.38	0.00364627		3589.38	-0.02304994
639.6	-0.01036661		1229.59	-0.01238056		1819.59	-0.01115579		2409.58	-0.00876924		2999.58	0.00321584		3589.58	-0.02250921
639.8	-0.0102242		1229.79	-0.01335563		1819.79	-0.01122034		2409.78	-0.00903025		2999.78	0.00164978		3589.78	-0.02285016
640	-0.01018441		1229.99	-0.01401428		1819.99	-0.01052479		2409.98	-0.00813425		2999.98	0.00104278		3589.98	-0.0232952
640.2	-0.00964766		1230.19	-0.01471228		1820.19	-0.0104438		2410.18	-0.00754452		3000.18	0.00083765		3590.18	-0.02277332
640.4	-0.01004056		1230.39	-0.01489023		1820.39	-0.00987747		2410.38	-0.00689831		3000.38	0.00112442		3590.38	-0.02316689
640.6	-0.01012368		1230.59	-0.01543167		1820.59	-0.01046079		2410.58	-0.00617136		3000.58	0.00012233		3590.58	-0.02270833
640.8	-0.00967651		1230.79	-0.01555866		1820.79	-0.01090632		2410.78	-0.00574292		3000.78	-0.00048875		3590.78	-0.02228376
641	-0.00913584		1230.99	-0.01538799		1820.99	-0.01061585		2410.98	-0.00565008		3000.98	-0.00064953		3590.98	-0.02216811
641.2	-0.00938587		1231.19	-0.01498496		1821.19	-0.01138448		2411.18	-0.00587669		3001.18	0.00001836		3591.18	-0.0229741
641.4	-0.00943182		1231.39	-0.01490245		1821.39	-0.01194196		2411.38	-0.00665694		3001.38	-0.00009954		3591.38	-0.02325613
641.6	-0.00938767		1231.59	-0.01450548		1821.59	-0.01207058		2411.58	-0.00727346		3001.58	-0.00004074		3591.58	-0.02393945
641.8	-0.00893606		1231.79	-0.01394611		1821.79	-0.01241876		2411.78	-0.00739199		3001.78	0.00070583		3591.78	-0.02352514
642	-0.00977305		1231.99	-0.01355961		1821.99	-0.0121276		2411.98	-0.00840593		3001.98	0.00067168		3591.98	-0.02359501
642.2	-0.01022529		1232.19	-0.0128021		1822.19	-0.01284751		2412.18	-0.00866601		3002.18	0.0004057		3592.18	-0.02305064
642.4	-0.01135032		1232.39	-0.01170813		1822.39	-0.01254704		2412.38	-0.00906814		3002.38	0.00011862		3592.38	-0.02311301
642.6	-0.01223618		1232.59	-0.0115771		1822.59	-0.01269795		2412.58	-0.00922598		3002.58	0.00038182		3592.58	-0.02331504
642.8	-0.01265348		1232.79	-0.01098838		1822.79	-0.0123345		2412.78	-0.01000936		3002.78	0.0002301		3592.78	-0.0223475
643	-0.01311255		1232.99	-0.01154234		1822.99	-0.01252327		2412.98	-0.00984037		3002.98	-0.00037304		3592.98	-0.02216897
643.2	-0.01271467		1233.19	-0.01044866		1823.19	-0.01196873		2413.18	-0.01071497		3003.18	0.00048448		3593.18	-0.02282777
643.4	-0.01329655		1233.39	-0.0107264		1823.39	-0.01290941		2413.38	-0.01131911		3003.38	0.00117159		3593.38	-0.02346207
643.6	-0.01389174		1233.59	-0.01174766		1823.59	-0.01299137		2413.58	-0.01257994		3003.58	0.00042749		3593.58	-0.02318253
643.8	-0.01413206		1233.79	-0.01299371		1823.79	-0.01337731		2413.78	-0.01230098		3003.78	0.00044568		3593.78	-0.02379089
644	-0.01518149		1233.99	-0.01318127		1823.99	-0.0122271		2413.98	-0.01136087		3003.98	0.00133227		3593.98	-0.0230693
644.2	-0.01476215		1234.19	-0.01380493		1824.19	-0.01164319		2414.18	-0.01180956		3004.18	0.00198413		3594.18	-0.02308437
644.4	-0.0144027		1234.39	-0.01388934		1824.39	-0.01150318		2414.38	-0.01201266		3004.38	0.00167143		3594.38	-0.02350078
644.6	-0.01400168		1234.59	-0.0142408		1824.59	-0.01175138		2414.58	-0.01214307		3004.58	0.00183574		3594.58	-0.02287448
644.8	-0.0130646		1234.79	-0.01459633		1824.79	-0.01348813		2414.78	-0.01208647		3004.78	0.00290093		3594.78	-0.02257234
645	-0.01247828		1234.99	-0.01487757		1824.99	-0.01339288		2414.98	-0.01287927		3004.98	0.00418178		3594.98	-0.02218399
645.2	-0.01226552		1235.19	-0.0144329		1825.19	-0.01430437		2415.18	-0.01363739		3005.18	0.00425997		3595.18	-0.02223757
645.4	-0.01162137		1235.39	-0.0135261		1825.39	-0.01362468		2415.38	-0.01400145		3005.38	0.00368841		3595.38	-0.02240812
645.6	-0.01116254		1235.59	-0.0136207		1825.59	-0.01383817		2415.58	-0.01416329		3005.58	0.00295523		3595.58	-0.02263811
645.8	-0.01077281		1235.79	-0.01322713		1825.79	-0.01371171		2415.78	-0.01473806		3005.78	0.00266265		3595.78	-0.0224392
646	-0.01092408		1235.99	-0.01307141		1825.99	-0.01330881		2415.98	-0.01390162		3005.98	0.00214588		3595.98	-0.02261586
646.2	-0.01071648		1236.19	-0.01264322		1826.19	-0.01398362		2416.18	-0.01265487		3006.18	0.00179189		3596.18	-0.02345173
646.4	-0.01116301		1236.39	-0.01236139		1826.39	-0.01319601		2416.38	-0.0127979		3006.38	0.00149489		3596.38	-0.02346168
646.6	-0.01096748		1236.59	-0.01316676		1826.59	-0.01324496		2416.58	-0.01353336		3006.58	0.00082395		3596.58	-0.02274996
646.8	-0.01073069		1236.79	-0.01275143		1826.79	-0.01263491		2416.78	-0.01322174		3006.78	-0.0004021		3596.78	-0.02259834
647	-0.01053612		1236.99	-0.01236136		1826.99	-0.0136845		2416.98	-0.01271563		3006.98	-0.00102634		3596.98	-0.02338415
647.2	-0.01169952		1237.19	-0.0119213		1827.19	-0.01352561		2417.18	-0.01204874		3007.18	-0.00042792		3597.18	-0.02298105
647.4	-0.01198543		1237.39	-0.01275568		1827.39	-0.01463163		2417.38	-0.01175763		3007.38	-0.00099524		3597.38	-0.02342215
647.6	-0.01252643		1237.59	-0.01311337		1827.59	-0.01402162		2417.58	-0.01143811		3007.58	-0.00188693		3597.58	-0.02269671
647.8	-0.0125324		1237.79	-0.01326219		1827.79	-0.01340854		2417.78	-0.0102754		3007.78	-0.00112133		3597.78	-0.02290638
648	-0.01267322		1237.99	-0.0133278		1827.99	-0.01279601		2417.98	-0.01026722		3007.98	-0.00088067		3597.98	-0.02210944
648.2	-0.01193489		1238.19	-0.01387873		1828.19	-0.01256824		2418.18	-0.01036302		3008.18	-0.00073705		3598.18	-0.02203092
648.4	-0.01195072		1238.39	-0.01409142		1828.39	-0.01256841		2418.38	-0.00957743		3008.38	-0.00023272		3598.38	-0.02137218
648.6	-0.01213176		1238.59	-0.01487769		1828.59	-0.01261022		2418.58	-0.00912314		3008.58	0.00041972		3598.58	-0.02052895
648.8	-0.01200331		1238.79	-0.01519517		1828.79	-0.01331065		2418.78	-0.00873452		3008.78	0.00100486		3598.78	-0.02010056
649	-0.0120571		1238.99	-0.01545407		1828.99	-0.01268474		2418.98	-0.00837004		3008.98	0.00089027		3598.98	-0.01973031
649.2	-0.01228249		1239.19	-0.01524381		1829.19	-0.0129126		2419.18	-0.00762661		3009.18	0.00010909		3599.18	-0.01952026
649.4	-0.01230314		1239.39	-0.01526435		1829.39	-0.01315219		2419.38	-0.00676805		3009.38	-0.00046743		3599.38	-0.01946052
649.6	-0.01246354		1239.59	-0.01592677		1829.59	-0.01333704		2419.58	-0.00619661		3009.58	-0.00067714		3599.58	-0.01908772
649.8	-0.01285141		1239.79	-0.01653258		1829.79	-0.01305637		2419.78	-0.00563203		3009.78	-0.00041323		3599.78	-0.01857843
