# Supplementary material for: Functional development of a V3/glycan-specific broadly neutralizing antibody isolated from a case of HIV superinfection
Source: eLife journal article supplement (doi:10.7554/elife.68110), 2021-07-15
Supplement: fig2-data2 [file G3.xls]

Vers 3.43 Data Simulation
Conc1	7.81E-09	7.81E-09	7.81E-09	7.81E-09	7.81E-09	7.81E-09	7.81E-09
Start1	290	879.99	1469.99	2059.99	2650	3240	3830
Stop1	649.8	1239.79	1829.8	2419.79	3009.8	3599.8	4189.8
Time1	Data1	Sim1	Time2	Data2	Sim2	Time3	Data3	Sim3	Time4	Data4	Sim4	Time5	Data5	Sim5	Time6	Data6	Sim6	Time7	Data7	Sim7
290	0.00040559		879.99	0.0044977		1469.99	-0.00153439		2059.99	-0.00170138		2650	-0.00626138		3240	0.00244387		3830	-0.00466383
290.2	-0.00057235		880.19	0.00586292		1470.19	-0.00175624		2060.19	-0.00123053		2650.2	-0.00724546		3240.2	0.00147309		3830.2	-0.00314158
290.4	-0.00135666		880.39	0.00583481		1470.39	-0.00213938		2060.39	-0.00169327		2650.4	-0.00765126		3240.4	0.00120167		3830.4	-0.00176646
290.6	-0.00180834		880.59	0.00618384		1470.59	-0.00235421		2060.59	-0.00083867		2650.6	-0.00899931		3240.6	0.00090554		3830.6	-0.00014186
290.8	-0.00199066		880.79	0.0066377		1470.79	-0.00287493		2060.79	0.00018968		2650.8	-0.01007497		3240.8	-0.00009407		3830.8	0.00104661
291	-0.00244506		880.99	0.0075699		1470.99	-0.00287739		2060.99	0.00160748		2651	-0.01060191		3241	-0.00029092		3831	0.00238832
291.2	-0.00335398		881.19	0.00757061		1471.19	-0.00296616		2061.19	0.00170141		2651.2	-0.01091894		3241.2	-0.00023093		3831.2	0.00328815
291.4	-0.00374546		881.39	0.0079013		1471.39	-0.00232837		2061.39	0.00256171		2651.4	-0.01128306		3241.4	0.00016622		3831.4	0.00364555
291.6	-0.00341292		881.59	0.00800879		1471.59	-0.00252979		2061.59	0.00274403		2651.6	-0.01255559		3241.6	-0.00017611		3831.6	0.00416341
291.8	-0.00287379		881.79	0.0083315		1471.79	-0.00198857		2061.79	0.00364328		2651.8	-0.0139334		3241.8	0.0004319		3831.8	0.00418423
292	-0.00257731		881.99	0.00880459		1471.99	-0.00171196		2061.99	0.00360333		2652	-0.01390174		3242	0.00071874		3832	0.00329659
292.2	-0.00201565		882.19	0.00867729		1472.19	-0.00144454		2062.19	0.00416967		2652.2	-0.01410155		3242.2	0.001924		3832.2	0.00230728
292.4	-0.00135761		882.39	0.00951828		1472.39	-0.00205548		2062.39	0.00345832		2652.4	-0.01445477		3242.4	0.0032926		3832.4	0.00184864
292.6	-0.00070615		882.59	0.01030932		1472.59	-0.00101742		2062.59	0.0021632		2652.6	-0.01451965		3242.6	0.00290909		3832.6	0.00132915
292.8	-0.00031949		882.79	0.01103748		1472.79	-0.00182987		2062.79	0.00226251		2652.8	-0.01418148		3242.8	0.00306427		3832.8	0.00138086
293	-0.00017187		882.99	0.01153927		1472.99	-0.00158117		2062.99	0.00159043		2653	-0.01351084		3243	0.00389352		3833	0.00180423
293.2	-0.0004994		883.19	0.01217325		1473.19	-0.00152544		2063.19	0.00192855		2653.2	-0.01325582		3243.2	0.00443574		3833.2	0.00170124
293.4	0.00006244		883.39	0.01233575		1473.39	-0.00156774		2063.39	0.00154232		2653.4	-0.01339551		3243.4	0.00418345		3833.4	0.002251
293.6	-0.00035758		883.59	0.01193464		1473.59	-0.00063301		2063.59	0.00200043		2653.6	-0.01254405		3243.6	0.00456422		3833.6	0.00284948
293.8	-0.00039704		883.79	0.01219813		1473.79	-0.00051199		2063.79	0.00200907		2653.8	-0.01229946		3243.8	0.00542944		3833.8	0.00167182
294	-0.00078508		883.99	0.01245845		1473.99	-0.00025724		2063.99	0.00132322		2654	-0.01147729		3244	0.00654603		3834	0.00208722
294.2	-0.00094066		884.19	0.01277206		1474.19	-0.00022121		2064.19	0.00059697		2654.2	-0.01135255		3244.2	0.00644149		3834.2	0.00165801
294.4	-0.00032456		884.39	0.01136305		1474.39	-0.00033504		2064.39	0.00032646		2654.4	-0.01059384		3244.4	0.00693071		3834.4	0.00164804
294.6	0.00008984		884.59	0.01131524		1474.59	-0.00080652		2064.59	0.0016003		2654.6	-0.01174579		3244.6	0.00603823		3834.6	0.00144601
294.8	0.00037359		884.79	0.01214227		1474.79	-0.00110028		2064.79	0.00139655		2654.8	-0.0113473		3244.8	0.00547132		3834.8	0.00088917
295	-0.00030429		884.99	0.01162117		1474.99	-0.0011016		2064.99	0.0016156		2655	-0.01120578		3245	0.0051781		3835	0.00159503
295.2	0.00023185		885.19	0.01046173		1475.19	-0.00087412		2065.19	0.00083956		2655.2	-0.010987		3245.2	0.00458696		3835.2	0.00246543
295.4	0.00074395		885.39	0.01049684		1475.39	-0.00099263		2065.39	0.00169662		2655.4	-0.01173529		3245.4	0.00375386		3835.4	0.00304856
295.6	0.001319		885.59	0.01046871		1475.59	-0.00119789		2065.59	0.00110092		2655.6	-0.01255278		3245.6	0.00212526		3835.6	0.00352138
295.8	0.00147556		885.79	0.01147393		1475.79	-0.00139601		2065.79	0.00128998		2655.8	-0.01268422		3245.8	0.00258362		3835.8	0.00346206
296	0.00139276		885.99	0.01255273		1475.99	-0.00185761		2065.99	0.0008474		2656	-0.01163311		3246	0.00222048		3836	0.00278299
296.2	0.00197604		886.19	0.01224908		1476.19	-0.00162214		2066.19	0.000544		2656.2	-0.01109617		3246.2	0.0022924		3836.2	0.00387264
296.4	0.00315201		886.39	0.01257136		1476.39	-0.00140139		2066.39	0.00082153		2656.4	-0.01088901		3246.4	0.00264739		3836.4	0.00320427
296.6	0.00366841		886.59	0.01247136		1476.59	-0.00188875		2066.59	0.00026856		2656.6	-0.0101154		3246.6	0.0021855		3836.6	0.00347843
296.8	0.00298842		886.79	0.01242431		1476.79	-0.00326844		2066.79	0.00138542		2656.8	-0.00986745		3246.8	0.00217217		3836.8	0.00358801
297	0.00267621		886.99	0.01249406		1476.99	-0.00297704		2066.99	0.00153649		2657	-0.00898124		3247	0.00280119		3837	0.00400106
297.2	0.00288045		887.19	0.01244487		1477.19	-0.0030164		2067.19	0.00254605		2657.2	-0.00891147		3247.2	0.00342316		3837.2	0.00427714
297.4	0.00324704		887.39	0.01233626		1477.39	-0.00221368		2067.39	0.00281427		2657.4	-0.00821916		3247.4	0.00300331		3837.4	0.00386138
297.6	0.00324647		887.59	0.01206683		1477.59	-0.00131984		2067.59	0.00319502		2657.6	-0.00736647		3247.6	0.00354108		3837.6	0.00423628
297.8	0.00299502		887.79	0.01251238		1477.79	-0.00140893		2067.79	0.00357567		2657.8	-0.00770317		3247.8	0.00417715		3837.8	0.00358917
298	0.0038097		887.99	0.01235679		1477.99	-0.00197778		2067.99	0.00365846		2658	-0.00713129		3248	0.00327885		3838	0.00396481
298.2	0.00505343		888.19	0.01286181		1478.19	-0.00162355		2068.19	0.00390038		2658.2	-0.00681669		3248.2	0.00278309		3838.2	0.00437102
298.4	0.00578403		888.39	0.01226331		1478.39	-0.00164656		2068.39	0.0050636		2658.4	-0.00707437		3248.4	0.00265298		3838.4	0.00441359
298.6	0.00667994		888.59	0.01328385		1478.59	-0.00176727		2068.59	0.00509625		2658.6	-0.0086817		3248.6	0.00169203		3838.6	0.0048352
298.8	0.00633941		888.79	0.01301582		1478.79	-0.00102078		2068.79	0.00397342		2658.8	-0.00863203		3248.8	0.00224298		3838.8	0.00548176
299	0.00679865		888.99	0.01150797		1478.99	-0.00106803		2068.99	0.00459341		2659	-0.00932677		3249	0.00204636		3839	0.00601669
299.2	0.0076356		889.19	0.01147868		1479.19	0.00027418		2069.19	0.00414903		2659.2	-0.00878937		3249.2	0.00161113		3839.2	0.00666437
299.4	0.00686807		889.39	0.01119668		1479.39	0.00077111		2069.39	0.0043429		2659.4	-0.00961704		3249.4	0.00195166		3839.4	0.00676252
299.6	0.00641121		889.59	0.01157021		1479.59	0.00121833		2069.59	0.00408086		2659.6	-0.00966902		3249.6	0.00209269		3839.6	0.00601922
299.8	0.00615025		889.79	0.01202208		1479.79	0.00080994		2069.79	0.00337817		2659.8	-0.00924211		3249.8	0.00306077		3839.8	0.00650641
300	0.00614121		889.99	0.01166852		1479.99	0.00129712		2069.99	0.00353486		2660	-0.00830833		3250	0.00312805		3840	0.00621126
300.2	0.00557808		890.19	0.01057283		1480.19	0.00118225		2070.19	0.00365919		2660.2	-0.00775286		3250.2	0.00281907		3840.2	0.00658419
300.4	0.00572008		890.39	0.0109357		1480.39	0.00030346		2070.39	0.00465544		2660.4	-0.00852686		3250.4	0.0038941		3840.4	0.00491771
300.6	0.00469978		890.59	0.01076975		1480.59	0.00023474		2070.59	0.00430528		2660.6	-0.00895972		3250.6	0.00309485		3840.6	0.00484883
300.8	0.00473728		890.79	0.01103308		1480.79	0.00001732		2070.79	0.00559145		2660.8	-0.00919033		3250.8	0.00365698		3840.8	0.00424301
301	0.00410166		890.99	0.01060511		1480.99	0.00088608		2070.99	0.0056803		2661	-0.0087232		3251	0.00403651		3841	0.00476757
301.2	0.00413484		891.19	0.01077863		1481.19	0.0009782		2071.19	0.00522271		2661.2	-0.00891724		3251.2	0.00397502		3841.2	0.00414908
301.4	0.00357783		891.39	0.01067542		1481.39	0.00042016		2071.39	0.00562778		2661.4	-0.0085211		3251.4	0.00392508		3841.4	0.00433379
301.6	0.00356798		891.59	0.01112159		1481.59	-0.00027998		2071.59	0.00574838		2661.6	-0.00861817		3251.6	0.00474428		3841.6	0.00452461
301.8	0.00365755		891.79	0.01239283		1481.79	-0.00035206		2071.79	0.00573395		2661.8	-0.0084126		3251.8	0.00514272		3841.8	0.00447194
302	0.00458403		891.99	0.01338546		1481.99	0.00023482		2071.99	0.00556798		2662	-0.0084057		3252	0.00433008		3842	0.00544969
302.2	0.00475665		892.19	0.0142604		1482.19	0.00011286		2072.19	0.00538073		2662.2	-0.00840719		3252.2	0.0050681		3842.2	0.00577173
302.4	0.00464714		892.39	0.0143875		1482.39	-0.00001034		2072.39	0.00557588		2662.4	-0.00846309		3252.4	0.0053837		3842.4	0.00573647
302.6	0.00555974		892.59	0.01473099		1482.59	0.00044553		2072.59	0.00363451		2662.6	-0.00881344		3252.6	0.00524085		3842.6	0.00568059
302.8	0.00460661		892.79	0.01387545		1482.79	0.00016466		2072.79	0.00236185		2662.8	-0.00761431		3252.8	0.00566993		3842.8	0.00504807
303	0.00499747		892.99	0.01348928		1482.99	0.00032269		2072.99	0.00227089		2663	-0.00747084		3253	0.00605314		3843	0.00468205
303.2	0.0050205		893.19	0.01334041		1483.19	0.00152335		2073.19	0.00129558		2663.2	-0.00693256		3253.2	0.00548486		3843.2	0.00512901
303.4	0.00527457		893.39	0.01347388		1483.39	0.000597		2073.39	0.00129901		2663.4	-0.00696739		3253.4	0.00604311		3843.4	0.00506101
303.6	0.00583058		893.59	0.01359048		1483.59	-0.00039232		2073.59	0.00070793		2663.6	-0.00618541		3253.6	0.00606167		3843.6	0.00429817
303.8	0.00645442		893.79	0.01420558		1483.79	-0.00091294		2073.79	-0.00006158		2663.8	-0.00474124		3253.8	0.00681998		3843.8	0.00463981
304	0.00710194		893.99	0.0138383		1483.99	-0.00183197		2073.99	0.00052954		2664	-0.0048361		3254	0.00672122		3844	0.00316184
304.2	0.00711719		894.19	0.01365733		1484.19	-0.0023572		2074.19	0.00058925		2664.2	-0.00523956		3254.2	0.00677059		3844.2	0.00216209
304.4	0.00824712		894.39	0.01345935		1484.39	-0.00303394		2074.39	0.00029021		2664.4	-0.00575367		3254.4	0.00754995		3844.4	0.00129074
304.6	0.008752		894.59	0.01282074		1484.59	-0.0036337		2074.59	0.00083173		2664.6	-0.0059233		3254.6	0.00577485		3844.6	0.0010962
304.8	0.00899976		894.79	0.01228133		1484.79	-0.00417059		2074.79	0.00141426		2664.8	-0.00585351		3254.8	0.00658397		3844.8	0.00083102
305	0.00846918		894.99	0.01132845		1484.99	-0.00374307		2074.99	0.001439		2665	-0.00640982		3255	0.00708172		3845	0.00086455
305.2	0.00872957		895.19	0.01139916		1485.19	-0.00377739		2075.19	0.00186268		2665.2	-0.00709503		3255.2	0.00654385		3845.2	0.00074403
305.4	0.00845939		895.39	0.01114821		1485.39	-0.00341805		2075.39	0.00280654		2665.4	-0.00752966		3255.4	0.0061745		3845.4	0.00134655
305.6	0.0094812		895.59	0.01218755		1485.59	-0.00284455		2075.59	0.00270397		2665.6	-0.00753323		3255.6	0.00640699		3845.6	0.00146265
305.8	0.00920152		895.79	0.01329581		1485.79	-0.00191201		2075.79	0.00332618		2665.8	-0.00703333		3255.8	0.0064744		3845.8	0.00264779
306	0.00941427		895.99	0.01395532		1485.99	-0.00095001		2075.99	0.00318324		2666	-0.00741716		3256	0.00610444		3846	0.00271843
306.2	0.00977777		896.19	0.01302305		1486.19	-0.0016316		2076.19	0.0035834		2666.2	-0.00683639		3256.2	0.00624284		3846.2	0.00317768
306.4	0.00918811		896.39	0.01284026		1486.39	-0.00085531		2076.39	0.00287009		2666.4	-0.00635506		3256.4	0.00538004		3846.4	0.00338426
306.6	0.00909708		896.59	0.01280098		1486.59	-0.00041812		2076.59	0.00228148		2666.6	-0.00668099		3256.6	0.00553285		3846.6	0.00327371
306.8	0.00791596		896.79	0.01302862		1486.79	-0.00063338		2076.79	0.00205156		2666.8	-0.00642536		3256.8	0.00601259		3846.8	0.0036508
307	0.00718633		896.99	0.01257765		1486.99	0.00078617		2076.99	0.00183901		2667	-0.00623788		3257	0.00647158		3847	0.00377976
307.2	0.00755044		897.19	0.01358407		1487.19	0.00111764		2077.19	0.00217354		2667.2	-0.00564689		3257.2	0.00583636		3847.2	0.00450348
307.4	0.00841246		897.39	0.01512768		1487.39	0.00045455		2077.39	0.0019827		2667.4	-0.0053416		3257.4	0.00609777		3847.4	0.0044005
307.6	0.0082215		897.59	0.01532088		1487.59	0.00045648		2077.59	0.00171346		2667.6	-0.00572054		3257.6	0.00602704		3847.6	0.00440424
307.8	0.00851253		897.79	0.01583601		1487.79	0.00100411		2077.79	0.00152948		2667.8	-0.00554358		3257.8	0.00629672		3847.8	0.00449038
308	0.00810508		897.99	0.01489814		1487.99	0.00124119		2077.99	0.00145716		2668	-0.00692538		3258	0.00630349		3848	0.00424208
308.2	0.00790415		898.19	0.01439793		1488.19	0.00158413		2078.19	0.0016648		2668.2	-0.00711495		3258.2	0.00660484		3848.2	0.00418388
308.4	0.00786602		898.39	0.01411445		1488.39	0.00069452		2078.39	0.00201923		2668.4	-0.00778595		3258.4	0.00603761		3848.4	0.00442179
308.6	0.00795811		898.59	0.01343913		1488.59	0.00071489		2078.59	0.00270068		2668.6	-0.00848637		3258.6	0.00478545		3848.6	0.00459347
308.8	0.00805254		898.79	0.01208938		1488.79	0.00107565		2078.79	0.00301713		2668.8	-0.00912963		3258.8	0.00550114		3848.8	0.00449634
309	0.00822897		898.99	0.01221817		1488.99	0.00160925		2078.99	0.00314187		2669	-0.0085759		3259	0.00524286		3849	0.00484434
309.2	0.00815913		899.19	0.01210843		1489.19	0.00229361		2079.19	0.00423128		2669.2	-0.0081295		3259.2	0.00354741		3849.2	0.00597937
309.4	0.00912292		899.39	0.01230888		1489.39	0.00274755		2079.39	0.00408945		2669.4	-0.00791369		3259.4	0.00343875		3849.4	0.0058227
309.6	0.01003646		899.59	0.01233743		1489.59	0.00234095		2079.59	0.00442743		2669.6	-0.00738128		3259.6	0.00351704		3849.6	0.00609439
309.8	0.01051469		899.79	0.01220548		1489.79	0.0022573		2079.79	0.0051173		2669.8	-0.00720579		3259.8	0.00375205		3849.8	0.00581186
310	0.0119691		899.99	0.01167192		1489.99	0.00240178		2079.99	0.00509817		2670	-0.00742462		3260	0.00361165		3850	0.00517665
310.2	0.01283526		900.19	0.01041872		1490.19	0.00145794		2080.19	0.00555716		2670.2	-0.00699976		3260.2	0.00329064		3850.2	0.00458358
310.4	0.01277438		900.39	0.0113041		1490.39	0.00166175		2080.39	0.00577509		2670.4	-0.00643208		3260.4	0.0041931		3850.4	0.00366766
310.6	0.01304516		900.59	0.01162828		1490.59	0.00121921		2080.59	0.00540475		2670.6	-0.00696457		3260.6	0.00443779		3850.6	0.00393167
310.8	0.01337135		900.79	0.01131092		1490.79	0.00130457		2080.79	0.00509103		2670.8	-0.0067419		3260.8	0.00506031		3850.8	0.00311558
311	0.01346554		900.99	0.01150587		1490.99	0.00193452		2080.99	0.00504184		2671	-0.00595269		3261	0.00461493		3851	0.00305502
311.2	0.0140225		901.19	0.01263145		1491.19	0.00070139		2081.19	0.00505005		2671.2	-0.00676593		3261.2	0.0045999		3851.2	0.00356928
311.4	0.01446683		901.39	0.0127895		1491.39	0.00029571		2081.39	0.00429254		2671.4	-0.00752277		3261.4	0.00441441		3851.4	0.00270637
311.6	0.01380034		901.59	0.01298416		1491.59	-0.00060187		2081.59	0.00441895		2671.6	-0.0076661		3261.6	0.00351791		3851.6	0.00305767
311.8	0.01425589		901.79	0.01291807		1491.79	0.00037986		2081.79	0.00414648		2671.8	-0.00774897		3261.8	0.00399003		3851.8	0.00365595
312	0.01323785		901.99	0.01307335		1491.99	0.00058733		2081.99	0.00301772		2672	-0.00769071		3262	0.00408526		3852	0.00343986
312.2	0.01348927		902.19	0.01283556		1492.19	0.00052004		2082.19	0.0027488		2672.2	-0.00678998		3262.2	0.00383497		3852.2	0.00375194
312.4	0.0137212		902.39	0.01224681		1492.39	0.00018707		2082.39	0.00204988		2672.4	-0.00679713		3262.4	0.00360412		3852.4	0.00346141
312.6	0.01372284		902.59	0.01142513		1492.59	0.00046121		2082.59	0.00168964		2672.6	-0.00676133		3262.6	0.00333638		3852.6	0.00399008
312.8	0.01327271		902.79	0.01092039		1492.79	0.00026254		2082.79	0.00207811		2672.8	-0.00649446		3262.8	0.0044269		3852.8	0.00433235
313	0.01235149		902.99	0.0117824		1492.99	0.00032183		2082.99	0.00255482		2673	-0.0054686		3263	0.00393611		3853	0.00478528
313.2	0.01203421		903.19	0.01141607		1493.19	0.0004587		2083.19	0.00335868		2673.2	-0.00550755		3263.2	0.00361498		3853.2	0.00522664
313.4	0.01243317		903.39	0.01206685		1493.39	0.00040052		2083.39	0.0029846		2673.4	-0.00588736		3263.4	0.00382773		3853.4	0.00420095
313.6	0.01239548		903.59	0.01213924		1493.59	0.00050633		2083.59	0.00335249		2673.6	-0.00598999		3263.6	0.00421344		3853.6	0.00401542
313.8	0.0131255		903.79	0.01233841		1493.79	0.00080659		2083.79	0.00343409		2673.8	-0.00734376		3263.8	0.00518367		3853.8	0.00299763
314	0.01373804		903.99	0.01284805		1493.99	0.00067528		2083.99	0.00348534		2674	-0.00758864		3264	0.00564915		3854	0.00354778
314.2	0.01423104		904.19	0.01332263		1494.19	0.00038348		2084.19	0.00401321		2674.2	-0.00804498		3264.2	0.00685637		3854.2	0.0035602
314.4	0.01445962		904.39	0.01441756		1494.39	0.00048951		2084.39	0.00312276		2674.4	-0.00834487		3264.4	0.00798465		3854.4	0.00367407
314.6	0.01416537		904.59	0.01413488		1494.59	-0.000112		2084.59	0.00243464		2674.6	-0.00963934		3264.6	0.00823252		3854.6	0.00397599
314.8	0.01447189		904.79	0.01362832		1494.79	-0.0004392		2084.79	0.00319156		2674.8	-0.00944242		3264.8	0.00856115		3854.8	0.00397826
315	0.01445459		904.99	0.01405357		1494.99	-0.00039896		2084.99	0.00308644		2675	-0.00905304		3265	0.00823202		3855	0.00418186
315.2	0.01476235		905.19	0.01434488		1495.19	-0.00156351		2085.19	0.00337114		2675.2	-0.00915532		3265.2	0.00858301		3855.2	0.00416595
315.4	0.01490285		905.39	0.01409228		1495.39	-0.00117335		2085.39	0.00420828		2675.4	-0.00852276		3265.4	0.00800062		3855.4	0.00343697
315.6	0.01526303		905.59	0.01443276		1495.59	-0.00182343		2085.59	0.00412417		2675.6	-0.00724662		3265.6	0.00754509		3855.6	0.00361809
315.8	0.01582218		905.79	0.0144365		1495.79	-0.00093082		2085.79	0.0035994		2675.8	-0.00704788		3265.8	0.00795313		3855.8	0.00376396
316	0.01601063		905.99	0.01380061		1495.99	-0.00030074		2085.99	0.00238604		2676	-0.00622606		3266	0.00779028		3856	0.00364743
316.2	0.01650545		906.19	0.01213189		1496.19	0.00026909		2086.19	0.00266387		2676.2	-0.00594699		3266.2	0.0079045		3856.2	0.00390493
316.4	0.0173012		906.39	0.0114305		1496.39	0.00074972		2086.39	0.0020006		2676.4	-0.00647989		3266.4	0.00759749		3856.4	0.0040533
316.6	0.01728247		906.59	0.0114739		1496.59	0.00126417		2086.59	0.00209645		2676.6	-0.00604944		3266.6	0.00721596		3856.6	0.00448282
316.8	0.01733794		906.79	0.01144618		1496.79	0.00125415		2086.79	0.00264922		2676.8	-0.00604752		3266.8	0.00735893		3856.8	0.00394276
317	0.01734611		906.99	0.01213084		1496.99	0.0016504		2086.99	0.00332689		2677	-0.00644649		3267	0.00680578		3857	0.0041323
317.2	0.01778589		907.19	0.01230661		1497.19	0.00179105		2087.19	0.00345068		2677.2	-0.00690299		3267.2	0.00732865		3857.2	0.00410967
317.4	0.01776656		907.39	0.01237422		1497.39	0.00220562		2087.39	0.00323458		2677.4	-0.0075746		3267.4	0.00719361		3857.4	0.00328433
317.6	0.01875051		907.59	0.01214227		1497.59	0.00268846		2087.59	0.00359149		2677.6	-0.00812993		3267.6	0.00732368		3857.6	0.00285187
317.8	0.01865145		907.79	0.01197633		1497.79	0.00236893		2087.79	0.00379716		2677.8	-0.00942144		3267.8	0.00741556		3857.8	0.00286354
318	0.0194244		907.99	0.01222224		1497.99	0.00188266		2087.99	0.00431975		2678	-0.0090426		3268	0.00733637		3858	0.00389165
318.2	0.01894331		908.19	0.01198287		1498.19	0.00221774		2088.19	0.00544034		2678.2	-0.00922276		3268.2	0.00764874		3858.2	0.00379832
318.4	0.01801348		908.39	0.01181791		1498.39	0.00170199		2088.39	0.00505343		2678.4	-0.00856664		3268.4	0.00724031		3858.4	0.00322497
318.6	0.01698758		908.59	0.01127856		1498.59	0.00127005		2088.59	0.00566902		2678.6	-0.00898882		3268.6	0.00660293		3858.6	0.00452687
318.8	0.01746617		908.79	0.01144463		1498.79	0.00147843		2088.79	0.0056022		2678.8	-0.00864172		3268.8	0.00584841		3858.8	0.00441958
319	0.01683834		908.99	0.01196718		1498.99	0.00195362		2088.99	0.00612973		2679	-0.00713368		3269	0.006153		3859	0.00387394
319.2	0.01663024		909.19	0.01283913		1499.19	0.00161146		2089.19	0.00633434		2679.2	-0.00669673		3269.2	0.00637163		3859.2	0.00339629
319.4	0.01585867		909.39	0.01329747		1499.39	0.002081		2089.39	0.00678593		2679.4	-0.00614878		3269.4	0.00581477		3859.4	0.00293199
319.6	0.01540579		909.59	0.01360104		1499.59	0.00170585		2089.59	0.00595577		2679.6	-0.00600941		3269.6	0.00602862		3859.6	0.00239025
319.8	0.01518328		909.79	0.01440162		1499.79	0.00248329		2089.79	0.0050751		2679.8	-0.00700894		3269.8	0.00590025		3859.8	0.00221504
320	0.01471472		909.99	0.01468452		1499.99	0.0029857		2089.99	0.00566854		2680	-0.00711511		3270	0.0064071		3860	0.00224326
320.2	0.01482702		910.19	0.0153549		1500.19	0.00251177		2090.19	0.00581158		2680.2	-0.00688696		3270.2	0.00623711		3860.2	0.0014258
320.4	0.01545303		910.39	0.01678649		1500.39	0.00224387		2090.39	0.0053396		2680.4	-0.00648536		3270.4	0.00608453		3860.4	0.00044235
320.6	0.01629043		910.59	0.01740915		1500.59	0.00146737		2090.59	0.00566237		2680.6	-0.00624839		3270.6	0.0061371		3860.6	0.00062509
320.8	0.01672104		910.79	0.01741896		1500.79	0.00134422		2090.79	0.00596408		2680.8	-0.00670733		3270.8	0.00655693		3860.8	0.00123133
321	0.01721358		910.99	0.01768666		1500.99	0.00102639		2090.99	0.00601759		2681	-0.00673364		3271	0.00727315		3861	0.00217188
321.2	0.01739715		911.19	0.01742599		1501.19	0.00086636		2091.19	0.00637851		2681.2	-0.00625264		3271.2	0.00765126		3861.2	0.00232274
321.4	0.0175932		911.39	0.01776136		1501.39	0.0011867		2091.39	0.00611366		2681.4	-0.00603636		3271.4	0.00756743		3861.4	0.00220679
321.6	0.0189302		911.59	0.01724974		1501.59	0.00161103		2091.59	0.0061189		2681.6	-0.00570223		3271.6	0.00671656		3861.6	0.00244822
321.8	0.01877541		911.79	0.01727743		1501.79	0.00263677		2091.79	0.00571782		2681.8	-0.00545784		3271.8	0.00687692		3861.8	0.0030356
322	0.01995074		911.99	0.01723376		1501.99	0.00374046		2091.99	0.00564246		2682	-0.00527539		3272	0.00628252		3862	0.00363106
322.2	0.01933684		912.19	0.01661705		1502.19	0.00360154		2092.19	0.00591519		2682.2	-0.00519658		3272.2	0.00606075		3862.2	0.0039996
322.4	0.01971187		912.39	0.01628547		1502.39	0.0039377		2092.39	0.00487129		2682.4	-0.00480067		3272.4	0.00536759		3862.4	0.00480201
322.6	0.02007773		912.59	0.01641004		1502.59	0.00496582		2092.59	0.00428868		2682.6	-0.00519328		3272.6	0.00430284		3862.6	0.00559107
322.8	0.02068765		912.79	0.01625445		1502.79	0.00549217		2092.79	0.00365986		2682.8	-0.00492979		3272.8	0.00447431		3862.8	0.00544377
323	0.02001807		912.99	0.01658646		1502.99	0.00543925		2092.99	0.00414107		2683	-0.00322046		3273	0.00417028		3863	0.00592207
323.2	0.01986617		913.19	0.01672838		1503.19	0.00491503		2093.19	0.00413231		2683.2	-0.0035696		3273.2	0.00351391		3863.2	0.00549983
323.4	0.01939521		913.39	0.01610146		1503.39	0.00498999		2093.39	0.00444568		2683.4	-0.00352878		3273.4	0.00283227		3863.4	0.00563851
323.6	0.01964079		913.59	0.01576867		1503.59	0.00418671		2093.59	0.00380428		2683.6	-0.00359589		3273.6	0.00290891		3863.6	0.00482195
323.8	0.01980484		913.79	0.01639222		1503.79	0.00401212		2093.79	0.00449293		2683.8	-0.00442251		3273.8	0.00280571		3863.8	0.00513682
324	0.01942912		913.99	0.01660505		1503.99	0.00321176		2093.99	0.00620299		2684	-0.00321058		3274	0.00388766		3864	0.00521265
324.2	0.01985828		914.19	0.01694527		1504.19	0.00296357		2094.19	0.00561769		2684.2	-0.00320492		3274.2	0.00418738		3864.2	0.00458896
324.4	0.01969585		914.39	0.01642907		1504.39	0.00266686		2094.39	0.00621278		2684.4	-0.00314634		3274.4	0.00468407		3864.4	0.00461489
324.6	0.02031049		914.59	0.01609429		1504.59	0.00228615		2094.59	0.00622391		2684.6	-0.00355344		3274.6	0.00471492		3864.6	0.00655876
324.8	0.02034046		914.79	0.01578879		1504.79	0.00190472		2094.79	0.00652483		2684.8	-0.00411287		3274.8	0.00589364		3864.8	0.00588006
325	0.0202083		914.99	0.01576591		1504.99	0.00117232		2094.99	0.00640287		2685	-0.00417209		3275	0.00593524		3865	0.00550461
325.2	0.01959786		915.19	0.01603808		1505.19	0.00143307		2095.19	0.00695632		2685.2	-0.00419701		3275.2	0.00695398		3865.2	0.00575361
325.4	0.02081552		915.39	0.01661939		1505.39	0.00155355		2095.39	0.00603504		2685.4	-0.00451849		3275.4	0.00721882		3865.4	0.00483953
325.6	0.02191903		915.59	0.01653484		1505.59	0.00204169		2095.59	0.00546857		2685.6	-0.00394274		3275.6	0.00710639		3865.6	0.00366384
325.8	0.02209416		915.79	0.01713294		1505.79	0.00297118		2095.79	0.00470241		2685.8	-0.00397161		3275.8	0.0083178		3865.8	0.00396205
326	0.02248457		915.99	0.01682987		1505.99	0.00314448		2095.99	0.00494944		2686	-0.00453437		3276	0.00824261		3866	0.00351105
326.2	0.02271824		916.19	0.01648165		1506.19	0.00336997		2096.19	0.00494985		2686.2	-0.00401486		3276.2	0.00826393		3866.2	0.00325616
326.4	0.02339655		916.39	0.01647581		1506.39	0.00369195		2096.39	0.0045689		2686.4	-0.00367733		3276.4	0.00801472		3866.4	0.00278743
326.6	0.02334578		916.59	0.01695584		1506.59	0.00400874		2096.59	0.00471934		2686.6	-0.00439232		3276.6	0.00714328		3866.6	0.00234058
326.8	0.02355255		916.79	0.01701159		1506.79	0.00388187		2096.79	0.00483935		2686.8	-0.00459576		3276.8	0.00757202		3866.8	0.0023267
327	0.02388369		916.99	0.01787896		1506.99	0.00304605		2096.99	0.00564806		2687	-0.00463899		3277	0.00635297		3867	0.00199572
327.2	0.02343671		917.19	0.01750907		1507.19	0.00266685		2097.19	0.00532733		2687.2	-0.00462851		3277.2	0.00622904		3867.2	0.00238363
327.4	0.023715		917.39	0.01697315		1507.39	0.00292787		2097.39	0.00580559		2687.4	-0.00468824		3277.4	0.00572426		3867.4	0.00307641
327.6	0.0237122		917.59	0.01724422		1507.59	0.00270441		2097.59	0.00604385		2687.6	-0.00543953		3277.6	0.00634534		3867.6	0.00332004
327.8	0.02329318		917.79	0.01722921		1507.79	0.00416494		2097.79	0.00672836		2687.8	-0.00538477		3277.8	0.00588902		3867.8	0.00422749
328	0.02326245		917.99	0.01748487		1507.99	0.00435043		2097.99	0.00630391		2688	-0.00521205		3278	0.00630073		3868	0.00499092
328.2	0.02308004		918.19	0.01728664		1508.19	0.0040792		2098.19	0.00587296		2688.2	-0.0063146		3278.2	0.00614546		3868.2	0.00564943
328.4	0.02246067		918.39	0.01700824		1508.39	0.00345663		2098.39	0.00608688		2688.4	-0.0061312		3278.4	0.00569634		3868.4	0.006631
328.6	0.02276405		918.59	0.01673219		1508.59	0.0032614		2098.59	0.00559025		2688.6	-0.00614661		3278.6	0.00529452		3868.6	0.00734735
328.8	0.02245994		918.79	0.01604621		1508.79	0.00221284		2098.79	0.00599969		2688.8	-0.00699819		3278.8	0.00531802		3868.8	0.00698165
329	0.0219933		918.99	0.0158034		1508.99	0.00181198		2098.99	0.00495292		2689	-0.00672932		3279	0.0047529		3869	0.00787696
329.2	0.02219087		919.19	0.01600924		1509.19	0.00180172		2099.19	0.00472417		2689.2	-0.00727323		3279.2	0.00526583		3869.2	0.00810393
329.4	0.02268699		919.39	0.01572813		1509.39	0.00288311		2099.39	0.00335582		2689.4	-0.00700026		3279.4	0.00546471		3869.4	0.00683971
329.6	0.0226218		919.59	0.01567677		1509.59	0.00339095		2099.59	0.00309826		2689.6	-0.00636692		3279.6	0.0071734		3869.6	0.00641752
329.8	0.02188578		919.79	0.01508932		1509.79	0.00338739		2099.79	0.00251982		2689.8	-0.00571867		3279.8	0.00856904		3869.8	0.00720539
330	0.02222283		919.99	0.0153265		1509.99	0.0045065		2099.99	0.00317474		2690	-0.00469412		3280	0.00923129		3870	0.00649861
330.2	0.02276794		920.19	0.01509269		1510.19	0.00474176		2100.19	0.0037175		2690.2	-0.00413297		3280.2	0.00969519		3870.2	0.00642844
330.4	0.02252862		920.39	0.01565738		1510.39	0.00423571		2100.39	0.00417653		2690.4	-0.00408623		3280.4	0.01026171		3870.4	0.00658913
330.6	0.02232907		920.59	0.0154735		1510.59	0.0053013		2100.59	0.00556778		2690.6	-0.00434964		3280.6	0.00928169		3870.6	0.0065395
330.8	0.02199549		920.79	0.01597056		1510.79	0.00487006		2100.79	0.00594716		2690.8	-0.00368583		3280.8	0.00949915		3870.8	0.00549924
331	0.0219242		920.99	0.01538544		1510.99	0.00427499		2100.99	0.00702342		2691	-0.0040219		3281	0.00909874		3871	0.00534606
331.2	0.02215222		921.19	0.01477646		1511.19	0.00439518		2101.19	0.00768216		2691.2	-0.00320191		3281.2	0.00908971		3871.2	0.00480926
331.4	0.02280485		921.39	0.01465582		1511.39	0.00465432		2101.39	0.00873309		2691.4	-0.00358229		3281.4	0.00816889		3871.4	0.00415429
331.6	0.02300263		921.59	0.01518609		1511.59	0.00461953		2101.59	0.00900206		2691.6	-0.00358746		3281.6	0.00742526		3871.6	0.00426006
331.8	0.02304692		921.79	0.01529089		1511.79	0.00497282		2101.79	0.00880801		2691.8	-0.00253178		3281.8	0.00571332		3871.8	0.0039875
332	0.02346918		921.99	0.01544816		1511.99	0.00320051		2101.99	0.00915721		2692	-0.00302232		3282	0.00520835		3872	0.00457022
332.2	0.02299355		922.19	0.01491677		1512.19	0.00251527		2102.19	0.00915077		2692.2	-0.00313492		3282.2	0.00486522		3872.2	0.00398189
332.4	0.02286344		922.39	0.01554868		1512.39	0.00194746		2102.39	0.00914694		2692.4	-0.00262144		3282.4	0.00432716		3872.4	0.00311275
332.6	0.0239004		922.59	0.01546559		1512.59	0.0025147		2102.59	0.00880339		2692.6	-0.00372548		3282.6	0.00387008		3872.6	0.00356995
332.8	0.02421828		922.79	0.01560072		1512.79	0.00213264		2102.79	0.00784385		2692.8	-0.00479639		3282.8	0.00418727		3872.8	0.00296957
333	0.02494092		922.99	0.01624716		1512.99	0.00203664		2102.99	0.00650127		2693	-0.00500837		3283	0.00449345		3873	0.00250407
333.2	0.02507641		923.19	0.01655043		1513.19	0.00225378		2103.19	0.00596418		2693.2	-0.00523524		3283.2	0.00542672		3873.2	0.00166713
333.4	0.02498171		923.39	0.01642153		1513.39	0.00314788		2103.39	0.00507516		2693.4	-0.0044392		3283.4	0.00653062		3873.4	0.00103673
333.6	0.02492749		923.59	0.01749684		1513.59	0.00276578		2103.59	0.00554062		2693.6	-0.00477118		3283.6	0.00856896		3873.6	0.00130988
333.8	0.02449957		923.79	0.01785015		1513.79	0.00258529		2103.79	0.005407		2693.8	-0.00454909		3283.8	0.00893943		3873.8	0.00264348
334	0.0254472		923.99	0.01799119		1513.99	0.00378892		2103.99	0.00552476		2694	-0.00458295		3284	0.00909401		3874	0.00310017
334.2	0.02492237		924.19	0.01714697		1514.19	0.00392035		2104.19	0.00562239		2694.2	-0.00545246		3284.2	0.00911555		3874.2	0.0035704
334.4	0.02454818		924.39	0.01679533		1514.39	0.00393651		2104.39	0.00568549		2694.4	-0.00601918		3284.4	0.00874115		3874.4	0.00486066
334.6	0.02402108		924.59	0.01591418		1514.59	0.00412725		2104.59	0.00655104		2694.6	-0.00615899		3284.6	0.00829289		3874.6	0.00503501
334.8	0.02421082		924.79	0.01713587		1514.79	0.00362028		2104.79	0.00593068		2694.8	-0.00666413		3284.8	0.00815007		3874.8	0.00538889
335	0.02497347		924.99	0.01654838		1514.99	0.00431096		2104.99	0.00608953		2695	-0.00742909		3285	0.00807193		3875	0.00576897
335.2	0.02567226		925.19	0.01716144		1515.19	0.00476453		2105.19	0.00670545		2695.2	-0.00778726		3285.2	0.007584		3875.2	0.00592988
335.4	0.02559134		925.39	0.01723766		1515.39	0.00541901		2105.39	0.00619457		2695.4	-0.00834618		3285.4	0.00707723		3875.4	0.00583248
335.6	0.02546545		925.59	0.01725798		1515.59	0.00582474		2105.59	0.00601799		2695.6	-0.00802977		3285.6	0.0065127		3875.6	0.00600116
335.8	0.02532104		925.79	0.01670282		1515.79	0.00570366		2105.79	0.00582828		2695.8	-0.00746208		3285.8	0.00578447		3875.8	0.00617198
336	0.02556086		925.99	0.01630824		1515.99	0.00507554		2105.99	0.00626166		2696	-0.00737232		3286	0.00581388		3876	0.00600435
336.2	0.02590492		926.19	0.01616458		1516.19	0.00517742		2106.19	0.00557372		2696.2	-0.00760568		3286.2	0.00642536		3876.2	0.00515054
336.4	0.02634083		926.39	0.01639008		1516.39	0.00564368		2106.39	0.00501628		2696.4	-0.00779404		3286.4	0.00675737		3876.4	0.00566729
336.6	0.02786319		926.59	0.0157968		1516.59	0.00614614		2106.59	0.00437482		2696.6	-0.00856797		3286.6	0.00682754		3876.6	0.00605977
336.8	0.02781368		926.79	0.01579215		1516.79	0.00604319		2106.79	0.00439443		2696.8	-0.00776716		3286.8	0.00809841		3876.8	0.00508425
337	0.02785011		926.99	0.0162796		1516.99	0.00622934		2106.99	0.00402363		2697	-0.0070544		3287	0.0091213		3877	0.00390671
337.2	0.02779338		927.19	0.01605877		1517.19	0.00642457		2107.19	0.00484989		2697.2	-0.00656399		3287.2	0.00972125		3877.2	0.00358796
337.4	0.02880193		927.39	0.01583842		1517.39	0.00650212		2107.39	0.00493769		2697.4	-0.0070343		3287.4	0.00993406		3877.4	0.00394744
337.6	0.02832137		927.59	0.01660529		1517.59	0.00588375		2107.59	0.00536186		2697.6	-0.00716917		3287.6	0.00995703		3877.6	0.00415754
337.8	0.02886811		927.79	0.01626658		1517.79	0.00613763		2107.79	0.0047944		2697.8	-0.00740633		3287.8	0.00954919		3877.8	0.00503362
338	0.0290967		927.99	0.0151674		1517.99	0.00625083		2107.99	0.00497631		2698	-0.0065055		3288	0.00957418		3878	0.00514528
338.2	0.02855981		928.19	0.01426145		1518.19	0.00614384		2108.19	0.00491138		2698.2	-0.00621253		3288.2	0.00955502		3878.2	0.00593961
338.4	0.02854346		928.39	0.01357035		1518.39	0.0050496		2108.39	0.00552938		2698.4	-0.00586773		3288.4	0.00905529		3878.4	0.00662278
338.6	0.02827365		928.59	0.0138534		1518.59	0.00476183		2108.59	0.00654734		2698.6	-0.00530855		3288.6	0.00879207		3878.6	0.0071606
338.8	0.02848046		928.79	0.01443689		1518.79	0.00542473		2108.79	0.00649158		2698.8	-0.00544771		3288.8	0.00921532		3878.8	0.00723832
339	0.02854186		928.99	0.01364547		1518.99	0.00486837		2108.99	0.00616768		2699	-0.00554172		3289	0.0094789		3879	0.00659791
339.2	0.02869382		929.19	0.01341088		1519.19	0.00498691		2109.19	0.00621125		2699.2	-0.00526713		3289.2	0.00947957		3879.2	0.00671905
339.4	0.02823044		929.39	0.01376566		1519.39	0.00494079		2109.39	0.00625616		2699.4	-0.00432882		3289.4	0.00960308		3879.4	0.00605425
339.6	0.02761843		929.59	0.01315589		1519.59	0.004644		2109.59	0.00683811		2699.6	-0.00387452		3289.6	0.00968197		3879.6	0.00630039
339.8	0.02745841		929.79	0.01285154		1519.79	0.0037116		2109.79	0.00676166		2699.8	-0.00337696		3289.8	0.00973112		3879.8	0.0059031
340	0.02725003		929.99	0.01333367		1519.99	0.00313871		2109.99	0.00693163		2700	-0.00326354		3290	0.01017827		3880	0.00454109
340.2	0.02742931		930.19	0.0138006		1520.19	0.00311365		2110.19	0.00667567		2700.2	-0.00358065		3290.2	0.01036976		3880.2	0.00437175
340.4	0.02733617		930.39	0.01381045		1520.39	0.00286338		2110.39	0.00668201		2700.4	-0.00361724		3290.4	0.01073359		3880.4	0.00390278
340.6	0.02794436		930.59	0.01382871		1520.59	0.00175396		2110.59	0.00734748		2700.6	-0.00385987		3290.6	0.01052457		3880.6	0.00230543
340.8	0.02792919		930.79	0.01422525		1520.79	0.00207492		2110.79	0.00814626		2700.8	-0.00316406		3290.8	0.01155268		3880.8	0.00149527
341	0.02862071		930.99	0.01515654		1520.99	0.0019193		2110.99	0.00761035		2701	-0.00296826		3291	0.01186012		3881	0.00027643
341.2	0.02858038		931.19	0.01605853		1521.19	0.0011125		2111.19	0.00836785		2701.2	-0.00354839		3291.2	0.0108377		3881.2	0.00005743
341.4	0.0291555		931.39	0.01714617		1521.39	0.00021493		2111.39	0.00779537		2701.4	-0.00393687		3291.4	0.01087047		3881.4	0.0011851
341.6	0.02852762		931.59	0.01860125		1521.59	0.00125695		2111.59	0.00758408		2701.6	-0.00339447		3291.6	0.00947425		3881.6	0.00153707
341.8	0.0291774		931.79	0.01879513		1521.79	0.00195629		2111.79	0.00746968		2701.8	-0.00401119		3291.8	0.00946937		3881.8	0.0017411
342	0.02817977		931.99	0.01915713		1521.99	0.00104269		2111.99	0.0084441		2702	-0.00315672		3292	0.00912617		3882	0.0023569
342.2	0.02794327		932.19	0.01887693		1522.19	0.00173137		2112.19	0.00782783		2702.2	-0.00405719		3292.2	0.00811925		3882.2	0.00317164
342.4	0.02847532		932.39	0.01861004		1522.39	0.00149213		2112.39	0.0083299		2702.4	-0.00406888		3292.4	0.00756543		3882.4	0.00350453
342.6	0.02881683		932.59	0.01945181		1522.59	0.00098743		2112.59	0.0085363		2702.6	-0.00487361		3292.6	0.00729917		3882.6	0.00428539
342.8	0.02930152		932.79	0.01917693		1522.79	0.0013898		2112.79	0.00754029		2702.8	-0.00555941		3292.8	0.00815689		3882.8	0.00529247
343	0.02941249		932.99	0.0189361		1522.99	0.00113095		2112.99	0.00726616		2703	-0.00682831		3293	0.00769774		3883	0.00584799
343.2	0.03021177		933.19	0.01891948		1523.19	0.00130852		2113.19	0.00677011		2703.2	-0.00630597		3293.2	0.00786622		3883.2	0.00695936
343.4	0.03003515		933.39	0.01893254		1523.39	0.00141052		2113.39	0.00732972		2703.4	-0.00556357		3293.4	0.00755698		3883.4	0.00763419
343.6	0.02958521		933.59	0.01821835		1523.59	0.0018918		2113.59	0.00660745		2703.6	-0.00687016		3293.6	0.00715062		3883.6	0.00816745
343.8	0.03027629		933.79	0.01874859		1523.79	0.00179372		2113.79	0.00517587		2703.8	-0.00620344		3293.8	0.0074701		3883.8	0.00786578
344	0.0309686		933.99	0.0189546		1523.99	0.00207037		2113.99	0.004798		2704	-0.00551741		3294	0.0075443		3884	0.00722067
344.2	0.03189869		934.19	0.0185479		1524.19	0.00246316		2114.19	0.00453027		2704.2	-0.00556662		3294.2	0.00801116		3884.2	0.00667732
344.4	0.03322014		934.39	0.01765731		1524.39	0.00234491		2114.39	0.00446901		2704.4	-0.00562565		3294.4	0.00742706		3884.4	0.00578689
344.6	0.03380756		934.59	0.01733919		1524.59	0.00251974		2114.59	0.00455874		2704.6	-0.00530523		3294.6	0.00775568		3884.6	0.00609647
344.8	0.03414352		934.79	0.01696677		1524.79	0.00292725		2114.79	0.00423856		2704.8	-0.00444124		3294.8	0.00841774		3884.8	0.00575247
345	0.03443196		934.99	0.0173268		1524.99	0.00341249		2114.99	0.00317385		2705	-0.00421125		3295	0.00887704		3885	0.00589765
345.2	0.03373072		935.19	0.01714499		1525.19	0.00435288		2115.19	0.00328945		2705.2	-0.00432558		3295.2	0.00851574		3885.2	0.00597068
345.4	0.0337727		935.39	0.01717222		1525.39	0.0051035		2115.39	0.00361576		2705.4	-0.00391324		3295.4	0.00875044		3885.4	0.0070773
345.6	0.03377278		935.59	0.01796025		1525.59	0.0061839		2115.59	0.0042186		2705.6	-0.00408898		3295.6	0.00878648		3885.6	0.00658256
345.8	0.03426433		935.79	0.01819261		1525.79	0.00568529		2115.79	0.00440875		2705.8	-0.00416409		3295.8	0.00895735		3885.8	0.00594587
346	0.0335724		935.99	0.019551		1525.99	0.0061906		2115.99	0.00425542		2706	-0.00409719		3296	0.00872082		3886	0.00560833
346.2	0.03443248		936.19	0.019619		1526.19	0.0075912		2116.19	0.00402214		2706.2	-0.00475228		3296.2	0.00877159		3886.2	0.00514479
346.4	0.03443153		936.39	0.01963992		1526.39	0.00707145		2116.39	0.00530637		2706.4	-0.00448054		3296.4	0.00960879		3886.4	0.00476556
346.6	0.03429367		936.59	0.0199625		1526.59	0.00662788		2116.59	0.00568538		2706.6	-0.00446479		3296.6	0.01024697		3886.6	0.0045407
346.8	0.03362675		936.79	0.01916723		1526.79	0.00666818		2116.79	0.00576568		2706.8	-0.00469243		3296.8	0.01112465		3886.8	0.00474312
347	0.03335425		936.99	0.01846788		1526.99	0.00595335		2116.99	0.00603556		2707	-0.00443443		3297	0.01040302		3887	0.00452641
347.2	0.0336671		937.19	0.01848421		1527.19	0.00470093		2117.19	0.00588354		2707.2	-0.00304602		3297.2	0.0104974		3887.2	0.00516306
347.4	0.03403076		937.39	0.0179449		1527.39	0.00427931		2117.39	0.0061016		2707.4	-0.00207066		3297.4	0.01033267		3887.4	0.00503473
347.6	0.0339678		937.59	0.01853976		1527.59	0.00330588		2117.59	0.00610724		2707.6	-0.00280567		3297.6	0.01062914		3887.6	0.00446638
347.8	0.03466951		937.79	0.01869648		1527.79	0.00280422		2117.79	0.00653633		2707.8	-0.00130873		3297.8	0.01015536		3887.8	0.00382558
348	0.03449958		937.99	0.01813714		1527.99	0.0033311		2117.99	0.0069195		2708	-0.00090324		3298	0.01021638		3888	0.00306011
348.2	0.03542841		938.19	0.01774327		1528.19	0.00340158		2118.19	0.00657042		2708.2	-0.00061416		3298.2	0.00996573		3888.2	0.00277774
348.4	0.03527483		938.39	0.01780636		1528.39	0.00301356		2118.39	0.00748307		2708.4	-0.00078439		3298.4	0.01005757		3888.4	0.0024368
348.6	0.03470357		938.59	0.01802976		1528.59	0.00268463		2118.59	0.00678329		2708.6	-0.00056716		3298.6	0.01173341		3888.6	0.00375838
348.8	0.03452885		938.79	0.01756962		1528.79	0.00255773		2118.79	0.00681827		2708.8	-0.00165358		3298.8	0.01110963		3888.8	0.00293811
349	0.03395035		938.99	0.01729241		1528.99	0.00327025		2118.99	0.0067094		2709	-0.0017376		3299	0.01097089		3889	0.00390771
349.2	0.03347022		939.19	0.01711673		1529.19	0.00391963		2119.19	0.00691478		2709.2	-0.00242231		3299.2	0.01030807		3889.2	0.00363004
349.4	0.03343935		939.39	0.01800784		1529.39	0.00300801		2119.39	0.00701858		2709.4	-0.00296617		3299.4	0.01046232		3889.4	0.00421871
349.6	0.03384369		939.59	0.01853875		1529.59	0.00302959		2119.59	0.0069802		2709.6	-0.00383694		3299.6	0.01034363		3889.6	0.00403401
349.8	0.0343216		939.79	0.01883172		1529.79	0.00361904		2119.79	0.00611141		2709.8	-0.00404111		3299.8	0.00873819		3889.8	0.00391435
350	0.03410815		939.99	0.01960809		1529.99	0.00469057		2119.99	0.00619783		2710	-0.00541938		3300	0.00897446		3890	0.003709
350.2	0.03373403		940.19	0.01936943		1530.19	0.00493008		2120.19	0.00731545		2710.2	-0.00614494		3300.2	0.00882821		3890.2	0.00417452
350.4	0.03271824		940.39	0.0190532		1530.39	0.00502705		2120.39	0.00800378		2710.4	-0.00620862		3300.4	0.00915562		3890.4	0.0046055
350.6	0.03343796		940.59	0.01955853		1530.59	0.00368766		2120.59	0.00774337		2710.6	-0.00574727		3300.6	0.00913928		3890.6	0.00431689
350.8	0.03352491		940.79	0.01894645		1530.79	0.00283691		2120.79	0.00739319		2710.8	-0.00506774		3300.8	0.00865607		3890.8	0.00493834
351	0.03453423		940.99	0.0184993		1530.99	0.00233706		2120.99	0.00714621		2711	-0.00440935		3301	0.00810444		3891	0.00561676
351.2	0.03552111		941.19	0.01926143		1531.19	0.00204021		2121.19	0.00664233		2711.2	-0.00334806		3301.2	0.00890338		3891.2	0.00543319
351.4	0.03677916		941.39	0.01923303		1531.39	0.00215416		2121.39	0.00621146		2711.4	-0.00283698		3301.4	0.00928713		3891.4	0.00523798
351.6	0.03700463		941.59	0.01957168		1531.59	0.00237521		2121.59	0.00619021		2711.6	-0.00317764		3301.6	0.00929524		3891.6	0.00520376
351.8	0.03657746		941.79	0.01967571		1531.79	0.00352126		2121.79	0.00628913		2711.8	-0.00290224		3301.8	0.0095971		3891.8	0.00534469
352	0.03677569		941.99	0.01991612		1531.99	0.0041714		2121.99	0.00580815		2712	-0.00284262		3302	0.01030991		3892	0.00497598
352.2	0.03747987		942.19	0.02045012		1532.19	0.0039001		2122.19	0.00559344		2712.2	-0.00305814		3302.2	0.01034046		3892.2	0.00451699
352.4	0.03735223		942.39	0.0211559		1532.39	0.00374123		2122.39	0.00589931		2712.4	-0.00436623		3302.4	0.01164296		3892.4	0.00427637
352.6	0.03758078		942.59	0.02151516		1532.59	0.00438766		2122.59	0.00557156		2712.6	-0.00500046		3302.6	0.01119288		3892.6	0.0045255
352.8	0.03704575		942.79	0.021611		1532.79	0.00465843		2122.79	0.00565914		2712.8	-0.00573197		3302.8	0.0110909		3892.8	0.00391169
353	0.03678835		942.99	0.02176613		1532.99	0.00442071		2122.99	0.00581354		2713	-0.00563275		3303	0.01169197		3893	0.00506612
353.2	0.03668075		943.19	0.02206884		1533.19	0.00404585		2123.19	0.00617219		2713.2	-0.00629184		3303.2	0.01154212		3893.2	0.00544548
353.4	0.03667736		943.39	0.0224347		1533.39	0.00371995		2123.39	0.00669529		2713.4	-0.00688436		3303.4	0.0111192		3893.4	0.00660677
353.6	0.03648355		943.59	0.02187398		1533.59	0.00400665		2123.59	0.0072486		2713.6	-0.00696808		3303.6	0.01019544		3893.6	0.00623184
353.8	0.03634669		943.79	0.02158127		1533.79	0.0040047		2123.79	0.00795738		2713.8	-0.0062797		3303.8	0.00928347		3893.8	0.0053716
354	0.036178		943.99	0.02192415		1533.99	0.00395921		2123.99	0.00864596		2714	-0.00698591		3304	0.00895817		3894	0.00533052
354.2	0.03600964		944.19	0.02186047		1534.19	0.00394739		2124.19	0.00895603		2714.2	-0.00591676		3304.2	0.00830581		3894.2	0.00511217
354.4	0.03643247		944.39	0.0226853		1534.39	0.00365957		2124.39	0.00913552		2714.4	-0.00408297		3304.4	0.00820554		3894.4	0.00544434
354.6	0.0369514		944.59	0.02311118		1534.59	0.00300808		2124.59	0.00865288		2714.6	-0.00250765		3304.6	0.00736667		3894.6	0.00501144
354.8	0.03715838		944.79	0.02258973		1534.79	0.00360631		2124.79	0.00901167		2714.8	-0.00147431		3304.8	0.00718955		3894.8	0.00633446
355	0.03750399		944.99	0.02250551		1534.99	0.00422528		2124.99	0.00889891		2715	-0.00074875		3305	0.00720301		3895	0.00606036
355.2	0.03859488		945.19	0.02292472		1535.19	0.00448891		2125.19	0.00827212		2715.2	-0.00025949		3305.2	0.00752966		3895.2	0.00525613
355.4	0.03962616		945.39	0.02205133		1535.39	0.00489794		2125.39	0.00834188		2715.4	-0.00080131		3305.4	0.00805966		3895.4	0.00533782
355.6	0.03955022		945.59	0.02174561		1535.59	0.00500919		2125.59	0.00826581		2715.6	-0.00126809		3305.6	0.00842465		3895.6	0.00525317
355.8	0.03910844		945.79	0.02264361		1535.79	0.00527146		2125.79	0.00875061		2715.8	-0.00210954		3305.8	0.00917476		3895.8	0.00506882
356	0.03996402		945.99	0.02284177		1535.99	0.00480006		2125.99	0.00847193		2716	-0.00361316		3306	0.00849841		3896	0.00474518
356.2	0.04064163		946.19	0.02216558		1536.19	0.00475246		2126.19	0.00805289		2716.2	-0.0038933		3306.2	0.00859203		3896.2	0.0048488
356.4	0.04142574		946.39	0.02251279		1536.39	0.00515155		2126.39	0.00791496		2716.4	-0.0049921		3306.4	0.00939807		3896.4	0.00475271
356.6	0.04135348		946.59	0.02194877		1536.59	0.00511259		2126.59	0.00828649		2716.6	-0.00546544		3306.6	0.00885766		3896.6	0.00529958
356.8	0.04102852		946.79	0.02188482		1536.79	0.00414297		2126.79	0.00741206		2716.8	-0.00660325		3306.8	0.01079413		3896.8	0.00597596
357	0.04069751		946.99	0.0227214		1536.99	0.00383671		2126.99	0.00810103		2717	-0.0072186		3307	0.0107399		3897	0.00630099
357.2	0.04053637		947.19	0.02317795		1537.19	0.00336652		2127.19	0.00822757		2717.2	-0.0075286		3307.2	0.01093126		3897.2	0.0066868
357.4	0.04103725		947.39	0.02155404		1537.39	0.0038474		2127.39	0.00822157		2717.4	-0.00762356		3307.4	0.01090508		3897.4	0.00565397
357.6	0.04035267		947.59	0.0206328		1537.59	0.00348554		2127.59	0.00723016		2717.6	-0.0074153		3307.6	0.0107495		3897.6	0.00442637
357.8	0.04081888		947.79	0.02014585		1537.79	0.00352048		2127.79	0.00720716		2717.8	-0.00793052		3307.8	0.01121763		3897.8	0.00408975
358	0.04056064		947.99	0.02066601		1537.99	0.0029559		2127.99	0.0069895		2718	-0.0083911		3308	0.01164423		3898	0.00454516
358.2	0.0403285		948.19	0.02038699		1538.19	0.00389828		2128.19	0.0071587		2718.2	-0.00731006		3308.2	0.01177923		3898.2	0.00513648
358.4	0.04045253		948.39	0.02135301		1538.39	0.00476741		2128.39	0.00719858		2718.4	-0.00654881		3308.4	0.01100879		3898.4	0.00554512
358.6	0.04029499		948.59	0.02091962		1538.59	0.0051233		2128.59	0.00685103		2718.6	-0.0065152		3308.6	0.0107207		3898.6	0.00569165
358.8	0.04063337		948.79	0.0217028		1538.79	0.00482266		2128.79	0.00823777		2718.8	-0.00645144		3308.8	0.01075113		3898.8	0.00676547
359	0.04124593		948.99	0.02162143		1538.99	0.00496088		2128.99	0.00812883		2719	-0.00543844		3309	0.0107767		3899	0.00618846
359.2	0.04223786		949.19	0.02236499		1539.19	0.00469622		2129.19	0.00802649		2719.2	-0.00483133		3309.2	0.01094545		3899.2	0.00627331
359.4	0.04219945		949.39	0.02281091		1539.39	0.00481239		2129.39	0.00754147		2719.4	-0.00513467		3309.4	0.01140829		3899.4	0.00624455
359.6	0.04180889		949.59	0.02372815		1539.59	0.00462253		2129.59	0.00792254		2719.6	-0.00551636		3309.6	0.01099521		3899.6	0.00612543
359.8	0.04240033		949.79	0.02417638		1539.79	0.00480409		2129.79	0.00899882		2719.8	-0.00545662		3309.8	0.0108753		3899.8	0.0064677
360	0.04286736		949.99	0.02387898		1539.99	0.00517683		2129.99	0.00836221		2720	-0.00516945		3310	0.01016436		3900	0.00704911
360.2	0.04350192		950.19	0.02387847		1540.19	0.00549767		2130.19	0.00898141		2720.2	-0.00364219		3310.2	0.00964492		3900.2	0.00770436
360.4	0.04393882		950.39	0.02431611		1540.39	0.00580328		2130.39	0.00855372		2720.4	-0.00397373		3310.4	0.00951782		3900.4	0.00745282
360.6	0.04430821		950.59	0.02383009		1540.59	0.00510333		2130.59	0.00917691		2720.6	-0.00404106		3310.6	0.00969157		3900.6	0.00712221
360.8	0.04399198		950.79	0.02455504		1540.79	0.00544957		2130.79	0.00849735		2720.8	-0.00396829		3310.8	0.01042786		3900.8	0.00655193
361	0.04348195		950.99	0.02466253		1540.99	0.00547645		2130.99	0.00871251		2721	-0.00364486		3311	0.00966365		3901	0.00615157
361.2	0.04356531		951.19	0.02371831		1541.19	0.00511498		2131.19	0.00837021		2721.2	-0.00345781		3311.2	0.00973428		3901.2	0.00575215
361.4	0.04308456		951.39	0.02248427		1541.39	0.00483995		2131.39	0.00790821		2721.4	-0.00295764		3311.4	0.00938346		3901.4	0.00513585
361.6	0.04303268		951.59	0.02356491		1541.59	0.0052595		2131.59	0.00706358		2721.6	-0.00435975		3311.6	0.00931838		3901.6	0.00532394
361.8	0.04336028		951.79	0.02333389		1541.79	0.0057762		2131.79	0.00791334		2721.8	-0.00486442		3311.8	0.00991293		3901.8	0.00499303
362	0.0423185		951.99	0.02427469		1541.99	0.00589268		2131.99	0.007755		2722	-0.00484887		3312	0.01020431		3902	0.00521433
362.2	0.04281241		952.19	0.02394513		1542.19	0.0072702		2132.19	0.0079241		2722.2	-0.00466559		3312.2	0.00974893		3902.2	0.00544525
362.4	0.04355468		952.39	0.0239714		1542.39	0.00759899		2132.39	0.0073033		2722.4	-0.00477551		3312.4	0.01008301		3902.4	0.00485903
362.6	0.04357336		952.59	0.02404973		1542.59	0.00751756		2132.59	0.00662939		2722.6	-0.00442063		3312.6	0.01029363		3902.6	0.00446837
362.8	0.04365152		952.79	0.02464274		1542.79	0.00749055		2132.79	0.00730224		2722.8	-0.00437041		3312.8	0.01043121		3902.8	0.00430969
363	0.04375169		952.99	0.02379312		1542.99	0.00780764		2132.99	0.00659849		2723	-0.00365632		3313	0.01122575		3903	0.00414015
363.2	0.04349091		953.19	0.02435065		1543.19	0.00844524		2133.19	0.00567439		2723.2	-0.00357569		3313.2	0.01199806		3903.2	0.00473268
363.4	0.04375378		953.39	0.02417722		1543.39	0.00890467		2133.39	0.00521445		2723.4	-0.00374358		3313.4	0.01292928		3903.4	0.00416851
363.6	0.0446068		953.59	0.02420515		1543.59	0.00919551		2133.59	0.00574568		2723.6	-0.00367495		3313.6	0.01300128		3903.6	0.00451865
363.8	0.04507878		953.79	0.02384525		1543.79	0.00894159		2133.79	0.00641427		2723.8	-0.00216266		3313.8	0.0129954		3903.8	0.00499002
364	0.04474106		953.99	0.02402228		1543.99	0.0086798		2133.99	0.00623134		2724	-0.00131771		3314	0.01247773		3904	0.00529769
364.2	0.04575114		954.19	0.02328746		1544.19	0.00802471		2134.19	0.00683997		2724.2	-0.00106367		3314.2	0.01285862		3904.2	0.00571745
364.4	0.04577991		954.39	0.02191804		1544.39	0.00786187		2134.39	0.00644581		2724.4	-0.00178721		3314.4	0.01298252		3904.4	0.00563696
364.6	0.04553781		954.59	0.02170837		1544.59	0.0076612		2134.59	0.00724336		2724.6	-0.00238297		3314.6	0.01342724		3904.6	0.00545223
364.8	0.04573395		954.79	0.02111319		1544.79	0.00836228		2134.79	0.00703413		2724.8	-0.00301003		3314.8	0.01264481		3904.8	0.00615613
365	0.04674258		954.99	0.02103225		1544.99	0.00757624		2134.99	0.00758561		2725	-0.00314313		3315	0.0118198		3905	0.00648451
365.2	0.04689419		955.19	0.02167037		1545.19	0.00708535		2135.19	0.00790325		2725.2	-0.00348643		3315.2	0.01130614		3905.2	0.00637378
365.4	0.04749668		955.39	0.02252199		1545.39	0.00662724		2135.39	0.00824275		2725.4	-0.00442344		3315.4	0.01059984		3905.4	0.00670858
365.6	0.04788151		955.59	0.02254085		1545.59	0.00705687		2135.59	0.0088216		2725.6	-0.00638941		3315.6	0.00966778		3905.6	0.00646469
365.8	0.04845583		955.79	0.02220233		1545.79	0.0073426		2135.79	0.0088056		2725.8	-0.00668866		3315.8	0.00949213		3905.8	0.00586146
366	0.04823579		955.99	0.02267606		1545.99	0.00724028		2135.99	0.00865098		2726	-0.00779074		3316	0.00824623		3906	0.00646588
366.2	0.04867336		956.19	0.02187723		1546.19	0.00768917		2136.19	0.00965836		2726.2	-0.00813088		3316.2	0.00778795		3906.2	0.00625999
366.4	0.04858957		956.39	0.02175313		1546.39	0.0069696		2136.39	0.00989281		2726.4	-0.0085834		3316.4	0.00763804		3906.4	0.00590612
366.6	0.04745174		956.59	0.02150381		1546.59	0.007219		2136.59	0.00921814		2726.6	-0.00836371		3316.6	0.00651747		3906.6	0.00510048
366.8	0.04637383		956.79	0.02139854		1546.79	0.00706019		2136.79	0.01040405		2726.8	-0.00832265		3316.8	0.0071571		3906.8	0.00623431
367	0.04574962		956.99	0.02058181		1546.99	0.00677606		2136.99	0.01003151		2727	-0.00695517		3317	0.00824589		3907	0.00630121
367.2	0.04522505		957.19	0.02119618		1547.19	0.00663788		2137.19	0.01020139		2727.2	-0.00672506		3317.2	0.00925882		3907.2	0.00599148
367.4	0.04542914		957.39	0.02208385		1547.39	0.00646524		2137.39	0.01086869		2727.4	-0.00575938		3317.4	0.00980841		3907.4	0.00541752
367.6	0.04491482		957.59	0.0228523		1547.59	0.00576346		2137.59	0.01141823		2727.6	-0.00490708		3317.6	0.01018447		3907.6	0.00555182
367.8	0.04404993		957.79	0.0226809		1547.79	0.00522066		2137.79	0.012324		2727.8	-0.00340535		3317.8	0.01070945		3907.8	0.00516282
368	0.04315622		957.99	0.0227678		1547.99	0.00527004		2137.99	0.01230726		2728	-0.00356411		3318	0.01133796		3908	0.00537657
368.2	0.04344198		958.19	0.02239089		1548.19	0.00555495		2138.19	0.01247541		2728.2	-0.00413709		3318.2	0.0124893		3908.2	0.00488652
368.4	0.04261077		958.39	0.02260742		1548.39	0.00524956		2138.39	0.0130442		2728.4	-0.00400106		3318.4	0.01279204		3908.4	0.00428639
368.6	0.04269398		958.59	0.02360391		1548.59	0.0057614		2138.59	0.01285741		2728.6	-0.00402337		3318.6	0.01366622		3908.6	0.00343373
368.8	0.04399691		958.79	0.02433909		1548.79	0.00616739		2138.79	0.01300346		2728.8	-0.00310493		3318.8	0.01330674		3908.8	0.00333288
369	0.04412144		958.99	0.02596213		1548.99	0.00577389		2138.99	0.01216776		2729	-0.00188073		3319	0.01411439		3909	0.00239178
369.2	0.0441653		959.19	0.02657534		1549.19	0.00535341		2139.19	0.0119416		2729.2	-0.00156019		3319.2	0.0141262		3909.2	0.00214445
369.4	0.04390142		959.39	0.02751261		1549.39	0.00539332		2139.39	0.01250277		2729.4	-0.00205759		3319.4	0.01389254		3909.4	0.00206978
369.6	0.04482048		959.59	0.02722712		1549.59	0.00557859		2139.59	0.01228598		2729.6	-0.00166708		3319.6	0.01371609		3909.6	0.00181196
369.8	0.04648595		959.79	0.02764629		1549.79	0.00667082		2139.79	0.01065488		2729.8	-0.00168895		3319.8	0.01325736		3909.8	0.00170162
370	0.04698255		959.99	0.02805207		1549.99	0.00645887		2139.99	0.01081014		2730	-0.00154094		3320	0.01234671		3910	0.00280072
370.2	0.04718953		960.19	0.02772667		1550.19	0.00696588		2140.19	0.01060969		2730.2	-0.00143527		3320.2	0.01288914		3910.2	0.00195616
370.4	0.04747759		960.39	0.0283423		1550.39	0.00626506		2140.39	0.0097447		2730.4	-0.00125761		3320.4	0.01267167		3910.4	0.00199956
370.6	0.04719431		960.59	0.02746455		1550.59	0.00688987		2140.59	0.00903464		2730.6	-0.00050918		3320.6	0.0123939		3910.6	0.00232821
370.8	0.04755271		960.79	0.02729703		1550.79	0.00676722		2140.79	0.00862543		2730.8	-0.0002633		3320.8	0.01269798		3910.8	0.00326435
371	0.04825972		960.99	0.02686981		1550.99	0.00654814		2140.99	0.00745577		2731	-0.0002356		3321	0.01246983		3911	0.00325267
371.2	0.04836814		961.19	0.02762944		1551.19	0.00670277		2141.19	0.00706469		2731.2	-0.00155865		3321.2	0.01131407		3911.2	0.00340564
371.4	0.04934797		961.39	0.02751293		1551.39	0.00711931		2141.39	0.00661518		2731.4	-0.00214476		3321.4	0.01065213		3911.4	0.00367929
371.6	0.04942089		961.59	0.02692586		1551.59	0.007163		2141.59	0.0063131		2731.6	-0.00225473		3321.6	0.01008712		3911.6	0.00389285
371.8	0.05018157		961.79	0.0268289		1551.79	0.00769447		2141.79	0.00597285		2731.8	-0.00296914		3321.8	0.00918995		3911.8	0.00410437
372	0.05006091		961.99	0.02595418		1551.99	0.00742624		2141.99	0.00503013		2732	-0.00396534		3322	0.00756275		3912	0.00474277
372.2	0.05011725		962.19	0.02577904		1552.19	0.00715887		2142.19	0.00511359		2732.2	-0.00404064		3322.2	0.00748635		3912.2	0.00497722
372.4	0.0492087		962.39	0.02461146		1552.39	0.0070037		2142.39	0.00556648		2732.4	-0.00335847		3322.4	0.00785133		3912.4	0.00583141
372.6	0.04912172		962.59	0.0249897		1552.59	0.00750555		2142.59	0.00600892		2732.6	-0.00327999		3322.6	0.00795783		3912.6	0.00595631
372.8	0.0488797		962.79	0.02551488		1552.79	0.00748585		2142.79	0.00627742		2732.8	-0.00293827		3322.8	0.00750994		3912.8	0.00554865
373	0.04750385		962.99	0.02538422		1552.99	0.0077159		2142.99	0.00639564		2733	-0.00332563		3323	0.00788614		3913	0.00566247
373.2	0.04743627		963.19	0.0248702		1553.19	0.00734454		2143.19	0.00719738		2733.2	-0.00311809		3323.2	0.00769373		3913.2	0.00598962
373.4	0.04654582		963.39	0.02518178		1553.39	0.00806424		2143.39	0.00814956		2733.4	-0.00296558		3323.4	0.00834081		3913.4	0.00644124
373.6	0.04777039		963.59	0.02448126		1553.59	0.0081433		2143.59	0.00880167		2733.6	-0.00242166		3323.6	0.00937392		3913.6	0.00611882
373.8	0.0484386		963.79	0.02420136		1553.79	0.00828919		2143.79	0.00885476		2733.8	-0.00203051		3323.8	0.01020312		3913.8	0.00627374
374	0.04860482		963.99	0.02424784		1553.99	0.00823345		2143.99	0.01061069		2734	-0.00177238		3324	0.01182792		3914	0.00617453
374.2	0.04825854		964.19	0.02421379		1554.19	0.00815434		2144.19	0.01032884		2734.2	-0.00197581		3324.2	0.01320564		3914.2	0.00476217
374.4	0.04825596		964.39	0.02460652		1554.39	0.00766022		2144.39	0.01088494		2734.4	-0.00145476		3324.4	0.01373981		3914.4	0.00536555
374.6	0.04805476		964.59	0.02380284		1554.59	0.00837518		2144.59	0.01107323		2734.6	-0.00128396		3324.6	0.01390397		3914.6	0.00474054
374.8	0.04847964		964.79	0.02409805		1554.79	0.00849062		2144.79	0.00999182		2734.8	-0.00161261		3324.8	0.01415348		3914.8	0.00469565
375	0.04903083		964.99	0.02407251		1554.99	0.00815336		2144.99	0.00978279		2735	-0.00139728		3325	0.01413585		3915	0.00453182
375.2	0.04963684		965.19	0.02361123		1555.19	0.00861693		2145.19	0.00904373		2735.2	-0.00224342		3325.2	0.01292456		3915.2	0.00486519
375.4	0.05083942		965.39	0.02397797		1555.39	0.00860807		2145.39	0.00850155		2735.4	-0.00209151		3325.4	0.01200832		3915.4	0.00528424
375.6	0.05142525		965.59	0.02463823		1555.59	0.00856505		2145.59	0.00842199		2735.6	-0.00231788		3325.6	0.01169656		3915.6	0.00540628
375.8	0.05107906		965.79	0.02445938		1555.79	0.00858581		2145.79	0.00707012		2735.8	-0.0033515		3325.8	0.01079774		3915.8	0.00653866
376	0.05137279		965.99	0.02439941		1555.99	0.00773464		2145.99	0.00609318		2736	-0.00434241		3326	0.01113238		3916	0.007493
376.2	0.05121869		966.19	0.02466008		1556.19	0.00798448		2146.19	0.00605802		2736.2	-0.00396973		3326.2	0.01170319		3916.2	0.00820299
376.4	0.0515142		966.39	0.02374243		1556.39	0.00788605		2146.39	0.00594076		2736.4	-0.00493368		3326.4	0.01157283		3916.4	0.00882465
376.6	0.05236424		966.59	0.02456677		1556.59	0.00784332		2146.59	0.00623569		2736.6	-0.0051038		3326.6	0.01075629		3916.6	0.00906064
376.8	0.05270713		966.79	0.02448431		1556.79	0.00738059		2146.79	0.00573996		2736.8	-0.00562806		3326.8	0.0100418		3916.8	0.0088302
377	0.05224665		966.99	0.023348		1556.99	0.00723785		2146.99	0.00574851		2737	-0.00590165		3327	0.00999543		3917	0.00964036
377.2	0.05337053		967.19	0.02356758		1557.19	0.00682293		2147.19	0.00593427		2737.2	-0.00613705		3327.2	0.01114977		3917.2	0.00948657
377.4	0.0534898		967.39	0.02396891		1557.39	0.00725891		2147.39	0.00656745		2737.4	-0.00491772		3327.4	0.01190749		3917.4	0.0103866
377.6	0.05424723		967.59	0.02381923		1557.59	0.00626016		2147.59	0.0074999		2737.6	-0.00438558		3327.6	0.01314947		3917.6	0.00973256
377.8	0.05405697		967.79	0.02374065		1557.79	0.00637801		2147.79	0.00766606		2737.8	-0.00341757		3327.8	0.01393133		3917.8	0.00930641
378	0.05373673		967.99	0.02401055		1557.99	0.00588796		2147.99	0.00857767		2738	-0.0027289		3328	0.01522551		3918	0.00897032
378.2	0.05323243		968.19	0.02380971		1558.19	0.00571115		2148.19	0.00819404		2738.2	-0.00226797		3328.2	0.01582074		3918.2	0.00799224
378.4	0.05229256		968.39	0.02348518		1558.39	0.00574619		2148.39	0.00823328		2738.4	-0.00135417		3328.4	0.01584855		3918.4	0.00781234
378.6	0.05114171		968.59	0.02268639		1558.59	0.00677463		2148.59	0.00838594		2738.6	-0.00048099		3328.6	0.01555183		3918.6	0.00700036
378.8	0.05054135		968.79	0.02180301		1558.79	0.00575723		2148.79	0.00805185		2738.8	0.00062262		3328.8	0.01529447		3918.8	0.00702029
379	0.0501408		968.99	0.02151239		1558.99	0.00619515		2148.99	0.00805172		2739	0.00158557		3329	0.0145866		3919	0.00624339
379.2	0.04983143		969.19	0.02206586		1559.19	0.00610415		2149.19	0.00784395		2739.2	0.00150471		3329.2	0.01342498		3919.2	0.00650254
379.4	0.04951449		969.39	0.02348131		1559.39	0.00535392		2149.39	0.0078381		2739.4	0.00115207		3329.4	0.01274747		3919.4	0.00545131
379.6	0.04813053		969.59	0.02432039		1559.59	0.00603767		2149.59	0.00802344		2739.6	0.00177257		3329.6	0.01354866		3919.6	0.00476488
379.8	0.04730372		969.79	0.02465963		1559.79	0.00535459		2149.79	0.006981		2739.8	0.00148401		3329.8	0.01255924		3919.8	0.00438839
380	0.04742785		969.99	0.02496381		1559.99	0.00515336		2149.99	0.00684159		2740	0.00200444		3330	0.01298184		3920	0.00370652
380.2	0.04720256		970.19	0.02489042		1560.19	0.00512301		2150.19	0.00661809		2740.2	0.00233067		3330.2	0.01240115		3920.2	0.0030826
380.4	0.04862726		970.39	0.02488374		1560.39	0.00562246		2150.39	0.00602129		2740.4	0.00167365		3330.4	0.01187665		3920.4	0.00256411
380.6	0.04886996		970.59	0.02585277		1560.59	0.0063189		2150.59	0.00702827		2740.6	0.00179538		3330.6	0.01085607		3920.6	0.00257466
380.8	0.04953655		970.79	0.02656068		1560.79	0.00574121		2150.79	0.00727732		2740.8	0.00027447		3330.8	0.01057521		3920.8	0.00263418
381	0.05009185		970.99	0.02700533		1560.99	0.00645255		2150.99	0.00741326		2741	-0.00096437		3331	0.01071608		3921	0.00356235
381.2	0.05157568		971.19	0.02771015		1561.19	0.00716226		2151.19	0.00729996		2741.2	-0.00143122		3331.2	0.01092978		3921.2	0.00442016
381.4	0.05184159		971.39	0.02873598		1561.39	0.00733251		2151.39	0.00769249		2741.4	-0.00054393		3331.4	0.01074286		3921.4	0.00505726
381.6	0.05288521		971.59	0.02919553		1561.59	0.00703936		2151.59	0.00802444		2741.6	-0.0011276		3331.6	0.01171349		3921.6	0.00500456
381.8	0.05331927		971.79	0.02916638		1561.79	0.0073652		2151.79	0.00796667		2741.8	-0.0020259		3331.8	0.012156		3921.8	0.00503131
382	0.05414993		971.99	0.02898158		1561.99	0.00743238		2151.99	0.00837292		2742	-0.00290979		3332	0.012992		3922	0.00572596
382.2	0.05477738		972.19	0.02871309		1562.19	0.00755466		2152.19	0.00852366		2742.2	-0.00395116		3332.2	0.01297648		3922.2	0.0055756
382.4	0.05481437		972.39	0.02832956		1562.39	0.00729491		2152.39	0.00830156		2742.4	-0.00384335		3332.4	0.01266681		3922.4	0.00548523
382.6	0.05544535		972.59	0.02696655		1562.59	0.00795911		2152.59	0.00925435		2742.6	-0.00362		3332.6	0.01225366		3922.6	0.0055073
382.8	0.05568234		972.79	0.02616851		1562.79	0.00783453		2152.79	0.00914687		2742.8	-0.00330799		3332.8	0.01286655		3922.8	0.00481596
383	0.05605187		972.99	0.02656168		1562.99	0.00798609		2152.99	0.00952788		2743	-0.00352322		3333	0.01305351		3923	0.00476638
383.2	0.05576229		973.19	0.0266573		1563.19	0.007174		2153.19	0.0098025		2743.2	-0.00370825		3333.2	0.01229655		3923.2	0.00512877
383.4	0.05605463		973.39	0.02629458		1563.39	0.00726779		2153.39	0.00986305		2743.4	-0.00358054		3333.4	0.01231411		3923.4	0.00490558
383.6	0.05537443		973.59	0.02572195		1563.59	0.00775738		2153.59	0.01030903		2743.6	-0.00171457		3333.6	0.01258505		3923.6	0.00486202
383.8	0.05539978		973.79	0.02491051		1563.79	0.00645085		2153.79	0.00963387		2743.8	-0.00236692		3333.8	0.01178543		3923.8	0.00478102
384	0.05531484		973.99	0.02417098		1563.99	0.00652432		2153.99	0.00902509		2744	-0.00180454		3334	0.0119454		3924	0.0048276
384.2	0.05600926		974.19	0.02384962		1564.19	0.00660926		2154.19	0.00825412		2744.2	-0.00145592		3334.2	0.01075447		3924.2	0.00467853
384.4	0.05596218		974.39	0.02416537		1564.39	0.0073802		2154.39	0.00857712		2744.4	-0.00176403		3334.4	0.00999028		3924.4	0.00520693
384.6	0.05514347		974.59	0.02471267		1564.59	0.00760982		2154.59	0.00899757		2744.6	-0.00236956		3334.6	0.0091571		3924.6	0.00558619
384.8	0.05553106		974.79	0.02467556		1564.79	0.00832036		2154.79	0.00836866		2744.8	-0.00228919		3334.8	0.00939723		3924.8	0.0055748
385	0.05574884		974.99	0.02412921		1564.99	0.00894293		2154.99	0.00762085		2745	-0.00218774		3335	0.0086132		3925	0.00644954
385.2	0.05556034		975.19	0.02410197		1565.19	0.00920167		2155.19	0.00693565		2745.2	-0.00235274		3335.2	0.00883978		3925.2	0.0061476
385.4	0.05592029		975.39	0.02552141		1565.39	0.00879205		2155.39	0.00733235		2745.4	-0.00275233		3335.4	0.00914069		3925.4	0.00594298
385.6	0.0561818		975.59	0.02466845		1565.59	0.00920148		2155.59	0.00606945		2745.6	-0.00330297		3335.6	0.00880923		3925.6	0.00520652
385.8	0.05592339		975.79	0.02410037		1565.79	0.00937667		2155.79	0.00554822		2745.8	-0.00439904		3335.8	0.00852077		3925.8	0.00430891
386	0.05629832		975.99	0.02502902		1565.99	0.00952941		2155.99	0.00572454		2746	-0.00425434		3336	0.00865202		3926	0.00364777
386.2	0.05664929		976.19	0.02597369		1566.19	0.00903192		2156.19	0.00567915		2746.2	-0.00415897		3336.2	0.00918227		3926.2	0.00283709
386.4	0.05625658		976.39	0.02616302		1566.39	0.00853662		2156.39	0.0057417		2746.4	-0.00408129		3336.4	0.00953191		3926.4	0.00219052
386.6	0.05673171		976.59	0.02603852		1566.59	0.00890515		2156.59	0.00647506		2746.6	-0.00426247		3336.6	0.01045642		3926.6	0.00193466
386.8	0.05643158		976.79	0.02630691		1566.79	0.0085198		2156.79	0.00647828		2746.8	-0.00448515		3336.8	0.01153459		3926.8	0.00207953
387	0.05641477		976.99	0.02665213		1566.99	0.00738563		2156.99	0.00650604		2747	-0.00471111		3337	0.01154533		3927	0.00213952
387.2	0.05685798		977.19	0.02679557		1567.19	0.00734095		2157.19	0.00622328		2747.2	-0.00431074		3337.2	0.0110227		3927.2	0.0027256
387.4	0.05767317		977.39	0.02708166		1567.39	0.00693137		2157.39	0.0065572		2747.4	-0.0041194		3337.4	0.01215856		3927.4	0.00314352
387.6	0.0577776		977.59	0.02697008		1567.59	0.00712872		2157.59	0.00708349		2747.6	-0.00382056		3337.6	0.0125813		3927.6	0.00397497
387.8	0.05792149		977.79	0.02674259		1567.79	0.00696479		2157.79	0.00699035		2747.8	-0.00410964		3337.8	0.01272203		3927.8	0.00393982
388	0.05836274		977.99	0.02715594		1567.99	0.00608882		2157.99	0.00784695		2748	-0.00392279		3338	0.01281805		3928	0.00399428
388.2	0.05868011		978.19	0.02761713		1568.19	0.00686316		2158.19	0.00820745		2748.2	-0.00367654		3338.2	0.01237728		3928.2	0.00369595
388.4	0.05841135		978.39	0.02822479		1568.39	0.00689744		2158.39	0.00921472		2748.4	-0.00411248		3338.4	0.01342573		3928.4	0.00366535
388.6	0.05887004		978.59	0.02784719		1568.59	0.00811021		2158.59	0.00864632		2748.6	-0.00403852		3338.6	0.01312868		3928.6	0.00280649
388.8	0.05877733		978.79	0.0280032		1568.79	0.00953011		2158.79	0.00971052		2748.8	-0.00394609		3338.8	0.01370496		3928.8	0.0029454
389	0.05822106		978.99	0.02831389		1568.99	0.00903802		2158.99	0.00958918		2749	-0.00405079		3339	0.01372017		3929	0.00351822
389.2	0.05791196		979.19	0.02805833		1569.19	0.00878281		2159.19	0.00935113		2749.2	-0.00374861		3339.2	0.01368938		3929.2	0.00304884
389.4	0.05768222		979.39	0.02786414		1569.39	0.00832928		2159.39	0.01032662		2749.4	-0.0035164		3339.4	0.01407267		3929.4	0.00333979
389.6	0.05653074		979.59	0.02710281		1569.59	0.00819259		2159.59	0.00962057		2749.6	-0.00362402		3339.6	0.01409268		3929.6	0.00316882
389.8	0.05633026		979.79	0.0272263		1569.79	0.00755176		2159.79	0.00916599		2749.8	-0.00402856		3339.8	0.01429218		3929.8	0.0037321
390	0.0566994		979.99	0.02796439		1569.99	0.0068901		2159.99	0.00952886		2750	-0.0037945		3340	0.01481163		3930	0.00472223
390.2	0.05655534		980.19	0.02794522		1570.19	0.00617409		2160.19	0.00882397		2750.2	-0.00404861		3340.2	0.01502286		3930.2	0.00501454
390.4	0.05666036		980.39	0.02715346		1570.39	0.0053776		2160.39	0.00778959		2750.4	-0.00412021		3340.4	0.01498167		3930.4	0.00477531
390.6	0.05684994		980.59	0.02640358		1570.59	0.00467797		2160.59	0.00697526		2750.6	-0.00429222		3340.6	0.01584061		3930.6	0.00471078
390.8	0.0574195		980.79	0.026087		1570.79	0.00351504		2160.79	0.00530757		2750.8	-0.00488997		3340.8	0.01595114		3930.8	0.00524208
391	0.05693684		980.99	0.02596793		1570.99	0.00349566		2160.99	0.00470338		2751	-0.00472404		3341	0.01560828		3931	0.00452687
391.2	0.05774242		981.19	0.02642471		1571.19	0.00388875		2161.19	0.00453717		2751.2	-0.00434409		3341.2	0.01536954		3931.2	0.0051799
391.4	0.05855514		981.39	0.02658959		1571.39	0.00421718		2161.39	0.00520933		2751.4	-0.00514716		3341.4	0.01588636		3931.4	0.005611
391.6	0.05898841		981.59	0.02570237		1571.59	0.0047317		2161.59	0.00542381		2751.6	-0.00505837		3341.6	0.01591443		3931.6	0.00653778
391.8	0.0591177		981.79	0.02519399		1571.79	0.00473471		2161.79	0.00602003		2751.8	-0.00558009		3341.8	0.0154531		3931.8	0.00633783
392	0.05930121		981.99	0.02612024		1571.99	0.00432564		2161.99	0.00728486		2752	-0.00496545		3342	0.01425468		3932	0.00684307
392.2	0.05918254		982.19	0.02637078		1572.19	0.00511738		2162.19	0.00808124		2752.2	-0.00467604		3342.2	0.01366727		3932.2	0.00681844
392.4	0.05950486		982.39	0.02674576		1572.39	0.00559723		2162.39	0.00823781		2752.4	-0.00471118		3342.4	0.01364038		3932.4	0.00719115
392.6	0.05978245		982.59	0.02739677		1572.59	0.00730647		2162.59	0.0092457		2752.6	-0.00430487		3342.6	0.01281147		3932.6	0.00787331
392.8	0.0581554		982.79	0.02762099		1572.79	0.00829358		2162.79	0.01056828		2752.8	-0.00401864		3342.8	0.01326887		3932.8	0.00833581
393	0.05701181		982.99	0.0277818		1572.99	0.00839295		2162.99	0.01013238		2753	-0.00270921		3343	0.0130969		3933	0.00849042
393.2	0.05691357		983.19	0.02765371		1573.19	0.00857692		2163.19	0.01107788		2753.2	-0.00261081		3343.2	0.01324217		3933.2	0.00890477
393.4	0.05651743		983.39	0.0290976		1573.39	0.00915887		2163.39	0.0120441		2753.4	-0.00246563		3343.4	0.01541303		3933.4	0.00895239
393.6	0.05655146		983.59	0.02930141		1573.59	0.0101934		2163.59	0.01162418		2753.6	-0.00214656		3343.6	0.01564993		3933.6	0.00894209
393.8	0.05695767		983.79	0.02904906		1573.79	0.01001723		2163.79	0.01145232		2753.8	-0.00194606		3343.8	0.0153415		3933.8	0.0086443
394	0.05699394		983.99	0.02962953		1573.99	0.01132944		2163.99	0.01204337		2754	-0.00172297		3344	0.01544603		3934	0.00775431
394.2	0.05732588		984.19	0.02918484		1574.19	0.01224717		2164.19	0.01071933		2754.2	-0.00125969		3344.2	0.01523839		3934.2	0.00652961
394.4	0.05778579		984.39	0.02887101		1574.39	0.01317594		2164.39	0.01027244		2754.4	-0.00193838		3344.4	0.0154417		3934.4	0.00607387
394.6	0.05832705		984.59	0.02878675		1574.59	0.01301647		2164.59	0.00982415		2754.6	-0.0019069		3344.6	0.01519437		3934.6	0.00558346
394.8	0.05970338		984.79	0.02860449		1574.79	0.01303538		2164.79	0.00934433		2754.8	-0.00286213		3344.8	0.01434969		3934.8	0.00490188
395	0.05965754		984.99	0.02852517		1574.99	0.01318709		2164.99	0.00960486		2755	-0.00286569		3345	0.01416323		3935	0.00461332
395.2	0.0612844		985.19	0.02858054		1575.19	0.01343244		2165.19	0.00920488		2755.2	-0.0035195		3345.2	0.01441186		3935.2	0.00482623
395.4	0.06183514		985.39	0.02749542		1575.39	0.01349687		2165.39	0.00889575		2755.4	-0.00416098		3345.4	0.01475889		3935.4	0.00551238
395.6	0.06197046		985.59	0.0266014		1575.59	0.01264488		2165.59	0.00835728		2755.6	-0.00401844		3345.6	0.01539548		3935.6	0.0057237
395.8	0.06153994		985.79	0.02557675		1575.79	0.01265701		2165.79	0.00780352		2755.8	-0.004721		3345.8	0.01477022		3935.8	0.00535467
396	0.0614376		985.99	0.02580924		1575.99	0.01262331		2165.99	0.00775012		2756	-0.0030358		3346	0.01449816		3936	0.00608186
396.2	0.06188216		986.19	0.02458078		1576.19	0.0119297		2166.19	0.00772684		2756.2	-0.00321896		3346.2	0.01411648		3936.2	0.0060962
396.4	0.06225754		986.39	0.02517552		1576.39	0.01194474		2166.39	0.00707726		2756.4	-0.00297046		3346.4	0.01404097		3936.4	0.00688989
396.6	0.06236996		986.59	0.02480222		1576.59	0.01187036		2166.59	0.00728515		2756.6	-0.00281517		3346.6	0.01388622		3936.6	0.00758938
396.8	0.06213845		986.79	0.02510964		1576.79	0.01099316		2166.79	0.00702476		2756.8	-0.00321288		3346.8	0.0142651		3936.8	0.00718761
397	0.06146946		986.99	0.02599306		1576.99	0.01081402		2166.99	0.00694031		2757	-0.00265505		3347	0.01467464		3937	0.00643423
397.2	0.06200693		987.19	0.02585479		1577.19	0.0097335		2167.19	0.00705837		2757.2	-0.00353881		3347.2	0.01568829		3937.2	0.00578745
397.4	0.06221298		987.39	0.02732603		1577.39	0.01018403		2167.39	0.00712081		2757.4	-0.00330832		3347.4	0.01601377		3937.4	0.00526315
397.6	0.062147		987.59	0.0275424		1577.59	0.01061583		2167.59	0.00689833		2757.6	-0.00263719		3347.6	0.01563996		3937.6	0.00478
397.8	0.06127656		987.79	0.02827616		1577.79	0.01036988		2167.79	0.00717913		2757.8	-0.00209362		3347.8	0.01449562		3937.8	0.00408687
398	0.06071402		987.99	0.02908457		1577.99	0.01161501		2167.99	0.00786182		2758	-0.00190603		3348	0.014383		3938	0.00359135
398.2	0.06019237		988.19	0.02990929		1578.19	0.01144517		2168.19	0.00769515		2758.2	-0.00254123		3348.2	0.01357218		3938.2	0.00409986
398.4	0.05991445		988.39	0.03060418		1578.39	0.01164987		2168.39	0.00830221		2758.4	-0.00315417		3348.4	0.01275967		3938.4	0.00413408
398.6	0.06001684		988.59	0.0311637		1578.59	0.0101655		2168.59	0.0080875		2758.6	-0.002485		3348.6	0.01215918		3938.6	0.00357679
398.8	0.05963025		988.79	0.03199716		1578.79	0.00991916		2168.79	0.00830259		2758.8	-0.00357847		3348.8	0.01204874		3938.8	0.00304298
399	0.05932348		988.99	0.03231501		1578.99	0.00988416		2168.99	0.0086418		2759	-0.00404882		3349	0.01244509		3939	0.00470669
399.2	0.05901755		989.19	0.03203679		1579.19	0.01004513		2169.19	0.00819131		2759.2	-0.00435529		3349.2	0.01246991		3939.2	0.0046763
399.4	0.05864383		989.39	0.03125052		1579.39	0.01041437		2169.39	0.00885648		2759.4	-0.00481474		3349.4	0.01296894		3939.4	0.0043242
399.6	0.05852625		989.59	0.03095305		1579.59	0.00962448		2169.59	0.00938422		2759.6	-0.00446238		3349.6	0.0133956		3939.6	0.00397685
399.8	0.0577682		989.79	0.03067554		1579.79	0.00988838		2169.79	0.00903942		2759.8	-0.00468139		3349.8	0.01393324		3939.8	0.00373464
400	0.05836915		989.99	0.03031607		1579.99	0.00955873		2169.99	0.00948703		2760	-0.00390196		3350	0.01379382		3940	0.00434184
400.2	0.05908743		990.19	0.03017162		1580.19	0.00949101		2170.19	0.0101017		2760.2	-0.00433687		3350.2	0.01296991		3940.2	0.0048797
400.4	0.05936068		990.39	0.0306105		1580.39	0.00937454		2170.39	0.01075593		2760.4	-0.00488213		3350.4	0.01252144		3940.4	0.00606667
400.6	0.06022961		990.59	0.02987454		1580.59	0.00947615		2170.59	0.01072939		2760.6	-0.005157		3350.6	0.01183719		3940.6	0.00665442
400.8	0.06047216		990.79	0.02905358		1580.79	0.00981282		2170.79	0.01086334		2760.8	-0.00490923		3350.8	0.01223902		3940.8	0.00663315
401	0.06036916		990.99	0.02848764		1580.99	0.01070601		2170.99	0.01048615		2761	-0.00495844		3351	0.01244734		3941	0.00678026
401.2	0.061731		991.19	0.02781292		1581.19	0.01081905		2171.19	0.01067341		2761.2	-0.00498654		3351.2	0.01234932		3941.2	0.00744272
401.4	0.06285388		991.39	0.02835713		1581.39	0.01155284		2171.39	0.01073607		2761.4	-0.0034486		3351.4	0.01181674		3941.4	0.00781426
401.6	0.06339477		991.59	0.02790727		1581.59	0.0117326		2171.59	0.00935348		2761.6	-0.00229656		3351.6	0.01202354		3941.6	0.00750047
401.8	0.06346032		991.79	0.02754671		1581.79	0.01179939		2171.79	0.00927123		2761.8	-0.00186087		3351.8	0.01145692		3941.8	0.00777695
402	0.0630409		991.99	0.02724995		1581.99	0.01154694		2171.99	0.00955344		2762	-0.00179942		3352	0.01201575		3942	0.00746375
402.2	0.06290184		992.19	0.02779822		1582.19	0.01193445		2172.19	0.00821334		2762.2	-0.00159954		3352.2	0.01157583		3942.2	0.00787088
402.4	0.06306266		992.39	0.02761393		1582.39	0.01221774		2172.39	0.00826174		2762.4	-0.00047711		3352.4	0.0119275		3942.4	0.00824264
402.6	0.06288837		992.59	0.02698558		1582.59	0.01168313		2172.59	0.00826105		2762.6	-0.00007633		3352.6	0.01248531		3942.6	0.00799
402.8	0.06308379		992.79	0.02727714		1582.79	0.01232184		2172.79	0.00830111		2762.8	-0.00070332		3352.8	0.01234788		3942.8	0.00807573
403	0.06332096		992.99	0.02666625		1582.99	0.01307307		2172.99	0.00877414		2763	-0.00058326		3353	0.01277416		3943	0.00865676
403.2	0.06256557		993.19	0.02693209		1583.19	0.01290784		2173.19	0.00895417		2763.2	-0.00163649		3353.2	0.01299579		3943.2	0.00735842
403.4	0.06205339		993.39	0.02805754		1583.39	0.01304062		2173.39	0.00971518		2763.4	-0.00215982		3353.4	0.01341183		3943.4	0.00595892
403.6	0.06129158		993.59	0.02903083		1583.59	0.01198856		2173.59	0.00976614		2763.6	-0.00201072		3353.6	0.01381226		3943.6	0.0052017
403.8	0.06079726		993.79	0.03002167		1583.79	0.01097404		2173.79	0.00939699		2763.8	-0.00316252		3353.8	0.01373639		3943.8	0.00447859
404	0.06125597		993.99	0.03058675		1583.99	0.01070352		2173.99	0.00992575		2764	-0.00297621		3354	0.01313337		3944	0.00472508
404.2	0.06149438		994.19	0.03185608		1584.19	0.01069214		2174.19	0.01046686		2764.2	-0.00339694		3354.2	0.01307927		3944.2	0.00498178
404.4	0.0623696		994.39	0.03195053		1584.39	0.01014927		2174.39	0.01020804		2764.4	-0.00366218		3354.4	0.01217721		3944.4	0.00458507
404.6	0.0631178		994.59	0.03195423		1584.59	0.01002996		2174.59	0.0094438		2764.6	-0.00331002		3354.6	0.01231348		3944.6	0.00428129
404.8	0.0644314		994.79	0.03175506		1584.79	0.01047822		2174.79	0.0091039		2764.8	-0.00358732		3354.8	0.01294737		3944.8	0.00443118
405	0.06560442		994.99	0.03215459		1584.99	0.00998236		2174.99	0.00870724		2765	-0.00301219		3355	0.01303397		3945	0.00458439
405.2	0.06732689		995.19	0.03191763		1585.19	0.00926956		2175.19	0.00911829		2765.2	-0.00192281		3355.2	0.01270884		3945.2	0.00524895
405.4	0.06818881		995.39	0.03198694		1585.39	0.00832675		2175.39	0.00913108		2765.4	-0.00132793		3355.4	0.01217761		3945.4	0.00534234
405.6	0.06808615		995.59	0.03119915		1585.59	0.00826602		2175.59	0.00851541		2765.6	-0.0005227		3355.6	0.01185551		3945.6	0.00586639
405.8	0.06792335		995.79	0.03047516		1585.79	0.00820437		2175.79	0.00874766		2765.8	0.00003632		3355.8	0.01195341		3945.8	0.00650244
406	0.06770858		995.99	0.02970404		1585.99	0.00809707		2175.99	0.00886475		2766	0.00121108		3356	0.01208625		3946	0.00620341
406.2	0.06734469		996.19	0.0297382		1586.19	0.0095314		2176.19	0.00836721		2766.2	0.00170186		3356.2	0.0125079		3946.2	0.00606904
406.4	0.06778105		996.39	0.02852857		1586.39	0.00975985		2176.39	0.00906451		2766.4	0.00225031		3356.4	0.01255497		3946.4	0.00672273
406.6	0.06764822		996.59	0.02721886		1586.59	0.00986046		2176.59	0.00967508		2766.6	0.00228111		3356.6	0.01315236		3946.6	0.00608407
406.8	0.06788686		996.79	0.02831307		1586.79	0.01075974		2176.79	0.00992554		2766.8	0.00193575		3356.8	0.01309698		3946.8	0.00687976
407	0.06713702		996.99	0.02781764		1586.99	0.01209068		2176.99	0.01028512		2767	0.00216708		3357	0.01401691		3947	0.00652385
407.2	0.06651347		997.19	0.02827505		1587.19	0.01202966		2177.19	0.01016732		2767.2	0.00182126		3357.2	0.01466369		3947.2	0.00588969
407.4	0.06641466		997.39	0.02849731		1587.39	0.0122433		2177.39	0.01012497		2767.4	0.00191779		3357.4	0.01447946		3947.4	0.00509048
407.6	0.06608156		997.59	0.0286453		1587.59	0.01248562		2177.59	0.0101309		2767.6	0.00214656		3357.6	0.01468617		3947.6	0.0049981
407.8	0.06636081		997.79	0.02866168		1587.79	0.01247146		2177.79	0.01010606		2767.8	0.00239461		3357.8	0.01461594		3947.8	0.00559305
408	0.06629587		997.99	0.02861914		1587.99	0.01277344		2177.99	0.00995441		2768	0.0025665		3358	0.01516581		3948	0.00556035
408.2	0.06624618		998.19	0.02899163		1588.19	0.01295922		2178.19	0.00910418		2768.2	0.00176142		3358.2	0.0148729		3948.2	0.00520767
408.4	0.06641174		998.39	0.02841742		1588.39	0.01289852		2178.39	0.00857918		2768.4	0.00143897		3358.4	0.01451683		3948.4	0.00442537
408.6	0.06630642		998.59	0.02800152		1588.59	0.01326185		2178.59	0.00832338		2768.6	0.00089462		3358.6	0.01535062		3948.6	0.0049009
408.8	0.066266		998.79	0.0276987		1588.79	0.01307575		2178.79	0.00845584		2768.8	0.00057052		3358.8	0.01604205		3948.8	0.00629834
409	0.06600596		998.99	0.02830826		1588.99	0.01237096		2178.99	0.00845051		2769	0.00082652		3359	0.0159859		3949	0.00706754
409.2	0.06673489		999.19	0.02870155		1589.19	0.01176455		2179.19	0.00879934		2769.2	0.00027146		3359.2	0.01562582		3949.2	0.00787397
409.4	0.0656039		999.39	0.02945082		1589.39	0.01085556		2179.39	0.00896344		2769.4	-0.00004503		3359.4	0.01512658		3949.4	0.00812043
409.6	0.06547185		999.59	0.0292369		1589.59	0.0106896		2179.59	0.00888523		2769.6	0.00000038		3359.6	0.01490815		3949.6	0.00822729
409.8	0.06561433		999.79	0.02960012		1589.79	0.0108766		2179.79	0.00908415		2769.8	-0.00032782		3359.8	0.01490367		3949.8	0.00775581
410	0.06599043		999.99	0.02949466		1589.99	0.01084912		2179.99	0.0094663		2770	-0.00058718		3360	0.01455985		3950	0.00671972
410.2	0.06580658		1000.19	0.03004346		1590.19	0.01109287		2180.19	0.00989704		2770.2	-0.00073935		3360.2	0.01426652		3950.2	0.00585191
410.4	0.06675943		1000.39	0.02961498		1590.39	0.01092569		2180.39	0.01066412		2770.4	-0.00015919		3360.4	0.01305042		3950.4	0.00587468
410.6	0.06687955		1000.59	0.03010558		1590.59	0.01101649		2180.59	0.01104318		2770.6	-0.00023172		3360.6	0.01257968		3950.6	0.00477451
410.8	0.06746858		1000.79	0.0303932		1590.79	0.01062176		2180.79	0.0113088		2770.8	-0.00047137		3360.8	0.01252293		3950.8	0.00482847
411	0.06783827		1000.99	0.02985211		1590.99	0.01085139		2180.99	0.01090869		2771	-0.00037168		3361	0.01230609		3951	0.00414734
411.2	0.06849968		1001.19	0.03046775		1591.19	0.01090312		2181.19	0.01131034		2771.2	-0.00046444		3361.2	0.01243624		3951.2	0.00373293
411.4	0.06861644		1001.39	0.02990301		1591.39	0.01061036		2181.39	0.01113682		2771.4	-0.00103928		3361.4	0.01201049		3951.4	0.00299629
411.6	0.06846067		1001.59	0.03022618		1591.59	0.01096099		2181.59	0.01045361		2771.6	0.00030695		3361.6	0.01207774		3951.6	0.00311996
411.8	0.06899463		1001.79	0.03015596		1591.79	0.0107679		2181.79	0.01041813		2771.8	0.00030867		3361.8	0.01215641		3951.8	0.00310012
412	0.06914027		1001.99	0.03053066		1591.99	0.01041558		2181.99	0.00985451		2772	0.00040855		3362	0.01256534		3952	0.00295737
412.2	0.06963156		1002.19	0.03150811		1592.19	0.00976843		2182.19	0.00942929		2772.2	0.0000564		3362.2	0.01231912		3952.2	0.00272886
412.4	0.06996907		1002.39	0.03086252		1592.39	0.00969006		2182.39	0.00967357		2772.4	0.00010471		3362.4	0.01241552		3952.4	0.00320022
412.6	0.07066414		1002.59	0.03155213		1592.59	0.0098332		2182.59	0.00895826		2772.6	0.00000994		3362.6	0.01418619		3952.6	0.00400552
412.8	0.07133512		1002.79	0.03215762		1592.79	0.00914637		2182.79	0.00897632		2772.8	0.00059642		3362.8	0.01481834		3952.8	0.00412729
413	0.07189081		1002.99	0.03365153		1592.99	0.00850856		2182.99	0.00842825		2773	0.00039705		3363	0.01566951		3953	0.00442217
413.2	0.07196988		1003.19	0.03312181		1593.19	0.00766163		2183.19	0.00838572		2773.2	0.00042405		3363.2	0.01565833		3953.2	0.00442649
413.4	0.0720315		1003.39	0.03372106		1593.39	0.00811616		2183.39	0.00791855		2773.4	0.00001618		3363.4	0.01595852		3953.4	0.00502652
413.6	0.07241372		1003.59	0.03345087		1593.59	0.00877343		2183.59	0.00928249		2773.6	-0.00002691		3363.6	0.01590887		3953.6	0.00508636
413.8	0.07202378		1003.79	0.03322383		1593.79	0.00953553		2183.79	0.00922518		2773.8	-0.00043763		3363.8	0.01586159		3953.8	0.00501318
414	0.0716504		1003.99	0.03307254		1593.99	0.00956815		2183.99	0.00943271		2774	-0.00036837		3364	0.01617235		3954	0.00456509
414.2	0.07150231		1004.19	0.0332748		1594.19	0.00983962		2184.19	0.00953541		2774.2	-0.00024233		3364.2	0.01544274		3954.2	0.00476665
414.4	0.07129269		1004.39	0.03275091		1594.39	0.01005578		2184.39	0.00958206		2774.4	-0.00059412		3364.4	0.01470309		3954.4	0.00516033
414.6	0.07139148		1004.59	0.03201196		1594.59	0.00994237		2184.59	0.00870027		2774.6	-0.00216219		3364.6	0.01472585		3954.6	0.00537505
414.8	0.07102762		1004.79	0.03166212		1594.79	0.00953789		2184.79	0.00926128		2774.8	-0.00246857		3364.8	0.01501136		3954.8	0.00660275
415	0.07121553		1004.99	0.03173879		1594.99	0.00972852		2184.99	0.00836567		2775	-0.00246191		3365	0.01512341		3955	0.00723518
415.2	0.07151421		1005.19	0.03122403		1595.19	0.00942422		2185.19	0.00918372		2775.2	-0.00283175		3365.2	0.01591259		3955.2	0.00777153
415.4	0.07106254		1005.39	0.03112443		1595.39	0.00938997		2185.39	0.00845632		2775.4	-0.00281651		3365.4	0.01603903		3955.4	0.00774906
415.6	0.07166489		1005.59	0.03171864		1595.59	0.00972409		2185.59	0.0083097		2775.6	-0.0027213		3365.6	0.01572363		3955.6	0.00826962
415.8	0.07216612		1005.79	0.03253585		1595.79	0.00920908		2185.79	0.00854868		2775.8	-0.00277151		3365.8	0.01537846		3955.8	0.00843774
416	0.07260014		1005.99	0.03315621		1595.99	0.00894092		2185.99	0.00848378		2776	-0.00226862		3366	0.01585488		3956	0.00922518
416.2	0.07200264		1006.19	0.03330257		1596.19	0.00817682		2186.19	0.00888254		2776.2	-0.0031288		3366.2	0.01531769		3956.2	0.00889765
416.4	0.0717187		1006.39	0.03181861		1596.39	0.00881045		2186.39	0.00903021		2776.4	-0.00339634		3366.4	0.01567105		3956.4	0.00868416
416.6	0.07180186		1006.59	0.03256475		1596.59	0.00846924		2186.59	0.00868628		2776.6	-0.00355016		3366.6	0.01690778		3956.6	0.00757266
416.8	0.07138247		1006.79	0.03203863		1596.79	0.00747901		2186.79	0.00931064		2776.8	-0.00359734		3366.8	0.01693387		3956.8	0.00652126
417	0.07094928		1006.99	0.03088494		1596.99	0.00770065		2186.99	0.00949187		2777	-0.00411956		3367	0.01715907		3957	0.00642527
417.2	0.07024175		1007.19	0.03021989		1597.19	0.00870919		2187.19	0.01034366		2777.2	-0.00383647		3367.2	0.01632275		3957.2	0.00500821
417.4	0.0701693		1007.39	0.03004593		1597.39	0.00966044		2187.39	0.00974613		2777.4	-0.00380075		3367.4	0.01683768		3957.4	0.00464877
417.6	0.06997433		1007.59	0.02947638		1597.59	0.00971436		2187.59	0.01097234		2777.6	-0.00360688		3367.6	0.01683667		3957.6	0.00412704
417.8	0.06915252		1007.79	0.02976936		1597.79	0.00992943		2187.79	0.01100448		2777.8	-0.00349024		3367.8	0.01679933		3957.8	0.0034184
418	0.06924012		1007.99	0.02998025		1597.99	0.01009713		2187.99	0.01125356		2778	-0.00221249		3368	0.0161856		3958	0.00319378
418.2	0.07011054		1008.19	0.02993368		1598.19	0.01026764		2188.19	0.01095207		2778.2	-0.00233586		3368.2	0.01557649		3958.2	0.00412781
418.4	0.07034362		1008.39	0.02979552		1598.39	0.01057434		2188.39	0.01077882		2778.4	-0.00211291		3368.4	0.01543285		3958.4	0.00368737
418.6	0.06991197		1008.59	0.02926438		1598.59	0.01202496		2188.59	0.01006299		2778.6	-0.00148196		3368.6	0.01483487		3958.6	0.00333955
418.8	0.0708098		1008.79	0.02936126		1598.79	0.01252963		2188.79	0.01046077		2778.8	0.00079441		3368.8	0.01543114		3958.8	0.00419245
419	0.07255555		1008.99	0.02929929		1598.99	0.01228854		2188.99	0.01028611		2779	0.00166118		3369	0.01569869		3959	0.0050795
419.2	0.07305008		1009.19	0.02958094		1599.19	0.01235306		2189.19	0.01061899		2779.2	0.00265892		3369.2	0.01472855		3959.2	0.00549961
419.4	0.07346975		1009.39	0.03095225		1599.39	0.0128342		2189.39	0.01037061		2779.4	0.00270379		3369.4	0.01384443		3959.4	0.00524026
419.6	0.0745169		1009.59	0.03136491		1599.59	0.01229375		2189.59	0.00968623		2779.6	0.0025112		3369.6	0.0137296		3959.6	0.00543424
419.8	0.07459382		1009.79	0.03263403		1599.79	0.01131139		2189.79	0.00960473		2779.8	0.00299603		3369.8	0.01445859		3959.8	0.00538552
420	0.07454237		1009.99	0.03306947		1599.99	0.01102774		2189.99	0.00901907		2780	0.00223999		3370	0.015717		3960	0.00510917
420.2	0.07453365		1010.19	0.03346115		1600.19	0.01044409		2190.19	0.00913842		2780.2	0.00131377		3370.2	0.01549703		3960.2	0.00466305
420.4	0.07522859		1010.39	0.03366522		1600.39	0.0103817		2190.39	0.00898309		2780.4	0.00064059		3370.4	0.01591741		3960.4	0.00409332
420.6	0.07535582		1010.59	0.03430785		1600.59	0.01078181		2190.59	0.00860137		2780.6	0.00050582		3370.6	0.01613711		3960.6	0.0042196
420.8	0.0757397		1010.79	0.03348184		1600.79	0.01043223		2190.79	0.00848369		2780.8	-0.00066768		3370.8	0.01610306		3960.8	0.00372891
421	0.07558354		1010.99	0.03325877		1600.99	0.01136777		2190.99	0.00833419		2781	-0.00090737		3371	0.0155735		3961	0.00351599
421.2	0.07476622		1011.19	0.0339915		1601.19	0.01107936		2191.19	0.00862314		2781.2	-0.00102984		3371.2	0.01642368		3961.2	0.00245999
421.4	0.07465561		1011.39	0.0332433		1601.39	0.01076624		2191.39	0.00853303		2781.4	-0.00133088		3371.4	0.01755918		3961.4	0.00253703
421.6	0.074508		1011.59	0.03354069		1601.59	0.01032816		2191.59	0.00892497		2781.6	-0.00233399		3371.6	0.01708595		3961.6	0.00292714
421.8	0.07402579		1011.79	0.03303683		1601.79	0.01056583		2191.79	0.00935937		2781.8	-0.00148867		3371.8	0.01684958		3961.8	0.00351576
422	0.07444601		1011.99	0.03235903		1601.99	0.01106474		2191.99	0.00934177		2782	-0.00105911		3372	0.01674298		3962	0.00335379
422.2	0.07506647		1012.19	0.03137311		1602.19	0.01174062		2192.19	0.00884192		2782.2	-0.00206459		3372.2	0.01656821		3962.2	0.00409571
422.4	0.07445453		1012.39	0.03029589		1602.39	0.0123953		2192.39	0.00873097		2782.4	-0.00197317		3372.4	0.01658555		3962.4	0.00336121
422.6	0.07399098		1012.59	0.02947702		1602.59	0.0140647		2192.59	0.00833599		2782.6	-0.00074308		3372.6	0.01602086		3962.6	0.00371402
422.8	0.07428146		1012.79	0.02922142		1602.79	0.01366116		2192.79	0.00859917		2782.8	0.0002356		3372.8	0.01636706		3962.8	0.00446629
423	0.07464087		1012.99	0.02952916		1602.99	0.01336699		2192.99	0.00922253		2783	0.00049275		3373	0.01538761		3963	0.00432111
423.2	0.07461803		1013.19	0.02962815		1603.19	0.0136707		2193.19	0.00857674		2783.2	0.00090341		3373.2	0.01539422		3963.2	0.00368417
423.4	0.07503989		1013.39	0.02992361		1603.39	0.01360047		2193.39	0.009125		2783.4	0.00037473		3373.4	0.01555395		3963.4	0.00423008
423.6	0.07475064		1013.59	0.02999512		1603.59	0.01315309		2193.59	0.00883006		2783.6	0.00053874		3373.6	0.01700774		3963.6	0.00431385
423.8	0.07498533		1013.79	0.03056429		1603.79	0.01210358		2193.79	0.00909414		2783.8	0.00033417		3373.8	0.0174849		3963.8	0.0041242
424	0.07507358		1013.99	0.03066782		1603.99	0.01219383		2193.99	0.00900541		2784	-0.00054751		3374	0.01740532		3964	0.00393904
424.2	0.0753022		1014.19	0.03136434		1604.19	0.01172544		2194.19	0.009955		2784.2	-0.00112294		3374.2	0.01687861		3964.2	0.00466479
424.4	0.07567282		1014.39	0.03131486		1604.39	0.01136872		2194.39	0.01031926		2784.4	-0.00188547		3374.4	0.01684558		3964.4	0.00417521
424.6	0.07578856		1014.59	0.03112338		1604.59	0.01100141		2194.59	0.01020363		2784.6	-0.00194752		3374.6	0.01727307		3964.6	0.00439694
424.8	0.07588467		1014.79	0.03148314		1604.79	0.01048005		2194.79	0.00984805		2784.8	-0.00270893		3374.8	0.01619614		3964.8	0.00425101
425	0.0753683		1014.99	0.03160445		1604.99	0.01039046		2194.99	0.01021075		2785	-0.00242699		3375	0.01631269		3965	0.00416549
425.2	0.07589005		1015.19	0.03174446		1605.19	0.00989491		2195.19	0.01039437		2785.2	-0.0026546		3375.2	0.01683017		3965.2	0.00399349
425.4	0.07604456		1015.39	0.03156656		1605.39	0.00962876		2195.39	0.01020715		2785.4	-0.00265113		3375.4	0.01653126		3965.4	0.0049002
425.6	0.07511834		1015.59	0.03193313		1605.59	0.00841851		2195.59	0.00946903		2785.6	-0.00230349		3375.6	0.01504009		3965.6	0.00579485
425.8	0.0753438		1015.79	0.03158855		1605.79	0.00946324		2195.79	0.00934159		2785.8	-0.00114176		3375.8	0.01538626		3965.8	0.00551941
426	0.07547548		1015.99	0.03224237		1605.99	0.00956588		2195.99	0.0090538		2786	-0.00154884		3376	0.0154344		3966	0.00498362
426.2	0.07602704		1016.19	0.03307912		1606.19	0.01080508		2196.19	0.00843931		2786.2	-0.00192041		3376.2	0.01522463		3966.2	0.00538244
426.4	0.07580175		1016.39	0.0335219		1606.39	0.01162404		2196.39	0.00792715		2786.4	-0.00082017		3376.4	0.0154914		3966.4	0.00464652
426.6	0.07625798		1016.59	0.03402457		1606.59	0.01303165		2196.59	0.00807914		2786.6	-0.0001383		3376.6	0.01488838		3966.6	0.00438183
426.8	0.07624008		1016.79	0.03446588		1606.79	0.01286312		2196.79	0.00825317		2786.8	0.00100867		3376.8	0.01553709		3966.8	0.0043377
427	0.07690881		1016.99	0.03450484		1606.99	0.01324695		2196.99	0.00858879		2787	0.00141958		3377	0.01555189		3967	0.00378447
427.2	0.07684081		1017.19	0.03444542		1607.19	0.01424798		2197.19	0.00869211		2787.2	0.0023112		3377.2	0.01604218		3967.2	0.00409119
427.4	0.07675677		1017.39	0.03467342		1607.39	0.0141996		2197.39	0.00914193		2787.4	0.00301722		3377.4	0.01571721		3967.4	0.00390604
427.6	0.07632121		1017.59	0.03427166		1607.59	0.01406455		2197.59	0.00841659		2787.6	0.00299488		3377.6	0.01617194		3967.6	0.00317934
427.8	0.07640542		1017.79	0.03358224		1607.79	0.01334059		2197.79	0.00821407		2787.8	0.00251045		3377.8	0.01632141		3967.8	0.00283523
428	0.07613585		1017.99	0.03293193		1607.99	0.01324265		2197.99	0.00825558		2788	0.00234385		3378	0.01567708		3968	0.00177208
428.2	0.07681068		1018.19	0.03302705		1608.19	0.01250629		2198.19	0.00843733		2788.2	0.00257754		3378.2	0.01558049		3968.2	0.00190619
428.4	0.07685884		1018.39	0.03247413		1608.39	0.01109457		2198.39	0.00820335		2788.4	0.00260254		3378.4	0.01514561		3968.4	0.00133435
428.6	0.07644114		1018.59	0.03175517		1608.59	0.00992209		2198.59	0.0079517		2788.6	0.0022209		3378.6	0.01512675		3968.6	0.00178962
428.8	0.07651546		1018.79	0.0309045		1608.79	0.00980317		2198.79	0.00713507		2788.8	0.00155603		3378.8	0.01367572		3968.8	0.00276748
429	0.0768433		1018.99	0.02980136		1608.99	0.00897157		2198.99	0.00672062		2789	0.00143111		3379	0.01354191		3969	0.00346257
429.2	0.0777783		1019.19	0.02976327		1609.19	0.00791811		2199.19	0.00625003		2789.2	0.00104267		3379.2	0.01282291		3969.2	0.00372141
429.4	0.07714083		1019.39	0.03026214		1609.39	0.00704301		2199.39	0.00557747		2789.4	0.00112992		3379.4	0.01269297		3969.4	0.00445332
429.6	0.07685271		1019.59	0.03122938		1609.59	0.00668371		2199.59	0.00583898		2789.6	0.00130527		3379.6	0.01237722		3969.6	0.00446431
429.8	0.07677026		1019.79	0.03225061		1609.79	0.00806692		2199.79	0.00568545		2789.8	0.00083094		3379.8	0.01319933		3969.8	0.00464196
430	0.07740442		1019.99	0.03288724		1609.99	0.00783423		2199.99	0.00645493		2790	0.0009783		3380	0.01375712		3970	0.00409037
430.2	0.07817892		1020.19	0.03322574		1610.19	0.01001133		2200.19	0.00638808		2790.2	0.00055698		3380.2	0.01414812		3970.2	0.00425697
430.4	0.07822924		1020.39	0.03370671		1610.39	0.01076851		2200.39	0.00549396		2790.4	0.00014282		3380.4	0.01495137		3970.4	0.00437004
430.6	0.07815754		1020.59	0.03458711		1610.59	0.01175063		2200.59	0.00694777		2790.6	0.00018755		3380.6	0.01535004		3970.6	0.00444182
430.8	0.07767065		1020.79	0.03576744		1610.79	0.0125445		2200.79	0.00743742		2790.8	0.00089348		3380.8	0.01567477		3970.8	0.00410794
431	0.07714286		1020.99	0.03596095		1610.99	0.01277152		2200.99	0.00786445		2791	0.00099009		3381	0.0147269		3971	0.00396201
431.2	0.07626448		1021.19	0.03646614		1611.19	0.01333499		2201.19	0.00796301		2791.2	0.00121823		3381.2	0.01505523		3971.2	0.00334084
431.4	0.07644681		1021.39	0.03622969		1611.39	0.01264671		2201.39	0.00776929		2791.4	0.00150641		3381.4	0.01519193		3971.4	0.00311623
431.6	0.07679131		1021.59	0.03544512		1611.59	0.01336178		2201.59	0.00728189		2791.6	0.00136853		3381.6	0.01506115		3971.6	0.00269673
431.8	0.07628947		1021.79	0.03479404		1611.79	0.01268384		2201.79	0.00697187		2791.8	0.00125765		3381.8	0.01488137		3971.8	0.00276549
432	0.07651397		1021.99	0.03472079		1611.99	0.01324709		2201.99	0.00631951		2792	0.00111813		3382	0.014417		3972	0.00256761
432.2	0.07724725		1022.19	0.03525263		1612.19	0.01303684		2202.19	0.00570681		2792.2	0.00075502		3382.2	0.01380021		3972.2	0.00260016
432.4	0.07678852		1022.39	0.03489048		1612.39	0.01214881		2202.39	0.0060963		2792.4	0.00006276		3382.4	0.0138582		3972.4	0.00201367
432.6	0.07727515		1022.59	0.03388162		1612.59	0.0114678		2202.59	0.00709375		2792.6	-0.00010096		3382.6	0.01419103		3972.6	0.00158308
432.8	0.07809577		1022.79	0.03342166		1612.79	0.01033622		2202.79	0.00730937		2792.8	0.00028745		3382.8	0.01377174		3972.8	0.00197091
433	0.07850952		1022.99	0.03431178		1612.99	0.00933836		2202.99	0.00695001		2793	0.00098057		3383	0.01323278		3973	0.0016831
433.2	0.0791969		1023.19	0.03487947		1613.19	0.00844924		2203.19	0.0076735		2793.2	0.0007059		3383.2	0.01349825		3973.2	0.00097094
433.4	0.07893837		1023.39	0.03514363		1613.39	0.00919148		2203.39	0.00857974		2793.4	0.00032594		3383.4	0.01370318		3973.4	0.00148294
433.6	0.07947382		1023.59	0.0356301		1613.59	0.00972312		2203.59	0.01022511		2793.6	-0.00069183		3383.6	0.01411579		3973.6	0.00094627
433.8	0.07948542		1023.79	0.0357129		1613.79	0.01023224		2203.79	0.009725		2793.8	-0.00110766		3383.8	0.0140778		3973.8	0.00127018
434	0.07934562		1023.99	0.03501254		1613.99	0.01045875		2203.99	0.0108281		2794	-0.00106146		3384	0.01416292		3974	0.00061433
434.2	0.07927436		1024.19	0.03531027		1614.19	0.01212739		2204.19	0.01015802		2794.2	-0.00169667		3384.2	0.01477132		3974.2	0.00192379
434.4	0.07908748		1024.39	0.03591065		1614.39	0.01190905		2204.39	0.00990763		2794.4	-0.00120114		3384.4	0.01535016		3974.4	0.0024409
434.6	0.07843476		1024.59	0.03588519		1614.59	0.0128316		2204.59	0.01118164		2794.6	-0.00096235		3384.6	0.01523261		3974.6	0.0027332
434.8	0.07807683		1024.79	0.03508182		1614.79	0.01303153		2204.79	0.01111777		2794.8	-0.00106969		3384.8	0.01487959		3974.8	0.00322939
435	0.07807191		1024.99	0.03412147		1614.99	0.01184615		2204.99	0.01155921		2795	-0.00067115		3385	0.01472378		3975	0.00413454
435.2	0.07749275		1025.19	0.03298099		1615.19	0.01203417		2205.19	0.01111203		2795.2	-0.00057516		3385.2	0.01535603		3975.2	0.0049536
435.4	0.07794984		1025.39	0.03185462		1615.39	0.0123297		2205.39	0.0108528		2795.4	-0.00013793		3385.4	0.01571179		3975.4	0.00538951
435.6	0.07822445		1025.59	0.03132875		1615.59	0.0132709		2205.59	0.01005333		2795.6	0.00006651		3385.6	0.01590239		3975.6	0.0042694
435.8	0.07771028		1025.79	0.0316216		1615.79	0.01268916		2205.79	0.00969917		2795.8	0.0002661		3385.8	0.01692969		3975.8	0.00410759
436	0.07821118		1025.99	0.03195305		1615.99	0.01400458		2205.99	0.00913278		2796	0.00037758		3386	0.01712338		3976	0.00430285
436.2	0.07830661		1026.19	0.03244737		1616.19	0.01386126		2206.19	0.00906202		2796.2	0.00070143		3386.2	0.01652986		3976.2	0.0035651
436.4	0.07820139		1026.39	0.03276599		1616.39	0.0137431		2206.39	0.01011908		2796.4	0.00142145		3386.4	0.01708248		3976.4	0.0029314
436.6	0.07843743		1026.59	0.03301478		1616.59	0.01267887		2206.59	0.01020034		2796.6	0.00125788		3386.6	0.01707141		3976.6	0.00313612
436.8	0.07904473		1026.79	0.03329724		1616.79	0.0123529		2206.79	0.00924093		2796.8	0.00198349		3386.8	0.0159909		3976.8	0.00320305
437	0.07879707		1026.99	0.03439699		1616.99	0.01250817		2206.99	0.00857878		2797	0.00232289		3387	0.0146969		3977	0.00294443
437.2	0.07887847		1027.19	0.03376042		1617.19	0.01243265		2207.19	0.00873352		2797.2	0.0015321		3387.2	0.01426727		3977.2	0.00263929
437.4	0.07938547		1027.39	0.03378928		1617.39	0.01333726		2207.39	0.00855242		2797.4	0.00074704		3387.4	0.0138443		3977.4	0.00298574
437.6	0.07995414		1027.59	0.03453469		1617.59	0.01252379		2207.59	0.00819348		2797.6	-0.00024659		3387.6	0.01360859		3977.6	0.00268653
437.8	0.07945131		1027.79	0.03451832		1617.79	0.01217471		2207.79	0.00715362		2797.8	0.00022524		3387.8	0.01346343		3977.8	0.00375461
438	0.07868121		1027.99	0.03455744		1617.99	0.01198986		2207.99	0.00734906		2798	0.00054022		3388	0.01332485		3978	0.00427321
438.2	0.07974173		1028.19	0.03551876		1618.19	0.01195435		2208.19	0.00593653		2798.2	0.00026927		3388.2	0.01372815		3978.2	0.00566403
438.4	0.07995328		1028.39	0.03549682		1618.39	0.0117778		2208.39	0.00602428		2798.4	0.00032174		3388.4	0.01453807		3978.4	0.00589301
438.6	0.07985937		1028.59	0.0352749		1618.59	0.01243168		2208.59	0.00687042		2798.6	0.00004015		3388.6	0.01434274		3978.6	0.00617478
438.8	0.08060328		1028.79	0.03492051		1618.79	0.0114005		2208.79	0.00639817		2798.8	0.0003666		3388.8	0.01355379		3978.8	0.00733389
439	0.08181458		1028.99	0.03488447		1618.99	0.01137367		2208.99	0.00784327		2799	0.00120766		3389	0.01303719		3979	0.00790024
439.2	0.08244252		1029.19	0.03476555		1619.19	0.01180945		2209.19	0.00751265		2799.2	0.00146609		3389.2	0.01428938		3979.2	0.00773272
439.4	0.08235845		1029.39	0.0349364		1619.39	0.0119299		2209.39	0.00826911		2799.4	0.00089454		3389.4	0.01471054		3979.4	0.00667254
439.6	0.08297791		1029.59	0.03466958		1619.59	0.01251137		2209.59	0.00892311		2799.6	0.00044113		3389.6	0.01509227		3979.6	0.00613674
439.8	0.08290576		1029.79	0.03512193		1619.79	0.01278529		2209.79	0.01029029		2799.8	0.00047949		3389.8	0.01549892		3979.8	0.0062922
440	0.08213591		1029.99	0.03561011		1619.99	0.01298432		2209.99	0.01009878		2800	-0.0005064		3390	0.01458028		3980	0.00654731
440.2	0.082536		1030.19	0.03616873		1620.19	0.01356017		2210.19	0.01123229		2800.2	-0.00085709		3390.2	0.01511871		3980.2	0.00582214
440.4	0.08239521		1030.39	0.03588663		1620.39	0.01462845		2210.39	0.01149782		2800.4	-0.00200026		3390.4	0.01549018		3980.4	0.00544872
440.6	0.08203203		1030.59	0.03547969		1620.59	0.01465989		2210.59	0.01136126		2800.6	-0.00222534		3390.6	0.01468917		3980.6	0.00551159
440.8	0.08197028		1030.79	0.03544469		1620.79	0.01540638		2210.79	0.01111175		2800.8	-0.00186026		3390.8	0.01373902		3980.8	0.00508722
441	0.08137587		1030.99	0.03599024		1620.99	0.01615072		2210.99	0.01097019		2801	-0.00232505		3391	0.0143839		3981	0.00505814
441.2	0.08077875		1031.19	0.0363259		1621.19	0.01649356		2211.19	0.01007119		2801.2	-0.00311628		3391.2	0.01429142		3981.2	0.00508702
441.4	0.08110536		1031.39	0.03638143		1621.39	0.01639902		2211.39	0.00940926		2801.4	-0.00424559		3391.4	0.0144517		3981.4	0.00441475
441.6	0.080517		1031.59	0.03713756		1621.59	0.01623454		2211.59	0.00899654		2801.6	-0.00424814		3391.6	0.01515613		3981.6	0.0042886
441.8	0.07993438		1031.79	0.03769656		1621.79	0.01613538		2211.79	0.00836031		2801.8	-0.00338875		3391.8	0.01599456		3981.8	0.00439498
442	0.07991769		1031.99	0.03788348		1621.99	0.01639434		2211.99	0.00864221		2802	-0.00275628		3392	0.01518707		3982	0.00403834
442.2	0.08039282		1032.19	0.03828552		1622.19	0.0163089		2212.19	0.00851473		2802.2	-0.00212024		3392.2	0.01582439		3982.2	0.00417932
442.4	0.08051113		1032.39	0.03833324		1622.39	0.0159807		2212.39	0.00876693		2802.4	-0.00132397		3392.4	0.01577812		3982.4	0.00377672
442.6	0.08161025		1032.59	0.03891093		1622.59	0.01549637		2212.59	0.00829092		2802.6	0.00020159		3392.6	0.01471253		3982.6	0.0041288
442.8	0.08318286		1032.79	0.03867288		1622.79	0.01508647		2212.79	0.00769852		2802.8	0.00100331		3392.8	0.01429755		3982.8	0.00447646
443	0.0843602		1032.99	0.03840317		1622.99	0.01618428		2212.99	0.00920484		2803	0.00197922		3393	0.01445377		3983	0.00399614
443.2	0.08447572		1033.19	0.03766065		1623.19	0.01549639		2213.19	0.00928604		2803.2	0.0020222		3393.2	0.01477171		3983.2	0.00377349
443.4	0.08369388		1033.39	0.03663352		1623.39	0.01541387		2213.39	0.00973813		2803.4	0.00232407		3393.4	0.01425206		3983.4	0.0035585
443.6	0.08372531		1033.59	0.03621391		1623.59	0.01586109		2213.59	0.0102073		2803.6	0.00274748		3393.6	0.01511883		3983.6	0.00331768
443.8	0.0837546		1033.79	0.03622739		1623.79	0.0152616		2213.79	0.01068576		2803.8	0.00401464		3393.8	0.01534236		3983.8	0.00326507
444	0.08377776		1033.99	0.03601394		1623.99	0.01463523		2213.99	0.00994829		2804	0.00381684		3394	0.01583293		3984	0.00359635
444.2	0.08395363		1034.19	0.03510768		1624.19	0.01460338		2214.19	0.01094749		2804.2	0.00377989		3394.2	0.01691732		3984.2	0.0036315
444.4	0.08374515		1034.39	0.03413086		1624.39	0.01448364		2214.39	0.00943812		2804.4	0.0032081		3394.4	0.01708905		3984.4	0.00380107
444.6	0.08332865		1034.59	0.03372321		1624.59	0.01324811		2214.59	0.0088401		2804.6	0.00431045		3394.6	0.01685314		3984.6	0.00441059
444.8	0.08275118		1034.79	0.03402705		1624.79	0.01308003		2214.79	0.00842763		2804.8	0.00300894		3394.8	0.01734719		3984.8	0.00439129
445	0.08368768		1034.99	0.03374361		1624.99	0.01342087		2214.99	0.00730942		2805	0.00302305		3395	0.01828122		3985	0.00477029
445.2	0.08324918		1035.19	0.03395636		1625.19	0.01275003		2215.19	0.00665892		2805.2	0.00257657		3395.2	0.0175724		3985.2	0.00461872
445.4	0.08394803		1035.39	0.03341382		1625.39	0.01230129		2215.39	0.00638334		2805.4	0.00195065		3395.4	0.01775004		3985.4	0.00427978
445.6	0.08368606		1035.59	0.03411674		1625.59	0.01167339		2215.59	0.0068674		2805.6	0.001712		3395.6	0.01804241		3985.6	0.00512923
445.8	0.08250129		1035.79	0.03474016		1625.79	0.01116411		2215.79	0.00709592		2805.8	0.00160013		3395.8	0.01878357		3985.8	0.00459289
446	0.08205718		1035.99	0.03440456		1625.99	0.01119713		2215.99	0.00750558		2806	0.00169597		3396	0.01841201		3986	0.00426176
446.2	0.0820662		1036.19	0.03588083		1626.19	0.01046558		2216.19	0.0069068		2806.2	0.00119215		3396.2	0.01863313		3986.2	0.00457574
446.4	0.08266817		1036.39	0.03586016		1626.39	0.01026027		2216.39	0.00635992		2806.4	0.00033858		3396.4	0.01853545		3986.4	0.00448264
446.6	0.08375613		1036.59	0.03678677		1626.59	0.01092118		2216.59	0.00658394		2806.6	0.00076332		3396.6	0.01792201		3986.6	0.00393944
446.8	0.08431031		1036.79	0.03616901		1626.79	0.01162106		2216.79	0.00748183		2806.8	0.00051481		3396.8	0.01752948		3986.8	0.00357204
447	0.08455893		1036.99	0.03626972		1626.99	0.01242224		2216.99	0.00867648		2807	0.00040737		3397	0.01772111		3987	0.00345737
447.2	0.08473165		1037.19	0.03614812		1627.19	0.01220638		2217.19	0.00909038		2807.2	0.00004167		3397.2	0.0173177		3987.2	0.00390926
447.4	0.08490253		1037.39	0.03620138		1627.39	0.01300625		2217.39	0.00863145		2807.4	0.00031637		3397.4	0.01786288		3987.4	0.00357103
447.6	0.08433386		1037.59	0.03682698		1627.59	0.01378326		2217.59	0.00884883		2807.6	0.00031123		3397.6	0.01785009		3987.6	0.00400122
447.8	0.08568745		1037.79	0.03609329		1627.79	0.01296737		2217.79	0.00836849		2807.8	0.00053576		3397.8	0.01709959		3987.8	0.00430254
448	0.08571262		1037.99	0.03631024		1627.99	0.01324427		2217.99	0.00789165		2808	0.00067228		3398	0.01734763		3988	0.00439943
448.2	0.0862591		1038.19	0.03560335		1628.19	0.0127651		2218.19	0.00826475		2808.2	0.00041589		3398.2	0.01699324		3988.2	0.00448467
448.4	0.08710962		1038.39	0.03539713		1628.39	0.01251765		2218.39	0.00678386		2808.4	0.00089907		3398.4	0.01727223		3988.4	0.00474935
448.6	0.08744087		1038.59	0.03456085		1628.59	0.01269807		2218.59	0.00712665		2808.6	0.00128371		3398.6	0.01784679		3988.6	0.00436873
448.8	0.08766604		1038.79	0.03428838		1628.79	0.01360715		2218.79	0.0081275		2808.8	0.00088838		3398.8	0.01806356		3988.8	0.0047284
449	0.08790721		1038.99	0.03359119		1628.99	0.01523136		2218.99	0.00756222		2809	0.00160808		3399	0.0182603		3989	0.00505749
449.2	0.08744103		1039.19	0.03297367		1629.19	0.01514292		2219.19	0.00789658		2809.2	0.0018215		3399.2	0.01873979		3989.2	0.00484742
449.4	0.08745135		1039.39	0.03267045		1629.39	0.01553008		2219.39	0.00868986		2809.4	0.00184188		3399.4	0.01943299		3989.4	0.0050112
449.6	0.08705431		1039.59	0.03200852		1629.59	0.01496851		2219.59	0.00913346		2809.6	0.00157294		3399.6	0.02052433		3989.6	0.00522884
449.8	0.08612059		1039.79	0.03206805		1629.79	0.01588377		2219.79	0.00873608		2809.8	0.00161353		3399.8	0.02182739		3989.8	0.00467392
450	0.08640902		1039.99	0.03150157		1629.99	0.01686322		2219.99	0.00798231		2810	0.00173969		3400	0.02200142		3990	0.00465631
450.2	0.08591007		1040.19	0.03230344		1630.19	0.01756733		2220.19	0.00801747		2810.2	0.00165382		3400.2	0.0217401		3990.2	0.00488712
450.4	0.08660655		1040.39	0.03186368		1630.39	0.01794141		2220.39	0.00785927		2810.4	0.00167488		3400.4	0.02281503		3990.4	0.0040386
450.6	0.08665199		1040.59	0.032515		1630.59	0.01869935		2220.59	0.00860858		2810.6	0.00207095		3400.6	0.02235719		3990.6	0.00350903
450.8	0.08679972		1040.79	0.03271122		1630.79	0.01918887		2220.79	0.00906117		2810.8	0.00227814		3400.8	0.02259456		3990.8	0.00312176
451	0.08759501		1040.99	0.03381676		1630.99	0.01887684		2220.99	0.00901735		2811	0.00174885		3401	0.02303865		3991	0.00314559
451.2	0.08777526		1041.19	0.03501138		1631.19	0.0186427		2221.19	0.00904686		2811.2	0.00086122		3401.2	0.02216511		3991.2	0.00287184
451.4	0.08734929		1041.39	0.03580834		1631.39	0.01840178		2221.39	0.00866571		2811.4	0.00153684		3401.4	0.0215014		3991.4	0.00258449
451.6	0.08646024		1041.59	0.03646452		1631.59	0.01795135		2221.59	0.00838869		2811.6	0.00066649		3401.6	0.01996687		3991.6	0.00276715
451.8	0.08736562		1041.79	0.03621987		1631.79	0.01685772		2221.79	0.00770568		2811.8	0.00092257		3401.8	0.01922874		3991.8	0.00253966
452	0.08772264		1041.99	0.03637595		1631.99	0.01636444		2221.99	0.00774952		2812	0.00096923		3402	0.01790714		3992	0.00204845
452.2	0.0879484		1042.19	0.0360777		1632.19	0.01560314		2222.19	0.00776993		2812.2	0.00057224		3402.2	0.01698381		3992.2	0.00232943
452.4	0.0881661		1042.39	0.03588446		1632.39	0.0150694		2222.39	0.00687615		2812.4	0.00026276		3402.4	0.01735991		3992.4	0.00244237
452.6	0.08872664		1042.59	0.0348189		1632.59	0.01521159		2222.59	0.00653055		2812.6	-0.00003293		3402.6	0.01712164		3992.6	0.00266051
452.8	0.08858637		1042.79	0.034064		1632.79	0.0151237		2222.79	0.00642632		2812.8	-0.00067706		3402.8	0.01513343		3992.8	0.0034227
453	0.08813509		1042.99	0.03382258		1632.99	0.01509615		2222.99	0.00608386		2813	-0.00012746		3403	0.01508212		3993	0.00307738
453.2	0.08902885		1043.19	0.03295884		1633.19	0.01388241		2223.19	0.00611		2813.2	-0.00017945		3403.2	0.01488316		3993.2	0.00275144
453.4	0.0895183		1043.39	0.03314176		1633.39	0.01320227		2223.39	0.00595927		2813.4	0.00023882		3403.4	0.01493939		3993.4	0.00358171
453.6	0.08961921		1043.59	0.03301051		1633.59	0.01230633		2223.59	0.00555448		2813.6	0.00023496		3403.6	0.01556033		3993.6	0.00446662
453.8	0.08945452		1043.79	0.03403552		1633.79	0.01273892		2223.79	0.00601153		2813.8	-0.00021456		3403.8	0.01549889		3993.8	0.00529144
454	0.08909421		1043.99	0.03464884		1633.99	0.01344607		2223.99	0.00523661		2814	-0.00040007		3404	0.01535407		3994	0.00470429
454.2	0.08910877		1044.19	0.03536082		1634.19	0.01318993		2224.19	0.00604657		2814.2	0.00003351		3404.2	0.01588509		3994.2	0.00447664
454.4	0.09012157		1044.39	0.03558923		1634.39	0.01253755		2224.39	0.00584913		2814.4	-0.00043121		3404.4	0.01653729		3994.4	0.00404031
454.6	0.09048432		1044.59	0.03663213		1634.59	0.01263828		2224.59	0.00675124		2814.6	-0.00043316		3404.6	0.01593244		3994.6	0.00369891
454.8	0.09098856		1044.79	0.03756976		1634.79	0.013048		2224.79	0.00747236		2814.8	0.00040275		3404.8	0.01600744		3994.8	0.00355409
455	0.09178812		1044.99	0.03893715		1634.99	0.01248603		2224.99	0.00761269		2815	0.00009665		3405	0.01655977		3995	0.00315041
455.2	0.09197667		1045.19	0.03949787		1635.19	0.01301418		2225.19	0.00810356		2815.2	0.00027237		3405.2	0.01615639		3995.2	0.00270745
455.4	0.09185281		1045.39	0.03916047		1635.39	0.01255535		2225.39	0.00718248		2815.4	0.00111348		3405.4	0.015825		3995.4	0.0027827
455.6	0.09213703		1045.59	0.03859772		1635.59	0.01299498		2225.59	0.00681579		2815.6	0.00025688		3405.6	0.01583832		3995.6	0.00224395
455.8	0.09251195		1045.79	0.03875186		1635.79	0.01347257		2225.79	0.00708729		2815.8	0.00105237		3405.8	0.01631042		3995.8	0.00206362
456	0.09288168		1045.99	0.03908139		1635.99	0.01374786		2225.99	0.00758319		2816	0.00065058		3406	0.01571998		3996	0.00203142
456.2	0.09314105		1046.19	0.03915946		1636.19	0.01422507		2226.19	0.00765791		2816.2	0.00056892		3406.2	0.01585326		3996.2	0.00245032
456.4	0.09371749		1046.39	0.03815857		1636.39	0.0141592		2226.39	0.0076099		2816.4	0.00045545		3406.4	0.01648538		3996.4	0.00229012
456.6	0.09423499		1046.59	0.03675401		1636.59	0.01426133		2226.59	0.00737992		2816.6	0.00023653		3406.6	0.01570239		3996.6	0.00212118
456.8	0.09363259		1046.79	0.03687749		1636.79	0.01510934		2226.79	0.00858206		2816.8	-0.0000069		3406.8	0.01554752		3996.8	0.00176376
457	0.09278229		1046.99	0.03768937		1636.99	0.01510175		2226.99	0.00890227		2817	0.00095484		3407	0.01646757		3997	0.00123688
457.2	0.09290003		1047.19	0.03784366		1637.19	0.01528228		2227.19	0.00871338		2817.2	0.00124909		3407.2	0.01546556		3997.2	0.00115775
457.4	0.09208219		1047.39	0.03808146		1637.39	0.01448844		2227.39	0.00861173		2817.4	0.00190703		3407.4	0.01652056		3997.4	0.00195658
457.6	0.0904617		1047.59	0.03871149		1637.59	0.01495817		2227.59	0.00990503		2817.6	0.00202648		3407.6	0.01700987		3997.6	0.00239533
457.8	0.08985352		1047.79	0.0387651		1637.79	0.01577646		2227.79	0.01003733		2817.8	0.00163292		3407.8	0.01684866		3997.8	0.00235482
458	0.08904899		1047.99	0.03901365		1637.99	0.01596876		2227.99	0.0086715		2818	0.00208641		3408	0.01697426		3998	0.00157398
458.2	0.08929463		1048.19	0.0392328		1638.19	0.01526187		2228.19	0.00992123		2818.2	0.00265976		3408.2	0.01732478		3998.2	0.00168331
458.4	0.08880377		1048.39	0.0394397		1638.39	0.0154627		2228.39	0.00923484		2818.4	0.00306838		3408.4	0.01672921		3998.4	0.0023492
458.6	0.08834525		1048.59	0.0401154		1638.59	0.01533182		2228.59	0.00877691		2818.6	0.00364992		3408.6	0.01677233		3998.6	0.00212729
458.8	0.08801996		1048.79	0.03964841		1638.79	0.01565977		2228.79	0.00834889		2818.8	0.00454363		3408.8	0.01705421		3998.8	0.00281525
459	0.08872543		1048.99	0.03936165		1638.99	0.01570479		2228.99	0.00690288		2819	0.00466968		3409	0.01683353		3999	0.00228289
459.2	0.08842794		1049.19	0.03908827		1639.19	0.01587097		2229.19	0.00600489		2819.2	0.00447933		3409.2	0.01615062		3999.2	0.00255905
459.4	0.08866417		1049.39	0.03827711		1639.39	0.01496699		2229.39	0.00481291		2819.4	0.0048087		3409.4	0.01643107		3999.4	0.0032501
459.6	0.08929426		1049.59	0.0379346		1639.59	0.01524667		2229.59	0.00495369		2819.6	0.00426145		3409.6	0.01661302		3999.6	0.0039458
459.8	0.08960244		1049.79	0.03864681		1639.79	0.01525781		2229.79	0.00433373		2819.8	0.00417059		3409.8	0.01665824		3999.8	0.00503827
460	0.08974911		1049.99	0.03808556		1639.99	0.01487379		2229.99	0.00442005		2820	0.00342313		3410	0.0168339		4000	0.00533614
460.2	0.09046872		1050.19	0.03743487		1640.19	0.01359879		2230.19	0.0041366		2820.2	0.00329418		3410.2	0.01643235		4000.2	0.00484185
460.4	0.09095871		1050.39	0.03672611		1640.39	0.0138119		2230.39	0.00451318		2820.4	0.00309465		3410.4	0.01688164		4000.4	0.00481958
460.6	0.09154043		1050.59	0.03672288		1640.59	0.01375256		2230.59	0.00331074		2820.6	0.00264091		3410.6	0.01704234		4000.6	0.0046612
460.8	0.09110357		1050.79	0.03754629		1640.79	0.01418081		2230.79	0.00397703		2820.8	0.0027438		3410.8	0.01766687		4000.8	0.00402317
461	0.0915484		1050.99	0.0374227		1640.99	0.01411669		2230.99	0.0038773		2821	0.00227389		3411	0.01672542		4001	0.00349035
461.2	0.09183748		1051.19	0.0371972		1641.19	0.01479852		2231.19	0.00428534		2821.2	0.00203605		3411.2	0.01642904		4001.2	0.00338159
461.4	0.09121602		1051.39	0.03662436		1641.39	0.01449326		2231.39	0.00438047		2821.4	0.00106224		3411.4	0.01762075		4001.4	0.00286218
461.6	0.09111328		1051.59	0.03720759		1641.59	0.01522022		2231.59	0.00607552		2821.6	0.00093233		3411.6	0.01894208		4001.6	0.00273793
461.8	0.09109787		1051.79	0.03718303		1641.79	0.01544256		2231.79	0.00623953		2821.8	0.00048064		3411.8	0.01891536		4001.8	0.00226516
462	0.09049864		1051.99	0.03708569		1641.99	0.0154261		2231.99	0.00739108		2822	0.00056544		3412	0.01895291		4002	0.00201945
462.2	0.09102808		1052.19	0.03774525		1642.19	0.01536749		2232.19	0.00869854		2822.2	0.00047299		3412.2	0.01939539		4002.2	0.00201838
462.4	0.09028899		1052.39	0.03771943		1642.39	0.01549163		2232.39	0.00831201		2822.4	0.00070299		3412.4	0.01873312		4002.4	0.00147083
462.6	0.09041645		1052.59	0.03879248		1642.59	0.01589672		2232.59	0.00853137		2822.6	0.00067866		3412.6	0.01849425		4002.6	0.00115639
462.8	0.09032423		1052.79	0.0385857		1642.79	0.01617515		2232.79	0.00959015		2822.8	0.00049604		3412.8	0.01804165		4002.8	0.0018614
463	0.09056779		1052.99	0.03827009		1642.99	0.01631561		2232.99	0.00964498		2823	0.00060034		3413	0.01695084		4003	0.00260665
463.2	0.09035746		1053.19	0.0382363		1643.19	0.01566002		2233.19	0.01024468		2823.2	0.00024944		3413.2	0.0169214		4003.2	0.00409724
463.4	0.09053687		1053.39	0.03844459		1643.39	0.0142847		2233.39	0.01135271		2823.4	0.00089583		3413.4	0.01698678		4003.4	0.0050409
463.6	0.09061096		1053.59	0.03886515		1643.59	0.01448006		2233.59	0.01168777		2823.6	0.00038283		3413.6	0.01726909		4003.6	0.00565081
463.8	0.09079997		1053.79	0.03906909		1643.79	0.01464686		2233.79	0.01087011		2823.8	-0.00025159		3413.8	0.0178746		4003.8	0.0059465
464	0.08983047		1053.99	0.03964632		1643.99	0.01381914		2233.99	0.01101339		2824	-0.00059686		3414	0.01842531		4004	0.00541532
464.2	0.09029655		1054.19	0.03979482		1644.19	0.01311559		2234.19	0.00979907		2824.2	-0.00027138		3414.2	0.0176072		4004.2	0.005334
464.4	0.09110262		1054.39	0.04055531		1644.39	0.01449144		2234.39	0.0090895		2824.4	-0.00029203		3414.4	0.01839799		4004.4	0.00563199
464.6	0.09126911		1054.59	0.04065267		1644.59	0.01390318		2234.59	0.00711714		2824.6	-0.00063089		3414.6	0.01886255		4004.6	0.00563013
464.8	0.0913935		1054.79	0.04005265		1644.79	0.01444337		2234.79	0.0070944		2824.8	-0.00129029		3414.8	0.01849933		4004.8	0.00499751
465	0.09208809		1054.99	0.03994997		1644.99	0.0149283		2234.99	0.00663333		2825	-0.00178118		3415	0.01810347		4005	0.00491555
465.2	0.09230246		1055.19	0.04030715		1645.19	0.01521113		2235.19	0.00700384		2825.2	-0.00114585		3415.2	0.01840792		4005.2	0.00429328
465.4	0.09229246		1055.39	0.04040112		1645.39	0.01451922		2235.39	0.00690098		2825.4	-0.00189704		3415.4	0.01958308		4005.4	0.0040936
465.6	0.09240419		1055.59	0.04043645		1645.59	0.0149682		2235.59	0.00692451		2825.6	-0.00138113		3415.6	0.01964923		4005.6	0.00371588
465.8	0.09232398		1055.79	0.03992186		1645.79	0.01520438		2235.79	0.00596521		2825.8	-0.00087677		3415.8	0.01841423		4005.8	0.00374769
466	0.09308258		1055.99	0.03913265		1645.99	0.01480944		2235.99	0.00556588		2826	-0.00002654		3416	0.01879631		4006	0.00328534
466.2	0.09386987		1056.19	0.03938118		1646.19	0.01430134		2236.19	0.00484766		2826.2	-0.00022019		3416.2	0.01837184		4006.2	0.00362733
466.4	0.09393587		1056.39	0.03910488		1646.39	0.01430152		2236.39	0.00512922		2826.4	0.00006994		3416.4	0.0177056		4006.4	0.00316085
466.6	0.09458872		1056.59	0.03922958		1646.59	0.01463281		2236.59	0.00558408		2826.6	0.00009034		3416.6	0.01801864		4006.6	0.00467431
466.8	0.09479375		1056.79	0.03850897		1646.79	0.0135218		2236.79	0.00618707		2826.8	-0.00050038		3416.8	0.01687186		4006.8	0.00511211
467	0.09577925		1056.99	0.03796547		1646.99	0.01341823		2236.99	0.00629318		2827	0.00032255		3417	0.0167966		4007	0.00526602
467.2	0.09581264		1057.19	0.03817573		1647.19	0.01299479		2237.19	0.00767419		2827.2	-0.00028334		3417.2	0.01810286		4007.2	0.00581261
467.4	0.09494023		1057.39	0.03913399		1647.39	0.01248225		2237.39	0.00858509		2827.4	-0.0005905		3417.4	0.01815894		4007.4	0.00539693
467.6	0.09505738		1057.59	0.03872564		1647.59	0.01328902		2237.59	0.00842883		2827.6	-0.0005728		3417.6	0.01927837		4007.6	0.00593456
467.8	0.09422423		1057.79	0.03811085		1647.79	0.01345279		2237.79	0.00804442		2827.8	-0.00149254		3417.8	0.01930849		4007.8	0.00543051
468	0.09289246		1057.99	0.03801213		1647.99	0.013323		2237.99	0.00800968		2828	-0.00146654		3418	0.01924621		4008	0.00480409
468.2	0.09286875		1058.19	0.03679699		1648.19	0.01425603		2238.19	0.007583		2828.2	-0.00130577		3418.2	0.01904971		4008.2	0.00470366
468.4	0.09280043		1058.39	0.03656482		1648.39	0.01504358		2238.39	0.00768865		2828.4	-0.00120481		3418.4	0.01953883		4008.4	0.00448137
468.6	0.09251754		1058.59	0.03543279		1648.59	0.01491183		2238.59	0.00765888		2828.6	-0.0011969		3418.6	0.01916672		4008.6	0.00434968
468.8	0.09249299		1058.79	0.03464846		1648.79	0.01578747		2238.79	0.00824579		2828.8	-0.00082924		3418.8	0.01874567		4008.8	0.0038579
469	0.09259246		1058.99	0.03443646		1648.99	0.01598747		2238.99	0.00888184		2829	0.00019781		3419	0.01841057		4009	0.00391991
469.2	0.09264139		1059.19	0.03381915		1649.19	0.01624346		2239.19	0.00968964		2829.2	0.00097525		3419.2	0.01790684		4009.2	0.00379312
469.4	0.0928777		1059.39	0.03304846		1649.39	0.01637273		2239.39	0.00925278		2829.4	0.00110851		3419.4	0.01776937		4009.4	0.00405344
469.6	0.09332713		1059.59	0.03214496		1649.59	0.01714266		2239.59	0.00883219		2829.6	0.00241743		3419.6	0.01697452		4009.6	0.0039171
469.8	0.09415983		1059.79	0.03153452		1649.79	0.01708255		2239.79	0.00881243		2829.8	0.003316		3419.8	0.01683373		4009.8	0.00457595
470	0.09415983		1059.99	0.03153452		1650	0.01708255		2239.99	0.00881243		2830	0.003316		3420	0.01683373		4010	0.00457595
470.2	0.09453721		1060.19	0.03173823		1650.2	0.01775313		2240.19	0.00867384		2830.2	0.00406672		3420.2	0.01639105		4010.2	0.0045042
470.4	0.09494404		1060.39	0.0313374		1650.4	0.01812217		2240.39	0.00898165		2830.4	0.00450352		3420.4	0.01606968		4010.4	0.00441432
470.6	0.09564246		1060.59	0.03188374		1650.6	0.01811034		2240.59	0.00875465		2830.6	0.00500474		3420.6	0.01535475		4010.6	0.00393096
470.8	0.09599642		1060.79	0.03178366		1650.8	0.01848048		2240.79	0.0087016		2830.8	0.00526496		3420.8	0.0145062		4010.8	0.00393191
471	0.09564711		1060.99	0.03218905		1651	0.01853428		2240.99	0.0089248		2831	0.00560488		3421	0.01365521		4011	0.00458077
471.2	0.09588334		1061.19	0.03301977		1651.2	0.01868023		2241.19	0.00880053		2831.2	0.00612932		3421.2	0.01303789		4011.2	0.00428481
471.4	0.09594528		1061.39	0.03338015		1651.4	0.01790499		2241.39	0.00856144		2831.4	0.00638324		3421.4	0.01337198		4011.4	0.00424528
471.6	0.09570178		1061.59	0.0342728		1651.6	0.01747029		2241.59	0.00841219		2831.6	0.00622054		3421.6	0.01292448		4011.6	0.00426442
471.8	0.09556432		1061.79	0.03468863		1651.8	0.01708482		2241.79	0.00834988		2831.8	0.0059189		3421.8	0.01276413		4011.8	0.00415171
472	0.09550545		1061.99	0.03507677		1652	0.01699628		2241.99	0.00795619		2832	0.00557576		3422	0.0131057		4012	0.00363717
472.2	0.0954447		1062.19	0.03506565		1652.2	0.01668656		2242.19	0.00771246		2832.2	0.00501859		3422.2	0.01334756		4012.2	0.00352721
472.4	0.09513449		1062.39	0.03477875		1652.4	0.01563102		2242.39	0.0073636		2832.4	0.00458616		3422.4	0.01296479		4012.4	0.0038045
472.6	0.09396255		1062.59	0.03471896		1652.6	0.01555826		2242.59	0.00744462		2832.6	0.00472481		3422.6	0.01332283		4012.6	0.00311459
472.8	0.09363042		1062.79	0.03522584		1652.8	0.01512609		2242.79	0.00801533		2832.8	0.00519006		3422.8	0.01342519		4012.8	0.00412271
473	0.09355341		1062.99	0.03548808		1653	0.01509001		2242.99	0.00795537		2833	0.00534582		3423	0.01298852		4013	0.00506095
473.2	0.09211334		1063.19	0.03461335		1653.2	0.0151399		2243.19	0.00834229		2833.2	0.00522327		3423.2	0.01269741		4013.2	0.00548027
473.4	0.09192227		1063.39	0.03500685		1653.4	0.01453056		2243.39	0.00915498		2833.4	0.00626984		3423.4	0.01245411		4013.4	0.00553501
473.6	0.09206017		1063.59	0.03486042		1653.6	0.01535143		2243.59	0.00875667		2833.6	0.00647339		3423.6	0.01167824		4013.6	0.00638235
473.8	0.09140234		1063.79	0.034682		1653.8	0.01559412		2243.79	0.00838569		2833.8	0.00777476		3423.8	0.01071267		4013.8	0.00622961
474	0.09173215		1063.99	0.03463511		1654	0.01530787		2243.99	0.00789748		2834	0.00742698		3424	0.00905942		4014	0.00584354
474.2	0.09220684		1064.19	0.03402121		1654.2	0.01561967		2244.19	0.00810232		2834.2	0.00714335		3424.2	0.00985297		4014.2	0.00580573
474.4	0.09274717		1064.39	0.03341674		1654.4	0.01565179		2244.39	0.00815843		2834.4	0.007033		3424.4	0.00896367		4014.4	0.00547409
474.6	0.09344659		1064.59	0.03317709		1654.6	0.01521572		2244.59	0.00803318		2834.6	0.0067902		3424.6	0.00894156		4014.6	0.00547055
474.8	0.09310063		1064.79	0.03230243		1654.8	0.01549998		2244.79	0.00789226		2834.8	0.00659579		3424.8	0.00865253		4014.8	0.00602455
475	0.09287517		1064.99	0.03272694		1655	0.01526273		2244.99	0.00708565		2835	0.00671501		3425	0.00868121		4015	0.00605274
475.2	0.09346092		1065.19	0.03216698		1655.2	0.01498114		2245.19	0.00620047		2835.2	0.00741229		3425.2	0.00904058		4015.2	0.00605188
475.4	0.0937095		1065.39	0.03189417		1655.4	0.01433246		2245.39	0.00547437		2835.4	0.00631028		3425.4	0.00964011		4015.4	0.00546903
475.6	0.09429067		1065.59	0.03175437		1655.6	0.01527996		2245.59	0.00515722		2835.6	0.00507598		3425.6	0.00936509		4015.6	0.005137
475.8	0.09462285		1065.79	0.03142785		1655.8	0.01620791		2245.79	0.00425297		2835.8	0.00437766		3425.8	0.01079022		4015.8	0.00389428
476	0.09507118		1065.99	0.03127781		1656	0.01593141		2245.99	0.00347776		2836	0.00356913		3426	0.01086396		4016	0.00259921
476.2	0.09453001		1066.19	0.03122963		1656.2	0.01485154		2246.19	0.00349773		2836.2	0.00283399		3426.2	0.01088727		4016.2	0.00164501
476.4	0.09426766		1066.39	0.03244007		1656.4	0.01341924		2246.39	0.00294875		2836.4	0.002215		3426.4	0.01066863		4016.4	0.00065606
476.6	0.09414996		1066.59	0.0325773		1656.6	0.01326182		2246.59	0.00305874		2836.6	0.00131967		3426.6	0.0106214		4016.6	0.00078455
476.8	0.0946061		1066.79	0.03340737		1656.8	0.01301176		2246.79	0.00317124		2836.8	0.00104432		3426.8	0.01077403		4016.8	0.0015431
477	0.09436946		1066.99	0.03426103		1657	0.01219666		2246.99	0.00365572		2837	0.00053602		3427	0.01103567		4017	0.00156084
477.2	0.09280504		1067.19	0.03379426		1657.2	0.01170067		2247.19	0.00386717		2837.2	0.00034579		3427.2	0.01145835		4017.2	0.00068781
477.4	0.09258221		1067.39	0.03431611		1657.4	0.01102915		2247.39	0.00474436		2837.4	0.00079657		3427.4	0.01153237		4017.4	0.00009521
477.6	0.09218942		1067.59	0.03424265		1657.6	0.01228676		2247.59	0.0050217		2837.6	0.00034361		3427.6	0.01123628		4017.6	0.00035118
477.8	0.09216897		1067.79	0.0337604		1657.8	0.01193153		2247.79	0.00518131		2837.8	0.00127696		3427.8	0.01110926		4017.8	0.00030001
478	0.09237853		1067.99	0.03313976		1658	0.01280806		2247.99	0.00569624		2838	0.00019203		3428	0.01030565		4018	0.00128086
478.2	0.0931828		1068.19	0.03198627		1658.2	0.01260009		2248.19	0.00670782		2838.2	0.0006954		3428.2	0.01091121		4018.2	0.00176848
478.4	0.09279851		1068.39	0.03179732		1658.4	0.01223094		2248.39	0.00681929		2838.4	0.00120479		3428.4	0.01005235		4018.4	0.00271401
478.6	0.09255066		1068.59	0.03076964		1658.6	0.01226912		2248.59	0.00661596		2838.6	0.00232702		3428.6	0.01011742		4018.6	0.00347361
478.8	0.09181336		1068.79	0.03028372		1658.8	0.01215084		2248.79	0.00591421		2838.8	0.00285841		3428.8	0.00916814		4018.8	0.00399412
479	0.09167354		1068.99	0.02982025		1659	0.01161098		2248.99	0.0050427		2839	0.00297661		3429	0.00836053		4019	0.00452682
479.2	0.0926721		1069.19	0.02803277		1659.2	0.01193976		2249.19	0.00514813		2839.2	0.00352206		3429.2	0.00857421		4019.2	0.0047218
479.4	0.09311066		1069.39	0.02756525		1659.4	0.0119474		2249.39	0.00531571		2839.4	0.00297333		3429.4	0.0083748		4019.4	0.00438332
479.6	0.09334985		1069.59	0.02704935		1659.6	0.01227003		2249.59	0.00547275		2839.6	0.00333237		3429.6	0.00906169		4019.6	0.00427393
479.8	0.09304048		1069.79	0.02608052		1659.8	0.01145363		2249.79	0.00548455		2839.8	0.00408913		3429.8	0.00832718		4019.8	0.002961
480	0.09337133		1069.99	0.02672747		1660	0.01027055		2249.99	0.00622992		2840	0.00451902		3430	0.00740322		4020	0.00169977
480.2	0.09286332		1070.19	0.02709998		1660.2	0.01030262		2250.19	0.00674884		2840.2	0.00509316		3430.2	0.00696956		4020.2	0.0008384
480.4	0.09289874		1070.39	0.02791399		1660.4	0.00988754		2250.39	0.00642547		2840.4	0.00556662		3430.4	0.00626123		4020.4	0.00116835
480.6	0.09270511		1070.59	0.02869342		1660.6	0.01082405		2250.59	0.00646042		2840.6	0.00623409		3430.6	0.0064069		4020.6	0.00182573
480.8	0.0922983		1070.79	0.02965165		1660.8	0.01030925		2250.79	0.00711155		2840.8	0.00725122		3430.8	0.00655805		4020.8	0.00129251
481	0.09185649		1070.99	0.02996207		1661	0.01058422		2250.99	0.00702455		2841	0.00775594		3431	0.00619938		4021	0.00010276
481.2	0.09152681		1071.19	0.0293094		1661.2	0.0115802		2251.19	0.00721646		2841.2	0.00730674		3431.2	0.00642515		4021.2	0.00052309
481.4	0.09196553		1071.39	0.02934964		1661.4	0.01232488		2251.39	0.00659109		2841.4	0.0069052		3431.4	0.00653095		4021.4	0.00158845
481.6	0.09230946		1071.59	0.02941283		1661.6	0.01382581		2251.59	0.00648768		2841.6	0.00625416		3431.6	0.0071582		4021.6	0.0027354
481.8	0.09254997		1071.79	0.02967509		1661.8	0.01430813		2251.79	0.00629894		2841.8	0.00629768		3431.8	0.00805261		4021.8	0.00398668
482	0.09245884		1071.99	0.03055116		1662	0.0147112		2251.99	0.00640898		2842	0.0040491		3432	0.00702333		4022	0.00405593
482.2	0.09260768		1072.19	0.0308728		1662.2	0.01439852		2252.19	0.00593888		2842.2	0.00326734		3432.2	0.00693955		4022.2	0.00447252
482.4	0.09217928		1072.39	0.03058264		1662.4	0.01440305		2252.39	0.00520643		2842.4	0.00245874		3432.4	0.00641052		4022.4	0.0054641
482.6	0.09270499		1072.59	0.03023213		1662.6	0.01476877		2252.59	0.00353048		2842.6	0.00193285		3432.6	0.00634199		4022.6	0.00506717
482.8	0.09237398		1072.79	0.03075431		1662.8	0.01360694		2252.79	0.00367233		2842.8	-0.00008787		3432.8	0.00603591		4022.8	0.00486046
483	0.09202736		1072.99	0.03014169		1663	0.0126901		2252.99	0.0030948		2843	-0.00146374		3433	0.0070427		4023	0.0044118
483.2	0.09274963		1073.19	0.0300343		1663.2	0.01192657		2253.19	0.00401035		2843.2	-0.00138662		3433.2	0.00803268		4023.2	0.00363871
483.4	0.09233205		1073.39	0.03005385		1663.4	0.01097688		2253.39	0.0037932		2843.4	-0.00196025		3433.4	0.00773		4023.4	0.0035771
483.6	0.09226378		1073.59	0.03000859		1663.6	0.00981759		2253.59	0.00461242		2843.6	-0.00168582		3433.6	0.00857025		4023.6	0.00257652
483.8	0.09237288		1073.79	0.030467		1663.8	0.00881432		2253.79	0.00441964		2843.8	-0.00044604		3433.8	0.0079272		4023.8	0.00095356
484	0.09222534		1073.99	0.0318167		1664	0.00863427		2253.99	0.00451982		2844	0.00054277		3434	0.00893421		4024	0.00049056
484.2	0.09141865		1074.19	0.03206977		1664.2	0.00881779		2254.19	0.00382337		2844.2	0.00161823		3434.2	0.00838247		4024.2	0.00056599
484.4	0.09127426		1074.39	0.03232701		1664.4	0.00894156		2254.39	0.00342748		2844.4	0.00296484		3434.4	0.00790527		4024.4	0.00035715
484.6	0.09090634		1074.59	0.03265956		1664.6	0.00936573		2254.59	0.00380918		2844.6	0.00420139		3434.6	0.00729496		4024.6	-0.00002221
484.8	0.09111791		1074.79	0.03239619		1664.8	0.00895032		2254.79	0.00403512		2844.8	0.00558888		3434.8	0.00661104		4024.8	-0.0004105
485	0.09120065		1074.99	0.03163099		1665	0.00981327		2254.99	0.00303238		2845	0.00689838		3435	0.00622368		4025	-0.00047376
485.2	0.09135678		1075.19	0.03133514		1665.2	0.00971959		2255.19	0.00248771		2845.2	0.00623971		3435.2	0.00626627		4025.2	0.0003628
485.4	0.09087831		1075.39	0.03165324		1665.4	0.00999935		2255.39	0.00186187		2845.4	0.00689136		3435.4	0.00705702		4025.4	0.00033597
485.6	0.09118605		1075.59	0.0324426		1665.6	0.01115448		2255.59	0.00177325		2845.6	0.0067966		3435.6	0.00725168		4025.6	-0.00020379
485.8	0.09096959		1075.79	0.03284254		1665.8	0.0118812		2255.79	0.00148241		2845.8	0.00695645		3435.8	0.00658084		4025.8	-0.00062369
486	0.09105008		1075.99	0.03250479		1666	0.01234483		2255.99	0.00070867		2846	0.00637251		3436	0.00599563		4026	-0.000412
486.2	0.09149996		1076.19	0.03176174		1666.2	0.01279304		2256.19	-0.00015707		2846.2	0.00607671		3436.2	0.00653605		4026.2	-0.00039545
486.4	0.09198048		1076.39	0.03142066		1666.4	0.01312864		2256.39	0.00057995		2846.4	0.00537728		3436.4	0.00675208		4026.4	-0.00060358
486.6	0.09124714		1076.59	0.03190628		1666.6	0.01326428		2256.59	-0.00007314		2846.6	0.00482464		3436.6	0.00708139		4026.6	-0.0014522
486.8	0.09103684		1076.79	0.03252149		1666.8	0.01246624		2256.79	0.00078361		2846.8	0.0041733		3436.8	0.00667955		4026.8	-0.00161231
487	0.0913477		1076.99	0.03195515		1667	0.01263667		2256.99	0.00082182		2847	0.00393649		3437	0.00734136		4027	-0.00085033
487.2	0.09231778		1077.19	0.03240079		1667.2	0.01201359		2257.19	0.00144886		2847.2	0.00365972		3437.2	0.00776468		4027.2	-0.00082525
487.4	0.09333736		1077.39	0.03237744		1667.4	0.01178491		2257.39	0.00126224		2847.4	0.0031162		3437.4	0.00849135		4027.4	-0.00069514
487.6	0.09334912		1077.59	0.03275233		1667.6	0.01167174		2257.59	0.00172349		2847.6	0.00327492		3437.6	0.00953294		4027.6	-0.00046826
487.8	0.09417722		1077.79	0.03370466		1667.8	0.01180704		2257.79	0.00123196		2847.8	0.00359765		3437.8	0.01034476		4027.8	-0.00040949
488	0.09396071		1077.99	0.03342875		1668	0.01212002		2257.99	0.00196169		2848	0.00329072		3438	0.01151038		4028	0.00058468
488.2	0.09450159		1078.19	0.03348158		1668.2	0.0124382		2258.19	0.00262914		2848.2	0.00331349		3438.2	0.01081334		4028.2	0.00053911
488.4	0.09482128		1078.39	0.03341824		1668.4	0.01197013		2258.39	0.0030959		2848.4	0.00368447		3438.4	0.01051069		4028.4	0.00034885
488.6	0.09470922		1078.59	0.03310044		1668.6	0.01097917		2258.59	0.00340399		2848.6	0.00341394		3438.6	0.00948575		4028.6	0.00101019
488.8	0.09491371		1078.79	0.0327909		1668.8	0.01035618		2258.79	0.00342585		2848.8	0.00377013		3438.8	0.00923018		4028.8	0.00077606
489	0.09495252		1078.99	0.03183951		1669	0.01007598		2258.99	0.00235541		2849	0.0031216		3439	0.00871425		4029	0.00097871
489.2	0.09458564		1079.19	0.0318705		1669.2	0.00921381		2259.19	0.00202271		2849.2	0.00242661		3439.2	0.00875749		4029.2	0.00138358
489.4	0.09423747		1079.39	0.03117926		1669.4	0.00965331		2259.39	0.00211952		2849.4	0.00258358		3439.4	0.00905564		4029.4	0.00139752
489.6	0.09393452		1079.59	0.03138409		1669.6	0.00999731		2259.59	0.00194424		2849.6	0.00211022		3439.6	0.0088923		4029.6	0.00150559
489.8	0.09303711		1079.79	0.03054523		1669.8	0.00979657		2259.79	0.00171758		2849.8	0.00148945		3439.8	0.00879981		4029.8	0.0020626
490	0.09209726		1079.99	0.02947059		1670	0.00927353		2259.99	0.00122558		2850	0.00073776		3440	0.00902262		4030	0.0028998
490.2	0.09117158		1080.19	0.0289927		1670.2	0.0083902		2260.19	0.00148071		2850.2	-0.00005706		3440.2	0.00987234		4030.2	0.00305105
490.4	0.09084279		1080.39	0.02909317		1670.4	0.00882934		2260.39	0.00202551		2850.4	-0.00052059		3440.4	0.01016235		4030.4	0.00261783
490.6	0.08985705		1080.59	0.02883403		1670.6	0.00922701		2260.59	0.00115726		2850.6	-0.00010855		3440.6	0.01018853		4030.6	0.00309124
490.8	0.09077839		1080.79	0.02836081		1670.8	0.00806725		2260.79	0.00099752		2850.8	0.00010721		3440.8	0.01020697		4030.8	0.00321844
491	0.09072216		1080.99	0.02860848		1671	0.00846809		2260.99	0.00136435		2851	0.00037637		3441	0.01076515		4031	0.00366832
491.2	0.09061146		1081.19	0.02966264		1671.2	0.00759948		2261.19	0.00113687		2851.2	0.00048629		3441.2	0.0118846		4031.2	0.00342729
491.4	0.09047553		1081.39	0.0303358		1671.4	0.00858258		2261.39	0.00097205		2851.4	0.00079411		3441.4	0.01138551		4031.4	0.00397035
491.6	0.089595		1081.59	0.03056345		1671.6	0.00952885		2261.59	0.0006621		2851.6	0.00143456		3441.6	0.01153091		4031.6	0.00387828
491.8	0.08986453		1081.79	0.03160185		1671.8	0.00999634		2261.79	0.00101768		2851.8	0.00187306		3441.8	0.01215681		4031.8	0.0031118
492	0.08965595		1081.99	0.03223647		1672	0.01020603		2261.99	0.00209636		2852	0.00214446		3442	0.01215782		4032	0.00259357
492.2	0.09021969		1082.19	0.03273936		1672.2	0.01074742		2262.19	0.00271859		2852.2	0.00276502		3442.2	0.01135409		4032.2	0.00116938
492.4	0.09083789		1082.39	0.03420409		1672.4	0.01162493		2262.39	0.00281199		2852.4	0.00282519		3442.4	0.01192894		4032.4	-0.0000857
492.6	0.0909424		1082.59	0.03393583		1672.6	0.01248582		2262.59	0.00267328		2852.6	0.00240561		3442.6	0.0114188		4032.6	-0.00072155
492.8	0.09007148		1082.79	0.0341609		1672.8	0.01295941		2262.79	0.00273008		2852.8	0.00234504		3442.8	0.01084299		4032.8	-0.00112436
493	0.08957254		1082.99	0.03388069		1673	0.01337693		2262.99	0.00172712		2853	0.00211443		3443	0.01005207		4033	-0.00141149
493.2	0.09019579		1083.19	0.03402164		1673.2	0.01398828		2263.19	0.00209778		2853.2	0.00217483		3443.2	0.0102541		4033.2	-0.00203113
493.4	0.09013241		1083.39	0.03382931		1673.4	0.01474802		2263.39	0.00210252		2853.4	0.00185705		3443.4	0.00992243		4033.4	-0.00163533
493.6	0.0900673		1083.59	0.03462448		1673.6	0.01487458		2263.59	0.00275499		2853.6	0.00136457		3443.6	0.01005763		4033.6	-0.0014291
493.8	0.08967807		1083.79	0.03389128		1673.8	0.01511677		2263.79	0.0027259		2853.8	0.0006527		3443.8	0.01007263		4033.8	-0.00154569
494	0.08973528		1083.99	0.03411387		1674	0.01466951		2263.99	0.00316762		2854	0.00072629		3444	0.0094131		4034	-0.00184363
494.2	0.08951369		1084.19	0.03411287		1674.2	0.01473161		2264.19	0.00369621		2854.2	0.00058362		3444.2	0.00995549		4034.2	-0.00170093
494.4	0.09027528		1084.39	0.03427009		1674.4	0.01486563		2264.39	0.00403014		2854.4	0.00082319		3444.4	0.00919662		4034.4	-0.00163006
494.6	0.09031196		1084.59	0.03356432		1674.6	0.01458992		2264.59	0.00359394		2854.6	0.00072186		3444.6	0.00819665		4034.6	-0.00062567
494.8	0.09062768		1084.79	0.03315525		1674.8	0.01264802		2264.79	0.00433794		2854.8	0.00115668		3444.8	0.0079715		4034.8	0.00011493
495	0.09059537		1084.99	0.03324509		1675	0.0121748		2264.99	0.00465329		2855	0.00123152		3445	0.0075112		4035	0.00065742
495.2	0.09030702		1085.19	0.03212112		1675.2	0.01132792		2265.19	0.00418874		2855.2	0.0010836		3445.2	0.00769987		4035.2	0.0012742
495.4	0.0902112		1085.39	0.03131875		1675.4	0.0114872		2265.39	0.00383072		2855.4	0.00154399		3445.4	0.00655054		4035.4	0.00162164
495.6	0.09028943		1085.59	0.03081111		1675.6	0.01004146		2265.59	0.00347551		2855.6	0.00169298		3445.6	0.00638364		4035.6	0.00220044
495.8	0.09079938		1085.79	0.03058998		1675.8	0.00982317		2265.79	0.00368957		2855.8	0.00151129		3445.8	0.00729182		4035.8	0.00221829
496	0.09194343		1085.99	0.03025468		1676	0.00973318		2265.99	0.00402671		2856	0.00165243		3446	0.00762431		4036	0.00193662
496.2	0.0919541		1086.19	0.02999633		1676.2	0.01021304		2266.19	0.00437016		2856.2	0.00192735		3446.2	0.00838026		4036.2	0.00099287
496.4	0.0917133		1086.39	0.03038644		1676.4	0.01039054		2266.39	0.00380067		2856.4	0.00170259		3446.4	0.00826396		4036.4	0.00080104
496.6	0.0900582		1086.59	0.02952008		1676.6	0.0101827		2266.59	0.00312029		2856.6	0.00184969		3446.6	0.00790879		4036.6	0.00060685
496.8	0.08942402		1086.79	0.02927802		1676.8	0.00945289		2266.79	0.00298289		2856.8	0.00171756		3446.8	0.00720965		4036.8	0.00092838
497	0.09034983		1086.99	0.02939695		1677	0.01002317		2266.99	0.00301935		2857	0.00238151		3447	0.00781953		4037	-0.00071088
497.2	0.09079586		1087.19	0.03003371		1677.2	0.01112288		2267.19	0.00261367		2857.2	0.00322956		3447.2	0.00874754		4037.2	-0.00131623
497.4	0.09059899		1087.39	0.03033875		1677.4	0.01111406		2267.39	0.00293873		2857.4	0.00302062		3447.4	0.00882627		4037.4	-0.00125385
497.6	0.09149808		1087.59	0.03086379		1677.6	0.01174431		2267.59	0.00321884		2857.6	0.00300953		3447.6	0.00887817		4037.6	-0.00190291
497.8	0.09090485		1087.79	0.03203265		1677.8	0.01193851		2267.79	0.00301865		2857.8	0.00384696		3447.8	0.00904271		4037.8	-0.00293902
498	0.09103254		1087.99	0.03295622		1678	0.01144627		2267.99	0.00367715		2858	0.00413299		3448	0.00797523		4038	-0.00378926
498.2	0.09124784		1088.19	0.0333944		1678.2	0.01258012		2268.19	0.0035258		2858.2	0.00328717		3448.2	0.00857681		4038.2	-0.00322128
498.4	0.09179607		1088.39	0.03322674		1678.4	0.01252315		2268.39	0.00333799		2858.4	0.00298217		3448.4	0.00818105		4038.4	-0.00161411
498.6	0.09089827		1088.59	0.03286731		1678.6	0.01223501		2268.59	0.00332332		2858.6	0.0022287		3448.6	0.00869348		4038.6	-0.00165581
498.8	0.09036403		1088.79	0.03299593		1678.8	0.01166436		2268.79	0.00434504		2858.8	0.00216118		3448.8	0.00879306		4038.8	-0.00144964
499	0.09028778		1088.99	0.032446		1679	0.01178514		2268.99	0.00388757		2859	0.00161169		3449	0.00840442		4039	-0.00058872
499.2	0.08907551		1089.19	0.03221667		1679.2	0.01190127		2269.19	0.00358899		2859.2	0.0011296		3449.2	0.0085276		4039.2	0.00035415
499.4	0.08908847		1089.39	0.03267702		1679.4	0.01103729		2269.39	0.00226824		2859.4	0.00079418		3449.4	0.00734006		4039.4	0.00182461
499.6	0.08929464		1089.59	0.03182066		1679.6	0.01025288		2269.59	0.00150553		2859.6	-0.00047837		3449.6	0.00712217		4039.6	0.00250661
499.8	0.08939305		1089.79	0.03173818		1679.8	0.01019527		2269.79	0.00136978		2859.8	-0.0005873		3449.8	0.00793235		4039.8	0.00220221
500	0.08969468		1089.99	0.03177001		1680	0.01056301		2269.99	0.00114518		2860	-0.0004033		3450	0.00650642		4040	0.0013591
500.2	0.08861464		1090.19	0.03188011		1680.2	0.01082023		2270.19	0.00065671		2860.2	-0.00031901		3450.2	0.00612255		4040.2	0.0011702
500.4	0.08789648		1090.39	0.03124412		1680.4	0.01108078		2270.39	-0.00036437		2860.4	-0.00003542		3450.4	0.0048485		4040.4	0.00159563
500.6	0.08772894		1090.59	0.03059107		1680.6	0.01073131		2270.59	-0.00052927		2860.6	-0.00016185		3450.6	0.00472283		4040.6	0.00087142
500.8	0.08831985		1090.79	0.03038176		1680.8	0.01034818		2270.79	-0.00092346		2860.8	0.00038105		3450.8	0.0045207		4040.8	0.00065828
501	0.08823578		1090.99	0.0309811		1681	0.01134847		2270.99	-0.00131498		2861	0.00134087		3451	0.00521389		4041	-0.00095915
501.2	0.08845194		1091.19	0.03132286		1681.2	0.01155152		2271.19	-0.00229387		2861.2	0.00202162		3451.2	0.00507657		4041.2	-0.00213348
501.4	0.08850438		1091.39	0.03135225		1681.4	0.01163075		2271.39	-0.00190197		2861.4	0.00229918		3451.4	0.00449262		4041.4	-0.00323364
501.6	0.08844175		1091.59	0.03212268		1681.6	0.01261973		2271.59	-0.00225276		2861.6	0.00367927		3451.6	0.00485195		4041.6	-0.00401085
501.8	0.08772468		1091.79	0.0328922		1681.8	0.01231825		2271.79	-0.00209922		2861.8	0.00441506		3451.8	0.00522902		4041.8	-0.00427897
502	0.087804		1091.99	0.03327139		1682	0.01260682		2271.99	-0.00109399		2862	0.00416555		3452	0.00523445		4042	-0.0049637
502.2	0.08783378		1092.19	0.03317283		1682.2	0.01308716		2272.19	-0.00124168		2862.2	0.0042763		3452.2	0.00598287		4042.2	-0.00424197
502.4	0.08765136		1092.39	0.03324036		1682.4	0.01261072		2272.39	-0.00025978		2862.4	0.00419869		3452.4	0.00628757		4042.4	-0.00363
502.6	0.08764778		1092.59	0.03338954		1682.6	0.01299402		2272.59	0.00046479		2862.6	0.00496688		3452.6	0.00681231		4042.6	-0.00374216
502.8	0.08740763		1092.79	0.03341688		1682.8	0.01359599		2272.79	0.00141766		2862.8	0.00527837		3452.8	0.00635439		4042.8	-0.0024172
503	0.08712555		1092.99	0.03249161		1683	0.0121585		2272.99	0.00173939		2863	0.00506779		3453	0.00726017		4043	-0.00046691
503.2	0.08759862		1093.19	0.03251405		1683.2	0.0109056		2273.19	0.00143285		2863.2	0.00380774		3453.2	0.00798939		4043.2	0.00017841
503.4	0.08873207		1093.39	0.0325215		1683.4	0.00981236		2273.39	0.00068863		2863.4	0.00329472		3453.4	0.0082794		4043.4	0.00033387
503.6	0.09018542		1093.59	0.03218628		1683.6	0.00979958		2273.59	0.0008539		2863.6	0.00262565		3453.6	0.00909142		4043.6	0.00082287
503.8	0.09036306		1093.79	0.03257996		1683.8	0.01014347		2273.79	0.00148447		2863.8	0.00236642		3453.8	0.0090786		4043.8	0.00147655
504	0.09094515		1093.99	0.03278127		1684	0.01078873		2273.99	0.00176955		2864	0.00199022		3454	0.00866863		4044	0.00123486
504.2	0.0903806		1094.19	0.03285982		1684.2	0.01060095		2274.19	0.00136732		2864.2	0.00127969		3454.2	0.00949522		4044.2	0.00184236
504.4	0.09048657		1094.39	0.0314554		1684.4	0.01012326		2274.39	0.00126634		2864.4	0.00081947		3454.4	0.00860731		4044.4	0.00241349
504.6	0.09074734		1094.59	0.03076235		1684.6	0.0099714		2274.59	0.00120157		2864.6	-0.00098032		3454.6	0.00869556		4044.6	0.00178527
504.8	0.09017966		1094.79	0.03116813		1684.8	0.01011624		2274.79	0.00099834		2864.8	-0.00067314		3454.8	0.00940602		4044.8	0.00201125
505	0.09039413		1094.99	0.03126386		1685	0.01038614		2274.99	0.00075872		2865	-0.00094476		3455	0.00917354		4045	0.00136087
505.2	0.09114058		1095.19	0.03158017		1685.2	0.01029174		2275.19	0.00106004		2865.2	-0.00106638		3455.2	0.00879255		4045.2	0.00020446
505.4	0.09021231		1095.39	0.0320277		1685.4	0.01064939		2275.39	0.00118199		2865.4	-0.0004318		3455.4	0.00820442		4045.4	-0.0001216
505.6	0.08967986		1095.59	0.03176891		1685.6	0.01070284		2275.59	0.00187366		2865.6	-0.00116159		3455.6	0.00788301		4045.6	0.00003011
505.8	0.08936524		1095.79	0.03175262		1685.8	0.01025898		2275.79	0.00154957		2865.8	-0.00074057		3455.8	0.00715722		4045.8	-0.00069811
506	0.08885299		1095.99	0.03202706		1686	0.01028862		2275.99	0.00192479		2866	-0.00071945		3456	0.00702271		4046	-0.00237974
506.2	0.08946051		1096.19	0.03138623		1686.2	0.01072679		2276.19	0.00114546		2866.2	-0.00027786		3456.2	0.00679693		4046.2	-0.00251798
506.4	0.08948489		1096.39	0.03092887		1686.4	0.01074765		2276.39	0.0022497		2866.4	-0.00008477		3456.4	0.00586456		4046.4	-0.00299771
506.6	0.08941287		1096.59	0.03025724		1686.6	0.01129866		2276.59	0.00244127		2866.6	0.0006363		3456.6	0.00487056		4046.6	-0.00262776
506.8	0.08850913		1096.79	0.02986606		1686.8	0.01059122		2276.79	0.00325763		2866.8	0.00007142		3456.8	0.00452437		4046.8	-0.00295627
507	0.0893296		1096.99	0.02935905		1687	0.00939285		2276.99	0.00342994		2867	-0.00013216		3457	0.00469269		4047	-0.00264667
507.2	0.08987728		1097.19	0.03041224		1687.2	0.00964326		2277.19	0.00276379		2867.2	-0.00004141		3457.2	0.00485718		4047.2	-0.00351579
507.4	0.09021675		1097.39	0.03119254		1687.4	0.01031197		2277.39	0.00297428		2867.4	0.00030465		3457.4	0.00552312		4047.4	-0.00433386
507.6	0.09058369		1097.59	0.03109333		1687.6	0.01076135		2277.59	0.00339407		2867.6	0.00008458		3457.6	0.0061673		4047.6	-0.00464793
507.8	0.08977849		1097.79	0.03136133		1687.8	0.01112497		2277.79	0.00370799		2867.8	0.00015218		3457.8	0.00646727		4047.8	-0.00480125
508	0.08958927		1097.99	0.03154844		1688	0.01106158		2277.99	0.00349623		2868	0.00006624		3458	0.00721016		4048	-0.00485063
508.2	0.08875498		1098.19	0.03181692		1688.2	0.01055836		2278.19	0.00259668		2868.2	-0.00032477		3458.2	0.00720673		4048.2	-0.00406927
508.4	0.08826845		1098.39	0.03109815		1688.4	0.01158333		2278.39	0.00225662		2868.4	-0.00148958		3458.4	0.00642396		4048.4	-0.00401971
508.6	0.08807034		1098.59	0.03071992		1688.6	0.01246443		2278.59	0.00230846		2868.6	-0.00223623		3458.6	0.00756503		4048.6	-0.00387546
508.8	0.08807492		1098.79	0.03117934		1688.8	0.01211837		2278.79	0.00143517		2868.8	-0.00117867		3458.8	0.00776515		4048.8	-0.00322815
509	0.08872208		1098.99	0.03088016		1689	0.01191295		2278.99	0.00050555		2869	-0.00145575		3459	0.00714191		4049	-0.00303883
509.2	0.08881364		1099.19	0.03115555		1689.2	0.01100539		2279.19	-0.00009852		2869.2	-0.00124488		3459.2	0.00727456		4049.2	-0.00286885
509.4	0.08943903		1099.39	0.03091729		1689.4	0.01083905		2279.39	-0.00051462		2869.4	-0.00027665		3459.4	0.00732556		4049.4	-0.00243738
509.6	0.08944953		1099.59	0.02966667		1689.6	0.0112751		2279.59	-0.00048994		2869.6	-0.00041953		3459.6	0.00700062		4049.6	-0.00254856
509.8	0.08872251		1099.79	0.02920658		1689.8	0.0109293		2279.79	-0.00124914		2869.8	0.00059373		3459.8	0.00678036		4049.8	-0.00237875
510	0.08837427		1099.99	0.02792848		1690	0.01040574		2279.99	-0.00035786		2870	0.00096987		3460	0.0066359		4050	-0.00138325
510.2	0.08859117		1100.19	0.02652876		1690.2	0.01023241		2280.19	-0.00027608		2870.2	0.00096705		3460.2	0.00557694		4050.2	-0.00103597
510.4	0.08802664		1100.39	0.02612994		1690.4	0.01003952		2280.39	0.00033259		2870.4	0.00157894		3460.4	0.00458358		4050.4	-0.00067298
510.6	0.08813485		1100.59	0.02559876		1690.6	0.00990639		2280.59	0.00015871		2870.6	0.00107263		3460.6	0.00387366		4050.6	-0.00026912
510.8	0.08780367		1100.79	0.02519934		1690.8	0.00903101		2280.79	0.00075705		2870.8	0.00109618		3460.8	0.00404097		4050.8	-0.00142576
511	0.08817477		1100.99	0.02488717		1691	0.00911127		2280.99	0.00045412		2871	0.00088871		3461	0.00432687		4051	-0.00086071
511.2	0.08762679		1101.19	0.02607507		1691.2	0.00917662		2281.19	0.00026361		2871.2	0.00098231		3461.2	0.00500029		4051.2	-0.00084985
511.4	0.08779738		1101.39	0.02587787		1691.4	0.00875198		2281.39	0.00042362		2871.4	0.00121177		3461.4	0.00593668		4051.4	-0.00072888
511.6	0.08749523		1101.59	0.02491802		1691.6	0.00914366		2281.59	0.00073577		2871.6	0.00079619		3461.6	0.00579189		4051.6	-0.00055129
511.8	0.08721354		1101.79	0.02561506		1691.8	0.00943784		2281.79	0.00104287		2871.8	0.00030395		3461.8	0.00529132		4051.8	-0.00042043
512	0.08709298		1101.99	0.02576926		1692	0.00913667		2281.99	0.00121627		2872	-0.0005547		3462	0.00446731		4052	-0.00050612
512.2	0.08704632		1102.19	0.02629386		1692.2	0.00875834		2282.19	0.00123798		2872.2	-0.0020329		3462.2	0.00419759		4052.2	-0.00129902
512.4	0.08708763		1102.39	0.02629915		1692.4	0.00921109		2282.39	0.00165911		2872.4	-0.00262619		3462.4	0.00493853		4052.4	-0.00260145
512.6	0.08804738		1102.59	0.02661353		1692.6	0.00924954		2282.59	0.00158747		2872.6	-0.00133845		3462.6	0.00505448		4052.6	-0.00272587
512.8	0.08882979		1102.79	0.02691786		1692.8	0.00928453		2282.79	0.00060612		2872.8	-0.00097141		3462.8	0.00484074		4052.8	-0.00325996
513	0.08923604		1102.99	0.02629605		1693	0.0091145		2282.99	0.0006869		2873	-0.00070946		3463	0.0041488		4053	-0.00410234
513.2	0.09017552		1103.19	0.02641173		1693.2	0.00819552		2283.19	0.00039897		2873.2	-0.00053605		3463.2	0.0045549		4053.2	-0.00547796
513.4	0.09101669		1103.39	0.02640123		1693.4	0.00873691		2283.39	0.00105726		2873.4	0.00045435		3463.4	0.00457717		4053.4	-0.00562213
513.6	0.09038926		1103.59	0.02670526		1693.6	0.0089567		2283.59	0.00082014		2873.6	0.00076951		3463.6	0.00478978		4053.6	-0.00512995
513.8	0.08978346		1103.79	0.02710394		1693.8	0.00829297		2283.79	0.00165727		2873.8	0.00046758		3463.8	0.0040193		4053.8	-0.0039247
514	0.09088806		1103.99	0.02701966		1694	0.00761032		2283.99	0.00146016		2874	0.00058096		3464	0.00428872		4054	-0.00317876
514.2	0.09135114		1104.19	0.02732709		1694.2	0.00800932		2284.19	0.00168221		2874.2	0.00005807		3464.2	0.00426268		4054.2	-0.00368065
514.4	0.09159947		1104.39	0.0276622		1694.4	0.00846672		2284.39	0.00090587		2874.4	0.00037352		3464.4	0.00398107		4054.4	-0.00296462
514.6	0.09129066		1104.59	0.02766628		1694.6	0.00799793		2284.59	0.00081465		2874.6	-0.00030785		3464.6	0.00375095		4054.6	-0.00334095
514.8	0.09069227		1104.79	0.02750745		1694.8	0.00789042		2284.79	0.0004848		2874.8	-0.00008374		3464.8	0.0044772		4054.8	-0.00302921
515	0.08991		1104.99	0.02836718		1695	0.00844436		2284.99	-0.00006631		2875	-0.0008093		3465	0.0044225		4055	-0.0024242
515.2	0.08963153		1105.19	0.02933768		1695.2	0.00863576		2285.19	-0.00117777		2875.2	-0.00076539		3465.2	0.00494081		4055.2	-0.00063035
515.4	0.08951615		1105.39	0.02913785		1695.4	0.0084615		2285.39	-0.00226324		2875.4	-0.00036075		3465.4	0.00564943		4055.4	-0.00036096
515.6	0.08909911		1105.59	0.02834248		1695.6	0.00928221		2285.59	-0.00152573		2875.6	-0.00267741		3465.6	0.00473051		4055.6	-0.00048087
515.8	0.0886693		1105.79	0.02894059		1695.8	0.00947763		2285.79	-0.001014		2875.8	-0.00338985		3465.8	0.00464112		4055.8	-0.00134438
516	0.08860184		1105.99	0.02868589		1696	0.00847092		2285.99	-0.00173683		2876	-0.00398561		3466	0.00479353		4056	-0.00084802
516.2	0.08818105		1106.19	0.02860169		1696.2	0.00789999		2286.19	-0.00153222		2876.2	-0.00370019		3466.2	0.00512616		4056.2	-0.00129954
516.4	0.08804523		1106.39	0.02844667		1696.4	0.00770649		2286.39	-0.00071857		2876.4	-0.0026959		3466.4	0.00501409		4056.4	-0.00161483
516.6	0.08814236		1106.59	0.02847311		1696.6	0.0084197		2286.59	-0.0007997		2876.6	-0.00173699		3466.6	0.00432025		4056.6	-0.0011262
516.8	0.08769475		1106.79	0.02778876		1696.8	0.00872348		2286.79	-0.00027838		2876.8	-0.00178545		3466.8	0.00460446		4056.8	-0.00196356
517	0.0878672		1106.99	0.02716524		1697	0.00821852		2286.99	0.00011178		2877	-0.00174783		3467	0.00413692		4057	-0.00281989
517.2	0.08889999		1107.19	0.02743435		1697.2	0.00813001		2287.19	-0.00019267		2877.2	-0.00218946		3467.2	0.00488571		4057.2	-0.00334416
517.4	0.0889437		1107.39	0.02706222		1697.4	0.00925191		2287.39	0.00054523		2877.4	-0.00204273		3467.4	0.00511191		4057.4	-0.00239804
517.6	0.08953896		1107.59	0.02700348		1697.6	0.0092252		2287.59	0.0017181		2877.6	-0.00252565		3467.6	0.00521918		4057.6	-0.00148377
517.8	0.09000467		1107.79	0.02675706		1697.8	0.00930048		2287.79	0.00264095		2877.8	-0.00312032		3467.8	0.00392706		4057.8	-0.00132353
518	0.09115526		1107.99	0.02650754		1698	0.00925889		2287.99	0.00186234		2878	-0.0026345		3468	0.00513463		4058	-0.00138892
518.2	0.09138271		1108.19	0.02606007		1698.2	0.01051242		2288.19	0.0025169		2878.2	-0.00237913		3468.2	0.00483076		4058.2	-0.00118725
518.4	0.09082758		1108.39	0.02625583		1698.4	0.01088906		2288.39	0.00201491		2878.4	-0.00180817		3468.4	0.00392316		4058.4	-0.00143948
518.6	0.0894514		1108.59	0.02644609		1698.6	0.01126653		2288.59	0.0015304		2878.6	-0.00168432		3468.6	0.0040366		4058.6	-0.00217465
518.8	0.08934274		1108.79	0.02603255		1698.8	0.01131049		2288.79	0.00025073		2878.8	-0.00138672		3468.8	0.00409923		4058.8	-0.0026866
519	0.08895197		1108.99	0.02728615		1699	0.01114196		2288.99	-0.000267		2879	-0.00163325		3469	0.0041163		4059	-0.00243484
519.2	0.0892529		1109.19	0.02779792		1699.2	0.01069901		2289.19	-0.00173833		2879.2	-0.00121792		3469.2	0.00467693		4059.2	-0.00156775
519.4	0.08917222		1109.39	0.02769585		1699.4	0.01006713		2289.39	-0.00161547		2879.4	-0.00052169		3469.4	0.00575764		4059.4	-0.00244421
519.6	0.08886753		1109.59	0.02758119		1699.6	0.00893017		2289.59	-0.00137691		2879.6	-0.00237089		3469.6	0.00604084		4059.6	-0.00304781
519.8	0.08864459		1109.79	0.02826928		1699.8	0.00831984		2289.79	-0.00275039		2879.8	-0.00180506		3469.8	0.00575408		4059.8	-0.00340457
520	0.08886645		1109.99	0.02861344		1700	0.00659544		2289.99	-0.00320146		2880	-0.00200443		3470	0.00587192		4060	-0.00362049
520.2	0.08836182		1110.19	0.02947407		1700.2	0.00630959		2290.19	-0.00265972		2880.2	-0.00163316		3470.2	0.00629098		4060.2	-0.00370391
520.4	0.08823333		1110.39	0.03051309		1700.4	0.0070893		2290.39	-0.00299194		2880.4	-0.0015129		3470.4	0.00673843		4060.4	-0.00403862
520.6	0.08836033		1110.59	0.03074155		1700.6	0.00763233		2290.59	-0.00308111		2880.6	-0.00200924		3470.6	0.00690619		4060.6	-0.0033163
520.8	0.08915686		1110.79	0.03086175		1700.8	0.00761418		2290.79	-0.00186015		2880.8	-0.00258855		3470.8	0.00685613		4060.8	-0.00374031
521	0.09016567		1110.99	0.03052607		1701	0.00819921		2290.99	-0.00102453		2881	-0.00253132		3471	0.00683608		4061	-0.00299249
521.2	0.09041129		1111.19	0.03001084		1701.2	0.00938754		2291.19	-0.00082062		2881.2	-0.00286346		3471.2	0.0065922		4061.2	-0.00172706
521.4	0.09040709		1111.39	0.02944548		1701.4	0.01016609		2291.39	0.00041179		2881.4	-0.00261899		3471.4	0.00659233		4061.4	-0.00113489
521.6	0.09092562		1111.59	0.02914687		1701.6	0.01089504		2291.59	0.00181126		2881.6	-0.00294557		3471.6	0.00656277		4061.6	-0.00017006
521.8	0.09038177		1111.79	0.0286978		1701.8	0.01135813		2291.79	0.00178933		2881.8	-0.00286492		3471.8	0.00624701		4061.8	-0.00016502
522	0.09041499		1111.99	0.02879418		1702	0.01242244		2291.99	0.00111921		2882	-0.00289159		3472	0.00683804		4062	0.00037538
522.2	0.08984732		1112.19	0.02834105		1702.2	0.01319528		2292.19	0.00110935		2882.2	-0.00275209		3472.2	0.00631974		4062.2	0.00162658
522.4	0.08948751		1112.39	0.02871323		1702.4	0.01377821		2292.39	0.00095448		2882.4	-0.00336479		3472.4	0.00598886		4062.4	0.00124945
522.6	0.088886		1112.59	0.02876601		1702.6	0.01424434		2292.59	0.0003542		2882.6	-0.00386077		3472.6	0.00637537		4062.6	0.00105759
522.8	0.08921577		1112.79	0.02882018		1702.8	0.01375029		2292.79	-0.00016807		2882.8	-0.00383894		3472.8	0.00616169		4062.8	0.00099567
523	0.08911343		1112.99	0.0293428		1703	0.01220985		2292.99	0.00033436		2883	-0.00376359		3473	0.00670123		4063	0.00203284
523.2	0.08844487		1113.19	0.0295097		1703.2	0.01084841		2293.19	-0.00060989		2883.2	-0.00456881		3473.2	0.00713554		4063.2	0.00120724
523.4	0.08810674		1113.39	0.02983051		1703.4	0.01016674		2293.39	-0.00060414		2883.4	-0.00484831		3473.4	0.00808161		4063.4	0.00035515
523.6	0.08824555		1113.59	0.03061477		1703.6	0.00897497		2293.59	-0.00118535		2883.6	-0.00613101		3473.6	0.00769835		4063.6	-0.00066702
523.8	0.08769872		1113.79	0.03049324		1703.8	0.00916552		2293.79	-0.00242415		2883.8	-0.00684999		3473.8	0.00706666		4063.8	-0.00142011
524	0.08749027		1113.99	0.03082684		1704	0.00839815		2293.99	-0.00246578		2884	-0.00686065		3474	0.00789999		4064	-0.00174919
524.2	0.08651215		1114.19	0.03134265		1704.2	0.0089624		2294.19	-0.00275312		2884.2	-0.00649677		3474.2	0.00759897		4064.2	-0.00173973
524.4	0.08594458		1114.39	0.03116098		1704.4	0.00943739		2294.39	-0.00327358		2884.4	-0.00587869		3474.4	0.00715334		4064.4	-0.00261313
524.6	0.08566605		1114.59	0.0304253		1704.6	0.00914795		2294.59	-0.00246233		2884.6	-0.00646779		3474.6	0.00662892		4064.6	-0.00276226
524.8	0.08552223		1114.79	0.03025763		1704.8	0.00903149		2294.79	-0.002308		2884.8	-0.00575951		3474.8	0.0061965		4064.8	-0.00281451
525	0.08533073		1114.99	0.02964349		1705	0.0094713		2294.99	-0.00257139		2885	-0.004484		3475	0.00672682		4065	-0.00180815
525.2	0.0853387		1115.19	0.02907013		1705.2	0.0104354		2295.19	-0.0037296		2885.2	-0.00462032		3475.2	0.00648404		4065.2	-0.00166665
525.4	0.08556515		1115.39	0.02838233		1705.4	0.01057493		2295.39	-0.00385945		2885.4	-0.00409028		3475.4	0.0070491		4065.4	-0.00190218
525.6	0.08560753		1115.59	0.02758958		1705.6	0.01101771		2295.59	-0.00349725		2885.6	-0.00376442		3475.6	0.00727381		4065.6	-0.00176444
525.8	0.08611627		1115.79	0.02756705		1705.8	0.0110455		2295.79	-0.0035192		2885.8	-0.00337673		3475.8	0.00801585		4065.8	-0.00229086
526	0.08662342		1115.99	0.02764375		1706	0.01134075		2295.99	-0.00389742		2886	-0.00317184		3476	0.00837776		4066	-0.00205053
526.2	0.0869689		1116.19	0.02825384		1706.2	0.0112292		2296.19	-0.00423742		2886.2	-0.002599		3476.2	0.00810357		4066.2	-0.00170656
526.4	0.08793195		1116.39	0.02873268		1706.4	0.01187401		2296.39	-0.00436987		2886.4	-0.00306815		3476.4	0.00817604		4066.4	-0.00162388
526.6	0.08831344		1116.59	0.02837901		1706.6	0.01138827		2296.59	-0.00411801		2886.6	-0.00216851		3476.6	0.00750419		4066.6	-0.00183332
526.8	0.08897714		1116.79	0.02853022		1706.8	0.01017032		2296.79	-0.00406498		2886.8	-0.00262996		3476.8	0.00645898		4066.8	-0.00180204
527	0.08884614		1116.99	0.02874496		1707	0.01029503		2296.99	-0.00375324		2887	-0.00281007		3477	0.0064364		4067	-0.00078397
527.2	0.08864324		1117.19	0.0294291		1707.2	0.01042416		2297.19	-0.00341404		2887.2	-0.00346425		3477.2	0.00570569		4067.2	-0.0022463
527.4	0.08910386		1117.39	0.02992643		1707.4	0.01089195		2297.39	-0.00233385		2887.4	-0.00278559		3477.4	0.00500245		4067.4	-0.00233714
527.6	0.0896171		1117.59	0.029276		1707.6	0.0112538		2297.59	-0.00179374		2887.6	-0.00298433		3477.6	0.00439376		4067.6	-0.00246527
527.8	0.08904388		1117.79	0.028748		1707.8	0.01091552		2297.79	-0.00195637		2887.8	-0.00319128		3477.8	0.00354834		4067.8	-0.00271711
528	0.08908918		1117.99	0.02884757		1708	0.01108067		2297.99	-0.00159061		2888	-0.00224588		3478	0.00333746		4068	-0.00273406
528.2	0.08745667		1118.19	0.02881059		1708.2	0.01104775		2298.19	-0.00142359		2888.2	-0.00187647		3478.2	0.00266338		4068.2	-0.00326239
528.4	0.0872413		1118.39	0.02900457		1708.4	0.01096667		2298.39	-0.00128847		2888.4	-0.00154842		3478.4	0.0032746		4068.4	-0.0035743
528.6	0.08639731		1118.59	0.02870608		1708.6	0.01032929		2298.59	-0.00128482		2888.6	-0.00167053		3478.6	0.00307637		4068.6	-0.00235739
528.8	0.08630238		1118.79	0.02874046		1708.8	0.01001011		2298.79	-0.00116869		2888.8	-0.00162503		3478.8	0.00375547		4068.8	-0.00228629
529	0.08692635		1118.99	0.02887908		1709	0.00999421		2298.99	-0.00142954		2889	-0.00129403		3479	0.00420027		4069	-0.0017378
529.2	0.08724012		1119.19	0.02782883		1709.2	0.01055835		2299.19	-0.00155259		2889.2	-0.00155231		3479.2	0.00474714		4069.2	-0.00216637
529.4	0.08770991		1119.39	0.02729251		1709.4	0.0095922		2299.39	-0.00094887		2889.4	-0.0017217		3479.4	0.00552082		4069.4	-0.0011871
529.6	0.08843432		1119.59	0.02735571		1709.6	0.00898351		2299.59	-0.0000432		2889.6	-0.0014809		3479.6	0.00571245		4069.6	-0.00152548
529.8	0.08924854		1119.79	0.027598		1709.8	0.00930092		2299.79	-0.0000873		2889.8	-0.00188847		3479.8	0.00622831		4069.8	-0.00141746
530	0.08893372		1119.99	0.0273142		1710	0.00875894		2299.99	-0.00131358		2890	-0.00117404		3480	0.00592391		4070	-0.0015499
530.2	0.08913489		1120.19	0.02773865		1710.2	0.00884591		2300.19	-0.00171371		2890.2	-0.00136334		3480.2	0.00592428		4070.2	-0.00139634
530.4	0.08944054		1120.39	0.02701334		1710.4	0.00849294		2300.39	-0.00216961		2890.4	-0.00248398		3480.4	0.00638532		4070.4	-0.00137867
530.6	0.09003628		1120.59	0.02702032		1710.6	0.00756027		2300.59	-0.0024723		2890.6	-0.00228097		3480.6	0.00562776		4070.6	-0.00191312
530.8	0.09053703		1120.79	0.02724675		1710.8	0.00738641		2300.79	-0.00274572		2890.8	-0.00371361		3480.8	0.00549878		4070.8	-0.00179904
531	0.09014421		1120.99	0.02703449		1711	0.00806027		2300.99	-0.00251089		2891	-0.00377667		3481	0.00546233		4071	-0.00162197
531.2	0.08985794		1121.19	0.02790172		1711.2	0.00709437		2301.19	-0.00157835		2891.2	-0.00397983		3481.2	0.00546899		4071.2	-0.00275001
531.4	0.08982525		1121.39	0.02776334		1711.4	0.00685063		2301.39	-0.00195003		2891.4	-0.00404779		3481.4	0.00528551		4071.4	-0.00324498
531.6	0.08936984		1121.59	0.02731791		1711.6	0.00802618		2301.59	-0.00203411		2891.6	-0.00452497		3481.6	0.00497352		4071.6	-0.0046779
531.8	0.08862603		1121.79	0.02743766		1711.8	0.00836069		2301.79	-0.00264414		2891.8	-0.00388047		3481.8	0.0045656		4071.8	-0.00541608
532	0.08808304		1121.99	0.02723054		1712	0.00892702		2301.99	-0.00233494		2892	-0.00354519		3482	0.00471109		4072	-0.00558732
532.2	0.08679127		1122.19	0.02739176		1712.2	0.00885734		2302.19	-0.0027562		2892.2	-0.00258467		3482.2	0.00442776		4072.2	-0.00476407
532.4	0.08698982		1122.39	0.02786694		1712.4	0.00892802		2302.39	-0.0024877		2892.4	-0.00212012		3482.4	0.00411587		4072.4	-0.0039346
532.6	0.08716886		1122.59	0.02808213		1712.6	0.00911433		2302.59	-0.00288223		2892.6	-0.00245256		3482.6	0.00283085		4072.6	-0.00369617
532.8	0.08732307		1122.79	0.02845994		1712.8	0.00975698		2302.79	-0.00285141		2892.8	-0.00211056		3482.8	0.00385849		4072.8	-0.00448744
533	0.08793642		1122.99	0.02779164		1713	0.00967388		2302.99	-0.00313553		2893	-0.00117812		3483	0.00378316		4073	-0.00464669
533.2	0.08821534		1123.19	0.02654977		1713.2	0.00976154		2303.19	-0.00316126		2893.2	-0.00131277		3483.2	0.00383859		4073.2	-0.00479483
533.4	0.08854433		1123.39	0.0268529		1713.4	0.00953854		2303.39	-0.00340063		2893.4	-0.0017888		3483.4	0.00280688		4073.4	-0.00368354
533.6	0.08891651		1123.59	0.02730405		1713.6	0.00929452		2303.59	-0.0034761		2893.6	-0.00183663		3483.6	0.00191826		4073.6	-0.00464655
533.8	0.08912389		1123.79	0.0265929		1713.8	0.00978494		2303.79	-0.00365157		2893.8	-0.00168262		3483.8	0.00224679		4073.8	-0.00420703
534	0.0884533		1123.99	0.02544132		1714	0.00953471		2303.99	-0.00412787		2894	-0.0008984		3484	0.00301631		4074	-0.00414518
534.2	0.08831824		1124.19	0.02511993		1714.2	0.00863453		2304.19	-0.00402238		2894.2	-0.00175892		3484.2	0.00315603		4074.2	-0.00371432
534.4	0.08866719		1124.39	0.02443261		1714.4	0.00813809		2304.39	-0.00513858		2894.4	-0.00241141		3484.4	0.00346427		4074.4	-0.00359166
534.6	0.08925863		1124.59	0.02441379		1714.6	0.00748424		2304.59	-0.00483996		2894.6	-0.00325719		3484.6	0.00379414		4074.6	-0.00338528
534.8	0.09031042		1124.79	0.0240574		1714.8	0.00747849		2304.79	-0.00494703		2894.8	-0.00452467		3484.8	0.00472464		4074.8	-0.00355662
535	0.08913873		1124.99	0.02393387		1715	0.00671676		2304.99	-0.00464534		2895	-0.00556039		3485	0.00487993		4075	-0.00485621
535.2	0.08868114		1125.19	0.02471902		1715.2	0.00647802		2305.19	-0.00431319		2895.2	-0.00600876		3485.2	0.00582791		4075.2	-0.00550711
535.4	0.08894925		1125.39	0.02424042		1715.4	0.00741682		2305.39	-0.00464963		2895.4	-0.00619558		3485.4	0.00518833		4075.4	-0.00720125
535.6	0.08868679		1125.59	0.02349795		1715.6	0.008081		2305.59	-0.00431159		2895.6	-0.0058702		3485.6	0.00585247		4075.6	-0.00716942
535.8	0.08848924		1125.79	0.02338756		1715.8	0.00825506		2305.79	-0.00436746		2895.8	-0.00492981		3485.8	0.00617443		4075.8	-0.00707856
536	0.08756842		1125.99	0.02294132		1716	0.00723625		2305.99	-0.0041066		2896	-0.0049014		3486	0.006128		4076	-0.00678682
536.2	0.08778931		1126.19	0.02360918		1716.2	0.00718016		2306.19	-0.00480617		2896.2	-0.00442431		3486.2	0.00595584		4076.2	-0.00600239
536.4	0.08778016		1126.39	0.02373512		1716.4	0.00677593		2306.39	-0.0050087		2896.4	-0.00434762		3486.4	0.00579354		4076.4	-0.00629602
536.6	0.0875895		1126.59	0.02391609		1716.6	0.00767311		2306.59	-0.00510039		2896.6	-0.00395111		3486.6	0.00608748		4076.6	-0.00631018
536.8	0.08716493		1126.79	0.02404549		1716.8	0.00808285		2306.79	-0.00570995		2896.8	-0.00282877		3486.8	0.00701427		4076.8	-0.00654026
537	0.08774953		1126.99	0.02331447		1717	0.00790836		2306.99	-0.00576783		2897	-0.00177864		3487	0.00658859		4077	-0.00670362
537.2	0.08759742		1127.19	0.02302069		1717.2	0.00837166		2307.19	-0.0057491		2897.2	-0.00179138		3487.2	0.00566946		4077.2	-0.00553471
537.4	0.08796478		1127.39	0.02345578		1717.4	0.00851028		2307.39	-0.0052418		2897.4	-0.00154643		3487.4	0.0040578		4077.4	-0.00460299
537.6	0.08865411		1127.59	0.02378798		1717.6	0.00889044		2307.59	-0.00505815		2897.6	-0.00155732		3487.6	0.00355828		4077.6	-0.00421349
537.8	0.08827013		1127.79	0.02347669		1717.8	0.00955564		2307.79	-0.00505621		2897.8	-0.00059543		3487.8	0.00395781		4077.8	-0.00262906
538	0.08789985		1127.99	0.02267561		1718	0.00961297		2307.99	-0.00475451		2898	0.00061349		3488	0.00296975		4078	-0.00194321
538.2	0.08872102		1128.19	0.02313824		1718.2	0.00900383		2308.19	-0.00534002		2898.2	-0.00011818		3488.2	0.0027929		4078.2	-0.00203913
538.4	0.08881535		1128.39	0.02298073		1718.4	0.01042975		2308.39	-0.00518946		2898.4	-0.00086424		3488.4	0.00211306		4078.4	-0.00176293
538.6	0.08873424		1128.59	0.02320334		1718.6	0.00992198		2308.59	-0.00465809		2898.6	-0.00096918		3488.6	0.00180504		4078.6	-0.00181949
538.8	0.08962547		1128.79	0.02298297		1718.8	0.01046715		2308.79	-0.00521624		2898.8	-0.00138516		3488.8	0.0021897		4078.8	-0.00239101
539	0.08867383		1128.99	0.02242319		1719	0.01007276		2308.99	-0.00495851		2899	-0.00222509		3489	0.00162943		4079	-0.0027428
539.2	0.08877552		1129.19	0.02294489		1719.2	0.01044612		2309.19	-0.00450324		2899.2	-0.00209298		3489.2	0.00148968		4079.2	-0.00227182
539.4	0.08866993		1129.39	0.02231138		1719.4	0.00975291		2309.39	-0.0052791		2899.4	-0.00173038		3489.4	0.00145985		4079.4	-0.00273019
539.6	0.08807515		1129.59	0.02161569		1719.6	0.00829351		2309.59	-0.00560671		2899.6	-0.00223625		3489.6	0.00220394		4079.6	-0.00195994
539.8	0.08800006		1129.79	0.02211419		1719.8	0.00818481		2309.79	-0.00582028		2899.8	-0.00248044		3489.8	0.00292571		4079.8	-0.00270284
540	0.08677772		1129.99	0.02249304		1720	0.00755024		2309.99	-0.00649028		2900	-0.00372428		3490	0.00383127		4080	-0.00283215
540.2	0.08731653		1130.19	0.02322368		1720.2	0.0077698		2310.19	-0.00641947		2900.2	-0.00538814		3490.2	0.00383562		4080.2	-0.00249951
540.4	0.08645532		1130.39	0.02330439		1720.4	0.00830778		2310.39	-0.00662812		2900.4	-0.00569714		3490.4	0.00476865		4080.4	-0.0024929
540.6	0.08622216		1130.59	0.02396024		1720.6	0.00896479		2310.59	-0.00660358		2900.6	-0.00575993		3490.6	0.00530277		4080.6	-0.00215939
540.8	0.0864385		1130.79	0.02424036		1720.8	0.00930271		2310.79	-0.00796726		2900.8	-0.00664385		3490.8	0.00488836		4080.8	-0.0026571
541	0.0868015		1130.99	0.0246923		1721	0.00912755		2310.99	-0.00754416		2901	-0.00735877		3491	0.00524013		4081	-0.00226585
541.2	0.08667075		1131.19	0.02517405		1721.2	0.00934406		2311.19	-0.007082		2901.2	-0.00803462		3491.2	0.00407117		4081.2	-0.00170254
541.4	0.08694204		1131.39	0.0264649		1721.4	0.00947308		2311.39	-0.00666917		2901.4	-0.0080395		3491.4	0.0036757		4081.4	-0.0016668
541.6	0.0873607		1131.59	0.02816967		1721.6	0.00953971		2311.59	-0.00682036		2901.6	-0.00803396		3491.6	0.00362714		4081.6	-0.00148558
541.8	0.08756753		1131.79	0.02819919		1721.8	0.00924863		2311.79	-0.00617929		2901.8	-0.00743424		3491.8	0.00379653		4081.8	-0.00091197
542	0.08808338		1131.99	0.02810717		1722	0.00933189		2311.99	-0.00587238		2902	-0.00691512		3492	0.00307462		4082	-0.0012709
542.2	0.08823626		1132.19	0.02942875		1722.2	0.0085761		2312.19	-0.00587209		2902.2	-0.00753846		3492.2	0.00202153		4082.2	-0.00177387
542.4	0.08742484		1132.39	0.02990044		1722.4	0.00867759		2312.39	-0.00545329		2902.4	-0.00717283		3492.4	0.00067383		4082.4	-0.00251069
542.6	0.087792		1132.59	0.02876686		1722.6	0.00770148		2312.59	-0.00474618		2902.6	-0.00623688		3492.6	0.00041762		4082.6	-0.00382861
542.8	0.08840804		1132.79	0.02822336		1722.8	0.00801855		2312.79	-0.00499132		2902.8	-0.00705557		3492.8	0.00075387		4082.8	-0.00453817
543	0.08730842		1132.99	0.02742658		1723	0.00668045		2312.99	-0.00445675		2903	-0.00666281		3493	0.00020617		4083	-0.00434883
543.2	0.08677531		1133.19	0.02742555		1723.2	0.00550353		2313.19	-0.00456551		2903.2	-0.00612971		3493.2	0.00011727		4083.2	-0.00462611
543.4	0.08594576		1133.39	0.02608601		1723.4	0.0046992		2313.39	-0.00530817		2903.4	-0.00532383		3493.4	0.00099197		4083.4	-0.00498023
543.6	0.08560431		1133.59	0.02508448		1723.6	0.00449075		2313.59	-0.00482023		2903.6	-0.00532914		3493.6	0.00193125		4083.6	-0.00524534
543.8	0.08507319		1133.79	0.02528219		1723.8	0.00538079		2313.79	-0.00516404		2903.8	-0.00498258		3493.8	0.00326572		4083.8	-0.00655595
544	0.08446327		1133.99	0.02502063		1724	0.00556875		2313.99	-0.00583485		2904	-0.00509312		3494	0.00369511		4084	-0.00700676
544.2	0.08546951		1134.19	0.02318641		1724.2	0.00516487		2314.19	-0.0052402		2904.2	-0.00535638		3494.2	0.00405183		4084.2	-0.00712688
544.4	0.08464828		1134.39	0.02194636		1724.4	0.00516645		2314.39	-0.00554436		2904.4	-0.00510779		3494.4	0.00528887		4084.4	-0.00737207
544.6	0.08430973		1134.59	0.0219146		1724.6	0.00525454		2314.59	-0.00525935		2904.6	-0.0056617		3494.6	0.00579515		4084.6	-0.00724486
544.8	0.08426697		1134.79	0.02161844		1724.8	0.00593544		2314.79	-0.00467665		2904.8	-0.00580212		3494.8	0.00537494		4084.8	-0.00691765
545	0.08469872		1134.99	0.02155741		1725	0.00489494		2314.99	-0.00375344		2905	-0.00557641		3495	0.00580967		4085	-0.00615462
545.2	0.08462426		1135.19	0.02140388		1725.2	0.0050204		2315.19	-0.00359625		2905.2	-0.00538592		3495.2	0.00571296		4085.2	-0.00533722
545.4	0.08455945		1135.39	0.0226403		1725.4	0.00441764		2315.39	-0.00269435		2905.4	-0.00527391		3495.4	0.00573467		4085.4	-0.00481791
545.6	0.08502631		1135.59	0.02238563		1725.6	0.0045224		2315.59	-0.0026569		2905.6	-0.00503388		3495.6	0.00491809		4085.6	-0.00481406
545.8	0.08542084		1135.79	0.02152891		1725.8	0.0046946		2315.79	-0.00245028		2905.8	-0.0044173		3495.8	0.00543739		4085.8	-0.00454119
546	0.08562426		1135.99	0.02282856		1726	0.0045939		2315.99	-0.00293519		2906	-0.00377239		3496	0.00463302		4086	-0.00497541
546.2	0.08555731		1136.19	0.02368049		1726.2	0.00435766		2316.19	-0.00276915		2906.2	-0.00388638		3496.2	0.00360019		4086.2	-0.00507326
546.4	0.08610651		1136.39	0.02397646		1726.4	0.00487986		2316.39	-0.00348575		2906.4	-0.00338909		3496.4	0.00424676		4086.4	-0.00594997
546.6	0.08650887		1136.59	0.02395828		1726.6	0.00529597		2316.59	-0.0033374		2906.6	-0.00400794		3496.6	0.00430919		4086.6	-0.00705633
546.8	0.08616325		1136.79	0.02504941		1726.8	0.0054257		2316.79	-0.00372204		2906.8	-0.00442767		3496.8	0.00433114		4086.8	-0.0068814
547	0.08510146		1136.99	0.02547295		1727	0.00487828		2316.99	-0.00387848		2907	-0.00421901		3497	0.00465492		4087	-0.00663323
547.2	0.08511989		1137.19	0.02560181		1727.2	0.00491873		2317.19	-0.00440951		2907.2	-0.00416788		3497.2	0.00438805		4087.2	-0.00695988
547.4	0.08454874		1137.39	0.02561187		1727.4	0.00486334		2317.39	-0.00524271		2907.4	-0.00334203		3497.4	0.00469981		4087.4	-0.00726933
547.6	0.08420484		1137.59	0.02646366		1727.6	0.00442392		2317.59	-0.00554318		2907.6	-0.00249618		3497.6	0.00504501		4087.6	-0.00808287
547.8	0.08387415		1137.79	0.02723009		1727.8	0.00490097		2317.79	-0.0062816		2907.8	-0.00240117		3497.8	0.00471923		4087.8	-0.00837587
548	0.08445154		1137.99	0.02656126		1728	0.00504178		2317.99	-0.0061671		2908	-0.00179767		3498	0.00442455		4088	-0.00854952
548.2	0.08507111		1138.19	0.02588044		1728.2	0.00473747		2318.19	-0.00578076		2908.2	-0.00186009		3498.2	0.0043569		4088.2	-0.00833901
548.4	0.08441898		1138.39	0.0266768		1728.4	0.00455779		2318.39	-0.00538124		2908.4	-0.00254092		3498.4	0.00393768		4088.4	-0.00790058
548.6	0.08489196		1138.59	0.02685254		1728.6	0.00553267		2318.59	-0.00489977		2908.6	-0.00323016		3498.6	0.00280324		4088.6	-0.00688721
548.8	0.08504178		1138.79	0.02647828		1728.8	0.00585435		2318.79	-0.00493179		2908.8	-0.00335103		3498.8	0.00126528		4088.8	-0.00647866
549	0.08479856		1138.99	0.02622791		1729	0.00551162		2318.99	-0.0051436		2909	-0.00427217		3499	0.00119928		4089	-0.00620957
549.2	0.08439726		1139.19	0.02633246		1729.2	0.00637431		2319.19	-0.00507421		2909.2	-0.00464661		3499.2	0.00090201		4089.2	-0.00595892
549.4	0.08368835		1139.39	0.02587023		1729.4	0.00586479		2319.39	-0.00494095		2909.4	-0.00489248		3499.4	0.00006289		4089.4	-0.00599284
549.6	0.08332767		1139.59	0.02438683		1729.6	0.00644153		2319.59	-0.00548257		2909.6	-0.00497464		3499.6	0.00105175		4089.6	-0.0064717
549.8	0.08394306		1139.79	0.02425189		1729.8	0.00706151		2319.79	-0.00568375		2909.8	-0.00536577		3499.8	0.00147405		4089.8	-0.00619933
550	0.0841323		1139.99	0.02445418		1730	0.00726659		2319.99	-0.00598357		2910	-0.00566662		3500	0.00180411		4090	-0.00616904
550.2	0.08398518		1140.19	0.02416072		1730.2	0.00739097		2320.19	-0.00557503		2910.2	-0.00622811		3500.2	0.00285904		4090.2	-0.00644243
550.4	0.08420074		1140.39	0.02392961		1730.4	0.00695384		2320.39	-0.005769		2910.4	-0.00658438		3500.4	0.00326012		4090.4	-0.00721541
550.6	0.08385892		1140.59	0.02359371		1730.6	0.0064522		2320.59	-0.00537125		2910.6	-0.00707053		3500.6	0.00380075		4090.6	-0.00818669
550.8	0.0843841		1140.79	0.02378535		1730.8	0.00600846		2320.79	-0.00514897		2910.8	-0.00657167		3500.8	0.00395004		4090.8	-0.00860208
551	0.08500321		1140.99	0.02301309		1731	0.00552636		2320.99	-0.00584096		2911	-0.00650489		3501	0.00449713		4091	-0.00887266
551.2	0.08498461		1141.19	0.02268204		1731.2	0.00531033		2321.19	-0.00555359		2911.2	-0.00594787		3501.2	0.00380956		4091.2	-0.00925938
551.4	0.08460955		1141.39	0.02349572		1731.4	0.00417784		2321.39	-0.00512268		2911.4	-0.00581165		3501.4	0.0038986		4091.4	-0.00946317
551.6	0.08469811		1141.59	0.02301664		1731.6	0.00431656		2321.59	-0.00473564		2911.6	-0.00552803		3501.6	0.00369242		4091.6	-0.0093405
551.8	0.08582968		1141.79	0.02242971		1731.8	0.0056244		2321.79	-0.00519222		2911.8	-0.00563836		3501.8	0.00329358		4091.8	-0.0089783
552	0.0876564		1141.99	0.02201192		1732	0.00650991		2321.99	-0.00498296		2912	-0.00457511		3502	0.00274596		4092	-0.00862789
552.2	0.08902465		1142.19	0.02276347		1732.2	0.0063629		2322.19	-0.00465637		2912.2	-0.00494377		3502.2	0.00145705		4092.2	-0.00838312
552.4	0.08890002		1142.39	0.02286196		1732.4	0.0065138		2322.39	-0.0043085		2912.4	-0.00555255		3502.4	0.00109816		4092.4	-0.00761607
552.6	0.08932956		1142.59	0.02251525		1732.6	0.00794888		2322.59	-0.00379841		2912.6	-0.00549742		3502.6	0.00012889		4092.6	-0.0060526
552.8	0.08885883		1142.79	0.02275139		1732.8	0.00888223		2322.79	-0.00375052		2912.8	-0.00607565		3502.8	-0.00024543		4092.8	-0.00571627
553	0.08830475		1142.99	0.02215204		1733	0.00899162		2322.99	-0.00345651		2913	-0.00571787		3503	-0.00003021		4093	-0.00482
553.2	0.08798496		1143.19	0.02176502		1733.2	0.00957291		2323.19	-0.00375533		2913.2	-0.00582301		3503.2	0.00056292		4093.2	-0.0040555
553.4	0.08718752		1143.39	0.02167265		1733.4	0.00902703		2323.39	-0.00397262		2913.4	-0.00630491		3503.4	0.00152652		4093.4	-0.00387276
553.6	0.08689469		1143.59	0.02211817		1733.6	0.00935664		2323.59	-0.00398715		2913.6	-0.00713957		3503.6	0.00231732		4093.6	-0.00416292
553.8	0.0869596		1143.79	0.02219381		1733.8	0.00985529		2323.79	-0.00382243		2913.8	-0.00773107		3503.8	0.00126426		4093.8	-0.00469193
554	0.08674076		1143.99	0.0226429		1734	0.0088072		2323.99	-0.00337607		2914	-0.00760667		3504	0.00209558		4094	-0.00474173
554.2	0.08626018		1144.19	0.02256572		1734.2	0.00747786		2324.19	-0.00331008		2914.2	-0.0077554		3504.2	0.00297956		4094.2	-0.00479044
554.4	0.08608501		1144.39	0.02275388		1734.4	0.00674803		2324.39	-0.00394277		2914.4	-0.00693452		3504.4	0.00301709		4094.4	-0.00498614
554.6	0.08578754		1144.59	0.02353918		1734.6	0.00600628		2324.59	-0.004362		2914.6	-0.00692798		3504.6	0.00405379		4094.6	-0.00608698
554.8	0.08605131		1144.79	0.02371028		1734.8	0.00571369		2324.79	-0.00386915		2914.8	-0.00710653		3504.8	0.00394322		4094.8	-0.00699043
555	0.08542469		1144.99	0.02251952		1735	0.00508183		2324.99	-0.00381404		2915	-0.00761363		3505	0.00367477		4095	-0.00726642
555.2	0.08441463		1145.19	0.02308761		1735.2	0.00525021		2325.19	-0.00301381		2915.2	-0.0077768		3505.2	0.00372191		4095.2	-0.00714824
555.4	0.08366203		1145.39	0.02329081		1735.4	0.00449224		2325.39	-0.00319229		2915.4	-0.00739722		3505.4	0.00347128		4095.4	-0.0078505
555.6	0.08344102		1145.59	0.02266359		1735.6	0.00486085		2325.59	-0.00521771		2915.6	-0.00700183		3505.6	0.00344228		4095.6	-0.00782588
555.8	0.08364238		1145.79	0.02253438		1735.8	0.00500457		2325.79	-0.00610626		2915.8	-0.00646527		3505.8	0.00256685		4095.8	-0.00734966
556	0.08377328		1145.99	0.02301233		1736	0.00441606		2325.99	-0.00539342		2916	-0.00582521		3506	0.00219564		4096	-0.00702341
556.2	0.08281539		1146.19	0.02366877		1736.2	0.00430009		2326.19	-0.00620055		2916.2	-0.00556022		3506.2	0.0017654		4096.2	-0.00669054
556.4	0.08338648		1146.39	0.02304822		1736.4	0.00443136		2326.39	-0.00601986		2916.4	-0.00506771		3506.4	0.00220784		4096.4	-0.00566198
556.6	0.08362375		1146.59	0.02315912		1736.6	0.00493543		2326.59	-0.00564763		2916.6	-0.00521524		3506.6	0.00116511		4096.6	-0.00453148
556.8	0.08278289		1146.79	0.02202862		1736.8	0.00540663		2326.79	-0.00613395		2916.8	-0.00519564		3506.8	0.0018004		4096.8	-0.00423186
557	0.08276993		1146.99	0.02140146		1737	0.00530064		2326.99	-0.00600786		2917	-0.0047328		3507	0.00142219		4097	-0.00383419
557.2	0.08306062		1147.19	0.0216826		1737.2	0.00511663		2327.19	-0.00612677		2917.2	-0.00431473		3507.2	0.00163548		4097.2	-0.00393051
557.4	0.08268124		1147.39	0.0221955		1737.4	0.00518928		2327.39	-0.00587529		2917.4	-0.00453043		3507.4	0.00157321		4097.4	-0.00452851
557.6	0.08308677		1147.59	0.02249005		1737.6	0.00640454		2327.59	-0.00657346		2917.6	-0.00515636		3507.6	0.0009301		4097.6	-0.0053815
557.8	0.08283667		1147.79	0.02252553		1737.8	0.00681895		2327.79	-0.00607929		2917.8	-0.00524349		3507.8	0.00050845		4097.8	-0.00578572
558	0.08303051		1147.99	0.0222662		1738	0.00664398		2327.99	-0.00614994		2918	-0.00568431		3508	0.00157099		4098	-0.00580867
558.2	0.08306805		1148.19	0.02138744		1738.2	0.00643041		2328.19	-0.00661871		2918.2	-0.00601088		3508.2	0.0015114		4098.2	-0.00628377
558.4	0.08428842		1148.39	0.02124032		1738.4	0.00691115		2328.39	-0.00695062		2918.4	-0.00607051		3508.4	0.00160379		4098.4	-0.00716041
558.6	0.08464965		1148.59	0.02114082		1738.6	0.00687728		2328.59	-0.00624266		2918.6	-0.00702174		3508.6	0.00237511		4098.6	-0.00780034
558.8	0.08475216		1148.79	0.02056473		1738.8	0.00774588		2328.79	-0.00552895		2918.8	-0.00654155		3508.8	0.00223787		4098.8	-0.00812479
559	0.08417604		1148.99	0.02041031		1739	0.00828595		2328.99	-0.00580793		2919	-0.00613221		3509	0.00230148		4099	-0.00846193
559.2	0.08427901		1149.19	0.0210047		1739.2	0.00926756		2329.19	-0.00696629		2919.2	-0.00533708		3509.2	0.00266169		4099.2	-0.00847443
559.4	0.08373088		1149.39	0.02151101		1739.4	0.00873042		2329.39	-0.00859692		2919.4	-0.0048816		3509.4	0.00374075		4099.4	-0.009303
559.6	0.08460492		1149.59	0.02175649		1739.6	0.00783223		2329.59	-0.00954962		2919.6	-0.00513585		3509.6	0.00446392		4099.6	-0.00845738
559.8	0.08444846		1149.79	0.02145396		1739.8	0.00633552		2329.79	-0.0094441		2919.8	-0.00448159		3509.8	0.00487202		4099.8	-0.00722295
560	0.08374092		1149.99	0.02163702		1740	0.00622301		2329.99	-0.00934259		2920	-0.00426113		3510	0.00611373		4100	-0.00741944
560.2	0.08483555		1150.19	0.02199416		1740.2	0.0060126		2330.19	-0.0102368		2920.2	-0.00456709		3510.2	0.00640599		4100.2	-0.00635883
560.4	0.08577526		1150.39	0.02196306		1740.4	0.00492022		2330.39	-0.00936134		2920.4	-0.0053889		3510.4	0.00584684		4100.4	-0.00595184
560.6	0.08577942		1150.59	0.02240311		1740.6	0.00480418		2330.59	-0.00888429		2920.6	-0.00647301		3510.6	0.00567031		4100.6	-0.00446082
560.8	0.085047		1150.79	0.02220889		1740.8	0.00433933		2330.79	-0.00836452		2920.8	-0.00676566		3510.8	0.00551017		4100.8	-0.00304848
561	0.08457943		1150.99	0.02291623		1741	0.00371375		2330.99	-0.00743893		2921	-0.00727728		3511	0.00419046		4101	-0.00281488
561.2	0.08516042		1151.19	0.0242307		1741.2	0.00266806		2331.19	-0.0074952		2921.2	-0.00717501		3511.2	0.00405776		4101.2	-0.00299203
561.4	0.08528831		1151.39	0.02395819		1741.4	0.00305403		2331.39	-0.00666649		2921.4	-0.00895165		3511.4	0.00369222		4101.4	-0.00281873
561.6	0.08478584		1151.59	0.02355603		1741.6	0.00294144		2331.59	-0.00704284		2921.6	-0.00934432		3511.6	0.00379929		4101.6	-0.003072
561.8	0.08370913		1151.79	0.02240022		1741.8	0.00193069		2331.79	-0.00642353		2921.8	-0.00969503		3511.8	0.00335995		4101.8	-0.00357746
562	0.08418439		1151.99	0.0209032		1742	0.00146469		2331.99	-0.00661302		2922	-0.01020724		3512	0.00260887		4102	-0.004272
562.2	0.0849757		1152.19	0.02009762		1742.2	0.00108903		2332.19	-0.00598964		2922.2	-0.01010805		3512.2	0.00216564		4102.2	-0.00495888
562.4	0.08523625		1152.39	0.02015722		1742.4	0.0012658		2332.39	-0.00601694		2922.4	-0.00978695		3512.4	0.00144083		4102.4	-0.00532112
562.6	0.08439277		1152.59	0.02016904		1742.6	0.00127465		2332.59	-0.00532269		2922.6	-0.00922029		3512.6	0.00025316		4102.6	-0.00521187
562.8	0.08416017		1152.79	0.01980429		1742.8	0.00180501		2332.79	-0.00606958		2922.8	-0.00810824		3512.8	-0.00071818		4102.8	-0.00557198
563	0.08398562		1152.99	0.01930009		1743	0.00183074		2332.99	-0.00623403		2923	-0.007844		3513	-0.00104945		4103	-0.00549071
563.2	0.08466584		1153.19	0.01931585		1743.2	0.00218147		2333.19	-0.0070021		2923.2	-0.0072724		3513.2	-0.00060703		4103.2	-0.00547078
563.4	0.08465174		1153.39	0.01923509		1743.4	0.00166459		2333.39	-0.00693554		2923.4	-0.00693412		3513.4	0.00069093		4103.4	-0.00597095
563.6	0.08499844		1153.59	0.01891504		1743.6	0.00117314		2333.59	-0.00683593		2923.6	-0.00655313		3513.6	0.00037262		4103.6	-0.00559857
563.8	0.08370603		1153.79	0.0179954		1743.8	0.00135911		2333.79	-0.00697405		2923.8	-0.0059519		3513.8	0.00058127		4103.8	-0.00560556
564	0.08317569		1153.99	0.01751671		1744	0.00265475		2333.99	-0.00724666		2924	-0.00634934		3514	0.0007257		4104	-0.00619689
564.2	0.08377557		1154.19	0.01805052		1744.2	0.00250042		2334.19	-0.0071861		2924.2	-0.00648833		3514.2	0.00134194		4104.2	-0.00608257
564.4	0.08364871		1154.39	0.01887872		1744.4	0.00306093		2334.39	-0.00754261		2924.4	-0.00703368		3514.4	0.0014444		4104.4	-0.00565355
564.6	0.08327619		1154.59	0.01907931		1744.6	0.00435388		2334.59	-0.00780392		2924.6	-0.00779375		3514.6	0.00182181		4104.6	-0.00474906
564.8	0.08209363		1154.79	0.01945386		1744.8	0.00435848		2334.79	-0.00838012		2924.8	-0.00833066		3514.8	0.0011086		4104.8	-0.00470995
565	0.08219619		1154.99	0.01953539		1745	0.00498404		2334.99	-0.00863116		2925	-0.00816371		3515	0.00206		4105	-0.00534805
565.2	0.08390088		1155.19	0.02023063		1745.2	0.00470983		2335.19	-0.00938613		2925.2	-0.00804701		3515.2	0.00250509		4105.2	-0.00566808
565.4	0.08405881		1155.39	0.01941616		1745.4	0.00521426		2335.39	-0.00938255		2925.4	-0.0086204		3515.4	0.00318575		4105.4	-0.00529278
565.6	0.08366059		1155.59	0.01958052		1745.6	0.00518744		2335.59	-0.00988925		2925.6	-0.00767873		3515.6	0.00399398		4105.6	-0.00658594
565.8	0.0836178		1155.79	0.01890669		1745.8	0.00474764		2335.79	-0.0095439		2925.8	-0.00779603		3515.8	0.00406524		4105.8	-0.00770613
566	0.08379158		1155.99	0.01959094		1746	0.00489988		2335.99	-0.00873128		2926	-0.00832567		3516	0.00446508		4106	-0.00747936
566.2	0.08401134		1156.19	0.02033508		1746.2	0.00491471		2336.19	-0.00773072		2926.2	-0.00789404		3516.2	0.00463954		4106.2	-0.00745886
566.4	0.08436178		1156.39	0.02085495		1746.4	0.00481096		2336.39	-0.00729965		2926.4	-0.00733744		3516.4	0.00300754		4106.4	-0.00710146
566.6	0.08299536		1156.59	0.02091459		1746.6	0.00427544		2336.59	-0.00746791		2926.6	-0.00743699		3516.6	0.00301031		4106.6	-0.00641092
566.8	0.08368187		1156.79	0.02087187		1746.8	0.00410686		2336.79	-0.00759981		2926.8	-0.00742367		3516.8	0.00273208		4106.8	-0.00635715
567	0.08371553		1156.99	0.02065851		1747	0.00304064		2336.99	-0.0072111		2927	-0.00813228		3517	0.00298904		4107	-0.0063913
567.2	0.08405724		1157.19	0.02091414		1747.2	0.00221511		2337.19	-0.00718846		2927.2	-0.00781814		3517.2	0.00311947		4107.2	-0.00662402
567.4	0.0849513		1157.39	0.02055629		1747.4	0.00168332		2337.39	-0.00680289		2927.4	-0.00776053		3517.4	0.00227069		4107.4	-0.00670493
567.6	0.08526098		1157.59	0.02068918		1747.6	0.00079168		2337.59	-0.00688483		2927.6	-0.00757029		3517.6	0.00181561		4107.6	-0.00646667
567.8	0.08537041		1157.79	0.01941417		1747.8	0.00046901		2337.79	-0.00687329		2927.8	-0.00735192		3517.8	0.00186397		4107.8	-0.00655252
568	0.08564209		1157.99	0.01948424		1748	0.00021016		2337.99	-0.00696572		2928	-0.00746488		3518	0.00229505		4108	-0.00665727
568.2	0.08647781		1158.19	0.01980187		1748.2	-0.00026818		2338.19	-0.00682154		2928.2	-0.00827498		3518.2	0.00239415		4108.2	-0.00687669
568.4	0.08611134		1158.39	0.0194467		1748.4	-0.00078635		2338.39	-0.00823685		2928.4	-0.00899001		3518.4	0.0020958		4108.4	-0.00637859
568.6	0.08492943		1158.59	0.01815144		1748.6	-0.00165002		2338.59	-0.00785089		2928.6	-0.00914487		3518.6	0.00201212		4108.6	-0.00626191
568.8	0.08522892		1158.79	0.01787809		1748.8	-0.00159991		2338.79	-0.00760485		2928.8	-0.00946806		3518.8	0.00148201		4108.8	-0.00610538
569	0.08634779		1158.99	0.01744272		1749	-0.0006218		2338.99	-0.00794115		2929	-0.00898312		3519	0.00232175		4109	-0.00563943
569.2	0.08733852		1159.19	0.01791258		1749.2	-0.00113814		2339.19	-0.00754719		2929.2	-0.00921916		3519.2	0.00197409		4109.2	-0.00608723
569.4	0.08691027		1159.39	0.01786499		1749.4	-0.00067829		2339.39	-0.00734097		2929.4	-0.00950191		3519.4	0.00179626		4109.4	-0.00596511
569.6	0.08600035		1159.59	0.01735229		1749.6	-0.00089262		2339.59	-0.00640318		2929.6	-0.00951732		3519.6	0.00197918		4109.6	-0.00603968
569.8	0.08523611		1159.79	0.01780364		1749.8	-0.0005545		2339.79	-0.00529495		2929.8	-0.0095718		3519.8	0.00234703		4109.8	-0.0061399
570	0.08440665		1159.99	0.0187202		1750	0.00063469		2339.99	-0.00436516		2930	-0.00879199		3520	0.00254139		4110	-0.00472156
570.2	0.08352895		1160.19	0.01938011		1750.2	0.00214441		2340.19	-0.00454798		2930.2	-0.0080518		3520.2	0.00191588		4110.2	-0.00455226
570.4	0.08353744		1160.39	0.01957687		1750.4	0.00244559		2340.39	-0.00514636		2930.4	-0.00685984		3520.4	0.00128018		4110.4	-0.00429833
570.6	0.08199773		1160.59	0.01991282		1750.6	0.0026993		2340.59	-0.00601941		2930.6	-0.00782244		3520.6	0.00173922		4110.6	-0.00405845
570.8	0.08253049		1160.79	0.01900815		1750.8	0.0036124		2340.79	-0.00478184		2930.8	-0.00735924		3520.8	0.000637		4110.8	-0.00418369
571	0.08265229		1160.99	0.0190565		1751	0.00300213		2340.99	-0.00434759		2931	-0.00681765		3521	0.00001759		4111	-0.00388519
571.2	0.08228781		1161.19	0.01952268		1751.2	0.00286194		2341.19	-0.00395855		2931.2	-0.00574863		3521.2	-0.00045531		4111.2	-0.00371655
571.4	0.08235499		1161.39	0.0186358		1751.4	0.00367488		2341.39	-0.00458646		2931.4	-0.00423692		3521.4	-0.00117008		4111.4	-0.00382188
571.6	0.08183512		1161.59	0.01845438		1751.6	0.00344766		2341.59	-0.00505351		2931.6	-0.00341426		3521.6	-0.00131049		4111.6	-0.00500758
571.8	0.08185047		1161.79	0.01781418		1751.8	0.00452132		2341.79	-0.00571163		2931.8	-0.00352455		3521.8	-0.00160918		4111.8	-0.00525265
572	0.08134036		1161.99	0.01788454		1752	0.00514373		2341.99	-0.00593399		2932	-0.00316539		3522	-0.00187005		4112	-0.00520342
572.2	0.08206328		1162.19	0.01694112		1752.2	0.00472117		2342.19	-0.00745914		2932.2	-0.00353078		3522.2	-0.00272803		4112.2	-0.00625783
572.4	0.08143706		1162.39	0.01680475		1752.4	0.00451		2342.39	-0.00817623		2932.4	-0.00329261		3522.4	-0.00277177		4112.4	-0.00603537
572.6	0.08206703		1162.59	0.016725		1752.6	0.00487428		2342.59	-0.00768889		2932.6	-0.00299955		3522.6	-0.00232308		4112.6	-0.00657507
572.8	0.08320417		1162.79	0.0167822		1752.8	0.00641853		2342.79	-0.00815449		2932.8	-0.00376351		3522.8	-0.00272598		4112.8	-0.00633288
573	0.08422137		1162.99	0.01659192		1753	0.0071011		2342.99	-0.0088587		2933	-0.00377411		3523	-0.00194627		4113	-0.00627313
573.2	0.08470649		1163.19	0.01729439		1753.2	0.00575305		2343.19	-0.00866209		2933.2	-0.00486796		3523.2	-0.00207311		4113.2	-0.00681562
573.4	0.08413983		1163.39	0.0183574		1753.4	0.00545384		2343.39	-0.00865078		2933.4	-0.00562645		3523.4	-0.00169384		4113.4	-0.00711882
573.6	0.08438206		1163.59	0.01887602		1753.6	0.0049683		2343.59	-0.00826324		2933.6	-0.00545122		3523.6	-0.00061412		4113.6	-0.00665216
573.8	0.08482731		1163.79	0.02018862		1753.8	0.00499885		2343.79	-0.00873668		2933.8	-0.00556433		3523.8	-0.0006775		4113.8	-0.00737628
574	0.08469365		1163.99	0.02000486		1754	0.00535923		2343.99	-0.00953428		2934	-0.00561075		3524	-0.00066715		4114	-0.00663824
574.2	0.08501852		1164.19	0.02019228		1754.2	0.00517241		2344.19	-0.01022397		2934.2	-0.00666554		3524.2	-0.00086166		4114.2	-0.00663975
574.4	0.08598492		1164.39	0.01960444		1754.4	0.00413979		2344.39	-0.01020467		2934.4	-0.00581326		3524.4	-0.00060315		4114.4	-0.00680967
574.6	0.0856784		1164.59	0.01889255		1754.6	0.00366262		2344.59	-0.00889752		2934.6	-0.00650123		3524.6	-0.00066806		4114.6	-0.00715256
574.8	0.08553395		1164.79	0.01790635		1754.8	0.00342669		2344.79	-0.00815846		2934.8	-0.00622655		3524.8	-0.00117413		4114.8	-0.00684529
575	0.08620911		1164.99	0.01839064		1755	0.00190369		2344.99	-0.00834406		2935	-0.00637181		3525	-0.00064842		4115	-0.00649896
575.2	0.08537339		1165.19	0.01878257		1755.2	0.00130053		2345.19	-0.00865389		2935.2	-0.00573326		3525.2	-0.00031761		4115.2	-0.00600205
575.4	0.08454042		1165.39	0.0180554		1755.4	0.00154798		2345.39	-0.00929596		2935.4	-0.00519139		3525.4	-0.00056331		4115.4	-0.0065321
575.6	0.08379787		1165.59	0.01798855		1755.6	0.00085737		2345.59	-0.00943017		2935.6	-0.00495891		3525.6	-0.00049958		4115.6	-0.00715314
575.8	0.0834769		1165.79	0.01784857		1755.8	0.00154686		2345.79	-0.00992454		2935.8	-0.00493628		3525.8	-0.00049268		4115.8	-0.00645652
576	0.08344341		1165.99	0.01753869		1756	0.0011834		2345.99	-0.00983969		2936	-0.00408184		3526	-0.0006906		4116	-0.00722884
576.2	0.08354195		1166.19	0.01763924		1756.2	0.00105937		2346.19	-0.01037005		2936.2	-0.00397072		3526.2	-0.0006483		4116.2	-0.00843477
576.4	0.08280445		1166.39	0.01818631		1756.4	0.00120979		2346.39	-0.00979812		2936.4	-0.00403493		3526.4	-0.0002538		4116.4	-0.00764701
576.6	0.08327724		1166.59	0.0176415		1756.6	0.0019989		2346.59	-0.00893649		2936.6	-0.00459745		3526.6	-0.00041973		4116.6	-0.00857616
576.8	0.08374307		1166.79	0.01764024		1756.8	0.00232965		2346.79	-0.00764956		2936.8	-0.00586761		3526.8	-0.00015404		4116.8	-0.00847829
577	0.08364512		1166.99	0.01837821		1757	0.00183435		2346.99	-0.00767405		2937	-0.00573712		3527	0.00038662		4117	-0.0092674
577.2	0.08342269		1167.19	0.01926324		1757.2	0.0004574		2347.19	-0.007747		2937.2	-0.00701596		3527.2	0.0005612		4117.2	-0.00986377
577.4	0.08300175		1167.39	0.02001469		1757.4	0.00007718		2347.39	-0.00741649		2937.4	-0.00799141		3527.4	0.00070983		4117.4	-0.01029937
577.6	0.08320102		1167.59	0.01899673		1757.6	0.00008978		2347.59	-0.00759426		2937.6	-0.00815282		3527.6	0.00119538		4117.6	-0.01053634
577.8	0.08347312		1167.79	0.01885364		1757.8	0.00039192		2347.79	-0.0077445		2937.8	-0.00837798		3527.8	0.00075611		4117.8	-0.01124858
578	0.08297579		1167.99	0.01816028		1758	0.00026621		2347.99	-0.00747227		2938	-0.00910353		3528	0.00072471		4118	-0.0105834
578.2	0.08207409		1168.19	0.01752238		1758.2	0.00067222		2348.19	-0.00747981		2938.2	-0.00939608		3528.2	0.00030232		4118.2	-0.01047812
578.4	0.08230598		1168.39	0.01690765		1758.4	0.00099554		2348.39	-0.00677299		2938.4	-0.00852456		3528.4	-0.00053371		4118.4	-0.00986333
578.6	0.08250393		1168.59	0.01669723		1758.6	0.00051278		2348.59	-0.00651991		2938.6	-0.00911395		3528.6	-0.00147911		4118.6	-0.00871645
578.8	0.08255957		1168.79	0.01663786		1758.8	0.00110484		2348.79	-0.00651693		2938.8	-0.00944033		3528.8	-0.0009712		4118.8	-0.00746606
579	0.08261994		1168.99	0.01741967		1759	0.00116745		2348.99	-0.00667745		2939	-0.0091056		3529	0.00058207		4119	-0.00674515
579.2	0.08181256		1169.19	0.01794359		1759.2	0.00129699		2349.19	-0.00670676		2939.2	-0.00855667		3529.2	-0.0000088		4119.2	-0.00588645
579.4	0.08058277		1169.39	0.01713316		1759.4	0.00148363		2349.39	-0.00814409		2939.4	-0.00930139		3529.4	0.00068039		4119.4	-0.00646301
579.6	0.08014841		1169.59	0.01656218		1759.6	0.00072113		2349.59	-0.00795272		2939.6	-0.00916942		3529.6	0.00120013		4119.6	-0.00622837
579.8	0.08017467		1169.79	0.01611394		1759.8	0.00089213		2349.79	-0.0071428		2939.8	-0.0092016		3529.8	0.00118029		4119.8	-0.0057673
580	0.08015448		1169.99	0.01606522		1760	-0.00005682		2349.99	-0.00647335		2940	-0.00890199		3530	0.00121067		4120	-0.00694687
580.2	0.07917626		1170.19	0.01626145		1760.2	0.00004686		2350.19	-0.00603614		2940.2	-0.00812781		3530.2	0.00127666		4120.2	-0.00730129
580.4	0.07918149		1170.39	0.01607475		1760.4	-0.00093266		2350.39	-0.0056063		2940.4	-0.0076105		3530.4	0.00027238		4120.4	-0.0075964
580.6	0.08060971		1170.59	0.01613768		1760.6	-0.00131851		2350.59	-0.00490569		2940.6	-0.00786398		3530.6	0.00051599		4120.6	-0.00861314
580.8	0.08167631		1170.79	0.01670204		1760.8	-0.00223695		2350.79	-0.00513945		2940.8	-0.00796492		3530.8	0.00055945		4120.8	-0.01017793
581	0.08204285		1170.99	0.01716626		1761	-0.00268533		2350.99	-0.00583982		2941	-0.0080912		3531	-0.00058862		4121	-0.01108447
581.2	0.08228286		1171.19	0.0174653		1761.2	-0.00205974		2351.19	-0.00626499		2941.2	-0.00901013		3531.2	-0.00017307		4121.2	-0.01125943
581.4	0.08229432		1171.39	0.0172655		1761.4	-0.00237679		2351.39	-0.00594393		2941.4	-0.00967006		3531.4	0.00011071		4121.4	-0.01120985
581.6	0.08222521		1171.59	0.01704906		1761.6	-0.00204769		2351.59	-0.00603231		2941.6	-0.01000333		3531.6	0.00076716		4121.6	-0.01203423
581.8	0.08243515		1171.79	0.01757043		1761.8	-0.00121579		2351.79	-0.00583938		2941.8	-0.01091219		3531.8	0.00074364		4121.8	-0.01206594
582	0.08183164		1171.99	0.0171012		1762	-0.00070826		2351.99	-0.00619636		2942	-0.01160679		3532	0.00002748		4122	-0.01100561
582.2	0.081399		1172.19	0.01784351		1762.2	0.00045217		2352.19	-0.0062482		2942.2	-0.01119396		3532.2	-0.00056602		4122.2	-0.01029396
582.4	0.08172814		1172.39	0.01843922		1762.4	0.00085962		2352.39	-0.00642308		2942.4	-0.01095228		3532.4	-0.00151136		4122.4	-0.00930364
582.6	0.08115074		1172.59	0.01873438		1762.6	0.00203627		2352.59	-0.00702159		2942.6	-0.0111669		3532.6	-0.00083043		4122.6	-0.00877408
582.8	0.08066384		1172.79	0.01891059		1762.8	0.00333354		2352.79	-0.00755861		2942.8	-0.01145383		3532.8	-0.00036568		4122.8	-0.00889689
583	0.07992588		1172.99	0.01930943		1763	0.00423562		2352.99	-0.0084163		2943	-0.01166644		3533	-0.00006736		4123	-0.00875903
583.2	0.0788825		1173.19	0.01892847		1763.2	0.0048361		2353.19	-0.00772752		2943.2	-0.01179312		3533.2	-0.00104985		4123.2	-0.00828286
583.4	0.07809307		1173.39	0.01851223		1763.4	0.00544071		2353.39	-0.00736076		2943.4	-0.01262707		3533.4	0.00023628		4123.4	-0.00798556
583.6	0.07727571		1173.59	0.01835567		1763.6	0.00435316		2353.59	-0.00636914		2943.6	-0.01184716		3533.6	0.00016166		4123.6	-0.00741459
583.8	0.07709274		1173.79	0.01837393		1763.8	0.00466507		2353.79	-0.0062415		2943.8	-0.01074676		3533.8	-0.00044108		4123.8	-0.00671239
584	0.07712732		1173.99	0.01877392		1764	0.00378071		2353.99	-0.00706348		2944	-0.00929877		3534	-0.00066064		4124	-0.00783388
584.2	0.07710181		1174.19	0.0179097		1764.2	0.00355897		2354.19	-0.00749868		2944.2	-0.00714879		3534.2	-0.0010487		4124.2	-0.00823053
584.4	0.07777895		1174.39	0.01695438		1764.4	0.00298795		2354.39	-0.00777073		2944.4	-0.00657887		3534.4	-0.00156888		4124.4	-0.00830216
584.6	0.07862013		1174.59	0.01643778		1764.6	0.00296886		2354.59	-0.00814209		2944.6	-0.00636039		3534.6	-0.00155506		4124.6	-0.00881757
584.8	0.08015031		1174.79	0.01585608		1764.8	0.0031493		2354.79	-0.0086176		2944.8	-0.00611317		3534.8	-0.0028669		4124.8	-0.01052528
585	0.0805768		1174.99	0.01518856		1765	0.0035068		2354.99	-0.00918921		2945	-0.00611807		3535	-0.00279942		4125	-0.01008719
585.2	0.08136721		1175.19	0.01459541		1765.2	0.00347981		2355.19	-0.00957925		2945.2	-0.0064521		3535.2	-0.00167565		4125.2	-0.0096432
585.4	0.08289361		1175.39	0.0138108		1765.4	0.00226034		2355.39	-0.00885406		2945.4	-0.00612457		3535.4	-0.00170529		4125.4	-0.0096766
585.6	0.0838953		1175.59	0.01366375		1765.6	0.00253251		2355.59	-0.0093367		2945.6	-0.00598466		3535.6	-0.00117827		4125.6	-0.01027472
585.8	0.08474923		1175.79	0.01355878		1765.8	0.00272825		2355.79	-0.00930148		2945.8	-0.00597385		3535.8	-0.00067905		4125.8	-0.01016378
586	0.08494796		1175.99	0.01335033		1766	0.00250516		2355.99	-0.00971773		2946	-0.00546412		3536	-0.00128587		4126	-0.00946625
586.2	0.08453825		1176.19	0.01504797		1766.2	0.00289452		2356.19	-0.00949526		2946.2	-0.00645185		3536.2	-0.00070753		4126.2	-0.00874546
586.4	0.08423061		1176.39	0.01499333		1766.4	0.00338284		2356.39	-0.0096304		2946.4	-0.00670861		3536.4	-0.00064249		4126.4	-0.0090221
586.6	0.08356478		1176.59	0.01500416		1766.6	0.00312465		2356.59	-0.00948627		2946.6	-0.00786163		3536.6	-0.00008823		4126.6	-0.00877789
586.8	0.08324678		1176.79	0.01595341		1766.8	0.00257866		2356.79	-0.00985221		2946.8	-0.00844539		3536.8	-0.00087715		4126.8	-0.0086051
587	0.08265974		1176.99	0.01720268		1767	0.0029501		2356.99	-0.00905435		2947	-0.00826618		3537	-0.00089121		4127	-0.00854675
587.2	0.08117044		1177.19	0.01804611		1767.2	0.00239166		2357.19	-0.00777164		2947.2	-0.00823929		3537.2	-0.00005583		4127.2	-0.00829094
587.4	0.08035832		1177.39	0.01892957		1767.4	0.00182355		2357.39	-0.00835457		2947.4	-0.00893034		3537.4	0.00093758		4127.4	-0.00865477
587.6	0.07924694		1177.59	0.0200918		1767.6	0.00115376		2357.59	-0.00969449		2947.6	-0.00871871		3537.6	0.00042498		4127.6	-0.00833723
587.8	0.07886078		1177.79	0.02028006		1767.8	0.00084241		2357.79	-0.01000903		2947.8	-0.00827264		3537.8	0.00012887		4127.8	-0.00855993
588	0.07892915		1177.99	0.02081673		1768	0.00003084		2357.99	-0.01018405		2948	-0.00817126		3538	0.00016027		4128	-0.00925008
588.2	0.07767919		1178.19	0.01939536		1768.2	0.00018189		2358.19	-0.00978572		2948.2	-0.00773682		3538.2	0.00053927		4128.2	-0.00966683
588.4	0.07772243		1178.39	0.01872861		1768.4	0.00048002		2358.39	-0.00997668		2948.4	-0.00815559		3538.4	0.00018814		4128.4	-0.01026619
588.6	0.07825114		1178.59	0.01878584		1768.6	-0.00009135		2358.59	-0.00957415		2948.6	-0.00803314		3538.6	0.00028214		4128.6	-0.01102482
588.8	0.07941793		1178.79	0.01850477		1768.8	-0.00104274		2358.79	-0.00913118		2948.8	-0.00791003		3538.8	0.00037867		4128.8	-0.01225612
589	0.07937266		1178.99	0.01742069		1769	-0.00063805		2358.99	-0.00932959		2949	-0.00861613		3539	0.00002576		4129	-0.01190376
589.2	0.08040335		1179.19	0.01654972		1769.2	-0.0007801		2359.19	-0.00818492		2949.2	-0.00820873		3539.2	-0.0000324		4129.2	-0.01180508
589.4	0.08065486		1179.39	0.01577147		1769.4	-0.00062184		2359.39	-0.00667203		2949.4	-0.00706638		3539.4	0.00030962		4129.4	-0.01221511
589.6	0.08076653		1179.59	0.01495299		1769.6	-0.00030352		2359.59	-0.00670919		2949.6	-0.00644774		3539.6	0.00094749		4129.6	-0.01263871
589.8	0.08068984		1179.79	0.01482348		1769.8	-0.00036917		2359.79	-0.00522807		2949.8	-0.00624096		3539.8	0.00093748		4129.8	-0.01225101
590	0.08071681		1179.99	0.01443805		1770	0.00009519		2359.99	-0.0054622		2950	-0.00618049		3540	0.00114517		4130	-0.01182094
590.2	0.08089682		1180.19	0.01425535		1770.2	0.00021936		2360.19	-0.00438086		2950.2	-0.0067081		3540.2	0.00155866		4130.2	-0.0108299
590.4	0.08222339		1180.39	0.01304417		1770.4	-0.00015505		2360.39	-0.00456604		2950.4	-0.00592483		3540.4	0.00178061		4130.4	-0.01123018
590.6	0.08228531		1180.59	0.0134768		1770.6	-0.00095395		2360.59	-0.00454607		2950.6	-0.00705785		3540.6	0.00167774		4130.6	-0.01117038
590.8	0.08356833		1180.79	0.01411536		1770.8	-0.0011412		2360.79	-0.00581006		2950.8	-0.00664248		3540.8	0.00164086		4130.8	-0.01043831
591	0.08343518		1180.99	0.01411877		1771	-0.00049976		2360.99	-0.00659983		2951	-0.00714698		3541	0.0010168		4131	-0.01042732
591.2	0.08362937		1181.19	0.0144029		1771.2	-0.00049172		2361.19	-0.00742673		2951.2	-0.00759419		3541.2	0.00174983		4131.2	-0.00956685
591.4	0.0835495		1181.39	0.01470575		1771.4	-0.00035124		2361.39	-0.00956096		2951.4	-0.00832597		3541.4	0.00140961		4131.4	-0.00960801
591.6	0.08376322		1181.59	0.01544013		1771.6	0.00001345		2361.59	-0.01002872		2951.6	-0.00824621		3541.6	0.00161708		4131.6	-0.00854527
591.8	0.08369945		1181.79	0.01508365		1771.8	-0.00084351		2361.79	-0.00994075		2951.8	-0.00835315		3541.8	0.00185525		4131.8	-0.00828161
592	0.08424589		1181.99	0.01521095		1772	-0.00085306		2361.99	-0.00977845		2952	-0.00935195		3542	0.00148133		4132	-0.00793162
592.2	0.08406052		1182.19	0.01482942		1772.2	-0.00054334		2362.19	-0.01000547		2952.2	-0.00949721		3542.2	0.00158252		4132.2	-0.00891677
592.4	0.08443761		1182.39	0.01585846		1772.4	-0.00116485		2362.39	-0.01036434		2952.4	-0.01073336		3542.4	0.00121814		4132.4	-0.00948271
592.6	0.0842214		1182.59	0.01717662		1772.6	-0.00166868		2362.59	-0.00973383		2952.6	-0.01112924		3542.6	0.00167221		4132.6	-0.00979292
592.8	0.08379642		1182.79	0.01724205		1772.8	-0.0023519		2362.79	-0.00897728		2952.8	-0.0117883		3542.8	0.00157931		4132.8	-0.01026862
593	0.08279514		1182.99	0.01668092		1773	-0.00133065		2362.99	-0.00911153		2953	-0.01193756		3543	0.00117622		4133	-0.01012514
593.2	0.0823421		1183.19	0.01617492		1773.2	-0.00192312		2363.19	-0.00839774		2953.2	-0.01152003		3543.2	0.00157477		4133.2	-0.01015909
593.4	0.08131		1183.39	0.01575428		1773.4	-0.00213612		2363.39	-0.00734706		2953.4	-0.01111638		3543.4	0.00208554		4133.4	-0.01032492
593.6	0.08114823		1183.59	0.01600362		1773.6	-0.00249754		2363.59	-0.00765992		2953.6	-0.01057899		3543.6	0.0013849		4133.6	-0.00981638
593.8	0.08112571		1183.79	0.01637602		1773.8	-0.0024775		2363.79	-0.00695289		2953.8	-0.01021061		3543.8	0.00078747		4133.8	-0.00972624
594	0.08074689		1183.99	0.01660063		1774	-0.0022685		2363.99	-0.00729014		2954	-0.00938914		3544	0.00086179		4134	-0.0092601
594.2	0.08048099		1184.19	0.01523001		1774.2	-0.00239603		2364.19	-0.0063728		2954.2	-0.0090595		3544.2	0.00003196		4134.2	-0.00823337
594.4	0.081009		1184.39	0.01488226		1774.4	-0.00219933		2364.39	-0.00728026		2954.4	-0.00829061		3544.4	-0.00023187		4134.4	-0.00874811
594.6	0.08063723		1184.59	0.01530354		1774.6	-0.00175314		2364.59	-0.00708465		2954.6	-0.00905739		3544.6	-0.00076195		4134.6	-0.00832584
594.8	0.08102086		1184.79	0.0146166		1774.8	-0.00112976		2364.79	-0.00865062		2954.8	-0.0078379		3544.8	-0.00100406		4134.8	-0.00715699
595	0.08086298		1184.99	0.01454633		1775	-0.00033828		2364.99	-0.00910614		2955	-0.00725014		3545	-0.00147613		4135	-0.00708752
595.2	0.08125047		1185.19	0.0155917		1775.2	-0.00077149		2365.19	-0.01027895		2955.2	-0.00664633		3545.2	-0.00069008		4135.2	-0.00714649
595.4	0.08102977		1185.39	0.01545752		1775.4	-0.00077064		2365.39	-0.01146096		2955.4	-0.00647518		3545.4	-0.0008032		4135.4	-0.00752059
595.6	0.08152867		1185.59	0.01563847		1775.6	-0.00031414		2365.59	-0.01083716		2955.6	-0.00626179		3545.6	-0.00051826		4135.6	-0.00674083
595.8	0.081575		1185.79	0.01557986		1775.8	0.00016009		2365.79	-0.01089463		2955.8	-0.00682506		3545.8	-0.0009738		4135.8	-0.00735141
596	0.0820773		1185.99	0.01644133		1776	0.00132415		2365.99	-0.011562		2956	-0.00719853		3546	-0.00146073		4136	-0.00878004
596.2	0.08203387		1186.19	0.01708485		1776.2	0.00188307		2366.19	-0.01210114		2956.2	-0.00754694		3546.2	-0.00077131		4136.2	-0.00965125
596.4	0.08091748		1186.39	0.017554		1776.4	0.00150785		2366.39	-0.01229371		2956.4	-0.0073557		3546.4	-0.00082317		4136.4	-0.01017813
596.6	0.08154214		1186.59	0.01725021		1776.6	0.00195116		2366.59	-0.01187081		2956.6	-0.00694751		3546.6	-0.00052761		4136.6	-0.0104696
596.8	0.08213727		1186.79	0.01649427		1776.8	0.00187319		2366.79	-0.01064526		2956.8	-0.00752756		3546.8	-0.00039059		4136.8	-0.00995812
597	0.08156777		1186.99	0.01512522		1777	0.00238393		2366.99	-0.01129392		2957	-0.00713015		3547	0.00017838		4137	-0.01042999
597.2	0.08121427		1187.19	0.01449068		1777.2	0.00189392		2367.19	-0.01112062		2957.2	-0.00813556		3547.2	0.00008341		4137.2	-0.00934484
597.4	0.08145756		1187.39	0.01422995		1777.4	0.00189143		2367.39	-0.00988196		2957.4	-0.00793286		3547.4	-0.00008112		4137.4	-0.00922135
597.6	0.0820353		1187.59	0.01390285		1777.6	0.00162596		2367.59	-0.010215		2957.6	-0.00890781		3547.6	-0.00067813		4137.6	-0.00844993
597.8	0.08148911		1187.79	0.01399545		1777.8	0.00135899		2367.79	-0.00915944		2957.8	-0.00944313		3547.8	-0.00110919		4137.8	-0.00812254
598	0.0798584		1187.99	0.01396446		1778	0.00074009		2367.99	-0.0080281		2958	-0.00859379		3548	-0.00120508		4138	-0.00714174
598.2	0.07969099		1188.19	0.01305142		1778.2	0.00074574		2368.19	-0.00795406		2958.2	-0.00831978		3548.2	-0.00191407		4138.2	-0.00679737
598.4	0.07977885		1188.39	0.01291595		1778.4	0.00092553		2368.39	-0.00750265		2958.4	-0.00869296		3548.4	-0.00201635		4138.4	-0.00613281
598.6	0.07938742		1188.59	0.01429787		1778.6	0.00088859		2368.59	-0.00736283		2958.6	-0.00935826		3548.6	-0.00128961		4138.6	-0.00607648
598.8	0.07917551		1188.79	0.01441554		1778.8	0.00081723		2368.79	-0.00771315		2958.8	-0.0086824		3548.8	-0.00088392		4138.8	-0.00573662
599	0.07896112		1188.99	0.01503527		1779	0.00062648		2368.99	-0.00789305		2959	-0.00937742		3549	-0.0007867		4139	-0.00636766
599.2	0.07900605		1189.19	0.01551978		1779.2	0.00035844		2369.19	-0.00817694		2959.2	-0.00992692		3549.2	-0.00124227		4139.2	-0.00676395
599.4	0.07952697		1189.39	0.01562307		1779.4	0.00108136		2369.39	-0.00809857		2959.4	-0.01057333		3549.4	-0.00080487		4139.4	-0.00734413
599.6	0.07921403		1189.59	0.01609302		1779.6	0.00129766		2369.59	-0.00836433		2959.6	-0.01126967		3549.6	0.00006542		4139.6	-0.00777503
599.8	0.07887186		1189.79	0.01659525		1779.8	0.00113957		2369.79	-0.00943712		2959.8	-0.01228095		3549.8	-0.00017305		4139.8	-0.00959091
600	0.07889435		1189.99	0.01708443		1780	0.00088323		2369.99	-0.010396		2960	-0.01202222		3550	-0.00017087		4140	-0.0105129
600.2	0.07929848		1190.19	0.01602907		1780.2	0.00033954		2370.19	-0.01039143		2960.2	-0.0115499		3550.2	0.00006994		4140.2	-0.01082488
600.4	0.07896664		1190.39	0.0162339		1780.4	-0.00024709		2370.39	-0.01035035		2960.4	-0.01135714		3550.4	-0.00022892		4140.4	-0.01129481
600.6	0.07977591		1190.59	0.01510738		1780.6	-0.00046287		2370.59	-0.00997387		2960.6	-0.01187271		3550.6	-0.00073896		4140.6	-0.01098316
600.8	0.07981877		1190.79	0.01482789		1780.8	-0.00075286		2370.79	-0.00929439		2960.8	-0.01230443		3550.8	-0.0000517		4140.8	-0.01160601
601	0.08015246		1190.99	0.01442873		1781	-0.00155155		2370.99	-0.00970494		2961	-0.01199057		3551	0.00051782		4141	-0.01211889
601.2	0.08074818		1191.19	0.01438667		1781.2	-0.002226		2371.19	-0.00926407		2961.2	-0.01295166		3551.2	-0.0002055		4141.2	-0.01207215
601.4	0.08143637		1191.39	0.01397564		1781.4	-0.00333041		2371.39	-0.00906386		2961.4	-0.01296165		3551.4	-0.00093459		4141.4	-0.0116929
601.6	0.08098377		1191.59	0.01308058		1781.6	-0.00309953		2371.59	-0.00936981		2961.6	-0.01364481		3551.6	-0.00110393		4141.6	-0.01108476
601.8	0.08041513		1191.79	0.01367766		1781.8	-0.00339512		2371.79	-0.0092034		2961.8	-0.01278365		3551.8	-0.00125765		4141.8	-0.00992798
602	0.08045122		1191.99	0.01395145		1782	-0.00345527		2371.99	-0.00917634		2962	-0.01137672		3552	-0.0013357		4142	-0.00966122
602.2	0.08055872		1192.19	0.01358699		1782.2	-0.00262728		2372.19	-0.01034846		2962.2	-0.01099719		3552.2	-0.00101377		4142.2	-0.00976295
602.4	0.07984314		1192.39	0.01333221		1782.4	-0.00199949		2372.39	-0.01048884		2962.4	-0.01083656		3552.4	-0.00107784		4142.4	-0.00989498
602.6	0.07984922		1192.59	0.01422143		1782.6	-0.00187497		2372.59	-0.01087518		2962.6	-0.01008828		3552.6	-0.00041988		4142.6	-0.01016653
602.8	0.07986972		1192.79	0.0141105		1782.8	-0.00106191		2372.79	-0.01108859		2962.8	-0.01024169		3552.8	-0.00058347		4142.8	-0.0096732
603	0.07971804		1192.99	0.01399907		1783	-0.00020188		2372.99	-0.01234643		2963	-0.01015354		3553	-0.00104119		4143	-0.009712
603.2	0.08019531		1193.19	0.01455015		1783.2	-0.00090527		2373.19	-0.01303306		2963.2	-0.00957949		3553.2	-0.00090537		4143.2	-0.00954738
603.4	0.08066346		1193.39	0.01536677		1783.4	-0.00174651		2373.39	-0.01356504		2963.4	-0.00944856		3553.4	-0.00034551		4143.4	-0.01010959
603.6	0.07985758		1193.59	0.01518771		1783.6	-0.00252671		2373.59	-0.01441389		2963.6	-0.01017718		3553.6	-0.00047226		4143.6	-0.01091492
603.8	0.07950705		1193.79	0.01540024		1783.8	-0.00273196		2373.79	-0.01444235		2963.8	-0.01000562		3553.8	-0.00050437		4143.8	-0.01104477
604	0.07944219		1193.99	0.01506061		1784	-0.00275134		2373.99	-0.01404742		2964	-0.00957733		3554	-0.00033831		4144	-0.011232
604.2	0.07903912		1194.19	0.01454632		1784.2	-0.00334761		2374.19	-0.01390605		2964.2	-0.01037036		3554.2	-0.00029607		4144.2	-0.01134063
604.4	0.07827999		1194.39	0.01496042		1784.4	-0.00430206		2374.39	-0.01337533		2964.4	-0.01141591		3554.4	-0.00034351		4144.4	-0.01086848
604.6	0.07836735		1194.59	0.01417626		1784.6	-0.00448171		2374.59	-0.01267532		2964.6	-0.01188781		3554.6	0.00007963		4144.6	-0.01083483
604.8	0.07849144		1194.79	0.01383097		1784.8	-0.00492433		2374.79	-0.01185072		2964.8	-0.01287584		3554.8	0.0011673		4144.8	-0.01121855
605	0.07912206		1194.99	0.01299999		1785	-0.00564739		2374.99	-0.01200588		2965	-0.01292526		3555	0.00040321		4145	-0.0102233
605.2	0.07871028		1195.19	0.01240874		1785.2	-0.00506582		2375.19	-0.01152214		2965.2	-0.01377016		3555.2	0.00023218		4145.2	-0.00993024
605.4	0.0782086		1195.39	0.01193298		1785.4	-0.00469539		2375.39	-0.01104717		2965.4	-0.01393798		3555.4	-0.00014469		4145.4	-0.00868007
605.6	0.07819498		1195.59	0.0111424		1785.6	-0.00331826		2375.59	-0.01016068		2965.6	-0.01316487		3555.6	0.00048944		4145.6	-0.00817849
605.8	0.07807912		1195.79	0.01187658		1785.8	-0.00291704		2375.79	-0.00968527		2965.8	-0.01299285		3555.8	0.00074793		4145.8	-0.00804255
606	0.077876		1195.99	0.01138572		1786	-0.00248205		2375.99	-0.00970489		2966	-0.01272834		3556	0.00029525		4146	-0.00882684
606.2	0.07832447		1196.19	0.01145763		1786.2	-0.00138206		2376.19	-0.01064472		2966.2	-0.01246835		3556.2	0.00141431		4146.2	-0.00882094
606.4	0.07874622		1196.39	0.01216932		1786.4	-0.00112339		2376.39	-0.01121793		2966.4	-0.01171621		3556.4	0.00090949		4146.4	-0.00913045
606.6	0.07923176		1196.59	0.01287441		1786.6	-0.00093534		2376.59	-0.0116688		2966.6	-0.01142815		3556.6	0.00088258		4146.6	-0.00899101
606.8	0.07907535		1196.79	0.01370567		1786.8	0.00027781		2376.79	-0.01332925		2966.8	-0.01217823		3556.8	0.00062694		4146.8	-0.00931907
607	0.07942793		1196.99	0.01364661		1787	0.00043573		2376.99	-0.01374749		2967	-0.01179772		3557	-0.00023469		4147	-0.01061933
607.2	0.08058051		1197.19	0.01466342		1787.2	-0.00052527		2377.19	-0.01356846		2967.2	-0.01206857		3557.2	-0.00059632		4147.2	-0.01081985
607.4	0.08055786		1197.39	0.01533786		1787.4	-0.00123418		2377.39	-0.01263237		2967.4	-0.01168233		3557.4	-0.00111016		4147.4	-0.01198481
607.6	0.07961631		1197.59	0.01442723		1787.6	-0.00105056		2377.59	-0.01257059		2967.6	-0.01219471		3557.6	-0.00200097		4147.6	-0.01270351
607.8	0.08004		1197.79	0.01436019		1787.8	-0.00186686		2377.79	-0.01215006		2967.8	-0.01174302		3557.8	-0.00197924		4147.8	-0.01228389
608	0.07930231		1197.99	0.01448634		1788	-0.00283997		2377.99	-0.01225782		2968	-0.01307973		3558	-0.00251978		4148	-0.01281428
608.2	0.07875298		1198.19	0.01503167		1788.2	-0.00357305		2378.19	-0.01175706		2968.2	-0.01405197		3558.2	-0.00340567		4148.2	-0.0133369
608.4	0.07915715		1198.39	0.01471027		1788.4	-0.00380269		2378.39	-0.01112749		2968.4	-0.01404482		3558.4	-0.003864		4148.4	-0.01312485
608.6	0.07906498		1198.59	0.01379438		1788.6	-0.00403003		2378.59	-0.01087288		2968.6	-0.01392492		3558.6	-0.00348493		4148.6	-0.01333244
608.8	0.07885375		1198.79	0.01288315		1788.8	-0.00449435		2378.79	-0.01044443		2968.8	-0.01403207		3558.8	-0.00413101		4148.8	-0.01314751
609	0.07884021		1198.99	0.01254056		1789	-0.00419978		2378.99	-0.00967218		2969	-0.01328059		3559	-0.00421143		4149	-0.01244599
609.2	0.07938355		1199.19	0.01210938		1789.2	-0.00362439		2379.19	-0.00915226		2969.2	-0.01302115		3559.2	-0.00353065		4149.2	-0.0124906
609.4	0.07935311		1199.39	0.01124054		1789.4	-0.00389433		2379.39	-0.0087173		2969.4	-0.01304516		3559.4	-0.00338452		4149.4	-0.01131892
609.6	0.07954802		1199.59	0.01117838		1789.6	-0.00367468		2379.59	-0.00930321		2969.6	-0.01218411		3559.6	-0.00258707		4149.6	-0.01129995
609.8	0.07880195		1199.79	0.0118238		1789.8	-0.002229		2379.79	-0.00990157		2969.8	-0.0117956		3559.8	-0.00287544		4149.8	-0.01114072
610	0.07868119		1199.99	0.01164031		1790	-0.00194138		2379.99	-0.01077827		2970	-0.0105902		3560	-0.00232765		4150	-0.01042503
610.2	0.07891561		1200.19	0.01254666		1790.2	-0.00065773		2380.19	-0.01171281		2970.2	-0.00957818		3560.2	-0.00060501		4150.2	-0.01030338
610.4	0.07826755		1200.39	0.01301407		1790.4	0.00032207		2380.39	-0.01217343		2970.4	-0.00934988		3560.4	-0.0012816		4150.4	-0.01133114
610.6	0.0771122		1200.59	0.01341483		1790.6	0.00144317		2380.59	-0.01214968		2970.6	-0.00978874		3560.6	-0.00097699		4150.6	-0.01167988
610.8	0.07719253		1200.79	0.01421287		1790.8	0.00179928		2380.79	-0.01170285		2970.8	-0.01031873		3560.8	-0.00064175		4150.8	-0.01205009
611	0.07756823		1200.99	0.01420831		1791	0.00180553		2380.99	-0.01074982		2971	-0.01046409		3561	-0.00113052		4151	-0.01306382
611.2	0.07814241		1201.19	0.01504994		1791.2	0.00166643		2381.19	-0.01052465		2971.2	-0.01069282		3561.2	-0.00070658		4151.2	-0.01288632
611.4	0.07806047		1201.39	0.01429057		1791.4	0.00119394		2381.39	-0.01016836		2971.4	-0.01049399		3561.4	-0.0013099		4151.4	-0.01316155
611.6	0.07829057		1201.59	0.01327034		1791.6	0.00098785		2381.59	-0.01041475		2971.6	-0.01063831		3561.6	-0.00192914		4151.6	-0.01289693
611.8	0.07846269		1201.79	0.014136		1791.8	-0.00018703		2381.79	-0.01059657		2971.8	-0.01103547		3561.8	-0.00145091		4151.8	-0.01266016
612	0.07820727		1201.99	0.01393839		1792	0.00038778		2381.99	-0.01033262		2972	-0.01110574		3562	-0.00163619		4152	-0.013631
612.2	0.07821766		1202.19	0.01325278		1792.2	0.00037717		2382.19	-0.00977057		2972.2	-0.01080247		3562.2	-0.00247133		4152.2	-0.0137934
612.4	0.07869396		1202.39	0.01181155		1792.4	-0.00023078		2382.39	-0.00968296		2972.4	-0.01092864		3562.4	-0.00223991		4152.4	-0.01372097
612.6	0.07860325		1202.59	0.01145935		1792.6	-0.00123915		2382.59	-0.00892095		2972.6	-0.01075586		3562.6	-0.00170007		4152.6	-0.01329345
612.8	0.07962983		1202.79	0.0110393		1792.8	-0.00172225		2382.79	-0.00838777		2972.8	-0.01123096		3562.8	-0.00182412		4152.8	-0.01319553
613	0.08050732		1202.99	0.0104258		1793	-0.00200708		2382.99	-0.00881356		2973	-0.01117188		3563	-0.00205169		4153	-0.01239147
613.2	0.08128521		1203.19	0.01000128		1793.2	-0.00337035		2383.19	-0.01008547		2973.2	-0.01040458		3563.2	-0.00157429		4153.2	-0.01194377
613.4	0.08018648		1203.39	0.00957079		1793.4	-0.00440038		2383.39	-0.01050171		2973.4	-0.01045013		3563.4	-0.00125101		4153.4	-0.0106145
613.6	0.07942084		1203.59	0.00980921		1793.6	-0.00488421		2383.59	-0.01161579		2973.6	-0.00975211		3563.6	-0.00017173		4153.6	-0.01050343
613.8	0.07949987		1203.79	0.01065144		1793.8	-0.00429799		2383.79	-0.01221562		2973.8	-0.00979882		3563.8	-0.00025943		4153.8	-0.00913808
614	0.0791107		1203.99	0.01158599		1794	-0.00491393		2383.99	-0.01223304		2974	-0.00979784		3564	0.00072567		4154	-0.00881482
614.2	0.07861675		1204.19	0.01218142		1794.2	-0.00410092		2384.19	-0.0133288		2974.2	-0.0102367		3564.2	0.00089154		4154.2	-0.00872951
614.4	0.07796986		1204.39	0.01295738		1794.4	-0.00319686		2384.39	-0.01365168		2974.4	-0.01176909		3564.4	0.00062777		4154.4	-0.00932109
614.6	0.07773401		1204.59	0.01358321		1794.6	-0.00384392		2384.59	-0.01406888		2974.6	-0.011801		3564.6	0.00117657		4154.6	-0.00960482
614.8	0.07872012		1204.79	0.01367171		1794.8	-0.00462824		2384.79	-0.01371279		2974.8	-0.01225524		3564.8	0.00066983		4154.8	-0.01041923
615	0.07914858		1204.99	0.0141946		1795	-0.00414548		2384.99	-0.01394027		2975	-0.01233946		3565	0.00024376		4155	-0.01083342
615.2	0.07938848		1205.19	0.01441123		1795.2	-0.00396942		2385.19	-0.01387735		2975.2	-0.01267532		3565.2	0.00115425		4155.2	-0.01146498
615.4	0.07877304		1205.39	0.01354924		1795.4	-0.00405561		2385.39	-0.01418826		2975.4	-0.01222496		3565.4	0.00060965		4155.4	-0.01132613
615.6	0.0773341		1205.59	0.01415372		1795.6	-0.0044964		2385.59	-0.01383001		2975.6	-0.01251389		3565.6	0.00027164		4155.6	-0.01165189
615.8	0.0764054		1205.79	0.01402622		1795.8	-0.0044546		2385.79	-0.01425382		2975.8	-0.01264082		3565.8	0.00030749		4155.8	-0.01232708
616	0.07669536		1205.99	0.01223426		1796	-0.00318902		2385.99	-0.01250212		2976	-0.01218114		3566	-0.00013917		4156	-0.01215318
616.2	0.07582816		1206.19	0.0119489		1796.2	-0.00248488		2386.19	-0.01163616		2976.2	-0.01297823		3566.2	-0.00113522		4156.2	-0.01212257
616.4	0.07588635		1206.39	0.01215076		1796.4	-0.00243037		2386.39	-0.01110235		2976.4	-0.0125274		3566.4	-0.0019357		4156.4	-0.01243239
616.6	0.07558096		1206.59	0.01302283		1796.6	-0.00199144		2386.59	-0.01029937		2976.6	-0.0120408		3566.6	-0.0025848		4156.6	-0.01158173
616.8	0.07496993		1206.79	0.01313565		1796.8	-0.001736		2386.79	-0.01057328		2976.8	-0.01196467		3566.8	-0.00384257		4156.8	-0.01090988
617	0.07452868		1206.99	0.01309885		1797	-0.00255282		2386.99	-0.01006665		2977	-0.01148856		3567	-0.00364945		4157	-0.0094064
617.2	0.07405081		1207.19	0.01294851		1797.2	-0.00304162		2387.19	-0.00950668		2977.2	-0.01068713		3567.2	-0.0026916		4157.2	-0.00783232
617.4	0.07370576		1207.39	0.01244144		1797.4	-0.00316388		2387.39	-0.0093826		2977.4	-0.01117084		3567.4	-0.00224717		4157.4	-0.00643594
617.6	0.07525948		1207.59	0.01175941		1797.6	-0.00306615		2387.59	-0.00987603		2977.6	-0.01126029		3567.6	-0.00159999		4157.6	-0.00565703
617.8	0.07640981		1207.79	0.01222308		1797.8	-0.00273049		2387.79	-0.01120327		2977.8	-0.01163826		3567.8	-0.00260699		4157.8	-0.00524483
618	0.07618285		1207.99	0.01242074		1798	-0.00217614		2387.99	-0.01136647		2978	-0.01114067		3568	-0.00210099		4158	-0.00544751
618.2	0.07592125		1208.19	0.01122462		1798.2	-0.00160238		2388.19	-0.01287026		2978.2	-0.01171848		3568.2	-0.00213993		4158.2	-0.00608346
618.4	0.07607009		1208.39	0.0111055		1798.4	-0.00243808		2388.39	-0.01304326		2978.4	-0.01151546		3568.4	-0.00173666		4158.4	-0.00680476
618.6	0.07701378		1208.59	0.01146167		1798.6	-0.00313737		2388.59	-0.01369906		2978.6	-0.01098445		3568.6	-0.00135509		4158.6	-0.00715892
618.8	0.07789209		1208.79	0.01100146		1798.8	-0.00355346		2388.79	-0.0138334		2978.8	-0.01055356		3568.8	-0.00173361		4158.8	-0.0081685
619	0.07772544		1208.99	0.01221559		1799	-0.00419946		2388.99	-0.01445969		2979	-0.01028746		3569	-0.00165779		4159	-0.00889651
619.2	0.07713618		1209.19	0.01284394		1799.2	-0.00397469		2389.19	-0.01429428		2979.2	-0.01022455		3569.2	-0.001498		4159.2	-0.0100158
619.4	0.07671822		1209.39	0.01296699		1799.4	-0.0045108		2389.39	-0.01435966		2979.4	-0.01002529		3569.4	-0.00263852		4159.4	-0.01007818
619.6	0.07662924		1209.59	0.01317902		1799.6	-0.00436753		2389.59	-0.01388872		2979.6	-0.01103687		3569.6	-0.00347132		4159.6	-0.0103166
619.8	0.07742866		1209.79	0.01334514		1799.8	-0.00397139		2389.79	-0.01372759		2979.8	-0.01041578		3569.8	-0.00306783		4159.8	-0.0106268
620	0.07813051		1209.99	0.01221538		1800	-0.00262663		2389.99	-0.01172608		2980	-0.01096883		3570	-0.0030121		4160	-0.01024497
620.2	0.07793528		1210.19	0.01359421		1800.2	-0.00160156		2390.19	-0.01172697		2980.2	-0.01126496		3570.2	-0.00375018		4160.2	-0.0117868
620.4	0.07850001		1210.39	0.0139405		1800.4	-0.00120733		2390.39	-0.01206547		2980.4	-0.01069732		3570.4	-0.00490742		4160.4	-0.01185014
620.6	0.07838575		1210.59	0.01385516		1800.6	-0.00112539		2390.59	-0.01184785		2980.6	-0.01088781		3570.6	-0.00464884		4160.6	-0.01094385
620.8	0.07864827		1210.79	0.01312727		1800.8	-0.00157517		2390.79	-0.01167566		2980.8	-0.0104648		3570.8	-0.00499259		4160.8	-0.01048733
621	0.07894791		1210.99	0.01206594		1801	-0.00226218		2390.99	-0.01031666		2981	-0.01046549		3571	-0.00439691		4161	-0.01074803
621.2	0.07909339		1211.19	0.01135031		1801.2	-0.00266239		2391.19	-0.01092364		2981.2	-0.01015275		3571.2	-0.00424035		4161.2	-0.01082878
621.4	0.07940155		1211.39	0.01084166		1801.4	-0.00278836		2391.39	-0.01169274		2981.4	-0.01031742		3571.4	-0.00427981		4161.4	-0.01145004
621.6	0.07950339		1211.59	0.01014864		1801.6	-0.00336608		2391.59	-0.01169613		2981.6	-0.00955527		3571.6	-0.00552549		4161.6	-0.01179719
621.8	0.07894207		1211.79	0.01092675		1801.8	-0.00353928		2391.79	-0.01243174		2981.8	-0.00989452		3571.8	-0.00652089		4161.8	-0.01217076
622	0.07813895		1211.99	0.01044348		1802	-0.00409215		2391.99	-0.01194987		2982	-0.00978251		3572	-0.00632878		4162	-0.0121576
622.2	0.07748235		1212.19	0.00983178		1802.2	-0.00549804		2392.19	-0.01274039		2982.2	-0.01010015		3572.2	-0.00615426		4162.2	-0.01223588
622.4	0.07776372		1212.39	0.01024614		1802.4	-0.00641499		2392.39	-0.01178326		2982.4	-0.00925726		3572.4	-0.00592262		4162.4	-0.01202021
622.6	0.07848125		1212.59	0.01021953		1802.6	-0.00546154		2392.59	-0.01268878		2982.6	-0.00826901		3572.6	-0.00577859		4162.6	-0.01215265
622.8	0.07862679		1212.79	0.00955324		1802.8	-0.00576643		2392.79	-0.01363084		2982.8	-0.00713098		3572.8	-0.00653136		4162.8	-0.01265542
623	0.0785732		1212.99	0.01059412		1803	-0.00476648		2392.99	-0.01314882		2983	-0.00797819		3573	-0.00635827		4163	-0.01249767
623.2	0.07835977		1213.19	0.01067602		1803.2	-0.00364214		2393.19	-0.01257537		2983.2	-0.00814594		3573.2	-0.00728905		4163.2	-0.01194365
623.4	0.07893976		1213.39	0.01016768		1803.4	-0.00361699		2393.39	-0.01245617		2983.4	-0.00832168		3573.4	-0.00674825		4163.4	-0.01149593
623.6	0.07853306		1213.59	0.00992856		1803.6	-0.00282072		2393.59	-0.01172289		2983.6	-0.00911346		3573.6	-0.00571488		4163.6	-0.01084993
623.8	0.07853913		1213.79	0.01016762		1803.8	-0.0028071		2393.79	-0.01100005		2983.8	-0.00922162		3573.8	-0.00470712		4163.8	-0.01039775
624	0.07775443		1213.99	0.0086405		1804	-0.00146393		2393.99	-0.01077289		2984	-0.01042839		3574	-0.00382185		4164	-0.01043707
624.2	0.07818441		1214.19	0.00920578		1804.2	-0.00117782		2394.19	-0.01092279		2984.2	-0.01104431		3574.2	-0.00322127		4164.2	-0.01026003
624.4	0.07803475		1214.39	0.00854174		1804.4	-0.00147775		2394.39	-0.01104184		2984.4	-0.01159445		3574.4	-0.00286322		4164.4	-0.00998717
624.6	0.07786149		1214.59	0.00877766		1804.6	-0.00251724		2394.59	-0.01168668		2984.6	-0.01175802		3574.6	-0.0015368		4164.6	-0.00983627
624.8	0.07751228		1214.79	0.00841382		1804.8	-0.00330959		2394.79	-0.0116798		2984.8	-0.01186546		3574.8	-0.00144059		4164.8	-0.00984287
625	0.07654437		1214.99	0.00809854		1805	-0.00377187		2394.99	-0.01194823		2985	-0.01214451		3575	-0.00118004		4165	-0.01004801
625.2	0.07645932		1215.19	0.00840909		1805.2	-0.0046926		2395.19	-0.01213922		2985.2	-0.01280218		3575.2	-0.0005462		4165.2	-0.01010701
625.4	0.07619803		1215.39	0.00876083		1805.4	-0.00479883		2395.39	-0.01263233		2985.4	-0.01310592		3575.4	-0.00116502		4165.4	-0.0101651
625.6	0.07603186		1215.59	0.00993119		1805.6	-0.00561921		2395.59	-0.01229651		2985.6	-0.01258911		3575.6	-0.00223695		4165.6	-0.01007684
625.8	0.07609255		1215.79	0.01104471		1805.8	-0.00644454		2395.79	-0.01326323		2985.8	-0.01259731		3575.8	-0.0024697		4165.8	-0.01092598
626	0.07621152		1215.99	0.01122007		1806	-0.00809439		2395.99	-0.01316964		2986	-0.01232988		3576	-0.00199026		4166	-0.01081302
626.2	0.07726981		1216.19	0.01079791		1806.2	-0.00870072		2396.19	-0.01368827		2986.2	-0.01255526		3576.2	-0.0024425		4166.2	-0.01118313
626.4	0.07740264		1216.39	0.01085842		1806.4	-0.00851093		2396.39	-0.01370602		2986.4	-0.01164308		3576.4	-0.00301825		4166.4	-0.01184877
626.6	0.07753986		1216.59	0.01072692		1806.6	-0.00799718		2396.59	-0.01443652		2986.6	-0.0112629		3576.6	-0.00422281		4166.6	-0.01225204
626.8	0.07819187		1216.79	0.01094954		1806.8	-0.00790251		2396.79	-0.01467356		2986.8	-0.01150861		3576.8	-0.00412843		4166.8	-0.01196528
627	0.07814364		1216.99	0.01176631		1807	-0.00722297		2396.99	-0.01365227		2987	-0.01134422		3577	-0.00361918		4167	-0.01305672
627.2	0.07751735		1217.19	0.01155586		1807.2	-0.00703086		2397.19	-0.01364168		2987.2	-0.01085763		3577.2	-0.00408047		4167.2	-0.01297738
627.4	0.0773904		1217.39	0.01090777		1807.4	-0.00609807		2397.39	-0.01294885		2987.4	-0.01071872		3577.4	-0.0034094		4167.4	-0.01306671
627.6	0.07670736		1217.59	0.01068889		1807.6	-0.00466131		2397.59	-0.01255511		2987.6	-0.01089133		3577.6	-0.00353565		4167.6	-0.01246237
627.8	0.0772817		1217.79	0.01055089		1807.8	-0.00421082		2397.79	-0.01196036		2987.8	-0.0102663		3577.8	-0.00294036		4167.8	-0.01220003
628	0.07655097		1217.99	0.00985261		1808	-0.00380168		2397.99	-0.01164795		2988	-0.01064576		3578	-0.00208499		4168	-0.01246732
628.2	0.0770603		1218.19	0.01038242		1808.2	-0.00367085		2398.19	-0.01104199		2988.2	-0.01084235		3578.2	-0.00124361		4168.2	-0.01234873
628.4	0.07714915		1218.39	0.0106777		1808.4	-0.00431401		2398.39	-0.01109928		2988.4	-0.01077416		3578.4	-0.00068399		4168.4	-0.01256319
628.6	0.07767244		1218.59	0.01101852		1808.6	-0.0043443		2398.59	-0.01204801		2988.6	-0.01038128		3578.6	-0.0002887		4168.6	-0.01156376
628.8	0.07767189		1218.79	0.0105552		1808.8	-0.00353663		2398.79	-0.01179561		2988.8	-0.01002986		3578.8	-0.00068275		4168.8	-0.01093994
629	0.07731827		1218.99	0.01069393		1809	-0.00349072		2398.99	-0.01223036		2989	-0.01019539		3579	-0.00052974		4169	-0.01157664
629.2	0.0770503		1219.19	0.0110197		1809.2	-0.00441184		2399.19	-0.01271175		2989.2	-0.0108668		3579.2	-0.00026461		4169.2	-0.01183684
629.4	0.07718217		1219.39	0.01194139		1809.4	-0.00484118		2399.39	-0.01363579		2989.4	-0.01065071		3579.4	-0.00102309		4169.4	-0.01216218
629.6	0.07742095		1219.59	0.01265055		1809.6	-0.00563279		2399.59	-0.01448074		2989.6	-0.01066862		3579.6	-0.00106773		4169.6	-0.01220306
629.8	0.07704734		1219.79	0.01211607		1809.8	-0.00666388		2399.79	-0.0151775		2989.8	-0.0113372		3579.8	-0.00169378		4169.8	-0.01263554
630	0.07767743		1219.99	0.01205392		1810	-0.00733913		2399.99	-0.01526779		2990	-0.01265668		3580	-0.0022837		4170	-0.01162531
630.2	0.07778585		1220.19	0.01144283		1810.2	-0.00753863		2400.19	-0.01602687		2990.2	-0.01398877		3580.2	-0.00334552		4170.2	-0.01170834
630.4	0.07718276		1220.39	0.01191584		1810.4	-0.00745256		2400.39	-0.01615612		2990.4	-0.01359766		3580.4	-0.00350406		4170.4	-0.0114099
630.6	0.0769947		1220.59	0.01250352		1810.6	-0.00730615		2400.59	-0.0161828		2990.6	-0.0138796		3580.6	-0.00380094		4170.6	-0.01111543
630.8	0.07666123		1220.79	0.01217281		1810.8	-0.00614067		2400.79	-0.01601744		2990.8	-0.01387242		3580.8	-0.00307261		4170.8	-0.01064461
631	0.07621266		1220.99	0.01153753		1811	-0.004882		2400.99	-0.01598939		2991	-0.01373768		3581	-0.00263545		4171	-0.01136475
631.2	0.0761363		1221.19	0.01099294		1811.2	-0.00368518		2401.19	-0.01599396		2991.2	-0.01369773		3581.2	-0.00241812		4171.2	-0.01063535
631.4	0.07627785		1221.39	0.01009155		1811.4	-0.00285138		2401.39	-0.01513539		2991.4	-0.01441417		3581.4	-0.00280653		4171.4	-0.01072301
631.6	0.07641355		1221.59	0.01025365		1811.6	-0.00138548		2401.59	-0.01441947		2991.6	-0.01358113		3581.6	-0.00197408		4171.6	-0.01081228
631.8	0.07565355		1221.79	0.01004317		1811.8	-0.00226087		2401.79	-0.01347097		2991.8	-0.01317283		3581.8	-0.00038865		4171.8	-0.01106271
632	0.07469311		1221.99	0.00989771		1812	-0.00322603		2401.99	-0.01322616		2992	-0.01261019		3582	-0.00004015		4172	-0.01061985
632.2	0.07456409		1222.19	0.00921589		1812.2	-0.00341425		2402.19	-0.01281943		2992.2	-0.01163005		3582.2	0.00083658		4172.2	-0.01038097
632.4	0.07500054		1222.39	0.0089386		1812.4	-0.00393484		2402.39	-0.01260061		2992.4	-0.01117175		3582.4	0.00138902		4172.4	-0.00915159
632.6	0.07440932		1222.59	0.00920494		1812.6	-0.00392124		2402.59	-0.01224175		2992.6	-0.01096849		3582.6	0.00135148		4172.6	-0.00858359
632.8	0.07434935		1222.79	0.00931804		1812.8	-0.00435615		2402.79	-0.01165336		2992.8	-0.01093973		3582.8	0.00119546		4172.8	-0.0098561
633	0.07465627		1222.99	0.00946286		1813	-0.0063219		2402.99	-0.01206835		2993	-0.01079833		3583	0.00157448		4173	-0.0102856
633.2	0.07489416		1223.19	0.00900012		1813.2	-0.00723442		2403.19	-0.01207044		2993.2	-0.01052426		3583.2	0.00160826		4173.2	-0.00963802
633.4	0.0755222		1223.39	0.00879462		1813.4	-0.00804315		2403.39	-0.01150884		2993.4	-0.01061234		3583.4	0.00127637		4173.4	-0.01003426
633.6	0.07549019		1223.59	0.0082455		1813.6	-0.00890183		2403.59	-0.01237666		2993.6	-0.01131565		3583.6	0.00096015		4173.6	-0.00994633
633.8	0.0754653		1223.79	0.00869928		1813.8	-0.01003244		2403.79	-0.01217114		2993.8	-0.01174811		3583.8	0.00014452		4173.8	-0.01009185
634	0.07562765		1223.99	0.0094485		1814	-0.01031411		2403.99	-0.01302482		2994	-0.01212233		3584	-0.00013765		4174	-0.01006796
634.2	0.07512485		1224.19	0.00926189		1814.2	-0.0098606		2404.19	-0.01280535		2994.2	-0.01200975		3584.2	-0.00076681		4174.2	-0.00995103
634.4	0.07567262		1224.39	0.00911263		1814.4	-0.00962796		2404.39	-0.01209481		2994.4	-0.0117957		3584.4	-0.00179374		4174.4	-0.01025447
634.6	0.07504522		1224.59	0.00845192		1814.6	-0.00944787		2404.59	-0.0125215		2994.6	-0.01159918		3584.6	-0.0019475		4174.6	-0.01062666
634.8	0.07547426		1224.79	0.00701267		1814.8	-0.00808906		2404.79	-0.01214821		2994.8	-0.01195974		3584.8	-0.00177872		4174.8	-0.01119213
635	0.0758131		1224.99	0.00676447		1815	-0.00756935		2404.99	-0.013194		2995	-0.01251475		3585	-0.00226226		4175	-0.01161412
635.2	0.07537898		1225.19	0.00685479		1815.2	-0.00723389		2405.19	-0.01263946		2995.2	-0.01229395		3585.2	-0.00271839		4175.2	-0.01174877
635.4	0.07423399		1225.39	0.00702397		1815.4	-0.00605355		2405.39	-0.01215493		2995.4	-0.01351656		3585.4	-0.00338118		4175.4	-0.01208691
635.6	0.07367323		1225.59	0.00626708		1815.6	-0.00466691		2405.59	-0.01172695		2995.6	-0.01269919		3585.6	-0.00317594		4175.6	-0.01185419
635.8	0.07277904		1225.79	0.00612803		1815.8	-0.00559798		2405.79	-0.01246392		2995.8	-0.01267555		3585.8	-0.00330463		4175.8	-0.01115652
636	0.07292912		1225.99	0.00585486		1816	-0.00559435		2405.99	-0.01294176		2996	-0.01186797		3586	-0.0040465		4176	-0.01037326
636.2	0.07354584		1226.19	0.00457165		1816.2	-0.00429757		2406.19	-0.01308062		2996.2	-0.01176873		3586.2	-0.00391991		4176.2	-0.00988086
636.4	0.07446435		1226.39	0.00556919		1816.4	-0.00355085		2406.39	-0.01314074		2996.4	-0.01180449		3586.4	-0.00450866		4176.4	-0.01013148
636.6	0.07445933		1226.59	0.00650229		1816.6	-0.00378202		2406.59	-0.0141212		2996.6	-0.01128117		3586.6	-0.00383094		4176.6	-0.01033227
636.8	0.07596075		1226.79	0.00658701		1816.8	-0.00420094		2406.79	-0.01496085		2996.8	-0.01148526		3586.8	-0.00327998		4176.8	-0.01046692
637	0.07720071		1226.99	0.00708178		1817	-0.00489995		2406.99	-0.01612476		2997	-0.01074836		3587	-0.00208313		4177	-0.00970203
637.2	0.07744342		1227.19	0.00735776		1817.2	-0.00502912		2407.19	-0.01625256		2997.2	-0.01090175		3587.2	-0.00169582		4177.2	-0.00925734
637.4	0.07788169		1227.39	0.00845977		1817.4	-0.0055995		2407.39	-0.01712588		2997.4	-0.01087668		3587.4	-0.00187979		4177.4	-0.01018021
637.6	0.07804628		1227.59	0.0096373		1817.6	-0.00611224		2407.59	-0.01804811		2997.6	-0.01134544		3587.6	-0.00127461		4177.6	-0.01157258
637.8	0.07869151		1227.79	0.01054957		1817.8	-0.00654756		2407.79	-0.01896812		2997.8	-0.01122305		3587.8	-0.00133471		4177.8	-0.01213551
638	0.07877882		1227.99	0.01054404		1818	-0.00564364		2407.99	-0.0189028		2998	-0.01178626		3588	-0.00172105		4178	-0.01247324
638.2	0.07903531		1228.19	0.01052463		1818.2	-0.00550712		2408.19	-0.01787237		2998.2	-0.01209295		3588.2	-0.00216345		4178.2	-0.01254258
638.4	0.07983103		1228.39	0.00940805		1818.4	-0.00578828		2408.39	-0.01804611		2998.4	-0.01157899		3588.4	-0.00272144		4178.4	-0.01286987
638.6	0.07860599		1228.59	0.00855584		1818.6	-0.00600744		2408.59	-0.01777883		2998.6	-0.01122673		3588.6	-0.0026792		4178.6	-0.01273694
638.8	0.07867939		1228.79	0.0078424		1818.8	-0.00606176		2408.79	-0.01735577		2998.8	-0.01207061		3588.8	-0.00272744		4178.8	-0.01272384
639	0.07781775		1228.99	0.00801518		1819	-0.00678456		2408.99	-0.01705629		2999	-0.01245287		3589	-0.00350486		4179	-0.0126682
639.2	0.07686998		1229.19	0.00737155		1819.2	-0.00726457		2409.19	-0.01507959		2999.2	-0.01217034		3589.2	-0.00384932		4179.2	-0.01208848
639.4	0.07634858		1229.39	0.00636719		1819.4	-0.00651197		2409.39	-0.01356598		2999.4	-0.01245977		3589.4	-0.00386767		4179.4	-0.01235395
639.6	0.07605142		1229.59	0.0053408		1819.6	-0.00698671		2409.59	-0.01272892		2999.6	-0.01173838		3589.6	-0.00405951		4179.6	-0.01245131
639.8	0.07562165		1229.79	0.00548366		1819.8	-0.00686337		2409.79	-0.01302789		2999.8	-0.01126006		3589.8	-0.00435088		4179.8	-0.01256117
640	0.07491508		1229.99	0.00568668		1820	-0.0066238		2409.99	-0.01273315		3000	-0.0104929		3590	-0.00493143		4180	-0.01294108
640.2	0.07413918		1230.19	0.00604074		1820.2	-0.00551781		2410.19	-0.01280186		3000.2	-0.01005269		3590.2	-0.00459414		4180.2	-0.01249466
640.4	0.07313879		1230.39	0.00768894		1820.4	-0.00669365		2410.39	-0.01253476		3000.4	-0.00986748		3590.4	-0.00446727		4180.4	-0.01282195
640.6	0.07240974		1230.59	0.00862938		1820.6	-0.00734094		2410.59	-0.01366681		3000.6	-0.0099154		3590.6	-0.00265586		4180.6	-0.01123351
640.8	0.07313434		1230.79	0.00896034		1820.8	-0.00785793		2410.79	-0.0137952		3000.8	-0.01037274		3590.8	-0.0018539		4180.8	-0.01096167
641	0.07376805		1230.99	0.00965354		1821	-0.00825765		2410.99	-0.01487425		3001	-0.00939349		3591	-0.00095658		4181	-0.01142792
641.2	0.07368666		1231.19	0.01122139		1821.2	-0.00860241		2411.19	-0.01512918		3001.2	-0.00966576		3591.2	-0.00201662		4181.2	-0.01187536
641.4	0.07353662		1231.39	0.01240291		1821.4	-0.00873746		2411.39	-0.01529661		3001.4	-0.00992648		3591.4	-0.00237266		4181.4	-0.01237946
641.6	0.07341779		1231.59	0.01266233		1821.6	-0.00935924		2411.59	-0.01572418		3001.6	-0.01113778		3591.6	-0.00147996		4181.6	-0.01400377
641.8	0.07328196		1231.79	0.01303792		1821.8	-0.00927788		2411.79	-0.01596152		3001.8	-0.01200215		3591.8	-0.00251331		4181.8	-0.01405026
642	0.07330158		1231.99	0.01310115		1822	-0.00916126		2411.99	-0.01526315		3002	-0.01292159		3592	-0.00298509		4182	-0.01415563
642.2	0.0728125		1232.19	0.01308246		1822.2	-0.00952004		2412.19	-0.01499758		3002.2	-0.01312665		3592.2	-0.00344127		4182.2	-0.01479276
642.4	0.07281051		1232.39	0.01255828		1822.4	-0.0093233		2412.39	-0.0144838		3002.4	-0.01299675		3592.4	-0.00398245		4182.4	-0.01476521
642.6	0.07245065		1232.59	0.01269232		1822.6	-0.01003478		2412.59	-0.01367588		3002.6	-0.01396805		3592.6	-0.00402345		4182.6	-0.0150142
642.8	0.07292961		1232.79	0.01200812		1822.8	-0.01000091		2412.79	-0.01286832		3002.8	-0.01508		3592.8	-0.00398266		4182.8	-0.01541339
643	0.07235547		1232.99	0.01186679		1823	-0.01059399		2412.99	-0.01156124		3003	-0.01427913		3593	-0.00458948		4183	-0.01629427
643.2	0.07224138		1233.19	0.0106175		1823.2	-0.01039047		2413.19	-0.01057418		3003.2	-0.01461746		3593.2	-0.00459888		4183.2	-0.01534115
643.4	0.07253853		1233.39	0.01001618		1823.4	-0.00925314		2413.39	-0.01077381		3003.4	-0.01548213		3593.4	-0.00414578		4183.4	-0.01577026
643.6	0.07303		1233.59	0.00945851		1823.6	-0.00881787		2413.59	-0.01126436		3003.6	-0.01520811		3593.6	-0.00440113		4183.6	-0.0156144
643.8	0.07317539		1233.79	0.00947903		1823.8	-0.00779651		2413.79	-0.01158312		3003.8	-0.01477023		3593.8	-0.00501378		4183.8	-0.01432521
644	0.07235707		1233.99	0.01026007		1824	-0.00638835		2413.99	-0.01211729		3004	-0.01452341		3594	-0.00481163		4184	-0.01312857
644.2	0.07174793		1234.19	0.01042244		1824.2	-0.00513758		2414.19	-0.01366157		3004.2	-0.01366461		3594.2	-0.00438122		4184.2	-0.01211958
644.4	0.07151827		1234.39	0.010022		1824.4	-0.00543809		2414.39	-0.01476965		3004.4	-0.01322582		3594.4	-0.00364108		4184.4	-0.01204508
644.6	0.07241096		1234.59	0.00987141		1824.6	-0.00398087		2414.59	-0.01668179		3004.6	-0.01355422		3594.6	-0.00217612		4184.6	-0.01096443
644.8	0.07265251		1234.79	0.00955485		1824.8	-0.00375339		2414.79	-0.0173192		3004.8	-0.01351009		3594.8	-0.00220175		4184.8	-0.01090327
645	0.07287527		1234.99	0.00926569		1825	-0.00355379		2414.99	-0.01727878		3005	-0.01341876		3595	-0.00271509		4185	-0.01070124
645.2	0.07249458		1235.19	0.00958421		1825.2	-0.00359936		2415.19	-0.01614042		3005.2	-0.01354387		3595.2	-0.0034013		4185.2	-0.01030535
645.4	0.07266632		1235.39	0.00875775		1825.4	-0.00478721		2415.39	-0.01608261		3005.4	-0.01397663		3595.4	-0.00337473		4185.4	-0.01043267
645.6	0.07237953		1235.59	0.00848341		1825.6	-0.00515478		2415.59	-0.01585205		3005.6	-0.01439831		3595.6	-0.0032478		4185.6	-0.0111024
645.8	0.07217478		1235.79	0.00878861		1825.8	-0.00492049		2415.79	-0.01509849		3005.8	-0.01335272		3595.8	-0.004437		4185.8	-0.01169671
646	0.07250215		1235.99	0.00942222		1826	-0.00527394		2415.99	-0.0143025		3006	-0.0132947		3596	-0.0049026		4186	-0.01215642
646.2	0.07295895		1236.19	0.00996254		1826.2	-0.00544035		2416.19	-0.01364053		3006.2	-0.01264739		3596.2	-0.00576058		4186.2	-0.01295238
646.4	0.07392053		1236.39	0.00947745		1826.4	-0.00545553		2416.39	-0.0126321		3006.4	-0.01246257		3596.4	-0.00536637		4186.4	-0.01284939
646.6	0.07431007		1236.59	0.00921315		1826.6	-0.00593265		2416.59	-0.01204375		3006.6	-0.01307804		3596.6	-0.00549093		4186.6	-0.01377114
646.8	0.07455862		1236.79	0.00870434		1826.8	-0.00668369		2416.79	-0.01123267		3006.8	-0.01279806		3596.8	-0.00598994		4186.8	-0.01465226
647	0.07515411		1236.99	0.00861212		1827	-0.00758631		2416.99	-0.01158442		3007	-0.01158343		3597	-0.00609627		4187	-0.01445954
647.2	0.07596963		1237.19	0.00837051		1827.2	-0.00729931		2417.19	-0.01165679		3007.2	-0.01196374		3597.2	-0.00535019		4187.2	-0.01419281
647.4	0.07701833		1237.39	0.00858033		1827.4	-0.00719212		2417.39	-0.01242369		3007.4	-0.01200883		3597.4	-0.00590773		4187.4	-0.01473227
647.6	0.07793492		1237.59	0.00828393		1827.6	-0.00703613		2417.59	-0.01273501		3007.6	-0.01096372		3597.6	-0.005677		4187.6	-0.01443244
647.8	0.07754837		1237.79	0.00935926		1827.8	-0.00672376		2417.79	-0.01311548		3007.8	-0.01026533		3597.8	-0.00603492		4187.8	-0.0138068
648	0.07708839		1237.99	0.00983755		1828	-0.0057237		2417.99	-0.01402615		3008	-0.0098217		3598	-0.00574585		4188	-0.01405826
648.2	0.07678721		1238.19	0.00974563		1828.2	-0.0058322		2418.19	-0.01509111		3008.2	-0.00913789		3598.2	-0.00577867		4188.2	-0.01439965
648.4	0.07658682		1238.39	0.00955036		1828.4	-0.00609454		2418.39	-0.01524815		3008.4	-0.00981663		3598.4	-0.00525603		4188.4	-0.01461653
648.6	0.07674935		1238.59	0.00976142		1828.6	-0.00589003		2418.59	-0.01541538		3008.6	-0.01076052		3598.6	-0.0050349		4188.6	-0.01409197
648.8	0.075854		1238.79	0.00963705		1828.8	-0.00652027		2418.79	-0.01466145		3008.8	-0.01107145		3598.8	-0.00553596		4188.8	-0.01426661
649	0.07574565		1238.99	0.00916853		1829	-0.00691008		2418.99	-0.01391868		3009	-0.0111951		3599	-0.00580477		4189	-0.01427682
649.2	0.07558531		1239.19	0.00901917		1829.2	-0.00745348		2419.19	-0.01400803		3009.2	-0.01114005		3599.2	-0.0057184		4189.2	-0.01447865
649.4	0.07534089		1239.39	0.00896932		1829.4	-0.00846783		2419.39	-0.01450713		3009.4	-0.01152334		3599.4	-0.00583182		4189.4	-0.01460748
649.6	0.07458581		1239.59	0.00922857		1829.6	-0.00828355		2419.59	-0.01392681		3009.6	-0.01158583		3599.6	-0.00582876		4189.6	-0.01456305
649.8	0.07441272		1239.79	0.00946108		1829.8	-0.00857517		2419.79	-0.01393246		3009.8	-0.01129977		3599.8	-0.00615307		4189.8	-0.01511971
