# Supplementary material for: Functional development of a V3/glycan-specific broadly neutralizing antibody isolated from a case of HIV superinfection
Source: eLife journal article supplement (doi:10.7554/elife.68110), 2021-07-15
Supplement: fig2-data2 [file G5.xls]

Vers 3.43 Data Simulation
Conc1	7.813E-09	7.813E-09	7.813E-09	7.813E-09	7.813E-09	7.813E-09
Start1	290	879.99	1470.01	2060	2650	3240
Stop1	649.8	1239.79	1829.81	2419.8	3009.8	3599.79
Time1	Data1	Sim1	Time2	Data2	Sim2	Time3	Data3	Sim3	Time4	Data4	Sim4	Time5	Data5	Sim5	Time6	Data6	Sim6
290	-0.00256471		879.99	-0.00343095		1470.01	-0.00274718		2060	0.00320205		2650	-0.00303786		3240	0.00035289
290.2	-0.001998		880.19	-0.00423404		1470.21	-0.00280629		2060.2	0.00216281		2650.2	-0.00334102		3240.2	0.00064231
290.4	-0.0016842		880.39	-0.00447231		1470.41	-0.00295599		2060.4	0.00117873		2650.4	-0.00387606		3240.4	0.00070735
290.6	-0.00169894		880.59	-0.00475357		1470.61	-0.0026702		2060.6	0.00054396		2650.6	-0.00387345		3240.6	0.0008394
290.8	-0.00135379		880.79	-0.00548968		1470.81	-0.00233964		2060.8	0.0000053		2650.8	-0.00385377		3240.8	0.00091153
291	-0.00119247		880.99	-0.00603857		1471.01	-0.0018056		2061	-0.00080152		2651	-0.0038086		3241	0.0014587
291.2	-0.00075607		881.19	-0.00643171		1471.21	-0.00083087		2061.2	-0.00139033		2651.2	-0.00385115		3241.2	0.00201365
291.4	-0.00127992		881.39	-0.00596473		1471.41	-0.00111576		2061.4	-0.0017629		2651.4	-0.00375761		3241.4	0.00242044
291.6	-0.00084024		881.59	-0.00573209		1471.61	-0.00100628		2061.6	-0.00218981		2651.6	-0.00365483		3241.6	0.00327918
291.8	-0.00091907		881.79	-0.00554102		1471.81	-0.00083542		2061.8	-0.00245964		2651.8	-0.00417017		3241.8	0.0035824
292	-0.00079326		881.99	-0.00569339		1472.01	-0.00062975		2062	-0.00256597		2652	-0.00449379		3242	0.00364003
292.2	-0.0005598		882.19	-0.00518967		1472.21	-0.00075884		2062.2	-0.00225429		2652.2	-0.00453784		3242.2	0.00388836
292.4	-0.00058205		882.39	-0.00398812		1472.41	-0.00097998		2062.4	-0.00179635		2652.4	-0.00470116		3242.4	0.00341626
292.6	-0.00096898		882.59	-0.00417449		1472.61	-0.0008912		2062.6	-0.00219574		2652.6	-0.00474319		3242.6	0.00347131
292.8	-0.0015107		882.79	-0.00440949		1472.81	-0.00098005		2062.8	-0.0016473		2652.8	-0.005018		3242.8	0.00386519
293	-0.00182506		882.99	-0.00388808		1473.01	-0.00156917		2063	-0.00109859		2653	-0.00519918		3243	0.00428451
293.2	-0.00147655		883.19	-0.00364013		1473.21	-0.00149502		2063.2	-0.00029407		2653.2	-0.00514299		3243.2	0.00409121
293.4	-0.00081988		883.39	-0.00350961		1473.41	-0.00159722		2063.4	0.00013322		2653.4	-0.00465831		3243.4	0.00420723
293.6	-0.00063371		883.59	-0.00330813		1473.61	-0.00218134		2063.6	0.0005236		2653.6	-0.00409377		3243.6	0.00562436
293.8	-0.00071531		883.79	-0.00323576		1473.81	-0.00220042		2063.8	0.00073095		2653.8	-0.00349481		3243.8	0.00479711
294	-0.00084799		883.99	-0.00331131		1474.01	-0.00152355		2064	0.00043349		2654	-0.00373717		3244	0.00482858
294.2	-0.00060504		884.19	-0.00333165		1474.21	-0.00152779		2064.2	-0.00052416		2654.2	-0.00323925		3244.2	0.0047551
294.4	-0.00091967		884.39	-0.00311118		1474.41	-0.0012613		2064.4	-0.00033113		2654.4	-0.00260424		3244.4	0.00442745
294.6	-0.00087737		884.59	-0.00289474		1474.61	-0.0015746		2064.6	-0.00010654		2654.6	-0.00275629		3244.6	0.00376699
294.8	0.00022682		884.79	-0.00312818		1474.81	-0.00209406		2064.8	0.00024853		2654.8	-0.00263102		3244.8	0.00316353
295	0.00139125		884.99	-0.00335806		1475.01	-0.00202227		2065	0.00011035		2655	-0.00229165		3245	0.00366229
295.2	0.00194939		885.19	-0.00277726		1475.21	-0.00320471		2065.2	0.00078862		2655.2	-0.00259025		3245.2	0.00310001
295.4	0.00205846		885.39	-0.00188063		1475.41	-0.0047862		2065.4	0.00056779		2655.4	-0.00323097		3245.4	0.0027982
295.6	0.00334555		885.59	-0.00160835		1475.61	-0.00521699		2065.6	0.00079037		2655.6	-0.00347962		3245.6	0.00248607
295.8	0.00353419		885.79	-0.00097989		1475.81	-0.00538587		2065.8	0.00100039		2655.8	-0.00472961		3245.8	0.00149648
296	0.00363193		885.99	-0.00004337		1476.01	-0.00588366		2066	0.00112593		2656	-0.0050788		3246	0.00002569
296.2	0.00343808		886.19	0.00048026		1476.21	-0.00624254		2066.2	0.00102759		2656.2	-0.00431646		3246.2	-0.00000141
296.4	0.00297852		886.39	0.00018394		1476.41	-0.00514424		2066.4	0.00122743		2656.4	-0.00400826		3246.4	-0.00030055
296.6	0.00203403		886.59	-0.00084918		1476.61	-0.0047768		2066.6	0.00042226		2656.6	-0.00410112		3246.6	-0.00007424
296.8	0.00177331		886.79	-0.0007731		1476.81	-0.00420223		2066.8	0.00008262		2656.8	-0.00412536		3246.8	-0.00010373
297	0.00190935		886.99	-0.00045145		1477.01	-0.00430838		2067	-0.00046116		2657	-0.00382637		3247	-0.00056132
297.2	0.0025073		887.19	-0.00134997		1477.21	-0.00364502		2067.2	-0.00111183		2657.2	-0.0036509		3247.2	-0.00078467
297.4	0.00221643		887.39	-0.0018009		1477.41	-0.00266385		2067.4	-0.00224444		2657.4	-0.00388399		3247.4	-0.00020283
297.6	0.00143324		887.59	-0.00220173		1477.61	-0.00138123		2067.6	-0.00313887		2657.6	-0.00313636		3247.6	-0.00025643
297.8	0.00071739		887.79	-0.00309169		1477.81	0.00002445		2067.8	-0.00373826		2657.8	-0.00354727		3247.8	-0.00109446
298	0.00059651		887.99	-0.00233286		1478.01	0.00140012		2068	-0.00440648		2658	-0.00416012		3248	-0.00009636
298.2	0.00008609		888.19	-0.00255461		1478.21	0.00187125		2068.2	-0.00430185		2658.2	-0.00325235		3248.2	-0.0002571
298.4	-0.0000239		888.39	-0.00293397		1478.41	0.00181123		2068.4	-0.00363661		2658.4	-0.003084		3248.4	-0.00055244
298.6	0.00062634		888.59	-0.00230553		1478.61	0.00155396		2068.6	-0.00304706		2658.6	-0.00393391		3248.6	-0.00070798
298.8	0.00083807		888.79	-0.00305724		1478.81	0.0012433		2068.8	-0.00175168		2658.8	-0.00361208		3248.8	0.00005061
299	0.00093497		888.99	-0.0032273		1479.01	0.00029698		2069	-0.00085571		2659	-0.00377839		3249	0.00098873
299.2	0.00006318		889.19	-0.0030081		1479.21	-0.00150234		2069.2	-0.00024616		2659.2	-0.00440794		3249.2	0.00045378
299.4	0.00030649		889.39	-0.00257716		1479.41	-0.00146761		2069.4	0.00053402		2659.4	-0.00402798		3249.4	0.0008318
299.6	0.00081315		889.59	-0.00235668		1479.61	-0.00148824		2069.6	0.00191142		2659.6	-0.00360018		3249.6	0.00114277
299.8	0.0002419		889.79	-0.00258072		1479.81	-0.00210575		2069.8	0.00282423		2659.8	-0.00366067		3249.8	0.00059797
300	0.00018417		889.99	-0.00271138		1480.01	-0.00224204		2070	0.00306072		2660	-0.00303696		3250	-0.00006873
300.2	0.00089015		890.19	-0.00420194		1480.21	-0.00257753		2070.2	0.00301241		2660.2	-0.00214665		3250.2	0.00051057
300.4	0.00118067		890.39	-0.0045912		1480.41	-0.00207341		2070.4	0.00334549		2660.4	-0.00247207		3250.4	0.0003135
300.6	0.00117751		890.59	-0.00464725		1480.61	-0.00236922		2070.6	0.00190513		2660.6	-0.00263404		3250.6	0.00146999
300.8	0.00159701		890.79	-0.00450708		1480.81	-0.00269117		2070.8	0.00153317		2660.8	-0.00283466		3250.8	0.00114568
301	0.00240667		890.99	-0.00461191		1481.01	-0.00304081		2071	0.00117501		2661	-0.00327285		3251	0.00078425
301.2	0.00342768		891.19	-0.00484783		1481.21	-0.00256805		2071.2	0.00076046		2661.2	-0.00415041		3251.2	0.00081703
301.4	0.00282374		891.39	-0.00506388		1481.41	-0.00181784		2071.4	0.00000667		2661.4	-0.00361812		3251.4	0.00103258
301.6	0.00351314		891.59	-0.00413986		1481.61	-0.00204512		2071.6	-0.00041361		2661.6	-0.00350179		3251.6	0.00117801
301.8	0.00355926		891.79	-0.0037148		1481.81	-0.0022042		2071.8	-0.00056145		2661.8	-0.00368259		3251.8	0.00171229
302	0.0045455		891.99	-0.00193444		1482.01	-0.0016951		2072	-0.0010383		2662	-0.00286648		3252	0.00247312
302.2	0.00462639		892.19	-0.00134918		1482.21	-0.00176999		2072.2	-0.0012156		2662.2	-0.00165788		3252.2	0.00168856
302.4	0.00479153		892.39	-0.00082923		1482.41	-0.00157493		2072.4	-0.00115333		2662.4	-0.0011491		3252.4	0.00256255
302.6	0.00495297		892.59	-0.00014121		1482.61	-0.0008109		2072.6	-0.00050487		2662.6	-0.00113729		3252.6	0.00318548
302.8	0.00483257		892.79	-0.00016434		1482.81	-0.00071767		2072.8	-0.00059291		2662.8	-0.00084427		3252.8	0.00310295
303	0.00539674		892.99	0.00078582		1483.01	-0.00121179		2073	-0.00036744		2663	-0.0003419		3253	0.00282457
303.2	0.00525437		893.19	0.0000839		1483.21	-0.00065243		2073.2	-0.00099637		2663.2	0.00026432		3253.2	0.00282942
303.4	0.00500749		893.39	0.00087812		1483.41	0.0009286		2073.4	0.00010459		2663.4	0.00016935		3253.4	0.00289389
303.6	0.00525127		893.59	0.00041161		1483.61	0.00137191		2073.6	-0.0002251		2663.6	-0.00000884		3253.6	0.00337268
303.8	0.00433937		893.79	-0.00025293		1483.81	0.00107666		2073.8	-0.00003707		2663.8	0.00005929		3253.8	0.00269278
304	0.00381504		893.99	-0.00027721		1484.01	0.00066483		2074	-0.00004538		2664	0.00000146		3254	0.00234049
304.2	0.00428705		894.19	-0.00064026		1484.21	0.00009372		2074.2	-0.0004144		2664.2	-0.00029285		3254.2	0.00133109
304.4	0.00381417		894.39	-0.00130294		1484.41	0.00064618		2074.4	-0.00062579		2664.4	-0.00072921		3254.4	0.00159076
304.6	0.00323984		894.59	-0.00158231		1484.61	0.00035723		2074.6	-0.0005765		2664.6	-0.00147707		3254.6	0.00196659
304.8	0.00214424		894.79	-0.00133789		1484.81	0.00040902		2074.8	-0.00041788		2664.8	-0.00213039		3254.8	0.00083779
305	0.00161935		894.99	-0.00040359		1485.01	0.00063271		2075	-0.00020726		2665	-0.00309104		3255	0.00099648
305.2	0.00143222		895.19	-0.00013535		1485.21	0.00071991		2075.2	0.00055203		2665.2	-0.00373013		3255.2	0.0009714
305.4	0.0005022		895.39	-0.00099511		1485.41	0.00096504		2075.4	0.00086779		2665.4	-0.002969		3255.4	0.00101597
305.6	0.00172518		895.59	-0.00044259		1485.61	0.00070436		2075.6	0.00104463		2665.6	-0.00384015		3255.6	0.00110748
305.8	0.00196524		895.79	-0.00054888		1485.81	0.00112392		2075.8	0.00162273		2665.8	-0.00387667		3255.8	0.00133976
306	0.0032541		895.99	-0.00038799		1486.01	0.00187963		2076	0.00153899		2666	-0.00306142		3256	0.00139605
306.2	0.00308441		896.19	-0.00054085		1486.21	0.00239345		2076.2	0.00153216		2666.2	-0.00284765		3256.2	0.00197948
306.4	0.00387301		896.39	-0.00123318		1486.41	0.00280876		2076.4	0.00148181		2666.4	-0.00231934		3256.4	0.00222887
306.6	0.00473764		896.59	-0.00158186		1486.61	0.00311521		2076.6	0.00155221		2666.6	-0.00266001		3256.6	0.00192456
306.8	0.005002		896.79	-0.00196893		1486.81	0.00268027		2076.8	0.00065629		2666.8	-0.00218617		3256.8	0.00111226
307	0.00598204		896.99	-0.00210471		1487.01	0.00226719		2077	0.0003527		2667	-0.00082753		3257	0.00158612
307.2	0.00589059		897.19	-0.00321594		1487.21	0.00257217		2077.2	-0.00053415		2667.2	-0.00094575		3257.2	0.00140666
307.4	0.00545009		897.39	-0.00266254		1487.41	0.00246386		2077.4	-0.00043979		2667.4	-0.00194561		3257.4	0.00200432
307.6	0.00614755		897.59	-0.00238911		1487.61	0.00205056		2077.6	-0.00124313		2667.6	-0.00134082		3257.6	0.00245146
307.8	0.00548981		897.79	-0.00231055		1487.81	0.00093045		2077.8	-0.00099658		2667.8	-0.00215376		3257.8	0.0023636
308	0.00541045		897.99	-0.00246167		1488.01	0.00049054		2078	-0.00122477		2668	-0.00167654		3258	0.00226443
308.2	0.0059384		898.19	-0.00284897		1488.21	0.00043663		2078.2	-0.00195309		2668.2	-0.00125521		3258.2	0.00153392
308.4	0.00489028		898.39	-0.00241842		1488.41	0.00010642		2078.4	-0.00184622		2668.4	-0.00129528		3258.4	0.00345124
308.6	0.00400031		898.59	-0.00169093		1488.61	-0.00056842		2078.6	-0.00134446		2668.6	-0.00153375		3258.6	0.00310146
308.8	0.00344848		898.79	-0.0004758		1488.81	-0.00122992		2078.8	-0.00233353		2668.8	-0.00158066		3258.8	0.0027238
309	0.00309522		898.99	0.00000489		1489.01	-0.00176964		2079	-0.00217251		2669	-0.00164558		3259	0.00294812
309.2	0.00321734		899.19	-0.00093747		1489.21	-0.0018667		2079.2	-0.00162609		2669.2	-0.00168192		3259.2	0.00212945
309.4	0.00307354		899.39	-0.00169338		1489.41	-0.00200062		2079.4	-0.00133058		2669.4	-0.0015102		3259.4	0.00176487
309.6	0.0039869		899.59	-0.00160371		1489.61	-0.00150372		2079.6	-0.00138468		2669.6	-0.00255233		3259.6	0.00164075
309.8	0.00508878		899.79	-0.00149328		1489.81	-0.00194181		2079.8	-0.00019848		2669.8	-0.0027529		3259.8	0.00131201
310	0.00614909		899.99	-0.00137541		1490.01	-0.00117671		2080	-0.0004577		2670	-0.00320045		3260	0.00134753
310.2	0.00648781		900.19	-0.0012658		1490.21	-0.00143307		2080.2	-0.00079027		2670.2	-0.00364304		3260.2	0.00168779
310.4	0.0073679		900.39	-0.00158638		1490.41	-0.00174975		2080.4	-0.00060286		2670.4	-0.00309272		3260.4	0.00025473
310.6	0.00793396		900.59	-0.00128294		1490.61	-0.00204281		2080.6	-0.00030699		2670.6	-0.00397491		3260.6	0.00046769
310.8	0.00704246		900.79	-0.00193574		1490.81	-0.00204241		2080.8	-0.00019842		2670.8	-0.00374735		3260.8	0.00014007
311	0.00786708		900.99	-0.00199196		1491.01	-0.00113961		2081	-0.0000948		2671	-0.00259717		3261	0.00017501
311.2	0.00822239		901.19	-0.00230481		1491.21	-0.00073342		2081.2	-0.00020892		2671.2	-0.00335704		3261.2	-0.00034796
311.4	0.00845988		901.39	-0.00197842		1491.41	0.00009855		2081.4	0.00027572		2671.4	-0.0041188		3261.4	0.00025274
311.6	0.00877188		901.59	-0.00171123		1491.61	0.00123519		2081.6	0.00093689		2671.6	-0.0040628		3261.6	-0.0000361
311.8	0.0083494		901.79	-0.00198115		1491.81	0.00156918		2081.8	0.00155785		2671.8	-0.00455556		3261.8	0.00096131
312	0.0077858		901.99	-0.0018341		1492.01	0.00223084		2082	0.00147778		2672	-0.00334687		3262	0.00213171
312.2	0.00693336		902.19	-0.00152595		1492.21	0.00191489		2082.2	0.00239276		2672.2	-0.00349763		3262.2	0.00203562
312.4	0.00683378		902.39	-0.0009975		1492.41	0.00210091		2082.4	0.00257693		2672.4	-0.00338462		3262.4	0.00265488
312.6	0.00650175		902.59	-0.00162037		1492.61	0.0023638		2082.6	0.00219683		2672.6	-0.00286314		3262.6	0.00200689
312.8	0.00698972		902.79	-0.00194207		1492.81	0.00205046		2082.8	0.00113124		2672.8	-0.00267001		3262.8	0.00158796
313	0.00610692		902.99	-0.00313315		1493.01	0.00195649		2083	0.00119569		2673	-0.00153157		3263	0.00150796
313.2	0.00495652		903.19	-0.00364168		1493.21	0.00265525		2083.2	0.00221955		2673.2	-0.00130005		3263.2	0.00131498
313.4	0.00502642		903.39	-0.00366212		1493.41	0.00168055		2083.4	0.00209414		2673.4	-0.00062986		3263.4	0.00068243
313.6	0.00616426		903.59	-0.00364241		1493.61	0.002295		2083.6	0.00202807		2673.6	-0.000821		3263.6	-0.00021284
313.8	0.00699002		903.79	-0.00353365		1493.81	0.00120066		2083.8	0.00117151		2673.8	-0.0004253		3263.8	-0.00003115
314	0.0078296		903.99	-0.00400228		1494.01	0.00108358		2084	0.00020688		2674	-0.00081184		3264	0.00058114
314.2	0.00797121		904.19	-0.00364587		1494.21	0.00033693		2084.2	0.00039712		2674.2	0.00000813		3264.2	0.00057922
314.4	0.00779815		904.39	-0.00301384		1494.41	0.0000377		2084.4	0.00015889		2674.4	-0.00020924		3264.4	0.00076387
314.6	0.00677637		904.59	-0.00337746		1494.61	-0.00053691		2084.6	-0.00003281		2674.6	-0.00063513		3264.6	0.00160775
314.8	0.00594719		904.79	-0.00446276		1494.81	-0.00010983		2084.8	-0.00009193		2674.8	0.000245		3264.8	0.00163266
315	0.00670497		904.99	-0.00433649		1495.01	-0.00003118		2085	-0.00070253		2675	0.00113403		3265	0.00143189
315.2	0.00738106		905.19	-0.00428084		1495.21	-0.00039454		2085.2	-0.00091513		2675.2	0.00126245		3265.2	0.00116955
315.4	0.00743731		905.39	-0.00340119		1495.41	0.0002386		2085.4	0.00026168		2675.4	0.00026702		3265.4	0.00086615
315.6	0.00684663		905.59	-0.00332738		1495.61	0.00031084		2085.6	-0.00001738		2675.6	-0.00063032		3265.6	0.00108456
315.8	0.00636161		905.79	-0.00242765		1495.81	0.00000861		2085.8	-0.00004906		2675.8	-0.00068257		3265.8	0.00220611
316	0.00502242		905.99	-0.00257815		1496.01	0.00044474		2086	-0.00043535		2676	-0.00126878		3266	0.00223491
316.2	0.00553623		906.19	-0.00266376		1496.21	0.00003797		2086.2	0.00051557		2676.2	-0.00122308		3266.2	0.00018343
316.4	0.00532577		906.39	-0.00283784		1496.41	0.00018927		2086.4	0.00010579		2676.4	-0.00050755		3266.4	0.00003285
316.6	0.00565313		906.59	-0.00256233		1496.61	0.00017881		2086.6	0.00046135		2676.6	-0.00060843		3266.6	0.00053626
316.8	0.00591717		906.79	-0.00282333		1496.81	-0.00045701		2086.8	0.00053991		2676.8	-0.00064598		3266.8	0.00013958
317	0.00481147		906.99	-0.00258155		1497.01	-0.00049705		2087	0.0011492		2677	0.00004317		3267	0.00084397
317.2	0.00485503		907.19	-0.00174641		1497.21	0.00014529		2087.2	0.00162435		2677.2	-0.00056732		3267.2	0.0016025
317.4	0.00480196		907.39	-0.00104655		1497.41	-0.0003916		2087.4	0.0006369		2677.4	-0.00077229		3267.4	0.00080552
317.6	0.00597251		907.59	-0.00063082		1497.61	-0.00030491		2087.6	0.0004906		2677.6	-0.00087522		3267.6	0.00077525
317.8	0.00569045		907.79	-0.00067916		1497.81	-0.0011873		2087.8	-0.0001395		2677.8	-0.00130028		3267.8	0.0015538
318	0.0069755		907.99	-0.00083476		1498.01	-0.00130222		2088	0.00100562		2678	-0.00141631		3268	0.00202349
318.2	0.00617576		908.19	-0.0002899		1498.21	-0.0014328		2088.2	0.00111306		2678.2	-0.00104686		3268.2	0.00186461
318.4	0.00554051		908.39	-0.0000359		1498.41	-0.00144947		2088.4	0.00084773		2678.4	-0.00158211		3268.4	0.0019735
318.6	0.0053427		908.59	-0.00066764		1498.61	-0.00102268		2088.6	0.00094431		2678.6	-0.00134238		3268.6	0.00156103
318.8	0.00592307		908.79	-0.00021852		1498.81	0.00007316		2088.8	0.0005359		2678.8	-0.00065434		3268.8	0.0008763
319	0.00636125		908.99	0.0002883		1499.01	0.00047041		2089	0.00059534		2679	-0.00110141		3269	0.00079409
319.2	0.00664288		909.19	0.0009414		1499.21	0.00074626		2089.2	0.0013487		2679.2	-0.00113198		3269.2	0.00077338
319.4	0.00714604		909.39	0.00150884		1499.41	0.0010852		2089.4	0.00268747		2679.4	-0.00199011		3269.4	0.00007701
319.6	0.00633198		909.59	0.00114782		1499.61	0.0010056		2089.6	0.00205592		2679.6	-0.00231868		3269.6	0.00037903
319.8	0.00607616		909.79	0.00110836		1499.81	0.00172466		2089.8	0.00258407		2679.8	-0.0017271		3269.8	0.00119551
320	0.00616599		909.99	0.00103759		1500.01	0.00182628		2090	0.00196354		2680	-0.00171752		3270	-0.00009569
320.2	0.00710633		910.19	0.00117737		1500.21	0.00030377		2090.2	0.00294326		2680.2	-0.00111409		3270.2	-0.00016497
320.4	0.00671454		910.39	0.00084655		1500.41	0.00059128		2090.4	0.00273335		2680.4	-0.00101654		3270.4	0.00140077
320.6	0.00755088		910.59	0.00119195		1500.61	0.00075712		2090.6	0.00339461		2680.6	-0.00112974		3270.6	0.00081925
320.8	0.00700935		910.79	0.00110652		1500.81	0.00102329		2090.8	0.00395699		2680.8	-0.00073954		3270.8	0.00128987
321	0.00620149		910.99	0.00093623		1501.01	0.00163194		2091	0.00445782		2681	-0.00034199		3271	0.0024788
321.2	0.00597889		911.19	0.00105107		1501.21	0.00137118		2091.2	0.0053148		2681.2	-0.00050237		3271.2	0.00331127
321.4	0.0057239		911.39	0.00098645		1501.41	0.00071561		2091.4	0.00461885		2681.4	-0.00023852		3271.4	0.00258178
321.6	0.00611973		911.59	0.00088481		1501.61	-0.0000949		2091.6	0.00396065		2681.6	0.00001845		3271.6	0.00223177
321.8	0.0052495		911.79	0.00088191		1501.81	0.00034844		2091.8	0.00333869		2681.8	-0.00050109		3271.8	0.00228289
322	0.00593374		911.99	0.00073036		1502.01	0.00040813		2092	0.00348145		2682	-0.00017919		3272	0.00280465
322.2	0.00601603		912.19	0.00086269		1502.21	0.00005304		2092.2	0.0021518		2682.2	-0.00051632		3272.2	0.00295292
322.4	0.00625174		912.39	0.000497		1502.41	-0.00000439		2092.4	0.00151912		2682.4	-0.0011902		3272.4	0.00229673
322.6	0.00712203		912.59	0.00025768		1502.61	0.0010486		2092.6	0.0003096		2682.6	-0.0015328		3272.6	0.00207994
322.8	0.00823725		912.79	0.00064504		1502.81	0.00146869		2092.8	-0.00004018		2682.8	-0.00180167		3272.8	0.00168093
323	0.00893847		912.99	-0.00030177		1503.01	0.00153949		2093	-0.00014139		2683	-0.00288155		3273	0.00181901
323.2	0.00915164		913.19	-0.00032976		1503.21	0.00080652		2093.2	0.00002509		2683.2	-0.00320916		3273.2	0.00060403
323.4	0.00994209		913.39	-0.00051734		1503.41	0.00038448		2093.4	-0.00041424		2683.4	-0.00361104		3273.4	-0.0002932
323.6	0.00996559		913.59	-0.00066536		1503.61	0.00040468		2093.6	-0.001328		2683.6	-0.00426759		3273.6	-0.00065086
323.8	0.01116492		913.79	-0.00081154		1503.81	0.00104026		2093.8	-0.00213075		2683.8	-0.00419465		3273.8	-0.00118801
324	0.01124573		913.99	-0.00061483		1504.01	0.00015734		2094	-0.00299597		2684	-0.00356179		3274	-0.00219153
324.2	0.01126296		914.19	-0.00103379		1504.21	0.00063522		2094.2	-0.00298931		2684.2	-0.00365393		3274.2	-0.0014128
324.4	0.01134877		914.39	-0.00076425		1504.41	0.00182888		2094.4	-0.00292801		2684.4	-0.00343893		3274.4	-0.00142959
324.6	0.0111304		914.59	-0.00015047		1504.61	0.00179695		2094.6	-0.00214237		2684.6	-0.00356844		3274.6	-0.00182314
324.8	0.01064805		914.79	-0.00049234		1504.81	0.00197954		2094.8	-0.00133155		2684.8	-0.0030742		3274.8	0.00016041
325	0.01033022		914.99	-0.00057128		1505.01	0.00136523		2095	-0.00090742		2685	-0.00239497		3275	0.0007407
325.2	0.00939996		915.19	0.00023677		1505.21	0.00035567		2095.2	-0.00040985		2685.2	-0.00178576		3275.2	0.00146629
325.4	0.00984819		915.39	0.00095551		1505.41	0.00012885		2095.4	-0.00102283		2685.4	-0.00121513		3275.4	0.00071898
325.6	0.00895777		915.59	0.00151883		1505.61	0.00058426		2095.6	-0.00060918		2685.6	-0.00074137		3275.6	0.00142005
325.8	0.00923423		915.79	0.00136593		1505.81	0.00099397		2095.8	-0.00009513		2685.8	-0.00105141		3275.8	0.002004
326	0.01011385		915.99	0.00119059		1506.01	0.00034124		2096	0.00048708		2686	-0.00123562		3276	0.00336459
326.2	0.01028549		916.19	0.00103369		1506.21	0.00019866		2096.2	0.00026877		2686.2	-0.00147565		3276.2	0.00419468
326.4	0.01004156		916.39	0.00025934		1506.41	0.00018322		2096.4	0.00062086		2686.4	-0.00110452		3276.4	0.00304173
326.6	0.01091827		916.59	0.00006584		1506.61	0.00064681		2096.6	0.00095415		2686.6	-0.00126329		3276.6	0.00300318
326.8	0.01088017		916.79	-0.00026383		1506.81	-0.00013692		2096.8	0.00153201		2686.8	-0.00155962		3276.8	0.00208204
327	0.01026323		916.99	-0.00209099		1507.01	-0.00059273		2097	0.00170604		2687	-0.00151211		3277	0.00118317
327.2	0.00974731		917.19	-0.00235102		1507.21	-0.00111862		2097.2	0.00088258		2687.2	-0.00132022		3277.2	0.00007595
327.4	0.01020289		917.39	-0.00270777		1507.41	-0.00107465		2097.4	0.00006142		2687.4	-0.00170062		3277.4	-0.00070562
327.6	0.00980674		917.59	-0.00395371		1507.61	-0.00097781		2097.6	-0.00035481		2687.6	-0.0017974		3277.6	-0.00123381
327.8	0.00945245		917.79	-0.00455733		1507.81	-0.00063457		2097.8	-0.00112576		2687.8	-0.00134596		3277.8	-0.00144316
328	0.00884274		917.99	-0.00503789		1508.01	-0.0012545		2098	-0.00124443		2688	-0.00121501		3278	-0.0014371
328.2	0.00868838		918.19	-0.00500368		1508.21	-0.00049125		2098.2	-0.00183489		2688.2	-0.00243903		3278.2	-0.00099852
328.4	0.00803768		918.39	-0.00379417		1508.41	-0.00123107		2098.4	-0.00097021		2688.4	-0.00228666		3278.4	-0.00111359
328.6	0.00762758		918.59	-0.00370287		1508.61	-0.00068414		2098.6	-0.00128542		2688.6	-0.00281217		3278.6	-0.00077533
328.8	0.00770156		918.79	-0.00394524		1508.81	-0.00057409		2098.8	-0.000804		2688.8	-0.00162417		3278.8	-0.0010716
329	0.00766063		918.99	-0.00295425		1509.01	-0.00059971		2099	0.00029294		2689	-0.00066694		3279	-0.001759
329.2	0.00746211		919.19	-0.002186		1509.21	-0.00050108		2099.2	0.00000825		2689.2	-0.00048767		3279.2	-0.00129231
329.4	0.00894799		919.39	-0.00158711		1509.41	0.00029821		2099.4	0.00048895		2689.4	-0.00048321		3279.4	-0.00128044
329.6	0.00906102		919.59	-0.00107125		1509.61	0.00073868		2099.6	0.0008443		2689.6	-0.00047123		3279.6	-0.00016162
329.8	0.01001362		919.79	-0.00070612		1509.81	0.00108328		2099.8	0.00106196		2689.8	-0.00077878		3279.8	-0.00145835
330	0.01097345		919.99	-0.00038899		1510.01	0.00211205		2100	0.00102395		2690	-0.00027012		3280	-0.00125411
330.2	0.01139954		920.19	-0.00051123		1510.21	0.00264056		2100.2	0.0009353		2690.2	-0.00005757		3280.2	-0.00193609
330.4	0.01209388		920.39	-0.00093593		1510.41	0.00264345		2100.4	0.00139721		2690.4	0.00033468		3280.4	-0.0025034
330.6	0.0121579		920.59	-0.0007483		1510.61	0.00257216		2100.6	0.00185535		2690.6	-0.00012198		3280.6	-0.00293534
330.8	0.01203845		920.79	-0.00140129		1510.81	0.00187269		2100.8	0.00207209		2690.8	0.00017763		3280.8	-0.00365889
331	0.01207396		920.99	-0.00189615		1511.01	0.00155964		2101	0.00217987		2691	0.00025274		3281	-0.0033699
331.2	0.01223713		921.19	-0.00183786		1511.21	0.00156651		2101.2	0.00183307		2691.2	-0.00023448		3281.2	-0.00324031
331.4	0.01204725		921.39	-0.00225588		1511.41	0.00115607		2101.4	0.00188235		2691.4	-0.00086395		3281.4	-0.00308449
331.6	0.01164764		921.59	-0.00368571		1511.61	0.00087274		2101.6	0.00240184		2691.6	-0.00097347		3281.6	-0.00230769
331.8	0.01121301		921.79	-0.0035806		1511.81	0.00015415		2101.8	0.00303572		2691.8	-0.0007577		3281.8	-0.00194154
332	0.0108266		921.99	-0.00397609		1512.01	-0.0001788		2102	0.00277198		2692	-0.00093356		3282	-0.00171508
332.2	0.01041392		922.19	-0.00316382		1512.21	0.00089361		2102.2	0.00304737		2692.2	-0.00131676		3282.2	-0.00098642
332.4	0.01017497		922.39	-0.00211659		1512.41	0.00081633		2102.4	0.00395404		2692.4	-0.00100628		3282.4	-0.00046864
332.6	0.0098629		922.59	-0.00232133		1512.61	0.00179529		2102.6	0.00363007		2692.6	-0.00114636		3282.6	0.0005495
332.8	0.00976399		922.79	-0.00217997		1512.81	0.00145087		2102.8	0.00382003		2692.8	-0.00050702		3282.8	0.00051208
333	0.00943484		922.99	-0.0017349		1513.01	0.00162821		2103	0.00327925		2693	-0.00039579		3283	0.00107294
333.2	0.00990728		923.19	-0.001544		1513.21	0.00194638		2103.2	0.0022908		2693.2	-0.00042842		3283.2	0.00237486
333.4	0.01041365		923.39	-0.00125459		1513.41	0.00208755		2103.4	0.00204196		2693.4	-0.00062894		3283.4	0.00245285
333.6	0.01107278		923.59	-0.00109402		1513.61	0.00206508		2103.6	0.00160541		2693.6	-0.00054391		3283.6	0.00186381
333.8	0.01176425		923.79	-0.00075925		1513.81	0.00232574		2103.8	0.00132905		2693.8	-0.00024764		3283.8	0.00002044
334	0.01315685		923.99	-0.00107155		1514.01	0.00248572		2104	0.00031755		2694	-0.00020105		3284	-0.00012464
334.2	0.01357731		924.19	-0.00112345		1514.21	0.00169387		2104.2	0.00023507		2694.2	-0.00061712		3284.2	-0.00046354
334.4	0.01399571		924.39	-0.0004324		1514.41	0.001863		2104.4	0.00007674		2694.4	-0.00093027		3284.4	-0.00075376
334.6	0.01457649		924.59	-0.00038044		1514.61	0.00214962		2104.6	-0.000112		2694.6	-0.00064433		3284.6	-0.00196567
334.8	0.01489576		924.79	-0.00068704		1514.81	0.00184314		2104.8	-0.00014547		2694.8	-0.00137398		3284.8	-0.00214014
335	0.01474293		924.99	-0.00042975		1515.01	0.0017662		2105	0.00018195		2695	-0.0015056		3285	-0.0016839
335.2	0.01425909		925.19	-0.0000797		1515.21	0.00268261		2105.2	-0.00034744		2695.2	-0.00106222		3285.2	-0.0019021
335.4	0.01397125		925.39	0.00014336		1515.41	0.00255074		2105.4	-0.00053348		2695.4	-0.00123809		3285.4	-0.00261613
335.6	0.01338215		925.59	-0.00023168		1515.61	0.00189913		2105.6	0.00049028		2695.6	-0.00045922		3285.6	-0.00276951
335.8	0.01232188		925.79	0.00039304		1515.81	0.00101683		2105.8	0.0005454		2695.8	0.00017713		3285.8	-0.00313857
336	0.0119508		925.99	0.00082341		1516.01	0.00116267		2106	0.00049359		2696	0.00014		3286	-0.00289159
336.2	0.01203526		926.19	0.00103106		1516.21	0.00117756		2106.2	0.00178801		2696.2	-0.00020652		3286.2	-0.00274305
336.4	0.01146086		926.39	0.00111799		1516.41	0.00089515		2106.4	0.00227078		2696.4	-0.00091129		3286.4	-0.00209346
336.6	0.01042291		926.59	0.00176831		1516.61	0.00125727		2106.6	0.00205095		2696.6	-0.00067192		3286.6	-0.00156128
336.8	0.00970937		926.79	0.0015848		1516.81	0.00115949		2106.8	0.00243338		2696.8	-0.00069997		3286.8	-0.00126311
337	0.00940323		926.99	0.00108528		1517.01	0.0000207		2107	0.00191704		2697	0.00002582		3287	-0.00051749
337.2	0.00913105		927.19	-0.00003616		1517.21	-0.00077047		2107.2	0.00174774		2697.2	0.00022049		3287.2	-0.00036586
337.4	0.00935823		927.39	-0.00084376		1517.41	-0.00147293		2107.4	0.00199399		2697.4	0.0003003		3287.4	-0.00102143
337.6	0.00975157		927.59	-0.00078873		1517.61	-0.00142936		2107.6	0.00218404		2697.6	0.00025886		3287.6	-0.00112766
337.8	0.00992019		927.79	-0.00052915		1517.81	-0.00238423		2107.8	0.00146466		2697.8	0.00087283		3287.8	-0.00115925
338	0.01102896		927.99	-0.00088358		1518.01	-0.00245605		2108	0.00113624		2698	0.00073929		3288	-0.00139727
338.2	0.0109563		928.19	-0.00071877		1518.21	-0.00231622		2108.2	0.00054071		2698.2	0.00069908		3288.2	-0.00242634
338.4	0.01085094		928.39	-0.0000508		1518.41	-0.00135119		2108.4	0.00033977		2698.4	0.00033132		3288.4	-0.00303126
338.6	0.01092903		928.59	-0.00159594		1518.61	-0.0016661		2108.6	-0.00036941		2698.6	0.00038273		3288.6	-0.00326754
338.8	0.01064758		928.79	-0.00157131		1518.81	-0.00116047		2108.8	-0.00067206		2698.8	0.00043891		3288.8	-0.00292025
339	0.01089182		928.99	-0.00187638		1519.01	-0.00129932		2109	-0.00131814		2699	0.00063124		3289	-0.00235914
339.2	0.01090259		929.19	-0.00183619		1519.21	-0.00049687		2109.2	-0.00173886		2699.2	0.0011604		3289.2	-0.00314289
339.4	0.01073718		929.39	-0.00168031		1519.41	-0.00042084		2109.4	-0.00085589		2699.4	0.0009047		3289.4	-0.00407917
339.6	0.01118037		929.59	-0.00236846		1519.61	-0.00064521		2109.6	0.00000829		2699.6	0.00122076		3289.6	-0.00434586
339.8	0.01237542		929.79	-0.00201669		1519.81	-0.0002154		2109.8	0.0001652		2699.8	0.00095979		3289.8	-0.00473478
340	0.013131		929.99	-0.00138373		1520.01	-0.00054366		2110	0.0009698		2700	0.00071571		3290	-0.0045764
340.2	0.01410153		930.19	-0.00155412		1520.21	-0.00036326		2110.2	0.0016482		2700.2	0.00050582		3290.2	-0.00478052
340.4	0.01423917		930.39	-0.00132897		1520.41	-0.00043634		2110.4	0.00238766		2700.4	-0.00020126		3290.4	-0.00465966
340.6	0.01367344		930.59	-0.00099037		1520.61	-0.00048124		2110.6	0.00298999		2700.6	0.00015083		3290.6	-0.00395898
340.8	0.01356412		930.79	-0.00088669		1520.81	-0.00089179		2110.8	0.00366503		2700.8	0.00093537		3290.8	-0.00265857
341	0.01298093		930.99	-0.00102758		1521.01	-0.00185026		2111	0.00327471		2701	0.00106216		3291	-0.00176175
341.2	0.01258299		931.19	-0.00138544		1521.21	-0.002001		2111.2	0.00364091		2701.2	0.00100286		3291.2	-0.00151217
341.4	0.0127112		931.39	-0.00123603		1521.41	-0.00137681		2111.4	0.00444835		2701.4	0.0010859		3291.4	-0.00038849
341.6	0.0127902		931.59	-0.0002063		1521.61	-0.00121997		2111.6	0.00409383		2701.6	0.00040497		3291.6	0.00011721
341.8	0.01299287		931.79	0.00062578		1521.81	-0.00219409		2111.8	0.00405647		2701.8	-0.00008819		3291.8	0.00027437
342	0.0126255		931.99	0.00072576		1522.01	-0.00252443		2112	0.00467322		2702	-0.00139665		3292	-0.00010637
342.2	0.01220495		932.19	0.00155965		1522.21	-0.00255889		2112.2	0.00412287		2702.2	-0.00168573		3292.2	-0.00091123
342.4	0.0109432		932.39	0.00160775		1522.41	-0.00234058		2112.4	0.00453746		2702.4	-0.00239155		3292.4	0.00036333
342.6	0.010211		932.59	0.00025852		1522.61	-0.00270782		2112.6	0.00325058		2702.6	-0.00278895		3292.6	0.00135951
342.8	0.0103619		932.79	0.00108289		1522.81	-0.00209104		2112.8	0.00321727		2702.8	-0.00285723		3292.8	0.00267777
343	0.00995856		932.99	0.00116126		1523.01	-0.00191198		2113	0.00221864		2703	-0.00304975		3293	0.00343944
343.2	0.01034698		933.19	0.00130064		1523.21	-0.000516		2113.2	0.00227326		2703.2	-0.0027796		3293.2	0.00346406
343.4	0.01097797		933.39	0.00204989		1523.41	0.00031663		2113.4	0.00223051		2703.4	-0.00372903		3293.4	0.00404901
343.6	0.01293913		933.59	0.00282986		1523.61	0.00036399		2113.6	0.00159041		2703.6	-0.00395626		3293.6	0.00463924
343.8	0.01315037		933.79	0.00310013		1523.81	0.00033599		2113.8	0.00097827		2703.8	-0.0036241		3293.8	0.00472406
344	0.01362441		933.99	0.00241862		1524.01	-0.00046112		2114	0.00123628		2704	-0.003608		3294	0.00453281
344.2	0.01424863		934.19	0.00202218		1524.21	0.00047763		2114.2	0.00054452		2704.2	-0.00321837		3294.2	0.00390952
344.4	0.01422549		934.39	0.00196218		1524.41	-0.00009242		2114.4	0.00058418		2704.4	-0.00347572		3294.4	0.00393
344.6	0.01502288		934.59	0.00207828		1524.61	0.00039913		2114.6	0.00028032		2704.6	-0.00241195		3294.6	0.00435181
344.8	0.01504079		934.79	0.00177681		1524.81	0.00111394		2114.8	0.00038983		2704.8	-0.00171122		3294.8	0.00431436
345	0.01467592		934.99	0.00127034		1525.01	0.00246772		2115	0.00037039		2705	-0.00202134		3295	0.00362626
345.2	0.01525395		935.19	0.00085488		1525.21	0.00334756		2115.2	0.00034902		2705.2	-0.00126239		3295.2	0.00183093
345.4	0.01488683		935.39	0.00024759		1525.41	0.00427458		2115.4	0.0003642		2705.4	-0.00120763		3295.4	0.00108581
345.6	0.01496791		935.59	-0.00029248		1525.61	0.00376711		2115.6	0.00050594		2705.6	-0.0014961		3295.6	-0.00057064
345.8	0.01468926		935.79	-0.00054522		1525.81	0.00353244		2115.8	0.00066309		2705.8	-0.00220183		3295.8	-0.00177544
346	0.01385582		935.99	-0.0015106		1526.01	0.00354267		2116	0.00126565		2706	-0.00206023		3296	-0.00260487
346.2	0.01339509		936.19	-0.00210524		1526.21	0.00401964		2116.2	0.00046863		2706.2	-0.0015525		3296.2	-0.00354246
346.4	0.01215446		936.39	-0.00231818		1526.41	0.00428745		2116.4	0.00006628		2706.4	-0.00154606		3296.4	-0.00287825
346.6	0.01164905		936.59	-0.00264034		1526.61	0.00351702		2116.6	-0.00132855		2706.6	-0.00127896		3296.6	-0.00351878
346.8	0.01095386		936.79	-0.00220916		1526.81	0.00318965		2116.8	-0.00099779		2706.8	-0.00067762		3296.8	-0.00297184
347	0.01046931		936.99	-0.00186656		1527.01	0.00262829		2117	-0.00173499		2707	-0.00016047		3297	-0.0028318
347.2	0.01047241		937.19	-0.00221978		1527.21	0.00159572		2117.2	-0.00096373		2707.2	-0.00063543		3297.2	-0.00267745
347.4	0.01000324		937.39	-0.00144142		1527.41	0.00054985		2117.4	-0.00081447		2707.4	-0.00043219		3297.4	-0.00246676
347.6	0.00958888		937.59	-0.001003		1527.61	0.00033649		2117.6	-0.0010181		2707.6	-0.00003416		3297.6	-0.00193486
347.8	0.00900774		937.79	-0.00224815		1527.81	-0.00054766		2117.8	0.00000057		2707.8	0.00017289		3297.8	-0.00229861
348	0.01004489		937.99	-0.00235725		1528.01	-0.00118156		2118	0.00072214		2708	0.00016274		3298	-0.00199935
348.2	0.01041557		938.19	-0.00164678		1528.21	-0.00155374		2118.2	0.0006028		2708.2	0.00001068		3298.2	-0.00224448
348.4	0.0111392		938.39	-0.00166791		1528.41	-0.00251261		2118.4	0.00064932		2708.4	-0.00073543		3298.4	-0.00188446
348.6	0.01164327		938.59	-0.00204106		1528.61	-0.00163203		2118.6	0.00085434		2708.6	-0.00108298		3298.6	-0.00249191
348.8	0.01148355		938.79	-0.00219165		1528.81	-0.00088551		2118.8	0.00158164		2708.8	-0.00091545		3298.8	-0.00249468
349	0.0111012		938.99	-0.00219671		1529.01	-0.00009881		2119	0.00110145		2709	-0.00084673		3299	-0.00310508
349.2	0.01181346		939.19	-0.00223925		1529.21	0.00056886		2119.2	0.00027373		2709.2	-0.00051855		3299.2	-0.00381905
349.4	0.01163275		939.39	-0.00279987		1529.41	0.00093343		2119.4	0.0006887		2709.4	-0.00115566		3299.4	-0.0029728
349.6	0.01234636		939.59	-0.00245356		1529.61	0.00108833		2119.6	0.00061		2709.6	-0.00122857		3299.6	-0.0035498
349.8	0.01298456		939.79	-0.00240311		1529.81	0.00205612		2119.8	0.00045403		2709.8	-0.00158795		3299.8	-0.0029853
350	0.01350284		939.99	-0.00230354		1530.01	0.00194725		2120	0.00064655		2710	-0.00095524		3300	-0.00324744
350.2	0.01418333		940.19	-0.00285733		1530.21	0.00211315		2120.2	-0.00093237		2710.2	-0.00082187		3300.2	-0.00334174
350.4	0.01461814		940.39	-0.0019186		1530.41	0.00226657		2120.4	-0.0006197		2710.4	-0.0004564		3300.4	-0.00359259
350.6	0.01487078		940.59	-0.00219794		1530.61	0.00166365		2120.6	-0.00025071		2710.6	0.00015437		3300.6	-0.00384085
350.8	0.01456335		940.79	-0.00168721		1530.81	0.00193625		2120.8	0.00121802		2710.8	0.00056385		3300.8	-0.00292838
351	0.01559593		940.99	-0.00130728		1531.01	0.00067801		2121	0.00198163		2711	0.00097096		3301	-0.00343904
351.2	0.01497618		941.19	-0.00130422		1531.21	0.00116346		2121.2	0.00309613		2711.2	0.00197757		3301.2	-0.00339923
351.4	0.01553609		941.39	-0.0007584		1531.41	0.00138266		2121.4	0.00318258		2711.4	0.00183646		3301.4	-0.00257187
351.6	0.01565498		941.59	-0.00070279		1531.61	0.00192816		2121.6	0.00383717		2711.6	0.00143616		3301.6	-0.0015811
351.8	0.01554306		941.79	-0.00099139		1531.81	0.0019273		2121.8	0.0042467		2711.8	0.00076073		3301.8	-0.00146132
352	0.01616077		941.99	-0.00036403		1532.01	0.00210534		2122	0.00364358		2712	-0.00028819		3302	-0.00046655
352.2	0.01646635		942.19	-0.00063505		1532.21	0.00158348		2122.2	0.00403675		2712.2	-0.0011871		3302.2	-0.00053907
352.4	0.01618319		942.39	-0.00065433		1532.41	0.00132888		2122.4	0.00298116		2712.4	-0.00158984		3302.4	-0.00028718
352.6	0.01546512		942.59	-0.00042553		1532.61	0.00120191		2122.6	0.00314471		2712.6	-0.0019082		3302.6	-0.00030617
352.8	0.01555972		942.79	-0.0006405		1532.81	0.00102417		2122.8	0.00330806		2712.8	-0.00156912		3302.8	0.00021049
353	0.0149718		942.99	-0.00108123		1533.01	0.00143026		2123	0.00330813		2713	-0.00214081		3303	0.00035361
353.2	0.01595822		943.19	-0.00041148		1533.21	0.00156734		2123.2	0.00307574		2713.2	-0.00254533		3303.2	-0.00000716
353.4	0.0153474		943.39	0.00107558		1533.41	0.00092272		2123.4	0.00351574		2713.4	-0.00264016		3303.4	-0.00027888
353.6	0.01526783		943.59	0.00164962		1533.61	0.00065987		2123.6	0.00349835		2713.6	-0.00245885		3303.6	-0.00108026
353.8	0.01454008		943.79	0.00059458		1533.81	-0.00007183		2123.8	0.00318085		2713.8	-0.00196706		3303.8	-0.00145595
354	0.01471445		943.99	0.00072789		1534.01	-0.00125632		2124	0.00272527		2714	-0.00129218		3304	-0.00267699
354.2	0.01436806		944.19	0.00053574		1534.21	-0.0018085		2124.2	0.00246806		2714.2	-0.0012072		3304.2	-0.00249506
354.4	0.0141073		944.39	0.00089655		1534.41	-0.00174404		2124.4	0.00233124		2714.4	-0.00053122		3304.4	-0.00333751
354.6	0.01471246		944.59	0.00079421		1534.61	-0.00166891		2124.6	0.00230862		2714.6	-0.00075376		3304.6	-0.0037446
354.8	0.0150034		944.79	0.00058662		1534.81	-0.00167979		2124.8	0.00221229		2714.8	-0.00014847		3304.8	-0.00381864
355	0.01598219		944.99	0.00019014		1535.01	-0.00188781		2125	0.00187746		2715	-0.00011294		3305	-0.00439383
355.2	0.01520439		945.19	0.00058036		1535.21	-0.00125307		2125.2	0.00190602		2715.2	0.00026367		3305.2	-0.0040863
355.4	0.01636569		945.39	0.00015279		1535.41	-0.00078282		2125.4	0.00140127		2715.4	-0.00002907		3305.4	-0.00340152
355.6	0.01582249		945.59	-0.00004553		1535.61	0.00001264		2125.6	0.00216873		2715.6	0.00086472		3305.6	-0.00315233
355.8	0.01611011		945.79	-0.00052518		1535.81	0.00033017		2125.8	0.00100366		2715.8	0.00123597		3305.8	-0.00304648
356	0.01680822		945.99	-0.00021866		1536.01	0.00064549		2126	0.0017004		2716	0.00137289		3306	-0.00258997
356.2	0.01746048		946.19	0.00009233		1536.21	0.00089636		2126.2	0.00260405		2716.2	0.00185648		3306.2	-0.00287018
356.4	0.01795097		946.39	0.00013342		1536.41	0.00178305		2126.4	0.00227507		2716.4	0.00205248		3306.4	-0.00261992
356.6	0.0185062		946.59	-0.00003678		1536.61	0.0022598		2126.6	0.00236635		2716.6	0.00204443		3306.6	-0.00234364
356.8	0.01909815		946.79	-0.00045768		1536.81	0.00298132		2126.8	0.00200604		2716.8	0.00216685		3306.8	-0.00204015
357	0.01956368		946.99	-0.00003924		1537.01	0.00327886		2127	0.00283854		2717	0.002496		3307	-0.00159391
357.2	0.01960311		947.19	0.00076014		1537.21	0.00303698		2127.2	0.00280405		2717.2	0.0027737		3307.2	-0.00243404
357.4	0.01927803		947.39	0.00167775		1537.41	0.00312253		2127.4	0.00312759		2717.4	0.00273218		3307.4	-0.00280191
357.6	0.01963224		947.59	0.00048488		1537.61	0.0027303		2127.6	0.00345146		2717.6	0.00318633		3307.6	-0.00199971
357.8	0.02006103		947.79	0.00018797		1537.81	0.00174626		2127.8	0.00242491		2717.8	0.00373645		3307.8	-0.00214688
358	0.02023588		947.99	0.00040491		1538.01	0.00132511		2128	0.00161828		2718	0.00301532		3308	-0.00168665
358.2	0.01984673		948.19	0.00111568		1538.21	0.00147274		2128.2	0.00085682		2718.2	0.00271999		3308.2	-0.00159535
358.4	0.01985595		948.39	0.00041686		1538.41	0.00148377		2128.4	0.00015699		2718.4	0.00182331		3308.4	-0.00194004
358.6	0.02004759		948.59	0.00101259		1538.61	0.00097078		2128.6	0.00103913		2718.6	0.00104642		3308.6	-0.00195104
358.8	0.01952993		948.79	0.00075424		1538.81	0.00019858		2128.8	0.00132992		2718.8	0.00138967		3308.8	-0.00126107
359	0.01876773		948.99	0.00131219		1539.01	0.00012496		2129	0.00214248		2719	0.00088567		3309	-0.00183424
359.2	0.01756438		949.19	0.00119517		1539.21	-0.00057275		2129.2	0.00261659		2719.2	0.00107493		3309.2	-0.0014524
359.4	0.01746483		949.39	0.00056685		1539.41	-0.00008462		2129.4	0.00249735		2719.4	0.00104455		3309.4	-0.00120622
359.6	0.01660934		949.59	0.00103174		1539.61	-0.00047635		2129.6	0.00350133		2719.6	0.00085546		3309.6	-0.00155244
359.8	0.01664388		949.79	0.00140014		1539.81	-0.0002451		2129.8	0.00330017		2719.8	0.00077499		3309.8	-0.00177384
360	0.01696208		949.99	0.00195466		1540.01	0.00046305		2130	0.00394756		2720	0.00110029		3310	-0.00204399
360.2	0.01728421		950.19	0.00261621		1540.21	0.00072842		2130.2	0.00379776		2720.2	0.00100663		3310.2	-0.00313964
360.4	0.01720737		950.39	0.00210121		1540.41	0.0009486		2130.4	0.00340338		2720.4	0.00106753		3310.4	-0.00321083
360.6	0.01647662		950.59	0.00155937		1540.61	0.00086332		2130.6	0.00325134		2720.6	0.00119315		3310.6	-0.00354662
360.8	0.01586074		950.79	0.00212925		1540.81	0.00111831		2130.8	0.00314745		2720.8	0.00135973		3310.8	-0.00394793
361	0.01603209		950.99	0.00263672		1541.01	0.00147564		2131	0.00398889		2721	0.00109847		3311	-0.00339535
361.2	0.01584982		951.19	0.00213215		1541.21	0.0009421		2131.2	0.00343161		2721.2	0.00166555		3311.2	-0.00444067
361.4	0.01610832		951.39	0.00135526		1541.41	0.00103039		2131.4	0.00270107		2721.4	0.00159184		3311.4	-0.00428833
361.6	0.01655708		951.59	0.00041099		1541.61	0.00065119		2131.6	0.00187792		2721.6	0.00234687		3311.6	-0.00351239
361.8	0.01620811		951.79	0.00026644		1541.81	0.00060181		2131.8	0.0012546		2721.8	0.00145271		3311.8	-0.00296977
362	0.01501979		951.99	-0.00005831		1542.01	0.00154436		2132	0.00199776		2722	0.00044021		3312	-0.00171026
362.2	0.01411689		952.19	0.00028272		1542.21	0.00167684		2132.2	0.00196157		2722.2	0.00053442		3312.2	-0.00119539
362.4	0.01330328		952.39	-0.00090577		1542.41	0.00181984		2132.4	0.00262915		2722.4	0.0001349		3312.4	-0.00108758
362.6	0.01348914		952.59	-0.00086195		1542.61	0.00139123		2132.6	0.00332365		2722.6	0.00045384		3312.6	-0.00091664
362.8	0.01356801		952.79	-0.00146093		1542.81	0.00126325		2132.8	0.00339629		2722.8	0.00038449		3312.8	-0.00017108
363	0.01319449		952.99	-0.00146731		1543.01	0.0018077		2133	0.00301585		2723	-0.00010564		3313	-0.00002817
363.2	0.0131738		953.19	-0.00203292		1543.21	0.00118984		2133.2	0.00210424		2723.2	-0.000352		3313.2	0.00084354
363.4	0.01408373		953.39	-0.00158669		1543.41	0.00122189		2133.4	0.00233014		2723.4	-0.00079363		3313.4	0.00065464
363.6	0.01454927		953.59	-0.00081734		1543.61	0.00086494		2133.6	0.00256922		2723.6	-0.0002897		3313.6	0.0000003
363.8	0.01506897		953.79	-0.00052506		1543.81	0.00102746		2133.8	0.00281586		2723.8	0.00055413		3313.8	-0.00017455
364	0.01604263		953.99	-0.00089192		1544.01	0.00051268		2134	0.00212173		2724	0.00132614		3314	-0.00138389
364.2	0.01631907		954.19	-0.0005709		1544.21	0.00030185		2134.2	0.00215536		2724.2	0.00113265		3314.2	-0.00265905
364.4	0.01600306		954.39	-0.00080093		1544.41	0.00009292		2134.4	0.00158645		2724.4	0.00099936		3314.4	-0.00304041
364.6	0.01610271		954.59	-0.00049768		1544.61	0.00032968		2134.6	0.00186071		2724.6	0.00110754		3314.6	-0.00347515
364.8	0.01636025		954.79	0.00064226		1544.81	-0.00024355		2134.8	0.00100106		2724.8	0.00093611		3314.8	-0.00330116
365	0.01654244		954.99	0.00030352		1545.01	-0.00020321		2135	0.00100431		2725	0.00088144		3315	-0.00391352
365.2	0.01707233		955.19	-0.00010487		1545.21	-0.00106358		2135.2	0.00042685		2725.2	0.0019289		3315.2	-0.00460039
365.4	0.01702392		955.39	-0.00024173		1545.41	-0.00025407		2135.4	0.00079615		2725.4	0.00155383		3315.4	-0.00442052
365.6	0.01692563		955.59	-0.00002985		1545.61	-0.00021799		2135.6	0.0011193		2725.6	0.00111892		3315.6	-0.00410314
365.8	0.01630546		955.79	-0.00000891		1545.81	0.00091003		2135.8	0.0018565		2725.8	0.00070819		3315.8	-0.00391787
366	0.01607293		955.99	0.00011505		1546.01	0.0017885		2136	0.00267623		2726	0.00084026		3316	-0.00326115
366.2	0.01569945		956.19	0.00054729		1546.21	0.00123153		2136.2	0.00173146		2726.2	0.00065014		3316.2	-0.00363273
366.4	0.01622502		956.39	-0.00031588		1546.41	0.00203191		2136.4	0.00171749		2726.4	0.00034076		3316.4	-0.00420258
366.6	0.01675927		956.59	0.00017551		1546.61	0.00222143		2136.6	0.00207768		2726.6	0.00071161		3316.6	-0.00385774
366.8	0.01628995		956.79	0.00038021		1546.81	0.0028326		2136.8	0.00176635		2726.8	0.00002494		3316.8	-0.00324122
367	0.01575585		956.99	0.00014447		1547.01	0.00357441		2137	0.00117132		2727	-0.00022625		3317	-0.00242482
367.2	0.01644865		957.19	0.0002276		1547.21	0.00322664		2137.2	0.00161603		2727.2	-0.00012213		3317.2	-0.00211373
367.4	0.01725291		957.39	0.00080395		1547.41	0.00260991		2137.4	0.00219047		2727.4	-0.00049044		3317.4	-0.00181272
367.6	0.01724243		957.59	0.00067364		1547.61	0.00254005		2137.6	0.00225811		2727.6	0.00000229		3317.6	-0.00215685
367.8	0.01775256		957.79	0.00042667		1547.81	0.00251825		2137.8	0.00216498		2727.8	0.00034885		3317.8	-0.00181226
368	0.0181589		957.99	0.00020829		1548.01	0.00213566		2138	0.00152544		2728	0.00075875		3318	-0.00301272
368.2	0.01873042		958.19	0.00005728		1548.21	0.00203495		2138.2	0.00115502		2728.2	-0.00002864		3318.2	-0.00320669
368.4	0.01895058		958.39	-0.00050387		1548.41	0.00176518		2138.4	0.00141005		2728.4	-0.00015313		3318.4	-0.00333921
368.6	0.01920465		958.59	0.00038947		1548.61	0.00148159		2138.6	0.00238835		2728.6	-0.00001308		3318.6	-0.0024588
368.8	0.01916179		958.79	0.00049621		1548.81	0.00098886		2138.8	0.00245295		2728.8	0.00005644		3318.8	-0.00163019
369	0.0190121		958.99	0.00013072		1549.01	0.00104601		2139	0.00311556		2729	0.0003893		3319	-0.00242921
369.2	0.01977866		959.19	-0.00015686		1549.21	0.00088706		2139.2	0.00354576		2729.2	0.00041876		3319.2	-0.00137982
369.4	0.01964111		959.39	-0.00068635		1549.41	0.00090365		2139.4	0.00366004		2729.4	-0.00001669		3319.4	-0.00138667
369.6	0.01948745		959.59	-0.00041647		1549.61	0.00083311		2139.6	0.0031723		2729.6	0.00046827		3319.6	-0.00111015
369.8	0.01946491		959.79	-0.00025351		1549.81	0.00152582		2139.8	0.0034223		2729.8	0.00103976		3319.8	-0.0011063
370	0.01907857		959.99	-0.00008993		1550.01	0.00120446		2140	0.00320247		2730	0.00210234		3320	-0.00008567
370.2	0.01830396		960.19	-0.00003779		1550.21	0.00053873		2140.2	0.00222054		2730.2	0.00232103		3320.2	-0.00046588
370.4	0.01810367		960.39	-0.0004498		1550.41	0.00154858		2140.4	0.00235937		2730.4	0.00290543		3320.4	-0.00023681
370.6	0.0173117		960.59	-0.00085124		1550.61	0.00202248		2140.6	0.0031668		2730.6	0.00391579		3320.6	0.00068526
370.8	0.01668198		960.79	-0.00135419		1550.81	0.00185371		2140.8	0.00277813		2730.8	0.00329429		3320.8	0.00066112
371	0.0167242		960.99	-0.00216342		1551.01	0.00198611		2141	0.00242476		2731	0.00302021		3321	0.00138371
371.2	0.01690744		961.19	-0.00261669		1551.21	0.00191476		2141.2	0.0027021		2731.2	0.00265908		3321.2	0.00158131
371.4	0.01649441		961.39	-0.00250064		1551.41	0.00100001		2141.4	0.00258525		2731.4	0.002038		3321.4	0.00202328
371.6	0.01636366		961.59	-0.0028489		1551.61	0.00137917		2141.6	0.00238361		2731.6	0.00130136		3321.6	0.00225211
371.8	0.01640483		961.79	-0.00309778		1551.81	0.00153452		2141.8	0.00222921		2731.8	0.0011511		3321.8	0.00294168
372	0.01625131		961.99	-0.00280709		1552.01	0.00108313		2142	0.00232688		2732	0.00032478		3322	0.00306632
372.2	0.01676541		962.19	-0.00250411		1552.21	0.00102429		2142.2	0.00275665		2732.2	-0.00050388		3322.2	0.00164711
372.4	0.01699374		962.39	-0.00192273		1552.41	0.0015523		2142.4	0.00306397		2732.4	-0.00071162		3322.4	0.00143475
372.6	0.01797435		962.59	-0.00105749		1552.61	0.00138153		2142.6	0.00316995		2732.6	-0.00194611		3322.6	0.00137476
372.8	0.01834254		962.79	-0.00095854		1552.81	0.00125541		2142.8	0.00280544		2732.8	-0.00240979		3322.8	-0.0000472
373	0.01885978		962.99	-0.00012614		1553.01	0.00109125		2143	0.00268672		2733	-0.0032595		3323	-0.00105261
373.2	0.02000416		963.19	0.00072355		1553.21	0.00175736		2143.2	0.00271504		2733.2	-0.00344629		3323.2	-0.00156669
373.4	0.01983998		963.39	0.00188006		1553.41	0.00236161		2143.4	0.00169605		2733.4	-0.00366422		3323.4	-0.00229301
373.6	0.01989752		963.59	0.00298705		1553.61	0.00269171		2143.6	0.00158019		2733.6	-0.00283803		3323.6	-0.00219035
373.8	0.01982742		963.79	0.00313713		1553.81	0.00290733		2143.8	0.00222793		2733.8	-0.00204123		3323.8	-0.00261333
374	0.01914197		963.99	0.00306838		1554.01	0.00245947		2144	0.00267078		2734	-0.00099776		3324	-0.00306165
374.2	0.01941363		964.19	0.00350098		1554.21	0.00222303		2144.2	0.00336911		2734.2	-0.00068508		3324.2	-0.00366834
374.4	0.01910134		964.39	0.0036361		1554.41	0.00289726		2144.4	0.00484222		2734.4	-0.00020006		3324.4	-0.00394293
374.6	0.01843652		964.59	0.00278286		1554.61	0.00291453		2144.6	0.00529831		2734.6	0.00030251		3324.6	-0.00382215
374.8	0.01784131		964.79	0.00246753		1554.81	0.00245293		2144.8	0.00447162		2734.8	0.00026407		3324.8	-0.00391217
375	0.01732898		964.99	0.00162767		1555.01	0.00314878		2145	0.00409194		2735	-0.00023306		3325	-0.00242072
375.2	0.01733946		965.19	0.00100561		1555.21	0.00284082		2145.2	0.00474478		2735.2	0.00006308		3325.2	-0.00165127
375.4	0.01667442		965.39	0.00188906		1555.41	0.00207904		2145.4	0.00525916		2735.4	-0.00021332		3325.4	-0.00072671
375.6	0.01660582		965.59	0.00122777		1555.61	0.00305918		2145.6	0.00462513		2735.6	0.00010132		3325.6	0.00016387
375.8	0.01642996		965.79	0.00145475		1555.81	0.00318719		2145.8	0.00440635		2735.8	0.00069738		3325.8	0.00060084
376	0.01696643		965.99	0.00219308		1556.01	0.00298308		2146	0.00337639		2736	0.00074449		3326	-0.00014987
376.2	0.01680779		966.19	0.0020752		1556.21	0.00317634		2146.2	0.00336408		2736.2	0.00120851		3326.2	-0.00170009
376.4	0.01733056		966.39	0.00164785		1556.41	0.00342706		2146.4	0.00281217		2736.4	0.00062159		3326.4	-0.00090691
376.6	0.0182217		966.59	0.0021165		1556.61	0.00307168		2146.6	0.00258189		2736.6	0.00012192		3326.6	-0.00129187
376.8	0.01797994		966.79	0.00257663		1556.81	0.00373498		2146.8	0.00227841		2736.8	0.00046398		3326.8	-0.00211388
377	0.01818837		966.99	0.00338185		1557.01	0.00435424		2147	0.00212331		2737	0.00067199		3327	-0.00143535
377.2	0.01793589		967.19	0.00397376		1557.21	0.00484883		2147.2	0.00249003		2737.2	0.00111312		3327.2	-0.00134987
377.4	0.01698637		967.39	0.00394395		1557.41	0.00482941		2147.4	0.00175183		2737.4	0.00074943		3327.4	-0.00138475
377.6	0.01659553		967.59	0.00439689		1557.61	0.00375616		2147.6	0.00256201		2737.6	0.00157617		3327.6	-0.00106947
377.8	0.01607035		967.79	0.0042345		1557.81	0.00317685		2147.8	0.00349275		2737.8	0.00154335		3327.8	-0.00157198
378	0.01636425		967.99	0.00437159		1558.01	0.00268369		2148	0.0041123		2738	0.00127839		3328	-0.00164169
378.2	0.01699744		968.19	0.0044433		1558.21	0.00225882		2148.2	0.00436851		2738.2	0.00117041		3328.2	-0.00239126
378.4	0.01717737		968.39	0.0042841		1558.41	0.00241744		2148.4	0.00379943		2738.4	0.00087064		3328.4	-0.00258737
378.6	0.01826804		968.59	0.00369662		1558.61	0.00197919		2148.6	0.00319839		2738.6	0.00104397		3328.6	-0.00259161
378.8	0.01884096		968.79	0.00449602		1558.81	0.0011547		2148.8	0.00299814		2738.8	0.00118877		3328.8	-0.00152607
379	0.01993171		968.99	0.00376153		1559.01	0.00138888		2149	0.00288568		2739	0.00080037		3329	-0.00128439
379.2	0.020514		969.19	0.00324769		1559.21	0.00099892		2149.2	0.00300158		2739.2	0.00082152		3329.2	-0.00165238
379.4	0.02037514		969.39	0.0031935		1559.41	0.00107466		2149.4	0.00243258		2739.4	0.00056964		3329.4	-0.00138522
379.6	0.02198784		969.59	0.00251658		1559.61	0.00149837		2149.6	0.0005366		2739.6	0.00065669		3329.6	-0.00133793
379.8	0.02237382		969.79	0.00270802		1559.81	0.00191352		2149.8	0.00009475		2739.8	0.00038714		3329.8	-0.00144421
380	0.0231455		969.99	0.00177668		1560.01	0.00207603		2150	-0.00094248		2740	0.00068207		3330	-0.00178211
380.2	0.02227924		970.19	0.00039208		1560.21	0.00140604		2150.2	-0.00000983		2740.2	0.00074876		3330.2	-0.00189183
380.4	0.02205086		970.39	-0.0003079		1560.41	0.00109583		2150.4	0.00060226		2740.4	0.00042938		3330.4	-0.0016187
380.6	0.02228092		970.59	-0.00050156		1560.61	0.00143086		2150.6	0.00109205		2740.6	0.00127471		3330.6	-0.00159175
380.8	0.02194061		970.79	-0.00036538		1560.81	0.00144023		2150.8	0.00183668		2740.8	0.00100685		3330.8	-0.00218878
381	0.02092026		970.99	0.00021414		1561.01	0.00106895		2151	0.00251534		2741	0.00177252		3331	-0.0021126
381.2	0.02001145		971.19	0.0011596		1561.21	0.00076747		2151.2	0.00339381		2741.2	0.00250657		3331.2	-0.00205697
381.4	0.019055		971.39	0.00151984		1561.41	0.00065689		2151.4	0.00300041		2741.4	0.00302257		3331.4	-0.00243956
381.6	0.01871717		971.59	0.00230562		1561.61	-0.00018454		2151.6	0.00370434		2741.6	0.00340305		3331.6	-0.0019093
381.8	0.01875511		971.79	0.00177518		1561.81	-0.00089216		2151.8	0.00392247		2741.8	0.0032111		3331.8	-0.00125826
382	0.01917791		971.99	0.00193812		1562.01	-0.00069871		2152	0.00415942		2742	0.00370538		3332	-0.00155629
382.2	0.018622		972.19	0.00167346		1562.21	-0.00048664		2152.2	0.00440718		2742.2	0.00394545		3332.2	-0.00185369
382.4	0.01851371		972.39	0.00259528		1562.41	-0.00066863		2152.4	0.00444923		2742.4	0.00387286		3332.4	-0.00176507
382.6	0.01866837		972.59	0.00249043		1562.61	-0.00133459		2152.6	0.00501759		2742.6	0.00391854		3332.6	-0.00204882
382.8	0.01855749		972.79	0.00263313		1562.81	-0.00196292		2152.8	0.00437665		2742.8	0.00420642		3332.8	-0.00131095
383	0.01855444		972.99	0.00223325		1563.01	-0.00133385		2153	0.00408397		2743	0.00336393		3333	-0.00130951
383.2	0.01849956		973.19	0.00213932		1563.21	-0.00167848		2153.2	0.00394213		2743.2	0.00305887		3333.2	-0.00076915
383.4	0.01862886		973.39	0.00227707		1563.41	-0.00149987		2153.4	0.00404335		2743.4	0.00311791		3333.4	-0.00088193
383.6	0.01980666		973.59	0.00303806		1563.61	-0.00087275		2153.6	0.00335182		2743.6	0.00313229		3333.6	-0.00094464
383.8	0.01997214		973.79	0.00256635		1563.81	-0.00009131		2153.8	0.00298596		2743.8	0.00301764		3333.8	-0.00097186
384	0.02011815		973.99	0.0015267		1564.01	0.0001718		2154	0.00278314		2744	0.00344519		3334	-0.00095183
384.2	0.01978214		974.19	0.000893		1564.21	-0.00003038		2154.2	0.00375968		2744.2	0.00312702		3334.2	-0.00195056
384.4	0.0200306		974.39	0.0005678		1564.41	0.00135148		2154.4	0.00378065		2744.4	0.00318872		3334.4	-0.00197212
384.6	0.02059357		974.59	-0.00007927		1564.61	0.00195249		2154.6	0.00335433		2744.6	0.00309038		3334.6	-0.00254239
384.8	0.02059575		974.79	0.00053775		1564.81	0.00233856		2154.8	0.00397587		2744.8	0.00216042		3334.8	-0.00355472
385	0.02047255		974.99	0.00073369		1565.01	0.00329647		2155	0.00300898		2745	0.00376555		3335	-0.00364499
385.2	0.02055952		975.19	0.00124497		1565.21	0.00388156		2155.2	0.00262606		2745.2	0.00447485		3335.2	-0.00362219
385.4	0.02071119		975.39	0.00092754		1565.41	0.0043087		2155.4	0.00156041		2745.4	0.004485		3335.4	-0.00382869
385.6	0.02078402		975.59	0.00048091		1565.61	0.00453398		2155.6	0.0018095		2745.6	0.00453235		3335.6	-0.00407196
385.8	0.02144005		975.79	0.00074268		1565.81	0.00554169		2155.8	0.0021227		2745.8	0.00566254		3335.8	-0.0029585
386	0.02081945		975.99	0.00092366		1566.01	0.00670023		2156	0.00235248		2746	0.00576915		3336	-0.00235674
386.2	0.01981169		976.19	0.00053325		1566.21	0.00605386		2156.2	0.00278415		2746.2	0.00547849		3336.2	-0.00227189
386.4	0.01921879		976.39	0.0005032		1566.41	0.00496258		2156.4	0.0021962		2746.4	0.00552257		3336.4	-0.00214312
386.6	0.01930948		976.59	-0.00034989		1566.61	0.00451728		2156.6	0.00200105		2746.6	0.00627395		3336.6	-0.0018695
386.8	0.01911962		976.79	0.00015431		1566.81	0.00381196		2156.8	0.00183864		2746.8	0.00628139		3336.8	-0.00067493
387	0.0192322		976.99	0.00077059		1567.01	0.00371325		2157	0.00201205		2747	0.00573454		3337	0.00087681
387.2	0.01894393		977.19	0.00044545		1567.21	0.00294731		2157.2	0.00237382		2747.2	0.00632118		3337.2	0.00123562
387.4	0.01906769		977.39	0.00050198		1567.41	0.00259476		2157.4	0.00296027		2747.4	0.00577342		3337.4	0.00127572
387.6	0.02019176		977.59	0.00137562		1567.61	0.00181129		2157.6	0.002296		2747.6	0.00533624		3337.6	0.00205148
387.8	0.02087189		977.79	0.00108706		1567.81	0.00029986		2157.8	0.00198433		2747.8	0.00433022		3337.8	0.00274679
388	0.0206372		977.99	0.00104747		1568.01	-0.00025147		2158	0.00237162		2748	0.00345817		3338	0.0030729
388.2	0.02064606		978.19	0.00148239		1568.21	-0.0003248		2158.2	0.00210269		2748.2	0.0024156		3338.2	0.00274741
388.4	0.02106207		978.39	0.00208475		1568.41	-0.00023464		2158.4	0.00200363		2748.4	0.00214057		3338.4	0.00301769
388.6	0.02086969		978.59	0.0027013		1568.61	-0.0008805		2158.6	0.00242008		2748.6	0.00096862		3338.6	0.00202222
388.8	0.02058509		978.79	0.0037186		1568.81	-0.00033401		2158.8	0.0027138		2748.8	0.00084755		3338.8	0.0007355
389	0.02052515		978.99	0.00353664		1569.01	0.00088249		2159	0.00156368		2749	0.00132692		3339	-0.00026395
389.2	0.02104022		979.19	0.00428839		1569.21	0.00098358		2159.2	0.00202979		2749.2	0.00106951		3339.2	-0.00132678
389.4	0.02075975		979.39	0.00471412		1569.41	0.00154398		2159.4	0.00215908		2749.4	0.00028013		3339.4	-0.00216584
389.6	0.02108106		979.59	0.00512838		1569.61	0.00275139		2159.6	0.00242737		2749.6	0.00080135		3339.6	-0.00297176
389.8	0.02100091		979.79	0.00613728		1569.81	0.00436261		2159.8	0.00251659		2749.8	0.0013198		3339.8	-0.00242207
390	0.01985536		979.99	0.00667657		1570.01	0.00437972		2160	0.00274184		2750	0.00091494		3340	-0.00322949
390.2	0.01907771		980.19	0.0064222		1570.21	0.00433114		2160.2	0.00263449		2750.2	0.00073663		3340.2	-0.00426276
390.4	0.01954643		980.39	0.00647679		1570.41	0.00568922		2160.4	0.00181277		2750.4	0.00110594		3340.4	-0.00436084
390.6	0.02023371		980.59	0.00647513		1570.61	0.00581519		2160.6	0.00186825		2750.6	0.00184295		3340.6	-0.00441242
390.8	0.02085674		980.79	0.00638106		1570.81	0.00578716		2160.8	0.0012957		2750.8	0.00195191		3340.8	-0.00365644
391	0.02137082		980.99	0.006104		1571.01	0.00588682		2161	0.00079003		2751	0.00195065		3341	-0.00337074
391.2	0.0215829		981.19	0.00491582		1571.21	0.00583867		2161.2	0.0006962		2751.2	0.00222267		3341.2	-0.00363389
391.4	0.02220216		981.39	0.00429619		1571.41	0.00517467		2161.4	0.00020832		2751.4	0.00135961		3341.4	-0.00377945
391.6	0.02357904		981.59	0.00488875		1571.61	0.00453895		2161.6	-0.00125537		2751.6	0.00137256		3341.6	-0.00330973
391.8	0.02410576		981.79	0.00378973		1571.81	0.00340276		2161.8	-0.00175574		2751.8	0.00163109		3341.8	-0.00237288
392	0.02383216		981.99	0.00326248		1572.01	0.00335217		2162	-0.00206168		2752	0.00119468		3342	-0.00203253
392.2	0.02383194		982.19	0.00301766		1572.21	0.00363457		2162.2	-0.00234961		2752.2	0.00110399		3342.2	-0.00186522
392.4	0.02475154		982.39	0.00294971		1572.41	0.00356717		2162.4	-0.00129831		2752.4	0.00098385		3342.4	-0.0026668
392.6	0.02442058		982.59	0.0021454		1572.61	0.00395992		2162.6	-0.00072997		2752.6	0.00014788		3342.6	-0.0030917
392.8	0.0243154		982.79	0.00150324		1572.81	0.0029731		2162.8	-0.00073643		2752.8	0.00008523		3342.8	-0.00404477
393	0.02452978		982.99	0.00124587		1573.01	0.00253939		2163	-0.00021346		2753	-0.00006608		3343	-0.00381631
393.2	0.02513348		983.19	0.00180703		1573.21	0.00236699		2163.2	0.0009126		2753.2	-0.00025671		3343.2	-0.00465902
393.4	0.02424367		983.39	0.00179284		1573.41	0.0028785		2163.4	0.00162663		2753.4	-0.00074556		3343.4	-0.00461653
393.6	0.02468722		983.59	0.00194145		1573.61	0.00310877		2163.6	0.0011637		2753.6	-0.00035016		3343.6	-0.00460833
393.8	0.02381253		983.79	0.00252547		1573.81	0.00372604		2163.8	0.00180244		2753.8	0.00002664		3343.8	-0.00450062
394	0.02313063		983.99	0.00388076		1574.01	0.00364704		2164	0.00327224		2754	0.0001595		3344	-0.00519174
394.2	0.02310084		984.19	0.00408665		1574.21	0.00429995		2164.2	0.00390837		2754.2	-0.00011545		3344.2	-0.00403249
394.4	0.02311095		984.39	0.00323145		1574.41	0.00500396		2164.4	0.00390003		2754.4	0.00088697		3344.4	-0.00305031
394.6	0.02298943		984.59	0.00320916		1574.61	0.0040687		2164.6	0.00427443		2754.6	0.00179868		3344.6	-0.00268644
394.8	0.02316257		984.79	0.00393195		1574.81	0.00393363		2164.8	0.0047583		2754.8	0.00272983		3344.8	-0.00226171
395	0.02278354		984.99	0.00459642		1575.01	0.00393377		2165	0.00404281		2755	0.00234646		3345	-0.00179655
395.2	0.02324616		985.19	0.00448138		1575.21	0.00381953		2165.2	0.00375833		2755.2	0.00314369		3345.2	-0.00076496
395.4	0.02377133		985.39	0.0048069		1575.41	0.00276581		2165.4	0.00411861		2755.4	0.00271855		3345.4	-0.0006133
395.6	0.02456853		985.59	0.00530608		1575.61	0.00258611		2165.6	0.00368711		2755.6	0.00348546		3345.6	-0.00013412
395.8	0.02484915		985.79	0.00456235		1575.81	0.00234802		2165.8	0.00391579		2755.8	0.00417693		3345.8	0.00042139
396	0.02474764		985.99	0.00457388		1576.01	0.00277427		2166	0.00359123		2756	0.00320914		3346	-0.00001839
396.2	0.02450427		986.19	0.00435152		1576.21	0.00340228		2166.2	0.00274923		2756.2	0.00353434		3346.2	-0.00040711
396.4	0.02420802		986.39	0.00356521		1576.41	0.00367201		2166.4	0.00234444		2756.4	0.00416173		3346.4	-0.00076261
396.6	0.02399046		986.59	0.00279902		1576.61	0.00297409		2166.6	0.00197691		2756.6	0.00336396		3346.6	-0.00040621
396.8	0.02423033		986.79	0.00327203		1576.81	0.00245448		2166.8	0.00152967		2756.8	0.00337233		3346.8	-0.00095362
397	0.02450654		986.99	0.00342217		1577.01	0.00286293		2167	0.00205545		2757	0.00272573		3347	-0.00142896
397.2	0.02440087		987.19	0.00252114		1577.21	0.00384089		2167.2	0.00196073		2757.2	0.00238597		3347.2	-0.00241215
397.4	0.02396211		987.39	0.0025378		1577.41	0.00357468		2167.4	0.00102288		2757.4	0.00289001		3347.4	-0.00207904
397.6	0.02383754		987.59	0.00236527		1577.61	0.00422886		2167.6	0.00035467		2757.6	0.00262091		3347.6	-0.00261426
397.8	0.02402329		987.79	0.00199017		1577.81	0.0049426		2167.8	0.00076695		2757.8	0.00285564		3347.8	-0.00292107
398	0.0236509		987.99	0.00176777		1578.01	0.00474527		2168	0.00092694		2758	0.00284825		3348	-0.00289677
398.2	0.024514		988.19	0.0011723		1578.21	0.00474779		2168.2	0.00087182		2758.2	0.00309028		3348.2	-0.00246363
398.4	0.02426061		988.39	0.00118265		1578.41	0.00499304		2168.4	0.00048248		2758.4	0.00396105		3348.4	-0.00277727
398.6	0.02463608		988.59	0.00223122		1578.61	0.00438381		2168.6	0.00058068		2758.6	0.00438316		3348.6	-0.00331328
398.8	0.0240554		988.79	0.00284885		1578.81	0.00350833		2168.8	0.0002355		2758.8	0.00534362		3348.8	-0.00348262
399	0.02415401		988.99	0.00279648		1579.01	0.0031916		2169	0.00004128		2759	0.00456647		3349	-0.0034186
399.2	0.02434669		989.19	0.00308041		1579.21	0.00248606		2169.2	0.00078885		2759.2	0.00488617		3349.2	-0.00342761
399.4	0.02446153		989.39	0.00327037		1579.41	0.00168775		2169.4	0.0015144		2759.4	0.00451494		3349.4	-0.0037713
399.6	0.02427266		989.59	0.00357512		1579.61	0.00245018		2169.6	0.00186353		2759.6	0.00525766		3349.6	-0.00397709
399.8	0.02422123		989.79	0.00367097		1579.81	0.00342777		2169.8	0.00151498		2759.8	0.00547873		3349.8	-0.00309693
400	0.02355597		989.99	0.00364278		1580.01	0.00422024		2170	0.00102361		2760	0.00471813		3350	-0.0032726
400.2	0.02310619		990.19	0.00347444		1580.21	0.00452235		2170.2	0.0006637		2760.2	0.00557019		3350.2	-0.00341482
400.4	0.02329221		990.39	0.00350189		1580.41	0.0046721		2170.4	0.00113907		2760.4	0.00499023		3350.4	-0.00269522
400.6	0.02342298		990.59	0.00361573		1580.61	0.00457612		2170.6	0.0020825		2760.6	0.00403947		3350.6	-0.00224667
400.8	0.02339989		990.79	0.00317835		1580.81	0.00531335		2170.8	0.00206188		2760.8	0.00330816		3350.8	-0.00217106
401	0.0233337		990.99	0.0030363		1581.01	0.00532174		2171	0.0028985		2761	0.00283712		3351	-0.00237813
401.2	0.0233935		991.19	0.0026503		1581.21	0.00552319		2171.2	0.0024428		2761.2	0.00251288		3351.2	-0.00164198
401.4	0.02426272		991.39	0.00256098		1581.41	0.00491116		2171.4	0.00235536		2761.4	0.00233107		3351.4	-0.00070199
401.6	0.02508964		991.59	0.00145336		1581.61	0.0049961		2171.6	0.00292949		2761.6	0.0019653		3351.6	-0.00028068
401.8	0.02658333		991.79	0.00128456		1581.81	0.00432836		2171.8	0.00329656		2761.8	0.0015972		3351.8	0.00085177
402	0.02653045		991.99	0.00172704		1582.01	0.00383359		2172	0.00357827		2762	0.00177347		3352	0.00097531
402.2	0.0265751		992.19	0.00218321		1582.21	0.00389125		2172.2	0.00385659		2762.2	0.00201012		3352.2	0.00049036
402.4	0.02657766		992.39	0.00217829		1582.41	0.00309619		2172.4	0.0036565		2762.4	0.00206262		3352.4	0.00105413
402.6	0.02644292		992.59	0.00175237		1582.61	0.00227342		2172.6	0.00351908		2762.6	0.0029494		3352.6	0.00123268
402.8	0.02534925		992.79	0.00197823		1582.81	0.00207102		2172.8	0.00299334		2762.8	0.00325341		3352.8	0.00017008
403	0.02513563		992.99	0.00273421		1583.01	0.00242116		2173	0.003104		2763	0.00274129		3353	0.00037523
403.2	0.02398215		993.19	0.00308123		1583.21	0.0015657		2173.2	0.00272076		2763.2	0.00265921		3353.2	0.00117296
403.4	0.02348765		993.39	0.00366294		1583.41	0.00155198		2173.4	0.00275217		2763.4	0.00220074		3353.4	0.0007306
403.6	0.02338889		993.59	0.00404926		1583.61	0.00154856		2173.6	0.00298286		2763.6	0.00209581		3353.6	0.00060924
403.8	0.02440668		993.79	0.00448388		1583.81	0.00182933		2173.8	0.00267629		2763.8	0.00155532		3353.8	0.00041487
404	0.02430187		993.99	0.00442347		1584.01	0.00175556		2174	0.00264829		2764	0.00123547		3354	-0.00113216
404.2	0.02393059		994.19	0.00420661		1584.21	0.00188645		2174.2	0.00225886		2764.2	0.00134377		3354.2	-0.00245488
404.4	0.02381714		994.39	0.00354676		1584.41	0.00217234		2174.4	0.00219697		2764.4	0.00052826		3354.4	-0.00235782
404.6	0.0237472		994.59	0.00321334		1584.61	0.00215333		2174.6	0.00198716		2764.6	0.00069678		3354.6	-0.00301023
404.8	0.02318665		994.79	0.00228749		1584.81	0.00305938		2174.8	0.001951		2764.8	0.00019326		3354.8	-0.00375531
405	0.02332123		994.99	0.00271884		1585.01	0.0029855		2175	0.00126776		2765	0.00034306		3355	-0.00437091
405.2	0.02377851		995.19	0.00176913		1585.21	0.00304874		2175.2	0.00047324		2765.2	-0.00001758		3355.2	-0.00407017
405.4	0.02441696		995.39	0.00152938		1585.41	0.00323726		2175.4	0.00033324		2765.4	0.0004792		3355.4	-0.00454039
405.6	0.02482022		995.59	0.00098232		1585.61	0.00374997		2175.6	0.00127432		2765.6	0.00134583		3355.6	-0.00546576
405.8	0.02528724		995.79	0.00113953		1585.81	0.00438985		2175.8	0.00094539		2765.8	0.00137253		3355.8	-0.00487207
406	0.02525193		995.99	0.00114185		1586.01	0.00497608		2176	0.00076474		2766	0.0021963		3356	-0.00511053
406.2	0.02574547		996.19	0.00061895		1586.21	0.00542145		2176.2	0.00036579		2766.2	0.00252547		3356.2	-0.00460269
406.4	0.02649976		996.39	0.00002471		1586.41	0.00558589		2176.4	0.00100546		2766.4	0.00394866		3356.4	-0.0038479
406.6	0.02695861		996.59	-0.00003364		1586.61	0.00598917		2176.6	0.00093812		2766.6	0.00531666		3356.6	-0.00296538
406.8	0.02632663		996.79	0.00059609		1586.81	0.00607007		2176.8	0.00018279		2766.8	0.00545875		3356.8	-0.00293022
407	0.02622594		996.99	0.0003809		1587.01	0.00568562		2177	0.00007894		2767	0.0055929		3357	-0.0014145
407.2	0.0261391		997.19	-0.00008481		1587.21	0.00473572		2177.2	0.0010744		2767.2	0.00505523		3357.2	-0.00134742
407.4	0.02681487		997.39	0.00016201		1587.41	0.00461001		2177.4	0.00089944		2767.4	0.0048965		3357.4	-0.00147937
407.6	0.02739903		997.59	0.00028258		1587.61	0.00373311		2177.6	0.00102265		2767.6	0.00437904		3357.6	-0.00122423
407.8	0.02873313		997.79	0.00052469		1587.81	0.0032773		2177.8	0.00118024		2767.8	0.00404317		3357.8	-0.00181266
408	0.02799328		997.99	0.00072086		1588.01	0.00255806		2178	0.00110485		2768	0.00433102		3358	-0.00226102
408.2	0.02769083		998.19	0.00059415		1588.21	0.00235976		2178.2	0.00118548		2768.2	0.00388781		3358.2	-0.00167646
408.4	0.02686224		998.39	0.00051731		1588.41	0.00109247		2178.4	0.00150587		2768.4	0.00382216		3358.4	-0.00117901
408.6	0.02637845		998.59	0.00197387		1588.61	0.00062662		2178.6	0.00151239		2768.6	0.00342041		3358.6	-0.00125838
408.8	0.02540966		998.79	0.00217028		1588.81	0.00142796		2178.8	0.00188835		2768.8	0.0030454		3358.8	-0.00154799
409	0.02563393		998.99	0.00344566		1589.01	0.00160724		2179	0.0005455		2769	0.00292046		3359	-0.00166331
409.2	0.0255439		999.19	0.00352187		1589.21	0.00155379		2179.2	0.00079654		2769.2	0.00301538		3359.2	-0.00191285
409.4	0.02545498		999.39	0.00439685		1589.41	0.00141048		2179.4	0.00122328		2769.4	0.00316359		3359.4	-0.00253749
409.6	0.02444103		999.59	0.00408234		1589.61	0.00138301		2179.6	0.00145507		2769.6	0.00317019		3359.6	-0.00244964
409.8	0.024424		999.79	0.00447543		1589.81	0.00158778		2179.8	0.00147369		2769.8	0.00317369		3359.8	-0.00179282
410	0.02421312		999.99	0.0044214		1590.01	0.0017797		2180	0.00142441		2770	0.00351192		3360	-0.00264282
410.2	0.02451263		1000.19	0.00433273		1590.21	0.00122232		2180.2	0.00203297		2770.2	0.00328995		3360.2	-0.00261502
410.4	0.02465338		1000.39	0.0047116		1590.41	0.00130947		2180.4	0.00237897		2770.4	0.00401067		3360.4	-0.0030919
410.6	0.02500366		1000.59	0.00369547		1590.61	0.00085258		2180.6	0.00212441		2770.6	0.00305729		3360.6	-0.00345315
410.8	0.02461805		1000.79	0.00426279		1590.81	0.00085908		2180.8	0.00190681		2770.8	0.00219348		3360.8	-0.00387514
411	0.02562168		1000.99	0.00366145		1591.01	0.00086085		2181	0.00188638		2771	0.00204751		3361	-0.00370275
411.2	0.02625336		1001.19	0.00359516		1591.21	0.00030545		2181.2	0.00257644		2771.2	0.00109903		3361.2	-0.00449827
411.4	0.02624406		1001.39	0.00332635		1591.41	0.00066122		2181.4	0.00172573		2771.4	0.00094109		3361.4	-0.00471332
411.6	0.02639914		1001.59	0.00354822		1591.61	0.0009268		2181.6	0.00185058		2771.6	-0.00027522		3361.6	-0.00501817
411.8	0.02704371		1001.79	0.00344427		1591.81	0.00073033		2181.8	0.00214191		2771.8	-0.00036875		3361.8	-0.00546944
412	0.02673552		1001.99	0.00323205		1592.01	0.00089254		2182	0.00175587		2772	-0.00068992		3362	-0.00497665
412.2	0.02606545		1002.19	0.00236695		1592.21	0.00172939		2182.2	0.00109043		2772.2	-0.00064578		3362.2	-0.00456728
412.4	0.02583277		1002.39	0.00205567		1592.41	0.00158753		2182.4	0.00069012		2772.4	-0.00074883		3362.4	-0.00484806
412.6	0.02630537		1002.59	0.00322095		1592.61	0.00286955		2182.6	0.00003308		2772.6	-0.00066281		3362.6	-0.00451217
412.8	0.0265576		1002.79	0.00369718		1592.81	0.00374841		2182.8	-0.00015115		2772.8	-0.00011937		3362.8	-0.00452624
413	0.02681316		1002.99	0.00363376		1593.01	0.00345477		2183	-0.00086354		2773	0.00021753		3363	-0.00445613
413.2	0.02636624		1003.19	0.00282318		1593.21	0.00236361		2183.2	-0.00094193		2773.2	0.00120202		3363.2	-0.00433176
413.4	0.02588521		1003.39	0.00237112		1593.41	0.00221913		2183.4	-0.00121713		2773.4	0.002378		3363.4	-0.00365196
413.6	0.0248678		1003.59	0.00133633		1593.61	0.002128		2183.6	-0.00196431		2773.6	0.00337757		3363.6	-0.00380095
413.8	0.02521693		1003.79	0.00184151		1593.81	0.00199878		2183.8	-0.00109199		2773.8	0.00418855		3363.8	-0.00410309
414	0.02485782		1003.99	0.00217457		1594.01	0.00121966		2184	-0.00198234		2774	0.00474144		3364	-0.00475315
414.2	0.02540619		1004.19	0.0023622		1594.21	0.0001631		2184.2	-0.00136206		2774.2	0.00420782		3364.2	-0.00445844
414.4	0.02549422		1004.39	0.00218967		1594.41	0.00048123		2184.4	-0.00179781		2774.4	0.00396142		3364.4	-0.00520414
414.6	0.02537914		1004.59	0.00151091		1594.61	0.0002395		2184.6	-0.0016558		2774.6	0.00350843		3364.6	-0.00388539
414.8	0.02634045		1004.79	0.00304513		1594.81	-0.00000849		2184.8	-0.00156397		2774.8	0.00406705		3364.8	-0.0035053
415	0.02739508		1004.99	0.00349545		1595.01	-0.00021788		2185	-0.00132263		2775	0.00477042		3365	-0.00373576
415.2	0.0275688		1005.19	0.00341575		1595.21	-0.00109369		2185.2	-0.00101513		2775.2	0.00412174		3365.2	-0.00394796
415.4	0.02653429		1005.39	0.00356973		1595.41	-0.00027958		2185.4	-0.00078269		2775.4	0.00422754		3365.4	-0.00387127
415.6	0.02654318		1005.59	0.00394011		1595.61	-0.00071422		2185.6	-0.00013357		2775.6	0.00325635		3365.6	-0.00373548
415.8	0.02654216		1005.79	0.00396967		1595.81	-0.00108306		2185.8	-0.00040723		2775.8	0.00314156		3365.8	-0.00456845
416	0.02697667		1005.99	0.00507552		1596.01	-0.00065454		2186	-0.00115826		2776	0.00266556		3366	-0.00417828
416.2	0.02676981		1006.19	0.0047884		1596.21	-0.00003165		2186.2	-0.0019005		2776.2	0.00203488		3366.2	-0.00487973
416.4	0.02723084		1006.39	0.00506383		1596.41	-0.00008135		2186.4	-0.00150926		2776.4	0.00107777		3366.4	-0.00545491
416.6	0.02724303		1006.59	0.00614986		1596.61	-0.00059409		2186.6	-0.00172082		2776.6	0.00125767		3366.6	-0.00563093
416.8	0.02770567		1006.79	0.0061646		1596.81	-0.00082096		2186.8	-0.00168624		2776.8	0.00064395		3366.8	-0.00564445
417	0.02785448		1006.99	0.00533852		1597.01	-0.00116996		2187	-0.0019574		2777	0.00073203		3367	-0.00562327
417.2	0.02757722		1007.19	0.0050705		1597.21	-0.00139468		2187.2	-0.00205986		2777.2	0.00196512		3367.2	-0.00505827
417.4	0.02837057		1007.39	0.00451964		1597.41	-0.00099772		2187.4	-0.00150128		2777.4	0.00266238		3367.4	-0.00501872
417.6	0.02832317		1007.59	0.00350578		1597.61	-0.00138709		2187.6	-0.00119848		2777.6	0.0032488		3367.6	-0.00637981
417.8	0.02863338		1007.79	0.00385635		1597.81	-0.00096733		2187.8	0.00044664		2777.8	0.00295156		3367.8	-0.00632941
418	0.02802216		1007.99	0.00397144		1598.01	-0.00076057		2188	0.00008292		2778	0.00327344		3368	-0.00608334
418.2	0.02857414		1008.19	0.003041		1598.21	0.00028322		2188.2	0.00040805		2778.2	0.00300964		3368.2	-0.00518343
418.4	0.02877918		1008.39	0.00281657		1598.41	0.00135328		2188.4	0.00078886		2778.4	0.00399742		3368.4	-0.00530287
418.6	0.02893252		1008.59	0.00323344		1598.61	0.00135465		2188.6	0.00160676		2778.6	0.00456638		3368.6	-0.00457412
418.8	0.02958384		1008.79	0.00384178		1598.81	0.00156465		2188.8	0.0019158		2778.8	0.00528654		3368.8	-0.00547818
419	0.02914509		1008.99	0.00315764		1599.01	0.00190308		2189	0.0026717		2779	0.00559994		3369	-0.0047545
419.2	0.02882757		1009.19	0.00252983		1599.21	0.00213401		2189.2	0.00310814		2779.2	0.00620692		3369.2	-0.00418019
419.4	0.02834724		1009.39	0.0025449		1599.41	0.00254566		2189.4	0.00344893		2779.4	0.00644505		3369.4	-0.00429346
419.6	0.028598		1009.59	0.00239276		1599.61	0.00202104		2189.6	0.00291297		2779.6	0.00660085		3369.6	-0.0049864
419.8	0.0286045		1009.79	0.002645		1599.81	0.00231587		2189.8	0.00173499		2779.8	0.00591754		3369.8	-0.00610801
420	0.02874508		1009.99	0.00286428		1600.01	0.0025016		2190	0.00141768		2780	0.00578573		3370	-0.00561223
420.2	0.02810891		1010.19	0.002183		1600.21	0.00289955		2190.2	0.0011319		2780.2	0.00522257		3370.2	-0.00642292
420.4	0.02821283		1010.39	0.00279808		1600.41	0.00248907		2190.4	0.00092115		2780.4	0.00459709		3370.4	-0.00603116
420.6	0.02821996		1010.59	0.00327042		1600.61	0.00146239		2190.6	0.00019575		2780.6	0.00462501		3370.6	-0.00598847
420.8	0.02803099		1010.79	0.00399094		1600.81	0.00149497		2190.8	-0.00002078		2780.8	0.00375127		3370.8	-0.00528291
421	0.02857383		1010.99	0.00356845		1601.01	0.00110335		2191	-0.00017031		2781	0.00433413		3371	-0.00473976
421.2	0.02827942		1011.19	0.00389308		1601.21	0.00092132		2191.2	-0.00035709		2781.2	0.00441489		3371.2	-0.00452641
421.4	0.02852312		1011.39	0.00392216		1601.41	0.0011196		2191.4	0.00037508		2781.4	0.00471743		3371.4	-0.00422285
421.6	0.0277346		1011.59	0.00332368		1601.61	0.00131077		2191.6	0.00048012		2781.6	0.00555596		3371.6	-0.00443853
421.8	0.02772283		1011.79	0.00408554		1601.81	0.00284617		2191.8	0.00092061		2781.8	0.0054338		3371.8	-0.00379543
422	0.02736569		1011.99	0.00465779		1602.01	0.00313025		2192	0.00116994		2782	0.00569596		3372	-0.00349482
422.2	0.02792106		1012.19	0.00478053		1602.21	0.00320701		2192.2	0.00240024		2782.2	0.00556736		3372.2	-0.00308172
422.4	0.0280878		1012.39	0.00436775		1602.41	0.00230295		2192.4	0.00429645		2782.4	0.0067379		3372.4	-0.00422615
422.6	0.027677		1012.59	0.00441475		1602.61	0.00206712		2192.6	0.00456078		2782.6	0.00628288		3372.6	-0.00443656
422.8	0.02733815		1012.79	0.00419608		1602.81	0.00208669		2192.8	0.00501569		2782.8	0.00668552		3372.8	-0.00412045
423	0.02738859		1012.99	0.00340994		1603.01	0.00245048		2193	0.00526308		2783	0.00670142		3373	-0.00356115
423.2	0.02810666		1013.19	0.00324016		1603.21	0.00223848		2193.2	0.00545535		2783.2	0.00664901		3373.2	-0.00380588
423.4	0.02851535		1013.39	0.00300372		1603.41	0.00030422		2193.4	0.0053383		2783.4	0.00561843		3373.4	-0.00417763
423.6	0.02767918		1013.59	0.00301052		1603.61	-0.00010929		2193.6	0.00500169		2783.6	0.00559378		3373.6	-0.00493113
423.8	0.02767743		1013.79	0.00303872		1603.81	-0.00115064		2193.8	0.00442407		2783.8	0.00513517		3373.8	-0.00523955
424	0.02795427		1013.99	0.00350804		1604.01	-0.0015527		2194	0.00379655		2784	0.00629394		3374	-0.00423964
424.2	0.02753139		1014.19	0.0032488		1604.21	-0.00162312		2194.2	0.00305806		2784.2	0.00552953		3374.2	-0.00441276
424.4	0.0274858		1014.39	0.00415843		1604.41	-0.00220415		2194.4	0.00228395		2784.4	0.00433686		3374.4	-0.00380703
424.6	0.02735672		1014.59	0.00396694		1604.61	-0.00228965		2194.6	0.00197317		2784.6	0.00385678		3374.6	-0.00414118
424.8	0.02759862		1014.79	0.00404971		1604.81	-0.00185642		2194.8	0.00109589		2784.8	0.00390993		3374.8	-0.00403254
425	0.02793713		1014.99	0.00289977		1605.01	-0.00162432		2195	0.00046439		2785	0.00404484		3375	-0.00393529
425.2	0.02758536		1015.19	0.00332545		1605.21	-0.00115496		2195.2	-0.00023067		2785.2	0.00342406		3375.2	-0.00415372
425.4	0.02794981		1015.39	0.00244061		1605.41	-0.0010899		2195.4	-0.00041913		2785.4	0.00419295		3375.4	-0.00419353
425.6	0.02728762		1015.59	0.00278151		1605.61	-0.00073035		2195.6	-0.00091027		2785.6	0.00426637		3375.6	-0.00561296
425.8	0.02673914		1015.79	0.00276434		1605.81	-0.0001759		2195.8	-0.00047238		2785.8	0.00359408		3375.8	-0.00625558
426	0.02599218		1015.99	0.00277015		1606.01	-0.00036825		2196	0.0009749		2786	0.00427669		3376	-0.00587999
426.2	0.02562866		1016.19	0.00218829		1606.21	0.0000536		2196.2	0.00145879		2786.2	0.00460587		3376.2	-0.00620721
426.4	0.02562224		1016.39	0.00168883		1606.41	0.00055588		2196.4	0.00248033		2786.4	0.0051754		3376.4	-0.00696067
426.6	0.02514458		1016.59	0.00250791		1606.61	0.00144596		2196.6	0.0016192		2786.6	0.00504524		3376.6	-0.00717572
426.8	0.0249511		1016.79	0.00287737		1606.81	0.0020132		2196.8	0.00195899		2786.8	0.00507584		3376.8	-0.00704186
427	0.02545535		1016.99	0.00312411		1607.01	0.00232348		2197	0.00175137		2787	0.00392643		3377	-0.00760182
427.2	0.02619107		1017.19	0.00337165		1607.21	0.00159572		2197.2	0.00303037		2787.2	0.0034764		3377.2	-0.00761348
427.4	0.02633406		1017.39	0.00399966		1607.41	0.00098896		2197.4	0.00329797		2787.4	0.00267176		3377.4	-0.00766272
427.6	0.02668906		1017.59	0.00453323		1607.61	0.001916		2197.6	0.00244784		2787.6	0.00283663		3377.6	-0.00709194
427.8	0.02750322		1017.79	0.00469599		1607.81	0.00154328		2197.8	0.00150055		2787.8	0.0035121		3377.8	-0.00623137
428	0.02786761		1017.99	0.00521665		1608.01	0.0021151		2198	0.00092707		2788	0.00392039		3378	-0.00514662
428.2	0.0283196		1018.19	0.00394735		1608.21	0.00263875		2198.2	0.00141349		2788.2	0.00345781		3378.2	-0.00463361
428.4	0.02916245		1018.39	0.0044593		1608.41	0.0028926		2198.4	0.00140643		2788.4	0.00367996		3378.4	-0.00420162
428.6	0.02971643		1018.59	0.00324398		1608.61	0.00356314		2198.6	0.00077591		2788.6	0.00437944		3378.6	-0.00468578
428.8	0.03030663		1018.79	0.00241013		1608.81	0.00332945		2198.8	0.00013037		2788.8	0.0048653		3378.8	-0.00438651
429	0.03054375		1018.99	0.0023974		1609.01	0.00295413		2199	0.00012949		2789	0.00404426		3379	-0.00405585
429.2	0.03002812		1019.19	0.00284353		1609.21	0.00205904		2199.2	0.00049741		2789.2	0.003923		3379.2	-0.0047544
429.4	0.02959755		1019.39	0.00202602		1609.41	0.00103408		2199.4	0.00038495		2789.4	0.00536237		3379.4	-0.00534817
429.6	0.02884672		1019.59	0.00248438		1609.61	0.00069398		2199.6	0.00063117		2789.6	0.00624706		3379.6	-0.00564876
429.8	0.02888122		1019.79	0.00135891		1609.81	0.000945		2199.8	0.00107078		2789.8	0.00687935		3379.8	-0.00555026
430	0.02888649		1019.99	0.00165164		1610.01	0.00065908		2200	0.00135941		2790	0.00753995		3380	-0.00553267
430.2	0.02883946		1020.19	0.00102556		1610.21	0.00062093		2200.2	0.00130833		2790.2	0.00750825		3380.2	-0.00636513
430.4	0.02898146		1020.39	0.00174279		1610.41	0.00094702		2200.4	0.00166176		2790.4	0.00839		3380.4	-0.00712864
430.6	0.02866505		1020.59	0.00198529		1610.61	0.00075548		2200.6	0.00055211		2790.6	0.00853216		3380.6	-0.00782987
430.8	0.02911187		1020.79	0.00203082		1610.81	0.00067086		2200.8	0.00068433		2790.8	0.00777751		3380.8	-0.00725079
431	0.02972508		1020.99	0.00238766		1611.01	0.0002599		2201	0.00110275		2791	0.00642099		3381	-0.00749012
431.2	0.03032374		1021.19	0.00272516		1611.21	0.00012661		2201.2	0.00170625		2791.2	0.00669321		3381.2	-0.00720566
431.4	0.03057084		1021.39	0.00311555		1611.41	-0.00002266		2201.4	0.0011534		2791.4	0.00571591		3381.4	-0.00686898
431.6	0.03091955		1021.59	0.00333602		1611.61	-0.00010153		2201.6	0.00153268		2791.6	0.0052577		3381.6	-0.00527253
431.8	0.03055012		1021.79	0.00334782		1611.81	-0.00048914		2201.8	0.00143612		2791.8	0.00602063		3381.8	-0.00447699
432	0.0308913		1021.99	0.00337075		1612.01	0.00033053		2202	0.00223242		2792	0.00564128		3382	-0.00393328
432.2	0.03087703		1022.19	0.00345816		1612.21	0.00079986		2202.2	0.00234892		2792.2	0.00472913		3382.2	-0.00353368
432.4	0.03057672		1022.39	0.00396101		1612.41	0.0012878		2202.4	0.0022049		2792.4	0.00493567		3382.4	-0.00302897
432.6	0.03007738		1022.59	0.00364065		1612.61	0.00112108		2202.6	0.00214814		2792.6	0.00433313		3382.6	-0.00248406
432.8	0.02956215		1022.79	0.00418488		1612.81	0.00025338		2202.8	0.00293363		2792.8	0.00282513		3382.8	-0.00194325
433	0.02901747		1022.99	0.00415613		1613.01	0.00009369		2203	0.00352355		2793	0.00189637		3383	-0.0021209
433.2	0.02904687		1023.19	0.00402507		1613.21	-0.00032917		2203.2	0.00374555		2793.2	0.0021112		3383.2	-0.00231662
433.4	0.02914857		1023.39	0.00357604		1613.41	-0.0003859		2203.4	0.00269695		2793.4	0.00313202		3383.4	-0.00196794
433.6	0.02861223		1023.59	0.00317573		1613.61	-0.00031592		2203.6	0.00252868		2793.6	0.00381906		3383.6	-0.00181836
433.8	0.02875155		1023.79	0.0029529		1613.81	0.0003449		2203.8	0.0032883		2793.8	0.00407497		3383.8	-0.00246435
434	0.02827805		1023.99	0.0032568		1614.01	-0.0000565		2204	0.00298126		2794	0.00408293		3384	-0.00223514
434.2	0.02830241		1024.19	0.00304722		1614.21	0.00008692		2204.2	0.00289629		2794.2	0.00552413		3384.2	-0.00304342
434.4	0.02927832		1024.39	0.00330995		1614.41	0.00006543		2204.4	0.00250435		2794.4	0.00708657		3384.4	-0.00291635
434.6	0.03026771		1024.59	0.00306744		1614.61	0.0001263		2204.6	0.00265336		2794.6	0.00716195		3384.6	-0.00255054
434.8	0.03033859		1024.79	0.00287753		1614.81	-0.00011239		2204.8	0.00226312		2794.8	0.00713304		3384.8	-0.00232282
435	0.03075487		1024.99	0.0029693		1615.01	-0.00006585		2205	0.00176104		2795	0.00782785		3385	-0.00278388
435.2	0.03109614		1025.19	0.00321197		1615.21	-0.0006117		2205.2	0.0026039		2795.2	0.00915333		3385.2	-0.00280395
435.4	0.03240743		1025.39	0.00337397		1615.41	-0.00118973		2205.4	0.00271912		2795.4	0.00914001		3385.4	-0.00235874
435.6	0.03370466		1025.59	0.00320606		1615.61	-0.00120379		2205.6	0.00383979		2795.6	0.00951989		3385.6	-0.00137972
435.8	0.03384153		1025.79	0.00347036		1615.81	-0.00151963		2205.8	0.00378594		2795.8	0.00989536		3385.8	-0.00169732
436	0.03440806		1025.99	0.00325398		1616.01	-0.00164184		2206	0.00443951		2796	0.00898441		3386	-0.00175289
436.2	0.03491		1026.19	0.00334521		1616.21	-0.00133372		2206.2	0.00386959		2796.2	0.00775245		3386.2	-0.00189911
436.4	0.03547745		1026.39	0.0031405		1616.41	-0.0013934		2206.4	0.00376968		2796.4	0.00766961		3386.4	-0.00130935
436.6	0.03522462		1026.59	0.00341484		1616.61	-0.00225954		2206.6	0.00441443		2796.6	0.00668849		3386.6	-0.00109653
436.8	0.03515894		1026.79	0.00377693		1616.81	-0.00222807		2206.8	0.00440648		2796.8	0.00550637		3386.8	-0.00133649
437	0.03492536		1026.99	0.00279927		1617.01	-0.00227643		2207	0.00477589		2797	0.0046963		3387	-0.00095774
437.2	0.03517696		1027.19	0.00353687		1617.21	-0.00233421		2207.2	0.00468857		2797.2	0.00492166		3387.2	-0.00080783
437.4	0.03391118		1027.39	0.00309323		1617.41	-0.00223731		2207.4	0.00531649		2797.4	0.00430319		3387.4	-0.00096019
437.6	0.03254909		1027.59	0.00293621		1617.61	-0.00208047		2207.6	0.00645095		2797.6	0.00427484		3387.6	-0.00099063
437.8	0.03194321		1027.79	0.00320204		1617.81	-0.00131174		2207.8	0.0066219		2797.8	0.00444225		3387.8	-0.0014798
438	0.03157021		1027.99	0.00365395		1618.01	-0.00142899		2208	0.00564841		2798	0.00402133		3388	-0.00082378
438.2	0.03154568		1028.19	0.00361569		1618.21	-0.00076724		2208.2	0.0051734		2798.2	0.00490735		3388.2	-0.00160102
438.4	0.03149473		1028.39	0.00347882		1618.41	-0.00006352		2208.4	0.00509822		2798.4	0.00508345		3388.4	-0.00175045
438.6	0.03110522		1028.59	0.00295383		1618.61	0.0003019		2208.6	0.00490296		2798.6	0.00456819		3388.6	-0.00261179
438.8	0.03096823		1028.79	0.00269015		1618.81	0.00038371		2208.8	0.00311786		2798.8	0.00414149		3388.8	-0.00321432
439	0.03171615		1028.99	0.00224879		1619.01	0.00055599		2209	0.00354318		2799	0.00469657		3389	-0.0034016
439.2	0.03237914		1029.19	0.00198568		1619.21	0.00049488		2209.2	0.0044925		2799.2	0.00544895		3389.2	-0.00391303
439.4	0.03329296		1029.39	0.0021395		1619.41	0.00048146		2209.4	0.00343034		2799.4	0.0055094		3389.4	-0.00427339
439.6	0.03366683		1029.59	0.0023807		1619.61	0.00077084		2209.6	0.003241		2799.6	0.00474319		3389.6	-0.00507215
439.8	0.03325166		1029.79	0.00281741		1619.81	0.0006562		2209.8	0.00285443		2799.8	0.00435911		3389.8	-0.00574372
440	0.03381454		1029.99	0.00305745		1620.01	0.00158383		2210	0.00252229		2800	0.00479847		3390	-0.00637244
440.2	0.03379264		1030.19	0.00376371		1620.21	0.00250512		2210.2	0.0014506		2800.2	0.00473224		3390.2	-0.00615511
440.4	0.03453226		1030.39	0.00486772		1620.41	0.00194544		2210.4	0.00117285		2800.4	0.00510778		3390.4	-0.0057556
440.6	0.03410293		1030.59	0.00548079		1620.61	0.00158439		2210.6	0.00119691		2800.6	0.00461582		3390.6	-0.00598197
440.8	0.03437856		1030.79	0.00599949		1620.81	0.000666		2210.8	0.0008699		2800.8	0.00414048		3390.8	-0.00593468
441	0.03361755		1030.99	0.00594704		1621.01	0.00064727		2211	0.00159116		2801	0.00439588		3391	-0.00535909
441.2	0.03287486		1031.19	0.00623281		1621.21	0.00095455		2211.2	0.00100616		2801.2	0.00448519		3391.2	-0.00520585
441.4	0.032067		1031.39	0.00603563		1621.41	0.00043556		2211.4	0.00139635		2801.4	0.00373534		3391.4	-0.00450988
441.6	0.0311068		1031.59	0.00627274		1621.61	0.00003258		2211.6	0.00125181		2801.6	0.0040434		3391.6	-0.00319632
441.8	0.03064885		1031.79	0.00620814		1621.81	-0.00014073		2211.8	0.00003177		2801.8	0.0045546		3391.8	-0.00270168
442	0.0311781		1031.99	0.00622453		1622.01	-0.00018021		2212	0.00015186		2802	0.00378254		3392	-0.00233757
442.2	0.03054656		1032.19	0.00604523		1622.21	0.00052509		2212.2	0.00021404		2802.2	0.0037259		3392.2	-0.00266998
442.4	0.03074119		1032.39	0.00512368		1622.41	0.00051581		2212.4	0.00023452		2802.4	0.0035084		3392.4	-0.00268778
442.6	0.03148226		1032.59	0.00405941		1622.61	0.00029365		2212.6	0.00051932		2802.6	0.00394437		3392.6	-0.00212381
442.8	0.03195012		1032.79	0.00317878		1622.81	0.00091083		2212.8	0.00022096		2802.8	0.00332893		3392.8	-0.00231092
443	0.03122954		1032.99	0.00242541		1623.01	0.00039829		2213	0.00125814		2803	0.00356347		3393	-0.00244184
443.2	0.03219324		1033.19	0.00262408		1623.21	0.00065553		2213.2	0.00132969		2803.2	0.00335536		3393.2	-0.00238524
443.4	0.03227061		1033.39	0.00283118		1623.41	0.00098689		2213.4	0.00132883		2803.4	0.002302		3393.4	-0.00253606
443.6	0.03228881		1033.59	0.00237388		1623.61	0.00201934		2213.6	0.00218698		2803.6	0.00180697		3393.6	-0.00315188
443.8	0.03187539		1033.79	0.00207084		1623.81	0.00218047		2213.8	0.00301162		2803.8	0.00231021		3393.8	-0.00283775
444	0.03258316		1033.99	0.00216974		1624.01	0.00194098		2214	0.00230113		2804	0.00185237		3394	-0.00328961
444.2	0.0325313		1034.19	0.00217175		1624.21	0.00182898		2214.2	0.00103673		2804.2	0.00211537		3394.2	-0.00291142
444.4	0.03336007		1034.39	0.00286301		1624.41	0.00148148		2214.4	0.00190212		2804.4	0.00144429		3394.4	-0.00390224
444.6	0.03264712		1034.59	0.00339996		1624.61	0.00125707		2214.6	0.00189242		2804.6	0.00104823		3394.6	-0.00425438
444.8	0.03253966		1034.79	0.00398429		1624.81	0.00049092		2214.8	0.00167379		2804.8	0.0016492		3394.8	-0.00486462
445	0.03212794		1034.99	0.00345013		1625.01	0.0010923		2215	0.00193919		2805	0.00205006		3395	-0.00487222
445.2	0.03124712		1035.19	0.00317297		1625.21	0.00023391		2215.2	0.00201143		2805.2	0.00208241		3395.2	-0.00561956
445.4	0.03210669		1035.39	0.0039869		1625.41	-0.00031607		2215.4	0.00240557		2805.4	0.00304611		3395.4	-0.00502762
445.6	0.03216873		1035.59	0.00401604		1625.61	-0.00030957		2215.6	0.0015565		2805.6	0.00351972		3395.6	-0.00494423
445.8	0.03218397		1035.79	0.00311792		1625.81	0.00034727		2215.8	0.00084825		2805.8	0.00406625		3395.8	-0.00585219
446	0.03326189		1035.99	0.00378297		1626.01	0.00075653		2216	0.00072477		2806	0.00466074		3396	-0.0057539
446.2	0.03291764		1036.19	0.00357312		1626.21	0.00151949		2216.2	-0.00013694		2806.2	0.00547761		3396.2	-0.00614247
446.4	0.03347873		1036.39	0.00318205		1626.41	0.00127221		2216.4	-0.0006625		2806.4	0.0062644		3396.4	-0.00568408
446.6	0.03324939		1036.59	0.00269053		1626.61	0.00192703		2216.6	-0.00072386		2806.6	0.00706168		3396.6	-0.00609556
446.8	0.03254431		1036.79	0.00279657		1626.81	0.00201454		2216.8	-0.00113215		2806.8	0.00637727		3396.8	-0.00672179
447	0.03236579		1036.99	0.00276389		1627.01	0.00206243		2217	-0.00059667		2807	0.00668757		3397	-0.0065247
447.2	0.03376377		1037.19	0.0032114		1627.21	0.00202954		2217.2	-0.00000078		2807.2	0.00567368		3397.2	-0.00653545
447.4	0.03265587		1037.39	0.00270954		1627.41	0.00265048		2217.4	0.00032491		2807.4	0.00502891		3397.4	-0.0067317
447.6	0.03199176		1037.59	0.0030206		1627.61	0.00289273		2217.6	0.00106131		2807.6	0.00570234		3397.6	-0.00669989
447.8	0.03197276		1037.79	0.00291203		1627.81	0.00226614		2217.8	0.00074967		2807.8	0.00533792		3397.8	-0.0063508
448	0.03258273		1037.99	0.00325462		1628.01	0.0017731		2218	0.00048096		2808	0.00455502		3398	-0.00653405
448.2	0.03200404		1038.19	0.00350657		1628.21	0.00181775		2218.2	0.00136413		2808.2	0.00471448		3398.2	-0.00603702
448.4	0.03197759		1038.39	0.00402276		1628.41	0.00184865		2218.4	0.00300625		2808.4	0.00386866		3398.4	-0.00599008
448.6	0.03266838		1038.59	0.0038949		1628.61	0.0010444		2218.6	0.00339272		2808.6	0.00381946		3398.6	-0.00528647
448.8	0.03317068		1038.79	0.00306775		1628.81	0.00032078		2218.8	0.0033214		2808.8	0.0035023		3398.8	-0.00494151
449	0.03398457		1038.99	0.00185907		1629.01	0.00072339		2219	0.00367864		2809	0.0031797		3399	-0.00421852
449.2	0.03404942		1039.19	0.00209832		1629.21	-0.00063848		2219.2	0.00260703		2809.2	0.00303097		3399.2	-0.00399365
449.4	0.03545087		1039.39	0.00205883		1629.41	-0.00015712		2219.4	0.00230459		2809.4	0.00260381		3399.4	-0.00274392
449.6	0.03538888		1039.59	0.00172092		1629.61	-0.00020579		2219.6	0.0012157		2809.6	0.00202401		3399.6	-0.00228919
449.8	0.03612902		1039.79	0.00079434		1629.81	0.00029836		2219.8	0.0006025		2809.8	0.00165694		3399.8	-0.001927
450	0.0375354		1039.99	0.00118366		1630.01	0.00019731		2220	0.00001079		2810	0.00185184		3400	-0.00061302
450.2	0.03721035		1040.19	0.00026703		1630.21	0.00077403		2220.2	-0.0015321		2810.2	0.00221366		3400.2	-0.00172065
450.4	0.03686324		1040.39	-0.0001111		1630.41	0.00122551		2220.4	-0.00187631		2810.4	0.00261596		3400.4	-0.00134851
450.6	0.03664329		1040.59	0.00020426		1630.61	0.0020089		2220.6	-0.00225348		2810.6	0.00297341		3400.6	-0.00253015
450.8	0.03664415		1040.79	0.00090073		1630.81	0.00152664		2220.8	-0.00194668		2810.8	0.00305489		3400.8	-0.00329888
451	0.03666945		1040.99	0.00150045		1631.01	0.00135572		2221	-0.00154749		2811	0.00385952		3401	-0.00356725
451.2	0.03656138		1041.19	0.00237082		1631.21	0.00083139		2221.2	-0.00067911		2811.2	0.0038814		3401.2	-0.00388842
451.4	0.03562941		1041.39	0.00246035		1631.41	0.00201967		2221.4	-0.00087463		2811.4	0.00429637		3401.4	-0.0043124
451.6	0.03656256		1041.59	0.00288905		1631.61	0.00221529		2221.6	0.00020037		2811.6	0.00521706		3401.6	-0.00480178
451.8	0.03645963		1041.79	0.00312713		1631.81	0.00177657		2221.8	0.00048937		2811.8	0.00505464		3401.8	-0.0049488
452	0.03603746		1041.99	0.00341558		1632.01	0.00237592		2222	0.00204498		2812	0.00534652		3402	-0.00539
452.2	0.03514979		1042.19	0.0044398		1632.21	0.0026902		2222.2	0.00268917		2812.2	0.00474584		3402.2	-0.00533965
452.4	0.03503838		1042.39	0.00507048		1632.41	0.00271654		2222.4	0.00359063		2812.4	0.00492345		3402.4	-0.00633549
452.6	0.03539092		1042.59	0.00464644		1632.61	0.00083861		2222.6	0.00373045		2812.6	0.0047083		3402.6	-0.00607319
452.8	0.03491444		1042.79	0.00412675		1632.81	0.00066298		2222.8	0.00364682		2812.8	0.00478227		3402.8	-0.00611296
453	0.03429071		1042.99	0.00375295		1633.01	0.00021087		2223	0.00262795		2813	0.00464542		3403	-0.00611437
453.2	0.03400246		1043.19	0.00377898		1633.21	-0.00051527		2223.2	0.00136129		2813.2	0.00398415		3403.2	-0.00599555
453.4	0.03349833		1043.39	0.00381888		1633.41	-0.00001822		2223.4	0.00226879		2813.4	0.00336015		3403.4	-0.00628228
453.6	0.0334481		1043.59	0.00308541		1633.61	-0.00025542		2223.6	0.00221027		2813.6	0.00350053		3403.6	-0.00516393
453.8	0.03380246		1043.79	0.00288569		1633.81	-0.00062076		2223.8	0.00181541		2813.8	0.00353588		3403.8	-0.00464064
454	0.03374871		1043.99	0.00209105		1634.01	-0.00049155		2224	0.0018186		2814	0.00361749		3404	-0.00420902
454.2	0.03346859		1044.19	0.00189937		1634.21	-0.00038066		2224.2	0.00070451		2814.2	0.00433923		3404.2	-0.0042967
454.4	0.03400293		1044.39	0.00207086		1634.41	-0.00048267		2224.4	0.00062424		2814.4	0.00408968		3404.4	-0.00367564
454.6	0.03529074		1044.59	0.00285597		1634.61	-0.00075492		2224.6	0.00072644		2814.6	0.0037463		3404.6	-0.0039035
454.8	0.03557174		1044.79	0.00216736		1634.81	-0.00135426		2224.8	0.00026986		2814.8	0.00356612		3404.8	-0.00377697
455	0.03567085		1044.99	0.00176032		1635.01	-0.00209261		2225	0.00062552		2815	0.00381122		3405	-0.00351678
455.2	0.03587126		1045.19	0.0013824		1635.21	-0.00175323		2225.2	0.00098073		2815.2	0.00313489		3405.2	-0.00379901
455.4	0.036693		1045.39	0.00160642		1635.41	-0.0008248		2225.4	0.00083341		2815.4	0.00221576		3405.4	-0.00462208
455.6	0.03835843		1045.59	0.0013023		1635.61	-0.00034759		2225.6	0.00156618		2815.6	0.00195599		3405.6	-0.00499852
455.8	0.03757793		1045.79	0.00177599		1635.81	-0.00022489		2225.8	0.00140358		2815.8	0.00193402		3405.8	-0.00521964
456	0.03686428		1045.99	0.00274117		1636.01	0.00062409		2226	0.00241187		2816	0.00190429		3406	-0.00544666
456.2	0.03670354		1046.19	0.00395383		1636.21	0.00029246		2226.2	0.00272506		2816.2	0.00068669		3406.2	-0.0053158
456.4	0.03629001		1046.39	0.00402411		1636.41	0.00049165		2226.4	0.00300667		2816.4	0.00095682		3406.4	-0.00611624
456.6	0.03647925		1046.59	0.00359822		1636.61	0.00003542		2226.6	0.00278446		2816.6	0.00145811		3406.6	-0.0052114
456.8	0.03658988		1046.79	0.00408333		1636.81	0.00024977		2226.8	0.0028653		2816.8	0.0022931		3406.8	-0.00489838
457	0.03616277		1046.99	0.00465104		1637.01	0.00078454		2227	0.00206276		2817	0.00284574		3407	-0.00433468
457.2	0.03589339		1047.19	0.00552079		1637.21	0.00123352		2227.2	0.00203351		2817.2	0.00307492		3407.2	-0.00417944
457.4	0.03550279		1047.39	0.00580862		1637.41	0.00102884		2227.4	0.00263961		2817.4	0.00431392		3407.4	-0.00422481
457.6	0.03445545		1047.59	0.00552862		1637.61	0.00119312		2227.6	0.00301905		2817.6	0.00436109		3407.6	-0.00288803
457.8	0.03398453		1047.79	0.00581139		1637.81	0.00096898		2227.8	0.00261638		2817.8	0.00512075		3407.8	-0.00271884
458	0.03417356		1047.99	0.0054373		1638.01	0.00133279		2228	0.00287359		2818	0.00633645		3408	-0.00195638
458.2	0.03422735		1048.19	0.00558206		1638.21	0.00129353		2228.2	0.00239866		2818.2	0.0067616		3408.2	-0.00116369
458.4	0.03407685		1048.39	0.00598191		1638.41	0.00076234		2228.4	0.00167671		2818.4	0.00685176		3408.4	-0.00078236
458.6	0.03431186		1048.59	0.00549812		1638.61	0.00048682		2228.6	0.00138271		2818.6	0.00598727		3408.6	-0.0006092
458.8	0.03330391		1048.79	0.00425701		1638.81	0.0001863		2228.8	0.00096447		2818.8	0.00584549		3408.8	-0.00001171
459	0.03384318		1048.99	0.00393935		1639.01	-0.00078945		2229	0.00141226		2819	0.0059197		3409	-0.00044929
459.2	0.03394018		1049.19	0.00412873		1639.21	0.00001879		2229.2	0.00129619		2819.2	0.00527617		3409.2	-0.00192136
459.4	0.03466871		1049.39	0.00399891		1639.41	0.00049257		2229.4	0.00124684		2819.4	0.00465988		3409.4	-0.00319426
459.6	0.03563071		1049.59	0.00235459		1639.61	-0.00000969		2229.6	0.00148842		2819.6	0.00567864		3409.6	-0.00339935
459.8	0.03514334		1049.79	0.00257463		1639.81	-0.00077467		2229.8	0.00167439		2819.8	0.00579373		3409.8	-0.00352676
460	0.03506262		1049.99	0.00330668		1640.01	-0.00095549		2230	0.00214533		2820	0.00576884		3410	-0.00379125
460.2	0.03493848		1050.19	0.00247166		1640.21	-0.00088165		2230.2	0.00185261		2820.2	0.00635937		3410.2	-0.00397476
460.4	0.03518994		1050.39	0.00291429		1640.41	-0.00092609		2230.4	0.00115451		2820.4	0.00652078		3410.4	-0.00423105
460.6	0.03590042		1050.59	0.00279902		1640.61	-0.00139941		2230.6	0.00154266		2820.6	0.00672043		3410.6	-0.00373649
460.8	0.03615973		1050.79	0.00325997		1640.81	-0.00200427		2230.8	0.00163137		2820.8	0.00706366		3410.8	-0.00427852
461	0.03652493		1050.99	0.00326376		1641.01	-0.00108013		2231	0.00121005		2821	0.00724586		3411	-0.00402512
461.2	0.03658589		1051.19	0.00333454		1641.21	-0.00093081		2231.2	0.0008125		2821.2	0.00757652		3411.2	-0.00399087
461.4	0.0368907		1051.39	0.0029948		1641.41	-0.00091024		2231.4	0.0011017		2821.4	0.00752462		3411.4	-0.00372391
461.6	0.03712846		1051.59	0.00268826		1641.61	-0.00083273		2231.6	0.00157573		2821.6	0.00720492		3411.6	-0.00330969
461.8	0.03747948		1051.79	0.00279554		1641.81	-0.00076096		2231.8	0.00073397		2821.8	0.00857035		3411.8	-0.00286765
462	0.03763233		1051.99	0.00347196		1642.01	-0.00022323		2232	0.00086606		2822	0.00878316		3412	-0.0025065
462.2	0.03761764		1052.19	0.00326117		1642.21	0.00032595		2232.2	0.00079807		2822.2	0.00813604		3412.2	-0.00217786
462.4	0.03771829		1052.39	0.00319649		1642.41	0.00033523		2232.4	0.00065899		2822.4	0.0078927		3412.4	-0.0011416
462.6	0.03805363		1052.59	0.00277492		1642.61	0.00092505		2232.6	0.00067598		2822.6	0.00638866		3412.6	-0.00206178
462.8	0.03772191		1052.79	0.00287676		1642.81	0.00186691		2232.8	0.00116676		2822.8	0.00618263		3412.8	-0.0025392
463	0.03869202		1052.99	0.00264836		1643.01	0.00252883		2233	0.0017264		2823	0.00627701		3413	-0.00389372
463.2	0.03840481		1053.19	0.00309971		1643.21	0.00403084		2233.2	0.00277605		2823.2	0.00545476		3413.2	-0.00444278
463.4	0.038213		1053.39	0.00302752		1643.41	0.00389945		2233.4	0.00272588		2823.4	0.00507972		3413.4	-0.00466795
463.6	0.03813413		1053.59	0.0026159		1643.61	0.00408755		2233.6	0.00327915		2823.6	0.00504816		3413.6	-0.00478004
463.8	0.03749542		1053.79	0.00315674		1643.81	0.0046201		2233.8	0.00281188		2823.8	0.00449139		3413.8	-0.00526622
464	0.03663422		1053.99	0.00362071		1644.01	0.00509356		2234	0.00187934		2824	0.00464261		3414	-0.00540088
464.2	0.03620056		1054.19	0.00331681		1644.21	0.00542387		2234.2	0.00189498		2824.2	0.0044169		3414.2	-0.00522794
464.4	0.03611389		1054.39	0.00425402		1644.41	0.00519868		2234.4	0.002231		2824.4	0.00347853		3414.4	-0.00587449
464.6	0.03547607		1054.59	0.00351281		1644.61	0.00514682		2234.6	0.00276872		2824.6	0.00327346		3414.6	-0.00708633
464.8	0.03539927		1054.79	0.00370342		1644.81	0.00442546		2234.8	0.00244884		2824.8	0.00361312		3414.8	-0.00781081
465	0.03565235		1054.99	0.00402036		1645.01	0.00480288		2235	0.00208972		2825	0.0035327		3415	-0.00754387
465.2	0.0348944		1055.19	0.00416959		1645.21	0.00440398		2235.2	0.00204035		2825.2	0.00393098		3415.2	-0.00747098
465.4	0.03436708		1055.39	0.00350985		1645.41	0.00361614		2235.4	0.00292061		2825.4	0.00356422		3415.4	-0.00725011
465.6	0.03515148		1055.59	0.00328679		1645.61	0.00310545		2235.6	0.00280712		2825.6	0.00403565		3415.6	-0.00760368
465.8	0.03411237		1055.79	0.00365188		1645.81	0.00249469		2235.8	0.00170357		2825.8	0.00455372		3415.8	-0.00720097
466	0.03444097		1055.99	0.00276688		1646.01	0.00281415		2236	0.00252545		2826	0.00496154		3416	-0.00652245
466.2	0.03468962		1056.19	0.00150718		1646.21	0.00280498		2236.2	0.00298291		2826.2	0.00501929		3416.2	-0.0055996
466.4	0.03499211		1056.39	0.00164276		1646.41	0.00238958		2236.4	0.00293246		2826.4	0.00457626		3416.4	-0.00469204
466.6	0.03474921		1056.59	0.00130986		1646.61	0.00253346		2236.6	0.00364763		2826.6	0.00450209		3416.6	-0.00552068
466.8	0.03510803		1056.79	0.00114099		1646.81	0.00277091		2236.8	0.00429099		2826.8	0.00476892		3416.8	-0.00467862
467	0.03559359		1056.99	0.00034972		1647.01	0.00247797		2237	0.00453721		2827	0.00470215		3417	-0.0039787
467.2	0.03593667		1057.19	0.00079294		1647.21	0.00266376		2237.2	0.00385142		2827.2	0.00430636		3417.2	-0.00331412
467.4	0.03618723		1057.39	0.00093598		1647.41	0.00201457		2237.4	0.00268237		2827.4	0.00434543		3417.4	-0.00379274
467.6	0.03716526		1057.59	0.00088622		1647.61	0.00269695		2237.6	0.00273769		2827.6	0.00449434		3417.6	-0.00348532
467.8	0.03763094		1057.79	0.00136866		1647.81	0.00225565		2237.8	0.00211071		2827.8	0.00484818		3417.8	-0.00335706
468	0.03800734		1057.99	0.00232546		1648.01	0.001949		2238	0.00189913		2828	0.00476711		3418	-0.00317013
468.2	0.03834076		1058.19	0.00276188		1648.21	0.00170967		2238.2	0.00228035		2828.2	0.00477513		3418.2	-0.00369518
468.4	0.03806724		1058.39	0.00344242		1648.41	0.00138264		2238.4	0.00219881		2828.4	0.0051682		3418.4	-0.00461618
468.6	0.03789611		1058.59	0.00370502		1648.61	0.00118294		2238.6	0.00170855		2828.6	0.00519603		3418.6	-0.00515047
468.8	0.03768583		1058.79	0.00469229		1648.81	0.00111967		2238.8	0.00147444		2828.8	0.00545416		3418.8	-0.00517492
469	0.03727048		1058.99	0.00509604		1649.01	0.00153167		2239	0.00145779		2829	0.00529259		3419	-0.00523484
469.2	0.03672338		1059.19	0.00508895		1649.21	0.00157398		2239.2	0.0016842		2829.2	0.00527113		3419.2	-0.00518339
469.4	0.03661785		1059.39	0.00506002		1649.41	0.00171339		2239.4	0.00194977		2829.4	0.00498653		3419.4	-0.00507932
469.6	0.03707007		1059.59	0.00563687		1649.61	0.00200591		2239.6	0.00138246		2829.6	0.00496797		3419.6	-0.00514081
469.8	0.03639695		1059.79	0.0054131		1649.81	0.00227503		2239.8	0.00085835		2829.8	0.00522205		3419.8	-0.00438974
470	0.03639695		1059.99	0.0054131		1650.01	0.00227503		2240	0.00085835		2830	0.00522205		3419.99	-0.00438974
470.2	0.03763554		1060.19	0.00577671		1650.21	0.00215022		2240.2	0.00071692		2830.2	0.00560557		3420.19	-0.0054736
470.4	0.03841007		1060.39	0.0061164		1650.41	0.00175776		2240.4	0.00097825		2830.4	0.00630798		3420.39	-0.00653535
470.6	0.0398834		1060.59	0.0064553		1650.61	0.00122189		2240.6	0.00051016		2830.6	0.00616424		3420.59	-0.00754424
470.8	0.04090112		1060.79	0.00666713		1650.81	0.00090122		2240.8	0.00005875		2830.8	0.00684635		3420.79	-0.00807533
471	0.04159042		1060.99	0.00720876		1651.01	0.00064189		2241	-0.00078158		2831	0.00674285		3420.99	-0.00888669
471.2	0.04243267		1061.19	0.00704022		1651.21	-0.00006404		2241.2	-0.00146577		2831.2	0.00704746		3421.19	-0.0087612
471.4	0.04319505		1061.39	0.00684691		1651.41	-0.0001514		2241.4	-0.00220097		2831.4	0.00742037		3421.39	-0.00917849
471.6	0.04335551		1061.59	0.00671573		1651.61	-0.00015218		2241.6	-0.00302902		2831.6	0.0075682		3421.59	-0.00920661
471.8	0.04378324		1061.79	0.00678436		1651.81	-0.00058967		2241.8	-0.0030182		2831.8	0.00749333		3421.79	-0.00910717
472	0.0438139		1061.99	0.00618212		1652.01	-0.0003873		2242	-0.00378537		2832	0.00764731		3421.99	-0.00771791
472.2	0.04333169		1062.19	0.00655479		1652.21	-0.00046085		2242.2	-0.00353867		2832.2	0.0075295		3422.19	-0.00707546
472.4	0.04229028		1062.39	0.00574529		1652.41	-0.0001513		2242.4	-0.00309826		2832.4	0.00713532		3422.39	-0.00710916
472.6	0.04096303		1062.59	0.00499941		1652.61	0.00081242		2242.6	-0.00368045		2832.6	0.00747372		3422.59	-0.0069418
472.8	0.04036567		1062.79	0.00502959		1652.81	0.0010145		2242.8	-0.00374071		2832.8	0.00669961		3422.79	-0.00690318
473	0.03974227		1062.99	0.00432969		1653.01	0.00206852		2243	-0.00389094		2833	0.00576128		3422.99	-0.00758936
473.2	0.03997231		1063.19	0.00455549		1653.21	0.00233512		2243.2	-0.00364448		2833.2	0.00610277		3423.19	-0.00804351
473.4	0.04043809		1063.39	0.00411606		1653.41	0.00231941		2243.4	-0.00344671		2833.4	0.00526609		3423.39	-0.00776107
473.6	0.04013908		1063.59	0.00432474		1653.61	0.00279602		2243.6	-0.00346086		2833.6	0.00515537		3423.59	-0.00730391
473.8	0.04134376		1063.79	0.00367245		1653.81	0.00241071		2243.8	-0.00350941		2833.8	0.0056717		3423.79	-0.00729999
474	0.04205115		1063.99	0.00385188		1654.01	0.00355604		2244	-0.00329289		2834	0.00597011		3423.99	-0.00723603
474.2	0.04269965		1064.19	0.00352937		1654.21	0.00471856		2244.2	-0.00301858		2834.2	0.00627913		3424.19	-0.00694621
474.4	0.04243583		1064.39	0.0031804		1654.41	0.00479063		2244.4	-0.00262684		2834.4	0.00621612		3424.39	-0.00676253
474.6	0.04315471		1064.59	0.00348053		1654.61	0.00481733		2244.6	-0.00358117		2834.6	0.00583279		3424.59	-0.0058643
474.8	0.0426657		1064.79	0.00384933		1654.81	0.00527949		2244.8	-0.00300653		2834.8	0.00639462		3424.79	-0.00526524
475	0.04228631		1064.99	0.00398401		1655.01	0.0046043		2245	-0.0036484		2835	0.00610555		3424.99	-0.00514788
475.2	0.04200527		1065.19	0.00350049		1655.21	0.00405145		2245.2	-0.00400409		2835.2	0.00630684		3425.19	-0.0050214
475.4	0.04104697		1065.39	0.00479533		1655.41	0.0045068		2245.4	-0.00421702		2835.4	0.00628925		3425.39	-0.00557946
475.6	0.03983252		1065.59	0.00537909		1655.61	0.00428357		2245.6	-0.00402543		2835.6	0.0069821		3425.59	-0.00540406
475.8	0.03878587		1065.79	0.0058761		1655.81	0.00355523		2245.8	-0.00284471		2835.8	0.00734468		3425.79	-0.00525219
476	0.03723633		1065.99	0.00560664		1656.01	0.00311135		2246	-0.0029807		2836	0.00783126		3425.99	-0.00420189
476.2	0.03606882		1066.19	0.00687825		1656.21	0.00222885		2246.2	-0.00172764		2836.2	0.00764966		3426.19	-0.004588
476.4	0.03524986		1066.39	0.00678688		1656.41	0.00166358		2246.4	-0.00199321		2836.4	0.00789603		3426.39	-0.00539368
476.6	0.03582374		1066.59	0.00711265		1656.61	0.00237083		2246.6	-0.00225415		2836.6	0.00786408		3426.59	-0.0056831
476.8	0.03650418		1066.79	0.00793924		1656.81	0.00128863		2246.8	-0.00251176		2836.8	0.00748692		3426.79	-0.00624421
477	0.03664132		1066.99	0.00767037		1657.01	0.00110393		2247	-0.00181422		2837	0.00750983		3426.99	-0.00620401
477.2	0.03783571		1067.19	0.00883023		1657.21	0.00042464		2247.2	-0.00110275		2837.2	0.00753168		3427.19	-0.00686104
477.4	0.03812277		1067.39	0.00881691		1657.41	-0.00035094		2247.4	-0.00006381		2837.4	0.00719404		3427.39	-0.00716893
477.6	0.03857761		1067.59	0.00906396		1657.61	-0.00029181		2247.6	-0.00062561		2837.6	0.00795759		3427.59	-0.00700081
477.8	0.0399285		1067.79	0.00832187		1657.81	-0.00001087		2247.8	-0.00032259		2837.8	0.00787057		3427.79	-0.00717261
478	0.04054792		1067.99	0.00825729		1658.01	0.00094095		2248	0.00018126		2838	0.0073306		3427.99	-0.00679163
478.2	0.04034348		1068.19	0.00801386		1658.21	0.00197144		2248.2	0.00031998		2838.2	0.00728263		3428.19	-0.00777204
478.4	0.04022976		1068.39	0.00850109		1658.41	0.00122912		2248.4	0.00045921		2838.4	0.00723334		3428.39	-0.00765898
478.6	0.0402376		1068.59	0.00832142		1658.61	0.00097582		2248.6	-0.00042521		2838.6	0.0067823		3428.59	-0.00736902
478.8	0.04040367		1068.79	0.0079682		1658.81	0.00158463		2248.8	-0.0005602		2838.8	0.00637261		3428.79	-0.00747837
479	0.04100801		1068.99	0.00740874		1659.01	0.00149087		2249	-0.00259176		2839	0.00616859		3428.99	-0.00806544
479.2	0.04053709		1069.19	0.00705163		1659.21	0.00227426		2249.2	-0.00293223		2839.2	0.00558009		3429.19	-0.00866123
479.4	0.03955068		1069.39	0.00695519		1659.41	0.00352415		2249.4	-0.0036537		2839.4	0.00564798		3429.39	-0.00864577
479.6	0.03943009		1069.59	0.00612099		1659.61	0.003631		2249.6	-0.00423566		2839.6	0.00580792		3429.59	-0.00852068
479.8	0.03877429		1069.79	0.00485598		1659.81	0.00356951		2249.8	-0.00422948		2839.8	0.00613589		3429.79	-0.00812348
480	0.03765534		1069.99	0.0042138		1660.01	0.00310691		2250	-0.00462108		2840	0.00635313		3429.99	-0.00806397
480.2	0.03737358		1070.19	0.00437826		1660.21	0.00271958		2250.2	-0.00471859		2840.2	0.00634976		3430.19	-0.00863863
480.4	0.03712758		1070.39	0.00426766		1660.41	0.00225834		2250.4	-0.00566481		2840.4	0.00571145		3430.39	-0.00943548
480.6	0.03689667		1070.59	0.00493487		1660.61	0.00256882		2250.6	-0.00510876		2840.6	0.00525701		3430.59	-0.0088925
480.8	0.03629548		1070.79	0.00534194		1660.81	0.00127355		2250.8	-0.00377794		2840.8	0.00498828		3430.79	-0.00864616
481	0.03565872		1070.99	0.00527126		1661.01	0.00193164		2251	-0.00257509		2841	0.00499583		3430.99	-0.00769852
481.2	0.03667064		1071.19	0.00587791		1661.21	0.00271936		2251.2	-0.00279365		2841.2	0.00541531		3431.19	-0.00918642
481.4	0.03589636		1071.39	0.00545361		1661.41	0.00295147		2251.4	-0.00221919		2841.4	0.00540229		3431.39	-0.00933657
481.6	0.03647725		1071.59	0.00595082		1661.61	0.00322058		2251.6	-0.00277402		2841.6	0.00492012		3431.59	-0.00878689
481.8	0.03635883		1071.79	0.00550101		1661.81	0.0030914		2251.8	-0.0017193		2841.8	0.00454475		3431.79	-0.00890092
482	0.03574545		1071.99	0.00579757		1662.01	0.00318994		2252	-0.00137131		2842	0.00442439		3431.99	-0.00885886
482.2	0.03545346		1072.19	0.00596223		1662.21	0.00345882		2252.2	-0.0018718		2842.2	0.00485229		3432.19	-0.00923379
482.4	0.03581603		1072.39	0.00555193		1662.41	0.00296577		2252.4	-0.00168287		2842.4	0.00462687		3432.39	-0.00878912
482.6	0.0357678		1072.59	0.00548955		1662.61	0.00375056		2252.6	-0.00214345		2842.6	0.00340321		3432.59	-0.00848907
482.8	0.03707082		1072.79	0.00548401		1662.81	0.00413801		2252.8	-0.0016468		2842.8	0.00340076		3432.79	-0.00831965
483	0.03752905		1072.99	0.00552697		1663.01	0.00441489		2253	-0.00195363		2843	0.00348513		3432.99	-0.00835643
483.2	0.03740085		1073.19	0.00503557		1663.21	0.00440366		2253.2	-0.00175833		2843.2	0.00324083		3433.19	-0.0076333
483.4	0.03803726		1073.39	0.00454727		1663.41	0.00448303		2253.4	-0.00137039		2843.4	0.00399242		3433.39	-0.00726701
483.6	0.03874244		1073.59	0.00467903		1663.61	0.00414847		2253.6	-0.00133185		2843.6	0.00524		3433.59	-0.00704151
483.8	0.03842497		1073.79	0.00391074		1663.81	0.00342687		2253.8	-0.00092544		2843.8	0.00666347		3433.79	-0.00682633
484	0.03862989		1073.99	0.00371336		1664.01	0.00237666		2254	-0.00108076		2844	0.00691505		3433.99	-0.00722668
484.2	0.03909499		1074.19	0.00397944		1664.21	0.00166167		2254.2	-0.00138101		2844.2	0.00654737		3434.19	-0.00749253
484.4	0.03947239		1074.39	0.00416549		1664.41	0.00159304		2254.4	-0.0016989		2844.4	0.00555574		3434.39	-0.00678777
484.6	0.04017177		1074.59	0.0037379		1664.61	0.00162401		2254.6	-0.0017503		2844.6	0.00574881		3434.59	-0.0070647
484.8	0.04030461		1074.79	0.00376017		1664.81	0.00206487		2254.8	-0.0019782		2844.8	0.00565233		3434.79	-0.00721612
485	0.04048842		1074.99	0.00426374		1665.01	0.00268651		2255	-0.00271175		2845	0.00551622		3434.99	-0.00742767
485.2	0.03994725		1075.19	0.00402052		1665.21	0.00297942		2255.2	-0.00302813		2845.2	0.00518913		3435.19	-0.00909722
485.4	0.03894214		1075.39	0.00400239		1665.41	0.00295034		2255.4	-0.00302077		2845.4	0.00486533		3435.39	-0.00948507
485.6	0.03855937		1075.59	0.00378834		1665.61	0.0029542		2255.6	-0.00304722		2845.6	0.00494573		3435.59	-0.00925214
485.8	0.03759669		1075.79	0.0026836		1665.81	0.00269123		2255.8	-0.00308177		2845.8	0.00516559		3435.79	-0.00977954
486	0.03728448		1075.99	0.00275282		1666.01	0.00280765		2256	-0.00359398		2846	0.00504446		3435.99	-0.01037758
486.2	0.03732062		1076.19	0.00281379		1666.21	0.00325018		2256.2	-0.00273476		2846.2	0.00513324		3436.19	-0.0106383
486.4	0.03726197		1076.39	0.00372665		1666.41	0.00242279		2256.4	-0.00296024		2846.4	0.00508621		3436.39	-0.01170265
486.6	0.03687615		1076.59	0.00463685		1666.61	0.00275472		2256.6	-0.00332871		2846.6	0.00513427		3436.59	-0.01184355
486.8	0.03684543		1076.79	0.00568521		1666.81	0.00208615		2256.8	-0.00269864		2846.8	0.00611661		3436.79	-0.01218338
487	0.03640711		1076.99	0.00597466		1667.01	0.00143324		2257	-0.00280556		2847	0.00655905		3436.99	-0.01174639
487.2	0.03626974		1077.19	0.00581361		1667.21	0.0014581		2257.2	-0.0032447		2847.2	0.00650927		3437.19	-0.01062243
487.4	0.03644501		1077.39	0.00557567		1667.41	0.00139535		2257.4	-0.0027503		2847.4	0.00737138		3437.39	-0.01051504
487.6	0.03660125		1077.59	0.00517169		1667.61	0.00226143		2257.6	-0.00354138		2847.6	0.00775256		3437.59	-0.01021494
487.8	0.03697025		1077.79	0.00435589		1667.81	0.00274691		2257.8	-0.00411186		2847.8	0.00769991		3437.79	-0.00951347
488	0.03800118		1077.99	0.00410493		1668.01	0.00302411		2258	-0.00506349		2848	0.00685055		3437.99	-0.00970454
488.2	0.03916972		1078.19	0.00419363		1668.21	0.00320996		2258.2	-0.00529964		2848.2	0.00634903		3438.19	-0.00914844
488.4	0.04045826		1078.39	0.00337563		1668.41	0.0033811		2258.4	-0.00596237		2848.4	0.00557016		3438.39	-0.00826616
488.6	0.04109918		1078.59	0.00273669		1668.61	0.00334162		2258.6	-0.00671323		2848.6	0.00586311		3438.59	-0.0078485
488.8	0.04048665		1078.79	0.00315021		1668.81	0.00383519		2258.8	-0.00700674		2848.8	0.00571352		3438.79	-0.00838548
489	0.04014688		1078.99	0.00313373		1669.01	0.00391312		2259	-0.00701336		2849	0.00573425		3438.99	-0.00834093
489.2	0.03957168		1079.19	0.00284409		1669.21	0.00400679		2259.2	-0.00673893		2849.2	0.00579134		3439.19	-0.00901458
489.4	0.03949075		1079.39	0.00284438		1669.41	0.00428239		2259.4	-0.00606476		2849.4	0.00583472		3439.39	-0.00922401
489.6	0.03889612		1079.59	0.00179278		1669.61	0.0041434		2259.6	-0.00500032		2849.6	0.00629828		3439.59	-0.00936692
489.8	0.03890397		1079.79	0.00150407		1669.81	0.00311575		2259.8	-0.00431892		2849.8	0.00684163		3439.79	-0.00992843
490	0.03902988		1079.99	0.00216215		1670.01	0.00264025		2260	-0.00387091		2850	0.00683066		3439.99	-0.0099979
490.2	0.03889939		1080.19	0.00347338		1670.21	0.00238713		2260.2	-0.00333895		2850.2	0.00732161		3440.19	-0.01010573
490.4	0.03875111		1080.39	0.00407698		1670.41	0.0013144		2260.4	-0.00445276		2850.4	0.007493		3440.39	-0.0111959
490.6	0.03792489		1080.59	0.004783		1670.61	0.00101846		2260.6	-0.00417021		2850.6	0.00703172		3440.59	-0.01117115
490.8	0.03785189		1080.79	0.00563218		1670.81	0.0002843		2260.8	-0.00365076		2850.8	0.00660966		3440.79	-0.01174421
491	0.0378113		1080.99	0.00483068		1671.01	0.00015296		2261	-0.00361407		2851	0.00514851		3440.99	-0.01190303
491.2	0.0372628		1081.19	0.00538853		1671.21	0.00114133		2261.2	-0.00367749		2851.2	0.00380521		3441.19	-0.01148976
491.4	0.03666934		1081.39	0.00538827		1671.41	0.00154599		2261.4	-0.00324878		2851.4	0.00383789		3441.39	-0.01186796
491.6	0.03699563		1081.59	0.00501091		1671.61	0.00222466		2261.6	-0.00280811		2851.6	0.00326765		3441.59	-0.01159875
491.8	0.03658857		1081.79	0.00520077		1671.81	0.00268985		2261.8	-0.00230577		2851.8	0.00365223		3441.79	-0.01133184
492	0.03737559		1081.99	0.00588818		1672.01	0.00267114		2262	-0.00182268		2852	0.00241771		3441.99	-0.0122001
492.2	0.03877172		1082.19	0.0052599		1672.21	0.00279526		2262.2	-0.00181601		2852.2	0.00236885		3442.19	-0.01178454
492.4	0.03852303		1082.39	0.00477125		1672.41	0.00256309		2262.4	-0.00186368		2852.4	0.00189429		3442.39	-0.01125946
492.6	0.0383326		1082.59	0.00525381		1672.61	0.00336924		2262.6	-0.00188973		2852.6	0.00236584		3442.59	-0.01139707
492.8	0.03789716		1082.79	0.0051676		1672.81	0.00280748		2262.8	-0.0023558		2852.8	0.00204312		3442.79	-0.01234283
493	0.03863188		1082.99	0.00467355		1673.01	0.00219749		2263	-0.00202664		2853	0.00278108		3442.99	-0.01160586
493.2	0.03938816		1083.19	0.00404045		1673.21	0.00145043		2263.2	-0.00188922		2853.2	0.00239483		3443.19	-0.01128024
493.4	0.03894955		1083.39	0.00347678		1673.41	0.00088002		2263.4	-0.00134843		2853.4	0.00363396		3443.39	-0.01059073
493.6	0.03954654		1083.59	0.00305062		1673.61	0.00085015		2263.6	-0.00143851		2853.6	0.00407839		3443.59	-0.01013679
493.8	0.0394937		1083.79	0.00354052		1673.81	0.00023062		2263.8	-0.00126215		2853.8	0.00416		3443.79	-0.01001099
494	0.0388963		1083.99	0.0032947		1674.01	0.00079827		2264	-0.00233119		2854	0.00449579		3443.99	-0.008568
494.2	0.03891054		1084.19	0.00264333		1674.21	0.00116698		2264.2	-0.00290827		2854.2	0.00605347		3444.19	-0.0093146
494.4	0.03931174		1084.39	0.0018335		1674.41	0.00091039		2264.4	-0.00417797		2854.4	0.00687653		3444.39	-0.0095377
494.6	0.03932327		1084.59	0.00179611		1674.61	0.00092362		2264.6	-0.00413303		2854.6	0.00695492		3444.59	-0.00901997
494.8	0.03947308		1084.79	0.00188675		1674.81	0.00124246		2264.8	-0.00441085		2854.8	0.00748251		3444.79	-0.00961562
495	0.03855507		1084.99	0.00219274		1675.01	0.00218918		2265	-0.00471137		2855	0.00713138		3444.99	-0.00912168
495.2	0.03780284		1085.19	0.00253175		1675.21	0.00335042		2265.2	-0.00417464		2855.2	0.00752373		3445.19	-0.00821561
495.4	0.03642134		1085.39	0.00235579		1675.41	0.00367524		2265.4	-0.00404878		2855.4	0.00765917		3445.39	-0.00817803
495.6	0.03628591		1085.59	0.0023234		1675.61	0.00367664		2265.6	-0.00398441		2855.6	0.0073561		3445.59	-0.00770726
495.8	0.03530691		1085.79	0.00281349		1675.81	0.00438073		2265.8	-0.00329618		2855.8	0.00746743		3445.79	-0.00799148
496	0.03558324		1085.99	0.00345745		1676.01	0.00430002		2266	-0.00357926		2856	0.00646756		3445.99	-0.00848247
496.2	0.0359205		1086.19	0.00322496		1676.21	0.00387716		2266.2	-0.00450643		2856.2	0.00659311		3446.19	-0.00831883
496.4	0.03459597		1086.39	0.00336883		1676.41	0.00353815		2266.4	-0.00359145		2856.4	0.00587697		3446.39	-0.00817249
496.6	0.034716		1086.59	0.00421942		1676.61	0.00308519		2266.6	-0.00416723		2856.6	0.00657709		3446.59	-0.00886724
496.8	0.03446601		1086.79	0.00326051		1676.81	0.00118029		2266.8	-0.0045435		2856.8	0.00579864		3446.79	-0.00805904
497	0.0350963		1086.99	0.00297816		1677.01	0.00044384		2267	-0.0047481		2857	0.00573195		3446.99	-0.00765013
497.2	0.03472674		1087.19	0.00348769		1677.21	-0.00037639		2267.2	-0.00470602		2857.2	0.00567002		3447.19	-0.0075098
497.4	0.03428061		1087.39	0.00461475		1677.41	-0.00098881		2267.4	-0.00445011		2857.4	0.00636497		3447.39	-0.00760322
497.6	0.03465602		1087.59	0.00428142		1677.61	-0.00094955		2267.6	-0.00406464		2857.6	0.00545858		3447.59	-0.00825759
497.8	0.03491699		1087.79	0.00413978		1677.81	-0.00134318		2267.8	-0.00353204		2857.8	0.00574318		3447.79	-0.00937874
498	0.03542469		1087.99	0.00317823		1678.01	-0.00116857		2268	-0.00335114		2858	0.00661481		3447.99	-0.00888176
498.2	0.03628532		1088.19	0.0027381		1678.21	-0.00100047		2268.2	-0.00321855		2858.2	0.00788965		3448.19	-0.01023653
498.4	0.03734955		1088.39	0.00323305		1678.41	-0.00209353		2268.4	-0.00374567		2858.4	0.00739313		3448.39	-0.01015803
498.6	0.03747797		1088.59	0.00361232		1678.61	-0.00168358		2268.6	-0.00348275		2858.6	0.00630958		3448.59	-0.0101266
498.8	0.03719395		1088.79	0.00372215		1678.81	-0.00084965		2268.8	-0.00291685		2858.8	0.0062203		3448.79	-0.01066729
499	0.0376316		1088.99	0.0034859		1679.01	0.00016016		2269	-0.00348537		2859	0.00618723		3448.99	-0.01062906
499.2	0.03835676		1089.19	0.00282947		1679.21	0.00074206		2269.2	-0.00251806		2859.2	0.00691288		3449.19	-0.01116084
499.4	0.0383347		1089.39	0.00330994		1679.41	0.00041488		2269.4	-0.00243836		2859.4	0.00736459		3449.39	-0.01209082
499.6	0.0390948		1089.59	0.0032602		1679.61	0.00060904		2269.6	-0.0029257		2859.6	0.00628921		3449.59	-0.01237
499.8	0.03877274		1089.79	0.00357757		1679.81	-0.00019835		2269.8	-0.00207231		2859.8	0.00551341		3449.79	-0.01327412
500	0.03910435		1089.99	0.00376998		1680.01	0.0002447		2270	-0.00296969		2860	0.00565145		3449.99	-0.01372051
500.2	0.03930996		1090.19	0.00348663		1680.21	0.00010352		2270.2	-0.00303169		2860.2	0.00600254		3450.19	-0.01385654
500.4	0.03906787		1090.39	0.00248512		1680.41	0.00095296		2270.4	-0.00277058		2860.4	0.00629731		3450.39	-0.01357359
500.6	0.03937154		1090.59	0.00297443		1680.61	0.00034502		2270.6	-0.00426039		2860.6	0.00742692		3450.59	-0.01287856
500.8	0.03859081		1090.79	0.00278122		1680.81	0.00026735		2270.8	-0.004031		2860.8	0.00675173		3450.79	-0.01221168
501	0.03794534		1090.99	0.00193418		1681.01	0.00060747		2271	-0.00427454		2861	0.00756202		3450.99	-0.01233347
501.2	0.03706136		1091.19	0.0019867		1681.21	0.00040103		2271.2	-0.00415448		2861.2	0.00855117		3451.19	-0.0121318
501.4	0.03674852		1091.39	0.00139943		1681.41	0.00023076		2271.4	-0.00495684		2861.4	0.00826257		3451.39	-0.01182206
501.6	0.03654967		1091.59	0.00032495		1681.61	0.00016752		2271.6	-0.0052043		2861.6	0.00743284		3451.59	-0.01148884
501.8	0.03683278		1091.79	0.00105628		1681.81	-0.00000663		2271.8	-0.00513323		2861.8	0.00770111		3451.79	-0.01089279
502	0.03642416		1091.99	0.00086745		1682.01	0.00012506		2272	-0.00535542		2862	0.00777395		3451.99	-0.01098527
502.2	0.03620567		1092.19	0.00064766		1682.21	0.00006145		2272.2	-0.00560829		2862.2	0.00695992		3452.19	-0.0118557
502.4	0.03553699		1092.39	0.00072002		1682.41	-0.00116628		2272.4	-0.00547303		2862.4	0.00590385		3452.39	-0.01213344
502.6	0.03455393		1092.59	0.00023352		1682.61	-0.00038647		2272.6	-0.00501447		2862.6	0.0052683		3452.59	-0.01183845
502.8	0.03423478		1092.79	0.00054766		1682.81	-0.00014796		2272.8	-0.00468709		2862.8	0.00602825		3452.79	-0.01218281
503	0.03519379		1092.99	0.00111		1683.01	-0.00014193		2273	-0.00489324		2863	0.0064043		3452.99	-0.01192041
503.2	0.03520053		1093.19	0.00146718		1683.21	-0.00066936		2273.2	-0.00400865		2863.2	0.00629439		3453.19	-0.01215372
503.4	0.03577687		1093.39	0.00239115		1683.41	-0.00130621		2273.4	-0.00411718		2863.4	0.00483871		3453.39	-0.01249717
503.6	0.03648266		1093.59	0.00341223		1683.61	-0.00131409		2273.6	-0.00391163		2863.6	0.00264593		3453.59	-0.01245409
503.8	0.03574877		1093.79	0.00395298		1683.81	-0.00227664		2273.8	-0.00352699		2863.8	0.00270388		3453.79	-0.01200192
504	0.03591658		1093.99	0.00409781		1684.01	-0.00156111		2274	-0.00357926		2864	0.00382728		3453.99	-0.01216813
504.2	0.03569737		1094.19	0.00394434		1684.21	-0.00170039		2274.2	-0.002799		2864.2	0.00406687		3454.19	-0.01191743
504.4	0.03589684		1094.39	0.00356195		1684.41	-0.0011074		2274.4	-0.00328369		2864.4	0.00360024		3454.39	-0.01125444
504.6	0.03576645		1094.59	0.00494591		1684.61	-0.00151582		2274.6	-0.00339021		2864.6	0.00400508		3454.59	-0.01034251
504.8	0.03575938		1094.79	0.00516459		1684.81	-0.00098413		2274.8	-0.00347708		2864.8	0.00361005		3454.79	-0.00953916
505	0.03496359		1094.99	0.00371239		1685.01	-0.00100465		2275	-0.00465015		2865	0.0039357		3454.99	-0.00866003
505.2	0.034882		1095.19	0.00400646		1685.21	-0.00112246		2275.2	-0.00516965		2865.2	0.0037243		3455.19	-0.0083156
505.4	0.03445906		1095.39	0.00384654		1685.41	-0.00102747		2275.4	-0.00559447		2865.4	0.00284038		3455.39	-0.00799257
505.6	0.0339896		1095.59	0.00366174		1685.61	-0.00082784		2275.6	-0.00504154		2865.6	0.00284527		3455.59	-0.00792557
505.8	0.03439088		1095.79	0.00328343		1685.81	-0.00045875		2275.8	-0.00500266		2865.8	0.00356773		3455.79	-0.0083271
506	0.03404879		1095.99	0.00178132		1686.01	-0.00007551		2276	-0.00558843		2866	0.00329197		3455.99	-0.00976927
506.2	0.03397835		1096.19	0.00122038		1686.21	-0.00042409		2276.2	-0.00535915		2866.2	0.00366361		3456.19	-0.01024769
506.4	0.03351732		1096.39	0.00128048		1686.41	-0.00077636		2276.4	-0.00534244		2866.4	0.00326987		3456.39	-0.01003513
506.6	0.03399337		1096.59	0.00096917		1686.61	0.00033504		2276.6	-0.0061615		2866.6	0.00302912		3456.59	-0.01035516
506.8	0.03516363		1096.79	0.00188404		1686.81	0.00048303		2276.8	-0.00573343		2866.8	0.00400417		3456.79	-0.0110164
507	0.0356361		1096.99	0.00210058		1687.01	0.00081455		2277	-0.00542956		2867	0.00506592		3456.99	-0.01049904
507.2	0.03516392		1097.19	0.00254525		1687.21	0.00074642		2277.2	-0.00495724		2867.2	0.00579709		3457.19	-0.01118478
507.4	0.0358658		1097.39	0.00385412		1687.41	0.00122538		2277.4	-0.0044711		2867.4	0.00594025		3457.39	-0.01158499
507.6	0.03545259		1097.59	0.00522526		1687.61	0.00215771		2277.6	-0.00380682		2867.6	0.0063015		3457.59	-0.01131518
507.8	0.03449433		1097.79	0.00548656		1687.81	0.00195442		2277.8	-0.00319742		2867.8	0.00669653		3457.79	-0.01166335
508	0.03493828		1097.99	0.00562658		1688.01	0.00240465		2278	-0.00282688		2868	0.00763325		3457.99	-0.01206176
508.2	0.03462499		1098.19	0.0055861		1688.21	0.00286557		2278.2	-0.00282649		2868.2	0.0069225		3458.19	-0.01114598
508.4	0.03514793		1098.39	0.00636276		1688.41	0.00271359		2278.4	-0.00319521		2868.4	0.00583797		3458.39	-0.00923118
508.6	0.03530205		1098.59	0.00697104		1688.61	0.00278241		2278.6	-0.00254917		2868.6	0.00606499		3458.59	-0.00852394
508.8	0.03475224		1098.79	0.00655882		1688.81	0.00248636		2278.8	-0.00311051		2868.8	0.00475038		3458.79	-0.00745536
509	0.03417574		1098.99	0.00620848		1689.01	0.00178005		2279	-0.00307375		2869	0.00486693		3458.99	-0.00787913
509.2	0.0349661		1099.19	0.00584627		1689.21	0.00127171		2279.2	-0.00255715		2869.2	0.00465518		3459.19	-0.00805057
509.4	0.03416346		1099.39	0.00550229		1689.41	0.00044617		2279.4	-0.002758		2869.4	0.00465868		3459.39	-0.00750715
509.6	0.03467774		1099.59	0.00412323		1689.61	0.00040126		2279.6	-0.00320781		2869.6	0.00436038		3459.59	-0.00775163
509.8	0.03489197		1099.79	0.00348882		1689.81	0.00034949		2279.8	-0.00446292		2869.8	0.00388046		3459.79	-0.00782759
510	0.03499068		1099.99	0.00316131		1690.01	-0.00031781		2280	-0.00536256		2870	0.00392441		3459.99	-0.00818618
510.2	0.03538109		1100.19	0.00298424		1690.21	-0.00082459		2280.2	-0.00586672		2870.2	0.00408622		3460.19	-0.00835404
510.4	0.03590198		1100.39	0.00270578		1690.41	-0.00132177		2280.4	-0.00644083		2870.4	0.0040282		3460.39	-0.00906892
510.6	0.03706815		1100.59	0.00313941		1690.61	-0.00076002		2280.6	-0.00685399		2870.6	0.00502995		3460.59	-0.01027309
510.8	0.03729885		1100.79	0.00341001		1690.81	-0.00102528		2280.8	-0.0064478		2870.8	0.00560884		3460.79	-0.01068315
511	0.03642385		1100.99	0.00342216		1691.01	-0.00095801		2281	-0.00699149		2871	0.00533852		3460.99	-0.01089603
511.2	0.03570007		1101.19	0.00393945		1691.21	-0.00124483		2281.2	-0.00630071		2871.2	0.00484195		3461.19	-0.01200788
511.4	0.03621681		1101.39	0.00432167		1691.41	-0.0011565		2281.4	-0.00620111		2871.4	0.00368949		3461.39	-0.01296193
511.6	0.03595395		1101.59	0.00479962		1691.61	-0.00123736		2281.6	-0.00613265		2871.6	0.00276972		3461.59	-0.01343506
511.8	0.03518946		1101.79	0.00439907		1691.81	-0.00153387		2281.8	-0.00666475		2871.8	0.00263638		3461.79	-0.01469568
512	0.03517059		1101.99	0.00373202		1692.01	-0.00142039		2282	-0.0077379		2872	0.00256018		3461.99	-0.01469113
512.2	0.03432525		1102.19	0.00423698		1692.21	-0.00182499		2282.2	-0.00727206		2872.2	0.00149476		3462.19	-0.01347618
512.4	0.03414425		1102.39	0.00438452		1692.41	-0.00268412		2282.4	-0.00708329		2872.4	0.00109751		3462.39	-0.01326588
512.6	0.03368375		1102.59	0.00429065		1692.61	-0.00226782		2282.6	-0.00729867		2872.6	0.00182579		3462.59	-0.01377423
512.8	0.03324702		1102.79	0.00324718		1692.81	-0.00284943		2282.8	-0.00791459		2872.8	0.00267506		3462.79	-0.0140202
513	0.03394143		1102.99	0.00314597		1693.01	-0.00292125		2283	-0.00743032		2873	0.00319882		3462.99	-0.01424855
513.2	0.03435177		1103.19	0.00210235		1693.21	-0.00260533		2283.2	-0.00740614		2873.2	0.00355902		3463.19	-0.01332
513.4	0.03316684		1103.39	0.0025718		1693.41	-0.00208445		2283.4	-0.00753136		2873.4	0.00338713		3463.39	-0.01318862
513.6	0.03390912		1103.59	0.00221424		1693.61	-0.00220798		2283.6	-0.00734709		2873.6	0.00328076		3463.59	-0.01327367
513.8	0.03331003		1103.79	0.00213403		1693.81	-0.00218692		2283.8	-0.00762572		2873.8	0.00338208		3463.79	-0.0134572
514	0.03435473		1103.99	0.00195096		1694.01	-0.00288993		2284	-0.00668506		2874	0.00387792		3463.99	-0.01310601
514.2	0.03408306		1104.19	0.00169878		1694.21	-0.00216823		2284.2	-0.00656854		2874.2	0.00444988		3464.19	-0.01306257
514.4	0.03460528		1104.39	0.00167312		1694.41	-0.00173677		2284.4	-0.00629419		2874.4	0.00549967		3464.39	-0.01379088
514.6	0.03440564		1104.59	0.00216538		1694.61	-0.00094298		2284.6	-0.00551083		2874.6	0.00570703		3464.59	-0.01350579
514.8	0.03465918		1104.79	0.00135001		1694.81	-0.00109883		2284.8	-0.00512372		2874.8	0.00481807		3464.79	-0.01355876
515	0.03443771		1104.99	0.00077822		1695.01	-0.00113733		2285	-0.00488924		2875	0.00386343		3464.99	-0.01293499
515.2	0.03436036		1105.19	0.00062243		1695.21	-0.00089183		2285.2	-0.00351391		2875.2	0.00377007		3465.19	-0.01292994
515.4	0.03478273		1105.39	0.00034925		1695.41	-0.00116781		2285.4	-0.00290441		2875.4	0.00312036		3465.39	-0.01342516
515.6	0.03486848		1105.59	0.00097361		1695.61	-0.00141572		2285.6	-0.00234229		2875.6	0.00298007		3465.59	-0.0132276
515.8	0.03378887		1105.79	0.00055317		1695.81	-0.00197091		2285.8	-0.00231671		2875.8	0.00355583		3465.79	-0.01340984
516	0.03353656		1105.99	0.00011194		1696.01	-0.00228311		2286	-0.00190944		2876	0.00394795		3465.99	-0.01225836
516.2	0.03359131		1106.19	0.00099215		1696.21	-0.00241694		2286.2	-0.00131363		2876.2	0.00398856		3466.19	-0.01113123
516.4	0.03330655		1106.39	0.00097425		1696.41	-0.00170919		2286.4	-0.00200578		2876.4	0.00455806		3466.39	-0.01150448
516.6	0.03364304		1106.59	0.00190145		1696.61	-0.00135241		2286.6	-0.00279424		2876.6	0.00513683		3466.59	-0.01154355
516.8	0.03373542		1106.79	0.00148943		1696.81	-0.00137333		2286.8	-0.00339121		2876.8	0.00515181		3466.79	-0.01208729
517	0.03376968		1106.99	0.00218007		1697.01	-0.00133039		2287	-0.00365423		2877	0.00360022		3466.99	-0.01182245
517.2	0.03350977		1107.19	0.00282149		1697.21	-0.00102151		2287.2	-0.00399586		2877.2	0.00402897		3467.19	-0.01147164
517.4	0.03328004		1107.39	0.00436628		1697.41	-0.00194282		2287.4	-0.00503219		2877.4	0.0032572		3467.39	-0.01299632
517.6	0.03377465		1107.59	0.00446494		1697.61	-0.00248903		2287.6	-0.0056766		2877.6	0.00342714		3467.59	-0.01380589
517.8	0.03436723		1107.79	0.00500309		1697.81	-0.00221554		2287.8	-0.00629005		2877.8	0.00286943		3467.79	-0.01446533
518	0.03533237		1107.99	0.00540992		1698.01	-0.00241649		2288	-0.00624944		2878	0.00386507		3467.99	-0.01394734
518.2	0.03514177		1108.19	0.00467246		1698.21	-0.00163017		2288.2	-0.00695707		2878.2	0.00466312		3468.19	-0.01418063
518.4	0.03560205		1108.39	0.00460099		1698.41	-0.00176738		2288.4	-0.00675105		2878.4	0.00524271		3468.39	-0.01477634
518.6	0.03587006		1108.59	0.00408815		1698.61	-0.00179308		2288.6	-0.00644242		2878.6	0.00501101		3468.59	-0.01470101
518.8	0.03614254		1108.79	0.00307087		1698.81	-0.00222523		2288.8	-0.00668277		2878.8	0.00454147		3468.79	-0.01495373
519	0.03614468		1108.99	0.00243376		1699.01	-0.00257858		2289	-0.0064281		2879	0.0037852		3468.99	-0.01461537
519.2	0.03659809		1109.19	0.00190357		1699.21	-0.00291377		2289.2	-0.00503322		2879.2	0.00356091		3469.19	-0.01506644
519.4	0.03665476		1109.39	0.00198672		1699.41	-0.00405909		2289.4	-0.00472404		2879.4	0.00310367		3469.39	-0.01495581
519.6	0.03630539		1109.59	0.0011981		1699.61	-0.00439879		2289.6	-0.00434135		2879.6	0.00398219		3469.59	-0.01384315
519.8	0.03504094		1109.79	0.00018745		1699.81	-0.00434347		2289.8	-0.00440464		2879.8	0.00463608		3469.79	-0.01325415
520	0.03492641		1109.99	-0.00070272		1700.01	-0.00356173		2290	-0.00430872		2880	0.00431682		3469.99	-0.01247738
520.2	0.0349731		1110.19	-0.00050083		1700.21	-0.00279885		2290.2	-0.00404958		2880.2	0.00369879		3470.19	-0.01229904
520.4	0.03498427		1110.39	-0.00062819		1700.41	-0.00237375		2290.4	-0.00441311		2880.4	0.00277873		3470.39	-0.01235304
520.6	0.03477371		1110.59	-0.00053755		1700.61	-0.00231177		2290.6	-0.00499749		2880.6	0.00244394		3470.59	-0.01266129
520.8	0.03389293		1110.79	-0.00075653		1700.81	-0.00166056		2290.8	-0.00542633		2880.8	0.0023602		3470.79	-0.01242393
521	0.03425478		1110.99	-0.00024918		1701.01	-0.0018812		2291	-0.00492895		2881	0.00259649		3470.99	-0.01274512
521.2	0.03345155		1111.19	0.00000099		1701.21	-0.00200223		2291.2	-0.00495021		2881.2	0.00385917		3471.19	-0.01329201
521.4	0.03380217		1111.39	0.00082484		1701.41	-0.00251107		2291.4	-0.00537376		2881.4	0.00344745		3471.39	-0.01433788
521.6	0.03399479		1111.59	0.00091632		1701.61	-0.00105475		2291.6	-0.00511859		2881.6	0.0044332		3471.59	-0.01450453
521.8	0.03520696		1111.79	0.00130113		1701.81	-0.00106211		2291.8	-0.00550601		2881.8	0.00469043		3471.79	-0.01414652
522	0.03609789		1111.99	0.00017574		1702.01	-0.00108205		2292	-0.00565834		2882	0.00518232		3471.99	-0.01399626
522.2	0.03621058		1112.19	0.00030335		1702.21	-0.00088653		2292.2	-0.00491918		2882.2	0.00517727		3472.19	-0.0146612
522.4	0.03582497		1112.39	0.00056922		1702.41	-0.00088493		2292.4	-0.00485463		2882.4	0.00520424		3472.39	-0.01526909
522.6	0.03483924		1112.59	0.00016862		1702.61	-0.00010787		2292.6	-0.00499713		2882.6	0.00450959		3472.59	-0.01582916
522.8	0.03388721		1112.79	0.00069048		1702.81	-0.00073698		2292.8	-0.00528149		2882.8	0.00428245		3472.79	-0.01563337
523	0.03371558		1112.99	0.00113801		1703.01	-0.00066456		2293	-0.00567207		2883	0.00390493		3472.99	-0.01637754
523.2	0.03335272		1113.19	0.00099051		1703.21	-0.00129911		2293.2	-0.00576854		2883.2	0.00422606		3473.19	-0.01642519
523.4	0.03255713		1113.39	0.00125518		1703.41	-0.00213312		2293.4	-0.00599898		2883.4	0.00343634		3473.39	-0.0159918
523.6	0.03178504		1113.59	0.00046469		1703.61	-0.00193564		2293.6	-0.00676942		2883.6	0.0040157		3473.59	-0.01619196
523.8	0.03211614		1113.79	0.00131343		1703.81	-0.00149271		2293.8	-0.00726477		2883.8	0.00289273		3473.79	-0.01642912
524	0.03228973		1113.99	0.00096029		1704.01	-0.00097228		2294	-0.00683608		2884	0.00189767		3473.99	-0.0159187
524.2	0.03200364		1114.19	0.00072301		1704.21	-0.00046034		2294.2	-0.00673673		2884.2	0.00120429		3474.19	-0.01520178
524.4	0.03298305		1114.39	0.00087756		1704.41	-0.00088981		2294.4	-0.00696633		2884.4	0.00081679		3474.39	-0.01532741
524.6	0.03223093		1114.59	0.00086607		1704.61	-0.00073148		2294.6	-0.00632926		2884.6	0.00152694		3474.59	-0.01483119
524.8	0.03275228		1114.79	0.00150822		1704.81	-0.00110321		2294.8	-0.00651228		2884.8	0.00253529		3474.79	-0.01457558
525	0.0338478		1114.99	0.0014475		1705.01	-0.00067483		2295	-0.00578718		2885	0.00354407		3474.99	-0.01514469
525.2	0.03339882		1115.19	0.00199083		1705.21	-0.00063764		2295.2	-0.00594843		2885.2	0.00431608		3475.19	-0.01480983
525.4	0.03444516		1115.39	0.00270253		1705.41	-0.0003754		2295.4	-0.00569732		2885.4	0.00345117		3475.39	-0.0139553
525.6	0.0349623		1115.59	0.00271813		1705.61	-0.00016985		2295.6	-0.00609216		2885.6	0.00422681		3475.59	-0.01340672
525.8	0.03584391		1115.79	0.00180971		1705.81	-0.00114162		2295.8	-0.00680454		2885.8	0.00386233		3475.79	-0.01294356
526	0.03662309		1115.99	0.00148111		1706.01	-0.00092918		2296	-0.00681488		2886	0.00394269		3475.99	-0.01282901
526.2	0.03620037		1116.19	0.00224737		1706.21	-0.00081963		2296.2	-0.00669394		2886.2	0.0047305		3476.19	-0.01267052
526.4	0.03571967		1116.39	0.0017254		1706.41	-0.00047406		2296.4	-0.00685192		2886.4	0.004499		3476.39	-0.01280752
526.6	0.03559174		1116.59	0.00286352		1706.61	-0.00088698		2296.6	-0.00750185		2886.6	0.00432511		3476.59	-0.01262574
526.8	0.03566211		1116.79	0.00362626		1706.81	-0.00149788		2296.8	-0.00744075		2886.8	0.00361143		3476.79	-0.01234679
527	0.03536198		1116.99	0.00336373		1707.01	-0.00162112		2297	-0.00756203		2887	0.00381205		3476.99	-0.01265903
527.2	0.03563637		1117.19	0.00342874		1707.21	-0.0027908		2297.2	-0.00773055		2887.2	0.00318335		3477.19	-0.01289561
527.4	0.03552553		1117.39	0.00413724		1707.41	-0.00257248		2297.4	-0.00757423		2887.4	0.0013745		3477.39	-0.01291855
527.6	0.03572491		1117.59	0.00428389		1707.61	-0.00209622		2297.6	-0.00872524		2887.6	0.00114883		3477.59	-0.01276837
527.8	0.03673325		1117.79	0.00508484		1707.81	-0.00197083		2297.8	-0.00803374		2887.8	0.00049063		3477.79	-0.01216355
528	0.0360792		1117.99	0.00465914		1708.01	-0.00142871		2298	-0.00696233		2888	0.00037444		3477.99	-0.01195982
528.2	0.03654492		1118.19	0.00419203		1708.21	-0.00189746		2298.2	-0.00691532		2888.2	0.00076715		3478.19	-0.01227537
528.4	0.03684101		1118.39	0.00401683		1708.41	-0.00219822		2298.4	-0.0063712		2888.4	0.00048023		3478.39	-0.01227216
528.6	0.03615254		1118.59	0.00393985		1708.61	-0.00153007		2298.6	-0.00582422		2888.6	0.00049303		3478.59	-0.01120178
528.8	0.03609913		1118.79	0.0047235		1708.81	-0.00055479		2298.8	-0.00685265		2888.8	0.00121007		3478.79	-0.01045491
529	0.03578703		1118.99	0.00438358		1709.01	0.00105743		2299	-0.00617563		2889	0.00139346		3478.99	-0.0105533
529.2	0.03498569		1119.19	0.00542298		1709.21	0.00087008		2299.2	-0.00628977		2889.2	0.00194562		3479.19	-0.01028179
529.4	0.03432478		1119.39	0.00515515		1709.41	0.00103565		2299.4	-0.00618395		2889.4	0.00179206		3479.39	-0.01058361
529.6	0.03432516		1119.59	0.00436423		1709.61	0.0006139		2299.6	-0.00595677		2889.6	0.00271277		3479.59	-0.01098494
529.8	0.03377339		1119.79	0.00374493		1709.81	0.00178649		2299.8	-0.0057699		2889.8	0.00319027		3479.79	-0.01089081
530	0.03381572		1119.99	0.00436405		1710.01	0.00259375		2300	-0.00575255		2890	0.0033388		3479.99	-0.01145222
530.2	0.03393779		1120.19	0.00367158		1710.21	0.00213924		2300.2	-0.00587755		2890.2	0.00348436		3480.19	-0.01251257
530.4	0.03364645		1120.39	0.00375042		1710.41	0.00125163		2300.4	-0.00514796		2890.4	0.00280357		3480.39	-0.01384842
530.6	0.03378129		1120.59	0.00489376		1710.61	0.00093297		2300.6	-0.00531066		2890.6	0.00267908		3480.59	-0.0135729
530.8	0.03309536		1120.79	0.00378069		1710.81	0.00087468		2300.8	-0.00529348		2890.8	0.00220245		3480.79	-0.01339636
531	0.03333085		1120.99	0.00426653		1711.01	0.00032037		2301	-0.00603026		2891	0.00282536		3480.99	-0.01368695
531.2	0.03346747		1121.19	0.00402205		1711.21	0.00011712		2301.2	-0.00649279		2891.2	0.00245935		3481.19	-0.01358237
531.4	0.03384436		1121.39	0.00364849		1711.41	-0.00020455		2301.4	-0.00667422		2891.4	0.0026948		3481.39	-0.01308322
531.6	0.03356037		1121.59	0.00295752		1711.61	-0.00148516		2301.6	-0.00726312		2891.6	0.00338687		3481.59	-0.01258416
531.8	0.03409937		1121.79	0.00276216		1711.81	-0.0024295		2301.8	-0.00726557		2891.8	0.00381775		3481.79	-0.01262596
532	0.03408058		1121.99	0.00162293		1712.01	-0.00300512		2302	-0.00745647		2892	0.00355649		3481.99	-0.0133598
532.2	0.03351778		1122.19	0.00088977		1712.21	-0.00402133		2302.2	-0.00832512		2892.2	0.00308841		3482.19	-0.01385543
532.4	0.03330106		1122.39	0.00033013		1712.41	-0.00344372		2302.4	-0.00820159		2892.4	0.00265963		3482.39	-0.01348529
532.6	0.03288405		1122.59	0.00028641		1712.61	-0.00339343		2302.6	-0.00843151		2892.6	0.00375578		3482.59	-0.01282366
532.8	0.03277373		1122.79	0.00055916		1712.81	-0.00246832		2302.8	-0.00864071		2892.8	0.00460741		3482.79	-0.01290022
533	0.0330172		1122.99	0.00056638		1713.01	-0.00146653		2303	-0.00794717		2893	0.00420307		3482.99	-0.01350927
533.2	0.0332033		1123.19	0.00050386		1713.21	-0.00180785		2303.2	-0.00769175		2893.2	0.00437022		3483.19	-0.01410119
533.4	0.03312542		1123.39	0.00016363		1713.41	-0.00036354		2303.4	-0.00688947		2893.4	0.00463906		3483.39	-0.01458594
533.6	0.03388521		1123.59	-0.00027608		1713.61	-0.00020497		2303.6	-0.00561079		2893.6	0.00455981		3483.59	-0.01451752
533.8	0.03428486		1123.79	0.00050823		1713.81	0.00100951		2303.8	-0.00537836		2893.8	0.00480065		3483.79	-0.01429056
534	0.03421921		1123.99	0.00011026		1714.01	0.00071079		2304	-0.00549153		2894	0.00457544		3483.99	-0.0153039
534.2	0.03446953		1124.19	0.00050273		1714.21	0.00034678		2304.2	-0.0049516		2894.2	0.00516357		3484.19	-0.01602872
534.4	0.03423903		1124.39	0.00105986		1714.41	0.0001289		2304.4	-0.00464323		2894.4	0.00575292		3484.39	-0.0158849
534.6	0.03411495		1124.59	0.00179153		1714.61	0.00023184		2304.6	-0.00472006		2894.6	0.00583866		3484.59	-0.01576357
534.8	0.03375605		1124.79	0.0011777		1714.81	-0.00028294		2304.8	-0.00616213		2894.8	0.0050205		3484.79	-0.01571519
535	0.03408831		1124.99	0.00208293		1715.01	-0.00009202		2305	-0.00629567		2895	0.00505423		3484.99	-0.01554543
535.2	0.03394389		1125.19	0.00149329		1715.21	-0.00114447		2305.2	-0.00709899		2895.2	0.00554368		3485.19	-0.01434165
535.4	0.03352805		1125.39	0.00198033		1715.41	-0.00247942		2305.4	-0.00779094		2895.4	0.0054692		3485.39	-0.01405757
535.6	0.033079		1125.59	0.00233531		1715.61	-0.00368543		2305.6	-0.00825421		2895.6	0.00511752		3485.59	-0.01394912
535.8	0.03349729		1125.79	0.00281685		1715.81	-0.00384653		2305.8	-0.00818318		2895.8	0.00505568		3485.79	-0.0148902
536	0.0328954		1125.99	0.00260634		1716.01	-0.00414237		2306	-0.00858379		2896	0.00486891		3485.99	-0.01539335
536.2	0.03244467		1126.19	0.00244086		1716.21	-0.00426576		2306.2	-0.0088113		2896.2	0.00508623		3486.19	-0.01602357
536.4	0.03236896		1126.39	0.00203728		1716.41	-0.00443057		2306.4	-0.00827305		2896.4	0.00538125		3486.39	-0.01628908
536.6	0.03212634		1126.59	0.0017925		1716.61	-0.00436717		2306.6	-0.00826289		2896.6	0.00542899		3486.59	-0.01617396
536.8	0.0317062		1126.79	0.00228471		1716.81	-0.00363431		2306.8	-0.00755252		2896.8	0.00508997		3486.79	-0.01620876
537	0.03185519		1126.99	0.00206367		1717.01	-0.0039557		2307	-0.00706736		2897	0.00437991		3486.99	-0.01518046
537.2	0.03135441		1127.19	0.00075241		1717.21	-0.0043119		2307.2	-0.00626258		2897.2	0.00504618		3487.19	-0.01458689
537.4	0.03185969		1127.39	0.00132864		1717.41	-0.00362202		2307.4	-0.00503223		2897.4	0.00579582		3487.39	-0.01421727
537.6	0.03222818		1127.59	0.00133491		1717.61	-0.0039425		2307.6	-0.00482947		2897.6	0.00595167		3487.59	-0.0144537
537.8	0.03221301		1127.79	0.00134733		1717.81	-0.00371688		2307.8	-0.00507572		2897.8	0.00584121		3487.79	-0.01405558
538	0.03162025		1127.99	0.00096616		1718.01	-0.00321084		2308	-0.00561125		2898	0.00575466		3487.99	-0.01456722
538.2	0.03222904		1128.19	0.00177132		1718.21	-0.00282362		2308.2	-0.00558803		2898.2	0.00534008		3488.19	-0.0149072
538.4	0.0323274		1128.39	0.00178198		1718.41	-0.00218104		2308.4	-0.00603501		2898.4	0.00463318		3488.39	-0.01482704
538.6	0.03322092		1128.59	0.00288223		1718.61	-0.0023046		2308.6	-0.00591238		2898.6	0.00296849		3488.59	-0.01558447
538.8	0.03322903		1128.79	0.0017605		1718.81	-0.00264062		2308.8	-0.00739714		2898.8	0.00107562		3488.79	-0.01501144
539	0.03343794		1128.99	0.00147015		1719.01	-0.00227281		2309	-0.00704049		2899	0.00148988		3488.99	-0.0141144
539.2	0.03420703		1129.19	0.00173936		1719.21	-0.00302932		2309.2	-0.00733782		2899.2	0.00157968		3489.19	-0.01406385
539.4	0.0343237		1129.39	0.00246124		1719.41	-0.0030733		2309.4	-0.00710502		2899.4	0.00087075		3489.39	-0.01431009
539.6	0.03511884		1129.59	0.00304252		1719.61	-0.00344658		2309.6	-0.00761632		2899.6	0.00090855		3489.59	-0.01498335
539.8	0.03515991		1129.79	0.00297975		1719.81	-0.00303351		2309.8	-0.00773869		2899.8	0.00074972		3489.79	-0.01487551
540	0.03549499		1129.99	0.0025451		1720.01	-0.00346792		2310	-0.00819886		2900	0.00099452		3489.99	-0.01514994
540.2	0.03559043		1130.19	0.002543		1720.21	-0.00408877		2310.2	-0.00767273		2900.2	0.0012742		3490.19	-0.01576439
540.4	0.03498249		1130.39	0.00309376		1720.41	-0.00477333		2310.4	-0.00748375		2900.4	0.0017885		3490.39	-0.01594456
540.6	0.03462762		1130.59	0.00286847		1720.61	-0.00445802		2310.6	-0.00736922		2900.6	0.00268784		3490.59	-0.01618906
540.8	0.03386846		1130.79	0.00309754		1720.81	-0.00539187		2310.8	-0.00575613		2900.8	0.00384907		3490.79	-0.01533317
541	0.03361194		1130.99	0.00278029		1721.01	-0.00575373		2311	-0.00520386		2901	0.00396794		3490.99	-0.0143387
541.2	0.03221775		1131.19	0.00236906		1721.21	-0.00532262		2311.2	-0.00490905		2901.2	0.0046729		3491.19	-0.01465217
541.4	0.03218819		1131.39	0.00273809		1721.41	-0.00517439		2311.4	-0.00468493		2901.4	0.00495421		3491.39	-0.01507414
541.6	0.03118664		1131.59	0.00179938		1721.61	-0.00492068		2311.6	-0.00521753		2901.6	0.00479201		3491.59	-0.01540072
541.8	0.03140467		1131.79	0.0013043		1721.81	-0.0042399		2311.8	-0.00572458		2901.8	0.00440145		3491.79	-0.01515222
542	0.03190894		1131.99	0.00069601		1722.01	-0.0035444		2312	-0.00609395		2902	0.0041588		3491.99	-0.01542218
542.2	0.03231474		1132.19	0.00103505		1722.21	-0.00316417		2312.2	-0.00649066		2902.2	0.00389839		3492.19	-0.01486348
542.4	0.03252391		1132.39	0.00154031		1722.41	-0.00248194		2312.4	-0.00642449		2902.4	0.00373942		3492.39	-0.01398408
542.6	0.03296328		1132.59	0.00154427		1722.61	-0.00294834		2312.6	-0.00707386		2902.6	0.00266202		3492.59	-0.01382942
542.8	0.03218805		1132.79	-0.00051992		1722.81	-0.00303972		2312.8	-0.00753206		2902.8	0.00184819		3492.79	-0.01361655
543	0.03326516		1132.99	0.00001736		1723.01	-0.00244706		2313	-0.00733382		2903	0.00243821		3492.99	-0.01342322
543.2	0.03455859		1133.19	0.0002073		1723.21	-0.00210695		2313.2	-0.00835259		2903.2	0.00236239		3493.19	-0.01356543
543.4	0.03530494		1133.39	-0.00000421		1723.41	-0.00205509		2313.4	-0.00913669		2903.4	0.0009621		3493.39	-0.01344255
543.6	0.03624069		1133.59	0.00028052		1723.61	-0.0020762		2313.6	-0.01026973		2903.6	0.00027614		3493.59	-0.01350443
543.8	0.0366034		1133.79	0.00002848		1723.81	-0.00259645		2313.8	-0.00998205		2903.8	0.00023493		3493.79	-0.01293413
544	0.03694094		1133.99	0.00033645		1724.01	-0.00283066		2314	-0.00988989		2904	0.00098254		3493.99	-0.01333224
544.2	0.03698783		1134.19	0.00023677		1724.21	-0.00302205		2314.2	-0.00963501		2904.2	0.00101266		3494.19	-0.0132825
544.4	0.03651806		1134.39	0.00059675		1724.41	-0.00276903		2314.4	-0.00958836		2904.4	0.00106005		3494.39	-0.01336706
544.6	0.03552042		1134.59	0.00039195		1724.61	-0.00274617		2314.6	-0.0085878		2904.6	0.00120984		3494.59	-0.01342974
544.8	0.03414		1134.79	0.0007095		1724.81	-0.00360298		2314.8	-0.00798156		2904.8	0.0018243		3494.79	-0.01274079
545	0.03266459		1134.99	0.00016798		1725.01	-0.00278889		2315	-0.00815046		2905	0.00112824		3494.99	-0.01263007
545.2	0.03184752		1135.19	-0.00105847		1725.21	-0.00258685		2315.2	-0.00775597		2905.2	0.00151953		3495.19	-0.0123814
545.4	0.03126156		1135.39	-0.00117506		1725.41	-0.00237479		2315.4	-0.00752138		2905.4	0.00160482		3495.39	-0.01228543
545.6	0.03060269		1135.59	-0.00212182		1725.61	-0.00260784		2315.6	-0.0080843		2905.6	0.00130052		3495.59	-0.01233742
545.8	0.03056088		1135.79	-0.00252489		1725.81	-0.00327144		2315.8	-0.00810455		2905.8	0.00132455		3495.79	-0.01236512
546	0.03042635		1135.99	-0.00339333		1726.01	-0.00355001		2316	-0.00768917		2906	0.00143384		3495.99	-0.01198134
546.2	0.0303504		1136.19	-0.00249754		1726.21	-0.00274983		2316.2	-0.00779752		2906.2	0.00127929		3496.19	-0.01152018
546.4	0.03005039		1136.39	-0.00212483		1726.41	-0.00263041		2316.4	-0.00787214		2906.4	0.00068045		3496.39	-0.01110585
546.6	0.03073772		1136.59	-0.00230666		1726.61	-0.00331236		2316.6	-0.0079209		2906.6	0.00085017		3496.59	-0.0122628
546.8	0.03173257		1136.79	-0.00229138		1726.81	-0.00347655		2316.8	-0.00720123		2906.8	0.00170364		3496.79	-0.01238229
547	0.03269868		1136.99	-0.00143987		1727.01	-0.00323682		2317	-0.00715719		2907	0.00252902		3496.99	-0.01216518
547.2	0.03385847		1137.19	-0.00194349		1727.21	-0.00317026		2317.2	-0.00779804		2907.2	0.0030333		3497.19	-0.01164684
547.4	0.03435209		1137.39	-0.00197265		1727.41	-0.00347376		2317.4	-0.00763442		2907.4	0.00275136		3497.39	-0.01207222
547.6	0.03524523		1137.59	-0.00186978		1727.61	-0.00372041		2317.6	-0.00809289		2907.6	0.00387063		3497.59	-0.01263151
547.8	0.03505358		1137.79	-0.00205551		1727.81	-0.00433559		2317.8	-0.00827037		2907.8	0.00466877		3497.79	-0.01304998
548	0.03576021		1137.99	-0.00172944		1728.01	-0.00365602		2318	-0.00798353		2908	0.00501344		3497.99	-0.01373615
548.2	0.03627698		1138.19	-0.00228082		1728.21	-0.00298862		2318.2	-0.0084308		2908.2	0.00483366		3498.19	-0.01389555
548.4	0.03584436		1138.39	-0.00171301		1728.41	-0.00279625		2318.4	-0.00786901		2908.4	0.00569024		3498.39	-0.01479626
548.6	0.03625717		1138.59	-0.00105006		1728.61	-0.00229195		2318.6	-0.00745175		2908.6	0.00656151		3498.59	-0.01517179
548.8	0.03592107		1138.79	-0.00010472		1728.81	-0.001896		2318.8	-0.00827685		2908.8	0.00703495		3498.79	-0.01526511
549	0.03577561		1138.99	0.00035081		1729.01	-0.00112438		2319	-0.00785426		2909	0.00668039		3498.99	-0.01585679
549.2	0.03618962		1139.19	0.00092395		1729.21	-0.00073349		2319.2	-0.00738097		2909.2	0.00761339		3499.19	-0.01573084
549.4	0.03525116		1139.39	0.00222292		1729.41	-0.00084769		2319.4	-0.00774454		2909.4	0.00768728		3499.39	-0.01594316
549.6	0.0353047		1139.59	0.00176574		1729.61	-0.00117881		2319.6	-0.007744		2909.6	0.00720656		3499.59	-0.01577008
549.8	0.03463299		1139.79	0.0020349		1729.81	-0.00179076		2319.8	-0.00688457		2909.8	0.00619734		3499.79	-0.01600853
550	0.03453198		1139.99	0.00214199		1730.01	-0.00125572		2320	-0.00694173		2910	0.00569258		3499.99	-0.01567203
550.2	0.03419448		1140.19	0.00261273		1730.21	-0.00081587		2320.2	-0.00659673		2910.2	0.00489472		3500.19	-0.01579588
550.4	0.03407721		1140.39	0.00301674		1730.41	-0.00133195		2320.4	-0.0068618		2910.4	0.00429821		3500.39	-0.01577618
550.6	0.03404028		1140.59	0.00210078		1730.61	-0.0012935		2320.6	-0.00638164		2910.6	0.00390447		3500.59	-0.01619673
550.8	0.03433402		1140.79	0.00271459		1730.81	-0.00155799		2320.8	-0.0060721		2910.8	0.00361251		3500.79	-0.01529987
551	0.03341414		1140.99	0.00238203		1731.01	-0.00165624		2321	-0.00637568		2911	0.00374838		3500.99	-0.01442354
551.2	0.03345547		1141.19	0.0019171		1731.21	-0.00174385		2321.2	-0.00662545		2911.2	0.00416492		3501.19	-0.01381087
551.4	0.03296144		1141.39	0.00114865		1731.41	-0.00215384		2321.4	-0.0068799		2911.4	0.0038411		3501.39	-0.01464338
551.6	0.03257895		1141.59	0.00063115		1731.61	-0.00273545		2321.6	-0.00716268		2911.6	0.00344982		3501.59	-0.01520042
551.8	0.03276647		1141.79	0.00125554		1731.81	-0.00251999		2321.8	-0.00771763		2911.8	0.00331206		3501.79	-0.01505082
552	0.03285904		1141.99	0.00134336		1732.01	-0.00202323		2322	-0.00737522		2912	0.00356655		3501.99	-0.01510619
552.2	0.0325512		1142.19	0.00097322		1732.21	-0.00191457		2322.2	-0.00812033		2912.2	0.0031929		3502.19	-0.01510068
552.4	0.03236416		1142.39	0.0016244		1732.41	-0.00210861		2322.4	-0.00742622		2912.4	0.00345612		3502.39	-0.0156879
552.6	0.03285141		1142.59	0.00250255		1732.61	-0.0016621		2322.6	-0.00751976		2912.6	0.00291335		3502.59	-0.01543835
552.8	0.03222271		1142.79	0.00352533		1732.81	-0.00165612		2322.8	-0.00804091		2912.8	0.00350641		3502.79	-0.01523258
553	0.03169758		1142.99	0.00276354		1733.01	-0.00223441		2323	-0.00744974		2913	0.00365928		3502.99	-0.0151325
553.2	0.03211677		1143.19	0.00275497		1733.21	-0.00182686		2323.2	-0.00687417		2913.2	0.00376447		3503.19	-0.01536909
553.4	0.03143185		1143.39	0.0025469		1733.41	-0.00245405		2323.4	-0.00715611		2913.4	0.00287319		3503.39	-0.01499948
553.6	0.03134648		1143.59	0.00172598		1733.61	-0.00340578		2323.6	-0.00689497		2913.6	0.00227972		3503.59	-0.0159266
553.8	0.03065294		1143.79	0.00198541		1733.81	-0.00433347		2323.8	-0.00632547		2913.8	0.00154736		3503.79	-0.01676392
554	0.03055561		1143.99	0.00182968		1734.01	-0.00456198		2324	-0.00636282		2914	0.00136566		3503.99	-0.0168041
554.2	0.03067427		1144.19	0.00038823		1734.21	-0.00418969		2324.2	-0.00670894		2914.2	0.00052851		3504.19	-0.01648488
554.4	0.03113076		1144.39	0.000016		1734.41	-0.0043377		2324.4	-0.00729123		2914.4	-0.00077088		3504.39	-0.01635527
554.6	0.03144549		1144.59	-0.00055609		1734.61	-0.00438047		2324.6	-0.00792061		2914.6	-0.00115219		3504.59	-0.01639394
554.8	0.03230449		1144.79	0.00022792		1734.81	-0.00451362		2324.8	-0.0082234		2914.8	-0.00029091		3504.79	-0.01605279
555	0.03219244		1144.99	-0.00032919		1735.01	-0.00453212		2325	-0.00826565		2915	0.00030706		3504.99	-0.01474014
555.2	0.03268243		1145.19	0.00011731		1735.21	-0.00446348		2325.2	-0.00828759		2915.2	0.0004527		3505.19	-0.01428606
555.4	0.03335135		1145.39	0.00040936		1735.41	-0.00443119		2325.4	-0.00869031		2915.4	0.00012578		3505.39	-0.01422073
555.6	0.03346727		1145.59	0.00054999		1735.61	-0.00385193		2325.6	-0.00945993		2915.6	0.00064911		3505.59	-0.01393416
555.8	0.03440623		1145.79	0.00130695		1735.81	-0.00302725		2325.8	-0.01017171		2915.8	0.00193668		3505.79	-0.01316046
556	0.0345941		1145.99	0.00109316		1736.01	-0.00320768		2326	-0.00991101		2916	0.00225458		3505.99	-0.01351733
556.2	0.03524594		1146.19	0.00094386		1736.21	-0.00340503		2326.2	-0.0099563		2916.2	0.00204446		3506.19	-0.01352066
556.4	0.03523593		1146.39	0.00092322		1736.41	-0.00240207		2326.4	-0.01005545		2916.4	0.00202773		3506.39	-0.01309593
556.6	0.03527143		1146.59	0.00022251		1736.61	-0.00136558		2326.6	-0.01021578		2916.6	0.00221765		3506.59	-0.01365211
556.8	0.03464066		1146.79	0.00036736		1736.81	-0.00114094		2326.8	-0.01057013		2916.8	0.00304585		3506.79	-0.01462898
557	0.03491376		1146.99	-0.00043131		1737.01	-0.00083694		2327	-0.01065316		2917	0.00278127		3506.99	-0.01496407
557.2	0.03448179		1147.19	-0.00024517		1737.21	-0.00058292		2327.2	-0.01035177		2917.2	0.00243858		3507.19	-0.0166806
557.4	0.03327548		1147.39	-0.00057442		1737.41	-0.00139241		2327.4	-0.01104906		2917.4	0.00224215		3507.39	-0.01665186
557.6	0.03302795		1147.59	-0.00017136		1737.61	-0.00224725		2327.6	-0.01087083		2917.6	0.0028076		3507.59	-0.01744925
557.8	0.03224669		1147.79	0.00030698		1737.81	-0.00206408		2327.8	-0.01034839		2917.8	0.00247735		3507.79	-0.01760363
558	0.03125183		1147.99	0.00023733		1738.01	-0.0027661		2328	-0.0102131		2918	0.00139185		3507.99	-0.01699822
558.2	0.03082103		1148.19	-0.00025598		1738.21	-0.00274291		2328.2	-0.01014716		2918.2	0.00075989		3508.19	-0.0165456
558.4	0.02947443		1148.39	0.00030475		1738.41	-0.00350989		2328.4	-0.01010601		2918.4	0.0003334		3508.39	-0.01678907
558.6	0.02877208		1148.59	0.00079611		1738.61	-0.00382711		2328.6	-0.00980795		2918.6	0.00103389		3508.59	-0.01685383
558.8	0.02837557		1148.79	0.00063925		1738.81	-0.00416526		2328.8	-0.00943134		2918.8	0.00121787		3508.79	-0.01654128
559	0.02835686		1148.99	0.00007		1739.01	-0.00472133		2329	-0.00842074		2919	0.00131927		3508.99	-0.0157237
559.2	0.02881768		1149.19	0.00016587		1739.21	-0.00503735		2329.2	-0.00836564		2919.2	0.00093537		3509.19	-0.01582738
559.4	0.02910685		1149.39	-0.00067628		1739.41	-0.00474225		2329.4	-0.00861015		2919.4	0.00138104		3509.39	-0.01546515
559.6	0.02973105		1149.59	-0.00161432		1739.61	-0.00437194		2329.6	-0.00837282		2919.6	0.00192369		3509.59	-0.01556254
559.8	0.03084926		1149.79	-0.00175879		1739.81	-0.00401301		2329.8	-0.00781778		2919.8	0.0024486		3509.79	-0.01514649
560	0.03166791		1149.99	-0.00228498		1740.01	-0.00472203		2330	-0.00738887		2920	0.00218743		3509.99	-0.0160175
560.2	0.03196713		1150.19	-0.00280929		1740.21	-0.003766		2330.2	-0.00746416		2920.2	0.00133643		3510.19	-0.01579289
560.4	0.03194923		1150.39	-0.00353461		1740.41	-0.00256411		2330.4	-0.00769676		2920.4	0.00159387		3510.39	-0.01573566
560.6	0.03238143		1150.59	-0.00305684		1740.61	-0.00218353		2330.6	-0.00819775		2920.6	0.00254281		3510.59	-0.01629608
560.8	0.03258231		1150.79	-0.00279101		1740.81	-0.00237168		2330.8	-0.00806978		2920.8	0.00298582		3510.79	-0.01629711
561	0.0333576		1150.99	-0.0032939		1741.01	-0.00255668		2331	-0.00828799		2921	0.002876		3510.99	-0.01489755
561.2	0.03289135		1151.19	-0.00310532		1741.21	-0.00282563		2331.2	-0.00768628		2921.2	0.00257139		3511.19	-0.01499376
561.4	0.03302275		1151.39	-0.0016652		1741.41	-0.00306787		2331.4	-0.00857753		2921.4	0.00247157		3511.39	-0.01401427
561.6	0.03368421		1151.59	-0.00117124		1741.61	-0.00319225		2331.6	-0.00837647		2921.6	0.00278496		3511.59	-0.01298475
561.8	0.03379416		1151.79	-0.00068595		1741.81	-0.00389087		2331.8	-0.00730307		2921.8	0.00222092		3511.79	-0.01310121
562	0.03375145		1151.99	-0.0002663		1742.01	-0.00444113		2332	-0.00722718		2922	0.00193476		3511.99	-0.01325627
562.2	0.03338884		1152.19	0.0006565		1742.21	-0.00481123		2332.2	-0.00677435		2922.2	0.00215751		3512.19	-0.01431215
562.4	0.03366732		1152.39	0.00114724		1742.41	-0.00586298		2332.4	-0.00729828		2922.4	0.00292619		3512.39	-0.01502069
562.6	0.03442101		1152.59	0.00081034		1742.61	-0.00573732		2332.6	-0.00669193		2922.6	0.00397521		3512.59	-0.01510123
562.8	0.03451239		1152.79	0.0001077		1742.81	-0.00542911		2332.8	-0.00648881		2922.8	0.00467693		3512.79	-0.01566002
563	0.03525454		1152.99	-0.00053559		1743.01	-0.00527411		2333	-0.00644899		2923	0.00529984		3512.99	-0.01614449
563.2	0.03598508		1153.19	-0.0013267		1743.21	-0.00521018		2333.2	-0.0075854		2923.2	0.0044565		3513.19	-0.01608994
563.4	0.03605538		1153.39	-0.00176131		1743.41	-0.00417144		2333.4	-0.00852408		2923.4	0.00506652		3513.39	-0.01599266
563.6	0.03670322		1153.59	-0.00217748		1743.61	-0.00300931		2333.6	-0.00857542		2923.6	0.00523367		3513.59	-0.01727179
563.8	0.0369909		1153.79	-0.00261601		1743.81	-0.00275878		2333.8	-0.00871491		2923.8	0.00487741		3513.79	-0.01754347
564	0.03730767		1153.99	-0.0037082		1744.01	-0.00340364		2334	-0.00947445		2924	0.00456067		3513.99	-0.01806391
564.2	0.03636513		1154.19	-0.00396015		1744.21	-0.00273147		2334.2	-0.01056214		2924.2	0.0043162		3514.19	-0.01788327
564.4	0.03580316		1154.39	-0.00435905		1744.41	-0.00316788		2334.4	-0.01015945		2924.4	0.00542396		3514.39	-0.01848265
564.6	0.03532842		1154.59	-0.00385247		1744.61	-0.0032804		2334.6	-0.01073986		2924.6	0.00483472		3514.59	-0.01825727
564.8	0.03473597		1154.79	-0.00492259		1744.81	-0.00309425		2334.8	-0.00970423		2924.8	0.00388388		3514.79	-0.01755043
565	0.03426582		1154.99	-0.00443941		1745.01	-0.00325634		2335	-0.01004482		2925	0.00258115		3514.99	-0.0168461
565.2	0.03414155		1155.19	-0.00369387		1745.21	-0.00284959		2335.2	-0.01008362		2925.2	0.00156261		3515.19	-0.01730126
565.4	0.03415937		1155.39	-0.00236886		1745.41	-0.00317183		2335.4	-0.01077719		2925.4	0.00144994		3515.39	-0.01672132
565.6	0.03457368		1155.59	-0.00179208		1745.61	-0.00353082		2335.6	-0.01005338		2925.6	0.00076479		3515.59	-0.01706969
565.8	0.03493895		1155.79	-0.00060386		1745.81	-0.00491684		2335.8	-0.00925944		2925.8	0.00071725		3515.79	-0.01797068
566	0.03502364		1155.99	0.00017966		1746.01	-0.0050475		2336	-0.0094791		2926	0.00032769		3515.99	-0.01794413
566.2	0.03470138		1156.19	0.00050173		1746.21	-0.00502838		2336.2	-0.00859119		2926.2	0.00033266		3516.19	-0.01811506
566.4	0.03527501		1156.39	0.0003936		1746.41	-0.0050304		2336.4	-0.00838007		2926.4	0.00113675		3516.39	-0.01773833
566.6	0.03535679		1156.59	0.00022067		1746.61	-0.00429692		2336.6	-0.00798309		2926.6	0.00190617		3516.59	-0.0168049
566.8	0.03515136		1156.79	0.00094765		1746.81	-0.00308235		2336.8	-0.00763208		2926.8	0.00208333		3516.79	-0.01712293
567	0.03517498		1156.99	0.00082499		1747.01	-0.0035081		2337	-0.00806174		2927	0.00188714		3516.99	-0.01645048
567.2	0.03513681		1157.19	0.00038379		1747.21	-0.00353902		2337.2	-0.00863687		2927.2	0.00176195		3517.19	-0.01584369
567.4	0.03514563		1157.39	0.00089707		1747.41	-0.00329914		2337.4	-0.00801656		2927.4	0.00213945		3517.39	-0.01561017
567.6	0.03495085		1157.59	-0.00030397		1747.61	-0.00274126		2337.6	-0.00762794		2927.6	0.00248867		3517.59	-0.0161299
567.8	0.03467917		1157.79	-0.00145435		1747.81	-0.00332625		2337.8	-0.00815772		2927.8	0.00240512		3517.79	-0.01495927
568	0.03448967		1157.99	-0.0023821		1748.01	-0.00337052		2338	-0.00863185		2928	0.00290194		3517.99	-0.01462279
568.2	0.03334185		1158.19	-0.00286037		1748.21	-0.0036015		2338.2	-0.00876126		2928.2	0.00293376		3518.19	-0.01479252
568.4	0.03332198		1158.39	-0.00389974		1748.41	-0.00390068		2338.4	-0.00820338		2928.4	0.00289959		3518.39	-0.01497193
568.6	0.03295837		1158.59	-0.00376806		1748.61	-0.00359629		2338.6	-0.00798188		2928.6	0.00150382		3518.59	-0.01408651
568.8	0.03292348		1158.79	-0.00379983		1748.81	-0.00342692		2338.8	-0.00807235		2928.8	0.00178973		3518.79	-0.01295339
569	0.03255135		1158.99	-0.00370481		1749.01	-0.00355951		2339	-0.00863482		2929	0.00233023		3518.99	-0.01312728
569.2	0.03282212		1159.19	-0.00399722		1749.21	-0.00379559		2339.2	-0.00882582		2929.2	0.00276263		3519.19	-0.0137928
569.4	0.03252326		1159.39	-0.00309138		1749.41	-0.00365367		2339.4	-0.00940429		2929.4	0.00334714		3519.39	-0.01374357
569.6	0.03241261		1159.59	-0.00240518		1749.61	-0.00362437		2339.6	-0.00911488		2929.6	0.00270121		3519.59	-0.01433441
569.8	0.03248996		1159.79	-0.00189929		1749.81	-0.00392351		2339.8	-0.00884796		2929.8	0.00332233		3519.79	-0.01428102
570	0.03171635		1159.99	-0.00160003		1750.01	-0.00264416		2340	-0.00788335		2930	0.00318898		3519.99	-0.01387499
570.2	0.03191273		1160.19	-0.00178025		1750.21	-0.00202695		2340.2	-0.00690991		2930.2	0.00400703		3520.19	-0.01476523
570.4	0.03244961		1160.39	-0.00112817		1750.41	-0.00201286		2340.4	-0.00699794		2930.4	0.00505265		3520.39	-0.01555815
570.6	0.03254374		1160.59	-0.00097738		1750.61	-0.00107032		2340.6	-0.00614133		2930.6	0.00513294		3520.59	-0.01533843
570.8	0.03272221		1160.79	-0.00071578		1750.81	-0.00053182		2340.8	-0.00499046		2930.8	0.00561472		3520.79	-0.01538189
571	0.03190363		1160.99	-0.00064176		1751.01	-0.00175037		2341	-0.00556716		2931	0.00537025		3520.99	-0.01545956
571.2	0.03201381		1161.19	-0.0001022		1751.21	-0.00200462		2341.2	-0.00596992		2931.2	0.00460439		3521.19	-0.01563052
571.4	0.03184895		1161.39	0.00024057		1751.41	-0.00219356		2341.4	-0.00573934		2931.4	0.00400172		3521.39	-0.01549499
571.6	0.03140929		1161.59	-0.00064928		1751.61	-0.00174639		2341.6	-0.00604311		2931.6	0.00408502		3521.59	-0.01572473
571.8	0.03152233		1161.79	-0.00064334		1751.81	-0.00124481		2341.8	-0.00626686		2931.8	0.00363767		3521.79	-0.0149078
572	0.03177489		1161.99	-0.0007347		1752.01	-0.00103798		2342	-0.00609482		2932	0.00314034		3521.99	-0.01520225
572.2	0.03161506		1162.19	-0.00161837		1752.21	-0.00145439		2342.2	-0.00631208		2932.2	0.0025412		3522.19	-0.01545391
572.4	0.03104695		1162.39	-0.0019427		1752.41	-0.001702		2342.4	-0.00718027		2932.4	0.00160719		3522.39	-0.01573094
572.6	0.03028699		1162.59	-0.0016829		1752.61	-0.00211359		2342.6	-0.00777092		2932.6	0.00126577		3522.59	-0.01540897
572.8	0.0296039		1162.79	-0.00195726		1752.81	-0.00219647		2342.8	-0.009392		2932.8	0.00131458		3522.79	-0.01518555
573	0.02915329		1162.99	-0.00255174		1753.01	-0.00198454		2343	-0.01006415		2933	0.00083934		3522.99	-0.01604964
573.2	0.02950844		1163.19	-0.00276308		1753.21	-0.00193766		2343.2	-0.01086784		2933.2	0.00008887		3523.19	-0.01632192
573.4	0.02970005		1163.39	-0.00171812		1753.41	-0.00162631		2343.4	-0.01174132		2933.4	0.00050271		3523.39	-0.01618515
573.6	0.02915377		1163.59	-0.00115982		1753.61	-0.00229071		2343.6	-0.01124		2933.6	0.0003523		3523.59	-0.01586529
573.8	0.02952139		1163.79	-0.00063929		1753.81	-0.00259146		2343.8	-0.01083375		2933.8	0.00095951		3523.79	-0.01569759
574	0.02974997		1163.99	-0.00072273		1754.01	-0.00273163		2344	-0.00982333		2934	0.00075967		3523.99	-0.01545416
574.2	0.03081882		1164.19	-0.00125424		1754.21	-0.00337392		2344.2	-0.0099037		2934.2	0.00081421		3524.19	-0.01653198
574.4	0.03129525		1164.39	-0.00172211		1754.41	-0.00368212		2344.4	-0.01035058		2934.4	0.00092222		3524.39	-0.01674838
574.6	0.03245889		1164.59	-0.00164267		1754.61	-0.00385613		2344.6	-0.00959785		2934.6	0.00109599		3524.59	-0.01635513
574.8	0.03307245		1164.79	-0.00128008		1754.81	-0.00524964		2344.8	-0.00997187		2934.8	0.00198502		3524.79	-0.01591212
575	0.03266623		1164.99	-0.00092129		1755.01	-0.0053068		2345	-0.01062816		2935	0.0017135		3524.99	-0.01587647
575.2	0.03362062		1165.19	-0.00065662		1755.21	-0.0059852		2345.2	-0.00941912		2935.2	0.00164816		3525.19	-0.01561681
575.4	0.03370776		1165.39	-0.00064678		1755.41	-0.00664911		2345.4	-0.00823852		2935.4	0.00177981		3525.39	-0.01544132
575.6	0.03416773		1165.59	-0.00119551		1755.61	-0.00678448		2345.6	-0.00709987		2935.6	0.0019283		3525.59	-0.01497307
575.8	0.03481481		1165.79	-0.00132013		1755.81	-0.0063259		2345.8	-0.0069344		2935.8	0.00228389		3525.79	-0.01470766
576	0.03479139		1165.99	-0.00135118		1756.01	-0.00660554		2346	-0.00646056		2936	0.00242406		3525.99	-0.01511914
576.2	0.03448331		1166.19	-0.00177674		1756.21	-0.00674464		2346.2	-0.00672236		2936.2	0.00172585		3526.19	-0.01595888
576.4	0.03376713		1166.39	-0.00135583		1756.41	-0.0060505		2346.4	-0.00671214		2936.4	0.00179033		3526.39	-0.01735271
576.6	0.0332927		1166.59	-0.00073431		1756.61	-0.00560671		2346.6	-0.00654182		2936.6	0.00224127		3526.59	-0.01778631
576.8	0.03238285		1166.79	-0.00083166		1756.81	-0.00488588		2346.8	-0.00691496		2936.8	0.00086256		3526.79	-0.01872776
577	0.03257274		1166.99	-0.00069536		1757.01	-0.00530941		2347	-0.00702346		2937	0.00101641		3526.99	-0.01941517
577.2	0.03260947		1167.19	-0.00092497		1757.21	-0.00542919		2347.2	-0.00720887		2937.2	0.00197837		3527.19	-0.0199236
577.4	0.03192156		1167.39	-0.00062377		1757.41	-0.0058487		2347.4	-0.00748011		2937.4	0.00268251		3527.39	-0.01985969
577.6	0.03052804		1167.59	0.00011814		1757.61	-0.00680037		2347.6	-0.0078645		2937.6	0.00202863		3527.59	-0.01954137
577.8	0.03032539		1167.79	0.00052601		1757.81	-0.00648363		2347.8	-0.00919337		2937.8	0.00192897		3527.79	-0.02002531
578	0.02941552		1167.99	-0.0003469		1758.01	-0.00706998		2348	-0.00972921		2938	0.00086506		3527.99	-0.02027416
578.2	0.02961992		1168.19	-0.00051121		1758.21	-0.00640315		2348.2	-0.01077649		2938.2	0.00096		3528.19	-0.02088152
578.4	0.03031633		1168.39	-0.00011786		1758.41	-0.00654548		2348.4	-0.01165018		2938.4	0.00131594		3528.39	-0.01909046
578.6	0.03084921		1168.59	-0.00035559		1758.61	-0.00660542		2348.6	-0.0116344		2938.6	0.00119639		3528.59	-0.01809193
578.8	0.03051722		1168.79	-0.00126804		1758.81	-0.00691957		2348.8	-0.01208902		2938.8	0.00148486		3528.79	-0.01707176
579	0.03038053		1168.99	-0.00134585		1759.01	-0.00682455		2349	-0.01119209		2939	0.00132283		3528.99	-0.01667795
579.2	0.0308918		1169.19	-0.00133122		1759.21	-0.00733742		2349.2	-0.0100747		2939.2	0.00139928		3529.19	-0.01620458
579.4	0.03108684		1169.39	-0.00225227		1759.41	-0.00778007		2349.4	-0.00974025		2939.4	0.00170766		3529.39	-0.01589459
579.6	0.03200113		1169.59	-0.00297937		1759.61	-0.00706896		2349.6	-0.01007962		2939.6	0.00237706		3529.59	-0.01551363
579.8	0.03288855		1169.79	-0.00334755		1759.81	-0.00641681		2349.8	-0.01067919		2939.8	0.0024276		3529.79	-0.01541827
580	0.03320953		1169.99	-0.00373528		1760.01	-0.00610968		2350	-0.01031148		2940	0.0025312		3529.99	-0.01505315
580.2	0.03354821		1170.19	-0.00322596		1760.21	-0.00489825		2350.2	-0.0096749		2940.2	0.0018327		3530.19	-0.01587065
580.4	0.03370894		1170.39	-0.00325637		1760.41	-0.00342602		2350.4	-0.0093777		2940.4	0.00185164		3530.39	-0.01705157
580.6	0.03322753		1170.59	-0.00272576		1760.61	-0.00362552		2350.6	-0.00914946		2940.6	0.00142058		3530.59	-0.016828
580.8	0.03296173		1170.79	-0.00313422		1760.81	-0.00353741		2350.8	-0.00964439		2940.8	0.0015748		3530.79	-0.01767362
581	0.03337798		1170.99	-0.00240171		1761.01	-0.00416464		2351	-0.00936799		2941	0.00276372		3530.99	-0.01759596
581.2	0.03277581		1171.19	-0.00260187		1761.21	-0.00384923		2351.2	-0.00929959		2941.2	0.00323355		3531.19	-0.01754067
581.4	0.0318013		1171.39	-0.00212874		1761.41	-0.00360051		2351.4	-0.01008295		2941.4	0.00239045		3531.39	-0.01703557
581.6	0.03100856		1171.59	-0.00186047		1761.61	-0.00410629		2351.6	-0.01086887		2941.6	0.00164304		3531.59	-0.01756853
581.8	0.0306662		1171.79	-0.00239644		1761.81	-0.00323903		2351.8	-0.01063994		2941.8	0.001782		3531.79	-0.0181579
582	0.03065002		1171.99	-0.00265963		1762.01	-0.00400393		2352	-0.01099598		2942	0.00076387		3531.99	-0.01836324
582.2	0.03071886		1172.19	-0.00216897		1762.21	-0.0040417		2352.2	-0.01022962		2942.2	0.00074362		3532.19	-0.01855807
582.4	0.02993567		1172.39	-0.00177378		1762.41	-0.0044688		2352.4	-0.00984293		2942.4	0.0005618		3532.39	-0.01715113
582.6	0.03048047		1172.59	-0.00168996		1762.61	-0.00365419		2352.6	-0.00968571		2942.6	0.00061901		3532.59	-0.01849303
582.8	0.0305254		1172.79	-0.00153502		1762.81	-0.00462123		2352.8	-0.0092343		2942.8	0.00114252		3532.79	-0.01912039
583	0.02995731		1172.99	-0.0012047		1763.01	-0.00434928		2353	-0.0080946		2943	0.00071222		3532.99	-0.01990306
583.2	0.03015235		1173.19	-0.00156188		1763.21	-0.00347962		2353.2	-0.00732877		2943.2	0.00169149		3533.19	-0.02013475
583.4	0.03013597		1173.39	-0.00257296		1763.41	-0.00367536		2353.4	-0.00708445		2943.4	0.00197898		3533.39	-0.02040896
583.6	0.03024085		1173.59	-0.00272844		1763.61	-0.00273863		2353.6	-0.00753226		2943.6	0.00162547		3533.59	-0.02126314
583.8	0.03061988		1173.79	-0.00290323		1763.81	-0.0024815		2353.8	-0.00723679		2943.8	0.0014762		3533.79	-0.02061324
584	0.0298032		1173.99	-0.00327789		1764.01	-0.00218596		2354	-0.00685977		2944	0.00136932		3533.99	-0.02067846
584.2	0.02938808		1174.19	-0.00307813		1764.21	-0.00175032		2354.2	-0.00692998		2944.2	0.00181206		3534.19	-0.02097859
584.4	0.02979281		1174.39	-0.00367283		1764.41	-0.00194744		2354.4	-0.00744428		2944.4	0.00180357		3534.39	-0.02024496
584.6	0.02953754		1174.59	-0.00298404		1764.61	-0.00264186		2354.6	-0.00647005		2944.6	0.00238183		3534.59	-0.01987441
584.8	0.03010266		1174.79	-0.00301612		1764.81	-0.00282239		2354.8	-0.0066566		2944.8	0.00293423		3534.79	-0.01966187
585	0.03017548		1174.99	-0.00330339		1765.01	-0.00324716		2355	-0.00645792		2945	0.00340035		3534.99	-0.01821087
585.2	0.02889834		1175.19	-0.0036743		1765.21	-0.00323631		2355.2	-0.00637234		2945.2	0.00270469		3535.19	-0.01686235
585.4	0.02832853		1175.39	-0.00392558		1765.41	-0.00319056		2355.4	-0.0064887		2945.4	0.00285966		3535.39	-0.01672004
585.6	0.02868822		1175.59	-0.00410905		1765.61	-0.00352204		2355.6	-0.00614476		2945.6	0.00259295		3535.59	-0.01683206
585.8	0.02897487		1175.79	-0.0046357		1765.81	-0.00344295		2355.8	-0.00648474		2945.8	0.00289704		3535.79	-0.01661718
586	0.02892623		1175.99	-0.0047107		1766.01	-0.0055417		2356	-0.00703038		2946	0.00205183		3535.99	-0.016487
586.2	0.02844071		1176.19	-0.00498165		1766.21	-0.00569985		2356.2	-0.0073236		2946.2	0.00258346		3536.19	-0.01643138
586.4	0.02920274		1176.39	-0.00477239		1766.41	-0.00601662		2356.4	-0.00865307		2946.4	0.00196582		3536.39	-0.01626442
586.6	0.03013482		1176.59	-0.00465143		1766.61	-0.0061859		2356.6	-0.00882576		2946.6	0.00207372		3536.59	-0.01652091
586.8	0.02964836		1176.79	-0.00449668		1766.81	-0.00736867		2356.8	-0.00910575		2946.8	0.0014221		3536.79	-0.0164277
587	0.02943418		1176.99	-0.00441571		1767.01	-0.00679563		2357	-0.00913746		2947	0.00086979		3536.99	-0.01710709
587.2	0.03024494		1177.19	-0.00433564		1767.21	-0.00677657		2357.2	-0.00928177		2947.2	0.00131326		3537.19	-0.01789875
587.4	0.03000783		1177.39	-0.00445871		1767.41	-0.00757163		2357.4	-0.00997944		2947.4	0.00120213		3537.39	-0.01834982
587.6	0.03071622		1177.59	-0.00394696		1767.61	-0.00792964		2357.6	-0.01060736		2947.6	0.00198279		3537.59	-0.01850053
587.8	0.03168791		1177.79	-0.00341288		1767.81	-0.00794889		2357.8	-0.01164293		2947.8	0.00233988		3537.79	-0.01780887
588	0.03149733		1177.99	-0.00362355		1768.01	-0.00831199		2358	-0.01209575		2948	0.00258623		3537.99	-0.01829036
588.2	0.03171782		1178.19	-0.00378493		1768.21	-0.00867489		2358.2	-0.01260441		2948.2	0.00315492		3538.19	-0.01789677
588.4	0.03263214		1178.39	-0.00301197		1768.41	-0.00823086		2358.4	-0.01148618		2948.4	0.00166601		3538.39	-0.01745779
588.6	0.03242109		1178.59	-0.00244835		1768.61	-0.00866583		2358.6	-0.01078539		2948.6	0.00148652		3538.59	-0.01733252
588.8	0.03188795		1178.79	-0.00164216		1768.81	-0.00785367		2358.8	-0.01097066		2948.8	0.00105819		3538.79	-0.01682538
589	0.03107735		1178.99	-0.00184458		1769.01	-0.00726905		2359	-0.01085128		2949	0.00150706		3538.99	-0.01634128
589.2	0.03027306		1179.19	-0.00167158		1769.21	-0.00598085		2359.2	-0.01025625		2949.2	0.00197244		3539.19	-0.01576315
589.4	0.03054772		1179.39	-0.00152795		1769.41	-0.0054609		2359.4	-0.00995909		2949.4	0.00272594		3539.39	-0.01642979
589.6	0.030827		1179.59	-0.00171786		1769.61	-0.00455097		2359.6	-0.01037513		2949.6	0.00188393		3539.59	-0.01568034
589.8	0.03039213		1179.79	-0.0022592		1769.81	-0.00492887		2359.8	-0.00989993		2949.8	0.00206897		3539.79	-0.01530473
590	0.03015059		1179.99	-0.00220767		1770.01	-0.00539193		2360	-0.00967673		2950	0.00209698		3539.99	-0.01579217
590.2	0.03023505		1180.19	-0.00221253		1770.21	-0.00436275		2360.2	-0.01175698		2950.2	0.00216751		3540.19	-0.01615784
590.4	0.03004458		1180.39	-0.00256692		1770.41	-0.00478552		2360.4	-0.01099674		2950.4	0.0011706		3540.39	-0.0163376
590.6	0.0290439		1180.59	-0.00283346		1770.61	-0.00533176		2360.6	-0.01080422		2950.6	0.00187592		3540.59	-0.01620458
590.8	0.02946465		1180.79	-0.00261117		1770.81	-0.00531511		2360.8	-0.01102405		2950.8	0.00068434		3540.79	-0.01724975
591	0.02987304		1180.99	-0.00281739		1771.01	-0.00566026		2361	-0.01057028		2951	0.00054608		3540.99	-0.01758489
591.2	0.03014839		1181.19	-0.00296374		1771.21	-0.0054017		2361.2	-0.01044802		2951.2	0.00173151		3541.19	-0.0179996
591.4	0.02985559		1181.39	-0.00272862		1771.41	-0.00570606		2361.4	-0.01026358		2951.4	0.0025589		3541.39	-0.01832188
591.6	0.03082111		1181.59	-0.00207005		1771.61	-0.00629116		2361.6	-0.00965768		2951.6	0.00312816		3541.59	-0.01809562
591.8	0.03163239		1181.79	-0.00227261		1771.81	-0.00552106		2361.8	-0.0104578		2951.8	0.00246134		3541.79	-0.01841841
592	0.03091338		1181.99	-0.00210645		1772.01	-0.00555986		2362	-0.00983837		2952	0.00271046		3541.99	-0.01842786
592.2	0.030979		1182.19	-0.00297754		1772.21	-0.00541267		2362.2	-0.00967398		2952.2	0.00156496		3542.19	-0.01812744
592.4	0.03175677		1182.39	-0.00196541		1772.41	-0.00479144		2362.4	-0.00954779		2952.4	0.00125279		3542.39	-0.01802094
592.6	0.0314169		1182.59	-0.00157032		1772.61	-0.00482844		2362.6	-0.00994111		2952.6	0.00236858		3542.59	-0.01857258
592.8	0.03142589		1182.79	-0.00181104		1772.81	-0.0034684		2362.8	-0.01068824		2952.8	0.00270847		3542.79	-0.01899214
593	0.03167828		1182.99	-0.00270203		1773.01	-0.00352849		2363	-0.01106856		2953	0.00340016		3542.99	-0.0186459
593.2	0.03193794		1183.19	-0.00257577		1773.21	-0.00300706		2363.2	-0.01096582		2953.2	0.00468112		3543.19	-0.01820848
593.4	0.03226162		1183.39	-0.0024589		1773.41	-0.00377301		2363.4	-0.01086184		2953.4	0.00456706		3543.39	-0.0182607
593.6	0.03278979		1183.59	-0.00244585		1773.61	-0.0034384		2363.6	-0.01047881		2953.6	0.00443754		3543.59	-0.01668151
593.8	0.03272135		1183.79	-0.00264865		1773.81	-0.00391871		2363.8	-0.01062023		2953.8	0.00410633		3543.79	-0.0161564
594	0.03229748		1183.99	-0.00290279		1774.01	-0.00426035		2364	-0.01076503		2954	0.00398228		3543.99	-0.01618398
594.2	0.03136149		1184.19	-0.00333855		1774.21	-0.004471		2364.2	-0.01086826		2954.2	0.00348824		3544.19	-0.01567204
594.4	0.03042327		1184.39	-0.00409959		1774.41	-0.00597586		2364.4	-0.00975899		2954.4	0.00247003		3544.39	-0.0151446
594.6	0.03050396		1184.59	-0.00415573		1774.61	-0.00629513		2364.6	-0.00998131		2954.6	0.00212403		3544.59	-0.01418298
594.8	0.03030287		1184.79	-0.00428112		1774.81	-0.00668835		2364.8	-0.00982941		2954.8	0.00134581		3544.79	-0.0140285
595	0.03002231		1184.99	-0.00460429		1775.01	-0.00667044		2365	-0.00932025		2955	0.00181289		3544.99	-0.01441346
595.2	0.02977509		1185.19	-0.00440488		1775.21	-0.00642194		2365.2	-0.008455		2955.2	0.00187112		3545.19	-0.0154222
595.4	0.02879181		1185.39	-0.00375068		1775.41	-0.00674322		2365.4	-0.00847304		2955.4	0.00206186		3545.39	-0.016199
595.6	0.02867083		1185.59	-0.00290292		1775.61	-0.00712804		2365.6	-0.00757262		2955.6	0.00160467		3545.59	-0.01530631
595.8	0.02816838		1185.79	-0.00199708		1775.81	-0.00676917		2365.8	-0.00823297		2955.8	0.00171361		3545.79	-0.0159695
596	0.02738845		1185.99	-0.0009224		1776.01	-0.00657926		2366	-0.00768008		2956	0.00246822		3545.99	-0.01711966
596.2	0.02764316		1186.19	-0.00187765		1776.21	-0.00597877		2366.2	-0.00747505		2956.2	0.00139848		3546.19	-0.01755579
596.4	0.02767739		1186.39	-0.00125308		1776.41	-0.00576065		2366.4	-0.00798314		2956.4	0.00224761		3546.39	-0.01782378
596.6	0.0274202		1186.59	-0.00104447		1776.61	-0.00519443		2366.6	-0.0081613		2956.6	0.00195295		3546.59	-0.01841645
596.8	0.02715155		1186.79	-0.00192675		1776.81	-0.00433987		2366.8	-0.00850798		2956.8	0.00121533		3546.79	-0.01830918
597	0.02740591		1186.99	-0.00176318		1777.01	-0.00456609		2367	-0.00826235		2957	0.00109357		3546.99	-0.0178026
597.2	0.02758712		1187.19	-0.00116988		1777.21	-0.00418592		2367.2	-0.00871495		2957.2	0.0007441		3547.19	-0.01779986
597.4	0.02819456		1187.39	-0.00160383		1777.41	-0.00440237		2367.4	-0.00801195		2957.4	0.00043092		3547.39	-0.01694569
597.6	0.02862675		1187.59	-0.00176336		1777.61	-0.0033948		2367.6	-0.00765691		2957.6	0.00024379		3547.59	-0.01523287
597.8	0.02823243		1187.79	-0.0023649		1777.81	-0.00290983		2367.8	-0.00812752		2957.8	-0.00001044		3547.79	-0.01466652
598	0.02844388		1187.99	-0.00200203		1778.01	-0.00294268		2368	-0.00728487		2958	-0.000126		3547.99	-0.01443117
598.2	0.02859409		1188.19	-0.00216815		1778.21	-0.00309177		2368.2	-0.00761974		2958.2	0.00019658		3548.19	-0.01349983
598.4	0.02857324		1188.39	-0.00274233		1778.41	-0.0038606		2368.4	-0.00813091		2958.4	-0.00079285		3548.39	-0.01280974
598.6	0.02913992		1188.59	-0.00355324		1778.61	-0.00319238		2368.6	-0.00841966		2958.6	-0.00100648		3548.59	-0.01301145
598.8	0.02934669		1188.79	-0.00343253		1778.81	-0.0038691		2368.8	-0.00896416		2958.8	-0.00075411		3548.79	-0.01420898
599	0.03006895		1188.99	-0.00395108		1779.01	-0.00429669		2369	-0.00875296		2959	-0.00045914		3548.99	-0.01543552
599.2	0.02970384		1189.19	-0.00273579		1779.21	-0.00446936		2369.2	-0.00848819		2959.2	-0.00005211		3549.19	-0.01576213
599.4	0.02918687		1189.39	-0.00241752		1779.41	-0.00468439		2369.4	-0.00886614		2959.4	0.00148649		3549.39	-0.01642996
599.6	0.02969367		1189.59	-0.00261637		1779.61	-0.00458332		2369.6	-0.00870095		2959.6	0.00156233		3549.59	-0.01731016
599.8	0.02942904		1189.79	-0.00246154		1779.81	-0.00557964		2369.8	-0.00966332		2959.8	0.00269531		3549.79	-0.01860981
600	0.02938779		1189.99	-0.00313375		1780.01	-0.00575236		2370	-0.00909118		2960	0.00260395		3549.99	-0.01939324
600.2	0.02991791		1190.19	-0.00417429		1780.21	-0.00564219		2370.2	-0.00872583		2960.2	0.00224354		3550.19	-0.01914961
600.4	0.02992827		1190.39	-0.00339033		1780.41	-0.0054953		2370.4	-0.00917992		2960.4	0.00266255		3550.39	-0.01930965
600.6	0.02927425		1190.59	-0.00284044		1780.61	-0.00455212		2370.6	-0.00886897		2960.6	0.0022109		3550.59	-0.01908219
600.8	0.02880299		1190.79	-0.0027886		1780.81	-0.00445791		2370.8	-0.00905107		2960.8	0.00250908		3550.79	-0.01907577
601	0.02934236		1190.99	-0.00312506		1781.01	-0.00446368		2371	-0.0089426		2961	0.00268309		3550.99	-0.01841296
601.2	0.02896267		1191.19	-0.0025167		1781.21	-0.00398611		2371.2	-0.00906526		2961.2	0.00190731		3551.19	-0.01869859
601.4	0.02965239		1191.39	-0.00225442		1781.41	-0.00479038		2371.4	-0.0080635		2961.4	0.00217734		3551.39	-0.01823344
601.6	0.02995781		1191.59	-0.00149691		1781.61	-0.00360425		2371.6	-0.00854947		2961.6	0.00226529		3551.59	-0.01815452
601.8	0.0297968		1191.79	-0.00077962		1781.81	-0.00369653		2371.8	-0.00919493		2961.8	0.00126449		3551.79	-0.0187027
602	0.02914406		1191.99	0.00001162		1782.01	-0.00426182		2372	-0.00835676		2962	0.00088599		3551.99	-0.01857683
602.2	0.02839639		1192.19	-0.00083934		1782.21	-0.00504304		2372.2	-0.00866223		2962.2	0.00084527		3552.19	-0.01780211
602.4	0.02830301		1192.39	-0.00139928		1782.41	-0.00523548		2372.4	-0.00873458		2962.4	0.00040692		3552.39	-0.01848069
602.6	0.02806057		1192.59	-0.0023745		1782.61	-0.00484644		2372.6	-0.00895375		2962.6	0.00053411		3552.59	-0.01962451
602.8	0.02825388		1192.79	-0.00201148		1782.81	-0.00538289		2372.8	-0.00981736		2962.8	0.00099817		3552.79	-0.02002893
603	0.02816927		1192.99	-0.0028598		1783.01	-0.0063194		2373	-0.01016216		2963	0.00153789		3552.99	-0.01984149
603.2	0.02786337		1193.19	-0.00320172		1783.21	-0.00610349		2373.2	-0.01049321		2963.2	0.00162869		3553.19	-0.02040818
603.4	0.02786297		1193.39	-0.00386876		1783.41	-0.00557293		2373.4	-0.01072548		2963.4	0.00263821		3553.39	-0.0205297
603.6	0.02771983		1193.59	-0.00427877		1783.61	-0.00523728		2373.6	-0.01144881		2963.6	0.00290083		3553.59	-0.01996145
603.8	0.02779783		1193.79	-0.00388371		1783.81	-0.00640064		2373.8	-0.0118268		2963.8	0.00291959		3553.79	-0.01905437
604	0.02755227		1193.99	-0.00385849		1784.01	-0.00524644		2374	-0.01152026		2964	0.00354466		3553.99	-0.01856096
604.2	0.02756184		1194.19	-0.00402333		1784.21	-0.00470764		2374.2	-0.01120564		2964.2	0.00469064		3554.19	-0.01782599
604.4	0.02734543		1194.39	-0.00306919		1784.41	-0.0038652		2374.4	-0.01059191		2964.4	0.00461518		3554.39	-0.01746582
604.6	0.02835651		1194.59	-0.00338319		1784.61	-0.0032608		2374.6	-0.00997778		2964.6	0.00446081		3554.59	-0.01663555
604.8	0.02934998		1194.79	-0.00304612		1784.81	-0.00313744		2374.8	-0.0100788		2964.8	0.00421756		3554.79	-0.01696802
605	0.03094822		1194.99	-0.00307168		1785.01	-0.00292961		2375	-0.00954585		2965	0.00395172		3554.99	-0.01624626
605.2	0.03084928		1195.19	-0.0019637		1785.21	-0.0029004		2375.2	-0.00887046		2965.2	0.00223693		3555.19	-0.01705703
605.4	0.03167582		1195.39	-0.00186539		1785.41	-0.00296578		2375.4	-0.00893028		2965.4	0.00244767		3555.39	-0.0173833
605.6	0.03182762		1195.59	-0.00165497		1785.61	-0.00143177		2375.6	-0.00868104		2965.6	0.00194606		3555.59	-0.01799401
605.8	0.03235654		1195.79	-0.00206109		1785.81	-0.00195062		2375.8	-0.00893077		2965.8	0.00105627		3555.79	-0.01774569
606	0.03211842		1195.99	-0.00288454		1786.01	-0.00231468		2376	-0.00841771		2966	0.00121564		3555.99	-0.01711565
606.2	0.03260516		1196.19	-0.00294853		1786.21	-0.00246097		2376.2	-0.00904972		2966.2	0.00131574		3556.19	-0.01767467
606.4	0.03322987		1196.39	-0.00245717		1786.41	-0.00241077		2376.4	-0.00920588		2966.4	0.0012119		3556.39	-0.01887323
606.6	0.03261431		1196.59	-0.0027537		1786.61	-0.00295658		2376.6	-0.01039542		2966.6	0.00097566		3556.59	-0.01934218
606.8	0.03293467		1196.79	-0.0030389		1786.81	-0.00501345		2376.8	-0.01078919		2966.8	0.00064115		3556.79	-0.01937717
607	0.0331563		1196.99	-0.00291251		1787.01	-0.0057192		2377	-0.01096682		2967	0.00058097		3556.99	-0.0195591
607.2	0.03317028		1197.19	-0.00311229		1787.21	-0.00558343		2377.2	-0.01074827		2967.2	0.00072083		3557.19	-0.01974358
607.4	0.03236618		1197.39	-0.00265425		1787.41	-0.00533892		2377.4	-0.0103749		2967.4	0.00108363		3557.39	-0.0188205
607.6	0.03132472		1197.59	-0.00331254		1787.61	-0.00553878		2377.6	-0.01109876		2967.6	0.00100078		3557.59	-0.01810878
607.8	0.03029909		1197.79	-0.00358711		1787.81	-0.00682984		2377.8	-0.01108389		2967.8	0.00189138		3557.79	-0.01804619
608	0.02948576		1197.99	-0.00361224		1788.01	-0.00644927		2378	-0.0107224		2968	0.0034472		3557.99	-0.01800044
608.2	0.02936134		1198.19	-0.00464219		1788.21	-0.00691672		2378.2	-0.01021988		2968.2	0.0035009		3558.19	-0.01824966
608.4	0.02983354		1198.39	-0.00465054		1788.41	-0.00688993		2378.4	-0.01003726		2968.4	0.00362256		3558.39	-0.01888893
608.6	0.02941323		1198.59	-0.00521402		1788.61	-0.00629203		2378.6	-0.01006915		2968.6	0.00353248		3558.59	-0.01864637
608.8	0.02892549		1198.79	-0.0044782		1788.81	-0.00567821		2378.8	-0.00981334		2968.8	0.00324405		3558.79	-0.01794972
609	0.02835496		1198.99	-0.00492023		1789.01	-0.00533233		2379	-0.00931598		2969	0.0036398		3558.99	-0.01733964
609.2	0.02754281		1199.19	-0.00549468		1789.21	-0.0043137		2379.2	-0.00876992		2969.2	0.00362142		3559.19	-0.01807588
609.4	0.02766289		1199.39	-0.00570938		1789.41	-0.0030761		2379.4	-0.00891955		2969.4	0.00419976		3559.39	-0.01810701
609.6	0.02789664		1199.59	-0.00553776		1789.61	-0.00272512		2379.6	-0.00895205		2969.6	0.00337462		3559.59	-0.01877711
609.8	0.02800262		1199.79	-0.00609486		1789.81	-0.00338148		2379.8	-0.00891674		2969.8	0.0023867		3559.79	-0.01878484
610	0.02697575		1199.99	-0.00641874		1790.01	-0.00346803		2380	-0.00832497		2970	0.00291687		3559.99	-0.01937987
610.2	0.02753302		1200.19	-0.00491723		1790.21	-0.00351183		2380.2	-0.00858698		2970.2	0.00308831		3560.19	-0.02027731
610.4	0.02706056		1200.39	-0.00523976		1790.41	-0.00393772		2380.4	-0.00850536		2970.4	0.00309432		3560.39	-0.02067403
610.6	0.02678783		1200.59	-0.00535282		1790.61	-0.00505803		2380.6	-0.00853391		2970.6	0.00373191		3560.59	-0.02071417
610.8	0.02711286		1200.79	-0.00601582		1790.81	-0.00575347		2380.8	-0.00713865		2970.8	0.0032772		3560.79	-0.0212306
611	0.02751334		1200.99	-0.00519448		1791.01	-0.00514922		2381	-0.00729151		2971	0.00340755		3560.99	-0.02047595
611.2	0.02785883		1201.19	-0.00573644		1791.21	-0.00568651		2381.2	-0.00655122		2971.2	0.00357109		3561.19	-0.01988643
611.4	0.02670198		1201.39	-0.00551323		1791.41	-0.00680028		2381.4	-0.00649327		2971.4	0.00313769		3561.39	-0.01958799
611.6	0.0259043		1201.59	-0.00588559		1791.61	-0.00754005		2381.6	-0.00709113		2971.6	0.00358737		3561.59	-0.0194055
611.8	0.02590186		1201.79	-0.00595335		1791.81	-0.00873099		2381.8	-0.00737063		2971.8	0.00408103		3561.79	-0.01916856
612	0.0261728		1201.99	-0.00627405		1792.01	-0.00914812		2382	-0.00796743		2972	0.0040429		3561.99	-0.01925561
612.2	0.02607193		1202.19	-0.00672311		1792.21	-0.00887766		2382.2	-0.00781101		2972.2	0.00365302		3562.19	-0.01959436
612.4	0.02568674		1202.39	-0.00609339		1792.41	-0.00914851		2382.4	-0.0080499		2972.4	0.00429109		3562.39	-0.01967157
612.6	0.02597961		1202.59	-0.00510352		1792.61	-0.00822911		2382.6	-0.0084659		2972.6	0.00345962		3562.59	-0.01869879
612.8	0.02686488		1202.79	-0.00536258		1792.81	-0.00792423		2382.8	-0.00940555		2972.8	0.00347097		3562.79	-0.01838894
613	0.02777335		1202.99	-0.00596804		1793.01	-0.00755969		2383	-0.0099062		2973	0.00429756		3562.99	-0.01830353
613.2	0.02812973		1203.19	-0.00581543		1793.21	-0.0069069		2383.2	-0.01059896		2973.2	0.0038855		3563.19	-0.01906537
613.4	0.02836619		1203.39	-0.00543297		1793.41	-0.00718981		2383.4	-0.01080339		2973.4	0.00241856		3563.39	-0.01948863
613.6	0.02896875		1203.59	-0.00585907		1793.61	-0.00740861		2383.6	-0.0105286		2973.6	0.00190414		3563.59	-0.02013604
613.8	0.0287469		1203.79	-0.00658655		1793.81	-0.00734189		2383.8	-0.0102191		2973.8	0.00169655		3563.79	-0.02044668
614	0.02866529		1203.99	-0.00610531		1794.01	-0.00625361		2384	-0.00996693		2974	0.0022522		3563.99	-0.02003309
614.2	0.02958757		1204.19	-0.00599607		1794.21	-0.00578923		2384.2	-0.00980394		2974.2	0.00131447		3564.19	-0.01982046
614.4	0.02913944		1204.39	-0.00639238		1794.41	-0.00588096		2384.4	-0.00916366		2974.4	0.00087013		3564.39	-0.01890605
614.6	0.0298833		1204.59	-0.00546774		1794.61	-0.00528045		2384.6	-0.00907084		2974.6	0.0009982		3564.59	-0.0183285
614.8	0.02962844		1204.79	-0.00504333		1794.81	-0.00576139		2384.8	-0.00806552		2974.8	0.00066374		3564.79	-0.01803068
615	0.029447		1204.99	-0.00416324		1795.01	-0.00621173		2385	-0.00766207		2975	0.00049756		3564.99	-0.01729586
615.2	0.02956609		1205.19	-0.00435161		1795.21	-0.00681978		2385.2	-0.00686744		2975.2	0.00056205		3565.19	-0.01711743
615.4	0.02908576		1205.39	-0.00366938		1795.41	-0.00726664		2385.4	-0.00657747		2975.4	0.00096292		3565.39	-0.01649076
615.6	0.02825477		1205.59	-0.00315875		1795.61	-0.00722214		2385.6	-0.0069786		2975.6	0.00171838		3565.59	-0.01656758
615.8	0.0280346		1205.79	-0.00203326		1795.81	-0.00745973		2385.8	-0.00678067		2975.8	0.00230567		3565.79	-0.01713815
616	0.02788299		1205.99	-0.00160226		1796.01	-0.00768389		2386	-0.00594543		2976	0.00275015		3565.99	-0.01717043
616.2	0.02748734		1206.19	-0.00114025		1796.21	-0.00667978		2386.2	-0.00589488		2976.2	0.00344517		3566.19	-0.01759684
616.4	0.02743033		1206.39	-0.00080369		1796.41	-0.00708289		2386.4	-0.00644737		2976.4	0.00421905		3566.39	-0.01776448
616.6	0.02851691		1206.59	-0.00079118		1796.61	-0.00710357		2386.6	-0.00731075		2976.6	0.00387817		3566.59	-0.01785354
616.8	0.0279453		1206.79	-0.00181829		1796.81	-0.00717053		2386.8	-0.00765242		2976.8	0.00400229		3566.79	-0.01804566
617	0.02823624		1206.99	-0.00173286		1797.01	-0.00688091		2387	-0.00827983		2977	0.00392397		3566.99	-0.01903415
617.2	0.02782326		1207.19	-0.00201221		1797.21	-0.00752822		2387.2	-0.00812888		2977.2	0.00307774		3567.19	-0.02008739
617.4	0.02788301		1207.39	-0.00238395		1797.41	-0.00717413		2387.4	-0.00826861		2977.4	0.00274269		3567.39	-0.01989335
617.6	0.02806181		1207.59	-0.0026268		1797.61	-0.00657358		2387.6	-0.00802121		2977.6	0.00225333		3567.59	-0.0204396
617.8	0.02756017		1207.79	-0.00344056		1797.81	-0.0065551		2387.8	-0.00892597		2977.8	0.00160024		3567.79	-0.02080982
618	0.02749943		1207.99	-0.00371751		1798.01	-0.00597148		2388	-0.00932497		2978	0.00062731		3567.99	-0.02007391
618.2	0.02766887		1208.19	-0.00402577		1798.21	-0.00545363		2388.2	-0.01030116		2978.2	-0.00089187		3568.19	-0.01945524
618.4	0.02790703		1208.39	-0.00294749		1798.41	-0.00575349		2388.4	-0.01092956		2978.4	-0.00084101		3568.39	-0.01918207
618.6	0.02812469		1208.59	-0.00247931		1798.61	-0.00553804		2388.6	-0.01142109		2978.6	-0.0002821		3568.59	-0.01992327
618.8	0.02832242		1208.79	-0.00247304		1798.81	-0.00644682		2388.8	-0.01110053		2978.8	0.00046481		3568.79	-0.01992781
619	0.02819782		1208.99	-0.0030137		1799.01	-0.0059137		2389	-0.01077542		2979	0.0006759		3568.99	-0.02008474
619.2	0.02863063		1209.19	-0.00327261		1799.21	-0.00635227		2389.2	-0.01142335		2979.2	0.00156081		3569.19	-0.0200619
619.4	0.02877319		1209.39	-0.00210438		1799.41	-0.00618875		2389.4	-0.01180799		2979.4	0.00233921		3569.39	-0.01996459
619.6	0.02798235		1209.59	-0.00089877		1799.61	-0.00613208		2389.6	-0.01229938		2979.6	0.00307552		3569.59	-0.01998917
619.8	0.02755067		1209.79	-0.00166921		1799.81	-0.00577112		2389.8	-0.01239714		2979.8	0.00362674		3569.79	-0.01982448
620	0.02738357		1209.99	-0.00238932		1800.01	-0.00620545		2390	-0.01164294		2980	0.00305653		3569.99	-0.01940127
620.2	0.02731509		1210.19	-0.00218958		1800.21	-0.00582764		2390.2	-0.01227306		2980.2	0.00354467		3570.19	-0.01964444
620.4	0.02741965		1210.39	-0.00272506		1800.41	-0.00596967		2390.4	-0.01174882		2980.4	0.00303186		3570.39	-0.02031923
620.6	0.02768446		1210.59	-0.0027119		1800.61	-0.00662072		2390.6	-0.01167167		2980.6	0.00250795		3570.59	-0.02045679
620.8	0.02780362		1210.79	-0.00317698		1800.81	-0.00633091		2390.8	-0.01161499		2980.8	0.00207143		3570.79	-0.02018075
621	0.02816288		1210.99	-0.00420823		1801.01	-0.00606273		2391	-0.01096843		2981	0.00153493		3570.99	-0.0206512
621.2	0.02808305		1211.19	-0.00527953		1801.21	-0.00632455		2391.2	-0.00988563		2981.2	0.00095986		3571.19	-0.02020509
621.4	0.02724684		1211.39	-0.0049283		1801.41	-0.0059112		2391.4	-0.00989791		2981.4	-0.00011351		3571.39	-0.02018405
621.6	0.02761485		1211.59	-0.00542564		1801.61	-0.00609007		2391.6	-0.00958058		2981.6	-0.0008451		3571.59	-0.02032701
621.8	0.02725117		1211.79	-0.00614952		1801.81	-0.00630432		2391.8	-0.00964804		2981.8	-0.00028702		3571.79	-0.01998599
622	0.02766199		1211.99	-0.00528446		1802.01	-0.00659735		2392	-0.00996186		2982	-0.00031671		3571.99	-0.01916181
622.2	0.02757379		1212.19	-0.00486491		1802.21	-0.00661832		2392.2	-0.01021284		2982.2	-0.00016426		3572.19	-0.01861989
622.4	0.02942982		1212.39	-0.00464734		1802.41	-0.00804721		2392.4	-0.01029689		2982.4	0.00115885		3572.39	-0.01943867
622.6	0.02965862		1212.59	-0.00554267		1802.61	-0.00801323		2392.6	-0.01032415		2982.6	0.00155741		3572.59	-0.01974095
622.8	0.02986876		1212.79	-0.00503149		1802.81	-0.00816409		2392.8	-0.01054998		2982.8	0.00273937		3572.79	-0.01877458
623	0.02848889		1212.99	-0.00552708		1803.01	-0.00851024		2393	-0.01048645		2983	0.00310436		3572.99	-0.01919853
623.2	0.02799252		1213.19	-0.00531782		1803.21	-0.00988118		2393.2	-0.01070519		2983.2	0.00372447		3573.19	-0.01954332
623.4	0.02765821		1213.39	-0.00512637		1803.41	-0.00996111		2393.4	-0.01123824		2983.4	0.00360976		3573.39	-0.01906374
623.6	0.02650383		1213.59	-0.00585646		1803.61	-0.00960597		2393.6	-0.01127596		2983.6	0.00394789		3573.59	-0.01915526
623.8	0.02508367		1213.79	-0.00726254		1803.81	-0.00921987		2393.8	-0.01169458		2983.8	0.00401317		3573.79	-0.01928746
624	0.02540072		1213.99	-0.0068239		1804.01	-0.00997299		2394	-0.0109425		2984	0.00313297		3573.99	-0.01902871
624.2	0.02530565		1214.19	-0.0061383		1804.21	-0.00913914		2394.2	-0.01193066		2984.2	0.00273945		3574.19	-0.01927544
624.4	0.02474997		1214.39	-0.0061858		1804.41	-0.00936866		2394.4	-0.01197615		2984.4	0.00196221		3574.39	-0.01983402
624.6	0.02464346		1214.59	-0.00502554		1804.61	-0.008889		2394.6	-0.01148317		2984.6	0.00184173		3574.59	-0.01959055
624.8	0.02470052		1214.79	-0.00537603		1804.81	-0.00876192		2394.8	-0.01163791		2984.8	0.00165632		3574.79	-0.01948203
625	0.02454195		1214.99	-0.00578967		1805.01	-0.00797221		2395	-0.01117933		2985	0.0005427		3574.99	-0.01996309
625.2	0.02432303		1215.19	-0.00533929		1805.21	-0.00746923		2395.2	-0.0115155		2985.2	0.00005893		3575.19	-0.01979741
625.4	0.02428579		1215.39	-0.00456742		1805.41	-0.0071272		2395.4	-0.01166612		2985.4	-0.00008524		3575.39	-0.0202389
625.6	0.02503358		1215.59	-0.00466756		1805.61	-0.00717021		2395.6	-0.01253346		2985.6	0.00053132		3575.59	-0.01966965
625.8	0.02543156		1215.79	-0.0047224		1805.81	-0.00783029		2395.8	-0.01295422		2985.8	0.00046779		3575.79	-0.01967735
626	0.02631331		1215.99	-0.00461262		1806.01	-0.00805041		2396	-0.01393699		2986	-0.00049298		3575.99	-0.0196156
626.2	0.02669216		1216.19	-0.00452217		1806.21	-0.00824203		2396.2	-0.01402467		2986.2	-0.00049356		3576.19	-0.01953279
626.4	0.02810495		1216.39	-0.00498515		1806.41	-0.00782483		2396.4	-0.01376465		2986.4	-0.00064825		3576.39	-0.02077845
626.6	0.02745007		1216.59	-0.00522572		1806.61	-0.00712163		2396.6	-0.01353472		2986.6	-0.0000757		3576.59	-0.02025449
626.8	0.02785904		1216.79	-0.00446184		1806.81	-0.00698258		2396.8	-0.01377655		2986.8	0.00007692		3576.79	-0.01970881
627	0.0271864		1216.99	-0.00521986		1807.01	-0.00726777		2397	-0.01334418		2987	0.00001484		3576.99	-0.02058192
627.2	0.02759593		1217.19	-0.00518982		1807.21	-0.00736143		2397.2	-0.01217008		2987.2	-0.00033513		3577.19	-0.0202852
627.4	0.02762671		1217.39	-0.00567331		1807.41	-0.00707682		2397.4	-0.01160716		2987.4	-0.00063105		3577.39	-0.01988331
627.6	0.02737846		1217.59	-0.0056571		1807.61	-0.00630163		2397.6	-0.01097722		2987.6	-0.00032883		3577.59	-0.01998683
627.8	0.027142		1217.79	-0.005321		1807.81	-0.00639235		2397.8	-0.01024506		2987.8	-0.00048118		3577.79	-0.01895057
628	0.02762871		1217.99	-0.00580776		1808.01	-0.00680447		2398	-0.00981521		2988	-0.00098537		3577.99	-0.01754533
628.2	0.02711849		1218.19	-0.00498634		1808.21	-0.00643763		2398.2	-0.01038822		2988.2	-0.00111906		3578.19	-0.01818573
628.4	0.02707686		1218.39	-0.00416162		1808.41	-0.00635687		2398.4	-0.00987363		2988.4	-0.00045092		3578.39	-0.01813869
628.6	0.02724778		1218.59	-0.00377333		1808.61	-0.00542275		2398.6	-0.00990352		2988.6	0.00046814		3578.59	-0.01828966
628.8	0.02760418		1218.79	-0.00451428		1808.81	-0.00609466		2398.8	-0.01044275		2988.8	0.00031708		3578.79	-0.01818648
629	0.02747829		1218.99	-0.00504728		1809.01	-0.0042167		2399	-0.01108892		2989	0.00010061		3578.99	-0.01790532
629.2	0.0274471		1219.19	-0.00505908		1809.21	-0.00384604		2399.2	-0.01129895		2989.2	0.00028842		3579.19	-0.01783445
629.4	0.02692576		1219.39	-0.00516685		1809.41	-0.00408391		2399.4	-0.01194532		2989.4	0.00099523		3579.39	-0.01821993
629.6	0.02676741		1219.59	-0.00543285		1809.61	-0.00499103		2399.6	-0.0131654		2989.6	0.00086729		3579.59	-0.01793927
629.8	0.02662696		1219.79	-0.00620348		1809.81	-0.00514981		2399.8	-0.01371227		2989.8	0.00043952		3579.79	-0.01867161
630	0.02659028		1219.99	-0.0062959		1810.01	-0.0054173		2400	-0.01442412		2990	0.00001951		3579.99	-0.01839487
630.2	0.02598698		1220.19	-0.00606074		1810.21	-0.00627179		2400.2	-0.01411343		2990.2	0.00102187		3580.19	-0.01913161
630.4	0.02534935		1220.39	-0.00643233		1810.41	-0.00646373		2400.4	-0.01412388		2990.4	0.001388		3580.39	-0.01996299
630.6	0.02546275		1220.59	-0.00607274		1810.61	-0.0072384		2400.6	-0.01418726		2990.6	0.00112835		3580.59	-0.01935957
630.8	0.02672167		1220.79	-0.00607949		1810.81	-0.00771888		2400.8	-0.01395162		2990.8	0.00031018		3580.79	-0.01962048
631	0.02672538		1220.99	-0.00615109		1811.01	-0.00833448		2401	-0.01368343		2991	0.00010945		3580.99	-0.02020435
631.2	0.02684645		1221.19	-0.00575679		1811.21	-0.00867618		2401.2	-0.01363428		2991.2	-0.00065648		3581.19	-0.02040293
631.4	0.02662265		1221.39	-0.00515144		1811.41	-0.00900815		2401.4	-0.01291291		2991.4	-0.00091698		3581.39	-0.02057873
631.6	0.02690103		1221.59	-0.00361879		1811.61	-0.00888515		2401.6	-0.01292964		2991.6	-0.00109124		3581.59	-0.02106657
631.8	0.02711706		1221.79	-0.0037661		1811.81	-0.00838604		2401.8	-0.01229981		2991.8	-0.00132113		3581.79	-0.02025897
632	0.0271165		1221.99	-0.00432002		1812.01	-0.00822557		2402	-0.01259234		2992	-0.00172828		3581.99	-0.01980793
632.2	0.02761354		1222.19	-0.00280427		1812.21	-0.00765506		2402.2	-0.01201809		2992.2	-0.00189803		3582.19	-0.02033531
632.4	0.02830517		1222.39	-0.00277886		1812.41	-0.00806689		2402.4	-0.01192538		2992.4	-0.00182812		3582.39	-0.02053376
632.6	0.02877532		1222.59	-0.00239262		1812.61	-0.00728503		2402.6	-0.01249103		2992.6	-0.00102498		3582.59	-0.02029602
632.8	0.02882353		1222.79	-0.00260338		1812.81	-0.00685178		2402.8	-0.01263615		2992.8	-0.00146282		3582.79	-0.01999203
633	0.02821679		1222.99	-0.0025232		1813.01	-0.00633231		2403	-0.01242956		2993	-0.0009375		3582.99	-0.02023455
633.2	0.02816492		1223.19	-0.0026885		1813.21	-0.00587431		2403.2	-0.01206835		2993.2	-0.00088327		3583.19	-0.01978178
633.4	0.02696466		1223.39	-0.00327768		1813.41	-0.00621973		2403.4	-0.01202569		2993.4	0.00010852		3583.39	-0.01960547
633.6	0.02712511		1223.59	-0.00352224		1813.61	-0.00679623		2403.6	-0.01257509		2993.6	0.00015696		3583.59	-0.01982967
633.8	0.0262884		1223.79	-0.00407527		1813.81	-0.00727468		2403.8	-0.01281159		2993.8	0.00027345		3583.79	-0.02026865
634	0.02608639		1223.99	-0.00465486		1814.01	-0.0082728		2404	-0.01285358		2994	0.00101407		3583.99	-0.01990478
634.2	0.02547828		1224.19	-0.00479501		1814.21	-0.00929128		2404.2	-0.01246471		2994.2	0.00236491		3584.19	-0.02044239
634.4	0.0256795		1224.39	-0.00553944		1814.41	-0.00990612		2404.4	-0.01155743		2994.4	0.00245893		3584.39	-0.01973878
634.6	0.02591164		1224.59	-0.00572035		1814.61	-0.00999981		2404.6	-0.0112808		2994.6	0.00257126		3584.59	-0.01940929
634.8	0.02632702		1224.79	-0.00577089		1814.81	-0.01016969		2404.8	-0.01138227		2994.8	0.00306288		3584.79	-0.01931905
635	0.02611399		1224.99	-0.00603122		1815.01	-0.00977257		2405	-0.01212198		2995	0.00303922		3584.99	-0.01973607
635.2	0.02550728		1225.19	-0.00615899		1815.21	-0.00924284		2405.2	-0.01186202		2995.2	0.00317041		3585.19	-0.01997771
635.4	0.02571276		1225.39	-0.00644507		1815.41	-0.00892781		2405.4	-0.01201934		2995.4	0.00304796		3585.39	-0.01942257
635.6	0.0263843		1225.59	-0.00640342		1815.61	-0.00805976		2405.6	-0.01171587		2995.6	0.00306969		3585.59	-0.01993242
635.8	0.02643088		1225.79	-0.00657791		1815.81	-0.00782087		2405.8	-0.01184286		2995.8	0.00321754		3585.79	-0.01884793
636	0.02675557		1225.99	-0.00659998		1816.01	-0.00834127		2406	-0.01188663		2996	0.00299077		3585.99	-0.01881597
636.2	0.02703876		1226.19	-0.00672526		1816.21	-0.00804306		2406.2	-0.01213134		2996.2	0.00220985		3586.19	-0.01842558
636.4	0.02777896		1226.39	-0.007711		1816.41	-0.00868249		2406.4	-0.01196496		2996.4	0.00227987		3586.39	-0.01813789
636.6	0.02813529		1226.59	-0.00660066		1816.61	-0.00726155		2406.6	-0.01246569		2996.6	0.00294243		3586.59	-0.01787878
636.8	0.02760874		1226.79	-0.00755544		1816.81	-0.00742995		2406.8	-0.01253269		2996.8	0.00140555		3586.79	-0.01809022
637	0.02767906		1226.99	-0.00749638		1817.01	-0.00746291		2407	-0.01172607		2997	0.00169658		3586.99	-0.01776342
637.2	0.0277559		1227.19	-0.00825456		1817.21	-0.00625559		2407.2	-0.01232076		2997.2	0.00159072		3587.19	-0.01723359
637.4	0.02707949		1227.39	-0.00853351		1817.41	-0.00648306		2407.4	-0.01214295		2997.4	0.00241389		3587.39	-0.01805729
637.6	0.02800667		1227.59	-0.00842274		1817.61	-0.00706488		2407.6	-0.01189059		2997.6	0.00259386		3587.59	-0.01871518
637.8	0.02740754		1227.79	-0.00963049		1817.81	-0.00732567		2407.8	-0.01148204		2997.8	0.00301492		3587.79	-0.01944092
638	0.02802513		1227.99	-0.00933259		1818.01	-0.00732405		2408	-0.01094354		2998	0.00304981		3587.99	-0.01955766
638.2	0.02859205		1228.19	-0.00902461		1818.21	-0.00760225		2408.2	-0.01080112		2998.2	0.00330211		3588.19	-0.01930297
638.4	0.02857772		1228.39	-0.00878581		1818.41	-0.00750416		2408.4	-0.01026605		2998.4	0.00285345		3588.39	-0.0194035
638.6	0.02747544		1228.59	-0.00756295		1818.61	-0.00615439		2408.6	-0.01027359		2998.6	0.00309953		3588.59	-0.02005382
638.8	0.02721245		1228.79	-0.00781369		1818.81	-0.005807		2408.8	-0.00968276		2998.8	0.00338687		3588.79	-0.02081368
639	0.02718713		1228.99	-0.00792905		1819.01	-0.00514186		2409	-0.00959804		2999	0.00346681		3588.99	-0.02136127
639.2	0.02598421		1229.19	-0.00819574		1819.21	-0.00514238		2409.2	-0.00960684		2999.2	0.00354775		3589.19	-0.02222135
639.4	0.02569717		1229.39	-0.00850341		1819.41	-0.00478831		2409.4	-0.01095086		2999.4	0.00254742		3589.39	-0.02221075
639.6	0.02563759		1229.59	-0.00772001		1819.61	-0.00495343		2409.6	-0.01159583		2999.6	0.00221921		3589.59	-0.02258484
639.8	0.02492461		1229.79	-0.00682122		1819.81	-0.00574094		2409.8	-0.01263887		2999.8	0.00187137		3589.79	-0.02289344
640	0.02471473		1229.99	-0.00695621		1820.01	-0.00561294		2410	-0.01339714		3000	0.00150617		3589.99	-0.02322608
640.2	0.02430634		1230.19	-0.00783297		1820.21	-0.00554873		2410.2	-0.01440294		3000.2	0.00007806		3590.19	-0.02303964
640.4	0.02397107		1230.39	-0.008456		1820.41	-0.00546913		2410.4	-0.01434236		3000.4	0.00077499		3590.39	-0.02313697
640.6	0.02321712		1230.59	-0.00826957		1820.61	-0.00520811		2410.6	-0.01559042		3000.6	0.00085097		3590.59	-0.02267814
640.8	0.02309751		1230.79	-0.0083117		1820.81	-0.00592397		2410.8	-0.01571358		3000.8	0.00059142		3590.79	-0.02298937
641	0.02367408		1230.99	-0.00823765		1821.01	-0.00588516		2411	-0.01567678		3001	0.00141977		3590.99	-0.02293367
641.2	0.02360562		1231.19	-0.0088662		1821.21	-0.00514442		2411.2	-0.01586022		3001.2	0.00163566		3591.19	-0.02377632
641.4	0.02390496		1231.39	-0.00947701		1821.41	-0.00542238		2411.4	-0.01553114		3001.4	0.00150544		3591.39	-0.02400208
641.6	0.02499621		1231.59	-0.00999454		1821.61	-0.00637716		2411.6	-0.01516309		3001.6	0.00105313		3591.59	-0.02395964
641.8	0.02604802		1231.79	-0.01023756		1821.81	-0.00582583		2411.8	-0.01527721		3001.8	0.00083003		3591.79	-0.023453
642	0.02642813		1231.99	-0.00947429		1822.01	-0.00523548		2412	-0.01497425		3002	-0.00022797		3591.99	-0.02251811
642.2	0.02716395		1232.19	-0.00968608		1822.21	-0.00484124		2412.2	-0.0151831		3002.2	0.00008277		3592.19	-0.02198336
642.4	0.02711052		1232.39	-0.00972559		1822.41	-0.00466074		2412.4	-0.01428677		3002.4	-0.00017201		3592.39	-0.021602
642.6	0.0276165		1232.59	-0.00936896		1822.61	-0.00372654		2412.6	-0.01306677		3002.6	0.00002085		3592.59	-0.02179165
642.8	0.02796144		1232.79	-0.01003805		1822.81	-0.00499089		2412.8	-0.01232257		3002.8	0.00046117		3592.79	-0.02172359
643	0.02827746		1232.99	-0.00944635		1823.01	-0.00509496		2413	-0.01263534		3003	0.00077628		3592.99	-0.02085616
643.2	0.02796255		1233.19	-0.00963903		1823.21	-0.00517925		2413.2	-0.012724		3003.2	0.00142713		3593.19	-0.0201928
643.4	0.02810363		1233.39	-0.00877959		1823.41	-0.00540297		2413.4	-0.01321294		3003.4	0.00134361		3593.39	-0.01986943
643.6	0.02916286		1233.59	-0.00793685		1823.61	-0.00695559		2413.6	-0.01335728		3003.6	0.00065031		3593.59	-0.01979638
643.8	0.02859518		1233.79	-0.00755535		1823.81	-0.00778066		2413.8	-0.01271457		3003.8	0.00003717		3593.79	-0.0203753
644	0.02787317		1233.99	-0.00704657		1824.01	-0.00766905		2414	-0.01218722		3004	0.0003696		3593.99	-0.01977105
644.2	0.02744221		1234.19	-0.00779167		1824.21	-0.00807794		2414.2	-0.01199527		3004.2	-0.00037203		3594.19	-0.01992251
644.4	0.02634942		1234.39	-0.00780667		1824.41	-0.00812482		2414.4	-0.01183207		3004.4	-0.00034061		3594.39	-0.02015989
644.6	0.0262268		1234.59	-0.00690741		1824.61	-0.00908286		2414.6	-0.01153581		3004.6	0.00008638		3594.59	-0.01998416
644.8	0.02660862		1234.79	-0.0065975		1824.81	-0.00989595		2414.8	-0.01105364		3004.8	-0.00011843		3594.79	-0.02134691
645	0.02605468		1234.99	-0.00700423		1825.01	-0.00994009		2415	-0.01070381		3005	-0.00052682		3594.99	-0.02187877
645.2	0.02606645		1235.19	-0.00745702		1825.21	-0.00999118		2415.2	-0.01097975		3005.2	-0.00060387		3595.19	-0.02232244
645.4	0.02668919		1235.39	-0.00722498		1825.41	-0.01028708		2415.4	-0.01181879		3005.4	-0.00117836		3595.39	-0.02213706
645.6	0.0265905		1235.59	-0.0064315		1825.61	-0.00926691		2415.6	-0.01312406		3005.6	-0.00100232		3595.59	-0.02266356
645.8	0.02742738		1235.79	-0.00617305		1825.81	-0.00862774		2415.8	-0.013642		3005.8	-0.00066857		3595.79	-0.02271724
646	0.0266794		1235.99	-0.00665513		1826.01	-0.00794875		2416	-0.01396503		3006	-0.00115059		3595.99	-0.02269165
646.2	0.02775224		1236.19	-0.00755384		1826.21	-0.00754721		2416.2	-0.0137271		3006.2	-0.0011988		3596.19	-0.02386111
646.4	0.02825746		1236.39	-0.00778883		1826.41	-0.00796417		2416.4	-0.0134067		3006.4	-0.00086519		3596.39	-0.02367642
646.6	0.02839303		1236.59	-0.00777647		1826.61	-0.00810935		2416.6	-0.01378429		3006.6	-0.00081701		3596.59	-0.02491389
646.8	0.02830881		1236.79	-0.00736347		1826.81	-0.00808671		2416.8	-0.01367219		3006.8	-0.00027411		3596.79	-0.02449829
647	0.02860249		1236.99	-0.00621009		1827.01	-0.00720735		2417	-0.01351244		3007	0.0009641		3596.99	-0.02359704
647.2	0.02851478		1237.19	-0.00551999		1827.21	-0.00686239		2417.2	-0.01346551		3007.2	0.00117653		3597.19	-0.0236514
647.4	0.02833822		1237.39	-0.00511298		1827.41	-0.00713419		2417.4	-0.012977		3007.4	0.0004729		3597.39	-0.02431579
647.6	0.02877579		1237.59	-0.00539		1827.61	-0.00717908		2417.6	-0.01295218		3007.6	-0.00021511		3597.59	-0.02382192
647.8	0.02773864		1237.79	-0.00541642		1827.81	-0.00653224		2417.8	-0.01220406		3007.8	-0.00055011		3597.79	-0.02362605
648	0.02736378		1237.99	-0.00516022		1828.01	-0.00560671		2418	-0.01135099		3008	-0.00034402		3597.99	-0.02323611
648.2	0.02709467		1238.19	-0.00596918		1828.21	-0.00546302		2418.2	-0.01128204		3008.2	-0.00076421		3598.19	-0.02324014
648.4	0.02652969		1238.39	-0.00634934		1828.41	-0.00546941		2418.4	-0.0111163		3008.4	-0.00071785		3598.39	-0.02310432
648.6	0.02630605		1238.59	-0.00645557		1828.61	-0.00576951		2418.6	-0.01049269		3008.6	0.00016404		3598.59	-0.02271443
648.8	0.02598581		1238.79	-0.00731064		1828.81	-0.00585902		2418.8	-0.0103629		3008.8	0.00002088		3598.79	-0.02276704
649	0.02552135		1238.99	-0.00762532		1829.01	-0.0056332		2419	-0.01059729		3009	0.00052264		3598.99	-0.02275873
649.2	0.02568226		1239.19	-0.0080985		1829.21	-0.00553616		2419.2	-0.01137516		3009.2	0.00096129		3599.19	-0.02272415
649.4	0.02569722		1239.39	-0.00793673		1829.41	-0.00515631		2419.4	-0.0120365		3009.4	0.0013691		3599.39	-0.02296033
649.6	0.02530079		1239.59	-0.00836645		1829.61	-0.00485207		2419.6	-0.01276154		3009.6	0.00212182		3599.59	-0.02345548
649.8	0.02566286		1239.79	-0.0092802		1829.81	-0.00569937		2419.8	-0.01223937		3009.8	0.00262134		3599.79	-0.02337202
