# Supplementary material for: Functional development of a V3/glycan-specific broadly neutralizing antibody isolated from a case of HIV superinfection
Source: eLife journal article supplement (doi:10.7554/elife.68110), 2021-07-15
Supplement: fig2-data2 [file G5.xls]

Vers 3.43 Data Simulation
Conc1	3.125E-08	3.125E-08	3.125E-08	3.125E-08	3.125E-08	3.125E-08	3.125E-08
Start1	290	880	1470	2060	2649.99	3239.99	3829.98
Stop1	649.8	1239.79	1829.8	2419.8	3009.79	3599.78	4189.78
Time1	Data1	Sim1	Time2	Data2	Sim2	Time3	Data3	Sim3	Time4	Data4	Sim4	Time5	Data5	Sim5	Time6	Data6	Sim6	Time7	Data7	Sim7
290	0.00089887		880	-0.006061		1470	0.00062768		2060	0.00168191		2649.99	-0.0028246		3239.99	-0.00042562		3829.98	0.00133951
290.2	0.00106097		880.2	-0.00638037		1470.2	-0.00001367		2060.2	0.00200261		2650.19	-0.00402771		3240.19	-0.00039503		3830.18	0.00075032
290.4	0.00117512		880.4	-0.00692823		1470.4	-0.00055479		2060.4	0.00239402		2650.39	-0.00486484		3240.39	-0.00025484		3830.38	-0.0005116
290.6	0.00117112		880.6	-0.00742872		1470.6	-0.00155222		2060.6	0.00290624		2650.59	-0.00594844		3240.59	-0.00026583		3830.58	-0.00130183
290.8	0.00116697		880.8	-0.00757253		1470.8	-0.00267051		2060.8	0.00376117		2650.79	-0.00734017		3240.79	0.00006052		3830.78	-0.00197075
291	0.00136615		881	-0.00777143		1471	-0.00283328		2061	0.00457547		2650.99	-0.00842894		3240.99	0.00001789		3830.98	-0.00196247
291.2	0.00211106		881.2	-0.00716635		1471.2	-0.00239306		2061.2	0.00512717		2651.19	-0.0090926		3241.19	0.00015698		3831.18	-0.00222467
291.4	0.00269824		881.4	-0.00715629		1471.4	-0.00287241		2061.4	0.00525154		2651.39	-0.01005941		3241.39	-0.00006521		3831.38	-0.00226448
291.6	0.002478		881.6	-0.00683767		1471.6	-0.00380171		2061.6	0.00546174		2651.59	-0.01025664		3241.59	-0.00061759		3831.58	-0.00248722
291.8	0.00239411		881.8	-0.0070337		1471.8	-0.00459556		2061.8	0.00593658		2651.79	-0.01035176		3241.79	-0.00048699		3831.78	-0.00287005
292	0.00228289		882	-0.0072115		1472	-0.00535009		2062	0.00681939		2651.99	-0.01038098		3241.99	-0.00067543		3831.98	-0.00318692
292.2	0.00273913		882.2	-0.0073282		1472.2	-0.00493628		2062.2	0.00746207		2652.19	-0.01090534		3242.19	-0.0003367		3832.18	-0.00367307
292.4	0.00360946		882.4	-0.00761584		1472.4	-0.0054435		2062.4	0.00766208		2652.39	-0.010087		3242.39	0.00033409		3832.38	-0.00294807
292.6	0.00375333		882.6	-0.00678549		1472.6	-0.00491825		2062.6	0.0078356		2652.59	-0.00980307		3242.59	0.00049906		3832.58	-0.00313573
292.8	0.00446902		882.8	-0.00662837		1472.8	-0.00413058		2062.8	0.00728417		2652.79	-0.00937947		3242.79	0.0002117		3832.78	-0.00370455
293	0.00506245		883	-0.00626876		1473	-0.00373858		2063	0.00665146		2652.99	-0.01002702		3242.99	0.00093926		3832.98	-0.00349995
293.2	0.00505024		883.2	-0.00559772		1473.2	-0.00237851		2063.2	0.00661332		2653.19	-0.01055401		3243.19	0.00185402		3833.18	-0.003633
293.4	0.00481361		883.4	-0.00582264		1473.4	-0.0028136		2063.4	0.0064756		2653.39	-0.01102126		3243.39	0.00246161		3833.38	-0.00415724
293.6	0.00569939		883.6	-0.00574697		1473.6	-0.00338974		2063.6	0.00675957		2653.59	-0.01114396		3243.59	0.00338748		3833.58	-0.00389491
293.8	0.00601361		883.8	-0.00444739		1473.8	-0.00292771		2063.8	0.00731362		2653.79	-0.01123043		3243.79	0.00412184		3833.78	-0.00256972
294	0.00623891		884	-0.00456953		1474	-0.00242761		2064	0.00736909		2653.99	-0.01094085		3243.99	0.00401631		3833.98	-0.00222169
294.2	0.00613687		884.2	-0.00529156		1474.2	-0.00179163		2064.2	0.00716663		2654.19	-0.01114522		3244.19	0.00462839		3834.18	-0.00197192
294.4	0.00636361		884.4	-0.00579671		1474.4	-0.0014531		2064.4	0.00656787		2654.39	-0.01066089		3244.39	0.00495249		3834.38	-0.00130102
294.6	0.00604394		884.6	-0.00544775		1474.6	-0.00121299		2064.6	0.00603921		2654.59	-0.01073095		3244.59	0.00461892		3834.58	-0.00087584
294.8	0.00609642		884.8	-0.00511956		1474.8	-0.00117661		2064.8	0.00610797		2654.79	-0.0100996		3244.79	0.00498289		3834.78	-0.00028664
295	0.005949		885	-0.00455331		1475	-0.00047799		2065	0.00615745		2654.99	-0.00997279		3244.99	0.00477509		3834.98	-0.00022495
295.2	0.00728972		885.2	-0.00366795		1475.2	0.00054386		2065.2	0.00553954		2655.19	-0.01013387		3245.19	0.00449043		3835.18	-0.00022307
295.4	0.00716176		885.4	-0.0041491		1475.4	-0.00076285		2065.4	0.00513363		2655.39	-0.00968236		3245.39	0.00442084		3835.38	0.00057533
295.6	0.00656476		885.6	-0.0042872		1475.6	-0.00073965		2065.6	0.00627781		2655.59	-0.00957374		3245.59	0.00449998		3835.58	0.00005583
295.8	0.00690841		885.8	-0.00470938		1475.8	-0.00089242		2065.8	0.00614928		2655.79	-0.00918472		3245.79	0.00533561		3835.78	-0.00021289
296	0.00674847		886	-0.0049791		1476	-0.00140644		2066	0.00585767		2655.99	-0.00889873		3245.99	0.00536458		3835.98	-0.00005596
296.2	0.00777524		886.2	-0.00534724		1476.2	-0.00162458		2066.2	0.00503331		2656.19	-0.00872515		3246.19	0.00685993		3836.18	-0.00015705
296.4	0.0077778		886.4	-0.00533519		1476.4	-0.00220397		2066.4	0.0042932		2656.39	-0.00759603		3246.39	0.00652745		3836.38	0.00007494
296.6	0.00717877		886.6	-0.00553959		1476.6	-0.00195523		2066.6	0.00438333		2656.59	-0.00775904		3246.59	0.00612131		3836.58	-0.00007264
296.8	0.00713669		886.8	-0.00520033		1476.8	-0.0016465		2066.8	0.00462979		2656.79	-0.00861135		3246.79	0.00661598		3836.78	-0.00066076
297	0.00661737		887	-0.00459033		1477	-0.00155227		2067	0.00603931		2656.99	-0.00968039		3246.99	0.00675705		3836.98	-0.00045129
297.2	0.00612729		887.2	-0.00426258		1477.2	-0.0022705		2067.2	0.00655824		2657.19	-0.00983085		3247.19	0.00672218		3837.18	-0.00107862
297.4	0.00601825		887.4	-0.00441264		1477.4	-0.0034546		2067.4	0.0066421		2657.39	-0.00952729		3247.39	0.00632012		3837.38	-0.00001694
297.6	0.00650123		887.6	-0.00390271		1477.6	-0.00388301		2067.6	0.00744398		2657.59	-0.00916635		3247.59	0.00535643		3837.58	0.00049268
297.8	0.00650557		887.8	-0.00412708		1477.8	-0.00388065		2067.8	0.00787246		2657.79	-0.00873283		3247.79	0.00441111		3837.78	0.00180717
298	0.00647577		888	-0.00486094		1478	-0.00347623		2068	0.00791365		2657.99	-0.00812037		3247.99	0.00417948		3837.98	0.00257905
298.2	0.00584995		888.2	-0.0057913		1478.2	-0.00401874		2068.2	0.00766727		2658.19	-0.0083719		3248.19	0.00367971		3838.18	0.00359408
298.4	0.00608429		888.4	-0.0061292		1478.4	-0.00470039		2068.4	0.00690725		2658.39	-0.00814327		3248.39	0.00219621		3838.38	0.00417345
298.6	0.00634827		888.6	-0.005445		1478.6	-0.00457888		2068.6	0.0063708		2658.59	-0.00875166		3248.59	0.00087276		3838.58	0.00337818
298.8	0.00661714		888.8	-0.0051249		1478.8	-0.00411325		2068.8	0.00708785		2658.79	-0.00896072		3248.79	0.00110581		3838.78	0.00374287
299	0.00731003		889	-0.00426463		1479	-0.00324112		2069	0.00696585		2658.99	-0.01071646		3248.99	0.0010659		3838.98	0.00364763
299.2	0.00864068		889.2	-0.0047247		1479.2	-0.00212465		2069.2	0.00662427		2659.19	-0.00999901		3249.19	0.00060452		3839.18	0.0039782
299.4	0.00831887		889.4	-0.0051223		1479.4	-0.00204427		2069.4	0.00607235		2659.39	-0.01030469		3249.39	0.00125668		3839.38	0.00392782
299.6	0.00920133		889.6	-0.00469924		1479.6	-0.0006962		2069.6	0.00609517		2659.59	-0.01082091		3249.59	0.00211164		3839.58	0.00387712
299.8	0.01020511		889.8	-0.0042458		1479.8	-0.00080225		2069.8	0.0043693		2659.79	-0.01063144		3249.79	0.00338563		3839.78	0.00455256
300	0.01054374		890	-0.00456466		1480	-0.00136136		2070	0.00412957		2659.99	-0.01069246		3249.99	0.00379582		3839.98	0.00412541
300.2	0.01102482		890.2	-0.00421643		1480.2	-0.00084201		2070.2	0.00451886		2660.19	-0.01173368		3250.19	0.00470539		3840.18	0.00334471
300.4	0.01037819		890.4	-0.00354862		1480.4	-0.00070788		2070.4	0.00539152		2660.39	-0.01227134		3250.39	0.00487135		3840.38	0.00219204
300.6	0.0098814		890.6	-0.00270748		1480.6	-0.00004438		2070.6	0.00576019		2660.59	-0.01310301		3250.59	0.00541049		3840.58	0.00162574
300.8	0.00976024		890.8	-0.00227228		1480.8	0.00082375		2070.8	0.00636565		2660.79	-0.01418687		3250.79	0.00577075		3840.78	0.00043684
301	0.00925383		891	-0.00171631		1481	0.00126955		2071	0.0074038		2660.99	-0.01388855		3250.99	0.00603817		3840.98	-0.00037232
301.2	0.00929776		891.2	-0.00190693		1481.2	0.00088385		2071.2	0.00741699		2661.19	-0.01374193		3251.19	0.00595623		3841.18	-0.0015802
301.4	0.00941806		891.4	-0.0024624		1481.4	0.00062084		2071.4	0.00718049		2661.39	-0.01240555		3251.39	0.00522309		3841.38	-0.00185973
301.6	0.00916373		891.6	-0.00309292		1481.6	0.00059464		2071.6	0.00735161		2661.59	-0.0119234		3251.59	0.00499689		3841.58	-0.0027599
301.8	0.00916935		891.8	-0.003799		1481.8	0.00035989		2071.8	0.00808862		2661.79	-0.0119322		3251.79	0.00432806		3841.78	-0.0023608
302	0.00872731		892	-0.00358399		1482	0.00013459		2072	0.00762848		2661.99	-0.01077904		3251.99	0.0039345		3841.98	-0.00200778
302.2	0.0086761		892.2	-0.00363077		1482.2	-0.00024215		2072.2	0.00681492		2662.19	-0.0109656		3252.19	0.00249565		3842.18	-0.00145355
302.4	0.00893581		892.4	-0.00299159		1482.4	-0.00021543		2072.4	0.00640068		2662.39	-0.01075982		3252.39	0.0016022		3842.38	-0.0017786
302.6	0.00949503		892.6	-0.00268072		1482.6	-0.00009969		2072.6	0.00579793		2662.59	-0.01043999		3252.59	0.00079572		3842.58	-0.00182659
302.8	0.00948023		892.8	-0.002453		1482.8	0.000753		2072.8	0.00562702		2662.79	-0.00978032		3252.79	0.00109138		3842.78	-0.00068277
303	0.01087685		893	-0.00275942		1483	0.00026363		2073	0.00447981		2662.99	-0.00914286		3252.99	0.00092103		3842.98	-0.00048891
303.2	0.01157908		893.2	-0.00313875		1483.2	-0.00011113		2073.2	0.00321463		2663.19	-0.0077197		3253.19	0.00051675		3843.18	-0.0002026
303.4	0.01217384		893.4	-0.00284415		1483.4	-0.00026673		2073.4	0.00286225		2663.39	-0.00809816		3253.39	0.00076956		3843.38	0.0007797
303.6	0.01332729		893.6	-0.00227519		1483.6	-0.00001261		2073.6	0.00305727		2663.59	-0.00792198		3253.59	0.00144069		3843.58	0.00183838
303.8	0.01370431		893.8	-0.00181505		1483.8	0.00041586		2073.8	0.00260962		2663.79	-0.00815995		3253.79	0.00153846		3843.78	0.00196968
304	0.01354114		894	-0.00209578		1484	0.00045095		2074	0.00348969		2663.99	-0.00823513		3253.99	0.00094949		3843.98	0.00128079
304.2	0.01281455		894.2	-0.00161592		1484.2	0.00098441		2074.2	0.00414695		2664.19	-0.00915331		3254.19	0.0012037		3844.18	0.00143932
304.4	0.01252759		894.4	-0.00160697		1484.4	0.00065351		2074.4	0.00446981		2664.39	-0.00962681		3254.39	0.0007206		3844.38	0.00198555
304.6	0.01162839		894.6	-0.00186084		1484.6	0.00087702		2074.6	0.00531231		2664.59	-0.0103561		3254.59	0.00086764		3844.58	0.00210742
304.8	0.01066973		894.8	-0.00250861		1484.8	0.00089226		2074.8	0.00661534		2664.79	-0.01132947		3254.79	0.00216157		3844.78	0.00167568
305	0.00997052		895	-0.00237543		1485	0.0006054		2075	0.00685545		2664.99	-0.01083669		3254.99	0.00325826		3844.98	0.00092016
305.2	0.00977456		895.2	-0.00231277		1485.2	-0.00013881		2075.2	0.00723792		2665.19	-0.01139199		3255.19	0.00398473		3845.18	0.00121569
305.4	0.00966693		895.4	-0.00228259		1485.4	-0.00002872		2075.4	0.00711682		2665.39	-0.01075052		3255.39	0.00374212		3845.38	0.00187824
305.6	0.0091084		895.6	-0.00277101		1485.6	-0.00051013		2075.6	0.00812242		2665.59	-0.01088821		3255.59	0.00450801		3845.58	0.0023908
305.8	0.00923934		895.8	-0.00275483		1485.8	-0.00086797		2075.8	0.0083126		2665.79	-0.01082663		3255.79	0.0037728		3845.78	0.0035612
306	0.00961001		896	-0.00263265		1486	-0.00060403		2076	0.00824402		2665.99	-0.01030007		3255.99	0.00419916		3845.98	0.00390848
306.2	0.00925078		896.2	-0.00280897		1486.2	-0.00042661		2076.2	0.00820832		2666.19	-0.00966391		3256.19	0.00471714		3846.18	0.00381345
306.4	0.00934531		896.4	-0.0031669		1486.4	-0.00100998		2076.4	0.00841945		2666.39	-0.00869083		3256.39	0.00465077		3846.38	0.00377525
306.6	0.01035355		896.6	-0.00394876		1486.6	-0.00155006		2076.6	0.00784768		2666.59	-0.00793745		3256.59	0.00383582		3846.58	0.00341054
306.8	0.01014108		896.8	-0.00324045		1486.8	-0.00062036		2076.8	0.00740374		2666.79	-0.00706297		3256.79	0.00414267		3846.78	0.00365879
307	0.0109034		897	-0.00324013		1487	-0.00094222		2077	0.00692626		2666.99	-0.00647123		3256.99	0.0038654		3846.98	0.00346131
307.2	0.01089399		897.2	-0.00331139		1487.2	-0.0007606		2077.2	0.00673585		2667.19	-0.006681		3257.19	0.00418893		3847.18	0.00308778
307.4	0.01136786		897.4	-0.00333147		1487.4	-0.00004006		2077.4	0.00731696		2667.39	-0.00709601		3257.39	0.00397479		3847.38	0.00305533
307.6	0.01203632		897.6	-0.00300829		1487.6	0.00063773		2077.6	0.00750072		2667.59	-0.00744919		3257.59	0.0042164		3847.58	0.00245469
307.8	0.01281524		897.8	-0.00381648		1487.8	0.00114287		2077.8	0.00720945		2667.79	-0.00709449		3257.79	0.00406491		3847.78	0.00249095
308	0.0131678		898	-0.00434744		1488	0.00066529		2078	0.00714884		2667.99	-0.00729935		3257.99	0.00401906		3847.98	0.00217646
308.2	0.01342338		898.2	-0.00409636		1488.2	0.00032326		2078.2	0.00663687		2668.19	-0.00815262		3258.19	0.00408364		3848.18	0.00234626
308.4	0.01351779		898.4	-0.00489768		1488.4	0.00025659		2078.4	0.00637041		2668.39	-0.00861286		3258.39	0.00333186		3848.38	0.00291055
308.6	0.01277374		898.6	-0.00498183		1488.6	-0.0000205		2078.6	0.00655638		2668.59	-0.00865363		3258.59	0.00387208		3848.58	0.0022518
308.8	0.01213516		898.8	-0.00498122		1488.8	0.00048698		2078.8	0.00692874		2668.79	-0.00925871		3258.79	0.00429342		3848.78	0.00209204
309	0.01340241		899	-0.00500137		1489	-0.0000026		2079	0.00627368		2668.99	-0.00937573		3258.99	0.00451158		3848.98	0.00202506
309.2	0.01383728		899.2	-0.00476099		1489.2	-0.00001021		2079.2	0.00683698		2669.19	-0.01033399		3259.19	0.00498069		3849.18	0.00329053
309.4	0.01457773		899.4	-0.00489718		1489.4	0.00088761		2079.4	0.00693659		2669.39	-0.01036281		3259.39	0.0052363		3849.38	0.00350175
309.6	0.0145929		899.6	-0.00596556		1489.6	0.00103687		2079.6	0.00783939		2669.59	-0.01100721		3259.59	0.00579098		3849.58	0.00417269
309.8	0.01473051		899.8	-0.00563992		1489.8	0.00133597		2079.8	0.00826641		2669.79	-0.01097691		3259.79	0.00556548		3849.78	0.00458351
310	0.01449696		900	-0.00506944		1490	0.00172561		2080	0.0084445		2669.99	-0.01073715		3259.99	0.00597281		3849.98	0.00283989
310.2	0.01349463		900.2	-0.00457087		1490.2	0.00137656		2080.2	0.00887152		2670.19	-0.0101125		3260.19	0.00653256		3850.18	0.00207843
310.4	0.01382561		900.4	-0.00384989		1490.4	0.00230065		2080.4	0.00832321		2670.39	-0.00922429		3260.39	0.00564211		3850.38	0.00153943
310.6	0.01312368		900.6	-0.00331409		1490.6	0.00283201		2080.6	0.00775468		2670.59	-0.00934337		3260.59	0.00503927		3850.58	0.00115704
310.8	0.012284		900.8	-0.00249411		1490.8	0.00389729		2080.8	0.00777493		2670.79	-0.00914489		3260.79	0.00560952		3850.78	0.00095654
311	0.01268101		901	-0.00266919		1491	0.00365744		2081	0.00752947		2670.99	-0.00852201		3260.99	0.00544626		3850.98	0.00174706
311.2	0.01294032		901.2	-0.00276229		1491.2	0.00354619		2081.2	0.00779882		2671.19	-0.00837645		3261.19	0.0061462		3851.18	0.00147731
311.4	0.01283192		901.4	-0.00166811		1491.4	0.00325193		2081.4	0.00750288		2671.39	-0.00786526		3261.39	0.00577829		3851.38	0.00169921
311.6	0.01251621		901.6	-0.00167496		1491.6	0.00189641		2081.6	0.00766862		2671.59	-0.00767583		3261.59	0.00607717		3851.58	0.00161556
311.8	0.01351636		901.8	-0.0015331		1491.8	0.00064353		2081.8	0.0069759		2671.79	-0.00711937		3261.79	0.00577274		3851.78	0.00177168
312	0.01385952		902	-0.00129758		1492	0.0000325		2082	0.00736542		2671.99	-0.00727799		3261.99	0.0048729		3851.98	0.00120509
312.2	0.01382329		902.2	-0.00109203		1492.2	-0.00074585		2082.2	0.0067556		2672.19	-0.00790304		3262.19	0.00453027		3852.18	0.00117936
312.4	0.01357928		902.4	-0.00130988		1492.4	-0.00084031		2082.4	0.0072063		2672.39	-0.00822951		3262.39	0.00331043		3852.38	0.00128337
312.6	0.01358785		902.6	-0.00153777		1492.6	-0.0015031		2082.6	0.00740986		2672.59	-0.00826626		3262.59	0.00216226		3852.58	0.00089504
312.8	0.01400843		902.8	-0.00186764		1492.8	-0.0017732		2082.8	0.00838271		2672.79	-0.0090855		3262.79	0.00294848		3852.78	0.00071841
313	0.0146204		903	-0.00289234		1493	-0.00243482		2083	0.00885165		2672.99	-0.00931941		3262.99	0.00276138		3852.98	0.00063244
313.2	0.01474418		903.2	-0.00297166		1493.2	-0.00189724		2083.2	0.00944387		2673.19	-0.01007329		3263.19	0.00258227		3853.18	0.00116641
313.4	0.01496852		903.4	-0.00203587		1493.4	-0.00146416		2083.4	0.00951513		2673.39	-0.00997462		3263.39	0.00223861		3853.38	0.00165363
313.6	0.01484942		903.6	-0.00200024		1493.6	-0.00162884		2083.6	0.00991753		2673.59	-0.00977856		3263.59	0.0019175		3853.58	0.00196867
313.8	0.01528011		903.8	-0.0010919		1493.8	-0.00169169		2083.8	0.00936096		2673.79	-0.00873113		3263.79	0.00202774		3853.78	0.00168477
314	0.015767		904	-0.00110202		1494	-0.00126167		2084	0.00870199		2673.99	-0.00825247		3263.99	0.00197525		3853.98	0.00163631
314.2	0.01674879		904.2	-0.00101854		1494.2	-0.00079585		2084.2	0.00879477		2674.19	-0.00819703		3264.19	0.00226921		3854.18	0.00266248
314.4	0.01708596		904.4	-0.0010985		1494.4	0.00137092		2084.4	0.00743003		2674.39	-0.00694202		3264.39	0.00280933		3854.38	0.00321541
314.6	0.01686748		904.6	-0.00146903		1494.6	0.00160281		2084.6	0.0078001		2674.59	-0.00705625		3264.59	0.00338538		3854.58	0.00414712
314.8	0.01691502		904.8	-0.00167893		1494.8	0.0021281		2084.8	0.00794994		2674.79	-0.0065267		3264.79	0.00452114		3854.78	0.00463533
315	0.01666117		905	-0.00143519		1495	0.00216033		2085	0.00752666		2674.99	-0.00606436		3264.99	0.00462083		3854.98	0.00565019
315.2	0.01657718		905.2	-0.00160742		1495.2	0.00235075		2085.2	0.0074196		2675.19	-0.00574082		3265.19	0.00558121		3855.18	0.00528556
315.4	0.01659881		905.4	-0.00117987		1495.4	0.0033174		2085.4	0.00808929		2675.39	-0.00510677		3265.39	0.00590366		3855.38	0.00557273
315.6	0.0165477		905.6	-0.00144813		1495.6	0.00266725		2085.6	0.00782975		2675.59	-0.00585472		3265.59	0.00643777		3855.58	0.00644342
315.8	0.01706474		905.8	-0.00157134		1495.8	0.00312827		2085.8	0.00812617		2675.79	-0.00569952		3265.79	0.00599944		3855.78	0.00662022
316	0.01725143		906	-0.00202608		1496	0.00337272		2086	0.00926681		2675.99	-0.00670265		3265.99	0.00504878		3855.98	0.00662074
316.2	0.01652554		906.2	-0.00296047		1496.2	0.0033957		2086.2	0.00879217		2676.19	-0.00755974		3266.19	0.00524329		3856.18	0.00647819
316.4	0.01663397		906.4	-0.00387931		1496.4	0.00382869		2086.4	0.00983403		2676.39	-0.00751949		3266.39	0.00419164		3856.38	0.00598321
316.6	0.01659251		906.6	-0.00547461		1496.6	0.00325445		2086.6	0.01042892		2676.59	-0.00769963		3266.59	0.00402285		3856.58	0.00574496
316.8	0.01574719		906.8	-0.00588466		1496.8	0.00252158		2086.8	0.01097778		2676.79	-0.00785211		3266.79	0.00504026		3856.78	0.00520568
317	0.01497727		907	-0.00696447		1497	0.002172		2087	0.01150658		2676.99	-0.00737211		3266.99	0.00462592		3856.98	0.00461422
317.2	0.0157773		907.2	-0.00637213		1497.2	0.00171432		2087.2	0.01053573		2677.19	-0.00837594		3267.19	0.00484503		3857.18	0.0051763
317.4	0.01486222		907.4	-0.00531415		1497.4	0.00149605		2087.4	0.0104677		2677.39	-0.00765709		3267.39	0.00429014		3857.38	0.00482411
317.6	0.01420988		907.6	-0.00638063		1497.6	0.00035931		2087.6	0.01093804		2677.59	-0.00739782		3267.59	0.00434667		3857.58	0.00479425
317.8	0.01365855		907.8	-0.00655372		1497.8	0.0005093		2087.8	0.01019595		2677.79	-0.00664499		3267.79	0.00411651		3857.78	0.0048406
318	0.01448095		908	-0.00657311		1498	0.00007161		2088	0.01078332		2677.99	-0.00791688		3267.99	0.00361404		3857.98	0.00439721
318.2	0.01546902		908.2	-0.00591511		1498.2	-0.00037711		2088.2	0.01073937		2678.19	-0.00873214		3268.19	0.00379975		3858.18	0.00397796
318.4	0.01480891		908.4	-0.00543073		1498.4	-0.00010667		2088.4	0.01021849		2678.39	-0.00863787		3268.39	0.00400216		3858.38	0.00358202
318.6	0.01520496		908.6	-0.00481623		1498.6	-0.00023667		2088.6	0.01024456		2678.59	-0.00861535		3268.59	0.0036043		3858.58	0.00295765
318.8	0.01525511		908.8	-0.00382406		1498.8	0.00014381		2088.8	0.00921368		2678.79	-0.00864593		3268.79	0.00365227		3858.78	0.00265783
319	0.01609232		909	-0.00243798		1499	0.00049053		2089	0.00815254		2678.99	-0.00902169		3268.99	0.00334982		3858.98	0.0022153
319.2	0.01713137		909.2	-0.00160268		1499.2	0.00078112		2089.2	0.0078608		2679.19	-0.00818059		3269.19	0.00401223		3859.18	0.00273104
319.4	0.01708623		909.4	-0.0000406		1499.4	0.00167272		2089.4	0.00869551		2679.39	-0.00751691		3269.39	0.00319757		3859.38	0.00402679
319.6	0.01689594		909.6	0.00119865		1499.6	0.00130323		2089.6	0.00827461		2679.59	-0.00729737		3269.59	0.00308475		3859.58	0.00440758
319.8	0.01687481		909.8	0.00208898		1499.8	0.00204151		2089.8	0.00841377		2679.79	-0.00606035		3269.79	0.00165561		3859.78	0.00385514
320	0.01875942		910	0.00268452		1500	0.00319715		2090	0.00878782		2679.99	-0.00588495		3269.99	0.00108358		3859.98	0.0040295
320.2	0.01862049		910.2	0.00140043		1500.2	0.00343894		2090.2	0.00876966		2680.19	-0.0055881		3270.19	0.00135771		3860.18	0.00337058
320.4	0.01956886		910.4	0.0019804		1500.4	0.00295254		2090.4	0.00925187		2680.39	-0.00505259		3270.39	0.00123897		3860.38	0.00415401
320.6	0.01986139		910.6	0.00187333		1500.6	0.00264025		2090.6	0.01003134		2680.59	-0.00519636		3270.59	0.00237357		3860.58	0.00421751
320.8	0.01956978		910.8	0.0013517		1500.8	0.00205976		2090.8	0.00965522		2680.79	-0.00505334		3270.79	0.00342886		3860.78	0.00359042
321	0.0198028		911	0.00082899		1501	0.00237862		2091	0.01059578		2680.99	-0.0049981		3270.99	0.00388818		3860.98	0.00309626
321.2	0.01922699		911.2	0.00066208		1501.2	0.00160265		2091.2	0.01060385		2681.19	-0.00558139		3271.19	0.00398751		3861.18	0.00361069
321.4	0.01831833		911.4	-0.00029887		1501.4	0.00184082		2091.4	0.01182636		2681.39	-0.00489112		3271.39	0.00354259		3861.38	0.00328011
321.6	0.01772529		911.6	-0.00166558		1501.6	0.00139048		2091.6	0.01285727		2681.59	-0.00555094		3271.59	0.00482825		3861.58	0.00350796
321.8	0.01789821		911.8	-0.0019109		1501.8	0.00099203		2091.8	0.01297873		2681.79	-0.00558723		3271.79	0.00496652		3861.78	0.00358213
322	0.01822789		912	-0.00255348		1502	0.00011242		2092	0.01315818		2681.99	-0.00663746		3271.99	0.00504326		3861.98	0.00341157
322.2	0.0183146		912.2	-0.00290167		1502.2	0.00005981		2092.2	0.01244171		2682.19	-0.00637133		3272.19	0.00551933		3862.18	0.00431152
322.4	0.01737816		912.4	-0.00259183		1502.4	0.00004594		2092.4	0.01250543		2682.39	-0.00660369		3272.39	0.00526812		3862.38	0.00429072
322.6	0.01838859		912.6	-0.00249379		1502.6	-0.00050323		2092.6	0.01228775		2682.59	-0.00596155		3272.59	0.00551483		3862.58	0.00402094
322.8	0.01830336		912.8	-0.00256842		1502.8	-0.00109502		2092.8	0.01101852		2682.79	-0.00632576		3272.79	0.00607533		3862.78	0.00463201
323	0.01807445		913	-0.00170818		1503	-0.00076471		2093	0.01030276		2682.99	-0.00656388		3272.99	0.00643933		3862.98	0.00505028
323.2	0.01745642		913.2	-0.00149141		1503.2	-0.00043736		2093.2	0.00978113		2683.19	-0.00533518		3273.19	0.00598126		3863.18	0.00593636
323.4	0.0164614		913.4	-0.00116547		1503.4	0.00072301		2093.4	0.0099278		2683.39	-0.0042612		3273.39	0.00516549		3863.38	0.00667133
323.6	0.01662776		913.6	-0.00122228		1503.6	0.00105824		2093.6	0.00948168		2683.59	-0.00366423		3273.59	0.00556072		3863.58	0.00657931
323.8	0.01674387		913.8	-0.00148478		1503.8	0.00189688		2093.8	0.00877961		2683.79	-0.00358425		3273.79	0.00435368		3863.78	0.00659882
324	0.01789293		914	-0.00154832		1504	0.00231193		2094	0.00881379		2683.99	-0.00385949		3273.99	0.00492681		3863.98	0.00614423
324.2	0.01822928		914.2	-0.00170275		1504.2	0.00170532		2094.2	0.00876974		2684.19	-0.00433378		3274.19	0.00505767		3864.18	0.00562418
324.4	0.01959631		914.4	-0.00159709		1504.4	0.00240526		2094.4	0.00887391		2684.39	-0.00307829		3274.39	0.00538933		3864.38	0.00568299
324.6	0.02086477		914.6	-0.00252993		1504.6	0.00319011		2094.6	0.00893955		2684.59	-0.00350723		3274.59	0.00637339		3864.58	0.0041059
324.8	0.02150743		914.8	-0.00380479		1504.8	0.00329252		2094.8	0.00880239		2684.79	-0.00369244		3274.79	0.00715095		3864.78	0.00344509
325	0.02181404		915	-0.00403789		1505	0.00374745		2095	0.00958899		2684.99	-0.00319843		3274.99	0.00708282		3864.98	0.00286979
325.2	0.02159554		915.2	-0.00389949		1505.2	0.00348069		2095.2	0.00936737		2685.19	-0.00300288		3275.19	0.00682845		3865.18	0.00294611
325.4	0.02255779		915.4	-0.00414498		1505.4	0.00369355		2095.4	0.01005366		2685.39	-0.00310533		3275.39	0.00756256		3865.38	0.00296365
325.6	0.02306709		915.6	-0.00353413		1505.6	0.00353394		2095.6	0.01081782		2685.59	-0.00368154		3275.59	0.00822718		3865.58	0.00251156
325.8	0.0228368		915.8	-0.00366838		1505.8	0.00312675		2095.8	0.01099417		2685.79	-0.00388072		3275.79	0.00793553		3865.78	0.00284429
326	0.0234541		916	-0.00375601		1506	0.00269937		2096	0.0117804		2685.99	-0.00396358		3275.99	0.00771664		3865.98	0.00310531
326.2	0.02367703		916.2	-0.00289856		1506.2	0.00239773		2096.2	0.01225586		2686.19	-0.00465769		3276.19	0.00720853		3866.18	0.0033914
326.4	0.02351553		916.4	-0.00220821		1506.4	0.00170896		2096.4	0.01311386		2686.39	-0.0055328		3276.39	0.00725336		3866.38	0.00318924
326.6	0.02371382		916.6	-0.00211872		1506.6	0.00084448		2096.6	0.01315984		2686.59	-0.00563016		3276.59	0.00747269		3866.58	0.00377054
326.8	0.02284447		916.8	-0.00167749		1506.8	0.00036982		2096.8	0.01269252		2686.79	-0.0061315		3276.79	0.00732143		3866.78	0.00460834
327	0.02197735		917	-0.00117991		1507	0.00100707		2097	0.01262071		2686.99	-0.00628168		3276.99	0.00748005		3866.98	0.00484008
327.2	0.02062386		917.2	-0.00117506		1507.2	0.00071556		2097.2	0.01211491		2687.19	-0.00613373		3277.19	0.00643606		3867.18	0.00495204
327.4	0.01996846		917.4	-0.00112499		1507.4	-0.00011248		2097.4	0.0127636		2687.39	-0.00676407		3277.39	0.00627327		3867.38	0.00635791
327.6	0.01958446		917.6	-0.00116577		1507.6	-0.00088589		2097.6	0.01290627		2687.59	-0.00728221		3277.59	0.00571247		3867.58	0.00667002
327.8	0.01885228		917.8	-0.00064389		1507.8	-0.00086721		2097.8	0.01313562		2687.79	-0.00737543		3277.79	0.00453334		3867.78	0.00604782
328	0.01816209		918	-0.00028544		1508	-0.00134725		2098	0.01276721		2687.99	-0.007368		3277.99	0.00533289		3867.98	0.00564635
328.2	0.01810836		918.2	-0.00118796		1508.2	-0.00070871		2098.2	0.01307973		2688.19	-0.00669584		3278.19	0.00549621		3868.18	0.00574377
328.4	0.01815901		918.4	-0.0016004		1508.4	0.00037151		2098.4	0.01226036		2688.39	-0.00521264		3278.39	0.00555805		3868.38	0.00563542
328.6	0.01788928		918.6	-0.0016612		1508.6	0.00074991		2098.6	0.01183555		2688.59	-0.00582632		3278.59	0.00599914		3868.58	0.00537391
328.8	0.01780809		918.8	-0.00169564		1508.8	0.00109596		2098.8	0.01167443		2688.79	-0.00574103		3278.79	0.00556824		3868.78	0.00520814
329	0.01773649		919	-0.00160199		1509	0.00206037		2099	0.01166649		2688.99	-0.0057275		3278.99	0.00490285		3868.98	0.00431565
329.2	0.01828829		919.2	-0.00210495		1509.2	0.00252661		2099.2	0.01089794		2689.19	-0.00573759		3279.19	0.0049178		3869.18	0.00417056
329.4	0.01974053		919.4	-0.00254844		1509.4	0.00290937		2099.4	0.01078409		2689.39	-0.00573465		3279.39	0.00485368		3869.38	0.00398506
329.6	0.0207323		919.6	-0.0029338		1509.6	0.00426884		2099.6	0.01047551		2689.59	-0.00596323		3279.59	0.00436807		3869.58	0.0030548
329.8	0.02119696		919.8	-0.00376265		1509.8	0.00475412		2099.8	0.01050847		2689.79	-0.00600476		3279.79	0.00408732		3869.78	0.00335351
330	0.0221588		920	-0.00379		1510	0.00460267		2100	0.01024912		2689.99	-0.00550246		3279.99	0.00466083		3869.98	0.00340408
330.2	0.02158813		920.2	-0.00331333		1510.2	0.00455685		2100.2	0.01038001		2690.19	-0.00575315		3280.19	0.00523966		3870.18	0.00402913
330.4	0.02187878		920.4	-0.00294634		1510.4	0.00439395		2100.4	0.01024096		2690.39	-0.00581914		3280.39	0.00548922		3870.38	0.00373073
330.6	0.02178972		920.6	-0.00220317		1510.6	0.00391596		2100.6	0.00967496		2690.59	-0.00528553		3280.59	0.00604708		3870.58	0.00428754
330.8	0.02217348		920.8	-0.00279373		1510.8	0.00288471		2100.8	0.0098895		2690.79	-0.00503683		3280.79	0.00543041		3870.78	0.00394707
331	0.02139919		921	-0.00323836		1511	0.00232834		2101	0.00942083		2690.99	-0.00477718		3280.99	0.00598051		3870.98	0.00374143
331.2	0.0212914		921.2	-0.00338874		1511.2	0.00099448		2101.2	0.00899839		2691.19	-0.00465711		3281.19	0.00521241		3871.18	0.00351469
331.4	0.02210343		921.4	-0.00294189		1511.4	0.00055144		2101.4	0.00975987		2691.39	-0.00439139		3281.39	0.00524072		3871.38	0.00410605
331.6	0.02156141		921.6	-0.0026448		1511.6	0.00043545		2101.6	0.00981079		2691.59	-0.00397766		3281.59	0.00606346		3871.58	0.00328925
331.8	0.02095523		921.8	-0.00183748		1511.8	0.00015472		2101.8	0.01006151		2691.79	-0.00377517		3281.79	0.00683552		3871.78	0.00271649
332	0.01992024		922	-0.00186049		1512	-0.00024013		2102	0.01013848		2691.99	-0.00360069		3281.99	0.00803048		3871.98	0.0036195
332.2	0.01937484		922.2	-0.00236958		1512.2	-0.00035507		2102.2	0.01147208		2692.19	-0.00274261		3282.19	0.00795093		3872.18	0.00421437
332.4	0.0200063		922.4	-0.00158959		1512.4	-0.00027111		2102.4	0.01095538		2692.39	-0.00288507		3282.39	0.00772752		3872.38	0.00514365
332.6	0.02026742		922.6	-0.00173186		1512.6	0.00009156		2102.6	0.01196758		2692.59	-0.00339179		3282.59	0.00746601		3872.58	0.00512928
332.8	0.02086191		922.8	-0.00161812		1512.8	0.00056254		2102.8	0.01264209		2692.79	-0.00416966		3282.79	0.00637841		3872.78	0.00550795
333	0.02088543		923	-0.00242393		1513	0.00074591		2103	0.01319595		2692.99	-0.00434226		3282.99	0.00658187		3872.98	0.00548577
333.2	0.02190757		923.2	-0.00305315		1513.2	0.0007871		2103.2	0.01189785		2693.19	-0.00356888		3283.19	0.00639176		3873.18	0.00565651
333.4	0.02264903		923.4	-0.00305363		1513.4	0.00133888		2103.4	0.01082684		2693.39	-0.00278575		3283.39	0.00484843		3873.38	0.00618985
333.6	0.02347887		923.6	-0.00300871		1513.6	0.0019834		2103.6	0.01129755		2693.59	-0.00238513		3283.59	0.00463732		3873.58	0.00609575
333.8	0.02392479		923.8	-0.00278605		1513.8	0.00182171		2103.8	0.01141375		2693.79	-0.00194693		3283.79	0.00412089		3873.78	0.00649721
334	0.0241807		924	-0.00272999		1514	0.0013274		2104	0.0107877		2693.99	-0.00190484		3283.99	0.00484359		3873.98	0.00632592
334.2	0.02417316		924.2	-0.00125619		1514.2	0.00120404		2104.2	0.01011363		2694.19	-0.00189477		3284.19	0.00407757		3874.18	0.00619749
334.4	0.02486677		924.4	-0.00037905		1514.4	0.00106809		2104.4	0.00964472		2694.39	-0.00170531		3284.39	0.00333053		3874.38	0.00507468
334.6	0.02459798		924.6	0.0000273		1514.6	0.00111886		2104.6	0.01012868		2694.59	-0.00166926		3284.59	0.00309502		3874.58	0.00461666
334.8	0.02449214		924.8	-0.00067802		1514.8	0.00120002		2104.8	0.01053976		2694.79	-0.00198857		3284.79	0.00223918		3874.78	0.00397079
335	0.02519717		925	0.00010164		1515	0.00129371		2105	0.01045103		2694.99	-0.00248274		3284.99	0.00269416		3874.98	0.00417747
335.2	0.02561933		925.2	0.00005867		1515.2	0.00186085		2105.2	0.01019265		2695.19	-0.00272059		3285.19	0.00210998		3875.18	0.00392192
335.4	0.02577099		925.4	0.00059732		1515.4	0.00249972		2105.4	0.0114259		2695.39	-0.00329291		3285.39	0.0026594		3875.38	0.00384364
335.6	0.02487106		925.6	0.00118964		1515.6	0.00247573		2105.6	0.01172143		2695.59	-0.00305402		3285.59	0.00333847		3875.58	0.00400349
335.8	0.02432028		925.8	0.00164328		1515.8	0.00257892		2105.8	0.01226788		2695.79	-0.00383995		3285.79	0.00387309		3875.78	0.00524783
336	0.02327656		926	0.00104257		1516	0.00157548		2106	0.01352153		2695.99	-0.00453651		3285.99	0.00516569		3875.98	0.00624546
336.2	0.02320278		926.2	0.00091145		1516.2	0.00164204		2106.2	0.01459038		2696.19	-0.00553402		3286.19	0.00438222		3876.18	0.00696661
336.4	0.02378848		926.4	0.00067359		1516.4	0.00232452		2106.4	0.01492628		2696.39	-0.00576717		3286.39	0.00426855		3876.38	0.00780419
336.6	0.02412257		926.6	0.00088354		1516.6	0.0026156		2106.6	0.01559354		2696.59	-0.00670704		3286.59	0.00448397		3876.58	0.00830944
336.8	0.0241448		926.8	0.00043871		1516.8	0.00234917		2106.8	0.01566229		2696.79	-0.00751048		3286.79	0.00400114		3876.78	0.010404
337	0.02437974		927	-0.00050733		1517	0.00214751		2107	0.01525542		2696.99	-0.00794025		3286.99	0.00454824		3876.98	0.01071648
337.2	0.02474952		927.2	-0.00081728		1517.2	0.0021117		2107.2	0.01381263		2697.19	-0.00759964		3287.19	0.00386487		3877.18	0.01131973
337.4	0.02514261		927.4	-0.00114845		1517.4	0.00288603		2107.4	0.01374106		2697.39	-0.00749236		3287.39	0.00308949		3877.38	0.01141825
337.6	0.02559507		927.6	-0.00167431		1517.6	0.00314412		2107.6	0.01428965		2697.59	-0.00725365		3287.59	0.00337482		3877.58	0.0101812
337.8	0.02544852		927.8	-0.00148396		1517.8	0.00374855		2107.8	0.01289504		2697.79	-0.00748252		3287.79	0.00365304		3877.78	0.00990881
338	0.02531499		928	-0.00121218		1518	0.00427579		2108	0.01229077		2697.99	-0.00768192		3287.99	0.00370838		3877.98	0.00940248
338.2	0.02570654		928.2	-0.00027657		1518.2	0.00433557		2108.2	0.01102842		2698.19	-0.00755688		3288.19	0.00278053		3878.18	0.00879656
338.4	0.0259679		928.4	-0.00020006		1518.4	0.00386406		2108.4	0.01166803		2698.39	-0.00724134		3288.39	0.00271892		3878.38	0.00903577
338.6	0.02563238		928.6	0.00075422		1518.6	0.0041684		2108.6	0.01131594		2698.59	-0.00695306		3288.59	0.00273516		3878.58	0.00881629
338.8	0.0250667		928.8	0.0010207		1518.8	0.00487704		2108.8	0.01048318		2698.79	-0.00647856		3288.79	0.00304286		3878.78	0.0092911
339	0.02498268		929	0.00158252		1519	0.00490005		2109	0.01008495		2698.99	-0.00594947		3288.99	0.00345525		3878.98	0.00934523
339.2	0.02403174		929.2	0.00103231		1519.2	0.00507529		2109.2	0.01016316		2699.19	-0.00546278		3289.19	0.00274473		3879.18	0.00850892
339.4	0.02399456		929.4	0.00172743		1519.4	0.00469719		2109.4	0.01071822		2699.39	-0.00498521		3289.39	0.00339351		3879.38	0.00829085
339.6	0.02345033		929.6	0.00258407		1519.6	0.00391166		2109.6	0.01067958		2699.59	-0.00394112		3289.59	0.00330204		3879.58	0.00802142
339.8	0.02287691		929.8	0.00239321		1519.8	0.00350329		2109.8	0.01130266		2699.79	-0.00480619		3289.79	0.00388898		3879.78	0.00818693
340	0.02251675		930	0.0024184		1520	0.00307936		2110	0.01257431		2699.99	-0.00428276		3289.99	0.00440066		3879.98	0.00739742
340.2	0.02280262		930.2	0.0025788		1520.2	0.00327343		2110.2	0.01255941		2700.19	-0.00380207		3290.19	0.00328178		3880.18	0.00692159
340.4	0.0231448		930.4	0.00137973		1520.4	0.00243007		2110.4	0.0129832		2700.39	-0.00320138		3290.39	0.00325117		3880.38	0.00715852
340.6	0.02367649		930.6	0.0008119		1520.6	0.00168031		2110.6	0.0139544		2700.59	-0.00379065		3290.59	0.00307749		3880.58	0.0078139
340.8	0.02381884		930.8	-0.00077307		1520.8	0.00165745		2110.8	0.01448902		2700.79	-0.00360676		3290.79	0.00258365		3880.78	0.00896033
341	0.02440307		931	-0.00182234		1521	0.002009		2111	0.013823		2700.99	-0.00355961		3290.99	0.00294566		3880.98	0.00784889
341.2	0.0249724		931.2	-0.00226626		1521.2	0.00177557		2111.2	0.01339881		2701.19	-0.00283324		3291.19	0.00250029		3881.18	0.00736633
341.4	0.02521832		931.4	-0.00254882		1521.4	0.00322003		2111.4	0.01378974		2701.39	-0.00259841		3291.39	0.00235443		3881.38	0.00670972
341.6	0.02532348		931.6	-0.00326814		1521.6	0.00324665		2111.6	0.01337081		2701.59	-0.00203107		3291.59	0.0021393		3881.58	0.00651083
341.8	0.02535518		931.8	-0.00217046		1521.8	0.00422453		2111.8	0.01258413		2701.79	-0.00249881		3291.79	0.00133031		3881.78	0.00657161
342	0.02550479		932	-0.00188425		1522	0.00428908		2112	0.01300077		2701.99	-0.00238327		3291.99	0.00054886		3881.98	0.00633787
342.2	0.02629172		932.2	-0.00189316		1522.2	0.00271566		2112.2	0.01200064		2702.19	-0.00187495		3292.19	0.00105429		3882.18	0.00610427
342.4	0.02642922		932.4	-0.00168644		1522.4	0.00256469		2112.4	0.01179885		2702.39	-0.00138481		3292.39	0.00201336		3882.38	0.00593309
342.6	0.02601848		932.6	-0.0006791		1522.6	0.00316139		2112.6	0.01087866		2702.59	-0.00156707		3292.59	0.00333916		3882.58	0.00501944
342.8	0.02622764		932.8	0.00003244		1522.8	0.00369507		2112.8	0.01091893		2702.79	-0.00133195		3292.79	0.00354879		3882.78	0.00439615
343	0.02624118		933	-0.00019424		1523	0.0034137		2113	0.01056415		2702.99	-0.00178821		3292.99	0.00383923		3882.98	0.00363828
343.2	0.02648082		933.2	0.00000327		1523.2	0.00398908		2113.2	0.0101412		2703.19	-0.00197156		3293.19	0.00327323		3883.18	0.00334699
343.4	0.02661672		933.4	0.00105672		1523.4	0.00425195		2113.4	0.01022338		2703.39	-0.00226722		3293.39	0.00399618		3883.38	0.00382386
343.6	0.02636991		933.6	0.00148417		1523.6	0.00446568		2113.6	0.00998653		2703.59	-0.0025676		3293.59	0.00389925		3883.58	0.00271489
343.8	0.02628207		933.8	0.0024279		1523.8	0.00573706		2113.8	0.0104993		2703.79	-0.0033765		3293.79	0.00364941		3883.78	0.00278244
344	0.02644045		934	0.00271812		1524	0.00570547		2114	0.0111882		2703.99	-0.00244254		3293.99	0.00388247		3883.98	0.00217562
344.2	0.0266521		934.2	0.00313638		1524.2	0.00610198		2114.2	0.01078434		2704.19	-0.00241103		3294.19	0.00450041		3884.18	0.00192061
344.4	0.02653573		934.4	0.00267128		1524.4	0.00651796		2114.4	0.01191744		2704.39	-0.00261648		3294.39	0.00474179		3884.38	0.00306862
344.6	0.02661979		934.6	0.00217402		1524.6	0.00760956		2114.6	0.01289026		2704.59	-0.00251592		3294.59	0.00494889		3884.58	0.00403588
344.8	0.02627222		934.8	0.00182299		1524.8	0.00802104		2114.8	0.01263184		2704.79	-0.00274111		3294.79	0.00498316		3884.78	0.00458622
345	0.02635248		935	0.00102623		1525	0.00796255		2115	0.01215462		2704.99	-0.00297623		3294.99	0.00482231		3884.98	0.00443102
345.2	0.02605937		935.2	0.00100804		1525.2	0.0073589		2115.2	0.01272461		2705.19	-0.00277548		3295.19	0.00368815		3885.18	0.0051476
345.4	0.02545959		935.4	0.00119165		1525.4	0.00788371		2115.4	0.01314263		2705.39	-0.00345898		3295.39	0.00289418		3885.38	0.00567437
345.6	0.02509345		935.6	0.00146419		1525.6	0.00706878		2115.6	0.01287544		2705.59	-0.00284805		3295.59	0.00275735		3885.58	0.00582021
345.8	0.02414023		935.8	0.00232913		1525.8	0.00685482		2115.8	0.01240833		2705.79	-0.0028122		3295.79	0.00229812		3885.78	0.00550051
346	0.0232964		936	0.00227744		1526	0.00603482		2116	0.01239685		2705.99	-0.0019309		3295.99	0.00229541		3885.98	0.00559194
346.2	0.02336913		936.2	0.00160286		1526.2	0.0053771		2116.2	0.01211004		2706.19	-0.00202752		3296.19	0.0023008		3886.18	0.00527764
346.4	0.02330074		936.4	0.00175559		1526.4	0.00529841		2116.4	0.01253838		2706.39	-0.00150078		3296.39	0.0018663		3886.38	0.00516518
346.6	0.02403156		936.6	0.00275854		1526.6	0.00431207		2116.6	0.01169304		2706.59	-0.00241442		3296.59	0.00211403		3886.58	0.00487924
346.8	0.02494227		936.8	0.00213959		1526.8	0.00318981		2116.8	0.0122892		2706.79	-0.0028702		3296.79	0.00191381		3886.78	0.00462127
347	0.02372632		937	0.00181585		1527	0.00302208		2117	0.01174084		2706.99	-0.00383207		3296.99	0.0019379		3886.98	0.00432802
347.2	0.02380433		937.2	0.00201141		1527.2	0.0026733		2117.2	0.01193853		2707.19	-0.00411153		3297.19	0.00206077		3887.18	0.00459184
347.4	0.02454924		937.4	0.0011856		1527.4	0.00307484		2117.4	0.01226495		2707.39	-0.00456061		3297.39	0.00251705		3887.38	0.00411027
347.6	0.02482241		937.6	0.00161101		1527.6	0.00278669		2117.6	0.01184004		2707.59	-0.00426532		3297.59	0.0028507		3887.58	0.00230449
347.8	0.02640016		937.8	0.00264104		1527.8	0.00242449		2117.8	0.01206305		2707.79	-0.00428803		3297.79	0.0029307		3887.78	0.0023663
348	0.02674893		938	0.00166384		1528	0.00268883		2118	0.01170005		2707.99	-0.00432336		3297.99	0.00402669		3887.98	0.00271467
348.2	0.02754208		938.2	0.00105291		1528.2	0.00330542		2118.2	0.01151257		2708.19	-0.0050871		3298.19	0.00551797		3888.18	0.00332406
348.4	0.02693053		938.4	-0.00036309		1528.4	0.00354905		2118.4	0.01128724		2708.39	-0.00490365		3298.39	0.00579003		3888.38	0.0048659
348.6	0.02682863		938.6	-0.00172504		1528.6	0.00317669		2118.6	0.01162485		2708.59	-0.00493575		3298.59	0.00580446		3888.58	0.00515695
348.8	0.02565461		938.8	-0.00203165		1528.8	0.00230605		2118.8	0.01093373		2708.79	-0.0046836		3298.79	0.00484235		3888.78	0.00521331
349	0.02532768		939	-0.00274739		1529	0.00160435		2119	0.01168033		2708.99	-0.00381559		3298.99	0.00483406		3888.98	0.00618757
349.2	0.02538082		939.2	-0.00221173		1529.2	0.00077788		2119.2	0.0118478		2709.19	-0.00373151		3299.19	0.00501342		3889.18	0.00647907
349.4	0.02499418		939.4	-0.00220302		1529.4	0.00046007		2119.4	0.01191754		2709.39	-0.0034903		3299.39	0.00472125		3889.38	0.00602484
349.6	0.02460877		939.6	-0.00225947		1529.6	0.00108629		2119.6	0.01201284		2709.59	-0.00226785		3299.59	0.00507419		3889.58	0.0062377
349.8	0.02490835		939.8	-0.0015849		1529.8	0.00124997		2119.8	0.01205047		2709.79	-0.00255466		3299.79	0.00470531		3889.78	0.00703161
350	0.02492254		940	-0.00166126		1530	0.0021014		2120	0.01223521		2709.99	-0.00291451		3299.99	0.0039564		3889.98	0.00740438
350.2	0.02664256		940.2	-0.00140865		1530.2	0.00337371		2120.2	0.0123771		2710.19	-0.0039463		3300.19	0.00416372		3890.18	0.00716998
350.4	0.0270607		940.4	-0.00069637		1530.4	0.00266859		2120.4	0.01287207		2710.39	-0.00397829		3300.39	0.00458182		3890.38	0.00718745
350.6	0.02854294		940.6	-0.00028139		1530.6	0.00270838		2120.6	0.01260858		2710.59	-0.00513996		3300.59	0.0056169		3890.58	0.00663305
350.8	0.02854434		940.8	-0.0003133		1530.8	0.00311512		2120.8	0.01315658		2710.79	-0.00508969		3300.79	0.00586268		3890.78	0.00680421
351	0.02820824		941	0.00069603		1531	0.0034456		2121	0.01277039		2710.99	-0.00608637		3300.99	0.0055073		3890.98	0.00595825
351.2	0.02906523		941.2	0.00040159		1531.2	0.00331456		2121.2	0.01273509		2711.19	-0.00613555		3301.19	0.00559621		3891.18	0.00625376
351.4	0.02970534		941.4	0.00008536		1531.4	0.00483804		2121.4	0.01155057		2711.39	-0.00565464		3301.39	0.00558228		3891.38	0.00568765
351.6	0.03037871		941.6	0.00150856		1531.6	0.00474552		2121.6	0.01093592		2711.59	-0.00549345		3301.59	0.00555637		3891.58	0.00513567
351.8	0.0311884		941.8	0.00174602		1531.8	0.00446361		2121.8	0.01024074		2711.79	-0.0051452		3301.79	0.00502584		3891.78	0.00550096
352	0.03046184		942	0.00091486		1532	0.00531791		2122	0.01033272		2711.99	-0.00563104		3301.99	0.00579102		3891.98	0.00673525
352.2	0.03073133		942.2	0.00022329		1532.2	0.00575832		2122.2	0.01014886		2712.19	-0.00525085		3302.19	0.00598765		3892.18	0.00680674
352.4	0.02998176		942.4	0.00026304		1532.4	0.00573513		2122.4	0.00922759		2712.39	-0.00422711		3302.39	0.00565883		3892.38	0.00669647
352.6	0.02991909		942.6	0.00034995		1532.6	0.00417192		2122.6	0.00957433		2712.59	-0.00419821		3302.59	0.00494492		3892.58	0.00655351
352.8	0.02870468		942.8	0.00062305		1532.8	0.00426195		2122.8	0.00981468		2712.79	-0.00213376		3302.79	0.0041119		3892.78	0.00647531
353	0.0295166		943	0.00019553		1533	0.00366645		2123	0.01137089		2712.99	-0.00122549		3302.99	0.00484906		3892.98	0.0064128
353.2	0.02986753		943.2	0.00061564		1533.2	0.00225092		2123.2	0.01183534		2713.19	-0.00204054		3303.19	0.00525138		3893.18	0.00536563
353.4	0.02990426		943.4	-0.00048238		1533.4	0.00244654		2123.4	0.01232832		2713.39	-0.0011458		3303.39	0.0038197		3893.38	0.00494747
353.6	0.03014616		943.6	-0.00087005		1533.6	0.00243306		2123.6	0.0128975		2713.59	-0.00146374		3303.59	0.004397		3893.58	0.00548643
353.8	0.0305599		943.8	-0.00037285		1533.8	0.00217871		2123.8	0.01341886		2713.79	-0.002269		3303.79	0.00453391		3893.78	0.00647793
354	0.03064711		944	-0.00109773		1534	0.00254765		2124	0.01308662		2713.99	-0.00208468		3303.99	0.00487403		3893.98	0.00662727
354.2	0.03067696		944.2	-0.0012018		1534.2	0.00308073		2124.2	0.01279295		2714.19	-0.00297771		3304.19	0.0047964		3894.18	0.00609036
354.4	0.02933356		944.4	-0.00083843		1534.4	0.00283948		2124.4	0.01317042		2714.39	-0.00308259		3304.39	0.00487705		3894.38	0.00631635
354.6	0.0293075		944.6	-0.00115887		1534.6	0.00356494		2124.6	0.01292577		2714.59	-0.00320911		3304.59	0.00506066		3894.58	0.0067281
354.8	0.02882322		944.8	-0.0010477		1534.8	0.00403736		2124.8	0.01217914		2714.79	-0.00342689		3304.79	0.00470575		3894.78	0.00763189
355	0.02793266		945	-0.00160808		1535	0.00442302		2125	0.0115792		2714.99	-0.0047538		3304.99	0.00392921		3894.98	0.00801036
355.2	0.02742806		945.2	-0.0009945		1535.2	0.00489592		2125.2	0.01177854		2715.19	-0.00393874		3305.19	0.00419993		3895.18	0.00931485
355.4	0.02686984		945.4	-0.00043795		1535.4	0.0058888		2125.4	0.01104904		2715.39	-0.00390766		3305.39	0.00402449		3895.38	0.00947428
355.6	0.02668822		945.6	-0.00042829		1535.6	0.0061869		2125.6	0.01178398		2715.59	-0.00436658		3305.59	0.00389331		3895.58	0.00997256
355.8	0.02728695		945.8	-0.00047744		1535.8	0.00631248		2125.8	0.01285905		2715.79	-0.00404327		3305.79	0.00350735		3895.78	0.01043044
356	0.02700001		946	-0.00058143		1536	0.00702096		2126	0.01306923		2715.99	-0.0050244		3305.99	0.00384373		3895.98	0.01027454
356.2	0.02785052		946.2	-0.00062199		1536.2	0.00740217		2126.2	0.01332374		2716.19	-0.00481726		3306.19	0.00278604		3896.18	0.0091709
356.4	0.02818166		946.4	-0.00083637		1536.4	0.00711249		2126.4	0.01320829		2716.39	-0.00449155		3306.39	0.00280018		3896.38	0.00813049
356.6	0.02841423		946.6	-0.00145719		1536.6	0.00686059		2126.6	0.01440664		2716.59	-0.00418668		3306.59	0.00232304		3896.58	0.00892321
356.8	0.02873937		946.8	-0.00155295		1536.8	0.00724823		2126.8	0.01536415		2716.79	-0.0024476		3306.79	0.00216616		3896.78	0.00777588
357	0.02975093		947	-0.00156916		1537	0.00609642		2127	0.01576977		2716.99	-0.00319044		3306.99	0.00282982		3896.98	0.00659694
357.2	0.03018271		947.2	-0.00112394		1537.2	0.00497688		2127.2	0.01618224		2717.19	-0.00355827		3307.19	0.00325797		3897.18	0.00640475
357.4	0.03009312		947.4	-0.00165663		1537.4	0.00490199		2127.4	0.01602799		2717.39	-0.00257809		3307.39	0.00298397		3897.38	0.00684995
357.6	0.03045783		947.6	-0.00187285		1537.6	0.00382841		2127.6	0.01581905		2717.59	-0.00237992		3307.59	0.00375705		3897.58	0.00771353
357.8	0.03095404		947.8	-0.00245395		1537.8	0.00415946		2127.8	0.01498999		2717.79	-0.00161182		3307.79	0.0035651		3897.78	0.00807811
358	0.03134723		948	-0.00215514		1538	0.00287168		2128	0.01426061		2717.99	-0.00084362		3307.99	0.00408241		3897.98	0.00769322
358.2	0.03105941		948.2	-0.00200165		1538.2	0.0024126		2128.2	0.01345598		2718.19	-0.00130454		3308.19	0.00323741		3898.18	0.00741221
358.4	0.03088133		948.4	-0.001569		1538.4	0.00206356		2128.4	0.01266666		2718.39	-0.00089905		3308.39	0.00433831		3898.38	0.00803901
358.6	0.03067369		948.6	-0.00251058		1538.6	0.00098294		2128.6	0.01172971		2718.59	-0.00099269		3308.59	0.00443986		3898.58	0.00865633
358.8	0.03062483		948.8	-0.00299713		1538.8	0.00120391		2128.8	0.01090964		2718.79	-0.00119408		3308.79	0.00417388		3898.78	0.0096313
359	0.03059094		949	-0.00228738		1539	0.00105788		2129	0.01078588		2718.99	-0.00152069		3308.99	0.00391565		3898.98	0.01018512
359.2	0.03059735		949.2	-0.00147708		1539.2	0.00105877		2129.2	0.01122143		2719.19	-0.00112959		3309.19	0.00448917		3899.18	0.00991022
359.4	0.0301481		949.4	-0.00195322		1539.4	0.0011373		2129.4	0.01065129		2719.39	-0.00092057		3309.39	0.0043361		3899.38	0.0099198
359.6	0.03054281		949.6	-0.002625		1539.6	0.00142525		2129.6	0.0119252		2719.59	-0.00103127		3309.59	0.00409479		3899.58	0.01011869
359.8	0.03176023		949.8	-0.00220073		1539.8	0.00174214		2129.8	0.0130662		2719.79	-0.00074847		3309.79	0.00416151		3899.78	0.0100241
360	0.03139918		950	-0.00185118		1540	0.00214426		2130	0.01279454		2719.99	-0.00053748		3309.99	0.00380254		3899.98	0.00933145
360.2	0.03138213		950.2	-0.00141159		1540.2	0.0021847		2130.2	0.01418055		2720.19	-0.00050886		3310.19	0.00362035		3900.18	0.00979041
360.4	0.03086018		950.4	-0.0014498		1540.4	0.00275967		2130.4	0.01404258		2720.39	-0.00002482		3310.39	0.00382347		3900.38	0.01011049
360.6	0.03021059		950.6	-0.00085632		1540.6	0.00342078		2130.6	0.0142769		2720.59	-0.00015722		3310.59	0.00356919		3900.58	0.01057793
360.8	0.03038399		950.8	-0.00019407		1540.8	0.00338642		2130.8	0.01409319		2720.79	-0.00041889		3310.79	0.00390604		3900.78	0.00925691
361	0.03094693		951	0.0006995		1541	0.00441672		2131	0.01446892		2720.99	-0.00077774		3310.99	0.00411298		3900.98	0.00921209
361.2	0.03199898		951.2	0.00059084		1541.2	0.0047737		2131.2	0.01408714		2721.19	-0.0001015		3311.19	0.00400162		3901.18	0.00931963
361.4	0.03230701		951.4	0.00094963		1541.4	0.00465183		2131.4	0.01473499		2721.39	0.00017927		3311.39	0.00386589		3901.38	0.00959047
361.6	0.03278967		951.6	0.00049237		1541.6	0.00510648		2131.6	0.01416663		2721.59	0.00009616		3311.59	0.00405854		3901.58	0.00994926
361.8	0.03250443		951.8	0.00052214		1541.8	0.00481706		2131.8	0.01336864		2721.79	-0.00026251		3311.79	0.00470697		3901.78	0.00976624
362	0.03218864		952	0.00131081		1542	0.00391481		2132	0.01335413		2721.99	-0.00102245		3311.99	0.00548545		3901.98	0.00957472
362.2	0.03179591		952.2	0.00104143		1542.2	0.00418172		2132.2	0.01240752		2722.19	-0.00220162		3312.19	0.00519623		3902.18	0.00974108
362.4	0.03131218		952.4	0.00108847		1542.4	0.00386323		2132.4	0.01182141		2722.39	-0.00267746		3312.39	0.00582675		3902.38	0.00968271
362.6	0.03087686		952.6	0.00138718		1542.6	0.00383024		2132.6	0.01186311		2722.59	-0.00354666		3312.59	0.00620982		3902.58	0.00970395
362.8	0.03097747		952.8	0.00156681		1542.8	0.00415138		2132.8	0.01213233		2722.79	-0.00452488		3312.79	0.0072366		3902.78	0.00991578
363	0.03122478		953	0.00261273		1543	0.00397306		2133	0.0119713		2722.99	-0.0047817		3312.99	0.00773318		3902.98	0.00896
363.2	0.03047088		953.2	0.0022328		1543.2	0.00385237		2133.2	0.01222425		2723.19	-0.00482199		3313.19	0.00758146		3903.18	0.00848001
363.4	0.03039563		953.4	0.00189831		1543.4	0.00360001		2133.4	0.01189656		2723.39	-0.00444398		3313.39	0.00792858		3903.38	0.00852497
363.6	0.03089049		953.6	0.00168078		1543.6	0.00347822		2133.6	0.01232173		2723.59	-0.00463709		3313.59	0.00789708		3903.58	0.00877128
363.8	0.03199916		953.8	0.00205997		1543.8	0.00348985		2133.8	0.01286775		2723.79	-0.00506041		3313.79	0.00781508		3903.78	0.00848744
364	0.0309597		954	0.00260796		1544	0.00333159		2134	0.01235288		2723.99	-0.00450243		3313.99	0.00718898		3903.98	0.00944014
364.2	0.02955931		954.2	0.00247517		1544.2	0.00348292		2134.2	0.01246783		2724.19	-0.00482804		3314.19	0.00711413		3904.18	0.0096437
364.4	0.02991372		954.4	0.00238325		1544.4	0.00369051		2134.4	0.01185964		2724.39	-0.00446901		3314.39	0.00714359		3904.38	0.00942588
364.6	0.02974603		954.6	0.00266288		1544.6	0.00446742		2134.6	0.01185603		2724.59	-0.00387031		3314.59	0.00682036		3904.58	0.00864059
364.8	0.03078222		954.8	0.00256162		1544.8	0.0046367		2134.8	0.01257573		2724.79	-0.00360381		3314.79	0.00665402		3904.78	0.00893827
365	0.03104556		955	0.00265175		1545	0.00545794		2135	0.0137092		2724.99	-0.00282072		3314.99	0.00594557		3904.98	0.00881403
365.2	0.03223894		955.2	0.00207524		1545.2	0.00606551		2135.2	0.01423224		2725.19	-0.00236089		3315.19	0.00566652		3905.18	0.00815956
365.4	0.03161843		955.4	0.00261756		1545.4	0.00672297		2135.4	0.01515963		2725.39	-0.00307693		3315.39	0.00612878		3905.38	0.0086487
365.6	0.03109172		955.6	0.00250906		1545.6	0.00762788		2135.6	0.01460296		2725.59	-0.0032993		3315.59	0.00643481		3905.58	0.00864968
365.8	0.03034513		955.8	0.00230227		1545.8	0.00721321		2135.8	0.0142378		2725.79	-0.00235059		3315.79	0.00741142		3905.78	0.00788468
366	0.03060736		956	0.00215348		1546	0.00684381		2136	0.01470124		2725.99	-0.00200307		3315.99	0.00744425		3905.98	0.00750785
366.2	0.03120112		956.2	0.00177725		1546.2	0.00703911		2136.2	0.0147306		2726.19	-0.00162594		3316.19	0.00719704		3906.18	0.00728035
366.4	0.03183573		956.4	0.00219215		1546.4	0.00691688		2136.4	0.01533278		2726.39	-0.00115837		3316.39	0.0075264		3906.38	0.00775124
366.6	0.03182607		956.6	0.00275085		1546.6	0.00741455		2136.6	0.01567374		2726.59	-0.00109311		3316.59	0.00805264		3906.58	0.00788362
366.8	0.0315011		956.8	0.00232728		1546.8	0.00732015		2136.8	0.01530698		2726.79	-0.00139593		3316.79	0.00792286		3906.78	0.00828665
367	0.03151015		957	0.00242773		1547	0.00763864		2137	0.01440026		2726.99	-0.00034601		3316.99	0.00705521		3906.98	0.00815426
367.2	0.03213189		957.2	0.00233348		1547.2	0.00716162		2137.2	0.0143948		2727.19	-0.00004845		3317.19	0.0065211		3907.18	0.00887179
367.4	0.03290525		957.4	0.00193236		1547.4	0.00670161		2137.4	0.0142516		2727.39	0.00006173		3317.39	0.0063226		3907.38	0.00910381
367.6	0.03277441		957.6	0.00138388		1547.6	0.00581896		2137.6	0.01456828		2727.59	-0.00065467		3317.59	0.00541233		3907.58	0.00993189
367.8	0.03277396		957.8	0.00200483		1547.8	0.0055131		2137.8	0.01564404		2727.79	-0.00117991		3317.79	0.00513632		3907.78	0.0092528
368	0.03227856		958	0.00204538		1548	0.00559281		2138	0.01528998		2727.99	-0.00107751		3317.99	0.00541601		3907.98	0.01013781
368.2	0.03209205		958.2	0.0014958		1548.2	0.0048355		2138.2	0.01584518		2728.19	-0.00172874		3318.19	0.00524769		3908.18	0.00942492
368.4	0.03246658		958.4	0.00219386		1548.4	0.00503975		2138.4	0.01651372		2728.39	-0.0015808		3318.39	0.00502505		3908.38	0.0091067
368.6	0.03205199		958.6	0.00205432		1548.6	0.00514043		2138.6	0.01681253		2728.59	-0.00130383		3318.59	0.00457507		3908.58	0.00893585
368.8	0.0322703		958.8	0.00206062		1548.8	0.00414652		2138.8	0.01732755		2728.79	-0.00165464		3318.79	0.00457702		3908.78	0.00908141
369	0.03247195		959	0.00251355		1549	0.00436393		2139	0.01856123		2728.99	-0.00179516		3318.99	0.00397791		3908.98	0.00872817
369.2	0.03302977		959.2	0.00325486		1549.2	0.00483006		2139.2	0.01850469		2729.19	-0.00230768		3319.19	0.00361736		3909.18	0.00899393
369.4	0.03254754		959.4	0.00402284		1549.4	0.00447236		2139.4	0.01859256		2729.39	-0.00272338		3319.39	0.00348517		3909.38	0.00829859
369.6	0.03310058		959.6	0.00406752		1549.6	0.00390205		2139.6	0.01817503		2729.59	-0.00193874		3319.59	0.00326491		3909.58	0.00743102
369.8	0.03323699		959.8	0.00348202		1549.8	0.00424085		2139.8	0.01793757		2729.79	-0.0007789		3319.79	0.00376405		3909.78	0.00654312
370	0.03406806		960	0.0029464		1550	0.00437002		2140	0.01806414		2729.99	-0.00164807		3319.99	0.00354271		3909.98	0.00617998
370.2	0.03405543		960.2	0.00256706		1550.2	0.00575185		2140.2	0.01788901		2730.19	-0.00147728		3320.19	0.00322378		3910.18	0.00637423
370.4	0.03356233		960.4	0.00317546		1550.4	0.00673599		2140.4	0.01737162		2730.39	-0.00226995		3320.39	0.00341221		3910.38	0.00663406
370.6	0.03310237		960.6	0.00273041		1550.6	0.00748104		2140.6	0.01635318		2730.59	-0.00203666		3320.59	0.00285711		3910.58	0.00685867
370.8	0.03303147		960.8	0.00204253		1550.8	0.00770391		2140.8	0.01509276		2730.79	-0.00235424		3320.79	0.002496		3910.78	0.00693973
371	0.03377671		961	0.0023282		1551	0.00838453		2141	0.01438715		2730.99	-0.0015004		3320.99	0.00242482		3910.98	0.00715669
371.2	0.03446903		961.2	0.00130969		1551.2	0.0080328		2141.2	0.01418312		2731.19	-0.00229917		3321.19	0.00256326		3911.18	0.0076173
371.4	0.03397424		961.4	0.00079269		1551.4	0.00811356		2141.4	0.01429692		2731.39	-0.00304996		3321.39	0.00250366		3911.38	0.00724025
371.6	0.03403978		961.6	0.00045424		1551.6	0.00850151		2141.6	0.01378725		2731.59	-0.00430423		3321.59	0.00264568		3911.58	0.00676844
371.8	0.0344899		961.8	0.00132273		1551.8	0.0089476		2141.8	0.01361838		2731.79	-0.00489028		3321.79	0.00384008		3911.78	0.00538205
372	0.03515133		962	0.00122953		1552	0.00915414		2142	0.0132045		2731.99	-0.0057283		3321.99	0.00465818		3911.98	0.00596417
372.2	0.03445559		962.2	0.0012659		1552.2	0.00884053		2142.2	0.01250135		2732.19	-0.00564577		3322.19	0.00482412		3912.18	0.00589686
372.4	0.03483563		962.4	0.00207148		1552.4	0.00924612		2142.4	0.01215972		2732.39	-0.00549037		3322.39	0.00548357		3912.38	0.00570278
372.6	0.03508279		962.6	0.00129896		1552.6	0.00790319		2142.6	0.01223918		2732.59	-0.00628759		3322.59	0.00570002		3912.58	0.00656614
372.8	0.0356889		962.8	0.00159617		1552.8	0.00653355		2142.8	0.01200931		2732.79	-0.00608628		3322.79	0.0053915		3912.78	0.00766534
373	0.03591725		963	0.00181235		1553	0.00653539		2143	0.01247955		2732.99	-0.00642776		3322.99	0.00487618		3912.98	0.00806474
373.2	0.03652228		963.2	0.00229607		1553.2	0.00629239		2143.2	0.01214866		2733.19	-0.00679873		3323.19	0.00493496		3913.18	0.00904823
373.4	0.03659775		963.4	0.00352712		1553.4	0.00558775		2143.4	0.01204741		2733.39	-0.00594639		3323.39	0.00420221		3913.38	0.00824164
373.6	0.03701348		963.6	0.00308408		1553.6	0.00493535		2143.6	0.01210705		2733.59	-0.00578588		3323.59	0.0047517		3913.58	0.00838787
373.8	0.03712523		963.8	0.00288211		1553.8	0.00512121		2143.8	0.0126016		2733.79	-0.00547418		3323.79	0.00493416		3913.78	0.00866252
374	0.03642017		964	0.00274327		1554	0.0050867		2144	0.01306906		2733.99	-0.00597545		3323.99	0.00503681		3913.98	0.00919492
374.2	0.03546832		964.2	0.00313616		1554.2	0.00518292		2144.2	0.01407983		2734.19	-0.00570278		3324.19	0.00484348		3914.18	0.01006682
374.4	0.03589797		964.4	0.00336969		1554.4	0.00415591		2144.4	0.01367363		2734.39	-0.00573354		3324.39	0.00480579		3914.38	0.01053387
374.6	0.03652923		964.6	0.00328283		1554.6	0.0038118		2144.6	0.01346163		2734.59	-0.00429891		3324.59	0.00427434		3914.58	0.01062012
374.8	0.03690373		964.8	0.00409328		1554.8	0.00333072		2144.8	0.01291569		2734.79	-0.00344373		3324.79	0.00381182		3914.78	0.00970685
375	0.03663676		965	0.00461637		1555	0.00359013		2145	0.01403572		2734.99	-0.00211815		3324.99	0.00368733		3914.98	0.00975288
375.2	0.03671154		965.2	0.00452799		1555.2	0.00335988		2145.2	0.01372762		2735.19	-0.0019937		3325.19	0.00380169		3915.18	0.00927107
375.4	0.03551136		965.4	0.00484288		1555.4	0.00323177		2145.4	0.01404936		2735.39	-0.00160068		3325.39	0.00366618		3915.38	0.00894835
375.6	0.03585343		965.6	0.00454776		1555.6	0.00354669		2145.6	0.01394382		2735.59	-0.00157848		3325.59	0.00417912		3915.58	0.0089993
375.8	0.03545514		965.8	0.00482295		1555.8	0.00370384		2145.8	0.01427817		2735.79	-0.00162767		3325.79	0.00474471		3915.78	0.00873955
376	0.03548781		966	0.00445225		1556	0.0035871		2146	0.01416556		2735.99	-0.00215439		3325.99	0.00457444		3915.98	0.0085739
376.2	0.03477369		966.2	0.00390587		1556.2	0.00357087		2146.2	0.01399354		2736.19	-0.00162279		3326.19	0.00430541		3916.18	0.0085602
376.4	0.03499546		966.4	0.00373021		1556.4	0.00386574		2146.4	0.01455541		2736.39	-0.00222628		3326.39	0.00425716		3916.38	0.00807408
376.6	0.03486342		966.6	0.00255934		1556.6	0.00319629		2146.6	0.01485082		2736.59	-0.00318867		3326.59	0.0036007		3916.58	0.00869734
376.8	0.03499727		966.8	0.00170313		1556.8	0.00338326		2146.8	0.0143562		2736.79	-0.00270498		3326.79	0.00368053		3916.78	0.00820496
377	0.03407591		967	0.00153885		1557	0.0038732		2147	0.01395958		2736.99	-0.0027214		3326.99	0.00371815		3916.98	0.00815702
377.2	0.0342191		967.2	0.00146941		1557.2	0.00437766		2147.2	0.01353937		2737.19	-0.00247497		3327.19	0.00433748		3917.18	0.00801574
377.4	0.03366506		967.4	0.0017718		1557.4	0.00452996		2147.4	0.01423231		2737.39	-0.00236663		3327.39	0.00415741		3917.38	0.00799436
377.6	0.03318739		967.6	0.00105237		1557.6	0.00496537		2147.6	0.01546964		2737.59	-0.00281017		3327.59	0.00500327		3917.58	0.00877856
377.8	0.03226732		967.8	0.00134489		1557.8	0.00571342		2147.8	0.01535311		2737.79	-0.00326737		3327.79	0.00454385		3917.78	0.00965235
378	0.03191675		968	0.00158526		1558	0.00688233		2148	0.01544117		2737.99	-0.00378778		3327.99	0.00438456		3917.98	0.00996818
378.2	0.03249827		968.2	0.00175198		1558.2	0.00638763		2148.2	0.01504964		2738.19	-0.00365583		3328.19	0.00452009		3918.18	0.00996295
378.4	0.03357794		968.4	0.00196326		1558.4	0.00635206		2148.4	0.01435455		2738.39	-0.0031614		3328.39	0.00521763		3918.38	0.01037683
378.6	0.03333742		968.6	0.00299243		1558.6	0.00725721		2148.6	0.01416287		2738.59	-0.00283999		3328.59	0.00520369		3918.58	0.00996214
378.8	0.03267519		968.8	0.00389178		1558.8	0.0073792		2148.8	0.01327623		2738.79	-0.00287997		3328.79	0.00463631		3918.78	0.00972937
379	0.03261972		969	0.00439839		1559	0.00833024		2149	0.01343027		2738.99	-0.00261702		3328.99	0.00502643		3918.98	0.01036316
379.2	0.03344416		969.2	0.00435967		1559.2	0.00769025		2149.2	0.01207848		2739.19	-0.00303574		3329.19	0.00509623		3919.18	0.01081825
379.4	0.03362148		969.4	0.00373212		1559.4	0.00716568		2149.4	0.01196087		2739.39	-0.00361125		3329.39	0.00459188		3919.38	0.01120586
379.6	0.034546		969.6	0.00443722		1559.6	0.00715932		2149.6	0.01224279		2739.59	-0.00440888		3329.59	0.00458141		3919.58	0.01074569
379.8	0.03466672		969.8	0.00509507		1559.8	0.0073479		2149.8	0.01187397		2739.79	-0.00462239		3329.79	0.00432831		3919.78	0.01036115
380	0.03567165		970	0.0046526		1560	0.00670723		2150	0.01204834		2739.99	-0.00547951		3329.99	0.00421892		3919.98	0.01014868
380.2	0.03635522		970.2	0.00478791		1560.2	0.0062582		2150.2	0.012316		2740.19	-0.0051907		3330.19	0.0043586		3920.18	0.01065031
380.4	0.03691031		970.4	0.0048104		1560.4	0.00664917		2150.4	0.01247501		2740.39	-0.00548024		3330.39	0.00423698		3920.38	0.01100274
380.6	0.03726836		970.6	0.00369048		1560.6	0.00581575		2150.6	0.01278183		2740.59	-0.00565769		3330.59	0.00318489		3920.58	0.01147745
380.8	0.03756963		970.8	0.00346477		1560.8	0.006071		2150.8	0.01306912		2740.79	-0.0051085		3330.79	0.00349636		3920.78	0.01082835
381	0.03768703		971	0.00366279		1561	0.00572499		2151	0.01381486		2740.99	-0.00468842		3330.99	0.00312136		3920.98	0.01105582
381.2	0.03782039		971.2	0.00388557		1561.2	0.00610953		2151.2	0.01489532		2741.19	-0.0043711		3331.19	0.00387046		3921.18	0.01075234
381.4	0.03738773		971.4	0.0043282		1561.4	0.0057856		2151.4	0.0167976		2741.39	-0.00435153		3331.39	0.0039803		3921.38	0.01150721
381.6	0.03599992		971.6	0.00439807		1561.6	0.0048485		2151.6	0.0176452		2741.59	-0.00383722		3331.59	0.00374589		3921.58	0.01190164
381.8	0.03581502		971.8	0.00399941		1561.8	0.00451179		2151.8	0.01741454		2741.79	-0.00407543		3331.79	0.00366078		3921.78	0.01173091
382	0.03648526		972	0.00335051		1562	0.00422411		2152	0.01776048		2741.99	-0.00306166		3331.99	0.00413658		3921.98	0.01108536
382.2	0.03662931		972.2	0.00179517		1562.2	0.00439969		2152.2	0.01771042		2742.19	-0.00244448		3332.19	0.00463394		3922.18	0.0108581
382.4	0.03627471		972.4	0.00114756		1562.4	0.00481754		2152.4	0.01787385		2742.39	-0.00188289		3332.39	0.00546877		3922.38	0.01104138
382.6	0.03590061		972.6	0.00164155		1562.6	0.00572933		2152.6	0.01696852		2742.59	-0.00139287		3332.59	0.00548249		3922.58	0.00963887
382.8	0.03588025		972.8	0.00085183		1562.8	0.00578039		2152.8	0.01573681		2742.79	-0.00099035		3332.79	0.00506124		3922.78	0.00903612
383	0.03753999		973	0.00071215		1563	0.00570433		2153	0.01539767		2742.99	-0.00072296		3332.99	0.00605882		3922.98	0.0092344
383.2	0.03856719		973.2	0.0005679		1563.2	0.00483998		2153.2	0.01449712		2743.19	-0.00103236		3333.19	0.00605202		3923.18	0.00900388
383.4	0.03886716		973.4	0.00095236		1563.4	0.00581334		2153.4	0.01432975		2743.39	-0.00070185		3333.39	0.00609032		3923.38	0.00874241
383.6	0.03902298		973.6	0.00159638		1563.6	0.00598191		2153.6	0.01421531		2743.59	0.00007498		3333.59	0.00727132		3923.58	0.00885168
383.8	0.03961561		973.8	0.00086864		1563.8	0.00623953		2153.8	0.01371871		2743.79	0.00038859		3333.79	0.00767537		3923.78	0.00924135
384	0.04010227		974	-0.00006333		1564	0.00602788		2154	0.01358456		2743.99	-0.00055699		3333.99	0.00795763		3923.98	0.00997275
384.2	0.0401332		974.2	0.00046448		1564.2	0.0065549		2154.2	0.01254778		2744.19	-0.00101654		3334.19	0.00760482		3924.18	0.00949967
384.4	0.03988549		974.4	-0.0003566		1564.4	0.00687508		2154.4	0.01214321		2744.39	-0.00122269		3334.39	0.00709306		3924.38	0.00940268
384.6	0.03932331		974.6	0.00003316		1564.6	0.00708134		2154.6	0.0122491		2744.59	-0.00182173		3334.59	0.0057871		3924.58	0.00824559
384.8	0.03935673		974.8	0.00098408		1564.8	0.00790057		2154.8	0.01244811		2744.79	-0.00171416		3334.79	0.00571514		3924.78	0.00802808
385	0.03883172		975	0.00150103		1565	0.00766268		2155	0.01299837		2744.99	-0.00201498		3334.99	0.00502829		3924.98	0.00822124
385.2	0.03756949		975.2	0.00196905		1565.2	0.00746631		2155.2	0.0133404		2745.19	-0.00145268		3335.19	0.00462989		3925.18	0.00842321
385.4	0.03725173		975.4	0.0016039		1565.4	0.00725635		2155.4	0.01401443		2745.39	-0.00147383		3335.39	0.00486236		3925.38	0.00879762
385.6	0.03606561		975.6	0.00175928		1565.6	0.00742901		2155.6	0.01408592		2745.59	-0.00180484		3335.59	0.00418531		3925.58	0.00956869
385.8	0.03633362		975.8	0.00150118		1565.8	0.00767658		2155.8	0.01434108		2745.79	-0.00200882		3335.79	0.00361433		3925.78	0.00968636
386	0.03620571		976	0.00136574		1566	0.00806293		2156	0.01457352		2745.99	-0.00107341		3335.99	0.00313957		3925.98	0.0099929
386.2	0.03596608		976.2	0.0012083		1566.2	0.00877721		2156.2	0.01407742		2746.19	-0.00120178		3336.19	0.00232587		3926.18	0.00970504
386.4	0.03574274		976.4	0.00135824		1566.4	0.00886351		2156.4	0.01409609		2746.39	-0.00104472		3336.39	0.00214024		3926.38	0.00973294
386.6	0.03629887		976.6	0.00206101		1566.6	0.0092146		2156.6	0.01391757		2746.59	-0.00113053		3336.59	0.0017092		3926.58	0.00880633
386.8	0.03666569		976.8	0.0021257		1566.8	0.00864733		2156.8	0.01345708		2746.79	-0.00150388		3336.79	0.00099555		3926.78	0.00914518
387	0.0373374		977	0.00336361		1567	0.00734082		2157	0.01334609		2746.99	-0.00148039		3336.99	0.00123295		3926.98	0.01013691
387.2	0.03730994		977.2	0.00361794		1567.2	0.00737922		2157.2	0.01316181		2747.19	-0.00124018		3337.19	0.00107132		3927.18	0.0107191
387.4	0.03737864		977.4	0.00392146		1567.4	0.00723861		2157.4	0.01359852		2747.39	-0.00078917		3337.39	0.00123941		3927.38	0.01034077
387.6	0.03816606		977.6	0.00367409		1567.6	0.00621043		2157.6	0.01370285		2747.59	-0.00076558		3337.59	0.00296829		3927.58	0.01047159
387.8	0.03827507		977.8	0.00290512		1567.8	0.00651168		2157.8	0.01383313		2747.79	-0.00182918		3337.79	0.00249707		3927.78	0.00908068
388	0.03850268		978	0.00202121		1568	0.00576403		2158	0.01318964		2747.99	-0.00236311		3337.99	0.0034646		3927.98	0.00927947
388.2	0.03875682		978.2	0.00176457		1568.2	0.00558191		2158.2	0.01263648		2748.19	-0.00248498		3338.19	0.00413106		3928.18	0.0083502
388.4	0.03890441		978.4	0.00093788		1568.4	0.00541236		2158.4	0.01264323		2748.39	-0.00262187		3338.39	0.00427497		3928.38	0.00850754
388.6	0.03846865		978.6	0.00138833		1568.6	0.00548429		2158.6	0.01205732		2748.59	-0.00341369		3338.59	0.00408715		3928.58	0.00818408
388.8	0.03802673		978.8	0.00160495		1568.8	0.00535395		2158.8	0.01178328		2748.79	-0.00347861		3338.79	0.00506909		3928.78	0.00895749
389	0.03784797		979	0.00126338		1569	0.00464352		2159	0.01215656		2748.99	-0.00395311		3338.99	0.00542159		3928.98	0.00895059
389.2	0.0374839		979.2	0.00141746		1569.2	0.0046746		2159.2	0.01296836		2749.19	-0.00346371		3339.19	0.00599257		3929.18	0.00924291
389.4	0.03745983		979.4	0.00180913		1569.4	0.00565978		2159.4	0.01241777		2749.39	-0.0031754		3339.39	0.00677585		3929.38	0.00964132
389.6	0.03652908		979.6	0.00258814		1569.6	0.00513128		2159.6	0.01261219		2749.59	-0.00274039		3339.59	0.00617897		3929.58	0.01016382
389.8	0.0361788		979.8	0.00333499		1569.8	0.00510831		2159.8	0.01318311		2749.79	-0.00221666		3339.79	0.00604016		3929.78	0.00974726
390	0.03613504		980	0.00421029		1570	0.00533427		2160	0.01324735		2749.99	-0.00144371		3339.99	0.00616604		3929.98	0.00938738
390.2	0.03573904		980.2	0.00491381		1570.2	0.00599633		2160.2	0.01272479		2750.19	-0.00198059		3340.19	0.00600276		3930.18	0.00933047
390.4	0.0352549		980.4	0.00503057		1570.4	0.00671356		2160.4	0.01307363		2750.39	-0.00130543		3340.39	0.00605336		3930.38	0.00992395
390.6	0.03585057		980.6	0.0058231		1570.6	0.00556386		2160.6	0.01373778		2750.59	-0.00111892		3340.59	0.00551194		3930.58	0.0098286
390.8	0.03552155		980.8	0.00559965		1570.8	0.00600934		2160.8	0.01390126		2750.79	-0.00056426		3340.79	0.00462251		3930.78	0.0095537
391	0.03586528		981	0.00566698		1571	0.00503816		2161	0.01443955		2750.99	0.00057242		3340.99	0.00329382		3930.98	0.00991389
391.2	0.03656077		981.2	0.00471456		1571.2	0.00565688		2161.2	0.01472983		2751.19	0.00027144		3341.19	0.00239428		3931.18	0.00901791
391.4	0.03726506		981.4	0.00442043		1571.4	0.00625351		2161.4	0.01474076		2751.39	0.00077047		3341.39	0.00222962		3931.38	0.00875967
391.6	0.03841051		981.6	0.00338742		1571.6	0.00635284		2161.6	0.01456888		2751.59	0.00083724		3341.59	0.0017244		3931.58	0.00857952
391.8	0.03885413		981.8	0.00349554		1571.8	0.00708259		2161.8	0.01386537		2751.79	0.00032598		3341.79	0.00070909		3931.78	0.00815846
392	0.03913318		982	0.00254813		1572	0.00682693		2162	0.01403111		2751.99	-0.00019842		3341.99	0.00134642		3931.98	0.0086067
392.2	0.03955769		982.2	0.0017181		1572.2	0.0075277		2162.2	0.01331146		2752.19	0.0000049		3342.19	0.00146817		3932.18	0.0089114
392.4	0.03951656		982.4	0.00135364		1572.4	0.00785398		2162.4	0.01235384		2752.39	-0.00024386		3342.39	0.00152568		3932.38	0.00842489
392.6	0.03869455		982.6	0.00081664		1572.6	0.00716499		2162.6	0.01125164		2752.59	-0.00074813		3342.59	0.00197034		3932.58	0.00844421
392.8	0.03858452		982.8	0.00044489		1572.8	0.00724098		2162.8	0.01093983		2752.79	-0.00097432		3342.79	0.00234571		3932.78	0.00911025
393	0.03864833		983	-0.00045485		1573	0.00670823		2163	0.01118921		2752.99	-0.00140276		3342.99	0.00272895		3932.98	0.0095945
393.2	0.03859344		983.2	0.00032741		1573.2	0.00643317		2163.2	0.01075141		2753.19	-0.00066439		3343.19	0.00260903		3933.18	0.00971026
393.4	0.03867567		983.4	0.00083628		1573.4	0.00612125		2163.4	0.01013394		2753.39	-0.00049477		3343.39	0.00286683		3933.38	0.01002201
393.6	0.03784621		983.6	0.00168628		1573.6	0.00605282		2163.6	0.01051222		2753.59	-0.00088068		3343.59	0.00386317		3933.58	0.01053196
393.8	0.03774756		983.8	0.00284829		1573.8	0.00612973		2163.8	0.01082526		2753.79	-0.00116112		3343.79	0.0045632		3933.78	0.01018087
394	0.03771071		984	0.00262394		1574	0.00578723		2164	0.01069063		2753.99	-0.00117107		3343.99	0.00490441		3933.98	0.01064046
394.2	0.03717232		984.2	0.00373822		1574.2	0.00662797		2164.2	0.0107987		2754.19	-0.00155133		3344.19	0.00559806		3934.18	0.0119324
394.4	0.03827023		984.4	0.00356842		1574.4	0.00634875		2164.4	0.01198892		2754.39	-0.00044919		3344.39	0.00529822		3934.38	0.01169219
394.6	0.0385108		984.6	0.00305677		1574.6	0.00511311		2164.6	0.012661		2754.59	-0.0008213		3344.59	0.00507433		3934.58	0.01144377
394.8	0.03795296		984.8	0.00302522		1574.8	0.00534705		2164.8	0.01277128		2754.79	-0.00065558		3344.79	0.00482755		3934.78	0.01060608
395	0.0380364		985	0.0034171		1575	0.00548922		2165	0.01275678		2754.99	-0.00017871		3344.99	0.00452493		3934.98	0.01050919
395.2	0.03854408		985.2	0.00299949		1575.2	0.00648604		2165.2	0.01254233		2755.19	-0.00121538		3345.19	0.00478007		3935.18	0.0112266
395.4	0.03806415		985.4	0.00330976		1575.4	0.00691202		2165.4	0.01264646		2755.39	-0.00087425		3345.39	0.00454363		3935.38	0.01188814
395.6	0.03798797		985.6	0.00315851		1575.6	0.00645662		2165.6	0.01324115		2755.59	-0.0013201		3345.59	0.00342338		3935.58	0.01075577
395.8	0.03782359		985.8	0.00378411		1575.8	0.00633774		2165.8	0.01289381		2755.79	-0.00139271		3345.79	0.00330843		3935.78	0.01023743
396	0.03802309		986	0.0027367		1576	0.00669379		2166	0.01379679		2755.99	-0.0013287		3345.99	0.00284626		3935.98	0.00986026
396.2	0.03911077		986.2	0.00199281		1576.2	0.0065913		2166.2	0.01330082		2756.19	-0.00108669		3346.19	0.00275969		3936.18	0.0100511
396.4	0.03925525		986.4	0.00200035		1576.4	0.00617626		2166.4	0.01315303		2756.39	-0.00087748		3346.39	0.00290315		3936.38	0.00954622
396.6	0.03962436		986.6	0.00153415		1576.6	0.00562756		2166.6	0.0128396		2756.59	-0.00110538		3346.59	0.00283965		3936.58	0.00967719
396.8	0.04065436		986.8	0.00099897		1576.8	0.00509873		2166.8	0.01265656		2756.79	-0.00098473		3346.79	0.00322795		3936.78	0.01031135
397	0.040934		987	0.00097116		1577	0.00449508		2167	0.01286163		2756.99	-0.0006359		3346.99	0.00356057		3936.98	0.01114454
397.2	0.04161469		987.2	0.00170519		1577.2	0.00448091		2167.2	0.01267544		2757.19	-0.00076799		3347.19	0.00348561		3937.18	0.01189159
397.4	0.04221373		987.4	0.00141006		1577.4	0.00472655		2167.4	0.01364948		2757.39	-0.00139146		3347.39	0.0040969		3937.38	0.01255617
397.6	0.04155343		987.6	0.00207937		1577.6	0.00539481		2167.6	0.01400932		2757.59	-0.00123685		3347.59	0.00517502		3937.58	0.01259708
397.8	0.0417919		987.8	0.00203977		1577.8	0.0055681		2167.8	0.01416498		2757.79	-0.00091057		3347.79	0.00574723		3937.78	0.01217698
398	0.04176221		988	0.00171546		1578	0.00621315		2168	0.01391117		2757.99	-0.00030632		3347.99	0.00594965		3937.98	0.0122002
398.2	0.04225521		988.2	0.00259072		1578.2	0.00632401		2168.2	0.01405514		2758.19	0.00056025		3348.19	0.00640275		3938.18	0.01292397
398.4	0.04340354		988.4	0.00214668		1578.4	0.00598479		2168.4	0.0140168		2758.39	0.00110093		3348.39	0.00614462		3938.38	0.01265059
398.6	0.04279045		988.6	0.00256104		1578.6	0.00505889		2168.6	0.01334635		2758.59	0.00086372		3348.59	0.00669896		3938.58	0.01263435
398.8	0.04309882		988.8	0.00347924		1578.8	0.00563789		2168.8	0.01303907		2758.79	0.00132744		3348.79	0.00742114		3938.78	0.01285493
399	0.04277171		989	0.00303113		1579	0.00691164		2169	0.01230441		2758.99	0.00145309		3348.99	0.00725644		3938.98	0.01343874
399.2	0.04255436		989.2	0.00257842		1579.2	0.00646328		2169.2	0.01167228		2759.19	0.00030612		3349.19	0.00674104		3939.18	0.01410795
399.4	0.04225319		989.4	0.00270217		1579.4	0.00618842		2169.4	0.01189097		2759.39	0.00019921		3349.39	0.0056928		3939.38	0.01345289
399.6	0.04257008		989.6	0.00266493		1579.6	0.00637524		2169.6	0.01236952		2759.59	0.00043754		3349.59	0.00518813		3939.58	0.01267543
399.8	0.04322227		989.8	0.00356101		1579.8	0.00641454		2169.8	0.01162409		2759.79	0.00072848		3349.79	0.00472798		3939.78	0.01267935
400	0.04369224		990	0.00373305		1580	0.00692869		2170	0.01175109		2759.99	0.00079134		3349.99	0.00481222		3939.98	0.01236461
400.2	0.04374212		990.2	0.00462088		1580.2	0.00664501		2170.2	0.01133635		2760.19	-0.00018754		3350.19	0.00511487		3940.18	0.01084618
400.4	0.04312248		990.4	0.00504752		1580.4	0.00636708		2170.4	0.0110051		2760.39	0.00052368		3350.39	0.00577443		3940.38	0.01035649
400.6	0.04335779		990.6	0.00458723		1580.6	0.00628594		2170.6	0.01111719		2760.59	0.00082143		3350.59	0.00512798		3940.58	0.00987786
400.8	0.04338294		990.8	0.00467791		1580.8	0.00631285		2170.8	0.01158747		2760.79	0.00103161		3350.79	0.00531697		3940.78	0.01026497
401	0.04313257		991	0.00482397		1581	0.00610636		2171	0.01254189		2760.99	0.00103721		3350.99	0.00489652		3940.98	0.0100107
401.2	0.04285874		991.2	0.00483701		1581.2	0.00616541		2171.2	0.01340081		2761.19	0.0003423		3351.19	0.00460283		3941.18	0.00933134
401.4	0.04273428		991.4	0.00514143		1581.4	0.00633087		2171.4	0.01446949		2761.39	0.00120875		3351.39	0.00475922		3941.38	0.00922168
401.6	0.04200641		991.6	0.00596449		1581.6	0.00626512		2171.6	0.01551131		2761.59	0.00077889		3351.59	0.0053511		3941.58	0.00841599
401.8	0.04183822		991.8	0.00518548		1581.8	0.00733025		2171.8	0.01621066		2761.79	0.00072664		3351.79	0.00522986		3941.78	0.00765188
402	0.04179692		992	0.0049918		1582	0.00720804		2172	0.01635005		2761.99	0.00070781		3351.99	0.00475753		3941.98	0.00778497
402.2	0.0415378		992.2	0.00424354		1582.2	0.00653155		2172.2	0.01669037		2762.19	0.00026946		3352.19	0.00508024		3942.18	0.00816262
402.4	0.04215945		992.4	0.00391298		1582.4	0.00578892		2172.4	0.01679658		2762.39	0.00006165		3352.39	0.00468768		3942.38	0.00770176
402.6	0.04158252		992.6	0.00341745		1582.6	0.00588063		2172.6	0.01660154		2762.59	0.00004269		3352.59	0.00491901		3942.58	0.00736874
402.8	0.04134292		992.8	0.00308403		1582.8	0.00639294		2172.8	0.01604983		2762.79	0.00035367		3352.79	0.00481539		3942.78	0.00860885
403	0.04048787		993	0.00201367		1583	0.00685327		2173	0.01562155		2762.99	-0.00034566		3352.99	0.00427998		3942.98	0.00888724
403.2	0.04058371		993.2	0.00164901		1583.2	0.00680093		2173.2	0.01517769		2763.19	-0.00114576		3353.19	0.0046182		3943.18	0.00946607
403.4	0.04146094		993.4	0.0016412		1583.4	0.00689453		2173.4	0.01557942		2763.39	-0.00066226		3353.39	0.00506905		3943.38	0.00999873
403.6	0.04119118		993.6	0.00184246		1583.6	0.00703366		2173.6	0.01576859		2763.59	0.00008287		3353.59	0.00582981		3943.58	0.00964156
403.8	0.04102415		993.8	0.00219837		1583.8	0.00696997		2173.8	0.01471463		2763.79	-0.00034064		3353.79	0.00524624		3943.78	0.01060843
404	0.04110624		994	0.00174256		1584	0.00730466		2174	0.01453542		2763.99	-0.00018737		3353.99	0.00432261		3943.98	0.01040163
404.2	0.0413925		994.2	0.00202172		1584.2	0.00764302		2174.2	0.01429246		2764.19	-0.00078232		3354.19	0.00419613		3944.18	0.01000404
404.4	0.04156529		994.4	0.00135538		1584.4	0.00803079		2174.4	0.01405533		2764.39	0.00028111		3354.39	0.0042362		3944.38	0.0105453
404.6	0.04201342		994.6	0.00146824		1584.6	0.00806691		2174.6	0.01483825		2764.59	0.00148322		3354.59	0.00347982		3944.58	0.01014017
404.8	0.04196562		994.8	0.00239008		1584.8	0.00756853		2174.8	0.01497419		2764.79	0.00228444		3354.79	0.00371775		3944.78	0.01064307
405	0.04292759		995	0.00290395		1585	0.00715279		2175	0.01468048		2764.99	0.00215091		3354.99	0.00277375		3944.98	0.01062485
405.2	0.04423985		995.2	0.00378648		1585.2	0.00735887		2175.2	0.01472109		2765.19	0.00163719		3355.19	0.00224655		3945.18	0.01101616
405.4	0.04455623		995.4	0.00450988		1585.4	0.00763295		2175.4	0.01508511		2765.39	0.00117104		3355.39	0.0027819		3945.38	0.01083916
405.6	0.04461151		995.6	0.00419721		1585.6	0.00808398		2175.6	0.01535362		2765.59	-0.00010893		3355.59	0.0021086		3945.58	0.01016806
405.8	0.0450145		995.8	0.00386041		1585.8	0.00871489		2175.8	0.01488317		2765.79	-0.00038351		3355.79	0.00150909		3945.78	0.00959903
406	0.04499534		996	0.00356463		1586	0.00828587		2176	0.01417896		2765.99	-0.00079802		3355.99	0.00164343		3945.98	0.00992801
406.2	0.04486077		996.2	0.00345148		1586.2	0.0077241		2176.2	0.01382943		2766.19	-0.00108411		3356.19	0.00178606		3946.18	0.00998985
406.4	0.04528473		996.4	0.00377699		1586.4	0.00782866		2176.4	0.01362911		2766.39	-0.0010219		3356.39	0.00175339		3946.38	0.00953634
406.6	0.04522615		996.6	0.00378211		1586.6	0.00827331		2176.6	0.0129055		2766.59	-0.00081682		3356.59	0.00136815		3946.58	0.00981493
406.8	0.04521707		996.8	0.00346444		1586.8	0.00817543		2176.8	0.01251119		2766.79	-0.00053227		3356.79	0.00095825		3946.78	0.01036791
407	0.04519459		997	0.00308365		1587	0.00869891		2177	0.01236189		2766.99	-0.00073548		3356.99	0.00161871		3946.98	0.01037165
407.2	0.04575964		997.2	0.00290395		1587.2	0.00794909		2177.2	0.01296056		2767.19	-0.00097554		3357.19	0.00269812		3947.18	0.01065344
407.4	0.04586266		997.4	0.0031073		1587.4	0.00746998		2177.4	0.01361834		2767.39	-0.00068624		3357.39	0.00278079		3947.38	0.01070323
407.6	0.04515293		997.6	0.00334972		1587.6	0.00716807		2177.6	0.01322761		2767.59	-0.00117354		3357.59	0.00313395		3947.58	0.01057515
407.8	0.04508214		997.8	0.00317788		1587.8	0.00724687		2177.8	0.01333026		2767.79	-0.00150346		3357.79	0.00271805		3947.78	0.01139251
408	0.04481963		998	0.00269437		1588	0.00802986		2178	0.01408832		2767.99	-0.00042871		3357.99	0.0035351		3947.98	0.01115842
408.2	0.04345661		998.2	0.00290923		1588.2	0.00754597		2178.2	0.01472942		2768.19	0.000599		3358.19	0.00434615		3948.18	0.01130578
408.4	0.04350754		998.4	0.00320005		1588.4	0.0068681		2178.4	0.01438374		2768.39	0.00109364		3358.39	0.00542181		3948.38	0.01114891
408.6	0.04252945		998.6	0.00359669		1588.6	0.00645864		2178.6	0.01521154		2768.59	0.00223033		3358.59	0.0061986		3948.58	0.01115989
408.8	0.04255097		998.8	0.00361506		1588.8	0.00574		2178.8	0.01518659		2768.79	0.00263243		3358.79	0.00634218		3948.78	0.0114042
409	0.04341493		999	0.0040265		1589	0.00633927		2179	0.01534105		2768.99	0.00150728		3358.99	0.00685118		3948.98	0.01087549
409.2	0.04326611		999.2	0.00383122		1589.2	0.00640326		2179.2	0.01566846		2769.19	0.00080478		3359.19	0.00670465		3949.18	0.01077492
409.4	0.04275833		999.4	0.00350328		1589.4	0.00599355		2179.4	0.01604015		2769.39	0.00123414		3359.39	0.00662949		3949.38	0.01005127
409.6	0.04246575		999.6	0.00354678		1589.6	0.00600667		2179.6	0.015974		2769.59	0.00146866		3359.59	0.00579615		3949.58	0.01023809
409.8	0.04294638		999.8	0.00365024		1589.8	0.00487309		2179.8	0.0153488		2769.79	0.00103576		3359.79	0.0051528		3949.78	0.01005734
410	0.04309185		1000	0.00366293		1590	0.00499478		2180	0.01470196		2769.99	0.00088239		3359.99	0.00451297		3949.98	0.0100466
410.2	0.04340812		1000.2	0.00417143		1590.2	0.00482865		2180.2	0.01474584		2770.19	0.00003734		3360.19	0.00333043		3950.18	0.00975113
410.4	0.04353706		1000.4	0.00352014		1590.4	0.0050601		2180.4	0.01483348		2770.39	-0.00045653		3360.39	0.00293553		3950.38	0.00981792
410.6	0.04381378		1000.6	0.00350103		1590.6	0.0045846		2180.6	0.01404313		2770.59	-0.00049349		3360.59	0.00090408		3950.58	0.01034231
410.8	0.044145		1000.8	0.0034675		1590.8	0.00554112		2180.8	0.01362374		2770.79	-0.00112073		3360.79	0.00010336		3950.78	0.01074371
411	0.04470814		1001	0.00328149		1591	0.0061693		2181	0.01327172		2770.99	-0.00186396		3360.99	0.00056212		3950.98	0.01040898
411.2	0.04507349		1001.2	0.00342749		1591.2	0.0052485		2181.2	0.01338704		2771.19	-0.00180104		3361.19	0.00007132		3951.18	0.01057132
411.4	0.04538151		1001.4	0.00407817		1591.4	0.00612084		2181.4	0.01313063		2771.39	-0.00146093		3361.39	0.000047		3951.38	0.01031284
411.6	0.04491304		1001.6	0.00431794		1591.6	0.00582846		2181.6	0.01336097		2771.59	-0.00134224		3361.59	0.00011659		3951.58	0.01071991
411.8	0.04401775		1001.8	0.00419429		1591.8	0.00645263		2181.8	0.01402402		2771.79	-0.00105102		3361.79	0.00015213		3951.78	0.0118761
412	0.04255409		1002	0.00437885		1592	0.00677359		2182	0.01387736		2771.99	-0.00081174		3361.99	0.00012501		3951.98	0.0124494
412.2	0.04141285		1002.2	0.00431785		1592.2	0.00636874		2182.2	0.0135996		2772.19	-0.00038187		3362.19	0.00025394		3952.18	0.01251972
412.4	0.04194265		1002.4	0.00426347		1592.4	0.00752627		2182.4	0.01260465		2772.39	-0.00101667		3362.39	0.00101463		3952.38	0.01222236
412.6	0.04064323		1002.6	0.00412143		1592.6	0.00702832		2182.6	0.01286282		2772.59	0.00009129		3362.59	0.00100393		3952.58	0.01189263
412.8	0.04091616		1002.8	0.00416553		1592.8	0.00717473		2182.8	0.0138618		2772.79	0.00039431		3362.79	0.00183674		3952.78	0.01121687
413	0.04082712		1003	0.00428096		1593	0.00828651		2183	0.01485407		2772.99	0.00134504		3362.99	0.00273528		3952.98	0.01188667
413.2	0.04050339		1003.2	0.0035601		1593.2	0.00817683		2183.2	0.01468229		2773.19	0.00247591		3363.19	0.00208343		3953.18	0.01177462
413.4	0.04085889		1003.4	0.00305511		1593.4	0.00784187		2183.4	0.01470656		2773.39	0.00316773		3363.39	0.00264611		3953.38	0.01169844
413.6	0.04004882		1003.6	0.00280561		1593.6	0.00742506		2183.6	0.01480089		2773.59	0.00254447		3363.59	0.00358415		3953.58	0.01119238
413.8	0.0408538		1003.8	0.0025076		1593.8	0.00709486		2183.8	0.01481082		2773.79	0.00234499		3363.79	0.00299044		3953.78	0.01120722
414	0.04162242		1004	0.00223337		1594	0.00718749		2184	0.01496382		2773.99	0.00171574		3363.99	0.00335586		3953.98	0.01098196
414.2	0.04244099		1004.2	0.00171409		1594.2	0.00613823		2184.2	0.01575232		2774.19	0.00137496		3364.19	0.00433638		3954.18	0.01088032
414.4	0.04316118		1004.4	0.00165856		1594.4	0.00554949		2184.4	0.01620106		2774.39	0.00167813		3364.39	0.00435219		3954.38	0.01191565
414.6	0.04456792		1004.6	0.00208945		1594.6	0.00461969		2184.6	0.01596286		2774.59	0.00107325		3364.59	0.00385212		3954.58	0.01271039
414.8	0.04591107		1004.8	0.00252365		1594.8	0.00517431		2184.8	0.01499431		2774.79	0.00067597		3364.79	0.00478035		3954.78	0.01274982
415	0.04580721		1005	0.00287606		1595	0.00499058		2185	0.01568357		2774.99	0.00131737		3364.99	0.00575617		3954.98	0.01206924
415.2	0.04618955		1005.2	0.00291246		1595.2	0.00420697		2185.2	0.01594547		2775.19	0.00239312		3365.19	0.00579876		3955.18	0.01321493
415.4	0.04657757		1005.4	0.00298603		1595.4	0.00544491		2185.4	0.016642		2775.39	0.00221838		3365.39	0.00578815		3955.38	0.01311606
415.6	0.04582298		1005.6	0.00314025		1595.6	0.00483855		2185.6	0.01779098		2775.59	0.00138592		3365.59	0.00510078		3955.58	0.01305157
415.8	0.04466529		1005.8	0.00333239		1595.8	0.00507504		2185.8	0.0175749		2775.79	0.00003483		3365.79	0.00455146		3955.78	0.01386774
416	0.04400763		1006	0.00435991		1596	0.00467655		2186	0.01718662		2775.99	-0.00029339		3365.99	0.00397787		3955.98	0.01358073
416.2	0.04414891		1006.2	0.00392263		1596.2	0.00453904		2186.2	0.01668382		2776.19	-0.00030073		3366.19	0.00407274		3956.18	0.01285149
416.4	0.04387251		1006.4	0.00412104		1596.4	0.00468312		2186.4	0.01625678		2776.39	-0.00058998		3366.39	0.00387291		3956.38	0.01300567
416.6	0.04356455		1006.6	0.00461456		1596.6	0.00350301		2186.6	0.01594619		2776.59	0.00018884		3366.59	0.0038705		3956.58	0.01254282
416.8	0.04408188		1006.8	0.00488726		1596.8	0.00450134		2186.8	0.01641249		2776.79	0.00034469		3366.79	0.0037808		3956.78	0.01266252
417	0.04352075		1007	0.00442408		1597	0.00572147		2187	0.01515829		2776.99	0.00129113		3366.99	0.00377966		3956.98	0.01270428
417.2	0.04381971		1007.2	0.00374192		1597.2	0.00569919		2187.2	0.01438311		2777.19	0.00036267		3367.19	0.00296884		3957.18	0.01168299
417.4	0.04417339		1007.4	0.00358036		1597.4	0.005712		2187.4	0.01385392		2777.39	-0.00099638		3367.39	0.00265136		3957.38	0.01186902
417.6	0.04356227		1007.6	0.00291799		1597.6	0.00584384		2187.6	0.01454263		2777.59	-0.000493		3367.59	0.00246874		3957.58	0.01161528
417.8	0.04493736		1007.8	0.00270713		1597.8	0.00636481		2187.8	0.0139444		2777.79	-0.00078275		3367.79	0.00259787		3957.78	0.01145567
418	0.04508414		1008	0.00287101		1598	0.0061994		2188	0.01317419		2777.99	-0.00101765		3367.99	0.00334486		3957.98	0.0110499
418.2	0.04615139		1008.2	0.00274714		1598.2	0.00610575		2188.2	0.01290504		2778.19	0.00048165		3368.19	0.00393984		3958.18	0.01101971
418.4	0.04640733		1008.4	0.00255559		1598.4	0.00609175		2188.4	0.012172		2778.39	0.00095158		3368.39	0.00363968		3958.38	0.01215691
418.6	0.04680723		1008.6	0.00292373		1598.6	0.00672917		2188.6	0.0109897		2778.59	0.00149729		3368.59	0.00396406		3958.58	0.01287413
418.8	0.0465105		1008.8	0.00336935		1598.8	0.00703284		2188.8	0.01048368		2778.79	0.0027353		3368.79	0.00500689		3958.78	0.01262186
419	0.04636561		1009	0.00300525		1599	0.00785739		2189	0.0118526		2778.99	0.00396123		3368.99	0.00519424		3958.98	0.01262892
419.2	0.04711218		1009.2	0.00217318		1599.2	0.00849823		2189.2	0.0122056		2779.19	0.00428858		3369.19	0.00568983		3959.18	0.01291153
419.4	0.04689501		1009.4	0.0019519		1599.4	0.00983439		2189.4	0.01326007		2779.39	0.00422627		3369.39	0.00542274		3959.38	0.01258893
419.6	0.04707604		1009.6	0.00224983		1599.6	0.00871628		2189.6	0.01434286		2779.59	0.00491769		3369.59	0.00640405		3959.58	0.01272698
419.8	0.04594388		1009.8	0.00213117		1599.8	0.00859464		2189.8	0.01436457		2779.79	0.0044671		3369.79	0.00626825		3959.78	0.01330082
420	0.04598955		1010	0.00239238		1600	0.00833238		2190	0.014638		2779.99	0.00446342		3369.99	0.00693647		3959.98	0.01336365
420.2	0.04579214		1010.2	0.0019543		1600.2	0.00791549		2190.2	0.01460972		2780.19	0.00410858		3370.19	0.007219		3960.18	0.01322413
420.4	0.04614627		1010.4	0.00239906		1600.4	0.00683256		2190.4	0.01477864		2780.39	0.0039285		3370.39	0.0073575		3960.38	0.01334628
420.6	0.04657899		1010.6	0.00308946		1600.6	0.00630598		2190.6	0.01469396		2780.59	0.00406344		3370.59	0.00610529		3960.58	0.01311156
420.8	0.04686709		1010.8	0.00340507		1600.8	0.00640987		2190.8	0.01543121		2780.79	0.00362839		3370.79	0.00524378		3960.78	0.01270114
421	0.0463487		1011	0.00332279		1601	0.00640198		2191	0.01591062		2780.99	0.0034439		3370.99	0.0048273		3960.98	0.01244115
421.2	0.04730586		1011.2	0.00305125		1601.2	0.00628016		2191.2	0.01775473		2781.19	0.0016052		3371.19	0.00451271		3961.18	0.01215668
421.4	0.04708272		1011.4	0.00330139		1601.4	0.00623781		2191.4	0.01782281		2781.39	0.00093387		3371.39	0.00316515		3961.38	0.01186573
421.6	0.04661203		1011.6	0.00316854		1601.6	0.00633852		2191.6	0.01765967		2781.59	0.00093709		3371.59	0.00363857		3961.58	0.01163288
421.8	0.04724267		1011.8	0.00403241		1601.8	0.00606223		2191.8	0.01711885		2781.79	-0.00056572		3371.79	0.00388654		3961.78	0.01062855
422	0.04694272		1012	0.0047298		1602	0.00642593		2192	0.0162711		2781.99	-0.00063138		3371.99	0.00337357		3961.98	0.01125455
422.2	0.04777187		1012.2	0.00427123		1602.2	0.00658229		2192.2	0.01609774		2782.19	-0.00085984		3372.19	0.00291827		3962.18	0.01171893
422.4	0.04783357		1012.4	0.00435007		1602.4	0.00636913		2192.4	0.01549345		2782.39	-0.00026491		3372.39	0.00232896		3962.38	0.01216642
422.6	0.04820704		1012.6	0.00445143		1602.6	0.0065191		2192.6	0.01548995		2782.59	0.00023511		3372.59	0.00222764		3962.58	0.01246005
422.8	0.04828858		1012.8	0.00469864		1602.8	0.00677329		2192.8	0.01591817		2782.79	0.00030895		3372.79	0.00304115		3962.78	0.01224327
423	0.04857638		1013	0.00448278		1603	0.00768976		2193	0.01602559		2782.99	0.00036478		3372.99	0.00343767		3962.98	0.01300885
423.2	0.04816061		1013.2	0.00464372		1603.2	0.00830696		2193.2	0.01578779		2783.19	0.00066789		3373.19	0.00454404		3963.18	0.01366227
423.4	0.04776964		1013.4	0.00444869		1603.4	0.00901958		2193.4	0.01561182		2783.39	0.00191416		3373.39	0.00515175		3963.38	0.01409265
423.6	0.04811512		1013.6	0.00490574		1603.6	0.00846705		2193.6	0.01513772		2783.59	0.00321438		3373.59	0.00587397		3963.58	0.01450454
423.8	0.04712385		1013.8	0.00462728		1603.8	0.0082435		2193.8	0.01500571		2783.79	0.00260244		3373.79	0.00608767		3963.78	0.01430737
424	0.04749271		1014	0.00451847		1604	0.00861638		2194	0.01394869		2783.99	0.00246098		3373.99	0.00651773		3963.98	0.01445553
424.2	0.04783418		1014.2	0.00442394		1604.2	0.00748758		2194.2	0.01353229		2784.19	0.00257259		3374.19	0.0065339		3964.18	0.01349214
424.4	0.04884991		1014.4	0.0043835		1604.4	0.00607365		2194.4	0.01336505		2784.39	0.00294589		3374.39	0.00606498		3964.38	0.01291419
424.6	0.04841629		1014.6	0.00412015		1604.6	0.00633957		2194.6	0.01289987		2784.59	0.00307206		3374.59	0.00529992		3964.58	0.01339397
424.8	0.04823705		1014.8	0.00439473		1604.8	0.00652258		2194.8	0.01273371		2784.79	0.003294		3374.79	0.00536833		3964.78	0.01283906
425	0.04825161		1015	0.00410776		1605	0.00623629		2195	0.01274317		2784.99	0.00276005		3374.99	0.00504187		3964.98	0.01244796
425.2	0.04817042		1015.2	0.00359735		1605.2	0.006562		2195.2	0.0133444		2785.19	0.00213288		3375.19	0.00550317		3965.18	0.01122158
425.4	0.04771735		1015.4	0.00401056		1605.4	0.00609646		2195.4	0.01243636		2785.39	0.00189347		3375.39	0.00452214		3965.38	0.01074302
425.6	0.04719069		1015.6	0.00386125		1605.6	0.00590373		2195.6	0.01249303		2785.59	0.00113321		3375.59	0.00461025		3965.58	0.0109056
425.8	0.04792784		1015.8	0.00470427		1605.8	0.00521853		2195.8	0.01287116		2785.79	-0.00017837		3375.79	0.00383074		3965.78	0.01069558
426	0.04801298		1016	0.00434352		1606	0.00587807		2196	0.01319133		2785.99	-0.00007869		3375.99	0.00328168		3965.98	0.01096063
426.2	0.04863389		1016.2	0.00378012		1606.2	0.00605618		2196.2	0.0136701		2786.19	-0.00089345		3376.19	0.00203528		3966.18	0.01006637
426.4	0.04831648		1016.4	0.00369826		1606.4	0.00600769		2196.4	0.01358451		2786.39	-0.00065592		3376.39	0.00162286		3966.38	0.01044165
426.6	0.0487403		1016.6	0.00381702		1606.6	0.00554796		2196.6	0.01519358		2786.59	-0.00120188		3376.59	0.00182622		3966.58	0.00992288
426.8	0.04885369		1016.8	0.00460071		1606.8	0.00657289		2196.8	0.01599099		2786.79	-0.00065935		3376.79	0.0018144		3966.78	0.00976076
427	0.04847457		1017	0.00428958		1607	0.00677976		2197	0.01552278		2786.99	-0.00025649		3376.99	0.00167427		3966.98	0.01020375
427.2	0.04796355		1017.2	0.00470649		1607.2	0.00708606		2197.2	0.01483429		2787.19	0.00027022		3377.19	0.00209805		3967.18	0.00976145
427.4	0.04804801		1017.4	0.00502515		1607.4	0.00772273		2197.4	0.0145414		2787.39	0.00100267		3377.39	0.00228982		3967.38	0.00943573
427.6	0.04781904		1017.6	0.00606513		1607.6	0.00711384		2197.6	0.01483718		2787.59	0.00136534		3377.59	0.00211694		3967.58	0.00968279
427.8	0.04666395		1017.8	0.00573417		1607.8	0.00693683		2197.8	0.01481108		2787.79	0.00052546		3377.79	0.0020672		3967.78	0.00995793
428	0.04688032		1018	0.00571587		1608	0.00792105		2198	0.01447196		2787.99	-0.00022876		3377.99	0.0017536		3967.98	0.00996916
428.2	0.04693544		1018.2	0.00553425		1608.2	0.00728842		2198.2	0.01457884		2788.19	-0.0001106		3378.19	0.0022111		3968.18	0.0097456
428.4	0.04644692		1018.4	0.00523962		1608.4	0.00742425		2198.4	0.01446378		2788.39	-0.00013159		3378.39	0.0016685		3968.38	0.01015444
428.6	0.04599936		1018.6	0.00576183		1608.6	0.0085529		2198.6	0.01415217		2788.59	-0.00004793		3378.59	0.00255849		3968.58	0.01137776
428.8	0.04522296		1018.8	0.00648679		1608.8	0.00884488		2198.8	0.01417447		2788.79	0.00048746		3378.79	0.00291988		3968.78	0.01136771
429	0.04490153		1019	0.00597706		1609	0.00855569		2199	0.01511111		2788.99	-0.00035594		3378.99	0.00316599		3968.98	0.01175423
429.2	0.04418077		1019.2	0.00565074		1609.2	0.00841143		2199.2	0.01544511		2789.19	-0.00112203		3379.19	0.00386014		3969.18	0.0120924
429.4	0.04374222		1019.4	0.00584248		1609.4	0.00792943		2199.4	0.01514175		2789.39	-0.00152369		3379.39	0.00363536		3969.38	0.01305666
429.6	0.04337748		1019.6	0.00595685		1609.6	0.00789599		2199.6	0.01619704		2789.59	-0.00168421		3379.59	0.00339012		3969.58	0.01369197
429.8	0.04417165		1019.8	0.00632017		1609.8	0.00774884		2199.8	0.01716778		2789.79	-0.00233878		3379.79	0.00395552		3969.78	0.0141789
430	0.04459694		1020	0.00560064		1610	0.00813863		2200	0.01772853		2789.99	-0.00207834		3379.99	0.00403357		3969.98	0.01410005
430.2	0.04476552		1020.2	0.00515846		1610.2	0.00759042		2200.2	0.01762092		2790.19	-0.0028006		3380.19	0.00401039		3970.18	0.01410688
430.4	0.04493817		1020.4	0.00524205		1610.4	0.00742716		2200.4	0.01872407		2790.39	-0.00233345		3380.39	0.00402587		3970.38	0.01529724
430.6	0.04742165		1020.6	0.00533177		1610.6	0.00693196		2200.6	0.01930984		2790.59	-0.00294477		3380.59	0.00486633		3970.58	0.01520175
430.8	0.04843135		1020.8	0.00553258		1610.8	0.00699735		2200.8	0.0181489		2790.79	-0.0022592		3380.79	0.00457888		3970.78	0.01493427
431	0.04868888		1021	0.00486862		1611	0.00728543		2201	0.01681944		2790.99	-0.00209664		3380.99	0.0046748		3970.98	0.01502806
431.2	0.04903735		1021.2	0.00427402		1611.2	0.00666993		2201.2	0.01644018		2791.19	-0.00157004		3381.19	0.00453424		3971.18	0.0142152
431.4	0.0497001		1021.4	0.00467387		1611.4	0.00692066		2201.4	0.01543854		2791.39	-0.00069444		3381.39	0.00505191		3971.38	0.0147403
431.6	0.05053703		1021.6	0.00515303		1611.6	0.00722084		2201.6	0.01576335		2791.59	0.00032017		3381.59	0.00461439		3971.58	0.01449592
431.8	0.04977993		1021.8	0.00432874		1611.8	0.00818768		2201.8	0.01540681		2791.79	0.00022117		3381.79	0.00487178		3971.78	0.01414314
432	0.05125832		1022	0.00370326		1612	0.00857506		2202	0.01537135		2791.99	0.00022068		3381.99	0.00476237		3971.98	0.01345067
432.2	0.05085184		1022.2	0.00291916		1612.2	0.00859045		2202.2	0.01557804		2792.19	0.00112228		3382.19	0.00498517		3972.18	0.01277886
432.4	0.050575		1022.4	0.00311928		1612.4	0.00866139		2202.4	0.01631078		2792.39	0.00153028		3382.39	0.00503766		3972.38	0.01210934
432.6	0.05022934		1022.6	0.00366903		1612.6	0.00942323		2202.6	0.01617092		2792.59	0.00224968		3382.59	0.00560423		3972.58	0.01203734
432.8	0.04996591		1022.8	0.00325741		1612.8	0.00956365		2202.8	0.0167294		2792.79	0.00281931		3382.79	0.00522881		3972.78	0.01142847
433	0.04984244		1023	0.00260032		1613	0.00918568		2203	0.01708027		2792.99	0.00247376		3382.99	0.00502201		3972.98	0.01096585
433.2	0.04893907		1023.2	0.00195917		1613.2	0.00873806		2203.2	0.017138		2793.19	0.00279518		3383.19	0.00503108		3973.18	0.0106266
433.4	0.04828974		1023.4	0.00232889		1613.4	0.00838514		2203.4	0.01738591		2793.39	0.00336441		3383.39	0.00417708		3973.38	0.01149724
433.6	0.04740722		1023.6	0.00265307		1613.6	0.00869507		2203.6	0.01766243		2793.59	0.00303614		3383.59	0.0037691		3973.58	0.01154489
433.8	0.04717346		1023.8	0.00236075		1613.8	0.00813045		2203.8	0.01763352		2793.79	0.00234492		3383.79	0.00408326		3973.78	0.01167585
434	0.04711139		1024	0.00239755		1614	0.00695486		2204	0.01651512		2793.99	0.00180228		3383.99	0.00337637		3973.98	0.01148274
434.2	0.04676331		1024.2	0.00281027		1614.2	0.00648395		2204.2	0.01634602		2794.19	0.00140498		3384.19	0.00270062		3974.18	0.01220094
434.4	0.04782869		1024.4	0.00338035		1614.4	0.00654811		2204.4	0.01652813		2794.39	0.00082884		3384.39	0.00199366		3974.38	0.01325697
434.6	0.04901977		1024.6	0.00352992		1614.6	0.00677897		2204.6	0.01506307		2794.59	-0.00029053		3384.59	0.0022584		3974.58	0.01357528
434.8	0.04792838		1024.8	0.00359863		1614.8	0.00650632		2204.8	0.01473794		2794.79	-0.00018913		3384.79	0.00110065		3974.78	0.0128827
435	0.04773694		1025	0.00289347		1615	0.00650491		2205	0.01349409		2794.99	0.00019311		3384.99	0.001176		3974.98	0.01320135
435.2	0.04780767		1025.2	0.00286896		1615.2	0.00630817		2205.2	0.01322549		2795.19	0.00019533		3385.19	0.0010722		3975.18	0.01298464
435.4	0.04803672		1025.4	0.00380552		1615.4	0.00649645		2205.4	0.01186437		2795.39	0.00034256		3385.39	0.00242455		3975.38	0.01422381
435.6	0.04854904		1025.6	0.00403047		1615.6	0.00678099		2205.6	0.01317982		2795.59	0.00075563		3385.59	0.00241232		3975.58	0.01360803
435.8	0.04745248		1025.8	0.00440897		1615.8	0.00698518		2205.8	0.01276758		2795.79	0.00011015		3385.79	0.00303956		3975.78	0.01362321
436	0.04842217		1026	0.0042731		1616	0.00669147		2206	0.01331524		2795.99	0.00026708		3385.99	0.00272962		3975.98	0.01392601
436.2	0.04720728		1026.2	0.00547542		1616.2	0.00642516		2206.2	0.01383276		2796.19	0.000824		3386.19	0.00354178		3976.18	0.01376062
436.4	0.04781254		1026.4	0.00621845		1616.4	0.00638511		2206.4	0.01353915		2796.39	0.00063639		3386.39	0.0048936		3976.38	0.0134062
436.6	0.04805602		1026.6	0.00608159		1616.6	0.00751893		2206.6	0.01393626		2796.59	0.00159501		3386.59	0.00499561		3976.58	0.01341387
436.8	0.04864832		1026.8	0.00610523		1616.8	0.00743514		2206.8	0.01455908		2796.79	0.0017702		3386.79	0.00535451		3976.78	0.01450602
437	0.04924458		1027	0.00578773		1617	0.00689236		2207	0.01362147		2796.99	0.0017638		3386.99	0.00638137		3976.98	0.01440668
437.2	0.04910881		1027.2	0.00532109		1617.2	0.00734603		2207.2	0.01399724		2797.19	0.0015564		3387.19	0.00650584		3977.18	0.01437176
437.4	0.04921091		1027.4	0.00549749		1617.4	0.00774721		2207.4	0.01351995		2797.39	0.00151646		3387.39	0.00641984		3977.38	0.01483936
437.6	0.04865305		1027.6	0.00552392		1617.6	0.00830789		2207.6	0.0132867		2797.59	0.00112915		3387.59	0.00657465		3977.58	0.01383523
437.8	0.04901634		1027.8	0.00539667		1617.8	0.00778934		2207.8	0.01296419		2797.79	0.00030352		3387.79	0.00651244		3977.78	0.01340535
438	0.04889386		1028	0.00551939		1618	0.00781212		2208	0.01280305		2797.99	0.00022436		3387.99	0.00655731		3977.98	0.01314882
438.2	0.04869154		1028.2	0.00610125		1618.2	0.00792976		2208.2	0.0129062		2798.19	-0.00022571		3388.19	0.00630552		3978.18	0.01264261
438.4	0.04879203		1028.4	0.00583437		1618.4	0.00832728		2208.4	0.01273013		2798.39	-0.00062592		3388.39	0.00566094		3978.38	0.01176623
438.6	0.04851089		1028.6	0.00569978		1618.6	0.00898493		2208.6	0.01318777		2798.59	-0.00154996		3388.59	0.00554878		3978.58	0.01078136
438.8	0.04802563		1028.8	0.00534061		1618.8	0.00885397		2208.8	0.0143422		2798.79	-0.00187878		3388.79	0.00460589		3978.78	0.01053537
439	0.04869527		1029	0.00584623		1619	0.00844398		2209	0.01399692		2798.99	-0.00083824		3388.99	0.00455829		3978.98	0.00984918
439.2	0.04810024		1029.2	0.00612729		1619.2	0.00891099		2209.2	0.0148244		2799.19	-0.00047405		3389.19	0.00450115		3979.18	0.00995329
439.4	0.04848196		1029.4	0.00579482		1619.4	0.00884022		2209.4	0.01462075		2799.39	-0.00058315		3389.39	0.00504122		3979.38	0.01074064
439.6	0.04881797		1029.6	0.00637812		1619.6	0.00798208		2209.6	0.01581911		2799.59	-0.00045831		3389.59	0.00469457		3979.58	0.01028949
439.8	0.04851986		1029.8	0.0064756		1619.8	0.00765745		2209.8	0.01579257		2799.79	-0.00082361		3389.79	0.00463092		3979.78	0.01083758
440	0.04904061		1030	0.00657962		1620	0.00710694		2210	0.01597495		2799.99	-0.00066443		3389.99	0.00440768		3979.98	0.01168391
440.2	0.04888606		1030.2	0.00694072		1620.2	0.00611123		2210.2	0.01577376		2800.19	-0.00147095		3390.19	0.00512139		3980.18	0.0121736
440.4	0.04949035		1030.4	0.00583665		1620.4	0.00576529		2210.4	0.0155537		2800.39	-0.00145002		3390.39	0.00509987		3980.38	0.01309402
440.6	0.04922963		1030.6	0.00518303		1620.6	0.00572422		2210.6	0.01622839		2800.59	-0.00042797		3390.59	0.00536505		3980.58	0.01472134
440.8	0.04941315		1030.8	0.00484754		1620.8	0.00490268		2210.8	0.01623113		2800.79	-0.00075161		3390.79	0.00514456		3980.78	0.01505946
441	0.0501272		1031	0.00363844		1621	0.00464622		2211	0.01556013		2800.99	-0.00068305		3390.99	0.00576802		3980.98	0.01443882
441.2	0.04965298		1031.2	0.00291584		1621.2	0.00485045		2211.2	0.01626399		2801.19	-0.00085529		3391.19	0.00535459		3981.18	0.01411625
441.4	0.04910018		1031.4	0.00237774		1621.4	0.00516325		2211.4	0.01615177		2801.39	-0.00053243		3391.39	0.00471571		3981.38	0.01463593
441.6	0.04871021		1031.6	0.00229268		1621.6	0.00534103		2211.6	0.01606854		2801.59	-0.00069625		3391.59	0.00401404		3981.58	0.01482312
441.8	0.04816119		1031.8	0.00222883		1621.8	0.00532974		2211.8	0.01562043		2801.79	-0.00040493		3391.79	0.00400704		3981.78	0.01442395
442	0.04733327		1032	0.00226178		1622	0.00588605		2212	0.01567766		2801.99	-0.00013042		3391.99	0.00450353		3981.98	0.0140557
442.2	0.04786344		1032.2	0.00260502		1622.2	0.0061777		2212.2	0.0165081		2802.19	-0.00003319		3392.19	0.00461227		3982.18	0.01319796
442.4	0.04851642		1032.4	0.00317906		1622.4	0.00660756		2212.4	0.01693726		2802.39	0.00046064		3392.39	0.00380306		3982.38	0.0124676
442.6	0.0486036		1032.6	0.00310576		1622.6	0.00731632		2212.6	0.0176374		2802.59	0.00101319		3392.59	0.00378095		3982.58	0.01243229
442.8	0.04794198		1032.8	0.00302781		1622.8	0.00743635		2212.8	0.01744631		2802.79	0.0020801		3392.79	0.00330699		3982.78	0.0123986
443	0.04854565		1033	0.00398366		1623	0.00773607		2213	0.01742299		2802.99	0.00259061		3392.99	0.00334936		3982.98	0.01130617
443.2	0.0483121		1033.2	0.00368275		1623.2	0.00852626		2213.2	0.01756223		2803.19	0.00229004		3393.19	0.00350641		3983.18	0.01177779
443.4	0.04975775		1033.4	0.00420517		1623.4	0.00827858		2213.4	0.01749574		2803.39	0.00179456		3393.39	0.00436915		3983.38	0.01202994
443.6	0.05027059		1033.6	0.00592038		1623.6	0.0078127		2213.6	0.01778796		2803.59	0.00194035		3393.59	0.00487268		3983.58	0.01187048
443.8	0.05067313		1033.8	0.00606914		1623.8	0.00772152		2213.8	0.01722031		2803.79	0.00122266		3393.79	0.00518312		3983.78	0.0121111
444	0.05118142		1034	0.00651796		1624	0.00787905		2214	0.01659802		2803.99	0.00077303		3393.99	0.00513868		3983.98	0.01243146
444.2	0.05084947		1034.2	0.00624913		1624.2	0.006994		2214.2	0.01660001		2804.19	0.00043221		3394.19	0.00529255		3984.18	0.01289823
444.4	0.05060662		1034.4	0.0063071		1624.4	0.00658021		2214.4	0.01565364		2804.39	0.00099126		3394.39	0.00505615		3984.38	0.01339375
444.6	0.04995894		1034.6	0.00613762		1624.6	0.00648433		2214.6	0.01532506		2804.59	0.00031121		3394.59	0.00523639		3984.58	0.0139855
444.8	0.04974955		1034.8	0.00572938		1624.8	0.00697445		2214.8	0.01520381		2804.79	-0.00052338		3394.79	0.00401636		3984.78	0.01307703
445	0.04975257		1035	0.00425295		1625	0.00731281		2215	0.01460474		2804.99	-0.00116905		3394.99	0.00422051		3984.98	0.01326104
445.2	0.04899052		1035.2	0.00346189		1625.2	0.00790595		2215.2	0.01475722		2805.19	-0.00159752		3395.19	0.00344072		3985.18	0.01303638
445.4	0.04845782		1035.4	0.00341851		1625.4	0.00824948		2215.4	0.01489647		2805.39	-0.00099089		3395.39	0.00275642		3985.38	0.01410378
445.6	0.0479559		1035.6	0.00324871		1625.6	0.00871151		2215.6	0.01462232		2805.59	-0.00061545		3395.59	0.00252232		3985.58	0.01386418
445.8	0.04792847		1035.8	0.00256176		1625.8	0.0091425		2215.8	0.01411548		2805.79	-0.00025876		3395.79	0.00276772		3985.78	0.01331828
446	0.04836599		1036	0.00185836		1626	0.00955092		2216	0.01412494		2805.99	-0.00003815		3395.99	0.00237005		3985.98	0.01430159
446.2	0.04904054		1036.2	0.001857		1626.2	0.00926526		2216.2	0.015211		2806.19	0.00104089		3396.19	0.00199438		3986.18	0.01460953
446.4	0.04896703		1036.4	0.00213343		1626.4	0.00929047		2216.4	0.015094		2806.39	0.001283		3396.39	0.00152666		3986.38	0.01369619
446.6	0.04881716		1036.6	0.00059679		1626.6	0.00943829		2216.6	0.01528684		2806.59	0.00223497		3396.59	0.0016666		3986.58	0.01332871
446.8	0.04898276		1036.8	0.00059842		1626.8	0.00962841		2216.8	0.01571255		2806.79	0.00206063		3396.79	0.00146719		3986.78	0.01231725
447	0.05000906		1037	0.00156781		1627	0.01004986		2217	0.01637637		2806.99	0.00187953		3396.99	0.00226979		3986.98	0.01159097
447.2	0.04982702		1037.2	0.00184989		1627.2	0.00974895		2217.2	0.01570026		2807.19	0.00237326		3397.19	0.00316793		3987.18	0.01148321
447.4	0.05038343		1037.4	0.00273724		1627.4	0.00933915		2217.4	0.01598983		2807.39	0.00292238		3397.39	0.00446038		3987.38	0.01140005
447.6	0.05002574		1037.6	0.00328842		1627.6	0.00915117		2217.6	0.01572621		2807.59	0.00317274		3397.59	0.00476805		3987.58	0.01113447
447.8	0.05038818		1037.8	0.00293657		1627.8	0.00800564		2217.8	0.01546999		2807.79	0.00269121		3397.79	0.00491707		3987.78	0.01158338
448	0.04998965		1038	0.00339309		1628	0.00791745		2218	0.01560708		2807.99	0.00276325		3397.99	0.00451984		3987.98	0.0112905
448.2	0.04900943		1038.2	0.00391211		1628.2	0.00737994		2218.2	0.01525994		2808.19	0.00216395		3398.19	0.00423245		3988.18	0.01184252
448.4	0.04874095		1038.4	0.00397728		1628.4	0.00637191		2218.4	0.0149103		2808.39	0.00132536		3398.39	0.00425871		3988.38	0.01216107
448.6	0.04793808		1038.6	0.00341683		1628.6	0.00655115		2218.6	0.01560474		2808.59	0.0000109		3398.59	0.00282161		3988.58	0.01260676
448.8	0.04770646		1038.8	0.00292888		1628.8	0.0068192		2218.8	0.01597962		2808.79	-0.00059497		3398.79	0.00290501		3988.78	0.01198107
449	0.047829		1039	0.00282142		1629	0.00735762		2219	0.01638723		2808.99	-0.00071922		3398.99	0.00270408		3988.98	0.01173863
449.2	0.04790453		1039.2	0.00302676		1629.2	0.00745144		2219.2	0.01625717		2809.19	-0.00111285		3399.19	0.00257535		3989.18	0.01218979
449.4	0.04815354		1039.4	0.00335399		1629.4	0.00752902		2219.4	0.01564627		2809.39	-0.00106275		3399.39	0.00247164		3989.38	0.01281326
449.6	0.04911539		1039.6	0.00306888		1629.6	0.00819362		2219.6	0.01489851		2809.59	-0.00158037		3399.59	0.00235607		3989.58	0.01273391
449.8	0.05084999		1039.8	0.00329738		1629.8	0.0083267		2219.8	0.0140487		2809.79	-0.00109119		3399.79	0.00241863		3989.78	0.01398293
450	0.05175378		1040	0.00381195		1630	0.00927546		2220	0.01430384		2809.99	-0.00077107		3399.99	0.00227522		3989.98	0.01458221
450.2	0.05164834		1040.2	0.00444619		1630.2	0.0090135		2220.2	0.01512997		2810.19	-0.0008389		3400.19	0.00246174		3990.18	0.01374553
450.4	0.05250099		1040.4	0.00478425		1630.4	0.00932154		2220.4	0.01541407		2810.39	-0.00033203		3400.39	0.00360265		3990.38	0.01280324
450.6	0.05338883		1040.6	0.00433098		1630.6	0.00904012		2220.6	0.01556711		2810.59	0.00021496		3400.59	0.00347475		3990.58	0.01265265
450.8	0.05305309		1040.8	0.00522164		1630.8	0.00937043		2220.8	0.01569268		2810.79	0.00061319		3400.79	0.00280944		3990.78	0.01245592
451	0.05321902		1041	0.00638724		1631	0.00925478		2221	0.01615016		2810.99	0.00134196		3400.99	0.0036467		3990.98	0.01259666
451.2	0.05294619		1041.2	0.00619988		1631.2	0.00931108		2221.2	0.01498503		2811.19	0.00150643		3401.19	0.0038677		3991.18	0.01225976
451.4	0.05313447		1041.4	0.00667513		1631.4	0.00902042		2221.4	0.01543756		2811.39	0.00145943		3401.39	0.00427444		3991.38	0.01208945
451.6	0.05278491		1041.6	0.00703218		1631.6	0.00839802		2221.6	0.01467331		2811.59	0.0016434		3401.59	0.00424378		3991.58	0.01196187
451.8	0.05248829		1041.8	0.00720744		1631.8	0.00757353		2221.8	0.01410189		2811.79	0.00154278		3401.79	0.00393398		3991.78	0.0114876
452	0.0514108		1042	0.0075677		1632	0.00756122		2222	0.01440633		2811.99	0.00121122		3401.99	0.00304999		3991.98	0.0114497
452.2	0.0507074		1042.2	0.00762203		1632.2	0.0067175		2222.2	0.01429595		2812.19	0.00061106		3402.19	0.00238576		3992.18	0.01203113
452.4	0.05000738		1042.4	0.00720386		1632.4	0.00610735		2222.4	0.01534794		2812.39	0.00040536		3402.39	0.00142683		3992.38	0.01268789
452.6	0.0493729		1042.6	0.00767998		1632.6	0.00705837		2222.6	0.01574873		2812.59	0.00036613		3402.59	0.00014236		3992.58	0.0132539
452.8	0.04829339		1042.8	0.00797886		1632.8	0.00768888		2222.8	0.01505652		2812.79	-0.00000227		3402.79	0.00063849		3992.78	0.01280616
453	0.04788797		1043	0.00779405		1633	0.00802549		2223	0.01500774		2812.99	0.00022295		3402.99	0.0003822		3992.98	0.01312544
453.2	0.04774363		1043.2	0.00760376		1633.2	0.00788523		2223.2	0.01520426		2813.19	-0.00064945		3403.19	0.00121587		3993.18	0.01370535
453.4	0.04820346		1043.4	0.00754173		1633.4	0.00849318		2223.4	0.01453149		2813.39	-0.0000178		3403.39	0.00145058		3993.38	0.01411282
453.6	0.0494133		1043.6	0.00794262		1633.6	0.00886622		2223.6	0.01416918		2813.59	0.00035725		3403.59	0.00156208		3993.58	0.01357681
453.8	0.05017858		1043.8	0.00827072		1633.8	0.00930448		2223.8	0.01389154		2813.79	0.00157071		3403.79	0.00224424		3993.78	0.01462291
454	0.05057169		1044	0.00763373		1634	0.00956859		2224	0.01338507		2813.99	0.00198321		3403.99	0.00307523		3993.98	0.01408719
454.2	0.05070625		1044.2	0.00810342		1634.2	0.00869048		2224.2	0.01331889		2814.19	0.00171951		3404.19	0.00326344		3994.18	0.01409798
454.4	0.05121744		1044.4	0.00856599		1634.4	0.00853057		2224.4	0.01348862		2814.39	0.00257624		3404.39	0.00377592		3994.38	0.01410525
454.6	0.05137012		1044.6	0.00797655		1634.6	0.00826056		2224.6	0.01376468		2814.59	0.0021776		3404.59	0.00293164		3994.58	0.01409353
454.8	0.05158676		1044.8	0.00830899		1634.8	0.00762025		2224.8	0.01370367		2814.79	0.00272401		3404.79	0.00248941		3994.78	0.01385275
455	0.05247072		1045	0.00879976		1635	0.00786206		2225	0.01350045		2814.99	0.00274565		3404.99	0.00359106		3994.98	0.01389886
455.2	0.05249172		1045.2	0.00822337		1635.2	0.00824092		2225.2	0.01197431		2815.19	0.00224441		3405.19	0.00426073		3995.18	0.01306939
455.4	0.05340464		1045.4	0.00834514		1635.4	0.00753981		2225.4	0.01212374		2815.39	0.00162605		3405.39	0.00434912		3995.38	0.01271188
455.6	0.05349944		1045.6	0.00810278		1635.6	0.00754101		2225.6	0.01180935		2815.59	0.00140139		3405.59	0.0044778		3995.58	0.01241452
455.8	0.0534819		1045.8	0.00771439		1635.8	0.0077545		2225.8	0.01209388		2815.79	0.00080749		3405.79	0.00390845		3995.78	0.01222423
456	0.0532187		1046	0.00716481		1636	0.00738345		2226	0.01293155		2815.99	0.00015279		3405.99	0.00382336		3995.98	0.0126598
456.2	0.05294161		1046.2	0.00735555		1636.2	0.00665367		2226.2	0.01307721		2816.19	-0.00023012		3406.19	0.00394443		3996.18	0.01199554
456.4	0.05254247		1046.4	0.00681403		1636.4	0.00691448		2226.4	0.01404901		2816.39	-0.00079423		3406.39	0.00388297		3996.38	0.01234801
456.6	0.05264764		1046.6	0.00666575		1636.6	0.00674614		2226.6	0.01435593		2816.59	-0.00082983		3406.59	0.00411192		3996.58	0.01214028
456.8	0.05198373		1046.8	0.00546563		1636.8	0.00780942		2226.8	0.01458233		2816.79	-0.0012819		3406.79	0.0041492		3996.78	0.01233894
457	0.05258888		1047	0.00534854		1637	0.00775146		2227	0.01625166		2816.99	-0.00080111		3406.99	0.0049294		3996.98	0.01211008
457.2	0.05258577		1047.2	0.00498402		1637.2	0.00734299		2227.2	0.01683293		2817.19	-0.00091705		3407.19	0.00468966		3997.18	0.01156497
457.4	0.05357764		1047.4	0.00525245		1637.4	0.00746124		2227.4	0.01576162		2817.39	0.0006907		3407.39	0.00423604		3997.38	0.01143856
457.6	0.05425517		1047.6	0.00534871		1637.6	0.00721791		2227.6	0.01602653		2817.59	0.00111803		3407.59	0.0041544		3997.58	0.0104127
457.8	0.05391257		1047.8	0.00542691		1637.8	0.00798498		2227.8	0.01674931		2817.79	0.00204041		3407.79	0.00443065		3997.78	0.01093823
458	0.0538126		1048	0.00555017		1638	0.00758669		2228	0.01685755		2817.99	0.00182036		3407.99	0.00397741		3997.98	0.0102387
458.2	0.05359011		1048.2	0.00641346		1638.2	0.00717493		2228.2	0.01758051		2818.19	0.00154203		3408.19	0.00393931		3998.18	0.01012733
458.4	0.0534765		1048.4	0.00599559		1638.4	0.00749765		2228.4	0.01805438		2818.39	0.00235292		3408.39	0.00383601		3998.38	0.01037517
458.6	0.05328616		1048.6	0.00502495		1638.6	0.00802648		2228.6	0.01766311		2818.59	0.00181243		3408.59	0.00329135		3998.58	0.01058283
458.8	0.05327804		1048.8	0.00489187		1638.8	0.0087737		2228.8	0.01776162		2818.79	0.00254406		3408.79	0.00389839		3998.78	0.01016356
459	0.05307643		1049	0.00445054		1639	0.01000424		2229	0.01746017		2818.99	0.00247128		3408.99	0.00435106		3998.98	0.01065318
459.2	0.0518689		1049.2	0.00400333		1639.2	0.01061792		2229.2	0.01702893		2819.19	0.00245203		3409.19	0.00449906		3999.18	0.01052878
459.4	0.05178965		1049.4	0.00402119		1639.4	0.01024757		2229.4	0.01754394		2819.39	0.00181755		3409.39	0.00419183		3999.38	0.01138956
459.6	0.05088831		1049.6	0.00325165		1639.6	0.01076325		2229.6	0.01767344		2819.59	0.00097701		3409.59	0.00468091		3999.58	0.01211026
459.8	0.0512383		1049.8	0.00251195		1639.8	0.0109552		2229.8	0.01761229		2819.79	0.0007343		3409.79	0.00480358		3999.78	0.01309347
460	0.05120417		1050	0.00194237		1640	0.01033255		2230	0.01744592		2819.99	0.00103883		3409.99	0.00550613		3999.98	0.0130239
460.2	0.05090267		1050.2	0.00172416		1640.2	0.01044595		2230.2	0.01758072		2820.19	0.00118954		3410.19	0.00598776		4000.18	0.01332054
460.4	0.05120505		1050.4	0.001301		1640.4	0.01101786		2230.4	0.01758675		2820.39	0.00106378		3410.39	0.00630953		4000.38	0.01480303
460.6	0.05121589		1050.6	0.00109908		1640.6	0.01195916		2230.6	0.01714668		2820.59	0.00153301		3410.59	0.00678468		4000.58	0.01582031
460.8	0.05083659		1050.8	0.0010019		1640.8	0.01238777		2230.8	0.01662255		2820.79	0.00109512		3410.79	0.0073687		4000.78	0.01669641
461	0.05143049		1051	0.00223171		1641	0.01144822		2231	0.016831		2820.99	0.0015212		3410.99	0.00765159		4000.98	0.01649798
461.2	0.0511676		1051.2	0.00210266		1641.2	0.01079025		2231.2	0.0162974		2821.19	0.00093588		3411.19	0.00634793		4001.18	0.01668352
461.4	0.05229132		1051.4	0.00341027		1641.4	0.01074033		2231.4	0.01596044		2821.39	0.00176955		3411.39	0.00606889		4001.38	0.01679766
461.6	0.05253203		1051.6	0.00358559		1641.6	0.01100992		2231.6	0.01628963		2821.59	0.00223882		3411.59	0.00626689		4001.58	0.01676967
461.8	0.05227316		1051.8	0.00372858		1641.8	0.01113346		2231.8	0.01602841		2821.79	0.00225393		3411.79	0.00575665		4001.78	0.01704766
462	0.05312741		1052	0.00475617		1642	0.01056335		2232	0.01590549		2821.99	0.00149013		3411.99	0.00542573		4001.98	0.0172174
462.2	0.05327124		1052.2	0.00446959		1642.2	0.0107839		2232.2	0.01575247		2822.19	0.00112216		3412.19	0.00558598		4002.18	0.01713625
462.4	0.05285724		1052.4	0.00411292		1642.4	0.01162034		2232.4	0.01570669		2822.39	0.00114243		3412.39	0.00470905		4002.38	0.0167893
462.6	0.05235897		1052.6	0.0039669		1642.6	0.01155276		2232.6	0.01480564		2822.59	0.00000944		3412.59	0.00463		4002.58	0.01620249
462.8	0.05222025		1052.8	0.00398272		1642.8	0.01151039		2232.8	0.01528212		2822.79	-0.00044559		3412.79	0.00469565		4002.78	0.01507806
463	0.05212073		1053	0.00387167		1643	0.01089252		2233	0.01499117		2822.99	-0.00139209		3412.99	0.0042862		4002.98	0.0141776
463.2	0.05152934		1053.2	0.00487887		1643.2	0.01070418		2233.2	0.01499324		2823.19	-0.00125873		3413.19	0.00381919		4003.18	0.0138732
463.4	0.05201372		1053.4	0.00446917		1643.4	0.00992683		2233.4	0.01520257		2823.39	-0.00259606		3413.39	0.00352142		4003.38	0.01400758
463.6	0.05223105		1053.6	0.00358937		1643.6	0.00953379		2233.6	0.01502252		2823.59	-0.0033163		3413.59	0.00331867		4003.58	0.01397361
463.8	0.05333702		1053.8	0.00442379		1643.8	0.00935232		2233.8	0.01488102		2823.79	-0.00234442		3413.79	0.00349046		4003.78	0.01328317
464	0.05310663		1054	0.00425581		1644	0.00885658		2234	0.01496802		2823.99	-0.00190858		3413.99	0.00317479		4003.98	0.01286706
464.2	0.05323767		1054.2	0.00445503		1644.2	0.00901116		2234.2	0.01567655		2824.19	-0.00153896		3414.19	0.00288081		4004.18	0.01228468
464.4	0.05370111		1054.4	0.00500023		1644.4	0.00869419		2234.4	0.01508435		2824.39	-0.00074014		3414.39	0.00311575		4004.38	0.01240864
464.6	0.05322369		1054.6	0.00587302		1644.6	0.00850067		2234.6	0.0141159		2824.59	-0.00052767		3414.59	0.00344005		4004.58	0.01221519
464.8	0.05320125		1054.8	0.00617415		1644.8	0.00716642		2234.8	0.01410123		2824.79	-0.00045704		3414.79	0.00333942		4004.78	0.01202799
465	0.05335037		1055	0.00682351		1645	0.00713063		2235	0.01348021		2824.99	-0.00014463		3414.99	0.0034431		4004.98	0.01176261
465.2	0.05252971		1055.2	0.00717945		1645.2	0.0069519		2235.2	0.01316951		2825.19	-0.00033697		3415.19	0.00286539		4005.18	0.0118962
465.4	0.05306698		1055.4	0.00709756		1645.4	0.00717804		2235.4	0.01222487		2825.39	0.00108356		3415.39	0.0035064		4005.38	0.01175319
465.6	0.05229023		1055.6	0.00689036		1645.6	0.00732357		2235.6	0.01220181		2825.59	0.00116085		3415.59	0.00400631		4005.58	0.01259951
465.8	0.05145493		1055.8	0.00667106		1645.8	0.00734766		2235.8	0.01226394		2825.79	0.00051592		3415.79	0.00339662		4005.78	0.01328805
466	0.05162674		1056	0.00689761		1646	0.00854874		2236	0.01255784		2825.99	-0.00003975		3415.99	0.00363493		4005.98	0.0138393
466.2	0.05120437		1056.2	0.0059222		1646.2	0.00903697		2236.2	0.0124682		2826.19	0.00031715		3416.19	0.00375912		4006.18	0.014706
466.4	0.05139432		1056.4	0.00610652		1646.4	0.00898452		2236.4	0.01239564		2826.39	0.00108352		3416.39	0.00381896		4006.38	0.01474068
466.6	0.05156404		1056.6	0.00595072		1646.6	0.00878167		2236.6	0.01202196		2826.59	0.00054206		3416.59	0.00393181		4006.58	0.01475338
466.8	0.05208709		1056.8	0.00556475		1646.8	0.00904047		2236.8	0.01243448		2826.79	0.00106829		3416.79	0.00457268		4006.78	0.01420579
467	0.05303347		1057	0.00507311		1647	0.00886115		2237	0.01289906		2826.99	0.00167451		3416.99	0.00414014		4006.98	0.01403637
467.2	0.0538647		1057.2	0.00468664		1647.2	0.00947843		2237.2	0.01292028		2827.19	0.00254524		3417.19	0.0036746		4007.18	0.01528602
467.4	0.05381182		1057.4	0.00335901		1647.4	0.00915248		2237.4	0.01240233		2827.39	0.00186223		3417.39	0.00402076		4007.38	0.01535994
467.6	0.0540493		1057.6	0.00328568		1647.6	0.00907326		2237.6	0.01300399		2827.59	0.00216626		3417.59	0.00427238		4007.58	0.01498946
467.8	0.05509681		1057.8	0.00385111		1647.8	0.00957946		2237.8	0.01412974		2827.79	0.00277122		3417.79	0.004187		4007.78	0.01406558
468	0.05559312		1058	0.00337219		1648	0.00947434		2238	0.01541086		2827.99	0.00301261		3417.99	0.00342807		4007.98	0.0139258
468.2	0.05610285		1058.2	0.00379248		1648.2	0.00959642		2238.2	0.01661695		2828.19	0.00350129		3418.19	0.00315424		4008.18	0.01300917
468.4	0.0556971		1058.4	0.00436822		1648.4	0.00894019		2238.4	0.01667746		2828.39	0.00390614		3418.39	0.00302253		4008.38	0.01300582
468.6	0.05509211		1058.6	0.00509683		1648.6	0.00824668		2238.6	0.01689227		2828.59	0.0033698		3418.59	0.00282695		4008.58	0.01270256
468.8	0.05462168		1058.8	0.00481383		1648.8	0.00760477		2238.8	0.01735415		2828.79	0.00308859		3418.79	0.00250663		4008.78	0.01257469
469	0.0535486		1059	0.00517707		1649	0.00732786		2239	0.01723102		2828.99	0.00259162		3418.99	0.00256943		4008.98	0.01240643
469.2	0.05248241		1059.2	0.0053131		1649.2	0.00694369		2239.2	0.017826		2829.19	0.00231257		3419.19	0.00186178		4009.18	0.01259206
469.4	0.05181281		1059.4	0.00493132		1649.4	0.00664585		2239.4	0.01797557		2829.39	0.00210541		3419.39	0.00184483		4009.38	0.01265553
469.6	0.05037275		1059.6	0.00517812		1649.6	0.00596484		2239.6	0.01824881		2829.59	0.00120014		3419.59	0.0014557		4009.58	0.01348358
469.8	0.04953625		1059.8	0.00516571		1649.8	0.00597029		2239.8	0.01787668		2829.79	0.00100007		3419.79	0.00102315		4009.78	0.01417242
470	0.04953625		1059.99	0.00516571		1650	0.00597029		2240	0.01787668		2829.99	0.00100007		3419.98	0.00102315		4009.98	0.01417242
470.2	0.04966367		1060.19	0.0062636		1650.2	0.00663731		2240.2	0.01712465		2830.19	0.00052859		3420.18	0.00086311		4010.18	0.01351994
470.4	0.05059984		1060.39	0.0072693		1650.4	0.00728112		2240.4	0.0167113		2830.39	0.00050584		3420.38	0.00089811		4010.38	0.01323727
470.6	0.05160903		1060.59	0.00749934		1650.6	0.00757891		2240.6	0.01594898		2830.59	0.00043738		3420.58	0.00100374		4010.58	0.01200897
470.8	0.05224101		1060.79	0.00805868		1650.8	0.00813057		2240.8	0.01541455		2830.79	0.00121373		3420.78	0.00144787		4010.78	0.01172293
471	0.05282172		1060.99	0.0085139		1651	0.00828431		2241	0.01473529		2830.99	0.00083732		3420.98	0.00156558		4010.98	0.01211317
471.2	0.05310711		1061.19	0.00917307		1651.2	0.00824406		2241.2	0.01419795		2831.19	0.00089076		3421.18	0.00192413		4011.18	0.0116654
471.4	0.05306059		1061.39	0.00890616		1651.4	0.00869707		2241.4	0.01424737		2831.39	0.00069638		3421.38	0.00186859		4011.38	0.01156036
471.6	0.05363364		1061.59	0.00944989		1651.6	0.00901043		2241.6	0.01408009		2831.59	0.00131378		3421.58	0.00255481		4011.58	0.0119679
471.8	0.05365113		1061.79	0.00987414		1651.8	0.0088931		2241.8	0.01373162		2831.79	0.0020013		3421.78	0.00251542		4011.78	0.01134089
472	0.05304085		1061.99	0.00937308		1652	0.00789281		2242	0.01358568		2831.99	0.00204973		3421.98	0.00264314		4011.98	0.01164741
472.2	0.05239728		1062.19	0.0086002		1652.2	0.00661331		2242.2	0.01320155		2832.19	0.0026414		3422.18	0.00261696		4012.18	0.01155161
472.4	0.05223362		1062.39	0.00791561		1652.4	0.006659		2242.4	0.01237929		2832.39	0.00289825		3422.38	0.00275272		4012.38	0.01169107
472.6	0.05313905		1062.59	0.00773946		1652.6	0.00623391		2242.6	0.01122125		2832.59	0.00431889		3422.58	0.00264872		4012.58	0.01138028
472.8	0.05404293		1062.79	0.00801129		1652.8	0.0061163		2242.8	0.01028185		2832.79	0.0040962		3422.78	0.00238692		4012.78	0.01074567
473	0.05439326		1062.99	0.00853564		1653	0.00576331		2243	0.00980371		2832.99	0.00374062		3422.98	0.00176179		4012.98	0.01124268
473.2	0.05545297		1063.19	0.00857907		1653.2	0.00580287		2243.2	0.00947281		2833.19	0.00347335		3423.18	0.00073222		4013.18	0.01263835
473.4	0.05559886		1063.39	0.00821797		1653.4	0.00498715		2243.4	0.00886578		2833.39	0.00265834		3423.38	0.00127844		4013.38	0.0120994
473.6	0.05552128		1063.59	0.00876335		1653.6	0.00513887		2243.6	0.00890585		2833.59	0.00322762		3423.58	0.001481		4013.58	0.01183832
473.8	0.05539597		1063.79	0.00876041		1653.8	0.00576128		2243.8	0.00808968		2833.79	0.00288029		3423.78	0.00130953		4013.78	0.01136572
474	0.05487605		1063.99	0.00944401		1654	0.00571197		2244	0.00736638		2833.99	0.00263282		3423.98	0.00154847		4013.98	0.01129306
474.2	0.05472091		1064.19	0.00988279		1654.2	0.00590707		2244.2	0.00787745		2834.19	0.00267296		3424.18	0.00198306		4014.18	0.01140217
474.4	0.05455977		1064.39	0.00978922		1654.4	0.00579052		2244.4	0.00767283		2834.39	0.00243657		3424.38	0.00271486		4014.38	0.01170796
474.6	0.05456178		1064.59	0.00902003		1654.6	0.00568366		2244.6	0.00739875		2834.59	0.00262813		3424.58	0.00341911		4014.58	0.01153537
474.8	0.05408825		1064.79	0.00895559		1654.8	0.00661145		2244.8	0.0075243		2834.79	0.00291775		3424.78	0.00357456		4014.78	0.0122623
475	0.05362447		1064.99	0.00842488		1655	0.00666063		2245	0.00828945		2834.99	0.00202126		3424.98	0.00395542		4014.98	0.01292101
475.2	0.05325858		1065.19	0.00934454		1655.2	0.00655633		2245.2	0.00886667		2835.19	0.00210962		3425.18	0.00384828		4015.18	0.01209722
475.4	0.05328217		1065.39	0.00865764		1655.4	0.00681243		2245.4	0.00982962		2835.39	0.00237793		3425.38	0.00337793		4015.38	0.01242531
475.6	0.05347546		1065.59	0.00835118		1655.6	0.00650729		2245.6	0.01067019		2835.59	0.00303653		3425.58	0.00371269		4015.58	0.01226898
475.8	0.05299353		1065.79	0.00738195		1655.8	0.00613402		2245.8	0.01128578		2835.79	0.00226811		3425.78	0.00317703		4015.78	0.0121225
476	0.05284899		1065.99	0.0051737		1656	0.004886		2246	0.01193852		2835.99	0.00171063		3425.98	0.00312514		4015.98	0.01240041
476.2	0.05248354		1066.19	0.00429108		1656.2	0.00445997		2246.2	0.01254132		2836.19	0.00127044		3426.18	0.00248302		4016.18	0.01193551
476.4	0.05329918		1066.39	0.00368615		1656.4	0.0047715		2246.4	0.01362631		2836.39	0.00098534		3426.38	0.00242356		4016.38	0.01103416
476.6	0.05343335		1066.59	0.00360406		1656.6	0.00470993		2246.6	0.01394306		2836.59	0.00137114		3426.58	0.00187606		4016.58	0.01143788
476.8	0.05376108		1066.79	0.00383808		1656.8	0.004845		2246.8	0.01403895		2836.79	0.00099759		3426.78	0.00232586		4016.78	0.01211539
477	0.05397641		1066.99	0.00391491		1657	0.00508842		2247	0.01493378		2836.99	0.0012874		3426.98	0.00232423		4016.98	0.01171941
477.2	0.05482678		1067.19	0.00386001		1657.2	0.00556547		2247.2	0.01400546		2837.19	0.00141481		3427.18	0.00261508		4017.18	0.01211678
477.4	0.0551143		1067.39	0.00521344		1657.4	0.00510226		2247.4	0.01381474		2837.39	0.00116058		3427.38	0.00281832		4017.38	0.01159729
477.6	0.05522181		1067.59	0.0053764		1657.6	0.00495111		2247.6	0.01287935		2837.59	0.00109698		3427.58	0.00145814		4017.58	0.01175864
477.8	0.05371464		1067.79	0.00547484		1657.8	0.00553183		2247.8	0.01239247		2837.79	0.000766		3427.78	0.00041522		4017.78	0.01174901
478	0.05337782		1067.99	0.00551824		1658	0.00479214		2248	0.01226763		2837.99	-0.0000697		3427.98	0.00051821		4017.98	0.01145571
478.2	0.05227174		1068.19	0.00599558		1658.2	0.004747		2248.2	0.01184077		2838.19	0.00055564		3428.18	0.0005393		4018.18	0.01237804
478.4	0.05153048		1068.39	0.00641798		1658.4	0.00487356		2248.4	0.0097826		2838.39	0.0006429		3428.38	0.00053799		4018.38	0.01234054
478.6	0.05290024		1068.59	0.00664666		1658.6	0.00502125		2248.6	0.00947396		2838.59	0.00112187		3428.58	0.00132734		4018.58	0.01208534
478.8	0.0523756		1068.79	0.00678757		1658.8	0.00550847		2248.8	0.00958025		2838.79	0.0021158		3428.78	0.00127626		4018.78	0.01094368
479	0.05184475		1068.99	0.00735904		1659	0.00504819		2249	0.00939182		2838.99	0.00189418		3428.98	0.00180637		4018.98	0.01053399
479.2	0.05152267		1069.19	0.00795253		1659.2	0.00489822		2249.2	0.00916527		2839.19	0.00281202		3429.18	0.00189641		4019.18	0.01016531
479.4	0.05107577		1069.39	0.007441		1659.4	0.00475894		2249.4	0.00922048		2839.39	0.00344274		3429.38	0.00239071		4019.38	0.01036645
479.6	0.05031647		1069.59	0.00653339		1659.6	0.00434954		2249.6	0.00931657		2839.59	0.00389029		3429.58	0.00316066		4019.58	0.01121723
479.8	0.04957294		1069.79	0.00639989		1659.8	0.00427929		2249.8	0.0094655		2839.79	0.00405139		3429.78	0.00340846		4019.78	0.011128
480	0.0492172		1069.99	0.00541857		1660	0.00448676		2250	0.01059088		2839.99	0.00420619		3429.98	0.00396507		4019.98	0.01082064
480.2	0.04827152		1070.19	0.00607929		1660.2	0.00460521		2250.2	0.01169876		2840.19	0.00423049		3430.18	0.00355534		4020.18	0.01002441
480.4	0.04838004		1070.39	0.00596276		1660.4	0.00538383		2250.4	0.01205326		2840.39	0.0044431		3430.38	0.00431291		4020.38	0.00920509
480.6	0.04863486		1070.59	0.00588883		1660.6	0.00545749		2250.6	0.01228512		2840.59	0.00489117		3430.58	0.00532198		4020.58	0.01047325
480.8	0.04934227		1070.79	0.00641106		1660.8	0.00579401		2250.8	0.01169146		2840.79	0.00549411		3430.78	0.00544955		4020.78	0.01004155
481	0.04940841		1070.99	0.0066762		1661	0.00646307		2251	0.01156538		2840.99	0.00527215		3430.98	0.00407308		4020.98	0.0094507
481.2	0.0496398		1071.19	0.00730583		1661.2	0.00685333		2251.2	0.01065801		2841.19	0.00509001		3431.18	0.00402871		4021.18	0.0094179
481.4	0.04982092		1071.39	0.00823556		1661.4	0.00669172		2251.4	0.01163779		2841.39	0.00507466		3431.38	0.0028026		4021.38	0.00940046
481.6	0.04964501		1071.59	0.00828105		1661.6	0.00613693		2251.6	0.0112274		2841.59	0.00421201		3431.58	0.00203274		4021.58	0.00900916
481.8	0.0494598		1071.79	0.00849526		1661.8	0.00586002		2251.8	0.01113431		2841.79	0.00351531		3431.78	0.00158178		4021.78	0.00915296
482	0.0502806		1071.99	0.00886194		1662	0.00518471		2252	0.01100354		2841.99	0.00175683		3431.98	0.00108511		4021.98	0.00877624
482.2	0.05015506		1072.19	0.00936143		1662.2	0.00512001		2252.2	0.01008926		2842.19	0.00214455		3432.18	0.00095332		4022.18	0.008982
482.4	0.05030267		1072.39	0.00900595		1662.4	0.00534525		2252.4	0.01000162		2842.39	0.00137173		3432.38	0.00139457		4022.38	0.0077012
482.6	0.05109097		1072.59	0.00896294		1662.6	0.00499903		2252.6	0.01088655		2842.59	0.00053273		3432.58	0.00215123		4022.58	0.0071593
482.8	0.05019272		1072.79	0.00852746		1662.8	0.00479251		2252.8	0.01171387		2842.79	0.00013567		3432.78	0.00219597		4022.78	0.00674677
483	0.04956139		1072.99	0.00851021		1663	0.00434366		2253	0.01145107		2842.99	-0.00200513		3432.98	0.00275104		4022.98	0.00730765
483.2	0.04903543		1073.19	0.00793129		1663.2	0.00396569		2253.2	0.0117151		2843.19	-0.00213742		3433.18	0.00303559		4023.18	0.00883583
483.4	0.04907226		1073.39	0.00786316		1663.4	0.00359665		2253.4	0.01083612		2843.39	-0.00279735		3433.38	0.00323433		4023.38	0.00956638
483.6	0.04814438		1073.59	0.00677996		1663.6	0.00314467		2253.6	0.01094784		2843.59	-0.00287533		3433.58	0.00341468		4023.58	0.01052859
483.8	0.047423		1073.79	0.00653558		1663.8	0.0031084		2253.8	0.01095282		2843.79	-0.00244467		3433.78	0.00306969		4023.78	0.00982385
484	0.0473068		1073.99	0.00618931		1664	0.00330726		2254	0.01135538		2843.99	-0.00229593		3433.98	0.00306895		4023.98	0.01081522
484.2	0.0471638		1074.19	0.00665035		1664.2	0.00307351		2254.2	0.01103234		2844.19	-0.00145828		3434.18	0.0026043		4024.18	0.01093194
484.4	0.04786306		1074.39	0.00763534		1664.4	0.00378938		2254.4	0.01061113		2844.39	-0.00114479		3434.38	0.00316695		4024.38	0.01133381
484.6	0.04792531		1074.59	0.00747577		1664.6	0.00416172		2254.6	0.010047		2844.59	-0.00167526		3434.58	0.00302664		4024.58	0.01162861
484.8	0.04683373		1074.79	0.00807872		1664.8	0.00502214		2254.8	0.00887491		2844.79	-0.00109738		3434.78	0.00199566		4024.78	0.01130173
485	0.04654937		1074.99	0.0085301		1665	0.00577		2255	0.00876687		2844.99	-0.00052514		3434.98	0.0012749		4024.98	0.01197296
485.2	0.04673973		1075.19	0.0086322		1665.2	0.00574921		2255.2	0.00882674		2845.19	-0.00008908		3435.18	0.00194531		4025.18	0.01178439
485.4	0.04718973		1075.39	0.00971355		1665.4	0.00495622		2255.4	0.00910138		2845.39	0.00050374		3435.38	0.00143562		4025.38	0.012041
485.6	0.04687718		1075.59	0.0097793		1665.6	0.00480201		2255.6	0.00813276		2845.59	-0.00009678		3435.58	0.0019077		4025.58	0.01238217
485.8	0.04766086		1075.79	0.00967684		1665.8	0.0039832		2255.8	0.00799625		2845.79	0.00078651		3435.78	0.00160304		4025.78	0.01261197
486	0.04705141		1075.99	0.00955007		1666	0.00384502		2256	0.00783658		2845.99	0.00087405		3435.98	0.00101274		4025.98	0.01183007
486.2	0.04603482		1076.19	0.00976916		1666.2	0.0040005		2256.2	0.0077759		2846.19	0.00208834		3436.18	0.00163608		4026.18	0.01111158
486.4	0.0458739		1076.39	0.0087552		1666.4	0.00445266		2256.4	0.00838574		2846.39	0.00169964		3436.38	0.00142813		4026.38	0.0110507
486.6	0.04621764		1076.59	0.00921752		1666.6	0.00365351		2256.6	0.00826085		2846.59	0.00168849		3436.58	0.00176541		4026.58	0.01131816
486.8	0.04586169		1076.79	0.00857659		1666.8	0.00334679		2256.8	0.00867585		2846.79	0.00121806		3436.78	0.001875		4026.78	0.01066584
487	0.04537142		1076.99	0.00769415		1667	0.00317038		2257	0.00790941		2846.99	0.00094375		3436.98	0.00146035		4026.98	0.01028178
487.2	0.04567601		1077.19	0.00576736		1667.2	0.00257747		2257.2	0.00772517		2847.19	0.00075479		3437.18	0.00107645		4027.18	0.01039489
487.4	0.04584074		1077.39	0.00490709		1667.4	0.00265356		2257.4	0.00674133		2847.39	0.00119299		3437.38	0.00096442		4027.38	0.01023412
487.6	0.04508703		1077.59	0.00426854		1667.6	0.00256794		2257.6	0.00763384		2847.59	0.00174722		3437.58	0.00089089		4027.58	0.00964156
487.8	0.04553579		1077.79	0.00444572		1667.8	0.002516		2257.8	0.00749551		2847.79	0.00184952		3437.78	-0.00021584		4027.78	0.00956979
488	0.04647313		1077.99	0.00463584		1668	0.00226246		2258	0.00759507		2847.99	0.00184524		3437.98	-0.00057907		4027.98	0.00985274
488.2	0.04651799		1078.19	0.00521351		1668.2	0.002454		2258.2	0.00786741		2848.19	0.00133162		3438.18	-0.00058009		4028.18	0.01024597
488.4	0.04685891		1078.39	0.0057104		1668.4	0.00319395		2258.4	0.00756024		2848.39	0.00069892		3438.38	-0.00096137		4028.38	0.00996626
488.6	0.04731913		1078.59	0.00547997		1668.6	0.00360962		2258.6	0.00736743		2848.59	-0.00061988		3438.58	-0.00150419		4028.58	0.00996401
488.8	0.04775293		1078.79	0.00565444		1668.8	0.00310421		2258.8	0.00752933		2848.79	-0.0001183		3438.78	-0.0017699		4028.78	0.01031838
489	0.04869428		1078.99	0.00545635		1669	0.00340914		2259	0.00810924		2848.99	-0.00092525		3438.98	-0.00170705		4028.98	0.01049833
489.2	0.04889076		1079.19	0.00597658		1669.2	0.00280161		2259.2	0.00841964		2849.19	-0.00145289		3439.18	-0.00137145		4029.18	0.01069217
489.4	0.04794316		1079.39	0.00645845		1669.4	0.00286092		2259.4	0.00866991		2849.39	-0.00112267		3439.38	-0.00208143		4029.38	0.01018977
489.6	0.04808481		1079.59	0.00605942		1669.6	0.00312385		2259.6	0.00911728		2849.59	-0.00227676		3439.58	-0.00188775		4029.58	0.0105403
489.8	0.04875088		1079.79	0.00652247		1669.8	0.00234006		2259.8	0.01007436		2849.79	-0.00114637		3439.78	-0.00193423		4029.78	0.01006022
490	0.04722049		1079.99	0.00648345		1670	0.00275198		2260	0.00990375		2849.99	-0.00095255		3439.98	-0.00235348		4029.98	0.01028127
490.2	0.04636991		1080.19	0.00629455		1670.2	0.00271113		2260.2	0.0103154		2850.19	-0.00084294		3440.18	-0.00270544		4030.18	0.0101157
490.4	0.04649849		1080.39	0.00564715		1670.4	0.00300984		2260.4	0.00917777		2850.39	-0.00122554		3440.38	-0.00190952		4030.38	0.01064154
490.6	0.04557926		1080.59	0.00555727		1670.6	0.00260137		2260.6	0.00811523		2850.59	-0.00086707		3440.58	-0.00075655		4030.58	0.00979857
490.8	0.04450188		1080.79	0.00396494		1670.8	0.00234841		2260.8	0.00760766		2850.79	-0.00191989		3440.78	-0.00034282		4030.78	0.00914857
491	0.04347537		1080.99	0.00298422		1671	0.00178055		2261	0.0063172		2850.99	-0.00132171		3440.98	-0.0002537		4030.98	0.00959287
491.2	0.04271299		1081.19	0.00210889		1671.2	0.00083385		2261.2	0.00642622		2851.19	-0.0023168		3441.18	0.00043148		4031.18	0.00931438
491.4	0.0420982		1081.39	0.00251784		1671.4	0.00099157		2261.4	0.00587508		2851.39	-0.00174877		3441.38	0.00023471		4031.38	0.00928693
491.6	0.04148597		1081.59	0.00294971		1671.6	0.00080214		2261.6	0.00637309		2851.59	-0.00194393		3441.58	0.0004308		4031.58	0.00881704
491.8	0.04191173		1081.79	0.0031082		1671.8	0.00112167		2261.8	0.00599526		2851.79	-0.00201593		3441.78	0.00029221		4031.78	0.00887643
492	0.04196582		1081.99	0.00300796		1672	0.00135194		2262	0.00611165		2851.99	-0.00083696		3441.98	0.00037306		4031.98	0.00845934
492.2	0.04121743		1082.19	0.003498		1672.2	0.00182967		2262.2	0.0067464		2852.19	-0.00107317		3442.18	0.00044184		4032.18	0.00902978
492.4	0.042658		1082.39	0.00378034		1672.4	0.00292108		2262.4	0.0068322		2852.39	-0.00019267		3442.38	-0.00060124		4032.38	0.00856614
492.6	0.04408437		1082.59	0.0043116		1672.6	0.00306699		2262.6	0.00751218		2852.59	-0.00042106		3442.58	-0.00115941		4032.58	0.00835201
492.8	0.04454876		1082.79	0.00359443		1672.8	0.0025752		2262.8	0.00834443		2852.79	0.00026241		3442.78	-0.00175851		4032.78	0.00840113
493	0.04558415		1082.99	0.00458938		1673	0.00269641		2263	0.00921158		2852.99	0.00059642		3442.98	-0.00200299		4032.98	0.00805251
493.2	0.04607327		1083.19	0.00492774		1673.2	0.00222142		2263.2	0.00953923		2853.19	0.00187873		3443.18	-0.00246974		4033.18	0.00893981
493.4	0.04639004		1083.39	0.00586795		1673.4	0.00328181		2263.4	0.01009503		2853.39	0.00172283		3443.38	-0.00330385		4033.38	0.00822471
493.6	0.04785212		1083.59	0.0062505		1673.6	0.00357585		2263.6	0.01049162		2853.59	0.00186969		3443.58	-0.00316435		4033.58	0.00922693
493.8	0.04776888		1083.79	0.0066337		1673.8	0.00349917		2263.8	0.0107127		2853.79	0.00235884		3443.78	-0.00381036		4033.78	0.00940073
494	0.04761639		1083.99	0.00609079		1674	0.00363434		2264	0.01069403		2853.99	0.0020153		3443.98	-0.00410876		4033.98	0.0100219
494.2	0.04812979		1084.19	0.00556401		1674.2	0.00378026		2264.2	0.01095861		2854.19	0.00194049		3444.18	-0.0033672		4034.18	0.00952392
494.4	0.0485444		1084.39	0.00474074		1674.4	0.00327637		2264.4	0.0102813		2854.39	0.00087966		3444.38	-0.0023244		4034.38	0.00950576
494.6	0.0481832		1084.59	0.0041399		1674.6	0.00250629		2264.6	0.01035738		2854.59	-0.00037632		3444.58	-0.00184829		4034.58	0.00900385
494.8	0.04747573		1084.79	0.00368796		1674.8	0.00207199		2264.8	0.0100657		2854.79	-0.00219181		3444.78	-0.00211054		4034.78	0.00931276
495	0.04690464		1084.99	0.00333616		1675	0.00221244		2265	0.01077061		2854.99	-0.00195969		3444.98	-0.00184546		4034.98	0.00896722
495.2	0.04614651		1085.19	0.00305048		1675.2	0.00237364		2265.2	0.01096651		2855.19	-0.00371111		3445.18	-0.00197235		4035.18	0.00786089
495.4	0.04632466		1085.39	0.00265841		1675.4	0.0028303		2265.4	0.01037607		2855.39	-0.00394216		3445.38	-0.00220195		4035.38	0.00799213
495.6	0.04593028		1085.59	0.00272856		1675.6	0.00352885		2265.6	0.0111307		2855.59	-0.0038793		3445.58	-0.00094132		4035.58	0.00805712
495.8	0.0461675		1085.79	0.00307384		1675.8	0.00447649		2265.8	0.01109427		2855.79	-0.00419168		3445.78	-0.00027049		4035.78	0.00787027
496	0.04604493		1085.99	0.00277553		1676	0.00494498		2266	0.01040898		2855.99	-0.00393364		3445.98	-0.00068531		4035.98	0.00806797
496.2	0.04581048		1086.19	0.00307629		1676.2	0.00472736		2266.2	0.00972666		2856.19	-0.00395513		3446.18	-0.00049007		4036.18	0.0080758
496.4	0.04621824		1086.39	0.00382561		1676.4	0.00457961		2266.4	0.00838629		2856.39	-0.00315601		3446.38	-0.00081066		4036.38	0.00792621
496.6	0.0468291		1086.59	0.00401666		1676.6	0.00359538		2266.6	0.0077254		2856.59	-0.00297895		3446.58	0.00002517		4036.58	0.00801432
496.8	0.04695886		1086.79	0.00483272		1676.8	0.00258457		2266.8	0.00705014		2856.79	-0.00231817		3446.78	-0.00053028		4036.78	0.00893126
497	0.04619518		1086.99	0.00635797		1677	0.00252647		2267	0.00591344		2856.99	-0.00197726		3446.98	-0.000307		4036.98	0.00962451
497.2	0.04514289		1087.19	0.00660247		1677.2	0.00294641		2267.2	0.00540004		2857.19	-0.00172011		3447.18	-0.00051583		4037.18	0.01073894
497.4	0.04513747		1087.39	0.00740616		1677.4	0.00399372		2267.4	0.00449471		2857.39	-0.00139779		3447.38	-0.00090146		4037.38	0.01092483
497.6	0.04563226		1087.59	0.00724662		1677.6	0.00411348		2267.6	0.00412134		2857.59	-0.00079151		3447.58	-0.00117202		4037.58	0.01179474
497.8	0.04507183		1087.79	0.00697621		1677.8	0.00369453		2267.8	0.00431781		2857.79	-0.00118758		3447.78	-0.00090725		4037.78	0.01088557
498	0.04548957		1087.99	0.00671774		1678	0.00383286		2268	0.00428563		2857.99	-0.00030121		3447.98	-0.00021257		4037.98	0.01047324
498.2	0.04587166		1088.19	0.00632744		1678.2	0.00414882		2268.2	0.00496171		2858.19	-0.00084863		3448.18	0.00007295		4038.18	0.00955464
498.4	0.04578794		1088.39	0.00579785		1678.4	0.00389927		2268.4	0.00500841		2858.39	-0.00142611		3448.38	-0.00105069		4038.38	0.00969541
498.6	0.04551644		1088.59	0.00553412		1678.6	0.0050356		2268.6	0.0057475		2858.59	-0.00202015		3448.58	-0.00125648		4038.58	0.01005017
498.8	0.04533735		1088.79	0.00499127		1678.8	0.00530418		2268.8	0.00577221		2858.79	-0.00229669		3448.78	-0.00152525		4038.78	0.00999736
499	0.04549555		1088.99	0.00438758		1679	0.00574011		2269	0.00706827		2858.99	-0.00240953		3448.98	-0.00122563		4038.98	0.00908442
499.2	0.04535689		1089.19	0.00440052		1679.2	0.00617757		2269.2	0.00656182		2859.19	-0.00340583		3449.18	-0.00187534		4039.18	0.00899018
499.4	0.04640995		1089.39	0.00365329		1679.4	0.00541855		2269.4	0.00769792		2859.39	-0.00361279		3449.38	-0.00220113		4039.38	0.00939138
499.6	0.0462451		1089.59	0.00349719		1679.6	0.00573433		2269.6	0.00839071		2859.59	-0.0034426		3449.58	-0.00264206		4039.58	0.00884825
499.8	0.04629674		1089.79	0.00345759		1679.8	0.00483167		2269.8	0.00786266		2859.79	-0.00377172		3449.78	-0.00314536		4039.78	0.00871409
500	0.04631278		1089.99	0.00272932		1680	0.00440754		2270	0.00729008		2859.99	-0.00346763		3449.98	-0.00341558		4039.98	0.00794967
500.2	0.04576774		1090.19	0.00353191		1680.2	0.00362115		2270.2	0.00757566		2860.19	-0.00328633		3450.18	-0.00359768		4040.18	0.00744764
500.4	0.04529989		1090.39	0.00375864		1680.4	0.00289233		2270.4	0.00743141		2860.39	-0.00331233		3450.38	-0.00351116		4040.38	0.00755724
500.6	0.04526686		1090.59	0.00381263		1680.6	0.00240089		2270.6	0.00738519		2860.59	-0.00289837		3450.58	-0.00321761		4040.58	0.00728402
500.8	0.043488		1090.79	0.00429496		1680.8	0.00251384		2270.8	0.00754977		2860.79	-0.00239017		3450.78	-0.00433174		4040.78	0.00773145
501	0.04231936		1090.99	0.00379637		1681	0.00235754		2271	0.00764195		2860.99	-0.0018443		3450.98	-0.00442734		4040.98	0.00741922
501.2	0.04235702		1091.19	0.00313614		1681.2	0.00203397		2271.2	0.00812631		2861.19	-0.00127022		3451.18	-0.00366527		4041.18	0.00714653
501.4	0.04295124		1091.39	0.00226966		1681.4	0.00197536		2271.4	0.00798376		2861.39	-0.0002979		3451.38	-0.00337984		4041.38	0.00650002
501.6	0.04382016		1091.59	0.00239979		1681.6	0.00152007		2271.6	0.00785239		2861.59	-0.00030173		3451.58	-0.00272848		4041.58	0.00614608
501.8	0.04333517		1091.79	0.00166508		1681.8	0.00129623		2271.8	0.00813719		2861.79	-0.00006244		3451.78	-0.00157643		4041.78	0.00568735
502	0.04373027		1091.99	0.00085729		1682	0.00214632		2272	0.00751238		2861.99	0.00073737		3451.98	-0.00153077		4041.98	0.00631993
502.2	0.04320784		1092.19	0.00086897		1682.2	0.00251212		2272.2	0.00801303		2862.19	0.0001952		3452.18	-0.00142689		4042.18	0.00665223
502.4	0.04216525		1092.39	-0.00064338		1682.4	0.00290095		2272.4	0.00799016		2862.39	0.00061396		3452.38	-0.00160695		4042.38	0.0068892
502.6	0.04187765		1092.59	-0.00067189		1682.6	0.00341011		2272.6	0.00809293		2862.59	-0.00002744		3452.58	-0.00147927		4042.58	0.00778664
502.8	0.04210529		1092.79	-0.00111939		1682.8	0.00336484		2272.8	0.00768356		2862.79	-0.00077552		3452.78	-0.00078803		4042.78	0.0073021
503	0.04258788		1092.99	-0.00072974		1683	0.00392467		2273	0.00815587		2862.99	-0.00125771		3452.98	-0.00039913		4042.98	0.00693663
503.2	0.04319033		1093.19	-0.00013654		1683.2	0.00405715		2273.2	0.00804939		2863.19	-0.0019428		3453.18	-0.00043352		4043.18	0.00689755
503.4	0.04418112		1093.39	-0.00047563		1683.4	0.00393102		2273.4	0.00875726		2863.39	-0.00207275		3453.38	-0.0009481		4043.38	0.00749682
503.6	0.04441638		1093.59	0.00049822		1683.6	0.00413914		2273.6	0.00738672		2863.59	-0.00234632		3453.58	-0.00119514		4043.58	0.00754064
503.8	0.04490075		1093.79	0.00103899		1683.8	0.00403825		2273.8	0.00772137		2863.79	-0.00301666		3453.78	-0.00110934		4043.78	0.0080234
504	0.0452097		1093.99	0.00168797		1684	0.00421676		2274	0.00759617		2863.99	-0.00320032		3453.98	-0.00168236		4043.98	0.00828889
504.2	0.04580295		1094.19	0.00249531		1684.2	0.00398526		2274.2	0.00810196		2864.19	-0.00296182		3454.18	-0.00250834		4044.18	0.0090984
504.4	0.04594838		1094.39	0.00258271		1684.4	0.00330916		2274.4	0.00835156		2864.39	-0.00294297		3454.38	-0.00250312		4044.38	0.00963023
504.6	0.04614115		1094.59	0.00375169		1684.6	0.00278725		2274.6	0.00868321		2864.59	-0.00238097		3454.58	-0.00290075		4044.58	0.00979047
504.8	0.04626895		1094.79	0.00441951		1684.8	0.0025114		2274.8	0.00889672		2864.79	-0.00188037		3454.78	-0.00360889		4044.78	0.01042252
505	0.04735416		1094.99	0.00493404		1685	0.00118442		2275	0.00911493		2864.99	-0.00245848		3454.98	-0.00395185		4044.98	0.0111514
505.2	0.04789213		1095.19	0.00482403		1685.2	-0.00028804		2275.2	0.00940676		2865.19	-0.00213702		3455.18	-0.00334808		4045.18	0.01119693
505.4	0.04813798		1095.39	0.00518435		1685.4	-0.00086113		2275.4	0.00888423		2865.39	-0.00194759		3455.38	-0.00298456		4045.38	0.01084961
505.6	0.04868035		1095.59	0.00547413		1685.6	-0.00092167		2275.6	0.00844424		2865.59	-0.00285412		3455.58	-0.00305375		4045.58	0.01121497
505.8	0.04737057		1095.79	0.00513002		1685.8	-0.00117561		2275.8	0.00806381		2865.79	-0.00278579		3455.78	-0.00291107		4045.78	0.01151363
506	0.04674021		1095.99	0.00502866		1686	-0.00085548		2276	0.00641966		2865.99	-0.00251187		3455.98	-0.00281855		4045.98	0.01148977
506.2	0.04536292		1096.19	0.005114		1686.2	-0.00187709		2276.2	0.00681236		2866.19	-0.00249889		3456.18	-0.00234189		4046.18	0.01101646
506.4	0.04510065		1096.39	0.00421282		1686.4	-0.00190185		2276.4	0.00642973		2866.39	-0.00329117		3456.38	-0.00267517		4046.38	0.01023618
506.6	0.04446422		1096.59	0.00465824		1686.6	-0.00212979		2276.6	0.00538719		2866.59	-0.00336603		3456.58	-0.00169921		4046.58	0.01012169
506.8	0.04362306		1096.79	0.00389433		1686.8	-0.00236679		2276.8	0.00505114		2866.79	-0.00417695		3456.78	-0.00144013		4046.78	0.00911206
507	0.04399294		1096.99	0.00375176		1687	-0.00269277		2277	0.00456025		2866.99	-0.00372159		3456.98	-0.00174741		4046.98	0.00899696
507.2	0.04354336		1097.19	0.00380096		1687.2	-0.00236489		2277.2	0.00356081		2867.19	-0.00345733		3457.18	-0.00200605		4047.18	0.00875674
507.4	0.04328375		1097.39	0.00299069		1687.4	-0.00194861		2277.4	0.00323216		2867.39	-0.00333395		3457.38	-0.00256103		4047.38	0.00903962
507.6	0.04348209		1097.59	0.00300466		1687.6	-0.00187787		2277.6	0.00259083		2867.59	-0.00318479		3457.58	-0.00286791		4047.58	0.00850933
507.8	0.04337976		1097.79	0.00228162		1687.8	-0.00128539		2277.8	0.00339399		2867.79	-0.00228209		3457.78	-0.00336269		4047.78	0.00845183
508	0.04360862		1097.99	0.00145261		1688	-0.00168144		2278	0.00302592		2867.99	-0.00113337		3457.98	-0.00397381		4047.98	0.00896936
508.2	0.04376996		1098.19	0.00059041		1688.2	-0.00121876		2278.2	0.00387194		2868.19	-0.00120876		3458.18	-0.00379996		4048.18	0.0085325
508.4	0.04345431		1098.39	0.00045322		1688.4	-0.00082292		2278.4	0.00403016		2868.39	-0.00148434		3458.38	-0.0035439		4048.38	0.00857248
508.6	0.04374651		1098.59	0.00123907		1688.6	-0.00000279		2278.6	0.00511518		2868.59	-0.00132934		3458.58	-0.00396578		4048.58	0.00843009
508.8	0.04426968		1098.79	0.0013014		1688.8	0.00015232		2278.8	0.00610469		2868.79	-0.0012899		3458.78	-0.00409284		4048.78	0.00875197
509	0.04457988		1098.99	0.0012805		1689	0.00047847		2279	0.00717189		2868.99	-0.00221213		3458.98	-0.00473725		4048.98	0.00888118
509.2	0.04466348		1099.19	0.00084914		1689.2	0.00072155		2279.2	0.00818832		2869.19	-0.00223122		3459.18	-0.00421016		4049.18	0.00785667
509.4	0.04460629		1099.39	0.00164307		1689.4	0.00226475		2279.4	0.00819378		2869.39	-0.00327409		3459.38	-0.00304558		4049.38	0.00745633
509.6	0.04434515		1099.59	0.00154871		1689.6	0.0031685		2279.6	0.00831295		2869.59	-0.0042674		3459.58	-0.00269165		4049.58	0.00701024
509.8	0.04385707		1099.79	0.00237459		1689.8	0.00276186		2279.8	0.00767262		2869.79	-0.00442073		3459.78	-0.0020921		4049.78	0.00683995
510	0.04387277		1099.99	0.00290051		1690	0.00233456		2280	0.00786207		2869.99	-0.00457983		3459.98	-0.00113195		4049.98	0.00577105
510.2	0.04339785		1100.19	0.00320872		1690.2	0.00188637		2280.2	0.00928913		2870.19	-0.00374317		3460.18	-0.0005016		4050.18	0.00539229
510.4	0.04315263		1100.39	0.00360066		1690.4	0.00181215		2280.4	0.00896617		2870.39	-0.00444054		3460.38	-0.00069973		4050.38	0.00422909
510.6	0.04258403		1100.59	0.00306215		1690.6	0.00168526		2280.6	0.00862942		2870.59	-0.00363866		3460.58	-0.00004062		4050.58	0.00429336
510.8	0.04252911		1100.79	0.00264179		1690.8	0.00191445		2280.8	0.00840828		2870.79	-0.00352323		3460.78	-0.00218412		4050.78	0.00439691
511	0.04316672		1100.99	0.00262404		1691	0.00128295		2281	0.00779234		2870.99	-0.00295625		3460.98	-0.0026454		4050.98	0.00501474
511.2	0.0427469		1101.19	0.00289672		1691.2	0.00131166		2281.2	0.00774504		2871.19	-0.00140211		3461.18	-0.00230816		4051.18	0.00494393
511.4	0.04325564		1101.39	0.00332762		1691.4	0.00078616		2281.4	0.00766911		2871.39	-0.00143302		3461.38	-0.00299141		4051.38	0.0047794
511.6	0.04340991		1101.59	0.00296029		1691.6	0.0008673		2281.6	0.00708656		2871.59	-0.00057288		3461.58	-0.00332887		4051.58	0.00526907
511.8	0.04357265		1101.79	0.00297893		1691.8	0.00010365		2281.8	0.00601222		2871.79	-0.00022282		3461.78	-0.00375958		4051.78	0.00578306
512	0.04331428		1101.99	0.00305706		1692	-0.00064133		2282	0.00507049		2871.99	-0.00023291		3461.98	-0.00407586		4051.98	0.00647008
512.2	0.04277177		1102.19	0.00348703		1692.2	0.00008421		2282.2	0.00533669		2872.19	-0.00089977		3462.18	-0.00349812		4052.18	0.00707235
512.4	0.04313735		1102.39	0.00433258		1692.4	-0.00032693		2282.4	0.00585212		2872.39	-0.00112106		3462.38	-0.00369046		4052.38	0.00794495
512.6	0.04308404		1102.59	0.00466278		1692.6	-0.00034815		2282.6	0.00706206		2872.59	-0.00052604		3462.58	-0.00419313		4052.58	0.00861886
512.8	0.04288351		1102.79	0.0046497		1692.8	-0.00052136		2282.8	0.00756337		2872.79	-0.00110827		3462.78	-0.00402651		4052.78	0.00912933
513	0.04297666		1102.99	0.00498784		1693	0.00067392		2283	0.00760894		2872.99	-0.00202636		3462.98	-0.00414483		4052.98	0.00936874
513.2	0.04299622		1103.19	0.00507462		1693.2	0.00083753		2283.2	0.00699654		2873.19	-0.00237129		3463.18	-0.00369825		4053.18	0.00928378
513.4	0.04281021		1103.39	0.00534219		1693.4	0.00150637		2283.4	0.0063903		2873.39	-0.00305222		3463.38	-0.00273833		4053.38	0.00919915
513.6	0.04262168		1103.59	0.00500234		1693.6	0.00107807		2283.6	0.00615502		2873.59	-0.00336478		3463.58	-0.00198973		4053.58	0.00914271
513.8	0.04237747		1103.79	0.00579901		1693.8	0.00085164		2283.8	0.00586978		2873.79	-0.0031868		3463.78	-0.00129987		4053.78	0.00847973
514	0.04210508		1103.99	0.00597458		1694	0.00115416		2284	0.0058517		2873.99	-0.00296605		3463.98	0.00011337		4053.98	0.00699586
514.2	0.04167359		1104.19	0.00606041		1694.2	0.00208615		2284.2	0.0063308		2874.19	-0.00242206		3464.18	-0.00000024		4054.18	0.00693271
514.4	0.04166579		1104.39	0.00577914		1694.4	0.00257511		2284.4	0.00585873		2874.39	-0.00264694		3464.38	-0.00055451		4054.38	0.00610741
514.6	0.04150353		1104.59	0.00500624		1694.6	0.0036082		2284.6	0.00499834		2874.59	-0.00172435		3464.58	-0.00043919		4054.58	0.00668903
514.8	0.0419249		1104.79	0.00583529		1694.8	0.00291596		2284.8	0.00460589		2874.79	-0.00128603		3464.78	-0.00090009		4054.78	0.0066762
515	0.04184738		1104.99	0.00587675		1695	0.0022677		2285	0.00445045		2874.99	-0.0008234		3464.98	-0.00078896		4054.98	0.00648878
515.2	0.04192468		1105.19	0.00527263		1695.2	0.00180923		2285.2	0.00457448		2875.19	-0.00056565		3465.18	-0.00068719		4055.18	0.00549256
515.4	0.04244957		1105.39	0.00490269		1695.4	0.00121403		2285.4	0.00415986		2875.39	-0.00073043		3465.38	-0.00145923		4055.38	0.00548663
515.6	0.04169745		1105.59	0.00380538		1695.6	0.00094618		2285.6	0.00359669		2875.59	-0.00049929		3465.58	-0.00149326		4055.58	0.00626531
515.8	0.04170104		1105.79	0.00416092		1695.8	0.0002378		2285.8	0.00343464		2875.79	-0.00024835		3465.78	-0.00129979		4055.78	0.00573724
516	0.04159706		1105.99	0.00352177		1696	-0.00051593		2286	0.00359774		2875.99	0.00027483		3465.98	-0.00133753		4055.98	0.00590779
516.2	0.04194334		1106.19	0.0040249		1696.2	-0.00015939		2286.2	0.00460864		2876.19	0.00025472		3466.18	-0.001544		4056.18	0.00666159
516.4	0.04206512		1106.39	0.003895		1696.4	-0.00116663		2286.4	0.00598193		2876.39	0.00045685		3466.38	-0.00217266		4056.38	0.00655841
516.6	0.04182341		1106.59	0.00406158		1696.6	-0.0011928		2286.6	0.00599355		2876.59	0.00077517		3466.58	-0.00289498		4056.58	0.00686548
516.8	0.04215611		1106.79	0.00453695		1696.8	-0.00136204		2286.8	0.00693536		2876.79	-0.0004625		3466.78	-0.00375028		4056.78	0.00718474
517	0.04202474		1106.99	0.00484064		1697	-0.00075303		2287	0.00699684		2876.99	0.00020757		3466.98	-0.00483722		4056.98	0.00691066
517.2	0.04170574		1107.19	0.00498936		1697.2	-0.00087386		2287.2	0.00577361		2877.19	-0.00027506		3467.18	-0.00567783		4057.18	0.00713366
517.4	0.04191693		1107.39	0.00511205		1697.4	-0.00095924		2287.4	0.00665168		2877.39	-0.0007114		3467.38	-0.00477272		4057.38	0.00707468
517.6	0.04183917		1107.59	0.005699		1697.6	-0.00168104		2287.6	0.006627		2877.59	-0.00084754		3467.58	-0.00417677		4057.58	0.00755868
517.8	0.04119549		1107.79	0.00633966		1697.8	-0.00113009		2287.8	0.00576512		2877.79	-0.00068719		3467.78	-0.00442158		4057.78	0.00674653
518	0.04091007		1107.99	0.00587732		1698	-0.00096085		2288	0.00633441		2877.99	-0.00087915		3467.98	-0.00459537		4057.98	0.0064072
518.2	0.04033819		1108.19	0.00561282		1698.2	-0.00001653		2288.2	0.00647081		2878.19	-0.00092828		3468.18	-0.00520449		4058.18	0.00782058
518.4	0.03950721		1108.39	0.00554111		1698.4	-0.00032735		2288.4	0.00638887		2878.39	-0.0008672		3468.38	-0.0046331		4058.38	0.00844393
518.6	0.03945514		1108.59	0.00561122		1698.6	-0.00070055		2288.6	0.00510366		2878.59	-0.00105905		3468.58	-0.00433799		4058.58	0.00807871
518.8	0.04043911		1108.79	0.00612984		1698.8	-0.00107767		2288.8	0.00509398		2878.79	-0.00181846		3468.78	-0.00428288		4058.78	0.00750067
519	0.04127604		1108.99	0.00553324		1699	-0.00100731		2289	0.00529259		2878.99	-0.00179316		3468.98	-0.00421283		4058.98	0.00638151
519.2	0.0417268		1109.19	0.00502529		1699.2	-0.0011451		2289.2	0.00562578		2879.19	-0.00161784		3469.18	-0.00325941		4059.18	0.00621284
519.4	0.04242475		1109.39	0.00468502		1699.4	-0.00081837		2289.4	0.00618827		2879.39	-0.00129663		3469.38	-0.00398851		4059.38	0.00654029
519.6	0.04267098		1109.59	0.00529866		1699.6	-0.00051727		2289.6	0.00602565		2879.59	-0.0022118		3469.58	-0.00438188		4059.58	0.00645653
519.8	0.04355336		1109.79	0.00524958		1699.8	-0.00068498		2289.8	0.00684814		2879.79	-0.00227834		3469.78	-0.00456589		4059.78	0.00536721
520	0.04416942		1109.99	0.00456583		1700	-0.00104921		2290	0.00735928		2879.99	-0.00302097		3469.98	-0.00524243		4059.98	0.00523337
520.2	0.04455699		1110.19	0.00477278		1700.2	-0.00043479		2290.2	0.00850887		2880.19	-0.00367411		3470.18	-0.00640013		4060.18	0.00542835
520.4	0.04413348		1110.39	0.00400918		1700.4	-0.00019745		2290.4	0.00793124		2880.39	-0.0045845		3470.38	-0.00691058		4060.38	0.00550626
520.6	0.04406053		1110.59	0.00453148		1700.6	0.00001508		2290.6	0.00788915		2880.59	-0.00549923		3470.58	-0.00782793		4060.58	0.00550414
520.8	0.04372285		1110.79	0.00404667		1700.8	0.00050425		2290.8	0.00745553		2880.79	-0.00657957		3470.78	-0.00822068		4060.78	0.00576452
521	0.04342858		1110.99	0.00365062		1701	0.00154067		2291	0.00643833		2880.99	-0.0062529		3470.98	-0.00770765		4060.98	0.00469417
521.2	0.04401384		1111.19	0.00341135		1701.2	0.00175219		2291.2	0.00555359		2881.19	-0.00723459		3471.18	-0.00738557		4061.18	0.00535171
521.4	0.04444707		1111.39	0.00339266		1701.4	0.00196247		2291.4	0.00563553		2881.39	-0.0071268		3471.38	-0.00633636		4061.38	0.00504328
521.6	0.04441689		1111.59	0.00286634		1701.6	0.00229076		2291.6	0.00467067		2881.59	-0.00671426		3471.58	-0.00597412		4061.58	0.0059116
521.8	0.04363021		1111.79	0.00120685		1701.8	0.00310506		2291.8	0.00454754		2881.79	-0.00624091		3471.78	-0.00651967		4061.78	0.00567402
522	0.04363246		1111.99	0.00046433		1702	0.0034451		2292	0.00484872		2881.99	-0.00588479		3471.98	-0.00580458		4061.98	0.00692429
522.2	0.04302149		1112.19	0.00021898		1702.2	0.00311708		2292.2	0.00393071		2882.19	-0.00502739		3472.18	-0.00475309		4062.18	0.00820534
522.4	0.04281498		1112.39	0.00048253		1702.4	0.00225812		2292.4	0.00421953		2882.39	-0.00448078		3472.38	-0.00334038		4062.38	0.00802833
522.6	0.04402363		1112.59	0.00072136		1702.6	0.00232093		2292.6	0.0037321		2882.59	-0.00320186		3472.58	-0.00324116		4062.58	0.00701315
522.8	0.04492204		1112.79	0.00095521		1702.8	0.00231363		2292.8	0.00406956		2882.79	-0.00261617		3472.78	-0.00285052		4062.78	0.00647516
523	0.04537095		1112.99	0.00223871		1703	0.00250566		2293	0.00429214		2882.99	-0.00120056		3472.98	-0.00323373		4062.98	0.0057067
523.2	0.04534409		1113.19	0.00279731		1703.2	0.00209832		2293.2	0.00437618		2883.19	-0.00061931		3473.18	-0.00351258		4063.18	0.0053055
523.4	0.04546614		1113.39	0.00361203		1703.4	0.00225543		2293.4	0.0050097		2883.39	-0.00169744		3473.38	-0.00432193		4063.38	0.00543777
523.6	0.04502131		1113.59	0.00499765		1703.6	0.00178322		2293.6	0.00493294		2883.59	-0.00210104		3473.58	-0.00500394		4063.58	0.00528921
523.8	0.04381787		1113.79	0.00447357		1703.8	0.00215633		2293.8	0.00541825		2883.79	-0.00216439		3473.78	-0.0051162		4063.78	0.00399472
524	0.04327903		1113.99	0.00452399		1704	0.00129458		2294	0.00548899		2883.99	-0.00289061		3473.98	-0.00506609		4063.98	0.00499145
524.2	0.04209582		1114.19	0.00483594		1704.2	0.00108524		2294.2	0.00574575		2884.19	-0.0036425		3474.18	-0.00604699		4064.18	0.00534616
524.4	0.04049935		1114.39	0.00546756		1704.4	0.00201265		2294.4	0.00435229		2884.39	-0.00452653		3474.38	-0.00586362		4064.38	0.00638155
524.6	0.039917		1114.59	0.00500314		1704.6	0.0018789		2294.6	0.004722		2884.59	-0.00501825		3474.58	-0.00572093		4064.58	0.00612307
524.8	0.03963046		1114.79	0.00398832		1704.8	0.00240692		2294.8	0.00360208		2884.79	-0.0050917		3474.78	-0.00478782		4064.78	0.00647671
525	0.03968305		1114.99	0.00389102		1705	0.00231919		2295	0.00317668		2884.99	-0.00505491		3474.98	-0.00468822		4064.98	0.00655791
525.2	0.03903317		1115.19	0.00420323		1705.2	0.00173581		2295.2	0.00237275		2885.19	-0.00474032		3475.18	-0.00488584		4065.18	0.0075935
525.4	0.03817251		1115.39	0.00348522		1705.4	0.00243754		2295.4	0.00225292		2885.39	-0.00440181		3475.38	-0.00501881		4065.38	0.00798446
525.6	0.03833776		1115.59	0.00294524		1705.6	0.00203822		2295.6	0.0021245		2885.59	-0.00386565		3475.58	-0.00576095		4065.58	0.00847438
525.8	0.03800067		1115.79	0.00148539		1705.8	0.00188327		2295.8	0.00285493		2885.79	-0.00351246		3475.78	-0.00619146		4065.78	0.00927912
526	0.03865859		1115.99	0.00062279		1706	0.00103488		2296	0.0026336		2885.99	-0.00314487		3475.98	-0.00520132		4065.98	0.01026153
526.2	0.03839432		1116.19	0.00048932		1706.2	0.00133887		2296.2	0.00264639		2886.19	-0.00191562		3476.18	-0.00496373		4066.18	0.01038785
526.4	0.03873387		1116.39	0.000286		1706.4	0.00064981		2296.4	0.00386198		2886.39	-0.00207665		3476.38	-0.00510347		4066.38	0.01049354
526.6	0.03929354		1116.59	-0.00096688		1706.6	0.00032947		2296.6	0.00348128		2886.59	-0.00198414		3476.58	-0.00585148		4066.58	0.00998403
526.8	0.03947204		1116.79	-0.00130646		1706.8	0.00023268		2296.8	0.00395295		2886.79	-0.00181982		3476.78	-0.00636288		4066.78	0.00906508
527	0.03946944		1116.99	-0.0009293		1707	0.00069905		2297	0.0036521		2886.99	-0.00150517		3476.98	-0.00616802		4066.98	0.00776226
527.2	0.03979232		1117.19	-0.00076011		1707.2	-0.00022767		2297.2	0.00354957		2887.19	-0.00171993		3477.18	-0.00582938		4067.18	0.00636602
527.4	0.03930635		1117.39	-0.00078303		1707.4	-0.00017245		2297.4	0.00307118		2887.39	-0.0032084		3477.38	-0.00579553		4067.38	0.00636404
527.6	0.03889705		1117.59	-0.00071903		1707.6	-0.00010498		2297.6	0.00339792		2887.59	-0.00262646		3477.58	-0.0057689		4067.58	0.00585928
527.8	0.03898637		1117.79	-0.00127155		1707.8	-0.00027815		2297.8	0.00341639		2887.79	-0.00304115		3477.78	-0.00478847		4067.78	0.00542253
528	0.03944954		1117.99	-0.00112771		1708	-0.00024743		2298	0.00312799		2887.99	-0.00345439		3477.98	-0.00447611		4067.98	0.00627854
528.2	0.03932892		1118.19	-0.00067627		1708.2	0.00029578		2298.2	0.00324924		2888.19	-0.00342029		3478.18	-0.00414941		4068.18	0.00575862
528.4	0.03925278		1118.39	-0.0009919		1708.4	0.00107572		2298.4	0.0032557		2888.39	-0.00244686		3478.38	-0.00338876		4068.38	0.00617845
528.6	0.03945725		1118.59	-0.00127811		1708.6	0.00058816		2298.6	0.00337946		2888.59	-0.00246234		3478.58	-0.00303313		4068.58	0.00579345
528.8	0.03992022		1118.79	-0.00040936		1708.8	-0.00013166		2298.8	0.00289256		2888.79	-0.00291288		3478.78	-0.0021887		4068.78	0.00640926
529	0.03977221		1118.99	0.00051301		1709	-0.00016324		2299	0.00309041		2888.99	-0.00316761		3478.98	-0.00243033		4068.98	0.00695135
529.2	0.04022001		1119.19	0.00132616		1709.2	-0.00000739		2299.2	0.00357529		2889.19	-0.00244613		3479.18	-0.00244607		4069.18	0.00792969
529.4	0.04053694		1119.39	0.00114121		1709.4	0.00042296		2299.4	0.00424074		2889.39	-0.00273418		3479.38	-0.00255404		4069.38	0.00831272
529.6	0.04055811		1119.59	0.00229663		1709.6	0.00026454		2299.6	0.00424868		2889.59	-0.00330605		3479.58	-0.00296086		4069.58	0.00863749
529.8	0.04024497		1119.79	0.00212689		1709.8	0.0005935		2299.8	0.00440742		2889.79	-0.00335974		3479.78	-0.00239874		4069.78	0.01026443
530	0.04018063		1119.99	0.00194783		1710	0.0013885		2300	0.00499247		2889.99	-0.00366418		3479.98	-0.00270607		4069.98	0.01006273
530.2	0.03932755		1120.19	0.0024258		1710.2	0.00181269		2300.2	0.00493709		2890.19	-0.00299877		3480.18	-0.00315982		4070.18	0.0102957
530.4	0.03853715		1120.39	0.0017171		1710.4	0.00044782		2300.4	0.00522207		2890.39	-0.00334744		3480.38	-0.00372748		4070.38	0.01080728
530.6	0.03829859		1120.59	0.00112766		1710.6	0.00006488		2300.6	0.0050084		2890.59	-0.0034276		3480.58	-0.00437278		4070.58	0.01050858
530.8	0.03742997		1120.79	0.0023368		1710.8	0.00036148		2300.8	0.00541483		2890.79	-0.00284574		3480.78	-0.00447379		4070.78	0.00927849
531	0.03790945		1120.99	0.00298069		1711	0.00010579		2301	0.00470026		2890.99	-0.00336048		3480.98	-0.00471762		4070.98	0.00863999
531.2	0.03748065		1121.19	0.0025327		1711.2	-0.00073921		2301.2	0.00458786		2891.19	-0.00330101		3481.18	-0.00642038		4071.18	0.00820066
531.4	0.03745533		1121.39	0.00214933		1711.4	-0.0009075		2301.4	0.00460151		2891.39	-0.00285928		3481.38	-0.00653029		4071.38	0.00843499
531.6	0.03782881		1121.59	0.00237196		1711.6	-0.00053502		2301.6	0.00521985		2891.59	-0.00243131		3481.58	-0.00629568		4071.58	0.00790977
531.8	0.03825099		1121.79	0.00214904		1711.8	-0.00076175		2301.8	0.00484791		2891.79	-0.00301315		3481.78	-0.00732776		4071.78	0.00682279
532	0.03831177		1121.99	0.00221373		1712	-0.00060581		2302	0.00561306		2891.99	-0.00211771		3481.98	-0.00775812		4071.98	0.00567907
532.2	0.03843344		1122.19	0.00240899		1712.2	-0.00139431		2302.2	0.00675745		2892.19	-0.00119842		3482.18	-0.00764128		4072.18	0.00500293
532.4	0.03828809		1122.39	0.00155764		1712.4	-0.00168142		2302.4	0.00697976		2892.39	-0.00029677		3482.38	-0.00787199		4072.38	0.00530369
532.6	0.03865729		1122.59	0.00131687		1712.6	-0.00219298		2302.6	0.00713012		2892.59	-0.00062499		3482.58	-0.00688153		4072.58	0.0061767
532.8	0.03905655		1122.79	0.00086119		1712.8	-0.00191715		2302.8	0.00718764		2892.79	-0.00123372		3482.78	-0.00579725		4072.78	0.00625928
533	0.03887891		1122.99	0.00083517		1713	-0.00176416		2303	0.00757988		2892.99	-0.00104924		3482.98	-0.00540199		4072.98	0.00601098
533.2	0.03932697		1123.19	0.00142756		1713.2	-0.00197476		2303.2	0.00681415		2893.19	-0.00170584		3483.18	-0.00472334		4073.18	0.00698449
533.4	0.03850986		1123.39	0.00087052		1713.4	-0.00253551		2303.4	0.00647259		2893.39	-0.00274806		3483.38	-0.00463049		4073.38	0.00647563
533.6	0.03699534		1123.59	0.00049431		1713.6	-0.00231015		2303.6	0.0064578		2893.59	-0.00292799		3483.58	-0.00428662		4073.58	0.00648931
533.8	0.03667808		1123.79	0.00014191		1713.8	-0.00301623		2303.8	0.00654776		2893.79	-0.00315006		3483.78	-0.00402926		4073.78	0.00626828
534	0.03606838		1123.99	-0.0007603		1714	-0.00281056		2304	0.00701599		2893.99	-0.00349476		3483.98	-0.00498957		4073.98	0.00624175
534.2	0.03537501		1124.19	-0.00090525		1714.2	-0.00340402		2304.2	0.0064245		2894.19	-0.00301881		3484.18	-0.0046171		4074.18	0.00744873
534.4	0.03509428		1124.39	-0.00042506		1714.4	-0.00371711		2304.4	0.00644534		2894.39	-0.00380021		3484.38	-0.00556407		4074.38	0.00801759
534.6	0.0351153		1124.59	-0.0003143		1714.6	-0.00390431		2304.6	0.00640761		2894.59	-0.00407627		3484.58	-0.00640563		4074.58	0.00773275
534.8	0.03494995		1124.79	0.00082925		1714.8	-0.00360785		2304.8	0.0069022		2894.79	-0.00420957		3484.78	-0.00636777		4074.78	0.00745247
535	0.03613967		1124.99	0.00059747		1715	-0.00327649		2305	0.00759928		2894.99	-0.00422642		3484.98	-0.00751625		4074.98	0.00796391
535.2	0.03602183		1125.19	-0.00013717		1715.2	-0.0032696		2305.2	0.00736331		2895.19	-0.00375653		3485.18	-0.00767998		4075.18	0.00810968
535.4	0.03642742		1125.39	0.00036718		1715.4	-0.00296171		2305.4	0.00809096		2895.39	-0.00335372		3485.38	-0.00751874		4075.38	0.00738169
535.6	0.03682494		1125.59	0.00038524		1715.6	-0.00264057		2305.6	0.0084812		2895.59	-0.00364663		3485.58	-0.00739006		4075.58	0.00740868
535.8	0.03733625		1125.79	0.00078651		1715.8	-0.00158522		2305.8	0.00922665		2895.79	-0.00280375		3485.78	-0.00825074		4075.78	0.00747053
536	0.03862873		1125.99	0.00135733		1716	-0.00178144		2306	0.01022821		2895.99	-0.00197812		3485.98	-0.00750038		4075.98	0.0068338
536.2	0.03844855		1126.19	0.00207837		1716.2	-0.00129828		2306.2	0.00980748		2896.19	-0.00139232		3486.18	-0.00671501		4076.18	0.00691216
536.4	0.03984595		1126.39	0.00145781		1716.4	-0.00104366		2306.4	0.00841383		2896.39	-0.00110399		3486.38	-0.00570894		4076.38	0.00777894
536.6	0.04064474		1126.59	0.00182465		1716.6	-0.0003721		2306.6	0.00790447		2896.59	-0.0014951		3486.58	-0.00495025		4076.58	0.00767514
536.8	0.040519		1126.79	0.00217112		1716.8	0.00038558		2306.8	0.00615925		2896.79	-0.00239224		3486.78	-0.00463179		4076.78	0.00696426
537	0.04057462		1126.99	0.00252163		1717	0.00040111		2307	0.00471545		2896.99	-0.00292787		3486.98	-0.00382243		4076.98	0.00740869
537.2	0.03996508		1127.19	0.00318786		1717.2	0.00049561		2307.2	0.00324771		2897.19	-0.00406507		3487.18	-0.0036		4077.18	0.00752557
537.4	0.03966416		1127.39	0.00183479		1717.4	0.00024412		2307.4	0.00351438		2897.39	-0.00371957		3487.38	-0.00367548		4077.38	0.00727835
537.6	0.03844364		1127.59	0.0019253		1717.6	-0.00002914		2307.6	0.00278591		2897.59	-0.00446942		3487.58	-0.00402456		4077.58	0.00632302
537.8	0.03844562		1127.79	0.00150765		1717.8	-0.00006627		2307.8	0.00193421		2897.79	-0.00516679		3487.78	-0.00474859		4077.78	0.00657708
538	0.03859779		1127.99	0.00099437		1718	0.00006093		2308	0.00145712		2897.99	-0.00561458		3487.98	-0.00545762		4077.98	0.00678955
538.2	0.0381141		1128.19	0.0012535		1718.2	-0.00023836		2308.2	0.00201249		2898.19	-0.00565205		3488.18	-0.00583507		4078.18	0.00786297
538.4	0.03800118		1128.39	0.00171222		1718.4	-0.00042105		2308.4	0.00219318		2898.39	-0.00558925		3488.38	-0.00758231		4078.38	0.00694664
538.6	0.03747227		1128.59	0.0015337		1718.6	-0.00093806		2308.6	0.00273675		2898.59	-0.00473529		3488.58	-0.0077037		4078.58	0.00663533
538.8	0.03761586		1128.79	0.00187369		1718.8	-0.00164252		2308.8	0.00364898		2898.79	-0.00442072		3488.78	-0.00720651		4078.78	0.00661374
539	0.03763216		1128.99	0.00116523		1719	-0.00133873		2309	0.00435045		2898.99	-0.00352587		3488.98	-0.00831715		4078.98	0.00642001
539.2	0.03788311		1129.19	0.00045235		1719.2	-0.00145764		2309.2	0.00481991		2899.19	-0.00330464		3489.18	-0.00849304		4079.18	0.00668472
539.4	0.03804925		1129.39	0.00008196		1719.4	-0.00099955		2309.4	0.0052978		2899.39	-0.00228077		3489.38	-0.00947015		4079.38	0.00641133
539.6	0.03917255		1129.59	-0.00010305		1719.6	-0.00016972		2309.6	0.00574853		2899.59	-0.002458		3489.58	-0.0092679		4079.58	0.00790406
539.8	0.04047863		1129.79	0.00048091		1719.8	-0.00024081		2309.8	0.00607223		2899.79	-0.0028358		3489.78	-0.009731		4079.78	0.00756775
540	0.04085924		1129.99	0.00125929		1720	-0.00108521		2310	0.00623739		2899.99	-0.00254895		3489.98	-0.00954012		4079.98	0.00680705
540.2	0.04106954		1130.19	0.00105998		1720.2	-0.00092106		2310.2	0.00578265		2900.19	-0.00254357		3490.18	-0.00910259		4080.18	0.00662875
540.4	0.04242916		1130.39	0.00066526		1720.4	-0.00056742		2310.4	0.00545514		2900.39	-0.00338822		3490.38	-0.00982195		4080.38	0.00681953
540.6	0.0423371		1130.59	0.00038392		1720.6	-0.00007057		2310.6	0.00478267		2900.59	-0.0039075		3490.58	-0.00973153		4080.58	0.00679755
540.8	0.04134899		1130.79	-0.00033255		1720.8	0.00085501		2310.8	0.00418598		2900.79	-0.00415496		3490.78	-0.00859443		4080.78	0.00797669
541	0.04096133		1130.99	-0.00050332		1721	0.00079326		2311	0.00376909		2900.99	-0.00414477		3490.98	-0.0077121		4080.98	0.00862401
541.2	0.03964878		1131.19	-0.00038012		1721.2	0.00015051		2311.2	0.00344391		2901.19	-0.00451183		3491.18	-0.00727257		4081.18	0.00833485
541.4	0.04000721		1131.39	-0.00166913		1721.4	-0.00028317		2311.4	0.00370097		2901.39	-0.00400707		3491.38	-0.00691303		4081.38	0.00836835
541.6	0.03931227		1131.59	-0.00180071		1721.6	-0.00053787		2311.6	0.0025827		2901.59	-0.00515652		3491.58	-0.00648219		4081.58	0.00806075
541.8	0.03887841		1131.79	-0.00211344		1721.8	-0.00090814		2311.8	0.00238009		2901.79	-0.00527103		3491.78	-0.00608193		4081.78	0.00854341
542	0.03837742		1131.99	-0.00150755		1722	-0.00139553		2312	0.00264864		2901.99	-0.00516167		3491.98	-0.00658435		4081.98	0.00837424
542.2	0.03777605		1132.19	-0.00080306		1722.2	-0.0025852		2312.2	0.0038113		2902.19	-0.00454758		3492.18	-0.00692743		4082.18	0.00902588
542.4	0.03803579		1132.39	0.00063978		1722.4	-0.00239729		2312.4	0.00493704		2902.39	-0.00388966		3492.38	-0.00643936		4082.38	0.0078821
542.6	0.03803075		1132.59	0.00125705		1722.6	-0.00300081		2312.6	0.00550807		2902.59	-0.00348108		3492.58	-0.00619755		4082.58	0.00716147
542.8	0.03754092		1132.79	0.00209677		1722.8	-0.00294502		2312.8	0.00544541		2902.79	-0.00357983		3492.78	-0.00578838		4082.78	0.00700299
543	0.03750597		1132.99	0.00202865		1723	-0.00252		2313	0.00555961		2902.99	-0.00312696		3492.98	-0.00677056		4082.98	0.00652499
543.2	0.0385928		1133.19	0.00220214		1723.2	-0.00143933		2313.2	0.00525743		2903.19	-0.00311029		3493.18	-0.00695715		4083.18	0.00683456
543.4	0.03866085		1133.39	0.00316519		1723.4	-0.00057266		2313.4	0.00486902		2903.39	-0.0037968		3493.38	-0.00759691		4083.38	0.00693326
543.6	0.03873568		1133.59	0.00332954		1723.6	-0.00069826		2313.6	0.00548789		2903.59	-0.00440628		3493.58	-0.00792168		4083.58	0.00744521
543.8	0.03918176		1133.79	0.00408715		1723.8	-0.00141016		2313.8	0.00534086		2903.79	-0.00474643		3493.78	-0.00834848		4083.78	0.00677854
544	0.03883349		1133.99	0.00430066		1724	-0.00115411		2314	0.00571952		2903.99	-0.00445483		3493.98	-0.00883882		4083.98	0.00708987
544.2	0.03959957		1134.19	0.0038644		1724.2	-0.00094963		2314.2	0.00577526		2904.19	-0.00528657		3494.18	-0.0094067		4084.18	0.00764773
544.4	0.04008768		1134.39	0.00317449		1724.4	-0.00116782		2314.4	0.00511344		2904.39	-0.00549663		3494.38	-0.01053295		4084.38	0.00824252
544.6	0.04005588		1134.59	0.00150985		1724.6	-0.00151062		2314.6	0.00399772		2904.59	-0.00516125		3494.58	-0.00949814		4084.58	0.00860437
544.8	0.03903566		1134.79	0.0006415		1724.8	-0.00132461		2314.8	0.00409379		2904.79	-0.00528113		3494.78	-0.00922997		4084.78	0.00899072
545	0.03814181		1134.99	0.00034397		1725	-0.00248738		2315	0.00326028		2904.99	-0.0052867		3494.98	-0.0088927		4084.98	0.00920183
545.2	0.03704836		1135.19	-0.00012582		1725.2	-0.00269811		2315.2	0.00289553		2905.19	-0.00527938		3495.18	-0.00819311		4085.18	0.01021855
545.4	0.03727477		1135.39	-0.00124522		1725.4	-0.00336732		2315.4	0.0028306		2905.39	-0.00510842		3495.38	-0.00813778		4085.38	0.00973735
545.6	0.03672402		1135.59	-0.00125117		1725.6	-0.0037129		2315.6	0.00198394		2905.59	-0.0051129		3495.58	-0.00732932		4085.58	0.00994721
545.8	0.03598176		1135.79	-0.00121474		1725.8	-0.0040405		2315.8	0.00213125		2905.79	-0.00447831		3495.78	-0.00732419		4085.78	0.00897673
546	0.03618961		1135.99	-0.00101696		1726	-0.00399252		2316	0.00221279		2905.99	-0.00399761		3495.98	-0.00706648		4085.98	0.00915649
546.2	0.03698272		1136.19	-0.00128567		1726.2	-0.00506647		2316.2	0.00376982		2906.19	-0.00397753		3496.18	-0.00606848		4086.18	0.00845207
546.4	0.03654475		1136.39	-0.00093133		1726.4	-0.0042471		2316.4	0.00426862		2906.39	-0.00397571		3496.38	-0.00551286		4086.38	0.00775247
546.6	0.0371093		1136.59	-0.00195862		1726.6	-0.0042135		2316.6	0.00390904		2906.59	-0.00416081		3496.58	-0.00571945		4086.58	0.00745899
546.8	0.03683776		1136.79	-0.00132558		1726.8	-0.00350689		2316.8	0.00404118		2906.79	-0.0041764		3496.78	-0.00510669		4086.78	0.00774682
547	0.03729934		1136.99	-0.00134866		1727	-0.00299503		2317	0.0047833		2906.99	-0.0039		3496.98	-0.00496752		4086.98	0.00705831
547.2	0.03765695		1137.19	-0.00056653		1727.2	-0.00192767		2317.2	0.0049748		2907.19	-0.00341887		3497.18	-0.00463758		4087.18	0.00736415
547.4	0.03736853		1137.39	-0.00017896		1727.4	-0.00218833		2317.4	0.00546567		2907.39	-0.00422617		3497.38	-0.0048855		4087.38	0.00717707
547.6	0.03775708		1137.59	-0.00095713		1727.6	-0.00248708		2317.6	0.00600753		2907.59	-0.0036436		3497.58	-0.00531741		4087.58	0.00728973
547.8	0.03830295		1137.79	-0.00071656		1727.8	-0.00193531		2317.8	0.0058632		2907.79	-0.00420572		3497.78	-0.00561582		4087.78	0.00814133
548	0.03822937		1137.99	-0.00048996		1728	-0.00180808		2318	0.00629385		2907.99	-0.0044379		3497.98	-0.00597637		4087.98	0.00882929
548.2	0.03835981		1138.19	-0.00094727		1728.2	-0.00167987		2318.2	0.00597304		2908.19	-0.00446505		3498.18	-0.00628449		4088.18	0.00901946
548.4	0.03871723		1138.39	-0.00140441		1728.4	-0.00193463		2318.4	0.00488523		2908.39	-0.00491079		3498.38	-0.00626673		4088.38	0.00945199
548.6	0.038073		1138.59	-0.00190984		1728.6	-0.00150204		2318.6	0.00509229		2908.59	-0.00558821		3498.58	-0.00575797		4088.58	0.01001638
548.8	0.0371494		1138.79	-0.00141327		1728.8	-0.00101583		2318.8	0.00498299		2908.79	-0.0058908		3498.78	-0.00624341		4088.78	0.0105654
549	0.03612656		1138.99	-0.00087813		1729	-0.00109005		2319	0.00448195		2908.99	-0.00634829		3498.98	-0.00628653		4088.98	0.01077556
549.2	0.03501431		1139.19	-0.00049873		1729.2	-0.00099507		2319.2	0.00438212		2909.19	-0.00586672		3499.18	-0.00628527		4089.18	0.01104332
549.4	0.03555229		1139.39	-0.00081959		1729.4	-0.00090119		2319.4	0.00450559		2909.39	-0.00606019		3499.38	-0.00569158		4089.38	0.00909003
549.6	0.03538982		1139.59	-0.00072159		1729.6	-0.00110296		2319.6	0.00415306		2909.59	-0.00519543		3499.58	-0.00587071		4089.58	0.00904655
549.8	0.03577992		1139.79	-0.00012073		1729.8	-0.00061274		2319.8	0.00442662		2909.79	-0.00465792		3499.78	-0.00592255		4089.78	0.00836392
550	0.03687021		1139.99	0.00032323		1730	-0.00049406		2320	0.00463215		2909.99	-0.00524378		3499.98	-0.00633339		4089.98	0.00877939
550.2	0.03773221		1140.19	0.00002939		1730.2	-0.00083893		2320.2	0.00587118		2910.19	-0.00467565		3500.18	-0.00687843		4090.18	0.00811281
550.4	0.03787403		1140.39	-0.00015544		1730.4	-0.00006908		2320.4	0.0051177		2910.39	-0.00440228		3500.38	-0.00716291		4090.38	0.00847175
550.6	0.03933035		1140.59	-0.00053131		1730.6	0.00007516		2320.6	0.00528527		2910.59	-0.00431192		3500.58	-0.00712029		4090.58	0.00805871
550.8	0.03915222		1140.79	0.00017954		1730.8	0.00006809		2320.8	0.00510642		2910.79	-0.00350092		3500.78	-0.00723149		4090.78	0.00744367
551	0.03955118		1140.99	-0.0002714		1731	0.0003734		2321	0.00519043		2910.99	-0.00212495		3500.98	-0.00696399		4090.98	0.00653522
551.2	0.04029216		1141.19	-0.00001017		1731.2	-0.00002367		2321.2	0.0047298		2911.19	-0.00097537		3501.18	-0.00672589		4091.18	0.00557512
551.4	0.04025908		1141.39	-0.00063614		1731.4	-0.0011262		2321.4	0.00458726		2911.39	-0.0002489		3501.38	-0.00755655		4091.38	0.004808
551.6	0.04036291		1141.59	-0.00099421		1731.6	-0.00067094		2321.6	0.00511239		2911.59	0.00020187		3501.58	-0.00818736		4091.58	0.00464239
551.8	0.04027245		1141.79	-0.00072384		1731.8	-0.00046703		2321.8	0.00403347		2911.79	0.00033159		3501.78	-0.00800001		4091.78	0.00484124
552	0.03982602		1141.99	-0.00105281		1732	-0.00044135		2322	0.00398528		2911.99	0.00093997		3501.98	-0.00742185		4091.98	0.0053605
552.2	0.03905535		1142.19	-0.00080531		1732.2	-0.00055234		2322.2	0.00372931		2912.19	0.00124392		3502.18	-0.00700793		4092.18	0.00524692
552.4	0.03821527		1142.39	-0.00098422		1732.4	-0.00078769		2322.4	0.00338683		2912.39	0.00034658		3502.38	-0.0066777		4092.38	0.00575936
552.6	0.03745093		1142.59	-0.00165157		1732.6	-0.00098442		2322.6	0.00278695		2912.59	0.00031389		3502.58	-0.00668476		4092.58	0.00633593
552.8	0.03619808		1142.79	-0.00145915		1732.8	-0.00084104		2322.8	0.00259858		2912.79	-0.00008408		3502.78	-0.00627002		4092.78	0.00640221
553	0.03475494		1142.99	-0.00123204		1733	-0.00096744		2323	0.00290481		2912.99	-0.00092944		3502.98	-0.00643207		4092.98	0.00626971
553.2	0.03396574		1143.19	-0.00131194		1733.2	-0.00039796		2323.2	0.00232083		2913.19	-0.00079282		3503.18	-0.00685212		4093.18	0.00579831
553.4	0.03438876		1143.39	-0.00098465		1733.4	-0.00036807		2323.4	0.00276082		2913.39	-0.00156467		3503.38	-0.00683358		4093.38	0.00562452
553.6	0.03348732		1143.59	-0.00110512		1733.6	-0.00057537		2323.6	0.00270576		2913.59	-0.00147727		3503.58	-0.00804563		4093.58	0.00598149
553.8	0.03427358		1143.79	-0.00028038		1733.8	0.00038189		2323.8	0.00325254		2913.79	-0.00229326		3503.78	-0.00864893		4093.78	0.00628984
554	0.03546617		1143.99	-0.00042444		1734	0.00041621		2324	0.00355502		2913.99	-0.00337251		3503.98	-0.00940279		4093.98	0.00688482
554.2	0.03604073		1144.19	-0.0009804		1734.2	0.00015392		2324.2	0.00347795		2914.19	-0.00347639		3504.18	-0.00992007		4094.18	0.00716441
554.4	0.03602923		1144.39	-0.00144493		1734.4	0.00020558		2324.4	0.00381934		2914.39	-0.0038565		3504.38	-0.00993497		4094.38	0.00797529
554.6	0.03658638		1144.59	-0.00169491		1734.6	-0.00034319		2324.6	0.00435761		2914.59	-0.0045686		3504.58	-0.01005479		4094.58	0.00828177
554.8	0.03601675		1144.79	-0.0014062		1734.8	-0.00067805		2324.8	0.00468512		2914.79	-0.00363344		3504.78	-0.01041558		4094.78	0.00807036
555	0.0369287		1144.99	-0.00189684		1735	-0.00065755		2325	0.00494397		2914.99	-0.0037415		3504.98	-0.01127649		4094.98	0.00716728
555.2	0.03659163		1145.19	-0.00176374		1735.2	-0.00179646		2325.2	0.00515341		2915.19	-0.00334207		3505.18	-0.01174215		4095.18	0.00630418
555.4	0.03569114		1145.39	-0.00258013		1735.4	-0.00198867		2325.4	0.00506764		2915.39	-0.00256128		3505.38	-0.01187225		4095.38	0.00582838
555.6	0.03562788		1145.59	-0.00284455		1735.6	-0.00192689		2325.6	0.00494127		2915.59	-0.00355838		3505.58	-0.01155326		4095.58	0.00558282
555.8	0.03600034		1145.79	-0.003401		1735.8	-0.00188346		2325.8	0.0041364		2915.79	-0.0035393		3505.78	-0.01060658		4095.78	0.0054017
556	0.03521456		1145.99	-0.00389291		1736	-0.0018856		2326	0.00394865		2915.99	-0.00359591		3505.98	-0.00945868		4095.98	0.00594693
556.2	0.03442046		1146.19	-0.00352653		1736.2	-0.00274753		2326.2	0.00404498		2916.19	-0.00375994		3506.18	-0.00863194		4096.18	0.00563656
556.4	0.03370054		1146.39	-0.00449564		1736.4	-0.00269552		2326.4	0.00340765		2916.39	-0.00509038		3506.38	-0.00795378		4096.38	0.00555262
556.6	0.03371397		1146.59	-0.00442681		1736.6	-0.00252767		2326.6	0.00254909		2916.59	-0.00562702		3506.58	-0.0071075		4096.58	0.00631174
556.8	0.03329633		1146.79	-0.0041681		1736.8	-0.0024644		2326.8	0.0030905		2916.79	-0.00653058		3506.78	-0.00646344		4096.78	0.00649259
557	0.03296589		1146.99	-0.00344771		1737	-0.00301931		2327	0.0023637		2916.99	-0.00711274		3506.98	-0.00705263		4096.98	0.00595264
557.2	0.0334541		1147.19	-0.00295485		1737.2	-0.00289474		2327.2	0.00096716		2917.19	-0.00745433		3507.18	-0.007146		4097.18	0.00609134
557.4	0.03403785		1147.39	-0.00201846		1737.4	-0.00323222		2327.4	0.00126006		2917.39	-0.00826694		3507.38	-0.00676699		4097.38	0.00672863
557.6	0.03447179		1147.59	-0.00258929		1737.6	-0.00292348		2327.6	0.00092895		2917.59	-0.00834447		3507.58	-0.00681568		4097.58	0.00697441
557.8	0.03643014		1147.79	-0.00159732		1737.8	-0.00277279		2327.8	0.00122849		2917.79	-0.00888572		3507.78	-0.0061585		4097.78	0.00828365
558	0.03725438		1147.99	-0.00172208		1738	-0.00299246		2328	0.00133465		2917.99	-0.00877589		3507.98	-0.00544888		4097.98	0.0085767
558.2	0.03771202		1148.19	-0.00166656		1738.2	-0.00355989		2328.2	0.00188259		2918.19	-0.00803873		3508.18	-0.00538168		4098.18	0.00899498
558.4	0.03818695		1148.39	-0.00072766		1738.4	-0.00395965		2328.4	0.00236206		2918.39	-0.00704189		3508.38	-0.00446648		4098.38	0.00988261
558.6	0.03907609		1148.59	0.0001481		1738.6	-0.00421255		2328.6	0.00266133		2918.59	-0.00687679		3508.58	-0.0045285		4098.58	0.01031072
558.8	0.03890865		1148.79	0.00090975		1738.8	-0.00383947		2328.8	0.00272558		2918.79	-0.00593306		3508.78	-0.00521847		4098.78	0.00985711
559	0.03942844		1148.99	0.00007611		1739	-0.00346272		2329	0.00311766		2918.99	-0.00599965		3508.98	-0.005361		4098.98	0.00986292
559.2	0.03944666		1149.19	0.00021843		1739.2	-0.00290698		2329.2	0.00343674		2919.19	-0.0050333		3509.18	-0.00516843		4099.18	0.00901827
559.4	0.0393193		1149.39	-0.00035537		1739.4	-0.00215982		2329.4	0.00355464		2919.39	-0.00511221		3509.38	-0.00493933		4099.38	0.0077672
559.6	0.0392082		1149.59	0.00024403		1739.6	-0.00154809		2329.6	0.00326725		2919.59	-0.00570552		3509.58	-0.00490348		4099.58	0.00746053
559.8	0.03927524		1149.79	-0.00058662		1739.8	-0.00068694		2329.8	0.0030086		2919.79	-0.0051774		3509.78	-0.00484539		4099.78	0.00697779
560	0.03838245		1149.99	-0.00094864		1740	-0.00026972		2330	0.00307537		2919.99	-0.00445232		3509.98	-0.00434627		4099.98	0.00663958
560.2	0.03812977		1150.19	-0.00142315		1740.2	-0.00012591		2330.2	0.00277989		2920.19	-0.00432227		3510.18	-0.00417262		4100.18	0.00588762
560.4	0.03765516		1150.39	-0.00146575		1740.4	0.00092535		2330.4	0.00268732		2920.39	-0.00451654		3510.38	-0.00425633		4100.38	0.00420932
560.6	0.03732378		1150.59	-0.00187509		1740.6	0.00122279		2330.6	0.00217895		2920.59	-0.00481969		3510.58	-0.00459877		4100.58	0.00362884
560.8	0.03694514		1150.79	-0.00220043		1740.8	0.00085313		2330.8	0.00169552		2920.79	-0.00471341		3510.78	-0.00513956		4100.78	0.00342385
561	0.03668729		1150.99	-0.00163578		1741	0.0008429		2331	0.00126933		2920.99	-0.00424199		3510.98	-0.00477731		4100.98	0.00260281
561.2	0.03711879		1151.19	-0.00089603		1741.2	0.00169654		2331.2	0.00064577		2921.19	-0.00446383		3511.18	-0.00490506		4101.18	0.00270342
561.4	0.03612696		1151.39	-0.00066757		1741.4	0.00220493		2331.4	0.00027637		2921.39	-0.00472059		3511.38	-0.00503409		4101.38	0.00231486
561.6	0.03589472		1151.59	-0.00083309		1741.6	0.0012002		2331.6	0.00049061		2921.59	-0.00365241		3511.58	-0.00485046		4101.58	0.00259973
561.8	0.03584695		1151.79	-0.00078734		1741.8	0.00057319		2331.8	0.00031073		2921.79	-0.00355851		3511.78	-0.00462928		4101.78	0.00335452
562	0.03559448		1151.99	-0.0013591		1742	0.00004605		2332	0.00130993		2921.99	-0.00208677		3511.98	-0.00525083		4101.98	0.00416898
562.2	0.03601381		1152.19	-0.00086102		1742.2	-0.00126878		2332.2	0.00099845		2922.19	-0.00124491		3512.18	-0.00518432		4102.18	0.00533949
562.4	0.03578409		1152.39	-0.00077531		1742.4	-0.00232489		2332.4	0.00056436		2922.39	-0.00112917		3512.38	-0.00420586		4102.38	0.00639566
562.6	0.03585271		1152.59	-0.00081653		1742.6	-0.00274308		2332.6	0.00050779		2922.59	-0.00150943		3512.58	-0.00503632		4102.58	0.00735523
562.8	0.03515989		1152.79	-0.00055811		1742.8	-0.00370628		2332.8	-0.00069118		2922.79	-0.00185922		3512.78	-0.00515428		4102.78	0.00761065
563	0.03494775		1152.99	-0.00125846		1743	-0.00379769		2333	-0.00134789		2922.99	-0.00223528		3512.98	-0.00540478		4102.98	0.00741585
563.2	0.03513329		1153.19	-0.00097002		1743.2	-0.00403761		2333.2	-0.00208762		2923.19	-0.00240833		3513.18	-0.00621789		4103.18	0.00660227
563.4	0.03415649		1153.39	-0.00120755		1743.4	-0.00449437		2333.4	-0.00216996		2923.39	-0.00348016		3513.38	-0.00578577		4103.38	0.00633146
563.6	0.03418557		1153.59	-0.00125531		1743.6	-0.00440049		2333.6	-0.00229152		2923.59	-0.00400158		3513.58	-0.00483368		4103.58	0.0058933
563.8	0.03495135		1153.79	-0.00262362		1743.8	-0.00473745		2333.8	-0.00199844		2923.79	-0.00429369		3513.78	-0.00465635		4103.78	0.00566759
564	0.03492894		1153.99	-0.00335189		1744	-0.00428462		2334	-0.00131182		2923.99	-0.00498517		3513.98	-0.00356558		4103.98	0.00486802
564.2	0.03490841		1154.19	-0.00278936		1744.2	-0.00411253		2334.2	-0.00123009		2924.19	-0.0058837		3514.18	-0.00391876		4104.18	0.00381809
564.4	0.03493759		1154.39	-0.00333754		1744.4	-0.00273653		2334.4	-0.00096919		2924.39	-0.00609713		3514.38	-0.00488158		4104.38	0.00306403
564.6	0.03528317		1154.59	-0.00397862		1744.6	-0.00181886		2334.6	-0.00088673		2924.59	-0.00723974		3514.58	-0.00574059		4104.58	0.00329667
564.8	0.0351006		1154.79	-0.00379962		1744.8	-0.00124068		2334.8	-0.00044442		2924.79	-0.00683643		3514.78	-0.00571561		4104.78	0.00322655
565	0.03472082		1154.99	-0.00306		1745	-0.00111754		2335	-0.00010187		2924.99	-0.00670102		3514.98	-0.00563488		4104.98	0.00227536
565.2	0.03514716		1155.19	-0.00248694		1745.2	-0.00053112		2335.2	-0.00019892		2925.19	-0.00682068		3515.18	-0.00638156		4105.18	0.00283016
565.4	0.03536347		1155.39	-0.00287546		1745.4	-0.00098332		2335.4	-0.00010001		2925.39	-0.00597133		3515.38	-0.00647692		4105.38	0.0040015
565.6	0.0362254		1155.59	-0.00251196		1745.6	-0.00188085		2335.6	-0.00027466		2925.59	-0.00472532		3515.58	-0.00721884		4105.58	0.00489612
565.8	0.03619997		1155.79	-0.00264679		1745.8	-0.00140665		2335.8	-0.00066968		2925.79	-0.00452065		3515.78	-0.00687173		4105.78	0.00544472
566	0.03712912		1155.99	-0.00297761		1746	-0.00152594		2336	0.0000328		2925.99	-0.0030021		3515.98	-0.00660357		4105.98	0.00624404
566.2	0.03807794		1156.19	-0.00221453		1746.2	-0.00242093		2336.2	-0.00070359		2926.19	-0.0027872		3516.18	-0.00747481		4106.18	0.00708639
566.4	0.03815218		1156.39	-0.00282091		1746.4	-0.00384654		2336.4	-0.00117369		2926.39	-0.00228823		3516.38	-0.00789232		4106.38	0.00773565
566.6	0.03807055		1156.59	-0.00186015		1746.6	-0.00456892		2336.6	-0.00162778		2926.59	-0.00176292		3516.58	-0.00884827		4106.58	0.00842401
566.8	0.03842796		1156.79	-0.00151318		1746.8	-0.00519872		2336.8	-0.00267509		2926.79	-0.00082732		3516.78	-0.00919002		4106.78	0.00758388
567	0.03842071		1156.99	-0.00173673		1747	-0.00510969		2337	-0.00321762		2926.99	0.00019681		3516.98	-0.00950558		4106.98	0.00728815
567.2	0.03848415		1157.19	-0.00206164		1747.2	-0.00630462		2337.2	-0.00385435		2927.19	0.00062236		3517.18	-0.00919718		4107.18	0.00740377
567.4	0.03806176		1157.39	-0.00263875		1747.4	-0.00648776		2337.4	-0.00340173		2927.39	0.00036589		3517.38	-0.0082815		4107.38	0.00703999
567.6	0.03869027		1157.59	-0.0034572		1747.6	-0.00598834		2337.6	-0.00229948		2927.59	-0.00041767		3517.58	-0.00709411		4107.58	0.00650326
567.8	0.0385816		1157.79	-0.0033095		1747.8	-0.00521973		2337.8	-0.00177237		2927.79	-0.00095597		3517.78	-0.00656762		4107.78	0.0065104
568	0.0381929		1157.99	-0.00342578		1748	-0.00439195		2338	-0.00069837		2927.99	-0.00241845		3517.98	-0.00634433		4107.98	0.00588816
568.2	0.03716059		1158.19	-0.00369179		1748.2	-0.00323414		2338.2	0.00003501		2928.19	-0.00339115		3518.18	-0.00658975		4108.18	0.00616681
568.4	0.03593909		1158.39	-0.0052962		1748.4	-0.00201784		2338.4	0.00083834		2928.39	-0.00394214		3518.38	-0.00775861		4108.38	0.00651267
568.6	0.03450356		1158.59	-0.00494306		1748.6	-0.00178655		2338.6	0.00303467		2928.59	-0.00491451		3518.58	-0.00849482		4108.58	0.00618241
568.8	0.03353721		1158.79	-0.0045805		1748.8	-0.00136552		2338.8	0.00362196		2928.79	-0.00488473		3518.78	-0.00832326		4108.78	0.00571013
569	0.03357137		1158.99	-0.0049646		1749	-0.00180586		2339	0.0043234		2928.99	-0.00544193		3518.98	-0.00815178		4108.98	0.00607954
569.2	0.03369631		1159.19	-0.00425963		1749.2	-0.00064316		2339.2	0.00488561		2929.19	-0.00533279		3519.18	-0.00773721		4109.18	0.00734272
569.4	0.03337366		1159.39	-0.00439516		1749.4	0.0003463		2339.4	0.00546181		2929.39	-0.00471827		3519.38	-0.00815536		4109.38	0.0077754
569.6	0.0323216		1159.59	-0.00306468		1749.6	0.00095378		2339.6	0.00537703		2929.59	-0.00503902		3519.58	-0.00819953		4109.58	0.00737028
569.8	0.03169565		1159.79	-0.00151644		1749.8	0.00124783		2339.8	0.00594141		2929.79	-0.00538175		3519.78	-0.00768381		4109.78	0.00715283
570	0.03213779		1159.99	-0.00093567		1750	0.00092809		2340	0.00661879		2929.99	-0.00509079		3519.98	-0.00863682		4109.98	0.00741864
570.2	0.03282715		1160.19	0.0011468		1750.2	0.00022799		2340.2	0.00641897		2930.19	-0.00496896		3520.18	-0.00998347		4110.18	0.00775426
570.4	0.03281791		1160.39	0.00165134		1750.4	-0.00053868		2340.4	0.00550195		2930.39	-0.00405668		3520.38	-0.01018761		4110.38	0.00802161
570.6	0.03287099		1160.59	0.00320668		1750.6	-0.00085817		2340.6	0.00460697		2930.59	-0.00303149		3520.58	-0.0106391		4110.58	0.00805327
570.8	0.0338814		1160.79	0.00322616		1750.8	-0.00151519		2340.8	0.0031918		2930.79	-0.00240661		3520.78	-0.01096207		4110.78	0.0072863
571	0.03469687		1160.99	0.00327775		1751	-0.00257146		2341	0.00213057		2930.99	-0.00228076		3520.98	-0.01102354		4110.98	0.00704246
571.2	0.03502597		1161.19	0.00321825		1751.2	-0.00328344		2341.2	0.00201222		2931.19	-0.00168131		3521.18	-0.01057746		4111.18	0.00704299
571.4	0.03531556		1161.39	0.00311401		1751.4	-0.00366296		2341.4	0.00235691		2931.39	-0.00290805		3521.38	-0.00965471		4111.38	0.00723392
571.6	0.0360071		1161.59	0.00258183		1751.6	-0.00385669		2341.6	0.00264962		2931.59	-0.00341922		3521.58	-0.00858699		4111.58	0.00710355
571.8	0.03615771		1161.79	0.0027353		1751.8	-0.00392625		2341.8	0.0016676		2931.79	-0.00352022		3521.78	-0.00833217		4111.78	0.00661144
572	0.03670149		1161.99	0.00186895		1752	-0.00411641		2342	0.00179235		2931.99	-0.00376933		3521.98	-0.0083821		4111.98	0.00640353
572.2	0.03544511		1162.19	0.00061851		1752.2	-0.00325236		2342.2	0.00160408		2932.19	-0.00414141		3522.18	-0.00753055		4112.18	0.00692262
572.4	0.03449849		1162.39	0.00108385		1752.4	-0.00297479		2342.4	0.00182873		2932.39	-0.00440488		3522.38	-0.0076801		4112.38	0.00638257
572.6	0.03469918		1162.59	0.00086833		1752.6	-0.00336141		2342.6	0.00227291		2932.59	-0.00468937		3522.58	-0.00664798		4112.58	0.00644954
572.8	0.03520657		1162.79	-0.00108714		1752.8	-0.003052		2342.8	0.00142773		2932.79	-0.00426838		3522.78	-0.00584875		4112.78	0.00719074
573	0.03476306		1162.99	-0.0027732		1753	-0.00320612		2343	0.00213086		2932.99	-0.0045588		3522.98	-0.00555461		4112.98	0.00717558
573.2	0.03369041		1163.19	-0.00303001		1753.2	-0.0014301		2343.2	0.00198407		2933.19	-0.00446165		3523.18	-0.00622183		4113.18	0.00824707
573.4	0.03314485		1163.39	-0.00310999		1753.4	-0.00155706		2343.4	0.00213373		2933.39	-0.00426996		3523.38	-0.00742993		4113.38	0.0084253
573.6	0.03287393		1163.59	-0.0032122		1753.6	-0.00174254		2343.6	0.0021561		2933.59	-0.00515478		3523.58	-0.00740038		4113.58	0.00813037
573.8	0.03222821		1163.79	-0.00269222		1753.8	-0.00220987		2343.8	0.00168662		2933.79	-0.0057047		3523.78	-0.00801288		4113.78	0.00806999
574	0.03175391		1163.99	-0.00283719		1754	-0.00265679		2344	0.00219055		2933.99	-0.00558737		3523.98	-0.00832972		4113.98	0.00762726
574.2	0.03171541		1164.19	-0.00235861		1754.2	-0.00256109		2344.2	0.00151147		2934.19	-0.00492057		3524.18	-0.00846549		4114.18	0.00779654
574.4	0.03115444		1164.39	-0.00401798		1754.4	-0.0033775		2344.4	0.0013491		2934.39	-0.00426459		3524.38	-0.00915366		4114.38	0.00869339
574.6	0.03119297		1164.59	-0.00386379		1754.6	-0.00392519		2344.6	0.00127176		2934.59	-0.00501648		3524.58	-0.00965852		4114.58	0.00891396
574.8	0.03136426		1164.79	-0.00402362		1754.8	-0.00401115		2344.8	0.00221195		2934.79	-0.00579042		3524.78	-0.00988953		4114.78	0.00848764
575	0.03195145		1164.99	-0.00416602		1755	-0.00441936		2345	0.00219331		2934.99	-0.00579027		3524.98	-0.00966695		4114.98	0.00769674
575.2	0.03136761		1165.19	-0.00376415		1755.2	-0.00446052		2345.2	0.00267602		2935.19	-0.0063176		3525.18	-0.00942567		4115.18	0.00788785
575.4	0.03139577		1165.39	-0.00389243		1755.4	-0.00511129		2345.4	0.00209231		2935.39	-0.00745142		3525.38	-0.00931872		4115.38	0.00714691
575.6	0.03236877		1165.59	-0.00415785		1755.6	-0.00552176		2345.6	0.00154073		2935.59	-0.00688754		3525.58	-0.0085838		4115.58	0.00593357
575.8	0.03262516		1165.79	-0.00349051		1755.8	-0.00572236		2345.8	0.0010329		2935.79	-0.00656246		3525.78	-0.0080612		4115.78	0.00494565
576	0.03335666		1165.99	-0.00267954		1756	-0.00540922		2346	0.00124138		2935.99	-0.00662075		3525.98	-0.00676703		4115.98	0.00412078
576.2	0.03246373		1166.19	-0.00250412		1756.2	-0.00478694		2346.2	0.00041829		2936.19	-0.00723677		3526.18	-0.00541791		4116.18	0.00352879
576.4	0.03311498		1166.39	-0.00229409		1756.4	-0.00514071		2346.4	-0.00018764		2936.39	-0.0070958		3526.38	-0.00511888		4116.38	0.00276515
576.6	0.03349671		1166.59	-0.00338329		1756.6	-0.00524393		2346.6	-0.00013126		2936.59	-0.00746427		3526.58	-0.00536469		4116.58	0.00251328
576.8	0.03358379		1166.79	-0.00439375		1756.8	-0.00455136		2346.8	-0.00088433		2936.79	-0.007369		3526.78	-0.00576887		4116.78	0.00161268
577	0.03323199		1166.99	-0.0041049		1757	-0.00369835		2347	-0.00133004		2936.99	-0.00740572		3526.98	-0.00655526		4116.98	0.00103067
577.2	0.03288306		1167.19	-0.00343354		1757.2	-0.00295224		2347.2	-0.00252109		2937.19	-0.00773383		3527.18	-0.00735063		4117.18	0.00183324
577.4	0.03342085		1167.39	-0.00263981		1757.4	-0.00388566		2347.4	-0.00262159		2937.39	-0.00727841		3527.38	-0.00884469		4117.38	0.00141636
577.6	0.03398893		1167.59	-0.00337978		1757.6	-0.00361589		2347.6	-0.0027582		2937.59	-0.00721344		3527.58	-0.00861047		4117.58	0.00149926
577.8	0.0335752		1167.79	-0.00272355		1757.8	-0.00387966		2347.8	-0.00257029		2937.79	-0.00652908		3527.78	-0.00900273		4117.78	0.00185526
578	0.03309254		1167.99	-0.00260533		1758	-0.00403512		2348	-0.00229729		2937.99	-0.00534386		3527.98	-0.00927512		4117.98	0.00269156
578.2	0.03303847		1168.19	-0.00290485		1758.2	-0.00330636		2348.2	-0.0027319		2938.19	-0.00435585		3528.18	-0.00934348		4118.18	0.00401666
578.4	0.03319116		1168.39	-0.00285071		1758.4	-0.00369712		2348.4	-0.00207427		2938.39	-0.00433275		3528.38	-0.00954591		4118.38	0.00494864
578.6	0.03311346		1168.59	-0.00207354		1758.6	-0.00317214		2348.6	-0.00139934		2938.59	-0.00437614		3528.58	-0.01010353		4118.58	0.00530245
578.8	0.03308972		1168.79	-0.001808		1758.8	-0.00293529		2348.8	-0.00034417		2938.79	-0.00418456		3528.78	-0.00957807		4118.78	0.00515416
579	0.03300176		1168.99	-0.00144943		1759	-0.00298864		2349	-0.000488		2938.99	-0.00406168		3528.98	-0.00912322		4118.98	0.00546358
579.2	0.03325162		1169.19	-0.0014924		1759.2	-0.00228273		2349.2	0.00002776		2939.19	-0.00449962		3529.18	-0.00853851		4119.18	0.00634743
579.4	0.03368465		1169.39	-0.00240275		1759.4	-0.00271815		2349.4	0.00052049		2939.39	-0.00442079		3529.38	-0.00808373		4119.38	0.00644203
579.6	0.03466785		1169.59	-0.00273616		1759.6	-0.00338022		2349.6	0.00122394		2939.59	-0.00457276		3529.58	-0.00660865		4119.58	0.00762473
579.8	0.03408702		1169.79	-0.00323878		1759.8	-0.0030551		2349.8	0.00165371		2939.79	-0.00427739		3529.78	-0.00582808		4119.78	0.00814689
580	0.0339455		1169.99	-0.00328484		1760	-0.00227676		2350	0.00191813		2939.99	-0.00523459		3529.98	-0.00514455		4119.98	0.00763796
580.2	0.03314024		1170.19	-0.00441395		1760.2	-0.00142146		2350.2	0.00111022		2940.19	-0.00578592		3530.18	-0.00464865		4120.18	0.00788128
580.4	0.03422134		1170.39	-0.00530916		1760.4	-0.00135661		2350.4	0.00135229		2940.39	-0.00623015		3530.38	-0.0042082		4120.38	0.00684857
580.6	0.03360563		1170.59	-0.00639048		1760.6	-0.00088958		2350.6	0.00113371		2940.59	-0.00594022		3530.58	-0.00384227		4120.58	0.00656172
580.8	0.0335709		1170.79	-0.00722664		1760.8	-0.00125282		2350.8	0.00005956		2940.79	-0.00582589		3530.78	-0.00324114		4120.78	0.00559192
581	0.03318863		1170.99	-0.00761625		1761	-0.00130261		2351	-0.00072226		2940.99	-0.00592871		3530.98	-0.00434763		4120.98	0.0054575
581.2	0.0337496		1171.19	-0.0073164		1761.2	-0.00175899		2351.2	-0.00152642		2941.19	-0.00603141		3531.18	-0.00436677		4121.18	0.00535755
581.4	0.03416433		1171.39	-0.0077554		1761.4	-0.0026732		2351.4	-0.00184356		2941.39	-0.00536733		3531.38	-0.00501421		4121.38	0.00477789
581.6	0.03433754		1171.59	-0.00732381		1761.6	-0.00299988		2351.6	-0.00183684		2941.59	-0.00550317		3531.58	-0.00482046		4121.58	0.00442521
581.8	0.03405807		1171.79	-0.00620574		1761.8	-0.00378562		2351.8	-0.00272589		2941.79	-0.00504423		3531.78	-0.00504956		4121.78	0.00460423
582	0.03443595		1171.99	-0.00611173		1762	-0.00475121		2352	-0.0032071		2941.99	-0.00445493		3531.98	-0.00600476		4121.98	0.00458913
582.2	0.03491378		1172.19	-0.00567727		1762.2	-0.00489084		2352.2	-0.00348406		2942.19	-0.00406621		3532.18	-0.00639581		4122.18	0.00431878
582.4	0.03533616		1172.39	-0.0050975		1762.4	-0.00544246		2352.4	-0.00285752		2942.39	-0.00408315		3532.38	-0.00780975		4122.38	0.00367277
582.6	0.03497147		1172.59	-0.00492766		1762.6	-0.00556776		2352.6	-0.00233441		2942.59	-0.0037577		3532.58	-0.00865555		4122.58	0.00309333
582.8	0.03459339		1172.79	-0.00366781		1762.8	-0.00481078		2352.8	-0.00205029		2942.79	-0.00349043		3532.78	-0.00880432		4122.78	0.0029979
583	0.03368631		1172.99	-0.00341536		1763	-0.00509434		2353	-0.00148784		2942.99	-0.00356837		3532.98	-0.00994595		4122.98	0.00429636
583.2	0.03357539		1173.19	-0.00376158		1763.2	-0.00498209		2353.2	-0.00119031		2943.19	-0.00263802		3533.18	-0.01042863		4123.18	0.00521823
583.4	0.03274176		1173.39	-0.00397277		1763.4	-0.0047846		2353.4	-0.00013938		2943.39	-0.00275244		3533.38	-0.01086289		4123.38	0.00598274
583.6	0.03232028		1173.59	-0.00281663		1763.6	-0.00453078		2353.6	0.00020129		2943.59	-0.00307554		3533.58	-0.01095614		4123.58	0.00687154
583.8	0.03071642		1173.79	-0.00334995		1763.8	-0.00361124		2353.8	0.00028432		2943.79	-0.00274409		3533.78	-0.01106581		4123.78	0.00655922
584	0.02994895		1173.99	-0.00365161		1764	-0.0023485		2354	0.00110974		2943.99	-0.00279377		3533.98	-0.01122162		4123.98	0.00539921
584.2	0.0304054		1174.19	-0.0042012		1764.2	-0.00219389		2354.2	0.00157482		2944.19	-0.00278394		3534.18	-0.01003717		4124.18	0.00592536
584.4	0.03033095		1174.39	-0.00387544		1764.4	-0.00152974		2354.4	0.00246615		2944.39	-0.00338997		3534.38	-0.00979896		4124.38	0.00566573
584.6	0.02959754		1174.59	-0.0042274		1764.6	-0.00107107		2354.6	0.00258204		2944.59	-0.0034218		3534.58	-0.01015368		4124.58	0.00616074
584.8	0.02871326		1174.79	-0.00415099		1764.8	-0.00124239		2354.8	0.00252479		2944.79	-0.00380632		3534.78	-0.00906306		4124.78	0.00686701
585	0.02822582		1174.99	-0.00395582		1765	-0.00124454		2355	0.00296646		2944.99	-0.00352708		3534.98	-0.00871299		4124.98	0.0076202
585.2	0.0284237		1175.19	-0.00380029		1765.2	-0.0015256		2355.2	0.00321883		2945.19	-0.00358001		3535.18	-0.0071615		4125.18	0.00771552
585.4	0.02779286		1175.39	-0.00395174		1765.4	-0.00187691		2355.4	0.00373508		2945.39	-0.00336045		3535.38	-0.00641005		4125.38	0.00760049
585.6	0.02779202		1175.59	-0.00218146		1765.6	-0.00322608		2355.6	0.0034672		2945.59	-0.00401853		3535.58	-0.00576816		4125.58	0.00773298
585.8	0.02875824		1175.79	-0.0027078		1765.8	-0.00421908		2355.8	0.00245505		2945.79	-0.00448479		3535.78	-0.00494158		4125.78	0.00795284
586	0.02976696		1175.99	-0.00359711		1766	-0.00497905		2356	0.00258419		2945.99	-0.00450273		3535.98	-0.0051225		4125.98	0.00777466
586.2	0.02993882		1176.19	-0.00392978		1766.2	-0.00472687		2356.2	0.00198781		2946.19	-0.00480099		3536.18	-0.00533312		4126.18	0.00773105
586.4	0.03054343		1176.39	-0.0033181		1766.4	-0.00491848		2356.4	0.00180955		2946.39	-0.00519145		3536.38	-0.0063318		4126.38	0.00769839
586.6	0.02993205		1176.59	-0.00328606		1766.6	-0.00532176		2356.6	0.00159063		2946.59	-0.00526177		3536.58	-0.00625868		4126.58	0.00669423
586.8	0.02973811		1176.79	-0.00347721		1766.8	-0.00537327		2356.8	0.00114941		2946.79	-0.00549713		3536.78	-0.00640275		4126.78	0.00656453
587	0.02925901		1176.99	-0.00355534		1767	-0.00647798		2357	0.00055711		2946.99	-0.00564559		3536.98	-0.0068231		4126.98	0.00660603
587.2	0.02929402		1177.19	-0.00359436		1767.2	-0.0059061		2357.2	0.00006704		2947.19	-0.00513837		3537.18	-0.00632766		4127.18	0.00622662
587.4	0.02921314		1177.39	-0.00342444		1767.4	-0.00634363		2357.4	-0.00014786		2947.39	-0.00597225		3537.38	-0.00640747		4127.38	0.00553097
587.6	0.02922765		1177.59	-0.00424266		1767.6	-0.00613938		2357.6	-0.00097546		2947.59	-0.00639944		3537.58	-0.00703866		4127.58	0.00567553
587.8	0.02913311		1177.79	-0.00584239		1767.8	-0.0050556		2357.8	-0.00017742		2947.79	-0.00640805		3537.78	-0.00625703		4127.78	0.00512976
588	0.03035822		1177.99	-0.00638358		1768	-0.00421292		2358	-0.00003363		2947.99	-0.00680043		3537.98	-0.00643704		4127.98	0.00477989
588.2	0.03121137		1178.19	-0.00685326		1768.2	-0.00346643		2358.2	-0.0000761		2948.19	-0.00744153		3538.18	-0.00629421		4128.18	0.00503103
588.4	0.03151031		1178.39	-0.00755816		1768.4	-0.00149302		2358.4	-0.00042398		2948.39	-0.00736185		3538.38	-0.00749323		4128.38	0.00497179
588.6	0.03207998		1178.59	-0.00802986		1768.6	-0.00160997		2358.6	-0.00050088		2948.59	-0.00651647		3538.58	-0.00844168		4128.58	0.00548254
588.8	0.03168289		1178.79	-0.00805383		1768.8	-0.00274266		2358.8	-0.00060636		2948.79	-0.004831		3538.78	-0.007222		4128.78	0.00639976
589	0.03311702		1178.99	-0.00811236		1769	-0.00279171		2359	-0.00056367		2948.99	-0.00461511		3538.98	-0.00734348		4128.98	0.0067425
589.2	0.03412713		1179.19	-0.00857424		1769.2	-0.00346213		2359.2	-0.00035252		2949.19	-0.00467794		3539.18	-0.007609		4129.18	0.00590567
589.4	0.03451257		1179.39	-0.00809352		1769.4	-0.00405275		2359.4	-0.00059226		2949.39	-0.004399		3539.38	-0.0084746		4129.38	0.00695427
589.6	0.03480452		1179.59	-0.00803339		1769.6	-0.00513605		2359.6	-0.00112626		2949.59	-0.0044399		3539.58	-0.00925425		4129.58	0.00745974
589.8	0.03551182		1179.79	-0.0090907		1769.8	-0.00521623		2359.8	-0.00189915		2949.79	-0.00382205		3539.78	-0.00955005		4129.78	0.0073648
590	0.0355901		1179.99	-0.00804268		1770	-0.00566107		2360	-0.0022798		2949.99	-0.00312607		3539.98	-0.01031957		4129.98	0.00813281
590.2	0.03580495		1180.19	-0.00783679		1770.2	-0.00612815		2360.2	-0.00262742		2950.19	-0.00370456		3540.18	-0.01148763		4130.18	0.00789099
590.4	0.03639021		1180.39	-0.00616985		1770.4	-0.00687234		2360.4	-0.00265766		2950.39	-0.00290877		3540.38	-0.0124072		4130.38	0.0073006
590.6	0.03606222		1180.59	-0.00614004		1770.6	-0.00753082		2360.6	-0.00255912		2950.59	-0.0031663		3540.58	-0.01224544		4130.58	0.00625578
590.8	0.03584906		1180.79	-0.00554298		1770.8	-0.00772317		2360.8	-0.00214926		2950.79	-0.00291827		3540.78	-0.01179367		4130.78	0.00538418
591	0.0349721		1180.99	-0.00417794		1771	-0.00885176		2361	-0.00200119		2950.99	-0.00245968		3540.98	-0.01197405		4130.98	0.00459113
591.2	0.03400056		1181.19	-0.00437927		1771.2	-0.00884932		2361.2	-0.0010018		2951.19	-0.00294364		3541.18	-0.01155419		4131.18	0.00459758
591.4	0.03304493		1181.39	-0.00486877		1771.4	-0.00938939		2361.4	-0.00103552		2951.39	-0.00359336		3541.38	-0.01071782		4131.38	0.00456225
591.6	0.03222174		1181.59	-0.00551755		1771.6	-0.00841202		2361.6	-0.00112198		2951.59	-0.00378888		3541.58	-0.00973228		4131.58	0.00505454
591.8	0.0313255		1181.79	-0.00517411		1771.8	-0.00802441		2361.8	-0.00038891		2951.79	-0.00476289		3541.78	-0.00799583		4131.78	0.00499222
592	0.03124094		1181.99	-0.00484093		1772	-0.00806435		2362	-0.00089053		2951.99	-0.00445447		3541.98	-0.00743105		4131.98	0.00468806
592.2	0.03101675		1182.19	-0.0048375		1772.2	-0.00742092		2362.2	-0.00051945		2952.19	-0.00518697		3542.18	-0.00648999		4132.18	0.00444641
592.4	0.03125963		1182.39	-0.00379491		1772.4	-0.00726923		2362.4	0.00002428		2952.39	-0.00440359		3542.38	-0.007133		4132.38	0.00432363
592.6	0.03156302		1182.59	-0.00350154		1772.6	-0.00851493		2362.6	0.00030842		2952.59	-0.00518269		3542.58	-0.00665581		4132.58	0.00435526
592.8	0.03230137		1182.79	-0.00286664		1772.8	-0.00825307		2362.8	-0.00003193		2952.79	-0.00551401		3542.78	-0.00542033		4132.78	0.00458965
593	0.03308186		1182.99	-0.00316148		1773	-0.00681034		2363	-0.00003014		2952.99	-0.00605986		3542.98	-0.00504151		4132.98	0.0049392
593.2	0.03208934		1183.19	-0.00343426		1773.2	-0.00674234		2363.2	0.00026476		2953.19	-0.00588098		3543.18	-0.00505317		4133.18	0.00389499
593.4	0.03191079		1183.39	-0.00329296		1773.4	-0.00623596		2363.4	0.00059112		2953.39	-0.00600774		3543.38	-0.00558543		4133.38	0.00437227
593.6	0.03149804		1183.59	-0.00410632		1773.6	-0.00664312		2363.6	0.00024623		2953.59	-0.00643436		3543.58	-0.00563552		4133.58	0.0041003
593.8	0.03165424		1183.79	-0.00373128		1773.8	-0.00690705		2363.8	-0.00069004		2953.79	-0.00685048		3543.78	-0.00557452		4133.78	0.00472039
594	0.03253128		1183.99	-0.00319703		1774	-0.00692938		2364	-0.00044078		2953.99	-0.00709323		3543.98	-0.00637452		4133.98	0.0048295
594.2	0.03394148		1184.19	-0.00375251		1774.2	-0.00645333		2364.2	-0.00040777		2954.19	-0.00742727		3544.18	-0.00735414		4134.18	0.00448358
594.4	0.03382141		1184.39	-0.00321294		1774.4	-0.00599533		2364.4	-0.00053155		2954.39	-0.00624784		3544.38	-0.00813737		4134.38	0.00418783
594.6	0.0339235		1184.59	-0.00354568		1774.6	-0.00575413		2364.6	-0.00056932		2954.59	-0.00612194		3544.58	-0.00849822		4134.58	0.00437068
594.8	0.03363563		1184.79	-0.00359375		1774.8	-0.00533038		2364.8	-0.00107212		2954.79	-0.00564778		3544.78	-0.00913468		4134.78	0.00373586
595	0.03272288		1184.99	-0.00381266		1775	-0.00610677		2365	-0.00112748		2954.99	-0.00673524		3544.98	-0.00992188		4134.98	0.00362718
595.2	0.03173438		1185.19	-0.00477349		1775.2	-0.00516376		2365.2	-0.00081788		2955.19	-0.00714424		3545.18	-0.00988939		4135.18	0.00465947
595.4	0.03251944		1185.39	-0.00450837		1775.4	-0.00566638		2365.4	-0.00125984		2955.39	-0.00823499		3545.38	-0.00865209		4135.38	0.00522085
595.6	0.03207066		1185.59	-0.00401343		1775.6	-0.00644264		2365.6	-0.00177556		2955.59	-0.00757784		3545.58	-0.00850265		4135.58	0.00601368
595.8	0.03150165		1185.79	-0.00410748		1775.8	-0.00641567		2365.8	-0.00188965		2955.79	-0.00832346		3545.78	-0.00804477		4135.78	0.0068217
596	0.03214584		1185.99	-0.00410515		1776	-0.00679319		2366	-0.00253061		2955.99	-0.00749251		3545.98	-0.00783346		4135.98	0.00634061
596.2	0.03214962		1186.19	-0.00476013		1776.2	-0.00663085		2366.2	-0.0021594		2956.19	-0.00775543		3546.18	-0.00781231		4136.18	0.00635834
596.4	0.03289631		1186.39	-0.00547527		1776.4	-0.00642554		2366.4	-0.00222895		2956.39	-0.00667385		3546.38	-0.00833171		4136.38	0.00609156
596.6	0.0335059		1186.59	-0.00665462		1776.6	-0.0057127		2366.6	-0.00290562		2956.59	-0.00666968		3546.58	-0.00760354		4136.58	0.00557085
596.8	0.03323925		1186.79	-0.00605437		1776.8	-0.00417537		2366.8	-0.00368311		2956.79	-0.00610863		3546.78	-0.00650029		4136.78	0.00569829
597	0.03244689		1186.99	-0.00635197		1777	-0.00411457		2367	-0.00274094		2956.99	-0.00579203		3546.98	-0.00646065		4136.98	0.00510069
597.2	0.03122805		1187.19	-0.00586893		1777.2	-0.00509123		2367.2	-0.00236024		2957.19	-0.0064141		3547.18	-0.0065325		4137.18	0.00464036
597.4	0.03119234		1187.39	-0.00582235		1777.4	-0.00559453		2367.4	-0.00213867		2957.39	-0.00630377		3547.38	-0.00734026		4137.38	0.00447004
597.6	0.03042612		1187.59	-0.00585142		1777.6	-0.00670764		2367.6	-0.00275941		2957.59	-0.00668833		3547.58	-0.00732484		4137.58	0.00477048
597.8	0.02995086		1187.79	-0.00487424		1777.8	-0.00737336		2367.8	-0.00259126		2957.79	-0.00588602		3547.78	-0.00788335		4137.78	0.00513318
598	0.0302837		1187.99	-0.00339285		1778	-0.00720583		2368	-0.00197667		2957.99	-0.00502802		3547.98	-0.007749		4137.98	0.00395121
598.2	0.02982458		1188.19	-0.00260945		1778.2	-0.00756363		2368.2	-0.00150577		2958.19	-0.00477016		3548.18	-0.00839241		4138.18	0.00379275
598.4	0.02857652		1188.39	-0.00235436		1778.4	-0.00768755		2368.4	-0.00166395		2958.39	-0.00463486		3548.38	-0.00876784		4138.38	0.00332712
598.6	0.02876826		1188.59	-0.00219187		1778.6	-0.00766162		2368.6	-0.00238832		2958.59	-0.00429766		3548.58	-0.0092087		4138.58	0.00338437
598.8	0.02855937		1188.79	-0.00234853		1778.8	-0.00733327		2368.8	-0.00306641		2958.79	-0.00526458		3548.78	-0.00911177		4138.78	0.00269274
599	0.02904235		1188.99	-0.00137094		1779	-0.00743929		2369	-0.00199799		2958.99	-0.00677151		3548.98	-0.00937825		4138.98	0.00285895
599.2	0.02963398		1189.19	-0.00121542		1779.2	-0.00718499		2369.2	-0.00183942		2959.19	-0.00637915		3549.18	-0.00950573		4139.18	0.0033127
599.4	0.03145989		1189.39	-0.00108384		1779.4	-0.00767699		2369.4	-0.00155627		2959.39	-0.00691116		3549.38	-0.0093333		4139.38	0.00337896
599.6	0.03095381		1189.59	-0.00164526		1779.6	-0.00756897		2369.6	-0.00167502		2959.59	-0.00718665		3549.58	-0.00996007		4139.58	0.00431983
599.8	0.0312813		1189.79	-0.00238054		1779.8	-0.00717568		2369.8	-0.00241971		2959.79	-0.00816673		3549.78	-0.00987839		4139.78	0.00387714
600	0.03238432		1189.99	-0.00302821		1780	-0.0069822		2370	-0.00281568		2959.99	-0.00744429		3549.98	-0.00982802		4139.98	0.00361432
600.2	0.03325068		1190.19	-0.00394268		1780.2	-0.00693619		2370.2	-0.00238791		2960.19	-0.00722687		3550.18	-0.00963767		4140.18	0.00379269
600.4	0.03474379		1190.39	-0.00481497		1780.4	-0.0062992		2370.4	-0.0018517		2960.39	-0.00688144		3550.38	-0.00941255		4140.38	0.00390203
600.6	0.03477784		1190.59	-0.00414322		1780.6	-0.00614865		2370.6	-0.00168623		2960.59	-0.00615038		3550.58	-0.00968754		4140.58	0.00417894
600.8	0.03477354		1190.79	-0.00402116		1780.8	-0.00615176		2370.8	-0.00131343		2960.79	-0.00662702		3550.78	-0.00991866		4140.78	0.00575688
601	0.03457001		1190.99	-0.00452143		1781	-0.00641299		2371	-0.00049492		2960.99	-0.00613431		3550.98	-0.0102745		4140.98	0.00678818
601.2	0.03414001		1191.19	-0.00400512		1781.2	-0.00618285		2371.2	-0.00062007		2961.19	-0.00612654		3551.18	-0.01028504		4141.18	0.00780978
601.4	0.03375176		1191.39	-0.00494509		1781.4	-0.00607935		2371.4	-0.00034806		2961.39	-0.00511642		3551.38	-0.01109319		4141.38	0.00820329
601.6	0.03283744		1191.59	-0.00519112		1781.6	-0.00659915		2371.6	0.00051811		2961.59	-0.00545327		3551.58	-0.01131604		4141.58	0.00906757
601.8	0.03266274		1191.79	-0.00483853		1781.8	-0.00690109		2371.8	0.00103942		2961.79	-0.00509123		3551.78	-0.01142101		4141.78	0.00953076
602	0.03257449		1191.99	-0.00482363		1782	-0.00605097		2372	0.00107128		2961.99	-0.00596299		3551.98	-0.0102087		4141.98	0.00925284
602.2	0.03168261		1192.19	-0.0055846		1782.2	-0.00644473		2372.2	0.00140818		2962.19	-0.00669735		3552.18	-0.01097531		4142.18	0.0081831
602.4	0.03133343		1192.39	-0.00634498		1782.4	-0.00542858		2372.4	0.00052898		2962.39	-0.00775402		3552.38	-0.01067614		4142.38	0.00696842
602.6	0.02992914		1192.59	-0.00553886		1782.6	-0.00538538		2372.6	-0.00019913		2962.59	-0.00717896		3552.58	-0.01063731		4142.58	0.00613557
602.8	0.02997716		1192.79	-0.00537909		1782.8	-0.00453995		2372.8	-0.00053479		2962.79	-0.00805909		3552.78	-0.01016849		4142.78	0.00480638
603	0.03077391		1192.99	-0.00509608		1783	-0.00440313		2373	-0.00121014		2962.99	-0.00805586		3552.98	-0.01015956		4142.98	0.00401284
603.2	0.0303916		1193.19	-0.00561935		1783.2	-0.00449423		2373.2	-0.00180553		2963.19	-0.00791041		3553.18	-0.00971286		4143.18	0.0037117
603.4	0.03065986		1193.39	-0.00518296		1783.4	-0.00411236		2373.4	-0.00231966		2963.39	-0.0091975		3553.38	-0.009588		4143.38	0.00344736
603.6	0.02971802		1193.59	-0.0048484		1783.6	-0.00384721		2373.6	-0.00249175		2963.59	-0.00945497		3553.58	-0.00914795		4143.58	0.00346655
603.8	0.02959625		1193.79	-0.00474607		1783.8	-0.00409456		2373.8	-0.00319576		2963.79	-0.00890265		3553.78	-0.00871568		4143.78	0.00231841
604	0.02978456		1193.99	-0.0044559		1784	-0.00432163		2374	-0.00330477		2963.99	-0.00749735		3553.98	-0.00846787		4143.98	0.00225766
604.2	0.0300491		1194.19	-0.00483323		1784.2	-0.00527295		2374.2	-0.0026049		2964.19	-0.00694162		3554.18	-0.00839806		4144.18	0.00259659
604.4	0.02976806		1194.39	-0.00404492		1784.4	-0.0045535		2374.4	-0.00171213		2964.39	-0.00614162		3554.38	-0.00848857		4144.38	0.00300416
604.6	0.03015001		1194.59	-0.0031928		1784.6	-0.00588364		2374.6	-0.00124597		2964.59	-0.00509736		3554.58	-0.00788871		4144.58	0.00304756
604.8	0.03054665		1194.79	-0.00428952		1784.8	-0.00595569		2374.8	-0.00173711		2964.79	-0.00578961		3554.78	-0.00776413		4144.78	0.00402378
605	0.03094619		1194.99	-0.00501694		1785	-0.00633199		2375	-0.00200055		2964.99	-0.0049244		3554.98	-0.00676626		4144.98	0.00481287
605.2	0.03130389		1195.19	-0.00517539		1785.2	-0.0069477		2375.2	-0.00222407		2965.19	-0.00497773		3555.18	-0.00695848		4145.18	0.00524331
605.4	0.03189176		1195.39	-0.00649933		1785.4	-0.00715134		2375.4	-0.00181799		2965.39	-0.00444291		3555.38	-0.00677955		4145.38	0.0060319
605.6	0.03186144		1195.59	-0.00625113		1785.6	-0.00757547		2375.6	-0.00142256		2965.59	-0.00407054		3555.58	-0.00714661		4145.58	0.00636084
605.8	0.03321247		1195.79	-0.00605881		1785.8	-0.00706789		2375.8	-0.00181411		2965.79	-0.0041716		3555.78	-0.00682881		4145.78	0.00624223
606	0.03257542		1195.99	-0.00589969		1786	-0.00705332		2376	-0.00132487		2965.99	-0.00519051		3555.98	-0.00651257		4145.98	0.00550283
606.2	0.03227868		1196.19	-0.00627062		1786.2	-0.00725734		2376.2	-0.00123084		2966.19	-0.00494554		3556.18	-0.00719122		4146.18	0.00360108
606.4	0.03162571		1196.39	-0.00618341		1786.4	-0.0068239		2376.4	-0.00156608		2966.39	-0.00520842		3556.38	-0.00734099		4146.38	0.0034995
606.6	0.03137572		1196.59	-0.0065873		1786.6	-0.00747265		2376.6	-0.00129529		2966.59	-0.00437233		3556.58	-0.00785487		4146.58	0.0033675
606.8	0.03286272		1196.79	-0.00783484		1786.8	-0.00679868		2376.8	-0.00210894		2966.79	-0.0057775		3556.78	-0.00825476		4146.78	0.00423399
607	0.03339182		1196.99	-0.00881074		1787	-0.00770024		2377	-0.00287024		2966.99	-0.00567491		3556.98	-0.008305		4146.98	0.00485193
607.2	0.0330997		1197.19	-0.0085125		1787.2	-0.00750163		2377.2	-0.00275969		2967.19	-0.00625162		3557.18	-0.00928426		4147.18	0.00573207
607.4	0.03284981		1197.39	-0.00808095		1787.4	-0.00758187		2377.4	-0.00234438		2967.39	-0.00605219		3557.38	-0.01045815		4147.38	0.00620046
607.6	0.03216588		1197.59	-0.00785821		1787.6	-0.00750718		2377.6	-0.00145299		2967.59	-0.00491841		3557.58	-0.01069698		4147.58	0.00655292
607.8	0.03194821		1197.79	-0.0078494		1787.8	-0.00785741		2377.8	-0.00200996		2967.79	-0.00486036		3557.78	-0.01084348		4147.78	0.00642889
608	0.03200229		1197.99	-0.00708282		1788	-0.0080909		2378	-0.00091894		2967.99	-0.00517885		3557.98	-0.01096565		4147.98	0.00693992
608.2	0.03298047		1198.19	-0.00751837		1788.2	-0.00833219		2378.2	-0.00115774		2968.19	-0.00570691		3558.18	-0.01110909		4148.18	0.00731807
608.4	0.03407775		1198.39	-0.00670733		1788.4	-0.00832686		2378.4	-0.0007998		2968.39	-0.0060293		3558.38	-0.01093055		4148.38	0.00664092
608.6	0.03523666		1198.59	-0.00704238		1788.6	-0.00994521		2378.6	-0.00022493		2968.59	-0.00617107		3558.58	-0.01004069		4148.58	0.00695835
608.8	0.03499411		1198.79	-0.0075609		1788.8	-0.00986001		2378.8	-0.0006694		2968.79	-0.00704064		3558.78	-0.00997561		4148.78	0.00858409
609	0.03486091		1198.99	-0.00697514		1789	-0.01015342		2379	-0.0005333		2968.99	-0.00619562		3558.98	-0.0094112		4148.98	0.00854562
609.2	0.03526128		1199.19	-0.0061889		1789.2	-0.01072634		2379.2	-0.00101921		2969.19	-0.00610467		3559.18	-0.00934172		4149.18	0.00770677
609.4	0.03513022		1199.39	-0.00574161		1789.4	-0.00974959		2379.4	-0.00022933		2969.39	-0.00587967		3559.38	-0.00887927		4149.38	0.00781279
609.6	0.03397274		1199.59	-0.00522317		1789.6	-0.00903177		2379.6	-0.00041782		2969.59	-0.00582		3559.58	-0.00950296		4149.58	0.0069145
609.8	0.03418991		1199.79	-0.00476711		1789.8	-0.00740885		2379.8	-0.00058625		2969.79	-0.00615082		3559.78	-0.00906302		4149.78	0.0071809
610	0.03303025		1199.99	-0.00380526		1790	-0.0066593		2380	-0.00059254		2969.99	-0.00616836		3559.98	-0.00899911		4149.98	0.00682384
610.2	0.03191584		1200.19	-0.00448326		1790.2	-0.00571518		2380.2	-0.00107327		2970.19	-0.00627885		3560.18	-0.00880843		4150.18	0.00609464
610.4	0.03068731		1200.39	-0.00429193		1790.4	-0.00458362		2380.4	-0.00089799		2970.39	-0.006743		3560.38	-0.0086555		4150.38	0.00686781
610.6	0.03058359		1200.59	-0.00545624		1790.6	-0.00432031		2380.6	-0.0009914		2970.59	-0.0060659		3560.58	-0.00856518		4150.58	0.00628571
610.8	0.03063511		1200.79	-0.0067636		1790.8	-0.00389502		2380.8	-0.00213468		2970.79	-0.00607823		3560.78	-0.00868755		4150.78	0.00592357
611	0.02989398		1200.99	-0.00752414		1791	-0.00436452		2381	-0.00214064		2970.99	-0.00606273		3560.98	-0.00907195		4150.98	0.00555028
611.2	0.02866518		1201.19	-0.00776059		1791.2	-0.00413254		2381.2	-0.00281232		2971.19	-0.00562852		3561.18	-0.00974621		4151.18	0.00533572
611.4	0.02804949		1201.39	-0.00779646		1791.4	-0.00447991		2381.4	-0.0029335		2971.39	-0.0049396		3561.38	-0.00917439		4151.38	0.00500635
611.6	0.02736917		1201.59	-0.00816908		1791.6	-0.00456967		2381.6	-0.00327876		2971.59	-0.00505073		3561.58	-0.00833685		4151.58	0.0044932
611.8	0.02800244		1201.79	-0.00879576		1791.8	-0.00478846		2381.8	-0.00371961		2971.79	-0.00489389		3561.78	-0.00816875		4151.78	0.0035722
612	0.02884824		1201.99	-0.00797229		1792	-0.00441974		2382	-0.00283596		2971.99	-0.00530773		3561.98	-0.00859727		4151.98	0.00296611
612.2	0.02986412		1202.19	-0.00819299		1792.2	-0.00502006		2382.2	-0.00337372		2972.19	-0.00592046		3562.18	-0.00926782		4152.18	0.00369652
612.4	0.03023508		1202.39	-0.00684823		1792.4	-0.00555134		2382.4	-0.00251285		2972.39	-0.00584486		3562.38	-0.00877424		4152.38	0.00426568
612.6	0.0296093		1202.59	-0.00682994		1792.6	-0.00636236		2382.6	-0.00205959		2972.59	-0.00570712		3562.58	-0.00889494		4152.58	0.00532652
612.8	0.02936613		1202.79	-0.00674386		1792.8	-0.0063676		2382.8	-0.00128864		2972.79	-0.00599178		3562.78	-0.00893273		4152.78	0.00594583
613	0.02993512		1202.99	-0.00677538		1793	-0.00625811		2383	-0.0017174		2972.99	-0.00488538		3562.98	-0.01028082		4152.98	0.00556536
613.2	0.03033446		1203.19	-0.00642354		1793.2	-0.00633284		2383.2	-0.00122489		2973.19	-0.00565866		3563.18	-0.01036149		4153.18	0.00530876
613.4	0.03024955		1203.39	-0.00682391		1793.4	-0.00508279		2383.4	-0.00073055		2973.39	-0.00636718		3563.38	-0.01089372		4153.38	0.005638
613.6	0.03019955		1203.59	-0.00724465		1793.6	-0.00453771		2383.6	-0.00065953		2973.59	-0.00648384		3563.58	-0.01104558		4153.58	0.00529381
613.8	0.02993918		1203.79	-0.006421		1793.8	-0.00376389		2383.8	-0.00023912		2973.79	-0.00625855		3563.78	-0.01065643		4153.78	0.00539978
614	0.02959741		1203.99	-0.00634966		1794	-0.00382828		2384	-0.00078357		2973.99	-0.0058439		3563.98	-0.01104294		4153.98	0.00567981
614.2	0.02877089		1204.19	-0.00695262		1794.2	-0.00382973		2384.2	-0.00057408		2974.19	-0.00563058		3564.18	-0.01040227		4154.18	0.00535418
614.4	0.0284639		1204.39	-0.0073298		1794.4	-0.00322654		2384.4	-0.00025212		2974.39	-0.00481697		3564.38	-0.00995238		4154.38	0.00540262
614.6	0.02886681		1204.59	-0.00912564		1794.6	-0.00401205		2384.6	-0.00033187		2974.59	-0.00411466		3564.58	-0.01025117		4154.58	0.00456904
614.8	0.02872981		1204.79	-0.01047628		1794.8	-0.00397265		2384.8	-0.0005903		2974.79	-0.00440221		3564.78	-0.01003802		4154.78	0.00412649
615	0.02797363		1204.99	-0.01078301		1795	-0.00459626		2385	0.00016777		2974.99	-0.00428092		3564.98	-0.0103044		4154.98	0.00455819
615.2	0.02737304		1205.19	-0.01184189		1795.2	-0.00515422		2385.2	-0.00028888		2975.19	-0.00463377		3565.18	-0.01041695		4155.18	0.00464588
615.4	0.02816154		1205.39	-0.01212626		1795.4	-0.00577211		2385.4	-0.00087358		2975.39	-0.00499235		3565.38	-0.00987704		4155.38	0.00474242
615.6	0.0289083		1205.59	-0.01242758		1795.6	-0.00638836		2385.6	-0.00070239		2975.59	-0.00550065		3565.58	-0.00911828		4155.58	0.00468112
615.8	0.02963294		1205.79	-0.01277881		1795.8	-0.00629876		2385.8	-0.00114091		2975.79	-0.00601042		3565.78	-0.00952327		4155.78	0.0040083
616	0.03074345		1205.99	-0.01142389		1796	-0.00683302		2386	-0.00080039		2975.99	-0.00678743		3565.98	-0.00942316		4155.98	0.00430235
616.2	0.0312566		1206.19	-0.01091585		1796.2	-0.00819734		2386.2	-0.0007617		2976.19	-0.00731928		3566.18	-0.00883804		4156.18	0.00596212
616.4	0.03145516		1206.39	-0.0101017		1796.4	-0.00868352		2386.4	-0.0003522		2976.39	-0.006753		3566.38	-0.00809621		4156.38	0.0061708
616.6	0.03138865		1206.59	-0.01039042		1796.6	-0.00884669		2386.6	-0.00034641		2976.59	-0.00673569		3566.58	-0.00836083		4156.58	0.00618909
616.8	0.03217447		1206.79	-0.00957898		1796.8	-0.00889387		2386.8	0.00004704		2976.79	-0.00635146		3566.78	-0.0085173		4156.78	0.00669541
617	0.03270144		1206.99	-0.0091418		1797	-0.00934508		2387	-0.00075692		2976.99	-0.00639875		3566.98	-0.00858877		4156.98	0.00619681
617.2	0.03234835		1207.19	-0.00867046		1797.2	-0.00857304		2387.2	-0.00056246		2977.19	-0.00729298		3567.18	-0.00821664		4157.18	0.00540417
617.4	0.03337451		1207.39	-0.00875468		1797.4	-0.00835886		2387.4	-0.0006885		2977.39	-0.00761179		3567.38	-0.00911753		4157.38	0.0046867
617.6	0.03290248		1207.59	-0.00892658		1797.6	-0.00828782		2387.6	-0.00073487		2977.59	-0.00694993		3567.58	-0.00923351		4157.58	0.00379908
617.8	0.03227741		1207.79	-0.00841432		1797.8	-0.00802813		2387.8	-0.00165616		2977.79	-0.00639496		3567.78	-0.0093758		4157.78	0.00369293
618	0.03134866		1207.99	-0.00777365		1798	-0.00783428		2388	-0.00205314		2977.99	-0.00554023		3567.98	-0.01012598		4157.98	0.00398823
618.2	0.0309597		1208.19	-0.00732891		1798.2	-0.00733854		2388.2	-0.00210424		2978.19	-0.00487274		3568.18	-0.01057679		4158.18	0.00303591
618.4	0.03012457		1208.39	-0.0073756		1798.4	-0.00727092		2388.4	-0.00210324		2978.39	-0.00468227		3568.38	-0.01139612		4158.38	0.00287619
618.6	0.02939715		1208.59	-0.00792328		1798.6	-0.00715384		2388.6	-0.00223682		2978.59	-0.00395984		3568.58	-0.01238921		4158.58	0.00190359
618.8	0.02912919		1208.79	-0.00795277		1798.8	-0.00614001		2388.8	-0.00233888		2978.79	-0.00409401		3568.78	-0.01229861		4158.78	0.0009393
619	0.02850337		1208.99	-0.00860645		1799	-0.00573779		2389	-0.00172017		2978.99	-0.00339294		3568.98	-0.01270758		4158.98	0.00061909
619.2	0.02826608		1209.19	-0.00992501		1799.2	-0.0051725		2389.2	-0.00269676		2979.19	-0.00467576		3569.18	-0.01319091		4159.18	0.00141767
619.4	0.02857138		1209.39	-0.00986201		1799.4	-0.00503346		2389.4	-0.00289384		2979.39	-0.00500839		3569.38	-0.0121389		4159.38	0.00183035
619.6	0.02851457		1209.59	-0.01026544		1799.6	-0.0042877		2389.6	-0.00137454		2979.59	-0.00513839		3569.58	-0.01149915		4159.58	0.00160331
619.8	0.0289213		1209.79	-0.00958963		1799.8	-0.00485142		2389.8	-0.00190345		2979.79	-0.00519202		3569.78	-0.01189976		4159.78	0.00198638
620	0.02952712		1209.99	-0.00861684		1800	-0.00515299		2390	-0.00105337		2979.99	-0.00418859		3569.98	-0.01078851		4159.98	0.00301998
620.2	0.02917928		1210.19	-0.00857017		1800.2	-0.00512794		2390.2	-0.00064922		2980.19	-0.00389614		3570.18	-0.01046994		4160.18	0.00429188
620.4	0.02876012		1210.39	-0.00803661		1800.4	-0.0053314		2390.4	-0.00022967		2980.39	-0.00409472		3570.38	-0.01032805		4160.38	0.00441954
620.6	0.02889125		1210.59	-0.00844801		1800.6	-0.00519427		2390.6	-0.00020083		2980.59	-0.00494786		3570.58	-0.00931823		4160.58	0.00453509
620.8	0.02874113		1210.79	-0.00765814		1800.8	-0.00545002		2390.8	0.00029147		2980.79	-0.00447011		3570.78	-0.00902243		4160.78	0.00570106
621	0.02825635		1210.99	-0.00836154		1801	-0.0051725		2391	0.00016073		2980.99	-0.00550998		3570.98	-0.00861436		4160.98	0.00575715
621.2	0.02813982		1211.19	-0.00911212		1801.2	-0.00436175		2391.2	0.00025323		2981.19	-0.00528973		3571.18	-0.00893838		4161.18	0.00620643
621.4	0.02893306		1211.39	-0.00888344		1801.4	-0.00431046		2391.4	0.00061173		2981.39	-0.00611844		3571.38	-0.00883244		4161.38	0.00621037
621.6	0.02893494		1211.59	-0.00901788		1801.6	-0.00501491		2391.6	0.00111563		2981.59	-0.00669915		3571.58	-0.00889292		4161.58	0.00672573
621.8	0.0287924		1211.79	-0.00846205		1801.8	-0.00507703		2391.8	0.00082205		2981.79	-0.00759132		3571.78	-0.0088149		4161.78	0.00714138
622	0.02693762		1211.99	-0.00794372		1802	-0.00526874		2392	0.00026827		2981.99	-0.00755239		3571.98	-0.00851423		4161.98	0.00658372
622.2	0.02779665		1212.19	-0.00805428		1802.2	-0.0056281		2392.2	-0.0001841		2982.19	-0.00784162		3572.18	-0.00904479		4162.18	0.00607887
622.4	0.02787727		1212.39	-0.0078666		1802.4	-0.00625653		2392.4	-0.00040401		2982.39	-0.00841834		3572.38	-0.00936275		4162.38	0.00596597
622.6	0.02837158		1212.59	-0.00803206		1802.6	-0.00601866		2392.6	-0.00089175		2982.59	-0.00830839		3572.58	-0.00880799		4162.58	0.00511
622.8	0.0287483		1212.79	-0.0086262		1802.8	-0.00582478		2392.8	-0.00120433		2982.79	-0.0089268		3572.78	-0.0078074		4162.78	0.00450141
623	0.02851804		1212.99	-0.00920439		1803	-0.00548079		2393	-0.00108863		2982.99	-0.00803647		3572.98	-0.00770331		4162.98	0.00427312
623.2	0.02818265		1213.19	-0.00986855		1803.2	-0.00552323		2393.2	-0.0017031		2983.19	-0.00816477		3573.18	-0.00716638		4163.18	0.00455952
623.4	0.02902523		1213.39	-0.00908421		1803.4	-0.0064841		2393.4	-0.00121981		2983.39	-0.00789294		3573.38	-0.00660865		4163.38	0.00423281
623.6	0.02901782		1213.59	-0.00877761		1803.6	-0.00677246		2393.6	-0.00083554		2983.59	-0.00661404		3573.58	-0.00652514		4163.58	0.00450374
623.8	0.03010655		1213.79	-0.00785617		1803.8	-0.00825507		2393.8	-0.00162859		2983.79	-0.00634063		3573.78	-0.00679211		4163.78	0.00475097
624	0.0297642		1213.99	-0.0076042		1804	-0.00858965		2394	-0.00110818		2983.99	-0.00581675		3573.98	-0.00692624		4163.98	0.00452806
624.2	0.02959565		1214.19	-0.00710613		1804.2	-0.00920233		2394.2	-0.00103357		2984.19	-0.00639143		3574.18	-0.00720922		4164.18	0.00492655
624.4	0.02927139		1214.39	-0.00617952		1804.4	-0.0095863		2394.4	-0.00046718		2984.39	-0.00652505		3574.38	-0.00759449		4164.38	0.00452529
624.6	0.02917265		1214.59	-0.00606582		1804.6	-0.00930666		2394.6	0.00015461		2984.59	-0.00695987		3574.58	-0.00767804		4164.58	0.00527267
624.8	0.02835903		1214.79	-0.00477129		1804.8	-0.00975138		2394.8	0.00062285		2984.79	-0.00607504		3574.78	-0.00848989		4164.78	0.00546668
625	0.02894154		1214.99	-0.00566627		1805	-0.00927824		2395	0.00120626		2984.99	-0.00694625		3574.98	-0.00924917		4164.98	0.00496036
625.2	0.02853606		1215.19	-0.0053287		1805.2	-0.00905213		2395.2	0.00138425		2985.19	-0.00630213		3575.18	-0.00957988		4165.18	0.00544563
625.4	0.02933471		1215.39	-0.00470693		1805.4	-0.00929005		2395.4	0.00182369		2985.39	-0.00754855		3575.38	-0.01035273		4165.38	0.00547544
625.6	0.02915863		1215.59	-0.00444049		1805.6	-0.00942142		2395.6	0.00214554		2985.59	-0.00893075		3575.58	-0.01088573		4165.58	0.00572183
625.8	0.02865791		1215.79	-0.00441966		1805.8	-0.00859741		2395.8	0.0013552		2985.79	-0.00934757		3575.78	-0.01130785		4165.78	0.00554741
626	0.02743011		1215.99	-0.00467914		1806	-0.00808476		2396	0.00032922		2985.99	-0.0086618		3575.98	-0.01153079		4165.98	0.0056485
626.2	0.02788347		1216.19	-0.00474897		1806.2	-0.00881896		2396.2	0.00016599		2986.19	-0.00887239		3576.18	-0.01235981		4166.18	0.00552995
626.4	0.02811078		1216.39	-0.00477633		1806.4	-0.00870494		2396.4	-0.00046052		2986.39	-0.00964099		3576.38	-0.0125704		4166.38	0.0059314
626.6	0.02758436		1216.59	-0.0056368		1806.6	-0.00741692		2396.6	-0.0007989		2986.59	-0.00969316		3576.58	-0.01120856		4166.58	0.00554051
626.8	0.02741555		1216.79	-0.00619881		1806.8	-0.00755617		2396.8	-0.00109355		2986.79	-0.0094359		3576.78	-0.01013183		4166.78	0.00595001
627	0.02755467		1216.99	-0.00668556		1807	-0.00743713		2397	-0.00177148		2986.99	-0.00829659		3576.98	-0.00948476		4166.98	0.00659191
627.2	0.0268011		1217.19	-0.00799369		1807.2	-0.00808214		2397.2	-0.00269588		2987.19	-0.00754793		3577.18	-0.00841404		4167.18	0.00722867
627.4	0.02716698		1217.39	-0.00731104		1807.4	-0.00818937		2397.4	-0.0028173		2987.39	-0.00739943		3577.38	-0.00760813		4167.38	0.00767487
627.6	0.0259695		1217.59	-0.00777718		1807.6	-0.00734244		2397.6	-0.00239601		2987.59	-0.00698073		3577.58	-0.00692622		4167.58	0.00861992
627.8	0.02654905		1217.79	-0.00732753		1807.8	-0.00767912		2397.8	-0.00304707		2987.79	-0.00732601		3577.78	-0.00633678		4167.78	0.00845806
628	0.02619047		1217.99	-0.00644475		1808	-0.00771811		2398	-0.00361871		2987.99	-0.00691806		3577.98	-0.00634586		4167.98	0.00943107
628.2	0.02667755		1218.19	-0.00622196		1808.2	-0.00749726		2398.2	-0.00388751		2988.19	-0.00695922		3578.18	-0.00516179		4168.18	0.01029724
628.4	0.02666704		1218.39	-0.00591214		1808.4	-0.00689703		2398.4	-0.00424113		2988.39	-0.00626612		3578.38	-0.00621059		4168.38	0.01044289
628.6	0.02682107		1218.59	-0.00582252		1808.6	-0.00766298		2398.6	-0.00354831		2988.59	-0.00612401		3578.58	-0.00665016		4168.58	0.00970785
628.8	0.02796368		1218.79	-0.00565037		1808.8	-0.00755501		2398.8	-0.00334509		2988.79	-0.00587967		3578.78	-0.00693498		4168.78	0.00882427
629	0.02895953		1218.99	-0.00602526		1809	-0.00708385		2399	-0.00243664		2988.99	-0.00610142		3578.98	-0.00734672		4168.98	0.00796668
629.2	0.02815611		1219.19	-0.00606658		1809.2	-0.00744523		2399.2	-0.00226478		2989.19	-0.00593197		3579.18	-0.00864344		4169.18	0.00852702
629.4	0.02861547		1219.39	-0.00682327		1809.4	-0.00742725		2399.4	-0.00181281		2989.39	-0.00662676		3579.38	-0.00937006		4169.38	0.00716807
629.6	0.02845341		1219.59	-0.00685739		1809.6	-0.00667067		2399.6	-0.00211107		2989.59	-0.00743212		3579.58	-0.00988748		4169.58	0.00695339
629.8	0.02872613		1219.79	-0.00763188		1809.8	-0.00666506		2399.8	-0.00182785		2989.79	-0.00698302		3579.78	-0.01091024		4169.78	0.0059583
630	0.02776		1219.99	-0.0078178		1810	-0.00733485		2400	-0.00178549		2989.99	-0.00671954		3579.98	-0.01152675		4169.98	0.00528181
630.2	0.02822127		1220.19	-0.0079178		1810.2	-0.00821742		2400.2	-0.00163668		2990.19	-0.00757258		3580.18	-0.01171396		4170.18	0.00447831
630.4	0.0287754		1220.39	-0.00819809		1810.4	-0.00738561		2400.4	-0.00086621		2990.39	-0.00924864		3580.38	-0.01225533		4170.38	0.00419053
630.6	0.02949089		1220.59	-0.00823819		1810.6	-0.00681803		2400.6	-0.00059315		2990.59	-0.0093752		3580.58	-0.01172457		4170.58	0.00383517
630.8	0.0299456		1220.79	-0.00838079		1810.8	-0.00752325		2400.8	-0.00070983		2990.79	-0.00945252		3580.78	-0.01150308		4170.78	0.00389157
631	0.03023307		1220.99	-0.00936808		1811	-0.00732321		2401	-0.00088567		2990.99	-0.00906486		3580.98	-0.01140233		4170.98	0.00377987
631.2	0.02941202		1221.19	-0.00944677		1811.2	-0.00763356		2401.2	-0.00098091		2991.19	-0.00887184		3581.18	-0.01108282		4171.18	0.00384309
631.4	0.02924243		1221.39	-0.00889693		1811.4	-0.00750551		2401.4	-0.00111808		2991.39	-0.00903956		3581.38	-0.0110152		4171.38	0.0043538
631.6	0.0297672		1221.59	-0.00956142		1811.6	-0.00742802		2401.6	-0.00145907		2991.59	-0.00901883		3581.58	-0.01114139		4171.58	0.0045825
631.8	0.03041337		1221.79	-0.00954167		1811.8	-0.00765171		2401.8	-0.0029873		2991.79	-0.00936858		3581.78	-0.00995296		4171.78	0.00585409
632	0.03077577		1221.99	-0.00962525		1812	-0.00766793		2402	-0.00421038		2991.99	-0.0092163		3581.98	-0.00998533		4171.98	0.00707564
632.2	0.03113442		1222.19	-0.00924883		1812.2	-0.00757842		2402.2	-0.00518361		2992.19	-0.00880751		3582.18	-0.00883812		4172.18	0.00638029
632.4	0.03107663		1222.39	-0.00952945		1812.4	-0.00806352		2402.4	-0.00524392		2992.39	-0.00833828		3582.38	-0.00967935		4172.38	0.00607676
632.6	0.03136577		1222.59	-0.00897798		1812.6	-0.00858771		2402.6	-0.00450674		2992.59	-0.00815792		3582.58	-0.00854674		4172.58	0.00541625
632.8	0.03113785		1222.79	-0.0083189		1812.8	-0.0077416		2402.8	-0.00438157		2992.79	-0.00811206		3582.78	-0.00818829		4172.78	0.00597659
633	0.02981212		1222.99	-0.00776071		1813	-0.00808905		2403	-0.00350497		2992.99	-0.00705946		3582.98	-0.008847		4172.98	0.00633027
633.2	0.028548		1223.19	-0.00736216		1813.2	-0.00784545		2403.2	-0.00378806		2993.19	-0.00692321		3583.18	-0.00954589		4173.18	0.00646598
633.4	0.02821351		1223.39	-0.00734251		1813.4	-0.00665718		2403.4	-0.00388027		2993.39	-0.0061906		3583.38	-0.0088863		4173.38	0.00558655
633.6	0.02777866		1223.59	-0.00748131		1813.6	-0.00546584		2403.6	-0.0031665		2993.59	-0.00648364		3583.58	-0.0085312		4173.58	0.00559577
633.8	0.02710944		1223.79	-0.00727186		1813.8	-0.00576637		2403.8	-0.00277938		2993.79	-0.00673646		3583.78	-0.00849247		4173.78	0.00451856
634	0.02614304		1223.99	-0.00570469		1814	-0.00562944		2404	-0.00206289		2993.99	-0.00684732		3583.98	-0.00981307		4173.98	0.00525454
634.2	0.02655617		1224.19	-0.00505542		1814.2	-0.00527389		2404.2	-0.00170819		2994.19	-0.00758027		3584.18	-0.01064902		4174.18	0.00517441
634.4	0.02641753		1224.39	-0.00516162		1814.4	-0.00552684		2404.4	-0.00116151		2994.39	-0.00788594		3584.38	-0.01135357		4174.38	0.00547776
634.6	0.02669637		1224.59	-0.00418697		1814.6	-0.00541359		2404.6	-0.00168245		2994.59	-0.00716056		3584.58	-0.01106155		4174.58	0.0055366
634.8	0.02614344		1224.79	-0.00419812		1814.8	-0.00535594		2404.8	-0.00190398		2994.79	-0.0081538		3584.78	-0.01135037		4174.78	0.00556339
635	0.0259949		1224.99	-0.00371701		1815	-0.00590669		2405	-0.00247228		2994.99	-0.00817727		3584.98	-0.01176347		4174.98	0.00611783
635.2	0.02522491		1225.19	-0.00360082		1815.2	-0.00658066		2405.2	-0.00272027		2995.19	-0.00862122		3585.18	-0.01205905		4175.18	0.0066912
635.4	0.02605184		1225.39	-0.00338911		1815.4	-0.00679594		2405.4	-0.00327508		2995.39	-0.00874119		3585.38	-0.01268913		4175.38	0.00705705
635.6	0.02674774		1225.59	-0.00455684		1815.6	-0.00693886		2405.6	-0.00352472		2995.59	-0.00953528		3585.58	-0.01212743		4175.58	0.00664243
635.8	0.02622072		1225.79	-0.00477827		1815.8	-0.00769111		2405.8	-0.00378929		2995.79	-0.00985239		3585.78	-0.0113784		4175.78	0.00672771
636	0.0268234		1225.99	-0.00516323		1816	-0.00797556		2406	-0.00367627		2995.99	-0.00943729		3585.98	-0.01145201		4175.98	0.00594312
636.2	0.02744935		1226.19	-0.00518431		1816.2	-0.00869683		2406.2	-0.00393663		2996.19	-0.00889608		3586.18	-0.01108622		4176.18	0.00588707
636.4	0.02730796		1226.39	-0.00589357		1816.4	-0.00925146		2406.4	-0.00270567		2996.39	-0.00868122		3586.38	-0.01110074		4176.38	0.00624823
636.6	0.02707288		1226.59	-0.00541102		1816.6	-0.00867432		2406.6	-0.00256422		2996.59	-0.00745378		3586.58	-0.00968147		4176.58	0.00653739
636.8	0.02687819		1226.79	-0.00529958		1816.8	-0.00876079		2406.8	-0.00211896		2996.79	-0.00735383		3586.78	-0.01016504		4176.78	0.00679919
637	0.02750542		1226.99	-0.00509363		1817	-0.00884696		2407	-0.00179713		2996.99	-0.00721216		3586.98	-0.00992006		4176.98	0.00708544
637.2	0.02771042		1227.19	-0.00546497		1817.2	-0.00757031		2407.2	-0.00193816		2997.19	-0.00752238		3587.18	-0.00868873		4177.18	0.00586354
637.4	0.02760659		1227.39	-0.00669893		1817.4	-0.00681766		2407.4	-0.00101289		2997.39	-0.00743958		3587.38	-0.00829516		4177.38	0.00519317
637.6	0.02754657		1227.59	-0.00812642		1817.6	-0.00630894		2407.6	-0.00078737		2997.59	-0.00833083		3587.58	-0.00836943		4177.58	0.00550654
637.8	0.02809223		1227.79	-0.00766653		1817.8	-0.00607826		2407.8	-0.00202938		2997.79	-0.00891615		3587.78	-0.00946133		4177.78	0.00551219
638	0.02754232		1227.99	-0.00784285		1818	-0.00523733		2408	-0.00131771		2997.99	-0.00847239		3587.98	-0.01044939		4177.98	0.00615977
638.2	0.02777835		1228.19	-0.00902683		1818.2	-0.00574654		2408.2	-0.00207435		2998.19	-0.00887093		3588.18	-0.01043487		4178.18	0.0064258
638.4	0.02742659		1228.39	-0.0097151		1818.4	-0.00572526		2408.4	-0.00325626		2998.39	-0.00891528		3588.38	-0.01098557		4178.38	0.00684317
638.6	0.02745598		1228.59	-0.00907784		1818.6	-0.00497691		2408.6	-0.00429651		2998.59	-0.00921699		3588.58	-0.01078251		4178.58	0.00657134
638.8	0.02691625		1228.79	-0.00863178		1818.8	-0.004945		2408.8	-0.00468783		2998.79	-0.01023976		3588.78	-0.01074708		4178.78	0.00621055
639	0.02712306		1228.99	-0.00875639		1819	-0.00533023		2409	-0.00516326		2998.99	-0.01042853		3588.98	-0.01131138		4178.98	0.00584484
639.2	0.02689856		1229.19	-0.00938576		1819.2	-0.00560806		2409.2	-0.00568082		2999.19	-0.01014635		3589.18	-0.01113775		4179.18	0.00636577
639.4	0.02697181		1229.39	-0.00819296		1819.4	-0.00610406		2409.4	-0.00620448		2999.39	-0.01013044		3589.38	-0.01068683		4179.38	0.00587137
639.6	0.02639561		1229.59	-0.0082908		1819.6	-0.0069211		2409.6	-0.0057566		2999.59	-0.01036612		3589.58	-0.01040297		4179.58	0.00485146
639.8	0.02587571		1229.79	-0.00791377		1819.8	-0.00725005		2409.8	-0.00526288		2999.79	-0.00968905		3589.78	-0.01090205		4179.78	0.0040856
640	0.02596897		1229.99	-0.00828006		1820	-0.00747783		2410	-0.0044687		2999.99	-0.00912259		3589.98	-0.01160215		4179.98	0.00445631
640.2	0.02625298		1230.19	-0.00769688		1820.2	-0.00814052		2410.2	-0.00448376		3000.19	-0.00829869		3590.18	-0.01184655		4180.18	0.00517279
640.4	0.02553138		1230.39	-0.00676981		1820.4	-0.00848686		2410.4	-0.00310133		3000.39	-0.00786593		3590.38	-0.01189546		4180.38	0.00520803
640.6	0.02542411		1230.59	-0.00621853		1820.6	-0.0081853		2410.6	-0.00304649		3000.59	-0.00721322		3590.58	-0.01192033		4180.58	0.00579425
640.8	0.02587552		1230.79	-0.00566609		1820.8	-0.00796203		2410.8	-0.00298295		3000.79	-0.00785442		3590.78	-0.01259746		4180.78	0.00653339
641	0.02614989		1230.99	-0.00545281		1821	-0.00779421		2411	-0.00276717		3000.99	-0.00766611		3590.98	-0.01253543		4180.98	0.00620962
641.2	0.02556063		1231.19	-0.00576487		1821.2	-0.00675673		2411.2	-0.00309082		3001.19	-0.00789871		3591.18	-0.01323759		4181.18	0.00555594
641.4	0.02513542		1231.39	-0.006683		1821.4	-0.00639788		2411.4	-0.00292769		3001.39	-0.00865669		3591.38	-0.01386231		4181.38	0.00551505
641.6	0.02474384		1231.59	-0.00780746		1821.6	-0.00640697		2411.6	-0.00333689		3001.59	-0.0089998		3591.58	-0.01473173		4181.58	0.00634766
641.8	0.0254601		1231.79	-0.00865173		1821.8	-0.00650336		2411.8	-0.00365197		3001.79	-0.00907273		3591.78	-0.01502063		4181.78	0.0049639
642	0.02519472		1231.99	-0.00963808		1822	-0.00695865		2412	-0.0031768		3001.99	-0.00826889		3591.98	-0.01575921		4181.98	0.00480808
642.2	0.02543073		1232.19	-0.01035355		1822.2	-0.00696713		2412.2	-0.00408887		3002.19	-0.00868536		3592.18	-0.01537338		4182.18	0.00497159
642.4	0.02554781		1232.39	-0.01074197		1822.4	-0.00685863		2412.4	-0.00421238		3002.39	-0.00871257		3592.38	-0.01537908		4182.38	0.00500951
642.6	0.02596761		1232.59	-0.01045514		1822.6	-0.00729099		2412.6	-0.00433383		3002.59	-0.00826552		3592.58	-0.0141416		4182.58	0.00486407
642.8	0.02594959		1232.79	-0.01050353		1822.8	-0.00797904		2412.8	-0.00380125		3002.79	-0.00859461		3592.78	-0.01390194		4182.78	0.00466656
643	0.026811		1232.99	-0.01096371		1823	-0.00821667		2413	-0.00403709		3002.99	-0.00885593		3592.98	-0.01270659		4182.98	0.00615329
643.2	0.02612901		1233.19	-0.01061199		1823.2	-0.00870308		2413.2	-0.00390691		3003.19	-0.00858964		3593.18	-0.01171818		4183.18	0.00684044
643.4	0.02626319		1233.39	-0.00951034		1823.4	-0.00907039		2413.4	-0.00368069		3003.39	-0.00936848		3593.38	-0.01063098		4183.38	0.00636314
643.6	0.02626949		1233.59	-0.00930084		1823.6	-0.00936513		2413.6	-0.00322969		3003.59	-0.00894205		3593.58	-0.01090395		4183.58	0.00598713
643.8	0.02653743		1233.79	-0.00970751		1823.8	-0.00883602		2413.8	-0.00315686		3003.79	-0.00880776		3593.78	-0.01065453		4183.78	0.00591487
644	0.02692803		1233.99	-0.00886299		1824	-0.00885335		2414	-0.0031659		3003.99	-0.00922274		3593.98	-0.01047863		4183.98	0.00607674
644.2	0.02735779		1234.19	-0.0083499		1824.2	-0.00835381		2414.2	-0.00375174		3004.19	-0.00972135		3594.18	-0.0100508		4184.18	0.00637148
644.4	0.027526		1234.39	-0.00786661		1824.4	-0.00764755		2414.4	-0.00384562		3004.39	-0.0098044		3594.38	-0.01113996		4184.38	0.00693802
644.6	0.02775134		1234.59	-0.00715547		1824.6	-0.00707301		2414.6	-0.00443344		3004.59	-0.00998883		3594.58	-0.01139104		4184.58	0.00667468
644.8	0.02854045		1234.79	-0.00720782		1824.8	-0.00697337		2414.8	-0.00463382		3004.79	-0.01053588		3594.78	-0.0120307		4184.78	0.00681993
645	0.02833328		1234.99	-0.00801514		1825	-0.0064623		2415	-0.00418629		3004.99	-0.01044814		3594.98	-0.01237613		4184.98	0.00592278
645.2	0.02854287		1235.19	-0.00842429		1825.2	-0.00532546		2415.2	-0.00389329		3005.19	-0.01080317		3595.18	-0.01288658		4185.18	0.00557773
645.4	0.02899901		1235.39	-0.00939879		1825.4	-0.00554682		2415.4	-0.00379222		3005.39	-0.01088229		3595.38	-0.01320727		4185.38	0.00464531
645.6	0.02923227		1235.59	-0.01051416		1825.6	-0.00621686		2415.6	-0.00425773		3005.59	-0.01036483		3595.58	-0.01407234		4185.58	0.00398773
645.8	0.03026266		1235.79	-0.010909		1825.8	-0.00673854		2415.8	-0.00445276		3005.79	-0.01008808		3595.78	-0.01429976		4185.78	0.0027576
646	0.03026019		1235.99	-0.01157725		1826	-0.00669332		2416	-0.00429069		3005.99	-0.00904698		3595.98	-0.01467637		4185.98	0.00343685
646.2	0.02968657		1236.19	-0.01210364		1826.2	-0.00654806		2416.2	-0.00472373		3006.19	-0.00883884		3596.18	-0.01356397		4186.18	0.00315761
646.4	0.02926824		1236.39	-0.01307486		1826.4	-0.00722268		2416.4	-0.0044811		3006.39	-0.00880765		3596.38	-0.01356776		4186.38	0.00326246
646.6	0.02849731		1236.59	-0.01342615		1826.6	-0.00801311		2416.6	-0.00393273		3006.59	-0.00781903		3596.58	-0.01335212		4186.58	0.00322382
646.8	0.02788911		1236.79	-0.01321883		1826.8	-0.00865983		2416.8	-0.00260647		3006.79	-0.00779781		3596.78	-0.0127694		4186.78	0.00346898
647	0.02742393		1236.99	-0.01352506		1827	-0.00938964		2417	-0.0020011		3006.99	-0.00846634		3596.98	-0.01123748		4186.98	0.00428601
647.2	0.02716394		1237.19	-0.01299198		1827.2	-0.01004493		2417.2	-0.00127727		3007.19	-0.00849449		3597.18	-0.01107756		4187.18	0.00311939
647.4	0.02698284		1237.39	-0.01212709		1827.4	-0.0102645		2417.4	-0.00136573		3007.39	-0.00880217		3597.38	-0.01019219		4187.38	0.00327501
647.6	0.02682301		1237.59	-0.01188114		1827.6	-0.01045392		2417.6	-0.00185234		3007.59	-0.00840221		3597.58	-0.00950274		4187.58	0.00293474
647.8	0.02698702		1237.79	-0.01162515		1827.8	-0.00973804		2417.8	-0.00228259		3007.79	-0.00898088		3597.78	-0.00823642		4187.78	0.00275003
648	0.02683598		1237.99	-0.01077544		1828	-0.00968372		2418	-0.00315304		3007.99	-0.00958997		3597.98	-0.00781188		4187.98	0.00254824
648.2	0.02679162		1238.19	-0.01083712		1828.2	-0.00951825		2418.2	-0.00382657		3008.19	-0.01023779		3598.18	-0.00765261		4188.18	0.00279515
648.4	0.02679392		1238.39	-0.01037324		1828.4	-0.00960482		2418.4	-0.0045878		3008.39	-0.01038909		3598.38	-0.00822133		4188.38	0.00301144
648.6	0.02647473		1238.59	-0.00971178		1828.6	-0.01016111		2418.6	-0.00521914		3008.59	-0.01119975		3598.58	-0.00783908		4188.58	0.00285255
648.8	0.0264321		1238.79	-0.01001784		1828.8	-0.01018506		2418.8	-0.00579825		3008.79	-0.01182612		3598.78	-0.00814859		4188.78	0.00347941
649	0.02616303		1238.99	-0.01001585		1829	-0.00982445		2419	-0.00669364		3008.99	-0.01193997		3598.98	-0.00824923		4188.98	0.00330135
649.2	0.02669916		1239.19	-0.00955945		1829.2	-0.01014103		2419.2	-0.00782552		3009.19	-0.0124624		3599.18	-0.00891966		4189.18	0.00329778
649.4	0.0266027		1239.39	-0.00953481		1829.4	-0.01093022		2419.4	-0.00944738		3009.39	-0.01306827		3599.38	-0.00976505		4189.38	0.00320659
649.6	0.02622169		1239.59	-0.00954755		1829.6	-0.01167577		2419.6	-0.01088162		3009.59	-0.01331802		3599.58	-0.01039882		4189.58	0.00367747
649.8	0.02603342		1239.79	-0.00922955		1829.8	-0.01254204		2419.8	-0.01160074		3009.79	-0.0136896		3599.78	-0.01112082		4189.78	0.00400046
