# Supplementary material for: Functional development of a V3/glycan-specific broadly neutralizing antibody isolated from a case of HIV superinfection
Source: eLife journal article supplement (doi:10.7554/elife.68110), 2021-07-15
Supplement: fig2-data2 [file G5.xls]

Vers 3.43 Data Simulation
Conc1	3.125E-08	3.125E-08	3.125E-08	3.125E-08	3.125E-08
Start1	290.01	880.01	1470	2060	2650
Stop1	649.81	1239.81	1829.8	2419.8	3009.8
Time1	Data1	Sim1	Time2	Data2	Sim2	Time3	Data3	Sim3	Time4	Data4	Sim4	Time5	Data5	Sim5
290.01	-0.00740517		880.01	-0.00812075		1470	0.00332653		2060	-0.00731982		2650	0.00314449
290.21	-0.00639211		880.21	-0.00731954		1470.2	0.00349077		2060.2	-0.00591812		2650.2	0.00442235
290.41	-0.00536602		880.41	-0.00640517		1470.4	0.00420944		2060.4	-0.00530133		2650.4	0.00567621
290.61	-0.00474356		880.61	-0.00541602		1470.6	0.00566618		2060.6	-0.00406517		2650.6	0.00697311
290.81	-0.00363302		880.81	-0.00432459		1470.8	0.00732532		2060.8	-0.0025657		2650.8	0.0084824
291.01	-0.00256533		881.01	-0.0030168		1471	0.00879132		2061	-0.00096106		2651	0.00945195
291.21	-0.00088227		881.21	-0.00192435		1471.2	0.01055374		2061.2	-0.00020194		2651.2	0.011313
291.41	0.00055764		881.41	-0.00116916		1471.4	0.01190859		2061.4	0.00062581		2651.4	0.01288127
291.61	0.00168918		881.61	-0.00063159		1471.6	0.0139998		2061.6	0.00156583		2651.6	0.01489589
291.81	0.00324803		881.81	0.0003174		1471.8	0.0146962		2061.8	0.00223552		2651.8	0.0159928
292.01	0.00463926		882.01	0.00038818		1472	0.01528562		2062	0.00253206		2652	0.01750673
292.21	0.00594173		882.21	0.00071182		1472.2	0.01560333		2062.2	0.00219882		2652.2	0.01876408
292.41	0.00698432		882.41	0.00150692		1472.4	0.01568989		2062.4	0.00220238		2652.4	0.01995921
292.61	0.00757791		882.61	0.00108199		1472.6	0.01650711		2062.6	0.00260864		2652.6	0.02054655
292.81	0.00873649		882.81	0.00125313		1472.8	0.01689519		2062.8	0.00347767		2652.8	0.02075777
293.01	0.0095456		883.01	0.00168082		1473	0.01707044		2063	0.00351608		2653	0.02039405
293.21	0.01002139		883.21	0.00115219		1473.2	0.01663018		2063.2	0.00424136		2653.2	0.02088997
293.41	0.01044415		883.41	0.00141822		1473.4	0.0168884		2063.4	0.00395986		2653.4	0.02119671
293.61	0.01065864		883.61	0.00160265		1473.6	0.01600208		2063.6	0.00371217		2653.6	0.020712
293.81	0.01129993		883.81	0.00205589		1473.8	0.01658944		2063.8	0.00377234		2653.8	0.02141526
294.01	0.01062541		884.01	0.00250472		1474	0.01593404		2064	0.0044213		2654	0.0213638
294.21	0.010586		884.21	0.00331607		1474.2	0.01553479		2064.2	0.00404397		2654.2	0.02052205
294.41	0.01004091		884.41	0.00349651		1474.4	0.01638987		2064.4	0.00415152		2654.4	0.02019531
294.61	0.01027157		884.61	0.00423378		1474.6	0.016461		2064.6	0.00438902		2654.6	0.01993275
294.81	0.01044097		884.81	0.00473265		1474.8	0.01725467		2064.8	0.00475103		2654.8	0.01998959
295.01	0.01060864		885.01	0.00553349		1475	0.01736017		2065	0.00465432		2655	0.02002958
295.21	0.01070127		885.21	0.00562391		1475.2	0.01759175		2065.2	0.00469851		2655.2	0.02132052
295.41	0.01100947		885.41	0.00608954		1475.4	0.01693766		2065.4	0.00523426		2655.4	0.02179176
295.61	0.0117245		885.61	0.00705334		1475.6	0.01721994		2065.6	0.00641726		2655.6	0.02227088
295.81	0.01284797		885.81	0.00694714		1475.8	0.01631254		2065.8	0.00678329		2655.8	0.0219561
296.01	0.01311016		886.01	0.00583749		1476	0.01669761		2066	0.00738303		2656	0.02202365
296.21	0.01292368		886.21	0.00628196		1476.2	0.0163799		2066.2	0.00768053		2656.2	0.02196792
296.41	0.01308913		886.41	0.00606109		1476.4	0.01645453		2066.4	0.00821591		2656.4	0.02153297
296.61	0.01334247		886.61	0.00563376		1476.6	0.01638168		2066.6	0.00912526		2656.6	0.02233666
296.81	0.01353461		886.81	0.00611668		1476.8	0.01609062		2066.8	0.01034183		2656.8	0.02268897
297.01	0.01326443		887.01	0.00579651		1477	0.0158128		2067	0.00995936		2657	0.02227133
297.21	0.01390346		887.21	0.00398946		1477.2	0.01576526		2067.2	0.01057494		2657.2	0.02163171
297.41	0.01356119		887.41	0.00393456		1477.4	0.01623956		2067.4	0.01061706		2657.4	0.02157203
297.61	0.01375292		887.61	0.00407028		1477.6	0.01612639		2067.6	0.01082542		2657.6	0.02183074
297.81	0.01289115		887.81	0.00485885		1477.8	0.01669167		2067.8	0.01141979		2657.8	0.0221713
298.01	0.01246743		888.01	0.00422342		1478	0.01649844		2068	0.01114388		2658	0.02194539
298.21	0.01246521		888.21	0.00410504		1478.2	0.01750216		2068.2	0.01042769		2658.2	0.02108884
298.41	0.01281006		888.41	0.00415994		1478.4	0.01729713		2068.4	0.01027562		2658.4	0.02136255
298.61	0.01326409		888.61	0.00497693		1478.6	0.01696501		2068.6	0.00898766		2658.6	0.02097324
298.81	0.01299296		888.81	0.00537029		1478.8	0.0181493		2068.8	0.0090016		2658.8	0.02137739
299.01	0.01353683		889.01	0.00611206		1479	0.01787681		2069	0.00911749		2659	0.0221323
299.21	0.01274499		889.21	0.00576082		1479.2	0.01809923		2069.2	0.0096276		2659.2	0.02259862
299.41	0.01347858		889.41	0.00576715		1479.4	0.01817644		2069.4	0.00939503		2659.4	0.02251781
299.61	0.01350223		889.61	0.00550662		1479.6	0.01914337		2069.6	0.00998034		2659.6	0.02178948
299.81	0.0127117		889.81	0.0048165		1479.8	0.02008247		2069.8	0.00873995		2659.8	0.02123003
300.01	0.01163522		890.01	0.00413139		1480	0.02013188		2070	0.00898715		2660	0.02048503
300.21	0.01078925		890.21	0.00390883		1480.2	0.01959059		2070.2	0.00828384		2660.2	0.02057798
300.41	0.01094542		890.41	0.00324216		1480.4	0.01935093		2070.4	0.00793976		2660.4	0.02061016
300.61	0.0103235		890.61	0.00284943		1480.6	0.01902593		2070.6	0.00807874		2660.6	0.02128334
300.81	0.00979094		890.81	0.00346655		1480.8	0.0191672		2070.8	0.00793629		2660.8	0.02146274
301.01	0.01017209		891.01	0.00288252		1481	0.01907008		2071	0.00714318		2661	0.02102162
301.21	0.01013861		891.21	0.00233196		1481.2	0.01903392		2071.2	0.0077658		2661.2	0.02123566
301.41	0.00925887		891.41	0.00259328		1481.4	0.01852252		2071.4	0.00825897		2661.4	0.02242676
301.61	0.00876926		891.61	0.00326777		1481.6	0.01848272		2071.6	0.00775154		2661.6	0.02260686
301.81	0.00869859		891.81	0.00382009		1481.8	0.01728992		2071.8	0.00805959		2661.8	0.02316174
302.01	0.00942013		892.01	0.00339949		1482	0.01666975		2072	0.00725933		2662	0.02369797
302.21	0.00897235		892.21	0.00433161		1482.2	0.01606458		2072.2	0.00680449		2662.2	0.02316948
302.41	0.00939552		892.41	0.00417011		1482.4	0.01538984		2072.4	0.00767287		2662.4	0.02252696
302.61	0.00949012		892.61	0.00387588		1482.6	0.01505761		2072.6	0.00659127		2662.6	0.02290854
302.81	0.01017937		892.81	0.00386868		1482.8	0.01525056		2072.8	0.00677824		2662.8	0.02366161
303.01	0.01033768		893.01	0.00292833		1483	0.01507023		2073	0.00708988		2663	0.02338651
303.21	0.00981042		893.21	0.0018763		1483.2	0.01549143		2073.2	0.00725904		2663.2	0.0233382
303.41	0.00996068		893.41	0.0015883		1483.4	0.01546567		2073.4	0.00666829		2663.4	0.02372348
303.61	0.0092612		893.61	0.00130941		1483.6	0.01599766		2073.6	0.0063024		2663.6	0.02348385
303.81	0.00935432		893.81	0.0014129		1483.8	0.01603519		2073.8	0.0048225		2663.8	0.0228175
304.01	0.00880693		894.01	0.00104652		1484	0.01593443		2074	0.00483233		2664	0.0227695
304.21	0.00861244		894.21	0.00055633		1484.2	0.0158963		2074.2	0.00383141		2664.2	0.0228338
304.41	0.00898209		894.41	0.00067323		1484.4	0.01631561		2074.4	0.00408549		2664.4	0.02212081
304.61	0.00929335		894.61	0.00107084		1484.6	0.01611541		2074.6	0.00410304		2664.6	0.02171938
304.81	0.00880782		894.81	0.00201869		1484.8	0.01599372		2074.8	0.00458877		2664.8	0.02250067
305.01	0.00902568		895.01	0.00185388		1485	0.01607254		2075	0.00456066		2665	0.02231574
305.21	0.00886597		895.21	0.0023802		1485.2	0.01568507		2075.2	0.0047883		2665.2	0.02285342
305.41	0.00851846		895.41	0.00277037		1485.4	0.01555989		2075.4	0.00551138		2665.4	0.02302894
305.61	0.00771248		895.61	0.00302057		1485.6	0.01518482		2075.6	0.00539511		2665.6	0.02287131
305.81	0.00722401		895.81	0.00322912		1485.8	0.014167		2075.8	0.00632684		2665.8	0.02339952
306.01	0.0075878		896.01	0.00335848		1486	0.01539501		2076	0.00653259		2666	0.02440739
306.21	0.00690191		896.21	0.00320252		1486.2	0.0156489		2076.2	0.00684806		2666.2	0.02451869
306.41	0.00763989		896.41	0.00249295		1486.4	0.01580779		2076.4	0.00695402		2666.4	0.02469574
306.61	0.00761873		896.61	0.00200988		1486.6	0.01657348		2076.6	0.00575677		2666.6	0.02520951
306.81	0.0079253		896.81	0.00305093		1486.8	0.01662534		2076.8	0.00652241		2666.8	0.02564124
307.01	0.00789492		897.01	0.00293047		1487	0.01654721		2077	0.00698445		2667	0.02528384
307.21	0.00796543		897.21	0.00291485		1487.2	0.01684463		2077.2	0.00750897		2667.2	0.02523489
307.41	0.00800815		897.41	0.00255051		1487.4	0.01761271		2077.4	0.00693402		2667.4	0.02545041
307.61	0.00813835		897.61	0.0022948		1487.6	0.01881667		2077.6	0.00717523		2667.6	0.02505668
307.81	0.00808596		897.81	0.00251052		1487.8	0.01863113		2077.8	0.00792447		2667.8	0.02435132
308.01	0.00777728		898.01	0.00219349		1488	0.01861787		2078	0.00772792		2668	0.02452693
308.21	0.00847443		898.21	0.00157131		1488.2	0.01833267		2078.2	0.00793125		2668.2	0.02370762
308.41	0.00879126		898.41	0.0012868		1488.4	0.01820371		2078.4	0.00805293		2668.4	0.0230984
308.61	0.00870554		898.61	0.00098041		1488.6	0.0170154		2078.6	0.00758818		2668.6	0.02294863
308.81	0.00845943		898.81	0.00033331		1488.8	0.01648732		2078.8	0.00768499		2668.8	0.02289156
309.01	0.00993663		899.01	-0.00081687		1489	0.01596656		2079	0.00778007		2669	0.02236149
309.21	0.00962158		899.21	-0.00099739		1489.2	0.01578825		2079.2	0.00731644		2669.2	0.02251817
309.41	0.00994116		899.41	-0.0018087		1489.4	0.01491598		2079.4	0.00717853		2669.4	0.02265053
309.61	0.00960205		899.61	-0.00226926		1489.6	0.01386987		2079.6	0.00660059		2669.6	0.02219524
309.81	0.00942315		899.81	-0.00143989		1489.8	0.01284148		2079.8	0.00654708		2669.8	0.02322152
310.01	0.00990198		900.01	-0.00122495		1490	0.01323948		2080	0.00572634		2670	0.02423384
310.21	0.00999874		900.21	-0.00138226		1490.2	0.01267161		2080.2	0.0055726		2670.2	0.02445147
310.41	0.01072713		900.41	-0.00165597		1490.4	0.01273279		2080.4	0.00414233		2670.4	0.02592309
310.61	0.01056073		900.61	-0.00184669		1490.6	0.01331894		2080.6	0.00427706		2670.6	0.02664848
310.81	0.01146396		900.81	-0.00068338		1490.8	0.01308523		2080.8	0.00432295		2670.8	0.0275709
311.01	0.01145637		901.01	-0.00113172		1491	0.01281738		2081	0.00470821		2671	0.02738697
311.21	0.01117606		901.21	-0.00171316		1491.2	0.01386716		2081.2	0.00443232		2671.2	0.02767253
311.41	0.01066263		901.41	-0.00131396		1491.4	0.01537995		2081.4	0.0049849		2671.4	0.02898004
311.61	0.00920146		901.61	-0.0012889		1491.6	0.01569767		2081.6	0.00585801		2671.6	0.02909989
311.81	0.00825143		901.81	-0.00142197		1491.8	0.01562569		2081.8	0.00681252		2671.8	0.02939112
312.01	0.00821723		902.01	-0.00141361		1492	0.01606761		2082	0.00649492		2672	0.02965369
312.21	0.0081981		902.21	-0.00073849		1492.2	0.01721697		2082.2	0.00732057		2672.2	0.02944106
312.41	0.00768456		902.41	-0.00043223		1492.4	0.017171		2082.4	0.00803751		2672.4	0.0295206
312.61	0.00789399		902.61	-0.00000207		1492.6	0.01734626		2082.6	0.00810936		2672.6	0.02839797
312.81	0.00857489		902.81	-0.00058595		1492.8	0.0176362		2082.8	0.0080614		2672.8	0.027978
313.01	0.0092509		903.01	-0.00075407		1493	0.01689713		2083	0.00844514		2673	0.02719419
313.21	0.0084015		903.21	-0.0001526		1493.2	0.01695506		2083.2	0.00744025		2673.2	0.02641962
313.41	0.00814371		903.41	-0.00000383		1493.4	0.01578853		2083.4	0.00797052		2673.4	0.02591904
313.61	0.00833072		903.61	0.00023995		1493.6	0.01444509		2083.6	0.00790571		2673.6	0.02495995
313.81	0.00756319		903.81	0.00079055		1493.8	0.01379896		2083.8	0.00832536		2673.8	0.02519539
314.01	0.00680756		904.01	0.00094419		1494	0.01358614		2084	0.0089964		2674	0.0252018
314.21	0.007081		904.21	-0.00021065		1494.2	0.01408881		2084.2	0.00962485		2674.2	0.02536132
314.41	0.00726074		904.41	-0.00057599		1494.4	0.01350505		2084.4	0.00897372		2674.4	0.02590784
314.61	0.00619069		904.61	-0.00088079		1494.6	0.01328047		2084.6	0.00964094		2674.6	0.02543097
314.81	0.00665403		904.81	-0.0006767		1494.8	0.01266537		2084.8	0.00811294		2674.8	0.02541605
315.01	0.00522301		905.01	-0.00116085		1495	0.01150517		2085	0.008208		2675	0.02535409
315.21	0.00449952		905.21	-0.00156285		1495.2	0.01189649		2085.2	0.007021		2675.2	0.02545307
315.41	0.00385501		905.41	-0.0015544		1495.4	0.01215099		2085.4	0.007485		2675.4	0.02624777
315.61	0.00238586		905.61	-0.00209708		1495.6	0.0117972		2085.6	0.0072857		2675.6	0.02634005
315.81	0.00277137		905.81	-0.00203007		1495.8	0.01143765		2085.8	0.00711419		2675.8	0.02672952
316.01	0.0027499		906.01	-0.00151843		1496	0.01157917		2086	0.00684274		2676	0.02608482
316.21	0.00324516		906.21	-0.00104437		1496.2	0.01170218		2086.2	0.00651383		2676.2	0.02622168
316.41	0.00356813		906.41	-0.00172605		1496.4	0.01100927		2086.4	0.00551646		2676.4	0.02535813
316.61	0.00462513		906.61	-0.00236921		1496.6	0.01041156		2086.6	0.00380265		2676.6	0.02422143
316.81	0.00487509		906.81	-0.0033002		1496.8	0.00979845		2086.8	0.00344087		2676.8	0.0242309
317.01	0.00548619		907.01	-0.00341509		1497	0.00912326		2087	0.00376077		2677	0.02357898
317.21	0.00474556		907.21	-0.00387038		1497.2	0.00954728		2087.2	0.00394082		2677.2	0.02384095
317.41	0.00449425		907.41	-0.00371712		1497.4	0.00940575		2087.4	0.0046733		2677.4	0.02450175
317.61	0.00453463		907.61	-0.00395494		1497.6	0.01013128		2087.6	0.00451358		2677.6	0.02425397
317.81	0.00362325		907.81	-0.00376453		1497.8	0.01039518		2087.8	0.00561257		2677.8	0.02466253
318.01	0.00355255		908.01	-0.00348871		1498	0.01013718		2088	0.00652107		2678	0.02408333
318.21	0.00415813		908.21	-0.00515836		1498.2	0.01085995		2088.2	0.00687743		2678.2	0.02365066
318.41	0.00459912		908.41	-0.00485642		1498.4	0.01031323		2088.4	0.00674329		2678.4	0.02396587
318.61	0.00418505		908.61	-0.00489964		1498.6	0.01075186		2088.6	0.00714468		2678.6	0.02452703
318.81	0.00494966		908.81	-0.00450312		1498.8	0.0103792		2088.8	0.00668469		2678.8	0.02504522
319.01	0.00378491		909.01	-0.00412666		1499	0.01114632		2089	0.00729851		2679	0.02563101
319.21	0.00332832		909.21	-0.0042623		1499.2	0.01145876		2089.2	0.00795082		2679.2	0.02623475
319.41	0.00348865		909.41	-0.003747		1499.4	0.01196434		2089.4	0.00844003		2679.4	0.02697267
319.61	0.00302526		909.61	-0.003135		1499.6	0.01218571		2089.6	0.00864169		2679.6	0.0268704
319.81	0.00348202		909.81	-0.00337216		1499.8	0.01196154		2089.8	0.008235		2679.8	0.02676212
320.01	0.0034957		910.01	-0.00371934		1500	0.01201166		2090	0.0087328		2680	0.02626604
320.21	0.00424052		910.21	-0.00394342		1500.2	0.01158943		2090.2	0.00879444		2680.2	0.0267948
320.41	0.00514701		910.41	-0.00472709		1500.4	0.01097743		2090.4	0.00823271		2680.4	0.02661718
320.61	0.00545121		910.61	-0.00469008		1500.6	0.01055246		2090.6	0.00781612		2680.6	0.02694163
320.81	0.00530871		910.81	-0.0046749		1500.8	0.01115688		2090.8	0.00863661		2680.8	0.02700336
321.01	0.00604451		911.01	-0.00501522		1501	0.01147868		2091	0.00923042		2681	0.02703142
321.21	0.00556658		911.21	-0.00504521		1501.2	0.01169046		2091.2	0.00971942		2681.2	0.02760166
321.41	0.00541676		911.41	-0.00512381		1501.4	0.0109693		2091.4	0.00994761		2681.4	0.02695071
321.61	0.0046178		911.61	-0.00455449		1501.6	0.01110989		2091.6	0.00996899		2681.6	0.02612593
321.81	0.00528448		911.81	-0.00498286		1501.8	0.01042519		2091.8	0.01067053		2681.8	0.02540451
322.01	0.00498148		912.01	-0.00526215		1502	0.01038605		2092	0.01020504		2682	0.02408057
322.21	0.00531042		912.21	-0.00658381		1502.2	0.01002591		2092.2	0.01005587		2682.2	0.02370554
322.41	0.00571014		912.41	-0.00638031		1502.4	0.00972969		2092.4	0.00995363		2682.4	0.0241311
322.61	0.0047921		912.61	-0.00627472		1502.6	0.00940466		2092.6	0.01068975		2682.6	0.02500384
322.81	0.00468129		912.81	-0.00573304		1502.8	0.00877314		2092.8	0.00995644		2682.8	0.0247776
323.01	0.00305474		913.01	-0.00521056		1503	0.00981233		2093	0.00980583		2683	0.02459143
323.21	0.00223659		913.21	-0.00529117		1503.2	0.00988494		2093.2	0.01008729		2683.2	0.02472402
323.41	0.00207195		913.41	-0.0047918		1503.4	0.01058526		2093.4	0.00882003		2683.4	0.02481652
323.61	0.00127812		913.61	-0.00401813		1503.6	0.01097714		2093.6	0.00806658		2683.6	0.02448147
323.81	0.00109263		913.81	-0.00470113		1503.8	0.01094338		2093.8	0.00743417		2683.8	0.02404324
324.01	0.00159141		914.01	-0.0048508		1504	0.01114967		2094	0.00718748		2684	0.02482867
324.21	0.00185763		914.21	-0.00381696		1504.2	0.01201907		2094.2	0.00670971		2684.2	0.02569511
324.41	0.00202517		914.41	-0.00350193		1504.4	0.01258601		2094.4	0.00586939		2684.4	0.02564168
324.61	0.00179477		914.61	-0.00338395		1504.6	0.01288476		2094.6	0.00624045		2684.6	0.02537642
324.81	0.00237181		914.81	-0.00315082		1504.8	0.01264231		2094.8	0.00657309		2684.8	0.02554542
325.01	0.00288414		915.01	-0.00349139		1505	0.01265995		2095	0.00706112		2685	0.02541824
325.21	0.00280261		915.21	-0.00326989		1505.2	0.01232828		2095.2	0.00714398		2685.2	0.02564333
325.41	0.00233144		915.41	-0.00389536		1505.4	0.01177891		2095.4	0.00769789		2685.4	0.02464214
325.61	0.00241467		915.61	-0.00433063		1505.6	0.01218953		2095.6	0.00694544		2685.6	0.02409053
325.81	0.00378136		915.81	-0.00586717		1505.8	0.01274524		2095.8	0.00698009		2685.8	0.02380858
326.01	0.00482851		916.01	-0.00651208		1506	0.01200801		2096	0.00638185		2686	0.0236752
326.21	0.00549003		916.21	-0.00754415		1506.2	0.01111232		2096.2	0.0064473		2686.2	0.02475527
326.41	0.00571112		916.41	-0.00751106		1506.4	0.01038438		2096.4	0.00650879		2686.4	0.02496
326.61	0.00543691		916.61	-0.00769967		1506.6	0.0096722		2096.6	0.00693644		2686.6	0.02475941
326.81	0.00517636		916.81	-0.007871		1506.8	0.00965648		2096.8	0.00654819		2686.8	0.02432165
327.01	0.00330469		917.01	-0.00850959		1507	0.01011285		2097	0.00656418		2687	0.02409
327.21	0.00264642		917.21	-0.00826552		1507.2	0.0097386		2097.2	0.00601787		2687.2	0.02481156
327.41	0.00244278		917.41	-0.00682489		1507.4	0.0093979		2097.4	0.00581876		2687.4	0.02495525
327.61	0.00269807		917.61	-0.00635416		1507.6	0.00911359		2097.6	0.00599032		2687.6	0.025197
327.81	0.00227503		917.81	-0.00720798		1507.8	0.00834911		2097.8	0.0056593		2687.8	0.02578924
328.01	0.00096361		918.01	-0.00652426		1508	0.0082871		2098	0.00559317		2688	0.02642835
328.21	-0.00030217		918.21	-0.00505699		1508.2	0.00853209		2098.2	0.00623925		2688.2	0.02623495
328.41	-0.00134035		918.41	-0.00404125		1508.4	0.00790264		2098.4	0.00666271		2688.4	0.02634621
328.61	-0.00203404		918.61	-0.00366683		1508.6	0.00768965		2098.6	0.0070227		2688.6	0.02687747
328.81	-0.00210618		918.81	-0.00328115		1508.8	0.00785718		2098.8	0.00613337		2688.8	0.02766613
329.01	-0.00225904		919.01	-0.00388666		1509	0.0073798		2099	0.00618918		2689	0.02748799
329.21	-0.00254464		919.21	-0.00410957		1509.2	0.00655035		2099.2	0.00626413		2689.2	0.02749029
329.41	-0.0028533		919.41	-0.00507076		1509.4	0.00713339		2099.4	0.00640526		2689.4	0.02702848
329.61	-0.00226175		919.61	-0.00560964		1509.6	0.00650725		2099.6	0.00588044		2689.6	0.0266816
329.81	-0.00070219		919.81	-0.00611244		1509.8	0.00703845		2099.8	0.0065594		2689.8	0.02676149
330.01	-0.00025273		920.01	-0.00657981		1510	0.00663243		2100	0.00646561		2690	0.02548103
330.21	-0.00079596		920.21	-0.0071933		1510.2	0.00702103		2100.2	0.00653817		2690.2	0.02543332
330.41	-0.00075091		920.41	-0.00778586		1510.4	0.00681199		2100.4	0.00663275		2690.4	0.02413728
330.61	-0.00111573		920.61	-0.00908031		1510.6	0.00776624		2100.6	0.00638773		2690.6	0.02328469
330.81	-0.00158499		920.81	-0.01017086		1510.8	0.008207		2100.8	0.00638334		2690.8	0.02410566
331.01	-0.00170147		921.01	-0.0117618		1511	0.00813996		2101	0.00618559		2691	0.02336874
331.21	-0.00116357		921.21	-0.01188807		1511.2	0.00779847		2101.2	0.00703549		2691.2	0.02368664
331.41	-0.0005802		921.41	-0.0117998		1511.4	0.00815411		2101.4	0.00736486		2691.4	0.02379192
331.61	-0.00071907		921.61	-0.01285346		1511.6	0.00871525		2101.6	0.00742804		2691.6	0.02339617
331.81	-0.00131292		921.81	-0.01358999		1511.8	0.00933173		2101.8	0.00676636		2691.8	0.02311719
332.01	-0.00197086		922.01	-0.01325214		1512	0.01036183		2102	0.00729734		2692	0.02205836
332.21	-0.00159945		922.21	-0.01212591		1512.2	0.01095415		2102.2	0.0075337		2692.2	0.02274108
332.41	-0.00217611		922.41	-0.0106294		1512.4	0.01082832		2102.4	0.00699286		2692.4	0.02295457
332.61	-0.00163817		922.61	-0.01003928		1512.6	0.0099807		2102.6	0.00716917		2692.6	0.02244034
332.81	-0.00115876		922.81	-0.00980893		1512.8	0.00900205		2102.8	0.00604972		2692.8	0.02338894
333.01	-0.00159148		923.01	-0.00942079		1513	0.00757742		2103	0.00611446		2693	0.02318022
333.21	-0.00161265		923.21	-0.00847158		1513.2	0.00728437		2103.2	0.00704693		2693.2	0.02300622
333.41	-0.00193482		923.41	-0.00812236		1513.4	0.00733435		2103.4	0.0075437		2693.4	0.02316289
333.61	-0.00129225		923.61	-0.00785543		1513.6	0.00663411		2103.6	0.00743705		2693.6	0.02332483
333.81	-0.00068416		923.81	-0.00797784		1513.8	0.00779704		2103.8	0.00797714		2693.8	0.02330702
334.01	-0.00134626		924.01	-0.00776698		1514	0.0074012		2104	0.0079632		2694	0.02306964
334.21	-0.00204418		924.21	-0.00759042		1514.2	0.00712104		2104.2	0.00853408		2694.2	0.02319954
334.41	-0.00199758		924.41	-0.00778265		1514.4	0.00684744		2104.4	0.00827318		2694.4	0.02321277
334.61	-0.00225653		924.61	-0.00793488		1514.6	0.006118		2104.6	0.00771836		2694.6	0.02355404
334.81	-0.00228298		924.81	-0.0081126		1514.8	0.00547954		2104.8	0.00879253		2694.8	0.02355747
335.01	-0.002629		925.01	-0.00838282		1515	0.00581728		2105	0.00873255		2695	0.02313092
335.21	-0.00360709		925.21	-0.00789153		1515.2	0.00644563		2105.2	0.00910238		2695.2	0.0227477
335.41	-0.00351683		925.41	-0.00778093		1515.4	0.00755018		2105.4	0.00822544		2695.4	0.02300196
335.61	-0.00435281		925.61	-0.00806201		1515.6	0.00823824		2105.6	0.00819301		2695.6	0.02237813
335.81	-0.00411382		925.81	-0.00780162		1515.8	0.00898249		2105.8	0.00732066		2695.8	0.02300809
336.01	-0.00455675		926.01	-0.00790172		1516	0.00922763		2106	0.00695236		2696	0.02321953
336.21	-0.00510424		926.21	-0.00743732		1516.2	0.00922922		2106.2	0.0062328		2696.2	0.02365078
336.41	-0.00543313		926.41	-0.0076866		1516.4	0.00875637		2106.4	0.00584326		2696.4	0.02311932
336.61	-0.00429618		926.61	-0.00810813		1516.6	0.00797842		2106.6	0.00538881		2696.6	0.02350552
336.81	-0.00377967		926.81	-0.00879364		1516.8	0.00800402		2106.8	0.00428692		2696.8	0.02461841
337.01	-0.0031171		927.01	-0.00899776		1517	0.00801286		2107	0.00438278		2697	0.02438871
337.21	-0.0024806		927.21	-0.00904236		1517.2	0.00767681		2107.2	0.00495537		2697.2	0.02485253
337.41	-0.00277251		927.41	-0.0104072		1517.4	0.00802746		2107.4	0.00453314		2697.4	0.02553001
337.61	-0.00197859		927.61	-0.01126418		1517.6	0.00835738		2107.6	0.00471981		2697.6	0.02581303
337.81	-0.00190817		927.81	-0.01125821		1517.8	0.00867318		2107.8	0.00500911		2697.8	0.02546267
338.01	-0.00259376		928.01	-0.0107902		1518	0.00847152		2108	0.00547393		2698	0.02569837
338.21	-0.00354745		928.21	-0.01029251		1518.2	0.00795228		2108.2	0.00573087		2698.2	0.02524258
338.41	-0.00376581		928.41	-0.01072163		1518.4	0.00717435		2108.4	0.00527874		2698.4	0.0253395
338.61	-0.00366072		928.61	-0.01129056		1518.6	0.00609166		2108.6	0.00564681		2698.6	0.0254046
338.81	-0.00497248		928.81	-0.01070206		1518.8	0.00593412		2108.8	0.00648982		2698.8	0.02462976
339.01	-0.00557057		929.01	-0.01040298		1519	0.00662369		2109	0.00622722		2699	0.02508276
339.21	-0.0061078		929.21	-0.01036844		1519.2	0.00636365		2109.2	0.00579993		2699.2	0.02494836
339.41	-0.00579441		929.41	-0.01117554		1519.4	0.00635224		2109.4	0.00659868		2699.4	0.02487162
339.61	-0.00646513		929.61	-0.01213388		1519.6	0.0065553		2109.6	0.00708372		2699.6	0.0240898
339.81	-0.00666196		929.81	-0.01213892		1519.8	0.0064752		2109.8	0.00768387		2699.8	0.02483173
340.01	-0.00630524		930.01	-0.01298668		1520	0.00630413		2110	0.00821809		2700	0.02430665
340.21	-0.00649392		930.21	-0.01309394		1520.2	0.00658524		2110.2	0.00858303		2700.2	0.02368911
340.41	-0.00483844		930.41	-0.01307519		1520.4	0.00600607		2110.4	0.00929722		2700.4	0.02335148
340.61	-0.00350306		930.61	-0.01276278		1520.6	0.00514554		2110.6	0.00961748		2700.6	0.02325694
340.81	-0.00250595		930.81	-0.01259632		1520.8	0.00393885		2110.8	0.01073343		2700.8	0.02349857
341.01	-0.00261393		931.01	-0.01304329		1521	0.00448083		2111	0.01080206		2701	0.02369537
341.21	-0.00295828		931.21	-0.01354348		1521.2	0.00420555		2111.2	0.01118773		2701.2	0.02386298
341.41	-0.00291007		931.41	-0.01364881		1521.4	0.00463576		2111.4	0.01155285		2701.4	0.02438696
341.61	-0.00316917		931.61	-0.01306048		1521.6	0.00532565		2111.6	0.01226789		2701.6	0.02413716
341.81	-0.0035401		931.81	-0.01225709		1521.8	0.00587015		2111.8	0.01186694		2701.8	0.02531236
342.01	-0.00458735		932.01	-0.01188114		1522	0.00608507		2112	0.01166445		2702	0.02542954
342.21	-0.00423721		932.21	-0.01189094		1522.2	0.00514628		2112.2	0.01116866		2702.2	0.02514417
342.41	-0.00435453		932.41	-0.01249648		1522.4	0.00557024		2112.4	0.01098079		2702.4	0.02581743
342.61	-0.00426185		932.61	-0.01285313		1522.6	0.00466447		2112.6	0.01111545		2702.6	0.02594751
342.81	-0.00504946		932.81	-0.01247573		1522.8	0.0040937		2112.8	0.01003865		2702.8	0.02563578
343.01	-0.00524325		933.01	-0.01360457		1523	0.00476486		2113	0.00932082		2703	0.02528201
343.21	-0.00577387		933.21	-0.01477262		1523.2	0.00445221		2113.2	0.00855774		2703.2	0.02538875
343.41	-0.00534927		933.41	-0.01595587		1523.4	0.004834		2113.4	0.00957581		2703.4	0.02445222
343.61	-0.00555557		933.61	-0.01655957		1523.6	0.00522441		2113.6	0.00926962		2703.6	0.02361526
343.81	-0.00536345		933.81	-0.01631523		1523.8	0.00485988		2113.8	0.0094164		2703.8	0.02350002
344.01	-0.0046631		934.01	-0.0162867		1524	0.00536208		2114	0.00831729		2704	0.02286739
344.21	-0.00432381		934.21	-0.01605351		1524.2	0.00553478		2114.2	0.00792257		2704.2	0.02252701
344.41	-0.00353583		934.41	-0.01612607		1524.4	0.00492829		2114.4	0.00767058		2704.4	0.02283732
344.61	-0.00418252		934.61	-0.01635535		1524.6	0.00411496		2114.6	0.00735482		2704.6	0.02271563
344.81	-0.00511657		934.81	-0.0165315		1524.8	0.00378233		2114.8	0.00800283		2704.8	0.02377326
345.01	-0.00631805		935.01	-0.01710926		1525	0.00413958		2115	0.00708469		2705	0.02376524
345.21	-0.0065613		935.21	-0.0168806		1525.2	0.00329456		2115.2	0.00723097		2705.2	0.02378202
345.41	-0.00738607		935.41	-0.0160314		1525.4	0.00318392		2115.4	0.00729329		2705.4	0.02421621
345.61	-0.00815739		935.61	-0.0158746		1525.6	0.00302287		2115.6	0.00713365		2705.6	0.02431486
345.81	-0.0084878		935.81	-0.01549982		1525.8	0.00274173		2115.8	0.00804335		2705.8	0.02521311
346.01	-0.00876252		936.01	-0.0155433		1526	0.00229697		2116	0.00839344		2706	0.02524448
346.21	-0.00851041		936.21	-0.01543708		1526.2	0.00194051		2116.2	0.0084502		2706.2	0.02654646
346.41	-0.00929306		936.41	-0.01513441		1526.4	0.00218761		2116.4	0.00871976		2706.4	0.02714103
346.61	-0.008657		936.61	-0.01551737		1526.6	0.00131261		2116.6	0.00823773		2706.6	0.02728408
346.81	-0.00796861		936.81	-0.01557601		1526.8	0.00165191		2116.8	0.00737812		2706.8	0.02736213
347.01	-0.00753601		937.01	-0.01566469		1527	0.00201842		2117	0.00835462		2707	0.02718182
347.21	-0.00725972		937.21	-0.01489751		1527.2	0.00202008		2117.2	0.00917807		2707.2	0.02724447
347.41	-0.00608179		937.41	-0.01444964		1527.4	0.00228917		2117.4	0.00921443		2707.4	0.02564096
347.61	-0.00530576		937.61	-0.01469542		1527.6	0.00263874		2117.6	0.0083414		2707.6	0.02477264
347.81	-0.00510739		937.81	-0.01495501		1527.8	0.00243525		2117.8	0.00811177		2707.8	0.02422564
348.01	-0.00554302		938.01	-0.01483168		1528	0.00375097		2118	0.00738959		2708	0.02374159
348.21	-0.00540853		938.21	-0.01531993		1528.2	0.00377026		2118.2	0.0076094		2708.2	0.02308617
348.41	-0.00579449		938.41	-0.015532		1528.4	0.00475556		2118.4	0.00710831		2708.4	0.0235327
348.61	-0.00525227		938.61	-0.01549385		1528.6	0.00447867		2118.6	0.00805566		2708.6	0.02329279
348.81	-0.00509258		938.81	-0.01581787		1528.8	0.00492491		2118.8	0.0088063		2708.8	0.02306614
349.01	-0.00536699		939.01	-0.01651048		1529	0.00504621		2119	0.00868953		2709	0.02254331
349.21	-0.00542682		939.21	-0.01609185		1529.2	0.00480339		2119.2	0.00991801		2709.2	0.02185439
349.41	-0.00599825		939.41	-0.01532309		1529.4	0.00484857		2119.4	0.01022449		2709.4	0.02167337
349.61	-0.00592813		939.61	-0.01594563		1529.6	0.00490502		2119.6	0.01034382		2709.6	0.02176996
349.81	-0.00710476		939.81	-0.01643155		1529.8	0.00438307		2119.8	0.01132894		2709.8	0.02209066
350.01	-0.0077569		940.01	-0.01682895		1530	0.00391533		2120	0.01023809		2710	0.0226644
350.21	-0.00766611		940.21	-0.01627533		1530.2	0.00430138		2120.2	0.00862414		2710.2	0.02306518
350.41	-0.00771586		940.41	-0.01634462		1530.4	0.00454359		2120.4	0.00812604		2710.4	0.0233977
350.61	-0.00744997		940.61	-0.01690435		1530.6	0.00415604		2120.6	0.00781751		2710.6	0.02385459
350.81	-0.0081186		940.81	-0.0165363		1530.8	0.00353759		2120.8	0.00836983		2710.8	0.02310515
351.01	-0.00875427		941.01	-0.01602436		1531	0.00311746		2121	0.00800777		2711	0.02286405
351.21	-0.00994525		941.21	-0.01550079		1531.2	0.0030293		2121.2	0.00786886		2711.2	0.02211537
351.41	-0.0099926		941.41	-0.01481599		1531.4	0.00286813		2121.4	0.00728684		2711.4	0.02234821
351.61	-0.01068108		941.61	-0.01483958		1531.6	0.00228192		2121.6	0.00701052		2711.6	0.02192263
351.81	-0.01191148		941.81	-0.01424708		1531.8	0.00210975		2121.8	0.0073242		2711.8	0.0216077
352.01	-0.0128154		942.01	-0.01407063		1532	0.00320621		2122	0.0078288		2712	0.02199219
352.21	-0.01328222		942.21	-0.01348767		1532.2	0.00288589		2122.2	0.00775432		2712.2	0.02227746
352.41	-0.01209122		942.41	-0.01294709		1532.4	0.00371635		2122.4	0.0072662		2712.4	0.02282068
352.61	-0.0110424		942.61	-0.01324022		1532.6	0.00371011		2122.6	0.00828041		2712.6	0.02264265
352.81	-0.01078595		942.81	-0.01370149		1532.8	0.00420125		2122.8	0.00767136		2712.8	0.02198613
353.01	-0.01061393		943.01	-0.01352998		1533	0.0039704		2123	0.00889323		2713	0.02159711
353.21	-0.01067746		943.21	-0.01296125		1533.2	0.00391588		2123.2	0.00961185		2713.2	0.02125174
353.41	-0.0111482		943.41	-0.01329099		1533.4	0.00418979		2123.4	0.00882118		2713.4	0.02169457
353.61	-0.01077494		943.61	-0.01473767		1533.6	0.003895		2123.6	0.00818454		2713.6	0.02172072
353.81	-0.01072909		943.81	-0.01476207		1533.8	0.00351842		2123.8	0.00848712		2713.8	0.02179694
354.01	-0.01051066		944.01	-0.01472953		1534	0.00364532		2124	0.00678107		2714	0.02219679
354.21	-0.00984364		944.21	-0.01497242		1534.2	0.00409383		2124.2	0.00696951		2714.2	0.02196556
354.41	-0.0096912		944.41	-0.01520486		1534.4	0.00363541		2124.4	0.00779724		2714.4	0.02256758
354.61	-0.01041607		944.61	-0.01542389		1534.6	0.00293795		2124.6	0.00838445		2714.6	0.02256654
354.81	-0.01019376		944.81	-0.01534063		1534.8	0.00320624		2124.8	0.00883688		2714.8	0.0226907
355.01	-0.0090478		945.01	-0.01509454		1535	0.00331395		2125	0.00826724		2715	0.02388232
355.21	-0.00925432		945.21	-0.01546397		1535.2	0.00319674		2125.2	0.00957616		2715.2	0.02347261
355.41	-0.0089958		945.41	-0.01530741		1535.4	0.00274777		2125.4	0.00998423		2715.4	0.02410252
355.61	-0.00911555		945.61	-0.01562496		1535.6	0.00183289		2125.6	0.00973888		2715.6	0.0235041
355.81	-0.00935425		945.81	-0.01524072		1535.8	0.00094615		2125.8	0.0095599		2715.8	0.02377397
356.01	-0.01077022		946.01	-0.01532906		1536	0.00100258		2126	0.00926514		2716	0.02428164
356.21	-0.0110946		946.21	-0.0153767		1536.2	0.00080414		2126.2	0.00833611		2716.2	0.02386502
356.41	-0.01028789		946.41	-0.01584683		1536.4	0.00092016		2126.4	0.00751148		2716.4	0.02419369
356.61	-0.01067972		946.61	-0.01644252		1536.6	0.00082418		2126.6	0.00803557		2716.6	0.02390669
356.81	-0.01134616		946.81	-0.01731475		1536.8	0.00012267		2126.8	0.00686935		2716.8	0.02427904
357.01	-0.01132032		947.01	-0.01741208		1537	-0.00022156		2127	0.00800813		2717	0.02452851
357.21	-0.01139944		947.21	-0.01821042		1537.2	-0.00047625		2127.2	0.00738609		2717.2	0.02526879
357.41	-0.01144707		947.41	-0.01899197		1537.4	-0.00065496		2127.4	0.00670272		2717.4	0.02611346
357.61	-0.01053509		947.61	-0.01959038		1537.6	-0.00104987		2127.6	0.00661735		2717.6	0.02564346
357.81	-0.01031776		947.81	-0.01957057		1537.8	-0.00127718		2127.8	0.00610499		2717.8	0.02559516
358.01	-0.01019871		948.01	-0.02016768		1538	-0.00183007		2128	0.00549149		2718	0.02577006
358.21	-0.01008529		948.21	-0.0197281		1538.2	-0.00226889		2128.2	0.00632593		2718.2	0.02552042
358.41	-0.01037192		948.41	-0.01965014		1538.4	-0.0029317		2128.4	0.00707883		2718.4	0.02620058
358.61	-0.01006681		948.61	-0.02017487		1538.6	-0.00349974		2128.6	0.00675895		2718.6	0.02572492
358.81	-0.00890628		948.81	-0.02062438		1538.8	-0.00306462		2128.8	0.0069142		2718.8	0.02554914
359.01	-0.008468		949.01	-0.02117918		1539	-0.00318289		2129	0.00697531		2719	0.0255777
359.21	-0.00918342		949.21	-0.02173553		1539.2	-0.00373058		2129.2	0.0083466		2719.2	0.02456529
359.41	-0.00897565		949.41	-0.0216455		1539.4	-0.00407784		2129.4	0.00820294		2719.4	0.02422927
359.61	-0.00923914		949.61	-0.02052944		1539.6	-0.00473296		2129.6	0.00849125		2719.6	0.02403047
359.81	-0.01016315		949.81	-0.01994481		1539.8	-0.00474329		2129.8	0.00894363		2719.8	0.02349188
360.01	-0.01106401		950.01	-0.01960112		1540	-0.00404041		2130	0.00865375		2720	0.02340107
360.21	-0.01104544		950.21	-0.0199226		1540.2	-0.00333782		2130.2	0.00973205		2720.2	0.02330482
360.41	-0.01107726		950.41	-0.01964206		1540.4	-0.00287077		2130.4	0.00960631		2720.4	0.02369937
360.61	-0.01135589		950.61	-0.01991615		1540.6	-0.00315342		2130.6	0.01146524		2720.6	0.02358403
360.81	-0.01171395		950.81	-0.02035659		1540.8	-0.00320115		2130.8	0.01107586		2720.8	0.02415527
361.01	-0.0114675		951.01	-0.02045311		1541	-0.00251993		2131	0.01178063		2721	0.02409702
361.21	-0.01210704		951.21	-0.0209217		1541.2	-0.00291399		2131.2	0.01186825		2721.2	0.02403058
361.41	-0.01260942		951.41	-0.02105298		1541.4	-0.00223381		2131.4	0.01120099		2721.4	0.02456714
361.61	-0.01289173		951.61	-0.02111219		1541.6	-0.00247151		2131.6	0.01089543		2721.6	0.02447728
361.81	-0.01359693		951.81	-0.02090188		1541.8	-0.00269991		2131.8	0.01043591		2721.8	0.02549697
362.01	-0.01360407		952.01	-0.02097917		1542	-0.00332414		2132	0.01017686		2722	0.02558122
362.21	-0.01426469		952.21	-0.01921396		1542.2	-0.00324454		2132.2	0.0099555		2722.2	0.02584924
362.41	-0.01420527		952.41	-0.01917572		1542.4	-0.00311141		2132.4	0.00970158		2722.4	0.02594178
362.61	-0.01423867		952.61	-0.0186237		1542.6	-0.00340199		2132.6	0.00872711		2722.6	0.02547006
362.81	-0.01468833		952.81	-0.01887123		1542.8	-0.00272029		2132.8	0.0087146		2722.8	0.02557429
363.01	-0.01488094		953.01	-0.019022		1543	-0.00302949		2133	0.0090772		2723	0.02506571
363.21	-0.0151368		953.21	-0.0192806		1543.2	-0.00320825		2133.2	0.00990052		2723.2	0.02475196
363.41	-0.01492237		953.41	-0.01893972		1543.4	-0.00287656		2133.4	0.00952822		2723.4	0.0252697
363.61	-0.01523563		953.61	-0.0184789		1543.6	-0.00296534		2133.6	0.01012205		2723.6	0.02572263
363.81	-0.01561914		953.81	-0.01907295		1543.8	-0.00276159		2133.8	0.00995305		2723.8	0.02551239
364.01	-0.01543589		954.01	-0.02004625		1544	-0.00281947		2134	0.00975359		2724	0.02531938
364.21	-0.01516025		954.21	-0.01982354		1544.2	-0.0019034		2134.2	0.01030149		2724.2	0.02524131
364.41	-0.014654		954.41	-0.02044521		1544.4	-0.00177374		2134.4	0.01032053		2724.4	0.0246588
364.61	-0.0149926		954.61	-0.0210122		1544.6	-0.00305883		2134.6	0.01047612		2724.6	0.02482282
364.81	-0.01545396		954.81	-0.02218124		1544.8	-0.00271854		2134.8	0.00956549		2724.8	0.02443041
365.01	-0.01594984		955.01	-0.02279195		1545	-0.00266205		2135	0.00961097		2725	0.02383308
365.21	-0.01588848		955.21	-0.02338874		1545.2	-0.00274284		2135.2	0.00913158		2725.2	0.02348613
365.41	-0.01594178		955.41	-0.02424231		1545.4	-0.00251402		2135.4	0.0087185		2725.4	0.02407247
365.61	-0.01587711		955.61	-0.02503565		1545.6	-0.00247574		2135.6	0.00927224		2725.6	0.02446015
365.81	-0.01524073		955.81	-0.02522786		1545.8	-0.0026837		2135.8	0.00826626		2725.8	0.02494729
366.01	-0.01431585		956.01	-0.02531525		1546	-0.00251996		2136	0.00737415		2726	0.02514171
366.21	-0.01425903		956.21	-0.02457182		1546.2	-0.00258651		2136.2	0.00762866		2726.2	0.02546147
366.41	-0.01403071		956.41	-0.02433933		1546.4	-0.00308503		2136.4	0.00727347		2726.4	0.02511837
366.61	-0.01388428		956.61	-0.02421992		1546.6	-0.00269583		2136.6	0.00797538		2726.6	0.02523205
366.81	-0.01350268		956.81	-0.02480042		1546.8	-0.00262642		2136.8	0.00794382		2726.8	0.02503419
367.01	-0.01332703		957.01	-0.02557401		1547	-0.00255736		2137	0.00805688		2727	0.02455982
367.21	-0.01353475		957.21	-0.02569586		1547.2	-0.00231272		2137.2	0.00796457		2727.2	0.0251205
367.41	-0.01374378		957.41	-0.02566888		1547.4	-0.00217921		2137.4	0.0080883		2727.4	0.02562694
367.61	-0.01362076		957.61	-0.02589803		1547.6	-0.00229119		2137.6	0.00825415		2727.6	0.02503062
367.81	-0.01342016		957.81	-0.02596948		1547.8	-0.0019362		2137.8	0.0079544		2727.8	0.02479675
368.01	-0.01292764		958.01	-0.02595779		1548	-0.00207686		2138	0.00826996		2728	0.02401666
368.21	-0.01329711		958.21	-0.0246213		1548.2	-0.00232539		2138.2	0.00785257		2728.2	0.02373008
368.41	-0.01380736		958.41	-0.02539284		1548.4	-0.00247527		2138.4	0.00849683		2728.4	0.02362686
368.61	-0.01445376		958.61	-0.02551475		1548.6	-0.00310464		2138.6	0.00902026		2728.6	0.02396964
368.81	-0.01485147		958.81	-0.02594347		1548.8	-0.00255106		2138.8	0.00855648		2728.8	0.0235562
369.01	-0.01563537		959.01	-0.02618065		1549	-0.0026992		2139	0.00857278		2729	0.02277562
369.21	-0.01585779		959.21	-0.02653486		1549.2	-0.00247725		2139.2	0.00788862		2729.2	0.0232641
369.41	-0.01553858		959.41	-0.02696237		1549.4	-0.00298521		2139.4	0.00850624		2729.4	0.02335784
369.61	-0.01507889		959.61	-0.02558164		1549.6	-0.00337773		2139.6	0.00809122		2729.6	0.02409408
369.81	-0.01485479		959.81	-0.02482528		1549.8	-0.00434367		2139.8	0.00732248		2729.8	0.02436288
370.01	-0.01489968		960.01	-0.02384776		1550	-0.00382582		2140	0.00721633		2730	0.02425338
370.21	-0.01542697		960.21	-0.02340106		1550.2	-0.00440505		2140.2	0.0074516		2730.2	0.02335442
370.41	-0.01582952		960.41	-0.02196765		1550.4	-0.00434403		2140.4	0.00670921		2730.4	0.02381155
370.61	-0.01558497		960.61	-0.02186577		1550.6	-0.00390325		2140.6	0.00675712		2730.6	0.0242343
370.81	-0.01570579		960.81	-0.02197358		1550.8	-0.00368729		2140.8	0.00631865		2730.8	0.02393304
371.01	-0.01619538		961.01	-0.02197665		1551	-0.00417331		2141	0.00567315		2731	0.02351178
371.21	-0.0167469		961.21	-0.02172943		1551.2	-0.00414533		2141.2	0.00549547		2731.2	0.02365619
371.41	-0.01689322		961.41	-0.0225654		1551.4	-0.00350913		2141.4	0.00627888		2731.4	0.02371013
371.61	-0.01603314		961.61	-0.02314014		1551.6	-0.00350324		2141.6	0.00623712		2731.6	0.02292146
371.81	-0.01615794		961.81	-0.02425723		1551.8	-0.00346839		2141.8	0.00663848		2731.8	0.02271587
372.01	-0.01649672		962.01	-0.02502736		1552	-0.00356739		2142	0.00653293		2732	0.02287862
372.21	-0.0182885		962.21	-0.02580878		1552.2	-0.00371189		2142.2	0.00688248		2732.2	0.02272221
372.41	-0.01907715		962.41	-0.02731268		1552.4	-0.00255708		2142.4	0.00791763		2732.4	0.02347155
372.61	-0.0186295		962.61	-0.02810317		1552.6	-0.00331305		2142.6	0.00841239		2732.6	0.02356449
372.81	-0.01923008		962.81	-0.02887902		1552.8	-0.0035536		2142.8	0.00751023		2732.8	0.02343932
373.01	-0.01982807		963.01	-0.02921324		1553	-0.00440159		2143	0.00852467		2733	0.02352121
373.21	-0.02034921		963.21	-0.02931816		1553.2	-0.00475058		2143.2	0.00922241		2733.2	0.02451258
373.41	-0.0196838		963.41	-0.02870538		1553.4	-0.00577633		2143.4	0.01041757		2733.4	0.02424296
373.61	-0.01920124		963.61	-0.02750067		1553.6	-0.00554036		2143.6	0.01019638		2733.6	0.0243993
373.81	-0.01841813		963.81	-0.02822537		1553.8	-0.00512827		2143.8	0.01110826		2733.8	0.02440466
374.01	-0.01844666		964.01	-0.02795474		1554	-0.00519927		2144	0.01088804		2734	0.02429002
374.21	-0.01846088		964.21	-0.02733281		1554.2	-0.00523499		2144.2	0.01033197		2734.2	0.02375199
374.41	-0.01824904		964.41	-0.02631801		1554.4	-0.00523333		2144.4	0.01027549		2734.4	0.02430634
374.61	-0.01804006		964.61	-0.02569264		1554.6	-0.00555078		2144.6	0.01136522		2734.6	0.02356668
374.81	-0.01749581		964.81	-0.02475214		1554.8	-0.00552738		2144.8	0.01170095		2734.8	0.02414027
375.01	-0.01722831		965.01	-0.02355477		1555	-0.00627415		2145	0.01084177		2735	0.02327383
375.21	-0.01688395		965.21	-0.02391625		1555.2	-0.00516745		2145.2	0.01126946		2735.2	0.02279098
375.41	-0.01673871		965.41	-0.02409554		1555.4	-0.00474632		2145.4	0.01137465		2735.4	0.02184968
375.61	-0.01643686		965.61	-0.02500486		1555.6	-0.00435367		2145.6	0.01106151		2735.6	0.02177331
375.81	-0.01655556		965.81	-0.02523167		1555.8	-0.00453592		2145.8	0.01126344		2735.8	0.02222059
376.01	-0.01738303		966.01	-0.02508763		1556	-0.00466088		2146	0.00987039		2736	0.02269845
376.21	-0.01870302		966.21	-0.02546468		1556.2	-0.00525916		2146.2	0.00981911		2736.2	0.02243443
376.41	-0.01861045		966.41	-0.02663284		1556.4	-0.00435708		2146.4	0.00907107		2736.4	0.02311305
376.61	-0.01881109		966.61	-0.02679421		1556.6	-0.00481773		2146.6	0.00888767		2736.6	0.02297794
376.81	-0.02015908		966.81	-0.02694112		1556.8	-0.00478313		2146.8	0.00958354		2736.8	0.02322245
377.01	-0.02115447		967.01	-0.02747049		1557	-0.00586666		2147	0.01021289		2737	0.02344167
377.21	-0.02223816		967.21	-0.02804465		1557.2	-0.00615179		2147.2	0.01012629		2737.2	0.02362682
377.41	-0.02126077		967.41	-0.02780566		1557.4	-0.00634275		2147.4	0.0102056		2737.4	0.02391098
377.61	-0.02173981		967.61	-0.02839709		1557.6	-0.00591771		2147.6	0.0100491		2737.6	0.02364804
377.81	-0.02217616		967.81	-0.02907518		1557.8	-0.00606904		2147.8	0.01082581		2737.8	0.02392116
378.01	-0.02187487		968.01	-0.02892126		1558	-0.00674881		2148	0.01000085		2738	0.02319579
378.21	-0.02174423		968.21	-0.02905011		1558.2	-0.00657365		2148.2	0.00911991		2738.2	0.02127867
378.41	-0.02159793		968.41	-0.02919684		1558.4	-0.00763771		2148.4	0.00981373		2738.4	0.021285
378.61	-0.02157371		968.61	-0.02845642		1558.6	-0.00818034		2148.6	0.01055623		2738.6	0.02121329
378.81	-0.02074935		968.81	-0.02793738		1558.8	-0.00767204		2148.8	0.00997554		2738.8	0.02157717
379.01	-0.01999746		969.01	-0.02753357		1559	-0.00800455		2149	0.00929915		2739	0.02003527
379.21	-0.01958753		969.21	-0.02807554		1559.2	-0.00837267		2149.2	0.00948766		2739.2	0.01939903
379.41	-0.01859191		969.41	-0.02699023		1559.4	-0.00825271		2149.4	0.0093309		2739.4	0.01939051
379.61	-0.01789855		969.61	-0.02653199		1559.6	-0.00836265		2149.6	0.00958314		2739.6	0.01987684
379.81	-0.01729921		969.81	-0.02538442		1559.8	-0.00965129		2149.8	0.00897604		2739.8	0.01999506
380.01	-0.01792027		970.01	-0.02472102		1560	-0.01009354		2150	0.00758137		2740	0.02071941
380.21	-0.01804619		970.21	-0.02481831		1560.2	-0.00995384		2150.2	0.00689222		2740.2	0.02056311
380.41	-0.01753123		970.41	-0.02522953		1560.4	-0.00964936		2150.4	0.00711079		2740.4	0.02095833
380.61	-0.01848681		970.61	-0.02462024		1560.6	-0.00960992		2150.6	0.00796444		2740.6	0.02143346
380.81	-0.01855428		970.81	-0.02360657		1560.8	-0.0100138		2150.8	0.00859682		2740.8	0.0214847
381.01	-0.01875099		971.01	-0.02360103		1561	-0.01015985		2151	0.00786806		2741	0.0220605
381.21	-0.01896953		971.21	-0.02350222		1561.2	-0.00987003		2151.2	0.00795494		2741.2	0.0224729
381.41	-0.01887474		971.41	-0.02411831		1561.4	-0.01038775		2151.4	0.0085772		2741.4	0.02237947
381.61	-0.01964747		971.61	-0.02488529		1561.6	-0.01009718		2151.6	0.00914942		2741.6	0.02193805
381.81	-0.0190904		971.81	-0.02568469		1561.8	-0.00969143		2151.8	0.00909319		2741.8	0.0221763
382.01	-0.01927379		972.01	-0.02653046		1562	-0.00955484		2152	0.00888429		2742	0.02244204
382.21	-0.01988618		972.21	-0.02696287		1562.2	-0.00962346		2152.2	0.00902505		2742.2	0.02186698
382.41	-0.02044959		972.41	-0.02678422		1562.4	-0.00943669		2152.4	0.00899515		2742.4	0.02312291
382.61	-0.0207356		972.61	-0.02745442		1562.6	-0.00860729		2152.6	0.0087235		2742.6	0.0235398
382.81	-0.0207833		972.81	-0.02842639		1562.8	-0.00860862		2152.8	0.00758102		2742.8	0.02340495
383.01	-0.02012761		973.01	-0.02862206		1563	-0.00956946		2153	0.00681778		2743	0.02324349
383.21	-0.02037777		973.21	-0.02827107		1563.2	-0.01011677		2153.2	0.00688942		2743.2	0.02287447
383.41	-0.01955869		973.41	-0.0277863		1563.4	-0.00886176		2153.4	0.00714621		2743.4	0.02305659
383.61	-0.0201659		973.61	-0.02906587		1563.6	-0.00894353		2153.6	0.00665913		2743.6	0.02290614
383.81	-0.02021535		973.81	-0.02934919		1563.8	-0.00956062		2153.8	0.00619184		2743.8	0.02262857
384.01	-0.02060692		974.01	-0.0300217		1564	-0.00899604		2154	0.00635097		2744	0.02288645
384.21	-0.02044407		974.21	-0.030548		1564.2	-0.00850701		2154.2	0.00687932		2744.2	0.02208012
384.41	-0.02017138		974.41	-0.03121205		1564.4	-0.00833375		2154.4	0.00816714		2744.4	0.02232891
384.61	-0.02040914		974.61	-0.03156787		1564.6	-0.00706075		2154.6	0.00909017		2744.6	0.02203784
384.81	-0.02014572		974.81	-0.03122375		1564.8	-0.00732489		2154.8	0.00946426		2744.8	0.02213598
385.01	-0.02031877		975.01	-0.0317819		1565	-0.00707236		2155	0.00961373		2745	0.02250751
385.21	-0.02075828		975.21	-0.03310526		1565.2	-0.00685067		2155.2	0.01031614		2745.2	0.02210029
385.41	-0.02144232		975.41	-0.0338241		1565.4	-0.00762971		2155.4	0.01066834		2745.4	0.02155948
385.61	-0.02178107		975.61	-0.03411373		1565.6	-0.00723989		2155.6	0.0118066		2745.6	0.02186034
385.81	-0.02184513		975.81	-0.03455085		1565.8	-0.00698244		2155.8	0.01181206		2745.8	0.02229082
386.01	-0.0223324		976.01	-0.03378882		1566	-0.00720475		2156	0.01259891		2746	0.02297293
386.21	-0.02252992		976.21	-0.03373815		1566.2	-0.00740697		2156.2	0.01231854		2746.2	0.02245612
386.41	-0.02357965		976.41	-0.0335528		1566.4	-0.0077251		2156.4	0.01143527		2746.4	0.02212265
386.61	-0.02329068		976.61	-0.03350792		1566.6	-0.00834791		2156.6	0.01057359		2746.6	0.02172678
386.81	-0.02380225		976.81	-0.03268986		1566.8	-0.00947055		2156.8	0.01010755		2746.8	0.02129745
387.01	-0.02386016		977.01	-0.03175151		1567	-0.01004529		2157	0.00991116		2747	0.02156493
387.21	-0.02443144		977.21	-0.0306521		1567.2	-0.01073685		2157.2	0.01049837		2747.2	0.02073552
387.41	-0.02386252		977.41	-0.03000617		1567.4	-0.01052365		2157.4	0.00959999		2747.4	0.02020446
387.61	-0.02416158		977.61	-0.03049438		1567.6	-0.01094276		2157.6	0.0090666		2747.6	0.02000564
387.81	-0.02354098		977.81	-0.02975412		1567.8	-0.01139583		2157.8	0.00891633		2747.8	0.0197336
388.01	-0.02303157		978.01	-0.0301735		1568	-0.01095972		2158	0.00914633		2748	0.02008137
388.21	-0.02316415		978.21	-0.03067085		1568.2	-0.01097896		2158.2	0.00974898		2748.2	0.01965944
388.41	-0.02350042		978.41	-0.03190778		1568.4	-0.01004698		2158.4	0.00989934		2748.4	0.02024259
388.61	-0.0234375		978.61	-0.03134668		1568.6	-0.0095563		2158.6	0.00987609		2748.6	0.02052455
388.81	-0.02448335		978.81	-0.03113688		1568.8	-0.01104282		2158.8	0.00916679		2748.8	0.02051657
389.01	-0.0247489		979.01	-0.03142		1569	-0.01065211		2159	0.00903044		2749	0.02087931
389.21	-0.02507453		979.21	-0.03171982		1569.2	-0.01015033		2159.2	0.00902016		2749.2	0.02133756
389.41	-0.02508597		979.41	-0.03156347		1569.4	-0.01059308		2159.4	0.00974365		2749.4	0.02188672
389.61	-0.02418117		979.61	-0.03181171		1569.6	-0.01085727		2159.6	0.01098474		2749.6	0.02249584
389.81	-0.02335527		979.81	-0.03205755		1569.8	-0.01090475		2159.8	0.010967		2749.8	0.02302603
390.01	-0.02342641		980.01	-0.03235094		1570	-0.01153133		2160	0.01155613		2750	0.02308173
390.21	-0.02331856		980.21	-0.03316883		1570.2	-0.01111959		2160.2	0.01163927		2750.2	0.02237899
390.41	-0.02386529		980.41	-0.0326818		1570.4	-0.01138429		2160.4	0.0111729		2750.4	0.02212176
390.61	-0.02356342		980.61	-0.03210455		1570.6	-0.01076522		2160.6	0.01047958		2750.6	0.02293599
390.81	-0.02354418		980.81	-0.03239407		1570.8	-0.01025339		2160.8	0.01152874		2750.8	0.02280571
391.01	-0.02365461		981.01	-0.03258315		1571	-0.00999217		2161	0.01082615		2751	0.02323227
391.21	-0.02392294		981.21	-0.03235525		1571.2	-0.01022771		2161.2	0.01120292		2751.2	0.02191812
391.41	-0.02451266		981.41	-0.03196908		1571.4	-0.0094103		2161.4	0.01015102		2751.4	0.02214005
391.61	-0.02497842		981.61	-0.03275493		1571.6	-0.00926367		2161.6	0.0100465		2751.6	0.02210699
391.81	-0.02523566		981.81	-0.03296467		1571.8	-0.00965776		2161.8	0.00981764		2751.8	0.02204807
392.01	-0.02524721		982.01	-0.03382892		1572	-0.00950403		2162	0.00948323		2752	0.02206005
392.21	-0.02695622		982.21	-0.03407621		1572.2	-0.00880351		2162.2	0.00872965		2752.2	0.02147788
392.41	-0.02754794		982.41	-0.03381203		1572.4	-0.00855861		2162.4	0.00756424		2752.4	0.02142802
392.61	-0.02750145		982.61	-0.03304518		1572.6	-0.00935646		2162.6	0.00630765		2752.6	0.02126207
392.81	-0.0274549		982.81	-0.03298926		1572.8	-0.01011848		2162.8	0.00537863		2752.8	0.02147746
393.01	-0.02739653		983.01	-0.03283441		1573	-0.00939591		2163	0.00526258		2753	0.0220314
393.21	-0.02825043		983.21	-0.03259574		1573.2	-0.01024758		2163.2	0.00469635		2753.2	0.02213128
393.41	-0.02779893		983.41	-0.03270671		1573.4	-0.01070194		2163.4	0.005028		2753.4	0.02233095
393.61	-0.02699025		983.61	-0.03314912		1573.6	-0.01179531		2163.6	0.00543525		2753.6	0.02257308
393.81	-0.02675781		983.81	-0.03370698		1573.8	-0.0123501		2163.8	0.00598074		2753.8	0.02202168
394.01	-0.02624992		984.01	-0.03406617		1574	-0.01298706		2164	0.00658191		2754	0.02148774
394.21	-0.02535636		984.21	-0.03416798		1574.2	-0.0123385		2164.2	0.00748154		2754.2	0.02210439
394.41	-0.02563933		984.41	-0.03379324		1574.4	-0.01296862		2164.4	0.00697873		2754.4	0.02264965
394.61	-0.02526569		984.61	-0.03464134		1574.6	-0.01326715		2164.6	0.00732677		2754.6	0.02340043
394.81	-0.02494412		984.81	-0.03529832		1574.8	-0.01405593		2164.8	0.00831903		2754.8	0.02318254
395.01	-0.02539638		985.01	-0.03580939		1575	-0.01410297		2165	0.00844996		2755	0.0241602
395.21	-0.02577149		985.21	-0.03564425		1575.2	-0.01387997		2165.2	0.00944464		2755.2	0.02384177
395.41	-0.02647419		985.41	-0.0359235		1575.4	-0.01355492		2165.4	0.00977207		2755.4	0.02479037
395.61	-0.02637305		985.61	-0.03638079		1575.6	-0.01405177		2165.6	0.0103348		2755.6	0.02487967
395.81	-0.02623792		985.81	-0.03571354		1575.8	-0.01374087		2165.8	0.01078438		2755.8	0.0254054
396.01	-0.02653195		986.01	-0.03547628		1576	-0.01330457		2166	0.01045364		2756	0.0259509
396.21	-0.02736145		986.21	-0.03501616		1576.2	-0.01288081		2166.2	0.00996051		2756.2	0.02497769
396.41	-0.02723585		986.41	-0.03535545		1576.4	-0.01268893		2166.4	0.00954098		2756.4	0.02487703
396.61	-0.02706201		986.61	-0.0348765		1576.6	-0.01248876		2166.6	0.00898021		2756.6	0.02516432
396.81	-0.02653603		986.81	-0.03459258		1576.8	-0.01251083		2166.8	0.00819874		2756.8	0.02555851
397.01	-0.02753525		987.01	-0.03450768		1577	-0.01248162		2167	0.00770271		2757	0.02547348
397.21	-0.0281209		987.21	-0.03456897		1577.2	-0.0124418		2167.2	0.00722741		2757.2	0.02481216
397.41	-0.02808567		987.41	-0.03473532		1577.4	-0.01200556		2167.4	0.00741051		2757.4	0.02434323
397.61	-0.02794471		987.61	-0.0348353		1577.6	-0.01230323		2167.6	0.00782696		2757.6	0.02509508
397.81	-0.02851162		987.81	-0.034862		1577.8	-0.0117951		2167.8	0.00843687		2757.8	0.02354202
398.01	-0.02807595		988.01	-0.03560443		1578	-0.01209659		2168	0.00811545		2758	0.02410384
398.21	-0.028235		988.21	-0.03545999		1578.2	-0.01191323		2168.2	0.00793855		2758.2	0.02448036
398.41	-0.02843463		988.41	-0.0357846		1578.4	-0.01327539		2168.4	0.00695234		2758.4	0.02421923
398.61	-0.02793892		988.61	-0.03658708		1578.6	-0.0139328		2168.6	0.00726885		2758.6	0.02406111
398.81	-0.02782573		988.81	-0.03688414		1578.8	-0.01450001		2168.8	0.0073111		2758.8	0.02343506
399.01	-0.02731379		989.01	-0.03761504		1579	-0.01401997		2169	0.00785759		2759	0.0233107
399.21	-0.02780913		989.21	-0.03739475		1579.2	-0.01417885		2169.2	0.00792807		2759.2	0.0237065
399.41	-0.02687564		989.41	-0.03796478		1579.4	-0.01377688		2169.4	0.00790913		2759.4	0.02376594
399.61	-0.02649549		989.61	-0.03792885		1579.6	-0.01384906		2169.6	0.00788867		2759.6	0.02349049
399.81	-0.02593526		989.81	-0.03675447		1579.8	-0.01407928		2169.8	0.00851197		2759.8	0.02367242
400.01	-0.02580492		990.01	-0.0370096		1580	-0.01492188		2170	0.00805993		2760	0.02320956
400.21	-0.02598848		990.21	-0.03690474		1580.2	-0.01501473		2170.2	0.00776865		2760.2	0.02244914
400.41	-0.02660921		990.41	-0.03679049		1580.4	-0.01516117		2170.4	0.00806577		2760.4	0.02306959
400.61	-0.02616538		990.61	-0.0357907		1580.6	-0.01584598		2170.6	0.00793278		2760.6	0.02314207
400.81	-0.02573184		990.81	-0.03561105		1580.8	-0.01652929		2170.8	0.00782065		2760.8	0.02358383
401.01	-0.02689553		991.01	-0.03558188		1581	-0.01709028		2171	0.00843466		2761	0.02324376
401.21	-0.02726928		991.21	-0.03572314		1581.2	-0.01697374		2171.2	0.00876664		2761.2	0.02305726
401.41	-0.02783656		991.41	-0.03608639		1581.4	-0.01715203		2171.4	0.00837788		2761.4	0.02294654
401.61	-0.02737717		991.61	-0.03599871		1581.6	-0.01704378		2171.6	0.00880813		2761.6	0.02369302
401.81	-0.02791662		991.81	-0.0363425		1581.8	-0.01632619		2171.8	0.00865673		2761.8	0.02260633
402.01	-0.02732805		992.01	-0.0371198		1582	-0.01595289		2172	0.00769694		2762	0.0229484
402.21	-0.02735321		992.21	-0.03644148		1582.2	-0.0157819		2172.2	0.00756971		2762.2	0.02234282
402.41	-0.0287115		992.41	-0.03709439		1582.4	-0.01597242		2172.4	0.00656938		2762.4	0.02149139
402.61	-0.02937523		992.61	-0.03807551		1582.6	-0.01564578		2172.6	0.00625999		2762.6	0.0206716
402.81	-0.02952238		992.81	-0.03844553		1582.8	-0.01594724		2172.8	0.00664668		2762.8	0.02020604
403.01	-0.0285055		993.01	-0.03861737		1583	-0.01442004		2173	0.00649386		2763	0.02051537
403.21	-0.02935427		993.21	-0.0385389		1583.2	-0.01448796		2173.2	0.00644361		2763.2	0.0215647
403.41	-0.02830262		993.41	-0.03897922		1583.4	-0.01455676		2173.4	0.00632663		2763.4	0.02104969
403.61	-0.02840713		993.61	-0.03922843		1583.6	-0.0149962		2173.6	0.00646049		2763.6	0.02037736
403.81	-0.02879601		993.81	-0.03841319		1583.8	-0.01527389		2173.8	0.00659099		2763.8	0.02059632
404.01	-0.02996116		994.01	-0.03832326		1584	-0.01583279		2174	0.00667476		2764	0.01976606
404.21	-0.03098726		994.21	-0.03772381		1584.2	-0.01567451		2174.2	0.00736918		2764.2	0.02028894
404.41	-0.03128816		994.41	-0.03732817		1584.4	-0.01654339		2174.4	0.00818245		2764.4	0.02045835
404.61	-0.03061778		994.61	-0.03741077		1584.6	-0.01675925		2174.6	0.00821887		2764.6	0.01962988
404.81	-0.03086026		994.81	-0.0373696		1584.8	-0.01705968		2174.8	0.00923317		2764.8	0.0199689
405.01	-0.03095508		995.01	-0.0378921		1585	-0.01747496		2175	0.00997776		2765	0.02035981
405.21	-0.03013026		995.21	-0.03871312		1585.2	-0.01735345		2175.2	0.00937139		2765.2	0.02115852
405.41	-0.02966145		995.41	-0.03967585		1585.4	-0.01779313		2175.4	0.00902682		2765.4	0.021027
405.61	-0.02914127		995.61	-0.0397261		1585.6	-0.01815671		2175.6	0.00934223		2765.6	0.02145424
405.81	-0.02854048		995.81	-0.04017238		1585.8	-0.01757174		2175.8	0.00894408		2765.8	0.02165356
406.01	-0.02770518		996.01	-0.04103787		1586	-0.01757553		2176	0.00919562		2766	0.02183263
406.21	-0.02874241		996.21	-0.04080407		1586.2	-0.01788791		2176.2	0.00951695		2766.2	0.02118168
406.41	-0.02952517		996.41	-0.04230262		1586.4	-0.01836538		2176.4	0.00864083		2766.4	0.02148978
406.61	-0.02952258		996.61	-0.04371352		1586.6	-0.01786733		2176.6	0.00906725		2766.6	0.02153654
406.81	-0.02904486		996.81	-0.04346162		1586.8	-0.01834556		2176.8	0.00924714		2766.8	0.0215849
407.01	-0.02991985		997.01	-0.04380067		1587	-0.01764791		2177	0.00788649		2767	0.02216133
407.21	-0.03081419		997.21	-0.04428353		1587.2	-0.01857005		2177.2	0.00785465		2767.2	0.0229013
407.41	-0.03059825		997.41	-0.0441101		1587.4	-0.01877163		2177.4	0.00712213		2767.4	0.0226635
407.61	-0.03117823		997.61	-0.04392054		1587.6	-0.01855533		2177.6	0.00651741		2767.6	0.02253351
407.81	-0.03248313		997.81	-0.04320168		1587.8	-0.01862788		2177.8	0.006101		2767.8	0.02313526
408.01	-0.03299966		998.01	-0.04204432		1588	-0.01894385		2178	0.00589436		2768	0.02331955
408.21	-0.03297585		998.21	-0.04090204		1588.2	-0.01902452		2178.2	0.00522342		2768.2	0.02374308
408.41	-0.03295618		998.41	-0.04091615		1588.4	-0.01828695		2178.4	0.00529439		2768.4	0.02394791
408.61	-0.03281022		998.61	-0.04161162		1588.6	-0.01733061		2178.6	0.00521203		2768.6	0.02469577
408.81	-0.03299323		998.81	-0.04132027		1588.8	-0.01748375		2178.8	0.0054563		2768.8	0.02585532
409.01	-0.03285365		999.01	-0.04193918		1589	-0.01797448		2179	0.00525605		2769	0.02648081
409.21	-0.03301069		999.21	-0.04210498		1589.2	-0.01771469		2179.2	0.00504139		2769.2	0.02667984
409.41	-0.03282596		999.41	-0.04204791		1589.4	-0.01784299		2179.4	0.00505117		2769.4	0.02618191
409.61	-0.03265689		999.61	-0.04189603		1589.6	-0.01732045		2179.6	0.00607736		2769.6	0.02567421
409.81	-0.03264939		999.81	-0.04159077		1589.8	-0.01762154		2179.8	0.00679074		2769.8	0.0257981
410.01	-0.03282827		1000.01	-0.0413836		1590	-0.01814517		2180	0.00795514		2770	0.02461488
410.21	-0.03386166		1000.21	-0.04102339		1590.2	-0.01846021		2180.2	0.0084475		2770.2	0.02368578
410.41	-0.03424253		1000.41	-0.041846		1590.4	-0.01892319		2180.4	0.00868521		2770.4	0.02339889
410.61	-0.03506561		1000.61	-0.04148361		1590.6	-0.01802545		2180.6	0.00905776		2770.6	0.02188397
410.81	-0.03492702		1000.81	-0.0417636		1590.8	-0.01890155		2180.8	0.00841988		2770.8	0.02101527
411.01	-0.03559721		1001.01	-0.04185689		1591	-0.01947892		2181	0.00752175		2771	0.02032661
411.21	-0.03435603		1001.21	-0.04230004		1591.2	-0.01947379		2181.2	0.00750446		2771.2	0.02023468
411.41	-0.03423465		1001.41	-0.04198522		1591.4	-0.01964624		2181.4	0.00708544		2771.4	0.01981421
411.61	-0.0339252		1001.61	-0.04191976		1591.6	-0.01969946		2181.6	0.00738209		2771.6	0.01938637
411.81	-0.03353848		1001.81	-0.04125921		1591.8	-0.02011268		2181.8	0.00724524		2771.8	0.01895297
412.01	-0.03337497		1002.01	-0.04104399		1592	-0.01995612		2182	0.00762206		2772	0.0187771
412.21	-0.03350217		1002.21	-0.04139128		1592.2	-0.01952076		2182.2	0.00774347		2772.2	0.01951744
412.41	-0.03297944		1002.41	-0.04250225		1592.4	-0.01852544		2182.4	0.00760195		2772.4	0.02009191
412.61	-0.03259871		1002.61	-0.04284747		1592.6	-0.01913442		2182.6	0.00858032		2772.6	0.02046468
412.81	-0.03276308		1002.81	-0.0434341		1592.8	-0.01895805		2182.8	0.00872126		2772.8	0.02077819
413.01	-0.03285981		1003.01	-0.04427119		1593	-0.01836388		2183	0.00902844		2773	0.02148748
413.21	-0.03305098		1003.21	-0.04385718		1593.2	-0.01795781		2183.2	0.00945189		2773.2	0.02184233
413.41	-0.03299641		1003.41	-0.04429652		1593.4	-0.01874503		2183.4	0.00973257		2773.4	0.02232291
413.61	-0.033456		1003.61	-0.04433297		1593.6	-0.01903274		2183.6	0.01025085		2773.6	0.02262696
413.81	-0.03379092		1003.81	-0.04355332		1593.8	-0.01925284		2183.8	0.01055068		2773.8	0.02308618
414.01	-0.03292921		1004.01	-0.04374047		1594	-0.01926566		2184	0.01018716		2774	0.02273126
414.21	-0.03352839		1004.21	-0.04417465		1594.2	-0.01880912		2184.2	0.01010124		2774.2	0.02294654
414.41	-0.03374022		1004.41	-0.04423766		1594.4	-0.01862924		2184.4	0.01001196		2774.4	0.02225211
414.61	-0.03308682		1004.61	-0.04477851		1594.6	-0.01835682		2184.6	0.0095084		2774.6	0.02116298
414.81	-0.03304057		1004.81	-0.04568748		1594.8	-0.01834371		2184.8	0.00900565		2774.8	0.02065954
415.01	-0.03354721		1005.01	-0.04503723		1595	-0.01807849		2185	0.00834467		2775	0.02000831
415.21	-0.03309532		1005.21	-0.04591124		1595.2	-0.01738259		2185.2	0.00862864		2775.2	0.01924061
415.41	-0.03317513		1005.41	-0.04569539		1595.4	-0.01662314		2185.4	0.00877062		2775.4	0.019006
415.61	-0.03309694		1005.61	-0.04537384		1595.6	-0.01611019		2185.6	0.00901408		2775.6	0.01907806
415.81	-0.03382027		1005.81	-0.04531084		1595.8	-0.01624342		2185.8	0.00888291		2775.8	0.01948787
416.01	-0.03453208		1006.01	-0.04521952		1596	-0.01555738		2186	0.00876455		2776	0.01996468
416.21	-0.03446509		1006.21	-0.04554735		1596.2	-0.01569519		2186.2	0.0088093		2776.2	0.02057811
416.41	-0.03450614		1006.41	-0.04574252		1596.4	-0.01543013		2186.4	0.00869744		2776.4	0.02024282
416.61	-0.0347706		1006.61	-0.04605446		1596.6	-0.01599361		2186.6	0.00978471		2776.6	0.01993321
416.81	-0.03581603		1006.81	-0.04658158		1596.8	-0.01618584		2186.8	0.00928169		2776.8	0.02050791
417.01	-0.03636797		1007.01	-0.04617533		1597	-0.01678347		2187	0.0089739		2777	0.02120248
417.21	-0.0362179		1007.21	-0.04548229		1597.2	-0.01794709		2187.2	0.00895025		2777.2	0.0203846
417.41	-0.03572783		1007.41	-0.04611829		1597.4	-0.01919706		2187.4	0.00875255		2777.4	0.02062663
417.61	-0.03587911		1007.61	-0.04574884		1597.6	-0.0191813		2187.6	0.00829662		2777.6	0.02038378
417.81	-0.03503142		1007.81	-0.04598824		1597.8	-0.01899395		2187.8	0.00858544		2777.8	0.02057277
418.01	-0.03429268		1008.01	-0.04629193		1598	-0.01966884		2188	0.00776276		2778	0.02049389
418.21	-0.03498524		1008.21	-0.04571023		1598.2	-0.01973446		2188.2	0.00831293		2778.2	0.02075768
418.41	-0.03426356		1008.41	-0.04472666		1598.4	-0.02064504		2188.4	0.00857254		2778.4	0.02035955
418.61	-0.03419885		1008.61	-0.04512444		1598.6	-0.02076731		2188.6	0.00848544		2778.6	0.02001979
418.81	-0.03434849		1008.81	-0.04491782		1598.8	-0.02052283		2188.8	0.00810265		2778.8	0.02084143
419.01	-0.03494948		1009.01	-0.04467947		1599	-0.02130983		2189	0.00771525		2779	0.02101056
419.21	-0.03409457		1009.21	-0.04558326		1599.2	-0.02156213		2189.2	0.00713511		2779.2	0.02097469
419.41	-0.03400374		1009.41	-0.04479365		1599.4	-0.02038076		2189.4	0.00685612		2779.4	0.02260699
419.61	-0.0341716		1009.61	-0.04440097		1599.6	-0.02041026		2189.6	0.00680513		2779.6	0.02317213
419.81	-0.03475324		1009.81	-0.04471512		1599.8	-0.02030753		2189.8	0.00626682		2779.8	0.02349184
420.01	-0.03421727		1010.01	-0.04411713		1600	-0.02064677		2190	0.00658619		2780	0.02369081
420.21	-0.03423881		1010.21	-0.04534836		1600.2	-0.02060988		2190.2	0.0065205		2780.2	0.02397864
420.41	-0.03445904		1010.41	-0.04630681		1600.4	-0.0209047		2190.4	0.00642111		2780.4	0.02407961
420.61	-0.03480565		1010.61	-0.04681886		1600.6	-0.0208724		2190.6	0.00680409		2780.6	0.0239533
420.81	-0.03537394		1010.81	-0.04789211		1600.8	-0.02123164		2190.8	0.00713451		2780.8	0.02438188
421.01	-0.03464329		1011.01	-0.04800465		1601	-0.02188899		2191	0.00720485		2781	0.02422162
421.21	-0.03470826		1011.21	-0.04843331		1601.2	-0.02225265		2191.2	0.00677406		2781.2	0.02308085
421.41	-0.03504464		1011.41	-0.04884742		1601.4	-0.02157783		2191.4	0.00663886		2781.4	0.02292088
421.61	-0.03623362		1011.61	-0.0484003		1601.6	-0.02130168		2191.6	0.00727388		2781.6	0.02228104
421.81	-0.03642117		1011.81	-0.04878896		1601.8	-0.02156403		2191.8	0.00765057		2781.8	0.02151579
422.01	-0.03688219		1012.01	-0.04823534		1602	-0.02222057		2192	0.00742544		2782	0.02163984
422.21	-0.03777162		1012.21	-0.04794249		1602.2	-0.02255387		2192.2	0.00794341		2782.2	0.02177255
422.41	-0.03805684		1012.41	-0.04690819		1602.4	-0.0231951		2192.4	0.00841684		2782.4	0.0208019
422.61	-0.0395447		1012.61	-0.04743138		1602.6	-0.02318406		2192.6	0.00858107		2782.6	0.02094096
422.81	-0.04042848		1012.81	-0.04710059		1602.8	-0.02309572		2192.8	0.00846938		2782.8	0.02147404
423.01	-0.04078908		1013.01	-0.04711999		1603	-0.02315764		2193	0.00855489		2783	0.0212764
423.21	-0.04059699		1013.21	-0.04632353		1603.2	-0.02248354		2193.2	0.00824921		2783.2	0.01947767
423.41	-0.04102647		1013.41	-0.04566232		1603.4	-0.02200746		2193.4	0.00857182		2783.4	0.01925825
423.61	-0.04059194		1013.61	-0.04508549		1603.6	-0.02225572		2193.6	0.00900851		2783.6	0.01903081
423.81	-0.04037023		1013.81	-0.04441093		1603.8	-0.02214605		2193.8	0.00913408		2783.8	0.01909999
424.01	-0.03959322		1014.01	-0.04419366		1604	-0.02213792		2194	0.01105149		2784	0.01911097
424.21	-0.03938333		1014.21	-0.04546511		1604.2	-0.02224291		2194.2	0.01094765		2784.2	0.01877428
424.41	-0.03839782		1014.41	-0.04590949		1604.4	-0.02270378		2194.4	0.01149432		2784.4	0.01954146
424.61	-0.03865766		1014.61	-0.04635527		1604.6	-0.02244095		2194.6	0.01108558		2784.6	0.02000723
424.81	-0.03815503		1014.81	-0.04710522		1604.8	-0.02302287		2194.8	0.01127966		2784.8	0.02051911
425.01	-0.03851987		1015.01	-0.04675378		1605	-0.02361957		2195	0.01018362		2785	0.01983676
425.21	-0.03911015		1015.21	-0.04724066		1605.2	-0.02249258		2195.2	0.00919976		2785.2	0.02010834
425.41	-0.03915148		1015.41	-0.04699625		1605.4	-0.02193919		2195.4	0.00845323		2785.4	0.01948696
425.61	-0.03954203		1015.61	-0.04764145		1605.6	-0.02271493		2195.6	0.0081373		2785.6	0.01971732
425.81	-0.03933246		1015.81	-0.04870418		1605.8	-0.02334001		2195.8	0.00748519		2785.8	0.02017171
426.01	-0.03904095		1016.01	-0.04947103		1606	-0.02357406		2196	0.00688656		2786	0.02048057
426.21	-0.03991983		1016.21	-0.04996711		1606.2	-0.02375239		2196.2	0.00725459		2786.2	0.02028358
426.41	-0.03925294		1016.41	-0.04877281		1606.4	-0.02430829		2196.4	0.00687452		2786.4	0.02060903
426.61	-0.03979558		1016.61	-0.04940601		1606.6	-0.02477024		2196.6	0.0071855		2786.6	0.02205982
426.81	-0.03996419		1016.81	-0.04856554		1606.8	-0.02559372		2196.8	0.00731256		2786.8	0.02209829
427.01	-0.03983859		1017.01	-0.04850007		1607	-0.02588506		2197	0.00752158		2787	0.02209427
427.21	-0.03980871		1017.21	-0.04749283		1607.2	-0.02548353		2197.2	0.00729509		2787.2	0.02144516
427.41	-0.04019623		1017.41	-0.04663696		1607.4	-0.02565864		2197.4	0.00806181		2787.4	0.02324645
427.61	-0.04036262		1017.61	-0.04610819		1607.6	-0.02536466		2197.6	0.00886457		2787.6	0.02314229
427.81	-0.04035235		1017.81	-0.04524207		1607.8	-0.02499905		2197.8	0.00940134		2787.8	0.02348351
428.01	-0.04054241		1018.01	-0.04619597		1608	-0.0252027		2198	0.01083207		2788	0.02353486
428.21	-0.04008516		1018.21	-0.04625198		1608.2	-0.02579848		2198.2	0.01014583		2788.2	0.02352809
428.41	-0.03999102		1018.41	-0.0470573		1608.4	-0.02533584		2198.4	0.00990665		2788.4	0.02438953
428.61	-0.04084353		1018.61	-0.047338		1608.6	-0.02513565		2198.6	0.00983099		2788.6	0.02382544
428.81	-0.04033572		1018.81	-0.047137		1608.8	-0.02458366		2198.8	0.00989605		2788.8	0.02341971
429.01	-0.04098061		1019.01	-0.04728266		1609	-0.02426609		2199	0.00910737		2789	0.02220533
429.21	-0.03997406		1019.21	-0.04781853		1609.2	-0.02310426		2199.2	0.00880095		2789.2	0.02227341
429.41	-0.04004973		1019.41	-0.04754181		1609.4	-0.02290365		2199.4	0.0082342		2789.4	0.02073736
429.61	-0.04008445		1019.61	-0.04894477		1609.6	-0.02276097		2199.6	0.00871829		2789.6	0.02104635
429.81	-0.03965003		1019.81	-0.04960092		1609.8	-0.02214607		2199.8	0.00812569		2789.8	0.02035469
430.01	-0.03926154		1020.01	-0.05031666		1610	-0.02179942		2200	0.0093103		2790	0.01890381
430.21	-0.03935915		1020.21	-0.04950786		1610.2	-0.02235561		2200.2	0.00900175		2790.2	0.01829839
430.41	-0.03854374		1020.41	-0.0488863		1610.4	-0.02252739		2200.4	0.00866499		2790.4	0.0181323
430.61	-0.03891498		1020.61	-0.0491554		1610.6	-0.0227792		2200.6	0.00927506		2790.6	0.01797769
430.81	-0.03964802		1020.81	-0.04889211		1610.8	-0.02275886		2200.8	0.0088281		2790.8	0.01716723
431.01	-0.04012756		1021.01	-0.0493257		1611	-0.02148789		2201	0.00833802		2791	0.01745178
431.21	-0.04033405		1021.21	-0.04915887		1611.2	-0.02092512		2201.2	0.00814533		2791.2	0.01791806
431.41	-0.04153464		1021.41	-0.04967015		1611.4	-0.02159399		2201.4	0.00875947		2791.4	0.01895272
431.61	-0.04202351		1021.61	-0.05009686		1611.6	-0.02198528		2201.6	0.00823903		2791.6	0.01845168
431.81	-0.04158442		1021.81	-0.04944149		1611.8	-0.02194498		2201.8	0.0089395		2791.8	0.01949762
432.01	-0.04153392		1022.01	-0.05032511		1612	-0.02219438		2202	0.00893144		2792	0.01990936
432.21	-0.04169932		1022.21	-0.05026632		1612.2	-0.02185968		2202.2	0.00884029		2792.2	0.02037839
432.41	-0.04239034		1022.41	-0.05006106		1612.4	-0.02207739		2202.4	0.00893561		2792.4	0.02085621
432.61	-0.04225073		1022.61	-0.04910772		1612.6	-0.02207067		2202.6	0.00856624		2792.6	0.02091545
432.81	-0.04222667		1022.81	-0.04868377		1612.8	-0.02169239		2202.8	0.00763307		2792.8	0.02101963
433.01	-0.04249917		1023.01	-0.04893569		1613	-0.02166992		2203	0.00801696		2793	0.02128464
433.21	-0.04243695		1023.21	-0.04924203		1613.2	-0.02136084		2203.2	0.00852592		2793.2	0.02162952
433.41	-0.04277675		1023.41	-0.04889195		1613.4	-0.02145685		2203.4	0.00982232		2793.4	0.02046938
433.61	-0.04263977		1023.61	-0.04953966		1613.6	-0.02178145		2203.6	0.01029601		2793.6	0.02057767
433.81	-0.04257489		1023.81	-0.04932227		1613.8	-0.02197641		2203.8	0.00999275		2793.8	0.01953768
434.01	-0.0423013		1024.01	-0.0499689		1614	-0.02186361		2204	0.01078903		2794	0.01874931
434.21	-0.04142688		1024.21	-0.04930987		1614.2	-0.02236911		2204.2	0.00902914		2794.2	0.01810045
434.41	-0.04174556		1024.41	-0.04975452		1614.4	-0.02277923		2204.4	0.00897662		2794.4	0.01783305
434.61	-0.04170146		1024.61	-0.05027841		1614.6	-0.02291178		2204.6	0.00878008		2794.6	0.01743576
434.81	-0.04245309		1024.81	-0.05031003		1614.8	-0.02269266		2204.8	0.00921661		2794.8	0.01680236
435.01	-0.04247345		1025.01	-0.05106943		1615	-0.02292392		2205	0.00970311		2795	0.01687142
435.21	-0.04281731		1025.21	-0.05087594		1615.2	-0.02388461		2205.2	0.00989843		2795.2	0.01729963
435.41	-0.04346562		1025.41	-0.05180617		1615.4	-0.02510454		2205.4	0.00978648		2795.4	0.01773062
435.61	-0.04365136		1025.61	-0.05140865		1615.6	-0.02604931		2205.6	0.00959646		2795.6	0.01780915
435.81	-0.0438254		1025.81	-0.05183576		1615.8	-0.02629675		2205.8	0.00953281		2795.8	0.01820273
436.01	-0.04505701		1026.01	-0.05290593		1616	-0.02677494		2206	0.0086471		2796	0.01904534
436.21	-0.04647168		1026.21	-0.05291677		1616.2	-0.02766227		2206.2	0.00878291		2796.2	0.01909077
436.41	-0.04660087		1026.41	-0.05197406		1616.4	-0.02785502		2206.4	0.00859455		2796.4	0.01994778
436.61	-0.04683862		1026.61	-0.05217077		1616.6	-0.02712435		2206.6	0.00799726		2796.6	0.02012483
436.81	-0.04695756		1026.81	-0.05183877		1616.8	-0.02703377		2206.8	0.00721365		2796.8	0.02031268
437.01	-0.04706526		1027.01	-0.05205948		1617	-0.02664947		2207	0.00775561		2797	0.02024855
437.21	-0.0473681		1027.21	-0.05214069		1617.2	-0.02637061		2207.2	0.0075363		2797.2	0.02023306
437.41	-0.0468651		1027.41	-0.0527778		1617.4	-0.02646656		2207.4	0.00860178		2797.4	0.01978039
437.61	-0.04608995		1027.61	-0.05326588		1617.6	-0.02676379		2207.6	0.00768616		2797.6	0.01968102
437.81	-0.04493671		1027.81	-0.05277364		1617.8	-0.02579548		2207.8	0.00731496		2797.8	0.01971206
438.01	-0.04401549		1028.01	-0.05284528		1618	-0.0255367		2208	0.00665674		2798	0.01980405
438.21	-0.04315222		1028.21	-0.05182001		1618.2	-0.02599891		2208.2	0.00672035		2798.2	0.01989535
438.41	-0.04406035		1028.41	-0.05196248		1618.4	-0.02603226		2208.4	0.00663262		2798.4	0.01988342
438.61	-0.04348395		1028.61	-0.05241318		1618.6	-0.02536099		2208.6	0.00645919		2798.6	0.01988738
438.81	-0.04396721		1028.81	-0.05297592		1618.8	-0.02540683		2208.8	0.00721436		2798.8	0.01953011
439.01	-0.04311503		1029.01	-0.05328414		1619	-0.02562524		2209	0.00699248		2799	0.01962658
439.21	-0.04240474		1029.21	-0.05214879		1619.2	-0.02581059		2209.2	0.00690655		2799.2	0.01984617
439.41	-0.04221082		1029.41	-0.0533262		1619.4	-0.02674031		2209.4	0.0066429		2799.4	0.02030335
439.61	-0.04249926		1029.61	-0.05318809		1619.6	-0.02662678		2209.6	0.00663162		2799.6	0.02050355
439.81	-0.04298365		1029.81	-0.05349063		1619.8	-0.02705052		2209.8	0.00645536		2799.8	0.02042005
440.01	-0.04373556		1030.01	-0.05338013		1620	-0.02713877		2210	0.00680199		2800	0.02062556
440.21	-0.04385387		1030.21	-0.0529857		1620.2	-0.02758589		2210.2	0.00749796		2800.2	0.02033579
440.41	-0.04331576		1030.41	-0.05227314		1620.4	-0.02693617		2210.4	0.00754054		2800.4	0.02029739
440.61	-0.04379894		1030.61	-0.05306038		1620.6	-0.02600809		2210.6	0.00706193		2800.6	0.02002057
440.81	-0.04367925		1030.81	-0.05275962		1620.8	-0.02657256		2210.8	0.0065945		2800.8	0.01973294
441.01	-0.04381008		1031.01	-0.05329796		1621	-0.02593625		2211	0.00742245		2801	0.01954757
441.21	-0.044442		1031.21	-0.05409289		1621.2	-0.02622776		2211.2	0.00794824		2801.2	0.01980847
441.41	-0.04459276		1031.41	-0.05531051		1621.4	-0.02687987		2211.4	0.00861573		2801.4	0.01910388
441.61	-0.04434289		1031.61	-0.05470014		1621.6	-0.02654461		2211.6	0.00804669		2801.6	0.01767147
441.81	-0.04457869		1031.81	-0.05459399		1621.8	-0.0266709		2211.8	0.00733841		2801.8	0.01764106
442.01	-0.04586155		1032.01	-0.05493084		1622	-0.0273555		2212	0.00709263		2802	0.01708675
442.21	-0.04614389		1032.21	-0.05475978		1622.2	-0.02731693		2212.2	0.00704649		2802.2	0.01652661
442.41	-0.04770818		1032.41	-0.0563573		1622.4	-0.0273626		2212.4	0.00565225		2802.4	0.01558166
442.61	-0.04777753		1032.61	-0.05695885		1622.6	-0.0287296		2212.6	0.00538051		2802.6	0.01606738
442.81	-0.04843968		1032.81	-0.05722773		1622.8	-0.02940773		2212.8	0.00603383		2802.8	0.01587716
443.01	-0.04821108		1033.01	-0.05674944		1623	-0.03041111		2213	0.00640999		2803	0.01630502
443.21	-0.04861865		1033.21	-0.05644965		1623.2	-0.03148925		2213.2	0.0058179		2803.2	0.01690095
443.41	-0.04936774		1033.41	-0.0571391		1623.4	-0.03223991		2213.4	0.00498707		2803.4	0.01690642
443.61	-0.0494642		1033.61	-0.05694901		1623.6	-0.03234861		2213.6	0.0049983		2803.6	0.01737331
443.81	-0.05006059		1033.81	-0.05685721		1623.8	-0.03364348		2213.8	0.00510496		2803.8	0.01812215
444.01	-0.04952198		1034.01	-0.0569869		1624	-0.03295295		2214	0.00598577		2804	0.01878482
444.21	-0.04885519		1034.21	-0.05752785		1624.2	-0.03259911		2214.2	0.00598808		2804.2	0.01976283
444.41	-0.04772134		1034.41	-0.05731804		1624.4	-0.03170857		2214.4	0.00584015		2804.4	0.02063578
444.61	-0.0478527		1034.61	-0.05825617		1624.6	-0.03054797		2214.6	0.00583546		2804.6	0.02178926
444.81	-0.0469561		1034.81	-0.05836371		1624.8	-0.03062494		2214.8	0.00667725		2804.8	0.02250669
445.01	-0.04579363		1035.01	-0.0577953		1625	-0.02904133		2215	0.00679434		2805	0.023368
445.21	-0.04585568		1035.21	-0.05808943		1625.2	-0.0286604		2215.2	0.00628195		2805.2	0.02365241
445.41	-0.0450228		1035.41	-0.05791166		1625.4	-0.02790832		2215.4	0.00645644		2805.4	0.02346074
445.61	-0.04478981		1035.61	-0.05679395		1625.6	-0.02700669		2215.6	0.00709615		2805.6	0.02282388
445.81	-0.04497258		1035.81	-0.05630352		1625.8	-0.02742589		2215.8	0.00742316		2805.8	0.02293398
446.01	-0.04512293		1036.01	-0.05625211		1626	-0.02765189		2216	0.00824291		2806	0.02221504
446.21	-0.04545062		1036.21	-0.05522384		1626.2	-0.02865004		2216.2	0.0081955		2806.2	0.0214855
446.41	-0.04587964		1036.41	-0.0557734		1626.4	-0.02904342		2216.4	0.0081903		2806.4	0.02088064
446.61	-0.04581952		1036.61	-0.05475589		1626.6	-0.03069852		2216.6	0.00925707		2806.6	0.02173086
446.81	-0.04652845		1036.81	-0.05512516		1626.8	-0.03077097		2216.8	0.00995462		2806.8	0.02081219
447.01	-0.04655388		1037.01	-0.05440912		1627	-0.03199959		2217	0.009525		2807	0.02020721
447.21	-0.04689763		1037.21	-0.05391598		1627.2	-0.03217227		2217.2	0.00920225		2807.2	0.02006573
447.41	-0.04680147		1037.41	-0.0543186		1627.4	-0.03227694		2217.4	0.00991969		2807.4	0.01971599
447.61	-0.04737044		1037.61	-0.05432454		1627.6	-0.03254149		2217.6	0.01021389		2807.6	0.02022227
447.81	-0.04798023		1037.81	-0.05477755		1627.8	-0.0329869		2217.8	0.01079774		2807.8	0.01993658
448.01	-0.04685202		1038.01	-0.05539792		1628	-0.03223631		2218	0.01135527		2808	0.0202164
448.21	-0.04690467		1038.21	-0.05584319		1628.2	-0.03209127		2218.2	0.0106781		2808.2	0.02046585
448.41	-0.04720508		1038.41	-0.05592892		1628.4	-0.03114288		2218.4	0.01065464		2808.4	0.02042174
448.61	-0.04822552		1038.61	-0.05677768		1628.6	-0.030641		2218.6	0.00957382		2808.6	0.01994063
448.81	-0.04816856		1038.81	-0.05660238		1628.8	-0.03106182		2218.8	0.00935051		2808.8	0.01994666
449.01	-0.0478906		1039.01	-0.05681282		1629	-0.03040877		2219	0.00804216		2809	0.02064551
449.21	-0.04813573		1039.21	-0.05771762		1629.2	-0.03067511		2219.2	0.0079727		2809.2	0.0204925
449.41	-0.04769276		1039.41	-0.05786748		1629.4	-0.03040844		2219.4	0.00881243		2809.4	0.02017487
449.61	-0.0486825		1039.61	-0.05847579		1629.6	-0.03046656		2219.6	0.0088816		2809.6	0.02033782
449.81	-0.04904626		1039.81	-0.05901693		1629.8	-0.02993821		2219.8	0.00866554		2809.8	0.02069686
450.01	-0.04858952		1040.01	-0.05924132		1630	-0.03030189		2220	0.00876993		2810	0.02076713
450.21	-0.04838606		1040.21	-0.05877984		1630.2	-0.03001661		2220.2	0.00867912		2810.2	0.02055987
450.41	-0.04812765		1040.41	-0.05925013		1630.4	-0.02905568		2220.4	0.00875949		2810.4	0.02069041
450.61	-0.04788397		1040.61	-0.05844138		1630.6	-0.02942537		2220.6	0.00811217		2810.6	0.02158538
450.81	-0.04736651		1040.81	-0.05790959		1630.8	-0.02926754		2220.8	0.00716753		2810.8	0.02076803
451.01	-0.04680083		1041.01	-0.05741307		1631	-0.03016113		2221	0.00737375		2811	0.02146863
451.21	-0.04725648		1041.21	-0.05791025		1631.2	-0.02972027		2221.2	0.007671		2811.2	0.02284167
451.41	-0.04761892		1041.41	-0.05773796		1631.4	-0.0297897		2221.4	0.00789325		2811.4	0.02268156
451.61	-0.0483062		1041.61	-0.05737454		1631.6	-0.02956242		2221.6	0.00769807		2811.6	0.02261174
451.81	-0.04807452		1041.81	-0.05789033		1631.8	-0.03016652		2221.8	0.00861249		2811.8	0.0226057
452.01	-0.04749241		1042.01	-0.0576655		1632	-0.02978877		2222	0.00854401		2812	0.0225207
452.21	-0.04831554		1042.21	-0.05747655		1632.2	-0.0302675		2222.2	0.00824147		2812.2	0.02202786
452.41	-0.04917961		1042.41	-0.05792942		1632.4	-0.03068365		2222.4	0.00810882		2812.4	0.02154225
452.61	-0.04902846		1042.61	-0.05819447		1632.6	-0.03150594		2222.6	0.00821692		2812.6	0.0209494
452.81	-0.04871638		1042.81	-0.05880195		1632.8	-0.03236076		2222.8	0.00908168		2812.8	0.02059961
453.01	-0.04857046		1043.01	-0.05939476		1633	-0.03197288		2223	0.00917012		2813	0.02070104
453.21	-0.04826795		1043.21	-0.05972844		1633.2	-0.03227596		2223.2	0.00975413		2813.2	0.02008233
453.41	-0.04863433		1043.41	-0.06011231		1633.4	-0.032013		2223.4	0.01017349		2813.4	0.02014358
453.61	-0.04960768		1043.61	-0.06076485		1633.6	-0.03120925		2223.6	0.01082009		2813.6	0.02063069
453.81	-0.04995038		1043.81	-0.06010257		1633.8	-0.03065195		2223.8	0.01120094		2813.8	0.0210892
454.01	-0.04956441		1044.01	-0.05915055		1634	-0.03132105		2224	0.01213387		2814	0.02025857
454.21	-0.0500501		1044.21	-0.05957582		1634.2	-0.0322656		2224.2	0.01170151		2814.2	0.0199199
454.41	-0.0505391		1044.41	-0.0592766		1634.4	-0.03302107		2224.4	0.0117877		2814.4	0.02123708
454.61	-0.05038977		1044.61	-0.05852044		1634.6	-0.03408552		2224.6	0.01047925		2814.6	0.02187311
454.81	-0.05123241		1044.81	-0.05801926		1634.8	-0.03502562		2224.8	0.01019164		2814.8	0.02155612
455.01	-0.05138655		1045.01	-0.05802237		1635	-0.03621889		2225	0.01035415		2815	0.0221959
455.21	-0.05179785		1045.21	-0.05752034		1635.2	-0.03499176		2225.2	0.00902527		2815.2	0.02277718
455.41	-0.05191293		1045.41	-0.05678744		1635.4	-0.03472525		2225.4	0.00922615		2815.4	0.02294841
455.61	-0.05099477		1045.61	-0.05671464		1635.6	-0.03556608		2225.6	0.00901326		2815.6	0.02294367
455.81	-0.05006147		1045.81	-0.05626304		1635.8	-0.03617787		2225.8	0.00861608		2815.8	0.02307642
456.01	-0.04887578		1046.01	-0.05644809		1636	-0.0354008		2226	0.00806894		2816	0.02222022
456.21	-0.04798675		1046.21	-0.05717409		1636.2	-0.03601238		2226.2	0.00857403		2816.2	0.02245665
456.41	-0.0471084		1046.41	-0.0581768		1636.4	-0.03611135		2226.4	0.00849846		2816.4	0.02244024
456.61	-0.04642973		1046.61	-0.05840429		1636.6	-0.03528515		2226.6	0.00882071		2816.6	0.02167196
456.81	-0.04629286		1046.81	-0.05865989		1636.8	-0.03528672		2226.8	0.00852252		2816.8	0.02166958
457.01	-0.04629248		1047.01	-0.05882454		1637	-0.03507597		2227	0.00824889		2817	0.02131275
457.21	-0.0464839		1047.21	-0.0596529		1637.2	-0.03419716		2227.2	0.00829033		2817.2	0.02173828
457.41	-0.04791342		1047.41	-0.06011271		1637.4	-0.03368694		2227.4	0.00880537		2817.4	0.02207336
457.61	-0.04868627		1047.61	-0.06038854		1637.6	-0.0333955		2227.6	0.00982116		2817.6	0.02150253
457.81	-0.04988529		1047.81	-0.05945373		1637.8	-0.03327039		2227.8	0.01030524		2817.8	0.02112884
458.01	-0.05098215		1048.01	-0.06015601		1638	-0.03507149		2228	0.01085697		2818	0.02095595
458.21	-0.05140837		1048.21	-0.06168315		1638.2	-0.03507994		2228.2	0.01094471		2818.2	0.02132356
458.41	-0.05184271		1048.41	-0.06191474		1638.4	-0.03483883		2228.4	0.01164957		2818.4	0.02133635
458.61	-0.05230186		1048.61	-0.06160622		1638.6	-0.03468604		2228.6	0.01077703		2818.6	0.02096914
458.81	-0.0531392		1048.81	-0.06212107		1638.8	-0.03503281		2228.8	0.01075143		2818.8	0.02076112
459.01	-0.05325813		1049.01	-0.06192719		1639	-0.03497735		2229	0.01073088		2819	0.02081973
459.21	-0.05367899		1049.21	-0.06173371		1639.2	-0.03391551		2229.2	0.01060237		2819.2	0.02062345
459.41	-0.05381569		1049.41	-0.0611339		1639.4	-0.03423216		2229.4	0.0104995		2819.4	0.02045354
459.61	-0.05351583		1049.61	-0.06105838		1639.6	-0.0345415		2229.6	0.00977948		2819.6	0.01966863
459.81	-0.05246662		1049.81	-0.06115007		1639.8	-0.03368935		2229.8	0.00923735		2819.8	0.01913098
460.01	-0.05187281		1050.01	-0.06209901		1640	-0.03287879		2230	0.00952241		2820	0.01853721
460.21	-0.05134645		1050.21	-0.06190577		1640.2	-0.033553		2230.2	0.00918949		2820.2	0.01838773
460.41	-0.05150409		1050.41	-0.06135614		1640.4	-0.03317535		2230.4	0.00857224		2820.4	0.01794221
460.61	-0.05104196		1050.61	-0.06007637		1640.6	-0.03286278		2230.6	0.00860945		2820.6	0.01745413
460.81	-0.05131545		1050.81	-0.05919711		1640.8	-0.03339636		2230.8	0.00833178		2820.8	0.01752545
461.01	-0.05076936		1051.01	-0.05913994		1641	-0.03342912		2231	0.00864283		2821	0.01739262
461.21	-0.05085465		1051.21	-0.05944249		1641.2	-0.0325337		2231.2	0.00857721		2821.2	0.01789355
461.41	-0.05126091		1051.41	-0.060179		1641.4	-0.0331213		2231.4	0.00965418		2821.4	0.0177392
461.61	-0.05109055		1051.61	-0.06011586		1641.6	-0.03385716		2231.6	0.00998595		2821.6	0.0178426
461.81	-0.05078905		1051.81	-0.06056089		1641.8	-0.03410487		2231.8	0.01022114		2821.8	0.01822062
462.01	-0.05030849		1052.01	-0.06239917		1642	-0.03517959		2232	0.01012877		2822	0.01814934
462.21	-0.04968831		1052.21	-0.06365698		1642.2	-0.03431795		2232.2	0.0102336		2822.2	0.01748749
462.41	-0.04911788		1052.41	-0.06367738		1642.4	-0.03435077		2232.4	0.01020885		2822.4	0.01726953
462.61	-0.04948502		1052.61	-0.06383688		1642.6	-0.0349076		2232.6	0.00971215		2822.6	0.01738279
462.81	-0.05008382		1052.81	-0.06366345		1642.8	-0.03521979		2232.8	0.01041498		2822.8	0.01862192
463.01	-0.05074565		1053.01	-0.06326752		1643	-0.03491089		2233	0.01039693		2823	0.01912452
463.21	-0.05176519		1053.21	-0.06363284		1643.2	-0.03479961		2233.2	0.01032106		2823.2	0.01933372
463.41	-0.05205967		1053.41	-0.06337536		1643.4	-0.03486939		2233.4	0.00995553		2823.4	0.02001929
463.61	-0.05212645		1053.61	-0.06380806		1643.6	-0.03488676		2233.6	0.00987555		2823.6	0.02070011
463.81	-0.05270664		1053.81	-0.06297978		1643.8	-0.03511205		2233.8	0.00898352		2823.8	0.0201398
464.01	-0.0533617		1054.01	-0.06306094		1644	-0.03588453		2234	0.00871508		2824	0.02027518
464.21	-0.05365372		1054.21	-0.06236478		1644.2	-0.03640818		2234.2	0.00804504		2824.2	0.01999526
464.41	-0.05369394		1054.41	-0.06067831		1644.4	-0.03604529		2234.4	0.00876604		2824.4	0.01926715
464.61	-0.0538336		1054.61	-0.05991992		1644.6	-0.03640841		2234.6	0.00860054		2824.6	0.0194162
464.81	-0.054581		1054.81	-0.05976428		1644.8	-0.03640851		2234.8	0.00859944		2824.8	0.01866896
465.01	-0.05439524		1055.01	-0.05957617		1645	-0.03668183		2235	0.00872367		2825	0.01915813
465.21	-0.0549282		1055.21	-0.05972937		1645.2	-0.03633383		2235.2	0.00863131		2825.2	0.01919965
465.41	-0.05485225		1055.41	-0.06054665		1645.4	-0.03633149		2235.4	0.00937959		2825.4	0.01878464
465.61	-0.05459087		1055.61	-0.06065117		1645.6	-0.0364941		2235.6	0.00873241		2825.6	0.01918121
465.81	-0.0541887		1055.81	-0.06095662		1645.8	-0.03671841		2235.8	0.00871168		2825.8	0.01831677
466.01	-0.05451014		1056.01	-0.06139762		1646	-0.03654476		2236	0.00874504		2826	0.01768185
466.21	-0.0556018		1056.21	-0.06147949		1646.2	-0.03609219		2236.2	0.00944821		2826.2	0.01793258
466.41	-0.05506751		1056.41	-0.06128088		1646.4	-0.03597994		2236.4	0.00942278		2826.4	0.01792733
466.61	-0.05515689		1056.61	-0.06127894		1646.6	-0.03616329		2236.6	0.00912935		2826.6	0.01822333
466.81	-0.05500307		1056.81	-0.06098969		1646.8	-0.03592442		2236.8	0.00948828		2826.8	0.01950836
467.01	-0.05571792		1057.01	-0.06171197		1647	-0.03555228		2237	0.00900788		2827	0.01960359
467.21	-0.05559532		1057.21	-0.06238756		1647.2	-0.03605542		2237.2	0.00927624		2827.2	0.02011016
467.41	-0.0551512		1057.41	-0.06249928		1647.4	-0.03641065		2237.4	0.00914386		2827.4	0.02011983
467.61	-0.05535245		1057.61	-0.06366082		1647.6	-0.03666585		2237.6	0.00851898		2827.6	0.02020768
467.81	-0.05537861		1057.81	-0.06410996		1647.8	-0.03688605		2237.8	0.00809184		2827.8	0.01978402
468.01	-0.05442423		1058.01	-0.06531864		1648	-0.03735059		2238	0.00847917		2828	0.02002027
468.21	-0.05402855		1058.21	-0.06522978		1648.2	-0.03707512		2238.2	0.00841553		2828.2	0.01964661
468.41	-0.05343312		1058.41	-0.06460522		1648.4	-0.03706422		2238.4	0.00871048		2828.4	0.01917268
468.61	-0.05343399		1058.61	-0.06506988		1648.6	-0.03732205		2238.6	0.00807555		2828.6	0.01961604
468.81	-0.05344921		1058.81	-0.06477807		1648.8	-0.03730335		2238.8	0.00795952		2828.8	0.01937643
469.01	-0.05335949		1059.01	-0.06427655		1649	-0.03765502		2239	0.00761239		2829	0.02003659
469.21	-0.05315992		1059.21	-0.06420082		1649.2	-0.03724293		2239.2	0.00740174		2829.2	0.01996029
469.41	-0.05280669		1059.41	-0.06417744		1649.4	-0.03706142		2239.4	0.00729121		2829.4	0.0198296
469.61	-0.05288452		1059.61	-0.0635584		1649.6	-0.03737129		2239.6	0.00668194		2829.6	0.02044352
469.81	-0.05321215		1059.81	-0.06278879		1649.8	-0.0376979		2239.8	0.00671718		2829.8	0.02034966
470.01	-0.05321215		1060.01	-0.06278879		1650	-0.0376979		2240	0.00671718		2830	0.02034966
470.21	-0.0555411		1060.21	-0.06245798		1650.2	-0.03930033		2240.2	0.00682767		2830.2	0.01886936
470.41	-0.05717075		1060.41	-0.06260524		1650.4	-0.04117729		2240.4	0.00660965		2830.4	0.01680989
470.61	-0.05916407		1060.61	-0.06345087		1650.6	-0.04309982		2240.6	0.0060131		2830.6	0.01444304
470.81	-0.06127194		1060.81	-0.06457286		1650.8	-0.04552168		2240.8	0.00546106		2830.8	0.01242172
471.01	-0.06266002		1061.01	-0.06582443		1651	-0.04693875		2241	0.00535944		2831	0.01049331
471.21	-0.06405481		1061.21	-0.06685216		1651.2	-0.04923439		2241.2	0.00505038		2831.2	0.00759441
471.41	-0.06550099		1061.41	-0.06823038		1651.4	-0.05070441		2241.4	0.00437064		2831.4	0.00546277
471.61	-0.06642479		1061.61	-0.06941468		1651.6	-0.05204486		2241.6	0.00328728		2831.6	0.00294828
471.81	-0.0668523		1061.81	-0.07108908		1651.8	-0.05337711		2241.8	0.00322653		2831.8	0.00033682
472.01	-0.06686692		1062.01	-0.07249652		1652	-0.05443182		2242	0.00358457		2832	-0.00063732
472.21	-0.06696162		1062.21	-0.0740609		1652.2	-0.05463573		2242.2	0.0034099		2832.2	-0.00194114
472.41	-0.06708512		1062.41	-0.07493037		1652.4	-0.05443609		2242.4	0.00304414		2832.4	-0.00343832
472.61	-0.06739327		1062.61	-0.07483571		1652.6	-0.05518986		2242.6	0.00353397		2832.6	-0.00501685
472.81	-0.06752389		1062.81	-0.07528469		1652.8	-0.05533039		2242.8	0.00341685		2832.8	-0.00618572
473.01	-0.06710844		1063.01	-0.07532864		1653	-0.05570499		2243	0.00356195		2833	-0.0060874
473.21	-0.06720445		1063.21	-0.07502366		1653.2	-0.05591055		2243.2	0.00289131		2833.2	-0.00618968
473.41	-0.06625125		1063.41	-0.07459085		1653.4	-0.05514012		2243.4	0.00334768		2833.4	-0.00618595
473.61	-0.06629125		1063.61	-0.07398207		1653.6	-0.05422707		2243.6	0.00367736		2833.6	-0.00559061
473.81	-0.06550511		1063.81	-0.0733783		1653.8	-0.05394051		2243.8	0.00444656		2833.8	-0.00583327
474.01	-0.06550166		1064.01	-0.07166514		1654	-0.05334803		2244	0.00368501		2834	-0.00599108
474.21	-0.06619641		1064.21	-0.07087619		1654.2	-0.05314563		2244.2	0.00349476		2834.2	-0.00617864
474.41	-0.06567014		1064.41	-0.07016327		1654.4	-0.0530401		2244.4	0.00334714		2834.4	-0.00602201
474.61	-0.06607229		1064.61	-0.07004785		1654.6	-0.05289603		2244.6	0.00322374		2834.6	-0.00566094
474.81	-0.0654066		1064.81	-0.06936498		1654.8	-0.05222868		2244.8	0.00341332		2834.8	-0.00449657
475.01	-0.06417793		1065.01	-0.06917668		1655	-0.05073678		2245	0.00315942		2835	-0.00403874
475.21	-0.06323636		1065.21	-0.0686591		1655.2	-0.04988502		2245.2	0.00224997		2835.2	-0.00482163
475.41	-0.06199387		1065.41	-0.06912461		1655.4	-0.04855285		2245.4	0.00126187		2835.4	-0.00504455
475.61	-0.06100751		1065.61	-0.06936978		1655.6	-0.04750627		2245.6	0.00116355		2835.6	-0.0057197
475.81	-0.06086143		1065.81	-0.06949426		1655.8	-0.04712859		2245.8	0.00164607		2835.8	-0.00563344
476.01	-0.0606587		1066.01	-0.06910683		1656	-0.04623944		2246	0.00186454		2836	-0.00537398
476.21	-0.06099252		1066.21	-0.06906836		1656.2	-0.04547621		2246.2	0.0023151		2836.2	-0.0065203
476.41	-0.06129817		1066.41	-0.06902644		1656.4	-0.04484103		2246.4	0.00230295		2836.4	-0.00742538
476.61	-0.06161907		1066.61	-0.06919917		1656.6	-0.04474344		2246.6	0.00200089		2836.6	-0.00713676
476.81	-0.06137704		1066.81	-0.06949592		1656.8	-0.04475223		2246.8	0.00163582		2836.8	-0.00630255
477.01	-0.06055076		1067.01	-0.06953505		1657	-0.04523156		2247	0.00148162		2837	-0.00618077
477.21	-0.06087795		1067.21	-0.06974916		1657.2	-0.04434159		2247.2	0.00151931		2837.2	-0.00639021
477.41	-0.06044167		1067.41	-0.06946405		1657.4	-0.04346686		2247.4	0.00242282		2837.4	-0.00663946
477.61	-0.06052286		1067.61	-0.06919092		1657.6	-0.04347465		2247.6	0.00319904		2837.6	-0.00622943
477.81	-0.06022414		1067.81	-0.06907084		1657.8	-0.04339636		2247.8	0.00344353		2837.8	-0.00658883
478.01	-0.060623		1068.01	-0.06778123		1658	-0.04271261		2248	0.00365095		2838	-0.00691628
478.21	-0.06164027		1068.21	-0.06719073		1658.2	-0.0428649		2248.2	0.00464952		2838.2	-0.00717631
478.41	-0.06124872		1068.41	-0.0664972		1658.4	-0.04342283		2248.4	0.00562997		2838.4	-0.00634557
478.61	-0.06062588		1068.61	-0.06639638		1658.6	-0.04253797		2248.6	0.00525999		2838.6	-0.00640964
478.81	-0.05956674		1068.81	-0.06606194		1658.8	-0.04176984		2248.8	0.00516654		2838.8	-0.00522296
479.01	-0.05973646		1069.01	-0.06580606		1659	-0.0413695		2249	0.00489884		2839	-0.00524804
479.21	-0.05960822		1069.21	-0.06543691		1659.2	-0.04134609		2249.2	0.00469304		2839.2	-0.00590447
479.41	-0.05946879		1069.41	-0.06508081		1659.4	-0.04132615		2249.4	0.00469928		2839.4	-0.00624452
479.61	-0.05993453		1069.61	-0.06358722		1659.6	-0.04158652		2249.6	0.00520488		2839.6	-0.00587129
479.81	-0.06081965		1069.81	-0.06292057		1659.8	-0.0422886		2249.8	0.00457495		2839.8	-0.00518517
480.01	-0.06055615		1070.01	-0.06198014		1660	-0.04246216		2250	0.0050682		2840	-0.00544663
480.21	-0.06063616		1070.21	-0.06156847		1660.2	-0.04320365		2250.2	0.00483483		2840.2	-0.00488526
480.41	-0.06022729		1070.41	-0.06155207		1660.4	-0.04344522		2250.4	0.00418783		2840.4	-0.00420273
480.61	-0.05961771		1070.61	-0.06168562		1660.6	-0.04411495		2250.6	0.00366511		2840.6	-0.00339667
480.81	-0.05894424		1070.81	-0.06094623		1660.8	-0.0449619		2250.8	0.00343557		2840.8	-0.0031972
481.01	-0.0589209		1071.01	-0.06110776		1661	-0.04490289		2251	0.00322907		2841	-0.00325541
481.21	-0.05854448		1071.21	-0.06097187		1661.2	-0.0442744		2251.2	0.00361799		2841.2	-0.00316216
481.41	-0.05724381		1071.41	-0.06056202		1661.4	-0.04421029		2251.4	0.0037253		2841.4	-0.00289907
481.61	-0.05695112		1071.61	-0.06071788		1661.6	-0.04441597		2251.6	0.00475839		2841.6	-0.00333702
481.81	-0.05589487		1071.81	-0.06125487		1661.8	-0.04392618		2251.8	0.00537328		2841.8	-0.00305746
482.01	-0.05566762		1072.01	-0.06178019		1662	-0.04351986		2252	0.00648722		2842	-0.00320852
482.21	-0.05562854		1072.21	-0.06212659		1662.2	-0.04362971		2252.2	0.00715978		2842.2	-0.00379997
482.41	-0.05582917		1072.41	-0.06300172		1662.4	-0.04344442		2252.4	0.00689032		2842.4	-0.00480604
482.61	-0.05571901		1072.61	-0.06333444		1662.6	-0.04219552		2252.6	0.00670953		2842.6	-0.00472546
482.81	-0.05623101		1072.81	-0.06330032		1662.8	-0.04214667		2252.8	0.00664733		2842.8	-0.00403545
483.01	-0.05726883		1073.01	-0.0633967		1663	-0.04119494		2253	0.00675561		2843	-0.00483607
483.21	-0.05765226		1073.21	-0.063484		1663.2	-0.04085606		2253.2	0.00646332		2843.2	-0.00523551
483.41	-0.05787034		1073.41	-0.0631059		1663.4	-0.04000695		2253.4	0.00699567		2843.4	-0.00529468
483.61	-0.05872435		1073.61	-0.06294429		1663.6	-0.04030285		2253.6	0.00707907		2843.6	-0.00511877
483.81	-0.05919875		1073.81	-0.06311169		1663.8	-0.04029337		2253.8	0.00641237		2843.8	-0.00535904
484.01	-0.05926736		1074.01	-0.06311849		1664	-0.04052235		2254	0.00674574		2844	-0.00529611
484.21	-0.05886048		1074.21	-0.06299021		1664.2	-0.0415138		2254.2	0.00621446		2844.2	-0.00467477
484.41	-0.05926983		1074.41	-0.06297292		1664.4	-0.04116583		2254.4	0.00597277		2844.4	-0.00452808
484.61	-0.05923433		1074.61	-0.06230259		1664.6	-0.04132546		2254.6	0.00500743		2844.6	-0.00418692
484.81	-0.0586532		1074.81	-0.06171108		1664.8	-0.04127565		2254.8	0.00497712		2844.8	-0.00385902
485.01	-0.0584136		1075.01	-0.06218889		1665	-0.04118951		2255	0.00466324		2845	-0.00334617
485.21	-0.057146		1075.21	-0.06244135		1665.2	-0.0417783		2255.2	0.00425281		2845.2	-0.00257723
485.41	-0.05598309		1075.41	-0.06192859		1665.4	-0.04210212		2255.4	0.00415279		2845.4	-0.00242915
485.61	-0.05596273		1075.61	-0.06178155		1665.6	-0.04319701		2255.6	0.00379822		2845.6	-0.00291206
485.81	-0.05521118		1075.81	-0.06235221		1665.8	-0.04310288		2255.8	0.00373125		2845.8	-0.00271067
486.01	-0.05515324		1076.01	-0.06293009		1666	-0.04337559		2256	0.00379221		2846	-0.00368889
486.21	-0.05543717		1076.21	-0.06304943		1666.2	-0.04325227		2256.2	0.00349652		2846.2	-0.00466809
486.41	-0.05564228		1076.41	-0.06360019		1666.4	-0.04245301		2256.4	0.00310102		2846.4	-0.00515459
486.61	-0.0545296		1076.61	-0.06354113		1666.6	-0.04237724		2256.6	0.00334636		2846.6	-0.00441427
486.81	-0.05455217		1076.81	-0.06408043		1666.8	-0.04216928		2256.8	0.00316532		2846.8	-0.0053527
487.01	-0.05520616		1077.01	-0.06459022		1667	-0.04170486		2257	0.00391363		2847	-0.00586757
487.21	-0.05518834		1077.21	-0.06440341		1667.2	-0.04145395		2257.2	0.00463349		2847.2	-0.00627236
487.41	-0.05526933		1077.41	-0.06433069		1667.4	-0.04118141		2257.4	0.00541561		2847.4	-0.00625489
487.61	-0.05613554		1077.61	-0.06413543		1667.6	-0.04135762		2257.6	0.00503229		2847.6	-0.00643328
487.81	-0.05646733		1077.81	-0.06405573		1667.8	-0.04106923		2257.8	0.00474585		2847.8	-0.00653392
488.01	-0.05616108		1078.01	-0.06419981		1668	-0.04192939		2258	0.00502544		2848	-0.00603926
488.21	-0.05577686		1078.21	-0.06307951		1668.2	-0.04217575		2258.2	0.00482776		2848.2	-0.00519816
488.41	-0.05548949		1078.41	-0.0627687		1668.4	-0.04179189		2258.4	0.00433687		2848.4	-0.00398266
488.61	-0.05486208		1078.61	-0.06133536		1668.6	-0.04143997		2258.6	0.00403466		2848.6	-0.00245317
488.81	-0.05515151		1078.81	-0.0615263		1668.8	-0.04140309		2258.8	0.00463486		2848.8	-0.0014718
489.01	-0.05491811		1079.01	-0.06116227		1669	-0.04175325		2259	0.00408778		2849	-0.00040973
489.21	-0.05538644		1079.21	-0.06019984		1669.2	-0.0422313		2259.2	0.00451158		2849.2	-0.00030765
489.41	-0.05557264		1079.41	-0.05995681		1669.4	-0.04191916		2259.4	0.00527416		2849.4	-0.00076661
489.61	-0.05554356		1079.61	-0.06036138		1669.6	-0.04226686		2259.6	0.00518395		2849.6	-0.00024093
489.81	-0.05501341		1079.81	-0.06109409		1669.8	-0.04140685		2259.8	0.00548545		2849.8	-0.00046159
490.01	-0.05500427		1080.01	-0.06103		1670	-0.04107512		2260	0.00566546		2850	-0.0007156
490.21	-0.05562896		1080.21	-0.06128725		1670.2	-0.0401877		2260.2	0.00565244		2850.2	-0.00058106
490.41	-0.05551981		1080.41	-0.0618512		1670.4	-0.03983421		2260.4	0.00585496		2850.4	-0.00041727
490.61	-0.05508063		1080.61	-0.06230602		1670.6	-0.03977733		2260.6	0.00601852		2850.6	-0.00169409
490.81	-0.05547628		1080.81	-0.06266598		1670.8	-0.03962377		2260.8	0.00673776		2850.8	-0.00244859
491.01	-0.05514657		1081.01	-0.06328098		1671	-0.03966654		2261	0.007049		2851	-0.0029961
491.21	-0.05463192		1081.21	-0.06345812		1671.2	-0.03922403		2261.2	0.00766204		2851.2	-0.00381567
491.41	-0.05441587		1081.41	-0.06388734		1671.4	-0.03890542		2261.4	0.00691643		2851.4	-0.00419245
491.61	-0.05448238		1081.61	-0.06433878		1671.6	-0.04000226		2261.6	0.00713105		2851.6	-0.00461225
491.81	-0.05480936		1081.81	-0.06434322		1671.8	-0.04054301		2261.8	0.00732506		2851.8	-0.00490124
492.01	-0.05388335		1082.01	-0.063895		1672	-0.04213426		2262	0.00668079		2852	-0.00526272
492.21	-0.05427579		1082.21	-0.06318497		1672.2	-0.04228154		2262.2	0.00607077		2852.2	-0.00481207
492.41	-0.05459406		1082.41	-0.06293319		1672.4	-0.04210919		2262.4	0.00524867		2852.4	-0.00398145
492.61	-0.05591946		1082.61	-0.06243682		1672.6	-0.04166486		2262.6	0.00466386		2852.6	-0.00396768
492.81	-0.05602802		1082.81	-0.06298859		1672.8	-0.04226459		2262.8	0.00554846		2852.8	-0.00448507
493.01	-0.05456606		1083.01	-0.06254302		1673	-0.04259628		2263	0.00562908		2853	-0.00537435
493.21	-0.05481031		1083.21	-0.06228872		1673.2	-0.04334342		2263.2	0.00560969		2853.2	-0.00593616
493.41	-0.05477588		1083.41	-0.06251888		1673.4	-0.04314593		2263.4	0.00639303		2853.4	-0.00537446
493.61	-0.05436413		1083.61	-0.06250344		1673.6	-0.04313786		2263.6	0.00601657		2853.6	-0.0055084
493.81	-0.05385476		1083.81	-0.06211157		1673.8	-0.04321997		2263.8	0.00533161		2853.8	-0.00520234
494.01	-0.05423524		1084.01	-0.0613082		1674	-0.04365931		2264	0.00520321		2854	-0.00523437
494.21	-0.05460336		1084.21	-0.06196085		1674.2	-0.04329288		2264.2	0.00495666		2854.2	-0.00563143
494.41	-0.05403055		1084.41	-0.06268568		1674.4	-0.04324455		2264.4	0.00496634		2854.4	-0.00619147
494.61	-0.05365255		1084.61	-0.06268725		1674.6	-0.0428126		2264.6	0.00428087		2854.6	-0.00699872
494.81	-0.05373958		1084.81	-0.06288082		1674.8	-0.04349835		2264.8	0.00453766		2854.8	-0.00660661
495.01	-0.05292725		1085.01	-0.0634929		1675	-0.04322053		2265	0.004229		2855	-0.00673622
495.21	-0.0531848		1085.21	-0.06367746		1675.2	-0.0422938		2265.2	0.00478464		2855.2	-0.00664318
495.41	-0.053123		1085.41	-0.06363646		1675.4	-0.04196424		2265.4	0.00462065		2855.4	-0.00633909
495.61	-0.05367722		1085.61	-0.06323457		1675.6	-0.04221055		2265.6	0.0046821		2855.6	-0.00546697
495.81	-0.0554243		1085.81	-0.06284395		1675.8	-0.04151254		2265.8	0.00408666		2855.8	-0.00582361
496.01	-0.05545554		1086.01	-0.06282531		1676	-0.04101359		2266	0.00370516		2856	-0.00561054
496.21	-0.05601222		1086.21	-0.06277349		1676.2	-0.04041959		2266.2	0.00445228		2856.2	-0.00501816
496.41	-0.05651748		1086.41	-0.06321253		1676.4	-0.03906364		2266.4	0.00376205		2856.4	-0.00406232
496.61	-0.05682305		1086.61	-0.06379291		1676.6	-0.03875839		2266.6	0.00383005		2856.6	-0.00423352
496.81	-0.05600549		1086.81	-0.06389324		1676.8	-0.03841852		2266.8	0.00421859		2856.8	-0.00394054
497.01	-0.05516109		1087.01	-0.06373296		1677	-0.03830524		2267	0.00371216		2857	-0.00440142
497.21	-0.0562229		1087.21	-0.06311973		1677.2	-0.03822635		2267.2	0.00366688		2857.2	-0.00419813
497.41	-0.05741555		1087.41	-0.06314248		1677.4	-0.03782582		2267.4	0.00436781		2857.4	-0.00415387
497.61	-0.05710694		1087.61	-0.0634394		1677.6	-0.03859003		2267.6	0.0036354		2857.6	-0.00426856
497.81	-0.05711163		1087.81	-0.06304017		1677.8	-0.03917442		2267.8	0.00365482		2857.8	-0.00420242
498.01	-0.05758766		1088.01	-0.06250308		1678	-0.03934271		2268	0.00376758		2858	-0.00511908
498.21	-0.05737741		1088.21	-0.06292688		1678.2	-0.03987992		2268.2	0.00384791		2858.2	-0.00625759
498.41	-0.05794628		1088.41	-0.06290316		1678.4	-0.04035784		2268.4	0.0033383		2858.4	-0.00585295
498.61	-0.05774364		1088.61	-0.06237401		1678.6	-0.04104703		2268.6	0.00232901		2858.6	-0.00652289
498.81	-0.05755718		1088.81	-0.06197669		1678.8	-0.04114594		2268.8	0.00285304		2858.8	-0.0060859
499.01	-0.05720684		1089.01	-0.06167078		1679	-0.04096147		2269	0.00274276		2859	-0.00608812
499.21	-0.05687446		1089.21	-0.06141203		1679.2	-0.04037081		2269.2	0.0026646		2859.2	-0.00553425
499.41	-0.05661823		1089.41	-0.0614097		1679.4	-0.03999547		2269.4	0.00301592		2859.4	-0.00519277
499.61	-0.05590014		1089.61	-0.06164395		1679.6	-0.03998642		2269.6	0.0024175		2859.6	-0.00483506
499.81	-0.05594222		1089.81	-0.06173409		1679.8	-0.04076495		2269.8	0.00321616		2859.8	-0.00562177
500.01	-0.05492697		1090.01	-0.06278812		1680	-0.0406275		2270	0.00449378		2860	-0.00507372
500.21	-0.05489315		1090.21	-0.063248		1680.2	-0.04127956		2270.2	0.00505052		2860.2	-0.00483972
500.41	-0.05461066		1090.41	-0.06345172		1680.4	-0.04115163		2270.4	0.0052544		2860.4	-0.00430141
500.61	-0.05455494		1090.61	-0.06346447		1680.6	-0.04198485		2270.6	0.00618864		2860.6	-0.00428598
500.81	-0.05473944		1090.81	-0.06336973		1680.8	-0.04279952		2270.8	0.00643297		2860.8	-0.00439786
501.01	-0.05449652		1091.01	-0.06291257		1681	-0.04333609		2271	0.00655207		2861	-0.00449387
501.21	-0.05538481		1091.21	-0.06215125		1681.2	-0.04427191		2271.2	0.00716107		2861.2	-0.00476524
501.41	-0.05486749		1091.41	-0.06186362		1681.4	-0.04500869		2271.4	0.00741324		2861.4	-0.00537486
501.61	-0.05455896		1091.61	-0.06102769		1681.6	-0.04523122		2271.6	0.00706085		2861.6	-0.006789
501.81	-0.05449292		1091.81	-0.06074022		1681.8	-0.04547131		2271.8	0.00654812		2861.8	-0.00743403
502.01	-0.05394657		1092.01	-0.06092138		1682	-0.04497307		2272	0.00618677		2862	-0.00766389
502.21	-0.05418929		1092.21	-0.06094346		1682.2	-0.04502447		2272.2	0.00596613		2862.2	-0.00793206
502.41	-0.0550163		1092.41	-0.06167219		1682.4	-0.04467346		2272.4	0.00557247		2862.4	-0.00775809
502.61	-0.05440081		1092.61	-0.06160839		1682.6	-0.04444726		2272.6	0.00454051		2862.6	-0.00852486
502.81	-0.05461448		1092.81	-0.06141012		1682.8	-0.04374303		2272.8	0.00435346		2862.8	-0.00802176
503.01	-0.05392256		1093.01	-0.06201147		1683	-0.04343269		2273	0.00406696		2863	-0.00839155
503.21	-0.05385866		1093.21	-0.06327208		1683.2	-0.04283199		2273.2	0.00416286		2863.2	-0.00747544
503.41	-0.05440321		1093.41	-0.0640512		1683.4	-0.04217813		2273.4	0.00463958		2863.4	-0.00734318
503.61	-0.05435862		1093.61	-0.06446065		1683.6	-0.04179177		2273.6	0.00414772		2863.6	-0.00682341
503.81	-0.05503301		1093.81	-0.06451724		1683.8	-0.04165646		2273.8	0.00509822		2863.8	-0.00623366
504.01	-0.05492643		1094.01	-0.06507433		1684	-0.04114423		2274	0.00562803		2864	-0.00499016
504.21	-0.05562457		1094.21	-0.06478199		1684.2	-0.04088049		2274.2	0.00566783		2864.2	-0.00345927
504.41	-0.05621757		1094.41	-0.06420003		1684.4	-0.04179034		2274.4	0.00649577		2864.4	-0.00228397
504.61	-0.05683822		1094.61	-0.06362129		1684.6	-0.04284394		2274.6	0.00628164		2864.6	-0.00096708
504.81	-0.05732402		1094.81	-0.06316501		1684.8	-0.0432124		2274.8	0.00547436		2864.8	-0.00045203
505.01	-0.05716295		1095.01	-0.06220533		1685	-0.04330112		2275	0.0053063		2865	0.00014625
505.21	-0.05740298		1095.21	-0.06191261		1685.2	-0.04375338		2275.2	0.00549637		2865.2	-0.0006377
505.41	-0.05600525		1095.41	-0.061454		1685.4	-0.04402734		2275.4	0.00519698		2865.4	-0.0007445
505.61	-0.0561668		1095.61	-0.06153695		1685.6	-0.04377733		2275.6	0.00411442		2865.6	-0.00154419
505.81	-0.05565558		1095.81	-0.06272782		1685.8	-0.04415301		2275.8	0.00278522		2865.8	-0.00147722
506.01	-0.05476209		1096.01	-0.06301663		1686	-0.04340351		2276	0.00279347		2866	-0.00208521
506.21	-0.05526765		1096.21	-0.06309417		1686.2	-0.0438081		2276.2	0.00281843		2866.2	-0.00227097
506.41	-0.05562397		1096.41	-0.06363177		1686.4	-0.04354508		2276.4	0.00297579		2866.4	-0.00370301
506.61	-0.05542163		1096.61	-0.06317908		1686.6	-0.04342035		2276.6	0.00246825		2866.6	-0.00507562
506.81	-0.0558821		1096.81	-0.06356213		1686.8	-0.04329805		2276.8	0.00324691		2866.8	-0.00686326
507.01	-0.05511326		1097.01	-0.06419793		1687	-0.04319192		2277	0.00446691		2867	-0.00800032
507.21	-0.05552324		1097.21	-0.0647146		1687.2	-0.04322903		2277.2	0.00490103		2867.2	-0.00792923
507.41	-0.05571944		1097.41	-0.06432396		1687.4	-0.04280631		2277.4	0.00507554		2867.4	-0.00867975
507.61	-0.05590708		1097.61	-0.06313678		1687.6	-0.04233671		2277.6	0.00533861		2867.6	-0.00871176
507.81	-0.05567229		1097.81	-0.06269362		1687.8	-0.04199466		2277.8	0.0050781		2867.8	-0.00854763
508.01	-0.05550282		1098.01	-0.06306233		1688	-0.0424764		2278	0.00413488		2868	-0.00806746
508.21	-0.05715434		1098.21	-0.06284022		1688.2	-0.04204861		2278.2	0.00423268		2868.2	-0.00712512
508.41	-0.05766204		1098.41	-0.06249062		1688.4	-0.04314399		2278.4	0.00397333		2868.4	-0.00707175
508.61	-0.05728982		1098.61	-0.06276688		1688.6	-0.04258597		2278.6	0.00368623		2868.6	-0.00582419
508.81	-0.05743171		1098.81	-0.06204041		1688.8	-0.04176301		2278.8	0.00334918		2868.8	-0.0057512
509.01	-0.05800731		1099.01	-0.06166701		1689	-0.04154672		2279	0.00365479		2869	-0.00527776
509.21	-0.05737961		1099.21	-0.06215607		1689.2	-0.04228984		2279.2	0.00406459		2869.2	-0.00550021
509.41	-0.05662895		1099.41	-0.0624201		1689.4	-0.04295204		2279.4	0.00368734		2869.4	-0.00528125
509.61	-0.05648313		1099.61	-0.06260892		1689.6	-0.04284858		2279.6	0.0033758		2869.6	-0.00510843
509.81	-0.05638967		1099.81	-0.06326873		1689.8	-0.04337077		2279.8	0.00295259		2869.8	-0.00485365
510.01	-0.05626507		1100.01	-0.06289678		1690	-0.04291618		2280	0.00390423		2870	-0.00428694
510.21	-0.05662311		1100.21	-0.06287573		1690.2	-0.04248939		2280.2	0.00413985		2870.2	-0.00422476
510.41	-0.05743143		1100.41	-0.06269467		1690.4	-0.04172045		2280.4	0.00485376		2870.4	-0.0046061
510.61	-0.0577497		1100.61	-0.06267834		1690.6	-0.04184346		2280.6	0.00564135		2870.6	-0.00506951
510.81	-0.05752254		1100.81	-0.06252796		1690.8	-0.04199417		2280.8	0.00708748		2870.8	-0.00569188
511.01	-0.05714231		1101.01	-0.06242608		1691	-0.04283838		2281	0.00766416		2871	-0.00504138
511.21	-0.0566508		1101.21	-0.06291663		1691.2	-0.04336215		2281.2	0.00718235		2871.2	-0.00472381
511.41	-0.05639247		1101.41	-0.06350866		1691.4	-0.04320877		2281.4	0.00717875		2871.4	-0.00539663
511.61	-0.05595738		1101.61	-0.0633242		1691.6	-0.04296672		2281.6	0.00699829		2871.6	-0.00492932
511.81	-0.05503353		1101.81	-0.06434094		1691.8	-0.04287446		2281.8	0.00649346		2871.8	-0.00475481
512.01	-0.055233		1102.01	-0.06463965		1692	-0.04359123		2282	0.00678592		2872	-0.00503649
512.21	-0.05529913		1102.21	-0.06433077		1692.2	-0.04329001		2282.2	0.00746237		2872.2	-0.00456472
512.41	-0.05510715		1102.41	-0.06427431		1692.4	-0.04339499		2282.4	0.00708439		2872.4	-0.00494348
512.61	-0.05538739		1102.61	-0.06419987		1692.6	-0.04293801		2282.6	0.00737162		2872.6	-0.004351
512.81	-0.05616603		1102.81	-0.0632457		1692.8	-0.04314371		2282.8	0.0070213		2872.8	-0.00502896
513.01	-0.0559905		1103.01	-0.06304203		1693	-0.04263914		2283	0.00690744		2873	-0.00582456
513.21	-0.05548677		1103.21	-0.06342422		1693.2	-0.04304159		2283.2	0.00660506		2873.2	-0.00677458
513.41	-0.05606801		1103.41	-0.06253994		1693.4	-0.04330574		2283.4	0.00582894		2873.4	-0.00706898
513.61	-0.05607575		1103.61	-0.0622174		1693.6	-0.04358008		2283.6	0.0056252		2873.6	-0.0062314
513.81	-0.05601411		1103.81	-0.0622543		1693.8	-0.04290147		2283.8	0.00526147		2873.8	-0.00535672
514.01	-0.05596323		1104.01	-0.06224049		1694	-0.04211273		2284	0.0049524		2874	-0.00505148
514.21	-0.05671369		1104.21	-0.06214638		1694.2	-0.04199939		2284.2	0.00453553		2874.2	-0.00477445
514.41	-0.05830699		1104.41	-0.06236409		1694.4	-0.04220425		2284.4	0.00489367		2874.4	-0.00392224
514.61	-0.05848244		1104.61	-0.06232778		1694.6	-0.04224413		2284.6	0.00514096		2874.6	-0.00388181
514.81	-0.05813181		1104.81	-0.06280451		1694.8	-0.04211936		2284.8	0.00538368		2874.8	-0.00315672
515.01	-0.05872553		1105.01	-0.06422539		1695	-0.04264081		2285	0.00539523		2875	-0.00279519
515.21	-0.05823924		1105.21	-0.06489819		1695.2	-0.04325096		2285.2	0.00520719		2875.2	-0.00281624
515.41	-0.05840374		1105.41	-0.06525216		1695.4	-0.04296378		2285.4	0.0050475		2875.4	-0.00329626
515.61	-0.05808736		1105.61	-0.06476857		1695.6	-0.04314141		2285.6	0.00579527		2875.6	-0.00312493
515.81	-0.05756533		1105.81	-0.06452093		1695.8	-0.04310425		2285.8	0.00622873		2875.8	-0.00374854
516.01	-0.05816932		1106.01	-0.06397967		1696	-0.04288122		2286	0.00631424		2876	-0.00381802
516.21	-0.05889515		1106.21	-0.06433307		1696.2	-0.04293981		2286.2	0.00625218		2876.2	-0.00408169
516.41	-0.05999635		1106.41	-0.06411244		1696.4	-0.04223008		2286.4	0.00585389		2876.4	-0.00527783
516.61	-0.05958121		1106.61	-0.06428697		1696.6	-0.04217523		2286.6	0.00580305		2876.6	-0.00623994
516.81	-0.05930218		1106.81	-0.0637037		1696.8	-0.04173394		2286.8	0.00551771		2876.8	-0.00770495
517.01	-0.05832143		1107.01	-0.06407505		1697	-0.04061354		2287	0.0050842		2877	-0.00796068
517.21	-0.05753422		1107.21	-0.06440265		1697.2	-0.04080569		2287.2	0.00479226		2877.2	-0.00863653
517.41	-0.0574467		1107.41	-0.06427624		1697.4	-0.04039467		2287.4	0.00423322		2877.4	-0.00884758
517.61	-0.05615884		1107.61	-0.06539864		1697.6	-0.04096865		2287.6	0.00506359		2877.6	-0.00838751
517.81	-0.05581608		1107.81	-0.06575298		1697.8	-0.04086918		2287.8	0.00510727		2877.8	-0.00811382
518.01	-0.05611153		1108.01	-0.06659032		1698	-0.04160161		2288	0.00440331		2878	-0.00861406
518.21	-0.05677923		1108.21	-0.06648682		1698.2	-0.04155809		2288.2	0.00411317		2878.2	-0.00769218
518.41	-0.05640773		1108.41	-0.06679108		1698.4	-0.04172621		2288.4	0.00431101		2878.4	-0.0067703
518.61	-0.05561073		1108.61	-0.06700296		1698.6	-0.04183102		2288.6	0.00357969		2878.6	-0.00611192
518.81	-0.05612915		1108.81	-0.06759843		1698.8	-0.0425731		2288.8	0.00334815		2878.8	-0.0054666
519.01	-0.05627961		1109.01	-0.06699616		1699	-0.04295559		2289	0.00276567		2879	-0.00518359
519.21	-0.05622361		1109.21	-0.06599418		1699.2	-0.0436865		2289.2	0.00222548		2879.2	-0.0039365
519.41	-0.05653869		1109.41	-0.06475417		1699.4	-0.04256115		2289.4	0.00259223		2879.4	-0.00387305
519.61	-0.05659864		1109.61	-0.06391194		1699.6	-0.04250048		2289.6	0.00367358		2879.6	-0.00347129
519.81	-0.05757176		1109.81	-0.06325817		1699.8	-0.04218704		2289.8	0.00335247		2879.8	-0.00328001
520.01	-0.05848236		1110.01	-0.06303821		1700	-0.0418231		2290	0.00322598		2880	-0.00310182
520.21	-0.05830729		1110.21	-0.06339692		1700.2	-0.04205963		2290.2	0.00327545		2880.2	-0.00436219
520.41	-0.05763912		1110.41	-0.06319543		1700.4	-0.04226967		2290.4	0.00317519		2880.4	-0.00462226
520.61	-0.05665087		1110.61	-0.06265183		1700.6	-0.04264983		2290.6	0.00332478		2880.6	-0.00521801
520.81	-0.05661913		1110.81	-0.06261036		1700.8	-0.04219904		2290.8	0.00361246		2880.8	-0.00550633
521.01	-0.05623809		1111.01	-0.06347996		1701	-0.04176534		2291	0.00427239		2881	-0.00612311
521.21	-0.05554293		1111.21	-0.06334669		1701.2	-0.04126512		2291.2	0.00578351		2881.2	-0.00764412
521.41	-0.0562686		1111.41	-0.0636368		1701.4	-0.04051152		2291.4	0.00584091		2881.4	-0.0076572
521.61	-0.05579807		1111.61	-0.06412133		1701.6	-0.04104013		2291.6	0.00688026		2881.6	-0.00806085
521.81	-0.05637702		1111.81	-0.063943		1701.8	-0.04172448		2291.8	0.00570458		2881.8	-0.00899289
522.01	-0.05616086		1112.01	-0.06474389		1702	-0.04185391		2292	0.00521175		2882	-0.00873218
522.21	-0.05586473		1112.21	-0.06470502		1702.2	-0.04181983		2292.2	0.00496026		2882.2	-0.00802282
522.41	-0.0563849		1112.41	-0.06538417		1702.4	-0.04273879		2292.4	0.00427554		2882.4	-0.00855768
522.61	-0.05695932		1112.61	-0.06452948		1702.6	-0.04310487		2292.6	0.0034995		2882.6	-0.00868393
522.81	-0.05747925		1112.81	-0.0648404		1702.8	-0.04328997		2292.8	0.00388477		2882.8	-0.0083909
523.01	-0.05713681		1113.01	-0.06450434		1703	-0.04306314		2293	0.00321072		2883	-0.00844782
523.21	-0.05768676		1113.21	-0.06440901		1703.2	-0.04361338		2293.2	0.0028484		2883.2	-0.0082875
523.41	-0.05807266		1113.41	-0.06366917		1703.4	-0.04354114		2293.4	0.00283962		2883.4	-0.00867742
523.61	-0.05831		1113.61	-0.06340187		1703.6	-0.04424332		2293.6	0.00323397		2883.6	-0.00912585
523.81	-0.05883475		1113.81	-0.0626838		1703.8	-0.04468547		2293.8	0.00289714		2883.8	-0.0093617
524.01	-0.05844751		1114.01	-0.06232334		1704	-0.04495215		2294	0.00299843		2884	-0.00992118
524.21	-0.05736261		1114.21	-0.06201971		1704.2	-0.0459952		2294.2	0.00295151		2884.2	-0.01031964
524.41	-0.05734534		1114.41	-0.06192335		1704.4	-0.04651506		2294.4	0.00295223		2884.4	-0.01000119
524.61	-0.05763593		1114.61	-0.06130932		1704.6	-0.04681489		2294.6	0.00364383		2884.6	-0.01003323
524.81	-0.05768005		1114.81	-0.06137849		1704.8	-0.04675062		2294.8	0.00420231		2884.8	-0.01020687
525.01	-0.05785135		1115.01	-0.06145745		1705	-0.04669302		2295	0.004728		2885	-0.00987964
525.21	-0.05840034		1115.21	-0.06123397		1705.2	-0.04568038		2295.2	0.00525754		2885.2	-0.00858761
525.41	-0.05835481		1115.41	-0.06160263		1705.4	-0.04561406		2295.4	0.00445183		2885.4	-0.00748571
525.61	-0.0580407		1115.61	-0.06174169		1705.6	-0.04521054		2295.6	0.0047747		2885.6	-0.00806576
525.81	-0.05761551		1115.81	-0.06220899		1705.8	-0.0454238		2295.8	0.00429323		2885.8	-0.00841408
526.01	-0.05749365		1116.01	-0.06281911		1706	-0.04496907		2296	0.00497729		2886	-0.00859077
526.21	-0.05790802		1116.21	-0.06265189		1706.2	-0.04465444		2296.2	0.00507058		2886.2	-0.00939886
526.41	-0.05898689		1116.41	-0.0624712		1706.4	-0.04461641		2296.4	0.00563737		2886.4	-0.01065843
526.61	-0.05926764		1116.61	-0.062243		1706.6	-0.04370891		2296.6	0.00657961		2886.6	-0.01011232
526.81	-0.05953023		1116.81	-0.06260521		1706.8	-0.04248084		2296.8	0.00660556		2886.8	-0.00901267
527.01	-0.05970264		1117.01	-0.06310668		1707	-0.04232012		2297	0.00627163		2887	-0.00957493
527.21	-0.05995595		1117.21	-0.062302		1707.2	-0.04216051		2297.2	0.0055929		2887.2	-0.00868007
527.41	-0.05963062		1117.41	-0.06226387		1707.4	-0.04223687		2297.4	0.00678942		2887.4	-0.00901022
527.61	-0.05892613		1117.61	-0.06237172		1707.6	-0.04149295		2297.6	0.00759875		2887.6	-0.00972506
527.81	-0.05877994		1117.81	-0.06303096		1707.8	-0.04103564		2297.8	0.00809061		2887.8	-0.00897619
528.01	-0.05853908		1118.01	-0.06411933		1708	-0.04068771		2298	0.00832825		2888	-0.00882197
528.21	-0.05823491		1118.21	-0.06443612		1708.2	-0.0407118		2298.2	0.00811687		2888.2	-0.00765758
528.41	-0.05863638		1118.41	-0.0646305		1708.4	-0.04048201		2298.4	0.00780954		2888.4	-0.0069757
528.61	-0.05885822		1118.61	-0.06483699		1708.6	-0.04123435		2298.6	0.00840132		2888.6	-0.00524856
528.81	-0.05897967		1118.81	-0.06559939		1708.8	-0.04210615		2298.8	0.00807887		2888.8	-0.00459854
529.01	-0.05980372		1119.01	-0.06601523		1709	-0.04273201		2299	0.00774345		2889	-0.00332909
529.21	-0.05966715		1119.21	-0.06581664		1709.2	-0.04183862		2299.2	0.00742911		2889.2	-0.00293129
529.41	-0.05817322		1119.41	-0.06600353		1709.4	-0.04218751		2299.4	0.00669239		2889.4	-0.00273435
529.61	-0.05727224		1119.61	-0.06595108		1709.6	-0.04166359		2299.6	0.00625123		2889.6	-0.00328145
529.81	-0.05663295		1119.81	-0.06563165		1709.8	-0.04261592		2299.8	0.0047665		2889.8	-0.00355573
530.01	-0.05729595		1120.01	-0.0651192		1710	-0.04370704		2300	0.0038937		2890	-0.00442152
530.21	-0.05746842		1120.21	-0.0652207		1710.2	-0.04365431		2300.2	0.00340184		2890.2	-0.00502513
530.41	-0.05815916		1120.41	-0.06553172		1710.4	-0.04335441		2300.4	0.00294801		2890.4	-0.00517822
530.61	-0.05830663		1120.61	-0.0656772		1710.6	-0.04416913		2300.6	0.00194841		2890.6	-0.00444509
530.81	-0.0577009		1120.81	-0.06521403		1710.8	-0.04405326		2300.8	0.00190962		2890.8	-0.00373768
531.01	-0.05734005		1121.01	-0.06507952		1711	-0.04524206		2301	0.00221226		2891	-0.00471521
531.21	-0.05721534		1121.21	-0.0642073		1711.2	-0.04603367		2301.2	0.0018444		2891.2	-0.00514118
531.41	-0.05617136		1121.41	-0.06525993		1711.4	-0.04643605		2301.4	0.0026773		2891.4	-0.00691746
531.61	-0.05503234		1121.61	-0.06536735		1711.6	-0.04523713		2301.6	0.00306479		2891.6	-0.00739175
531.81	-0.05577693		1121.81	-0.06593255		1711.8	-0.04577941		2301.8	0.00299367		2891.8	-0.00723868
532.01	-0.05612387		1122.01	-0.06540363		1712	-0.04570549		2302	0.00332172		2892	-0.00809948
532.21	-0.05625438		1122.21	-0.06587337		1712.2	-0.04586666		2302.2	0.00368841		2892.2	-0.00821663
532.41	-0.05591631		1122.41	-0.0658809		1712.4	-0.04645985		2302.4	0.00414507		2892.4	-0.00915029
532.61	-0.05651316		1122.61	-0.06612721		1712.6	-0.04655343		2302.6	0.00539464		2892.6	-0.00821014
532.81	-0.0577269		1122.81	-0.06669388		1712.8	-0.04612273		2302.8	0.00501973		2892.8	-0.00883802
533.01	-0.05846836		1123.01	-0.06597649		1713	-0.04550967		2303	0.00560899		2893	-0.00809035
533.21	-0.05713092		1123.21	-0.0653727		1713.2	-0.04446436		2303.2	0.00601867		2893.2	-0.00781948
533.41	-0.05732504		1123.41	-0.06510853		1713.4	-0.04463879		2303.4	0.00597205		2893.4	-0.00757631
533.61	-0.05760006		1123.61	-0.06522978		1713.6	-0.04463644		2303.6	0.00581921		2893.6	-0.00743054
533.81	-0.05877289		1123.81	-0.06484041		1713.8	-0.04472248		2303.8	0.00508426		2893.8	-0.00749233
534.01	-0.05977023		1124.01	-0.06516911		1714	-0.0440425		2304	0.00519891		2894	-0.00751309
534.21	-0.06093617		1124.21	-0.06497509		1714.2	-0.04346972		2304.2	0.00490601		2894.2	-0.00748375
534.41	-0.06063505		1124.41	-0.06499045		1714.4	-0.04345338		2304.4	0.00362643		2894.4	-0.00667926
534.61	-0.06084545		1124.61	-0.06385611		1714.6	-0.04376078		2304.6	0.00368934		2894.6	-0.00640183
534.81	-0.06026808		1124.81	-0.06313883		1714.8	-0.04245926		2304.8	0.00369333		2894.8	-0.0052749
535.01	-0.06067836		1125.01	-0.06166428		1715	-0.04253993		2305	0.00321385		2895	-0.00561772
535.21	-0.06026597		1125.21	-0.0615018		1715.2	-0.04271651		2305.2	0.00275755		2895.2	-0.00620768
535.41	-0.06010577		1125.41	-0.06208427		1715.4	-0.04224602		2305.4	0.00188264		2895.4	-0.00634433
535.61	-0.05979114		1125.61	-0.06246015		1715.6	-0.04238294		2305.6	0.00132823		2895.6	-0.00625632
535.81	-0.06002735		1125.81	-0.06339074		1715.8	-0.04325509		2305.8	0.0012986		2895.8	-0.00590367
536.01	-0.05986397		1126.01	-0.06347117		1716	-0.04362781		2306	0.00158981		2896	-0.00576502
536.21	-0.05933285		1126.21	-0.06502416		1716.2	-0.04340318		2306.2	0.00175675		2896.2	-0.00583129
536.41	-0.05994495		1126.41	-0.06397112		1716.4	-0.0431786		2306.4	0.00189039		2896.4	-0.00603488
536.61	-0.06159034		1126.61	-0.06420014		1716.6	-0.04217574		2306.6	0.00257206		2896.6	-0.00624891
536.81	-0.06150061		1126.81	-0.06460317		1716.8	-0.04232864		2306.8	0.00260663		2896.8	-0.00671041
537.01	-0.06075269		1127.01	-0.06459393		1717	-0.04279362		2307	0.00369927		2897	-0.00650614
537.21	-0.05964195		1127.21	-0.06475072		1717.2	-0.04334182		2307.2	0.00417751		2897.2	-0.00750285
537.41	-0.06060971		1127.41	-0.06496662		1717.4	-0.04412948		2307.4	0.00448478		2897.4	-0.00835588
537.61	-0.0597794		1127.61	-0.0658992		1717.6	-0.04449743		2307.6	0.00475838		2897.6	-0.0081963
537.81	-0.05984013		1127.81	-0.06589045		1717.8	-0.04457826		2307.8	0.00487221		2897.8	-0.00851067
538.01	-0.05955641		1128.01	-0.06561621		1718	-0.04481392		2308	0.0048876		2898	-0.00915351
538.21	-0.05912709		1128.21	-0.06508558		1718.2	-0.04609902		2308.2	0.00361238		2898.2	-0.00955274
538.41	-0.05744284		1128.41	-0.06468593		1718.4	-0.04565998		2308.4	0.00331858		2898.4	-0.00876637
538.61	-0.05800841		1128.61	-0.06339218		1718.6	-0.04501255		2308.6	0.00315862		2898.6	-0.00859322
538.81	-0.05680066		1128.81	-0.06335758		1718.8	-0.04520558		2308.8	0.00176764		2898.8	-0.00859513
539.01	-0.05651076		1129.01	-0.06317306		1719	-0.04559608		2309	0.00178447		2899	-0.00908
539.21	-0.05616588		1129.21	-0.06396026		1719.2	-0.04579055		2309.2	0.00160299		2899.2	-0.00902254
539.41	-0.05588425		1129.41	-0.06456044		1719.4	-0.04540284		2309.4	0.00130562		2899.4	-0.008386
539.61	-0.0557646		1129.61	-0.06491394		1719.6	-0.0460546		2309.6	0.00122557		2899.6	-0.00824632
539.81	-0.05653606		1129.81	-0.06501317		1719.8	-0.04560802		2309.8	0.00152753		2899.8	-0.0073011
540.01	-0.05744635		1130.01	-0.06440408		1720	-0.04523582		2310	0.00139177		2900	-0.00670671
540.21	-0.05736115		1130.21	-0.064194		1720.2	-0.04354331		2310.2	0.00170601		2900.2	-0.00675936
540.41	-0.05819887		1130.41	-0.06299831		1720.4	-0.04285672		2310.4	0.00143728		2900.4	-0.00695994
540.61	-0.05838727		1130.61	-0.06210173		1720.6	-0.04141193		2310.6	0.00126801		2900.6	-0.00739934
540.81	-0.05860494		1130.81	-0.06208523		1720.8	-0.04162633		2310.8	0.00185485		2900.8	-0.00684929
541.01	-0.05841921		1131.01	-0.06222438		1721	-0.04125708		2311	0.00237817		2901	-0.00672596
541.21	-0.05878877		1131.21	-0.06214998		1721.2	-0.0409861		2311.2	0.00311799		2901.2	-0.0074339
541.41	-0.05817556		1131.41	-0.06258716		1721.4	-0.04099663		2311.4	0.00342197		2901.4	-0.00660852
541.61	-0.05751387		1131.61	-0.06332941		1721.6	-0.04053574		2311.6	0.00354758		2901.6	-0.00656954
541.81	-0.05737955		1131.81	-0.0630382		1721.8	-0.04039249		2311.8	0.00383333		2901.8	-0.00693441
542.01	-0.05768301		1132.01	-0.06298811		1722	-0.04068055		2312	0.0042978		2902	-0.00816696
542.21	-0.05791397		1132.21	-0.06300363		1722.2	-0.04201948		2312.2	0.00302798		2902.2	-0.00818478
542.41	-0.05787831		1132.41	-0.06255019		1722.4	-0.04116112		2312.4	0.00390916		2902.4	-0.00813553
542.61	-0.05897955		1132.61	-0.06314423		1722.6	-0.04161643		2312.6	0.00357499		2902.6	-0.00869681
542.81	-0.05844282		1132.81	-0.0640298		1722.8	-0.04239168		2312.8	0.00310475		2902.8	-0.00938013
543.01	-0.05855106		1133.01	-0.06451973		1723	-0.04289919		2313	0.00348047		2903	-0.0093642
543.21	-0.05846677		1133.21	-0.06499125		1723.2	-0.0430391		2313.2	0.0038044		2903.2	-0.00902561
543.41	-0.05829879		1133.41	-0.06589455		1723.4	-0.04325341		2313.4	0.003969		2903.4	-0.0085361
543.61	-0.05939633		1133.61	-0.06669622		1723.6	-0.04386644		2313.6	0.00348049		2903.6	-0.00756009
543.81	-0.05935542		1133.81	-0.06725049		1723.8	-0.04392986		2313.8	0.00272375		2903.8	-0.00691529
544.01	-0.05909836		1134.01	-0.06682109		1724	-0.04415058		2314	0.00279601		2904	-0.00609418
544.21	-0.05853928		1134.21	-0.06673607		1724.2	-0.0440336		2314.2	0.00317292		2904.2	-0.00589107
544.41	-0.05868612		1134.41	-0.0672915		1724.4	-0.04439292		2314.4	0.00297875		2904.4	-0.00569533
544.61	-0.05950014		1134.61	-0.06708353		1724.6	-0.04366828		2314.6	0.00333948		2904.6	-0.00546417
544.81	-0.06012452		1134.81	-0.06847526		1724.8	-0.0436515		2314.8	0.00438977		2904.8	-0.00568047
545.01	-0.05957398		1135.01	-0.06917024		1725	-0.04257711		2315	0.00495733		2905	-0.00600456
545.21	-0.0595779		1135.21	-0.06951931		1725.2	-0.0426119		2315.2	0.00528673		2905.2	-0.00633468
545.41	-0.05953481		1135.41	-0.06954417		1725.4	-0.04211229		2315.4	0.00529178		2905.4	-0.00645975
545.61	-0.06023585		1135.61	-0.06985505		1725.6	-0.04157472		2315.6	0.00502115		2905.6	-0.00709164
545.81	-0.06044976		1135.81	-0.06938616		1725.8	-0.04137802		2315.8	0.00484075		2905.8	-0.00740114
546.01	-0.06155828		1136.01	-0.0695467		1726	-0.0409544		2316	0.00477424		2906	-0.00832977
546.21	-0.06222121		1136.21	-0.06920941		1726.2	-0.04129144		2316.2	0.00429924		2906.2	-0.00834805
546.41	-0.06279451		1136.41	-0.06859347		1726.4	-0.04041159		2316.4	0.00471532		2906.4	-0.00821902
546.61	-0.0632979		1136.61	-0.0680941		1726.6	-0.04111066		2316.6	0.00393245		2906.6	-0.0076278
546.81	-0.06318943		1136.81	-0.06768818		1726.8	-0.04106174		2316.8	0.00367574		2906.8	-0.00781147
547.01	-0.06338904		1137.01	-0.06757557		1727	-0.04135305		2317	0.00391052		2907	-0.00771937
547.21	-0.06334586		1137.21	-0.06688054		1727.2	-0.04114275		2317.2	0.0041818		2907.2	-0.00710537
547.41	-0.06335191		1137.41	-0.06733593		1727.4	-0.04108196		2317.4	0.00404698		2907.4	-0.00678864
547.61	-0.06400312		1137.61	-0.06667832		1727.6	-0.04179855		2317.6	0.00388367		2907.6	-0.00728481
547.81	-0.06344006		1137.81	-0.06563289		1727.8	-0.04241253		2317.8	0.0034164		2907.8	-0.00798592
548.01	-0.06375369		1138.01	-0.06525069		1728	-0.04237886		2318	0.00433738		2908	-0.00776334
548.21	-0.06302373		1138.21	-0.06512537		1728.2	-0.04272858		2318.2	0.00487302		2908.2	-0.00824929
548.41	-0.06285361		1138.41	-0.06537228		1728.4	-0.04243174		2318.4	0.00424852		2908.4	-0.00833671
548.61	-0.06169201		1138.61	-0.06545445		1728.6	-0.04213944		2318.6	0.00493937		2908.6	-0.00986627
548.81	-0.06058235		1138.81	-0.06619527		1728.8	-0.04268001		2318.8	0.00554083		2908.8	-0.01052462
549.01	-0.05996145		1139.01	-0.06585284		1729	-0.04313333		2319	0.00488739		2909	-0.01127672
549.21	-0.05982546		1139.21	-0.06549644		1729.2	-0.04371981		2319.2	0.00436258		2909.2	-0.01155174
549.41	-0.06017899		1139.41	-0.06480582		1729.4	-0.04367723		2319.4	0.00308905		2909.4	-0.01181701
549.61	-0.05950569		1139.61	-0.06484144		1729.6	-0.04398782		2319.6	0.00276229		2909.6	-0.01099406
549.81	-0.05941919		1139.81	-0.06422057		1729.8	-0.04442137		2319.8	0.0021964		2909.8	-0.01128353
550.01	-0.05898679		1140.01	-0.06442083		1730	-0.04484081		2320	0.00274522		2910	-0.01089633
550.21	-0.0581866		1140.21	-0.06385699		1730.2	-0.04556646		2320.2	0.00286944		2910.2	-0.01010568
550.41	-0.05758708		1140.41	-0.06440986		1730.4	-0.04619292		2320.4	0.00224021		2910.4	-0.01013046
550.61	-0.05698062		1140.61	-0.06458603		1730.6	-0.04670184		2320.6	0.00228478		2910.6	-0.01005951
550.81	-0.05755729		1140.81	-0.06529459		1730.8	-0.04626301		2320.8	0.00272876		2910.8	-0.0101568
551.01	-0.05773792		1141.01	-0.06530956		1731	-0.04661593		2321	0.0028953		2911	-0.01030599
551.21	-0.05754234		1141.21	-0.06507822		1731.2	-0.04596579		2321.2	0.002846		2911.2	-0.01022652
551.41	-0.05739076		1141.41	-0.06526933		1731.4	-0.04629683		2321.4	0.00262455		2911.4	-0.01062578
551.61	-0.05812206		1141.61	-0.06441865		1731.6	-0.04684675		2321.6	0.00258881		2911.6	-0.01075721
551.81	-0.05815922		1141.81	-0.06396104		1731.8	-0.04614558		2321.8	0.00262035		2911.8	-0.0097965
552.01	-0.05873034		1142.01	-0.06414678		1732	-0.04555657		2322	0.00298247		2912	-0.00987384
552.21	-0.05878082		1142.21	-0.06392014		1732.2	-0.04501059		2322.2	0.00352551		2912.2	-0.01019075
552.41	-0.05881666		1142.41	-0.0633475		1732.4	-0.04396942		2322.4	0.00368456		2912.4	-0.0100998
552.61	-0.05894732		1142.61	-0.06400855		1732.6	-0.04365066		2322.6	0.00433166		2912.6	-0.01130026
552.81	-0.06001993		1142.81	-0.06477232		1732.8	-0.04303483		2322.8	0.00459723		2912.8	-0.01045908
553.01	-0.06102802		1143.01	-0.06494884		1733	-0.042437		2323	0.00375602		2913	-0.01064422
553.21	-0.06179093		1143.21	-0.0654162		1733.2	-0.04223429		2323.2	0.00388659		2913.2	-0.01033961
553.41	-0.06230578		1143.41	-0.06507055		1733.4	-0.04169131		2323.4	0.00319199		2913.4	-0.00929457
553.61	-0.06256031		1143.61	-0.06546952		1733.6	-0.04149978		2323.6	0.00407978		2913.6	-0.00849493
553.81	-0.06211492		1143.81	-0.06584902		1733.8	-0.04158453		2323.8	0.00381596		2913.8	-0.00875956
554.01	-0.06128422		1144.01	-0.06658372		1734	-0.04178084		2324	0.00501544		2914	-0.00810678
554.21	-0.06054042		1144.21	-0.06677908		1734.2	-0.04190119		2324.2	0.00505684		2914.2	-0.00753893
554.41	-0.06012044		1144.41	-0.06800561		1734.4	-0.042534		2324.4	0.00486116		2914.4	-0.00828083
554.61	-0.05989812		1144.61	-0.06809394		1734.6	-0.04200694		2324.6	0.00499587		2914.6	-0.00782414
554.81	-0.05965773		1144.81	-0.06806498		1734.8	-0.04224591		2324.8	0.00511971		2914.8	-0.00747556
555.01	-0.05948262		1145.01	-0.06795014		1735	-0.0431235		2325	0.00421431		2915	-0.00739054
555.21	-0.05843708		1145.21	-0.06799014		1735.2	-0.04396402		2325.2	0.00387323		2915.2	-0.00744054
555.41	-0.05837412		1145.41	-0.06776792		1735.4	-0.04458079		2325.4	0.00365351		2915.4	-0.00744264
555.61	-0.05889857		1145.61	-0.06694848		1735.6	-0.04477256		2325.6	0.00418743		2915.6	-0.0073734
555.81	-0.05918178		1145.81	-0.06652306		1735.8	-0.04375946		2325.8	0.00463208		2915.8	-0.00755839
556.01	-0.05936618		1146.01	-0.06571243		1736	-0.04353008		2326	0.00525123		2916	-0.00827613
556.21	-0.05911214		1146.21	-0.06472505		1736.2	-0.04288206		2326.2	0.00549791		2916.2	-0.007933
556.41	-0.05882663		1146.41	-0.06458328		1736.4	-0.0429396		2326.4	0.00556279		2916.4	-0.00759315
556.61	-0.05963391		1146.61	-0.06551207		1736.6	-0.04301606		2326.6	0.00553411		2916.6	-0.00752481
556.81	-0.05977026		1146.81	-0.06626765		1736.8	-0.04257054		2326.8	0.00561614		2916.8	-0.00762997
557.01	-0.05975771		1147.01	-0.06621499		1737	-0.04326078		2327	0.00493407		2917	-0.0072785
557.21	-0.05983298		1147.21	-0.06638499		1737.2	-0.04315356		2327.2	0.00489912		2917.2	-0.00702264
557.41	-0.05979255		1147.41	-0.06609718		1737.4	-0.04315224		2327.4	0.00422262		2917.4	-0.00618761
557.61	-0.06010203		1147.61	-0.0665447		1737.6	-0.04371145		2327.6	0.00414866		2917.6	-0.00659352
557.81	-0.05948601		1147.81	-0.06732389		1737.8	-0.04376353		2327.8	0.00350131		2917.8	-0.00725164
558.01	-0.05970084		1148.01	-0.06724032		1738	-0.04404275		2328	0.00380778		2918	-0.00703743
558.21	-0.05901031		1148.21	-0.06734416		1738.2	-0.04442036		2328.2	0.00318072		2918.2	-0.00628834
558.41	-0.05845234		1148.41	-0.06828545		1738.4	-0.04495349		2328.4	0.00277151		2918.4	-0.00648932
558.61	-0.0576597		1148.61	-0.06831198		1738.6	-0.04510697		2328.6	0.00292081		2918.6	-0.00558446
558.81	-0.0572576		1148.81	-0.06809729		1738.8	-0.04544648		2328.8	0.00350126		2918.8	-0.00541162
559.01	-0.05784396		1149.01	-0.06790918		1739	-0.0465932		2329	0.00373634		2919	-0.00565286
559.21	-0.05748486		1149.21	-0.06738732		1739.2	-0.04697257		2329.2	0.00434108		2919.2	-0.00603945
559.41	-0.05771961		1149.41	-0.06622039		1739.4	-0.04682905		2329.4	0.00497246		2919.4	-0.00629033
559.61	-0.05821484		1149.61	-0.06494925		1739.6	-0.04708139		2329.6	0.00513327		2919.6	-0.00587023
559.81	-0.05781736		1149.81	-0.06406436		1739.8	-0.04677718		2329.8	0.00538083		2919.8	-0.00576675
560.01	-0.05818025		1150.01	-0.06311337		1740	-0.04719901		2330	0.00598599		2920	-0.00636515
560.21	-0.05783125		1150.21	-0.06247275		1740.2	-0.04700359		2330.2	0.00653024		2920.2	-0.00585377
560.41	-0.05871628		1150.41	-0.0631715		1740.4	-0.0469934		2330.4	0.00714863		2920.4	-0.00548832
560.61	-0.05877017		1150.61	-0.06388198		1740.6	-0.0470094		2330.6	0.0075826		2920.6	-0.00494315
560.81	-0.05847345		1150.81	-0.06376026		1740.8	-0.04688492		2330.8	0.00760919		2920.8	-0.00547321
561.01	-0.05812358		1151.01	-0.0638163		1741	-0.04730184		2331	0.00746585		2921	-0.00518063
561.21	-0.0583389		1151.21	-0.06470005		1741.2	-0.04668434		2331.2	0.00728397		2921.2	-0.0056513
561.41	-0.0580198		1151.41	-0.06517154		1741.4	-0.04635846		2331.4	0.00636592		2921.4	-0.00569984
561.61	-0.05892872		1151.61	-0.06573638		1741.6	-0.0453778		2331.6	0.00576422		2921.6	-0.00609734
561.81	-0.05890428		1151.81	-0.06637982		1741.8	-0.04506042		2331.8	0.00453548		2921.8	-0.00712495
562.01	-0.05885064		1152.01	-0.06679656		1742	-0.04485375		2332	0.00444656		2922	-0.00670643
562.21	-0.05832343		1152.21	-0.06745605		1742.2	-0.04462743		2332.2	0.0040182		2922.2	-0.00660909
562.41	-0.05798023		1152.41	-0.06838527		1742.4	-0.04495631		2332.4	0.00313553		2922.4	-0.00753348
562.61	-0.05782219		1152.61	-0.06845082		1742.6	-0.04453526		2332.6	0.00319302		2922.6	-0.00717162
562.81	-0.05896263		1152.81	-0.06907498		1742.8	-0.04454271		2332.8	0.00313939		2922.8	-0.00740402
563.01	-0.05986441		1153.01	-0.06892483		1743	-0.04471265		2333	0.00310971		2923	-0.00728628
563.21	-0.05975163		1153.21	-0.06911856		1743.2	-0.04399986		2333.2	0.00283797		2923.2	-0.00770121
563.41	-0.06062457		1153.41	-0.06880416		1743.4	-0.04432162		2333.4	0.00258114		2923.4	-0.00700701
563.61	-0.06123208		1153.61	-0.06864327		1743.6	-0.0449125		2333.6	0.00155918		2923.6	-0.00722037
563.81	-0.06163524		1153.81	-0.06790624		1743.8	-0.04502763		2333.8	0.00212605		2923.8	-0.00803332
564.01	-0.06285388		1154.01	-0.06723319		1744	-0.04501987		2334	0.00251101		2924	-0.00861152
564.21	-0.06315304		1154.21	-0.06732566		1744.2	-0.0453357		2334.2	0.00313307		2924.2	-0.00720998
564.41	-0.06388984		1154.41	-0.06726732		1744.4	-0.04565033		2334.4	0.00328566		2924.4	-0.00661546
564.61	-0.06330767		1154.61	-0.06720561		1744.6	-0.04652963		2334.6	0.00350916		2924.6	-0.00681326
564.81	-0.06286705		1154.81	-0.06605045		1744.8	-0.04650798		2334.8	0.00275512		2924.8	-0.00723308
565.01	-0.0623853		1155.01	-0.06633861		1745	-0.04556221		2335	0.00281574		2925	-0.00700176
565.21	-0.06209582		1155.21	-0.06665426		1745.2	-0.04465657		2335.2	0.0031946		2925.2	-0.00767787
565.41	-0.06183477		1155.41	-0.0660686		1745.4	-0.04467452		2335.4	0.00411245		2925.4	-0.0076788
565.61	-0.06179307		1155.61	-0.0652818		1745.6	-0.04509515		2335.6	0.00490678		2925.6	-0.0078582
565.81	-0.0613386		1155.81	-0.06435488		1745.8	-0.04562433		2335.8	0.00411852		2925.8	-0.00858111
566.01	-0.06104634		1156.01	-0.06367201		1746	-0.04528943		2336	0.00398735		2926	-0.00811623
566.21	-0.06075748		1156.21	-0.06409113		1746.2	-0.04465895		2336.2	0.00379827		2926.2	-0.00946986
566.41	-0.06046788		1156.41	-0.06539367		1746.4	-0.04507723		2336.4	0.0032076		2926.4	-0.00983494
566.61	-0.05950658		1156.61	-0.06586504		1746.6	-0.04447595		2336.6	0.00403151		2926.6	-0.00936095
566.81	-0.0590191		1156.81	-0.06579112		1746.8	-0.04348483		2336.8	0.00432301		2926.8	-0.00875039
567.01	-0.05867374		1157.01	-0.06513137		1747	-0.04293146		2337	0.00497276		2927	-0.00890975
567.21	-0.05828505		1157.21	-0.06541209		1747.2	-0.04322683		2337.2	0.0050999		2927.2	-0.00902575
567.41	-0.05899265		1157.41	-0.06526539		1747.4	-0.04335524		2337.4	0.00506055		2927.4	-0.00844066
567.61	-0.05844646		1157.61	-0.06433514		1747.6	-0.04381725		2337.6	0.00487417		2927.6	-0.00903482
567.81	-0.05928106		1157.81	-0.06459824		1747.8	-0.04438733		2337.8	0.00488564		2927.8	-0.00817723
568.01	-0.05810487		1158.01	-0.0650491		1748	-0.04483007		2338	0.00445208		2928	-0.00707477
568.21	-0.05880825		1158.21	-0.06568144		1748.2	-0.04495049		2338.2	0.0042619		2928.2	-0.00725099
568.41	-0.05909309		1158.41	-0.06652977		1748.4	-0.04434575		2338.4	0.00454111		2928.4	-0.0081953
568.61	-0.05882821		1158.61	-0.06784971		1748.6	-0.04472612		2338.6	0.00369935		2928.6	-0.00885354
568.81	-0.05884685		1158.81	-0.068198		1748.8	-0.04367708		2338.8	0.00316928		2928.8	-0.00891201
569.01	-0.05805068		1159.01	-0.06914072		1749	-0.04365137		2339	0.00396448		2929	-0.00895426
569.21	-0.0587929		1159.21	-0.06990574		1749.2	-0.04333778		2339.2	0.00486392		2929.2	-0.00979414
569.41	-0.05923843		1159.41	-0.06969723		1749.4	-0.04336551		2339.4	0.0056434		2929.4	-0.0089862
569.61	-0.05876881		1159.61	-0.0692285		1749.6	-0.04398547		2339.6	0.00459458		2929.6	-0.0087791
569.81	-0.05913509		1159.81	-0.06892086		1749.8	-0.04399988		2339.8	0.00371131		2929.8	-0.0089727
570.01	-0.05946827		1160.01	-0.06938825		1750	-0.04405337		2340	0.00363541		2930	-0.00883312
570.21	-0.05936629		1160.21	-0.06987047		1750.2	-0.04409944		2340.2	0.00379956		2930.2	-0.00954117
570.41	-0.05859446		1160.41	-0.06964438		1750.4	-0.04431931		2340.4	0.00401717		2930.4	-0.00904321
570.61	-0.05815124		1160.61	-0.0692962		1750.6	-0.04326671		2340.6	0.00324741		2930.6	-0.00918388
570.81	-0.05881805		1160.81	-0.068334		1750.8	-0.04321686		2340.8	0.00354362		2930.8	-0.0086212
571.01	-0.05952633		1161.01	-0.06741699		1751	-0.04403795		2341	0.0035389		2931	-0.00899674
571.21	-0.05936497		1161.21	-0.06768179		1751.2	-0.04419364		2341.2	0.00409606		2931.2	-0.00879611
571.41	-0.05973923		1161.41	-0.06755675		1751.4	-0.04358051		2341.4	0.00361275		2931.4	-0.00854973
571.61	-0.05901618		1161.61	-0.06693938		1751.6	-0.04443355		2341.6	0.00315311		2931.6	-0.00791419
571.81	-0.0590903		1161.81	-0.06737938		1751.8	-0.04506986		2341.8	0.0028548		2931.8	-0.00791242
572.01	-0.05810258		1162.01	-0.06723614		1752	-0.04515171		2342	0.00304508		2932	-0.00882292
572.21	-0.05919775		1162.21	-0.06675979		1752.2	-0.0444906		2342.2	0.00297884		2932.2	-0.01004885
572.41	-0.05923706		1162.41	-0.06764732		1752.4	-0.04431815		2342.4	0.00326236		2932.4	-0.01054988
572.61	-0.05968531		1162.61	-0.06682971		1752.6	-0.04420115		2342.6	0.00288481		2932.6	-0.01098282
572.81	-0.06011592		1162.81	-0.06667636		1752.8	-0.04388386		2342.8	0.00298855		2932.8	-0.01097212
573.01	-0.06020786		1163.01	-0.06641307		1753	-0.04401061		2343	0.0040036		2933	-0.01087294
573.21	-0.06071468		1163.21	-0.06610295		1753.2	-0.04366299		2343.2	0.00471091		2933.2	-0.01094323
573.41	-0.05984051		1163.41	-0.06553923		1753.4	-0.04412963		2343.4	0.00458288		2933.4	-0.01051724
573.61	-0.05945492		1163.61	-0.06545848		1753.6	-0.04509909		2343.6	0.00488652		2933.6	-0.01067866
573.81	-0.05954414		1163.81	-0.06574782		1753.8	-0.0454455		2343.8	0.00511914		2933.8	-0.00999053
574.01	-0.05975857		1164.01	-0.06571895		1754	-0.04587666		2344	0.00540988		2934	-0.00889949
574.21	-0.06000725		1164.21	-0.06537018		1754.2	-0.04566959		2344.2	0.00493279		2934.2	-0.00816795
574.41	-0.06056017		1164.41	-0.06605545		1754.4	-0.04476833		2344.4	0.00455749		2934.4	-0.00775198
574.61	-0.06113928		1164.61	-0.06629196		1754.6	-0.04573736		2344.6	0.00393853		2934.6	-0.00779372
574.81	-0.0612422		1164.81	-0.06667868		1754.8	-0.04667901		2344.8	0.00472059		2934.8	-0.00679256
575.01	-0.0612998		1165.01	-0.0663767		1755	-0.04626805		2345	0.00399417		2935	-0.00659966
575.21	-0.06032979		1165.21	-0.06705077		1755.2	-0.04605096		2345.2	0.0035249		2935.2	-0.00661859
575.41	-0.06023991		1165.41	-0.06711206		1755.4	-0.04582		2345.4	0.00332552		2935.4	-0.00584261
575.61	-0.05938527		1165.61	-0.06732613		1755.6	-0.04680995		2345.6	0.00371309		2935.6	-0.00605946
575.81	-0.05925678		1165.81	-0.06687924		1755.8	-0.04699103		2345.8	0.00363225		2935.8	-0.00637168
576.01	-0.05861076		1166.01	-0.06674123		1756	-0.04804573		2346	0.00292915		2936	-0.00693229
576.21	-0.05807316		1166.21	-0.06661715		1756.2	-0.04764644		2346.2	0.00246977		2936.2	-0.00688911
576.41	-0.05795063		1166.41	-0.06703709		1756.4	-0.04868607		2346.4	0.00265961		2936.4	-0.00768342
576.61	-0.05807968		1166.61	-0.06642495		1756.6	-0.04821785		2346.6	0.00316113		2936.6	-0.00805299
576.81	-0.05837899		1166.81	-0.06657762		1756.8	-0.04859964		2346.8	0.00349733		2936.8	-0.00835962
577.01	-0.05743749		1167.01	-0.06637212		1757	-0.04830237		2347	0.00457079		2937	-0.00947672
577.21	-0.05729659		1167.21	-0.06636126		1757.2	-0.04824522		2347.2	0.00495522		2937.2	-0.00918546
577.41	-0.05716254		1167.41	-0.06631683		1757.4	-0.04788808		2347.4	0.00518885		2937.4	-0.00946855
577.61	-0.05775044		1167.61	-0.06682719		1757.6	-0.04771074		2347.6	0.00634295		2937.6	-0.00874305
577.81	-0.05832588		1167.81	-0.06712153		1757.8	-0.04797552		2347.8	0.00596111		2937.8	-0.00760043
578.01	-0.05894211		1168.01	-0.06718457		1758	-0.04805117		2348	0.00655396		2938	-0.00797002
578.21	-0.05998496		1168.21	-0.06716567		1758.2	-0.0479769		2348.2	0.00646865		2938.2	-0.00835653
578.41	-0.060944		1168.41	-0.06697685		1758.4	-0.04747563		2348.4	0.00656471		2938.4	-0.00824788
578.61	-0.06121227		1168.61	-0.06698789		1758.6	-0.04837365		2348.6	0.00722719		2938.6	-0.00848377
578.81	-0.06195498		1168.81	-0.06713702		1758.8	-0.04633446		2348.8	0.00719939		2938.8	-0.00811251
579.01	-0.06260513		1169.01	-0.06659872		1759	-0.04555911		2349	0.00711023		2939	-0.00804726
579.21	-0.06265346		1169.21	-0.06658937		1759.2	-0.04523482		2349.2	0.00711588		2939.2	-0.00815732
579.41	-0.06292339		1169.41	-0.06715016		1759.4	-0.04492974		2349.4	0.00791324		2939.4	-0.00749531
579.61	-0.0635329		1169.61	-0.06702329		1759.6	-0.04520848		2349.6	0.00705673		2939.6	-0.00841908
579.81	-0.0633816		1169.81	-0.06692534		1759.8	-0.04619693		2349.8	0.0058124		2939.8	-0.00788878
580.01	-0.06341327		1170.01	-0.06725352		1760	-0.04730275		2350	0.00516113		2940	-0.00828587
580.21	-0.06331025		1170.21	-0.0679269		1760.2	-0.04778073		2350.2	0.00502474		2940.2	-0.0083692
580.41	-0.06356633		1170.41	-0.06858925		1760.4	-0.04879109		2350.4	0.00534991		2940.4	-0.00838568
580.61	-0.06358015		1170.61	-0.06867394		1760.6	-0.04759234		2350.6	0.00504446		2940.6	-0.00826252
580.81	-0.06434089		1170.81	-0.06901819		1760.8	-0.04773943		2350.8	0.00462368		2940.8	-0.00826387
581.01	-0.06329161		1171.01	-0.06928611		1761	-0.04737078		2351	0.00453076		2941	-0.00827912
581.21	-0.06344713		1171.21	-0.06914076		1761.2	-0.0475488		2351.2	0.00314659		2941.2	-0.00782018
581.41	-0.06235221		1171.41	-0.07013918		1761.4	-0.04736788		2351.4	0.00218821		2941.4	-0.00749643
581.61	-0.06216565		1171.61	-0.0712422		1761.6	-0.04695864		2351.6	0.00213799		2941.6	-0.00714258
581.81	-0.06161877		1171.81	-0.07173631		1761.8	-0.04668007		2351.8	0.00124765		2941.8	-0.00729325
582.01	-0.06115302		1172.01	-0.07205422		1762	-0.04645793		2352	0.00173954		2942	-0.00700407
582.21	-0.06054667		1172.21	-0.07181671		1762.2	-0.04593976		2352.2	0.00184201		2942.2	-0.00701968
582.41	-0.06113973		1172.41	-0.07151248		1762.4	-0.04499504		2352.4	0.00234878		2942.4	-0.00714389
582.61	-0.06088916		1172.61	-0.07113356		1762.6	-0.04386222		2352.6	0.00342409		2942.6	-0.00737082
582.81	-0.0612428		1172.81	-0.07039344		1762.8	-0.04285593		2352.8	0.0034756		2942.8	-0.00714654
583.01	-0.06113747		1173.01	-0.07049292		1763	-0.04326177		2353	0.00395295		2943	-0.00774602
583.21	-0.06058579		1173.21	-0.0704499		1763.2	-0.04234883		2353.2	0.00449939		2943.2	-0.00801997
583.41	-0.06071407		1173.41	-0.07046797		1763.4	-0.04193107		2353.4	0.00457372		2943.4	-0.00722414
583.61	-0.06133186		1173.61	-0.07074557		1763.6	-0.04238562		2353.6	0.0046338		2943.6	-0.0075561
583.81	-0.06041434		1173.81	-0.07074915		1763.8	-0.04333484		2353.8	0.00479022		2943.8	-0.0073165
584.01	-0.06017969		1174.01	-0.0706894		1764	-0.04303023		2354	0.00552074		2944	-0.00694892
584.21	-0.05929059		1174.21	-0.07111413		1764.2	-0.04377398		2354.2	0.00540824		2944.2	-0.0069839
584.41	-0.05855815		1174.41	-0.07117203		1764.4	-0.04366972		2354.4	0.00611195		2944.4	-0.00713996
584.61	-0.05805015		1174.61	-0.07025724		1764.6	-0.04426376		2354.6	0.00574794		2944.6	-0.00764553
584.81	-0.05831396		1174.81	-0.06975564		1764.8	-0.04540019		2354.8	0.00559472		2944.8	-0.0076236
585.01	-0.05730096		1175.01	-0.06915966		1765	-0.04552286		2355	0.00554355		2945	-0.00782687
585.21	-0.0572665		1175.21	-0.06917263		1765.2	-0.04630371		2355.2	0.00458863		2945.2	-0.00821699
585.41	-0.056515		1175.41	-0.06966887		1765.4	-0.04622472		2355.4	0.00411235		2945.4	-0.00795586
585.61	-0.05735971		1175.61	-0.06910741		1765.6	-0.04616707		2355.6	0.00414126		2945.6	-0.00813908
585.81	-0.05755252		1175.81	-0.06867812		1765.8	-0.04693551		2355.8	0.00294163		2945.8	-0.00763421
586.01	-0.05909434		1176.01	-0.06870971		1766	-0.04690152		2356	0.00286091		2946	-0.00708348
586.21	-0.05951959		1176.21	-0.06808377		1766.2	-0.04671863		2356.2	0.0022669		2946.2	-0.00799485
586.41	-0.06090032		1176.41	-0.06755329		1766.4	-0.0467325		2356.4	0.00235868		2946.4	-0.00841242
586.61	-0.06140062		1176.61	-0.06661159		1766.6	-0.04750311		2356.6	0.00274188		2946.6	-0.00801928
586.81	-0.06289238		1176.81	-0.06619746		1766.8	-0.04813762		2356.8	0.00240279		2946.8	-0.0086555
587.01	-0.0641021		1177.01	-0.06583994		1767	-0.04711611		2357	0.00308597		2947	-0.00882767
587.21	-0.06538708		1177.21	-0.06527506		1767.2	-0.04650082		2357.2	0.00283524		2947.2	-0.00751677
587.41	-0.06608151		1177.41	-0.06588006		1767.4	-0.04619988		2357.4	0.00197295		2947.4	-0.00663004
587.61	-0.06524504		1177.61	-0.06699953		1767.6	-0.04614623		2357.6	0.00243487		2947.6	-0.00715332
587.81	-0.06410903		1177.81	-0.06699307		1767.8	-0.0461147		2357.8	0.00295709		2947.8	-0.00758976
588.01	-0.06380427		1178.01	-0.06697682		1768	-0.04576481		2358	0.00371109		2948	-0.00732593
588.21	-0.06344634		1178.21	-0.06713147		1768.2	-0.04597718		2358.2	0.00486932		2948.2	-0.00729456
588.41	-0.06380013		1178.41	-0.06727152		1768.4	-0.04614421		2358.4	0.0055474		2948.4	-0.00821231
588.61	-0.06340324		1178.61	-0.06768459		1768.6	-0.04657146		2358.6	0.00535291		2948.6	-0.00768323
588.81	-0.06298154		1178.81	-0.06832531		1768.8	-0.04626962		2358.8	0.00517506		2948.8	-0.00726731
589.01	-0.06299351		1179.01	-0.06853226		1769	-0.04570363		2359	0.00529556		2949	-0.00699649
589.21	-0.06274042		1179.21	-0.0693197		1769.2	-0.04587392		2359.2	0.00540872		2949.2	-0.00733722
589.41	-0.06180138		1179.41	-0.06992548		1769.4	-0.04590482		2359.4	0.00449635		2949.4	-0.0077219
589.61	-0.06228475		1179.61	-0.07049725		1769.6	-0.04631403		2359.6	0.00329565		2949.6	-0.00747822
589.81	-0.06183533		1179.81	-0.07101677		1769.8	-0.0465955		2359.8	0.00253597		2949.8	-0.00778907
590.01	-0.06180265		1180.01	-0.0707656		1770	-0.04641057		2360	0.00240054		2950	-0.0079894
590.21	-0.06093311		1180.21	-0.07043879		1770.2	-0.04728008		2360.2	0.0018362		2950.2	-0.00796445
590.41	-0.06043463		1180.41	-0.07001816		1770.4	-0.04796809		2360.4	0.00182015		2950.4	-0.00814593
590.61	-0.06051752		1180.61	-0.06982688		1770.6	-0.04837821		2360.6	0.00223251		2950.6	-0.00777931
590.81	-0.06108465		1180.81	-0.07027877		1770.8	-0.04816197		2360.8	0.00160272		2950.8	-0.00807805
591.01	-0.06099372		1181.01	-0.06977928		1771	-0.04701809		2361	0.00163733		2951	-0.00802855
591.21	-0.06034687		1181.21	-0.06936279		1771.2	-0.04698198		2361.2	0.0012109		2951.2	-0.0080795
591.41	-0.0593094		1181.41	-0.07012148		1771.4	-0.0463264		2361.4	0.00124534		2951.4	-0.00854665
591.61	-0.05873708		1181.61	-0.06961196		1771.6	-0.04703399		2361.6	0.00244067		2951.6	-0.00891587
591.81	-0.05902916		1181.81	-0.06933668		1771.8	-0.04676724		2361.8	0.00391266		2951.8	-0.00935714
592.01	-0.06033381		1182.01	-0.06900925		1772	-0.04562872		2362	0.004018		2952	-0.00953127
592.21	-0.06074774		1182.21	-0.06883401		1772.2	-0.04501198		2362.2	0.00480741		2952.2	-0.00939504
592.41	-0.06062471		1182.41	-0.06864326		1772.4	-0.04537341		2362.4	0.00448147		2952.4	-0.01017648
592.61	-0.06005123		1182.61	-0.06890862		1772.6	-0.04437283		2362.6	0.00438813		2952.6	-0.01006945
592.81	-0.06014966		1182.81	-0.06839955		1772.8	-0.04411229		2362.8	0.00437964		2952.8	-0.0093908
593.01	-0.0609382		1183.01	-0.06771842		1773	-0.04386551		2363	0.00503991		2953	-0.01002158
593.21	-0.06061181		1183.21	-0.06770279		1773.2	-0.04363874		2363.2	0.00574911		2953.2	-0.0100232
593.41	-0.06078181		1183.41	-0.06742081		1773.4	-0.04369875		2363.4	0.0056382		2953.4	-0.01030285
593.61	-0.06092769		1183.61	-0.06709966		1773.6	-0.0440718		2363.6	0.00578121		2953.6	-0.00974933
593.81	-0.06097807		1183.81	-0.06686884		1773.8	-0.04369611		2363.8	0.00681161		2953.8	-0.00990921
594.01	-0.06102682		1184.01	-0.06726635		1774	-0.04430421		2364	0.00693915		2954	-0.00933294
594.21	-0.06072911		1184.21	-0.06789249		1774.2	-0.04462357		2364.2	0.00601245		2954.2	-0.0084037
594.41	-0.06095616		1184.41	-0.06811405		1774.4	-0.04467525		2364.4	0.00619653		2954.4	-0.00785313
594.61	-0.06119643		1184.61	-0.06899641		1774.6	-0.04485169		2364.6	0.00575072		2954.6	-0.00787701
594.81	-0.06160337		1184.81	-0.06955868		1774.8	-0.0448435		2364.8	0.00515585		2954.8	-0.00731056
595.01	-0.06128614		1185.01	-0.06855184		1775	-0.04427111		2365	0.00477749		2955	-0.00700445
595.21	-0.06237988		1185.21	-0.06847194		1775.2	-0.04422784		2365.2	0.00460921		2955.2	-0.00627425
595.41	-0.06331285		1185.41	-0.06919514		1775.4	-0.0444135		2365.4	0.00442588		2955.4	-0.00527121
595.61	-0.06364636		1185.61	-0.06959301		1775.6	-0.04540268		2365.6	0.00492503		2955.6	-0.0051144
595.81	-0.06354868		1185.81	-0.07051231		1775.8	-0.04497504		2365.8	0.00420744		2955.8	-0.00514108
596.01	-0.06383746		1186.01	-0.07060207		1776	-0.04475294		2366	0.00262177		2956	-0.00559409
596.21	-0.06274178		1186.21	-0.07048227		1776.2	-0.04551773		2366.2	0.00227181		2956.2	-0.00587765
596.41	-0.06195814		1186.41	-0.07070833		1776.4	-0.04615077		2366.4	0.00194819		2956.4	-0.00655171
596.61	-0.06111907		1186.61	-0.07146852		1776.6	-0.04569816		2366.6	0.00149611		2956.6	-0.00672472
596.81	-0.06082275		1186.81	-0.07081659		1776.8	-0.04622004		2366.8	0.00100066		2956.8	-0.00639013
597.01	-0.0606585		1187.01	-0.07046692		1777	-0.04607574		2367	0.00092991		2957	-0.00742504
597.21	-0.06040554		1187.21	-0.07032638		1777.2	-0.04573674		2367.2	0.00128488		2957.2	-0.00674
597.41	-0.06053597		1187.41	-0.07032237		1777.4	-0.04574033		2367.4	0.00160379		2957.4	-0.00698067
597.61	-0.06073258		1187.61	-0.06956663		1777.6	-0.04648647		2367.6	0.00231201		2957.6	-0.00729128
597.81	-0.06047152		1187.81	-0.06952484		1777.8	-0.04643044		2367.8	0.00230334		2957.8	-0.00743045
598.01	-0.06061674		1188.01	-0.06983664		1778	-0.04759506		2368	0.00195844		2958	-0.00833176
598.21	-0.06018006		1188.21	-0.06955398		1778.2	-0.04785628		2368.2	0.00113849		2958.2	-0.00827013
598.41	-0.06067598		1188.41	-0.06904993		1778.4	-0.04760064		2368.4	0.00292993		2958.4	-0.00865379
598.61	-0.06155461		1188.61	-0.0689742		1778.6	-0.04697191		2368.6	0.00371936		2958.6	-0.00965578
598.81	-0.06270126		1188.81	-0.0684065		1778.8	-0.0464389		2368.8	0.00395586		2958.8	-0.00873432
599.01	-0.06168076		1189.01	-0.06722967		1779	-0.04570783		2369	0.00420017		2959	-0.0087638
599.21	-0.06274924		1189.21	-0.06736709		1779.2	-0.04560607		2369.2	0.00421454		2959.2	-0.00850964
599.41	-0.06297724		1189.41	-0.06701918		1779.4	-0.04586533		2369.4	0.00414989		2959.4	-0.00836421
599.61	-0.06185029		1189.61	-0.06705835		1779.6	-0.0460252		2369.6	0.00473271		2959.6	-0.00893444
599.81	-0.0623894		1189.81	-0.06727872		1779.8	-0.04634967		2369.8	0.00368455		2959.8	-0.00860154
600.01	-0.06173924		1190.01	-0.06748077		1780	-0.04660419		2370	0.00283829		2960	-0.00930649
600.21	-0.06138424		1190.21	-0.06822663		1780.2	-0.04740384		2370.2	0.00344325		2960.2	-0.00973826
600.41	-0.06100688		1190.41	-0.06869719		1780.4	-0.04721646		2370.4	0.00356623		2960.4	-0.00912452
600.61	-0.06077076		1190.61	-0.06858894		1780.6	-0.04723133		2370.6	0.00334349		2960.6	-0.00841134
600.81	-0.06099813		1190.81	-0.06835732		1780.8	-0.04794445		2370.8	0.00273565		2960.8	-0.00842042
601.01	-0.06112605		1191.01	-0.06890069		1781	-0.04809888		2371	0.00252749		2961	-0.0077966
601.21	-0.06155239		1191.21	-0.06892416		1781.2	-0.04806021		2371.2	0.00261738		2961.2	-0.00722711
601.41	-0.06168206		1191.41	-0.06879931		1781.4	-0.04817196		2371.4	0.00239464		2961.4	-0.00732108
601.61	-0.06111465		1191.61	-0.06830939		1781.6	-0.04862024		2371.6	0.00234869		2961.6	-0.00786615
601.81	-0.06086053		1191.81	-0.06934859		1781.8	-0.04913713		2371.8	0.00199667		2961.8	-0.00820257
602.01	-0.06145346		1192.01	-0.06975154		1782	-0.04956847		2372	0.00186923		2962	-0.00902282
602.21	-0.06074813		1192.21	-0.06946594		1782.2	-0.04921421		2372.2	0.00230761		2962.2	-0.00851134
602.41	-0.06123555		1192.41	-0.0689733		1782.4	-0.04840643		2372.4	0.00248258		2962.4	-0.0084854
602.61	-0.06238085		1192.61	-0.06935892		1782.6	-0.04797327		2372.6	0.00279589		2962.6	-0.00870176
602.81	-0.06264853		1192.81	-0.0690262		1782.8	-0.04744476		2372.8	0.00204558		2962.8	-0.00808903
603.01	-0.06155124		1193.01	-0.06849732		1783	-0.046369		2373	0.00192745		2963	-0.00837627
603.21	-0.06259856		1193.21	-0.06881187		1783.2	-0.04675601		2373.2	0.00122543		2963.2	-0.00811443
603.41	-0.06288954		1193.41	-0.0688009		1783.4	-0.04668405		2373.4	0.00150834		2963.4	-0.00858132
603.61	-0.06256646		1193.61	-0.06954696		1783.6	-0.04651826		2373.6	0.00205496		2963.6	-0.00835406
603.81	-0.06361499		1193.81	-0.07000803		1783.8	-0.04695497		2373.8	0.00190371		2963.8	-0.00774638
604.01	-0.0625801		1194.01	-0.07008625		1784	-0.04669125		2374	0.0017642		2964	-0.00796945
604.21	-0.06303151		1194.21	-0.06994267		1784.2	-0.04649966		2374.2	0.0018602		2964.2	-0.00713187
604.41	-0.06367159		1194.41	-0.07041549		1784.4	-0.04634565		2374.4	0.00187587		2964.4	-0.00576585
604.61	-0.06478663		1194.61	-0.06972947		1784.6	-0.04671389		2374.6	0.00221005		2964.6	-0.00575283
604.81	-0.06541771		1194.81	-0.07013553		1784.8	-0.04740716		2374.8	0.00252206		2964.8	-0.00589201
605.01	-0.06613671		1195.01	-0.07045132		1785	-0.04698957		2375	0.00248565		2965	-0.00548738
605.21	-0.06662155		1195.21	-0.07021163		1785.2	-0.04639668		2375.2	0.00255308		2965.2	-0.00626299
605.41	-0.06639824		1195.41	-0.07109437		1785.4	-0.04659422		2375.4	0.00300475		2965.4	-0.0070856
605.61	-0.06625759		1195.61	-0.07097615		1785.6	-0.04677788		2375.6	0.00347765		2965.6	-0.00778871
605.81	-0.06698025		1195.81	-0.07185663		1785.8	-0.04725163		2375.8	0.00326045		2965.8	-0.008474
606.01	-0.06691492		1196.01	-0.07113986		1786	-0.04695147		2376	0.00245144		2966	-0.00885994
606.21	-0.06601569		1196.21	-0.07122787		1786.2	-0.04615286		2376.2	0.00305376		2966.2	-0.00906274
606.41	-0.06595472		1196.41	-0.07151735		1786.4	-0.04664179		2376.4	0.00210728		2966.4	-0.00887403
606.61	-0.06587321		1196.61	-0.07199184		1786.6	-0.04578593		2376.6	0.00344245		2966.6	-0.0093564
606.81	-0.06553207		1196.81	-0.07242605		1786.8	-0.04593618		2376.8	0.00388211		2966.8	-0.01002717
607.01	-0.06431245		1197.01	-0.07231984		1787	-0.04613079		2377	0.00331727		2967	-0.01001703
607.21	-0.06397321		1197.21	-0.07236426		1787.2	-0.0470575		2377.2	0.00331313		2967.2	-0.01000842
607.41	-0.06336121		1197.41	-0.07303016		1787.4	-0.0465774		2377.4	0.00343555		2967.4	-0.01058678
607.61	-0.0624909		1197.61	-0.07317284		1787.6	-0.04549839		2377.6	0.00350114		2967.6	-0.0091917
607.81	-0.06212739		1197.81	-0.07274526		1787.8	-0.04569486		2377.8	0.00352869		2967.8	-0.00866707
608.01	-0.06197152		1198.01	-0.07240811		1788	-0.04590396		2378	0.003141		2968	-0.00836118
608.21	-0.06187871		1198.21	-0.0719783		1788.2	-0.04647419		2378.2	0.00273972		2968.2	-0.00694839
608.41	-0.06307105		1198.41	-0.07164737		1788.4	-0.04699849		2378.4	0.00335361		2968.4	-0.00645333
608.61	-0.06385378		1198.61	-0.06987798		1788.6	-0.04715438		2378.6	0.00360118		2968.6	-0.00639959
608.81	-0.06461168		1198.81	-0.06970968		1788.8	-0.04795167		2378.8	0.00403462		2968.8	-0.00635177
609.01	-0.06476342		1199.01	-0.06937705		1789	-0.04782634		2379	0.00359642		2969	-0.00641159
609.21	-0.06546866		1199.21	-0.0693796		1789.2	-0.04786246		2379.2	0.00338563		2969.2	-0.00712727
609.41	-0.0654809		1199.41	-0.06968477		1789.4	-0.04772233		2379.4	0.00375177		2969.4	-0.00668647
609.61	-0.06580878		1199.61	-0.06850341		1789.6	-0.04753787		2379.6	0.00329867		2969.6	-0.0072067
609.81	-0.06537		1199.81	-0.06927574		1789.8	-0.0473771		2379.8	0.00267986		2969.8	-0.00742758
610.01	-0.06469967		1200.01	-0.06907056		1790	-0.04704959		2380	0.00245808		2970	-0.00755755
610.21	-0.06343508		1200.21	-0.0693942		1790.2	-0.04711446		2380.2	0.00343096		2970.2	-0.0077758
610.41	-0.06322117		1200.41	-0.06961197		1790.4	-0.04776484		2380.4	0.00269097		2970.4	-0.00809829
610.61	-0.06288294		1200.61	-0.07035		1790.6	-0.04742336		2380.6	0.00263903		2970.6	-0.00835471
610.81	-0.06204606		1200.81	-0.07032061		1790.8	-0.04850023		2380.8	0.00250634		2970.8	-0.00917237
611.01	-0.06107329		1201.01	-0.06987386		1791	-0.0479923		2381	0.00201776		2971	-0.00944419
611.21	-0.06085577		1201.21	-0.06988873		1791.2	-0.04742813		2381.2	0.00254486		2971.2	-0.0092518
611.41	-0.05970407		1201.41	-0.07075828		1791.4	-0.04681169		2381.4	0.0026659		2971.4	-0.00893919
611.61	-0.0599362		1201.61	-0.07059746		1791.6	-0.04659302		2381.6	0.00227984		2971.6	-0.00782745
611.81	-0.06034669		1201.81	-0.07017277		1791.8	-0.04667092		2381.8	0.0026442		2971.8	-0.00738424
612.01	-0.06013991		1202.01	-0.07061542		1792	-0.04624696		2382	0.00383144		2972	-0.00637665
612.21	-0.06053056		1202.21	-0.07021634		1792.2	-0.04565421		2382.2	0.00411652		2972.2	-0.0059742
612.41	-0.06211806		1202.41	-0.07014846		1792.4	-0.0454522		2382.4	0.00376129		2972.4	-0.00631071
612.61	-0.06254275		1202.61	-0.06961904		1792.6	-0.04578413		2382.6	0.00391685		2972.6	-0.00612245
612.81	-0.06266477		1202.81	-0.0702886		1792.8	-0.04616386		2382.8	0.00417765		2972.8	-0.00634003
613.01	-0.0621036		1203.01	-0.07029625		1793	-0.04604606		2383	0.0043852		2973	-0.00665414
613.21	-0.06274246		1203.21	-0.07057786		1793.2	-0.04600838		2383.2	0.0043567		2973.2	-0.0065375
613.41	-0.06281513		1203.41	-0.07030394		1793.4	-0.04676791		2383.4	0.00439551		2973.4	-0.00689664
613.61	-0.06292169		1203.61	-0.0695188		1793.6	-0.04709398		2383.6	0.0036233		2973.6	-0.00747306
613.81	-0.06345611		1203.81	-0.07074059		1793.8	-0.04747408		2383.8	0.00326242		2973.8	-0.00770452
614.01	-0.06376542		1204.01	-0.07105155		1794	-0.04793358		2384	0.00222879		2974	-0.00831282
614.21	-0.06429029		1204.21	-0.07149955		1794.2	-0.0483525		2384.2	0.00280663		2974.2	-0.00881963
614.41	-0.06517541		1204.41	-0.07178568		1794.4	-0.04828771		2384.4	0.0018163		2974.4	-0.00986571
614.61	-0.06463339		1204.61	-0.07128724		1794.6	-0.04889552		2384.6	0.00130208		2974.6	-0.01026454
614.81	-0.06383055		1204.81	-0.07037099		1794.8	-0.04855727		2384.8	0.00145999		2974.8	-0.01173586
615.01	-0.06355823		1205.01	-0.06987518		1795	-0.04806278		2385	0.00131817		2975	-0.01238535
615.21	-0.06332944		1205.21	-0.06934059		1795.2	-0.04761348		2385.2	0.00126876		2975.2	-0.01241146
615.41	-0.06322157		1205.41	-0.06934184		1795.4	-0.04732931		2385.4	0.00180245		2975.4	-0.01323412
615.61	-0.06346691		1205.61	-0.06891011		1795.6	-0.04615595		2385.6	0.00191506		2975.6	-0.01212612
615.81	-0.0626034		1205.81	-0.06917443		1795.8	-0.04509871		2385.8	0.00326972		2975.8	-0.01198017
616.01	-0.06270934		1206.01	-0.07026629		1796	-0.04521998		2386	0.00351518		2976	-0.01176162
616.21	-0.06301655		1206.21	-0.07023191		1796.2	-0.04528874		2386.2	0.0024552		2976.2	-0.01246822
616.41	-0.06298165		1206.41	-0.07032725		1796.4	-0.0456736		2386.4	0.00154361		2976.4	-0.01245593
616.61	-0.06215004		1206.61	-0.07045855		1796.6	-0.04605697		2386.6	0.00235345		2976.6	-0.01215019
616.81	-0.06192011		1206.81	-0.0710087		1796.8	-0.04623086		2386.8	0.00296904		2976.8	-0.0122972
617.01	-0.0614285		1207.01	-0.07112229		1797	-0.04676229		2387	0.00308843		2977	-0.01137174
617.21	-0.062293		1207.21	-0.07098958		1797.2	-0.04691693		2387.2	0.00288468		2977.2	-0.0107028
617.41	-0.0622384		1207.41	-0.07125679		1797.4	-0.04783441		2387.4	0.00186079		2977.4	-0.01061054
617.61	-0.06299376		1207.61	-0.07154735		1797.6	-0.04792908		2387.6	0.00160427		2977.6	-0.00977817
617.81	-0.06382565		1207.81	-0.07251431		1797.8	-0.04805145		2387.8	0.0010998		2977.8	-0.00945433
618.01	-0.06365461		1208.01	-0.07254763		1798	-0.04826358		2388	0.00018888		2978	-0.00893006
618.21	-0.06427796		1208.21	-0.07234142		1798.2	-0.04799615		2388.2	0.00059413		2978.2	-0.00861782
618.41	-0.06383495		1208.41	-0.07149831		1798.4	-0.04896123		2388.4	-0.00002658		2978.4	-0.0094388
618.61	-0.06349254		1208.61	-0.07056885		1798.6	-0.04858407		2388.6	0.00013763		2978.6	-0.00949142
618.81	-0.06327729		1208.81	-0.0693293		1798.8	-0.04903882		2388.8	0.00059119		2978.8	-0.01019976
619.01	-0.0630654		1209.01	-0.06860114		1799	-0.04955032		2389	0.00067214		2979	-0.00990696
619.21	-0.06333138		1209.21	-0.06790158		1799.2	-0.04974838		2389.2	0.0014079		2979.2	-0.01061491
619.41	-0.06298903		1209.41	-0.06755742		1799.4	-0.04979968		2389.4	0.00234739		2979.4	-0.01021599
619.61	-0.06204638		1209.61	-0.06748467		1799.6	-0.04987939		2389.6	0.00256325		2979.6	-0.00882368
619.81	-0.06202129		1209.81	-0.06753545		1799.8	-0.05042363		2389.8	0.00197351		2979.8	-0.00972439
620.01	-0.06251481		1210.01	-0.06716929		1800	-0.05071834		2390	0.00147025		2980	-0.00959311
620.21	-0.06219214		1210.21	-0.06730423		1800.2	-0.05040371		2390.2	0.00196671		2980.2	-0.00943378
620.41	-0.06222836		1210.41	-0.06769868		1800.4	-0.04943863		2390.4	0.00176033		2980.4	-0.00885464
620.61	-0.0620858		1210.61	-0.06820013		1800.6	-0.04924847		2390.6	0.00188676		2980.6	-0.00899543
620.81	-0.06211728		1210.81	-0.06833341		1800.8	-0.04828955		2390.8	0.00228403		2980.8	-0.00873014
621.01	-0.06249731		1211.01	-0.06852654		1801	-0.04757244		2391	0.00240226		2981	-0.00797603
621.21	-0.06229991		1211.21	-0.06858069		1801.2	-0.04601474		2391.2	0.00136102		2981.2	-0.00883265
621.41	-0.06239514		1211.41	-0.06938105		1801.4	-0.04611348		2391.4	0.00059997		2981.4	-0.00905163
621.61	-0.06301698		1211.61	-0.06935629		1801.6	-0.04559245		2391.6	0.0005174		2981.6	-0.00910148
621.81	-0.06265962		1211.81	-0.06981183		1801.8	-0.04460132		2391.8	-0.00012387		2981.8	-0.00933375
622.01	-0.06219759		1212.01	-0.0697772		1802	-0.04441714		2392	0.0000085		2982	-0.00996048
622.21	-0.06287387		1212.21	-0.06899795		1802.2	-0.04449369		2392.2	0.00067793		2982.2	-0.01055968
622.41	-0.06271124		1212.41	-0.06813139		1802.4	-0.04615288		2392.4	0.00119981		2982.4	-0.01071803
622.61	-0.06257934		1212.61	-0.06778361		1802.6	-0.04609875		2392.6	0.00123567		2982.6	-0.01204119
622.81	-0.06202217		1212.81	-0.06716581		1802.8	-0.04763809		2392.8	0.00171261		2982.8	-0.01289979
623.01	-0.06161503		1213.01	-0.06717063		1803	-0.04947119		2393	0.00215366		2983	-0.01272424
623.21	-0.06139695		1213.21	-0.06712467		1803.2	-0.04996989		2393.2	0.00253271		2983.2	-0.01314135
623.41	-0.0606049		1213.41	-0.06777604		1803.4	-0.04981802		2393.4	0.00282319		2983.4	-0.01274115
623.61	-0.06095011		1213.61	-0.06740729		1803.6	-0.04997678		2393.6	0.00226954		2983.6	-0.0131995
623.81	-0.06110611		1213.81	-0.06753147		1803.8	-0.05119934		2393.8	0.00221745		2983.8	-0.01324673
624.01	-0.06159174		1214.01	-0.06734902		1804	-0.05128685		2394	0.00261715		2984	-0.012094
624.21	-0.06165441		1214.21	-0.06844773		1804.2	-0.05124509		2394.2	0.00246031		2984.2	-0.01163229
624.41	-0.06219439		1214.41	-0.06827146		1804.4	-0.05093197		2394.4	0.00130421		2984.4	-0.01105017
624.61	-0.06327313		1214.61	-0.06812301		1804.6	-0.0508742		2394.6	0.00211107		2984.6	-0.01090172
624.81	-0.06383593		1214.81	-0.06754136		1804.8	-0.04994608		2394.8	0.00288686		2984.8	-0.01042752
625.01	-0.0645766		1215.01	-0.06722548		1805	-0.04951364		2395	0.00246779		2985	-0.01000553
625.21	-0.06432061		1215.21	-0.06745613		1805.2	-0.04893462		2395.2	0.00121058		2985.2	-0.00947227
625.41	-0.06530187		1215.41	-0.06730318		1805.4	-0.04911978		2395.4	0.00101276		2985.4	-0.0093387
625.61	-0.06550128		1215.61	-0.06693878		1805.6	-0.04820442		2395.6	0.00054008		2985.6	-0.00819699
625.81	-0.06613434		1215.81	-0.06737115		1805.8	-0.04823068		2395.8	0.00053151		2985.8	-0.00750759
626.01	-0.06578804		1216.01	-0.06668752		1806	-0.04782768		2396	0.000578		2986	-0.00732263
626.21	-0.06674788		1216.21	-0.06621188		1806.2	-0.04772664		2396.2	0.00074901		2986.2	-0.0071289
626.41	-0.06627632		1216.41	-0.0666116		1806.4	-0.04813316		2396.4	0.00010533		2986.4	-0.00754461
626.61	-0.06580415		1216.61	-0.06750915		1806.6	-0.04825145		2396.6	-0.00008761		2986.6	-0.00915776
626.81	-0.06542713		1216.81	-0.06814666		1806.8	-0.04905051		2396.8	0.0006055		2986.8	-0.00855557
627.01	-0.06468869		1217.01	-0.06890886		1807	-0.04946728		2397	0.00073262		2987	-0.00816074
627.21	-0.06416631		1217.21	-0.06983526		1807.2	-0.04797904		2397.2	0.00020791		2987.2	-0.00797296
627.41	-0.06408926		1217.41	-0.07031528		1807.4	-0.04870693		2397.4	0.00000198		2987.4	-0.00851951
627.61	-0.06438886		1217.61	-0.06994368		1807.6	-0.04888998		2397.6	0.00024972		2987.6	-0.0088131
627.81	-0.06365527		1217.81	-0.07088152		1807.8	-0.05049225		2397.8	0.00070053		2987.8	-0.00835416
628.01	-0.06380044		1218.01	-0.07075833		1808	-0.05063038		2398	0.00069929		2988	-0.00853754
628.21	-0.06400526		1218.21	-0.07131637		1808.2	-0.0512368		2398.2	0.00152396		2988.2	-0.00949003
628.41	-0.06496961		1218.41	-0.07088105		1808.4	-0.05072903		2398.4	0.00181558		2988.4	-0.00914751
628.61	-0.06498835		1218.61	-0.07106187		1808.6	-0.05027222		2398.6	0.00334251		2988.6	-0.00936766
628.81	-0.06527138		1218.81	-0.0705648		1808.8	-0.04989112		2398.8	0.00365161		2988.8	-0.00938292
629.01	-0.06581255		1219.01	-0.07105109		1809	-0.0497463		2399	0.00412681		2989	-0.00872807
629.21	-0.06602662		1219.21	-0.07080869		1809.2	-0.04872918		2399.2	0.00376678		2989.2	-0.00895231
629.41	-0.06634727		1219.41	-0.0704896		1809.4	-0.04788959		2399.4	0.00342409		2989.4	-0.00904735
629.61	-0.06604463		1219.61	-0.07036127		1809.6	-0.04754539		2399.6	0.0035191		2989.6	-0.00833077
629.81	-0.06622492		1219.81	-0.07081901		1809.8	-0.04724059		2399.8	0.00325913		2989.8	-0.00825771
630.01	-0.0655853		1220.01	-0.07087849		1810	-0.0464742		2400	0.00306187		2990	-0.00888719
630.21	-0.06606143		1220.21	-0.07136416		1810.2	-0.04683075		2400.2	0.00234246		2990.2	-0.00942215
630.41	-0.06543384		1220.41	-0.07183852		1810.4	-0.04737131		2400.4	0.00106197		2990.4	-0.00988871
630.61	-0.065459		1220.61	-0.07124414		1810.6	-0.04777576		2400.6	0.00039353		2990.6	-0.01010395
630.81	-0.06535167		1220.81	-0.07206803		1810.8	-0.04811323		2400.8	-0.00047658		2990.8	-0.0105651
631.01	-0.0644377		1221.01	-0.07291506		1811	-0.04785131		2401	0.00000332		2991	-0.01043912
631.21	-0.06458353		1221.21	-0.07355356		1811.2	-0.04842295		2401.2	0.00014511		2991.2	-0.00990854
631.41	-0.0650267		1221.41	-0.07437105		1811.4	-0.04990867		2401.4	0.0003431		2991.4	-0.01009949
631.61	-0.06490426		1221.61	-0.07454405		1811.6	-0.0496271		2401.6	0.00136527		2991.6	-0.01061137
631.81	-0.06479983		1221.81	-0.0751144		1811.8	-0.05101967		2401.8	0.00151885		2991.8	-0.01085972
632.01	-0.06510983		1222.01	-0.0750681		1812	-0.05143568		2402	0.00202449		2992	-0.01119326
632.21	-0.06563243		1222.21	-0.07473648		1812.2	-0.05175511		2402.2	0.00283485		2992.2	-0.01143456
632.41	-0.06548902		1222.41	-0.0741369		1812.4	-0.05155562		2402.4	0.00215		2992.4	-0.01093038
632.61	-0.06518014		1222.61	-0.07452607		1812.6	-0.05052602		2402.6	0.00322971		2992.6	-0.01093303
632.81	-0.06608117		1222.81	-0.07440342		1812.8	-0.04982553		2402.8	0.00403002		2992.8	-0.01098982
633.01	-0.06564188		1223.01	-0.07350318		1813	-0.04938137		2403	0.00470865		2993	-0.01045189
633.21	-0.06601382		1223.21	-0.07227456		1813.2	-0.04914996		2403.2	0.00405394		2993.2	-0.01109217
633.41	-0.06588944		1223.41	-0.07188277		1813.4	-0.0491058		2403.4	0.00380221		2993.4	-0.01037842
633.61	-0.06570573		1223.61	-0.07157718		1813.6	-0.04876782		2403.6	0.00430723		2993.6	-0.01043748
633.81	-0.06573015		1223.81	-0.07130445		1813.8	-0.0476615		2403.8	0.00352847		2993.8	-0.00966538
634.01	-0.06526275		1224.01	-0.0705966		1814	-0.04757006		2404	0.00260694		2994	-0.00986612
634.21	-0.0652648		1224.21	-0.07030377		1814.2	-0.04756089		2404.2	0.00073575		2994.2	-0.01002562
634.41	-0.06467945		1224.41	-0.07003576		1814.4	-0.04706469		2404.4	0.00021424		2994.4	-0.00940557
634.61	-0.06481393		1224.61	-0.06946165		1814.6	-0.0472737		2404.6	-0.00032016		2994.6	-0.00956383
634.81	-0.06480187		1224.81	-0.07038928		1814.8	-0.04675834		2404.8	0.00003978		2994.8	-0.00961463
635.01	-0.06451347		1225.01	-0.07074874		1815	-0.04696872		2405	0.00045365		2995	-0.00820479
635.21	-0.06498669		1225.21	-0.07161738		1815.2	-0.04810076		2405.2	0.00021578		2995.2	-0.00790103
635.41	-0.06540073		1225.41	-0.07289639		1815.4	-0.04888759		2405.4	0.000487		2995.4	-0.00745996
635.61	-0.06504997		1225.61	-0.07354673		1815.6	-0.04891785		2405.6	0.00088464		2995.6	-0.00751707
635.81	-0.06525004		1225.81	-0.07409791		1815.8	-0.04967576		2405.8	0.0006737		2995.8	-0.00762144
636.01	-0.06526116		1226.01	-0.0748484		1816	-0.05031078		2406	0.00074226		2996	-0.00793145
636.21	-0.06562659		1226.21	-0.0741925		1816.2	-0.05003045		2406.2	0.00034037		2996.2	-0.00819667
636.41	-0.06537985		1226.41	-0.0738903		1816.4	-0.05001859		2406.4	0.00064346		2996.4	-0.00819673
636.61	-0.06601386		1226.61	-0.07439444		1816.6	-0.04992377		2406.6	0.00157122		2996.6	-0.00841237
636.81	-0.06625045		1226.81	-0.07418005		1816.8	-0.05104294		2406.8	0.00247411		2996.8	-0.00876007
637.01	-0.06604458		1227.01	-0.07299612		1817	-0.05143393		2407	0.00332474		2997	-0.00884322
637.21	-0.0666979		1227.21	-0.07323025		1817.2	-0.0515526		2407.2	0.00325898		2997.2	-0.00924115
637.41	-0.06615323		1227.41	-0.07423891		1817.4	-0.05070262		2407.4	0.00332572		2997.4	-0.01003879
637.61	-0.065191		1227.61	-0.07465246		1817.6	-0.05066712		2407.6	0.00407766		2997.6	-0.01078058
637.81	-0.06494362		1227.81	-0.07485833		1817.8	-0.04970662		2407.8	0.00322123		2997.8	-0.01081532
638.01	-0.06395083		1228.01	-0.07410726		1818	-0.05011778		2408	0.00285866		2998	-0.01121021
638.21	-0.0636908		1228.21	-0.07408152		1818.2	-0.05021787		2408.2	0.00299394		2998.2	-0.01121422
638.41	-0.06358959		1228.41	-0.07428807		1818.4	-0.05004285		2408.4	0.00267082		2998.4	-0.01163309
638.61	-0.06393334		1228.61	-0.07440858		1818.6	-0.04999479		2408.6	0.00204918		2998.6	-0.01169055
638.81	-0.06366178		1228.81	-0.0745521		1818.8	-0.0494739		2408.8	0.00212321		2998.8	-0.01138047
639.01	-0.06359526		1229.01	-0.07451724		1819	-0.04987243		2409	0.00116198		2999	-0.01165671
639.21	-0.06268858		1229.21	-0.07490269		1819.2	-0.05036043		2409.2	0.00054051		2999.2	-0.01159141
639.41	-0.06202695		1229.41	-0.07509287		1819.4	-0.04976443		2409.4	0.00015047		2999.4	-0.01130139
639.61	-0.06159193		1229.61	-0.07448803		1819.6	-0.04908418		2409.6	-0.00029561		2999.6	-0.01176365
639.81	-0.06183881		1229.81	-0.07441268		1819.8	-0.04895143		2409.8	0.00014548		2999.8	-0.01215915
640.01	-0.06193404		1230.01	-0.07446642		1820	-0.04878594		2410	0.00027741		3000	-0.01238117
640.21	-0.06208368		1230.21	-0.07313551		1820.2	-0.04973878		2410.2	0.00020957		3000.2	-0.01175848
640.41	-0.06218698		1230.41	-0.07295632		1820.4	-0.05032819		2410.4	0.00088068		3000.4	-0.01109711
640.61	-0.06251504		1230.61	-0.07280413		1820.6	-0.05101917		2410.6	0.00102844		3000.6	-0.01037883
640.81	-0.06204923		1230.81	-0.07278929		1820.8	-0.05043558		2410.8	0.00129342		3000.8	-0.0101956
641.01	-0.06175638		1231.01	-0.07279898		1821	-0.04956766		2411	0.00099547		3001	-0.00948585
641.21	-0.0619759		1231.21	-0.07405974		1821.2	-0.0489496		2411.2	0.00053519		3001.2	-0.00955979
641.41	-0.0618509		1231.41	-0.0744142		1821.4	-0.04888168		2411.4	0.00072564		3001.4	-0.00945218
641.61	-0.06158746		1231.61	-0.07483032		1821.6	-0.04963041		2411.6	0.0009653		3001.6	-0.00902257
641.81	-0.06212837		1231.81	-0.07535725		1821.8	-0.04910729		2411.8	0.00106654		3001.8	-0.00801509
642.01	-0.06233472		1232.01	-0.07514079		1822	-0.04980552		2412	0.00122503		3002	-0.00739298
642.21	-0.06268867		1232.21	-0.07533503		1822.2	-0.04963992		2412.2	0.00196166		3002.2	-0.00710817
642.41	-0.06364159		1232.41	-0.07544384		1822.4	-0.04886232		2412.4	0.00097589		3002.4	-0.00763236
642.61	-0.06419216		1232.61	-0.07567684		1822.6	-0.04848158		2412.6	0.00174194		3002.6	-0.00735906
642.81	-0.0646127		1232.81	-0.07470034		1822.8	-0.04824662		2412.8	0.00207194		3002.8	-0.00809364
643.01	-0.06493301		1233.01	-0.07418514		1823	-0.04842447		2413	0.00174986		3003	-0.00869403
643.21	-0.06471242		1233.21	-0.07424918		1823.2	-0.04836085		2413.2	0.00125882		3003.2	-0.00860753
643.41	-0.06482097		1233.41	-0.07386275		1823.4	-0.04795142		2413.4	0.00213563		3003.4	-0.00889966
643.61	-0.0651312		1233.61	-0.07388486		1823.6	-0.04905889		2413.6	0.00290316		3003.6	-0.00994318
643.81	-0.06491305		1233.81	-0.07396384		1823.8	-0.04995649		2413.8	0.00355885		3003.8	-0.01072084
644.01	-0.06496252		1234.01	-0.07389069		1824	-0.05093878		2414	0.00344212		3004	-0.01213633
644.21	-0.06498578		1234.21	-0.07273034		1824.2	-0.05231791		2414.2	0.00287901		3004.2	-0.01233882
644.41	-0.06516903		1234.41	-0.07235176		1824.4	-0.0515018		2414.4	0.00283726		3004.4	-0.01266058
644.61	-0.06490114		1234.61	-0.07187148		1824.6	-0.05195378		2414.6	0.00256608		3004.6	-0.01248506
644.81	-0.06446575		1234.81	-0.07155837		1824.8	-0.05159432		2414.8	0.00133913		3004.8	-0.01255433
645.01	-0.06404232		1235.01	-0.07147659		1825	-0.05181074		2415	0.00105606		3005	-0.01245357
645.21	-0.06393761		1235.21	-0.07163526		1825.2	-0.05144124		2415.2	0.00133316		3005.2	-0.01264016
645.41	-0.06360681		1235.41	-0.07150792		1825.4	-0.05120503		2415.4	0.00153273		3005.4	-0.01187998
645.61	-0.06340881		1235.61	-0.07151117		1825.6	-0.05014804		2415.6	0.0019075		3005.6	-0.01155747
645.81	-0.06297656		1235.81	-0.07056626		1825.8	-0.04958497		2415.8	0.00179827		3005.8	-0.01117514
646.01	-0.06304972		1236.01	-0.07068517		1826	-0.04953773		2416	0.00146142		3006	-0.01105746
646.21	-0.06250999		1236.21	-0.07048188		1826.2	-0.04934197		2416.2	0.00267564		3006.2	-0.01066455
646.41	-0.06368039		1236.41	-0.07082862		1826.4	-0.04901646		2416.4	0.00235558		3006.4	-0.01080965
646.61	-0.0649297		1236.61	-0.0720079		1826.6	-0.04902801		2416.6	0.00309692		3006.6	-0.01073143
646.81	-0.06532699		1236.81	-0.07159657		1826.8	-0.04896126		2416.8	0.00243934		3006.8	-0.00986557
647.01	-0.06566531		1237.01	-0.07230627		1827	-0.04833001		2417	0.00270928		3007	-0.00926147
647.21	-0.06640065		1237.21	-0.07281355		1827.2	-0.0481377		2417.2	0.0031941		3007.2	-0.00887698
647.41	-0.06695135		1237.41	-0.07272125		1827.4	-0.04909196		2417.4	0.00370579		3007.4	-0.0090153
647.61	-0.06742878		1237.61	-0.07275498		1827.6	-0.04937696		2417.6	0.00344899		3007.6	-0.00970607
647.81	-0.06763617		1237.81	-0.07238003		1827.8	-0.04891638		2417.8	0.00302253		3007.8	-0.00989401
648.01	-0.06812866		1238.01	-0.07242598		1828	-0.04861995		2418	0.0025718		3008	-0.01028529
648.21	-0.06805807		1238.21	-0.07164325		1828.2	-0.04849926		2418.2	0.0019463		3008.2	-0.0100442
648.41	-0.06806965		1238.41	-0.07175241		1828.4	-0.04829421		2418.4	0.00146509		3008.4	-0.01005739
648.61	-0.06775559		1238.61	-0.07151471		1828.6	-0.0487426		2418.6	0.00055203		3008.6	-0.00990761
648.81	-0.06719661		1238.81	-0.07109525		1828.8	-0.04867193		2418.8	-0.00033593		3008.8	-0.01019948
649.01	-0.06692495		1239.01	-0.07111778		1829	-0.04862887		2419	-0.00035964		3009	-0.01066296
649.21	-0.0666985		1239.21	-0.07100096		1829.2	-0.04807259		2419.2	-0.00059253		3009.2	-0.01075417
649.41	-0.06641297		1239.41	-0.07069664		1829.4	-0.04787751		2419.4	-0.00078711		3009.4	-0.01107701
649.61	-0.06600908		1239.61	-0.06996445		1829.6	-0.04785425		2419.6	-0.00106223		3009.6	-0.01140077
649.81	-0.0653457		1239.81	-0.07032949		1829.8	-0.04899503		2419.8	-0.00195257		3009.8	-0.01216686
