# Supplementary material for: Functional development of a V3/glycan-specific broadly neutralizing antibody isolated from a case of HIV superinfection
Source: eLife journal article supplement (doi:10.7554/elife.68110), 2021-07-15
Supplement: fig2-data2 [file G7.xls]

Vers 3.43 Data Simulation
Conc1	3.125E-08	3.125E-08	3.125E-08	3.125E-08	3.125E-08	3.125E-08	3.125E-08	3.125E-08
Start1	200	729.99	1259.99	1789.98	2319.98	2849.98	3379.98	3909.98
Stop1	559.79	1089.79	1619.79	2149.78	2679.78	3209.78	3739.78	4269.78
Time1	Data1	Sim1	Time2	Data2	Sim2	Time3	Data3	Sim3	Time4	Data4	Sim4	Time5	Data5	Sim5	Time6	Data6	Sim6	Time7	Data7	Sim7	Time8	Data8	Sim8
200	-0.00149361		729.99	-0.0015721		1259.99	0.00025814		1789.98	-0.00342689		2319.98	0.00288814		2849.98	0.00030796		3379.98	0.00237701		3909.98	-0.00417554
200.2	-0.00217403		730.19	-0.00161367		1260.19	0.00061267		1790.18	-0.00303084		2320.18	0.00272722		2850.18	0.00050034		3380.18	0.00150717		3910.18	-0.00457058
200.4	-0.00234227		730.39	-0.00226144		1260.39	0.0004476		1790.38	-0.00343205		2320.38	0.00270706		2850.38	0.00041901		3380.38	0.00060806		3910.38	-0.00572803
200.6	-0.00290815		730.59	-0.00208363		1260.59	0.00060402		1790.58	-0.0036813		2320.58	0.00311068		2850.58	-0.00009723		3380.58	0.00038051		3910.58	-0.00636935
200.8	-0.00267579		730.79	-0.0020123		1260.79	0.00086404		1790.78	-0.00368455		2320.78	0.0027922		2850.78	-0.00053398		3380.78	-0.00036586		3910.78	-0.00757116
201	-0.00283414		730.99	-0.00127258		1260.99	0.00186321		1790.98	-0.00396871		2320.98	0.00305939		2850.98	-0.00084914		3380.98	-0.00054305		3910.98	-0.00842952
201.2	-0.00258681		731.19	-0.00070257		1261.19	0.00159415		1791.18	-0.00382944		2321.18	0.0019517		2851.18	-0.00131775		3381.18	-0.00130693		3911.18	-0.00972104
201.4	-0.00222449		731.39	0.00002031		1261.39	0.00187053		1791.38	-0.00421246		2321.38	0.00144737		2851.38	-0.00201335		3381.38	-0.00236194		3911.38	-0.01044624
201.6	-0.00159942		731.59	0.00086225		1261.59	0.00253893		1791.58	-0.00395491		2321.58	0.00128752		2851.58	-0.00297751		3381.58	-0.00374505		3911.58	-0.01067711
201.8	-0.00145311		731.79	0.00111241		1261.79	0.00163594		1791.78	-0.00409321		2321.78	0.00157358		2851.78	-0.00384642		3381.78	-0.00539862		3911.78	-0.01081575
202	-0.00093711		731.99	0.00153251		1261.99	0.00135335		1791.98	-0.00388983		2321.98	0.00171004		2851.98	-0.00511344		3381.98	-0.00674012		3911.98	-0.01059964
202.2	-0.00043583		732.19	0.00142208		1262.19	0.00117535		1792.18	-0.00361029		2322.18	0.00138505		2852.18	-0.00550312		3382.18	-0.007539		3912.18	-0.01045619
202.4	-0.00160854		732.39	0.00182842		1262.39	0.00110288		1792.38	-0.00329409		2322.38	0.00059858		2852.38	-0.00588151		3382.38	-0.00923843		3912.38	-0.0109893
202.6	-0.00079655		732.59	0.00091241		1262.59	0.00129301		1792.58	-0.00356145		2322.58	0.00172235		2852.58	-0.00572009		3382.58	-0.00971249		3912.58	-0.01106761
202.8	0.00013552		732.79	0.00133149		1262.79	0.00135338		1792.78	-0.00262363		2322.78	0.00116422		2852.78	-0.00554057		3382.78	-0.01050623		3912.78	-0.0101831
203	-0.00040845		732.99	0.00014788		1262.99	0.00129292		1792.98	-0.0024911		2322.98	0.00094462		2852.98	-0.00533234		3382.98	-0.01124937		3912.98	-0.01026381
203.2	-0.00077514		733.19	-0.00068815		1263.19	0.00119637		1793.18	-0.00257449		2323.18	0.00064826		2853.18	-0.00539365		3383.18	-0.01177251		3913.18	-0.01035289
203.4	-0.00120368		733.39	-0.00242641		1263.39	0.00144155		1793.38	-0.00201065		2323.38	-0.00068943		2853.38	-0.00561471		3383.38	-0.0123535		3913.38	-0.01023239
203.6	-0.00161831		733.59	-0.00234676		1263.59	0.00118735		1793.58	-0.00311736		2323.58	-0.00104684		2853.58	-0.00546046		3383.58	-0.01201356		3913.58	-0.01041363
203.8	-0.00136768		733.79	-0.0025327		1263.79	0.00143831		1793.78	-0.00315819		2323.78	-0.00116246		2853.78	-0.00445101		3383.78	-0.01124556		3913.78	-0.01023158
204	-0.00179533		733.99	-0.00286563		1263.99	0.00044771		1793.98	-0.0035344		2323.98	-0.00095864		2853.98	-0.0035396		3383.98	-0.010784		3913.98	-0.01053647
204.2	-0.00240692		734.19	-0.00280558		1264.19	0.00009881		1794.18	-0.00320776		2324.18	-0.00034843		2854.18	-0.00268409		3384.18	-0.01011132		3914.18	-0.01126031
204.4	-0.00159664		734.39	-0.00349797		1264.39	-0.00047359		1794.38	-0.00325525		2324.38	0.0002724		2854.38	-0.00258872		3384.38	-0.00883086		3914.38	-0.01230976
204.6	-0.00159949		734.59	-0.00231456		1264.59	-0.0000869		1794.58	-0.00435195		2324.58	0.0007564		2854.58	-0.00254348		3384.58	-0.0071463		3914.58	-0.0130006
204.8	-0.00036634		734.79	-0.00151723		1264.79	0.0003892		1794.78	-0.00435339		2324.78	0.0003389		2854.78	-0.00209518		3384.78	-0.00612485		3914.78	-0.01367311
205	-0.00102278		734.99	-0.00038833		1264.99	0.00026745		1794.98	-0.0054552		2324.98	0.00066716		2854.98	-0.001881		3384.98	-0.00433668		3914.98	-0.01432822
205.2	-0.00042527		735.19	-0.00009649		1265.19	-0.00003891		1795.18	-0.00579048		2325.18	0.00007915		2855.18	-0.00187811		3385.18	-0.00491685		3915.18	-0.01480519
205.4	-0.00084238		735.39	0.00099471		1265.39	0.00066804		1795.38	-0.0064963		2325.38	0.00114441		2855.38	-0.00269276		3385.38	-0.00523197		3915.38	-0.01477279
205.6	-0.0004783		735.59	0.00170085		1265.59	0.00032739		1795.58	-0.00617781		2325.58	0.00196972		2855.58	-0.00312952		3385.58	-0.00626244		3915.58	-0.01459476
205.8	-0.00112298		735.79	0.00144962		1265.79	-0.00100764		1795.78	-0.0068104		2325.78	0.00260077		2855.78	-0.00435982		3385.78	-0.00646865		3915.78	-0.01512541
206	-0.00069724		735.99	0.0018503		1265.99	-0.00003939		1795.98	-0.00622999		2325.98	0.00275615		2855.98	-0.00460627		3385.98	-0.00638868		3915.98	-0.015585
206.2	-0.00069275		736.19	0.00119935		1266.19	0.0010171		1796.18	-0.00635809		2326.18	0.00264047		2856.18	-0.00455125		3386.18	-0.00706563		3916.18	-0.01590034
206.4	-0.0016212		736.39	0.0015185		1266.39	0.00136061		1796.38	-0.00549456		2326.38	0.00282606		2856.38	-0.00539741		3386.38	-0.00789661		3916.38	-0.0170188
206.6	-0.0019572		736.59	0.00008706		1266.59	0.00148119		1796.58	-0.0053349		2326.58	0.00413225		2856.58	-0.00569251		3386.58	-0.00836317		3916.58	-0.01734089
206.8	-0.00257104		736.79	-0.00013166		1266.79	0.00062782		1796.78	-0.00424206		2326.78	0.00337297		2856.78	-0.00512323		3386.78	-0.00881679		3916.78	-0.01663888
207	-0.00345636		736.99	-0.00169886		1266.99	0.00202279		1796.98	-0.00412671		2326.98	0.00207461		2856.98	-0.00518936		3386.98	-0.0080457		3916.98	-0.01707385
207.2	-0.00296705		737.19	-0.00253494		1267.19	0.00271897		1797.18	-0.00473292		2327.18	0.00154483		2857.18	-0.00502616		3387.18	-0.00906244		3917.18	-0.01757947
207.4	-0.00326327		737.39	-0.00359807		1267.39	0.0033361		1797.38	-0.00401271		2327.38	0.0005166		2857.38	-0.00561784		3387.38	-0.00938351		3917.38	-0.01761413
207.6	-0.00344398		737.59	-0.00372983		1267.59	0.0042894		1797.58	-0.00487971		2327.58	0.00038265		2857.58	-0.00465134		3387.58	-0.00996714		3917.58	-0.01846162
207.8	-0.00295786		737.79	-0.00464199		1267.79	0.0043756		1797.78	-0.00391623		2327.78	0.00044724		2857.78	-0.00433511		3387.78	-0.01087847		3917.78	-0.01879598
208	-0.00265925		737.99	-0.00470632		1267.99	0.00360279		1797.98	-0.00360299		2327.98	0.00023092		2857.98	-0.00449061		3387.98	-0.01178657		3917.98	-0.01968439
208.2	-0.00196327		738.19	-0.00470744		1268.19	0.00315856		1798.18	-0.00258997		2328.18	0.000989		2858.18	-0.00433963		3388.18	-0.01219862		3918.18	-0.01995285
208.4	-0.00085738		738.39	-0.00474736		1268.39	0.00335389		1798.38	-0.00244652		2328.38	0.00110405		2858.38	-0.00446574		3388.38	-0.01251638		3918.38	-0.01972804
208.6	-0.00077272		738.59	-0.00439933		1268.59	0.00349709		1798.58	-0.00334265		2328.58	0.001394		2858.58	-0.00467529		3388.58	-0.01283152		3918.58	-0.01951775
208.8	-0.00009027		738.79	-0.00441757		1268.79	0.00298066		1798.78	-0.00289518		2328.78	0.00127542		2858.78	-0.00579309		3388.78	-0.01262804		3918.78	-0.01944654
209	-0.00059824		738.99	-0.00430632		1268.99	0.00218267		1798.98	-0.00365134		2328.98	0.00197376		2858.98	-0.0062218		3388.98	-0.01299837		3918.98	-0.01980771
209.2	0.0001737		739.19	-0.00429327		1269.19	0.00242112		1799.18	-0.0040889		2329.18	0.00247328		2859.18	-0.00697958		3389.18	-0.01454174		3919.18	-0.02030027
209.4	-0.00021624		739.39	-0.00347896		1269.39	0.00245543		1799.38	-0.00411218		2329.38	0.00315535		2859.38	-0.00761115		3389.38	-0.01464973		3919.38	-0.01985789
209.6	0.00153732		739.59	-0.00351651		1269.59	0.00063834		1799.58	-0.0035555		2329.58	0.00315118		2859.58	-0.00838496		3389.58	-0.01556424		3919.58	-0.01915117
209.8	0.00189743		739.79	-0.00294536		1269.79	0.00037979		1799.78	-0.00384751		2329.78	0.00256303		2859.78	-0.00914952		3389.78	-0.0160801		3919.78	-0.02022695
210	0.00220797		739.99	-0.00211959		1269.99	0.00077474		1799.98	-0.00364383		2329.98	0.00216726		2859.98	-0.00864436		3389.98	-0.01653233		3919.98	-0.01967433
210.2	0.00150709		740.19	-0.00250524		1270.19	0.00070589		1800.18	-0.00343161		2330.18	0.0010492		2860.18	-0.00966264		3390.18	-0.01726791		3920.18	-0.01884675
210.4	0.00111511		740.39	-0.00234677		1270.39	0.00002945		1800.38	-0.00258055		2330.38	0.0000715		2860.38	-0.01049847		3390.38	-0.01692006		3920.38	-0.01936999
210.6	0.00113492		740.59	-0.0031982		1270.59	0.00029967		1800.58	-0.00279095		2330.58	-0.00074133		2860.58	-0.01022031		3390.58	-0.01645499		3920.58	-0.01961042
210.8	0.00087183		740.79	-0.00344159		1270.79	0.00039659		1800.78	-0.00320402		2330.78	-0.00170812		2860.78	-0.00959401		3390.78	-0.01512971		3920.78	-0.01910343
211	0.0000114		740.99	-0.00280113		1270.99	0.00150611		1800.98	-0.00376116		2330.98	-0.00329132		2860.98	-0.00980284		3390.98	-0.01426891		3920.98	-0.0195049
211.2	0.00015198		741.19	-0.00229964		1271.19	0.00053821		1801.18	-0.0051908		2331.18	-0.00286773		2861.18	-0.00983489		3391.18	-0.01516508		3921.18	-0.02027792
211.4	-0.00075896		741.39	-0.00180853		1271.39	0.00100402		1801.38	-0.00449185		2331.38	-0.00416512		2861.38	-0.00964193		3391.38	-0.01450974		3921.38	-0.02081168
211.6	-0.00079983		741.59	-0.00155038		1271.59	0.00063815		1801.58	-0.00485552		2331.58	-0.00382648		2861.58	-0.00892265		3391.58	-0.01502788		3921.58	-0.02219788
211.8	-0.00090374		741.79	-0.00065705		1271.79	0.00096231		1801.78	-0.00430132		2331.78	-0.00340429		2861.78	-0.0077808		3391.78	-0.01470753		3921.78	-0.02196441
212	-0.00163042		741.99	0.00025486		1271.99	0.00010651		1801.98	-0.00403754		2331.98	-0.0030321		2861.98	-0.00667625		3391.98	-0.01422398		3921.98	-0.02253731
212.2	-0.00179622		742.19	0.00040621		1272.19	0.00050691		1802.18	-0.00388464		2332.18	-0.00200742		2862.18	-0.00578107		3392.18	-0.01379146		3922.18	-0.02294588
212.4	-0.00269893		742.39	0.00012682		1272.39	0.00110074		1802.38	-0.00326472		2332.38	-0.00095953		2862.38	-0.00585795		3392.38	-0.01414579		3922.38	-0.02306073
212.6	-0.00272259		742.59	-0.00039411		1272.59	0.0010521		1802.58	-0.00330265		2332.58	-0.0000294		2862.58	-0.00663393		3392.58	-0.01327378		3922.58	-0.02289738
212.8	-0.0025223		742.79	-0.0010517		1272.79	0.00134585		1802.78	-0.00339683		2332.78	0.00070428		2862.78	-0.00693079		3392.78	-0.01305282		3922.78	-0.02359979
213	-0.00221558		742.99	-0.00132399		1272.99	0.00173164		1802.98	-0.00324271		2332.98	0.00198483		2862.98	-0.00675786		3392.98	-0.0136568		3922.98	-0.02356366
213.2	-0.0014473		743.19	-0.00197324		1273.19	0.0014081		1803.18	-0.00341462		2333.18	0.00244193		2863.18	-0.00777862		3393.18	-0.01483583		3923.18	-0.0234481
213.4	-0.0017552		743.39	-0.00224458		1273.39	0.00165594		1803.38	-0.00271844		2333.38	0.00334348		2863.38	-0.00800116		3393.38	-0.01542241		3923.38	-0.02320801
213.6	-0.00083663		743.59	-0.00306277		1273.59	0.0008363		1803.58	-0.00249977		2333.58	0.00260739		2863.58	-0.00840418		3393.58	-0.01727171		3923.58	-0.0230209
213.8	-0.00151272		743.79	-0.00335555		1273.79	0.00161176		1803.78	-0.00204095		2333.78	0.0020277		2863.78	-0.00929184		3393.78	-0.01820903		3923.78	-0.02356042
214	-0.00260431		743.99	-0.00432697		1273.99	0.00172478		1803.98	-0.00230945		2333.98	0.00127157		2863.98	-0.01092022		3393.98	-0.01865914		3923.98	-0.02234214
214.2	-0.00243935		744.19	-0.00592242		1274.19	0.00170448		1804.18	-0.00189737		2334.18	-0.00015297		2864.18	-0.01193207		3394.18	-0.01968633		3924.18	-0.02215899
214.4	-0.00191248		744.39	-0.00702886		1274.39	0.00161497		1804.38	-0.00237919		2334.38	-0.00093832		2864.38	-0.01260498		3394.38	-0.02006196		3924.38	-0.0226943
214.6	-0.00216967		744.59	-0.00756859		1274.59	0.00207316		1804.58	-0.00259611		2334.58	-0.00184776		2864.58	-0.01281617		3394.58	-0.01988773		3924.58	-0.02316164
214.8	-0.00311435		744.79	-0.0065342		1274.79	0.00204311		1804.78	-0.00311191		2334.78	-0.00219636		2864.78	-0.01368138		3394.78	-0.0204113		3924.78	-0.02353871
215	-0.00305203		744.99	-0.00615317		1274.99	0.00148044		1804.98	-0.00371946		2334.98	-0.0042177		2864.98	-0.01382056		3394.98	-0.02107709		3924.98	-0.024209
215.2	-0.00295108		745.19	-0.00576199		1275.19	0.00115661		1805.18	-0.00406438		2335.18	-0.0044566		2865.18	-0.01438008		3395.18	-0.02166255		3925.18	-0.02497959
215.4	-0.00379855		745.39	-0.00530487		1275.39	0.00130205		1805.38	-0.00325506		2335.38	-0.00523916		2865.38	-0.0144596		3395.38	-0.02172531		3925.38	-0.02612336
215.6	-0.00370719		745.59	-0.00478246		1275.59	0.00010478		1805.58	-0.0046213		2335.58	-0.00493795		2865.58	-0.01351095		3395.58	-0.02213234		3925.58	-0.02656678
215.8	-0.00449513		745.79	-0.004307		1275.79	-0.00005627		1805.78	-0.00569072		2335.78	-0.00508855		2865.78	-0.01246301		3395.78	-0.02240938		3925.78	-0.02681906
216	-0.00473018		745.99	-0.00405845		1275.99	-0.00094577		1805.98	-0.00581374		2335.98	-0.00538824		2865.98	-0.01151759		3395.98	-0.0215233		3925.98	-0.0275755
216.2	-0.00476041		746.19	-0.00408253		1276.19	-0.00102153		1806.18	-0.00665948		2336.18	-0.00500756		2866.18	-0.01089768		3396.18	-0.02173055		3926.18	-0.02801673
216.4	-0.00435184		746.39	-0.00431713		1276.39	-0.00118923		1806.38	-0.00615445		2336.38	-0.00498868		2866.38	-0.01068347		3396.38	-0.02215874		3926.38	-0.02778097
216.6	-0.00367679		746.59	-0.00431649		1276.59	-0.0015617		1806.58	-0.00661054		2336.58	-0.00511958		2866.58	-0.01109448		3396.58	-0.02122483		3926.58	-0.0279721
216.8	-0.00302012		746.79	-0.0045856		1276.79	-0.00145092		1806.78	-0.00643029		2336.78	-0.00469974		2866.78	-0.01025832		3396.78	-0.02153615		3926.78	-0.02837838
217	-0.00203997		746.99	-0.00434807		1276.99	-0.00261677		1806.98	-0.00700956		2336.98	-0.00447728		2866.98	-0.01094315		3396.98	-0.02203427		3926.98	-0.0280199
217.2	-0.00245549		747.19	-0.00419954		1277.19	-0.00215342		1807.18	-0.00748012		2337.18	-0.0043839		2867.18	-0.0115238		3397.18	-0.02245156		3927.18	-0.02843834
217.4	-0.00304072		747.39	-0.00454898		1277.39	-0.00138291		1807.38	-0.00778969		2337.38	-0.00383955		2867.38	-0.0109097		3397.38	-0.02241868		3927.38	-0.02866642
217.6	-0.003225		747.59	-0.00473209		1277.59	-0.00130158		1807.58	-0.00791358		2337.58	-0.00486145		2867.58	-0.01160039		3397.58	-0.02323131		3927.58	-0.02766134
217.8	-0.00345968		747.79	-0.00488004		1277.79	-0.00074402		1807.78	-0.00729758		2337.78	-0.00476941		2867.78	-0.01208311		3397.78	-0.02329032		3927.78	-0.02808464
218	-0.00372081		747.99	-0.00507532		1277.99	-0.00043497		1807.98	-0.00740516		2337.98	-0.00431433		2867.98	-0.0119782		3397.98	-0.02301901		3927.98	-0.02739817
218.2	-0.00300054		748.19	-0.00614677		1278.19	0.00038749		1808.18	-0.00713625		2338.18	-0.00409891		2868.18	-0.01112782		3398.18	-0.02357657		3928.18	-0.02703274
218.4	-0.00266915		748.39	-0.00584691		1278.39	0.00060875		1808.38	-0.00647933		2338.38	-0.00319226		2868.38	-0.01140198		3398.38	-0.02278116		3928.38	-0.02653557
218.6	-0.00372617		748.59	-0.00566237		1278.59	0.00178275		1808.58	-0.00517786		2338.58	-0.003755		2868.58	-0.01173171		3398.58	-0.02280912		3928.58	-0.02668589
218.8	-0.00381969		748.79	-0.00405788		1278.79	0.0022018		1808.78	-0.00472319		2338.78	-0.0036309		2868.78	-0.01236191		3398.78	-0.02342736		3928.78	-0.02686244
219	-0.00356245		748.99	-0.00399718		1278.99	0.00219034		1808.98	-0.00510829		2338.98	-0.00367433		2868.98	-0.01260226		3398.98	-0.02320736		3928.98	-0.02715194
219.2	-0.00411926		749.19	-0.00367878		1279.19	0.00267635		1809.18	-0.00548503		2339.18	-0.00330679		2869.18	-0.01308479		3399.18	-0.02230619		3929.18	-0.02774365
219.4	-0.0038242		749.39	-0.00378613		1279.39	0.00216119		1809.38	-0.00564876		2339.38	-0.00202799		2869.38	-0.01298827		3399.38	-0.0220257		3929.38	-0.02777568
219.6	-0.00439897		749.59	-0.00337516		1279.59	0.00169565		1809.58	-0.00691882		2339.58	-0.00236947		2869.58	-0.0133304		3399.58	-0.02267954		3929.58	-0.02793063
219.8	-0.00411055		749.79	-0.00319897		1279.79	0.00186315		1809.78	-0.00703833		2339.78	-0.00251276		2869.78	-0.01379767		3399.78	-0.02254346		3929.78	-0.02829918
220	-0.00280061		749.99	-0.00306006		1279.99	0.00148869		1809.98	-0.00704027		2339.98	-0.0020946		2869.98	-0.0143931		3399.98	-0.02191482		3929.98	-0.02877316
220.2	-0.00247169		750.19	-0.00256069		1280.19	0.00180828		1810.18	-0.00761383		2340.18	-0.00224629		2870.18	-0.0149919		3400.18	-0.02266868		3930.18	-0.02991334
220.4	-0.00206428		750.39	-0.00281611		1280.39	0.00160024		1810.38	-0.00737683		2340.38	-0.00229485		2870.38	-0.01609378		3400.38	-0.02269453		3930.38	-0.03004489
220.6	-0.00158666		750.59	-0.00251018		1280.59	0.00077923		1810.58	-0.00726095		2340.58	-0.00246354		2870.58	-0.01681368		3400.58	-0.02239593		3930.58	-0.03156089
220.8	-0.00050809		750.79	-0.00180502		1280.79	0.00092415		1810.78	-0.00794537		2340.78	-0.00254013		2870.78	-0.01715956		3400.78	-0.02183559		3930.78	-0.03207313
221	0.000016		750.99	-0.00119575		1280.99	0.00053873		1810.98	-0.00854649		2340.98	-0.00348328		2870.98	-0.01811425		3400.98	-0.02210081		3930.98	-0.03255813
221.2	-0.00080023		751.19	-0.00104245		1281.19	0.00185956		1811.18	-0.0083303		2341.18	-0.00404968		2871.18	-0.01852803		3401.18	-0.02239404		3931.18	-0.03326158
221.4	-0.00093762		751.39	-0.00132409		1281.39	0.00091651		1811.38	-0.00860043		2341.38	-0.00521605		2871.38	-0.0187282		3401.38	-0.02289103		3931.38	-0.03328085
221.6	-0.00073416		751.59	-0.00135353		1281.59	0.0006922		1811.58	-0.00804041		2341.58	-0.00575693		2871.58	-0.01871524		3401.58	-0.02353309		3931.58	-0.03379383
221.8	-0.00056618		751.79	-0.00141864		1281.79	0.00044285		1811.78	-0.00676395		2341.78	-0.00543875		2871.78	-0.01726592		3401.78	-0.02417747		3931.78	-0.03407955
222	-0.0009601		751.99	-0.0013267		1281.99	0.00028626		1811.98	-0.00669103		2341.98	-0.00574473		2871.98	-0.01729004		3401.98	-0.02407624		3931.98	-0.03346479
222.2	-0.00144663		752.19	-0.00149716		1282.19	-0.00011145		1812.18	-0.00605227		2342.18	-0.00566703		2872.18	-0.01739001		3402.18	-0.02499927		3932.18	-0.03296277
222.4	-0.00142387		752.39	-0.00093803		1282.39	-0.00021896		1812.38	-0.00507143		2342.38	-0.00548465		2872.38	-0.01716764		3402.38	-0.0250617		3932.38	-0.03289686
222.6	-0.00231325		752.59	-0.00128799		1282.59	-0.0007602		1812.58	-0.00483408		2342.58	-0.0060295		2872.58	-0.01734632		3402.58	-0.02640404		3932.58	-0.03357068
222.8	-0.00203351		752.79	-0.00017246		1282.79	-0.00094623		1812.78	-0.00566117		2342.78	-0.00540497		2872.78	-0.01636193		3402.78	-0.02660048		3932.78	-0.03356311
223	-0.00272587		752.99	-0.0008407		1282.99	-0.00126511		1812.98	-0.00631905		2342.98	-0.00580343		2872.98	-0.01592523		3402.98	-0.02656669		3932.98	-0.03481158
223.2	-0.0029613		753.19	-0.00202992		1283.19	-0.0017509		1813.18	-0.00620504		2343.18	-0.0062632		2873.18	-0.01528718		3403.18	-0.02632656		3933.18	-0.03531372
223.4	-0.00343828		753.39	-0.0028081		1283.39	-0.00207619		1813.38	-0.00631495		2343.38	-0.00633307		2873.38	-0.01463304		3403.38	-0.026047		3933.38	-0.03573631
223.6	-0.00414994		753.59	-0.00286389		1283.59	-0.0014907		1813.58	-0.00618332		2343.58	-0.00709381		2873.58	-0.01514348		3403.58	-0.02659388		3933.58	-0.03557434
223.8	-0.0037604		753.79	-0.00343129		1283.79	-0.00104242		1813.78	-0.00632748		2343.78	-0.00600007		2873.78	-0.01496826		3403.78	-0.02570127		3933.78	-0.03575222
224	-0.00328317		753.99	-0.00465086		1283.99	-0.00153077		1813.98	-0.00614037		2343.98	-0.00509438		2873.98	-0.01600178		3403.98	-0.02594126		3933.98	-0.03655825
224.2	-0.0036358		754.19	-0.00428635		1284.19	-0.00065097		1814.18	-0.0059461		2344.18	-0.00542226		2874.18	-0.01624518		3404.18	-0.02569738		3934.18	-0.03662347
224.4	-0.0030794		754.39	-0.00480157		1284.39	-0.0003814		1814.38	-0.00602496		2344.38	-0.00449816		2874.38	-0.01687292		3404.38	-0.02549339		3934.38	-0.03578659
224.6	-0.0027219		754.59	-0.00441833		1284.59	0.00007367		1814.58	-0.00548821		2344.58	-0.0052079		2874.58	-0.0171699		3404.58	-0.02499979		3934.58	-0.03751007
224.8	-0.0022899		754.79	-0.0035205		1284.79	0.00089283		1814.78	-0.00487246		2344.78	-0.00510649		2874.78	-0.01899251		3404.78	-0.02451964		3934.78	-0.03669968
225	-0.00185671		754.99	-0.00415548		1284.99	0.00135682		1814.98	-0.00397059		2344.98	-0.00467647		2874.98	-0.01962227		3404.98	-0.02519322		3934.98	-0.03658986
225.2	-0.00215361		755.19	-0.00409796		1285.19	0.00192563		1815.18	-0.00336622		2345.18	-0.00441798		2875.18	-0.02044133		3405.18	-0.02596703		3935.18	-0.03568855
225.4	-0.00246928		755.39	-0.00346677		1285.39	0.00119809		1815.38	-0.00233663		2345.38	-0.00412656		2875.38	-0.02093812		3405.38	-0.02670123		3935.38	-0.03568361
225.6	-0.00203997		755.59	-0.00361279		1285.59	0.00088713		1815.58	-0.00174728		2345.58	-0.00320653		2875.58	-0.02048525		3405.58	-0.02774436		3935.58	-0.03530237
225.8	-0.00240394		755.79	-0.00279861		1285.79	0.0004048		1815.78	-0.00140691		2345.78	-0.00357195		2875.78	-0.0198104		3405.78	-0.02814916		3935.78	-0.03445724
226	-0.00267558		755.99	-0.00277184		1285.99	-0.00001451		1815.98	-0.00148606		2345.98	-0.00470577		2875.98	-0.01957856		3405.98	-0.02862102		3935.98	-0.03392025
226.2	-0.00224654		756.19	-0.00263526		1286.19	-0.00061703		1816.18	-0.00208232		2346.18	-0.00449764		2876.18	-0.01867714		3406.18	-0.02974203		3936.18	-0.03375076
226.4	-0.00124532		756.39	-0.00256618		1286.39	-0.00023503		1816.38	-0.00281113		2346.38	-0.00545096		2876.38	-0.01750457		3406.38	-0.03135384		3936.38	-0.03403053
226.6	-0.00119703		756.59	-0.00243227		1286.59	-0.00178537		1816.58	-0.00366153		2346.58	-0.00575856		2876.58	-0.01723693		3406.58	-0.03229108		3936.58	-0.03465602
226.8	-0.00108305		756.79	-0.00263024		1286.79	-0.00170012		1816.78	-0.00402031		2346.78	-0.00607174		2876.78	-0.01665651		3406.78	-0.03212504		3936.78	-0.03496121
227	-0.0014665		756.99	-0.00339417		1286.99	-0.00286112		1816.98	-0.0038412		2346.98	-0.00679222		2876.98	-0.01715552		3406.98	-0.03200644		3936.98	-0.03680878
227.2	-0.00132927		757.19	-0.003831		1287.19	-0.00313199		1817.18	-0.00423278		2347.18	-0.00667807		2877.18	-0.01653531		3407.18	-0.03177181		3937.18	-0.03777306
227.4	-0.00092586		757.39	-0.00433257		1287.39	-0.00312798		1817.38	-0.00511236		2347.38	-0.007555		2877.38	-0.01589587		3407.38	-0.03079786		3937.38	-0.03806249
227.6	-0.00133875		757.59	-0.0047877		1287.59	-0.00302816		1817.58	-0.00583744		2347.58	-0.00675219		2877.58	-0.01638076		3407.58	-0.03188739		3937.58	-0.0376421
227.8	-0.00114429		757.79	-0.00459191		1287.79	-0.00328125		1817.78	-0.00618588		2347.78	-0.00686399		2877.78	-0.01640957		3407.78	-0.0317488		3937.78	-0.03901655
228	-0.00119393		757.99	-0.00495181		1287.99	-0.00393433		1817.98	-0.00611593		2347.98	-0.00676402		2877.98	-0.01762646		3407.98	-0.03199924		3937.98	-0.03958782
228.2	-0.00169268		758.19	-0.00463957		1288.19	-0.00337783		1818.18	-0.00750815		2348.18	-0.00664141		2878.18	-0.01904927		3408.18	-0.03206011		3938.18	-0.03912162
228.4	-0.00235098		758.39	-0.00487964		1288.39	-0.00339298		1818.38	-0.00746116		2348.38	-0.00550092		2878.38	-0.02029395		3408.38	-0.03210914		3938.38	-0.03910502
228.6	-0.00314886		758.59	-0.00463035		1288.59	-0.00407638		1818.58	-0.00741854		2348.58	-0.00523036		2878.58	-0.0212797		3408.58	-0.03152578		3938.58	-0.0401591
228.8	-0.00310168		758.79	-0.00425533		1288.79	-0.00355498		1818.78	-0.00687429		2348.78	-0.00433558		2878.78	-0.02283504		3408.78	-0.03180818		3938.78	-0.03974267
229	-0.00342758		758.99	-0.00503434		1288.99	-0.00283073		1818.98	-0.0065436		2348.98	-0.00353223		2878.98	-0.0232241		3408.98	-0.03212498		3938.98	-0.04010181
229.2	-0.00483463		759.19	-0.00378011		1289.19	-0.00214369		1819.18	-0.00638502		2349.18	-0.00365349		2879.18	-0.02368862		3409.18	-0.03257819		3939.18	-0.03969436
229.4	-0.00578327		759.39	-0.00379121		1289.39	-0.00221335		1819.38	-0.00638454		2349.38	-0.00296683		2879.38	-0.02333946		3409.38	-0.03368552		3939.38	-0.04024733
229.6	-0.00705198		759.59	-0.00436183		1289.59	-0.00247747		1819.58	-0.0068217		2349.58	-0.00319662		2879.58	-0.02217016		3409.58	-0.03338744		3939.58	-0.03885917
229.8	-0.00731202		759.79	-0.00450588		1289.79	-0.00204058		1819.78	-0.00682578		2349.78	-0.00336141		2879.78	-0.02101274		3409.78	-0.03279907		3939.78	-0.03920296
230	-0.00738695		759.99	-0.00421057		1289.99	-0.00195735		1819.98	-0.00621258		2349.98	-0.00369805		2879.98	-0.02036		3409.98	-0.03283462		3939.98	-0.03943322
230.2	-0.00649657		760.19	-0.00363425		1290.19	-0.00124166		1820.18	-0.00696699		2350.18	-0.00337568		2880.18	-0.01996543		3410.18	-0.03380947		3940.18	-0.03996008
230.4	-0.00580643		760.39	-0.00283823		1290.39	-0.00114973		1820.38	-0.00688881		2350.38	-0.00342086		2880.38	-0.0205298		3410.38	-0.03399155		3940.38	-0.03959148
230.6	-0.00544934		760.59	-0.00276253		1290.59	-0.00179184		1820.58	-0.0070251		2350.58	-0.00324685		2880.58	-0.02045232		3410.58	-0.03335446		3940.58	-0.03998103
230.8	-0.00509451		760.79	-0.00302672		1290.79	-0.00152031		1820.78	-0.0065878		2350.78	-0.00350035		2880.78	-0.02060758		3410.78	-0.03284111		3940.78	-0.04011051
231	-0.00502192		760.99	-0.00280182		1290.99	-0.00104977		1820.98	-0.00637593		2350.98	-0.00305789		2880.98	-0.02030886		3410.98	-0.03356823		3940.98	-0.04125372
231.2	-0.00444387		761.19	-0.00247597		1291.19	-0.00138373		1821.18	-0.00668598		2351.18	-0.00401132		2881.18	-0.01986554		3411.18	-0.03368384		3941.18	-0.04196185
231.4	-0.00377514		761.39	-0.0026703		1291.39	-0.00175337		1821.38	-0.00701526		2351.38	-0.00480676		2881.38	-0.0194804		3411.38	-0.03298381		3941.38	-0.04192197
231.6	-0.00316596		761.59	-0.00156167		1291.59	-0.00224992		1821.58	-0.00696367		2351.58	-0.00479338		2881.58	-0.02029358		3411.58	-0.03330733		3941.58	-0.04198103
231.8	-0.00254879		761.79	-0.00102341		1291.79	-0.00230856		1821.78	-0.00580883		2351.78	-0.00574297		2881.78	-0.02085864		3411.78	-0.03319305		3941.78	-0.04210529
232	-0.00315173		761.99	-0.00126293		1291.99	-0.00317101		1821.98	-0.00605608		2351.98	-0.00520734		2881.98	-0.02189724		3411.98	-0.03226312		3941.98	-0.04146894
232.2	-0.00252496		762.19	-0.0021992		1292.19	-0.00357132		1822.18	-0.00674399		2352.18	-0.00486471		2882.18	-0.02304853		3412.18	-0.03235127		3942.18	-0.04106844
232.4	-0.00298255		762.39	-0.00213373		1292.39	-0.00460454		1822.38	-0.00567997		2352.38	-0.00544546		2882.38	-0.02295036		3412.38	-0.03262857		3942.38	-0.04126134
232.6	-0.00280688		762.59	-0.00297847		1292.59	-0.00525848		1822.58	-0.00592667		2352.58	-0.00566232		2882.58	-0.02339302		3412.58	-0.03211083		3942.58	-0.04166189
232.8	-0.00315423		762.79	-0.00325723		1292.79	-0.00483034		1822.78	-0.00629498		2352.78	-0.006653		2882.78	-0.02385343		3412.78	-0.03321665		3942.78	-0.04178162
233	-0.0037037		762.99	-0.00363559		1292.99	-0.00492868		1822.98	-0.00592433		2352.98	-0.00652562		2882.98	-0.02389824		3412.98	-0.03362919		3942.98	-0.04077481
233.2	-0.00365382		763.19	-0.00242696		1293.19	-0.00544361		1823.18	-0.00673952		2353.18	-0.00722727		2883.18	-0.02361242		3413.18	-0.03484355		3943.18	-0.04034685
233.4	-0.00482652		763.39	-0.00246481		1293.39	-0.00583752		1823.38	-0.00748963		2353.38	-0.00751218		2883.38	-0.02313077		3413.38	-0.03502969		3943.38	-0.03957735
233.6	-0.00590683		763.59	-0.00240598		1293.59	-0.00600934		1823.58	-0.00709355		2353.58	-0.00822636		2883.58	-0.02318948		3413.58	-0.03393844		3943.58	-0.03892726
233.8	-0.00580755		763.79	-0.00201157		1293.79	-0.0055603		1823.78	-0.00784845		2353.78	-0.00782598		2883.78	-0.02280426		3413.78	-0.03398351		3943.78	-0.04025425
234	-0.00617268		763.99	-0.00146487		1293.99	-0.00558928		1823.98	-0.00766292		2353.98	-0.0078381		2883.98	-0.02307374		3413.98	-0.03435633		3943.98	-0.04003305
234.2	-0.00617964		764.19	-0.00067026		1294.19	-0.00562588		1824.18	-0.0088515		2354.18	-0.00787969		2884.18	-0.02370216		3414.18	-0.03609542		3944.18	-0.04012579
234.4	-0.00642545		764.39	-0.00056554		1294.39	-0.00626684		1824.38	-0.00893132		2354.38	-0.007739		2884.38	-0.0241082		3414.38	-0.03574818		3944.38	-0.04029626
234.6	-0.0069364		764.59	-0.00115082		1294.59	-0.00640472		1824.58	-0.00975644		2354.58	-0.00760109		2884.58	-0.0228966		3414.58	-0.03676022		3944.58	-0.04136567
234.8	-0.00674974		764.79	-0.00090616		1294.79	-0.00594285		1824.78	-0.00995541		2354.78	-0.00678359		2884.78	-0.02397006		3414.78	-0.03765985		3944.78	-0.04269849
235	-0.00659273		764.99	-0.0011161		1294.99	-0.00564186		1824.98	-0.01013513		2354.98	-0.0057377		2884.98	-0.02484089		3414.98	-0.03855929		3944.98	-0.04391332
235.2	-0.00569109		765.19	-0.00071167		1295.19	-0.00587834		1825.18	-0.00985367		2355.18	-0.00569627		2885.18	-0.02520225		3415.18	-0.03811019		3945.18	-0.04522127
235.4	-0.00522864		765.39	-0.0006159		1295.39	-0.00411005		1825.38	-0.00884415		2355.38	-0.00465444		2885.38	-0.0258454		3415.38	-0.03747797		3945.38	-0.04583813
235.6	-0.0041843		765.59	-0.00054522		1295.59	-0.00388515		1825.58	-0.00812448		2355.58	-0.0040256		2885.58	-0.02654638		3415.58	-0.03828292		3945.58	-0.04688048
235.8	-0.00460597		765.79	-0.00262614		1295.79	-0.00332668		1825.78	-0.00814341		2355.78	-0.00380047		2885.78	-0.02720999		3415.78	-0.03830396		3945.78	-0.04747747
236	-0.00413132		765.99	-0.00304182		1295.99	-0.0031016		1825.98	-0.00859007		2355.98	-0.00374762		2885.98	-0.02707877		3415.98	-0.03773253		3945.98	-0.04794897
236.2	-0.00413116		766.19	-0.00408596		1296.19	-0.00314957		1826.18	-0.0079097		2356.18	-0.0032916		2886.18	-0.02633308		3416.18	-0.03824755		3946.18	-0.04802172
236.4	-0.00486758		766.39	-0.00520953		1296.39	-0.0030076		1826.38	-0.00753843		2356.38	-0.00417671		2886.38	-0.02539726		3416.38	-0.03802685		3946.38	-0.04818934
236.6	-0.00463937		766.59	-0.00598725		1296.59	-0.00240495		1826.58	-0.00718126		2356.58	-0.00374171		2886.58	-0.02533966		3416.58	-0.03740147		3946.58	-0.04847897
236.8	-0.0047849		766.79	-0.00523848		1296.79	-0.00168292		1826.78	-0.00728441		2356.78	-0.00505381		2886.78	-0.02506845		3416.78	-0.03849909		3946.78	-0.04809779
237	-0.00498693		766.99	-0.00465779		1296.99	-0.00146842		1826.98	-0.00694573		2356.98	-0.00450654		2886.98	-0.02424658		3416.98	-0.03859937		3946.98	-0.04781295
237.2	-0.00549434		767.19	-0.00440481		1297.19	-0.0014882		1827.18	-0.00748212		2357.18	-0.00593648		2887.18	-0.02375461		3417.18	-0.03904342		3947.18	-0.04698942
237.4	-0.00727045		767.39	-0.00467799		1297.39	-0.00079298		1827.38	-0.0075108		2357.38	-0.00641144		2887.38	-0.02343073		3417.38	-0.03748563		3947.38	-0.04628839
237.6	-0.00816684		767.59	-0.00511044		1297.59	-0.00025089		1827.58	-0.00713146		2357.58	-0.00665337		2887.58	-0.02318101		3417.58	-0.03754722		3947.58	-0.04623579
237.8	-0.00822476		767.79	-0.00494935		1297.79	-0.00009822		1827.78	-0.00742038		2357.78	-0.00700738		2887.78	-0.02298169		3417.78	-0.03777342		3947.78	-0.04661878
238	-0.00818378		767.99	-0.0043222		1297.99	0.00014572		1827.98	-0.00698027		2357.98	-0.0074205		2887.98	-0.02354103		3417.98	-0.03793478		3947.98	-0.04585584
238.2	-0.00781108		768.19	-0.00419889		1298.19	0.00016418		1828.18	-0.00730369		2358.18	-0.00750439		2888.18	-0.02433616		3418.18	-0.03768187		3948.18	-0.04564228
238.4	-0.00783759		768.39	-0.00465519		1298.39	-0.00053454		1828.38	-0.00653409		2358.38	-0.00783499		2888.38	-0.02447908		3418.38	-0.03625113		3948.38	-0.04601722
238.6	-0.00795204		768.59	-0.00469589		1298.59	-0.00133426		1828.58	-0.00785245		2358.58	-0.00818989		2888.58	-0.02443194		3418.58	-0.03665691		3948.58	-0.04699036
238.8	-0.0075859		768.79	-0.00486532		1298.79	-0.00054873		1828.78	-0.00712513		2358.78	-0.00771715		2888.78	-0.02579605		3418.78	-0.03558147		3948.78	-0.04755598
239	-0.00786752		768.99	-0.00504971		1298.99	-0.00016979		1828.98	-0.00727299		2358.98	-0.00773611		2888.98	-0.02612232		3418.98	-0.03524196		3948.98	-0.04746724
239.2	-0.00791064		769.19	-0.00480578		1299.19	0.00021325		1829.18	-0.00656898		2359.18	-0.00788401		2889.18	-0.02677521		3419.18	-0.03517722		3949.18	-0.0478678
239.4	-0.00724578		769.39	-0.004975		1299.39	0.00090354		1829.38	-0.00637078		2359.38	-0.00836778		2889.38	-0.02733003		3419.38	-0.03497941		3949.38	-0.04809843
239.6	-0.00723385		769.59	-0.005686		1299.59	0.00024793		1829.58	-0.00649769		2359.58	-0.00893466		2889.58	-0.02754826		3419.58	-0.03626162		3949.58	-0.0481342
239.8	-0.00754471		769.79	-0.00652521		1299.79	-0.00075164		1829.78	-0.00715941		2359.78	-0.00967724		2889.78	-0.02758969		3419.78	-0.03642562		3949.78	-0.04767954
240	-0.00680338		769.99	-0.00717926		1299.99	-0.00075639		1829.98	-0.00678295		2359.98	-0.010073		2889.98	-0.02673398		3419.98	-0.0371407		3949.98	-0.04745813
240.2	-0.00722452		770.19	-0.00685804		1300.19	-0.00160914		1830.18	-0.00640819		2360.18	-0.01003721		2890.18	-0.02577305		3420.18	-0.03837038		3950.18	-0.04735107
240.4	-0.00666022		770.39	-0.00719054		1300.39	-0.00144429		1830.38	-0.00607484		2360.38	-0.01027489		2890.38	-0.02651419		3420.38	-0.0389248		3950.38	-0.04768645
240.6	-0.00595964		770.59	-0.00589332		1300.59	-0.00078283		1830.58	-0.00526946		2360.58	-0.00996997		2890.58	-0.02685396		3420.58	-0.04002207		3950.58	-0.04764344
240.8	-0.00625733		770.79	-0.00565483		1300.79	-0.00111284		1830.78	-0.00522112		2360.78	-0.01051402		2890.78	-0.02656211		3420.78	-0.04159143		3950.78	-0.04821776
241	-0.00657658		770.99	-0.00570062		1300.99	-0.00115682		1830.98	-0.0047197		2360.98	-0.00903069		2890.98	-0.02585492		3420.98	-0.04234781		3950.98	-0.04884776
241.2	-0.00581869		771.19	-0.00566329		1301.19	-0.00130796		1831.18	-0.0050643		2361.18	-0.008687		2891.18	-0.0261887		3421.18	-0.04349504		3951.18	-0.04900457
241.4	-0.0053463		771.39	-0.0050849		1301.39	-0.00121482		1831.38	-0.00459245		2361.38	-0.0083537		2891.38	-0.0262003		3421.38	-0.04351457		3951.38	-0.04990692
241.6	-0.00494156		771.59	-0.00508593		1301.59	-0.00177645		1831.58	-0.00409928		2361.58	-0.0076228		2891.58	-0.02639004		3421.58	-0.04455276		3951.58	-0.05028709
241.8	-0.00391738		771.79	-0.00431659		1301.79	-0.00218874		1831.78	-0.00414412		2361.78	-0.00696831		2891.78	-0.02734754		3421.78	-0.04467453		3951.78	-0.05117887
242	-0.00364238		771.99	-0.00439393		1301.99	-0.00255155		1831.98	-0.00467601		2361.98	-0.00686571		2891.98	-0.02730617		3421.98	-0.04403468		3951.98	-0.05132751
242.2	-0.002874		772.19	-0.00473672		1302.19	-0.00346199		1832.18	-0.00500992		2362.18	-0.00625143		2892.18	-0.0282927		3422.18	-0.04302053		3952.18	-0.0513921
242.4	-0.00259057		772.39	-0.00491577		1302.39	-0.00422786		1832.38	-0.00565917		2362.38	-0.00623458		2892.38	-0.02818958		3422.38	-0.04206412		3952.38	-0.05173053
242.6	-0.00206292		772.59	-0.00571011		1302.59	-0.00442048		1832.58	-0.00656245		2362.58	-0.00526974		2892.58	-0.02857205		3422.58	-0.04111501		3952.58	-0.05252705
242.8	-0.00124523		772.79	-0.0059413		1302.79	-0.00322496		1832.78	-0.00664182		2362.78	-0.00493448		2892.78	-0.02829823		3422.78	-0.04036262		3952.78	-0.05308993
243	-0.00120038		772.99	-0.00467405		1302.99	-0.00426099		1832.98	-0.0075849		2362.98	-0.0049228		2892.98	-0.02820829		3422.98	-0.04072235		3952.98	-0.05295194
243.2	-0.00132736		773.19	-0.00430278		1303.19	-0.00500848		1833.18	-0.00747331		2363.18	-0.00496211		2893.18	-0.02882388		3423.18	-0.0403997		3953.18	-0.0538927
243.4	-0.00102387		773.39	-0.00411525		1303.39	-0.00478212		1833.38	-0.00862261		2363.38	-0.00584016		2893.38	-0.02875213		3423.38	-0.04001392		3953.38	-0.05348437
243.6	-0.00223066		773.59	-0.00465859		1303.59	-0.005186		1833.58	-0.00825447		2363.58	-0.00612451		2893.58	-0.02833508		3423.58	-0.04087857		3953.58	-0.05321696
243.8	-0.00147772		773.79	-0.00482359		1303.79	-0.00537162		1833.78	-0.00878478		2363.78	-0.00603426		2893.78	-0.02869831		3423.78	-0.04123312		3953.78	-0.0533803
244	-0.00194698		773.99	-0.00528756		1303.99	-0.00444427		1833.98	-0.00899516		2363.98	-0.00627369		2893.98	-0.02923048		3423.98	-0.04194148		3953.98	-0.05303147
244.2	-0.00288655		774.19	-0.00376327		1304.19	-0.00416288		1834.18	-0.00900574		2364.18	-0.00661435		2894.18	-0.02917003		3424.18	-0.04269248		3954.18	-0.0529656
244.4	-0.00406672		774.39	-0.00386075		1304.39	-0.00253599		1834.38	-0.00809755		2364.38	-0.00692048		2894.38	-0.02902854		3424.38	-0.04280443		3954.38	-0.0532017
244.6	-0.00490766		774.59	-0.00414346		1304.59	-0.00124984		1834.58	-0.00780394		2364.58	-0.00726196		2894.58	-0.02886217		3424.58	-0.04333676		3954.58	-0.05277849
244.8	-0.00611424		774.79	-0.00531673		1304.79	-0.00056392		1834.78	-0.00757624		2364.78	-0.00677332		2894.78	-0.02711017		3424.78	-0.04417976		3954.78	-0.05374853
245	-0.00713472		774.99	-0.00483841		1304.99	0.00054545		1834.98	-0.00732618		2364.98	-0.00656893		2894.98	-0.02694611		3424.98	-0.04490439		3954.98	-0.05353362
245.2	-0.00779477		775.19	-0.00466281		1305.19	0.00072454		1835.18	-0.00702292		2365.18	-0.00719954		2895.18	-0.02701091		3425.18	-0.04544187		3955.18	-0.05360931
245.4	-0.00883653		775.39	-0.00462027		1305.39	-0.00005909		1835.38	-0.00626506		2365.38	-0.00763051		2895.38	-0.02654431		3425.38	-0.04553866		3955.38	-0.05327122
245.6	-0.00936369		775.59	-0.00561024		1305.59	-0.00059065		1835.58	-0.00685905		2365.58	-0.00725842		2895.58	-0.02670156		3425.58	-0.04656341		3955.58	-0.05313672
245.8	-0.00948399		775.79	-0.00544002		1305.79	0.00006934		1835.78	-0.00673164		2365.78	-0.00744357		2895.78	-0.02704179		3425.78	-0.04659524		3955.78	-0.05397992
246	-0.00920663		775.99	-0.0058266		1305.99	0.00040404		1835.98	-0.00722682		2365.98	-0.00797537		2895.98	-0.02704548		3425.98	-0.04651367		3955.98	-0.05344171
246.2	-0.00717059		776.19	-0.00597985		1306.19	-0.0004367		1836.18	-0.00749904		2366.18	-0.00785048		2896.18	-0.02778225		3426.18	-0.04641888		3956.18	-0.0530866
246.4	-0.00625135		776.39	-0.00729611		1306.39	-0.00068319		1836.38	-0.00794725		2366.38	-0.00784467		2896.38	-0.02824812		3426.38	-0.04617548		3956.38	-0.05328317
246.6	-0.00577004		776.59	-0.00713111		1306.59	-0.00114739		1836.58	-0.00725725		2366.58	-0.00811127		2896.58	-0.02924149		3426.58	-0.04584939		3956.58	-0.05429741
246.8	-0.00501983		776.79	-0.00658859		1306.79	-0.00225557		1836.78	-0.00731785		2366.78	-0.00842513		2896.78	-0.02925591		3426.78	-0.04680868		3956.78	-0.05584973
247	-0.00422646		776.99	-0.00588852		1306.99	-0.00390063		1836.98	-0.00749272		2366.98	-0.00799345		2896.98	-0.03060605		3426.98	-0.04701174		3956.98	-0.05580738
247.2	-0.00418013		777.19	-0.00594949		1307.19	-0.00415569		1837.18	-0.0074602		2367.18	-0.00800694		2897.18	-0.03242962		3427.18	-0.04678098		3957.18	-0.05713221
247.4	-0.0037067		777.39	-0.00579664		1307.39	-0.00366858		1837.38	-0.0071253		2367.38	-0.00846893		2897.38	-0.03276497		3427.38	-0.04645608		3957.38	-0.05647426
247.6	-0.00316296		777.59	-0.00550002		1307.59	-0.00376463		1837.58	-0.00602977		2367.58	-0.0075745		2897.58	-0.03439624		3427.58	-0.04697592		3957.58	-0.05712904
247.8	-0.00230679		777.79	-0.00482468		1307.79	-0.00305447		1837.78	-0.00608017		2367.78	-0.00683887		2897.78	-0.03570285		3427.78	-0.0467758		3957.78	-0.05698188
248	-0.00324471		777.99	-0.00464622		1307.99	-0.00279568		1837.98	-0.00598523		2367.98	-0.00725274		2897.98	-0.03603018		3427.98	-0.04706707		3957.98	-0.05651139
248.2	-0.00335275		778.19	-0.00357778		1308.19	-0.00262736		1838.18	-0.00469814		2368.18	-0.00841479		2898.18	-0.03557281		3428.18	-0.04748324		3958.18	-0.05730353
248.4	-0.00395197		778.39	-0.00393926		1308.39	-0.00211383		1838.38	-0.00427359		2368.38	-0.00858327		2898.38	-0.03553337		3428.38	-0.04755952		3958.38	-0.05763422
248.6	-0.00453919		778.59	-0.00378342		1308.59	-0.00187712		1838.58	-0.0052172		2368.58	-0.00885679		2898.58	-0.03447723		3428.58	-0.04737775		3958.58	-0.05711747
248.8	-0.00459834		778.79	-0.00383461		1308.79	-0.00216785		1838.78	-0.0044207		2368.78	-0.00896281		2898.78	-0.03266051		3428.78	-0.04767249		3958.78	-0.05788831
249	-0.00577821		778.99	-0.00338044		1308.99	-0.00265556		1838.98	-0.0037898		2368.98	-0.00986529		2898.98	-0.03375409		3428.98	-0.04766802		3958.98	-0.05704032
249.2	-0.00576715		779.19	-0.00390077		1309.19	-0.00299218		1839.18	-0.00348257		2369.18	-0.00966176		2899.18	-0.0332761		3429.18	-0.04706053		3959.18	-0.0576446
249.4	-0.00581107		779.39	-0.00386288		1309.39	-0.00325886		1839.38	-0.00345904		2369.38	-0.00940454		2899.38	-0.03358041		3429.38	-0.0468344		3959.38	-0.0569942
249.6	-0.00600353		779.59	-0.00398706		1309.59	-0.00201158		1839.58	-0.00377107		2369.58	-0.00992037		2899.58	-0.03351414		3429.58	-0.04731869		3959.58	-0.05700881
249.8	-0.0063712		779.79	-0.00351919		1309.79	-0.00119569		1839.78	-0.00335348		2369.78	-0.01005545		2899.78	-0.03347321		3429.78	-0.04704954		3959.78	-0.05635605
250	-0.00614436		779.99	-0.00417462		1309.99	-0.00116937		1839.98	-0.00416922		2369.98	-0.01036481		2899.98	-0.03379691		3429.98	-0.04761153		3959.98	-0.05616475
250.2	-0.0054921		780.19	-0.00509898		1310.19	-0.00180682		1840.18	-0.0042973		2370.18	-0.01058489		2900.18	-0.034437		3430.18	-0.04743068		3960.18	-0.05672002
250.4	-0.00658209		780.39	-0.00522021		1310.39	-0.00154497		1840.38	-0.0045472		2370.38	-0.01040045		2900.38	-0.03481858		3430.38	-0.04778037		3960.38	-0.056757
250.6	-0.0066895		780.59	-0.0038821		1310.59	-0.00193637		1840.58	-0.00461081		2370.58	-0.01000249		2900.58	-0.036091		3430.58	-0.04848406		3960.58	-0.05850067
250.8	-0.00573629		780.79	-0.00367		1310.79	-0.0019114		1840.78	-0.00499673		2370.78	-0.00976304		2900.78	-0.03612672		3430.78	-0.04869446		3960.78	-0.05928096
251	-0.00490312		780.99	-0.00326763		1310.99	-0.00187664		1840.98	-0.00495453		2370.98	-0.00968151		2900.98	-0.03630557		3430.98	-0.04844527		3960.98	-0.05855386
251.2	-0.00539326		781.19	-0.00260543		1311.19	-0.00077393		1841.18	-0.00501854		2371.18	-0.0094973		2901.18	-0.03605981		3431.18	-0.04818706		3961.18	-0.05920475
251.4	-0.00570023		781.39	-0.00221869		1311.39	-0.00037021		1841.38	-0.00484527		2371.38	-0.00979796		2901.38	-0.03477802		3431.38	-0.04808607		3961.38	-0.05857867
251.6	-0.0054357		781.59	-0.00192361		1311.59	-0.00041599		1841.58	-0.00505155		2371.58	-0.00911245		2901.58	-0.03539403		3431.58	-0.04919307		3961.58	-0.05873245
251.8	-0.00491746		781.79	-0.00190426		1311.79	-0.000211		1841.78	-0.00491632		2371.78	-0.00926497		2901.78	-0.03445691		3431.78	-0.04949798		3961.78	-0.05829703
252	-0.00479344		781.99	-0.0019018		1311.99	-0.00046317		1841.98	-0.00535331		2371.98	-0.01034097		2901.98	-0.03343431		3431.98	-0.05064201		3961.98	-0.05865249
252.2	-0.00505443		782.19	-0.00111562		1312.19	-0.00098037		1842.18	-0.00535219		2372.18	-0.01056607		2902.18	-0.03206424		3432.18	-0.05154485		3962.18	-0.05942822
252.4	-0.00474162		782.39	-0.00197054		1312.39	-0.00166715		1842.38	-0.00642503		2372.38	-0.01053381		2902.38	-0.03182497		3432.38	-0.05169697		3962.38	-0.05954274
252.6	-0.00480205		782.59	-0.00258712		1312.59	-0.00205866		1842.58	-0.00697802		2372.58	-0.01029287		2902.58	-0.03040739		3432.58	-0.05152042		3962.58	-0.06057763
252.8	-0.00425139		782.79	-0.00387867		1312.79	-0.00300342		1842.78	-0.0063602		2372.78	-0.00984		2902.78	-0.03073029		3432.78	-0.05170005		3962.78	-0.06147858
253	-0.00448608		782.99	-0.00458285		1312.99	-0.00353146		1842.98	-0.00721327		2372.98	-0.00962108		2902.98	-0.03181709		3432.98	-0.0516457		3962.98	-0.06091596
253.2	-0.00498491		783.19	-0.00490156		1313.19	-0.00371269		1843.18	-0.0077914		2373.18	-0.0093239		2903.18	-0.03196271		3433.18	-0.05108604		3963.18	-0.06138479
253.4	-0.00616757		783.39	-0.00491054		1313.39	-0.00460513		1843.38	-0.00738455		2373.38	-0.00945128		2903.38	-0.032389		3433.38	-0.05108245		3963.38	-0.06127851
253.6	-0.0064335		783.59	-0.00548433		1313.59	-0.00429817		1843.58	-0.00791572		2373.58	-0.00904215		2903.58	-0.03298718		3433.58	-0.05116314		3963.58	-0.06160012
253.8	-0.00702365		783.79	-0.00682959		1313.79	-0.00507056		1843.78	-0.00814842		2373.78	-0.00851025		2903.78	-0.03475532		3433.78	-0.0509935		3963.78	-0.06191677
254	-0.00642761		783.99	-0.00810729		1313.99	-0.00470083		1843.98	-0.00743705		2373.98	-0.00836522		2903.98	-0.03614305		3433.98	-0.05104821		3963.98	-0.06300865
254.2	-0.0077266		784.19	-0.00818677		1314.19	-0.0044403		1844.18	-0.00715271		2374.18	-0.00770273		2904.18	-0.0378807		3434.18	-0.05056442		3964.18	-0.0629689
254.4	-0.00759375		784.39	-0.00793917		1314.39	-0.00437417		1844.38	-0.00744377		2374.38	-0.00735141		2904.38	-0.03920657		3434.38	-0.05035497		3964.38	-0.06355068
254.6	-0.00679052		784.59	-0.00726331		1314.59	-0.00401319		1844.58	-0.00640574		2374.58	-0.00704452		2904.58	-0.04090818		3434.58	-0.04975223		3964.58	-0.06386598
254.8	-0.00714071		784.79	-0.00699944		1314.79	-0.00258467		1844.78	-0.00566181		2374.78	-0.00821889		2904.78	-0.04020472		3434.78	-0.0489681		3964.78	-0.06307796
255	-0.00713773		784.99	-0.00752522		1314.99	-0.00278935		1844.98	-0.0057886		2374.98	-0.00863889		2904.98	-0.03988157		3434.98	-0.04872412		3964.98	-0.06164612
255.2	-0.00794894		785.19	-0.00700233		1315.19	-0.00263224		1845.18	-0.00517885		2375.18	-0.00898698		2905.18	-0.04017744		3435.18	-0.04901877		3965.18	-0.06189878
255.4	-0.00783622		785.39	-0.00718962		1315.39	-0.00269738		1845.38	-0.00532814		2375.38	-0.00993565		2905.38	-0.04039787		3435.38	-0.0494496		3965.38	-0.06185304
255.6	-0.00722013		785.59	-0.00712361		1315.59	-0.00266856		1845.58	-0.00539212		2375.58	-0.00967036		2905.58	-0.04044559		3435.58	-0.04956547		3965.58	-0.06206383
255.8	-0.00694521		785.79	-0.00752462		1315.79	-0.00371181		1845.78	-0.00488989		2375.78	-0.01064187		2905.78	-0.03988456		3435.78	-0.04934497		3965.78	-0.06161232
256	-0.00683576		785.99	-0.00746214		1315.99	-0.00452076		1845.98	-0.00520533		2375.98	-0.01145287		2905.98	-0.03873879		3435.98	-0.04962219		3965.98	-0.06232429
256.2	-0.0073429		786.19	-0.00723298		1316.19	-0.00473212		1846.18	-0.00478329		2376.18	-0.01207898		2906.18	-0.03881309		3436.18	-0.05060355		3966.18	-0.06324762
256.4	-0.00681442		786.39	-0.00798816		1316.39	-0.00530206		1846.38	-0.00463392		2376.38	-0.01339311		2906.38	-0.03928395		3436.38	-0.05073529		3966.38	-0.0640293
256.6	-0.00658525		786.59	-0.00819017		1316.59	-0.00543009		1846.58	-0.00466199		2376.58	-0.01331272		2906.58	-0.03868317		3436.58	-0.05123881		3966.58	-0.06530728
256.8	-0.00598716		786.79	-0.00770201		1316.79	-0.00589708		1846.78	-0.00469034		2376.78	-0.01377927		2906.78	-0.03825274		3436.78	-0.05183862		3966.78	-0.06495124
257	-0.00605715		786.99	-0.008173		1316.99	-0.00596896		1846.98	-0.00489354		2376.98	-0.01448772		2906.98	-0.03808897		3436.98	-0.05367678		3966.98	-0.06436566
257.2	-0.00708226		787.19	-0.00754164		1317.19	-0.00584749		1847.18	-0.00533858		2377.18	-0.01426103		2907.18	-0.03783047		3437.18	-0.05409561		3967.18	-0.06496145
257.4	-0.00696377		787.39	-0.00670759		1317.39	-0.00655216		1847.38	-0.00534067		2377.38	-0.01355137		2907.38	-0.03832053		3437.38	-0.05429324		3967.38	-0.06573324
257.6	-0.006333		787.59	-0.00725111		1317.59	-0.00592262		1847.58	-0.00610508		2377.58	-0.01292134		2907.58	-0.03923563		3437.58	-0.05451425		3967.58	-0.06547735
257.8	-0.00663435		787.79	-0.00707793		1317.79	-0.00503386		1847.78	-0.00654483		2377.78	-0.01304509		2907.78	-0.04010458		3437.78	-0.05546438		3967.78	-0.06524908
258	-0.00645109		787.99	-0.00615459		1317.99	-0.00349296		1847.98	-0.00607566		2377.98	-0.01249511		2907.98	-0.04027237		3437.98	-0.0555925		3967.98	-0.06447867
258.2	-0.00691478		788.19	-0.00475454		1318.19	-0.00278036		1848.18	-0.00649144		2378.18	-0.01169144		2908.18	-0.04074483		3438.18	-0.05526215		3968.18	-0.06332071
258.4	-0.00608837		788.39	-0.0044755		1318.39	-0.00170149		1848.38	-0.00671206		2378.38	-0.01046851		2908.38	-0.04079129		3438.38	-0.05517534		3968.38	-0.06304208
258.6	-0.00582226		788.59	-0.00417852		1318.59	-0.00086212		1848.58	-0.00685236		2378.58	-0.0101791		2908.58	-0.04057051		3438.58	-0.05551556		3968.58	-0.06204865
258.8	-0.00577828		788.79	-0.00356018		1318.79	-0.00070684		1848.78	-0.00749058		2378.78	-0.00994731		2908.78	-0.04009233		3438.78	-0.0552637		3968.78	-0.06220013
259	-0.00512445		788.99	-0.00390227		1318.99	-0.00172614		1848.98	-0.00794578		2378.98	-0.00902699		2908.98	-0.03998871		3438.98	-0.05462386		3968.98	-0.06145826
259.2	-0.00554805		789.19	-0.00279511		1319.19	-0.00220103		1849.18	-0.00724133		2379.18	-0.00850229		2909.18	-0.04127599		3439.18	-0.0545056		3969.18	-0.0618208
259.4	-0.00507362		789.39	-0.0032831		1319.39	-0.00189669		1849.38	-0.00812691		2379.38	-0.0080974		2909.38	-0.04128607		3439.38	-0.0546746		3969.38	-0.06173437
259.6	-0.0054127		789.59	-0.00347788		1319.59	-0.00228777		1849.58	-0.00842646		2379.58	-0.0075492		2909.58	-0.04001125		3439.58	-0.05364771		3969.58	-0.06187375
259.8	-0.0053246		789.79	-0.00339954		1319.79	-0.00372917		1849.78	-0.00808588		2379.78	-0.00794319		2909.78	-0.03984564		3439.78	-0.05368504		3969.78	-0.06225737
260	-0.00556367		789.99	-0.00403485		1319.99	-0.00353771		1849.98	-0.00854629		2379.98	-0.00884447		2909.98	-0.03937961		3439.98	-0.05329383		3969.98	-0.06338425
260.2	-0.00593161		790.19	-0.00473973		1320.19	-0.00352276		1850.18	-0.00755326		2380.18	-0.00916837		2910.18	-0.03959061		3440.18	-0.05352802		3970.18	-0.06395545
260.4	-0.00589167		790.39	-0.00623002		1320.39	-0.00387762		1850.38	-0.00695068		2380.38	-0.00909631		2910.38	-0.03945401		3440.38	-0.0530699		3970.38	-0.06479733
260.6	-0.00580801		790.59	-0.00672658		1320.59	-0.00292613		1850.58	-0.00686155		2380.58	-0.00825114		2910.58	-0.03943364		3440.58	-0.0529113		3970.58	-0.06541865
260.8	-0.00571168		790.79	-0.00753388		1320.79	-0.00300123		1850.78	-0.00686628		2380.78	-0.00856146		2910.78	-0.03924776		3440.78	-0.05314338		3970.78	-0.06590976
261	-0.00669875		790.99	-0.00844572		1320.99	-0.00231148		1850.98	-0.00682699		2380.98	-0.00870897		2910.98	-0.03995594		3440.98	-0.05396247		3970.98	-0.06637431
261.2	-0.00700118		791.19	-0.00748817		1321.19	-0.00298082		1851.18	-0.00746992		2381.18	-0.00837963		2911.18	-0.04024311		3441.18	-0.05339367		3971.18	-0.06733259
261.4	-0.00667548		791.39	-0.00710646		1321.39	-0.00281632		1851.38	-0.00715508		2381.38	-0.00874861		2911.38	-0.04059291		3441.38	-0.05374345		3971.38	-0.06788513
261.6	-0.00665106		791.59	-0.0076763		1321.59	-0.00202045		1851.58	-0.00682224		2381.58	-0.00924666		2911.58	-0.0409265		3441.58	-0.05333435		3971.58	-0.0679137
261.8	-0.0065946		791.79	-0.00754015		1321.79	-0.00195514		1851.78	-0.00599071		2381.78	-0.00961945		2911.78	-0.04142471		3441.78	-0.05415928		3971.78	-0.06825408
262	-0.00572603		791.99	-0.00770526		1321.99	-0.00224047		1851.98	-0.00517725		2381.98	-0.00952197		2911.98	-0.04200404		3441.98	-0.05420096		3971.98	-0.06811162
262.2	-0.00465077		792.19	-0.00754003		1322.19	-0.0027043		1852.18	-0.00455674		2382.18	-0.00932482		2912.18	-0.04203049		3442.18	-0.05412975		3972.18	-0.06772685
262.4	-0.00388917		792.39	-0.00779887		1322.39	-0.00274799		1852.38	-0.00427316		2382.38	-0.00961052		2912.38	-0.04281908		3442.38	-0.05538064		3972.38	-0.06785549
262.6	-0.00317261		792.59	-0.00719296		1322.59	-0.00272469		1852.58	-0.00508189		2382.58	-0.01012057		2912.58	-0.04352604		3442.58	-0.05629794		3972.58	-0.06736235
262.8	-0.00287617		792.79	-0.00549689		1322.79	-0.00335183		1852.78	-0.00450268		2382.78	-0.01039271		2912.78	-0.04437516		3442.78	-0.0566117		3972.78	-0.0678261
263	-0.00285764		792.99	-0.00543503		1322.99	-0.0033878		1852.98	-0.00410665		2382.98	-0.01118812		2912.98	-0.04478575		3442.98	-0.05834886		3972.98	-0.06735398
263.2	-0.0035517		793.19	-0.00452896		1323.19	-0.00389392		1853.18	-0.00338298		2383.18	-0.01144745		2913.18	-0.04570815		3443.18	-0.05955987		3973.18	-0.06695774
263.4	-0.00342185		793.39	-0.00466786		1323.39	-0.00378357		1853.38	-0.00406787		2383.38	-0.01136123		2913.38	-0.04463937		3443.38	-0.06021887		3973.38	-0.0661646
263.6	-0.00408713		793.59	-0.00379335		1323.59	-0.00390933		1853.58	-0.00489864		2383.58	-0.01150758		2913.58	-0.04353089		3443.58	-0.05951299		3973.58	-0.06557574
263.8	-0.00451206		793.79	-0.00366949		1323.79	-0.00518024		1853.78	-0.00592393		2383.78	-0.01084556		2913.78	-0.04253373		3443.78	-0.06000516		3973.78	-0.06526167
264	-0.00570183		793.99	-0.00432741		1323.99	-0.00579468		1853.98	-0.00666596		2383.98	-0.01061342		2913.98	-0.04126062		3443.98	-0.05976419		3973.98	-0.06473209
264.2	-0.00680551		794.19	-0.00381788		1324.19	-0.006336		1854.18	-0.00694		2384.18	-0.01019358		2914.18	-0.04175448		3444.18	-0.06000767		3974.18	-0.06464646
264.4	-0.00779973		794.39	-0.00332997		1324.39	-0.00635601		1854.38	-0.00767938		2384.38	-0.0100339		2914.38	-0.04263555		3444.38	-0.05980964		3974.38	-0.06490726
264.6	-0.00827269		794.59	-0.00274975		1324.59	-0.00641681		1854.58	-0.00858519		2384.58	-0.01054517		2914.58	-0.04296577		3444.58	-0.05997842		3974.58	-0.06557824
264.8	-0.00901172		794.79	-0.0031751		1324.79	-0.00675404		1854.78	-0.00929378		2384.78	-0.01064838		2914.78	-0.0431367		3444.78	-0.05977799		3974.78	-0.06601836
265	-0.00957915		794.99	-0.0024582		1324.99	-0.00653664		1854.98	-0.00910389		2384.98	-0.01041279		2914.98	-0.04307609		3444.98	-0.06020757		3974.98	-0.06581428
265.2	-0.01014234		795.19	-0.00251644		1325.19	-0.0071352		1855.18	-0.00949824		2385.18	-0.01024245		2915.18	-0.044005		3445.18	-0.06036307		3975.18	-0.06657808
265.4	-0.00963885		795.39	-0.00360079		1325.39	-0.00663392		1855.38	-0.00865549		2385.38	-0.01094783		2915.38	-0.04534831		3445.38	-0.06081486		3975.38	-0.06689394
265.6	-0.0097957		795.59	-0.00461152		1325.59	-0.0070149		1855.58	-0.00799202		2385.58	-0.0105697		2915.58	-0.04584542		3445.58	-0.06038735		3975.58	-0.0672567
265.8	-0.00909277		795.79	-0.00531651		1325.79	-0.00724605		1855.78	-0.00752808		2385.78	-0.01084294		2915.78	-0.0460226		3445.78	-0.06141781		3975.78	-0.06757913
266	-0.00795343		795.99	-0.00555065		1325.99	-0.006119		1855.98	-0.0074854		2385.98	-0.01064068		2915.98	-0.04680723		3445.98	-0.06129373		3975.98	-0.06884667
266.2	-0.00745927		796.19	-0.00506955		1326.19	-0.00561451		1856.18	-0.00680885		2386.18	-0.01061624		2916.18	-0.04711154		3446.18	-0.06118638		3976.18	-0.06928239
266.4	-0.00710982		796.39	-0.00567308		1326.39	-0.00432677		1856.38	-0.00686805		2386.38	-0.01163831		2916.38	-0.04807922		3446.38	-0.06259932		3976.38	-0.06933972
266.6	-0.00713066		796.59	-0.00474692		1326.59	-0.00317534		1856.58	-0.00701486		2386.58	-0.0111793		2916.58	-0.04832702		3446.58	-0.06248966		3976.58	-0.06933761
266.8	-0.00681365		796.79	-0.00441016		1326.79	-0.00322294		1856.78	-0.00645401		2386.78	-0.01176267		2916.78	-0.04892902		3446.78	-0.06225457		3976.78	-0.07043889
267	-0.00634897		796.99	-0.00502933		1326.99	-0.00257933		1856.98	-0.00586025		2386.98	-0.01210164		2916.98	-0.0482726		3446.98	-0.06223323		3976.98	-0.07094158
267.2	-0.00631962		797.19	-0.00513611		1327.19	-0.00313719		1857.18	-0.00607919		2387.18	-0.01150443		2917.18	-0.04775646		3447.18	-0.06055249		3977.18	-0.07142704
267.4	-0.00545491		797.39	-0.00478621		1327.39	-0.00287366		1857.38	-0.00701585		2387.38	-0.01121583		2917.38	-0.04627839		3447.38	-0.06004857		3977.38	-0.07180143
267.6	-0.00537281		797.59	-0.00386264		1327.59	-0.00314642		1857.58	-0.00791739		2387.58	-0.01135511		2917.58	-0.04489864		3447.58	-0.05921648		3977.58	-0.07265278
267.8	-0.0058562		797.79	-0.0045429		1327.79	-0.0036349		1857.78	-0.00844388		2387.78	-0.01135736		2917.78	-0.04396814		3447.78	-0.05935014		3977.78	-0.07407121
268	-0.00627776		797.99	-0.00422947		1327.99	-0.00395701		1857.98	-0.00802243		2387.98	-0.01174012		2917.98	-0.04437418		3447.98	-0.05870142		3977.98	-0.07473955
268.2	-0.00639994		798.19	-0.00361353		1328.19	-0.00375384		1858.18	-0.0075987		2388.18	-0.01305319		2918.18	-0.04425679		3448.18	-0.05854547		3978.18	-0.07639158
268.4	-0.0067321		798.39	-0.00347583		1328.39	-0.00367986		1858.38	-0.00786575		2388.38	-0.01358865		2918.38	-0.04428084		3448.38	-0.05863639		3978.38	-0.07721179
268.6	-0.00708296		798.59	-0.00401917		1328.59	-0.00360295		1858.58	-0.00799003		2388.58	-0.01328668		2918.58	-0.04405674		3448.58	-0.05990984		3978.58	-0.07868453
268.8	-0.0078069		798.79	-0.00440919		1328.79	-0.00392382		1858.78	-0.00697098		2388.78	-0.01202196		2918.78	-0.04420238		3448.78	-0.06045089		3978.78	-0.07879911
269	-0.00712158		798.99	-0.00468004		1328.99	-0.00366045		1858.98	-0.00673615		2388.98	-0.01215499		2918.98	-0.0444981		3448.98	-0.0619211		3978.98	-0.07862293
269.2	-0.00755953		799.19	-0.0061901		1329.19	-0.00403764		1859.18	-0.00671613		2389.18	-0.01170533		2919.18	-0.04593994		3449.18	-0.06204808		3979.18	-0.07869969
269.4	-0.00601356		799.39	-0.0070632		1329.39	-0.00459541		1859.38	-0.00530927		2389.38	-0.01174255		2919.38	-0.0461563		3449.38	-0.06288509		3979.38	-0.07848168
269.6	-0.00577261		799.59	-0.00704182		1329.59	-0.00456635		1859.58	-0.00516116		2389.58	-0.01037965		2919.58	-0.04561226		3449.58	-0.06338089		3979.58	-0.07878687
269.8	-0.00565091		799.79	-0.00757878		1329.79	-0.00405248		1859.78	-0.00488341		2389.78	-0.01056302		2919.78	-0.04609832		3449.78	-0.06403606		3979.78	-0.07922115
270	-0.00603295		799.99	-0.00750958		1329.99	-0.00445323		1859.98	-0.00446407		2389.98	-0.00967214		2919.98	-0.04668981		3449.98	-0.06438368		3979.98	-0.07919657
270.2	-0.00621483		800.19	-0.00755159		1330.19	-0.00448819		1860.18	-0.0036836		2390.18	-0.00953151		2920.18	-0.04692603		3450.18	-0.06503577		3980.18	-0.07799885
270.4	-0.00590936		800.39	-0.00807822		1330.39	-0.004734		1860.38	-0.00427803		2390.38	-0.00940043		2920.38	-0.04722831		3450.38	-0.06590216		3980.38	-0.07653211
270.6	-0.00626513		800.59	-0.00729811		1330.59	-0.00510873		1860.58	-0.00487172		2390.58	-0.00874781		2920.58	-0.04695451		3450.58	-0.0658769		3980.58	-0.07533567
270.8	-0.0058684		800.79	-0.00712756		1330.79	-0.00509457		1860.78	-0.00528254		2390.78	-0.00925287		2920.78	-0.04740686		3450.78	-0.06531147		3980.78	-0.07503581
271	-0.00648142		800.99	-0.0070691		1330.99	-0.00514272		1860.98	-0.00548846		2390.98	-0.01039547		2920.98	-0.04644189		3450.98	-0.0656419		3980.98	-0.0756386
271.2	-0.00572811		801.19	-0.00763827		1331.19	-0.00590497		1861.18	-0.00655562		2391.18	-0.01045752		2921.18	-0.04606016		3451.18	-0.06561744		3981.18	-0.07576199
271.4	-0.00599522		801.39	-0.00650016		1331.39	-0.00510257		1861.38	-0.00678396		2391.38	-0.0109602		2921.38	-0.04592499		3451.38	-0.0657632		3981.38	-0.0756011
271.6	-0.00634181		801.59	-0.00660001		1331.59	-0.00469778		1861.58	-0.00644239		2391.58	-0.0123777		2921.58	-0.04596738		3451.58	-0.0652727		3981.58	-0.07618078
271.8	-0.00739027		801.79	-0.00733656		1331.79	-0.0043274		1861.78	-0.00615014		2391.78	-0.01351055		2921.78	-0.04642864		3451.78	-0.06580081		3981.78	-0.07723918
272	-0.00752124		801.99	-0.00751468		1331.99	-0.00440417		1861.98	-0.00613259		2391.98	-0.01373228		2921.98	-0.04651345		3451.98	-0.06549136		3981.98	-0.07866003
272.2	-0.00782831		802.19	-0.00720141		1332.19	-0.0043785		1862.18	-0.00660626		2392.18	-0.01425705		2922.18	-0.04643584		3452.18	-0.06576262		3982.18	-0.07981852
272.4	-0.00781802		802.39	-0.00713264		1332.39	-0.0041059		1862.38	-0.0068055		2392.38	-0.01364545		2922.38	-0.04700375		3452.38	-0.06626564		3982.38	-0.08033121
272.6	-0.00748854		802.59	-0.007596		1332.59	-0.00427219		1862.58	-0.0061712		2392.58	-0.01249033		2922.58	-0.04727718		3452.58	-0.06659159		3982.58	-0.08080335
272.8	-0.0074932		802.79	-0.00750046		1332.79	-0.00426313		1862.78	-0.00572939		2392.78	-0.01207037		2922.78	-0.04763228		3452.78	-0.06622387		3982.78	-0.07944555
273	-0.00595966		802.99	-0.00764835		1332.99	-0.00437494		1862.98	-0.00602425		2392.98	-0.01172128		2922.98	-0.04830268		3452.98	-0.06607607		3982.98	-0.07880839
273.2	-0.00568141		803.19	-0.00764346		1333.19	-0.00433432		1863.18	-0.00606367		2393.18	-0.01024452		2923.18	-0.04853663		3453.18	-0.0647573		3983.18	-0.07902286
273.4	-0.00530667		803.39	-0.00671981		1333.39	-0.00587137		1863.38	-0.00583549		2393.38	-0.00944622		2923.38	-0.04843994		3453.38	-0.06464629		3983.38	-0.07957135
273.6	-0.00542835		803.59	-0.00585813		1333.59	-0.00574569		1863.58	-0.00632098		2393.58	-0.00902911		2923.58	-0.04946834		3453.58	-0.06445838		3983.58	-0.07960048
273.8	-0.00644433		803.79	-0.00588561		1333.79	-0.00656097		1863.78	-0.00663045		2393.78	-0.00888417		2923.78	-0.05010525		3453.78	-0.06415834		3983.78	-0.07937371
274	-0.0062948		803.99	-0.0053014		1333.99	-0.00644844		1863.98	-0.00652471		2393.98	-0.00831726		2923.98	-0.05026099		3453.98	-0.06396497		3983.98	-0.07828411
274.2	-0.00589645		804.19	-0.00521464		1334.19	-0.0059638		1864.18	-0.00658438		2394.18	-0.0084781		2924.18	-0.05061347		3454.18	-0.06395172		3984.18	-0.07796195
274.4	-0.00581178		804.39	-0.00577725		1334.39	-0.00674162		1864.38	-0.00761747		2394.38	-0.00833447		2924.38	-0.05036396		3454.38	-0.06495514		3984.38	-0.0768781
274.6	-0.00547419		804.59	-0.0062693		1334.59	-0.00663033		1864.58	-0.0078574		2394.58	-0.00870962		2924.58	-0.04948885		3454.58	-0.06568406		3984.58	-0.07656626
274.8	-0.00576845		804.79	-0.00737192		1334.79	-0.00545929		1864.78	-0.00781904		2394.78	-0.00942062		2924.78	-0.04954511		3454.78	-0.06585375		3984.78	-0.07674371
275	-0.00674575		804.99	-0.00826144		1334.99	-0.00557609		1864.98	-0.00785771		2394.98	-0.00989224		2924.98	-0.04901307		3454.98	-0.06697487		3984.98	-0.07755666
275.2	-0.00558418		805.19	-0.00930609		1335.19	-0.00535513		1865.18	-0.00841786		2395.18	-0.00979777		2925.18	-0.0489438		3455.18	-0.06669479		3985.18	-0.07723755
275.4	-0.00656653		805.39	-0.0088006		1335.39	-0.00466681		1865.38	-0.00785569		2395.38	-0.01125969		2925.38	-0.04931846		3455.38	-0.06694281		3985.38	-0.07733046
275.6	-0.00615464		805.59	-0.00986993		1335.59	-0.00471832		1865.58	-0.00727163		2395.58	-0.01273609		2925.58	-0.04965868		3455.58	-0.06683462		3985.58	-0.07797468
275.8	-0.00649978		805.79	-0.0110985		1335.79	-0.00517102		1865.78	-0.00718159		2395.78	-0.0133581		2925.78	-0.0498186		3455.78	-0.06702056		3985.78	-0.07844246
276	-0.00659765		805.99	-0.01201578		1335.99	-0.00541371		1865.98	-0.00721391		2395.98	-0.01345616		2925.98	-0.05023643		3455.98	-0.06706535		3985.98	-0.07926733
276.2	-0.00679577		806.19	-0.01158473		1336.19	-0.00542502		1866.18	-0.0066907		2396.18	-0.01396102		2926.18	-0.05124302		3456.18	-0.06730478		3986.18	-0.07942319
276.4	-0.00655975		806.39	-0.01147512		1336.39	-0.00528727		1866.38	-0.0055276		2396.38	-0.01362791		2926.38	-0.05113712		3456.38	-0.06811648		3986.38	-0.07995685
276.6	-0.00630583		806.59	-0.01130621		1336.59	-0.00610623		1866.58	-0.00501977		2396.58	-0.01362145		2926.58	-0.05137204		3456.58	-0.06840832		3986.58	-0.07971717
276.8	-0.00648885		806.79	-0.01057915		1336.79	-0.00618016		1866.78	-0.00511325		2396.78	-0.01421418		2926.78	-0.05163526		3456.78	-0.06873566		3986.78	-0.07842868
277	-0.00666135		806.99	-0.00919123		1336.99	-0.00709047		1866.98	-0.0048978		2396.98	-0.01457788		2926.98	-0.05120075		3456.98	-0.06905857		3986.98	-0.0797878
277.2	-0.00728197		807.19	-0.00838956		1337.19	-0.00675872		1867.18	-0.004769		2397.18	-0.01390809		2927.18	-0.05144286		3457.18	-0.06907155		3987.18	-0.07993239
277.4	-0.00785885		807.39	-0.00772623		1337.39	-0.00755257		1867.38	-0.00501627		2397.38	-0.01434597		2927.38	-0.05154938		3457.38	-0.07027644		3987.38	-0.08041925
277.6	-0.00810203		807.59	-0.00716681		1337.59	-0.00691836		1867.58	-0.0045924		2397.58	-0.01523363		2927.58	-0.05244999		3457.58	-0.07150401		3987.58	-0.0801954
277.8	-0.00897296		807.79	-0.00678804		1337.79	-0.00661575		1867.78	-0.00438218		2397.78	-0.01485508		2927.78	-0.05216722		3457.78	-0.07177179		3987.78	-0.08051237
278	-0.0082124		807.99	-0.00554409		1337.99	-0.00549851		1867.98	-0.00340973		2397.98	-0.01383602		2927.98	-0.05137821		3457.98	-0.07226413		3987.98	-0.08027007
278.2	-0.00829093		808.19	-0.00523668		1338.19	-0.00557463		1868.18	-0.00324613		2398.18	-0.0135571		2928.18	-0.05117206		3458.18	-0.07229326		3988.18	-0.08011697
278.4	-0.00843979		808.39	-0.00596925		1338.39	-0.00543232		1868.38	-0.00359843		2398.38	-0.01290034		2928.38	-0.05004427		3458.38	-0.07296287		3988.38	-0.08039232
278.6	-0.00761306		808.59	-0.00623041		1338.59	-0.00525032		1868.58	-0.00366731		2398.58	-0.01220864		2928.58	-0.04978956		3458.58	-0.07312079		3988.58	-0.08082834
278.8	-0.00822625		808.79	-0.0071621		1338.79	-0.00435305		1868.78	-0.00450178		2398.78	-0.01143462		2928.78	-0.05078575		3458.78	-0.07294641		3988.78	-0.08140189
279	-0.00832804		808.99	-0.00693471		1338.99	-0.00440351		1868.98	-0.00552805		2398.98	-0.010751		2928.98	-0.05119328		3458.98	-0.0727022		3988.98	-0.08220431
279.2	-0.00769397		809.19	-0.0074545		1339.19	-0.00383337		1869.18	-0.00630329		2399.18	-0.01089263		2929.18	-0.05172822		3459.18	-0.07205317		3989.18	-0.08184261
279.4	-0.00812841		809.39	-0.00783925		1339.39	-0.00333285		1869.38	-0.00674903		2399.38	-0.01110108		2929.38	-0.0522826		3459.38	-0.07110152		3989.38	-0.08218764
279.6	-0.0079105		809.59	-0.00887143		1339.59	-0.00324382		1869.58	-0.00676947		2399.58	-0.01057278		2929.58	-0.05287661		3459.58	-0.06978976		3989.58	-0.08205459
279.8	-0.00856979		809.79	-0.00983615		1339.79	-0.00335151		1869.78	-0.0067846		2399.78	-0.00986256		2929.78	-0.05375895		3459.78	-0.070124		3989.78	-0.08271484
280	-0.00905514		809.99	-0.00999794		1339.99	-0.00330789		1869.98	-0.00712259		2399.98	-0.00975949		2929.98	-0.054075		3459.98	-0.06961134		3989.98	-0.08319289
280.2	-0.00888327		810.19	-0.0107846		1340.19	-0.00251436		1870.18	-0.00705522		2400.18	-0.0095237		2930.18	-0.05465181		3460.18	-0.06937092		3990.18	-0.08329835
280.4	-0.00957566		810.39	-0.01058459		1340.39	-0.00310241		1870.38	-0.00748913		2400.38	-0.00967807		2930.38	-0.05488692		3460.38	-0.06938607		3990.38	-0.08409929
280.6	-0.0099239		810.59	-0.01142391		1340.59	-0.00463722		1870.58	-0.00793101		2400.58	-0.01115294		2930.58	-0.05527545		3460.58	-0.06946393		3990.58	-0.08396214
280.8	-0.01049474		810.79	-0.01150285		1340.79	-0.00445079		1870.78	-0.00822663		2400.78	-0.01195807		2930.78	-0.05557687		3460.78	-0.06955991		3990.78	-0.08438556
281	-0.01053663		810.99	-0.010882		1340.99	-0.00456927		1870.98	-0.00804337		2400.98	-0.012724		2930.98	-0.05520808		3460.98	-0.07047579		3990.98	-0.08463469
281.2	-0.01025182		811.19	-0.01122193		1341.19	-0.00438245		1871.18	-0.00778228		2401.18	-0.01265624		2931.18	-0.05600188		3461.18	-0.07131795		3991.18	-0.08391396
281.4	-0.01005775		811.39	-0.01082486		1341.39	-0.00472907		1871.38	-0.00859234		2401.38	-0.01373429		2931.38	-0.05591707		3461.38	-0.07255814		3991.38	-0.08434198
281.6	-0.01007196		811.59	-0.01000251		1341.59	-0.00498346		1871.58	-0.00842949		2401.58	-0.01523371		2931.58	-0.05594969		3461.58	-0.0729145		3991.58	-0.08454168
281.8	-0.01015729		811.79	-0.0088953		1341.79	-0.0056504		1871.78	-0.00867909		2401.78	-0.01525867		2931.78	-0.05569251		3461.78	-0.07330152		3991.78	-0.08398802
282	-0.00881439		811.99	-0.00806547		1341.99	-0.00630304		1871.98	-0.00815407		2401.98	-0.01563726		2931.98	-0.0554199		3461.98	-0.07369803		3991.98	-0.08448091
282.2	-0.00868615		812.19	-0.00839825		1342.19	-0.00669974		1872.18	-0.0084683		2402.18	-0.01668553		2932.18	-0.05553386		3462.18	-0.07380131		3992.18	-0.08489482
282.4	-0.00809641		812.39	-0.00799179		1342.39	-0.00743374		1872.38	-0.00847753		2402.38	-0.01616096		2932.38	-0.05540439		3462.38	-0.07539184		3992.38	-0.08584103
282.6	-0.00683143		812.59	-0.00713521		1342.59	-0.00780575		1872.58	-0.00804874		2402.58	-0.01534068		2932.58	-0.05619198		3462.58	-0.07651856		3992.58	-0.08680753
282.8	-0.00621297		812.79	-0.00708381		1342.79	-0.00736529		1872.78	-0.00859508		2402.78	-0.01575914		2932.78	-0.05762243		3462.78	-0.07697103		3992.78	-0.08789271
283	-0.00595431		812.99	-0.00678131		1342.99	-0.0076203		1872.98	-0.00797867		2402.98	-0.01556967		2932.98	-0.05805409		3462.98	-0.07675798		3992.98	-0.08832843
283.2	-0.00633692		813.19	-0.00672284		1343.19	-0.00737477		1873.18	-0.00741207		2403.18	-0.01510676		2933.18	-0.05807446		3463.18	-0.07631332		3993.18	-0.08912731
283.4	-0.00657385		813.39	-0.00654187		1343.39	-0.00751929		1873.38	-0.00786928		2403.38	-0.01488761		2933.38	-0.05814873		3463.38	-0.07586372		3993.38	-0.09031303
283.6	-0.0066157		813.59	-0.0066256		1343.59	-0.00729109		1873.58	-0.00652044		2403.58	-0.01421779		2933.58	-0.05856248		3463.58	-0.0758397		3993.58	-0.09079329
283.8	-0.00599536		813.79	-0.00676467		1343.79	-0.00719861		1873.78	-0.00573104		2403.78	-0.01431738		2933.78	-0.05809067		3463.78	-0.07566779		3993.78	-0.09069636
284	-0.00587268		813.99	-0.00704115		1343.99	-0.00699667		1873.98	-0.00613145		2403.98	-0.01413315		2933.98	-0.05732239		3463.98	-0.07438621		3993.98	-0.09040277
284.2	-0.00550543		814.19	-0.00745477		1344.19	-0.0064082		1874.18	-0.00598853		2404.18	-0.01443553		2934.18	-0.05669809		3464.18	-0.07399653		3994.18	-0.09015464
284.4	-0.00614398		814.39	-0.0069795		1344.39	-0.00671674		1874.38	-0.00703548		2404.38	-0.01474047		2934.38	-0.05676763		3464.38	-0.07297388		3994.38	-0.09030773
284.6	-0.00596961		814.59	-0.00834285		1344.59	-0.00764112		1874.58	-0.00641613		2404.58	-0.01488177		2934.58	-0.05669678		3464.58	-0.07249227		3994.58	-0.09027995
284.8	-0.00603126		814.79	-0.00766609		1344.79	-0.0068607		1874.78	-0.00639384		2404.78	-0.01377924		2934.78	-0.05604498		3464.78	-0.07196048		3994.78	-0.09029866
285	-0.00610049		814.99	-0.00668555		1344.99	-0.00728129		1874.98	-0.00719968		2404.98	-0.01358943		2934.98	-0.05608649		3464.98	-0.07248374		3994.98	-0.08826619
285.2	-0.00631278		815.19	-0.00636797		1345.19	-0.00696482		1875.18	-0.00800472		2405.18	-0.01327357		2935.18	-0.05627312		3465.18	-0.07300678		3995.18	-0.08758704
285.4	-0.00738317		815.39	-0.00630966		1345.39	-0.00648916		1875.38	-0.00902781		2405.38	-0.01359751		2935.38	-0.05536056		3465.38	-0.07338261		3995.38	-0.08745585
285.6	-0.00895447		815.59	-0.00611925		1345.59	-0.00619135		1875.58	-0.00976012		2405.58	-0.01442219		2935.58	-0.05542528		3465.58	-0.07436384		3995.58	-0.08738384
285.8	-0.01002263		815.79	-0.00569788		1345.79	-0.0054442		1875.78	-0.0100025		2405.78	-0.01392775		2935.78	-0.0558678		3465.78	-0.07529703		3995.78	-0.08624252
286	-0.01012903		815.99	-0.0051468		1345.99	-0.00515962		1875.98	-0.00983883		2405.98	-0.01382072		2935.98	-0.056347		3465.98	-0.07585029		3995.98	-0.08694613
286.2	-0.01123803		816.19	-0.00544971		1346.19	-0.00485196		1876.18	-0.00985056		2406.18	-0.01353839		2936.18	-0.05658684		3466.18	-0.07687473		3996.18	-0.0855488
286.4	-0.01187559		816.39	-0.00471639		1346.39	-0.00408797		1876.38	-0.01048175		2406.38	-0.01279438		2936.38	-0.05696658		3466.38	-0.07844331		3996.38	-0.08562481
286.6	-0.01228064		816.59	-0.00534039		1346.59	-0.00397406		1876.58	-0.01028536		2406.58	-0.01284987		2936.58	-0.05785582		3466.58	-0.07892548		3996.58	-0.08589776
286.8	-0.01237279		816.79	-0.00586009		1346.79	-0.00382217		1876.78	-0.01071286		2406.78	-0.0134922		2936.78	-0.05941218		3466.78	-0.07947462		3996.78	-0.08616895
287	-0.01311319		816.99	-0.00634445		1346.99	-0.00399909		1876.98	-0.0107343		2406.98	-0.01296412		2936.98	-0.0597865		3466.98	-0.07993945		3996.98	-0.08734867
287.2	-0.01365971		817.19	-0.00611582		1347.19	-0.00361983		1877.18	-0.01213283		2407.18	-0.01300745		2937.18	-0.06012496		3467.18	-0.07999683		3997.18	-0.08842773
287.4	-0.01408235		817.39	-0.00583167		1347.39	-0.00360218		1877.38	-0.01278598		2407.38	-0.01402037		2937.38	-0.06068834		3467.38	-0.08033644		3997.38	-0.08848793
287.6	-0.01282646		817.59	-0.00598236		1347.59	-0.00403254		1877.58	-0.01244788		2407.58	-0.01444032		2937.58	-0.06072515		3467.58	-0.07974236		3997.58	-0.08927265
287.8	-0.01158087		817.79	-0.0059635		1347.79	-0.00481219		1877.78	-0.01242865		2407.78	-0.01554828		2937.78	-0.05999219		3467.78	-0.07943891		3997.78	-0.089262
288	-0.01049568		817.99	-0.00638147		1347.99	-0.00517584		1877.98	-0.01268718		2407.98	-0.01523785		2937.98	-0.05996316		3467.98	-0.07889		3997.98	-0.08965462
288.2	-0.00960066		818.19	-0.0071295		1348.19	-0.00535737		1878.18	-0.0121585		2408.18	-0.01582783		2938.18	-0.059701		3468.18	-0.07772805		3998.18	-0.09100895
288.4	-0.00897047		818.39	-0.0077649		1348.39	-0.00563402		1878.38	-0.01166323		2408.38	-0.01521945		2938.38	-0.06063014		3468.38	-0.07734714		3998.38	-0.09155992
288.6	-0.00880825		818.59	-0.00827673		1348.59	-0.00705837		1878.58	-0.0107991		2408.58	-0.01521893		2938.58	-0.05980248		3468.58	-0.07687031		3998.58	-0.09272414
288.8	-0.00822886		818.79	-0.00753374		1348.79	-0.00685896		1878.78	-0.01020144		2408.78	-0.01416607		2938.78	-0.06014897		3468.78	-0.07694871		3998.78	-0.09232541
289	-0.00745108		818.99	-0.00691296		1348.99	-0.00708513		1878.98	-0.00951689		2408.98	-0.01346006		2938.98	-0.06118035		3468.98	-0.07760089		3998.98	-0.09262189
289.2	-0.00759757		819.19	-0.0070528		1349.19	-0.00636233		1879.18	-0.00915013		2409.18	-0.01279175		2939.18	-0.06080046		3469.18	-0.07818539		3999.18	-0.09333752
289.4	-0.00765166		819.39	-0.00678436		1349.39	-0.00660872		1879.38	-0.00843484		2409.38	-0.01282018		2939.38	-0.06084554		3469.38	-0.07781525		3999.38	-0.09387844
289.6	-0.0076174		819.59	-0.00648205		1349.59	-0.00646481		1879.58	-0.0073951		2409.58	-0.01207215		2939.58	-0.06181589		3469.58	-0.07784714		3999.58	-0.09437313
289.8	-0.00740457		819.79	-0.00636888		1349.79	-0.00598406		1879.78	-0.00600151		2409.78	-0.01083536		2939.78	-0.06193009		3469.78	-0.07728199		3999.78	-0.09412301
290	-0.00827553		819.99	-0.00648138		1349.99	-0.00626871		1879.98	-0.00589851		2409.98	-0.01042589		2939.98	-0.06213433		3469.98	-0.07691637		3999.98	-0.09389334
290.2	-0.0088866		820.19	-0.00756026		1350.19	-0.00559467		1880.18	-0.00493845		2410.18	-0.01036958		2940.18	-0.06147988		3470.18	-0.07713406		4000.18	-0.09275414
290.4	-0.00960775		820.39	-0.00729324		1350.39	-0.00494004		1880.38	-0.00515675		2410.38	-0.00986816		2940.38	-0.06161879		3470.38	-0.07797476		4000.38	-0.09343348
290.6	-0.00965985		820.59	-0.00813486		1350.59	-0.00568914		1880.58	-0.00466407		2410.58	-0.0098781		2940.58	-0.06230222		3470.58	-0.07853424		4000.58	-0.09335236
290.8	-0.00962581		820.79	-0.00757071		1350.79	-0.005433		1880.78	-0.00453319		2410.78	-0.01012487		2940.78	-0.06205556		3470.78	-0.07885574		4000.78	-0.09323791
291	-0.00993235		820.99	-0.00764643		1350.99	-0.00510661		1880.98	-0.00516272		2410.98	-0.0106489		2940.98	-0.06196796		3470.98	-0.0790711		4000.98	-0.09321409
291.2	-0.01017221		821.19	-0.00705572		1351.19	-0.00496746		1881.18	-0.00651966		2411.18	-0.01101931		2941.18	-0.06183633		3471.18	-0.07853131		4001.18	-0.09301339
291.4	-0.01069285		821.39	-0.00693271		1351.39	-0.00572178		1881.38	-0.00701899		2411.38	-0.01239828		2941.38	-0.06182539		3471.38	-0.07892173		4001.38	-0.09305973
291.6	-0.00970202		821.59	-0.00722457		1351.59	-0.00684474		1881.58	-0.00705458		2411.58	-0.01326448		2941.58	-0.06124985		3471.58	-0.07870735		4001.58	-0.09313391
291.8	-0.00931106		821.79	-0.00724083		1351.79	-0.00770049		1881.78	-0.00692245		2411.78	-0.01437364		2941.78	-0.06147726		3471.78	-0.07879992		4001.78	-0.09323198
292	-0.00874786		821.99	-0.00782711		1351.99	-0.00781614		1881.98	-0.00625724		2411.98	-0.01433496		2941.98	-0.06099422		3471.98	-0.07899612		4001.98	-0.09385883
292.2	-0.00887675		822.19	-0.00785278		1352.19	-0.00832621		1882.18	-0.00623573		2412.18	-0.01468669		2942.18	-0.06116222		3472.18	-0.07824049		4002.18	-0.09493791
292.4	-0.00817787		822.39	-0.00740513		1352.39	-0.00874418		1882.38	-0.00591279		2412.38	-0.01449404		2942.38	-0.06103018		3472.38	-0.07911278		4002.38	-0.09537521
292.6	-0.00816971		822.59	-0.00706384		1352.59	-0.00898056		1882.58	-0.0067263		2412.58	-0.01506191		2942.58	-0.06031885		3472.58	-0.07915522		4002.58	-0.09587312
292.8	-0.00812829		822.79	-0.00702595		1352.79	-0.00920892		1882.78	-0.00629461		2412.78	-0.01515465		2942.78	-0.06118186		3472.78	-0.08002609		4002.78	-0.09599898
293	-0.00783225		822.99	-0.00730943		1352.99	-0.00963126		1882.98	-0.00704313		2412.98	-0.01494539		2942.98	-0.06117735		3472.98	-0.0807881		4002.98	-0.09718799
293.2	-0.00814771		823.19	-0.00767432		1353.19	-0.01000673		1883.18	-0.00740843		2413.18	-0.01604475		2943.18	-0.06075929		3473.18	-0.08111089		4003.18	-0.09760333
293.4	-0.0077631		823.39	-0.00724913		1353.39	-0.01022485		1883.38	-0.00743628		2413.38	-0.01684159		2943.38	-0.06103791		3473.38	-0.08062422		4003.38	-0.09758023
293.6	-0.00788356		823.59	-0.00781532		1353.59	-0.00976293		1883.58	-0.00712717		2413.58	-0.01624952		2943.58	-0.06118129		3473.58	-0.08073301		4003.58	-0.09830885
293.8	-0.00862045		823.79	-0.00858105		1353.79	-0.00958203		1883.78	-0.00768913		2413.78	-0.01575277		2943.78	-0.06158669		3473.78	-0.08118685		4003.78	-0.09800861
294	-0.00965932		823.99	-0.00895143		1353.99	-0.00807655		1883.98	-0.00840513		2413.98	-0.01517825		2943.98	-0.06248665		3473.98	-0.08146056		4003.98	-0.09798394
294.2	-0.00945052		824.19	-0.00881701		1354.19	-0.00719198		1884.18	-0.00880692		2414.18	-0.015785		2944.18	-0.06285275		3474.18	-0.08230096		4004.18	-0.09658371
294.4	-0.00992384		824.39	-0.00823115		1354.39	-0.00640261		1884.38	-0.00962287		2414.38	-0.01542225		2944.38	-0.06427804		3474.38	-0.08364245		4004.38	-0.09667525
294.6	-0.00978896		824.59	-0.00810439		1354.59	-0.00581341		1884.58	-0.00884297		2414.58	-0.01530052		2944.58	-0.06500144		3474.58	-0.08361915		4004.58	-0.09690612
294.8	-0.00981843		824.79	-0.00802774		1354.79	-0.00589684		1884.78	-0.00794305		2414.78	-0.01509711		2944.78	-0.06522098		3474.78	-0.08428891		4004.78	-0.09589372
295	-0.01129988		824.99	-0.00827636		1354.99	-0.00639864		1884.98	-0.00772652		2414.98	-0.01476721		2944.98	-0.06659399		3474.98	-0.08500739		4004.98	-0.09582128
295.2	-0.01165619		825.19	-0.00781339		1355.19	-0.00667737		1885.18	-0.00748932		2415.18	-0.01465843		2945.18	-0.06760332		3475.18	-0.0847806		4005.18	-0.09594979
295.4	-0.01144872		825.39	-0.0072201		1355.39	-0.00750359		1885.38	-0.0067719		2415.38	-0.01465945		2945.38	-0.06854238		3475.38	-0.08575278		4005.38	-0.09628367
295.6	-0.01105137		825.59	-0.00704958		1355.59	-0.00819113		1885.58	-0.0062322		2415.58	-0.01466919		2945.58	-0.06849862		3475.58	-0.08636673		4005.58	-0.0962273
295.8	-0.0106968		825.79	-0.00704311		1355.79	-0.00861441		1885.78	-0.00597327		2415.78	-0.0140753		2945.78	-0.06954179		3475.78	-0.08633503		4005.78	-0.09682627
296	-0.01019233		825.99	-0.00785048		1355.99	-0.00879106		1885.98	-0.00518412		2415.98	-0.0132815		2945.98	-0.0688816		3475.98	-0.0861869		4005.98	-0.09660283
296.2	-0.00960206		826.19	-0.0075014		1356.19	-0.00849251		1886.18	-0.00557807		2416.18	-0.01329138		2946.18	-0.06915413		3476.18	-0.08547195		4006.18	-0.09671957
296.4	-0.00892484		826.39	-0.00790967		1356.39	-0.00855571		1886.38	-0.00614186		2416.38	-0.01296861		2946.38	-0.06893384		3476.38	-0.08638444		4006.38	-0.09725449
296.6	-0.00848948		826.59	-0.00831153		1356.59	-0.00783691		1886.58	-0.00648704		2416.58	-0.01404152		2946.58	-0.06875306		3476.58	-0.08700469		4006.58	-0.09710518
296.8	-0.008708		826.79	-0.00914052		1356.79	-0.00821955		1886.78	-0.00704827		2416.78	-0.01477985		2946.78	-0.06769832		3476.78	-0.08651008		4006.78	-0.09647743
297	-0.00815404		826.99	-0.00956379		1356.99	-0.00835469		1886.98	-0.00808074		2416.98	-0.01572137		2946.98	-0.06680997		3476.98	-0.08600401		4006.98	-0.09662335
297.2	-0.00821183		827.19	-0.0099202		1357.19	-0.00842737		1887.18	-0.00798811		2417.18	-0.01702326		2947.18	-0.06561648		3477.18	-0.0852141		4007.18	-0.09663352
297.4	-0.00741532		827.39	-0.01020226		1357.39	-0.0076228		1887.38	-0.00920614		2417.38	-0.0174245		2947.38	-0.06558871		3477.38	-0.08477613		4007.38	-0.09615638
297.6	-0.00732662		827.59	-0.01050425		1357.59	-0.00672465		1887.58	-0.00957838		2417.58	-0.01713467		2947.58	-0.06599144		3477.58	-0.08475076		4007.58	-0.09614356
297.8	-0.00757088		827.79	-0.01120144		1357.79	-0.00590113		1887.78	-0.01022174		2417.78	-0.01712347		2947.78	-0.06577506		3477.78	-0.08460155		4007.78	-0.09593939
298	-0.00731294		827.99	-0.01117115		1357.99	-0.00476771		1887.98	-0.01039758		2417.98	-0.01789458		2947.98	-0.06599401		3477.98	-0.08453986		4007.98	-0.09584635
298.2	-0.0072144		828.19	-0.0107915		1358.19	-0.00503432		1888.18	-0.0106874		2418.18	-0.01895117		2948.18	-0.0655824		3478.18	-0.08459651		4008.18	-0.09479447
298.4	-0.00779934		828.39	-0.01010036		1358.39	-0.00495403		1888.38	-0.0097515		2418.38	-0.01832676		2948.38	-0.0659584		3478.38	-0.08513915		4008.38	-0.09626894
298.6	-0.00816091		828.59	-0.0097132		1358.59	-0.00569088		1888.58	-0.00818674		2418.58	-0.01792734		2948.58	-0.06559082		3478.58	-0.08373134		4008.58	-0.09672703
298.8	-0.00955458		828.79	-0.00971354		1358.79	-0.00706949		1888.78	-0.00742133		2418.78	-0.01759555		2948.78	-0.06656851		3478.78	-0.08388454		4008.78	-0.09615776
299	-0.0114603		828.99	-0.00890378		1358.99	-0.00748741		1888.98	-0.00668746		2418.98	-0.01693582		2948.98	-0.06634497		3478.98	-0.08363512		4008.98	-0.09763398
299.2	-0.01063022		829.19	-0.00760591		1359.19	-0.00784856		1889.18	-0.00677144		2419.18	-0.01760204		2949.18	-0.06660734		3479.18	-0.08372902		4009.18	-0.09841972
299.4	-0.00993354		829.39	-0.00651296		1359.39	-0.00870834		1889.38	-0.00680297		2419.38	-0.01664478		2949.38	-0.06696661		3479.38	-0.08466449		4009.38	-0.0993441
299.6	-0.00926226		829.59	-0.00661096		1359.59	-0.00894607		1889.58	-0.00718288		2419.58	-0.01623426		2949.58	-0.06697758		3479.58	-0.08491014		4009.58	-0.09955782
299.8	-0.00892639		829.79	-0.00639779		1359.79	-0.00921513		1889.78	-0.00695159		2419.78	-0.01519347		2949.78	-0.06787864		3479.78	-0.08514978		4009.78	-0.09978628
300	-0.00841517		829.99	-0.00668801		1359.99	-0.00945812		1889.98	-0.00685111		2419.98	-0.01428285		2949.98	-0.0680724		3479.98	-0.08555699		4009.98	-0.10026083
300.2	-0.00813115		830.19	-0.00591618		1360.19	-0.00926751		1890.18	-0.00679288		2420.18	-0.01400424		2950.18	-0.06863146		3480.18	-0.08551125		4010.18	-0.10128029
300.4	-0.00842221		830.39	-0.00595315		1360.39	-0.00946938		1890.38	-0.00676008		2420.38	-0.01316515		2950.38	-0.06851203		3480.38	-0.08664869		4010.38	-0.10171634
300.6	-0.00771044		830.59	-0.00590583		1360.59	-0.00931599		1890.58	-0.00628743		2420.58	-0.01274837		2950.58	-0.06837238		3480.58	-0.08637583		4010.58	-0.10186528
300.8	-0.0074526		830.79	-0.00666201		1360.79	-0.00999974		1890.78	-0.00708119		2420.78	-0.01247986		2950.78	-0.06787271		3480.78	-0.08548212		4010.78	-0.10128849
301	-0.00814691		830.99	-0.00682515		1360.99	-0.00977024		1890.98	-0.0072907		2420.98	-0.01258832		2950.98	-0.06762046		3480.98	-0.08539867		4010.98	-0.10202282
301.2	-0.00804893		831.19	-0.00804656		1361.19	-0.00926196		1891.18	-0.00766403		2421.18	-0.01151792		2951.18	-0.06756741		3481.18	-0.0861355		4011.18	-0.10199339
301.4	-0.00779169		831.39	-0.0083225		1361.39	-0.0081435		1891.38	-0.00866402		2421.38	-0.01148543		2951.38	-0.06763979		3481.38	-0.08612011		4011.38	-0.10164451
301.6	-0.00866804		831.59	-0.00832148		1361.59	-0.00759547		1891.58	-0.00818771		2421.58	-0.01228682		2951.58	-0.06775004		3481.58	-0.08585964		4011.58	-0.10094639
301.8	-0.00926018		831.79	-0.00889704		1361.79	-0.00762898		1891.78	-0.00770836		2421.78	-0.01304504		2951.78	-0.06710638		3481.78	-0.08591348		4011.78	-0.1011811
302	-0.00935459		831.99	-0.00829288		1361.99	-0.00702486		1891.98	-0.00795024		2421.98	-0.01405199		2951.98	-0.06727008		3481.98	-0.08633632		4011.98	-0.10098139
302.2	-0.00946616		832.19	-0.0075047		1362.19	-0.0069722		1892.18	-0.00827379		2422.18	-0.01357466		2952.18	-0.06784066		3482.18	-0.08671036		4012.18	-0.10093265
302.4	-0.00930808		832.39	-0.00691855		1362.39	-0.00661443		1892.38	-0.00802841		2422.38	-0.01349424		2952.38	-0.0678322		3482.38	-0.08630218		4012.38	-0.10173179
302.6	-0.00917376		832.59	-0.00723813		1362.59	-0.00578886		1892.58	-0.00811669		2422.58	-0.01335338		2952.58	-0.06745033		3482.58	-0.08547741		4012.58	-0.10205578
302.8	-0.00981952		832.79	-0.00720808		1362.79	-0.00525838		1892.78	-0.00831108		2422.78	-0.01386389		2952.78	-0.06893434		3482.78	-0.08613239		4012.78	-0.10205633
303	-0.00969177		832.99	-0.00709639		1362.99	-0.00534456		1892.98	-0.00870711		2422.98	-0.01391439		2952.98	-0.06862389		3482.98	-0.08733161		4012.98	-0.10274004
303.2	-0.00836064		833.19	-0.00765617		1363.19	-0.00537998		1893.18	-0.00916768		2423.18	-0.01459586		2953.18	-0.06928233		3483.18	-0.08806972		4013.18	-0.10237335
303.4	-0.00754465		833.39	-0.00773515		1363.39	-0.00483883		1893.38	-0.00909693		2423.38	-0.01399088		2953.38	-0.07022687		3483.38	-0.08833668		4013.38	-0.1027644
303.6	-0.00648165		833.59	-0.0081113		1363.59	-0.00464436		1893.58	-0.00889021		2423.58	-0.01472541		2953.58	-0.07051741		3483.58	-0.08879883		4013.58	-0.10315911
303.8	-0.00606302		833.79	-0.00748352		1363.79	-0.00546126		1893.78	-0.00876779		2423.78	-0.01483626		2953.78	-0.07072651		3483.78	-0.08943378		4013.78	-0.10333941
304	-0.00593135		833.99	-0.0067914		1363.99	-0.00575058		1893.98	-0.00882226		2423.98	-0.01442015		2953.98	-0.07071979		3483.98	-0.08995764		4013.98	-0.10362314
304.2	-0.00596616		834.19	-0.00592419		1364.19	-0.00671619		1894.18	-0.00829248		2424.18	-0.01433256		2954.18	-0.07108562		3484.18	-0.09017072		4014.18	-0.10327731
304.4	-0.00603723		834.39	-0.00556507		1364.39	-0.00670578		1894.38	-0.00782513		2424.38	-0.01364445		2954.38	-0.07059375		3484.38	-0.09079994		4014.38	-0.10369776
304.6	-0.00543584		834.59	-0.00575448		1364.59	-0.00689589		1894.58	-0.00825512		2424.58	-0.01325359		2954.58	-0.0709166		3484.58	-0.09007334		4014.58	-0.10416064
304.8	-0.00628386		834.79	-0.00659558		1364.79	-0.00681358		1894.78	-0.00816453		2424.78	-0.0135421		2954.78	-0.07149101		3484.78	-0.0902678		4014.78	-0.10351654
305	-0.00742121		834.99	-0.00676556		1364.99	-0.0060301		1894.98	-0.00799659		2424.98	-0.01339459		2954.98	-0.07128302		3484.98	-0.09025003		4014.98	-0.10357447
305.2	-0.00809333		835.19	-0.00806698		1365.19	-0.00526882		1895.18	-0.00785501		2425.18	-0.01356358		2955.18	-0.07133779		3485.18	-0.09043127		4015.18	-0.10402013
305.4	-0.00848893		835.39	-0.00845281		1365.39	-0.00427972		1895.38	-0.00721598		2425.38	-0.01482373		2955.38	-0.07085043		3485.38	-0.08942325		4015.38	-0.10388937
305.6	-0.00946516		835.59	-0.00877889		1365.59	-0.00396793		1895.58	-0.00611755		2425.58	-0.0164736		2955.58	-0.07116857		3485.58	-0.08893717		4015.58	-0.10398672
305.8	-0.01048113		835.79	-0.00838687		1365.79	-0.00442335		1895.78	-0.00681769		2425.78	-0.01611892		2955.78	-0.07116396		3485.78	-0.08846351		4015.78	-0.104736
306	-0.01010981		835.99	-0.00818908		1365.99	-0.00476527		1895.98	-0.00707388		2425.98	-0.0166053		2955.98	-0.07229885		3485.98	-0.08824575		4015.98	-0.1051127
306.2	-0.00984621		836.19	-0.00748683		1366.19	-0.0047952		1896.18	-0.00679117		2426.18	-0.01640649		2956.18	-0.07267306		3486.18	-0.08778608		4016.18	-0.10578476
306.4	-0.00975046		836.39	-0.00729602		1366.39	-0.00496553		1896.38	-0.00613352		2426.38	-0.01618568		2956.38	-0.07223432		3486.38	-0.08735294		4016.38	-0.10587058
306.6	-0.00961123		836.59	-0.00753848		1366.59	-0.00496748		1896.58	-0.00574392		2426.58	-0.01617694		2956.58	-0.07208756		3486.58	-0.08683818		4016.58	-0.10639735
306.8	-0.01032305		836.79	-0.00853476		1366.79	-0.00573743		1896.78	-0.00580198		2426.78	-0.01648364		2956.78	-0.07304651		3486.78	-0.08705005		4016.78	-0.10646793
307	-0.01017229		836.99	-0.00916062		1366.99	-0.00639115		1896.98	-0.00587017		2426.98	-0.01621424		2956.98	-0.07336514		3486.98	-0.08814843		4016.98	-0.10745064
307.2	-0.00924831		837.19	-0.00880494		1367.19	-0.00648482		1897.18	-0.0059532		2427.18	-0.01686843		2957.18	-0.07306203		3487.18	-0.08815705		4017.18	-0.10757094
307.4	-0.00900696		837.39	-0.0085758		1367.39	-0.00776194		1897.38	-0.00659605		2427.38	-0.01676642		2957.38	-0.07321159		3487.38	-0.08886514		4017.38	-0.10762729
307.6	-0.00812666		837.59	-0.00864277		1367.59	-0.00992697		1897.58	-0.00675181		2427.58	-0.01702923		2957.58	-0.07340059		3487.58	-0.08977342		4017.58	-0.10694675
307.8	-0.00800464		837.79	-0.00818026		1367.79	-0.01094074		1897.78	-0.00748667		2427.78	-0.01615272		2957.78	-0.07333291		3487.78	-0.09092867		4017.78	-0.10685696
308	-0.00783968		837.99	-0.00760116		1367.99	-0.01165801		1897.98	-0.00773106		2427.98	-0.01580047		2957.98	-0.0732616		3487.98	-0.0925203		4017.98	-0.10640458
308.2	-0.00781663		838.19	-0.00744464		1368.19	-0.01320812		1898.18	-0.00765382		2428.18	-0.01526984		2958.18	-0.07306701		3488.18	-0.09281565		4018.18	-0.10556468
308.4	-0.00742377		838.39	-0.00792271		1368.39	-0.0126061		1898.38	-0.00772127		2428.38	-0.01516711		2958.38	-0.0727255		3488.38	-0.09324058		4018.38	-0.10533481
308.6	-0.00826625		838.59	-0.00846729		1368.59	-0.01197641		1898.58	-0.00788488		2428.58	-0.01441834		2958.58	-0.07385534		3488.58	-0.09371777		4018.58	-0.105013
308.8	-0.00875423		838.79	-0.00854954		1368.79	-0.0109146		1898.78	-0.00754362		2428.78	-0.01421663		2958.78	-0.07457766		3488.78	-0.09401084		4018.78	-0.10559168
309	-0.008766		838.99	-0.00928198		1368.99	-0.00920935		1898.98	-0.00740724		2428.98	-0.01424332		2958.98	-0.0748686		3488.98	-0.09417785		4018.98	-0.10635329
309.2	-0.00959206		839.19	-0.01094361		1369.19	-0.00772477		1899.18	-0.00761157		2429.18	-0.01450709		2959.18	-0.07503696		3489.18	-0.09489825		4019.18	-0.10714195
309.4	-0.00942123		839.39	-0.01152907		1369.39	-0.00689624		1899.38	-0.00745074		2429.38	-0.01447699		2959.38	-0.07524496		3489.38	-0.09520059		4019.38	-0.10688882
309.6	-0.00958892		839.59	-0.01245181		1369.59	-0.00655764		1899.58	-0.00826922		2429.58	-0.01514976		2959.58	-0.0755677		3489.58	-0.09448328		4019.58	-0.10772475
309.8	-0.00955498		839.79	-0.01190181		1369.79	-0.00627814		1899.78	-0.00884013		2429.78	-0.01482177		2959.78	-0.07559211		3489.78	-0.09461575		4019.78	-0.10780079
310	-0.00940839		839.99	-0.01168669		1369.99	-0.00654464		1899.98	-0.00881305		2429.98	-0.01517148		2959.98	-0.07667454		3489.98	-0.09458309		4019.98	-0.10852235
310.2	-0.00948815		840.19	-0.01068157		1370.19	-0.00609101		1900.18	-0.00940195		2430.18	-0.01511265		2960.18	-0.07708115		3490.18	-0.09415191		4020.18	-0.10957711
310.4	-0.00935623		840.39	-0.010212		1370.39	-0.00735842		1900.38	-0.00935662		2430.38	-0.01506082		2960.38	-0.07750074		3490.38	-0.09391047		4020.38	-0.10975764
310.6	-0.00981163		840.59	-0.00996629		1370.59	-0.0074236		1900.58	-0.00900447		2430.58	-0.01481517		2960.58	-0.07721131		3490.58	-0.09310662		4020.58	-0.11069307
310.8	-0.01000812		840.79	-0.01057721		1370.79	-0.00682486		1900.78	-0.00914851		2430.78	-0.01467187		2960.78	-0.07812235		3490.78	-0.09341186		4020.78	-0.11155604
311	-0.00945613		840.99	-0.01044315		1370.99	-0.00725033		1900.98	-0.00923994		2430.98	-0.01511433		2960.98	-0.07892885		3490.98	-0.09402369		4020.98	-0.11234992
311.2	-0.00842692		841.19	-0.01036355		1371.19	-0.00948971		1901.18	-0.01004353		2431.18	-0.01523753		2961.18	-0.0780347		3491.18	-0.09320207		4021.18	-0.11148365
311.4	-0.00879279		841.39	-0.0105897		1371.39	-0.0107945		1901.38	-0.00957655		2431.38	-0.01501253		2961.38	-0.07768814		3491.38	-0.09369701		4021.38	-0.11082615
311.6	-0.00752837		841.59	-0.01077351		1371.59	-0.01251367		1901.58	-0.00959006		2431.58	-0.0154961		2961.58	-0.07824595		3491.58	-0.09400861		4021.58	-0.10977964
311.8	-0.00705258		841.79	-0.01034251		1371.79	-0.01200113		1901.78	-0.00941836		2431.78	-0.01626742		2961.78	-0.07761605		3491.78	-0.09353932		4021.78	-0.10933045
312	-0.00610489		841.99	-0.0101739		1371.99	-0.01255399		1901.98	-0.00914461		2431.98	-0.01695526		2961.98	-0.07664391		3491.98	-0.09324157		4021.98	-0.10826602
312.2	-0.00612464		842.19	-0.01008861		1372.19	-0.01329183		1902.18	-0.00891623		2432.18	-0.01684367		2962.18	-0.07572981		3492.18	-0.09301655		4022.18	-0.10757335
312.4	-0.00590307		842.39	-0.01030635		1372.39	-0.01241648		1902.38	-0.0089927		2432.38	-0.01731822		2962.38	-0.07529584		3492.38	-0.09381434		4022.38	-0.10780649
312.6	-0.00642714		842.59	-0.01035535		1372.59	-0.01189619		1902.58	-0.00868772		2432.58	-0.01687933		2962.58	-0.07560708		3492.58	-0.09457159		4022.58	-0.1094316
312.8	-0.00659846		842.79	-0.01092808		1372.79	-0.01095572		1902.78	-0.00843273		2432.78	-0.01694542		2962.78	-0.07573444		3492.78	-0.09544523		4022.78	-0.11030605
313	-0.00704331		842.99	-0.01143475		1372.99	-0.01021232		1902.98	-0.00794102		2432.98	-0.01718722		2962.98	-0.07540321		3492.98	-0.09687727		4022.98	-0.11079175
313.2	-0.00763785		843.19	-0.01226375		1373.19	-0.00939643		1903.18	-0.00824566		2433.18	-0.01741087		2963.18	-0.0747065		3493.18	-0.09866138		4023.18	-0.11103648
313.4	-0.00822393		843.39	-0.01135999		1373.39	-0.00881481		1903.38	-0.00749733		2433.38	-0.01757306		2963.38	-0.07449004		3493.38	-0.09896733		4023.38	-0.11108927
313.6	-0.00808486		843.59	-0.01111708		1373.59	-0.00847947		1903.58	-0.00798977		2433.58	-0.01773291		2963.58	-0.07421459		3493.58	-0.09907712		4023.58	-0.11153809
313.8	-0.0082676		843.79	-0.00983575		1373.79	-0.00867488		1903.78	-0.00726112		2433.78	-0.01769609		2963.78	-0.07420398		3493.78	-0.1002371		4023.78	-0.11149551
314	-0.00876337		843.99	-0.00985966		1373.99	-0.0094509		1903.98	-0.0076208		2433.98	-0.017082		2963.98	-0.07524175		3493.98	-0.10009327		4023.98	-0.11234543
314.2	-0.00880428		844.19	-0.00952617		1374.19	-0.0091382		1904.18	-0.00762954		2434.18	-0.0169949		2964.18	-0.07602262		3494.18	-0.10021516		4024.18	-0.11223081
314.4	-0.0086077		844.39	-0.00912002		1374.39	-0.00916553		1904.38	-0.00735749		2434.38	-0.01638194		2964.38	-0.07604266		3494.38	-0.10106014		4024.38	-0.11202006
314.6	-0.00941038		844.59	-0.00910334		1374.59	-0.00849772		1904.58	-0.00704185		2434.58	-0.01486608		2964.58	-0.07628414		3494.58	-0.10108638		4024.58	-0.11238157
314.8	-0.00857569		844.79	-0.00922359		1374.79	-0.00910321		1904.78	-0.00682629		2434.78	-0.01519588		2964.78	-0.07680073		3494.78	-0.1012267		4024.78	-0.11308529
315	-0.00925523		844.99	-0.00934208		1374.99	-0.00938299		1904.98	-0.00803296		2434.98	-0.01510035		2964.98	-0.07691955		3494.98	-0.10095267		4024.98	-0.11252142
315.2	-0.00924768		845.19	-0.00841006		1375.19	-0.0105153		1905.18	-0.00847355		2435.18	-0.01472574		2965.18	-0.0763005		3495.18	-0.09955602		4025.18	-0.11179058
315.4	-0.00930713		845.39	-0.0078957		1375.39	-0.0096957		1905.38	-0.00806597		2435.38	-0.01551952		2965.38	-0.07675698		3495.38	-0.0989414		4025.38	-0.11093724
315.6	-0.00835804		845.59	-0.008363		1375.59	-0.00988142		1905.58	-0.00978158		2435.58	-0.01554071		2965.58	-0.07767999		3495.58	-0.09851742		4025.58	-0.1105777
315.8	-0.00859491		845.79	-0.00857851		1375.79	-0.00892791		1905.78	-0.00973437		2435.78	-0.0158933		2965.78	-0.07818492		3495.78	-0.09636541		4025.78	-0.11026236
316	-0.0081721		845.99	-0.00896929		1375.99	-0.00896571		1905.98	-0.00975227		2435.98	-0.0157893		2965.98	-0.07762976		3495.98	-0.09567457		4025.98	-0.1101596
316.2	-0.00843034		846.19	-0.00882153		1376.19	-0.00868152		1906.18	-0.01032123		2436.18	-0.01575423		2966.18	-0.07647088		3496.18	-0.09576291		4026.18	-0.11044606
316.4	-0.00843094		846.39	-0.00932062		1376.39	-0.00845908		1906.38	-0.01057869		2436.38	-0.01596136		2966.38	-0.0773762		3496.38	-0.09613382		4026.38	-0.11064114
316.6	-0.00818319		846.59	-0.01027957		1376.59	-0.00812851		1906.58	-0.01067006		2436.58	-0.01571954		2966.58	-0.07763511		3496.58	-0.09590289		4026.58	-0.1101472
316.8	-0.00906762		846.79	-0.01049605		1376.79	-0.00770261		1906.78	-0.00982705		2436.78	-0.01592169		2966.78	-0.07759957		3496.78	-0.09672818		4026.78	-0.11034889
317	-0.00928657		846.99	-0.00968114		1376.99	-0.00707424		1906.98	-0.00935939		2436.98	-0.0159405		2966.98	-0.07769497		3496.98	-0.09778944		4026.98	-0.11054349
317.2	-0.00963926		847.19	-0.00947326		1377.19	-0.00776233		1907.18	-0.00874487		2437.18	-0.01584627		2967.18	-0.07802248		3497.18	-0.09846923		4027.18	-0.10941092
317.4	-0.00982413		847.39	-0.00857298		1377.39	-0.00827274		1907.38	-0.00838122		2437.38	-0.01539881		2967.38	-0.07837741		3497.38	-0.09857647		4027.38	-0.10932275
317.6	-0.00961908		847.59	-0.00827511		1377.59	-0.00939288		1907.58	-0.00736112		2437.58	-0.01533688		2967.58	-0.07878115		3497.58	-0.09923676		4027.58	-0.10919898
317.8	-0.00957242		847.79	-0.00872734		1377.79	-0.00936245		1907.78	-0.00638176		2437.78	-0.01557266		2967.78	-0.07882007		3497.78	-0.09989131		4027.78	-0.10969441
318	-0.00916578		847.99	-0.00832059		1377.99	-0.0092459		1907.98	-0.00621112		2437.98	-0.01574215		2967.98	-0.07881316		3497.98	-0.10069098		4027.98	-0.11068153
318.2	-0.00899353		848.19	-0.00801953		1378.19	-0.00958425		1908.18	-0.00678349		2438.18	-0.01665465		2968.18	-0.07958931		3498.18	-0.10155296		4028.18	-0.11127128
318.4	-0.00894089		848.39	-0.00819331		1378.39	-0.00989723		1908.38	-0.00631665		2438.38	-0.01654482		2968.38	-0.07960949		3498.38	-0.10269223		4028.38	-0.11209697
318.6	-0.00894666		848.59	-0.00769993		1378.59	-0.01092118		1908.58	-0.0062119		2438.58	-0.01638628		2968.58	-0.07976249		3498.58	-0.10285012		4028.58	-0.11257317
318.8	-0.00823181		848.79	-0.0076414		1378.79	-0.01185718		1908.78	-0.00643837		2438.78	-0.01684563		2968.78	-0.08060094		3498.78	-0.10332235		4028.78	-0.11338191
319	-0.00933201		848.99	-0.0072736		1378.99	-0.01147464		1908.98	-0.00684271		2438.98	-0.01716602		2968.98	-0.08126278		3498.98	-0.10236261		4028.98	-0.11315868
319.2	-0.00842946		849.19	-0.00726832		1379.19	-0.01235988		1909.18	-0.00608307		2439.18	-0.01759864		2969.18	-0.08162854		3499.18	-0.1018302		4029.18	-0.11353475
319.4	-0.00831853		849.39	-0.00802379		1379.39	-0.01255821		1909.38	-0.00646836		2439.38	-0.01839839		2969.38	-0.08286199		3499.38	-0.1015366		4029.38	-0.1140794
319.6	-0.00893946		849.59	-0.00905273		1379.59	-0.01288035		1909.58	-0.00734093		2439.58	-0.01774862		2969.58	-0.08396497		3499.58	-0.10168072		4029.58	-0.11498317
319.8	-0.00978226		849.79	-0.00975789		1379.79	-0.01210961		1909.78	-0.00702579		2439.78	-0.0183458		2969.78	-0.08453525		3499.78	-0.10103295		4029.78	-0.11520304
320	-0.00925123		849.99	-0.00969318		1379.99	-0.01183262		1909.98	-0.00653411		2439.98	-0.01831876		2969.98	-0.08419776		3499.98	-0.10122441		4029.98	-0.11580941
320.2	-0.00923294		850.19	-0.01012241		1380.19	-0.01188771		1910.18	-0.00687239		2440.18	-0.01767121		2970.18	-0.08398024		3500.18	-0.10181488		4030.18	-0.1164537
320.4	-0.00999437		850.39	-0.01067472		1380.39	-0.01200924		1910.38	-0.00675778		2440.38	-0.01743167		2970.38	-0.08521897		3500.38	-0.10191157		4030.38	-0.11632369
320.6	-0.00988695		850.59	-0.01119142		1380.59	-0.01130668		1910.58	-0.00669923		2440.58	-0.0166372		2970.58	-0.08452022		3500.58	-0.1019834		4030.58	-0.11665008
320.8	-0.01074587		850.79	-0.0114245		1380.79	-0.01083419		1910.78	-0.00510966		2440.78	-0.01602617		2970.78	-0.0854766		3500.78	-0.10323019		4030.78	-0.11783893
321	-0.01025603		850.99	-0.01175292		1380.99	-0.01053086		1910.98	-0.00481487		2440.98	-0.01492239		2970.98	-0.08597901		3500.98	-0.10375725		4030.98	-0.11774323
321.2	-0.01100781		851.19	-0.01168622		1381.19	-0.01073927		1911.18	-0.00468815		2441.18	-0.01404068		2971.18	-0.08592381		3501.18	-0.10407308		4031.18	-0.11760276
321.4	-0.01141355		851.39	-0.01247154		1381.39	-0.01009307		1911.38	-0.0045695		2441.38	-0.0135194		2971.38	-0.08581911		3501.38	-0.10430181		4031.38	-0.11873068
321.6	-0.01117703		851.59	-0.0126096		1381.59	-0.00986501		1911.58	-0.00416939		2441.58	-0.01340139		2971.58	-0.08583284		3501.58	-0.10431733		4031.58	-0.11940445
321.8	-0.0099171		851.79	-0.01295003		1381.79	-0.00878155		1911.78	-0.00461164		2441.78	-0.01294527		2971.78	-0.08540664		3501.78	-0.10431492		4031.78	-0.12073695
322	-0.00896508		851.99	-0.01267999		1381.99	-0.00846127		1911.98	-0.00484363		2441.98	-0.01392236		2971.98	-0.08499038		3501.98	-0.10499268		4031.98	-0.12161645
322.2	-0.00803362		852.19	-0.01283986		1382.19	-0.00890846		1912.18	-0.00527033		2442.18	-0.01368599		2972.18	-0.08463179		3502.18	-0.10547042		4032.18	-0.12176444
322.4	-0.00705264		852.39	-0.0123277		1382.39	-0.00810176		1912.38	-0.00469206		2442.38	-0.01321172		2972.38	-0.08453208		3502.38	-0.10559877		4032.38	-0.12060207
322.6	-0.00623164		852.59	-0.01157678		1382.59	-0.00880635		1912.58	-0.00567167		2442.58	-0.01336639		2972.58	-0.0843482		3502.58	-0.10480494		4032.58	-0.11917175
322.8	-0.00561305		852.79	-0.0111174		1382.79	-0.00826465		1912.78	-0.00608458		2442.78	-0.01381102		2972.78	-0.08479443		3502.78	-0.10463477		4032.78	-0.11915483
323	-0.00533267		852.99	-0.01117079		1382.99	-0.00835569		1912.98	-0.00654655		2442.98	-0.01513174		2972.98	-0.08397343		3502.98	-0.10405618		4032.98	-0.11862961
323.2	-0.00518992		853.19	-0.01194846		1383.19	-0.00906842		1913.18	-0.00729851		2443.18	-0.01560791		2973.18	-0.08375872		3503.18	-0.10478157		4033.18	-0.11823756
323.4	-0.00609586		853.39	-0.01190312		1383.39	-0.00950079		1913.38	-0.00865567		2443.38	-0.01576587		2973.38	-0.08368512		3503.38	-0.10469354		4033.38	-0.11772728
323.6	-0.00648344		853.59	-0.01188707		1383.59	-0.00978299		1913.58	-0.00944037		2443.58	-0.01570038		2973.58	-0.08314994		3503.58	-0.1047964		4033.58	-0.11736881
323.8	-0.00795023		853.79	-0.01041189		1383.79	-0.00902089		1913.78	-0.00959807		2443.78	-0.01677838		2973.78	-0.08320247		3503.78	-0.10541128		4033.78	-0.11681407
324	-0.00726385		853.99	-0.00937586		1383.99	-0.00983452		1913.98	-0.01009268		2443.98	-0.01661232		2973.98	-0.08329788		3503.98	-0.1054396		4033.98	-0.11639819
324.2	-0.00847242		854.19	-0.0089607		1384.19	-0.0104013		1914.18	-0.0104468		2444.18	-0.01700663		2974.18	-0.0830565		3504.18	-0.10570267		4034.18	-0.11607945
324.4	-0.00972996		854.39	-0.0083628		1384.39	-0.01010794		1914.38	-0.01021594		2444.38	-0.01773659		2974.38	-0.08278915		3504.38	-0.10519968		4034.38	-0.11585448
324.6	-0.00950088		854.59	-0.00801573		1384.59	-0.00969819		1914.58	-0.00911451		2444.58	-0.01779065		2974.58	-0.08236931		3504.58	-0.10473701		4034.58	-0.11599846
324.8	-0.01011144		854.79	-0.0078019		1384.79	-0.00989479		1914.78	-0.00853009		2444.78	-0.01797965		2974.78	-0.08298287		3504.78	-0.10509648		4034.78	-0.11612726
325	-0.01084799		854.99	-0.00797744		1384.99	-0.01002614		1914.98	-0.00768266		2444.98	-0.01784016		2974.98	-0.08326638		3504.98	-0.10414824		4034.98	-0.11643388
325.2	-0.0124074		855.19	-0.00838466		1385.19	-0.01006104		1915.18	-0.00654386		2445.18	-0.0170945		2975.18	-0.08321574		3505.18	-0.10388268		4035.18	-0.11560321
325.4	-0.01228859		855.39	-0.00914908		1385.39	-0.01044112		1915.38	-0.00629068		2445.38	-0.01800194		2975.38	-0.08342255		3505.38	-0.10405747		4035.38	-0.11676158
325.6	-0.01234556		855.59	-0.0093489		1385.59	-0.01126374		1915.58	-0.00579794		2445.58	-0.01772764		2975.58	-0.08426009		3505.58	-0.10358053		4035.58	-0.11789996
325.8	-0.01194957		855.79	-0.00997851		1385.79	-0.01152283		1915.78	-0.00527088		2445.78	-0.01709633		2975.78	-0.0844529		3505.78	-0.10433681		4035.78	-0.11890384
326	-0.01266952		855.99	-0.01021571		1385.99	-0.01158925		1915.98	-0.00505086		2445.98	-0.01738463		2975.98	-0.0840828		3505.98	-0.10572392		4035.98	-0.11982672
326.2	-0.01272843		856.19	-0.01085236		1386.19	-0.0113679		1916.18	-0.00558916		2446.18	-0.0169318		2976.18	-0.08431866		3506.18	-0.10627141		4036.18	-0.12023637
326.4	-0.01305542		856.39	-0.01149524		1386.39	-0.01042395		1916.38	-0.00517349		2446.38	-0.01731057		2976.38	-0.08549709		3506.38	-0.10600491		4036.38	-0.12044856
326.6	-0.01269133		856.59	-0.01313137		1386.59	-0.0108329		1916.58	-0.0053602		2446.58	-0.01846427		2976.58	-0.08496081		3506.58	-0.10552342		4036.58	-0.12032863
326.8	-0.0121744		856.79	-0.01403909		1386.79	-0.01067783		1916.78	-0.00644315		2446.78	-0.01951174		2976.78	-0.08591282		3506.78	-0.10635816		4036.78	-0.12057198
327	-0.01197639		856.99	-0.01540167		1386.99	-0.01183617		1916.98	-0.00697178		2446.98	-0.0205282		2976.98	-0.08554312		3506.98	-0.10659324		4036.98	-0.12078044
327.2	-0.01179906		857.19	-0.01633734		1387.19	-0.01234946		1917.18	-0.00671434		2447.18	-0.02019111		2977.18	-0.08614132		3507.18	-0.10666602		4037.18	-0.12036468
327.4	-0.01119843		857.39	-0.01603919		1387.39	-0.0120294		1917.38	-0.00756327		2447.38	-0.01973295		2977.38	-0.08648925		3507.38	-0.10744868		4037.38	-0.1203642
327.6	-0.01037889		857.59	-0.01534392		1387.59	-0.01120788		1917.58	-0.00819377		2447.58	-0.02032758		2977.58	-0.08701138		3507.58	-0.10771289		4037.58	-0.12057428
327.8	-0.01111231		857.79	-0.0149484		1387.79	-0.01029974		1917.78	-0.00857543		2447.78	-0.01990805		2977.78	-0.08789853		3507.78	-0.1089892		4037.78	-0.12033762
328	-0.01055814		857.99	-0.01469338		1387.99	-0.00987413		1917.98	-0.00892762		2447.98	-0.01963849		2977.98	-0.08797164		3507.98	-0.10957409		4037.98	-0.12042864
328.2	-0.01074948		858.19	-0.01407846		1388.19	-0.00980047		1918.18	-0.0081538		2448.18	-0.01987792		2978.18	-0.08820906		3508.18	-0.11007591		4038.18	-0.1207956
328.4	-0.01010872		858.39	-0.01330511		1388.39	-0.0091796		1918.38	-0.00825614		2448.38	-0.01891166		2978.38	-0.08815274		3508.38	-0.11005399		4038.38	-0.12098645
328.6	-0.00935669		858.59	-0.01228731		1388.59	-0.00879261		1918.58	-0.00831469		2448.58	-0.01856568		2978.58	-0.08780723		3508.58	-0.10987519		4038.58	-0.12108853
328.8	-0.00883832		858.79	-0.01116281		1388.79	-0.00923004		1918.78	-0.00829686		2448.78	-0.01850373		2978.78	-0.08854082		3508.78	-0.11043764		4038.78	-0.12123865
329	-0.00903913		858.99	-0.01095999		1388.99	-0.00943513		1918.98	-0.00692711		2448.98	-0.01737329		2978.98	-0.08859197		3508.98	-0.11012311		4038.98	-0.12118261
329.2	-0.00889499		859.19	-0.01111073		1389.19	-0.00988991		1919.18	-0.00667499		2449.18	-0.01700062		2979.18	-0.08810329		3509.18	-0.11044905		4039.18	-0.12144221
329.4	-0.00930123		859.39	-0.01061283		1389.39	-0.01068537		1919.38	-0.00726002		2449.38	-0.01754422		2979.38	-0.08837488		3509.38	-0.11143719		4039.38	-0.12257992
329.6	-0.00938438		859.59	-0.01026299		1389.59	-0.01097851		1919.58	-0.00626575		2449.58	-0.01598884		2979.58	-0.08884934		3509.58	-0.11131028		4039.58	-0.12360369
329.8	-0.01041591		859.79	-0.00964066		1389.79	-0.01103756		1919.78	-0.00654245		2449.78	-0.01484629		2979.78	-0.087788		3509.78	-0.11159775		4039.78	-0.12482168
330	-0.01133526		859.99	-0.00955798		1389.99	-0.01098612		1919.98	-0.00645118		2449.98	-0.01464522		2979.98	-0.08807718		3509.98	-0.11220554		4039.98	-0.12555882
330.2	-0.01185951		860.19	-0.0095644		1390.19	-0.01079636		1920.18	-0.00640685		2450.18	-0.01541499		2980.18	-0.08845652		3510.18	-0.11113885		4040.18	-0.12623018
330.4	-0.01163116		860.39	-0.00956641		1390.39	-0.01115326		1920.38	-0.00584695		2450.38	-0.01543898		2980.38	-0.08863898		3510.38	-0.11072797		4040.38	-0.12701337
330.6	-0.01064485		860.59	-0.01017435		1390.59	-0.01125879		1920.58	-0.00644852		2450.58	-0.01609558		2980.58	-0.08799759		3510.58	-0.11023383		4040.58	-0.12669346
330.8	-0.01036676		860.79	-0.00954834		1390.79	-0.01236975		1920.78	-0.00734917		2450.78	-0.01589443		2980.78	-0.08826677		3510.78	-0.10996868		4040.78	-0.12722299
331	-0.00999204		860.99	-0.00966253		1390.99	-0.01255343		1920.98	-0.00680346		2450.98	-0.01579448		2980.98	-0.08798022		3510.98	-0.10968529		4040.98	-0.12832867
331.2	-0.00971639		861.19	-0.01050368		1391.19	-0.01235741		1921.18	-0.00716374		2451.18	-0.01543656		2981.18	-0.08825801		3511.18	-0.11002375		4041.18	-0.12843851
331.4	-0.0102107		861.39	-0.01058108		1391.39	-0.01127285		1921.38	-0.00869176		2451.38	-0.01529186		2981.38	-0.08919137		3511.38	-0.11028622		4041.38	-0.12914601
331.6	-0.01002722		861.59	-0.01043014		1391.59	-0.01012238		1921.58	-0.00886977		2451.58	-0.015803		2981.58	-0.08975117		3511.58	-0.10985409		4041.58	-0.12869866
331.8	-0.01069117		861.79	-0.01019982		1391.79	-0.0105647		1921.78	-0.0090231		2451.78	-0.01559354		2981.78	-0.08967525		3511.78	-0.11004958		4041.78	-0.12882577
332	-0.01041206		861.99	-0.00958607		1391.99	-0.0101676		1921.98	-0.00862924		2451.98	-0.01571887		2981.98	-0.08982709		3511.98	-0.10949051		4041.98	-0.12885183
332.2	-0.00990667		862.19	-0.00919038		1392.19	-0.01010461		1922.18	-0.00854987		2452.18	-0.01573807		2982.18	-0.0901204		3512.18	-0.1101171		4042.18	-0.12941466
332.4	-0.01023751		862.39	-0.00879798		1392.39	-0.00969856		1922.38	-0.0098759		2452.38	-0.01592456		2982.38	-0.09013816		3512.38	-0.10981967		4042.38	-0.12878068
332.6	-0.01040791		862.59	-0.00865211		1392.59	-0.00948716		1922.58	-0.00974753		2452.58	-0.01632971		2982.58	-0.09006597		3512.58	-0.11040458		4042.58	-0.12914587
332.8	-0.01018824		862.79	-0.00848423		1392.79	-0.00972195		1922.78	-0.00898357		2452.78	-0.01664728		2982.78	-0.09106928		3512.78	-0.11103426		4042.78	-0.12935511
333	-0.01117307		862.99	-0.00893373		1392.99	-0.01001604		1922.98	-0.00863255		2452.98	-0.01626579		2982.98	-0.09208726		3512.98	-0.11099885		4042.98	-0.12963552
333.2	-0.01117839		863.19	-0.00980149		1393.19	-0.0108747		1923.18	-0.00884101		2453.18	-0.01724743		2983.18	-0.09277472		3513.18	-0.11115674		4043.18	-0.12947681
333.4	-0.01175151		863.39	-0.00965276		1393.39	-0.01020996		1923.38	-0.00899979		2453.38	-0.01722769		2983.38	-0.09260101		3513.38	-0.11189405		4043.38	-0.12943503
333.6	-0.01148145		863.59	-0.00928726		1393.59	-0.00975762		1923.58	-0.00852543		2453.58	-0.01647271		2983.58	-0.09248154		3513.58	-0.11167163		4043.58	-0.12957345
333.8	-0.0130926		863.79	-0.00891919		1393.79	-0.01020686		1923.78	-0.00931486		2453.78	-0.01660505		2983.78	-0.09187127		3513.78	-0.11171968		4043.78	-0.13000464
334	-0.01319419		863.99	-0.00940158		1393.99	-0.00978599		1923.98	-0.00942175		2453.98	-0.01584562		2983.98	-0.09267529		3513.98	-0.11277631		4043.98	-0.12977585
334.2	-0.01298467		864.19	-0.00915609		1394.19	-0.00917918		1924.18	-0.01025405		2454.18	-0.01603784		2984.18	-0.0923665		3514.18	-0.1125896		4044.18	-0.13022315
334.4	-0.01246469		864.39	-0.00951702		1394.39	-0.00902161		1924.38	-0.01016143		2454.38	-0.01491288		2984.38	-0.09185712		3514.38	-0.11364001		4044.38	-0.13034673
334.6	-0.01194289		864.59	-0.00975158		1394.59	-0.00838232		1924.58	-0.01071926		2454.58	-0.01539766		2984.58	-0.09171834		3514.58	-0.11338876		4044.58	-0.13100468
334.8	-0.01217461		864.79	-0.00938335		1394.79	-0.00883202		1924.78	-0.0102619		2454.78	-0.01556472		2984.78	-0.09136324		3514.78	-0.11320793		4044.78	-0.13148561
335	-0.01236327		864.99	-0.01038963		1394.99	-0.00820939		1924.98	-0.01018723		2454.98	-0.01573705		2984.98	-0.09070124		3514.98	-0.11367978		4044.98	-0.13149497
335.2	-0.01253614		865.19	-0.01099613		1395.19	-0.00782035		1925.18	-0.01071812		2455.18	-0.01565487		2985.18	-0.09085921		3515.18	-0.11392575		4045.18	-0.13089331
335.4	-0.01224879		865.39	-0.01161508		1395.39	-0.0073101		1925.38	-0.01034837		2455.38	-0.01610881		2985.38	-0.09157226		3515.38	-0.11317143		4045.38	-0.13049422
335.6	-0.01197592		865.59	-0.01106277		1395.59	-0.00726946		1925.58	-0.00928164		2455.58	-0.01636476		2985.58	-0.09100581		3515.58	-0.11350615		4045.58	-0.12977986
335.8	-0.01185952		865.79	-0.01103285		1395.79	-0.00816071		1925.78	-0.00949266		2455.78	-0.01575542		2985.78	-0.09091571		3515.78	-0.11347213		4045.78	-0.12986496
336	-0.01254147		865.99	-0.01123541		1395.99	-0.00831505		1925.98	-0.00801333		2455.98	-0.01593504		2985.98	-0.09088595		3515.98	-0.11352052		4045.98	-0.1295067
336.2	-0.01282671		866.19	-0.01147368		1396.19	-0.00916163		1926.18	-0.00744585		2456.18	-0.01649642		2986.18	-0.09129577		3516.18	-0.1137445		4046.18	-0.12948758
336.4	-0.01246052		866.39	-0.01087679		1396.39	-0.01005993		1926.38	-0.0077866		2456.38	-0.01713678		2986.38	-0.09178485		3516.38	-0.11348204		4046.38	-0.12879968
336.6	-0.01217783		866.59	-0.01139615		1396.59	-0.01086552		1926.58	-0.00677453		2456.58	-0.01695383		2986.58	-0.09233925		3516.58	-0.11424307		4046.58	-0.12908737
336.8	-0.01132563		866.79	-0.01103289		1396.79	-0.01154742		1926.78	-0.00614378		2456.78	-0.01798684		2986.78	-0.09293417		3516.78	-0.11347252		4046.78	-0.1282734
337	-0.01102016		866.99	-0.01091574		1396.99	-0.01186903		1926.98	-0.00649596		2456.98	-0.01918504		2986.98	-0.09383822		3516.98	-0.1134327		4046.98	-0.12769375
337.2	-0.01062725		867.19	-0.0111177		1397.19	-0.0120838		1927.18	-0.00695602		2457.18	-0.01945688		2987.18	-0.0940107		3517.18	-0.11409662		4047.18	-0.12770992
337.4	-0.01023935		867.39	-0.01058732		1397.39	-0.01132769		1927.38	-0.00737821		2457.38	-0.019461		2987.38	-0.09329932		3517.38	-0.11528702		4047.38	-0.12829303
337.6	-0.00993262		867.59	-0.00995962		1397.59	-0.01167893		1927.58	-0.00905407		2457.58	-0.01939239		2987.58	-0.09338674		3517.58	-0.11485114		4047.58	-0.12819485
337.8	-0.00988147		867.79	-0.00958945		1397.79	-0.01284689		1927.78	-0.00971252		2457.78	-0.0197563		2987.78	-0.09352476		3517.78	-0.11547246		4047.78	-0.1295168
338	-0.00957875		867.99	-0.00974802		1397.99	-0.01205357		1927.98	-0.01123766		2457.98	-0.01882402		2987.98	-0.09321095		3517.98	-0.1156675		4047.98	-0.12994468
338.2	-0.00934764		868.19	-0.00956614		1398.19	-0.01209094		1928.18	-0.01245531		2458.18	-0.01912889		2988.18	-0.09326727		3518.18	-0.11587305		4048.18	-0.13063486
338.4	-0.00874133		868.39	-0.00939677		1398.39	-0.01200387		1928.38	-0.01262379		2458.38	-0.01964623		2988.38	-0.09260564		3518.38	-0.1157739		4048.38	-0.13093175
338.6	-0.00877517		868.59	-0.00933206		1398.59	-0.01123934		1928.58	-0.01334524		2458.58	-0.01986334		2988.58	-0.09272977		3518.58	-0.11557334		4048.58	-0.13137079
338.8	-0.00932429		868.79	-0.00895589		1398.79	-0.0105258		1928.78	-0.01240832		2458.78	-0.01960878		2988.78	-0.09216068		3518.78	-0.11611403		4048.78	-0.13126345
339	-0.00973703		868.99	-0.00988399		1398.99	-0.01009807		1928.98	-0.01245957		2458.98	-0.01966095		2988.98	-0.09226074		3518.98	-0.11696078		4048.98	-0.13130323
339.2	-0.01043601		869.19	-0.00972463		1399.19	-0.00986297		1929.18	-0.01227403		2459.18	-0.01999388		2989.18	-0.09307774		3519.18	-0.11693326		4049.18	-0.131823
339.4	-0.01090496		869.39	-0.01023128		1399.39	-0.00984633		1929.38	-0.01125143		2459.38	-0.01989634		2989.38	-0.09305789		3519.38	-0.11663752		4049.38	-0.13101257
339.6	-0.01193008		869.59	-0.00990236		1399.59	-0.01000472		1929.58	-0.01087089		2459.58	-0.01953939		2989.58	-0.09283305		3519.58	-0.11796342		4049.58	-0.13062656
339.8	-0.01228446		869.79	-0.01061915		1399.79	-0.01049855		1929.78	-0.01018523		2459.78	-0.02023911		2989.78	-0.09307557		3519.78	-0.11764286		4049.78	-0.13042755
340	-0.01279914		869.99	-0.01023198		1399.99	-0.01131139		1929.98	-0.00809478		2459.98	-0.02092967		2989.98	-0.09302476		3519.98	-0.11731847		4049.98	-0.12996805
340.2	-0.0124852		870.19	-0.01052302		1400.19	-0.01148685		1930.18	-0.00669605		2460.18	-0.02034698		2990.18	-0.09331457		3520.18	-0.11737941		4050.18	-0.12987857
340.4	-0.01245454		870.39	-0.0102653		1400.39	-0.01136331		1930.38	-0.00634795		2460.38	-0.01918908		2990.38	-0.09371256		3520.38	-0.1174142		4050.38	-0.12966564
340.6	-0.01249731		870.59	-0.01065346		1400.59	-0.01198436		1930.58	-0.00498344		2460.58	-0.01927633		2990.58	-0.09454959		3520.58	-0.11750557		4050.58	-0.12977223
340.8	-0.01271853		870.79	-0.01094549		1400.79	-0.01165505		1930.78	-0.0049875		2460.78	-0.02057539		2990.78	-0.0944798		3520.78	-0.11771756		4050.78	-0.12940775
341	-0.01324218		870.99	-0.0115797		1400.99	-0.01174413		1930.98	-0.0054975		2460.98	-0.020009		2990.98	-0.0954248		3520.98	-0.11812756		4050.98	-0.12940528
341.2	-0.01300732		871.19	-0.01236556		1401.19	-0.01119987		1931.18	-0.00570387		2461.18	-0.01882309		2991.18	-0.09604805		3521.18	-0.11833774		4051.18	-0.13047071
341.4	-0.01197139		871.39	-0.01235836		1401.39	-0.01081518		1931.38	-0.00595969		2461.38	-0.01948102		2991.38	-0.09565274		3521.38	-0.11830736		4051.38	-0.13073818
341.6	-0.01178201		871.59	-0.01175548		1401.59	-0.01109236		1931.58	-0.00726736		2461.58	-0.0188588		2991.58	-0.0960543		3521.58	-0.11744878		4051.58	-0.13118103
341.8	-0.01169933		871.79	-0.01167258		1401.79	-0.01201036		1931.78	-0.00757179		2461.78	-0.01830219		2991.78	-0.09640717		3521.78	-0.11799407		4051.78	-0.13238471
342	-0.01150285		871.99	-0.0118562		1401.99	-0.01079363		1931.98	-0.00947733		2461.98	-0.01721228		2991.98	-0.09645805		3521.98	-0.11790329		4051.98	-0.13251881
342.2	-0.01154526		872.19	-0.01198937		1402.19	-0.01025218		1932.18	-0.00956592		2462.18	-0.01760326		2992.18	-0.09690006		3522.18	-0.11854144		4052.18	-0.13359284
342.4	-0.01176686		872.39	-0.01185268		1402.39	-0.00990434		1932.38	-0.0101301		2462.38	-0.01746338		2992.38	-0.09621623		3522.38	-0.1185544		4052.38	-0.13455451
342.6	-0.01156046		872.59	-0.01250825		1402.59	-0.00988415		1932.58	-0.01011313		2462.58	-0.01654307		2992.58	-0.096627		3522.58	-0.12022879		4052.58	-0.13495611
342.8	-0.0114009		872.79	-0.01278274		1402.79	-0.00968229		1932.78	-0.00951493		2462.78	-0.01782463		2992.78	-0.09660468		3522.78	-0.12029828		4052.78	-0.13586518
343	-0.01149161		872.99	-0.01325543		1402.99	-0.01019094		1932.98	-0.00999678		2462.98	-0.01841799		2992.98	-0.09719053		3522.98	-0.12007183		4052.98	-0.13640134
343.2	-0.01147117		873.19	-0.01262325		1403.19	-0.01104822		1933.18	-0.00970719		2463.18	-0.0191587		2993.18	-0.09702739		3523.18	-0.11991783		4053.18	-0.13662055
343.4	-0.01059876		873.39	-0.01242512		1403.39	-0.01111487		1933.38	-0.00934253		2463.38	-0.01938985		2993.38	-0.09683728		3523.38	-0.11989091		4053.38	-0.13567275
343.6	-0.01072214		873.59	-0.01222001		1403.59	-0.01077401		1933.58	-0.00874737		2463.58	-0.02077729		2993.58	-0.09677971		3523.58	-0.12032537		4053.58	-0.13632412
343.8	-0.01064382		873.79	-0.01147499		1403.79	-0.01130012		1933.78	-0.00771033		2463.78	-0.02158538		2993.78	-0.09643786		3523.78	-0.12016283		4053.78	-0.13664981
344	-0.00982357		873.99	-0.01062492		1403.99	-0.0121737		1933.98	-0.00710324		2463.98	-0.02052715		2993.98	-0.09665333		3523.98	-0.12054156		4053.98	-0.13725842
344.2	-0.00995282		874.19	-0.01101598		1404.19	-0.01254577		1934.18	-0.00643508		2464.18	-0.0202332		2994.18	-0.09654082		3524.18	-0.12107554		4054.18	-0.13774326
344.4	-0.01061328		874.39	-0.01088168		1404.39	-0.01255827		1934.38	-0.00666325		2464.38	-0.01983343		2994.38	-0.09716368		3524.38	-0.12084235		4054.38	-0.13813806
344.6	-0.01039757		874.59	-0.01137348		1404.59	-0.01285539		1934.58	-0.00639449		2464.58	-0.0207852		2994.58	-0.09695809		3524.58	-0.12134345		4054.58	-0.13856196
344.8	-0.01068069		874.79	-0.01235417		1404.79	-0.01300203		1934.78	-0.00664349		2464.78	-0.02056225		2994.78	-0.09655653		3524.78	-0.12182166		4054.78	-0.13845463
345	-0.01039688		874.99	-0.01214498		1404.99	-0.01236908		1934.98	-0.00750325		2464.98	-0.01983456		2994.98	-0.09685642		3524.98	-0.1215482		4054.98	-0.13811724
345.2	-0.00988185		875.19	-0.0123385		1405.19	-0.012279		1935.18	-0.00815872		2465.18	-0.0200152		2995.18	-0.09707858		3525.18	-0.12139388		4055.18	-0.1391564
345.4	-0.00980661		875.39	-0.01140261		1405.39	-0.01275804		1935.38	-0.00840676		2465.38	-0.02015595		2995.38	-0.09664163		3525.38	-0.1210498		4055.38	-0.13929479
345.6	-0.01069062		875.59	-0.01019968		1405.59	-0.01284425		1935.58	-0.00927196		2465.58	-0.01922228		2995.58	-0.09655038		3525.58	-0.12085123		4055.58	-0.13928443
345.8	-0.01187557		875.79	-0.00937933		1405.79	-0.0128014		1935.78	-0.00995026		2465.78	-0.01891835		2995.78	-0.09625606		3525.78	-0.12081168		4055.78	-0.13889067
346	-0.0124613		875.99	-0.01001301		1405.99	-0.01211942		1935.98	-0.01107321		2465.98	-0.01872497		2995.98	-0.09639932		3525.98	-0.12081172		4055.98	-0.13919007
346.2	-0.01254571		876.19	-0.01008607		1406.19	-0.01247296		1936.18	-0.01155408		2466.18	-0.01876477		2996.18	-0.09571607		3526.18	-0.12165236		4056.18	-0.13964864
346.4	-0.01277424		876.39	-0.0102757		1406.39	-0.01246361		1936.38	-0.01115742		2466.38	-0.01834555		2996.38	-0.09471832		3526.38	-0.1215718		4056.38	-0.13943443
346.6	-0.01238042		876.59	-0.01017206		1406.59	-0.01217346		1936.58	-0.01052394		2466.58	-0.0189502		2996.58	-0.09501901		3526.58	-0.12253539		4056.58	-0.13902153
346.8	-0.01322937		876.79	-0.00941597		1406.79	-0.0113122		1936.78	-0.01011443		2466.78	-0.01936072		2996.78	-0.09501006		3526.78	-0.12120346		4056.78	-0.13941362
347	-0.01408154		876.99	-0.00972238		1406.99	-0.01168498		1936.98	-0.009494		2466.98	-0.01880248		2996.98	-0.09573393		3526.98	-0.12142743		4056.98	-0.13947145
347.2	-0.01432551		877.19	-0.00951337		1407.19	-0.01203071		1937.18	-0.00901661		2467.18	-0.01957183		2997.18	-0.09540493		3527.18	-0.12109243		4057.18	-0.13911996
347.4	-0.01411841		877.39	-0.00914507		1407.39	-0.01117963		1937.38	-0.00854961		2467.38	-0.02025844		2997.38	-0.09562749		3527.38	-0.12064037		4057.38	-0.13917502
347.6	-0.01526618		877.59	-0.00859371		1407.59	-0.01111268		1937.58	-0.00814651		2467.58	-0.02097824		2997.58	-0.09550207		3527.58	-0.12064512		4057.58	-0.13908844
347.8	-0.01479301		877.79	-0.00854185		1407.79	-0.01157428		1937.78	-0.00768456		2467.78	-0.02043309		2997.78	-0.09576954		3527.78	-0.12153483		4057.78	-0.13925849
348	-0.01469819		877.99	-0.00914895		1407.99	-0.01173287		1937.98	-0.00742135		2467.98	-0.02080313		2997.98	-0.0958476		3527.98	-0.12164957		4057.98	-0.13979098
348.2	-0.01499696		878.19	-0.0092758		1408.19	-0.01242097		1938.18	-0.00655605		2468.18	-0.0214804		2998.18	-0.09662145		3528.18	-0.12243376		4058.18	-0.14000602
348.4	-0.01539446		878.39	-0.00921816		1408.39	-0.01230342		1938.38	-0.0068766		2468.38	-0.02129975		2998.38	-0.09686006		3528.38	-0.12310072		4058.38	-0.14060502
348.6	-0.01471915		878.59	-0.00963063		1408.59	-0.01252462		1938.58	-0.00678426		2468.58	-0.02113183		2998.58	-0.09732791		3528.58	-0.12369608		4058.58	-0.14071246
348.8	-0.01387348		878.79	-0.00954786		1408.79	-0.01232621		1938.78	-0.00678242		2468.78	-0.02107255		2998.78	-0.09758508		3528.78	-0.12467173		4058.78	-0.14050452
349	-0.01354008		878.99	-0.00933067		1408.99	-0.01225747		1938.98	-0.00887233		2468.98	-0.02118401		2998.98	-0.09747001		3528.98	-0.12525221		4058.98	-0.14058326
349.2	-0.01345585		879.19	-0.01002867		1409.19	-0.0132861		1939.18	-0.0099799		2469.18	-0.02093078		2999.18	-0.09788615		3529.18	-0.1257432		4059.18	-0.14136015
349.4	-0.01336255		879.39	-0.00942868		1409.39	-0.01330961		1939.38	-0.01026124		2469.38	-0.02063622		2999.38	-0.09877292		3529.38	-0.12550392		4059.38	-0.14051996
349.6	-0.01344506		879.59	-0.00915071		1409.59	-0.0126849		1939.58	-0.01047427		2469.58	-0.02058481		2999.58	-0.09938494		3529.58	-0.12596326		4059.58	-0.14095412
349.8	-0.01355534		879.79	-0.00941944		1409.79	-0.01293911		1939.78	-0.01096554		2469.78	-0.02023334		2999.78	-0.09982377		3529.78	-0.12558726		4059.78	-0.14097342
350	-0.01278757		879.99	-0.01063559		1409.99	-0.01335775		1939.98	-0.01116616		2469.98	-0.01977796		2999.98	-0.10080966		3529.98	-0.12596369		4059.98	-0.14151798
350.2	-0.01204792		880.19	-0.00942073		1410.19	-0.01316783		1940.18	-0.01045197		2470.18	-0.01931337		3000.18	-0.10172811		3530.18	-0.12562183		4060.18	-0.14165964
350.4	-0.012636		880.39	-0.00927183		1410.39	-0.01204099		1940.38	-0.00918226		2470.38	-0.01930805		3000.38	-0.10216395		3530.38	-0.12507351		4060.38	-0.14159303
350.6	-0.01309598		880.59	-0.00864011		1410.59	-0.01177468		1940.58	-0.00869895		2470.58	-0.01886366		3000.58	-0.10236309		3530.58	-0.12411042		4060.58	-0.14060017
350.8	-0.01393557		880.79	-0.00971211		1410.79	-0.0118871		1940.78	-0.00823286		2470.78	-0.01812775		3000.78	-0.10208706		3530.78	-0.12327083		4060.78	-0.14091745
351	-0.01416235		880.99	-0.0107184		1410.99	-0.01255271		1940.98	-0.00752779		2470.98	-0.019015		3000.98	-0.1025898		3530.98	-0.12314784		4060.98	-0.14137879
351.2	-0.01407868		881.19	-0.01094649		1411.19	-0.0132977		1941.18	-0.00740528		2471.18	-0.01919653		3001.18	-0.10224013		3531.18	-0.12160764		4061.18	-0.14109417
351.4	-0.01336945		881.39	-0.01117449		1411.39	-0.01310994		1941.38	-0.00676365		2471.38	-0.01991924		3001.38	-0.10224337		3531.38	-0.12159484		4061.38	-0.14147742
351.6	-0.01422895		881.59	-0.0113387		1411.59	-0.01280131		1941.58	-0.0060012		2471.58	-0.01961321		3001.58	-0.10216902		3531.58	-0.12146704		4061.58	-0.14213307
351.8	-0.01339067		881.79	-0.01200143		1411.79	-0.01292454		1941.78	-0.00543993		2471.78	-0.01923798		3001.78	-0.10276867		3531.78	-0.12140286		4061.78	-0.14296242
352	-0.01321098		881.99	-0.01184963		1411.99	-0.01401046		1941.98	-0.00597685		2471.98	-0.02001601		3001.98	-0.10247965		3531.98	-0.12206736		4061.98	-0.14307759
352.2	-0.01274042		882.19	-0.01110929		1412.19	-0.0148075		1942.18	-0.00612104		2472.18	-0.01989633		3002.18	-0.10286791		3532.18	-0.12281258		4062.18	-0.14388829
352.4	-0.0139456		882.39	-0.01025314		1412.39	-0.0140061		1942.38	-0.006418		2472.38	-0.0200958		3002.38	-0.10231898		3532.38	-0.12368788		4062.38	-0.14392972
352.6	-0.01365557		882.59	-0.00948278		1412.59	-0.01324126		1942.58	-0.00688878		2472.58	-0.01912731		3002.58	-0.10219333		3532.58	-0.12443339		4062.58	-0.14369794
352.8	-0.01334313		882.79	-0.00893433		1412.79	-0.01308801		1942.78	-0.00755905		2472.78	-0.01926718		3002.78	-0.1022219		3532.78	-0.12532768		4062.78	-0.1439025
353	-0.01377534		882.99	-0.00830415		1412.99	-0.01261054		1942.98	-0.00921907		2472.98	-0.01849753		3002.98	-0.10282461		3532.98	-0.1259066		4062.98	-0.14463283
353.2	-0.01337464		883.19	-0.00869307		1413.19	-0.01173261		1943.18	-0.00994715		2473.18	-0.0181318		3003.18	-0.10275509		3533.18	-0.12648918		4063.18	-0.14481503
353.4	-0.0136338		883.39	-0.00813361		1413.39	-0.01053935		1943.38	-0.0108122		2473.38	-0.01822675		3003.38	-0.10288115		3533.38	-0.12598642		4063.38	-0.14508217
353.6	-0.01431817		883.59	-0.00811002		1413.59	-0.0100307		1943.58	-0.01096231		2473.58	-0.01806907		3003.58	-0.10260626		3533.58	-0.12647771		4063.58	-0.14576844
353.8	-0.01479033		883.79	-0.00782031		1413.79	-0.01015904		1943.78	-0.01154949		2473.78	-0.01793439		3003.78	-0.10216467		3533.78	-0.12656262		4063.78	-0.14518842
354	-0.01428187		883.99	-0.00792985		1413.99	-0.00997979		1943.98	-0.01171857		2473.98	-0.01792449		3003.98	-0.10206094		3533.98	-0.12627514		4063.98	-0.14393502
354.2	-0.01407395		884.19	-0.00774083		1414.19	-0.00929865		1944.18	-0.01166196		2474.18	-0.01741059		3004.18	-0.10276359		3534.18	-0.12518101		4064.18	-0.14364843
354.4	-0.01408395		884.39	-0.00920611		1414.39	-0.0089837		1944.38	-0.01156062		2474.38	-0.01727788		3004.38	-0.10180528		3534.38	-0.12500962		4064.38	-0.14208147
354.6	-0.01383278		884.59	-0.00993947		1414.59	-0.00970655		1944.58	-0.01103243		2474.58	-0.01865445		3004.58	-0.09997818		3534.58	-0.12399323		4064.58	-0.14099661
354.8	-0.01367681		884.79	-0.01186109		1414.79	-0.00962319		1944.78	-0.01102898		2474.78	-0.01920952		3004.78	-0.09993557		3534.78	-0.12451468		4064.78	-0.1418476
355	-0.01268066		884.99	-0.01185722		1414.99	-0.0103501		1944.98	-0.01065113		2474.98	-0.02020706		3004.98	-0.10086613		3534.98	-0.12464553		4064.98	-0.14177464
355.2	-0.01273015		885.19	-0.01213418		1415.19	-0.01112741		1945.18	-0.00985131		2475.18	-0.02061299		3005.18	-0.10139409		3535.18	-0.12462878		4065.18	-0.14208884
355.4	-0.01234232		885.39	-0.01163624		1415.39	-0.01111473		1945.38	-0.00987467		2475.38	-0.02157471		3005.38	-0.10173111		3535.38	-0.12500213		4065.38	-0.14213482
355.6	-0.01272545		885.59	-0.0122483		1415.59	-0.01090913		1945.58	-0.00916484		2475.58	-0.02189887		3005.58	-0.10281382		3535.58	-0.12457577		4065.58	-0.14293475
355.8	-0.01172421		885.79	-0.01288563		1415.79	-0.01172211		1945.78	-0.00952861		2475.78	-0.02233107		3005.78	-0.10346453		3535.78	-0.12537481		4065.78	-0.14316083
356	-0.01233152		885.99	-0.01257898		1415.99	-0.01245202		1945.98	-0.01006037		2475.98	-0.02289335		3005.98	-0.10388057		3535.98	-0.12620788		4065.98	-0.14348883
356.2	-0.0128736		886.19	-0.01247812		1416.19	-0.01253345		1946.18	-0.01025506		2476.18	-0.02343598		3006.18	-0.10446125		3536.18	-0.12625627		4066.18	-0.14386665
356.4	-0.01375781		886.39	-0.01256339		1416.39	-0.01205419		1946.38	-0.00990478		2476.38	-0.02343511		3006.38	-0.10509539		3536.38	-0.12731411		4066.38	-0.14387816
356.6	-0.01306469		886.59	-0.01270459		1416.59	-0.01255871		1946.58	-0.01045923		2476.58	-0.02234544		3006.58	-0.10572018		3536.58	-0.12826427		4066.58	-0.14413046
356.8	-0.0131499		886.79	-0.01188344		1416.79	-0.01305524		1946.78	-0.01009363		2476.78	-0.02297873		3006.78	-0.10627138		3536.78	-0.12862409		4066.78	-0.14443068
357	-0.01369894		886.99	-0.01162789		1416.99	-0.01238414		1946.98	-0.01055374		2476.98	-0.02259754		3006.98	-0.10636499		3536.98	-0.12907501		4066.98	-0.1445229
357.2	-0.01393118		887.19	-0.01159754		1417.19	-0.0120188		1947.18	-0.01017838		2477.18	-0.02241798		3007.18	-0.10559106		3537.18	-0.12957208		4067.18	-0.1441637
357.4	-0.01438521		887.39	-0.01103286		1417.39	-0.01240505		1947.38	-0.01085184		2477.38	-0.022671		3007.38	-0.10573579		3537.38	-0.12947275		4067.38	-0.14452506
357.6	-0.01397612		887.59	-0.01158199		1417.59	-0.01363218		1947.58	-0.01024541		2477.58	-0.02225794		3007.58	-0.10628577		3537.58	-0.12976487		4067.58	-0.14442006
357.8	-0.01283864		887.79	-0.01173553		1417.79	-0.01320293		1947.78	-0.01006055		2477.78	-0.02143006		3007.78	-0.10538745		3537.78	-0.12994291		4067.78	-0.14520561
358	-0.01251838		887.99	-0.01287768		1417.99	-0.01247764		1947.98	-0.00912503		2477.98	-0.02116989		3007.98	-0.10618912		3537.98	-0.12932138		4067.98	-0.14437533
358.2	-0.01301274		888.19	-0.0128878		1418.19	-0.0124707		1948.18	-0.00879968		2478.18	-0.0194603		3008.18	-0.10619755		3538.18	-0.12929471		4068.18	-0.14513105
358.4	-0.01278671		888.39	-0.01310919		1418.39	-0.01211616		1948.38	-0.00854179		2478.38	-0.01946686		3008.38	-0.10582545		3538.38	-0.13006658		4068.38	-0.14549425
358.6	-0.012632		888.59	-0.01284917		1418.59	-0.01229393		1948.58	-0.00782056		2478.58	-0.01968984		3008.58	-0.10570971		3538.58	-0.12984438		4068.58	-0.14739558
358.8	-0.01343471		888.79	-0.01239133		1418.79	-0.01183595		1948.78	-0.00828455		2478.78	-0.01894068		3008.78	-0.10671417		3538.78	-0.13074175		4068.78	-0.14897598
359	-0.01439467		888.99	-0.01188513		1418.99	-0.01247407		1948.98	-0.00765327		2478.98	-0.01954437		3008.98	-0.10717537		3538.98	-0.13061145		4068.98	-0.1498511
359.2	-0.01529917		889.19	-0.01214951		1419.19	-0.01241247		1949.18	-0.00741293		2479.18	-0.02005858		3009.18	-0.10807964		3539.18	-0.13053345		4069.18	-0.1509928
359.4	-0.01551807		889.39	-0.01272989		1419.39	-0.01181316		1949.38	-0.00742925		2479.38	-0.02041697		3009.38	-0.1081357		3539.38	-0.13037948		4069.38	-0.15124378
359.6	-0.01492626		889.59	-0.01302524		1419.59	-0.01106048		1949.58	-0.00759395		2479.58	-0.02017225		3009.58	-0.10835156		3539.58	-0.13026703		4069.58	-0.15128424
359.8	-0.01459193		889.79	-0.01309482		1419.79	-0.0113659		1949.78	-0.00761791		2479.78	-0.02014349		3009.78	-0.10824545		3539.78	-0.13080627		4069.78	-0.15106657
360	-0.01561911		889.99	-0.01278152		1419.99	-0.01157538		1949.98	-0.00877035		2479.98	-0.01990275		3009.98	-0.1087745		3539.98	-0.13036512		4069.98	-0.15155818
360.2	-0.0149522		890.19	-0.01279855		1420.19	-0.01108059		1950.18	-0.00979		2480.18	-0.02000543		3010.18	-0.10834883		3540.18	-0.13013791		4070.18	-0.15236088
360.4	-0.01380845		890.39	-0.01246124		1420.39	-0.01069817		1950.38	-0.01009318		2480.38	-0.01990375		3010.38	-0.10780984		3540.38	-0.13144832		4070.38	-0.15196755
360.6	-0.01317315		890.59	-0.0119055		1420.59	-0.01057399		1950.58	-0.01064928		2480.58	-0.01983174		3010.58	-0.10706959		3540.58	-0.13159096		4070.58	-0.1519029
360.8	-0.01339504		890.79	-0.01081364		1420.79	-0.01017899		1950.78	-0.01135989		2480.78	-0.01964318		3010.78	-0.10737262		3540.78	-0.13133699		4070.78	-0.1519861
361	-0.01300876		890.99	-0.01037939		1420.99	-0.0099251		1950.98	-0.01159972		2480.98	-0.01859357		3010.98	-0.1073486		3540.98	-0.13157618		4070.98	-0.15188369
361.2	-0.01173332		891.19	-0.00995544		1421.19	-0.00980072		1951.18	-0.01073743		2481.18	-0.01807019		3011.18	-0.10796278		3541.18	-0.13144845		4071.18	-0.15143032
361.4	-0.01065009		891.39	-0.01032553		1421.39	-0.01014164		1951.38	-0.01029321		2481.38	-0.0172003		3011.38	-0.10803491		3541.38	-0.13147269		4071.38	-0.15165394
361.6	-0.00954517		891.59	-0.01107758		1421.59	-0.01026586		1951.58	-0.0096516		2481.58	-0.01656007		3011.58	-0.10828884		3541.58	-0.1311889		4071.58	-0.15105041
361.8	-0.00896199		891.79	-0.01123835		1421.79	-0.00934908		1951.78	-0.00851951		2481.78	-0.01559283		3011.78	-0.10863542		3541.78	-0.13192087		4071.78	-0.15125412
362	-0.00971267		891.99	-0.01168511		1421.99	-0.00944706		1951.98	-0.00768643		2481.98	-0.0154794		3011.98	-0.10995396		3541.98	-0.13174479		4071.98	-0.14998655
362.2	-0.01019769		892.19	-0.01096388		1422.19	-0.01027206		1952.18	-0.00816509		2482.18	-0.01391948		3012.18	-0.11063662		3542.18	-0.13250133		4072.18	-0.15135263
362.4	-0.00979953		892.39	-0.01213087		1422.39	-0.01012584		1952.38	-0.00714375		2482.38	-0.01424817		3012.38	-0.11153537		3542.38	-0.13415271		4072.38	-0.15237059
362.6	-0.01056479		892.59	-0.01237963		1422.59	-0.01071168		1952.58	-0.00659945		2482.58	-0.01420449		3012.58	-0.1111414		3542.58	-0.13480697		4072.58	-0.152967
362.8	-0.01239869		892.79	-0.01363252		1422.79	-0.01188698		1952.78	-0.0066248		2482.78	-0.01511747		3012.78	-0.1113256		3542.78	-0.13584235		4072.78	-0.15314118
363	-0.0132712		892.99	-0.01547515		1422.99	-0.01256463		1952.98	-0.00573974		2482.98	-0.01621376		3012.98	-0.11148977		3542.98	-0.13598584		4072.98	-0.15239087
363.2	-0.01351161		893.19	-0.01631778		1423.19	-0.01301755		1953.18	-0.00522065		2483.18	-0.0171463		3013.18	-0.11211669		3543.18	-0.1368959		4073.18	-0.15200222
363.4	-0.01373579		893.39	-0.01707094		1423.39	-0.012923		1953.38	-0.00479771		2483.38	-0.01774965		3013.38	-0.11144101		3543.38	-0.13767965		4073.38	-0.15124698
363.6	-0.01330036		893.59	-0.01644444		1423.59	-0.01343247		1953.58	-0.00512999		2483.58	-0.01766435		3013.58	-0.11141628		3543.58	-0.13775423		4073.58	-0.15023292
363.8	-0.01408311		893.79	-0.0161231		1423.79	-0.01350269		1953.78	-0.00547081		2483.78	-0.01837605		3013.78	-0.11183898		3543.78	-0.13764189		4073.78	-0.15093936
364	-0.01427526		893.99	-0.0156734		1423.99	-0.01274228		1953.98	-0.00684595		2483.98	-0.01831081		3013.98	-0.1113258		3543.98	-0.13737416		4073.98	-0.15193604
364.2	-0.01425904		894.19	-0.01489023		1424.19	-0.01221068		1954.18	-0.00776742		2484.18	-0.01868808		3014.18	-0.10970197		3544.18	-0.13742234		4074.18	-0.15173968
364.4	-0.01402565		894.39	-0.01432994		1424.39	-0.01144386		1954.38	-0.00976165		2484.38	-0.01890281		3014.38	-0.1093362		3544.38	-0.13822101		4074.38	-0.15055478
364.6	-0.01371672		894.59	-0.01408843		1424.59	-0.01077184		1954.58	-0.01074822		2484.58	-0.01916222		3014.58	-0.10952826		3544.58	-0.13742782		4074.58	-0.15116567
364.8	-0.014001		894.79	-0.01292289		1424.79	-0.01042621		1954.78	-0.01208557		2484.78	-0.01845431		3014.78	-0.11041383		3544.78	-0.13719806		4074.78	-0.15099663
365	-0.01233699		894.99	-0.01223841		1424.99	-0.00994329		1954.98	-0.01214063		2484.98	-0.01784457		3014.98	-0.10990841		3544.98	-0.13688344		4074.98	-0.15045901
365.2	-0.01174254		895.19	-0.012112		1425.19	-0.00940953		1955.18	-0.01195249		2485.18	-0.01857191		3015.18	-0.11026825		3545.18	-0.13591724		4075.18	-0.15085336
365.4	-0.01181788		895.39	-0.01186149		1425.39	-0.00891507		1955.38	-0.01152312		2485.38	-0.01816789		3015.38	-0.11017645		3545.38	-0.13532175		4075.38	-0.15184114
365.6	-0.01087048		895.59	-0.01206133		1425.59	-0.00896589		1955.58	-0.01181019		2485.58	-0.01864347		3015.58	-0.11069912		3545.58	-0.1342946		4075.58	-0.15200154
365.8	-0.01065013		895.79	-0.01265077		1425.79	-0.00872333		1955.78	-0.01137454		2485.78	-0.0189097		3015.78	-0.11127278		3545.78	-0.13400742		4075.78	-0.15300261
366	-0.01123857		895.99	-0.01216533		1425.99	-0.00836314		1955.98	-0.01172395		2485.98	-0.02021121		3015.98	-0.11239334		3545.98	-0.13354827		4075.98	-0.15341435
366.2	-0.01147784		896.19	-0.01200485		1426.19	-0.00873523		1956.18	-0.0119198		2486.18	-0.01953708		3016.18	-0.11363007		3546.18	-0.13374368		4076.18	-0.15449442
366.4	-0.01175146		896.39	-0.01238739		1426.39	-0.00915954		1956.38	-0.01117927		2486.38	-0.01963445		3016.38	-0.11311703		3546.38	-0.13406867		4076.38	-0.15512935
366.6	-0.01267975		896.59	-0.01233171		1426.59	-0.00983791		1956.58	-0.01112433		2486.58	-0.02004985		3016.58	-0.11239039		3546.58	-0.13377086		4076.58	-0.15556878
366.8	-0.0135282		896.79	-0.01323198		1426.79	-0.01147451		1956.78	-0.01103063		2486.78	-0.02060013		3016.78	-0.11290081		3546.78	-0.13386915		4076.78	-0.15678484
367	-0.01387996		896.99	-0.01336232		1426.99	-0.01195378		1956.98	-0.01009304		2486.98	-0.02090422		3016.98	-0.11327181		3546.98	-0.13472241		4076.98	-0.15712345
367.2	-0.01444815		897.19	-0.01322106		1427.19	-0.01313164		1957.18	-0.00878908		2487.18	-0.02077349		3017.18	-0.11303215		3547.18	-0.1353472		4077.18	-0.15843035
367.4	-0.01444826		897.39	-0.01309782		1427.39	-0.01329354		1957.38	-0.00798697		2487.38	-0.02029225		3017.38	-0.11213602		3547.38	-0.13564928		4077.38	-0.15830033
367.6	-0.01450792		897.59	-0.01240221		1427.59	-0.01459344		1957.58	-0.00738496		2487.58	-0.02042466		3017.58	-0.11304221		3547.58	-0.13569913		4077.58	-0.15784841
367.8	-0.01494789		897.79	-0.01292315		1427.79	-0.01367879		1957.78	-0.00817697		2487.78	-0.02015789		3017.78	-0.11330794		3547.78	-0.13647888		4077.78	-0.15796249
368	-0.01505159		897.99	-0.01327094		1427.99	-0.01417563		1957.98	-0.00817239		2487.98	-0.02022078		3017.98	-0.11348672		3547.98	-0.13783105		4077.98	-0.15745893
368.2	-0.01546697		898.19	-0.01286614		1428.19	-0.01483132		1958.18	-0.00871775		2488.18	-0.01971034		3018.18	-0.11356545		3548.18	-0.13890024		4078.18	-0.15637996
368.4	-0.01500802		898.39	-0.01323937		1428.39	-0.01511866		1958.38	-0.01057929		2488.38	-0.0190155		3018.38	-0.11440231		3548.38	-0.13938738		4078.38	-0.15606177
368.6	-0.01406673		898.59	-0.01315694		1428.59	-0.0151515		1958.58	-0.0097325		2488.58	-0.0191286		3018.58	-0.1145236		3548.58	-0.13955991		4078.58	-0.15553214
368.8	-0.01366101		898.79	-0.01312455		1428.79	-0.01502322		1958.78	-0.0102113		2488.78	-0.01846839		3018.78	-0.11450502		3548.78	-0.13921917		4078.78	-0.15498908
369	-0.01261818		898.99	-0.01306157		1428.99	-0.01384119		1958.98	-0.00943892		2488.98	-0.01799988		3018.98	-0.11487544		3548.98	-0.13874417		4078.98	-0.15491985
369.2	-0.01294968		899.19	-0.01341849		1429.19	-0.01349029		1959.18	-0.00947583		2489.18	-0.01861152		3019.18	-0.1153419		3549.18	-0.13834895		4079.18	-0.15528207
369.4	-0.01316875		899.39	-0.01359137		1429.39	-0.01321732		1959.38	-0.00874087		2489.38	-0.01800239		3019.38	-0.11552935		3549.38	-0.13735502		4079.38	-0.15500069
369.6	-0.01286641		899.59	-0.01413782		1429.59	-0.01331753		1959.58	-0.00910723		2489.58	-0.0186561		3019.58	-0.11581979		3549.58	-0.13689666		4079.58	-0.15521125
369.8	-0.01297423		899.79	-0.01488521		1429.79	-0.01315126		1959.78	-0.00877184		2489.78	-0.0191327		3019.78	-0.11637702		3549.78	-0.13679939		4079.78	-0.15553104
370	-0.01332017		899.99	-0.01391532		1429.99	-0.01253095		1959.98	-0.00846262		2489.98	-0.01973217		3019.98	-0.11663399		3549.98	-0.13720682		4079.98	-0.1557716
370.2	-0.01330391		900.19	-0.01366663		1430.19	-0.01298024		1960.18	-0.00807234		2490.18	-0.01918335		3020.18	-0.11697947		3550.18	-0.13627438		4080.18	-0.15588068
370.4	-0.01330553		900.39	-0.01386471		1430.39	-0.01213647		1960.38	-0.00730355		2490.38	-0.01980275		3020.38	-0.11619242		3550.38	-0.13625445		4080.38	-0.15716311
370.6	-0.01331513		900.59	-0.01411377		1430.59	-0.01199395		1960.58	-0.00663699		2490.58	-0.02043377		3020.58	-0.11534111		3550.58	-0.1367234		4080.58	-0.15853378
370.8	-0.01340325		900.79	-0.01399257		1430.79	-0.01259765		1960.78	-0.00628069		2490.78	-0.02003214		3020.78	-0.1151181		3550.78	-0.13705977		4080.78	-0.15969493
371	-0.01341401		900.99	-0.01372473		1430.99	-0.01209778		1960.98	-0.0054685		2490.98	-0.02045598		3020.98	-0.11429563		3550.98	-0.13742776		4080.98	-0.16010676
371.2	-0.01400944		901.19	-0.01328516		1431.19	-0.01317048		1961.18	-0.00510016		2491.18	-0.0206749		3021.18	-0.1133163		3551.18	-0.13716579		4081.18	-0.1612099
371.4	-0.01402425		901.39	-0.01280494		1431.39	-0.0123992		1961.38	-0.00519102		2491.38	-0.02117298		3021.38	-0.11342225		3551.38	-0.13766829		4081.38	-0.16125187
371.6	-0.01396435		901.59	-0.01283539		1431.59	-0.01308211		1961.58	-0.00618706		2491.58	-0.02115672		3021.58	-0.11461065		3551.58	-0.13887372		4081.58	-0.16160833
371.8	-0.01413381		901.79	-0.01280498		1431.79	-0.01218161		1961.78	-0.00697423		2491.78	-0.02120703		3021.78	-0.11473509		3551.78	-0.14007103		4081.78	-0.16213773
372	-0.01422637		901.99	-0.01223163		1431.99	-0.01262614		1961.98	-0.00662205		2491.98	-0.02174611		3021.98	-0.11513783		3551.98	-0.14056562		4081.98	-0.16206069
372.2	-0.01522761		902.19	-0.01244722		1432.19	-0.01243999		1962.18	-0.00718173		2492.18	-0.02072652		3022.18	-0.1146915		3552.18	-0.14104824		4082.18	-0.16239313
372.4	-0.01526646		902.39	-0.01312256		1432.39	-0.01267459		1962.38	-0.00769373		2492.38	-0.02027571		3022.38	-0.11520461		3552.38	-0.14079099		4082.38	-0.16305683
372.6	-0.01440626		902.59	-0.01322268		1432.59	-0.01184997		1962.58	-0.0076184		2492.58	-0.02025109		3022.58	-0.11497452		3552.58	-0.14086132		4082.58	-0.16220549
372.8	-0.01422169		902.79	-0.01341873		1432.79	-0.01192768		1962.78	-0.00803769		2492.78	-0.0193237		3022.78	-0.11564724		3552.78	-0.14086243		4082.78	-0.16155285
373	-0.01436142		902.99	-0.01326415		1432.99	-0.01102937		1962.98	-0.00833773		2492.98	-0.01865212		3022.98	-0.11705625		3552.98	-0.14079893		4082.98	-0.16158129
373.2	-0.01535406		903.19	-0.01350912		1433.19	-0.01191033		1963.18	-0.00893724		2493.18	-0.01944348		3023.18	-0.1169354		3553.18	-0.14049259		4083.18	-0.1611882
373.4	-0.01546965		903.39	-0.0139955		1433.39	-0.01211283		1963.38	-0.00876949		2493.38	-0.01919764		3023.38	-0.11734497		3553.38	-0.13982102		4083.38	-0.1612022
373.6	-0.01589929		903.59	-0.01437447		1433.59	-0.0123977		1963.58	-0.00978796		2493.58	-0.0193821		3023.58	-0.11810682		3553.58	-0.14078573		4083.58	-0.16082118
373.8	-0.01620983		903.79	-0.0149659		1433.79	-0.01170796		1963.78	-0.00911716		2493.78	-0.02002253		3023.78	-0.11861738		3553.78	-0.14105568		4083.78	-0.16056547
374	-0.01584667		903.99	-0.01444477		1433.99	-0.01109634		1963.98	-0.00942264		2493.98	-0.02054631		3023.98	-0.11844866		3553.98	-0.14045031		4083.98	-0.15985359
374.2	-0.0156557		904.19	-0.01502055		1434.19	-0.01115193		1964.18	-0.00925235		2494.18	-0.02114121		3024.18	-0.11885006		3554.18	-0.1404537		4084.18	-0.15922376
374.4	-0.01436726		904.39	-0.01449113		1434.39	-0.01081794		1964.38	-0.00886449		2494.38	-0.02114732		3024.38	-0.11825341		3554.38	-0.14118251		4084.38	-0.1599939
374.6	-0.01398185		904.59	-0.01359328		1434.59	-0.01181681		1964.58	-0.00923764		2494.58	-0.02119151		3024.58	-0.11748621		3554.58	-0.14159737		4084.58	-0.16067298
374.8	-0.01320738		904.79	-0.01282753		1434.79	-0.01206163		1964.78	-0.00942674		2494.78	-0.02063573		3024.78	-0.11706948		3554.78	-0.14098091		4084.78	-0.16094972
375	-0.0127654		904.99	-0.01174309		1434.99	-0.01237213		1964.98	-0.00940211		2494.98	-0.02070328		3024.98	-0.11682565		3554.98	-0.14117983		4084.98	-0.16141567
375.2	-0.01298926		905.19	-0.00986133		1435.19	-0.0138541		1965.18	-0.00971671		2495.18	-0.02082906		3025.18	-0.11703083		3555.18	-0.14052704		4085.18	-0.16197482
375.4	-0.01210751		905.39	-0.00856345		1435.39	-0.01335261		1965.38	-0.00982233		2495.38	-0.02104453		3025.38	-0.11710169		3555.38	-0.14002257		4085.38	-0.16219099
375.6	-0.01169622		905.59	-0.00795036		1435.59	-0.01471524		1965.58	-0.01007978		2495.58	-0.02138208		3025.58	-0.11649305		3555.58	-0.14037192		4085.58	-0.16237956
375.8	-0.01134445		905.79	-0.00704302		1435.79	-0.01454737		1965.78	-0.0090252		2495.78	-0.02159482		3025.78	-0.11591097		3555.78	-0.14009898		4085.78	-0.16231837
376	-0.01074838		905.99	-0.00679883		1435.99	-0.01443848		1965.98	-0.00937002		2495.98	-0.02197057		3025.98	-0.11637249		3555.98	-0.13933696		4085.98	-0.16273512
376.2	-0.01119931		906.19	-0.00698378		1436.19	-0.01462969		1966.18	-0.00962451		2496.18	-0.02126176		3026.18	-0.1160114		3556.18	-0.14057632		4086.18	-0.16285262
376.4	-0.01022059		906.39	-0.00714913		1436.39	-0.01474312		1966.38	-0.00971157		2496.38	-0.02148256		3026.38	-0.11684586		3556.38	-0.14028679		4086.38	-0.16266007
376.6	-0.0096608		906.59	-0.0076989		1436.59	-0.01468246		1966.58	-0.01070871		2496.58	-0.02176334		3026.58	-0.11701643		3556.58	-0.14084051		4086.58	-0.16242833
376.8	-0.01078278		906.79	-0.00788091		1436.79	-0.01473398		1966.78	-0.01056465		2496.78	-0.02118811		3026.78	-0.11796068		3556.78	-0.14128018		4086.78	-0.1627172
377	-0.01176793		906.99	-0.00901141		1436.99	-0.01450428		1966.98	-0.01124228		2496.98	-0.0218951		3026.98	-0.11898552		3556.98	-0.1410408		4086.98	-0.16343882
377.2	-0.01284868		907.19	-0.01099814		1437.19	-0.01448559		1967.18	-0.01102874		2497.18	-0.02247757		3027.18	-0.1194102		3557.18	-0.14112315		4087.18	-0.16274977
377.4	-0.01243646		907.39	-0.01287938		1437.39	-0.01336738		1967.38	-0.01101225		2497.38	-0.0228703		3027.38	-0.12020598		3557.38	-0.14150447		4087.38	-0.16301367
377.6	-0.01331436		907.59	-0.01373954		1437.59	-0.01306672		1967.58	-0.01089422		2497.58	-0.02395724		3027.58	-0.12050059		3557.58	-0.14214368		4087.58	-0.16305757
377.8	-0.01342571		907.79	-0.01509663		1437.79	-0.01240729		1967.78	-0.01058724		2497.78	-0.0246376		3027.78	-0.12109493		3557.78	-0.14233882		4087.78	-0.16382697
378	-0.01308284		907.99	-0.01591039		1437.99	-0.01242909		1967.98	-0.01103242		2497.98	-0.02442235		3027.98	-0.12118231		3557.98	-0.14288397		4087.98	-0.16393124
378.2	-0.01312343		908.19	-0.0165144		1438.19	-0.01286875		1968.18	-0.01062422		2498.18	-0.02442977		3028.18	-0.12138105		3558.18	-0.14451523		4088.18	-0.16450872
378.4	-0.01241422		908.39	-0.01601159		1438.39	-0.01319733		1968.38	-0.01066061		2498.38	-0.02426655		3028.38	-0.12143302		3558.38	-0.14511676		4088.38	-0.16562464
378.6	-0.01272686		908.59	-0.01624331		1438.59	-0.01372298		1968.58	-0.01090406		2498.58	-0.0243803		3028.58	-0.12134111		3558.58	-0.14537587		4088.58	-0.16614627
378.8	-0.01267725		908.79	-0.01600265		1438.79	-0.01396427		1968.78	-0.01061726		2498.78	-0.02393063		3028.78	-0.12143184		3558.78	-0.14565524		4088.78	-0.16638756
379	-0.01288106		908.99	-0.01507389		1438.99	-0.01478644		1968.98	-0.01072355		2498.98	-0.02405483		3028.98	-0.12142074		3558.98	-0.14599143		4088.98	-0.16645155
379.2	-0.01292466		909.19	-0.01390898		1439.19	-0.01565482		1969.18	-0.01108285		2499.18	-0.02490659		3029.18	-0.12103632		3559.18	-0.14560473		4089.18	-0.1663285
379.4	-0.01276848		909.39	-0.01336957		1439.39	-0.01585353		1969.38	-0.01107121		2499.38	-0.0252478		3029.38	-0.120583		3559.38	-0.14580758		4089.38	-0.16642511
379.6	-0.0130003		909.59	-0.01252222		1439.59	-0.01683619		1969.58	-0.01129533		2499.58	-0.02548984		3029.58	-0.12016144		3559.58	-0.14659052		4089.58	-0.16664068
379.8	-0.01240962		909.79	-0.01129195		1439.79	-0.01677517		1969.78	-0.01136838		2499.78	-0.02538631		3029.78	-0.11999016		3559.78	-0.14655826		4089.78	-0.16656977
379.99	-0.01240962		909.99	-0.01129195		1439.99	-0.01677517		1969.98	-0.01136838		2499.98	-0.02538631		3029.98	-0.11999016		3559.98	-0.14655826		4089.98	-0.16656977
380.19	-0.01172853		910.19	-0.01130925		1440.19	-0.01736465		1970.18	-0.01012643		2500.18	-0.02548883		3030.18	-0.11953535		3560.18	-0.14680471		4090.18	-0.16604733
380.39	-0.01227392		910.39	-0.01158167		1440.39	-0.01740727		1970.38	-0.00877608		2500.38	-0.02567657		3030.38	-0.12038202		3560.38	-0.14661178		4090.38	-0.16493277
380.59	-0.01248833		910.59	-0.01194436		1440.59	-0.01733227		1970.58	-0.00745388		2500.58	-0.02592182		3030.58	-0.12056006		3560.58	-0.14682022		4090.58	-0.16419477
380.79	-0.01275223		910.79	-0.0116131		1440.79	-0.01732201		1970.78	-0.00712634		2500.78	-0.02653169		3030.78	-0.12052294		3560.78	-0.14703455		4090.78	-0.16315495
380.99	-0.01310192		910.99	-0.01129594		1440.99	-0.0178748		1970.98	-0.0066455		2500.98	-0.02672158		3030.98	-0.12020917		3560.98	-0.14721196		4090.98	-0.16208774
381.19	-0.01313289		911.19	-0.01166205		1441.19	-0.0173115		1971.18	-0.00572785		2501.18	-0.02713765		3031.18	-0.11980594		3561.18	-0.14757981		4091.18	-0.16182463
381.39	-0.0135956		911.39	-0.01122188		1441.39	-0.01692699		1971.38	-0.00538483		2501.38	-0.02767481		3031.38	-0.11927136		3561.38	-0.14741055		4091.38	-0.1613572
381.59	-0.01389992		911.59	-0.01134504		1441.59	-0.01604565		1971.58	-0.00554253		2501.58	-0.02810319		3031.58	-0.11856925		3561.58	-0.14717165		4091.58	-0.16067912
381.79	-0.01419603		911.79	-0.01216066		1441.79	-0.01524748		1971.78	-0.0058716		2501.78	-0.02787405		3031.78	-0.11807393		3561.78	-0.14743901		4091.78	-0.16012152
381.99	-0.01401235		911.99	-0.01247468		1441.99	-0.01418643		1971.98	-0.00627476		2501.98	-0.02822969		3031.98	-0.11756918		3561.98	-0.14664889		4091.98	-0.16014788
382.19	-0.01344623		912.19	-0.01274605		1442.19	-0.01322693		1972.18	-0.00708002		2502.18	-0.02846297		3032.18	-0.11719661		3562.18	-0.14586944		4092.18	-0.15970227
382.39	-0.01333455		912.39	-0.01277714		1442.39	-0.01345249		1972.38	-0.00733654		2502.38	-0.02873192		3032.38	-0.11673762		3562.38	-0.14572848		4092.38	-0.15924869
382.59	-0.01274274		912.59	-0.01180432		1442.59	-0.01342018		1972.58	-0.0066399		2502.58	-0.02870485		3032.58	-0.11752738		3562.58	-0.14571561		4092.58	-0.15886133
382.79	-0.01316789		912.79	-0.0109751		1442.79	-0.01303107		1972.78	-0.00677519		2502.78	-0.02792508		3032.78	-0.11750515		3562.78	-0.14555474		4092.78	-0.15982
382.99	-0.01327158		912.99	-0.00999574		1442.99	-0.01221745		1972.98	-0.00701938		2502.98	-0.02704497		3032.98	-0.11747268		3562.98	-0.14635185		4092.98	-0.16044183
383.19	-0.01330826		913.19	-0.01016902		1443.19	-0.01233685		1973.18	-0.00692939		2503.18	-0.02683561		3033.18	-0.11667904		3563.18	-0.14672394		4093.18	-0.16049623
383.39	-0.01325246		913.39	-0.01028147		1443.39	-0.01239691		1973.38	-0.00589136		2503.38	-0.02657061		3033.38	-0.11695707		3563.38	-0.14730907		4093.38	-0.16095145
383.59	-0.0132949		913.59	-0.01092188		1443.59	-0.01236846		1973.58	-0.0058758		2503.58	-0.02518952		3033.58	-0.11695451		3563.58	-0.14700144		4093.58	-0.16107651
383.79	-0.0131373		913.79	-0.0110704		1443.79	-0.01362509		1973.78	-0.0059174		2503.78	-0.02512393		3033.78	-0.11640967		3563.78	-0.14744984		4093.78	-0.16132145
383.99	-0.01322783		913.99	-0.01154634		1443.99	-0.01239749		1973.98	-0.00524594		2503.98	-0.02425033		3033.98	-0.11706421		3563.98	-0.14799958		4093.98	-0.16088978
384.19	-0.01251016		914.19	-0.01133114		1444.19	-0.01222602		1974.18	-0.0046398		2504.18	-0.02321782		3034.18	-0.11795919		3564.18	-0.14783676		4094.18	-0.16020744
384.39	-0.01381797		914.39	-0.0116774		1444.39	-0.01150856		1974.38	-0.00475762		2504.38	-0.02311956		3034.38	-0.11909858		3564.38	-0.14773663		4094.38	-0.15985874
384.59	-0.01371962		914.59	-0.01080918		1444.59	-0.01158571		1974.58	-0.00521639		2504.58	-0.02316963		3034.58	-0.11884579		3564.58	-0.14909		4094.58	-0.15973867
384.79	-0.01375102		914.79	-0.0107869		1444.79	-0.01283663		1974.78	-0.00595012		2504.78	-0.02304716		3034.78	-0.11839398		3564.78	-0.14975211		4094.78	-0.15966994
384.99	-0.01337024		914.99	-0.01068322		1444.99	-0.01316455		1974.98	-0.00609544		2504.98	-0.02248503		3034.98	-0.11819068		3564.98	-0.15045421		4094.98	-0.15965053
385.19	-0.01414966		915.19	-0.01119294		1445.19	-0.0127908		1975.18	-0.00621865		2505.18	-0.02342207		3035.18	-0.11758037		3565.18	-0.15068588		4095.18	-0.15983049
385.39	-0.01461632		915.39	-0.01065498		1445.39	-0.01291314		1975.38	-0.00659439		2505.38	-0.02445136		3035.38	-0.11739202		3565.38	-0.14987212		4095.38	-0.16002206
385.59	-0.01520949		915.59	-0.01083397		1445.59	-0.01293139		1975.58	-0.00735625		2505.58	-0.02500753		3035.58	-0.11762388		3565.58	-0.14940412		4095.58	-0.16030926
385.79	-0.01428834		915.79	-0.01227317		1445.79	-0.01293387		1975.78	-0.00759432		2505.78	-0.02552876		3035.78	-0.11821195		3565.78	-0.1485932		4095.78	-0.16083878
385.99	-0.01338595		915.99	-0.01222001		1445.99	-0.01280048		1975.98	-0.00756487		2505.98	-0.02711574		3035.98	-0.11838207		3565.98	-0.14711402		4095.98	-0.16064606
386.19	-0.01341654		916.19	-0.01253575		1446.19	-0.01349883		1976.18	-0.00814474		2506.18	-0.02805519		3036.18	-0.11860152		3566.18	-0.14578775		4096.18	-0.15966839
386.39	-0.01342159		916.39	-0.01175154		1446.39	-0.01414471		1976.38	-0.00834695		2506.38	-0.02853555		3036.38	-0.11872752		3566.38	-0.14520237		4096.38	-0.16046361
386.59	-0.01346487		916.59	-0.01093631		1446.59	-0.01466607		1976.58	-0.00841796		2506.58	-0.02731291		3036.58	-0.11931916		3566.58	-0.14462412		4096.58	-0.1600385
386.79	-0.01466018		916.79	-0.01081541		1446.79	-0.01498903		1976.78	-0.00840817		2506.78	-0.02704691		3036.78	-0.11977508		3566.78	-0.14402507		4096.78	-0.16068698
386.99	-0.01468544		916.99	-0.01025728		1446.99	-0.01536449		1976.98	-0.00855768		2506.98	-0.0274795		3036.98	-0.11905921		3566.98	-0.14375144		4096.98	-0.1614704
387.19	-0.01450885		917.19	-0.0103916		1447.19	-0.01594276		1977.18	-0.00821733		2507.18	-0.02738026		3037.18	-0.11915905		3567.18	-0.14319042		4097.18	-0.16058136
387.39	-0.01552606		917.39	-0.0107735		1447.39	-0.01591241		1977.38	-0.00782152		2507.38	-0.02771532		3037.38	-0.11944641		3567.38	-0.14323235		4097.38	-0.16151003
387.59	-0.01570132		917.59	-0.01082458		1447.59	-0.01506236		1977.58	-0.0068894		2507.58	-0.02732288		3037.58	-0.11916506		3567.58	-0.14342756		4097.58	-0.16125707
387.79	-0.01478084		917.79	-0.01100002		1447.79	-0.01525249		1977.78	-0.00690991		2507.78	-0.02792529		3037.78	-0.11936067		3567.78	-0.14378649		4097.78	-0.1607401
387.99	-0.01482841		917.99	-0.01096269		1447.99	-0.01452479		1977.98	-0.00701767		2507.98	-0.02726802		3037.98	-0.11982782		3567.98	-0.14424435		4097.98	-0.15995658
388.19	-0.01408652		918.19	-0.01023113		1448.19	-0.01374369		1978.18	-0.00675122		2508.18	-0.02723371		3038.18	-0.11965384		3568.18	-0.14468944		4098.18	-0.1600578
388.39	-0.01442634		918.39	-0.00995775		1448.39	-0.01387049		1978.38	-0.00676728		2508.38	-0.02697502		3038.38	-0.11922146		3568.38	-0.14510462		4098.38	-0.15962083
388.59	-0.01447527		918.59	-0.00990425		1448.59	-0.0137355		1978.58	-0.00722741		2508.58	-0.02662929		3038.58	-0.11957224		3568.58	-0.14612688		4098.58	-0.15968731
388.79	-0.0141244		918.79	-0.01045293		1448.79	-0.01406621		1978.78	-0.00770593		2508.78	-0.02621597		3038.78	-0.11924296		3568.78	-0.14644566		4098.78	-0.15983712
388.99	-0.01442482		918.99	-0.00977127		1448.99	-0.01382008		1978.98	-0.00764213		2508.98	-0.02587645		3038.98	-0.11965987		3568.98	-0.14711405		4098.98	-0.15996664
389.19	-0.01535062		919.19	-0.00938773		1449.19	-0.01439488		1979.18	-0.00786654		2509.18	-0.02601956		3039.18	-0.11904054		3569.18	-0.14684024		4099.18	-0.16020689
389.39	-0.01498622		919.39	-0.0088744		1449.39	-0.0146015		1979.38	-0.00749901		2509.38	-0.02555583		3039.38	-0.1196955		3569.38	-0.14651239		4099.38	-0.16122623
389.59	-0.01496482		919.59	-0.00866446		1449.59	-0.01437096		1979.58	-0.00728711		2509.58	-0.02526803		3039.58	-0.12045898		3569.58	-0.14618167		4099.58	-0.16161436
389.79	-0.01387562		919.79	-0.00997278		1449.79	-0.01413236		1979.78	-0.00648817		2509.78	-0.02543237		3039.78	-0.1208672		3569.78	-0.14542442		4099.78	-0.16200697
389.99	-0.01393354		919.99	-0.00959918		1449.99	-0.01383434		1979.98	-0.0061719		2509.98	-0.02548316		3039.98	-0.12126245		3569.98	-0.14496429		4099.98	-0.16210938
390.19	-0.01365822		920.19	-0.00953807		1450.19	-0.01336986		1980.18	-0.00590738		2510.18	-0.02476165		3040.18	-0.12152942		3570.18	-0.14418785		4100.18	-0.16257427
390.39	-0.01360652		920.39	-0.00915486		1450.39	-0.01368879		1980.38	-0.00577729		2510.38	-0.02448112		3040.38	-0.12094495		3570.38	-0.14417123		4100.38	-0.1643789
390.59	-0.01315081		920.59	-0.00927443		1450.59	-0.01383407		1980.58	-0.00608663		2510.58	-0.02372119		3040.58	-0.12093363		3570.58	-0.14398697		4100.58	-0.16486464
390.79	-0.01351754		920.79	-0.0091371		1450.79	-0.01381238		1980.78	-0.00565206		2510.78	-0.02383728		3040.78	-0.12159191		3570.78	-0.14383686		4100.78	-0.16542216
390.99	-0.01256642		920.99	-0.00904627		1450.99	-0.0132215		1980.98	-0.00578176		2510.98	-0.02430133		3040.98	-0.12073829		3570.98	-0.14416245		4100.98	-0.16605943
391.19	-0.01235436		921.19	-0.00947735		1451.19	-0.01287019		1981.18	-0.00581638		2511.18	-0.02495853		3041.18	-0.1211305		3571.18	-0.14465753		4101.18	-0.16591282
391.39	-0.01285984		921.39	-0.00986174		1451.39	-0.01223815		1981.38	-0.00588398		2511.38	-0.02633627		3041.38	-0.12054099		3571.38	-0.14536086		4101.38	-0.16712682
391.59	-0.01290539		921.59	-0.0097425		1451.59	-0.01284483		1981.58	-0.00513109		2511.58	-0.02595615		3041.58	-0.12009125		3571.58	-0.14629215		4101.58	-0.1665402
391.79	-0.01288681		921.79	-0.01022163		1451.79	-0.01426878		1981.78	-0.00654433		2511.78	-0.02586231		3041.78	-0.1194439		3571.78	-0.14733208		4101.78	-0.16573523
391.99	-0.01260809		921.99	-0.01088758		1451.99	-0.01424711		1981.98	-0.00698484		2511.98	-0.02557846		3041.98	-0.11930933		3571.98	-0.14780431		4101.98	-0.16545307
392.19	-0.01194142		922.19	-0.01108758		1452.19	-0.01332116		1982.18	-0.00664375		2512.18	-0.02667968		3042.18	-0.11884489		3572.18	-0.14812803		4102.18	-0.16403697
392.39	-0.0123257		922.39	-0.01131586		1452.39	-0.01363732		1982.38	-0.00747713		2512.38	-0.02591629		3042.38	-0.11901278		3572.38	-0.14749128		4102.38	-0.16241764
392.59	-0.01286512		922.59	-0.01222144		1452.59	-0.01317745		1982.58	-0.00839187		2512.58	-0.02611752		3042.58	-0.11873965		3572.58	-0.14821184		4102.58	-0.16249524
392.79	-0.01253747		922.79	-0.01196359		1452.79	-0.01363898		1982.78	-0.00853102		2512.78	-0.02573008		3042.78	-0.11845708		3572.78	-0.14881587		4102.78	-0.16188429
392.99	-0.01248724		922.99	-0.01190365		1452.99	-0.01384956		1982.98	-0.00758418		2512.98	-0.02575681		3042.98	-0.11861017		3572.98	-0.14962744		4102.98	-0.16168563
393.19	-0.01208461		923.19	-0.0118228		1453.19	-0.01386649		1983.18	-0.00829505		2513.18	-0.02572567		3043.18	-0.11783579		3573.18	-0.14881016		4103.18	-0.16105317
393.39	-0.01232448		923.39	-0.01222811		1453.39	-0.01372361		1983.38	-0.00762825		2513.38	-0.02519191		3043.38	-0.1183425		3573.38	-0.14928831		4103.38	-0.16040006
393.59	-0.01202582		923.59	-0.01177531		1453.59	-0.01335583		1983.58	-0.00712848		2513.58	-0.02475656		3043.58	-0.11837646		3573.58	-0.14827426		4103.58	-0.15940108
393.79	-0.01204445		923.79	-0.01181136		1453.79	-0.01322707		1983.78	-0.00619923		2513.78	-0.02480479		3043.78	-0.11926985		3573.78	-0.14775481		4103.78	-0.15937749
393.99	-0.01256901		923.99	-0.01169977		1453.99	-0.01303868		1983.98	-0.00629724		2513.98	-0.02421255		3043.98	-0.11959073		3573.98	-0.14661211		4103.98	-0.15872759
394.19	-0.01277817		924.19	-0.01162774		1454.19	-0.01215652		1984.18	-0.00616299		2514.18	-0.02322811		3044.18	-0.12004092		3574.18	-0.14636929		4104.18	-0.15852462
394.39	-0.01304793		924.39	-0.01143601		1454.39	-0.01170573		1984.38	-0.00581877		2514.38	-0.02243268		3044.38	-0.119675		3574.38	-0.14567615		4104.38	-0.15901763
394.59	-0.01211884		924.59	-0.01127695		1454.59	-0.01116586		1984.58	-0.00516091		2514.58	-0.02210288		3044.58	-0.12002096		3574.58	-0.14609338		4104.58	-0.1581558
394.79	-0.01257581		924.79	-0.01192		1454.79	-0.01148671		1984.78	-0.00416565		2514.78	-0.02119412		3044.78	-0.12040938		3574.78	-0.14591208		4104.78	-0.15842461
394.99	-0.01205105		924.99	-0.01185156		1454.99	-0.01142248		1984.98	-0.00390777		2514.98	-0.0217235		3044.98	-0.12042251		3574.98	-0.14615633		4104.98	-0.15921472
395.19	-0.01263924		925.19	-0.01154496		1455.19	-0.01187526		1985.18	-0.00430997		2515.18	-0.02238673		3045.18	-0.1212039		3575.18	-0.146138		4105.18	-0.15948944
395.39	-0.01394722		925.39	-0.01191094		1455.39	-0.01262742		1985.38	-0.00406887		2515.38	-0.02312947		3045.38	-0.12133391		3575.38	-0.14648057		4105.38	-0.15955334
395.59	-0.01437425		925.59	-0.0123065		1455.59	-0.01389335		1985.58	-0.00427329		2515.58	-0.02320597		3045.58	-0.1216663		3575.58	-0.14697939		4105.58	-0.15970019
395.79	-0.01481951		925.79	-0.01231222		1455.79	-0.01459876		1985.78	-0.00493633		2515.78	-0.02279096		3045.78	-0.12130364		3575.78	-0.14730799		4105.78	-0.15972227
395.99	-0.01454731		925.99	-0.0116931		1455.99	-0.01444594		1985.98	-0.00462573		2515.98	-0.02458457		3045.98	-0.12225272		3575.98	-0.14696733		4105.98	-0.16033898
396.19	-0.01374912		926.19	-0.01130834		1456.19	-0.01465812		1986.18	-0.00484887		2516.18	-0.02519967		3046.18	-0.12254038		3576.18	-0.14737122		4106.18	-0.16113245
396.39	-0.01401582		926.39	-0.011056		1456.39	-0.01427791		1986.38	-0.00578483		2516.38	-0.02515661		3046.38	-0.12291824		3576.38	-0.14684449		4106.38	-0.16206594
396.59	-0.01420146		926.59	-0.01159501		1456.59	-0.01371709		1986.58	-0.00591785		2516.58	-0.02646901		3046.58	-0.12268134		3576.58	-0.14724651		4106.58	-0.16302799
396.79	-0.01443803		926.79	-0.01162716		1456.79	-0.01385925		1986.78	-0.00613886		2516.78	-0.02733445		3046.78	-0.12274101		3576.78	-0.14685946		4106.78	-0.16376838
396.99	-0.01446821		926.99	-0.01116773		1456.99	-0.01386116		1986.98	-0.00571595		2516.98	-0.02881414		3046.98	-0.12226791		3576.98	-0.14654728		4106.98	-0.1637
397.19	-0.01434447		927.19	-0.01139456		1457.19	-0.01394089		1987.18	-0.00737231		2517.18	-0.02845684		3047.18	-0.12200001		3577.18	-0.14566363		4107.18	-0.16315557
397.39	-0.01448401		927.39	-0.01126151		1457.39	-0.01439672		1987.38	-0.00733698		2517.38	-0.02856349		3047.38	-0.12236168		3577.38	-0.14602805		4107.38	-0.16258675
397.59	-0.01396178		927.59	-0.01024607		1457.59	-0.01469713		1987.58	-0.007373		2517.58	-0.0280685		3047.58	-0.12147989		3577.58	-0.14550723		4107.58	-0.16224388
397.79	-0.01443948		927.79	-0.01081227		1457.79	-0.01456525		1987.78	-0.00650689		2517.78	-0.02815332		3047.78	-0.12190826		3577.78	-0.1457868		4107.78	-0.16181237
397.99	-0.01517496		927.99	-0.01151391		1457.99	-0.0141311		1987.98	-0.00670362		2517.98	-0.02748506		3047.98	-0.12120893		3577.98	-0.14498841		4107.98	-0.16145661
398.19	-0.01498197		928.19	-0.01142214		1458.19	-0.01304249		1988.18	-0.00613363		2518.18	-0.02673679		3048.18	-0.12180546		3578.18	-0.14557418		4108.18	-0.16109605
398.39	-0.01353059		928.39	-0.0113536		1458.39	-0.01285175		1988.38	-0.00487091		2518.38	-0.02635438		3048.38	-0.12075615		3578.38	-0.14570861		4108.38	-0.1605521
398.59	-0.01315566		928.59	-0.01204179		1458.59	-0.01392275		1988.58	-0.00498085		2518.58	-0.02602068		3048.58	-0.11992102		3578.58	-0.14540317		4108.58	-0.16027446
398.79	-0.0138202		928.79	-0.01257119		1458.79	-0.01399959		1988.78	-0.00452471		2518.78	-0.02490467		3048.78	-0.11943987		3578.78	-0.14511688		4108.78	-0.16139921
398.99	-0.01441232		928.99	-0.01201583		1458.99	-0.01354525		1988.98	-0.00426467		2518.98	-0.0251503		3048.98	-0.11950162		3578.98	-0.14519523		4108.98	-0.1612087
399.19	-0.01506455		929.19	-0.01182419		1459.19	-0.0135279		1989.18	-0.00350375		2519.18	-0.02580932		3049.18	-0.11870329		3579.18	-0.14553025		4109.18	-0.16159461
399.39	-0.01573267		929.39	-0.01206668		1459.39	-0.01310928		1989.38	-0.00310389		2519.38	-0.02597116		3049.38	-0.11843879		3579.38	-0.1456834		4109.38	-0.16205176
399.59	-0.0147619		929.59	-0.01127615		1459.59	-0.01301327		1989.58	-0.00242142		2519.58	-0.02535162		3049.58	-0.11838563		3579.58	-0.14522948		4109.58	-0.16246087
399.79	-0.01384499		929.79	-0.01058136		1459.79	-0.01298158		1989.78	-0.00267012		2519.78	-0.02481525		3049.78	-0.11807898		3579.78	-0.14548376		4109.78	-0.16326629
399.99	-0.01266107		929.99	-0.01011905		1459.99	-0.01256827		1989.98	-0.00316747		2519.98	-0.02591145		3049.98	-0.11911937		3579.98	-0.14596644		4109.98	-0.16388774
400.19	-0.01212692		930.19	-0.0104453		1460.19	-0.01250516		1990.18	-0.00362751		2520.18	-0.02591364		3050.18	-0.11902633		3580.18	-0.14642416		4110.18	-0.16495452
400.39	-0.01288204		930.39	-0.0106397		1460.39	-0.01245567		1990.38	-0.00369646		2520.38	-0.02644522		3050.38	-0.11952437		3580.38	-0.1456849		4110.38	-0.16482943
400.59	-0.01238314		930.59	-0.01111236		1460.59	-0.01257185		1990.58	-0.00385563		2520.58	-0.02675018		3050.58	-0.12011913		3580.58	-0.1459297		4110.58	-0.16496615
400.79	-0.012797		930.79	-0.01097834		1460.79	-0.0130046		1990.78	-0.00352667		2520.78	-0.02736991		3050.78	-0.12078455		3580.78	-0.14665434		4110.78	-0.16465108
400.99	-0.01209214		930.99	-0.01018802		1460.99	-0.01281881		1990.98	-0.00396973		2520.98	-0.02707695		3050.98	-0.12150413		3580.98	-0.14757517		4110.98	-0.1638462
401.19	-0.01166067		931.19	-0.01103625		1461.19	-0.01303089		1991.18	-0.0044807		2521.18	-0.02680787		3051.18	-0.12268715		3581.18	-0.14794941		4111.18	-0.16392779
401.39	-0.01143866		931.39	-0.01101686		1461.39	-0.01294956		1991.38	-0.00420458		2521.38	-0.02713577		3051.38	-0.12369364		3581.38	-0.14793462		4111.38	-0.16326666
401.59	-0.01152618		931.59	-0.01167973		1461.59	-0.01332716		1991.58	-0.00370051		2521.58	-0.02576498		3051.58	-0.1238495		3581.58	-0.14843672		4111.58	-0.16245376
401.79	-0.01137234		931.79	-0.01301989		1461.79	-0.01368209		1991.78	-0.00302572		2521.78	-0.02578869		3051.78	-0.12511836		3581.78	-0.14883251		4111.78	-0.16114542
401.99	-0.01130873		931.99	-0.01304017		1461.99	-0.01347453		1991.98	-0.00347044		2521.98	-0.02573558		3051.98	-0.12600221		3581.98	-0.14911494		4111.98	-0.16085523
402.19	-0.01049005		932.19	-0.01353845		1462.19	-0.01448829		1992.18	-0.002953		2522.18	-0.02568277		3052.18	-0.12734918		3582.18	-0.14972049		4112.18	-0.16031141
402.39	-0.01047584		932.39	-0.01420505		1462.39	-0.01487699		1992.38	-0.00304919		2522.38	-0.02563497		3052.38	-0.12656559		3582.38	-0.14991608		4112.38	-0.16021465
402.59	-0.01110715		932.59	-0.01477005		1462.59	-0.01480214		1992.58	-0.00327527		2522.58	-0.02506306		3052.58	-0.12617782		3582.58	-0.14895442		4112.58	-0.16059457
402.79	-0.0120209		932.79	-0.01490916		1462.79	-0.01435001		1992.78	-0.00289988		2522.78	-0.02537286		3052.78	-0.12593587		3582.78	-0.14974015		4112.78	-0.16055514
402.99	-0.01211875		932.99	-0.01525869		1462.99	-0.01430265		1992.98	-0.00346383		2522.98	-0.02533018		3052.98	-0.12549913		3582.98	-0.14920745		4112.98	-0.15989891
403.19	-0.01234603		933.19	-0.01487069		1463.19	-0.0138372		1993.18	-0.0036433		2523.18	-0.02555632		3053.18	-0.12426473		3583.18	-0.14920699		4113.18	-0.16017416
403.39	-0.01304719		933.39	-0.01478488		1463.39	-0.01264616		1993.38	-0.00395004		2523.38	-0.02524208		3053.38	-0.12331392		3583.38	-0.14868644		4113.38	-0.15997548
403.59	-0.01277824		933.59	-0.01535176		1463.59	-0.01212812		1993.58	-0.00401403		2523.58	-0.02486299		3053.58	-0.12280141		3583.58	-0.14837477		4113.58	-0.16100614
403.79	-0.01263992		933.79	-0.0150982		1463.79	-0.01184461		1993.78	-0.00521837		2523.78	-0.02478295		3053.78	-0.12203751		3583.78	-0.14775187		4113.78	-0.16148224
403.99	-0.01349372		933.99	-0.01545245		1463.99	-0.01150748		1993.98	-0.00513439		2523.98	-0.02520288		3053.98	-0.1213928		3583.98	-0.14700756		4113.98	-0.1622138
404.19	-0.01407903		934.19	-0.01508161		1464.19	-0.01182009		1994.18	-0.00482836		2524.18	-0.02578694		3054.18	-0.12088681		3584.18	-0.14682332		4114.18	-0.16314772
404.39	-0.01357914		934.39	-0.01553957		1464.39	-0.01209755		1994.38	-0.00612998		2524.38	-0.02641026		3054.38	-0.12036278		3584.38	-0.14667805		4114.38	-0.16359708
404.59	-0.01269557		934.59	-0.01567682		1464.59	-0.01167311		1994.58	-0.00605339		2524.58	-0.02689875		3054.58	-0.11973273		3584.58	-0.14687593		4114.58	-0.1640207
404.79	-0.01313854		934.79	-0.01498152		1464.79	-0.01092367		1994.78	-0.00558541		2524.78	-0.02700056		3054.78	-0.1196511		3584.78	-0.14752006		4114.78	-0.16369961
404.99	-0.01288798		934.99	-0.01456035		1464.99	-0.01080122		1994.98	-0.00598673		2524.98	-0.02595986		3054.98	-0.11961756		3584.98	-0.14658401		4114.98	-0.16404264
405.19	-0.01253978		935.19	-0.01507798		1465.19	-0.01149729		1995.18	-0.00519413		2525.18	-0.0264691		3055.18	-0.1193257		3585.18	-0.14606128		4115.18	-0.1645926
405.39	-0.01165072		935.39	-0.01560705		1465.39	-0.01144247		1995.38	-0.00484705		2525.38	-0.02613085		3055.38	-0.11945955		3585.38	-0.14605325		4115.38	-0.16388186
405.59	-0.01143016		935.59	-0.0159646		1465.59	-0.01245743		1995.58	-0.0042261		2525.58	-0.0255667		3055.58	-0.11960171		3585.58	-0.14605214		4115.58	-0.16350658
405.79	-0.01082748		935.79	-0.0158414		1465.79	-0.01256276		1995.78	-0.00412523		2525.78	-0.02539214		3055.78	-0.11942876		3585.78	-0.14674413		4115.78	-0.1638658
405.99	-0.01096501		935.99	-0.01477395		1465.99	-0.0119139		1995.98	-0.00378019		2525.98	-0.02523659		3055.98	-0.11976343		3585.98	-0.14670781		4115.98	-0.16391697
406.19	-0.01025668		936.19	-0.01507078		1466.19	-0.01224247		1996.18	-0.00312035		2526.18	-0.02497368		3056.18	-0.11990124		3586.18	-0.1469192		4116.18	-0.16400294
406.39	-0.01099719		936.39	-0.01502398		1466.39	-0.01158373		1996.38	-0.00374216		2526.38	-0.024995		3056.38	-0.1205489		3586.38	-0.14745766		4116.38	-0.16360477
406.59	-0.01052308		936.59	-0.01472858		1466.59	-0.01130814		1996.58	-0.00385609		2526.58	-0.02430785		3056.58	-0.12178022		3586.58	-0.14771653		4116.58	-0.16360363
406.79	-0.01138241		936.79	-0.01483137		1466.79	-0.01136734		1996.78	-0.00511723		2526.78	-0.02394898		3056.78	-0.12236011		3586.78	-0.14803397		4116.78	-0.16331121
406.99	-0.01200134		936.99	-0.01431327		1466.99	-0.01124667		1996.98	-0.00618595		2526.98	-0.02350929		3056.98	-0.12231911		3586.98	-0.14793301		4116.98	-0.16310422
407.19	-0.01282797		937.19	-0.0125186		1467.19	-0.01042979		1997.18	-0.00571217		2527.18	-0.02409845		3057.18	-0.12267441		3587.18	-0.14868614		4117.18	-0.16361556
407.39	-0.0141447		937.39	-0.0121293		1467.39	-0.00979288		1997.38	-0.00541532		2527.38	-0.0243679		3057.38	-0.12275874		3587.38	-0.14900104		4117.38	-0.16388837
407.59	-0.01433607		937.59	-0.01162816		1467.59	-0.01028036		1997.58	-0.00509873		2527.58	-0.02446613		3057.58	-0.12366093		3587.58	-0.14839568		4117.58	-0.16412959
407.79	-0.01485461		937.79	-0.01078531		1467.79	-0.01025373		1997.78	-0.00499443		2527.78	-0.02470795		3057.78	-0.12335909		3587.78	-0.14755277		4117.78	-0.16300391
407.99	-0.01558658		937.99	-0.01119678		1467.99	-0.01028221		1997.98	-0.0053618		2527.98	-0.02547923		3057.98	-0.12339945		3587.98	-0.14758421		4117.98	-0.1636597
408.19	-0.01515517		938.19	-0.00983878		1468.19	-0.01122379		1998.18	-0.00619478		2528.18	-0.02607846		3058.18	-0.12276878		3588.18	-0.14811635		4118.18	-0.16357601
408.39	-0.01500833		938.39	-0.01035537		1468.39	-0.01142309		1998.38	-0.00604197		2528.38	-0.02605374		3058.38	-0.12220995		3588.38	-0.14853043		4118.38	-0.1638031
408.59	-0.01464025		938.59	-0.00958237		1468.59	-0.01236767		1998.58	-0.00531911		2528.58	-0.02579253		3058.58	-0.12245476		3588.58	-0.14834248		4118.58	-0.16347567
408.79	-0.01419152		938.79	-0.00903204		1468.79	-0.01225133		1998.78	-0.0053514		2528.78	-0.02547323		3058.78	-0.12268396		3588.78	-0.1480563		4118.78	-0.16285957
408.99	-0.0136137		938.99	-0.00943647		1468.99	-0.01239884		1998.98	-0.00504131		2528.98	-0.02554763		3058.98	-0.12243662		3588.98	-0.14746356		4118.98	-0.16301398
409.19	-0.01260417		939.19	-0.00982615		1469.19	-0.01235809		1999.18	-0.00501621		2529.18	-0.02601093		3059.18	-0.12128319		3589.18	-0.14794542		4119.18	-0.16370457
409.39	-0.01180412		939.39	-0.00985187		1469.39	-0.01281069		1999.38	-0.00547285		2529.38	-0.02635123		3059.38	-0.12120157		3589.38	-0.14812594		4119.38	-0.16317895
409.59	-0.01153949		939.59	-0.00933362		1469.59	-0.01385026		1999.58	-0.00606089		2529.58	-0.02704481		3059.58	-0.12046136		3589.58	-0.14811956		4119.58	-0.16310135
409.79	-0.01153153		939.79	-0.00934368		1469.79	-0.01316917		1999.78	-0.00596215		2529.78	-0.0263831		3059.78	-0.11969055		3589.78	-0.14817845		4119.78	-0.16361667
409.99	-0.01173864		939.99	-0.00900965		1469.99	-0.013073		1999.98	-0.00578925		2529.98	-0.02649538		3059.98	-0.12004914		3589.98	-0.14746543		4119.98	-0.1640011
410.19	-0.0116942		940.19	-0.01018404		1470.19	-0.01318348		2000.18	-0.00617868		2530.18	-0.02591674		3060.18	-0.12022108		3590.18	-0.14791467		4120.18	-0.16409389
410.39	-0.01203561		940.39	-0.01120356		1470.39	-0.01305874		2000.38	-0.00677651		2530.38	-0.02551331		3060.38	-0.12062493		3590.38	-0.1482672		4120.38	-0.16435672
410.59	-0.01266359		940.59	-0.01176377		1470.59	-0.01314461		2000.58	-0.00799723		2530.58	-0.02460992		3060.58	-0.12023806		3590.58	-0.14838386		4120.58	-0.1645613
410.79	-0.01272308		940.79	-0.01195224		1470.79	-0.01293587		2000.78	-0.01027578		2530.78	-0.0242131		3060.78	-0.12003626		3590.78	-0.14794739		4120.78	-0.16505034
410.99	-0.01315608		940.99	-0.01116277		1470.99	-0.01244315		2000.98	-0.01033999		2530.98	-0.02442193		3060.98	-0.11936009		3590.98	-0.14816083		4120.98	-0.16518886
411.19	-0.01393492		941.19	-0.0110137		1471.19	-0.0117675		2001.18	-0.0095763		2531.18	-0.02491496		3061.18	-0.12030267		3591.18	-0.14863374		4121.18	-0.16491932
411.39	-0.01395817		941.39	-0.01182835		1471.39	-0.01199215		2001.38	-0.00962139		2531.38	-0.02392168		3061.38	-0.1198129		3591.38	-0.14937588		4121.38	-0.16421308
411.59	-0.01437196		941.59	-0.0117247		1471.59	-0.01287369		2001.58	-0.00917058		2531.58	-0.02378693		3061.58	-0.12153134		3591.58	-0.14937797		4121.58	-0.16445401
411.79	-0.01530403		941.79	-0.01226748		1471.79	-0.01226656		2001.78	-0.00868969		2531.78	-0.02377417		3061.78	-0.12184004		3591.78	-0.14982628		4121.78	-0.16432099
411.99	-0.01582407		941.99	-0.0125318		1471.99	-0.01281442		2001.98	-0.00828351		2531.98	-0.02350451		3061.98	-0.12300535		3591.98	-0.14982437		4121.98	-0.16463224
412.19	-0.0161813		942.19	-0.01194087		1472.19	-0.01386934		2002.18	-0.00745033		2532.18	-0.0235551		3062.18	-0.12306931		3592.18	-0.15002953		4122.18	-0.16382177
412.39	-0.01536756		942.39	-0.01206449		1472.39	-0.01404003		2002.38	-0.00656876		2532.38	-0.02416399		3062.38	-0.12406273		3592.38	-0.15028351		4122.38	-0.1625178
412.59	-0.01447208		942.59	-0.01102797		1472.59	-0.01401021		2002.58	-0.00611784		2532.58	-0.02403088		3062.58	-0.12476093		3592.58	-0.15034931		4122.58	-0.16203565
412.79	-0.01450356		942.79	-0.01125232		1472.79	-0.01348798		2002.78	-0.00532101		2532.78	-0.02449204		3062.78	-0.12544005		3592.78	-0.15071904		4122.78	-0.16131519
412.99	-0.01445149		942.99	-0.01088684		1472.99	-0.01332936		2002.98	-0.00403139		2532.98	-0.02500616		3062.98	-0.1258598		3592.98	-0.15061304		4122.98	-0.16061652
413.19	-0.01438606		943.19	-0.01067489		1473.19	-0.01355689		2003.18	-0.0037803		2533.18	-0.02474412		3063.18	-0.12640618		3593.18	-0.15045375		4123.18	-0.16064981
413.39	-0.01494085		943.39	-0.00966431		1473.39	-0.01369931		2003.38	-0.0033716		2533.38	-0.02593507		3063.38	-0.12660597		3593.38	-0.15086104		4123.38	-0.16019632
413.59	-0.01437304		943.59	-0.00955442		1473.59	-0.01337222		2003.58	-0.00383712		2533.58	-0.02622627		3063.58	-0.12618848		3593.58	-0.15018727		4123.58	-0.16058621
413.79	-0.01438166		943.79	-0.00944535		1473.79	-0.01218564		2003.78	-0.00375685		2533.78	-0.02555044		3063.78	-0.1266566		3593.78	-0.14925602		4123.78	-0.16083388
413.99	-0.01470502		943.99	-0.00981127		1473.99	-0.01241398		2003.98	-0.00437284		2533.98	-0.02591567		3063.98	-0.12682348		3593.98	-0.1487815		4123.98	-0.16150467
414.19	-0.01340424		944.19	-0.01082552		1474.19	-0.01223383		2004.18	-0.00441381		2534.18	-0.02541378		3064.18	-0.1267437		3594.18	-0.14932561		4124.18	-0.1611418
414.39	-0.01216465		944.39	-0.01103541		1474.39	-0.01236082		2004.38	-0.00512993		2534.38	-0.02536421		3064.38	-0.12630728		3594.38	-0.14967419		4124.38	-0.16242724
414.59	-0.01246		944.59	-0.01094919		1474.59	-0.01225278		2004.58	-0.00664714		2534.58	-0.02519737		3064.58	-0.12569307		3594.58	-0.14913335		4124.58	-0.16196166
414.79	-0.0122501		944.79	-0.01131583		1474.79	-0.01224783		2004.78	-0.00680092		2534.78	-0.02509719		3064.78	-0.12560889		3594.78	-0.14881939		4124.78	-0.16242263
414.99	-0.01223126		944.99	-0.01188618		1474.99	-0.01196585		2004.98	-0.00603342		2534.98	-0.02561064		3064.98	-0.12427244		3594.98	-0.14891513		4124.98	-0.16220335
415.19	-0.01278931		945.19	-0.01277448		1475.19	-0.01262473		2005.18	-0.00647731		2535.18	-0.02601139		3065.18	-0.12481395		3595.18	-0.14909043		4125.18	-0.16170512
415.39	-0.01343759		945.39	-0.01295209		1475.39	-0.01298181		2005.38	-0.00638082		2535.38	-0.0258311		3065.38	-0.12402744		3595.38	-0.14893787		4125.38	-0.16228445
415.59	-0.0149795		945.59	-0.01214161		1475.59	-0.0127426		2005.58	-0.0055515		2535.58	-0.02612302		3065.58	-0.12501363		3595.58	-0.14906639		4125.58	-0.16354395
415.79	-0.015453		945.79	-0.01273505		1475.79	-0.01333032		2005.78	-0.00542269		2535.78	-0.02639688		3065.78	-0.12402489		3595.78	-0.14891317		4125.78	-0.16291904
415.99	-0.0150967		945.99	-0.0126077		1475.99	-0.01392633		2005.98	-0.00530013		2535.98	-0.0269703		3065.98	-0.12367356		3595.98	-0.14845545		4125.98	-0.16234906
416.19	-0.01495351		946.19	-0.01248337		1476.19	-0.0144144		2006.18	-0.00530914		2536.18	-0.02736303		3066.18	-0.12168326		3596.18	-0.14890842		4126.18	-0.1619479
416.39	-0.01388		946.39	-0.01175981		1476.39	-0.01411546		2006.38	-0.00526551		2536.38	-0.02750142		3066.38	-0.12105625		3596.38	-0.1491976		4126.38	-0.16168698
416.59	-0.01440245		946.59	-0.01206808		1476.59	-0.01395918		2006.58	-0.00467952		2536.58	-0.02684887		3066.58	-0.12072539		3596.58	-0.15022757		4126.58	-0.16212698
416.79	-0.01460613		946.79	-0.01262497		1476.79	-0.01550253		2006.78	-0.00424979		2536.78	-0.02699108		3066.78	-0.12103809		3596.78	-0.15048423		4126.78	-0.1617073
416.99	-0.01452071		946.99	-0.01145781		1476.99	-0.01598522		2006.98	-0.00398769		2536.98	-0.02660921		3066.98	-0.12161853		3596.98	-0.14993919		4126.98	-0.16173501
417.19	-0.01482203		947.19	-0.01123062		1477.19	-0.01472283		2007.18	-0.00462958		2537.18	-0.02708885		3067.18	-0.12204883		3597.18	-0.14985976		4127.18	-0.16195623
417.39	-0.01469791		947.39	-0.0107961		1477.39	-0.0142326		2007.38	-0.00423471		2537.38	-0.02792214		3067.38	-0.12222744		3597.38	-0.14986212		4127.38	-0.16261554
417.59	-0.0133345		947.59	-0.01121323		1477.59	-0.0140038		2007.58	-0.00515063		2537.58	-0.02714765		3067.58	-0.12245487		3597.58	-0.14951954		4127.58	-0.16248759
417.79	-0.01302643		947.79	-0.01077585		1477.79	-0.01406955		2007.78	-0.00545721		2537.78	-0.02707199		3067.78	-0.12280975		3597.78	-0.14937755		4127.78	-0.16174939
417.99	-0.0132008		947.99	-0.01044583		1477.99	-0.01498812		2007.98	-0.006386		2537.98	-0.02665407		3067.98	-0.12315206		3597.98	-0.14994596		4127.98	-0.16208678
418.19	-0.01263184		948.19	-0.01070964		1478.19	-0.01544026		2008.18	-0.00709711		2538.18	-0.02714133		3068.18	-0.12327584		3598.18	-0.15012523		4128.18	-0.16314341
418.39	-0.0133481		948.39	-0.01024361		1478.39	-0.01477864		2008.38	-0.00711732		2538.38	-0.0275373		3068.38	-0.12379847		3598.38	-0.14947343		4128.38	-0.16413341
418.59	-0.01428566		948.59	-0.01061813		1478.59	-0.01429054		2008.58	-0.00687428		2538.58	-0.02692744		3068.58	-0.12321808		3598.58	-0.14845175		4128.58	-0.16397532
418.79	-0.01533812		948.79	-0.01204778		1478.79	-0.01397471		2008.78	-0.00603589		2538.78	-0.02671795		3068.78	-0.12317348		3598.78	-0.14856604		4128.78	-0.16443498
418.99	-0.01558732		948.99	-0.01285937		1478.99	-0.01400064		2008.98	-0.00587624		2538.98	-0.0261107		3068.98	-0.12267033		3598.98	-0.14807652		4128.98	-0.16434291
419.19	-0.01647849		949.19	-0.01277879		1479.19	-0.01390362		2009.18	-0.00597267		2539.18	-0.02603399		3069.18	-0.12255606		3599.18	-0.14786337		4129.18	-0.163527
419.39	-0.01733402		949.39	-0.01250621		1479.39	-0.01376302		2009.38	-0.00589768		2539.38	-0.02549816		3069.38	-0.12143523		3599.38	-0.14851745		4129.38	-0.16436905
419.59	-0.0172234		949.59	-0.01237825		1479.59	-0.01396991		2009.58	-0.00540366		2539.58	-0.02529317		3069.58	-0.12169495		3599.58	-0.1487057		4129.58	-0.16493482
419.79	-0.01621789		949.79	-0.01275405		1479.79	-0.0139687		2009.78	-0.00638622		2539.78	-0.02603009		3069.78	-0.12109818		3599.78	-0.14774131		4129.78	-0.1640671
419.99	-0.01609678		949.99	-0.01335125		1479.99	-0.01334983		2009.98	-0.00678132		2539.98	-0.02659859		3069.98	-0.12086875		3599.98	-0.1474111		4129.98	-0.16378071
420.19	-0.01582228		950.19	-0.01387812		1480.19	-0.01375926		2010.18	-0.0066396		2540.18	-0.02632392		3070.18	-0.12063712		3600.18	-0.14752711		4130.18	-0.16361418
420.39	-0.01545892		950.39	-0.01439507		1480.39	-0.01375553		2010.38	-0.00675832		2540.38	-0.02668648		3070.38	-0.12129749		3600.38	-0.14821864		4130.38	-0.16387712
420.59	-0.01497072		950.59	-0.01551687		1480.59	-0.01410425		2010.58	-0.00660761		2540.58	-0.02690932		3070.58	-0.12186104		3600.58	-0.14921536		4130.58	-0.16372285
420.79	-0.01422388		950.79	-0.01539759		1480.79	-0.01499017		2010.78	-0.00595268		2540.78	-0.02755867		3070.78	-0.12248198		3600.78	-0.14936357		4130.78	-0.16256129
420.99	-0.01357928		950.99	-0.01415731		1480.99	-0.01435559		2010.98	-0.00638251		2540.98	-0.02755287		3070.98	-0.12254351		3600.98	-0.15012951		4130.98	-0.16288633
421.19	-0.01401266		951.19	-0.01435814		1481.19	-0.01354246		2011.18	-0.00549938		2541.18	-0.02807342		3071.18	-0.12268346		3601.18	-0.15037518		4131.18	-0.16196679
421.39	-0.01404756		951.39	-0.01388832		1481.39	-0.01389438		2011.38	-0.00458043		2541.38	-0.02729268		3071.38	-0.12274057		3601.38	-0.15059799		4131.38	-0.16253486
421.59	-0.01382915		951.59	-0.01386259		1481.59	-0.01392392		2011.58	-0.00521296		2541.58	-0.02683331		3071.58	-0.12134487		3601.58	-0.15110371		4131.58	-0.16209195
421.79	-0.01402202		951.79	-0.01302283		1481.79	-0.01359017		2011.78	-0.00612566		2541.78	-0.02758124		3071.78	-0.12084741		3601.78	-0.15072396		4131.78	-0.16210821
421.99	-0.0143996		951.99	-0.0125355		1481.99	-0.01353413		2011.98	-0.0066117		2541.98	-0.0276511		3071.98	-0.12167185		3601.98	-0.15098482		4131.98	-0.16263794
422.19	-0.01401763		952.19	-0.01295064		1482.19	-0.01318168		2012.18	-0.00652657		2542.18	-0.02819536		3072.18	-0.12238649		3602.18	-0.15045705		4132.18	-0.16446058
422.39	-0.0141607		952.39	-0.01241336		1482.39	-0.01276012		2012.38	-0.00504828		2542.38	-0.02773899		3072.38	-0.12307592		3602.38	-0.1507145		4132.38	-0.16488948
422.59	-0.01373008		952.59	-0.01321867		1482.59	-0.01253314		2012.58	-0.00549511		2542.58	-0.02681055		3072.58	-0.12356353		3602.58	-0.15054824		4132.58	-0.16478044
422.79	-0.01384489		952.79	-0.01366918		1482.79	-0.0126655		2012.78	-0.00516715		2542.78	-0.02665239		3072.78	-0.1245296		3602.78	-0.15069672		4132.78	-0.16456246
422.99	-0.01364305		952.99	-0.01347983		1482.99	-0.01381296		2012.98	-0.0054616		2542.98	-0.0261582		3072.98	-0.12432489		3602.98	-0.15007191		4132.98	-0.16366357
423.19	-0.01256862		953.19	-0.01374899		1483.19	-0.01434377		2013.18	-0.00547998		2543.18	-0.02625029		3073.18	-0.12438512		3603.18	-0.14956946		4133.18	-0.16317887
423.39	-0.0123082		953.39	-0.01429567		1483.39	-0.01484073		2013.38	-0.0060048		2543.38	-0.02634057		3073.38	-0.12496481		3603.38	-0.14904092		4133.38	-0.16406571
423.59	-0.01173408		953.59	-0.0147989		1483.59	-0.01421337		2013.58	-0.00562602		2543.58	-0.02703991		3073.58	-0.12635999		3603.58	-0.14761939		4133.58	-0.16354323
423.79	-0.01121069		953.79	-0.01470822		1483.79	-0.0139711		2013.78	-0.00615162		2543.78	-0.02767581		3073.78	-0.12587016		3603.78	-0.14751187		4133.78	-0.16291856
423.99	-0.01197662		953.99	-0.0151972		1483.99	-0.01494321		2013.98	-0.00597124		2543.98	-0.02805432		3073.98	-0.1260958		3603.98	-0.14762647		4133.98	-0.16288606
424.19	-0.01173513		954.19	-0.01468556		1484.19	-0.01634099		2014.18	-0.00584715		2544.18	-0.02809886		3074.18	-0.12652905		3604.18	-0.14776176		4134.18	-0.16312487
424.39	-0.01183316		954.39	-0.014494		1484.39	-0.01609013		2014.38	-0.00581036		2544.38	-0.02733907		3074.38	-0.12603757		3604.38	-0.14724122		4134.38	-0.16340797
424.59	-0.01259102		954.59	-0.01389369		1484.59	-0.01615546		2014.58	-0.00547833		2544.58	-0.02758639		3074.58	-0.12547365		3604.58	-0.14710216		4134.58	-0.16309072
424.79	-0.01317517		954.79	-0.01296263		1484.79	-0.01674651		2014.78	-0.00483187		2544.78	-0.0276961		3074.78	-0.12442539		3604.78	-0.14833976		4134.78	-0.16276551
424.99	-0.01312988		954.99	-0.01245529		1484.99	-0.0171427		2014.98	-0.00549812		2544.98	-0.0258096		3074.98	-0.12356261		3604.98	-0.14914116		4134.98	-0.16389418
425.19	-0.01460612		955.19	-0.01286051		1485.19	-0.01722506		2015.18	-0.00522869		2545.18	-0.02503598		3075.18	-0.12277154		3605.18	-0.14932882		4135.18	-0.1633014
425.39	-0.01530804		955.39	-0.01250202		1485.39	-0.01746264		2015.38	-0.00600615		2545.38	-0.02479622		3075.38	-0.12233208		3605.38	-0.14934645		4135.38	-0.16408423
425.59	-0.01593211		955.59	-0.01270249		1485.59	-0.01702916		2015.58	-0.00620104		2545.58	-0.02527089		3075.58	-0.12138119		3605.58	-0.14962018		4135.58	-0.163754
425.79	-0.01616567		955.79	-0.0123585		1485.79	-0.01651371		2015.78	-0.00685714		2545.78	-0.02555307		3075.78	-0.12207297		3605.78	-0.1496202		4135.78	-0.16333856
425.99	-0.01627217		955.99	-0.01267824		1485.99	-0.016828		2015.98	-0.00735634		2545.98	-0.02517342		3075.98	-0.12357406		3605.98	-0.15070869		4135.98	-0.16292034
426.19	-0.01597674		956.19	-0.01282837		1486.19	-0.01613468		2016.18	-0.00819298		2546.18	-0.0257532		3076.18	-0.12357766		3606.18	-0.15208062		4136.18	-0.16298071
426.39	-0.01609143		956.39	-0.01266571		1486.39	-0.01486063		2016.38	-0.00880034		2546.38	-0.02723379		3076.38	-0.12377998		3606.38	-0.15257722		4136.38	-0.16147959
426.59	-0.01562193		956.59	-0.01238601		1486.59	-0.01336018		2016.58	-0.01013204		2546.58	-0.02728667		3076.58	-0.12518432		3606.58	-0.15255808		4136.58	-0.16050546
426.79	-0.01521954		956.79	-0.01207304		1486.79	-0.01299478		2016.78	-0.01005841		2546.78	-0.02792369		3076.78	-0.12532937		3606.78	-0.15231285		4136.78	-0.16097492
426.99	-0.01497333		956.99	-0.01322138		1486.99	-0.01296694		2016.98	-0.01058402		2546.98	-0.02778058		3076.98	-0.12460487		3606.98	-0.15160569		4136.98	-0.16041376
427.19	-0.01372972		957.19	-0.01383621		1487.19	-0.01205055		2017.18	-0.00957576		2547.18	-0.02843693		3077.18	-0.12583243		3607.18	-0.15108195		4137.18	-0.16154285
427.39	-0.01314493		957.39	-0.01398303		1487.39	-0.0111824		2017.38	-0.00939553		2547.38	-0.02961757		3077.38	-0.12588414		3607.38	-0.15126074		4137.38	-0.16179325
427.59	-0.01321607		957.59	-0.01448553		1487.59	-0.01106538		2017.58	-0.00872106		2547.58	-0.03016591		3077.58	-0.12561975		3607.58	-0.15110013		4137.58	-0.16239185
427.79	-0.01329121		957.79	-0.01438413		1487.79	-0.01158391		2017.78	-0.00838522		2547.78	-0.0304495		3077.78	-0.12494337		3607.78	-0.15148677		4137.78	-0.1633706
427.99	-0.01403791		957.99	-0.01416689		1487.99	-0.01223718		2017.98	-0.00795509		2547.98	-0.03066679		3077.98	-0.12568834		3607.98	-0.15026476		4137.98	-0.16364275
428.19	-0.01386278		958.19	-0.01394184		1488.19	-0.0124221		2018.18	-0.00814415		2548.18	-0.0297009		3078.18	-0.1257906		3608.18	-0.14961746		4138.18	-0.16487475
428.39	-0.01426635		958.39	-0.01372209		1488.39	-0.01258139		2018.38	-0.00728281		2548.38	-0.02849255		3078.38	-0.12540901		3608.38	-0.14873846		4138.38	-0.16570663
428.59	-0.01513565		958.59	-0.01406547		1488.59	-0.01318557		2018.58	-0.00640622		2548.58	-0.02812802		3078.58	-0.125185		3608.58	-0.14919836		4138.58	-0.16642727
428.79	-0.01513235		958.79	-0.01435502		1488.79	-0.01356814		2018.78	-0.00623373		2548.78	-0.02663578		3078.78	-0.12471843		3608.78	-0.15013969		4138.78	-0.16764333
428.99	-0.01587614		958.99	-0.01468228		1488.99	-0.014536		2018.98	-0.00610497		2548.98	-0.0251632		3078.98	-0.1249329		3608.98	-0.15027341		4138.98	-0.16809595
429.19	-0.01685229		959.19	-0.01531826		1489.19	-0.01434092		2019.18	-0.00543832		2549.18	-0.0247306		3079.18	-0.12458855		3609.18	-0.15083406		4139.18	-0.16842797
429.39	-0.01784653		959.39	-0.01546776		1489.39	-0.01502161		2019.38	-0.00481319		2549.38	-0.02424113		3079.38	-0.12578956		3609.38	-0.15107811		4139.38	-0.16849008
429.59	-0.01845564		959.59	-0.01518511		1489.59	-0.01541905		2019.58	-0.00453687		2549.58	-0.02413582		3079.58	-0.1258944		3609.58	-0.15163434		4139.58	-0.16801467
429.79	-0.01859427		959.79	-0.01582029		1489.79	-0.01566692		2019.78	-0.00455266		2549.78	-0.02375719		3079.78	-0.12631697		3609.78	-0.15249519		4139.78	-0.16757009
429.99	-0.01887617		959.99	-0.01623699		1489.99	-0.01527792		2019.98	-0.00459347		2549.98	-0.02330716		3079.98	-0.1265301		3609.98	-0.15303516		4139.98	-0.16660752
430.19	-0.01829376		960.19	-0.01546564		1490.19	-0.01367734		2020.18	-0.00488924		2550.18	-0.02361187		3080.18	-0.12548656		3610.18	-0.15328373		4140.18	-0.16626113
430.39	-0.01829249		960.39	-0.0147004		1490.39	-0.01300963		2020.38	-0.00435707		2550.38	-0.02404892		3080.38	-0.12623531		3610.38	-0.15340664		4140.38	-0.16534016
430.59	-0.01782546		960.59	-0.01366906		1490.59	-0.01280657		2020.58	-0.00426746		2550.58	-0.02384553		3080.58	-0.1258497		3610.58	-0.15347411		4140.58	-0.1653686
430.79	-0.01832632		960.79	-0.01335722		1490.79	-0.01292046		2020.78	-0.00456299		2550.78	-0.02453307		3080.78	-0.12519802		3610.78	-0.15228341		4140.78	-0.16532661
430.99	-0.01857471		960.99	-0.01354337		1490.99	-0.01281822		2020.98	-0.00496		2550.98	-0.02483793		3080.98	-0.12511302		3610.98	-0.15107798		4140.98	-0.16533889
431.19	-0.01805518		961.19	-0.01321674		1491.19	-0.012047		2021.18	-0.00522228		2551.18	-0.02642696		3081.18	-0.12572684		3611.18	-0.15018402		4141.18	-0.16538536
431.39	-0.0174124		961.39	-0.01340581		1491.39	-0.01288299		2021.38	-0.00517038		2551.38	-0.02670247		3081.38	-0.1259493		3611.38	-0.14991242		4141.38	-0.16478006
431.59	-0.01822646		961.59	-0.01361844		1491.59	-0.01331869		2021.58	-0.00510713		2551.58	-0.02725357		3081.58	-0.12651823		3611.58	-0.14878359		4141.58	-0.16536451
431.79	-0.01774146		961.79	-0.01354689		1491.79	-0.01380356		2021.78	-0.0053715		2551.78	-0.02821513		3081.78	-0.12706084		3611.78	-0.14827894		4141.78	-0.1655858
431.99	-0.01781648		961.99	-0.01275535		1491.99	-0.0137224		2021.98	-0.00615367		2551.98	-0.02827573		3081.98	-0.12811051		3611.98	-0.14747797		4141.98	-0.16574017
432.19	-0.0169474		962.19	-0.01232254		1492.19	-0.01337882		2022.18	-0.00651968		2552.18	-0.02861994		3082.18	-0.12753572		3612.18	-0.1476249		4142.18	-0.16644665
432.39	-0.01738243		962.39	-0.01215841		1492.39	-0.01402346		2022.38	-0.00647153		2552.38	-0.02880687		3082.38	-0.12781389		3612.38	-0.14763261		4142.38	-0.16712631
432.59	-0.01694616		962.59	-0.01214375		1492.59	-0.01394615		2022.58	-0.00667594		2552.58	-0.02897962		3082.58	-0.127793		3612.58	-0.14785324		4142.58	-0.16651019
432.79	-0.01672882		962.79	-0.01231087		1492.79	-0.01343134		2022.78	-0.0071629		2552.78	-0.02898218		3082.78	-0.12766037		3612.78	-0.14774163		4142.78	-0.16720738
432.99	-0.01693601		962.99	-0.01280948		1492.99	-0.01426914		2022.98	-0.00727169		2552.98	-0.02969445		3082.98	-0.12697533		3612.98	-0.14842296		4142.98	-0.16754893
433.19	-0.01607171		963.19	-0.0131262		1493.19	-0.01349822		2023.18	-0.00755033		2553.18	-0.02943221		3083.18	-0.12698235		3613.18	-0.14868227		4143.18	-0.16767781
433.39	-0.01603074		963.39	-0.01288361		1493.39	-0.014296		2023.38	-0.00764413		2553.38	-0.0294807		3083.38	-0.12689419		3613.38	-0.14852448		4143.38	-0.16692562
433.59	-0.01522023		963.59	-0.01294315		1493.59	-0.0145725		2023.58	-0.00783159		2553.58	-0.0296872		3083.58	-0.12657244		3613.58	-0.14878132		4143.58	-0.16695688
433.79	-0.01553732		963.79	-0.01387826		1493.79	-0.01442988		2023.78	-0.00764714		2553.78	-0.02899761		3083.78	-0.12611613		3613.78	-0.14983302		4143.78	-0.166753
433.99	-0.01517091		963.99	-0.01499769		1493.99	-0.01392774		2023.98	-0.00714877		2553.98	-0.02724665		3083.98	-0.12583643		3613.98	-0.14962825		4143.98	-0.1663639
434.19	-0.01506554		964.19	-0.01448051		1494.19	-0.01369409		2024.18	-0.00659034		2554.18	-0.02718939		3084.18	-0.12564295		3614.18	-0.15030233		4144.18	-0.16645507
434.39	-0.01485703		964.39	-0.01374733		1494.39	-0.01438608		2024.38	-0.00573483		2554.38	-0.02689601		3084.38	-0.12554911		3614.38	-0.15117807		4144.38	-0.16591911
434.59	-0.01463474		964.59	-0.01281549		1494.59	-0.01502788		2024.58	-0.00523486		2554.58	-0.02675346		3084.58	-0.12422196		3614.58	-0.1510799		4144.58	-0.16627092
434.79	-0.01586138		964.79	-0.01301279		1494.79	-0.01502141		2024.78	-0.0053415		2554.78	-0.02607592		3084.78	-0.12410945		3614.78	-0.15112992		4144.78	-0.16566966
434.99	-0.01545598		964.99	-0.01346521		1494.99	-0.0145494		2024.98	-0.00484044		2554.98	-0.02601583		3084.98	-0.12483126		3614.98	-0.15153789		4144.98	-0.16633639
435.19	-0.01579452		965.19	-0.01377116		1495.19	-0.01500918		2025.18	-0.00455827		2555.18	-0.02578571		3085.18	-0.12568754		3615.18	-0.15216327		4145.18	-0.16633813
435.39	-0.01647845		965.39	-0.0130271		1495.39	-0.01550222		2025.38	-0.00369926		2555.38	-0.02585732		3085.38	-0.12724733		3615.38	-0.15298657		4145.38	-0.16660425
435.59	-0.01716638		965.59	-0.01313742		1495.59	-0.01621597		2025.58	-0.00399384		2555.58	-0.0264179		3085.58	-0.12752955		3615.58	-0.1537675		4145.58	-0.16740394
435.79	-0.01675049		965.79	-0.01231557		1495.79	-0.0164391		2025.78	-0.00401268		2555.78	-0.02692453		3085.78	-0.12830953		3615.78	-0.15448982		4145.78	-0.16794575
435.99	-0.01757694		965.99	-0.0119087		1495.99	-0.01643685		2025.98	-0.00432664		2555.98	-0.02698566		3085.98	-0.12921853		3615.98	-0.15542344		4145.98	-0.1680092
436.19	-0.01736766		966.19	-0.01181208		1496.19	-0.0165716		2026.18	-0.00452375		2556.18	-0.02773336		3086.18	-0.12860578		3616.18	-0.15524254		4146.18	-0.16833715
436.39	-0.01789427		966.39	-0.0120044		1496.39	-0.0168875		2026.38	-0.00516243		2556.38	-0.02761307		3086.38	-0.12898633		3616.38	-0.15489092		4146.38	-0.16904588
436.59	-0.01732513		966.59	-0.01210996		1496.59	-0.01648685		2026.58	-0.00530483		2556.58	-0.02758725		3086.58	-0.12892375		3616.58	-0.15425567		4146.58	-0.16905136
436.79	-0.01658284		966.79	-0.01213612		1496.79	-0.01589958		2026.78	-0.00557977		2556.78	-0.02768565		3086.78	-0.12865616		3616.78	-0.15389473		4146.78	-0.16967348
436.99	-0.01697003		966.99	-0.01200162		1496.99	-0.01623403		2026.98	-0.00664568		2556.98	-0.02830243		3086.98	-0.1274297		3616.98	-0.15378239		4146.98	-0.17002505
437.19	-0.01625554		967.19	-0.01170842		1497.19	-0.01524761		2027.18	-0.00731137		2557.18	-0.02825599		3087.18	-0.12814035		3617.18	-0.15288598		4147.18	-0.16963583
437.39	-0.01634422		967.39	-0.01273933		1497.39	-0.01590175		2027.38	-0.0076732		2557.38	-0.02882687		3087.38	-0.12725948		3617.38	-0.15203728		4147.38	-0.16885571
437.59	-0.0158595		967.59	-0.01378731		1497.59	-0.01589294		2027.58	-0.0084941		2557.58	-0.02850758		3087.58	-0.12785166		3617.58	-0.15149975		4147.58	-0.16862988
437.79	-0.01608321		967.79	-0.01445094		1497.79	-0.01600217		2027.78	-0.00872488		2557.78	-0.02807079		3087.78	-0.1268383		3617.78	-0.15077631		4147.78	-0.16879947
437.99	-0.01595435		967.99	-0.01485656		1497.99	-0.01533682		2027.98	-0.00779386		2557.98	-0.02700973		3087.98	-0.12624707		3617.98	-0.14968067		4147.98	-0.16859911
438.19	-0.01540535		968.19	-0.01434528		1498.19	-0.01577195		2028.18	-0.00788511		2558.18	-0.02697008		3088.18	-0.12535834		3618.18	-0.14939034		4148.18	-0.16748572
438.39	-0.01583		968.39	-0.01422634		1498.39	-0.01568337		2028.38	-0.00719872		2558.38	-0.02635692		3088.38	-0.12454859		3618.38	-0.14881764		4148.38	-0.16751802
438.59	-0.0150257		968.59	-0.01441249		1498.59	-0.01533763		2028.58	-0.00634067		2558.58	-0.02658264		3088.58	-0.12361616		3618.58	-0.14852341		4148.58	-0.16740488
438.79	-0.01538034		968.79	-0.01544688		1498.79	-0.01466623		2028.78	-0.00597061		2558.78	-0.02661423		3088.78	-0.1232264		3618.78	-0.14912383		4148.78	-0.16667583
438.99	-0.01551858		968.99	-0.01490508		1498.99	-0.01456703		2028.98	-0.00575559		2558.98	-0.02728419		3088.98	-0.12370545		3618.98	-0.14978926		4148.98	-0.16714734
439.19	-0.01654666		969.19	-0.01418264		1499.19	-0.01458026		2029.18	-0.00594061		2559.18	-0.02744876		3089.18	-0.12407793		3619.18	-0.14953158		4149.18	-0.16672502
439.39	-0.01695849		969.39	-0.01353811		1499.39	-0.01404561		2029.38	-0.00612382		2559.38	-0.0278066		3089.38	-0.12452591		3619.38	-0.15037844		4149.38	-0.16609087
439.59	-0.01668162		969.59	-0.01348775		1499.59	-0.01430446		2029.58	-0.00641443		2559.58	-0.02840408		3089.58	-0.12457349		3619.58	-0.15035478		4149.58	-0.16647223
439.79	-0.01702158		969.79	-0.01302993		1499.79	-0.01329817		2029.78	-0.00590497		2559.78	-0.02836874		3089.78	-0.12579375		3619.78	-0.15054158		4149.78	-0.16611728
439.99	-0.01732734		969.99	-0.01312632		1499.99	-0.01345915		2029.98	-0.0063492		2559.98	-0.02805596		3089.98	-0.126986		3619.98	-0.15081612		4149.98	-0.16600496
440.19	-0.01643292		970.19	-0.01285		1500.19	-0.01282978		2030.18	-0.00644803		2560.18	-0.02781448		3090.18	-0.12729345		3620.18	-0.15096297		4150.18	-0.16568399
440.39	-0.01658752		970.39	-0.01320791		1500.39	-0.01283145		2030.38	-0.00659533		2560.38	-0.02724118		3090.38	-0.12844477		3620.38	-0.15105589		4150.38	-0.16557279
440.59	-0.0164727		970.59	-0.01309372		1500.59	-0.01230492		2030.58	-0.00676012		2560.58	-0.02682325		3090.58	-0.12905369		3620.58	-0.1515149		4150.58	-0.16637043
440.79	-0.01615265		970.79	-0.0134906		1500.79	-0.01259318		2030.78	-0.00683438		2560.78	-0.02700717		3090.78	-0.12948811		3620.78	-0.15211373		4150.78	-0.16630718
440.99	-0.01611357		970.99	-0.01444258		1500.99	-0.0128832		2030.98	-0.00769725		2560.98	-0.02690885		3090.98	-0.12975441		3620.98	-0.15170543		4150.98	-0.16667054
441.19	-0.01584154		971.19	-0.01456955		1501.19	-0.01318324		2031.18	-0.00833943		2561.18	-0.02682331		3091.18	-0.13081717		3621.18	-0.15149288		4151.18	-0.1667259
441.39	-0.01648456		971.39	-0.01532282		1501.39	-0.01307603		2031.38	-0.00811886		2561.38	-0.02707534		3091.38	-0.1309583		3621.38	-0.15155293		4151.38	-0.16680026
441.59	-0.01627463		971.59	-0.01460138		1501.59	-0.0141149		2031.58	-0.00819242		2561.58	-0.02692892		3091.58	-0.1312558		3621.58	-0.15152368		4151.58	-0.16727765
441.79	-0.01611913		971.79	-0.01537899		1501.79	-0.01391685		2031.78	-0.00808306		2561.78	-0.02745853		3091.78	-0.12998237		3621.78	-0.15166211		4151.78	-0.16701468
441.99	-0.01697925		971.99	-0.01583074		1501.99	-0.01388297		2031.98	-0.00806143		2561.98	-0.02657653		3091.98	-0.12916517		3621.98	-0.15172938		4151.98	-0.16632857
442.19	-0.01634362		972.19	-0.01602377		1502.19	-0.01496318		2032.18	-0.00818429		2562.18	-0.02586679		3092.18	-0.12805104		3622.18	-0.15102736		4152.18	-0.16548516
442.39	-0.01676556		972.39	-0.01738245		1502.39	-0.01460584		2032.38	-0.00722733		2562.38	-0.0261066		3092.38	-0.12710516		3622.38	-0.1502913		4152.38	-0.16683333
442.59	-0.01549219		972.59	-0.01695684		1502.59	-0.01481197		2032.58	-0.00720656		2562.58	-0.02636084		3092.58	-0.12610051		3622.58	-0.15037834		4152.58	-0.16676998
442.79	-0.01674196		972.79	-0.01688154		1502.79	-0.01479822		2032.78	-0.00662118		2562.78	-0.02626984		3092.78	-0.12511566		3622.78	-0.15098179		4152.78	-0.16680122
442.99	-0.01734071		972.99	-0.01612673		1502.99	-0.01466683		2032.98	-0.00618393		2562.98	-0.02691542		3092.98	-0.12504392		3622.98	-0.15125719		4152.98	-0.16652686
443.19	-0.01750819		973.19	-0.01612171		1503.19	-0.01375695		2033.18	-0.00567892		2563.18	-0.02684101		3093.18	-0.12460928		3623.18	-0.14992385		4153.18	-0.1660088
443.39	-0.01708236		973.39	-0.0157536		1503.39	-0.01347085		2033.38	-0.0049812		2563.38	-0.02722081		3093.38	-0.12402016		3623.38	-0.15039255		4153.38	-0.16554321
443.59	-0.01675953		973.59	-0.01531107		1503.59	-0.01311023		2033.58	-0.00393253		2563.58	-0.02761067		3093.58	-0.12433244		3623.58	-0.14982491		4153.58	-0.16541896
443.79	-0.0158527		973.79	-0.01512831		1503.79	-0.01327777		2033.78	-0.00323567		2563.78	-0.02737701		3093.78	-0.12466193		3623.78	-0.1499654		4153.78	-0.16394383
443.99	-0.01570045		973.99	-0.01377079		1503.99	-0.01342994		2033.98	-0.00331089		2563.98	-0.02739022		3093.98	-0.12518774		3623.98	-0.15064561		4153.98	-0.16321164
444.19	-0.01585147		974.19	-0.01409192		1504.19	-0.01258997		2034.18	-0.00364367		2564.18	-0.02723071		3094.18	-0.12567167		3624.18	-0.15062185		4154.18	-0.16227364
444.39	-0.0158198		974.39	-0.01467838		1504.39	-0.01272073		2034.38	-0.00407848		2564.38	-0.0261325		3094.38	-0.12537942		3624.38	-0.15026458		4154.38	-0.16305804
444.59	-0.0155559		974.59	-0.01488114		1504.59	-0.01296764		2034.58	-0.00462304		2564.58	-0.02597288		3094.58	-0.12462371		3624.58	-0.15017791		4154.58	-0.16436413
444.79	-0.01525965		974.79	-0.01548821		1504.79	-0.013566		2034.78	-0.00520061		2564.78	-0.02631432		3094.78	-0.12508407		3624.78	-0.150247		4154.78	-0.16465531
444.99	-0.01467239		974.99	-0.01488405		1504.99	-0.01371586		2034.98	-0.00594629		2564.98	-0.02651065		3094.98	-0.12583757		3624.98	-0.15016964		4154.98	-0.16497651
445.19	-0.01510185		975.19	-0.01423247		1505.19	-0.01382243		2035.18	-0.00646506		2565.18	-0.02723132		3095.18	-0.12619663		3625.18	-0.14985704		4155.18	-0.16566173
445.39	-0.01531289		975.39	-0.01414279		1505.39	-0.01306447		2035.38	-0.0065324		2565.38	-0.02757986		3095.38	-0.12653622		3625.38	-0.14983933		4155.38	-0.16608464
445.59	-0.01537442		975.59	-0.01409957		1505.59	-0.01441052		2035.58	-0.00791252		2565.58	-0.02762458		3095.58	-0.12692252		3625.58	-0.14987616		4155.58	-0.1658751
445.79	-0.01567493		975.79	-0.01520142		1505.79	-0.01406072		2035.78	-0.00888814		2565.78	-0.02717467		3095.78	-0.12629493		3625.78	-0.1488797		4155.78	-0.1660757
445.99	-0.01619842		975.99	-0.01524306		1505.99	-0.0144422		2035.98	-0.00928065		2565.98	-0.02613095		3095.98	-0.12663813		3625.98	-0.14850926		4155.98	-0.16718735
446.19	-0.01572503		976.19	-0.01615176		1506.19	-0.01538715		2036.18	-0.00918544		2566.18	-0.02588484		3096.18	-0.12600264		3626.18	-0.14839011		4156.18	-0.16808921
446.39	-0.01611726		976.39	-0.01714046		1506.39	-0.01461015		2036.38	-0.00915944		2566.38	-0.02549274		3096.38	-0.1259931		3626.38	-0.14904507		4156.38	-0.16985053
446.59	-0.01566907		976.59	-0.01594131		1506.59	-0.0145147		2036.58	-0.00892103		2566.58	-0.0252292		3096.58	-0.12649572		3626.58	-0.14941481		4156.58	-0.16877139
446.79	-0.01624178		976.79	-0.016239		1506.79	-0.01499952		2036.78	-0.00784349		2566.78	-0.02510107		3096.78	-0.12703851		3626.78	-0.15010887		4156.78	-0.16854733
446.99	-0.01619481		976.99	-0.01637623		1506.99	-0.01498468		2036.98	-0.00765055		2566.98	-0.0253647		3096.98	-0.12802571		3626.98	-0.15042398		4156.98	-0.16826849
447.19	-0.01631337		977.19	-0.01672919		1507.19	-0.01495406		2037.18	-0.0076071		2567.18	-0.02532312		3097.18	-0.12820614		3627.18	-0.15042815		4157.18	-0.1681296
447.39	-0.01615281		977.39	-0.01628707		1507.39	-0.01517342		2037.38	-0.00673496		2567.38	-0.02621671		3097.38	-0.12862061		3627.38	-0.15179068		4157.38	-0.16783443
447.59	-0.01566502		977.59	-0.01651067		1507.59	-0.01477819		2037.58	-0.00637503		2567.58	-0.02589388		3097.58	-0.12865848		3627.58	-0.15171878		4157.58	-0.16701732
447.79	-0.01517165		977.79	-0.01673148		1507.79	-0.01489868		2037.78	-0.00701328		2567.78	-0.02616755		3097.78	-0.12939694		3627.78	-0.15220235		4157.78	-0.16575982
447.99	-0.01590878		977.99	-0.01638825		1507.99	-0.01438849		2037.98	-0.00823904		2567.98	-0.02615742		3097.98	-0.12976376		3627.98	-0.15287358		4157.98	-0.16576558
448.19	-0.01644556		978.19	-0.01661376		1508.19	-0.01447093		2038.18	-0.00897261		2568.18	-0.02573784		3098.18	-0.13000737		3628.18	-0.15236139		4158.18	-0.16638137
448.39	-0.01658522		978.39	-0.01726509		1508.39	-0.01487917		2038.38	-0.00877997		2568.38	-0.02530737		3098.38	-0.12939962		3628.38	-0.152345		4158.38	-0.16781962
448.59	-0.01661165		978.59	-0.01636483		1508.59	-0.01507891		2038.58	-0.00951887		2568.58	-0.02534476		3098.58	-0.12878741		3628.58	-0.15135722		4158.58	-0.16838258
448.79	-0.01624136		978.79	-0.01538657		1508.79	-0.01537584		2038.78	-0.00987671		2568.78	-0.02555356		3098.78	-0.13024246		3628.78	-0.15160939		4158.78	-0.16893986
448.99	-0.01622793		978.99	-0.01489197		1508.99	-0.01530721		2038.98	-0.00874771		2568.98	-0.02557742		3098.98	-0.13096989		3628.98	-0.15135648		4158.98	-0.16877045
449.19	-0.01647148		979.19	-0.01456764		1509.19	-0.01558455		2039.18	-0.00873026		2569.18	-0.02541451		3099.18	-0.13039538		3629.18	-0.150512		4159.18	-0.16873715
449.39	-0.01690456		979.39	-0.01466616		1509.39	-0.01517052		2039.38	-0.0081828		2569.38	-0.0247621		3099.38	-0.13029781		3629.38	-0.15008534		4159.38	-0.16887615
449.59	-0.01678075		979.59	-0.01513919		1509.59	-0.01633287		2039.58	-0.00751817		2569.58	-0.02511218		3099.58	-0.12968764		3629.58	-0.15010057		4159.58	-0.16914121
449.79	-0.01690439		979.79	-0.01570591		1509.79	-0.01642255		2039.78	-0.00603254		2569.78	-0.02486241		3099.78	-0.12831175		3629.78	-0.14932606		4159.78	-0.16997454
449.99	-0.01674392		979.99	-0.01592641		1509.99	-0.01687299		2039.98	-0.00585987		2569.98	-0.02478489		3099.98	-0.12841803		3629.98	-0.14982786		4159.98	-0.1704901
450.19	-0.01695766		980.19	-0.01529867		1510.19	-0.01811954		2040.18	-0.00545826		2570.18	-0.02461091		3100.18	-0.12740777		3630.18	-0.15100707		4160.18	-0.17061955
450.39	-0.01637116		980.39	-0.0146403		1510.39	-0.01792062		2040.38	-0.00463924		2570.38	-0.02457565		3100.38	-0.12780032		3630.38	-0.1514222		4160.38	-0.17079192
450.59	-0.015942		980.59	-0.01403071		1510.59	-0.01842107		2040.58	-0.00407304		2570.58	-0.0247682		3100.58	-0.12800823		3630.58	-0.15164604		4160.58	-0.16896338
450.79	-0.01606502		980.79	-0.0136196		1510.79	-0.01950681		2040.78	-0.00369495		2570.78	-0.02501565		3100.78	-0.12753248		3630.78	-0.15255173		4160.78	-0.16851779
450.99	-0.0160113		980.99	-0.01440102		1510.99	-0.01957705		2040.98	-0.0042715		2570.98	-0.02545857		3100.98	-0.12735751		3630.98	-0.15296349		4160.98	-0.16846748
451.19	-0.0162789		981.19	-0.01495812		1511.19	-0.01944884		2041.18	-0.00541697		2571.18	-0.026101		3101.18	-0.12725255		3631.18	-0.15326187		4161.18	-0.16771352
451.39	-0.01552778		981.39	-0.01487421		1511.39	-0.01983508		2041.38	-0.00588749		2571.38	-0.02677266		3101.38	-0.12722087		3631.38	-0.15356198		4161.38	-0.16654805
451.59	-0.0147425		981.59	-0.01565623		1511.59	-0.01911586		2041.58	-0.00693469		2571.58	-0.02644186		3101.58	-0.12654935		3631.58	-0.15338532		4161.58	-0.16572498
451.79	-0.01540769		981.79	-0.01581543		1511.79	-0.01846183		2041.78	-0.00813118		2571.78	-0.02652583		3101.78	-0.12709986		3631.78	-0.15429851		4161.78	-0.16550604
451.99	-0.01621026		981.99	-0.01561566		1511.99	-0.01798059		2041.98	-0.00952751		2571.98	-0.02623586		3101.98	-0.12632053		3631.98	-0.15439877		4161.98	-0.16564604
452.19	-0.01690619		982.19	-0.01520074		1512.19	-0.01749362		2042.18	-0.00918426		2572.18	-0.02568763		3102.18	-0.12617551		3632.18	-0.15455388		4162.18	-0.16615108
452.39	-0.01700785		982.39	-0.01568278		1512.39	-0.01653645		2042.38	-0.0098061		2572.38	-0.02522563		3102.38	-0.12638216		3632.38	-0.15406789		4162.38	-0.16633198
452.59	-0.01651506		982.59	-0.01476641		1512.59	-0.01598795		2042.58	-0.0103185		2572.58	-0.02470107		3102.58	-0.12593143		3632.58	-0.15363624		4162.58	-0.16548797
452.79	-0.01711684		982.79	-0.01467754		1512.79	-0.01650449		2042.78	-0.01030763		2572.78	-0.02433155		3102.78	-0.1267716		3632.78	-0.1538926		4162.78	-0.16576902
452.99	-0.01784676		982.99	-0.01504174		1512.99	-0.01591921		2042.98	-0.00970454		2572.98	-0.02440637		3102.98	-0.12653046		3632.98	-0.15359074		4162.98	-0.16530986
453.19	-0.01763898		983.19	-0.01420487		1513.19	-0.01505218		2043.18	-0.00959271		2573.18	-0.02401471		3103.18	-0.1256765		3633.18	-0.15298702		4163.18	-0.16586731
453.39	-0.01812069		983.39	-0.01357709		1513.39	-0.01460323		2043.38	-0.00910099		2573.38	-0.02430104		3103.38	-0.1253151		3633.38	-0.15262555		4163.38	-0.16614043
453.59	-0.0179602		983.59	-0.01348366		1513.59	-0.01561975		2043.58	-0.00848217		2573.58	-0.02514291		3103.58	-0.12502138		3633.58	-0.15204129		4163.58	-0.16615336
453.79	-0.01821458		983.79	-0.01387103		1513.79	-0.01538876		2043.78	-0.00767818		2573.78	-0.02478263		3103.78	-0.12544782		3633.78	-0.15148053		4163.78	-0.16730779
453.99	-0.01843577		983.99	-0.01312368		1513.99	-0.01590047		2043.98	-0.0083054		2573.98	-0.02502152		3103.98	-0.12659229		3633.98	-0.15151117		4163.98	-0.16783148
454.19	-0.01930915		984.19	-0.01287902		1514.19	-0.01661043		2044.18	-0.00808815		2574.18	-0.02545207		3104.18	-0.12585828		3634.18	-0.15154815		4164.18	-0.16842474
454.39	-0.01867952		984.39	-0.01274036		1514.39	-0.01692517		2044.38	-0.00753884		2574.38	-0.02671817		3104.38	-0.12636911		3634.38	-0.15010897		4164.38	-0.16874023
454.59	-0.01826892		984.59	-0.01234364		1514.59	-0.01818525		2044.58	-0.00755314		2574.58	-0.02686434		3104.58	-0.12587791		3634.58	-0.14967836		4164.58	-0.16797138
454.79	-0.01896869		984.79	-0.01260026		1514.79	-0.01865263		2044.78	-0.00691434		2574.78	-0.02766215		3104.78	-0.12546641		3634.78	-0.14947252		4164.78	-0.16785735
454.99	-0.02004627		984.99	-0.01365812		1514.99	-0.01871789		2044.98	-0.00721427		2574.98	-0.02751873		3104.98	-0.12640567		3634.98	-0.14851134		4164.98	-0.16780659
455.19	-0.02021713		985.19	-0.01345661		1515.19	-0.01920118		2045.18	-0.00839893		2575.18	-0.0277103		3105.18	-0.1261509		3635.18	-0.14851738		4165.18	-0.16693236
455.39	-0.02047276		985.39	-0.0136019		1515.39	-0.02034938		2045.38	-0.00802559		2575.38	-0.02739716		3105.38	-0.12652867		3635.38	-0.14917123		4165.38	-0.16660877
455.59	-0.02046863		985.59	-0.01463078		1515.59	-0.01888736		2045.58	-0.00863366		2575.58	-0.02698695		3105.58	-0.12587136		3635.58	-0.14920371		4165.58	-0.16683802
455.79	-0.02136		985.79	-0.01455284		1515.79	-0.01909927		2045.78	-0.00896462		2575.78	-0.0265444		3105.78	-0.12563327		3635.78	-0.14986928		4165.78	-0.16689726
455.99	-0.02128241		985.99	-0.01581047		1515.99	-0.01905083		2045.98	-0.00932346		2575.98	-0.02658232		3105.98	-0.12571618		3635.98	-0.15028406		4165.98	-0.16664925
456.19	-0.02112169		986.19	-0.01627114		1516.19	-0.01849403		2046.18	-0.00964302		2576.18	-0.02656555		3106.18	-0.12654065		3636.18	-0.15056068		4166.18	-0.16618162
456.39	-0.02043708		986.39	-0.01721756		1516.39	-0.01826989		2046.38	-0.0103689		2576.38	-0.02686055		3106.38	-0.12721812		3636.38	-0.15103386		4166.38	-0.16658159
456.59	-0.02055702		986.59	-0.0169904		1516.59	-0.01831288		2046.58	-0.0104267		2576.58	-0.02739576		3106.58	-0.1275452		3636.58	-0.15199791		4166.58	-0.16644268
456.79	-0.02014115		986.79	-0.01670874		1516.79	-0.0184446		2046.78	-0.01005638		2576.78	-0.02696564		3106.78	-0.128177		3636.78	-0.15221525		4166.78	-0.16660991
456.99	-0.01873807		986.99	-0.0166668		1516.99	-0.01819181		2046.98	-0.00942083		2576.98	-0.02695732		3106.98	-0.128835		3636.98	-0.15339278		4166.98	-0.16629246
457.19	-0.0180563		987.19	-0.01639436		1517.19	-0.01752013		2047.18	-0.00826438		2577.18	-0.0265703		3107.18	-0.12919609		3637.18	-0.15397203		4167.18	-0.16652422
457.39	-0.01796697		987.39	-0.01607542		1517.39	-0.0169415		2047.38	-0.00839237		2577.38	-0.02713897		3107.38	-0.12922233		3637.38	-0.15427906		4167.38	-0.16589353
457.59	-0.01695272		987.59	-0.01693141		1517.59	-0.01723922		2047.58	-0.0081136		2577.58	-0.02787554		3107.58	-0.12972467		3637.58	-0.15494756		4167.58	-0.1662707
457.79	-0.01697791		987.79	-0.01746107		1517.79	-0.01689195		2047.78	-0.00730729		2577.78	-0.02756785		3107.78	-0.12929636		3637.78	-0.15557461		4167.78	-0.16789849
457.99	-0.01765449		987.99	-0.01739255		1517.99	-0.01662894		2047.98	-0.00840319		2577.98	-0.028017		3107.98	-0.1286458		3637.98	-0.15560472		4167.98	-0.16799161
458.19	-0.01764876		988.19	-0.01738757		1518.19	-0.01645407		2048.18	-0.00791922		2578.18	-0.02872437		3108.18	-0.12705801		3638.18	-0.15533677		4168.18	-0.16881361
458.39	-0.01677077		988.39	-0.01681655		1518.39	-0.01666908		2048.38	-0.0074352		2578.38	-0.0290211		3108.38	-0.12719777		3638.38	-0.15501657		4168.38	-0.16880997
458.59	-0.01712045		988.59	-0.01739981		1518.59	-0.01764808		2048.58	-0.00721799		2578.58	-0.02839847		3108.58	-0.12662657		3638.58	-0.15551851		4168.58	-0.16879648
458.79	-0.01785924		988.79	-0.01783818		1518.79	-0.01710333		2048.78	-0.00656776		2578.78	-0.02801684		3108.78	-0.12659998		3638.78	-0.15583034		4168.78	-0.16884392
458.99	-0.01815909		988.99	-0.01859098		1518.99	-0.0166039		2048.98	-0.00693081		2578.98	-0.02731473		3108.98	-0.1269675		3638.98	-0.15493056		4168.98	-0.16917031
459.19	-0.01798827		989.19	-0.01799259		1519.19	-0.01675453		2049.18	-0.00723951		2579.18	-0.02669357		3109.18	-0.12659468		3639.18	-0.15499202		4169.18	-0.16775598
459.39	-0.01879449		989.39	-0.01765737		1519.39	-0.01647063		2049.38	-0.00730066		2579.38	-0.02619465		3109.38	-0.12703306		3639.38	-0.15417672		4169.38	-0.16771183
459.59	-0.01873133		989.59	-0.01743888		1519.59	-0.01575334		2049.58	-0.00826432		2579.58	-0.02583851		3109.58	-0.12646801		3639.58	-0.15370041		4169.58	-0.16739916
459.79	-0.01859338		989.79	-0.01721716		1519.79	-0.01622326		2049.78	-0.00782765		2579.78	-0.0257238		3109.78	-0.12629665		3639.78	-0.15330576		4169.78	-0.1672145
459.99	-0.01808144		989.99	-0.01715358		1519.99	-0.01570604		2049.98	-0.00743221		2579.98	-0.02586644		3109.98	-0.12737695		3639.98	-0.15303824		4169.98	-0.16716224
460.19	-0.01843503		990.19	-0.01611971		1520.19	-0.01556905		2050.18	-0.00774606		2580.18	-0.02563041		3110.18	-0.12830962		3640.18	-0.15216266		4170.18	-0.16715559
460.39	-0.01851141		990.39	-0.01558526		1520.39	-0.015638		2050.38	-0.00726908		2580.38	-0.0265495		3110.38	-0.12912299		3640.38	-0.15142856		4170.38	-0.16738654
460.59	-0.01846419		990.59	-0.01519676		1520.59	-0.01638692		2050.58	-0.00771969		2580.58	-0.02685722		3110.58	-0.12941355		3640.58	-0.1510255		4170.58	-0.166773
460.79	-0.01753146		990.79	-0.0156711		1520.79	-0.01625525		2050.78	-0.00758065		2580.78	-0.02648059		3110.78	-0.12913377		3640.78	-0.15101964		4170.78	-0.166276
460.99	-0.01787163		990.99	-0.01582227		1520.99	-0.01672559		2050.98	-0.00815955		2580.98	-0.0273266		3110.98	-0.12944078		3640.98	-0.15200719		4170.98	-0.16672773
461.19	-0.01794714		991.19	-0.01598756		1521.19	-0.01622151		2051.18	-0.00814794		2581.18	-0.02853073		3111.18	-0.13009378		3641.18	-0.15254473		4171.18	-0.16636554
461.39	-0.01827148		991.39	-0.01568751		1521.39	-0.01637108		2051.38	-0.00957656		2581.38	-0.02955088		3111.38	-0.12918348		3641.38	-0.15302533		4171.38	-0.16618462
461.59	-0.01826209		991.59	-0.01491642		1521.59	-0.0170145		2051.58	-0.0093539		2581.58	-0.03026893		3111.58	-0.12899548		3641.58	-0.15404067		4171.58	-0.16721606
461.79	-0.01912066		991.79	-0.01515757		1521.79	-0.01683598		2051.78	-0.00871273		2581.78	-0.03068124		3111.78	-0.12829334		3641.78	-0.15476366		4171.78	-0.16737114
461.99	-0.01923245		991.99	-0.01512357		1521.99	-0.01680376		2051.98	-0.00893808		2581.98	-0.03103582		3111.98	-0.1273956		3641.98	-0.15495127		4171.98	-0.16699565
462.19	-0.01824619		992.19	-0.01537998		1522.19	-0.01659145		2052.18	-0.00819622		2582.18	-0.03125701		3112.18	-0.12615666		3642.18	-0.15551672		4172.18	-0.16704798
462.39	-0.01842469		992.39	-0.01551613		1522.39	-0.01662495		2052.38	-0.00828296		2582.38	-0.03059582		3112.38	-0.1262235		3642.38	-0.15585537		4172.38	-0.16750101
462.59	-0.01849429		992.59	-0.01627781		1522.59	-0.01764025		2052.58	-0.00869527		2582.58	-0.0297749		3112.58	-0.12668525		3642.58	-0.15577505		4172.58	-0.16812435
462.79	-0.01783741		992.79	-0.01640925		1522.79	-0.01754315		2052.78	-0.00869272		2582.78	-0.02907114		3112.78	-0.12710869		3642.78	-0.1551964		4172.78	-0.16874945
462.99	-0.01756608		992.99	-0.01609977		1522.99	-0.01787047		2052.98	-0.00939704		2582.98	-0.02930164		3112.98	-0.12741989		3642.98	-0.15490405		4172.98	-0.1692226
463.19	-0.0174381		993.19	-0.0155342		1523.19	-0.01775289		2053.18	-0.00994767		2583.18	-0.02786045		3113.18	-0.12690022		3643.18	-0.15484326		4173.18	-0.16877896
463.39	-0.01783977		993.39	-0.01553783		1523.39	-0.01804938		2053.38	-0.01019208		2583.38	-0.02781131		3113.38	-0.12643035		3643.38	-0.15457384		4173.38	-0.16967659
463.59	-0.01778443		993.59	-0.01495973		1523.59	-0.01818481		2053.58	-0.00995038		2583.58	-0.02775735		3113.58	-0.12629336		3643.58	-0.15398968		4173.58	-0.16996758
463.79	-0.01752097		993.79	-0.01467139		1523.79	-0.01773664		2053.78	-0.00896172		2583.78	-0.02809509		3113.78	-0.12640093		3643.78	-0.15287279		4173.78	-0.16957265
463.99	-0.0180022		993.99	-0.01433906		1523.99	-0.01775757		2053.98	-0.00832328		2583.98	-0.02814453		3113.98	-0.12723366		3643.98	-0.15203166		4173.98	-0.17013344
464.19	-0.01897744		994.19	-0.01432284		1524.19	-0.01709674		2054.18	-0.00879382		2584.18	-0.02860327		3114.18	-0.12679732		3644.18	-0.15073037		4174.18	-0.17056737
464.39	-0.01875712		994.39	-0.01415932		1524.39	-0.01715148		2054.38	-0.00891984		2584.38	-0.0288918		3114.38	-0.12704263		3644.38	-0.14989768		4174.38	-0.17054631
464.59	-0.0181743		994.59	-0.01468879		1524.59	-0.01714372		2054.58	-0.00984048		2584.58	-0.02905178		3114.58	-0.1267		3644.58	-0.1498439		4174.58	-0.17043148
464.79	-0.01834478		994.79	-0.01428142		1524.79	-0.01689765		2054.78	-0.00990679		2584.78	-0.02963928		3114.78	-0.12770232		3644.78	-0.15046868		4174.78	-0.17042252
464.99	-0.01895902		994.99	-0.01408501		1524.99	-0.01732185		2054.98	-0.01029338		2584.98	-0.03059335		3114.98	-0.12890148		3644.98	-0.15098449		4174.98	-0.17026985
465.19	-0.01891301		995.19	-0.0141087		1525.19	-0.01767705		2055.18	-0.00931247		2585.18	-0.03126111		3115.18	-0.12940717		3645.18	-0.15081418		4175.18	-0.168912
465.39	-0.01919105		995.39	-0.01377312		1525.39	-0.01759474		2055.38	-0.00916543		2585.38	-0.0309767		3115.38	-0.12919793		3645.38	-0.15048939		4175.38	-0.16897929
465.59	-0.01950924		995.59	-0.01329629		1525.59	-0.01658938		2055.58	-0.00817379		2585.58	-0.03078918		3115.58	-0.12965769		3645.58	-0.15071307		4175.58	-0.16833318
465.79	-0.01914145		995.79	-0.01414203		1525.79	-0.01640895		2055.78	-0.00773605		2585.78	-0.03059843		3115.78	-0.13011672		3645.78	-0.15108172		4175.78	-0.16719676
465.99	-0.01869991		995.99	-0.01466426		1525.99	-0.01662658		2055.98	-0.00803195		2585.98	-0.03052454		3115.98	-0.12940109		3645.98	-0.15059514		4175.98	-0.16719486
466.19	-0.01842048		996.19	-0.0151741		1526.19	-0.01591279		2056.18	-0.00811919		2586.18	-0.02983186		3116.18	-0.12911893		3646.18	-0.15108809		4176.18	-0.16687606
466.39	-0.01905499		996.39	-0.01482116		1526.39	-0.01662015		2056.38	-0.00847372		2586.38	-0.02968255		3116.38	-0.13069185		3646.38	-0.15055828		4176.38	-0.16730776
466.59	-0.01877497		996.59	-0.01568915		1526.59	-0.018124		2056.58	-0.0091578		2586.58	-0.02865562		3116.58	-0.13055038		3646.58	-0.14974394		4176.58	-0.16716692
466.79	-0.01787548		996.79	-0.0163585		1526.79	-0.01791398		2056.78	-0.00932602		2586.78	-0.02883214		3116.78	-0.13088403		3646.78	-0.15005502		4176.78	-0.16770151
466.99	-0.01726957		996.99	-0.01736656		1526.99	-0.01797154		2056.98	-0.00998972		2586.98	-0.02871943		3116.98	-0.13084737		3646.98	-0.1507195		4176.98	-0.16767209
467.19	-0.01686317		997.19	-0.01807216		1527.19	-0.01694026		2057.18	-0.01001785		2587.18	-0.02811547		3117.18	-0.13070719		3647.18	-0.15086328		4177.18	-0.16734621
467.39	-0.01673646		997.39	-0.01803702		1527.39	-0.01725583		2057.38	-0.00849037		2587.38	-0.02867124		3117.38	-0.13162712		3647.38	-0.15103228		4177.38	-0.16718082
467.59	-0.01678316		997.59	-0.01791829		1527.59	-0.0167674		2057.58	-0.00775563		2587.58	-0.02920979		3117.58	-0.13172534		3647.58	-0.15074519		4177.58	-0.16692747
467.79	-0.01628247		997.79	-0.01751608		1527.79	-0.01658105		2057.78	-0.00692158		2587.78	-0.02931685		3117.78	-0.1317265		3647.78	-0.15139936		4177.78	-0.16658499
467.99	-0.01558338		997.99	-0.01778915		1527.99	-0.0163774		2057.98	-0.00622918		2587.98	-0.02997402		3117.98	-0.13136483		3647.98	-0.15177281		4177.98	-0.16739559
468.19	-0.01566265		998.19	-0.01744339		1528.19	-0.0162162		2058.18	-0.00614603		2588.18	-0.03046685		3118.18	-0.13108935		3648.18	-0.15175023		4178.18	-0.16642437
468.39	-0.01562857		998.39	-0.01699658		1528.39	-0.01626462		2058.38	-0.00613006		2588.38	-0.03042938		3118.38	-0.13154174		3648.38	-0.15251896		4178.38	-0.16554977
468.59	-0.01552936		998.59	-0.01672206		1528.59	-0.01621147		2058.58	-0.00599158		2588.58	-0.03101738		3118.58	-0.13143772		3648.58	-0.15385135		4178.58	-0.16442536
468.79	-0.01612639		998.79	-0.01590382		1528.79	-0.01657771		2058.78	-0.00604614		2588.78	-0.03109529		3118.78	-0.13180465		3648.78	-0.1548604		4178.78	-0.16480852
468.99	-0.01697838		998.99	-0.0155776		1528.99	-0.01609354		2058.98	-0.00534934		2588.98	-0.03097498		3118.98	-0.13121213		3648.98	-0.15560291		4178.98	-0.16436553
469.19	-0.01765701		999.19	-0.01512944		1529.19	-0.01567931		2059.18	-0.00488041		2589.18	-0.03000728		3119.18	-0.1304996		3649.18	-0.15596566		4179.18	-0.1646588
469.39	-0.01815137		999.39	-0.01540565		1529.39	-0.01542795		2059.38	-0.00563997		2589.38	-0.03001516		3119.38	-0.13035557		3649.38	-0.1574058		4179.38	-0.16538908
469.59	-0.01923076		999.59	-0.01471638		1529.59	-0.01556928		2059.58	-0.00612068		2589.58	-0.03000651		3119.58	-0.12965314		3649.58	-0.15860227		4179.58	-0.16516267
469.79	-0.01887499		999.79	-0.01445065		1529.79	-0.0156787		2059.78	-0.00714538		2589.78	-0.02907124		3119.78	-0.12947369		3649.78	-0.15922299		4179.78	-0.16470084
469.99	-0.01907144		999.99	-0.01484226		1529.99	-0.01610852		2059.98	-0.00842531		2589.98	-0.02870082		3119.98	-0.12793503		3649.98	-0.15957132		4179.98	-0.16504883
470.19	-0.01958472		1000.19	-0.01389858		1530.19	-0.0163494		2060.18	-0.00900558		2590.18	-0.02811988		3120.18	-0.12773674		3650.18	-0.15955322		4180.18	-0.16500849
470.39	-0.0206176		1000.39	-0.01381188		1530.39	-0.01771226		2060.38	-0.00935794		2590.38	-0.02697351		3120.38	-0.12793244		3650.38	-0.15880053		4180.38	-0.16633488
470.59	-0.02098772		1000.59	-0.01502364		1530.59	-0.01779317		2060.58	-0.01033706		2590.58	-0.02569838		3120.58	-0.12671467		3650.58	-0.15822455		4180.58	-0.16723481
470.79	-0.02066924		1000.79	-0.01567717		1530.79	-0.01777643		2060.78	-0.01033681		2590.78	-0.02552102		3120.78	-0.12750482		3650.78	-0.15831909		4180.78	-0.16843627
470.99	-0.02083535		1000.99	-0.01624352		1530.99	-0.01785985		2060.98	-0.01082778		2590.98	-0.02497691		3120.98	-0.12778486		3650.98	-0.15804019		4180.98	-0.16958732
471.19	-0.02062214		1001.19	-0.0158985		1531.19	-0.01871568		2061.18	-0.01031301		2591.18	-0.02555304		3121.18	-0.12796637		3651.18	-0.15780261		4181.18	-0.16985236
471.39	-0.02073157		1001.39	-0.01596116		1531.39	-0.02044521		2061.38	-0.00962987		2591.38	-0.02588974		3121.38	-0.12856279		3651.38	-0.15738182		4181.38	-0.17057329
471.59	-0.02047946		1001.59	-0.01597762		1531.59	-0.0210272		2061.58	-0.00946557		2591.58	-0.0264638		3121.58	-0.1281975		3651.58	-0.15684579		4181.58	-0.1705821
471.79	-0.01987786		1001.79	-0.01579382		1531.79	-0.02190334		2061.78	-0.00845573		2591.78	-0.02818641		3121.78	-0.12859403		3651.78	-0.15626621		4181.78	-0.17119264
471.99	-0.01946573		1001.99	-0.01633247		1531.99	-0.02267323		2061.98	-0.00812575		2591.98	-0.02880256		3121.98	-0.12926412		3651.98	-0.15614137		4181.98	-0.17117458
472.19	-0.02006081		1002.19	-0.015826		1532.19	-0.02385984		2062.18	-0.00753452		2592.18	-0.02956247		3122.18	-0.12931902		3652.18	-0.15568185		4182.18	-0.17007419
472.39	-0.02010501		1002.39	-0.01556453		1532.39	-0.02352165		2062.38	-0.00694551		2592.38	-0.03015915		3122.38	-0.12966782		3652.38	-0.15585477		4182.38	-0.17014411
472.59	-0.01982292		1002.59	-0.01512149		1532.59	-0.02375548		2062.58	-0.00614031		2592.58	-0.03085115		3122.58	-0.12978822		3652.58	-0.15530661		4182.58	-0.17040984
472.79	-0.01949665		1002.79	-0.01540676		1532.79	-0.02256195		2062.78	-0.00645473		2592.78	-0.03127287		3122.78	-0.1296922		3652.78	-0.15458124		4182.78	-0.1708352
472.99	-0.01895359		1002.99	-0.0151021		1532.99	-0.02155423		2062.98	-0.0060543		2592.98	-0.03185196		3122.98	-0.12938531		3652.98	-0.15409462		4182.98	-0.17054751
473.19	-0.01847872		1003.19	-0.01549302		1533.19	-0.02098335		2063.18	-0.00641388		2593.18	-0.03196311		3123.18	-0.12888518		3653.18	-0.15463296		4183.18	-0.16954231
473.39	-0.0180971		1003.39	-0.01577991		1533.39	-0.02060249		2063.38	-0.0059859		2593.38	-0.0330089		3123.38	-0.12862195		3653.38	-0.15539745		4183.38	-0.16786954
473.59	-0.01733786		1003.59	-0.01535066		1533.59	-0.01964636		2063.58	-0.00626818		2593.58	-0.03233591		3123.58	-0.12842363		3653.58	-0.1550875		4183.58	-0.16680897
473.79	-0.01636696		1003.79	-0.01530122		1533.79	-0.01890661		2063.78	-0.00742315		2593.78	-0.03126126		3123.78	-0.12838757		3653.78	-0.15459497		4183.78	-0.16618568
473.99	-0.01589949		1003.99	-0.01527505		1533.99	-0.01808038		2063.98	-0.0071679		2593.98	-0.03145277		3123.98	-0.12811826		3653.98	-0.15454494		4183.98	-0.16617115
474.19	-0.01592691		1004.19	-0.01395418		1534.19	-0.01825987		2064.18	-0.00736264		2594.18	-0.03128458		3124.18	-0.12808487		3654.18	-0.1527297		4184.18	-0.16604788
474.39	-0.01617425		1004.39	-0.01465024		1534.39	-0.01763325		2064.38	-0.00808691		2594.38	-0.03028529		3124.38	-0.12817022		3654.38	-0.15233817		4184.38	-0.16642706
474.59	-0.01639324		1004.59	-0.0151443		1534.59	-0.01611341		2064.58	-0.00880243		2594.58	-0.02983195		3124.58	-0.12784796		3654.58	-0.1518051		4184.58	-0.16717635
474.79	-0.016918		1004.79	-0.01471441		1534.79	-0.01617622		2064.78	-0.0088983		2594.78	-0.02977943		3124.78	-0.12817327		3654.78	-0.15205968		4184.78	-0.16755057
474.99	-0.01643144		1004.99	-0.01414342		1534.99	-0.01551081		2064.98	-0.00920786		2594.98	-0.02980381		3124.98	-0.12731319		3654.98	-0.15279132		4184.98	-0.16811947
475.19	-0.01738591		1005.19	-0.01386133		1535.19	-0.01695937		2065.18	-0.00908325		2595.18	-0.03051068		3125.18	-0.12750955		3655.18	-0.15293962		4185.18	-0.16862647
475.39	-0.01844328		1005.39	-0.01361858		1535.39	-0.01747405		2065.38	-0.00966539		2595.38	-0.03016246		3125.38	-0.12772319		3655.38	-0.15307089		4185.38	-0.16937293
475.59	-0.0191366		1005.59	-0.01319205		1535.59	-0.01710356		2065.58	-0.00951162		2595.58	-0.0297476		3125.58	-0.12768725		3655.58	-0.15354264		4185.58	-0.16945231
475.79	-0.02037069		1005.79	-0.01298753		1535.79	-0.01753431		2065.78	-0.00875366		2595.78	-0.02966152		3125.78	-0.12770976		3655.78	-0.15436688		4185.78	-0.17061755
475.99	-0.02067256		1005.99	-0.01174998		1535.99	-0.01779382		2065.98	-0.00874859		2595.98	-0.02857871		3125.98	-0.12809003		3655.98	-0.15524043		4185.98	-0.17110036
476.19	-0.02156693		1006.19	-0.01149928		1536.19	-0.01832648		2066.18	-0.00867012		2596.18	-0.02964115		3126.18	-0.12840742		3656.18	-0.15482648		4186.18	-0.17069369
476.39	-0.02219654		1006.39	-0.0123548		1536.39	-0.01911504		2066.38	-0.00900137		2596.38	-0.02986566		3126.38	-0.12918766		3656.38	-0.15505485		4186.38	-0.17063135
476.59	-0.02236314		1006.59	-0.01202468		1536.59	-0.01902579		2066.58	-0.00975494		2596.58	-0.03048802		3126.58	-0.12878554		3656.58	-0.1545843		4186.58	-0.17027611
476.79	-0.02154227		1006.79	-0.01185539		1536.79	-0.01864389		2066.78	-0.00990452		2596.78	-0.03084457		3126.78	-0.12865827		3656.78	-0.15415914		4186.78	-0.16944246
476.99	-0.02107437		1006.99	-0.01189424		1536.99	-0.01880768		2066.98	-0.00955838		2596.98	-0.03023367		3126.98	-0.12847166		3656.98	-0.15441276		4186.98	-0.16872061
477.19	-0.02080684		1007.19	-0.01277608		1537.19	-0.01890581		2067.18	-0.0086665		2597.18	-0.03008441		3127.18	-0.1287967		3657.18	-0.15524646		4187.18	-0.16768411
477.39	-0.02051321		1007.39	-0.01349185		1537.39	-0.01822048		2067.38	-0.00835814		2597.38	-0.03012578		3127.38	-0.1284766		3657.38	-0.15536171		4187.38	-0.16755065
477.59	-0.01986666		1007.59	-0.01400445		1537.59	-0.01760788		2067.58	-0.0083331		2597.58	-0.03031953		3127.58	-0.12884391		3657.58	-0.15460592		4187.58	-0.16741402
477.79	-0.0196154		1007.79	-0.01467855		1537.79	-0.01784024		2067.78	-0.00839678		2597.78	-0.03022416		3127.78	-0.12876904		3657.78	-0.15412494		4187.78	-0.16682976
477.99	-0.01864115		1007.99	-0.01580377		1537.99	-0.01719309		2067.98	-0.00828249		2597.98	-0.03003534		3127.98	-0.12857636		3657.98	-0.15459698		4187.98	-0.16681676
478.19	-0.01859412		1008.19	-0.01584086		1538.19	-0.01727123		2068.18	-0.00870886		2598.18	-0.03007003		3128.18	-0.12926251		3658.18	-0.1538608		4188.18	-0.16696305
478.39	-0.01891879		1008.39	-0.01702457		1538.39	-0.0170925		2068.38	-0.00947763		2598.38	-0.0293271		3128.38	-0.13027092		3658.38	-0.15452399		4188.38	-0.16831132
478.59	-0.01882603		1008.59	-0.0173186		1538.59	-0.01698038		2068.58	-0.00945892		2598.58	-0.02887893		3128.58	-0.13079029		3658.58	-0.15378888		4188.58	-0.16970838
478.79	-0.01977176		1008.79	-0.01645138		1538.79	-0.01744486		2068.78	-0.00932145		2598.78	-0.0293373		3128.78	-0.13113167		3658.78	-0.15364899		4188.78	-0.17064355
478.99	-0.0199328		1008.99	-0.01644113		1538.99	-0.0170499		2068.98	-0.00854653		2598.98	-0.02915067		3128.98	-0.13100683		3658.98	-0.15417666		4188.98	-0.17112941
479.19	-0.0212877		1009.19	-0.01713199		1539.19	-0.01782657		2069.18	-0.00850923		2599.18	-0.02983664		3129.18	-0.13198523		3659.18	-0.15407033		4189.18	-0.17265967
479.39	-0.02201847		1009.39	-0.01684789		1539.39	-0.01814354		2069.38	-0.0086098		2599.38	-0.02942666		3129.38	-0.13199935		3659.38	-0.15447127		4189.38	-0.17351099
479.59	-0.02214189		1009.59	-0.01679612		1539.59	-0.01729782		2069.58	-0.00917427		2599.58	-0.02848365		3129.58	-0.13237307		3659.58	-0.15530574		4189.58	-0.17361135
479.79	-0.02212416		1009.79	-0.01624793		1539.79	-0.0180066		2069.78	-0.00898255		2599.78	-0.0283641		3129.78	-0.13259952		3659.78	-0.15477948		4189.78	-0.17451176
479.99	-0.02211664		1009.99	-0.01588773		1539.99	-0.01810863		2069.98	-0.00912783		2599.98	-0.02900349		3129.98	-0.13301952		3659.98	-0.15455229		4189.98	-0.17434471
480.19	-0.02191235		1010.19	-0.0159519		1540.19	-0.01880453		2070.18	-0.00965054		2600.18	-0.02955621		3130.18	-0.13305591		3660.18	-0.15415848		4190.18	-0.17337806
480.39	-0.0218978		1010.39	-0.01562492		1540.39	-0.01938016		2070.38	-0.01009151		2600.38	-0.02952253		3130.38	-0.13246054		3660.38	-0.15466736		4190.38	-0.17300384
480.59	-0.02146904		1010.59	-0.0143673		1540.59	-0.01869956		2070.58	-0.01016578		2600.58	-0.02961496		3130.58	-0.13163689		3660.58	-0.15415108		4190.58	-0.17290705
480.79	-0.02061719		1010.79	-0.0144098		1540.79	-0.01853615		2070.78	-0.00930173		2600.78	-0.0294734		3130.78	-0.13101422		3660.78	-0.15385517		4190.78	-0.17213984
480.99	-0.02018004		1010.99	-0.01433654		1540.99	-0.01798609		2070.98	-0.00919303		2600.98	-0.02866755		3130.98	-0.13083392		3660.98	-0.15396596		4190.98	-0.17232167
481.19	-0.01990445		1011.19	-0.01496174		1541.19	-0.01744505		2071.18	-0.00917976		2601.18	-0.02931379		3131.18	-0.13032923		3661.18	-0.15382444		4191.18	-0.17160212
481.39	-0.02002234		1011.39	-0.01496691		1541.39	-0.01670628		2071.38	-0.00907656		2601.38	-0.02916328		3131.38	-0.12891502		3661.38	-0.15382215		4191.38	-0.17055376
481.59	-0.01895132		1011.59	-0.01589025		1541.59	-0.01672524		2071.58	-0.00825591		2601.58	-0.02872653		3131.58	-0.12903685		3661.58	-0.15398382		4191.58	-0.16870556
481.79	-0.01807284		1011.79	-0.01739851		1541.79	-0.01677435		2071.78	-0.00878363		2601.78	-0.02823569		3131.78	-0.12904011		3661.78	-0.15407375		4191.78	-0.16812676
481.99	-0.01766613		1011.99	-0.01749842		1541.99	-0.01634793		2071.98	-0.00902462		2601.98	-0.02778003		3131.98	-0.12923251		3661.98	-0.15441169		4191.98	-0.16840959
482.19	-0.01861212		1012.19	-0.0172847		1542.19	-0.01656099		2072.18	-0.00851682		2602.18	-0.02807836		3132.18	-0.12969578		3662.18	-0.153974		4192.18	-0.16837019
482.39	-0.01931267		1012.39	-0.0179001		1542.39	-0.017965		2072.38	-0.00916241		2602.38	-0.02679589		3132.38	-0.13002151		3662.38	-0.15300163		4192.38	-0.16916461
482.59	-0.01926872		1012.59	-0.01754803		1542.59	-0.01773976		2072.58	-0.00844974		2602.58	-0.0275185		3132.58	-0.12955137		3662.58	-0.15267503		4192.58	-0.1684639
482.79	-0.01968572		1012.79	-0.01681359		1542.79	-0.01750341		2072.78	-0.00631131		2602.78	-0.02725784		3132.78	-0.12930423		3662.78	-0.15209746		4192.78	-0.16780728
482.99	-0.01921206		1012.99	-0.01700394		1542.99	-0.01807264		2072.98	-0.00554453		2602.98	-0.02763222		3132.98	-0.12869546		3662.98	-0.15291993		4192.98	-0.16721467
483.19	-0.01877649		1013.19	-0.01716692		1543.19	-0.01856176		2073.18	-0.0058157		2603.18	-0.02799384		3133.18	-0.12844729		3663.18	-0.15307294		4193.18	-0.16863145
483.39	-0.01928481		1013.39	-0.01683921		1543.39	-0.01861365		2073.38	-0.00583556		2603.38	-0.02775317		3133.38	-0.12762976		3663.38	-0.15350266		4193.38	-0.16909525
483.59	-0.02010342		1013.59	-0.01648553		1543.59	-0.01715808		2073.58	-0.00659325		2603.58	-0.02780309		3133.58	-0.12768192		3663.58	-0.15366352		4193.58	-0.16908094
483.79	-0.01972067		1013.79	-0.01545383		1543.79	-0.01780005		2073.78	-0.00663343		2603.78	-0.02790631		3133.78	-0.12736832		3663.78	-0.15382781		4193.78	-0.16948415
483.99	-0.0194052		1013.99	-0.01519853		1543.99	-0.01707015		2073.98	-0.00640391		2603.98	-0.02760801		3133.98	-0.12728555		3663.98	-0.15520896		4193.98	-0.16979742
484.19	-0.01871203		1014.19	-0.01374645		1544.19	-0.01721368		2074.18	-0.00653251		2604.18	-0.02805605		3134.18	-0.12700644		3664.18	-0.15564953		4194.18	-0.17037677
484.39	-0.01911047		1014.39	-0.01373421		1544.39	-0.01665012		2074.38	-0.0072886		2604.38	-0.02871846		3134.38	-0.12676916		3664.38	-0.15606254		4194.38	-0.17153995
484.59	-0.01916538		1014.59	-0.01373996		1544.59	-0.01608349		2074.58	-0.00791716		2604.58	-0.02792283		3134.58	-0.12792145		3664.58	-0.15645815		4194.58	-0.17206593
484.79	-0.01868976		1014.79	-0.01381167		1544.79	-0.01597696		2074.78	-0.00829719		2604.78	-0.0277479		3134.78	-0.12826292		3664.78	-0.15648401		4194.78	-0.17160705
484.99	-0.01938574		1014.99	-0.01328539		1544.99	-0.01629257		2074.98	-0.00864298		2604.98	-0.02794827		3134.98	-0.12917918		3664.98	-0.15688072		4194.98	-0.17273341
485.19	-0.02024851		1015.19	-0.01391157		1545.19	-0.01675208		2075.18	-0.00886794		2605.18	-0.02794608		3135.18	-0.12906516		3665.18	-0.1574713		4195.18	-0.17262819
485.39	-0.02054049		1015.39	-0.01332281		1545.39	-0.01694703		2075.38	-0.00921338		2605.38	-0.02791918		3135.38	-0.12970355		3665.38	-0.15730383		4195.38	-0.17267134
485.59	-0.02037295		1015.59	-0.01385609		1545.59	-0.01736453		2075.58	-0.009701		2605.58	-0.02832729		3135.58	-0.13071859		3665.58	-0.15748817		4195.58	-0.17227308
485.79	-0.02015816		1015.79	-0.01475156		1545.79	-0.01727969		2075.78	-0.01008535		2605.78	-0.02817642		3135.78	-0.1313314		3665.78	-0.15663318		4195.78	-0.17264451
485.99	-0.02112407		1015.99	-0.01406257		1545.99	-0.01783714		2075.98	-0.01005305		2605.98	-0.02841381		3135.98	-0.13224781		3665.98	-0.15673669		4195.98	-0.17252592
486.19	-0.02171426		1016.19	-0.0149026		1546.19	-0.01879753		2076.18	-0.00990451		2606.18	-0.02886726		3136.18	-0.1323257		3666.18	-0.15648096		4196.18	-0.17202397
486.39	-0.02133673		1016.39	-0.01532834		1546.39	-0.01976286		2076.38	-0.00999339		2606.38	-0.02841131		3136.38	-0.13339941		3666.38	-0.15550173		4196.38	-0.17168865
486.59	-0.02103964		1016.59	-0.01509675		1546.59	-0.01928655		2076.58	-0.0083377		2606.58	-0.02904017		3136.58	-0.13300865		3666.58	-0.15512961		4196.58	-0.17069742
486.79	-0.02060589		1016.79	-0.01473091		1546.79	-0.02034764		2076.78	-0.00776712		2606.78	-0.02881863		3136.78	-0.13278408		3666.78	-0.15353026		4196.78	-0.17019672
486.99	-0.02105029		1016.99	-0.01515552		1546.99	-0.02056703		2076.98	-0.00863234		2606.98	-0.02967908		3136.98	-0.13259024		3666.98	-0.15366921		4196.98	-0.17016356
487.19	-0.0220157		1017.19	-0.01556047		1547.19	-0.02034697		2077.18	-0.00971824		2607.18	-0.03057403		3137.18	-0.13248848		3667.18	-0.1525632		4197.18	-0.17091406
487.39	-0.02224081		1017.39	-0.01562837		1547.39	-0.02049713		2077.38	-0.00946795		2607.38	-0.03143691		3137.38	-0.13268252		3667.38	-0.15220996		4197.38	-0.170042
487.59	-0.02230822		1017.59	-0.01550598		1547.59	-0.01973779		2077.58	-0.00982464		2607.58	-0.03243752		3137.58	-0.13340857		3667.58	-0.15171064		4197.58	-0.17004724
487.79	-0.02122373		1017.79	-0.01516344		1547.79	-0.02044565		2077.78	-0.00992494		2607.78	-0.03269441		3137.78	-0.13279239		3667.78	-0.1521937		4197.78	-0.17028744
487.99	-0.02093543		1017.99	-0.01433146		1547.99	-0.01946059		2077.98	-0.0095234		2607.98	-0.03395658		3137.98	-0.13240417		3667.98	-0.15252221		4197.98	-0.17125906
488.19	-0.02051171		1018.19	-0.01383266		1548.19	-0.01914105		2078.18	-0.00985775		2608.18	-0.03538594		3138.18	-0.13072271		3668.18	-0.15229961		4198.18	-0.17191169
488.39	-0.02021267		1018.39	-0.01388691		1548.39	-0.01809551		2078.38	-0.00999363		2608.38	-0.03496717		3138.38	-0.13008921		3668.38	-0.15229377		4198.38	-0.17234193
488.59	-0.01988069		1018.59	-0.01437114		1548.59	-0.01882015		2078.58	-0.00976144		2608.58	-0.03523116		3138.58	-0.13067477		3668.58	-0.15284393		4198.58	-0.17243812
488.79	-0.01958712		1018.79	-0.01358318		1548.79	-0.01884515		2078.78	-0.0094204		2608.78	-0.03681697		3138.78	-0.13011435		3668.78	-0.15351072		4198.78	-0.17272673
488.99	-0.02117521		1018.99	-0.01340669		1548.99	-0.01869612		2078.98	-0.00900781		2608.98	-0.03811098		3138.98	-0.12969807		3668.98	-0.15345019		4198.98	-0.17363076
489.19	-0.02134549		1019.19	-0.01369932		1549.19	-0.01860678		2079.18	-0.00858551		2609.18	-0.03732417		3139.18	-0.12930609		3669.18	-0.15323948		4199.18	-0.17327683
489.39	-0.02119575		1019.39	-0.01344696		1549.39	-0.01742934		2079.38	-0.00839725		2609.38	-0.03764105		3139.38	-0.12950639		3669.38	-0.15275143		4199.38	-0.17284762
489.59	-0.02111233		1019.59	-0.01419058		1549.59	-0.0171904		2079.58	-0.00833178		2609.58	-0.03733376		3139.58	-0.128875		3669.58	-0.15285917		4199.58	-0.17182991
489.79	-0.02108022		1019.79	-0.01496542		1549.79	-0.01710116		2079.78	-0.00842159		2609.78	-0.03643956		3139.78	-0.12914607		3669.78	-0.15276008		4199.78	-0.1716063
489.99	-0.02189357		1019.99	-0.01524597		1549.99	-0.01809343		2079.98	-0.00811127		2609.98	-0.03670508		3139.98	-0.12922021		3669.98	-0.15263047		4199.98	-0.17137854
490.19	-0.0214293		1020.19	-0.01632889		1550.19	-0.01815455		2080.18	-0.00800031		2610.18	-0.03597579		3140.18	-0.12906992		3670.18	-0.15261786		4200.18	-0.17136958
490.39	-0.02139629		1020.39	-0.01662702		1550.39	-0.01779581		2080.38	-0.00822837		2610.38	-0.03482045		3140.38	-0.12987657		3670.38	-0.15150296		4200.38	-0.17184377
490.59	-0.02162739		1020.59	-0.01715613		1550.59	-0.01797288		2080.58	-0.00833526		2610.58	-0.0343991		3140.58	-0.12952917		3670.58	-0.15083131		4200.58	-0.17117174
490.79	-0.02088751		1020.79	-0.01768915		1550.79	-0.01901416		2080.78	-0.00890715		2610.78	-0.03335072		3140.78	-0.12973048		3670.78	-0.15054735		4200.78	-0.17117065
490.99	-0.02121182		1020.99	-0.01799656		1550.99	-0.01874316		2080.98	-0.0095492		2610.98	-0.03334091		3140.98	-0.13062953		3670.98	-0.1511146		4200.98	-0.17153884
491.19	-0.02100547		1021.19	-0.01840464		1551.19	-0.01888431		2081.18	-0.01061537		2611.18	-0.03373024		3141.18	-0.13085144		3671.18	-0.1513512		4201.18	-0.17251631
491.39	-0.02036684		1021.39	-0.01869424		1551.39	-0.01969932		2081.38	-0.01059099		2611.38	-0.0335242		3141.38	-0.13193963		3671.38	-0.15238932		4201.38	-0.17290558
491.59	-0.01969724		1021.59	-0.01808622		1551.59	-0.01949697		2081.58	-0.01127183		2611.58	-0.03337022		3141.58	-0.13101566		3671.58	-0.15251689		4201.58	-0.17361371
491.79	-0.02004065		1021.79	-0.01762421		1551.79	-0.0197641		2081.78	-0.01129761		2611.78	-0.03357761		3141.78	-0.13035164		3671.78	-0.15313492		4201.78	-0.17380776
491.99	-0.01994831		1021.99	-0.0170281		1551.99	-0.01952727		2081.98	-0.0109699		2611.98	-0.03288067		3141.98	-0.12979117		3671.98	-0.15364766		4201.98	-0.17447341
492.19	-0.01946301		1022.19	-0.01715142		1552.19	-0.0202086		2082.18	-0.01043321		2612.18	-0.03223629		3142.18	-0.12956849		3672.18	-0.15481311		4202.18	-0.17464709
492.39	-0.01901937		1022.39	-0.01681921		1552.39	-0.02017844		2082.38	-0.00924847		2612.38	-0.03136836		3142.38	-0.13046874		3672.38	-0.1554419		4202.38	-0.17571689
492.59	-0.01900104		1022.59	-0.01763717		1552.59	-0.02079817		2082.58	-0.00894599		2612.58	-0.03185185		3142.58	-0.13110585		3672.58	-0.15690649		4202.58	-0.17571735
492.79	-0.01937024		1022.79	-0.01646828		1552.79	-0.02080845		2082.78	-0.00798215		2612.78	-0.03191954		3142.78	-0.13184827		3672.78	-0.15710351		4202.78	-0.17545774
492.99	-0.01974404		1022.99	-0.01716359		1552.99	-0.02102193		2082.98	-0.00730769		2612.98	-0.03165413		3142.98	-0.13170637		3672.98	-0.15661296		4202.98	-0.17486619
493.19	-0.01939583		1023.19	-0.01769144		1553.19	-0.02162568		2083.18	-0.00627633		2613.18	-0.03105832		3143.18	-0.1318412		3673.18	-0.15692035		4203.18	-0.17388541
493.39	-0.01961438		1023.39	-0.01751538		1553.39	-0.02077357		2083.38	-0.00682598		2613.38	-0.0317887		3143.38	-0.13237175		3673.38	-0.15772031		4203.38	-0.17341707
493.59	-0.01918961		1023.59	-0.01804964		1553.59	-0.02129264		2083.58	-0.00651134		2613.58	-0.03137002		3143.58	-0.1324261		3673.58	-0.15771524		4203.58	-0.17263722
493.79	-0.02051387		1023.79	-0.01816209		1553.79	-0.02209612		2083.78	-0.00631386		2613.78	-0.03138419		3143.78	-0.13225619		3673.78	-0.15775968		4203.78	-0.17291852
493.99	-0.02053577		1023.99	-0.01852568		1553.99	-0.02253668		2083.98	-0.00558472		2613.98	-0.03174176		3143.98	-0.13282454		3673.98	-0.15697236		4203.98	-0.17285622
494.19	-0.02081361		1024.19	-0.01842101		1554.19	-0.02180966		2084.18	-0.00543687		2614.18	-0.03282826		3144.18	-0.13317686		3674.18	-0.15652832		4204.18	-0.17336086
494.39	-0.02077804		1024.39	-0.01880258		1554.39	-0.02209865		2084.38	-0.00568592		2614.38	-0.03314848		3144.38	-0.13282194		3674.38	-0.15522607		4204.38	-0.1726188
494.59	-0.02025399		1024.59	-0.01858213		1554.59	-0.02241922		2084.58	-0.00626649		2614.58	-0.03359293		3144.58	-0.13233454		3674.58	-0.15452264		4204.58	-0.17229609
494.79	-0.02026761		1024.79	-0.01872533		1554.79	-0.0221432		2084.78	-0.00598019		2614.78	-0.03384538		3144.78	-0.13256129		3674.78	-0.15494497		4204.78	-0.17327949
494.99	-0.0212854		1024.99	-0.01775415		1554.99	-0.02151352		2084.98	-0.00726599		2614.98	-0.0348694		3144.98	-0.13302194		3674.98	-0.15500455		4204.98	-0.17324092
495.19	-0.02188782		1025.19	-0.01762784		1555.19	-0.0207511		2085.18	-0.00854535		2615.18	-0.03521226		3145.18	-0.13289122		3675.18	-0.15433956		4205.18	-0.17366727
495.39	-0.02200568		1025.39	-0.01710923		1555.39	-0.0200424		2085.38	-0.00909759		2615.38	-0.03491964		3145.38	-0.1324359		3675.38	-0.15371676		4205.38	-0.17382671
495.59	-0.0219051		1025.59	-0.01651599		1555.59	-0.01997542		2085.58	-0.00925564		2615.58	-0.03439237		3145.58	-0.13102138		3675.58	-0.15372745		4205.58	-0.17295177
495.79	-0.02334471		1025.79	-0.01749352		1555.79	-0.01947577		2085.78	-0.008772		2615.78	-0.03350393		3145.78	-0.13160757		3675.78	-0.15436196		4205.78	-0.17269846
495.99	-0.02381931		1025.99	-0.01772501		1555.99	-0.01858177		2085.98	-0.00895659		2615.98	-0.03244933		3145.98	-0.13182499		3675.98	-0.15470609		4205.98	-0.17328902
496.19	-0.02408353		1026.19	-0.0180662		1556.19	-0.01767329		2086.18	-0.00922274		2616.18	-0.03272194		3146.18	-0.13175508		3676.18	-0.15561279		4206.18	-0.17381093
496.39	-0.02432295		1026.39	-0.01784452		1556.39	-0.01633287		2086.38	-0.00937517		2616.38	-0.03196879		3146.38	-0.13186686		3676.38	-0.1556819		4206.38	-0.17441056
496.59	-0.02475234		1026.59	-0.0174413		1556.59	-0.01599085		2086.58	-0.01003867		2616.58	-0.03117854		3146.58	-0.13115205		3676.58	-0.1562415		4206.58	-0.17342662
496.79	-0.0247397		1026.79	-0.01658934		1556.79	-0.01505656		2086.78	-0.00987526		2616.78	-0.03134801		3146.78	-0.13177728		3676.78	-0.15583446		4206.78	-0.17314987
496.99	-0.02429507		1026.99	-0.01712892		1556.99	-0.01478691		2086.98	-0.01028347		2616.98	-0.0310562		3146.98	-0.13142014		3676.98	-0.15641504		4206.98	-0.17274891
497.19	-0.02459718		1027.19	-0.01669519		1557.19	-0.01460666		2087.18	-0.01057719		2617.18	-0.03172034		3147.18	-0.13183846		3677.18	-0.15700783		4207.18	-0.17282734
497.39	-0.02463087		1027.39	-0.01638427		1557.39	-0.01355249		2087.38	-0.01133304		2617.38	-0.03078026		3147.38	-0.1324922		3677.38	-0.15663822		4207.38	-0.17399154
497.59	-0.0244054		1027.59	-0.01615927		1557.59	-0.01460429		2087.58	-0.01064311		2617.58	-0.02945911		3147.58	-0.13248426		3677.58	-0.15618354		4207.58	-0.17314157
497.79	-0.02569923		1027.79	-0.01555617		1557.79	-0.01537869		2087.78	-0.01079993		2617.78	-0.02948062		3147.78	-0.13212977		3677.78	-0.1557161		4207.78	-0.17299034
497.99	-0.02469663		1027.99	-0.01502707		1557.99	-0.01648027		2087.98	-0.0105443		2617.98	-0.02946422		3147.98	-0.13298438		3677.98	-0.15470826		4207.98	-0.17268255
498.19	-0.02437647		1028.19	-0.01421575		1558.19	-0.01769398		2088.18	-0.01003028		2618.18	-0.02966188		3148.18	-0.13184014		3678.18	-0.1544137		4208.18	-0.17248601
498.39	-0.02296113		1028.39	-0.01423229		1558.39	-0.01893592		2088.38	-0.01033007		2618.38	-0.02963506		3148.38	-0.13117393		3678.38	-0.15435114		4208.38	-0.17154044
498.59	-0.02290897		1028.59	-0.01423199		1558.59	-0.01975193		2088.58	-0.01094854		2618.58	-0.03025775		3148.58	-0.13155933		3678.58	-0.15362353		4208.58	-0.17262445
498.79	-0.02293635		1028.79	-0.01511463		1558.79	-0.02012087		2088.78	-0.01086635		2618.78	-0.03101485		3148.78	-0.13174156		3678.78	-0.15361123		4208.78	-0.17311054
498.99	-0.02290813		1028.99	-0.01451488		1558.99	-0.0208538		2088.98	-0.01148483		2618.98	-0.03118939		3148.98	-0.13139179		3678.98	-0.15323138		4208.98	-0.17244342
499.19	-0.02224703		1029.19	-0.01505511		1559.19	-0.02145353		2089.18	-0.0114378		2619.18	-0.03143078		3149.18	-0.13085161		3679.18	-0.1534484		4209.18	-0.17282849
499.39	-0.02143238		1029.39	-0.0155268		1559.39	-0.02151504		2089.38	-0.01094052		2619.38	-0.03192007		3149.38	-0.13026529		3679.38	-0.15400965		4209.38	-0.17361753
499.59	-0.02112042		1029.59	-0.01577317		1559.59	-0.02262584		2089.58	-0.0111233		2619.58	-0.03132842		3149.58	-0.12989645		3679.58	-0.1546887		4209.58	-0.17369301
499.79	-0.0210001		1029.79	-0.01661015		1559.79	-0.02248145		2089.78	-0.01092433		2619.78	-0.03171591		3149.78	-0.1301935		3679.78	-0.15528426		4209.78	-0.17409262
499.99	-0.02072803		1029.99	-0.01693017		1559.99	-0.0225155		2089.98	-0.01087892		2619.98	-0.03285878		3149.98	-0.13063766		3679.98	-0.15543674		4209.98	-0.17341086
500.19	-0.02074352		1030.19	-0.01679939		1560.19	-0.02154913		2090.18	-0.01109326		2620.18	-0.03404583		3150.18	-0.13010802		3680.18	-0.15618269		4210.18	-0.17315024
500.39	-0.02075872		1030.39	-0.0160607		1560.39	-0.02126475		2090.38	-0.01091227		2620.38	-0.03357844		3150.38	-0.13115818		3680.38	-0.15654993		4210.38	-0.17304264
500.59	-0.02104691		1030.59	-0.0160103		1560.59	-0.02034314		2090.58	-0.0116367		2620.58	-0.03300253		3150.58	-0.13056619		3680.58	-0.15692784		4210.58	-0.17257717
500.79	-0.02062083		1030.79	-0.01613947		1560.79	-0.01974576		2090.78	-0.01140126		2620.78	-0.0333418		3150.78	-0.13091828		3680.78	-0.15751737		4210.78	-0.17242038
500.99	-0.02135677		1030.99	-0.01598827		1560.99	-0.0196919		2090.98	-0.01150835		2620.98	-0.03297332		3150.98	-0.13060621		3680.98	-0.15786841		4210.98	-0.17290279
501.19	-0.02174669		1031.19	-0.01562088		1561.19	-0.01942182		2091.18	-0.01214941		2621.18	-0.03232608		3151.18	-0.13155648		3681.18	-0.1579852		4211.18	-0.17380994
501.39	-0.02254734		1031.39	-0.01572955		1561.39	-0.01915566		2091.38	-0.01261635		2621.38	-0.03075035		3151.38	-0.13211287		3681.38	-0.15715049		4211.38	-0.17360668
501.59	-0.02261049		1031.59	-0.01549512		1561.59	-0.01938308		2091.58	-0.01196697		2621.58	-0.03075547		3151.58	-0.13198739		3681.58	-0.15798081		4211.58	-0.17210857
501.79	-0.02313804		1031.79	-0.01527089		1561.79	-0.01986391		2091.78	-0.01211591		2621.78	-0.03012053		3151.78	-0.13194696		3681.78	-0.157447		4211.78	-0.17204217
501.99	-0.02256691		1031.99	-0.01474126		1561.99	-0.02052708		2091.98	-0.01153403		2621.98	-0.03027283		3151.98	-0.13267032		3681.98	-0.15736771		4211.98	-0.17181551
502.19	-0.02220153		1032.19	-0.01505935		1562.19	-0.01991504		2092.18	-0.01158343		2622.18	-0.0307934		3152.18	-0.13218791		3682.18	-0.15768555		4212.18	-0.17255006
502.39	-0.02178563		1032.39	-0.01569865		1562.39	-0.0195271		2092.38	-0.01147626		2622.38	-0.03155315		3152.38	-0.13223836		3682.38	-0.15768446		4212.38	-0.17362852
502.59	-0.02231922		1032.59	-0.01659819		1562.59	-0.0183407		2092.58	-0.01116711		2622.58	-0.03101614		3152.58	-0.13204483		3682.58	-0.15745861		4212.58	-0.17401469
502.79	-0.02206538		1032.79	-0.01715522		1562.79	-0.01762552		2092.78	-0.01066311		2622.78	-0.03106932		3152.78	-0.13137171		3682.78	-0.15765107		4212.78	-0.17414687
502.99	-0.02207477		1032.99	-0.0167502		1562.99	-0.01796308		2092.98	-0.00973804		2622.98	-0.03165542		3152.98	-0.13088232		3682.98	-0.15790314		4212.98	-0.17449542
503.19	-0.02182646		1033.19	-0.01696163		1563.19	-0.0176884		2093.18	-0.00934931		2623.18	-0.03222901		3153.18	-0.13078867		3683.18	-0.15764028		4213.18	-0.1755299
503.39	-0.02203189		1033.39	-0.01702088		1563.39	-0.01748559		2093.38	-0.00946771		2623.38	-0.03259727		3153.38	-0.13015955		3683.38	-0.15735221		4213.38	-0.17609102
503.59	-0.02189524		1033.59	-0.01677637		1563.59	-0.01777898		2093.58	-0.01007185		2623.58	-0.0328014		3153.58	-0.12948622		3683.58	-0.15708866		4213.58	-0.17562636
503.79	-0.02203907		1033.79	-0.01712597		1563.79	-0.01783858		2093.78	-0.00911917		2623.78	-0.03448117		3153.78	-0.13012764		3683.78	-0.15748332		4213.78	-0.17556756
503.99	-0.02309051		1033.99	-0.01711643		1563.99	-0.01816954		2093.98	-0.00878999		2623.98	-0.03486956		3153.98	-0.13100801		3683.98	-0.15733254		4213.98	-0.17480457
504.19	-0.02413204		1034.19	-0.01721113		1564.19	-0.01799391		2094.18	-0.00898513		2624.18	-0.03629731		3154.18	-0.13124161		3684.18	-0.15710918		4214.18	-0.17533055
504.39	-0.02434353		1034.39	-0.01675414		1564.39	-0.01890162		2094.38	-0.0087228		2624.38	-0.03580627		3154.38	-0.13164611		3684.38	-0.15648436		4214.38	-0.17436032
504.59	-0.02500648		1034.59	-0.01686897		1564.59	-0.01892592		2094.58	-0.00921069		2624.58	-0.03519036		3154.58	-0.13160172		3684.58	-0.15708431		4214.58	-0.17354171
504.79	-0.02492236		1034.79	-0.01670529		1564.79	-0.01935457		2094.78	-0.0091272		2624.78	-0.0362588		3154.78	-0.13281397		3684.78	-0.15728478		4214.78	-0.17297037
504.99	-0.02576577		1034.99	-0.01639094		1564.99	-0.01945954		2094.98	-0.00914116		2624.98	-0.03660447		3154.98	-0.13373106		3684.98	-0.15640176		4214.98	-0.17264346
505.19	-0.02555953		1035.19	-0.01622979		1565.19	-0.0204396		2095.18	-0.00984522		2625.18	-0.03625683		3155.18	-0.13465853		3685.18	-0.1563989		4215.18	-0.17211943
505.39	-0.02604552		1035.39	-0.0162633		1565.39	-0.02022877		2095.38	-0.01007461		2625.38	-0.03668641		3155.38	-0.13485294		3685.38	-0.15507298		4215.38	-0.1716092
505.59	-0.02570847		1035.59	-0.01574926		1565.59	-0.02016005		2095.58	-0.01012713		2625.58	-0.03697362		3155.58	-0.13519488		3685.58	-0.1550889		4215.58	-0.17236493
505.79	-0.02520703		1035.79	-0.01589759		1565.79	-0.02060674		2095.78	-0.01088935		2625.78	-0.03605035		3155.78	-0.13599836		3685.78	-0.15462581		4215.78	-0.17275825
505.99	-0.02439597		1035.99	-0.01643283		1565.99	-0.01997214		2095.98	-0.01023859		2625.98	-0.0358602		3155.98	-0.13564575		3685.98	-0.15453503		4215.98	-0.173632
506.19	-0.023596		1036.19	-0.01622356		1566.19	-0.01979941		2096.18	-0.01037644		2626.18	-0.03481445		3156.18	-0.13459432		3686.18	-0.15371106		4216.18	-0.1740202
506.39	-0.02258742		1036.39	-0.01621968		1566.39	-0.01911178		2096.38	-0.00946293		2626.38	-0.03343375		3156.38	-0.13343687		3686.38	-0.15341443		4216.38	-0.17432281
506.59	-0.02171165		1036.59	-0.0167557		1566.59	-0.01779686		2096.58	-0.00958046		2626.58	-0.03243893		3156.58	-0.13282241		3686.58	-0.15325591		4216.58	-0.17408525
506.79	-0.02124101		1036.79	-0.01664052		1566.79	-0.01893097		2096.78	-0.01026323		2626.78	-0.03225946		3156.78	-0.13230311		3686.78	-0.15259716		4216.78	-0.17470905
506.99	-0.02073977		1036.99	-0.01660441		1566.99	-0.01898504		2096.98	-0.00978128		2626.98	-0.03156944		3156.98	-0.13146984		3686.98	-0.15234906		4216.98	-0.17526805
507.19	-0.01988183		1037.19	-0.01675579		1567.19	-0.01875362		2097.18	-0.01000729		2627.18	-0.03094274		3157.18	-0.13057194		3687.18	-0.15254223		4217.18	-0.17505848
507.39	-0.01960892		1037.39	-0.01686352		1567.39	-0.01961312		2097.38	-0.01057625		2627.38	-0.03028426		3157.38	-0.12939062		3687.38	-0.15308979		4217.38	-0.17412971
507.59	-0.01907198		1037.59	-0.01584976		1567.59	-0.0196808		2097.58	-0.01080925		2627.58	-0.03101096		3157.58	-0.12875853		3687.58	-0.15293521		4217.58	-0.17420363
507.79	-0.0191804		1037.79	-0.01627523		1567.79	-0.02025411		2097.78	-0.01081777		2627.78	-0.0308287		3157.78	-0.12915504		3687.78	-0.153329		4217.78	-0.17495851
507.99	-0.01968258		1037.99	-0.01631173		1567.99	-0.02096406		2097.98	-0.01148424		2627.98	-0.03084991		3157.98	-0.12891147		3687.98	-0.15371278		4217.98	-0.17450692
508.19	-0.0192222		1038.19	-0.01670618		1568.19	-0.0213101		2098.18	-0.01138996		2628.18	-0.03164597		3158.18	-0.12927881		3688.18	-0.15484723		4218.18	-0.17443524
508.39	-0.01932492		1038.39	-0.01598248		1568.39	-0.02162469		2098.38	-0.01124752		2628.38	-0.03093306		3158.38	-0.13000771		3688.38	-0.15590927		4218.38	-0.17388297
508.59	-0.01994191		1038.59	-0.01596337		1568.59	-0.02150274		2098.58	-0.01133991		2628.58	-0.0308125		3158.58	-0.13117645		3688.58	-0.15743276		4218.58	-0.17392631
508.79	-0.01998888		1038.79	-0.01572223		1568.79	-0.021419		2098.78	-0.01160844		2628.78	-0.03209689		3158.78	-0.13205681		3688.78	-0.15816909		4218.78	-0.17354241
508.99	-0.02081147		1038.99	-0.01539904		1568.99	-0.02139644		2098.98	-0.01122009		2628.98	-0.03237869		3158.98	-0.13224634		3688.98	-0.15819223		4218.98	-0.173817
509.19	-0.02173414		1039.19	-0.01475754		1569.19	-0.02149188		2099.18	-0.01116816		2629.18	-0.03225767		3159.18	-0.13264118		3689.18	-0.15938		4219.18	-0.17421148
509.39	-0.02295303		1039.39	-0.01432128		1569.39	-0.02125921		2099.38	-0.0109722		2629.38	-0.03212158		3159.38	-0.13321186		3689.38	-0.15913584		4219.38	-0.17465822
509.59	-0.02317497		1039.59	-0.01474477		1569.59	-0.02096005		2099.58	-0.01034559		2629.58	-0.03225689		3159.58	-0.13369305		3689.58	-0.15960499		4219.58	-0.1751492
509.79	-0.02390663		1039.79	-0.01597331		1569.79	-0.02092662		2099.78	-0.00998977		2629.78	-0.03287868		3159.78	-0.13413488		3689.78	-0.15949476		4219.78	-0.17518342
509.99	-0.02467208		1039.99	-0.01541782		1569.99	-0.02028592		2099.98	-0.00970807		2629.98	-0.03287558		3159.98	-0.13270475		3689.98	-0.15884804		4219.98	-0.17574486
510.19	-0.02449146		1040.19	-0.01499674		1570.19	-0.01968136		2100.18	-0.00942478		2630.18	-0.03321802		3160.18	-0.13234879		3690.18	-0.15766006		4220.18	-0.17550727
510.39	-0.02443589		1040.39	-0.01575362		1570.39	-0.01850652		2100.38	-0.00837292		2630.38	-0.03344536		3160.38	-0.1320106		3690.38	-0.15728922		4220.38	-0.1760915
510.59	-0.02454421		1040.59	-0.01634643		1570.59	-0.01906274		2100.58	-0.00851906		2630.58	-0.03406652		3160.58	-0.1321414		3690.58	-0.15723235		4220.58	-0.17631015
510.79	-0.02498981		1040.79	-0.01623872		1570.79	-0.01961005		2100.78	-0.00770023		2630.78	-0.0343231		3160.78	-0.13202		3690.78	-0.15637025		4220.78	-0.17600914
510.99	-0.02473029		1040.99	-0.01837268		1570.99	-0.01869799		2100.98	-0.00708761		2630.98	-0.03438183		3160.98	-0.13186886		3690.98	-0.15658536		4220.98	-0.17575716
511.19	-0.02438837		1041.19	-0.01851968		1571.19	-0.01876647		2101.18	-0.0068692		2631.18	-0.03417833		3161.18	-0.13199042		3691.18	-0.1569525		4221.18	-0.17446048
511.39	-0.02455674		1041.39	-0.01873951		1571.39	-0.0190044		2101.38	-0.006947		2631.38	-0.03412177		3161.38	-0.13156326		3691.38	-0.15607139		4221.38	-0.1739544
511.59	-0.02418896		1041.59	-0.01828262		1571.59	-0.01894469		2101.58	-0.0072738		2631.58	-0.03442843		3161.58	-0.13184272		3691.58	-0.15575165		4221.58	-0.17406921
511.79	-0.02434711		1041.79	-0.01949592		1571.79	-0.01901693		2101.78	-0.00834694		2631.78	-0.03403957		3161.78	-0.13206426		3691.78	-0.15565719		4221.78	-0.1739883
511.99	-0.02382665		1041.99	-0.01856739		1571.99	-0.01959458		2101.98	-0.00817967		2631.98	-0.03387401		3161.98	-0.132621		3691.98	-0.15636088		4221.98	-0.17387612
512.19	-0.02360115		1042.19	-0.01832201		1572.19	-0.0202773		2102.18	-0.0087124		2632.18	-0.03371282		3162.18	-0.13258021		3692.18	-0.15679825		4222.18	-0.17382731
512.39	-0.02386399		1042.39	-0.01763707		1572.39	-0.02052955		2102.38	-0.00907735		2632.38	-0.03348231		3162.38	-0.13282983		3692.38	-0.15645961		4222.38	-0.17351853
512.59	-0.02440733		1042.59	-0.01743539		1572.59	-0.02166847		2102.58	-0.00975455		2632.58	-0.03259541		3162.58	-0.13265136		3692.58	-0.1563224		4222.58	-0.1737421
512.79	-0.02436564		1042.79	-0.01593166		1572.79	-0.02235629		2102.78	-0.01013628		2632.78	-0.03275725		3162.78	-0.13268372		3692.78	-0.1563864		4222.78	-0.17377168
512.99	-0.02476056		1042.99	-0.01542373		1572.99	-0.02308982		2102.98	-0.01042663		2632.98	-0.03272938		3162.98	-0.13307123		3692.98	-0.15590701		4222.98	-0.17453264
513.19	-0.02527654		1043.19	-0.01433467		1573.19	-0.02386623		2103.18	-0.01098406		2633.18	-0.0324998		3163.18	-0.13296595		3693.18	-0.15637172		4223.18	-0.17434461
513.39	-0.02560452		1043.39	-0.01413567		1573.39	-0.0246355		2103.38	-0.01126769		2633.38	-0.03236667		3163.38	-0.13249246		3693.38	-0.1558995		4223.38	-0.17373562
513.59	-0.02464726		1043.59	-0.01425633		1573.59	-0.0246683		2103.58	-0.01160808		2633.58	-0.03302491		3163.58	-0.13263157		3693.58	-0.15513907		4223.58	-0.17418602
513.79	-0.0247545		1043.79	-0.01381494		1573.79	-0.02422841		2103.78	-0.01277104		2633.78	-0.03395094		3163.78	-0.13244904		3693.78	-0.15482221		4223.78	-0.17405903
513.99	-0.02455763		1043.99	-0.0133125		1573.99	-0.02334886		2103.98	-0.01223811		2633.98	-0.03293934		3163.98	-0.13139757		3693.98	-0.15423165		4223.98	-0.17498361
514.19	-0.02407031		1044.19	-0.01351795		1574.19	-0.02295493		2104.18	-0.01235804		2634.18	-0.03270008		3164.18	-0.13186952		3694.18	-0.15491974		4224.18	-0.17457511
514.39	-0.02432907		1044.39	-0.01289889		1574.39	-0.02349337		2104.38	-0.0123669		2634.38	-0.03281055		3164.38	-0.13211667		3694.38	-0.15479721		4224.38	-0.17509977
514.59	-0.02421624		1044.59	-0.01308764		1574.59	-0.02384883		2104.58	-0.01275737		2634.58	-0.03240068		3164.58	-0.13280902		3694.58	-0.15533636		4224.58	-0.17510754
514.79	-0.02457553		1044.79	-0.01343056		1574.79	-0.02282969		2104.78	-0.01238479		2634.78	-0.03235909		3164.78	-0.13321409		3694.78	-0.15551192		4224.78	-0.17406404
514.99	-0.02446328		1044.99	-0.01524217		1574.99	-0.02245036		2104.98	-0.01254582		2634.98	-0.03166706		3164.98	-0.13324754		3694.98	-0.1566647		4224.98	-0.1741385
515.19	-0.02446608		1045.19	-0.01502317		1575.19	-0.02181182		2105.18	-0.01202588		2635.18	-0.03097294		3165.18	-0.13376374		3695.18	-0.1580113		4225.18	-0.173848
515.39	-0.02471296		1045.39	-0.01709113		1575.39	-0.02117832		2105.38	-0.01161778		2635.38	-0.03117153		3165.38	-0.13326453		3695.38	-0.15835624		4225.38	-0.17407865
515.59	-0.02437881		1045.59	-0.01716031		1575.59	-0.0209505		2105.58	-0.01153777		2635.58	-0.03078584		3165.58	-0.13365282		3695.58	-0.15869246		4225.58	-0.17336598
515.79	-0.02459277		1045.79	-0.01872695		1575.79	-0.02042252		2105.78	-0.01180916		2635.78	-0.03076718		3165.78	-0.13400702		3695.78	-0.15884372		4225.78	-0.17323163
515.99	-0.02440068		1045.99	-0.01896643		1575.99	-0.02069053		2105.98	-0.01044105		2635.98	-0.03086129		3165.98	-0.1340901		3695.98	-0.16041127		4225.98	-0.17334486
516.19	-0.0245628		1046.19	-0.0199418		1576.19	-0.02074158		2106.18	-0.01070826		2636.18	-0.03175103		3166.18	-0.13348449		3696.18	-0.15999431		4226.18	-0.17381189
516.39	-0.02502862		1046.39	-0.02076866		1576.39	-0.02074375		2106.38	-0.00969005		2636.38	-0.03168086		3166.38	-0.1333632		3696.38	-0.16018252		4226.38	-0.17428697
516.59	-0.02490746		1046.59	-0.02116843		1576.59	-0.02110965		2106.58	-0.00875115		2636.58	-0.03103816		3166.58	-0.13350464		3696.58	-0.15986778		4226.58	-0.17538031
516.79	-0.0239342		1046.79	-0.02048341		1576.79	-0.02093102		2106.78	-0.00792642		2636.78	-0.03178378		3166.78	-0.13299811		3696.78	-0.16017882		4226.78	-0.17532351
516.99	-0.02315332		1046.99	-0.02090838		1576.99	-0.02120958		2106.98	-0.00759295		2636.98	-0.03231448		3166.98	-0.13360685		3696.98	-0.16027228		4226.98	-0.17501476
517.19	-0.02325931		1047.19	-0.02070862		1577.19	-0.02160864		2107.18	-0.0082922		2637.18	-0.03297243		3167.18	-0.13305458		3697.18	-0.16020381		4227.18	-0.17453654
517.39	-0.02317555		1047.39	-0.02054095		1577.39	-0.02131201		2107.38	-0.0075789		2637.38	-0.03399688		3167.38	-0.13302561		3697.38	-0.15908977		4227.38	-0.17413158
517.59	-0.02261352		1047.59	-0.02031616		1577.59	-0.0206622		2107.58	-0.00783083		2637.58	-0.03461823		3167.58	-0.1333351		3697.58	-0.15867203		4227.58	-0.17439548
517.79	-0.02251068		1047.79	-0.01997109		1577.79	-0.02094269		2107.78	-0.00788854		2637.78	-0.03508697		3167.78	-0.13332081		3697.78	-0.15771904		4227.78	-0.17411513
517.99	-0.0224341		1047.99	-0.01941898		1577.99	-0.02065034		2107.98	-0.00726661		2637.98	-0.0345894		3167.98	-0.1330962		3697.98	-0.15853738		4227.98	-0.17468156
518.19	-0.02279823		1048.19	-0.01851458		1578.19	-0.02051698		2108.18	-0.00823616		2638.18	-0.03574357		3168.18	-0.13333173		3698.18	-0.1596217		4228.18	-0.17428362
518.39	-0.02334164		1048.39	-0.01731052		1578.39	-0.02173088		2108.38	-0.0077284		2638.38	-0.03588926		3168.38	-0.13262819		3698.38	-0.15988996		4228.38	-0.17453239
518.59	-0.02350695		1048.59	-0.0163836		1578.59	-0.02168221		2108.58	-0.00814629		2638.58	-0.03558402		3168.58	-0.13267074		3698.58	-0.16019322		4228.58	-0.17401198
518.79	-0.02401473		1048.79	-0.01595322		1578.79	-0.02177156		2108.78	-0.00849212		2638.78	-0.03519877		3168.78	-0.13183714		3698.78	-0.16025902		4228.78	-0.17370203
518.99	-0.02473942		1048.99	-0.01605917		1578.99	-0.02181603		2108.98	-0.00929754		2638.98	-0.03427542		3168.98	-0.13179385		3698.98	-0.16058673		4228.98	-0.17449378
519.19	-0.02506095		1049.19	-0.01626817		1579.19	-0.02145962		2109.18	-0.00940788		2639.18	-0.03477084		3169.18	-0.13181552		3699.18	-0.16123828		4229.18	-0.17423703
519.39	-0.02592467		1049.39	-0.01757987		1579.39	-0.02200296		2109.38	-0.00868923		2639.38	-0.03499136		3169.38	-0.13141795		3699.38	-0.16060744		4229.38	-0.17495014
519.59	-0.02603781		1049.59	-0.0169743		1579.59	-0.0227497		2109.58	-0.00831682		2639.58	-0.03370248		3169.58	-0.13204825		3699.58	-0.16013219		4229.58	-0.17490872
519.79	-0.02682389		1049.79	-0.01716887		1579.79	-0.02367555		2109.78	-0.0090029		2639.78	-0.03400757		3169.78	-0.13303697		3699.78	-0.15997069		4229.78	-0.17504617
519.99	-0.02686957		1049.99	-0.01713369		1579.99	-0.02458159		2109.98	-0.00762795		2639.98	-0.03452701		3169.98	-0.1328482		3699.98	-0.15975848		4229.98	-0.1756452
520.19	-0.02674885		1050.19	-0.01711557		1580.19	-0.02486582		2110.18	-0.00772251		2640.18	-0.03429224		3170.18	-0.13328948		3700.18	-0.159088		4230.18	-0.17616953
520.39	-0.0266266		1050.39	-0.01835818		1580.39	-0.02489826		2110.38	-0.00732014		2640.38	-0.03321852		3170.38	-0.13401984		3700.38	-0.1585547		4230.38	-0.17626431
520.59	-0.02549664		1050.59	-0.01893164		1580.59	-0.0245781		2110.58	-0.00659093		2640.58	-0.03203704		3170.58	-0.13429268		3700.58	-0.15841047		4230.58	-0.17621598
520.79	-0.02429145		1050.79	-0.01949278		1580.79	-0.02493883		2110.78	-0.00654141		2640.78	-0.03173945		3170.78	-0.13424407		3700.78	-0.15905506		4230.78	-0.17573668
520.99	-0.02353826		1050.99	-0.02007202		1580.99	-0.02424915		2110.98	-0.00659939		2640.98	-0.03201554		3170.98	-0.13517735		3700.98	-0.15843642		4230.98	-0.1749613
521.19	-0.02360339		1051.19	-0.0214642		1581.19	-0.02444467		2111.18	-0.00666124		2641.18	-0.03180647		3171.18	-0.13491023		3701.18	-0.15792476		4231.18	-0.17510859
521.39	-0.02346661		1051.39	-0.02189332		1581.39	-0.02333446		2111.38	-0.00585735		2641.38	-0.03277427		3171.38	-0.13507603		3701.38	-0.15734896		4231.38	-0.17463549
521.59	-0.02337934		1051.59	-0.02309627		1581.59	-0.02403689		2111.58	-0.00684998		2641.58	-0.03260546		3171.58	-0.13444639		3701.58	-0.15760572		4231.58	-0.1753402
521.79	-0.02297962		1051.79	-0.02340979		1581.79	-0.02441984		2111.78	-0.00760949		2641.78	-0.03294686		3171.78	-0.13347892		3701.78	-0.15767367		4231.78	-0.17530874
521.99	-0.02319005		1051.99	-0.02399902		1581.99	-0.0234979		2111.98	-0.00799938		2641.98	-0.03341152		3171.98	-0.1335925		3701.98	-0.15936223		4231.98	-0.17510372
522.19	-0.02328926		1052.19	-0.02338993		1582.19	-0.02297554		2112.18	-0.00808264		2642.18	-0.03422576		3172.18	-0.13333798		3702.18	-0.15919831		4232.18	-0.17466505
522.39	-0.02331156		1052.39	-0.02236357		1582.39	-0.02301615		2112.38	-0.00810887		2642.38	-0.03426167		3172.38	-0.13276738		3702.38	-0.15955112		4232.38	-0.17446552
522.59	-0.02314478		1052.59	-0.02168725		1582.59	-0.02203692		2112.58	-0.00923122		2642.58	-0.03405501		3172.58	-0.13216333		3702.58	-0.15891268		4232.58	-0.17394015
522.79	-0.0237226		1052.79	-0.02131057		1582.79	-0.02107982		2112.78	-0.00969283		2642.78	-0.03298779		3172.78	-0.13166473		3702.78	-0.15897719		4232.78	-0.17403313
522.99	-0.02421442		1052.99	-0.02123706		1582.99	-0.02090304		2112.98	-0.01021302		2642.98	-0.0334981		3172.98	-0.13146732		3702.98	-0.15946683		4232.98	-0.17437097
523.19	-0.02486315		1053.19	-0.0214702		1583.19	-0.02075793		2113.18	-0.01037046		2643.18	-0.03512972		3173.18	-0.13154783		3703.18	-0.15941186		4233.18	-0.1745724
523.39	-0.02624413		1053.39	-0.02097995		1583.39	-0.02102913		2113.38	-0.00947202		2643.38	-0.03487392		3173.38	-0.1325179		3703.38	-0.15898888		4233.38	-0.17531904
523.59	-0.02651597		1053.59	-0.02000687		1583.59	-0.02141943		2113.58	-0.01042749		2643.58	-0.03458835		3173.58	-0.13355381		3703.58	-0.15923184		4233.58	-0.1754672
523.79	-0.02658136		1053.79	-0.01934403		1583.79	-0.02114968		2113.78	-0.01140361		2643.78	-0.03573658		3173.78	-0.13466335		3703.78	-0.15850225		4233.78	-0.17533606
523.99	-0.02623058		1053.99	-0.01915421		1583.99	-0.02060692		2113.98	-0.01113018		2643.98	-0.03560487		3173.98	-0.13459505		3703.98	-0.15798124		4233.98	-0.17578526
524.19	-0.02563661		1054.19	-0.01875734		1584.19	-0.02000728		2114.18	-0.0116415		2644.18	-0.03513223		3174.18	-0.13546017		3704.18	-0.15799007		4234.18	-0.1760716
524.39	-0.02588743		1054.39	-0.01953614		1584.39	-0.01988285		2114.38	-0.01146858		2644.38	-0.03421125		3174.38	-0.13626872		3704.38	-0.15765252		4234.38	-0.17656973
524.59	-0.02601131		1054.59	-0.01991675		1584.59	-0.02046913		2114.58	-0.01050564		2644.58	-0.03363508		3174.58	-0.13609231		3704.58	-0.15824247		4234.58	-0.17610667
524.79	-0.02603381		1054.79	-0.02073321		1584.79	-0.01967887		2114.78	-0.00976344		2644.78	-0.03476444		3174.78	-0.13632519		3704.78	-0.15867714		4234.78	-0.17626757
524.99	-0.02604032		1054.99	-0.02113356		1584.99	-0.02002017		2114.98	-0.00944907		2644.98	-0.03523488		3174.98	-0.13630667		3704.98	-0.15852084		4234.98	-0.17619927
525.19	-0.02615216		1055.19	-0.02197615		1585.19	-0.02061406		2115.18	-0.0091376		2645.18	-0.03533668		3175.18	-0.13613807		3705.18	-0.15863709		4235.18	-0.17625282
525.39	-0.02599646		1055.39	-0.02114689		1585.39	-0.02052608		2115.38	-0.01012278		2645.38	-0.03592084		3175.38	-0.135786		3705.38	-0.15919899		4235.38	-0.17658805
525.59	-0.025281		1055.59	-0.0212678		1585.59	-0.02185817		2115.58	-0.01045457		2645.58	-0.03591556		3175.58	-0.13528684		3705.58	-0.15938385		4235.58	-0.17704236
525.79	-0.02514476		1055.79	-0.02070622		1585.79	-0.02163493		2115.78	-0.01036324		2645.78	-0.03570026		3175.78	-0.13434638		3705.78	-0.15969071		4235.78	-0.17659076
525.99	-0.02508126		1055.99	-0.02003468		1585.99	-0.02095946		2115.98	-0.00934902		2645.98	-0.03534449		3175.98	-0.13531305		3705.98	-0.15977406		4235.98	-0.17598462
526.19	-0.02492742		1056.19	-0.01904371		1586.19	-0.02045534		2116.18	-0.00886589		2646.18	-0.03576664		3176.18	-0.13396507		3706.18	-0.15915533		4236.18	-0.17510901
526.39	-0.02545426		1056.39	-0.01850853		1586.39	-0.02000753		2116.38	-0.00908607		2646.38	-0.03527976		3176.38	-0.13373172		3706.38	-0.15985662		4236.38	-0.17472726
526.59	-0.02542762		1056.59	-0.0178539		1586.59	-0.02013811		2116.58	-0.00932332		2646.58	-0.03456716		3176.58	-0.13392526		3706.58	-0.15981801		4236.58	-0.17413435
526.79	-0.02578011		1056.79	-0.01813546		1586.79	-0.01993489		2116.78	-0.00972356		2646.78	-0.03357579		3176.78	-0.13423227		3706.78	-0.15937624		4236.78	-0.17415238
526.99	-0.02536454		1056.99	-0.01862388		1586.99	-0.0206729		2116.98	-0.00967136		2646.98	-0.03375001		3176.98	-0.13454398		3706.98	-0.15891044		4236.98	-0.17381234
527.19	-0.02645776		1057.19	-0.01898366		1587.19	-0.02043038		2117.18	-0.01068292		2647.18	-0.03315712		3177.18	-0.1350226		3707.18	-0.15841898		4237.18	-0.17325144
527.39	-0.02594948		1057.39	-0.01821926		1587.39	-0.02108412		2117.38	-0.01054731		2647.38	-0.03337087		3177.38	-0.13499039		3707.38	-0.15803766		4237.38	-0.17208375
527.59	-0.02559007		1057.59	-0.01896839		1587.59	-0.02137949		2117.58	-0.01226809		2647.58	-0.03348833		3177.58	-0.13577082		3707.58	-0.15757812		4237.58	-0.17272523
527.79	-0.02485157		1057.79	-0.01939926		1587.79	-0.02160635		2117.78	-0.01243783		2647.78	-0.03345857		3177.78	-0.13564359		3707.78	-0.15664728		4237.78	-0.17254018
527.99	-0.02547834		1057.99	-0.01985863		1587.99	-0.02204533		2117.98	-0.01290698		2647.98	-0.03368678		3177.98	-0.13546942		3707.98	-0.15541513		4237.98	-0.17251067
528.19	-0.02622254		1058.19	-0.02089138		1588.19	-0.02257125		2118.18	-0.01354725		2648.18	-0.03349161		3178.18	-0.13594272		3708.18	-0.15527162		4238.18	-0.17299097
528.39	-0.02715853		1058.39	-0.02173802		1588.39	-0.02309104		2118.38	-0.0138598		2648.38	-0.03293076		3178.38	-0.13554704		3708.38	-0.15569587		4238.38	-0.17331664
528.59	-0.02666613		1058.59	-0.02172683		1588.59	-0.02382312		2118.58	-0.01313515		2648.58	-0.03442838		3178.58	-0.1351554		3708.58	-0.15584088		4238.58	-0.17310481
528.79	-0.02694667		1058.79	-0.02279391		1588.79	-0.02269316		2118.78	-0.01228562		2648.78	-0.03560166		3178.78	-0.13499841		3708.78	-0.15704949		4238.78	-0.17385867
528.99	-0.02550614		1058.99	-0.02275968		1588.99	-0.02317808		2118.98	-0.01191527		2648.98	-0.03516861		3178.98	-0.13457189		3708.98	-0.15738749		4238.98	-0.17411281
529.19	-0.02567305		1059.19	-0.02272712		1589.19	-0.02325691		2119.18	-0.01079752		2649.18	-0.03572409		3179.18	-0.13482447		3709.18	-0.15792565		4239.18	-0.17576037
529.39	-0.02501837		1059.39	-0.02209222		1589.39	-0.02242779		2119.38	-0.00960418		2649.38	-0.03584296		3179.38	-0.1344703		3709.38	-0.15898564		4239.38	-0.17668724
529.59	-0.02395782		1059.59	-0.02269624		1589.59	-0.02261898		2119.58	-0.00834235		2649.58	-0.03578171		3179.58	-0.13420803		3709.58	-0.15932157		4239.58	-0.17723528
529.79	-0.02424466		1059.79	-0.02182246		1589.79	-0.02208663		2119.78	-0.00838426		2649.78	-0.03492197		3179.78	-0.13435596		3709.78	-0.15995265		4239.78	-0.17786887
529.99	-0.02448889		1059.99	-0.021438		1589.99	-0.021656		2119.98	-0.00774751		2649.98	-0.03460166		3179.98	-0.13462081		3709.98	-0.16044295		4239.98	-0.17793051
530.19	-0.02449396		1060.19	-0.02067796		1590.19	-0.02204932		2120.18	-0.00823935		2650.18	-0.03461847		3180.18	-0.13401026		3710.18	-0.16007348		4240.18	-0.17900603
530.39	-0.0245156		1060.39	-0.01971443		1590.39	-0.02201811		2120.38	-0.00812374		2650.38	-0.03434007		3180.38	-0.1344944		3710.38	-0.160331		4240.38	-0.17997499
530.59	-0.02467438		1060.59	-0.01944896		1590.59	-0.02253852		2120.58	-0.00803978		2650.58	-0.03455553		3180.58	-0.13489798		3710.58	-0.16039507		4240.58	-0.1796151
530.79	-0.02413148		1060.79	-0.01893946		1590.79	-0.02219336		2120.78	-0.00753979		2650.78	-0.0342775		3180.78	-0.13537275		3710.78	-0.16062268		4240.78	-0.1797843
530.99	-0.02390893		1060.99	-0.01875748		1590.99	-0.02280561		2120.98	-0.00729761		2650.98	-0.03479574		3180.98	-0.13531516		3710.98	-0.1607881		4240.98	-0.17922509
531.19	-0.02447767		1061.19	-0.01848686		1591.19	-0.02313751		2121.18	-0.00821432		2651.18	-0.03473547		3181.18	-0.13439575		3711.18	-0.16077813		4241.18	-0.17860908
531.39	-0.0240124		1061.39	-0.01778806		1591.39	-0.02383475		2121.38	-0.00820672		2651.38	-0.03560631		3181.38	-0.1346275		3711.38	-0.16072564		4241.38	-0.17799722
531.59	-0.02496784		1061.59	-0.01761402		1591.59	-0.02438415		2121.58	-0.00923554		2651.58	-0.03540345		3181.58	-0.13505096		3711.58	-0.16044215		4241.58	-0.17881336
531.79	-0.02571541		1061.79	-0.01783166		1591.79	-0.02456769		2121.78	-0.00968892		2651.78	-0.03495835		3181.78	-0.13454645		3711.78	-0.15987593		4241.78	-0.17817117
531.99	-0.02649578		1061.99	-0.01806167		1591.99	-0.02501037		2121.98	-0.01027162		2651.98	-0.035199		3181.98	-0.1355218		3711.98	-0.15924638		4241.98	-0.17822178
532.19	-0.02641125		1062.19	-0.018083		1592.19	-0.02488527		2122.18	-0.0107226		2652.18	-0.03477809		3182.18	-0.13558263		3712.18	-0.15963294		4242.18	-0.17740935
532.39	-0.02590868		1062.39	-0.0183575		1592.39	-0.02470917		2122.38	-0.01008573		2652.38	-0.03491899		3182.38	-0.13516321		3712.38	-0.15952838		4242.38	-0.17732919
532.59	-0.02614678		1062.59	-0.01867668		1592.59	-0.02433322		2122.58	-0.00871001		2652.58	-0.03578073		3182.58	-0.13551749		3712.58	-0.15897813		4242.58	-0.17681815
532.79	-0.02666319		1062.79	-0.01971286		1592.79	-0.02243802		2122.78	-0.00882319		2652.78	-0.03519195		3182.78	-0.13569021		3712.78	-0.15982621		4242.78	-0.1767247
532.99	-0.02636067		1062.99	-0.01985449		1592.99	-0.02132845		2122.98	-0.00880824		2652.98	-0.03523348		3182.98	-0.13560753		3712.98	-0.15913301		4242.98	-0.17671589
533.19	-0.02631387		1063.19	-0.01986307		1593.19	-0.02045946		2123.18	-0.00806586		2653.18	-0.03552057		3183.18	-0.13607788		3713.18	-0.15907549		4243.18	-0.17769314
533.39	-0.02570609		1063.39	-0.02035985		1593.39	-0.01894449		2123.38	-0.00870633		2653.38	-0.035175		3183.38	-0.13589945		3713.38	-0.15940799		4243.38	-0.17691143
533.59	-0.02480859		1063.59	-0.02135961		1593.59	-0.01871065		2123.58	-0.0092712		2653.58	-0.03460561		3183.58	-0.13623874		3713.58	-0.15937786		4243.58	-0.17699824
533.79	-0.02515208		1063.79	-0.02049467		1593.79	-0.01931251		2123.78	-0.01059645		2653.78	-0.03404063		3183.78	-0.13572413		3713.78	-0.15905214		4243.78	-0.1769331
533.99	-0.02562134		1063.99	-0.02180622		1593.99	-0.01928134		2123.98	-0.01051812		2653.98	-0.03433595		3183.98	-0.13537679		3713.98	-0.15898277		4243.98	-0.17741572
534.19	-0.02503202		1064.19	-0.02198136		1594.19	-0.01957897		2124.18	-0.01117348		2654.18	-0.03489681		3184.18	-0.13461706		3714.18	-0.15798816		4244.18	-0.17781651
534.39	-0.02513029		1064.39	-0.02207852		1594.39	-0.01961023		2124.38	-0.01188712		2654.38	-0.03520707		3184.38	-0.13404952		3714.38	-0.15771847		4244.38	-0.17658526
534.59	-0.02551181		1064.59	-0.02228657		1594.59	-0.01986346		2124.58	-0.01218385		2654.58	-0.03576482		3184.58	-0.13482967		3714.58	-0.15856417		4244.58	-0.17641928
534.79	-0.02494507		1064.79	-0.02160369		1594.79	-0.02006059		2124.78	-0.01197555		2654.78	-0.03548081		3184.78	-0.13568015		3714.78	-0.15926571		4244.78	-0.17735076
534.99	-0.02554791		1064.99	-0.02227774		1594.99	-0.02147589		2124.98	-0.01264339		2654.98	-0.0353903		3184.98	-0.13478022		3714.98	-0.15913562		4244.98	-0.17666252
535.19	-0.02605848		1065.19	-0.02125037		1595.19	-0.02238199		2125.18	-0.01330635		2655.18	-0.03614341		3185.18	-0.13409252		3715.18	-0.15862541		4245.18	-0.17647683
535.39	-0.0262407		1065.39	-0.02107506		1595.39	-0.02342089		2125.38	-0.01382309		2655.38	-0.03611296		3185.38	-0.13440882		3715.38	-0.15831249		4245.38	-0.17663387
535.59	-0.02668422		1065.59	-0.02065867		1595.59	-0.02463604		2125.58	-0.01433892		2655.58	-0.03684114		3185.58	-0.13415477		3715.58	-0.15789148		4245.58	-0.176679
535.79	-0.02715753		1065.79	-0.02122568		1595.79	-0.02534154		2125.78	-0.01373037		2655.78	-0.03610996		3185.78	-0.13506387		3715.78	-0.15788996		4245.78	-0.17630958
535.99	-0.02685597		1065.99	-0.02162122		1595.99	-0.02608725		2125.98	-0.01236984		2655.98	-0.03609091		3185.98	-0.13653088		3715.98	-0.15843358		4245.98	-0.17631784
536.19	-0.02670788		1066.19	-0.02181518		1596.19	-0.02591171		2126.18	-0.01121768		2656.18	-0.03619596		3186.18	-0.13638902		3716.18	-0.15825159		4246.18	-0.17564441
536.39	-0.02708551		1066.39	-0.02231896		1596.39	-0.02568883		2126.38	-0.01034549		2656.38	-0.03659838		3186.38	-0.13640165		3716.38	-0.15805971		4246.38	-0.1760652
536.59	-0.02738922		1066.59	-0.0215033		1596.59	-0.0248765		2126.58	-0.01004154		2656.58	-0.03628274		3186.58	-0.1360324		3716.58	-0.15876721		4246.58	-0.17541298
536.79	-0.02722374		1066.79	-0.02091886		1596.79	-0.02429599		2126.78	-0.01049276		2656.78	-0.03583698		3186.78	-0.13701703		3716.78	-0.15890793		4246.78	-0.17519886
536.99	-0.02749994		1066.99	-0.02126443		1596.99	-0.02379545		2126.98	-0.00936432		2656.98	-0.03571213		3186.98	-0.13791656		3716.98	-0.15790291		4246.98	-0.17507303
537.19	-0.02691132		1067.19	-0.02069235		1597.19	-0.02326812		2127.18	-0.00924575		2657.18	-0.03515863		3187.18	-0.13827515		3717.18	-0.1584306		4247.18	-0.17519137
537.39	-0.02772561		1067.39	-0.02079829		1597.39	-0.02294814		2127.38	-0.009716		2657.38	-0.03417229		3187.38	-0.13809961		3717.38	-0.15900543		4247.38	-0.17569773
537.59	-0.02658269		1067.59	-0.02047177		1597.59	-0.02288653		2127.58	-0.00925896		2657.58	-0.03302941		3187.58	-0.13831328		3717.58	-0.15894514		4247.58	-0.17666374
537.79	-0.02653901		1067.79	-0.01946689		1597.79	-0.02343453		2127.78	-0.00983651		2657.78	-0.03229486		3187.78	-0.13771087		3717.78	-0.15860265		4247.78	-0.17645743
537.99	-0.02660779		1067.99	-0.02118966		1597.99	-0.02286837		2127.98	-0.00970036		2657.98	-0.03168958		3187.98	-0.13749152		3717.98	-0.15892894		4247.98	-0.17684442
538.19	-0.02569316		1068.19	-0.02056143		1598.19	-0.02278896		2128.18	-0.01051215		2658.18	-0.03131142		3188.18	-0.13718863		3718.18	-0.15914366		4248.18	-0.17646401
538.39	-0.02543935		1068.39	-0.02052334		1598.39	-0.02273086		2128.38	-0.01055906		2658.38	-0.03097657		3188.38	-0.13794922		3718.38	-0.15984115		4248.38	-0.17672155
538.59	-0.02570172		1068.59	-0.02058834		1598.59	-0.02162088		2128.58	-0.01048059		2658.58	-0.03104907		3188.58	-0.13858363		3718.58	-0.16090546		4248.58	-0.17757198
538.79	-0.02467926		1068.79	-0.02024712		1598.79	-0.0215693		2128.78	-0.01103516		2658.78	-0.03105687		3188.78	-0.13783838		3718.78	-0.16142119		4248.78	-0.17815999
538.99	-0.02466004		1068.99	-0.02037169		1598.99	-0.02228749		2128.98	-0.01161663		2658.98	-0.03102633		3188.98	-0.1370621		3718.98	-0.16159821		4248.98	-0.17753725
539.19	-0.02504626		1069.19	-0.01977466		1599.19	-0.02311459		2129.18	-0.01195411		2659.18	-0.03254052		3189.18	-0.13669267		3719.18	-0.16146777		4249.18	-0.17796234
539.39	-0.02445621		1069.39	-0.02059049		1599.39	-0.02288028		2129.38	-0.0125149		2659.38	-0.0321851		3189.38	-0.13654436		3719.38	-0.16103076		4249.38	-0.17839838
539.59	-0.02426384		1069.59	-0.02071564		1599.59	-0.02292107		2129.58	-0.01250481		2659.58	-0.0334043		3189.58	-0.1371288		3719.58	-0.16044143		4249.58	-0.1784716
539.79	-0.02426033		1069.79	-0.02113161		1599.79	-0.02265835		2129.78	-0.01242788		2659.78	-0.03340955		3189.78	-0.13690907		3719.78	-0.16092736		4249.78	-0.17772164
539.99	-0.02390543		1069.99	-0.02118021		1599.99	-0.02204147		2129.98	-0.01188841		2659.98	-0.03392748		3189.98	-0.13683757		3719.98	-0.16049252		4249.98	-0.17779362
540.19	-0.02375716		1070.19	-0.02112086		1600.19	-0.02173012		2130.18	-0.01170582		2660.18	-0.03523467		3190.18	-0.13578554		3720.18	-0.1599804		4250.18	-0.17783686
540.39	-0.02341961		1070.39	-0.02046571		1600.39	-0.02134611		2130.38	-0.01200992		2660.38	-0.03627309		3190.38	-0.13573176		3720.38	-0.15977444		4250.38	-0.17763751
540.59	-0.02375076		1070.59	-0.01993211		1600.59	-0.02164873		2130.58	-0.01120753		2660.58	-0.03647369		3190.58	-0.13618781		3720.58	-0.1596862		4250.58	-0.17673306
540.79	-0.02429066		1070.79	-0.02004989		1600.79	-0.02158983		2130.78	-0.01118938		2660.78	-0.03737027		3190.78	-0.13708673		3720.78	-0.15878422		4250.78	-0.17693649
540.99	-0.02535658		1070.99	-0.02035041		1600.99	-0.02094593		2130.98	-0.00995621		2660.98	-0.0378499		3190.98	-0.13694011		3720.98	-0.15761912		4250.98	-0.17685447
541.19	-0.02585699		1071.19	-0.01929832		1601.19	-0.02109837		2131.18	-0.01008415		2661.18	-0.03740702		3191.18	-0.13680816		3721.18	-0.15843281		4251.18	-0.17689502
541.39	-0.02619159		1071.39	-0.01962546		1601.39	-0.02102469		2131.38	-0.00929359		2661.38	-0.03665979		3191.38	-0.13650961		3721.38	-0.15835499		4251.38	-0.17798276
541.59	-0.02538402		1071.59	-0.01981343		1601.59	-0.02182499		2131.58	-0.0093886		2661.58	-0.03676074		3191.58	-0.13662947		3721.58	-0.15855956		4251.58	-0.17761158
541.79	-0.02595319		1071.79	-0.01981567		1601.79	-0.02160645		2131.78	-0.00959408		2661.78	-0.03724238		3191.78	-0.1361763		3721.78	-0.15873839		4251.78	-0.17679822
541.99	-0.02689869		1071.99	-0.02093123		1601.99	-0.02146593		2131.98	-0.00944339		2661.98	-0.03714601		3191.98	-0.13656566		3721.98	-0.16000948		4251.98	-0.17695312
542.19	-0.02624293		1072.19	-0.02004535		1602.19	-0.02142281		2132.18	-0.01009209		2662.18	-0.0374978		3192.18	-0.13774402		3722.18	-0.16089554		4252.18	-0.17678657
542.39	-0.02613711		1072.39	-0.02072736		1602.39	-0.02134068		2132.38	-0.0099084		2662.38	-0.03762113		3192.38	-0.13854794		3722.38	-0.16079048		4252.38	-0.17650644
542.59	-0.0264441		1072.59	-0.02081446		1602.59	-0.02163305		2132.58	-0.01021506		2662.58	-0.03721773		3192.58	-0.13841819		3722.58	-0.16080192		4252.58	-0.17617568
542.79	-0.02535201		1072.79	-0.02090595		1602.79	-0.02264189		2132.78	-0.01017256		2662.78	-0.03715909		3192.78	-0.13812103		3722.78	-0.16120989		4252.78	-0.17674242
542.99	-0.02590042		1072.99	-0.02094143		1602.99	-0.02365429		2132.98	-0.01052907		2662.98	-0.03695382		3192.98	-0.1384061		3722.98	-0.16112655		4252.98	-0.17668403
543.19	-0.02608697		1073.19	-0.02132314		1603.19	-0.02321924		2133.18	-0.01096628		2663.18	-0.03777307		3193.18	-0.13772644		3723.18	-0.16053267		4253.18	-0.17765212
543.39	-0.02526896		1073.39	-0.02151297		1603.39	-0.02300241		2133.38	-0.01138874		2663.38	-0.03739649		3193.38	-0.13740622		3723.38	-0.15861087		4253.38	-0.17869784
543.59	-0.02495833		1073.59	-0.02105312		1603.59	-0.02282512		2133.58	-0.01156707		2663.58	-0.03765912		3193.58	-0.13713783		3723.58	-0.15801858		4253.58	-0.17872701
543.79	-0.02517045		1073.79	-0.02085886		1603.79	-0.02228984		2133.78	-0.01177788		2663.78	-0.03721161		3193.78	-0.13603583		3723.78	-0.15871648		4253.78	-0.17886117
543.99	-0.02578626		1073.99	-0.02039631		1603.99	-0.0218938		2133.98	-0.01122159		2663.98	-0.0372732		3193.98	-0.13528224		3723.98	-0.15807807		4253.98	-0.17960223
544.19	-0.02634021		1074.19	-0.02024815		1604.19	-0.02127635		2134.18	-0.01157081		2664.18	-0.03780499		3194.18	-0.13462512		3724.18	-0.15822829		4254.18	-0.17964336
544.39	-0.02599935		1074.39	-0.01967604		1604.39	-0.02119422		2134.38	-0.01091193		2664.38	-0.03833585		3194.38	-0.13428645		3724.38	-0.15821838		4254.38	-0.17943017
544.59	-0.02662632		1074.59	-0.02015715		1604.59	-0.0210638		2134.58	-0.01031795		2664.58	-0.03800353		3194.58	-0.13349626		3724.58	-0.15841613		4254.58	-0.17908244
544.79	-0.02680394		1074.79	-0.02016904		1604.79	-0.02071236		2134.78	-0.00999868		2664.78	-0.03882036		3194.78	-0.13280245		3724.78	-0.15894128		4254.78	-0.17978083
544.99	-0.0277287		1074.99	-0.01940761		1604.99	-0.02102637		2134.98	-0.00878326		2664.98	-0.03791399		3194.98	-0.13342605		3724.98	-0.15930798		4254.98	-0.18021467
545.19	-0.0272605		1075.19	-0.01920067		1605.19	-0.02225996		2135.18	-0.00870621		2665.18	-0.03780248		3195.18	-0.13385476		3725.18	-0.16115283		4255.18	-0.17923767
545.39	-0.02685177		1075.39	-0.01963347		1605.39	-0.02210481		2135.38	-0.00834378		2665.38	-0.03822981		3195.38	-0.13400427		3725.38	-0.16150593		4255.38	-0.17928606
545.59	-0.02740831		1075.59	-0.01937628		1605.59	-0.02283148		2135.58	-0.0089256		2665.58	-0.03830798		3195.58	-0.13503217		3725.58	-0.16199647		4255.58	-0.17869627
545.79	-0.02778209		1075.79	-0.01936652		1605.79	-0.02269158		2135.78	-0.00894529		2665.78	-0.03843619		3195.78	-0.13547006		3725.78	-0.16258626		4255.78	-0.1782319
545.99	-0.02808973		1075.99	-0.01955177		1605.99	-0.02306792		2135.98	-0.00917714		2665.98	-0.0380778		3195.98	-0.13666147		3725.98	-0.1639735		4255.98	-0.17757198
546.19	-0.02854201		1076.19	-0.02002277		1606.19	-0.02326149		2136.18	-0.00898767		2666.18	-0.03826656		3196.18	-0.13730054		3726.18	-0.16338177		4256.18	-0.17745223
546.39	-0.02885425		1076.39	-0.02071658		1606.39	-0.02382435		2136.38	-0.00784062		2666.38	-0.03801591		3196.38	-0.13798206		3726.38	-0.16307107		4256.38	-0.17656241
546.59	-0.02930774		1076.59	-0.0208873		1606.59	-0.02378674		2136.58	-0.00786778		2666.58	-0.03770254		3196.58	-0.13768339		3726.58	-0.16237148		4256.58	-0.17626146
546.79	-0.02897942		1076.79	-0.02155535		1606.79	-0.02336475		2136.78	-0.00899782		2666.78	-0.0378038		3196.78	-0.13719361		3726.78	-0.1622651		4256.78	-0.17638955
546.99	-0.02985281		1076.99	-0.02188915		1606.99	-0.02360626		2136.98	-0.00983481		2666.98	-0.03792734		3196.98	-0.13695334		3726.98	-0.16184033		4256.98	-0.17675222
547.19	-0.02962273		1077.19	-0.02227395		1607.19	-0.02399557		2137.18	-0.01052343		2667.18	-0.03772502		3197.18	-0.13702698		3727.18	-0.16053901		4257.18	-0.1769645
547.39	-0.02951985		1077.39	-0.02180821		1607.39	-0.02466356		2137.38	-0.0103375		2667.38	-0.03728458		3197.38	-0.13721793		3727.38	-0.15922466		4257.38	-0.17740781
547.59	-0.0297809		1077.59	-0.02169043		1607.59	-0.02429789		2137.58	-0.01086961		2667.58	-0.03715585		3197.58	-0.13684074		3727.58	-0.15934551		4257.58	-0.17718007
547.79	-0.03075076		1077.79	-0.02198416		1607.79	-0.02356522		2137.78	-0.0113216		2667.78	-0.03691136		3197.78	-0.13605484		3727.78	-0.158741		4257.78	-0.17757801
547.99	-0.03130057		1077.99	-0.02169774		1607.99	-0.02365651		2137.98	-0.01179027		2667.98	-0.03720491		3197.98	-0.13538398		3727.98	-0.15829078		4257.98	-0.17701383
548.19	-0.03048352		1078.19	-0.02123997		1608.19	-0.02316209		2138.18	-0.01208471		2668.18	-0.03757468		3198.18	-0.13529757		3728.18	-0.15886931		4258.18	-0.17717918
548.39	-0.02951898		1078.39	-0.02126353		1608.39	-0.02328212		2138.38	-0.01205757		2668.38	-0.03713809		3198.38	-0.13419078		3728.38	-0.15929187		4258.38	-0.17826245
548.59	-0.02929888		1078.59	-0.0213105		1608.59	-0.02367611		2138.58	-0.01294413		2668.58	-0.03624555		3198.58	-0.13409597		3728.58	-0.15968533		4258.58	-0.17891666
548.79	-0.02847513		1078.79	-0.02084428		1608.79	-0.02352395		2138.78	-0.01278365		2668.78	-0.03637392		3198.78	-0.13477973		3728.78	-0.16057263		4258.78	-0.17928584
548.99	-0.02696809		1078.99	-0.01981487		1608.99	-0.0230216		2138.98	-0.01286046		2668.98	-0.03515667		3198.98	-0.13555436		3728.98	-0.16127972		4258.98	-0.17874904
549.19	-0.02559137		1079.19	-0.02006691		1609.19	-0.02324373		2139.18	-0.01290447		2669.18	-0.03486687		3199.18	-0.13579828		3729.18	-0.16149505		4259.18	-0.1779976
549.39	-0.02416143		1079.39	-0.02014218		1609.39	-0.02308194		2139.38	-0.01280709		2669.38	-0.03423295		3199.38	-0.13630196		3729.38	-0.16167041		4259.38	-0.17767421
549.59	-0.02408595		1079.59	-0.01985979		1609.59	-0.02449233		2139.58	-0.01270825		2669.58	-0.03444812		3199.58	-0.13736796		3729.58	-0.1621242		4259.58	-0.17663164
549.79	-0.02403135		1079.79	-0.02056125		1609.79	-0.02434658		2139.78	-0.01246725		2669.78	-0.03482847		3199.78	-0.13716792		3729.78	-0.16341287		4259.78	-0.17580691
549.99	-0.02436714		1079.99	-0.02091833		1609.99	-0.02463584		2139.98	-0.01165088		2669.98	-0.03494208		3199.98	-0.13870917		3729.98	-0.16401857		4259.98	-0.17606299
550.19	-0.02498699		1080.19	-0.02120245		1610.19	-0.0247952		2140.18	-0.0108142		2670.18	-0.0346691		3200.18	-0.13890999		3730.18	-0.16377719		4260.18	-0.17652114
550.39	-0.02455489		1080.39	-0.02138355		1610.39	-0.02522983		2140.38	-0.0116003		2670.38	-0.03388985		3200.38	-0.13992791		3730.38	-0.16498171		4260.38	-0.1763274
550.59	-0.02523909		1080.59	-0.02111778		1610.59	-0.02513686		2140.58	-0.01257817		2670.58	-0.03426674		3200.58	-0.14078969		3730.58	-0.16467814		4260.58	-0.17658499
550.79	-0.02524009		1080.79	-0.02161299		1610.79	-0.02553501		2140.78	-0.01380059		2670.78	-0.03421459		3200.78	-0.1411227		3730.78	-0.16538283		4260.78	-0.1777059
550.99	-0.02569403		1080.99	-0.02121536		1610.99	-0.02577652		2140.98	-0.0136103		2670.98	-0.03440183		3200.98	-0.14169607		3730.98	-0.16554402		4260.98	-0.179097
551.19	-0.02665259		1081.19	-0.02036126		1611.19	-0.02587842		2141.18	-0.01360572		2671.18	-0.03515489		3201.18	-0.14173438		3731.18	-0.16462499		4261.18	-0.17952018
551.39	-0.02753923		1081.39	-0.02021241		1611.39	-0.02499673		2141.38	-0.01285514		2671.38	-0.03513929		3201.38	-0.1411477		3731.38	-0.16394394		4261.38	-0.18001413
551.59	-0.02775703		1081.59	-0.01990973		1611.59	-0.02396326		2141.58	-0.01355768		2671.58	-0.03546123		3201.58	-0.14058568		3731.58	-0.16387663		4261.58	-0.1801799
551.79	-0.02832737		1081.79	-0.01938007		1611.79	-0.02304057		2141.78	-0.01361538		2671.78	-0.03590691		3201.78	-0.14000239		3731.78	-0.16405775		4261.78	-0.18044231
551.99	-0.02838438		1081.99	-0.01901926		1611.99	-0.02293201		2141.98	-0.0130304		2671.98	-0.03707897		3201.98	-0.13951396		3731.98	-0.16435455		4261.98	-0.18087519
552.19	-0.02838843		1082.19	-0.01847214		1612.19	-0.02275607		2142.18	-0.01275744		2672.18	-0.03623205		3202.18	-0.13922863		3732.18	-0.16477289		4262.18	-0.18204827
552.39	-0.02898783		1082.39	-0.01873143		1612.39	-0.02262355		2142.38	-0.01306268		2672.38	-0.03572103		3202.38	-0.13837322		3732.38	-0.16456935		4262.38	-0.18296538
552.59	-0.02811043		1082.59	-0.01850495		1612.59	-0.02247688		2142.58	-0.01289832		2672.58	-0.0361815		3202.58	-0.13871728		3732.58	-0.16412667		4262.58	-0.18252479
552.79	-0.02762561		1082.79	-0.01882553		1612.79	-0.02141126		2142.78	-0.01185477		2672.78	-0.03653713		3202.78	-0.138046		3732.78	-0.16365859		4262.78	-0.18207949
552.99	-0.02701296		1082.99	-0.01911812		1612.99	-0.02110566		2142.98	-0.01186938		2672.98	-0.03656486		3202.98	-0.13737844		3732.98	-0.16355305		4262.98	-0.18095298
553.19	-0.0273818		1083.19	-0.0200681		1613.19	-0.02163802		2143.18	-0.01128653		2673.18	-0.03723372		3203.18	-0.13740303		3733.18	-0.16295599		4263.18	-0.18068776
553.39	-0.02652433		1083.39	-0.02049598		1613.39	-0.0222976		2143.38	-0.01075416		2673.38	-0.03891951		3203.38	-0.13758526		3733.38	-0.16233344		4263.38	-0.18034981
553.59	-0.02747131		1083.59	-0.02056348		1613.59	-0.02320663		2143.58	-0.01015417		2673.58	-0.04009857		3203.58	-0.13824019		3733.58	-0.16200502		4263.58	-0.18004449
553.79	-0.02763899		1083.79	-0.02117976		1613.79	-0.02282644		2143.78	-0.01001047		2673.78	-0.04039041		3203.78	-0.13852793		3733.78	-0.16193128		4263.78	-0.18034476
553.99	-0.02752834		1083.99	-0.02103203		1613.99	-0.02242764		2143.98	-0.00991285		2673.98	-0.04002825		3203.98	-0.13979606		3733.98	-0.16170805		4263.98	-0.18119936
554.19	-0.02804546		1084.19	-0.0203037		1614.19	-0.02251979		2144.18	-0.01074777		2674.18	-0.03954709		3204.18	-0.13945033		3734.18	-0.16212167		4264.18	-0.18079167
554.39	-0.02890216		1084.39	-0.02039316		1614.39	-0.02219221		2144.38	-0.01120219		2674.38	-0.03933582		3204.38	-0.14006765		3734.38	-0.16217457		4264.38	-0.18109152
554.59	-0.02964926		1084.59	-0.01944372		1614.59	-0.02239381		2144.58	-0.01117291		2674.58	-0.03956028		3204.58	-0.14011572		3734.58	-0.16119386		4264.58	-0.18194473
554.79	-0.03058874		1084.79	-0.02022047		1614.79	-0.02201876		2144.78	-0.01228747		2674.78	-0.03873553		3204.78	-0.13982456		3734.78	-0.16104968		4264.78	-0.18247124
554.99	-0.03052198		1084.99	-0.0199859		1614.99	-0.02199114		2144.98	-0.01203054		2674.98	-0.03865027		3204.98	-0.13883446		3734.98	-0.16123636		4264.98	-0.18118571
555.19	-0.03028377		1085.19	-0.01946825		1615.19	-0.02220545		2145.18	-0.01305961		2675.18	-0.03847385		3205.18	-0.13828275		3735.18	-0.16012328		4265.18	-0.18100829
555.39	-0.0287787		1085.39	-0.02027236		1615.39	-0.02221289		2145.38	-0.01330363		2675.38	-0.03845624		3205.38	-0.13776025		3735.38	-0.16032491		4265.38	-0.18132467
555.59	-0.02803761		1085.59	-0.02119069		1615.59	-0.02134554		2145.58	-0.01416722		2675.58	-0.03841104		3205.58	-0.13766639		3735.58	-0.16147674		4265.58	-0.18155751
555.79	-0.02816965		1085.79	-0.02250812		1615.79	-0.02221878		2145.78	-0.01420796		2675.78	-0.03891966		3205.78	-0.13706253		3735.78	-0.16231406		4265.78	-0.18205223
555.99	-0.02798374		1085.99	-0.02350029		1615.99	-0.023245		2145.98	-0.01388547		2675.98	-0.03910473		3205.98	-0.13684327		3735.98	-0.16290003		4265.98	-0.18196801
556.19	-0.02730545		1086.19	-0.0233407		1616.19	-0.02437322		2146.18	-0.01371339		2676.18	-0.03849675		3206.18	-0.1362057		3736.18	-0.16325743		4266.18	-0.18105161
556.39	-0.02669201		1086.39	-0.02329187		1616.39	-0.02492986		2146.38	-0.01359257		2676.38	-0.03964719		3206.38	-0.13578224		3736.38	-0.16350591		4266.38	-0.18058253
556.59	-0.02613882		1086.59	-0.02411231		1616.59	-0.02518013		2146.58	-0.01257217		2676.58	-0.04059866		3206.58	-0.13565738		3736.58	-0.1634733		4266.58	-0.18015495
556.79	-0.02654972		1086.79	-0.02542584		1616.79	-0.02550699		2146.78	-0.01196281		2676.78	-0.04092553		3206.78	-0.13548001		3736.78	-0.16419755		4266.78	-0.17994954
556.99	-0.02613978		1086.99	-0.02573207		1616.99	-0.02619134		2146.98	-0.01164817		2676.98	-0.04074536		3206.98	-0.13582309		3736.98	-0.1646324		4266.98	-0.18003951
557.19	-0.02578661		1087.19	-0.0263218		1617.19	-0.02651847		2147.18	-0.01064653		2677.18	-0.0414415		3207.18	-0.13652737		3737.18	-0.16398266		4267.18	-0.18049886
557.39	-0.02452762		1087.39	-0.02656808		1617.39	-0.02620026		2147.38	-0.01090477		2677.38	-0.04188136		3207.38	-0.1364509		3737.38	-0.16341513		4267.38	-0.181193
557.59	-0.02471829		1087.59	-0.02618789		1617.59	-0.02656021		2147.58	-0.01121571		2677.58	-0.04165311		3207.58	-0.13680341		3737.58	-0.16271474		4267.58	-0.18069519
557.79	-0.02465736		1087.79	-0.02596059		1617.79	-0.02610658		2147.78	-0.01168457		2677.78	-0.04124237		3207.78	-0.13693031		3737.78	-0.16203004		4267.78	-0.18055909
557.99	-0.0253134		1087.99	-0.02551716		1617.99	-0.02571124		2147.98	-0.01196336		2677.98	-0.04052597		3207.98	-0.13691159		3737.98	-0.16141242		4267.98	-0.18075971
558.19	-0.02628154		1088.19	-0.02480938		1618.19	-0.02650816		2148.18	-0.01210623		2678.18	-0.04028994		3208.18	-0.13662059		3738.18	-0.16084968		4268.18	-0.18046414
558.39	-0.02701383		1088.39	-0.02440114		1618.39	-0.02674442		2148.38	-0.01196298		2678.38	-0.03977824		3208.38	-0.13674241		3738.38	-0.16002319		4268.38	-0.18091137
558.59	-0.027372		1088.59	-0.02373819		1618.59	-0.02768212		2148.58	-0.01236813		2678.58	-0.03920011		3208.58	-0.13693834		3738.58	-0.15943334		4268.58	-0.18104652
558.79	-0.02791621		1088.79	-0.0238698		1618.79	-0.02810957		2148.78	-0.0128905		2678.78	-0.03853532		3208.78	-0.13714746		3738.78	-0.15931215		4268.78	-0.18058422
558.99	-0.0270876		1088.99	-0.02304152		1618.99	-0.02870565		2148.98	-0.01283227		2678.98	-0.03854128		3208.98	-0.13673692		3738.98	-0.15938427		4268.98	-0.18021911
559.19	-0.02701853		1089.19	-0.02241533		1619.19	-0.02909293		2149.18	-0.01351813		2679.18	-0.0386381		3209.18	-0.13727962		3739.18	-0.15886792		4269.18	-0.18159976
559.39	-0.02735538		1089.39	-0.02260407		1619.39	-0.02904556		2149.38	-0.01302536		2679.38	-0.03904075		3209.38	-0.13703841		3739.38	-0.15975199		4269.38	-0.18205727
559.59	-0.02831303		1089.59	-0.02291948		1619.59	-0.02905814		2149.58	-0.01319398		2679.58	-0.03906611		3209.58	-0.1372139		3739.58	-0.16025393		4269.58	-0.18204647
559.79	-0.02873046		1089.79	-0.022515		1619.79	-0.030256		2149.78	-0.01282188		2679.78	-0.03959307		3209.78	-0.13678782		3739.78	-0.16084379		4269.78	-0.18203294
