# Supplementary material for: Functional development of a V3/glycan-specific broadly neutralizing antibody isolated from a case of HIV superinfection
Source: eLife journal article supplement (doi:10.7554/elife.68110), 2021-07-15
Supplement: fig2-data2 [file G7.xls]

Vers 3.43 Data Simulation
Conc1	1.563E-08	1.563E-08	1.563E-08	1.563E-08	1.563E-08	1.563E-08	1.563E-08
Start1	200	730.02	1260.01	1790.04	2320.04	2850.04	3380.04
Stop1	559.79	1089.82	1619.81	2149.84	2679.84	3209.84	3739.84
Time1	Data1	Sim1	Time2	Data2	Sim2	Time3	Data3	Sim3	Time4	Data4	Sim4	Time5	Data5	Sim5	Time6	Data6	Sim6	Time7	Data7	Sim7
200	0.00326682		730.02	-0.00235934		1260.01	0.00402899		1790.04	0.00757484		2320.04	-0.0051662		2850.04	0.00115803		3380.04	-0.00369889
200.2	0.00342452		730.22	-0.00118674		1260.21	0.00587866		1790.24	0.00809403		2320.24	-0.00494776		2850.24	0.00052314		3380.24	-0.00363021
200.4	0.0037532		730.42	-0.00074767		1260.41	0.00743895		1790.44	0.00930718		2320.44	-0.00509757		2850.44	-0.00051768		3380.44	-0.00339568
200.6	0.00415982		730.62	-0.00026704		1260.61	0.00896099		1790.64	0.01059401		2320.64	-0.00498123		2850.64	-0.00176369		3380.64	-0.00368096
200.8	0.00500073		730.82	0.00093142		1260.81	0.01055461		1790.84	0.01121214		2320.84	-0.00527654		2850.84	-0.0028059		3380.84	-0.00376873
201	0.00487037		731.02	0.00196285		1261.01	0.01222112		1791.04	0.01152759		2321.04	-0.00484889		2851.04	-0.00368108		3381.04	-0.0036764
201.2	0.00542248		731.22	0.00293993		1261.21	0.01321216		1791.24	0.0113671		2321.24	-0.00493443		2851.24	-0.00427856		3381.24	-0.00394799
201.4	0.00637629		731.42	0.0033999		1261.41	0.01371629		1791.44	0.01181313		2321.44	-0.00472875		2851.44	-0.00474877		3381.44	-0.00459906
201.6	0.00710502		731.62	0.00362692		1261.61	0.01369466		1791.64	0.01129266		2321.64	-0.00462573		2851.64	-0.00529842		3381.64	-0.00523205
201.8	0.0075465		731.82	0.00372114		1261.81	0.01340221		1791.84	0.0108736		2321.84	-0.00481169		2851.84	-0.00594092		3381.84	-0.00617133
202	0.00779022		732.02	0.00410944		1262.01	0.01361253		1792.04	0.01004072		2322.04	-0.00548722		2852.04	-0.00702646		3382.04	-0.00628418
202.2	0.00764337		732.22	0.00344327		1262.21	0.01258776		1792.24	0.00881076		2322.24	-0.00612666		2852.24	-0.00729385		3382.24	-0.00629886
202.4	0.00721686		732.42	0.00305236		1262.41	0.0126051		1792.44	0.00772676		2322.44	-0.00569359		2852.44	-0.00640214		3382.44	-0.00681089
202.6	0.00683582		732.62	0.00295388		1262.61	0.01200577		1792.64	0.00780772		2322.64	-0.00560852		2852.64	-0.00677809		3382.64	-0.00687029
202.8	0.00787887		732.82	0.00343331		1262.81	0.01208805		1792.84	0.00750913		2322.84	-0.00587534		2852.84	-0.00762286		3382.84	-0.00703012
203	0.00726899		733.02	0.00285546		1263.01	0.01235622		1793.04	0.00722465		2323.04	-0.00565909		2853.04	-0.00735984		3383.04	-0.00641561
203.2	0.00791321		733.22	0.00296382		1263.21	0.01244174		1793.24	0.00717985		2323.24	-0.00633143		2853.24	-0.0074429		3383.24	-0.00614442
203.4	0.00682829		733.42	0.00356414		1263.41	0.01296635		1793.44	0.00788453		2323.44	-0.00736336		2853.44	-0.00804863		3383.44	-0.00699978
203.6	0.0072054		733.62	0.00311181		1263.61	0.01271756		1793.64	0.00825335		2323.64	-0.0070521		2853.64	-0.00819049		3383.64	-0.00607487
203.8	0.0067844		733.82	0.00293491		1263.81	0.01217681		1793.84	0.00871234		2323.84	-0.00718286		2853.84	-0.00837953		3383.84	-0.0052931
204	0.00682265		734.02	0.00226081		1264.01	0.01142031		1794.04	0.00882072		2324.04	-0.00724718		2854.04	-0.00730034		3384.04	-0.00554071
204.2	0.00612408		734.22	0.00339675		1264.21	0.01199392		1794.24	0.00850468		2324.24	-0.00668105		2854.24	-0.00781608		3384.24	-0.00510468
204.4	0.00625584		734.42	0.00275058		1264.41	0.01206284		1794.44	0.00994282		2324.44	-0.00680576		2854.44	-0.00844159		3384.44	-0.00484348
204.6	0.00609094		734.62	0.00382608		1264.61	0.01232875		1794.64	0.01004255		2324.64	-0.00633047		2854.64	-0.00843489		3384.64	-0.00537623
204.8	0.00640891		734.82	0.00454102		1264.81	0.0121485		1794.84	0.00982888		2324.84	-0.00658589		2854.84	-0.00803552		3384.84	-0.00517924
205	0.00542448		735.02	0.00505858		1265.01	0.01169996		1795.04	0.00952238		2325.04	-0.0057082		2855.04	-0.00766884		3385.04	-0.00496825
205.2	0.0062024		735.22	0.00515251		1265.21	0.01124938		1795.24	0.00929143		2325.24	-0.00588251		2855.24	-0.00700361		3385.24	-0.00580739
205.4	0.0069387		735.42	0.00446568		1265.41	0.01079659		1795.44	0.00925841		2325.44	-0.00575223		2855.44	-0.00712375		3385.44	-0.00672821
205.6	0.00654748		735.62	0.00439813		1265.61	0.01038205		1795.64	0.0083213		2325.64	-0.0063629		2855.64	-0.00725197		3385.64	-0.00753036
205.8	0.00679074		735.82	0.00446721		1265.81	0.00996485		1795.84	0.00875752		2325.84	-0.00653454		2855.84	-0.0076196		3385.84	-0.00760341
206	0.00651268		736.02	0.00421519		1266.01	0.01019373		1796.04	0.00815902		2326.04	-0.00624136		2856.04	-0.00792291		3386.04	-0.00657524
206.2	0.00623628		736.22	0.00264275		1266.21	0.00968434		1796.24	0.00792066		2326.24	-0.00605948		2856.24	-0.00712288		3386.24	-0.00649059
206.4	0.00624844		736.42	0.00244222		1266.41	0.00966567		1796.44	0.00821159		2326.44	-0.00670866		2856.44	-0.00626312		3386.44	-0.00684748
206.6	0.00660839		736.62	0.00274589		1266.61	0.00998188		1796.64	0.00851953		2326.64	-0.00701978		2856.64	-0.00666612		3386.64	-0.00685578
206.8	0.00762646		736.82	0.0037148		1266.81	0.01109037		1796.84	0.00773531		2326.84	-0.00690224		2856.84	-0.00739644		3386.84	-0.00635198
207	0.00676824		737.02	0.00298998		1267.01	0.01031413		1797.04	0.00825189		2327.04	-0.00760847		2857.04	-0.00688572		3387.04	-0.00518456
207.2	0.0068491		737.22	0.00291371		1267.21	0.01045618		1797.24	0.0080233		2327.24	-0.00829394		2857.24	-0.00685256		3387.24	-0.00520651
207.4	0.00613121		737.42	0.00322809		1267.41	0.01048255		1797.44	0.00892256		2327.44	-0.0090352		2857.44	-0.00742384		3387.44	-0.00522009
207.6	0.00562892		737.62	0.00253224		1267.61	0.00995826		1797.64	0.00946441		2327.64	-0.00899418		2857.64	-0.00689134		3387.64	-0.00449467
207.8	0.00444639		737.82	0.00290365		1267.81	0.00972987		1797.84	0.00918717		2327.84	-0.00907389		2857.84	-0.00560454		3387.84	-0.0042017
208	0.00471394		738.02	0.00359342		1268.01	0.0096652		1798.04	0.00896306		2328.04	-0.00876843		2858.04	-0.00558551		3388.04	-0.00413566
208.2	0.00414657		738.22	0.00464472		1268.21	0.00946823		1798.24	0.00875764		2328.24	-0.00912862		2858.24	-0.00589437		3388.24	-0.00385858
208.4	0.00395888		738.42	0.00496896		1268.41	0.00946341		1798.44	0.00976803		2328.44	-0.00853533		2858.44	-0.00567782		3388.44	-0.00357019
208.6	0.00418935		738.62	0.00557235		1268.61	0.00967161		1798.64	0.0088728		2328.64	-0.00879576		2858.64	-0.00536889		3388.64	-0.0037114
208.8	0.00476344		738.82	0.00577743		1268.81	0.00958059		1798.84	0.00948051		2328.84	-0.00854327		2858.84	-0.00532372		3388.84	-0.00352369
209	0.00470277		739.02	0.00604897		1269.01	0.00929167		1799.04	0.00863002		2329.04	-0.00794494		2859.04	-0.00499161		3389.04	-0.00330441
209.2	0.00540527		739.22	0.00601683		1269.21	0.00885711		1799.24	0.0090626		2329.24	-0.00792634		2859.24	-0.00482317		3389.24	-0.00434039
209.4	0.00623068		739.42	0.00569293		1269.41	0.00815386		1799.44	0.00939834		2329.44	-0.0071778		2859.44	-0.0060642		3389.44	-0.00501906
209.6	0.00661911		739.62	0.00589266		1269.61	0.00787172		1799.64	0.00948564		2329.64	-0.00722957		2859.64	-0.00666448		3389.64	-0.00584063
209.8	0.00752988		739.82	0.0051129		1269.81	0.00777072		1799.84	0.00987858		2329.84	-0.00663629		2859.84	-0.00798988		3389.84	-0.00560869
210	0.00785118		740.02	0.00477157		1270.01	0.00828199		1800.04	0.0092659		2330.04	-0.00722116		2860.04	-0.00804259		3390.04	-0.0057586
210.2	0.00815485		740.22	0.00453628		1270.21	0.00838314		1800.24	0.00944945		2330.24	-0.00694798		2860.24	-0.00736018		3390.24	-0.00706248
210.4	0.00844609		740.42	0.00477521		1270.41	0.00798195		1800.44	0.00937186		2330.44	-0.00734174		2860.44	-0.00697547		3390.44	-0.00742455
210.6	0.00947329		740.62	0.00442593		1270.61	0.00830066		1800.64	0.00914473		2330.64	-0.00714292		2860.64	-0.00651716		3390.64	-0.00737998
210.8	0.00944529		740.82	0.00452083		1270.81	0.00848403		1800.84	0.00931602		2330.84	-0.00725811		2860.84	-0.00637955		3390.84	-0.00624609
211	0.00851743		741.02	0.00418023		1271.01	0.00759803		1801.04	0.0099269		2331.04	-0.00862125		2861.04	-0.00640884		3391.04	-0.00563512
211.2	0.00847802		741.22	0.00366499		1271.21	0.00815516		1801.24	0.00994888		2331.24	-0.00886215		2861.24	-0.00591457		3391.24	-0.00537058
211.4	0.0078832		741.42	0.00441622		1271.41	0.00810338		1801.44	0.01032578		2331.44	-0.00965784		2861.44	-0.00601354		3391.44	-0.00484019
211.6	0.00703494		741.62	0.00399105		1271.61	0.00795379		1801.64	0.01035699		2331.64	-0.00941942		2861.64	-0.00538986		3391.64	-0.00406367
211.8	0.00688048		741.82	0.00454322		1271.81	0.00772432		1801.84	0.00973229		2331.84	-0.00922469		2861.84	-0.00466456		3391.84	-0.0038012
212	0.00661501		742.02	0.00455288		1272.01	0.007188		1802.04	0.00916505		2332.04	-0.00911782		2862.04	-0.00469818		3392.04	-0.00338894
212.2	0.00537151		742.22	0.00509411		1272.21	0.00673883		1802.24	0.00897141		2332.24	-0.00974486		2862.24	-0.00366623		3392.24	-0.00357498
212.4	0.00564452		742.42	0.00481209		1272.41	0.00672875		1802.44	0.00904436		2332.44	-0.00952605		2862.44	-0.00328029		3392.44	-0.00317539
212.6	0.00599766		742.62	0.00419836		1272.61	0.00725522		1802.64	0.00851027		2332.64	-0.00968803		2862.64	-0.00317017		3392.64	-0.00336822
212.8	0.00546041		742.82	0.00413213		1272.81	0.00682631		1802.84	0.00834421		2332.84	-0.00955097		2862.84	-0.00303291		3392.84	-0.003374
213	0.0060581		743.02	0.00335802		1273.01	0.00658405		1803.04	0.00674483		2333.04	-0.00901681		2863.04	-0.00351123		3393.04	-0.00286802
213.2	0.00541924		743.22	0.00279883		1273.21	0.00645197		1803.24	0.00675157		2333.24	-0.00813463		2863.24	-0.00423859		3393.24	-0.00422684
213.4	0.00526381		743.42	0.00282339		1273.41	0.0063157		1803.44	0.0066204		2333.44	-0.00778738		2863.44	-0.00586236		3393.44	-0.00464861
213.6	0.00519995		743.62	0.00236268		1273.61	0.00690002		1803.64	0.00616901		2333.64	-0.00767822		2863.64	-0.00695166		3393.64	-0.0056347
213.8	0.00474783		743.82	0.00180167		1273.81	0.0073825		1803.84	0.00629341		2333.84	-0.00740806		2863.84	-0.00718789		3393.84	-0.0061518
214	0.00483856		744.02	0.00214316		1274.01	0.0072125		1804.04	0.00605771		2334.04	-0.00758411		2864.04	-0.00683925		3394.04	-0.0064372
214.2	0.00483102		744.22	0.00264191		1274.21	0.00760479		1804.24	0.00611861		2334.24	-0.00583597		2864.24	-0.00663363		3394.24	-0.00754012
214.4	0.00565911		744.42	0.00281784		1274.41	0.00828724		1804.44	0.00704948		2334.44	-0.00646216		2864.44	-0.00709077		3394.44	-0.00726135
214.6	0.00652219		744.62	0.00271296		1274.61	0.00863238		1804.64	0.00758538		2334.64	-0.00656696		2864.64	-0.00623059		3394.64	-0.00727544
214.8	0.00610584		744.82	0.00276998		1274.81	0.00918691		1804.84	0.00854257		2334.84	-0.00609839		2864.84	-0.00611949		3394.84	-0.0073336
215	0.00606243		745.02	0.00294867		1275.01	0.00895665		1805.04	0.00966991		2335.04	-0.00566762		2865.04	-0.00623106		3395.04	-0.00727721
215.2	0.00645268		745.22	0.00224324		1275.21	0.00893745		1805.24	0.01023069		2335.24	-0.0057182		2865.24	-0.00548804		3395.24	-0.00775216
215.4	0.00648454		745.42	0.00295162		1275.41	0.00894643		1805.44	0.01083653		2335.44	-0.00558102		2865.44	-0.0056141		3395.44	-0.00771927
215.6	0.0062868		745.62	0.0031481		1275.61	0.00745008		1805.64	0.01188053		2335.64	-0.00551874		2865.64	-0.00500441		3395.64	-0.00780246
215.8	0.00632186		745.82	0.00358089		1275.81	0.00699854		1805.84	0.0126525		2335.84	-0.00525265		2865.84	-0.00454097		3395.84	-0.00798736
216	0.00571771		746.02	0.00423424		1276.01	0.00674001		1806.04	0.01326305		2336.04	-0.004438		2866.04	-0.00516995		3396.04	-0.00793069
216.2	0.00447679		746.22	0.00469721		1276.21	0.0058924		1806.24	0.01429861		2336.24	-0.005334		2866.24	-0.00461501		3396.24	-0.00841983
216.4	0.0040687		746.42	0.00499631		1276.41	0.00586007		1806.44	0.01429387		2336.44	-0.00523093		2866.44	-0.00483583		3396.44	-0.00858594
216.6	0.00406497		746.62	0.00505802		1276.61	0.00556939		1806.64	0.01403726		2336.64	-0.00485662		2866.64	-0.00568583		3396.64	-0.00851077
216.8	0.00400975		746.82	0.00533214		1276.81	0.00518548		1806.84	0.01275078		2336.84	-0.00531518		2866.84	-0.00619398		3396.84	-0.00885039
217	0.00448094		747.02	0.00541872		1277.01	0.00609552		1807.04	0.01282987		2337.04	-0.00563001		2867.04	-0.00721102		3397.04	-0.00871551
217.2	0.00327939		747.22	0.00587136		1277.21	0.00605834		1807.24	0.01293848		2337.24	-0.00568417		2867.24	-0.00775816		3397.24	-0.0096151
217.4	0.00338862		747.42	0.00699557		1277.41	0.00559949		1807.44	0.01235831		2337.44	-0.00566359		2867.44	-0.00866109		3397.44	-0.00940547
217.6	0.00341185		747.62	0.00613357		1277.61	0.00625593		1807.64	0.01222107		2337.64	-0.00501549		2867.64	-0.00868511		3397.64	-0.01000189
217.8	0.00284072		747.82	0.00603824		1277.81	0.00630672		1807.84	0.0114718		2337.84	-0.00579901		2867.84	-0.00829691		3397.84	-0.00995098
218	0.00333787		748.02	0.00532355		1278.01	0.00704844		1808.04	0.01037405		2338.04	-0.00615409		2868.04	-0.00920021		3398.04	-0.00957989
218.2	0.00438508		748.22	0.00539625		1278.21	0.00828229		1808.24	0.01004859		2338.24	-0.00605665		2868.24	-0.00958186		3398.24	-0.00939811
218.4	0.0051934		748.42	0.00460247		1278.41	0.00896016		1808.44	0.01101635		2338.44	-0.00683345		2868.44	-0.00893978		3398.44	-0.00985914
218.6	0.00594895		748.62	0.00343321		1278.61	0.00934674		1808.64	0.01057784		2338.64	-0.00670273		2868.64	-0.00808087		3398.64	-0.00945899
218.8	0.00692106		748.82	0.00263793		1278.81	0.01038923		1808.84	0.01077082		2338.84	-0.00693644		2868.84	-0.00807451		3398.84	-0.00932589
219	0.00789474		749.02	0.00209486		1279.01	0.01080676		1809.04	0.01062617		2339.04	-0.00679271		2869.04	-0.00787929		3399.04	-0.00823568
219.2	0.00841604		749.22	0.00111246		1279.21	0.01141889		1809.24	0.01036097		2339.24	-0.00738888		2869.24	-0.0074345		3399.24	-0.007656
219.4	0.0085111		749.42	0.00130075		1279.41	0.01165496		1809.44	0.01057012		2339.44	-0.00854108		2869.44	-0.00749264		3399.44	-0.0071413
219.6	0.008057		749.62	0.00131559		1279.61	0.01120861		1809.64	0.01103409		2339.64	-0.00908037		2869.64	-0.00864299		3399.64	-0.00616102
219.8	0.00752591		749.82	0.00164777		1279.81	0.01113167		1809.84	0.01152394		2339.84	-0.00918196		2869.84	-0.00874418		3399.84	-0.0056939
220	0.00654897		750.02	0.00264472		1280.01	0.01152972		1810.04	0.01168247		2340.04	-0.00922322		2870.04	-0.00916451		3400.04	-0.005333
220.2	0.00562152		750.22	0.00283513		1280.21	0.01124871		1810.24	0.01186223		2340.24	-0.01052511		2870.24	-0.00900996		3400.24	-0.0052877
220.4	0.00609159		750.42	0.00425513		1280.41	0.01113938		1810.44	0.01150932		2340.44	-0.01075099		2870.44	-0.00893083		3400.44	-0.00535321
220.6	0.00666774		750.62	0.00435499		1280.61	0.01101983		1810.64	0.01123416		2340.64	-0.01142968		2870.64	-0.00887422		3400.64	-0.00496927
220.8	0.00672973		750.82	0.00478669		1280.81	0.01125325		1810.84	0.01046634		2340.84	-0.01222908		2870.84	-0.00759354		3400.84	-0.00567259
221	0.00623036		751.02	0.00464029		1281.01	0.01148664		1811.04	0.01042296		2341.04	-0.01299499		2871.04	-0.00808798		3401.04	-0.0057056
221.2	0.00557836		751.22	0.00489368		1281.21	0.01019407		1811.24	0.00959579		2341.24	-0.01205999		2871.24	-0.00754213		3401.24	-0.00581689
221.4	0.00574488		751.42	0.00451417		1281.41	0.00976707		1811.44	0.00827605		2341.44	-0.01093685		2871.44	-0.00697527		3401.44	-0.005863
221.6	0.00565225		751.62	0.00366517		1281.61	0.00937491		1811.64	0.0078192		2341.64	-0.0099669		2871.64	-0.00635497		3401.64	-0.00636366
221.8	0.00581528		751.82	0.00341216		1281.81	0.00878583		1811.84	0.00647746		2341.84	-0.00961615		2871.84	-0.00652193		3401.84	-0.00698187
222	0.00620657		752.02	0.00329463		1282.01	0.00908545		1812.04	0.00655197		2342.04	-0.00870693		2872.04	-0.00662346		3402.04	-0.00730434
222.2	0.0069511		752.22	0.00348588		1282.21	0.00900173		1812.24	0.00668608		2342.24	-0.00909641		2872.24	-0.00648825		3402.24	-0.00701677
222.4	0.00742282		752.42	0.00324927		1282.41	0.00907432		1812.44	0.00713811		2342.44	-0.00821569		2872.44	-0.00543469		3402.44	-0.00797001
222.6	0.0082508		752.62	0.00301181		1282.61	0.0092239		1812.64	0.00692316		2342.64	-0.00763732		2872.64	-0.00538671		3402.64	-0.00751567
222.8	0.00844416		752.82	0.00286913		1282.81	0.00947675		1812.84	0.0066169		2342.84	-0.00729906		2872.84	-0.00526653		3402.84	-0.00740928
223	0.00830666		753.02	0.00318912		1283.01	0.00976143		1813.04	0.00757277		2343.04	-0.0071103		2873.04	-0.00530245		3403.04	-0.00728943
223.2	0.00740678		753.22	0.00328769		1283.21	0.00970665		1813.24	0.0082172		2343.24	-0.00695206		2873.24	-0.00539433		3403.24	-0.00710627
223.4	0.00786232		753.42	0.00408392		1283.41	0.00926238		1813.44	0.00891969		2343.44	-0.00691183		2873.44	-0.00635656		3403.44	-0.00873147
223.6	0.00780821		753.62	0.00466371		1283.61	0.00926582		1813.64	0.00913541		2343.64	-0.00601526		2873.64	-0.00720027		3403.64	-0.00841613
223.8	0.00698212		753.82	0.00574797		1283.81	0.00946424		1813.84	0.00971092		2343.84	-0.00552935		2873.84	-0.0058982		3403.84	-0.00876796
224	0.00708764		754.02	0.0054885		1284.01	0.01026586		1814.04	0.00974893		2344.04	-0.00588745		2874.04	-0.00521176		3404.04	-0.00867901
224.2	0.00713617		754.22	0.00535546		1284.21	0.01006053		1814.24	0.00967852		2344.24	-0.00684946		2874.24	-0.00552445		3404.24	-0.00857158
224.4	0.00735853		754.42	0.00603818		1284.41	0.00969797		1814.44	0.01012724		2344.44	-0.00631574		2874.44	-0.00468172		3404.44	-0.00962084
224.6	0.00633754		754.62	0.0054927		1284.61	0.01037609		1814.64	0.0094866		2344.64	-0.00697234		2874.64	-0.00379214		3404.64	-0.00934963
224.8	0.00682909		754.82	0.00501578		1284.81	0.00998921		1814.84	0.0085486		2344.84	-0.0066946		2874.84	-0.00369828		3404.84	-0.00953289
225	0.00612726		755.02	0.00422506		1285.01	0.01072234		1815.04	0.00833203		2345.04	-0.00690851		2875.04	-0.00436863		3405.04	-0.00948765
225.2	0.00542886		755.22	0.00413982		1285.21	0.00992209		1815.24	0.00794135		2345.24	-0.00629537		2875.24	-0.00374599		3405.24	-0.00957214
225.4	0.00632762		755.42	0.00392364		1285.41	0.00947058		1815.44	0.00737589		2345.44	-0.00582139		2875.44	-0.00444104		3405.44	-0.01024964
225.6	0.00626184		755.62	0.00418459		1285.61	0.00837404		1815.64	0.00676351		2345.64	-0.00580789		2875.64	-0.00511103		3405.64	-0.01036163
225.8	0.00615548		755.82	0.00440433		1285.81	0.00824408		1815.84	0.00680931		2345.84	-0.0064425		2875.84	-0.00536076		3405.84	-0.01034063
226	0.0058521		756.02	0.00448704		1286.01	0.00758979		1816.04	0.00686515		2346.04	-0.00694502		2876.04	-0.00568983		3406.04	-0.00987107
226.2	0.00532062		756.22	0.00398754		1286.21	0.00823436		1816.24	0.00675973		2346.24	-0.00751783		2876.24	-0.00599473		3406.24	-0.00902855
226.4	0.0059055		756.42	0.00447633		1286.41	0.00797224		1816.44	0.00669195		2346.44	-0.00704225		2876.44	-0.00615302		3406.44	-0.00855914
226.6	0.00548384		756.62	0.00409941		1286.61	0.00800016		1816.64	0.00647939		2346.64	-0.00682621		2876.64	-0.00621642		3406.64	-0.00843287
226.8	0.00543634		756.82	0.00398229		1286.81	0.00823096		1816.84	0.00655443		2346.84	-0.00714905		2876.84	-0.00637191		3406.84	-0.00839682
227	0.00507566		757.02	0.0043062		1287.01	0.00844293		1817.04	0.00784164		2347.04	-0.0075665		2877.04	-0.00684524		3407.04	-0.00898785
227.2	0.00516537		757.22	0.00400145		1287.21	0.00805822		1817.24	0.00772105		2347.24	-0.00708436		2877.24	-0.00749667		3407.24	-0.00971449
227.4	0.00588314		757.42	0.00403958		1287.41	0.00812568		1817.44	0.00827964		2347.44	-0.00700949		2877.44	-0.00813358		3407.44	-0.01125994
227.6	0.00595579		757.62	0.00390169		1287.61	0.0086341		1817.64	0.00852625		2347.64	-0.00689526		2877.64	-0.00739993		3407.64	-0.01116373
227.8	0.00531296		757.82	0.00408329		1287.81	0.00920722		1817.84	0.00931588		2347.84	-0.00732153		2877.84	-0.0066231		3407.84	-0.01155086
228	0.00577499		758.02	0.00306751		1288.01	0.00964987		1818.04	0.00967057		2348.04	-0.00805781		2878.04	-0.0059907		3408.04	-0.01212004
228.2	0.00587361		758.22	0.00341926		1288.21	0.00957906		1818.24	0.01036298		2348.24	-0.00776453		2878.24	-0.00646874		3408.24	-0.01269658
228.4	0.00595656		758.42	0.00369916		1288.41	0.01010811		1818.44	0.01058589		2348.44	-0.00689584		2878.44	-0.00585818		3408.44	-0.01388078
228.6	0.00608042		758.62	0.00305654		1288.61	0.01100752		1818.64	0.01037286		2348.64	-0.00786893		2878.64	-0.00513709		3408.64	-0.01278436
228.8	0.00693593		758.82	0.00286208		1288.81	0.01214373		1818.84	0.01101815		2348.84	-0.00791113		2878.84	-0.00533315		3408.84	-0.01356711
229	0.00739838		759.02	0.0024566		1289.01	0.01307694		1819.04	0.01040886		2349.04	-0.00817468		2879.04	-0.00480102		3409.04	-0.01387061
229.2	0.00714868		759.22	0.00186987		1289.21	0.01184452		1819.24	0.00923737		2349.24	-0.00795902		2879.24	-0.00507085		3409.24	-0.01437829
229.4	0.00822973		759.42	0.0013769		1289.41	0.01096772		1819.44	0.00893186		2349.44	-0.00770088		2879.44	-0.00574133		3409.44	-0.0140908
229.6	0.00751775		759.62	0.00137526		1289.61	0.01041217		1819.64	0.00763568		2349.64	-0.00781049		2879.64	-0.00618754		3409.64	-0.01340903
229.8	0.00763393		759.82	0.00079536		1289.81	0.01015556		1819.84	0.00719156		2349.84	-0.00806808		2879.84	-0.00662536		3409.84	-0.0127645
230	0.00843095		760.02	0.0002552		1290.01	0.00982019		1820.04	0.00609226		2350.04	-0.0083128		2880.04	-0.00740378		3410.04	-0.01247831
230.2	0.00847542		760.22	0.00012016		1290.21	0.01066171		1820.24	0.00528404		2350.24	-0.00785684		2880.24	-0.00798596		3410.24	-0.01164816
230.4	0.00960498		760.42	0.0003048		1290.41	0.0096044		1820.44	0.00429115		2350.44	-0.00802394		2880.44	-0.00885314		3410.44	-0.01097509
230.6	0.0094183		760.62	0.00015293		1290.61	0.0090687		1820.64	0.00401792		2350.64	-0.00738667		2880.64	-0.00878205		3410.64	-0.01116706
230.8	0.00897041		760.82	0.0009661		1290.81	0.00921286		1820.84	0.00398712		2350.84	-0.00841853		2880.84	-0.00969276		3410.84	-0.01098158
231	0.00862354		761.02	0.00110844		1291.01	0.00938738		1821.04	0.00470142		2351.04	-0.00803995		2881.04	-0.01030024		3411.04	-0.01102572
231.2	0.00828015		761.22	0.00184583		1291.21	0.00909986		1821.24	0.00505492		2351.24	-0.00809239		2881.24	-0.01014414		3411.24	-0.0112793
231.4	0.00762422		761.42	0.00275247		1291.41	0.00981799		1821.44	0.00589558		2351.44	-0.00830184		2881.44	-0.00941827		3411.44	-0.0115142
231.6	0.00711207		761.62	0.00378487		1291.61	0.01021304		1821.64	0.00682365		2351.64	-0.0082334		2881.64	-0.00929755		3411.64	-0.01104176
231.8	0.00729023		761.82	0.003995		1291.81	0.00991513		1821.84	0.00773333		2351.84	-0.00769785		2881.84	-0.00890882		3411.84	-0.01071614
232	0.00761234		762.02	0.0047019		1292.01	0.00962012		1822.04	0.00822646		2352.04	-0.00715068		2882.04	-0.00851196		3412.04	-0.01075079
232.2	0.00774816		762.22	0.00555349		1292.21	0.00876354		1822.24	0.00856483		2352.24	-0.00701833		2882.24	-0.00896761		3412.24	-0.01139354
232.4	0.00743697		762.42	0.00506867		1292.41	0.0090796		1822.44	0.0085928		2352.44	-0.00693164		2882.44	-0.00827045		3412.44	-0.01156748
232.6	0.00750092		762.62	0.00478436		1292.61	0.0092852		1822.64	0.00962872		2352.64	-0.00743042		2882.64	-0.00816338		3412.64	-0.01092701
232.8	0.00782962		762.82	0.00418612		1292.81	0.00968849		1822.84	0.00951612		2352.84	-0.00750015		2882.84	-0.00830107		3412.84	-0.01167169
233	0.00820148		763.02	0.0032657		1293.01	0.00858028		1823.04	0.00870462		2353.04	-0.00710656		2883.04	-0.00808157		3413.04	-0.01167771
233.2	0.00728289		763.22	0.00200586		1293.21	0.00761227		1823.24	0.00851324		2353.24	-0.00679071		2883.24	-0.00830957		3413.24	-0.01140334
233.4	0.00736199		763.42	0.00169934		1293.41	0.00727214		1823.44	0.00825272		2353.44	-0.00668525		2883.44	-0.00819896		3413.44	-0.01145618
233.6	0.00712053		763.62	0.00204413		1293.61	0.00657396		1823.64	0.0076754		2353.64	-0.00716022		2883.64	-0.00869941		3413.64	-0.01193735
233.8	0.00734175		763.82	0.00133966		1293.81	0.00719573		1823.84	0.00734785		2353.84	-0.00723621		2883.84	-0.00921465		3413.84	-0.01191779
234	0.00820024		764.02	0.00123838		1294.01	0.00720955		1824.04	0.00744454		2354.04	-0.00792276		2884.04	-0.00887605		3414.04	-0.01239783
234.2	0.00789071		764.22	0.00080122		1294.21	0.00709142		1824.24	0.00737548		2354.24	-0.00747365		2884.24	-0.00887596		3414.24	-0.01291149
234.4	0.00709194		764.42	0.00072026		1294.41	0.00742748		1824.44	0.00764094		2354.44	-0.00747152		2884.44	-0.00830757		3414.44	-0.01307359
234.6	0.00758134		764.62	0.0006273		1294.61	0.00819201		1824.64	0.00780653		2354.64	-0.00706586		2884.64	-0.00859775		3414.64	-0.01228861
234.8	0.00703438		764.82	0.00153111		1294.81	0.00980739		1824.84	0.00807421		2354.84	-0.00745165		2884.84	-0.00858659		3414.84	-0.0117297
235	0.0066254		765.02	0.00223465		1295.01	0.01080675		1825.04	0.00922641		2355.04	-0.00683019		2885.04	-0.00800027		3415.04	-0.01154069
235.2	0.00610613		765.22	0.00352208		1295.21	0.01197917		1825.24	0.00988967		2355.24	-0.00690376		2885.24	-0.00747476		3415.24	-0.01078982
235.4	0.00573983		765.42	0.00331743		1295.41	0.01304901		1825.44	0.01047536		2355.44	-0.00716237		2885.44	-0.00738927		3415.44	-0.01011721
235.6	0.00592343		765.62	0.00284106		1295.61	0.01312958		1825.64	0.01081427		2355.64	-0.00659952		2885.64	-0.00795444		3415.64	-0.00976398
235.8	0.00642636		765.82	0.00298315		1295.81	0.01283292		1825.84	0.01073472		2355.84	-0.00616042		2885.84	-0.00779523		3415.84	-0.00990556
236	0.0061051		766.02	0.00325818		1296.01	0.012683		1826.04	0.01043223		2356.04	-0.00573324		2886.04	-0.00829916		3416.04	-0.00963397
236.2	0.00553109		766.22	0.00310179		1296.21	0.0130221		1826.24	0.01054025		2356.24	-0.00556382		2886.24	-0.00842403		3416.24	-0.00988321
236.4	0.00490163		766.42	0.00259708		1296.41	0.01421916		1826.44	0.01031155		2356.44	-0.00564693		2886.44	-0.00845835		3416.44	-0.01014532
236.6	0.00538466		766.62	0.00271062		1296.61	0.01369899		1826.64	0.01060077		2356.64	-0.00531427		2886.64	-0.00919564		3416.64	-0.00985765
236.8	0.00649968		766.82	0.00239408		1296.81	0.01341921		1826.84	0.01042929		2356.84	-0.00496077		2886.84	-0.00906603		3416.84	-0.00968343
237	0.00674444		767.02	0.00260109		1297.01	0.01272408		1827.04	0.01076474		2357.04	-0.00506122		2887.04	-0.00899492		3417.04	-0.00928056
237.2	0.00657227		767.22	0.00245251		1297.21	0.01272333		1827.24	0.01009797		2357.24	-0.00550338		2887.24	-0.00897916		3417.24	-0.00955595
237.4	0.00742993		767.42	0.00297759		1297.41	0.01259796		1827.44	0.00948513		2357.44	-0.0064038		2887.44	-0.00900423		3417.44	-0.00950793
237.6	0.00803022		767.62	0.0028965		1297.61	0.01138673		1827.64	0.00934992		2357.64	-0.00587822		2887.64	-0.00949013		3417.64	-0.00992323
237.8	0.00784101		767.82	0.00240789		1297.81	0.0108815		1827.84	0.00888954		2357.84	-0.00518852		2887.84	-0.00965199		3417.84	-0.01073315
238	0.00878118		768.02	0.00219436		1298.01	0.00888764		1828.04	0.00915066		2358.04	-0.00595446		2888.04	-0.00915644		3418.04	-0.01183072
238.2	0.00873047		768.22	0.00215833		1298.21	0.00763563		1828.24	0.00857386		2358.24	-0.00609046		2888.24	-0.00969366		3418.24	-0.01297243
238.4	0.00880845		768.42	0.00185584		1298.41	0.00704838		1828.44	0.00846775		2358.44	-0.0061108		2888.44	-0.00941632		3418.44	-0.0122967
238.6	0.01047896		768.62	0.00157236		1298.61	0.00656141		1828.64	0.00890139		2358.64	-0.00706831		2888.64	-0.00937249		3418.64	-0.01108282
238.8	0.00992937		768.82	0.00224908		1298.81	0.00605825		1828.84	0.00912024		2358.84	-0.00743781		2888.84	-0.00803584		3418.84	-0.01082666
239	0.01017812		769.02	0.00228558		1299.01	0.00542496		1829.04	0.00957113		2359.04	-0.00724197		2889.04	-0.00781142		3419.04	-0.01068611
239.2	0.0101125		769.22	0.00240827		1299.21	0.00539264		1829.24	0.0095478		2359.24	-0.00829217		2889.24	-0.00644122		3419.24	-0.01016069
239.4	0.00939917		769.42	0.00209193		1299.41	0.00537416		1829.44	0.0089779		2359.44	-0.0095932		2889.44	-0.00623305		3419.44	-0.01095144
239.6	0.00841948		769.62	0.00125421		1299.61	0.00574935		1829.64	0.00867818		2359.64	-0.00950113		2889.64	-0.00633061		3419.64	-0.01209718
239.8	0.00778829		769.82	0.00139425		1299.81	0.00630684		1829.84	0.00877084		2359.84	-0.01015764		2889.84	-0.00666797		3419.84	-0.01248069
240	0.00662957		770.02	0.00125499		1300.01	0.00677852		1830.04	0.009785		2360.04	-0.00991196		2890.04	-0.00632433		3420.04	-0.01243621
240.2	0.00630614		770.22	0.00146003		1300.21	0.00767486		1830.24	0.01065191		2360.24	-0.00953002		2890.24	-0.0066323		3420.24	-0.01274711
240.4	0.00627479		770.42	0.00106315		1300.41	0.00878714		1830.44	0.01013198		2360.44	-0.01014893		2890.44	-0.00703318		3420.44	-0.01285718
240.6	0.00597172		770.62	0.00154788		1300.61	0.00907176		1830.64	0.0107219		2360.64	-0.00999951		2890.64	-0.00742419		3420.64	-0.01174104
240.8	0.00519078		770.82	0.00123423		1300.81	0.01054772		1830.84	0.01046879		2360.84	-0.00960936		2890.84	-0.00708712		3420.84	-0.01158105
241	0.00383571		771.02	0.00227996		1301.01	0.01102768		1831.04	0.00974347		2361.04	-0.01051785		2891.04	-0.00740022		3421.04	-0.01164875
241.2	0.00323954		771.22	0.00249545		1301.21	0.01181315		1831.24	0.00849011		2361.24	-0.01052709		2891.24	-0.00833146		3421.24	-0.0118517
241.4	0.00394027		771.42	0.00298535		1301.41	0.01165682		1831.44	0.00781587		2361.44	-0.01076819		2891.44	-0.00821418		3421.44	-0.01147951
241.6	0.00385013		771.62	0.0028566		1301.61	0.01163011		1831.64	0.00780053		2361.64	-0.0092166		2891.64	-0.00943986		3421.64	-0.01248326
241.8	0.00385496		771.82	0.00357713		1301.81	0.01158883		1831.84	0.00802931		2361.84	-0.0083101		2891.84	-0.00989799		3421.84	-0.01345608
242	0.00432525		772.02	0.00361151		1302.01	0.0107419		1832.04	0.00830554		2362.04	-0.0087307		2892.04	-0.00962047		3422.04	-0.01386039
242.2	0.00482531		772.22	0.00388733		1302.21	0.01032564		1832.24	0.00814316		2362.24	-0.00941935		2892.24	-0.00988316		3422.24	-0.01319409
242.4	0.0055806		772.42	0.00324756		1302.41	0.01048215		1832.44	0.00777829		2362.44	-0.00918421		2892.44	-0.00834		3422.44	-0.01231907
242.6	0.00635176		772.62	0.00393778		1302.61	0.0108843		1832.64	0.00709241		2362.64	-0.00922154		2892.64	-0.00789959		3422.64	-0.01179523
242.8	0.00641298		772.82	0.00483223		1302.81	0.00993371		1832.84	0.00659751		2362.84	-0.0083626		2892.84	-0.00763363		3422.84	-0.01159694
243	0.00624239		773.02	0.00599907		1303.01	0.01047522		1833.04	0.00650956		2363.04	-0.00862765		2893.04	-0.00764012		3423.04	-0.0116164
243.2	0.00609408		773.22	0.0067212		1303.21	0.01123098		1833.24	0.00645532		2363.24	-0.00975796		2893.24	-0.00645002		3423.24	-0.0110339
243.4	0.00562568		773.42	0.00586129		1303.41	0.01161067		1833.44	0.00673063		2363.44	-0.00920387		2893.44	-0.00682256		3423.44	-0.01177357
243.6	0.00531688		773.62	0.00509553		1303.61	0.01169772		1833.64	0.0077203		2363.64	-0.00846643		2893.64	-0.00659432		3423.64	-0.0125062
243.8	0.00583961		773.82	0.00487189		1303.81	0.0112677		1833.84	0.00804948		2363.84	-0.0081786		2893.84	-0.00620458		3423.84	-0.01229008
244	0.00591088		774.02	0.00431072		1304.01	0.01038711		1834.04	0.00861025		2364.04	-0.00782036		2894.04	-0.00538577		3424.04	-0.01277231
244.2	0.00626806		774.22	0.00324419		1304.21	0.01046907		1834.24	0.00897187		2364.24	-0.00769342		2894.24	-0.00567158		3424.24	-0.01239863
244.4	0.00557591		774.42	0.00200993		1304.41	0.01057384		1834.44	0.00919642		2364.44	-0.00803327		2894.44	-0.00514203		3424.44	-0.01213951
244.6	0.00486274		774.62	0.00185488		1304.61	0.01019955		1834.64	0.0098465		2364.64	-0.00742554		2894.64	-0.00423125		3424.64	-0.01191197
244.8	0.00450529		774.82	0.00127565		1304.81	0.00986043		1834.84	0.00968994		2364.84	-0.00707148		2894.84	-0.00307364		3424.84	-0.01277702
245	0.00475922		775.02	0.00156012		1305.01	0.00869592		1835.04	0.00865838		2365.04	-0.0080987		2895.04	-0.00339476		3425.04	-0.01302846
245.2	0.00512311		775.22	0.00089053		1305.21	0.00837336		1835.24	0.0088445		2365.24	-0.00790859		2895.24	-0.00397032		3425.24	-0.01274666
245.4	0.00546907		775.42	0.00131981		1305.41	0.00787654		1835.44	0.01009482		2365.44	-0.00785684		2895.44	-0.00367752		3425.44	-0.01317624
245.6	0.00594381		775.62	0.00076277		1305.61	0.00826244		1835.64	0.01151868		2365.64	-0.00653922		2895.64	-0.0049301		3425.64	-0.01338314
245.8	0.00606766		775.82	0.00049298		1305.81	0.00732359		1835.84	0.01144198		2365.84	-0.00642129		2895.84	-0.00537385		3425.84	-0.01372633
246	0.00644274		776.02	-0.00011509		1306.01	0.00638738		1836.04	0.01179709		2366.04	-0.0073414		2896.04	-0.00568372		3426.04	-0.01383738
246.2	0.00743846		776.22	0.00055863		1306.21	0.00726224		1836.24	0.01158516		2366.24	-0.00728591		2896.24	-0.00616129		3426.24	-0.01362951
246.4	0.00749738		776.42	0.00072481		1306.41	0.00742836		1836.44	0.01165106		2366.44	-0.00689683		2896.44	-0.00694795		3426.44	-0.01404462
246.6	0.00789679		776.62	0.00167622		1306.61	0.00773855		1836.64	0.01123994		2366.64	-0.00710411		2896.64	-0.00849895		3426.64	-0.01361022
246.8	0.00772083		776.82	0.001733		1306.81	0.00762377		1836.84	0.01209773		2366.84	-0.00720927		2896.84	-0.00911372		3426.84	-0.01377258
247	0.00729125		777.02	0.00303253		1307.01	0.00890299		1837.04	0.01236495		2367.04	-0.00720453		2897.04	-0.00889222		3427.04	-0.0135399
247.2	0.0076503		777.22	0.00255639		1307.21	0.00943975		1837.24	0.0120481		2367.24	-0.00782733		2897.24	-0.00869941		3427.24	-0.01336037
247.4	0.00697039		777.42	0.00226367		1307.41	0.01015843		1837.44	0.01159994		2367.44	-0.00778405		2897.44	-0.00906781		3427.44	-0.01372468
247.6	0.00714331		777.62	0.00204614		1307.61	0.01031567		1837.64	0.01081971		2367.64	-0.00807338		2897.64	-0.00902311		3427.64	-0.01363211
247.8	0.00745712		777.82	0.00126899		1307.81	0.01025493		1837.84	0.00976623		2367.84	-0.00849765		2897.84	-0.00871745		3427.84	-0.01317506
248	0.00725578		778.02	0.0008985		1308.01	0.00954497		1838.04	0.00913361		2368.04	-0.00886568		2898.04	-0.00857399		3428.04	-0.01396655
248.2	0.00724154		778.22	-0.00032829		1308.21	0.00972052		1838.24	0.00882401		2368.24	-0.00952279		2898.24	-0.00853018		3428.24	-0.01296987
248.4	0.00724879		778.42	-0.00033307		1308.41	0.00961637		1838.44	0.00831129		2368.44	-0.00936261		2898.44	-0.00776955		3428.44	-0.01279975
248.6	0.00738413		778.62	0.00022303		1308.61	0.00921421		1838.64	0.0071391		2368.64	-0.00954223		2898.64	-0.00703938		3428.64	-0.01278751
248.8	0.00769532		778.82	0.00029024		1308.81	0.00824937		1838.84	0.00630671		2368.84	-0.00953443		2898.84	-0.00653496		3428.84	-0.01266884
249	0.00670737		779.02	0.00005784		1309.01	0.00752126		1839.04	0.00544506		2369.04	-0.00994177		2899.04	-0.00732909		3429.04	-0.01194492
249.2	0.00662852		779.22	0.00012259		1309.21	0.00737965		1839.24	0.00647573		2369.24	-0.00939126		2899.24	-0.00703567		3429.24	-0.01184596
249.4	0.00666922		779.42	0.00128931		1309.41	0.00685251		1839.44	0.00665767		2369.44	-0.00892054		2899.44	-0.00641009		3429.44	-0.0119408
249.6	0.00729699		779.62	0.00162594		1309.61	0.00656721		1839.64	0.00657951		2369.64	-0.00843112		2899.64	-0.00659942		3429.64	-0.01185395
249.8	0.0066604		779.82	0.00258278		1309.81	0.00586298		1839.84	0.00647502		2369.84	-0.0087718		2899.84	-0.00689652		3429.84	-0.01206247
250	0.00760998		780.02	0.00342227		1310.01	0.00624455		1840.04	0.00727547		2370.04	-0.00919597		2900.04	-0.00727923		3430.04	-0.01149337
250.2	0.00797534		780.22	0.00424451		1310.21	0.00658239		1840.24	0.00751279		2370.24	-0.00853389		2900.24	-0.00753568		3430.24	-0.01176873
250.4	0.00720849		780.42	0.00454412		1310.41	0.00629031		1840.44	0.00806611		2370.44	-0.00917235		2900.44	-0.00803646		3430.44	-0.0116997
250.6	0.00726644		780.62	0.00476235		1310.61	0.00764171		1840.64	0.00821796		2370.64	-0.00903421		2900.64	-0.00778938		3430.64	-0.0119941
250.8	0.0071013		780.82	0.00501826		1310.81	0.00804577		1840.84	0.00888401		2370.84	-0.00854393		2900.84	-0.00732501		3430.84	-0.01239824
251	0.00669098		781.02	0.00634406		1311.01	0.00913555		1841.04	0.00874434		2371.04	-0.00788023		2901.04	-0.00714084		3431.04	-0.01193081
251.2	0.00643646		781.22	0.00528678		1311.21	0.01037158		1841.24	0.00844961		2371.24	-0.00887252		2901.24	-0.0070709		3431.24	-0.01183976
251.4	0.00646931		781.42	0.00552967		1311.41	0.01097245		1841.44	0.00880232		2371.44	-0.00881266		2901.44	-0.00747483		3431.44	-0.01158414
251.6	0.00667145		781.62	0.00551187		1311.61	0.01072367		1841.64	0.00861701		2371.64	-0.00925173		2901.64	-0.00786863		3431.64	-0.01150331
251.8	0.00671828		781.82	0.00635482		1311.81	0.01142316		1841.84	0.00899112		2371.84	-0.00927905		2901.84	-0.00809911		3431.84	-0.01185796
252	0.00648327		782.02	0.00637868		1312.01	0.01191225		1842.04	0.00869527		2372.04	-0.00950184		2902.04	-0.00826988		3432.04	-0.01217918
252.2	0.00668922		782.22	0.00574504		1312.21	0.0124474		1842.24	0.00847141		2372.24	-0.00973259		2902.24	-0.00854132		3432.24	-0.01159623
252.4	0.00660877		782.42	0.00584663		1312.41	0.0121839		1842.44	0.00895513		2372.44	-0.00949072		2902.44	-0.00837291		3432.44	-0.01184094
252.6	0.00630121		782.62	0.00490459		1312.61	0.01241975		1842.64	0.00862148		2372.64	-0.00952969		2902.64	-0.00807656		3432.64	-0.01212545
252.8	0.00573854		782.82	0.00461208		1312.81	0.01100375		1842.84	0.00976984		2372.84	-0.00856399		2902.84	-0.00813196		3432.84	-0.01171253
253	0.00496885		783.02	0.0044685		1313.01	0.01111247		1843.04	0.00997416		2373.04	-0.00826226		2903.04	-0.00849126		3433.04	-0.01240131
253.2	0.00570799		783.22	0.00554062		1313.21	0.01094305		1843.24	0.01044444		2373.24	-0.0081019		2903.24	-0.00802658		3433.24	-0.01336814
253.4	0.00543531		783.42	0.00628009		1313.41	0.01002181		1843.44	0.01035727		2373.44	-0.00744953		2903.44	-0.00889204		3433.44	-0.01386738
253.6	0.00556955		783.62	0.0058175		1313.61	0.00974635		1843.64	0.00986702		2373.64	-0.0074454		2903.64	-0.00930607		3433.64	-0.01371955
253.8	0.00609198		783.82	0.00679146		1313.81	0.00894633		1843.84	0.00998349		2373.84	-0.00822247		2903.84	-0.00993716		3433.84	-0.01383115
254	0.00642565		784.02	0.00660701		1314.01	0.00864986		1844.04	0.0093847		2374.04	-0.00854101		2904.04	-0.00994118		3434.04	-0.01309122
254.2	0.0062095		784.22	0.00599406		1314.21	0.00745835		1844.24	0.0093566		2374.24	-0.00855168		2904.24	-0.00956656		3434.24	-0.01352228
254.4	0.00660031		784.42	0.00578411		1314.41	0.00731544		1844.44	0.00879394		2374.44	-0.00813741		2904.44	-0.00897993		3434.44	-0.0128997
254.6	0.00676641		784.62	0.00506005		1314.61	0.00725704		1844.64	0.00865919		2374.64	-0.00743422		2904.64	-0.00818976		3434.64	-0.01286815
254.8	0.00724895		784.82	0.00498386		1314.81	0.00655427		1844.84	0.00774846		2374.84	-0.0074023		2904.84	-0.0078186		3434.84	-0.01222483
255	0.00724696		785.02	0.00463001		1315.01	0.00628323		1845.04	0.00691703		2375.04	-0.00674936		2905.04	-0.00827488		3435.04	-0.01244098
255.2	0.00678578		785.22	0.00368757		1315.21	0.00727351		1845.24	0.00725894		2375.24	-0.00724296		2905.24	-0.00797656		3435.24	-0.01239899
255.4	0.00702189		785.42	0.00397187		1315.41	0.00733674		1845.44	0.0073379		2375.44	-0.00668606		2905.44	-0.00866875		3435.44	-0.01188752
255.6	0.00633391		785.62	0.00343735		1315.61	0.00840758		1845.64	0.00751203		2375.64	-0.0071629		2905.64	-0.00864589		3435.64	-0.01178448
255.8	0.00553532		785.82	0.00292848		1315.81	0.00976921		1845.84	0.00874927		2375.84	-0.00662195		2905.84	-0.00877274		3435.84	-0.01106893
256	0.00523787		786.02	0.0017204		1316.01	0.00977044		1846.04	0.0088235		2376.04	-0.00639424		2906.04	-0.00863117		3436.04	-0.01038671
256.2	0.00527049		786.22	0.00045245		1316.21	0.00945181		1846.24	0.00907745		2376.24	-0.00598465		2906.24	-0.00881763		3436.24	-0.01132596
256.4	0.00561838		786.42	-0.00039081		1316.41	0.00924001		1846.44	0.00914521		2376.44	-0.0061228		2906.44	-0.00916937		3436.44	-0.01113547
256.6	0.00546901		786.62	-0.00115795		1316.61	0.00965181		1846.64	0.01002102		2376.64	-0.00589874		2906.64	-0.00926837		3436.64	-0.01092834
256.8	0.00536854		786.82	-0.0010028		1316.81	0.00939073		1846.84	0.01121908		2376.84	-0.00510213		2906.84	-0.00995654		3436.84	-0.01124591
257	0.00558133		787.02	-0.00169969		1317.01	0.01049902		1847.04	0.0113398		2377.04	-0.00577547		2907.04	-0.01026408		3437.04	-0.01169699
257.2	0.00605161		787.22	-0.00152178		1317.21	0.01049899		1847.24	0.01214638		2377.24	-0.00688181		2907.24	-0.01112245		3437.24	-0.01195821
257.4	0.00656386		787.42	-0.00248865		1317.41	0.00979743		1847.44	0.01274801		2377.44	-0.0073355		2907.44	-0.01249871		3437.44	-0.01211745
257.6	0.00757257		787.62	-0.00208924		1317.61	0.01021535		1847.64	0.01286913		2377.64	-0.00868351		2907.64	-0.01279968		3437.64	-0.01179636
257.8	0.00857226		787.82	-0.00013401		1317.81	0.00924305		1847.84	0.01335036		2377.84	-0.00960517		2907.84	-0.01323607		3437.84	-0.0118285
258	0.00809555		788.02	-0.00009846		1318.01	0.00885038		1848.04	0.01333948		2378.04	-0.01024267		2908.04	-0.01283896		3438.04	-0.01087109
258.2	0.00924267		788.22	0.00031522		1318.21	0.00832261		1848.24	0.01332718		2378.24	-0.01130703		2908.24	-0.01308796		3438.24	-0.0106828
258.4	0.00951687		788.42	0.00127643		1318.41	0.00824588		1848.44	0.01295177		2378.44	-0.01092638		2908.44	-0.01252304		3438.44	-0.00976282
258.6	0.00845624		788.62	0.00140614		1318.61	0.00766286		1848.64	0.01275072		2378.64	-0.01148165		2908.64	-0.01164766		3438.64	-0.00982861
258.8	0.00818615		788.82	0.00269338		1318.81	0.00801402		1848.84	0.01156539		2378.84	-0.01142753		2908.84	-0.01118354		3438.84	-0.00972084
259	0.00791836		789.02	0.00355045		1319.01	0.00830393		1849.04	0.01079511		2379.04	-0.01111011		2909.04	-0.01102236		3439.04	-0.00990432
259.2	0.00725928		789.22	0.00459582		1319.21	0.00979348		1849.24	0.0107802		2379.24	-0.01157521		2909.24	-0.01100487		3439.24	-0.00960076
259.4	0.00695246		789.42	0.00582999		1319.41	0.00990477		1849.44	0.01016357		2379.44	-0.01132408		2909.44	-0.01025824		3439.44	-0.00948878
259.6	0.00575885		789.62	0.00662984		1319.61	0.00948404		1849.64	0.00932112		2379.64	-0.01128192		2909.64	-0.00889604		3439.64	-0.01011623
259.8	0.00589398		789.82	0.00718146		1319.81	0.0089324		1849.84	0.0095576		2379.84	-0.01025243		2909.84	-0.008644		3439.84	-0.01021437
260	0.0067136		790.02	0.00775326		1320.01	0.00812605		1850.04	0.00909152		2380.04	-0.00922329		2910.04	-0.00773931		3440.04	-0.01095707
260.2	0.00751564		790.22	0.00710941		1320.21	0.00802647		1850.24	0.00877562		2380.24	-0.0085454		2910.24	-0.00688827		3440.24	-0.01286502
260.4	0.00814711		790.42	0.00679875		1320.41	0.00736897		1850.44	0.00704743		2380.44	-0.00741711		2910.44	-0.00699769		3440.44	-0.01282726
260.6	0.00862429		790.62	0.00582814		1320.61	0.00731303		1850.64	0.00734078		2380.64	-0.00743546		2910.64	-0.00594372		3440.64	-0.01358485
260.8	0.00828226		790.82	0.00526647		1320.81	0.00761231		1850.84	0.00641918		2380.84	-0.00657899		2910.84	-0.00574739		3440.84	-0.01475092
261	0.00798159		791.02	0.00465794		1321.01	0.00809432		1851.04	0.00623652		2381.04	-0.00666101		2911.04	-0.005097		3441.04	-0.01501026
261.2	0.00824081		791.22	0.00430088		1321.21	0.00776182		1851.24	0.00581697		2381.24	-0.00729602		2911.24	-0.00469137		3441.24	-0.01597451
261.4	0.00843516		791.42	0.00367532		1321.41	0.00782561		1851.44	0.0055226		2381.44	-0.00752033		2911.44	-0.00507062		3441.44	-0.01694097
261.6	0.00845034		791.62	0.00415083		1321.61	0.00863942		1851.64	0.00497466		2381.64	-0.00719129		2911.64	-0.00425322		3441.64	-0.01650327
261.8	0.00791047		791.82	0.00338135		1321.81	0.00808694		1851.84	0.00459042		2381.84	-0.00699955		2911.84	-0.00457048		3441.84	-0.01658774
262	0.00730117		792.02	0.00230376		1322.01	0.00851605		1852.04	0.0054496		2382.04	-0.00702073		2912.04	-0.00437235		3442.04	-0.01607377
262.2	0.00770971		792.22	0.00180821		1322.21	0.00894664		1852.24	0.00587159		2382.24	-0.00733418		2912.24	-0.004484		3442.24	-0.01563961
262.4	0.00604778		792.42	0.00187099		1322.41	0.00962203		1852.44	0.00642797		2382.44	-0.0069741		2912.44	-0.00443818		3442.44	-0.01517107
262.6	0.0056756		792.62	0.00164121		1322.61	0.01003236		1852.64	0.00630737		2382.64	-0.0074585		2912.64	-0.00437602		3442.64	-0.01482033
262.8	0.00568617		792.82	0.00280637		1322.81	0.01066884		1852.84	0.00742175		2382.84	-0.0073914		2912.84	-0.00523781		3442.84	-0.01427903
263	0.00541184		793.02	0.00303453		1323.01	0.01128458		1853.04	0.0086091		2383.04	-0.00795297		2913.04	-0.00694779		3443.04	-0.01427958
263.2	0.00485855		793.22	0.00412876		1323.21	0.01200145		1853.24	0.00929987		2383.24	-0.00870438		2913.24	-0.00816296		3443.24	-0.01425307
263.4	0.00533504		793.42	0.0049332		1323.41	0.01149231		1853.44	0.01022859		2383.44	-0.00898243		2913.44	-0.0079128		3443.44	-0.01421019
263.6	0.00526505		793.62	0.00458539		1323.61	0.01121185		1853.64	0.01045979		2383.64	-0.00865882		2913.64	-0.00768984		3443.64	-0.01422411
263.8	0.00609219		793.82	0.00452564		1323.81	0.0123004		1853.84	0.01207632		2383.84	-0.00806854		2913.84	-0.00830299		3443.84	-0.01423454
264	0.00706527		794.02	0.004433		1324.01	0.01213209		1854.04	0.01287491		2384.04	-0.00732789		2914.04	-0.00807458		3444.04	-0.01442146
264.2	0.00752352		794.22	0.00303142		1324.21	0.01272499		1854.24	0.01293188		2384.24	-0.00724799		2914.24	-0.00832838		3444.24	-0.01478317
264.4	0.00805313		794.42	0.00338245		1324.41	0.0120945		1854.44	0.01263397		2384.44	-0.00777993		2914.44	-0.00933956		3444.44	-0.01394259
264.6	0.00872329		794.62	0.00301021		1324.61	0.01105811		1854.64	0.01275017		2384.64	-0.00868225		2914.64	-0.00918594		3444.64	-0.01300081
264.8	0.00805929		794.82	0.00322092		1324.81	0.01048362		1854.84	0.0121008		2384.84	-0.00867348		2914.84	-0.00894577		3444.84	-0.01314362
265	0.00837069		795.02	0.00315685		1325.01	0.01026652		1855.04	0.01182726		2385.04	-0.00818133		2915.04	-0.00859399		3445.04	-0.01292077
265.2	0.00899437		795.22	0.00328373		1325.21	0.00936724		1855.24	0.01100896		2385.24	-0.00890295		2915.24	-0.00830326		3445.24	-0.01306531
265.4	0.00956586		795.42	0.00327605		1325.41	0.00906776		1855.44	0.01082447		2385.44	-0.00831611		2915.44	-0.00798943		3445.44	-0.01215285
265.6	0.00981467		795.62	0.00283444		1325.61	0.00903907		1855.64	0.01022481		2385.64	-0.00741735		2915.64	-0.00726772		3445.64	-0.01113664
265.8	0.01024333		795.82	0.00316793		1325.81	0.00822088		1855.84	0.01056658		2385.84	-0.00773729		2915.84	-0.00781456		3445.84	-0.01180015
266	0.01086898		796.02	0.00308949		1326.01	0.00824469		1856.04	0.01088327		2386.04	-0.00725368		2916.04	-0.0067274		3446.04	-0.01199698
266.2	0.010994		796.22	0.00308258		1326.21	0.00833698		1856.24	0.01050858		2386.24	-0.00758143		2916.24	-0.00754296		3446.24	-0.01204237
266.4	0.01001508		796.42	0.00387871		1326.41	0.00925235		1856.44	0.01036248		2386.44	-0.00766727		2916.44	-0.00761869		3446.44	-0.0123282
266.6	0.01016866		796.62	0.00348128		1326.61	0.00837329		1856.64	0.01007203		2386.64	-0.00819414		2916.64	-0.0080699		3446.64	-0.01221765
266.8	0.00915382		796.82	0.00372525		1326.81	0.00856655		1856.84	0.01156937		2386.84	-0.00816978		2916.84	-0.00945518		3446.84	-0.0129809
267	0.00887533		797.02	0.00404252		1327.01	0.00903248		1857.04	0.01105237		2387.04	-0.00773261		2917.04	-0.00961876		3447.04	-0.01332868
267.2	0.00838282		797.22	0.00425171		1327.21	0.00941943		1857.24	0.01119878		2387.24	-0.00785851		2917.24	-0.00962009		3447.24	-0.01244356
267.4	0.00892469		797.42	0.00378988		1327.41	0.00927339		1857.44	0.01182975		2387.44	-0.00737829		2917.44	-0.00908959		3447.44	-0.01195112
267.6	0.0085607		797.62	0.00253543		1327.61	0.00990378		1857.64	0.01184894		2387.64	-0.00756416		2917.64	-0.00848631		3447.64	-0.01251091
267.8	0.00789349		797.82	0.00205302		1327.81	0.01056304		1857.84	0.0123561		2387.84	-0.00796808		2917.84	-0.00826179		3447.84	-0.01239005
268	0.00724732		798.02	0.00144906		1328.01	0.01111664		1858.04	0.0127691		2388.04	-0.00815755		2918.04	-0.00810486		3448.04	-0.01254791
268.2	0.00724771		798.22	0.0011629		1328.21	0.01159256		1858.24	0.01251218		2388.24	-0.0086654		2918.24	-0.00846486		3448.24	-0.01234079
268.4	0.0079233		798.42	0.00176972		1328.41	0.01065856		1858.44	0.01256997		2388.44	-0.00880054		2918.44	-0.00849443		3448.44	-0.01158069
268.6	0.00710555		798.62	0.00129962		1328.61	0.01053112		1858.64	0.01125876		2388.64	-0.00831403		2918.64	-0.00912685		3448.64	-0.01167886
268.8	0.00672666		798.82	0.00148168		1328.81	0.01126583		1858.84	0.01076093		2388.84	-0.00820135		2918.84	-0.00868244		3448.84	-0.01242447
269	0.00749044		799.02	0.00211428		1329.01	0.01151913		1859.04	0.00990974		2389.04	-0.00748993		2919.04	-0.00898233		3449.04	-0.01172822
269.2	0.00796987		799.22	0.00284585		1329.21	0.01121616		1859.24	0.00989287		2389.24	-0.00789653		2919.24	-0.0092428		3449.24	-0.01186976
269.4	0.00864744		799.42	0.00338573		1329.41	0.01090608		1859.44	0.0102716		2389.44	-0.00768394		2919.44	-0.00932605		3449.44	-0.01164187
269.6	0.00855025		799.62	0.0042162		1329.61	0.0108148		1859.64	0.00925811		2389.64	-0.00843238		2919.64	-0.00908089		3449.64	-0.01263686
269.8	0.00821956		799.82	0.00531057		1329.81	0.01068901		1859.84	0.00961648		2389.84	-0.00958483		2919.84	-0.00884741		3449.84	-0.01398336
270	0.00811689		800.02	0.00568477		1330.01	0.01053895		1860.04	0.00905284		2390.04	-0.00975321		2920.04	-0.00829262		3450.04	-0.0148999
270.2	0.00775838		800.22	0.00666537		1330.21	0.01009895		1860.24	0.00885734		2390.24	-0.0097964		2920.24	-0.00893611		3450.24	-0.01442921
270.4	0.00746846		800.42	0.00732196		1330.41	0.00918724		1860.44	0.00880361		2390.44	-0.00925096		2920.44	-0.00882818		3450.44	-0.01501932
270.6	0.00724364		800.62	0.00680858		1330.61	0.00832452		1860.64	0.00873449		2390.64	-0.01000197		2920.64	-0.0086365		3450.64	-0.01520764
270.8	0.00677633		800.82	0.00717543		1330.81	0.00882072		1860.84	0.00857798		2390.84	-0.0097104		2920.84	-0.00817938		3450.84	-0.01556042
271	0.00733189		801.02	0.00670946		1331.01	0.00828549		1861.04	0.00788711		2391.04	-0.00927777		2921.04	-0.00803404		3451.04	-0.0150974
271.2	0.00706718		801.22	0.00622264		1331.21	0.00808357		1861.24	0.00847018		2391.24	-0.00943481		2921.24	-0.00768591		3451.24	-0.01512297
271.4	0.00788768		801.42	0.00606108		1331.41	0.00791262		1861.44	0.00835224		2391.44	-0.01010413		2921.44	-0.00732974		3451.44	-0.01596454
271.6	0.00771935		801.62	0.00530345		1331.61	0.00834303		1861.64	0.00807864		2391.64	-0.01095513		2921.64	-0.00650762		3451.64	-0.01697441
271.8	0.00771566		801.82	0.00498017		1331.81	0.00919082		1861.84	0.00706116		2391.84	-0.01108805		2921.84	-0.00679163		3451.84	-0.01685833
272	0.00847675		802.02	0.0049395		1332.01	0.00982475		1862.04	0.00664576		2392.04	-0.01048009		2922.04	-0.00697921		3452.04	-0.01753227
272.2	0.00922345		802.22	0.00460685		1332.21	0.00956298		1862.24	0.00656692		2392.24	-0.00970347		2922.24	-0.00716352		3452.24	-0.01754365
272.4	0.00986506		802.42	0.00378985		1332.41	0.00994021		1862.44	0.00652814		2392.44	-0.00952323		2922.44	-0.00658558		3452.44	-0.01770324
272.6	0.00932101		802.62	0.00282427		1332.61	0.01052105		1862.64	0.0059576		2392.64	-0.00973611		2922.64	-0.0069569		3452.64	-0.01819414
272.8	0.00992405		802.82	0.00158275		1332.81	0.01030048		1862.84	0.00567671		2392.84	-0.00978909		2922.84	-0.00696877		3452.84	-0.01787928
273	0.01044924		803.02	0.00217751		1333.01	0.00970075		1863.04	0.00573696		2393.04	-0.00970838		2923.04	-0.00749442		3453.04	-0.01677449
273.2	0.01089233		803.22	0.00214941		1333.21	0.00908307		1863.24	0.00647844		2393.24	-0.00933592		2923.24	-0.00817105		3453.24	-0.01713208
273.4	0.01024333		803.42	0.00269929		1333.41	0.00909406		1863.44	0.00722382		2393.44	-0.00953245		2923.44	-0.008369		3453.44	-0.01633404
273.6	0.00917673		803.62	0.00253441		1333.61	0.00882082		1863.64	0.00702906		2393.64	-0.00968862		2923.64	-0.00793956		3453.64	-0.01555975
273.8	0.00838539		803.82	0.00271406		1333.81	0.00980078		1863.84	0.0078101		2393.84	-0.00934002		2923.84	-0.0080726		3453.84	-0.01524457
274	0.00877603		804.02	0.00305293		1334.01	0.00948952		1864.04	0.00778267		2394.04	-0.00860115		2924.04	-0.00747363		3454.04	-0.01413366
274.2	0.00854888		804.22	0.00310399		1334.21	0.00912666		1864.24	0.00864183		2394.24	-0.00760431		2924.24	-0.00689616		3454.24	-0.01356527
274.4	0.00834291		804.42	0.00265802		1334.41	0.00977624		1864.44	0.00847961		2394.44	-0.00781282		2924.44	-0.00653785		3454.44	-0.01349183
274.6	0.00755504		804.62	0.00218523		1334.61	0.01023919		1864.64	0.00843196		2394.64	-0.00833893		2924.64	-0.00599874		3454.64	-0.01323169
274.8	0.0066089		804.82	0.00188372		1334.81	0.01040457		1864.84	0.00873609		2394.84	-0.00821152		2924.84	-0.0058259		3454.84	-0.01313451
275	0.00641989		805.02	0.00217735		1335.01	0.01021016		1865.04	0.00962444		2395.04	-0.00813062		2925.04	-0.00659909		3455.04	-0.01266006
275.2	0.00651931		805.22	0.00279246		1335.21	0.01049018		1865.24	0.01012175		2395.24	-0.00846906		2925.24	-0.00639941		3455.24	-0.01281182
275.4	0.00615577		805.42	0.00276704		1335.41	0.01054074		1865.44	0.01017138		2395.44	-0.00942565		2925.44	-0.00705956		3455.44	-0.01271413
275.6	0.00519519		805.62	0.00276481		1335.61	0.01043308		1865.64	0.01051647		2395.64	-0.00933328		2925.64	-0.00745653		3455.64	-0.01251715
275.8	0.00605001		805.82	0.00264122		1335.81	0.01020584		1865.84	0.01001099		2395.84	-0.00946629		2925.84	-0.00857496		3455.84	-0.01207292
276	0.00607757		806.02	0.00257054		1336.01	0.00982569		1866.04	0.0108061		2396.04	-0.00961653		2926.04	-0.00789288		3456.04	-0.01209383
276.2	0.00599713		806.22	0.00330523		1336.21	0.01008423		1866.24	0.0116717		2396.24	-0.00935889		2926.24	-0.00755088		3456.24	-0.01176415
276.4	0.00656984		806.42	0.00359694		1336.41	0.00994295		1866.44	0.01100674		2396.44	-0.00954191		2926.44	-0.00737058		3456.44	-0.01134481
276.6	0.00654953		806.62	0.00383454		1336.61	0.00986092		1866.64	0.01120982		2396.64	-0.00978743		2926.64	-0.00839244		3456.64	-0.01136634
276.8	0.00602247		806.82	0.00428254		1336.81	0.0094714		1866.84	0.01027056		2396.84	-0.00988706		2926.84	-0.00937392		3456.84	-0.01120643
277	0.00614361		807.02	0.00549003		1337.01	0.00918177		1867.04	0.01050148		2397.04	-0.00932768		2927.04	-0.00906262		3457.04	-0.01060435
277.2	0.00626933		807.22	0.00539308		1337.21	0.00938002		1867.24	0.00977135		2397.24	-0.00882973		2927.24	-0.00976454		3457.24	-0.01132689
277.4	0.00544907		807.42	0.00553458		1337.41	0.00930979		1867.44	0.0093802		2397.44	-0.00841365		2927.44	-0.00953433		3457.44	-0.01190419
277.6	0.00581186		807.62	0.00499319		1337.61	0.01002373		1867.64	0.00838799		2397.64	-0.00829665		2927.64	-0.00931		3457.64	-0.01269162
277.8	0.00620769		807.82	0.00371972		1337.81	0.01034408		1867.84	0.00831248		2397.84	-0.00781522		2927.84	-0.0089023		3457.84	-0.01356686
278	0.00749901		808.02	0.00365587		1338.01	0.00969422		1868.04	0.00783577		2398.04	-0.00776001		2928.04	-0.00887777		3458.04	-0.01353959
278.2	0.00786754		808.22	0.00336217		1338.21	0.00979415		1868.24	0.00820515		2398.24	-0.00765945		2928.24	-0.00899695		3458.24	-0.0145886
278.4	0.00848293		808.42	0.00270557		1338.41	0.01016506		1868.44	0.00770963		2398.44	-0.00742742		2928.44	-0.00879677		3458.44	-0.01512967
278.6	0.00797227		808.62	0.00236527		1338.61	0.00961058		1868.64	0.00829833		2398.64	-0.0071834		2928.64	-0.00894122		3458.64	-0.01597711
278.8	0.00773422		808.82	0.00164478		1338.81	0.00924109		1868.84	0.0085823		2398.84	-0.00762068		2928.84	-0.00943963		3458.84	-0.0165745
279	0.00807942		809.02	0.00119593		1339.01	0.00954841		1869.04	0.00848137		2399.04	-0.00743398		2929.04	-0.00972187		3459.04	-0.01666697
279.2	0.0077874		809.22	0.0002723		1339.21	0.00926205		1869.24	0.0087026		2399.24	-0.00800677		2929.24	-0.00986308		3459.24	-0.01728534
279.4	0.00631879		809.42	0.00048772		1339.41	0.00907729		1869.44	0.00922469		2399.44	-0.00729725		2929.44	-0.00981328		3459.44	-0.01785386
279.6	0.00650084		809.62	0.00003782		1339.61	0.00884026		1869.64	0.01028966		2399.64	-0.00710971		2929.64	-0.01013508		3459.64	-0.01808225
279.8	0.00719704		809.82	-0.00024228		1339.81	0.0094411		1869.84	0.01043119		2399.84	-0.00772813		2929.84	-0.00995969		3459.84	-0.01707637
280	0.00770011		810.02	0.00037043		1340.01	0.00990681		1870.04	0.01157166		2400.04	-0.00822212		2930.04	-0.00906617		3460.04	-0.01660089
280.2	0.00819989		810.22	0.0008131		1340.21	0.01079096		1870.24	0.01161878		2400.24	-0.00862163		2930.24	-0.00900134		3460.24	-0.01593112
280.4	0.00853191		810.42	0.00139159		1340.41	0.01117377		1870.44	0.01156127		2400.44	-0.0086591		2930.44	-0.00968809		3460.44	-0.01518261
280.6	0.0074058		810.62	0.00216509		1340.61	0.01104579		1870.64	0.0114823		2400.64	-0.00920016		2930.64	-0.00953489		3460.64	-0.01564718
280.8	0.00718705		810.82	0.00274517		1340.81	0.01072706		1870.84	0.01042135		2400.84	-0.00959339		2930.84	-0.00950639		3460.84	-0.01442507
281	0.00722913		811.02	0.00281081		1341.01	0.01104286		1871.04	0.01012329		2401.04	-0.00934166		2931.04	-0.00819309		3461.04	-0.01464396
281.2	0.00701247		811.22	0.00236132		1341.21	0.01123019		1871.24	0.0090248		2401.24	-0.00978464		2931.24	-0.00748196		3461.24	-0.01542353
281.4	0.00636884		811.42	0.00245062		1341.41	0.0106568		1871.44	0.0079142		2401.44	-0.00966554		2931.44	-0.00630105		3461.44	-0.01594561
281.6	0.00747792		811.62	0.00273404		1341.61	0.01013978		1871.64	0.00748531		2401.64	-0.00979168		2931.64	-0.00627377		3461.64	-0.01520421
281.8	0.0071301		811.82	0.00261608		1341.81	0.00921927		1871.84	0.00803626		2401.84	-0.00889816		2931.84	-0.00645909		3461.84	-0.014804
282	0.00731187		812.02	0.00264965		1342.01	0.00857289		1872.04	0.00710752		2402.04	-0.00986353		2932.04	-0.00674276		3462.04	-0.01448648
282.2	0.00725292		812.22	0.00242891		1342.21	0.00827239		1872.24	0.00674919		2402.24	-0.00920996		2932.24	-0.0065657		3462.24	-0.014803
282.4	0.00775963		812.42	0.0023233		1342.41	0.00742515		1872.44	0.00625667		2402.44	-0.00883966		2932.44	-0.00568528		3462.44	-0.01479152
282.6	0.0068049		812.62	0.00215871		1342.61	0.00749874		1872.64	0.00618907		2402.64	-0.00897984		2932.64	-0.00641809		3462.64	-0.01517373
282.8	0.00674409		812.82	0.00166215		1342.81	0.0064546		1872.84	0.00600743		2402.84	-0.00899142		2932.84	-0.00680936		3462.84	-0.01507119
283	0.00624198		813.02	0.00162916		1343.01	0.00648804		1873.04	0.00597617		2403.04	-0.00871269		2933.04	-0.00696774		3463.04	-0.01540287
283.2	0.00602841		813.22	0.0021214		1343.21	0.00669776		1873.24	0.00689971		2403.24	-0.00820746		2933.24	-0.00749283		3463.24	-0.01525952
283.4	0.00547865		813.42	0.00174367		1343.41	0.00663852		1873.44	0.00735571		2403.44	-0.00729626		2933.44	-0.00853636		3463.44	-0.01579636
283.6	0.0057076		813.62	0.00108603		1343.61	0.00584139		1873.64	0.00796246		2403.64	-0.00833413		2933.64	-0.00930251		3463.64	-0.01493315
283.8	0.00558686		813.82	0.00113791		1343.81	0.00623435		1873.84	0.00811362		2403.84	-0.00837747		2933.84	-0.00914488		3463.84	-0.01404013
284	0.00656675		814.02	0.00136017		1344.01	0.00592022		1874.04	0.0087292		2404.04	-0.0077575		2934.04	-0.00983944		3464.04	-0.01385477
284.2	0.00663927		814.22	0.00039988		1344.21	0.00653151		1874.24	0.00817769		2404.24	-0.00757143		2934.24	-0.01042063		3464.24	-0.01371804
284.4	0.00664377		814.42	0.00038534		1344.41	0.00724594		1874.44	0.00884205		2404.44	-0.00661124		2934.44	-0.01037867		3464.44	-0.01334582
284.6	0.00672366		814.62	0.0013747		1344.61	0.00691449		1874.64	0.0087056		2404.64	-0.00675549		2934.64	-0.0101468		3464.64	-0.01340797
284.8	0.00811739		814.82	0.00133251		1344.81	0.00764889		1874.84	0.00833508		2404.84	-0.00741955		2934.84	-0.01033454		3464.84	-0.01289616
285	0.00818605		815.02	0.00164532		1345.01	0.00800678		1875.04	0.00791983		2405.04	-0.00714515		2935.04	-0.00904662		3465.04	-0.0144962
285.2	0.0087767		815.22	0.00156093		1345.21	0.00868344		1875.24	0.0081463		2405.24	-0.00720537		2935.24	-0.00839146		3465.24	-0.01455008
285.4	0.00890225		815.42	0.00297404		1345.41	0.00881116		1875.44	0.00747264		2405.44	-0.00692182		2935.44	-0.00859335		3465.44	-0.01508467
285.6	0.0097902		815.62	0.00437088		1345.61	0.00886663		1875.64	0.00797147		2405.64	-0.0073091		2935.64	-0.00819253		3465.64	-0.01464489
285.8	0.00926831		815.82	0.00410969		1345.81	0.00946145		1875.84	0.00765014		2405.84	-0.00750428		2935.84	-0.00785733		3465.84	-0.01556711
286	0.00942431		816.02	0.00397282		1346.01	0.00965843		1876.04	0.00650189		2406.04	-0.00927722		2936.04	-0.00791117		3466.04	-0.01584521
286.2	0.00978912		816.22	0.00548573		1346.21	0.0093412		1876.24	0.00608209		2406.24	-0.00956917		2936.24	-0.00808492		3466.24	-0.01588866
286.4	0.00926581		816.42	0.00628973		1346.41	0.00891657		1876.44	0.0059699		2406.44	-0.01039297		2936.44	-0.00747901		3466.44	-0.01538338
286.6	0.0090203		816.62	0.0069032		1346.61	0.00931171		1876.64	0.00554582		2406.64	-0.01158946		2936.64	-0.00826787		3466.64	-0.01607738
286.8	0.00923902		816.82	0.00753721		1346.81	0.00924979		1876.84	0.00491915		2406.84	-0.01190856		2936.84	-0.00867686		3466.84	-0.01582885
287	0.00890907		817.02	0.00739747		1347.01	0.0094572		1877.04	0.00450709		2407.04	-0.01239732		2937.04	-0.00920717		3467.04	-0.01657351
287.2	0.00873704		817.22	0.00740308		1347.21	0.00911879		1877.24	0.00462159		2407.24	-0.01210964		2937.24	-0.00997808		3467.24	-0.01587692
287.4	0.00764675		817.42	0.00705252		1347.41	0.00770905		1877.44	0.00397782		2407.44	-0.01248011		2937.44	-0.01053775		3467.44	-0.01586426
287.6	0.00653782		817.62	0.00763828		1347.61	0.00729411		1877.64	0.00349655		2407.64	-0.01175794		2937.64	-0.01079158		3467.64	-0.01485239
287.8	0.00618291		817.82	0.00672518		1347.81	0.00768441		1877.84	0.00386037		2407.84	-0.01033942		2937.84	-0.01130781		3467.84	-0.0152163
288	0.00583253		818.02	0.00626625		1348.01	0.0077818		1878.04	0.00404693		2408.04	-0.00988667		2938.04	-0.01239384		3468.04	-0.01557501
288.2	0.00501048		818.22	0.00564404		1348.21	0.0084007		1878.24	0.00496011		2408.24	-0.00938989		2938.24	-0.01229757		3468.24	-0.01499613
288.4	0.00507789		818.42	0.00568188		1348.41	0.00884752		1878.44	0.00610088		2408.44	-0.00877477		2938.44	-0.01258777		3468.44	-0.01562537
288.6	0.0056468		818.62	0.00599789		1348.61	0.00833786		1878.64	0.00689686		2408.64	-0.00854776		2938.64	-0.01344091		3468.64	-0.0159612
288.8	0.00573102		818.82	0.00500087		1348.81	0.00849976		1878.84	0.00715482		2408.84	-0.008454		2938.84	-0.01329135		3468.84	-0.01697032
289	0.00554327		819.02	0.00551409		1349.01	0.00857795		1879.04	0.00797571		2409.04	-0.00748711		2939.04	-0.01279798		3469.04	-0.0170507
289.2	0.00601016		819.22	0.00537756		1349.21	0.00913386		1879.24	0.00789674		2409.24	-0.00752456		2939.24	-0.01298594		3469.24	-0.01699916
289.4	0.00590268		819.42	0.0059719		1349.41	0.00891216		1879.44	0.0078361		2409.44	-0.00742274		2939.44	-0.01233284		3469.44	-0.01701725
289.6	0.00586227		819.62	0.00558416		1349.61	0.00830623		1879.64	0.00820899		2409.64	-0.00785226		2939.64	-0.01173043		3469.64	-0.01648291
289.8	0.00584162		819.82	0.00465534		1349.81	0.00807501		1879.84	0.00854456		2409.84	-0.00807637		2939.84	-0.01085041		3469.84	-0.01696181
290	0.00660456		820.02	0.0047753		1350.01	0.00798909		1880.04	0.0085863		2410.04	-0.00860247		2940.04	-0.01001309		3470.04	-0.01736786
290.2	0.00694047		820.22	0.00434216		1350.21	0.00715555		1880.24	0.00865045		2410.24	-0.00794289		2940.24	-0.00909239		3470.24	-0.01625137
290.4	0.0069467		820.42	0.0045638		1350.41	0.00721812		1880.44	0.00828022		2410.44	-0.00791304		2940.44	-0.00820878		3470.44	-0.01568418
290.6	0.00791295		820.62	0.0035521		1350.61	0.0067598		1880.64	0.00795442		2410.64	-0.00792472		2940.64	-0.00766353		3470.64	-0.01625725
290.8	0.00836454		820.82	0.00265815		1350.81	0.00716488		1880.84	0.00750807		2410.84	-0.00831902		2940.84	-0.00661477		3470.84	-0.01656214
291	0.00862076		821.02	0.0016595		1351.01	0.00593396		1881.04	0.00772502		2411.04	-0.00853619		2941.04	-0.00578049		3471.04	-0.01684018
291.2	0.0086763		821.22	0.00149478		1351.21	0.00595271		1881.24	0.00795903		2411.24	-0.00743481		2941.24	-0.00556325		3471.24	-0.0162363
291.4	0.00927525		821.42	0.0013934		1351.41	0.00638		1881.44	0.00752045		2411.44	-0.00734788		2941.44	-0.00515033		3471.44	-0.01581701
291.6	0.00902925		821.62	0.00137973		1351.61	0.00714257		1881.64	0.00750027		2411.64	-0.00723109		2941.64	-0.00573157		3471.64	-0.01609264
291.8	0.00991187		821.82	0.00051447		1351.81	0.00793681		1881.84	0.00838039		2411.84	-0.0084486		2941.84	-0.00571068		3471.84	-0.01644499
292	0.01062179		822.02	0.00157511		1352.01	0.00855203		1882.04	0.00907623		2412.04	-0.00906076		2942.04	-0.00582911		3472.04	-0.01679869
292.2	0.01046051		822.22	0.00200409		1352.21	0.00875204		1882.24	0.00996863		2412.24	-0.00895356		2942.24	-0.00647623		3472.24	-0.01629568
292.4	0.01124143		822.42	0.00253711		1352.41	0.00863844		1882.44	0.01040269		2412.44	-0.00929442		2942.44	-0.00718196		3472.44	-0.01709704
292.6	0.01127182		822.62	0.00277887		1352.61	0.00860403		1882.64	0.01074822		2412.64	-0.00948449		2942.64	-0.00795106		3472.64	-0.01718999
292.8	0.01106602		822.82	0.00342215		1352.81	0.00831819		1882.84	0.01082054		2412.84	-0.00982172		2942.84	-0.00779679		3472.84	-0.01666393
293	0.01053654		823.02	0.00320654		1353.01	0.00768243		1883.04	0.01095858		2413.04	-0.01008611		2943.04	-0.00859319		3473.04	-0.01641629
293.2	0.00992342		823.22	0.00286975		1353.21	0.0074895		1883.24	0.00988143		2413.24	-0.01038044		2943.24	-0.00984674		3473.24	-0.01659312
293.4	0.00937385		823.42	0.00317562		1353.41	0.0071099		1883.44	0.01027819		2413.44	-0.01021404		2943.44	-0.01025188		3473.44	-0.01711568
293.6	0.00863326		823.62	0.00295853		1353.61	0.00688606		1883.64	0.01035054		2413.64	-0.00976548		2943.64	-0.01108344		3473.64	-0.01678048
293.8	0.0082153		823.82	0.00299318		1353.81	0.00683371		1883.84	0.01095951		2413.84	-0.00866429		2943.84	-0.01118395		3473.84	-0.01696084
294	0.00775982		824.02	0.00324694		1354.01	0.00701461		1884.04	0.0098233		2414.04	-0.00783081		2944.04	-0.01173837		3474.04	-0.01676344
294.2	0.00664114		824.22	0.00299901		1354.21	0.00660413		1884.24	0.00980741		2414.24	-0.00738822		2944.24	-0.01220993		3474.24	-0.01564273
294.4	0.00595086		824.42	0.00335656		1354.41	0.00705175		1884.44	0.00900129		2414.44	-0.00719358		2944.44	-0.01226041		3474.44	-0.01556622
294.6	0.00481193		824.62	0.00227342		1354.61	0.00691689		1884.64	0.00831632		2414.64	-0.00691377		2944.64	-0.01191214		3474.64	-0.01529606
294.8	0.00463719		824.82	0.00195614		1354.81	0.00748066		1884.84	0.00801574		2414.84	-0.00764023		2944.84	-0.01118736		3474.84	-0.01576034
295	0.00461089		825.02	0.00111748		1355.01	0.00711707		1885.04	0.00813556		2415.04	-0.00677803		2945.04	-0.01045341		3475.04	-0.01570391
295.2	0.00448513		825.22	0.00115454		1355.21	0.00825472		1885.24	0.00806037		2415.24	-0.00618595		2945.24	-0.00981395		3475.24	-0.01504064
295.4	0.00556543		825.42	0.00108344		1355.41	0.00897116		1885.44	0.00769187		2415.44	-0.00709524		2945.44	-0.00899485		3475.44	-0.01491984
295.6	0.00580204		825.62	0.00089577		1355.61	0.00966586		1885.64	0.00794866		2415.64	-0.00777507		2945.64	-0.00826992		3475.64	-0.01377887
295.8	0.00690144		825.82	0.00101392		1355.81	0.0107811		1885.84	0.00815883		2415.84	-0.00815905		2945.84	-0.00696871		3475.84	-0.01364741
296	0.00719094		826.02	0.00165458		1356.01	0.01106445		1886.04	0.00919877		2416.04	-0.00749146		2946.04	-0.00596835		3476.04	-0.01378133
296.2	0.0069833		826.22	0.00193064		1356.21	0.01062066		1886.24	0.01004436		2416.24	-0.00753503		2946.24	-0.00536247		3476.24	-0.01414232
296.4	0.00814263		826.42	0.00202093		1356.41	0.01038409		1886.44	0.01045111		2416.44	-0.00799018		2946.44	-0.0049209		3476.44	-0.01401165
296.6	0.0081763		826.62	0.00183626		1356.61	0.0106962		1886.64	0.01078842		2416.64	-0.0082401		2946.64	-0.00434235		3476.64	-0.01435274
296.8	0.00825816		826.82	0.00121608		1356.81	0.00985466		1886.84	0.01043014		2416.84	-0.00877344		2946.84	-0.00300232		3476.84	-0.0137621
297	0.00776891		827.02	-0.00003241		1357.01	0.01013203		1887.04	0.01092189		2417.04	-0.00845983		2947.04	-0.00283048		3477.04	-0.01537298
297.2	0.0076765		827.22	0.00051632		1357.21	0.00990374		1887.24	0.01011362		2417.24	-0.0085454		2947.24	-0.00347049		3477.24	-0.01616952
297.4	0.00833485		827.42	0.00046472		1357.41	0.0097661		1887.44	0.01030957		2417.44	-0.00835426		2947.44	-0.00420102		3477.44	-0.01663207
297.6	0.00818815		827.62	0.00057201		1357.61	0.01016225		1887.64	0.01005266		2417.64	-0.0086266		2947.64	-0.00464443		3477.64	-0.01697865
297.8	0.00815082		827.82	0.00015382		1357.81	0.01010354		1887.84	0.0101511		2417.84	-0.0087909		2947.84	-0.0054534		3477.84	-0.01813343
298	0.00815989		828.02	0.0009126		1358.01	0.01040985		1888.04	0.00906795		2418.04	-0.00904359		2948.04	-0.00640527		3478.04	-0.01835992
298.2	0.00814782		828.22	0.00090945		1358.21	0.01035281		1888.24	0.00847682		2418.24	-0.00955796		2948.24	-0.00628586		3478.24	-0.01827026
298.4	0.00790641		828.42	0.00059227		1358.41	0.01123666		1888.44	0.00738903		2418.44	-0.00908268		2948.44	-0.00708242		3478.44	-0.01789314
298.6	0.00700111		828.62	0.00019085		1358.61	0.01125962		1888.64	0.00646132		2418.64	-0.00884914		2948.64	-0.00722785		3478.64	-0.01717477
298.8	0.0074427		828.82	0.00038695		1358.81	0.01113085		1888.84	0.00699485		2418.84	-0.00783311		2948.84	-0.00750145		3478.84	-0.01776803
299	0.00784358		829.02	0.00009021		1359.01	0.01091582		1889.04	0.0069053		2419.04	-0.00719811		2949.04	-0.00784992		3479.04	-0.01794952
299.2	0.0076749		829.22	0.00011106		1359.21	0.01177512		1889.24	0.00708141		2419.24	-0.00655282		2949.24	-0.00784206		3479.24	-0.01779558
299.4	0.0081574		829.42	-0.00016252		1359.41	0.01151354		1889.44	0.0074443		2419.44	-0.00645292		2949.44	-0.00823204		3479.44	-0.01697864
299.6	0.00805689		829.62	-0.00062353		1359.61	0.01203402		1889.64	0.00785921		2419.64	-0.00573757		2949.64	-0.00926335		3479.64	-0.01628804
299.8	0.0077477		829.82	-0.00004438		1359.81	0.01142498		1889.84	0.00718216		2419.84	-0.00530182		2949.84	-0.00903992		3479.84	-0.01624724
300	0.00720002		830.02	-0.00020034		1360.01	0.0108412		1890.04	0.00759944		2420.04	-0.00484421		2950.04	-0.00942137		3480.04	-0.01583998
300.2	0.00699276		830.22	0.00062		1360.21	0.01015998		1890.24	0.00749741		2420.24	-0.0053846		2950.24	-0.01004983		3480.24	-0.01575174
300.4	0.00696173		830.42	0.00112789		1360.41	0.00949024		1890.44	0.00725106		2420.44	-0.00567526		2950.44	-0.0105564		3480.44	-0.01449283
300.6	0.00634806		830.62	0.00128699		1360.61	0.00916593		1890.64	0.00786954		2420.64	-0.00525484		2950.64	-0.00966538		3480.64	-0.01440493
300.8	0.00618973		830.82	0.00106939		1360.81	0.00802653		1890.84	0.00747875		2420.84	-0.00596407		2950.84	-0.00898014		3480.84	-0.01375852
301	0.0058646		831.02	0.0009091		1361.01	0.00753723		1891.04	0.00897204		2421.04	-0.0064009		2951.04	-0.00896319		3481.04	-0.01520627
301.2	0.00600747		831.22	0.00176541		1361.21	0.00591722		1891.24	0.00861127		2421.24	-0.00710381		2951.24	-0.01015402		3481.24	-0.01510349
301.4	0.00600524		831.42	0.00165283		1361.41	0.00578099		1891.44	0.00910184		2421.44	-0.0081504		2951.44	-0.01002642		3481.44	-0.01558504
301.6	0.00537351		831.62	0.00274642		1361.61	0.00515011		1891.64	0.00956834		2421.64	-0.00929851		2951.64	-0.01024972		3481.64	-0.01700993
301.8	0.0051332		831.82	0.00293364		1361.81	0.00426191		1891.84	0.00958055		2421.84	-0.00973934		2951.84	-0.00970326		3481.84	-0.01659536
302	0.00545216		832.02	0.00429835		1362.01	0.00381028		1892.04	0.00952501		2422.04	-0.01002316		2952.04	-0.00931288		3482.04	-0.01617318
302.2	0.00524398		832.22	0.00439209		1362.21	0.00358458		1892.24	0.00975603		2422.24	-0.01041441		2952.24	-0.00815197		3482.24	-0.01490242
302.4	0.00588685		832.42	0.00391192		1362.41	0.00350873		1892.44	0.00998742		2422.44	-0.00990686		2952.44	-0.00842386		3482.44	-0.0142777
302.6	0.00494588		832.62	0.00420095		1362.61	0.00352053		1892.64	0.01056729		2422.64	-0.01002237		2952.64	-0.00825159		3482.64	-0.01387783
302.8	0.00542966		832.82	0.00433775		1362.81	0.00350492		1892.84	0.01143326		2422.84	-0.00968734		2952.84	-0.00815183		3482.84	-0.01386144
303	0.00628836		833.02	0.00402342		1363.01	0.0041521		1893.04	0.01058239		2423.04	-0.00977281		2953.04	-0.00773811		3483.04	-0.01331077
303.2	0.00648958		833.22	0.00347772		1363.21	0.00487571		1893.24	0.01019409		2423.24	-0.00935927		2953.24	-0.00753432		3483.24	-0.01254118
303.4	0.00725199		833.42	0.00326497		1363.41	0.00462168		1893.44	0.01017568		2423.44	-0.00958084		2953.44	-0.00797361		3483.44	-0.01127748
303.6	0.00734932		833.62	0.00327223		1363.61	0.00564927		1893.64	0.00982901		2423.64	-0.00919647		2953.64	-0.00756612		3483.64	-0.01145252
303.8	0.0068958		833.82	0.00298193		1363.81	0.00515179		1893.84	0.00863523		2423.84	-0.00945723		2953.84	-0.00674636		3483.84	-0.01072242
304	0.007908		834.02	0.00254584		1364.01	0.00557198		1894.04	0.00899158		2424.04	-0.00905147		2954.04	-0.007799		3484.04	-0.01066253
304.2	0.00811878		834.22	0.00343274		1364.21	0.00573485		1894.24	0.00917285		2424.24	-0.00910381		2954.24	-0.00810465		3484.24	-0.01085588
304.4	0.00840172		834.42	0.00380534		1364.41	0.0056123		1894.44	0.00960846		2424.44	-0.0087061		2954.44	-0.00775572		3484.44	-0.01158169
304.6	0.00918551		834.62	0.00386325		1364.61	0.00618251		1894.64	0.00990995		2424.64	-0.00894317		2954.64	-0.00734569		3484.64	-0.01216642
304.8	0.01034231		834.82	0.00342321		1364.81	0.00662847		1894.84	0.0095259		2424.84	-0.01011835		2954.84	-0.00692606		3484.84	-0.01332811
305	0.01039613		835.02	0.00395461		1365.01	0.00678547		1895.04	0.00981086		2425.04	-0.01006958		2955.04	-0.00684198		3485.04	-0.01485185
305.2	0.00993362		835.22	0.00486802		1365.21	0.00674569		1895.24	0.00937715		2425.24	-0.0095775		2955.24	-0.00669393		3485.24	-0.01561635
305.4	0.00912827		835.42	0.00460596		1365.41	0.00659018		1895.44	0.0102544		2425.44	-0.0092604		2955.44	-0.00673036		3485.44	-0.01705536
305.6	0.0086779		835.62	0.00497832		1365.61	0.00586681		1895.64	0.01027188		2425.64	-0.00954194		2955.64	-0.00666027		3485.64	-0.01699225
305.8	0.00873575		835.82	0.00506062		1365.81	0.00584922		1895.84	0.00938682		2425.84	-0.0091892		2955.84	-0.00661304		3485.84	-0.01667918
306	0.00811503		836.02	0.00555912		1366.01	0.00646894		1896.04	0.00884065		2426.04	-0.00879969		2956.04	-0.00710975		3486.04	-0.01686731
306.2	0.00754523		836.22	0.00506647		1366.21	0.00670187		1896.24	0.00861653		2426.24	-0.00873347		2956.24	-0.00736893		3486.24	-0.01658665
306.4	0.00706974		836.42	0.0037385		1366.41	0.00750685		1896.44	0.00790414		2426.44	-0.00862304		2956.44	-0.00790766		3486.44	-0.01662699
306.6	0.00597304		836.62	0.00422149		1366.61	0.00831684		1896.64	0.00762917		2426.64	-0.00905175		2956.64	-0.00872165		3486.64	-0.01617838
306.8	0.00636013		836.82	0.00444574		1366.81	0.00865043		1896.84	0.00681633		2426.84	-0.0085173		2956.84	-0.00927315		3486.84	-0.01508672
307	0.00577919		837.02	0.00439273		1367.01	0.00956658		1897.04	0.00572546		2427.04	-0.00872342		2957.04	-0.0101594		3487.04	-0.01437255
307.2	0.00546009		837.22	0.00476335		1367.21	0.00893546		1897.24	0.00590984		2427.24	-0.00880286		2957.24	-0.01090113		3487.24	-0.01405019
307.4	0.00489863		837.42	0.0044142		1367.41	0.00923398		1897.44	0.00650283		2427.44	-0.00898204		2957.44	-0.0111139		3487.44	-0.01374996
307.6	0.00390526		837.62	0.00395169		1367.61	0.00931161		1897.64	0.00770919		2427.64	-0.00858714		2957.64	-0.01117531		3487.64	-0.01477157
307.8	0.00328006		837.82	0.00368337		1367.81	0.00796709		1897.84	0.00810558		2427.84	-0.00841419		2957.84	-0.01131281		3487.84	-0.01472827
308	0.00462948		838.02	0.00411997		1368.01	0.00728505		1898.04	0.00904467		2428.04	-0.00784315		2958.04	-0.0123745		3488.04	-0.01469847
308.2	0.00402944		838.22	0.00468289		1368.21	0.00635549		1898.24	0.00974808		2428.24	-0.0087435		2958.24	-0.01153149		3488.24	-0.01566691
308.4	0.00517907		838.42	0.00518881		1368.41	0.00551523		1898.44	0.01043504		2428.44	-0.00944741		2958.44	-0.01114739		3488.44	-0.01642986
308.6	0.00574649		838.62	0.00502968		1368.61	0.00587404		1898.64	0.01128185		2428.64	-0.01027747		2958.64	-0.0104874		3488.64	-0.01654656
308.8	0.00633085		838.82	0.00516249		1368.81	0.00523901		1898.84	0.01171501		2428.84	-0.01011594		2958.84	-0.00970867		3488.84	-0.01687618
309	0.00588528		839.02	0.00629231		1369.01	0.00490248		1899.04	0.01171177		2429.04	-0.00937519		2959.04	-0.00936096		3489.04	-0.01672125
309.2	0.005782		839.22	0.00594466		1369.21	0.00438216		1899.24	0.01216898		2429.24	-0.00856589		2959.24	-0.00832433		3489.24	-0.01776435
309.4	0.00624042		839.42	0.00582854		1369.41	0.00339436		1899.44	0.01323172		2429.44	-0.00807495		2959.44	-0.00881543		3489.44	-0.01859762
309.6	0.00731211		839.62	0.00564459		1369.61	0.00400996		1899.64	0.01236695		2429.64	-0.00795103		2959.64	-0.00787864		3489.64	-0.01866146
309.8	0.00787652		839.82	0.00549448		1369.81	0.00459335		1899.84	0.01133028		2429.84	-0.00668794		2959.84	-0.00797733		3489.84	-0.01935448
310	0.00830646		840.02	0.00510368		1370.01	0.0052866		1900.04	0.0106589		2430.04	-0.00649056		2960.04	-0.00695252		3490.04	-0.01963693
310.2	0.00862768		840.22	0.00420147		1370.21	0.00581083		1900.24	0.01086983		2430.24	-0.00554082		2960.24	-0.00711123		3490.24	-0.02026284
310.4	0.00918871		840.42	0.00346569		1370.41	0.00746002		1900.44	0.01063388		2430.44	-0.00531794		2960.44	-0.00646254		3490.44	-0.01976346
310.6	0.00969725		840.62	0.00376076		1370.61	0.00814839		1900.64	0.01030945		2430.64	-0.00537137		2960.64	-0.00712908		3490.64	-0.01935926
310.8	0.00945861		840.82	0.00330493		1370.81	0.00911828		1900.84	0.0096005		2430.84	-0.00574873		2960.84	-0.00742026		3490.84	-0.01916991
311	0.00769438		841.02	0.00326926		1371.01	0.0101391		1901.04	0.00903292		2431.04	-0.00590972		2961.04	-0.00825591		3491.04	-0.01791908
311.2	0.00757352		841.22	0.00363549		1371.21	0.01098348		1901.24	0.00903285		2431.24	-0.00599223		2961.24	-0.00871898		3491.24	-0.01709266
311.4	0.00733555		841.42	0.00260862		1371.41	0.01149655		1901.44	0.00952035		2431.44	-0.00606418		2961.44	-0.00842184		3491.44	-0.0167905
311.6	0.00679106		841.62	0.00225743		1371.61	0.01036246		1901.64	0.00951632		2431.64	-0.00619914		2961.64	-0.0088733		3491.64	-0.01656344
311.8	0.00634908		841.82	0.00195539		1371.81	0.00974613		1901.84	0.00801108		2431.84	-0.00613203		2961.84	-0.00879407		3491.84	-0.01604967
312	0.00639383		842.02	0.00104714		1372.01	0.00991247		1902.04	0.00811029		2432.04	-0.00676146		2962.04	-0.0089491		3492.04	-0.01558401
312.2	0.00567475		842.22	0.00040945		1372.21	0.00936709		1902.24	0.00824409		2432.24	-0.00726521		2962.24	-0.00846093		3492.24	-0.01598924
312.4	0.00567301		842.42	0.00060767		1372.41	0.00913279		1902.44	0.00840878		2432.44	-0.00772811		2962.44	-0.01011303		3492.44	-0.0161005
312.6	0.00483965		842.62	0.00005593		1372.61	0.00967021		1902.64	0.00865677		2432.64	-0.00799134		2962.64	-0.00966413		3492.64	-0.01617711
312.8	0.00488476		842.82	0.00058466		1372.81	0.00881542		1902.84	0.00845885		2432.84	-0.00774718		2962.84	-0.01017461		3492.84	-0.0157798
313	0.00489074		843.02	0.00006458		1373.01	0.00886541		1903.04	0.0078485		2433.04	-0.00686211		2963.04	-0.0099915		3493.04	-0.01585879
313.2	0.00544737		843.22	0.00029543		1373.21	0.00771412		1903.24	0.00838891		2433.24	-0.00662134		2963.24	-0.0089801		3493.24	-0.01718316
313.4	0.00652592		843.42	0.00064275		1373.41	0.00756665		1903.44	0.00914914		2433.44	-0.00625946		2963.44	-0.00922353		3493.44	-0.01797116
313.6	0.00720561		843.62	0.00020537		1373.61	0.00726118		1903.64	0.00863683		2433.64	-0.00524983		2963.64	-0.00822257		3493.64	-0.01847135
313.8	0.0072432		843.82	0.00024313		1373.81	0.00683745		1903.84	0.00885765		2433.84	-0.00538467		2963.84	-0.0073259		3493.84	-0.01854991
314	0.00806312		844.02	0.00074855		1374.01	0.00736049		1904.04	0.00942061		2434.04	-0.00552412		2964.04	-0.00669141		3494.04	-0.01875269
314.2	0.00812837		844.22	0.00111551		1374.21	0.00775783		1904.24	0.00961955		2434.24	-0.00454382		2964.24	-0.00664563		3494.24	-0.01868798
314.4	0.00888639		844.42	0.00103392		1374.41	0.00847933		1904.44	0.00975343		2434.44	-0.00603703		2964.44	-0.00594659		3494.44	-0.01840267
314.6	0.0086726		844.62	0.00073537		1374.61	0.00883479		1904.64	0.00963106		2434.64	-0.00668672		2964.64	-0.00648793		3494.64	-0.01849795
314.8	0.00815995		844.82	0.00130182		1374.81	0.00901448		1904.84	0.00941724		2434.84	-0.00721492		2964.84	-0.00676638		3494.84	-0.01832047
315	0.00720298		845.02	0.00227645		1375.01	0.00959545		1905.04	0.00941984		2435.04	-0.00766297		2965.04	-0.00681542		3495.04	-0.01679709
315.2	0.00858078		845.22	0.00278875		1375.21	0.00965508		1905.24	0.01017113		2435.24	-0.00768401		2965.24	-0.0060764		3495.24	-0.01664226
315.4	0.00867081		845.42	0.00298873		1375.41	0.00843126		1905.44	0.00989276		2435.44	-0.00779146		2965.44	-0.00559586		3495.44	-0.01640074
315.6	0.00733324		845.62	0.00358989		1375.61	0.00764044		1905.64	0.00936962		2435.64	-0.00776521		2965.64	-0.00592514		3495.64	-0.0156886
315.8	0.00683926		845.82	0.00347069		1375.81	0.0077475		1905.84	0.0085276		2435.84	-0.00756366		2965.84	-0.00492936		3495.84	-0.01611475
316	0.00600308		846.02	0.00290496		1376.01	0.0077081		1906.04	0.00920116		2436.04	-0.00773622		2966.04	-0.00460754		3496.04	-0.01606384
316.2	0.00598431		846.22	0.00306461		1376.21	0.00717874		1906.24	0.00950167		2436.24	-0.00724096		2966.24	-0.00568607		3496.24	-0.0165294
316.4	0.00591507		846.42	0.00278986		1376.41	0.0067606		1906.44	0.0094528		2436.44	-0.00704016		2966.44	-0.00694068		3496.44	-0.01701129
316.6	0.0055017		846.62	0.00241901		1376.61	0.00675543		1906.64	0.00948857		2436.64	-0.0066752		2966.64	-0.00624688		3496.64	-0.01663374
316.8	0.00577912		846.82	0.00234076		1376.81	0.00637121		1906.84	0.00960916		2436.84	-0.00633164		2966.84	-0.0063278		3496.84	-0.01582201
317	0.0058877		847.02	0.00231103		1377.01	0.00642554		1907.04	0.00953539		2437.04	-0.00584414		2967.04	-0.00602887		3497.04	-0.01614105
317.2	0.00637635		847.22	0.00282284		1377.21	0.00614726		1907.24	0.01014858		2437.24	-0.00599425		2967.24	-0.0062025		3497.24	-0.01677581
317.4	0.0062059		847.42	0.00238329		1377.41	0.00580646		1907.44	0.01127084		2437.44	-0.00629611		2967.44	-0.00669052		3497.44	-0.01713275
317.6	0.00612587		847.62	0.00210757		1377.61	0.00564801		1907.64	0.01085376		2437.64	-0.0065349		2967.64	-0.00708493		3497.64	-0.01735506
317.8	0.00565562		847.82	0.0017313		1377.81	0.00661048		1907.84	0.01102001		2437.84	-0.00705788		2967.84	-0.00728759		3497.84	-0.01681936
318	0.00635989		848.02	0.00162353		1378.01	0.00726669		1908.04	0.01073889		2438.04	-0.00863737		2968.04	-0.00832348		3498.04	-0.01719582
318.2	0.00579713		848.22	0.00109167		1378.21	0.00743963		1908.24	0.01020947		2438.24	-0.00890567		2968.24	-0.00846171		3498.24	-0.01727388
318.4	0.00620135		848.42	0.00067699		1378.41	0.00773869		1908.44	0.01037491		2438.44	-0.01061806		2968.44	-0.00902383		3498.44	-0.01660548
318.6	0.00540455		848.62	0.00033345		1378.61	0.00729041		1908.64	0.01098881		2438.64	-0.01062455		2968.64	-0.0096505		3498.64	-0.01593611
318.8	0.00514592		848.82	0.00064712		1378.81	0.00720297		1908.84	0.01112523		2438.84	-0.00995157		2968.84	-0.0097203		3498.84	-0.01526507
319	0.00527185		849.02	0.00154908		1379.01	0.00724086		1909.04	0.01170474		2439.04	-0.010617		2969.04	-0.00882427		3499.04	-0.01435599
319.2	0.0060367		849.22	0.00199613		1379.21	0.00743897		1909.24	0.01178547		2439.24	-0.00986281		2969.24	-0.0084803		3499.24	-0.01420366
319.4	0.00551627		849.42	0.0028902		1379.41	0.00688516		1909.44	0.01032464		2439.44	-0.01057901		2969.44	-0.00854805		3499.44	-0.01369593
319.6	0.0047674		849.62	0.00290443		1379.61	0.00681644		1909.64	0.01029808		2439.64	-0.01018896		2969.64	-0.00774371		3499.64	-0.01416358
319.8	0.00535741		849.82	0.00327205		1379.81	0.00722226		1909.84	0.00915945		2439.84	-0.00983804		2969.84	-0.00708545		3499.84	-0.01464294
320	0.00547859		850.02	0.00324302		1380.01	0.00769999		1910.04	0.00940616		2440.04	-0.01029403		2970.04	-0.00692385		3500.04	-0.01437984
320.2	0.00635555		850.22	0.00359984		1380.21	0.00772621		1910.24	0.00932798		2440.24	-0.00891469		2970.24	-0.007248		3500.24	-0.01438299
320.4	0.0061294		850.42	0.00385272		1380.41	0.0072955		1910.44	0.00885119		2440.44	-0.00833312		2970.44	-0.00662157		3500.44	-0.01436124
320.6	0.00666686		850.62	0.00379917		1380.61	0.0071079		1910.64	0.00815845		2440.64	-0.00875436		2970.64	-0.00549375		3500.64	-0.01476712
320.8	0.00725127		850.82	0.00463758		1380.81	0.00797245		1910.84	0.00852236		2440.84	-0.00826757		2970.84	-0.00476734		3500.84	-0.0149513
321	0.00770893		851.02	0.00496049		1381.01	0.00842802		1911.04	0.00813706		2441.04	-0.00711931		2971.04	-0.00427224		3501.04	-0.01608187
321.2	0.00744061		851.22	0.00460026		1381.21	0.00847985		1911.24	0.00841754		2441.24	-0.00646913		2971.24	-0.00448894		3501.24	-0.01721086
321.4	0.00598729		851.42	0.00401939		1381.41	0.00893331		1911.44	0.00862357		2441.44	-0.00665883		2971.44	-0.00475881		3501.44	-0.01855864
321.6	0.00594222		851.62	0.00363857		1381.61	0.0094206		1911.64	0.00841331		2441.64	-0.00640889		2971.64	-0.00435175		3501.64	-0.01928696
321.8	0.00567927		851.82	0.0032681		1381.81	0.00960831		1911.84	0.00877955		2441.84	-0.00610843		2971.84	-0.00440334		3501.84	-0.01999054
322	0.00612559		852.02	0.00293305		1382.01	0.0091745		1912.04	0.00837865		2442.04	-0.00667417		2972.04	-0.00440097		3502.04	-0.02045135
322.2	0.00585272		852.22	0.00161534		1382.21	0.00871977		1912.24	0.00875723		2442.24	-0.00642028		2972.24	-0.0046009		3502.24	-0.01954983
322.4	0.00591632		852.42	0.00149287		1382.41	0.00899463		1912.44	0.00907191		2442.44	-0.00756242		2972.44	-0.005377		3502.44	-0.01826703
322.6	0.00482477		852.62	0.00062059		1382.61	0.00882081		1912.64	0.00964596		2442.64	-0.00725476		2972.64	-0.00574806		3502.64	-0.01756537
322.8	0.00529193		852.82	0.00070214		1382.81	0.00944784		1912.84	0.0100302		2442.84	-0.00743219		2972.84	-0.00532465		3502.84	-0.01814001
323	0.00630288		853.02	0.00033636		1383.01	0.0094409		1913.04	0.01046918		2443.04	-0.00822255		2973.04	-0.00568175		3503.04	-0.01857488
323.2	0.0067582		853.22	0.00055144		1383.21	0.00969743		1913.24	0.01003974		2443.24	-0.00898503		2973.24	-0.00635375		3503.24	-0.01850606
323.4	0.00679956		853.42	-0.00027167		1383.41	0.00925589		1913.44	0.00974348		2443.44	-0.00964165		2973.44	-0.00655025		3503.44	-0.01838266
323.6	0.00725383		853.62	-0.00081324		1383.61	0.00928516		1913.64	0.0095758		2443.64	-0.01008426		2973.64	-0.00612378		3503.64	-0.0186123
323.8	0.00813864		853.82	-0.0006768		1383.81	0.00917926		1913.84	0.00910022		2443.84	-0.01104319		2973.84	-0.0068937		3503.84	-0.0177605
324	0.00851016		854.02	-0.00051154		1384.01	0.00868121		1914.04	0.00903846		2444.04	-0.01189372		2974.04	-0.00737836		3504.04	-0.01732699
324.2	0.00867977		854.22	0.00013591		1384.21	0.00791951		1914.24	0.00968891		2444.24	-0.01147085		2974.24	-0.00742679		3504.24	-0.01699709
324.4	0.00814877		854.42	0.00052488		1384.41	0.00689286		1914.44	0.00938927		2444.44	-0.01170486		2974.44	-0.00721387		3504.44	-0.01738502
324.6	0.00905777		854.62	0.00000701		1384.61	0.00641585		1914.64	0.00869861		2444.64	-0.01199788		2974.64	-0.00778261		3504.64	-0.018505
324.8	0.00910961		854.82	0.00095577		1384.81	0.00669262		1914.84	0.00839598		2444.84	-0.01111044		2974.84	-0.00782088		3504.84	-0.01784527
325	0.00911842		855.02	0.0013754		1385.01	0.00669616		1915.04	0.00738516		2445.04	-0.01088924		2975.04	-0.00730968		3505.04	-0.01908081
325.2	0.00848218		855.22	0.00149143		1385.21	0.00639756		1915.24	0.00731278		2445.24	-0.01025659		2975.24	-0.00692474		3505.24	-0.02042167
325.4	0.00803421		855.42	0.00163478		1385.41	0.00639476		1915.44	0.0073307		2445.44	-0.01046602		2975.44	-0.00700791		3505.44	-0.02032676
325.6	0.00869837		855.62	0.00244715		1385.61	0.00545513		1915.64	0.00813271		2445.64	-0.00971223		2975.64	-0.00594679		3505.64	-0.02013171
325.8	0.00903101		855.82	0.00293506		1385.81	0.00594693		1915.84	0.00766449		2445.84	-0.00985809		2975.84	-0.00638214		3505.84	-0.02042271
326	0.00923678		856.02	0.00297547		1386.01	0.00644221		1916.04	0.00719106		2446.04	-0.00957304		2976.04	-0.00633762		3506.04	-0.02025711
326.2	0.00879443		856.22	0.0026075		1386.21	0.00726422		1916.24	0.00797951		2446.24	-0.01037004		2976.24	-0.00624205		3506.24	-0.01942503
326.4	0.00841204		856.42	0.00341634		1386.41	0.00843379		1916.44	0.00811447		2446.44	-0.01083615		2976.44	-0.00645567		3506.44	-0.01898945
326.6	0.00766615		856.62	0.00390529		1386.61	0.00840815		1916.64	0.00837669		2446.64	-0.01069043		2976.64	-0.00590977		3506.64	-0.01897865
326.8	0.00838121		856.82	0.00429495		1386.81	0.00843713		1916.84	0.00879429		2446.84	-0.0108765		2976.84	-0.00578523		3506.84	-0.01978029
327	0.00874302		857.02	0.00324588		1387.01	0.00819917		1917.04	0.00885063		2447.04	-0.0106916		2977.04	-0.0062945		3507.04	-0.01915951
327.2	0.00923185		857.22	0.00364955		1387.21	0.00839126		1917.24	0.00902757		2447.24	-0.01168452		2977.24	-0.00604859		3507.24	-0.01879444
327.4	0.00924196		857.42	0.00254463		1387.41	0.00843618		1917.44	0.00949282		2447.44	-0.01089422		2977.44	-0.00642741		3507.44	-0.01845906
327.6	0.00993602		857.62	0.00230251		1387.61	0.00845349		1917.64	0.0095144		2447.64	-0.01040066		2977.64	-0.00613402		3507.64	-0.01793709
327.8	0.00962038		857.82	0.00229271		1387.81	0.00826551		1917.84	0.00968754		2447.84	-0.01026986		2977.84	-0.00588121		3507.84	-0.01758779
328	0.00980448		858.02	0.00156201		1388.01	0.00785931		1918.04	0.0098287		2448.04	-0.00931958		2978.04	-0.00639236		3508.04	-0.0172062
328.2	0.0100133		858.22	0.00060323		1388.21	0.00747608		1918.24	0.00992863		2448.24	-0.00832739		2978.24	-0.0058076		3508.24	-0.01721963
328.4	0.0091753		858.42	-0.00041322		1388.41	0.00696163		1918.44	0.00855909		2448.44	-0.00724228		2978.44	-0.00635237		3508.44	-0.01783635
328.6	0.00877399		858.62	-0.00139779		1388.61	0.00605081		1918.64	0.00797842		2448.64	-0.00774784		2978.64	-0.00673961		3508.64	-0.01699533
328.8	0.00941653		858.82	-0.00204936		1388.81	0.0060999		1918.84	0.00697914		2448.84	-0.00711895		2978.84	-0.00599455		3508.84	-0.01679592
329	0.00921976		859.02	-0.00266442		1389.01	0.00624635		1919.04	0.00613657		2449.04	-0.00648554		2979.04	-0.00677231		3509.04	-0.01731283
329.2	0.00901032		859.22	-0.00269093		1389.21	0.00600201		1919.24	0.00558251		2449.24	-0.00521472		2979.24	-0.00740337		3509.24	-0.01719425
329.4	0.00816548		859.42	-0.00195462		1389.41	0.0050039		1919.44	0.00552185		2449.44	-0.00579165		2979.44	-0.00789076		3509.44	-0.01738273
329.6	0.00830006		859.62	-0.0015405		1389.61	0.00476098		1919.64	0.00618798		2449.64	-0.00531289		2979.64	-0.0081806		3509.64	-0.0175331
329.8	0.00832785		859.82	-0.0012188		1389.81	0.00516188		1919.84	0.00556979		2449.84	-0.00625541		2979.84	-0.00814515		3509.84	-0.01814818
330	0.00741676		860.02	-0.00087018		1390.01	0.00546317		1920.04	0.00546801		2450.04	-0.00627609		2980.04	-0.00854871		3510.04	-0.01852141
330.2	0.00651474		860.22	-0.0007952		1390.21	0.00540633		1920.24	0.00551911		2450.24	-0.00697719		2980.24	-0.00802231		3510.24	-0.0181711
330.4	0.00628714		860.42	0.00030127		1390.41	0.00541154		1920.44	0.00516092		2450.44	-0.00771593		2980.44	-0.00861077		3510.44	-0.01821682
330.6	0.00554025		860.62	0.00064738		1390.61	0.00560848		1920.64	0.00463994		2450.64	-0.0082862		2980.64	-0.00910945		3510.64	-0.0188348
330.8	0.00647977		860.82	0.00085269		1390.81	0.0063548		1920.84	0.00486311		2450.84	-0.00903673		2980.84	-0.01036173		3510.84	-0.01843615
331	0.00661351		861.02	0.00084898		1391.01	0.00658626		1921.04	0.00554414		2451.04	-0.00929995		2981.04	-0.0103158		3511.04	-0.01799982
331.2	0.00672666		861.22	0.0014548		1391.21	0.00676131		1921.24	0.00676475		2451.24	-0.00994579		2981.24	-0.01036641		3511.24	-0.01828069
331.4	0.00712506		861.42	0.00179398		1391.41	0.00656788		1921.44	0.00685768		2451.44	-0.01015014		2981.44	-0.00990171		3511.44	-0.01780939
331.6	0.00775784		861.62	0.00276203		1391.61	0.00759353		1921.64	0.00646934		2451.64	-0.01037926		2981.64	-0.00880454		3511.64	-0.01690875
331.8	0.00762676		861.82	0.00288417		1391.81	0.00748919		1921.84	0.00567448		2451.84	-0.01139276		2981.84	-0.00801246		3511.84	-0.017224
332	0.00816287		862.02	0.00216498		1392.01	0.00671425		1922.04	0.00576176		2452.04	-0.01113201		2982.04	-0.008619		3512.04	-0.01755852
332.2	0.00873403		862.22	0.00241606		1392.21	0.00662522		1922.24	0.0050414		2452.24	-0.01071349		2982.24	-0.00790569		3512.24	-0.01736087
332.4	0.00845011		862.42	0.00240389		1392.41	0.00610741		1922.44	0.00481227		2452.44	-0.01064246		2982.44	-0.00834151		3512.44	-0.01688231
332.6	0.00873146		862.62	0.00253544		1392.61	0.0058262		1922.64	0.00612036		2452.64	-0.01053379		2982.64	-0.0083723		3512.64	-0.01667038
332.8	0.0102834		862.82	0.00280171		1392.81	0.00638377		1922.84	0.00632471		2452.84	-0.01047596		2982.84	-0.00932821		3512.84	-0.01730887
333	0.01021551		863.02	0.00288968		1393.01	0.00588177		1923.04	0.00637175		2453.04	-0.00960779		2983.04	-0.01007429		3513.04	-0.01732855
333.2	0.00991581		863.22	0.00383838		1393.21	0.00479702		1923.24	0.00681773		2453.24	-0.00938034		2983.24	-0.00982623		3513.24	-0.01763844
333.4	0.00972817		863.42	0.00496551		1393.41	0.00395252		1923.44	0.0069039		2453.44	-0.00978148		2983.44	-0.00944742		3513.44	-0.01804548
333.6	0.01025521		863.62	0.00436264		1393.61	0.00423094		1923.64	0.00742524		2453.64	-0.00955331		2983.64	-0.00996592		3513.64	-0.01776708
333.8	0.00916352		863.82	0.00367439		1393.81	0.00447961		1923.84	0.0077236		2453.84	-0.0105361		2983.84	-0.00953888		3513.84	-0.01811196
334	0.0078802		864.02	0.00275995		1394.01	0.0057704		1924.04	0.00793651		2454.04	-0.00990128		2984.04	-0.00888741		3514.04	-0.01809042
334.2	0.00714014		864.22	0.00205147		1394.21	0.00586083		1924.24	0.00819339		2454.24	-0.00928795		2984.24	-0.00848861		3514.24	-0.01781271
334.4	0.00645671		864.42	0.00214616		1394.41	0.00645992		1924.44	0.00805646		2454.44	-0.00904642		2984.44	-0.00912669		3514.44	-0.01765492
334.6	0.00587826		864.62	0.00138048		1394.61	0.00778175		1924.64	0.00745102		2454.64	-0.00953148		2984.64	-0.00926122		3514.64	-0.01740491
334.8	0.00467636		864.82	0.00140594		1394.81	0.00862953		1924.84	0.00821456		2454.84	-0.009745		2984.84	-0.00878701		3514.84	-0.0169961
335	0.00369198		865.02	0.00054329		1395.01	0.0085513		1925.04	0.00831481		2455.04	-0.00953599		2985.04	-0.00759939		3515.04	-0.01644526
335.2	0.00285856		865.22	0.00078042		1395.21	0.00940648		1925.24	0.0081797		2455.24	-0.0092632		2985.24	-0.00738822		3515.24	-0.0162346
335.4	0.00353798		865.42	0.0015463		1395.41	0.00946573		1925.44	0.00837764		2455.44	-0.00925284		2985.44	-0.00672879		3515.44	-0.01577807
335.6	0.00314251		865.62	0.00206715		1395.61	0.00998014		1925.64	0.00817338		2455.64	-0.00930583		2985.64	-0.00784161		3515.64	-0.01591266
335.8	0.00306398		865.82	0.00104538		1395.81	0.00914901		1925.84	0.00758717		2455.84	-0.00881122		2985.84	-0.00785886		3515.84	-0.01632134
336	0.00337163		866.02	0.00044726		1396.01	0.00813124		1926.04	0.00829298		2456.04	-0.00804087		2986.04	-0.00733558		3516.04	-0.01602422
336.2	0.00449184		866.22	0.00103558		1396.21	0.00870421		1926.24	0.00753503		2456.24	-0.00761337		2986.24	-0.00746578		3516.24	-0.01483159
336.4	0.00468863		866.42	0.00120867		1396.41	0.00868354		1926.44	0.00816795		2456.44	-0.00768895		2986.44	-0.00756194		3516.44	-0.01503515
336.6	0.00480079		866.62	0.00266461		1396.61	0.00905691		1926.64	0.00940134		2456.64	-0.00788172		2986.64	-0.00765637		3516.64	-0.01534007
336.8	0.00492774		866.82	0.00232098		1396.81	0.00954522		1926.84	0.00955038		2456.84	-0.00872516		2986.84	-0.00827869		3516.84	-0.01520048
337	0.00530538		867.02	0.00180178		1397.01	0.00923773		1927.04	0.00992718		2457.04	-0.00811791		2987.04	-0.00781124		3517.04	-0.01554562
337.2	0.00532255		867.22	0.0026029		1397.21	0.00931689		1927.24	0.01020917		2457.24	-0.00922058		2987.24	-0.00807367		3517.24	-0.0160759
337.4	0.00531963		867.42	0.003268		1397.41	0.00867305		1927.44	0.01013917		2457.44	-0.00999877		2987.44	-0.00774904		3517.44	-0.0177277
337.6	0.00514259		867.62	0.00193237		1397.61	0.0080839		1927.64	0.01032042		2457.64	-0.0109055		2987.64	-0.00770411		3517.64	-0.01823681
337.8	0.0047898		867.82	0.00140155		1397.81	0.00818834		1927.84	0.01104915		2457.84	-0.01120278		2987.84	-0.00691128		3517.84	-0.01858767
338	0.004941		868.02	0.00117095		1398.01	0.00841789		1928.04	0.01143104		2458.04	-0.01080257		2988.04	-0.00611543		3518.04	-0.01912166
338.2	0.0045869		868.22	0.00158575		1398.21	0.00820894		1928.24	0.0105788		2458.24	-0.01051178		2988.24	-0.00654542		3518.24	-0.01964737
338.4	0.00452317		868.42	0.00202453		1398.41	0.00867545		1928.44	0.01032584		2458.44	-0.01060632		2988.44	-0.00571191		3518.44	-0.01946468
338.6	0.00499363		868.62	0.00182073		1398.61	0.0085542		1928.64	0.00984981		2458.64	-0.01157727		2988.64	-0.00583996		3518.64	-0.0204192
338.8	0.00457117		868.82	0.00237429		1398.81	0.00836373		1928.84	0.0104779		2458.84	-0.01155444		2988.84	-0.0071257		3518.84	-0.02112318
339	0.00513729		869.02	0.0021677		1399.01	0.00822868		1929.04	0.0103565		2459.04	-0.0115343		2989.04	-0.00807761		3519.04	-0.02071097
339.2	0.00528057		869.22	0.00280685		1399.21	0.00817252		1929.24	0.01070921		2459.24	-0.01048767		2989.24	-0.00889297		3519.24	-0.02084001
339.4	0.00626263		869.42	0.00307013		1399.41	0.00724765		1929.44	0.01144034		2459.44	-0.00989766		2989.44	-0.01032462		3519.44	-0.02062332
339.6	0.00598236		869.62	0.00284398		1399.61	0.00683905		1929.64	0.01007082		2459.64	-0.00984176		2989.64	-0.01098841		3519.64	-0.02056268
339.8	0.00583855		869.82	0.00215856		1399.81	0.00652421		1929.84	0.00950721		2459.84	-0.00909314		2989.84	-0.01020415		3519.84	-0.01996103
340	0.00599542		870.02	0.00208095		1400.01	0.00614937		1930.04	0.00873276		2460.04	-0.00909814		2990.04	-0.00962404		3520.04	-0.01941981
340.2	0.00607525		870.22	0.00287641		1400.21	0.00595688		1930.24	0.00775533		2460.24	-0.00915208		2990.24	-0.00958644		3520.24	-0.01804236
340.4	0.0057897		870.42	0.00308039		1400.41	0.0059664		1930.44	0.00778425		2460.44	-0.00917275		2990.44	-0.00939353		3520.44	-0.01814641
340.6	0.0056399		870.62	0.00303852		1400.61	0.00645396		1930.64	0.00769207		2460.64	-0.00951466		2990.64	-0.00941269		3520.64	-0.01697173
340.8	0.0061435		870.82	0.002023		1400.81	0.00693035		1930.84	0.00751853		2460.84	-0.00983102		2990.84	-0.00959564		3520.84	-0.01643693
341	0.00645151		871.02	0.0023117		1401.01	0.00621824		1931.04	0.00756188		2461.04	-0.00988376		2991.04	-0.0090757		3521.04	-0.01674322
341.2	0.00590041		871.22	0.0021313		1401.21	0.00587259		1931.24	0.00761114		2461.24	-0.01058177		2991.24	-0.00756638		3521.24	-0.01683681
341.4	0.00582801		871.42	0.0020477		1401.41	0.00459128		1931.44	0.00726472		2461.44	-0.01018855		2991.44	-0.00714483		3521.44	-0.01724883
341.6	0.00610656		871.62	0.00161532		1401.61	0.00553544		1931.64	0.00790789		2461.64	-0.0102231		2991.64	-0.00681592		3521.64	-0.0171201
341.8	0.00655724		871.82	0.00143064		1401.81	0.00660575		1931.84	0.00850892		2461.84	-0.00899924		2991.84	-0.00636063		3521.84	-0.01674606
342	0.00662536		872.02	0.00144661		1402.01	0.00715405		1932.04	0.00854767		2462.04	-0.00926219		2992.04	-0.00605158		3522.04	-0.01719382
342.2	0.00695145		872.22	0.0012103		1402.21	0.00778028		1932.24	0.00795035		2462.24	-0.00829294		2992.24	-0.00615892		3522.24	-0.01718523
342.4	0.00811571		872.42	0.00224725		1402.41	0.00803061		1932.44	0.00895016		2462.44	-0.009308		2992.44	-0.00592033		3522.44	-0.0168733
342.6	0.00869496		872.62	0.00309925		1402.61	0.0075864		1932.64	0.00931358		2462.64	-0.00939195		2992.64	-0.00757458		3522.64	-0.0176337
342.8	0.00812879		872.82	0.00330143		1402.81	0.00869041		1932.84	0.0099028		2462.84	-0.00894458		2992.84	-0.00789507		3522.84	-0.01681289
343	0.00747456		873.02	0.00333433		1403.01	0.00974772		1933.04	0.01001217		2463.04	-0.00804213		2993.04	-0.00789587		3523.04	-0.01662563
343.2	0.00773836		873.22	0.0040679		1403.21	0.00996621		1933.24	0.0100138		2463.24	-0.00765574		2993.24	-0.00881352		3523.24	-0.01662999
343.4	0.00721076		873.42	0.00419177		1403.41	0.01009956		1933.44	0.00971989		2463.44	-0.007421		2993.44	-0.00950113		3523.44	-0.01718214
343.6	0.00667034		873.62	0.0042931		1403.61	0.0097048		1933.64	0.00948174		2463.64	-0.00706041		2993.64	-0.00889911		3523.64	-0.01748939
343.8	0.0064257		873.82	0.00431313		1403.81	0.0087395		1933.84	0.00902321		2463.84	-0.00760474		2993.84	-0.00927077		3523.84	-0.01803084
344	0.00642474		874.02	0.00427873		1404.01	0.00849265		1934.04	0.00777111		2464.04	-0.00748424		2994.04	-0.00991725		3524.04	-0.01800947
344.2	0.00671393		874.22	0.00429622		1404.21	0.00801616		1934.24	0.00762712		2464.24	-0.00756557		2994.24	-0.01035272		3524.24	-0.01784767
344.4	0.0067585		874.42	0.00428024		1404.41	0.00830207		1934.44	0.00679413		2464.44	-0.00834997		2994.44	-0.01117866		3524.44	-0.01846828
344.6	0.0060015		874.62	0.0041549		1404.61	0.00855832		1934.64	0.00636899		2464.64	-0.0088009		2994.64	-0.01031146		3524.64	-0.0180898
344.8	0.0066508		874.82	0.00432265		1404.81	0.00770975		1934.84	0.00615873		2464.84	-0.00943032		2994.84	-0.0101642		3524.84	-0.01837134
345	0.00554454		875.02	0.00443923		1405.01	0.00718509		1935.04	0.00696091		2465.04	-0.00944502		2995.04	-0.0095014		3525.04	-0.01885596
345.2	0.00612091		875.22	0.00379132		1405.21	0.00753342		1935.24	0.00762985		2465.24	-0.01010437		2995.24	-0.00838421		3525.24	-0.01898011
345.4	0.00651587		875.42	0.0035112		1405.41	0.00721231		1935.44	0.00745641		2465.44	-0.00993162		2995.44	-0.00905952		3525.44	-0.02054786
345.6	0.00710975		875.62	0.00263593		1405.61	0.00860816		1935.64	0.00844355		2465.64	-0.01057631		2995.64	-0.00830172		3525.64	-0.02114011
345.8	0.00704414		875.82	0.00226191		1405.81	0.0094648		1935.84	0.00822644		2465.84	-0.0109053		2995.84	-0.00744411		3525.84	-0.02099474
346	0.0073896		876.02	0.00212637		1406.01	0.00939381		1936.04	0.00864797		2466.04	-0.01107556		2996.04	-0.00692283		3526.04	-0.02177242
346.2	0.00724509		876.22	0.00179327		1406.21	0.01007729		1936.24	0.00894054		2466.24	-0.01058115		2996.24	-0.00663528		3526.24	-0.02143077
346.4	0.0073282		876.42	0.00290948		1406.41	0.01029579		1936.44	0.00917797		2466.44	-0.01096107		2996.44	-0.00632916		3526.44	-0.02080675
346.6	0.00630936		876.62	0.00277544		1406.61	0.00992426		1936.64	0.00953352		2466.64	-0.01019527		2996.64	-0.00578894		3526.64	-0.01961468
346.8	0.0056105		876.82	0.00152642		1406.81	0.01055429		1936.84	0.00968299		2466.84	-0.01012507		2996.84	-0.00438555		3526.84	-0.01909436
347	0.0052716		877.02	0.0020721		1407.01	0.01031498		1937.04	0.0097194		2467.04	-0.01026829		2997.04	-0.00369671		3527.04	-0.0196205
347.2	0.00545168		877.22	0.00155054		1407.21	0.0094088		1937.24	0.00987788		2467.24	-0.01077044		2997.24	-0.00396889		3527.24	-0.01878588
347.4	0.00462454		877.42	0.00193099		1407.41	0.00859906		1937.44	0.0095535		2467.44	-0.01093334		2997.44	-0.00399843		3527.44	-0.01898608
347.6	0.004713		877.62	0.00167281		1407.61	0.00828721		1937.64	0.00954265		2467.64	-0.01067374		2997.64	-0.00448421		3527.64	-0.01843364
347.8	0.00512304		877.82	0.00158078		1407.81	0.00755028		1937.84	0.00882649		2467.84	-0.01128106		2997.84	-0.00525216		3527.84	-0.01761705
348	0.00484173		878.02	0.00114476		1408.01	0.00806058		1938.04	0.00776855		2468.04	-0.01097023		2998.04	-0.00620072		3528.04	-0.01806007
348.2	0.00523285		878.22	0.00168309		1408.21	0.00700058		1938.24	0.00749478		2468.24	-0.01060724		2998.24	-0.00668675		3528.24	-0.01842737
348.4	0.0047434		878.42	0.00249635		1408.41	0.0077232		1938.44	0.00617788		2468.44	-0.01038577		2998.44	-0.00688283		3528.44	-0.01820162
348.6	0.0047732		878.62	0.00211627		1408.61	0.0069394		1938.64	0.00578575		2468.64	-0.01000784		2998.64	-0.00651826		3528.64	-0.01809416
348.8	0.00598518		878.82	0.0013308		1408.81	0.00673046		1938.84	0.0057725		2468.84	-0.01050316		2998.84	-0.00810656		3528.84	-0.01807905
349	0.00600603		879.02	0.00136632		1409.01	0.00701556		1939.04	0.00632306		2469.04	-0.00975097		2999.04	-0.00885792		3529.04	-0.01823581
349.2	0.00671272		879.22	0.00094396		1409.21	0.0068417		1939.24	0.00623597		2469.24	-0.00977865		2999.24	-0.00976882		3529.24	-0.01816951
349.4	0.00770283		879.42	0.00031592		1409.41	0.00666492		1939.44	0.00545911		2469.44	-0.0101522		2999.44	-0.01019091		3529.44	-0.01884922
349.6	0.00734277		879.62	-0.00018155		1409.61	0.0078275		1939.64	0.00607294		2469.64	-0.01026983		2999.64	-0.00952426		3529.64	-0.01800069
349.8	0.00681729		879.82	-0.00035754		1409.81	0.00825399		1939.84	0.00684155		2469.84	-0.01069392		2999.84	-0.00889918		3529.84	-0.01826839
350	0.00633969		880.02	-0.00039325		1410.01	0.00801176		1940.04	0.00764697		2470.04	-0.01037267		3000.04	-0.00872044		3530.04	-0.01777127
350.2	0.00541328		880.22	-0.00126283		1410.21	0.00814443		1940.24	0.00774496		2470.24	-0.01090942		3000.24	-0.00841558		3530.24	-0.01780224
350.4	0.00507417		880.42	-0.00127466		1410.41	0.00864845		1940.44	0.008186		2470.44	-0.01169439		3000.44	-0.00814928		3530.44	-0.01781191
350.6	0.00473628		880.62	-0.00177654		1410.61	0.00854429		1940.64	0.00880383		2470.64	-0.01142045		3000.64	-0.00643071		3530.64	-0.01791228
350.8	0.0045197		880.82	-0.00212694		1410.81	0.00837113		1940.84	0.00861325		2470.84	-0.01131721		3000.84	-0.00521919		3530.84	-0.01872046
351	0.00426489		881.02	-0.00170559		1411.01	0.00835851		1941.04	0.00863436		2471.04	-0.01172469		3001.04	-0.00499043		3531.04	-0.01914523
351.2	0.00441197		881.22	-0.00177992		1411.21	0.00779707		1941.24	0.00865258		2471.24	-0.01196525		3001.24	-0.0052038		3531.24	-0.01816533
351.4	0.00388846		881.42	-0.00115731		1411.41	0.00688801		1941.44	0.00895282		2471.44	-0.01223496		3001.44	-0.00577811		3531.44	-0.01886196
351.6	0.00356722		881.62	-0.0014746		1411.61	0.00664333		1941.64	0.00847778		2471.64	-0.01184477		3001.64	-0.00500238		3531.64	-0.01855554
351.8	0.00389765		881.82	-0.00050463		1411.81	0.0053562		1941.84	0.00916151		2471.84	-0.01137759		3001.84	-0.00521881		3531.84	-0.0185775
352	0.0030858		882.02	-0.00068632		1412.01	0.00582865		1942.04	0.00857447		2472.04	-0.01109972		3002.04	-0.00554201		3532.04	-0.01964018
352.2	0.00340158		882.22	0.00010423		1412.21	0.00521835		1942.24	0.0085675		2472.24	-0.01032375		3002.24	-0.00597972		3532.24	-0.01951463
352.4	0.00422408		882.42	0.00095989		1412.41	0.00578337		1942.44	0.00776082		2472.44	-0.00935982		3002.44	-0.0061151		3532.44	-0.01814668
352.6	0.00528077		882.62	-0.00009943		1412.61	0.00509877		1942.64	0.0076174		2472.64	-0.00885855		3002.64	-0.00683463		3532.64	-0.01770994
352.8	0.00575446		882.82	0.00069042		1412.81	0.00552431		1942.84	0.00720542		2472.84	-0.00855176		3002.84	-0.00741207		3532.84	-0.01755596
353	0.00545173		883.02	0.00215182		1413.01	0.00503168		1943.04	0.00701213		2473.04	-0.00772147		3003.04	-0.00802931		3533.04	-0.01655529
353.2	0.00519935		883.22	0.0023622		1413.21	0.00510044		1943.24	0.00671482		2473.24	-0.00755479		3003.24	-0.00787605		3533.24	-0.01592064
353.4	0.005546		883.42	0.0027277		1413.41	0.00570022		1943.44	0.00649921		2473.44	-0.00862574		3003.44	-0.0076579		3533.44	-0.01545341
353.6	0.0051488		883.62	0.00347818		1413.61	0.00623289		1943.64	0.00686823		2473.64	-0.00832957		3003.64	-0.00787903		3533.64	-0.01475927
353.8	0.00537083		883.82	0.0035752		1413.81	0.00635985		1943.84	0.00739224		2473.84	-0.00941652		3003.84	-0.00819465		3533.84	-0.01455214
354	0.00494246		884.02	0.00368321		1414.01	0.0062816		1944.04	0.00774378		2474.04	-0.01006417		3004.04	-0.00758249		3534.04	-0.01445292
354.2	0.00499928		884.22	0.00254077		1414.21	0.00659823		1944.24	0.00771992		2474.24	-0.01072392		3004.24	-0.00728409		3534.24	-0.01487109
354.4	0.00539131		884.42	0.00273456		1414.41	0.008001		1944.44	0.00779529		2474.44	-0.01133726		3004.44	-0.00779805		3534.44	-0.01552951
354.6	0.00554345		884.62	0.00233541		1414.61	0.00741819		1944.64	0.00778299		2474.64	-0.01089442		3004.64	-0.00682412		3534.64	-0.01571317
354.8	0.00572654		884.82	0.00229595		1414.81	0.00716352		1944.84	0.00723637		2474.84	-0.01131114		3004.84	-0.00651522		3534.84	-0.01609811
355	0.00619303		885.02	0.00180832		1415.01	0.00719477		1945.04	0.0086264		2475.04	-0.01192955		3005.04	-0.00626154		3535.04	-0.01633572
355.2	0.00639917		885.22	0.00148488		1415.21	0.00666327		1945.24	0.00917835		2475.24	-0.01200126		3005.24	-0.00541995		3535.24	-0.0164382
355.4	0.00652286		885.42	0.00103948		1415.41	0.00652999		1945.44	0.00980578		2475.44	-0.0125479		3005.44	-0.00546282		3535.44	-0.01793402
355.6	0.00666516		885.62	0.0014919		1415.61	0.00694738		1945.64	0.00947987		2475.64	-0.01226097		3005.64	-0.00485999		3535.64	-0.01786942
355.8	0.00760928		885.82	0.00115781		1415.81	0.00686526		1945.84	0.01085163		2475.84	-0.01212285		3005.84	-0.00574625		3535.84	-0.01808046
356	0.00785512		886.02	-0.00001875		1416.01	0.00749242		1946.04	0.01077502		2476.04	-0.01276884		3006.04	-0.00609263		3536.04	-0.01914917
356.2	0.00840893		886.22	0.00011339		1416.21	0.00694528		1946.24	0.01033942		2476.24	-0.01195395		3006.24	-0.00625547		3536.24	-0.01892881
356.4	0.00875044		886.42	0.00002118		1416.41	0.00693416		1946.44	0.01031794		2476.44	-0.01208084		3006.44	-0.00592327		3536.44	-0.01850205
356.6	0.00871131		886.62	-0.00068072		1416.61	0.00677795		1946.64	0.00989659		2476.64	-0.01191064		3006.64	-0.00571594		3536.64	-0.01910587
356.8	0.00739054		886.82	0.00032813		1416.81	0.00664882		1946.84	0.00954797		2476.84	-0.01181531		3006.84	-0.0054565		3536.84	-0.0189949
357	0.00601338		887.02	0.00077585		1417.01	0.00593539		1947.04	0.00975044		2477.04	-0.01127258		3007.04	-0.00615346		3537.04	-0.0188636
357.2	0.00643463		887.22	0.00111691		1417.21	0.00567682		1947.24	0.00930703		2477.24	-0.01122305		3007.24	-0.00651653		3537.24	-0.01894656
357.4	0.00655046		887.42	0.00153635		1417.41	0.00555866		1947.44	0.00956358		2477.44	-0.01176183		3007.44	-0.00694181		3537.44	-0.01890479
357.6	0.006977		887.62	0.00109672		1417.61	0.00455268		1947.64	0.00851631		2477.64	-0.01167739		3007.64	-0.00745065		3537.64	-0.01875169
357.8	0.00646124		887.82	0.0008116		1417.81	0.0039448		1947.84	0.00841763		2477.84	-0.01243009		3007.84	-0.00703342		3537.84	-0.0188869
358	0.0056166		888.02	0.00052795		1418.01	0.00324526		1948.04	0.00851983		2478.04	-0.013358		3008.04	-0.00690273		3538.04	-0.01941909
358.2	0.00503426		888.22	-0.00014698		1418.21	0.00372456		1948.24	0.00767858		2478.24	-0.01314971		3008.24	-0.00725925		3538.24	-0.01910852
358.4	0.00496192		888.42	-0.00018175		1418.41	0.00503648		1948.44	0.00718694		2478.44	-0.01381119		3008.44	-0.00651975		3538.44	-0.01974465
358.6	0.00480943		888.62	0.00035507		1418.61	0.00443242		1948.64	0.0073488		2478.64	-0.01345834		3008.64	-0.00544907		3538.64	-0.01974842
358.8	0.00437414		888.82	0.00002314		1418.81	0.0049811		1948.84	0.00727728		2478.84	-0.01264024		3008.84	-0.00559853		3538.84	-0.01977339
359	0.00457348		889.02	-0.00048036		1419.01	0.00553613		1949.04	0.0085652		2479.04	-0.01258736		3009.04	-0.00532773		3539.04	-0.02027074
359.2	0.00448659		889.22	-0.00084259		1419.21	0.00611884		1949.24	0.00875996		2479.24	-0.01324953		3009.24	-0.00464944		3539.24	-0.02049897
359.4	0.00450544		889.42	-0.00090877		1419.41	0.00682863		1949.44	0.00863418		2479.44	-0.01315773		3009.44	-0.00457775		3539.44	-0.02117635
359.6	0.0035811		889.62	-0.00007192		1419.61	0.00761775		1949.64	0.00853432		2479.64	-0.01225445		3009.64	-0.00537479		3539.64	-0.02062317
359.8	0.0041155		889.82	-0.00150737		1419.81	0.0075703		1949.84	0.00899137		2479.84	-0.01205772		3009.84	-0.00639768		3539.84	-0.02083318
360	0.00399431		890.02	-0.00172404		1420.01	0.00778818		1950.04	0.00935188		2480.04	-0.0115746		3010.04	-0.0056673		3540.04	-0.02088335
360.2	0.00413502		890.22	-0.00093974		1420.21	0.00810757		1950.24	0.00913057		2480.24	-0.01066316		3010.24	-0.00541515		3540.24	-0.02012044
360.4	0.0044064		890.42	-0.00066759		1420.41	0.00856883		1950.44	0.00986463		2480.44	-0.01090024		3010.44	-0.0049398		3540.44	-0.01963495
360.6	0.00506126		890.62	-0.00053595		1420.61	0.00809331		1950.64	0.01025587		2480.64	-0.00990314		3010.64	-0.00480479		3540.64	-0.01915309
360.8	0.00476861		890.82	0.00004767		1420.81	0.00816823		1950.84	0.01077328		2480.84	-0.00941741		3010.84	-0.00479385		3540.84	-0.01847612
361	0.00609571		891.02	0.00020721		1421.01	0.00704134		1951.04	0.01059869		2481.04	-0.0087067		3011.04	-0.00494781		3541.04	-0.01852866
361.2	0.00752831		891.22	0.00118105		1421.21	0.00692855		1951.24	0.01058883		2481.24	-0.00895132		3011.24	-0.00529676		3541.24	-0.01847615
361.4	0.00754597		891.42	0.00057175		1421.41	0.0066629		1951.44	0.01075598		2481.44	-0.00819958		3011.44	-0.00583479		3541.44	-0.0181882
361.6	0.00823513		891.62	0.00110143		1421.61	0.00580725		1951.64	0.0101701		2481.64	-0.00789106		3011.64	-0.00639465		3541.64	-0.01804341
361.8	0.00819582		891.82	0.00193281		1421.81	0.00615815		1951.84	0.01045728		2481.84	-0.00829038		3011.84	-0.00605769		3541.84	-0.01846355
362	0.0079222		892.02	0.00200337		1422.01	0.0064852		1952.04	0.01055183		2482.04	-0.0085182		3012.04	-0.00647323		3542.04	-0.01807129
362.2	0.00813309		892.22	0.00306898		1422.21	0.00697963		1952.24	0.01002298		2482.24	-0.00842728		3012.24	-0.0064325		3542.24	-0.01792179
362.4	0.00790259		892.42	0.00392089		1422.41	0.00691303		1952.44	0.00988608		2482.44	-0.00996462		3012.44	-0.00621472		3542.44	-0.0178806
362.6	0.0084286		892.62	0.00541862		1422.61	0.00637957		1952.64	0.00994387		2482.64	-0.00976712		3012.64	-0.00718448		3542.64	-0.01798341
362.8	0.00756923		892.82	0.00430745		1422.81	0.00649296		1952.84	0.01081211		2482.84	-0.01009981		3012.84	-0.00763904		3542.84	-0.01786628
363	0.00697494		893.02	0.00455121		1423.01	0.00659912		1953.04	0.01117487		2483.04	-0.0116729		3013.04	-0.00793918		3543.04	-0.01847262
363.2	0.00674133		893.22	0.00423007		1423.21	0.00695769		1953.24	0.01145096		2483.24	-0.01304142		3013.24	-0.00768537		3543.24	-0.0186658
363.4	0.00562065		893.42	0.00436209		1423.41	0.00764364		1953.44	0.01120246		2483.44	-0.01269473		3013.44	-0.00783545		3543.44	-0.01880084
363.6	0.00507022		893.62	0.00410813		1423.61	0.00916063		1953.64	0.01117366		2483.64	-0.01367908		3013.64	-0.00817574		3543.64	-0.01849506
363.8	0.00567915		893.82	0.00341311		1423.81	0.00918943		1953.84	0.01095909		2483.84	-0.01358049		3013.84	-0.00809807		3543.84	-0.01926958
364	0.00451073		894.02	0.00435038		1424.01	0.00893702		1954.04	0.01078046		2484.04	-0.01395878		3014.04	-0.00699915		3544.04	-0.01957825
364.2	0.00565324		894.22	0.00425786		1424.21	0.00905049		1954.24	0.01053789		2484.24	-0.0152425		3014.24	-0.00727562		3544.24	-0.01984869
364.4	0.00590679		894.42	0.00284993		1424.41	0.00876797		1954.44	0.01019801		2484.44	-0.01540232		3014.44	-0.00688637		3544.44	-0.01929363
364.6	0.00645152		894.62	0.00146258		1424.61	0.00780023		1954.64	0.00960357		2484.64	-0.01502105		3014.64	-0.0067686		3544.64	-0.018524
364.8	0.00620612		894.82	0.0005029		1424.81	0.0076056		1954.84	0.00980012		2484.84	-0.01463897		3014.84	-0.00674155		3544.84	-0.01885618
365	0.00644655		895.02	0.00014834		1425.01	0.00675275		1955.04	0.00971746		2485.04	-0.01444324		3015.04	-0.00686781		3545.04	-0.01937308
365.2	0.00619495		895.22	0.00039363		1425.21	0.00714223		1955.24	0.00939961		2485.24	-0.01411023		3015.24	-0.00735589		3545.24	-0.01899605
365.4	0.00638094		895.42	-0.00008735		1425.41	0.00717031		1955.44	0.00902059		2485.44	-0.01263494		3015.44	-0.00783327		3545.44	-0.01921708
365.6	0.00654081		895.62	0.00069362		1425.61	0.00739476		1955.64	0.00895614		2485.64	-0.01260663		3015.64	-0.00655936		3545.64	-0.0190314
365.8	0.00617724		895.82	0.00047782		1425.81	0.007702		1955.84	0.00894715		2485.84	-0.01198094		3015.84	-0.00614423		3545.84	-0.01904842
366	0.00537567		896.02	0.0012714		1426.01	0.00728499		1956.04	0.00860212		2486.04	-0.01155274		3016.04	-0.00684487		3546.04	-0.01829969
366.2	0.00523798		896.22	0.00263388		1426.21	0.00796257		1956.24	0.00896297		2486.24	-0.01109183		3016.24	-0.00741414		3546.24	-0.01856714
366.4	0.00604806		896.42	0.00310332		1426.41	0.00828318		1956.44	0.0092284		2486.44	-0.01136935		3016.44	-0.00730028		3546.44	-0.01850887
366.6	0.00707257		896.62	0.00391642		1426.61	0.00867411		1956.64	0.00968601		2486.64	-0.01004544		3016.64	-0.00796658		3546.64	-0.01922585
366.8	0.00687474		896.82	0.0030103		1426.81	0.00951061		1956.84	0.01063693		2486.84	-0.01011664		3016.84	-0.00846317		3546.84	-0.01961099
367	0.00656005		897.02	0.00368896		1427.01	0.00880982		1957.04	0.01019148		2487.04	-0.00976756		3017.04	-0.00940145		3547.04	-0.01992122
367.2	0.00722737		897.22	0.00370035		1427.21	0.0089264		1957.24	0.01070416		2487.24	-0.00930138		3017.24	-0.00854247		3547.24	-0.02001263
367.4	0.00751074		897.42	0.00456732		1427.41	0.00938998		1957.44	0.01100031		2487.44	-0.00881859		3017.44	-0.0078691		3547.44	-0.02061034
367.6	0.00780726		897.62	0.00496457		1427.61	0.00996171		1957.64	0.01043055		2487.64	-0.00940258		3017.64	-0.0077428		3547.64	-0.02158735
367.8	0.00778234		897.82	0.00534451		1427.81	0.00862861		1957.84	0.01024449		2487.84	-0.00908881		3017.84	-0.0078418		3547.84	-0.02226366
368	0.00810211		898.02	0.00573028		1428.01	0.00698426		1958.04	0.00999614		2488.04	-0.00933223		3018.04	-0.00729743		3548.04	-0.02230642
368.2	0.00919284		898.22	0.00401337		1428.21	0.00659883		1958.24	0.01031816		2488.24	-0.00941621		3018.24	-0.00660918		3548.24	-0.02193651
368.4	0.00847489		898.42	0.00263638		1428.41	0.00666128		1958.44	0.00925823		2488.44	-0.00828101		3018.44	-0.00636955		3548.44	-0.02141676
368.6	0.00808629		898.62	0.00213767		1428.61	0.00587407		1958.64	0.00925902		2488.64	-0.007936		3018.64	-0.00714364		3548.64	-0.02084439
368.8	0.00787378		898.82	0.0019216		1428.81	0.00601359		1958.84	0.00977832		2488.84	-0.00802605		3018.84	-0.00728547		3548.84	-0.02109577
369	0.00725357		899.02	0.00192246		1429.01	0.00600956		1959.04	0.00862556		2489.04	-0.00844854		3019.04	-0.00706765		3549.04	-0.02062932
369.2	0.00681378		899.22	0.00152615		1429.21	0.00597597		1959.24	0.00780295		2489.24	-0.00841238		3019.24	-0.00767571		3549.24	-0.01956447
369.4	0.00618798		899.42	0.00126768		1429.41	0.00545911		1959.44	0.0077922		2489.44	-0.00855765		3019.44	-0.00871779		3549.44	-0.01957798
369.6	0.00518038		899.62	0.00066293		1429.61	0.00481063		1959.64	0.00753551		2489.64	-0.00832726		3019.64	-0.00801132		3549.64	-0.01831387
369.8	0.00452062		899.82	0.00041299		1429.81	0.00505208		1959.84	0.0070173		2489.84	-0.00721347		3019.84	-0.00895686		3549.84	-0.01825897
370	0.00372239		900.02	0.00023598		1430.01	0.00544628		1960.04	0.00761178		2490.04	-0.00773289		3020.04	-0.00951255		3550.04	-0.01708365
370.2	0.0039453		900.22	0.00047905		1430.21	0.00637583		1960.24	0.00828719		2490.24	-0.00795977		3020.24	-0.00898774		3550.24	-0.0180144
370.4	0.00411105		900.42	0.00041412		1430.41	0.00545489		1960.44	0.00764336		2490.44	-0.00804977		3020.44	-0.00889732		3550.44	-0.0177161
370.6	0.00374136		900.62	0.00113316		1430.61	0.00571924		1960.64	0.00782628		2490.64	-0.00813278		3020.64	-0.00920736		3550.64	-0.01690299
370.8	0.00306674		900.82	0.00164928		1430.81	0.00555786		1960.84	0.00788995		2490.84	-0.00847279		3020.84	-0.00883532		3550.84	-0.01599203
371	0.00323718		901.02	0.00299631		1431.01	0.00427816		1961.04	0.00786304		2491.04	-0.00891904		3021.04	-0.00826156		3551.04	-0.01550652
371.2	0.00401763		901.22	0.00378431		1431.21	0.005147		1961.24	0.00859214		2491.24	-0.00884416		3021.24	-0.00694155		3551.24	-0.01562217
371.4	0.00422867		901.42	0.00362511		1431.41	0.00526802		1961.44	0.0086108		2491.44	-0.00954796		3021.44	-0.00614616		3551.44	-0.01600601
371.6	0.004351		901.62	0.00437341		1431.61	0.00583839		1961.64	0.00861937		2491.64	-0.0095181		3021.64	-0.00551864		3551.64	-0.01601327
371.8	0.00569433		901.82	0.00383726		1431.81	0.00580572		1961.84	0.00930721		2491.84	-0.00918552		3021.84	-0.00432609		3551.84	-0.01583021
372	0.00619192		902.02	0.00388036		1432.01	0.00640777		1962.04	0.00918837		2492.04	-0.0091457		3022.04	-0.00355285		3552.04	-0.01547246
372.2	0.0061281		902.22	0.00280634		1432.21	0.00799396		1962.24	0.00927808		2492.24	-0.01011655		3022.24	-0.00321606		3552.24	-0.01472658
372.4	0.00649099		902.42	0.00268452		1432.41	0.00904665		1962.44	0.00845856		2492.44	-0.01018659		3022.44	-0.00337048		3552.44	-0.01387454
372.6	0.00677354		902.62	0.001874		1432.61	0.00900772		1962.64	0.00865753		2492.64	-0.0106418		3022.64	-0.00423022		3552.64	-0.01312296
372.8	0.00789799		902.82	0.00164135		1432.81	0.00945752		1962.84	0.00876683		2492.84	-0.01128104		3022.84	-0.00383587		3552.84	-0.01318921
373	0.00777137		903.02	0.00084912		1433.01	0.00944505		1963.04	0.00855684		2493.04	-0.01128726		3023.04	-0.00534586		3553.04	-0.01349719
373.2	0.00764569		903.22	0.00012932		1433.21	0.00834204		1963.24	0.00948461		2493.24	-0.01184905		3023.24	-0.00558958		3553.24	-0.01427104
373.4	0.00722928		903.42	-0.00019191		1433.41	0.00763442		1963.44	0.00934347		2493.44	-0.01182746		3023.44	-0.00627796		3553.44	-0.01508452
373.6	0.00741484		903.62	-0.00096902		1433.61	0.00762163		1963.64	0.00929519		2493.64	-0.01127526		3023.64	-0.00616355		3553.64	-0.01596063
373.8	0.00772599		903.82	-0.00080069		1433.81	0.00870171		1963.84	0.00851706		2493.84	-0.0111839		3023.84	-0.00743004		3553.84	-0.01763726
374	0.00735321		904.02	-0.00119093		1434.01	0.00854735		1964.04	0.0090952		2494.04	-0.01183632		3024.04	-0.00737364		3554.04	-0.01807651
374.2	0.00620195		904.22	-0.00036828		1434.21	0.00788953		1964.24	0.00751615		2494.24	-0.0122921		3024.24	-0.00774827		3554.24	-0.01918595
374.4	0.00637266		904.42	0.00040536		1434.41	0.00806542		1964.44	0.00690808		2494.44	-0.01213049		3024.44	-0.00876901		3554.44	-0.0193564
374.6	0.00648278		904.62	0.00146525		1434.61	0.00870271		1964.64	0.00718387		2494.64	-0.01248527		3024.64	-0.00912028		3554.64	-0.01931721
374.8	0.00656646		904.82	0.00220168		1434.81	0.00809004		1964.84	0.00705537		2494.84	-0.01201932		3024.84	-0.00947185		3554.84	-0.02025089
375	0.00677326		905.02	0.00297036		1435.01	0.00735641		1965.04	0.00777403		2495.04	-0.01164617		3025.04	-0.01025332		3555.04	-0.02153781
375.2	0.00662174		905.22	0.00316615		1435.21	0.00711973		1965.24	0.00825948		2495.24	-0.01122969		3025.24	-0.01008399		3555.24	-0.02188915
375.4	0.00649743		905.42	0.0032039		1435.41	0.00617011		1965.44	0.00806939		2495.44	-0.01180136		3025.44	-0.00971689		3555.44	-0.02211133
375.6	0.00767578		905.62	0.00414733		1435.61	0.00591833		1965.64	0.00829056		2495.64	-0.01118878		3025.64	-0.00940882		3555.64	-0.02174216
375.8	0.00819076		905.82	0.00331081		1435.81	0.00526676		1965.84	0.00791243		2495.84	-0.01114103		3025.84	-0.00931753		3555.84	-0.02146039
376	0.00791536		906.02	0.00305815		1436.01	0.00459048		1966.04	0.00728439		2496.04	-0.0120782		3026.04	-0.00945218		3556.04	-0.01983432
376.2	0.00813399		906.22	0.00343384		1436.21	0.00480698		1966.24	0.00698367		2496.24	-0.0123895		3026.24	-0.00959864		3556.24	-0.01915196
376.4	0.0082052		906.42	0.00346347		1436.41	0.00446796		1966.44	0.00699367		2496.44	-0.01231608		3026.44	-0.00955161		3556.44	-0.01762567
376.6	0.00832143		906.62	0.00361912		1436.61	0.00437129		1966.64	0.00763675		2496.64	-0.0122272		3026.64	-0.00953546		3556.64	-0.01744724
376.8	0.00879801		906.82	0.00442625		1436.81	0.00472269		1966.84	0.00837968		2496.84	-0.01223802		3026.84	-0.00898107		3556.84	-0.01752617
377	0.0084283		907.02	0.00374075		1437.01	0.00408477		1967.04	0.00837155		2497.04	-0.01129009		3027.04	-0.00858671		3557.04	-0.0164151
377.2	0.00841242		907.22	0.00372255		1437.21	0.00350022		1967.24	0.00926682		2497.24	-0.01123501		3027.24	-0.00679715		3557.24	-0.01648827
377.4	0.00762593		907.42	0.00393512		1437.41	0.00407926		1967.44	0.00891712		2497.44	-0.01064309		3027.44	-0.00652632		3557.44	-0.0158551
377.6	0.00733208		907.62	0.0036916		1437.61	0.00542345		1967.64	0.00886302		2497.64	-0.01032055		3027.64	-0.00625596		3557.64	-0.01601871
377.8	0.0073784		907.82	0.00333244		1437.81	0.00627698		1967.84	0.00865333		2497.84	-0.01021116		3027.84	-0.00630951		3557.84	-0.01601412
378	0.00686612		908.02	0.00256124		1438.01	0.00647442		1968.04	0.00886414		2498.04	-0.01012152		3028.04	-0.0062035		3558.04	-0.01554153
378.2	0.0063633		908.22	0.00251306		1438.21	0.00693031		1968.24	0.00820151		2498.24	-0.01016254		3028.24	-0.00662022		3558.24	-0.01555411
378.4	0.00699575		908.42	0.00231451		1438.41	0.00809203		1968.44	0.00867968		2498.44	-0.00955813		3028.44	-0.0067093		3558.44	-0.01616228
378.6	0.0064857		908.62	0.00210619		1438.61	0.00807014		1968.64	0.00883705		2498.64	-0.00895507		3028.64	-0.00676648		3558.64	-0.01603206
378.8	0.00623877		908.82	0.00232249		1438.81	0.00785929		1968.84	0.00890807		2498.84	-0.00844465		3028.84	-0.00709331		3558.84	-0.01659038
379	0.00546322		909.02	0.0024359		1439.01	0.00732021		1969.04	0.00888631		2499.04	-0.00826475		3029.04	-0.00746011		3559.04	-0.01692716
379.2	0.00534399		909.22	0.0024092		1439.21	0.00721363		1969.24	0.00809334		2499.24	-0.00886848		3029.24	-0.00686193		3559.24	-0.01669052
379.4	0.00506846		909.42	0.00245076		1439.41	0.00651072		1969.44	0.0072092		2499.44	-0.00888304		3029.44	-0.00692188		3559.44	-0.01691955
379.6	0.00495982		909.62	0.00245959		1439.61	0.00611455		1969.64	0.00639087		2499.64	-0.00865929		3029.64	-0.00712341		3559.64	-0.01674298
379.8	0.00412681		909.82	0.00258636		1439.81	0.00563848		1969.84	0.00545938		2499.84	-0.00887048		3029.84	-0.00754387		3559.84	-0.01717264
379.99	0.00412681		910.02	0.00258636		1440.01	0.00563848		1970.04	0.00545938		2500.04	-0.00887048		3030.04	-0.00754387		3560.04	-0.01717264
380.19	0.00403218		910.22	0.00333408		1440.21	0.00531902		1970.24	0.00481771		2500.24	-0.00849721		3030.24	-0.00737246		3560.24	-0.01657694
380.39	0.0038117		910.42	0.0034616		1440.41	0.00501079		1970.44	0.00536832		2500.44	-0.0082105		3030.44	-0.00722938		3560.44	-0.01630044
380.59	0.00379239		910.62	0.0041728		1440.61	0.00468905		1970.64	0.0055448		2500.64	-0.00734009		3030.64	-0.00695717		3560.64	-0.01582403
380.79	0.00439767		910.82	0.00500623		1440.81	0.0048187		1970.84	0.00573381		2500.84	-0.00656507		3030.84	-0.00679091		3560.84	-0.01481686
380.99	0.00492353		911.02	0.0052794		1441.01	0.00419607		1971.04	0.00536184		2501.04	-0.00604636		3031.04	-0.00663362		3561.04	-0.013554
381.19	0.00556329		911.22	0.00499707		1441.21	0.00368822		1971.24	0.00502191		2501.24	-0.00633566		3031.24	-0.00616796		3561.24	-0.01333089
381.39	0.00554854		911.42	0.00505833		1441.41	0.00398457		1971.44	0.00509498		2501.44	-0.00557247		3031.44	-0.00613647		3561.44	-0.01242971
381.59	0.00508157		911.62	0.00532098		1441.61	0.00390237		1971.64	0.00433956		2501.64	-0.00522644		3031.64	-0.00698432		3561.64	-0.01153924
381.79	0.00493874		911.82	0.00545743		1441.81	0.00418978		1971.84	0.00356792		2501.84	-0.00446967		3031.84	-0.00643134		3561.84	-0.0109133
381.99	0.00530565		912.02	0.00560669		1442.01	0.00474187		1972.04	0.00263279		2502.04	-0.00435354		3032.04	-0.00644016		3562.04	-0.0110531
382.19	0.00573487		912.22	0.00576512		1442.21	0.00558092		1972.24	0.00212544		2502.24	-0.00355866		3032.24	-0.00663644		3562.24	-0.01070753
382.39	0.00627593		912.42	0.00561221		1442.41	0.00563413		1972.44	0.00153738		2502.44	-0.0034143		3032.44	-0.00689199		3562.44	-0.01022568
382.59	0.00654457		912.62	0.00627266		1442.61	0.0051675		1972.64	0.00070589		2502.64	-0.00347578		3032.64	-0.00736517		3562.64	-0.01045669
382.79	0.00687472		912.82	0.00667421		1442.81	0.00535886		1972.84	0.00054059		2502.84	-0.00451849		3032.84	-0.00805882		3562.84	-0.01078042
382.99	0.00602063		913.02	0.00583289		1443.01	0.00524641		1973.04	0.00085306		2503.04	-0.00566774		3033.04	-0.00764032		3563.04	-0.01089759
383.19	0.00524445		913.22	0.00606553		1443.21	0.00570833		1973.24	0.00080805		2503.24	-0.00489568		3033.24	-0.00761206		3563.24	-0.01163327
383.39	0.00518628		913.42	0.0051042		1443.41	0.00509559		1973.44	0.00210043		2503.44	-0.00582024		3033.44	-0.00712809		3563.44	-0.01225188
383.59	0.00483432		913.62	0.0052384		1443.61	0.00527512		1973.64	0.00197591		2503.64	-0.00568678		3033.64	-0.00802067		3563.64	-0.01264753
383.79	0.00511733		913.82	0.00507616		1443.81	0.00527407		1973.84	0.00122156		2503.84	-0.00552471		3033.84	-0.00759811		3563.84	-0.0137685
383.99	0.00546393		914.02	0.00517145		1444.01	0.00497806		1974.04	0.00102826		2504.04	-0.00538304		3034.04	-0.00733566		3564.04	-0.0133542
384.19	0.00471975		914.22	0.00535806		1444.21	0.00484368		1974.24	0.00168101		2504.24	-0.00517621		3034.24	-0.00756223		3564.24	-0.01362802
384.39	0.00446798		914.42	0.00543037		1444.41	0.00556804		1974.44	0.00289931		2504.44	-0.00524057		3034.44	-0.00711481		3564.44	-0.0133851
384.59	0.00511567		914.62	0.00682795		1444.61	0.00556162		1974.64	0.00319666		2504.64	-0.0051538		3034.64	-0.00668472		3564.64	-0.0134171
384.79	0.00571941		914.82	0.00670774		1444.81	0.00583342		1974.84	0.00342642		2504.84	-0.00562526		3034.84	-0.00657536		3564.84	-0.01338284
384.99	0.00560779		915.02	0.00659501		1445.01	0.00513215		1975.04	0.0030622		2505.04	-0.00635853		3035.04	-0.0063843		3565.04	-0.01315081
385.19	0.00489628		915.22	0.00613104		1445.21	0.00547438		1975.24	0.00333555		2505.24	-0.00630657		3035.24	-0.00566496		3565.24	-0.01297208
385.39	0.00446075		915.42	0.00689831		1445.41	0.00607911		1975.44	0.00432499		2505.44	-0.00501749		3035.44	-0.00587262		3565.44	-0.0119408
385.59	0.00424791		915.62	0.00744769		1445.61	0.00446504		1975.64	0.00426201		2505.64	-0.00530207		3035.64	-0.00592352		3565.64	-0.01164747
385.79	0.00427621		915.82	0.00734605		1445.81	0.00468882		1975.84	0.00470856		2505.84	-0.00492764		3035.84	-0.00442474		3565.84	-0.01158993
385.99	0.00496456		916.02	0.00763508		1446.01	0.00484443		1976.04	0.00452665		2506.04	-0.00430392		3036.04	-0.00473485		3566.04	-0.0118459
386.19	0.00496097		916.22	0.00774733		1446.21	0.00485357		1976.24	0.00454169		2506.24	-0.00429068		3036.24	-0.00508547		3566.24	-0.01116493
386.39	0.00430502		916.42	0.00812364		1446.41	0.00429135		1976.44	0.00388404		2506.44	-0.00457696		3036.44	-0.0063607		3566.44	-0.01142649
386.59	0.00328547		916.62	0.00817836		1446.61	0.00361169		1976.64	0.0034349		2506.64	-0.00433331		3036.64	-0.00691368		3566.64	-0.01145012
386.79	0.00219419		916.82	0.00697533		1446.81	0.00319674		1976.84	0.00416672		2506.84	-0.0050077		3036.84	-0.00679177		3566.84	-0.01173468
386.99	0.00218325		917.02	0.00643191		1447.01	0.00343694		1977.04	0.00469964		2507.04	-0.00544569		3037.04	-0.00623479		3567.04	-0.0127981
387.19	0.00169096		917.22	0.005067		1447.21	0.00348393		1977.24	0.00394884		2507.24	-0.00424462		3037.24	-0.00653124		3567.24	-0.01302282
387.39	0.00224868		917.42	0.00392151		1447.41	0.00322649		1977.44	0.00327314		2507.44	-0.00482599		3037.44	-0.00657753		3567.44	-0.01296237
387.59	0.00277781		917.62	0.00341402		1447.61	0.00287797		1977.64	0.00217724		2507.64	-0.00397525		3037.64	-0.00558593		3567.64	-0.01326965
387.79	0.00252019		917.82	0.00372875		1447.81	0.0029086		1977.84	0.00173694		2507.84	-0.00396627		3037.84	-0.00474382		3567.84	-0.01354077
387.99	0.0020629		918.02	0.00460607		1448.01	0.00236974		1978.04	0.00210066		2508.04	-0.00416513		3038.04	-0.00372859		3568.04	-0.013734
388.19	0.00225445		918.22	0.00408551		1448.21	0.00291148		1978.24	0.00197078		2508.24	-0.00480861		3038.24	-0.00407649		3568.24	-0.0143912
388.39	0.00288944		918.42	0.00388843		1448.41	0.00415655		1978.44	0.00099884		2508.44	-0.00496175		3038.44	-0.00382462		3568.44	-0.01404085
388.59	0.00390519		918.62	0.00442456		1448.61	0.00436889		1978.64	0.00070407		2508.64	-0.00529814		3038.64	-0.00372167		3568.64	-0.01502091
388.79	0.00363279		918.82	0.00421651		1448.81	0.004793		1978.84	0.0007742		2508.84	-0.00557138		3038.84	-0.00384525		3568.84	-0.01585511
388.99	0.00371961		919.02	0.00431019		1449.01	0.00503954		1979.04	0.00087371		2509.04	-0.00568781		3039.04	-0.003986		3569.04	-0.01540013
389.19	0.00338524		919.22	0.0037772		1449.21	0.00586514		1979.24	0.00194896		2509.24	-0.00491447		3039.24	-0.00354604		3569.24	-0.01570863
389.39	0.00467172		919.42	0.00449925		1449.41	0.00579475		1979.44	0.00375679		2509.44	-0.00468289		3039.44	-0.00359153		3569.44	-0.01483002
389.59	0.00479923		919.62	0.00453681		1449.61	0.00540885		1979.64	0.0043964		2509.64	-0.00549281		3039.64	-0.00305495		3569.64	-0.01501046
389.79	0.00521123		919.82	0.00468781		1449.81	0.00655493		1979.84	0.00510189		2509.84	-0.00496379		3039.84	-0.00214644		3569.84	-0.01451418
389.99	0.00577609		920.02	0.00516075		1450.01	0.00668425		1980.04	0.0048862		2510.04	-0.00472365		3040.04	-0.00238663		3570.04	-0.01369025
390.19	0.00543245		920.22	0.00561254		1450.21	0.00650033		1980.24	0.00503584		2510.24	-0.00543185		3040.24	-0.00280649		3570.24	-0.01340874
390.39	0.00547583		920.42	0.00623569		1450.41	0.00675678		1980.44	0.0056536		2510.44	-0.00527525		3040.44	-0.00365048		3570.44	-0.01273868
390.59	0.00490643		920.62	0.00568095		1450.61	0.00643734		1980.64	0.00539181		2510.64	-0.0051976		3040.64	-0.00345638		3570.64	-0.01235488
390.79	0.00506361		920.82	0.00524449		1450.81	0.00648583		1980.84	0.0048661		2510.84	-0.00601204		3040.84	-0.00283635		3570.84	-0.01296814
390.99	0.00454356		921.02	0.00579614		1451.01	0.00697909		1981.04	0.00455237		2511.04	-0.00560614		3041.04	-0.00300789		3571.04	-0.01348712
391.19	0.00390373		921.22	0.00555241		1451.21	0.00669203		1981.24	0.00343854		2511.24	-0.00467895		3041.24	-0.00428233		3571.24	-0.01274119
391.39	0.00415957		921.42	0.00566148		1451.41	0.00644979		1981.44	0.00331882		2511.44	-0.00468439		3041.44	-0.00444479		3571.44	-0.01225036
391.59	0.00403262		921.62	0.00549153		1451.61	0.00543649		1981.64	0.00348901		2511.64	-0.00448338		3041.64	-0.00341669		3571.64	-0.01247992
391.79	0.00303517		921.82	0.00568774		1451.81	0.00588881		1981.84	0.0031633		2511.84	-0.00439537		3041.84	-0.00419646		3571.84	-0.01292782
391.99	0.00306413		922.02	0.00539084		1452.01	0.00526669		1982.04	0.00279452		2512.04	-0.00450844		3042.04	-0.00488681		3572.04	-0.01409534
392.19	0.00354694		922.22	0.00467404		1452.21	0.00564751		1982.24	0.00164883		2512.24	-0.00410857		3042.24	-0.00615027		3572.24	-0.01416345
392.39	0.00344183		922.42	0.00412654		1452.41	0.00492414		1982.44	0.00159667		2512.44	-0.00370416		3042.44	-0.0067398		3572.44	-0.01442298
392.59	0.0032364		922.62	0.00461738		1452.61	0.00460556		1982.64	0.00194687		2512.64	-0.004134		3042.64	-0.00701888		3572.64	-0.01534981
392.79	0.00230848		922.82	0.00401167		1452.81	0.00480176		1982.84	0.00175641		2512.84	-0.00311341		3042.84	-0.00788291		3572.84	-0.01664243
392.99	0.0018646		923.02	0.00329011		1453.01	0.0052431		1983.04	0.00213541		2513.04	-0.00313188		3043.04	-0.00778069		3573.04	-0.01631167
393.19	0.00162349		923.22	0.0030928		1453.21	0.00489201		1983.24	0.00324965		2513.24	-0.00303669		3043.24	-0.00736323		3573.24	-0.01628079
393.39	0.00262544		923.42	0.00385214		1453.41	0.00471357		1983.44	0.00414629		2513.44	-0.0034275		3043.44	-0.0068807		3573.44	-0.01547577
393.59	0.00243337		923.62	0.00440697		1453.61	0.00532757		1983.64	0.00361976		2513.64	-0.004394		3043.64	-0.00633342		3573.64	-0.01522821
393.79	0.00288961		923.82	0.00505374		1453.81	0.00486472		1983.84	0.00367126		2513.84	-0.00412993		3043.84	-0.00585476		3573.84	-0.01456911
393.99	0.00277111		924.02	0.00633538		1454.01	0.00471856		1984.04	0.0037779		2514.04	-0.00458306		3044.04	-0.00542178		3574.04	-0.01368125
394.19	0.00273416		924.22	0.00667267		1454.21	0.00525656		1984.24	0.00346408		2514.24	-0.00527177		3044.24	-0.00516251		3574.24	-0.01488013
394.39	0.00321872		924.42	0.00609897		1454.41	0.00541598		1984.44	0.0037588		2514.44	-0.00536328		3044.44	-0.00472138		3574.44	-0.01431307
394.59	0.00305374		924.62	0.00589593		1454.61	0.0054948		1984.64	0.00301424		2514.64	-0.00511452		3044.64	-0.00373455		3574.64	-0.01419278
394.79	0.00348546		924.82	0.00635118		1454.81	0.00592571		1984.84	0.00293952		2514.84	-0.00601298		3044.84	-0.00334623		3574.84	-0.01405411
394.99	0.00293109		925.02	0.00657635		1455.01	0.00582117		1985.04	0.00306292		2515.04	-0.00508671		3045.04	-0.00396664		3575.04	-0.01413748
395.19	0.00372909		925.22	0.00633213		1455.21	0.0056021		1985.24	0.00256937		2515.24	-0.00499888		3045.24	-0.00431932		3575.24	-0.01331791
395.39	0.00397024		925.42	0.00610346		1455.41	0.00528141		1985.44	0.0029664		2515.44	-0.0055359		3045.44	-0.00348303		3575.44	-0.01277711
395.59	0.00384282		925.62	0.00640344		1455.61	0.00511125		1985.64	0.0031032		2515.64	-0.00559716		3045.64	-0.00323883		3575.64	-0.01308968
395.79	0.00459411		925.82	0.00638406		1455.81	0.00546956		1985.84	0.00285217		2515.84	-0.00489308		3045.84	-0.00446465		3575.84	-0.01325697
395.99	0.00545394		926.02	0.00641226		1456.01	0.00477859		1986.04	0.00206923		2516.04	-0.00501307		3046.04	-0.00569211		3576.04	-0.01388359
396.19	0.0057089		926.22	0.00642986		1456.21	0.00411185		1986.24	0.00146321		2516.24	-0.00469503		3046.24	-0.00499347		3576.24	-0.01407505
396.39	0.0056498		926.42	0.00641157		1456.41	0.00417122		1986.44	0.00137904		2516.44	-0.00503861		3046.44	-0.00484562		3576.44	-0.01447988
396.59	0.00600728		926.62	0.00614587		1456.61	0.00439326		1986.64	0.00031225		2516.64	-0.00514558		3046.64	-0.00491147		3576.64	-0.01455115
396.79	0.00637751		926.82	0.00531962		1456.81	0.00430825		1986.84	-0.00033195		2516.84	-0.00385225		3046.84	-0.00560681		3576.84	-0.0147596
396.99	0.00600914		927.02	0.00586659		1457.01	0.00370315		1987.04	0.00038634		2517.04	-0.0044216		3047.04	-0.00528449		3577.04	-0.01457951
397.19	0.00696905		927.22	0.00597572		1457.21	0.00301651		1987.24	0.00013618		2517.24	-0.0040793		3047.24	-0.0057872		3577.24	-0.0132549
397.39	0.00702131		927.42	0.00608194		1457.41	0.00347103		1987.44	0.00035649		2517.44	-0.00457704		3047.44	-0.00655187		3577.44	-0.01345071
397.59	0.00669687		927.62	0.00575863		1457.61	0.00324465		1987.64	-0.00029227		2517.64	-0.00493257		3047.64	-0.00575755		3577.64	-0.01293301
397.79	0.00563236		927.82	0.00519419		1457.81	0.00239322		1987.84	0.00060604		2517.84	-0.0046388		3047.84	-0.00488919		3577.84	-0.01366113
397.99	0.00508056		928.02	0.00448958		1458.01	0.00182892		1988.04	0.00145832		2518.04	-0.00518798		3048.04	-0.00470996		3578.04	-0.01418171
398.19	0.0040596		928.22	0.00258943		1458.21	0.00192062		1988.24	0.00081135		2518.24	-0.00524832		3048.24	-0.00478353		3578.24	-0.01524932
398.39	0.00340251		928.42	0.00135317		1458.41	0.00182075		1988.44	0.00117437		2518.44	-0.00498094		3048.44	-0.0040519		3578.44	-0.01442008
398.59	0.00317904		928.62	0.00138807		1458.61	0.00196735		1988.64	0.00095005		2518.64	-0.00543466		3048.64	-0.00396442		3578.64	-0.01410361
398.79	0.0026114		928.82	0.00179588		1458.81	0.00207816		1988.84	0.00085859		2518.84	-0.00510621		3048.84	-0.00455996		3578.84	-0.01441217
398.99	0.0021968		929.02	0.00186076		1459.01	0.00205204		1989.04	0.00117837		2519.04	-0.00431675		3049.04	-0.00543678		3579.04	-0.01473396
399.19	0.00230649		929.22	0.0023545		1459.21	0.00289701		1989.24	0.00201443		2519.24	-0.00441092		3049.24	-0.00604757		3579.24	-0.0139218
399.39	0.00283088		929.42	0.00248225		1459.41	0.00297924		1989.44	0.0028482		2519.44	-0.00495051		3049.44	-0.0059116		3579.44	-0.01362925
399.59	0.00335697		929.62	0.0022485		1459.61	0.00405556		1989.64	0.00287357		2519.64	-0.00448462		3049.64	-0.00731519		3579.64	-0.0134945
399.79	0.00374822		929.82	0.0023325		1459.81	0.00441557		1989.84	0.00297559		2519.84	-0.00420339		3049.84	-0.00785518		3579.84	-0.01344493
399.99	0.0037619		930.02	0.00208266		1460.01	0.00470545		1990.04	0.00263618		2520.04	-0.00469953		3050.04	-0.00817251		3580.04	-0.012998
400.19	0.00407272		930.22	0.00322502		1460.21	0.00545585		1990.24	0.00277406		2520.24	-0.0046346		3050.24	-0.00765121		3580.24	-0.01286561
400.39	0.00518582		930.42	0.00360595		1460.41	0.00586974		1990.44	0.00294508		2520.44	-0.0035586		3050.44	-0.0081171		3580.44	-0.01269953
400.59	0.00593605		930.62	0.00363679		1460.61	0.00474758		1990.64	0.00318053		2520.64	-0.00408127		3050.64	-0.00816893		3580.64	-0.0118114
400.79	0.00677602		930.82	0.00465916		1460.81	0.00389262		1990.84	0.00342606		2520.84	-0.00355293		3050.84	-0.00854679		3580.84	-0.01148303
400.99	0.00666387		931.02	0.00601152		1461.01	0.00358317		1991.04	0.00374607		2521.04	-0.00369681		3051.04	-0.00829179		3581.04	-0.01170082
401.19	0.00738598		931.22	0.00645578		1461.21	0.00396562		1991.24	0.00383342		2521.24	-0.00373947		3051.24	-0.00753705		3581.24	-0.0109786
401.39	0.00638984		931.42	0.00654041		1461.41	0.00362979		1991.44	0.00414124		2521.44	-0.00409443		3051.44	-0.00757694		3581.44	-0.01090333
401.59	0.00664667		931.62	0.00632716		1461.61	0.00295904		1991.64	0.00378422		2521.64	-0.00472062		3051.64	-0.0062381		3581.64	-0.01131673
401.79	0.00583672		931.82	0.00698349		1461.81	0.00229123		1991.84	0.00418035		2521.84	-0.00569289		3051.84	-0.00661146		3581.84	-0.0123737
401.99	0.00660442		932.02	0.00731561		1462.01	0.00216884		1992.04	0.00332551		2522.04	-0.00635335		3052.04	-0.00710816		3582.04	-0.01227251
402.19	0.005686		932.22	0.00776557		1462.21	0.0029401		1992.24	0.00221885		2522.24	-0.00692006		3052.24	-0.00644514		3582.24	-0.01270735
402.39	0.00528223		932.42	0.00792363		1462.41	0.00264524		1992.44	0.00243468		2522.44	-0.00769043		3052.44	-0.00549003		3582.44	-0.0133337
402.59	0.00474272		932.62	0.00862304		1462.61	0.00233624		1992.64	0.00233622		2522.64	-0.00807297		3052.64	-0.00533759		3582.64	-0.01393524
402.79	0.00364218		932.82	0.00914755		1462.81	0.00236813		1992.84	0.00186375		2522.84	-0.0079938		3052.84	-0.00545105		3582.84	-0.01412884
402.99	0.00329143		933.02	0.00863352		1463.01	0.00188613		1993.04	0.0017601		2523.04	-0.00790485		3053.04	-0.00526422		3583.04	-0.01383446
403.19	0.00264946		933.22	0.00788402		1463.21	0.00193614		1993.24	0.00115351		2523.24	-0.00727062		3053.24	-0.00532037		3583.24	-0.01381355
403.39	0.00217471		933.42	0.0066821		1463.41	0.00212921		1993.44	0.00046128		2523.44	-0.00746342		3053.44	-0.0045055		3583.44	-0.01391752
403.59	0.00166046		933.62	0.00607576		1463.61	0.00304267		1993.64	0.0005041		2523.64	-0.00687857		3053.64	-0.0057297		3583.64	-0.01396803
403.79	0.00154448		933.82	0.00510888		1463.81	0.00362014		1993.84	0.00111402		2523.84	-0.00657912		3053.84	-0.00547936		3583.84	-0.01409482
403.99	0.00213521		934.02	0.0042891		1464.01	0.00322337		1994.04	-0.00007371		2524.04	-0.00661227		3054.04	-0.0064324		3584.04	-0.01419357
404.19	0.00221135		934.22	0.00400442		1464.21	0.00321483		1994.24	0.00006905		2524.24	-0.00626526		3054.24	-0.00633117		3584.24	-0.01400741
404.39	0.00210779		934.42	0.00344258		1464.41	0.00235842		1994.44	-0.00002605		2524.44	-0.00545572		3054.44	-0.00565892		3584.44	-0.0142351
404.59	0.00121241		934.62	0.00274024		1464.61	0.00198201		1994.64	-0.00030643		2524.64	-0.00700554		3054.64	-0.00524093		3584.64	-0.01312933
404.79	0.00128744		934.82	0.0021896		1464.81	0.00161818		1994.84	-0.00070269		2524.84	-0.00691106		3054.84	-0.00553102		3584.84	-0.01304253
404.99	0.00089397		935.02	0.00167009		1465.01	0.00276559		1995.04	-0.00060734		2525.04	-0.00671154		3055.04	-0.00565869		3585.04	-0.01341814
405.19	0.00056281		935.22	0.00128028		1465.21	0.00318759		1995.24	-0.00102595		2525.24	-0.00679301		3055.24	-0.00561334		3585.24	-0.01309586
405.39	0.00076383		935.42	0.00108693		1465.41	0.00221967		1995.44	-0.00134996		2525.44	-0.00695425		3055.44	-0.00679944		3585.44	-0.01230928
405.59	0.00187704		935.62	0.00111285		1465.61	0.00282327		1995.64	-0.00080984		2525.64	-0.00835304		3055.64	-0.00684618		3585.64	-0.01388766
405.79	0.00157988		935.82	0.00281921		1465.81	0.0031096		1995.84	0.00000652		2525.84	-0.00927133		3055.84	-0.0066783		3585.84	-0.0149369
405.99	0.00200758		936.02	0.00366606		1466.01	0.00283603		1996.04	0.00005225		2526.04	-0.00960612		3056.04	-0.00639242		3586.04	-0.01422799
406.19	0.00120481		936.22	0.00360966		1466.21	0.00283587		1996.24	0.00095993		2526.24	-0.00953228		3056.24	-0.00651453		3586.24	-0.01494874
406.39	0.00112309		936.42	0.00417351		1466.41	0.00230028		1996.44	0.00166862		2526.44	-0.00915098		3056.44	-0.00677797		3586.44	-0.01540318
406.59	0.00109283		936.62	0.00520542		1466.61	0.00296867		1996.64	0.0013272		2526.64	-0.00910852		3056.64	-0.00730899		3586.64	-0.01576182
406.79	0.00139117		936.82	0.00573097		1466.81	0.00253875		1996.84	0.00110712		2526.84	-0.00820883		3056.84	-0.00760961		3586.84	-0.01574869
406.99	0.00183565		937.02	0.00560156		1467.01	0.00296529		1997.04	0.0010461		2527.04	-0.00684025		3057.04	-0.00775173		3587.04	-0.01518139
407.19	0.00233247		937.22	0.00629687		1467.21	0.00414233		1997.24	0.00109804		2527.24	-0.0064516		3057.24	-0.00856661		3587.24	-0.01538256
407.39	0.00325919		937.42	0.0067102		1467.41	0.00466886		1997.44	0.00148088		2527.44	-0.00643244		3057.44	-0.00876679		3587.44	-0.01580679
407.59	0.00417511		937.62	0.00672949		1467.61	0.00469884		1997.64	0.00192953		2527.64	-0.00605898		3057.64	-0.00976081		3587.64	-0.01659759
407.79	0.00469918		937.82	0.00573789		1467.81	0.00513838		1997.84	0.00170405		2527.84	-0.00596932		3057.84	-0.01006375		3587.84	-0.01646331
407.99	0.0047015		938.02	0.00618346		1468.01	0.00478636		1998.04	0.00132103		2528.04	-0.00651843		3058.04	-0.01037132		3588.04	-0.01729688
408.19	0.00437357		938.22	0.00606337		1468.21	0.00520607		1998.24	0.00184411		2528.24	-0.00674855		3058.24	-0.0099776		3588.24	-0.0164278
408.39	0.00335071		938.42	0.00615778		1468.41	0.00564192		1998.44	0.00171526		2528.44	-0.00578755		3058.44	-0.00941754		3588.44	-0.01621987
408.59	0.00271437		938.62	0.00488819		1468.61	0.00559392		1998.64	0.0018052		2528.64	-0.00560028		3058.64	-0.00956065		3588.64	-0.01549901
408.79	0.00232413		938.82	0.00451659		1468.81	0.00544066		1998.84	0.00177532		2528.84	-0.00526337		3058.84	-0.00887006		3588.84	-0.01530655
408.99	0.00240981		939.02	0.00412883		1469.01	0.00597721		1999.04	0.00184839		2529.04	-0.00519023		3059.04	-0.00879062		3589.04	-0.01519659
409.19	0.00108681		939.22	0.00294127		1469.21	0.00530391		1999.24	0.00073316		2529.24	-0.0051038		3059.24	-0.00813254		3589.24	-0.01456669
409.39	0.00091699		939.42	0.00326898		1469.41	0.00494543		1999.44	0.00107921		2529.44	-0.00535988		3059.44	-0.00815593		3589.44	-0.01463737
409.59	-0.00054247		939.62	0.00338908		1469.61	0.00512415		1999.64	0.00192642		2529.64	-0.00601246		3059.64	-0.00772469		3589.64	-0.01443425
409.79	-0.00151168		939.82	0.00397553		1469.81	0.00493535		1999.84	0.00229859		2529.84	-0.00534856		3059.84	-0.00678773		3589.84	-0.01421652
409.99	-0.00188629		940.02	0.00437577		1470.01	0.00401452		2000.04	0.00202531		2530.04	-0.0048647		3060.04	-0.00731181		3590.04	-0.01347909
410.19	-0.00173286		940.22	0.00434175		1470.21	0.00389202		2000.24	0.00166784		2530.24	-0.0036561		3060.24	-0.00777723		3590.24	-0.01402129
410.39	-0.00060087		940.42	0.00574662		1470.41	0.00383659		2000.44	0.00170181		2530.44	-0.00302675		3060.44	-0.00759863		3590.44	-0.01421618
410.59	0.00011128		940.62	0.00598116		1470.61	0.00404689		2000.64	0.00118108		2530.64	-0.00309869		3060.64	-0.00714277		3590.64	-0.01437244
410.79	0.00093904		940.82	0.00648501		1470.81	0.00398665		2000.84	0.00107505		2530.84	-0.00227763		3060.84	-0.00669405		3590.84	-0.0150247
410.99	0.0009185		941.02	0.00610896		1471.01	0.00433961		2001.04	0.0006424		2531.04	-0.0024249		3061.04	-0.00702524		3591.04	-0.01452721
411.19	0.0013233		941.22	0.00645786		1471.21	0.00410303		2001.24	0.00005214		2531.24	-0.00261151		3061.24	-0.00704049		3591.24	-0.01559938
411.39	0.00189385		941.42	0.00644928		1471.41	0.00352444		2001.44	-0.00055506		2531.44	-0.00345508		3061.44	-0.00665712		3591.44	-0.0169887
411.59	0.00231835		941.62	0.00568105		1471.61	0.0039515		2001.64	-0.0011675		2531.64	-0.0039742		3061.64	-0.0064197		3591.64	-0.01675154
411.79	0.00223386		941.82	0.00531654		1471.81	0.00483347		2001.84	-0.00101878		2531.84	-0.00465311		3061.84	-0.00679963		3591.84	-0.01725884
411.99	0.00211109		942.02	0.00603092		1472.01	0.00426827		2002.04	-0.0011093		2532.04	-0.0049417		3062.04	-0.00722338		3592.04	-0.01789955
412.19	0.00226645		942.22	0.00556954		1472.21	0.00378503		2002.24	-0.00110396		2532.24	-0.00536239		3062.24	-0.00730386		3592.24	-0.01761737
412.39	0.00192988		942.42	0.00546007		1472.41	0.00449738		2002.44	-0.00172475		2532.44	-0.00468209		3062.44	-0.00718647		3592.44	-0.01822923
412.59	0.00209454		942.62	0.00575016		1472.61	0.00447999		2002.64	-0.00162693		2532.64	-0.00512258		3062.64	-0.006737		3592.64	-0.01806979
412.79	0.0026401		942.82	0.00567494		1472.81	0.00492671		2002.84	-0.00173071		2532.84	-0.00581258		3062.84	-0.00619261		3592.84	-0.0177724
412.99	0.00249032		943.02	0.00500716		1473.01	0.00517813		2003.04	-0.00188306		2533.04	-0.00648679		3063.04	-0.00604191		3593.04	-0.01718063
413.19	0.00073751		943.22	0.00443827		1473.21	0.004808		2003.24	-0.00208162		2533.24	-0.00659555		3063.24	-0.00621384		3593.24	-0.01660684
413.39	0.00063542		943.42	0.00554934		1473.41	0.00460374		2003.44	-0.00120937		2533.44	-0.00683982		3063.44	-0.00650885		3593.44	-0.01655811
413.59	0.0001777		943.62	0.00547728		1473.61	0.00358253		2003.64	-0.00037316		2533.64	-0.00706628		3063.64	-0.00688542		3593.64	-0.01572095
413.79	0.00062133		943.82	0.0053601		1473.81	0.00373774		2003.84	-0.00063034		2533.84	-0.00664033		3063.84	-0.00747061		3593.84	-0.01591931
413.99	0.00091831		944.02	0.00564173		1474.01	0.00319125		2004.04	-0.00031129		2534.04	-0.00683116		3064.04	-0.00835107		3594.04	-0.0154573
414.19	0.0013537		944.22	0.00540463		1474.21	0.00306661		2004.24	-0.00083348		2534.24	-0.00615887		3064.24	-0.00812076		3594.24	-0.01518695
414.39	0.00189249		944.42	0.00572965		1474.41	0.00330571		2004.44	-0.00045668		2534.44	-0.0063468		3064.44	-0.00731717		3594.44	-0.01556047
414.59	0.00187973		944.62	0.00542224		1474.61	0.00280847		2004.64	-0.00031059		2534.64	-0.00648916		3064.64	-0.00639708		3594.64	-0.01544381
414.79	0.00156758		944.82	0.00561502		1474.81	0.00253042		2004.84	-0.00055164		2534.84	-0.00618442		3064.84	-0.00686706		3594.84	-0.01612118
414.99	0.00136384		945.02	0.00476605		1475.01	0.00250804		2005.04	-0.00125342		2535.04	-0.00570603		3065.04	-0.00646992		3595.04	-0.01557661
415.19	0.00128805		945.22	0.0044433		1475.21	0.00211613		2005.24	-0.00169279		2535.24	-0.00613098		3065.24	-0.00646264		3595.24	-0.01593473
415.39	0.00034141		945.42	0.00411969		1475.41	0.00217618		2005.44	-0.0016745		2535.44	-0.00615568		3065.44	-0.00619752		3595.44	-0.01581168
415.59	0.00058277		945.62	0.00373288		1475.61	0.00217178		2005.64	-0.00198377		2535.64	-0.00533013		3065.64	-0.00599313		3595.64	-0.01520453
415.79	0.00046097		945.82	0.00348509		1475.81	0.00237054		2005.84	-0.0013491		2535.84	-0.00433227		3065.84	-0.00667861		3595.84	-0.01564587
415.99	0.00065906		946.02	0.00331166		1476.01	0.00195278		2006.04	-0.00142061		2536.04	-0.00412779		3066.04	-0.00684624		3596.04	-0.01529989
416.19	0.00120045		946.22	0.00313002		1476.21	0.00239263		2006.24	-0.0015444		2536.24	-0.00447921		3066.24	-0.00703329		3596.24	-0.01590591
416.39	0.0020422		946.42	0.0029857		1476.41	0.00332813		2006.44	-0.00161297		2536.44	-0.00325161		3066.44	-0.00700457		3596.44	-0.01605738
416.59	0.00225288		946.62	0.00355456		1476.61	0.00336634		2006.64	-0.00071422		2536.64	-0.00284362		3066.64	-0.00651586		3596.64	-0.01602941
416.79	0.00261247		946.82	0.00266495		1476.81	0.00350951		2006.84	-0.0007084		2536.84	-0.00242773		3066.84	-0.00714996		3596.84	-0.01574337
416.99	0.00215071		947.02	0.00200456		1477.01	0.00287926		2007.04	-0.00026427		2537.04	-0.00202894		3067.04	-0.00706153		3597.04	-0.01538598
417.19	0.00167629		947.22	0.00205962		1477.21	0.00176832		2007.24	0.00057175		2537.24	-0.00136304		3067.24	-0.00806526		3597.24	-0.0153265
417.39	0.00233342		947.42	0.00113551		1477.41	0.00147795		2007.44	0.00041901		2537.44	-0.00102644		3067.44	-0.00784112		3597.44	-0.01584578
417.59	0.00292428		947.62	0.00141399		1477.61	0.0002157		2007.64	0.00091608		2537.64	-0.00100521		3067.64	-0.00874219		3597.64	-0.01583382
417.79	0.0026094		947.82	0.00151973		1477.81	0.00056799		2007.84	0.00095882		2537.84	-0.00034199		3067.84	-0.00959062		3597.84	-0.01597495
417.99	0.00293165		948.02	0.00144123		1478.01	0.00055008		2008.04	0.00179459		2538.04	-0.00072516		3068.04	-0.00948899		3598.04	-0.01606075
418.19	0.00219712		948.22	0.00185309		1478.21	0.00096113		2008.24	0.00207224		2538.24	-0.00158242		3068.24	-0.00909093		3598.24	-0.01663689
418.39	0.00246846		948.42	0.00217504		1478.41	0.0004744		2008.44	0.00179071		2538.44	-0.00311697		3068.44	-0.00899077		3598.44	-0.01686148
418.59	0.00295559		948.62	0.00301987		1478.61	0.00045272		2008.64	0.00231901		2538.64	-0.00376513		3068.64	-0.00952826		3598.64	-0.01614322
418.79	0.00258568		948.82	0.00359736		1478.81	0.00059801		2008.84	0.00212437		2538.84	-0.00528385		3068.84	-0.01018972		3598.84	-0.01694637
418.99	0.00311489		949.02	0.00369442		1479.01	0.00100749		2009.04	0.00239111		2539.04	-0.00664017		3069.04	-0.00994302		3599.04	-0.01710931
419.19	0.00235758		949.22	0.00398316		1479.21	-0.0001607		2009.24	0.00251515		2539.24	-0.00785956		3069.24	-0.01119371		3599.24	-0.01700389
419.39	0.00168717		949.42	0.00412563		1479.41	-0.00022385		2009.44	0.00195282		2539.44	-0.00821969		3069.44	-0.01056483		3599.44	-0.01680367
419.59	0.0024315		949.62	0.00509982		1479.61	0.00010977		2009.64	0.00191384		2539.64	-0.0091231		3069.64	-0.01081681		3599.64	-0.01699756
419.79	0.00225504		949.82	0.00526546		1479.81	0.0004206		2009.84	0.0017639		2539.84	-0.01019375		3069.84	-0.01105125		3599.84	-0.01637828
419.99	0.00170332		950.02	0.00508221		1480.01	0.00059648		2010.04	0.00147471		2540.04	-0.01051437		3070.04	-0.01112446		3600.04	-0.01625711
420.19	0.00279544		950.22	0.0056072		1480.21	0.00051926		2010.24	0.00151192		2540.24	-0.01036756		3070.24	-0.01122842		3600.24	-0.01637788
420.39	0.00262445		950.42	0.00556395		1480.41	0.00007289		2010.44	0.00146413		2540.44	-0.01017651		3070.44	-0.01106048		3600.44	-0.01596497
420.59	0.00177226		950.62	0.00538085		1480.61	0.00055512		2010.64	0.00091408		2540.64	-0.01051912		3070.64	-0.01123095		3600.64	-0.01557425
420.79	0.00099276		950.82	0.00509394		1480.81	0.00043602		2010.84	0.00041561		2540.84	-0.00985172		3070.84	-0.0114248		3600.84	-0.01471451
420.99	0.00058772		951.02	0.00480675		1481.01	0.00017879		2011.04	0.00065204		2541.04	-0.00887212		3071.04	-0.01022513		3601.04	-0.01456133
421.19	-0.00001213		951.22	0.00483306		1481.21	0.00027315		2011.24	0.00067707		2541.24	-0.0081871		3071.24	-0.01030209		3601.24	-0.01496971
421.39	0.00029407		951.42	0.00383963		1481.41	0.00082563		2011.44	0.00008608		2541.44	-0.00760898		3071.44	-0.00940606		3601.44	-0.01561873
421.59	-0.00058962		951.62	0.00494893		1481.61	0.0006535		2011.64	0.00004972		2541.64	-0.00664287		3071.64	-0.00967456		3601.64	-0.01563377
421.79	-0.00094085		951.82	0.00484778		1481.81	0.00124344		2011.84	0.00066925		2541.84	-0.0060833		3071.84	-0.01014056		3601.84	-0.01523359
421.99	-0.00168141		952.02	0.00383012		1482.01	0.00162475		2012.04	0.00129434		2542.04	-0.00648545		3072.04	-0.01030665		3602.04	-0.01591817
422.19	-0.00150964		952.22	0.00360514		1482.21	0.00260779		2012.24	0.00087084		2542.24	-0.00697192		3072.24	-0.01005358		3602.24	-0.01697582
422.39	-0.00108991		952.42	0.00409918		1482.41	0.00228197		2012.44	0.00107126		2542.44	-0.00719833		3072.44	-0.00988172		3602.44	-0.01712977
422.59	-0.00105639		952.62	0.00438561		1482.61	0.00272347		2012.64	0.00219283		2542.64	-0.00749029		3072.64	-0.01035492		3602.64	-0.01772296
422.79	-0.00087843		952.82	0.00433734		1482.81	0.00263112		2012.84	0.00185814		2542.84	-0.00794554		3072.84	-0.01087115		3602.84	-0.01805653
422.99	-0.00005921		953.02	0.0039648		1483.01	0.00218264		2013.04	0.00159964		2543.04	-0.00853744		3073.04	-0.01131695		3603.04	-0.01804474
423.19	-0.00028463		953.22	0.00390077		1483.21	0.00225187		2013.24	0.00078554		2543.24	-0.00797509		3073.24	-0.01212084		3603.24	-0.01814793
423.39	-0.00046331		953.42	0.00449627		1483.41	0.00306588		2013.44	0.0008814		2543.44	-0.00773904		3073.44	-0.01152713		3603.44	-0.01845438
423.59	-0.00023133		953.62	0.00515355		1483.61	0.00266437		2013.64	0.00125533		2543.64	-0.00806548		3073.64	-0.01203446		3603.64	-0.01865239
423.79	-0.00066627		953.82	0.00482521		1483.81	0.00267982		2013.84	0.00050182		2543.84	-0.00768705		3073.84	-0.01200517		3603.84	-0.01805009
423.99	0.00052023		954.02	0.00422297		1484.01	0.00333063		2014.04	0.00042744		2544.04	-0.00725229		3074.04	-0.01252277		3604.04	-0.01782305
424.19	0.00135448		954.22	0.00427299		1484.21	0.00353382		2014.24	0.00062797		2544.24	-0.00761301		3074.24	-0.01290696		3604.24	-0.01708297
424.39	0.00091038		954.42	0.00336383		1484.41	0.00295698		2014.44	-0.00003103		2544.44	-0.00774433		3074.44	-0.01355155		3604.44	-0.01720189
424.59	0.00085736		954.62	0.00277007		1484.61	0.0035749		2014.64	0.00001296		2544.64	-0.00813256		3074.64	-0.01341738		3604.64	-0.01691624
424.79	0.00127359		954.82	0.00355884		1484.81	0.00261954		2014.84	-0.00050154		2544.84	-0.00747926		3074.84	-0.01245796		3604.84	-0.01617187
424.99	0.00153796		955.02	0.00328088		1485.01	0.00293633		2015.04	-0.00008631		2545.04	-0.00699504		3075.04	-0.01152481		3605.04	-0.0161516
425.19	0.00143121		955.22	0.0032922		1485.21	0.00285463		2015.24	-0.00078383		2545.24	-0.00706847		3075.24	-0.01191488		3605.24	-0.01615991
425.39	0.00198444		955.42	0.00317752		1485.41	0.00232043		2015.44	-0.00051737		2545.44	-0.00781889		3075.44	-0.0112739		3605.44	-0.01540133
425.59	0.0016744		955.62	0.00377686		1485.61	0.00125282		2015.64	-0.00023146		2545.64	-0.0077451		3075.64	-0.01123224		3605.64	-0.01485919
425.79	0.00177282		955.82	0.00383152		1485.81	0.00098113		2015.84	0.00035825		2545.84	-0.0076816		3075.84	-0.010795		3605.84	-0.01485973
425.99	0.00098901		956.02	0.00296854		1486.01	0.00067474		2016.04	-0.00010451		2546.04	-0.00780215		3076.04	-0.00998421		3606.04	-0.01590911
426.19	0.00169511		956.22	0.00324949		1486.21	0.00035107		2016.24	-0.00018162		2546.24	-0.00820315		3076.24	-0.00904025		3606.24	-0.01605298
426.39	0.00118917		956.42	0.00321085		1486.41	-0.00003176		2016.44	0.00054929		2546.44	-0.00769017		3076.44	-0.00797146		3606.44	-0.01553161
426.59	0.00182007		956.62	0.00334741		1486.61	-0.0005728		2016.64	0.00048962		2546.64	-0.00764289		3076.64	-0.00802806		3606.64	-0.01513443
426.79	0.00220859		956.82	0.00305447		1486.81	-0.00033177		2016.84	0.00049928		2546.84	-0.00644985		3076.84	-0.00812512		3606.84	-0.01445148
426.99	0.00191915		957.02	0.0023189		1487.01	-0.00030681		2017.04	0.00043679		2547.04	-0.00651794		3077.04	-0.00840029		3607.04	-0.01449844
427.19	0.00170506		957.22	0.00248536		1487.21	0.0008045		2017.24	0.00079243		2547.24	-0.00574778		3077.24	-0.00868946		3607.24	-0.01468254
427.39	0.00127076		957.42	0.00264572		1487.41	0.00093775		2017.44	0.00155099		2547.44	-0.00506811		3077.44	-0.00877133		3607.44	-0.01482346
427.59	0.00089238		957.62	0.00159822		1487.61	0.00086502		2017.64	0.00166363		2547.64	-0.00463328		3077.64	-0.00903991		3607.64	-0.01456408
427.79	0.00103943		957.82	0.00096974		1487.81	0.00230022		2017.84	0.00163854		2547.84	-0.00377156		3077.84	-0.00862017		3607.84	-0.01452559
427.99	0.00260062		958.02	0.00077069		1488.01	0.00259535		2018.04	0.0020767		2548.04	-0.00396904		3078.04	-0.0084707		3608.04	-0.01503485
428.19	0.00159264		958.22	-0.00041919		1488.21	0.00297817		2018.24	0.00241821		2548.24	-0.00316068		3078.24	-0.00918618		3608.24	-0.01534454
428.39	0.00208501		958.42	-0.0006457		1488.41	0.00314615		2018.44	0.00256547		2548.44	-0.00263743		3078.44	-0.00898495		3608.44	-0.01596711
428.59	0.00183173		958.62	-0.00064253		1488.61	0.00374045		2018.64	0.00293178		2548.64	-0.00340689		3078.64	-0.00838555		3608.64	-0.01615444
428.79	0.00150534		958.82	0.00076793		1488.81	0.00317547		2018.84	0.00240141		2548.84	-0.00253284		3078.84	-0.00871261		3608.84	-0.01587683
428.99	0.00080579		959.02	0.00057999		1489.01	0.00354123		2019.04	0.00242252		2549.04	-0.00312181		3079.04	-0.009343		3609.04	-0.01689184
429.19	0.00098167		959.22	0.00144239		1489.21	0.00306915		2019.24	0.00192034		2549.24	-0.00421543		3079.24	-0.00975023		3609.24	-0.01680415
429.39	0.00126182		959.42	0.00264732		1489.41	0.00320848		2019.44	0.00211586		2549.44	-0.00534733		3079.44	-0.00869121		3609.44	-0.01768343
429.59	0.00092433		959.62	0.00329026		1489.61	0.00296273		2019.64	0.00137101		2549.64	-0.00513727		3079.64	-0.00795537		3609.64	-0.01776278
429.79	0.00048182		959.82	0.00326165		1489.81	0.00340195		2019.84	0.00108065		2549.84	-0.0053494		3079.84	-0.00751455		3609.84	-0.01845297
429.99	0.00024792		960.02	0.00359692		1490.01	0.00322409		2020.04	0.00048272		2550.04	-0.00578713		3080.04	-0.00709283		3610.04	-0.01849186
430.19	0.0005819		960.22	0.00413273		1490.21	0.00313099		2020.24	0.00077676		2550.24	-0.00618854		3080.24	-0.0071494		3610.24	-0.01779885
430.39	0.00035767		960.42	0.00408277		1490.41	0.00206105		2020.44	-0.00008769		2550.44	-0.00574308		3080.44	-0.00730974		3610.44	-0.01766859
430.59	0.00005507		960.62	0.00450501		1490.61	0.00128296		2020.64	-0.00059514		2550.64	-0.00571216		3080.64	-0.0083385		3610.64	-0.01713694
430.79	-0.000964		960.82	0.00359812		1490.81	0.00157477		2020.84	-0.00147766		2550.84	-0.00581478		3080.84	-0.00911565		3610.84	-0.01762374
430.99	-0.00147152		961.02	0.00308568		1491.01	0.00110997		2021.04	-0.00230063		2551.04	-0.00681151		3081.04	-0.0096804		3611.04	-0.01820617
431.19	-0.0004238		961.22	0.00327748		1491.21	0.00056431		2021.24	-0.00168281		2551.24	-0.00695827		3081.24	-0.00983685		3611.24	-0.01817773
431.39	-0.00063962		961.42	0.00350316		1491.41	0.00073109		2021.44	-0.00124024		2551.44	-0.00721721		3081.44	-0.00988003		3611.44	-0.01850787
431.59	-0.00054185		961.62	0.00341973		1491.61	0.00074514		2021.64	-0.00080628		2551.64	-0.00676456		3081.64	-0.0095468		3611.64	-0.01847072
431.79	0.0003094		961.82	0.0032437		1491.81	0.00150075		2021.84	-0.00058137		2551.84	-0.006717		3081.84	-0.0093688		3611.84	-0.01864762
431.99	0.00083987		962.02	0.0023701		1492.01	0.00113879		2022.04	0.00012512		2552.04	-0.00669191		3082.04	-0.0094226		3612.04	-0.01874581
432.19	0.00072065		962.22	0.00179527		1492.21	0.0009243		2022.24	0.00043769		2552.24	-0.00656834		3082.24	-0.00987543		3612.24	-0.01807616
432.39	0.00145028		962.42	0.00233683		1492.41	0.00104802		2022.44	0.00046748		2552.44	-0.00692094		3082.44	-0.00902718		3612.44	-0.01871583
432.59	0.00109065		962.62	0.00264548		1492.61	0.00046976		2022.64	0.00031678		2552.64	-0.00760818		3082.64	-0.00915947		3612.64	-0.01856174
432.79	0.00110993		962.82	0.00323433		1492.81	0.00000643		2022.84	-0.00011161		2552.84	-0.00753772		3082.84	-0.00949778		3612.84	-0.01856288
432.99	0.00183908		963.02	0.0026616		1493.01	0.0003234		2023.04	-0.0005225		2553.04	-0.00850684		3083.04	-0.00899999		3613.04	-0.01867607
433.19	0.0025773		963.22	0.00341591		1493.21	0.00054963		2023.24	-0.00046486		2553.24	-0.00911137		3083.24	-0.00858205		3613.24	-0.01838277
433.39	0.00281581		963.42	0.00353404		1493.41	0.00171547		2023.44	-0.00000105		2553.44	-0.00898431		3083.44	-0.00811175		3613.44	-0.01950789
433.59	0.00287646		963.62	0.0034241		1493.61	0.00118945		2023.64	-0.00001729		2553.64	-0.00869767		3083.64	-0.00875225		3613.64	-0.01875535
433.79	0.00312832		963.82	0.0030667		1493.81	0.00133368		2023.84	0.00117563		2553.84	-0.00841425		3083.84	-0.00944698		3613.84	-0.01957608
433.99	0.00342546		964.02	0.00393426		1494.01	0.00109954		2024.04	-0.00012029		2554.04	-0.00802523		3084.04	-0.00980368		3614.04	-0.01886543
434.19	0.0035237		964.22	0.00418542		1494.21	0.0005067		2024.24	-0.00053512		2554.24	-0.00760118		3084.24	-0.01012596		3614.24	-0.01843994
434.39	0.00306098		964.42	0.00391544		1494.41	-0.00061214		2024.44	-0.00158551		2554.44	-0.00752711		3084.44	-0.0114213		3614.44	-0.0191579
434.59	0.00331299		964.62	0.0037295		1494.61	-0.00048024		2024.64	-0.00179503		2554.64	-0.00771915		3084.64	-0.01204415		3614.64	-0.01915839
434.79	0.003072		964.82	0.0038994		1494.81	-0.00044221		2024.84	-0.00164929		2554.84	-0.00742211		3084.84	-0.01228447		3614.84	-0.02070752
434.99	0.0030337		965.02	0.00376566		1495.01	-0.00072797		2025.04	-0.00143921		2555.04	-0.00816526		3085.04	-0.01350072		3615.04	-0.02163872
435.19	0.00336849		965.22	0.00431353		1495.21	-0.00107967		2025.24	-0.00104896		2555.24	-0.0084125		3085.24	-0.01385733		3615.24	-0.02096221
435.39	0.00217172		965.42	0.00449789		1495.41	-0.0004953		2025.44	-0.00064769		2555.44	-0.00876255		3085.44	-0.01460179		3615.44	-0.02070515
435.59	0.00159485		965.62	0.00445398		1495.61	-0.00034019		2025.64	-0.00098544		2555.64	-0.00797755		3085.64	-0.01524071		3615.64	-0.01985836
435.79	0.00162482		965.82	0.00423443		1495.81	-0.00021524		2025.84	-0.00089674		2555.84	-0.0076724		3085.84	-0.01548505		3615.84	-0.01950425
435.99	0.00059171		966.02	0.00400433		1496.01	-0.00112019		2026.04	-0.00073013		2556.04	-0.00691331		3086.04	-0.01463308		3616.04	-0.01851643
436.19	-0.00046589		966.22	0.00465346		1496.21	-0.00131823		2026.24	-0.00161552		2556.24	-0.00656679		3086.24	-0.01376327		3616.24	-0.01792421
436.39	-0.00110849		966.42	0.00416263		1496.41	-0.00079838		2026.44	-0.00239797		2556.44	-0.00594714		3086.44	-0.01252105		3616.44	-0.01774112
436.59	-0.00203353		966.62	0.0044495		1496.61	-0.00091311		2026.64	-0.0027125		2556.64	-0.00633264		3086.64	-0.01177303		3616.64	-0.0165644
436.79	-0.00158707		966.82	0.00354131		1496.81	-0.00069628		2026.84	-0.00272262		2556.84	-0.00660849		3086.84	-0.01104859		3616.84	-0.01673867
436.99	-0.00181856		967.02	0.00258045		1497.01	-0.00008785		2027.04	-0.00303208		2557.04	-0.00664281		3087.04	-0.01027895		3617.04	-0.01641883
437.19	-0.00184323		967.22	0.00243155		1497.21	0.0001269		2027.24	-0.00294471		2557.24	-0.00779205		3087.24	-0.00965841		3617.24	-0.01654507
437.39	-0.00171617		967.42	0.00258866		1497.41	0.00070303		2027.44	-0.00261244		2557.44	-0.0074906		3087.44	-0.0092189		3617.44	-0.01706641
437.59	-0.00172436		967.62	0.00250917		1497.61	0.00011138		2027.64	-0.00326751		2557.64	-0.00709699		3087.64	-0.008541		3617.64	-0.01777182
437.79	-0.00162097		967.82	0.00174219		1497.81	-0.00020666		2027.84	-0.00276213		2557.84	-0.00679735		3087.84	-0.00790139		3617.84	-0.01851053
437.99	-0.00125836		968.02	0.00099231		1498.01	-0.00026111		2028.04	-0.00418047		2558.04	-0.00655763		3088.04	-0.0071801		3618.04	-0.01894015
438.19	-0.00174308		968.22	0.00076501		1498.21	-0.00031539		2028.24	-0.00368634		2558.24	-0.00704231		3088.24	-0.00658722		3618.24	-0.01872109
438.39	-0.00131758		968.42	0.00021556		1498.41	-0.00144858		2028.44	-0.00325658		2558.44	-0.00756195		3088.44	-0.00758038		3618.44	-0.01995484
438.59	-0.00106668		968.62	0.00040438		1498.61	-0.00163163		2028.64	-0.00267174		2558.64	-0.00768363		3088.64	-0.00790915		3618.64	-0.02025924
438.79	-0.0012583		968.82	0.00068742		1498.81	-0.00143731		2028.84	-0.00215886		2558.84	-0.00768869		3088.84	-0.00791988		3618.84	-0.02163673
438.99	-0.00051859		969.02	0.00068517		1499.01	-0.00206577		2029.04	-0.00257355		2559.04	-0.00864669		3089.04	-0.00952197		3619.04	-0.02125368
439.19	-0.00089186		969.22	0.00089028		1499.21	-0.00260043		2029.24	-0.00254725		2559.24	-0.00866306		3089.24	-0.00966709		3619.24	-0.02025819
439.39	-0.00166283		969.42	0.0006491		1499.41	-0.00208259		2029.44	-0.00226412		2559.44	-0.00892393		3089.44	-0.01111231		3619.44	-0.02050404
439.59	-0.00176246		969.62	0.00000948		1499.61	-0.0018635		2029.64	-0.00228458		2559.64	-0.00862324		3089.64	-0.01139448		3619.64	-0.01992423
439.79	-0.00144827		969.82	-0.00032015		1499.81	-0.00224079		2029.84	-0.00121814		2559.84	-0.00778633		3089.84	-0.01156815		3619.84	-0.02007439
439.99	-0.00101627		970.02	-0.00074884		1500.01	-0.00195633		2030.04	-0.00088819		2560.04	-0.00720236		3090.04	-0.01129619		3620.04	-0.01890494
440.19	-0.00113218		970.22	-0.00055054		1500.21	-0.0019226		2030.24	-0.00104211		2560.24	-0.00752415		3090.24	-0.01174442		3620.24	-0.01807297
440.39	-0.00074312		970.42	-0.00024373		1500.41	-0.00159707		2030.44	-0.0009627		2560.44	-0.00773629		3090.44	-0.01127841		3620.44	-0.01802814
440.59	-0.00105324		970.62	0.0005238		1500.61	-0.00100568		2030.64	-0.00125542		2560.64	-0.00904941		3090.64	-0.01112212		3620.64	-0.01785782
440.79	-0.00036306		970.82	0.00062717		1500.81	-0.00053397		2030.84	-0.00044195		2560.84	-0.00960781		3090.84	-0.01080925		3620.84	-0.01845069
440.99	-0.00032432		971.02	0.00086088		1501.01	0.00043161		2031.04	-0.00024102		2561.04	-0.0095822		3091.04	-0.01048521		3621.04	-0.01789536
441.19	-0.00054064		971.22	0.00160052		1501.21	0.00154023		2031.24	-0.00041626		2561.24	-0.01073667		3091.24	-0.0094353		3621.24	-0.01788176
441.39	-0.00125914		971.42	0.00189203		1501.41	0.00207722		2031.44	0.00010283		2561.44	-0.01011424		3091.44	-0.00826663		3621.44	-0.01853676
441.59	-0.00146662		971.62	0.00136733		1501.61	0.00185636		2031.64	-0.00060601		2561.64	-0.01086213		3091.64	-0.00806697		3621.64	-0.01886916
441.79	-0.00240293		971.82	0.00133981		1501.81	0.00205825		2031.84	-0.0008201		2561.84	-0.01103451		3091.84	-0.00744676		3621.84	-0.01818922
441.99	-0.00313494		972.02	0.00102152		1502.01	0.0031212		2032.04	-0.00126221		2562.04	-0.0113097		3092.04	-0.00753474		3622.04	-0.01740706
442.19	-0.00327846		972.22	0.00215316		1502.21	0.0028908		2032.24	-0.00159516		2562.24	-0.01092651		3092.24	-0.00786689		3622.24	-0.01613902
442.39	-0.0032937		972.42	0.00216084		1502.41	0.0026569		2032.44	-0.00215701		2562.44	-0.01052337		3092.44	-0.0084997		3622.44	-0.01719132
442.59	-0.00382999		972.62	0.00256471		1502.61	0.00271349		2032.64	-0.00302106		2562.64	-0.01029339		3092.64	-0.00913328		3622.64	-0.01708047
442.79	-0.00386793		972.82	0.00268247		1502.81	0.00330734		2032.84	-0.00365861		2562.84	-0.01028276		3092.84	-0.00900283		3622.84	-0.01709542
442.99	-0.00447215		973.02	0.00265288		1503.01	0.00222372		2033.04	-0.00450346		2563.04	-0.00976882		3093.04	-0.01005144		3623.04	-0.01644272
443.19	-0.00555119		973.22	0.00235573		1503.21	0.00186515		2033.24	-0.00393339		2563.24	-0.009817		3093.24	-0.00931623		3623.24	-0.01714
443.39	-0.00451787		973.42	0.00166982		1503.41	0.00243419		2033.44	-0.00321919		2563.44	-0.00974942		3093.44	-0.0094182		3623.44	-0.01697724
443.59	-0.00340548		973.62	0.00078415		1503.61	0.00231885		2033.64	-0.00211457		2563.64	-0.00965678		3093.64	-0.00972857		3623.64	-0.01696249
443.79	-0.00227715		973.82	0.00111181		1503.81	0.0017651		2033.84	-0.00191091		2563.84	-0.00955955		3093.84	-0.00943913		3623.84	-0.01748093
443.99	-0.00207145		974.02	0.00119529		1504.01	0.00152889		2034.04	-0.00249804		2564.04	-0.00999132		3094.04	-0.0093799		3624.04	-0.01726361
444.19	-0.00251765		974.22	0.00236645		1504.21	0.00146169		2034.24	-0.0027783		2564.24	-0.01085754		3094.24	-0.00946638		3624.24	-0.01815504
444.39	-0.00245498		974.42	0.00276571		1504.41	0.0018825		2034.44	-0.00280466		2564.44	-0.01080021		3094.44	-0.00861964		3624.44	-0.01948011
444.59	-0.00247584		974.62	0.00248005		1504.61	0.00272173		2034.64	-0.0032861		2564.64	-0.01093594		3094.64	-0.00872551		3624.64	-0.02049781
444.79	-0.00215045		974.82	0.00288616		1504.81	0.00314008		2034.84	-0.00250133		2564.84	-0.00993681		3094.84	-0.00822974		3624.84	-0.02051206
444.99	-0.00255187		975.02	0.00258612		1505.01	0.00338593		2035.04	-0.00251976		2565.04	-0.00901232		3095.04	-0.00765172		3625.04	-0.02044211
445.19	-0.00328113		975.22	0.00247322		1505.21	0.00332872		2035.24	-0.0026772		2565.24	-0.00835706		3095.24	-0.00664364		3625.24	-0.0203596
445.39	-0.00419077		975.42	0.00198313		1505.41	0.00292512		2035.44	-0.0022907		2565.44	-0.00815805		3095.44	-0.0064245		3625.44	-0.02031693
445.59	-0.00330335		975.62	0.00232491		1505.61	0.00249449		2035.64	-0.00328225		2565.64	-0.00850299		3095.64	-0.00807986		3625.64	-0.01975794
445.79	-0.0032846		975.82	0.002432		1505.81	0.00345197		2035.84	-0.00250989		2565.84	-0.00710897		3095.84	-0.00833578		3625.84	-0.01966587
445.99	-0.00310834		976.02	0.00235398		1506.01	0.00275158		2036.04	-0.00207693		2566.04	-0.00631833		3096.04	-0.01003301		3626.04	-0.01898625
446.19	-0.00319302		976.22	0.0022514		1506.21	0.00165399		2036.24	-0.00215091		2566.24	-0.00476133		3096.24	-0.01062537		3626.24	-0.01918591
446.39	-0.0031336		976.42	0.00197897		1506.41	0.00181781		2036.44	-0.00201857		2566.44	-0.00424969		3096.44	-0.01094123		3626.44	-0.0195729
446.59	-0.0033656		976.62	0.00185584		1506.61	0.00100448		2036.64	-0.00209771		2566.64	-0.00312058		3096.64	-0.01191387		3626.64	-0.01937633
446.79	-0.00398464		976.82	0.00090578		1506.81	0.00119863		2036.84	-0.00155372		2566.84	-0.00306337		3096.84	-0.0114748		3626.84	-0.0199608
446.99	-0.00437638		977.02	0.00042835		1507.01	-0.0003545		2037.04	-0.00130348		2567.04	-0.00261663		3097.04	-0.01197271		3627.04	-0.02024837
447.19	-0.00371364		977.22	0.00062238		1507.21	-0.00000178		2037.24	-0.00064109		2567.24	-0.00330611		3097.24	-0.01237468		3627.24	-0.02056087
447.39	-0.00269052		977.42	0.000452		1507.41	-0.00040883		2037.44	-0.00042187		2567.44	-0.00448887		3097.44	-0.01310541		3627.44	-0.02026052
447.59	-0.00337936		977.62	-0.00006345		1507.61	-0.0011778		2037.64	0.00007698		2567.64	-0.00537909		3097.64	-0.01314323		3627.64	-0.02049926
447.79	-0.00284209		977.82	0.00039653		1507.81	-0.00177318		2037.84	-0.00104763		2567.84	-0.00592524		3097.84	-0.01271329		3627.84	-0.02013637
447.99	-0.00305046		978.02	0.00050981		1508.01	-0.00097504		2038.04	-0.00120872		2568.04	-0.00643183		3098.04	-0.0128951		3628.04	-0.02018929
448.19	-0.00216658		978.22	0.000741		1508.21	-0.00047078		2038.24	-0.00134263		2568.24	-0.00678014		3098.24	-0.01237307		3628.24	-0.02093768
448.39	-0.0024905		978.42	0.00014999		1508.41	0.00001399		2038.44	-0.00189816		2568.44	-0.006949		3098.44	-0.01208216		3628.44	-0.02025525
448.59	-0.00315373		978.62	0.00040356		1508.61	0.00060115		2038.64	-0.00278121		2568.64	-0.00731226		3098.64	-0.01224528		3628.64	-0.0200287
448.79	-0.00382237		978.82	0.00128016		1508.81	0.00038857		2038.84	-0.0028465		2568.84	-0.00681576		3098.84	-0.01166437		3628.84	-0.01849938
448.99	-0.00450032		979.02	0.00117843		1509.01	0.00028814		2039.04	-0.00267426		2569.04	-0.00786004		3099.04	-0.01088456		3629.04	-0.01856538
449.19	-0.0046206		979.22	0.00101524		1509.21	0.00052716		2039.24	-0.00342807		2569.24	-0.007693		3099.24	-0.01066741		3629.24	-0.01754721
449.39	-0.00508169		979.42	0.00070767		1509.41	0.00091121		2039.44	-0.00351112		2569.44	-0.0081424		3099.44	-0.01101414		3629.44	-0.01721682
449.59	-0.00345575		979.62	0.00208389		1509.61	0.00029657		2039.64	-0.00364412		2569.64	-0.00878022		3099.64	-0.01155962		3629.64	-0.01648674
449.79	-0.00393923		979.82	0.00219003		1509.81	0.00060858		2039.84	-0.0028417		2569.84	-0.00858562		3099.84	-0.0112323		3629.84	-0.01628928
449.99	-0.00463239		980.02	0.00310713		1510.01	-0.00088367		2040.04	-0.0028652		2570.04	-0.00803842		3100.04	-0.01117468		3630.04	-0.01550822
450.19	-0.00515908		980.22	0.00240551		1510.21	-0.00032888		2040.24	-0.00260122		2570.24	-0.0075698		3100.24	-0.01018349		3630.24	-0.01609509
450.39	-0.00531443		980.42	0.00219652		1510.41	-0.00018714		2040.44	-0.00242987		2570.44	-0.00717885		3100.44	-0.01022216		3630.44	-0.01694097
450.59	-0.00633437		980.62	0.00133443		1510.61	-0.00058414		2040.64	-0.00271636		2570.64	-0.0063297		3100.64	-0.01127753		3630.64	-0.0170434
450.79	-0.00657217		980.82	0.00093766		1510.81	-0.00034888		2040.84	-0.00349585		2570.84	-0.00665299		3100.84	-0.01056381		3630.84	-0.01864717
450.99	-0.00700288		981.02	0.00120218		1511.01	0.00036487		2041.04	-0.00378374		2571.04	-0.00664658		3101.04	-0.01131588		3631.04	-0.01842776
451.19	-0.00739616		981.22	0.00129277		1511.21	0.00050434		2041.24	-0.00414909		2571.24	-0.0069297		3101.24	-0.01186566		3631.24	-0.01917971
451.39	-0.00783401		981.42	0.00079997		1511.41	-0.00036836		2041.44	-0.00409883		2571.44	-0.00674581		3101.44	-0.0118396		3631.44	-0.01983719
451.59	-0.00702223		981.62	0.00053945		1511.61	-0.00040372		2041.64	-0.0042573		2571.64	-0.00634149		3101.64	-0.01153507		3631.64	-0.0200514
451.79	-0.00578388		981.82	0.00052599		1511.81	0.00022373		2041.84	-0.00452275		2571.84	-0.00628344		3101.84	-0.01175579		3631.84	-0.02051447
451.99	-0.00585398		982.02	-0.00000729		1512.01	0.00097274		2042.04	-0.00387709		2572.04	-0.00582184		3102.04	-0.01144109		3632.04	-0.02063166
452.19	-0.00579776		982.22	0.00005194		1512.21	0.00117566		2042.24	-0.00441494		2572.24	-0.00593894		3102.24	-0.01133641		3632.24	-0.0212728
452.39	-0.00606881		982.42	0.00052529		1512.41	0.00063609		2042.44	-0.00455773		2572.44	-0.00732046		3102.44	-0.01146424		3632.44	-0.02052425
452.59	-0.0060286		982.62	0.0003111		1512.61	-0.00012801		2042.64	-0.00436806		2572.64	-0.00780629		3102.64	-0.0116218		3632.64	-0.0212667
452.79	-0.00511218		982.82	-0.00014803		1512.81	-0.00007906		2042.84	-0.00428459		2572.84	-0.00812536		3102.84	-0.01185546		3632.84	-0.02100693
452.99	-0.00471292		983.02	-0.00038225		1513.01	-0.00006104		2043.04	-0.00392497		2573.04	-0.00905696		3103.04	-0.01200956		3633.04	-0.02113022
453.19	-0.00382042		983.22	-0.00106319		1513.21	-0.000212		2043.24	-0.00400916		2573.24	-0.0090938		3103.24	-0.01251132		3633.24	-0.02088616
453.39	-0.00345058		983.42	-0.00062529		1513.41	-0.00015657		2043.44	-0.00395447		2573.44	-0.01016501		3103.44	-0.01244727		3633.44	-0.02068821
453.59	-0.00253578		983.62	-0.00002053		1513.61	-0.00093785		2043.64	-0.00363377		2573.64	-0.01106295		3103.64	-0.01217662		3633.64	-0.02031671
453.79	-0.00190134		983.82	-0.00001016		1513.81	-0.00125967		2043.84	-0.00357568		2573.84	-0.01070706		3103.84	-0.0123937		3633.84	-0.0203796
453.99	-0.00084675		984.02	0.00106357		1514.01	-0.00135654		2044.04	-0.00366693		2574.04	-0.00959136		3104.04	-0.01195505		3634.04	-0.02037298
454.19	-0.00127444		984.22	0.00021902		1514.21	-0.00151158		2044.24	-0.00352937		2574.24	-0.00985609		3104.24	-0.01155414		3634.24	-0.02029272
454.39	-0.00172733		984.42	-0.00022758		1514.41	-0.00218568		2044.44	-0.00348359		2574.44	-0.01000037		3104.44	-0.01194588		3634.44	-0.02012651
454.59	-0.00164364		984.62	0.00006912		1514.61	-0.00228487		2044.64	-0.00387038		2574.64	-0.00927182		3104.64	-0.01218632		3634.64	-0.02031521
454.79	-0.00154683		984.82	0.0001674		1514.81	-0.00194629		2044.84	-0.00413373		2574.84	-0.0095801		3104.84	-0.01162228		3634.84	-0.02088755
454.99	-0.00242845		985.02	-0.00025737		1515.01	-0.0018503		2045.04	-0.00339487		2575.04	-0.00925735		3105.04	-0.01224542		3635.04	-0.02015486
455.19	-0.00280682		985.22	-0.00011767		1515.21	-0.00232801		2045.24	-0.00416163		2575.24	-0.00842511		3105.24	-0.01262449		3635.24	-0.02093643
455.39	-0.00309002		985.42	-0.00047017		1515.41	-0.00196397		2045.44	-0.00447257		2575.44	-0.00753353		3105.44	-0.01212447		3635.44	-0.02071669
455.59	-0.00276661		985.62	-0.00060829		1515.61	-0.00145134		2045.64	-0.00478289		2575.64	-0.00762623		3105.64	-0.01171203		3635.64	-0.02024417
455.79	-0.00328922		985.82	-0.00130176		1515.81	-0.00111963		2045.84	-0.00461658		2575.84	-0.00726097		3105.84	-0.01047353		3635.84	-0.0207682
455.99	-0.00429677		986.02	-0.00127393		1516.01	-0.00137725		2046.04	-0.00448698		2576.04	-0.00662346		3106.04	-0.01036057		3636.04	-0.02078643
456.19	-0.00508947		986.22	-0.00157847		1516.21	-0.0017948		2046.24	-0.00481595		2576.24	-0.00735948		3106.24	-0.0110671		3636.24	-0.02092224
456.39	-0.00504716		986.42	-0.00169871		1516.41	-0.00260062		2046.44	-0.00431587		2576.44	-0.00754821		3106.44	-0.01081943		3636.44	-0.02054384
456.59	-0.00559283		986.62	-0.00271063		1516.61	-0.0023861		2046.64	-0.00520083		2576.64	-0.00743158		3106.64	-0.01113792		3636.64	-0.02088069
456.79	-0.00608094		986.82	-0.00358662		1516.81	-0.00267572		2046.84	-0.00568905		2576.84	-0.00752646		3106.84	-0.01164951		3636.84	-0.02007086
456.99	-0.00599306		987.02	-0.00384827		1517.01	-0.00284232		2047.04	-0.00499348		2577.04	-0.00800595		3107.04	-0.01219592		3637.04	-0.02012462
457.19	-0.0060575		987.22	-0.0042184		1517.21	-0.00275798		2047.24	-0.00463824		2577.24	-0.00864327		3107.24	-0.01211169		3637.24	-0.01986834
457.39	-0.00584448		987.42	-0.00366352		1517.41	-0.00307824		2047.44	-0.00568929		2577.44	-0.00922998		3107.44	-0.0120324		3637.44	-0.01926007
457.59	-0.00528819		987.62	-0.00336433		1517.61	-0.00389959		2047.64	-0.00568841		2577.64	-0.00896365		3107.64	-0.01197344		3637.64	-0.0190263
457.79	-0.00479841		987.82	-0.00347535		1517.81	-0.0037462		2047.84	-0.00588446		2577.84	-0.00938101		3107.84	-0.01231861		3637.84	-0.01875305
457.99	-0.00456259		988.02	-0.00300305		1518.01	-0.00301745		2048.04	-0.00593592		2578.04	-0.00871771		3108.04	-0.01135906		3638.04	-0.01871229
458.19	-0.00541327		988.22	-0.00374522		1518.21	-0.00303889		2048.24	-0.00595111		2578.24	-0.00933126		3108.24	-0.0113358		3638.24	-0.01879281
458.39	-0.0053883		988.42	-0.00425402		1518.41	-0.00270962		2048.44	-0.00552337		2578.44	-0.00921447		3108.44	-0.01159944		3638.44	-0.01927851
458.59	-0.00500148		988.62	-0.00359272		1518.61	-0.00220728		2048.64	-0.00555033		2578.64	-0.00849192		3108.64	-0.01212731		3638.64	-0.02058308
458.79	-0.00480786		988.82	-0.00359809		1518.81	-0.00153875		2048.84	-0.00485679		2578.84	-0.00910242		3108.84	-0.01259731		3638.84	-0.02044021
458.99	-0.00525479		989.02	-0.0031464		1519.01	-0.00013241		2049.04	-0.00442112		2579.04	-0.00853771		3109.04	-0.01315274		3639.04	-0.02079142
459.19	-0.0056577		989.22	-0.00358345		1519.21	0.00106416		2049.24	-0.00472976		2579.24	-0.00812648		3109.24	-0.01333065		3639.24	-0.02167596
459.39	-0.00580841		989.42	-0.00317846		1519.41	0.00174058		2049.44	-0.00371613		2579.44	-0.00826259		3109.44	-0.01242933		3639.44	-0.02166202
459.59	-0.00579589		989.62	-0.00361231		1519.61	0.0020179		2049.64	-0.00279881		2579.64	-0.00848077		3109.64	-0.01180055		3639.64	-0.02243862
459.79	-0.00600505		989.82	-0.00419439		1519.81	0.00190954		2049.84	-0.0020538		2579.84	-0.00789398		3109.84	-0.01180953		3639.84	-0.02309375
459.99	-0.00661304		990.02	-0.00373745		1520.01	0.00225792		2050.04	-0.00124888		2580.04	-0.00743779		3110.04	-0.0127705		3640.04	-0.0232322
460.19	-0.0070387		990.22	-0.00374961		1520.21	0.00221086		2050.24	-0.00107193		2580.24	-0.00719006		3110.24	-0.0121422		3640.24	-0.02266908
460.39	-0.0073289		990.42	-0.00379203		1520.41	0.0019892		2050.44	-0.00116614		2580.44	-0.00736083		3110.44	-0.01145074		3640.44	-0.02259789
460.59	-0.00777064		990.62	-0.00431932		1520.61	0.00113561		2050.64	-0.0018319		2580.64	-0.00721451		3110.64	-0.01123057		3640.64	-0.02315725
460.79	-0.00746485		990.82	-0.00390929		1520.81	0.00062779		2050.84	-0.00129303		2580.84	-0.00742748		3110.84	-0.01154448		3640.84	-0.02345405
460.99	-0.00718525		991.02	-0.00317199		1521.01	0.0002018		2051.04	-0.00091206		2581.04	-0.00786445		3111.04	-0.0121066		3641.04	-0.0232979
461.19	-0.00756137		991.22	-0.00244205		1521.21	0.00014013		2051.24	-0.00176258		2581.24	-0.00854554		3111.24	-0.0120579		3641.24	-0.02147181
461.39	-0.00727825		991.42	-0.00160552		1521.41	-0.00113999		2051.44	-0.00264768		2581.44	-0.00892759		3111.44	-0.0118231		3641.44	-0.02083761
461.59	-0.00696194		991.62	-0.00148134		1521.61	-0.00110367		2051.64	-0.00223805		2581.64	-0.00943421		3111.64	-0.01074107		3641.64	-0.02023671
461.79	-0.00633188		991.82	-0.00144147		1521.81	-0.00070967		2051.84	-0.00200187		2581.84	-0.00978315		3111.84	-0.01086428		3641.84	-0.01992961
461.99	-0.0054475		992.02	-0.00042746		1522.01	-0.00041081		2052.04	-0.00264576		2582.04	-0.00955704		3112.04	-0.0108994		3642.04	-0.02028328
462.19	-0.00472263		992.22	-0.00046059		1522.21	-0.00021184		2052.24	-0.00337047		2582.24	-0.00965681		3112.24	-0.01113799		3642.24	-0.02028222
462.39	-0.00457137		992.42	-0.00021451		1522.41	-0.00119455		2052.44	-0.00378459		2582.44	-0.00965195		3112.44	-0.01153131		3642.44	-0.02008029
462.59	-0.00390266		992.62	0.00091375		1522.61	-0.00153787		2052.64	-0.00390889		2582.64	-0.00999646		3112.64	-0.01277704		3642.64	-0.02068557
462.79	-0.00416776		992.82	0.00064741		1522.81	-0.00105887		2052.84	-0.00380442		2582.84	-0.00996052		3112.84	-0.01319254		3642.84	-0.02076426
462.99	-0.00483372		993.02	0.00070504		1523.01	-0.00080589		2053.04	-0.00411509		2583.04	-0.00992856		3113.04	-0.01374859		3643.04	-0.0220723
463.19	-0.00540643		993.22	0.00017313		1523.21	-0.00121824		2053.24	-0.00485735		2583.24	-0.01001268		3113.24	-0.01392645		3643.24	-0.02234452
463.39	-0.0060393		993.42	0.00093847		1523.41	-0.00128047		2053.44	-0.00388605		2583.44	-0.01008228		3113.44	-0.01342669		3643.44	-0.02231964
463.59	-0.00583683		993.62	0.00063683		1523.61	-0.00110022		2053.64	-0.00337647		2583.64	-0.00953364		3113.64	-0.01353698		3643.64	-0.022093
463.79	-0.00532064		993.82	0.00054729		1523.81	-0.00122936		2053.84	-0.00309179		2583.84	-0.00873452		3113.84	-0.01399793		3643.84	-0.02157839
463.99	-0.00504316		994.02	0.00037186		1524.01	-0.00064586		2054.04	-0.00298337		2584.04	-0.00891662		3114.04	-0.01375248		3644.04	-0.02168778
464.19	-0.00525989		994.22	-0.00017835		1524.21	-0.00134545		2054.24	-0.00330143		2584.24	-0.00809494		3114.24	-0.01298057		3644.24	-0.02097794
464.39	-0.00553288		994.42	-0.00037668		1524.41	-0.00120777		2054.44	-0.00393953		2584.44	-0.00811944		3114.44	-0.01403046		3644.44	-0.02015602
464.59	-0.0053342		994.62	-0.00016808		1524.61	-0.0014666		2054.64	-0.00386593		2584.64	-0.00710317		3114.64	-0.01429908		3644.64	-0.02065643
464.79	-0.00531422		994.82	-0.00065535		1524.81	-0.00121112		2054.84	-0.00378325		2584.84	-0.00753016		3114.84	-0.01474104		3644.84	-0.01950634
464.99	-0.00535795		995.02	-0.0012201		1525.01	-0.00214825		2055.04	-0.00388092		2585.04	-0.00768875		3115.04	-0.01444654		3645.04	-0.01794357
465.19	-0.00531213		995.22	-0.00099585		1525.21	-0.00153631		2055.24	-0.00354213		2585.24	-0.00850963		3115.24	-0.01419756		3645.24	-0.01616228
465.39	-0.00450104		995.42	-0.00138285		1525.41	-0.00177718		2055.44	-0.00282652		2585.44	-0.00874303		3115.44	-0.01281015		3645.44	-0.01566325
465.59	-0.00372916		995.62	-0.00194941		1525.61	-0.00109885		2055.64	-0.00205218		2585.64	-0.00954308		3115.64	-0.0120584		3645.64	-0.01483766
465.79	-0.00349697		995.82	-0.00232444		1525.81	-0.00081952		2055.84	-0.00204196		2585.84	-0.010035		3115.84	-0.01219205		3645.84	-0.01504739
465.99	-0.00359333		996.02	-0.00181825		1526.01	-0.00094996		2056.04	-0.00202328		2586.04	-0.01037169		3116.04	-0.01138778		3646.04	-0.0155597
466.19	-0.00237054		996.22	-0.00208562		1526.21	-0.00133383		2056.24	-0.0024316		2586.24	-0.01062718		3116.24	-0.01138955		3646.24	-0.01535732
466.39	-0.00290791		996.42	-0.00195058		1526.41	-0.00242384		2056.44	-0.00197349		2586.44	-0.01084122		3116.44	-0.01140058		3646.44	-0.01589535
466.59	-0.00247961		996.62	-0.00204638		1526.61	-0.00279645		2056.64	-0.00194891		2586.64	-0.01157399		3116.64	-0.01184202		3646.64	-0.0176468
466.79	-0.0033216		996.82	-0.00316408		1526.81	-0.0031004		2056.84	-0.00282857		2586.84	-0.01203559		3116.84	-0.01098714		3646.84	-0.01883992
466.99	-0.00323802		997.02	-0.00346188		1527.01	-0.00351898		2057.04	-0.00364255		2587.04	-0.01217653		3117.04	-0.01163583		3647.04	-0.01986294
467.19	-0.00339451		997.22	-0.00351034		1527.21	-0.00385009		2057.24	-0.00456758		2587.24	-0.01237338		3117.24	-0.01140023		3647.24	-0.0192388
467.39	-0.0039643		997.42	-0.00348573		1527.41	-0.00298754		2057.44	-0.00460145		2587.44	-0.01185729		3117.44	-0.01172861		3647.44	-0.01900049
467.59	-0.00380062		997.62	-0.00299673		1527.61	-0.00272237		2057.64	-0.00530085		2587.64	-0.01097437		3117.64	-0.01137446		3647.64	-0.01894748
467.79	-0.00364242		997.82	-0.0033595		1527.81	-0.00304401		2057.84	-0.00563977		2587.84	-0.01012438		3117.84	-0.0106542		3647.84	-0.01997294
467.99	-0.00462454		998.02	-0.00312639		1528.01	-0.00297421		2058.04	-0.00620153		2588.04	-0.00950685		3118.04	-0.01043403		3648.04	-0.01969471
468.19	-0.00502187		998.22	-0.00246893		1528.21	-0.00345791		2058.24	-0.00632681		2588.24	-0.00849631		3118.24	-0.01105801		3648.24	-0.01928944
468.39	-0.00552773		998.42	-0.00253804		1528.41	-0.00325294		2058.44	-0.00678698		2588.44	-0.00881274		3118.44	-0.01181375		3648.44	-0.01927224
468.59	-0.00633442		998.62	-0.00373511		1528.61	-0.00362788		2058.64	-0.00625448		2588.64	-0.00874969		3118.64	-0.0122287		3648.64	-0.02014653
468.79	-0.00625398		998.82	-0.0040442		1528.81	-0.0034803		2058.84	-0.00653965		2588.84	-0.00898666		3118.84	-0.01176486		3648.84	-0.01948125
468.99	-0.00632713		999.02	-0.00317356		1529.01	-0.00288814		2059.04	-0.00710147		2589.04	-0.00897041		3119.04	-0.0115963		3649.04	-0.01946139
469.19	-0.00697052		999.22	-0.00345335		1529.21	-0.00191641		2059.24	-0.00630314		2589.24	-0.00921464		3119.24	-0.01201061		3649.24	-0.0191079
469.39	-0.00674518		999.42	-0.00364425		1529.41	-0.00221685		2059.44	-0.00689723		2589.44	-0.00978288		3119.44	-0.01175736		3649.44	-0.01957546
469.59	-0.00711127		999.62	-0.00342338		1529.61	-0.00235968		2059.64	-0.00620955		2589.64	-0.01014607		3119.64	-0.01196666		3649.64	-0.01987932
469.79	-0.00714611		999.82	-0.00301546		1529.81	-0.00211831		2059.84	-0.00583466		2589.84	-0.0106401		3119.84	-0.01184415		3649.84	-0.02037038
469.99	-0.00689901		1000.02	-0.00167124		1530.01	-0.00282001		2060.04	-0.00518438		2590.04	-0.01072523		3120.04	-0.01073712		3650.04	-0.02136071
470.19	-0.00560721		1000.22	-0.00181842		1530.21	-0.00386638		2060.24	-0.00519817		2590.24	-0.01134397		3120.24	-0.01153282		3650.24	-0.02158043
470.39	-0.0057267		1000.42	-0.00105739		1530.41	-0.00474022		2060.44	-0.00405738		2590.44	-0.01133492		3120.44	-0.0110314		3650.44	-0.02251899
470.59	-0.00495367		1000.62	-0.00186256		1530.61	-0.00527619		2060.64	-0.00432408		2590.64	-0.01241996		3120.64	-0.01151574		3650.64	-0.02316244
470.79	-0.00511773		1000.82	-0.0020335		1530.81	-0.00558464		2060.84	-0.0044757		2590.84	-0.01241772		3120.84	-0.01174357		3650.84	-0.02250682
470.99	-0.00489402		1001.02	-0.00230449		1531.01	-0.00516617		2061.04	-0.00543073		2591.04	-0.01153472		3121.04	-0.01281442		3651.04	-0.02167825
471.19	-0.00556715		1001.22	-0.00203036		1531.21	-0.00500998		2061.24	-0.00544001		2591.24	-0.01105842		3121.24	-0.01393042		3651.24	-0.02155769
471.39	-0.00572844		1001.42	-0.00168337		1531.41	-0.00477318		2061.44	-0.0058737		2591.44	-0.01059791		3121.44	-0.01461372		3651.44	-0.02153225
471.59	-0.00466331		1001.62	-0.00152505		1531.61	-0.00589035		2061.64	-0.00489741		2591.64	-0.01069844		3121.64	-0.01434991		3651.64	-0.02214704
471.79	-0.00494187		1001.82	-0.00130258		1531.81	-0.00634339		2061.84	-0.00407138		2591.84	-0.01069292		3121.84	-0.01405908		3651.84	-0.02285005
471.99	-0.00465273		1002.02	-0.00124969		1532.01	-0.00607116		2062.04	-0.00447053		2592.04	-0.01049455		3122.04	-0.01407265		3652.04	-0.0218731
472.19	-0.00364913		1002.22	-0.0021178		1532.21	-0.0060014		2062.24	-0.00438317		2592.24	-0.01065684		3122.24	-0.01488134		3652.24	-0.02197374
472.39	-0.0040336		1002.42	-0.00346534		1532.41	-0.00584452		2062.44	-0.00543425		2592.44	-0.01072136		3122.44	-0.01508762		3652.44	-0.0220708
472.59	-0.00384175		1002.62	-0.00419545		1532.61	-0.00499918		2062.64	-0.00514381		2592.64	-0.01068097		3122.64	-0.01508856		3652.64	-0.02198237
472.79	-0.00355621		1002.82	-0.00426479		1532.81	-0.00460915		2062.84	-0.00580754		2592.84	-0.01076565		3122.84	-0.01411475		3652.84	-0.02188326
472.99	-0.0036598		1003.02	-0.00426997		1533.01	-0.00380848		2063.04	-0.00643919		2593.04	-0.01069703		3123.04	-0.01443387		3653.04	-0.02160331
473.19	-0.00449938		1003.22	-0.00514043		1533.21	-0.00414295		2063.24	-0.00568585		2593.24	-0.01070821		3123.24	-0.01475065		3653.24	-0.02089119
473.39	-0.00484601		1003.42	-0.00468349		1533.41	-0.00395708		2063.44	-0.0067364		2593.44	-0.01144772		3123.44	-0.01426532		3653.44	-0.02056243
473.59	-0.00442584		1003.62	-0.00437399		1533.61	-0.00368841		2063.64	-0.00630277		2593.64	-0.0117486		3123.64	-0.01318362		3653.64	-0.01990212
473.79	-0.00465166		1003.82	-0.0036562		1533.81	-0.00347025		2063.84	-0.0058859		2593.84	-0.01222685		3123.84	-0.01244363		3653.84	-0.01980134
473.99	-0.00462161		1004.02	-0.00295744		1534.01	-0.00356606		2064.04	-0.00574779		2594.04	-0.01189261		3124.04	-0.01136192		3654.04	-0.02074075
474.19	-0.00452492		1004.22	-0.00252007		1534.21	-0.00310306		2064.24	-0.00602326		2594.24	-0.01154513		3124.24	-0.01115259		3654.24	-0.02079211
474.39	-0.00546562		1004.42	-0.00194977		1534.41	-0.00238972		2064.44	-0.0061222		2594.44	-0.01187898		3124.44	-0.01023204		3654.44	-0.02077764
474.59	-0.0061711		1004.62	-0.00247758		1534.61	-0.00224876		2064.64	-0.00597112		2594.64	-0.01222651		3124.64	-0.01004565		3654.64	-0.02040845
474.79	-0.00673256		1004.82	-0.00224983		1534.81	-0.00301248		2064.84	-0.00520408		2594.84	-0.01134381		3124.84	-0.01005055		3654.84	-0.01987527
474.99	-0.00644666		1005.02	-0.00252372		1535.01	-0.00280115		2065.04	-0.00545849		2595.04	-0.01083533		3125.04	-0.01052283		3655.04	-0.01919985
475.19	-0.00664894		1005.22	-0.00200897		1535.21	-0.00266559		2065.24	-0.0040769		2595.24	-0.01048052		3125.24	-0.0114295		3655.24	-0.01905587
475.39	-0.00610336		1005.42	-0.00190157		1535.41	-0.0035633		2065.44	-0.00394108		2595.44	-0.01068357		3125.44	-0.01042795		3655.44	-0.01884554
475.59	-0.00550522		1005.62	-0.00197777		1535.61	-0.00383726		2065.64	-0.00309277		2595.64	-0.01125089		3125.64	-0.01007159		3655.64	-0.01918809
475.79	-0.00617377		1005.82	-0.00109971		1535.81	-0.00369184		2065.84	-0.00328134		2595.84	-0.01104908		3125.84	-0.00872877		3655.84	-0.01968634
475.99	-0.00497985		1006.02	-0.00100976		1536.01	-0.00365689		2066.04	-0.00356865		2596.04	-0.01028997		3126.04	-0.00859601		3656.04	-0.01905289
476.19	-0.00511368		1006.22	-0.00102674		1536.21	-0.00351545		2066.24	-0.0030294		2596.24	-0.00991285		3126.24	-0.00914095		3656.24	-0.02012256
476.39	-0.00551504		1006.42	-0.0018089		1536.41	-0.00343156		2066.44	-0.00363563		2596.44	-0.00998594		3126.44	-0.00940661		3656.44	-0.02061057
476.59	-0.00530391		1006.62	-0.00219008		1536.61	-0.00396222		2066.64	-0.00235619		2596.64	-0.01054922		3126.64	-0.00884713		3656.64	-0.02036336
476.79	-0.00518483		1006.82	-0.00246906		1536.81	-0.00442592		2066.84	-0.00309376		2596.84	-0.01078005		3126.84	-0.00942702		3656.84	-0.02008089
476.99	-0.00477863		1007.02	-0.001895		1537.01	-0.00451132		2067.04	-0.00354122		2597.04	-0.01072537		3127.04	-0.01092833		3657.04	-0.02001575
477.19	-0.00524751		1007.22	-0.00233219		1537.21	-0.00418507		2067.24	-0.00372003		2597.24	-0.01154023		3127.24	-0.01147466		3657.24	-0.01981387
477.39	-0.0047557		1007.42	-0.00243503		1537.41	-0.00405291		2067.44	-0.00437745		2597.44	-0.01213854		3127.44	-0.01228846		3657.44	-0.01956851
477.59	-0.00370327		1007.62	-0.00241079		1537.61	-0.00464		2067.64	-0.00397286		2597.64	-0.01259396		3127.64	-0.01258559		3657.64	-0.01932843
477.79	-0.00438548		1007.82	-0.00224662		1537.81	-0.00467013		2067.84	-0.00434181		2597.84	-0.01235036		3127.84	-0.01407052		3657.84	-0.01945857
477.99	-0.00389152		1008.02	-0.0023682		1538.01	-0.00491573		2068.04	-0.00515453		2598.04	-0.01184151		3128.04	-0.01487245		3658.04	-0.02056813
478.19	-0.00389204		1008.22	-0.00250517		1538.21	-0.00447359		2068.24	-0.00513494		2598.24	-0.01168044		3128.24	-0.01505367		3658.24	-0.01994763
478.39	-0.0044184		1008.42	-0.00290421		1538.41	-0.00454566		2068.44	-0.00492565		2598.44	-0.0120153		3128.44	-0.01583016		3658.44	-0.01954487
478.59	-0.00465427		1008.62	-0.00291571		1538.61	-0.00452862		2068.64	-0.00397181		2598.64	-0.01198054		3128.64	-0.0161218		3658.64	-0.01994813
478.79	-0.00405065		1008.82	-0.00263521		1538.81	-0.00426291		2068.84	-0.00399163		2598.84	-0.01096598		3128.84	-0.0162515		3658.84	-0.01990607
478.99	-0.00372172		1009.02	-0.00255435		1539.01	-0.0028215		2069.04	-0.00399396		2599.04	-0.01096912		3129.04	-0.01603827		3659.04	-0.01991178
479.19	-0.00491326		1009.22	-0.00203988		1539.21	-0.00323228		2069.24	-0.00370162		2599.24	-0.01085863		3129.24	-0.01534235		3659.24	-0.02067957
479.39	-0.00484758		1009.42	-0.00219944		1539.41	-0.002696		2069.44	-0.00398195		2599.44	-0.01022572		3129.44	-0.01463511		3659.44	-0.021823
479.59	-0.00466589		1009.62	-0.00167356		1539.61	-0.00161645		2069.64	-0.00373839		2599.64	-0.01066712		3129.64	-0.01502247		3659.64	-0.02186047
479.79	-0.00584483		1009.82	-0.00263027		1539.81	-0.00144263		2069.84	-0.00322891		2599.84	-0.01024914		3129.84	-0.01444524		3659.84	-0.02317471
479.99	-0.00600615		1010.02	-0.00233797		1540.01	-0.0019973		2070.04	-0.0038264		2600.04	-0.00979189		3130.04	-0.0144563		3660.04	-0.02399931
480.19	-0.00732462		1010.22	-0.00217469		1540.21	-0.00190312		2070.24	-0.00314722		2600.24	-0.01024696		3130.24	-0.01321999		3660.24	-0.02498929
480.39	-0.00759113		1010.42	-0.00351671		1540.41	-0.00226622		2070.44	-0.00291833		2600.44	-0.01049838		3130.44	-0.01299995		3660.44	-0.02469053
480.59	-0.00759136		1010.62	-0.00308437		1540.61	-0.00281148		2070.64	-0.00272038		2600.64	-0.01147799		3130.64	-0.01254429		3660.64	-0.02415309
480.79	-0.00658498		1010.82	-0.00324627		1540.81	-0.00255999		2070.84	-0.0035069		2600.84	-0.01225666		3130.84	-0.01286147		3660.84	-0.0237335
480.99	-0.00643302		1011.02	-0.00389919		1541.01	-0.00228586		2071.04	-0.00385542		2601.04	-0.01261303		3131.04	-0.01321106		3661.04	-0.02364908
481.19	-0.00600396		1011.22	-0.00441981		1541.21	-0.00185825		2071.24	-0.00413058		2601.24	-0.01297809		3131.24	-0.01289745		3661.24	-0.02351329
481.39	-0.0058757		1011.42	-0.0050901		1541.41	-0.0021907		2071.44	-0.00432969		2601.44	-0.01267654		3131.44	-0.01301826		3661.44	-0.02236811
481.59	-0.00623509		1011.62	-0.00462084		1541.61	-0.00296784		2071.64	-0.00478923		2601.64	-0.01281418		3131.64	-0.01283738		3661.64	-0.0219568
481.79	-0.00616465		1011.82	-0.00431487		1541.81	-0.00387444		2071.84	-0.00560843		2601.84	-0.01232215		3131.84	-0.01319477		3661.84	-0.02136304
481.99	-0.00566765		1012.02	-0.00477495		1542.01	-0.00460379		2072.04	-0.00552511		2602.04	-0.01224382		3132.04	-0.01351813		3662.04	-0.02154329
482.19	-0.0053624		1012.22	-0.00508514		1542.21	-0.00455435		2072.24	-0.00531644		2602.24	-0.01204928		3132.24	-0.01322952		3662.24	-0.01971891
482.39	-0.00589765		1012.42	-0.00412775		1542.41	-0.00494604		2072.44	-0.00546699		2602.44	-0.01219616		3132.44	-0.01362051		3662.44	-0.01950538
482.59	-0.00659283		1012.62	-0.00392465		1542.61	-0.00474823		2072.64	-0.00639516		2602.64	-0.0120755		3132.64	-0.01299568		3662.64	-0.02001013
482.79	-0.00590696		1012.82	-0.0034806		1542.81	-0.00490759		2072.84	-0.0072297		2602.84	-0.01173138		3132.84	-0.01341342		3662.84	-0.01941508
482.99	-0.00592469		1013.02	-0.00349576		1543.01	-0.00455682		2073.04	-0.00703607		2603.04	-0.01172526		3133.04	-0.01392606		3663.04	-0.01913684
483.19	-0.00633527		1013.22	-0.00335617		1543.21	-0.00527592		2073.24	-0.0071815		2603.24	-0.01177625		3133.24	-0.01498765		3663.24	-0.01940857
483.39	-0.00539401		1013.42	-0.00288683		1543.41	-0.00395485		2073.44	-0.00632096		2603.44	-0.01101695		3133.44	-0.01590192		3663.44	-0.01934948
483.59	-0.00488448		1013.62	-0.00311507		1543.61	-0.0043059		2073.64	-0.00572213		2603.64	-0.01148509		3133.64	-0.01647895		3663.64	-0.0190443
483.79	-0.00568206		1013.82	-0.00402805		1543.81	-0.00523862		2073.84	-0.00545868		2603.84	-0.01126261		3133.84	-0.01619041		3663.84	-0.01989866
483.99	-0.00607583		1014.02	-0.00230325		1544.01	-0.00561552		2074.04	-0.00535494		2604.04	-0.01126769		3134.04	-0.015786		3664.04	-0.01966689
484.19	-0.00712515		1014.22	-0.00223926		1544.21	-0.00506282		2074.24	-0.00402336		2604.24	-0.01222548		3134.24	-0.01514725		3664.24	-0.01945966
484.39	-0.00676888		1014.42	-0.0029547		1544.41	-0.00491892		2074.44	-0.00355017		2604.44	-0.01277532		3134.44	-0.01618486		3664.44	-0.01972112
484.59	-0.00715715		1014.62	-0.00208175		1544.61	-0.00459553		2074.64	-0.00421016		2604.64	-0.01385146		3134.64	-0.0157632		3664.64	-0.01947037
484.79	-0.00660985		1014.82	-0.00268185		1544.81	-0.00324218		2074.84	-0.00366828		2604.84	-0.01350128		3134.84	-0.01564419		3664.84	-0.01955551
484.99	-0.00754871		1015.02	-0.00338853		1545.01	-0.00210946		2075.04	-0.00381346		2605.04	-0.0134664		3135.04	-0.01544026		3665.04	-0.02063112
485.19	-0.00814425		1015.22	-0.00305297		1545.21	-0.00136419		2075.24	-0.00436969		2605.24	-0.01336151		3135.24	-0.01501703		3665.24	-0.02206958
485.39	-0.00822673		1015.42	-0.00264811		1545.41	-0.00114651		2075.44	-0.00468016		2605.44	-0.01266422		3135.44	-0.01404551		3665.44	-0.02239525
485.59	-0.00887191		1015.62	-0.00270492		1545.61	-0.00106894		2075.64	-0.00440209		2605.64	-0.01224248		3135.64	-0.0136844		3665.64	-0.02272497
485.79	-0.00872725		1015.82	-0.00276205		1545.81	-0.00150686		2075.84	-0.00456981		2605.84	-0.01197147		3135.84	-0.01289671		3665.84	-0.02316182
485.99	-0.00918818		1016.02	-0.00382851		1546.01	-0.00166262		2076.04	-0.00469873		2606.04	-0.01220892		3136.04	-0.01290593		3666.04	-0.0237989
486.19	-0.00948211		1016.22	-0.00392774		1546.21	-0.00263278		2076.24	-0.00450285		2606.24	-0.0116156		3136.24	-0.01226806		3666.24	-0.02351041
486.39	-0.00961879		1016.42	-0.00356437		1546.41	-0.00312903		2076.44	-0.00468806		2606.44	-0.01183687		3136.44	-0.01153755		3666.44	-0.0245831
486.59	-0.00980093		1016.62	-0.00455368		1546.61	-0.00274961		2076.64	-0.00522879		2606.64	-0.01167154		3136.64	-0.01165768		3666.64	-0.02429285
486.79	-0.00975966		1016.82	-0.00434244		1546.81	-0.00321058		2076.84	-0.00483378		2606.84	-0.01225036		3136.84	-0.01232437		3666.84	-0.02409254
486.99	-0.00982186		1017.02	-0.00356537		1547.01	-0.00361516		2077.04	-0.00461088		2607.04	-0.0116452		3137.04	-0.01260351		3667.04	-0.02440344
487.19	-0.00905687		1017.22	-0.00360313		1547.21	-0.00404072		2077.24	-0.00440145		2607.24	-0.01214685		3137.24	-0.01258106		3667.24	-0.02505155
487.39	-0.00881204		1017.42	-0.00288533		1547.41	-0.00344693		2077.44	-0.00312107		2607.44	-0.01235402		3137.44	-0.0119616		3667.44	-0.02495441
487.59	-0.0088661		1017.62	-0.00327085		1547.61	-0.00394221		2077.64	-0.00276272		2607.64	-0.01311106		3137.64	-0.01262131		3667.64	-0.02493687
487.79	-0.01002479		1017.82	-0.00284302		1547.81	-0.00425999		2077.84	-0.0032073		2607.84	-0.013151		3137.84	-0.01223908		3667.84	-0.0246063
487.99	-0.01006213		1018.02	-0.00241225		1548.01	-0.0050824		2078.04	-0.00308761		2608.04	-0.01377418		3138.04	-0.01193407		3668.04	-0.02394353
488.19	-0.01005785		1018.22	-0.00348532		1548.21	-0.00605572		2078.24	-0.00294305		2608.24	-0.01389687		3138.24	-0.01172087		3668.24	-0.02406943
488.39	-0.0098843		1018.42	-0.00363782		1548.41	-0.00563243		2078.44	-0.00297282		2608.44	-0.01372066		3138.44	-0.01216254		3668.44	-0.02368405
488.59	-0.00999758		1018.62	-0.00296989		1548.61	-0.00515882		2078.64	-0.00268786		2608.64	-0.01350903		3138.64	-0.0124538		3668.64	-0.02270018
488.79	-0.00941783		1018.82	-0.00337208		1548.81	-0.00475157		2078.84	-0.00181051		2608.84	-0.01179282		3138.84	-0.01226252		3668.84	-0.02301722
488.99	-0.01024268		1019.02	-0.00367183		1549.01	-0.00444408		2079.04	-0.00288499		2609.04	-0.01184612		3139.04	-0.01229648		3669.04	-0.02371987
489.19	-0.00930748		1019.22	-0.00423875		1549.21	-0.00463552		2079.24	-0.00406967		2609.24	-0.01155497		3139.24	-0.01263874		3669.24	-0.02444753
489.39	-0.00858202		1019.42	-0.00461414		1549.41	-0.00474051		2079.44	-0.00398143		2609.44	-0.01134955		3139.44	-0.01259516		3669.44	-0.02392413
489.59	-0.00862486		1019.62	-0.00519965		1549.61	-0.00526553		2079.64	-0.00497539		2609.64	-0.01134173		3139.64	-0.01373106		3669.64	-0.02304225
489.79	-0.00777218		1019.82	-0.00482158		1549.81	-0.00594823		2079.84	-0.00562093		2609.84	-0.0120464		3139.84	-0.01389299		3669.84	-0.0237351
489.99	-0.00720638		1020.02	-0.00535891		1550.01	-0.00701308		2080.04	-0.00589904		2610.04	-0.01208666		3140.04	-0.01403289		3670.04	-0.02342344
490.19	-0.00694869		1020.22	-0.00547435		1550.21	-0.00694496		2080.24	-0.00657873		2610.24	-0.01192488		3140.24	-0.01366631		3670.24	-0.02293235
490.39	-0.00585404		1020.42	-0.0045109		1550.41	-0.00711827		2080.44	-0.00689446		2610.44	-0.01227333		3140.44	-0.01330473		3670.44	-0.02289563
490.59	-0.00595265		1020.62	-0.00450041		1550.61	-0.00630747		2080.64	-0.00778559		2610.64	-0.01243759		3140.64	-0.01412345		3670.64	-0.02291728
490.79	-0.00605666		1020.82	-0.00367294		1550.81	-0.00709288		2080.84	-0.00800185		2610.84	-0.01302398		3140.84	-0.01433139		3670.84	-0.02320424
490.99	-0.00568566		1021.02	-0.00306773		1551.01	-0.00783911		2081.04	-0.00773861		2611.04	-0.01313262		3141.04	-0.01465528		3671.04	-0.02416181
491.19	-0.00547055		1021.22	-0.00347593		1551.21	-0.00782696		2081.24	-0.0072		2611.24	-0.01414569		3141.24	-0.01422898		3671.24	-0.02538714
491.39	-0.00628098		1021.42	-0.00325499		1551.41	-0.0073082		2081.44	-0.00618911		2611.44	-0.01428064		3141.44	-0.01403187		3671.44	-0.02483141
491.59	-0.00666276		1021.62	-0.0040533		1551.61	-0.00681114		2081.64	-0.00690442		2611.64	-0.01397483		3141.64	-0.0142956		3671.64	-0.02538084
491.79	-0.00665543		1021.82	-0.00450735		1551.81	-0.00721653		2081.84	-0.00709892		2611.84	-0.01305474		3141.84	-0.01376686		3671.84	-0.02487773
491.99	-0.00605742		1022.02	-0.0056065		1552.01	-0.00710217		2082.04	-0.00674433		2612.04	-0.01296538		3142.04	-0.01389409		3672.04	-0.02474589
492.19	-0.0064733		1022.22	-0.0066267		1552.21	-0.0061301		2082.24	-0.00598499		2612.24	-0.01255185		3142.24	-0.0135769		3672.24	-0.0255935
492.39	-0.00646554		1022.42	-0.00656474		1552.41	-0.00526282		2082.44	-0.0053715		2612.44	-0.01201227		3142.44	-0.01432944		3672.44	-0.02500523
492.59	-0.006084		1022.62	-0.00702992		1552.61	-0.00455732		2082.64	-0.00444868		2612.64	-0.0110092		3142.64	-0.0145516		3672.64	-0.02529428
492.79	-0.00657011		1022.82	-0.00721639		1552.81	-0.00429071		2082.84	-0.00433998		2612.84	-0.01018513		3142.84	-0.01378558		3672.84	-0.02601578
492.99	-0.00672879		1023.02	-0.00740437		1553.01	-0.00438432		2083.04	-0.00560354		2613.04	-0.01078129		3143.04	-0.01390889		3673.04	-0.02562764
493.19	-0.00639227		1023.22	-0.00775472		1553.21	-0.00524985		2083.24	-0.00522246		2613.24	-0.01179392		3143.24	-0.01378511		3673.24	-0.02507635
493.39	-0.0068431		1023.42	-0.00730528		1553.41	-0.0055221		2083.44	-0.00541074		2613.44	-0.0118828		3143.44	-0.01389458		3673.44	-0.02461262
493.59	-0.00700365		1023.62	-0.00724259		1553.61	-0.00675272		2083.64	-0.00634426		2613.64	-0.01197322		3143.64	-0.01422145		3673.64	-0.02477693
493.79	-0.0071774		1023.82	-0.00699446		1553.81	-0.00629976		2083.84	-0.00619635		2613.84	-0.01180455		3143.84	-0.01419989		3673.84	-0.02561471
493.99	-0.00818018		1024.02	-0.0059425		1554.01	-0.00637617		2084.04	-0.0065227		2614.04	-0.01212198		3144.04	-0.01392248		3674.04	-0.02515891
494.19	-0.00902146		1024.22	-0.0052884		1554.21	-0.00542286		2084.24	-0.0071751		2614.24	-0.01162008		3144.24	-0.01414829		3674.24	-0.02472931
494.39	-0.0091567		1024.42	-0.00406132		1554.41	-0.00654732		2084.44	-0.00665363		2614.44	-0.01184463		3144.44	-0.01435635		3674.44	-0.02529986
494.59	-0.00993081		1024.62	-0.00416786		1554.61	-0.0065708		2084.64	-0.00698574		2614.64	-0.0117309		3144.64	-0.01441086		3674.64	-0.02538837
494.79	-0.01095215		1024.82	-0.00404057		1554.81	-0.00802412		2084.84	-0.00643948		2614.84	-0.01210184		3144.84	-0.01481933		3674.84	-0.0252075
494.99	-0.01176806		1025.02	-0.00384351		1555.01	-0.00869357		2085.04	-0.00613946		2615.04	-0.01204177		3145.04	-0.01438562		3675.04	-0.02620268
495.19	-0.01225976		1025.22	-0.00405207		1555.21	-0.00817988		2085.24	-0.00602618		2615.24	-0.01196492		3145.24	-0.01429031		3675.24	-0.02597714
495.39	-0.01285025		1025.42	-0.00483265		1555.41	-0.00689594		2085.44	-0.00578054		2615.44	-0.01100098		3145.44	-0.0150973		3675.44	-0.02466244
495.59	-0.01293263		1025.62	-0.00576676		1555.61	-0.00651885		2085.64	-0.0060182		2615.64	-0.01116348		3145.64	-0.01558888		3675.64	-0.02501169
495.79	-0.01223203		1025.82	-0.00582388		1555.81	-0.00696831		2085.84	-0.00608439		2615.84	-0.01151834		3145.84	-0.01547844		3675.84	-0.0247516
495.99	-0.01287037		1026.02	-0.00676001		1556.01	-0.00602381		2086.04	-0.00622631		2616.04	-0.01245409		3146.04	-0.01523514		3676.04	-0.02545504
496.19	-0.01332724		1026.22	-0.00717256		1556.21	-0.00577981		2086.24	-0.00660448		2616.24	-0.0126415		3146.24	-0.01522884		3676.24	-0.0254698
496.39	-0.01332569		1026.42	-0.00687747		1556.41	-0.00609555		2086.44	-0.00702341		2616.44	-0.0125448		3146.44	-0.01506998		3676.44	-0.02416254
496.59	-0.0124957		1026.62	-0.0065815		1556.61	-0.0050247		2086.64	-0.00706823		2616.64	-0.01235537		3146.64	-0.01515117		3676.64	-0.02413499
496.79	-0.01239928		1026.82	-0.00577576		1556.81	-0.006354		2086.84	-0.00663831		2616.84	-0.01276375		3146.84	-0.01504766		3676.84	-0.023563
496.99	-0.01168386		1027.02	-0.00607677		1557.01	-0.00760423		2087.04	-0.00681126		2617.04	-0.01353542		3147.04	-0.01521049		3677.04	-0.02274383
497.19	-0.011999		1027.22	-0.00613856		1557.21	-0.00757589		2087.24	-0.00692815		2617.24	-0.01416668		3147.24	-0.01470034		3677.24	-0.02296522
497.39	-0.01190925		1027.42	-0.0066476		1557.41	-0.00675393		2087.44	-0.00763208		2617.44	-0.01331227		3147.44	-0.01487488		3677.44	-0.02329756
497.59	-0.01158737		1027.62	-0.0066979		1557.61	-0.00620565		2087.64	-0.00792972		2617.64	-0.01220732		3147.64	-0.01456601		3677.64	-0.02291974
497.79	-0.01124079		1027.82	-0.0052584		1557.81	-0.00510256		2087.84	-0.00826958		2617.84	-0.01165847		3147.84	-0.01498099		3677.84	-0.0225586
497.99	-0.01144286		1028.02	-0.00465349		1558.01	-0.00478929		2088.04	-0.00840134		2618.04	-0.01230807		3148.04	-0.01462144		3678.04	-0.02254419
498.19	-0.01120102		1028.22	-0.00510843		1558.21	-0.005278		2088.24	-0.00872226		2618.24	-0.01195259		3148.24	-0.01411235		3678.24	-0.02230227
498.39	-0.01035568		1028.42	-0.00519758		1558.41	-0.00568399		2088.44	-0.00788229		2618.44	-0.01220481		3148.44	-0.01373144		3678.44	-0.02322408
498.59	-0.00958907		1028.62	-0.00442664		1558.61	-0.00508104		2088.64	-0.00814784		2618.64	-0.01178153		3148.64	-0.01362999		3678.64	-0.0230176
498.79	-0.00980522		1028.82	-0.00466794		1558.81	-0.0045626		2088.84	-0.00802154		2618.84	-0.01237918		3148.84	-0.01351296		3678.84	-0.02291373
498.99	-0.00968122		1029.02	-0.00361306		1559.01	-0.0039977		2089.04	-0.0070655		2619.04	-0.0120126		3149.04	-0.01365612		3679.04	-0.02338749
499.19	-0.00925061		1029.22	-0.00406097		1559.21	-0.00276198		2089.24	-0.00671196		2619.24	-0.01154158		3149.24	-0.01383389		3679.24	-0.02310912
499.39	-0.00881743		1029.42	-0.00379233		1559.41	-0.00273367		2089.44	-0.0066269		2619.44	-0.01093365		3149.44	-0.01491509		3679.44	-0.02390275
499.59	-0.00829621		1029.62	-0.00445799		1559.61	-0.00349522		2089.64	-0.00659004		2619.64	-0.01145648		3149.64	-0.01502753		3679.64	-0.02457671
499.79	-0.00795259		1029.82	-0.00420891		1559.81	-0.00351855		2089.84	-0.00689095		2619.84	-0.01191439		3149.84	-0.01521884		3679.84	-0.0248544
499.99	-0.0094307		1030.02	-0.00462073		1560.01	-0.00312459		2090.04	-0.00635006		2620.04	-0.01134203		3150.04	-0.015608		3680.04	-0.02548345
500.19	-0.00960322		1030.22	-0.00409281		1560.21	-0.00312992		2090.24	-0.006845		2620.24	-0.01101575		3150.24	-0.01641554		3680.24	-0.02520803
500.39	-0.00936996		1030.42	-0.00404364		1560.41	-0.00387571		2090.44	-0.00646123		2620.44	-0.01105229		3150.44	-0.01743389		3680.44	-0.02544886
500.59	-0.00919406		1030.62	-0.00452835		1560.61	-0.0050988		2090.64	-0.00660834		2620.64	-0.01093733		3150.64	-0.01913936		3680.64	-0.02567907
500.79	-0.00989271		1030.82	-0.0044672		1560.81	-0.00657308		2090.84	-0.00640961		2620.84	-0.01065499		3150.84	-0.01925379		3680.84	-0.02602505
500.99	-0.01040074		1031.02	-0.00524435		1561.01	-0.00740085		2091.04	-0.00673443		2621.04	-0.01062543		3151.04	-0.01879601		3681.04	-0.02525272
501.19	-0.01188814		1031.22	-0.00596374		1561.21	-0.00638014		2091.24	-0.00712955		2621.24	-0.01016919		3151.24	-0.01823845		3681.24	-0.02478344
501.39	-0.01295798		1031.42	-0.00663955		1561.41	-0.00624818		2091.44	-0.00741279		2621.44	-0.00987496		3151.44	-0.01844883		3681.44	-0.02394472
501.59	-0.01278857		1031.62	-0.00677838		1561.61	-0.00581244		2091.64	-0.00758497		2621.64	-0.0105763		3151.64	-0.01806431		3681.64	-0.02333657
501.79	-0.01286832		1031.82	-0.00662649		1561.81	-0.00662866		2091.84	-0.00823602		2621.84	-0.01232909		3151.84	-0.01766332		3681.84	-0.02353936
501.99	-0.01340613		1032.02	-0.00750443		1562.01	-0.00695039		2092.04	-0.00832086		2622.04	-0.01291335		3152.04	-0.0168677		3682.04	-0.02373552
502.19	-0.0138898		1032.22	-0.00747997		1562.21	-0.00710903		2092.24	-0.00798304		2622.24	-0.01412409		3152.24	-0.01592744		3682.24	-0.02313822
502.39	-0.013858		1032.42	-0.00770109		1562.41	-0.00652554		2092.44	-0.00814908		2622.44	-0.01390394		3152.44	-0.01532187		3682.44	-0.02369944
502.59	-0.01430196		1032.62	-0.00652721		1562.61	-0.00680244		2092.64	-0.00843522		2622.64	-0.01387819		3152.64	-0.01487475		3682.64	-0.02371157
502.79	-0.01457018		1032.82	-0.00702386		1562.81	-0.00644176		2092.84	-0.00781013		2622.84	-0.01374691		3152.84	-0.0142769		3682.84	-0.0235954
502.99	-0.01492753		1033.02	-0.00611736		1563.01	-0.00619862		2093.04	-0.0074097		2623.04	-0.01313471		3153.04	-0.01451812		3683.04	-0.02418548
503.19	-0.01474453		1033.22	-0.00590424		1563.21	-0.00594906		2093.24	-0.00679767		2623.24	-0.0127669		3153.24	-0.0151837		3683.24	-0.02426734
503.39	-0.01380585		1033.42	-0.00530776		1563.41	-0.00659578		2093.44	-0.00619333		2623.44	-0.01311181		3153.44	-0.0159952		3683.44	-0.02471956
503.59	-0.01286791		1033.62	-0.00590562		1563.61	-0.00627713		2093.64	-0.00626149		2623.64	-0.0137921		3153.64	-0.01561538		3683.64	-0.0251256
503.79	-0.01208308		1033.82	-0.00468719		1563.81	-0.00643564		2093.84	-0.00545021		2623.84	-0.01432953		3153.84	-0.01667216		3683.84	-0.02514604
503.99	-0.01206427		1034.02	-0.00367167		1564.01	-0.00676046		2094.04	-0.00536929		2624.04	-0.01387031		3154.04	-0.01661985		3684.04	-0.02591695
504.19	-0.01042543		1034.22	-0.00334621		1564.21	-0.00663976		2094.24	-0.00504017		2624.24	-0.01351925		3154.24	-0.01758472		3684.24	-0.02572412
504.39	-0.00949822		1034.42	-0.00361308		1564.41	-0.00758969		2094.44	-0.00505855		2624.44	-0.01353151		3154.44	-0.0176124		3684.44	-0.02602074
504.59	-0.01000041		1034.62	-0.00384536		1564.61	-0.00806354		2094.64	-0.00580443		2624.64	-0.01299607		3154.64	-0.01748148		3684.64	-0.02474345
504.79	-0.00993621		1034.82	-0.00280458		1564.81	-0.00836945		2094.84	-0.00512479		2624.84	-0.01260639		3154.84	-0.01582847		3684.84	-0.02493355
504.99	-0.01035802		1035.02	-0.0034496		1565.01	-0.00737813		2095.04	-0.00522878		2625.04	-0.01223332		3155.04	-0.01535824		3685.04	-0.02388162
505.19	-0.01060078		1035.22	-0.00412317		1565.21	-0.00729273		2095.24	-0.00528128		2625.24	-0.01259681		3155.24	-0.01466615		3685.24	-0.02346883
505.39	-0.01046337		1035.42	-0.00372926		1565.41	-0.00769221		2095.44	-0.00579666		2625.44	-0.01277833		3155.44	-0.0144244		3685.44	-0.02354424
505.59	-0.01023038		1035.62	-0.00463154		1565.61	-0.00699853		2095.64	-0.00573427		2625.64	-0.01354861		3155.64	-0.01440354		3685.64	-0.02260979
505.79	-0.01070419		1035.82	-0.00450466		1565.81	-0.00840569		2095.84	-0.00668652		2625.84	-0.01390588		3155.84	-0.01342331		3685.84	-0.02267513
505.99	-0.0116469		1036.02	-0.00481483		1566.01	-0.0080524		2096.04	-0.00684841		2626.04	-0.01370561		3156.04	-0.01264771		3686.04	-0.02287641
506.19	-0.01173425		1036.22	-0.00539526		1566.21	-0.00849106		2096.24	-0.00782698		2626.24	-0.01383201		3156.24	-0.01259151		3686.24	-0.0223167
506.39	-0.01216876		1036.42	-0.00609396		1566.41	-0.00846813		2096.44	-0.00928204		2626.44	-0.01314404		3156.44	-0.01214108		3686.44	-0.02232688
506.59	-0.01192957		1036.62	-0.00621572		1566.61	-0.00888108		2096.64	-0.00909062		2626.64	-0.01303676		3156.64	-0.01186165		3686.64	-0.02194878
506.79	-0.01159632		1036.82	-0.00698742		1566.81	-0.00800515		2096.84	-0.00892425		2626.84	-0.01313703		3156.84	-0.01231446		3686.84	-0.02190054
506.99	-0.01282332		1037.02	-0.00710619		1567.01	-0.00774678		2097.04	-0.00885284		2627.04	-0.01429247		3157.04	-0.01250522		3687.04	-0.02210394
507.19	-0.01199365		1037.22	-0.00673234		1567.21	-0.00777163		2097.24	-0.00847971		2627.24	-0.01442003		3157.24	-0.01265816		3687.24	-0.02246318
507.39	-0.01065472		1037.42	-0.00738365		1567.41	-0.00772218		2097.44	-0.00896894		2627.44	-0.01525931		3157.44	-0.01293929		3687.44	-0.02305098
507.59	-0.00991801		1037.62	-0.00715106		1567.61	-0.00768374		2097.64	-0.00890773		2627.64	-0.01519465		3157.64	-0.01459133		3687.64	-0.02399787
507.79	-0.00900436		1037.82	-0.00693697		1567.81	-0.00859866		2097.84	-0.00785186		2627.84	-0.01584393		3157.84	-0.015629		3687.84	-0.02367994
507.99	-0.00924509		1038.02	-0.00739063		1568.01	-0.00842285		2098.04	-0.00765144		2628.04	-0.01550321		3158.04	-0.01569245		3688.04	-0.02351371
508.19	-0.00889149		1038.22	-0.00821435		1568.21	-0.0073892		2098.24	-0.0075328		2628.24	-0.01487749		3158.24	-0.01664117		3688.24	-0.02259759
508.39	-0.00968479		1038.42	-0.00840991		1568.41	-0.00811838		2098.44	-0.00762205		2628.44	-0.01439441		3158.44	-0.01615653		3688.44	-0.02202519
508.59	-0.01015943		1038.62	-0.00813054		1568.61	-0.00840995		2098.64	-0.00731431		2628.64	-0.01383387		3158.64	-0.01599025		3688.64	-0.02186016
508.79	-0.009631		1038.82	-0.00758975		1568.81	-0.00904579		2098.84	-0.00695917		2628.84	-0.01358987		3158.84	-0.01555854		3688.84	-0.02346323
508.99	-0.01030949		1039.02	-0.00847588		1569.01	-0.00826794		2099.04	-0.00694397		2629.04	-0.01319919		3159.04	-0.01628116		3689.04	-0.02386085
509.19	-0.01039828		1039.22	-0.00793876		1569.21	-0.0096203		2099.24	-0.00714474		2629.24	-0.01274821		3159.24	-0.01663787		3689.24	-0.02433552
509.39	-0.01166438		1039.42	-0.00762788		1569.41	-0.00926913		2099.44	-0.00726881		2629.44	-0.01215763		3159.44	-0.01754298		3689.44	-0.02586493
509.59	-0.0124536		1039.62	-0.00827323		1569.61	-0.0088531		2099.64	-0.00696448		2629.64	-0.01269376		3159.64	-0.01849161		3689.64	-0.02560666
509.79	-0.01226792		1039.82	-0.0074848		1569.81	-0.00949586		2099.84	-0.00648508		2629.84	-0.01279917		3159.84	-0.01758039		3689.84	-0.0269415
509.99	-0.01255525		1040.02	-0.00730633		1570.01	-0.0095253		2100.04	-0.00685674		2630.04	-0.01261273		3160.04	-0.01726333		3690.04	-0.02737972
510.19	-0.01217911		1040.22	-0.0077714		1570.21	-0.0099602		2100.24	-0.00782293		2630.24	-0.01305803		3160.24	-0.01746472		3690.24	-0.02737195
510.39	-0.01125577		1040.42	-0.00776433		1570.41	-0.00930382		2100.44	-0.00715881		2630.44	-0.01260857		3160.44	-0.01706016		3690.44	-0.02731083
510.59	-0.01090762		1040.62	-0.00786229		1570.61	-0.00884101		2100.64	-0.00604515		2630.64	-0.01234993		3160.64	-0.0165121		3690.64	-0.02684821
510.79	-0.01119624		1040.82	-0.00744216		1570.81	-0.00788145		2100.84	-0.00600373		2630.84	-0.01247614		3160.84	-0.01672535		3690.84	-0.02751722
510.99	-0.01165863		1041.02	-0.00732624		1571.01	-0.00774024		2101.04	-0.00598467		2631.04	-0.01276429		3161.04	-0.01622256		3691.04	-0.02770579
511.19	-0.01074008		1041.22	-0.00734013		1571.21	-0.00737906		2101.24	-0.00630442		2631.24	-0.01268707		3161.24	-0.01619475		3691.24	-0.02813248
511.39	-0.01020056		1041.42	-0.00714986		1571.41	-0.00707124		2101.44	-0.0065802		2631.44	-0.01332366		3161.44	-0.01738807		3691.44	-0.0281999
511.59	-0.00993158		1041.62	-0.00680885		1571.61	-0.00709527		2101.64	-0.00676808		2631.64	-0.01350408		3161.64	-0.01753245		3691.64	-0.0285169
511.79	-0.00919419		1041.82	-0.0070827		1571.81	-0.00712569		2101.84	-0.00692552		2631.84	-0.01422886		3161.84	-0.01679599		3691.84	-0.02764723
511.99	-0.00933242		1042.02	-0.00722981		1572.01	-0.00646658		2102.04	-0.00761024		2632.04	-0.01358023		3162.04	-0.01747278		3692.04	-0.0263466
512.19	-0.00903092		1042.22	-0.00720324		1572.21	-0.00646167		2102.24	-0.0083096		2632.24	-0.01359686		3162.24	-0.01710976		3692.24	-0.02511585
512.39	-0.00917723		1042.42	-0.00748314		1572.41	-0.00733477		2102.44	-0.00783817		2632.44	-0.0140773		3162.44	-0.01707938		3692.44	-0.02505898
512.59	-0.00941982		1042.62	-0.00737721		1572.61	-0.00845615		2102.64	-0.00783561		2632.64	-0.01428117		3162.64	-0.01655601		3692.64	-0.02601134
512.79	-0.00937396		1042.82	-0.0077922		1572.81	-0.00929871		2102.84	-0.00832215		2632.84	-0.01447161		3162.84	-0.01658778		3692.84	-0.02638709
512.99	-0.01012384		1043.02	-0.0077272		1573.01	-0.00918367		2103.04	-0.00818435		2633.04	-0.01490355		3163.04	-0.01657337		3693.04	-0.02554331
513.19	-0.01005875		1043.22	-0.00668134		1573.21	-0.00915981		2103.24	-0.00845141		2633.24	-0.01469601		3163.24	-0.01613095		3693.24	-0.02495001
513.39	-0.01025633		1043.42	-0.00649134		1573.41	-0.00937763		2103.44	-0.0074855		2633.44	-0.01529014		3163.44	-0.01607384		3693.44	-0.02496526
513.59	-0.00980519		1043.62	-0.00658472		1573.61	-0.00971407		2103.64	-0.00693746		2633.64	-0.01613054		3163.64	-0.01647513		3693.64	-0.02442965
513.79	-0.00959454		1043.82	-0.00632572		1573.81	-0.01076839		2103.84	-0.00692675		2633.84	-0.01637581		3163.84	-0.0160361		3693.84	-0.02358213
513.99	-0.00982048		1044.02	-0.00643576		1574.01	-0.01137186		2104.04	-0.00741586		2634.04	-0.01656116		3164.04	-0.01583872		3694.04	-0.02352027
514.19	-0.0096815		1044.22	-0.00691418		1574.21	-0.01109649		2104.24	-0.00696729		2634.24	-0.01621048		3164.24	-0.01579477		3694.24	-0.02326705
514.39	-0.00884502		1044.42	-0.00686739		1574.41	-0.01031176		2104.44	-0.00540584		2634.44	-0.01545996		3164.44	-0.01554331		3694.44	-0.02216989
514.59	-0.01043785		1044.62	-0.00664771		1574.61	-0.01048331		2104.64	-0.00565471		2634.64	-0.01580137		3164.64	-0.01524137		3694.64	-0.02305123
514.79	-0.01114986		1044.82	-0.00662874		1574.81	-0.0105022		2104.84	-0.00605286		2634.84	-0.01618241		3164.84	-0.01651694		3694.84	-0.02403192
514.99	-0.01104441		1045.02	-0.00666005		1575.01	-0.01110536		2105.04	-0.00660367		2635.04	-0.01551109		3165.04	-0.01639521		3695.04	-0.02441572
515.19	-0.01116735		1045.22	-0.00651282		1575.21	-0.01066892		2105.24	-0.00655179		2635.24	-0.01520319		3165.24	-0.01644069		3695.24	-0.0246481
515.39	-0.01137006		1045.42	-0.00617136		1575.41	-0.01023705		2105.44	-0.00674923		2635.44	-0.01409939		3165.44	-0.01747193		3695.44	-0.0245465
515.59	-0.01069492		1045.62	-0.00639866		1575.61	-0.01004719		2105.64	-0.00637859		2635.64	-0.01375439		3165.64	-0.01812142		3695.64	-0.02562463
515.79	-0.01062566		1045.82	-0.00647854		1575.81	-0.00956728		2105.84	-0.00642125		2635.84	-0.01351258		3165.84	-0.0191912		3695.84	-0.02590892
515.99	-0.01023204		1046.02	-0.00674258		1576.01	-0.00933592		2106.04	-0.0067025		2636.04	-0.01306071		3166.04	-0.02027982		3696.04	-0.02647995
516.19	-0.01087106		1046.22	-0.00718187		1576.21	-0.00917218		2106.24	-0.00694955		2636.24	-0.01348738		3166.24	-0.02064874		3696.24	-0.02700023
516.39	-0.01130543		1046.42	-0.00715221		1576.41	-0.01042835		2106.44	-0.00697608		2636.44	-0.01426454		3166.44	-0.02041314		3696.44	-0.0276502
516.59	-0.01200123		1046.62	-0.00723688		1576.61	-0.01133178		2106.64	-0.00666486		2636.64	-0.01347448		3166.64	-0.01954346		3696.64	-0.02782158
516.79	-0.01143604		1046.82	-0.00748188		1576.81	-0.01114483		2106.84	-0.0069241		2636.84	-0.01354234		3166.84	-0.0193406		3696.84	-0.02714049
516.99	-0.01105231		1047.02	-0.00709543		1577.01	-0.0110168		2107.04	-0.00696504		2637.04	-0.01430496		3167.04	-0.01916329		3697.04	-0.02688888
517.19	-0.01040514		1047.22	-0.00671842		1577.21	-0.01044043		2107.24	-0.00691523		2637.24	-0.01488792		3167.24	-0.01850457		3697.24	-0.02728152
517.39	-0.00991639		1047.42	-0.00712146		1577.41	-0.01157776		2107.44	-0.00668955		2637.44	-0.01512391		3167.44	-0.01895925		3697.44	-0.02725283
517.59	-0.00996446		1047.62	-0.00748734		1577.61	-0.01154765		2107.64	-0.00701458		2637.64	-0.01511814		3167.64	-0.01887205		3697.64	-0.02736283
517.79	-0.00983291		1047.82	-0.00728905		1577.81	-0.01093127		2107.84	-0.00718642		2637.84	-0.01554839		3167.84	-0.01798787		3697.84	-0.0258524
517.99	-0.01035758		1048.02	-0.00742435		1578.01	-0.01088744		2108.04	-0.00769402		2638.04	-0.01539685		3168.04	-0.0172038		3698.04	-0.02629973
518.19	-0.01081529		1048.22	-0.00727266		1578.21	-0.01044942		2108.24	-0.0077332		2638.24	-0.01550145		3168.24	-0.01649109		3698.24	-0.02578069
518.39	-0.01119902		1048.42	-0.00737636		1578.41	-0.01036167		2108.44	-0.00754968		2638.44	-0.01649217		3168.44	-0.01632862		3698.44	-0.02627152
518.59	-0.01274314		1048.62	-0.00706318		1578.61	-0.01106121		2108.64	-0.00802034		2638.64	-0.01688404		3168.64	-0.01630208		3698.64	-0.02630777
518.79	-0.01304306		1048.82	-0.00703118		1578.81	-0.01081885		2108.84	-0.00719318		2638.84	-0.01581495		3168.84	-0.01565272		3698.84	-0.02490882
518.99	-0.01319294		1049.02	-0.00773707		1579.01	-0.01043465		2109.04	-0.00763268		2639.04	-0.01468956		3169.04	-0.01486221		3699.04	-0.02411315
519.19	-0.01405457		1049.22	-0.00753292		1579.21	-0.00997212		2109.24	-0.00719453		2639.24	-0.0144908		3169.24	-0.0152689		3699.24	-0.02434366
519.39	-0.01390598		1049.42	-0.0076238		1579.41	-0.00983245		2109.44	-0.00727098		2639.44	-0.01453635		3169.44	-0.01574315		3699.44	-0.02440675
519.59	-0.01413056		1049.62	-0.00777374		1579.61	-0.00942856		2109.64	-0.00668788		2639.64	-0.01574568		3169.64	-0.01580102		3699.64	-0.02534768
519.79	-0.01490448		1049.82	-0.00799627		1579.81	-0.00895531		2109.84	-0.00723781		2639.84	-0.01621433		3169.84	-0.01529209		3699.84	-0.02594621
519.99	-0.01447121		1050.02	-0.00826573		1580.01	-0.00843804		2110.04	-0.00739982		2640.04	-0.01586119		3170.04	-0.01502467		3700.04	-0.02571527
520.19	-0.01528844		1050.22	-0.00788145		1580.21	-0.00817135		2110.24	-0.00799795		2640.24	-0.01573357		3170.24	-0.01486631		3700.24	-0.02546798
520.39	-0.01589606		1050.42	-0.00747694		1580.41	-0.00923275		2110.44	-0.00760636		2640.44	-0.01626068		3170.44	-0.01403974		3700.44	-0.02511696
520.59	-0.0159201		1050.62	-0.00753567		1580.61	-0.00828741		2110.64	-0.00673653		2640.64	-0.01605145		3170.64	-0.01363013		3700.64	-0.02486094
520.79	-0.01491347		1050.82	-0.00714458		1580.81	-0.00805791		2110.84	-0.00672519		2640.84	-0.01571993		3170.84	-0.01440817		3700.84	-0.0241454
520.99	-0.01496077		1051.02	-0.00763706		1581.01	-0.00822418		2111.04	-0.0066184		2641.04	-0.01523779		3171.04	-0.0153779		3701.04	-0.02524138
521.19	-0.01428943		1051.22	-0.00746905		1581.21	-0.00721386		2111.24	-0.0066564		2641.24	-0.01496045		3171.24	-0.01667328		3701.24	-0.02490903
521.39	-0.01367009		1051.42	-0.00720897		1581.41	-0.00814318		2111.44	-0.00690006		2641.44	-0.01416187		3171.44	-0.0171115		3701.44	-0.02436831
521.59	-0.01326346		1051.62	-0.00716427		1581.61	-0.00811415		2111.64	-0.00759667		2641.64	-0.01436164		3171.64	-0.01820264		3701.64	-0.02358065
521.79	-0.01276327		1051.82	-0.00724541		1581.81	-0.00799652		2111.84	-0.00820561		2641.84	-0.01484499		3171.84	-0.01941718		3701.84	-0.02244781
521.99	-0.01273206		1052.02	-0.00773534		1582.01	-0.00914821		2112.04	-0.0087368		2642.04	-0.01472432		3172.04	-0.02054494		3702.04	-0.02259839
522.19	-0.01292179		1052.22	-0.00809721		1582.21	-0.00967639		2112.24	-0.00830723		2642.24	-0.01543798		3172.24	-0.02092512		3702.24	-0.02142316
522.39	-0.01248907		1052.42	-0.00807535		1582.41	-0.01067992		2112.44	-0.00836901		2642.44	-0.01554324		3172.44	-0.02134373		3702.44	-0.02115687
522.59	-0.01214714		1052.62	-0.00890341		1582.61	-0.01112911		2112.64	-0.00851167		2642.64	-0.01504767		3172.64	-0.02120313		3702.64	-0.01985392
522.79	-0.01186381		1052.82	-0.0095264		1582.81	-0.01171238		2112.84	-0.00910513		2642.84	-0.01453594		3172.84	-0.0213715		3702.84	-0.01953697
522.99	-0.01196638		1053.02	-0.01056701		1583.01	-0.01183184		2113.04	-0.00964307		2643.04	-0.01512465		3173.04	-0.0217566		3703.04	-0.02058999
523.19	-0.01235917		1053.22	-0.00937085		1583.21	-0.01193486		2113.24	-0.00986356		2643.24	-0.01618427		3173.24	-0.02098389		3703.24	-0.02155338
523.39	-0.01200586		1053.42	-0.0094034		1583.41	-0.01186563		2113.44	-0.00978454		2643.44	-0.01734009		3173.44	-0.01980677		3703.44	-0.02193942
523.59	-0.01230658		1053.62	-0.00968876		1583.61	-0.01167371		2113.64	-0.00910319		2643.64	-0.01841886		3173.64	-0.01926887		3703.64	-0.0218875
523.79	-0.01212954		1053.82	-0.01044236		1583.81	-0.01162141		2113.84	-0.01025547		2643.84	-0.01868918		3173.84	-0.01778714		3703.84	-0.02191648
523.99	-0.01154472		1054.02	-0.0107724		1584.01	-0.01059169		2114.04	-0.00987182		2644.04	-0.01824146		3174.04	-0.01729655		3704.04	-0.02215353
524.19	-0.01186124		1054.22	-0.0099915		1584.21	-0.01057015		2114.24	-0.01005408		2644.24	-0.01851648		3174.24	-0.01690651		3704.24	-0.02330364
524.39	-0.01210926		1054.42	-0.00984058		1584.41	-0.01026325		2114.44	-0.00960317		2644.44	-0.01904428		3174.44	-0.01630358		3704.44	-0.02408224
524.59	-0.01189674		1054.62	-0.00964678		1584.61	-0.00891768		2114.64	-0.00927319		2644.64	-0.01875239		3174.64	-0.01595167		3704.64	-0.02471774
524.79	-0.01198213		1054.82	-0.01009513		1584.81	-0.0087076		2114.84	-0.00882615		2644.84	-0.01804039		3174.84	-0.01708293		3704.84	-0.02496263
524.99	-0.0122343		1055.02	-0.01037083		1585.01	-0.00814931		2115.04	-0.00896226		2645.04	-0.01759496		3175.04	-0.01662803		3705.04	-0.02680585
525.19	-0.01183754		1055.22	-0.00984525		1585.21	-0.00723223		2115.24	-0.00879556		2645.24	-0.01734014		3175.24	-0.01727749		3705.24	-0.02625531
525.39	-0.01154295		1055.42	-0.00980253		1585.41	-0.00736283		2115.44	-0.00887421		2645.44	-0.01729608		3175.44	-0.01709685		3705.44	-0.02691808
525.59	-0.01128606		1055.62	-0.01015957		1585.61	-0.00717866		2115.64	-0.00922959		2645.64	-0.01742972		3175.64	-0.01813922		3705.64	-0.02631958
525.79	-0.01149356		1055.82	-0.01013747		1585.81	-0.00679515		2115.84	-0.00871722		2645.84	-0.01734602		3175.84	-0.01860021		3705.84	-0.02640678
525.99	-0.0125182		1056.02	-0.00946787		1586.01	-0.00705505		2116.04	-0.00856163		2646.04	-0.01703001		3176.04	-0.01879505		3706.04	-0.02663939
526.19	-0.01342338		1056.22	-0.00944531		1586.21	-0.00783123		2116.24	-0.0079962		2646.24	-0.01687755		3176.24	-0.01836539		3706.24	-0.02624332
526.39	-0.01247485		1056.42	-0.00893697		1586.41	-0.00751258		2116.44	-0.00823766		2646.44	-0.0157337		3176.44	-0.01797061		3706.44	-0.02653327
526.59	-0.0135883		1056.62	-0.0094225		1586.61	-0.00733398		2116.64	-0.00791929		2646.64	-0.01503206		3176.64	-0.01816379		3706.64	-0.02654433
526.79	-0.01446471		1056.82	-0.00891301		1586.81	-0.00742558		2116.84	-0.00772403		2646.84	-0.01553776		3176.84	-0.0182499		3706.84	-0.02713968
526.99	-0.01506096		1057.02	-0.00824192		1587.01	-0.00682635		2117.04	-0.00734919		2647.04	-0.01528353		3177.04	-0.01764658		3707.04	-0.02722961
527.19	-0.01654552		1057.22	-0.00752211		1587.21	-0.00633049		2117.24	-0.00747705		2647.24	-0.0155269		3177.24	-0.01760857		3707.24	-0.02707105
527.39	-0.01658163		1057.42	-0.00696083		1587.41	-0.00647926		2117.44	-0.00669305		2647.44	-0.01597848		3177.44	-0.01777044		3707.44	-0.02714095
527.59	-0.01632705		1057.62	-0.00775874		1587.61	-0.00692218		2117.64	-0.00661369		2647.64	-0.01629909		3177.64	-0.01807824		3707.64	-0.02640122
527.79	-0.01604954		1057.82	-0.008612		1587.81	-0.00710772		2117.84	-0.0076113		2647.84	-0.01588342		3177.84	-0.01764577		3707.84	-0.02664903
527.99	-0.01510368		1058.02	-0.00881967		1588.01	-0.00712057		2118.04	-0.00680569		2648.04	-0.01529825		3178.04	-0.01766253		3708.04	-0.02747209
528.19	-0.01465619		1058.22	-0.00909176		1588.21	-0.00813279		2118.24	-0.00767197		2648.24	-0.01542484		3178.24	-0.01816075		3708.24	-0.02799975
528.39	-0.01391427		1058.42	-0.00958395		1588.41	-0.00804646		2118.44	-0.00822175		2648.44	-0.01533619		3178.44	-0.01812497		3708.44	-0.02820169
528.59	-0.01335741		1058.62	-0.01045774		1588.61	-0.00787907		2118.64	-0.00856332		2648.64	-0.01557797		3178.64	-0.0176797		3708.64	-0.02777451
528.79	-0.01279109		1058.82	-0.01073373		1588.81	-0.00868892		2118.84	-0.00891434		2648.84	-0.01562814		3178.84	-0.01729377		3708.84	-0.02813825
528.99	-0.01274104		1059.02	-0.01079363		1589.01	-0.00901099		2119.04	-0.00992558		2649.04	-0.01578648		3179.04	-0.01593057		3709.04	-0.02895038
529.19	-0.01246881		1059.22	-0.01171029		1589.21	-0.00868949		2119.24	-0.01021205		2649.24	-0.01561221		3179.24	-0.01619048		3709.24	-0.02819674
529.39	-0.01198618		1059.42	-0.01180353		1589.41	-0.0083534		2119.44	-0.01167382		2649.44	-0.01594534		3179.44	-0.01611185		3709.44	-0.02813034
529.59	-0.01229054		1059.62	-0.01174352		1589.61	-0.00897951		2119.64	-0.0120132		2649.64	-0.01578015		3179.64	-0.01591337		3709.64	-0.02751839
529.79	-0.01257785		1059.82	-0.01101555		1589.81	-0.00862121		2119.84	-0.01153324		2649.84	-0.01660031		3179.84	-0.01589465		3709.84	-0.02778885
529.99	-0.01274868		1060.02	-0.01028623		1590.01	-0.00857275		2120.04	-0.01190108		2650.04	-0.01595561		3180.04	-0.01591578		3710.04	-0.02819981
530.19	-0.01296333		1060.22	-0.01029051		1590.21	-0.00907583		2120.24	-0.01080199		2650.24	-0.01564087		3180.24	-0.01566467		3710.24	-0.02799315
530.39	-0.01381917		1060.42	-0.00974765		1590.41	-0.00894968		2120.44	-0.01102202		2650.44	-0.01467528		3180.44	-0.01581281		3710.44	-0.0278046
530.59	-0.01517387		1060.62	-0.00978556		1590.61	-0.00941886		2120.64	-0.01098828		2650.64	-0.01468094		3180.64	-0.01616053		3710.64	-0.02763554
530.79	-0.01523019		1060.82	-0.00932081		1590.81	-0.00953475		2120.84	-0.01059094		2650.84	-0.01521564		3180.84	-0.01683288		3710.84	-0.02698883
530.99	-0.01592278		1061.02	-0.00891164		1591.01	-0.01000917		2121.04	-0.01031519		2651.04	-0.01465797		3181.04	-0.01671864		3711.04	-0.02615196
531.19	-0.01665371		1061.22	-0.00834826		1591.21	-0.01025016		2121.24	-0.00945526		2651.24	-0.01500719		3181.24	-0.01697515		3711.24	-0.02629504
531.39	-0.01676623		1061.42	-0.00758603		1591.41	-0.01048509		2121.44	-0.00861589		2651.44	-0.01520019		3181.44	-0.0171474		3711.44	-0.02581729
531.59	-0.01611742		1061.62	-0.00801578		1591.61	-0.01170821		2121.64	-0.0085313		2651.64	-0.01449925		3181.64	-0.01739003		3711.64	-0.02552046
531.79	-0.01605935		1061.82	-0.00751327		1591.81	-0.01188725		2121.84	-0.00832242		2651.84	-0.01432439		3181.84	-0.01730161		3711.84	-0.02533971
531.99	-0.01547082		1062.02	-0.00799945		1592.01	-0.01190809		2122.04	-0.00744911		2652.04	-0.01454573		3182.04	-0.0170317		3712.04	-0.02544647
532.19	-0.01524304		1062.22	-0.00788842		1592.21	-0.01191393		2122.24	-0.00760644		2652.24	-0.01492245		3182.24	-0.0178355		3712.24	-0.02556591
532.39	-0.01454025		1062.42	-0.0081482		1592.41	-0.01159137		2122.44	-0.00782915		2652.44	-0.01500871		3182.44	-0.01828571		3712.44	-0.02534203
532.59	-0.01379995		1062.62	-0.00822958		1592.61	-0.01103487		2122.64	-0.00813678		2652.64	-0.01632439		3182.64	-0.01803458		3712.64	-0.02543016
532.79	-0.01338392		1062.82	-0.00785257		1592.81	-0.01038925		2122.84	-0.00861853		2652.84	-0.01616438		3182.84	-0.01723381		3712.84	-0.02652202
532.99	-0.0131364		1063.02	-0.00828957		1593.01	-0.00935096		2123.04	-0.00916419		2653.04	-0.01693402		3183.04	-0.01726906		3713.04	-0.02696624
533.19	-0.01248185		1063.22	-0.00899784		1593.21	-0.00914904		2123.24	-0.00879443		2653.24	-0.01672977		3183.24	-0.01734682		3713.24	-0.02669125
533.39	-0.01255651		1063.42	-0.00906823		1593.41	-0.008641		2123.44	-0.00958013		2653.44	-0.01640792		3183.44	-0.01802918		3713.44	-0.02685744
533.59	-0.0125284		1063.62	-0.00868066		1593.61	-0.00826129		2123.64	-0.00896114		2653.64	-0.0167096		3183.64	-0.01791649		3713.64	-0.02755543
533.79	-0.0116742		1063.82	-0.00886891		1593.81	-0.00701457		2123.84	-0.00942681		2653.84	-0.01680915		3183.84	-0.01768415		3713.84	-0.02843725
533.99	-0.01104088		1064.02	-0.00971446		1594.01	-0.00728213		2124.04	-0.00924446		2654.04	-0.01605838		3184.04	-0.01713713		3714.04	-0.02841501
534.19	-0.01199656		1064.22	-0.01024254		1594.21	-0.00716846		2124.24	-0.00883151		2654.24	-0.01649628		3184.24	-0.01729786		3714.24	-0.02864251
534.39	-0.0119583		1064.42	-0.01061313		1594.41	-0.00741876		2124.44	-0.00902234		2654.44	-0.01694104		3184.44	-0.01775445		3714.44	-0.02857517
534.59	-0.01123094		1064.62	-0.01064495		1594.61	-0.00731294		2124.64	-0.0093404		2654.64	-0.01687383		3184.64	-0.01737214		3714.64	-0.02771299
534.79	-0.01149842		1064.82	-0.01083994		1594.81	-0.00756604		2124.84	-0.00934542		2654.84	-0.01677537		3184.84	-0.01715663		3714.84	-0.02686289
534.99	-0.01211372		1065.02	-0.01066045		1595.01	-0.00810791		2125.04	-0.01023399		2655.04	-0.01700927		3185.04	-0.01654431		3715.04	-0.02681696
535.19	-0.01195368		1065.22	-0.00971521		1595.21	-0.00828153		2125.24	-0.01020273		2655.24	-0.01716159		3185.24	-0.01679279		3715.24	-0.02624436
535.39	-0.01271358		1065.42	-0.00963312		1595.41	-0.00849965		2125.44	-0.01015977		2655.44	-0.01769429		3185.44	-0.01681425		3715.44	-0.02605157
535.59	-0.01345215		1065.62	-0.00973903		1595.61	-0.00829898		2125.64	-0.00988057		2655.64	-0.0183597		3185.64	-0.01653827		3715.64	-0.02674236
535.79	-0.01411673		1065.82	-0.00948348		1595.81	-0.00828978		2125.84	-0.00959401		2655.84	-0.02000025		3185.84	-0.01624639		3715.84	-0.02668947
535.99	-0.01481728		1066.02	-0.00952562		1596.01	-0.00815346		2126.04	-0.00901842		2656.04	-0.02049876		3186.04	-0.01590491		3716.04	-0.02749113
536.19	-0.01589058		1066.22	-0.00940772		1596.21	-0.0082809		2126.24	-0.00908911		2656.24	-0.02027976		3186.24	-0.01766187		3716.24	-0.02842764
536.39	-0.01619644		1066.42	-0.00922871		1596.41	-0.00805779		2126.44	-0.00861058		2656.44	-0.0205241		3186.44	-0.01812678		3716.44	-0.02912163
536.59	-0.01707168		1066.62	-0.00884827		1596.61	-0.00778936		2126.64	-0.00862426		2656.64	-0.02047583		3186.64	-0.01793866		3716.64	-0.02974402
536.79	-0.01808063		1066.82	-0.00889593		1596.81	-0.00805283		2126.84	-0.00812165		2656.84	-0.01927305		3186.84	-0.01801853		3716.84	-0.02973307
536.99	-0.01831635		1067.02	-0.00867787		1597.01	-0.00813629		2127.04	-0.00886773		2657.04	-0.01937445		3187.04	-0.01882674		3717.04	-0.02974731
537.19	-0.01862974		1067.22	-0.00862284		1597.21	-0.00866657		2127.24	-0.00840199		2657.24	-0.0187876		3187.24	-0.01860434		3717.24	-0.03009933
537.39	-0.01854716		1067.42	-0.00840213		1597.41	-0.00861147		2127.44	-0.00868873		2657.44	-0.01797636		3187.44	-0.01891247		3717.44	-0.030645
537.59	-0.01811885		1067.62	-0.00867199		1597.61	-0.00907858		2127.64	-0.00871884		2657.64	-0.01707444		3187.64	-0.01785757		3717.64	-0.03077064
537.79	-0.01708113		1067.82	-0.01018349		1597.81	-0.00991666		2127.84	-0.0091568		2657.84	-0.01629803		3187.84	-0.01711702		3717.84	-0.03021071
537.99	-0.01661211		1068.02	-0.01020403		1598.01	-0.01045855		2128.04	-0.00825725		2658.04	-0.01637411		3188.04	-0.01734576		3718.04	-0.02923555
538.19	-0.01648602		1068.22	-0.01011156		1598.21	-0.01145553		2128.24	-0.00906649		2658.24	-0.01670656		3188.24	-0.01784977		3718.24	-0.02926673
538.39	-0.01556631		1068.42	-0.01093158		1598.41	-0.01212685		2128.44	-0.00873369		2658.44	-0.01631577		3188.44	-0.01767468		3718.44	-0.02827058
538.59	-0.01535116		1068.62	-0.01044848		1598.61	-0.01170002		2128.64	-0.00957668		2658.64	-0.01564653		3188.64	-0.01698896		3718.64	-0.02691239
538.79	-0.01517257		1068.82	-0.01109137		1598.81	-0.01206103		2128.84	-0.01101379		2658.84	-0.01586348		3188.84	-0.01700968		3718.84	-0.02687153
538.99	-0.01512065		1069.02	-0.01072322		1599.01	-0.01187499		2129.04	-0.0114507		2659.04	-0.01634664		3189.04	-0.01775586		3719.04	-0.02628025
539.19	-0.01408067		1069.22	-0.01107407		1599.21	-0.01170788		2129.24	-0.01168922		2659.24	-0.01576172		3189.24	-0.01851804		3719.24	-0.02555121
539.39	-0.01417404		1069.42	-0.01157202		1599.41	-0.01071933		2129.44	-0.01241228		2659.44	-0.01682189		3189.44	-0.01909836		3719.44	-0.02622516
539.59	-0.01427177		1069.62	-0.01192833		1599.61	-0.01009507		2129.64	-0.01337463		2659.64	-0.01754921		3189.64	-0.01917716		3719.64	-0.02682468
539.79	-0.01408731		1069.82	-0.01078438		1599.81	-0.01083614		2129.84	-0.0133637		2659.84	-0.01812993		3189.84	-0.01939299		3719.84	-0.0265542
539.99	-0.01499236		1070.02	-0.01115745		1600.01	-0.01019263		2130.04	-0.01200563		2660.04	-0.0185198		3190.04	-0.01957571		3720.04	-0.02727392
540.19	-0.01572454		1070.22	-0.0113704		1600.21	-0.00973723		2130.24	-0.01158825		2660.24	-0.01807037		3190.24	-0.02087362		3720.24	-0.0284847
540.39	-0.01624355		1070.42	-0.01128157		1600.41	-0.00885008		2130.44	-0.01118812		2660.44	-0.01774187		3190.44	-0.02106756		3720.44	-0.0276289
540.59	-0.01663725		1070.62	-0.01050016		1600.61	-0.00922288		2130.64	-0.01152857		2660.64	-0.01790009		3190.64	-0.02153168		3720.64	-0.02714729
540.79	-0.01692193		1070.82	-0.01027683		1600.81	-0.00843932		2130.84	-0.01070333		2660.84	-0.01771171		3190.84	-0.02175183		3720.84	-0.02692859
540.99	-0.01637089		1071.02	-0.00994123		1601.01	-0.00786148		2131.04	-0.01047333		2661.04	-0.0177967		3191.04	-0.02143101		3721.04	-0.02722669
541.19	-0.01685656		1071.22	-0.00961796		1601.21	-0.00793239		2131.24	-0.00910081		2661.24	-0.01761766		3191.24	-0.02038441		3721.24	-0.02772363
541.39	-0.0175117		1071.42	-0.01015695		1601.41	-0.00829959		2131.44	-0.00830661		2661.44	-0.01691839		3191.44	-0.0194521		3721.44	-0.02777521
541.59	-0.01775629		1071.62	-0.01042829		1601.61	-0.00855507		2131.64	-0.00768663		2661.64	-0.0164988		3191.64	-0.01806032		3721.64	-0.02810269
541.79	-0.01852473		1071.82	-0.0103465		1601.81	-0.00890119		2131.84	-0.00691961		2661.84	-0.01669877		3191.84	-0.01761318		3721.84	-0.02749867
541.99	-0.01843055		1072.02	-0.00966228		1602.01	-0.01001197		2132.04	-0.00674783		2662.04	-0.01700314		3192.04	-0.01800717		3722.04	-0.02792311
542.19	-0.01839308		1072.22	-0.00979568		1602.21	-0.01111524		2132.24	-0.00699326		2662.24	-0.01665889		3192.24	-0.01734336		3722.24	-0.02800182
542.39	-0.01822382		1072.42	-0.01020483		1602.41	-0.01105625		2132.44	-0.0066822		2662.44	-0.01703746		3192.44	-0.01747094		3722.44	-0.02804366
542.59	-0.0184643		1072.62	-0.00962455		1602.61	-0.01085295		2132.64	-0.0073998		2662.64	-0.01710995		3192.64	-0.01701957		3722.64	-0.02843092
542.79	-0.01829738		1072.82	-0.010653		1602.81	-0.01191219		2132.84	-0.0077578		2662.84	-0.01742386		3192.84	-0.01695207		3722.84	-0.02919793
542.99	-0.01802321		1073.02	-0.01031428		1603.01	-0.01159241		2133.04	-0.00777261		2663.04	-0.01720123		3193.04	-0.01680958		3723.04	-0.0287307
543.19	-0.01684346		1073.22	-0.01034104		1603.21	-0.01174186		2133.24	-0.00904366		2663.24	-0.01676725		3193.24	-0.01683438		3723.24	-0.02940549
543.39	-0.01537563		1073.42	-0.01005945		1603.41	-0.01090805		2133.44	-0.00962537		2663.44	-0.01774629		3193.44	-0.01652505		3723.44	-0.03062867
543.59	-0.01444416		1073.62	-0.01012124		1603.61	-0.01135691		2133.64	-0.01047534		2663.64	-0.01840178		3193.64	-0.015764		3723.64	-0.03053455
543.79	-0.01401401		1073.82	-0.010195		1603.81	-0.0119281		2133.84	-0.00977183		2663.84	-0.01889891		3193.84	-0.01655786		3723.84	-0.03011725
543.99	-0.01415265		1074.02	-0.01153135		1604.01	-0.01082236		2134.04	-0.00980908		2664.04	-0.01916914		3194.04	-0.01642907		3724.04	-0.03038336
544.19	-0.01411537		1074.22	-0.01158328		1604.21	-0.01017161		2134.24	-0.01101615		2664.24	-0.01868313		3194.24	-0.01707025		3724.24	-0.03031369
544.39	-0.01407918		1074.42	-0.01055724		1604.41	-0.00972118		2134.44	-0.01129161		2664.44	-0.0191094		3194.44	-0.01776544		3724.44	-0.02822529
544.59	-0.01422757		1074.62	-0.00986065		1604.61	-0.01018911		2134.64	-0.01079199		2664.64	-0.0201721		3194.64	-0.01754708		3724.64	-0.02790438
544.79	-0.01449923		1074.82	-0.01083493		1604.81	-0.00862233		2134.84	-0.00991497		2664.84	-0.02026431		3194.84	-0.0179431		3724.84	-0.02761505
544.99	-0.01427139		1075.02	-0.01008146		1605.01	-0.00863128		2135.04	-0.01014487		2665.04	-0.01962779		3195.04	-0.01716447		3725.04	-0.0272686
545.19	-0.01511804		1075.22	-0.01014082		1605.21	-0.00837008		2135.24	-0.00917802		2665.24	-0.01981916		3195.24	-0.01686399		3725.24	-0.02678542
545.39	-0.01552447		1075.42	-0.00933497		1605.41	-0.008304		2135.44	-0.00906116		2665.44	-0.01973425		3195.44	-0.01708796		3725.44	-0.02582723
545.59	-0.01566573		1075.62	-0.00826122		1605.61	-0.00818227		2135.64	-0.00934357		2665.64	-0.01920712		3195.64	-0.0163065		3725.64	-0.02520201
545.79	-0.01611026		1075.82	-0.00788238		1605.81	-0.00860096		2135.84	-0.00924579		2665.84	-0.01913617		3195.84	-0.01645659		3725.84	-0.02416316
545.99	-0.01524711		1076.02	-0.00813154		1606.01	-0.00943875		2136.04	-0.01032971		2666.04	-0.01859324		3196.04	-0.01742274		3726.04	-0.02434391
546.19	-0.01536741		1076.22	-0.00790806		1606.21	-0.00897406		2136.24	-0.01038183		2666.24	-0.01812453		3196.24	-0.01783872		3726.24	-0.02387532
546.39	-0.01547244		1076.42	-0.00777016		1606.41	-0.00948905		2136.44	-0.0109019		2666.44	-0.01847629		3196.44	-0.01834882		3726.44	-0.02379993
546.59	-0.01512151		1076.62	-0.00843732		1606.61	-0.00951307		2136.64	-0.01037096		2666.64	-0.01854817		3196.64	-0.01708896		3726.64	-0.02428462
546.79	-0.01461194		1076.82	-0.00839375		1606.81	-0.00977709		2136.84	-0.01061879		2666.84	-0.01922304		3196.84	-0.01817728		3726.84	-0.02505942
546.99	-0.01425962		1077.02	-0.00820975		1607.01	-0.00892461		2137.04	-0.01079267		2667.04	-0.01886722		3197.04	-0.0186168		3727.04	-0.02499354
547.19	-0.01383263		1077.22	-0.00834191		1607.21	-0.00875072		2137.24	-0.01150153		2667.24	-0.01873514		3197.24	-0.01912011		3727.24	-0.02615163
547.39	-0.01308566		1077.42	-0.00897673		1607.41	-0.007724		2137.44	-0.01114543		2667.44	-0.01928916		3197.44	-0.01882728		3727.44	-0.02704567
547.59	-0.01363004		1077.62	-0.00972795		1607.61	-0.00816415		2137.64	-0.01070085		2667.64	-0.01926506		3197.64	-0.01943022		3727.64	-0.02695048
547.79	-0.01406349		1077.82	-0.01127166		1607.81	-0.00812037		2137.84	-0.01049618		2667.84	-0.01916594		3197.84	-0.02008203		3727.84	-0.02759977
547.99	-0.01510982		1078.02	-0.01234577		1608.01	-0.00809568		2138.04	-0.01137005		2668.04	-0.01923547		3198.04	-0.01991867		3728.04	-0.02783191
548.19	-0.01572177		1078.22	-0.012911		1608.21	-0.00828951		2138.24	-0.01045487		2668.24	-0.01850958		3198.24	-0.02056583		3728.24	-0.02857997
548.39	-0.0167736		1078.42	-0.01286493		1608.41	-0.00890237		2138.44	-0.01042352		2668.44	-0.0193966		3198.44	-0.02002244		3728.44	-0.02838371
548.59	-0.01766049		1078.62	-0.01396179		1608.61	-0.00953538		2138.64	-0.01023018		2668.64	-0.01928874		3198.64	-0.01994093		3728.64	-0.02931358
548.79	-0.01785391		1078.82	-0.01419082		1608.81	-0.00935058		2138.84	-0.00956628		2668.84	-0.01945155		3198.84	-0.02036094		3728.84	-0.03047126
548.99	-0.01782313		1079.02	-0.01310088		1609.01	-0.01083511		2139.04	-0.01002965		2669.04	-0.01815236		3199.04	-0.02002694		3729.04	-0.03084945
549.19	-0.01819889		1079.22	-0.01383165		1609.21	-0.01143472		2139.24	-0.00923136		2669.24	-0.01907641		3199.24	-0.01980049		3729.24	-0.03043375
549.39	-0.01766627		1079.42	-0.01323357		1609.41	-0.01267662		2139.44	-0.0096493		2669.44	-0.01837124		3199.44	-0.01928924		3729.44	-0.03023566
549.59	-0.01753169		1079.62	-0.01329083		1609.61	-0.01280694		2139.64	-0.0099202		2669.64	-0.0177763		3199.64	-0.01791981		3729.64	-0.03064659
549.79	-0.01750775		1079.82	-0.01307371		1609.81	-0.01292161		2139.84	-0.00949989		2669.84	-0.01808758		3199.84	-0.01756022		3729.84	-0.03064881
549.99	-0.01711197		1080.02	-0.01319083		1610.01	-0.01368215		2140.04	-0.00982632		2670.04	-0.01746439		3200.04	-0.01754141		3730.04	-0.03046753
550.19	-0.01718246		1080.22	-0.01228655		1610.21	-0.01335757		2140.24	-0.00907476		2670.24	-0.01752956		3200.24	-0.01654382		3730.24	-0.03039178
550.39	-0.01665515		1080.42	-0.01185326		1610.41	-0.0132242		2140.44	-0.009258		2670.44	-0.01778774		3200.44	-0.01615484		3730.44	-0.02995607
550.59	-0.01610232		1080.62	-0.01311177		1610.61	-0.01348539		2140.64	-0.00847439		2670.64	-0.01885313		3200.64	-0.01517745		3730.64	-0.03069983
550.79	-0.01572611		1080.82	-0.01250415		1610.81	-0.01291237		2140.84	-0.00904876		2670.84	-0.01902829		3200.84	-0.01650804		3730.84	-0.03090684
550.99	-0.01529082		1081.02	-0.01274048		1611.01	-0.01260151		2141.04	-0.00852615		2671.04	-0.01886182		3201.04	-0.01625376		3731.04	-0.02980373
551.19	-0.01575855		1081.22	-0.01318381		1611.21	-0.0128452		2141.24	-0.00852076		2671.24	-0.01871708		3201.24	-0.01629635		3731.24	-0.0304126
551.39	-0.01566072		1081.42	-0.01376423		1611.41	-0.01205736		2141.44	-0.00821529		2671.44	-0.01879864		3201.44	-0.01611573		3731.44	-0.0303054
551.59	-0.01604796		1081.62	-0.01435688		1611.61	-0.0130047		2141.64	-0.00846081		2671.64	-0.01835987		3201.64	-0.01660817		3731.64	-0.02989279
551.79	-0.01619258		1081.82	-0.01517273		1611.81	-0.01370684		2141.84	-0.00912378		2671.84	-0.01857705		3201.84	-0.01614488		3731.84	-0.03023949
551.99	-0.01722853		1082.02	-0.01502258		1612.01	-0.01461177		2142.04	-0.00946168		2672.04	-0.01791173		3202.04	-0.01672248		3732.04	-0.02961822
552.19	-0.01739011		1082.22	-0.0148762		1612.21	-0.01456392		2142.24	-0.00891248		2672.24	-0.01726434		3202.24	-0.01685196		3732.24	-0.02987409
552.39	-0.01793602		1082.42	-0.01451807		1612.41	-0.01480103		2142.44	-0.00940871		2672.44	-0.01787898		3202.44	-0.01676896		3732.44	-0.02961166
552.59	-0.017359		1082.62	-0.01425948		1612.61	-0.0147594		2142.64	-0.00958556		2672.64	-0.01722326		3202.64	-0.01719915		3732.64	-0.03007454
552.79	-0.01752283		1082.82	-0.01382735		1612.81	-0.01547006		2142.84	-0.00976703		2672.84	-0.01686952		3202.84	-0.01827041		3732.84	-0.03021303
552.99	-0.01708801		1083.02	-0.01379492		1613.01	-0.01584708		2143.04	-0.01047748		2673.04	-0.01648963		3203.04	-0.018165		3733.04	-0.02952152
553.19	-0.01734305		1083.22	-0.0141609		1613.21	-0.01591684		2143.24	-0.0098644		2673.24	-0.0173125		3203.24	-0.01828419		3733.24	-0.02930389
553.39	-0.01787297		1083.42	-0.01320182		1613.41	-0.01640381		2143.44	-0.00963771		2673.44	-0.01718061		3203.44	-0.01786501		3733.44	-0.02932878
553.59	-0.01836723		1083.62	-0.01259017		1613.61	-0.01573026		2143.64	-0.0096512		2673.64	-0.01811986		3203.64	-0.01786211		3733.64	-0.02903114
553.79	-0.01875815		1083.82	-0.01216927		1613.81	-0.01567465		2143.84	-0.00915488		2673.84	-0.01797538		3203.84	-0.01787747		3733.84	-0.02919898
553.99	-0.01912135		1084.02	-0.01157736		1614.01	-0.01531605		2144.04	-0.00881844		2674.04	-0.01762236		3204.04	-0.01811755		3734.04	-0.0298902
554.19	-0.01944426		1084.22	-0.01079181		1614.21	-0.01411946		2144.24	-0.00906796		2674.24	-0.01848855		3204.24	-0.01813657		3734.24	-0.03041047
554.39	-0.0190899		1084.42	-0.01061232		1614.41	-0.01374296		2144.44	-0.00874108		2674.44	-0.0190442		3204.44	-0.01838819		3734.44	-0.03004418
554.59	-0.01924137		1084.62	-0.01150181		1614.61	-0.01400483		2144.64	-0.00869318		2674.64	-0.01996838		3204.64	-0.01866573		3734.64	-0.03146511
554.79	-0.01909641		1084.82	-0.01071307		1614.81	-0.01283535		2144.84	-0.00911851		2674.84	-0.02085024		3204.84	-0.02032839		3734.84	-0.03139447
554.99	-0.01935091		1085.02	-0.01019314		1615.01	-0.01265825		2145.04	-0.00919233		2675.04	-0.02149275		3205.04	-0.02061053		3735.04	-0.03074333
555.19	-0.01976155		1085.22	-0.01036336		1615.21	-0.01200676		2145.24	-0.00908154		2675.24	-0.02165113		3205.24	-0.0215075		3735.24	-0.03106025
555.39	-0.01954514		1085.42	-0.01070492		1615.41	-0.01141244		2145.44	-0.00911192		2675.44	-0.02204162		3205.44	-0.02118599		3735.44	-0.03107009
555.59	-0.02021786		1085.62	-0.01056757		1615.61	-0.01118778		2145.64	-0.00860906		2675.64	-0.02299976		3205.64	-0.02126287		3735.64	-0.03104843
555.79	-0.02020554		1085.82	-0.01036876		1615.81	-0.01139492		2145.84	-0.00881876		2675.84	-0.02386836		3205.84	-0.021675		3735.84	-0.0316208
555.99	-0.02039721		1086.02	-0.01021197		1616.01	-0.01114653		2146.04	-0.00893873		2676.04	-0.02388274		3206.04	-0.02179499		3736.04	-0.03119138
556.19	-0.01960948		1086.22	-0.01119668		1616.21	-0.01059583		2146.24	-0.00886014		2676.24	-0.02383485		3206.24	-0.02122627		3736.24	-0.0311268
556.39	-0.01899749		1086.42	-0.01150867		1616.41	-0.01043621		2146.44	-0.00903		2676.44	-0.02369368		3206.44	-0.02071511		3736.44	-0.03097811
556.59	-0.01796032		1086.62	-0.01233016		1616.61	-0.01087541		2146.64	-0.00956543		2676.64	-0.02303544		3206.64	-0.02048382		3736.64	-0.03014142
556.79	-0.01769881		1086.82	-0.01318784		1616.81	-0.01202092		2146.84	-0.01021241		2676.84	-0.02236048		3206.84	-0.02084264		3736.84	-0.0290355
556.99	-0.01724983		1087.02	-0.01327957		1617.01	-0.0120301		2147.04	-0.00996491		2677.04	-0.02257252		3207.04	-0.0204839		3737.04	-0.02888529
557.19	-0.01739324		1087.22	-0.01329888		1617.21	-0.01324392		2147.24	-0.01042476		2677.24	-0.0226071		3207.24	-0.02078316		3737.24	-0.02979154
557.39	-0.01831474		1087.42	-0.01294883		1617.41	-0.01356827		2147.44	-0.01094058		2677.44	-0.02248897		3207.44	-0.02089382		3737.44	-0.03023188
557.59	-0.0184046		1087.62	-0.01344163		1617.61	-0.01448791		2147.64	-0.01121943		2677.64	-0.02196075		3207.64	-0.02165167		3737.64	-0.03094847
557.79	-0.01834116		1087.82	-0.01342368		1617.81	-0.01461404		2147.84	-0.01178711		2677.84	-0.02056489		3207.84	-0.02149092		3737.84	-0.03167733
557.99	-0.0184199		1088.02	-0.01298388		1618.01	-0.01432775		2148.04	-0.01248477		2678.04	-0.02024923		3208.04	-0.02152519		3738.04	-0.03197019
558.19	-0.01826844		1088.22	-0.01297834		1618.21	-0.01471947		2148.24	-0.01306115		2678.24	-0.0204168		3208.24	-0.0214315		3738.24	-0.03188468
558.39	-0.01816306		1088.42	-0.01290639		1618.41	-0.01483653		2148.44	-0.01271748		2678.44	-0.01991057		3208.44	-0.02125448		3738.44	-0.03183435
558.59	-0.01852718		1088.62	-0.01310902		1618.61	-0.01446549		2148.64	-0.01321826		2678.64	-0.01988065		3208.64	-0.0217927		3738.64	-0.03220185
558.79	-0.01883723		1088.82	-0.01264859		1618.81	-0.01377533		2148.84	-0.01306216		2678.84	-0.01998417		3208.84	-0.02205973		3738.84	-0.0312788
558.99	-0.01906219		1089.02	-0.01222633		1619.01	-0.0133753		2149.04	-0.01253817		2679.04	-0.01954977		3209.04	-0.0217023		3739.04	-0.03069254
559.19	-0.01938976		1089.22	-0.01283568		1619.21	-0.01276512		2149.24	-0.01172837		2679.24	-0.01933381		3209.24	-0.02185871		3739.24	-0.030556
559.39	-0.02003013		1089.42	-0.01337582		1619.41	-0.01248736		2149.44	-0.01120718		2679.44	-0.01952629		3209.44	-0.0213023		3739.44	-0.03064196
559.59	-0.02061772		1089.62	-0.01316668		1619.61	-0.01195276		2149.64	-0.01081287		2679.64	-0.02011867		3209.64	-0.0213929		3739.64	-0.03045661
559.79	-0.0206314		1089.82	-0.01344564		1619.81	-0.01220718		2149.84	-0.01089673		2679.84	-0.02006553		3209.84	-0.02124205		3739.84	-0.03038537
