# Supplementary material for: Functional development of a V3/glycan-specific broadly neutralizing antibody isolated from a case of HIV superinfection
Source: eLife journal article supplement (doi:10.7554/elife.68110), 2021-07-15
Supplement: fig2-data2 [file G9.xls]

Vers 3.43 Data Simulation
Conc1	7.813E-09	7.813E-09	7.813E-09	7.813E-09	7.813E-09	7.813E-09	7.813E-09
Start1	199.99	729.99	1259.98	1789.98	2319.97	2849.97	3380
Stop1	559.79	1089.79	1619.78	2149.78	2679.77	3209.77	3739.8
Time1	Data1	Sim1	Time2	Data2	Sim2	Time3	Data3	Sim3	Time4	Data4	Sim4	Time5	Data5	Sim5	Time6	Data6	Sim6	Time7	Data7	Sim7
199.99	0.00488003		729.99	-0.01080135		1259.98	0.00277528		1789.98	0.00078728		2319.97	0.00020269		2849.97	-0.00349004		3380	-0.00042261
200.19	0.00374619		730.19	-0.01114656		1260.18	0.00206583		1790.18	-0.00006797		2320.17	0.00069315		2850.17	-0.00397443		3380.2	-0.0007511
200.39	0.00301027		730.39	-0.01145002		1260.38	0.00131433		1790.38	-0.00001322		2320.37	0.0017285		2850.37	-0.00391696		3380.4	-0.00073433
200.59	0.00283934		730.59	-0.01167798		1260.58	0.00177951		1790.58	-0.00001331		2320.57	0.00290401		2850.57	-0.00497373		3380.6	-0.00062627
200.79	0.00235088		730.79	-0.01158787		1260.78	0.00231778		1790.78	-0.00008557		2320.77	0.00324098		2850.77	-0.00551345		3380.8	-0.00068353
200.99	0.00171136		730.99	-0.01113698		1260.98	0.00187538		1790.98	-0.00058983		2320.97	0.00384744		2850.97	-0.00593499		3381	-0.00059163
201.19	0.00199689		731.19	-0.01092863		1261.18	0.00245398		1791.18	-0.00110736		2321.17	0.00403403		2851.17	-0.00724457		3381.2	-0.00047023
201.39	0.00249645		731.39	-0.01108798		1261.38	0.00310056		1791.38	-0.00127018		2321.37	0.00406832		2851.37	-0.00736296		3381.4	0.00020618
201.59	0.00293131		731.59	-0.01158403		1261.58	0.00308534		1791.58	-0.00088155		2321.57	0.00404764		2851.57	-0.00675119		3381.6	0.00037797
201.79	0.00296193		731.79	-0.01155149		1261.78	0.00334389		1791.78	-0.00089006		2321.77	0.00379646		2851.77	-0.00703543		3381.8	0.00017737
201.99	0.00410046		731.99	-0.01144628		1261.98	0.00406655		1791.98	0.00003866		2321.97	0.00432557		2851.97	-0.00658985		3382	0.00027941
202.19	0.00560012		732.19	-0.01183101		1262.18	0.00511021		1792.18	0.0009458		2322.17	0.00405319		2852.17	-0.00592335		3382.2	0.00036289
202.39	0.00527115		732.39	-0.0115805		1262.38	0.00586049		1792.38	0.00088947		2322.37	0.00423307		2852.37	-0.00592623		3382.4	-0.00070178
202.59	0.00526981		732.59	-0.01254113		1262.58	0.00599092		1792.58	0.0006888		2322.57	0.00446738		2852.57	-0.00497832		3382.6	-0.00082647
202.79	0.00482792		732.79	-0.01297145		1262.78	0.00520612		1792.78	-0.00009849		2322.77	0.0052399		2852.77	-0.00534939		3382.8	-0.00139876
202.99	0.00455819		732.99	-0.01334825		1262.98	0.00445525		1792.98	-0.00063466		2322.97	0.00587521		2852.97	-0.00502172		3383	-0.00150901
203.19	0.00365902		733.19	-0.01483026		1263.18	0.00365405		1793.18	-0.00064742		2323.17	0.00548995		2853.17	-0.00515324		3383.2	-0.00210084
203.39	0.00325824		733.39	-0.01529328		1263.38	0.00328259		1793.38	-0.0012306		2323.37	0.00531423		2853.37	-0.00514874		3383.4	-0.00246169
203.59	0.00184038		733.59	-0.0162015		1263.58	0.00309819		1793.58	-0.00137402		2323.57	0.00537979		2853.57	-0.00524199		3383.6	-0.00177971
203.79	0.00067409		733.79	-0.01643837		1263.78	0.00273208		1793.78	-0.00179769		2323.77	0.00494002		2853.77	-0.00528254		3383.8	-0.00240085
203.99	0.00030289		733.99	-0.01640279		1263.98	0.00241921		1793.98	-0.00163366		2323.97	0.00521826		2853.97	-0.0050006		3384	-0.00243932
204.19	-0.00015792		734.19	-0.01699381		1264.18	0.00192505		1794.18	-0.00120974		2324.17	0.00507454		2854.17	-0.00533853		3384.2	-0.00295313
204.39	0.00046865		734.39	-0.01683753		1264.38	0.00224155		1794.38	-0.00005121		2324.37	0.00560236		2854.37	-0.00517719		3384.4	-0.00248325
204.59	0.00089041		734.59	-0.0163394		1264.58	0.00309785		1794.58	0.00008732		2324.57	0.00504886		2854.57	-0.00579229		3384.6	-0.00164772
204.79	-0.0003163		734.79	-0.01596799		1264.78	0.00307422		1794.78	0.00009698		2324.77	0.00390781		2854.77	-0.00572498		3384.8	-0.00161572
204.99	0.00025381		734.99	-0.01590016		1264.98	0.00223591		1794.98	-0.000485		2324.97	0.00378332		2854.97	-0.00585118		3385	-0.00076194
205.19	0.00133887		735.19	-0.01561675		1265.18	0.00248727		1795.18	-0.00068242		2325.17	0.00287762		2855.17	-0.00616094		3385.2	-0.00054413
205.39	0.00183967		735.39	-0.01573147		1265.38	0.00213623		1795.38	-0.00083722		2325.37	0.0025483		2855.37	-0.00533421		3385.4	0.00022053
205.59	0.00174133		735.59	-0.01640786		1265.58	0.00180037		1795.58	-0.00131161		2325.57	0.00176336		2855.57	-0.00428113		3385.6	0.00005105
205.79	0.0018723		735.79	-0.0160749		1265.78	0.00257209		1795.78	-0.00188606		2325.77	0.00161907		2855.77	-0.00479552		3385.8	0.00033731
205.99	0.0032624		735.99	-0.01627155		1265.98	0.00296997		1795.98	-0.00091628		2325.97	0.0026488		2855.97	-0.00398057		3386	0.00063708
206.19	0.00346479		736.19	-0.01680095		1266.18	0.00351829		1796.18	-0.00075264		2326.17	0.00199717		2856.17	-0.00340058		3386.2	0.00083754
206.39	0.00300006		736.39	-0.016584		1266.38	0.00352425		1796.38	-0.0008264		2326.37	0.00259182		2856.37	-0.00254192		3386.4	0.00044803
206.59	0.00391713		736.59	-0.01742249		1266.58	0.00463701		1796.58	-0.00161107		2326.57	0.00345351		2856.57	-0.00207714		3386.6	0.00056725
206.79	0.0046187		736.79	-0.0174995		1266.78	0.00492325		1796.78	-0.00291563		2326.77	0.00379958		2856.77	-0.0024386		3386.8	-0.00011194
206.99	0.00426663		736.99	-0.01837901		1266.98	0.00495503		1796.98	-0.00326593		2326.97	0.00387855		2856.97	-0.00245086		3387	-0.00017338
207.19	0.00441273		737.19	-0.01873743		1267.18	0.00507443		1797.18	-0.00357249		2327.17	0.0037939		2857.17	-0.0021668		3387.2	-0.00119162
207.39	0.00465298		737.39	-0.01908683		1267.38	0.00559787		1797.38	-0.0043186		2327.37	0.00396226		2857.37	-0.00277486		3387.4	-0.00091445
207.59	0.00441883		737.59	-0.01885464		1267.58	0.00593895		1797.58	-0.00460269		2327.57	0.0049863		2857.57	-0.00283155		3387.6	0.00043265
207.79	0.00483081		737.79	-0.01825612		1267.78	0.00560489		1797.78	-0.00642683		2327.77	0.00475981		2857.77	-0.00338832		3387.8	-0.00026128
207.99	0.00524132		737.99	-0.01827683		1267.98	0.00569676		1797.98	-0.0062339		2327.97	0.00513811		2857.97	-0.00375644		3388	-0.00029464
208.19	0.00529861		738.19	-0.01829902		1268.18	0.00549563		1798.18	-0.00578098		2328.17	0.00474728		2858.17	-0.00435946		3388.2	-0.00083341
208.39	0.00555614		738.39	-0.0171849		1268.38	0.00538222		1798.38	-0.00598621		2328.37	0.00492689		2858.37	-0.00435752		3388.4	-0.00036615
208.59	0.00557327		738.59	-0.01636774		1268.58	0.00509869		1798.58	-0.00587029		2328.57	0.00453845		2858.57	-0.00442347		3388.6	-0.00037883
208.79	0.00521319		738.79	-0.01510045		1268.78	0.00522866		1798.78	-0.00595452		2328.77	0.00465296		2858.77	-0.00521465		3388.8	-0.0007218
208.99	0.00623041		738.99	-0.01433468		1268.98	0.0045772		1798.98	-0.00651734		2328.97	0.00483386		2858.97	-0.00550888		3389	-0.000465
209.19	0.00626869		739.19	-0.01311525		1269.18	0.0045334		1799.18	-0.00649086		2329.17	0.00444243		2859.17	-0.00605622		3389.2	-0.00098136
209.39	0.00579689		739.39	-0.01291396		1269.38	0.00445129		1799.38	-0.00638219		2329.37	0.00448327		2859.37	-0.00595343		3389.4	-0.00036584
209.59	0.00512166		739.59	-0.01348168		1269.58	0.00476931		1799.58	-0.00667001		2329.57	0.00383456		2859.57	-0.00565831		3389.6	-0.00030585
209.79	0.00550163		739.79	-0.01350087		1269.78	0.00465276		1799.78	-0.00607118		2329.77	0.00382028		2859.77	-0.00582885		3389.8	-0.00006673
209.99	0.00536445		739.99	-0.01298748		1269.98	0.00416931		1799.98	-0.0054029		2329.97	0.00319702		2859.97	-0.00584176		3390	-0.00008852
210.19	0.00493292		740.19	-0.01309398		1270.18	0.00441675		1800.18	-0.00569535		2330.17	0.00161715		2860.17	-0.00503443		3390.2	-0.00005717
210.39	0.00530007		740.39	-0.01318713		1270.38	0.00472794		1800.38	-0.00576146		2330.37	0.0016343		2860.37	-0.00368538		3390.4	-0.00063404
210.59	0.00548438		740.59	-0.01344201		1270.58	0.00520345		1800.58	-0.00648745		2330.57	0.0011571		2860.57	-0.00318072		3390.6	-0.00083968
210.79	0.00485043		740.79	-0.01362783		1270.78	0.00510246		1800.78	-0.00566138		2330.77	0.00093986		2860.77	-0.00257513		3390.8	-0.00025053
210.99	0.00466547		740.99	-0.01369759		1270.98	0.00509818		1800.98	-0.00543267		2330.97	0.00025001		2860.97	-0.00159537		3391	-0.0006978
211.19	0.00350726		741.19	-0.01267789		1271.18	0.00620725		1801.18	-0.00507521		2331.17	0.000441		2861.17	-0.00110717		3391.2	-0.00031502
211.39	0.00377913		741.39	-0.01453205		1271.38	0.00573737		1801.38	-0.00547208		2331.37	0.00078675		2861.37	-0.00044373		3391.4	-0.00056394
211.59	0.00375312		741.59	-0.01385107		1271.58	0.00538095		1801.58	-0.00579609		2331.57	0.00096725		2861.57	-0.00027474		3391.6	-0.00063589
211.79	0.00393399		741.79	-0.01486642		1271.78	0.0046357		1801.78	-0.00574449		2331.77	0.00041306		2861.77	-0.00123099		3391.8	-0.00091701
211.99	0.00400915		741.99	-0.0150289		1271.98	0.00375506		1801.98	-0.00546505		2331.97	0.00130891		2861.97	-0.00129239		3392	-0.00090088
212.19	0.00323663		742.19	-0.01520275		1272.18	0.00290588		1802.18	-0.00534081		2332.17	0.00129646		2862.17	-0.00202952		3392.2	-0.00152424
212.39	0.00332044		742.39	-0.01468232		1272.38	0.0028228		1802.38	-0.00519755		2332.37	0.00202936		2862.37	-0.0024863		3392.4	-0.00195782
212.59	0.00338193		742.59	-0.01440579		1272.58	0.00356409		1802.58	-0.00471178		2332.57	0.00267951		2862.57	-0.00323649		3392.6	-0.00154557
212.79	0.00360721		742.79	-0.01430712		1272.78	0.00430069		1802.78	-0.00436643		2332.77	0.00276426		2862.77	-0.00462061		3392.8	-0.00137016
212.99	0.00410784		742.99	-0.01501552		1272.98	0.00306411		1802.98	-0.00341872		2332.97	0.00320356		2862.97	-0.00499497		3393	-0.0020684
213.19	0.00349805		743.19	-0.01545239		1273.18	0.00323283		1803.18	-0.00253394		2333.17	0.00317724		2863.17	-0.00592258		3393.2	-0.00214249
213.39	0.00354035		743.39	-0.01633985		1273.38	0.0031367		1803.38	-0.00162021		2333.37	0.00425406		2863.37	-0.00600269		3393.4	-0.00159795
213.59	0.00366994		743.59	-0.01665618		1273.58	0.00354618		1803.58	-0.00152666		2333.57	0.00356387		2863.57	-0.00658742		3393.6	-0.00196256
213.79	0.00365927		743.79	-0.01646093		1273.78	0.00343473		1803.78	-0.0015633		2333.77	0.00355602		2863.77	-0.00667833		3393.8	-0.00218862
213.99	0.00362882		743.99	-0.01608724		1273.98	0.00306681		1803.98	-0.00168156		2333.97	0.003033		2863.97	-0.00676935		3394	-0.0018879
214.19	0.00392619		744.19	-0.01620239		1274.18	0.00343985		1804.18	-0.0019203		2334.17	0.0029577		2864.17	-0.00653841		3394.2	-0.00267423
214.39	0.00440143		744.39	-0.01590514		1274.38	0.00280455		1804.38	-0.00127072		2334.37	0.00371592		2864.37	-0.00616878		3394.4	-0.003797
214.59	0.00408194		744.59	-0.01619045		1274.58	0.0034172		1804.58	-0.00134675		2334.57	0.00363491		2864.57	-0.0068638		3394.6	-0.00313833
214.79	0.00438215		744.79	-0.01667412		1274.78	0.00408114		1804.78	0.00035786		2334.77	0.00398405		2864.77	-0.00585471		3394.8	-0.00252207
214.99	0.00459395		744.99	-0.01622874		1274.98	0.00499737		1804.98	0.00038368		2334.97	0.00333609		2864.97	-0.00490332		3395	-0.00206813
215.19	0.00400445		745.19	-0.01664559		1275.18	0.00561325		1805.18	0.00159448		2335.17	0.00322131		2865.17	-0.00458434		3395.2	-0.00167787
215.39	0.00483866		745.39	-0.01871623		1275.38	0.00458549		1805.38	0.00146377		2335.37	0.00284087		2865.37	-0.00375476		3395.4	-0.00236819
215.59	0.00459808		745.59	-0.01824512		1275.58	0.0047022		1805.58	0.00115481		2335.57	0.00215704		2865.57	-0.00404112		3395.6	-0.00200141
215.79	0.00533166		745.79	-0.01912161		1275.78	0.00459819		1805.78	0.00033599		2335.77	0.00188862		2865.77	-0.00329109		3395.8	-0.00165086
215.99	0.00524144		745.99	-0.01950661		1275.98	0.00444029		1805.98	-0.00092763		2335.97	0.00188763		2865.97	-0.00312055		3396	-0.00155601
216.19	0.00490284		746.19	-0.01940228		1276.18	0.0045722		1806.18	-0.0014001		2336.17	0.00207094		2866.17	-0.00286489		3396.2	-0.00104115
216.39	0.00534858		746.39	-0.01902015		1276.38	0.00474736		1806.38	-0.00201116		2336.37	0.00189435		2866.37	-0.00239591		3396.4	-0.0007412
216.59	0.0054437		746.59	-0.01917356		1276.58	0.00502397		1806.58	-0.00236577		2336.57	0.00213401		2866.57	-0.00264613		3396.6	0.00032208
216.79	0.00578824		746.79	-0.01873654		1276.78	0.00499938		1806.78	-0.00259249		2336.77	0.00198186		2866.77	-0.00269308		3396.8	-0.00036462
216.99	0.00583947		746.99	-0.01811829		1276.98	0.0038815		1806.98	-0.00315195		2336.97	0.00239681		2866.97	-0.00240817		3397	-0.0011603
217.19	0.00604012		747.19	-0.01837151		1277.18	0.00413568		1807.18	-0.00353313		2337.17	0.00293108		2867.17	-0.0023293		3397.2	-0.00025834
217.39	0.00618809		747.39	-0.01761041		1277.38	0.00324808		1807.38	-0.00359185		2337.37	0.0032353		2867.37	-0.00166762		3397.4	-0.00030784
217.59	0.00588417		747.59	-0.016109		1277.58	0.00314859		1807.58	-0.00422995		2337.57	0.00273716		2867.57	-0.00104081		3397.6	-0.00068457
217.79	0.00545073		747.79	-0.01608803		1277.78	0.00243684		1807.78	-0.00484275		2337.77	0.00375204		2867.77	-0.00124128		3397.8	-0.00047041
217.99	0.0065063		747.99	-0.01619432		1277.98	0.00199855		1807.98	-0.00568795		2337.97	0.00311445		2867.97	-0.00118291		3398	-0.00074201
218.19	0.00683949		748.19	-0.01548004		1278.18	0.00220963		1808.18	-0.00608048		2338.17	0.00337092		2868.17	-0.002052		3398.2	-0.00122356
218.39	0.00654735		748.39	-0.01448594		1278.38	0.00219051		1808.38	-0.0060253		2338.37	0.00367304		2868.37	-0.00261185		3398.4	-0.00083776
218.59	0.00749114		748.59	-0.01461813		1278.58	0.00365458		1808.58	-0.00559535		2338.57	0.00335639		2868.57	-0.00320963		3398.6	0.00037411
218.79	0.00729738		748.79	-0.01475557		1278.78	0.003557		1808.78	-0.00436697		2338.77	0.00261689		2868.77	-0.0028412		3398.8	-0.00020749
218.99	0.00668258		748.99	-0.01405309		1278.98	0.00417787		1808.98	-0.00482114		2338.97	0.00143413		2868.97	-0.00275113		3399	-0.00016252
219.19	0.00728131		749.19	-0.01361226		1279.18	0.00379426		1809.18	-0.00487359		2339.17	0.00077831		2869.17	-0.0022317		3399.2	-0.00104349
219.39	0.00778597		749.39	-0.01398994		1279.38	0.00480557		1809.38	-0.00541191		2339.37	0.00015094		2869.37	-0.00274646		3399.4	-0.00166572
219.59	0.00774934		749.59	-0.01355296		1279.58	0.00535042		1809.58	-0.00594396		2339.57	-0.00022187		2869.57	-0.00267439		3399.6	-0.00217891
219.79	0.00851881		749.79	-0.01393194		1279.78	0.00581108		1809.78	-0.00643821		2339.77	-0.00011513		2869.77	-0.00267334		3399.8	-0.00253648
219.99	0.00782332		749.99	-0.01420464		1279.98	0.00589219		1809.98	-0.00660769		2339.97	0.00048673		2869.97	-0.0036568		3400	-0.00247585
220.19	0.00739952		750.19	-0.01363792		1280.18	0.00526726		1810.18	-0.00653614		2340.17	0.00119258		2870.17	-0.00363248		3400.2	-0.00236005
220.39	0.00667192		750.39	-0.01386282		1280.38	0.00560832		1810.38	-0.00638036		2340.37	0.00142403		2870.37	-0.00364463		3400.4	-0.00256231
220.59	0.0063042		750.59	-0.01387944		1280.58	0.00497615		1810.58	-0.00664968		2340.57	0.0017735		2870.57	-0.00408334		3400.6	-0.00272738
220.79	0.00559394		750.79	-0.01366548		1280.78	0.004805		1810.78	-0.00691289		2340.77	0.00209069		2870.77	-0.0032417		3400.8	-0.003959
220.99	0.00568808		750.99	-0.01374162		1280.98	0.0034727		1810.98	-0.00651589		2340.97	0.00249567		2870.97	-0.00287842		3401	-0.00426229
221.19	0.00626508		751.19	-0.0141615		1281.18	0.00251249		1811.18	-0.00567215		2341.17	0.00279651		2871.17	-0.00189593		3401.2	-0.00366535
221.39	0.00547997		751.39	-0.01386183		1281.38	0.00148663		1811.38	-0.00551188		2341.37	0.0025766		2871.37	-0.00165728		3401.4	-0.00381792
221.59	0.00513027		751.59	-0.01422355		1281.58	0.00172966		1811.58	-0.00536479		2341.57	0.0033094		2871.57	-0.00098038		3401.6	-0.00356161
221.79	0.00536156		751.79	-0.01607794		1281.78	0.00123734		1811.78	-0.00561696		2341.77	0.00329473		2871.77	-0.00144587		3401.8	-0.00314153
221.99	0.00551077		751.99	-0.0164974		1281.98	0.0016691		1811.98	-0.00618427		2341.97	0.00253758		2871.97	-0.00117658		3402	-0.00299312
222.19	0.00453804		752.19	-0.01624037		1282.18	0.00180656		1812.18	-0.00547482		2342.17	0.00203104		2872.17	-0.00161833		3402.2	-0.00250868
222.39	0.00387624		752.39	-0.01615859		1282.38	0.0019556		1812.38	-0.00462132		2342.37	0.00128863		2872.37	-0.00229508		3402.4	-0.00291429
222.59	0.00496903		752.59	-0.01609311		1282.58	0.00196289		1812.58	-0.00330198		2342.57	0.00049746		2872.57	-0.00167427		3402.6	-0.0031036
222.79	0.0039888		752.79	-0.01539392		1282.78	0.0019085		1812.78	-0.00326168		2342.77	-0.00010807		2872.77	-0.00175022		3402.8	-0.00406767
222.99	0.004033		752.99	-0.01534642		1282.98	0.00206587		1812.98	-0.00369142		2342.97	-0.00016618		2872.97	-0.00120603		3403	-0.00425331
223.19	0.00596823		753.19	-0.01530853		1283.18	0.00291264		1813.18	-0.00446139		2343.17	0.00016412		2873.17	-0.00132141		3403.2	-0.0050937
223.39	0.00641965		753.39	-0.01641842		1283.38	0.00454539		1813.38	-0.00393843		2343.37	-0.00018644		2873.37	-0.0028153		3403.4	-0.00516531
223.59	0.00649428		753.59	-0.01666256		1283.58	0.00525151		1813.58	-0.00296235		2343.57	0.00061414		2873.57	-0.00347519		3403.6	-0.00514482
223.79	0.0066988		753.79	-0.01669328		1283.78	0.00515053		1813.78	-0.00286239		2343.77	0.00078224		2873.77	-0.00417007		3403.8	-0.00451178
223.99	0.00629958		753.99	-0.01607692		1283.98	0.00507333		1813.98	-0.00354692		2343.97	0.00159138		2873.97	-0.00490703		3404	-0.00511511
224.19	0.00585298		754.19	-0.01570729		1284.18	0.00507887		1814.18	-0.00367733		2344.17	0.00202017		2874.17	-0.00505746		3404.2	-0.00465899
224.39	0.00513659		754.39	-0.0160679		1284.38	0.00545856		1814.38	-0.0042748		2344.37	0.0019765		2874.37	-0.00473357		3404.4	-0.00438871
224.59	0.00528915		754.59	-0.01553015		1284.58	0.00406708		1814.58	-0.00431849		2344.57	0.00198611		2874.57	-0.00529343		3404.6	-0.00577792
224.79	0.0054263		754.79	-0.01481611		1284.78	0.00385053		1814.78	-0.00412617		2344.77	0.00221909		2874.77	-0.00477993		3404.8	-0.0065669
224.99	0.00586836		754.99	-0.01395659		1284.98	0.00366997		1814.98	-0.00421108		2344.97	0.00275081		2874.97	-0.0041051		3405	-0.00551848
225.19	0.00659065		755.19	-0.01375139		1285.18	0.00341748		1815.18	-0.00404856		2345.17	0.00345487		2875.17	-0.00321565		3405.2	-0.00535184
225.39	0.00644735		755.39	-0.01400502		1285.38	0.00375274		1815.38	-0.00382962		2345.37	0.00397545		2875.37	-0.00331268		3405.4	-0.0055386
225.59	0.00663778		755.59	-0.01467588		1285.58	0.00447883		1815.58	-0.00370893		2345.57	0.00465886		2875.57	-0.00263316		3405.6	-0.00545074
225.79	0.00723783		755.79	-0.01438449		1285.78	0.0045056		1815.78	-0.00309478		2345.77	0.00410559		2875.77	-0.00168134		3405.8	-0.00510409
225.99	0.00701062		755.99	-0.01380446		1285.98	0.00497653		1815.98	-0.0027527		2345.97	0.00396359		2875.97	-0.00133074		3406	-0.00457031
226.19	0.00702753		756.19	-0.01362932		1286.18	0.00514366		1816.18	-0.00233242		2346.17	0.0033281		2876.17	-0.00154102		3406.2	-0.00458878
226.39	0.00776737		756.39	-0.01336072		1286.38	0.00512894		1816.38	-0.00150067		2346.37	0.00325752		2876.37	-0.00181391		3406.4	-0.00504522
226.59	0.00853372		756.59	-0.0129874		1286.58	0.00527751		1816.58	-0.00158478		2346.57	0.00337254		2876.57	-0.00159585		3406.6	-0.00452003
226.79	0.00866158		756.79	-0.01264229		1286.78	0.00637971		1816.78	-0.00116126		2346.77	0.00343725		2876.77	-0.00220502		3406.8	-0.00484158
226.99	0.00922986		756.99	-0.01344266		1286.98	0.00715876		1816.98	-0.00164302		2346.97	0.00224326		2876.97	-0.00203948		3407	-0.00449259
227.19	0.01040153		757.19	-0.01356693		1287.18	0.00809857		1817.18	-0.0019913		2347.17	0.00185593		2877.17	-0.0018388		3407.2	-0.0049485
227.39	0.01034191		757.39	-0.01373062		1287.38	0.00809766		1817.38	-0.00123716		2347.37	0.00107379		2877.37	-0.00240036		3407.4	-0.0041943
227.59	0.01057007		757.59	-0.01339338		1287.58	0.0076566		1817.58	-0.00137812		2347.57	0.00069452		2877.57	-0.00244422		3407.6	-0.00370182
227.79	0.01059181		757.79	-0.0127509		1287.78	0.00640582		1817.78	-0.00253183		2347.77	-0.00080632		2877.77	-0.00314387		3407.8	-0.00364
227.99	0.01033009		757.99	-0.01196223		1287.98	0.00563192		1817.98	-0.00370216		2347.97	-0.00073444		2877.97	-0.00396799		3408	-0.00401598
228.19	0.00977779		758.19	-0.0114585		1288.18	0.00535594		1818.18	-0.00336304		2348.17	-0.00152403		2878.17	-0.00429338		3408.2	-0.00339544
228.39	0.0091059		758.39	-0.01194991		1288.38	0.00459339		1818.38	-0.00408097		2348.37	-0.00217848		2878.37	-0.00499327		3408.4	-0.00406037
228.59	0.00822489		758.59	-0.01151959		1288.58	0.00359749		1818.58	-0.00382925		2348.57	-0.00234771		2878.57	-0.00666729		3408.6	-0.00459463
228.79	0.00790571		758.79	-0.01104996		1288.78	0.00397665		1818.78	-0.00385934		2348.77	-0.00199582		2878.77	-0.00588923		3408.8	-0.00256809
228.99	0.00703889		758.99	-0.01104405		1288.98	0.00382797		1818.98	-0.00441786		2348.97	-0.00144156		2878.97	-0.00520786		3409	-0.00135884
229.19	0.00704654		759.19	-0.01195988		1289.18	0.00277697		1819.18	-0.00422878		2349.17	-0.00066854		2879.17	-0.006205		3409.2	-0.00154601
229.39	0.006927		759.39	-0.01235393		1289.38	0.00290696		1819.38	-0.00441078		2349.37	-0.00066201		2879.37	-0.00678091		3409.4	-0.00142997
229.59	0.00772485		759.59	-0.01279953		1289.58	0.00176573		1819.58	-0.00448752		2349.57	-0.00039961		2879.57	-0.00645514		3409.6	-0.00073766
229.79	0.00811578		759.79	-0.01214005		1289.78	0.00088577		1819.78	-0.00399243		2349.77	-0.00024925		2879.77	-0.0058814		3409.8	-0.00026344
229.99	0.00891477		759.99	-0.01300913		1289.98	0.00040122		1819.98	-0.00477701		2349.97	0.00066479		2879.97	-0.00602571		3410	-0.00073095
230.19	0.00951657		760.19	-0.01408421		1290.18	0.00050592		1820.18	-0.00467652		2350.17	0.00049877		2880.17	-0.00587646		3410.2	-0.00160384
230.39	0.01005771		760.39	-0.01455177		1290.38	0.00094446		1820.38	-0.00454328		2350.37	0.00085816		2880.37	-0.0052841		3410.4	-0.00278256
230.59	0.01033856		760.59	-0.01436178		1290.58	0.00124014		1820.58	-0.00521033		2350.57	0.00147917		2880.57	-0.00448052		3410.6	-0.00315692
230.79	0.01024582		760.79	-0.01403027		1290.78	0.00206341		1820.78	-0.00451126		2350.77	0.0011219		2880.77	-0.00386636		3410.8	-0.00400771
230.99	0.0105698		760.99	-0.0147419		1290.98	0.00214283		1820.98	-0.00507687		2350.97	0.0010397		2880.97	-0.00297949		3411	-0.0046235
231.19	0.01020685		761.19	-0.01422165		1291.18	0.00195006		1821.18	-0.00521155		2351.17	0.00154871		2881.17	-0.00198499		3411.2	-0.00535621
231.39	0.01016819		761.39	-0.01353199		1291.38	0.00169217		1821.38	-0.00539611		2351.37	0.00157401		2881.37	-0.00218763		3411.4	-0.00514759
231.59	0.01039398		761.59	-0.01353201		1291.58	0.00137673		1821.58	-0.00489804		2351.57	0.00108154		2881.57	-0.00231395		3411.6	-0.00606937
231.79	0.01067937		761.79	-0.01360626		1291.78	0.00183894		1821.78	-0.00510269		2351.77	0.00116877		2881.77	-0.00227547		3411.8	-0.00627959
231.99	0.0106384		761.99	-0.01341209		1291.98	0.00185011		1821.98	-0.00480024		2351.97	0.0023849		2881.97	-0.00189234		3412	-0.00607426
232.19	0.01064496		762.19	-0.01319561		1292.18	0.00287567		1822.18	-0.00453416		2352.17	0.00150148		2882.17	-0.00203979		3412.2	-0.00648316
232.39	0.00989136		762.39	-0.0135309		1292.38	0.00389148		1822.38	-0.00428177		2352.37	0.00194188		2882.37	-0.00368247		3412.4	-0.00575188
232.59	0.00922191		762.59	-0.01358224		1292.58	0.00444217		1822.58	-0.00352989		2352.57	0.0021054		2882.57	-0.00341042		3412.6	-0.00458209
232.79	0.00994642		762.79	-0.01357922		1292.78	0.00492122		1822.78	-0.00352372		2352.77	0.00224306		2882.77	-0.00301098		3412.8	-0.00398224
232.99	0.01013931		762.99	-0.01432408		1292.98	0.00462228		1822.98	-0.00377945		2352.97	0.00201417		2882.97	-0.00384291		3413	-0.00426376
233.19	0.0102585		763.19	-0.01485037		1293.18	0.00377918		1823.18	-0.00337894		2353.17	0.00213287		2883.17	-0.00441214		3413.2	-0.00370358
233.39	0.0103194		763.39	-0.01510581		1293.38	0.00365319		1823.38	-0.0027466		2353.37	0.00098158		2883.37	-0.00430847		3413.4	-0.003121
233.59	0.01111436		763.59	-0.01551176		1293.58	0.00335159		1823.58	-0.0022468		2353.57	0.00132295		2883.57	-0.00363906		3413.6	-0.00313729
233.79	0.01101911		763.79	-0.01511969		1293.78	0.00344482		1823.78	-0.00248643		2353.77	0.00138932		2883.77	-0.00319864		3413.8	-0.00300493
233.99	0.0112488		763.99	-0.01618944		1293.98	0.00356857		1823.98	-0.00231975		2353.97	0.00045856		2883.97	-0.00265871		3414	-0.00377706
234.19	0.0118673		764.19	-0.01692676		1294.18	0.00418476		1824.18	-0.00246047		2354.17	-0.0000437		2884.17	-0.00259669		3414.2	-0.0036444
234.39	0.01117634		764.39	-0.01633156		1294.38	0.00508886		1824.38	-0.00300066		2354.37	-0.00025584		2884.37	-0.00160875		3414.4	-0.00362774
234.59	0.01069171		764.59	-0.01626649		1294.58	0.0043465		1824.58	-0.00410714		2354.57	-0.00025622		2884.57	-0.00072237		3414.6	-0.00287857
234.79	0.0092849		764.79	-0.0166792		1294.78	0.00512257		1824.78	-0.00431378		2354.77	-0.00027476		2884.77	-0.00071574		3414.8	-0.0026674
234.99	0.00851974		764.99	-0.01654483		1294.98	0.00497674		1824.98	-0.00437162		2354.97	0.00004284		2884.97	-0.00046503		3415	-0.00237562
235.19	0.00728859		765.19	-0.01605647		1295.18	0.00459436		1825.18	-0.00488204		2355.17	-0.00033962		2885.17	-0.00103469		3415.2	-0.00263595
235.39	0.00649234		765.39	-0.01575781		1295.38	0.00450517		1825.38	-0.00466628		2355.37	-0.00035024		2885.37	-0.00193773		3415.4	-0.00272627
235.59	0.00635943		765.59	-0.01575773		1295.58	0.00437097		1825.58	-0.00444183		2355.57	0.00000393		2885.57	-0.00181847		3415.6	-0.00331431
235.79	0.0070597		765.79	-0.01579096		1295.78	0.00510299		1825.78	-0.00495132		2355.77	0.00061057		2885.77	-0.00136569		3415.8	-0.00314256
235.99	0.00739332		765.99	-0.01505204		1295.98	0.00530014		1825.98	-0.0049191		2355.97	0.00131059		2885.97	-0.00160426		3416	-0.00305636
236.19	0.00757847		766.19	-0.01443724		1296.18	0.00550444		1826.18	-0.00480875		2356.17	0.00128969		2886.17	-0.00228171		3416.2	-0.00333211
236.39	0.00792971		766.39	-0.01457842		1296.38	0.0057984		1826.38	-0.00450525		2356.37	0.00185894		2886.37	-0.00246514		3416.4	-0.00357771
236.59	0.00931738		766.59	-0.01513855		1296.58	0.0053275		1826.58	-0.00438873		2356.57	0.00234281		2886.57	-0.00199265		3416.6	-0.00480385
236.79	0.01084038		766.79	-0.01559565		1296.78	0.00417381		1826.78	-0.00451793		2356.77	0.00238846		2886.77	-0.00248516		3416.8	-0.00471222
236.99	0.01111481		766.99	-0.01649814		1296.98	0.00406481		1826.98	-0.0048697		2356.97	0.00212988		2886.97	-0.00226627		3417	-0.00418773
237.19	0.01080038		767.19	-0.01614984		1297.18	0.0027456		1827.18	-0.00480422		2357.17	0.00198135		2887.17	-0.00203603		3417.2	-0.00320933
237.39	0.01151063		767.39	-0.01637013		1297.38	0.00258307		1827.38	-0.0047938		2357.37	0.00165331		2887.37	-0.00191905		3417.4	-0.00288987
237.59	0.01199326		767.59	-0.01677813		1297.58	0.00196832		1827.58	-0.00566287		2357.57	0.00242546		2887.57	-0.00120171		3417.6	-0.0028985
237.79	0.01264359		767.79	-0.01701376		1297.78	0.0015644		1827.78	-0.00566406		2357.77	0.0014252		2887.77	-0.00164549		3417.8	-0.00230554
237.99	0.01285235		767.99	-0.01828206		1297.98	0.00202879		1827.98	-0.00553648		2357.97	0.00085983		2887.97	-0.00119899		3418	-0.00272852
238.19	0.01376782		768.19	-0.01783588		1298.18	0.002651		1828.18	-0.00618426		2358.17	0.00120455		2888.17	-0.00065857		3418.2	-0.00222261
238.39	0.01297726		768.39	-0.01762823		1298.38	0.00279112		1828.38	-0.00632074		2358.37	0.00116182		2888.37	-0.00025422		3418.4	-0.00290388
238.59	0.01315053		768.59	-0.01766424		1298.58	0.00270689		1828.58	-0.0071664		2358.57	0.00082289		2888.57	-0.00002241		3418.6	-0.00317309
238.79	0.0117835		768.79	-0.01683351		1298.78	0.00382138		1828.78	-0.00686212		2358.77	0.00116168		2888.77	-0.00063014		3418.8	-0.00389536
238.99	0.01093972		768.99	-0.01621285		1298.98	0.00336717		1828.98	-0.00590263		2358.97	0.00072703		2888.97	-0.0016662		3419	-0.00367516
239.19	0.00968775		769.19	-0.01566461		1299.18	0.00414585		1829.18	-0.00525407		2359.17	0.00046557		2889.17	-0.00271002		3419.2	-0.00454278
239.39	0.00899515		769.39	-0.01450359		1299.38	0.00497125		1829.38	-0.00470829		2359.37	0.00071198		2889.37	-0.00334217		3419.4	-0.00433852
239.59	0.00959402		769.59	-0.01370917		1299.58	0.00599031		1829.58	-0.00424096		2359.57	0.00132783		2889.57	-0.0028314		3419.6	-0.00406601
239.79	0.0098367		769.79	-0.01311937		1299.78	0.0063038		1829.78	-0.00368965		2359.77	0.00151017		2889.77	-0.00298745		3419.8	-0.00508916
239.99	0.00927366		769.99	-0.01260678		1299.98	0.0062352		1829.98	-0.00395534		2359.97	0.00191022		2889.97	-0.00301061		3420	-0.0052798
240.19	0.00895446		770.19	-0.01276247		1300.18	0.00543037		1830.18	-0.003873		2360.17	0.00174556		2890.17	-0.00276755		3420.2	-0.00567734
240.39	0.00990398		770.39	-0.01291934		1300.38	0.00562952		1830.38	-0.0032905		2360.37	0.00099889		2890.37	-0.00303822		3420.4	-0.00550426
240.59	0.01056051		770.59	-0.01308707		1300.58	0.00508377		1830.58	-0.002811		2360.57	0.00140282		2890.57	-0.00257234		3420.6	-0.00561339
240.79	0.01074363		770.79	-0.01336311		1300.78	0.00456748		1830.78	-0.00316793		2360.77	0.00138041		2890.77	-0.00286989		3420.8	-0.00451244
240.99	0.00995417		770.99	-0.01375627		1300.98	0.00513618		1830.98	-0.00328172		2360.97	0.00105658		2890.97	-0.00265231		3421	-0.0041555
241.19	0.00954083		771.19	-0.01442877		1301.18	0.0038959		1831.18	-0.00287101		2361.17	0.00179273		2891.17	-0.00223887		3421.2	-0.00369656
241.39	0.00946412		771.39	-0.01518272		1301.38	0.00395648		1831.38	-0.00326429		2361.37	0.00209394		2891.37	-0.00119383		3421.4	-0.00314872
241.59	0.00926933		771.59	-0.01546594		1301.58	0.00388866		1831.58	-0.00337606		2361.57	0.00230824		2891.57	-0.00118676		3421.6	-0.00284767
241.79	0.00981743		771.79	-0.01540466		1301.78	0.00437152		1831.78	-0.00305617		2361.77	0.00279463		2891.77	-0.00151107		3421.8	-0.00299914
241.99	0.01034977		771.99	-0.01493636		1301.98	0.00457002		1831.98	-0.00341765		2361.97	0.00291929		2891.97	-0.00056696		3422	-0.00331046
242.19	0.01127628		772.19	-0.01453039		1302.18	0.00415639		1832.18	-0.00332558		2362.17	0.00362126		2892.17	-0.0004439		3422.2	-0.00330593
242.39	0.01178828		772.39	-0.01417054		1302.38	0.00301679		1832.38	-0.00329289		2362.37	0.00416957		2892.37	-0.00070585		3422.4	-0.00456147
242.59	0.0121967		772.59	-0.01404238		1302.58	0.00264687		1832.58	-0.00335089		2362.57	0.00371237		2892.57	-0.00039465		3422.6	-0.0043807
242.79	0.01150269		772.79	-0.014035		1302.78	0.00187458		1832.78	-0.00338004		2362.77	0.00468572		2892.77	-0.00049234		3422.8	-0.00463992
242.99	0.01153134		772.99	-0.01370505		1302.98	0.00101328		1832.98	-0.00348156		2362.97	0.00457818		2892.97	-0.00098869		3423	-0.00411688
243.19	0.01184496		773.19	-0.01406632		1303.18	0.00091001		1833.18	-0.0034608		2363.17	0.00508387		2893.17	-0.00005068		3423.2	-0.00452252
243.39	0.01267408		773.39	-0.01342063		1303.38	0.0003483		1833.38	-0.00385256		2363.37	0.00483994		2893.37	-0.00009599		3423.4	-0.00536704
243.59	0.01258526		773.59	-0.01349307		1303.58	-0.00066604		1833.58	-0.00409121		2363.57	0.00439545		2893.57	0.00047867		3423.6	-0.00622845
243.79	0.0131649		773.79	-0.01380439		1303.78	-0.00237787		1833.78	-0.00489874		2363.77	0.00339551		2893.77	0.00030433		3423.8	-0.0078221
243.99	0.01343674		773.99	-0.01403443		1303.98	-0.002579		1833.98	-0.00526675		2363.97	0.00191909		2893.97	0.00012949		3424	-0.00740937
244.19	0.01334339		774.19	-0.01559146		1304.18	-0.00353991		1834.18	-0.00479738		2364.17	0.00105276		2894.17	0.00040332		3424.2	-0.00739592
244.39	0.0133102		774.39	-0.01623093		1304.38	-0.00276104		1834.38	-0.0036093		2364.37	-0.00010849		2894.37	-0.00020483		3424.4	-0.00725927
244.59	0.01275576		774.59	-0.01640619		1304.58	-0.00198871		1834.58	-0.00314308		2364.57	-0.00019776		2894.57	0.00087804		3424.6	-0.00759803
244.79	0.01196535		774.79	-0.01706811		1304.78	-0.00140214		1834.78	-0.00301864		2364.77	-0.0003541		2894.77	0.00049505		3424.8	-0.00741926
244.99	0.01141257		774.99	-0.01800827		1304.98	-0.00091047		1834.98	-0.00279994		2364.97	-0.00053308		2894.97	0.00104743		3425	-0.00720574
245.19	0.01142916		775.19	-0.01864505		1305.18	-0.00087209		1835.18	-0.0021964		2365.17	-0.00006858		2895.17	0.00156782		3425.2	-0.00607987
245.39	0.01171253		775.39	-0.01688812		1305.38	0.00063847		1835.38	-0.00164017		2365.37	0.00018067		2895.37	0.00150585		3425.4	-0.00545083
245.59	0.01224826		775.59	-0.01666691		1305.58	0.0012754		1835.58	-0.00120258		2365.57	-0.00066659		2895.57	0.00113378		3425.6	-0.00468277
245.79	0.01278916		775.79	-0.01667045		1305.78	0.00215065		1835.78	-0.00195103		2365.77	-0.00038491		2895.77	0.00137762		3425.8	-0.00453831
245.99	0.01323718		775.99	-0.01618162		1305.98	0.00239408		1835.98	-0.00172283		2365.97	-0.00083162		2895.97	0.00110048		3426	-0.00368023
246.19	0.01339245		776.19	-0.01645669		1306.18	0.0021256		1836.18	-0.00125486		2366.17	0.00027833		2896.17	0.00112104		3426.2	-0.00300482
246.39	0.01392535		776.39	-0.01579798		1306.38	0.00195781		1836.38	-0.0012589		2366.37	0.00021808		2896.37	0.0002724		3426.4	-0.00351352
246.59	0.01372073		776.59	-0.01565652		1306.58	0.00179348		1836.58	-0.00182843		2366.57	0.00069833		2896.57	-0.00001675		3426.6	-0.00279395
246.79	0.01427096		776.79	-0.01492319		1306.78	0.00243588		1836.78	-0.00236218		2366.77	0.00130234		2896.77	0.00016493		3426.8	-0.00316081
246.99	0.0146116		776.99	-0.01357665		1306.98	0.00237741		1836.98	-0.00267717		2366.97	0.00155115		2896.97	-0.00044687		3427	-0.00254036
247.19	0.01476828		777.19	-0.0132925		1307.18	0.0023218		1837.18	-0.00301801		2367.17	0.00239917		2897.17	0.00018732		3427.2	-0.00378258
247.39	0.01514629		777.39	-0.01245473		1307.38	0.00185371		1837.38	-0.00391449		2367.37	0.00270231		2897.37	-0.0009479		3427.4	-0.00493877
247.59	0.01515024		777.59	-0.01205731		1307.58	0.0017617		1837.58	-0.00443684		2367.57	0.00226104		2897.57	-0.00127617		3427.6	-0.00526875
247.79	0.0161308		777.79	-0.01186771		1307.78	0.00208786		1837.78	-0.00512319		2367.77	0.0013677		2897.77	-0.001582		3427.8	-0.00551532
247.99	0.01539419		777.99	-0.01183061		1307.98	0.00250983		1837.98	-0.00522713		2367.97	0.00053662		2897.97	-0.00152057		3428	-0.00572389
248.19	0.01383158		778.19	-0.01305325		1308.18	0.00281423		1838.18	-0.00574804		2368.17	0.00098341		2898.17	-0.00089016		3428.2	-0.00612423
248.39	0.0124571		778.39	-0.01335778		1308.38	0.00311424		1838.38	-0.00610329		2368.37	0.00048721		2898.37	-0.00107729		3428.4	-0.00659292
248.59	0.01178998		778.59	-0.01371812		1308.58	0.0037191		1838.58	-0.00608165		2368.57	0.00167644		2898.57	0.0002354		3428.6	-0.00633976
248.79	0.01147962		778.79	-0.0138615		1308.78	0.00330644		1838.78	-0.00661544		2368.77	0.00242939		2898.77	0.00011638		3428.8	-0.00674991
248.99	0.01110073		778.99	-0.01458001		1308.98	0.00321267		1838.98	-0.00638416		2368.97	0.00323137		2898.97	0.00034825		3429	-0.0057873
249.19	0.01038004		779.19	-0.01435491		1309.18	0.00360491		1839.18	-0.00561034		2369.17	0.0034488		2899.17	-0.00012647		3429.2	-0.00457889
249.39	0.01007697		779.39	-0.01370548		1309.38	0.00454951		1839.38	-0.0050256		2369.37	0.00344077		2899.37	-0.00017565		3429.4	-0.00442747
249.59	0.01004743		779.59	-0.01458579		1309.58	0.00401738		1839.58	-0.00527441		2369.57	0.00234198		2899.57	-0.00056674		3429.6	-0.0036667
249.79	0.01045907		779.79	-0.01433993		1309.78	0.00436212		1839.78	-0.00592327		2369.77	0.00314377		2899.77	-0.00152		3429.8	-0.00354449
249.99	0.010165		779.99	-0.01409719		1309.98	0.00341498		1839.98	-0.00452185		2369.97	0.00328908		2899.97	-0.00216252		3430	-0.00261761
250.19	0.00992458		780.19	-0.01523706		1310.18	0.00260424		1840.18	-0.00421681		2370.17	0.00343973		2900.17	-0.00211335		3430.2	-0.00326766
250.39	0.00977555		780.39	-0.01600154		1310.38	0.00221152		1840.38	-0.00375535		2370.37	0.0027747		2900.37	-0.00284751		3430.4	-0.00376517
250.59	0.01003805		780.59	-0.01615507		1310.58	0.00204314		1840.58	-0.00305191		2370.57	0.0035361		2900.57	-0.00260619		3430.6	-0.00345872
250.79	0.01045259		780.79	-0.01594746		1310.78	0.0026597		1840.78	-0.00224049		2370.77	0.00377416		2900.77	-0.00312355		3430.8	-0.00289164
250.99	0.01047478		780.99	-0.01682702		1310.98	0.00279934		1840.98	-0.00192774		2370.97	0.00460115		2900.97	-0.00254198		3431	-0.00216424
251.19	0.01127286		781.19	-0.0172086		1311.18	0.00311985		1841.18	-0.00188692		2371.17	0.00502652		2901.17	-0.00232468		3431.2	-0.00272738
251.39	0.01206567		781.39	-0.01733099		1311.38	0.00287598		1841.38	-0.0016554		2371.37	0.00473209		2901.37	-0.0024459		3431.4	-0.00289428
251.59	0.0123233		781.59	-0.0171782		1311.58	0.00281407		1841.58	-0.00150746		2371.57	0.00424938		2901.57	-0.00145733		3431.6	-0.00447474
251.79	0.01234059		781.79	-0.01792118		1311.78	0.00253744		1841.78	-0.00280754		2371.77	0.00353909		2901.77	-0.00176575		3431.8	-0.00428306
251.99	0.01168097		781.99	-0.01785648		1311.98	0.0026238		1841.98	-0.0034457		2371.97	0.00296849		2901.97	-0.00170969		3432	-0.00508257
252.19	0.011041		782.19	-0.01855215		1312.18	0.00249171		1842.18	-0.0034274		2372.17	0.00368915		2902.17	-0.00131348		3432.2	-0.00498281
252.39	0.01079238		782.39	-0.0186475		1312.38	0.00192542		1842.38	-0.00261017		2372.37	0.00364724		2902.37	-0.0013959		3432.4	-0.00510462
252.59	0.01144046		782.59	-0.01880624		1312.58	0.00243613		1842.58	-0.00223352		2372.57	0.00510287		2902.57	0.00023186		3432.6	-0.00447457
252.79	0.0115279		782.79	-0.01741992		1312.78	0.00199897		1842.78	-0.00237147		2372.77	0.00487313		2902.77	-0.00051337		3432.8	-0.00492638
252.99	0.01239382		782.99	-0.01648466		1312.98	0.00107278		1842.98	-0.00155123		2372.97	0.0048886		2902.97	-0.0010231		3433	-0.00405656
253.19	0.01369976		783.19	-0.01522871		1313.18	0.00152376		1843.18	-0.00145164		2373.17	0.00502027		2903.17	-0.00163723		3433.2	-0.00403679
253.39	0.01555618		783.39	-0.01427958		1313.38	0.00177111		1843.38	-0.00142837		2373.37	0.00471315		2903.37	-0.00167321		3433.4	-0.00374756
253.59	0.0165811		783.59	-0.01333899		1313.58	0.00149578		1843.58	-0.00210034		2373.57	0.00437419		2903.57	-0.00202146		3433.6	-0.00354565
253.79	0.01773868		783.79	-0.0128555		1313.78	0.00110597		1843.78	-0.00234341		2373.77	0.00442917		2903.77	-0.00245267		3433.8	-0.0039425
253.99	0.01727656		783.99	-0.01274216		1313.98	-0.00013371		1843.98	-0.00117242		2373.97	0.00340829		2903.97	-0.00220819		3434	-0.00380518
254.19	0.0167955		784.19	-0.01312515		1314.18	0.00002839		1844.18	-0.00116094		2374.17	0.00243415		2904.17	-0.00230562		3434.2	-0.004783
254.39	0.01664211		784.39	-0.01237654		1314.38	0.00057117		1844.38	-0.00087309		2374.37	0.00170814		2904.37	-0.00140539		3434.4	-0.00478931
254.59	0.01664426		784.59	-0.01188566		1314.58	0.00169057		1844.58	-0.00103017		2374.57	0.00169517		2904.57	-0.00129879		3434.6	-0.0041571
254.79	0.01664435		784.79	-0.01171183		1314.78	0.00237372		1844.78	-0.00115111		2374.77	0.00199455		2904.77	-0.00086464		3434.8	-0.00399804
254.99	0.01726578		784.99	-0.01282159		1314.98	0.002728		1844.98	-0.00157347		2374.97	0.00178028		2904.97	0.00058996		3435	-0.00466062
255.19	0.0175836		785.19	-0.01273753		1315.18	0.00291991		1845.18	-0.00176189		2375.17	0.00103363		2905.17	0.00072719		3435.2	-0.00495648
255.39	0.01709203		785.39	-0.01316127		1315.38	0.00238505		1845.38	-0.00242435		2375.37	0.00116525		2905.37	0.00115396		3435.4	-0.00580362
255.59	0.01591088		785.59	-0.01345391		1315.58	0.00228309		1845.58	-0.00268151		2375.57	0.00153937		2905.57	0.00107729		3435.6	-0.00629498
255.79	0.01539427		785.79	-0.01417834		1315.78	0.00257129		1845.78	-0.0033936		2375.77	0.00143302		2905.77	0.00045409		3435.8	-0.00601683
255.99	0.01502881		785.99	-0.01457872		1315.98	0.00372473		1845.98	-0.00301449		2375.97	0.00201402		2905.97	0.00059398		3436	-0.00680235
256.19	0.01476152		786.19	-0.01528382		1316.18	0.00343421		1846.18	-0.00310359		2376.17	0.00294751		2906.17	-0.00000603		3436.2	-0.00659797
256.39	0.01357479		786.39	-0.01498596		1316.38	0.00341247		1846.38	-0.00292138		2376.37	0.00425255		2906.37	-0.00012028		3436.4	-0.00695643
256.59	0.01430637		786.59	-0.01557773		1316.58	0.00305459		1846.58	-0.0032484		2376.57	0.00525004		2906.57	-0.00002094		3436.6	-0.00698424
256.79	0.01423769		786.79	-0.01499022		1316.78	0.002509		1846.78	-0.00383881		2376.77	0.00461441		2906.77	-0.00197373		3436.8	-0.0077427
256.99	0.01403577		786.99	-0.01448078		1316.98	0.00191772		1846.98	-0.00389464		2376.97	0.00508393		2906.97	-0.00263986		3437	-0.00696592
257.19	0.01420964		787.19	-0.01540439		1317.18	0.00268985		1847.18	-0.00433551		2377.17	0.00489386		2907.17	-0.00314942		3437.2	-0.0066907
257.39	0.01408697		787.39	-0.0156973		1317.38	0.0027927		1847.38	-0.00417889		2377.37	0.00423039		2907.37	-0.00366397		3437.4	-0.00586801
257.59	0.01422424		787.59	-0.01551444		1317.58	0.003134		1847.58	-0.00427341		2377.57	0.00380847		2907.57	-0.0032788		3437.6	-0.00541676
257.79	0.01422088		787.79	-0.0162665		1317.78	0.0027366		1847.78	-0.00510056		2377.77	0.00369901		2907.77	-0.00316862		3437.8	-0.00574684
257.99	0.0134009		787.99	-0.01568848		1317.98	0.00202015		1847.98	-0.00542295		2377.97	0.00302556		2907.97	-0.00359497		3438	-0.00544865
258.19	0.01288891		788.19	-0.01499388		1318.18	0.00307857		1848.18	-0.00580514		2378.17	0.00295878		2908.17	-0.00289365		3438.2	-0.00554765
258.39	0.01236759		788.39	-0.01513149		1318.38	0.00336873		1848.38	-0.00579533		2378.37	0.0024714		2908.37	-0.00253911		3438.4	-0.00456019
258.59	0.0128547		788.59	-0.01475685		1318.58	0.00383469		1848.58	-0.00535876		2378.57	0.00263039		2908.57	-0.00241815		3438.6	-0.00359132
258.79	0.01314367		788.79	-0.01388328		1318.78	0.00372733		1848.78	-0.00493048		2378.77	0.00190544		2908.77	-0.00147963		3438.8	-0.004301
258.99	0.01355085		788.99	-0.01337728		1318.98	0.00317435		1848.98	-0.00484542		2378.97	0.0006637		2908.97	-0.00105037		3439	-0.00387149
259.19	0.01371129		789.19	-0.01309517		1319.18	0.00365729		1849.18	-0.00442372		2379.17	-0.00041182		2909.17	-0.00033743		3439.2	-0.00392324
259.39	0.01389187		789.39	-0.01356767		1319.38	0.00329057		1849.38	-0.00431581		2379.37	-0.00031946		2909.37	-0.00031827		3439.4	-0.00456789
259.59	0.01382244		789.59	-0.01372518		1319.58	0.0032245		1849.58	-0.00367775		2379.57	-0.00009833		2909.57	0.00046601		3439.6	-0.00472202
259.79	0.0143087		789.79	-0.01438817		1319.78	0.00390217		1849.78	-0.00335399		2379.77	0.00030081		2909.77	0.0003611		3439.8	-0.0054438
259.99	0.01377688		789.99	-0.01386172		1319.98	0.00491422		1849.98	-0.00354585		2379.97	0.00041203		2909.97	0.00037611		3440	-0.00522641
260.19	0.0130433		790.19	-0.01313213		1320.18	0.0042878		1850.18	-0.00442791		2380.17	0.00003601		2910.17	-0.00010203		3440.2	-0.00499329
260.39	0.01273854		790.39	-0.01231533		1320.38	0.0037325		1850.38	-0.00301093		2380.37	0.00046912		2910.37	-0.00062215		3440.4	-0.00494977
260.59	0.01379291		790.59	-0.01246846		1320.58	0.0038844		1850.58	-0.00240107		2380.57	0.00053		2910.57	-0.00106351		3440.6	-0.00492113
260.79	0.01272301		790.79	-0.01244063		1320.78	0.00443537		1850.78	-0.00237149		2380.77	0.00032422		2910.77	-0.00153847		3440.8	-0.00490605
260.99	0.01268777		790.99	-0.01257776		1320.98	0.00445186		1850.98	-0.00174906		2380.97	0.00065552		2910.97	-0.00188014		3441	-0.00439528
261.19	0.01386841		791.19	-0.01349889		1321.18	0.00535027		1851.18	-0.00135092		2381.17	0.00029037		2911.17	-0.00182408		3441.2	-0.00411333
261.39	0.01407158		791.39	-0.0133166		1321.38	0.00524495		1851.38	-0.00133593		2381.37	0.00004224		2911.37	-0.00188446		3441.4	-0.0038754
261.59	0.01491275		791.59	-0.01434687		1321.58	0.00481137		1851.58	-0.00200388		2381.57	0.00072225		2911.57	-0.00141006		3441.6	-0.00418262
261.79	0.01422915		791.79	-0.01517732		1321.78	0.0041346		1851.78	-0.00319047		2381.77	0.00223994		2911.77	-0.00103196		3441.8	-0.00470218
261.99	0.01430896		791.99	-0.01456176		1321.98	0.00342714		1851.98	-0.00293843		2381.97	0.00171334		2911.97	-0.00133863		3442	-0.00445351
262.19	0.01449466		792.19	-0.0154443		1322.18	0.00409982		1852.18	-0.0026814		2382.17	0.00186355		2912.17	-0.00001312		3442.2	-0.00376629
262.39	0.01480039		792.39	-0.01584991		1322.38	0.00323319		1852.38	-0.00284359		2382.37	0.00124017		2912.37	-0.00017476		3442.4	-0.00395192
262.59	0.01480611		792.59	-0.01555351		1322.58	0.00306241		1852.58	-0.00296614		2382.57	0.00135233		2912.57	-0.00017663		3442.6	-0.00497757
262.79	0.01449524		792.79	-0.01542292		1322.78	0.00278226		1852.78	-0.00366636		2382.77	0.0007641		2912.77	-0.00005279		3442.8	-0.00651633
262.99	0.0155779		792.99	-0.01582727		1322.98	0.00205249		1852.98	-0.00346428		2382.97	0.00139139		2912.97	0.00056968		3443	-0.00648955
263.19	0.01614335		793.19	-0.01629115		1323.18	0.0025272		1853.18	-0.00321509		2383.17	0.00188361		2913.17	0.00135218		3443.2	-0.00762088
263.39	0.0158991		793.39	-0.01749553		1323.38	0.00228521		1853.38	-0.00370635		2383.37	0.00260677		2913.37	0.00118335		3443.4	-0.0078131
263.59	0.01568773		793.59	-0.01707148		1323.58	0.00263719		1853.58	-0.0033088		2383.57	0.00260713		2913.57	0.0013036		3443.6	-0.00800768
263.79	0.01522747		793.79	-0.01668365		1323.78	0.0022217		1853.78	-0.00396172		2383.77	0.00248548		2913.77	0.00089546		3443.8	-0.00779875
263.99	0.01483283		793.99	-0.01561014		1323.98	0.00212473		1853.98	-0.00411978		2383.97	0.00272151		2913.97	0.00081151		3444	-0.00728302
264.19	0.01439438		794.19	-0.01514921		1324.18	0.001335		1854.18	-0.00411353		2384.17	0.00240582		2914.17	0.00004974		3444.2	-0.00666475
264.39	0.01511234		794.39	-0.01423562		1324.38	0.0018793		1854.38	-0.00289551		2384.37	0.00272996		2914.37	-0.00066835		3444.4	-0.0054355
264.59	0.01638497		794.59	-0.01407671		1324.58	0.00286189		1854.58	-0.00350665		2384.57	0.00275581		2914.57	-0.00119025		3444.6	-0.00491337
264.79	0.01686419		794.79	-0.01417691		1324.78	0.00303703		1854.78	-0.00300231		2384.77	0.0020467		2914.77	-0.00174886		3444.8	-0.00517158
264.99	0.01799458		794.99	-0.01337897		1324.98	0.00308468		1854.98	-0.00329317		2384.97	0.00135386		2914.97	-0.00231433		3445	-0.00514794
265.19	0.01836672		795.19	-0.01238289		1325.18	0.0038952		1855.18	-0.00292427		2385.17	0.00100066		2915.17	-0.00340708		3445.2	-0.00471236
265.39	0.01817824		795.39	-0.01164403		1325.38	0.00342042		1855.38	-0.00263871		2385.37	0.00113668		2915.37	-0.00405768		3445.4	-0.00495186
265.59	0.01839732		795.59	-0.01253986		1325.58	0.00366711		1855.58	-0.00176244		2385.57	0.00170153		2915.57	-0.00371471		3445.6	-0.0054844
265.79	0.01821496		795.79	-0.01209513		1325.78	0.00357579		1855.78	-0.0020964		2385.77	0.00162315		2915.77	-0.00294172		3445.8	-0.00581393
265.99	0.01832518		795.99	-0.01175007		1325.98	0.0035939		1855.98	-0.0025017		2385.97	-0.00042355		2915.97	-0.00309162		3446	-0.00635291
266.19	0.01847198		796.19	-0.01213211		1326.18	0.00361559		1856.18	-0.00193146		2386.17	-0.00039857		2916.17	-0.00249925		3446.2	-0.00585004
266.39	0.01847938		796.39	-0.01242192		1326.38	0.00394228		1856.38	-0.00210664		2386.37	-0.00062135		2916.37	-0.00286903		3446.4	-0.00688088
266.59	0.01727366		796.59	-0.01270424		1326.58	0.00465138		1856.58	-0.00222778		2386.57	-0.0000071		2916.57	-0.00310175		3446.6	-0.00745052
266.79	0.01744574		796.79	-0.01265735		1326.78	0.00451802		1856.78	-0.00183493		2386.77	0.00009888		2916.77	-0.00212432		3446.8	-0.00844363
266.99	0.01737036		796.99	-0.0125708		1326.98	0.00465225		1856.98	-0.00090743		2386.97	0.00010191		2916.97	-0.00065983		3447	-0.00763015
267.19	0.01661937		797.19	-0.01287657		1327.18	0.00484104		1857.18	-0.0005046		2387.17	-0.00028933		2917.17	-0.00041894		3447.2	-0.00782434
267.39	0.01564284		797.39	-0.01326335		1327.38	0.00356793		1857.38	-0.00083479		2387.37	-0.00063165		2917.37	-0.00061272		3447.4	-0.0079454
267.59	0.01572737		797.59	-0.01296676		1327.58	0.00319171		1857.58	-0.00062727		2387.57	-0.00065915		2917.57	0.0003026		3447.6	-0.00714575
267.79	0.01458228		797.79	-0.01325269		1327.78	0.00193481		1857.78	-0.00107805		2387.77	0.0002865		2917.77	0.00094398		3447.8	-0.00658199
267.99	0.01403373		797.99	-0.01343656		1327.98	0.00145219		1857.98	-0.0010296		2387.97	0.0015361		2917.97	0.00084694		3448	-0.00643604
268.19	0.01487501		798.19	-0.01415147		1328.18	0.00138303		1858.18	-0.001174		2388.17	0.00089258		2918.17	0.00098601		3448.2	-0.00671398
268.39	0.01570395		798.39	-0.01459789		1328.38	0.00136212		1858.38	-0.00149001		2388.37	0.00081791		2918.37	0.00108704		3448.4	-0.00646349
268.59	0.01650329		798.59	-0.01513488		1328.58	0.00104544		1858.58	-0.00215069		2388.57	0.00090854		2918.57	0.00128304		3448.6	-0.00738695
268.79	0.0160031		798.79	-0.01592866		1328.78	0.00147809		1858.78	-0.00168359		2388.77	0.00099989		2918.77	0.00168247		3448.8	-0.00799058
268.99	0.01674381		798.99	-0.01543329		1328.98	0.00209389		1858.98	-0.00208992		2388.97	0.00109621		2918.97	0.00185766		3449	-0.007968
269.19	0.01769355		799.19	-0.01500706		1329.18	0.00294253		1859.18	-0.00122262		2389.17	0.00170582		2919.17	0.00088512		3449.2	-0.00769666
269.39	0.0180889		799.39	-0.01479473		1329.38	0.00292705		1859.38	-0.00115607		2389.37	0.00196794		2919.37	0.00145413		3449.4	-0.00821413
269.59	0.01917555		799.59	-0.01468732		1329.58	0.00278911		1859.58	-0.0016636		2389.57	0.00181182		2919.57	0.00096855		3449.6	-0.00841823
269.79	0.02022942		799.79	-0.01373665		1329.78	0.00261926		1859.78	-0.00263001		2389.77	0.0016328		2919.77	0.00104896		3449.8	-0.00812164
269.99	0.02081038		799.99	-0.01317326		1329.98	0.00366481		1859.98	-0.00281864		2389.97	0.00124143		2919.97	0.00051134		3450	-0.00780714
270.19	0.0215128		800.19	-0.0137702		1330.18	0.00439554		1860.18	-0.00146662		2390.17	0.00158965		2920.17	0.00100587		3450.2	-0.00628211
270.39	0.02155346		800.39	-0.01381423		1330.38	0.00528472		1860.38	-0.00131905		2390.37	0.00147163		2920.37	0.00120884		3450.4	-0.00729237
270.59	0.02133786		800.59	-0.0135403		1330.58	0.00587125		1860.58	-0.0009325		2390.57	0.0013156		2920.57	0.00150069		3450.6	-0.00738575
270.79	0.02107855		800.79	-0.01326878		1330.78	0.00684045		1860.78	-0.00003371		2390.77	0.00067713		2920.77	0.00171627		3450.8	-0.00711396
270.99	0.02076084		800.99	-0.01260544		1330.98	0.00755389		1860.98	-0.0000997		2390.97	-0.00017307		2920.97	0.00135271		3451	-0.00582382
271.19	0.02061563		801.19	-0.01216318		1331.18	0.00687944		1861.18	0.00045146		2391.17	-0.00009738		2921.17	0.00081027		3451.2	-0.0053488
271.39	0.02144732		801.39	-0.01187341		1331.38	0.00560015		1861.38	0.00069933		2391.37	-0.00110391		2921.37	0.00056932		3451.4	-0.00512423
271.59	0.02182496		801.59	-0.01250938		1331.58	0.00530624		1861.58	0.00097007		2391.57	-0.00122		2921.57	0.00104532		3451.6	-0.0048537
271.79	0.02074278		801.79	-0.01340293		1331.78	0.00504763		1861.78	0.00126976		2391.77	-0.00099845		2921.77	0.00151452		3451.8	-0.00522579
271.99	0.02014961		801.99	-0.01359967		1331.98	0.00466458		1861.98	0.00187166		2391.97	-0.00228508		2921.97	0.00121354		3452	-0.00537957
272.19	0.02056406		802.19	-0.01444051		1332.18	0.00464947		1862.18	0.00256663		2392.17	-0.00302365		2922.17	0.00117045		3452.2	-0.00582139
272.39	0.01898664		802.39	-0.01467512		1332.38	0.00467898		1862.38	0.00219793		2392.37	-0.00318307		2922.37	0.00158517		3452.4	-0.00632581
272.59	0.01759868		802.59	-0.01500665		1332.58	0.00448443		1862.58	0.00177314		2392.57	-0.00374038		2922.57	0.00122558		3452.6	-0.00638256
272.79	0.01689165		802.79	-0.01514138		1332.78	0.00435356		1862.78	0.00114518		2392.77	-0.00419723		2922.77	0.00078504		3452.8	-0.00682737
272.99	0.01745263		802.99	-0.01487673		1332.98	0.00391123		1862.98	0.00027231		2392.97	-0.0047526		2922.97	0.00086825		3453	-0.00696786
273.19	0.01786071		803.19	-0.01474012		1333.18	0.00390302		1863.18	-0.00015116		2393.17	-0.0045674		2923.17	0.0002829		3453.2	-0.00707841
273.39	0.0174791		803.39	-0.01409271		1333.38	0.0028222		1863.38	-0.00158104		2393.37	-0.00448593		2923.37	0.00105857		3453.4	-0.00760046
273.59	0.01845674		803.59	-0.01403694		1333.58	0.00299934		1863.58	-0.00288523		2393.57	-0.0040468		2923.57	0.00089521		3453.6	-0.00772282
273.79	0.0188988		803.79	-0.01331036		1333.78	0.00343071		1863.78	-0.00336658		2393.77	-0.00308141		2923.77	0.00213931		3453.8	-0.00753439
273.99	0.01925004		803.99	-0.01371093		1333.98	0.00340806		1863.98	-0.0037766		2393.97	-0.00219746		2923.97	0.00200316		3454	-0.00759766
274.19	0.01919402		804.19	-0.01332268		1334.18	0.00431572		1864.18	-0.00352565		2394.17	-0.00156357		2924.17	0.00196901		3454.2	-0.00701468
274.39	0.0198278		804.39	-0.01301196		1334.38	0.00411988		1864.38	-0.00351969		2394.37	-0.00130796		2924.37	0.00234512		3454.4	-0.0077369
274.59	0.02075746		804.59	-0.01367612		1334.58	0.00498897		1864.58	-0.00486315		2394.57	-0.00089827		2924.57	0.00210591		3454.6	-0.00742734
274.79	0.02077482		804.79	-0.0127102		1334.78	0.00497464		1864.78	-0.00508125		2394.77	-0.00114478		2924.77	0.00127611		3454.8	-0.00719399
274.99	0.02174601		804.99	-0.01212602		1334.98	0.00472178		1864.98	-0.00507		2394.97	-0.00067383		2924.97	0.00133815		3455	-0.00676903
275.19	0.02207284		805.19	-0.01182607		1335.18	0.00449696		1865.18	-0.0039986		2395.17	0.00005996		2925.17	0.00180703		3455.2	-0.00657861
275.39	0.0231818		805.39	-0.01236047		1335.38	0.00445982		1865.38	-0.00348382		2395.37	-0.00037321		2925.37	0.00199698		3455.4	-0.00687628
275.59	0.02290119		805.59	-0.01313974		1335.58	0.00471904		1865.58	-0.00295009		2395.57	0.00052137		2925.57	0.00122004		3455.6	-0.00795072
275.79	0.02261001		805.79	-0.01294334		1335.78	0.00528687		1865.78	-0.00196976		2395.77	0.00052315		2925.77	0.00132833		3455.8	-0.00764335
275.99	0.02279413		805.99	-0.01221511		1335.98	0.00528541		1865.98	-0.0009544		2395.97	-0.00044831		2925.97	0.00006359		3456	-0.00742869
276.19	0.02311155		806.19	-0.01219468		1336.18	0.00474785		1866.18	-0.00007669		2396.17	0.00027472		2926.17	0.00045161		3456.2	-0.00805364
276.39	0.02228584		806.39	-0.01216984		1336.38	0.00436865		1866.38	0.00015155		2396.37	-0.0006835		2926.37	0.00036138		3456.4	-0.00897272
276.59	0.02122539		806.59	-0.01326809		1336.58	0.00333995		1866.58	0.00017098		2396.57	-0.00061281		2926.57	0.0001919		3456.6	-0.00908662
276.79	0.02090469		806.79	-0.01294508		1336.78	0.00307956		1866.78	0.00035305		2396.77	-0.00042669		2926.77	0.00067789		3456.8	-0.00980562
276.99	0.02014328		806.99	-0.01305952		1336.98	0.00284122		1866.98	0.00056393		2396.97	-0.000373		2926.97	0.00156839		3457	-0.00975755
277.19	0.01949317		807.19	-0.01259178		1337.18	0.00278759		1867.18	0.0010433		2397.17	-0.00030715		2927.17	0.00205834		3457.2	-0.01080633
277.39	0.0193624		807.39	-0.01158212		1337.38	0.00241031		1867.38	0.00128908		2397.37	-0.00018717		2927.37	0.00257199		3457.4	-0.01077269
277.59	0.02019201		807.59	-0.01224868		1337.58	0.00229255		1867.58	0.00048655		2397.57	0.00006595		2927.57	0.00261695		3457.6	-0.01028559
277.79	0.02005858		807.79	-0.01108747		1337.78	0.00198841		1867.78	0.00054192		2397.77	0.00091921		2927.77	0.00327381		3457.8	-0.00960229
277.99	0.02003518		807.99	-0.01194341		1337.98	0.00233239		1867.98	-0.00061589		2397.97	0.00106738		2927.97	0.00337324		3458	-0.00911115
278.19	0.02035058		808.19	-0.01080199		1338.18	0.00301219		1868.18	-0.00032682		2398.17	0.00094248		2928.17	0.00399138		3458.2	-0.0087433
278.39	0.02052612		808.39	-0.01118234		1338.38	0.00275077		1868.38	-0.00015472		2398.37	0.00071864		2928.37	0.00435785		3458.4	-0.00875801
278.59	0.02047801		808.59	-0.01123562		1338.58	0.00360798		1868.58	-0.00164412		2398.57	0.00153755		2928.57	0.00361103		3458.6	-0.00859408
278.79	0.01958699		808.79	-0.01026278		1338.78	0.00432528		1868.78	-0.00140148		2398.77	0.00172378		2928.77	0.00393847		3458.8	-0.00778363
278.99	0.01948225		808.99	-0.01026291		1338.98	0.00451783		1868.98	-0.00136139		2398.97	0.00332422		2928.97	0.00389102		3459	-0.00759934
279.19	0.01910582		809.19	-0.01011913		1339.18	0.0050492		1869.18	-0.00177884		2399.17	0.00386209		2929.17	0.00271184		3459.2	-0.00714116
279.39	0.01946156		809.39	-0.01001497		1339.38	0.00492495		1869.38	-0.00206979		2399.37	0.00472819		2929.37	0.00196323		3459.4	-0.00744513
279.59	0.02028484		809.59	-0.01020929		1339.58	0.00512651		1869.58	-0.00222905		2399.57	0.00509053		2929.57	0.00095317		3459.6	-0.00757558
279.79	0.02083071		809.79	-0.00948325		1339.78	0.00518903		1869.78	-0.00213174		2399.77	0.00438907		2929.77	0.00131073		3459.8	-0.00706025
279.99	0.02180839		809.99	-0.01015319		1339.98	0.00530278		1869.98	-0.00252343		2399.97	0.0049344		2929.97	0.00069997		3460	-0.00730865
280.19	0.02175005		810.19	-0.01062813		1340.18	0.00434065		1870.18	-0.00161001		2400.17	0.00515691		2930.17	0.00196506		3460.2	-0.00815522
280.39	0.02146355		810.39	-0.01181042		1340.38	0.00275203		1870.38	-0.00211354		2400.37	0.00466667		2930.37	0.00150695		3460.4	-0.00842139
280.59	0.02151097		810.59	-0.0127138		1340.58	0.00243048		1870.58	-0.00204117		2400.57	0.00542883		2930.57	0.0015289		3460.6	-0.0078925
280.79	0.02188857		810.79	-0.01283989		1340.78	0.00229146		1870.78	-0.00156846		2400.77	0.00586138		2930.77	0.00205704		3460.8	-0.00775442
280.99	0.02202776		810.99	-0.01376857		1340.98	0.00193886		1870.98	-0.00131629		2400.97	0.00660289		2930.97	0.00201116		3461	-0.00777999
281.19	0.02221939		811.19	-0.01560507		1341.18	0.00209819		1871.18	-0.00144466		2401.17	0.00520837		2931.17	0.00118893		3461.2	-0.00746515
281.39	0.02309594		811.39	-0.0163632		1341.38	0.00146316		1871.38	-0.00120622		2401.37	0.00509796		2931.37	0.00029795		3461.4	-0.00680047
281.59	0.02370067		811.59	-0.01806419		1341.58	0.00097304		1871.58	-0.00130138		2401.57	0.00491122		2931.57	0.00048577		3461.6	-0.00637514
281.79	0.02383009		811.79	-0.01827739		1341.78	0.00151308		1871.78	-0.00103964		2401.77	0.00391771		2931.77	0.00081089		3461.8	-0.00618023
281.99	0.02365136		811.99	-0.01850577		1341.98	0.00237722		1871.98	-0.00022938		2401.97	0.00292645		2931.97	0.00030233		3462	-0.00638104
282.19	0.02315022		812.19	-0.01749048		1342.18	0.00351718		1872.18	0.00101718		2402.17	0.00159852		2932.17	-0.00026493		3462.2	-0.00741695
282.39	0.02285334		812.39	-0.01799426		1342.38	0.00430326		1872.38	0.00150151		2402.37	0.00138779		2932.37	-0.00182999		3462.4	-0.00812978
282.59	0.02267899		812.59	-0.0178827		1342.58	0.00504452		1872.58	0.00107697		2402.57	0.001079		2932.57	-0.001548		3462.6	-0.00817676
282.79	0.0227591		812.79	-0.01791814		1342.78	0.00510246		1872.78	0.00080083		2402.77	0.00036021		2932.77	-0.00183235		3462.8	-0.0077768
282.99	0.02305663		812.99	-0.01740068		1342.98	0.00400591		1872.98	0.00058057		2402.97	0.00025444		2932.97	-0.00255081		3463	-0.00800528
283.19	0.02391077		813.19	-0.01656892		1343.18	0.00445601		1873.18	-0.00023697		2403.17	0.00004227		2933.17	-0.0032511		3463.2	-0.00771774
283.39	0.02334955		813.39	-0.01606086		1343.38	0.00449667		1873.38	-0.00028511		2403.37	-0.00029585		2933.37	-0.00246141		3463.4	-0.0090767
283.59	0.02417112		813.59	-0.01526252		1343.58	0.00520236		1873.58	-0.00029873		2403.57	-0.00093354		2933.57	-0.00190521		3463.6	-0.00969988
283.79	0.02436522		813.79	-0.01450572		1343.78	0.00531149		1873.78	-0.00072325		2403.77	-0.00078863		2933.77	-0.00181319		3463.8	-0.01080442
283.99	0.02436778		813.99	-0.01393456		1343.98	0.00530539		1873.98	-0.00121411		2403.97	0.00060514		2933.97	-0.00128703		3464	-0.01096022
284.19	0.02383296		814.19	-0.01348193		1344.18	0.00386636		1874.18	-0.00099645		2404.17	0.00037866		2934.17	0.00033828		3464.2	-0.01088803
284.39	0.02386135		814.39	-0.01274135		1344.38	0.00278806		1874.38	-0.00203361		2404.37	0.00102037		2934.37	0.00045665		3464.4	-0.00979824
284.59	0.02447732		814.59	-0.01191421		1344.58	0.00326083		1874.58	-0.00183581		2404.57	0.0022461		2934.57	0.00112347		3464.6	-0.00844256
284.79	0.02470647		814.79	-0.01157885		1344.78	0.00278962		1874.78	-0.00151656		2404.77	0.00341696		2934.77	0.002265		3464.8	-0.00766858
284.99	0.02503781		814.99	-0.01273473		1344.98	0.00205344		1874.98	-0.00197063		2404.97	0.00403129		2934.97	0.00144414		3465	-0.00733418
285.19	0.02457937		815.19	-0.01252984		1345.18	0.0021605		1875.18	-0.00231451		2405.17	0.00365659		2935.17	0.0013663		3465.2	-0.00641815
285.39	0.0241481		815.39	-0.01092844		1345.38	0.00190321		1875.38	-0.00184712		2405.37	0.00405349		2935.37	0.00219594		3465.4	-0.00653172
285.59	0.02429183		815.59	-0.01110104		1345.58	0.00350789		1875.58	-0.00206307		2405.57	0.00403134		2935.57	0.00265428		3465.6	-0.00571293
285.79	0.02360449		815.79	-0.01058535		1345.78	0.00396067		1875.78	-0.00157896		2405.77	0.00393171		2935.77	0.00238457		3465.8	-0.00602663
285.99	0.02287124		815.99	-0.01009778		1345.98	0.00522232		1875.98	-0.00087779		2405.97	0.00368514		2935.97	0.00163842		3466	-0.00651424
286.19	0.02227744		816.19	-0.01039332		1346.18	0.00598794		1876.18	-0.00099443		2406.17	0.00362547		2936.17	0.00157288		3466.2	-0.00760962
286.39	0.02206644		816.39	-0.0102207		1346.38	0.00653562		1876.38	-0.00078665		2406.37	0.0045788		2936.37	0.00075094		3466.4	-0.0074647
286.59	0.02247847		816.59	-0.01024801		1346.58	0.00698022		1876.58	-0.00138964		2406.57	0.00458169		2936.57	0.00236551		3466.6	-0.00725883
286.79	0.0240379		816.79	-0.01074698		1346.78	0.00688181		1876.78	-0.00161164		2406.77	0.00518905		2936.77	0.00160005		3466.8	-0.00718122
286.99	0.02469718		816.99	-0.01084629		1346.98	0.00721247		1876.98	-0.00102106		2406.97	0.00555516		2936.97	0.002031		3467	-0.00734142
287.19	0.02553229		817.19	-0.01132252		1347.18	0.00820294		1877.18	-0.00053603		2407.17	0.00608574		2937.17	0.00180839		3467.2	-0.00763116
287.39	0.0247379		817.39	-0.01176752		1347.38	0.0083704		1877.38	-0.00023404		2407.37	0.00569264		2937.37	0.00234619		3467.4	-0.00828571
287.59	0.02578295		817.59	-0.01222797		1347.58	0.00772366		1877.58	0.00074855		2407.57	0.00619982		2937.57	0.00279263		3467.6	-0.00767583
287.79	0.02552414		817.79	-0.01286573		1347.78	0.00760731		1877.78	0.00088838		2407.77	0.00609964		2937.77	0.0023934		3467.8	-0.00741556
287.99	0.02506008		817.99	-0.01282651		1347.98	0.00666004		1877.98	0.00071021		2407.97	0.00532797		2937.97	0.00228868		3468	-0.00647702
288.19	0.02455435		818.19	-0.01339863		1348.18	0.00564718		1878.18	0.00005979		2408.17	0.00459525		2938.17	0.00179054		3468.2	-0.00628524
288.39	0.02532031		818.39	-0.01347568		1348.38	0.00488135		1878.38	-0.00010648		2408.37	0.00472237		2938.37	0.00214122		3468.4	-0.00547519
288.59	0.02472804		818.59	-0.01398001		1348.58	0.00485991		1878.58	0.00078318		2408.57	0.00404531		2938.57	0.00170249		3468.6	-0.00537516
288.79	0.02458571		818.79	-0.01471696		1348.78	0.0040602		1878.78	0.00069406		2408.77	0.00371425		2938.77	0.00145902		3468.8	-0.0046897
288.99	0.02476219		818.99	-0.01602533		1348.98	0.00364802		1878.98	0.00062217		2408.97	0.00322577		2938.97	0.0010254		3469	-0.0050259
289.19	0.02367783		819.19	-0.01481292		1349.18	0.00444294		1879.18	0.00066195		2409.17	0.00220603		2939.17	0.00126674		3469.2	-0.00441756
289.39	0.0227105		819.39	-0.01407045		1349.38	0.00408488		1879.38	-0.00007682		2409.37	0.0013952		2939.37	0.00146418		3469.4	-0.00463187
289.59	0.02330223		819.59	-0.0148016		1349.58	0.0044359		1879.58	-0.00063641		2409.57	0.00193419		2939.57	0.00125013		3469.6	-0.00490417
289.79	0.02203283		819.79	-0.01502125		1349.78	0.00308601		1879.78	-0.00046092		2409.77	0.00205162		2939.77	0.00106153		3469.8	-0.0057156
289.99	0.02159185		819.99	-0.01462239		1349.98	0.00316013		1879.98	-0.00180329		2409.97	0.00170632		2939.97	0.00096089		3470	-0.00525436
290.19	0.02114171		820.19	-0.01376159		1350.18	0.00277537		1880.18	-0.00212325		2410.17	0.00200487		2940.17	0.00134859		3470.2	-0.00526078
290.39	0.02130359		820.39	-0.01329102		1350.38	0.00305572		1880.38	-0.00221477		2410.37	0.00245754		2940.37	0.00133085		3470.4	-0.00460167
290.59	0.02229266		820.59	-0.01350877		1350.58	0.00300028		1880.58	-0.00267655		2410.57	0.00165923		2940.57	0.00255198		3470.6	-0.00438123
290.79	0.02295383		820.79	-0.01343887		1350.78	0.00352357		1880.78	-0.00188108		2410.77	0.0026279		2940.77	0.00150389		3470.8	-0.00421138
290.99	0.0232344		820.99	-0.01371476		1350.98	0.00371927		1880.98	-0.00206555		2410.97	0.00314569		2940.97	0.00135837		3471	-0.00452827
291.19	0.02366084		821.19	-0.01429369		1351.18	0.00371828		1881.18	-0.00118332		2411.17	0.00352974		2941.17	0.00212011		3471.2	-0.00389055
291.39	0.02317774		821.39	-0.01468419		1351.38	0.00363676		1881.38	-0.00098521		2411.37	0.00341251		2941.37	0.0021826		3471.4	-0.00427806
291.59	0.02358402		821.59	-0.01470925		1351.58	0.00316254		1881.58	-0.00001275		2411.57	0.00311029		2941.57	0.00202927		3471.6	-0.00430223
291.79	0.02425319		821.79	-0.014596		1351.78	0.00451939		1881.78	-0.00019429		2411.77	0.0019851		2941.77	0.00191355		3471.8	-0.00436825
291.99	0.02444397		821.99	-0.01490867		1351.98	0.00382273		1881.98	-0.00062889		2411.97	0.00188699		2941.97	0.00224767		3472	-0.00467037
292.19	0.02505183		822.19	-0.01564501		1352.18	0.00462082		1882.18	-0.00066577		2412.17	0.00200472		2942.17	0.00195859		3472.2	-0.00434803
292.39	0.02539593		822.39	-0.0161108		1352.38	0.00475398		1882.38	0.00023276		2412.37	0.00244171		2942.37	0.0022211		3472.4	-0.00456772
292.59	0.02463172		822.59	-0.0158857		1352.58	0.00610479		1882.58	0.00065628		2412.57	0.00204764		2942.57	0.00122092		3472.6	-0.00532806
292.79	0.02502816		822.79	-0.01663225		1352.78	0.00565864		1882.78	0.00034313		2412.77	0.00203435		2942.77	0.00133125		3472.8	-0.00531918
292.99	0.02477131		822.99	-0.01659567		1352.98	0.00549968		1882.98	0.00063454		2412.97	0.00210782		2942.97	0.00154055		3473	-0.00644655
293.19	0.02442661		823.19	-0.01551737		1353.18	0.00600158		1883.18	0.00023834		2413.17	0.00254208		2943.17	0.00143388		3473.2	-0.00634186
293.39	0.02402123		823.39	-0.01455847		1353.38	0.00556335		1883.38	-0.00074065		2413.37	0.00393703		2943.37	0.00144116		3473.4	-0.00750367
293.59	0.02441402		823.59	-0.01421338		1353.58	0.00576189		1883.58	-0.00103432		2413.57	0.00455572		2943.57	0.00164092		3473.6	-0.00819078
293.79	0.02375541		823.79	-0.01377881		1353.78	0.00500104		1883.78	-0.00189769		2413.77	0.00515228		2943.77	0.00141327		3473.8	-0.00846681
293.99	0.02395234		823.99	-0.0132004		1353.98	0.00456104		1883.98	-0.00295188		2413.97	0.0050114		2943.97	0.00108575		3474	-0.00869455
294.19	0.02419786		824.19	-0.01193633		1354.18	0.00443792		1884.18	-0.00302631		2414.17	0.00455372		2944.17	0.00088388		3474.2	-0.00907972
294.39	0.02412536		824.39	-0.01175094		1354.38	0.00469704		1884.38	-0.00292655		2414.37	0.00509195		2944.37	0.00020367		3474.4	-0.00885069
294.59	0.02453402		824.59	-0.01033842		1354.58	0.00484444		1884.58	-0.00326872		2414.57	0.00453591		2944.57	0.00063102		3474.6	-0.00957498
294.79	0.02563625		824.79	-0.01037193		1354.78	0.00539291		1884.78	-0.0026385		2414.77	0.006305		2944.77	-0.00036231		3474.8	-0.00955895
294.99	0.02635484		824.99	-0.01061386		1354.98	0.00558418		1884.98	-0.0030922		2414.97	0.00710188		2944.97	0.00135824		3475	-0.01014449
295.19	0.02627351		825.19	-0.01109678		1355.18	0.00629199		1885.18	-0.00232149		2415.17	0.00685109		2945.17	0.00251537		3475.2	-0.00935969
295.39	0.02606528		825.39	-0.01097948		1355.38	0.00606986		1885.38	-0.00220158		2415.37	0.00640992		2945.37	0.00225475		3475.4	-0.01046487
295.59	0.02674545		825.59	-0.01099245		1355.58	0.00620372		1885.58	-0.00187779		2415.57	0.00627334		2945.57	0.00192375		3475.6	-0.0101093
295.79	0.02737231		825.79	-0.01149847		1355.78	0.00684905		1885.78	-0.00206598		2415.77	0.00545918		2945.77	0.00275024		3475.8	-0.00934564
295.99	0.02753409		825.99	-0.01198358		1355.98	0.00618772		1885.98	-0.00227379		2415.97	0.00567966		2945.97	0.00341161		3476	-0.00928192
296.19	0.02721859		826.19	-0.01241021		1356.18	0.00692565		1886.18	-0.00209446		2416.17	0.00523717		2946.17	0.0035701		3476.2	-0.00791408
296.39	0.02619914		826.39	-0.01267287		1356.38	0.00644053		1886.38	-0.00179981		2416.37	0.00530421		2946.37	0.00336963		3476.4	-0.0078226
296.59	0.02635375		826.59	-0.01277022		1356.58	0.00675565		1886.58	-0.00121382		2416.57	0.00471234		2946.57	0.00337103		3476.6	-0.00719795
296.79	0.02575803		826.79	-0.01388498		1356.78	0.0051325		1886.78	-0.00056189		2416.77	0.00364257		2946.77	0.00338371		3476.8	-0.00625548
296.99	0.02504948		826.99	-0.01294817		1356.98	0.00465226		1886.98	0.00036446		2416.97	0.00369884		2946.97	0.0029575		3477	-0.006007
297.19	0.02493816		827.19	-0.01310836		1357.18	0.00518691		1887.18	0.00026142		2417.17	0.00286695		2947.17	0.00215617		3477.2	-0.00515075
297.39	0.02421717		827.39	-0.01280876		1357.38	0.0055619		1887.38	-0.0001295		2417.37	0.00201379		2947.37	0.00188048		3477.4	-0.00544211
297.59	0.02475951		827.59	-0.01370184		1357.58	0.00492878		1887.58	0.00052937		2417.57	0.00212931		2947.57	0.0017624		3477.6	-0.00532756
297.79	0.02505253		827.79	-0.014399		1357.78	0.00366043		1887.78	-0.00005662		2417.77	0.00216682		2947.77	0.00158014		3477.8	-0.00581716
297.99	0.02518897		827.99	-0.01471428		1357.98	0.00323853		1887.98	-0.00081289		2417.97	0.00218411		2947.97	0.00151595		3478	-0.00568052
298.19	0.02525542		828.19	-0.01388863		1358.18	0.00330281		1888.18	0.00012584		2418.17	0.00267274		2948.17	0.00099925		3478.2	-0.0048926
298.39	0.02590163		828.39	-0.01429391		1358.38	0.00366364		1888.38	0.00035568		2418.37	0.00275345		2948.37	0.00058003		3478.4	-0.00528592
298.59	0.02698098		828.59	-0.01396657		1358.58	0.0028476		1888.58	0.00100146		2418.57	0.00280552		2948.57	0.00111244		3478.6	-0.00590777
298.79	0.02682153		828.79	-0.01588144		1358.78	0.0029259		1888.78	0.0007461		2418.77	0.00385355		2948.77	0.00119337		3478.8	-0.00603885
298.99	0.02661699		828.99	-0.01655301		1358.98	0.00395105		1888.98	0.00002875		2418.97	0.00443311		2948.97	0.00209684		3479	-0.00583813
299.19	0.02629279		829.19	-0.01672971		1359.18	0.00388679		1889.18	0.0003315		2419.17	0.0039015		2949.17	0.00184461		3479.2	-0.00622252
299.39	0.02584293		829.39	-0.01642848		1359.38	0.00336264		1889.38	0.00019479		2419.37	0.00372638		2949.37	0.00167726		3479.4	-0.00775055
299.59	0.02677574		829.59	-0.01592805		1359.58	0.0038118		1889.58	-0.00030473		2419.57	0.00448245		2949.57	0.00178385		3479.6	-0.00758156
299.79	0.02779329		829.79	-0.01567833		1359.78	0.00347311		1889.78	-0.00056443		2419.77	0.00469244		2949.77	0.00290074		3479.8	-0.0076009
299.99	0.02783298		829.99	-0.01569981		1359.98	0.00293222		1889.98	-0.00115623		2419.97	0.0050676		2949.97	0.00366778		3480	-0.00787736
300.19	0.02809638		830.19	-0.01555304		1360.18	0.0026126		1890.18	-0.00052201		2420.17	0.00545739		2950.17	0.00332874		3480.2	-0.00723171
300.39	0.02814781		830.39	-0.01504923		1360.38	0.00216965		1890.38	-0.0000673		2420.37	0.00519056		2950.37	0.00274726		3480.4	-0.00785989
300.59	0.02766651		830.59	-0.01388443		1360.58	0.00170116		1890.58	0.00048872		2420.57	0.0041761		2950.57	0.00276128		3480.6	-0.00822483
300.79	0.02721926		830.79	-0.01330882		1360.78	0.0008374		1890.78	0.00060393		2420.77	0.00357963		2950.77	0.00305072		3480.8	-0.00909856
300.99	0.02755282		830.99	-0.01231657		1360.98	0.00091661		1890.98	-0.00036699		2420.97	0.00342462		2950.97	0.00339633		3481	-0.00995139
301.19	0.02712955		831.19	-0.01200967		1361.18	0.00111318		1891.18	-0.00093255		2421.17	0.00300899		2951.17	0.00394458		3481.2	-0.0106453
301.39	0.02658076		831.39	-0.01078614		1361.38	0.00094095		1891.38	-0.00066052		2421.37	0.00295946		2951.37	0.00429707		3481.4	-0.01052959
301.59	0.0277453		831.59	-0.01102725		1361.58	0.00083642		1891.58	-0.00086118		2421.57	0.00415574		2951.57	0.0035892		3481.6	-0.01070164
301.79	0.02864875		831.79	-0.01087854		1361.78	0.00056941		1891.78	-0.00172457		2421.77	0.00398652		2951.77	0.00333101		3481.8	-0.00980891
301.99	0.02943508		831.99	-0.01084112		1361.98	0.00128631		1891.98	-0.0014365		2421.97	0.00473962		2951.97	0.00261249		3482	-0.01019943
302.19	0.02950447		832.19	-0.0110427		1362.18	0.00222511		1892.18	-0.00085604		2422.17	0.00482035		2952.17	0.0018731		3482.2	-0.01047738
302.39	0.03006767		832.39	-0.01123407		1362.38	0.00328921		1892.38	-0.00184444		2422.37	0.00449611		2952.37	0.00141015		3482.4	-0.01047528
302.59	0.0302964		832.59	-0.01190714		1362.58	0.00401233		1892.58	-0.00175502		2422.57	0.00578329		2952.57	0.00128915		3482.6	-0.00953836
302.79	0.02983294		832.79	-0.012787		1362.78	0.00525908		1892.78	-0.00271494		2422.77	0.0057449		2952.77	0.0006445		3482.8	-0.00877024
302.99	0.03011872		832.99	-0.01242983		1362.98	0.00692346		1892.98	-0.0025368		2422.97	0.00638825		2952.97	0.00073988		3483	-0.00725318
303.19	0.02979288		833.19	-0.0122647		1363.18	0.00721355		1893.18	-0.00233131		2423.17	0.00606362		2953.17	0.00097579		3483.2	-0.00697508
303.39	0.03011907		833.39	-0.01249998		1363.38	0.00760221		1893.38	-0.00233806		2423.37	0.00592395		2953.37	0.00093718		3483.4	-0.00673731
303.59	0.03056856		833.59	-0.01293896		1363.58	0.0076559		1893.58	-0.00249631		2423.57	0.00678585		2953.57	0.00162288		3483.6	-0.00565709
303.79	0.03111825		833.79	-0.01421108		1363.78	0.00733929		1893.78	-0.00243988		2423.77	0.00671728		2953.77	0.00201603		3483.8	-0.00503327
303.99	0.03080394		833.99	-0.01523255		1363.98	0.00718339		1893.98	-0.00248297		2423.97	0.00601076		2953.97	0.00161727		3484	-0.0049569
304.19	0.03047355		834.19	-0.01599133		1364.18	0.00729972		1894.18	-0.00158149		2424.17	0.00520357		2954.17	0.0010141		3484.2	-0.00539261
304.39	0.02873614		834.39	-0.0158592		1364.38	0.00745162		1894.38	-0.00167881		2424.37	0.00467561		2954.37	0.00148992		3484.4	-0.00514164
304.59	0.0282866		834.59	-0.01544133		1364.58	0.00671486		1894.58	-0.00233902		2424.57	0.0040147		2954.57	0.00182172		3484.6	-0.00506561
304.79	0.02795254		834.79	-0.0161951		1364.78	0.00558794		1894.78	-0.00191047		2424.77	0.00316572		2954.77	0.00269822		3484.8	-0.00590006
304.99	0.02798576		834.99	-0.01629948		1364.98	0.00471197		1894.98	-0.00185083		2424.97	0.00320303		2954.97	0.00322617		3485	-0.00574078
305.19	0.02690255		835.19	-0.01579687		1365.18	0.00473204		1895.18	-0.00050529		2425.17	0.00348892		2955.17	0.00363154		3485.2	-0.00568689
305.39	0.02672857		835.39	-0.01517998		1365.38	0.00414545		1895.38	-0.00061237		2425.37	0.00252894		2955.37	0.00285797		3485.4	-0.00502825
305.59	0.02806222		835.59	-0.01566311		1365.58	0.0049787		1895.58	-0.00015986		2425.57	0.0033487		2955.57	0.0025251		3485.6	-0.00503973
305.79	0.02802797		835.79	-0.01524663		1365.78	0.00452874		1895.78	0.00013778		2425.77	0.00364696		2955.77	0.00291095		3485.8	-0.00518272
305.99	0.02773236		835.99	-0.01445585		1365.98	0.00511148		1895.98	0.00109698		2425.97	0.0043746		2955.97	0.00277976		3486	-0.00639916
306.19	0.02785856		836.19	-0.01418312		1366.18	0.00586691		1896.18	0.00170207		2426.17	0.00461875		2956.17	0.00246157		3486.2	-0.00602314
306.39	0.02855999		836.39	-0.01386809		1366.38	0.00638914		1896.38	0.00227623		2426.37	0.00558828		2956.37	0.00226511		3486.4	-0.00523353
306.59	0.02960023		836.59	-0.0134869		1366.58	0.00667824		1896.58	0.0023909		2426.57	0.00701309		2956.57	0.0018949		3486.6	-0.00504571
306.79	0.02941195		836.79	-0.01248801		1366.78	0.0070574		1896.78	0.00207649		2426.77	0.00784893		2956.77	0.00271697		3486.8	-0.00494552
306.99	0.02938952		836.99	-0.01280245		1366.98	0.00702692		1896.98	0.00238002		2426.97	0.00933748		2956.97	0.00372928		3487	-0.0050913
307.19	0.02916438		837.19	-0.01247797		1367.18	0.00701143		1897.18	0.00212281		2427.17	0.00977894		2957.17	0.00337178		3487.2	-0.00555961
307.39	0.0291654		837.39	-0.01231566		1367.38	0.00669738		1897.38	0.00178822		2427.37	0.00993332		2957.37	0.00302841		3487.4	-0.0067884
307.59	0.02919107		837.59	-0.01272698		1367.58	0.00613923		1897.58	0.00103632		2427.57	0.01028904		2957.57	0.00319649		3487.6	-0.00743418
307.79	0.0299016		837.79	-0.01271651		1367.78	0.00593102		1897.78	0.0005892		2427.77	0.00968727		2957.77	0.00222313		3487.8	-0.00727569
307.99	0.02935712		837.99	-0.0137169		1367.98	0.00606853		1897.98	0.00022274		2427.97	0.00874006		2957.97	0.0010802		3488	-0.00761955
308.19	0.02860645		838.19	-0.01392604		1368.18	0.00637604		1898.18	-0.00019047		2428.17	0.00746816		2958.17	0.00084311		3488.2	-0.00837711
308.39	0.02892101		838.39	-0.01366702		1368.38	0.00558116		1898.38	-0.00190536		2428.37	0.00676512		2958.37	0.00166325		3488.4	-0.0076666
308.59	0.02977342		838.59	-0.01432721		1368.58	0.00460256		1898.58	-0.00202017		2428.57	0.00589451		2958.57	0.00187979		3488.6	-0.00865223
308.79	0.02957063		838.79	-0.01502246		1368.78	0.00388222		1898.78	-0.00119509		2428.77	0.00446937		2958.77	0.00131148		3488.8	-0.00928741
308.99	0.02979092		838.99	-0.01513726		1368.98	0.00359146		1898.98	-0.00067085		2428.97	0.0047148		2958.97	0.00095008		3489	-0.00940239
309.19	0.02916623		839.19	-0.0139808		1369.18	0.00348853		1899.18	-0.00067374		2429.17	0.00424982		2959.17	0.00079294		3489.2	-0.00898771
309.39	0.02989591		839.39	-0.01330039		1369.38	0.00243182		1899.38	-0.00115906		2429.37	0.00287441		2959.37	0.00051585		3489.4	-0.00944388
309.59	0.0306623		839.59	-0.01344729		1369.58	0.00289128		1899.58	0.00030847		2429.57	0.00303025		2959.57	0.00077545		3489.6	-0.00944382
309.79	0.03020786		839.79	-0.01299619		1369.78	0.00189848		1899.78	0.00074088		2429.77	0.00337022		2959.77	0.00104641		3489.8	-0.00945352
309.99	0.02977924		839.99	-0.01307657		1369.98	0.00143792		1899.98	0.00130526		2429.97	0.0039379		2959.97	0.001113		3490	-0.00909944
310.19	0.02964811		840.19	-0.01302872		1370.18	0.00112906		1900.18	0.00213218		2430.17	0.00425431		2960.17	0.00138348		3490.2	-0.00892265
310.39	0.02962718		840.39	-0.01229916		1370.38	0.00084049		1900.38	0.0019581		2430.37	0.00502606		2960.37	0.0019359		3490.4	-0.00800443
310.59	0.02951481		840.59	-0.01128208		1370.58	0.00036278		1900.58	0.00128696		2430.57	0.00618902		2960.57	0.00243109		3490.6	-0.00793151
310.79	0.02882624		840.79	-0.01129133		1370.78	0.00127301		1900.78	0.00079073		2430.77	0.00710838		2960.77	0.00295034		3490.8	-0.00769466
310.99	0.02888562		840.99	-0.01161274		1370.98	0.00093402		1900.98	0.00079156		2430.97	0.0071538		2960.97	0.0027257		3491	-0.00810967
311.19	0.02854412		841.19	-0.01081793		1371.18	0.00185769		1901.18	-0.00023995		2431.17	0.00723418		2961.17	0.00082799		3491.2	-0.00791601
311.39	0.02897293		841.39	-0.01147164		1371.38	0.00234477		1901.38	-0.0010499		2431.37	0.00777681		2961.37	0.00078104		3491.4	-0.00796354
311.59	0.02964078		841.59	-0.0114811		1371.58	0.00289316		1901.58	-0.0017064		2431.57	0.00743585		2961.57	0.00084473		3491.6	-0.00820926
311.79	0.0296431		841.79	-0.01108324		1371.78	0.00337725		1901.78	-0.00245379		2431.77	0.00686708		2961.77	0.0001566		3491.8	-0.00782644
311.99	0.02965297		841.99	-0.01104733		1371.98	0.00381991		1901.98	-0.00345441		2431.97	0.00702866		2961.97	-0.0001698		3492	-0.00766112
312.19	0.03066156		842.19	-0.01000491		1372.18	0.0044141		1902.18	-0.00340161		2432.17	0.00710354		2962.17	0.0002794		3492.2	-0.00794423
312.39	0.03224678		842.39	-0.01002379		1372.38	0.00419982		1902.38	-0.00352664		2432.37	0.00686838		2962.37	0.00101732		3492.4	-0.00770104
312.59	0.03307952		842.59	-0.00938889		1372.58	0.00468972		1902.58	-0.00192269		2432.57	0.00702072		2962.57	0.00057247		3492.6	-0.00711609
312.79	0.03286416		842.79	-0.00946551		1372.78	0.00488109		1902.78	-0.00070333		2432.77	0.00674549		2962.77	0.00025611		3492.8	-0.00726432
312.99	0.03317887		842.99	-0.00980364		1372.98	0.00503834		1902.98	0.00025864		2432.97	0.0063229		2962.97	0.00078204		3493	-0.00752067
313.19	0.03342208		843.19	-0.00932673		1373.18	0.00544461		1903.18	-0.00010572		2433.17	0.00535045		2963.17	0.00095745		3493.2	-0.00661555
313.39	0.0341644		843.39	-0.00955124		1373.38	0.00492894		1903.38	0.00051637		2433.37	0.00396586		2963.37	0.00114718		3493.4	-0.00773348
313.59	0.03352015		843.59	-0.01126318		1373.58	0.00506996		1903.58	0.00129808		2433.57	0.00464661		2963.57	0.00133897		3493.6	-0.00768518
313.79	0.03190284		843.79	-0.01157027		1373.78	0.00527022		1903.78	0.00154392		2433.77	0.00451157		2963.77	0.00206865		3493.8	-0.00819818
313.99	0.03062214		843.99	-0.01168691		1373.98	0.00509144		1903.98	0.00147209		2433.97	0.00445406		2963.97	0.00267838		3494	-0.00855155
314.19	0.03049445		844.19	-0.01166176		1374.18	0.00526189		1904.18	0.00223515		2434.17	0.00475384		2964.17	0.0028954		3494.2	-0.0094492
314.39	0.03039903		844.39	-0.0115444		1374.38	0.0056033		1904.38	0.00187702		2434.37	0.00422711		2964.37	0.00293101		3494.4	-0.0096128
314.59	0.03007158		844.59	-0.01244916		1374.58	0.00542021		1904.58	0.00109598		2434.57	0.00369676		2964.57	0.00304183		3494.6	-0.01116059
314.79	0.02959962		844.79	-0.01295652		1374.78	0.00558718		1904.78	0.00066741		2434.77	0.00341814		2964.77	0.00220775		3494.8	-0.01119057
314.99	0.02992569		844.99	-0.01323025		1374.98	0.0052452		1904.98	0.00008515		2434.97	0.00316875		2964.97	0.00227048		3495	-0.01183424
315.19	0.02952431		845.19	-0.01357195		1375.18	0.0049966		1905.18	-0.00004053		2435.17	0.00434695		2965.17	0.00121095		3495.2	-0.01129076
315.39	0.02928367		845.39	-0.01382424		1375.38	0.00506744		1905.38	-0.00002938		2435.37	0.00536295		2965.37	0.00138578		3495.4	-0.01148256
315.59	0.02886409		845.59	-0.01293189		1375.58	0.00503572		1905.58	-0.00051268		2435.57	0.00526387		2965.57	0.00083616		3495.6	-0.01164354
315.79	0.02875883		845.79	-0.01274459		1375.78	0.0044581		1905.78	-0.00033964		2435.77	0.00574293		2965.77	0.00062891		3495.8	-0.01112464
315.99	0.02981924		845.99	-0.01112134		1375.98	0.00360813		1905.98	-0.00035898		2435.97	0.00684909		2965.97	0.0003247		3496	-0.01023641
316.19	0.03115763		846.19	-0.01157107		1376.18	0.00346815		1906.18	0.00004944		2436.17	0.00721764		2966.17	0.00103562		3496.2	-0.01086755
316.39	0.03188902		846.39	-0.01242085		1376.38	0.00289769		1906.38	0.00058748		2436.37	0.00668595		2966.37	0.00104193		3496.4	-0.01000615
316.59	0.03185586		846.59	-0.01213692		1376.58	0.00317971		1906.58	0.00128707		2436.57	0.0071517		2966.57	0.00095002		3496.6	-0.0096482
316.79	0.03151883		846.79	-0.01297769		1376.78	0.00304343		1906.78	0.00208164		2436.77	0.00784229		2966.77	0.00083961		3496.8	-0.01012451
316.99	0.03203757		846.99	-0.01345182		1376.98	0.0027782		1906.98	0.00247863		2436.97	0.0068128		2966.97	0.00147042		3497	-0.00902631
317.19	0.03212478		847.19	-0.01375112		1377.18	0.00280397		1907.18	0.00160308		2437.17	0.00626573		2967.17	0.00112893		3497.2	-0.0081436
317.39	0.03181616		847.39	-0.01358222		1377.38	0.00277105		1907.38	0.00161053		2437.37	0.00582777		2967.37	0.00152285		3497.4	-0.00832156
317.59	0.03131622		847.59	-0.01480496		1377.58	0.00312054		1907.58	0.00127332		2437.57	0.00598861		2967.57	0.00172214		3497.6	-0.00913105
317.79	0.03142806		847.79	-0.01421183		1377.78	0.00347163		1907.78	0.00145634		2437.77	0.00603749		2967.77	0.00214702		3497.8	-0.0095043
317.99	0.03160283		847.99	-0.01382031		1377.98	0.00330503		1907.98	0.00065506		2437.97	0.00648664		2967.97	0.00324317		3498	-0.00925066
318.19	0.03168636		848.19	-0.01482127		1378.18	0.00314498		1908.18	0.00000536		2438.17	0.0061605		2968.17	0.0033694		3498.2	-0.0099265
318.39	0.03191102		848.39	-0.01528535		1378.38	0.00338604		1908.38	-0.00093224		2438.37	0.00470979		2968.37	0.00358169		3498.4	-0.01026791
318.59	0.03151353		848.59	-0.01537789		1378.58	0.00198258		1908.58	-0.00145717		2438.57	0.00346574		2968.57	0.00391857		3498.6	-0.01043302
318.79	0.03176872		848.79	-0.01451299		1378.78	0.00237991		1908.78	-0.00195559		2438.77	0.00329613		2968.77	0.00432673		3498.8	-0.00981242
318.99	0.03127765		848.99	-0.01410319		1378.98	0.00219557		1908.98	-0.00207557		2438.97	0.00361598		2968.97	0.00484189		3499	-0.00938791
319.19	0.0304088		849.19	-0.01336089		1379.18	0.0020491		1909.18	-0.00175342		2439.17	0.00425127		2969.17	0.0046379		3499.2	-0.00811415
319.39	0.02989234		849.39	-0.01212268		1379.38	0.00249148		1909.38	-0.00234248		2439.37	0.00408192		2969.37	0.00453437		3499.4	-0.00852906
319.59	0.03001871		849.59	-0.01163028		1379.58	0.00216626		1909.58	-0.00272115		2439.57	0.00449038		2969.57	0.00466021		3499.6	-0.00851661
319.79	0.03059762		849.79	-0.01150543		1379.78	0.00209805		1909.78	-0.00243144		2439.77	0.00369304		2969.77	0.00440879		3499.8	-0.00827452
319.99	0.03146976		849.99	-0.01084102		1379.98	0.00268652		1909.98	-0.00240564		2439.97	0.00413491		2969.97	0.00430619		3500	-0.00766669
320.19	0.03173114		850.19	-0.01194515		1380.18	0.00352596		1910.18	-0.00226543		2440.17	0.00362914		2970.17	0.00384776		3500.2	-0.00807341
320.39	0.03239211		850.39	-0.01221787		1380.38	0.0033392		1910.38	-0.00071976		2440.37	0.00304315		2970.37	0.00284834		3500.4	-0.00753374
320.59	0.03209988		850.59	-0.01171442		1380.58	0.00338424		1910.58	0.0000299		2440.57	0.00428215		2970.57	0.00249867		3500.6	-0.00845463
320.79	0.03270101		850.79	-0.01173238		1380.78	0.00266327		1910.78	0.00028058		2440.77	0.00449625		2970.77	0.00149247		3500.8	-0.00839135
320.99	0.03216776		850.99	-0.01160142		1380.98	0.00251386		1910.98	0.00095993		2440.97	0.00399973		2970.97	0.00220466		3501	-0.00825445
321.19	0.03226583		851.19	-0.01100713		1381.18	0.00303552		1911.18	0.0004502		2441.17	0.00415002		2971.17	0.00156247		3501.2	-0.00833912
321.39	0.03220902		851.39	-0.01015245		1381.38	0.00363635		1911.38	0.00036791		2441.37	0.0044452		2971.37	0.00089626		3501.4	-0.00869952
321.59	0.03238895		851.59	-0.00994348		1381.58	0.00361289		1911.58	0.00005209		2441.57	0.00449025		2971.57	0.00032025		3501.6	-0.00987526
321.79	0.03301901		851.79	-0.009653		1381.78	0.00429973		1911.78	-0.00016949		2441.77	0.00556011		2971.77	0.00087262		3501.8	-0.00967569
321.99	0.03332536		851.99	-0.0100099		1381.98	0.00407654		1911.98	-0.00066133		2441.97	0.00515476		2971.97	0.0016359		3502	-0.00940405
322.19	0.03363853		852.19	-0.01166441		1382.18	0.00461077		1912.18	-0.00134629		2442.17	0.00437299		2972.17	0.00101451		3502.2	-0.00911395
322.39	0.03436097		852.39	-0.01170605		1382.38	0.00501574		1912.38	-0.00110925		2442.37	0.00417589		2972.37	0.00137253		3502.4	-0.00869827
322.59	0.03414743		852.59	-0.01156231		1382.58	0.00395497		1912.58	-0.00122134		2442.57	0.00401155		2972.57	0.0020379		3502.6	-0.0084023
322.79	0.03503033		852.79	-0.0119048		1382.78	0.00409309		1912.78	-0.00091744		2442.77	0.00403202		2972.77	0.00299279		3502.8	-0.00828355
322.99	0.03481585		852.99	-0.01181872		1382.98	0.00346591		1912.98	0.00031572		2442.97	0.00556937		2972.97	0.00350578		3503	-0.0081652
323.19	0.03519927		853.19	-0.01180453		1383.18	0.00375522		1913.18	0.00096559		2443.17	0.00512855		2973.17	0.00352648		3503.2	-0.00872697
323.39	0.03563451		853.39	-0.01174267		1383.38	0.00411024		1913.38	0.00100246		2443.37	0.00418932		2973.37	0.00409067		3503.4	-0.00898119
323.59	0.03582437		853.59	-0.01213345		1383.58	0.00453887		1913.58	0.0012208		2443.57	0.00417416		2973.57	0.00430256		3503.6	-0.00831691
323.79	0.03590896		853.79	-0.01204653		1383.78	0.00520888		1913.78	0.00126943		2443.77	0.00343643		2973.77	0.00419518		3503.8	-0.00749248
323.99	0.03526216		853.99	-0.01187179		1383.98	0.00535624		1913.98	0.00152577		2443.97	0.00387551		2973.97	0.00473141		3504	-0.00753586
324.19	0.0359965		854.19	-0.01210229		1384.18	0.00442427		1914.18	0.00176592		2444.17	0.00329583		2974.17	0.00400564		3504.2	-0.00879699
324.39	0.03664601		854.39	-0.01232145		1384.38	0.0036342		1914.38	0.00273111		2444.37	0.00344566		2974.37	0.00372034		3504.4	-0.00945028
324.59	0.03581821		854.59	-0.01175826		1384.58	0.0038245		1914.58	0.00343954		2444.57	0.00424125		2974.57	0.0027402		3504.6	-0.0102064
324.79	0.03635882		854.79	-0.01135776		1384.78	0.00352985		1914.78	0.00341449		2444.77	0.00430901		2974.77	0.00189608		3504.8	-0.01061002
324.99	0.03579204		854.99	-0.01089814		1384.98	0.0040258		1914.98	0.00444426		2444.97	0.00463604		2974.97	0.00196552		3505	-0.01075269
325.19	0.03618815		855.19	-0.00986028		1385.18	0.00483697		1915.18	0.0041234		2445.17	0.00467739		2975.17	0.00184397		3505.2	-0.01061419
325.39	0.03604284		855.39	-0.00945771		1385.38	0.00515393		1915.38	0.00313835		2445.37	0.00461885		2975.37	0.00087388		3505.4	-0.01019994
325.59	0.03570969		855.59	-0.009792		1385.58	0.0051674		1915.58	0.0016216		2445.57	0.00474142		2975.57	0.00101507		3505.6	-0.0101339
325.79	0.03542251		855.79	-0.01043924		1385.78	0.00597579		1915.78	0.00086375		2445.77	0.00581118		2975.77	0.00175528		3505.8	-0.01033791
325.99	0.03522883		855.99	-0.01064759		1385.98	0.00628583		1915.98	-0.00015424		2445.97	0.00521949		2975.97	0.00124512		3506	-0.01005064
326.19	0.0347633		856.19	-0.0113981		1386.18	0.00730056		1916.18	-0.00131909		2446.17	0.00562321		2976.17	0.00082881		3506.2	-0.00983962
326.39	0.03484282		856.39	-0.01203068		1386.38	0.00681089		1916.38	-0.00119315		2446.37	0.00613479		2976.37	0.00139104		3506.4	-0.00987034
326.59	0.03502721		856.59	-0.01225517		1386.58	0.00624175		1916.58	-0.00183155		2446.57	0.00607428		2976.57	0.00151591		3506.6	-0.00974604
326.79	0.0349564		856.79	-0.01330657		1386.78	0.00674454		1916.78	-0.00227872		2446.77	0.00597767		2976.77	0.00190094		3506.8	-0.00948148
326.99	0.03484793		856.99	-0.01306044		1386.98	0.00711325		1916.98	-0.00219896		2446.97	0.00555888		2976.97	0.0018718		3507	-0.01022791
327.19	0.03424384		857.19	-0.01328909		1387.18	0.0072125		1917.18	-0.00300148		2447.17	0.00458969		2977.17	0.00146483		3507.2	-0.01103165
327.39	0.03409147		857.39	-0.01365887		1387.38	0.00713065		1917.38	-0.00402295		2447.37	0.00466465		2977.37	0.00223633		3507.4	-0.0102788
327.59	0.03396922		857.59	-0.0137044		1387.58	0.00713468		1917.58	-0.00413165		2447.57	0.00480755		2977.57	0.00272345		3507.6	-0.01083727
327.79	0.03346442		857.79	-0.01338155		1387.78	0.00655883		1917.78	-0.00510007		2447.77	0.00432631		2977.77	0.00279093		3507.8	-0.01199151
327.99	0.03415251		857.99	-0.0122355		1387.98	0.00587276		1917.98	-0.00475145		2447.97	0.00439527		2977.97	0.00371833		3508	-0.01312496
328.19	0.03555953		858.19	-0.01245453		1388.18	0.00531881		1918.18	-0.00452175		2448.17	0.00448645		2978.17	0.00384833		3508.2	-0.01336967
328.39	0.03578491		858.39	-0.01231647		1388.38	0.00516341		1918.38	-0.00360932		2448.37	0.00518678		2978.37	0.00325009		3508.4	-0.01316321
328.59	0.0357524		858.59	-0.01171356		1388.58	0.00521722		1918.58	-0.0031944		2448.57	0.00625933		2978.57	0.00298719		3508.6	-0.01398139
328.79	0.03691609		858.79	-0.01091841		1388.78	0.00498717		1918.78	-0.00245076		2448.77	0.00677979		2978.77	0.0030906		3508.8	-0.01344759
328.99	0.03763984		858.99	-0.01103812		1388.98	0.00504658		1918.98	-0.00185268		2448.97	0.00723201		2978.97	0.00376953		3509	-0.01284142
329.19	0.0377552		859.19	-0.01071878		1389.18	0.00453593		1919.18	-0.00113018		2449.17	0.00688224		2979.17	0.00508654		3509.2	-0.01165265
329.39	0.03824192		859.39	-0.0110843		1389.38	0.00391286		1919.38	-0.00149274		2449.37	0.00747149		2979.37	0.00538023		3509.4	-0.01021853
329.59	0.03812483		859.59	-0.01115164		1389.58	0.00364237		1919.58	-0.00127006		2449.57	0.00870723		2979.57	0.00586946		3509.6	-0.01026239
329.79	0.0381218		859.79	-0.01017009		1389.78	0.00431941		1919.78	-0.00088635		2449.77	0.00881838		2979.77	0.00657215		3509.8	-0.01067117
329.99	0.0386051		859.99	-0.00952088		1389.98	0.00472848		1919.98	-0.00090616		2449.97	0.00842123		2979.97	0.00525166		3510	-0.00964772
330.19	0.03816659		860.19	-0.01018949		1390.18	0.00474962		1920.18	-0.00085986		2450.17	0.00879593		2980.17	0.00537383		3510.2	-0.00956614
330.39	0.03833273		860.39	-0.01014853		1390.38	0.00462578		1920.38	-0.00049827		2450.37	0.00875293		2980.37	0.00562805		3510.4	-0.0092963
330.59	0.03806332		860.59	-0.01066696		1390.58	0.00586583		1920.58	-0.00095908		2450.57	0.0091884		2980.57	0.00536213		3510.6	-0.00917335
330.79	0.03726753		860.79	-0.01047544		1390.78	0.00679972		1920.78	-0.00118991		2450.77	0.00851507		2980.77	0.00516509		3510.8	-0.00910654
330.99	0.03652237		860.99	-0.0101698		1390.98	0.00629777		1920.98	-0.00098471		2450.97	0.00732397		2980.97	0.00442618		3511	-0.00955892
331.19	0.03524842		861.19	-0.01004706		1391.18	0.00642216		1921.18	-0.00194665		2451.17	0.00725097		2981.17	0.00423604		3511.2	-0.00920403
331.39	0.03564598		861.39	-0.00938555		1391.38	0.00606302		1921.38	-0.00173105		2451.37	0.00683279		2981.37	0.00496768		3511.4	-0.00889666
331.59	0.03506842		861.59	-0.00885515		1391.58	0.005745		1921.58	-0.00171366		2451.57	0.00522198		2981.57	0.0050623		3511.6	-0.00933576
331.79	0.03511069		861.79	-0.00774829		1391.78	0.00506237		1921.78	-0.00192508		2451.77	0.00414379		2981.77	0.00524169		3511.8	-0.00987596
331.99	0.03591765		861.99	-0.00726574		1391.98	0.00533617		1921.98	-0.00193623		2451.97	0.00386472		2981.97	0.00485186		3512	-0.01052129
332.19	0.03525142		862.19	-0.00806474		1392.18	0.00502885		1922.18	-0.00280964		2452.17	0.00343891		2982.17	0.0042086		3512.2	-0.01026976
332.39	0.03495363		862.39	-0.0082147		1392.38	0.00485292		1922.38	-0.00297478		2452.37	0.0031532		2982.37	0.00351057		3512.4	-0.01032344
332.59	0.03603577		862.59	-0.00895048		1392.58	0.00464525		1922.58	-0.00299422		2452.57	0.00313649		2982.57	0.0032462		3512.6	-0.01094203
332.79	0.03695799		862.79	-0.0088672		1392.78	0.00355465		1922.78	-0.00221195		2452.77	0.00228369		2982.77	0.0031017		3512.8	-0.00968846
332.99	0.03789887		862.99	-0.00988032		1392.98	0.00309899		1922.98	-0.00275163		2452.97	0.00190767		2982.97	0.00320401		3513	-0.00994762
333.19	0.03849466		863.19	-0.01067983		1393.18	0.0022702		1923.18	-0.00245668		2453.17	0.00102568		2983.17	0.00277839		3513.2	-0.00913736
333.39	0.03895458		863.39	-0.01104608		1393.38	0.00226161		1923.38	-0.00305093		2453.37	0.00171724		2983.37	0.00241182		3513.4	-0.00977135
333.59	0.03901175		863.59	-0.01124293		1393.58	0.00124484		1923.58	-0.0025913		2453.57	0.00198042		2983.57	0.00141812		3513.6	-0.01004458
333.79	0.03899933		863.79	-0.01119766		1393.78	0.00190028		1923.78	-0.00307299		2453.77	0.00134729		2983.77	0.00067643		3513.8	-0.01009011
333.99	0.03991889		863.99	-0.01197558		1393.98	0.00188375		1923.98	-0.00337714		2453.97	0.00100652		2983.97	0.00008688		3514	-0.00940587
334.19	0.03995341		864.19	-0.01331765		1394.18	0.0016806		1924.18	-0.0034384		2454.17	0.00149398		2984.17	0.00026092		3514.2	-0.00956524
334.39	0.0403312		864.39	-0.01373614		1394.38	0.0023401		1924.38	-0.00264139		2454.37	0.00234784		2984.37	0.00043149		3514.4	-0.00969426
334.59	0.04025332		864.59	-0.01433097		1394.58	0.00313556		1924.58	-0.00288482		2454.57	0.0026462		2984.57	0.00037737		3514.6	-0.00917757
334.79	0.0400717		864.79	-0.01351877		1394.78	0.00285541		1924.78	-0.00285222		2454.77	0.00195022		2984.77	0.00066997		3514.8	-0.00761628
334.99	0.03929844		864.99	-0.01439112		1394.98	0.0025807		1924.98	-0.00316075		2454.97	0.00202877		2984.97	0.00045238		3515	-0.00694966
335.19	0.03893277		865.19	-0.01433751		1395.18	0.00286254		1925.18	-0.00355729		2455.17	0.00321282		2985.17	0.00178732		3515.2	-0.00640372
335.39	0.03906261		865.39	-0.01408307		1395.38	0.00341553		1925.38	-0.00269679		2455.37	0.00339825		2985.37	0.00291814		3515.4	-0.00710527
335.59	0.03777137		865.59	-0.01474564		1395.58	0.00437624		1925.58	-0.00201036		2455.57	0.0033147		2985.57	0.00301673		3515.6	-0.00729766
335.79	0.0379543		865.79	-0.01415074		1395.78	0.00559181		1925.78	-0.00186467		2455.77	0.00286585		2985.77	0.0036471		3515.8	-0.00762726
335.99	0.03731328		865.99	-0.01474085		1395.98	0.00631211		1925.98	-0.00215928		2455.97	0.00323692		2985.97	0.00382413		3516	-0.00866868
336.19	0.0363087		866.19	-0.01476283		1396.18	0.00610978		1926.18	-0.00222824		2456.17	0.00315974		2986.17	0.00423731		3516.2	-0.00771334
336.39	0.03655133		866.39	-0.0150727		1396.38	0.0061399		1926.38	-0.00202653		2456.37	0.00388395		2986.37	0.00475859		3516.4	-0.00739022
336.59	0.0379608		866.59	-0.01529543		1396.58	0.00549218		1926.58	-0.00167584		2456.57	0.00450467		2986.57	0.00453552		3516.6	-0.00741071
336.79	0.03800257		866.79	-0.01424571		1396.78	0.00592608		1926.78	-0.00170199		2456.77	0.00442828		2986.77	0.00393305		3516.8	-0.00732607
336.99	0.03792096		866.99	-0.0145049		1396.98	0.00640647		1926.98	-0.00241566		2456.97	0.00455884		2986.97	0.00327048		3517	-0.00833801
337.19	0.03773174		867.19	-0.01483452		1397.18	0.00649352		1927.18	-0.0023219		2457.17	0.00500282		2987.17	0.00297687		3517.2	-0.00812356
337.39	0.03686938		867.39	-0.01407544		1397.38	0.00674209		1927.38	-0.00277351		2457.37	0.00503261		2987.37	0.0028116		3517.4	-0.00957167
337.59	0.03696012		867.59	-0.01348833		1397.58	0.00676839		1927.58	-0.00235011		2457.57	0.00445738		2987.57	0.00240174		3517.6	-0.00969723
337.79	0.0366378		867.79	-0.01259056		1397.78	0.00782346		1927.78	-0.00324596		2457.77	0.00398068		2987.77	0.00270743		3517.8	-0.01008896
337.99	0.03742757		867.99	-0.01230806		1397.98	0.00685893		1927.98	-0.00318272		2457.97	0.00373169		2987.97	0.00290115		3518	-0.00972565
338.19	0.03742109		868.19	-0.01250793		1398.18	0.00614466		1928.18	-0.00298351		2458.17	0.00397997		2988.17	0.00256469		3518.2	-0.0095335
338.39	0.03754213		868.39	-0.01227864		1398.38	0.00639213		1928.38	-0.00327798		2458.37	0.00384356		2988.37	0.00318549		3518.4	-0.00966212
338.59	0.03792323		868.59	-0.01218543		1398.58	0.00589059		1928.58	-0.0040191		2458.57	0.0035126		2988.57	0.00279609		3518.6	-0.00961589
338.79	0.0383464		868.79	-0.01334178		1398.78	0.00573366		1928.78	-0.00433129		2458.77	0.00390117		2988.77	0.00227775		3518.8	-0.00843448
338.99	0.0384013		868.99	-0.01438047		1398.98	0.00567636		1928.98	-0.00431084		2458.97	0.00405835		2988.97	0.00204681		3519	-0.00855803
339.19	0.03917053		869.19	-0.01442383		1399.18	0.00572379		1929.18	-0.00399428		2459.17	0.00440765		2989.17	0.002788		3519.2	-0.00925777
339.39	0.03891416		869.39	-0.01457397		1399.38	0.0057092		1929.38	-0.00277312		2459.37	0.00423501		2989.37	0.0023776		3519.4	-0.00957408
339.59	0.03953665		869.59	-0.01474918		1399.58	0.00550868		1929.58	-0.00216995		2459.57	0.00492259		2989.57	0.00187639		3519.6	-0.00973313
339.79	0.03974395		869.79	-0.01454312		1399.78	0.00572029		1929.78	-0.00213309		2459.77	0.00453887		2989.77	0.00217331		3519.8	-0.00991947
339.99	0.03962266		869.99	-0.01444792		1399.98	0.00494381		1929.98	-0.00145289		2459.97	0.00461858		2989.97	0.00196244		3520	-0.01064523
340.19	0.04016363		870.19	-0.0139209		1400.18	0.00460105		1930.18	-0.00128195		2460.17	0.00428424		2990.17	0.00133129		3520.2	-0.00993042
340.39	0.04059751		870.39	-0.01459275		1400.38	0.00457954		1930.38	-0.00074279		2460.37	0.00456502		2990.37	0.00091893		3520.4	-0.00976199
340.59	0.04051551		870.59	-0.01444078		1400.58	0.00374981		1930.58	-0.0003726		2460.57	0.00416371		2990.57	0.00021896		3520.6	-0.00969304
340.79	0.03936081		870.79	-0.01409151		1400.78	0.00497445		1930.78	-0.00043105		2460.77	0.003761		2990.77	-0.00045607		3520.8	-0.01050677
340.99	0.03853247		870.99	-0.01414782		1400.98	0.0048752		1930.98	-0.00084356		2460.97	0.00352747		2990.97	-0.00071532		3521	-0.01044334
341.19	0.0377612		871.19	-0.01383992		1401.18	0.0053201		1931.18	-0.00029389		2461.17	0.00403452		2991.17	-0.00049261		3521.2	-0.01002429
341.39	0.03746883		871.39	-0.0125761		1401.38	0.00564717		1931.38	-0.00057652		2461.37	0.00317127		2991.37	-0.00026383		3521.4	-0.01139533
341.59	0.03648639		871.59	-0.0120649		1401.58	0.00569865		1931.58	-0.00000337		2461.57	0.00296863		2991.57	-0.0002122		3521.6	-0.01159168
341.79	0.03582796		871.79	-0.01174939		1401.78	0.00587575		1931.78	-0.00091297		2461.77	0.00311872		2991.77	0.00050638		3521.8	-0.01162028
341.99	0.03538145		871.99	-0.01135605		1401.98	0.00552787		1931.98	-0.00077798		2461.97	0.00251096		2991.97	0.00126077		3522	-0.01154247
342.19	0.03525438		872.19	-0.01154648		1402.18	0.00564147		1932.18	-0.00061443		2462.17	0.00259362		2992.17	0.00205634		3522.2	-0.01108285
342.39	0.03510485		872.39	-0.01150162		1402.38	0.00594632		1932.38	-0.00184613		2462.37	0.00250959		2992.37	0.00271072		3522.4	-0.0110181
342.59	0.03536733		872.59	-0.01207018		1402.58	0.00564548		1932.58	-0.00189093		2462.57	0.00346183		2992.57	0.00187126		3522.6	-0.01132454
342.79	0.03660076		872.79	-0.01297089		1402.78	0.00566064		1932.78	-0.0017814		2462.77	0.00444893		2992.77	0.00222776		3522.8	-0.01099529
342.99	0.03675433		872.99	-0.01241535		1402.98	0.00491495		1932.98	-0.00131335		2462.97	0.00492929		2992.97	0.00276261		3523	-0.01112861
343.19	0.03774152		873.19	-0.0126001		1403.18	0.00444288		1933.18	-0.00141493		2463.17	0.00495754		2993.17	0.00313581		3523.2	-0.01172197
343.39	0.03757322		873.39	-0.01343035		1403.38	0.00361659		1933.38	-0.00095295		2463.37	0.00572888		2993.37	0.00376498		3523.4	-0.01139573
343.59	0.03759332		873.59	-0.01344703		1403.58	0.0034829		1933.58	-0.0006796		2463.57	0.00602682		2993.57	0.00404319		3523.6	-0.01106123
343.79	0.03721757		873.79	-0.01395308		1403.78	0.00419313		1933.78	-0.00063922		2463.77	0.00511142		2993.77	0.00433517		3523.8	-0.01078149
343.99	0.03803278		873.99	-0.01453058		1403.98	0.00386969		1933.98	-0.00027789		2463.97	0.00456687		2993.97	0.00474498		3524	-0.01093378
344.19	0.03868748		874.19	-0.0148952		1404.18	0.00449766		1934.18	-0.00002907		2464.17	0.00463664		2994.17	0.00495645		3524.2	-0.01030313
344.39	0.03948569		874.39	-0.01564975		1404.38	0.00450711		1934.38	0.00023264		2464.37	0.00504191		2994.37	0.00572482		3524.4	-0.00966343
344.59	0.04016699		874.59	-0.01564264		1404.58	0.00483994		1934.58	-0.00050814		2464.57	0.00627352		2994.57	0.00615684		3524.6	-0.00980462
344.79	0.04072403		874.79	-0.01477159		1404.78	0.00542881		1934.78	-0.00019072		2464.77	0.00750359		2994.77	0.0061104		3524.8	-0.00988893
344.99	0.04090931		874.99	-0.01515115		1404.98	0.00571258		1934.98	-0.00021847		2464.97	0.00737472		2994.97	0.00602672		3525	-0.00892487
345.19	0.04144742		875.19	-0.01423303		1405.18	0.00628463		1935.18	-0.00011084		2465.17	0.00809132		2995.17	0.00594744		3525.2	-0.00927312
345.39	0.04190146		875.39	-0.01322061		1405.38	0.00611673		1935.38	-0.00023228		2465.37	0.00794273		2995.37	0.00562668		3525.4	-0.01014352
345.59	0.04139739		875.59	-0.01255239		1405.58	0.00628572		1935.58	0.0001551		2465.57	0.00758719		2995.57	0.00505388		3525.6	-0.01023967
345.79	0.04129931		875.79	-0.01194543		1405.78	0.00714973		1935.78	-0.00008632		2465.77	0.00781633		2995.77	0.00519171		3525.8	-0.01052237
345.99	0.04070458		875.99	-0.01106102		1405.98	0.00703177		1935.98	-0.00006243		2465.97	0.00754668		2995.97	0.00529866		3526	-0.01111287
346.19	0.04098564		876.19	-0.01089194		1406.18	0.00707242		1936.18	0.00055952		2466.17	0.00837105		2996.17	0.00489143		3526.2	-0.01018611
346.39	0.04074584		876.39	-0.0098916		1406.38	0.00654876		1936.38	0.00062697		2466.37	0.00842931		2996.37	0.00447557		3526.4	-0.01034262
346.59	0.04096325		876.59	-0.00953729		1406.58	0.0066455		1936.58	0.00156557		2466.57	0.00850312		2996.57	0.0036889		3526.6	-0.01081083
346.79	0.04121444		876.79	-0.00886741		1406.78	0.00650428		1936.78	0.00175221		2466.77	0.00753507		2996.77	0.00354061		3526.8	-0.01047296
346.99	0.04009401		876.99	-0.00840628		1406.98	0.00594615		1936.98	0.00165536		2466.97	0.00734203		2996.97	0.00221747		3527	-0.00989447
347.19	0.03984262		877.19	-0.0085447		1407.18	0.00562185		1937.18	0.00144233		2467.17	0.00637178		2997.17	0.0019871		3527.2	-0.01001311
347.39	0.03887747		877.39	-0.00923156		1407.38	0.00603551		1937.38	0.00167299		2467.37	0.00615327		2997.37	0.00277853		3527.4	-0.00925442
347.59	0.03791559		877.59	-0.00941602		1407.58	0.00612027		1937.58	0.00240199		2467.57	0.00575505		2997.57	0.00219245		3527.6	-0.00848106
347.79	0.03823446		877.79	-0.01004158		1407.78	0.00617747		1937.78	0.00128402		2467.77	0.00514633		2997.77	0.00290024		3527.8	-0.00755981
347.99	0.03911561		877.99	-0.01068037		1407.98	0.00575663		1937.98	0.00190868		2467.97	0.004971		2997.97	0.00301914		3528	-0.00782489
348.19	0.03977109		878.19	-0.00991902		1408.18	0.00621887		1938.18	0.00188307		2468.17	0.00584804		2998.17	0.0035637		3528.2	-0.00709613
348.39	0.04106023		878.39	-0.01063629		1408.38	0.00588893		1938.38	0.00138666		2468.37	0.00704037		2998.37	0.00419513		3528.4	-0.00714381
348.59	0.04137578		878.59	-0.01130794		1408.58	0.00700027		1938.58	0.00071098		2468.57	0.00823582		2998.57	0.00385695		3528.6	-0.00779649
348.79	0.04201024		878.79	-0.01025525		1408.78	0.00624409		1938.78	0.00129939		2468.77	0.00787645		2998.77	0.0038272		3528.8	-0.00711335
348.99	0.0421746		878.99	-0.01151438		1408.98	0.00682922		1938.98	-0.00003744		2468.97	0.00680104		2998.97	0.00339081		3529	-0.00750797
349.19	0.0425379		879.19	-0.01064851		1409.18	0.00694348		1939.18	-0.00087966		2469.17	0.00685316		2999.17	0.00207382		3529.2	-0.00825813
349.39	0.04179149		879.39	-0.01033733		1409.38	0.00590729		1939.38	-0.00056389		2469.37	0.00727268		2999.37	0.00250934		3529.4	-0.00853578
349.59	0.04194648		879.59	-0.01119814		1409.58	0.00634605		1939.58	-0.00111214		2469.57	0.00694546		2999.57	0.00228783		3529.6	-0.00918989
349.79	0.04108933		879.79	-0.01183159		1409.78	0.006215		1939.78	-0.00143007		2469.77	0.0076093		2999.77	0.00174625		3529.8	-0.00966171
349.99	0.0420324		879.99	-0.0120913		1409.98	0.00532108		1939.98	-0.00158632		2469.97	0.00740372		2999.97	0.00224996		3530	-0.00985573
350.19	0.04231435		880.19	-0.01242624		1410.18	0.00546591		1940.18	-0.00052246		2470.17	0.00789367		3000.17	0.00245937		3530.2	-0.00935612
350.39	0.04223363		880.39	-0.0116436		1410.38	0.00419504		1940.38	0.00004212		2470.37	0.0078563		3000.37	0.00201973		3530.4	-0.00982487
350.59	0.04238654		880.59	-0.01182425		1410.58	0.00474919		1940.58	-0.00035833		2470.57	0.00734368		3000.57	0.00164793		3530.6	-0.00915383
350.79	0.04208453		880.79	-0.01245302		1410.78	0.00502183		1940.78	-0.00023356		2470.77	0.00743496		3000.77	0.0011917		3530.8	-0.00861421
350.99	0.04066117		880.99	-0.01217558		1410.98	0.004208		1940.98	0.00075597		2470.97	0.00854362		3000.97	0.00123932		3531	-0.00909268
351.19	0.04055442		881.19	-0.01211585		1411.18	0.00393031		1941.18	0.00088104		2471.17	0.00856066		3001.17	0.00224618		3531.2	-0.00916141
351.39	0.0398416		881.39	-0.0122675		1411.38	0.00463712		1941.38	0.00116026		2471.37	0.00791628		3001.37	0.00334255		3531.4	-0.00877307
351.59	0.04002296		881.59	-0.01227139		1411.58	0.00333038		1941.58	0.00195904		2471.57	0.00798519		3001.57	0.00338396		3531.6	-0.00819989
351.79	0.04084174		881.79	-0.01161238		1411.78	0.00346786		1941.78	0.00157436		2471.77	0.00820278		3001.77	0.00387088		3531.8	-0.00729811
351.99	0.04177909		881.99	-0.01117546		1411.98	0.0037091		1941.98	0.00277486		2471.97	0.00757983		3001.97	0.00352632		3532	-0.00878077
352.19	0.04255623		882.19	-0.01061041		1412.18	0.00420716		1942.18	0.00176611		2472.17	0.00754598		3002.17	0.00388517		3532.2	-0.00934164
352.39	0.04257915		882.39	-0.0106451		1412.38	0.00372142		1942.38	0.00171096		2472.37	0.00738087		3002.37	0.00302177		3532.4	-0.00930185
352.59	0.04310912		882.59	-0.01081877		1412.58	0.00464962		1942.58	0.00127723		2472.57	0.00733331		3002.57	0.00234835		3532.6	-0.00986136
352.79	0.04351873		882.79	-0.00997898		1412.78	0.00468077		1942.78	0.00201368		2472.77	0.00667709		3002.77	0.00193709		3532.8	-0.00987969
352.99	0.04307427		882.99	-0.01066698		1412.98	0.00562462		1942.98	0.00100441		2472.97	0.00651619		3002.97	0.00153461		3533	-0.01098363
353.19	0.04280477		883.19	-0.01021729		1413.18	0.00652182		1943.18	0.00096295		2473.17	0.00619563		3003.17	0.00134255		3533.2	-0.01074063
353.39	0.04291682		883.39	-0.01010753		1413.38	0.00691526		1943.38	0.00190341		2473.37	0.00644002		3003.37	0.00244215		3533.4	-0.01122264
353.59	0.04345352		883.59	-0.0107687		1413.58	0.00699776		1943.58	0.00157643		2473.57	0.00552077		3003.57	0.0025495		3533.6	-0.01152398
353.79	0.04341615		883.79	-0.01037535		1413.78	0.0058768		1943.78	0.00167513		2473.77	0.00604791		3003.77	0.00283171		3533.8	-0.01101216
353.99	0.04459248		883.99	-0.01051521		1413.98	0.00512516		1943.98	0.00152991		2473.97	0.00608146		3003.97	0.00356989		3534	-0.0105554
354.19	0.04388983		884.19	-0.01021775		1414.18	0.00523034		1944.18	0.00163204		2474.17	0.0060373		3004.17	0.00427247		3534.2	-0.01026702
354.39	0.04340158		884.39	-0.00966222		1414.38	0.00400513		1944.38	0.00122152		2474.37	0.00623923		3004.37	0.00437629		3534.4	-0.00951248
354.59	0.04340797		884.59	-0.00968307		1414.58	0.00481759		1944.58	0.00051403		2474.57	0.00638123		3004.57	0.0054703		3534.6	-0.00907029
354.79	0.04312957		884.79	-0.01074764		1414.78	0.00440659		1944.78	0.00045593		2474.77	0.00702356		3004.77	0.00653744		3534.8	-0.00955907
354.99	0.04278407		884.99	-0.01038146		1414.98	0.00346583		1944.98	0.00097038		2474.97	0.00723725		3004.97	0.00777609		3535	-0.00990014
355.19	0.04335275		885.19	-0.01117545		1415.18	0.00304926		1945.18	0.00053766		2475.17	0.00595215		3005.17	0.00900919		3535.2	-0.00915343
355.39	0.04306231		885.39	-0.01197331		1415.38	0.00322136		1945.38	0.00023936		2475.37	0.00508454		3005.37	0.00944069		3535.4	-0.00877629
355.59	0.04417607		885.59	-0.01253026		1415.58	0.00195867		1945.58	-0.00043561		2475.57	0.00522216		3005.57	0.00964705		3535.6	-0.00828423
355.79	0.04433212		885.79	-0.01305022		1415.78	0.00335047		1945.78	-0.00130871		2475.77	0.00520477		3005.77	0.00962282		3535.8	-0.00827646
355.99	0.04423546		885.99	-0.01359569		1415.98	0.00345393		1945.98	-0.00250253		2475.97	0.00434828		3005.97	0.00934448		3536	-0.00958234
356.19	0.04387994		886.19	-0.01381619		1416.18	0.00354754		1946.18	-0.00484009		2476.17	0.00427652		3006.17	0.00845979		3536.2	-0.0097356
356.39	0.0428478		886.39	-0.01311698		1416.38	0.0040891		1946.38	-0.00513052		2476.37	0.00388466		3006.37	0.00752032		3536.4	-0.00913879
356.59	0.04241014		886.59	-0.0129151		1416.58	0.00454658		1946.58	-0.00477955		2476.57	0.00482126		3006.57	0.00702275		3536.6	-0.01044355
356.79	0.04133188		886.79	-0.01275361		1416.78	0.00542556		1946.78	-0.00377009		2476.77	0.00502525		3006.77	0.00557572		3536.8	-0.01061351
356.99	0.04070356		886.99	-0.01271645		1416.98	0.00631562		1946.98	-0.00409038		2476.97	0.00458462		3006.97	0.0052393		3537	-0.01171706
357.19	0.0403568		887.19	-0.01265757		1417.18	0.00679766		1947.18	-0.00358912		2477.17	0.00462526		3007.17	0.00445006		3537.2	-0.01186728
357.39	0.04062895		887.39	-0.01280441		1417.38	0.00711732		1947.38	-0.00226301		2477.37	0.00508997		3007.37	0.00372023		3537.4	-0.01238611
357.59	0.04059763		887.59	-0.01297353		1417.58	0.00631527		1947.58	-0.00156968		2477.57	0.00552179		3007.57	0.00276501		3537.6	-0.01227183
357.79	0.04029135		887.79	-0.01284769		1417.78	0.00539706		1947.78	-0.00089916		2477.77	0.00634808		3007.77	0.00213856		3537.8	-0.01288885
357.99	0.03954117		887.99	-0.01304639		1417.98	0.00569971		1947.98	-0.00068008		2477.97	0.0059291		3007.97	0.00176455		3538	-0.01363304
358.19	0.03943288		888.19	-0.01291785		1418.18	0.00618208		1948.18	-0.00082479		2478.17	0.00660868		3008.17	0.00166376		3538.2	-0.01406985
358.39	0.04007594		888.39	-0.01268198		1418.38	0.00629625		1948.38	-0.00077145		2478.37	0.00793321		3008.37	0.00130806		3538.4	-0.01420574
358.59	0.04132292		888.59	-0.01232288		1418.58	0.00636546		1948.58	-0.00055164		2478.57	0.00802711		3008.57	0.00168032		3538.6	-0.01469816
358.79	0.04177487		888.79	-0.01365377		1418.78	0.00598995		1948.78	-0.00025037		2478.77	0.00872642		3008.77	0.00209839		3538.8	-0.01426029
358.99	0.04238623		888.99	-0.01360261		1418.98	0.00548166		1948.98	-0.00004776		2478.97	0.00837951		3008.97	0.0031637		3539	-0.01397441
359.19	0.04268608		889.19	-0.0143947		1419.18	0.00513558		1949.18	0.00019328		2479.17	0.00865328		3009.17	0.00366136		3539.2	-0.01203289
359.39	0.04267161		889.39	-0.01411712		1419.38	0.00454146		1949.38	-0.00030637		2479.37	0.00943694		3009.37	0.003285		3539.4	-0.01171837
359.59	0.04366934		889.59	-0.01328549		1419.58	0.00428823		1949.58	-0.00120054		2479.57	0.00899292		3009.57	0.00428539		3539.6	-0.01153233
359.79	0.04380519		889.79	-0.01349062		1419.78	0.00595735		1949.78	-0.00199604		2479.77	0.00886089		3009.77	0.00448402		3539.8	-0.01074803
359.99	0.04399361		889.99	-0.01253774		1419.98	0.00484847		1949.98	-0.00260638		2479.97	0.00840455		3009.97	0.00522443		3540	-0.01018631
360.19	0.04415529		890.19	-0.01114333		1420.18	0.00455727		1950.18	-0.00300685		2480.17	0.00795038		3010.17	0.00448343		3540.2	-0.00951919
360.39	0.04388638		890.39	-0.01039463		1420.38	0.00533624		1950.38	-0.00191131		2480.37	0.00764902		3010.37	0.00462234		3540.4	-0.00953738
360.59	0.042928		890.59	-0.01014992		1420.58	0.00536311		1950.58	-0.00126502		2480.57	0.00778001		3010.57	0.00437879		3540.6	-0.00986503
360.79	0.04269875		890.79	-0.01106633		1420.78	0.00651701		1950.78	-0.0017316		2480.77	0.0077618		3010.77	0.00282308		3540.8	-0.00968892
360.99	0.04282789		890.99	-0.01114636		1420.98	0.00620746		1950.98	-0.00126598		2480.97	0.00828026		3010.97	0.00268296		3541	-0.00982233
361.19	0.04324311		891.19	-0.01149778		1421.18	0.00598388		1951.18	-0.00098085		2481.17	0.00834913		3011.17	0.00177613		3541.2	-0.00974737
361.39	0.04370276		891.39	-0.0120744		1421.38	0.00558761		1951.38	-0.00004838		2481.37	0.00795164		3011.37	0.00084166		3541.4	-0.01037866
361.59	0.04308606		891.59	-0.01213774		1421.58	0.00453274		1951.58	0.00026043		2481.57	0.00730231		3011.57	0.0002581		3541.6	-0.01154666
361.79	0.04250372		891.79	-0.01170484		1421.78	0.00420747		1951.78	0.00035795		2481.77	0.00647316		3011.77	0.00047206		3541.8	-0.01311851
361.99	0.0422401		891.99	-0.01137345		1421.98	0.00433426		1951.98	0.00038803		2481.97	0.00558828		3011.97	-0.00039993		3542	-0.01338618
362.19	0.04285735		892.19	-0.01133102		1422.18	0.00451555		1952.18	0.00074637		2482.17	0.00676916		3012.17	-0.0004681		3542.2	-0.01322631
362.39	0.04321822		892.39	-0.0112522		1422.38	0.0041468		1952.38	0.00048907		2482.37	0.00678845		3012.37	-0.00052048		3542.4	-0.01324805
362.59	0.04344726		892.59	-0.01113213		1422.58	0.00317957		1952.58	0.00023535		2482.57	0.00588263		3012.57	-0.0003679		3542.6	-0.01318908
362.79	0.04367847		892.79	-0.01116933		1422.78	0.00397588		1952.78	0.00016899		2482.77	0.00658292		3012.77	-0.00012925		3542.8	-0.01279016
362.99	0.0434706		892.99	-0.01114085		1422.98	0.00369636		1952.98	0.00091481		2482.97	0.00634337		3012.97	0.00046787		3543	-0.01305201
363.19	0.04319052		893.19	-0.01025697		1423.18	0.00295529		1953.18	0.0006585		2483.17	0.00731313		3013.17	0.00060634		3543.2	-0.01218237
363.39	0.04327036		893.39	-0.009659		1423.38	0.00275149		1953.38	-0.0000508		2483.37	0.0065679		3013.37	0.00094072		3543.4	-0.01240819
363.59	0.04335794		893.59	-0.00964014		1423.58	0.00319931		1953.58	-0.001054		2483.57	0.00619578		3013.57	0.00184199		3543.6	-0.01191525
363.79	0.04292278		893.79	-0.0097461		1423.78	0.00347413		1953.78	-0.00105761		2483.77	0.00669676		3013.77	0.00241615		3543.8	-0.01082263
363.99	0.04296877		893.99	-0.00995471		1423.98	0.00238491		1953.98	-0.00049696		2483.97	0.00725281		3013.97	0.00273972		3544	-0.01020724
364.19	0.04321475		894.19	-0.00971831		1424.18	0.0040697		1954.18	-0.00030854		2484.17	0.00758501		3014.17	0.00255061		3544.2	-0.01046056
364.39	0.0424136		894.39	-0.01070368		1424.38	0.00497919		1954.38	-0.0014972		2484.37	0.00805157		3014.37	0.0032254		3544.4	-0.00984133
364.59	0.04225763		894.59	-0.01061341		1424.58	0.0048076		1954.58	-0.00238098		2484.57	0.00844832		3014.57	0.00288631		3544.6	-0.00874414
364.79	0.04196445		894.79	-0.01088854		1424.78	0.00462949		1954.78	-0.00295306		2484.77	0.00938586		3014.77	0.00291604		3544.8	-0.0082914
364.99	0.04244369		894.99	-0.01046537		1424.98	0.00445152		1954.98	-0.00196741		2484.97	0.00866946		3014.97	0.00303478		3545	-0.00781677
365.19	0.04260682		895.19	-0.01095231		1425.18	0.00373352		1955.18	-0.00223757		2485.17	0.00732014		3015.17	0.0032798		3545.2	-0.0082839
365.39	0.04287561		895.39	-0.01050501		1425.38	0.00304861		1955.38	-0.00215288		2485.37	0.00709989		3015.37	0.00379941		3545.4	-0.00869835
365.59	0.04317661		895.59	-0.01070106		1425.58	0.00360768		1955.58	-0.00111703		2485.57	0.00643472		3015.57	0.00420483		3545.6	-0.00863776
365.79	0.04345685		895.79	-0.00977036		1425.78	0.00388891		1955.78	-0.00204473		2485.77	0.0059255		3015.77	0.00491531		3545.8	-0.00824267
365.99	0.04420939		895.99	-0.00957329		1425.98	0.00386121		1955.98	-0.00214078		2485.97	0.00583859		3015.97	0.00480514		3546	-0.00765311
366.19	0.04413379		896.19	-0.01015659		1426.18	0.00469507		1956.18	-0.00102842		2486.17	0.00666922		3016.17	0.00503494		3546.2	-0.00760612
366.39	0.04454792		896.39	-0.01115456		1426.38	0.00539741		1956.38	-0.00068492		2486.37	0.00543023		3016.37	0.00402237		3546.4	-0.0079764
366.59	0.04521399		896.59	-0.01045503		1426.58	0.0059581		1956.58	-0.00067535		2486.57	0.00470782		3016.57	0.00464645		3546.6	-0.00837081
366.79	0.04562879		896.79	-0.01029432		1426.78	0.00658039		1956.78	-0.00029961		2486.77	0.00455581		3016.77	0.00479784		3546.8	-0.0091642
366.99	0.04558996		896.99	-0.0106358		1426.98	0.0065562		1956.98	-0.00074817		2486.97	0.00401127		3016.97	0.00483024		3547	-0.00941102
367.19	0.04626711		897.19	-0.01041305		1427.18	0.00660073		1957.18	-0.00171259		2487.17	0.00449193		3017.17	0.00501844		3547.2	-0.0097326
367.39	0.04619044		897.39	-0.01104335		1427.38	0.00693651		1957.38	-0.00184762		2487.37	0.00421717		3017.37	0.0049069		3547.4	-0.01006899
367.59	0.04556619		897.59	-0.01133645		1427.58	0.00696661		1957.58	-0.00201276		2487.57	0.00500084		3017.57	0.00466636		3547.6	-0.01056862
367.79	0.04613642		897.79	-0.01145127		1427.78	0.00719501		1957.78	-0.00171926		2487.77	0.00539169		3017.77	0.00548987		3547.8	-0.01147976
367.99	0.04633377		897.99	-0.0115228		1427.98	0.00723061		1957.98	-0.00197064		2487.97	0.00625054		3017.97	0.00505331		3548	-0.01215882
368.19	0.04622004		898.19	-0.01103227		1428.18	0.00827842		1958.18	-0.00261548		2488.17	0.0067749		3018.17	0.00513296		3548.2	-0.01264668
368.39	0.04595333		898.39	-0.01108076		1428.38	0.00726691		1958.38	-0.0033563		2488.37	0.00680988		3018.37	0.00520826		3548.4	-0.01187297
368.59	0.04565952		898.59	-0.0102495		1428.58	0.00728461		1958.58	-0.00326692		2488.57	0.00705006		3018.57	0.00536631		3548.6	-0.01222161
368.79	0.04516915		898.79	-0.01008077		1428.78	0.00694714		1958.78	-0.00320668		2488.77	0.00665788		3018.77	0.00579611		3548.8	-0.01228434
368.99	0.04501324		898.99	-0.01070514		1428.98	0.00670128		1958.98	-0.00254386		2488.97	0.0060499		3018.97	0.00529106		3549	-0.01172505
369.19	0.04469072		899.19	-0.01104618		1429.18	0.0058592		1959.18	-0.00241599		2489.17	0.00650927		3019.17	0.00579292		3549.2	-0.01127686
369.39	0.04436443		899.39	-0.01052848		1429.38	0.00622472		1959.38	-0.00198671		2489.37	0.00721193		3019.37	0.00581879		3549.4	-0.0109458
369.59	0.04399529		899.59	-0.01127961		1429.58	0.00613466		1959.58	-0.00140534		2489.57	0.00785192		3019.57	0.00555173		3549.6	-0.01032809
369.79	0.04318683		899.79	-0.01049048		1429.78	0.00559689		1959.78	-0.00223126		2489.77	0.00808012		3019.77	0.00532428		3549.8	-0.01033868
369.99	0.04367915		899.99	-0.01062807		1429.98	0.0055099		1959.98	-0.0006886		2489.97	0.00870436		3019.97	0.00474757		3550	-0.01002463
370.19	0.04412957		900.19	-0.0111058		1430.18	0.00597274		1960.18	0.00143862		2490.17	0.00866968		3020.17	0.00361312		3550.2	-0.01031573
370.39	0.04461759		900.39	-0.01136876		1430.38	0.00631407		1960.38	0.00121579		2490.37	0.00826774		3020.37	0.00318795		3550.4	-0.01033853
370.59	0.04554691		900.59	-0.01126875		1430.58	0.00679126		1960.58	0.00020983		2490.57	0.00789332		3020.57	0.00407836		3550.6	-0.01045916
370.79	0.04612058		900.79	-0.0118401		1430.78	0.00657282		1960.78	0.00059283		2490.77	0.00803372		3020.77	0.00316796		3550.8	-0.01037208
370.99	0.04635424		900.99	-0.01222124		1430.98	0.0067403		1960.98	0.00027389		2490.97	0.00841129		3020.97	0.00322996		3551	-0.00923628
371.19	0.04699099		901.19	-0.01324345		1431.18	0.00702525		1961.18	0.00081072		2491.17	0.00818687		3021.17	0.00316591		3551.2	-0.00920255
371.39	0.04666382		901.39	-0.01366034		1431.38	0.00694172		1961.38	0.00070183		2491.37	0.00853015		3021.37	0.00267852		3551.4	-0.00925826
371.59	0.04691231		901.59	-0.01447345		1431.58	0.00756646		1961.58	0.00136517		2491.57	0.00816065		3021.57	0.00256256		3551.6	-0.00942144
371.79	0.04772301		901.79	-0.01416747		1431.78	0.00730021		1961.78	0.00125494		2491.77	0.00752151		3021.77	0.00370485		3551.8	-0.00984772
371.99	0.04762511		901.99	-0.01391923		1431.98	0.00731226		1961.98	0.00092923		2491.97	0.00678982		3021.97	0.00357494		3552	-0.009596
372.19	0.04704383		902.19	-0.01429274		1432.18	0.00657321		1962.18	0.00079954		2492.17	0.00564708		3022.17	0.00419132		3552.2	-0.00918982
372.39	0.04678434		902.39	-0.01458042		1432.38	0.00601697		1962.38	0.00014621		2492.37	0.0045575		3022.37	0.00475372		3552.4	-0.00820642
372.59	0.04618801		902.59	-0.01497568		1432.58	0.00622977		1962.58	-0.00084517		2492.57	0.00416925		3022.57	0.00476841		3552.6	-0.00913491
372.79	0.04624628		902.79	-0.0152321		1432.78	0.00564372		1962.78	-0.00128798		2492.77	0.00319759		3022.77	0.00507799		3552.8	-0.0084946
372.99	0.04592312		902.99	-0.01586789		1432.98	0.0059743		1962.98	-0.00206753		2492.97	0.00279051		3022.97	0.0051492		3553	-0.00876498
373.19	0.04538967		903.19	-0.01539103		1433.18	0.00549341		1963.18	-0.0027003		2493.17	0.00269145		3023.17	0.00491203		3553.2	-0.00862924
373.39	0.04493779		903.39	-0.01543268		1433.38	0.00569955		1963.38	-0.00327547		2493.37	0.00372188		3023.37	0.00574865		3553.4	-0.00878601
373.59	0.04410881		903.59	-0.01478309		1433.58	0.0054422		1963.58	-0.00325241		2493.57	0.00344485		3023.57	0.006376		3553.6	-0.00981896
373.79	0.04426923		903.79	-0.01414421		1433.78	0.0056707		1963.78	-0.00279912		2493.77	0.00374234		3023.77	0.00604155		3553.8	-0.01047753
373.99	0.0451334		903.99	-0.01372642		1433.98	0.0054882		1963.98	-0.00258589		2493.97	0.00490412		3023.97	0.00604797		3554	-0.01033249
374.19	0.04564783		904.19	-0.01399526		1434.18	0.00551807		1964.18	-0.00225196		2494.17	0.00567153		3024.17	0.00563243		3554.2	-0.01038845
374.39	0.04495894		904.39	-0.01364843		1434.38	0.00597001		1964.38	-0.00268149		2494.37	0.00659127		3024.37	0.00549094		3554.4	-0.01007467
374.59	0.04551235		904.59	-0.01402393		1434.58	0.00612857		1964.58	-0.00268405		2494.57	0.00653018		3024.57	0.00510104		3554.6	-0.01084038
374.79	0.04541928		904.79	-0.01321208		1434.78	0.00556545		1964.78	-0.00254938		2494.77	0.00794537		3024.77	0.00472112		3554.8	-0.01071423
374.99	0.04518492		904.99	-0.01319799		1434.98	0.00607402		1964.98	-0.00221407		2494.97	0.0079185		3024.97	0.00504517		3555	-0.0101043
375.19	0.04585366		905.19	-0.01325748		1435.18	0.00691568		1965.18	-0.00118034		2495.17	0.00711152		3025.17	0.00461875		3555.2	-0.01070919
375.39	0.04584453		905.39	-0.01282019		1435.38	0.00639746		1965.38	-0.00118329		2495.37	0.00732879		3025.37	0.00473258		3555.4	-0.01170493
375.59	0.04635083		905.59	-0.01291765		1435.58	0.00620144		1965.58	-0.00068182		2495.57	0.0068666		3025.57	0.005202		3555.6	-0.01228659
375.79	0.04646538		905.79	-0.01279141		1435.78	0.00616964		1965.78	-0.00086626		2495.77	0.00667233		3025.77	0.00696154		3555.8	-0.01196656
375.99	0.04577682		905.99	-0.014073		1435.98	0.00598925		1965.98	-0.00110203		2495.97	0.00623564		3025.97	0.00699951		3556	-0.0117914
376.19	0.04627233		906.19	-0.0145666		1436.18	0.0054392		1966.18	-0.00167898		2496.17	0.00597491		3026.17	0.00695492		3556.2	-0.01146107
376.39	0.04659473		906.39	-0.01454784		1436.38	0.00528466		1966.38	-0.0018425		2496.37	0.00540057		3026.37	0.00744673		3556.4	-0.01122854
376.59	0.047202		906.59	-0.01468694		1436.58	0.00558835		1966.58	-0.00191292		2496.57	0.00470957		3026.57	0.00745928		3556.6	-0.01288074
376.79	0.04798515		906.79	-0.01417725		1436.78	0.00541272		1966.78	-0.00151321		2496.77	0.0043854		3026.77	0.00764984		3556.8	-0.01252793
376.99	0.04843278		906.99	-0.01459205		1436.98	0.00585755		1966.98	-0.00166725		2496.97	0.00445088		3026.97	0.00749775		3557	-0.01298165
377.19	0.04827263		907.19	-0.01456959		1437.18	0.00581418		1967.18	-0.00214279		2497.17	0.00468491		3027.17	0.00793421		3557.2	-0.01214175
377.39	0.04826328		907.39	-0.01421598		1437.38	0.00649173		1967.38	-0.00187716		2497.37	0.00475596		3027.37	0.00877301		3557.4	-0.012331
377.59	0.04814493		907.59	-0.01425546		1437.58	0.00674871		1967.58	-0.00120932		2497.57	0.00435968		3027.57	0.0082723		3557.6	-0.01262087
377.79	0.0485514		907.79	-0.01501245		1437.78	0.00592466		1967.78	-0.00036892		2497.77	0.00623909		3027.77	0.00728832		3557.8	-0.01268165
377.99	0.04836037		907.99	-0.01516951		1437.98	0.00490058		1967.98	0.00001755		2497.97	0.00728957		3027.97	0.00666087		3558	-0.01260131
378.19	0.04800436		908.19	-0.01528932		1438.18	0.004325		1968.18	0.00040604		2498.17	0.00788634		3028.17	0.00562917		3558.2	-0.01246916
378.39	0.04750797		908.39	-0.01459085		1438.38	0.00399213		1968.38	0.00067324		2498.37	0.00813734		3028.37	0.00463508		3558.4	-0.01281999
378.59	0.0473922		908.59	-0.01419662		1438.58	0.00353437		1968.58	0.00069022		2498.57	0.00805942		3028.57	0.00394921		3558.6	-0.0135255
378.79	0.04683557		908.79	-0.01314832		1438.78	0.00343572		1968.78	0.00058991		2498.77	0.00821461		3028.77	0.00370511		3558.8	-0.01312141
378.99	0.04661061		908.99	-0.01255661		1438.98	0.00372952		1968.98	0.0009215		2498.97	0.0075624		3028.97	0.00342145		3559	-0.0129942
379.19	0.04648312		909.19	-0.01160574		1439.18	0.0037014		1969.18	0.0004766		2499.17	0.0069518		3029.17	0.00320408		3559.2	-0.0132258
379.39	0.0459292		909.39	-0.01086581		1439.38	0.00334564		1969.38	-0.00051396		2499.37	0.00689937		3029.37	0.00324637		3559.4	-0.01317777
379.59	0.04548773		909.59	-0.01028028		1439.58	0.00376064		1969.58	-0.00081379		2499.57	0.00697592		3029.57	0.00322726		3559.6	-0.01252497
379.79	0.04473727		909.79	-0.00983934		1439.78	0.00415644		1969.78	-0.00134101		2499.77	0.00644285		3029.77	0.00375223		3559.8	-0.0115322
379.99	0.04473727		909.99	-0.00983934		1439.98	0.00415644		1969.98	-0.00134101		2499.97	0.00644285		3029.97	0.00375223		3560	-0.0115322
380.19	0.04504847		910.19	-0.00905256		1440.18	0.00360174		1970.18	-0.00141912		2500.17	0.00656422		3030.17	0.00328217		3560.2	-0.01177846
380.39	0.0454132		910.39	-0.00780389		1440.38	0.00294658		1970.38	-0.00112612		2500.37	0.00684171		3030.37	0.00303522		3560.4	-0.01202959
380.59	0.04563572		910.59	-0.00642155		1440.58	0.00237201		1970.58	-0.00147402		2500.57	0.00676688		3030.57	0.00269824		3560.6	-0.01232551
380.79	0.04523329		910.79	-0.0058356		1440.78	0.00225076		1970.78	-0.00118467		2500.77	0.00669804		3030.77	0.00289388		3560.8	-0.01345453
380.99	0.04472785		910.99	-0.005562		1440.98	0.00142766		1970.98	-0.00066751		2500.97	0.00709224		3030.97	0.00262181		3561	-0.01366906
381.19	0.04440414		911.19	-0.00594115		1441.18	0.00088635		1971.18	-0.0006588		2501.17	0.00696127		3031.17	0.00260738		3561.2	-0.01335219
381.39	0.0439099		911.39	-0.00547659		1441.38	0.00041591		1971.38	-0.00095025		2501.37	0.00607089		3031.37	0.00280953		3561.4	-0.01382194
381.59	0.04351914		911.59	-0.0047388		1441.58	0.00084567		1971.58	-0.0012024		2501.57	0.00635393		3031.57	0.00286027		3561.6	-0.01361592
381.79	0.04278049		911.79	-0.00389471		1441.78	0.00139068		1971.78	-0.00178319		2501.77	0.00676776		3031.77	0.00335924		3561.8	-0.01401538
381.99	0.04278177		911.99	-0.00442566		1441.98	0.0025252		1971.98	-0.00194728		2501.97	0.00650958		3031.97	0.00450525		3562	-0.0139691
382.19	0.04248669		912.19	-0.00539392		1442.18	0.00295678		1972.18	-0.00259632		2502.17	0.00653144		3032.17	0.00597076		3562.2	-0.01350455
382.39	0.04240776		912.39	-0.00515971		1442.38	0.00310225		1972.38	-0.00226105		2502.37	0.00675674		3032.37	0.00724588		3562.4	-0.01335232
382.59	0.04273043		912.59	-0.00523168		1442.58	0.00377599		1972.58	-0.00227438		2502.57	0.00792084		3032.57	0.00815927		3562.6	-0.01284484
382.79	0.04321019		912.79	-0.00499898		1442.78	0.00510555		1972.78	-0.00245912		2502.77	0.0088247		3032.77	0.00825424		3562.8	-0.01267974
382.99	0.04373174		912.99	-0.00449134		1442.98	0.00580042		1972.98	-0.0017042		2502.97	0.00872452		3032.97	0.00839534		3563	-0.01271889
383.19	0.04428623		913.19	-0.0048164		1443.18	0.00658699		1973.18	-0.00069852		2503.17	0.00830622		3033.17	0.00804275		3563.2	-0.01288056
383.39	0.04345334		913.39	-0.00457992		1443.38	0.00674616		1973.38	0.00074175		2503.37	0.00846719		3033.37	0.00841289		3563.4	-0.01326198
383.59	0.04294971		913.59	-0.00439211		1443.58	0.00574724		1973.58	0.00225477		2503.57	0.00878367		3033.57	0.008337		3563.6	-0.01234207
383.79	0.04263978		913.79	-0.00410083		1443.78	0.00568637		1973.78	0.00265501		2503.77	0.00910745		3033.77	0.0081235		3563.8	-0.01187844
383.99	0.04241786		913.99	-0.00425519		1443.98	0.00533094		1973.98	0.00343425		2503.97	0.0094216		3033.97	0.00848848		3564	-0.0114888
384.19	0.04382843		914.19	-0.00451707		1444.18	0.00540971		1974.18	0.00378591		2504.17	0.00964017		3034.17	0.00861762		3564.2	-0.01199018
384.39	0.04340572		914.39	-0.00417349		1444.38	0.00515458		1974.38	0.00349879		2504.37	0.00903692		3034.37	0.00937685		3564.4	-0.01183617
384.59	0.0430337		914.59	-0.0044235		1444.58	0.0048988		1974.58	0.00423233		2504.57	0.00859465		3034.57	0.00966373		3564.6	-0.01186563
384.79	0.04270789		914.79	-0.00536855		1444.78	0.00419562		1974.78	0.00513106		2504.77	0.00809541		3034.77	0.00967912		3564.8	-0.01206458
384.99	0.04304799		914.99	-0.00537202		1444.98	0.00322196		1974.98	0.00505798		2504.97	0.00797846		3034.97	0.00940356		3565	-0.01143386
385.19	0.0431515		915.19	-0.00469718		1445.18	0.00313542		1975.18	0.00509246		2505.17	0.00674728		3035.17	0.00869385		3565.2	-0.0121978
385.39	0.04282399		915.39	-0.00398653		1445.38	0.00256856		1975.38	0.00487928		2505.37	0.00650026		3035.37	0.00817372		3565.4	-0.01286753
385.59	0.04318731		915.59	-0.00328261		1445.58	0.00242821		1975.58	0.00450725		2505.57	0.00686039		3035.57	0.00864231		3565.6	-0.01272914
385.79	0.04302107		915.79	-0.00310909		1445.78	0.00170483		1975.78	0.00383206		2505.77	0.00735422		3035.77	0.00903519		3565.8	-0.01351734
385.99	0.04378567		915.99	-0.00381582		1445.98	0.00192671		1975.98	0.00377246		2505.97	0.00671525		3035.97	0.0095833		3566	-0.01354573
386.19	0.04332288		916.19	-0.00384223		1446.18	0.00097286		1976.18	0.00365539		2506.17	0.00680553		3036.17	0.00972454		3566.2	-0.01365696
386.39	0.04308929		916.39	-0.00298595		1446.38	0.00123783		1976.38	0.00314326		2506.37	0.00637026		3036.37	0.00984494		3566.4	-0.01397477
386.59	0.04369346		916.59	-0.00355771		1446.58	0.00177785		1976.58	0.0029868		2506.57	0.00585539		3036.57	0.00912313		3566.6	-0.01408769
386.79	0.04436777		916.79	-0.00353427		1446.78	0.00229953		1976.78	0.00274		2506.77	0.00595358		3036.77	0.00952568		3566.8	-0.01509143
386.99	0.04392768		916.99	-0.00395235		1446.98	0.00253125		1976.98	0.00329127		2506.97	0.00651078		3036.97	0.00959886		3567	-0.01614364
387.19	0.04320154		917.19	-0.00335054		1447.18	0.00177282		1977.18	0.00368638		2507.17	0.00673318		3037.17	0.00860152		3567.2	-0.01658763
387.39	0.04264385		917.39	-0.0027745		1447.38	0.00228223		1977.38	0.00414787		2507.37	0.00769919		3037.37	0.00875136		3567.4	-0.01626732
387.59	0.04278142		917.59	-0.00318992		1447.58	0.00295465		1977.58	0.0039893		2507.57	0.00823588		3037.57	0.0091747		3567.6	-0.01623392
387.79	0.04283928		917.79	-0.00313379		1447.78	0.00437276		1977.78	0.00445808		2507.77	0.00821572		3037.77	0.00902168		3567.8	-0.01601265
387.99	0.04299508		917.99	-0.00345688		1447.98	0.00498186		1977.98	0.00399365		2507.97	0.00785152		3037.97	0.00970188		3568	-0.01513273
388.19	0.04331363		918.19	-0.00367385		1448.18	0.00498942		1978.18	0.00404386		2508.17	0.00763742		3038.17	0.00990343		3568.2	-0.01429133
388.39	0.04281503		918.39	-0.00348601		1448.38	0.00497622		1978.38	0.0039557		2508.37	0.00761358		3038.37	0.01047397		3568.4	-0.01380467
388.59	0.04295318		918.59	-0.00345905		1448.58	0.00511546		1978.58	0.00526878		2508.57	0.0078002		3038.57	0.01021083		3568.6	-0.01281404
388.79	0.04396724		918.79	-0.00345248		1448.78	0.00472189		1978.78	0.00443283		2508.77	0.00768261		3038.77	0.00895938		3568.8	-0.01218108
388.99	0.04425745		918.99	-0.00308494		1448.98	0.00475624		1978.98	0.00444146		2508.97	0.00769154		3038.97	0.00917277		3569	-0.01176033
389.19	0.04414299		919.19	-0.00293218		1449.18	0.00399718		1979.18	0.00479594		2509.17	0.00760446		3039.17	0.0088366		3569.2	-0.01187494
389.39	0.04445141		919.39	-0.00375083		1449.38	0.00301994		1979.38	0.00421416		2509.37	0.00823741		3039.37	0.00926147		3569.4	-0.01100809
389.59	0.04524345		919.59	-0.00336703		1449.58	0.00204753		1979.58	0.00430098		2509.57	0.00748238		3039.57	0.01038277		3569.6	-0.01099922
389.79	0.04460666		919.79	-0.00352122		1449.78	0.00250045		1979.78	0.00486005		2509.77	0.00846339		3039.77	0.00968788		3569.8	-0.01033985
389.99	0.04500835		919.99	-0.00326502		1449.98	0.00303118		1979.98	0.00491677		2509.97	0.00765497		3039.97	0.01000068		3570	-0.01035777
390.19	0.04447622		920.19	-0.00336471		1450.18	0.00322088		1980.18	0.00439652		2510.17	0.00757514		3040.17	0.00958342		3570.2	-0.01080375
390.39	0.04513639		920.39	-0.00335889		1450.38	0.00367228		1980.38	0.0027916		2510.37	0.00739611		3040.37	0.01024399		3570.4	-0.0107449
390.59	0.04572072		920.59	-0.00403415		1450.58	0.0033573		1980.58	0.00284757		2510.57	0.00808108		3040.57	0.01105313		3570.6	-0.01102202
390.79	0.04491819		920.79	-0.00372064		1450.78	0.00328955		1980.78	0.00226683		2510.77	0.0085042		3040.77	0.01068359		3570.8	-0.01178838
390.99	0.04445		920.99	-0.00266808		1450.98	0.00278995		1980.98	0.00176505		2510.97	0.00937403		3040.97	0.00994937		3571	-0.01306283
391.19	0.04406804		921.19	-0.00168181		1451.18	0.0026326		1981.18	0.00184292		2511.17	0.00947266		3041.17	0.00951811		3571.2	-0.01261518
391.39	0.04409007		921.39	-0.00181442		1451.38	0.00354294		1981.38	0.00155981		2511.37	0.01008328		3041.37	0.00933327		3571.4	-0.01290241
391.59	0.04397201		921.59	-0.00201553		1451.58	0.00432022		1981.58	0.00204534		2511.57	0.01005798		3041.57	0.00964301		3571.6	-0.01274465
391.79	0.04369348		921.79	-0.00125078		1451.78	0.00447695		1981.78	0.0028111		2511.77	0.00967111		3041.77	0.00977964		3571.8	-0.01182001
391.99	0.04329563		921.99	-0.00064535		1451.98	0.00314093		1981.98	0.0029371		2511.97	0.00918511		3041.97	0.00966268		3572	-0.0115852
392.19	0.04371585		922.19	-0.00135069		1452.18	0.00242191		1982.18	0.00422836		2512.17	0.00904303		3042.17	0.00904017		3572.2	-0.01154941
392.39	0.0433706		922.39	-0.00080891		1452.38	0.00262947		1982.38	0.00460946		2512.37	0.00960619		3042.37	0.00847163		3572.4	-0.01119803
392.59	0.04294704		922.59	-0.0008417		1452.58	0.00208861		1982.58	0.00591745		2512.57	0.00911693		3042.57	0.00814979		3572.6	-0.01097196
392.79	0.04303998		922.79	-0.0008518		1452.78	0.00134921		1982.78	0.00621489		2512.77	0.00848809		3042.77	0.00741646		3572.8	-0.01170637
392.99	0.04266914		922.99	-0.00052756		1452.98	0.00146849		1982.98	0.00689179		2512.97	0.00745324		3042.97	0.00847429		3573	-0.01252282
393.19	0.04319338		923.19	-0.00042364		1453.18	0.00128558		1983.18	0.00753652		2513.17	0.00671704		3043.17	0.00815544		3573.2	-0.01345572
393.39	0.04311208		923.39	-0.00115226		1453.38	0.00109628		1983.38	0.0080092		2513.37	0.00582147		3043.37	0.00883466		3573.4	-0.01344944
393.59	0.04333458		923.59	-0.00119815		1453.58	0.000457		1983.58	0.00894441		2513.57	0.00454564		3043.57	0.00926276		3573.6	-0.01282678
393.79	0.04309289		923.79	-0.00082963		1453.78	0.00184237		1983.78	0.00872294		2513.77	0.00437582		3043.77	0.00877228		3573.8	-0.0123354
393.99	0.04325065		923.99	-0.00012671		1453.98	0.00222833		1983.98	0.00792994		2513.97	0.00336927		3043.97	0.00888922		3574	-0.01400229
394.19	0.04287378		924.19	-0.00092147		1454.18	0.003297		1984.18	0.00688609		2514.17	0.0028611		3044.17	0.00842121		3574.2	-0.01388083
394.39	0.04317349		924.39	-0.00193975		1454.38	0.0032818		1984.38	0.00583814		2514.37	0.00330123		3044.37	0.00870382		3574.4	-0.01420004
394.59	0.04385132		924.59	-0.00212779		1454.58	0.00251065		1984.58	0.00611618		2514.57	0.00325729		3044.57	0.0078143		3574.6	-0.01506583
394.79	0.04336503		924.79	-0.00206767		1454.78	0.00199825		1984.78	0.00636803		2514.77	0.00305884		3044.77	0.00692403		3574.8	-0.0151021
394.99	0.04313746		924.99	-0.0015551		1454.98	0.00179899		1984.98	0.00618459		2514.97	0.00407749		3044.97	0.0069355		3575	-0.01576378
395.19	0.04346633		925.19	-0.00276095		1455.18	0.00168495		1985.18	0.00535259		2515.17	0.00432445		3045.17	0.00689036		3575.2	-0.01494367
395.39	0.0434703		925.39	-0.00305761		1455.38	0.0020938		1985.38	0.00527981		2515.37	0.00424719		3045.37	0.00704824		3575.4	-0.01471683
395.59	0.04322517		925.59	-0.00329171		1455.58	0.00344969		1985.58	0.00624236		2515.57	0.00449982		3045.57	0.00771627		3575.6	-0.01382793
395.79	0.04343602		925.79	-0.00311536		1455.78	0.00306749		1985.78	0.00677539		2515.77	0.00477447		3045.77	0.00779689		3575.8	-0.01314399
395.99	0.04307424		925.99	-0.00251567		1455.98	0.00254481		1985.98	0.00870857		2515.97	0.00529928		3045.97	0.00714192		3576	-0.01294286
396.19	0.04284797		926.19	-0.00250264		1456.18	0.00313817		1986.18	0.00973277		2516.17	0.00631996		3046.17	0.00669953		3576.2	-0.0126339
396.39	0.04248741		926.39	-0.00149168		1456.38	0.0036231		1986.38	0.00989757		2516.37	0.00640209		3046.37	0.00667745		3576.4	-0.01222364
396.59	0.04262978		926.59	-0.00165535		1456.58	0.0032783		1986.58	0.01165989		2516.57	0.00642049		3046.57	0.00608343		3576.6	-0.01334404
396.79	0.04304204		926.79	-0.00153976		1456.78	0.00359246		1986.78	0.0124975		2516.77	0.00654746		3046.77	0.00570512		3576.8	-0.01323412
396.99	0.04366817		926.99	-0.00076596		1456.98	0.004088		1986.98	0.01310361		2516.97	0.00675387		3046.97	0.00589419		3577	-0.0132871
397.19	0.04356431		927.19	-0.00076175		1457.18	0.00389074		1987.18	0.0137478		2517.17	0.00684498		3047.17	0.0053098		3577.2	-0.01226189
397.39	0.04321369		927.39	-0.00069409		1457.38	0.0033475		1987.38	0.0132676		2517.37	0.00720862		3047.37	0.00606172		3577.4	-0.01210125
397.59	0.04413309		927.59	-0.00000229		1457.58	0.00375496		1987.58	0.01303053		2517.57	0.00748355		3047.57	0.00578099		3577.6	-0.011599
397.79	0.04378451		927.79	0.00046058		1457.78	0.00446186		1987.78	0.01227266		2517.77	0.00749444		3047.77	0.00546724		3577.8	-0.01182461
397.99	0.04328898		927.99	0.00023442		1457.98	0.00389045		1987.98	0.0115808		2517.97	0.00796519		3047.97	0.00595685		3578	-0.0119032
398.19	0.04347394		928.19	-0.00060141		1458.18	0.00345922		1988.18	0.00985084		2518.17	0.00758674		3048.17	0.00574519		3578.2	-0.01052064
398.39	0.04376519		928.39	-0.00172273		1458.38	0.0023074		1988.38	0.00907665		2518.37	0.0078288		3048.37	0.0054382		3578.4	-0.01058648
398.59	0.04469837		928.59	-0.00213252		1458.58	0.00204568		1988.58	0.00778645		2518.57	0.0072036		3048.57	0.00572517		3578.6	-0.0104253
398.79	0.04423946		928.79	-0.00269257		1458.78	0.00226447		1988.78	0.00661672		2518.77	0.00708932		3048.77	0.00712605		3578.8	-0.00971633
398.99	0.04332935		928.99	-0.00281925		1458.98	0.00281772		1988.98	0.00483571		2518.97	0.00648539		3048.97	0.00721398		3579	-0.01024042
399.19	0.04369429		929.19	-0.00380837		1459.18	0.00315995		1989.18	0.0039169		2519.17	0.00604089		3049.17	0.00750879		3579.2	-0.0101107
399.39	0.04308215		929.39	-0.00360607		1459.38	0.00330154		1989.38	0.00513873		2519.37	0.0054498		3049.37	0.00914416		3579.4	-0.0099646
399.59	0.04305624		929.59	-0.00359795		1459.58	0.00344854		1989.58	0.00570636		2519.57	0.00505592		3049.57	0.00903483		3579.6	-0.01036383
399.79	0.04310921		929.79	-0.00334875		1459.78	0.00340128		1989.78	0.00686436		2519.77	0.0044471		3049.77	0.00909934		3579.8	-0.01076307
399.99	0.04276112		929.99	-0.00293019		1459.98	0.00305574		1989.98	0.00855381		2519.97	0.0045589		3049.97	0.00822498		3580	-0.01150223
400.19	0.0425969		930.19	-0.00347892		1460.18	0.00305052		1990.18	0.00884374		2520.17	0.00396689		3050.17	0.0062085		3580.2	-0.01193765
400.39	0.04262232		930.39	-0.00401375		1460.38	0.00292974		1990.38	0.0103363		2520.37	0.00336982		3050.37	0.00531551		3580.4	-0.01251365
400.59	0.0423235		930.59	-0.0041975		1460.58	0.0021336		1990.58	0.01224855		2520.57	0.00395863		3050.57	0.00380007		3580.6	-0.01336158
400.79	0.0425301		930.79	-0.00424368		1460.78	0.00167716		1990.78	0.01381265		2520.77	0.004324		3050.77	0.00291619		3580.8	-0.01349739
400.99	0.04219328		930.99	-0.00337586		1460.98	0.00163663		1990.98	0.01446755		2520.97	0.00440095		3050.97	0.00303825		3581	-0.0139131
401.19	0.04165516		931.19	-0.00338954		1461.18	0.00125975		1991.18	0.01459607		2521.17	0.0043776		3051.17	0.00243596		3581.2	-0.01354186
401.39	0.04156916		931.39	-0.00335035		1461.38	0.00084267		1991.38	0.01457635		2521.37	0.00485211		3051.37	0.0023445		3581.4	-0.01431836
401.59	0.0418932		931.59	-0.0034524		1461.58	0.00135786		1991.58	0.01475887		2521.57	0.00484663		3051.57	0.00270324		3581.6	-0.01290882
401.79	0.04157039		931.79	-0.00375878		1461.78	0.00068894		1991.78	0.01360581		2521.77	0.00492528		3051.77	0.00308376		3581.8	-0.01175482
401.99	0.04140185		931.99	-0.00366741		1461.98	0.00054341		1991.98	0.01232155		2521.97	0.00615077		3051.97	0.00393312		3582	-0.01051779
402.19	0.04107207		932.19	-0.00376371		1462.18	0.00022715		1992.18	0.01077307		2522.17	0.0060298		3052.17	0.0035172		3582.2	-0.00999198
402.39	0.04103571		932.39	-0.00471463		1462.38	0.00088613		1992.38	0.00921618		2522.37	0.00550889		3052.37	0.00459809		3582.4	-0.00970871
402.59	0.04206905		932.59	-0.00441032		1462.58	0.00146047		1992.58	0.00748338		2522.57	0.00617275		3052.57	0.00576536		3582.6	-0.00995098
402.79	0.04236779		932.79	-0.00404481		1462.78	0.0015588		1992.78	0.00652341		2522.77	0.00636616		3052.77	0.00714486		3582.8	-0.01011735
402.99	0.0425122		932.99	-0.00416182		1462.98	0.00185145		1992.98	0.00561365		2522.97	0.00652851		3052.97	0.00799544		3583	-0.01016604
403.19	0.04325904		933.19	-0.00414715		1463.18	0.00201833		1993.18	0.00542052		2523.17	0.00756979		3053.17	0.0092237		3583.2	-0.01001377
403.39	0.0438217		933.39	-0.00396245		1463.38	0.0011838		1993.38	0.00615543		2523.37	0.00776626		3053.37	0.01060595		3583.4	-0.0099043
403.59	0.04493299		933.59	-0.00353878		1463.58	0.0016419		1993.58	0.0064726		2523.57	0.00792326		3053.57	0.01044186		3583.6	-0.01000891
403.79	0.04544943		933.79	-0.00382223		1463.78	0.00220769		1993.78	0.00706521		2523.77	0.00793622		3053.77	0.01061515		3583.8	-0.01035381
403.99	0.04549373		933.99	-0.00340232		1463.98	0.00224256		1993.98	0.00752354		2523.97	0.00877824		3053.97	0.00931355		3584	-0.01037687
404.19	0.04547736		934.19	-0.0040488		1464.18	0.0024011		1994.18	0.00847689		2524.17	0.00902764		3054.17	0.0081771		3584.2	-0.01090206
404.39	0.04506196		934.39	-0.00394875		1464.38	0.00216037		1994.38	0.01015436		2524.37	0.00949422		3054.37	0.00813143		3584.4	-0.0123586
404.59	0.04536385		934.59	-0.0038982		1464.58	0.00208503		1994.58	0.01100328		2524.57	0.00993744		3054.57	0.00763481		3584.6	-0.01342973
404.79	0.04576392		934.79	-0.00408662		1464.78	0.00259116		1994.78	0.01170901		2524.77	0.01008068		3054.77	0.00629506		3584.8	-0.01376912
404.99	0.04552117		934.99	-0.00303443		1464.98	0.00287765		1994.98	0.01267902		2524.97	0.00970051		3054.97	0.00643097		3585	-0.01433961
405.19	0.04455285		935.19	-0.0031238		1465.18	0.00254848		1995.18	0.01289367		2525.17	0.00988126		3055.17	0.00487846		3585.2	-0.01474616
405.39	0.04452589		935.39	-0.00261346		1465.38	0.00251204		1995.38	0.01291827		2525.37	0.00900414		3055.37	0.00402771		3585.4	-0.01481967
405.59	0.04385694		935.59	-0.00221287		1465.58	0.00308425		1995.58	0.01302334		2525.57	0.00880327		3055.57	0.0036257		3585.6	-0.01395193
405.79	0.04313638		935.79	-0.00110339		1465.78	0.00249796		1995.78	0.01194991		2525.77	0.00911323		3055.77	0.00322112		3585.8	-0.01358609
405.99	0.04248023		935.99	-0.00058307		1465.98	0.00247457		1995.98	0.01131266		2525.97	0.00847086		3055.97	0.00252343		3586	-0.01304471
406.19	0.04216846		936.19	-0.00095595		1466.18	0.00236635		1996.18	0.01018485		2526.17	0.00789941		3056.17	0.00198919		3586.2	-0.01338104
406.39	0.04299885		936.39	-0.00129378		1466.38	0.00290279		1996.38	0.00852702		2526.37	0.00656306		3056.37	0.00292502		3586.4	-0.01294632
406.59	0.04419411		936.59	-0.0013572		1466.58	0.00202351		1996.58	0.00808162		2526.57	0.00664853		3056.57	0.00282824		3586.6	-0.01374419
406.79	0.04395541		936.79	-0.00155808		1466.78	0.0018593		1996.78	0.00750688		2526.77	0.00545193		3056.77	0.00434043		3586.8	-0.01425086
406.99	0.04385507		936.99	-0.00158856		1466.98	0.00147441		1996.98	0.00726349		2526.97	0.00466278		3056.97	0.00547585		3587	-0.01390363
407.19	0.04335688		937.19	-0.00162716		1467.18	0.001206		1997.18	0.00724872		2527.17	0.00394114		3057.17	0.00579064		3587.2	-0.01341293
407.39	0.04322557		937.39	-0.00269946		1467.38	0.00123452		1997.38	0.00834804		2527.37	0.00373673		3057.37	0.00640892		3587.4	-0.01335071
407.59	0.0428286		937.59	-0.00302356		1467.58	0.00047924		1997.58	0.00901693		2527.57	0.00353202		3057.57	0.00630262		3587.6	-0.01337681
407.79	0.04241182		937.79	-0.00321403		1467.78	0.00064034		1997.78	0.00884289		2527.77	0.00353828		3057.77	0.00540866		3587.8	-0.01304679
407.99	0.0422635		937.99	-0.00347754		1467.98	0.00079584		1997.98	0.00899524		2527.97	0.00398897		3057.97	0.00556399		3588	-0.01271429
408.19	0.04273639		938.19	-0.00390582		1468.18	0.00074472		1998.18	0.00974828		2528.17	0.00448272		3058.17	0.00535742		3588.2	-0.01393471
408.39	0.0427556		938.39	-0.00371538		1468.38	0.00132136		1998.38	0.00984921		2528.37	0.0050835		3058.37	0.00540002		3588.4	-0.01482569
408.59	0.04312123		938.59	-0.00335604		1468.58	0.00172341		1998.58	0.01029734		2528.57	0.00551606		3058.57	0.00584555		3588.6	-0.01451376
408.79	0.04279942		938.79	-0.00314359		1468.78	0.00190805		1998.78	0.01047548		2528.77	0.0058346		3058.77	0.00521963		3588.8	-0.01457057
408.99	0.04249764		938.99	-0.00249014		1468.98	0.00210067		1998.98	0.01101307		2528.97	0.00618995		3058.97	0.00596137		3589	-0.01521049
409.19	0.04244107		939.19	-0.00245993		1469.18	0.00224291		1999.18	0.01125159		2529.17	0.00681317		3059.17	0.00532921		3589.2	-0.01479141
409.39	0.04312559		939.39	-0.00184122		1469.38	0.00221025		1999.38	0.01153568		2529.37	0.00629211		3059.37	0.00510599		3589.4	-0.01439816
409.59	0.04210165		939.59	-0.00142482		1469.58	0.00181228		1999.58	0.01152877		2529.57	0.00665785		3059.57	0.0052088		3589.6	-0.01308649
409.79	0.04224601		939.79	-0.00087261		1469.78	0.00131249		1999.78	0.01089898		2529.77	0.00680108		3059.77	0.00613731		3589.8	-0.01192603
409.99	0.04289537		939.99	-0.00138159		1469.98	0.00190728		1999.98	0.01012959		2529.97	0.00669859		3059.97	0.00607733		3590	-0.01089913
410.19	0.04372875		940.19	-0.00148484		1470.18	0.00222943		2000.18	0.00953495		2530.17	0.00680067		3060.17	0.00657765		3590.2	-0.01113986
410.39	0.0450501		940.39	-0.00136339		1470.38	0.00153423		2000.38	0.00853731		2530.37	0.00616419		3060.37	0.00740037		3590.4	-0.01133849
410.59	0.04595092		940.59	-0.00116783		1470.58	0.00083096		2000.58	0.00945687		2530.57	0.00544508		3060.57	0.00721835		3590.6	-0.01195633
410.79	0.04560695		940.79	-0.00162905		1470.78	0.00028503		2000.78	0.00968087		2530.77	0.00493175		3060.77	0.00820912		3590.8	-0.01168881
410.99	0.04532728		940.99	-0.00257641		1470.98	-0.0000031		2000.98	0.00991297		2530.97	0.00450987		3060.97	0.00809786		3591	-0.01172892
411.19	0.04465462		941.19	-0.00377858		1471.18	-0.00021782		2001.18	0.01018357		2531.17	0.00458756		3061.17	0.00686706		3591.2	-0.01180786
411.39	0.04403837		941.39	-0.00466377		1471.38	-0.00081615		2001.38	0.01078975		2531.37	0.00518263		3061.37	0.00606008		3591.4	-0.01244097
411.59	0.04367505		941.59	-0.00437153		1471.58	-0.00165048		2001.58	0.01106005		2531.57	0.00492574		3061.57	0.00482615		3591.6	-0.01303405
411.79	0.04379242		941.79	-0.00403597		1471.78	-0.00136795		2001.78	0.01061394		2531.77	0.00544226		3061.77	0.00461504		3591.8	-0.01284577
411.99	0.04445757		941.99	-0.00412388		1471.98	-0.00186744		2001.98	0.01022765		2531.97	0.00611645		3061.97	0.00546687		3592	-0.01377438
412.19	0.04536058		942.19	-0.00378414		1472.18	-0.00140395		2002.18	0.01045778		2532.17	0.00719612		3062.17	0.00570003		3592.2	-0.01384257
412.39	0.04533754		942.39	-0.00372379		1472.38	-0.00124865		2002.38	0.01048304		2532.37	0.0076282		3062.37	0.00605949		3592.4	-0.01416643
412.59	0.04467948		942.59	-0.00343003		1472.58	-0.00122428		2002.58	0.0107054		2532.57	0.00762317		3062.57	0.0065904		3592.6	-0.01515261
412.79	0.04471764		942.79	-0.00325137		1472.78	-0.0009469		2002.78	0.00954569		2532.77	0.00764162		3062.77	0.00654587		3592.8	-0.01565504
412.99	0.04525655		942.99	-0.00336725		1472.98	-0.00032131		2002.98	0.00884584		2532.97	0.00736982		3062.97	0.00714241		3593	-0.01619838
413.19	0.04519604		943.19	-0.00337728		1473.18	0.00029991		2003.18	0.00803299		2533.17	0.00593566		3063.17	0.0077394		3593.2	-0.01641974
413.39	0.04420941		943.39	-0.00398158		1473.38	-0.00036307		2003.38	0.00754612		2533.37	0.00497591		3063.37	0.00767885		3593.4	-0.01622317
413.59	0.04370443		943.59	-0.00370613		1473.58	-0.00024615		2003.58	0.00660533		2533.57	0.00520168		3063.57	0.0079524		3593.6	-0.01607797
413.79	0.04346197		943.79	-0.00363986		1473.78	0.00047953		2003.78	0.00535944		2533.77	0.0053676		3063.77	0.0091691		3593.8	-0.01618555
413.99	0.04289265		943.99	-0.00366215		1473.98	0.00091418		2003.98	0.00412268		2533.97	0.00461983		3063.97	0.00906489		3594	-0.0162164
414.19	0.04328735		944.19	-0.00386531		1474.18	0.00097241		2004.18	0.00377802		2534.17	0.00308472		3064.17	0.00893935		3594.2	-0.01656218
414.39	0.04288114		944.39	-0.00417485		1474.38	0.00020881		2004.38	0.00301533		2534.37	0.0026596		3064.37	0.00862711		3594.4	-0.01592031
414.59	0.04231619		944.59	-0.004241		1474.58	-0.00023777		2004.58	0.00319277		2534.57	0.00251394		3064.57	0.00926811		3594.6	-0.01474429
414.79	0.04168662		944.79	-0.00480941		1474.78	-0.00055392		2004.78	0.00267545		2534.77	0.0022065		3064.77	0.0092918		3594.8	-0.01441924
414.99	0.04081051		944.99	-0.00434677		1474.98	-0.00072361		2004.98	0.00246065		2534.97	0.00158834		3064.97	0.00933726		3595	-0.014275
415.19	0.03975557		945.19	-0.004269		1475.18	-0.00073836		2005.18	0.00212514		2535.17	0.00234366		3065.17	0.00867953		3595.2	-0.01383158
415.39	0.03881535		945.39	-0.00437114		1475.38	-0.00127139		2005.38	0.00247014		2535.37	0.00243685		3065.37	0.00905518		3595.4	-0.01349577
415.59	0.03970033		945.59	-0.00436691		1475.58	-0.00047418		2005.58	0.00325367		2535.57	0.00344463		3065.57	0.00941236		3595.6	-0.0135604
415.79	0.03971877		945.79	-0.00417191		1475.78	-0.00057565		2005.78	0.00363267		2535.77	0.00503166		3065.77	0.01055512		3595.8	-0.01346556
415.99	0.04079119		945.99	-0.00436497		1475.98	-0.00024154		2005.98	0.00361721		2535.97	0.00579602		3065.97	0.01118556		3596	-0.01405609
416.19	0.04021204		946.19	-0.00475325		1476.18	0.00048005		2006.18	0.00468728		2536.17	0.00665983		3066.17	0.0107429		3596.2	-0.01367995
416.39	0.04066393		946.39	-0.00500756		1476.38	0.00066927		2006.38	0.00507606		2536.37	0.00681537		3066.37	0.00978296		3596.4	-0.01452602
416.59	0.04134117		946.59	-0.00509508		1476.58	0.00171049		2006.58	0.00504371		2536.57	0.00737363		3066.57	0.00954366		3596.6	-0.01485473
416.79	0.04231912		946.79	-0.00475067		1476.78	0.00214216		2006.78	0.00505316		2536.77	0.00667541		3066.77	0.00897102		3596.8	-0.01447983
416.99	0.04246904		946.99	-0.00538931		1476.98	0.00276009		2006.98	0.0049515		2536.97	0.00635272		3066.97	0.00757068		3597	-0.01465798
417.19	0.04226535		947.19	-0.00565685		1477.18	0.00178834		2007.18	0.00499491		2537.17	0.00630244		3067.17	0.00686411		3597.2	-0.01512758
417.39	0.04229298		947.39	-0.0049752		1477.38	0.00151234		2007.38	0.00517594		2537.37	0.00691275		3067.37	0.00576784		3597.4	-0.0153807
417.59	0.04269548		947.59	-0.00489408		1477.58	0.00199616		2007.58	0.00433949		2537.57	0.00807827		3067.57	0.00537843		3597.6	-0.01609907
417.79	0.04286208		947.79	-0.00485959		1477.78	0.00142517		2007.78	0.00455316		2537.77	0.00696233		3067.77	0.00570661		3597.8	-0.01532992
417.99	0.0433733		947.99	-0.00509626		1477.98	0.00115827		2007.98	0.00489312		2537.97	0.00569616		3067.97	0.00463796		3598	-0.0149695
418.19	0.04386841		948.19	-0.00432572		1478.18	0.00045766		2008.18	0.00527082		2538.17	0.00480457		3068.17	0.00385114		3598.2	-0.01478769
418.39	0.04440413		948.39	-0.00403075		1478.38	-0.00039321		2008.38	0.00436132		2538.37	0.00457363		3068.37	0.00373471		3598.4	-0.01473301
418.59	0.04460543		948.59	-0.00419314		1478.58	-0.00027882		2008.58	0.00474496		2538.57	0.00507586		3068.57	0.00435233		3598.6	-0.01472692
418.79	0.04486755		948.79	-0.00357549		1478.78	-0.0008264		2008.78	0.00417753		2538.77	0.00446189		3068.77	0.00444137		3598.8	-0.01491463
418.99	0.04481453		948.99	-0.00353194		1478.98	-0.00129914		2008.98	0.00380684		2538.97	0.00497504		3068.97	0.00442943		3599	-0.0139067
419.19	0.04428311		949.19	-0.00358693		1479.18	-0.00171423		2009.18	0.0039813		2539.17	0.00514829		3069.17	0.00544909		3599.2	-0.01366009
419.39	0.0438649		949.39	-0.00417534		1479.38	-0.00317455		2009.38	0.00431937		2539.37	0.00527362		3069.37	0.00715468		3599.4	-0.01361902
419.59	0.04431432		949.59	-0.00414723		1479.58	-0.00350815		2009.58	0.00482349		2539.57	0.00609565		3069.57	0.00833535		3599.6	-0.01441562
419.79	0.04366097		949.79	-0.0046152		1479.78	-0.00369741		2009.78	0.0050766		2539.77	0.00627478		3069.77	0.00954604		3599.8	-0.01498559
419.99	0.04383679		949.99	-0.00478498		1479.98	-0.00365912		2009.98	0.00507453		2539.97	0.00589509		3069.97	0.00964122		3600	-0.0153225
420.19	0.0432748		950.19	-0.00568748		1480.18	-0.00368321		2010.18	0.00497904		2540.17	0.00560188		3070.17	0.00920738		3600.2	-0.0146394
420.39	0.0443621		950.39	-0.00551281		1480.38	-0.00303639		2010.38	0.0043479		2540.37	0.00666297		3070.37	0.01014594		3600.4	-0.01386645
420.59	0.0447774		950.59	-0.00536861		1480.58	-0.00248337		2010.58	0.00449042		2540.57	0.00679244		3070.57	0.01033107		3600.6	-0.01317977
420.79	0.04395842		950.79	-0.00485981		1480.78	-0.00260702		2010.78	0.00385554		2540.77	0.0065227		3070.77	0.00997443		3600.8	-0.0124276
420.99	0.04376378		950.99	-0.00475925		1480.98	-0.00311408		2010.98	0.00346897		2540.97	0.00637437		3070.97	0.01028911		3601	-0.01202447
421.19	0.04362698		951.19	-0.00464588		1481.18	-0.00347892		2011.18	0.00236817		2541.17	0.0064426		3071.17	0.01125446		3601.2	-0.01190986
421.39	0.0427342		951.39	-0.00349471		1481.38	-0.00305483		2011.38	0.00172471		2541.37	0.00624235		3071.37	0.01146774		3601.4	-0.0119051
421.59	0.04321701		951.59	-0.00510301		1481.58	-0.00309228		2011.58	0.00152521		2541.57	0.00575219		3071.57	0.01041582		3601.6	-0.01161591
421.79	0.04378166		951.79	-0.00490682		1481.78	-0.003566		2011.78	0.00220158		2541.77	0.0044107		3071.77	0.00925251		3601.8	-0.01139047
421.99	0.0441386		951.99	-0.00463174		1481.98	-0.00299373		2011.98	0.00185083		2541.97	0.00446728		3071.97	0.00753828		3602	-0.01222945
422.19	0.0428873		952.19	-0.00408727		1482.18	-0.00211154		2012.18	0.00111416		2542.17	0.00418309		3072.17	0.00658245		3602.2	-0.01240361
422.39	0.04237207		952.39	-0.00452857		1482.38	-0.00119203		2012.38	0.00072939		2542.37	0.00363653		3072.37	0.00604863		3602.4	-0.01283739
422.59	0.04243448		952.59	-0.00493013		1482.58	-0.00071062		2012.58	0.00119148		2542.57	0.00405223		3072.57	0.0060813		3602.6	-0.01299837
422.79	0.04228084		952.79	-0.00424847		1482.78	-0.00061171		2012.78	0.00038957		2542.77	0.00368038		3072.77	0.00606579		3602.8	-0.01270174
422.99	0.04166915		952.99	-0.003891		1482.98	0.00011057		2012.98	0.00127605		2542.97	0.00376767		3072.97	0.00529258		3603	-0.01272024
423.19	0.04108231		953.19	-0.00265982		1483.18	-0.00057533		2013.18	0.00230444		2543.17	0.00368203		3073.17	0.00544144		3603.2	-0.01315989
423.39	0.04152925		953.39	-0.00298448		1483.38	-0.00095178		2013.38	0.00268042		2543.37	0.00479898		3073.37	0.00587978		3603.4	-0.01429612
423.59	0.04231723		953.59	-0.0026669		1483.58	0.00030632		2013.58	0.00340349		2543.57	0.00487334		3073.57	0.00589236		3603.6	-0.01512969
423.79	0.04271643		953.79	-0.00312799		1483.78	0.00101683		2013.78	0.00360404		2543.77	0.00538559		3073.77	0.00609823		3603.8	-0.01553811
423.99	0.04251582		953.99	-0.00341113		1483.98	0.00166761		2013.98	0.00339116		2543.97	0.00556253		3073.97	0.00556909		3604	-0.01521398
424.19	0.04239404		954.19	-0.00357297		1484.18	0.00224952		2014.18	0.00296062		2544.17	0.00634664		3074.17	0.00614472		3604.2	-0.01450824
424.39	0.04260977		954.39	-0.00389123		1484.38	0.00264864		2014.38	0.00340765		2544.37	0.00759536		3074.37	0.00683034		3604.4	-0.01487006
424.59	0.04321866		954.59	-0.00484691		1484.58	0.00283397		2014.58	0.00384025		2544.57	0.00768826		3074.57	0.00697959		3604.6	-0.01413847
424.79	0.04249093		954.79	-0.00511405		1484.78	0.00271867		2014.78	0.0034526		2544.77	0.00829262		3074.77	0.00781606		3604.8	-0.01354457
424.99	0.04271803		954.99	-0.00493624		1484.98	0.00155436		2014.98	0.00316622		2544.97	0.00781389		3074.97	0.00834427		3605	-0.01312369
425.19	0.04197093		955.19	-0.00518617		1485.18	0.00047202		2015.18	0.00244686		2545.17	0.00799252		3075.17	0.00847529		3605.2	-0.01270251
425.39	0.04171661		955.39	-0.00585776		1485.38	-0.00066411		2015.38	0.00264425		2545.37	0.00706492		3075.37	0.00817478		3605.4	-0.01286721
425.59	0.04218672		955.59	-0.00655676		1485.58	-0.00111085		2015.58	0.00246445		2545.57	0.00705107		3075.57	0.00716742		3605.6	-0.01304901
425.79	0.04131179		955.79	-0.00578852		1485.78	-0.00084202		2015.78	0.00225644		2545.77	0.00591011		3075.77	0.00566831		3605.8	-0.01322963
425.99	0.04109005		955.99	-0.00521293		1485.98	0.0002175		2015.98	0.00123674		2545.97	0.00549292		3075.97	0.00466203		3606	-0.01367334
426.19	0.04000025		956.19	-0.00530387		1486.18	0.00033806		2016.18	0.00010746		2546.17	0.00479015		3076.17	0.00454206		3606.2	-0.01352906
426.39	0.04047473		956.39	-0.00595199		1486.38	-0.00046755		2016.38	0.00008553		2546.37	0.00345409		3076.37	0.00478891		3606.4	-0.01434998
426.59	0.04121728		956.59	-0.00594378		1486.58	-0.00104264		2016.58	-0.00020619		2546.57	0.00350758		3076.57	0.00556065		3606.6	-0.01568304
426.79	0.04053381		956.79	-0.00511955		1486.78	-0.00130633		2016.78	0.00011923		2546.77	0.0031902		3076.77	0.00505349		3606.8	-0.01687796
426.99	0.04017655		956.99	-0.00488966		1486.98	-0.00145389		2016.98	0.00070362		2546.97	0.00322878		3076.97	0.00394887		3607	-0.01746198
427.19	0.04114404		957.19	-0.00458703		1487.18	-0.00238528		2017.18	0.00011128		2547.17	0.00304041		3077.17	0.00374265		3607.2	-0.01789337
427.39	0.04128876		957.39	-0.00503293		1487.38	-0.00229539		2017.38	0.00010813		2547.37	0.00415338		3077.37	0.00430475		3607.4	-0.0183017
427.59	0.04135394		957.59	-0.00518392		1487.58	-0.00244197		2017.58	0.00012606		2547.57	0.0040575		3077.57	0.00431941		3607.6	-0.01766173
427.79	0.04147899		957.79	-0.00574976		1487.78	-0.00305891		2017.78	0.00030287		2547.77	0.0047058		3077.77	0.00480101		3607.8	-0.0177596
427.99	0.04154148		957.99	-0.00601172		1487.98	-0.00320345		2017.98	0.0004337		2547.97	0.00526391		3077.97	0.00463929		3608	-0.01742615
428.19	0.04133582		958.19	-0.00530141		1488.18	-0.00240262		2018.18	0.00046336		2548.17	0.00582402		3078.17	0.00500778		3608.2	-0.01768954
428.39	0.04223341		958.39	-0.00610349		1488.38	-0.00290505		2018.38	0.00114725		2548.37	0.00672601		3078.37	0.00413044		3608.4	-0.01761868
428.59	0.04300359		958.59	-0.00582769		1488.58	-0.00252563		2018.58	0.00098718		2548.57	0.00747387		3078.57	0.00440838		3608.6	-0.01645457
428.79	0.04254532		958.79	-0.00524965		1488.78	-0.00337788		2018.78	0.00128719		2548.77	0.00746706		3078.77	0.00468057		3608.8	-0.01578873
428.99	0.04221581		958.99	-0.00432623		1488.98	-0.00457584		2018.98	0.00118176		2548.97	0.00725691		3078.97	0.00412706		3609	-0.01509381
429.19	0.04149644		959.19	-0.0044633		1489.18	-0.00450613		2019.18	0.0013536		2549.17	0.00772702		3079.17	0.00507155		3609.2	-0.0147002
429.39	0.04204909		959.39	-0.00446259		1489.38	-0.00350246		2019.38	0.00108179		2549.37	0.00691169		3079.37	0.0050704		3609.4	-0.01439343
429.59	0.0422014		959.59	-0.00324812		1489.58	-0.00258283		2019.58	0.00109511		2549.57	0.00687008		3079.57	0.00423224		3609.6	-0.01415167
429.79	0.0419299		959.79	-0.00332538		1489.78	-0.00198687		2019.78	0.00041165		2549.77	0.00519866		3079.77	0.00360698		3609.8	-0.01440342
429.99	0.0424317		959.99	-0.00299966		1489.98	-0.000889		2019.98	-0.00011891		2549.97	0.00477446		3079.97	0.00334695		3610	-0.01497324
430.19	0.04250585		960.19	-0.00331494		1490.18	-0.00131498		2020.18	-0.00021731		2550.17	0.00427793		3080.17	0.00446633		3610.2	-0.01542618
430.39	0.0432827		960.39	-0.00386138		1490.38	-0.00117436		2020.38	0.00023906		2550.37	0.00379595		3080.37	0.00497079		3610.4	-0.01654175
430.59	0.04291882		960.59	-0.00379179		1490.58	-0.00142084		2020.58	0.00072983		2550.57	0.00378078		3080.57	0.00575861		3610.6	-0.01691178
430.79	0.04292671		960.79	-0.00418503		1490.78	-0.00097092		2020.78	0.00048506		2550.77	0.00361701		3080.77	0.00535378		3610.8	-0.01737979
430.99	0.04375821		960.99	-0.00482933		1490.98	-0.0002698		2020.98	-0.00010371		2550.97	0.00334523		3080.97	0.0051479		3611	-0.01705093
431.19	0.04480297		961.19	-0.00565224		1491.18	-0.00013464		2021.18	-0.00056513		2551.17	0.00346016		3081.17	0.00602096		3611.2	-0.01706467
431.39	0.04421391		961.39	-0.00534266		1491.38	0.00038617		2021.38	0.00003751		2551.37	0.00419095		3081.37	0.00570744		3611.4	-0.0164623
431.59	0.04465799		961.59	-0.0051157		1491.58	0.00066913		2021.58	0.00016021		2551.57	0.00380376		3081.57	0.00580372		3611.6	-0.01670533
431.79	0.04497183		961.79	-0.00531579		1491.78	0.00155015		2021.78	0.00024184		2551.77	0.00333273		3081.77	0.00575688		3611.8	-0.01712517
431.99	0.04459918		961.99	-0.0042919		1491.98	0.00141991		2021.98	0.00015806		2551.97	0.00368666		3081.97	0.00511804		3612	-0.01695546
432.19	0.04331833		962.19	-0.00375907		1492.18	0.00276838		2022.18	0.00043741		2552.17	0.00371197		3082.17	0.00465705		3612.2	-0.01754943
432.39	0.04424858		962.39	-0.00374833		1492.38	0.00179323		2022.38	0.00136249		2552.37	0.00417135		3082.37	0.0037112		3612.4	-0.01708481
432.59	0.04403608		962.59	-0.00272223		1492.58	0.00182423		2022.58	0.00109449		2552.57	0.00404403		3082.57	0.00324921		3612.6	-0.01701247
432.79	0.04297659		962.79	-0.00282827		1492.78	0.00057273		2022.78	0.00213831		2552.77	0.0042153		3082.77	0.00253809		3612.8	-0.01695944
432.99	0.04229458		962.99	-0.00231946		1492.98	0.00024618		2022.98	0.00273535		2552.97	0.00484293		3082.97	0.00190929		3613	-0.01708741
433.19	0.04220676		963.19	-0.00267693		1493.18	-0.00016157		2023.18	0.00287318		2553.17	0.00465704		3083.17	0.00283042		3613.2	-0.01716281
433.39	0.04270456		963.39	-0.00207517		1493.38	-0.00064901		2023.38	0.00333277		2553.37	0.00340569		3083.37	0.00280131		3613.4	-0.01727359
433.59	0.04153124		963.59	-0.00243274		1493.58	-0.00045133		2023.58	0.00309847		2553.57	0.00354735		3083.57	0.00349376		3613.6	-0.01769448
433.79	0.04101043		963.79	-0.00268771		1493.78	-0.00124548		2023.78	0.00241629		2553.77	0.00326364		3083.77	0.00341034		3613.8	-0.01811044
433.99	0.04050283		963.99	-0.0026456		1493.98	-0.00137798		2023.98	0.00188903		2553.97	0.00339078		3083.97	0.00325943		3614	-0.01825821
434.19	0.04061211		964.19	-0.00243296		1494.18	-0.00253781		2024.18	0.00078216		2554.17	0.00370475		3084.17	0.00455978		3614.2	-0.01859077
434.39	0.04046706		964.39	-0.00317701		1494.38	-0.00310331		2024.38	0.00058839		2554.37	0.00431096		3084.37	0.00491688		3614.4	-0.01858377
434.59	0.0394859		964.59	-0.00353282		1494.58	-0.0030246		2024.58	-0.00075403		2554.57	0.00423945		3084.57	0.00555952		3614.6	-0.01866124
434.79	0.04031686		964.79	-0.00391845		1494.78	-0.00202135		2024.78	-0.00199542		2554.77	0.00458791		3084.77	0.00528427		3614.8	-0.01870764
434.99	0.04149818		964.99	-0.00404701		1494.98	-0.00246591		2024.98	-0.00175861		2554.97	0.00485919		3084.97	0.00618195		3615	-0.01827012
435.19	0.04107649		965.19	-0.00358093		1495.18	-0.00117673		2025.18	-0.002362		2555.17	0.00555086		3085.17	0.0065597		3615.2	-0.0178525
435.39	0.04015579		965.39	-0.00295943		1495.38	-0.00079877		2025.38	-0.00275833		2555.37	0.00570528		3085.37	0.00648092		3615.4	-0.01738746
435.59	0.03979343		965.59	-0.00361585		1495.58	-0.00028527		2025.58	-0.00278582		2555.57	0.00582358		3085.57	0.00664797		3615.6	-0.01721488
435.79	0.04005993		965.79	-0.00425562		1495.78	-0.00007371		2025.78	-0.00312007		2555.77	0.00514931		3085.77	0.00703514		3615.8	-0.01712611
435.99	0.0395864		965.99	-0.00347147		1495.98	-0.00017807		2025.98	-0.00288023		2555.97	0.0053634		3085.97	0.00698944		3616	-0.01715484
436.19	0.03998866		966.19	-0.00384962		1496.18	0.0006402		2026.18	-0.00278246		2556.17	0.00509501		3086.17	0.00693037		3616.2	-0.0172806
436.39	0.04130066		966.39	-0.00452815		1496.38	0.00033237		2026.38	-0.002372		2556.37	0.00474211		3086.37	0.00578426		3616.4	-0.01687642
436.59	0.04125565		966.59	-0.00495312		1496.58	-0.00004742		2026.58	-0.00174851		2556.57	0.00406378		3086.57	0.00512155		3616.6	-0.01715178
436.79	0.04160986		966.79	-0.00623212		1496.78	-0.00073289		2026.78	-0.00083989		2556.77	0.00376891		3086.77	0.00499951		3616.8	-0.01689433
436.99	0.0429687		966.99	-0.00638536		1496.98	-0.00101605		2026.98	-0.00036225		2556.97	0.00330136		3086.97	0.00486469		3617	-0.01625734
437.19	0.04360592		967.19	-0.00791155		1497.18	-0.00179291		2027.18	-0.00077034		2557.17	0.00269448		3087.17	0.0048312		3617.2	-0.01569447
437.39	0.04346969		967.39	-0.00831971		1497.38	-0.00159136		2027.38	-0.00027718		2557.37	0.00238421		3087.37	0.00451912		3617.4	-0.01493042
437.59	0.04217709		967.59	-0.00873225		1497.58	-0.00146164		2027.58	-0.00094797		2557.57	0.00272598		3087.57	0.00445438		3617.6	-0.01456545
437.79	0.04208279		967.79	-0.00814019		1497.78	-0.00249039		2027.78	-0.00065549		2557.77	0.0032082		3087.77	0.00296791		3617.8	-0.01437014
437.99	0.04174727		967.99	-0.00787796		1497.98	-0.00331773		2027.98	-0.00086209		2557.97	0.00378383		3087.97	0.00340169		3618	-0.0143479
438.19	0.04219304		968.19	-0.00686456		1498.18	-0.00370004		2028.18	-0.00141534		2558.17	0.00421056		3088.17	0.00357483		3618.2	-0.0140299
438.39	0.04217097		968.39	-0.00647431		1498.38	-0.00323053		2028.38	-0.00113963		2558.37	0.00427759		3088.37	0.00300826		3618.4	-0.0145876
438.59	0.04246544		968.59	-0.00622714		1498.58	-0.00284637		2028.58	-0.00147316		2558.57	0.00378447		3088.57	0.00286577		3618.6	-0.01544014
438.79	0.04325993		968.79	-0.00566932		1498.78	-0.00246169		2028.78	-0.00103629		2558.77	0.00419863		3088.77	0.00323876		3618.8	-0.01517562
438.99	0.04245334		968.99	-0.00496074		1498.98	-0.00247801		2028.98	-0.00049341		2558.97	0.00495084		3088.97	0.00465193		3619	-0.01577692
439.19	0.04172969		969.19	-0.00442579		1499.18	-0.00078046		2029.18	-0.00162813		2559.17	0.00577435		3089.17	0.00480809		3619.2	-0.01646152
439.39	0.04092794		969.39	-0.00522646		1499.38	-0.00091069		2029.38	-0.00150911		2559.37	0.00551557		3089.37	0.00476068		3619.4	-0.01668258
439.59	0.03995655		969.59	-0.0046235		1499.58	-0.0003213		2029.58	-0.00135361		2559.57	0.00548528		3089.57	0.0045029		3619.6	-0.01751953
439.79	0.03978018		969.79	-0.00523602		1499.78	-0.00061494		2029.78	-0.00123069		2559.77	0.00509435		3089.77	0.00402939		3619.8	-0.01857643
439.99	0.03913728		969.99	-0.00479116		1499.98	-0.00115154		2029.98	-0.00160284		2559.97	0.00528253		3089.97	0.00374521		3620	-0.01866207
440.19	0.03866183		970.19	-0.00518669		1500.18	-0.00073		2030.18	-0.00183536		2560.17	0.00516504		3090.17	0.00407704		3620.2	-0.01929717
440.39	0.03900776		970.39	-0.00643847		1500.38	-0.001065		2030.38	-0.00223617		2560.37	0.00445099		3090.37	0.00360763		3620.4	-0.01973264
440.59	0.03899935		970.59	-0.00700181		1500.58	-0.00157753		2030.58	-0.00212635		2560.57	0.00409421		3090.57	0.00371654		3620.6	-0.02041664
440.79	0.03973669		970.79	-0.00722721		1500.78	-0.00221991		2030.78	-0.00240331		2560.77	0.00472182		3090.77	0.00343682		3620.8	-0.0195842
440.99	0.03998098		970.99	-0.00734342		1500.98	-0.00244498		2030.98	-0.00239737		2560.97	0.0044302		3090.97	0.00318419		3621	-0.01910085
441.19	0.03990977		971.19	-0.0079168		1501.18	-0.00260227		2031.18	-0.0019245		2561.17	0.00481689		3091.17	0.00251983		3621.2	-0.01805981
441.39	0.03960484		971.39	-0.00808081		1501.38	-0.00230212		2031.38	-0.0015083		2561.37	0.00466947		3091.37	0.00241294		3621.4	-0.01809886
441.59	0.03926752		971.59	-0.00779431		1501.58	-0.00240886		2031.58	-0.002227		2561.57	0.00556641		3091.57	0.00328184		3621.6	-0.01781006
441.79	0.03938363		971.79	-0.00794183		1501.78	-0.0025976		2031.78	-0.00178447		2561.77	0.00649035		3091.77	0.00315855		3621.8	-0.01793161
441.99	0.03978711		971.99	-0.00744519		1501.98	-0.00225479		2031.98	-0.00184196		2561.97	0.00603691		3091.97	0.00374452		3622	-0.01717318
442.19	0.04074191		972.19	-0.00683066		1502.18	-0.00216564		2032.18	-0.00123155		2562.17	0.00600265		3092.17	0.00360743		3622.2	-0.01668669
442.39	0.04143947		972.39	-0.00642759		1502.38	-0.00203655		2032.38	-0.00100111		2562.37	0.00550234		3092.37	0.00362746		3622.4	-0.01737637
442.59	0.04170605		972.59	-0.00594151		1502.58	-0.00150023		2032.58	-0.00015901		2562.57	0.00521802		3092.57	0.00480694		3622.6	-0.01725894
442.79	0.04092559		972.79	-0.00524889		1502.78	-0.00083662		2032.78	0.00004072		2562.77	0.00526571		3092.77	0.00605		3622.8	-0.0174135
442.99	0.03994682		972.99	-0.00593383		1502.98	-0.00025062		2032.98	-0.00016628		2562.97	0.004889		3092.97	0.00610459		3623	-0.01726973
443.19	0.0395814		973.19	-0.00568383		1503.18	0.00004055		2033.18	-0.000349		2563.17	0.00532341		3093.17	0.00592766		3623.2	-0.01710924
443.39	0.03847529		973.39	-0.00612919		1503.38	0.00059841		2033.38	-0.00010112		2563.37	0.0047909		3093.37	0.00495386		3623.4	-0.01717825
443.59	0.03803551		973.59	-0.00591892		1503.58	0.00160649		2033.58	0.00016833		2563.57	0.00545015		3093.57	0.00452351		3623.6	-0.0174058
443.79	0.03741562		973.79	-0.00689244		1503.78	0.00065017		2033.78	0.00029856		2563.77	0.00531068		3093.77	0.00409124		3623.8	-0.01797545
443.99	0.03711165		973.99	-0.0073041		1503.98	0.00011598		2033.98	0.00030607		2563.97	0.00539271		3093.97	0.00481602		3624	-0.01800202
444.19	0.03662649		974.19	-0.00747401		1504.18	0.00007963		2034.18	0.00069307		2564.17	0.0051203		3094.17	0.00570826		3624.2	-0.0179723
444.39	0.0372505		974.39	-0.00829259		1504.38	-0.00100026		2034.38	0.00024938		2564.37	0.00465835		3094.37	0.00516508		3624.4	-0.01842659
444.59	0.03673807		974.59	-0.00846667		1504.58	-0.00201957		2034.58	0.00030855		2564.57	0.00467628		3094.57	0.00524325		3624.6	-0.01872292
444.79	0.03670677		974.79	-0.0085195		1504.78	-0.00224835		2034.78	0.00010808		2564.77	0.00513252		3094.77	0.00606679		3624.8	-0.0177549
444.99	0.03600293		974.99	-0.008361		1504.98	-0.00257877		2034.98	0.00020396		2564.97	0.00489362		3094.97	0.00625916		3625	-0.0175084
445.19	0.03606235		975.19	-0.00841116		1505.18	-0.00285211		2035.18	-0.00027237		2565.17	0.00562762		3095.17	0.0058734		3625.2	-0.01714054
445.39	0.03640782		975.39	-0.00879821		1505.38	-0.00308464		2035.38	-0.00107367		2565.37	0.00543539		3095.37	0.00557808		3625.4	-0.01727993
445.59	0.03627661		975.59	-0.00878104		1505.58	-0.00412325		2035.58	-0.00150378		2565.57	0.00590905		3095.57	0.00589952		3625.6	-0.01643927
445.79	0.03653189		975.79	-0.008359		1505.78	-0.00452805		2035.78	-0.00120162		2565.77	0.00629436		3095.77	0.00495468		3625.8	-0.01580991
445.99	0.03733843		975.99	-0.00761911		1505.98	-0.00478448		2035.98	-0.00099252		2565.97	0.00520042		3095.97	0.00461286		3626	-0.01430381
446.19	0.03855772		976.19	-0.00748864		1506.18	-0.00530289		2036.18	-0.00095126		2566.17	0.00584629		3096.17	0.0046142		3626.2	-0.01411579
446.39	0.03874008		976.39	-0.00670181		1506.38	-0.00543498		2036.38	-0.00248878		2566.37	0.0055139		3096.37	0.00411451		3626.4	-0.01463933
446.59	0.03809544		976.59	-0.0063158		1506.58	-0.00479071		2036.58	-0.00295866		2566.57	0.0054596		3096.57	0.00423559		3626.6	-0.01454977
446.79	0.03838613		976.79	-0.00698217		1506.78	-0.00495099		2036.78	-0.00354992		2566.77	0.00514324		3096.77	0.00345441		3626.8	-0.01436128
446.99	0.0383413		976.99	-0.00824092		1506.98	-0.00505003		2036.98	-0.00355894		2566.97	0.00526204		3096.97	0.00311273		3627	-0.01355118
447.19	0.03828763		977.19	-0.00737814		1507.18	-0.00453435		2037.18	-0.00351238		2567.17	0.00587851		3097.17	0.00279957		3627.2	-0.01439558
447.39	0.03928065		977.39	-0.00794493		1507.38	-0.00307761		2037.38	-0.00339285		2567.37	0.00516828		3097.37	0.00214908		3627.4	-0.01519539
447.59	0.03952836		977.59	-0.00804004		1507.58	-0.0019818		2037.58	-0.00262203		2567.57	0.00519321		3097.57	0.00205191		3627.6	-0.01524815
447.79	0.03966091		977.79	-0.00818418		1507.78	-0.00272217		2037.78	-0.00231938		2567.77	0.00373554		3097.77	0.00222398		3627.8	-0.01627777
447.99	0.04126048		977.99	-0.00816462		1507.98	-0.00307638		2037.98	-0.00219596		2567.97	0.00398494		3097.97	0.00285619		3628	-0.01559638
448.19	0.04119885		978.19	-0.00720775		1508.18	-0.00309755		2038.18	-0.00246608		2568.17	0.00389164		3098.17	0.00306229		3628.2	-0.01572017
448.39	0.04144509		978.39	-0.00746593		1508.38	-0.00319284		2038.38	-0.00269137		2568.37	0.00346488		3098.37	0.00300246		3628.4	-0.01708265
448.59	0.04146262		978.59	-0.00688802		1508.58	-0.00364266		2038.58	-0.00262862		2568.57	0.00422394		3098.57	0.00385813		3628.6	-0.01645608
448.79	0.04144737		978.79	-0.00666619		1508.78	-0.00313199		2038.78	-0.00211829		2568.77	0.00475296		3098.77	0.00425785		3628.8	-0.01721125
448.99	0.04097007		978.99	-0.00677911		1508.98	-0.00330759		2038.98	-0.0018978		2568.97	0.0052236		3098.97	0.00428439		3629	-0.01692157
449.19	0.04071855		979.19	-0.00675607		1509.18	-0.00273665		2039.18	-0.00182831		2569.17	0.00527417		3099.17	0.00371017		3629.2	-0.0175165
449.39	0.04047133		979.39	-0.00667955		1509.38	-0.00297578		2039.38	-0.00173787		2569.37	0.00508258		3099.37	0.00303358		3629.4	-0.01748627
449.59	0.04005377		979.59	-0.0068391		1509.58	-0.00309114		2039.58	-0.001868		2569.57	0.00558182		3099.57	0.00354056		3629.6	-0.01823092
449.79	0.04051084		979.79	-0.0063514		1509.78	-0.00260247		2039.78	-0.00140062		2569.77	0.00584963		3099.77	0.00248932		3629.8	-0.01802848
449.99	0.03989916		979.99	-0.00635901		1509.98	-0.00286501		2039.98	-0.00186012		2569.97	0.00520338		3099.97	0.0024934		3630	-0.01893292
450.19	0.03963786		980.19	-0.00659225		1510.18	-0.00266454		2040.18	-0.00267017		2570.17	0.00530851		3100.17	0.00228756		3630.2	-0.01974836
450.39	0.03863799		980.39	-0.00741421		1510.38	-0.00310262		2040.38	-0.0033212		2570.37	0.00454654		3100.37	0.00247063		3630.4	-0.01968235
450.59	0.03799464		980.59	-0.00800028		1510.58	-0.00309355		2040.58	-0.00276002		2570.57	0.00456543		3100.57	0.00274837		3630.6	-0.01933909
450.79	0.03811565		980.79	-0.00842649		1510.78	-0.00308995		2040.78	-0.00188053		2570.77	0.00462414		3100.77	0.00245333		3630.8	-0.01951831
450.99	0.03807567		980.99	-0.00896625		1510.98	-0.00308832		2040.98	-0.00129171		2570.97	0.00452653		3100.97	0.00265575		3631	-0.01938021
451.19	0.0375261		981.19	-0.00862913		1511.18	-0.0025856		2041.18	-0.00145529		2571.17	0.00441087		3101.17	0.00232581		3631.2	-0.01967422
451.39	0.03812508		981.39	-0.00885507		1511.38	-0.00243481		2041.38	-0.00064884		2571.37	0.00425605		3101.37	0.00223423		3631.4	-0.01944898
451.59	0.03723767		981.59	-0.0087964		1511.58	-0.00227374		2041.58	-0.00073159		2571.57	0.00352962		3101.57	0.0024605		3631.6	-0.01879973
451.79	0.03866129		981.79	-0.00853963		1511.78	-0.00282431		2041.78	-0.00113076		2571.77	0.00315699		3101.77	0.00234864		3631.8	-0.01941341
451.99	0.03947184		981.99	-0.00848936		1511.98	-0.00349548		2041.98	-0.00149068		2571.97	0.00366362		3101.97	0.00265698		3632	-0.01865654
452.19	0.03835672		982.19	-0.00879118		1512.18	-0.00397487		2042.18	-0.00159726		2572.17	0.00331709		3102.17	0.00250422		3632.2	-0.01906754
452.39	0.03831706		982.39	-0.00938959		1512.38	-0.00478643		2042.38	-0.0024792		2572.37	0.00277146		3102.37	0.00237973		3632.4	-0.01872886
452.59	0.03781291		982.59	-0.00959152		1512.58	-0.00482109		2042.58	-0.00303725		2572.57	0.00298457		3102.57	0.00220209		3632.6	-0.01826184
452.79	0.03648364		982.79	-0.00972726		1512.78	-0.00458773		2042.78	-0.00373229		2572.77	0.00284219		3102.77	0.00229672		3632.8	-0.0190752
452.99	0.03613064		982.99	-0.01001035		1512.98	-0.00452965		2042.98	-0.00467459		2572.97	0.00220738		3102.97	0.00269148		3633	-0.01831038
453.19	0.03544214		983.19	-0.00983319		1513.18	-0.00422164		2043.18	-0.00526393		2573.17	0.00126215		3103.17	0.00243478		3633.2	-0.01845415
453.39	0.03486437		983.39	-0.00970485		1513.38	-0.00418332		2043.38	-0.00662489		2573.37	0.00027613		3103.37	0.00241183		3633.4	-0.01810816
453.59	0.03465597		983.59	-0.00936242		1513.58	-0.00373891		2043.58	-0.00705342		2573.57	0.00038177		3103.57	0.00274756		3633.6	-0.01890238
453.79	0.0338895		983.79	-0.00833082		1513.78	-0.00391221		2043.78	-0.00661868		2573.77	0.00041047		3103.77	0.00229166		3633.8	-0.01809201
453.99	0.03325984		983.99	-0.00865186		1513.98	-0.00418233		2043.98	-0.00758649		2573.97	0.00054727		3103.97	0.003262		3634	-0.01799936
454.19	0.03347547		984.19	-0.00914289		1514.18	-0.00333072		2044.18	-0.00741241		2574.17	0.0007776		3104.17	0.00390674		3634.2	-0.01705649
454.39	0.0328027		984.39	-0.00860978		1514.38	-0.00327057		2044.38	-0.00688425		2574.37	0.0007768		3104.37	0.00492062		3634.4	-0.01698816
454.59	0.03320868		984.59	-0.00780122		1514.58	-0.00228593		2044.58	-0.00588528		2574.57	0.0014955		3104.57	0.00476183		3634.6	-0.01661823
454.79	0.03379666		984.79	-0.00750598		1514.78	-0.00204212		2044.78	-0.00467625		2574.77	0.00276308		3104.77	0.00483418		3634.8	-0.0170993
454.99	0.03496075		984.99	-0.00746967		1514.98	-0.00201434		2044.98	-0.00397385		2574.97	0.00340252		3104.97	0.00536584		3635	-0.01609671
455.19	0.03451901		985.19	-0.0068689		1515.18	-0.00179465		2045.18	-0.00358748		2575.17	0.00416886		3105.17	0.00602124		3635.2	-0.01626611
455.39	0.03497883		985.39	-0.00583708		1515.38	-0.00125261		2045.38	-0.00266911		2575.37	0.00454413		3105.37	0.00668099		3635.4	-0.01677648
455.59	0.03554105		985.59	-0.00582454		1515.58	-0.00092614		2045.58	-0.00208493		2575.57	0.00416456		3105.57	0.00676973		3635.6	-0.016999
455.79	0.03729498		985.79	-0.0059814		1515.78	-0.00105694		2045.78	-0.00198635		2575.77	0.00464787		3105.77	0.00689267		3635.8	-0.0182075
455.99	0.03756144		985.99	-0.0057101		1515.98	-0.00130725		2045.98	-0.00065986		2575.97	0.00408198		3105.97	0.00702866		3636	-0.01814025
456.19	0.03800171		986.19	-0.00592173		1516.18	-0.00156199		2046.18	-0.00055876		2576.17	0.00421055		3106.17	0.00580692		3636.2	-0.01908433
456.39	0.03817704		986.39	-0.00669757		1516.38	-0.00151024		2046.38	-0.00104111		2576.37	0.00419039		3106.37	0.00542091		3636.4	-0.01946705
456.59	0.03740138		986.59	-0.00652946		1516.58	-0.00123567		2046.58	-0.00129516		2576.57	0.0043602		3106.57	0.00515765		3636.6	-0.01978264
456.79	0.03742856		986.79	-0.00680472		1516.78	-0.0020849		2046.78	-0.00162707		2576.77	0.0042406		3106.77	0.00532505		3636.8	-0.01996296
456.99	0.03770743		986.99	-0.00848776		1516.98	-0.00174937		2046.98	-0.00174684		2576.97	0.00306443		3106.97	0.00478333		3637	-0.01907446
457.19	0.03633702		987.19	-0.00945403		1517.18	-0.00241201		2047.18	-0.00260469		2577.17	0.00242447		3107.17	0.00476289		3637.2	-0.01893353
457.39	0.03510653		987.39	-0.00974019		1517.38	-0.00283844		2047.38	-0.00374131		2577.37	0.00169118		3107.37	0.00409289		3637.4	-0.01888565
457.59	0.03455514		987.59	-0.01029605		1517.58	-0.00302035		2047.58	-0.00425392		2577.57	0.00171801		3107.57	0.00502943		3637.6	-0.01841853
457.79	0.03490314		987.79	-0.01133538		1517.78	-0.00352198		2047.78	-0.00501834		2577.77	0.00160871		3107.77	0.00480254		3637.8	-0.01777652
457.99	0.03449536		987.99	-0.01257177		1517.98	-0.00394824		2047.98	-0.00595391		2577.97	0.00184859		3107.97	0.00469525		3638	-0.01785955
458.19	0.03421306		988.19	-0.01262554		1518.18	-0.00351574		2048.18	-0.00601466		2578.17	0.00072349		3108.17	0.00432159		3638.2	-0.01780987
458.39	0.03431937		988.39	-0.01273705		1518.38	-0.00379823		2048.38	-0.00648667		2578.37	-0.00007996		3108.37	0.003947		3638.4	-0.01760526
458.59	0.03428372		988.59	-0.01314379		1518.58	-0.00378134		2048.58	-0.00557319		2578.57	0.00002996		3108.57	0.0038523		3638.6	-0.01778133
458.79	0.03371506		988.79	-0.01284638		1518.78	-0.00416921		2048.78	-0.0052383		2578.77	-0.00000511		3108.77	0.00443522		3638.8	-0.01784804
458.99	0.03333016		988.99	-0.01257438		1518.98	-0.0045063		2048.98	-0.00577554		2578.97	0.00023048		3108.97	0.00379519		3639	-0.01779765
459.19	0.03346299		989.19	-0.01274714		1519.18	-0.00424482		2049.18	-0.00576684		2579.17	0.00066016		3109.17	0.00376411		3639.2	-0.01836925
459.39	0.03397875		989.39	-0.01239296		1519.38	-0.00401828		2049.38	-0.0051898		2579.37	0.00010314		3109.37	0.00395804		3639.4	-0.01899859
459.59	0.03467672		989.59	-0.01264023		1519.58	-0.00416892		2049.58	-0.00467208		2579.57	0.0003481		3109.57	0.00272029		3639.6	-0.0195921
459.79	0.03593		989.79	-0.01179648		1519.78	-0.00339314		2049.78	-0.00394429		2579.77	0.00050117		3109.77	0.00232437		3639.8	-0.01993457
459.99	0.03626222		989.99	-0.01041179		1519.98	-0.00319127		2049.98	-0.00319225		2579.97	0.00045491		3109.97	0.0015696		3640	-0.02031145
460.19	0.03698846		990.19	-0.01028482		1520.18	-0.00215826		2050.18	-0.00325807		2580.17	0.00097544		3110.17	0.00130151		3640.2	-0.02065034
460.39	0.03683139		990.39	-0.00993611		1520.38	-0.00124908		2050.38	-0.00262066		2580.37	0.00167675		3110.37	0.00139598		3640.4	-0.02128542
460.59	0.03616875		990.59	-0.00976384		1520.58	-0.00160531		2050.58	-0.00350694		2580.57	0.00189782		3110.57	0.00098665		3640.6	-0.02104698
460.79	0.03713278		990.79	-0.00922845		1520.78	-0.0015859		2050.78	-0.00279665		2580.77	0.00269501		3110.77	0.00150823		3640.8	-0.02091202
460.99	0.03635258		990.99	-0.00956917		1520.98	-0.00145232		2050.98	-0.00294523		2580.97	0.00346186		3110.97	0.00195569		3641	-0.0206441
461.19	0.0363328		991.19	-0.00859002		1521.18	-0.00235614		2051.18	-0.00282749		2581.17	0.00339602		3111.17	0.00293803		3641.2	-0.02126547
461.39	0.03691584		991.39	-0.00899651		1521.38	-0.00261089		2051.38	-0.0027683		2581.37	0.00391958		3111.37	0.0023007		3641.4	-0.02077881
461.59	0.03724074		991.59	-0.00990591		1521.58	-0.00276115		2051.58	-0.00292698		2581.57	0.00372523		3111.57	0.00376525		3641.6	-0.02079537
461.79	0.03797845		991.79	-0.00988013		1521.78	-0.00304261		2051.78	-0.00331905		2581.77	0.00376529		3111.77	0.00240635		3641.8	-0.02114813
461.99	0.03714287		991.99	-0.00969247		1521.98	-0.00299086		2051.98	-0.00258775		2581.97	0.00426282		3111.97	0.00271139		3642	-0.02063884
462.19	0.03690749		992.19	-0.00950206		1522.18	-0.00277227		2052.18	-0.00206066		2582.17	0.0034873		3112.17	0.00222314		3642.2	-0.02046374
462.39	0.03665116		992.39	-0.01029133		1522.38	-0.00282193		2052.38	-0.00206071		2582.37	0.00283324		3112.37	0.00239657		3642.4	-0.02058381
462.59	0.03582563		992.59	-0.00981873		1522.58	-0.00332277		2052.58	-0.00141896		2582.57	0.00312307		3112.57	0.00254016		3642.6	-0.02070633
462.79	0.03528543		992.79	-0.01002043		1522.78	-0.00347436		2052.78	-0.00150096		2582.77	0.00321127		3112.77	0.00331611		3642.8	-0.0209117
462.99	0.03564315		992.99	-0.01053424		1522.98	-0.00329832		2052.98	-0.00171583		2582.97	0.00316751		3112.97	0.0035729		3643	-0.02107789
463.19	0.0358733		993.19	-0.01118614		1523.18	-0.00303692		2053.18	-0.0016456		2583.17	0.00304045		3113.17	0.00450025		3643.2	-0.02117802
463.39	0.03637152		993.39	-0.01068007		1523.38	-0.00247517		2053.38	-0.00124839		2583.37	0.00255969		3113.37	0.00497637		3643.4	-0.02046477
463.59	0.03639067		993.59	-0.01031441		1523.58	-0.00241869		2053.58	-0.00113825		2583.57	0.00211441		3113.57	0.00470482		3643.6	-0.01992146
463.79	0.03721211		993.79	-0.00982323		1523.78	-0.00237271		2053.78	-0.00076881		2583.77	0.00224381		3113.77	0.00460232		3643.8	-0.01936739
463.99	0.03765698		993.99	-0.00921978		1523.98	-0.00206649		2053.98	-0.00127912		2583.97	0.00246436		3113.97	0.00485724		3644	-0.01953204
464.19	0.03880142		994.19	-0.00944936		1524.18	-0.00141717		2054.18	-0.00104535		2584.17	0.00177329		3114.17	0.0039705		3644.2	-0.01957766
464.39	0.03934232		994.39	-0.00958811		1524.38	-0.00182525		2054.38	-0.00142621		2584.37	0.00230101		3114.37	0.00293768		3644.4	-0.02028932
464.59	0.0392374		994.59	-0.00993389		1524.58	-0.00325198		2054.58	-0.00282251		2584.57	0.00275844		3114.57	0.00271302		3644.6	-0.01978346
464.79	0.03971212		994.79	-0.0097432		1524.78	-0.00377539		2054.78	-0.00332921		2584.77	0.00348192		3114.77	0.00307872		3644.8	-0.01936305
464.99	0.039105		994.99	-0.01033652		1524.98	-0.00452159		2054.98	-0.00341236		2584.97	0.00335905		3114.97	0.00305971		3645	-0.01966462
465.19	0.03935225		995.19	-0.00971892		1525.18	-0.00482547		2055.18	-0.00286761		2585.17	0.00303507		3115.17	0.00244677		3645.2	-0.02012539
465.39	0.03919658		995.39	-0.010174		1525.38	-0.00559889		2055.38	-0.00296664		2585.37	0.00326301		3115.37	0.00150116		3645.4	-0.02067142
465.59	0.03838012		995.59	-0.00950974		1525.58	-0.0055001		2055.58	-0.00356822		2585.57	0.0025502		3115.57	0.00162659		3645.6	-0.0214904
465.79	0.03821209		995.79	-0.00855787		1525.78	-0.00553059		2055.78	-0.0030906		2585.77	0.00266304		3115.77	0.00018589		3645.8	-0.02121042
465.99	0.03776466		995.99	-0.00862149		1525.98	-0.00567		2055.98	-0.00224035		2585.97	0.00272297		3115.97	0.00060853		3646	-0.02219958
466.19	0.03719958		996.19	-0.00848818		1526.18	-0.00681351		2056.18	-0.00205946		2586.17	0.00242292		3116.17	-0.000414		3646.2	-0.02299687
466.39	0.03683047		996.39	-0.00886577		1526.38	-0.00690708		2056.38	-0.00263182		2586.37	0.00226812		3116.37	0.00024518		3646.4	-0.02461785
466.59	0.03657293		996.59	-0.00807084		1526.58	-0.0070407		2056.58	-0.0026713		2586.57	0.00260319		3116.57	0.00073364		3646.6	-0.02482
466.79	0.03590924		996.79	-0.00870436		1526.78	-0.00680146		2056.78	-0.00243466		2586.77	0.00223649		3116.77	0.00208269		3646.8	-0.02512268
466.99	0.03525638		996.99	-0.00820851		1526.98	-0.00614475		2056.98	-0.00215048		2586.97	0.00158315		3116.97	0.00273434		3647	-0.02429059
467.19	0.03396364		997.19	-0.00806621		1527.18	-0.0061872		2057.18	-0.00225191		2587.17	0.00139917		3117.17	0.00263071		3647.2	-0.02394765
467.39	0.03374544		997.39	-0.008688		1527.38	-0.00663178		2057.38	-0.00142267		2587.37	0.00216806		3117.37	0.00251088		3647.4	-0.0226288
467.59	0.03343434		997.59	-0.00950957		1527.58	-0.00656663		2057.58	-0.00118481		2587.57	0.00193588		3117.57	0.00248489		3647.6	-0.02237833
467.79	0.03447018		997.79	-0.01021546		1527.78	-0.00613625		2057.78	-0.00101455		2587.77	0.00254409		3117.77	0.00157215		3647.8	-0.02172027
467.99	0.0349431		997.99	-0.01080626		1527.98	-0.00517943		2057.98	-0.0009758		2587.97	0.00248557		3117.97	0.00194425		3648	-0.02181092
468.19	0.0352169		998.19	-0.01181351		1528.18	-0.0050014		2058.18	-0.00172253		2588.17	0.00176615		3118.17	0.00166347		3648.2	-0.02153738
468.39	0.03526449		998.39	-0.01251031		1528.38	-0.00475888		2058.38	-0.00213273		2588.37	0.00277283		3118.37	0.00227616		3648.4	-0.02121015
468.59	0.03528938		998.59	-0.01329551		1528.58	-0.00530109		2058.58	-0.00284486		2588.57	0.00337686		3118.57	0.00335775		3648.6	-0.02023966
468.79	0.0350988		998.79	-0.01412477		1528.78	-0.00472859		2058.78	-0.00332422		2588.77	0.00346969		3118.77	0.00398329		3648.8	-0.01929233
468.99	0.03524225		998.99	-0.01472158		1528.98	-0.00439243		2058.98	-0.00191288		2588.97	0.00373973		3118.97	0.00459923		3649	-0.0195248
469.19	0.03520838		999.19	-0.01489525		1529.18	-0.00451415		2059.18	-0.00231698		2589.17	0.00384777		3119.17	0.00440603		3649.2	-0.01969362
469.39	0.0347885		999.39	-0.01485217		1529.38	-0.00458817		2059.38	-0.00253464		2589.37	0.00352143		3119.37	0.00518014		3649.4	-0.01979584
469.59	0.03484016		999.59	-0.01402435		1529.58	-0.00430612		2059.58	-0.00395853		2589.57	0.0036707		3119.57	0.0051908		3649.6	-0.01939819
469.79	0.03526321		999.79	-0.01411729		1529.78	-0.00483234		2059.78	-0.00392904		2589.77	0.00296569		3119.77	0.00521566		3649.8	-0.01951354
469.99	0.03634642		999.99	-0.01376036		1529.98	-0.00457356		2059.98	-0.00361147		2589.97	0.00229887		3119.97	0.00557819		3650	-0.02031243
470.19	0.03611762		1000.19	-0.01337162		1530.18	-0.00532226		2060.18	-0.00435051		2590.17	0.00212675		3120.17	0.00529429		3650.2	-0.02009313
470.39	0.03606225		1000.39	-0.01282937		1530.38	-0.00487129		2060.38	-0.0051398		2590.37	0.00153514		3120.37	0.00555895		3650.4	-0.02103285
470.59	0.03707874		1000.59	-0.01181234		1530.58	-0.0050809		2060.58	-0.00459935		2590.57	0.00054344		3120.57	0.00479277		3650.6	-0.02002389
470.79	0.03724644		1000.79	-0.01139355		1530.78	-0.00442332		2060.78	-0.00475172		2590.77	0.00012885		3120.77	0.00400437		3650.8	-0.01926328
470.99	0.03648145		1000.99	-0.00971481		1530.98	-0.00341085		2060.98	-0.00511541		2590.97	-0.00072498		3120.97	0.00310453		3651	-0.01874374
471.19	0.03645876		1001.19	-0.0099798		1531.18	-0.0031477		2061.18	-0.00564503		2591.17	-0.00074585		3121.17	0.00170346		3651.2	-0.01852574
471.39	0.03674021		1001.39	-0.0098588		1531.38	-0.00345967		2061.38	-0.00492957		2591.37	-0.00016312		3121.37	0.00145103		3651.4	-0.01899377
471.59	0.03774421		1001.59	-0.00883516		1531.58	-0.00284154		2061.58	-0.00557282		2591.57	-0.00044769		3121.57	0.00120702		3651.6	-0.01841646
471.79	0.03824735		1001.79	-0.00850239		1531.78	-0.00303365		2061.78	-0.00547388		2591.77	-0.00076687		3121.77	0.00025847		3651.8	-0.01819723
471.99	0.0381724		1001.99	-0.00784466		1531.98	-0.00311663		2061.98	-0.00504868		2591.97	-0.00090419		3121.97	0.00067687		3652	-0.01877694
472.19	0.0382813		1002.19	-0.0077342		1532.18	-0.00360388		2062.18	-0.00468464		2592.17	-0.00086243		3122.17	0.00094441		3652.2	-0.01852487
472.39	0.03781436		1002.39	-0.00825475		1532.38	-0.0044939		2062.38	-0.00448807		2592.37	-0.00020922		3122.37	0.00074934		3652.4	-0.0185275
472.59	0.03767831		1002.59	-0.00911956		1532.58	-0.00486378		2062.58	-0.00394964		2592.57	0.00053299		3122.57	0.00075331		3652.6	-0.01774298
472.79	0.03723183		1002.79	-0.00954223		1532.78	-0.0052755		2062.78	-0.00365626		2592.77	0.00094853		3122.77	0.00080475		3652.8	-0.01824371
472.99	0.03713697		1002.99	-0.01096672		1532.98	-0.00586714		2062.98	-0.00361613		2592.97	0.00122151		3122.97	0.0012082		3653	-0.018893
473.19	0.03671454		1003.19	-0.01080245		1533.18	-0.00612485		2063.18	-0.00431632		2593.17	0.00131108		3123.17	0.00149193		3653.2	-0.0188959
473.39	0.03595975		1003.39	-0.01030782		1533.38	-0.00563495		2063.38	-0.00462975		2593.37	0.00124552		3123.37	0.0027564		3653.4	-0.01853845
473.59	0.03606881		1003.59	-0.01125749		1533.58	-0.00601329		2063.58	-0.00482644		2593.57	0.00082387		3123.57	0.00281205		3653.6	-0.01793444
473.79	0.03659471		1003.79	-0.01205007		1533.78	-0.00601586		2063.78	-0.0040828		2593.77	-0.00064013		3123.77	0.00313172		3653.8	-0.01829781
473.99	0.03661734		1003.99	-0.01193818		1533.98	-0.00560461		2063.98	-0.00409907		2593.97	-0.00070384		3123.97	0.0032435		3654	-0.01838827
474.19	0.03621493		1004.19	-0.01203167		1534.18	-0.00575387		2064.18	-0.00543485		2594.17	-0.00147783		3124.17	0.00259585		3654.2	-0.01890092
474.39	0.03710502		1004.39	-0.01222062		1534.38	-0.00514915		2064.38	-0.00522313		2594.37	-0.00123657		3124.37	0.00226404		3654.4	-0.01938161
474.59	0.03736646		1004.59	-0.01195489		1534.58	-0.00458042		2064.58	-0.00501764		2594.57	-0.00192682		3124.57	0.00207105		3654.6	-0.01903176
474.79	0.03714778		1004.79	-0.01178231		1534.78	-0.00318087		2064.78	-0.00579782		2594.77	-0.00230606		3124.77	0.00113355		3654.8	-0.01850771
474.99	0.03708042		1004.99	-0.01179593		1534.98	-0.00246713		2064.98	-0.00621885		2594.97	-0.00243919		3124.97	0.00148783		3655	-0.01791534
475.19	0.03704394		1005.19	-0.01248723		1535.18	-0.00254411		2065.18	-0.00616389		2595.17	-0.00234662		3125.17	0.00161473		3655.2	-0.01831028
475.39	0.03703248		1005.39	-0.01216422		1535.38	-0.00300867		2065.38	-0.00614964		2595.37	-0.0022492		3125.37	0.00228311		3655.4	-0.01871306
475.59	0.03729773		1005.59	-0.01162188		1535.58	-0.00324023		2065.58	-0.00666138		2595.57	-0.00279781		3125.57	0.0022851		3655.6	-0.01826387
475.79	0.0373154		1005.79	-0.01161929		1535.78	-0.00309372		2065.78	-0.00626336		2595.77	-0.00286985		3125.77	0.00222691		3655.8	-0.01885179
475.99	0.03739511		1005.99	-0.0114392		1535.98	-0.00344976		2065.98	-0.00600613		2595.97	-0.00218963		3125.97	0.00243884		3656	-0.01893939
476.19	0.03696208		1006.19	-0.01219297		1536.18	-0.00428358		2066.18	-0.00556844		2596.17	-0.00160309		3126.17	0.00320515		3656.2	-0.0184889
476.39	0.03647172		1006.39	-0.01295124		1536.38	-0.00462959		2066.38	-0.00537998		2596.37	-0.00127947		3126.37	0.00330855		3656.4	-0.01878718
476.59	0.03650457		1006.59	-0.01258945		1536.58	-0.00417307		2066.58	-0.00426734		2596.57	0.00049716		3126.57	0.00372049		3656.6	-0.01888028
476.79	0.03663198		1006.79	-0.01247272		1536.78	-0.00495067		2066.78	-0.00471522		2596.77	0.00132366		3126.77	0.00366148		3656.8	-0.01917703
476.99	0.03576104		1006.99	-0.01286655		1536.98	-0.00509629		2066.98	-0.00538815		2596.97	0.00161261		3126.97	0.00352348		3657	-0.01934721
477.19	0.03605899		1007.19	-0.01241495		1537.18	-0.00511187		2067.18	-0.00500216		2597.17	0.00152681		3127.17	0.00247948		3657.2	-0.01849257
477.39	0.03583177		1007.39	-0.01221315		1537.38	-0.00528503		2067.38	-0.0047511		2597.37	0.0010171		3127.37	0.00279748		3657.4	-0.01883592
477.59	0.03598847		1007.59	-0.01272841		1537.58	-0.00589294		2067.58	-0.00480096		2597.57	0.00047049		3127.57	0.00194295		3657.6	-0.01859535
477.79	0.03655839		1007.79	-0.01238515		1537.78	-0.00627178		2067.78	-0.00566496		2597.77	0.00005487		3127.77	0.00144772		3657.8	-0.01881949
477.99	0.03687493		1007.99	-0.01165179		1537.98	-0.00658659		2067.98	-0.00652767		2597.97	0.00042233		3127.97	0.00030863		3658	-0.020107
478.19	0.03737709		1008.19	-0.01179869		1538.18	-0.00653178		2068.18	-0.00719119		2598.17	-0.00076278		3128.17	-0.00123685		3658.2	-0.02042079
478.39	0.03732735		1008.39	-0.01141859		1538.38	-0.00675504		2068.38	-0.0065478		2598.37	-0.00037925		3128.37	-0.0015841		3658.4	-0.02054111
478.59	0.03655284		1008.59	-0.01097268		1538.58	-0.00710621		2068.58	-0.00663696		2598.57	-0.00144901		3128.57	-0.00224612		3658.6	-0.02072495
478.79	0.03659701		1008.79	-0.01107545		1538.78	-0.00659181		2068.78	-0.00663546		2598.77	-0.0014783		3128.77	-0.00279569		3658.8	-0.02048141
478.99	0.03642239		1008.99	-0.01115428		1538.98	-0.00609024		2068.98	-0.00667902		2598.97	-0.00243267		3128.97	-0.00288016		3659	-0.02066441
479.19	0.03585886		1009.19	-0.01105474		1539.18	-0.00618692		2069.18	-0.00607951		2599.17	-0.00310471		3129.17	-0.00275406		3659.2	-0.02177142
479.39	0.03583883		1009.39	-0.00990848		1539.38	-0.00640604		2069.38	-0.00576959		2599.37	-0.00307636		3129.37	-0.00310313		3659.4	-0.02226255
479.59	0.03536097		1009.59	-0.00849852		1539.58	-0.00615895		2069.58	-0.00533813		2599.57	-0.00305257		3129.57	-0.00212173		3659.6	-0.02248381
479.79	0.03518026		1009.79	-0.00860589		1539.78	-0.00572736		2069.78	-0.00480503		2599.77	-0.00208088		3129.77	-0.00192439		3659.8	-0.02261628
479.99	0.03482974		1009.99	-0.00938282		1539.98	-0.00596083		2069.98	-0.0044472		2599.97	-0.00144582		3129.97	-0.00160008		3660	-0.0222549
480.19	0.0341141		1010.19	-0.01027439		1540.18	-0.00584642		2070.18	-0.00405505		2600.17	-0.00081754		3130.17	-0.00119177		3660.2	-0.02269889
480.39	0.0335989		1010.39	-0.01071634		1540.38	-0.00497078		2070.38	-0.00371683		2600.37	-0.00022867		3130.37	-0.00208405		3660.4	-0.02270552
480.59	0.0332905		1010.59	-0.01107131		1540.58	-0.00448789		2070.58	-0.0040396		2600.57	0.00147796		3130.57	-0.00226963		3660.6	-0.02241597
480.79	0.0326679		1010.79	-0.01157711		1540.78	-0.00505311		2070.78	-0.00432562		2600.77	0.0016676		3130.77	-0.00282517		3660.8	-0.02154238
480.99	0.03233474		1010.99	-0.0122626		1540.98	-0.0043827		2070.98	-0.00468967		2600.97	0.00175528		3130.97	-0.0020662		3661	-0.02148763
481.19	0.03348815		1011.19	-0.01296707		1541.18	-0.00400495		2071.18	-0.00407487		2601.17	0.00157478		3131.17	-0.00250075		3661.2	-0.02076169
481.39	0.03363038		1011.39	-0.01280591		1541.38	-0.00446361		2071.38	-0.00458661		2601.37	0.00177351		3131.37	-0.00145368		3661.4	-0.02156911
481.59	0.03410269		1011.59	-0.0137912		1541.58	-0.00438917		2071.58	-0.00584252		2601.57	0.0023969		3131.57	-0.00226908		3661.6	-0.02058535
481.79	0.03424351		1011.79	-0.01490649		1541.78	-0.00442078		2071.78	-0.00670724		2601.77	0.00300093		3131.77	-0.00169976		3661.8	-0.02078578
481.99	0.0348495		1011.99	-0.0141976		1541.98	-0.00447677		2071.98	-0.00732236		2601.97	0.00334346		3131.97	-0.00161504		3662	-0.02172251
482.19	0.0350744		1012.19	-0.01436767		1542.18	-0.00356843		2072.18	-0.00786699		2602.17	0.00294983		3132.17	-0.00159919		3662.2	-0.02150402
482.39	0.03460231		1012.39	-0.013479		1542.38	-0.00337775		2072.38	-0.00773415		2602.37	0.00378822		3132.37	-0.00132136		3662.4	-0.02231533
482.59	0.03477551		1012.59	-0.01390323		1542.58	-0.00337621		2072.58	-0.00760442		2602.57	0.00320285		3132.57	-0.00172665		3662.6	-0.02231038
482.79	0.03463274		1012.79	-0.01378335		1542.78	-0.00252495		2072.78	-0.00743379		2602.77	0.00238812		3132.77	-0.00162514		3662.8	-0.022084
482.99	0.03481662		1012.99	-0.01311193		1542.98	-0.00238151		2072.98	-0.00723559		2602.97	0.00079486		3132.97	-0.00139323		3663	-0.02218141
483.19	0.03476704		1013.19	-0.0125181		1543.18	-0.00302962		2073.18	-0.00642864		2603.17	-0.00044789		3133.17	-0.00112647		3663.2	-0.02242776
483.39	0.03433989		1013.39	-0.01144631		1543.38	-0.00298368		2073.38	-0.00536879		2603.37	-0.00084946		3133.37	-0.00134167		3663.4	-0.02223762
483.59	0.03452565		1013.59	-0.01096945		1543.58	-0.0037581		2073.58	-0.00511846		2603.57	-0.00100331		3133.57	-0.00077185		3663.6	-0.0218282
483.79	0.03454588		1013.79	-0.01120387		1543.78	-0.00370731		2073.78	-0.0049098		2603.77	-0.00130347		3133.77	-0.00159442		3663.8	-0.02201628
483.99	0.03533524		1013.99	-0.01129298		1543.98	-0.00353643		2073.98	-0.00525635		2603.97	-0.00067007		3133.97	-0.00189891		3664	-0.02223623
484.19	0.03578256		1014.19	-0.01088114		1544.18	-0.00329789		2074.18	-0.0053608		2604.17	-0.00026361		3134.17	-0.00223369		3664.2	-0.02290349
484.39	0.03573176		1014.39	-0.01056343		1544.38	-0.00311379		2074.38	-0.00525422		2604.37	-0.00064635		3134.37	-0.00260645		3664.4	-0.02285014
484.59	0.03586659		1014.59	-0.00974198		1544.58	-0.00320903		2074.58	-0.00534924		2604.57	-0.00043033		3134.57	-0.00152024		3664.6	-0.02277025
484.79	0.03571561		1014.79	-0.00898508		1544.78	-0.0039257		2074.78	-0.00462662		2604.77	-0.00041282		3134.77	-0.00096967		3664.8	-0.02237561
484.99	0.03610393		1014.99	-0.00854786		1544.98	-0.00395514		2074.98	-0.00473489		2604.97	-0.00092005		3134.97	0.00027436		3665	-0.02242767
485.19	0.03733094		1015.19	-0.00813382		1545.18	-0.00503973		2075.18	-0.00519186		2605.17	-0.00117703		3135.17	0.00035788		3665.2	-0.02257517
485.39	0.0368964		1015.39	-0.00805655		1545.38	-0.0060762		2075.38	-0.00634784		2605.37	-0.00088054		3135.37	0.0007218		3665.4	-0.0229133
485.59	0.03661031		1015.59	-0.00863072		1545.58	-0.00532059		2075.58	-0.0072168		2605.57	-0.00068907		3135.57	0.0006877		3665.6	-0.02269986
485.79	0.03605091		1015.79	-0.00834301		1545.78	-0.00567083		2075.78	-0.00720998		2605.77	-0.0007936		3135.77	0.00158111		3665.8	-0.02298299
485.99	0.03635834		1015.99	-0.0078515		1545.98	-0.00597806		2075.98	-0.00752815		2605.97	-0.00008159		3135.97	0.00233699		3666	-0.02304627
486.19	0.03671184		1016.19	-0.00839085		1546.18	-0.00559152		2076.18	-0.00816803		2606.17	0.00029449		3136.17	0.0022832		3666.2	-0.02322348
486.39	0.0362727		1016.39	-0.00973944		1546.38	-0.00595252		2076.38	-0.00855798		2606.37	-0.00002918		3136.37	0.00272565		3666.4	-0.02309698
486.59	0.03650565		1016.59	-0.01055065		1546.58	-0.00659977		2076.58	-0.00862881		2606.57	-0.00124344		3136.57	0.00296626		3666.6	-0.02195127
486.79	0.03639184		1016.79	-0.01077157		1546.78	-0.0063867		2076.78	-0.0088143		2606.77	-0.00171496		3136.77	0.00337078		3666.8	-0.02157043
486.99	0.03610182		1016.99	-0.01159498		1546.98	-0.00643702		2076.98	-0.00966075		2606.97	-0.00251537		3136.97	0.00407908		3667	-0.0221715
487.19	0.03594593		1017.19	-0.01201433		1547.18	-0.00643967		2077.18	-0.00928499		2607.17	-0.00301638		3137.17	0.00353048		3667.2	-0.02113384
487.39	0.03577028		1017.39	-0.01216778		1547.38	-0.00696076		2077.38	-0.00871262		2607.37	-0.00275907		3137.37	0.00357896		3667.4	-0.02110889
487.59	0.0361365		1017.59	-0.01261811		1547.58	-0.00730575		2077.58	-0.00877284		2607.57	-0.00179969		3137.57	0.00268083		3667.6	-0.02075959
487.79	0.03582713		1017.79	-0.01311097		1547.78	-0.00620801		2077.78	-0.0082334		2607.77	-0.00166154		3137.77	0.00230412		3667.8	-0.02098176
487.99	0.03549051		1017.99	-0.01347906		1547.98	-0.0055514		2077.98	-0.00717334		2607.97	-0.0016062		3137.97	0.00200837		3668	-0.02149112
488.19	0.03463421		1018.19	-0.01367712		1548.18	-0.00540199		2078.18	-0.00669419		2608.17	-0.00244628		3138.17	0.00127011		3668.2	-0.02131514
488.39	0.03390339		1018.39	-0.0143538		1548.38	-0.00479543		2078.38	-0.00609499		2608.37	-0.00324821		3138.37	0.00080179		3668.4	-0.02152201
488.59	0.0342512		1018.59	-0.01295842		1548.58	-0.0046779		2078.58	-0.00597875		2608.57	-0.00357452		3138.57	0.00114067		3668.6	-0.02039081
488.79	0.03441495		1018.79	-0.01297357		1548.78	-0.0053983		2078.78	-0.00517714		2608.77	-0.00356755		3138.77	0.00059055		3668.8	-0.02097484
488.99	0.03476359		1018.99	-0.01240571		1548.98	-0.00593199		2078.98	-0.00446728		2608.97	-0.0037984		3138.97	0.00036943		3669	-0.0214158
489.19	0.03559905		1019.19	-0.01284014		1549.18	-0.0057147		2079.18	-0.00475357		2609.17	-0.00387035		3139.17	-0.00029263		3669.2	-0.02173606
489.39	0.03472075		1019.39	-0.01268526		1549.38	-0.00621376		2079.38	-0.00411608		2609.37	-0.00365451		3139.37	-0.0010872		3669.4	-0.02152741
489.59	0.03439642		1019.59	-0.01237554		1549.58	-0.0058347		2079.58	-0.00427156		2609.57	-0.00368004		3139.57	-0.0005072		3669.6	-0.02187879
489.79	0.03442439		1019.79	-0.01217729		1549.78	-0.00648469		2079.78	-0.00366439		2609.77	-0.00334742		3139.77	-0.00077933		3669.8	-0.02242359
489.99	0.03397012		1019.99	-0.01248801		1549.98	-0.00656253		2079.98	-0.00463261		2609.97	-0.00265482		3139.97	-0.00000332		3670	-0.02269413
490.19	0.03468792		1020.19	-0.01277915		1550.18	-0.00658355		2080.18	-0.00567267		2610.17	-0.00217174		3140.17	-0.00015594		3670.2	-0.02281105
490.39	0.03496167		1020.39	-0.01271775		1550.38	-0.0060975		2080.38	-0.00690607		2610.37	-0.00212856		3140.37	0.0005404		3670.4	-0.02264179
490.59	0.03521125		1020.59	-0.01147507		1550.58	-0.0063657		2080.58	-0.00746087		2610.57	-0.00188286		3140.57	0.00123671		3670.6	-0.02317414
490.79	0.03590582		1020.79	-0.01131096		1550.78	-0.00607782		2080.78	-0.00790082		2610.77	-0.00134346		3140.77	0.00159581		3670.8	-0.02346024
490.99	0.03597132		1020.99	-0.01090971		1550.98	-0.00670378		2080.98	-0.00894908		2610.97	-0.00031152		3140.97	0.00263496		3671	-0.02337832
491.19	0.03558544		1021.19	-0.01047969		1551.18	-0.00690351		2081.18	-0.00940154		2611.17	-0.00028101		3141.17	0.00300504		3671.2	-0.02218137
491.39	0.03574788		1021.39	-0.01119881		1551.38	-0.00754974		2081.38	-0.00912263		2611.37	-0.0005476		3141.37	0.0029452		3671.4	-0.02189149
491.59	0.03521534		1021.59	-0.01115562		1551.58	-0.00703486		2081.58	-0.00883481		2611.57	0.00010094		3141.57	0.00209044		3671.6	-0.02162277
491.79	0.03385608		1021.79	-0.01126453		1551.78	-0.00663732		2081.78	-0.00868027		2611.77	-0.00106189		3141.77	0.001935		3671.8	-0.0213432
491.99	0.03362876		1021.99	-0.01192993		1551.98	-0.00664038		2081.98	-0.0082466		2611.97	-0.001932		3141.97	0.00176758		3672	-0.02104663
492.19	0.03392475		1022.19	-0.01260645		1552.18	-0.00606469		2082.18	-0.00882739		2612.17	-0.00194262		3142.17	0.00093876		3672.2	-0.02067912
492.39	0.03433738		1022.39	-0.01305848		1552.38	-0.00578233		2082.38	-0.00859723		2612.37	-0.00253886		3142.37	0.0007513		3672.4	-0.02053198
492.59	0.03490305		1022.59	-0.01293674		1552.58	-0.00679443		2082.58	-0.00862928		2612.57	-0.00196795		3142.57	0.00028591		3672.6	-0.02002044
492.79	0.03530453		1022.79	-0.01352679		1552.78	-0.00680356		2082.78	-0.00792952		2612.77	-0.00155754		3142.77	-0.0001472		3672.8	-0.02066255
492.99	0.03516446		1022.99	-0.01428529		1552.98	-0.00759025		2082.98	-0.00807376		2612.97	-0.00205401		3142.97	-0.0000005		3673	-0.02012177
493.19	0.03482794		1023.19	-0.01573405		1553.18	-0.00733744		2083.18	-0.00831749		2613.17	-0.00246861		3143.17	0.00026127		3673.2	-0.01975978
493.39	0.03421983		1023.39	-0.01615261		1553.38	-0.0079951		2083.38	-0.00828408		2613.37	-0.00232986		3143.37	0.00096389		3673.4	-0.01936494
493.59	0.03319408		1023.59	-0.01656497		1553.58	-0.00735181		2083.58	-0.00807161		2613.57	-0.00241282		3143.57	0.00139268		3673.6	-0.02069679
493.79	0.03340346		1023.79	-0.01642698		1553.78	-0.00731798		2083.78	-0.00723042		2613.77	-0.0026099		3143.77	0.00053252		3673.8	-0.02163112
493.99	0.03396087		1023.99	-0.01647985		1553.98	-0.00695429		2083.98	-0.0072575		2613.97	-0.00222555		3143.97	0.0015531		3674	-0.02224633
494.19	0.03566479		1024.19	-0.01630315		1554.18	-0.00617332		2084.18	-0.00689171		2614.17	-0.00154343		3144.17	0.00133792		3674.2	-0.02275815
494.39	0.0362124		1024.39	-0.01593117		1554.38	-0.00549756		2084.38	-0.00643902		2614.37	-0.00122316		3144.37	0.0018037		3674.4	-0.02343078
494.59	0.03614267		1024.59	-0.01523813		1554.58	-0.0060089		2084.58	-0.00542864		2614.57	-0.00159606		3144.57	0.00240395		3674.6	-0.02419899
494.79	0.03653337		1024.79	-0.01486554		1554.78	-0.00584617		2084.78	-0.00489624		2614.77	-0.00150222		3144.77	0.00233444		3674.8	-0.02359583
494.99	0.03505956		1024.99	-0.01375608		1554.98	-0.00640544		2084.98	-0.00463468		2614.97	-0.00075367		3144.97	0.00271231		3675	-0.02307934
495.19	0.03437621		1025.19	-0.01368276		1555.18	-0.00634084		2085.18	-0.00416616		2615.17	-0.00137099		3145.17	0.00281018		3675.2	-0.02405712
495.39	0.03462285		1025.39	-0.01363591		1555.38	-0.00588901		2085.38	-0.00298996		2615.37	-0.00165927		3145.37	0.00236238		3675.4	-0.02450119
495.59	0.03362926		1025.59	-0.01323087		1555.58	-0.00573746		2085.58	-0.00309704		2615.57	-0.00106554		3145.57	0.00213493		3675.6	-0.02530347
495.79	0.03241257		1025.79	-0.01301202		1555.78	-0.00648008		2085.78	-0.00317979		2615.77	-0.00198902		3145.77	0.00161864		3675.8	-0.02506871
495.99	0.03270688		1025.99	-0.01289391		1555.98	-0.00720619		2085.98	-0.00313838		2615.97	-0.00180048		3145.97	0.00109019		3676	-0.02455522
496.19	0.03237587		1026.19	-0.01274213		1556.18	-0.00612895		2086.18	-0.00343351		2616.17	-0.00173842		3146.17	0.0004007		3676.2	-0.02496853
496.39	0.0316158		1026.39	-0.01298234		1556.38	-0.00731795		2086.38	-0.00322781		2616.37	-0.00296788		3146.37	0.00072917		3676.4	-0.02474593
496.59	0.03192427		1026.59	-0.01347068		1556.58	-0.00837482		2086.58	-0.003298		2616.57	-0.00303024		3146.57	0.00073678		3676.6	-0.02451211
496.79	0.03171944		1026.79	-0.01380019		1556.78	-0.00799813		2086.78	-0.00372335		2616.77	-0.00317136		3146.77	0.00049417		3676.8	-0.02378315
496.99	0.03190564		1026.99	-0.01495284		1556.98	-0.00867554		2086.98	-0.00389239		2616.97	-0.0041223		3146.97	0.00079988		3677	-0.02290967
497.19	0.03266692		1027.19	-0.01568917		1557.18	-0.00912871		2087.18	-0.00398092		2617.17	-0.00444493		3147.17	0.00054485		3677.2	-0.02277365
497.39	0.03287543		1027.39	-0.01582356		1557.38	-0.00949952		2087.38	-0.00496658		2617.37	-0.00480935		3147.37	0.00027945		3677.4	-0.02394629
497.59	0.0329673		1027.59	-0.0158453		1557.58	-0.00951146		2087.58	-0.00490185		2617.57	-0.0052157		3147.57	0.00048858		3677.6	-0.02502761
497.79	0.03386407		1027.79	-0.01556451		1557.78	-0.01016776		2087.78	-0.00566199		2617.77	-0.00536072		3147.77	0.00016581		3677.8	-0.02540419
497.99	0.03463151		1027.99	-0.01569445		1557.98	-0.00989402		2087.98	-0.00624643		2617.97	-0.00551044		3147.97	0.00045321		3678	-0.02514943
498.19	0.03578056		1028.19	-0.01590305		1558.18	-0.00990141		2088.18	-0.00698496		2618.17	-0.005539		3148.17	-0.00060284		3678.2	-0.02485637
498.39	0.03586568		1028.39	-0.0162316		1558.38	-0.00950403		2088.38	-0.00712358		2618.37	-0.00552937		3148.37	0.00000542		3678.4	-0.02422992
498.59	0.03540972		1028.59	-0.01512601		1558.58	-0.01012481		2088.58	-0.00752765		2618.57	-0.00587737		3148.57	-0.00027905		3678.6	-0.02380001
498.79	0.03553855		1028.79	-0.01469818		1558.78	-0.00946843		2088.78	-0.00832851		2618.77	-0.00515265		3148.77	-0.00034863		3678.8	-0.02336991
498.99	0.03515623		1028.99	-0.01557303		1558.98	-0.00923039		2088.98	-0.00860733		2618.97	-0.00404079		3148.97	0.00000424		3679	-0.02308653
499.19	0.03476032		1029.19	-0.01563184		1559.18	-0.00905881		2089.18	-0.00862192		2619.17	-0.00360681		3149.17	0.00045702		3679.2	-0.02419509
499.39	0.0342785		1029.39	-0.01567439		1559.38	-0.00824469		2089.38	-0.0086402		2619.37	-0.00350676		3149.37	0.00017893		3679.4	-0.02371183
499.59	0.03401495		1029.59	-0.01517619		1559.58	-0.00808296		2089.58	-0.00883792		2619.57	-0.00247583		3149.57	0.00017743		3679.6	-0.02333987
499.79	0.03339719		1029.79	-0.01366613		1559.78	-0.00776195		2089.78	-0.00901404		2619.77	-0.00254411		3149.77	-0.00003974		3679.8	-0.02272087
499.99	0.03421059		1029.99	-0.01272132		1559.98	-0.00653751		2089.98	-0.00864491		2619.97	-0.00197188		3149.97	-0.00009541		3680	-0.02159407
500.19	0.03437691		1030.19	-0.0126887		1560.18	-0.00500555		2090.18	-0.00861664		2620.17	-0.00174651		3150.17	-0.00008389		3680.2	-0.0217347
500.39	0.03379625		1030.39	-0.01209436		1560.38	-0.00551285		2090.38	-0.00754197		2620.37	-0.00177646		3150.37	-0.00003257		3680.4	-0.02200709
500.59	0.03430975		1030.59	-0.01232848		1560.58	-0.00503374		2090.58	-0.00723546		2620.57	-0.00145951		3150.57	-0.00080383		3680.6	-0.02179735
500.79	0.03393977		1030.79	-0.01227153		1560.78	-0.00454313		2090.78	-0.00793461		2620.77	-0.00122175		3150.77	-0.00133894		3680.8	-0.02152795
500.99	0.03430989		1030.99	-0.01210794		1560.98	-0.00503549		2090.98	-0.00761206		2620.97	-0.00149306		3150.97	-0.00049636		3681	-0.02147566
501.19	0.03401211		1031.19	-0.01182044		1561.18	-0.00548536		2091.18	-0.0079307		2621.17	-0.00162817		3151.17	-0.00139552		3681.2	-0.02210546
501.39	0.03308554		1031.39	-0.0120451		1561.38	-0.00498673		2091.38	-0.0080659		2621.37	-0.00138567		3151.37	-0.00128842		3681.4	-0.02330243
501.59	0.03289771		1031.59	-0.01210931		1561.58	-0.005265		2091.58	-0.00768638		2621.57	-0.00163769		3151.57	-0.00043248		3681.6	-0.02269374
501.79	0.03229674		1031.79	-0.01173688		1561.78	-0.00543908		2091.78	-0.00839967		2621.77	-0.00144058		3151.77	-0.00085131		3681.8	-0.0227864
501.99	0.03203453		1031.99	-0.01179655		1561.98	-0.00561167		2091.98	-0.00849725		2621.97	-0.00184528		3151.97	-0.00054815		3682	-0.02255403
502.19	0.03342258		1032.19	-0.01242569		1562.18	-0.00603589		2092.18	-0.00800683		2622.17	-0.00188087		3152.17	-0.00026364		3682.2	-0.02228781
502.39	0.03245723		1032.39	-0.0128332		1562.38	-0.00652944		2092.38	-0.00762084		2622.37	-0.00185878		3152.37	0.00095632		3682.4	-0.02149584
502.59	0.03166809		1032.59	-0.01315188		1562.58	-0.00713253		2092.58	-0.00715532		2622.57	-0.00141751		3152.57	0.0012346		3682.6	-0.02156957
502.79	0.03161148		1032.79	-0.01396874		1562.78	-0.00667317		2092.78	-0.00740504		2622.77	-0.00038624		3152.77	0.00140681		3682.8	-0.02177711
502.99	0.03125704		1032.99	-0.01512505		1562.98	-0.00724669		2092.98	-0.00730768		2622.97	-0.00097794		3152.97	0.00117273		3683	-0.02245183
503.19	0.03087796		1033.19	-0.01503212		1563.18	-0.00729132		2093.18	-0.00651694		2623.17	-0.00070862		3153.17	0.0012141		3683.2	-0.02219752
503.39	0.03198771		1033.39	-0.0148444		1563.38	-0.00670695		2093.38	-0.00572694		2623.37	-0.00066779		3153.37	0.00099691		3683.4	-0.02151098
503.59	0.0322838		1033.59	-0.01477082		1563.58	-0.00676134		2093.58	-0.00554443		2623.57	0.00002678		3153.57	0.00057504		3683.6	-0.02127462
503.79	0.03263053		1033.79	-0.01531168		1563.78	-0.0072484		2093.78	-0.00577365		2623.77	0.00044394		3153.77	0.00075797		3683.8	-0.02088525
503.99	0.03359588		1033.99	-0.01599903		1563.98	-0.00710522		2093.98	-0.00620217		2623.97	0.00101342		3153.97	0.00065516		3684	-0.02033494
504.19	0.03276199		1034.19	-0.01662879		1564.18	-0.00749472		2094.18	-0.0062754		2624.17	0.00156399		3154.17	0.00030308		3684.2	-0.02066197
504.39	0.03171935		1034.39	-0.01589258		1564.38	-0.0081663		2094.38	-0.00564674		2624.37	0.0014353		3154.37	0.00047645		3684.4	-0.02169292
504.59	0.03088749		1034.59	-0.01630571		1564.58	-0.00889839		2094.58	-0.00608254		2624.57	0.0009133		3154.57	0.00042047		3684.6	-0.02139294
504.79	0.0299679		1034.79	-0.01604565		1564.78	-0.00913535		2094.78	-0.00677684		2624.77	0.00019915		3154.77	0.00062136		3684.8	-0.02129566
504.99	0.02983896		1034.99	-0.01524517		1564.98	-0.00957748		2094.98	-0.00615457		2624.97	-0.00013249		3154.97	0.00050718		3685	-0.02162473
505.19	0.02981145		1035.19	-0.01427641		1565.18	-0.00961093		2095.18	-0.00665772		2625.17	-0.00088955		3155.17	0.00007586		3685.2	-0.02111973
505.39	0.02950045		1035.39	-0.01414071		1565.38	-0.00975195		2095.38	-0.00687463		2625.37	-0.00157521		3155.37	0.00023358		3685.4	-0.02137714
505.59	0.03030478		1035.59	-0.01316218		1565.58	-0.01041219		2095.58	-0.0073965		2625.57	-0.00197481		3155.57	0.00084016		3685.6	-0.02122863
505.79	0.03017403		1035.79	-0.01298615		1565.78	-0.01051459		2095.78	-0.00787156		2625.77	-0.00174686		3155.77	0.00103055		3685.8	-0.02105462
505.99	0.03037269		1035.99	-0.01273476		1565.98	-0.00995928		2095.98	-0.00819211		2625.97	-0.00207768		3155.97	0.00155593		3686	-0.02107568
506.19	0.03052597		1036.19	-0.01277762		1566.18	-0.00900452		2096.18	-0.00795673		2626.17	-0.00200202		3156.17	0.00109897		3686.2	-0.0205513
506.39	0.03003599		1036.39	-0.01289991		1566.38	-0.00899254		2096.38	-0.00805308		2626.37	-0.00220919		3156.37	0.00066724		3686.4	-0.02030679
506.59	0.03004406		1036.59	-0.01333707		1566.58	-0.00798466		2096.58	-0.00811458		2626.57	-0.00210252		3156.57	0.00016087		3686.6	-0.02093673
506.79	0.0305751		1036.79	-0.01278356		1566.78	-0.00776559		2096.78	-0.00817672		2626.77	-0.00244009		3156.77	-0.00058303		3686.8	-0.02155743
506.99	0.03073238		1036.99	-0.01299645		1566.98	-0.00757568		2096.98	-0.00777681		2626.97	-0.00286973		3156.97	-0.00053908		3687	-0.02145936
507.19	0.03091871		1037.19	-0.01373748		1567.18	-0.00733446		2097.18	-0.00721728		2627.17	-0.00186682		3157.17	0.00000238		3687.2	-0.02144849
507.39	0.03081071		1037.39	-0.01378735		1567.38	-0.00690246		2097.38	-0.00698043		2627.37	-0.00192878		3157.37	-0.00078961		3687.4	-0.02211899
507.59	0.03100109		1037.59	-0.01502511		1567.58	-0.00671383		2097.58	-0.00707644		2627.57	-0.00145967		3157.57	-0.00143741		3687.6	-0.02277863
507.79	0.03184791		1037.79	-0.01555331		1567.78	-0.0069826		2097.78	-0.00681891		2627.77	-0.00069464		3157.77	-0.00009659		3687.8	-0.02397775
507.99	0.03233707		1037.99	-0.01595337		1567.98	-0.00698916		2097.98	-0.00677877		2627.97	-0.00139823		3157.97	0.0002502		3688	-0.0249006
508.19	0.03139715		1038.19	-0.01533523		1568.18	-0.00762412		2098.18	-0.00628007		2628.17	-0.00136137		3158.17	0.00050847		3688.2	-0.02488007
508.39	0.03073283		1038.39	-0.01505846		1568.38	-0.00861467		2098.38	-0.00587463		2628.37	-0.00158499		3158.37	0.00054456		3688.4	-0.0257458
508.59	0.03071602		1038.59	-0.01572562		1568.58	-0.00976795		2098.58	-0.00591994		2628.57	-0.00230575		3158.57	0.00041362		3688.6	-0.02553705
508.79	0.03053333		1038.79	-0.01514548		1568.78	-0.00979121		2098.78	-0.00615872		2628.77	-0.00272799		3158.77	0.00043666		3688.8	-0.02639077
508.99	0.03173962		1038.99	-0.01463307		1568.98	-0.01055344		2098.98	-0.0055674		2628.97	-0.00262975		3158.97	-0.0000528		3689	-0.02610415
509.19	0.03160926		1039.19	-0.01410874		1569.18	-0.01133156		2099.18	-0.00607447		2629.17	-0.00260404		3159.17	0.00002495		3689.2	-0.02530852
509.39	0.03203904		1039.39	-0.0140349		1569.38	-0.0112981		2099.38	-0.00655119		2629.37	-0.00304874		3159.37	-0.00087522		3689.4	-0.0250577
509.59	0.03214002		1039.59	-0.0133974		1569.58	-0.01125924		2099.58	-0.00686215		2629.57	-0.00206434		3159.57	-0.00104941		3689.6	-0.02337996
509.79	0.03187906		1039.79	-0.0141801		1569.78	-0.010512		2099.78	-0.0077886		2629.77	-0.00221457		3159.77	-0.00158667		3689.8	-0.0229701
509.99	0.03153069		1039.99	-0.01368957		1569.98	-0.00971807		2099.98	-0.00917725		2629.97	-0.00254306		3159.97	-0.00224537		3690	-0.02249604
510.19	0.03107843		1040.19	-0.01370311		1570.18	-0.00957191		2100.18	-0.00893445		2630.17	-0.00196072		3160.17	-0.00322615		3690.2	-0.02153891
510.39	0.03130814		1040.39	-0.01311857		1570.38	-0.00960878		2100.38	-0.00989821		2630.37	-0.00207114		3160.37	-0.0030156		3690.4	-0.02058199
510.59	0.03072324		1040.59	-0.01270423		1570.58	-0.009209		2100.58	-0.01016795		2630.57	-0.00185966		3160.57	-0.00231946		3690.6	-0.02073351
510.79	0.03125652		1040.79	-0.01202184		1570.78	-0.0089604		2100.78	-0.00962272		2630.77	-0.00190907		3160.77	-0.00239127		3690.8	-0.02041593
510.99	0.03061708		1040.99	-0.01174014		1570.98	-0.00822587		2100.98	-0.00995345		2630.97	-0.00099609		3160.97	-0.00235976		3691	-0.01949281
511.19	0.03090966		1041.19	-0.01204383		1571.18	-0.00866264		2101.18	-0.01038034		2631.17	-0.00091532		3161.17	-0.00221936		3691.2	-0.02078655
511.39	0.03143172		1041.39	-0.01246128		1571.38	-0.00820386		2101.38	-0.01003691		2631.37	-0.00061882		3161.37	-0.00291405		3691.4	-0.02161538
511.59	0.03180068		1041.59	-0.0125613		1571.58	-0.00796746		2101.58	-0.00953487		2631.57	-0.0009179		3161.57	-0.00271946		3691.6	-0.02232807
511.79	0.03263709		1041.79	-0.01305636		1571.78	-0.00855068		2101.78	-0.00924808		2631.77	-0.00130611		3161.77	-0.00253992		3691.8	-0.02306551
511.99	0.03324348		1041.99	-0.01362021		1571.98	-0.00933058		2101.98	-0.00956966		2631.97	-0.00263263		3161.97	-0.00274012		3692	-0.02277607
512.19	0.03271113		1042.19	-0.01408753		1572.18	-0.00945076		2102.18	-0.00998134		2632.17	-0.00158978		3162.17	-0.00292969		3692.2	-0.02214221
512.39	0.03248038		1042.39	-0.01525055		1572.38	-0.01025015		2102.38	-0.01006041		2632.37	-0.00207849		3162.37	-0.00313309		3692.4	-0.02294178
512.59	0.03257744		1042.59	-0.01624201		1572.58	-0.01037918		2102.58	-0.00996555		2632.57	-0.00196469		3162.57	-0.00302609		3692.6	-0.02282328
512.79	0.03235407		1042.79	-0.01625897		1572.78	-0.01000569		2102.78	-0.01032656		2632.77	-0.00190468		3162.77	-0.00254153		3692.8	-0.02360524
512.99	0.03294073		1042.99	-0.01630573		1572.98	-0.01028012		2102.98	-0.0098556		2632.97	-0.00156369		3162.97	-0.0030145		3693	-0.02280711
513.19	0.03244679		1043.19	-0.01547858		1573.18	-0.01042955		2103.18	-0.0098541		2633.17	-0.00169656		3163.17	-0.00278226		3693.2	-0.02253237
513.39	0.03215248		1043.39	-0.01562154		1573.38	-0.00986753		2103.38	-0.00984259		2633.37	-0.0020246		3163.37	-0.00247124		3693.4	-0.02209954
513.59	0.03106432		1043.59	-0.01589537		1573.58	-0.00949408		2103.58	-0.01016352		2633.57	-0.0016802		3163.57	-0.00191446		3693.6	-0.0209322
513.79	0.03102033		1043.79	-0.01629052		1573.78	-0.00933502		2103.78	-0.01053344		2633.77	-0.00200105		3163.77	-0.00104027		3693.8	-0.02185067
513.99	0.03075765		1043.99	-0.01534628		1573.98	-0.00927436		2103.98	-0.01042928		2633.97	-0.00181627		3163.97	-0.00015543		3694	-0.02209919
514.19	0.03035154		1044.19	-0.01509516		1574.18	-0.00917478		2104.18	-0.00928638		2634.17	-0.00123166		3164.17	0.00028911		3694.2	-0.02175202
514.39	0.03087079		1044.39	-0.01541508		1574.38	-0.00838678		2104.38	-0.0100141		2634.37	-0.00110282		3164.37	0.0009557		3694.4	-0.02146628
514.59	0.03117753		1044.59	-0.01588388		1574.58	-0.00856132		2104.58	-0.00952558		2634.57	-0.00108523		3164.57	0.00123012		3694.6	-0.02200286
514.79	0.03118268		1044.79	-0.01552078		1574.78	-0.0084371		2104.78	-0.00976778		2634.77	-0.00090771		3164.77	0.00071994		3694.8	-0.02226506
514.99	0.03053374		1044.99	-0.01472213		1574.98	-0.00898631		2104.98	-0.01046446		2634.97	-0.00165006		3164.97	0.00118484		3695	-0.02253077
515.19	0.03093518		1045.19	-0.01516643		1575.18	-0.00970562		2105.18	-0.00936338		2635.17	-0.00205783		3165.17	0.00151242		3695.2	-0.02429552
515.39	0.03122436		1045.39	-0.015363		1575.38	-0.00971056		2105.38	-0.00867511		2635.37	-0.00288061		3165.37	0.00126073		3695.4	-0.02405676
515.59	0.03144896		1045.59	-0.0150551		1575.58	-0.01016171		2105.58	-0.0077411		2635.57	-0.00394439		3165.57	0.0008819		3695.6	-0.02436222
515.79	0.03252288		1045.79	-0.01516054		1575.78	-0.01025359		2105.78	-0.00823732		2635.77	-0.005312		3165.77	0.00086612		3695.8	-0.02390547
515.99	0.0327092		1045.99	-0.01546977		1575.98	-0.01097159		2105.98	-0.00915114		2635.97	-0.00634925		3165.97	0.00159913		3696	-0.02368883
516.19	0.03297614		1046.19	-0.01599968		1576.18	-0.01056648		2106.18	-0.00930448		2636.17	-0.00679514		3166.17	0.00152495		3696.2	-0.02405752
516.39	0.03304886		1046.39	-0.01642651		1576.38	-0.01057275		2106.38	-0.0096538		2636.37	-0.00723329		3166.37	0.00211337		3696.4	-0.02419678
516.59	0.0333051		1046.59	-0.01630319		1576.58	-0.01110312		2106.58	-0.00978124		2636.57	-0.00665363		3166.57	0.0016675		3696.6	-0.02455834
516.79	0.03309708		1046.79	-0.01574318		1576.78	-0.01114675		2106.78	-0.01018562		2636.77	-0.00731019		3166.77	0.00220058		3696.8	-0.02517415
516.99	0.03265643		1046.99	-0.01490898		1576.98	-0.01131865		2106.98	-0.00972443		2636.97	-0.00721707		3166.97	0.00186623		3697	-0.02495709
517.19	0.03185422		1047.19	-0.01497305		1577.18	-0.01202906		2107.18	-0.00984811		2637.17	-0.00706202		3167.17	0.00291631		3697.2	-0.02483583
517.39	0.03087328		1047.39	-0.01491027		1577.38	-0.01209701		2107.38	-0.01058336		2637.37	-0.00662851		3167.37	0.00284528		3697.4	-0.02457769
517.59	0.0302401		1047.59	-0.01455678		1577.58	-0.01231766		2107.58	-0.01146411		2637.57	-0.00633966		3167.57	0.00224486		3697.6	-0.02357371
517.79	0.03034265		1047.79	-0.01385902		1577.78	-0.01278778		2107.78	-0.0115924		2637.77	-0.00515034		3167.77	0.00238675		3697.8	-0.02348115
517.99	0.02999981		1047.99	-0.01311245		1577.98	-0.0128824		2107.98	-0.01139443		2637.97	-0.00468114		3167.97	0.00175033		3698	-0.02367088
518.19	0.02880512		1048.19	-0.01317297		1578.18	-0.01353055		2108.18	-0.01174772		2638.17	-0.00421649		3168.17	0.0004849		3698.2	-0.02249803
518.39	0.02825141		1048.39	-0.01406981		1578.38	-0.01370954		2108.38	-0.01273052		2638.37	-0.00362775		3168.37	0.0001799		3698.4	-0.02240131
518.59	0.02777326		1048.59	-0.01344398		1578.58	-0.01408031		2108.58	-0.01282793		2638.57	-0.00260468		3168.57	-0.00067412		3698.6	-0.0222788
518.79	0.02721958		1048.79	-0.01301416		1578.78	-0.01459373		2108.78	-0.01281781		2638.77	-0.00244212		3168.77	-0.00103109		3698.8	-0.02312595
518.99	0.02720569		1048.99	-0.01262053		1578.98	-0.01557048		2108.98	-0.01193683		2638.97	-0.00279202		3168.97	-0.00141114		3699	-0.02314484
519.19	0.02699928		1049.19	-0.01265814		1579.18	-0.01529105		2109.18	-0.01006872		2639.17	-0.00222547		3169.17	-0.00222281		3699.2	-0.02372244
519.39	0.027283		1049.39	-0.01228934		1579.38	-0.01488486		2109.38	-0.00938145		2639.37	-0.00311167		3169.37	-0.00352801		3699.4	-0.02360234
519.59	0.02765849		1049.59	-0.01249548		1579.58	-0.01446816		2109.58	-0.00826331		2639.57	-0.00294425		3169.57	-0.0046183		3699.6	-0.02410824
519.79	0.02841709		1049.79	-0.01288653		1579.78	-0.01268298		2109.78	-0.00849577		2639.77	-0.00366465		3169.77	-0.00475907		3699.8	-0.02272162
519.99	0.02885693		1049.99	-0.01366193		1579.98	-0.01213707		2109.98	-0.00830421		2639.97	-0.00383618		3169.97	-0.00541006		3700	-0.0228366
520.19	0.0295677		1050.19	-0.01473213		1580.18	-0.01151995		2110.18	-0.00766608		2640.17	-0.00379697		3170.17	-0.00549875		3700.2	-0.02306656
520.39	0.02955145		1050.39	-0.01497192		1580.38	-0.0107076		2110.38	-0.00708165		2640.37	-0.00353318		3170.37	-0.00537065		3700.4	-0.02280872
520.59	0.02958657		1050.59	-0.01516666		1580.58	-0.01093782		2110.58	-0.00720533		2640.57	-0.00328414		3170.57	-0.00491474		3700.6	-0.02302846
520.79	0.02937641		1050.79	-0.0157073		1580.78	-0.01061312		2110.78	-0.00736827		2640.77	-0.00389744		3170.77	-0.00374499		3700.8	-0.02300635
520.99	0.02953754		1050.99	-0.01636122		1580.98	-0.01073571		2110.98	-0.00755445		2640.97	-0.00398636		3170.97	-0.00327292		3701	-0.02280084
521.19	0.02895704		1051.19	-0.01760321		1581.18	-0.01156904		2111.18	-0.00855942		2641.17	-0.0039071		3171.17	-0.00258782		3701.2	-0.02188454
521.39	0.02939902		1051.39	-0.01714904		1581.38	-0.01115499		2111.38	-0.00939147		2641.37	-0.00356925		3171.37	-0.00301945		3701.4	-0.02164041
521.59	0.02870922		1051.59	-0.01695999		1581.58	-0.01090836		2111.58	-0.0104297		2641.57	-0.0045282		3171.57	-0.00277075		3701.6	-0.02078981
521.79	0.02797937		1051.79	-0.01661886		1581.78	-0.01096375		2111.78	-0.01133648		2641.77	-0.00443021		3171.77	-0.00144958		3701.8	-0.02064575
521.99	0.02647785		1051.99	-0.01615038		1581.98	-0.01055878		2111.98	-0.01200991		2641.97	-0.00472138		3171.97	-0.00109256		3702	-0.02118874
522.19	0.02556901		1052.19	-0.0156979		1582.18	-0.01088844		2112.18	-0.01281009		2642.17	-0.00547613		3172.17	-0.0007091		3702.2	-0.02131723
522.39	0.02553332		1052.39	-0.01679409		1582.38	-0.01068464		2112.38	-0.01242747		2642.37	-0.00477193		3172.37	-0.0003298		3702.4	-0.02224783
522.59	0.02470519		1052.59	-0.01665165		1582.58	-0.0115173		2112.58	-0.01169493		2642.57	-0.00428362		3172.57	0.00003567		3702.6	-0.02311479
522.79	0.02473036		1052.79	-0.01701378		1582.78	-0.01160536		2112.78	-0.01111021		2642.77	-0.0048076		3172.77	0.00056095		3702.8	-0.02450297
522.99	0.02471585		1052.99	-0.01581872		1582.98	-0.01202229		2112.98	-0.01023357		2642.97	-0.00461261		3172.97	-0.00013913		3703	-0.02464519
523.19	0.02428408		1053.19	-0.01583704		1583.18	-0.01166633		2113.18	-0.00923966		2643.17	-0.00461563		3173.17	-0.00055538		3703.2	-0.02521947
523.39	0.0248622		1053.39	-0.01626762		1583.38	-0.01112425		2113.38	-0.00917111		2643.37	-0.00476362		3173.37	-0.00109302		3703.4	-0.02486423
523.59	0.02604025		1053.59	-0.01641834		1583.58	-0.00952989		2113.58	-0.00907322		2643.57	-0.00437771		3173.57	-0.00136772		3703.6	-0.02472452
523.79	0.02773948		1053.79	-0.01592678		1583.78	-0.00951259		2113.78	-0.00929666		2643.77	-0.00536866		3173.77	-0.00061037		3703.8	-0.02449486
523.99	0.02798645		1053.99	-0.01620484		1583.98	-0.00995043		2113.98	-0.0092418		2643.97	-0.00522517		3173.97	-0.00067802		3704	-0.02511529
524.19	0.02906808		1054.19	-0.01718046		1584.18	-0.01004392		2114.18	-0.0089662		2644.17	-0.00499694		3174.17	-0.0000912		3704.2	-0.02451118
524.39	0.02941782		1054.39	-0.0159508		1584.38	-0.01001712		2114.38	-0.00836823		2644.37	-0.00559891		3174.37	0.00013874		3704.4	-0.02374644
524.59	0.02965188		1054.59	-0.01598851		1584.58	-0.01048093		2114.58	-0.00840752		2644.57	-0.0054098		3174.57	0.00040976		3704.6	-0.02336003
524.79	0.02989676		1054.79	-0.0156796		1584.78	-0.01135311		2114.78	-0.00894251		2644.77	-0.00578565		3174.77	0.0001088		3704.8	-0.02337653
524.99	0.02996421		1054.99	-0.01615439		1584.98	-0.01105422		2114.98	-0.00988209		2644.97	-0.00585889		3174.97	-0.00070719		3705	-0.0233284
525.19	0.03010099		1055.19	-0.01610632		1585.18	-0.0114767		2115.18	-0.01093661		2645.17	-0.00612227		3175.17	-0.00093189		3705.2	-0.02287782
525.39	0.030482		1055.39	-0.01546297		1585.38	-0.01075013		2115.38	-0.01068072		2645.37	-0.00621274		3175.37	-0.00175961		3705.4	-0.02287527
525.59	0.03020476		1055.59	-0.01506286		1585.58	-0.01064809		2115.58	-0.01061492		2645.57	-0.00709251		3175.57	-0.00262687		3705.6	-0.02173571
525.79	0.03036812		1055.79	-0.01494358		1585.78	-0.01018166		2115.78	-0.01014121		2645.77	-0.00695134		3175.77	-0.00311892		3705.8	-0.02258573
525.99	0.03028851		1055.99	-0.01394314		1585.98	-0.0103953		2115.98	-0.00970771		2645.97	-0.00740805		3175.97	-0.00451294		3706	-0.02327848
526.19	0.03027785		1056.19	-0.01319172		1586.18	-0.01066664		2116.18	-0.00884291		2646.17	-0.0073436		3176.17	-0.00523434		3706.2	-0.02406301
526.39	0.03072192		1056.39	-0.0137313		1586.38	-0.01097007		2116.38	-0.00853071		2646.37	-0.00708733		3176.37	-0.00590455		3706.4	-0.02436776
526.59	0.03022354		1056.59	-0.01342531		1586.58	-0.01171386		2116.58	-0.00896689		2646.57	-0.00671169		3176.57	-0.00557165		3706.6	-0.02428307
526.79	0.03080809		1056.79	-0.01346701		1586.78	-0.01152992		2116.78	-0.00889529		2646.77	-0.00607016		3176.77	-0.00627993		3706.8	-0.02416543
526.99	0.03014851		1056.99	-0.01299449		1586.98	-0.01215604		2116.98	-0.00923639		2646.97	-0.00543174		3176.97	-0.00721837		3707	-0.02405425
527.19	0.02990867		1057.19	-0.01422878		1587.18	-0.01169766		2117.18	-0.00893293		2647.17	-0.00582504		3177.17	-0.00640064		3707.2	-0.02398491
527.39	0.03051527		1057.39	-0.01448077		1587.38	-0.01129179		2117.38	-0.00961674		2647.37	-0.00573782		3177.37	-0.00613818		3707.4	-0.0247406
527.59	0.03145983		1057.59	-0.0142044		1587.58	-0.01061718		2117.58	-0.00941141		2647.57	-0.00576105		3177.57	-0.00644898		3707.6	-0.02579861
527.79	0.0320066		1057.79	-0.01504538		1587.78	-0.01223288		2117.78	-0.00975676		2647.77	-0.0054615		3177.77	-0.00587777		3707.8	-0.02550612
527.99	0.03094289		1057.99	-0.01583426		1587.98	-0.01236501		2117.98	-0.00921319		2647.97	-0.00476779		3177.97	-0.00624421		3708	-0.02538373
528.19	0.03068954		1058.19	-0.01610421		1588.18	-0.01197396		2118.18	-0.00938494		2648.17	-0.0056287		3178.17	-0.00586274		3708.2	-0.02488519
528.39	0.02985255		1058.39	-0.01573116		1588.38	-0.01296592		2118.38	-0.00979303		2648.37	-0.00660586		3178.37	-0.00487256		3708.4	-0.0254605
528.59	0.0298327		1058.59	-0.01659154		1588.58	-0.01213038		2118.58	-0.01083345		2648.57	-0.00612671		3178.57	-0.00437018		3708.6	-0.02594338
528.79	0.02934666		1058.79	-0.01589288		1588.78	-0.01212437		2118.78	-0.01224718		2648.77	-0.0061724		3178.77	-0.00418268		3708.8	-0.02615829
528.99	0.02924006		1058.99	-0.01634106		1588.98	-0.01018291		2118.98	-0.01311399		2648.97	-0.00652878		3178.97	-0.00386963		3709	-0.02620978
529.19	0.02951649		1059.19	-0.0157811		1589.18	-0.010019		2119.18	-0.01278755		2649.17	-0.00656888		3179.17	-0.00348333		3709.2	-0.02594106
529.39	0.0297759		1059.39	-0.01575826		1589.38	-0.00946285		2119.38	-0.01252326		2649.37	-0.00677421		3179.37	-0.00399141		3709.4	-0.02585644
529.59	0.03075983		1059.59	-0.01602177		1589.58	-0.00952864		2119.58	-0.01213819		2649.57	-0.00683045		3179.57	-0.00417348		3709.6	-0.02612745
529.79	0.03070787		1059.79	-0.01579096		1589.78	-0.00895457		2119.78	-0.01226931		2649.77	-0.00654292		3179.77	-0.00395232		3709.8	-0.02741238
529.99	0.03061869		1059.99	-0.01568304		1589.98	-0.01010037		2119.98	-0.0123848		2649.97	-0.00693602		3179.97	-0.00390443		3710	-0.02761949
530.19	0.03060841		1060.19	-0.01593336		1590.18	-0.00966479		2120.18	-0.01293917		2650.17	-0.00647899		3180.17	-0.00361789		3710.2	-0.02732625
530.39	0.03180483		1060.39	-0.01614858		1590.38	-0.01029501		2120.38	-0.01329189		2650.37	-0.00619951		3180.37	-0.0029431		3710.4	-0.02625209
530.59	0.03131161		1060.59	-0.01664688		1590.58	-0.01051753		2120.58	-0.01329907		2650.57	-0.00562279		3180.57	-0.00242392		3710.6	-0.02622238
530.79	0.03115955		1060.79	-0.01749468		1590.78	-0.01028056		2120.78	-0.01213957		2650.77	-0.00503475		3180.77	-0.00274803		3710.8	-0.02585451
530.99	0.03032187		1060.99	-0.01783993		1590.98	-0.00937483		2120.98	-0.0120611		2650.97	-0.0047059		3180.97	-0.0026098		3711	-0.02580727
531.19	0.03010596		1061.19	-0.01835015		1591.18	-0.00857512		2121.18	-0.01037957		2651.17	-0.00538739		3181.17	-0.0022045		3711.2	-0.02603429
531.39	0.03064581		1061.39	-0.01850293		1591.38	-0.00819346		2121.38	-0.00994433		2651.37	-0.00428326		3181.37	-0.00246148		3711.4	-0.0263027
531.59	0.03040818		1061.59	-0.01834285		1591.58	-0.00833191		2121.58	-0.00928321		2651.57	-0.00349971		3181.57	-0.00278953		3711.6	-0.02598629
531.79	0.03008685		1061.79	-0.01958453		1591.78	-0.00947361		2121.78	-0.00942632		2651.77	-0.00349223		3181.77	-0.00309315		3711.8	-0.0252684
531.99	0.02891029		1061.99	-0.01899924		1591.98	-0.00928174		2121.98	-0.00855653		2651.97	-0.00465185		3181.97	-0.00331915		3712	-0.02517395
532.19	0.02909009		1062.19	-0.01982408		1592.18	-0.00848983		2122.18	-0.00827244		2652.17	-0.00483267		3182.17	-0.00357137		3712.2	-0.02500328
532.39	0.02917233		1062.39	-0.01964178		1592.38	-0.00879591		2122.38	-0.0082256		2652.37	-0.00548823		3182.37	-0.00399814		3712.4	-0.02540702
532.59	0.02883143		1062.59	-0.01913334		1592.58	-0.00752591		2122.58	-0.00776298		2652.57	-0.00584836		3182.57	-0.00406759		3712.6	-0.0253656
532.79	0.02729522		1062.79	-0.01729961		1592.78	-0.00788389		2122.78	-0.00776064		2652.77	-0.00665657		3182.77	-0.00385068		3712.8	-0.0252202
532.99	0.02764185		1062.99	-0.01760632		1592.98	-0.00758573		2122.98	-0.007796		2652.97	-0.00693559		3182.97	-0.00329305		3713	-0.02489983
533.19	0.02769445		1063.19	-0.01639606		1593.18	-0.00835314		2123.18	-0.00764949		2653.17	-0.00683656		3183.17	-0.00383357		3713.2	-0.02502766
533.39	0.0277577		1063.39	-0.01691894		1593.38	-0.00843314		2123.38	-0.00855745		2653.37	-0.00682308		3183.37	-0.00425711		3713.4	-0.02496707
533.59	0.02759434		1063.59	-0.01713537		1593.58	-0.00878815		2123.58	-0.00932663		2653.57	-0.00645603		3183.57	-0.00420301		3713.6	-0.02472696
533.79	0.02728374		1063.79	-0.01757048		1593.78	-0.00914814		2123.78	-0.01004589		2653.77	-0.00618595		3183.77	-0.004136		3713.8	-0.0247261
533.99	0.02733477		1063.99	-0.01834793		1593.98	-0.01023987		2123.98	-0.01077163		2653.97	-0.00689237		3183.97	-0.00423411		3714	-0.02536489
534.19	0.02724783		1064.19	-0.01811002		1594.18	-0.0106155		2124.18	-0.01106568		2654.17	-0.00634621		3184.17	-0.00428114		3714.2	-0.02489668
534.39	0.02802482		1064.39	-0.01857692		1594.38	-0.01171		2124.38	-0.01147847		2654.37	-0.00564729		3184.37	-0.00368855		3714.4	-0.02413388
534.59	0.02701697		1064.59	-0.01926783		1594.58	-0.01154421		2124.58	-0.01193823		2654.57	-0.00580909		3184.57	-0.0040225		3714.6	-0.02419657
534.79	0.02710282		1064.79	-0.01973918		1594.78	-0.0116023		2124.78	-0.01229134		2654.77	-0.00589365		3184.77	-0.00396701		3714.8	-0.0235297
534.99	0.0266869		1064.99	-0.02008435		1594.98	-0.01155786		2124.98	-0.01284355		2654.97	-0.0056914		3184.97	-0.00435031		3715	-0.02329595
535.19	0.02683538		1065.19	-0.01956697		1595.18	-0.01195449		2125.18	-0.0124057		2655.17	-0.00622312		3185.17	-0.00427488		3715.2	-0.02221812
535.39	0.02719972		1065.39	-0.01988461		1595.38	-0.01179993		2125.38	-0.01251101		2655.37	-0.00536323		3185.37	-0.00360735		3715.4	-0.0219093
535.59	0.02681233		1065.59	-0.0201946		1595.58	-0.0125174		2125.58	-0.0126588		2655.57	-0.00517928		3185.57	-0.00374911		3715.6	-0.02180974
535.79	0.02680386		1065.79	-0.02129925		1595.78	-0.01271318		2125.78	-0.01198723		2655.77	-0.00603211		3185.77	-0.00357265		3715.8	-0.02141649
535.99	0.02628119		1065.99	-0.02059659		1595.98	-0.01219622		2125.98	-0.01056448		2655.97	-0.00576828		3185.97	-0.00336931		3716	-0.02163696
536.19	0.02681111		1066.19	-0.02071181		1596.18	-0.01178561		2126.18	-0.00945108		2656.17	-0.00607353		3186.17	-0.0039417		3716.2	-0.02224486
536.39	0.02725351		1066.39	-0.01941682		1596.38	-0.01232205		2126.38	-0.00857054		2656.37	-0.00743303		3186.37	-0.00349673		3716.4	-0.02318035
536.59	0.02765476		1066.59	-0.01879213		1596.58	-0.01305445		2126.58	-0.00781658		2656.57	-0.0070714		3186.57	-0.0026163		3716.6	-0.02404407
536.79	0.0276185		1066.79	-0.01825296		1596.78	-0.01363509		2126.78	-0.00798393		2656.77	-0.00730111		3186.77	-0.00271468		3716.8	-0.02457446
536.99	0.02878907		1066.99	-0.01852046		1596.98	-0.01329686		2126.98	-0.00833977		2656.97	-0.00717399		3186.97	-0.0028745		3717	-0.02472026
537.19	0.02802886		1067.19	-0.01764673		1597.18	-0.01239559		2127.18	-0.0091841		2657.17	-0.00700176		3187.17	-0.00312622		3717.2	-0.02537948
537.39	0.02819349		1067.39	-0.01733026		1597.38	-0.01159809		2127.38	-0.00983914		2657.37	-0.00702034		3187.37	-0.00358792		3717.4	-0.02592423
537.59	0.02801555		1067.59	-0.01712246		1597.58	-0.01147032		2127.58	-0.01080584		2657.57	-0.00691369		3187.57	-0.003445		3717.6	-0.02678757
537.79	0.02810979		1067.79	-0.01730069		1597.78	-0.01143535		2127.78	-0.01134054		2657.77	-0.00688661		3187.77	-0.00289066		3717.8	-0.02779384
537.99	0.02724859		1067.99	-0.01755816		1597.98	-0.01173915		2127.98	-0.01208688		2657.97	-0.00664938		3187.97	-0.00257116		3718	-0.02908523
538.19	0.02757904		1068.19	-0.01702044		1598.18	-0.01214156		2128.18	-0.01218668		2658.17	-0.00614828		3188.17	-0.0026334		3718.2	-0.02873606
538.39	0.02687688		1068.39	-0.01754119		1598.38	-0.01217778		2128.38	-0.01362481		2658.37	-0.00670074		3188.37	-0.00216143		3718.4	-0.02863476
538.59	0.02636425		1068.59	-0.01692668		1598.58	-0.01205299		2128.58	-0.01372786		2658.57	-0.00680333		3188.57	-0.00198962		3718.6	-0.0292816
538.79	0.02670162		1068.79	-0.01677381		1598.78	-0.01197461		2128.78	-0.01407657		2658.77	-0.00761634		3188.77	-0.00113083		3718.8	-0.02821611
538.99	0.02662778		1068.99	-0.01749392		1598.98	-0.0125239		2128.98	-0.01386302		2658.97	-0.00658824		3188.97	-0.00168044		3719	-0.02779435
539.19	0.02592402		1069.19	-0.01746885		1599.18	-0.01294379		2129.18	-0.01366909		2659.17	-0.00688213		3189.17	-0.00146197		3719.2	-0.02723847
539.39	0.02539867		1069.39	-0.01842827		1599.38	-0.01289824		2129.38	-0.01311906		2659.37	-0.00659136		3189.37	-0.0004835		3719.4	-0.02731642
539.59	0.02568179		1069.59	-0.01935989		1599.58	-0.0136802		2129.58	-0.01296489		2659.57	-0.00700101		3189.57	-0.0007246		3719.6	-0.02637515
539.79	0.02534438		1069.79	-0.01975318		1599.78	-0.0134888		2129.78	-0.0125584		2659.77	-0.00694788		3189.77	0.00016462		3719.8	-0.02609502
539.99	0.02489154		1069.99	-0.01908174		1599.98	-0.01328743		2129.98	-0.01190293		2659.97	-0.0070696		3189.97	-0.00043956		3720	-0.02644987
540.19	0.0257747		1070.19	-0.01971393		1600.18	-0.01318479		2130.18	-0.01150517		2660.17	-0.0084463		3190.17	-0.00181875		3720.2	-0.02675744
540.39	0.02684201		1070.39	-0.01990342		1600.38	-0.01362168		2130.38	-0.01132932		2660.37	-0.00868373		3190.37	-0.001535		3720.4	-0.02633536
540.59	0.0272137		1070.59	-0.02069826		1600.58	-0.01398259		2130.58	-0.01127737		2660.57	-0.00879781		3190.57	-0.00278852		3720.6	-0.02583877
540.79	0.02739179		1070.79	-0.02119346		1600.78	-0.01402075		2130.78	-0.01124973		2660.77	-0.0097163		3190.77	-0.00384046		3720.8	-0.02555951
540.99	0.02727793		1070.99	-0.02159901		1600.98	-0.0136462		2130.98	-0.01204004		2660.97	-0.00974894		3190.97	-0.00387789		3721	-0.0254537
541.19	0.02694291		1071.19	-0.02119964		1601.18	-0.01328274		2131.18	-0.01201274		2661.17	-0.00949464		3191.17	-0.00365363		3721.2	-0.02482694
541.39	0.02725176		1071.39	-0.02030312		1601.38	-0.01274129		2131.38	-0.01202754		2661.37	-0.00888306		3191.37	-0.00477671		3721.4	-0.02462453
541.59	0.02697476		1071.59	-0.01988091		1601.58	-0.01316968		2131.58	-0.01268773		2661.57	-0.00850529		3191.57	-0.00550531		3721.6	-0.02519806
541.79	0.0270481		1071.79	-0.01934166		1601.78	-0.013312		2131.78	-0.01451507		2661.77	-0.00811198		3191.77	-0.00572019		3721.8	-0.02521948
541.99	0.02650908		1071.99	-0.01875543		1601.98	-0.01314243		2131.98	-0.01468893		2661.97	-0.0076008		3191.97	-0.00617811		3722	-0.02618459
542.19	0.02700837		1072.19	-0.01768975		1602.18	-0.01253084		2132.18	-0.01494576		2662.17	-0.0071085		3192.17	-0.00725404		3722.2	-0.02600986
542.39	0.02696103		1072.39	-0.01650915		1602.38	-0.0119634		2132.38	-0.01551798		2662.37	-0.00774849		3192.37	-0.00781182		3722.4	-0.02604777
542.59	0.02782735		1072.59	-0.01556086		1602.58	-0.0123553		2132.58	-0.01543682		2662.57	-0.0072604		3192.57	-0.00778315		3722.6	-0.02593214
542.79	0.02793827		1072.79	-0.01583215		1602.78	-0.01226846		2132.78	-0.01578272		2662.77	-0.00735473		3192.77	-0.00785708		3722.8	-0.02515024
542.99	0.02766727		1072.99	-0.01684078		1602.98	-0.01300824		2132.98	-0.01578113		2662.97	-0.00698805		3192.97	-0.00929884		3723	-0.02607011
543.19	0.02695701		1073.19	-0.01664665		1603.18	-0.0130178		2133.18	-0.01551369		2663.17	-0.00740957		3193.17	-0.00914331		3723.2	-0.02584578
543.39	0.02629783		1073.39	-0.01723109		1603.38	-0.01292058		2133.38	-0.01470859		2663.37	-0.00753474		3193.37	-0.00841749		3723.4	-0.02586548
543.59	0.026184		1073.59	-0.01839939		1603.58	-0.01354939		2133.58	-0.01420749		2663.57	-0.00814526		3193.57	-0.00810277		3723.6	-0.02639483
543.79	0.02546215		1073.79	-0.01882151		1603.78	-0.01275233		2133.78	-0.01304059		2663.77	-0.00756341		3193.77	-0.00704474		3723.8	-0.02786585
543.99	0.02488793		1073.99	-0.01923045		1603.98	-0.01255291		2133.98	-0.01146939		2663.97	-0.0081169		3193.97	-0.00762342		3724	-0.02786308
544.19	0.02523237		1074.19	-0.02144524		1604.18	-0.01284067		2134.18	-0.01066586		2664.17	-0.00750013		3194.17	-0.00766337		3724.2	-0.02830705
544.39	0.02509764		1074.39	-0.02175891		1604.38	-0.0134958		2134.38	-0.00957386		2664.37	-0.00793356		3194.37	-0.00632549		3724.4	-0.02740941
544.59	0.0244277		1074.59	-0.02349947		1604.58	-0.01377723		2134.58	-0.00896691		2664.57	-0.00829926		3194.57	-0.00635544		3724.6	-0.02715599
544.79	0.0243371		1074.79	-0.02421588		1604.78	-0.01342871		2134.78	-0.00929596		2664.77	-0.00780222		3194.77	-0.00497895		3724.8	-0.02693743
544.99	0.02478208		1074.99	-0.0250391		1604.98	-0.01333314		2134.98	-0.00940647		2664.97	-0.00724334		3194.97	-0.00327924		3725	-0.02676005
545.19	0.02532824		1075.19	-0.02489376		1605.18	-0.01277475		2135.18	-0.00961654		2665.17	-0.00642066		3195.17	-0.00249772		3725.2	-0.02574004
545.39	0.02547765		1075.39	-0.02499017		1605.38	-0.01271367		2135.38	-0.01002436		2665.37	-0.00623433		3195.37	-0.00283957		3725.4	-0.02585943
545.59	0.02555744		1075.59	-0.02363939		1605.58	-0.01315483		2135.58	-0.01096902		2665.57	-0.00636747		3195.57	-0.00351856		3725.6	-0.02569323
545.79	0.02622043		1075.79	-0.02299334		1605.78	-0.0129874		2135.78	-0.01205835		2665.77	-0.00559472		3195.77	-0.00346699		3725.8	-0.02479953
545.99	0.02703845		1075.99	-0.02214064		1605.98	-0.01290512		2135.98	-0.01151928		2665.97	-0.00606944		3195.97	-0.00360812		3726	-0.02521702
546.19	0.02882726		1076.19	-0.02195261		1606.18	-0.0131208		2136.18	-0.01243774		2666.17	-0.0060301		3196.17	-0.0039771		3726.2	-0.0240322
546.39	0.0300102		1076.39	-0.02164265		1606.38	-0.01332617		2136.38	-0.01339316		2666.37	-0.00671214		3196.37	-0.00372301		3726.4	-0.02318731
546.59	0.02996545		1076.59	-0.02143591		1606.58	-0.01379064		2136.58	-0.01373745		2666.57	-0.00686459		3196.57	-0.00348834		3726.6	-0.02329196
546.79	0.02968771		1076.79	-0.02058027		1606.78	-0.01279464		2136.78	-0.0137653		2666.77	-0.00696324		3196.77	-0.0036289		3726.8	-0.02358593
546.99	0.02877514		1076.99	-0.02065032		1606.98	-0.01223049		2136.98	-0.01371097		2666.97	-0.00764824		3196.97	-0.00501803		3727	-0.02350943
547.19	0.02825435		1077.19	-0.02010998		1607.18	-0.01289771		2137.18	-0.01336217		2667.17	-0.00827304		3197.17	-0.00568185		3727.2	-0.02347524
547.39	0.02745002		1077.39	-0.01986357		1607.38	-0.01376125		2137.38	-0.01249077		2667.37	-0.00808513		3197.37	-0.00554472		3727.4	-0.02411837
547.59	0.02725713		1077.59	-0.01893213		1607.58	-0.01487735		2137.58	-0.01174292		2667.57	-0.0082447		3197.57	-0.00599108		3727.6	-0.02501978
547.79	0.02603379		1077.79	-0.01795122		1607.78	-0.01438707		2137.78	-0.00980451		2667.77	-0.00785388		3197.77	-0.00729137		3727.8	-0.02601129
547.99	0.02464844		1077.99	-0.01708648		1607.98	-0.01395322		2137.98	-0.00964642		2667.97	-0.00780179		3197.97	-0.00862333		3728	-0.02633074
548.19	0.02415467		1078.19	-0.01677246		1608.18	-0.01349134		2138.18	-0.00927917		2668.17	-0.00763523		3198.17	-0.00834461		3728.2	-0.02647908
548.39	0.02324867		1078.39	-0.01623241		1608.38	-0.01341671		2138.38	-0.0091319		2668.37	-0.00856478		3198.37	-0.00810928		3728.4	-0.02600278
548.59	0.02312307		1078.59	-0.0168233		1608.58	-0.01326663		2138.58	-0.00985083		2668.57	-0.00818199		3198.57	-0.008635		3728.6	-0.02612984
548.79	0.0233858		1078.79	-0.01665015		1608.78	-0.0128692		2138.78	-0.01037215		2668.77	-0.00791018		3198.77	-0.00768414		3728.8	-0.02737877
548.99	0.02428067		1078.99	-0.01713141		1608.98	-0.01319602		2138.98	-0.0098824		2668.97	-0.00846487		3198.97	-0.00705988		3729	-0.02777378
549.19	0.02412221		1079.19	-0.01763708		1609.18	-0.01250064		2139.18	-0.01006838		2669.17	-0.00838794		3199.17	-0.00700589		3729.2	-0.02778398
549.39	0.02413104		1079.39	-0.01800483		1609.38	-0.01307105		2139.38	-0.00984811		2669.37	-0.00890026		3199.37	-0.00718938		3729.4	-0.0285346
549.59	0.02379229		1079.59	-0.01800473		1609.58	-0.01291519		2139.58	-0.01054549		2669.57	-0.00919629		3199.57	-0.0068531		3729.6	-0.02816093
549.79	0.02448007		1079.79	-0.0197419		1609.78	-0.0130897		2139.78	-0.01087022		2669.77	-0.00907383		3199.77	-0.00665163		3729.8	-0.02831987
549.99	0.02529701		1079.99	-0.02137265		1609.98	-0.01327363		2139.98	-0.01059158		2669.97	-0.0088689		3199.97	-0.00543585		3730	-0.02863631
550.19	0.02561259		1080.19	-0.02278339		1610.18	-0.0131907		2140.18	-0.01116235		2670.17	-0.00890523		3200.17	-0.00461909		3730.2	-0.02802847
550.39	0.02498633		1080.39	-0.02354236		1610.38	-0.01247959		2140.38	-0.01111675		2670.37	-0.00853517		3200.37	-0.00454398		3730.4	-0.02804889
550.59	0.02413793		1080.59	-0.02400723		1610.58	-0.01296032		2140.58	-0.01061888		2670.57	-0.00886227		3200.57	-0.00515504		3730.6	-0.02826907
550.79	0.0243087		1080.79	-0.02376355		1610.78	-0.01216906		2140.78	-0.01127		2670.77	-0.00914515		3200.77	-0.00500472		3730.8	-0.02780075
550.99	0.02498526		1080.99	-0.02467694		1610.98	-0.01221108		2140.98	-0.01095579		2670.97	-0.00948512		3200.97	-0.00580449		3731	-0.0271984
551.19	0.02513364		1081.19	-0.02402939		1611.18	-0.01316741		2141.18	-0.01087226		2671.17	-0.00964453		3201.17	-0.0059703		3731.2	-0.02724472
551.39	0.02510035		1081.39	-0.02343802		1611.38	-0.01257434		2141.38	-0.00956076		2671.37	-0.00840922		3201.37	-0.00520745		3731.4	-0.02692068
551.59	0.02488763		1081.59	-0.02239917		1611.58	-0.01238532		2141.58	-0.00906804		2671.57	-0.00767843		3201.57	-0.00509464		3731.6	-0.02674814
551.79	0.02430567		1081.79	-0.02161016		1611.78	-0.01190825		2141.78	-0.00817749		2671.77	-0.0073753		3201.77	-0.00519705		3731.8	-0.02779961
551.99	0.02446084		1081.99	-0.02061569		1611.98	-0.01189652		2141.98	-0.00889229		2671.97	-0.00677381		3201.97	-0.00451519		3732	-0.02751708
552.19	0.02472086		1082.19	-0.02026097		1612.18	-0.01221793		2142.18	-0.00840939		2672.17	-0.00688364		3202.17	-0.00393764		3732.2	-0.0268174
552.39	0.02464971		1082.39	-0.02049277		1612.38	-0.01356386		2142.38	-0.0087601		2672.37	-0.00639511		3202.37	-0.00368088		3732.4	-0.0272942
552.59	0.02549663		1082.59	-0.0197424		1612.58	-0.01418452		2142.58	-0.00872736		2672.57	-0.00649275		3202.57	-0.00363309		3732.6	-0.02751493
552.79	0.02553052		1082.79	-0.01953968		1612.78	-0.01425507		2142.78	-0.00868267		2672.77	-0.00662903		3202.77	-0.00266945		3732.8	-0.02819203
552.99	0.02591864		1082.99	-0.01923255		1612.98	-0.01412674		2142.98	-0.00898249		2672.97	-0.00737422		3202.97	-0.00247633		3733	-0.02824726
553.19	0.02517898		1083.19	-0.01920995		1613.18	-0.01428989		2143.18	-0.01010844		2673.17	-0.00770667		3203.17	-0.00279653		3733.2	-0.02839354
553.39	0.02513408		1083.39	-0.01922924		1613.38	-0.01433477		2143.38	-0.01140755		2673.37	-0.00865194		3203.37	-0.00280355		3733.4	-0.02857896
553.59	0.02399859		1083.59	-0.02004885		1613.58	-0.01419132		2143.58	-0.01239725		2673.57	-0.00922438		3203.57	-0.0024426		3733.6	-0.02885893
553.79	0.02414519		1083.79	-0.02045237		1613.78	-0.01491377		2143.78	-0.01251892		2673.77	-0.00963764		3203.77	-0.00359278		3733.8	-0.02892583
553.99	0.02379442		1083.99	-0.02028931		1613.98	-0.01508517		2143.98	-0.01201562		2673.97	-0.00964181		3203.97	-0.00339881		3734	-0.02925255
554.19	0.02319127		1084.19	-0.020291		1614.18	-0.01554562		2144.18	-0.01268988		2674.17	-0.01076871		3204.17	-0.0037721		3734.2	-0.02937925
554.39	0.02295624		1084.39	-0.02090179		1614.38	-0.01546314		2144.38	-0.01278623		2674.37	-0.01147742		3204.37	-0.00482445		3734.4	-0.029138
554.59	0.02259191		1084.59	-0.02070206		1614.58	-0.01544155		2144.58	-0.01325949		2674.57	-0.01209766		3204.57	-0.00588978		3734.6	-0.02884668
554.79	0.02315014		1084.79	-0.02073382		1614.78	-0.0146763		2144.78	-0.012903		2674.77	-0.01295268		3204.77	-0.00540709		3734.8	-0.02868128
554.99	0.02236286		1084.99	-0.02142451		1614.98	-0.01548328		2144.98	-0.01134117		2674.97	-0.01229114		3204.97	-0.00582159		3735	-0.02856946
555.19	0.0218444		1085.19	-0.0211885		1615.18	-0.01579981		2145.18	-0.01123452		2675.17	-0.01170248		3205.17	-0.00549226		3735.2	-0.02842975
555.39	0.0211785		1085.39	-0.02131743		1615.38	-0.01556468		2145.38	-0.01001495		2675.37	-0.01078493		3205.37	-0.00478814		3735.4	-0.02780852
555.59	0.0211442		1085.59	-0.02129022		1615.58	-0.01616291		2145.58	-0.00913255		2675.57	-0.01016085		3205.57	-0.00460296		3735.6	-0.02807927
555.79	0.02104754		1085.79	-0.02119601		1615.78	-0.01614179		2145.78	-0.00861783		2675.77	-0.00924967		3205.77	-0.00457564		3735.8	-0.02802153
555.99	0.0207064		1085.99	-0.02143709		1615.98	-0.01636347		2145.98	-0.00867723		2675.97	-0.00936027		3205.97	-0.00404296		3736	-0.02660113
556.19	0.0203898		1086.19	-0.02208182		1616.18	-0.01586961		2146.18	-0.00820272		2676.17	-0.00876354		3206.17	-0.00441719		3736.2	-0.02611067
556.39	0.02100818		1086.39	-0.02225686		1616.38	-0.01589247		2146.38	-0.00839976		2676.37	-0.00816624		3206.37	-0.00456983		3736.4	-0.02605088
556.59	0.02176106		1086.59	-0.0223352		1616.58	-0.01502002		2146.58	-0.00830923		2676.57	-0.00747218		3206.57	-0.00502503		3736.6	-0.02596766
556.79	0.0212631		1086.79	-0.02266425		1616.78	-0.01396187		2146.78	-0.00843517		2676.77	-0.00735582		3206.77	-0.00543227		3736.8	-0.02560901
556.99	0.0211013		1086.99	-0.02295684		1616.98	-0.01298071		2146.98	-0.00976671		2676.97	-0.0083102		3206.97	-0.00591235		3737	-0.02573399
557.19	0.02087108		1087.19	-0.02291528		1617.18	-0.01227234		2147.18	-0.01084586		2677.17	-0.00900745		3207.17	-0.00629551		3737.2	-0.02574468
557.39	0.02230957		1087.39	-0.02323415		1617.38	-0.01219098		2147.38	-0.01167443		2677.37	-0.00947139		3207.37	-0.00639792		3737.4	-0.02612479
557.59	0.02184463		1087.59	-0.02350026		1617.58	-0.01230081		2147.58	-0.01205346		2677.57	-0.00964237		3207.57	-0.00677535		3737.6	-0.02701233
557.79	0.02321		1087.79	-0.02334171		1617.78	-0.01301832		2147.78	-0.01221205		2677.77	-0.01047228		3207.77	-0.00768582		3737.8	-0.02675604
557.99	0.02393137		1087.99	-0.02323473		1617.98	-0.01290499		2147.98	-0.01254835		2677.97	-0.01056361		3207.97	-0.00770734		3738	-0.02713995
558.19	0.02479301		1088.19	-0.02344198		1618.18	-0.01305259		2148.18	-0.01306146		2678.17	-0.01100286		3208.17	-0.00773164		3738.2	-0.02726576
558.39	0.02525767		1088.39	-0.02359824		1618.38	-0.01272297		2148.38	-0.0132587		2678.37	-0.01120995		3208.37	-0.00825033		3738.4	-0.02764589
558.59	0.02515353		1088.59	-0.02303611		1618.58	-0.01268565		2148.58	-0.01357598		2678.57	-0.01061584		3208.57	-0.00807097		3738.6	-0.02823102
558.79	0.02518727		1088.79	-0.02338274		1618.78	-0.01327896		2148.78	-0.01305002		2678.77	-0.01053503		3208.77	-0.00737912		3738.8	-0.02906948
558.99	0.02449205		1088.99	-0.02287695		1618.98	-0.01387531		2148.98	-0.01316703		2678.97	-0.00941218		3208.97	-0.00713643		3739	-0.02974812
559.19	0.02478763		1089.19	-0.02211034		1619.18	-0.01321707		2149.18	-0.01382509		2679.17	-0.00891854		3209.17	-0.0063907		3739.2	-0.03033988
559.39	0.0240222		1089.39	-0.02163355		1619.38	-0.01271264		2149.38	-0.01367293		2679.37	-0.00824398		3209.37	-0.00576779		3739.4	-0.03068833
559.59	0.02411629		1089.59	-0.02139618		1619.58	-0.01199072		2149.58	-0.01381309		2679.57	-0.00708311		3209.57	-0.00534886		3739.6	-0.03123182
559.79	0.02351876		1089.79	-0.02077185		1619.78	-0.01128358		2149.78	-0.01467827		2679.77	-0.00583442		3209.77	-0.00459067		3739.8	-0.03104061
