# Supplementary material for: Functional development of a V3/glycan-specific broadly neutralizing antibody isolated from a case of HIV superinfection
Source: eLife journal article supplement (doi:10.7554/elife.68110), 2021-07-15
Supplement: fig2-data2 [file G9.xls]

Vers 3.43 Data Simulation
Conc1	7.813E-09	7.813E-09	7.813E-09	7.813E-09	3.125E-08	3.125E-08	3.125E-08	3.125E-08
Start1	199.99	729.99	1259.98	1789.99	2319.98	2850.01	3380	3910
Stop1	559.79	1089.79	1619.78	2149.79	2679.78	3209.81	3739.8	4269.8
Time1	Data1	Sim1	Time2	Data2	Sim2	Time3	Data3	Sim3	Time4	Data4	Sim4	Time5	Data5	Sim5	Time6	Data6	Sim6	Time7	Data7	Sim7	Time8	Data8	Sim8
199.99	-0.00033484		729.99	0.00072712		1259.98	-0.00068007		1789.99	0.00039566		2319.98	-0.00190783		2850.01	-0.00804786		3380	0.00589963		3910	-0.00542516
200.19	-0.00109442		730.19	0.00027898		1260.18	-0.00090625		1790.19	-0.00019055		2320.18	-0.00229683		2850.21	-0.00827567		3380.2	0.00532218		3910.2	-0.00479458
200.39	-0.00113082		730.39	0.00023908		1260.38	-0.00123822		1790.39	-0.00083114		2320.38	-0.00234435		2850.41	-0.00853651		3380.4	0.0045833		3910.4	-0.00508976
200.59	-0.0020693		730.59	0.00053946		1260.58	-0.00027796		1790.59	-0.00196756		2320.58	-0.00264665		2850.61	-0.00897918		3380.6	0.00298805		3910.6	-0.00496715
200.79	-0.00236556		730.79	0.00090938		1260.78	-0.00085424		1790.79	-0.00231435		2320.78	-0.00319124		2850.81	-0.00865188		3380.8	0.00260183		3910.8	-0.00526914
200.99	-0.00230649		730.99	0.00039749		1260.98	-0.00132582		1790.99	-0.002753		2320.98	-0.0037554		2851.01	-0.00815753		3381	0.00249822		3911	-0.00560152
201.19	-0.00320212		731.19	0.00003804		1261.18	-0.00216362		1791.19	-0.00250444		2321.18	-0.00411878		2851.21	-0.00833584		3381.2	0.00225838		3911.2	-0.00589404
201.39	-0.00399955		731.39	-0.00053141		1261.38	-0.00204974		1791.39	-0.0034102		2321.38	-0.00486712		2851.41	-0.00794855		3381.4	0.00220469		3911.4	-0.00580703
201.59	-0.00465535		731.59	-0.00143011		1261.58	-0.00275077		1791.59	-0.00354089		2321.58	-0.00516084		2851.61	-0.00725368		3381.6	0.00171752		3911.6	-0.00626856
201.79	-0.00464219		731.79	-0.00154261		1261.78	-0.00332457		1791.79	-0.00306581		2321.78	-0.00570767		2851.81	-0.00701064		3381.8	0.0015524		3911.8	-0.0060093
201.99	-0.00429507		731.99	-0.00170025		1261.98	-0.00431644		1791.99	-0.00330213		2321.98	-0.00554321		2852.01	-0.00706986		3382	0.00224885		3912	-0.00579334
202.19	-0.00439407		732.19	-0.00185977		1262.18	-0.00441043		1792.19	-0.00329928		2322.18	-0.00619385		2852.21	-0.00677857		3382.2	0.00278792		3912.2	-0.0055953
202.39	-0.00405025		732.39	-0.00220306		1262.38	-0.00529718		1792.39	-0.00357008		2322.38	-0.00686668		2852.41	-0.00684838		3382.4	0.0029381		3912.4	-0.00576767
202.59	-0.00447218		732.59	-0.00157717		1262.58	-0.00568645		1792.59	-0.00296559		2322.58	-0.00636934		2852.61	-0.00750544		3382.6	0.00327454		3912.6	-0.00594861
202.79	-0.00499024		732.79	-0.00035573		1262.78	-0.00615673		1792.79	-0.00303595		2322.78	-0.00669102		2852.81	-0.00739284		3382.8	0.0026858		3912.8	-0.00659088
202.99	-0.00506936		732.99	-0.0002424		1262.98	-0.00689901		1792.99	-0.0036702		2322.98	-0.00708515		2853.01	-0.00767457		3383	0.00336747		3913	-0.00716486
203.19	-0.00480528		733.19	0.00010054		1263.18	-0.00752857		1793.19	-0.0035826		2323.18	-0.00709331		2853.21	-0.00734		3383.2	0.0031162		3913.2	-0.00641777
203.39	-0.00416991		733.39	-0.00013778		1263.38	-0.00733456		1793.39	-0.00339148		2323.38	-0.00710974		2853.41	-0.00805479		3383.4	0.00280892		3913.4	-0.00737601
203.59	-0.00422269		733.59	0.00012174		1263.58	-0.00765122		1793.59	-0.0029543		2323.58	-0.00751714		2853.61	-0.00857224		3383.6	0.00245087		3913.6	-0.00713854
203.79	-0.00391888		733.79	0.00084148		1263.78	-0.0065534		1793.79	-0.00289751		2323.78	-0.00853208		2853.81	-0.00885162		3383.8	0.00298029		3913.8	-0.00672723
203.99	-0.00349307		733.99	0.00043475		1263.98	-0.00615704		1793.99	-0.00352558		2323.98	-0.00870238		2854.01	-0.00829665		3384	0.00264513		3914	-0.00573891
204.19	-0.00254781		734.19	-0.00010518		1264.18	-0.00521449		1794.19	-0.00363521		2324.18	-0.00888548		2854.21	-0.00926905		3384.2	0.00339087		3914.2	-0.00535596
204.39	-0.00172932		734.39	-0.00033523		1264.38	-0.00393931		1794.39	-0.00363626		2324.38	-0.00900429		2854.41	-0.00961696		3384.4	0.00272779		3914.4	-0.0059827
204.59	-0.00210486		734.59	0.00005177		1264.58	-0.0025681		1794.59	-0.00361178		2324.58	-0.00914808		2854.61	-0.01016944		3384.6	0.00211512		3914.6	-0.00611254
204.79	-0.00151675		734.79	0.00008069		1264.78	-0.00258002		1794.79	-0.00286095		2324.78	-0.01002969		2854.81	-0.01029708		3384.8	0.00289492		3914.8	-0.00664113
204.99	-0.0015384		734.99	-0.00116357		1264.98	-0.00152636		1794.99	-0.00278933		2324.98	-0.010696		2855.01	-0.01037419		3385	0.00281444		3915	-0.00749731
205.19	-0.00168302		735.19	-0.001923		1265.18	-0.00124117		1795.19	-0.00279232		2325.18	-0.01064911		2855.21	-0.01081249		3385.2	0.00243116		3915.2	-0.00784796
205.39	-0.00140732		735.39	-0.00240941		1265.38	-0.00017245		1795.39	-0.00291449		2325.38	-0.01052472		2855.41	-0.01039527		3385.4	0.00317859		3915.4	-0.00802335
205.59	-0.00141708		735.59	-0.00353278		1265.58	-0.0007332		1795.59	-0.00279416		2325.58	-0.00964939		2855.61	-0.0103877		3385.6	0.00248822		3915.6	-0.00827502
205.79	-0.0014869		735.79	-0.0031313		1265.78	-0.00041313		1795.79	-0.00270776		2325.78	-0.0095257		2855.81	-0.01007362		3385.8	0.00244872		3915.8	-0.00799158
205.99	-0.0016288		735.99	-0.0025728		1265.98	-0.00041137		1795.99	-0.00297799		2325.98	-0.00859497		2856.01	-0.01004991		3386	0.00279552		3916	-0.00852991
206.19	-0.00191324		736.19	-0.0018274		1266.18	-0.00046532		1796.19	-0.00322904		2326.18	-0.00903563		2856.21	-0.00875697		3386.2	0.00268426		3916.2	-0.009571
206.39	-0.00171914		736.39	-0.00142059		1266.38	-0.00164263		1796.39	-0.00272946		2326.38	-0.00862112		2856.41	-0.008532		3386.4	0.00239227		3916.4	-0.0113825
206.59	-0.00214675		736.59	-0.00116751		1266.58	-0.00257693		1796.59	-0.00258318		2326.58	-0.00756335		2856.61	-0.00831815		3386.6	0.00190629		3916.6	-0.01178928
206.79	-0.00188904		736.79	-0.00014244		1266.78	-0.00378364		1796.79	-0.00312787		2326.78	-0.0074138		2856.81	-0.00811978		3386.8	0.00103365		3916.8	-0.01213232
206.99	-0.00267426		736.99	-0.00078642		1266.98	-0.00503228		1796.99	-0.00377188		2326.98	-0.00698565		2857.01	-0.00764385		3387	0.00019263		3917	-0.01132528
207.19	-0.00278959		737.19	0.00001919		1267.18	-0.00548734		1797.19	-0.00367141		2327.18	-0.00713257		2857.21	-0.00766607		3387.2	-0.00060318		3917.2	-0.01089488
207.39	-0.0039485		737.39	-0.00006056		1267.38	-0.00562734		1797.39	-0.00326255		2327.38	-0.00765554		2857.41	-0.00828383		3387.4	-0.00097496		3917.4	-0.01158685
207.59	-0.00441717		737.59	-0.00005283		1267.58	-0.00580017		1797.59	-0.00314309		2327.58	-0.00851279		2857.61	-0.00743881		3387.6	-0.00147876		3917.6	-0.01093112
207.79	-0.00414901		737.79	-0.00022985		1267.78	-0.00597593		1797.79	-0.00333899		2327.78	-0.00912778		2857.81	-0.00687743		3387.8	-0.00059783		3917.8	-0.01086284
207.99	-0.00393191		737.99	-0.00012931		1267.98	-0.00526095		1797.99	-0.00407561		2327.98	-0.00865906		2858.01	-0.00752338		3388	-0.00083505		3918	-0.01008226
208.19	-0.0036051		738.19	0.00012237		1268.18	-0.0046301		1798.19	-0.0042575		2328.18	-0.00869296		2858.21	-0.00811677		3388.2	-0.00072274		3918.2	-0.00971016
208.39	-0.0033378		738.39	0.00037623		1268.38	-0.00392881		1798.39	-0.00378342		2328.38	-0.009148		2858.41	-0.00831631		3388.4	-0.00192484		3918.4	-0.00967915
208.59	-0.00288267		738.59	0.00085123		1268.58	-0.00333854		1798.59	-0.0041876		2328.58	-0.00943878		2858.61	-0.00859912		3388.6	-0.0020099		3918.6	-0.00966138
208.79	-0.00247255		738.79	0.00110131		1268.78	-0.00220476		1798.79	-0.00407287		2328.78	-0.00969817		2858.81	-0.00896148		3388.8	-0.00122694		3918.8	-0.01000177
208.99	-0.00110724		738.99	-0.00013944		1268.98	-0.00140776		1798.99	-0.00467437		2328.98	-0.00890068		2859.01	-0.00913405		3389	-0.00025805		3919	-0.01051637
209.19	0.00000186		739.19	-0.00050702		1269.18	-0.00122927		1799.19	-0.00482009		2329.18	-0.00876253		2859.21	-0.00831479		3389.2	0.00074092		3919.2	-0.01101904
209.39	0.00020724		739.39	-0.00102177		1269.38	0.00020164		1799.39	-0.0052959		2329.38	-0.00854994		2859.41	-0.00848342		3389.4	0.00182375		3919.4	-0.01094959
209.59	0.00026581		739.59	-0.00192003		1269.58	0.00101402		1799.59	-0.0060654		2329.58	-0.00828063		2859.61	-0.00809574		3389.6	0.0014779		3919.6	-0.01085395
209.79	0.00150538		739.79	-0.00147726		1269.78	0.00209169		1799.79	-0.0065323		2329.78	-0.00769578		2859.81	-0.00743666		3389.8	0.00214624		3919.8	-0.01108334
209.99	0.00251395		739.99	-0.00163814		1269.98	0.00305058		1799.99	-0.00617495		2329.98	-0.00699822		2860.01	-0.00683404		3390	0.00259858		3920	-0.01154989
210.19	0.00297087		740.19	-0.0019202		1270.18	0.00229265		1800.19	-0.00657116		2330.18	-0.00714462		2860.21	-0.0057268		3390.2	0.00357519		3920.2	-0.012115
210.39	0.00268046		740.39	-0.00226038		1270.38	0.00215462		1800.39	-0.00619756		2330.38	-0.00655643		2860.41	-0.00689905		3390.4	0.00297986		3920.4	-0.01194245
210.59	0.00218596		740.59	-0.0030207		1270.58	0.00202161		1800.59	-0.0066257		2330.58	-0.00590399		2860.61	-0.00703291		3390.6	0.00376444		3920.6	-0.01183676
210.79	0.0022759		740.79	-0.00241783		1270.78	0.00113228		1800.79	-0.00638161		2330.78	-0.00474415		2860.81	-0.00782011		3390.8	0.00348603		3920.8	-0.01176227
210.99	0.00015122		740.99	-0.00252586		1270.98	0.00003041		1800.99	-0.00690757		2330.98	-0.00520312		2861.01	-0.00862029		3391	0.00378365		3921	-0.01103913
211.19	-0.00014642		741.19	-0.00215135		1271.18	0.00042187		1801.19	-0.00667072		2331.18	-0.00526422		2861.21	-0.00940117		3391.2	0.00500066		3921.2	-0.01115603
211.39	-0.0014756		741.39	-0.00214209		1271.38	-0.00010278		1801.39	-0.00621959		2331.38	-0.00523482		2861.41	-0.00890683		3391.4	0.00453393		3921.4	-0.01018333
211.59	-0.0021686		741.59	-0.00234829		1271.58	-0.00086705		1801.59	-0.00616776		2331.58	-0.00599861		2861.61	-0.00785718		3391.6	0.00488564		3921.6	-0.00963384
211.79	-0.00270333		741.79	-0.0014281		1271.78	-0.00081056		1801.79	-0.0060755		2331.78	-0.00564255		2861.81	-0.00743206		3391.8	0.00450154		3921.8	-0.00998444
211.99	-0.00264568		741.99	-0.00080905		1271.98	-0.00071844		1801.99	-0.00632776		2331.98	-0.00518811		2862.01	-0.00827665		3392	0.00411798		3922	-0.00913624
212.19	-0.00224836		742.19	-0.00025031		1272.18	-0.00070987		1802.19	-0.00585817		2332.18	-0.00452858		2862.21	-0.00751331		3392.2	0.00369251		3922.2	-0.00865305
212.39	-0.00153213		742.39	0.00040131		1272.38	-0.00088066		1802.39	-0.00444958		2332.38	-0.00423361		2862.41	-0.00737861		3392.4	0.00310201		3922.4	-0.0089343
212.59	-0.0013215		742.59	0.00054311		1272.58	-0.00144034		1802.59	-0.00418458		2332.58	-0.00418562		2862.61	-0.00697312		3392.6	0.00301819		3922.6	-0.00935229
212.79	-0.00062654		742.79	0.00136107		1272.78	-0.00219675		1802.79	-0.00371717		2332.78	-0.00356439		2862.81	-0.00683859		3392.8	0.00324548		3922.8	-0.00997263
212.99	0.00036542		742.99	0.00105707		1272.98	-0.00171843		1802.99	-0.0039292		2332.98	-0.00421138		2863.01	-0.00635383		3393	0.00353612		3923	-0.01044495
213.19	0.00089204		743.19	0.00172081		1273.18	-0.00149056		1803.19	-0.00402208		2333.18	-0.00492007		2863.21	-0.00525885		3393.2	0.00281245		3923.2	-0.01070431
213.39	0.00128142		743.39	0.0014046		1273.38	-0.00134035		1803.39	-0.00488273		2333.38	-0.00509267		2863.41	-0.00524374		3393.4	0.00218844		3923.4	-0.01081777
213.59	0.00172448		743.59	0.00112358		1273.58	-0.00227124		1803.59	-0.00465		2333.58	-0.00430198		2863.61	-0.00515905		3393.6	0.00166753		3923.6	-0.01146166
213.79	0.00387849		743.79	0.00175066		1273.78	-0.0024483		1803.79	-0.00515472		2333.78	-0.00415362		2863.81	-0.00581476		3393.8	0.00077924		3923.8	-0.01162485
213.99	0.00417919		743.99	0.00120941		1273.98	-0.00293328		1803.99	-0.0043433		2333.98	-0.00492964		2864.01	-0.00561479		3394	0.00013002		3924	-0.01166751
214.19	0.00434824		744.19	0.00142457		1274.18	-0.00407971		1804.19	-0.00492153		2334.18	-0.00494436		2864.21	-0.00574951		3394.2	-0.00048904		3924.2	-0.01175422
214.39	0.00427259		744.39	0.00207421		1274.38	-0.00499278		1804.39	-0.00465359		2334.38	-0.0052377		2864.41	-0.00759239		3394.4	-0.00131424		3924.4	-0.01136019
214.59	0.00432781		744.59	0.00149158		1274.58	-0.00606386		1804.59	-0.00493457		2334.58	-0.00491137		2864.61	-0.00800911		3394.6	-0.00115082		3924.6	-0.01148585
214.79	0.00510505		744.79	0.001613		1274.78	-0.00670992		1804.79	-0.0054443		2334.78	-0.00495883		2864.81	-0.00923071		3394.8	-0.00181083		3924.8	-0.01106764
214.99	0.00539128		744.99	0.00104732		1274.98	-0.00739462		1804.99	-0.00617511		2334.98	-0.00588386		2865.01	-0.00945586		3395	-0.00109644		3925	-0.01065536
215.19	0.00550259		745.19	0.00078372		1275.18	-0.00627166		1805.19	-0.00628648		2335.18	-0.00508994		2865.21	-0.00930943		3395.2	-0.00096024		3925.2	-0.01015651
215.39	0.00502085		745.39	0.000999		1275.38	-0.00636728		1805.39	-0.00653535		2335.38	-0.00437084		2865.41	-0.00890646		3395.4	-0.00121806		3925.4	-0.00914138
215.59	0.00468178		745.59	0.00082598		1275.58	-0.00565858		1805.59	-0.00772161		2335.58	-0.00440576		2865.61	-0.00851939		3395.6	-0.00001392		3925.6	-0.00984197
215.79	0.00427966		745.79	0.00092095		1275.78	-0.00495754		1805.79	-0.00767796		2335.78	-0.00393716		2865.81	-0.00889179		3395.8	0.00034626		3925.8	-0.00987196
215.99	0.00407201		745.99	0.00028252		1275.98	-0.00436905		1805.99	-0.0075311		2335.98	-0.00371513		2866.01	-0.00952006		3396	0.00082065		3926	-0.0096622
216.19	0.00398698		746.19	0.00045873		1276.18	-0.00374103		1806.19	-0.00727009		2336.18	-0.00251915		2866.21	-0.00911497		3396.2	0.00133173		3926.2	-0.00945622
216.39	0.00385919		746.39	0.00004132		1276.38	-0.00351781		1806.39	-0.0063226		2336.38	-0.00294322		2866.41	-0.0093628		3396.4	0.00234411		3926.4	-0.00976221
216.59	0.00277431		746.59	0.00003551		1276.58	-0.00336815		1806.59	-0.00644796		2336.58	-0.00348131		2866.61	-0.00889363		3396.6	0.00275094		3926.6	-0.00997466
216.79	0.00206903		746.79	-0.00017699		1276.78	-0.00280279		1806.79	-0.00643328		2336.78	-0.00449588		2866.81	-0.00815007		3396.8	0.00427957		3926.8	-0.0093325
216.99	0.00176388		746.99	-0.00001152		1276.98	-0.0022839		1806.99	-0.00672548		2336.98	-0.0045434		2867.01	-0.00831615		3397	0.00539214		3927	-0.00879547
217.19	0.00167024		747.19	0.00085757		1277.18	-0.00305433		1807.19	-0.0073427		2337.18	-0.00405238		2867.21	-0.00799296		3397.2	0.00599035		3927.2	-0.00858349
217.39	0.00098018		747.39	0.00131749		1277.38	-0.00274713		1807.39	-0.0074376		2337.38	-0.00452827		2867.41	-0.00801312		3397.4	0.00600833		3927.4	-0.00962981
217.59	0.0004702		747.59	0.00102706		1277.58	-0.00309842		1807.59	-0.0073792		2337.58	-0.00414293		2867.61	-0.00840067		3397.6	0.00533754		3927.6	-0.01000841
217.79	0.00093358		747.79	0.00172168		1277.78	-0.00325046		1807.79	-0.00799222		2337.78	-0.00450242		2867.81	-0.00783208		3397.8	0.00463876		3927.8	-0.00913522
217.99	0.00101768		747.99	0.00155271		1277.98	-0.00383551		1807.99	-0.00745407		2337.98	-0.00475426		2868.01	-0.00733376		3398	0.00394505		3928	-0.00897839
218.19	0.00075237		748.19	0.00220598		1278.18	-0.00393058		1808.19	-0.00759784		2338.18	-0.00449704		2868.21	-0.00702733		3398.2	0.00294049		3928.2	-0.0084472
218.39	0.00085378		748.39	0.00242652		1278.38	-0.00417443		1808.39	-0.00693587		2338.38	-0.00561077		2868.41	-0.00729933		3398.4	0.00282461		3928.4	-0.00859028
218.59	0.00159269		748.59	0.00162591		1278.58	-0.00425487		1808.59	-0.00639259		2338.58	-0.00539945		2868.61	-0.00617061		3398.6	0.00225537		3928.6	-0.00853717
218.79	0.00215079		748.79	0.00157837		1278.78	-0.00443693		1808.79	-0.0062004		2338.78	-0.00582041		2868.81	-0.00619247		3398.8	0.00217261		3928.8	-0.00887064
218.99	0.00204816		748.99	0.00181506		1278.98	-0.00426164		1808.99	-0.00616824		2338.98	-0.00538772		2869.01	-0.00499708		3399	0.00193123		3929	-0.00924756
219.19	0.00114624		749.19	0.00222488		1279.18	-0.00384673		1809.19	-0.00694756		2339.18	-0.00461106		2869.21	-0.00485246		3399.2	0.00140014		3929.2	-0.00908871
219.39	0.00088185		749.39	0.002038		1279.38	-0.00384895		1809.39	-0.00726825		2339.38	-0.00416755		2869.41	-0.00471798		3399.4	0.00107154		3929.4	-0.00850816
219.59	0.00132917		749.59	0.00200338		1279.58	-0.0034566		1809.59	-0.00698235		2339.58	-0.00458992		2869.61	-0.00462524		3399.6	0.00081937		3929.6	-0.00959794
219.79	0.00148202		749.79	0.00170326		1279.78	-0.00345423		1809.79	-0.0063762		2339.78	-0.0045461		2869.81	-0.00392371		3399.8	0.00011996		3929.8	-0.00943197
219.99	0.00267249		749.99	0.00237994		1279.98	-0.00348219		1809.99	-0.00656827		2339.98	-0.00426233		2870.01	-0.00348949		3400	-0.00061193		3930	-0.00977991
220.19	0.00296708		750.19	0.00195542		1280.18	-0.00367575		1810.19	-0.00661417		2340.18	-0.00397254		2870.21	-0.00349152		3400.2	0.0002954		3930.2	-0.01020681
220.39	0.00348532		750.39	0.00248251		1280.38	-0.00368592		1810.39	-0.00642785		2340.38	-0.00529253		2870.41	-0.00390398		3400.4	0.00071616		3930.4	-0.01072146
220.59	0.00344773		750.59	0.00241589		1280.58	-0.00390059		1810.59	-0.00629142		2340.58	-0.00584159		2870.61	-0.00411188		3400.6	0.00052739		3930.6	-0.01087258
220.79	0.00397833		750.79	0.00284123		1280.78	-0.00377686		1810.79	-0.00591404		2340.78	-0.00650505		2870.81	-0.00451323		3400.8	0.00159492		3930.8	-0.01021038
220.99	0.00446285		750.99	0.00379241		1280.98	-0.00269926		1810.99	-0.00599645		2340.98	-0.00607535		2871.01	-0.00646868		3401	0.00168726		3931	-0.01083122
221.19	0.00508745		751.19	0.00407236		1281.18	-0.00172157		1811.19	-0.00539334		2341.18	-0.00685393		2871.21	-0.00678855		3401.2	0.00195176		3931.2	-0.01184396
221.39	0.00482685		751.39	0.00332459		1281.38	-0.00011586		1811.39	-0.0052618		2341.38	-0.00673743		2871.41	-0.00705655		3401.4	0.00147944		3931.4	-0.01199197
221.59	0.00481407		751.59	0.00150854		1281.58	-0.00011728		1811.59	-0.00554569		2341.58	-0.00665913		2871.61	-0.00731599		3401.6	0.00161692		3931.6	-0.0122675
221.79	0.00610457		751.79	0.00115045		1281.78	0.00076577		1811.79	-0.00525365		2341.78	-0.00649736		2871.81	-0.00829271		3401.8	0.00167685		3931.8	-0.01137066
221.99	0.00695289		751.99	0.00027142		1281.98	0.00148553		1811.99	-0.0044469		2341.98	-0.00676754		2872.01	-0.00948887		3402	0.00149023		3932	-0.01188095
222.19	0.00717147		752.19	-0.00048733		1282.18	0.00150048		1812.19	-0.00470899		2342.18	-0.00653927		2872.21	-0.00956318		3402.2	0.00188912		3932.2	-0.01139106
222.39	0.00703376		752.39	-0.00171898		1282.38	0.00206278		1812.39	-0.00399078		2342.38	-0.00646672		2872.41	-0.00980999		3402.4	0.00228862		3932.4	-0.01175524
222.59	0.00741396		752.59	-0.0023932		1282.58	0.00172029		1812.59	-0.00330087		2342.58	-0.00594478		2872.61	-0.00998808		3402.6	0.00229292		3932.6	-0.01082013
222.79	0.00780854		752.79	-0.00262069		1282.78	0.00156752		1812.79	-0.00338616		2342.78	-0.00486526		2872.81	-0.01109854		3402.8	0.00208251		3932.8	-0.01053311
222.99	0.00849789		752.99	-0.00222537		1282.98	0.00151853		1812.99	-0.00381066		2342.98	-0.00388654		2873.01	-0.01036399		3403	0.00168429		3933	-0.01011718
223.19	0.0083085		753.19	-0.00232574		1283.18	0.0009651		1813.19	-0.00439264		2343.18	-0.00302365		2873.21	-0.01111858		3403.2	0.0009772		3933.2	-0.0095205
223.39	0.00864905		753.39	-0.00222249		1283.38	0.000922		1813.39	-0.00441982		2343.38	-0.00254976		2873.41	-0.01085833		3403.4	0.00071493		3933.4	-0.00927167
223.59	0.00950272		753.59	-0.00156649		1283.58	0.00020022		1813.59	-0.00494605		2343.58	-0.00172786		2873.61	-0.01051083		3403.6	0.00117657		3933.6	-0.00935103
223.79	0.00920824		753.79	-0.00097111		1283.78	-0.0003602		1813.79	-0.00575227		2343.78	-0.00130274		2873.81	-0.01028719		3403.8	0.00109243		3933.8	-0.00882842
223.99	0.00999031		753.99	0.00013895		1283.98	-0.0010017		1813.99	-0.00650737		2343.98	-0.00162589		2874.01	-0.00988394		3404	0.00130015		3934	-0.00859985
224.19	0.00973459		754.19	0.00056889		1284.18	-0.00083061		1814.19	-0.00648072		2344.18	-0.0014544		2874.21	-0.00961539		3404.2	0.00155068		3934.2	-0.00910483
224.39	0.00889633		754.39	0.00179842		1284.38	-0.00114988		1814.39	-0.00590388		2344.38	-0.00207146		2874.41	-0.0096233		3404.4	0.00169973		3934.4	-0.00864363
224.59	0.00851107		754.59	0.0018591		1284.58	-0.00143999		1814.59	-0.00602403		2344.58	-0.00247691		2874.61	-0.00923008		3404.6	0.00214592		3934.6	-0.00839792
224.79	0.00781294		754.79	0.00314425		1284.78	-0.00134051		1814.79	-0.00614388		2344.78	-0.00309885		2874.81	-0.00907847		3404.8	0.00294717		3934.8	-0.00771002
224.99	0.00709039		754.99	0.00304569		1284.98	-0.00024626		1814.99	-0.00574292		2344.98	-0.00341886		2875.01	-0.00931412		3405	0.00320738		3935	-0.00745086
225.19	0.00677771		755.19	0.00256635		1285.18	-0.00049761		1815.19	-0.00576791		2345.18	-0.00421948		2875.21	-0.00885983		3405.2	0.00364405		3935.2	-0.00738285
225.39	0.00648026		755.39	0.00186193		1285.38	-0.00032499		1815.39	-0.00652766		2345.38	-0.00482317		2875.41	-0.00763033		3405.4	0.00467289		3935.4	-0.00653023
225.59	0.00653523		755.59	0.0017443		1285.58	0.0000328		1815.59	-0.00639814		2345.58	-0.0054853		2875.61	-0.00756833		3405.6	0.00541059		3935.6	-0.00697635
225.79	0.00694762		755.79	0.00153833		1285.78	0.00060984		1815.79	-0.00587832		2345.78	-0.00579997		2875.81	-0.00758748		3405.8	0.00532063		3935.8	-0.00655347
225.99	0.00646367		755.99	0.00011959		1285.98	0.00023175		1815.99	-0.0066331		2345.98	-0.00551057		2876.01	-0.00676309		3406	0.00553959		3936	-0.00766221
226.19	0.00621986		756.19	-0.00046534		1286.18	-0.00033551		1816.19	-0.00629783		2346.18	-0.0046696		2876.21	-0.00611574		3406.2	0.00553804		3936.2	-0.00742759
226.39	0.00543087		756.39	-0.00104816		1286.38	-0.00005141		1816.39	-0.00549145		2346.38	-0.00414292		2876.41	-0.0060565		3406.4	0.00523831		3936.4	-0.00701068
226.59	0.00632103		756.59	-0.00180897		1286.58	-0.0005568		1816.59	-0.00488776		2346.58	-0.00429509		2876.61	-0.00632096		3406.6	0.00426289		3936.6	-0.00678847
226.79	0.0071461		756.79	-0.00166607		1286.78	-0.00079497		1816.79	-0.00466644		2346.78	-0.00328892		2876.81	-0.00721124		3406.8	0.00342368		3936.8	-0.00802095
226.99	0.0071792		756.99	-0.00036468		1286.98	-0.00091352		1816.99	-0.00540074		2346.98	-0.00343746		2877.01	-0.00772448		3407	0.00286299		3937	-0.00851633
227.19	0.00720857		757.19	-0.00115186		1287.18	-0.00063969		1817.19	-0.00646305		2347.18	-0.0035337		2877.21	-0.00755587		3407.2	0.00157025		3937.2	-0.00904734
227.39	0.00771914		757.39	-0.00066894		1287.38	-0.00100705		1817.39	-0.00697977		2347.38	-0.00393049		2877.41	-0.00751626		3407.4	0.0006475		3937.4	-0.00933487
227.59	0.00816054		757.59	-0.00062443		1287.58	-0.00128454		1817.59	-0.00711147		2347.58	-0.00396877		2877.61	-0.00727583		3407.6	0.00043415		3937.6	-0.00923665
227.79	0.00876948		757.79	-0.00014447		1287.78	-0.00076733		1817.79	-0.00664794		2347.78	-0.00423241		2877.81	-0.00779587		3407.8	-0.00051135		3937.8	-0.01037388
227.99	0.01048992		757.99	0.00047609		1287.98	-0.00023417		1817.99	-0.00748001		2347.98	-0.00429304		2878.01	-0.00662252		3408	-0.00063348		3938	-0.01063784
228.19	0.01085841		758.19	0.00068078		1288.18	0.00018033		1818.19	-0.00726324		2348.18	-0.00382845		2878.21	-0.00610378		3408.2	-0.00032893		3938.2	-0.01100727
228.39	0.01048352		758.39	0.00083049		1288.38	-0.00040268		1818.39	-0.00702052		2348.38	-0.00455109		2878.41	-0.00558796		3408.4	-0.00009655		3938.4	-0.01039258
228.59	0.01147871		758.59	0.00113546		1288.58	-0.00114436		1818.59	-0.00823538		2348.58	-0.00491686		2878.61	-0.00528741		3408.6	0.00059087		3938.6	-0.01060712
228.79	0.01164863		758.79	0.00105065		1288.78	-0.00130779		1818.79	-0.00760224		2348.78	-0.00463972		2878.81	-0.00569265		3408.8	0.00099721		3938.8	-0.01082646
228.99	0.0117931		758.99	0.00054953		1288.98	-0.00081755		1818.99	-0.00710621		2348.98	-0.00455846		2879.01	-0.00566767		3409	0.00160373		3939	-0.01125676
229.19	0.01238591		759.19	-0.0000376		1289.18	-0.00042948		1819.19	-0.00749371		2349.18	-0.00440406		2879.21	-0.00612982		3409.2	0.00325751		3939.2	-0.01136742
229.39	0.01311032		759.39	0.0002705		1289.38	-0.00002869		1819.39	-0.0073893		2349.38	-0.00422503		2879.41	-0.00474423		3409.4	0.0041483		3939.4	-0.01043359
229.59	0.01277501		759.59	-0.00022689		1289.58	0.00043501		1819.59	-0.00669584		2349.58	-0.00372867		2879.61	-0.0052875		3409.6	0.00433103		3939.6	-0.01026507
229.79	0.01272547		759.79	-0.00111419		1289.78	0.00025264		1819.79	-0.00590635		2349.78	-0.0040132		2879.81	-0.00569316		3409.8	0.00439772		3939.8	-0.01003484
229.99	0.01243689		759.99	-0.00196788		1289.98	0.00078038		1819.99	-0.00575795		2349.98	-0.00403924		2880.01	-0.00558511		3410	0.00473071		3940	-0.00974001
230.19	0.01198434		760.19	-0.0017379		1290.18	0.00077403		1820.19	-0.00423312		2350.18	-0.00413484		2880.21	-0.00583685		3410.2	0.00458074		3940.2	-0.00933826
230.39	0.01184487		760.39	-0.00162913		1290.38	0.00134064		1820.39	-0.00423703		2350.38	-0.00483696		2880.41	-0.00615718		3410.4	0.00460005		3940.4	-0.00936648
230.59	0.012192		760.59	-0.00205891		1290.58	0.00191215		1820.59	-0.00359405		2350.58	-0.00465299		2880.61	-0.00677791		3410.6	0.00325564		3940.6	-0.01044307
230.79	0.01232455		760.79	-0.00171452		1290.78	0.0017433		1820.79	-0.00406989		2350.78	-0.00449706		2880.81	-0.00755435		3410.8	0.00312488		3940.8	-0.01069569
230.99	0.01211048		760.99	-0.00117865		1290.98	0.00138759		1820.99	-0.00469223		2350.98	-0.00536092		2881.01	-0.00704606		3411	0.0025208		3941	-0.01062374
231.19	0.0116246		761.19	-0.00120064		1291.18	0.00166372		1821.19	-0.00449734		2351.18	-0.00598392		2881.21	-0.00573068		3411.2	0.00222271		3941.2	-0.01097419
231.39	0.0112518		761.39	-0.00108503		1291.38	0.00156214		1821.39	-0.00461579		2351.38	-0.0059648		2881.41	-0.00599664		3411.4	0.00199996		3941.4	-0.01112863
231.59	0.01155936		761.59	-0.00128042		1291.58	0.00187616		1821.59	-0.00439848		2351.58	-0.00560762		2881.61	-0.00610803		3411.6	0.00209528		3941.6	-0.01135713
231.79	0.011937		761.79	-0.00118027		1291.78	0.00192656		1821.79	-0.00536512		2351.78	-0.00536003		2881.81	-0.00688723		3411.8	0.00208729		3941.8	-0.0124827
231.99	0.01184744		761.99	-0.00150783		1291.98	0.00119696		1821.99	-0.00599807		2351.98	-0.00522961		2882.01	-0.00591548		3412	0.00305961		3942	-0.01246713
232.19	0.01130766		762.19	-0.00128739		1292.18	0.00076537		1822.19	-0.0058764		2352.18	-0.00491357		2882.21	-0.00548495		3412.2	0.00300727		3942.2	-0.01302375
232.39	0.01114369		762.39	-0.00158472		1292.38	-0.00088707		1822.39	-0.00623441		2352.38	-0.0048177		2882.41	-0.00555837		3412.4	0.00335395		3942.4	-0.01342429
232.59	0.01045897		762.59	-0.00183701		1292.58	-0.00195492		1822.59	-0.00701102		2352.58	-0.00379763		2882.61	-0.00638468		3412.6	0.00367049		3942.6	-0.01382364
232.79	0.01047429		762.79	-0.0020972		1292.78	-0.00243721		1822.79	-0.00675795		2352.78	-0.00312397		2882.81	-0.00650431		3412.8	0.00390278		3942.8	-0.01375507
232.99	0.01106943		762.99	-0.001472		1292.98	-0.0025787		1822.99	-0.00698466		2352.98	-0.00270843		2883.01	-0.00587957		3413	0.00445191		3943	-0.01322727
233.19	0.01159993		763.19	-0.00062524		1293.18	-0.00277951		1823.19	-0.00659517		2353.18	-0.00164801		2883.21	-0.00568983		3413.2	0.00526116		3943.2	-0.01267779
233.39	0.01136728		763.39	0.00024247		1293.38	-0.00279444		1823.39	-0.00687165		2353.38	-0.00219423		2883.41	-0.0053412		3413.4	0.00462429		3943.4	-0.01208688
233.59	0.01119474		763.59	0.00038508		1293.58	-0.00362527		1823.59	-0.0067406		2353.58	-0.00219704		2883.61	-0.00615728		3413.6	0.00483994		3943.6	-0.01074561
233.79	0.01098646		763.79	0.00090719		1293.78	-0.00419633		1823.79	-0.00638205		2353.78	-0.00308795		2883.81	-0.00652115		3413.8	0.00531179		3943.8	-0.01082077
233.99	0.01148681		763.99	0.0018698		1293.98	-0.00329299		1823.99	-0.00638936		2353.98	-0.00403714		2884.01	-0.0067343		3414	0.00538841		3944	-0.0107099
234.19	0.01146502		764.19	0.00247336		1294.18	-0.00358089		1824.19	-0.00605099		2354.18	-0.0044126		2884.21	-0.00646737		3414.2	0.0050532		3944.2	-0.01166715
234.39	0.01164713		764.39	0.00268464		1294.38	-0.00327292		1824.39	-0.00663719		2354.38	-0.00466168		2884.41	-0.00672351		3414.4	0.00495666		3944.4	-0.01148832
234.59	0.01154062		764.59	0.00309302		1294.58	-0.00201514		1824.59	-0.00580761		2354.58	-0.00421077		2884.61	-0.00695486		3414.6	0.00383572		3944.6	-0.01139196
234.79	0.01173832		764.79	0.00410291		1294.78	-0.00254161		1824.79	-0.00569481		2354.78	-0.00511831		2884.81	-0.00717504		3414.8	0.0039798		3944.8	-0.00976237
234.99	0.01142826		764.99	0.00434232		1294.98	-0.00136857		1824.99	-0.00511961		2354.98	-0.00497595		2885.01	-0.00651273		3415	0.00310592		3945	-0.00996186
235.19	0.01010147		765.19	0.0042224		1295.18	0.000152		1825.19	-0.0053407		2355.18	-0.00421335		2885.21	-0.00638557		3415.2	0.00281542		3945.2	-0.00959742
235.39	0.01080062		765.39	0.00329631		1295.38	0.00082666		1825.39	-0.00690667		2355.38	-0.00417265		2885.41	-0.00669797		3415.4	0.0021861		3945.4	-0.00929563
235.59	0.011045		765.59	0.00289529		1295.58	0.00154113		1825.59	-0.00689617		2355.58	-0.00407484		2885.61	-0.00621811		3415.6	0.00149582		3945.6	-0.00943396
235.79	0.01051211		765.79	0.00293549		1295.78	0.00151565		1825.79	-0.00781802		2355.78	-0.00442859		2885.81	-0.00663006		3415.8	0.00219205		3945.8	-0.0101019
235.99	0.00996154		765.99	0.00317878		1295.98	0.00162093		1825.99	-0.00739391		2355.98	-0.00456495		2886.01	-0.00565809		3416	0.00284782		3946	-0.01054236
236.19	0.01013538		766.19	0.00365529		1296.18	0.0016686		1826.19	-0.00779918		2356.18	-0.00460714		2886.21	-0.00538689		3416.2	0.00286052		3946.2	-0.0109467
236.39	0.01054647		766.39	0.00249605		1296.38	0.00126787		1826.39	-0.00840171		2356.38	-0.00434631		2886.41	-0.00488542		3416.4	0.00339578		3946.4	-0.01067582
236.59	0.01040735		766.59	0.00275263		1296.58	0.0009246		1826.59	-0.00819634		2356.58	-0.00318902		2886.61	-0.00441868		3416.6	0.00282194		3946.6	-0.01067723
236.79	0.01177936		766.79	0.0035259		1296.78	0.0007461		1826.79	-0.00773795		2356.78	-0.00358802		2886.81	-0.00334871		3416.8	0.00348475		3946.8	-0.01097496
236.99	0.01307078		766.99	0.00373565		1296.98	-0.00014035		1826.99	-0.00709074		2356.98	-0.00231808		2887.01	-0.00301652		3417	0.00436016		3947	-0.01125532
237.19	0.01299585		767.19	0.00440825		1297.18	-0.00010973		1827.19	-0.00664224		2357.18	-0.00197796		2887.21	-0.00341767		3417.2	0.00509066		3947.2	-0.01178083
237.39	0.01346876		767.39	0.00407459		1297.38	-0.00055264		1827.39	-0.0071635		2357.38	-0.00189976		2887.41	-0.00428265		3417.4	0.00562324		3947.4	-0.01136933
237.59	0.01352436		767.59	0.00448405		1297.58	-0.00170972		1827.59	-0.00697403		2357.58	-0.00116358		2887.61	-0.00453925		3417.6	0.00639441		3947.6	-0.01119203
237.79	0.01404998		767.79	0.00435077		1297.78	-0.00231169		1827.79	-0.00643448		2357.78	-0.00216089		2887.81	-0.00519275		3417.8	0.00668321		3947.8	-0.01213451
237.99	0.01486734		767.99	0.00449709		1297.98	-0.00227462		1827.99	-0.00628033		2357.98	-0.00243282		2888.01	-0.00579173		3418	0.00659266		3948	-0.01172642
238.19	0.01502644		768.19	0.00363354		1298.18	-0.00335663		1828.19	-0.00580909		2358.18	-0.00202909		2888.21	-0.00583294		3418.2	0.00634788		3948.2	-0.01084191
238.39	0.01612157		768.39	0.00292105		1298.38	-0.00278746		1828.39	-0.00523074		2358.38	-0.00162757		2888.41	-0.00608795		3418.4	0.00616223		3948.4	-0.0098807
238.59	0.01605227		768.59	0.00322849		1298.58	-0.00196755		1828.59	-0.00470094		2358.58	-0.00154172		2888.61	-0.00656392		3418.6	0.00513567		3948.6	-0.00994961
238.79	0.01608158		768.79	0.00329704		1298.78	-0.00232771		1828.79	-0.00442204		2358.78	-0.00098764		2888.81	-0.00622649		3418.8	0.00447876		3948.8	-0.00922944
238.99	0.01597993		768.99	0.00234995		1298.98	-0.00137568		1828.99	-0.0045987		2358.98	-0.0007458		2889.01	-0.00601755		3419	0.00341108		3949	-0.00932428
239.19	0.01581149		769.19	0.00188982		1299.18	-0.00107266		1829.19	-0.00545101		2359.18	0.00003112		2889.21	-0.0058297		3419.2	0.00223185		3949.2	-0.00917274
239.39	0.01671584		769.39	0.00217902		1299.38	-0.00030753		1829.39	-0.0061728		2359.38	-0.00051778		2889.41	-0.00546852		3419.4	0.00146		3949.4	-0.00958138
239.59	0.01585488		769.59	0.00175107		1299.58	0.00103448		1829.59	-0.00605087		2359.58	-0.00058616		2889.61	-0.00503077		3419.6	0.00147616		3949.6	-0.00950691
239.79	0.01535472		769.79	0.00273372		1299.78	0.00096481		1829.79	-0.00649626		2359.78	-0.00112318		2889.81	-0.00561739		3419.8	0.00259381		3949.8	-0.00945306
239.99	0.01547475		769.99	0.00288949		1299.98	0.0012847		1829.99	-0.00606626		2359.98	-0.00097531		2890.01	-0.00478271		3420	0.00261459		3950	-0.00898957
240.19	0.01625504		770.19	0.00339335		1300.18	0.00105279		1830.19	-0.00616298		2360.18	-0.00076026		2890.21	-0.00481953		3420.2	0.00311484		3950.2	-0.00905541
240.39	0.01715203		770.39	0.00283938		1300.38	0.00072852		1830.39	-0.00648158		2360.38	-0.00035811		2890.41	-0.00384564		3420.4	0.00345924		3950.4	-0.00895173
240.59	0.01744212		770.59	0.00326886		1300.58	-0.0005382		1830.59	-0.00592826		2360.58	-0.00060528		2890.61	-0.0038937		3420.6	0.00339451		3950.6	-0.00975946
240.79	0.01854794		770.79	0.00316904		1300.78	-0.00075407		1830.79	-0.00576061		2360.78	-0.00170646		2890.81	-0.0038595		3420.8	0.00376954		3950.8	-0.01017828
240.99	0.01860119		770.99	0.00257564		1300.98	-0.00035225		1830.99	-0.00483439		2360.98	-0.00104578		2891.01	-0.00478248		3421	0.0041567		3951	-0.01001063
241.19	0.01802487		771.19	0.00317625		1301.18	0.00010884		1831.19	-0.00431477		2361.18	-0.00235863		2891.21	-0.00539248		3421.2	0.00427807		3951.2	-0.01019993
241.39	0.01833652		771.39	0.00309522		1301.38	0.00058941		1831.39	-0.00386349		2361.38	-0.00248577		2891.41	-0.00604181		3421.4	0.00438193		3951.4	-0.01028761
241.59	0.01914152		771.59	0.0032513		1301.58	0.00048595		1831.59	-0.00320036		2361.58	-0.00328484		2891.61	-0.00602705		3421.6	0.00440569		3951.6	-0.01015874
241.79	0.01919989		771.79	0.00246622		1301.78	0.00069944		1831.79	-0.00243867		2361.78	-0.00443727		2891.81	-0.00649858		3421.8	0.00404026		3951.8	-0.01024669
241.99	0.01964114		771.99	0.00206281		1301.98	0.00132728		1831.99	-0.0022267		2361.98	-0.00436643		2892.01	-0.00618286		3422	0.00378116		3952	-0.00985254
242.19	0.01956768		772.19	0.00223937		1302.18	0.00177226		1832.19	-0.00232426		2362.18	-0.00425518		2892.21	-0.00601896		3422.2	0.00312912		3952.2	-0.01003487
242.39	0.01952644		772.39	0.00173996		1302.38	0.00244521		1832.39	-0.00231679		2362.38	-0.00488012		2892.41	-0.00623423		3422.4	0.00272046		3952.4	-0.0107097
242.59	0.01805354		772.59	0.00160785		1302.58	0.00252921		1832.59	-0.00349177		2362.58	-0.00500166		2892.61	-0.00659937		3422.6	0.00211666		3952.6	-0.01192648
242.79	0.01762766		772.79	0.00197892		1302.78	0.00256174		1832.79	-0.00289959		2362.78	-0.00492094		2892.81	-0.00677517		3422.8	0.00210234		3952.8	-0.01200006
242.99	0.0171037		772.99	0.0016849		1302.98	0.00296026		1832.99	-0.00352754		2362.98	-0.00472853		2893.01	-0.00634288		3423	0.00165866		3953	-0.01174116
243.19	0.01718709		773.19	0.00141533		1303.18	0.00337319		1833.19	-0.00410633		2363.18	-0.00446332		2893.21	-0.00538364		3423.2	0.00144079		3953.2	-0.01210973
243.39	0.01676222		773.39	0.00204496		1303.38	0.00331474		1833.39	-0.0048789		2363.38	-0.00448614		2893.41	-0.00446444		3423.4	0.00235556		3953.4	-0.01147126
243.59	0.01644628		773.59	0.00237094		1303.58	0.00256167		1833.59	-0.00574425		2363.58	-0.00370667		2893.61	-0.00471621		3423.6	0.00400416		3953.6	-0.01108053
243.79	0.01719428		773.79	0.0033823		1303.78	0.00152461		1833.79	-0.00585187		2363.78	-0.00248914		2893.81	-0.00461164		3423.8	0.00470105		3953.8	-0.01082327
243.99	0.01744769		773.99	0.00382812		1303.98	0.00116591		1833.99	-0.00616587		2363.98	-0.00147732		2894.01	-0.00462899		3424	0.00563522		3954	-0.0103543
244.19	0.01769015		774.19	0.00466273		1304.18	-0.0000328		1834.19	-0.00637831		2364.18	-0.0003512		2894.21	-0.00422975		3424.2	0.00673513		3954.2	-0.01066977
244.39	0.01836214		774.39	0.00459451		1304.38	-0.00084053		1834.39	-0.00693269		2364.38	0.00092322		2894.41	-0.00327782		3424.4	0.00707243		3954.4	-0.01068236
244.59	0.01871462		774.59	0.00441704		1304.58	-0.00112972		1834.59	-0.00641303		2364.58	0.00053114		2894.61	-0.00307987		3424.6	0.00715695		3954.6	-0.01082358
244.79	0.01877081		774.79	0.0036266		1304.78	-0.00060667		1834.79	-0.00651871		2364.78	0.00119973		2894.81	-0.0026172		3424.8	0.00729451		3954.8	-0.01065697
244.99	0.01963286		774.99	0.00340761		1304.98	-0.00005129		1834.99	-0.00580766		2364.98	0.00163059		2895.01	-0.00272965		3425	0.00648395		3955	-0.0100333
245.19	0.01945886		775.19	0.00318782		1305.18	-0.00028245		1835.19	-0.00588606		2365.18	0.00161513		2895.21	-0.00211633		3425.2	0.00625277		3955.2	-0.01014392
245.39	0.02051742		775.39	0.00364643		1305.38	0.00004174		1835.39	-0.00538022		2365.38	0.00237581		2895.41	-0.00194974		3425.4	0.00647733		3955.4	-0.00990526
245.59	0.02167923		775.59	0.00340845		1305.58	-0.00063583		1835.59	-0.00540029		2365.58	0.00207599		2895.61	-0.00137709		3425.6	0.0053864		3955.6	-0.01025117
245.79	0.02110859		775.79	0.00304633		1305.78	0.00004909		1835.79	-0.00585935		2365.78	0.00179227		2895.81	-0.00168109		3425.8	0.00417579		3955.8	-0.01092874
245.99	0.02113623		775.99	0.00335149		1305.98	0.00064504		1835.99	-0.00579267		2365.98	0.00176934		2896.01	-0.00181484		3426	0.00352343		3956	-0.01057432
246.19	0.02044695		776.19	0.00322263		1306.18	0.00075216		1836.19	-0.00659463		2366.18	0.00181458		2896.21	-0.00237291		3426.2	0.00250716		3956.2	-0.01105475
246.39	0.02016674		776.39	0.00266508		1306.38	0.00033573		1836.39	-0.00660265		2366.38	0.00153938		2896.41	-0.00333802		3426.4	0.00118872		3956.4	-0.01091689
246.59	0.01912304		776.59	0.00244595		1306.58	0.00087575		1836.59	-0.00653957		2366.58	0.00159905		2896.61	-0.00321951		3426.6	0.00095886		3956.6	-0.01213829
246.79	0.01903288		776.79	0.00330904		1306.78	0.00195013		1836.79	-0.00488056		2366.78	0.00056218		2896.81	-0.00373798		3426.8	0.00084431		3956.8	-0.01177782
246.99	0.01880499		776.99	0.00286474		1306.98	0.00277452		1836.99	-0.00558379		2366.98	0.00002764		2897.01	-0.00363088		3427	0.00055741		3957	-0.01109482
247.19	0.01983088		777.19	0.0033087		1307.18	0.00239944		1837.19	-0.00546089		2367.18	-0.00135345		2897.21	-0.00418681		3427.2	0.0007454		3957.2	-0.01141845
247.39	0.02013877		777.39	0.00355868		1307.38	0.00165527		1837.39	-0.00589527		2367.38	-0.00148008		2897.41	-0.00536028		3427.4	0.00169759		3957.4	-0.01132262
247.59	0.02066476		777.59	0.00437396		1307.58	0.00170885		1837.59	-0.00594803		2367.58	-0.00117356		2897.61	-0.00625345		3427.6	0.00194239		3957.6	-0.01230123
247.79	0.02041064		777.79	0.00489015		1307.78	0.00253258		1837.79	-0.00613891		2367.78	-0.00090503		2897.81	-0.0065663		3427.8	0.00140778		3957.8	-0.0120624
247.99	0.01976919		777.99	0.00497152		1307.98	0.00275191		1837.99	-0.00619258		2367.98	-0.00069234		2898.01	-0.00704094		3428	0.00207069		3958	-0.01199362
248.19	0.02030148		778.19	0.00482033		1308.18	0.00262891		1838.19	-0.00619272		2368.18	0.00003875		2898.21	-0.00625777		3428.2	0.00210681		3958.2	-0.01227307
248.39	0.02115557		778.39	0.00483459		1308.38	0.00372722		1838.39	-0.00616056		2368.38	0.0001215		2898.41	-0.00564762		3428.4	0.00265832		3958.4	-0.01138107
248.59	0.02131419		778.59	0.00476576		1308.58	0.00362497		1838.59	-0.00664279		2368.58	-0.00117317		2898.61	-0.00522623		3428.6	0.00289717		3958.6	-0.01084632
248.79	0.02193914		778.79	0.00415818		1308.78	0.00363623		1838.79	-0.00708482		2368.78	-0.00163904		2898.81	-0.00459019		3428.8	0.00259992		3958.8	-0.01120542
248.99	0.02282046		778.99	0.00377118		1308.98	0.00312647		1838.99	-0.00700166		2368.98	-0.0022362		2899.01	-0.00477106		3429	0.00196389		3959	-0.01073161
249.19	0.02190479		779.19	0.00308747		1309.18	0.0028418		1839.19	-0.00690379		2369.18	-0.00267517		2899.21	-0.0045209		3429.2	0.00295678		3959.2	-0.01098059
249.39	0.02271142		779.39	0.00252475		1309.38	0.00259656		1839.39	-0.00665935		2369.38	-0.00275445		2899.41	-0.0043268		3429.4	0.00319078		3959.4	-0.01085507
249.59	0.02286774		779.59	0.00024458		1309.58	0.00295706		1839.59	-0.00730713		2369.58	-0.00336758		2899.61	-0.00407268		3429.6	0.00200276		3959.6	-0.01161905
249.79	0.02214408		779.79	0.00031756		1309.78	0.0031693		1839.79	-0.00723248		2369.78	-0.00375174		2899.81	-0.00446738		3429.8	0.00222762		3959.8	-0.01104185
249.99	0.02152477		779.99	0.00102484		1309.98	0.00360622		1839.99	-0.00647878		2369.98	-0.00351888		2900.01	-0.00421033		3430	0.00213795		3960	-0.01101041
250.19	0.0209117		780.19	0.00016466		1310.18	0.0041943		1840.19	-0.00747082		2370.18	-0.00294939		2900.21	-0.0034503		3430.2	0.00184948		3960.2	-0.01118848
250.39	0.0206695		780.39	0.00004261		1310.38	0.00424227		1840.39	-0.0074075		2370.38	-0.00356318		2900.41	-0.00348767		3430.4	0.00099645		3960.4	-0.01087536
250.59	0.02091116		780.59	-0.00018537		1310.58	0.00489751		1840.59	-0.00746493		2370.58	-0.00378621		2900.61	-0.0035832		3430.6	0.00208017		3960.6	-0.0110606
250.79	0.02183854		780.79	0.00006914		1310.78	0.00550804		1840.79	-0.0073155		2370.78	-0.00358753		2900.81	-0.00421962		3430.8	0.00161187		3960.8	-0.00941943
250.99	0.02189426		780.99	-0.00038025		1310.98	0.00460096		1840.99	-0.00846149		2370.98	-0.00418807		2901.01	-0.00493611		3431	0.00136799		3961	-0.00911245
251.19	0.02264172		781.19	0.00019108		1311.18	0.00410791		1841.19	-0.00875235		2371.18	-0.00415426		2901.21	-0.00483209		3431.2	0.00110629		3961.2	-0.00937327
251.39	0.02346377		781.39	0.00052353		1311.38	0.00384067		1841.39	-0.00927379		2371.38	-0.00362107		2901.41	-0.00585916		3431.4	0.0014003		3961.4	-0.00974715
251.59	0.02297519		781.59	0.00036449		1311.58	0.00366048		1841.59	-0.00963634		2371.58	-0.0023068		2901.61	-0.00598803		3431.6	0.00051001		3961.6	-0.00993933
251.79	0.02292841		781.79	0.00078915		1311.78	0.00312153		1841.79	-0.01018685		2371.78	-0.00184761		2901.81	-0.00599742		3431.8	-0.00013512		3961.8	-0.00910406
251.99	0.0234622		781.99	0.00193226		1311.98	0.00224677		1841.99	-0.01027306		2371.98	-0.00100949		2902.01	-0.00612941		3432	0.00068879		3962	-0.00914489
252.19	0.0245985		782.19	0.00270289		1312.18	0.00197876		1842.19	-0.01045399		2372.18	-0.0003927		2902.21	-0.00508848		3432.2	0.00043502		3962.2	-0.00849256
252.39	0.02462541		782.39	0.00343723		1312.38	0.00168924		1842.39	-0.0098287		2372.38	-0.00005974		2902.41	-0.00440368		3432.4	0.00145185		3962.4	-0.00863248
252.59	0.02475811		782.59	0.00430472		1312.58	-0.00002568		1842.59	-0.00961078		2372.58	-0.00041154		2902.61	-0.00496302		3432.6	0.00162301		3962.6	-0.00974468
252.79	0.0247306		782.79	0.00415232		1312.78	-0.00021778		1842.79	-0.00863433		2372.78	-0.00002961		2902.81	-0.00490202		3432.8	0.00285302		3962.8	-0.01031375
252.99	0.02483992		782.99	0.0043483		1312.98	-0.00035026		1842.99	-0.00771475		2372.98	0.00026214		2903.01	-0.0055815		3433	0.00399787		3963	-0.01069781
253.19	0.02547404		783.19	0.00317873		1313.18	-0.00044736		1843.19	-0.00717727		2373.18	-0.0008149		2903.21	-0.00487063		3433.2	0.00472851		3963.2	-0.01127878
253.39	0.025298		783.39	0.00247164		1313.38	-0.00017077		1843.39	-0.0068578		2373.38	-0.00018021		2903.41	-0.00457857		3433.4	0.00458284		3963.4	-0.01186384
253.59	0.02466942		783.59	0.00204274		1313.58	0.00042054		1843.59	-0.00639968		2373.58	-0.00046407		2903.61	-0.00444103		3433.6	0.00419412		3963.6	-0.01173662
253.79	0.0228261		783.79	0.00455362		1313.78	0.00041115		1843.79	-0.00529405		2373.78	-0.0006539		2903.81	-0.00355777		3433.8	0.00469604		3963.8	-0.0117568
253.99	0.02219855		783.99	0.00524792		1313.98	0.0013759		1843.99	-0.0052279		2373.98	-0.00116284		2904.01	-0.00258814		3434	0.00459466		3964	-0.01115705
254.19	0.02200711		784.19	0.00485376		1314.18	0.00172136		1844.19	-0.00604774		2374.18	-0.00160636		2904.21	-0.00194088		3434.2	0.004934		3964.2	-0.01084733
254.39	0.02247712		784.39	0.00482037		1314.38	0.00179991		1844.39	-0.0064292		2374.38	-0.00216202		2904.41	-0.00193066		3434.4	0.00454121		3964.4	-0.01070057
254.59	0.02325372		784.59	0.00484781		1314.58	0.00254292		1844.59	-0.0064415		2374.58	-0.00215389		2904.61	-0.00220088		3434.6	0.00491518		3964.6	-0.01008363
254.79	0.02277167		784.79	0.00590564		1314.78	0.00314362		1844.79	-0.00662311		2374.78	-0.00191968		2904.81	-0.00265547		3434.8	0.00432334		3964.8	-0.01011999
254.99	0.02171887		784.99	0.00560903		1314.98	0.00288183		1844.99	-0.00680888		2374.98	-0.00333443		2905.01	-0.00288797		3435	0.00414681		3965	-0.01062292
255.19	0.02201921		785.19	0.00614779		1315.18	0.00303137		1845.19	-0.00660959		2375.18	-0.0030964		2905.21	-0.00375663		3435.2	0.00370593		3965.2	-0.01024491
255.39	0.02181703		785.39	0.00525635		1315.38	0.0029746		1845.39	-0.00684996		2375.38	-0.00273362		2905.41	-0.00499501		3435.4	0.00330392		3965.4	-0.01053306
255.59	0.02091816		785.59	0.00494527		1315.58	0.00314549		1845.59	-0.00771142		2375.58	-0.00257062		2905.61	-0.0053047		3435.6	0.00314239		3965.6	-0.01019382
255.79	0.02102091		785.79	0.00506432		1315.78	0.00260459		1845.79	-0.00824		2375.78	-0.00273363		2905.81	-0.00502853		3435.8	0.00364972		3965.8	-0.01004096
255.99	0.02066206		785.99	0.00519411		1315.98	0.00267692		1845.99	-0.00892123		2375.98	-0.00183292		2906.01	-0.00501696		3436	0.00424548		3966	-0.01031074
256.19	0.02101531		786.19	0.0047151		1316.18	0.00283832		1846.19	-0.0091504		2376.18	-0.00120808		2906.21	-0.00511184		3436.2	0.00426727		3966.2	-0.01134528
256.39	0.02097116		786.39	0.00460781		1316.38	0.00208257		1846.39	-0.00895014		2376.38	-0.00011854		2906.41	-0.00579787		3436.4	0.00539819		3966.4	-0.01313123
256.59	0.02111425		786.59	0.00443682		1316.58	0.00144384		1846.59	-0.00949549		2376.58	-0.00049412		2906.61	-0.00633845		3436.6	0.00628741		3966.6	-0.01372853
256.79	0.02176292		786.79	0.00355261		1316.78	0.00206035		1846.79	-0.01045808		2376.78	-0.00010973		2906.81	-0.00697826		3436.8	0.00739698		3966.8	-0.01426286
256.99	0.02289383		786.99	0.00294296		1316.98	0.00196228		1846.99	-0.01084332		2376.98	-0.00002355		2907.01	-0.00674195		3437	0.00823711		3967	-0.01447591
257.19	0.02322065		787.19	0.0012768		1317.18	0.00198777		1847.19	-0.01135119		2377.18	-0.00083672		2907.21	-0.00581525		3437.2	0.00743879		3967.2	-0.01393938
257.39	0.02227061		787.39	0.00155967		1317.38	0.00243739		1847.39	-0.01080106		2377.38	-0.00007982		2907.41	-0.00528106		3437.4	0.00698348		3967.4	-0.0142247
257.59	0.02190065		787.59	0.0020814		1317.58	0.0029151		1847.59	-0.01022946		2377.58	0.00047429		2907.61	-0.00485681		3437.6	0.00636899		3967.6	-0.0130062
257.79	0.02115067		787.79	0.00361715		1317.78	0.00370947		1847.79	-0.00976047		2377.78	0.00120784		2907.81	-0.00448186		3437.8	0.00550089		3967.8	-0.01268806
257.99	0.02191911		787.99	0.00450063		1317.98	0.00443192		1847.99	-0.00962094		2377.98	0.00035891		2908.01	-0.00466871		3438	0.00499082		3968	-0.0122395
258.19	0.02304325		788.19	0.00494544		1318.18	0.0051787		1848.19	-0.00926063		2378.18	0.00062204		2908.21	-0.00460767		3438.2	0.00440026		3968.2	-0.01214417
258.39	0.02294817		788.39	0.00455591		1318.38	0.00538259		1848.39	-0.00874125		2378.38	0.00070585		2908.41	-0.00445424		3438.4	0.00357834		3968.4	-0.0110435
258.59	0.02286267		788.59	0.0055532		1318.58	0.00556852		1848.59	-0.00746312		2378.58	0.00008991		2908.61	-0.00381662		3438.6	0.00255944		3968.6	-0.01063585
258.79	0.02227674		788.79	0.00617689		1318.78	0.00614476		1848.79	-0.00718032		2378.78	0.00005923		2908.81	-0.00446043		3438.8	0.00205174		3968.8	-0.01105678
258.99	0.0230019		788.99	0.00615489		1318.98	0.00546506		1848.99	-0.00528972		2378.98	-0.00081796		2909.01	-0.00366104		3439	0.00195348		3969	-0.0103171
259.19	0.02356625		789.19	0.00664071		1319.18	0.0055696		1849.19	-0.00409203		2379.18	-0.00087463		2909.21	-0.00429751		3439.2	0.00143557		3969.2	-0.00999164
259.39	0.02370679		789.39	0.00555952		1319.38	0.00576207		1849.39	-0.00440925		2379.38	-0.00121052		2909.41	-0.00376323		3439.4	0.00088216		3969.4	-0.01005591
259.59	0.02399198		789.59	0.00640176		1319.58	0.0055782		1849.59	-0.00396073		2379.58	-0.00142419		2909.61	-0.00323256		3439.6	0.00138957		3969.6	-0.01041633
259.79	0.023834		789.79	0.0057248		1319.78	0.00489347		1849.79	-0.00344628		2379.78	-0.00133732		2909.81	-0.00217246		3439.8	0.00186717		3969.8	-0.01095153
259.99	0.02444619		789.99	0.00554669		1319.98	0.00543435		1849.99	-0.00364661		2379.98	-0.001396		2910.01	-0.00264373		3440	0.00234815		3970	-0.010786
260.19	0.0244852		790.19	0.00612596		1320.18	0.00482149		1850.19	-0.00382381		2380.18	-0.00069478		2910.21	-0.00263563		3440.2	0.0033581		3970.2	-0.01187597
260.39	0.02529201		790.39	0.00572604		1320.38	0.0039362		1850.39	-0.00428006		2380.38	0.00022736		2910.41	-0.00311804		3440.4	0.00416231		3970.4	-0.01168113
260.59	0.02552923		790.59	0.0054618		1320.58	0.00378812		1850.59	-0.00519608		2380.58	-0.00067469		2910.61	-0.00243609		3440.6	0.005184		3970.6	-0.01160426
260.79	0.02607858		790.79	0.00557404		1320.78	0.00350338		1850.79	-0.00591256		2380.78	-0.00053524		2910.81	-0.00291499		3440.8	0.00580924		3970.8	-0.01124525
260.99	0.026309		790.99	0.00523928		1320.98	0.00255189		1850.99	-0.0062523		2380.98	-0.00024746		2911.01	-0.00227308		3441	0.00623938		3971	-0.01090532
261.19	0.02587486		791.19	0.0048496		1321.18	0.00268034		1851.19	-0.0066454		2381.18	-0.00024905		2911.21	-0.0023048		3441.2	0.00509176		3971.2	-0.01107915
261.39	0.02606205		791.39	0.00562		1321.38	0.00269595		1851.39	-0.00695421		2381.38	0.0001204		2911.41	-0.00282518		3441.4	0.00519065		3971.4	-0.01100878
261.59	0.02563894		791.59	0.00623491		1321.58	0.0024487		1851.59	-0.00672884		2381.58	0.00103559		2911.61	-0.00417215		3441.6	0.00484164		3971.6	-0.01005886
261.79	0.02538898		791.79	0.00649805		1321.78	0.00282691		1851.79	-0.00654502		2381.78	0.00081691		2911.81	-0.00463507		3441.8	0.00359852		3971.8	-0.01017641
261.99	0.02581777		791.99	0.00713133		1321.98	0.00319281		1851.99	-0.00707752		2381.98	-0.00015409		2912.01	-0.00529418		3442	0.00296848		3972	-0.0102134
262.19	0.02613979		792.19	0.00641883		1322.18	0.00277661		1852.19	-0.00732484		2382.18	-0.00018111		2912.21	-0.00494524		3442.2	0.00273086		3972.2	-0.00957116
262.39	0.02584548		792.39	0.00659917		1322.38	0.00275469		1852.39	-0.00742128		2382.38	-0.00074305		2912.41	-0.00487178		3442.4	0.00208506		3972.4	-0.0094399
262.59	0.02583836		792.59	0.00675863		1322.58	0.00284202		1852.59	-0.00703956		2382.58	-0.00162279		2912.61	-0.00481908		3442.6	0.00148855		3972.6	-0.01027175
262.79	0.02648235		792.79	0.00668804		1322.78	0.00338447		1852.79	-0.00679993		2382.78	-0.00236489		2912.81	-0.00584956		3442.8	0.00162581		3972.8	-0.01041485
262.99	0.02680768		792.99	0.00741964		1322.98	0.00340091		1852.99	-0.00647214		2382.98	-0.00268865		2913.01	-0.00491294		3443	0.00187465		3973	-0.01106558
263.19	0.02583275		793.19	0.00700538		1323.18	0.00369987		1853.19	-0.00674466		2383.18	-0.00307917		2913.21	-0.00514256		3443.2	0.00095275		3973.2	-0.01166301
263.39	0.02574101		793.39	0.00594713		1323.38	0.00407368		1853.39	-0.00771127		2383.38	-0.00361861		2913.41	-0.00432938		3443.4	0.00074699		3973.4	-0.01245637
263.59	0.02583452		793.59	0.0060294		1323.58	0.00415658		1853.59	-0.00759638		2383.58	-0.0031668		2913.61	-0.00433127		3443.6	0.00155946		3973.6	-0.01337277
263.79	0.02548277		793.79	0.00571589		1323.78	0.00379399		1853.79	-0.00753312		2383.78	-0.00342286		2913.81	-0.00392433		3443.8	0.00205188		3973.8	-0.01393639
263.99	0.02613608		793.99	0.00472905		1323.98	0.00416152		1853.99	-0.0077099		2383.98	-0.002808		2914.01	-0.00445875		3444	0.00295796		3974	-0.01355044
264.19	0.02607295		794.19	0.00485178		1324.18	0.00387207		1854.19	-0.00769146		2384.18	-0.00188259		2914.21	-0.00381835		3444.2	0.00351608		3974.2	-0.01458873
264.39	0.02661621		794.39	0.00474138		1324.38	0.00296883		1854.39	-0.00848785		2384.38	-0.00262325		2914.41	-0.00442351		3444.4	0.00423389		3974.4	-0.01446967
264.59	0.02665749		794.59	0.00434953		1324.58	0.00304623		1854.59	-0.00928002		2384.58	-0.00262161		2914.61	-0.00335573		3444.6	0.00451078		3974.6	-0.01448983
264.79	0.02723001		794.79	0.00432865		1324.78	0.00271564		1854.79	-0.0096118		2384.78	-0.00235235		2914.81	-0.00401656		3444.8	0.00405475		3974.8	-0.01466531
264.99	0.02706737		794.99	0.00398219		1324.98	0.00168542		1854.99	-0.00957282		2384.98	-0.00201079		2915.01	-0.00395906		3445	0.00439504		3975	-0.01513405
265.19	0.02743621		795.19	0.00441965		1325.18	0.00146435		1855.19	-0.01031564		2385.18	-0.00195078		2915.21	-0.0038572		3445.2	0.00376152		3975.2	-0.01474694
265.39	0.02805746		795.39	0.00462065		1325.38	0.00071844		1855.39	-0.01011859		2385.38	-0.00166096		2915.41	-0.00360241		3445.4	0.00341479		3975.4	-0.01359086
265.59	0.02750099		795.59	0.00406088		1325.58	-0.00001721		1855.59	-0.00939067		2385.58	-0.00133719		2915.61	-0.0032035		3445.6	0.00307277		3975.6	-0.01295711
265.79	0.02796138		795.79	0.00437164		1325.78	-0.00011329		1855.79	-0.00940842		2385.78	-0.00214507		2915.81	-0.00332355		3445.8	0.00217275		3975.8	-0.0129516
265.99	0.02875618		795.99	0.00475912		1325.98	-0.00015499		1855.99	-0.00967781		2385.98	-0.00248045		2916.01	-0.00401687		3446	0.0024542		3976	-0.0125623
266.19	0.02926184		796.19	0.00496647		1326.18	0.00003914		1856.19	-0.00926422		2386.18	-0.0020285		2916.21	-0.00301051		3446.2	0.00278505		3976.2	-0.01242785
266.39	0.02932416		796.39	0.00570558		1326.38	0.00103633		1856.39	-0.00841487		2386.38	-0.00234362		2916.41	-0.00333196		3446.4	0.00247601		3976.4	-0.01186195
266.59	0.02858852		796.59	0.00596568		1326.58	0.00140692		1856.59	-0.00796044		2386.58	-0.0028527		2916.61	-0.00383469		3446.6	0.00254518		3976.6	-0.01079982
266.79	0.02857079		796.79	0.00661064		1326.78	0.00159328		1856.79	-0.00796544		2386.78	-0.00287155		2916.81	-0.00383685		3446.8	0.00250016		3976.8	-0.01122948
266.99	0.0278173		796.99	0.00716302		1326.98	0.00213219		1856.99	-0.00797574		2386.98	-0.00262147		2917.01	-0.00328159		3447	0.00224291		3977	-0.0113779
267.19	0.02772625		797.19	0.00752948		1327.18	0.00268783		1857.19	-0.00725796		2387.18	-0.00190798		2917.21	-0.00241164		3447.2	0.00173426		3977.2	-0.01093031
267.39	0.02774454		797.39	0.00627398		1327.38	0.00358264		1857.39	-0.00729075		2387.38	-0.00141508		2917.41	-0.00216874		3447.4	0.00189374		3977.4	-0.01077729
267.59	0.02771947		797.59	0.00642096		1327.58	0.00333279		1857.59	-0.00688486		2387.58	-0.00058541		2917.61	-0.00214064		3447.6	0.00237953		3977.6	-0.01069007
267.79	0.02765568		797.79	0.00622238		1327.78	0.00322413		1857.79	-0.00616292		2387.78	-0.00089895		2917.81	-0.0013806		3447.8	0.00204073		3977.8	-0.01052312
267.99	0.02803744		797.99	0.00530737		1327.98	0.00405453		1857.99	-0.00644501		2387.98	-0.0005713		2918.01	-0.00144909		3448	0.00212742		3978	-0.01007609
268.19	0.02841439		798.19	0.00495076		1328.18	0.00368225		1858.19	-0.00619367		2388.18	-0.00059945		2918.21	-0.00110872		3448.2	0.00208062		3978.2	-0.01119767
268.39	0.02886273		798.39	0.00528101		1328.38	0.00413286		1858.39	-0.00632827		2388.38	-0.00100259		2918.41	-0.00069728		3448.4	0.00249452		3978.4	-0.01127574
268.59	0.02868046		798.59	0.00482365		1328.58	0.00443013		1858.59	-0.00572585		2388.58	-0.00008992		2918.61	-0.00032823		3448.6	0.00166818		3978.6	-0.01127317
268.79	0.02909154		798.79	0.00516733		1328.78	0.00443911		1858.79	-0.00421646		2388.78	0.00011787		2918.81	-0.00099296		3448.8	0.00153514		3978.8	-0.01159811
268.99	0.02896889		798.99	0.00557718		1328.98	0.00363661		1858.99	-0.00413922		2388.98	0.00000432		2919.01	-0.00075493		3449	0.00282745		3979	-0.01188871
269.19	0.02951501		799.19	0.00466933		1329.18	0.00338388		1859.19	-0.0053426		2389.18	0.00064438		2919.21	-0.00128343		3449.2	0.00248908		3979.2	-0.01177102
269.39	0.02925386		799.39	0.0039924		1329.38	0.0027104		1859.39	-0.00502194		2389.38	0.00061461		2919.41	-0.0018683		3449.4	0.00263693		3979.4	-0.01153542
269.59	0.02988532		799.59	0.00458688		1329.58	0.00268611		1859.59	-0.00511881		2389.58	0.00014657		2919.61	-0.00260956		3449.6	0.0035481		3979.6	-0.01182439
269.79	0.03040744		799.79	0.00508387		1329.78	0.00278949		1859.79	-0.00512473		2389.78	-0.00011998		2919.81	-0.00402361		3449.8	0.00317507		3979.8	-0.01244362
269.99	0.03149067		799.99	0.00526947		1329.98	0.00342593		1859.99	-0.00607952		2389.98	0.0002445		2920.01	-0.00513504		3450	0.00431213		3980	-0.01230597
270.19	0.0318567		800.19	0.00589854		1330.18	0.00408321		1860.19	-0.00617772		2390.18	0.00050639		2920.21	-0.00503529		3450.2	0.00395309		3980.2	-0.01247814
270.39	0.03150254		800.39	0.0061843		1330.38	0.00376727		1860.39	-0.0064969		2390.38	0.00009386		2920.41	-0.0058086		3450.4	0.00424716		3980.4	-0.01261621
270.59	0.03156021		800.59	0.00621915		1330.58	0.00329706		1860.59	-0.00717186		2390.58	-0.00000657		2920.61	-0.00599761		3450.6	0.00351434		3980.6	-0.01348637
270.79	0.03173137		800.79	0.00647192		1330.78	0.00376784		1860.79	-0.0071348		2390.78	0.00016486		2920.81	-0.00531104		3450.8	0.00256135		3980.8	-0.01369634
270.99	0.03140161		800.99	0.00614042		1330.98	0.00442923		1860.99	-0.00661754		2390.98	-0.00035563		2921.01	-0.00453375		3451	0.00176146		3981	-0.01302682
271.19	0.0314005		801.19	0.00602677		1331.18	0.0045785		1861.19	-0.00692251		2391.18	-0.00032188		2921.21	-0.00415985		3451.2	0.00161325		3981.2	-0.01275157
271.39	0.03119622		801.39	0.00475511		1331.38	0.00421686		1861.39	-0.00743844		2391.38	-0.00098734		2921.41	-0.00506742		3451.4	0.00091652		3981.4	-0.012743
271.59	0.0311698		801.59	0.00465039		1331.58	0.00346127		1861.59	-0.00818047		2391.58	-0.00109016		2921.61	-0.00471293		3451.6	0.00050974		3981.6	-0.01291139
271.79	0.03137399		801.79	0.00389018		1331.78	0.00261393		1861.79	-0.008358		2391.78	-0.00191714		2921.81	-0.00428729		3451.8	0.00037818		3981.8	-0.01305204
271.99	0.03178284		801.99	0.00358741		1331.98	0.00290973		1861.99	-0.00887999		2391.98	-0.00171281		2922.01	-0.00414456		3452	0.00017568		3982	-0.01309642
272.19	0.03288204		802.19	0.00313065		1332.18	0.0018599		1862.19	-0.00875334		2392.18	-0.00158219		2922.21	-0.00383226		3452.2	0.00034729		3982.2	-0.01288465
272.39	0.03274529		802.39	0.00349252		1332.38	0.00181428		1862.39	-0.00958195		2392.38	-0.00152948		2922.41	-0.00309847		3452.4	0.00060692		3982.4	-0.01284852
272.59	0.03242863		802.59	0.00265835		1332.58	0.00124667		1862.59	-0.00967875		2392.58	-0.00100501		2922.61	-0.00391913		3452.6	0.00032364		3982.6	-0.01296882
272.79	0.032973		802.79	0.00223395		1332.78	0.00148853		1862.79	-0.0098213		2392.78	-0.00065375		2922.81	-0.00388084		3452.8	0.00184499		3982.8	-0.01260151
272.99	0.03236178		802.99	0.00261435		1332.98	0.00144418		1862.99	-0.01028724		2392.98	-0.00071861		2923.01	-0.00381907		3453	0.00242579		3983	-0.01259787
273.19	0.03172693		803.19	0.00192766		1333.18	0.00204709		1863.19	-0.01093969		2393.18	-0.0004715		2923.21	-0.0040673		3453.2	0.00248996		3983.2	-0.01180891
273.39	0.03132662		803.39	0.00247675		1333.38	0.00236504		1863.39	-0.01015075		2393.38	-0.00073763		2923.41	-0.0042516		3453.4	0.00322285		3983.4	-0.01099856
273.59	0.03251637		803.59	0.00316657		1333.58	0.00259198		1863.59	-0.00972352		2393.58	-0.00024569		2923.61	-0.0046718		3453.6	0.00311988		3983.6	-0.01041453
273.79	0.0324769		803.79	0.00315039		1333.78	0.003897		1863.79	-0.00978983		2393.78	0.00011249		2923.81	-0.00415977		3453.8	0.00327366		3983.8	-0.0105852
273.99	0.03256768		803.99	0.00358848		1333.98	0.00459987		1863.99	-0.00979589		2393.98	0.00041522		2924.01	-0.00470291		3454	0.00420691		3984	-0.01021495
274.19	0.03156614		804.19	0.00415235		1334.18	0.00463183		1864.19	-0.00922015		2394.18	0.00034673		2924.21	-0.00369605		3454.2	0.0043427		3984.2	-0.00992271
274.39	0.03022616		804.39	0.00383115		1334.38	0.00448861		1864.39	-0.00907501		2394.38	0.0004904		2924.41	-0.0029236		3454.4	0.00462208		3984.4	-0.01076888
274.59	0.02993465		804.59	0.00438141		1334.58	0.00443252		1864.59	-0.00878472		2394.58	0.00044485		2924.61	-0.00196355		3454.6	0.00390932		3984.6	-0.01056931
274.79	0.02997946		804.79	0.00478636		1334.78	0.00523371		1864.79	-0.0082964		2394.78	0.00067304		2924.81	-0.00181173		3454.8	0.0041454		3984.8	-0.00990518
274.99	0.02950084		804.99	0.00484785		1334.98	0.00487354		1864.99	-0.00759512		2394.98	0.00001024		2925.01	-0.00171828		3455	0.00470056		3985	-0.01003488
275.19	0.02943905		805.19	0.0054164		1335.18	0.00524512		1865.19	-0.00745778		2395.18	0.00041797		2925.21	-0.00211547		3455.2	0.00446886		3985.2	-0.01031402
275.39	0.02919916		805.39	0.0054784		1335.38	0.00557236		1865.39	-0.00656383		2395.38	0.00051464		2925.41	-0.00189436		3455.4	0.00409081		3985.4	-0.01047285
275.59	0.0290516		805.59	0.00544123		1335.58	0.00583947		1865.59	-0.00600227		2395.58	0.00067992		2925.61	-0.0014112		3455.6	0.0043934		3985.6	-0.01061435
275.79	0.02962473		805.79	0.00565406		1335.78	0.00536338		1865.79	-0.00615996		2395.78	0.00003333		2925.81	-0.00164054		3455.8	0.00523939		3985.8	-0.0116607
275.99	0.03041014		805.99	0.00485854		1335.98	0.00613929		1865.99	-0.00692531		2395.98	-0.00011065		2926.01	-0.00156201		3456	0.00449263		3986	-0.01177373
276.19	0.03184665		806.19	0.00511729		1336.18	0.00540991		1866.19	-0.00763266		2396.18	-0.00062694		2926.21	-0.00109776		3456.2	0.00434166		3986.2	-0.01210648
276.39	0.03273312		806.39	0.00534406		1336.38	0.0052766		1866.39	-0.00848209		2396.38	-0.00067362		2926.41	-0.00065601		3456.4	0.00389965		3986.4	-0.01315598
276.59	0.03355625		806.59	0.0046161		1336.58	0.00532187		1866.59	-0.00799687		2396.58	-0.00109851		2926.61	-0.0008028		3456.6	0.00373297		3986.6	-0.01336624
276.79	0.03433724		806.79	0.00532762		1336.78	0.00475012		1866.79	-0.00772826		2396.78	-0.00073649		2926.81	-0.00074207		3456.8	0.00412748		3986.8	-0.01304848
276.99	0.03443561		806.99	0.00562535		1336.98	0.00469501		1866.99	-0.00721022		2396.98	-0.00103065		2927.01	-0.00071		3457	0.00317536		3987	-0.01328579
277.19	0.03530409		807.19	0.00499953		1337.18	0.00478653		1867.19	-0.00702786		2397.18	-0.00141492		2927.21	-0.00108786		3457.2	0.00318449		3987.2	-0.01329981
277.39	0.03606733		807.39	0.00535096		1337.38	0.00455704		1867.39	-0.00590084		2397.38	-0.00139552		2927.41	-0.00156088		3457.4	0.00327553		3987.4	-0.01354502
277.59	0.03690575		807.59	0.0060968		1337.58	0.00450742		1867.59	-0.00546966		2397.58	-0.00121202		2927.61	-0.00269017		3457.6	0.00242832		3987.6	-0.01369501
277.79	0.03593533		807.79	0.0068424		1337.78	0.0050299		1867.79	-0.00588753		2397.78	-0.00126522		2927.81	-0.00288926		3457.8	0.00260714		3987.8	-0.01334935
277.99	0.03519779		807.99	0.00616726		1337.98	0.00446677		1867.99	-0.00562116		2397.98	-0.0011301		2928.01	-0.003855		3458	0.00309623		3988	-0.01286876
278.19	0.03452732		808.19	0.00639177		1338.18	0.00363562		1868.19	-0.00600597		2398.18	-0.00059328		2928.21	-0.00410131		3458.2	0.00378493		3988.2	-0.01284761
278.39	0.03406494		808.39	0.00629321		1338.38	0.00339892		1868.39	-0.00576483		2398.38	-0.00014641		2928.41	-0.00450448		3458.4	0.00365905		3988.4	-0.01264495
278.59	0.03421806		808.59	0.00696614		1338.58	0.00281819		1868.59	-0.00559933		2398.58	0.00042633		2928.61	-0.00466931		3458.6	0.00438415		3988.6	-0.01195294
278.79	0.03395877		808.79	0.00699591		1338.78	0.00301031		1868.79	-0.00543925		2398.78	0.00222668		2928.81	-0.00542872		3458.8	0.00481638		3988.8	-0.01208896
278.99	0.03277155		808.99	0.00722386		1338.98	0.00319049		1868.99	-0.00483364		2398.98	0.002136		2929.01	-0.00547352		3459	0.0052973		3989	-0.01179715
279.19	0.03221289		809.19	0.00745743		1339.18	0.00319619		1869.19	-0.00442164		2399.18	0.00309128		2929.21	-0.00431872		3459.2	0.0054619		3989.2	-0.01170138
279.39	0.03148595		809.39	0.00714819		1339.38	0.0032554		1869.39	-0.00457275		2399.38	0.00285123		2929.41	-0.00416077		3459.4	0.00653758		3989.4	-0.01152587
279.59	0.03070969		809.59	0.00711138		1339.58	0.00351775		1869.59	-0.00482265		2399.58	0.00290387		2929.61	-0.00312897		3459.6	0.00657076		3989.6	-0.01238507
279.79	0.03084313		809.79	0.00676975		1339.78	0.00316021		1869.79	-0.00567857		2399.78	0.00262016		2929.81	-0.00242136		3459.8	0.00659239		3989.8	-0.01298523
279.99	0.03197367		809.99	0.00619848		1339.98	0.00307912		1869.99	-0.00607111		2399.98	0.00221753		2930.01	-0.00217053		3460	0.00585028		3990	-0.01245485
280.19	0.03249392		810.19	0.00700548		1340.18	0.0024457		1870.19	-0.00655427		2400.18	0.00175041		2930.21	-0.0019835		3460.2	0.00554792		3990.2	-0.01317633
280.39	0.03289491		810.39	0.00579075		1340.38	0.00153856		1870.39	-0.00681059		2400.38	0.00121995		2930.41	-0.00231491		3460.4	0.0051927		3990.4	-0.01342008
280.59	0.03323368		810.59	0.00558588		1340.58	0.00026766		1870.59	-0.00735578		2400.58	0.00096807		2930.61	-0.00261663		3460.6	0.0050671		3990.6	-0.01325775
280.79	0.03340874		810.79	0.00551083		1340.78	-0.00012238		1870.79	-0.00825121		2400.78	0.00064636		2930.81	-0.00324422		3460.8	0.00462817		3990.8	-0.01319839
280.99	0.03273679		810.99	0.00509562		1340.98	-0.00036846		1870.99	-0.00943286		2400.98	-0.00028576		2931.01	-0.00300288		3461	0.00477087		3991	-0.01341545
281.19	0.03313743		811.19	0.00472989		1341.18	0.00051042		1871.19	-0.00985916		2401.18	0.00016811		2931.21	-0.00362274		3461.2	0.00510348		3991.2	-0.01346937
281.39	0.03288627		811.39	0.0050568		1341.38	0.00089801		1871.39	-0.01035544		2401.38	0.00030291		2931.41	-0.00428005		3461.4	0.00486001		3991.4	-0.01303098
281.59	0.03263425		811.59	0.00538643		1341.58	0.00155717		1871.59	-0.01133721		2401.58	0.00073005		2931.61	-0.00512234		3461.6	0.00409832		3991.6	-0.01302749
281.79	0.03318156		811.79	0.00530169		1341.78	0.0018865		1871.79	-0.01262518		2401.78	0.00104226		2931.81	-0.00567884		3461.8	0.00378988		3991.8	-0.01214954
281.99	0.03392151		811.99	0.00481394		1341.98	0.00171822		1871.99	-0.01213494		2401.98	0.00033675		2932.01	-0.00557536		3462	0.00417114		3992	-0.01232786
282.19	0.03421829		812.19	0.004989		1342.18	0.00280846		1872.19	-0.01257821		2402.18	-0.00019344		2932.21	-0.00567945		3462.2	0.00474448		3992.2	-0.01220479
282.39	0.03477418		812.39	0.00470162		1342.38	0.00371658		1872.39	-0.01099116		2402.38	-0.0005216		2932.41	-0.00522937		3462.4	0.00467442		3992.4	-0.01183068
282.59	0.03523233		812.59	0.00489078		1342.58	0.0041848		1872.59	-0.01099696		2402.58	-0.0005717		2932.61	-0.00515702		3462.6	0.00497499		3992.6	-0.01215903
282.79	0.0361949		812.79	0.00563861		1342.78	0.00524387		1872.79	-0.0110485		2402.78	0.00004634		2932.81	-0.00452492		3462.8	0.00443364		3992.8	-0.01229641
282.99	0.03669389		812.99	0.00517401		1342.98	0.00599794		1872.99	-0.01026394		2402.98	-0.00055678		2933.01	-0.00399231		3463	0.00504953		3993	-0.01207671
283.19	0.03779584		813.19	0.00547232		1343.18	0.00603579		1873.19	-0.00875324		2403.18	-0.00020047		2933.21	-0.00237091		3463.2	0.0053229		3993.2	-0.01111661
283.39	0.03885946		813.39	0.00513019		1343.38	0.00655116		1873.39	-0.00869359		2403.38	-0.00037004		2933.41	-0.00285172		3463.4	0.00471829		3993.4	-0.0113681
283.59	0.03974809		813.59	0.00544886		1343.58	0.00716546		1873.59	-0.00749813		2403.58	0.00049579		2933.61	-0.00204526		3463.6	0.0036766		3993.6	-0.01235131
283.79	0.0414494		813.79	0.00518177		1343.78	0.00747125		1873.79	-0.0065012		2403.78	0.00051816		2933.81	-0.00219		3463.8	0.00300113		3993.8	-0.01198998
283.99	0.04188488		813.99	0.00493321		1343.98	0.00686818		1873.99	-0.00611274		2403.98	0.00005033		2934.01	-0.00286551		3464	0.0022833		3994	-0.01218499
284.19	0.04122524		814.19	0.00473342		1344.18	0.00673907		1874.19	-0.00535175		2404.18	-0.00011664		2934.21	-0.00384595		3464.2	0.00179424		3994.2	-0.01287818
284.39	0.04076125		814.39	0.00403463		1344.38	0.00719667		1874.39	-0.0051823		2404.38	-0.00127968		2934.41	-0.00388751		3464.4	0.00143999		3994.4	-0.01226286
284.59	0.04055709		814.59	0.00489371		1344.58	0.00738694		1874.59	-0.00523109		2404.58	-0.00101227		2934.61	-0.00391979		3464.6	0.00097298		3994.6	-0.0114085
284.79	0.03950035		814.79	0.00502611		1344.78	0.00741202		1874.79	-0.00557631		2404.78	-0.00135946		2934.81	-0.00382524		3464.8	0.00081138		3994.8	-0.01098644
284.99	0.03883736		814.99	0.0058692		1344.98	0.00751169		1874.99	-0.00623788		2404.98	-0.00077199		2935.01	-0.00354284		3465	0.00188964		3995	-0.01068208
285.19	0.03844203		815.19	0.00509944		1345.18	0.00785327		1875.19	-0.00640012		2405.18	0.00027451		2935.21	-0.00341595		3465.2	0.00172351		3995.2	-0.0106578
285.39	0.03790296		815.39	0.00546096		1345.38	0.00685987		1875.39	-0.00699931		2405.38	0.00001644		2935.41	-0.00445157		3465.4	0.00143884		3995.4	-0.01094871
285.59	0.03742986		815.59	0.00542196		1345.58	0.00681801		1875.59	-0.00769736		2405.58	0.00005662		2935.61	-0.00518939		3465.6	0.00141211		3995.6	-0.01165119
285.79	0.03779398		815.79	0.00513769		1345.78	0.00527757		1875.79	-0.00782769		2405.78	-0.00045932		2935.81	-0.0057933		3465.8	0.00161379		3995.8	-0.01107921
285.99	0.0370062		815.99	0.00417346		1345.98	0.00492758		1875.99	-0.00728798		2405.98	-0.00142963		2936.01	-0.00510177		3466	0.0030411		3996	-0.01120095
286.19	0.03665536		816.19	0.00337735		1346.18	0.00584886		1876.19	-0.00810352		2406.18	-0.00178653		2936.21	-0.00456823		3466.2	0.00333477		3996.2	-0.0111182
286.39	0.0365636		816.39	0.00315514		1346.38	0.00568326		1876.39	-0.00737779		2406.38	-0.00134735		2936.41	-0.00479525		3466.4	0.0026353		3996.4	-0.01220855
286.59	0.0362815		816.59	0.00334614		1346.58	0.00600508		1876.59	-0.0085801		2406.58	-0.00117169		2936.61	-0.00441036		3466.6	0.00340951		3996.6	-0.01255804
286.79	0.03647171		816.79	0.0035828		1346.78	0.00609201		1876.79	-0.00850891		2406.78	-0.00038709		2936.81	-0.00389177		3466.8	0.00453765		3996.8	-0.01265507
286.99	0.03721129		816.99	0.00264002		1346.98	0.00570652		1876.99	-0.00868131		2406.98	0.00055361		2937.01	-0.00388151		3467	0.00500878		3997	-0.01285608
287.19	0.03836824		817.19	0.00247624		1347.18	0.00552195		1877.19	-0.0080451		2407.18	0.00106905		2937.21	-0.00288449		3467.2	0.00515455		3997.2	-0.01319735
287.39	0.03992614		817.39	0.00190705		1347.38	0.0050299		1877.39	-0.00815785		2407.38	0.00205381		2937.41	-0.00269712		3467.4	0.00416744		3997.4	-0.01477192
287.59	0.04004698		817.59	0.00201337		1347.58	0.00465176		1877.59	-0.00815787		2407.58	0.00240762		2937.61	-0.00195672		3467.6	0.00399251		3997.6	-0.01532746
287.79	0.04014304		817.79	0.00208428		1347.78	0.0045641		1877.79	-0.00815629		2407.78	0.00283502		2937.81	-0.00170721		3467.8	0.0032586		3997.8	-0.01509357
287.99	0.04044851		817.99	0.00207094		1347.98	0.00409019		1877.99	-0.00855841		2407.98	0.00237873		2938.01	-0.00193612		3468	0.00376817		3998	-0.01545457
288.19	0.0412171		818.19	0.00257678		1348.18	0.00400341		1878.19	-0.00852129		2408.18	0.00183218		2938.21	-0.00231056		3468.2	0.00419633		3998.2	-0.01525894
288.39	0.04125772		818.39	0.00275232		1348.38	0.00506295		1878.39	-0.00843027		2408.38	0.00085264		2938.41	-0.00173265		3468.4	0.00402957		3998.4	-0.01499342
288.59	0.04191671		818.59	0.00425788		1348.58	0.00385447		1878.59	-0.00869389		2408.58	0.00151972		2938.61	-0.00145326		3468.6	0.00304201		3998.6	-0.01473224
288.79	0.04208595		818.79	0.00566791		1348.78	0.00329248		1878.79	-0.00937843		2408.78	0.00048987		2938.81	-0.00117291		3468.8	0.00282986		3998.8	-0.0148207
288.99	0.04247719		818.99	0.00600512		1348.98	0.00388067		1878.99	-0.00991439		2408.98	0.00052656		2939.01	-0.0016507		3469	0.00272945		3999	-0.01444608
289.19	0.04223528		819.19	0.00592492		1349.18	0.00296663		1879.19	-0.01076439		2409.18	0.00123411		2939.21	-0.00252089		3469.2	0.0020561		3999.2	-0.01410796
289.39	0.0416395		819.39	0.0067463		1349.38	0.00263288		1879.39	-0.01069069		2409.38	0.00078455		2939.41	-0.00374334		3469.4	0.00148329		3999.4	-0.01351022
289.59	0.04145272		819.59	0.00595401		1349.58	0.0028639		1879.59	-0.01055895		2409.58	0.00030189		2939.61	-0.00391191		3469.6	0.00169974		3999.6	-0.01386513
289.79	0.04135073		819.79	0.00601468		1349.78	0.00231738		1879.79	-0.01089276		2409.78	0.00005392		2939.81	-0.00358932		3469.8	0.00174477		3999.8	-0.01297297
289.99	0.04113269		819.99	0.00548499		1349.98	0.00331064		1879.99	-0.01086192		2409.98	-0.00053453		2940.01	-0.0032093		3470	0.00179947		4000	-0.0125453
290.19	0.04099801		820.19	0.00573986		1350.18	0.00326641		1880.19	-0.01080759		2410.18	-0.00123466		2940.21	-0.00340156		3470.2	0.00111266		4000.2	-0.0127493
290.39	0.04150515		820.39	0.00577775		1350.38	0.00335787		1880.39	-0.01016655		2410.38	-0.00066894		2940.41	-0.00353124		3470.4	0.00132107		4000.4	-0.01313688
290.59	0.04052427		820.59	0.00646708		1350.58	0.00400533		1880.59	-0.0099846		2410.58	0.00038105		2940.61	-0.00295991		3470.6	0.00230068		4000.6	-0.01259536
290.79	0.04070843		820.79	0.00647806		1350.78	0.00441293		1880.79	-0.00945154		2410.78	0.00067833		2940.81	-0.00303962		3470.8	0.00263324		4000.8	-0.01215048
290.99	0.04186526		820.99	0.00665615		1350.98	0.00502932		1880.99	-0.00970431		2410.98	0.00124172		2941.01	-0.00300901		3471	0.00245278		4001	-0.01252854
291.19	0.0422768		821.19	0.0057684		1351.18	0.0054418		1881.19	-0.00863704		2411.18	0.0016483		2941.21	-0.0037185		3471.2	0.00230737		4001.2	-0.01261792
291.39	0.04286377		821.39	0.00561477		1351.38	0.00581537		1881.39	-0.00841947		2411.38	0.00159311		2941.41	-0.00327922		3471.4	0.00152672		4001.4	-0.01233932
291.59	0.04223113		821.59	0.0057998		1351.58	0.00564355		1881.59	-0.00816385		2411.58	0.00164574		2941.61	-0.00296468		3471.6	0.00199941		4001.6	-0.01183054
291.79	0.04224806		821.79	0.00578788		1351.78	0.00580197		1881.79	-0.00819856		2411.78	0.00191334		2941.81	-0.00271831		3471.8	0.00218504		4001.8	-0.01108976
291.99	0.0432547		821.99	0.00504752		1351.98	0.0065402		1881.99	-0.00794936		2411.98	0.0008757		2942.01	-0.00326319		3472	0.00332972		4002	-0.01132207
292.19	0.04313554		822.19	0.00467616		1352.18	0.00646793		1882.19	-0.00847112		2412.18	0.00064288		2942.21	-0.00299751		3472.2	0.00306001		4002.2	-0.0111793
292.39	0.04270431		822.39	0.00363591		1352.38	0.00631467		1882.39	-0.00779645		2412.38	0.00002087		2942.41	-0.00305397		3472.4	0.00211795		4002.4	-0.01191408
292.59	0.04209721		822.59	0.00441556		1352.58	0.00509188		1882.59	-0.00821258		2412.58	-0.00010713		2942.61	-0.00313658		3472.6	0.00066091		4002.6	-0.01217549
292.79	0.04147845		822.79	0.00425577		1352.78	0.0054657		1882.79	-0.0081933		2412.78	-0.00044137		2942.81	-0.00327773		3472.8	0.00137891		4002.8	-0.01223916
292.99	0.041365		822.99	0.00399821		1352.98	0.00523179		1882.99	-0.00821509		2412.98	-0.00058286		2943.01	-0.00307433		3473	0.00173913		4003	-0.01154832
293.19	0.04045609		823.19	0.00515962		1353.18	0.00411176		1883.19	-0.00712766		2413.18	-0.00050987		2943.21	-0.00260814		3473.2	0.0018191		4003.2	-0.01168702
293.39	0.04009515		823.39	0.00498897		1353.38	0.00381425		1883.39	-0.00677084		2413.38	-0.00115797		2943.41	-0.00169764		3473.4	0.00190109		4003.4	-0.01196544
293.59	0.04001339		823.59	0.00435847		1353.58	0.00367432		1883.59	-0.00652299		2413.58	-0.00121911		2943.61	-0.00049236		3473.6	0.00255696		4003.6	-0.01280117
293.79	0.04001737		823.79	0.00470299		1353.78	0.00327546		1883.79	-0.00629273		2413.78	-0.00122968		2943.81	-0.00004349		3473.8	0.00259252		4003.8	-0.01277751
293.99	0.0395295		823.99	0.00462401		1353.98	0.00272727		1883.99	-0.00538246		2413.98	-0.00180159		2944.01	0.00029019		3474	0.00229608		4004	-0.01314188
294.19	0.03967469		824.19	0.004693		1354.18	0.00191746		1884.19	-0.00478295		2414.18	-0.00141701		2944.21	0.00001872		3474.2	0.00188859		4004.2	-0.0129762
294.39	0.03957133		824.39	0.00440152		1354.38	0.002087		1884.39	-0.00463128		2414.38	-0.00029652		2944.41	0.00046365		3474.4	0.00260631		4004.4	-0.01282343
294.59	0.03957321		824.59	0.00518048		1354.58	0.00244702		1884.59	-0.00558644		2414.58	-0.00033223		2944.61	0.00029852		3474.6	0.00277834		4004.6	-0.01327864
294.79	0.04037548		824.79	0.00493711		1354.78	0.0034534		1884.79	-0.00601228		2414.78	0.00009152		2944.81	-0.00019297		3474.8	0.00329324		4004.8	-0.01322244
294.99	0.04141045		824.99	0.00449108		1354.98	0.00406568		1884.99	-0.00614397		2414.98	0.00027373		2945.01	-0.00095287		3475	0.00325566		4005	-0.0137669
295.19	0.04210191		825.19	0.00363223		1355.18	0.0047774		1885.19	-0.00541072		2415.18	0.00065187		2945.21	-0.00169162		3475.2	0.0028934		4005.2	-0.01382343
295.39	0.04179312		825.39	0.00450702		1355.38	0.00605455		1885.39	-0.00562882		2415.38	0.00089232		2945.41	-0.00037624		3475.4	0.00366002		4005.4	-0.01336414
295.59	0.04237865		825.59	0.00421521		1355.58	0.0056238		1885.59	-0.0053286		2415.58	0.00101795		2945.61	-0.00172007		3475.6	0.00420723		4005.6	-0.01313077
295.79	0.04202749		825.79	0.00364102		1355.78	0.00663211		1885.79	-0.00601323		2415.78	0.00078832		2945.81	-0.00212455		3475.8	0.00399316		4005.8	-0.01264952
295.99	0.04267594		825.99	0.00319737		1355.98	0.00786653		1885.99	-0.00647738		2415.98	0.00071126		2946.01	-0.00320694		3476	0.00415483		4006	-0.01293392
296.19	0.04272923		826.19	0.00313752		1356.18	0.00784684		1886.19	-0.00752962		2416.18	0.00109836		2946.21	-0.00296665		3476.2	0.00414547		4006.2	-0.01306934
296.39	0.04269497		826.39	0.00283677		1356.38	0.00718008		1886.39	-0.00782075		2416.38	0.00062527		2946.41	-0.00375958		3476.4	0.00354406		4006.4	-0.01352786
296.59	0.04302003		826.59	0.00378708		1356.58	0.0076237		1886.59	-0.00808739		2416.58	0.00044465		2946.61	-0.00423134		3476.6	0.00313046		4006.6	-0.01302771
296.79	0.04362348		826.79	0.0040289		1356.78	0.00707198		1886.79	-0.00879311		2416.78	0.00047279		2946.81	-0.00427596		3476.8	0.00444426		4006.8	-0.01305056
296.99	0.04387884		826.99	0.00529002		1356.98	0.0069186		1886.99	-0.00831949		2416.98	0.000367		2947.01	-0.0041427		3477	0.00452003		4007	-0.01309658
297.19	0.04326716		827.19	0.00664799		1357.18	0.00658737		1887.19	-0.00831703		2417.18	0.0009308		2947.21	-0.00366922		3477.2	0.00480386		4007.2	-0.01314542
297.39	0.04275821		827.39	0.00673672		1357.38	0.00659951		1887.39	-0.00928873		2417.38	0.00157844		2947.41	-0.00283518		3477.4	0.00486817		4007.4	-0.01281914
297.59	0.04190957		827.59	0.00729325		1357.58	0.00659916		1887.59	-0.00892632		2417.58	0.00195122		2947.61	-0.00196176		3477.6	0.00496037		4007.6	-0.01258049
297.79	0.04198348		827.79	0.00768038		1357.78	0.00602904		1887.79	-0.00853634		2417.78	0.00180865		2947.81	-0.00254508		3477.8	0.00520406		4007.8	-0.01200645
297.99	0.04148934		827.99	0.00810863		1357.98	0.00523701		1887.99	-0.00888203		2417.98	0.00168958		2948.01	-0.00215423		3478	0.00524801		4008	-0.0111058
298.19	0.04243525		828.19	0.00836663		1358.18	0.0052361		1888.19	-0.00904024		2418.18	0.00320718		2948.21	-0.00231032		3478.2	0.00510805		4008.2	-0.01021113
298.39	0.04275163		828.39	0.00825369		1358.38	0.00513801		1888.39	-0.00988663		2418.38	0.00353485		2948.41	-0.00207519		3478.4	0.00620025		4008.4	-0.0095716
298.59	0.04363515		828.59	0.00878057		1358.58	0.00490753		1888.59	-0.01046529		2418.58	0.00330529		2948.61	-0.00194872		3478.6	0.00580752		4008.6	-0.00951619
298.79	0.04343126		828.79	0.00911683		1358.78	0.0053227		1888.79	-0.00948238		2418.78	0.00368557		2948.81	-0.00162645		3478.8	0.00622167		4008.8	-0.0088792
298.99	0.04354226		828.99	0.00871771		1358.98	0.00480376		1888.99	-0.00837306		2418.98	0.00350814		2949.01	-0.00162755		3479	0.00548382		4009	-0.00910764
299.19	0.04368596		829.19	0.00906422		1359.18	0.00514819		1889.19	-0.00751337		2419.18	0.0043335		2949.21	-0.00130949		3479.2	0.00554456		4009.2	-0.00894628
299.39	0.04318166		829.39	0.00821893		1359.38	0.00471002		1889.39	-0.00804062		2419.38	0.0039095		2949.41	-0.00094193		3479.4	0.00575484		4009.4	-0.00869788
299.59	0.0433029		829.59	0.00709672		1359.58	0.00382219		1889.59	-0.00723275		2419.58	0.00331608		2949.61	-0.00075335		3479.6	0.00471623		4009.6	-0.00898282
299.79	0.04251566		829.79	0.00743182		1359.78	0.00518891		1889.79	-0.0071561		2419.78	0.00369193		2949.81	-0.000391		3479.8	0.00335761		4009.8	-0.00944154
299.99	0.04345005		829.99	0.00829488		1359.98	0.00519093		1889.99	-0.0076143		2419.98	0.00319207		2950.01	-0.00066067		3480	0.0025617		4010	-0.00936208
300.19	0.04386818		830.19	0.00834046		1360.18	0.00501025		1890.19	-0.00720392		2420.18	0.00310735		2950.21	-0.00117158		3480.2	0.0020532		4010.2	-0.01027866
300.39	0.0441143		830.39	0.00792798		1360.38	0.0036537		1890.39	-0.0074585		2420.38	0.00276831		2950.41	-0.00180073		3480.4	0.00112575		4010.4	-0.01068611
300.59	0.0443519		830.59	0.00696574		1360.58	0.00419598		1890.59	-0.00766244		2420.58	0.00216211		2950.61	-0.00202501		3480.6	0.00084509		4010.6	-0.0104163
300.79	0.0438008		830.79	0.0069637		1360.78	0.00397939		1890.79	-0.00801185		2420.78	0.0016894		2950.81	-0.00228956		3480.8	0.00115242		4010.8	-0.0116783
300.99	0.04309841		830.99	0.00706569		1360.98	0.00481536		1890.99	-0.00803678		2420.98	0.00123736		2951.01	-0.00180692		3481	0.00169923		4011	-0.01187169
301.19	0.04280388		831.19	0.00687078		1361.18	0.0062091		1891.19	-0.00854087		2421.18	0.00097229		2951.21	-0.00097232		3481.2	0.00255016		4011.2	-0.01229289
301.39	0.0428712		831.39	0.00605965		1361.38	0.00712231		1891.39	-0.00905352		2421.38	-0.00001169		2951.41	-0.00068317		3481.4	0.00218049		4011.4	-0.01241178
301.59	0.0430775		831.59	0.0063463		1361.58	0.008406		1891.59	-0.00918227		2421.58	0.00009227		2951.61	-0.00031998		3481.6	0.00302067		4011.6	-0.01261734
301.79	0.04392823		831.79	0.00556931		1361.78	0.00868942		1891.79	-0.00943259		2421.78	-0.00009211		2951.81	-0.00066417		3481.8	0.00411209		4011.8	-0.01250422
301.99	0.04431007		831.99	0.00600944		1361.98	0.00819392		1891.99	-0.00977732		2421.98	0.00025898		2952.01	-0.00114925		3482	0.00475942		4012	-0.01269024
302.19	0.0451953		832.19	0.00623148		1362.18	0.00881457		1892.19	-0.0101962		2422.18	0.00216796		2952.21	-0.0014799		3482.2	0.00434843		4012.2	-0.0121573
302.39	0.04594573		832.39	0.0058014		1362.38	0.00935135		1892.39	-0.01092217		2422.38	0.00233143		2952.41	-0.00188615		3482.4	0.00511081		4012.4	-0.01171655
302.59	0.04653467		832.59	0.00554439		1362.58	0.00911948		1892.59	-0.01076803		2422.58	0.00291341		2952.61	-0.00141861		3482.6	0.00518859		4012.6	-0.01169209
302.79	0.04642724		832.79	0.00573415		1362.78	0.00939132		1892.79	-0.01046948		2422.78	0.00374948		2952.81	-0.00136597		3482.8	0.00524785		4012.8	-0.0113813
302.99	0.04611045		832.99	0.00502448		1362.98	0.00929399		1892.99	-0.01032045		2422.98	0.00496927		2953.01	-0.00103992		3483	0.00532801		4013	-0.01148862
303.19	0.04553001		833.19	0.00521222		1363.18	0.00928627		1893.19	-0.00957064		2423.18	0.00523694		2953.21	-0.00115738		3483.2	0.00533945		4013.2	-0.01081735
303.39	0.0451612		833.39	0.00483143		1363.38	0.00787178		1893.39	-0.01001006		2423.38	0.00478769		2953.41	-0.00132544		3483.4	0.00493537		4013.4	-0.01069494
303.59	0.04453488		833.59	0.00595692		1363.58	0.00736632		1893.59	-0.00911409		2423.58	0.00503394		2953.61	-0.00131516		3483.6	0.00381658		4013.6	-0.01154843
303.79	0.0449578		833.79	0.00774602		1363.78	0.00778058		1893.79	-0.00975683		2423.78	0.00518902		2953.81	-0.00231703		3483.8	0.003464		4013.8	-0.01155398
303.99	0.04604064		833.99	0.00846684		1363.98	0.00645897		1893.99	-0.00915591		2423.98	0.00478858		2954.01	-0.00204742		3484	0.00405437		4014	-0.01164376
304.19	0.04630926		834.19	0.00824045		1364.18	0.00610298		1894.19	-0.00839683		2424.18	0.00452528		2954.21	-0.00205245		3484.2	0.004498		4014.2	-0.01246388
304.39	0.04698914		834.39	0.00820403		1364.38	0.00477211		1894.39	-0.00855787		2424.38	0.00442393		2954.41	-0.00188738		3484.4	0.00409884		4014.4	-0.01224782
304.59	0.04643556		834.59	0.00770458		1364.58	0.00484069		1894.59	-0.00838466		2424.58	0.00349813		2954.61	-0.00098428		3484.6	0.00416584		4014.6	-0.01204548
304.79	0.04629641		834.79	0.00860761		1364.78	0.00541936		1894.79	-0.00849743		2424.78	0.00250546		2954.81	-0.00025539		3484.8	0.00473028		4014.8	-0.01293739
304.99	0.04645819		834.99	0.00791743		1364.98	0.00648158		1894.99	-0.00908556		2424.98	0.00156422		2955.01	-0.00028416		3485	0.00568919		4015	-0.01300044
305.19	0.04684025		835.19	0.00749387		1365.18	0.00712109		1895.19	-0.00939507		2425.18	0.00037632		2955.21	0.00074366		3485.2	0.00446638		4015.2	-0.01349746
305.39	0.04701821		835.39	0.00697478		1365.38	0.00711974		1895.39	-0.01007573		2425.38	-0.0013379		2955.41	0.00094349		3485.4	0.00384692		4015.4	-0.01394594
305.59	0.04726549		835.59	0.00760687		1365.58	0.00664986		1895.59	-0.01036933		2425.58	-0.00182329		2955.61	0.00147563		3485.6	0.00521336		4015.6	-0.0148108
305.79	0.04795263		835.79	0.00674889		1365.78	0.00559631		1895.79	-0.01075622		2425.78	-0.00284059		2955.81	0.0010821		3485.8	0.00453925		4015.8	-0.01465482
305.99	0.04798253		835.99	0.00626003		1365.98	0.00495112		1895.99	-0.01140538		2425.98	-0.00330605		2956.01	0.00044409		3486	0.00424908		4016	-0.01534181
306.19	0.04864113		836.19	0.00562386		1366.18	0.00468532		1896.19	-0.01236773		2426.18	-0.00332865		2956.21	0.00011039		3486.2	0.00374872		4016.2	-0.01442524
306.39	0.04904348		836.39	0.0050649		1366.38	0.00440959		1896.39	-0.01301689		2426.38	-0.00313358		2956.41	-0.00061664		3486.4	0.00457559		4016.4	-0.0140741
306.59	0.04966807		836.59	0.00440119		1366.58	0.00427092		1896.59	-0.01302262		2426.58	-0.00311499		2956.61	-0.00086058		3486.6	0.00431471		4016.6	-0.0139304
306.79	0.04909796		836.79	0.00478862		1366.78	0.00477685		1896.79	-0.01243729		2426.78	-0.0023382		2956.81	-0.00080668		3486.8	0.00445265		4016.8	-0.01340182
306.99	0.04864945		836.99	0.00459797		1366.98	0.00478849		1896.99	-0.01168555		2426.98	-0.00235319		2957.01	-0.00132756		3487	0.00414416		4017	-0.01291169
307.19	0.04743522		837.19	0.00511508		1367.18	0.00506457		1897.19	-0.01064957		2427.18	-0.00253351		2957.21	-0.00223355		3487.2	0.0031273		4017.2	-0.01219771
307.39	0.04776247		837.39	0.00556247		1367.38	0.00434247		1897.39	-0.01116248		2427.38	-0.00217827		2957.41	-0.00253293		3487.4	0.00261372		4017.4	-0.01217951
307.59	0.04724023		837.59	0.00645052		1367.58	0.00451419		1897.59	-0.01093765		2427.58	-0.00169512		2957.61	-0.00309691		3487.6	0.00242363		4017.6	-0.01240189
307.79	0.0476886		837.79	0.00693193		1367.78	0.00515223		1897.79	-0.01131033		2427.78	-0.0015573		2957.81	-0.00328352		3487.8	0.00267146		4017.8	-0.01193052
307.99	0.04756047		837.99	0.00710482		1367.98	0.00549794		1897.99	-0.01010078		2427.98	-0.00087819		2958.01	-0.00342355		3488	0.00324738		4018	-0.01210664
308.19	0.04701524		838.19	0.00710195		1368.18	0.00605316		1898.19	-0.01027823		2428.18	0.00044663		2958.21	-0.0038247		3488.2	0.00307363		4018.2	-0.01234414
308.39	0.04740844		838.39	0.0071448		1368.38	0.00583089		1898.39	-0.01032187		2428.38	0.00099115		2958.41	-0.00420009		3488.4	0.00248562		4018.4	-0.01171065
308.59	0.046307		838.59	0.00682997		1368.58	0.00620517		1898.59	-0.01044034		2428.58	0.00149601		2958.61	-0.004044		3488.6	0.00322219		4018.6	-0.01157969
308.79	0.04566261		838.79	0.00686728		1368.78	0.00688098		1898.79	-0.01042791		2428.78	0.00148525		2958.81	-0.00384391		3488.8	0.00342997		4018.8	-0.0119333
308.99	0.04541138		838.99	0.00585784		1368.98	0.00687518		1898.99	-0.011214		2428.98	0.00114959		2959.01	-0.00400265		3489	0.00299005		4019	-0.01222352
309.19	0.0455867		839.19	0.00672984		1369.18	0.00611583		1899.19	-0.01120859		2429.18	0.00042302		2959.21	-0.00278383		3489.2	0.00190228		4019.2	-0.01263699
309.39	0.04537217		839.39	0.00671232		1369.38	0.00636948		1899.39	-0.01129248		2429.38	0.00056613		2959.41	-0.00304643		3489.4	0.0026184		4019.4	-0.01366299
309.59	0.04533189		839.59	0.00744304		1369.58	0.00582882		1899.59	-0.01188911		2429.58	0.00018193		2959.61	-0.00197798		3489.6	0.00289339		4019.6	-0.01397325
309.79	0.04532735		839.79	0.00716202		1369.78	0.00618594		1899.79	-0.01265315		2429.78	-0.00023975		2959.81	-0.001627		3489.8	0.00226915		4019.8	-0.01381688
309.99	0.04504288		839.99	0.00719415		1369.98	0.00555478		1899.99	-0.01251741		2429.98	0.00001286		2960.01	-0.00134842		3490	0.00289386		4020	-0.01412245
310.19	0.04600087		840.19	0.00788433		1370.18	0.00454857		1900.19	-0.01303407		2430.18	-0.00006465		2960.21	-0.00125171		3490.2	0.00344128		4020.2	-0.01403529
310.39	0.04649335		840.39	0.00776952		1370.38	0.00442728		1900.39	-0.01252538		2430.38	0.00091022		2960.41	-0.00047765		3490.4	0.00377292		4020.4	-0.01456408
310.59	0.04665771		840.59	0.00738452		1370.58	0.0050157		1900.59	-0.01196701		2430.58	0.00109231		2960.61	-0.00022846		3490.6	0.00352629		4020.6	-0.01505396
310.79	0.04550658		840.79	0.00750946		1370.78	0.00493175		1900.79	-0.01096097		2430.78	0.00193382		2960.81	0.00048028		3490.8	0.00390801		4020.8	-0.01424068
310.99	0.04539792		840.99	0.00753665		1370.98	0.00566981		1900.99	-0.01067006		2430.98	0.00175778		2961.01	0.00009036		3491	0.0033378		4021	-0.01444639
311.19	0.04495748		841.19	0.00804604		1371.18	0.00578839		1901.19	-0.01054904		2431.18	0.00195673		2961.21	0.00083813		3491.2	0.00323119		4021.2	-0.01435255
311.39	0.04522271		841.39	0.00820608		1371.38	0.00513617		1901.39	-0.01060324		2431.38	0.00231973		2961.41	0.00096893		3491.4	0.0032625		4021.4	-0.01391897
311.59	0.04552979		841.59	0.00851059		1371.58	0.00551686		1901.59	-0.01070745		2431.58	0.00185515		2961.61	0.00102388		3491.6	0.0034467		4021.6	-0.01384147
311.79	0.0448382		841.79	0.00812572		1371.78	0.0059757		1901.79	-0.01107902		2431.78	0.00128841		2961.81	0.00112236		3491.8	0.00325669		4021.8	-0.01402934
311.99	0.04500911		841.99	0.00777738		1371.98	0.00626693		1901.99	-0.01096182		2431.98	0.00200492		2962.01	0.00134741		3492	0.00305972		4022	-0.0138165
312.19	0.04502337		842.19	0.00713		1372.18	0.00581666		1902.19	-0.01135095		2432.18	0.00161851		2962.21	0.00139709		3492.2	0.00286081		4022.2	-0.01307148
312.39	0.04471059		842.39	0.00632351		1372.38	0.0055713		1902.39	-0.01121215		2432.38	0.00044014		2962.41	0.00122647		3492.4	0.00252467		4022.4	-0.01247713
312.59	0.04402353		842.59	0.00623238		1372.58	0.00555077		1902.59	-0.01079582		2432.58	0.00099926		2962.61	0.00108813		3492.6	0.00200598		4022.6	-0.01171331
312.79	0.04408421		842.79	0.00587951		1372.78	0.00557069		1902.79	-0.01027084		2432.78	0.00042879		2962.81	0.00163616		3492.8	0.00175767		4022.8	-0.0125972
312.99	0.04468735		842.99	0.00595154		1372.98	0.00563465		1902.99	-0.01088196		2432.98	0.00034841		2963.01	0.00177699		3493	0.00123357		4023	-0.01272116
313.19	0.04587962		843.19	0.00688405		1373.18	0.00580654		1903.19	-0.01037984		2433.18	-0.00024718		2963.21	0.00122544		3493.2	0.00079832		4023.2	-0.01292821
313.39	0.04648975		843.39	0.00627477		1373.38	0.00665985		1903.39	-0.01042189		2433.38	-0.00020507		2963.41	0.00087385		3493.4	0.00051001		4023.4	-0.01290054
313.59	0.04704527		843.59	0.0064802		1373.58	0.00733452		1903.59	-0.00979163		2433.58	-0.00138728		2963.61	0.00147772		3493.6	0.0005513		4023.6	-0.01278572
313.79	0.04758747		843.79	0.00642418		1373.78	0.00723356		1903.79	-0.00880279		2433.78	-0.00113603		2963.81	0.00117711		3493.8	0.00131641		4023.8	-0.01297353
313.99	0.04826278		843.99	0.00649511		1373.98	0.00699127		1903.99	-0.00801218		2433.98	-0.00045086		2964.01	0.00097035		3494	0.00165658		4024	-0.0142062
314.19	0.04842533		844.19	0.00603174		1374.18	0.00677979		1904.19	-0.00817436		2434.18	-0.00065265		2964.21	0.00025508		3494.2	0.00157135		4024.2	-0.01569687
314.39	0.04811634		844.39	0.00565703		1374.38	0.0067634		1904.39	-0.00695425		2434.38	0.00003479		2964.41	-0.00021166		3494.4	0.00160859		4024.4	-0.0161634
314.59	0.04790483		844.59	0.00614906		1374.58	0.00631005		1904.59	-0.00643572		2434.58	0.00020827		2964.61	-0.00177745		3494.6	0.00165218		4024.6	-0.01646351
314.79	0.04828769		844.79	0.00613876		1374.78	0.00595786		1904.79	-0.00667334		2434.78	0.00063467		2964.81	-0.00173344		3494.8	0.00205756		4024.8	-0.01666105
314.99	0.04869667		844.99	0.00754434		1374.98	0.00593185		1904.99	-0.00669493		2434.98	0.00050395		2965.01	-0.00224248		3495	0.00189173		4025	-0.01720829
315.19	0.04881552		845.19	0.00744486		1375.18	0.00496062		1905.19	-0.00653114		2435.18	0.00043384		2965.21	-0.00180493		3495.2	0.0026181		4025.2	-0.01741725
315.39	0.04945425		845.39	0.00740243		1375.38	0.00450268		1905.39	-0.00601579		2435.38	0.00026456		2965.41	-0.00227569		3495.4	0.00330672		4025.4	-0.01702406
315.59	0.04996179		845.59	0.00802384		1375.58	0.00446278		1905.59	-0.006057		2435.58	0.0002282		2965.61	-0.00226002		3495.6	0.0039987		4025.6	-0.01728673
315.79	0.04958563		845.79	0.00803401		1375.78	0.00462578		1905.79	-0.00629298		2435.78	0.00033873		2965.81	-0.00193054		3495.8	0.00425248		4025.8	-0.01670841
315.99	0.0501327		845.99	0.00743352		1375.98	0.00489497		1905.99	-0.00614191		2435.98	0.0007992		2966.01	-0.00200274		3496	0.00458538		4026	-0.01560085
316.19	0.04944502		846.19	0.00708675		1376.18	0.00472073		1906.19	-0.00659555		2436.18	0.0005034		2966.21	-0.00243686		3496.2	0.00518101		4026.2	-0.01460002
316.39	0.04914975		846.39	0.00701716		1376.38	0.00566243		1906.39	-0.00645642		2436.38	0.0013823		2966.41	-0.00209048		3496.4	0.00545308		4026.4	-0.01490927
316.59	0.04967492		846.59	0.00680182		1376.58	0.00621882		1906.59	-0.00664879		2436.58	0.0018412		2966.61	-0.00157906		3496.6	0.00455568		4026.6	-0.01420495
316.79	0.05028628		846.79	0.00755317		1376.78	0.00674847		1906.79	-0.00685844		2436.78	0.00217362		2966.81	-0.00147874		3496.8	0.00535546		4026.8	-0.01475503
316.99	0.05040768		846.99	0.00698211		1376.98	0.00722565		1906.99	-0.00718923		2436.98	0.00282221		2967.01	-0.00137534		3497	0.00428876		4027	-0.01387996
317.19	0.05045241		847.19	0.0067327		1377.18	0.00799408		1907.19	-0.00723788		2437.18	0.00278675		2967.21	-0.0014819		3497.2	0.00404216		4027.2	-0.01369943
317.39	0.04993829		847.39	0.00647334		1377.38	0.00901726		1907.39	-0.00709665		2437.38	0.00246978		2967.41	-0.00124694		3497.4	0.00386226		4027.4	-0.01370321
317.59	0.05000373		847.59	0.00631798		1377.58	0.00972466		1907.59	-0.00685672		2437.58	0.00197826		2967.61	-0.00086684		3497.6	0.00376334		4027.6	-0.01308529
317.79	0.0493091		847.79	0.00623317		1377.78	0.00995131		1907.79	-0.00701733		2437.78	0.00255414		2967.81	-0.00132201		3497.8	0.00329408		4027.8	-0.01284504
317.99	0.0495227		847.99	0.00649739		1377.98	0.0100639		1907.99	-0.0073653		2437.98	0.0030009		2968.01	-0.00104793		3498	0.00268616		4028	-0.01302854
318.19	0.04930788		848.19	0.00654981		1378.18	0.00972067		1908.19	-0.00703448		2438.18	0.00321963		2968.21	-0.00121102		3498.2	0.00207525		4028.2	-0.01281581
318.39	0.04954616		848.39	0.00718667		1378.38	0.00916904		1908.39	-0.00745202		2438.38	0.00304034		2968.41	-0.00214549		3498.4	0.00201506		4028.4	-0.0135987
318.59	0.05037001		848.59	0.00695045		1378.58	0.00757885		1908.59	-0.00821368		2438.58	0.00382327		2968.61	-0.00198157		3498.6	0.00130224		4028.6	-0.01335715
318.79	0.049844		848.79	0.0068666		1378.78	0.00689857		1908.79	-0.00910616		2438.78	0.00396409		2968.81	-0.0011654		3498.8	0.00097091		4028.8	-0.01359447
318.99	0.04976385		848.99	0.00738428		1378.98	0.00677691		1908.99	-0.008385		2438.98	0.00346474		2969.01	-0.00074007		3499	0.00148269		4029	-0.01370613
319.19	0.05022987		849.19	0.00690406		1379.18	0.00669698		1909.19	-0.00820378		2439.18	0.00359914		2969.21	0.00063538		3499.2	0.00210838		4029.2	-0.01345479
319.39	0.05077631		849.39	0.00649471		1379.38	0.00626314		1909.39	-0.00847509		2439.38	0.00359776		2969.41	0.00070476		3499.4	0.00215331		4029.4	-0.01333103
319.59	0.05118976		849.59	0.00689994		1379.58	0.00645178		1909.59	-0.0086018		2439.58	0.00345034		2969.61	0.00090671		3499.6	0.00276381		4029.6	-0.01361704
319.79	0.05187424		849.79	0.00665487		1379.78	0.00706433		1909.79	-0.00889804		2439.78	0.00307274		2969.81	0.00125169		3499.8	0.0027736		4029.8	-0.01361266
319.99	0.05159601		849.99	0.00630551		1379.98	0.00773771		1909.99	-0.0092069		2439.98	0.00234301		2970.01	0.00044633		3500	0.00264514		4030	-0.01322183
320.19	0.05163397		850.19	0.00675439		1380.18	0.00781835		1910.19	-0.00946506		2440.18	0.00225142		2970.21	0.00028968		3500.2	0.00299857		4030.2	-0.01382114
320.39	0.05242786		850.39	0.00747871		1380.38	0.00854085		1910.39	-0.00819983		2440.38	0.0023459		2970.41	0.00098897		3500.4	0.00375785		4030.4	-0.01444479
320.59	0.0528789		850.59	0.00756005		1380.58	0.00854669		1910.59	-0.00900046		2440.58	0.00194729		2970.61	0.00068655		3500.6	0.00354006		4030.6	-0.01391613
320.79	0.05244448		850.79	0.00847439		1380.78	0.00931071		1910.79	-0.00955397		2440.78	0.00231726		2970.81	0.000477		3500.8	0.00408311		4030.8	-0.01338091
320.99	0.05207768		850.99	0.00701468		1380.98	0.01003496		1910.99	-0.01012888		2440.98	0.00266233		2971.01	0.00081999		3501	0.00415499		4031	-0.01380259
321.19	0.05221883		851.19	0.00740063		1381.18	0.01037953		1911.19	-0.01013615		2441.18	0.00168425		2971.21	0.00032031		3501.2	0.00435413		4031.2	-0.0133533
321.39	0.05228942		851.39	0.00696895		1381.38	0.01078359		1911.39	-0.01052794		2441.38	0.00063987		2971.41	-0.00010964		3501.4	0.00433199		4031.4	-0.01210691
321.59	0.05243696		851.59	0.00678296		1381.58	0.01037552		1911.59	-0.01145215		2441.58	0.00024839		2971.61	-0.00049676		3501.6	0.00473273		4031.6	-0.01184551
321.79	0.05211412		851.79	0.00662434		1381.78	0.01036296		1911.79	-0.01109262		2441.78	0.00043263		2971.81	-0.00108222		3501.8	0.00444387		4031.8	-0.01152226
321.99	0.05345812		851.99	0.0070206		1381.98	0.00973724		1911.99	-0.01090444		2441.98	0.00045452		2972.01	-0.0006385		3502	0.00473508		4032	-0.01137752
322.19	0.05459539		852.19	0.00665558		1382.18	0.00974593		1912.19	-0.01104762		2442.18	-0.00020132		2972.21	-0.00087898		3502.2	0.00435478		4032.2	-0.01171696
322.39	0.05471176		852.39	0.00670242		1382.38	0.00838943		1912.39	-0.01129622		2442.38	-0.00080134		2972.41	-0.00185644		3502.4	0.00327596		4032.4	-0.01249492
322.59	0.05486689		852.59	0.00594704		1382.58	0.00775171		1912.59	-0.01054402		2442.58	-0.00067476		2972.61	-0.00081986		3502.6	0.00265394		4032.6	-0.01221712
322.79	0.05462153		852.79	0.00569085		1382.78	0.00748766		1912.79	-0.01050225		2442.78	-0.00164757		2972.81	-0.00053577		3502.8	0.00274636		4032.8	-0.01173328
322.99	0.05469217		852.99	0.00493021		1382.98	0.00768901		1912.99	-0.00959211		2442.98	-0.00191311		2973.01	0.00073603		3503	0.00331445		4033	-0.01173006
323.19	0.05385856		853.19	0.00419092		1383.18	0.00713968		1913.19	-0.00874265		2443.18	-0.00178885		2973.21	0.00050102		3503.2	0.00339714		4033.2	-0.01204872
323.39	0.0538984		853.39	0.00367591		1383.38	0.00672936		1913.39	-0.00836595		2443.38	-0.00251538		2973.41	0.00006451		3503.4	0.00308135		4033.4	-0.01229605
323.59	0.0542183		853.59	0.00348223		1383.58	0.00717921		1913.59	-0.00746337		2443.58	-0.00342315		2973.61	-0.00098727		3503.6	0.00328006		4033.6	-0.01249521
323.79	0.05408017		853.79	0.00383419		1383.78	0.00730732		1913.79	-0.0075407		2443.78	-0.00326167		2973.81	-0.00075846		3503.8	0.0027093		4033.8	-0.01205071
323.99	0.05377009		853.99	0.00392017		1383.98	0.00804383		1913.99	-0.00734501		2443.98	-0.0036231		2974.01	-0.00096009		3504	0.00292034		4034	-0.01182731
324.19	0.05369682		854.19	0.00490208		1384.18	0.00823701		1914.19	-0.00696196		2444.18	-0.0030153		2974.21	-0.0010765		3504.2	0.00341022		4034.2	-0.01279261
324.39	0.053769		854.39	0.00577551		1384.38	0.00906516		1914.39	-0.00680133		2444.38	-0.00241888		2974.41	-0.00010906		3504.4	0.00387427		4034.4	-0.01248917
324.59	0.05319542		854.59	0.00600013		1384.58	0.00954453		1914.59	-0.00756905		2444.58	-0.00230388		2974.61	-0.0003805		3504.6	0.00401986		4034.6	-0.01269113
324.79	0.05207883		854.79	0.00614878		1384.78	0.01075795		1914.79	-0.00828454		2444.78	-0.00131315		2974.81	-0.00014682		3504.8	0.00426517		4034.8	-0.01283609
324.99	0.05218963		854.99	0.00638263		1384.98	0.01178066		1914.99	-0.0089061		2444.98	-0.00034142		2975.01	-0.00014832		3505	0.00501004		4035	-0.01443261
325.19	0.05248918		855.19	0.00727815		1385.18	0.01278645		1915.19	-0.00994955		2445.18	-0.00051629		2975.21	-0.00121214		3505.2	0.00431975		4035.2	-0.01434237
325.39	0.05211514		855.39	0.00764733		1385.38	0.01338982		1915.39	-0.01074694		2445.38	-0.00003355		2975.41	-0.00176741		3505.4	0.00471617		4035.4	-0.01476593
325.59	0.05261453		855.59	0.00872007		1385.58	0.01406072		1915.59	-0.01154745		2445.58	0.00043889		2975.61	-0.00234871		3505.6	0.00465116		4035.6	-0.01634126
325.79	0.05298194		855.79	0.00904193		1385.78	0.0148929		1915.79	-0.01131238		2445.78	0.00071983		2975.81	-0.00242211		3505.8	0.00381489		4035.8	-0.0161444
325.99	0.05442253		855.99	0.00951876		1385.98	0.01459913		1915.99	-0.0120419		2445.98	0.00106347		2976.01	-0.00237007		3506	0.00331379		4036	-0.0157057
326.19	0.05485778		856.19	0.00898648		1386.18	0.01409807		1916.19	-0.0127551		2446.18	0.00077435		2976.21	-0.00334281		3506.2	0.0025006		4036.2	-0.0163336
326.39	0.05449601		856.39	0.00929439		1386.38	0.01298228		1916.39	-0.01209005		2446.38	0.0008837		2976.41	-0.00431229		3506.4	0.00110418		4036.4	-0.01642044
326.59	0.0540205		856.59	0.00863644		1386.58	0.01276713		1916.59	-0.01194577		2446.58	0.00143225		2976.61	-0.0038549		3506.6	0.00121511		4036.6	-0.01606752
326.79	0.05384023		856.79	0.00811076		1386.78	0.0116461		1916.79	-0.0122084		2446.78	0.00171454		2976.81	-0.00417969		3506.8	0.00133438		4036.8	-0.01499001
326.99	0.05257527		856.99	0.00750192		1386.98	0.01156734		1916.99	-0.01078748		2446.98	0.0020922		2977.01	-0.00428094		3507	0.00149052		4037	-0.01535187
327.19	0.05284591		857.19	0.00771661		1387.18	0.01048912		1917.19	-0.0096457		2447.18	0.00145714		2977.21	-0.00541299		3507.2	0.00137266		4037.2	-0.01581795
327.39	0.05335272		857.39	0.00690511		1387.38	0.00960948		1917.39	-0.00906081		2447.38	0.00062869		2977.41	-0.00486663		3507.4	0.00097517		4037.4	-0.01518319
327.59	0.05402599		857.59	0.00613195		1387.58	0.00929087		1917.59	-0.00883565		2447.58	0.00079627		2977.61	-0.00529959		3507.6	0.00135605		4037.6	-0.01509879
327.79	0.05336503		857.79	0.00618759		1387.78	0.00812799		1917.79	-0.0081095		2447.78	0.00065294		2977.81	-0.00517907		3507.8	0.0012727		4037.8	-0.01470294
327.99	0.0540727		857.99	0.00624383		1387.98	0.00813375		1917.99	-0.00707517		2447.98	0.00044584		2978.01	-0.00459985		3508	0.0013445		4038	-0.01437851
328.19	0.05403186		858.19	0.0068072		1388.18	0.00729869		1918.19	-0.00668536		2448.18	0.00037559		2978.21	-0.00424929		3508.2	0.00179822		4038.2	-0.0148448
328.39	0.05444079		858.39	0.00629351		1388.38	0.00653242		1918.39	-0.00642388		2448.38	0.00072758		2978.41	-0.00271974		3508.4	0.00231939		4038.4	-0.01407404
328.59	0.05552151		858.59	0.00614484		1388.58	0.00615068		1918.59	-0.00613074		2448.58	0.00030158		2978.61	-0.00220518		3508.6	0.0024901		4038.6	-0.01489819
328.79	0.05537717		858.79	0.00690747		1388.78	0.00628376		1918.79	-0.0069226		2448.78	0.00067746		2978.81	-0.00140415		3508.8	0.00307386		4038.8	-0.01503936
328.99	0.05572979		858.99	0.00749188		1388.98	0.00647621		1918.99	-0.00680978		2448.98	0.00030586		2979.01	-0.00132998		3509	0.00333492		4039	-0.01600778
329.19	0.0564344		859.19	0.00773088		1389.18	0.00677532		1919.19	-0.00698339		2449.18	-0.00013394		2979.21	-0.00152646		3509.2	0.00365613		4039.2	-0.01554758
329.39	0.05708381		859.39	0.00786613		1389.38	0.00633612		1919.39	-0.00615146		2449.38	-0.00016607		2979.41	-0.00154629		3509.4	0.00419045		4039.4	-0.01504345
329.59	0.05753073		859.59	0.00758417		1389.58	0.00630809		1919.59	-0.00639892		2449.58	-0.00010679		2979.61	-0.00135354		3509.6	0.0045478		4039.6	-0.01436741
329.79	0.05754866		859.79	0.00763777		1389.78	0.00631472		1919.79	-0.0061478		2449.78	-0.00017414		2979.81	-0.00048854		3509.8	0.00508388		4039.8	-0.0133273
329.99	0.05803146		859.99	0.00721383		1389.98	0.00576147		1919.99	-0.00672201		2449.98	0.00070544		2980.01	0.00009249		3510	0.00539667		4040	-0.01297576
330.19	0.05757474		860.19	0.00681815		1390.18	0.00545473		1920.19	-0.00714994		2450.18	0.0011214		2980.21	-0.00001181		3510.2	0.00563693		4040.2	-0.01286071
330.39	0.05633391		860.39	0.00766878		1390.38	0.00594272		1920.39	-0.00709736		2450.38	0.00195583		2980.41	-0.00022661		3510.4	0.00499991		4040.4	-0.01189052
330.59	0.05542999		860.59	0.0076494		1390.58	0.00643483		1920.59	-0.00772753		2450.58	0.00346018		2980.61	-0.00027085		3510.6	0.00709925		4040.6	-0.01097283
330.79	0.05516062		860.79	0.00822291		1390.78	0.00711695		1920.79	-0.0077735		2450.78	0.00401822		2980.81	-0.00111993		3510.8	0.00724336		4040.8	-0.01064673
330.99	0.05492133		860.99	0.00817539		1390.98	0.00794432		1920.99	-0.00796218		2450.98	0.00406272		2981.01	-0.00154749		3511	0.00779886		4041	-0.01067116
331.19	0.05504401		861.19	0.00822885		1391.18	0.00795688		1921.19	-0.00813518		2451.18	0.0039943		2981.21	-0.00256585		3511.2	0.00784446		4041.2	-0.01060672
331.39	0.05433739		861.39	0.00775908		1391.38	0.00811253		1921.39	-0.00806377		2451.38	0.00408821		2981.41	-0.00287149		3511.4	0.00807737		4041.4	-0.01080193
331.59	0.05421178		861.59	0.00808746		1391.58	0.00863901		1921.59	-0.00844603		2451.58	0.00438613		2981.61	-0.00385132		3511.6	0.00795605		4041.6	-0.01135032
331.79	0.0530263		861.79	0.008634		1391.78	0.0087236		1921.79	-0.00871705		2451.78	0.00416045		2981.81	-0.00465516		3511.8	0.00591384		4041.8	-0.01148817
331.99	0.05340803		861.99	0.00979398		1391.98	0.00891967		1921.99	-0.00890278		2451.98	0.00394317		2982.01	-0.00308088		3512	0.00522801		4042	-0.01172506
332.19	0.05306909		862.19	0.00909061		1392.18	0.00882891		1922.19	-0.0091132		2452.18	0.00353191		2982.21	-0.00235692		3512.2	0.00449193		4042.2	-0.01236077
332.39	0.05382939		862.39	0.00943156		1392.38	0.00855291		1922.39	-0.00894589		2452.38	0.00302861		2982.41	-0.00145459		3512.4	0.00304004		4042.4	-0.01254219
332.59	0.05425965		862.59	0.01025146		1392.58	0.00879163		1922.59	-0.00881498		2452.58	0.00160729		2982.61	-0.00146963		3512.6	0.00219402		4042.6	-0.01344932
332.79	0.05383772		862.79	0.01013674		1392.78	0.00813972		1922.79	-0.00901869		2452.78	0.00113749		2982.81	-0.00146047		3512.8	0.00141487		4042.8	-0.01450798
332.99	0.0546804		862.99	0.00879395		1392.98	0.00789494		1922.99	-0.00846299		2452.98	0.00039771		2983.01	-0.00178201		3513	0.00073094		4043	-0.01548294
333.19	0.05530595		863.19	0.00818017		1393.18	0.00660405		1923.19	-0.00764761		2453.18	0.00017251		2983.21	-0.00182906		3513.2	0.00020786		4043.2	-0.01553753
333.39	0.05525987		863.39	0.00780603		1393.38	0.00604077		1923.39	-0.0076625		2453.38	0.00085403		2983.41	-0.0019266		3513.4	-0.00037914		4043.4	-0.01532041
333.59	0.05535999		863.59	0.00744932		1393.58	0.00589983		1923.59	-0.00761787		2453.58	0.00151101		2983.61	-0.00148033		3513.6	-0.00027702		4043.6	-0.01496358
333.79	0.0551457		863.79	0.00689843		1393.78	0.00557057		1923.79	-0.00697685		2453.78	0.00193927		2983.81	-0.00024885		3513.8	-0.00045293		4043.8	-0.01525713
333.99	0.05568454		863.99	0.00648277		1393.98	0.00615182		1923.99	-0.00741458		2453.98	0.00349405		2984.01	-0.00031326		3514	-0.00049321		4044	-0.01557123
334.19	0.05568371		864.19	0.00639638		1394.18	0.00632228		1924.19	-0.00796035		2454.18	0.00335839		2984.21	-0.00017354		3514.2	-0.00033024		4044.2	-0.01468214
334.39	0.05527445		864.39	0.00645387		1394.38	0.00676589		1924.39	-0.00830833		2454.38	0.00434635		2984.41	-0.000568		3514.4	0.00038067		4044.4	-0.0148845
334.59	0.05570112		864.59	0.00564615		1394.58	0.00739043		1924.59	-0.00800976		2454.58	0.00558585		2984.61	-0.00025228		3514.6	0.00208687		4044.6	-0.01423059
334.79	0.05612182		864.79	0.00549789		1394.78	0.00706663		1924.79	-0.00861828		2454.78	0.00553913		2984.81	-0.00018743		3514.8	0.00141958		4044.8	-0.01319126
334.99	0.05623585		864.99	0.00505852		1394.98	0.00766407		1924.99	-0.00962597		2454.98	0.00522941		2985.01	-0.00115078		3515	0.00190316		4045	-0.01250017
335.19	0.05613094		865.19	0.0049145		1395.18	0.00802447		1925.19	-0.01062718		2455.18	0.00496627		2985.21	-0.00187375		3515.2	0.00217869		4045.2	-0.011379
335.39	0.05598163		865.39	0.00553397		1395.38	0.00764493		1925.39	-0.01125442		2455.38	0.00437852		2985.41	-0.00181965		3515.4	0.00224742		4045.4	-0.01162827
335.59	0.05611308		865.59	0.00596487		1395.58	0.00789965		1925.59	-0.01224569		2455.58	0.004529		2985.61	-0.00184265		3515.6	0.00172031		4045.6	-0.01237787
335.79	0.05504045		865.79	0.00668213		1395.78	0.00891924		1925.79	-0.01247961		2455.78	0.00419687		2985.81	-0.00082284		3515.8	0.0008131		4045.8	-0.0117887
335.99	0.05522169		865.99	0.00696372		1395.98	0.00860989		1925.99	-0.01217767		2455.98	0.00295147		2986.01	0.00046496		3516	0.00179571		4046	-0.01179584
336.19	0.05511568		866.19	0.00645521		1396.18	0.00887571		1926.19	-0.01184789		2456.18	0.00295451		2986.21	0.00028572		3516.2	0.00220103		4046.2	-0.01096711
336.39	0.05553993		866.39	0.00677706		1396.38	0.00862816		1926.39	-0.01157627		2456.38	0.00234907		2986.41	0.00067155		3516.4	0.00273834		4046.4	-0.01088283
336.59	0.05647477		866.59	0.00662178		1396.58	0.00849004		1926.59	-0.01178105		2456.58	0.00211751		2986.61	0.0005331		3516.6	0.00320404		4046.6	-0.01184256
336.79	0.05664251		866.79	0.00545407		1396.78	0.00800634		1926.79	-0.01180465		2456.78	0.00214434		2986.81	-0.00048161		3516.8	0.00353395		4046.8	-0.01318338
336.99	0.05709147		866.99	0.00471632		1396.98	0.00871943		1926.99	-0.01078176		2456.98	0.00222		2987.01	-0.00133444		3517	0.00412544		4047	-0.01327947
337.19	0.05670932		867.19	0.00488271		1397.18	0.00861819		1927.19	-0.01002105		2457.18	0.00258971		2987.21	-0.00139677		3517.2	0.00361787		4047.2	-0.01364909
337.39	0.05665888		867.39	0.00508507		1397.38	0.00839963		1927.39	-0.01017953		2457.38	0.00312089		2987.41	-0.00202098		3517.4	0.00330536		4047.4	-0.01367614
337.59	0.05660082		867.59	0.00492124		1397.58	0.00807754		1927.59	-0.00976268		2457.58	0.00241179		2987.61	-0.00240901		3517.6	0.00261602		4047.6	-0.01405085
337.79	0.05676796		867.79	0.00463224		1397.78	0.00834288		1927.79	-0.00956615		2457.78	0.00275318		2987.81	-0.00319221		3517.8	0.00232689		4047.8	-0.01454548
337.99	0.05835898		867.99	0.00501042		1397.98	0.00876304		1927.99	-0.00965424		2457.98	0.0031215		2988.01	-0.00397573		3518	0.00176927		4048	-0.01381697
338.19	0.05826373		868.19	0.00518091		1398.18	0.00798216		1928.19	-0.01021211		2458.18	0.00294217		2988.21	-0.00402528		3518.2	0.00197793		4048.2	-0.01346468
338.39	0.05895985		868.39	0.00583145		1398.38	0.00790492		1928.39	-0.01018598		2458.38	0.00421068		2988.41	-0.00480884		3518.4	0.00273184		4048.4	-0.01331217
338.59	0.05979778		868.59	0.00551715		1398.58	0.00805096		1928.59	-0.00987884		2458.58	0.00417211		2988.61	-0.00477897		3518.6	0.00303457		4048.6	-0.01238136
338.79	0.06035426		868.79	0.00569684		1398.78	0.00816206		1928.79	-0.01021813		2458.78	0.00373955		2988.81	-0.00557227		3518.8	0.00234545		4048.8	-0.01162812
338.99	0.06060205		868.99	0.00596699		1398.98	0.00838958		1928.99	-0.01092453		2458.98	0.00324701		2989.01	-0.00714635		3519	0.00225693		4049	-0.01221513
339.19	0.06069625		869.19	0.00567095		1399.18	0.00762113		1929.19	-0.01101468		2459.18	0.00275756		2989.21	-0.00709451		3519.2	0.00231139		4049.2	-0.01163504
339.39	0.06001412		869.39	0.00569047		1399.38	0.00694693		1929.39	-0.01023887		2459.38	0.0019118		2989.41	-0.00583514		3519.4	0.00259608		4049.4	-0.01208089
339.59	0.06025498		869.59	0.00637756		1399.58	0.00701892		1929.59	-0.01031507		2459.58	0.00135939		2989.61	-0.00478976		3519.6	0.00286127		4049.6	-0.01328711
339.79	0.05943333		869.79	0.0064161		1399.78	0.00692522		1929.79	-0.01051354		2459.78	0.00043669		2989.81	-0.00391001		3519.8	0.00349682		4049.8	-0.01302663
339.99	0.05936548		869.99	0.00596437		1399.98	0.00611182		1929.99	-0.0100916		2459.98	0.00014793		2990.01	-0.00367855		3520	0.0043226		4050	-0.01351971
340.19	0.05908694		870.19	0.0054083		1400.18	0.00592414		1930.19	-0.00993687		2460.18	0.00090181		2990.21	-0.00281875		3520.2	0.00551059		4050.2	-0.01336925
340.39	0.05919866		870.39	0.00556509		1400.38	0.00581761		1930.39	-0.009367		2460.38	0.00065597		2990.41	-0.00201214		3520.4	0.00611175		4050.4	-0.01421246
340.59	0.05978293		870.59	0.00582411		1400.58	0.00593747		1930.59	-0.00936803		2460.58	0.00076289		2990.61	-0.0014941		3520.6	0.00645776		4050.6	-0.01535824
340.79	0.05879005		870.79	0.00482699		1400.78	0.00608555		1930.79	-0.00922188		2460.78	0.00067116		2990.81	-0.00164704		3520.8	0.00654295		4050.8	-0.01553398
340.99	0.05864861		870.99	0.00421759		1400.98	0.00656939		1930.99	-0.0089313		2460.98	0.00131736		2991.01	-0.00095791		3521	0.00628725		4051	-0.01560982
341.19	0.05832325		871.19	0.00426048		1401.18	0.00623702		1931.19	-0.00880717		2461.18	0.00147238		2991.21	-0.00040181		3521.2	0.00445603		4051.2	-0.01624781
341.39	0.05750865		871.39	0.00458599		1401.38	0.00573499		1931.39	-0.00887244		2461.38	0.0014506		2991.41	-0.00098164		3521.4	0.00357675		4051.4	-0.01615904
341.59	0.0573522		871.59	0.00427873		1401.58	0.00594742		1931.59	-0.00906514		2461.58	0.00126206		2991.61	-0.00142406		3521.6	0.00240971		4051.6	-0.01623186
341.79	0.05847385		871.79	0.00446914		1401.78	0.00697737		1931.79	-0.0092153		2461.78	0.0019631		2991.81	-0.00219974		3521.8	0.00248173		4051.8	-0.01591886
341.99	0.05943281		871.99	0.00468282		1401.98	0.00686386		1931.99	-0.00949967		2461.98	0.00256409		2992.01	-0.00220549		3522	0.00195203		4052	-0.01497091
342.19	0.05945638		872.19	0.00539465		1402.18	0.00722399		1932.19	-0.0101096		2462.18	0.00314856		2992.21	-0.00285828		3522.2	0.00146952		4052.2	-0.01445257
342.39	0.05971221		872.39	0.00604541		1402.38	0.00816807		1932.39	-0.00988852		2462.38	0.00377717		2992.41	-0.00403801		3522.4	0.00169397		4052.4	-0.0142925
342.59	0.05978411		872.59	0.00507547		1402.58	0.00899994		1932.59	-0.00948177		2462.58	0.00350289		2992.61	-0.00426713		3522.6	0.00106832		4052.6	-0.0141306
342.79	0.05961556		872.79	0.00489111		1402.78	0.0095439		1932.79	-0.00981356		2462.78	0.0034347		2992.81	-0.00395313		3522.8	0.00001026		4052.8	-0.01389931
342.99	0.05965536		872.99	0.00569888		1402.98	0.00964496		1932.99	-0.01073049		2462.98	0.00308745		2993.01	-0.00445749		3523	0.00004125		4053	-0.01400057
343.19	0.05974395		873.19	0.00556182		1403.18	0.00928349		1933.19	-0.01005453		2463.18	0.00258675		2993.21	-0.00442501		3523.2	0.00016391		4053.2	-0.01295476
343.39	0.0592442		873.39	0.00602148		1403.38	0.00966489		1933.39	-0.0107132		2463.38	0.00157535		2993.41	-0.00399187		3523.4	0.00094974		4053.4	-0.01308773
343.59	0.0601225		873.59	0.00665596		1403.58	0.00976367		1933.59	-0.01190735		2463.58	0.00140506		2993.61	-0.004718		3523.6	0.00151402		4053.6	-0.01305874
343.79	0.06035544		873.79	0.00696065		1403.78	0.01017909		1933.79	-0.01238347		2463.78	0.0014408		2993.81	-0.00468768		3523.8	0.00164253		4053.8	-0.01221635
343.99	0.06066021		873.99	0.00688535		1403.98	0.00990256		1933.99	-0.01258471		2463.98	0.00252329		2994.01	-0.00384296		3524	0.00206518		4054	-0.01225879
344.19	0.06093218		874.19	0.00703849		1404.18	0.00942455		1934.19	-0.01305876		2464.18	0.00250439		2994.21	-0.0032627		3524.2	0.00259161		4054.2	-0.01266778
344.39	0.06121498		874.39	0.00698801		1404.38	0.00942085		1934.39	-0.01289832		2464.38	0.00233641		2994.41	-0.0028949		3524.4	0.00273174		4054.4	-0.01298422
344.59	0.06203546		874.59	0.00630167		1404.58	0.00915586		1934.59	-0.01331892		2464.58	0.00232646		2994.61	-0.00188125		3524.6	0.00300906		4054.6	-0.01335975
344.79	0.06112373		874.79	0.00594319		1404.78	0.008552		1934.79	-0.01386489		2464.78	0.00243311		2994.81	-0.00143246		3524.8	0.00293348		4054.8	-0.01384736
344.99	0.06106955		874.99	0.0057658		1404.98	0.00805118		1934.99	-0.01398892		2464.98	0.00300434		2995.01	-0.00170051		3525	0.00334471		4055	-0.01413025
345.19	0.0607073		875.19	0.00680364		1405.18	0.00817822		1935.19	-0.01303578		2465.18	0.00260491		2995.21	-0.00160757		3525.2	0.0021344		4055.2	-0.01436593
345.39	0.06104871		875.39	0.00658698		1405.38	0.00789781		1935.39	-0.01285528		2465.38	0.00214554		2995.41	-0.00135204		3525.4	0.00219879		4055.4	-0.01391283
345.59	0.06152427		875.59	0.00647961		1405.58	0.0082316		1935.59	-0.01212465		2465.58	0.00147459		2995.61	-0.00143415		3525.6	0.00277448		4055.6	-0.01449261
345.79	0.06160994		875.79	0.00764524		1405.78	0.00832957		1935.79	-0.01181559		2465.78	0.00070535		2995.81	-0.00134691		3525.8	0.00360649		4055.8	-0.01443732
345.99	0.06184346		875.99	0.00792077		1405.98	0.00794207		1935.99	-0.01159796		2465.98	0.00100452		2996.01	-0.0011031		3526	0.00334502		4056	-0.01411673
346.19	0.06189774		876.19	0.00837842		1406.18	0.00773442		1936.19	-0.01132457		2466.18	0.00151271		2996.21	-0.00116035		3526.2	0.00325337		4056.2	-0.01411966
346.39	0.06094497		876.39	0.00847873		1406.38	0.0076883		1936.39	-0.01062687		2466.38	0.00258528		2996.41	-0.00162224		3526.4	0.00412758		4056.4	-0.01395896
346.59	0.06098507		876.59	0.00831494		1406.58	0.00777896		1936.59	-0.01048059		2466.58	0.0026827		2996.61	-0.00091862		3526.6	0.00387278		4056.6	-0.01352765
346.79	0.06068772		876.79	0.00930437		1406.78	0.00723934		1936.79	-0.01063792		2466.78	0.00302075		2996.81	-0.0003553		3526.8	0.00334565		4056.8	-0.0130575
346.99	0.0604829		876.99	0.0103379		1406.98	0.00716429		1936.99	-0.01045526		2466.98	0.00321584		2997.01	-0.00057945		3527	0.00389305		4057	-0.0119405
347.19	0.05977968		877.19	0.01050197		1407.18	0.00649693		1937.19	-0.00871226		2467.18	0.00330733		2997.21	-0.00084052		3527.2	0.00360365		4057.2	-0.01057602
347.39	0.05895872		877.39	0.01116617		1407.38	0.00645482		1937.39	-0.00896854		2467.38	0.00351312		2997.41	-0.00083676		3527.4	0.00355103		4057.4	-0.01037728
347.59	0.05883722		877.59	0.01132954		1407.58	0.006397		1937.59	-0.00884816		2467.58	0.00383059		2997.61	-0.00129798		3527.6	0.00384336		4057.6	-0.01025077
347.79	0.05872026		877.79	0.01151483		1407.78	0.00681819		1937.79	-0.00860426		2467.78	0.00499075		2997.81	-0.00080367		3527.8	0.00363375		4057.8	-0.01054017
347.99	0.05875434		877.99	0.01166302		1407.98	0.00677995		1937.99	-0.00849691		2467.98	0.00585364		2998.01	-0.00027171		3528	0.00313728		4058	-0.01158068
348.19	0.05846153		878.19	0.01058407		1408.18	0.00697909		1938.19	-0.00853903		2468.18	0.00523584		2998.21	-0.00116822		3528.2	0.00337533		4058.2	-0.01168622
348.39	0.05928427		878.39	0.0095596		1408.38	0.00766717		1938.39	-0.00839251		2468.38	0.00502979		2998.41	-0.00146596		3528.4	0.00331379		4058.4	-0.01112686
348.59	0.05954724		878.59	0.00898766		1408.58	0.00817758		1938.59	-0.00933385		2468.58	0.00513166		2998.61	-0.00208201		3528.6	0.00370588		4058.6	-0.01148484
348.79	0.05967091		878.79	0.00871826		1408.78	0.00901077		1938.79	-0.01004523		2468.78	0.00459365		2998.81	-0.00280818		3528.8	0.00316709		4058.8	-0.01175259
348.99	0.06040705		878.99	0.00876379		1408.98	0.0094136		1938.99	-0.01008551		2468.98	0.00394484		2999.01	-0.00310922		3529	0.00307437		4059	-0.0112309
349.19	0.06148552		879.19	0.00963055		1409.18	0.01011154		1939.19	-0.00883282		2469.18	0.0024565		2999.21	-0.00250626		3529.2	0.00256464		4059.2	-0.0112485
349.39	0.06248268		879.39	0.00840949		1409.38	0.010163		1939.39	-0.00981144		2469.38	0.00196474		2999.41	-0.00363818		3529.4	0.00333589		4059.4	-0.01142427
349.59	0.06266609		879.59	0.00903044		1409.58	0.01053575		1939.59	-0.01037286		2469.58	0.00156433		2999.61	-0.00442043		3529.6	0.0049661		4059.6	-0.01339334
349.79	0.06412838		879.79	0.00939908		1409.78	0.00990001		1939.79	-0.01110233		2469.78	0.00162789		2999.81	-0.00466489		3529.8	0.00456487		4059.8	-0.013322
349.99	0.06564373		879.99	0.00855359		1409.98	0.00972668		1939.99	-0.01144845		2469.98	0.0020823		3000.01	-0.00510982		3530	0.00431794		4060	-0.01348239
350.19	0.06603332		880.19	0.00833627		1410.18	0.00913934		1940.19	-0.01178862		2470.18	0.00252034		3000.21	-0.00516492		3530.2	0.00435401		4060.2	-0.01369936
350.39	0.06598536		880.39	0.00847926		1410.38	0.00935578		1940.39	-0.01231395		2470.38	0.00320159		3000.41	-0.00567196		3530.4	0.00434119		4060.4	-0.01348546
350.59	0.06635952		880.59	0.00890755		1410.58	0.0098181		1940.59	-0.0130076		2470.58	0.00235688		3000.61	-0.00451742		3530.6	0.00367021		4060.6	-0.0137703
350.79	0.06642713		880.79	0.0091575		1410.78	0.00952859		1940.79	-0.01259461		2470.78	0.00197718		3000.81	-0.00398075		3530.8	0.00346484		4060.8	-0.01419776
350.99	0.06609851		880.99	0.00927772		1410.98	0.00964897		1940.99	-0.01181669		2470.98	0.00210868		3001.01	-0.00331696		3531	0.00415914		4061	-0.01422231
351.19	0.06533646		881.19	0.00930151		1411.18	0.00943161		1941.19	-0.01082122		2471.18	0.00223536		3001.21	-0.00305792		3531.2	0.00445381		4061.2	-0.01457502
351.39	0.06414906		881.39	0.00933781		1411.38	0.00882783		1941.39	-0.01025118		2471.38	0.00260548		3001.41	-0.00276265		3531.4	0.00521876		4061.4	-0.01494891
351.59	0.06376782		881.59	0.00928927		1411.58	0.00935504		1941.59	-0.01044003		2471.58	0.00278288		3001.61	-0.00224709		3531.6	0.0054232		4061.6	-0.01495692
351.79	0.06330091		881.79	0.00959115		1411.78	0.01000373		1941.79	-0.01047259		2471.78	0.00338765		3001.81	-0.00035569		3531.8	0.00539648		4061.8	-0.01477257
351.99	0.0633307		881.99	0.00987424		1411.98	0.01079285		1941.99	-0.01072151		2471.98	0.00318121		3002.01	0.00080951		3532	0.00479046		4062	-0.01436702
352.19	0.06324744		882.19	0.00880019		1412.18	0.01177934		1942.19	-0.0108157		2472.18	0.00245158		3002.21	0.0011133		3532.2	0.00538035		4062.2	-0.01404436
352.39	0.06351899		882.39	0.00847833		1412.38	0.0122191		1942.39	-0.00998501		2472.38	0.0025283		3002.41	0.00218227		3532.4	0.00463289		4062.4	-0.01452049
352.59	0.06417667		882.59	0.00819065		1412.58	0.012908		1942.59	-0.01064615		2472.58	0.00289461		3002.61	0.00255894		3532.6	0.00527044		4062.6	-0.01467603
352.79	0.06467095		882.79	0.0090253		1412.78	0.01282122		1942.79	-0.00990158		2472.78	0.00227255		3002.81	0.00280837		3532.8	0.00583264		4062.8	-0.0140517
352.99	0.06479955		882.99	0.01018133		1412.98	0.01278451		1942.99	-0.01007185		2472.98	0.00186188		3003.01	0.00335867		3533	0.00635466		4063	-0.0129863
353.19	0.06505951		883.19	0.00989575		1413.18	0.01258199		1943.19	-0.00893259		2473.18	0.00182824		3003.21	0.0024763		3533.2	0.00772045		4063.2	-0.01296557
353.39	0.06529368		883.39	0.00935697		1413.38	0.01156356		1943.39	-0.0097068		2473.38	0.00206361		3003.41	0.00068142		3533.4	0.00873785		4063.4	-0.01212752
353.59	0.06565691		883.59	0.00931689		1413.58	0.01034918		1943.59	-0.00950769		2473.58	0.00154583		3003.61	0.00026905		3533.6	0.00887808		4063.6	-0.01220147
353.79	0.06739653		883.79	0.00887729		1413.78	0.00984151		1943.79	-0.00876906		2473.78	0.00186121		3003.81	-0.00030013		3533.8	0.00827385		4063.8	-0.01107218
353.99	0.06758027		883.99	0.00806159		1413.98	0.00992281		1943.99	-0.00876144		2473.98	0.00188636		3004.01	-0.00117324		3534	0.00785683		4064	-0.01071709
354.19	0.067789		884.19	0.00787409		1414.18	0.00999169		1944.19	-0.00842005		2474.18	0.00195666		3004.21	-0.0012729		3534.2	0.00705079		4064.2	-0.01106437
354.39	0.06888323		884.39	0.00823036		1414.38	0.00984184		1944.39	-0.00805912		2474.38	0.00187715		3004.41	-0.00221322		3534.4	0.00684474		4064.4	-0.01134503
354.59	0.06950769		884.59	0.00810501		1414.58	0.00958436		1944.59	-0.00755868		2474.58	0.0010234		3004.61	-0.00261949		3534.6	0.00645848		4064.6	-0.01198979
354.79	0.06950462		884.79	0.00750202		1414.78	0.00912026		1944.79	-0.00651144		2474.78	0.0008282		3004.81	-0.0033919		3534.8	0.00654993		4064.8	-0.01216617
354.99	0.06947069		884.99	0.00733989		1414.98	0.00881553		1944.99	-0.00636329		2474.98	0.00059299		3005.01	-0.00380398		3535	0.00619836		4065	-0.01227143
355.19	0.06956458		885.19	0.00699949		1415.18	0.00919774		1945.19	-0.00749986		2475.18	0.00050191		3005.21	-0.00391618		3535.2	0.00566186		4065.2	-0.01133636
355.39	0.06847159		885.39	0.00705382		1415.38	0.00878262		1945.39	-0.00719406		2475.38	0.00022649		3005.41	-0.00329133		3535.4	0.00483801		4065.4	-0.01155473
355.59	0.06864431		885.59	0.00736147		1415.58	0.00915922		1945.59	-0.00856474		2475.58	0.00017981		3005.61	-0.00196399		3535.6	0.00411013		4065.6	-0.01232333
355.79	0.06827856		885.79	0.00726834		1415.78	0.0096964		1945.79	-0.0093343		2475.78	0.00069985		3005.81	0.00021437		3535.8	0.00400925		4065.8	-0.01300031
355.99	0.06899859		885.99	0.00718753		1415.98	0.01065737		1945.99	-0.00943146		2475.98	0.00133775		3006.01	0.00035603		3536	0.00406549		4066	-0.01290443
356.19	0.06864576		886.19	0.00615966		1416.18	0.01128811		1946.19	-0.00966614		2476.18	0.0023565		3006.21	0.0011678		3536.2	0.00331201		4066.2	-0.0134177
356.39	0.06792694		886.39	0.00547331		1416.38	0.01076184		1946.39	-0.00943802		2476.38	0.00322425		3006.41	0.00086508		3536.4	0.00265337		4066.4	-0.01367953
356.59	0.06805088		886.59	0.00557261		1416.58	0.01143016		1946.59	-0.01030937		2476.58	0.00362011		3006.61	0.00117766		3536.6	0.00377588		4066.6	-0.01301939
356.79	0.0665707		886.79	0.00625192		1416.78	0.01152996		1946.79	-0.01028516		2476.78	0.00283745		3006.81	0.00098659		3536.8	0.00422006		4066.8	-0.01278098
356.99	0.066684		886.99	0.00566805		1416.98	0.0116904		1946.99	-0.01120428		2476.98	0.00264971		3007.01	0.00153517		3537	0.00479884		4067	-0.01255144
357.19	0.06559523		887.19	0.00514962		1417.18	0.01154819		1947.19	-0.01060198		2477.18	0.00227767		3007.21	0.00044054		3537.2	0.00566545		4067.2	-0.01217836
357.39	0.0649782		887.39	0.00549744		1417.38	0.01126642		1947.39	-0.01021863		2477.38	0.00268953		3007.41	0.00019493		3537.4	0.00502986		4067.4	-0.01183277
357.59	0.06423423		887.59	0.00425925		1417.58	0.0119908		1947.59	-0.009959		2477.58	0.00275236		3007.61	0.00004992		3537.6	0.00460512		4067.6	-0.01228531
357.79	0.0648673		887.79	0.00511768		1417.78	0.01298364		1947.79	-0.01013858		2477.78	0.00283433		3007.81	-0.00012039		3537.8	0.00486914		4067.8	-0.01220435
357.99	0.06464111		887.99	0.00441477		1417.98	0.01359108		1947.99	-0.00965258		2477.98	0.0017973		3008.01	-0.00099787		3538	0.00416132		4068	-0.01291898
358.19	0.06469958		888.19	0.00518361		1418.18	0.01314362		1948.19	-0.00899127		2478.18	0.00140605		3008.21	-0.00112693		3538.2	0.00374544		4068.2	-0.01333996
358.39	0.06563467		888.39	0.00563285		1418.38	0.01212013		1948.39	-0.00908831		2478.38	0.000512		3008.41	-0.00167284		3538.4	0.00348184		4068.4	-0.01362611
358.59	0.06476924		888.59	0.00650155		1418.58	0.01195886		1948.59	-0.00912283		2478.58	0.00031858		3008.61	-0.00227319		3538.6	0.00358571		4068.6	-0.01380992
358.79	0.06463579		888.79	0.00683356		1418.78	0.01244356		1948.79	-0.00895122		2478.78	-0.00059703		3008.81	-0.00291254		3538.8	0.00358963		4068.8	-0.01369228
358.99	0.06527797		888.99	0.00735057		1418.98	0.01289474		1948.99	-0.01009865		2478.98	-0.00113636		3009.01	-0.00310177		3539	0.00297893		4069	-0.01376291
359.19	0.0649182		889.19	0.00774786		1419.18	0.01373244		1949.19	-0.01042181		2479.18	-0.00024744		3009.21	-0.00302616		3539.2	0.00298617		4069.2	-0.01393551
359.39	0.06452369		889.39	0.00849664		1419.38	0.0124987		1949.39	-0.0093573		2479.38	-0.0001273		3009.41	-0.00278964		3539.4	0.00270413		4069.4	-0.01440048
359.59	0.06485454		889.59	0.00869807		1419.58	0.01299916		1949.59	-0.00948153		2479.58	0.00061256		3009.61	-0.00272299		3539.6	0.00319818		4069.6	-0.01468875
359.79	0.06491129		889.79	0.0086593		1419.78	0.01349051		1949.79	-0.00970072		2479.78	0.00094177		3009.81	-0.00309931		3539.8	0.00373926		4069.8	-0.01457492
359.99	0.0649174		889.99	0.00872464		1419.98	0.01359797		1949.99	-0.00935533		2479.98	0.00153992		3010.01	-0.00358794		3540	0.00442591		4070	-0.01499089
360.19	0.0640455		890.19	0.00791753		1420.18	0.01303344		1950.19	-0.00951487		2480.18	0.00216122		3010.21	-0.00369379		3540.2	0.00431637		4070.2	-0.01539898
360.39	0.06322831		890.39	0.00722353		1420.38	0.01293888		1950.39	-0.00876505		2480.38	0.00159413		3010.41	-0.0044926		3540.4	0.00489169		4070.4	-0.01548362
360.59	0.06358128		890.59	0.00709444		1420.58	0.0132409		1950.59	-0.00882114		2480.58	0.00204437		3010.61	-0.00326617		3540.6	0.00608723		4070.6	-0.01575125
360.79	0.0631987		890.79	0.00633851		1420.78	0.01253015		1950.79	-0.00867827		2480.78	0.0019308		3010.81	-0.00313418		3540.8	0.00692871		4070.8	-0.01661015
360.99	0.06311822		890.99	0.00642341		1420.98	0.01169099		1950.99	-0.00914477		2480.98	0.00266093		3011.01	-0.00268429		3541	0.00753493		4071	-0.01691171
361.19	0.06198812		891.19	0.00677846		1421.18	0.01220314		1951.19	-0.00871838		2481.18	0.0037899		3011.21	-0.00278876		3541.2	0.00714407		4071.2	-0.01708825
361.39	0.06172079		891.39	0.00615752		1421.38	0.01129529		1951.39	-0.0086683		2481.38	0.00509801		3011.41	-0.00239111		3541.4	0.00631055		4071.4	-0.01713394
361.59	0.06245151		891.59	0.00576436		1421.58	0.01144708		1951.59	-0.00874095		2481.58	0.00400674		3011.61	-0.00211292		3541.6	0.00691563		4071.6	-0.01692205
361.79	0.06330369		891.79	0.00654205		1421.78	0.01174053		1951.79	-0.00903735		2481.78	0.00303199		3011.81	-0.00233414		3541.8	0.00646855		4071.8	-0.01686436
361.99	0.06352508		891.99	0.00529403		1421.98	0.01061599		1951.99	-0.00842332		2481.98	0.00250058		3012.01	-0.00216196		3542	0.0060208		4072	-0.01698311
362.19	0.06439028		892.19	0.00650923		1422.18	0.00997129		1952.19	-0.00923577		2482.18	0.00266019		3012.21	-0.00144078		3542.2	0.00546342		4072.2	-0.01667115
362.39	0.06493347		892.39	0.00671858		1422.38	0.00985368		1952.39	-0.00989193		2482.38	0.00252975		3012.41	-0.00099809		3542.4	0.00504813		4072.4	-0.01675258
362.59	0.06432618		892.59	0.00755015		1422.58	0.01021218		1952.59	-0.00975925		2482.58	0.0024661		3012.61	-0.00141193		3542.6	0.00533031		4072.6	-0.01604798
362.79	0.06477579		892.79	0.00821858		1422.78	0.01068587		1952.79	-0.00974117		2482.78	0.00234705		3012.81	-0.00098131		3542.8	0.00444206		4072.8	-0.01499162
362.99	0.0654459		892.99	0.00836693		1422.98	0.01093315		1952.99	-0.01070564		2482.98	0.00241576		3013.01	-0.00012221		3543	0.00351048		4073	-0.01474676
363.19	0.06532678		893.19	0.00869626		1423.18	0.0112042		1953.19	-0.01049307		2483.18	0.00302488		3013.21	-0.00070823		3543.2	0.00380171		4073.2	-0.01509882
363.39	0.06483333		893.39	0.00994075		1423.38	0.01041443		1953.39	-0.01059331		2483.38	0.00235183		3013.41	-0.00059571		3543.4	0.00270012		4073.4	-0.01405559
363.59	0.06484893		893.59	0.0103017		1423.58	0.01132696		1953.59	-0.01070974		2483.58	0.00148566		3013.61	-0.00019094		3543.6	0.00303951		4073.6	-0.01484546
363.79	0.06507228		893.79	0.01170904		1423.78	0.01174326		1953.79	-0.01163799		2483.78	0.00154214		3013.81	-0.00009989		3543.8	0.00320999		4073.8	-0.01500255
363.99	0.06544021		893.99	0.01185006		1423.98	0.01218985		1953.99	-0.01182672		2483.98	0.00149376		3014.01	-0.0003148		3544	0.00341752		4074	-0.01495716
364.19	0.06584551		894.19	0.01151332		1424.18	0.012516		1954.19	-0.0118731		2484.18	0.00208634		3014.21	-0.000642		3544.2	0.0032336		4074.2	-0.01468337
364.39	0.06592105		894.39	0.01120242		1424.38	0.01336069		1954.39	-0.01265278		2484.38	0.00222485		3014.41	-0.00034885		3544.4	0.00251519		4074.4	-0.0147335
364.59	0.06608153		894.59	0.01133734		1424.58	0.01407089		1954.59	-0.01233861		2484.58	0.00305928		3014.61	0.00006084		3544.6	0.00238251		4074.6	-0.01569591
364.79	0.06584217		894.79	0.01138491		1424.78	0.01400532		1954.79	-0.01268954		2484.78	0.00373269		3014.81	0.0002917		3544.8	0.00276005		4074.8	-0.0160735
364.99	0.06638934		894.99	0.01188818		1424.98	0.01402002		1954.99	-0.01270247		2484.98	0.00421577		3015.01	0.00033674		3545	0.00310063		4075	-0.01645496
365.19	0.06696777		895.19	0.01068837		1425.18	0.01441331		1955.19	-0.01267884		2485.18	0.00512424		3015.21	0.00098633		3545.2	0.00271895		4075.2	-0.01631433
365.39	0.06807495		895.39	0.00996713		1425.38	0.01353274		1955.39	-0.01229736		2485.38	0.00442783		3015.41	0.00053409		3545.4	0.00277304		4075.4	-0.01603685
365.59	0.06918147		895.59	0.00993142		1425.58	0.0140703		1955.59	-0.01182626		2485.58	0.00295943		3015.61	0.00036402		3545.6	0.00326547		4075.6	-0.01607485
365.79	0.06947211		895.79	0.00911622		1425.78	0.0141666		1955.79	-0.01119513		2485.78	0.00255305		3015.81	-0.00041364		3545.8	0.00269245		4075.8	-0.01578714
365.99	0.06983134		895.99	0.00810986		1425.98	0.01313619		1955.99	-0.01161633		2485.98	0.00228056		3016.01	-0.0006192		3546	0.00307792		4076	-0.01523067
366.19	0.07076617		896.19	0.00861471		1426.18	0.01304323		1956.19	-0.0118376		2486.18	0.00158301		3016.21	-0.00133589		3546.2	0.00244364		4076.2	-0.01589253
366.39	0.07050703		896.39	0.00877151		1426.38	0.01310315		1956.39	-0.0118081		2486.38	0.00204134		3016.41	-0.0007938		3546.4	0.00351223		4076.4	-0.0153147
366.59	0.07045939		896.59	0.00863821		1426.58	0.01235399		1956.59	-0.01172124		2486.58	0.00223818		3016.61	-0.00094206		3546.6	0.00402797		4076.6	-0.01484686
366.79	0.07097077		896.79	0.00935341		1426.78	0.0117163		1956.79	-0.01189226		2486.78	0.00251301		3016.81	-0.00087331		3546.8	0.00416734		4076.8	-0.01451133
366.99	0.07129231		896.99	0.00948477		1426.98	0.01209759		1956.99	-0.01244314		2486.98	0.00259776		3017.01	-0.0019351		3547	0.00431299		4077	-0.0154195
367.19	0.07077454		897.19	0.01003194		1427.18	0.01107907		1957.19	-0.01204695		2487.18	0.00245296		3017.21	-0.00315958		3547.2	0.00446492		4077.2	-0.01542217
367.39	0.07045115		897.39	0.01170103		1427.38	0.01009379		1957.39	-0.01165031		2487.38	0.00192983		3017.41	-0.00316771		3547.4	0.00385912		4077.4	-0.01518676
367.59	0.07100692		897.59	0.01211437		1427.58	0.00979482		1957.59	-0.01197776		2487.58	0.00173462		3017.61	-0.00413652		3547.6	0.00385135		4077.6	-0.01595471
367.79	0.07066124		897.79	0.01233836		1427.78	0.00979274		1957.79	-0.01326769		2487.78	0.00190777		3017.81	-0.0049024		3547.8	0.00354372		4077.8	-0.01586061
367.99	0.07063253		897.99	0.01135637		1427.98	0.00952193		1957.99	-0.01324786		2487.98	0.00165475		3018.01	-0.00533188		3548	0.00311395		4078	-0.0159128
368.19	0.07007979		898.19	0.01160112		1428.18	0.00969039		1958.19	-0.01303299		2488.18	0.00177961		3018.21	-0.00509213		3548.2	0.00270538		4078.2	-0.01597945
368.39	0.06902245		898.39	0.01093357		1428.38	0.0101582		1958.39	-0.01298634		2488.38	0.00174481		3018.41	-0.00515062		3548.4	0.00269274		4078.4	-0.01574761
368.59	0.068763		898.59	0.01063925		1428.58	0.01022024		1958.59	-0.01159891		2488.58	0.00200913		3018.61	-0.00526033		3548.6	0.00271487		4078.6	-0.01595217
368.79	0.06828802		898.79	0.01073472		1428.78	0.01021277		1958.79	-0.01122272		2488.78	0.00214921		3018.81	-0.00534699		3548.8	0.0037076		4078.8	-0.01555683
368.99	0.06803511		898.99	0.01026848		1428.98	0.0098022		1958.99	-0.01048191		2488.98	0.00133053		3019.01	-0.00547278		3549	0.00435104		4079	-0.01567845
369.19	0.06784179		899.19	0.00995316		1429.18	0.00984891		1959.19	-0.01046479		2489.18	0.0010484		3019.21	-0.00515498		3549.2	0.00417806		4079.2	-0.01541009
369.39	0.0674215		899.39	0.01011469		1429.38	0.0095649		1959.39	-0.00940602		2489.38	0.00068211		3019.41	-0.00508892		3549.4	0.00363742		4079.4	-0.01526657
369.59	0.06762763		899.59	0.01039449		1429.58	0.00986454		1959.59	-0.00890435		2489.58	0.00004903		3019.61	-0.00487426		3549.6	0.00246377		4079.6	-0.01539024
369.79	0.06713004		899.79	0.00956156		1429.78	0.00917721		1959.79	-0.00845955		2489.78	0.0007512		3019.81	-0.0047709		3549.8	0.0020966		4079.8	-0.01516442
369.99	0.06664004		899.99	0.00918859		1429.98	0.00803934		1959.99	-0.00928366		2489.98	0.00157464		3020.01	-0.00420953		3550	0.00240992		4080	-0.01554629
370.19	0.06675552		900.19	0.00943693		1430.18	0.00763664		1960.19	-0.00937432		2490.18	0.00195966		3020.21	-0.00330014		3550.2	0.00249823		4080.2	-0.01617349
370.39	0.06699749		900.39	0.00952509		1430.38	0.00786079		1960.39	-0.00961718		2490.38	0.00372537		3020.41	-0.00204302		3550.4	0.00327218		4080.4	-0.01553323
370.59	0.0667248		900.59	0.00891117		1430.58	0.00737894		1960.59	-0.009998		2490.58	0.00429143		3020.61	-0.00234689		3550.6	0.00352681		4080.6	-0.01631271
370.79	0.06728874		900.79	0.0094803		1430.78	0.00724892		1960.79	-0.00999779		2490.78	0.00522815		3020.81	-0.00275633		3550.8	0.00265636		4080.8	-0.0168405
370.99	0.06668299		900.99	0.00968152		1430.98	0.00732412		1960.99	-0.01017951		2490.98	0.00517994		3021.01	-0.00319367		3551	0.00190862		4081	-0.01717458
371.19	0.06705113		901.19	0.00979857		1431.18	0.00660128		1961.19	-0.01005885		2491.18	0.00446196		3021.21	-0.00266577		3551.2	0.00108582		4081.2	-0.01679433
371.39	0.0681042		901.39	0.01005399		1431.38	0.00643405		1961.39	-0.01012726		2491.38	0.00381922		3021.41	-0.00247407		3551.4	0.00146862		4081.4	-0.01745768
371.59	0.06838301		901.59	0.00943713		1431.58	0.00659971		1961.59	-0.0113079		2491.58	0.00412361		3021.61	-0.00240682		3551.6	0.00084499		4081.6	-0.01711529
371.79	0.06792031		901.79	0.00880084		1431.78	0.00811878		1961.79	-0.01185783		2491.78	0.00355777		3021.81	-0.00199598		3551.8	0.00085848		4081.8	-0.01635902
371.99	0.06910025		901.99	0.0080595		1431.98	0.00840553		1961.99	-0.01185522		2491.98	0.00376286		3022.01	-0.00147096		3552	0.00079183		4082	-0.01610033
372.19	0.06972998		902.19	0.0087407		1432.18	0.00941113		1962.19	-0.01139814		2492.18	0.00390115		3022.21	-0.00219613		3552.2	0.00157644		4082.2	-0.01569888
372.39	0.07078664		902.39	0.00772278		1432.38	0.00982562		1962.39	-0.01100191		2492.38	0.00379818		3022.41	-0.00256332		3552.4	0.00193357		4082.4	-0.01577023
372.59	0.07141811		902.59	0.00845849		1432.58	0.0096917		1962.59	-0.01060211		2492.58	0.00285634		3022.61	-0.00311117		3552.6	0.00266919		4082.6	-0.01551441
372.79	0.0708035		902.79	0.00892151		1432.78	0.00998447		1962.79	-0.01018281		2492.78	0.00203951		3022.81	-0.0038163		3552.8	0.00404524		4082.8	-0.01534092
372.99	0.07134411		902.99	0.0094473		1432.98	0.01009622		1962.99	-0.00973437		2492.98	0.00154517		3023.01	-0.00356012		3553	0.00435046		4083	-0.01570954
373.19	0.07250044		903.19	0.00972225		1433.18	0.01082056		1963.19	-0.00934017		2493.18	0.00082291		3023.21	-0.00280198		3553.2	0.00354061		4083.2	-0.01586215
373.39	0.07260862		903.39	0.00971431		1433.38	0.01191361		1963.39	-0.00915021		2493.38	0.00011325		3023.41	-0.00213955		3553.4	0.0031073		4083.4	-0.01629354
373.59	0.07337748		903.59	0.00974495		1433.58	0.01143645		1963.59	-0.00893626		2493.58	-0.00081413		3023.61	-0.00191894		3553.6	0.00399726		4083.6	-0.01645938
373.79	0.07260445		903.79	0.00959713		1433.78	0.01045314		1963.79	-0.00898915		2493.78	-0.00009422		3023.81	-0.00201193		3553.8	0.00508373		4083.8	-0.01607003
373.99	0.07245918		903.99	0.00978741		1433.98	0.01011547		1963.99	-0.00870915		2493.98	0.00025307		3024.01	-0.00136852		3554	0.00551963		4084	-0.01641542
374.19	0.07242031		904.19	0.00995004		1434.18	0.01080828		1964.19	-0.00796975		2494.18	0.00016435		3024.21	-0.00124951		3554.2	0.00562691		4084.2	-0.01568081
374.39	0.07269519		904.39	0.01014791		1434.38	0.01087461		1964.39	-0.00729161		2494.38	0.00122326		3024.41	-0.00120825		3554.4	0.00543219		4084.4	-0.0149176
374.59	0.07217754		904.59	0.01066164		1434.58	0.01109075		1964.59	-0.00699246		2494.58	0.00076318		3024.61	-0.00105464		3554.6	0.00573386		4084.6	-0.01555833
374.79	0.07258996		904.79	0.01165319		1434.78	0.01110401		1964.79	-0.00682136		2494.78	0.00067104		3024.81	0.00029547		3554.8	0.00549238		4084.8	-0.01540381
374.99	0.07211214		904.99	0.01098779		1434.98	0.01141407		1964.99	-0.00671495		2494.98	0.00047032		3025.01	0.0012348		3555	0.005551		4085	-0.01444374
375.19	0.07248164		905.19	0.00972587		1435.18	0.01225528		1965.19	-0.00671076		2495.18	0.00134285		3025.21	0.00194328		3555.2	0.00533772		4085.2	-0.01433811
375.39	0.07274918		905.39	0.00961		1435.38	0.01272105		1965.39	-0.00776819		2495.38	0.00143274		3025.41	0.0017773		3555.4	0.00533965		4085.4	-0.01436975
375.59	0.07228199		905.59	0.00939534		1435.58	0.01339683		1965.59	-0.00862491		2495.58	0.00274041		3025.61	0.0022337		3555.6	0.0035039		4085.6	-0.01245019
375.79	0.07203131		905.79	0.00939872		1435.78	0.01315439		1965.79	-0.00895693		2495.78	0.00341885		3025.81	0.00188758		3555.8	0.00238919		4085.8	-0.01287975
375.99	0.07339494		905.99	0.00936373		1435.98	0.01240035		1965.99	-0.01003078		2495.98	0.00427389		3026.01	0.00258204		3556	0.00154357		4086	-0.01329357
376.19	0.07385382		906.19	0.00944969		1436.18	0.01302672		1966.19	-0.01032133		2496.18	0.0046006		3026.21	0.00227611		3556.2	0.00214167		4086.2	-0.01288653
376.39	0.07440578		906.39	0.00849447		1436.38	0.01217433		1966.39	-0.01091953		2496.38	0.00377014		3026.41	0.00258142		3556.4	0.00230053		4086.4	-0.0125665
376.59	0.07413688		906.59	0.00847808		1436.58	0.01215739		1966.59	-0.01159152		2496.58	0.00468097		3026.61	0.0026266		3556.6	0.00344764		4086.6	-0.01195726
376.79	0.07355353		906.79	0.00849235		1436.78	0.01199621		1966.79	-0.01209059		2496.78	0.00566323		3026.81	0.00216086		3556.8	0.00338481		4086.8	-0.01327947
376.99	0.07403756		906.99	0.00891207		1436.98	0.01179101		1966.99	-0.01254995		2496.98	0.00638587		3027.01	0.00197423		3557	0.00269255		4087	-0.01445565
377.19	0.07459683		907.19	0.00841224		1437.18	0.01165504		1967.19	-0.01295758		2497.18	0.00545221		3027.21	0.00167848		3557.2	0.00316804		4087.2	-0.01443057
377.39	0.07440606		907.39	0.00819956		1437.38	0.01148332		1967.39	-0.01346863		2497.38	0.00523538		3027.41	0.00109611		3557.4	0.00444006		4087.4	-0.01413661
377.59	0.07434224		907.59	0.0084776		1437.58	0.01004242		1967.59	-0.01261044		2497.58	0.00547534		3027.61	0.00092129		3557.6	0.00531505		4087.6	-0.0139793
377.79	0.07393206		907.79	0.00928211		1437.78	0.01019134		1967.79	-0.01258816		2497.78	0.00559367		3027.81	0.00047283		3557.8	0.00516075		4087.8	-0.01433442
377.99	0.07403128		907.99	0.00930585		1437.98	0.01043679		1967.99	-0.01223949		2497.98	0.00539816		3028.01	0.00066679		3558	0.00502873		4088	-0.01471931
378.19	0.07398901		908.19	0.0094955		1438.18	0.01089217		1968.19	-0.01176087		2498.18	0.00501441		3028.21	0.00040401		3558.2	0.00510011		4088.2	-0.01439054
378.39	0.0744788		908.39	0.00955491		1438.38	0.01098729		1968.39	-0.01186073		2498.38	0.00502736		3028.41	0.0010598		3558.4	0.00505851		4088.4	-0.01443786
378.59	0.07431077		908.59	0.00956902		1438.58	0.01140656		1968.59	-0.01185019		2498.58	0.00410926		3028.61	0.00176899		3558.6	0.00541962		4088.6	-0.01480771
378.79	0.07447181		908.79	0.00890605		1438.78	0.01162422		1968.79	-0.01181194		2498.78	0.00395028		3028.81	0.00254693		3558.8	0.00553139		4088.8	-0.01425187
378.99	0.07415257		908.99	0.007301		1438.98	0.01212448		1968.99	-0.01165995		2498.98	0.00426293		3029.01	0.00267601		3559	0.00473497		4089	-0.0135848
379.19	0.07412019		909.19	0.00657145		1439.18	0.01254016		1969.19	-0.01188405		2499.18	0.00420477		3029.21	0.00286052		3559.2	0.00386066		4089.2	-0.013391
379.39	0.0742589		909.39	0.00694595		1439.38	0.01229869		1969.39	-0.01231852		2499.38	0.003306		3029.41	0.00314372		3559.4	0.0025266		4089.4	-0.01241685
379.59	0.07444965		909.59	0.00630647		1439.58	0.01204123		1969.59	-0.01190958		2499.58	0.00351464		3029.61	0.00386183		3559.6	0.00117309		4089.6	-0.01134468
379.79	0.07479324		909.79	0.00580969		1439.78	0.01155975		1969.79	-0.01207989		2499.78	0.00330776		3029.81	0.00432017		3559.8	0.00062637		4089.8	-0.01160104
379.99	0.07479324		909.99	0.00580969		1439.98	0.01155975		1969.99	-0.01207989		2499.98	0.00330776		3030.01	0.00432017		3560	0.00062637		4090	-0.01160104
380.19	0.07517392		910.19	0.00566642		1440.18	0.01141843		1970.19	-0.01183135		2500.18	0.0036173		3030.21	0.00493121		3560.2	0.00015174		4090.2	-0.01112989
380.39	0.07610433		910.39	0.00566167		1440.38	0.01155595		1970.39	-0.01138467		2500.38	0.00357616		3030.41	0.00548279		3560.4	0.00067236		4090.4	-0.01029391
380.59	0.07679205		910.59	0.00606403		1440.58	0.01241758		1970.59	-0.01098362		2500.58	0.00418382		3030.61	0.00580133		3560.6	0.0005152		4090.6	-0.00943487
380.79	0.07729626		910.79	0.00596735		1440.78	0.01286652		1970.79	-0.01042265		2500.78	0.00428453		3030.81	0.00583722		3560.8	0.00012348		4090.8	-0.00864312
380.99	0.07759332		910.99	0.00675819		1440.98	0.01405365		1970.99	-0.01002881		2500.98	0.00491787		3031.01	0.00599617		3561	-0.00003496		4091	-0.00796383
381.19	0.07829887		911.19	0.00723462		1441.18	0.0146699		1971.19	-0.00971023		2501.18	0.0053104		3031.21	0.00668119		3561.2	-0.00000295		4091.2	-0.0074474
381.39	0.07880046		911.39	0.0077681		1441.38	0.01535712		1971.39	-0.00939508		2501.38	0.00531566		3031.41	0.00747417		3561.4	-0.00059261		4091.4	-0.00721316
381.59	0.07875636		911.59	0.0085411		1441.58	0.01511496		1971.59	-0.00953491		2501.58	0.00567595		3031.61	0.00832455		3561.6	-0.00079844		4091.6	-0.0066356
381.79	0.07969879		911.79	0.00908872		1441.78	0.01524601		1971.79	-0.00910245		2501.78	0.00577831		3031.81	0.00833364		3561.8	-0.00126125		4091.8	-0.00651104
381.99	0.08011185		911.99	0.00935769		1441.98	0.01542204		1971.99	-0.00880495		2501.98	0.0065124		3032.01	0.00920651		3562	-0.00105373		4092	-0.00626036
382.19	0.0805208		912.19	0.00994473		1442.18	0.01470368		1972.19	-0.00884873		2502.18	0.00655069		3032.21	0.00961885		3562.2	-0.00117985		4092.2	-0.00680831
382.39	0.08046315		912.39	0.01043151		1442.38	0.01416362		1972.39	-0.00988269		2502.38	0.00619265		3032.41	0.00933145		3562.4	-0.00204335		4092.4	-0.00763041
382.59	0.08095091		912.59	0.00982806		1442.58	0.01477153		1972.59	-0.00995907		2502.58	0.00524381		3032.61	0.0080481		3562.6	-0.00231345		4092.6	-0.0087512
382.79	0.08102831		912.79	0.00977003		1442.78	0.01395037		1972.79	-0.00978911		2502.78	0.00428005		3032.81	0.00728259		3562.8	-0.00283486		4092.8	-0.00892412
382.99	0.08067805		912.99	0.009838		1442.98	0.01363409		1972.99	-0.00997795		2502.98	0.00355544		3033.01	0.00704552		3563	-0.00307697		4093	-0.00958243
383.19	0.08083719		913.19	0.00996987		1443.18	0.01375537		1973.19	-0.0100836		2503.18	0.00411833		3033.21	0.00698262		3563.2	-0.00288544		4093.2	-0.01008627
383.39	0.08084404		913.39	0.0101018		1443.38	0.01440642		1973.39	-0.00956934		2503.38	0.00490753		3033.41	0.00741184		3563.4	-0.00310125		4093.4	-0.01022413
383.59	0.08023187		913.59	0.01003503		1443.58	0.01346115		1973.59	-0.00943968		2503.58	0.00484697		3033.61	0.00855117		3563.6	-0.00248055		4093.6	-0.01091251
383.79	0.07957147		913.79	0.01023678		1443.78	0.01401532		1973.79	-0.00835755		2503.78	0.00552936		3033.81	0.00807309		3563.8	-0.00237823		4093.8	-0.01102751
383.99	0.07864333		913.99	0.01064487		1443.98	0.01322965		1973.99	-0.00826089		2503.98	0.00495534		3034.01	0.00799702		3564	-0.00206739		4094	-0.01020918
384.19	0.07753857		914.19	0.01003254		1444.18	0.01317469		1974.19	-0.00838785		2504.18	0.0059284		3034.21	0.00888015		3564.2	-0.002753		4094.2	-0.01056881
384.39	0.07793845		914.39	0.00984903		1444.38	0.01359112		1974.39	-0.00759796		2504.38	0.00682431		3034.41	0.00856615		3564.4	-0.00236631		4094.4	-0.0104576
384.59	0.07751073		914.59	0.00980035		1444.58	0.01425743		1974.59	-0.00685414		2504.58	0.00699589		3034.61	0.00809542		3564.6	-0.00254538		4094.6	-0.01051738
384.79	0.07731491		914.79	0.01011794		1444.78	0.01427022		1974.79	-0.00643422		2504.78	0.00699447		3034.81	0.00755014		3564.8	-0.00182257		4094.8	-0.00962068
384.99	0.0770436		914.99	0.01055745		1444.98	0.01455806		1974.99	-0.00633354		2504.98	0.00742882		3035.01	0.00772174		3565	-0.00088353		4095	-0.00900823
385.19	0.07680348		915.19	0.01041677		1445.18	0.01465837		1975.19	-0.0068412		2505.18	0.00721438		3035.21	0.00852019		3565.2	-0.00078339		4095.2	-0.0083942
385.39	0.07606115		915.39	0.01085474		1445.38	0.01488856		1975.39	-0.00696744		2505.38	0.00744964		3035.41	0.00870687		3565.4	-0.0013983		4095.4	-0.0083378
385.59	0.07581373		915.59	0.01040332		1445.58	0.01432843		1975.59	-0.00713342		2505.58	0.00822607		3035.61	0.00841534		3565.6	-0.0017802		4095.6	-0.00849602
385.79	0.07655476		915.79	0.01070711		1445.78	0.01473065		1975.79	-0.00691939		2505.78	0.00832942		3035.81	0.00785383		3565.8	-0.00161036		4095.8	-0.00928664
385.99	0.07732752		915.99	0.01045979		1445.98	0.015124		1975.99	-0.00767499		2505.98	0.008151		3036.01	0.00885537		3566	-0.00105894		4096	-0.00896609
386.19	0.07776603		916.19	0.01051123		1446.18	0.01427328		1976.19	-0.0091353		2506.18	0.00696848		3036.21	0.00850966		3566.2	-0.00193248		4096.2	-0.00911663
386.39	0.07801575		916.39	0.01043223		1446.38	0.01470586		1976.39	-0.01051167		2506.38	0.00567033		3036.41	0.00846685		3566.4	-0.00217013		4096.4	-0.00932181
386.59	0.07826705		916.59	0.0097563		1446.58	0.01419209		1976.59	-0.01114469		2506.58	0.00483986		3036.61	0.00815682		3566.6	-0.00253445		4096.6	-0.00923427
386.79	0.07867172		916.79	0.00978698		1446.78	0.01399115		1976.79	-0.01219356		2506.78	0.00404036		3036.81	0.00862887		3566.8	-0.00315547		4096.8	-0.0082838
386.99	0.0791691		916.99	0.01032601		1446.98	0.01369236		1976.99	-0.01324762		2506.98	0.00362656		3037.01	0.00978408		3567	-0.00311871		4097	-0.0082929
387.19	0.08039414		917.19	0.01018463		1447.18	0.01430779		1977.19	-0.01374343		2507.18	0.00402149		3037.21	0.01013217		3567.2	-0.00225981		4097.2	-0.00776862
387.39	0.07996682		917.39	0.00983398		1447.38	0.01382348		1977.39	-0.01365262		2507.38	0.00326421		3037.41	0.01016993		3567.4	-0.00228947		4097.4	-0.00767164
387.59	0.07978652		917.59	0.00982055		1447.58	0.01360136		1977.59	-0.01388941		2507.58	0.00331514		3037.61	0.01060252		3567.6	-0.00211133		4097.6	-0.00757221
387.79	0.07937365		917.79	0.00909392		1447.78	0.01393207		1977.79	-0.01330893		2507.78	0.00356915		3037.81	0.00990898		3567.8	-0.0019625		4097.8	-0.0078352
387.99	0.07920619		917.99	0.00807354		1447.98	0.01270376		1977.99	-0.01379901		2507.98	0.0028604		3038.01	0.01011688		3568	-0.00197996		4098	-0.00749564
388.19	0.07908421		918.19	0.0077011		1448.18	0.0135263		1978.19	-0.01408482		2508.18	0.00414363		3038.21	0.01008994		3568.2	-0.00237398		4098.2	-0.00807523
388.39	0.08017348		918.39	0.00780911		1448.38	0.01381557		1978.39	-0.01280542		2508.38	0.00442441		3038.41	0.00908424		3568.4	-0.00180597		4098.4	-0.00792503
388.59	0.08026433		918.59	0.00822883		1448.58	0.01371498		1978.59	-0.01218177		2508.58	0.0039121		3038.61	0.00845972		3568.6	-0.00080639		4098.6	-0.00813517
388.79	0.08038656		918.79	0.00810976		1448.78	0.01356921		1978.79	-0.01183796		2508.78	0.00366132		3038.81	0.0086796		3568.8	-0.00059078		4098.8	-0.00705748
388.99	0.08043114		918.99	0.00744192		1448.98	0.01411955		1978.99	-0.01085571		2508.98	0.00392058		3039.01	0.00943028		3569	-0.00053695		4099	-0.00741514
389.19	0.07997771		919.19	0.00757372		1449.18	0.01525925		1979.19	-0.00978658		2509.18	0.00360829		3039.21	0.0098747		3569.2	-0.00116551		4099.2	-0.00805604
389.39	0.07967591		919.39	0.00760442		1449.38	0.01554433		1979.39	-0.00889279		2509.38	0.00369839		3039.41	0.00921484		3569.4	-0.00130782		4099.4	-0.00907613
389.59	0.07976845		919.59	0.00719058		1449.58	0.01571663		1979.59	-0.00787086		2509.58	0.00403773		3039.61	0.00952455		3569.6	-0.00080407		4099.6	-0.01028564
389.79	0.08025995		919.79	0.00821436		1449.78	0.01584381		1979.79	-0.00708797		2509.78	0.00355678		3039.81	0.00973258		3569.8	0.00033885		4099.8	-0.01076237
389.99	0.0808271		919.99	0.00801932		1449.98	0.01542394		1979.99	-0.00750274		2509.98	0.00329542		3040.01	0.01019554		3570	0.00034153		4100	-0.00961078
390.19	0.08139832		920.19	0.00906789		1450.18	0.01483293		1980.19	-0.00847289		2510.18	0.00274522		3040.21	0.01063527		3570.2	-0.00033564		4100.2	-0.00910307
390.39	0.08147403		920.39	0.00880665		1450.38	0.01423137		1980.39	-0.00882128		2510.38	0.00328277		3040.41	0.01073088		3570.4	-0.00120525		4100.4	-0.00915818
390.59	0.08123264		920.59	0.00843234		1450.58	0.0134975		1980.59	-0.00879991		2510.58	0.00390928		3040.61	0.01084841		3570.6	-0.00159735		4100.6	-0.0098409
390.79	0.08132643		920.79	0.00922848		1450.78	0.01323866		1980.79	-0.00861867		2510.78	0.00386143		3040.81	0.01049087		3570.8	-0.0024472		4100.8	-0.00998082
390.99	0.08170426		920.99	0.00958174		1450.98	0.01254735		1980.99	-0.00831814		2510.98	0.00438831		3041.01	0.00997443		3571	-0.0016057		4101	-0.01031682
391.19	0.08076644		921.19	0.00938665		1451.18	0.01171459		1981.19	-0.0081905		2511.18	0.0052422		3041.21	0.00853564		3571.2	-0.0008658		4101.2	-0.00951775
391.39	0.07919413		921.39	0.00976016		1451.38	0.01068246		1981.39	-0.00871729		2511.38	0.00453095		3041.41	0.00855215		3571.4	-0.00109835		4101.4	-0.01005152
391.59	0.07886272		921.59	0.00954138		1451.58	0.01024758		1981.59	-0.00905652		2511.58	0.00555695		3041.61	0.0085626		3571.6	-0.00114841		4101.6	-0.0107508
391.79	0.07842481		921.79	0.00922797		1451.78	0.00987476		1981.79	-0.00973198		2511.78	0.00585397		3041.81	0.00835067		3571.8	-0.00106033		4101.8	-0.0108473
391.99	0.07802447		921.99	0.00889792		1451.98	0.00909107		1981.99	-0.01085751		2511.98	0.00643538		3042.01	0.00777737		3572	-0.00090028		4102	-0.0105003
392.19	0.07751812		922.19	0.00948383		1452.18	0.01015366		1982.19	-0.01198922		2512.18	0.00780352		3042.21	0.00712303		3572.2	-0.00138453		4102.2	-0.0104474
392.39	0.07686648		922.39	0.01001414		1452.38	0.01055241		1982.39	-0.01284531		2512.38	0.00789961		3042.41	0.00687268		3572.4	-0.00142728		4102.4	-0.00991772
392.59	0.07681237		922.59	0.00965134		1452.58	0.01079665		1982.59	-0.0131684		2512.58	0.00768109		3042.61	0.00683875		3572.6	-0.00128371		4102.6	-0.00936887
392.79	0.07729839		922.79	0.00942035		1452.78	0.0118678		1982.79	-0.01267679		2512.78	0.0067387		3042.81	0.00724147		3572.8	-0.00178516		4102.8	-0.00831418
392.99	0.07725804		922.99	0.01050756		1452.98	0.01226922		1982.99	-0.01201034		2512.98	0.00676781		3043.01	0.00723815		3573	-0.00142013		4103	-0.00856612
393.19	0.07760462		923.19	0.01095193		1453.18	0.01247505		1983.19	-0.01263745		2513.18	0.00562032		3043.21	0.0070225		3573.2	-0.00122173		4103.2	-0.00866045
393.39	0.0776397		923.39	0.01085926		1453.38	0.01292776		1983.39	-0.01338415		2513.38	0.00509927		3043.41	0.00715023		3573.4	-0.00112022		4103.4	-0.00807103
393.59	0.07752582		923.59	0.01114067		1453.58	0.0126361		1983.59	-0.01309427		2513.58	0.00488792		3043.61	0.00879402		3573.6	-0.00078708		4103.6	-0.0082126
393.79	0.07829481		923.79	0.01213502		1453.78	0.01270182		1983.79	-0.01343177		2513.78	0.00406213		3043.81	0.00834831		3573.8	-0.00158873		4103.8	-0.00843541
393.99	0.07891837		923.99	0.01283909		1453.98	0.01303571		1983.99	-0.01372818		2513.98	0.00357661		3044.01	0.00919124		3574	-0.00220491		4104	-0.00787318
394.19	0.08008581		924.19	0.01328293		1454.18	0.01321303		1984.19	-0.01325658		2514.18	0.00293162		3044.21	0.00903227		3574.2	-0.003496		4104.2	-0.00835449
394.39	0.0804475		924.39	0.01258046		1454.38	0.01278976		1984.39	-0.01224203		2514.38	0.00345981		3044.41	0.00898243		3574.4	-0.00484499		4104.4	-0.00923533
394.59	0.08030568		924.59	0.01359791		1454.58	0.0124844		1984.59	-0.0111662		2514.58	0.00222567		3044.61	0.00884928		3574.6	-0.0050173		4104.6	-0.01010171
394.79	0.08014021		924.79	0.01452827		1454.78	0.01238584		1984.79	-0.01013225		2514.78	0.00131681		3044.81	0.00854661		3574.8	-0.00578155		4104.8	-0.0102086
394.99	0.07974669		924.99	0.01383491		1454.98	0.0119585		1984.99	-0.00901623		2514.98	0.00214708		3045.01	0.00815434		3575	-0.00457693		4105	-0.01007484
395.19	0.07988535		925.19	0.01404256		1455.18	0.01107459		1985.19	-0.00899813		2515.18	0.00167665		3045.21	0.00820374		3575.2	-0.0049811		4105.2	-0.01049612
395.39	0.08017505		925.39	0.01352895		1455.38	0.01140409		1985.39	-0.00799168		2515.38	0.00179562		3045.41	0.00946234		3575.4	-0.00539515		4105.4	-0.01070817
395.59	0.08043468		925.59	0.01364362		1455.58	0.01122851		1985.59	-0.0070556		2515.58	0.00301084		3045.61	0.00836121		3575.6	-0.00574715		4105.6	-0.01065911
395.79	0.0805144		925.79	0.01386727		1455.78	0.01126057		1985.79	-0.00712312		2515.78	0.00359335		3045.81	0.00870949		3575.8	-0.00471828		4105.8	-0.01025267
395.99	0.07949085		925.99	0.01318069		1455.98	0.01047355		1985.99	-0.00736381		2515.98	0.00478264		3046.01	0.00819062		3576	-0.00448007		4106	-0.00934245
396.19	0.07866383		926.19	0.01277961		1456.18	0.01166402		1986.19	-0.00731032		2516.18	0.00544926		3046.21	0.00804396		3576.2	-0.00451985		4106.2	-0.0086599
396.39	0.07865191		926.39	0.01220024		1456.38	0.01218118		1986.39	-0.00719144		2516.38	0.00583501		3046.41	0.00817484		3576.4	-0.00436932		4106.4	-0.00793144
396.59	0.07947721		926.59	0.01133178		1456.58	0.01257072		1986.59	-0.00610954		2516.58	0.00672887		3046.61	0.00809193		3576.6	-0.00428556		4106.6	-0.00742364
396.79	0.07989998		926.79	0.01151553		1456.78	0.01303844		1986.79	-0.00633131		2516.78	0.00650022		3046.81	0.00779474		3576.8	-0.00378301		4106.8	-0.00693235
396.99	0.08018938		926.99	0.01117975		1456.98	0.01295268		1986.99	-0.00668993		2516.98	0.00665607		3047.01	0.00776087		3577	-0.00270702		4107	-0.00640115
397.19	0.08128653		927.19	0.01048651		1457.18	0.01365889		1987.19	-0.00727566		2517.18	0.00669578		3047.21	0.00838534		3577.2	-0.00178933		4107.2	-0.00616129
397.39	0.08097731		927.39	0.00997683		1457.38	0.01382146		1987.39	-0.00707039		2517.38	0.00609249		3047.41	0.00867895		3577.4	-0.00162946		4107.4	-0.00589742
397.59	0.08121786		927.59	0.01005149		1457.58	0.01343057		1987.59	-0.00696504		2517.58	0.00638906		3047.61	0.00859888		3577.6	-0.00160126		4107.6	-0.00677079
397.79	0.08168103		927.79	0.00969767		1457.78	0.01388588		1987.79	-0.00764859		2517.78	0.00582555		3047.81	0.0078869		3577.8	-0.00139927		4107.8	-0.00730134
397.99	0.08142444		927.99	0.00972536		1457.98	0.01410476		1987.99	-0.00778761		2517.98	0.00514524		3048.01	0.00818215		3578	-0.0004429		4108	-0.007247
398.19	0.08118123		928.19	0.00943552		1458.18	0.01344329		1988.19	-0.00787095		2518.18	0.00433529		3048.21	0.00744777		3578.2	-0.00051622		4108.2	-0.00849308
398.39	0.08096885		928.39	0.00992916		1458.38	0.01359266		1988.39	-0.00910821		2518.38	0.00375424		3048.41	0.00762575		3578.4	-0.00039368		4108.4	-0.00925706
398.59	0.08025026		928.59	0.01070181		1458.58	0.01377961		1988.59	-0.00968743		2518.58	0.00194281		3048.61	0.00720221		3578.6	-0.00027679		4108.6	-0.00957745
398.79	0.08041953		928.79	0.01040012		1458.78	0.01374437		1988.79	-0.00993412		2518.78	0.00169028		3048.81	0.00687047		3578.8	-0.00030211		4108.8	-0.00980901
398.99	0.08083345		928.99	0.00941517		1458.98	0.01334003		1988.99	-0.01068077		2518.98	0.00152334		3049.01	0.00645317		3579	-0.0000969		4109	-0.00915277
399.19	0.08124291		929.19	0.00970933		1459.18	0.01397257		1989.19	-0.01068434		2519.18	0.0009001		3049.21	0.00688128		3579.2	-0.00075258		4109.2	-0.00931591
399.39	0.08029131		929.39	0.00967287		1459.38	0.01420313		1989.39	-0.01020749		2519.38	0.00068366		3049.41	0.00663313		3579.4	-0.0011475		4109.4	-0.00876396
399.59	0.08108621		929.59	0.00990806		1459.58	0.01371628		1989.59	-0.01123238		2519.58	0.00103256		3049.61	0.0065482		3579.6	-0.00106896		4109.6	-0.00887676
399.79	0.08158684		929.79	0.00969687		1459.78	0.01335474		1989.79	-0.01190611		2519.78	0.00115994		3049.81	0.00738708		3579.8	-0.00054221		4109.8	-0.00880607
399.99	0.08096716		929.99	0.00860886		1459.98	0.01309319		1989.99	-0.01198361		2519.98	0.00175708		3050.01	0.00679242		3580	-0.0017541		4110	-0.00807647
400.19	0.08107319		930.19	0.00827982		1460.18	0.0133576		1990.19	-0.01203193		2520.18	0.00252746		3050.21	0.00672142		3580.2	-0.00202818		4110.2	-0.00798054
400.39	0.08193505		930.39	0.00853777		1460.38	0.01250316		1990.39	-0.01221214		2520.38	0.00271363		3050.41	0.00677592		3580.4	-0.00280112		4110.4	-0.00834727
400.59	0.08180909		930.59	0.00928228		1460.58	0.01235152		1990.59	-0.01190416		2520.58	0.0029013		3050.61	0.00743768		3580.6	-0.00247594		4110.6	-0.00815639
400.79	0.08245091		930.79	0.009426		1460.78	0.01352913		1990.79	-0.01217642		2520.78	0.00305609		3050.81	0.00735795		3580.8	-0.00176853		4110.8	-0.00772052
400.99	0.08294613		930.99	0.00944633		1460.98	0.01351391		1990.99	-0.01175053		2520.98	0.00334281		3051.01	0.00780957		3581	-0.00158733		4111	-0.00838055
401.19	0.08254448		931.19	0.0103974		1461.18	0.01384186		1991.19	-0.0114535		2521.18	0.00336586		3051.21	0.00781703		3581.2	-0.00193233		4111.2	-0.00940377
401.39	0.08143319		931.39	0.01080786		1461.38	0.01419494		1991.39	-0.01152451		2521.38	0.00313025		3051.41	0.00806659		3581.4	-0.00173818		4111.4	-0.0099078
401.59	0.08065682		931.59	0.01132768		1461.58	0.01426501		1991.59	-0.01071981		2521.58	0.00365677		3051.61	0.00775579		3581.6	-0.00156918		4111.6	-0.01081048
401.79	0.07935978		931.79	0.01114382		1461.78	0.01472048		1991.79	-0.01082915		2521.78	0.00327981		3051.81	0.00838162		3581.8	-0.0008815		4111.8	-0.01114528
401.99	0.07834095		931.99	0.01195013		1461.98	0.0146076		1991.99	-0.00977993		2521.98	0.00318177		3052.01	0.00822818		3582	-0.0003155		4112	-0.01281618
402.19	0.07714267		932.19	0.01236005		1462.18	0.01443015		1992.19	-0.00929956		2522.18	0.00210848		3052.21	0.00844859		3582.2	-0.00043093		4112.2	-0.01332515
402.39	0.07688194		932.39	0.01247151		1462.38	0.01454099		1992.39	-0.00912067		2522.38	0.00169269		3052.41	0.00801283		3582.4	0.00016506		4112.4	-0.01235962
402.59	0.07722663		932.59	0.01257183		1462.58	0.01541733		1992.59	-0.00808		2522.58	0.00056614		3052.61	0.00834549		3582.6	-0.00000501		4112.6	-0.01176611
402.79	0.07676781		932.79	0.01221274		1462.78	0.01507423		1992.79	-0.00816638		2522.78	0.00079423		3052.81	0.00789276		3582.8	0.00046932		4112.8	-0.01144301
402.99	0.07636272		932.99	0.01104121		1462.98	0.01488373		1992.99	-0.00817622		2522.98	0.00104827		3053.01	0.00828584		3583	0.00013966		4113	-0.01041802
403.19	0.07606807		933.19	0.01069534		1463.18	0.0158866		1993.19	-0.00733207		2523.18	0.00176217		3053.21	0.00851135		3583.2	0.00020024		4113.2	-0.00988688
403.39	0.07700566		933.39	0.00988254		1463.38	0.01491657		1993.39	-0.0074426		2523.38	0.0022249		3053.41	0.00789078		3583.4	0.00009419		4113.4	-0.00927147
403.59	0.0785853		933.59	0.00902807		1463.58	0.01450412		1993.59	-0.00800441		2523.58	0.00279622		3053.61	0.00763207		3583.6	0.000187		4113.6	-0.00906565
403.79	0.07914455		933.79	0.00883634		1463.78	0.01379364		1993.79	-0.00766468		2523.78	0.00345494		3053.81	0.0065279		3583.8	0.00008427		4113.8	-0.00903881
403.99	0.07928395		933.99	0.0081688		1463.98	0.01373493		1993.99	-0.00785542		2523.98	0.00431487		3054.01	0.00569682		3584	0.00002917		4114	-0.00952936
404.19	0.07970677		934.19	0.00941411		1464.18	0.01306544		1994.19	-0.00811888		2524.18	0.00439645		3054.21	0.00569929		3584.2	-0.0002929		4114.2	-0.00993194
404.39	0.0800729		934.39	0.00973568		1464.38	0.01264702		1994.39	-0.00852255		2524.38	0.00425094		3054.41	0.00488252		3584.4	-0.00130639		4114.4	-0.01034694
404.59	0.08017052		934.59	0.00976134		1464.58	0.01319204		1994.59	-0.00823055		2524.58	0.0042696		3054.61	0.00563689		3584.6	-0.00172989		4114.6	-0.01042216
404.79	0.08088988		934.79	0.00912272		1464.78	0.01360979		1994.79	-0.00913785		2524.78	0.00507109		3054.81	0.00549774		3584.8	-0.00226284		4114.8	-0.01106233
404.99	0.0805234		934.99	0.00930792		1464.98	0.01211265		1994.99	-0.01021597		2524.98	0.00413431		3055.01	0.00562269		3585	-0.00321467		4115	-0.01200682
405.19	0.07983788		935.19	0.00983473		1465.18	0.01240346		1995.19	-0.01071417		2525.18	0.00372063		3055.21	0.00530946		3585.2	-0.0035231		4115.2	-0.01217572
405.39	0.0796517		935.39	0.01051854		1465.38	0.01233199		1995.39	-0.01050313		2525.38	0.00365504		3055.41	0.00552188		3585.4	-0.00270207		4115.4	-0.01226383
405.59	0.07894201		935.59	0.01113083		1465.58	0.0122485		1995.59	-0.00991629		2525.58	0.00321256		3055.61	0.00513151		3585.6	-0.0033691		4115.6	-0.01282231
405.79	0.07852509		935.79	0.01104451		1465.78	0.01222295		1995.79	-0.01049595		2525.78	0.00194966		3055.81	0.00560497		3585.8	-0.00382583		4115.8	-0.01283601
405.99	0.07802694		935.99	0.01131188		1465.98	0.01183948		1995.99	-0.00989315		2525.98	0.00151417		3056.01	0.00611124		3586	-0.00386722		4116	-0.01337688
406.19	0.07795076		936.19	0.01115696		1466.18	0.0117845		1996.19	-0.01009176		2526.18	0.00080402		3056.21	0.00679211		3586.2	-0.00387162		4116.2	-0.01177461
406.39	0.07804336		936.39	0.0107543		1466.38	0.0106558		1996.39	-0.00950046		2526.38	0.0004118		3056.41	0.00686431		3586.4	-0.00332451		4116.4	-0.01142888
406.59	0.07825235		936.59	0.01062872		1466.58	0.01093563		1996.59	-0.00975552		2526.58	0.00062227		3056.61	0.00831845		3586.6	-0.0033518		4116.6	-0.01197084
406.79	0.07761809		936.79	0.0099762		1466.78	0.01036227		1996.79	-0.00962688		2526.78	0.00147962		3056.81	0.00830996		3586.8	-0.00250622		4116.8	-0.01207594
406.99	0.07732332		936.99	0.00934244		1466.98	0.00970245		1996.99	-0.00973902		2526.98	0.0016167		3057.01	0.00872568		3587	-0.00271084		4117	-0.01170131
407.19	0.07744819		937.19	0.00906152		1467.18	0.01003616		1997.19	-0.00916805		2527.18	0.00134774		3057.21	0.00833208		3587.2	-0.00268867		4117.2	-0.01192088
407.39	0.07775759		937.39	0.00886616		1467.38	0.01014778		1997.39	-0.00912718		2527.38	0.00163105		3057.41	0.00806671		3587.4	-0.00234344		4117.4	-0.0118673
407.59	0.07829732		937.59	0.00834201		1467.58	0.0106418		1997.59	-0.00887853		2527.58	0.00190848		3057.61	0.00826701		3587.6	-0.00247878		4117.6	-0.01159442
407.79	0.07801786		937.79	0.00807473		1467.78	0.01149891		1997.79	-0.00914603		2527.78	0.00193244		3057.81	0.0085871		3587.8	-0.00220016		4117.8	-0.01189754
407.99	0.07721586		937.99	0.00840844		1467.98	0.01279946		1997.99	-0.00926721		2527.98	0.00280238		3058.01	0.0093133		3588	-0.00202933		4118	-0.01278951
408.19	0.07638987		938.19	0.0090221		1468.18	0.01258423		1998.19	-0.01000969		2528.18	0.00242785		3058.21	0.00865208		3588.2	-0.00214264		4118.2	-0.01208965
408.39	0.07543704		938.39	0.00909203		1468.38	0.01331093		1998.39	-0.00974724		2528.38	0.002948		3058.41	0.00827361		3588.4	-0.00255768		4118.4	-0.01185318
408.59	0.07547376		938.59	0.00903556		1468.58	0.01380963		1998.59	-0.00965757		2528.58	0.00301536		3058.61	0.00917553		3588.6	-0.00228515		4118.6	-0.01188216
408.79	0.07563639		938.79	0.01006506		1468.78	0.01403777		1998.79	-0.01142261		2528.78	0.00381217		3058.81	0.00861542		3588.8	-0.00175917		4118.8	-0.01252725
408.99	0.07604056		938.99	0.01098712		1468.98	0.0139793		1998.99	-0.01231519		2528.98	0.0031754		3059.01	0.00733013		3589	-0.00178262		4119	-0.01186329
409.19	0.07624721		939.19	0.01158647		1469.18	0.01466129		1999.19	-0.01266015		2529.18	0.00320103		3059.21	0.00644032		3589.2	-0.00117131		4119.2	-0.01083268
409.39	0.07615681		939.39	0.01193813		1469.38	0.01522209		1999.39	-0.01266892		2529.38	0.0031235		3059.41	0.00612667		3589.4	-0.00112672		4119.4	-0.01045417
409.59	0.07647776		939.59	0.01230582		1469.58	0.01577496		1999.59	-0.01276257		2529.58	0.00181706		3059.61	0.00603255		3589.6	-0.00144544		4119.6	-0.01055973
409.79	0.07768364		939.79	0.01189969		1469.78	0.01544276		1999.79	-0.01274379		2529.78	0.00079026		3059.81	0.00586793		3589.8	-0.00183011		4119.8	-0.01091452
409.99	0.07808231		939.99	0.01141696		1469.98	0.01519629		1999.99	-0.01305826		2529.98	0.00098323		3060.01	0.00565301		3590	-0.00171486		4120	-0.0107073
410.19	0.07921572		940.19	0.01124623		1470.18	0.014067		2000.19	-0.01364773		2530.18	0.00112797		3060.21	0.0046251		3590.2	-0.00103258		4120.2	-0.01096828
410.39	0.0798468		940.39	0.01045262		1470.38	0.01331916		2000.39	-0.01320888		2530.38	0.00074193		3060.41	0.00492312		3590.4	-0.00124871		4120.4	-0.01175817
410.59	0.08054989		940.59	0.00994581		1470.58	0.0136776		2000.59	-0.01367919		2530.58	0.0009524		3060.61	0.00516816		3590.6	-0.00134655		4120.6	-0.01241391
410.79	0.08022605		940.79	0.00953455		1470.78	0.01334567		2000.79	-0.0140969		2530.78	0.00050291		3060.81	0.00468486		3590.8	-0.00120099		4120.8	-0.01241363
410.99	0.07998476		940.99	0.00882027		1470.98	0.01259219		2000.99	-0.01467196		2530.98	-0.00062698		3061.01	0.00466642		3591	-0.00121397		4121	-0.01171157
411.19	0.08040313		941.19	0.00835616		1471.18	0.01222029		2001.19	-0.01359187		2531.18	-0.00064185		3061.21	0.0051374		3591.2	-0.00196282		4121.2	-0.01152187
411.39	0.07941516		941.39	0.0069169		1471.38	0.01350927		2001.39	-0.01425334		2531.38	-0.00021812		3061.41	0.00618994		3591.4	-0.00192516		4121.4	-0.01091768
411.59	0.07968333		941.59	0.00619556		1471.58	0.01312649		2001.59	-0.01422143		2531.58	0.00016377		3061.61	0.00635977		3591.6	-0.00233974		4121.6	-0.01000406
411.79	0.07859721		941.79	0.00528257		1471.78	0.01400561		2001.79	-0.01451264		2531.78	0.00051248		3061.81	0.00632506		3591.8	-0.00182883		4121.8	-0.0102694
411.99	0.07837469		941.99	0.00630737		1471.98	0.01426621		2001.99	-0.01441075		2531.98	0.00199276		3062.01	0.00634024		3592	-0.00177613		4122	-0.01027205
412.19	0.07781659		942.19	0.00695753		1472.18	0.01402652		2002.19	-0.01441745		2532.18	0.00139021		3062.21	0.00594875		3592.2	-0.00203891		4122.2	-0.01045541
412.39	0.07707751		942.39	0.00733295		1472.38	0.01414095		2002.39	-0.01372363		2532.38	0.00171814		3062.41	0.00583024		3592.4	-0.00273486		4122.4	-0.0107408
412.59	0.07717767		942.59	0.00706372		1472.58	0.01383667		2002.59	-0.0133488		2532.58	0.00190072		3062.61	0.00596332		3592.6	-0.00225304		4122.6	-0.01133587
412.79	0.07603204		942.79	0.00830339		1472.78	0.01365826		2002.79	-0.01363046		2532.78	0.00249535		3062.81	0.00540369		3592.8	-0.00183912		4122.8	-0.01107781
412.99	0.07537884		942.99	0.00829496		1472.98	0.01429991		2002.99	-0.01291884		2532.98	0.00201109		3063.01	0.00509571		3593	-0.00174806		4123	-0.00985354
413.19	0.07502703		943.19	0.0081551		1473.18	0.01348927		2003.19	-0.01289808		2533.18	0.00162645		3063.21	0.00537961		3593.2	-0.00176034		4123.2	-0.00979132
413.39	0.07549173		943.39	0.00869554		1473.38	0.01366135		2003.39	-0.01279617		2533.38	0.00129137		3063.41	0.00519695		3593.4	-0.00210778		4123.4	-0.01059067
413.59	0.07594339		943.59	0.00884418		1473.58	0.01354519		2003.59	-0.01243125		2533.58	0.00010975		3063.61	0.00491084		3593.6	-0.00222293		4123.6	-0.01086324
413.79	0.07594829		943.79	0.00849861		1473.78	0.01247356		2003.79	-0.01280283		2533.78	-0.00038363		3063.81	0.00474211		3593.8	-0.00262146		4123.8	-0.0105075
413.99	0.07650966		943.99	0.00808898		1473.98	0.01185265		2003.99	-0.01313621		2533.98	-0.00030992		3064.01	0.00458331		3594	-0.0024878		4124	-0.01023577
414.19	0.07704527		944.19	0.00833211		1474.18	0.0110188		2004.19	-0.01283112		2534.18	-0.00018671		3064.21	0.00451311		3594.2	-0.00237404		4124.2	-0.01056451
414.39	0.07671388		944.39	0.00791272		1474.38	0.01139842		2004.39	-0.01283198		2534.38	-0.00038407		3064.41	0.00568894		3594.4	-0.00247178		4124.4	-0.01024032
414.59	0.07655317		944.59	0.00839952		1474.58	0.01145207		2004.59	-0.01377642		2534.58	-0.00071085		3064.61	0.00564986		3594.6	-0.00279295		4124.6	-0.00997371
414.79	0.07603108		944.79	0.00909325		1474.78	0.01152974		2004.79	-0.01364327		2534.78	-0.00169857		3064.81	0.00579693		3594.8	-0.00216187		4124.8	-0.00967221
414.99	0.0749401		944.99	0.00891134		1474.98	0.01140717		2004.99	-0.01350969		2534.98	-0.00224654		3065.01	0.00633131		3595	-0.00177102		4125	-0.00962234
415.19	0.07523707		945.19	0.00908142		1475.18	0.01180436		2005.19	-0.01260425		2535.18	-0.00131924		3065.21	0.00628371		3595.2	-0.00268824		4125.2	-0.01078127
415.39	0.07455033		945.39	0.00836269		1475.38	0.01269995		2005.39	-0.01250045		2535.38	-0.00142355		3065.41	0.00628334		3595.4	-0.00298721		4125.4	-0.01124767
415.59	0.07558249		945.59	0.00864341		1475.58	0.01333692		2005.59	-0.01170889		2535.58	-0.0005912		3065.61	0.00598991		3595.6	-0.0027646		4125.6	-0.01142263
415.79	0.07548921		945.79	0.00866528		1475.78	0.01435275		2005.79	-0.01192794		2535.78	-0.00010808		3065.81	0.00636144		3595.8	-0.00273096		4125.8	-0.01211471
415.99	0.07603773		945.99	0.0096714		1475.98	0.0143269		2005.99	-0.01178886		2535.98	0.00012142		3066.01	0.00683633		3596	-0.00284417		4126	-0.01286803
416.19	0.0746429		946.19	0.00967961		1476.18	0.01375722		2006.19	-0.01137327		2536.18	-0.00076933		3066.21	0.00673736		3596.2	-0.00247212		4126.2	-0.014439
416.39	0.07398777		946.39	0.0091605		1476.38	0.01339312		2006.39	-0.01079718		2536.38	-0.00100057		3066.41	0.006838		3596.4	-0.0025176		4126.4	-0.0145136
416.59	0.0737697		946.59	0.00941486		1476.58	0.01390269		2006.59	-0.01066852		2536.58	-0.00041596		3066.61	0.00720011		3596.6	-0.00226658		4126.6	-0.01502378
416.79	0.07343405		946.79	0.01036162		1476.78	0.01452629		2006.79	-0.01100539		2536.78	-0.00045913		3066.81	0.00697532		3596.8	-0.00146282		4126.8	-0.01486861
416.99	0.07386399		946.99	0.01025258		1476.98	0.01445584		2006.99	-0.01121831		2536.98	-0.00077233		3067.01	0.00744823		3597	-0.0012243		4127	-0.0152179
417.19	0.07522231		947.19	0.01045733		1477.18	0.0131484		2007.19	-0.0117093		2537.18	-0.0007822		3067.21	0.00794295		3597.2	-0.00137348		4127.2	-0.01539047
417.39	0.07603332		947.39	0.01069951		1477.38	0.01308533		2007.39	-0.0117268		2537.38	-0.0007477		3067.41	0.00857345		3597.4	-0.00156729		4127.4	-0.01491892
417.59	0.07603909		947.59	0.01001172		1477.58	0.01219321		2007.59	-0.01215214		2537.58	-0.00076397		3067.61	0.00908033		3597.6	-0.00085957		4127.6	-0.01416369
417.79	0.07675102		947.79	0.01029075		1477.78	0.01076087		2007.79	-0.012909		2537.78	0.00021124		3067.81	0.00925507		3597.8	-0.00083224		4127.8	-0.01317651
417.99	0.07833724		947.99	0.0104553		1477.98	0.01031428		2007.99	-0.01348096		2537.98	0.00067446		3068.01	0.0087636		3598	-0.00124208		4128	-0.01309184
418.19	0.07782449		948.19	0.01076991		1478.18	0.00911382		2008.19	-0.01403003		2538.18	0.0008998		3068.21	0.00900221		3598.2	-0.00167445		4128.2	-0.01211768
418.39	0.07790444		948.39	0.01130052		1478.38	0.00930133		2008.39	-0.01526027		2538.38	0.00134139		3068.41	0.00863977		3598.4	-0.0021476		4128.4	-0.01239955
418.59	0.07837623		948.59	0.01123418		1478.58	0.0090144		2008.59	-0.0152544		2538.58	0.00196569		3068.61	0.00832937		3598.6	-0.00292666		4128.6	-0.01311908
418.79	0.07808127		948.79	0.01129685		1478.78	0.00939673		2008.79	-0.01501433		2538.78	0.00245418		3068.81	0.00812114		3598.8	-0.00336424		4128.8	-0.01249931
418.99	0.07749427		948.99	0.0099194		1478.98	0.00932086		2008.99	-0.01569047		2538.98	0.00329477		3069.01	0.00882937		3599	-0.00396885		4129	-0.0124159
419.19	0.07879327		949.19	0.00878879		1479.18	0.01008084		2009.19	-0.01578101		2539.18	0.00398457		3069.21	0.00783037		3599.2	-0.00521691		4129.2	-0.01242784
419.39	0.07857582		949.39	0.00808602		1479.38	0.01096746		2009.39	-0.01622877		2539.38	0.00457545		3069.41	0.00814396		3599.4	-0.00600031		4129.4	-0.01201331
419.59	0.07930733		949.59	0.00728516		1479.58	0.01173518		2009.59	-0.01611471		2539.58	0.00492773		3069.61	0.00797879		3599.6	-0.00575989		4129.6	-0.01140746
419.79	0.07937488		949.79	0.00697695		1479.78	0.01167712		2009.79	-0.01579915		2539.78	0.00472469		3069.81	0.00804476		3599.8	-0.00608847		4129.8	-0.01122307
419.99	0.07980157		949.99	0.00694143		1479.98	0.01214783		2009.99	-0.0154103		2539.98	0.00446203		3070.01	0.00806658		3600	-0.00490517		4130	-0.01132187
420.19	0.07933833		950.19	0.00660107		1480.18	0.01238985		2010.19	-0.01492321		2540.18	0.00348141		3070.21	0.00794697		3600.2	-0.00469738		4130.2	-0.01182295
420.39	0.07983722		950.39	0.00544277		1480.38	0.01285642		2010.39	-0.01452072		2540.38	0.00354142		3070.41	0.00819097		3600.4	-0.00493669		4130.4	-0.01128397
420.59	0.07985848		950.59	0.00559464		1480.58	0.01321877		2010.59	-0.01466725		2540.58	0.00326457		3070.61	0.008504		3600.6	-0.00453677		4130.6	-0.01166738
420.79	0.07981464		950.79	0.00622229		1480.78	0.01309343		2010.79	-0.01361421		2540.78	0.00253474		3070.81	0.00859773		3600.8	-0.00364405		4130.8	-0.01207718
420.99	0.07911212		950.99	0.00679663		1480.98	0.01274052		2010.99	-0.0134219		2540.98	0.00182152		3071.01	0.01018236		3601	-0.00327553		4131	-0.01235792
421.19	0.07908184		951.19	0.00751296		1481.18	0.01291159		2011.19	-0.01285158		2541.18	0.00128593		3071.21	0.01070068		3601.2	-0.00325253		4131.2	-0.01159606
421.39	0.07908121		951.39	0.00718668		1481.38	0.01305625		2011.39	-0.0125272		2541.38	0.00083461		3071.41	0.0107341		3601.4	-0.00260633		4131.4	-0.01112272
421.59	0.07923767		951.59	0.00748551		1481.58	0.01340862		2011.59	-0.01355606		2541.58	0.00123293		3071.61	0.01057433		3601.6	-0.0014945		4131.6	-0.01092879
421.79	0.07932273		951.79	0.0075877		1481.78	0.01309625		2011.79	-0.01367508		2541.78	0.00087727		3071.81	0.01044142		3601.8	-0.00170302		4131.8	-0.01026009
421.99	0.07893916		951.99	0.00803402		1481.98	0.01222321		2011.99	-0.01315083		2541.98	0.00045334		3072.01	0.00999903		3602	-0.00089841		4132	-0.01098064
422.19	0.07759841		952.19	0.00822412		1482.18	0.01153996		2012.19	-0.01367091		2542.18	0.00054469		3072.21	0.00940841		3602.2	-0.00167513		4132.2	-0.01178125
422.39	0.07739379		952.39	0.00819462		1482.38	0.0117673		2012.39	-0.01422479		2542.38	0.0012013		3072.41	0.00906282		3602.4	-0.00124202		4132.4	-0.01260481
422.59	0.07625795		952.59	0.00729921		1482.58	0.01182158		2012.59	-0.01404018		2542.58	0.00205177		3072.61	0.00927916		3602.6	-0.00136264		4132.6	-0.01270191
422.79	0.07560203		952.79	0.00706744		1482.78	0.01211083		2012.79	-0.01471068		2542.78	0.00264039		3072.81	0.00921115		3602.8	-0.00169688		4132.8	-0.01217423
422.99	0.07506645		952.99	0.00632524		1482.98	0.01137773		2012.99	-0.0153782		2542.98	0.00252937		3073.01	0.00905287		3603	-0.0018705		4133	-0.01263707
423.19	0.07437721		953.19	0.00626009		1483.18	0.01202743		2013.19	-0.01539945		2543.18	0.00235794		3073.21	0.00870426		3603.2	-0.00250468		4133.2	-0.01169463
423.39	0.07426551		953.39	0.00731905		1483.38	0.01129757		2013.39	-0.01479143		2543.38	0.00298508		3073.41	0.00870982		3603.4	-0.00355415		4133.4	-0.01179035
423.59	0.07438346		953.59	0.00734114		1483.58	0.01081516		2013.59	-0.01419014		2543.58	0.00232116		3073.61	0.00816449		3603.6	-0.00407196		4133.6	-0.01109553
423.79	0.07432945		953.79	0.00793313		1483.78	0.01056846		2013.79	-0.01393899		2543.78	0.00178347		3073.81	0.0077509		3603.8	-0.00443813		4133.8	-0.01131676
423.99	0.07454123		953.99	0.00859881		1483.98	0.0105404		2013.99	-0.01461382		2543.98	0.00176583		3074.01	0.00782173		3604	-0.00327392		4134	-0.0116868
424.19	0.07402724		954.19	0.00830118		1484.18	0.01005714		2014.19	-0.01465432		2544.18	0.00064392		3074.21	0.00751878		3604.2	-0.00389028		4134.2	-0.01120778
424.39	0.0736319		954.39	0.00888019		1484.38	0.01002025		2014.39	-0.01463441		2544.38	0.00024063		3074.41	0.00797859		3604.4	-0.00430666		4134.4	-0.01132686
424.59	0.07352239		954.59	0.01006774		1484.58	0.01038874		2014.59	-0.01476154		2544.58	-0.00060654		3074.61	0.00800664		3604.6	-0.00436579		4134.6	-0.01175036
424.79	0.07354793		954.79	0.01054949		1484.78	0.01113427		2014.79	-0.01496705		2544.78	-0.00171366		3074.81	0.00784083		3604.8	-0.00394173		4134.8	-0.0114661
424.99	0.07345358		954.99	0.01123801		1484.98	0.01193571		2014.99	-0.01547769		2544.98	-0.00300928		3075.01	0.00886884		3605	-0.00374384		4135	-0.01041198
425.19	0.07423643		955.19	0.01038111		1485.18	0.01196231		2015.19	-0.01540017		2545.18	-0.00289235		3075.21	0.00841501		3605.2	-0.00429045		4135.2	-0.00909072
425.39	0.07534933		955.39	0.00889392		1485.38	0.01254073		2015.39	-0.01530803		2545.38	-0.00371991		3075.41	0.00916385		3605.4	-0.00387297		4135.4	-0.00899434
425.59	0.07627214		955.59	0.00849558		1485.58	0.01400975		2015.59	-0.01596126		2545.58	-0.00364222		3075.61	0.00904915		3605.6	-0.00368951		4135.6	-0.00926934
425.79	0.07636185		955.79	0.00758537		1485.78	0.01448125		2015.79	-0.01540435		2545.78	-0.00381447		3075.81	0.00888986		3605.8	-0.00309467		4135.8	-0.00968251
425.99	0.07686006		955.99	0.00747441		1485.98	0.01421726		2015.99	-0.01529672		2545.98	-0.00316097		3076.01	0.00867814		3606	-0.00332589		4136	-0.01095683
426.19	0.0766654		956.19	0.00751614		1486.18	0.01484377		2016.19	-0.01580026		2546.18	-0.00222676		3076.21	0.00804981		3606.2	-0.00390397		4136.2	-0.01165441
426.39	0.07655876		956.39	0.00618911		1486.38	0.0150007		2016.39	-0.01536427		2546.38	-0.00138173		3076.41	0.0083221		3606.4	-0.00346348		4136.4	-0.01157444
426.59	0.07634523		956.59	0.00595426		1486.58	0.014321		2016.59	-0.01492532		2546.58	-0.00033945		3076.61	0.00748635		3606.6	-0.00424531		4136.6	-0.01228154
426.79	0.07612737		956.79	0.00546157		1486.78	0.01312774		2016.79	-0.01454219		2546.78	0.00075143		3076.81	0.00750156		3606.8	-0.00461191		4136.8	-0.01296128
426.99	0.07686037		956.99	0.00538613		1486.98	0.01255238		2016.99	-0.01411282		2546.98	0.00169836		3077.01	0.00737894		3607	-0.00548626		4137	-0.01298498
427.19	0.07660515		957.19	0.00550792		1487.18	0.01240124		2017.19	-0.01377535		2547.18	0.00234088		3077.21	0.00686184		3607.2	-0.00569762		4137.2	-0.01279461
427.39	0.07700282		957.39	0.00620961		1487.38	0.0118369		2017.39	-0.01339839		2547.38	0.00324493		3077.41	0.00584587		3607.4	-0.00721821		4137.4	-0.01415358
427.59	0.07671258		957.59	0.00613022		1487.58	0.01219532		2017.59	-0.01327974		2547.58	0.0036247		3077.61	0.00473413		3607.6	-0.00716981		4137.6	-0.01460352
427.79	0.0774198		957.79	0.0071584		1487.78	0.01175317		2017.79	-0.01223492		2547.78	0.00356135		3077.81	0.00422492		3607.8	-0.00750966		4137.8	-0.01557725
427.99	0.07737558		957.99	0.00809296		1487.98	0.01168408		2017.99	-0.01208971		2547.98	0.0041756		3078.01	0.00403615		3608	-0.00736849		4138	-0.01523109
428.19	0.07700759		958.19	0.00846308		1488.18	0.01147583		2018.19	-0.01130707		2548.18	0.00369118		3078.21	0.00348788		3608.2	-0.00757808		4138.2	-0.01537146
428.39	0.07663734		958.39	0.00890242		1488.38	0.01111576		2018.39	-0.01091058		2548.38	0.00321992		3078.41	0.0044869		3608.4	-0.00843078		4138.4	-0.01579631
428.59	0.07698508		958.59	0.00959464		1488.58	0.01096759		2018.59	-0.01124723		2548.58	0.00308056		3078.61	0.00469731		3608.6	-0.00783336		4138.6	-0.01531734
428.79	0.07637792		958.79	0.01005391		1488.78	0.01126995		2018.79	-0.01176059		2548.78	0.0020483		3078.81	0.00527394		3608.8	-0.0073095		4138.8	-0.01535426
428.99	0.07572323		958.99	0.0103432		1488.98	0.01120947		2018.99	-0.01153062		2548.98	0.00140866		3079.01	0.00504319		3609	-0.00710985		4139	-0.01573353
429.19	0.0761766		959.19	0.00978871		1489.18	0.01037483		2019.19	-0.0123039		2549.18	0.00118971		3079.21	0.0051459		3609.2	-0.00680204		4139.2	-0.01578476
429.39	0.07548664		959.39	0.00944953		1489.38	0.01046362		2019.39	-0.01249898		2549.38	0.00013802		3079.41	0.00577778		3609.4	-0.00627207		4139.4	-0.01610064
429.59	0.07549728		959.59	0.00951594		1489.58	0.01088101		2019.59	-0.01359002		2549.58	0.00065863		3079.61	0.00522514		3609.6	-0.00544063		4139.6	-0.01567482
429.79	0.07497088		959.79	0.00962977		1489.78	0.01037306		2019.79	-0.01375068		2549.78	0.00115149		3079.81	0.00553405		3609.8	-0.00502106		4139.8	-0.01569219
429.99	0.07529715		959.99	0.00981941		1489.98	0.00994836		2019.99	-0.0141447		2549.98	0.00100787		3080.01	0.00573154		3610	-0.00524919		4140	-0.01512403
430.19	0.07449313		960.19	0.01012932		1490.18	0.01000102		2020.19	-0.01472597		2550.18	0.00135806		3080.21	0.00564085		3610.2	-0.00396726		4140.2	-0.01450074
430.39	0.07487425		960.39	0.00905402		1490.38	0.0098321		2020.39	-0.01605076		2550.38	0.00127182		3080.41	0.00533097		3610.4	-0.0039345		4140.4	-0.0140937
430.59	0.07528792		960.59	0.00902759		1490.58	0.00896777		2020.59	-0.01699425		2550.58	0.00175406		3080.61	0.00541625		3610.6	-0.00349929		4140.6	-0.01393952
430.79	0.07584557		960.79	0.00827987		1490.78	0.00867385		2020.79	-0.01719913		2550.78	0.00137062		3080.81	0.00548328		3610.8	-0.0033779		4140.8	-0.01337832
430.99	0.0777924		960.99	0.0082912		1490.98	0.0092674		2020.99	-0.01705653		2550.98	0.00111362		3081.01	0.00417121		3611	-0.0027145		4141	-0.0131317
431.19	0.07783808		961.19	0.00814717		1491.18	0.00985784		2021.19	-0.0174303		2551.18	0.00061435		3081.21	0.00317481		3611.2	-0.00314234		4141.2	-0.01320764
431.39	0.07847409		961.39	0.00755204		1491.38	0.01013517		2021.39	-0.01715574		2551.38	-0.00021167		3081.41	0.00366105		3611.4	-0.00422874		4141.4	-0.01366437
431.59	0.07884663		961.59	0.00688566		1491.58	0.01071174		2021.59	-0.01716773		2551.58	-0.00027917		3081.61	0.00405409		3611.6	-0.00381177		4141.6	-0.01400911
431.79	0.07915132		961.79	0.00704879		1491.78	0.01125296		2021.79	-0.01607674		2551.78	-0.0008164		3081.81	0.0044778		3611.8	-0.00484841		4141.8	-0.01360239
431.99	0.07898104		961.99	0.00612488		1491.98	0.0112611		2021.99	-0.01600482		2551.98	-0.00068902		3082.01	0.00489467		3612	-0.00507628		4142	-0.01313506
432.19	0.07870661		962.19	0.00554161		1492.18	0.01126812		2022.19	-0.01537621		2552.18	-0.00127805		3082.21	0.00575166		3612.2	-0.00481323		4142.2	-0.01455038
432.39	0.0782418		962.39	0.00565018		1492.38	0.01153511		2022.39	-0.01544078		2552.38	-0.00140451		3082.41	0.00705707		3612.4	-0.00519884		4142.4	-0.01390843
432.59	0.07778262		962.59	0.00572675		1492.58	0.01245577		2022.59	-0.01539792		2552.58	-0.00155494		3082.61	0.0072601		3612.6	-0.00466029		4142.6	-0.01394666
432.79	0.07680358		962.79	0.00461415		1492.78	0.01273671		2022.79	-0.01540853		2552.78	-0.00170647		3082.81	0.00722669		3612.8	-0.00415618		4142.8	-0.01513186
432.99	0.07622692		962.99	0.00365874		1492.98	0.01187847		2022.99	-0.01500628		2552.98	-0.00235248		3083.01	0.00707543		3613	-0.00432054		4143	-0.01536582
433.19	0.07632995		963.19	0.00302252		1493.18	0.01203981		2023.19	-0.01586241		2553.18	-0.00177518		3083.21	0.0075348		3613.2	-0.00409559		4143.2	-0.01514672
433.39	0.07450656		963.39	0.00287829		1493.38	0.01180513		2023.39	-0.01540516		2553.38	-0.001289		3083.41	0.00714874		3613.4	-0.00393211		4143.4	-0.0143034
433.59	0.07485168		963.59	0.00319385		1493.58	0.01236318		2023.59	-0.01605422		2553.58	-0.00010054		3083.61	0.00716063		3613.6	-0.00337767		4143.6	-0.01381171
433.79	0.07418662		963.79	0.00344628		1493.78	0.01326069		2023.79	-0.01562534		2553.78	0.00050981		3083.81	0.00696161		3613.8	-0.00432618		4143.8	-0.01409539
433.99	0.07388346		963.99	0.00400844		1493.98	0.01351113		2023.99	-0.01604356		2553.98	0.00049887		3084.01	0.00761815		3614	-0.00452824		4144	-0.01326128
434.19	0.07404865		964.19	0.00418951		1494.18	0.01388617		2024.19	-0.01637281		2554.18	0.00161443		3084.21	0.00761814		3614.2	-0.00419391		4144.2	-0.01344778
434.39	0.07387366		964.39	0.00462808		1494.38	0.01410569		2024.39	-0.01674335		2554.38	0.00241232		3084.41	0.00725449		3614.4	-0.00443547		4144.4	-0.01336779
434.59	0.07444395		964.59	0.00577757		1494.58	0.01486061		2024.59	-0.01577232		2554.58	0.00322197		3084.61	0.00653779		3614.6	-0.00502848		4144.6	-0.01263654
434.79	0.0752883		964.79	0.00684346		1494.78	0.01499394		2024.79	-0.0142521		2554.78	0.00278559		3084.81	0.00517049		3614.8	-0.00562175		4144.8	-0.01222015
434.99	0.07505206		964.99	0.00787106		1494.98	0.01512486		2024.99	-0.01383719		2554.98	0.00333933		3085.01	0.00428852		3615	-0.00495914		4145	-0.01302386
435.19	0.07424383		965.19	0.00837452		1495.18	0.01518704		2025.19	-0.01407735		2555.18	0.00322334		3085.21	0.00431941		3615.2	-0.00607808		4145.2	-0.01367513
435.39	0.07434999		965.39	0.00822332		1495.38	0.0140239		2025.39	-0.01324341		2555.38	0.00298461		3085.41	0.00558916		3615.4	-0.00602543		4145.4	-0.01405442
435.59	0.07457096		965.59	0.00817819		1495.58	0.01442522		2025.59	-0.01373401		2555.58	0.00324766		3085.61	0.00590855		3615.6	-0.00579084		4145.6	-0.01377812
435.79	0.07497991		965.79	0.00844797		1495.78	0.01369636		2025.79	-0.01346568		2555.78	0.00286341		3085.81	0.00508601		3615.8	-0.00609431		4145.8	-0.01326313
435.99	0.07544647		965.99	0.00889994		1495.98	0.01311921		2025.99	-0.01326208		2555.98	0.0028396		3086.01	0.00490084		3616	-0.00514654		4146	-0.013875
436.19	0.07561636		966.19	0.00899343		1496.18	0.01260314		2026.19	-0.01285867		2556.18	0.00226828		3086.21	0.00472588		3616.2	-0.00416363		4146.2	-0.01420759
436.39	0.07516604		966.39	0.00904		1496.38	0.01229025		2026.39	-0.01251649		2556.38	0.00147277		3086.41	0.00443857		3616.4	-0.00363299		4146.4	-0.01360328
436.59	0.07494296		966.59	0.00793899		1496.58	0.01163457		2026.59	-0.01258872		2556.58	0.00115305		3086.61	0.00421357		3616.6	-0.00329721		4146.6	-0.01381395
436.79	0.07526156		966.79	0.00693623		1496.78	0.01077464		2026.79	-0.01261558		2556.78	0.00062949		3086.81	0.00405214		3616.8	-0.00286199		4146.8	-0.01433983
436.99	0.07570816		966.99	0.00679742		1496.98	0.01050467		2026.99	-0.01257385		2556.98	0.00067503		3087.01	0.00396403		3617	-0.0031398		4147	-0.01411569
437.19	0.07561617		967.19	0.00591024		1497.18	0.01139748		2027.19	-0.01230618		2557.18	0.00075315		3087.21	0.00404654		3617.2	-0.00298375		4147.2	-0.01491712
437.39	0.07453095		967.39	0.00631942		1497.38	0.01058496		2027.39	-0.01211581		2557.38	0.00054356		3087.41	0.00450735		3617.4	-0.00273315		4147.4	-0.01482064
437.59	0.0754277		967.59	0.00636647		1497.58	0.01076831		2027.59	-0.01220635		2557.58	0.00098196		3087.61	0.00482486		3617.6	-0.00283046		4147.6	-0.01505078
437.79	0.07466068		967.79	0.0063757		1497.78	0.01061695		2027.79	-0.01138392		2557.78	0.00059671		3087.81	0.00512811		3617.8	-0.00345783		4147.8	-0.01561862
437.99	0.07473212		967.99	0.0067726		1497.98	0.01034462		2027.99	-0.0111028		2557.98	0.00079539		3088.01	0.00665661		3618	-0.0030206		4148	-0.01512152
438.19	0.07464649		968.19	0.0063216		1498.18	0.01094981		2028.19	-0.01038231		2558.18	0.00176059		3088.21	0.00667893		3618.2	-0.00239789		4148.2	-0.01493148
438.39	0.07421659		968.39	0.006608		1498.38	0.01162677		2028.39	-0.01077488		2558.38	0.00178323		3088.41	0.00692769		3618.4	-0.00187981		4148.4	-0.01456637
438.59	0.07507376		968.59	0.00719414		1498.58	0.01285542		2028.59	-0.01005241		2558.58	0.00105274		3088.61	0.00725821		3618.6	-0.0028907		4148.6	-0.01453651
438.79	0.07462271		968.79	0.00704693		1498.78	0.01190847		2028.79	-0.01021313		2558.78	0.00040517		3088.81	0.00709098		3618.8	-0.00253989		4148.8	-0.01439639
438.99	0.07401556		968.99	0.00755476		1498.98	0.01174969		2028.99	-0.01091525		2558.98	0.00046585		3089.01	0.00741833		3619	-0.00154117		4149	-0.01431152
439.19	0.07441029		969.19	0.00752128		1499.18	0.01143904		2029.19	-0.01145772		2559.18	0.00034473		3089.21	0.00795513		3619.2	-0.00268761		4149.2	-0.01336172
439.39	0.07425795		969.39	0.00755972		1499.38	0.01073464		2029.39	-0.01204261		2559.38	0.00028244		3089.41	0.0090212		3619.4	-0.00263081		4149.4	-0.01281506
439.59	0.07479813		969.59	0.00667711		1499.58	0.01118262		2029.59	-0.01388595		2559.58	-0.00015835		3089.61	0.00916972		3619.6	-0.00266296		4149.6	-0.01210217
439.79	0.07474608		969.79	0.00764577		1499.78	0.01056221		2029.79	-0.01464566		2559.78	-0.00018764		3089.81	0.00803462		3619.8	-0.0020838		4149.8	-0.01243744
439.99	0.07507222		969.99	0.00843247		1499.98	0.01081013		2029.99	-0.01472531		2559.98	-0.00101748		3090.01	0.00743528		3620	-0.00063805		4150	-0.01269701
440.19	0.07450323		970.19	0.00776532		1500.18	0.00938784		2030.19	-0.01535841		2560.18	-0.00157933		3090.21	0.00724225		3620.2	-0.00015434		4150.2	-0.01225592
440.39	0.07335946		970.39	0.00730019		1500.38	0.00883884		2030.39	-0.01582339		2560.38	-0.0020141		3090.41	0.00692179		3620.4	0.00011487		4150.4	-0.01214627
440.59	0.07292527		970.59	0.00690509		1500.58	0.00835593		2030.59	-0.01678617		2560.58	-0.00097757		3090.61	0.00733533		3620.6	0.00041258		4150.6	-0.01208222
440.79	0.07266376		970.79	0.00678709		1500.78	0.00901845		2030.79	-0.01677913		2560.78	-0.00101241		3090.81	0.00702629		3620.8	-0.00039871		4150.8	-0.01203905
440.99	0.07259948		970.99	0.00714009		1500.98	0.00837154		2030.99	-0.01700542		2560.98	-0.0000049		3091.01	0.00729838		3621	-0.00159132		4151	-0.01254724
441.19	0.07250199		971.19	0.00632894		1501.18	0.00802788		2031.19	-0.01671168		2561.18	-0.00009568		3091.21	0.00764412		3621.2	-0.00205608		4151.2	-0.01321059
441.39	0.07150136		971.39	0.00691697		1501.38	0.00739191		2031.39	-0.01659489		2561.38	0.00057805		3091.41	0.00804453		3621.4	-0.00252814		4151.4	-0.01343818
441.59	0.07163141		971.59	0.00668295		1501.58	0.00732225		2031.59	-0.01661018		2561.58	0.00119107		3091.61	0.00813778		3621.6	-0.0027892		4151.6	-0.01344466
441.79	0.07115531		971.79	0.00674782		1501.78	0.00707094		2031.79	-0.01646097		2561.78	0.00115661		3091.81	0.00850941		3621.8	-0.00314871		4151.8	-0.01405536
441.99	0.07129226		971.99	0.00672338		1501.98	0.00770177		2031.99	-0.01652107		2561.98	0.0015952		3092.01	0.00897478		3622	-0.00305648		4152	-0.01410698
442.19	0.07190278		972.19	0.00563223		1502.18	0.00775442		2032.19	-0.01676199		2562.18	0.00182847		3092.21	0.00792527		3622.2	-0.00355524		4152.2	-0.01403067
442.39	0.07263199		972.39	0.00566501		1502.38	0.00828823		2032.39	-0.01679118		2562.38	0.00136612		3092.41	0.00748533		3622.4	-0.00443842		4152.4	-0.01387025
442.59	0.07317687		972.59	0.00637819		1502.58	0.00816211		2032.59	-0.01699615		2562.58	-0.00021443		3092.61	0.00757655		3622.6	-0.00575764		4152.6	-0.01370237
442.79	0.07380466		972.79	0.00629306		1502.78	0.00848587		2032.79	-0.01682709		2562.78	0.00046319		3092.81	0.00618118		3622.8	-0.00590439		4152.8	-0.01361339
442.99	0.07490728		972.99	0.00661896		1502.98	0.00966032		2032.99	-0.01706062		2562.98	0.00026608		3093.01	0.0058917		3623	-0.00643865		4153	-0.01347149
443.19	0.07507392		973.19	0.00626941		1503.18	0.00957283		2033.19	-0.01748048		2563.18	-0.00003157		3093.21	0.00626123		3623.2	-0.00735273		4153.2	-0.01343293
443.39	0.07495519		973.39	0.00626353		1503.38	0.01055784		2033.39	-0.01827645		2563.38	-0.00126867		3093.41	0.00549793		3623.4	-0.00761916		4153.4	-0.0145288
443.59	0.07640974		973.59	0.00614861		1503.58	0.01133746		2033.59	-0.0193732		2563.58	-0.00134948		3093.61	0.00460333		3623.6	-0.00749503		4153.6	-0.01525288
443.79	0.07617905		973.79	0.00636913		1503.78	0.01153429		2033.79	-0.01840891		2563.78	-0.00145091		3093.81	0.00423034		3623.8	-0.00669902		4153.8	-0.01604355
443.99	0.07683214		973.99	0.00595765		1503.98	0.01188979		2033.99	-0.01767501		2563.98	-0.00192862		3094.01	0.00412623		3624	-0.00618358		4154	-0.01628439
444.19	0.07511341		974.19	0.00568699		1504.18	0.01104193		2034.19	-0.01781424		2564.18	-0.00179452		3094.21	0.00491287		3624.2	-0.0059114		4154.2	-0.01601522
444.39	0.07471758		974.39	0.00519815		1504.38	0.01172461		2034.39	-0.01788961		2564.38	-0.00210298		3094.41	0.00554337		3624.4	-0.00541522		4154.4	-0.01610114
444.59	0.07449138		974.59	0.00505968		1504.58	0.01212401		2034.59	-0.01844311		2564.58	-0.00187623		3094.61	0.00581772		3624.6	-0.00577946		4154.6	-0.01699752
444.79	0.07488535		974.79	0.00463646		1504.78	0.01297445		2034.79	-0.01775377		2564.78	-0.00181446		3094.81	0.00577748		3624.8	-0.00685669		4154.8	-0.01725442
444.99	0.07474059		974.99	0.0046071		1504.98	0.01237643		2034.99	-0.01715063		2564.98	-0.0014998		3095.01	0.00582793		3625	-0.00684774		4155	-0.01692286
445.19	0.07410228		975.19	0.0042075		1505.18	0.0130045		2035.19	-0.01646032		2565.18	-0.00150508		3095.21	0.00675306		3625.2	-0.00618258		4155.2	-0.01627464
445.39	0.07356389		975.39	0.00490394		1505.38	0.01352648		2035.39	-0.0162133		2565.38	-0.00055306		3095.41	0.00702658		3625.4	-0.00548597		4155.4	-0.01582531
445.59	0.07373919		975.59	0.00473966		1505.58	0.01349483		2035.59	-0.01631174		2565.58	-0.00016295		3095.61	0.0073608		3625.6	-0.00455935		4155.6	-0.0157163
445.79	0.07433635		975.79	0.00442443		1505.78	0.01360868		2035.79	-0.01613428		2565.78	0.00023441		3095.81	0.00727485		3625.8	-0.00426007		4155.8	-0.01556434
445.99	0.07481882		975.99	0.00529853		1505.98	0.01382143		2035.99	-0.01483337		2565.98	0.00087047		3096.01	0.00776277		3626	-0.00318137		4156	-0.01502276
446.19	0.07569425		976.19	0.00570106		1506.18	0.01301275		2036.19	-0.01408921		2566.18	0.00138574		3096.21	0.00737302		3626.2	-0.00366027		4156.2	-0.01305409
446.39	0.0761793		976.39	0.0062499		1506.38	0.01279292		2036.39	-0.0138329		2566.38	0.00104872		3096.41	0.00734631		3626.4	-0.0037559		4156.4	-0.01164554
446.59	0.07647383		976.59	0.00643433		1506.58	0.01253876		2036.59	-0.01380298		2566.58	0.00062642		3096.61	0.00686882		3626.6	-0.0034544		4156.6	-0.01098064
446.79	0.07722739		976.79	0.00622206		1506.78	0.01274571		2036.79	-0.01242717		2566.78	0.0007009		3096.81	0.00661057		3626.8	-0.00323597		4156.8	-0.01156979
446.99	0.07730104		976.99	0.00614734		1506.98	0.01221741		2036.99	-0.01338662		2566.98	-0.00000875		3097.01	0.00637224		3627	-0.00335739		4157	-0.0116795
447.19	0.07671206		977.19	0.00623058		1507.18	0.0108327		2037.19	-0.01348249		2567.18	-0.00000315		3097.21	0.00660486		3627.2	-0.00290928		4157.2	-0.01195063
447.39	0.07660523		977.39	0.00634796		1507.38	0.01049395		2037.39	-0.014023		2567.38	-0.00087185		3097.41	0.00587648		3627.4	-0.00377859		4157.4	-0.01227565
447.59	0.07660318		977.59	0.0068853		1507.58	0.00960682		2037.59	-0.01408413		2567.58	-0.00017464		3097.61	0.00633529		3627.6	-0.00312439		4157.6	-0.01211229
447.79	0.07492788		977.79	0.00650479		1507.78	0.0090382		2037.79	-0.01309127		2567.78	-0.0013695		3097.81	0.00684417		3627.8	-0.00312224		4157.8	-0.01255164
447.99	0.07569268		977.99	0.00732743		1507.98	0.00814927		2037.99	-0.01399877		2567.98	-0.00061445		3098.01	0.00719408		3628	-0.00318354		4158	-0.01271795
448.19	0.07502406		978.19	0.00756612		1508.18	0.00727995		2038.19	-0.01491795		2568.18	-0.00086704		3098.21	0.00793752		3628.2	-0.00258197		4158.2	-0.01299629
448.39	0.07568083		978.39	0.00685027		1508.38	0.00705072		2038.39	-0.01515226		2568.38	-0.00181233		3098.41	0.00761382		3628.4	-0.00311806		4158.4	-0.01330978
448.59	0.0755062		978.59	0.00726751		1508.58	0.00679888		2038.59	-0.01577004		2568.58	-0.00202478		3098.61	0.00670178		3628.6	-0.00354172		4158.6	-0.01467975
448.79	0.07580068		978.79	0.00691231		1508.78	0.00717754		2038.79	-0.0147591		2568.78	-0.00218421		3098.81	0.00642121		3628.8	-0.0040077		4158.8	-0.01469118
448.99	0.07526848		978.99	0.0075253		1508.98	0.00676254		2038.99	-0.0154821		2568.98	-0.00251834		3099.01	0.00600726		3629	-0.00389001		4159	-0.0143035
449.19	0.07533169		979.19	0.00756917		1509.18	0.00739092		2039.19	-0.01526992		2569.18	-0.00256755		3099.21	0.00690044		3629.2	-0.00439564		4159.2	-0.01473112
449.39	0.07637825		979.39	0.00812651		1509.38	0.00757556		2039.39	-0.01567881		2569.38	-0.00200841		3099.41	0.00663362		3629.4	-0.00380887		4159.4	-0.01519752
449.59	0.07605637		979.59	0.00805231		1509.58	0.00738427		2039.59	-0.01566902		2569.58	-0.00210589		3099.61	0.00602846		3629.6	-0.00368743		4159.6	-0.01608427
449.79	0.0768145		979.79	0.00854215		1509.78	0.007491		2039.79	-0.01531302		2569.78	-0.00162089		3099.81	0.00574788		3629.8	-0.00361253		4159.8	-0.01638391
449.99	0.07742665		979.99	0.00942495		1509.98	0.00807466		2039.99	-0.01454675		2569.98	-0.0012195		3100.01	0.00551904		3630	-0.00336418		4160	-0.01641119
450.19	0.07761227		980.19	0.00880182		1510.18	0.00820511		2040.19	-0.01566703		2570.18	-0.00035615		3100.21	0.00479905		3630.2	-0.00403724		4160.2	-0.01517308
450.39	0.07691374		980.39	0.0077781		1510.38	0.00891304		2040.39	-0.01591616		2570.38	0.00008842		3100.41	0.00434862		3630.4	-0.0042622		4160.4	-0.01442501
450.59	0.07643143		980.59	0.00727705		1510.58	0.00942095		2040.59	-0.01536069		2570.58	-0.00005596		3100.61	0.00410739		3630.6	-0.00439033		4160.6	-0.0143683
450.79	0.07565277		980.79	0.00731961		1510.78	0.00936936		2040.79	-0.01485188		2570.78	-0.00011228		3100.81	0.00475783		3630.8	-0.00471133		4160.8	-0.01546008
450.99	0.07484925		980.99	0.00696642		1510.98	0.00918864		2040.99	-0.01538094		2570.98	0.00105988		3101.01	0.00406588		3631	-0.00527459		4161	-0.01464205
451.19	0.07396578		981.19	0.0073959		1511.18	0.0087037		2041.19	-0.01486995		2571.18	0.00115991		3101.21	0.00384199		3631.2	-0.00553292		4161.2	-0.01352574
451.39	0.07317526		981.39	0.00728264		1511.38	0.00854984		2041.39	-0.01513571		2571.38	-0.00027519		3101.41	0.00358056		3631.4	-0.00489352		4161.4	-0.01343384
451.59	0.07189417		981.59	0.00734951		1511.58	0.00863491		2041.59	-0.01550871		2571.58	-0.00030188		3101.61	0.00396894		3631.6	-0.00360213		4161.6	-0.01346868
451.79	0.07104102		981.79	0.0069521		1511.78	0.00873748		2041.79	-0.01547405		2571.78	-0.00105357		3101.81	0.00424914		3631.8	-0.00273545		4161.8	-0.0146312
451.99	0.0720274		981.99	0.00730154		1511.98	0.00895143		2041.99	-0.0158335		2571.98	0.00022771		3102.01	0.00414333		3632	-0.00171853		4162	-0.01415229
452.19	0.07212744		982.19	0.00675338		1512.18	0.00883489		2042.19	-0.01651796		2572.18	-0.0009352		3102.21	0.00416198		3632.2	-0.00157689		4162.2	-0.01446531
452.39	0.07249085		982.39	0.00643477		1512.38	0.00936231		2042.39	-0.01625165		2572.38	-0.00153305		3102.41	0.00446152		3632.4	-0.00209651		4162.4	-0.01398718
452.59	0.0727521		982.59	0.00686875		1512.58	0.00955877		2042.59	-0.01605797		2572.58	-0.00123285		3102.61	0.0040402		3632.6	-0.00196349		4162.6	-0.01561584
452.79	0.07309017		982.79	0.00641598		1512.78	0.00976753		2042.79	-0.0152034		2572.78	-0.0015602		3102.81	0.00429696		3632.8	-0.00311308		4162.8	-0.01603464
452.99	0.07376281		982.99	0.0073014		1512.98	0.0093252		2042.99	-0.01540276		2572.98	-0.00128292		3103.01	0.00555129		3633	-0.00397202		4163	-0.01587607
453.19	0.07446944		983.19	0.00692721		1513.18	0.00959141		2043.19	-0.01373831		2573.18	-0.00055364		3103.21	0.00624361		3633.2	-0.00399395		4163.2	-0.01680884
453.39	0.07518388		983.39	0.00708199		1513.38	0.00977824		2043.39	-0.01374784		2573.38	-0.00021043		3103.41	0.0059891		3633.4	-0.00302775		4163.4	-0.01721248
453.59	0.07624466		983.59	0.00694393		1513.58	0.00959288		2043.59	-0.01319383		2573.58	0.0000884		3103.61	0.00537428		3633.6	-0.00317301		4163.6	-0.01733354
453.79	0.07726693		983.79	0.00672683		1513.78	0.00942262		2043.79	-0.01272973		2573.78	0.00117644		3103.81	0.00557019		3633.8	-0.0032735		4163.8	-0.01665233
453.99	0.07786947		983.99	0.00673771		1513.98	0.01024805		2043.99	-0.01284353		2573.98	0.00130012		3104.01	0.00574032		3634	-0.00319934		4164	-0.01656979
454.19	0.07753519		984.19	0.0071458		1514.18	0.01076576		2044.19	-0.01315786		2574.18	0.00160679		3104.21	0.00646308		3634.2	-0.00364696		4164.2	-0.01560201
454.39	0.07716894		984.39	0.00677512		1514.38	0.01146249		2044.39	-0.01328323		2574.38	0.00108733		3104.41	0.00684226		3634.4	-0.00460765		4164.4	-0.0143647
454.59	0.07745231		984.59	0.0064389		1514.58	0.01136191		2044.59	-0.01327021		2574.58	0.0005095		3104.61	0.00713437		3634.6	-0.00522759		4164.6	-0.01421689
454.79	0.07780548		984.79	0.00693352		1514.78	0.01026591		2044.79	-0.01351665		2574.78	0.00023019		3104.81	0.00668052		3634.8	-0.00566081		4164.8	-0.0140493
454.99	0.07792322		984.99	0.0066336		1514.98	0.0096243		2044.99	-0.01432391		2574.98	0.00048947		3105.01	0.00616732		3635	-0.00571763		4165	-0.01319533
455.19	0.07732879		985.19	0.00692297		1515.18	0.00910553		2045.19	-0.01497319		2575.18	-0.00059273		3105.21	0.00599305		3635.2	-0.00516502		4165.2	-0.01297736
455.39	0.07727192		985.39	0.0062283		1515.38	0.00917433		2045.39	-0.01639197		2575.38	-0.0015159		3105.41	0.00605398		3635.4	-0.00406639		4165.4	-0.01412994
455.59	0.07573952		985.59	0.0064022		1515.58	0.00900996		2045.59	-0.01766257		2575.58	-0.00165532		3105.61	0.00620057		3635.6	-0.00427351		4165.6	-0.01430316
455.79	0.0754553		985.79	0.00617009		1515.78	0.00944921		2045.79	-0.01822165		2575.78	-0.00146703		3105.81	0.00572801		3635.8	-0.00382478		4165.8	-0.01474263
455.99	0.07560474		985.99	0.00570167		1515.98	0.00986005		2045.99	-0.01882766		2575.98	-0.00216766		3106.01	0.00535848		3636	-0.00342583		4166	-0.01460375
456.19	0.0757199		986.19	0.00482686		1516.18	0.00942005		2046.19	-0.02011086		2576.18	-0.00216476		3106.21	0.00600521		3636.2	-0.00356537		4166.2	-0.01507228
456.39	0.07546712		986.39	0.00462994		1516.38	0.00960434		2046.39	-0.02001181		2576.38	-0.00150411		3106.41	0.00616102		3636.4	-0.0035498		4166.4	-0.01513286
456.59	0.07492483		986.59	0.00439585		1516.58	0.00928308		2046.59	-0.01981673		2576.58	-0.0011554		3106.61	0.00580189		3636.6	-0.0031895		4166.6	-0.01607947
456.79	0.07465306		986.79	0.00444649		1516.78	0.00953488		2046.79	-0.01984119		2576.78	-0.00108434		3106.81	0.00638662		3636.8	-0.00362782		4166.8	-0.01613803
456.99	0.0749017		986.99	0.00447133		1516.98	0.00898483		2046.99	-0.01971009		2576.98	-0.00002274		3107.01	0.00707685		3637	-0.00312238		4167	-0.01527267
457.19	0.07498546		987.19	0.00381164		1517.18	0.00936131		2047.19	-0.01903978		2577.18	0.00044924		3107.21	0.00650183		3637.2	-0.00233672		4167.2	-0.01555204
457.39	0.07473761		987.39	0.0039953		1517.38	0.00926238		2047.39	-0.0182254		2577.38	0.0009801		3107.41	0.00661193		3637.4	-0.00215627		4167.4	-0.01462681
457.59	0.07440221		987.59	0.00445197		1517.58	0.0087946		2047.59	-0.01767009		2577.58	0.0010483		3107.61	0.0067476		3637.6	-0.00193879		4167.6	-0.01428699
457.79	0.0737547		987.79	0.00512929		1517.78	0.00943164		2047.79	-0.0173363		2577.78	0.00105745		3107.81	0.00699628		3637.8	-0.00192279		4167.8	-0.01385727
457.99	0.07312675		987.99	0.0060288		1517.98	0.00974596		2047.99	-0.0168293		2577.98	-0.00011947		3108.01	0.00684094		3638	-0.00227473		4168	-0.01467023
458.19	0.07307665		988.19	0.00595642		1518.18	0.01027444		2048.19	-0.01737007		2578.18	-0.00045385		3108.21	0.00773518		3638.2	-0.00273628		4168.2	-0.01473323
458.39	0.07365505		988.39	0.00548749		1518.38	0.01085577		2048.39	-0.0181925		2578.38	-0.0013487		3108.41	0.00783984		3638.4	-0.00361912		4168.4	-0.01518555
458.59	0.07442404		988.59	0.00603639		1518.58	0.00974409		2048.59	-0.017987		2578.58	-0.00163326		3108.61	0.00785222		3638.6	-0.00470465		4168.6	-0.01570955
458.79	0.07451199		988.79	0.00715246		1518.78	0.00930027		2048.79	-0.01880604		2578.78	-0.00196352		3108.81	0.00745692		3638.8	-0.00518812		4168.8	-0.01600077
458.99	0.07412137		988.99	0.00710047		1518.98	0.01001394		2048.99	-0.01919878		2578.98	-0.00184908		3109.01	0.00756825		3639	-0.00486572		4169	-0.01622048
459.19	0.07384403		989.19	0.00783446		1519.18	0.00958177		2049.19	-0.0186873		2579.18	-0.00228711		3109.21	0.00778111		3639.2	-0.00520514		4169.2	-0.01659278
459.39	0.07445237		989.39	0.00720775		1519.38	0.00956012		2049.39	-0.01893497		2579.38	-0.00176363		3109.41	0.00755044		3639.4	-0.00672735		4169.4	-0.01752219
459.59	0.07362507		989.59	0.0066358		1519.58	0.00991268		2049.59	-0.0183639		2579.58	-0.00216639		3109.61	0.00717563		3639.6	-0.00739238		4169.6	-0.01732534
459.79	0.0740465		989.79	0.00589306		1519.78	0.01063761		2049.79	-0.01768793		2579.78	-0.00264353		3109.81	0.00689595		3639.8	-0.00689219		4169.8	-0.01753312
459.99	0.0740701		989.99	0.00552265		1519.98	0.01076886		2049.99	-0.01783901		2579.98	-0.00331812		3110.01	0.00676405		3640	-0.0065215		4170	-0.01828014
460.19	0.07439151		990.19	0.00482207		1520.18	0.01045082		2050.19	-0.01851917		2580.18	-0.00275106		3110.21	0.00624845		3640.2	-0.00664852		4170.2	-0.01786725
460.39	0.07360041		990.39	0.00433731		1520.38	0.01032474		2050.39	-0.01832046		2580.38	-0.002922		3110.41	0.0060399		3640.4	-0.00667225		4170.4	-0.01792358
460.59	0.07382304		990.59	0.0044542		1520.58	0.01092053		2050.59	-0.01792278		2580.58	-0.0027976		3110.61	0.00569014		3640.6	-0.00596079		4170.6	-0.01785987
460.79	0.07440687		990.79	0.0043616		1520.78	0.01082822		2050.79	-0.01777938		2580.78	-0.00315609		3110.81	0.00509232		3640.8	-0.005809		4170.8	-0.01742329
460.99	0.07427175		990.99	0.00355121		1520.98	0.00975175		2050.99	-0.01779524		2580.98	-0.00278796		3111.01	0.00471295		3641	-0.00492049		4171	-0.01643314
461.19	0.07475009		991.19	0.0038047		1521.18	0.0101407		2051.19	-0.01726472		2581.18	-0.00231032		3111.21	0.00416766		3641.2	-0.00374971		4171.2	-0.01594825
461.39	0.07455629		991.39	0.00361264		1521.38	0.01006792		2051.39	-0.01664963		2581.38	-0.00188443		3111.41	0.00440212		3641.4	-0.00316612		4171.4	-0.01489043
461.59	0.07448127		991.59	0.00370656		1521.58	0.01026953		2051.59	-0.01654561		2581.58	-0.00184523		3111.61	0.00427597		3641.6	-0.0027196		4171.6	-0.01493134
461.79	0.07489383		991.79	0.00360961		1521.78	0.01015551		2051.79	-0.01518754		2581.78	-0.00174532		3111.81	0.00378974		3641.8	-0.00326547		4171.8	-0.01586722
461.99	0.07516109		991.99	0.003557		1521.98	0.00934059		2051.99	-0.01481255		2581.98	-0.00121304		3112.01	0.00394591		3642	-0.00352617		4172	-0.01651744
462.19	0.07574613		992.19	0.0039559		1522.18	0.01017004		2052.19	-0.01560165		2582.18	-0.0019818		3112.21	0.00419348		3642.2	-0.0029535		4172.2	-0.01683317
462.39	0.07575977		992.39	0.00500599		1522.38	0.01016151		2052.39	-0.01590347		2582.38	-0.00252175		3112.41	0.0045017		3642.4	-0.00284465		4172.4	-0.01709982
462.59	0.07473302		992.59	0.00562434		1522.58	0.01010786		2052.59	-0.01609133		2582.58	-0.00221448		3112.61	0.00507764		3642.6	-0.00265057		4172.6	-0.0167098
462.79	0.07419182		992.79	0.00644655		1522.78	0.01081597		2052.79	-0.01645108		2582.78	-0.00191181		3112.81	0.00509753		3642.8	-0.00197985		4172.8	-0.01632828
462.99	0.07380339		992.99	0.00673253		1522.98	0.01064314		2052.99	-0.01640994		2582.98	-0.00194964		3113.01	0.0048295		3643	-0.00225173		4173	-0.01623266
463.19	0.0729544		993.19	0.0066316		1523.18	0.01003617		2053.19	-0.01588937		2583.18	-0.00140042		3113.21	0.00491575		3643.2	-0.00309406		4173.2	-0.01684296
463.39	0.07272541		993.39	0.00590887		1523.38	0.00989451		2053.39	-0.01634363		2583.38	-0.00031088		3113.41	0.00435063		3643.4	-0.00288703		4173.4	-0.01741546
463.59	0.07229911		993.59	0.00621073		1523.58	0.01124791		2053.59	-0.01652952		2583.58	-0.00104124		3113.61	0.00443768		3643.6	-0.00301806		4173.6	-0.01731711
463.79	0.07117991		993.79	0.00604637		1523.78	0.01113909		2053.79	-0.01740938		2583.78	-0.00085833		3113.81	0.00513848		3643.8	-0.00329914		4173.8	-0.01771561
463.99	0.0701614		993.99	0.00541136		1523.98	0.0121384		2053.99	-0.0184829		2583.98	-0.00067421		3114.01	0.00529207		3644	-0.00466913		4174	-0.01790254
464.19	0.06993077		994.19	0.00459455		1524.18	0.01222383		2054.19	-0.01865204		2584.18	-0.00081285		3114.21	0.00478151		3644.2	-0.0051251		4174.2	-0.01757479
464.39	0.06933689		994.39	0.00490158		1524.38	0.01206397		2054.39	-0.01840998		2584.38	-0.00058756		3114.41	0.00513887		3644.4	-0.00572815		4174.4	-0.01846077
464.59	0.07016106		994.59	0.00541606		1524.58	0.01223867		2054.59	-0.01827241		2584.58	-0.00007259		3114.61	0.0043851		3644.6	-0.00683206		4174.6	-0.01866928
464.79	0.07063728		994.79	0.0051097		1524.78	0.01168151		2054.79	-0.01811407		2584.78	0.0004234		3114.81	0.00405374		3644.8	-0.00699328		4174.8	-0.01795016
464.99	0.07072349		994.99	0.00401117		1524.98	0.01168757		2054.99	-0.01826996		2584.98	0.00090651		3115.01	0.00411509		3645	-0.00721829		4175	-0.01811402
465.19	0.0713102		995.19	0.00474541		1525.18	0.01150996		2055.19	-0.0179207		2585.18	0.00109691		3115.21	0.00393977		3645.2	-0.00711225		4175.2	-0.01803241
465.39	0.07179978		995.39	0.00413057		1525.38	0.01128678		2055.39	-0.01729628		2585.38	0.0014835		3115.41	0.00429303		3645.4	-0.00823376		4175.4	-0.01804557
465.59	0.0724041		995.59	0.0042351		1525.58	0.01039759		2055.59	-0.0163335		2585.58	0.00141008		3115.61	0.00439245		3645.6	-0.00850975		4175.6	-0.01899704
465.79	0.07324603		995.79	0.00411446		1525.78	0.01011025		2055.79	-0.01559682		2585.78	0.00145558		3115.81	0.00385501		3645.8	-0.00835708		4175.8	-0.01925288
465.99	0.07360401		995.99	0.00447368		1525.98	0.00989811		2055.99	-0.01572528		2585.98	0.000813		3116.01	0.00391124		3646	-0.00776814		4176	-0.01836686
466.19	0.07346323		996.19	0.00584143		1526.18	0.01004173		2056.19	-0.01627178		2586.18	-0.00090852		3116.21	0.00420124		3646.2	-0.00685555		4176.2	-0.01808604
466.39	0.07339817		996.39	0.00581017		1526.38	0.00991795		2056.39	-0.0159961		2586.38	-0.0011257		3116.41	0.00568167		3646.4	-0.00625284		4176.4	-0.01791106
466.59	0.07338676		996.59	0.00609549		1526.58	0.01044598		2056.59	-0.01585074		2586.58	-0.00141503		3116.61	0.00619643		3646.6	-0.00675255		4176.6	-0.01763371
466.79	0.07460919		996.79	0.00669784		1526.78	0.0099991		2056.79	-0.01594624		2586.78	-0.0017294		3116.81	0.00595641		3646.8	-0.0065234		4176.8	-0.01653721
466.99	0.07411286		996.99	0.00638104		1526.98	0.00959257		2056.99	-0.01736504		2586.98	-0.00238173		3117.01	0.00591366		3647	-0.00634679		4177	-0.01652044
467.19	0.07426845		997.19	0.00570023		1527.18	0.0093134		2057.19	-0.01809874		2587.18	-0.0027406		3117.21	0.00636535		3647.2	-0.00535006		4177.2	-0.01691642
467.39	0.07483921		997.39	0.00587382		1527.38	0.00899655		2057.39	-0.01840126		2587.38	-0.00322215		3117.41	0.00733783		3647.4	-0.00466642		4177.4	-0.01628596
467.59	0.07451714		997.59	0.00585863		1527.58	0.00999541		2057.59	-0.01953122		2587.58	-0.00379532		3117.61	0.00799822		3647.6	-0.00496757		4177.6	-0.01628101
467.79	0.07363476		997.79	0.00505596		1527.78	0.00986138		2057.79	-0.01988543		2587.78	-0.00340934		3117.81	0.00848905		3647.8	-0.00545838		4177.8	-0.01716866
467.99	0.07348506		997.99	0.00452661		1527.98	0.01018466		2057.99	-0.01991944		2587.98	-0.00384603		3118.01	0.00776414		3648	-0.00551555		4178	-0.01638906
468.19	0.07338369		998.19	0.00433876		1528.18	0.00938514		2058.19	-0.01918067		2588.18	-0.00347821		3118.21	0.00698969		3648.2	-0.0054051		4178.2	-0.01642295
468.39	0.07332026		998.39	0.004634		1528.38	0.00892047		2058.39	-0.01900252		2588.38	-0.00262723		3118.41	0.00695221		3648.4	-0.0052322		4178.4	-0.01729146
468.59	0.07311152		998.59	0.00415235		1528.58	0.00904315		2058.59	-0.01890734		2588.58	-0.00180877		3118.61	0.00633439		3648.6	-0.0056173		4178.6	-0.01654461
468.79	0.07313649		998.79	0.00315816		1528.78	0.00884084		2058.79	-0.01805161		2588.78	-0.0013701		3118.81	0.00658949		3648.8	-0.00488245		4178.8	-0.01632064
468.99	0.07247918		998.99	0.00249001		1528.98	0.00852512		2058.99	-0.01790439		2588.98	-0.00182082		3119.01	0.00597785		3649	-0.00492639		4179	-0.01563789
469.19	0.07251412		999.19	0.00256749		1529.18	0.00838713		2059.19	-0.01741124		2589.18	-0.00143076		3119.21	0.00540057		3649.2	-0.0049058		4179.2	-0.01481206
469.39	0.07266764		999.39	0.00197374		1529.38	0.00888361		2059.39	-0.01711444		2589.38	-0.00058319		3119.41	0.00489183		3649.4	-0.00471818		4179.4	-0.01456021
469.59	0.07289397		999.59	0.00256846		1529.58	0.00897283		2059.59	-0.01674828		2589.58	-0.00148331		3119.61	0.00363187		3649.6	-0.00472169		4179.6	-0.01494024
469.79	0.07283286		999.79	0.00294474		1529.78	0.00948683		2059.79	-0.0168609		2589.78	-0.00108849		3119.81	0.00279854		3649.8	-0.00382831		4179.8	-0.01403689
469.99	0.07268939		999.99	0.00391517		1529.98	0.00933492		2059.99	-0.01644181		2589.98	-0.00166748		3120.01	0.00270384		3650	-0.00453422		4180	-0.01397553
470.19	0.07344025		1000.19	0.00466484		1530.18	0.00963796		2060.19	-0.01661938		2590.18	-0.00147173		3120.21	0.00381551		3650.2	-0.00499631		4180.2	-0.01343622
470.39	0.0734761		1000.39	0.0041061		1530.38	0.00987535		2060.39	-0.0164137		2590.38	-0.00147835		3120.41	0.00402864		3650.4	-0.00495396		4180.4	-0.0135008
470.59	0.07400681		1000.59	0.00462677		1530.58	0.00999947		2060.59	-0.01664156		2590.58	-0.00160607		3120.61	0.00409951		3650.6	-0.00604344		4180.6	-0.01254804
470.79	0.07451629		1000.79	0.00497245		1530.78	0.01072601		2060.79	-0.017139		2590.78	-0.00181082		3120.81	0.00365848		3650.8	-0.00615894		4180.8	-0.01194779
470.99	0.07398381		1000.99	0.00458927		1530.98	0.011006		2060.99	-0.01821571		2590.98	-0.00220194		3121.01	0.00317093		3651	-0.00684266		4181	-0.01276268
471.19	0.07337717		1001.19	0.00465743		1531.18	0.0109698		2061.19	-0.01792131		2591.18	-0.00242847		3121.21	0.00265685		3651.2	-0.00712821		4181.2	-0.01334613
471.39	0.07288396		1001.39	0.00440216		1531.38	0.01122922		2061.39	-0.017107		2591.38	-0.0019096		3121.41	0.00298264		3651.4	-0.00770368		4181.4	-0.01313607
471.59	0.07237912		1001.59	0.00422456		1531.58	0.01166368		2061.59	-0.017531		2591.58	-0.00174148		3121.61	0.00302502		3651.6	-0.00658118		4181.6	-0.01416838
471.79	0.07261319		1001.79	0.00328743		1531.78	0.01110326		2061.79	-0.01636889		2591.78	-0.0017808		3121.81	0.00378131		3651.8	-0.00670675		4181.8	-0.01478652
471.99	0.07248396		1001.99	0.00313951		1531.98	0.01058885		2061.99	-0.01567417		2591.98	-0.00244116		3122.01	0.00366293		3652	-0.00644209		4182	-0.01392325
472.19	0.07195635		1002.19	0.00256262		1532.18	0.01079792		2062.19	-0.01550814		2592.18	-0.00156786		3122.21	0.00403677		3652.2	-0.00677802		4182.2	-0.01447737
472.39	0.07181112		1002.39	0.00194605		1532.38	0.01087285		2062.39	-0.01523492		2592.38	-0.00134416		3122.41	0.00450396		3652.4	-0.00565383		4182.4	-0.01477159
472.59	0.07170638		1002.59	0.00142067		1532.58	0.01070661		2062.59	-0.01498475		2592.58	-0.00125906		3122.61	0.00588421		3652.6	-0.00526315		4182.6	-0.01430071
472.79	0.07201188		1002.79	0.00091424		1532.78	0.01037577		2062.79	-0.01506299		2592.78	-0.00197928		3122.81	0.0067363		3652.8	-0.00541794		4182.8	-0.01475166
472.99	0.07233137		1002.99	0.00078607		1532.98	0.01073943		2062.99	-0.01535615		2592.98	-0.00193295		3123.01	0.00650113		3653	-0.00532005		4183	-0.01413383
473.19	0.07257637		1003.19	0.00112784		1533.18	0.01079602		2063.19	-0.01535077		2593.18	-0.00121549		3123.21	0.00678849		3653.2	-0.00586995		4183.2	-0.01547045
473.39	0.07187068		1003.39	0.00140494		1533.38	0.01072903		2063.39	-0.01530484		2593.38	-0.00178417		3123.41	0.00682062		3653.4	-0.00604716		4183.4	-0.01614509
473.59	0.07214871		1003.59	0.00276658		1533.58	0.01129082		2063.59	-0.01629043		2593.58	-0.00216087		3123.61	0.00667958		3653.6	-0.00633441		4183.6	-0.01729158
473.79	0.07244648		1003.79	0.00279604		1533.78	0.01100469		2063.79	-0.0171408		2593.78	-0.00204795		3123.81	0.00698483		3653.8	-0.0057127		4183.8	-0.01745194
473.99	0.07278964		1003.99	0.00351354		1533.98	0.01021295		2063.99	-0.01780889		2593.98	-0.00212408		3124.01	0.00720572		3654	-0.00611143		4184	-0.01779216
474.19	0.07352023		1004.19	0.00358584		1534.18	0.01044235		2064.19	-0.01825615		2594.18	-0.00233807		3124.21	0.00768179		3654.2	-0.00599354		4184.2	-0.01777777
474.39	0.07260504		1004.39	0.00370434		1534.38	0.00995231		2064.39	-0.01844001		2594.38	-0.00249759		3124.41	0.00702361		3654.4	-0.00626454		4184.4	-0.01764291
474.59	0.07274723		1004.59	0.00412383		1534.58	0.01040955		2064.59	-0.01886152		2594.58	-0.00234473		3124.61	0.00562821		3654.6	-0.00713283		4184.6	-0.01730591
474.79	0.07283479		1004.79	0.00347241		1534.78	0.01113388		2064.79	-0.01997044		2594.78	-0.0025021		3124.81	0.00386519		3654.8	-0.00697211		4184.8	-0.01803412
474.99	0.07204446		1004.99	0.00306653		1534.98	0.01120403		2064.99	-0.02028804		2594.98	-0.00288911		3125.01	0.0019806		3655	-0.00763381		4185	-0.01888755
475.19	0.07081497		1005.19	0.00272565		1535.18	0.0107668		2065.19	-0.01948103		2595.18	-0.00249834		3125.21	0.00143248		3655.2	-0.00744714		4185.2	-0.01904289
475.39	0.07140764		1005.39	0.00277713		1535.38	0.01018342		2065.39	-0.01901767		2595.38	-0.00325498		3125.41	0.00222382		3655.4	-0.00708008		4185.4	-0.01822304
475.59	0.0724689		1005.59	0.00288962		1535.58	0.00980187		2065.59	-0.01849738		2595.58	-0.00438721		3125.61	0.00263041		3655.6	-0.00592766		4185.6	-0.01903221
475.79	0.07327398		1005.79	0.00282113		1535.78	0.00908686		2065.79	-0.0173676		2595.78	-0.00512919		3125.81	0.00246264		3655.8	-0.00636789		4185.8	-0.01910095
475.99	0.07342886		1005.99	0.00377366		1535.98	0.00826925		2065.99	-0.01693678		2595.98	-0.00576252		3126.01	0.00253448		3656	-0.00660325		4186	-0.01865857
476.19	0.07329499		1006.19	0.00367678		1536.18	0.00747725		2066.19	-0.01703329		2596.18	-0.00508226		3126.21	0.00306492		3656.2	-0.00611963		4186.2	-0.01804184
476.39	0.07334514		1006.39	0.00458624		1536.38	0.00704611		2066.39	-0.01704828		2596.38	-0.00534559		3126.41	0.00373531		3656.4	-0.00553083		4186.4	-0.017777
476.59	0.0743136		1006.59	0.00520899		1536.58	0.00622791		2066.59	-0.01703238		2596.58	-0.00575432		3126.61	0.00476537		3656.6	-0.00549168		4186.6	-0.0182735
476.79	0.07468699		1006.79	0.00527925		1536.78	0.00529397		2066.79	-0.01698278		2596.78	-0.00579426		3126.81	0.00555062		3656.8	-0.00667982		4186.8	-0.01803828
476.99	0.0743799		1006.99	0.00531432		1536.98	0.00610384		2066.99	-0.01638288		2596.98	-0.0050897		3127.01	0.00552147		3657	-0.00627781		4187	-0.01839518
477.19	0.07442612		1007.19	0.00601224		1537.18	0.00588885		2067.19	-0.0158451		2597.18	-0.00522212		3127.21	0.00622756		3657.2	-0.00629853		4187.2	-0.01792465
477.39	0.07304982		1007.39	0.0059778		1537.38	0.00676822		2067.39	-0.01653451		2597.38	-0.00641197		3127.41	0.00711319		3657.4	-0.00650311		4187.4	-0.0165502
477.59	0.07356511		1007.59	0.00665061		1537.58	0.0070878		2067.59	-0.01820503		2597.58	-0.00623369		3127.61	0.00800506		3657.6	-0.0060356		4187.6	-0.0160389
477.79	0.07385653		1007.79	0.00639942		1537.78	0.00689026		2067.79	-0.01874604		2597.78	-0.00599183		3127.81	0.00883252		3657.8	-0.0050369		4187.8	-0.01455103
477.99	0.07335129		1007.99	0.00635701		1537.98	0.0068698		2067.99	-0.01913958		2597.98	-0.00564347		3128.01	0.00941686		3658	-0.00522897		4188	-0.01380291
478.19	0.07426761		1008.19	0.00648463		1538.18	0.00724992		2068.19	-0.01912184		2598.18	-0.00612439		3128.21	0.00967448		3658.2	-0.00571207		4188.2	-0.01324708
478.39	0.07351074		1008.39	0.00568492		1538.38	0.00705986		2068.39	-0.01994659		2598.38	-0.00565046		3128.41	0.00909675		3658.4	-0.00521791		4188.4	-0.01259625
478.59	0.07381545		1008.59	0.00544907		1538.58	0.00769598		2068.59	-0.02113978		2598.58	-0.00494462		3128.61	0.00678385		3658.6	-0.00522666		4188.6	-0.01307897
478.79	0.07330097		1008.79	0.00495459		1538.78	0.00859611		2068.79	-0.02168943		2598.78	-0.00545118		3128.81	0.00564144		3658.8	-0.00473777		4188.8	-0.01421829
478.99	0.07261615		1008.99	0.00446779		1538.98	0.0091742		2068.99	-0.02090164		2598.98	-0.00507151		3129.01	0.0052283		3659	-0.00536098		4189	-0.0144312
479.19	0.07228507		1009.19	0.00383601		1539.18	0.00918345		2069.19	-0.02001472		2599.18	-0.00495161		3129.21	0.00537417		3659.2	-0.00448962		4189.2	-0.0150515
479.39	0.07243446		1009.39	0.00442679		1539.38	0.00872804		2069.39	-0.01996033		2599.38	-0.00563134		3129.41	0.00505153		3659.4	-0.00461143		4189.4	-0.01537489
479.59	0.07261777		1009.59	0.00397837		1539.58	0.00903061		2069.59	-0.01937417		2599.58	-0.00471225		3129.61	0.00409301		3659.6	-0.00398226		4189.6	-0.01630323
479.79	0.07284992		1009.79	0.00408613		1539.78	0.00970229		2069.79	-0.01924014		2599.78	-0.00436625		3129.81	0.0030038		3659.8	-0.00438204		4189.8	-0.01735056
479.99	0.07232835		1009.99	0.00413608		1539.98	0.00958912		2069.99	-0.01914852		2599.98	-0.0038551		3130.01	0.00296834		3660	-0.00473835		4190	-0.01764544
480.19	0.07232256		1010.19	0.00370369		1540.18	0.00924128		2070.19	-0.01965364		2600.18	-0.0029649		3130.21	0.00248427		3660.2	-0.00503298		4190.2	-0.0180327
480.39	0.07250701		1010.39	0.00338561		1540.38	0.0101437		2070.39	-0.01989752		2600.38	-0.00210931		3130.41	0.001549		3660.4	-0.0053528		4190.4	-0.01879018
480.59	0.07319299		1010.59	0.00252103		1540.58	0.01002534		2070.59	-0.01908922		2600.58	-0.00190212		3130.61	0.00220003		3660.6	-0.00555162		4190.6	-0.01949224
480.79	0.07289098		1010.79	0.00152459		1540.78	0.00979864		2070.79	-0.01876351		2600.78	-0.00126324		3130.81	0.00188468		3660.8	-0.0060037		4190.8	-0.01947071
480.99	0.07194631		1010.99	0.00101275		1540.98	0.0107013		2070.99	-0.01887455		2600.98	-0.00082893		3131.01	0.00194203		3661	-0.00564894		4191	-0.01978008
481.19	0.07234819		1011.19	0.00148773		1541.18	0.01007766		2071.19	-0.01935088		2601.18	-0.00090355		3131.21	0.00226517		3661.2	-0.00564647		4191.2	-0.01869401
481.39	0.07100819		1011.39	0.00170699		1541.38	0.01030071		2071.39	-0.02035192		2601.38	-0.00043637		3131.41	0.00302903		3661.4	-0.00604733		4191.4	-0.01821847
481.59	0.07122855		1011.59	0.00125881		1541.58	0.00994913		2071.59	-0.02019504		2601.58	-0.00089051		3131.61	0.00402887		3661.6	-0.0061929		4191.6	-0.01739996
481.79	0.07086869		1011.79	0.0014196		1541.78	0.00971269		2071.79	-0.02087904		2601.78	-0.00092639		3131.81	0.00444324		3661.8	-0.006393		4191.8	-0.01672446
481.99	0.07129635		1011.99	0.00179724		1541.98	0.00825507		2071.99	-0.02099542		2601.98	-0.00189067		3132.01	0.00508986		3662	-0.00757259		4192	-0.01678113
482.19	0.07222894		1012.19	0.00261638		1542.18	0.00799491		2072.19	-0.0215044		2602.18	-0.00277121		3132.21	0.00530019		3662.2	-0.00739655		4192.2	-0.01714241
482.39	0.07228065		1012.39	0.00322551		1542.38	0.00788412		2072.39	-0.02216764		2602.38	-0.0025824		3132.41	0.00454077		3662.4	-0.00729696		4192.4	-0.01711054
482.59	0.07219527		1012.59	0.00428031		1542.58	0.00829413		2072.59	-0.02213644		2602.58	-0.00285828		3132.61	0.00387546		3662.6	-0.00736102		4192.6	-0.01748723
482.79	0.07199067		1012.79	0.00423078		1542.78	0.0084682		2072.79	-0.02241733		2602.78	-0.00372545		3132.81	0.00493175		3662.8	-0.00700844		4192.8	-0.01805334
482.99	0.07203352		1012.99	0.00318287		1542.98	0.00882291		2072.99	-0.02221657		2602.98	-0.00454299		3133.01	0.00586296		3663	-0.00662786		4193	-0.01803859
483.19	0.07178381		1013.19	0.00410541		1543.18	0.00873191		2073.19	-0.02208076		2603.18	-0.00566295		3133.21	0.00613891		3663.2	-0.0059519		4193.2	-0.01919326
483.39	0.07104488		1013.39	0.0044547		1543.38	0.00790958		2073.39	-0.0221702		2603.38	-0.00524315		3133.41	0.00662891		3663.4	-0.00520311		4193.4	-0.01842437
483.59	0.07162358		1013.59	0.00375167		1543.58	0.00852781		2073.59	-0.02188078		2603.58	-0.00412816		3133.61	0.00640075		3663.6	-0.00425061		4193.6	-0.01837732
483.79	0.07245103		1013.79	0.00279866		1543.78	0.00843163		2073.79	-0.02124501		2603.78	-0.00373848		3133.81	0.00569438		3663.8	-0.00410474		4193.8	-0.01890928
483.99	0.07259176		1013.99	0.00230024		1543.98	0.00881878		2073.99	-0.02116449		2603.98	-0.00389506		3134.01	0.00592084		3664	-0.00415195		4194	-0.01770081
484.19	0.07329707		1014.19	0.00101205		1544.18	0.00853243		2074.19	-0.02078382		2604.18	-0.00377262		3134.21	0.00610504		3664.2	-0.00352448		4194.2	-0.01759445
484.39	0.07319763		1014.39	0.00038333		1544.38	0.00929896		2074.39	-0.01974153		2604.38	-0.0036796		3134.41	0.00593826		3664.4	-0.00324998		4194.4	-0.01717448
484.59	0.07316332		1014.59	0.00048359		1544.58	0.00937168		2074.59	-0.0197445		2604.58	-0.00304852		3134.61	0.00669173		3664.6	-0.00330151		4194.6	-0.0166735
484.79	0.07236842		1014.79	0.00023658		1544.78	0.0093564		2074.79	-0.01908826		2604.78	-0.00224548		3134.81	0.006151		3664.8	-0.00330316		4194.8	-0.0165865
484.99	0.0720029		1014.99	0.00051998		1544.98	0.0094805		2074.99	-0.0187117		2604.98	-0.00219627		3135.01	0.00650209		3665	-0.00284614		4195	-0.01613293
485.19	0.07235089		1015.19	0.00046757		1545.18	0.0096272		2075.19	-0.01857337		2605.18	-0.00284378		3135.21	0.00576992		3665.2	-0.00279695		4195.2	-0.01567243
485.39	0.07218966		1015.39	-0.00008747		1545.38	0.00927199		2075.39	-0.01818757		2605.38	-0.00250139		3135.41	0.00525253		3665.4	-0.00314473		4195.4	-0.01543973
485.59	0.07181735		1015.59	-0.00081372		1545.58	0.00866786		2075.59	-0.01797436		2605.58	-0.00338997		3135.61	0.00600061		3665.6	-0.00336595		4195.6	-0.01488298
485.79	0.07184427		1015.79	-0.00007509		1545.78	0.00803249		2075.79	-0.01914256		2605.78	-0.00374308		3135.81	0.00600835		3665.8	-0.00415858		4195.8	-0.01541703
485.99	0.07310524		1015.99	0.0003916		1545.98	0.00806033		2075.99	-0.01930918		2605.98	-0.00405534		3136.01	0.0059414		3666	-0.00443857		4196	-0.01613726
486.19	0.07319972		1016.19	0.00114639		1546.18	0.00877764		2076.19	-0.01930927		2606.18	-0.00382095		3136.21	0.00597078		3666.2	-0.00520058		4196.2	-0.01695188
486.39	0.07313877		1016.39	0.00207728		1546.38	0.0085482		2076.39	-0.01970138		2606.38	-0.00378679		3136.41	0.00540895		3666.4	-0.00567429		4196.4	-0.0167363
486.59	0.07252166		1016.59	0.00271305		1546.58	0.00917942		2076.59	-0.01989545		2606.58	-0.00371253		3136.61	0.00513841		3666.6	-0.00590947		4196.6	-0.0176028
486.79	0.07278152		1016.79	0.00310201		1546.78	0.00925596		2076.79	-0.0206555		2606.78	-0.00381179		3136.81	0.00482332		3666.8	-0.00666491		4196.8	-0.01826663
486.99	0.072071		1016.99	0.00328074		1546.98	0.00872186		2076.99	-0.02023126		2606.98	-0.00458336		3137.01	0.00501399		3667	-0.00650734		4197	-0.01827504
487.19	0.07176561		1017.19	0.00418612		1547.18	0.00756044		2077.19	-0.0189274		2607.18	-0.00396565		3137.21	0.00500858		3667.2	-0.00670949		4197.2	-0.01900831
487.39	0.07150461		1017.39	0.00450586		1547.38	0.00800974		2077.39	-0.01850416		2607.38	-0.00263612		3137.41	0.0042633		3667.4	-0.00657788		4197.4	-0.01875021
487.59	0.07212328		1017.59	0.00510086		1547.58	0.00845027		2077.59	-0.01768287		2607.58	-0.00262547		3137.61	0.00347871		3667.6	-0.00657428		4197.6	-0.01865384
487.79	0.07216686		1017.79	0.00521876		1547.78	0.00840469		2077.79	-0.01724982		2607.78	-0.00256953		3137.81	0.00324028		3667.8	-0.00633279		4197.8	-0.01791722
487.99	0.07198852		1017.99	0.00578857		1547.98	0.01013079		2077.99	-0.01710221		2607.98	-0.00363085		3138.01	0.00358863		3668	-0.00654297		4198	-0.01658009
488.19	0.07157887		1018.19	0.00581569		1548.18	0.00988252		2078.19	-0.01636014		2608.18	-0.00344601		3138.21	0.00397337		3668.2	-0.00609567		4198.2	-0.01649154
488.39	0.07064064		1018.39	0.00645859		1548.38	0.01057158		2078.39	-0.01631813		2608.38	-0.00319873		3138.41	0.00326321		3668.4	-0.0068892		4198.4	-0.01600251
488.59	0.07055557		1018.59	0.00686325		1548.58	0.01066537		2078.59	-0.01632868		2608.58	-0.00218744		3138.61	0.00288822		3668.6	-0.00679344		4198.6	-0.01567723
488.79	0.07059351		1018.79	0.00651724		1548.78	0.01097085		2078.79	-0.01578801		2608.78	-0.00245137		3138.81	0.00350432		3668.8	-0.00709937		4198.8	-0.01587585
488.99	0.07104602		1018.99	0.00585182		1548.98	0.01066432		2078.99	-0.01571914		2608.98	-0.00308417		3139.01	0.00377636		3669	-0.00626133		4199	-0.01518451
489.19	0.07113579		1019.19	0.00513883		1549.18	0.01001256		2079.19	-0.01615059		2609.18	-0.00320054		3139.21	0.00338976		3669.2	-0.00655234		4199.2	-0.01543744
489.39	0.07154598		1019.39	0.00518705		1549.38	0.00962998		2079.39	-0.01666631		2609.38	-0.00365825		3139.41	0.0035659		3669.4	-0.00578849		4199.4	-0.01664017
489.59	0.07131335		1019.59	0.00479045		1549.58	0.00898779		2079.59	-0.01697285		2609.58	-0.00463663		3139.61	0.00493795		3669.6	-0.00550791		4199.6	-0.01780817
489.79	0.07188136		1019.79	0.00531016		1549.78	0.0089088		2079.79	-0.01775559		2609.78	-0.00566046		3139.81	0.00519503		3669.8	-0.00645562		4199.8	-0.01883548
489.99	0.07235087		1019.99	0.00478003		1549.98	0.00907813		2079.99	-0.01839057		2609.98	-0.0050286		3140.01	0.00554461		3670	-0.00619234		4200	-0.02050889
490.19	0.07226652		1020.19	0.00527804		1550.18	0.00798368		2080.19	-0.01895937		2610.18	-0.00439735		3140.21	0.00613839		3670.2	-0.0070771		4200.2	-0.02128874
490.39	0.0725922		1020.39	0.00575363		1550.38	0.00717493		2080.39	-0.02023189		2610.38	-0.004522		3140.41	0.00580397		3670.4	-0.00742783		4200.4	-0.02151841
490.59	0.07323307		1020.59	0.00658652		1550.58	0.00685693		2080.59	-0.02048737		2610.58	-0.00332892		3140.61	0.00533011		3670.6	-0.00764259		4200.6	-0.02220912
490.79	0.07376259		1020.79	0.00633849		1550.78	0.00650288		2080.79	-0.02103875		2610.78	-0.00282985		3140.81	0.00549256		3670.8	-0.00810257		4200.8	-0.02259932
490.99	0.07290199		1020.99	0.00649088		1550.98	0.005057		2080.99	-0.02089322		2610.98	-0.00295498		3141.01	0.00572802		3671	-0.00834172		4201	-0.02168248
491.19	0.07235327		1021.19	0.00672518		1551.18	0.00507652		2081.19	-0.020705		2611.18	-0.00248395		3141.21	0.00547538		3671.2	-0.00873395		4201.2	-0.02214002
491.39	0.07219226		1021.39	0.00731285		1551.38	0.00590928		2081.39	-0.02036248		2611.38	-0.00280626		3141.41	0.00422018		3671.4	-0.00885463		4201.4	-0.02151019
491.59	0.07168463		1021.59	0.00692649		1551.58	0.00542627		2081.59	-0.0204747		2611.58	-0.00308621		3141.61	0.00457987		3671.6	-0.0089554		4201.6	-0.02021274
491.79	0.07133456		1021.79	0.00611764		1551.78	0.00542854		2081.79	-0.0198699		2611.78	-0.00296822		3141.81	0.0041551		3671.8	-0.00899456		4201.8	-0.01854277
491.99	0.07128693		1021.99	0.00535714		1551.98	0.00560088		2081.99	-0.01959526		2611.98	-0.00383044		3142.01	0.00351477		3672	-0.00895389		4202	-0.01766496
492.19	0.07118588		1022.19	0.00447696		1552.18	0.00524399		2082.19	-0.0191827		2612.18	-0.0021548		3142.21	0.00356419		3672.2	-0.00888805		4202.2	-0.01768185
492.39	0.07097613		1022.39	0.00392053		1552.38	0.00534322		2082.39	-0.01861289		2612.38	-0.002004		3142.41	0.00322284		3672.4	-0.00897402		4202.4	-0.01685036
492.59	0.07178288		1022.59	0.00359972		1552.58	0.00542644		2082.59	-0.01858552		2612.58	-0.00162764		3142.61	0.00339617		3672.6	-0.0085403		4202.6	-0.01593312
492.79	0.07165357		1022.79	0.00294729		1552.78	0.00577833		2082.79	-0.01777206		2612.78	-0.00185134		3142.81	0.00402771		3672.8	-0.00904564		4202.8	-0.01556562
492.99	0.0711575		1022.99	0.00198857		1552.98	0.00534912		2082.99	-0.01712249		2612.98	-0.00124317		3143.01	0.00314033		3673	-0.00901989		4203	-0.01494704
493.19	0.07078305		1023.19	0.00205467		1553.18	0.00610512		2083.19	-0.01663582		2613.18	-0.00265684		3143.21	0.00182145		3673.2	-0.00827203		4203.2	-0.01615457
493.39	0.07127468		1023.39	0.00168785		1553.38	0.00696124		2083.39	-0.01615729		2613.38	-0.00356098		3143.41	0.002098		3673.4	-0.00726617		4203.4	-0.01614951
493.59	0.07105856		1023.59	0.00072836		1553.58	0.00777528		2083.59	-0.01571238		2613.58	-0.00343774		3143.61	0.00167226		3673.6	-0.00784648		4203.6	-0.01655928
493.79	0.07122877		1023.79	0.0011486		1553.78	0.0080448		2083.79	-0.01620506		2613.78	-0.0030663		3143.81	0.0017941		3673.8	-0.00840099		4203.8	-0.01646503
493.99	0.07133476		1023.99	-0.00037506		1553.98	0.00813445		2083.99	-0.01648785		2613.98	-0.00247527		3144.01	0.00129449		3674	-0.00806513		4204	-0.01758619
494.19	0.07180036		1024.19	0.00046694		1554.18	0.00743151		2084.19	-0.01728575		2614.18	-0.00268368		3144.21	0.00139149		3674.2	-0.00885319		4204.2	-0.0174204
494.39	0.07243995		1024.39	0.00010894		1554.38	0.00823625		2084.39	-0.01781353		2614.38	-0.0030293		3144.41	0.00084972		3674.4	-0.00925677		4204.4	-0.01693897
494.59	0.0726844		1024.59	0.00074867		1554.58	0.00834546		2084.59	-0.01759803		2614.58	-0.00217067		3144.61	0.00101196		3674.6	-0.00974726		4204.6	-0.01714157
494.79	0.07282552		1024.79	0.00102362		1554.78	0.00832944		2084.79	-0.01797254		2614.78	-0.003079		3144.81	0.00070786		3674.8	-0.0097714		4204.8	-0.01666641
494.99	0.07182778		1024.99	0.00140994		1554.98	0.00802351		2084.99	-0.01832714		2614.98	-0.00405268		3145.01	0.00055241		3675	-0.00966494		4205	-0.01570103
495.19	0.07100522		1025.19	0.00174898		1555.18	0.00810695		2085.19	-0.01844988		2615.18	-0.00453044		3145.21	0.00018859		3675.2	-0.00979016		4205.2	-0.0165581
495.39	0.07186968		1025.39	0.00197191		1555.38	0.00801212		2085.39	-0.01884216		2615.38	-0.00441677		3145.41	0.00000641		3675.4	-0.00922201		4205.4	-0.01707199
495.59	0.07230378		1025.59	0.00148584		1555.58	0.00819313		2085.59	-0.01898953		2615.58	-0.00455336		3145.61	0.00120173		3675.6	-0.00884166		4205.6	-0.01652861
495.79	0.07290237		1025.79	0.00172763		1555.78	0.00732425		2085.79	-0.01859205		2615.78	-0.00529962		3145.81	0.0021532		3675.8	-0.00871636		4205.8	-0.01666278
495.99	0.07326987		1025.99	0.00123624		1555.98	0.00709912		2085.99	-0.01872774		2615.98	-0.00580756		3146.01	0.002457		3676	-0.00769682		4206	-0.01728755
496.19	0.07351336		1026.19	0.00119237		1556.18	0.00724206		2086.19	-0.0186919		2616.18	-0.00442416		3146.21	0.00372646		3676.2	-0.00705634		4206.2	-0.0176619
496.39	0.07301903		1026.39	0.00106423		1556.38	0.00700965		2086.39	-0.01859234		2616.38	-0.00550758		3146.41	0.00517041		3676.4	-0.00650607		4206.4	-0.01699897
496.59	0.07299102		1026.59	0.00083382		1556.58	0.00657331		2086.59	-0.01889002		2616.58	-0.00548431		3146.61	0.00515486		3676.6	-0.00625272		4206.6	-0.01689015
496.79	0.07263343		1026.79	0.00009494		1556.78	0.0061179		2086.79	-0.01850891		2616.78	-0.00499835		3146.81	0.0055087		3676.8	-0.00687358		4206.8	-0.01722107
496.99	0.07203912		1026.99	0.00037192		1556.98	0.00697172		2086.99	-0.01939804		2616.98	-0.00441856		3147.01	0.00597082		3677	-0.00674332		4207	-0.01698744
497.19	0.07148422		1027.19	0.00032445		1557.18	0.00840144		2087.19	-0.0196358		2617.18	-0.00500166		3147.21	0.0063481		3677.2	-0.00523139		4207.2	-0.01714769
497.39	0.07115113		1027.39	-0.00063396		1557.38	0.00835904		2087.39	-0.01987515		2617.38	-0.00462158		3147.41	0.00645003		3677.4	-0.00543632		4207.4	-0.01638295
497.59	0.07033118		1027.59	-0.00084056		1557.58	0.00835301		2087.59	-0.02056039		2617.58	-0.00437424		3147.61	0.00528855		3677.6	-0.00604323		4207.6	-0.01677693
497.79	0.07034795		1027.79	-0.00083918		1557.78	0.00817688		2087.79	-0.02097703		2617.78	-0.00426628		3147.81	0.00489968		3677.8	-0.00641132		4207.8	-0.01637735
497.99	0.06930675		1027.99	-0.00165943		1557.98	0.00709904		2087.99	-0.02098487		2617.98	-0.00467857		3148.01	0.00378598		3678	-0.00698128		4208	-0.01648507
498.19	0.06857511		1028.19	-0.00098322		1558.18	0.00682146		2088.19	-0.02189035		2618.18	-0.00414698		3148.21	0.00360462		3678.2	-0.00808192		4208.2	-0.01662507
498.39	0.06816349		1028.39	-0.00119688		1558.38	0.00671976		2088.39	-0.02193325		2618.38	-0.00445833		3148.41	0.00287605		3678.4	-0.00900826		4208.4	-0.01655575
498.59	0.06796252		1028.59	0.00014294		1558.58	0.00645126		2088.59	-0.02194076		2618.58	-0.00491894		3148.61	0.00313325		3678.6	-0.00925695		4208.6	-0.01759781
498.79	0.06822548		1028.79	0.0015167		1558.78	0.00630386		2088.79	-0.0226935		2618.78	-0.00538568		3148.81	0.00298934		3678.8	-0.00862671		4208.8	-0.01764556
498.99	0.06817993		1028.99	0.00160149		1558.98	0.00643102		2088.99	-0.02403458		2618.98	-0.00588534		3149.01	0.00348524		3679	-0.00920174		4209	-0.01916505
499.19	0.06828168		1029.19	0.00277243		1559.18	0.00672565		2089.19	-0.02385545		2619.18	-0.0057529		3149.21	0.0030222		3679.2	-0.00940309		4209.2	-0.02080728
499.39	0.06901773		1029.39	0.00335604		1559.38	0.00711195		2089.39	-0.02364612		2619.38	-0.00558298		3149.41	0.00283337		3679.4	-0.00935147		4209.4	-0.02151174
499.59	0.06940308		1029.59	0.00376488		1559.58	0.00765645		2089.59	-0.02269569		2619.58	-0.00724102		3149.61	0.0028771		3679.6	-0.01013703		4209.6	-0.02152217
499.79	0.06969238		1029.79	0.00429149		1559.78	0.00641012		2089.79	-0.02333899		2619.78	-0.00733664		3149.81	0.00253722		3679.8	-0.00998154		4209.8	-0.02215109
499.99	0.07028883		1029.99	0.00365113		1559.98	0.00720914		2089.99	-0.02213056		2619.98	-0.00737304		3150.01	0.00205116		3680	-0.00905572		4210	-0.02155168
500.19	0.07046433		1030.19	0.00364059		1560.18	0.00771664		2090.19	-0.02178131		2620.18	-0.00661061		3150.21	0.00298983		3680.2	-0.00953653		4210.2	-0.02148134
500.39	0.07008389		1030.39	0.0026742		1560.38	0.00705475		2090.39	-0.0217623		2620.38	-0.0065108		3150.41	0.00413301		3680.4	-0.0093024		4210.4	-0.01987048
500.59	0.07100482		1030.59	0.00286707		1560.58	0.00715698		2090.59	-0.02177744		2620.58	-0.00622949		3150.61	0.00371345		3680.6	-0.00933883		4210.6	-0.01884451
500.79	0.07160243		1030.79	0.00309632		1560.78	0.00761446		2090.79	-0.02225028		2620.78	-0.00509299		3150.81	0.00449126		3680.8	-0.00980471		4210.8	-0.01822775
500.99	0.0710305		1030.99	0.00340445		1560.98	0.00873534		2090.99	-0.02324941		2620.98	-0.00446833		3151.01	0.00528091		3681	-0.00924077		4211	-0.01725637
501.19	0.07088752		1031.19	0.00282927		1561.18	0.00881531		2091.19	-0.02362695		2621.18	-0.00380949		3151.21	0.00532172		3681.2	-0.00852044		4211.2	-0.01723803
501.39	0.07068788		1031.39	0.00211223		1561.38	0.00804524		2091.39	-0.02414223		2621.38	-0.00426308		3151.41	0.00500396		3681.4	-0.00922989		4211.4	-0.01691856
501.59	0.07050002		1031.59	0.0018124		1561.58	0.00780527		2091.59	-0.02412366		2621.58	-0.00407752		3151.61	0.00540072		3681.6	-0.00928801		4211.6	-0.01593604
501.79	0.07002629		1031.79	0.00124563		1561.78	0.00786794		2091.79	-0.02400324		2621.78	-0.00376198		3151.81	0.00476196		3681.8	-0.00981685		4211.8	-0.01535811
501.99	0.06872076		1031.99	0.00105142		1561.98	0.00679688		2091.99	-0.02463135		2621.98	-0.00341211		3152.01	0.0048856		3682	-0.00969486		4212	-0.01577621
502.19	0.06939612		1032.19	0.00026806		1562.18	0.0067639		2092.19	-0.02551673		2622.18	-0.00301705		3152.21	0.00473492		3682.2	-0.00964221		4212.2	-0.01699249
502.39	0.06957267		1032.39	0.0000037		1562.38	0.00585039		2092.39	-0.02552035		2622.38	-0.00364003		3152.41	0.00499773		3682.4	-0.00972913		4212.4	-0.0176455
502.59	0.07016757		1032.59	0.00104449		1562.58	0.00646464		2092.59	-0.02484464		2622.58	-0.00404889		3152.61	0.0053356		3682.6	-0.00842289		4212.6	-0.01891798
502.79	0.07079589		1032.79	0.00135521		1562.78	0.00668245		2092.79	-0.02456622		2622.78	-0.00410092		3152.81	0.00545132		3682.8	-0.00889933		4212.8	-0.01967762
502.99	0.07125332		1032.99	0.00098642		1562.98	0.00694715		2092.99	-0.0243497		2622.98	-0.00511219		3153.01	0.00497602		3683	-0.00903423		4213	-0.02075662
503.19	0.07135556		1033.19	0.00195647		1563.18	0.0076517		2093.19	-0.02319968		2623.18	-0.00572656		3153.21	0.00365424		3683.2	-0.00834457		4213.2	-0.02158447
503.39	0.07137944		1033.39	0.00327944		1563.38	0.00765693		2093.39	-0.02195713		2623.38	-0.00653884		3153.41	0.0028876		3683.4	-0.00814557		4213.4	-0.02248376
503.59	0.07204488		1033.59	0.00361221		1563.58	0.0072866		2093.59	-0.02207935		2623.58	-0.00760868		3153.61	0.00198075		3683.6	-0.00691756		4213.6	-0.02301774
503.79	0.07248197		1033.79	0.00351696		1563.78	0.0065907		2093.79	-0.02141126		2623.78	-0.00694768		3153.81	0.00195765		3683.8	-0.00620057		4213.8	-0.02260639
503.99	0.07293265		1033.99	0.00413339		1563.98	0.00712169		2093.99	-0.02024928		2623.98	-0.00686925		3154.01	0.00155182		3684	-0.00613931		4214	-0.02247977
504.19	0.07274757		1034.19	0.00416554		1564.18	0.00655583		2094.19	-0.02043738		2624.18	-0.00694759		3154.21	0.00129161		3684.2	-0.00689442		4214.2	-0.02213402
504.39	0.07245449		1034.39	0.00366206		1564.38	0.00692354		2094.39	-0.02088995		2624.38	-0.00647546		3154.41	0.00098893		3684.4	-0.00640164		4214.4	-0.02122928
504.59	0.07277978		1034.59	0.00421248		1564.58	0.00841867		2094.59	-0.02033593		2624.58	-0.00616097		3154.61	0.00028938		3684.6	-0.00611918		4214.6	-0.02098264
504.79	0.07286292		1034.79	0.00430628		1564.78	0.0087031		2094.79	-0.02082843		2624.78	-0.00505343		3154.81	0.00043795		3684.8	-0.00675957		4214.8	-0.02135949
504.99	0.07259332		1034.99	0.00428546		1564.98	0.00865621		2094.99	-0.02198354		2624.98	-0.00554407		3155.01	0.00099859		3685	-0.0068043		4215	-0.0209718
505.19	0.07151496		1035.19	0.00423948		1565.18	0.00878841		2095.19	-0.02173198		2625.18	-0.00550752		3155.21	0.00131148		3685.2	-0.00772482		4215.2	-0.021138
505.39	0.0709039		1035.39	0.00293207		1565.38	0.00891144		2095.39	-0.02141772		2625.38	-0.00488294		3155.41	0.00162621		3685.4	-0.00837509		4215.4	-0.02073138
505.59	0.07048617		1035.59	0.00328698		1565.58	0.00873732		2095.59	-0.02106479		2625.58	-0.00476207		3155.61	0.0016754		3685.6	-0.00845171		4215.6	-0.02038685
505.79	0.07018007		1035.79	0.00303021		1565.78	0.00861421		2095.79	-0.02210763		2625.78	-0.00517091		3155.81	0.0008921		3685.8	-0.00931016		4215.8	-0.02109253
505.99	0.0696706		1035.99	0.00238948		1565.98	0.00878687		2095.99	-0.02274119		2625.98	-0.0056165		3156.01	0.00134323		3686	-0.00906566		4216	-0.02223885
506.19	0.06949921		1036.19	0.00104642		1566.18	0.00820459		2096.19	-0.02279413		2626.18	-0.00593506		3156.21	0.00084155		3686.2	-0.00957218		4216.2	-0.02257371
506.39	0.06994805		1036.39	0.00060484		1566.38	0.00780751		2096.39	-0.0222226		2626.38	-0.00635571		3156.41	0.00143486		3686.4	-0.00970633		4216.4	-0.02245029
506.59	0.06972262		1036.59	0.00011467		1566.58	0.00828534		2096.59	-0.02184871		2626.58	-0.00712488		3156.61	0.0012709		3686.6	-0.01029798		4216.6	-0.02262909
506.79	0.06918119		1036.79	-0.00039329		1566.78	0.00782686		2096.79	-0.02215938		2626.78	-0.00769874		3156.81	0.00179403		3686.8	-0.01097699		4216.8	-0.02245984
506.99	0.06965951		1036.99	-0.00015269		1566.98	0.00713038		2096.99	-0.02256085		2626.98	-0.00819932		3157.01	0.00222548		3687	-0.01066711		4217	-0.02205599
507.19	0.06961896		1037.19	0.00021608		1567.18	0.00669044		2097.19	-0.02184162		2627.18	-0.00858529		3157.21	0.00209528		3687.2	-0.01048435		4217.2	-0.02199575
507.39	0.06937154		1037.39	0.00078628		1567.38	0.0063283		2097.39	-0.0214083		2627.38	-0.00871685		3157.41	0.00261933		3687.4	-0.00920033		4217.4	-0.02173058
507.59	0.06936456		1037.59	0.00050953		1567.58	0.00599955		2097.59	-0.02155134		2627.58	-0.00787463		3157.61	0.00228977		3687.6	-0.00856917		4217.6	-0.02113655
507.79	0.06969121		1037.79	0.00012141		1567.78	0.00616137		2097.79	-0.02117236		2627.78	-0.00698283		3157.81	0.00265102		3687.8	-0.0088787		4217.8	-0.02003084
507.99	0.07004103		1037.99	0.00068047		1567.98	0.00579497		2097.99	-0.02138845		2627.98	-0.00615593		3158.01	0.00223477		3688	-0.00838015		4218	-0.01980365
508.19	0.06993773		1038.19	-0.0000806		1568.18	0.00584278		2098.19	-0.02169276		2628.18	-0.00552756		3158.21	0.00266831		3688.2	-0.00822247		4218.2	-0.01872864
508.39	0.06999529		1038.39	0.00040457		1568.38	0.00731154		2098.39	-0.02171783		2628.38	-0.00431017		3158.41	0.00320381		3688.4	-0.00747239		4218.4	-0.01833068
508.59	0.07024685		1038.59	0.00125052		1568.58	0.0074087		2098.59	-0.02134818		2628.58	-0.00381233		3158.61	0.00363719		3688.6	-0.00637637		4218.6	-0.01760948
508.79	0.0707414		1038.79	0.00147664		1568.78	0.00697927		2098.79	-0.02151984		2628.78	-0.00420253		3158.81	0.00422797		3688.8	-0.00696785		4218.8	-0.01687185
508.99	0.07043185		1038.99	0.00188502		1568.98	0.00628087		2098.99	-0.02131586		2628.98	-0.00506771		3159.01	0.00451942		3689	-0.00638825		4219	-0.01695939
509.19	0.06934252		1039.19	0.00202314		1569.18	0.00694141		2099.19	-0.02024358		2629.18	-0.00443291		3159.21	0.00434319		3689.2	-0.00670557		4219.2	-0.01735362
509.39	0.06958572		1039.39	0.00241702		1569.38	0.00705258		2099.39	-0.01986044		2629.38	-0.00390126		3159.41	0.00453567		3689.4	-0.00701844		4219.4	-0.01719673
509.59	0.0695143		1039.59	0.00316853		1569.58	0.00726898		2099.59	-0.02069483		2629.58	-0.00388386		3159.61	0.00485658		3689.6	-0.00764171		4219.6	-0.01671987
509.79	0.07002666		1039.79	0.00272157		1569.78	0.00755582		2099.79	-0.02112963		2629.78	-0.00474953		3159.81	0.00474242		3689.8	-0.00755743		4219.8	-0.01678096
509.99	0.07023907		1039.99	0.00219809		1569.98	0.00765128		2099.99	-0.02104484		2629.98	-0.00519055		3160.01	0.00419279		3690	-0.00732694		4220	-0.0173055
510.19	0.07082847		1040.19	0.00178006		1570.18	0.00739338		2100.19	-0.02188016		2630.18	-0.00503945		3160.21	0.00422388		3690.2	-0.0078088		4220.2	-0.01749531
510.39	0.07195618		1040.39	0.0016673		1570.38	0.00756744		2100.39	-0.02205721		2630.38	-0.00597402		3160.41	0.00401562		3690.4	-0.00835783		4220.4	-0.0180339
510.59	0.07123919		1040.59	0.00149546		1570.58	0.00755215		2100.59	-0.02230275		2630.58	-0.00637473		3160.61	0.00375712		3690.6	-0.00941182		4220.6	-0.01828662
510.79	0.07222005		1040.79	0.0018545		1570.78	0.00715107		2100.79	-0.02160838		2630.78	-0.00594434		3160.81	0.0040322		3690.8	-0.00944912		4220.8	-0.01813197
510.99	0.07336802		1040.99	0.00184217		1570.98	0.00795466		2100.99	-0.0210573		2630.98	-0.00552403		3161.01	0.00342445		3691	-0.01018261		4221	-0.0181471
511.19	0.07399758		1041.19	0.00168463		1571.18	0.00775241		2101.19	-0.02078482		2631.18	-0.00527932		3161.21	0.00284044		3691.2	-0.01048575		4221.2	-0.01890007
511.39	0.07369844		1041.39	0.00129968		1571.38	0.00801218		2101.39	-0.02076332		2631.38	-0.00473386		3161.41	0.00205797		3691.4	-0.00995589		4221.4	-0.01971926
511.59	0.07446198		1041.59	0.00127787		1571.58	0.00777141		2101.59	-0.02015637		2631.58	-0.00369304		3161.61	0.00198432		3691.6	-0.01004396		4221.6	-0.0202418
511.79	0.07464004		1041.79	0.00097831		1571.78	0.00777301		2101.79	-0.01995724		2631.78	-0.00371458		3161.81	0.00192358		3691.8	-0.00975762		4221.8	-0.01999749
511.99	0.07458382		1041.99	0.00131177		1571.98	0.0073082		2101.99	-0.02049558		2631.98	-0.00436631		3162.01	0.00244851		3692	-0.00898037		4222	-0.01950654
512.19	0.07371851		1042.19	0.00145038		1572.18	0.00748285		2102.19	-0.02117119		2632.18	-0.00412878		3162.21	0.00207694		3692.2	-0.00832759		4222.2	-0.01887184
512.39	0.07351741		1042.39	0.00206122		1572.38	0.00818091		2102.39	-0.02115783		2632.38	-0.00416173		3162.41	0.00195889		3692.4	-0.00774157		4222.4	-0.0189616
512.59	0.07245558		1042.59	0.00199813		1572.58	0.00775857		2102.59	-0.02113552		2632.58	-0.00507206		3162.61	0.00226594		3692.6	-0.00706899		4222.6	-0.01864908
512.79	0.0717452		1042.79	0.00226214		1572.78	0.00720001		2102.79	-0.0211132		2632.78	-0.00601238		3162.81	0.00276674		3692.8	-0.00699075		4222.8	-0.01886143
512.99	0.07041314		1042.99	0.00232494		1572.98	0.00674338		2102.99	-0.02147945		2632.98	-0.00615466		3163.01	0.00241439		3693	-0.00636096		4223	-0.0203627
513.19	0.06990423		1043.19	0.00273447		1573.18	0.00699843		2103.19	-0.02146767		2633.18	-0.00595981		3163.21	0.00275827		3693.2	-0.00581171		4223.2	-0.01991582
513.39	0.06989507		1043.39	0.0031504		1573.38	0.00731732		2103.39	-0.02290762		2633.38	-0.00556964		3163.41	0.00313967		3693.4	-0.00581985		4223.4	-0.01955009
513.59	0.06918374		1043.59	0.00243576		1573.58	0.00644811		2103.59	-0.02390961		2633.58	-0.00540028		3163.61	0.0033621		3693.6	-0.00513274		4223.6	-0.01885358
513.79	0.06911102		1043.79	0.00242049		1573.78	0.0057761		2103.79	-0.02393338		2633.78	-0.00647061		3163.81	0.00309003		3693.8	-0.00445672		4223.8	-0.01943776
513.99	0.06835204		1043.99	0.00208691		1573.98	0.00525548		2103.99	-0.02391406		2633.98	-0.00658203		3164.01	0.00281113		3694	-0.00482418		4224	-0.0208199
514.19	0.06820195		1044.19	0.00208538		1574.18	0.00546268		2104.19	-0.02408854		2634.18	-0.00685316		3164.21	0.00324968		3694.2	-0.00491341		4224.2	-0.02115725
514.39	0.0675672		1044.39	0.00190075		1574.38	0.00573866		2104.39	-0.02347452		2634.38	-0.00774052		3164.41	0.00293189		3694.4	-0.00457868		4224.4	-0.02092354
514.59	0.06671374		1044.59	0.0014231		1574.58	0.00527029		2104.59	-0.02317753		2634.58	-0.0073089		3164.61	0.00275196		3694.6	-0.00518838		4224.6	-0.02099631
514.79	0.06772995		1044.79	0.00170435		1574.78	0.00540788		2104.79	-0.02233388		2634.78	-0.00646206		3164.81	0.00241551		3694.8	-0.00547492		4224.8	-0.02025394
514.99	0.06799643		1044.99	0.00074488		1574.98	0.00602547		2104.99	-0.02213982		2634.98	-0.00632516		3165.01	0.00185376		3695	-0.00603821		4225	-0.02016938
515.19	0.06825817		1045.19	0.00014996		1575.18	0.00505279		2105.19	-0.02288997		2635.18	-0.00588872		3165.21	0.00159997		3695.2	-0.00630812		4225.2	-0.02058444
515.39	0.06793285		1045.39	-0.00031329		1575.38	0.00566302		2105.39	-0.02226253		2635.38	-0.005485		3165.41	0.00149461		3695.4	-0.00653093		4225.4	-0.020027
515.59	0.06888866		1045.59	-0.00006024		1575.58	0.00494516		2105.59	-0.02255351		2635.58	-0.00539524		3165.61	0.00207865		3695.6	-0.0067915		4225.6	-0.0196745
515.79	0.06884455		1045.79	-0.00080057		1575.78	0.00502963		2105.79	-0.02328114		2635.78	-0.00549769		3165.81	0.00213074		3695.8	-0.00689925		4225.8	-0.01911067
515.99	0.06882848		1045.99	-0.002221		1575.98	0.00585148		2105.99	-0.02361254		2635.98	-0.00624976		3166.01	0.00183068		3696	-0.007332		4226	-0.0181969
516.19	0.06875423		1046.19	-0.00292089		1576.18	0.00648562		2106.19	-0.02334767		2636.18	-0.00557856		3166.21	0.00108105		3696.2	-0.00745908		4226.2	-0.017366
516.39	0.06896847		1046.39	-0.00318459		1576.38	0.00613647		2106.39	-0.02251068		2636.38	-0.00594863		3166.41	0.00148487		3696.4	-0.0082921		4226.4	-0.0169276
516.59	0.06828758		1046.59	-0.00406534		1576.58	0.00561091		2106.59	-0.02237623		2636.58	-0.00603318		3166.61	0.00202217		3696.6	-0.0082822		4226.6	-0.01666947
516.79	0.06817229		1046.79	-0.00415502		1576.78	0.00602763		2106.79	-0.02210465		2636.78	-0.00669698		3166.81	0.00200018		3696.8	-0.00790924		4226.8	-0.01701692
516.99	0.06788181		1046.99	-0.00463869		1576.98	0.00598757		2106.99	-0.02163811		2636.98	-0.00725133		3167.01	0.00146489		3697	-0.00874196		4227	-0.01791046
517.19	0.06825691		1047.19	-0.00454089		1577.18	0.00593911		2107.19	-0.0216199		2637.18	-0.00733101		3167.21	0.00210197		3697.2	-0.00896422		4227.2	-0.01815047
517.39	0.06776931		1047.39	-0.00521398		1577.38	0.00550483		2107.39	-0.02237572		2637.38	-0.00713632		3167.41	0.00188952		3697.4	-0.01011241		4227.4	-0.01826199
517.59	0.06761679		1047.59	-0.00586712		1577.58	0.00401359		2107.59	-0.02223971		2637.58	-0.00772761		3167.61	0.00128472		3697.6	-0.01057935		4227.6	-0.01852362
517.79	0.06756376		1047.79	-0.0058188		1577.78	0.00371463		2107.79	-0.02151017		2637.78	-0.00765929		3167.81	0.00108789		3697.8	-0.01069204		4227.8	-0.01937143
517.99	0.06737848		1047.99	-0.00538286		1577.98	0.00449515		2107.99	-0.02108295		2637.98	-0.00750016		3168.01	0.00115664		3698	-0.01144251		4228	-0.02014643
518.19	0.06746134		1048.19	-0.00456383		1578.18	0.00491333		2108.19	-0.02067972		2638.18	-0.0078251		3168.21	0.00098164		3698.2	-0.01100424		4228.2	-0.01975856
518.39	0.0674068		1048.39	-0.00394668		1578.38	0.00496057		2108.39	-0.02061312		2638.38	-0.00712302		3168.41	0.00111565		3698.4	-0.01073821		4228.4	-0.01943384
518.59	0.06814531		1048.59	-0.00360387		1578.58	0.00492577		2108.59	-0.02080654		2638.58	-0.00747738		3168.61	0.0011738		3698.6	-0.0107011		4228.6	-0.01997619
518.79	0.06926965		1048.79	-0.00227409		1578.78	0.00567995		2108.79	-0.02039549		2638.78	-0.00755796		3168.81	0.00129222		3698.8	-0.01097463		4228.8	-0.01948091
518.99	0.06919826		1048.99	-0.00310053		1578.98	0.00625787		2108.99	-0.0213012		2638.98	-0.00671041		3169.01	0.00152692		3699	-0.01160408		4229	-0.0203398
519.19	0.06856224		1049.19	-0.00231155		1579.18	0.00567023		2109.19	-0.02284673		2639.18	-0.00602077		3169.21	0.00231038		3699.2	-0.0117019		4229.2	-0.02092429
519.39	0.06916013		1049.39	-0.00194748		1579.38	0.00586396		2109.39	-0.02292693		2639.38	-0.00645359		3169.41	0.00302361		3699.4	-0.01160297		4229.4	-0.02072155
519.59	0.07054608		1049.59	-0.00167705		1579.58	0.00665904		2109.59	-0.02376319		2639.58	-0.00585592		3169.61	0.00293394		3699.6	-0.01152927		4229.6	-0.02018092
519.79	0.07106434		1049.79	-0.00199618		1579.78	0.00853765		2109.79	-0.02441545		2639.78	-0.00568963		3169.81	0.00344764		3699.8	-0.01111467		4229.8	-0.02026929
519.99	0.07048192		1049.99	-0.00249701		1579.98	0.0094401		2109.99	-0.02310386		2639.98	-0.00607023		3170.01	0.00346975		3700	-0.01047223		4230	-0.01872223
520.19	0.06999915		1050.19	-0.0013765		1580.18	0.00931473		2110.19	-0.02320903		2640.18	-0.00600971		3170.21	0.00406866		3700.2	-0.00940077		4230.2	-0.01765713
520.39	0.06994698		1050.39	-0.00073634		1580.38	0.0090536		2110.39	-0.02249098		2640.38	-0.00577184		3170.41	0.00499431		3700.4	-0.0093239		4230.4	-0.01725933
520.59	0.06928434		1050.59	-0.00150273		1580.58	0.00957172		2110.59	-0.02217626		2640.58	-0.00580911		3170.61	0.00438787		3700.6	-0.00821704		4230.6	-0.01731902
520.79	0.06835478		1050.79	-0.0011366		1580.78	0.00915753		2110.79	-0.02249573		2640.78	-0.00705755		3170.81	0.00411628		3700.8	-0.00823022		4230.8	-0.01818153
520.99	0.06793203		1050.99	-0.00060127		1580.98	0.00761556		2110.99	-0.02245171		2640.98	-0.00692773		3171.01	0.00387291		3701	-0.00880446		4231	-0.01884815
521.19	0.06810359		1051.19	-0.00165759		1581.18	0.00691796		2111.19	-0.0223396		2641.18	-0.00656346		3171.21	0.00411915		3701.2	-0.00875184		4231.2	-0.01921538
521.39	0.06820346		1051.39	-0.00208466		1581.38	0.00601768		2111.39	-0.022806		2641.38	-0.006778		3171.41	0.0032192		3701.4	-0.00908175		4231.4	-0.01925594
521.59	0.06875954		1051.59	-0.00213086		1581.58	0.00538165		2111.59	-0.02268943		2641.58	-0.00744406		3171.61	0.00237926		3701.6	-0.00852166		4231.6	-0.01981857
521.79	0.06883421		1051.79	-0.00144137		1581.78	0.00548014		2111.79	-0.02300101		2641.78	-0.0070775		3171.81	0.00235949		3701.8	-0.00813318		4231.8	-0.01927401
521.99	0.06913045		1051.99	-0.00021591		1581.98	0.00606784		2111.99	-0.02346093		2641.98	-0.00696479		3172.01	0.00241598		3702	-0.00867196		4232	-0.02106822
522.19	0.06959342		1052.19	0.00024949		1582.18	0.00517922		2112.19	-0.02339965		2642.18	-0.00700809		3172.21	0.00227377		3702.2	-0.00786386		4232.2	-0.02147891
522.39	0.0699241		1052.39	-0.00012158		1582.38	0.00439419		2112.39	-0.02388943		2642.38	-0.00663432		3172.41	0.00201718		3702.4	-0.00827391		4232.4	-0.02165282
522.59	0.07068867		1052.59	-0.00013335		1582.58	0.00403643		2112.59	-0.02446537		2642.58	-0.00795184		3172.61	0.00193768		3702.6	-0.00865216		4232.6	-0.0216478
522.79	0.070452		1052.79	0.00048641		1582.78	0.00495977		2112.79	-0.02492657		2642.78	-0.00762631		3172.81	0.00163827		3702.8	-0.00952048		4232.8	-0.02137069
522.99	0.0708227		1052.99	-0.00037014		1582.98	0.00553933		2112.99	-0.02620659		2642.98	-0.0066098		3173.01	0.00155793		3703	-0.01003191		4233	-0.02210572
523.19	0.07128107		1053.19	0.0000879		1583.18	0.00554367		2113.19	-0.02644957		2643.18	-0.00667372		3173.21	0.00079183		3703.2	-0.00960576		4233.2	-0.02216016
523.39	0.07197518		1053.39	-0.00003373		1583.38	0.00663681		2113.39	-0.02610643		2643.38	-0.00663462		3173.41	-0.00068942		3703.4	-0.009639		4233.4	-0.02137976
523.59	0.0719748		1053.59	0.00026688		1583.58	0.00827971		2113.59	-0.02547318		2643.58	-0.00530456		3173.61	-0.00101685		3703.6	-0.00995661		4233.6	-0.02063525
523.79	0.07136946		1053.79	0.00059728		1583.78	0.00855209		2113.79	-0.02545008		2643.78	-0.00524606		3173.81	-0.00073027		3703.8	-0.00935075		4233.8	-0.0212354
523.99	0.06994674		1053.99	0.00162629		1583.98	0.00877923		2113.99	-0.02457057		2643.98	-0.00470753		3174.01	-0.00120206		3704	-0.00844424		4234	-0.02064011
524.19	0.06900826		1054.19	0.002719		1584.18	0.00903867		2114.19	-0.02552482		2644.18	-0.00440093		3174.21	-0.00134993		3704.2	-0.00794718		4234.2	-0.02036245
524.39	0.06867825		1054.39	0.00343816		1584.38	0.00888031		2114.39	-0.02459886		2644.38	-0.00392155		3174.41	-0.00116781		3704.4	-0.00788401		4234.4	-0.02091272
524.59	0.06669932		1054.59	0.00283051		1584.58	0.00756116		2114.59	-0.02467672		2644.58	-0.00394592		3174.61	-0.00242189		3704.6	-0.00710542		4234.6	-0.02164636
524.79	0.06523535		1054.79	0.00275904		1584.78	0.00670893		2114.79	-0.02535221		2644.78	-0.0046132		3174.81	-0.00143543		3704.8	-0.00728117		4234.8	-0.02165848
524.99	0.06420182		1054.99	0.00308498		1584.98	0.00658771		2114.99	-0.02482798		2644.98	-0.00406327		3175.01	-0.00145806		3705	-0.00744629		4235	-0.02152998
525.19	0.0641004		1055.19	0.00157217		1585.18	0.00632354		2115.19	-0.02405831		2645.18	-0.00370216		3175.21	-0.00103433		3705.2	-0.00670995		4235.2	-0.02198761
525.39	0.0640818		1055.39	0.00148557		1585.38	0.0057995		2115.39	-0.02409505		2645.38	-0.00336839		3175.41	-0.00169069		3705.4	-0.0062836		4235.4	-0.02230575
525.59	0.06418367		1055.59	0.00073433		1585.58	0.00491223		2115.59	-0.02359453		2645.58	-0.00403539		3175.61	-0.00143812		3705.6	-0.00538596		4235.6	-0.02198717
525.79	0.06435524		1055.79	0.00039437		1585.78	0.00485697		2115.79	-0.02416917		2645.78	-0.00392096		3175.81	-0.00121689		3705.8	-0.00569637		4235.8	-0.02247697
525.99	0.06504627		1055.99	-0.00062914		1585.98	0.00420716		2115.99	-0.02311961		2645.98	-0.00365595		3176.01	-0.00125387		3706	-0.00596784		4236	-0.02338022
526.19	0.06573144		1056.19	-0.00151927		1586.18	0.00410518		2116.19	-0.02250269		2646.18	-0.003741		3176.21	-0.00090939		3706.2	-0.00575686		4236.2	-0.02241978
526.39	0.06638235		1056.39	-0.00258297		1586.38	0.00447397		2116.39	-0.02197257		2646.38	-0.00383814		3176.41	-0.00067052		3706.4	-0.0063697		4236.4	-0.02166307
526.59	0.06783643		1056.59	-0.00264888		1586.58	0.00464264		2116.59	-0.02222173		2646.58	-0.0041893		3176.61	-0.00042611		3706.6	-0.00682632		4236.6	-0.02151641
526.79	0.06909702		1056.79	-0.00281128		1586.78	0.00469488		2116.79	-0.02239605		2646.78	-0.00401596		3176.81	-0.00090736		3706.8	-0.00726613		4236.8	-0.02171509
526.99	0.07015479		1056.99	-0.00338568		1586.98	0.00518625		2116.99	-0.0225775		2646.98	-0.0038148		3177.01	-0.00140152		3707	-0.00765335		4237	-0.02265062
527.19	0.07055655		1057.19	-0.00395342		1587.18	0.00542764		2117.19	-0.02217188		2647.18	-0.00348938		3177.21	-0.00165892		3707.2	-0.00791596		4237.2	-0.02161442
527.39	0.07019153		1057.39	-0.0043255		1587.38	0.00589508		2117.39	-0.02119687		2647.38	-0.00359582		3177.41	-0.00095118		3707.4	-0.00903004		4237.4	-0.02156205
527.59	0.07043045		1057.59	-0.00448309		1587.58	0.00577224		2117.59	-0.02009683		2647.58	-0.00368385		3177.61	-0.00072111		3707.6	-0.00932007		4237.6	-0.02154184
527.79	0.06999265		1057.79	-0.00404462		1587.78	0.00602225		2117.79	-0.02011072		2647.78	-0.0035851		3177.81	-0.00045786		3707.8	-0.00967512		4237.8	-0.02209044
527.99	0.06893577		1057.99	-0.00349643		1587.98	0.00711681		2117.99	-0.02045144		2647.98	-0.00366859		3178.01	-0.0000183		3708	-0.00968429		4238	-0.02203544
528.19	0.06834386		1058.19	-0.00372739		1588.18	0.00646809		2118.19	-0.02092752		2648.18	-0.00347326		3178.21	0.00048572		3708.2	-0.00930667		4238.2	-0.0204939
528.39	0.06822825		1058.39	-0.0028537		1588.38	0.00614091		2118.39	-0.02062213		2648.38	-0.0030025		3178.41	0.00110004		3708.4	-0.00904442		4238.4	-0.02075268
528.59	0.06764632		1058.59	-0.00283806		1588.58	0.00562815		2118.59	-0.0211995		2648.58	-0.00280596		3178.61	0.00093854		3708.6	-0.00855471		4238.6	-0.02021853
528.79	0.06770166		1058.79	-0.00207785		1588.78	0.00636145		2118.79	-0.02060522		2648.78	-0.00348854		3178.81	0.00206871		3708.8	-0.00852278		4238.8	-0.0202098
528.99	0.06782939		1058.99	-0.00183648		1588.98	0.0062038		2118.99	-0.02083898		2648.98	-0.00310906		3179.01	0.00162677		3709	-0.0081474		4239	-0.02046859
529.19	0.06808583		1059.19	-0.00230295		1589.18	0.00532297		2119.19	-0.02060171		2649.18	-0.00296621		3179.21	0.00181056		3709.2	-0.00822031		4239.2	-0.02053195
529.39	0.06899031		1059.39	-0.00241398		1589.38	0.00554782		2119.39	-0.0207169		2649.38	-0.00374371		3179.41	0.00174626		3709.4	-0.00763884		4239.4	-0.02004174
529.59	0.06998997		1059.59	-0.00255085		1589.58	0.00494533		2119.59	-0.02091483		2649.58	-0.00477445		3179.61	0.00164081		3709.6	-0.00757043		4239.6	-0.01957165
529.79	0.0703586		1059.79	-0.00200736		1589.78	0.00530869		2119.79	-0.02090247		2649.78	-0.00509674		3179.81	0.00144645		3709.8	-0.00822598		4239.8	-0.01985726
529.99	0.07134249		1059.99	-0.00146805		1589.98	0.00499392		2119.99	-0.02021784		2649.98	-0.00584875		3180.01	0.0014425		3710	-0.00782165		4240	-0.01913357
530.19	0.07156539		1060.19	-0.00062018		1590.18	0.0054342		2120.19	-0.02042742		2650.18	-0.00642534		3180.21	0.00112022		3710.2	-0.00764917		4240.2	-0.01862314
530.39	0.0720225		1060.39	-0.00068414		1590.38	0.00573992		2120.39	-0.02129101		2650.38	-0.00607858		3180.41	0.00089029		3710.4	-0.00793632		4240.4	-0.01852445
530.59	0.07288131		1060.59	0.00038353		1590.58	0.00562292		2120.59	-0.02215099		2650.58	-0.00587368		3180.61	0.00029304		3710.6	-0.00845609		4240.6	-0.01891096
530.79	0.07275969		1060.79	0.00044318		1590.78	0.00582266		2120.79	-0.02319623		2650.78	-0.00619172		3180.81	-0.00035619		3710.8	-0.00866686		4240.8	-0.01859582
530.99	0.07166132		1060.99	0.00059811		1590.98	0.00763941		2120.99	-0.02312386		2650.98	-0.00569977		3181.01	-0.000608		3711	-0.00851232		4241	-0.01858014
531.19	0.07071302		1061.19	0.00036773		1591.18	0.0075044		2121.19	-0.02286742		2651.18	-0.0058471		3181.21	0.00017906		3711.2	-0.00948844		4241.2	-0.01809678
531.39	0.06937719		1061.39	0.00051486		1591.38	0.00713246		2121.39	-0.02269047		2651.38	-0.00668321		3181.41	0.00054372		3711.4	-0.00995276		4241.4	-0.01934437
531.59	0.06932067		1061.59	0.00050379		1591.58	0.00766616		2121.59	-0.02293621		2651.58	-0.00648559		3181.61	-0.00012501		3711.6	-0.00960066		4241.6	-0.0191333
531.79	0.06846897		1061.79	0.00044623		1591.78	0.00772341		2121.79	-0.02332764		2651.78	-0.00644264		3181.81	0.00069113		3711.8	-0.00995325		4241.8	-0.01897039
531.99	0.06802121		1061.99	0.00051542		1591.98	0.00741074		2121.99	-0.02363561		2651.98	-0.00629288		3182.01	0.00066787		3712	-0.00948264		4242	-0.01860344
532.19	0.0677575		1062.19	0.00078519		1592.18	0.00618343		2122.19	-0.02338775		2652.18	-0.00588161		3182.21	-0.00003802		3712.2	-0.00924291		4242.2	-0.01832501
532.39	0.0676207		1062.39	0.00150248		1592.38	0.00634927		2122.39	-0.02347958		2652.38	-0.00585353		3182.41	0.00086086		3712.4	-0.00960468		4242.4	-0.02014363
532.59	0.06692582		1062.59	0.00160987		1592.58	0.00559714		2122.59	-0.02342289		2652.58	-0.00655298		3182.61	0.00091735		3712.6	-0.01006997		4242.6	-0.02039469
532.79	0.06656309		1062.79	0.00090951		1592.78	0.00538643		2122.79	-0.02276375		2652.78	-0.0068587		3182.81	0.00101234		3712.8	-0.00986287		4242.8	-0.02119581
532.99	0.06632865		1062.99	0.0003375		1592.98	0.00440104		2122.99	-0.02423546		2652.98	-0.00669766		3183.01	0.00039761		3713	-0.01034363		4243	-0.02115378
533.19	0.06587919		1063.19	0.0010995		1593.18	0.00358632		2123.19	-0.02435745		2653.18	-0.0070265		3183.21	0.00082061		3713.2	-0.01066409		4243.2	-0.02134838
533.39	0.06607297		1063.39	0.00071709		1593.38	0.00391183		2123.39	-0.02490788		2653.38	-0.00731662		3183.41	0.00090641		3713.4	-0.00983695		4243.4	-0.02167485
533.59	0.06574412		1063.59	0.00126233		1593.58	0.00290804		2123.59	-0.02543702		2653.58	-0.0068107		3183.61	0.00048019		3713.6	-0.01071467		4243.6	-0.02216302
533.79	0.06472345		1063.79	0.00097269		1593.78	0.00265213		2123.79	-0.02563006		2653.78	-0.00775241		3183.81	0.00118535		3713.8	-0.01077562		4243.8	-0.02253361
533.99	0.06429236		1063.99	0.00122955		1593.98	0.00277528		2123.99	-0.02518585		2653.98	-0.00847519		3184.01	0.00164051		3714	-0.01019649		4244	-0.02195669
534.19	0.06469772		1064.19	0.00046052		1594.18	0.0030886		2124.19	-0.02521995		2654.18	-0.00799174		3184.21	0.00162002		3714.2	-0.01011502		4244.2	-0.02143597
534.39	0.06481893		1064.39	-0.00065616		1594.38	0.00386768		2124.39	-0.02537343		2654.38	-0.00716717		3184.41	0.00180876		3714.4	-0.01007284		4244.4	-0.02122394
534.59	0.06593279		1064.59	-0.00148298		1594.58	0.0046349		2124.59	-0.02518133		2654.58	-0.00731356		3184.61	0.00189482		3714.6	-0.01025594		4244.6	-0.02053291
534.79	0.06587536		1064.79	-0.00236583		1594.78	0.0049843		2124.79	-0.02538888		2654.78	-0.00683304		3184.81	0.00145207		3714.8	-0.00995172		4244.8	-0.02044345
534.99	0.06606648		1064.99	-0.0022624		1594.98	0.00563649		2124.99	-0.02349335		2654.98	-0.00627841		3185.01	0.00178502		3715	-0.00977213		4245	-0.01999647
535.19	0.06641267		1065.19	-0.00293859		1595.18	0.00538573		2125.19	-0.02290987		2655.18	-0.00606558		3185.21	0.00229231		3715.2	-0.0103332		4245.2	-0.01995212
535.39	0.06732529		1065.39	-0.00338795		1595.38	0.00587959		2125.39	-0.02225214		2655.38	-0.00546067		3185.41	0.00189204		3715.4	-0.01011629		4245.4	-0.02010198
535.59	0.06847726		1065.59	-0.00336747		1595.58	0.00673505		2125.59	-0.0216251		2655.58	-0.00526706		3185.61	0.00129827		3715.6	-0.00981878		4245.6	-0.01997918
535.79	0.06969679		1065.79	-0.00354173		1595.78	0.00646669		2125.79	-0.02062793		2655.78	-0.00513805		3185.81	0.00168829		3715.8	-0.00985451		4245.8	-0.01955825
535.99	0.06967454		1065.99	-0.00275845		1595.98	0.00651701		2125.99	-0.02014947		2655.98	-0.00474016		3186.01	0.00109241		3716	-0.00962183		4246	-0.0202607
536.19	0.06949308		1066.19	-0.00253488		1596.18	0.00694814		2126.19	-0.01962809		2656.18	-0.00527681		3186.21	0.00126865		3716.2	-0.00954215		4246.2	-0.02080069
536.39	0.06940259		1066.39	-0.00170096		1596.38	0.00738796		2126.39	-0.01929855		2656.38	-0.00533662		3186.41	0.00170883		3716.4	-0.00987185		4246.4	-0.02142717
536.59	0.06909695		1066.59	-0.00137668		1596.58	0.00678649		2126.59	-0.01900046		2656.58	-0.00581433		3186.61	0.00073147		3716.6	-0.00962835		4246.6	-0.02103431
536.79	0.06939369		1066.79	-0.00173074		1596.78	0.00727706		2126.79	-0.01949671		2656.78	-0.00462956		3186.81	-0.00005901		3716.8	-0.00942035		4246.8	-0.02147867
536.99	0.0690049		1066.99	-0.00075017		1596.98	0.00692928		2126.99	-0.02029907		2656.98	-0.0043394		3187.01	0.00010953		3717	-0.00969467		4247	-0.02149127
537.19	0.06757205		1067.19	-0.00022844		1597.18	0.00673054		2127.19	-0.0209562		2657.18	-0.00486485		3187.21	0.0003876		3717.2	-0.00872666		4247.2	-0.02188249
537.39	0.06653095		1067.39	-0.00041751		1597.38	0.00735773		2127.39	-0.02219202		2657.38	-0.00453356		3187.41	-0.00021278		3717.4	-0.0081726		4247.4	-0.0223432
537.59	0.06529201		1067.59	0.00033803		1597.58	0.00723656		2127.59	-0.0233552		2657.58	-0.00462672		3187.61	-0.00040857		3717.6	-0.00896279		4247.6	-0.02212726
537.79	0.06469368		1067.79	-0.0001158		1597.78	0.00710156		2127.79	-0.02476261		2657.78	-0.00572153		3187.81	-0.00019142		3717.8	-0.00884806		4247.8	-0.0216197
537.99	0.06467288		1067.99	-0.00010644		1597.98	0.00787165		2127.99	-0.02484272		2657.98	-0.00588398		3188.01	-0.00113306		3718	-0.0080444		4248	-0.02152909
538.19	0.06486629		1068.19	-0.00144556		1598.18	0.00769468		2128.19	-0.02571358		2658.18	-0.00511266		3188.21	-0.00124322		3718.2	-0.00758587		4248.2	-0.02091776
538.39	0.06428783		1068.39	-0.00228674		1598.38	0.00776033		2128.39	-0.02600259		2658.38	-0.0048874		3188.41	-0.00212849		3718.4	-0.00766203		4248.4	-0.02031696
538.59	0.06481955		1068.59	-0.00244188		1598.58	0.00750528		2128.59	-0.02692763		2658.58	-0.0047302		3188.61	-0.00278053		3718.6	-0.008417		4248.6	-0.02004807
538.79	0.06503834		1068.79	-0.00218925		1598.78	0.00717199		2128.79	-0.02664609		2658.78	-0.00492841		3188.81	-0.00349332		3718.8	-0.00830908		4248.8	-0.02010971
538.99	0.06486667		1068.99	-0.00232688		1598.98	0.00619442		2128.99	-0.02637324		2658.98	-0.00488667		3189.01	-0.00353593		3719	-0.00894214		4249	-0.01980435
539.19	0.0649964		1069.19	-0.00317423		1599.18	0.00494961		2129.19	-0.02623675		2659.18	-0.0048553		3189.21	-0.00328394		3719.2	-0.00933951		4249.2	-0.020353
539.39	0.06556922		1069.39	-0.00298096		1599.38	0.00330182		2129.39	-0.02586648		2659.38	-0.00562934		3189.41	-0.00263529		3719.4	-0.00928836		4249.4	-0.02097696
539.59	0.06587761		1069.59	-0.00239458		1599.58	0.00294824		2129.59	-0.02506164		2659.58	-0.00669988		3189.61	-0.00151461		3719.6	-0.00873285		4249.6	-0.02153935
539.79	0.06627679		1069.79	-0.0017355		1599.78	0.00183529		2129.79	-0.02466552		2659.78	-0.00641879		3189.81	-0.00026826		3719.8	-0.00873596		4249.8	-0.02163313
539.99	0.06566198		1069.99	-0.00057243		1599.98	0.00114366		2129.99	-0.02388561		2659.98	-0.00756412		3190.01	0.00022716		3720	-0.00863886		4250	-0.02314188
540.19	0.06521253		1070.19	-0.00050926		1600.18	-0.00011253		2130.19	-0.02315856		2660.18	-0.0077316		3190.21	0.00080581		3720.2	-0.00863894		4250.2	-0.02381355
540.39	0.06501787		1070.39	0.00025111		1600.38	-0.00058331		2130.39	-0.02273647		2660.38	-0.00749342		3190.41	0.0009958		3720.4	-0.00845064		4250.4	-0.02471616
540.59	0.06485815		1070.59	-0.00033031		1600.58	-0.00167914		2130.59	-0.0221691		2660.58	-0.00765049		3190.61	0.0008983		3720.6	-0.00787339		4250.6	-0.02589318
540.79	0.06473494		1070.79	-0.00023331		1600.78	-0.00122038		2130.79	-0.02205166		2660.78	-0.0071011		3190.81	0.0022444		3720.8	-0.00786015		4250.8	-0.02642455
540.99	0.06422644		1070.99	-0.00041887		1600.98	-0.0004661		2130.99	-0.02137204		2660.98	-0.00719611		3191.01	0.00326762		3721	-0.00740796		4251	-0.02715952
541.19	0.06449162		1071.19	-0.00114735		1601.18	-0.00024328		2131.19	-0.02144396		2661.18	-0.00745612		3191.21	0.00272044		3721.2	-0.0079601		4251.2	-0.027778
541.39	0.06506822		1071.39	-0.00076818		1601.38	0.00152203		2131.39	-0.02118702		2661.38	-0.00756476		3191.41	0.00250591		3721.4	-0.00840389		4251.4	-0.02731204
541.59	0.06525919		1071.59	-0.00087951		1601.58	0.00231037		2131.59	-0.02161431		2661.58	-0.0074323		3191.61	0.00255808		3721.6	-0.00940321		4251.6	-0.02689846
541.79	0.06623188		1071.79	-0.00124734		1601.78	0.00364907		2131.79	-0.02124401		2661.78	-0.00706546		3191.81	0.00221238		3721.8	-0.00896624		4251.8	-0.0268882
541.99	0.06705046		1071.99	-0.00155298		1601.98	0.0051227		2131.99	-0.0206148		2661.98	-0.0066058		3192.01	0.00205172		3722	-0.00871085		4252	-0.02670753
542.19	0.06714121		1072.19	-0.00163385		1602.18	0.00586912		2132.19	-0.0207941		2662.18	-0.00612708		3192.21	0.00170013		3722.2	-0.00845324		4252.2	-0.02614994
542.39	0.06701029		1072.39	-0.00135388		1602.38	0.00703492		2132.39	-0.02029213		2662.38	-0.00591994		3192.41	0.00034236		3722.4	-0.00968756		4252.4	-0.02607818
542.59	0.06822555		1072.59	-0.00196697		1602.58	0.00764153		2132.59	-0.02095104		2662.58	-0.00579103		3192.61	-0.00058289		3722.6	-0.01046327		4252.6	-0.02519767
542.79	0.06897574		1072.79	-0.0025574		1602.78	0.00788344		2132.79	-0.02127796		2662.78	-0.00674613		3192.81	-0.00058908		3722.8	-0.0108289		4252.8	-0.024906
542.99	0.06884127		1072.99	-0.00289439		1602.98	0.00792786		2132.99	-0.02121266		2662.98	-0.00608105		3193.01	0.00014483		3723	-0.01171732		4253	-0.02414938
543.19	0.06894597		1073.19	-0.00238294		1603.18	0.00786344		2133.19	-0.02103964		2663.18	-0.00675218		3193.21	0.00130326		3723.2	-0.01178698		4253.2	-0.0233078
543.39	0.06915393		1073.39	-0.0019581		1603.38	0.00731498		2133.39	-0.02115696		2663.38	-0.00759628		3193.41	0.00138728		3723.4	-0.01225806		4253.4	-0.02237935
543.59	0.06938738		1073.59	-0.00157683		1603.58	0.00736488		2133.59	-0.02031833		2663.58	-0.00755624		3193.61	0.00125891		3723.6	-0.01295062		4253.6	-0.02221834
543.79	0.06840298		1073.79	-0.00110782		1603.78	0.00623712		2133.79	-0.02078962		2663.78	-0.00676149		3193.81	0.00107537		3723.8	-0.01341308		4253.8	-0.0220025
543.99	0.06751891		1073.99	-0.0008461		1603.98	0.00603736		2133.99	-0.02097441		2663.98	-0.00753433		3194.01	0.00116632		3724	-0.0128649		4254	-0.02280311
544.19	0.06699962		1074.19	-0.00113225		1604.18	0.00507512		2134.19	-0.02142795		2664.18	-0.00645882		3194.21	-0.00003268		3724.2	-0.0123389		4254.2	-0.02321116
544.39	0.06638026		1074.39	-0.00075191		1604.38	0.00445326		2134.39	-0.02173509		2664.38	-0.0066992		3194.41	0.00029306		3724.4	-0.01163418		4254.4	-0.02343601
544.59	0.06614876		1074.59	-0.00121526		1604.58	0.00324594		2134.59	-0.02138837		2664.58	-0.00693335		3194.61	0.00026758		3724.6	-0.0112404		4254.6	-0.02437686
544.79	0.0658925		1074.79	-0.00101423		1604.78	0.00383683		2134.79	-0.02193896		2664.78	-0.00647609		3194.81	0.00100773		3724.8	-0.01119337		4254.8	-0.02448176
544.99	0.06625766		1074.99	-0.00217613		1604.98	0.00323475		2134.99	-0.02187316		2664.98	-0.00618212		3195.01	0.00030186		3725	-0.01139106		4255	-0.02449164
545.19	0.06738632		1075.19	-0.00211448		1605.18	0.00277288		2135.19	-0.02226656		2665.18	-0.00612069		3195.21	-0.000455		3725.2	-0.01188587		4255.2	-0.02422297
545.39	0.06704965		1075.39	-0.00224652		1605.38	0.0026874		2135.39	-0.02194305		2665.38	-0.0063319		3195.41	0.00021765		3725.4	-0.01056877		4255.4	-0.02396126
545.59	0.06747681		1075.59	-0.00237946		1605.58	0.00244955		2135.59	-0.02249296		2665.58	-0.00604088		3195.61	0.00000296		3725.6	-0.0097958		4255.6	-0.0242156
545.79	0.06778045		1075.79	-0.0016102		1605.78	0.00304063		2135.79	-0.02184102		2665.78	-0.00584476		3195.81	0.00003418		3725.8	-0.00874939		4255.8	-0.02380555
545.99	0.06830439		1075.99	-0.00180285		1605.98	0.00388186		2135.99	-0.02237122		2665.98	-0.00557394		3196.01	0.00055349		3726	-0.00822957		4256	-0.0236637
546.19	0.06812045		1076.19	-0.00260742		1606.18	0.00396099		2136.19	-0.02243816		2666.18	-0.00492282		3196.21	-0.00053631		3726.2	-0.00742791		4256.2	-0.02387576
546.39	0.06783788		1076.39	-0.00349424		1606.38	0.00480886		2136.39	-0.02338435		2666.38	-0.00494164		3196.41	-0.00045146		3726.4	-0.00788436		4256.4	-0.02335612
546.59	0.06809028		1076.59	-0.00459076		1606.58	0.00519716		2136.59	-0.0241361		2666.58	-0.00519583		3196.61	-0.000663		3726.6	-0.00766998		4256.6	-0.02238757
546.79	0.0673145		1076.79	-0.00480888		1606.78	0.00558994		2136.79	-0.02438637		2666.78	-0.00589159		3196.81	0.00011306		3726.8	-0.00787653		4256.8	-0.02252877
546.99	0.0665169		1076.99	-0.00399398		1606.98	0.0061986		2136.99	-0.0242355		2666.98	-0.00605604		3197.01	0.00091453		3727	-0.00829727		4257	-0.02193041
547.19	0.06573639		1077.19	-0.00325972		1607.18	0.0063544		2137.19	-0.02554253		2667.18	-0.00663991		3197.21	0.00134775		3727.2	-0.00779271		4257.2	-0.02210818
547.39	0.06541964		1077.39	-0.00296398		1607.38	0.00579197		2137.39	-0.02499824		2667.38	-0.00701739		3197.41	0.00079015		3727.4	-0.00820334		4257.4	-0.02264179
547.59	0.06536873		1077.59	-0.00298211		1607.58	0.00637926		2137.59	-0.02517223		2667.58	-0.00704096		3197.61	0.0007013		3727.6	-0.00822837		4257.6	-0.02265164
547.79	0.06438572		1077.79	-0.00317101		1607.78	0.00611966		2137.79	-0.02569161		2667.78	-0.00731426		3197.81	0.00057369		3727.8	-0.00782317		4257.8	-0.02260339
547.99	0.06477282		1077.99	-0.00275848		1607.98	0.0061874		2137.99	-0.02523687		2667.98	-0.00775595		3198.01	0.00011224		3728	-0.00772902		4258	-0.02321866
548.19	0.065169		1078.19	-0.00294903		1608.18	0.00596106		2138.19	-0.02458089		2668.18	-0.00809603		3198.21	-0.00035751		3728.2	-0.00773391		4258.2	-0.02332883
548.39	0.06459069		1078.39	-0.00266115		1608.38	0.00528932		2138.39	-0.02397339		2668.38	-0.00871826		3198.41	0.00025174		3728.4	-0.00826398		4258.4	-0.02318723
548.59	0.06524561		1078.59	-0.0030777		1608.58	0.00562719		2138.59	-0.02373288		2668.58	-0.00859223		3198.61	-0.00031644		3728.6	-0.00803329		4258.6	-0.02288053
548.79	0.06584403		1078.79	-0.00305445		1608.78	0.00527811		2138.79	-0.02375754		2668.78	-0.0089316		3198.81	-0.00019283		3728.8	-0.00848988		4258.8	-0.02311653
548.99	0.06698642		1078.99	-0.00368324		1608.98	0.00438365		2138.99	-0.02334098		2668.98	-0.00888266		3199.01	0.00004716		3729	-0.00860667		4259	-0.02234708
549.19	0.06778819		1079.19	-0.00319574		1609.18	0.00405604		2139.19	-0.02312793		2669.18	-0.0087778		3199.21	-0.00015653		3729.2	-0.00880455		4259.2	-0.02269658
549.39	0.06736538		1079.39	-0.00340297		1609.38	0.00353703		2139.39	-0.02322036		2669.38	-0.0079663		3199.41	0.00015105		3729.4	-0.00777094		4259.4	-0.02268394
549.59	0.06776906		1079.59	-0.0025792		1609.58	0.00348523		2139.59	-0.0237086		2669.58	-0.00692311		3199.61	0.00033115		3729.6	-0.00748548		4259.6	-0.02254998
549.79	0.06804145		1079.79	-0.00265143		1609.78	0.0040209		2139.79	-0.02396844		2669.78	-0.00594928		3199.81	0.00093522		3729.8	-0.0070637		4259.8	-0.02192369
549.99	0.06786119		1079.99	-0.00372354		1609.98	0.00450741		2139.99	-0.02410603		2669.98	-0.00511556		3200.01	0.00066805		3730	-0.00757534		4260	-0.02180066
550.19	0.06669136		1080.19	-0.00430051		1610.18	0.00445976		2140.19	-0.02439191		2670.18	-0.00450006		3200.21	0.00037324		3730.2	-0.00851606		4260.2	-0.02131867
550.39	0.06616571		1080.39	-0.00439965		1610.38	0.00478747		2140.39	-0.02441742		2670.38	-0.00490317		3200.41	0.00071344		3730.4	-0.00930606		4260.4	-0.02170442
550.59	0.0649758		1080.59	-0.00353956		1610.58	0.00491952		2140.59	-0.02406414		2670.58	-0.00507159		3200.61	0.00091127		3730.6	-0.00927799		4260.6	-0.02197604
550.79	0.06478558		1080.79	-0.00266252		1610.78	0.00465011		2140.79	-0.02461637		2670.78	-0.00473697		3200.81	0.00122402		3730.8	-0.00994586		4260.8	-0.02299372
550.99	0.06461979		1080.99	-0.00164614		1610.98	0.00483838		2140.99	-0.02551243		2670.98	-0.00500602		3201.01	0.0012252		3731	-0.01038561		4261	-0.02265151
551.19	0.06441798		1081.19	-0.00163826		1611.18	0.00415403		2141.19	-0.02580282		2671.18	-0.00397648		3201.21	0.00073594		3731.2	-0.01091786		4261.2	-0.02256318
551.39	0.06395149		1081.39	-0.00163774		1611.38	0.00402806		2141.39	-0.02585574		2671.38	-0.00454121		3201.41	-0.00053178		3731.4	-0.01172532		4261.4	-0.02301485
551.59	0.06421092		1081.59	-0.00208464		1611.58	0.00466849		2141.59	-0.02569365		2671.58	-0.00495245		3201.61	-0.00108708		3731.6	-0.01216895		4261.6	-0.0234503
551.79	0.06379148		1081.79	-0.0023771		1611.78	0.00405721		2141.79	-0.02467776		2671.78	-0.00599951		3201.81	-0.00233549		3731.8	-0.01266294		4261.8	-0.02403685
551.99	0.06437068		1081.99	-0.00258902		1611.98	0.00390354		2141.99	-0.0241168		2671.98	-0.00684404		3202.01	-0.00307094		3732	-0.01284986		4262	-0.02408034
552.19	0.06419057		1082.19	-0.00299921		1612.18	0.00431666		2142.19	-0.02425648		2672.18	-0.00744195		3202.21	-0.00298566		3732.2	-0.01334224		4262.2	-0.02397723
552.39	0.06393792		1082.39	-0.00295683		1612.38	0.00404207		2142.39	-0.024446		2672.38	-0.00791525		3202.41	-0.00262337		3732.4	-0.01363817		4262.4	-0.02384556
552.59	0.06494258		1082.59	-0.00334622		1612.58	0.00399051		2142.59	-0.02498845		2672.58	-0.00837164		3202.61	-0.00340353		3732.6	-0.01301741		4262.6	-0.02407087
552.79	0.0650231		1082.79	-0.00407531		1612.78	0.0031069		2142.79	-0.02456012		2672.78	-0.00842127		3202.81	-0.002836		3732.8	-0.01365902		4262.8	-0.02447392
552.99	0.06506985		1082.99	-0.00429823		1612.98	0.002064		2142.99	-0.02428644		2672.98	-0.00866734		3203.01	-0.00205415		3733	-0.01289172		4263	-0.02372517
553.19	0.06528397		1083.19	-0.00409863		1613.18	0.00237573		2143.19	-0.0247278		2673.18	-0.00866398		3203.21	-0.00186471		3733.2	-0.01272653		4263.2	-0.02396816
553.39	0.06471391		1083.39	-0.00396891		1613.38	0.00212849		2143.39	-0.02580317		2673.38	-0.00778582		3203.41	-0.00163729		3733.4	-0.01204866		4263.4	-0.02352225
553.59	0.06577761		1083.59	-0.00413821		1613.58	0.00178059		2143.59	-0.02626095		2673.58	-0.00720957		3203.61	-0.00205194		3733.6	-0.01113093		4263.6	-0.0238649
553.79	0.06633724		1083.79	-0.00449579		1613.78	0.0029947		2143.79	-0.02681572		2673.78	-0.00699441		3203.81	-0.00139786		3733.8	-0.01091577		4263.8	-0.02338809
553.99	0.06599123		1083.99	-0.00408625		1613.98	0.00327111		2143.99	-0.02672472		2673.98	-0.0067001		3204.01	-0.00082661		3734	-0.01125177		4264	-0.02330332
554.19	0.06588227		1084.19	-0.00354365		1614.18	0.00380066		2144.19	-0.02677904		2674.18	-0.00670824		3204.21	0.00026912		3734.2	-0.01140617		4264.2	-0.02327976
554.39	0.06725976		1084.39	-0.00296307		1614.38	0.00398773		2144.39	-0.02602384		2674.38	-0.00729214		3204.41	0.00083236		3734.4	-0.01051561		4264.4	-0.02396136
554.59	0.06708405		1084.59	-0.00219454		1614.58	0.0048465		2144.59	-0.02643084		2674.58	-0.00711663		3204.61	0.00136149		3734.6	-0.01044518		4264.6	-0.02404991
554.79	0.06757965		1084.79	-0.00188356		1614.78	0.00460718		2144.79	-0.02612404		2674.78	-0.00680966		3204.81	0.00067737		3734.8	-0.01083176		4264.8	-0.02399385
554.99	0.06837741		1084.99	-0.00275922		1614.98	0.00484241		2144.99	-0.02546765		2674.98	-0.00679769		3205.01	0.00047628		3735	-0.01078983		4265	-0.02300443
555.19	0.06808727		1085.19	-0.00300063		1615.18	0.00491493		2145.19	-0.02475998		2675.18	-0.00666478		3205.21	0.00010084		3735.2	-0.01107294		4265.2	-0.02358931
555.39	0.06751387		1085.39	-0.00247934		1615.38	0.0050613		2145.39	-0.0246367		2675.38	-0.00717931		3205.41	-0.00027198		3735.4	-0.01036622		4265.4	-0.02422222
555.59	0.06787878		1085.59	-0.00195443		1615.58	0.00516364		2145.59	-0.02354451		2675.58	-0.00765846		3205.61	-0.00008705		3735.6	-0.00998438		4265.6	-0.02502178
555.79	0.06779396		1085.79	-0.00209089		1615.78	0.00453827		2145.79	-0.02380003		2675.78	-0.0079378		3205.81	-0.00085735		3735.8	-0.01017212		4265.8	-0.02528458
555.99	0.06745694		1085.99	-0.00184885		1615.98	0.00406088		2145.99	-0.02469883		2675.98	-0.00770869		3206.01	-0.0017793		3736	-0.01000792		4266	-0.02548971
556.19	0.0667006		1086.19	-0.00154827		1616.18	0.00347551		2146.19	-0.02526816		2676.18	-0.0070493		3206.21	-0.00232339		3736.2	-0.00979249		4266.2	-0.02589444
556.39	0.06651767		1086.39	-0.00125164		1616.38	0.00270632		2146.39	-0.02531167		2676.38	-0.00737274		3206.41	-0.00168172		3736.4	-0.00961085		4266.4	-0.02551473
556.59	0.06612984		1086.59	-0.00175496		1616.58	0.00235463		2146.59	-0.02538776		2676.58	-0.00765443		3206.61	-0.00218259		3736.6	-0.0099189		4266.6	-0.02540902
556.79	0.06620616		1086.79	-0.00292558		1616.78	0.00178352		2146.79	-0.02531357		2676.78	-0.00779685		3206.81	-0.00077643		3736.8	-0.01044767		4266.8	-0.02444863
556.99	0.06669525		1086.99	-0.00292304		1616.98	0.00142531		2146.99	-0.0255967		2676.98	-0.00800058		3207.01	-0.00070666		3737	-0.0100804		4267	-0.02389373
557.19	0.06694715		1087.19	-0.00366315		1617.18	0.00190625		2147.19	-0.02661456		2677.18	-0.00738565		3207.21	-0.00058707		3737.2	-0.00994746		4267.2	-0.0238309
557.39	0.0668125		1087.39	-0.00352735		1617.38	0.00102015		2147.39	-0.02771656		2677.38	-0.00624392		3207.41	-0.00052798		3737.4	-0.01003702		4267.4	-0.02345863
557.59	0.06784134		1087.59	-0.00373083		1617.58	0.00119794		2147.59	-0.02842102		2677.58	-0.00654445		3207.61	-0.00026922		3737.6	-0.00898018		4267.6	-0.02347474
557.79	0.06709193		1087.79	-0.00342701		1617.78	0.0020206		2147.79	-0.02843729		2677.78	-0.00624528		3207.81	0.00082487		3737.8	-0.00952962		4267.8	-0.02300489
557.99	0.06656281		1087.99	-0.00323682		1617.98	0.00233685		2147.99	-0.02816271		2677.98	-0.00628436		3208.01	0.00095299		3738	-0.00944821		4268	-0.0229008
558.19	0.06636879		1088.19	-0.00346951		1618.18	0.0030404		2148.19	-0.02743812		2678.18	-0.00667935		3208.21	0.00113603		3738.2	-0.00960788		4268.2	-0.0227311
558.39	0.06651139		1088.39	-0.00378648		1618.38	0.00363713		2148.39	-0.02651516		2678.38	-0.00714883		3208.41	0.00135682		3738.4	-0.00952331		4268.4	-0.02294833
558.59	0.06573073		1088.59	-0.00439176		1618.58	0.00407918		2148.59	-0.02594558		2678.58	-0.0071961		3208.61	0.00169375		3738.6	-0.01010673		4268.6	-0.02293909
558.79	0.06583604		1088.79	-0.00507398		1618.78	0.00413639		2148.79	-0.02484703		2678.78	-0.0079003		3208.81	0.0018047		3738.8	-0.00995248		4268.8	-0.0224695
558.99	0.0666022		1088.99	-0.00623581		1618.98	0.00468437		2148.99	-0.02421677		2678.98	-0.00834804		3209.01	0.00246537		3739	-0.01015178		4269	-0.02219709
559.19	0.06630373		1089.19	-0.00617053		1619.18	0.00492923		2149.19	-0.02375504		2679.18	-0.00914593		3209.21	0.00304233		3739.2	-0.01040222		4269.2	-0.02233647
559.39	0.06625729		1089.39	-0.00604457		1619.38	0.00458216		2149.39	-0.0233217		2679.38	-0.00939916		3209.41	0.00349316		3739.4	-0.0103929		4269.4	-0.02230009
559.59	0.06668572		1089.59	-0.00661854		1619.58	0.0047793		2149.59	-0.02301753		2679.58	-0.01021908		3209.61	0.00382708		3739.6	-0.01081524		4269.6	-0.02289131
559.79	0.06683061		1089.79	-0.0071025		1619.78	0.00431871		2149.79	-0.02318641		2679.78	-0.0104514		3209.81	0.00370945		3739.8	-0.01140183		4269.8	-0.02308173
