# Supplementary material for: Functional development of a V3/glycan-specific broadly neutralizing antibody isolated from a case of HIV superinfection
Source: eLife journal article supplement (doi:10.7554/elife.68110), 2021-07-15
Supplement: fig2-data2 [file QA013.2 Lineage_BLI Expt w Dbl Ref_2020.06.25.xlsx]

## Sheet: BLI Plate set-up BG505 SOSIP
Date:	2020.06.25					BB = Octet binding buffer
			mAbs at 10 ug/ml in BB			N = Neutralization Buffer (Octet buffer)
			200 µl per well			R = Regeneration Buffer							Typical Expt. Set-Up
	1	2	3	4	5	6	7	8	9	10	11	12	nM		Dilution series of SOSIP
A	BB	QA013.2 mature	QA013.2 EVQ mat/Lmat	QA013.2 DIRIA CDR1-3 naïve FWR/Lmat	QA013.2 G7/L4	10E8				BG505 SOSIP 500 nM	R	N	500	Determine full kinetic range	400 uL total vol
B	BB	QA013.2 mature	QA013.2 EVQ mat/Lmat	QA013.2 DIRIA CDR1-3 naïve FWR/Lmat	QA013.2 G7/L4	10E8				BG505 SOSIP 250 nM	R	N	250		200 uL BB + 200 uL
C	BB	QA013.2 mature	QA013.2 EVQ mat/Lmat	QA013.2 DIRIA CDR1-3 naïve FWR/Lmat	QA013.2 G7/L4	10E8				BG505 SOSIP 125 nM	R	N	125		200 uL BB + 200 uL
D	BB	QA013.2 mature	QA013.2 EVQ mat/Lmat	QA013.2 DIRIA CDR1-3 naïve FWR/Lmat	QA013.2 G7/L4	10E8				BG505 SOSIP 62.5 nM	R	N	62.5		200 uL BB + 200 uL
E	BB	QA013.2 mature	QA013.2 EVQ mat/Lmat	QA013.2 DIRIA CDR1-3 naïve FWR/Lmat	QA013.2 G7/L4	10E8				BG505 SOSIP 31.25 nM	R	N	31.25		200 uL BB + 200 uL
F	BB	QA013.2 mature	QA013.2 EVQ mat/Lmat	QA013.2 DIRIA CDR1-3 naïve FWR/Lmat	QA013.2 G7/L4	10E8				BG505 SOSIP 15.625 nM	R	N	15.625		200 uL BB + 200 uL
G	BB	QA013.2 mature	QA013.2 EVQ mat/Lmat	QA013.2 DIRIA CDR1-3 naïve FWR/Lmat	QA013.2 G7/L4	10E8				BG505 SOSIP 7.8125 nM	R	N	250	Yes/No binding	200 uL BB + 200 uL
H	BB	BB	BB	BB	BB	BB	BB	BB	BB	BB	R	N
	Hydrated anti-human IgG Fc Capture (AHC) or anti-human Fab-							Time (s)	Shaker (rpm)
	CH1 biosensors were immobilized for 4 min with purified infant antibodies						Sensor Check	30	1000
	diluted to 10 µg mL-1 in PBS (pH 7.4) supplemented with 1% BSA, 0.03%						Baseline	30	1000
	TWEEN 20, 0.02% sodium azide. After a stable baseline signal was established,						Loading	80	600
	antibody-immobilized tips were moved to wells containing a 2-fold dilution						Association	180	600
	series of Env SOSIP trimer to monitor association for 4min. Tips were then						Dissociation	180	600
	moved back to wells containing buffer to monitor dissociation for 6 min.
	Ab	uL to add	concentration (ug/mL)	total volume (uL)	final concentration (ug/mL)	volume BB to add (uL)		Antigen	Desired volume (uL)	MW	Concentration (mg/mL)	Vol. for 500 nM	Volume BB
	QA013.2 mature	47.5113	663	3150	10	3102.49		BG505 SOSIP	410	354902	6.48	11.2276	398.772
	EVQ mat/Lmat	37.7834	397	1500	10	1462.22						https://www.graphpad.com/quickcalcs/molarityform.cfm
	DIRIA CDR1-3 w/ naïve FWR/Lmat	27.0758	554	1500	10	1472.92		500 nM =	5e-07	mol/L
	G7/L4	41.9441	751	3150	10	3108.06
	10E8	31.5	1000	3150	10	3118.5		2.05e-10	(desired number of moles)
								7.2755e-05	(number of grams)
								11.2276	(number of uL)

## Sheet: BLI set-up QA013 765 autologous
Date:	2020.06.25					BB = Octet binding buffer
			mAbs at 10 ug/ml in BB			N = Neutralization Buffer (Octet buffer)
			200 µl per well			R = Regeneration Buffer							Typical Expt. Set-Up
	1	2	3	4	5	6	7	8	9	10	11	12	nM		Dilution series of SOSIP
A	BB	QA013.2 mature	QA013.2 MIG1627/Lmat	QA013.2 G7/L4	QA013.2 G0/L0 naïve	10E8				BG505 SOSIP 500 nM	R	N	500	Determine full kinetic range	400 uL total vol
B	BB	QA013.2 mature	QA013.2 MIG1627/Lmat	QA013.2 G7/L4	QA013.2 G0/L0 naïve	10E8				BG505 SOSIP 250 nM	R	N	250		200 uL BB + 200 uL
C	BB	QA013.2 mature	QA013.2 MIG1627/Lmat	QA013.2 G7/L4	QA013.2 G0/L0 naïve	10E8				BG505 SOSIP 125 nM	R	N	125		200 uL BB + 200 uL
D	BB	QA013.2 mature	QA013.2 MIG1627/Lmat	QA013.2 G7/L4	QA013.2 G0/L0 naïve	10E8				BG505 SOSIP 62.5 nM	R	N	62.5		200 uL BB + 200 uL
E	BB	QA013.2 mature	QA013.2 MIG1627/Lmat	QA013.2 G7/L4	QA013.2 G0/L0 naïve	10E8				BG505 SOSIP 31.25 nM	R	N	31.25		200 uL BB + 200 uL
F	BB	QA013.2 mature	QA013.2 MIG1627/Lmat	QA013.2 G7/L4	QA013.2 G0/L0 naïve	10E8				BG505 SOSIP 15.625 nM	R	N	15.625		200 uL BB + 200 uL
G	BB	QA013.2 mature	QA013.2 MIG1627/Lmat	QA013.2 G7/L4	QA013.2 G0/L0 naïve	10E8				BG505 SOSIP 7.8125 nM	R	N	250	Yes/No binding	200 uL BB + 200 uL
H	BB	BB	BB	BB	BB	BB	BB	BB	BB	BB	R	N
	Hydrated anti-human IgG Fc Capture (AHC) or anti-human Fab-							Time (s)	Shaker (rpm)
	CH1 biosensors were immobilized for 4 min with purified infant antibodies						Sensor Check	30	1000
	diluted to 10 µg mL-1 in PBS (pH 7.4) supplemented with 1% BSA, 0.03%						Baseline	30	1000
	TWEEN 20, 0.02% sodium azide. After a stable baseline signal was established,						Loading	80	600
	antibody-immobilized tips were moved to wells containing a 2-fold dilution						Association	180	600
	series of Env SOSIP trimer to monitor association for 4min. Tips were then						Dissociation	180	600
	moved back to wells containing buffer to monitor dissociation for 6 min.
	Ab	uL to add	concentration (ug/mL)	total volume (uL)	final concentration (ug/mL)	volume BB to add (uL)		Antigen	Desired volume (uL)	MW	Concentration (mg/mL)	Vol. for 500 nM	Volume BB
	QA013.2 mature	22.6244	663	1500	10	1477.38		QA013.765M.C1	410	142866	1	29.2876	380.712
	MIG1627/Lmat	49.8339	301	1500	10	1450.17						https://www.graphpad.com/quickcalcs/molarityform.cfm
	G7/L4	13.556	554	751	10	737.444		500 nM =	5e-07	mol/L
	G0/L0 naïve	13.5135	1110	1500	10	1486.49
	10E8	15	1000	1500	10	1485		2.05e-10	(desired number of moles)
								2.92876e-05	(number of grams)
								29.2876	(number of uL)
