# Supplementary material for: Functional development of a V3/glycan-specific broadly neutralizing antibody isolated from a case of HIV superinfection
Source: eLife journal article supplement (doi:10.7554/elife.68110), 2021-07-15
Supplement: fig2-data2 [file QA013.2 Lineage_BLI Expt w Dbl Ref_2020.07.16.xlsx]

## Sheet: BLI Plate set-up BG505 SOSIP
Date:	2020.07.16					BB = Octet binding buffer
			mAbs at 10 ug/ml in BB			N = Neutralization Buffer (Octet buffer)
			200 µl per well			R = Regeneration Buffer							Typical Expt. Set-Up
	1	2	3	4	5	6	7	8	9	10	11	12	nM		Dilution series of SOSIP
A	BB	QA013.2 EVQ mature	QA013.2 Gmat/L0	QA013.2 EVQ∆FWR/Lmat	QA013.2 G7/L4	QA013.2 Naïve	10E8			BG505 SOSIP 500 nM	R	N	500	Determine full kinetic range	400 uL total vol
B	BB	QA013.2 EVQ mature	QA013.2 Gmat/L0	QA013.2 EVQ∆FWR/Lmat	QA013.2 G7/L4	QA013.2 Naïve	10E8			BG505 SOSIP 250 nM	R	N	250		200 uL BB + 200 uL
C	BB	QA013.2 EVQ mature	QA013.2 Gmat/L0	QA013.2 EVQ∆FWR/Lmat	QA013.2 G7/L4	QA013.2 Naïve	10E8			BG505 SOSIP 125 nM	R	N	125		200 uL BB + 200 uL
D	BB	QA013.2 EVQ mature	QA013.2 Gmat/L0	QA013.2 EVQ∆FWR/Lmat	QA013.2 G7/L4	QA013.2 Naïve	10E8			BG505 SOSIP 62.5 nM	R	N	62.5		200 uL BB + 200 uL
E	BB	QA013.2 EVQ mature	QA013.2 Gmat/L0	QA013.2 EVQ∆FWR/Lmat	QA013.2 G7/L4	QA013.2 Naïve	10E8			BG505 SOSIP 31.25 nM	R	N	31.25		200 uL BB + 200 uL
F	BB	QA013.2 EVQ mature	QA013.2 Gmat/L0	QA013.2 EVQ∆FWR/Lmat	QA013.2 G7/L4	QA013.2 Naïve	10E8			BG505 SOSIP 15.625 nM	R	N	15.625		200 uL BB + 200 uL
G	BB	QA013.2 EVQ mature	QA013.2 Gmat/L0	QA013.2 EVQ∆FWR/Lmat	QA013.2 G7/L4	QA013.2 Naïve	10E8			BG505 SOSIP 7.8125 nM	R	N	250	Yes/No binding	200 uL BB + 200 uL
H	BB	BB	BB	BB	BB	BB	BB	BB	BB	BB	R	N
	Hydrated anti-human IgG Fc Capture (AHC) or anti-human Fab-							Time (s)	Shaker (rpm)
	CH1 biosensors were immobilized for 4 min with purified infant antibodies						Sensor Check	30	1000
	diluted to 10 µg mL-1 in PBS (pH 7.4) supplemented with 1% BSA, 0.03%						Baseline	30	1000
	TWEEN 20, 0.02% sodium azide. After a stable baseline signal was established,						Loading	80	600
	antibody-immobilized tips were moved to wells containing a 2-fold dilution						Association	180	600
	series of Env SOSIP trimer to monitor association for 4min. Tips were then						Dissociation	180	600
	moved back to wells containing buffer to monitor dissociation for 6 min.
	Ab	uL to add	concentration (ug/mL)	total volume (uL)	final concentration (ug/mL)	volume BB to add (uL)		Antigen	Desired volume (uL)	MW	Concentration (mg/mL)	Vol. for 500 nM	Volume BB
	EVQ mat/Lmat	37.7834	397	1500	10	1462.22		BG505 SOSIP	410	354902	6.48	11.2276	398.772
	Gmat/L0	8.79765	1705	1500	10	1491.2						https://www.graphpad.com/quickcalcs/molarityform.cfm
	EVQ∆FWR/Lmat	21.4592	699	1500	10	1478.54		500 nM =	5e-07	mol/L
	G7/L4	19.9734	751	1500	10	1480.03
	Naïve	13.5135	1110	1500	10	1486.49		2.05e-10	(desired number of moles)
	10E8	15	1000	1500	10	1485		7.2755e-05	(number of grams)
								11.2276	(number of uL)

## Sheet: BLI set-up QA013 765 autologous
Date:	2020.07.16					BB = Octet binding buffer
			mAbs at 10 ug/ml in BB			N = Neutralization Buffer (Octet buffer)
			200 µl per well			R = Regeneration Buffer							Typical Expt. Set-Up
	1	2	3	4	5	6	7	8	9	10	11	12	nM		Dilution series of SOSIP
A	BB	QA013.2 EVQ mature	QA013.2 Gmat/L0	QA013.2 EVQ∆CDRH3/Lmat	QA013.2 EVQ∆CDRH3/∆CDRL3	QA013.2 Naïve	10E8			QA013.765M.C1 gp120 1000 nM	R	N	500	Determine full kinetic range	400 uL total vol
B	BB	QA013.2 EVQ mature	QA013.2 Gmat/L0	QA013.2 EVQ∆CDRH3/Lmat	QA013.2 EVQ∆CDRH3/∆CDRL3	QA013.2 Naïve	10E8			QA013.765M.C1 gp120 500 nM	R	N	250		200 uL BB + 200 uL
C	BB	QA013.2 EVQ mature	QA013.2 Gmat/L0	QA013.2 EVQ∆CDRH3/Lmat	QA013.2 EVQ∆CDRH3/∆CDRL3	QA013.2 Naïve	10E8			QA013.765M.C1 gp120 250 nM	R	N	125		200 uL BB + 200 uL
D	BB	QA013.2 EVQ mature	QA013.2 Gmat/L0	QA013.2 EVQ∆CDRH3/Lmat	QA013.2 EVQ∆CDRH3/∆CDRL3	QA013.2 Naïve	10E8			QA013.765M.C1 gp120 125 nM	R	N	62.5		200 uL BB + 200 uL
E	BB	QA013.2 EVQ mature	QA013.2 Gmat/L0	QA013.2 EVQ∆CDRH3/Lmat	QA013.2 EVQ∆CDRH3/∆CDRL3	QA013.2 Naïve	10E8			QA013.765M.C1 gp120 62.5 nM	R	N	31.25		200 uL BB + 200 uL
F	BB	QA013.2 EVQ mature	QA013.2 Gmat/L0	QA013.2 EVQ∆CDRH3/Lmat	QA013.2 EVQ∆CDRH3/∆CDRL3	QA013.2 Naïve	10E8			QA013.765M.C1 gp120 31.25 nM	R	N	15.625		200 uL BB + 200 uL
G	BB	QA013.2 EVQ mature	QA013.2 Gmat/L0	QA013.2 EVQ∆CDRH3/Lmat	QA013.2 EVQ∆CDRH3/∆CDRL3	QA013.2 Naïve	10E8			QA013.765M.C1 gp120 15.625 nM	R	N	250	Yes/No binding	200 uL BB + 200 uL
H	BB	BB	BB	BB	BB	BB	BB	BB	BB	BB	R	N
	Hydrated anti-human IgG Fc Capture (AHC) or anti-human Fab-							Time (s)	Shaker (rpm)
	CH1 biosensors were immobilized for 4 min with purified infant antibodies						Sensor Check	30	1000
	diluted to 10 µg mL-1 in PBS (pH 7.4) supplemented with 1% BSA, 0.03%						Baseline	30	1000
	TWEEN 20, 0.02% sodium azide. After a stable baseline signal was established,						Loading	80	600
	antibody-immobilized tips were moved to wells containing a 2-fold dilution						Association	180	600
	series of Env SOSIP trimer to monitor association for 4min. Tips were then						Dissociation	180	600
	moved back to wells containing buffer to monitor dissociation for 6 min.
	Ab	uL to add	concentration (ug/mL)	total volume (uL)	final concentration (ug/mL)	volume BB to add (uL)		Antigen	Desired volume (uL)	MW	Concentration (mg/mL)	Vol. for 1 µM	Volume BB
	QA013.2 EVQ mature	37.7834	397	1500	10	1462.22		QA013.765M.C1	410	142866	1	58.5751	351.425
	QA013.2 Gmat/L0	8.79765	1705	1500	10	1491.2						https://www.graphpad.com/quickcalcs/molarityform.cfm
	EVQ∆CDRH3/Lmat	66.9643	224	1500	10	1433.04		1 uM =	1e-06	mol/L
	EVQ∆CDRH3/∆CDRL3	51.0204	294	1500	10	1448.98
	Naïve	13.5135	1110	1500	10	1486.49		4.1e-10	(desired number of moles)
	10E8	15	1000	1500	10	1485		5.85751e-05	(number of grams)
								58.5751	(number of uL)
