# Supplementary material for: Functional development of a V3/glycan-specific broadly neutralizing antibody isolated from a case of HIV superinfection
Source: eLife journal article supplement (doi:10.7554/elife.68110), 2021-07-15
Supplement: fig2-data2 [file QA013.2 Lineage_BLI Expt w Dbl Ref_2020.08.06.xlsx]

## Sheet: BLI Plate set-up BG505 SOSIP
Date:	2020.08.06					BB = Octet binding buffer
			mAbs at 10 ug/ml in BB			N = Neutralization Buffer (Octet buffer)
			200 µl per well			R = Regeneration Buffer							Typical Expt. Set-Up
	1	2	3	4	5	6	7	8	9	10	11	12	nM		Dilution series of SOSIP
A	BB	QA013.2 EVQ mature	QA013.2 EVQ mat/∆CDRL2	QA013.2 EVQ mat/∆CDRL3	QA013.2 G0/Lmat	QA013.2 EVQ D106V/Lmat	QA013.2 EVQ ∆CDRH3/Lmat	10E8		BG505 SOSIP 500 nM	R	N	500	Determine full kinetic range	400 uL total vol
B	BB	QA013.2 EVQ mature	QA013.2 EVQ mat/∆CDRL3	QA013.2 EVQ mat/∆CDRL4	QA013.2 G0/Lmat	QA013.2 EVQ D106V/Lmat	QA013.2 EVQ ∆CDRH3/Lmat	10E8		BG505 SOSIP 250 nM	R	N	250		200 uL BB + 200 uL
C	BB	QA013.2 EVQ mature	QA013.2 EVQ mat/∆CDRL4	QA013.2 EVQ mat/∆CDRL5	QA013.2 G0/Lmat	QA013.2 EVQ D106V/Lmat	QA013.2 EVQ ∆CDRH3/Lmat	10E8		BG505 SOSIP 125 nM	R	N	125		200 uL BB + 200 uL
D	BB	QA013.2 EVQ mature	QA013.2 EVQ mat/∆CDRL5	QA013.2 EVQ mat/∆CDRL6	QA013.2 G0/Lmat	QA013.2 EVQ D106V/Lmat	QA013.2 EVQ ∆CDRH3/Lmat	10E8		BG505 SOSIP 62.5 nM	R	N	62.5		200 uL BB + 200 uL
E	BB	QA013.2 EVQ mature	QA013.2 EVQ mat/∆CDRL6	QA013.2 EVQ mat/∆CDRL7	QA013.2 G0/Lmat	QA013.2 EVQ D106V/Lmat	QA013.2 EVQ ∆CDRH3/Lmat	10E8		BG505 SOSIP 31.25 nM	R	N	31.25		200 uL BB + 200 uL
F	BB	QA013.2 EVQ mature	QA013.2 EVQ mat/∆CDRL7	QA013.2 EVQ mat/∆CDRL8	QA013.2 G0/Lmat	QA013.2 EVQ D106V/Lmat	QA013.2 EVQ ∆CDRH3/Lmat	10E8		BG505 SOSIP 15.625 nM	R	N	15.625		200 uL BB + 200 uL
G	BB	QA013.2 EVQ mature	QA013.2 EVQ mat/∆CDRL8	QA013.2 EVQ mat/∆CDRL9	QA013.2 G0/Lmat	QA013.2 EVQ D106V/Lmat	QA013.2 EVQ ∆CDRH3/Lmat	10E8		BG505 SOSIP 7.8125 nM	R	N	250	Yes/No binding	200 uL BB + 200 uL
H	BB	BB	BB	BB	BB	BB	BB	BB	BB	BB	R	N
	Hydrated anti-human IgG Fc Capture (AHC) or anti-human Fab-							Time (s)	Shaker (rpm)
	CH1 biosensors were immobilized for 80 sec with purified antibodies						Sensor Check	30	1000
	diluted to 10 µg mL-1 in PBS (pH 7.4) supplemented with 0.1% BSA, 0.005%						Baseline	30	1000
	TWEEN 20, 0.02% sodium azide. After a stable baseline signal was established,						Loading	80	600
	antibody-immobilized tips were moved to wells containing a 2-fold dilution						Association	180	600
	series of Env SOSIP trimer to monitor association for 3min. Tips were then						Dissociation	180	600
	moved back to wells containing buffer to monitor dissociation for 3 min.
	Ab	uL to add	concentration (ug/mL)	total volume (uL)	final concentration (ug/mL)	volume BB to add (uL)		Antigen	Desired volume (uL)	MW	Concentration (mg/mL)	Vol. for 500 nM	Volume BB
	EVQ mat/Lmat	51.3699	292	1500	10	1448.63		BG505 SOSIP	410	354902	2.41	30.1888	379.811
	EVQ mat/∆CDRL2	34.4037	436	1500	10	1465.6						https://www.graphpad.com/quickcalcs/molarityform.cfm
	EVQ mat/∆CDRL3	34.965	429	1500	10	1465.03		500 nM =	5e-07	mol/L
	G0/Lmat	47.9233	313	1500	10	1452.08
	EVQ D106V/Lmat	31.4465	477	1500	10	1468.55		2.05e-10	(desired number of moles)
	EVQ ∆CDRH3/Lmat	66.9643	224	1500	10	1433.04		7.2755e-05	(number of grams)
	10E8	15	1000	1500	10	1485		30.1888	(number of uL)

## Sheet: BLI set-up QA013 765 autologous
Date:	2020.08.06					BB = Octet binding buffer
			mAbs at 10 ug/ml in BB			N = Neutralization Buffer (Octet buffer)
			200 µl per well			R = Regeneration Buffer							Typical Expt. Set-Up
	1	2	3	4	5	6	7	8	9	10	11	12	nM		Dilution series of SOSIP
A	BB	QA013.2 EVQ mature	QA013.2 EVQ mat/∆CDRL2	QA013.2 EVQ mat/∆CDRL3	QA013.2 G0/Lmat	QA013.2 EVQ D106V/Lmat	QA013.2 EVQ ∆CDRH1/Lmat	10E8		QA013.765M.C1 gp120 1000 nM	R	N	500	Determine full kinetic range	400 uL total vol
B	BB	QA013.2 EVQ mature	QA013.2 EVQ mat/∆CDRL2	QA013.2 EVQ mat/∆CDRL3	QA013.2 G0/Lmat	QA013.2 EVQ D106V/Lmat	QA013.2 EVQ ∆CDRH1/Lmat	10E8		QA013.765M.C1 gp120 500 nM	R	N	250		200 uL BB + 200 uL
C	BB	QA013.2 EVQ mature	QA013.2 EVQ mat/∆CDRL2	QA013.2 EVQ mat/∆CDRL3	QA013.2 G0/Lmat	QA013.2 EVQ D106V/Lmat	QA013.2 EVQ ∆CDRH1/Lmat	10E8		QA013.765M.C1 gp120 250 nM	R	N	125		200 uL BB + 200 uL
D	BB	QA013.2 EVQ mature	QA013.2 EVQ mat/∆CDRL2	QA013.2 EVQ mat/∆CDRL3	QA013.2 G0/Lmat	QA013.2 EVQ D106V/Lmat	QA013.2 EVQ ∆CDRH1/Lmat	10E8		QA013.765M.C1 gp120 125 nM	R	N	62.5		200 uL BB + 200 uL
E	BB	QA013.2 EVQ mature	QA013.2 EVQ mat/∆CDRL2	QA013.2 EVQ mat/∆CDRL3	QA013.2 G0/Lmat	QA013.2 EVQ D106V/Lmat	QA013.2 EVQ ∆CDRH1/Lmat	10E8		QA013.765M.C1 gp120 62.5 nM	R	N	31.25		200 uL BB + 200 uL
F	BB	QA013.2 EVQ mature	QA013.2 EVQ mat/∆CDRL2	QA013.2 EVQ mat/∆CDRL3	QA013.2 G0/Lmat	QA013.2 EVQ D106V/Lmat	QA013.2 EVQ ∆CDRH1/Lmat	10E8		QA013.765M.C1 gp120 31.25 nM	R	N	15.625		200 uL BB + 200 uL
G	BB	QA013.2 EVQ mature	QA013.2 EVQ mat/∆CDRL2	QA013.2 EVQ mat/∆CDRL3	QA013.2 G0/Lmat	QA013.2 EVQ D106V/Lmat	QA013.2 EVQ ∆CDRH1/Lmat	10E8		QA013.765M.C1 gp120 15.625 nM	R	N	250	Yes/No binding	200 uL BB + 200 uL
H	BB	BB	BB	BB	BB	BB	BB	BB	BB	BB	R	N
	Hydrated anti-human IgG Fc Capture (AHC) or anti-human Fab-							Time (s)	Shaker (rpm)
	CH1 biosensors were immobilized for 80 sec with purified antibodies						Sensor Check	30	1000
	diluted to 10 µg mL-1 in PBS (pH 7.4) supplemented with 0.1% BSA, 0.005%						Baseline	30	1000
	TWEEN 20, 0.02% sodium azide. After a stable baseline signal was established,						Loading	80	600
	antibody-immobilized tips were moved to wells containing a 2-fold dilution						Association	180	600
	series of Env SOSIP trimer to monitor association for 3min. Tips were then						Dissociation	180	600
	moved back to wells containing buffer to monitor dissociation for 3 min.
	Ab	uL to add	concentration (ug/mL)	total volume (uL)	final concentration (ug/mL)	volume BB to add (uL)		Antigen	Desired volume (uL)	MW	Conc (mg/mL)	Vol. for 1 µM	Volume BB
	EVQ mat/Lmat	51.3699	292	1500	10	1448.63		QA013.765M.C1	410	142866	1	58.5751	351.425
	EVQ mat/∆CDRL2	34.4037	436	1500	10	1465.6						https://www.graphpad.com/quickcalcs/molarityform.cfm
	EVQ mat/∆CDRL3	34.965	429	1500	10	1465.03		1 uM =	1e-06	mol/L
	G0/Lmat	47.9233	313	1500	10	1452.08
	EVQ D106V/Lmat	31.4465	477	1500	10	1468.55		4.1e-10	(desired number of moles)
	EVQ ∆CDRH1/Lmat	27.8293	539	1500	10	1472.17		5.85751e-05	(number of grams)
	10E8	15	1000	1500	10	1485		58.5751	(number of uL)
