# Supplementary material for: Functional development of a V3/glycan-specific broadly neutralizing antibody isolated from a case of HIV superinfection
Source: eLife journal article supplement (doi:10.7554/elife.68110), 2021-07-15
Supplement: fig2-data2 [file QA013.2_lineage_replicates_autologous-gp120_BG505-gp120_21.02.04.xlsx]

## Sheet: human IgG Fc capture
Date:	2021.02.04					BB = Octet binding buffer
						N = Neutralization Buffer (Octet buffer)
						R = Regeneration Buffer							Typical Expt. Set-Up
	1	2	3	4	5	6	7	8	9	10	11	12	nM		Dilution series of SOSIP
A	Original BB	QA013.2 G0/Lmat	QA013.2 G7/L4	QA013.2 Gmat/L0	QA013.2 Naïve	QA013.2 mature		QA013.765M.C1 gp120 2000 nM	QA013.70 dpi gp120 2000 nM	BG505.W6.C2 gp120 2000 nM	R	Original BB	500	Determine full kinetic range	400 uL total vol
B	Original BB	QA013.2 G0/Lmat	QA013.2 G7/L4	QA013.2 Gmat/L0	QA013.2 Naïve	QA013.2 mature		QA013.765M.C1 gp120 1000 nM	QA013.70 dpi gp120 1000 nM	BG505.W6.C2 gp120 1000 nM	R	Original BB	250		200 uL BB + 200 uL
C	Original BB	QA013.2 G0/Lmat	QA013.2 G7/L4	QA013.2 Gmat/L0	QA013.2 Naïve	QA013.2 mature		QA013.765M.C1 gp120 500 nM	QA013.70 dpi gp120 500 nM	BG505.W6.C2 gp120 500 nM	R	Original BB	125		200 uL BB + 200 uL
D	Original BB	QA013.2 G0/Lmat	QA013.2 G7/L4	QA013.2 Gmat/L0	QA013.2 Naïve	QA013.2 mature		QA013.765M.C1 gp120 250 nM	QA013.70 dpi gp120 250 nM	BG505.W6.C2 gp120 250 nM	R	Original BB	62.5		200 uL BB + 200 uL
E	Original BB	QA013.2 G0/Lmat	QA013.2 G7/L4	QA013.2 Gmat/L0	QA013.2 Naïve	QA013.2 mature		QA013.765M.C1 gp120 125 nM	QA013.70 dpi gp120 125 nM	BG505.W6.C2 gp120 125 nM	R	Original BB	31.25		200 uL BB + 200 uL
F	Original BB	QA013.2 G0/Lmat	QA013.2 G7/L4	QA013.2 Gmat/L0	QA013.2 Naïve	QA013.2 mature		QA013.765M.C1 gp120 62.5 nM	QA013.70 dpi gp120 62.5 nM	BG505.W6.C2 gp120 62.5 nM	R	Original BB	15.625		200 uL BB + 200 uL
G	Original BB	QA013.2 G0/Lmat	QA013.2 G7/L4	QA013.2 Gmat/L0	QA013.2 Naïve	QA013.2 mature		QA013.765M.C1 gp120 31.25 nM	QA013.70 dpi gp120 31.25 nM	BG505.W6.C2 gp120 31.25 nM	R	Original BB	250	Yes/No binding	200 uL BB + 200 uL
H	Original BB	Original BB	Original BB	Original BB	Original BB	Original BB		Original BB	Original BB	Original BB	R	Original BB
	Using hydrated human IgG Fc-capture biosensors							Time (s)	Shaker (rpm)
							Baseline	60	1000
	Re-using BG505.SOSIP trimer diluted aliquots						Regeneration	30	1000
							Baseline	60	1000
							Loading	80	600
							Association	180	600
							Dissociation	180	600
							Regeneration	30	1000
	mAbs	Working Conc. (ug/mL)	Total Volume (uL)	mAb Conc.	Volume Needed	Volume Binding Buffer
	QA013.2 G0/Lmat	10	1500		#DIV/0!	#DIV/0!
	QA013.2 G7/L4	10	1500		#DIV/0!	#DIV/0!
	QA013.2 Gmat/L0	10	1500		#DIV/0!	#DIV/0!
	QA013.2 Naïve (G0/L0)	10	1500		#DIV/0!	#DIV/0!
	QA013.2 mature	10	1500		#DIV/0!	#DIV/0!
